# Supplementary material
Source: PubMed Central journal article supplement (PMC1224651)
Supplement: pnas_0506290102_1.pdf [file pnas_0506290102_1.pdf]

Table 1. REMARK model depicted in Fig. 4b with two oligonucleotides

|      |    |     |     |   |         |         |        |
|------|----|-----|-----|---|---------|---------|--------|
| ATOM | 1  | AUC | SPH | 1 | -6.134  | -13.136 | 72.020 |
| ATOM | 2  | AU  | SPH | 1 | -8.435  | -10.686 | 67.050 |
| ATOM | 3  | AU  | SPH | 1 | -9.237  | -9.832  | 68.089 |
| ATOM | 4  | AU  | SPH | 1 | -9.828  | -9.203  | 69.396 |
| ATOM | 5  | AU  | SPH | 1 | -10.167 | -8.842  | 70.882 |
| ATOM | 6  | AU  | SPH | 1 | -10.231 | -8.774  | 72.446 |
| ATOM | 7  | AU  | SPH | 1 | -10.016 | -9.003  | 73.980 |
| ATOM | 8  | AU  | SPH | 1 | -9.536  | -9.513  | 75.381 |
| ATOM | 9  | AU  | SPH | 1 | -8.825  | -10.271 | 76.553 |
| ATOM | 10 | AU  | SPH | 1 | -7.930  | -11.224 | 77.416 |
| ATOM | 11 | AU  | SPH | 1 | -6.913  | -12.307 | 77.911 |
| ATOM | 12 | AU  | SPH | 1 | -5.842  | -13.446 | 78.005 |
| ATOM | 13 | AU  | SPH | 1 | -4.792  | -14.565 | 77.691 |
| ATOM | 14 | AU  | SPH | 1 | -3.833  | -15.586 | 76.990 |
| ATOM | 15 | AU  | SPH | 1 | -8.435  | -10.686 | 67.050 |
| ATOM | 16 | AU  | SPH | 1 | -9.500  | -10.139 | 68.060 |
| ATOM | 17 | AU  | SPH | 1 | -10.336 | -9.796  | 69.339 |
| ATOM | 18 | AU  | SPH | 1 | -10.885 | -9.681  | 70.801 |
| ATOM | 19 | AU  | SPH | 1 | -11.111 | -9.801  | 72.347 |
| ATOM | 20 | AU  | SPH | 1 | -10.997 | -10.149 | 73.870 |
| ATOM | 21 | AU  | SPH | 1 | -10.552 | -10.700 | 75.267 |
| ATOM | 22 | AU  | SPH | 1 | -9.806  | -11.417 | 76.442 |
| ATOM | 23 | AU  | SPH | 1 | -8.810  | -12.251 | 77.317 |
| ATOM | 24 | AU  | SPH | 1 | -7.631  | -13.146 | 77.830 |
| ATOM | 25 | AU  | SPH | 1 | -6.350  | -14.040 | 77.947 |
| ATOM | 26 | AU  | SPH | 1 | -5.055  | -14.872 | 77.661 |
| ATOM | 27 | AU  | SPH | 1 | -3.833  | -15.586 | 76.990 |
| ATOM | 28 | AU  | SPH | 1 | -8.435  | -10.686 | 67.050 |
| ATOM | 29 | AU  | SPH | 1 | -9.685  | -10.489 | 67.973 |
| ATOM | 30 | AU  | SPH | 1 | -10.693 | -10.472 | 69.171 |
| ATOM | 31 | AU  | SPH | 1 | -11.391 | -10.637 | 70.564 |
| ATOM | 32 | AU  | SPH | 1 | -11.730 | -10.973 | 72.056 |
| ATOM | 33 | AU  | SPH | 1 | -11.688 | -11.455 | 73.545 |
| ATOM | 34 | AU  | SPH | 1 | -11.267 | -12.052 | 74.931 |
| ATOM | 35 | AU  | SPH | 1 | -10.497 | -12.723 | 76.118 |
| ATOM | 36 | AU  | SPH | 1 | -9.429  | -13.423 | 77.026 |
| ATOM | 37 | AU  | SPH | 1 | -8.137  | -14.102 | 77.593 |
| ATOM | 38 | AU  | SPH | 1 | -6.708  | -14.716 | 77.780 |
| ATOM | 39 | AU  | SPH | 1 | -5.240  | -15.222 | 77.574 |
| ATOM | 40 | AU  | SPH | 1 | -3.833  | -15.586 | 76.990 |
| ATOM | 41 | AU  | SPH | 1 | -8.435  | -10.686 | 67.050 |
| ATOM | 42 | AU  | SPH | 1 | -9.780  | -10.858 | 67.834 |
| ATOM | 43 | AU  | SPH | 1 | -10.876 | -11.186 | 68.904 |
| ATOM | 44 | AU  | SPH | 1 | -11.649 | -11.646 | 70.186 |
| ATOM | 45 | AU  | SPH | 1 | -12.046 | -12.208 | 71.593 |
| ATOM | 46 | AU  | SPH | 1 | -12.041 | -12.833 | 73.029 |
| ATOM | 47 | AU  | SPH | 1 | -11.632 | -13.479 | 74.397 |
| ATOM | 48 | AU  | SPH | 1 | -10.849 | -14.101 | 75.602 |
| ATOM | 49 | AU  | SPH | 1 | -9.745  | -14.658 | 76.563 |
| ATOM | 50 | AU  | SPH | 1 | -8.395  | -15.111 | 77.215 |
| ATOM | 51 | AU  | SPH | 1 | -6.890  | -15.429 | 77.512 |
| ATOM | 52 | AU  | SPH | 1 | -5.334  | -15.591 | 77.436 |

|      |     |    |     |   |         |         |        |
|------|-----|----|-----|---|---------|---------|--------|
| ATOM | 53  | AU | SPH | 1 | -3.833  | -15.586 | 76.990 |
| ATOM | 54  | AU | SPH | 1 | -8.435  | -10.686 | 67.050 |
| ATOM | 55  | AU | SPH | 1 | -9.777  | -11.221 | 67.654 |
| ATOM | 56  | AU | SPH | 1 | -10.871 | -11.887 | 68.556 |
| ATOM | 57  | AU | SPH | 1 | -11.642 | -12.638 | 69.694 |
| ATOM | 58  | AU | SPH | 1 | -12.038 | -13.423 | 70.990 |
| ATOM | 59  | AU | SPH | 1 | -12.031 | -14.188 | 72.357 |
| ATOM | 60  | AU | SPH | 1 | -11.623 | -14.882 | 73.701 |
| ATOM | 61  | AU | SPH | 1 | -10.840 | -15.456 | 74.930 |
| ATOM | 62  | AU | SPH | 1 | -9.737  | -15.873 | 75.960 |
| ATOM | 63  | AU | SPH | 1 | -8.388  | -16.103 | 76.723 |
| ATOM | 64  | AU | SPH | 1 | -6.886  | -16.131 | 77.164 |
| ATOM | 65  | AU | SPH | 1 | -5.332  | -15.954 | 77.256 |
| ATOM | 66  | AU | SPH | 1 | -3.833  | -15.586 | 76.990 |
| ATOM | 67  | AU | SPH | 1 | -8.435  | -10.686 | 67.050 |
| ATOM | 68  | AU | SPH | 1 | -9.678  | -11.554 | 67.445 |
| ATOM | 69  | AU | SPH | 1 | -10.679 | -12.529 | 68.151 |
| ATOM | 70  | AU | SPH | 1 | -11.371 | -13.546 | 69.121 |
| ATOM | 71  | AU | SPH | 1 | -11.706 | -14.535 | 70.288 |
| ATOM | 72  | AU | SPH | 1 | -11.661 | -15.429 | 71.574 |
| ATOM | 73  | AU | SPH | 1 | -11.239 | -16.166 | 72.890 |
| ATOM | 74  | AU | SPH | 1 | -10.470 | -16.697 | 74.147 |
| ATOM | 75  | AU | SPH | 1 | -9.405  | -16.985 | 75.258 |
| ATOM | 76  | AU | SPH | 1 | -8.117  | -17.011 | 76.149 |
| ATOM | 77  | AU | SPH | 1 | -6.694  | -16.773 | 76.759 |
| ATOM | 78  | AU | SPH | 1 | -5.233  | -16.287 | 77.046 |
| ATOM | 79  | AU | SPH | 1 | -3.833  | -15.586 | 76.990 |
| ATOM | 80  | AU | SPH | 1 | -8.435  | -10.686 | 67.050 |
| ATOM | 81  | AU | SPH | 1 | -9.489  | -11.833 | 67.219 |
| ATOM | 82  | AU | SPH | 1 | -10.313 | -13.068 | 67.716 |
| ATOM | 83  | AU | SPH | 1 | -10.854 | -14.308 | 68.506 |
| ATOM | 84  | AU | SPH | 1 | -11.072 | -15.468 | 69.535 |
| ATOM | 85  | AU | SPH | 1 | -10.954 | -16.469 | 70.734 |
| ATOM | 86  | AU | SPH | 1 | -10.507 | -17.243 | 72.020 |
| ATOM | 87  | AU | SPH | 1 | -9.763  | -17.738 | 73.306 |
| ATOM | 88  | AU | SPH | 1 | -8.771  | -17.918 | 74.505 |
| ATOM | 89  | AU | SPH | 1 | -7.599  | -17.773 | 75.534 |
| ATOM | 90  | AU | SPH | 1 | -6.328  | -17.311 | 76.324 |
| ATOM | 91  | AU | SPH | 1 | -5.043  | -16.566 | 76.821 |
| ATOM | 92  | AU | SPH | 1 | -3.833  | -15.586 | 76.990 |
| ATOM | 93  | AU | SPH | 1 | -8.435  | -10.686 | 67.050 |
| ATOM | 94  | AU | SPH | 1 | -9.222  | -12.039 | 66.994 |
| ATOM | 95  | AU | SPH | 1 | -9.799  | -13.467 | 67.281 |
| ATOM | 96  | AU | SPH | 1 | -10.125 | -14.872 | 67.891 |
| ATOM | 97  | AU | SPH | 1 | -10.180 | -16.159 | 68.782 |
| ATOM | 98  | AU | SPH | 1 | -9.959  | -17.240 | 69.893 |
| ATOM | 99  | AU | SPH | 1 | -9.478  | -18.041 | 71.150 |
| ATOM | 100 | AU | SPH | 1 | -8.768  | -18.508 | 72.466 |
| ATOM | 101 | AU | SPH | 1 | -7.879  | -18.609 | 73.752 |
| ATOM | 102 | AU | SPH | 1 | -6.871  | -18.337 | 74.919 |
| ATOM | 103 | AU | SPH | 1 | -5.813  | -17.710 | 75.889 |
| ATOM | 104 | AU | SPH | 1 | -4.777  | -16.772 | 76.595 |
| ATOM | 105 | AU | SPH | 1 | -3.833  | -15.586 | 76.990 |
| ATOM | 106 | AU | SPH | 1 | -8.435  | -10.686 | 67.050 |

|      |     |    |     |   |        |         |        |
|------|-----|----|-----|---|--------|---------|--------|
| ATOM | 107 | AU | SPH | 1 | -8.897 | -12.159 | 66.784 |
| ATOM | 108 | AU | SPH | 1 | -9.170 | -13.699 | 66.876 |
| ATOM | 109 | AU | SPH | 1 | -9.236 | -15.200 | 67.317 |
| ATOM | 110 | AU | SPH | 1 | -9.091 | -16.560 | 68.080 |
| ATOM | 111 | AU | SPH | 1 | -8.745 | -17.687 | 69.110 |
| ATOM | 112 | AU | SPH | 1 | -8.220 | -18.505 | 70.339 |
| ATOM | 113 | AU | SPH | 1 | -7.554 | -18.956 | 71.683 |
| ATOM | 114 | AU | SPH | 1 | -6.790 | -19.010 | 73.050 |
| ATOM | 115 | AU | SPH | 1 | -5.982 | -18.665 | 74.346 |
| ATOM | 116 | AU | SPH | 1 | -5.184 | -17.942 | 75.484 |
| ATOM | 117 | AU | SPH | 1 | -4.451 | -16.892 | 76.386 |
| ATOM | 118 | AU | SPH | 1 | -3.833 | -15.586 | 76.990 |
| ATOM | 119 | AU | SPH | 1 | -8.435 | -10.686 | 67.050 |
| ATOM | 120 | AU | SPH | 1 | -8.534 | -12.184 | 66.604 |
| ATOM | 121 | AU | SPH | 1 | -8.470 | -13.747 | 66.528 |
| ATOM | 122 | AU | SPH | 1 | -8.247 | -15.269 | 66.825 |
| ATOM | 123 | AU | SPH | 1 | -7.879 | -16.645 | 67.477 |
| ATOM | 124 | AU | SPH | 1 | -7.393 | -17.782 | 68.438 |
| ATOM | 125 | AU | SPH | 1 | -6.821 | -18.602 | 69.643 |
| ATOM | 126 | AU | SPH | 1 | -6.202 | -19.050 | 71.011 |
| ATOM | 127 | AU | SPH | 1 | -5.578 | -19.095 | 72.447 |
| ATOM | 128 | AU | SPH | 1 | -4.992 | -18.734 | 73.854 |
| ATOM | 129 | AU | SPH | 1 | -4.485 | -17.991 | 75.136 |
| ATOM | 130 | AU | SPH | 1 | -4.089 | -16.917 | 76.206 |
| ATOM | 131 | AU | SPH | 1 | -3.833 | -15.586 | 76.990 |
| ATOM | 132 | AU | SPH | 1 | -8.435 | -10.686 | 67.050 |
| ATOM | 133 | AU | SPH | 1 | -8.160 | -12.113 | 66.466 |
| ATOM | 134 | AU | SPH | 1 | -7.747 | -13.610 | 66.260 |
| ATOM | 135 | AU | SPH | 1 | -7.224 | -15.074 | 66.447 |
| ATOM | 136 | AU | SPH | 1 | -6.626 | -16.407 | 67.014 |
| ATOM | 137 | AU | SPH | 1 | -5.996 | -17.516 | 67.922 |
| ATOM | 138 | AU | SPH | 1 | -5.374 | -18.327 | 69.109 |
| ATOM | 139 | AU | SPH | 1 | -4.804 | -18.784 | 70.495 |
| ATOM | 140 | AU | SPH | 1 | -4.325 | -18.857 | 71.984 |
| ATOM | 141 | AU | SPH | 1 | -3.970 | -18.539 | 73.476 |
| ATOM | 142 | AU | SPH | 1 | -3.761 | -17.853 | 74.869 |
| ATOM | 143 | AU | SPH | 1 | -3.715 | -16.846 | 76.067 |
| ATOM | 144 | AU | SPH | 1 | -3.833 | -15.586 | 76.990 |
| ATOM | 145 | AU | SPH | 1 | -8.435 | -10.686 | 67.050 |
| ATOM | 146 | AU | SPH | 1 | -7.799 | -11.950 | 66.379 |
| ATOM | 147 | AU | SPH | 1 | -7.049 | -13.295 | 66.093 |
| ATOM | 148 | AU | SPH | 1 | -6.238 | -14.630 | 66.210 |
| ATOM | 149 | AU | SPH | 1 | -5.419 | -15.862 | 66.723 |
| ATOM | 150 | AU | SPH | 1 | -4.648 | -16.909 | 67.598 |
| ATOM | 151 | AU | SPH | 1 | -3.979 | -17.698 | 68.773 |
| ATOM | 152 | AU | SPH | 1 | -3.457 | -18.177 | 70.170 |
| ATOM | 153 | AU | SPH | 1 | -3.118 | -18.312 | 71.693 |
| ATOM | 154 | AU | SPH | 1 | -2.983 | -18.095 | 73.239 |
| ATOM | 155 | AU | SPH | 1 | -3.064 | -17.539 | 74.701 |
| ATOM | 156 | AU | SPH | 1 | -3.354 | -16.683 | 75.980 |
| ATOM | 157 | AU | SPH | 1 | -3.833 | -15.586 | 76.990 |
| ATOM | 158 | AU | SPH | 1 | -8.435 | -10.686 | 67.050 |
| ATOM | 159 | AU | SPH | 1 | -7.476 | -11.707 | 66.349 |
| ATOM | 160 | AU | SPH | 1 | -6.426 | -12.826 | 66.035 |

|      |     |    |     |   |        |         |        |
|------|-----|----|-----|---|--------|---------|--------|
| ATOM | 161 | AU | SPH | 1 | -5.355 | -13.965 | 66.129 |
| ATOM | 162 | AU | SPH | 1 | -4.338 | -15.048 | 66.624 |
| ATOM | 163 | AU | SPH | 1 | -3.443 | -16.001 | 67.487 |
| ATOM | 164 | AU | SPH | 1 | -2.732 | -16.759 | 68.659 |
| ATOM | 165 | AU | SPH | 1 | -2.252 | -17.269 | 70.060 |
| ATOM | 166 | AU | SPH | 1 | -2.037 | -17.498 | 71.594 |
| ATOM | 167 | AU | SPH | 1 | -2.101 | -17.430 | 73.158 |
| ATOM | 168 | AU | SPH | 1 | -2.440 | -17.069 | 74.644 |
| ATOM | 169 | AU | SPH | 1 | -3.031 | -16.440 | 75.951 |
| ATOM | 170 | AU | SPH | 1 | -3.833 | -15.586 | 76.990 |
| ATOM | 171 | AU | SPH | 1 | -8.435 | -10.686 | 67.050 |
| ATOM | 172 | AU | SPH | 1 | -7.213 | -11.400 | 66.379 |
| ATOM | 173 | AU | SPH | 1 | -5.918 | -12.232 | 66.093 |
| ATOM | 174 | AU | SPH | 1 | -4.637 | -13.126 | 66.210 |
| ATOM | 175 | AU | SPH | 1 | -3.458 | -14.021 | 66.723 |
| ATOM | 176 | AU | SPH | 1 | -2.462 | -14.855 | 67.598 |
| ATOM | 177 | AU | SPH | 1 | -1.716 | -15.572 | 68.773 |
| ATOM | 178 | AU | SPH | 1 | -1.271 | -16.123 | 70.170 |
| ATOM | 179 | AU | SPH | 1 | -1.157 | -16.471 | 71.693 |
| ATOM | 180 | AU | SPH | 1 | -1.383 | -16.591 | 73.239 |
| ATOM | 181 | AU | SPH | 1 | -1.932 | -16.476 | 74.701 |
| ATOM | 182 | AU | SPH | 1 | -2.768 | -16.133 | 75.980 |
| ATOM | 183 | AU | SPH | 1 | -3.833 | -15.586 | 76.990 |
| ATOM | 184 | AU | SPH | 1 | -8.435 | -10.686 | 67.050 |
| ATOM | 185 | AU | SPH | 1 | -7.028 | -11.050 | 66.466 |
| ATOM | 186 | AU | SPH | 1 | -5.560 | -11.556 | 66.260 |
| ATOM | 187 | AU | SPH | 1 | -4.131 | -12.170 | 66.447 |
| ATOM | 188 | AU | SPH | 1 | -2.839 | -12.849 | 67.014 |
| ATOM | 189 | AU | SPH | 1 | -1.771 | -13.549 | 67.922 |
| ATOM | 190 | AU | SPH | 1 | -1.001 | -14.220 | 69.109 |
| ATOM | 191 | AU | SPH | 1 | -0.580 | -14.817 | 70.495 |
| ATOM | 192 | AU | SPH | 1 | -0.538 | -15.299 | 71.984 |
| ATOM | 193 | AU | SPH | 1 | -0.877 | -15.635 | 73.476 |
| ATOM | 194 | AU | SPH | 1 | -1.575 | -15.800 | 74.869 |
| ATOM | 195 | AU | SPH | 1 | -2.583 | -15.783 | 76.067 |
| ATOM | 196 | AU | SPH | 1 | -3.833 | -15.586 | 76.990 |
| ATOM | 197 | AU | SPH | 1 | -8.435 | -10.686 | 67.050 |
| ATOM | 198 | AU | SPH | 1 | -6.934 | -10.681 | 66.604 |
| ATOM | 199 | AU | SPH | 1 | -5.378 | -10.843 | 66.528 |
| ATOM | 200 | AU | SPH | 1 | -3.873 | -11.161 | 66.825 |
| ATOM | 201 | AU | SPH | 1 | -2.523 | -11.614 | 67.477 |
| ATOM | 202 | AU | SPH | 1 | -1.419 | -12.171 | 68.438 |
| ATOM | 203 | AU | SPH | 1 | -0.636 | -12.793 | 69.643 |
| ATOM | 204 | AU | SPH | 1 | -0.227 | -13.439 | 71.011 |
| ATOM | 205 | AU | SPH | 1 | -0.222 | -14.064 | 72.447 |
| ATOM | 206 | AU | SPH | 1 | -0.619 | -14.626 | 73.854 |
| ATOM | 207 | AU | SPH | 1 | -1.392 | -15.086 | 75.136 |
| ATOM | 208 | AU | SPH | 1 | -2.488 | -15.414 | 76.206 |
| ATOM | 209 | AU | SPH | 1 | -3.833 | -15.586 | 76.990 |
| ATOM | 210 | AU | SPH | 1 | -8.435 | -10.686 | 67.050 |
| ATOM | 211 | AU | SPH | 1 | -6.936 | -10.318 | 66.784 |
| ATOM | 212 | AU | SPH | 1 | -5.382 | -10.141 | 66.876 |
| ATOM | 213 | AU | SPH | 1 | -3.880 | -10.169 | 67.317 |
| ATOM | 214 | AU | SPH | 1 | -2.531 | -10.399 | 68.080 |

|      |     |    |     |   |        |         |        |
|------|-----|----|-----|---|--------|---------|--------|
| ATOM | 215 | AU | SPH | 1 | -1.428 | -10.816 | 69.110 |
| ATOM | 216 | AU | SPH | 1 | -0.645 | -11.390 | 70.339 |
| ATOM | 217 | AU | SPH | 1 | -0.237 | -12.084 | 71.683 |
| ATOM | 218 | AU | SPH | 1 | -0.230 | -12.849 | 73.050 |
| ATOM | 219 | AU | SPH | 1 | -0.626 | -13.634 | 74.346 |
| ATOM | 220 | AU | SPH | 1 | -1.397 | -14.385 | 75.484 |
| ATOM | 221 | AU | SPH | 1 | -2.491 | -15.051 | 76.386 |
| ATOM | 222 | AU | SPH | 1 | -3.833 | -15.586 | 76.990 |
| ATOM | 223 | AU | SPH | 1 | -8.435 | -10.686 | 67.050 |
| ATOM | 224 | AU | SPH | 1 | -7.035 | -9.985  | 66.994 |
| ATOM | 225 | AU | SPH | 1 | -5.574 | -9.499  | 67.281 |
| ATOM | 226 | AU | SPH | 1 | -4.151 | -9.261  | 67.891 |
| ATOM | 227 | AU | SPH | 1 | -2.863 | -9.287  | 68.782 |
| ATOM | 228 | AU | SPH | 1 | -1.798 | -9.575  | 69.893 |
| ATOM | 229 | AU | SPH | 1 | -1.029 | -10.106 | 71.150 |
| ATOM | 230 | AU | SPH | 1 | -0.607 | -10.843 | 72.466 |
| ATOM | 231 | AU | SPH | 1 | -0.562 | -11.737 | 73.752 |
| ATOM | 232 | AU | SPH | 1 | -0.897 | -12.726 | 74.919 |
| ATOM | 233 | AU | SPH | 1 | -1.589 | -13.743 | 75.889 |
| ATOM | 234 | AU | SPH | 1 | -2.590 | -14.718 | 76.595 |
| ATOM | 235 | AU | SPH | 1 | -3.833 | -15.586 | 76.990 |
| ATOM | 236 | AU | SPH | 1 | -8.435 | -10.686 | 67.050 |
| ATOM | 237 | AU | SPH | 1 | -7.225 | -9.706  | 67.219 |
| ATOM | 238 | AU | SPH | 1 | -5.940 | -8.961  | 67.716 |
| ATOM | 239 | AU | SPH | 1 | -4.669 | -8.499  | 68.506 |
| ATOM | 240 | AU | SPH | 1 | -3.497 | -8.354  | 69.535 |
| ATOM | 241 | AU | SPH | 1 | -2.505 | -8.534  | 70.734 |
| ATOM | 242 | AU | SPH | 1 | -1.761 | -9.029  | 72.020 |
| ATOM | 243 | AU | SPH | 1 | -1.314 | -9.803  | 73.306 |
| ATOM | 244 | AU | SPH | 1 | -1.196 | -10.804 | 74.505 |
| ATOM | 245 | AU | SPH | 1 | -1.414 | -11.964 | 75.534 |
| ATOM | 246 | AU | SPH | 1 | -1.955 | -13.204 | 76.324 |
| ATOM | 247 | AU | SPH | 1 | -2.779 | -14.439 | 76.821 |
| ATOM | 248 | AU | SPH | 1 | -3.833 | -15.586 | 76.990 |
| ATOM | 249 | AU | SPH | 1 | -8.435 | -10.686 | 67.050 |
| ATOM | 250 | AU | SPH | 1 | -7.491 | -9.500  | 67.445 |
| ATOM | 251 | AU | SPH | 1 | -6.455 | -8.562  | 68.151 |
| ATOM | 252 | AU | SPH | 1 | -5.397 | -7.935  | 69.121 |
| ATOM | 253 | AU | SPH | 1 | -4.389 | -7.663  | 70.288 |
| ATOM | 254 | AU | SPH | 1 | -3.500 | -7.764  | 71.574 |
| ATOM | 255 | AU | SPH | 1 | -2.790 | -8.231  | 72.890 |
| ATOM | 256 | AU | SPH | 1 | -2.309 | -9.032  | 74.147 |
| ATOM | 257 | AU | SPH | 1 | -2.088 | -10.113 | 75.258 |
| ATOM | 258 | AU | SPH | 1 | -2.143 | -11.400 | 76.149 |
| ATOM | 259 | AU | SPH | 1 | -2.469 | -12.805 | 76.759 |
| ATOM | 260 | AU | SPH | 1 | -3.046 | -14.233 | 77.046 |
| ATOM | 261 | AU | SPH | 1 | -3.833 | -15.586 | 76.990 |
| ATOM | 262 | AU | SPH | 1 | -8.435 | -10.686 | 67.050 |
| ATOM | 263 | AU | SPH | 1 | -7.817 | -9.380  | 67.654 |
| ATOM | 264 | AU | SPH | 1 | -7.084 | -8.330  | 68.556 |
| ATOM | 265 | AU | SPH | 1 | -6.286 | -7.607  | 69.694 |
| ATOM | 266 | AU | SPH | 1 | -5.478 | -7.262  | 70.990 |
| ATOM | 267 | AU | SPH | 1 | -4.714 | -7.316  | 72.357 |
| ATOM | 268 | AU | SPH | 1 | -4.048 | -7.767  | 73.701 |

|      |     |     |     |   |        |         |        |      |      |   |
|------|-----|-----|-----|---|--------|---------|--------|------|------|---|
| ATOM | 269 | AU  | SPH | 1 | -3.523 | -8.585  | 74.930 |      |      |   |
| ATOM | 270 | AU  | SPH | 1 | -3.177 | -9.712  | 75.960 |      |      |   |
| ATOM | 271 | AU  | SPH | 1 | -3.032 | -11.072 | 76.723 |      |      |   |
| ATOM | 272 | AU  | SPH | 1 | -3.098 | -12.573 | 77.164 |      |      |   |
| ATOM | 273 | AU  | SPH | 1 | -3.371 | -14.113 | 77.256 |      |      |   |
| ATOM | 274 | AU  | SPH | 1 | -3.833 | -15.586 | 76.990 |      |      |   |
| ATOM | 275 | AU  | SPH | 1 | -8.435 | -10.686 | 67.050 |      |      |   |
| ATOM | 276 | AU  | SPH | 1 | -8.179 | -9.355  | 67.834 |      |      |   |
| ATOM | 277 | AU  | SPH | 1 | -7.783 | -8.281  | 68.904 |      |      |   |
| ATOM | 278 | AU  | SPH | 1 | -7.276 | -7.538  | 70.186 |      |      |   |
| ATOM | 279 | AU  | SPH | 1 | -6.690 | -7.177  | 71.593 |      |      |   |
| ATOM | 280 | AU  | SPH | 1 | -6.066 | -7.222  | 73.029 |      |      |   |
| ATOM | 281 | AU  | SPH | 1 | -5.447 | -7.670  | 74.397 |      |      |   |
| ATOM | 282 | AU  | SPH | 1 | -4.875 | -8.490  | 75.602 |      |      |   |
| ATOM | 283 | AU  | SPH | 1 | -4.389 | -9.627  | 76.563 |      |      |   |
| ATOM | 284 | AU  | SPH | 1 | -4.021 | -11.003 | 77.215 |      |      |   |
| ATOM | 285 | AU  | SPH | 1 | -3.798 | -12.525 | 77.512 |      |      |   |
| ATOM | 286 | AU  | SPH | 1 | -3.734 | -14.088 | 77.436 |      |      |   |
| ATOM | 287 | AU  | SPH | 1 | -3.833 | -15.586 | 76.990 |      |      |   |
| ATOM | 288 | AU  | SPH | 1 | -8.435 | -10.686 | 67.050 |      |      |   |
| ATOM | 289 | AU  | SPH | 1 | -8.553 | -9.426  | 67.973 |      |      |   |
| ATOM | 290 | AU  | SPH | 1 | -8.507 | -8.419  | 69.171 |      |      |   |
| ATOM | 291 | AU  | SPH | 1 | -8.298 | -7.733  | 70.564 |      |      |   |
| ATOM | 292 | AU  | SPH | 1 | -7.943 | -7.415  | 72.056 |      |      |   |
| ATOM | 293 | AU  | SPH | 1 | -7.464 | -7.488  | 73.545 |      |      |   |
| ATOM | 294 | AU  | SPH | 1 | -6.894 | -7.945  | 74.931 |      |      |   |
| ATOM | 295 | AU  | SPH | 1 | -6.272 | -8.756  | 76.118 |      |      |   |
| ATOM | 296 | AU  | SPH | 1 | -5.642 | -9.865  | 77.026 |      |      |   |
| ATOM | 297 | AU  | SPH | 1 | -5.044 | -11.198 | 77.593 |      |      |   |
| ATOM | 298 | AU  | SPH | 1 | -4.521 | -12.662 | 77.780 |      |      |   |
| ATOM | 299 | AU  | SPH | 1 | -4.108 | -14.159 | 77.574 |      |      |   |
| ATOM | 300 | AU  | SPH | 1 | -3.833 | -15.586 | 76.990 |      |      |   |
| ATOM | 301 | AU  | SPH | 1 | -8.435 | -10.686 | 67.050 |      |      |   |
| ATOM | 302 | AU  | SPH | 1 | -8.914 | -9.589  | 68.060 |      |      |   |
| ATOM | 303 | AU  | SPH | 1 | -9.204 | -8.733  | 69.339 |      |      |   |
| ATOM | 304 | AU  | SPH | 1 | -9.285 | -8.177  | 70.801 |      |      |   |
| ATOM | 305 | AU  | SPH | 1 | -9.150 | -7.960  | 72.347 |      |      |   |
| ATOM | 306 | AU  | SPH | 1 | -8.811 | -8.095  | 73.870 |      |      |   |
| ATOM | 307 | AU  | SPH | 1 | -8.289 | -8.574  | 75.267 |      |      |   |
| ATOM | 308 | AU  | SPH | 1 | -7.620 | -9.363  | 76.442 |      |      |   |
| ATOM | 309 | AU  | SPH | 1 | -6.849 | -10.410 | 77.317 |      |      |   |
| ATOM | 310 | AU  | SPH | 1 | -6.030 | -11.642 | 77.830 |      |      |   |
| ATOM | 311 | AU  | SPH | 1 | -5.219 | -12.977 | 77.947 |      |      |   |
| ATOM | 312 | AU  | SPH | 1 | -4.469 | -14.322 | 77.661 |      |      |   |
| ATOM | 313 | AU  | SPH | 1 | -3.833 | -15.586 | 76.990 |      |      |   |
| TER  |     |     |     |   |        |         |        |      |      |   |
| ATOM | 1   | C1' | A A | 1 | 2.250  | -5.432  | -0.471 | 1.00 | 0.00 | C |
| ATOM | 2   | N1  | A A | 1 | 0.711  | -0.555  | -0.047 | 1.00 | 0.00 | N |
| ATOM | 3   | C2  | A A | 1 | 1.916  | -1.116  | -0.092 | 1.00 | 0.00 | C |
| ATOM | 4   | N3  | A A | 1 | 2.243  | -2.386  | -0.206 | 1.00 | 0.00 | N |
| ATOM | 5   | C4  | A A | 1 | 1.137  | -3.148  | -0.274 | 1.00 | 0.00 | C |
| ATOM | 6   | C5  | A A | 1 | -0.164 | -2.730  | -0.240 | 1.00 | 0.00 | C |
| ATOM | 7   | C6  | A A | 1 | -0.374 | -1.340  | -0.118 | 1.00 | 0.00 | C |
| ATOM | 8   | N6  | A A | 1 | -1.597 | -0.784  | -0.072 | 1.00 | 0.00 | N |

|      |    |      |     |   |        |        |        |      |      |   |
|------|----|------|-----|---|--------|--------|--------|------|------|---|
| ATOM | 9  | N7   | A A | 1 | -1.035 | -3.801 | -0.335 | 1.00 | 0.00 | N |
| ATOM | 10 | C8   | A A | 1 | -0.250 | -4.834 | -0.421 | 1.00 | 0.00 | C |
| ATOM | 11 | N9   | A A | 1 | 1.082  | -4.515 | -0.392 | 1.00 | 0.00 | N |
| ATOM | 12 | C2'  | A A | 1 | 2.047  | -6.749 | 0.266  | 1.00 | 0.00 | C |
| ATOM | 13 | C3'  | A A | 1 | 2.791  | -7.729 | -0.627 | 1.00 | 0.00 | C |
| ATOM | 14 | O3'  | A A | 1 | 4.175  | -7.716 | -0.286 | 1.00 | 0.00 | O |
| ATOM | 15 | C4'  | A A | 1 | 2.536  | -7.175 | -2.028 | 1.00 | 0.00 | C |
| ATOM | 16 | O4'  | A A | 1 | 2.477  | -5.725 | -1.836 | 1.00 | 0.00 | O |
| ATOM | 17 | C5'  | A A | 1 | 1.264  | -7.625 | -2.706 | 1.00 | 0.00 | C |
| ATOM | 18 | O5'  | A A | 1 | 0.202  | -7.749 | -1.726 | 1.00 | 0.00 | O |
| ATOM | 19 | H2   | A A | 1 | 2.755  | -0.424 | -0.026 | 1.00 | 0.00 | H |
| ATOM | 20 | H8   | A A | 1 | -0.617 | -5.857 | -0.509 | 1.00 | 0.00 | H |
| ATOM | 21 | H1'  | A A | 1 | 3.125  | -4.903 | -0.092 | 1.00 | 0.00 | H |
| ATOM | 22 | H3'  | A A | 1 | 2.405  | -8.745 | -0.530 | 1.00 | 0.00 | H |
| ATOM | 23 | H4'  | A A | 1 | 3.374  | -7.489 | -2.649 | 1.00 | 0.00 | H |
| ATOM | 24 | H61  | A A | 1 | -1.695 | 0.235  | 0.016  | 1.00 | 0.00 | H |
| ATOM | 25 | H62  | A A | 1 | -2.434 | -1.382 | -0.126 | 1.00 | 0.00 | H |
| ATOM | 26 | H5T  | A A | 1 | -0.457 | -8.436 | -1.844 | 1.00 | 0.00 | H |
| ATOM | 27 | H2'1 | A A | 1 | 0.995  | -7.015 | 0.356  | 1.00 | 0.00 | H |
| ATOM | 28 | H2'2 | A A | 1 | 2.469  | -6.730 | 1.271  | 1.00 | 0.00 | H |
| ATOM | 29 | H5'1 | A A | 1 | 0.983  | -6.892 | -3.462 | 1.00 | 0.00 | H |
| ATOM | 30 | H5'2 | A A | 1 | 1.435  | -8.587 | -3.186 | 1.00 | 0.00 | H |
| ATOM | 31 | C1'  | G A | 2 | 4.998  | -3.052 | 2.911  | 1.00 | 0.00 | C |
| ATOM | 32 | N1   | G A | 2 | 0.895  | -0.052 | 3.332  | 1.00 | 0.00 | N |
| ATOM | 33 | C2   | G A | 2 | 2.235  | 0.281  | 3.290  | 1.00 | 0.00 | C |
| ATOM | 34 | N2   | G A | 2 | 2.522  | 1.585  | 3.373  | 1.00 | 0.00 | N |
| ATOM | 35 | N3   | G A | 2 | 3.213  | -0.616 | 3.174  | 1.00 | 0.00 | N |
| ATOM | 36 | C4   | G A | 2 | 2.741  | -1.889 | 3.109  | 1.00 | 0.00 | C |
| ATOM | 37 | C5   | G A | 2 | 1.423  | -2.315 | 3.146  | 1.00 | 0.00 | C |
| ATOM | 38 | C6   | G A | 2 | 0.385  | -1.361 | 3.265  | 1.00 | 0.00 | C |
| ATOM | 39 | O6   | G A | 2 | -0.832 | -1.541 | 3.312  | 1.00 | 0.00 | O |
| ATOM | 40 | N7   | G A | 2 | 1.363  | -3.707 | 3.053  | 1.00 | 0.00 | N |
| ATOM | 41 | C8   | G A | 2 | 2.616  | -4.072 | 2.961  | 1.00 | 0.00 | C |
| ATOM | 42 | N9   | G A | 2 | 3.513  | -3.024 | 2.989  | 1.00 | 0.00 | N |
| ATOM | 43 | C2'  | G A | 2 | 5.630  | -4.225 | 3.648  | 1.00 | 0.00 | C |
| ATOM | 44 | C3'  | G A | 2 | 6.813  | -4.562 | 2.756  | 1.00 | 0.00 | C |
| ATOM | 45 | O3'  | G A | 2 | 7.911  | -3.718 | 3.096  | 1.00 | 0.00 | O |
| ATOM | 46 | C4'  | G A | 2 | 6.275  | -4.273 | 1.355  | 1.00 | 0.00 | C |
| ATOM | 47 | O4'  | G A | 2 | 5.357  | -3.151 | 1.546  | 1.00 | 0.00 | O |
| ATOM | 48 | C5'  | G A | 2 | 5.530  | -5.399 | 0.678  | 1.00 | 0.00 | C |
| ATOM | 49 | O5'  | G A | 2 | 4.757  | -6.135 | 1.658  | 1.00 | 0.00 | O |
| ATOM | 50 | O1P  | G A | 2 | 5.854  | -8.400 | 1.682  | 1.00 | 0.00 | O |
| ATOM | 51 | O2P  | G A | 2 | 3.432  | -8.173 | 2.293  | 1.00 | 0.00 | O |
| ATOM | 52 | P    | G A | 2 | 4.570  | -7.707 | 1.464  | 1.00 | 0.00 | P |
| ATOM | 53 | H1   | G A | 2 | 0.217  | 0.719  | 3.420  | 1.00 | 0.00 | H |
| ATOM | 54 | H8   | G A | 2 | 2.925  | -5.113 | 2.871  | 1.00 | 0.00 | H |
| ATOM | 55 | H1'  | G A | 2 | 5.378  | -2.103 | 3.290  | 1.00 | 0.00 | H |
| ATOM | 56 | H21  | G A | 2 | 1.761  | 2.274  | 3.461  | 1.00 | 0.00 | H |
| ATOM | 57 | H3'  | G A | 2 | 7.115  | -5.605 | 2.854  | 1.00 | 0.00 | H |
| ATOM | 58 | H22  | G A | 2 | 3.503  | 1.898  | 3.349  | 1.00 | 0.00 | H |
| ATOM | 59 | H4'  | G A | 2 | 7.133  | -4.020 | 0.733  | 1.00 | 0.00 | H |
| ATOM | 60 | H2'1 | G A | 2 | 4.948  | -5.071 | 3.739  | 1.00 | 0.00 | H |
| ATOM | 61 | H2'2 | G A | 2 | 5.954  | -3.956 | 4.654  | 1.00 | 0.00 | H |
| ATOM | 62 | H5'1 | G A | 2 | 4.865  | -4.983 | -0.079 | 1.00 | 0.00 | H |

|      |     |      |     |   |        |        |        |      |      |   |
|------|-----|------|-----|---|--------|--------|--------|------|------|---|
| ATOM | 63  | H5'2 | G A | 2 | 6.247  | -6.064 | 0.197  | 1.00 | 0.00 | H |
| ATOM | 64  | C1'  | G A | 3 | 5.838  | 0.469  | 6.291  | 1.00 | 0.00 | C |
| ATOM | 65  | N1   | G A | 3 | 0.755  | 0.484  | 6.712  | 1.00 | 0.00 | N |
| ATOM | 66  | C2   | G A | 3 | 1.644  | 1.541  | 6.670  | 1.00 | 0.00 | C |
| ATOM | 67  | N2   | G A | 3 | 1.109  | 2.766  | 6.754  | 1.00 | 0.00 | N |
| ATOM | 68  | N3   | G A | 3 | 2.961  | 1.390  | 6.554  | 1.00 | 0.00 | N |
| ATOM | 69  | C4   | G A | 3 | 3.328  | 0.083  | 6.489  | 1.00 | 0.00 | C |
| ATOM | 70  | C5   | G A | 3 | 2.512  | -1.036 | 6.526  | 1.00 | 0.00 | C |
| ATOM | 71  | C6   | G A | 3 | 1.112  | -0.875 | 6.645  | 1.00 | 0.00 | C |
| ATOM | 72  | O6   | G A | 3 | 0.233  | -1.736 | 6.693  | 1.00 | 0.00 | O |
| ATOM | 73  | N7   | G A | 3 | 3.281  | -2.197 | 6.433  | 1.00 | 0.00 | N |
| ATOM | 74  | C8   | G A | 3 | 4.509  | -1.757 | 6.341  | 1.00 | 0.00 | C |
| ATOM | 75  | N9   | G A | 3 | 4.619  | -0.382 | 6.369  | 1.00 | 0.00 | N |
| ATOM | 76  | C2'  | G A | 3 | 7.038  | -0.109 | 7.028  | 1.00 | 0.00 | C |
| ATOM | 77  | C3'  | G A | 3 | 8.193  | 0.314  | 6.136  | 1.00 | 0.00 | C |
| ATOM | 78  | O3'  | G A | 3 | 8.585  | 1.642  | 6.476  | 1.00 | 0.00 | O |
| ATOM | 79  | C4'  | G A | 3 | 7.589  | 0.232  | 4.735  | 1.00 | 0.00 | C |
| ATOM | 80  | O4'  | G A | 3 | 6.186  | 0.600  | 4.926  | 1.00 | 0.00 | O |
| ATOM | 81  | C5'  | G A | 3 | 7.647  | -1.117 | 4.058  | 1.00 | 0.00 | C |
| ATOM | 82  | O5'  | G A | 3 | 7.455  | -2.167 | 5.038  | 1.00 | 0.00 | O |
| ATOM | 83  | O1P  | G A | 3 | 9.674  | -3.355 | 5.062  | 1.00 | 0.00 | O |
| ATOM | 84  | O2P  | G A | 3 | 7.581  | -4.595 | 5.673  | 1.00 | 0.00 | O |
| ATOM | 85  | P    | G A | 3 | 8.228  | -3.549 | 4.844  | 1.00 | 0.00 | P |
| ATOM | 86  | H1   | G A | 3 | -0.248 | 0.710  | 6.799  | 1.00 | 0.00 | H |
| ATOM | 87  | H8   | G A | 3 | 5.371  | -2.417 | 6.251  | 1.00 | 0.00 | H |
| ATOM | 88  | H1'  | G A | 3 | 5.587  | 1.460  | 6.670  | 1.00 | 0.00 | H |
| ATOM | 89  | H21  | G A | 3 | 0.088  | 2.876  | 6.841  | 1.00 | 0.00 | H |
| ATOM | 90  | H3'  | G A | 3 | 9.051  | -0.352 | 6.234  | 1.00 | 0.00 | H |
| ATOM | 91  | H22  | G A | 3 | 1.718  | 3.595  | 6.731  | 1.00 | 0.00 | H |
| ATOM | 92  | H4'  | G A | 3 | 8.134  | 0.941  | 4.113  | 1.00 | 0.00 | H |
| ATOM | 93  | H2'1 | G A | 3 | 6.984  | -1.194 | 7.119  | 1.00 | 0.00 | H |
| ATOM | 94  | H2'2 | G A | 3 | 7.142  | 0.299  | 8.034  | 1.00 | 0.00 | H |
| ATOM | 95  | H5'1 | G A | 3 | 6.865  | -1.171 | 3.301  | 1.00 | 0.00 | H |
| ATOM | 96  | H5'2 | G A | 3 | 8.618  | -1.234 | 3.577  | 1.00 | 0.00 | H |
| ATOM | 97  | C1'  | C A | 4 | 4.447  | 3.812  | 9.671  | 1.00 | 0.00 | C |
| ATOM | 98  | N1   | C A | 4 | 3.955  | 2.408  | 9.749  | 1.00 | 0.00 | N |
| ATOM | 99  | C2   | C A | 4 | 2.582  | 2.205  | 9.867  | 1.00 | 0.00 | C |
| ATOM | 100 | O2   | C A | 4 | 1.833  | 3.189  | 9.903  | 1.00 | 0.00 | O |
| ATOM | 101 | N3   | C A | 4 | 2.115  | 0.935  | 9.939  | 1.00 | 0.00 | N |
| ATOM | 102 | C4   | C A | 4 | 2.951  | -0.110 | 9.899  | 1.00 | 0.00 | C |
| ATOM | 103 | N4   | C A | 4 | 2.439  | -1.330 | 9.970  | 1.00 | 0.00 | N |
| ATOM | 104 | C5   | C A | 4 | 4.367  | 0.071  | 9.780  | 1.00 | 0.00 | C |
| ATOM | 105 | C6   | C A | 4 | 4.816  | 1.357  | 9.706  | 1.00 | 0.00 | C |
| ATOM | 106 | C2'  | C A | 4 | 5.756  | 4.045  | 10.412 | 1.00 | 0.00 | C |
| ATOM | 107 | C3'  | C A | 4 | 6.449  | 5.064  | 9.519  | 1.00 | 0.00 | C |
| ATOM | 108 | O3'  | C A | 4 | 5.989  | 6.371  | 9.857  | 1.00 | 0.00 | O |
| ATOM | 109 | C4'  | C A | 4 | 6.011  | 4.642  | 8.119  | 1.00 | 0.00 | C |
| ATOM | 110 | O4'  | C A | 4 | 4.657  | 4.119  | 8.305  | 1.00 | 0.00 | O |
| ATOM | 111 | C5'  | C A | 4 | 6.849  | 3.581  | 7.445  | 1.00 | 0.00 | C |
| ATOM | 112 | O5'  | C A | 4 | 7.305  | 2.618  | 8.429  | 1.00 | 0.00 | O |
| ATOM | 113 | O1P  | C A | 4 | 9.799  | 2.952  | 8.460  | 1.00 | 0.00 | O |
| ATOM | 114 | O2P  | C A | 4 | 8.825  | 0.722  | 9.071  | 1.00 | 0.00 | O |
| ATOM | 115 | P    | C A | 4 | 8.740  | 1.948  | 8.240  | 1.00 | 0.00 | P |
| ATOM | 116 | H5   | C A | 4 | 5.052  | -0.777 | 9.752  | 1.00 | 0.00 | H |



|      |     |      |     |   |        |        |        |      |      |   |
|------|-----|------|-----|---|--------|--------|--------|------|------|---|
| ATOM | 117 | H6   | C A | 4 | 5.885  | 1.545  | 9.610  | 1.00 | 0.00 | H |
| ATOM | 118 | H1'  | C A | 4 | 3.663  | 4.468  | 10.046 | 1.00 | 0.00 | H |
| ATOM | 119 | H3'  | C A | 4 | 7.533  | 5.025  | 9.622  | 1.00 | 0.00 | H |
| ATOM | 120 | H4'  | C A | 4 | 6.041  | 5.535  | 7.495  | 1.00 | 0.00 | H |
| ATOM | 121 | H41  | C A | 4 | 3.060  | -2.152 | 9.940  | 1.00 | 0.00 | H |
| ATOM | 122 | H42  | C A | 4 | 1.420  | -1.458 | 10.057 | 1.00 | 0.00 | H |
| ATOM | 123 | H2'1 | C A | 4 | 6.347  | 3.135  | 10.506 | 1.00 | 0.00 | H |
| ATOM | 124 | H2'2 | C A | 4 | 5.598  | 4.439  | 11.417 | 1.00 | 0.00 | H |
| ATOM | 125 | H5'1 | C A | 4 | 6.249  | 3.077  | 6.687  | 1.00 | 0.00 | H |
| ATOM | 126 | H5'2 | C A | 4 | 7.707  | 4.053  | 6.967  | 1.00 | 0.00 | H |
| ATOM | 127 | C1'  | C A | 5 | 1.358  | 5.698  | 13.051 | 1.00 | 0.00 | C |
| ATOM | 128 | N1   | C A | 5 | 1.785  | 4.274  | 13.129 | 1.00 | 0.00 | N |
| ATOM | 129 | C2   | C A | 5 | 0.794  | 3.302  | 13.247 | 1.00 | 0.00 | C |
| ATOM | 130 | O2   | C A | 5 | -0.392 | 3.657  | 13.283 | 1.00 | 0.00 | O |
| ATOM | 131 | N3   | C A | 5 | 1.162  | 1.999  | 13.319 | 1.00 | 0.00 | N |
| ATOM | 132 | C4   | C A | 5 | 2.452  | 1.645  | 13.279 | 1.00 | 0.00 | C |
| ATOM | 133 | N4   | C A | 5 | 2.755  | 0.358  | 13.350 | 1.00 | 0.00 | N |
| ATOM | 134 | C5   | C A | 5 | 3.492  | 2.624  | 13.160 | 1.00 | 0.00 | C |
| ATOM | 135 | C6   | C A | 5 | 3.098  | 3.928  | 13.086 | 1.00 | 0.00 | C |
| ATOM | 136 | C2'  | C A | 5 | 2.280  | 6.656  | 13.792 | 1.00 | 0.00 | C |
| ATOM | 137 | C3'  | C A | 5 | 2.241  | 7.887  | 12.899 | 1.00 | 0.00 | C |
| ATOM | 138 | O3'  | C A | 5 | 1.101  | 8.674  | 13.237 | 1.00 | 0.00 | O |
| ATOM | 139 | C4'  | C A | 5 | 2.135  | 7.288  | 11.499 | 1.00 | 0.00 | C |
| ATOM | 140 | O4'  | C A | 5 | 1.347  | 6.070  | 11.685 | 1.00 | 0.00 | O |
| ATOM | 141 | C5'  | C A | 5 | 3.437  | 6.923  | 10.825 | 1.00 | 0.00 | C |
| ATOM | 142 | O5'  | C A | 5 | 4.372  | 6.411  | 11.809 | 1.00 | 0.00 | O |
| ATOM | 143 | O1P  | C A | 5 | 6.193  | 8.148  | 11.840 | 1.00 | 0.00 | O |
| ATOM | 144 | O2P  | C A | 5 | 6.715  | 5.771  | 12.451 | 1.00 | 0.00 | O |
| ATOM | 145 | P    | C A | 5 | 5.926  | 6.713  | 11.620 | 1.00 | 0.00 | P |
| ATOM | 146 | H5   | C A | 5 | 4.545  | 2.341  | 13.132 | 1.00 | 0.00 | H |
| ATOM | 147 | H6   | C A | 5 | 3.853  | 4.709  | 12.990 | 1.00 | 0.00 | H |
| ATOM | 148 | H1'  | C A | 5 | 0.337  | 5.768  | 13.426 | 1.00 | 0.00 | H |
| ATOM | 149 | H3'  | C A | 5 | 3.141  | 8.494  | 13.002 | 1.00 | 0.00 | H |
| ATOM | 150 | H4'  | C A | 5 | 1.635  | 8.029  | 10.875 | 1.00 | 0.00 | H |
| ATOM | 151 | H41  | C A | 5 | 3.740  | 0.058  | 13.320 | 1.00 | 0.00 | H |
| ATOM | 152 | H42  | C A | 5 | 2.005  | -0.344 | 13.437 | 1.00 | 0.00 | H |
| ATOM | 153 | H2'1 | C A | 5 | 3.293  | 6.267  | 13.886 | 1.00 | 0.00 | H |
| ATOM | 154 | H2'2 | C A | 5 | 1.920  | 6.882  | 14.797 | 1.00 | 0.00 | H |
| ATOM | 155 | H5'1 | C A | 5 | 3.247  | 6.162  | 10.067 | 1.00 | 0.00 | H |
| ATOM | 156 | H5'2 | C A | 5 | 3.853  | 7.809  | 10.347 | 1.00 | 0.00 | H |
| ATOM | 157 | C1'  | G A | 6 | -2.250 | 5.407  | 16.431 | 1.00 | 0.00 | C |
| ATOM | 158 | N1   | G A | 6 | -0.693 | 0.567  | 16.851 | 1.00 | 0.00 | N |
| ATOM | 159 | C2   | G A | 6 | -1.975 | 1.087  | 16.810 | 1.00 | 0.00 | C |
| ATOM | 160 | N2   | G A | 6 | -2.974 | 0.201  | 16.895 | 1.00 | 0.00 | N |
| ATOM | 161 | N3   | G A | 6 | -2.237 | 2.388  | 16.694 | 1.00 | 0.00 | N |
| ATOM | 162 | C4   | G A | 6 | -1.107 | 3.139  | 16.629 | 1.00 | 0.00 | C |
| ATOM | 163 | C5   | G A | 6 | 0.209  | 2.709  | 16.666 | 1.00 | 0.00 | C |
| ATOM | 164 | C6   | G A | 6 | 0.489  | 1.329  | 16.785 | 1.00 | 0.00 | C |
| ATOM | 165 | O6   | G A | 6 | 1.579  | 0.759  | 16.835 | 1.00 | 0.00 | O |
| ATOM | 166 | N7   | G A | 6 | 1.076  | 3.799  | 16.573 | 1.00 | 0.00 | N |
| ATOM | 167 | C8   | G A | 6 | 0.278  | 4.831  | 16.481 | 1.00 | 0.00 | C |
| ATOM | 168 | N9   | G A | 6 | -1.064 | 4.511  | 16.509 | 1.00 | 0.00 | N |
| ATOM | 169 | C2'  | G A | 6 | -2.071 | 6.727  | 17.168 | 1.00 | 0.00 | C |
| ATOM | 170 | C3'  | G A | 6 | -2.831 | 7.695  | 16.276 | 1.00 | 0.00 | C |

|      |     |      |     |   |        |        |        |      |      |   |
|------|-----|------|-----|---|--------|--------|--------|------|------|---|
| ATOM | 171 | O3'  | G A | 6 | -4.215 | 7.658  | 16.616 | 1.00 | 0.00 | O |
| ATOM | 172 | C4'  | G A | 6 | -2.565 | 7.146  | 14.875 | 1.00 | 0.00 | C |
| ATOM | 173 | O4'  | G A | 6 | -2.482 | 5.698  | 15.066 | 1.00 | 0.00 | O |
| ATOM | 174 | C5'  | G A | 6 | -1.301 | 7.618  | 14.198 | 1.00 | 0.00 | C |
| ATOM | 175 | O5'  | G A | 6 | -0.242 | 7.760  | 15.178 | 1.00 | 0.00 | O |
| ATOM | 176 | O1P  | G A | 6 | 0.201  | 10.237 | 15.202 | 1.00 | 0.00 | O |
| ATOM | 177 | O2P  | G A | 6 | 2.028  | 8.630  | 15.813 | 1.00 | 0.00 | O |
| ATOM | 178 | P    | G A | 6 | 0.833  | 8.922  | 14.984 | 1.00 | 0.00 | P |
| ATOM | 179 | H1   | G A | 6 | -0.598 | -0.457 | 16.936 | 1.00 | 0.00 | H |
| ATOM | 180 | H8   | G A | 6 | 0.639  | 5.856  | 16.391 | 1.00 | 0.00 | H |
| ATOM | 181 | H1'  | G A | 6 | -3.115 | 4.862  | 16.810 | 1.00 | 0.00 | H |
| ATOM | 182 | H21  | G A | 6 | -2.764 | -0.804 | 16.981 | 1.00 | 0.00 | H |
| ATOM | 183 | H3'  | G A | 6 | -2.463 | 8.717  | 16.374 | 1.00 | 0.00 | H |
| ATOM | 184 | H22  | G A | 6 | -3.952 | 0.524  | 16.873 | 1.00 | 0.00 | H |
| ATOM | 185 | H4'  | G A | 6 | -3.408 | 7.445  | 14.253 | 1.00 | 0.00 | H |
| ATOM | 186 | H2'1 | G A | 6 | -1.022 | 7.011  | 17.259 | 1.00 | 0.00 | H |
| ATOM | 187 | H2'2 | G A | 6 | -2.491 | 6.700  | 18.174 | 1.00 | 0.00 | H |
| ATOM | 188 | H5'1 | G A | 6 | -1.007 | 6.892  | 13.441 | 1.00 | 0.00 | H |
| ATOM | 189 | H5'2 | G A | 6 | -1.489 | 8.578  | 13.717 | 1.00 | 0.00 | H |
| ATOM | 190 | C1'  | C A | 7 | -4.999 | 3.052  | 19.811 | 1.00 | 0.00 | C |
| ATOM | 191 | N1   | C A | 7 | -3.513 | 3.018  | 19.889 | 1.00 | 0.00 | N |
| ATOM | 192 | C2   | C A | 7 | -2.895 | 1.775  | 20.007 | 1.00 | 0.00 | C |
| ATOM | 193 | O2   | C A | 7 | -3.599 | 0.758  | 20.043 | 1.00 | 0.00 | O |
| ATOM | 194 | N3   | C A | 7 | -1.542 | 1.722  | 20.079 | 1.00 | 0.00 | N |
| ATOM | 195 | C4   | C A | 7 | -0.806 | 2.840  | 20.039 | 1.00 | 0.00 | C |
| ATOM | 196 | N4   | C A | 7 | 0.512  | 2.730  | 20.110 | 1.00 | 0.00 | N |
| ATOM | 197 | C5   | C A | 7 | -1.415 | 4.133  | 19.922 | 1.00 | 0.00 | C |
| ATOM | 198 | C6   | C A | 7 | -2.779 | 4.162  | 19.846 | 1.00 | 0.00 | C |
| ATOM | 199 | C2'  | C A | 7 | -5.626 | 4.225  | 20.552 | 1.00 | 0.00 | C |
| ATOM | 200 | C3'  | C A | 7 | -6.809 | 4.568  | 19.659 | 1.00 | 0.00 | C |
| ATOM | 201 | O3'  | C A | 7 | -7.910 | 3.727  | 19.997 | 1.00 | 0.00 | O |
| ATOM | 202 | C4'  | C A | 7 | -6.272 | 4.282  | 18.259 | 1.00 | 0.00 | C |
| ATOM | 203 | O4'  | C A | 7 | -5.356 | 3.156  | 18.445 | 1.00 | 0.00 | O |
| ATOM | 204 | C5'  | C A | 7 | -5.521 | 5.408  | 17.585 | 1.00 | 0.00 | C |
| ATOM | 205 | O5'  | C A | 7 | -4.747 | 6.139  | 18.569 | 1.00 | 0.00 | O |
| ATOM | 206 | O1P  | C A | 7 | -5.836 | 8.408  | 18.600 | 1.00 | 0.00 | O |
| ATOM | 207 | O2P  | C A | 7 | -3.414 | 8.169  | 19.211 | 1.00 | 0.00 | O |
| ATOM | 208 | P    | C A | 7 | -4.553 | 7.710  | 18.380 | 1.00 | 0.00 | P |
| ATOM | 209 | H5   | C A | 7 | -0.821 | 5.047  | 19.895 | 1.00 | 0.00 | H |
| ATOM | 210 | H6   | C A | 7 | -3.288 | 5.121  | 19.748 | 1.00 | 0.00 | H |
| ATOM | 211 | H1'  | C A | 7 | -5.382 | 2.103  | 20.186 | 1.00 | 0.00 | H |
| ATOM | 212 | H3'  | C A | 7 | -7.107 | 5.612  | 19.762 | 1.00 | 0.00 | H |
| ATOM | 213 | H4'  | C A | 7 | -7.131 | 4.035  | 17.635 | 1.00 | 0.00 | H |
| ATOM | 214 | H41  | C A | 7 | 1.102  | 3.574  | 20.079 | 1.00 | 0.00 | H |
| ATOM | 215 | H42  | C A | 7 | 0.949  | 1.801  | 20.197 | 1.00 | 0.00 | H |
| ATOM | 216 | H2'1 | C A | 7 | -4.943 | 5.068  | 20.646 | 1.00 | 0.00 | H |
| ATOM | 217 | H2'2 | C A | 7 | -5.952 | 3.953  | 21.557 | 1.00 | 0.00 | H |
| ATOM | 218 | H5'1 | C A | 7 | -4.856 | 4.992  | 16.827 | 1.00 | 0.00 | H |
| ATOM | 219 | H5'2 | C A | 7 | -6.235 | 6.078  | 17.107 | 1.00 | 0.00 | H |
| ATOM | 220 | C1'  | A A | 8 | -5.862 | -0.462 | 23.189 | 1.00 | 0.00 | C |
| ATOM | 221 | N1   | A A | 8 | -0.747 | -0.505 | 23.614 | 1.00 | 0.00 | N |
| ATOM | 222 | C2   | A A | 8 | -1.653 | -1.477 | 23.568 | 1.00 | 0.00 | C |
| ATOM | 223 | N3   | A A | 8 | -2.962 | -1.397 | 23.454 | 1.00 | 0.00 | N |
| ATOM | 224 | C4   | A A | 8 | -3.344 | -0.108 | 23.386 | 1.00 | 0.00 | C |

|      |     |      |     |   |        |        |        |      |      |   |
|------|-----|------|-----|---|--------|--------|--------|------|------|---|
| ATOM | 225 | C5   | A A | 8 | -2.545 | 1.000  | 23.420 | 1.00 | 0.00 | C |
| ATOM | 226 | C6   | A A | 8 | -1.159 | 0.770  | 23.542 | 1.00 | 0.00 | C |
| ATOM | 227 | N6   | A A | 8 | -0.252 | 1.761  | 23.588 | 1.00 | 0.00 | N |
| ATOM | 228 | N7   | A A | 8 | -3.294 | 2.160  | 23.324 | 1.00 | 0.00 | N |
| ATOM | 229 | C8   | A A | 8 | -4.520 | 1.733  | 23.239 | 1.00 | 0.00 | C |
| ATOM | 230 | N9   | A A | 8 | -4.628 | 0.366  | 23.268 | 1.00 | 0.00 | N |
| ATOM | 231 | C2'  | A A | 8 | -7.052 | 0.138  | 23.926 | 1.00 | 0.00 | C |
| ATOM | 232 | C3'  | A A | 8 | -8.214 | -0.266 | 23.033 | 1.00 | 0.00 | C |
| ATOM | 233 | O3'  | A A | 8 | -8.628 | -1.586 | 23.374 | 1.00 | 0.00 | O |
| ATOM | 234 | C4'  | A A | 8 | -7.608 | -0.195 | 21.632 | 1.00 | 0.00 | C |
| ATOM | 235 | O4'  | A A | 8 | -6.210 | -0.587 | 21.824 | 1.00 | 0.00 | O |
| ATOM | 236 | C5'  | A A | 8 | -7.644 | 1.154  | 20.954 | 1.00 | 0.00 | C |
| ATOM | 237 | O5'  | A A | 8 | -7.432 | 2.202  | 21.934 | 1.00 | 0.00 | O |
| ATOM | 238 | O1P  | A A | 8 | -9.631 | 3.428  | 21.957 | 1.00 | 0.00 | O |
| ATOM | 239 | O2P  | A A | 8 | -7.515 | 4.632  | 22.568 | 1.00 | 0.00 | O |
| ATOM | 240 | P    | A A | 8 | -8.181 | 3.597  | 21.739 | 1.00 | 0.00 | P |
| ATOM | 241 | H2   | A A | 8 | -1.254 | -2.488 | 23.634 | 1.00 | 0.00 | H |
| ATOM | 242 | H8   | A A | 8 | -5.380 | 2.397  | 23.153 | 1.00 | 0.00 | H |
| ATOM | 243 | H1'  | A A | 8 | -5.629 | -1.457 | 23.568 | 1.00 | 0.00 | H |
| ATOM | 244 | H3'  | A A | 8 | -9.060 | 0.414  | 23.130 | 1.00 | 0.00 | H |
| ATOM | 245 | H4'  | A A | 8 | -8.165 | -0.895 | 21.011 | 1.00 | 0.00 | H |
| ATOM | 246 | H61  | A A | 8 | 0.749  | 1.539  | 23.675 | 1.00 | 0.00 | H |
| ATOM | 247 | H62  | A A | 8 | -0.561 | 2.743  | 23.536 | 1.00 | 0.00 | H |
| ATOM | 248 | H2'1 | A A | 8 | -6.979 | 1.221  | 24.016 | 1.00 | 0.00 | H |
| ATOM | 249 | H2'2 | A A | 8 | -7.163 | -0.269 | 24.931 | 1.00 | 0.00 | H |
| ATOM | 250 | H5'1 | A A | 8 | -6.859 | 1.194  | 20.198 | 1.00 | 0.00 | H |
| ATOM | 251 | H5'2 | A A | 8 | -8.612 | 1.289  | 20.474 | 1.00 | 0.00 | H |
| ATOM | 252 | C1'  | C A | 9 | -4.447 | -3.812 | 26.571 | 1.00 | 0.00 | C |
| ATOM | 253 | N1   | C A | 9 | -3.955 | -2.409 | 26.649 | 1.00 | 0.00 | N |
| ATOM | 254 | C2   | C A | 9 | -2.582 | -2.204 | 26.767 | 1.00 | 0.00 | C |
| ATOM | 255 | O2   | C A | 9 | -1.833 | -3.189 | 26.803 | 1.00 | 0.00 | O |
| ATOM | 256 | N3   | C A | 9 | -2.114 | -0.935 | 26.839 | 1.00 | 0.00 | N |
| ATOM | 257 | C4   | C A | 9 | -2.950 | 0.111  | 26.799 | 1.00 | 0.00 | C |
| ATOM | 258 | N4   | C A | 9 | -2.438 | 1.331  | 26.870 | 1.00 | 0.00 | N |
| ATOM | 259 | C5   | C A | 9 | -4.368 | -0.069 | 26.682 | 1.00 | 0.00 | C |
| ATOM | 260 | C6   | C A | 9 | -4.817 | -1.357 | 26.606 | 1.00 | 0.00 | C |
| ATOM | 261 | C2'  | C A | 9 | -5.756 | -4.045 | 27.312 | 1.00 | 0.00 | C |
| ATOM | 262 | C3'  | C A | 9 | -6.449 | -5.064 | 26.419 | 1.00 | 0.00 | C |
| ATOM | 263 | O3'  | C A | 9 | -5.989 | -6.371 | 26.757 | 1.00 | 0.00 | O |
| ATOM | 264 | C4'  | C A | 9 | -6.011 | -4.642 | 25.019 | 1.00 | 0.00 | C |
| ATOM | 265 | O4'  | C A | 9 | -4.657 | -4.119 | 25.205 | 1.00 | 0.00 | O |
| ATOM | 266 | C5'  | C A | 9 | -6.849 | -3.581 | 24.345 | 1.00 | 0.00 | C |
| ATOM | 267 | O5'  | C A | 9 | -7.305 | -2.618 | 25.329 | 1.00 | 0.00 | O |
| ATOM | 268 | O1P  | C A | 9 | -9.799 | -2.952 | 25.360 | 1.00 | 0.00 | O |
| ATOM | 269 | O2P  | C A | 9 | -8.825 | -0.722 | 25.971 | 1.00 | 0.00 | O |
| ATOM | 270 | P    | C A | 9 | -8.740 | -1.948 | 25.140 | 1.00 | 0.00 | P |
| ATOM | 271 | H5   | C A | 9 | -5.053 | 0.779  | 26.655 | 1.00 | 0.00 | H |
| ATOM | 272 | H6   | C A | 9 | -5.886 | -1.545 | 26.508 | 1.00 | 0.00 | H |
| ATOM | 273 | H1'  | C A | 9 | -3.663 | -4.469 | 26.946 | 1.00 | 0.00 | H |
| ATOM | 274 | H3'  | C A | 9 | -7.533 | -5.025 | 26.522 | 1.00 | 0.00 | H |
| ATOM | 275 | H4'  | C A | 9 | -6.041 | -5.535 | 24.395 | 1.00 | 0.00 | H |
| ATOM | 276 | H41  | C A | 9 | -3.059 | 2.153  | 26.839 | 1.00 | 0.00 | H |
| ATOM | 277 | H42  | C A | 9 | -1.419 | 1.458  | 26.957 | 1.00 | 0.00 | H |
| ATOM | 278 | H2'1 | C A | 9 | -6.347 | -3.135 | 27.406 | 1.00 | 0.00 | H |

|      |     |      |   |   |    |        |         |        |      |      |   |
|------|-----|------|---|---|----|--------|---------|--------|------|------|---|
| ATOM | 279 | H2'2 | C | A | 9  | -5.598 | -4.439  | 28.317 | 1.00 | 0.00 | H |
| ATOM | 280 | H5'1 | C | A | 9  | -6.249 | -3.077  | 23.587 | 1.00 | 0.00 | H |
| ATOM | 281 | H5'2 | C | A | 9  | -7.707 | -4.053  | 23.867 | 1.00 | 0.00 | H |
| ATOM | 282 | C1'  | C | A | 10 | -1.358 | -5.698  | 29.951 | 1.00 | 0.00 | C |
| ATOM | 283 | N1   | C | A | 10 | -1.785 | -4.274  | 30.029 | 1.00 | 0.00 | N |
| ATOM | 284 | C2   | C | A | 10 | -0.794 | -3.302  | 30.147 | 1.00 | 0.00 | C |
| ATOM | 285 | O2   | C | A | 10 | 0.392  | -3.657  | 30.183 | 1.00 | 0.00 | O |
| ATOM | 286 | N3   | C | A | 10 | -1.161 | -1.999  | 30.219 | 1.00 | 0.00 | N |
| ATOM | 287 | C4   | C | A | 10 | -2.452 | -1.644  | 30.179 | 1.00 | 0.00 | C |
| ATOM | 288 | N4   | C | A | 10 | -2.755 | -0.356  | 30.250 | 1.00 | 0.00 | N |
| ATOM | 289 | C5   | C | A | 10 | -3.493 | -2.623  | 30.062 | 1.00 | 0.00 | C |
| ATOM | 290 | C6   | C | A | 10 | -3.099 | -3.929  | 29.986 | 1.00 | 0.00 | C |
| ATOM | 291 | C2'  | C | A | 10 | -2.280 | -6.656  | 30.692 | 1.00 | 0.00 | C |
| ATOM | 292 | C3'  | C | A | 10 | -2.241 | -7.887  | 29.799 | 1.00 | 0.00 | C |
| ATOM | 293 | O3'  | C | A | 10 | -1.101 | -8.674  | 30.137 | 1.00 | 0.00 | O |
| ATOM | 294 | C4'  | C | A | 10 | -2.135 | -7.288  | 28.399 | 1.00 | 0.00 | C |
| ATOM | 295 | O4'  | C | A | 10 | -1.347 | -6.070  | 28.585 | 1.00 | 0.00 | O |
| ATOM | 296 | C5'  | C | A | 10 | -3.437 | -6.922  | 27.725 | 1.00 | 0.00 | C |
| ATOM | 297 | O5'  | C | A | 10 | -4.372 | -6.411  | 28.709 | 1.00 | 0.00 | O |
| ATOM | 298 | O1P  | C | A | 10 | -6.193 | -8.148  | 28.740 | 1.00 | 0.00 | O |
| ATOM | 299 | O2P  | C | A | 10 | -6.715 | -5.771  | 29.351 | 1.00 | 0.00 | O |
| ATOM | 300 | P    | C | A | 10 | -5.926 | -6.713  | 28.520 | 1.00 | 0.00 | P |
| ATOM | 301 | H5   | C | A | 10 | -4.546 | -2.340  | 30.035 | 1.00 | 0.00 | H |
| ATOM | 302 | H6   | C | A | 10 | -3.854 | -4.709  | 29.888 | 1.00 | 0.00 | H |
| ATOM | 303 | H1'  | C | A | 10 | -0.337 | -5.769  | 30.326 | 1.00 | 0.00 | H |
| ATOM | 304 | H3'  | C | A | 10 | -3.141 | -8.494  | 29.902 | 1.00 | 0.00 | H |
| ATOM | 305 | H4'  | C | A | 10 | -1.635 | -8.029  | 27.775 | 1.00 | 0.00 | H |
| ATOM | 306 | H41  | C | A | 10 | -3.740 | -0.056  | 30.219 | 1.00 | 0.00 | H |
| ATOM | 307 | H42  | C | A | 10 | -2.005 | 0.345   | 30.337 | 1.00 | 0.00 | H |
| ATOM | 308 | H2'1 | C | A | 10 | -3.293 | -6.267  | 30.786 | 1.00 | 0.00 | H |
| ATOM | 309 | H2'2 | C | A | 10 | -1.920 | -6.882  | 31.697 | 1.00 | 0.00 | H |
| ATOM | 310 | H5'1 | C | A | 10 | -3.247 | -6.161  | 26.967 | 1.00 | 0.00 | H |
| ATOM | 311 | H5'2 | C | A | 10 | -3.853 | -7.808  | 27.247 | 1.00 | 0.00 | H |
| ATOM | 312 | C1'  | T | A | 11 | 2.250  | -5.431  | 33.329 | 1.00 | 0.00 | C |
| ATOM | 313 | N1   | T | A | 11 | 1.083  | -4.513  | 33.410 | 1.00 | 0.00 | N |
| ATOM | 314 | C2   | T | A | 11 | 1.350  | -3.164  | 33.529 | 1.00 | 0.00 | C |
| ATOM | 315 | O2   | T | A | 11 | 2.483  | -2.716  | 33.569 | 1.00 | 0.00 | O |
| ATOM | 316 | N3   | T | A | 11 | 0.237  | -2.346  | 33.600 | 1.00 | 0.00 | N |
| ATOM | 317 | C4   | T | A | 11 | -1.082 | -2.750  | 33.567 | 1.00 | 0.00 | C |
| ATOM | 318 | O4   | T | A | 11 | -1.999 | -1.922  | 33.642 | 1.00 | 0.00 | O |
| ATOM | 319 | C5   | T | A | 11 | -1.261 | -4.177  | 33.441 | 1.00 | 0.00 | C |
| ATOM | 320 | C6   | T | A | 11 | -0.199 | -5.003  | 33.368 | 1.00 | 0.00 | C |
| ATOM | 321 | C7   | T | A | 11 | -2.680 | -4.660  | 33.398 | 1.00 | 0.00 | C |
| ATOM | 322 | C2'  | T | A | 11 | 2.048  | -6.748  | 34.068 | 1.00 | 0.00 | C |
| ATOM | 323 | C3'  | T | A | 11 | 2.787  | -7.731  | 33.174 | 1.00 | 0.00 | C |
| ATOM | 324 | O3'  | T | A | 11 | 4.173  | -7.720  | 33.510 | 1.00 | 0.00 | O |
| ATOM | 325 | C4'  | T | A | 11 | 2.528  | -7.178  | 31.775 | 1.00 | 0.00 | C |
| ATOM | 326 | O4'  | T | A | 11 | 2.473  | -5.728  | 31.964 | 1.00 | 0.00 | O |
| ATOM | 327 | C5'  | T | A | 11 | 1.252  | -7.626  | 31.100 | 1.00 | 0.00 | C |
| ATOM | 328 | O5'  | T | A | 11 | 0.195  | -7.747  | 32.084 | 1.00 | 0.00 | O |
| ATOM | 329 | O1P  | T | A | 11 | -0.296 | -10.215 | 32.112 | 1.00 | 0.00 | O |
| ATOM | 330 | O2P  | T | A | 11 | -2.090 | -8.573  | 32.727 | 1.00 | 0.00 | O |
| ATOM | 331 | P    | T | A | 11 | -0.903 | -8.888  | 31.895 | 1.00 | 0.00 | P |
| ATOM | 332 | H3   | T | A | 11 | 0.409  | -1.335  | 33.685 | 1.00 | 0.00 | H |

|      |     |      |     |    |        |        |        |      |      |   |
|------|-----|------|-----|----|--------|--------|--------|------|------|---|
| ATOM | 333 | H6   | T A | 11 | -0.359 | -6.078 | 33.273 | 1.00 | 0.00 | H |
| ATOM | 334 | H1'  | T A | 11 | 3.127  | -4.904 | 33.705 | 1.00 | 0.00 | H |
| ATOM | 335 | H3'  | T A | 11 | 2.400  | -8.744 | 33.275 | 1.00 | 0.00 | H |
| ATOM | 336 | H4'  | T A | 11 | 3.364  | -7.494 | 31.149 | 1.00 | 0.00 | H |
| ATOM | 337 | H71  | T A | 11 | -2.887 | -5.259 | 34.285 | 1.00 | 0.00 | H |
| ATOM | 338 | H72  | T A | 11 | -3.355 | -3.804 | 33.373 | 1.00 | 0.00 | H |
| ATOM | 339 | H73  | T A | 11 | -2.832 | -5.268 | 32.506 | 1.00 | 0.00 | H |
| ATOM | 340 | H2'1 | T A | 11 | 0.996  | -7.011 | 34.162 | 1.00 | 0.00 | H |
| ATOM | 341 | H2'2 | T A | 11 | 2.472  | -6.728 | 35.073 | 1.00 | 0.00 | H |
| ATOM | 342 | H5'1 | T A | 11 | 0.970  | -6.894 | 30.344 | 1.00 | 0.00 | H |
| ATOM | 343 | H5'2 | T A | 11 | 1.421  | -8.590 | 30.621 | 1.00 | 0.00 | H |
| ATOM | 344 | C1'  | A A | 12 | 5.014  | -3.071 | 36.709 | 1.00 | 0.00 | C |
| ATOM | 345 | N1   | A A | 12 | 0.901  | -0.030 | 37.133 | 1.00 | 0.00 | N |
| ATOM | 346 | C2   | A A | 12 | 2.205  | 0.223  | 37.088 | 1.00 | 0.00 | C |
| ATOM | 347 | N3   | A A | 12 | 3.217  | -0.612 | 36.974 | 1.00 | 0.00 | N |
| ATOM | 348 | C4   | A A | 12 | 2.769  | -1.878 | 36.906 | 1.00 | 0.00 | C |
| ATOM | 349 | C5   | A A | 12 | 1.472  | -2.305 | 36.940 | 1.00 | 0.00 | C |
| ATOM | 350 | C6   | A A | 12 | 0.485  | -1.304 | 37.062 | 1.00 | 0.00 | C |
| ATOM | 351 | N6   | A A | 12 | -0.831 | -1.573 | 37.108 | 1.00 | 0.00 | N |
| ATOM | 352 | N7   | A A | 12 | 1.396  | -3.683 | 36.844 | 1.00 | 0.00 | N |
| ATOM | 353 | C8   | A A | 12 | 2.638  | -4.059 | 36.759 | 1.00 | 0.00 | C |
| ATOM | 354 | N9   | A A | 12 | 3.529  | -3.016 | 36.788 | 1.00 | 0.00 | N |
| ATOM | 355 | C2'  | A A | 12 | 5.623  | -4.256 | 37.446 | 1.00 | 0.00 | C |
| ATOM | 356 | C3'  | A A | 12 | 6.801  | -4.613 | 36.553 | 1.00 | 0.00 | C |
| ATOM | 357 | O3'  | A A | 12 | 7.913  | -3.788 | 36.894 | 1.00 | 0.00 | O |
| ATOM | 358 | C4'  | A A | 12 | 6.269  | -4.314 | 35.152 | 1.00 | 0.00 | C |
| ATOM | 359 | O4'  | A A | 12 | 5.369  | -3.176 | 35.344 | 1.00 | 0.00 | O |
| ATOM | 360 | C5'  | A A | 12 | 5.505  | -5.426 | 34.474 | 1.00 | 0.00 | C |
| ATOM | 361 | O5'  | A A | 12 | 4.718  | -6.150 | 35.454 | 1.00 | 0.00 | O |
| ATOM | 362 | O1P  | A A | 12 | 5.776  | -8.434 | 35.477 | 1.00 | 0.00 | O |
| ATOM | 363 | O2P  | A A | 12 | 3.357  | -8.165 | 36.088 | 1.00 | 0.00 | O |
| ATOM | 364 | P    | A A | 12 | 4.504  | -7.718 | 35.259 | 1.00 | 0.00 | P |
| ATOM | 365 | H2   | A A | 12 | 2.477  | 1.276  | 37.154 | 1.00 | 0.00 | H |
| ATOM | 366 | H8   | A A | 12 | 2.944  | -5.102 | 36.673 | 1.00 | 0.00 | H |
| ATOM | 367 | H1'  | A A | 12 | 5.410  | -2.130 | 37.088 | 1.00 | 0.00 | H |
| ATOM | 368 | H3'  | A A | 12 | 7.086  | -5.660 | 36.650 | 1.00 | 0.00 | H |
| ATOM | 369 | H4'  | A A | 12 | 7.132  | -4.076 | 34.531 | 1.00 | 0.00 | H |
| ATOM | 370 | H61  | A A | 12 | -1.511 | -0.805 | 37.195 | 1.00 | 0.00 | H |
| ATOM | 371 | H62  | A A | 12 | -1.159 | -2.549 | 37.056 | 1.00 | 0.00 | H |
| ATOM | 372 | H2'1 | A A | 12 | 4.928  | -5.090 | 37.536 | 1.00 | 0.00 | H |
| ATOM | 373 | H2'2 | A A | 12 | 5.952  | -3.993 | 38.451 | 1.00 | 0.00 | H |
| ATOM | 374 | H5'1 | A A | 12 | 4.847  | -4.998 | 33.718 | 1.00 | 0.00 | H |
| ATOM | 375 | H5'2 | A A | 12 | 6.209  | -6.104 | 33.994 | 1.00 | 0.00 | H |
| ATOM | 376 | C1'  | G A | 13 | 5.838  | 0.469  | 40.091 | 1.00 | 0.00 | C |
| ATOM | 377 | N1   | G A | 13 | 0.754  | 0.484  | 40.511 | 1.00 | 0.00 | N |
| ATOM | 378 | C2   | G A | 13 | 1.644  | 1.542  | 40.470 | 1.00 | 0.00 | C |
| ATOM | 379 | N2   | G A | 13 | 1.110  | 2.768  | 40.555 | 1.00 | 0.00 | N |
| ATOM | 380 | N3   | G A | 13 | 2.962  | 1.390  | 40.354 | 1.00 | 0.00 | N |
| ATOM | 381 | C4   | G A | 13 | 3.328  | 0.083  | 40.289 | 1.00 | 0.00 | C |
| ATOM | 382 | C5   | G A | 13 | 2.512  | -1.036 | 40.326 | 1.00 | 0.00 | C |
| ATOM | 383 | C6   | G A | 13 | 1.112  | -0.875 | 40.445 | 1.00 | 0.00 | C |
| ATOM | 384 | O6   | G A | 13 | 0.234  | -1.737 | 40.495 | 1.00 | 0.00 | O |
| ATOM | 385 | N7   | G A | 13 | 3.281  | -2.197 | 40.233 | 1.00 | 0.00 | N |
| ATOM | 386 | C8   | G A | 13 | 4.509  | -1.757 | 40.141 | 1.00 | 0.00 | C |

|      |     |      |     |    |        |        |        |      |      |   |
|------|-----|------|-----|----|--------|--------|--------|------|------|---|
| ATOM | 387 | N9   | G A | 13 | 4.619  | -0.382 | 40.169 | 1.00 | 0.00 | N |
| ATOM | 388 | C2'  | G A | 13 | 7.038  | -0.109 | 40.828 | 1.00 | 0.00 | C |
| ATOM | 389 | C3'  | G A | 13 | 8.193  | 0.314  | 39.936 | 1.00 | 0.00 | C |
| ATOM | 390 | O3'  | G A | 13 | 8.585  | 1.642  | 40.276 | 1.00 | 0.00 | O |
| ATOM | 391 | C4'  | G A | 13 | 7.589  | 0.232  | 38.535 | 1.00 | 0.00 | C |
| ATOM | 392 | O4'  | G A | 13 | 6.186  | 0.600  | 38.726 | 1.00 | 0.00 | O |
| ATOM | 393 | C5'  | G A | 13 | 7.647  | -1.117 | 37.858 | 1.00 | 0.00 | C |
| ATOM | 394 | O5'  | G A | 13 | 7.455  | -2.167 | 38.838 | 1.00 | 0.00 | O |
| ATOM | 395 | O1P  | G A | 13 | 9.674  | -3.355 | 38.862 | 1.00 | 0.00 | O |
| ATOM | 396 | O2P  | G A | 13 | 7.581  | -4.595 | 39.473 | 1.00 | 0.00 | O |
| ATOM | 397 | P    | G A | 13 | 8.228  | -3.549 | 38.644 | 1.00 | 0.00 | P |
| ATOM | 398 | H1   | G A | 13 | -0.249 | 0.710  | 40.596 | 1.00 | 0.00 | H |
| ATOM | 399 | H8   | G A | 13 | 5.372  | -2.417 | 40.051 | 1.00 | 0.00 | H |
| ATOM | 400 | H1'  | G A | 13 | 5.587  | 1.460  | 40.470 | 1.00 | 0.00 | H |
| ATOM | 401 | H21  | G A | 13 | 0.088  | 2.877  | 40.641 | 1.00 | 0.00 | H |
| ATOM | 402 | H3'  | G A | 13 | 9.051  | -0.352 | 40.034 | 1.00 | 0.00 | H |
| ATOM | 403 | H22  | G A | 13 | 1.719  | 3.596  | 40.533 | 1.00 | 0.00 | H |
| ATOM | 404 | H4'  | G A | 13 | 8.134  | 0.941  | 37.913 | 1.00 | 0.00 | H |
| ATOM | 405 | H2'1 | G A | 13 | 6.984  | -1.194 | 40.919 | 1.00 | 0.00 | H |
| ATOM | 406 | H2'2 | G A | 13 | 7.142  | 0.299  | 41.834 | 1.00 | 0.00 | H |
| ATOM | 407 | H5'1 | G A | 13 | 6.865  | -1.171 | 37.101 | 1.00 | 0.00 | H |
| ATOM | 408 | H5'2 | G A | 13 | 8.618  | -1.234 | 37.377 | 1.00 | 0.00 | H |
| ATOM | 409 | C1'  | G A | 14 | 4.447  | 3.811  | 43.471 | 1.00 | 0.00 | C |
| ATOM | 410 | N1   | G A | 14 | 0.325  | 0.835  | 43.891 | 1.00 | 0.00 | N |
| ATOM | 411 | C2   | G A | 14 | 0.424  | 2.214  | 43.850 | 1.00 | 0.00 | C |
| ATOM | 412 | N2   | G A | 14 | -0.728 | 2.891  | 43.935 | 1.00 | 0.00 | N |
| ATOM | 413 | N3   | G A | 14 | 1.580  | 2.866  | 43.734 | 1.00 | 0.00 | N |
| ATOM | 414 | C4   | G A | 14 | 2.643  | 2.023  | 43.669 | 1.00 | 0.00 | C |
| ATOM | 415 | C5   | G A | 14 | 2.640  | 0.639  | 43.706 | 1.00 | 0.00 | C |
| ATOM | 416 | C6   | G A | 14 | 1.415  | -0.054 | 43.825 | 1.00 | 0.00 | C |
| ATOM | 417 | O6   | G A | 14 | 1.209  | -1.267 | 43.875 | 1.00 | 0.00 | O |
| ATOM | 418 | N7   | G A | 14 | 3.947  | 0.152  | 43.613 | 1.00 | 0.00 | N |
| ATOM | 419 | C8   | G A | 14 | 4.681  | 1.230  | 43.521 | 1.00 | 0.00 | C |
| ATOM | 420 | N9   | G A | 14 | 3.961  | 2.406  | 43.549 | 1.00 | 0.00 | N |
| ATOM | 421 | C2'  | G A | 14 | 5.758  | 4.048  | 44.208 | 1.00 | 0.00 | C |
| ATOM | 422 | C3'  | G A | 14 | 6.444  | 5.070  | 43.316 | 1.00 | 0.00 | C |
| ATOM | 423 | O3'  | G A | 14 | 5.981  | 6.375  | 43.656 | 1.00 | 0.00 | O |
| ATOM | 424 | C4'  | G A | 14 | 6.003  | 4.648  | 41.915 | 1.00 | 0.00 | C |
| ATOM | 425 | O4'  | G A | 14 | 4.652  | 4.121  | 42.106 | 1.00 | 0.00 | O |
| ATOM | 426 | C5'  | G A | 14 | 6.843  | 3.591  | 41.238 | 1.00 | 0.00 | C |
| ATOM | 427 | O5'  | G A | 14 | 7.305  | 2.629  | 42.218 | 1.00 | 0.00 | O |
| ATOM | 428 | O1P  | G A | 14 | 9.798  | 2.972  | 42.242 | 1.00 | 0.00 | O |
| ATOM | 429 | O2P  | G A | 14 | 8.834  | 0.738  | 42.853 | 1.00 | 0.00 | O |
| ATOM | 430 | P    | G A | 14 | 8.742  | 1.965  | 42.024 | 1.00 | 0.00 | P |
| ATOM | 431 | H1   | G A | 14 | -0.619 | 0.428  | 43.976 | 1.00 | 0.00 | H |
| ATOM | 432 | H8   | G A | 14 | 5.767  | 1.202  | 43.431 | 1.00 | 0.00 | H |
| ATOM | 433 | H1'  | G A | 14 | 3.662  | 4.465  | 43.850 | 1.00 | 0.00 | H |
| ATOM | 434 | H21  | G A | 14 | -1.619 | 2.380  | 44.021 | 1.00 | 0.00 | H |
| ATOM | 435 | H3'  | G A | 14 | 7.529  | 5.035  | 43.414 | 1.00 | 0.00 | H |
| ATOM | 436 | H22  | G A | 14 | -0.723 | 3.920  | 43.913 | 1.00 | 0.00 | H |
| ATOM | 437 | H4'  | G A | 14 | 6.027  | 5.542  | 41.293 | 1.00 | 0.00 | H |
| ATOM | 438 | H2'1 | G A | 14 | 6.352  | 3.139  | 44.299 | 1.00 | 0.00 | H |
| ATOM | 439 | H2'2 | G A | 14 | 5.602  | 4.440  | 45.214 | 1.00 | 0.00 | H |
| ATOM | 440 | H5'1 | G A | 14 | 6.242  | 3.087  | 40.481 | 1.00 | 0.00 | H |

|      |     |      |   |   |    |        |        |        |      |      |   |
|------|-----|------|---|---|----|--------|--------|--------|------|------|---|
| ATOM | 441 | H5'2 | G | A | 14 | 7.698  | 4.067  | 40.757 | 1.00 | 0.00 | H |
| ATOM | 442 | C1'  | A | A | 15 | 1.372  | 5.717  | 46.849 | 1.00 | 0.00 | C |
| ATOM | 443 | N1   | A | A | 15 | -0.249 | 0.866  | 47.273 | 1.00 | 0.00 | N |
| ATOM | 444 | C2   | A | A | 15 | -0.894 | 2.029  | 47.228 | 1.00 | 0.00 | C |
| ATOM | 445 | N3   | A | A | 15 | -0.413 | 3.249  | 47.114 | 1.00 | 0.00 | N |
| ATOM | 446 | C4   | A | A | 15 | 0.931  | 3.214  | 47.046 | 1.00 | 0.00 | C |
| ATOM | 447 | C5   | A | A | 15 | 1.738  | 2.112  | 47.080 | 1.00 | 0.00 | C |
| ATOM | 448 | C6   | A | A | 15 | 1.091  | 0.864  | 47.202 | 1.00 | 0.00 | C |
| ATOM | 449 | N6   | A | A | 15 | 1.754  | -0.304 | 47.248 | 1.00 | 0.00 | N |
| ATOM | 450 | N7   | A | A | 15 | 3.072  | 2.466  | 46.984 | 1.00 | 0.00 | N |
| ATOM | 451 | C8   | A | A | 15 | 3.045  | 3.763  | 46.899 | 1.00 | 0.00 | C |
| ATOM | 452 | N9   | A | A | 15 | 1.778  | 4.289  | 46.928 | 1.00 | 0.00 | N |
| ATOM | 453 | C2'  | A | A | 15 | 2.310  | 6.664  | 47.586 | 1.00 | 0.00 | C |
| ATOM | 454 | C3'  | A | A | 15 | 2.285  | 7.895  | 46.693 | 1.00 | 0.00 | C |
| ATOM | 455 | O3'  | A | A | 15 | 1.158  | 8.696  | 47.034 | 1.00 | 0.00 | O |
| ATOM | 456 | C4'  | A | A | 15 | 2.166  | 7.296  | 45.292 | 1.00 | 0.00 | C |
| ATOM | 457 | O4'  | A | A | 15 | 1.361  | 6.088  | 45.484 | 1.00 | 0.00 | O |
| ATOM | 458 | C5'  | A | A | 15 | 3.459  | 6.912  | 44.614 | 1.00 | 0.00 | C |
| ATOM | 459 | O5'  | A | A | 15 | 4.391  | 6.388  | 45.594 | 1.00 | 0.00 | O |
| ATOM | 460 | O1P  | A | A | 15 | 6.236  | 8.100  | 45.617 | 1.00 | 0.00 | O |
| ATOM | 461 | O2P  | A | A | 15 | 6.728  | 5.716  | 46.228 | 1.00 | 0.00 | O |
| ATOM | 462 | P    | A | A | 15 | 5.949  | 6.668  | 45.399 | 1.00 | 0.00 | P |
| ATOM | 463 | H2   | A | A | 15 | -1.980 | 1.961  | 47.294 | 1.00 | 0.00 | H |
| ATOM | 464 | H8   | A | A | 15 | 3.942  | 4.376  | 46.813 | 1.00 | 0.00 | H |
| ATOM | 465 | H1'  | A | A | 15 | 0.354  | 5.803  | 47.228 | 1.00 | 0.00 | H |
| ATOM | 466 | H3'  | A | A | 15 | 3.194  | 8.489  | 46.790 | 1.00 | 0.00 | H |
| ATOM | 467 | H4'  | A | A | 15 | 1.672  | 8.042  | 44.671 | 1.00 | 0.00 | H |
| ATOM | 468 | H61  | A | A | 15 | 1.232  | -1.188 | 47.335 | 1.00 | 0.00 | H |
| ATOM | 469 | H62  | A | A | 15 | 2.783  | -0.314 | 47.196 | 1.00 | 0.00 | H |
| ATOM | 470 | H2'1 | A | A | 15 | 3.318  | 6.259  | 47.676 | 1.00 | 0.00 | H |
| ATOM | 471 | H2'2 | A | A | 15 | 1.958  | 6.896  | 48.591 | 1.00 | 0.00 | H |
| ATOM | 472 | H5'1 | A | A | 15 | 3.255  | 6.154  | 43.858 | 1.00 | 0.00 | H |
| ATOM | 473 | H5'2 | A | A | 15 | 3.886  | 7.791  | 44.134 | 1.00 | 0.00 | H |
| ATOM | 474 | C1'  | C | A | 16 | -2.251 | 5.407  | 50.231 | 1.00 | 0.00 | C |
| ATOM | 475 | N1   | C | A | 16 | -1.069 | 4.506  | 50.309 | 1.00 | 0.00 | N |
| ATOM | 476 | C2   | C | A | 16 | -1.298 | 3.137  | 50.427 | 1.00 | 0.00 | C |
| ATOM | 477 | O2   | C | A | 16 | -2.466 | 2.729  | 50.463 | 1.00 | 0.00 | O |
| ATOM | 478 | N3   | C | A | 16 | -0.235 | 2.299  | 50.500 | 1.00 | 0.00 | N |
| ATOM | 479 | C4   | C | A | 16 | 1.017  | 2.772  | 50.459 | 1.00 | 0.00 | C |
| ATOM | 480 | N4   | C | A | 16 | 2.019  | 1.907  | 50.530 | 1.00 | 0.00 | N |
| ATOM | 481 | C5   | C | A | 16 | 1.284  | 4.175  | 50.342 | 1.00 | 0.00 | C |
| ATOM | 482 | C6   | C | A | 16 | 0.198  | 5.001  | 50.266 | 1.00 | 0.00 | C |
| ATOM | 483 | C2'  | C | A | 16 | -2.069 | 6.724  | 50.972 | 1.00 | 0.00 | C |
| ATOM | 484 | C3'  | C | A | 16 | -2.824 | 7.697  | 50.079 | 1.00 | 0.00 | C |
| ATOM | 485 | O3'  | C | A | 16 | -4.208 | 7.665  | 50.417 | 1.00 | 0.00 | O |
| ATOM | 486 | C4'  | C | A | 16 | -2.557 | 7.150  | 48.679 | 1.00 | 0.00 | C |
| ATOM | 487 | O4'  | C | A | 16 | -2.478 | 5.701  | 48.865 | 1.00 | 0.00 | O |
| ATOM | 488 | C5'  | C | A | 16 | -1.288 | 7.620  | 48.005 | 1.00 | 0.00 | C |
| ATOM | 489 | O5'  | C | A | 16 | -0.232 | 7.756  | 48.989 | 1.00 | 0.00 | O |
| ATOM | 490 | O1P  | C | A | 16 | 0.221  | 10.232 | 49.020 | 1.00 | 0.00 | O |
| ATOM | 491 | O2P  | C | A | 16 | 2.040  | 8.616  | 49.631 | 1.00 | 0.00 | O |
| ATOM | 492 | P    | C | A | 16 | 0.848  | 8.914  | 48.800 | 1.00 | 0.00 | P |
| ATOM | 493 | H5   | C | A | 16 | 2.303  | 4.565  | 50.316 | 1.00 | 0.00 | H |
| ATOM | 494 | H6   | C | A | 16 | 0.350  | 6.076  | 50.168 | 1.00 | 0.00 | H |

|      |     |      |   |   |    |        |        |        |      |      |   |
|------|-----|------|---|---|----|--------|--------|--------|------|------|---|
| ATOM | 495 | H1'  | C | A | 16 | -3.119 | 4.864  | 50.606 | 1.00 | 0.00 | H |
| ATOM | 496 | H3'  | C | A | 16 | -2.450 | 8.717  | 50.182 | 1.00 | 0.00 | H |
| ATOM | 497 | H4'  | C | A | 16 | -3.396 | 7.456  | 48.055 | 1.00 | 0.00 | H |
| ATOM | 498 | H41  | C | A | 16 | 2.993  | 2.244  | 50.499 | 1.00 | 0.00 | H |
| ATOM | 499 | H42  | C | A | 16 | 1.826  | 0.899  | 50.617 | 1.00 | 0.00 | H |
| ATOM | 500 | H2'1 | C | A | 16 | -1.020 | 7.005  | 51.066 | 1.00 | 0.00 | H |
| ATOM | 501 | H2'2 | C | A | 16 | -2.492 | 6.696  | 51.977 | 1.00 | 0.00 | H |
| ATOM | 502 | H5'1 | C | A | 16 | -0.996 | 6.893  | 47.247 | 1.00 | 0.00 | H |
| ATOM | 503 | H5'2 | C | A | 16 | -1.472 | 8.582  | 47.527 | 1.00 | 0.00 | H |
| ATOM | 504 | C1'  | G | A | 17 | -4.998 | 3.052  | 53.611 | 1.00 | 0.00 | C |
| ATOM | 505 | N1   | G | A | 17 | -0.894 | 0.051  | 54.031 | 1.00 | 0.00 | N |
| ATOM | 506 | C2   | G | A | 17 | -2.237 | -0.281 | 53.990 | 1.00 | 0.00 | C |
| ATOM | 507 | N2   | G | A | 17 | -2.524 | -1.586 | 54.075 | 1.00 | 0.00 | N |
| ATOM | 508 | N3   | G | A | 17 | -3.214 | 0.616  | 53.874 | 1.00 | 0.00 | N |
| ATOM | 509 | C4   | G | A | 17 | -2.741 | 1.889  | 53.809 | 1.00 | 0.00 | C |
| ATOM | 510 | C5   | G | A | 17 | -1.424 | 2.315  | 53.846 | 1.00 | 0.00 | C |
| ATOM | 511 | C6   | G | A | 17 | -0.385 | 1.363  | 53.965 | 1.00 | 0.00 | C |
| ATOM | 512 | O6   | G | A | 17 | 0.832  | 1.542  | 54.015 | 1.00 | 0.00 | O |
| ATOM | 513 | N7   | G | A | 17 | -1.363 | 3.707  | 53.753 | 1.00 | 0.00 | N |
| ATOM | 514 | C8   | G | A | 17 | -2.616 | 4.072  | 53.661 | 1.00 | 0.00 | C |
| ATOM | 515 | N9   | G | A | 17 | -3.513 | 3.024  | 53.689 | 1.00 | 0.00 | N |
| ATOM | 516 | C2'  | G | A | 17 | -5.630 | 4.225  | 54.348 | 1.00 | 0.00 | C |
| ATOM | 517 | C3'  | G | A | 17 | -6.813 | 4.562  | 53.456 | 1.00 | 0.00 | C |
| ATOM | 518 | O3'  | G | A | 17 | -7.911 | 3.718  | 53.796 | 1.00 | 0.00 | O |
| ATOM | 519 | C4'  | G | A | 17 | -6.275 | 4.273  | 52.055 | 1.00 | 0.00 | C |
| ATOM | 520 | O4'  | G | A | 17 | -5.357 | 3.151  | 52.246 | 1.00 | 0.00 | O |
| ATOM | 521 | C5'  | G | A | 17 | -5.530 | 5.399  | 51.378 | 1.00 | 0.00 | C |
| ATOM | 522 | O5'  | G | A | 17 | -4.757 | 6.135  | 52.358 | 1.00 | 0.00 | O |
| ATOM | 523 | O1P  | G | A | 17 | -5.855 | 8.400  | 52.382 | 1.00 | 0.00 | O |
| ATOM | 524 | O2P  | G | A | 17 | -3.432 | 8.173  | 52.993 | 1.00 | 0.00 | O |
| ATOM | 525 | P    | G | A | 17 | -4.570 | 7.707  | 52.164 | 1.00 | 0.00 | P |
| ATOM | 526 | H1   | G | A | 17 | -0.216 | -0.721 | 54.116 | 1.00 | 0.00 | H |
| ATOM | 527 | H8   | G | A | 17 | -2.925 | 5.114  | 53.571 | 1.00 | 0.00 | H |
| ATOM | 528 | H1'  | G | A | 17 | -5.378 | 2.103  | 53.990 | 1.00 | 0.00 | H |
| ATOM | 529 | H21  | G | A | 17 | -1.763 | -2.275 | 54.161 | 1.00 | 0.00 | H |
| ATOM | 530 | H3'  | G | A | 17 | -7.115 | 5.605  | 53.554 | 1.00 | 0.00 | H |
| ATOM | 531 | H22  | G | A | 17 | -3.505 | -1.899 | 54.053 | 1.00 | 0.00 | H |
| ATOM | 532 | H4'  | G | A | 17 | -7.133 | 4.020  | 51.433 | 1.00 | 0.00 | H |
| ATOM | 533 | H2'1 | G | A | 17 | -4.948 | 5.071  | 54.439 | 1.00 | 0.00 | H |
| ATOM | 534 | H2'2 | G | A | 17 | -5.954 | 3.956  | 55.354 | 1.00 | 0.00 | H |
| ATOM | 535 | H5'1 | G | A | 17 | -4.865 | 4.983  | 50.621 | 1.00 | 0.00 | H |
| ATOM | 536 | H5'2 | G | A | 17 | -6.247 | 6.064  | 50.897 | 1.00 | 0.00 | H |
| ATOM | 537 | C1'  | G | A | 18 | -5.838 | -0.469 | 56.991 | 1.00 | 0.00 | C |
| ATOM | 538 | N1   | G | A | 18 | -0.754 | -0.484 | 57.411 | 1.00 | 0.00 | N |
| ATOM | 539 | C2   | G | A | 18 | -1.645 | -1.542 | 57.370 | 1.00 | 0.00 | C |
| ATOM | 540 | N2   | G | A | 18 | -1.110 | -2.768 | 57.455 | 1.00 | 0.00 | N |
| ATOM | 541 | N3   | G | A | 18 | -2.962 | -1.390 | 57.254 | 1.00 | 0.00 | N |
| ATOM | 542 | C4   | G | A | 18 | -3.328 | -0.083 | 57.189 | 1.00 | 0.00 | C |
| ATOM | 543 | C5   | G | A | 18 | -2.512 | 1.036  | 57.226 | 1.00 | 0.00 | C |
| ATOM | 544 | C6   | G | A | 18 | -1.112 | 0.875  | 57.345 | 1.00 | 0.00 | C |
| ATOM | 545 | O6   | G | A | 18 | -0.234 | 1.737  | 57.395 | 1.00 | 0.00 | O |
| ATOM | 546 | N7   | G | A | 18 | -3.281 | 2.197  | 57.133 | 1.00 | 0.00 | N |
| ATOM | 547 | C8   | G | A | 18 | -4.509 | 1.757  | 57.041 | 1.00 | 0.00 | C |
| ATOM | 548 | N9   | G | A | 18 | -4.619 | 0.382  | 57.069 | 1.00 | 0.00 | N |



|      |     |      |       |    |        |        |        |      |      |   |
|------|-----|------|-------|----|--------|--------|--------|------|------|---|
| ATOM | 549 | C2'  | G A   | 18 | -7.038 | 0.109  | 57.728 | 1.00 | 0.00 | C |
| ATOM | 550 | C3'  | G A   | 18 | -8.193 | -0.314 | 56.836 | 1.00 | 0.00 | C |
| ATOM | 551 | O3'  | G A   | 18 | -8.585 | -1.642 | 57.176 | 1.00 | 0.00 | O |
| ATOM | 552 | C4'  | G A   | 18 | -7.589 | -0.232 | 55.435 | 1.00 | 0.00 | C |
| ATOM | 553 | O4'  | G A   | 18 | -6.186 | -0.600 | 55.626 | 1.00 | 0.00 | O |
| ATOM | 554 | C5'  | G A   | 18 | -7.647 | 1.117  | 54.758 | 1.00 | 0.00 | C |
| ATOM | 555 | O5'  | G A   | 18 | -7.455 | 2.167  | 55.738 | 1.00 | 0.00 | O |
| ATOM | 556 | O1P  | G A   | 18 | -9.674 | 3.355  | 55.762 | 1.00 | 0.00 | O |
| ATOM | 557 | O2P  | G A   | 18 | -7.581 | 4.595  | 56.373 | 1.00 | 0.00 | O |
| ATOM | 558 | P    | G A   | 18 | -8.228 | 3.549  | 55.544 | 1.00 | 0.00 | P |
| ATOM | 559 | H1   | G A   | 18 | 0.249  | -0.710 | 57.496 | 1.00 | 0.00 | H |
| ATOM | 560 | H8   | G A   | 18 | -5.372 | 2.417  | 56.951 | 1.00 | 0.00 | H |
| ATOM | 561 | H1'  | G A   | 18 | -5.587 | -1.460 | 57.370 | 1.00 | 0.00 | H |
| ATOM | 562 | H21  | G A   | 18 | -0.088 | -2.877 | 57.541 | 1.00 | 0.00 | H |
| ATOM | 563 | H3'  | G A   | 18 | -9.051 | 0.352  | 56.934 | 1.00 | 0.00 | H |
| ATOM | 564 | H22  | G A   | 18 | -1.719 | -3.596 | 57.433 | 1.00 | 0.00 | H |
| ATOM | 565 | H4'  | G A   | 18 | -8.134 | -0.941 | 54.813 | 1.00 | 0.00 | H |
| ATOM | 566 | H2'1 | G A   | 18 | -6.984 | 1.194  | 57.819 | 1.00 | 0.00 | H |
| ATOM | 567 | H2'2 | G A   | 18 | -7.142 | -0.299 | 58.734 | 1.00 | 0.00 | H |
| ATOM | 568 | H5'1 | G A   | 18 | -6.865 | 1.171  | 54.001 | 1.00 | 0.00 | H |
| ATOM | 569 | H5'2 | G A   | 18 | -8.618 | 1.234  | 54.277 | 1.00 | 0.00 | H |
| ATOM | 570 | C1'  | T A   | 19 | -4.470 | -3.818 | 60.369 | 1.00 | 0.00 | C |
| ATOM | 571 | N1   | T A   | 19 | -3.957 | -2.425 | 60.450 | 1.00 | 0.00 | N |
| ATOM | 572 | C2   | T A   | 19 | -2.592 | -2.261 | 60.569 | 1.00 | 0.00 | C |
| ATOM | 573 | O2   | T A   | 19 | -1.816 | -3.201 | 60.609 | 1.00 | 0.00 | O |
| ATOM | 574 | N3   | T A   | 19 | -2.159 | -0.950 | 60.640 | 1.00 | 0.00 | N |
| ATOM | 575 | C4   | T A   | 19 | -2.949 | 0.179  | 60.607 | 1.00 | 0.00 | C |
| ATOM | 576 | O4   | T A   | 19 | -2.446 | 1.306  | 60.682 | 1.00 | 0.00 | O |
| ATOM | 577 | C5   | T A   | 19 | -4.362 | -0.091 | 60.481 | 1.00 | 0.00 | C |
| ATOM | 578 | C6   | T A   | 19 | -4.820 | -1.357 | 60.408 | 1.00 | 0.00 | C |
| ATOM | 579 | C7   | T A   | 19 | -5.260 | 1.109  | 60.438 | 1.00 | 0.00 | C |
| ATOM | 580 | C2'  | T A   | 19 | -5.785 | -4.033 | 61.108 | 1.00 | 0.00 | C |
| ATOM | 581 | C3'  | T A   | 19 | -6.491 | -5.040 | 60.214 | 1.00 | 0.00 | C |
| ATOM | 582 | O3'  | T A   | 19 | -6.052 | -6.354 | 60.550 | 1.00 | 0.00 | O |
| ATOM | 583 | C4'  | T A   | 19 | -6.045 | -4.622 | 58.815 | 1.00 | 0.00 | C |
| ATOM | 584 | O4'  | T A   | 19 | -4.684 | -4.122 | 59.004 | 1.00 | 0.00 | O |
| ATOM | 585 | C5'  | T A   | 19 | -6.866 | -3.548 | 58.140 | 1.00 | 0.00 | C |
| ATOM | 586 | O5'  | T A   | 19 | -7.308 | -2.579 | 59.124 | 1.00 | 0.00 | O |
| ATOM | 587 | O1P  | T A   | 19 | -9.807 | -2.876 | 59.152 | 1.00 | 0.00 | O |
| ATOM | 588 | O2P  | T A   | 19 | -8.799 | -0.662 | 59.767 | 1.00 | 0.00 | O |
| ATOM | 589 | P    | T A   | 19 | -8.732 | -1.887 | 58.935 | 1.00 | 0.00 | P |
| ATOM | 590 | H3   | T A   | 19 | -1.143 | -0.802 | 60.725 | 1.00 | 0.00 | H |
| ATOM | 591 | H6   | T A   | 19 | -5.891 | -1.536 | 60.313 | 1.00 | 0.00 | H |
| ATOM | 592 | H1'  | T A   | 19 | -3.697 | -4.489 | 60.745 | 1.00 | 0.00 | H |
| ATOM | 593 | H3'  | T A   | 19 | -7.575 | -4.984 | 60.315 | 1.00 | 0.00 | H |
| ATOM | 594 | H4'  | T A   | 19 | -6.088 | -5.515 | 58.189 | 1.00 | 0.00 | H |
| ATOM | 595 | H71  | T A   | 19 | -5.893 | 1.121  | 61.325 | 1.00 | 0.00 | H |
| ATOM | 596 | H72  | T A   | 19 | -4.654 | 2.015  | 60.413 | 1.00 | 0.00 | H |
| ATOM | 597 | H73  | T A   | 19 | -5.886 | 1.066  | 59.546 | 1.00 | 0.00 | H |
| ATOM | 598 | H2'1 | T A   | 19 | -6.360 | -3.113 | 61.202 | 1.00 | 0.00 | H |
| ATOM | 599 | H2'2 | T A   | 19 | -5.635 | -4.430 | 62.113 | 1.00 | 0.00 | H |
| ATOM | 600 | H5'1 | T A   | 19 | -6.257 | -3.053 | 57.384 | 1.00 | 0.00 | H |
| ATOM | 601 | H5'2 | T A   | 19 | -7.730 | -4.006 | 57.661 | 1.00 | 0.00 | H |
| ATOM | 602 | C01  | LNK A | 20 | -7.147 | -8.663 | 63.257 | 0.00 | 0.00 | C |

|      |     |      |     |   |    |        |         |        |      |      |   |
|------|-----|------|-----|---|----|--------|---------|--------|------|------|---|
| ATOM | 603 | O1   | LNK | A | 20 | -7.198 | -7.404  | 62.581 | 1.00 | 0.00 | O |
| ATOM | 604 | S    | LNK | A | 20 | -8.698 | -10.406 | 66.482 | 0.00 | 0.00 | S |
| ATOM | 605 | C02  | LNK | A | 20 | -8.061 | -8.616  | 64.496 | 0.00 | 0.00 | C |
| ATOM | 606 | C03  | LNK | A | 20 | -7.418 | -9.423  | 65.640 | 0.00 | 0.00 | C |
| ATOM | 607 | O1P  | LNK | A | 20 | -5.848 | -5.314  | 62.964 | 1.00 | 0.00 | O |
| ATOM | 608 | O2P  | LNK | A | 20 | -4.688 | -7.514  | 62.625 | 1.00 | 0.00 | O |
| ATOM | 609 | P    | LNK | A | 20 | -5.833 | -6.630  | 62.295 | 1.00 | 0.00 | P |
| ATOM | 610 | H01  | LNK | A | 20 | -6.123 | -8.868  | 63.569 | 0.00 | 0.00 | H |
| ATOM | 611 | H02  | LNK | A | 20 | -7.487 | -9.451  | 62.585 | 0.00 | 0.00 | H |
| ATOM | 612 | H03  | LNK | A | 20 | -6.958 | -8.739  | 66.353 | 0.00 | 0.00 | H |
| ATOM | 613 | H04  | LNK | A | 20 | -9.032 | -9.046  | 64.248 | 0.00 | 0.00 | H |
| ATOM | 614 | H05  | LNK | A | 20 | -8.193 | -7.581  | 64.811 | 0.00 | 0.00 | H |
| ATOM | 615 | H06  | LNK | A | 20 | -6.658 | -10.089 | 65.232 | 0.00 | 0.00 | H |
| ATOM | 616 | AU   | LNK | A | 20 | -8.435 | -10.686 | 67.050 |      |      |   |
| TER  |     |      |     |   |    |        |         |        |      |      |   |
| ATOM | 618 | C1'  | A   | B | 2  | 5.862  | -0.463  | 61.311 | 1.00 | 0.00 | C |
| ATOM | 619 | N1   | A   | B | 2  | 0.747  | -0.505  | 60.891 | 1.00 | 0.00 | N |
| ATOM | 620 | C2   | A   | B | 2  | 1.652  | -1.477  | 60.933 | 1.00 | 0.00 | C |
| ATOM | 621 | N3   | A   | B | 2  | 2.961  | -1.397  | 61.046 | 1.00 | 0.00 | N |
| ATOM | 622 | C4   | A   | B | 2  | 3.344  | -0.108  | 61.117 | 1.00 | 0.00 | C |
| ATOM | 623 | C5   | A   | B | 2  | 2.545  | 0.999   | 61.087 | 1.00 | 0.00 | C |
| ATOM | 624 | C6   | A   | B | 2  | 1.158  | 0.770   | 60.965 | 1.00 | 0.00 | C |
| ATOM | 625 | N6   | A   | B | 2  | 0.251  | 1.761   | 60.923 | 1.00 | 0.00 | N |
| ATOM | 626 | N7   | A   | B | 2  | 3.294  | 2.159   | 61.186 | 1.00 | 0.00 | N |
| ATOM | 627 | C8   | A   | B | 2  | 4.519  | 1.732   | 61.268 | 1.00 | 0.00 | C |
| ATOM | 628 | N9   | A   | B | 2  | 4.627  | 0.366   | 61.236 | 1.00 | 0.00 | N |
| ATOM | 629 | C2'  | A   | B | 2  | 7.051  | 0.140   | 60.575 | 1.00 | 0.00 | C |
| ATOM | 630 | C3'  | A   | B | 2  | 8.214  | -0.266  | 61.465 | 1.00 | 0.00 | C |
| ATOM | 631 | O3'  | A   | B | 2  | 8.628  | -1.586  | 61.121 | 1.00 | 0.00 | O |
| ATOM | 632 | C4'  | A   | B | 2  | 7.609  | -0.198  | 62.867 | 1.00 | 0.00 | C |
| ATOM | 633 | O4'  | A   | B | 2  | 6.211  | -0.590  | 62.676 | 1.00 | 0.00 | O |
| ATOM | 634 | C5'  | A   | B | 2  | 7.645  | 1.149   | 63.549 | 1.00 | 0.00 | C |
| ATOM | 635 | O5'  | A   | B | 2  | 7.433  | 2.199   | 62.572 | 1.00 | 0.00 | O |
| ATOM | 636 | H2   | A   | B | 2  | 1.254  | -2.488  | 60.864 | 1.00 | 0.00 | H |
| ATOM | 637 | H8   | A   | B | 2  | 5.379  | 2.397   | 61.354 | 1.00 | 0.00 | H |
| ATOM | 638 | H1'  | A   | B | 2  | 5.629  | -1.457  | 60.929 | 1.00 | 0.00 | H |
| ATOM | 639 | H3'  | A   | B | 2  | 9.060  | 0.414   | 61.369 | 1.00 | 0.00 | H |
| ATOM | 640 | H4'  | A   | B | 2  | 8.167  | -0.900  | 63.486 | 1.00 | 0.00 | H |
| ATOM | 641 | H61  | A   | B | 2  | -0.750 | 1.539   | 60.836 | 1.00 | 0.00 | H |
| ATOM | 642 | H62  | A   | B | 2  | 0.560  | 2.743   | 60.978 | 1.00 | 0.00 | H |
| ATOM | 643 | H2'1 | A   | B | 2  | 6.978  | 1.224   | 60.488 | 1.00 | 0.00 | H |
| ATOM | 644 | H2'2 | A   | B | 2  | 7.162  | -0.264  | 59.568 | 1.00 | 0.00 | H |
| ATOM | 645 | H5'1 | A   | B | 2  | 6.862  | 1.187   | 64.306 | 1.00 | 0.00 | H |
| ATOM | 646 | H5'2 | A   | B | 2  | 8.614  | 1.281   | 64.028 | 1.00 | 0.00 | H |
| ATOM | 647 | C1'  | C   | B | 3  | 4.447  | -3.812  | 57.929 | 1.00 | 0.00 | C |
| ATOM | 648 | N1   | C   | B | 3  | 3.955  | -2.409  | 57.854 | 1.00 | 0.00 | N |
| ATOM | 649 | C2   | C   | B | 3  | 2.582  | -2.204  | 57.734 | 1.00 | 0.00 | C |
| ATOM | 650 | O2   | C   | B | 3  | 1.833  | -3.189  | 57.696 | 1.00 | 0.00 | O |
| ATOM | 651 | N3   | C   | B | 3  | 2.114  | -0.935  | 57.664 | 1.00 | 0.00 | N |
| ATOM | 652 | C4   | C   | B | 3  | 2.950  | 0.111   | 57.707 | 1.00 | 0.00 | C |
| ATOM | 653 | N4   | C   | B | 3  | 2.437  | 1.332   | 57.638 | 1.00 | 0.00 | N |
| ATOM | 654 | C5   | C   | B | 3  | 4.368  | -0.068  | 57.825 | 1.00 | 0.00 | C |
| ATOM | 655 | C6   | C   | B | 3  | 4.817  | -1.357  | 57.899 | 1.00 | 0.00 | C |
| ATOM | 656 | C2'  | C   | B | 3  | 5.757  | -4.044  | 57.188 | 1.00 | 0.00 | C |

|      |     |      |     |   |        |        |        |      |      |   |
|------|-----|------|-----|---|--------|--------|--------|------|------|---|
| ATOM | 657 | C3'  | C B | 3 | 6.449  | -5.064 | 58.079 | 1.00 | 0.00 | C |
| ATOM | 658 | O3'  | C B | 3 | 5.989  | -6.370 | 57.739 | 1.00 | 0.00 | O |
| ATOM | 659 | C4'  | C B | 3 | 6.010  | -4.644 | 59.480 | 1.00 | 0.00 | C |
| ATOM | 660 | O4'  | C B | 3 | 4.656  | -4.121 | 59.294 | 1.00 | 0.00 | O |
| ATOM | 661 | C5'  | C B | 3 | 6.848  | -3.585 | 60.157 | 1.00 | 0.00 | C |
| ATOM | 662 | O5'  | C B | 3 | 7.304  | -2.620 | 59.175 | 1.00 | 0.00 | O |
| ATOM | 663 | O1P  | C B | 3 | 9.799  | -2.954 | 59.145 | 1.00 | 0.00 | O |
| ATOM | 664 | O2P  | C B | 3 | 8.824  | -0.723 | 58.538 | 1.00 | 0.00 | O |
| ATOM | 665 | P    | C B | 3 | 8.738  | -1.951 | 59.366 | 1.00 | 0.00 | P |
| ATOM | 666 | H5   | C B | 3 | 5.053  | 0.779  | 57.853 | 1.00 | 0.00 | H |
| ATOM | 667 | H6   | C B | 3 | 5.886  | -1.544 | 57.997 | 1.00 | 0.00 | H |
| ATOM | 668 | H1'  | C B | 3 | 3.663  | -4.469 | 57.552 | 1.00 | 0.00 | H |
| ATOM | 669 | H3'  | C B | 3 | 7.533  | -5.025 | 57.978 | 1.00 | 0.00 | H |
| ATOM | 670 | H4'  | C B | 3 | 6.040  | -5.538 | 60.103 | 1.00 | 0.00 | H |
| ATOM | 671 | H41  | C B | 3 | 3.058  | 2.154  | 57.672 | 1.00 | 0.00 | H |
| ATOM | 672 | H42  | C B | 3 | 1.418  | 1.459  | 57.551 | 1.00 | 0.00 | H |
| ATOM | 673 | H2'1 | C B | 3 | 6.347  | -3.133 | 57.096 | 1.00 | 0.00 | H |
| ATOM | 674 | H2'2 | C B | 3 | 5.599  | -4.436 | 56.183 | 1.00 | 0.00 | H |
| ATOM | 675 | H5'1 | C B | 3 | 6.247  | -3.082 | 60.915 | 1.00 | 0.00 | H |
| ATOM | 676 | H5'2 | C B | 3 | 7.705  | -4.057 | 60.634 | 1.00 | 0.00 | H |
| ATOM | 677 | C1'  | C B | 4 | 1.358  | -5.698 | 54.549 | 1.00 | 0.00 | C |
| ATOM | 678 | N1   | C B | 4 | 1.784  | -4.274 | 54.474 | 1.00 | 0.00 | N |
| ATOM | 679 | C2   | C B | 4 | 0.794  | -3.301 | 54.354 | 1.00 | 0.00 | C |
| ATOM | 680 | O2   | C B | 4 | -0.392 | -3.657 | 54.316 | 1.00 | 0.00 | O |
| ATOM | 681 | N3   | C B | 4 | 1.160  | -1.999 | 54.284 | 1.00 | 0.00 | N |
| ATOM | 682 | C4   | C B | 4 | 2.452  | -1.644 | 54.327 | 1.00 | 0.00 | C |
| ATOM | 683 | N4   | C B | 4 | 2.755  | -0.356 | 54.258 | 1.00 | 0.00 | N |
| ATOM | 684 | C5   | C B | 4 | 3.493  | -2.623 | 54.445 | 1.00 | 0.00 | C |
| ATOM | 685 | C6   | C B | 4 | 3.099  | -3.929 | 54.519 | 1.00 | 0.00 | C |
| ATOM | 686 | C2'  | C B | 4 | 2.281  | -6.655 | 53.808 | 1.00 | 0.00 | C |
| ATOM | 687 | C3'  | C B | 4 | 2.241  | -7.887 | 54.699 | 1.00 | 0.00 | C |
| ATOM | 688 | O3'  | C B | 4 | 1.102  | -8.674 | 54.359 | 1.00 | 0.00 | O |
| ATOM | 689 | C4'  | C B | 4 | 2.133  | -7.290 | 56.100 | 1.00 | 0.00 | C |
| ATOM | 690 | O4'  | C B | 4 | 1.344  | -6.071 | 55.914 | 1.00 | 0.00 | O |
| ATOM | 691 | C5'  | C B | 4 | 3.434  | -6.924 | 56.777 | 1.00 | 0.00 | C |
| ATOM | 692 | O5'  | C B | 4 | 4.370  | -6.412 | 55.795 | 1.00 | 0.00 | O |
| ATOM | 693 | O1P  | C B | 4 | 6.191  | -8.149 | 55.765 | 1.00 | 0.00 | O |
| ATOM | 694 | O2P  | C B | 4 | 6.714  | -5.771 | 55.158 | 1.00 | 0.00 | O |
| ATOM | 695 | P    | C B | 4 | 5.923  | -6.714 | 55.986 | 1.00 | 0.00 | P |
| ATOM | 696 | H5   | C B | 4 | 4.545  | -2.340 | 54.473 | 1.00 | 0.00 | H |
| ATOM | 697 | H6   | C B | 4 | 3.854  | -4.709 | 54.617 | 1.00 | 0.00 | H |
| ATOM | 698 | H1'  | C B | 4 | 0.337  | -5.769 | 54.172 | 1.00 | 0.00 | H |
| ATOM | 699 | H3'  | C B | 4 | 3.142  | -8.493 | 54.598 | 1.00 | 0.00 | H |
| ATOM | 700 | H4'  | C B | 4 | 1.631  | -8.031 | 56.723 | 1.00 | 0.00 | H |
| ATOM | 701 | H41  | C B | 4 | 3.740  | -0.055 | 54.292 | 1.00 | 0.00 | H |
| ATOM | 702 | H42  | C B | 4 | 2.005  | 0.347  | 54.171 | 1.00 | 0.00 | H |
| ATOM | 703 | H2'1 | C B | 4 | 3.294  | -6.265 | 53.716 | 1.00 | 0.00 | H |
| ATOM | 704 | H2'2 | C B | 4 | 1.923  | -6.880 | 52.803 | 1.00 | 0.00 | H |
| ATOM | 705 | H5'1 | C B | 4 | 3.242  | -6.165 | 57.535 | 1.00 | 0.00 | H |
| ATOM | 706 | H5'2 | C B | 4 | 3.849  | -7.811 | 57.254 | 1.00 | 0.00 | H |
| ATOM | 707 | C1'  | G B | 5 | -2.250 | -5.407 | 51.169 | 1.00 | 0.00 | C |
| ATOM | 708 | N1   | G B | 5 | -0.693 | -0.566 | 50.752 | 1.00 | 0.00 | N |
| ATOM | 709 | C2   | G B | 5 | -1.975 | -1.087 | 50.790 | 1.00 | 0.00 | C |
| ATOM | 710 | N2   | G B | 5 | -2.974 | -0.201 | 50.704 | 1.00 | 0.00 | N |

|      |     |      |     |   |        |         |        |      |      |   |
|------|-----|------|-----|---|--------|---------|--------|------|------|---|
| ATOM | 711 | N3   | G B | 5 | -2.237 | -2.388  | 50.906 | 1.00 | 0.00 | N |
| ATOM | 712 | C4   | G B | 5 | -1.107 | -3.139  | 50.974 | 1.00 | 0.00 | C |
| ATOM | 713 | C5   | G B | 5 | 0.209  | -2.708  | 50.939 | 1.00 | 0.00 | C |
| ATOM | 714 | C6   | G B | 5 | 0.489  | -1.328  | 50.820 | 1.00 | 0.00 | C |
| ATOM | 715 | O6   | G B | 5 | 1.579  | -0.759  | 50.772 | 1.00 | 0.00 | O |
| ATOM | 716 | N7   | G B | 5 | 1.076  | -3.799  | 51.034 | 1.00 | 0.00 | N |
| ATOM | 717 | C8   | G B | 5 | 0.278  | -4.832  | 51.124 | 1.00 | 0.00 | C |
| ATOM | 718 | N9   | G B | 5 | -1.064 | -4.511  | 51.093 | 1.00 | 0.00 | N |
| ATOM | 719 | C2'  | G B | 5 | -2.069 | -6.727  | 50.432 | 1.00 | 0.00 | C |
| ATOM | 720 | C3'  | G B | 5 | -2.831 | -7.695  | 51.323 | 1.00 | 0.00 | C |
| ATOM | 721 | O3'  | G B | 5 | -4.214 | -7.658  | 50.980 | 1.00 | 0.00 | O |
| ATOM | 722 | C4'  | G B | 5 | -2.568 | -7.146  | 52.724 | 1.00 | 0.00 | C |
| ATOM | 723 | O4'  | G B | 5 | -2.485 | -5.698  | 52.533 | 1.00 | 0.00 | O |
| ATOM | 724 | C5'  | G B | 5 | -1.305 | -7.618  | 53.404 | 1.00 | 0.00 | C |
| ATOM | 725 | O5'  | G B | 5 | -0.245 | -7.760  | 52.426 | 1.00 | 0.00 | O |
| ATOM | 726 | O1P  | G B | 5 | 0.200  | -10.237 | 52.403 | 1.00 | 0.00 | O |
| ATOM | 727 | O2P  | G B | 5 | 2.027  | -8.629  | 51.796 | 1.00 | 0.00 | O |
| ATOM | 728 | P    | G B | 5 | 0.831  | -8.921  | 52.622 | 1.00 | 0.00 | P |
| ATOM | 729 | H1   | G B | 5 | -0.598 | 0.457   | 50.667 | 1.00 | 0.00 | H |
| ATOM | 730 | H8   | G B | 5 | 0.639  | -5.856  | 51.214 | 1.00 | 0.00 | H |
| ATOM | 731 | H1'  | G B | 5 | -3.114 | -4.863  | 50.789 | 1.00 | 0.00 | H |
| ATOM | 732 | H21  | G B | 5 | -2.764 | 0.804   | 50.618 | 1.00 | 0.00 | H |
| ATOM | 733 | H3'  | G B | 5 | -2.462 | -8.717  | 51.226 | 1.00 | 0.00 | H |
| ATOM | 734 | H22  | G B | 5 | -3.952 | -0.524  | 50.723 | 1.00 | 0.00 | H |
| ATOM | 735 | H4'  | G B | 5 | -3.412 | -7.445  | 53.345 | 1.00 | 0.00 | H |
| ATOM | 736 | H2'1 | G B | 5 | -1.020 | -7.011  | 50.343 | 1.00 | 0.00 | H |
| ATOM | 737 | H2'2 | G B | 5 | -2.488 | -6.700  | 49.426 | 1.00 | 0.00 | H |
| ATOM | 738 | H5'1 | G B | 5 | -1.013 | -6.890  | 54.161 | 1.00 | 0.00 | H |
| ATOM | 739 | H5'2 | G B | 5 | -1.494 | -8.578  | 53.884 | 1.00 | 0.00 | H |
| ATOM | 740 | C1'  | T B | 6 | -5.013 | -3.071  | 47.791 | 1.00 | 0.00 | C |
| ATOM | 741 | N1   | T B | 6 | -3.529 | -3.014  | 47.713 | 1.00 | 0.00 | N |
| ATOM | 742 | C2   | T B | 6 | -2.952 | -1.766  | 47.594 | 1.00 | 0.00 | C |
| ATOM | 743 | O2   | T B | 6 | -3.605 | -0.738  | 47.551 | 1.00 | 0.00 | O |
| ATOM | 744 | N3   | T B | 6 | -1.570 | -1.760  | 47.526 | 1.00 | 0.00 | N |
| ATOM | 745 | C4   | T B | 6 | -0.740 | -2.860  | 47.562 | 1.00 | 0.00 | C |
| ATOM | 746 | O4   | T B | 6 | 0.487  | -2.730  | 47.489 | 1.00 | 0.00 | O |
| ATOM | 747 | C5   | T B | 6 | -1.435 | -4.119  | 47.689 | 1.00 | 0.00 | C |
| ATOM | 748 | C6   | T B | 6 | -2.780 | -4.164  | 47.759 | 1.00 | 0.00 | C |
| ATOM | 749 | C7   | T B | 6 | -0.570 | -5.344  | 47.735 | 1.00 | 0.00 | C |
| ATOM | 750 | C2'  | T B | 6 | -5.621 | -4.257  | 47.052 | 1.00 | 0.00 | C |
| ATOM | 751 | C3'  | T B | 6 | -6.799 | -4.616  | 47.945 | 1.00 | 0.00 | C |
| ATOM | 752 | O3'  | T B | 6 | -7.913 | -3.794  | 47.604 | 1.00 | 0.00 | O |
| ATOM | 753 | C4'  | T B | 6 | -6.268 | -4.319  | 49.345 | 1.00 | 0.00 | C |
| ATOM | 754 | O4'  | T B | 6 | -5.370 | -3.179  | 49.155 | 1.00 | 0.00 | O |
| ATOM | 755 | C5'  | T B | 6 | -5.500 | -5.430  | 50.023 | 1.00 | 0.00 | C |
| ATOM | 756 | O5'  | T B | 6 | -4.713 | -6.151  | 49.041 | 1.00 | 0.00 | O |
| ATOM | 757 | O1P  | T B | 6 | -5.767 | -8.436  | 49.015 | 1.00 | 0.00 | O |
| ATOM | 758 | O2P  | T B | 6 | -3.348 | -8.162  | 48.405 | 1.00 | 0.00 | O |
| ATOM | 759 | P    | T B | 6 | -4.495 | -7.719  | 49.234 | 1.00 | 0.00 | P |
| ATOM | 760 | H3   | T B | 6 | -1.115 | -0.839  | 47.440 | 1.00 | 0.00 | H |
| ATOM | 761 | H6   | T B | 6 | -3.281 | -5.127  | 47.854 | 1.00 | 0.00 | H |
| ATOM | 762 | H1'  | T B | 6 | -5.412 | -2.130  | 47.413 | 1.00 | 0.00 | H |
| ATOM | 763 | H3'  | T B | 6 | -7.081 | -5.664  | 47.845 | 1.00 | 0.00 | H |
| ATOM | 764 | H4'  | T B | 6 | -7.131 | -4.083  | 49.968 | 1.00 | 0.00 | H |

|      |     |      |     |   |        |        |        |      |      |   |
|------|-----|------|-----|---|--------|--------|--------|------|------|---|
| ATOM | 765 | H71  | T B | 6 | -0.753 | -5.952 | 46.849 | 1.00 | 0.00 | H |
| ATOM | 766 | H72  | T B | 6 | 0.479  | -5.048 | 47.763 | 1.00 | 0.00 | H |
| ATOM | 767 | H73  | T B | 6 | -0.807 | -5.924 | 48.628 | 1.00 | 0.00 | H |
| ATOM | 768 | H2'1 | T B | 6 | -4.924 | -5.088 | 46.961 | 1.00 | 0.00 | H |
| ATOM | 769 | H2'2 | T B | 6 | -5.951 | -3.993 | 46.047 | 1.00 | 0.00 | H |
| ATOM | 770 | H5'1 | T B | 6 | -4.843 | -5.002 | 50.780 | 1.00 | 0.00 | H |
| ATOM | 771 | H5'2 | T B | 6 | -6.204 | -6.110 | 50.501 | 1.00 | 0.00 | H |
| ATOM | 772 | C1'  | C B | 7 | -5.839 | 0.470  | 44.409 | 1.00 | 0.00 | C |
| ATOM | 773 | N1   | C B | 7 | -4.615 | -0.377 | 44.334 | 1.00 | 0.00 | N |
| ATOM | 774 | C2   | C B | 7 | -3.385 | 0.265  | 44.214 | 1.00 | 0.00 | C |
| ATOM | 775 | O2   | C B | 7 | -3.357 | 1.503  | 44.176 | 1.00 | 0.00 | O |
| ATOM | 776 | N3   | C B | 7 | -2.259 | -0.487 | 44.144 | 1.00 | 0.00 | N |
| ATOM | 777 | C4   | C B | 7 | -2.321 | -1.824 | 44.187 | 1.00 | 0.00 | C |
| ATOM | 778 | N4   | C B | 7 | -1.190 | -2.509 | 44.118 | 1.00 | 0.00 | N |
| ATOM | 779 | C5   | C B | 7 | -3.574 | -2.512 | 44.305 | 1.00 | 0.00 | C |
| ATOM | 780 | C6   | C B | 7 | -4.694 | -1.733 | 44.379 | 1.00 | 0.00 | C |
| ATOM | 781 | C2'  | C B | 7 | -7.034 | -0.112 | 43.668 | 1.00 | 0.00 | C |
| ATOM | 782 | C3'  | C B | 7 | -8.193 | 0.307  | 44.559 | 1.00 | 0.00 | C |
| ATOM | 783 | O3'  | C B | 7 | -8.589 | 1.633  | 44.219 | 1.00 | 0.00 | O |
| ATOM | 784 | C4'  | C B | 7 | -7.592 | 0.225  | 45.960 | 1.00 | 0.00 | C |
| ATOM | 785 | O4'  | C B | 7 | -6.190 | 0.598  | 45.774 | 1.00 | 0.00 | O |
| ATOM | 786 | C5'  | C B | 7 | -7.647 | -1.126 | 46.637 | 1.00 | 0.00 | C |
| ATOM | 787 | O5'  | C B | 7 | -7.449 | -2.173 | 45.655 | 1.00 | 0.00 | O |
| ATOM | 788 | O1P  | C B | 7 | -9.663 | -3.370 | 45.625 | 1.00 | 0.00 | O |
| ATOM | 789 | O2P  | C B | 7 | -7.564 | -4.601 | 45.018 | 1.00 | 0.00 | O |
| ATOM | 790 | P    | C B | 7 | -8.216 | -3.559 | 45.846 | 1.00 | 0.00 | P |
| ATOM | 791 | H5   | C B | 7 | -3.629 | -3.600 | 44.333 | 1.00 | 0.00 | H |
| ATOM | 792 | H6   | C B | 7 | -5.669 | -2.210 | 44.477 | 1.00 | 0.00 | H |
| ATOM | 793 | H1'  | C B | 7 | -5.590 | 1.462  | 44.032 | 1.00 | 0.00 | H |
| ATOM | 794 | H3'  | C B | 7 | -9.049 | -0.363 | 44.458 | 1.00 | 0.00 | H |
| ATOM | 795 | H4'  | C B | 7 | -8.142 | 0.930  | 46.583 | 1.00 | 0.00 | H |
| ATOM | 796 | H41  | C B | 7 | -1.209 | -3.539 | 44.152 | 1.00 | 0.00 | H |
| ATOM | 797 | H42  | C B | 7 | -0.290 | -2.013 | 44.031 | 1.00 | 0.00 | H |
| ATOM | 798 | H2'1 | C B | 7 | -6.976 | -1.196 | 43.576 | 1.00 | 0.00 | H |
| ATOM | 799 | H2'2 | C B | 7 | -7.137 | 0.297  | 42.663 | 1.00 | 0.00 | H |
| ATOM | 800 | H5'1 | C B | 7 | -6.865 | -1.178 | 47.395 | 1.00 | 0.00 | H |
| ATOM | 801 | H5'2 | C B | 7 | -8.618 | -1.247 | 47.114 | 1.00 | 0.00 | H |
| ATOM | 802 | C1'  | C B | 8 | -4.447 | 3.812  | 41.029 | 1.00 | 0.00 | C |
| ATOM | 803 | N1   | C B | 8 | -3.955 | 2.409  | 40.954 | 1.00 | 0.00 | N |
| ATOM | 804 | C2   | C B | 8 | -2.582 | 2.204  | 40.834 | 1.00 | 0.00 | C |
| ATOM | 805 | O2   | C B | 8 | -1.833 | 3.189  | 40.796 | 1.00 | 0.00 | O |
| ATOM | 806 | N3   | C B | 8 | -2.114 | 0.935  | 40.764 | 1.00 | 0.00 | N |
| ATOM | 807 | C4   | C B | 8 | -2.950 | -0.111 | 40.807 | 1.00 | 0.00 | C |
| ATOM | 808 | N4   | C B | 8 | -2.437 | -1.331 | 40.738 | 1.00 | 0.00 | N |
| ATOM | 809 | C5   | C B | 8 | -4.368 | 0.068  | 40.925 | 1.00 | 0.00 | C |
| ATOM | 810 | C6   | C B | 8 | -4.817 | 1.357  | 40.999 | 1.00 | 0.00 | C |
| ATOM | 811 | C2'  | C B | 8 | -5.757 | 4.044  | 40.288 | 1.00 | 0.00 | C |
| ATOM | 812 | C3'  | C B | 8 | -6.449 | 5.064  | 41.179 | 1.00 | 0.00 | C |
| ATOM | 813 | O3'  | C B | 8 | -5.989 | 6.370  | 40.839 | 1.00 | 0.00 | O |
| ATOM | 814 | C4'  | C B | 8 | -6.010 | 4.644  | 42.580 | 1.00 | 0.00 | C |
| ATOM | 815 | O4'  | C B | 8 | -4.656 | 4.121  | 42.394 | 1.00 | 0.00 | O |
| ATOM | 816 | C5'  | C B | 8 | -6.848 | 3.585  | 43.257 | 1.00 | 0.00 | C |
| ATOM | 817 | O5'  | C B | 8 | -7.304 | 2.619  | 42.275 | 1.00 | 0.00 | O |
| ATOM | 818 | O1P  | C B | 8 | -9.799 | 2.954  | 42.245 | 1.00 | 0.00 | O |

|      |     |      |     |    |        |        |        |      |      |   |
|------|-----|------|-----|----|--------|--------|--------|------|------|---|
| ATOM | 819 | O2P  | C B | 8  | -8.824 | 0.723  | 41.638 | 1.00 | 0.00 | O |
| ATOM | 820 | P    | C B | 8  | -8.738 | 1.951  | 42.466 | 1.00 | 0.00 | P |
| ATOM | 821 | H5   | C B | 8  | -5.053 | -0.779 | 40.953 | 1.00 | 0.00 | H |
| ATOM | 822 | H6   | C B | 8  | -5.886 | 1.544  | 41.097 | 1.00 | 0.00 | H |
| ATOM | 823 | H1'  | C B | 8  | -3.663 | 4.469  | 40.652 | 1.00 | 0.00 | H |
| ATOM | 824 | H3'  | C B | 8  | -7.533 | 5.025  | 41.078 | 1.00 | 0.00 | H |
| ATOM | 825 | H4'  | C B | 8  | -6.041 | 5.538  | 43.203 | 1.00 | 0.00 | H |
| ATOM | 826 | H41  | C B | 8  | -3.058 | -2.153 | 40.772 | 1.00 | 0.00 | H |
| ATOM | 827 | H42  | C B | 8  | -1.418 | -1.458 | 40.651 | 1.00 | 0.00 | H |
| ATOM | 828 | H2'1 | C B | 8  | -6.347 | 3.133  | 40.196 | 1.00 | 0.00 | H |
| ATOM | 829 | H2'2 | C B | 8  | -5.599 | 4.436  | 39.283 | 1.00 | 0.00 | H |
| ATOM | 830 | H5'1 | C B | 8  | -6.247 | 3.082  | 44.015 | 1.00 | 0.00 | H |
| ATOM | 831 | H5'2 | C B | 8  | -7.705 | 4.057  | 43.734 | 1.00 | 0.00 | H |
| ATOM | 832 | C1'  | T B | 9  | -1.372 | 5.716  | 37.651 | 1.00 | 0.00 | C |
| ATOM | 833 | N1   | T B | 9  | -1.776 | 4.287  | 37.573 | 1.00 | 0.00 | N |
| ATOM | 834 | C2   | T B | 9  | -0.768 | 3.352  | 37.454 | 1.00 | 0.00 | C |
| ATOM | 835 | O2   | T B | 9  | 0.411  | 3.657  | 37.411 | 1.00 | 0.00 | O |
| ATOM | 836 | N3   | T B | 9  | -1.188 | 2.037  | 37.386 | 1.00 | 0.00 | N |
| ATOM | 837 | C4   | T B | 9  | -2.491 | 1.588  | 37.422 | 1.00 | 0.00 | C |
| ATOM | 838 | O4   | T B | 9  | -2.746 | 0.380  | 37.349 | 1.00 | 0.00 | O |
| ATOM | 839 | C5   | T B | 9  | -3.475 | 2.638  | 37.549 | 1.00 | 0.00 | C |
| ATOM | 840 | C6   | T B | 9  | -3.101 | 3.930  | 37.619 | 1.00 | 0.00 | C |
| ATOM | 841 | C7   | T B | 9  | -4.906 | 2.193  | 37.595 | 1.00 | 0.00 | C |
| ATOM | 842 | C2'  | T B | 9  | -2.312 | 6.662  | 36.912 | 1.00 | 0.00 | C |
| ATOM | 843 | C3'  | T B | 9  | -2.289 | 7.893  | 37.805 | 1.00 | 0.00 | C |
| ATOM | 844 | O3'  | T B | 9  | -1.163 | 8.698  | 37.464 | 1.00 | 0.00 | O |
| ATOM | 845 | C4'  | T B | 9  | -2.171 | 7.295  | 39.205 | 1.00 | 0.00 | C |
| ATOM | 846 | O4'  | T B | 9  | -1.363 | 6.090  | 39.015 | 1.00 | 0.00 | O |
| ATOM | 847 | C5'  | T B | 9  | -3.465 | 6.909  | 39.883 | 1.00 | 0.00 | C |
| ATOM | 848 | O5'  | T B | 9  | -4.394 | 6.384  | 38.901 | 1.00 | 0.00 | O |
| ATOM | 849 | O1P  | T B | 9  | -6.241 | 8.092  | 38.875 | 1.00 | 0.00 | O |
| ATOM | 850 | O2P  | T B | 9  | -6.728 | 5.707  | 38.265 | 1.00 | 0.00 | O |
| ATOM | 851 | P    | T B | 9  | -5.952 | 6.660  | 39.094 | 1.00 | 0.00 | P |
| ATOM | 852 | H3   | T B | 9  | -0.454 | 1.320  | 37.300 | 1.00 | 0.00 | H |
| ATOM | 853 | H6   | T B | 9  | -3.862 | 4.705  | 37.714 | 1.00 | 0.00 | H |
| ATOM | 854 | H1'  | T B | 9  | -0.353 | 5.805  | 37.273 | 1.00 | 0.00 | H |
| ATOM | 855 | H3'  | T B | 9  | -3.199 | 8.484  | 37.705 | 1.00 | 0.00 | H |
| ATOM | 856 | H4'  | T B | 9  | -1.679 | 8.044  | 39.828 | 1.00 | 0.00 | H |
| ATOM | 857 | H71  | T B | 9  | -5.428 | 2.555  | 36.709 | 1.00 | 0.00 | H |
| ATOM | 858 | H72  | T B | 9  | -4.949 | 1.104  | 37.623 | 1.00 | 0.00 | H |
| ATOM | 859 | H73  | T B | 9  | -5.384 | 2.598  | 38.488 | 1.00 | 0.00 | H |
| ATOM | 860 | H2'1 | T B | 9  | -3.318 | 6.256  | 36.821 | 1.00 | 0.00 | H |
| ATOM | 861 | H2'2 | T B | 9  | -1.959 | 6.893  | 35.907 | 1.00 | 0.00 | H |
| ATOM | 862 | H5'1 | T B | 9  | -3.261 | 6.152  | 40.640 | 1.00 | 0.00 | H |
| ATOM | 863 | H5'2 | T B | 9  | -3.893 | 7.788  | 40.361 | 1.00 | 0.00 | H |
| ATOM | 864 | C1'  | A B | 10 | 2.251  | 5.431  | 34.271 | 1.00 | 0.00 | C |
| ATOM | 865 | N1   | A B | 10 | 0.711  | 0.554  | 33.851 | 1.00 | 0.00 | N |
| ATOM | 866 | C2   | A B | 10 | 1.916  | 1.116  | 33.893 | 1.00 | 0.00 | C |
| ATOM | 867 | N3   | A B | 10 | 2.243  | 2.385  | 34.006 | 1.00 | 0.00 | N |
| ATOM | 868 | C4   | A B | 10 | 1.137  | 3.147  | 34.077 | 1.00 | 0.00 | C |
| ATOM | 869 | C5   | A B | 10 | -0.165 | 2.729  | 34.047 | 1.00 | 0.00 | C |
| ATOM | 870 | C6   | A B | 10 | -0.374 | 1.340  | 33.925 | 1.00 | 0.00 | C |
| ATOM | 871 | N6   | A B | 10 | -1.598 | 0.784  | 33.883 | 1.00 | 0.00 | N |
| ATOM | 872 | N7   | A B | 10 | -1.036 | 3.800  | 34.146 | 1.00 | 0.00 | N |

|      |     |      |     |    |        |        |        |      |      |   |
|------|-----|------|-----|----|--------|--------|--------|------|------|---|
| ATOM | 873 | C8   | A B | 10 | -0.251 | 4.833  | 34.228 | 1.00 | 0.00 | C |
| ATOM | 874 | N9   | A B | 10 | 1.082  | 4.514  | 34.196 | 1.00 | 0.00 | N |
| ATOM | 875 | C2'  | A B | 10 | 2.045  | 6.748  | 33.535 | 1.00 | 0.00 | C |
| ATOM | 876 | C3'  | A B | 10 | 2.791  | 7.730  | 34.425 | 1.00 | 0.00 | C |
| ATOM | 877 | O3'  | A B | 10 | 4.174  | 7.716  | 34.081 | 1.00 | 0.00 | O |
| ATOM | 878 | C4'  | A B | 10 | 2.540  | 7.175  | 35.827 | 1.00 | 0.00 | C |
| ATOM | 879 | O4'  | A B | 10 | 2.481  | 5.725  | 35.636 | 1.00 | 0.00 | O |
| ATOM | 880 | C5'  | A B | 10 | 1.270  | 7.625  | 36.509 | 1.00 | 0.00 | C |
| ATOM | 881 | O5'  | A B | 10 | 0.205  | 7.748  | 35.532 | 1.00 | 0.00 | O |
| ATOM | 882 | O1P  | A B | 10 | -0.282 | 10.218 | 35.510 | 1.00 | 0.00 | O |
| ATOM | 883 | O2P  | A B | 10 | -2.082 | 8.578  | 34.904 | 1.00 | 0.00 | O |
| ATOM | 884 | P    | A B | 10 | -0.890 | 8.891  | 35.729 | 1.00 | 0.00 | P |
| ATOM | 885 | H2   | A B | 10 | 2.754  | 0.423  | 33.824 | 1.00 | 0.00 | H |
| ATOM | 886 | H8   | A B | 10 | -0.618 | 5.856  | 34.314 | 1.00 | 0.00 | H |
| ATOM | 887 | H1'  | A B | 10 | 3.124  | 4.903  | 33.889 | 1.00 | 0.00 | H |
| ATOM | 888 | H3'  | A B | 10 | 2.404  | 8.744  | 34.329 | 1.00 | 0.00 | H |
| ATOM | 889 | H4'  | A B | 10 | 3.380  | 7.489  | 36.446 | 1.00 | 0.00 | H |
| ATOM | 890 | H61  | A B | 10 | -1.695 | -0.237 | 33.796 | 1.00 | 0.00 | H |
| ATOM | 891 | H62  | A B | 10 | -2.436 | 1.380  | 33.938 | 1.00 | 0.00 | H |
| ATOM | 892 | H2'1 | A B | 10 | 0.992  | 7.014  | 33.448 | 1.00 | 0.00 | H |
| ATOM | 893 | H2'2 | A B | 10 | 2.464  | 6.730  | 32.528 | 1.00 | 0.00 | H |
| ATOM | 894 | H5'1 | A B | 10 | 0.991  | 6.892  | 37.266 | 1.00 | 0.00 | H |
| ATOM | 895 | H5'2 | A B | 10 | 1.442  | 8.587  | 36.988 | 1.00 | 0.00 | H |
| ATOM | 896 | C1'  | G B | 11 | 4.998  | 3.052  | 30.889 | 1.00 | 0.00 | C |
| ATOM | 897 | N1   | G B | 11 | 0.894  | 0.051  | 30.472 | 1.00 | 0.00 | N |
| ATOM | 898 | C2   | G B | 11 | 2.237  | -0.281 | 30.510 | 1.00 | 0.00 | C |
| ATOM | 899 | N2   | G B | 11 | 2.524  | -1.586 | 30.424 | 1.00 | 0.00 | N |
| ATOM | 900 | N3   | G B | 11 | 3.214  | 0.617  | 30.626 | 1.00 | 0.00 | N |
| ATOM | 901 | C4   | G B | 11 | 2.741  | 1.889  | 30.694 | 1.00 | 0.00 | C |
| ATOM | 902 | C5   | G B | 11 | 1.424  | 2.314  | 30.659 | 1.00 | 0.00 | C |
| ATOM | 903 | C6   | G B | 11 | 0.385  | 1.362  | 30.540 | 1.00 | 0.00 | C |
| ATOM | 904 | O6   | G B | 11 | -0.832 | 1.542  | 30.492 | 1.00 | 0.00 | O |
| ATOM | 905 | N7   | G B | 11 | 1.363  | 3.706  | 30.754 | 1.00 | 0.00 | N |
| ATOM | 906 | C8   | G B | 11 | 2.616  | 4.072  | 30.844 | 1.00 | 0.00 | C |
| ATOM | 907 | N9   | G B | 11 | 3.513  | 3.024  | 30.813 | 1.00 | 0.00 | N |
| ATOM | 908 | C2'  | G B | 11 | 5.628  | 4.226  | 30.152 | 1.00 | 0.00 | C |
| ATOM | 909 | C3'  | G B | 11 | 6.813  | 4.562  | 31.043 | 1.00 | 0.00 | C |
| ATOM | 910 | O3'  | G B | 11 | 7.910  | 3.719  | 30.700 | 1.00 | 0.00 | O |
| ATOM | 911 | C4'  | G B | 11 | 6.278  | 4.272  | 32.444 | 1.00 | 0.00 | C |
| ATOM | 912 | O4'  | G B | 11 | 5.359  | 3.149  | 32.253 | 1.00 | 0.00 | O |
| ATOM | 913 | C5'  | G B | 11 | 5.533  | 5.396  | 33.124 | 1.00 | 0.00 | C |
| ATOM | 914 | O5'  | G B | 11 | 4.759  | 6.134  | 32.146 | 1.00 | 0.00 | O |
| ATOM | 915 | O1P  | G B | 11 | 5.855  | 8.399  | 32.123 | 1.00 | 0.00 | O |
| ATOM | 916 | O2P  | G B | 11 | 3.432  | 8.172  | 31.516 | 1.00 | 0.00 | O |
| ATOM | 917 | P    | G B | 11 | 4.572  | 7.706  | 32.342 | 1.00 | 0.00 | P |
| ATOM | 918 | H1   | G B | 11 | 0.216  | -0.721 | 30.387 | 1.00 | 0.00 | H |
| ATOM | 919 | H8   | G B | 11 | 2.924  | 5.113  | 30.934 | 1.00 | 0.00 | H |
| ATOM | 920 | H1'  | G B | 11 | 5.378  | 2.103  | 30.509 | 1.00 | 0.00 | H |
| ATOM | 921 | H21  | G B | 11 | 1.763  | -2.275 | 30.338 | 1.00 | 0.00 | H |
| ATOM | 922 | H3'  | G B | 11 | 7.115  | 5.605  | 30.946 | 1.00 | 0.00 | H |
| ATOM | 923 | H22  | G B | 11 | 3.505  | -1.899 | 30.443 | 1.00 | 0.00 | H |
| ATOM | 924 | H4'  | G B | 11 | 7.137  | 4.018  | 33.065 | 1.00 | 0.00 | H |
| ATOM | 925 | H2'1 | G B | 11 | 4.946  | 5.072  | 30.063 | 1.00 | 0.00 | H |
| ATOM | 926 | H2'2 | G B | 11 | 5.951  | 3.958  | 29.146 | 1.00 | 0.00 | H |

|      |     |      |     |    |        |        |        |      |      |   |
|------|-----|------|-----|----|--------|--------|--------|------|------|---|
| ATOM | 927 | H5'1 | G B | 11 | 4.869  | 4.979  | 33.881 | 1.00 | 0.00 | H |
| ATOM | 928 | H5'2 | G B | 11 | 6.251  | 6.061  | 33.604 | 1.00 | 0.00 | H |
| ATOM | 929 | C1'  | G B | 12 | 5.838  | -0.469 | 27.509 | 1.00 | 0.00 | C |
| ATOM | 930 | N1   | G B | 12 | 0.753  | -0.484 | 27.092 | 1.00 | 0.00 | N |
| ATOM | 931 | C2   | G B | 12 | 1.645  | -1.542 | 27.130 | 1.00 | 0.00 | C |
| ATOM | 932 | N2   | G B | 12 | 1.110  | -2.767 | 27.044 | 1.00 | 0.00 | N |
| ATOM | 933 | N3   | G B | 12 | 2.962  | -1.390 | 27.246 | 1.00 | 0.00 | N |
| ATOM | 934 | C4   | G B | 12 | 3.327  | -0.083 | 27.313 | 1.00 | 0.00 | C |
| ATOM | 935 | C5   | G B | 12 | 2.512  | 1.035  | 27.279 | 1.00 | 0.00 | C |
| ATOM | 936 | C6   | G B | 12 | 1.113  | 0.875  | 27.160 | 1.00 | 0.00 | C |
| ATOM | 937 | O6   | G B | 12 | 0.234  | 1.736  | 27.112 | 1.00 | 0.00 | O |
| ATOM | 938 | N7   | G B | 12 | 3.281  | 2.197  | 27.374 | 1.00 | 0.00 | N |
| ATOM | 939 | C8   | G B | 12 | 4.509  | 1.757  | 27.464 | 1.00 | 0.00 | C |
| ATOM | 940 | N9   | G B | 12 | 4.619  | 0.382  | 27.433 | 1.00 | 0.00 | N |
| ATOM | 941 | C2'  | G B | 12 | 7.037  | 0.111  | 26.772 | 1.00 | 0.00 | C |
| ATOM | 942 | C3'  | G B | 12 | 8.194  | -0.314 | 27.663 | 1.00 | 0.00 | C |
| ATOM | 943 | O3'  | G B | 12 | 8.586  | -1.641 | 27.320 | 1.00 | 0.00 | O |
| ATOM | 944 | C4'  | G B | 12 | 7.590  | -0.234 | 29.064 | 1.00 | 0.00 | C |
| ATOM | 945 | O4'  | G B | 12 | 6.187  | -0.602 | 28.873 | 1.00 | 0.00 | O |
| ATOM | 946 | C5'  | G B | 12 | 7.648  | 1.113  | 29.744 | 1.00 | 0.00 | C |
| ATOM | 947 | O5'  | G B | 12 | 7.455  | 2.165  | 28.766 | 1.00 | 0.00 | O |
| ATOM | 948 | O1P  | G B | 12 | 9.674  | 3.353  | 28.743 | 1.00 | 0.00 | O |
| ATOM | 949 | O2P  | G B | 12 | 7.580  | 4.595  | 28.136 | 1.00 | 0.00 | O |
| ATOM | 950 | P    | G B | 12 | 8.228  | 3.547  | 28.962 | 1.00 | 0.00 | P |
| ATOM | 951 | H1   | G B | 12 | -0.250 | -0.710 | 27.007 | 1.00 | 0.00 | H |
| ATOM | 952 | H8   | G B | 12 | 5.372  | 2.417  | 27.555 | 1.00 | 0.00 | H |
| ATOM | 953 | H1'  | G B | 12 | 5.587  | -1.459 | 27.129 | 1.00 | 0.00 | H |
| ATOM | 954 | H21  | G B | 12 | 0.089  | -2.877 | 26.958 | 1.00 | 0.00 | H |
| ATOM | 955 | H3'  | G B | 12 | 9.051  | 0.352  | 27.566 | 1.00 | 0.00 | H |
| ATOM | 956 | H22  | G B | 12 | 1.720  | -3.596 | 27.063 | 1.00 | 0.00 | H |
| ATOM | 957 | H4'  | G B | 12 | 8.135  | -0.944 | 29.685 | 1.00 | 0.00 | H |
| ATOM | 958 | H2'1 | G B | 12 | 6.983  | 1.196  | 26.683 | 1.00 | 0.00 | H |
| ATOM | 959 | H2'2 | G B | 12 | 7.141  | -0.295 | 25.766 | 1.00 | 0.00 | H |
| ATOM | 960 | H5'1 | G B | 12 | 6.866  | 1.166  | 30.501 | 1.00 | 0.00 | H |
| ATOM | 961 | H5'2 | G B | 12 | 8.620  | 1.230  | 30.224 | 1.00 | 0.00 | H |
| ATOM | 962 | C1'  | T B | 13 | 4.470  | -3.818 | 24.131 | 1.00 | 0.00 | C |
| ATOM | 963 | N1   | T B | 13 | 3.957  | -2.425 | 24.053 | 1.00 | 0.00 | N |
| ATOM | 964 | C2   | T B | 13 | 2.591  | -2.261 | 23.934 | 1.00 | 0.00 | C |
| ATOM | 965 | O2   | T B | 13 | 1.816  | -3.201 | 23.891 | 1.00 | 0.00 | O |
| ATOM | 966 | N3   | T B | 13 | 2.158  | -0.950 | 23.866 | 1.00 | 0.00 | N |
| ATOM | 967 | C4   | T B | 13 | 2.948  | 0.180  | 23.902 | 1.00 | 0.00 | C |
| ATOM | 968 | O4   | T B | 13 | 2.445  | 1.307  | 23.829 | 1.00 | 0.00 | O |
| ATOM | 969 | C5   | T B | 13 | 4.361  | -0.091 | 24.029 | 1.00 | 0.00 | C |
| ATOM | 970 | C6   | T B | 13 | 4.819  | -1.357 | 24.099 | 1.00 | 0.00 | C |
| ATOM | 971 | C7   | T B | 13 | 5.259  | 1.109  | 24.075 | 1.00 | 0.00 | C |
| ATOM | 972 | C2'  | T B | 13 | 5.786  | -4.031 | 23.392 | 1.00 | 0.00 | C |
| ATOM | 973 | C3'  | T B | 13 | 6.491  | -5.040 | 24.285 | 1.00 | 0.00 | C |
| ATOM | 974 | O3'  | T B | 13 | 6.053  | -6.353 | 23.944 | 1.00 | 0.00 | O |
| ATOM | 975 | C4'  | T B | 13 | 6.044  | -4.626 | 25.685 | 1.00 | 0.00 | C |
| ATOM | 976 | O4'  | T B | 13 | 4.682  | -4.125 | 25.495 | 1.00 | 0.00 | O |
| ATOM | 977 | C5'  | T B | 13 | 6.864  | -3.553 | 26.363 | 1.00 | 0.00 | C |
| ATOM | 978 | O5'  | T B | 13 | 7.307  | -2.582 | 25.381 | 1.00 | 0.00 | O |
| ATOM | 979 | O1P  | T B | 13 | 9.805  | -2.878 | 25.355 | 1.00 | 0.00 | O |
| ATOM | 980 | O2P  | T B | 13 | 8.798  | -0.662 | 24.745 | 1.00 | 0.00 | O |



|      |      |      |     |    |        |        |        |      |      |   |
|------|------|------|-----|----|--------|--------|--------|------|------|---|
| ATOM | 981  | P    | T B | 13 | 8.730  | -1.890 | 25.574 | 1.00 | 0.00 | P |
| ATOM | 982  | H3   | T B | 13 | 1.142  | -0.802 | 23.780 | 1.00 | 0.00 | H |
| ATOM | 983  | H6   | T B | 13 | 5.890  | -1.536 | 24.194 | 1.00 | 0.00 | H |
| ATOM | 984  | H1'  | T B | 13 | 3.698  | -4.489 | 23.753 | 1.00 | 0.00 | H |
| ATOM | 985  | H3'  | T B | 13 | 7.575  | -4.984 | 24.185 | 1.00 | 0.00 | H |
| ATOM | 986  | H4'  | T B | 13 | 6.087  | -5.520 | 26.308 | 1.00 | 0.00 | H |
| ATOM | 987  | H71  | T B | 13 | 5.893  | 1.124  | 23.189 | 1.00 | 0.00 | H |
| ATOM | 988  | H72  | T B | 13 | 4.653  | 2.016  | 24.103 | 1.00 | 0.00 | H |
| ATOM | 989  | H73  | T B | 13 | 5.884  | 1.063  | 24.968 | 1.00 | 0.00 | H |
| ATOM | 990  | H2'1 | T B | 13 | 6.361  | -3.111 | 23.301 | 1.00 | 0.00 | H |
| ATOM | 991  | H2'2 | T B | 13 | 5.637  | -4.426 | 22.387 | 1.00 | 0.00 | H |
| ATOM | 992  | H5'1 | T B | 13 | 6.254  | -3.061 | 27.120 | 1.00 | 0.00 | H |
| ATOM | 993  | H5'2 | T B | 13 | 7.728  | -4.012 | 26.841 | 1.00 | 0.00 | H |
| ATOM | 994  | C1'  | G B | 14 | 1.358  | -5.697 | 20.749 | 1.00 | 0.00 | C |
| ATOM | 995  | N1   | G B | 14 | -0.228 | -0.866 | 20.332 | 1.00 | 0.00 | N |
| ATOM | 996  | C2   | G B | 14 | -0.959 | -2.040 | 20.370 | 1.00 | 0.00 | C |
| ATOM | 997  | N2   | G B | 14 | -2.288 | -1.911 | 20.284 | 1.00 | 0.00 | N |
| ATOM | 998  | N3   | G B | 14 | -0.407 | -3.247 | 20.486 | 1.00 | 0.00 | N |
| ATOM | 999  | C4   | G B | 14 | 0.950  | -3.190 | 20.554 | 1.00 | 0.00 | C |
| ATOM | 1000 | C5   | G B | 14 | 1.761  | -2.069 | 20.519 | 1.00 | 0.00 | C |
| ATOM | 1001 | C6   | G B | 14 | 1.176  | -0.787 | 20.400 | 1.00 | 0.00 | C |
| ATOM | 1002 | O6   | G B | 14 | 1.724  | 0.315  | 20.352 | 1.00 | 0.00 | O |
| ATOM | 1003 | N7   | G B | 14 | 3.104  | -2.441 | 20.614 | 1.00 | 0.00 | N |
| ATOM | 1004 | C8   | G B | 14 | 3.064  | -3.746 | 20.704 | 1.00 | 0.00 | C |
| ATOM | 1005 | N9   | G B | 14 | 1.790  | -4.275 | 20.673 | 1.00 | 0.00 | N |
| ATOM | 1006 | C2'  | G B | 14 | 2.280  | -6.659 | 20.012 | 1.00 | 0.00 | C |
| ATOM | 1007 | C3'  | G B | 14 | 2.233  | -7.890 | 20.903 | 1.00 | 0.00 | C |
| ATOM | 1008 | O3'  | G B | 14 | 1.092  | -8.672 | 20.560 | 1.00 | 0.00 | O |
| ATOM | 1009 | C4'  | G B | 14 | 2.123  | -7.290 | 22.304 | 1.00 | 0.00 | C |
| ATOM | 1010 | O4'  | G B | 14 | 1.339  | -6.070 | 22.113 | 1.00 | 0.00 | O |
| ATOM | 1011 | C5'  | G B | 14 | 3.422  | -6.930 | 22.984 | 1.00 | 0.00 | C |
| ATOM | 1012 | O5'  | G B | 14 | 4.363  | -6.421 | 22.006 | 1.00 | 0.00 | O |
| ATOM | 1013 | O1P  | G B | 14 | 6.179  | -8.164 | 21.983 | 1.00 | 0.00 | O |
| ATOM | 1014 | O2P  | G B | 14 | 6.712  | -5.789 | 21.376 | 1.00 | 0.00 | O |
| ATOM | 1015 | P    | G B | 14 | 5.916  | -6.729 | 22.202 | 1.00 | 0.00 | P |
| ATOM | 1016 | H1   | G B | 14 | -0.753 | 0.018  | 20.247 | 1.00 | 0.00 | H |
| ATOM | 1017 | H8   | G B | 14 | 3.960  | -4.361 | 20.795 | 1.00 | 0.00 | H |
| ATOM | 1018 | H1'  | G B | 14 | 0.338  | -5.765 | 20.369 | 1.00 | 0.00 | H |
| ATOM | 1019 | H21  | G B | 14 | -2.708 | -0.973 | 20.198 | 1.00 | 0.00 | H |
| ATOM | 1020 | H3'  | G B | 14 | 3.132  | -8.499 | 20.806 | 1.00 | 0.00 | H |
| ATOM | 1021 | H22  | G B | 14 | -2.889 | -2.747 | 20.303 | 1.00 | 0.00 | H |
| ATOM | 1022 | H4'  | G B | 14 | 1.616  | -8.029 | 22.925 | 1.00 | 0.00 | H |
| ATOM | 1023 | H2'1 | G B | 14 | 3.295  | -6.272 | 19.923 | 1.00 | 0.00 | H |
| ATOM | 1024 | H2'2 | G B | 14 | 1.926  | -6.883 | 19.006 | 1.00 | 0.00 | H |
| ATOM | 1025 | H5'1 | G B | 14 | 3.231  | -6.170 | 23.741 | 1.00 | 0.00 | H |
| ATOM | 1026 | H5'2 | G B | 14 | 3.833  | -7.818 | 23.464 | 1.00 | 0.00 | H |
| ATOM | 1027 | C1'  | C B | 15 | -2.251 | -5.407 | 17.369 | 1.00 | 0.00 | C |
| ATOM | 1028 | N1   | C B | 15 | -1.069 | -4.506 | 17.294 | 1.00 | 0.00 | N |
| ATOM | 1029 | C2   | C B | 15 | -1.298 | -3.137 | 17.174 | 1.00 | 0.00 | C |
| ATOM | 1030 | O2   | C B | 15 | -2.466 | -2.729 | 17.136 | 1.00 | 0.00 | O |
| ATOM | 1031 | N3   | C B | 15 | -0.235 | -2.299 | 17.104 | 1.00 | 0.00 | N |
| ATOM | 1032 | C4   | C B | 15 | 1.017  | -2.771 | 17.147 | 1.00 | 0.00 | C |
| ATOM | 1033 | N4   | C B | 15 | 2.019  | -1.907 | 17.078 | 1.00 | 0.00 | N |
| ATOM | 1034 | C5   | C B | 15 | 1.284  | -4.176 | 17.265 | 1.00 | 0.00 | C |

|      |      |      |     |    |        |         |        |      |      |   |
|------|------|------|-----|----|--------|---------|--------|------|------|---|
| ATOM | 1035 | C6   | C B | 15 | 0.198  | -4.999  | 17.339 | 1.00 | 0.00 | C |
| ATOM | 1036 | C2'  | C B | 15 | -2.067 | -6.724  | 16.628 | 1.00 | 0.00 | C |
| ATOM | 1037 | C3'  | C B | 15 | -2.823 | -7.698  | 17.519 | 1.00 | 0.00 | C |
| ATOM | 1038 | O3'  | C B | 15 | -4.208 | -7.666  | 17.179 | 1.00 | 0.00 | O |
| ATOM | 1039 | C4'  | C B | 15 | -2.560 | -7.151  | 18.920 | 1.00 | 0.00 | C |
| ATOM | 1040 | O4'  | C B | 15 | -2.481 | -5.702  | 18.734 | 1.00 | 0.00 | O |
| ATOM | 1041 | C5'  | C B | 15 | -1.292 | -7.620  | 19.597 | 1.00 | 0.00 | C |
| ATOM | 1042 | O5'  | C B | 15 | -0.235 | -7.756  | 18.615 | 1.00 | 0.00 | O |
| ATOM | 1043 | O1P  | C B | 15 | 0.219  | -10.232 | 18.585 | 1.00 | 0.00 | O |
| ATOM | 1044 | O2P  | C B | 15 | 2.040  | -8.616  | 17.978 | 1.00 | 0.00 | O |
| ATOM | 1045 | P    | C B | 15 | 0.846  | -8.913  | 18.806 | 1.00 | 0.00 | P |
| ATOM | 1046 | H5   | C B | 15 | 2.302  | -4.564  | 17.294 | 1.00 | 0.00 | H |
| ATOM | 1047 | H6   | C B | 15 | 0.350  | -6.075  | 17.436 | 1.00 | 0.00 | H |
| ATOM | 1048 | H1'  | C B | 15 | -3.118 | -4.864  | 16.992 | 1.00 | 0.00 | H |
| ATOM | 1049 | H3'  | C B | 15 | -2.450 | -8.717  | 17.418 | 1.00 | 0.00 | H |
| ATOM | 1050 | H4'  | C B | 15 | -3.401 | -7.456  | 19.543 | 1.00 | 0.00 | H |
| ATOM | 1051 | H41  | C B | 15 | 2.993  | -2.243  | 17.112 | 1.00 | 0.00 | H |
| ATOM | 1052 | H42  | C B | 15 | 1.825  | -0.898  | 16.991 | 1.00 | 0.00 | H |
| ATOM | 1053 | H2'1 | C B | 15 | -1.018 | -7.004  | 16.536 | 1.00 | 0.00 | H |
| ATOM | 1054 | H2'2 | C B | 15 | -2.488 | -6.696  | 15.623 | 1.00 | 0.00 | H |
| ATOM | 1055 | H5'1 | C B | 15 | -1.001 | -6.893  | 20.355 | 1.00 | 0.00 | H |
| ATOM | 1056 | H5'2 | C B | 15 | -1.477 | -8.582  | 20.074 | 1.00 | 0.00 | H |
| ATOM | 1057 | C1'  | G B | 16 | -4.998 | -3.052  | 13.989 | 1.00 | 0.00 | C |
| ATOM | 1058 | N1   | G B | 16 | -0.894 | -0.051  | 13.572 | 1.00 | 0.00 | N |
| ATOM | 1059 | C2   | G B | 16 | -2.237 | 0.281   | 13.610 | 1.00 | 0.00 | C |
| ATOM | 1060 | N2   | G B | 16 | -2.524 | 1.586   | 13.524 | 1.00 | 0.00 | N |
| ATOM | 1061 | N3   | G B | 16 | -3.214 | -0.617  | 13.726 | 1.00 | 0.00 | N |
| ATOM | 1062 | C4   | G B | 16 | -2.741 | -1.889  | 13.794 | 1.00 | 0.00 | C |
| ATOM | 1063 | C5   | G B | 16 | -1.424 | -2.314  | 13.759 | 1.00 | 0.00 | C |
| ATOM | 1064 | C6   | G B | 16 | -0.385 | -1.361  | 13.640 | 1.00 | 0.00 | C |
| ATOM | 1065 | O6   | G B | 16 | 0.832  | -1.542  | 13.593 | 1.00 | 0.00 | O |
| ATOM | 1066 | N7   | G B | 16 | -1.363 | -3.706  | 13.854 | 1.00 | 0.00 | N |
| ATOM | 1067 | C8   | G B | 16 | -2.616 | -4.072  | 13.944 | 1.00 | 0.00 | C |
| ATOM | 1068 | N9   | G B | 16 | -3.513 | -3.024  | 13.913 | 1.00 | 0.00 | N |
| ATOM | 1069 | C2'  | G B | 16 | -5.628 | -4.226  | 13.252 | 1.00 | 0.00 | C |
| ATOM | 1070 | C3'  | G B | 16 | -6.813 | -4.562  | 14.143 | 1.00 | 0.00 | C |
| ATOM | 1071 | O3'  | G B | 16 | -7.910 | -3.719  | 13.800 | 1.00 | 0.00 | O |
| ATOM | 1072 | C4'  | G B | 16 | -6.278 | -4.272  | 15.544 | 1.00 | 0.00 | C |
| ATOM | 1073 | O4'  | G B | 16 | -5.359 | -3.149  | 15.353 | 1.00 | 0.00 | O |
| ATOM | 1074 | C5'  | G B | 16 | -5.533 | -5.396  | 16.224 | 1.00 | 0.00 | C |
| ATOM | 1075 | O5'  | G B | 16 | -4.759 | -6.134  | 15.246 | 1.00 | 0.00 | O |
| ATOM | 1076 | O1P  | G B | 16 | -5.855 | -8.399  | 15.223 | 1.00 | 0.00 | O |
| ATOM | 1077 | O2P  | G B | 16 | -3.432 | -8.172  | 14.616 | 1.00 | 0.00 | O |
| ATOM | 1078 | P    | G B | 16 | -4.572 | -7.706  | 15.442 | 1.00 | 0.00 | P |
| ATOM | 1079 | H1   | G B | 16 | -0.216 | 0.721   | 13.487 | 1.00 | 0.00 | H |
| ATOM | 1080 | H8   | G B | 16 | -2.924 | -5.113  | 14.035 | 1.00 | 0.00 | H |
| ATOM | 1081 | H1'  | G B | 16 | -5.378 | -2.103  | 13.609 | 1.00 | 0.00 | H |
| ATOM | 1082 | H21  | G B | 16 | -1.763 | 2.275   | 13.438 | 1.00 | 0.00 | H |
| ATOM | 1083 | H3'  | G B | 16 | -7.115 | -5.605  | 14.046 | 1.00 | 0.00 | H |
| ATOM | 1084 | H22  | G B | 16 | -3.505 | 1.898   | 13.544 | 1.00 | 0.00 | H |
| ATOM | 1085 | H4'  | G B | 16 | -7.137 | -4.018  | 16.165 | 1.00 | 0.00 | H |
| ATOM | 1086 | H2'1 | G B | 16 | -4.946 | -5.072  | 13.163 | 1.00 | 0.00 | H |
| ATOM | 1087 | H2'2 | G B | 16 | -5.951 | -3.958  | 12.246 | 1.00 | 0.00 | H |
| ATOM | 1088 | H5'1 | G B | 16 | -4.869 | -4.979  | 16.981 | 1.00 | 0.00 | H |

|      |      |      |     |    |        |        |        |      |      |   |
|------|------|------|-----|----|--------|--------|--------|------|------|---|
| ATOM | 1089 | H5'2 | G B | 16 | -6.251 | -6.061 | 16.704 | 1.00 | 0.00 | H |
| ATOM | 1090 | C1'  | G B | 17 | -5.838 | 0.469  | 10.609 | 1.00 | 0.00 | C |
| ATOM | 1091 | N1   | G B | 17 | -0.753 | 0.484  | 10.192 | 1.00 | 0.00 | N |
| ATOM | 1092 | C2   | G B | 17 | -1.645 | 1.542  | 10.230 | 1.00 | 0.00 | C |
| ATOM | 1093 | N2   | G B | 17 | -1.110 | 2.766  | 10.144 | 1.00 | 0.00 | N |
| ATOM | 1094 | N3   | G B | 17 | -2.962 | 1.390  | 10.346 | 1.00 | 0.00 | N |
| ATOM | 1095 | C4   | G B | 17 | -3.327 | 0.083  | 10.413 | 1.00 | 0.00 | C |
| ATOM | 1096 | C5   | G B | 17 | -2.512 | -1.035 | 10.379 | 1.00 | 0.00 | C |
| ATOM | 1097 | C6   | G B | 17 | -1.113 | -0.875 | 10.260 | 1.00 | 0.00 | C |
| ATOM | 1098 | O6   | G B | 17 | -0.234 | -1.736 | 10.213 | 1.00 | 0.00 | O |
| ATOM | 1099 | N7   | G B | 17 | -3.281 | -2.197 | 10.474 | 1.00 | 0.00 | N |
| ATOM | 1100 | C8   | G B | 17 | -4.509 | -1.757 | 10.564 | 1.00 | 0.00 | C |
| ATOM | 1101 | N9   | G B | 17 | -4.619 | -0.382 | 10.533 | 1.00 | 0.00 | N |
| ATOM | 1102 | C2'  | G B | 17 | -7.037 | -0.111 | 9.872  | 1.00 | 0.00 | C |
| ATOM | 1103 | C3'  | G B | 17 | -8.194 | 0.314  | 10.763 | 1.00 | 0.00 | C |
| ATOM | 1104 | O3'  | G B | 17 | -8.586 | 1.641  | 10.420 | 1.00 | 0.00 | O |
| ATOM | 1105 | C4'  | G B | 17 | -7.590 | 0.234  | 12.164 | 1.00 | 0.00 | C |
| ATOM | 1106 | O4'  | G B | 17 | -6.187 | 0.602  | 11.973 | 1.00 | 0.00 | O |
| ATOM | 1107 | C5'  | G B | 17 | -7.648 | -1.113 | 12.844 | 1.00 | 0.00 | C |
| ATOM | 1108 | O5'  | G B | 17 | -7.455 | -2.165 | 11.866 | 1.00 | 0.00 | O |
| ATOM | 1109 | O1P  | G B | 17 | -9.674 | -3.353 | 11.843 | 1.00 | 0.00 | O |
| ATOM | 1110 | O2P  | G B | 17 | -7.580 | -4.595 | 11.236 | 1.00 | 0.00 | O |
| ATOM | 1111 | P    | G B | 17 | -8.228 | -3.547 | 12.062 | 1.00 | 0.00 | P |
| ATOM | 1112 | H1   | G B | 17 | 0.250  | 0.710  | 10.106 | 1.00 | 0.00 | H |
| ATOM | 1113 | H8   | G B | 17 | -5.371 | -2.417 | 10.655 | 1.00 | 0.00 | H |
| ATOM | 1114 | H1'  | G B | 17 | -5.587 | 1.459  | 10.229 | 1.00 | 0.00 | H |
| ATOM | 1115 | H21  | G B | 17 | -0.089 | 2.877  | 10.058 | 1.00 | 0.00 | H |
| ATOM | 1116 | H3'  | G B | 17 | -9.051 | -0.352 | 10.666 | 1.00 | 0.00 | H |
| ATOM | 1117 | H22  | G B | 17 | -1.720 | 3.596  | 10.164 | 1.00 | 0.00 | H |
| ATOM | 1118 | H4'  | G B | 17 | -8.135 | 0.944  | 12.785 | 1.00 | 0.00 | H |
| ATOM | 1119 | H2'1 | G B | 17 | -6.983 | -1.196 | 9.783  | 1.00 | 0.00 | H |
| ATOM | 1120 | H2'2 | G B | 17 | -7.141 | 0.295  | 8.866  | 1.00 | 0.00 | H |
| ATOM | 1121 | H5'1 | G B | 17 | -6.866 | -1.166 | 13.601 | 1.00 | 0.00 | H |
| ATOM | 1122 | H5'2 | G B | 17 | -8.620 | -1.230 | 13.324 | 1.00 | 0.00 | H |
| ATOM | 1123 | C1'  | C B | 18 | -4.447 | 3.812  | 7.229  | 1.00 | 0.00 | C |
| ATOM | 1124 | N1   | C B | 18 | -3.955 | 2.408  | 7.154  | 1.00 | 0.00 | N |
| ATOM | 1125 | C2   | C B | 18 | -2.582 | 2.205  | 7.035  | 1.00 | 0.00 | C |
| ATOM | 1126 | O2   | C B | 18 | -1.833 | 3.189  | 6.997  | 1.00 | 0.00 | O |
| ATOM | 1127 | N3   | C B | 18 | -2.115 | 0.935  | 6.964  | 1.00 | 0.00 | N |
| ATOM | 1128 | C4   | C B | 18 | -2.952 | -0.110 | 7.008  | 1.00 | 0.00 | C |
| ATOM | 1129 | N4   | C B | 18 | -2.439 | -1.330 | 6.937  | 1.00 | 0.00 | N |
| ATOM | 1130 | C5   | C B | 18 | -4.367 | 0.071  | 7.127  | 1.00 | 0.00 | C |
| ATOM | 1131 | C6   | C B | 18 | -4.815 | 1.357  | 7.199  | 1.00 | 0.00 | C |
| ATOM | 1132 | C2'  | C B | 18 | -5.757 | 4.044  | 6.488  | 1.00 | 0.00 | C |
| ATOM | 1133 | C3'  | C B | 18 | -6.449 | 5.064  | 7.379  | 1.00 | 0.00 | C |
| ATOM | 1134 | O3'  | C B | 18 | -5.989 | 6.370  | 7.039  | 1.00 | 0.00 | O |
| ATOM | 1135 | C4'  | C B | 18 | -6.010 | 4.644  | 8.780  | 1.00 | 0.00 | C |
| ATOM | 1136 | O4'  | C B | 18 | -4.656 | 4.121  | 8.594  | 1.00 | 0.00 | O |
| ATOM | 1137 | C5'  | C B | 18 | -6.848 | 3.585  | 9.457  | 1.00 | 0.00 | C |
| ATOM | 1138 | O5'  | C B | 18 | -7.304 | 2.620  | 8.475  | 1.00 | 0.00 | O |
| ATOM | 1139 | O1P  | C B | 18 | -9.799 | 2.953  | 8.445  | 1.00 | 0.00 | O |
| ATOM | 1140 | O2P  | C B | 18 | -8.824 | 0.722  | 7.838  | 1.00 | 0.00 | O |
| ATOM | 1141 | P    | C B | 18 | -8.738 | 1.950  | 8.666  | 1.00 | 0.00 | P |
| ATOM | 1142 | H5   | C B | 18 | -5.052 | -0.776 | 7.159  | 1.00 | 0.00 | H |

|      |      |      |     |    |        |        |        |      |      |   |
|------|------|------|-----|----|--------|--------|--------|------|------|---|
| ATOM | 1143 | H6   | C B | 18 | -5.884 | 1.544  | 7.294  | 1.00 | 0.00 | H |
| ATOM | 1144 | H1'  | C B | 18 | -3.663 | 4.468  | 6.852  | 1.00 | 0.00 | H |
| ATOM | 1145 | H3'  | C B | 18 | -7.533 | 5.025  | 7.278  | 1.00 | 0.00 | H |
| ATOM | 1146 | H4'  | C B | 18 | -6.040 | 5.538  | 9.403  | 1.00 | 0.00 | H |
| ATOM | 1147 | H41  | C B | 18 | -3.061 | -2.152 | 6.970  | 1.00 | 0.00 | H |
| ATOM | 1148 | H42  | C B | 18 | -1.421 | -1.457 | 6.851  | 1.00 | 0.00 | H |
| ATOM | 1149 | H2'1 | C B | 18 | -6.347 | 3.133  | 6.396  | 1.00 | 0.00 | H |
| ATOM | 1150 | H2'2 | C B | 18 | -5.599 | 4.435  | 5.483  | 1.00 | 0.00 | H |
| ATOM | 1151 | H5'1 | C B | 18 | -6.247 | 3.082  | 10.215 | 1.00 | 0.00 | H |
| ATOM | 1152 | H5'2 | C B | 18 | -7.705 | 4.057  | 9.934  | 1.00 | 0.00 | H |
| ATOM | 1153 | C1'  | C B | 19 | -1.358 | 5.698  | 3.849  | 1.00 | 0.00 | C |
| ATOM | 1154 | N1   | C B | 19 | -1.784 | 4.274  | 3.774  | 1.00 | 0.00 | N |
| ATOM | 1155 | C2   | C B | 19 | -0.793 | 3.301  | 3.655  | 1.00 | 0.00 | C |
| ATOM | 1156 | O2   | C B | 19 | 0.392  | 3.657  | 3.618  | 1.00 | 0.00 | O |
| ATOM | 1157 | N3   | C B | 19 | -1.161 | 1.999  | 3.585  | 1.00 | 0.00 | N |
| ATOM | 1158 | C4   | C B | 19 | -2.453 | 1.646  | 3.628  | 1.00 | 0.00 | C |
| ATOM | 1159 | N4   | C B | 19 | -2.756 | 0.360  | 3.557  | 1.00 | 0.00 | N |
| ATOM | 1160 | C5   | C B | 19 | -3.490 | 2.625  | 3.748  | 1.00 | 0.00 | C |
| ATOM | 1161 | C6   | C B | 19 | -3.097 | 3.928  | 3.818  | 1.00 | 0.00 | C |
| ATOM | 1162 | C2'  | C B | 19 | -2.281 | 6.654  | 3.108  | 1.00 | 0.00 | C |
| ATOM | 1163 | C3'  | C B | 19 | -2.241 | 7.887  | 3.999  | 1.00 | 0.00 | C |
| ATOM | 1164 | O3'  | C B | 19 | -1.102 | 8.674  | 3.659  | 1.00 | 0.00 | O |
| ATOM | 1165 | C4'  | C B | 19 | -2.133 | 7.290  | 5.400  | 1.00 | 0.00 | C |
| ATOM | 1166 | O4'  | C B | 19 | -1.345 | 6.071  | 5.214  | 1.00 | 0.00 | O |
| ATOM | 1167 | C5'  | C B | 19 | -3.434 | 6.924  | 6.077  | 1.00 | 0.00 | C |
| ATOM | 1168 | O5'  | C B | 19 | -4.370 | 6.412  | 5.095  | 1.00 | 0.00 | O |
| ATOM | 1169 | O1P  | C B | 19 | -6.191 | 8.149  | 5.065  | 1.00 | 0.00 | O |
| ATOM | 1170 | O2P  | C B | 19 | -6.714 | 5.771  | 4.458  | 1.00 | 0.00 | O |
| ATOM | 1171 | P    | C B | 19 | -5.923 | 6.714  | 5.286  | 1.00 | 0.00 | P |
| ATOM | 1172 | H5   | C B | 19 | -4.542 | 2.343  | 3.781  | 1.00 | 0.00 | H |
| ATOM | 1173 | H6   | C B | 19 | -3.852 | 4.709  | 3.912  | 1.00 | 0.00 | H |
| ATOM | 1174 | H1'  | C B | 19 | -0.337 | 5.768  | 3.472  | 1.00 | 0.00 | H |
| ATOM | 1175 | H3'  | C B | 19 | -3.142 | 8.492  | 3.898  | 1.00 | 0.00 | H |
| ATOM | 1176 | H4'  | C B | 19 | -1.631 | 8.031  | 6.023  | 1.00 | 0.00 | H |
| ATOM | 1177 | H41  | C B | 19 | -3.741 | 0.059  | 3.589  | 1.00 | 0.00 | H |
| ATOM | 1178 | H42  | C B | 19 | -2.006 | -0.343 | 3.470  | 1.00 | 0.00 | H |
| ATOM | 1179 | H2'1 | C B | 19 | -3.294 | 6.265  | 3.016  | 1.00 | 0.00 | H |
| ATOM | 1180 | H2'2 | C B | 19 | -1.923 | 6.879  | 2.103  | 1.00 | 0.00 | H |
| ATOM | 1181 | H5'1 | C B | 19 | -3.242 | 6.166  | 6.835  | 1.00 | 0.00 | H |
| ATOM | 1182 | H5'2 | C B | 19 | -3.849 | 7.811  | 6.554  | 1.00 | 0.00 | H |
| ATOM | 1183 | C1'  | T B | 20 | 2.250  | 5.431  | 0.471  | 1.00 | 0.00 | C |
| ATOM | 1184 | N1   | T B | 20 | 1.083  | 4.513  | 0.393  | 1.00 | 0.00 | N |
| ATOM | 1185 | C2   | T B | 20 | 1.349  | 3.164  | 0.274  | 1.00 | 0.00 | C |
| ATOM | 1186 | O2   | T B | 20 | 2.482  | 2.716  | 0.232  | 1.00 | 0.00 | O |
| ATOM | 1187 | N3   | T B | 20 | 0.236  | 2.348  | 0.205  | 1.00 | 0.00 | N |
| ATOM | 1188 | C4   | T B | 20 | -1.081 | 2.750  | 0.243  | 1.00 | 0.00 | C |
| ATOM | 1189 | O4   | T B | 20 | -1.998 | 1.922  | 0.171  | 1.00 | 0.00 | O |
| ATOM | 1190 | C5   | T B | 20 | -1.260 | 4.176  | 0.369  | 1.00 | 0.00 | C |
| ATOM | 1191 | C6   | T B | 20 | -0.199 | 5.003  | 0.439  | 1.00 | 0.00 | C |
| ATOM | 1192 | C7   | T B | 20 | -2.679 | 4.659  | 0.415  | 1.00 | 0.00 | C |
| ATOM | 1193 | C2'  | T B | 20 | 2.045  | 6.748  | -0.268 | 1.00 | 0.00 | C |
| ATOM | 1194 | C3'  | T B | 20 | 2.787  | 7.731  | 0.625  | 1.00 | 0.00 | C |
| ATOM | 1195 | O3'  | T B | 20 | 4.172  | 7.721  | 0.284  | 1.00 | 0.00 | O |
| ATOM | 1196 | C4'  | T B | 20 | 2.532  | 7.178  | 2.025  | 1.00 | 0.00 | C |

|      |      |      |     |    |        |        |        |      |      |   |
|------|------|------|-----|----|--------|--------|--------|------|------|---|
| ATOM | 1197 | O4'  | T B | 20 | 2.476  | 5.728  | 1.835  | 1.00 | 0.00 | O |
| ATOM | 1198 | C5'  | T B | 20 | 1.258  | 7.626  | 2.703  | 1.00 | 0.00 | C |
| ATOM | 1199 | O5'  | T B | 20 | 0.197  | 7.747  | 1.721  | 1.00 | 0.00 | O |
| ATOM | 1200 | O1P  | T B | 20 | -0.293 | 10.215 | 1.695  | 1.00 | 0.00 | O |
| ATOM | 1201 | O2P  | T B | 20 | -2.089 | 8.572  | 1.085  | 1.00 | 0.00 | O |
| ATOM | 1202 | P    | T B | 20 | -0.900 | 8.887  | 1.914  | 1.00 | 0.00 | P |
| ATOM | 1203 | H3   | T B | 20 | 0.408  | 1.337  | 0.117  | 1.00 | 0.00 | H |
| ATOM | 1204 | H6   | T B | 20 | -0.359 | 6.077  | 0.534  | 1.00 | 0.00 | H |
| ATOM | 1205 | H1'  | T B | 20 | 3.126  | 4.904  | 0.093  | 1.00 | 0.00 | H |
| ATOM | 1206 | H3'  | T B | 20 | 2.399  | 8.744  | 0.525  | 1.00 | 0.00 | H |
| ATOM | 1207 | H4'  | T B | 20 | 3.369  | 7.495  | 2.648  | 1.00 | 0.00 | H |
| ATOM | 1208 | H3T  | T B | 20 | 4.364  | 7.864  | -0.645 | 1.00 | 0.00 | H |
| ATOM | 1209 | H71  | T B | 20 | -2.889 | 5.258  | -0.471 | 1.00 | 0.00 | H |
| ATOM | 1210 | H72  | T B | 20 | -3.354 | 3.802  | 0.443  | 1.00 | 0.00 | H |
| ATOM | 1211 | H73  | T B | 20 | -2.829 | 5.267  | 1.308  | 1.00 | 0.00 | H |
| ATOM | 1212 | H2'1 | T B | 20 | 0.993  | 7.011  | -0.359 | 1.00 | 0.00 | H |
| ATOM | 1213 | H2'2 | T B | 20 | 2.467  | 6.728  | -1.273 | 1.00 | 0.00 | H |
| ATOM | 1214 | H5'1 | T B | 20 | 0.978  | 6.894  | 3.460  | 1.00 | 0.00 | H |
| ATOM | 1215 | H5'2 | T B | 20 | 1.428  | 8.589  | 3.181  | 1.00 | 0.00 | H |
| TER  |      |      |     |    |        |        |        |      |      |   |
| ATOM | 1    | C1'  | A A | 1  | 6.665  | 33.054 | 16.457 | 1.00 | 0.00 | C |
| ATOM | 2    | N1   | A A | 1  | 1.819  | 34.704 | 16.821 | 1.00 | 0.00 | N |
| ATOM | 3    | C2   | A A | 1  | 2.965  | 35.169 | 17.309 | 1.00 | 0.00 | C |
| ATOM | 4    | N3   | A A | 1  | 4.185  | 34.694 | 17.174 | 1.00 | 0.00 | N |
| ATOM | 5    | C4   | A A | 1  | 4.170  | 33.577 | 16.425 | 1.00 | 0.00 | C |
| ATOM | 6    | C5   | A A | 1  | 3.085  | 32.972 | 15.855 | 1.00 | 0.00 | C |
| ATOM | 7    | C6   | A A | 1  | 1.835  | 33.588 | 16.077 | 1.00 | 0.00 | C |
| ATOM | 8    | N6   | A A | 1  | 0.682  | 33.108 | 15.580 | 1.00 | 0.00 | N |
| ATOM | 9    | N7   | A A | 1  | 3.456  | 31.838 | 15.154 | 1.00 | 0.00 | N |
| ATOM | 10   | C8   | A A | 1  | 4.745  | 31.781 | 15.316 | 1.00 | 0.00 | C |
| ATOM | 11   | N9   | A A | 1  | 5.250  | 32.803 | 16.075 | 1.00 | 0.00 | N |
| ATOM | 12   | C2'  | A A | 1  | 7.452  | 31.787 | 16.760 | 1.00 | 0.00 | C |
| ATOM | 13   | C3'  | A A | 1  | 8.833  | 32.138 | 16.228 | 1.00 | 0.00 | C |
| ATOM | 14   | O3'  | A A | 1  | 9.550  | 32.860 | 17.227 | 1.00 | 0.00 | O |
| ATOM | 15   | C4'  | A A | 1  | 8.519  | 33.001 | 15.007 | 1.00 | 0.00 | C |
| ATOM | 16   | O4'  | A A | 1  | 7.294  | 33.713 | 15.375 | 1.00 | 0.00 | O |
| ATOM | 17   | C5'  | A A | 1  | 8.279  | 32.265 | 13.710 | 1.00 | 0.00 | C |
| ATOM | 18   | O5'  | A A | 1  | 7.578  | 31.023 | 13.972 | 1.00 | 0.00 | O |
| ATOM | 19   | H2   | A A | 1  | 2.883  | 36.076 | 17.908 | 1.00 | 0.00 | H |
| ATOM | 20   | H8   | A A | 1  | 5.366  | 30.993 | 14.887 | 1.00 | 0.00 | H |
| ATOM | 21   | H1'  | A A | 1  | 6.672  | 33.732 | 17.311 | 1.00 | 0.00 | H |
| ATOM | 22   | H3'  | A A | 1  | 9.401  | 31.250 | 15.947 | 1.00 | 0.00 | H |
| ATOM | 23   | H4'  | A A | 1  | 9.370  | 33.665 | 14.862 | 1.00 | 0.00 | H |
| ATOM | 24   | H61  | A A | 1  | -0.202 | 33.595 | 15.770 | 1.00 | 0.00 | H |
| ATOM | 25   | H62  | A A | 1  | 0.688  | 32.251 | 15.008 | 1.00 | 0.00 | H |
| ATOM | 26   | H5T  | A A | 1  | 7.770  | 30.260 | 13.423 | 1.00 | 0.00 | H |
| ATOM | 27   | H2'1 | A A | 1  | 7.043  | 30.914 | 16.253 | 1.00 | 0.00 | H |
| ATOM | 28   | H2'2 | A A | 1  | 7.484  | 31.564 | 17.826 | 1.00 | 0.00 | H |
| ATOM | 29   | H5'1 | A A | 1  | 7.682  | 32.892 | 13.048 | 1.00 | 0.00 | H |
| ATOM | 30   | H5'2 | A A | 1  | 9.236  | 32.054 | 13.236 | 1.00 | 0.00 | H |
| ATOM | 31   | C1'  | G A | 2  | 5.688  | 34.504 | 21.105 | 1.00 | 0.00 | C |
| ATOM | 32   | N1   | G A | 2  | 0.866  | 33.421 | 19.846 | 1.00 | 0.00 | N |
| ATOM | 33   | C2   | G A | 2  | 1.378  | 34.492 | 20.552 | 1.00 | 0.00 | C |
| ATOM | 34   | N2   | G A | 2  | 0.489  | 35.395 | 20.981 | 1.00 | 0.00 | N |

|      |    |      |     |   |        |        |        |      |      |   |
|------|----|------|-----|---|--------|--------|--------|------|------|---|
| ATOM | 35 | N3   | G A | 2 | 2.675  | 34.652 | 20.809 | 1.00 | 0.00 | N |
| ATOM | 36 | C4   | G A | 2 | 3.430  | 33.641 | 20.305 | 1.00 | 0.00 | C |
| ATOM | 37 | C5   | G A | 2 | 3.006  | 32.531 | 19.591 | 1.00 | 0.00 | C |
| ATOM | 38 | C6   | G A | 2 | 1.628  | 32.365 | 19.315 | 1.00 | 0.00 | C |
| ATOM | 39 | O6   | G A | 2 | 1.064  | 31.458 | 18.701 | 1.00 | 0.00 | O |
| ATOM | 40 | N7   | G A | 2 | 4.097  | 31.727 | 19.255 | 1.00 | 0.00 | N |
| ATOM | 41 | C8   | G A | 2 | 5.124  | 32.361 | 19.760 | 1.00 | 0.00 | C |
| ATOM | 42 | N9   | G A | 2 | 4.799  | 33.532 | 20.414 | 1.00 | 0.00 | N |
| ATOM | 43 | C2'  | G A | 2 | 6.840  | 33.854 | 21.859 | 1.00 | 0.00 | C |
| ATOM | 44 | C3'  | G A | 2 | 7.961  | 34.860 | 21.658 | 1.00 | 0.00 | C |
| ATOM | 45 | O3'  | G A | 2 | 7.853  | 35.884 | 22.645 | 1.00 | 0.00 | O |
| ATOM | 46 | C4'  | G A | 2 | 7.695  | 35.387 | 20.248 | 1.00 | 0.00 | C |
| ATOM | 47 | O4'  | G A | 2 | 6.239  | 35.360 | 20.122 | 1.00 | 0.00 | O |
| ATOM | 48 | C5'  | G A | 2 | 8.296  | 34.594 | 19.112 | 1.00 | 0.00 | C |
| ATOM | 49 | O5'  | G A | 2 | 8.247  | 33.179 | 19.422 | 1.00 | 0.00 | O |
| ATOM | 50 | O1P  | G A | 2 | 10.674 | 32.547 | 19.635 | 1.00 | 0.00 | O |
| ATOM | 51 | O2P  | G A | 2 | 8.985  | 30.825 | 18.946 | 1.00 | 0.00 | O |
| ATOM | 52 | P    | G A | 2 | 9.428  | 32.240 | 18.907 | 1.00 | 0.00 | P |
| ATOM | 53 | H1   | G A | 2 | -0.154 | 33.393 | 19.699 | 1.00 | 0.00 | H |
| ATOM | 54 | H8   | G A | 2 | 6.147  | 31.997 | 19.673 | 1.00 | 0.00 | H |
| ATOM | 55 | H1'  | G A | 2 | 5.077  | 35.110 | 21.774 | 1.00 | 0.00 | H |
| ATOM | 56 | H21  | G A | 2 | -0.513 | 35.266 | 20.778 | 1.00 | 0.00 | H |
| ATOM | 57 | H3'  | G A | 2 | 8.945  | 34.396 | 21.725 | 1.00 | 0.00 | H |
| ATOM | 58 | H22  | G A | 2 | 0.807  | 36.216 | 21.515 | 1.00 | 0.00 | H |
| ATOM | 59 | H4'  | G A | 2 | 8.107  | 36.395 | 20.205 | 1.00 | 0.00 | H |
| ATOM | 60 | H2'1 | G A | 2 | 7.105  | 32.879 | 21.448 | 1.00 | 0.00 | H |
| ATOM | 61 | H2'2 | G A | 2 | 6.616  | 33.714 | 22.917 | 1.00 | 0.00 | H |
| ATOM | 62 | H5'1 | G A | 2 | 7.731  | 34.791 | 18.201 | 1.00 | 0.00 | H |
| ATOM | 63 | H5'2 | G A | 2 | 9.330  | 34.905 | 18.966 | 1.00 | 0.00 | H |
| ATOM | 64 | C1'  | G A | 3 | 2.710  | 35.400 | 24.959 | 1.00 | 0.00 | C |
| ATOM | 65 | N1   | G A | 3 | -0.299 | 31.950 | 22.711 | 1.00 | 0.00 | N |
| ATOM | 66 | C2   | G A | 3 | -0.622 | 33.155 | 23.304 | 1.00 | 0.00 | C |
| ATOM | 67 | N2   | G A | 3 | -1.920 | 33.486 | 23.300 | 1.00 | 0.00 | N |
| ATOM | 68 | N3   | G A | 3 | 0.276  | 33.967 | 23.856 | 1.00 | 0.00 | N |
| ATOM | 69 | C4   | G A | 3 | 1.539  | 33.472 | 23.777 | 1.00 | 0.00 | C |
| ATOM | 70 | C5   | G A | 3 | 1.954  | 32.279 | 23.207 | 1.00 | 0.00 | C |
| ATOM | 71 | C6   | G A | 3 | 1.000  | 31.419 | 22.616 | 1.00 | 0.00 | C |
| ATOM | 72 | O6   | G A | 3 | 1.171  | 30.330 | 22.066 | 1.00 | 0.00 | O |
| ATOM | 73 | N7   | G A | 3 | 3.337  | 32.140 | 23.334 | 1.00 | 0.00 | N |
| ATOM | 74 | C8   | G A | 3 | 3.709  | 33.227 | 23.957 | 1.00 | 0.00 | C |
| ATOM | 75 | N9   | G A | 3 | 2.673  | 34.086 | 24.261 | 1.00 | 0.00 | N |
| ATOM | 76 | C2'  | G A | 3 | 3.715  | 35.460 | 26.101 | 1.00 | 0.00 | C |
| ATOM | 77 | C3'  | G A | 3 | 4.214  | 36.892 | 26.010 | 1.00 | 0.00 | C |
| ATOM | 78 | O3'  | G A | 3 | 3.316  | 37.747 | 26.714 | 1.00 | 0.00 | O |
| ATOM | 79 | C4'  | G A | 3 | 4.206  | 37.161 | 24.506 | 1.00 | 0.00 | C |
| ATOM | 80 | O4'  | G A | 3 | 3.071  | 36.383 | 24.008 | 1.00 | 0.00 | O |
| ATOM | 81 | C5'  | G A | 3 | 5.444  | 36.750 | 23.745 | 1.00 | 0.00 | C |
| ATOM | 82 | O5'  | G A | 3 | 5.979  | 35.524 | 24.301 | 1.00 | 0.00 | O |
| ATOM | 83 | O1P  | G A | 3 | 8.192  | 36.237 | 25.265 | 1.00 | 0.00 | O |
| ATOM | 84 | O2P  | G A | 3 | 7.859  | 33.870 | 24.506 | 1.00 | 0.00 | O |
| ATOM | 85 | P    | G A | 3 | 7.560  | 35.309 | 24.309 | 1.00 | 0.00 | P |
| ATOM | 86 | H1   | G A | 3 | -1.071 | 31.397 | 22.308 | 1.00 | 0.00 | H |
| ATOM | 87 | H8   | G A | 3 | 4.746  | 33.438 | 24.215 | 1.00 | 0.00 | H |
| ATOM | 88 | H1'  | G A | 3 | 1.704  | 35.628 | 25.311 | 1.00 | 0.00 | H |

|      |     |      |     |   |        |        |        |      |      |   |
|------|-----|------|-----|---|--------|--------|--------|------|------|---|
| ATOM | 89  | H21  | G A | 3 | -2.610 | 32.854 | 22.868 | 1.00 | 0.00 | H |
| ATOM | 90  | H3'  | G A | 3 | 5.217  | 37.003 | 26.424 | 1.00 | 0.00 | H |
| ATOM | 91  | H22  | G A | 3 | -2.226 | 34.370 | 23.728 | 1.00 | 0.00 | H |
| ATOM | 92  | H4'  | G A | 3 | 4.076  | 38.235 | 24.376 | 1.00 | 0.00 | H |
| ATOM | 93  | H2'1 | G A | 3 | 4.529  | 34.747 | 25.973 | 1.00 | 0.00 | H |
| ATOM | 94  | H2'2 | G A | 3 | 3.254  | 35.261 | 27.069 | 1.00 | 0.00 | H |
| ATOM | 95  | H5'1 | G A | 3 | 5.186  | 36.599 | 22.697 | 1.00 | 0.00 | H |
| ATOM | 96  | H5'2 | G A | 3 | 6.188  | 37.544 | 23.818 | 1.00 | 0.00 | H |
| ATOM | 97  | C1'  | C A | 4 | -1.406 | 34.767 | 27.641 | 1.00 | 0.00 | C |
| ATOM | 98  | N1   | C A | 4 | -0.586 | 33.595 | 27.225 | 1.00 | 0.00 | N |
| ATOM | 99  | C2   | C A | 4 | -1.235 | 32.540 | 26.588 | 1.00 | 0.00 | C |
| ATOM | 100 | O2   | C A | 4 | -2.455 | 32.617 | 26.395 | 1.00 | 0.00 | O |
| ATOM | 101 | N3   | C A | 4 | -0.507 | 31.464 | 26.202 | 1.00 | 0.00 | N |
| ATOM | 102 | C4   | C A | 4 | 0.812  | 31.409 | 26.427 | 1.00 | 0.00 | C |
| ATOM | 103 | N4   | C A | 4 | 1.475  | 30.334 | 26.025 | 1.00 | 0.00 | N |
| ATOM | 104 | C5   | C A | 4 | 1.503  | 32.479 | 27.082 | 1.00 | 0.00 | C |
| ATOM | 105 | C6   | C A | 4 | 0.752  | 33.553 | 27.459 | 1.00 | 0.00 | C |
| ATOM | 106 | C2'  | C A | 4 | -0.985 | 35.368 | 28.974 | 1.00 | 0.00 | C |
| ATOM | 107 | C3'  | C A | 4 | -1.224 | 36.853 | 28.743 | 1.00 | 0.00 | C |
| ATOM | 108 | O3'  | C A | 4 | -2.594 | 37.152 | 29.005 | 1.00 | 0.00 | O |
| ATOM | 109 | C4'  | C A | 4 | -0.867 | 37.029 | 27.269 | 1.00 | 0.00 | C |
| ATOM | 110 | O4'  | C A | 4 | -1.264 | 35.765 | 26.647 | 1.00 | 0.00 | O |
| ATOM | 111 | C5'  | C A | 4 | 0.589  | 37.283 | 26.957 | 1.00 | 0.00 | C |
| ATOM | 112 | O5'  | C A | 4 | 1.425  | 36.520 | 27.864 | 1.00 | 0.00 | O |
| ATOM | 113 | O1P  | C A | 4 | 2.584  | 38.293 | 29.222 | 1.00 | 0.00 | O |
| ATOM | 114 | O2P  | C A | 4 | 3.680  | 36.063 | 28.875 | 1.00 | 0.00 | O |
| ATOM | 115 | P    | C A | 4 | 2.818  | 37.141 | 28.330 | 1.00 | 0.00 | P |
| ATOM | 116 | H5   | C A | 4 | 2.577  | 32.436 | 27.271 | 1.00 | 0.00 | H |
| ATOM | 117 | H6   | C A | 4 | 1.234  | 34.394 | 27.957 | 1.00 | 0.00 | H |
| ATOM | 118 | H1'  | C A | 4 | -2.451 | 34.461 | 27.662 | 1.00 | 0.00 | H |
| ATOM | 119 | H3'  | C A | 4 | -0.592 | 37.471 | 29.379 | 1.00 | 0.00 | H |
| ATOM | 120 | H4'  | C A | 4 | -1.439 | 37.882 | 26.904 | 1.00 | 0.00 | H |
| ATOM | 121 | H41  | C A | 4 | 2.491  | 30.267 | 26.184 | 1.00 | 0.00 | H |
| ATOM | 122 | H42  | C A | 4 | 0.976  | 29.565 | 25.556 | 1.00 | 0.00 | H |
| ATOM | 123 | H2'1 | C A | 4 | 0.060  | 35.168 | 29.208 | 1.00 | 0.00 | H |
| ATOM | 124 | H2'2 | C A | 4 | -1.585 | 34.993 | 29.805 | 1.00 | 0.00 | H |
| ATOM | 125 | H5'1 | C A | 4 | 0.794  | 36.986 | 25.929 | 1.00 | 0.00 | H |
| ATOM | 126 | H5'2 | C A | 4 | 0.799  | 38.347 | 27.071 | 1.00 | 0.00 | H |
| ATOM | 127 | C1'  | C A | 5 | -5.337 | 32.199 | 29.215 | 1.00 | 0.00 | C |
| ATOM | 128 | N1   | C A | 5 | -3.974 | 31.602 | 29.267 | 1.00 | 0.00 | N |
| ATOM | 129 | C2   | C A | 5 | -3.792 | 30.343 | 28.700 | 1.00 | 0.00 | C |
| ATOM | 130 | O2   | C A | 5 | -4.762 | 29.774 | 28.181 | 1.00 | 0.00 | O |
| ATOM | 131 | N3   | C A | 5 | -2.558 | 29.782 | 28.737 | 1.00 | 0.00 | N |
| ATOM | 132 | C4   | C A | 5 | -1.529 | 30.419 | 29.307 | 1.00 | 0.00 | C |
| ATOM | 133 | N4   | C A | 5 | -0.345 | 29.827 | 29.312 | 1.00 | 0.00 | N |
| ATOM | 134 | C5   | C A | 5 | -1.688 | 31.715 | 29.899 | 1.00 | 0.00 | C |
| ATOM | 135 | C6   | C A | 5 | -2.937 | 32.261 | 29.847 | 1.00 | 0.00 | C |
| ATOM | 136 | C2'  | C A | 5 | -5.715 | 32.976 | 30.468 | 1.00 | 0.00 | C |
| ATOM | 137 | C3'  | C A | 5 | -6.542 | 34.116 | 29.896 | 1.00 | 0.00 | C |
| ATOM | 138 | O3'  | C A | 5 | -7.888 | 33.678 | 29.725 | 1.00 | 0.00 | O |
| ATOM | 139 | C4'  | C A | 5 | -5.854 | 34.401 | 28.564 | 1.00 | 0.00 | C |
| ATOM | 140 | O4'  | C A | 5 | -5.373 | 33.094 | 28.118 | 1.00 | 0.00 | O |
| ATOM | 141 | C5'  | C A | 5 | -4.685 | 35.358 | 28.603 | 1.00 | 0.00 | C |
| ATOM | 142 | O5'  | C A | 5 | -3.933 | 35.164 | 29.829 | 1.00 | 0.00 | O |

|      |     |      |     |   |         |        |        |      |      |   |
|------|-----|------|-----|---|---------|--------|--------|------|------|---|
| ATOM | 143 | O1P  | C A | 5 | -4.277  | 37.325 | 31.071 | 1.00 | 0.00 | O |
| ATOM | 144 | O2P  | C A | 5 | -2.205  | 35.966 | 31.466 | 1.00 | 0.00 | O |
| ATOM | 145 | P    | C A | 5 | -3.246  | 36.428 | 30.515 | 1.00 | 0.00 | P |
| ATOM | 146 | H5   | C A | 5 | -0.854  | 32.237 | 30.369 | 1.00 | 0.00 | H |
| ATOM | 147 | H6   | C A | 5 | -3.107  | 33.247 | 30.281 | 1.00 | 0.00 | H |
| ATOM | 148 | H1'  | C A | 5 | -6.051  | 31.399 | 29.019 | 1.00 | 0.00 | H |
| ATOM | 149 | H3'  | C A | 5 | -6.529  | 34.994 | 30.543 | 1.00 | 0.00 | H |
| ATOM | 150 | H4'  | C A | 5 | -6.609  | 34.827 | 27.902 | 1.00 | 0.00 | H |
| ATOM | 151 | H41  | C A | 5 | 0.465   | 30.296 | 29.743 | 1.00 | 0.00 | H |
| ATOM | 152 | H42  | C A | 5 | -0.233  | 28.894 | 28.887 | 1.00 | 0.00 | H |
| ATOM | 153 | H2'1 | C A | 5 | -4.842  | 33.349 | 31.003 | 1.00 | 0.00 | H |
| ATOM | 154 | H2'2 | C A | 5 | -6.297  | 32.374 | 31.168 | 1.00 | 0.00 | H |
| ATOM | 155 | H5'1 | C A | 5 | -4.041  | 35.173 | 27.743 | 1.00 | 0.00 | H |
| ATOM | 156 | H5'2 | C A | 5 | -5.059  | 36.380 | 28.558 | 1.00 | 0.00 | H |
| ATOM | 157 | C1'  | G A | 6 | -7.833  | 28.029 | 30.168 | 1.00 | 0.00 | C |
| ATOM | 158 | N1   | G A | 6 | -3.171  | 25.990 | 30.531 | 1.00 | 0.00 | N |
| ATOM | 159 | C2   | G A | 6 | -4.312  | 25.495 | 29.924 | 1.00 | 0.00 | C |
| ATOM | 160 | N2   | G A | 6 | -4.196  | 24.297 | 29.339 | 1.00 | 0.00 | N |
| ATOM | 161 | N3   | G A | 6 | -5.475  | 26.144 | 29.904 | 1.00 | 0.00 | N |
| ATOM | 162 | C4   | G A | 6 | -5.411  | 27.337 | 30.551 | 1.00 | 0.00 | C |
| ATOM | 163 | C5   | G A | 6 | -4.322  | 27.909 | 31.186 | 1.00 | 0.00 | C |
| ATOM | 164 | C6   | G A | 6 | -3.086  | 27.223 | 31.205 | 1.00 | 0.00 | C |
| ATOM | 165 | O6   | G A | 6 | -2.017  | 27.562 | 31.713 | 1.00 | 0.00 | O |
| ATOM | 166 | N7   | G A | 6 | -4.674  | 29.145 | 31.730 | 1.00 | 0.00 | N |
| ATOM | 167 | C8   | G A | 6 | -5.934  | 29.284 | 31.412 | 1.00 | 0.00 | C |
| ATOM | 168 | N9   | G A | 6 | -6.455  | 28.225 | 30.695 | 1.00 | 0.00 | N |
| ATOM | 169 | C2'  | G A | 6 | -8.924  | 28.544 | 31.096 | 1.00 | 0.00 | C |
| ATOM | 170 | C3'  | G A | 6 | -9.956  | 29.070 | 30.112 | 1.00 | 0.00 | C |
| ATOM | 171 | O3'  | G A | 6 | -10.787 | 27.994 | 29.684 | 1.00 | 0.00 | O |
| ATOM | 172 | C4'  | G A | 6 | -9.094  | 29.622 | 28.978 | 1.00 | 0.00 | C |
| ATOM | 173 | O4'  | G A | 6 | -7.932  | 28.735 | 28.946 | 1.00 | 0.00 | O |
| ATOM | 174 | C5'  | G A | 6 | -8.613  | 31.045 | 29.132 | 1.00 | 0.00 | C |
| ATOM | 175 | O5'  | G A | 6 | -8.309  | 31.313 | 30.524 | 1.00 | 0.00 | O |
| ATOM | 176 | O1P  | G A | 6 | -10.031 | 33.029 | 31.175 | 1.00 | 0.00 | O |
| ATOM | 177 | O2P  | G A | 6 | -7.823  | 32.953 | 32.365 | 1.00 | 0.00 | O |
| ATOM | 178 | P    | G A | 6 | -8.580  | 32.775 | 31.101 | 1.00 | 0.00 | P |
| ATOM | 179 | H1   | G A | 6 | -2.318  | 25.411 | 30.484 | 1.00 | 0.00 | H |
| ATOM | 180 | H8   | G A | 6 | -6.525  | 30.157 | 31.688 | 1.00 | 0.00 | H |
| ATOM | 181 | H1'  | G A | 6 | -7.969  | 26.968 | 29.955 | 1.00 | 0.00 | H |
| ATOM | 182 | H21  | G A | 6 | -3.293  | 23.802 | 29.355 | 1.00 | 0.00 | H |
| ATOM | 183 | H3'  | G A | 6 | -10.578 | 29.853 | 30.550 | 1.00 | 0.00 | H |
| ATOM | 184 | H22  | G A | 6 | -5.010  | 23.871 | 28.872 | 1.00 | 0.00 | H |
| ATOM | 185 | H4'  | G A | 6 | -9.694  | 29.570 | 28.070 | 1.00 | 0.00 | H |
| ATOM | 186 | H2'1 | G A | 6 | -8.566  | 29.335 | 31.757 | 1.00 | 0.00 | H |
| ATOM | 187 | H2'2 | G A | 6 | -9.339  | 27.756 | 31.725 | 1.00 | 0.00 | H |
| ATOM | 188 | H5'1 | G A | 6 | -7.719  | 31.189 | 28.526 | 1.00 | 0.00 | H |
| ATOM | 189 | H5'2 | G A | 6 | -9.391  | 31.726 | 28.787 | 1.00 | 0.00 | H |
| ATOM | 190 | C1'  | C A | 7 | -8.194  | 23.204 | 31.225 | 1.00 | 0.00 | C |
| ATOM | 191 | N1   | C A | 7 | -7.330  | 24.095 | 32.046 | 1.00 | 0.00 | N |
| ATOM | 192 | C2   | C A | 7 | -6.010  | 23.706 | 32.260 | 1.00 | 0.00 | C |
| ATOM | 193 | O2   | C A | 7 | -5.611  | 22.644 | 31.764 | 1.00 | 0.00 | O |
| ATOM | 194 | N3   | C A | 7 | -5.205  | 24.503 | 33.005 | 1.00 | 0.00 | N |
| ATOM | 195 | C4   | C A | 7 | -5.665  | 25.646 | 33.531 | 1.00 | 0.00 | C |
| ATOM | 196 | N4   | C A | 7 | -4.835  | 26.388 | 34.249 | 1.00 | 0.00 | N |



|      |     |      |     |   |         |        |        |      |      |   |
|------|-----|------|-----|---|---------|--------|--------|------|------|---|
| ATOM | 197 | C5   | C A | 7 | -7.020  | 26.070 | 33.331 | 1.00 | 0.00 | C |
| ATOM | 198 | C6   | C A | 7 | -7.811  | 25.253 | 32.573 | 1.00 | 0.00 | C |
| ATOM | 199 | C2'  | C A | 7 | -9.631  | 23.116 | 31.719 | 1.00 | 0.00 | C |
| ATOM | 200 | C3'  | C A | 7 | -10.409 | 23.008 | 30.416 | 1.00 | 0.00 | C |
| ATOM | 201 | O3'  | C A | 7 | -10.437 | 21.644 | 30.000 | 1.00 | 0.00 | O |
| ATOM | 202 | C4'  | C A | 7 | -9.601  | 23.886 | 29.464 | 1.00 | 0.00 | C |
| ATOM | 203 | O4'  | C A | 7 | -8.216  | 23.722 | 29.907 | 1.00 | 0.00 | O |
| ATOM | 204 | C5'  | C A | 7 | -9.935  | 25.361 | 29.465 | 1.00 | 0.00 | C |
| ATOM | 205 | O5'  | C A | 7 | -10.264 | 25.789 | 30.810 | 1.00 | 0.00 | O |
| ATOM | 206 | O1P  | C A | 7 | -12.700 | 26.401 | 30.648 | 1.00 | 0.00 | O |
| ATOM | 207 | O2P  | C A | 7 | -11.240 | 27.503 | 32.365 | 1.00 | 0.00 | O |
| ATOM | 208 | P    | C A | 7 | -11.366 | 26.924 | 31.006 | 1.00 | 0.00 | P |
| ATOM | 209 | H5   | C A | 7 | -7.402  | 26.996 | 33.762 | 1.00 | 0.00 | H |
| ATOM | 210 | H6   | C A | 7 | -8.847  | 25.536 | 32.386 | 1.00 | 0.00 | H |
| ATOM | 211 | H1'  | C A | 7 | -7.732  | 22.218 | 31.190 | 1.00 | 0.00 | H |
| ATOM | 212 | H3'  | C A | 7 | -11.431 | 23.375 | 30.520 | 1.00 | 0.00 | H |
| ATOM | 213 | H4'  | C A | 7 | -9.775  | 23.506 | 28.458 | 1.00 | 0.00 | H |
| ATOM | 214 | H41  | C A | 7 | -5.162  | 27.273 | 34.662 | 1.00 | 0.00 | H |
| ATOM | 215 | H42  | C A | 7 | -3.862  | 26.082 | 34.394 | 1.00 | 0.00 | H |
| ATOM | 216 | H2'1 | C A | 7 | -9.929  | 23.998 | 32.286 | 1.00 | 0.00 | H |
| ATOM | 217 | H2'2 | C A | 7 | -9.798  | 22.246 | 32.355 | 1.00 | 0.00 | H |
| ATOM | 218 | H5'1 | C A | 7 | -9.075  | 25.923 | 29.098 | 1.00 | 0.00 | H |
| ATOM | 219 | H5'2 | C A | 7 | -10.784 | 25.535 | 28.805 | 1.00 | 0.00 | H |
| ATOM | 220 | C1'  | A A | 8 | -6.551  | 18.909 | 33.057 | 1.00 | 0.00 | C |
| ATOM | 221 | N1   | A A | 8 | -3.666  | 21.940 | 36.030 | 1.00 | 0.00 | N |
| ATOM | 222 | C2   | A A | 8 | -3.403  | 20.817 | 35.368 | 1.00 | 0.00 | C |
| ATOM | 223 | N3   | A A | 8 | -4.195  | 20.084 | 34.615 | 1.00 | 0.00 | N |
| ATOM | 224 | C4   | A A | 8 | -5.427  | 20.626 | 34.572 | 1.00 | 0.00 | C |
| ATOM | 225 | C5   | A A | 8 | -5.857  | 21.766 | 35.190 | 1.00 | 0.00 | C |
| ATOM | 226 | C6   | A A | 8 | -4.903  | 22.457 | 35.966 | 1.00 | 0.00 | C |
| ATOM | 227 | N6   | A A | 8 | -5.180  | 23.591 | 36.631 | 1.00 | 0.00 | N |
| ATOM | 228 | N7   | A A | 8 | -7.191  | 22.012 | 34.915 | 1.00 | 0.00 | N |
| ATOM | 229 | C8   | A A | 8 | -7.538  | 21.022 | 34.145 | 1.00 | 0.00 | C |
| ATOM | 230 | N9   | A A | 8 | -6.518  | 20.141 | 33.891 | 1.00 | 0.00 | N |
| ATOM | 231 | C2'  | A A | 8 | -7.855  | 18.130 | 33.167 | 1.00 | 0.00 | C |
| ATOM | 232 | C3'  | A A | 8 | -8.026  | 17.599 | 31.752 | 1.00 | 0.00 | C |
| ATOM | 233 | O3'  | A A | 8 | -7.279  | 16.393 | 31.613 | 1.00 | 0.00 | O |
| ATOM | 234 | C4'  | A A | 8 | -7.462  | 18.730 | 30.893 | 1.00 | 0.00 | C |
| ATOM | 235 | O4'  | A A | 8 | -6.385  | 19.298 | 31.708 | 1.00 | 0.00 | O |
| ATOM | 236 | C5'  | A A | 8 | -8.424  | 19.834 | 30.523 | 1.00 | 0.00 | C |
| ATOM | 237 | O5'  | A A | 8 | -9.327  | 20.089 | 31.629 | 1.00 | 0.00 | O |
| ATOM | 238 | O1P  | A A | 8 | -11.568 | 19.388 | 30.721 | 1.00 | 0.00 | O |
| ATOM | 239 | O2P  | A A | 8 | -11.431 | 21.136 | 32.517 | 1.00 | 0.00 | O |
| ATOM | 240 | P    | A A | 8 | -10.828 | 20.522 | 31.308 | 1.00 | 0.00 | P |
| ATOM | 241 | H2   | A A | 8 | -2.383  | 20.449 | 35.464 | 1.00 | 0.00 | H |
| ATOM | 242 | H8   | A A | 8 | -8.542  | 20.903 | 33.740 | 1.00 | 0.00 | H |
| ATOM | 243 | H1'  | A A | 8 | -5.700  | 18.288 | 33.334 | 1.00 | 0.00 | H |
| ATOM | 244 | H3'  | A A | 8 | -9.071  | 17.406 | 31.512 | 1.00 | 0.00 | H |
| ATOM | 245 | H4'  | A A | 8 | -7.103  | 18.277 | 29.970 | 1.00 | 0.00 | H |
| ATOM | 246 | H61  | A A | 8 | -4.446  | 24.058 | 37.181 | 1.00 | 0.00 | H |
| ATOM | 247 | H62  | A A | 8 | -6.128  | 23.993 | 36.589 | 1.00 | 0.00 | H |
| ATOM | 248 | H2'1 | A A | 8 | -8.692  | 18.763 | 33.457 | 1.00 | 0.00 | H |
| ATOM | 249 | H2'2 | A A | 8 | -7.790  | 17.317 | 33.891 | 1.00 | 0.00 | H |
| ATOM | 250 | H5'1 | A A | 8 | -7.858  | 20.738 | 30.295 | 1.00 | 0.00 | H |

|      |     |      |     |    |        |        |        |      |      |   |
|------|-----|------|-----|----|--------|--------|--------|------|------|---|
| ATOM | 251 | H5'2 | A A | 8  | -8.993 | 19.534 | 29.645 | 1.00 | 0.00 | H |
| ATOM | 252 | C1'  | C A | 9  | -3.733 | 16.164 | 36.088 | 1.00 | 0.00 | C |
| ATOM | 253 | N1   | C A | 9  | -4.582 | 17.258 | 36.634 | 1.00 | 0.00 | N |
| ATOM | 254 | C2   | C A | 9  | -3.981 | 18.196 | 37.471 | 1.00 | 0.00 | C |
| ATOM | 255 | O2   | C A | 9  | -2.774 | 18.082 | 37.724 | 1.00 | 0.00 | O |
| ATOM | 256 | N3   | C A | 9  | -4.736 | 19.199 | 37.978 | 1.00 | 0.00 | N |
| ATOM | 257 | C4   | C A | 9  | -6.040 | 19.295 | 37.687 | 1.00 | 0.00 | C |
| ATOM | 258 | N4   | C A | 9  | -6.731 | 20.298 | 38.208 | 1.00 | 0.00 | N |
| ATOM | 259 | C5   | C A | 9  | -6.687 | 18.342 | 36.832 | 1.00 | 0.00 | C |
| ATOM | 260 | C6   | C A | 9  | -5.905 | 17.342 | 36.328 | 1.00 | 0.00 | C |
| ATOM | 261 | C2'  | C A | 9  | -4.442 | 14.820 | 36.004 | 1.00 | 0.00 | C |
| ATOM | 262 | C3'  | C A | 9  | -3.855 | 14.230 | 34.729 | 1.00 | 0.00 | C |
| ATOM | 263 | O3'  | C A | 9  | -2.617 | 13.593 | 35.037 | 1.00 | 0.00 | O |
| ATOM | 264 | C4'  | C A | 9  | -3.667 | 15.458 | 33.842 | 1.00 | 0.00 | C |
| ATOM | 265 | O4'  | C A | 9  | -3.343 | 16.536 | 34.778 | 1.00 | 0.00 | O |
| ATOM | 266 | C5'  | C A | 9  | -4.861 | 15.880 | 33.018 | 1.00 | 0.00 | C |
| ATOM | 267 | O5'  | C A | 9  | -6.080 | 15.657 | 33.771 | 1.00 | 0.00 | O |
| ATOM | 268 | O1P  | C A | 9  | -7.251 | 13.853 | 32.464 | 1.00 | 0.00 | O |
| ATOM | 269 | O2P  | C A | 9  | -8.586 | 15.470 | 33.842 | 1.00 | 0.00 | O |
| ATOM | 270 | P    | C A | 9  | -7.399 | 15.225 | 32.985 | 1.00 | 0.00 | P |
| ATOM | 271 | H5   | C A | 9  | -7.750 | 18.413 | 36.596 | 1.00 | 0.00 | H |
| ATOM | 272 | H6   | C A | 9  | -6.350 | 16.599 | 35.667 | 1.00 | 0.00 | H |
| ATOM | 273 | H1'  | C A | 9  | -2.833 | 16.094 | 36.698 | 1.00 | 0.00 | H |
| ATOM | 274 | H3'  | C A | 9  | -4.528 | 13.509 | 34.267 | 1.00 | 0.00 | H |
| ATOM | 275 | H4'  | C A | 9  | -2.852 | 15.231 | 33.155 | 1.00 | 0.00 | H |
| ATOM | 276 | H41  | C A | 9  | -7.735 | 20.397 | 37.997 | 1.00 | 0.00 | H |
| ATOM | 277 | H42  | C A | 9  | -6.264 | 20.980 | 38.824 | 1.00 | 0.00 | H |
| ATOM | 278 | H2'1 | C A | 9  | -5.524 | 14.926 | 35.928 | 1.00 | 0.00 | H |
| ATOM | 279 | H2'2 | C A | 9  | -4.234 | 14.188 | 36.868 | 1.00 | 0.00 | H |
| ATOM | 280 | H5'1 | C A | 9  | -4.770 | 16.937 | 32.768 | 1.00 | 0.00 | H |
| ATOM | 281 | H5'2 | C A | 9  | -4.884 | 15.296 | 32.098 | 1.00 | 0.00 | H |
| ATOM | 282 | C1'  | C A | 10 | -1.119 | 15.344 | 40.213 | 1.00 | 0.00 | C |
| ATOM | 283 | N1   | C A | 10 | -2.512 | 15.862 | 40.292 | 1.00 | 0.00 | N |
| ATOM | 284 | C2   | C A | 10 | -2.740 | 17.003 | 41.058 | 1.00 | 0.00 | C |
| ATOM | 285 | O2   | C A | 10 | -1.784 | 17.536 | 41.638 | 1.00 | 0.00 | O |
| ATOM | 286 | N3   | C A | 10 | -4.001 | 17.493 | 41.143 | 1.00 | 0.00 | N |
| ATOM | 287 | C4   | C A | 10 | -5.016 | 16.895 | 40.505 | 1.00 | 0.00 | C |
| ATOM | 288 | N4   | C A | 10 | -6.229 | 17.417 | 40.620 | 1.00 | 0.00 | N |
| ATOM | 289 | C5   | C A | 10 | -4.812 | 15.717 | 39.714 | 1.00 | 0.00 | C |
| ATOM | 290 | C6   | C A | 10 | -3.532 | 15.245 | 39.638 | 1.00 | 0.00 | C |
| ATOM | 291 | C2'  | C A | 10 | -1.030 | 13.824 | 40.209 | 1.00 | 0.00 | C |
| ATOM | 292 | C3'  | C A | 10 | 0.146  | 13.578 | 39.275 | 1.00 | 0.00 | C |
| ATOM | 293 | O3'  | C A | 10 | 1.360  | 13.678 | 40.016 | 1.00 | 0.00 | O |
| ATOM | 294 | C4'  | C A | 10 | 0.003  | 14.697 | 38.247 | 1.00 | 0.00 | C |
| ATOM | 295 | O4'  | C A | 10 | -0.550 | 15.818 | 39.006 | 1.00 | 0.00 | O |
| ATOM | 296 | C5'  | C A | 10 | -0.904 | 14.417 | 37.071 | 1.00 | 0.00 | C |
| ATOM | 297 | O5'  | C A | 10 | -2.038 | 13.624 | 37.505 | 1.00 | 0.00 | O |
| ATOM | 298 | O1P  | C A | 10 | -1.707 | 11.432 | 36.315 | 1.00 | 0.00 | O |
| ATOM | 299 | O2P  | C A | 10 | -4.016 | 12.178 | 36.950 | 1.00 | 0.00 | O |
| ATOM | 300 | P    | C A | 10 | -2.652 | 12.550 | 36.500 | 1.00 | 0.00 | P |
| ATOM | 301 | H5   | C A | 10 | -5.635 | 15.223 | 39.197 | 1.00 | 0.00 | H |
| ATOM | 302 | H6   | C A | 10 | -3.325 | 14.357 | 39.042 | 1.00 | 0.00 | H |
| ATOM | 303 | H1'  | C A | 10 | -0.550 | 15.767 | 41.041 | 1.00 | 0.00 | H |
| ATOM | 304 | H3'  | C A | 10 | 0.093  | 12.598 | 38.802 | 1.00 | 0.00 | H |

|      |     |      |   |   |    |        |        |        |      |      |   |
|------|-----|------|---|---|----|--------|--------|--------|------|------|---|
| ATOM | 305 | H4'  | C | A | 10 | 1.001  | 14.897 | 37.856 | 1.00 | 0.00 | H |
| ATOM | 306 | H41  | C | A | 10 | -7.026 | 16.978 | 40.138 | 1.00 | 0.00 | H |
| ATOM | 307 | H42  | C | A | 10 | -6.373 | 18.262 | 41.192 | 1.00 | 0.00 | H |
| ATOM | 308 | H2'1 | C | A | 10 | -1.938 | 13.356 | 39.832 | 1.00 | 0.00 | H |
| ATOM | 309 | H2'2 | C | A | 10 | -0.839 | 13.418 | 41.204 | 1.00 | 0.00 | H |
| ATOM | 310 | H5'1 | C | A | 10 | -1.253 | 15.362 | 36.654 | 1.00 | 0.00 | H |
| ATOM | 311 | H5'2 | C | A | 10 | -0.344 | 13.874 | 36.310 | 1.00 | 0.00 | H |
| ATOM | 312 | C1'  | T | A | 11 | 0.080  | 16.112 | 44.953 | 1.00 | 0.00 | C |
| ATOM | 313 | N1   | T | A | 11 | -1.335 | 15.861 | 44.573 | 1.00 | 0.00 | N |
| ATOM | 314 | C2   | T | A | 11 | -2.279 | 16.759 | 45.030 | 1.00 | 0.00 | C |
| ATOM | 315 | O2   | T | A | 11 | -1.993 | 17.724 | 45.718 | 1.00 | 0.00 | O |
| ATOM | 316 | N3   | T | A | 11 | -3.582 | 16.489 | 44.653 | 1.00 | 0.00 | N |
| ATOM | 317 | C4   | T | A | 11 | -4.010 | 15.427 | 43.883 | 1.00 | 0.00 | C |
| ATOM | 318 | O4   | T | A | 11 | -5.210 | 15.286 | 43.612 | 1.00 | 0.00 | O |
| ATOM | 319 | C5   | T | A | 11 | -2.953 | 14.543 | 43.453 | 1.00 | 0.00 | C |
| ATOM | 320 | C6   | T | A | 11 | -1.673 | 14.777 | 43.801 | 1.00 | 0.00 | C |
| ATOM | 321 | C7   | T | A | 11 | -3.374 | 13.376 | 42.611 | 1.00 | 0.00 | C |
| ATOM | 322 | C2'  | T | A | 11 | 0.868  | 14.844 | 45.258 | 1.00 | 0.00 | C |
| ATOM | 323 | C3'  | T | A | 11 | 2.248  | 15.191 | 44.723 | 1.00 | 0.00 | C |
| ATOM | 324 | O3'  | T | A | 11 | 2.969  | 15.915 | 45.718 | 1.00 | 0.00 | O |
| ATOM | 325 | C4'  | T | A | 11 | 1.932  | 16.049 | 43.501 | 1.00 | 0.00 | C |
| ATOM | 326 | O4'  | T | A | 11 | 0.710  | 16.765 | 43.868 | 1.00 | 0.00 | O |
| ATOM | 327 | C5'  | T | A | 11 | 1.688  | 15.311 | 42.205 | 1.00 | 0.00 | C |
| ATOM | 328 | O5'  | T | A | 11 | 0.987  | 14.071 | 42.473 | 1.00 | 0.00 | O |
| ATOM | 329 | O1P  | T | A | 11 | 2.664  | 12.304 | 41.843 | 1.00 | 0.00 | O |
| ATOM | 330 | O2P  | T | A | 11 | 0.208  | 11.807 | 41.709 | 1.00 | 0.00 | O |
| ATOM | 331 | P    | T | A | 11 | 1.302  | 12.799 | 41.565 | 1.00 | 0.00 | P |
| ATOM | 332 | H3   | T | A | 11 | -4.304 | 17.146 | 44.978 | 1.00 | 0.00 | H |
| ATOM | 333 | H6   | T | A | 11 | -0.890 | 14.095 | 43.464 | 1.00 | 0.00 | H |
| ATOM | 334 | H1'  | T | A | 11 | 0.091  | 16.791 | 45.806 | 1.00 | 0.00 | H |
| ATOM | 335 | H3'  | T | A | 11 | 2.813  | 14.302 | 44.445 | 1.00 | 0.00 | H |
| ATOM | 336 | H4'  | T | A | 11 | 2.785  | 16.713 | 43.350 | 1.00 | 0.00 | H |
| ATOM | 337 | H71  | T | A | 11 | -3.189 | 12.450 | 43.155 | 1.00 | 0.00 | H |
| ATOM | 338 | H72  | T | A | 11 | -4.438 | 13.457 | 42.383 | 1.00 | 0.00 | H |
| ATOM | 339 | H73  | T | A | 11 | -2.804 | 13.372 | 41.682 | 1.00 | 0.00 | H |
| ATOM | 340 | H2'1 | T | A | 11 | 0.456  | 13.971 | 44.755 | 1.00 | 0.00 | H |
| ATOM | 341 | H2'2 | T | A | 11 | 0.900  | 14.623 | 46.326 | 1.00 | 0.00 | H |
| ATOM | 342 | H5'1 | T | A | 11 | 1.092  | 15.937 | 41.542 | 1.00 | 0.00 | H |
| ATOM | 343 | H5'2 | T | A | 11 | 2.646  | 15.097 | 41.730 | 1.00 | 0.00 | H |
| ATOM | 344 | C1'  | A | A | 12 | -0.871 | 17.560 | 49.604 | 1.00 | 0.00 | C |
| ATOM | 345 | N1   | A | A | 12 | -5.732 | 16.494 | 48.350 | 1.00 | 0.00 | N |
| ATOM | 346 | C2   | A | A | 12 | -5.176 | 17.497 | 49.021 | 1.00 | 0.00 | C |
| ATOM | 347 | N3   | A | A | 12 | -3.909 | 17.714 | 49.308 | 1.00 | 0.00 | N |
| ATOM | 348 | C4   | A | A | 12 | -3.146 | 16.723 | 48.814 | 1.00 | 0.00 | C |
| ATOM | 349 | C5   | A | A | 12 | -3.557 | 15.628 | 48.109 | 1.00 | 0.00 | C |
| ATOM | 350 | C6   | A | A | 12 | -4.943 | 15.520 | 47.869 | 1.00 | 0.00 | C |
| ATOM | 351 | N6   | A | A | 12 | -5.493 | 14.499 | 47.189 | 1.00 | 0.00 | N |
| ATOM | 352 | N7   | A | A | 12 | -2.485 | 14.824 | 47.764 | 1.00 | 0.00 | N |
| ATOM | 353 | C8   | A | A | 12 | -1.457 | 15.441 | 48.268 | 1.00 | 0.00 | C |
| ATOM | 354 | N9   | A | A | 12 | -1.781 | 16.604 | 48.919 | 1.00 | 0.00 | N |
| ATOM | 355 | C2'  | A | A | 12 | 0.278  | 16.889 | 50.344 | 1.00 | 0.00 | C |
| ATOM | 356 | C3'  | A | A | 12 | 1.412  | 17.881 | 50.137 | 1.00 | 0.00 | C |
| ATOM | 357 | O3'  | A | A | 12 | 1.327  | 18.902 | 51.129 | 1.00 | 0.00 | O |
| ATOM | 358 | C4'  | A | A | 12 | 1.142  | 18.418 | 48.732 | 1.00 | 0.00 | C |

|      |     |      |   |   |    |         |        |        |      |      |   |
|------|-----|------|---|---|----|---------|--------|--------|------|------|---|
| ATOM | 359 | O4'  | A | A | 12 | -0.318  | 18.410 | 48.618 | 1.00 | 0.00 | O |
| ATOM | 360 | C5'  | A | A | 12 | 1.720   | 17.621 | 47.588 | 1.00 | 0.00 | C |
| ATOM | 361 | O5'  | A | A | 12 | 1.654   | 16.204 | 47.892 | 1.00 | 0.00 | O |
| ATOM | 362 | O1P  | A | A | 12 | 4.074   | 15.536 | 48.082 | 1.00 | 0.00 | O |
| ATOM | 363 | O2P  | A | A | 12 | 2.353   | 13.841 | 47.401 | 1.00 | 0.00 | O |
| ATOM | 364 | P    | A | A | 12 | 2.817   | 15.250 | 47.363 | 1.00 | 0.00 | P |
| ATOM | 365 | H2   | A | A | 12 | -5.871  | 18.252 | 49.388 | 1.00 | 0.00 | H |
| ATOM | 366 | H8   | A | A | 12 | -0.435  | 15.071 | 48.182 | 1.00 | 0.00 | H |
| ATOM | 367 | H1'  | A | A | 12 | -1.466  | 18.173 | 50.280 | 1.00 | 0.00 | H |
| ATOM | 368 | H3'  | A | A | 12 | 2.389   | 17.404 | 50.194 | 1.00 | 0.00 | H |
| ATOM | 369 | H4'  | A | A | 12 | 1.568   | 19.420 | 48.690 | 1.00 | 0.00 | H |
| ATOM | 370 | H61  | A | A | 12 | -6.511  | 14.469 | 47.039 | 1.00 | 0.00 | H |
| ATOM | 371 | H62  | A | A | 12 | -4.894  | 13.746 | 46.818 | 1.00 | 0.00 | H |
| ATOM | 372 | H2'1 | A | A | 12 | 0.525   | 15.913 | 49.928 | 1.00 | 0.00 | H |
| ATOM | 373 | H2'2 | A | A | 12 | 0.062   | 16.749 | 51.403 | 1.00 | 0.00 | H |
| ATOM | 374 | H5'1 | A | A | 12 | 1.149   | 17.829 | 46.683 | 1.00 | 0.00 | H |
| ATOM | 375 | H5'2 | A | A | 12 | 2.757   | 17.916 | 47.433 | 1.00 | 0.00 | H |
| ATOM | 376 | C1'  | G | A | 13 | -3.873  | 18.457 | 53.455 | 1.00 | 0.00 | C |
| ATOM | 377 | N1   | G | A | 13 | -6.883  | 15.006 | 51.206 | 1.00 | 0.00 | N |
| ATOM | 378 | C2   | G | A | 13 | -7.206  | 16.213 | 51.800 | 1.00 | 0.00 | C |
| ATOM | 379 | N2   | G | A | 13 | -8.505  | 16.544 | 51.798 | 1.00 | 0.00 | N |
| ATOM | 380 | N3   | G | A | 13 | -6.307  | 17.024 | 52.353 | 1.00 | 0.00 | N |
| ATOM | 381 | C4   | G | A | 13 | -5.044  | 16.528 | 52.273 | 1.00 | 0.00 | C |
| ATOM | 382 | C5   | G | A | 13 | -4.629  | 15.336 | 51.703 | 1.00 | 0.00 | C |
| ATOM | 383 | C6   | G | A | 13 | -5.584  | 14.475 | 51.112 | 1.00 | 0.00 | C |
| ATOM | 384 | O6   | G | A | 13 | -5.411  | 13.386 | 50.564 | 1.00 | 0.00 | O |
| ATOM | 385 | N7   | G | A | 13 | -3.246  | 15.196 | 51.830 | 1.00 | 0.00 | N |
| ATOM | 386 | C8   | G | A | 13 | -2.874  | 16.284 | 52.453 | 1.00 | 0.00 | C |
| ATOM | 387 | N9   | G | A | 13 | -3.911  | 17.142 | 52.757 | 1.00 | 0.00 | N |
| ATOM | 388 | C2'  | G | A | 13 | -2.869  | 18.517 | 54.597 | 1.00 | 0.00 | C |
| ATOM | 389 | C3'  | G | A | 13 | -2.369  | 19.949 | 54.506 | 1.00 | 0.00 | C |
| ATOM | 390 | O3'  | G | A | 13 | -3.267  | 20.804 | 55.210 | 1.00 | 0.00 | O |
| ATOM | 391 | C4'  | G | A | 13 | -2.377  | 20.218 | 53.002 | 1.00 | 0.00 | C |
| ATOM | 392 | O4'  | G | A | 13 | -3.512  | 19.440 | 52.504 | 1.00 | 0.00 | O |
| ATOM | 393 | C5'  | G | A | 13 | -1.139  | 19.807 | 52.241 | 1.00 | 0.00 | C |
| ATOM | 394 | O5'  | G | A | 13 | -0.605  | 18.581 | 52.797 | 1.00 | 0.00 | O |
| ATOM | 395 | O1P  | G | A | 13 | 1.609   | 19.294 | 53.761 | 1.00 | 0.00 | O |
| ATOM | 396 | O2P  | G | A | 13 | 1.276   | 16.926 | 53.002 | 1.00 | 0.00 | O |
| ATOM | 397 | P    | G | A | 13 | 0.976   | 18.366 | 52.805 | 1.00 | 0.00 | P |
| ATOM | 398 | H1   | G | A | 13 | -7.655  | 14.454 | 50.800 | 1.00 | 0.00 | H |
| ATOM | 399 | H8   | G | A | 13 | -1.837  | 16.495 | 52.712 | 1.00 | 0.00 | H |
| ATOM | 400 | H1'  | G | A | 13 | -4.880  | 18.685 | 53.807 | 1.00 | 0.00 | H |
| ATOM | 401 | H21  | G | A | 13 | -9.194  | 15.911 | 51.364 | 1.00 | 0.00 | H |
| ATOM | 402 | H3'  | G | A | 13 | -1.366  | 20.060 | 54.920 | 1.00 | 0.00 | H |
| ATOM | 403 | H22  | G | A | 13 | -8.810  | 17.427 | 52.226 | 1.00 | 0.00 | H |
| ATOM | 404 | H4'  | G | A | 13 | -2.508  | 21.291 | 52.872 | 1.00 | 0.00 | H |
| ATOM | 405 | H2'1 | G | A | 13 | -2.054  | 17.804 | 54.469 | 1.00 | 0.00 | H |
| ATOM | 406 | H2'2 | G | A | 13 | -3.330  | 18.317 | 55.565 | 1.00 | 0.00 | H |
| ATOM | 407 | H5'1 | G | A | 13 | -1.397  | 19.655 | 51.193 | 1.00 | 0.00 | H |
| ATOM | 408 | H5'2 | G | A | 13 | -0.395  | 20.600 | 52.314 | 1.00 | 0.00 | H |
| ATOM | 409 | C1'  | G | A | 14 | -7.989  | 17.823 | 56.137 | 1.00 | 0.00 | C |
| ATOM | 410 | N1   | G | A | 14 | -8.067  | 13.242 | 53.893 | 1.00 | 0.00 | N |
| ATOM | 411 | C2   | G | A | 14 | -9.099  | 14.131 | 54.134 | 1.00 | 0.00 | C |
| ATOM | 412 | N2   | G | A | 14 | -10.315 | 13.747 | 53.726 | 1.00 | 0.00 | N |

|      |     |      |     |    |         |        |        |      |      |   |
|------|-----|------|-----|----|---------|--------|--------|------|------|---|
| ATOM | 413 | N3   | G A | 14 | -8.932  | 15.308 | 54.735 | 1.00 | 0.00 | N |
| ATOM | 414 | C4   | G A | 14 | -7.639  | 15.528 | 55.087 | 1.00 | 0.00 | C |
| ATOM | 415 | C5   | G A | 14 | -6.547  | 14.700 | 54.891 | 1.00 | 0.00 | C |
| ATOM | 416 | C6   | G A | 14 | -6.721  | 13.453 | 54.251 | 1.00 | 0.00 | C |
| ATOM | 417 | O6   | G A | 14 | -5.884  | 12.589 | 53.990 | 1.00 | 0.00 | O |
| ATOM | 418 | N7   | G A | 14 | -5.392  | 15.298 | 55.403 | 1.00 | 0.00 | N |
| ATOM | 419 | C8   | G A | 14 | -5.811  | 16.442 | 55.878 | 1.00 | 0.00 | C |
| ATOM | 420 | N9   | G A | 14 | -7.165  | 16.654 | 55.724 | 1.00 | 0.00 | N |
| ATOM | 421 | C2'  | G A | 14 | -7.569  | 18.430 | 57.468 | 1.00 | 0.00 | C |
| ATOM | 422 | C3'  | G A | 14 | -7.815  | 19.912 | 57.235 | 1.00 | 0.00 | C |
| ATOM | 423 | O3'  | G A | 14 | -9.185  | 20.207 | 57.497 | 1.00 | 0.00 | O |
| ATOM | 424 | C4'  | G A | 14 | -7.459  | 20.086 | 55.759 | 1.00 | 0.00 | C |
| ATOM | 425 | O4'  | G A | 14 | -7.852  | 18.819 | 55.141 | 1.00 | 0.00 | O |
| ATOM | 426 | C5'  | G A | 14 | -6.004  | 20.345 | 55.446 | 1.00 | 0.00 | C |
| ATOM | 427 | O5'  | G A | 14 | -5.165  | 19.588 | 56.352 | 1.00 | 0.00 | O |
| ATOM | 428 | O1P  | G A | 14 | -4.013  | 21.369 | 57.706 | 1.00 | 0.00 | O |
| ATOM | 429 | O2P  | G A | 14 | -2.907  | 19.144 | 57.363 | 1.00 | 0.00 | O |
| ATOM | 430 | P    | G A | 14 | -3.775  | 20.216 | 56.817 | 1.00 | 0.00 | P |
| ATOM | 431 | H1   | G A | 14 | -8.301  | 12.359 | 53.414 | 1.00 | 0.00 | H |
| ATOM | 432 | H8   | G A | 14 | -5.148  | 17.165 | 56.354 | 1.00 | 0.00 | H |
| ATOM | 433 | H1'  | G A | 14 | -9.033  | 17.513 | 56.160 | 1.00 | 0.00 | H |
| ATOM | 434 | H21  | G A | 14 | -10.436 | 12.836 | 53.258 | 1.00 | 0.00 | H |
| ATOM | 435 | H3'  | G A | 14 | -7.184  | 20.535 | 57.867 | 1.00 | 0.00 | H |
| ATOM | 436 | H22  | G A | 14 | -11.127 | 14.361 | 53.877 | 1.00 | 0.00 | H |
| ATOM | 437 | H4'  | G A | 14 | -8.036  | 20.935 | 55.392 | 1.00 | 0.00 | H |
| ATOM | 438 | H2'1 | G A | 14 | -6.523  | 18.234 | 57.701 | 1.00 | 0.00 | H |
| ATOM | 439 | H2'2 | G A | 14 | -8.166  | 18.055 | 58.300 | 1.00 | 0.00 | H |
| ATOM | 440 | H5'1 | G A | 14 | -5.801  | 20.047 | 54.418 | 1.00 | 0.00 | H |
| ATOM | 441 | H5'2 | G A | 14 | -5.799  | 21.411 | 55.556 | 1.00 | 0.00 | H |
| ATOM | 442 | C1'  | A A | 15 | -11.927 | 15.277 | 57.719 | 1.00 | 0.00 | C |
| ATOM | 443 | N1   | A A | 15 | -9.079  | 11.198 | 56.455 | 1.00 | 0.00 | N |
| ATOM | 444 | C2   | A A | 15 | -10.366 | 11.487 | 56.276 | 1.00 | 0.00 | C |
| ATOM | 445 | N3   | A A | 15 | -11.039 | 12.563 | 56.626 | 1.00 | 0.00 | N |
| ATOM | 446 | C4   | A A | 15 | -10.227 | 13.436 | 57.251 | 1.00 | 0.00 | C |
| ATOM | 447 | C5   | A A | 15 | -8.894  | 13.292 | 57.514 | 1.00 | 0.00 | C |
| ATOM | 448 | C6   | A A | 15 | -8.295  | 12.089 | 57.082 | 1.00 | 0.00 | C |
| ATOM | 449 | N6   | A A | 15 | -6.995  | 11.808 | 57.270 | 1.00 | 0.00 | N |
| ATOM | 450 | N7   | A A | 15 | -8.391  | 14.399 | 58.174 | 1.00 | 0.00 | N |
| ATOM | 451 | C8   | A A | 15 | -9.422  | 15.181 | 58.300 | 1.00 | 0.00 | C |
| ATOM | 452 | N9   | A A | 15 | -10.573 | 14.663 | 57.761 | 1.00 | 0.00 | N |
| ATOM | 453 | C2'  | A A | 15 | -12.286 | 16.059 | 58.976 | 1.00 | 0.00 | C |
| ATOM | 454 | C3'  | A A | 15 | -13.106 | 17.209 | 58.411 | 1.00 | 0.00 | C |
| ATOM | 455 | O3'  | A A | 15 | -14.456 | 16.785 | 58.251 | 1.00 | 0.00 | O |
| ATOM | 456 | C4'  | A A | 15 | -12.425 | 17.486 | 57.071 | 1.00 | 0.00 | C |
| ATOM | 457 | O4'  | A A | 15 | -11.963 | 16.170 | 56.623 | 1.00 | 0.00 | O |
| ATOM | 458 | C5'  | A A | 15 | -11.245 | 18.428 | 57.099 | 1.00 | 0.00 | C |
| ATOM | 459 | O5'  | A A | 15 | -10.485 | 18.227 | 58.318 | 1.00 | 0.00 | O |
| ATOM | 460 | O1P  | A A | 15 | -10.793 | 20.393 | 59.562 | 1.00 | 0.00 | O |
| ATOM | 461 | O2P  | A A | 15 | -8.733  | 19.010 | 59.940 | 1.00 | 0.00 | O |
| ATOM | 462 | P    | A A | 15 | -9.776  | 19.483 | 58.998 | 1.00 | 0.00 | P |
| ATOM | 463 | H2   | A A | 15 | -10.948 | 10.720 | 55.764 | 1.00 | 0.00 | H |
| ATOM | 464 | H8   | A A | 15 | -9.379  | 16.155 | 58.787 | 1.00 | 0.00 | H |
| ATOM | 465 | H1'  | A A | 15 | -12.653 | 14.486 | 57.531 | 1.00 | 0.00 | H |
| ATOM | 466 | H3'  | A A | 15 | -13.076 | 18.088 | 59.055 | 1.00 | 0.00 | H |

|      |     |      |   |   |    |         |        |        |      |      |   |
|------|-----|------|---|---|----|---------|--------|--------|------|------|---|
| ATOM | 467 | H4'  | A | A | 15 | -13.181 | 17.917 | 56.416 | 1.00 | 0.00 | H |
| ATOM | 468 | H61  | A | A | 15 | -6.608  | 10.915 | 56.931 | 1.00 | 0.00 | H |
| ATOM | 469 | H62  | A | A | 15 | -6.386  | 12.486 | 57.752 | 1.00 | 0.00 | H |
| ATOM | 470 | H2'1 | A | A | 15 | -11.403 | 16.422 | 59.502 | 1.00 | 0.00 | H |
| ATOM | 471 | H2'2 | A | A | 15 | -12.868 | 15.466 | 59.680 | 1.00 | 0.00 | H |
| ATOM | 472 | H5'1 | A | A | 15 | -10.612 | 18.234 | 56.234 | 1.00 | 0.00 | H |
| ATOM | 473 | H5'2 | A | A | 15 | -11.606 | 19.454 | 57.057 | 1.00 | 0.00 | H |
| ATOM | 474 | C1'  | C | A | 16 | -14.417 | 11.085 | 58.663 | 1.00 | 0.00 | C |
| ATOM | 475 | N1   | C | A | 16 | -13.037 | 11.276 | 59.188 | 1.00 | 0.00 | N |
| ATOM | 476 | C2   | C | A | 16 | -12.102 | 10.272 | 58.947 | 1.00 | 0.00 | C |
| ATOM | 477 | O2   | C | A | 16 | -12.455 | 9.269  | 58.312 | 1.00 | 0.00 | O |
| ATOM | 478 | N3   | C | A | 16 | -10.840 | 10.426 | 59.417 | 1.00 | 0.00 | N |
| ATOM | 479 | C4   | C | A | 16 | -10.490 | 11.522 | 60.101 | 1.00 | 0.00 | C |
| ATOM | 480 | N4   | C | A | 16 | -9.241  | 11.622 | 60.533 | 1.00 | 0.00 | N |
| ATOM | 481 | C5   | C | A | 16 | -11.431 | 12.570 | 60.368 | 1.00 | 0.00 | C |
| ATOM | 482 | C6   | C | A | 16 | -12.696 | 12.396 | 59.882 | 1.00 | 0.00 | C |
| ATOM | 483 | C2'  | C | A | 16 | -15.505 | 11.598 | 59.596 | 1.00 | 0.00 | C |
| ATOM | 484 | C3'  | C | A | 16 | -16.538 | 12.131 | 58.615 | 1.00 | 0.00 | C |
| ATOM | 485 | O3'  | C | A | 16 | -17.372 | 11.059 | 58.185 | 1.00 | 0.00 | O |
| ATOM | 486 | C4'  | C | A | 16 | -15.677 | 12.684 | 57.482 | 1.00 | 0.00 | C |
| ATOM | 487 | O4'  | C | A | 16 | -14.515 | 11.796 | 57.443 | 1.00 | 0.00 | O |
| ATOM | 488 | C5'  | C | A | 16 | -15.192 | 14.107 | 57.641 | 1.00 | 0.00 | C |
| ATOM | 489 | O5'  | C | A | 16 | -14.886 | 14.368 | 59.034 | 1.00 | 0.00 | O |
| ATOM | 490 | O1P  | C | A | 16 | -16.602 | 16.087 | 59.696 | 1.00 | 0.00 | O |
| ATOM | 491 | O2P  | C | A | 16 | -14.392 | 16.000 | 60.880 | 1.00 | 0.00 | O |
| ATOM | 492 | P    | C | A | 16 | -15.151 | 15.829 | 59.617 | 1.00 | 0.00 | P |
| ATOM | 493 | H5   | C | A | 16 | -11.152 | 13.462 | 60.932 | 1.00 | 0.00 | H |
| ATOM | 494 | H6   | C | A | 16 | -13.445 | 13.169 | 60.052 | 1.00 | 0.00 | H |
| ATOM | 495 | H1'  | C | A | 16 | -14.556 | 10.026 | 58.446 | 1.00 | 0.00 | H |
| ATOM | 496 | H3'  | C | A | 16 | -17.155 | 12.914 | 59.060 | 1.00 | 0.00 | H |
| ATOM | 497 | H4'  | C | A | 16 | -16.280 | 12.640 | 56.576 | 1.00 | 0.00 | H |
| ATOM | 498 | H41  | C | A | 16 | -8.945  | 12.457 | 61.061 | 1.00 | 0.00 | H |
| ATOM | 499 | H42  | C | A | 16 | -8.567  | 10.867 | 60.343 | 1.00 | 0.00 | H |
| ATOM | 500 | H2'1 | C | A | 16 | -15.145 | 12.386 | 60.259 | 1.00 | 0.00 | H |
| ATOM | 501 | H2'2 | C | A | 16 | -15.921 | 10.808 | 60.222 | 1.00 | 0.00 | H |
| ATOM | 502 | H5'1 | C | A | 16 | -14.298 | 14.250 | 57.033 | 1.00 | 0.00 | H |
| ATOM | 503 | H5'2 | C | A | 16 | -15.970 | 14.791 | 57.300 | 1.00 | 0.00 | H |
| ATOM | 504 | C1'  | G | A | 17 | -14.777 | 6.262  | 59.721 | 1.00 | 0.00 | C |
| ATOM | 505 | N1   | G | A | 17 | -10.117 | 6.923  | 61.689 | 1.00 | 0.00 | N |
| ATOM | 506 | C2   | G | A | 17 | -10.615 | 5.892  | 60.912 | 1.00 | 0.00 | C |
| ATOM | 507 | N2   | G | A | 17 | -9.758  | 4.904  | 60.624 | 1.00 | 0.00 | N |
| ATOM | 508 | N3   | G | A | 17 | -11.867 | 5.849  | 60.460 | 1.00 | 0.00 | N |
| ATOM | 509 | C4   | G | A | 17 | -12.596 | 6.926  | 60.855 | 1.00 | 0.00 | C |
| ATOM | 510 | C5   | G | A | 17 | -12.187 | 7.998  | 61.631 | 1.00 | 0.00 | C |
| ATOM | 511 | C6   | G | A | 17 | -10.856 | 8.047  | 62.108 | 1.00 | 0.00 | C |
| ATOM | 512 | O6   | G | A | 17 | -10.310 | 8.904  | 62.803 | 1.00 | 0.00 | O |
| ATOM | 513 | N7   | G | A | 17 | -13.241 | 8.895  | 61.811 | 1.00 | 0.00 | N |
| ATOM | 514 | C8   | G | A | 17 | -14.232 | 8.354  | 61.150 | 1.00 | 0.00 | C |
| ATOM | 515 | N9   | G | A | 17 | -13.918 | 7.155  | 60.543 | 1.00 | 0.00 | N |
| ATOM | 516 | C2'  | G | A | 17 | -16.216 | 6.172  | 60.210 | 1.00 | 0.00 | C |
| ATOM | 517 | C3'  | G | A | 17 | -16.989 | 6.060  | 58.906 | 1.00 | 0.00 | C |
| ATOM | 518 | O3'  | G | A | 17 | -17.014 | 4.696  | 58.493 | 1.00 | 0.00 | O |
| ATOM | 519 | C4'  | G | A | 17 | -16.178 | 6.938  | 57.954 | 1.00 | 0.00 | C |
| ATOM | 520 | O4'  | G | A | 17 | -14.796 | 6.774  | 58.402 | 1.00 | 0.00 | O |

|      |     |      |     |    |         |        |        |      |      |   |
|------|-----|------|-----|----|---------|--------|--------|------|------|---|
| ATOM | 521 | C5'  | G A | 17 | -16.515 | 8.410  | 57.949 | 1.00 | 0.00 | C |
| ATOM | 522 | O5'  | G A | 17 | -16.848 | 8.842  | 59.291 | 1.00 | 0.00 | O |
| ATOM | 523 | O1P  | G A | 17 | -19.284 | 9.450  | 59.118 | 1.00 | 0.00 | O |
| ATOM | 524 | O2P  | G A | 17 | -17.833 | 10.560 | 60.838 | 1.00 | 0.00 | O |
| ATOM | 525 | P    | G A | 17 | -17.954 | 9.976  | 59.479 | 1.00 | 0.00 | P |
| ATOM | 526 | H1   | G A | 17 | -9.131  | 6.863  | 61.982 | 1.00 | 0.00 | H |
| ATOM | 527 | H8   | G A | 17 | -15.221 | 8.809  | 61.086 | 1.00 | 0.00 | H |
| ATOM | 528 | H1'  | G A | 17 | -14.314 | 5.275  | 59.691 | 1.00 | 0.00 | H |
| ATOM | 529 | H21  | G A | 17 | -8.790  | 4.946  | 60.974 | 1.00 | 0.00 | H |
| ATOM | 530 | H3'  | G A | 17 | -18.012 | 6.427  | 59.004 | 1.00 | 0.00 | H |
| ATOM | 531 | H22  | G A | 17 | -10.067 | 4.106  | 60.052 | 1.00 | 0.00 | H |
| ATOM | 532 | H4'  | G A | 17 | -16.348 | 6.554  | 56.949 | 1.00 | 0.00 | H |
| ATOM | 533 | H2'1 | G A | 17 | -16.516 | 7.056  | 60.774 | 1.00 | 0.00 | H |
| ATOM | 534 | H2'2 | G A | 17 | -16.384 | 5.304  | 60.848 | 1.00 | 0.00 | H |
| ATOM | 535 | H5'1 | G A | 17 | -15.655 | 8.972  | 57.583 | 1.00 | 0.00 | H |
| ATOM | 536 | H5'2 | G A | 17 | -17.361 | 8.581  | 57.284 | 1.00 | 0.00 | H |
| ATOM | 537 | C1'  | G A | 18 | -13.116 | 1.976  | 61.566 | 1.00 | 0.00 | C |
| ATOM | 538 | N1   | G A | 18 | -10.270 | 5.006  | 64.523 | 1.00 | 0.00 | N |
| ATOM | 539 | C2   | G A | 18 | -9.931  | 3.840  | 63.860 | 1.00 | 0.00 | C |
| ATOM | 540 | N2   | G A | 18 | -8.665  | 3.424  | 64.006 | 1.00 | 0.00 | N |
| ATOM | 541 | N3   | G A | 18 | -10.784 | 3.145  | 63.112 | 1.00 | 0.00 | N |
| ATOM | 542 | C4   | G A | 18 | -12.022 | 3.706  | 63.082 | 1.00 | 0.00 | C |
| ATOM | 543 | C5   | G A | 18 | -12.451 | 4.862  | 63.714 | 1.00 | 0.00 | C |
| ATOM | 544 | C6   | G A | 18 | -11.543 | 5.603  | 64.506 | 1.00 | 0.00 | C |
| ATOM | 545 | O6   | G A | 18 | -11.735 | 6.642  | 65.138 | 1.00 | 0.00 | O |
| ATOM | 546 | N7   | G A | 18 | -13.798 | 5.094  | 63.431 | 1.00 | 0.00 | N |
| ATOM | 547 | C8   | G A | 18 | -14.134 | 4.099  | 62.652 | 1.00 | 0.00 | C |
| ATOM | 548 | N9   | G A | 18 | -13.109 | 3.213  | 62.395 | 1.00 | 0.00 | N |
| ATOM | 549 | C2'  | G A | 18 | -14.407 | 1.177  | 61.667 | 1.00 | 0.00 | C |
| ATOM | 550 | C3'  | G A | 18 | -14.559 | 0.639  | 60.254 | 1.00 | 0.00 | C |
| ATOM | 551 | O3'  | G A | 18 | -13.794 | -0.556 | 60.123 | 1.00 | 0.00 | O |
| ATOM | 552 | C4'  | G A | 18 | -14.005 | 1.776  | 59.396 | 1.00 | 0.00 | C |
| ATOM | 553 | O4'  | G A | 18 | -12.945 | 2.362  | 60.216 | 1.00 | 0.00 | O |
| ATOM | 554 | C5'  | G A | 18 | -14.980 | 2.865  | 59.015 | 1.00 | 0.00 | C |
| ATOM | 555 | O5'  | G A | 18 | -15.896 | 3.109  | 60.111 | 1.00 | 0.00 | O |
| ATOM | 556 | O1P  | G A | 18 | -18.119 | 2.372  | 59.188 | 1.00 | 0.00 | O |
| ATOM | 557 | O2P  | G A | 18 | -18.024 | 4.126  | 60.978 | 1.00 | 0.00 | O |
| ATOM | 558 | P    | G A | 18 | -17.402 | 3.518  | 59.777 | 1.00 | 0.00 | P |
| ATOM | 559 | H1   | G A | 18 | -9.531  | 5.473  | 65.072 | 1.00 | 0.00 | H |
| ATOM | 560 | H8   | G A | 18 | -15.137 | 3.978  | 62.242 | 1.00 | 0.00 | H |
| ATOM | 561 | H1'  | G A | 18 | -12.257 | 1.369  | 61.853 | 1.00 | 0.00 | H |
| ATOM | 562 | H21  | G A | 18 | -8.009  | 3.970  | 64.584 | 1.00 | 0.00 | H |
| ATOM | 563 | H3'  | G A | 18 | -15.601 | 0.431  | 60.005 | 1.00 | 0.00 | H |
| ATOM | 564 | H22  | G A | 18 | -8.351  | 2.563  | 63.540 | 1.00 | 0.00 | H |
| ATOM | 565 | H4'  | G A | 18 | -13.633 | 1.325  | 58.476 | 1.00 | 0.00 | H |
| ATOM | 566 | H2'1 | G A | 18 | -15.257 | 1.799  | 61.948 | 1.00 | 0.00 | H |
| ATOM | 567 | H2'2 | G A | 18 | -14.338 | 0.368  | 62.395 | 1.00 | 0.00 | H |
| ATOM | 568 | H5'1 | G A | 18 | -14.427 | 3.776  | 58.786 | 1.00 | 0.00 | H |
| ATOM | 569 | H5'2 | G A | 18 | -15.537 | 2.554  | 58.131 | 1.00 | 0.00 | H |
| ATOM | 570 | C1'  | T A | 19 | -10.324 | -0.796 | 64.569 | 1.00 | 0.00 | C |
| ATOM | 571 | N1   | T A | 19 | -11.154 | 0.303  | 65.127 | 1.00 | 0.00 | N |
| ATOM | 572 | C2   | T A | 19 | -10.525 | 1.212  | 65.954 | 1.00 | 0.00 | C |
| ATOM | 573 | O2   | T A | 19 | -9.340  | 1.139  | 66.232 | 1.00 | 0.00 | O |
| ATOM | 574 | N3   | T A | 19 | -11.334 | 2.218  | 66.450 | 1.00 | 0.00 | N |

|      |     |      |       |    |         |         |        |      |      |   |
|------|-----|------|-------|----|---------|---------|--------|------|------|---|
| ATOM | 575 | C4   | T A   | 19 | -12.679 | 2.388   | 66.201 | 1.00 | 0.00 | C |
| ATOM | 576 | O4   | T A   | 19 | -13.301 | 3.329   | 66.706 | 1.00 | 0.00 | O |
| ATOM | 577 | C5   | T A   | 19 | -13.250 | 1.391   | 65.327 | 1.00 | 0.00 | C |
| ATOM | 578 | C6   | T A   | 19 | -12.491 | 0.396   | 64.824 | 1.00 | 0.00 | C |
| ATOM | 579 | C7   | T A   | 19 | -14.711 | 1.538   | 65.026 | 1.00 | 0.00 | C |
| ATOM | 580 | C2'  | T A   | 19 | -11.051 | -2.133  | 64.483 | 1.00 | 0.00 | C |
| ATOM | 581 | C3'  | T A   | 19 | -10.481 | -2.723  | 63.204 | 1.00 | 0.00 | C |
| ATOM | 582 | O3'  | T A   | 19 | -9.249  | -3.378  | 63.498 | 1.00 | 0.00 | O |
| ATOM | 583 | C4'  | T A   | 19 | -10.285 | -1.493  | 62.321 | 1.00 | 0.00 | C |
| ATOM | 584 | O4'  | T A   | 19 | -9.939  | -0.426  | 63.259 | 1.00 | 0.00 | O |
| ATOM | 585 | C5'  | T A   | 19 | -11.479 | -1.053  | 61.506 | 1.00 | 0.00 | C |
| ATOM | 586 | O5'  | T A   | 19 | -12.695 | -1.263  | 62.267 | 1.00 | 0.00 | O |
| ATOM | 587 | O1P  | T A   | 19 | -13.898 | -3.048  | 60.962 | 1.00 | 0.00 | O |
| ATOM | 588 | O2P  | T A   | 19 | -15.201 | -1.420  | 62.358 | 1.00 | 0.00 | O |
| ATOM | 589 | P    | T A   | 19 | -14.026 | -1.675  | 61.491 | 1.00 | 0.00 | P |
| ATOM | 590 | H3   | T A   | 19 | -10.885 | 2.911   | 67.066 | 1.00 | 0.00 | H |
| ATOM | 591 | H6   | T A   | 19 | -12.944 | -0.345  | 64.166 | 1.00 | 0.00 | H |
| ATOM | 592 | H1'  | T A   | 19 | -9.420  | -0.882  | 65.173 | 1.00 | 0.00 | H |
| ATOM | 593 | H3'  | T A   | 19 | -11.167 | -3.434  | 62.742 | 1.00 | 0.00 | H |
| ATOM | 594 | H4'  | T A   | 19 | -9.477  | -1.728  | 61.625 | 1.00 | 0.00 | H |
| ATOM | 595 | H71  | T A   | 19 | -15.256 | 0.696   | 65.451 | 1.00 | 0.00 | H |
| ATOM | 596 | H72  | T A   | 19 | -15.080 | 2.467   | 65.463 | 1.00 | 0.00 | H |
| ATOM | 597 | H73  | T A   | 19 | -14.862 | 1.560   | 63.946 | 1.00 | 0.00 | H |
| ATOM | 598 | H2'1 | T A   | 19 | -12.131 | -2.011  | 64.418 | 1.00 | 0.00 | H |
| ATOM | 599 | H2'2 | T A   | 19 | -10.845 | -2.772  | 65.343 | 1.00 | 0.00 | H |
| ATOM | 600 | H5'1 | T A   | 19 | -11.376 | 0.004   | 61.261 | 1.00 | 0.00 | H |
| ATOM | 601 | H5'2 | T A   | 19 | -11.517 | -1.632  | 60.585 | 1.00 | 0.00 | H |
| ATOM | 602 | C01  | LNK A | 20 | -8.567  | -6.781  | 64.842 | 0.00 | 0.00 | C |
| ATOM | 603 | O1   | LNK A | 20 | -9.466  | -5.741  | 64.451 | 1.00 | 0.00 | O |
| ATOM | 604 | S    | LNK A | 20 | -8.698  | -10.406 | 66.482 | 0.00 | 0.00 | S |
| ATOM | 605 | C02  | LNK A | 20 | -9.370  | -7.959  | 65.426 | 0.00 | 0.00 | C |
| ATOM | 606 | C03  | LNK A | 20 | -8.582  | -8.592  | 66.588 | 0.00 | 0.00 | C |
| ATOM | 607 | O1P  | LNK A | 20 | -10.430 | -3.851  | 65.807 | 1.00 | 0.00 | O |
| ATOM | 608 | O2P  | LNK A | 20 | -7.948  | -4.223  | 65.757 | 1.00 | 0.00 | O |
| ATOM | 609 | P    | LNK A | 20 | -9.244  | -4.273  | 65.036 | 1.00 | 0.00 | P |
| ATOM | 610 | H01  | LNK A | 20 | -7.877  | -6.403  | 65.597 | 0.00 | 0.00 | H |
| ATOM | 611 | H02  | LNK A | 20 | -8.004  | -7.121  | 63.973 | 0.00 | 0.00 | H |
| ATOM | 612 | H03  | LNK A | 20 | -9.001  | -8.257  | 67.537 | 0.00 | 0.00 | H |
| ATOM | 613 | H04  | LNK A | 20 | -9.537  | -8.706  | 64.649 | 0.00 | 0.00 | H |
| ATOM | 614 | H05  | LNK A | 20 | -10.331 | -7.598  | 65.793 | 0.00 | 0.00 | H |
| ATOM | 615 | H06  | LNK A | 20 | -7.537  | -8.291  | 66.525 | 0.00 | 0.00 | H |
| ATOM | 616 | AU   | LNK A | 20 | -8.435  | -10.686 | 67.050 |      |      |   |
| TER  |     |      |       |    |         |         |        |      |      |   |
| ATOM | 618 | C1'  | A B   | 2  | -7.251  | 7.291   | 71.205 | 1.00 | 0.00 | C |
| ATOM | 619 | N1   | A B   | 2  | -10.070 | 4.209   | 68.223 | 1.00 | 0.00 | N |
| ATOM | 620 | C2   | A B   | 2  | -8.785  | 4.199   | 68.564 | 1.00 | 0.00 | C |
| ATOM | 621 | N3   | A B   | 2  | -8.120  | 5.025   | 69.343 | 1.00 | 0.00 | N |
| ATOM | 622 | C4   | A B   | 2  | -8.940  | 5.986   | 69.809 | 1.00 | 0.00 | C |
| ATOM | 623 | C5   | A B   | 2  | -10.273 | 6.137   | 69.555 | 1.00 | 0.00 | C |
| ATOM | 624 | C6   | A B   | 2  | -10.863 | 5.178   | 68.704 | 1.00 | 0.00 | C |
| ATOM | 625 | N6   | A B   | 2  | -12.163 | 5.197   | 68.365 | 1.00 | 0.00 | N |
| ATOM | 626 | N7   | A B   | 2  | -10.786 | 7.242   | 70.211 | 1.00 | 0.00 | N |
| ATOM | 627 | C8   | A B   | 2  | -9.760  | 7.735   | 70.839 | 1.00 | 0.00 | C |
| ATOM | 628 | N9   | A B   | 2  | -8.605  | 7.023   | 70.644 | 1.00 | 0.00 | N |



|      |     |      |     |   |         |        |        |      |      |   |
|------|-----|------|-----|---|---------|--------|--------|------|------|---|
| ATOM | 629 | C2'  | A B | 2 | -6.906  | 8.772  | 71.292 | 1.00 | 0.00 | C |
| ATOM | 630 | C3'  | A B | 2 | -6.089  | 8.832  | 72.573 | 1.00 | 0.00 | C |
| ATOM | 631 | O3'  | A B | 2 | -4.734  | 8.499  | 72.280 | 1.00 | 0.00 | O |
| ATOM | 632 | C4'  | A B | 2 | -6.763  | 7.782  | 73.456 | 1.00 | 0.00 | C |
| ATOM | 633 | O4'  | A B | 2 | -7.216  | 6.756  | 72.514 | 1.00 | 0.00 | O |
| ATOM | 634 | C5'  | A B | 2 | -7.947  | 8.249  | 74.269 | 1.00 | 0.00 | C |
| ATOM | 635 | O5'  | A B | 2 | -8.714  | 9.216  | 73.508 | 1.00 | 0.00 | O |
| ATOM | 636 | H2   | A B | 2 | -8.196  | 3.389  | 68.137 | 1.00 | 0.00 | H |
| ATOM | 637 | H8   | A B | 2 | -9.812  | 8.629  | 71.460 | 1.00 | 0.00 | H |
| ATOM | 638 | H1'  | A B | 2 | -6.520  | 6.754  | 70.602 | 1.00 | 0.00 | H |
| ATOM | 639 | H3'  | A B | 2 | -6.126  | 9.818  | 73.036 | 1.00 | 0.00 | H |
| ATOM | 640 | H4'  | A B | 2 | -6.005  | 7.419  | 74.149 | 1.00 | 0.00 | H |
| ATOM | 641 | H61  | A B | 2 | -12.544 | 4.472  | 67.743 | 1.00 | 0.00 | H |
| ATOM | 642 | H62  | A B | 2 | -12.778 | 5.940  | 68.730 | 1.00 | 0.00 | H |
| ATOM | 643 | H2'1 | A B | 2 | -7.793  | 9.401  | 71.358 | 1.00 | 0.00 | H |
| ATOM | 644 | H2'2 | A B | 2 | -6.324  | 9.112  | 70.435 | 1.00 | 0.00 | H |
| ATOM | 645 | H5'1 | A B | 2 | -8.574  | 7.392  | 74.512 | 1.00 | 0.00 | H |
| ATOM | 646 | H5'2 | A B | 2 | -7.590  | 8.705  | 75.191 | 1.00 | 0.00 | H |
| ATOM | 647 | C1'  | C B | 3 | -4.739  | 6.129  | 67.083 | 1.00 | 0.00 | C |
| ATOM | 648 | N1   | C B | 3 | -6.123  | 6.670  | 66.996 | 1.00 | 0.00 | N |
| ATOM | 649 | C2   | C B | 3 | -7.051  | 5.973  | 66.225 | 1.00 | 0.00 | C |
| ATOM | 650 | O2   | C B | 3 | -6.689  | 4.938  | 65.648 | 1.00 | 0.00 | O |
| ATOM | 651 | N3   | C B | 3 | -8.315  | 6.449  | 66.133 | 1.00 | 0.00 | N |
| ATOM | 652 | C4   | C B | 3 | -8.676  | 7.572  | 66.768 | 1.00 | 0.00 | C |
| ATOM | 653 | N4   | C B | 3 | -9.928  | 7.991  | 66.646 | 1.00 | 0.00 | N |
| ATOM | 654 | C5   | C B | 3 | -7.743  | 8.314  | 67.565 | 1.00 | 0.00 | C |
| ATOM | 655 | C6   | C B | 3 | -6.475  | 7.812  | 67.647 | 1.00 | 0.00 | C |
| ATOM | 656 | C2'  | C B | 3 | -3.659  | 7.202  | 67.092 | 1.00 | 0.00 | C |
| ATOM | 657 | C3'  | C B | 3 | -2.624  | 6.602  | 68.031 | 1.00 | 0.00 | C |
| ATOM | 658 | O3'  | C B | 3 | -1.783  | 5.717  | 67.296 | 1.00 | 0.00 | O |
| ATOM | 659 | C4'  | C B | 3 | -3.483  | 5.865  | 69.056 | 1.00 | 0.00 | C |
| ATOM | 660 | O4'  | C B | 3 | -4.640  | 5.398  | 68.290 | 1.00 | 0.00 | O |
| ATOM | 661 | C5'  | C B | 3 | -3.977  | 6.679  | 70.229 | 1.00 | 0.00 | C |
| ATOM | 662 | O5'  | C B | 3 | -4.292  | 8.025  | 69.792 | 1.00 | 0.00 | O |
| ATOM | 663 | O1P  | C B | 3 | -2.589  | 9.440  | 70.991 | 1.00 | 0.00 | O |
| ATOM | 664 | O2P  | C B | 3 | -4.805  | 10.423 | 70.343 | 1.00 | 0.00 | O |
| ATOM | 665 | P    | C B | 3 | -4.039  | 9.236  | 70.797 | 1.00 | 0.00 | P |
| ATOM | 666 | H5   | C B | 3 | -8.030  | 9.232  | 68.078 | 1.00 | 0.00 | H |
| ATOM | 667 | H6   | C B | 3 | -5.732  | 8.337  | 68.247 | 1.00 | 0.00 | H |
| ATOM | 668 | H1'  | C B | 3 | -4.593  | 5.433  | 66.256 | 1.00 | 0.00 | H |
| ATOM | 669 | H3'  | C B | 3 | -2.014  | 7.369  | 68.508 | 1.00 | 0.00 | H |
| ATOM | 670 | H4'  | C B | 3 | -2.876  | 5.050  | 69.451 | 1.00 | 0.00 | H |
| ATOM | 671 | H41  | C B | 3 | -10.233 | 8.850  | 67.127 | 1.00 | 0.00 | H |
| ATOM | 672 | H42  | C B | 3 | -10.597 | 7.457  | 66.071 | 1.00 | 0.00 | H |
| ATOM | 673 | H2'1 | C B | 3 | -4.028  | 8.157  | 67.465 | 1.00 | 0.00 | H |
| ATOM | 674 | H2'2 | C B | 3 | -3.242  | 7.376  | 66.099 | 1.00 | 0.00 | H |
| ATOM | 675 | H5'1 | C B | 3 | -4.869  | 6.208  | 70.642 | 1.00 | 0.00 | H |
| ATOM | 676 | H5'2 | C B | 3 | -3.203  | 6.712  | 70.993 | 1.00 | 0.00 | H |
| ATOM | 677 | C1'  | C B | 4 | -4.352  | 4.749  | 62.343 | 1.00 | 0.00 | C |
| ATOM | 678 | N1   | C B | 4 | -5.226  | 5.889  | 62.730 | 1.00 | 0.00 | N |
| ATOM | 679 | C2   | C B | 4 | -6.545  | 5.884  | 62.280 | 1.00 | 0.00 | C |
| ATOM | 680 | O2   | C B | 4 | -6.934  | 4.938  | 61.582 | 1.00 | 0.00 | O |
| ATOM | 681 | N3   | C B | 4 | -7.357  | 6.913  | 62.621 | 1.00 | 0.00 | N |
| ATOM | 682 | C4   | C B | 4 | -6.907  | 7.924  | 63.377 | 1.00 | 0.00 | C |

|      |     |      |     |   |         |       |        |      |      |   |
|------|-----|------|-----|---|---------|-------|--------|------|------|---|
| ATOM | 683 | N4   | C B | 4 | -7.745  | 8.904 | 63.684 | 1.00 | 0.00 | N |
| ATOM | 684 | C5   | C B | 4 | -5.554  | 7.959 | 63.851 | 1.00 | 0.00 | C |
| ATOM | 685 | C6   | C B | 4 | -4.755  | 6.908 | 63.498 | 1.00 | 0.00 | C |
| ATOM | 686 | C2'  | C B | 4 | -2.917  | 5.152 | 62.035 | 1.00 | 0.00 | C |
| ATOM | 687 | C3'  | C B | 4 | -2.133  | 3.961 | 62.565 | 1.00 | 0.00 | C |
| ATOM | 688 | O3'  | C B | 4 | -2.094  | 2.944 | 61.566 | 1.00 | 0.00 | O |
| ATOM | 689 | C4'  | C B | 4 | -2.943  | 3.538 | 63.788 | 1.00 | 0.00 | C |
| ATOM | 690 | O4'  | C B | 4 | -4.329  | 3.838 | 63.426 | 1.00 | 0.00 | O |
| ATOM | 691 | C5'  | C B | 4 | -2.620  | 4.243 | 65.085 | 1.00 | 0.00 | C |
| ATOM | 692 | O5'  | C B | 4 | -2.299  | 5.632 | 64.820 | 1.00 | 0.00 | O |
| ATOM | 693 | O1P  | C B | 4 | 0.133   | 5.798 | 65.445 | 1.00 | 0.00 | O |
| ATOM | 694 | O2P  | C B | 4 | -1.341  | 7.824 | 65.589 | 1.00 | 0.00 | O |
| ATOM | 695 | P    | C B | 4 | -1.205  | 6.353 | 65.728 | 1.00 | 0.00 | P |
| ATOM | 696 | H5   | C B | 4 | -5.181  | 8.782 | 64.459 | 1.00 | 0.00 | H |
| ATOM | 697 | H6   | C B | 4 | -3.721  | 6.887 | 63.840 | 1.00 | 0.00 | H |
| ATOM | 698 | H1'  | C B | 4 | -4.808  | 4.244 | 61.490 | 1.00 | 0.00 | H |
| ATOM | 699 | H3'  | C B | 4 | -1.115  | 4.234 | 62.843 | 1.00 | 0.00 | H |
| ATOM | 700 | H4'  | C B | 4 | -2.763  | 2.472 | 63.935 | 1.00 | 0.00 | H |
| ATOM | 701 | H41  | C B | 4 | -7.426  | 9.692 | 64.267 | 1.00 | 0.00 | H |
| ATOM | 702 | H42  | C B | 4 | -8.717  | 8.878 | 63.341 | 1.00 | 0.00 | H |
| ATOM | 703 | H2'1 | C B | 4 | -2.628  | 6.073 | 62.540 | 1.00 | 0.00 | H |
| ATOM | 704 | H2'2 | C B | 4 | -2.747  | 5.295 | 60.968 | 1.00 | 0.00 | H |
| ATOM | 705 | H5'1 | C B | 4 | -3.482  | 4.183 | 65.750 | 1.00 | 0.00 | H |
| ATOM | 706 | H5'2 | C B | 4 | -1.769  | 3.752 | 65.555 | 1.00 | 0.00 | H |
| ATOM | 707 | C1'  | G B | 5 | -5.995  | 4.307 | 57.692 | 1.00 | 0.00 | C |
| ATOM | 708 | N1   | G B | 5 | -8.872  | 8.335 | 58.927 | 1.00 | 0.00 | N |
| ATOM | 709 | C2   | G B | 5 | -9.200  | 7.193 | 58.217 | 1.00 | 0.00 | C |
| ATOM | 710 | N2   | G B | 5 | -10.462 | 7.114 | 57.777 | 1.00 | 0.00 | N |
| ATOM | 711 | N3   | G B | 5 | -8.338  | 6.208 | 57.969 | 1.00 | 0.00 | N |
| ATOM | 712 | C4   | G B | 5 | -7.106  | 6.458 | 58.483 | 1.00 | 0.00 | C |
| ATOM | 713 | C5   | G B | 5 | -6.687  | 7.568 | 59.198 | 1.00 | 0.00 | C |
| ATOM | 714 | C6   | G B | 5 | -7.601  | 8.612 | 59.466 | 1.00 | 0.00 | C |
| ATOM | 715 | O6   | G B | 5 | -7.420  | 9.665 | 60.077 | 1.00 | 0.00 | O |
| ATOM | 716 | N7   | G B | 5 | -5.340  | 7.438 | 59.544 | 1.00 | 0.00 | N |
| ATOM | 717 | C8   | G B | 5 | -4.993  | 6.281 | 59.043 | 1.00 | 0.00 | C |
| ATOM | 718 | N9   | G B | 5 | -6.013  | 5.626 | 58.381 | 1.00 | 0.00 | N |
| ATOM | 719 | C2'  | G B | 5 | -4.697  | 4.022 | 56.948 | 1.00 | 0.00 | C |
| ATOM | 720 | C3'  | G B | 5 | -4.537  | 2.524 | 57.151 | 1.00 | 0.00 | C |
| ATOM | 721 | O3'  | G B | 5 | -5.293  | 1.834 | 56.159 | 1.00 | 0.00 | O |
| ATOM | 722 | C4'  | G B | 5 | -5.096  | 2.310 | 58.556 | 1.00 | 0.00 | C |
| ATOM | 723 | O4'  | G B | 5 | -6.164  | 3.303 | 58.674 | 1.00 | 0.00 | O |
| ATOM | 724 | C5'  | G B | 5 | -4.129  | 2.501 | 59.700 | 1.00 | 0.00 | C |
| ATOM | 725 | O5'  | G B | 5 | -3.217  | 3.586 | 59.395 | 1.00 | 0.00 | O |
| ATOM | 726 | O1P  | G B | 5 | -0.987  | 2.436 | 59.200 | 1.00 | 0.00 | O |
| ATOM | 727 | O2P  | G B | 5 | -1.100  | 4.846 | 59.887 | 1.00 | 0.00 | O |
| ATOM | 728 | P    | G B | 5 | -1.715  | 3.498 | 59.923 | 1.00 | 0.00 | P |
| ATOM | 729 | H1   | G B | 5 | -9.615  | 9.035 | 59.071 | 1.00 | 0.00 | H |
| ATOM | 730 | H8   | G B | 5 | -3.989  | 5.869 | 59.137 | 1.00 | 0.00 | H |
| ATOM | 731 | H1'  | G B | 5 | -6.849  | 4.263 | 57.017 | 1.00 | 0.00 | H |
| ATOM | 732 | H21  | G B | 5 | -11.124 | 7.878 | 57.976 | 1.00 | 0.00 | H |
| ATOM | 733 | H3'  | G B | 5 | -3.494  | 2.212 | 57.091 | 1.00 | 0.00 | H |
| ATOM | 734 | H22  | G B | 5 | -10.769 | 6.292 | 57.239 | 1.00 | 0.00 | H |
| ATOM | 735 | H4'  | G B | 5 | -5.463  | 1.285 | 58.598 | 1.00 | 0.00 | H |
| ATOM | 736 | H2'1 | G B | 5 | -3.852  | 4.571 | 57.364 | 1.00 | 0.00 | H |

|      |     |      |     |   |         |        |        |      |      |   |
|------|-----|------|-----|---|---------|--------|--------|------|------|---|
| ATOM | 737 | H2'2 | G B | 5 | -4.763  | 4.274  | 55.889 | 1.00 | 0.00 | H |
| ATOM | 738 | H5'1 | G B | 5 | -4.688  | 2.733  | 60.606 | 1.00 | 0.00 | H |
| ATOM | 739 | H5'2 | G B | 5 | -3.567  | 1.579  | 59.851 | 1.00 | 0.00 | H |
| ATOM | 740 | C1'  | T B | 6 | -8.780  | 5.597  | 53.808 | 1.00 | 0.00 | C |
| ATOM | 741 | N1   | T B | 6 | -7.959  | 6.618  | 54.513 | 1.00 | 0.00 | N |
| ATOM | 742 | C2   | T B | 6 | -8.598  | 7.775  | 54.911 | 1.00 | 0.00 | C |
| ATOM | 743 | O2   | T B | 6 | -9.782  | 7.979  | 54.708 | 1.00 | 0.00 | O |
| ATOM | 744 | N3   | T B | 6 | -7.797  | 8.695  | 55.563 | 1.00 | 0.00 | N |
| ATOM | 745 | C4   | T B | 6 | -6.453  | 8.566  | 55.840 | 1.00 | 0.00 | C |
| ATOM | 746 | O4   | T B | 6 | -5.838  | 9.463  | 56.428 | 1.00 | 0.00 | O |
| ATOM | 747 | C5   | T B | 6 | -5.874  | 7.324  | 55.385 | 1.00 | 0.00 | C |
| ATOM | 748 | C6   | T B | 6 | -6.623  | 6.403  | 54.748 | 1.00 | 0.00 | C |
| ATOM | 749 | C7   | T B | 6 | -4.412  | 7.139  | 55.668 | 1.00 | 0.00 | C |
| ATOM | 750 | C2'  | T B | 6 | -8.041  | 4.887  | 52.680 | 1.00 | 0.00 | C |
| ATOM | 751 | C3'  | T B | 6 | -8.605  | 3.478  | 52.771 | 1.00 | 0.00 | C |
| ATOM | 752 | O3'  | T B | 6 | -9.832  | 3.416  | 52.047 | 1.00 | 0.00 | O |
| ATOM | 753 | C4'  | T B | 6 | -8.810  | 3.288  | 54.272 | 1.00 | 0.00 | C |
| ATOM | 754 | O4'  | T B | 6 | -9.165  | 4.623  | 54.758 | 1.00 | 0.00 | O |
| ATOM | 755 | C5'  | T B | 6 | -7.617  | 2.791  | 55.056 | 1.00 | 0.00 | C |
| ATOM | 756 | O5'  | T B | 6 | -6.401  | 3.366  | 54.514 | 1.00 | 0.00 | O |
| ATOM | 757 | O1P  | T B | 6 | -5.182  | 1.372  | 53.579 | 1.00 | 0.00 | O |
| ATOM | 758 | O2P  | T B | 6 | -3.894  | 3.384  | 54.349 | 1.00 | 0.00 | O |
| ATOM | 759 | P    | T B | 6 | -5.066  | 2.494  | 54.533 | 1.00 | 0.00 | P |
| ATOM | 760 | H3   | T B | 6 | -8.252  | 9.567  | 55.874 | 1.00 | 0.00 | H |
| ATOM | 761 | H6   | T B | 6 | -6.163  | 5.473  | 54.414 | 1.00 | 0.00 | H |
| ATOM | 762 | H1'  | T B | 6 | -9.684  | 6.081  | 53.439 | 1.00 | 0.00 | H |
| ATOM | 763 | H3'  | T B | 6 | -7.914  | 2.736  | 52.371 | 1.00 | 0.00 | H |
| ATOM | 764 | H4'  | T B | 6 | -9.614  | 2.562  | 54.393 | 1.00 | 0.00 | H |
| ATOM | 765 | H71  | T B | 6 | -3.861  | 7.111  | 54.728 | 1.00 | 0.00 | H |
| ATOM | 766 | H72  | T B | 6 | -4.052  | 7.968  | 56.277 | 1.00 | 0.00 | H |
| ATOM | 767 | H73  | T B | 6 | -4.261  | 6.201  | 56.204 | 1.00 | 0.00 | H |
| ATOM | 768 | H2'1 | T B | 6 | -6.963  | 4.894  | 52.825 | 1.00 | 0.00 | H |
| ATOM | 769 | H2'2 | T B | 6 | -8.245  | 5.334  | 51.707 | 1.00 | 0.00 | H |
| ATOM | 770 | H5'1 | T B | 6 | -7.728  | 3.081  | 56.101 | 1.00 | 0.00 | H |
| ATOM | 771 | H5'2 | T B | 6 | -7.573  | 1.705  | 54.987 | 1.00 | 0.00 | H |
| ATOM | 772 | C1'  | C B | 7 | -11.413 | 8.831  | 51.111 | 1.00 | 0.00 | C |
| ATOM | 773 | N1   | C B | 7 | -10.022 | 9.156  | 51.537 | 1.00 | 0.00 | N |
| ATOM | 774 | C2   | C B | 7 | -9.804  | 10.377 | 52.171 | 1.00 | 0.00 | C |
| ATOM | 775 | O2   | C B | 7 | -10.766 | 11.136 | 52.355 | 1.00 | 0.00 | O |
| ATOM | 776 | N3   | C B | 7 | -8.546  | 10.693 | 52.566 | 1.00 | 0.00 | N |
| ATOM | 777 | C4   | C B | 7 | -7.526  | 9.852  | 52.353 | 1.00 | 0.00 | C |
| ATOM | 778 | N4   | C B | 7 | -6.319  | 10.210 | 52.763 | 1.00 | 0.00 | N |
| ATOM | 779 | C5   | C B | 7 | -7.721  | 8.591  | 51.698 | 1.00 | 0.00 | C |
| ATOM | 780 | C6   | C B | 7 | -8.997  | 8.292  | 51.314 | 1.00 | 0.00 | C |
| ATOM | 781 | C2'  | C B | 7 | -11.491 | 8.099  | 49.779 | 1.00 | 0.00 | C |
| ATOM | 782 | C3'  | C B | 7 | -12.662 | 7.156  | 50.005 | 1.00 | 0.00 | C |
| ATOM | 783 | O3'  | C B | 7 | -13.878 | 7.847  | 49.731 | 1.00 | 0.00 | O |
| ATOM | 784 | C4'  | C B | 7 | -12.525 | 6.790  | 51.480 | 1.00 | 0.00 | C |
| ATOM | 785 | O4'  | C B | 7 | -11.982 | 7.997  | 52.103 | 1.00 | 0.00 | O |
| ATOM | 786 | C5'  | C B | 7 | -11.614 | 5.627  | 51.803 | 1.00 | 0.00 | C |
| ATOM | 787 | O5'  | C B | 7 | -10.476 | 5.635  | 50.906 | 1.00 | 0.00 | O |
| ATOM | 788 | O1P  | C B | 7 | -10.787 | 3.537  | 49.551 | 1.00 | 0.00 | O |
| ATOM | 789 | O2P  | C B | 7 | -8.486  | 4.465  | 49.914 | 1.00 | 0.00 | O |
| ATOM | 790 | P    | C B | 7 | -9.850  | 4.241  | 50.448 | 1.00 | 0.00 | P |

|      |     |      |     |   |         |        |        |      |      |   |
|------|-----|------|-----|---|---------|--------|--------|------|------|---|
| ATOM | 791 | H5   | C B | 7 | -6.892  | 7.907  | 51.516 | 1.00 | 0.00 | H |
| ATOM | 792 | H6   | C B | 7 | -9.196  | 7.342  | 50.819 | 1.00 | 0.00 | H |
| ATOM | 793 | H1'  | C B | 7 | -11.986 | 9.757  | 51.083 | 1.00 | 0.00 | H |
| ATOM | 794 | H3'  | C B | 7 | -12.601 | 6.269  | 49.372 | 1.00 | 0.00 | H |
| ATOM | 795 | H4'  | C B | 7 | -13.523 | 6.537  | 51.839 | 1.00 | 0.00 | H |
| ATOM | 796 | H41  | C B | 7 | -5.517  | 9.580  | 52.614 | 1.00 | 0.00 | H |
| ATOM | 797 | H42  | C B | 7 | -6.181  | 11.118 | 53.231 | 1.00 | 0.00 | H |
| ATOM | 798 | H2'1 | C B | 7 | -10.577 | 7.550  | 49.555 | 1.00 | 0.00 | H |
| ATOM | 799 | H2'2 | C B | 7 | -11.679 | 8.775  | 48.946 | 1.00 | 0.00 | H |
| ATOM | 800 | H5'1 | C B | 7 | -11.271 | 5.717  | 52.834 | 1.00 | 0.00 | H |
| ATOM | 801 | H5'2 | C B | 7 | -12.167 | 4.697  | 51.688 | 1.00 | 0.00 | H |
| ATOM | 802 | C1'  | C B | 8 | -12.615 | 13.364 | 49.520 | 1.00 | 0.00 | C |
| ATOM | 803 | N1   | C B | 8 | -11.202 | 12.898 | 49.480 | 1.00 | 0.00 | N |
| ATOM | 804 | C2   | C B | 8 | -10.228 | 13.716 | 50.049 | 1.00 | 0.00 | C |
| ATOM | 805 | O2   | C B | 8 | -10.575 | 14.788 | 50.561 | 1.00 | 0.00 | O |
| ATOM | 806 | N3   | C B | 8 | -8.936  | 13.310 | 50.023 | 1.00 | 0.00 | N |
| ATOM | 807 | C4   | C B | 8 | -8.592  | 12.144 | 49.460 | 1.00 | 0.00 | C |
| ATOM | 808 | N4   | C B | 8 | -7.313  | 11.794 | 49.466 | 1.00 | 0.00 | N |
| ATOM | 809 | C5   | C B | 8 | -9.570  | 11.283 | 48.862 | 1.00 | 0.00 | C |
| ATOM | 810 | C6   | C B | 8 | -10.868 | 11.711 | 48.905 | 1.00 | 0.00 | C |
| ATOM | 811 | C2'  | C B | 8 | -13.407 | 13.034 | 48.262 | 1.00 | 0.00 | C |
| ATOM | 812 | C3'  | C B | 8 | -14.789 | 12.740 | 48.824 | 1.00 | 0.00 | C |
| ATOM | 813 | O3'  | C B | 8 | -15.498 | 13.966 | 48.986 | 1.00 | 0.00 | O |
| ATOM | 814 | C4'  | C B | 8 | -14.476 | 12.073 | 50.162 | 1.00 | 0.00 | C |
| ATOM | 815 | O4'  | C B | 8 | -13.247 | 12.727 | 50.614 | 1.00 | 0.00 | O |
| ATOM | 816 | C5'  | C B | 8 | -14.246 | 10.580 | 50.131 | 1.00 | 0.00 | C |
| ATOM | 817 | O5'  | C B | 8 | -13.547 | 10.218 | 48.912 | 1.00 | 0.00 | O |
| ATOM | 818 | O1P  | C B | 8 | -15.239 | 8.834  | 47.662 | 1.00 | 0.00 | O |
| ATOM | 819 | O2P  | C B | 8 | -12.786 | 8.460  | 47.287 | 1.00 | 0.00 | O |
| ATOM | 820 | P    | C B | 8 | -13.875 | 8.816  | 48.229 | 1.00 | 0.00 | P |
| ATOM | 821 | H5   | C B | 8 | -9.295  | 10.337 | 48.397 | 1.00 | 0.00 | H |
| ATOM | 822 | H6   | C B | 8 | -11.649 | 11.087 | 48.470 | 1.00 | 0.00 | H |
| ATOM | 823 | H1'  | C B | 8 | -12.615 | 14.437 | 49.711 | 1.00 | 0.00 | H |
| ATOM | 824 | H3'  | C B | 8 | -15.360 | 12.075 | 48.177 | 1.00 | 0.00 | H |
| ATOM | 825 | H4'  | C B | 8 | -15.326 | 12.263 | 50.817 | 1.00 | 0.00 | H |
| ATOM | 826 | H41  | C B | 8 | -7.022  | 10.901 | 49.042 | 1.00 | 0.00 | H |
| ATOM | 827 | H42  | C B | 8 | -6.611  | 12.415 | 49.894 | 1.00 | 0.00 | H |
| ATOM | 828 | H2'1 | C B | 8 | -13.002 | 12.171 | 47.733 | 1.00 | 0.00 | H |
| ATOM | 829 | H2'2 | C B | 8 | -13.432 | 13.867 | 47.559 | 1.00 | 0.00 | H |
| ATOM | 830 | H5'1 | C B | 8 | -13.648 | 10.291 | 50.996 | 1.00 | 0.00 | H |
| ATOM | 831 | H5'2 | C B | 8 | -15.206 | 10.069 | 50.171 | 1.00 | 0.00 | H |
| ATOM | 832 | C1'  | T B | 9 | -11.708 | 18.133 | 48.558 | 1.00 | 0.00 | C |
| ATOM | 833 | N1   | T B | 9 | -10.788 | 17.081 | 48.052 | 1.00 | 0.00 | N |
| ATOM | 834 | C2   | T B | 9 | -9.443  | 17.239 | 48.316 | 1.00 | 0.00 | C |
| ATOM | 835 | O2   | T B | 9 | -9.001  | 18.192 | 48.934 | 1.00 | 0.00 | O |
| ATOM | 836 | N3   | T B | 9 | -8.624  | 16.238 | 47.829 | 1.00 | 0.00 | N |
| ATOM | 837 | C4   | T B | 9 | -9.021  | 15.125 | 47.119 | 1.00 | 0.00 | C |
| ATOM | 838 | O4   | T B | 9 | -8.192  | 14.294 | 46.730 | 1.00 | 0.00 | O |
| ATOM | 839 | C5   | T B | 9 | -10.446 | 15.045 | 46.893 | 1.00 | 0.00 | C |
| ATOM | 840 | C6   | T B | 9 | -11.273 | 16.003 | 47.354 | 1.00 | 0.00 | C |
| ATOM | 841 | C7   | T B | 9 | -10.921 | 13.848 | 46.126 | 1.00 | 0.00 | C |
| ATOM | 842 | C2'  | T B | 9 | -12.856 | 18.455 | 47.608 | 1.00 | 0.00 | C |
| ATOM | 843 | C3'  | T B | 9 | -13.997 | 18.740 | 48.573 | 1.00 | 0.00 | C |
| ATOM | 844 | O3'  | T B | 9 | -13.925 | 20.100 | 48.994 | 1.00 | 0.00 | O |

|      |     |      |     |    |         |        |        |      |      |   |
|------|-----|------|-----|----|---------|--------|--------|------|------|---|
| ATOM | 845 | C4'  | T B | 9  | -13.726 | 17.765 | 49.716 | 1.00 | 0.00 | C |
| ATOM | 846 | O4'  | T B | 9  | -12.266 | 17.673 | 49.774 | 1.00 | 0.00 | O |
| ATOM | 847 | C5'  | T B | 9  | -14.293 | 16.373 | 49.562 | 1.00 | 0.00 | C |
| ATOM | 848 | O5'  | T B | 9  | -14.217 | 15.965 | 48.172 | 1.00 | 0.00 | O |
| ATOM | 849 | O1P  | T B | 9  | -16.630 | 15.794 | 47.482 | 1.00 | 0.00 | O |
| ATOM | 850 | O2P  | T B | 9  | -14.893 | 14.397 | 46.330 | 1.00 | 0.00 | O |
| ATOM | 851 | P    | T B | 9  | -15.367 | 15.034 | 47.582 | 1.00 | 0.00 | P |
| ATOM | 852 | H3   | T B | 9  | -7.616  | 16.331 | 48.016 | 1.00 | 0.00 | H |
| ATOM | 853 | H6   | T B | 9  | -12.344 | 15.921 | 47.170 | 1.00 | 0.00 | H |
| ATOM | 854 | H1'  | T B | 9  | -11.121 | 19.026 | 48.776 | 1.00 | 0.00 | H |
| ATOM | 855 | H3'  | T B | 9  | -14.969 | 18.553 | 48.119 | 1.00 | 0.00 | H |
| ATOM | 856 | H4'  | T B | 9  | -14.161 | 18.204 | 50.616 | 1.00 | 0.00 | H |
| ATOM | 857 | H71  | T B | 9  | -11.336 | 14.169 | 45.170 | 1.00 | 0.00 | H |
| ATOM | 858 | H72  | T B | 9  | -10.085 | 13.171 | 45.950 | 1.00 | 0.00 | H |
| ATOM | 859 | H73  | T B | 9  | -11.692 | 13.331 | 46.699 | 1.00 | 0.00 | H |
| ATOM | 860 | H2'1 | T B | 9  | -13.093 | 17.621 | 46.949 | 1.00 | 0.00 | H |
| ATOM | 861 | H2'2 | T B | 9  | -12.642 | 19.319 | 46.979 | 1.00 | 0.00 | H |
| ATOM | 862 | H5'1 | T B | 9  | -13.721 | 15.682 | 50.181 | 1.00 | 0.00 | H |
| ATOM | 863 | H5'2 | T B | 9  | -15.331 | 16.373 | 49.889 | 1.00 | 0.00 | H |
| ATOM | 864 | C1'  | A B | 10 | -8.745  | 21.977 | 47.519 | 1.00 | 0.00 | C |
| ATOM | 865 | N1   | A B | 10 | -5.666  | 18.358 | 45.580 | 1.00 | 0.00 | N |
| ATOM | 866 | C2   | A B | 10 | -5.430  | 19.435 | 46.325 | 1.00 | 0.00 | C |
| ATOM | 867 | N3   | A B | 10 | -6.275  | 20.327 | 46.795 | 1.00 | 0.00 | N |
| ATOM | 868 | C4   | A B | 10 | -7.529  | 20.030 | 46.412 | 1.00 | 0.00 | C |
| ATOM | 869 | C5   | A B | 10 | -7.937  | 18.969 | 45.651 | 1.00 | 0.00 | C |
| ATOM | 870 | C6   | A B | 10 | -6.928  | 18.086 | 45.215 | 1.00 | 0.00 | C |
| ATOM | 871 | N6   | A B | 10 | -7.180  | 17.001 | 44.462 | 1.00 | 0.00 | N |
| ATOM | 872 | N7   | A B | 10 | -9.308  | 18.987 | 45.463 | 1.00 | 0.00 | N |
| ATOM | 873 | C8   | A B | 10 | -9.696  | 20.050 | 46.103 | 1.00 | 0.00 | C |
| ATOM | 874 | N9   | A B | 10 | -8.672  | 20.732 | 46.707 | 1.00 | 0.00 | N |
| ATOM | 875 | C2'  | A B | 10 | -9.768  | 22.982 | 47.008 | 1.00 | 0.00 | C |
| ATOM | 876 | C3'  | A B | 10 | -10.295 | 23.586 | 48.300 | 1.00 | 0.00 | C |
| ATOM | 877 | O3'  | A B | 10 | -9.423  | 24.634 | 48.717 | 1.00 | 0.00 | O |
| ATOM | 878 | C4'  | A B | 10 | -10.270 | 22.399 | 49.263 | 1.00 | 0.00 | C |
| ATOM | 879 | O4'  | A B | 10 | -9.113  | 21.611 | 48.836 | 1.00 | 0.00 | O |
| ATOM | 880 | C5'  | A B | 10 | -11.490 | 21.508 | 49.261 | 1.00 | 0.00 | C |
| ATOM | 881 | O5'  | A B | 10 | -12.008 | 21.389 | 47.911 | 1.00 | 0.00 | O |
| ATOM | 882 | O1P  | A B | 10 | -14.248 | 22.529 | 48.046 | 1.00 | 0.00 | O |
| ATOM | 883 | O2P  | A B | 10 | -13.858 | 20.726 | 46.345 | 1.00 | 0.00 | O |
| ATOM | 884 | P    | A B | 10 | -13.584 | 21.257 | 47.703 | 1.00 | 0.00 | P |
| ATOM | 885 | H2   | A B | 10 | -4.385  | 19.601 | 46.583 | 1.00 | 0.00 | H |
| ATOM | 886 | H8   | A B | 10 | -10.737 | 20.370 | 46.154 | 1.00 | 0.00 | H |
| ATOM | 887 | H1'  | A B | 10 | -7.750  | 22.418 | 47.558 | 1.00 | 0.00 | H |
| ATOM | 888 | H3'  | A B | 10 | -11.305 | 23.978 | 48.186 | 1.00 | 0.00 | H |
| ATOM | 889 | H4'  | A B | 10 | -10.159 | 22.808 | 50.267 | 1.00 | 0.00 | H |
| ATOM | 890 | H61  | A B | 10 | -6.406  | 16.387 | 44.172 | 1.00 | 0.00 | H |
| ATOM | 891 | H62  | A B | 10 | -8.145  | 16.785 | 44.176 | 1.00 | 0.00 | H |
| ATOM | 892 | H2'1 | A B | 10 | -10.567 | 22.508 | 46.438 | 1.00 | 0.00 | H |
| ATOM | 893 | H2'2 | A B | 10 | -9.317  | 23.744 | 46.370 | 1.00 | 0.00 | H |
| ATOM | 894 | H5'1 | A B | 10 | -11.214 | 20.522 | 49.636 | 1.00 | 0.00 | H |
| ATOM | 895 | H5'2 | A B | 10 | -12.250 | 21.939 | 49.910 | 1.00 | 0.00 | H |
| ATOM | 896 | C1'  | G B | 11 | -4.618  | 24.040 | 45.688 | 1.00 | 0.00 | C |
| ATOM | 897 | N1   | G B | 11 | -4.503  | 19.875 | 42.743 | 1.00 | 0.00 | N |
| ATOM | 898 | C2   | G B | 11 | -3.476  | 20.521 | 43.410 | 1.00 | 0.00 | C |

|      |     |      |   |   |    |        |        |        |      |      |   |
|------|-----|------|---|---|----|--------|--------|--------|------|------|---|
| ATOM | 899 | N2   | G | B | 11 | -2.256 | 19.986 | 43.271 | 1.00 | 0.00 | N |
| ATOM | 900 | N3   | G | B | 11 | -3.653 | 21.611 | 44.155 | 1.00 | 0.00 | N |
| ATOM | 901 | C4   | G | B | 11 | -4.949 | 22.017 | 44.177 | 1.00 | 0.00 | C |
| ATOM | 902 | C5   | G | B | 11 | -6.036 | 21.440 | 43.542 | 1.00 | 0.00 | C |
| ATOM | 903 | C6   | G | B | 11 | -5.851 | 20.281 | 42.754 | 1.00 | 0.00 | C |
| ATOM | 904 | O6   | G | B | 11 | -6.683 | 19.632 | 42.119 | 1.00 | 0.00 | O |
| ATOM | 905 | N7   | G | B | 11 | -7.197 | 22.166 | 43.817 | 1.00 | 0.00 | N |
| ATOM | 906 | C8   | G | B | 11 | -6.787 | 23.135 | 44.595 | 1.00 | 0.00 | C |
| ATOM | 907 | N9   | G | B | 11 | -5.433 | 23.112 | 44.858 | 1.00 | 0.00 | N |
| ATOM | 908 | C2'  | G | B | 11 | -5.047 | 25.497 | 45.580 | 1.00 | 0.00 | C |
| ATOM | 909 | C3'  | G | B | 11 | -4.809 | 26.003 | 46.994 | 1.00 | 0.00 | C |
| ATOM | 910 | O3'  | G | B | 11 | -3.442 | 26.384 | 47.129 | 1.00 | 0.00 | O |
| ATOM | 911 | C4'  | G | B | 11 | -5.158 | 24.790 | 47.853 | 1.00 | 0.00 | C |
| ATOM | 912 | O4'  | G | B | 11 | -4.754 | 23.643 | 47.038 | 1.00 | 0.00 | O |
| ATOM | 913 | C5'  | G | B | 11 | -6.612 | 24.629 | 48.228 | 1.00 | 0.00 | C |
| ATOM | 914 | O5'  | G | B | 11 | -7.452 | 25.055 | 47.127 | 1.00 | 0.00 | O |
| ATOM | 915 | O1P  | G | B | 11 | -8.621 | 27.088 | 48.039 | 1.00 | 0.00 | O |
| ATOM | 916 | O2P  | G | B | 11 | -9.712 | 25.711 | 46.248 | 1.00 | 0.00 | O |
| ATOM | 917 | P    | G | B | 11 | -8.848 | 25.754 | 47.453 | 1.00 | 0.00 | P |
| ATOM | 918 | H1   | G | B | 11 | -4.261 | 19.034 | 42.198 | 1.00 | 0.00 | H |
| ATOM | 919 | H8   | G | B | 11 | -7.456 | 23.894 | 44.999 | 1.00 | 0.00 | H |
| ATOM | 920 | H1'  | G | B | 11 | -3.571 | 23.919 | 45.407 | 1.00 | 0.00 | H |
| ATOM | 921 | H21  | G | B | 11 | -2.128 | 19.141 | 42.697 | 1.00 | 0.00 | H |
| ATOM | 922 | H3'  | G | B | 11 | -5.446 | 26.853 | 47.237 | 1.00 | 0.00 | H |
| ATOM | 923 | H22  | G | B | 11 | -1.448 | 20.421 | 43.739 | 1.00 | 0.00 | H |
| ATOM | 924 | H4'  | G | B | 11 | -4.584 | 24.879 | 48.776 | 1.00 | 0.00 | H |
| ATOM | 925 | H2'1 | G | B | 11 | -6.094 | 25.599 | 45.294 | 1.00 | 0.00 | H |
| ATOM | 926 | H2'2 | G | B | 11 | -4.453 | 26.051 | 44.854 | 1.00 | 0.00 | H |
| ATOM | 927 | H5'1 | G | B | 11 | -6.808 | 23.582 | 48.458 | 1.00 | 0.00 | H |
| ATOM | 928 | H5'2 | G | B | 11 | -6.822 | 25.235 | 49.109 | 1.00 | 0.00 | H |
| ATOM | 929 | C1'  | G | B | 12 | -0.676 | 24.217 | 42.694 | 1.00 | 0.00 | C |
| ATOM | 930 | N1   | G | B | 12 | -3.500 | 21.167 | 39.734 | 1.00 | 0.00 | N |
| ATOM | 931 | C2   | G | B | 12 | -2.154 | 21.101 | 40.051 | 1.00 | 0.00 | C |
| ATOM | 932 | N2   | G | B | 12 | -1.469 | 20.088 | 39.505 | 1.00 | 0.00 | N |
| ATOM | 933 | N3   | G | B | 12 | -1.542 | 21.973 | 40.849 | 1.00 | 0.00 | N |
| ATOM | 934 | C4   | G | B | 12 | -2.386 | 22.936 | 41.305 | 1.00 | 0.00 | C |
| ATOM | 935 | C5   | G | B | 12 | -3.736 | 23.084 | 41.041 | 1.00 | 0.00 | C |
| ATOM | 936 | C6   | G | B | 12 | -4.388 | 22.156 | 40.198 | 1.00 | 0.00 | C |
| ATOM | 937 | O6   | G | B | 12 | -5.568 | 22.121 | 39.847 | 1.00 | 0.00 | O |
| ATOM | 938 | N7   | G | B | 12 | -4.238 | 24.206 | 41.705 | 1.00 | 0.00 | N |
| ATOM | 939 | C8   | G | B | 12 | -3.201 | 24.689 | 42.338 | 1.00 | 0.00 | C |
| ATOM | 940 | N9   | G | B | 12 | -2.038 | 23.972 | 42.144 | 1.00 | 0.00 | N |
| ATOM | 941 | C2'  | G | B | 12 | -0.307 | 25.691 | 42.782 | 1.00 | 0.00 | C |
| ATOM | 942 | C3'  | G | B | 12 | 0.522  | 25.736 | 44.057 | 1.00 | 0.00 | C |
| ATOM | 943 | O3'  | G | B | 12 | 1.869  | 25.384 | 43.752 | 1.00 | 0.00 | O |
| ATOM | 944 | C4'  | G | B | 12 | -0.161 | 24.694 | 44.942 | 1.00 | 0.00 | C |
| ATOM | 945 | O4'  | G | B | 12 | -0.636 | 23.678 | 44.002 | 1.00 | 0.00 | O |
| ATOM | 946 | C5'  | G | B | 12 | -1.332 | 25.176 | 45.764 | 1.00 | 0.00 | C |
| ATOM | 947 | O5'  | G | B | 12 | -2.090 | 26.157 | 45.012 | 1.00 | 0.00 | O |
| ATOM | 948 | O1P  | G | B | 12 | -1.758 | 28.279 | 46.324 | 1.00 | 0.00 | O |
| ATOM | 949 | O2P  | G | B | 12 | -3.829 | 27.970 | 44.941 | 1.00 | 0.00 | O |
| ATOM | 950 | P    | G | B | 12 | -2.784 | 27.359 | 45.799 | 1.00 | 0.00 | P |
| ATOM | 951 | H1   | G | B | 12 | -3.879 | 20.437 | 39.112 | 1.00 | 0.00 | H |
| ATOM | 952 | H8   | G | B | 12 | -3.249 | 25.580 | 42.965 | 1.00 | 0.00 | H |

|      |      |      |     |    |        |        |        |      |      |   |
|------|------|------|-----|----|--------|--------|--------|------|------|---|
| ATOM | 953  | H1'  | G B | 12 | 0.041  | 23.669 | 42.084 | 1.00 | 0.00 | H |
| ATOM | 954  | H21  | G B | 12 | -1.950 | 19.414 | 38.891 | 1.00 | 0.00 | H |
| ATOM | 955  | H3'  | G B | 12 | 0.502  | 26.720 | 44.523 | 1.00 | 0.00 | H |
| ATOM | 956  | H22  | G B | 12 | -0.463 | 19.985 | 39.698 | 1.00 | 0.00 | H |
| ATOM | 957  | H4'  | G B | 12 | 0.595  | 24.317 | 45.629 | 1.00 | 0.00 | H |
| ATOM | 958  | H2'1 | G B | 12 | -1.184 | 26.334 | 42.856 | 1.00 | 0.00 | H |
| ATOM | 959  | H2'2 | G B | 12 | 0.272  | 26.025 | 41.921 | 1.00 | 0.00 | H |
| ATOM | 960  | H5'1 | G B | 12 | -1.970 | 24.328 | 46.010 | 1.00 | 0.00 | H |
| ATOM | 961  | H5'2 | G B | 12 | -0.961 | 25.625 | 46.686 | 1.00 | 0.00 | H |
| ATOM | 962  | C1'  | T B | 13 | 1.862  | 23.082 | 38.599 | 1.00 | 0.00 | C |
| ATOM | 963  | N1   | T B | 13 | 0.474  | 23.606 | 38.498 | 1.00 | 0.00 | N |
| ATOM | 964  | C2   | T B | 13 | -0.417 | 22.888 | 37.724 | 1.00 | 0.00 | C |
| ATOM | 965  | O2   | T B | 13 | -0.105 | 21.866 | 37.138 | 1.00 | 0.00 | O |
| ATOM | 966  | N3   | T B | 13 | -1.695 | 23.411 | 37.659 | 1.00 | 0.00 | N |
| ATOM | 967  | C4   | T B | 13 | -2.148 | 24.557 | 38.278 | 1.00 | 0.00 | C |
| ATOM | 968  | O4   | T B | 13 | -3.319 | 24.929 | 38.143 | 1.00 | 0.00 | O |
| ATOM | 969  | C5   | T B | 13 | -1.146 | 25.238 | 39.065 | 1.00 | 0.00 | C |
| ATOM | 970  | C6   | T B | 13 | 0.110  | 24.757 | 39.153 | 1.00 | 0.00 | C |
| ATOM | 971  | C7   | T B | 13 | -1.595 | 26.489 | 39.760 | 1.00 | 0.00 | C |
| ATOM | 972  | C2'  | T B | 13 | 2.930  | 24.169 | 38.616 | 1.00 | 0.00 | C |
| ATOM | 973  | C3'  | T B | 13 | 3.963  | 23.584 | 39.566 | 1.00 | 0.00 | C |
| ATOM | 974  | O3'  | T B | 13 | 4.823  | 22.709 | 38.840 | 1.00 | 0.00 | O |
| ATOM | 975  | C4'  | T B | 13 | 3.105  | 22.838 | 40.584 | 1.00 | 0.00 | C |
| ATOM | 976  | O4'  | T B | 13 | 1.962  | 22.355 | 39.808 | 1.00 | 0.00 | O |
| ATOM | 977  | C5'  | T B | 13 | 2.589  | 23.648 | 41.751 | 1.00 | 0.00 | C |
| ATOM | 978  | O5'  | T B | 13 | 2.262  | 24.990 | 41.309 | 1.00 | 0.00 | O |
| ATOM | 979  | O1P  | T B | 13 | 3.935  | 26.426 | 42.519 | 1.00 | 0.00 | O |
| ATOM | 980  | O2P  | T B | 13 | 1.713  | 27.381 | 41.850 | 1.00 | 0.00 | O |
| ATOM | 981  | P    | T B | 13 | 2.490  | 26.206 | 42.313 | 1.00 | 0.00 | P |
| ATOM | 982  | H3   | T B | 13 | -2.379 | 22.891 | 37.090 | 1.00 | 0.00 | H |
| ATOM | 983  | H6   | T B | 13 | 0.848  | 25.289 | 39.752 | 1.00 | 0.00 | H |
| ATOM | 984  | H1'  | T B | 13 | 2.026  | 22.387 | 37.776 | 1.00 | 0.00 | H |
| ATOM | 985  | H3'  | T B | 13 | 4.560  | 24.359 | 40.046 | 1.00 | 0.00 | H |
| ATOM | 986  | H4'  | T B | 13 | 3.719  | 22.031 | 40.986 | 1.00 | 0.00 | H |
| ATOM | 987  | H71  | T B | 13 | -1.071 | 27.347 | 39.340 | 1.00 | 0.00 | H |
| ATOM | 988  | H72  | T B | 13 | -2.670 | 26.617 | 39.621 | 1.00 | 0.00 | H |
| ATOM | 989  | H73  | T B | 13 | -1.374 | 26.414 | 40.825 | 1.00 | 0.00 | H |
| ATOM | 990  | H2'1 | T B | 13 | 2.545  | 25.119 | 38.984 | 1.00 | 0.00 | H |
| ATOM | 991  | H2'2 | T B | 13 | 3.354  | 24.348 | 37.628 | 1.00 | 0.00 | H |
| ATOM | 992  | H5'1 | T B | 13 | 1.700  | 23.166 | 42.157 | 1.00 | 0.00 | H |
| ATOM | 993  | H5'2 | T B | 13 | 3.357  | 23.693 | 42.522 | 1.00 | 0.00 | H |
| ATOM | 994  | C1'  | G B | 14 | 2.231  | 21.693 | 33.847 | 1.00 | 0.00 | C |
| ATOM | 995  | N1   | G B | 14 | -2.442 | 23.706 | 33.470 | 1.00 | 0.00 | N |
| ATOM | 996  | C2   | G B | 14 | -1.934 | 22.535 | 32.936 | 1.00 | 0.00 | C |
| ATOM | 997  | N2   | G B | 14 | -2.782 | 21.804 | 32.204 | 1.00 | 0.00 | N |
| ATOM | 998  | N3   | G B | 14 | -0.680 | 22.126 | 33.120 | 1.00 | 0.00 | N |
| ATOM | 999  | C4   | G B | 14 | 0.040  | 22.992 | 33.882 | 1.00 | 0.00 | C |
| ATOM | 1000 | C5   | G B | 14 | -0.380 | 24.182 | 34.451 | 1.00 | 0.00 | C |
| ATOM | 1001 | C6   | G B | 14 | -1.713 | 24.616 | 34.260 | 1.00 | 0.00 | C |
| ATOM | 1002 | O6   | G B | 14 | -2.266 | 25.633 | 34.680 | 1.00 | 0.00 | O |
| ATOM | 1003 | N7   | G B | 14 | 0.668  | 24.776 | 35.159 | 1.00 | 0.00 | N |
| ATOM | 1004 | C8   | G B | 14 | 1.665  | 23.944 | 35.001 | 1.00 | 0.00 | C |
| ATOM | 1005 | N9   | G B | 14 | 1.362  | 22.836 | 34.236 | 1.00 | 0.00 | N |
| ATOM | 1006 | C2'  | G B | 14 | 3.668  | 22.090 | 33.541 | 1.00 | 0.00 | C |

|      |      |      |     |    |        |        |        |      |      |   |
|------|------|------|-----|----|--------|--------|--------|------|------|---|
| ATOM | 1007 | C3'  | G B | 14 | 4.447  | 20.895 | 34.068 | 1.00 | 0.00 | C |
| ATOM | 1008 | O3'  | G B | 14 | 4.482  | 19.882 | 33.066 | 1.00 | 0.00 | O |
| ATOM | 1009 | C4'  | G B | 14 | 3.634  | 20.473 | 35.290 | 1.00 | 0.00 | C |
| ATOM | 1010 | O4'  | G B | 14 | 2.251  | 20.779 | 34.926 | 1.00 | 0.00 | O |
| ATOM | 1011 | C5'  | G B | 14 | 3.960  | 21.172 | 36.588 | 1.00 | 0.00 | C |
| ATOM | 1012 | O5'  | G B | 14 | 4.285  | 22.561 | 36.329 | 1.00 | 0.00 | O |
| ATOM | 1013 | O1P  | G B | 14 | 6.718  | 22.716 | 36.956 | 1.00 | 0.00 | O |
| ATOM | 1014 | O2P  | G B | 14 | 5.252  | 24.746 | 37.104 | 1.00 | 0.00 | O |
| ATOM | 1015 | P    | G B | 14 | 5.383  | 23.275 | 37.240 | 1.00 | 0.00 | P |
| ATOM | 1016 | H1   | G B | 14 | -3.430 | 23.929 | 33.274 | 1.00 | 0.00 | H |
| ATOM | 1017 | H8   | G B | 14 | 2.651  | 24.112 | 35.437 | 1.00 | 0.00 | H |
| ATOM | 1018 | H1'  | G B | 14 | 1.774  | 21.192 | 32.993 | 1.00 | 0.00 | H |
| ATOM | 1019 | H21  | G B | 14 | -3.753 | 22.126 | 32.069 | 1.00 | 0.00 | H |
| ATOM | 1020 | H3'  | G B | 14 | 5.466  | 21.163 | 34.347 | 1.00 | 0.00 | H |
| ATOM | 1021 | H22  | G B | 14 | -2.466 | 20.923 | 31.775 | 1.00 | 0.00 | H |
| ATOM | 1022 | H4'  | G B | 14 | 3.810  | 19.406 | 35.433 | 1.00 | 0.00 | H |
| ATOM | 1023 | H2'1 | G B | 14 | 3.960  | 23.009 | 34.049 | 1.00 | 0.00 | H |
| ATOM | 1024 | H2'2 | G B | 14 | 3.840  | 22.237 | 32.475 | 1.00 | 0.00 | H |
| ATOM | 1025 | H5'1 | G B | 14 | 3.098  | 21.114 | 37.252 | 1.00 | 0.00 | H |
| ATOM | 1026 | H5'2 | G B | 14 | 4.809  | 20.676 | 37.058 | 1.00 | 0.00 | H |
| ATOM | 1027 | C1'  | C B | 15 | 0.588  | 21.250 | 29.195 | 1.00 | 0.00 | C |
| ATOM | 1028 | N1   | C B | 15 | 0.564  | 22.568 | 29.884 | 1.00 | 0.00 | N |
| ATOM | 1029 | C2   | C B | 15 | -0.633 | 23.281 | 29.889 | 1.00 | 0.00 | C |
| ATOM | 1030 | O2   | C B | 15 | -1.621 | 22.791 | 29.325 | 1.00 | 0.00 | O |
| ATOM | 1031 | N3   | C B | 15 | -0.677 | 24.484 | 30.512 | 1.00 | 0.00 | N |
| ATOM | 1032 | C4   | C B | 15 | 0.408  | 24.987 | 31.112 | 1.00 | 0.00 | C |
| ATOM | 1033 | N4   | C B | 15 | 0.309  | 26.166 | 31.709 | 1.00 | 0.00 | N |
| ATOM | 1034 | C5   | C B | 15 | 1.657  | 24.279 | 31.120 | 1.00 | 0.00 | C |
| ATOM | 1035 | C6   | C B | 15 | 1.674  | 23.068 | 30.491 | 1.00 | 0.00 | C |
| ATOM | 1036 | C2'  | C B | 15 | 1.886  | 20.971 | 28.450 | 1.00 | 0.00 | C |
| ATOM | 1037 | C3'  | C B | 15 | 2.054  | 19.473 | 28.655 | 1.00 | 0.00 | C |
| ATOM | 1038 | O3'  | C B | 15 | 1.300  | 18.777 | 27.664 | 1.00 | 0.00 | O |
| ATOM | 1039 | C4'  | C B | 15 | 1.497  | 19.257 | 30.060 | 1.00 | 0.00 | C |
| ATOM | 1040 | O4'  | C B | 15 | 0.425  | 20.246 | 30.180 | 1.00 | 0.00 | O |
| ATOM | 1041 | C5'  | C B | 15 | 2.465  | 19.455 | 31.204 | 1.00 | 0.00 | C |
| ATOM | 1042 | O5'  | C B | 15 | 3.371  | 20.543 | 30.896 | 1.00 | 0.00 | O |
| ATOM | 1043 | O1P  | C B | 15 | 5.607  | 19.404 | 30.699 | 1.00 | 0.00 | O |
| ATOM | 1044 | O2P  | C B | 15 | 5.484  | 21.815 | 31.384 | 1.00 | 0.00 | O |
| ATOM | 1045 | P    | C B | 15 | 4.874  | 20.463 | 31.422 | 1.00 | 0.00 | P |
| ATOM | 1046 | H5   | C B | 15 | 2.543  | 24.689 | 31.603 | 1.00 | 0.00 | H |
| ATOM | 1047 | H6   | C B | 15 | 2.598  | 22.489 | 30.476 | 1.00 | 0.00 | H |
| ATOM | 1048 | H1'  | C B | 15 | -0.268 | 21.201 | 28.521 | 1.00 | 0.00 | H |
| ATOM | 1049 | H3'  | C B | 15 | 3.098  | 19.167 | 28.595 | 1.00 | 0.00 | H |
| ATOM | 1050 | H4'  | C B | 15 | 1.136  | 18.230 | 30.104 | 1.00 | 0.00 | H |
| ATOM | 1051 | H41  | C B | 15 | 1.128  | 26.576 | 32.182 | 1.00 | 0.00 | H |
| ATOM | 1052 | H42  | C B | 15 | -0.588 | 26.674 | 31.700 | 1.00 | 0.00 | H |
| ATOM | 1053 | H2'1 | C B | 15 | 2.728  | 21.524 | 28.864 | 1.00 | 0.00 | H |
| ATOM | 1054 | H2'2 | C B | 15 | 1.818  | 21.222 | 27.391 | 1.00 | 0.00 | H |
| ATOM | 1055 | H5'1 | C B | 15 | 1.906  | 19.685 | 32.111 | 1.00 | 0.00 | H |
| ATOM | 1056 | H5'2 | C B | 15 | 3.032  | 18.536 | 31.355 | 1.00 | 0.00 | H |
| ATOM | 1057 | C1'  | G B | 16 | -2.203 | 22.562 | 25.322 | 1.00 | 0.00 | C |
| ATOM | 1058 | N1   | G B | 16 | -2.156 | 27.145 | 27.563 | 1.00 | 0.00 | N |
| ATOM | 1059 | C2   | G B | 16 | -3.197 | 26.461 | 26.960 | 1.00 | 0.00 | C |
| ATOM | 1060 | N2   | G B | 16 | -4.384 | 27.082 | 26.954 | 1.00 | 0.00 | N |



|      |      |      |     |    |        |        |        |      |      |   |
|------|------|------|-----|----|--------|--------|--------|------|------|---|
| ATOM | 1061 | N3   | G B | 16 | -3.066 | 25.255 | 26.411 | 1.00 | 0.00 | N |
| ATOM | 1062 | C4   | G B | 16 | -1.796 | 24.781 | 26.503 | 1.00 | 0.00 | C |
| ATOM | 1063 | C5   | G B | 16 | -0.695 | 25.392 | 27.080 | 1.00 | 0.00 | C |
| ATOM | 1064 | C6   | G B | 16 | -0.835 | 26.672 | 27.667 | 1.00 | 0.00 | C |
| ATOM | 1065 | O6   | G B | 16 | 0.017  | 27.368 | 28.222 | 1.00 | 0.00 | O |
| ATOM | 1066 | N7   | G B | 16 | 0.429  | 24.572 | 26.964 | 1.00 | 0.00 | N |
| ATOM | 1067 | C8   | G B | 16 | -0.016 | 23.512 | 26.338 | 1.00 | 0.00 | C |
| ATOM | 1068 | N9   | G B | 16 | -1.359 | 23.566 | 26.023 | 1.00 | 0.00 | N |
| ATOM | 1069 | C2'  | G B | 16 | -1.486 | 21.844 | 24.186 | 1.00 | 0.00 | C |
| ATOM | 1070 | C3'  | G B | 16 | -2.072 | 20.444 | 24.275 | 1.00 | 0.00 | C |
| ATOM | 1071 | O3'  | G B | 16 | -3.305 | 20.407 | 23.561 | 1.00 | 0.00 | O |
| ATOM | 1072 | C4'  | G B | 16 | -2.269 | 20.253 | 25.778 | 1.00 | 0.00 | C |
| ATOM | 1073 | O4'  | G B | 16 | -2.598 | 21.591 | 26.271 | 1.00 | 0.00 | O |
| ATOM | 1074 | C5'  | G B | 16 | -1.080 | 19.733 | 26.550 | 1.00 | 0.00 | C |
| ATOM | 1075 | O5'  | G B | 16 | 0.142  | 20.287 | 26.001 | 1.00 | 0.00 | O |
| ATOM | 1076 | O1P  | G B | 16 | 1.320  | 18.277 | 25.051 | 1.00 | 0.00 | O |
| ATOM | 1077 | O2P  | G B | 16 | 2.647  | 20.262 | 25.818 | 1.00 | 0.00 | O |
| ATOM | 1078 | P    | G B | 16 | 1.462  | 19.391 | 26.006 | 1.00 | 0.00 | P |
| ATOM | 1079 | H1   | G B | 16 | -2.364 | 28.071 | 27.964 | 1.00 | 0.00 | H |
| ATOM | 1080 | H8   | G B | 16 | 0.618  | 22.662 | 26.087 | 1.00 | 0.00 | H |
| ATOM | 1081 | H1'  | G B | 16 | -3.102 | 23.064 | 24.961 | 1.00 | 0.00 | H |
| ATOM | 1082 | H21  | G B | 16 | -4.479 | 28.014 | 27.383 | 1.00 | 0.00 | H |
| ATOM | 1083 | H3'  | G B | 16 | -1.397 | 19.692 | 23.868 | 1.00 | 0.00 | H |
| ATOM | 1084 | H22  | G B | 16 | -5.198 | 26.627 | 26.519 | 1.00 | 0.00 | H |
| ATOM | 1085 | H4'  | G B | 16 | -3.085 | 19.541 | 25.902 | 1.00 | 0.00 | H |
| ATOM | 1086 | H2'1 | G B | 16 | -0.405 | 21.831 | 24.323 | 1.00 | 0.00 | H |
| ATOM | 1087 | H2'2 | G B | 16 | -1.689 | 22.299 | 23.216 | 1.00 | 0.00 | H |
| ATOM | 1088 | H5'1 | G B | 16 | -1.178 | 20.021 | 27.596 | 1.00 | 0.00 | H |
| ATOM | 1089 | H5'2 | G B | 16 | -1.056 | 18.645 | 26.478 | 1.00 | 0.00 | H |
| ATOM | 1090 | C1'  | G B | 17 | -4.828 | 25.774 | 22.616 | 1.00 | 0.00 | C |
| ATOM | 1091 | N1   | G B | 17 | -1.842 | 29.241 | 24.872 | 1.00 | 0.00 | N |
| ATOM | 1092 | C2   | G B | 17 | -3.203 | 29.270 | 24.620 | 1.00 | 0.00 | C |
| ATOM | 1093 | N2   | G B | 17 | -3.853 | 30.369 | 25.021 | 1.00 | 0.00 | N |
| ATOM | 1094 | N3   | G B | 17 | -3.860 | 28.281 | 24.018 | 1.00 | 0.00 | N |
| ATOM | 1095 | C4   | G B | 17 | -3.042 | 27.252 | 23.674 | 1.00 | 0.00 | C |
| ATOM | 1096 | C5   | G B | 17 | -1.679 | 27.137 | 23.881 | 1.00 | 0.00 | C |
| ATOM | 1097 | C6   | G B | 17 | -0.980 | 28.184 | 24.524 | 1.00 | 0.00 | C |
| ATOM | 1098 | O6   | G B | 17 | 0.218  | 28.267 | 24.794 | 1.00 | 0.00 | O |
| ATOM | 1099 | N7   | G B | 17 | -1.214 | 25.921 | 23.378 | 1.00 | 0.00 | N |
| ATOM | 1100 | C8   | G B | 17 | -2.286 | 25.347 | 22.896 | 1.00 | 0.00 | C |
| ATOM | 1101 | N9   | G B | 17 | -3.437 | 26.095 | 23.037 | 1.00 | 0.00 | N |
| ATOM | 1102 | C2'  | G B | 17 | -4.910 | 25.039 | 21.285 | 1.00 | 0.00 | C |
| ATOM | 1103 | C3'  | G B | 17 | -6.086 | 24.101 | 21.513 | 1.00 | 0.00 | C |
| ATOM | 1104 | O3'  | G B | 17 | -7.300 | 24.796 | 21.239 | 1.00 | 0.00 | O |
| ATOM | 1105 | C4'  | G B | 17 | -5.949 | 23.738 | 22.990 | 1.00 | 0.00 | C |
| ATOM | 1106 | O4'  | G B | 17 | -5.399 | 24.945 | 23.608 | 1.00 | 0.00 | O |
| ATOM | 1107 | C5'  | G B | 17 | -5.043 | 22.574 | 23.314 | 1.00 | 0.00 | C |
| ATOM | 1108 | O5'  | G B | 17 | -3.904 | 22.574 | 22.417 | 1.00 | 0.00 | O |
| ATOM | 1109 | O1P  | G B | 17 | -4.227 | 20.474 | 21.067 | 1.00 | 0.00 | O |
| ATOM | 1110 | O2P  | G B | 17 | -1.920 | 21.392 | 21.426 | 1.00 | 0.00 | O |
| ATOM | 1111 | P    | G B | 17 | -3.286 | 21.176 | 21.961 | 1.00 | 0.00 | P |
| ATOM | 1112 | H1   | G B | 17 | -1.430 | 30.057 | 25.351 | 1.00 | 0.00 | H |
| ATOM | 1113 | H8   | G B | 17 | -2.273 | 24.366 | 22.423 | 1.00 | 0.00 | H |
| ATOM | 1114 | H1'  | G B | 17 | -5.398 | 26.702 | 22.585 | 1.00 | 0.00 | H |

|      |      |      |     |    |        |        |        |      |      |   |
|------|------|------|-----|----|--------|--------|--------|------|------|---|
| ATOM | 1115 | H21  | G B | 17 | -3.339 | 31.129 | 25.490 | 1.00 | 0.00 | H |
| ATOM | 1116 | H3'  | G B | 17 | -6.028 | 23.213 | 20.883 | 1.00 | 0.00 | H |
| ATOM | 1117 | H22  | G B | 17 | -4.867 | 30.453 | 24.861 | 1.00 | 0.00 | H |
| ATOM | 1118 | H4'  | G B | 17 | -6.947 | 23.492 | 23.350 | 1.00 | 0.00 | H |
| ATOM | 1119 | H2'1 | G B | 17 | -3.999 | 24.485 | 21.061 | 1.00 | 0.00 | H |
| ATOM | 1120 | H2'2 | G B | 17 | -5.097 | 25.714 | 20.450 | 1.00 | 0.00 | H |
| ATOM | 1121 | H5'1 | G B | 17 | -4.699 | 22.663 | 24.345 | 1.00 | 0.00 | H |
| ATOM | 1122 | H5'2 | G B | 17 | -5.600 | 21.644 | 23.202 | 1.00 | 0.00 | H |
| ATOM | 1123 | C1'  | C B | 18 | -6.032 | 30.307 | 21.024 | 1.00 | 0.00 | C |
| ATOM | 1124 | N1   | C B | 18 | -4.618 | 29.840 | 20.984 | 1.00 | 0.00 | N |
| ATOM | 1125 | C2   | C B | 18 | -3.645 | 30.659 | 21.554 | 1.00 | 0.00 | C |
| ATOM | 1126 | O2   | C B | 18 | -3.991 | 31.731 | 22.066 | 1.00 | 0.00 | O |
| ATOM | 1127 | N3   | C B | 18 | -2.353 | 30.252 | 21.527 | 1.00 | 0.00 | N |
| ATOM | 1128 | C4   | C B | 18 | -2.010 | 29.086 | 20.964 | 1.00 | 0.00 | C |
| ATOM | 1129 | N4   | C B | 18 | -0.732 | 28.737 | 20.968 | 1.00 | 0.00 | N |
| ATOM | 1130 | C5   | C B | 18 | -2.989 | 28.227 | 20.369 | 1.00 | 0.00 | C |
| ATOM | 1131 | C6   | C B | 18 | -4.283 | 28.655 | 20.410 | 1.00 | 0.00 | C |
| ATOM | 1132 | C2'  | C B | 18 | -6.823 | 29.977 | 19.766 | 1.00 | 0.00 | C |
| ATOM | 1133 | C3'  | C B | 18 | -8.205 | 29.683 | 20.328 | 1.00 | 0.00 | C |
| ATOM | 1134 | O3'  | C B | 18 | -8.914 | 30.910 | 20.490 | 1.00 | 0.00 | O |
| ATOM | 1135 | C4'  | C B | 18 | -7.892 | 29.017 | 21.666 | 1.00 | 0.00 | C |
| ATOM | 1136 | O4'  | C B | 18 | -6.663 | 29.670 | 22.118 | 1.00 | 0.00 | O |
| ATOM | 1137 | C5'  | C B | 18 | -7.662 | 27.524 | 21.635 | 1.00 | 0.00 | C |
| ATOM | 1138 | O5'  | C B | 18 | -6.964 | 27.162 | 20.416 | 1.00 | 0.00 | O |
| ATOM | 1139 | O1P  | C B | 18 | -8.655 | 25.777 | 19.166 | 1.00 | 0.00 | O |
| ATOM | 1140 | O2P  | C B | 18 | -6.202 | 25.402 | 18.790 | 1.00 | 0.00 | O |
| ATOM | 1141 | P    | C B | 18 | -7.291 | 25.759 | 19.733 | 1.00 | 0.00 | P |
| ATOM | 1142 | H5   | C B | 18 | -2.714 | 27.279 | 19.907 | 1.00 | 0.00 | H |
| ATOM | 1143 | H6   | C B | 18 | -5.064 | 28.034 | 19.972 | 1.00 | 0.00 | H |
| ATOM | 1144 | H1'  | C B | 18 | -6.030 | 31.380 | 21.215 | 1.00 | 0.00 | H |
| ATOM | 1145 | H3'  | C B | 18 | -8.776 | 29.018 | 19.681 | 1.00 | 0.00 | H |
| ATOM | 1146 | H4'  | C B | 18 | -8.742 | 29.207 | 22.322 | 1.00 | 0.00 | H |
| ATOM | 1147 | H41  | C B | 18 | -0.441 | 27.844 | 20.543 | 1.00 | 0.00 | H |
| ATOM | 1148 | H42  | C B | 18 | -0.030 | 29.357 | 21.397 | 1.00 | 0.00 | H |
| ATOM | 1149 | H2'1 | C B | 18 | -6.419 | 29.115 | 19.237 | 1.00 | 0.00 | H |
| ATOM | 1150 | H2'2 | C B | 18 | -6.848 | 30.810 | 19.063 | 1.00 | 0.00 | H |
| ATOM | 1151 | H5'1 | C B | 18 | -7.065 | 27.235 | 22.500 | 1.00 | 0.00 | H |
| ATOM | 1152 | H5'2 | C B | 18 | -8.622 | 27.012 | 21.675 | 1.00 | 0.00 | H |
| ATOM | 1153 | C1'  | C B | 19 | -5.102 | 35.076 | 20.065 | 1.00 | 0.00 | C |
| ATOM | 1154 | N1   | C B | 19 | -4.199 | 34.011 | 19.551 | 1.00 | 0.00 | N |
| ATOM | 1155 | C2   | C B | 19 | -2.833 | 34.136 | 19.800 | 1.00 | 0.00 | C |
| ATOM | 1156 | O2   | C B | 19 | -2.429 | 35.120 | 20.434 | 1.00 | 0.00 | O |
| ATOM | 1157 | N3   | C B | 19 | -1.995 | 33.176 | 19.340 | 1.00 | 0.00 | N |
| ATOM | 1158 | C4   | C B | 19 | -2.463 | 32.123 | 18.657 | 1.00 | 0.00 | C |
| ATOM | 1159 | N4   | C B | 19 | -1.600 | 31.215 | 18.232 | 1.00 | 0.00 | N |
| ATOM | 1160 | C5   | C B | 19 | -3.860 | 31.972 | 18.386 | 1.00 | 0.00 | C |
| ATOM | 1161 | C6   | C B | 19 | -4.685 | 32.948 | 18.859 | 1.00 | 0.00 | C |
| ATOM | 1162 | C2'  | C B | 19 | -6.248 | 35.415 | 19.123 | 1.00 | 0.00 | C |
| ATOM | 1163 | C3'  | C B | 19 | -7.380 | 35.714 | 20.096 | 1.00 | 0.00 | C |
| ATOM | 1164 | O3'  | C B | 19 | -7.286 | 37.071 | 20.521 | 1.00 | 0.00 | O |
| ATOM | 1165 | C4'  | C B | 19 | -7.115 | 34.732 | 21.235 | 1.00 | 0.00 | C |
| ATOM | 1166 | O4'  | C B | 19 | -5.657 | 34.618 | 21.283 | 1.00 | 0.00 | O |
| ATOM | 1167 | C5'  | C B | 19 | -7.702 | 33.348 | 21.079 | 1.00 | 0.00 | C |
| ATOM | 1168 | O5'  | C B | 19 | -7.641 | 32.943 | 19.688 | 1.00 | 0.00 | O |

|      |      |      |     |    |         |        |        |      |      |   |
|------|------|------|-----|----|---------|--------|--------|------|------|---|
| ATOM | 1169 | O1P  | C B | 19 | -10.061 | 32.808 | 19.013 | 1.00 | 0.00 | O |
| ATOM | 1170 | O2P  | C B | 19 | -8.351  | 31.391 | 17.845 | 1.00 | 0.00 | O |
| ATOM | 1171 | P    | C B | 19 | -8.809  | 32.031 | 19.102 | 1.00 | 0.00 | P |
| ATOM | 1172 | H5   | C B | 19 | -4.246  | 31.118 | 17.829 | 1.00 | 0.00 | H |
| ATOM | 1173 | H6   | C B | 19 | -5.758  | 32.874 | 18.679 | 1.00 | 0.00 | H |
| ATOM | 1174 | H1'  | C B | 19 | -4.499  | 35.958 | 20.282 | 1.00 | 0.00 | H |
| ATOM | 1175 | H3'  | C B | 19 | -8.358  | 35.541 | 19.647 | 1.00 | 0.00 | H |
| ATOM | 1176 | H4'  | C B | 19 | -7.539  | 35.173 | 22.138 | 1.00 | 0.00 | H |
| ATOM | 1177 | H41  | C B | 19 | -1.931  | 30.394 | 17.705 | 1.00 | 0.00 | H |
| ATOM | 1178 | H42  | C B | 19 | -0.593  | 31.328 | 18.428 | 1.00 | 0.00 | H |
| ATOM | 1179 | H2'1 | C B | 19 | -6.501  | 34.587 | 18.463 | 1.00 | 0.00 | H |
| ATOM | 1180 | H2'2 | C B | 19 | -6.026  | 36.279 | 18.496 | 1.00 | 0.00 | H |
| ATOM | 1181 | H5'1 | C B | 19 | -7.137  | 32.648 | 21.693 | 1.00 | 0.00 | H |
| ATOM | 1182 | H5'2 | C B | 19 | -8.739  | 33.361 | 21.413 | 1.00 | 0.00 | H |
| ATOM | 1183 | C1'  | T B | 20 | -2.162  | 38.919 | 19.022 | 1.00 | 0.00 | C |
| ATOM | 1184 | N1   | T B | 20 | -2.086  | 37.677 | 18.209 | 1.00 | 0.00 | N |
| ATOM | 1185 | C2   | T B | 20 | -0.837  | 37.120 | 18.025 | 1.00 | 0.00 | C |
| ATOM | 1186 | O2   | T B | 20 | 0.177   | 37.604 | 18.497 | 1.00 | 0.00 | O |
| ATOM | 1187 | N3   | T B | 20 | -0.813  | 35.967 | 17.263 | 1.00 | 0.00 | N |
| ATOM | 1188 | C4   | T B | 20 | -1.895  | 35.341 | 16.686 | 1.00 | 0.00 | C |
| ATOM | 1189 | O4   | T B | 20 | -1.748  | 34.308 | 16.020 | 1.00 | 0.00 | O |
| ATOM | 1190 | C5   | T B | 20 | -3.157  | 35.995 | 16.933 | 1.00 | 0.00 | C |
| ATOM | 1191 | C6   | T B | 20 | -3.220  | 37.121 | 17.671 | 1.00 | 0.00 | C |
| ATOM | 1192 | C7   | T B | 20 | -4.364  | 35.347 | 16.323 | 1.00 | 0.00 | C |
| ATOM | 1193 | C2'  | T B | 20 | -3.184  | 39.927 | 18.509 | 1.00 | 0.00 | C |
| ATOM | 1194 | C3'  | T B | 20 | -3.714  | 40.527 | 19.802 | 1.00 | 0.00 | C |
| ATOM | 1195 | O3'  | T B | 20 | -2.846  | 41.577 | 20.223 | 1.00 | 0.00 | O |
| ATOM | 1196 | C4'  | T B | 20 | -3.693  | 39.340 | 20.762 | 1.00 | 0.00 | C |
| ATOM | 1197 | O4'  | T B | 20 | -2.535  | 38.553 | 20.337 | 1.00 | 0.00 | O |
| ATOM | 1198 | C5'  | T B | 20 | -4.913  | 38.447 | 20.754 | 1.00 | 0.00 | C |
| ATOM | 1199 | O5'  | T B | 20 | -5.426  | 38.332 | 19.402 | 1.00 | 0.00 | O |
| ATOM | 1200 | O1P  | T B | 20 | -7.666  | 39.472 | 19.531 | 1.00 | 0.00 | O |
| ATOM | 1201 | O2P  | T B | 20 | -7.270  | 37.671 | 17.829 | 1.00 | 0.00 | O |
| ATOM | 1202 | P    | T B | 20 | -7.000  | 38.199 | 19.188 | 1.00 | 0.00 | P |
| ATOM | 1203 | H3   | T B | 20 | 0.108   | 35.531 | 17.113 | 1.00 | 0.00 | H |
| ATOM | 1204 | H6   | T B | 20 | -4.185  | 37.597 | 17.844 | 1.00 | 0.00 | H |
| ATOM | 1205 | H1'  | T B | 20 | -1.167  | 39.361 | 19.067 | 1.00 | 0.00 | H |
| ATOM | 1206 | H3'  | T B | 20 | -4.724  | 40.920 | 19.684 | 1.00 | 0.00 | H |
| ATOM | 1207 | H4'  | T B | 20 | -3.587  | 39.747 | 21.768 | 1.00 | 0.00 | H |
| ATOM | 1208 | H3T  | T B | 20 | -2.668  | 42.249 | 19.562 | 1.00 | 0.00 | H |
| ATOM | 1209 | H71  | T B | 20 | -4.789  | 36.007 | 15.566 | 1.00 | 0.00 | H |
| ATOM | 1210 | H72  | T B | 20 | -4.075  | 34.402 | 15.861 | 1.00 | 0.00 | H |
| ATOM | 1211 | H73  | T B | 20 | -5.108  | 35.158 | 17.098 | 1.00 | 0.00 | H |
| ATOM | 1212 | H2'1 | T B | 20 | -3.979  | 39.454 | 17.936 | 1.00 | 0.00 | H |
| ATOM | 1213 | H2'2 | T B | 20 | -2.730  | 40.689 | 17.875 | 1.00 | 0.00 | H |
| ATOM | 1214 | H5'1 | T B | 20 | -4.638  | 37.462 | 21.129 | 1.00 | 0.00 | H |
| ATOM | 1215 | H5'2 | T B | 20 | -5.674  | 38.878 | 21.401 | 1.00 | 0.00 | H |
| TER  |      |      |     |    |         |        |        |      |      |   |
| ATOM | 1    | C1'  | A A | 1  | -24.723 | 49.842 | 39.266 | 1.00 | 0.00 | C |
| ATOM | 2    | N1   | A A | 1  | -28.886 | 47.525 | 37.358 | 1.00 | 0.00 | N |
| ATOM | 3    | C2   | A A | 1  | -28.694 | 48.284 | 38.433 | 1.00 | 0.00 | C |
| ATOM | 4    | N3   | A A | 1  | -27.590 | 48.855 | 38.867 | 1.00 | 0.00 | N |
| ATOM | 5    | C4   | A A | 1  | -26.563 | 48.569 | 38.046 | 1.00 | 0.00 | C |
| ATOM | 6    | C5   | A A | 1  | -26.594 | 47.808 | 36.911 | 1.00 | 0.00 | C |

|      |    |      |     |   |         |        |        |      |      |   |
|------|----|------|-----|---|---------|--------|--------|------|------|---|
| ATOM | 7  | C6   | A A | 1 | -27.844 | 47.257 | 36.558 | 1.00 | 0.00 | C |
| ATOM | 8  | N6   | A A | 1 | -28.026 | 46.489 | 35.469 | 1.00 | 0.00 | N |
| ATOM | 9  | N7   | A A | 1 | -25.342 | 47.735 | 36.325 | 1.00 | 0.00 | N |
| ATOM | 10 | C8   | A A | 1 | -24.588 | 48.444 | 37.112 | 1.00 | 0.00 | C |
| ATOM | 11 | N9   | A A | 1 | -25.261 | 48.983 | 38.178 | 1.00 | 0.00 | N |
| ATOM | 12 | C2'  | A A | 1 | -23.322 | 49.454 | 39.718 | 1.00 | 0.00 | C |
| ATOM | 13 | C3'  | A A | 1 | -22.706 | 50.808 | 40.035 | 1.00 | 0.00 | C |
| ATOM | 14 | O3'  | A A | 1 | -23.063 | 51.186 | 41.362 | 1.00 | 0.00 | O |
| ATOM | 15 | C4'  | A A | 1 | -23.335 | 51.722 | 38.985 | 1.00 | 0.00 | C |
| ATOM | 16 | O4'  | A A | 1 | -24.676 | 51.170 | 38.783 | 1.00 | 0.00 | O |
| ATOM | 17 | C5'  | A A | 1 | -22.634 | 51.790 | 37.649 | 1.00 | 0.00 | C |
| ATOM | 18 | O5'  | A A | 1 | -22.099 | 50.486 | 37.308 | 1.00 | 0.00 | O |
| ATOM | 19 | H2   | A A | 1 | -29.579 | 48.460 | 39.043 | 1.00 | 0.00 | H |
| ATOM | 20 | H8   | A A | 1 | -23.523 | 48.597 | 36.940 | 1.00 | 0.00 | H |
| ATOM | 21 | H1'  | A A | 1 | -25.425 | 49.813 | 40.100 | 1.00 | 0.00 | H |
| ATOM | 22 | H3'  | A A | 1 | -21.619 | 50.794 | 39.944 | 1.00 | 0.00 | H |
| ATOM | 23 | H4'  | A A | 1 | -23.346 | 52.726 | 39.407 | 1.00 | 0.00 | H |
| ATOM | 24 | H61  | A A | 1 | -28.958 | 46.113 | 35.256 | 1.00 | 0.00 | H |
| ATOM | 25 | H62  | A A | 1 | -27.229 | 46.280 | 34.850 | 1.00 | 0.00 | H |
| ATOM | 26 | H5T  | A A | 1 | -21.275 | 50.439 | 36.818 | 1.00 | 0.00 | H |
| ATOM | 27 | H2'1 | A A | 1 | -22.764 | 48.937 | 38.939 | 1.00 | 0.00 | H |
| ATOM | 28 | H2'2 | A A | 1 | -23.334 | 48.809 | 40.597 | 1.00 | 0.00 | H |
| ATOM | 29 | H5'1 | A A | 1 | -23.347 | 52.106 | 36.887 | 1.00 | 0.00 | H |
| ATOM | 30 | H5'2 | A A | 1 | -21.825 | 52.516 | 37.705 | 1.00 | 0.00 | H |
| ATOM | 31 | C1'  | G A | 2 | -27.342 | 47.733 | 42.920 | 1.00 | 0.00 | C |
| ATOM | 32 | N1   | G A | 2 | -29.001 | 44.651 | 39.211 | 1.00 | 0.00 | N |
| ATOM | 33 | C2   | G A | 2 | -29.697 | 45.249 | 40.243 | 1.00 | 0.00 | C |
| ATOM | 34 | N2   | G A | 2 | -31.009 | 44.992 | 40.297 | 1.00 | 0.00 | N |
| ATOM | 35 | N3   | G A | 2 | -29.131 | 46.043 | 41.151 | 1.00 | 0.00 | N |
| ATOM | 36 | C4   | G A | 2 | -27.794 | 46.188 | 40.948 | 1.00 | 0.00 | C |
| ATOM | 37 | C5   | G A | 2 | -27.016 | 45.627 | 39.948 | 1.00 | 0.00 | C |
| ATOM | 38 | C6   | G A | 2 | -27.620 | 44.788 | 38.982 | 1.00 | 0.00 | C |
| ATOM | 39 | O6   | G A | 2 | -27.103 | 44.207 | 38.028 | 1.00 | 0.00 | O |
| ATOM | 40 | N7   | G A | 2 | -25.685 | 46.024 | 40.092 | 1.00 | 0.00 | N |
| ATOM | 41 | C8   | G A | 2 | -25.699 | 46.797 | 41.148 | 1.00 | 0.00 | C |
| ATOM | 42 | N9   | G A | 2 | -26.944 | 46.944 | 41.724 | 1.00 | 0.00 | N |
| ATOM | 43 | C2'  | G A | 2 | -26.311 | 47.713 | 44.041 | 1.00 | 0.00 | C |
| ATOM | 44 | C3'  | G A | 2 | -26.430 | 49.116 | 44.610 | 1.00 | 0.00 | C |
| ATOM | 45 | O3'  | G A | 2 | -27.499 | 49.150 | 45.553 | 1.00 | 0.00 | O |
| ATOM | 46 | C4'  | G A | 2 | -26.727 | 49.961 | 43.371 | 1.00 | 0.00 | C |
| ATOM | 47 | O4'  | G A | 2 | -27.516 | 49.077 | 42.513 | 1.00 | 0.00 | O |
| ATOM | 48 | C5'  | G A | 2 | -25.530 | 50.451 | 42.591 | 1.00 | 0.00 | C |
| ATOM | 49 | O5'  | G A | 2 | -24.493 | 49.439 | 42.597 | 1.00 | 0.00 | O |
| ATOM | 50 | O1P  | G A | 2 | -22.639 | 50.515 | 43.918 | 1.00 | 0.00 | O |
| ATOM | 51 | O2P  | G A | 2 | -22.104 | 48.776 | 42.190 | 1.00 | 0.00 | O |
| ATOM | 52 | P    | G A | 2 | -22.967 | 49.905 | 42.615 | 1.00 | 0.00 | P |
| ATOM | 53 | H1   | G A | 2 | -29.535 | 44.057 | 38.560 | 1.00 | 0.00 | H |
| ATOM | 54 | H8   | G A | 2 | -24.805 | 47.282 | 41.539 | 1.00 | 0.00 | H |
| ATOM | 55 | H1'  | G A | 2 | -28.305 | 47.361 | 43.270 | 1.00 | 0.00 | H |
| ATOM | 56 | H21  | G A | 2 | -31.442 | 44.379 | 39.591 | 1.00 | 0.00 | H |
| ATOM | 57 | H3'  | G A | 2 | -25.509 | 49.441 | 45.095 | 1.00 | 0.00 | H |
| ATOM | 58 | H22  | G A | 2 | -31.584 | 45.407 | 41.044 | 1.00 | 0.00 | H |
| ATOM | 59 | H4'  | G A | 2 | -27.284 | 50.834 | 43.710 | 1.00 | 0.00 | H |
| ATOM | 60 | H2'1 | G A | 2 | -25.303 | 47.519 | 43.671 | 1.00 | 0.00 | H |

|      |     |      |     |   |         |        |        |      |      |   |
|------|-----|------|-----|---|---------|--------|--------|------|------|---|
| ATOM | 61  | H2'2 | G A | 2 | -26.534 | 46.957 | 44.795 | 1.00 | 0.00 | H |
| ATOM | 62  | H5'1 | G A | 2 | -25.833 | 50.662 | 41.566 | 1.00 | 0.00 | H |
| ATOM | 63  | H5'2 | G A | 2 | -25.156 | 51.367 | 43.049 | 1.00 | 0.00 | H |
| ATOM | 64  | C1'  | G A | 3 | -30.514 | 44.421 | 44.790 | 1.00 | 0.00 | C |
| ATOM | 65  | N1   | G A | 3 | -29.057 | 41.612 | 40.790 | 1.00 | 0.00 | N |
| ATOM | 66  | C2   | G A | 3 | -30.317 | 41.812 | 41.320 | 1.00 | 0.00 | C |
| ATOM | 67  | N2   | G A | 3 | -31.323 | 41.177 | 40.706 | 1.00 | 0.00 | N |
| ATOM | 68  | N3   | G A | 3 | -30.555 | 42.582 | 42.379 | 1.00 | 0.00 | N |
| ATOM | 69  | C4   | G A | 3 | -29.421 | 43.140 | 42.878 | 1.00 | 0.00 | C |
| ATOM | 70  | C5   | G A | 3 | -28.123 | 42.995 | 42.416 | 1.00 | 0.00 | C |
| ATOM | 71  | C6   | G A | 3 | -27.870 | 42.180 | 41.289 | 1.00 | 0.00 | C |
| ATOM | 72  | O6   | G A | 3 | -26.799 | 41.931 | 40.735 | 1.00 | 0.00 | O |
| ATOM | 73  | N7   | G A | 3 | -27.243 | 43.735 | 43.209 | 1.00 | 0.00 | N |
| ATOM | 74  | C8   | G A | 3 | -28.017 | 44.294 | 44.103 | 1.00 | 0.00 | C |
| ATOM | 75  | N9   | G A | 3 | -29.353 | 43.980 | 43.968 | 1.00 | 0.00 | N |
| ATOM | 76  | C2'  | G A | 3 | -30.208 | 44.526 | 46.277 | 1.00 | 0.00 | C |
| ATOM | 77  | C3'  | G A | 3 | -31.043 | 45.726 | 46.690 | 1.00 | 0.00 | C |
| ATOM | 78  | O3'  | G A | 3 | -32.376 | 45.298 | 46.962 | 1.00 | 0.00 | O |
| ATOM | 79  | C4'  | G A | 3 | -30.969 | 46.631 | 45.461 | 1.00 | 0.00 | C |
| ATOM | 80  | O4'  | G A | 3 | -30.904 | 45.702 | 44.333 | 1.00 | 0.00 | O |
| ATOM | 81  | C5'  | G A | 3 | -29.783 | 47.565 | 45.387 | 1.00 | 0.00 | C |
| ATOM | 82  | O5'  | G A | 3 | -28.609 | 46.912 | 45.931 | 1.00 | 0.00 | O |
| ATOM | 83  | O1P  | G A | 3 | -28.095 | 48.259 | 47.994 | 1.00 | 0.00 | O |
| ATOM | 84  | O2P  | G A | 3 | -26.254 | 47.046 | 46.797 | 1.00 | 0.00 | O |
| ATOM | 85  | P    | G A | 3 | -27.533 | 47.793 | 46.712 | 1.00 | 0.00 | P |
| ATOM | 86  | H1   | G A | 3 | -28.981 | 40.998 | 39.964 | 1.00 | 0.00 | H |
| ATOM | 87  | H8   | G A | 3 | -27.640 | 44.951 | 44.886 | 1.00 | 0.00 | H |
| ATOM | 88  | H1'  | G A | 3 | -31.341 | 43.734 | 44.608 | 1.00 | 0.00 | H |
| ATOM | 89  | H21  | G A | 3 | -31.132 | 40.584 | 39.885 | 1.00 | 0.00 | H |
| ATOM | 90  | H3'  | G A | 3 | -30.637 | 46.224 | 47.571 | 1.00 | 0.00 | H |
| ATOM | 91  | H22  | G A | 3 | -32.286 | 41.283 | 41.054 | 1.00 | 0.00 | H |
| ATOM | 92  | H4'  | G A | 3 | -31.873 | 47.239 | 45.460 | 1.00 | 0.00 | H |
| ATOM | 93  | H2'1 | G A | 3 | -29.149 | 44.694 | 46.471 | 1.00 | 0.00 | H |
| ATOM | 94  | H2'2 | G A | 3 | -30.502 | 43.629 | 46.824 | 1.00 | 0.00 | H |
| ATOM | 95  | H5'1 | G A | 3 | -29.607 | 47.837 | 44.347 | 1.00 | 0.00 | H |
| ATOM | 96  | H5'2 | G A | 3 | -30.002 | 48.466 | 45.960 | 1.00 | 0.00 | H |
| ATOM | 97  | C1'  | C A | 4 | -32.893 | 40.077 | 44.838 | 1.00 | 0.00 | C |
| ATOM | 98  | N1   | C A | 4 | -31.409 | 40.125 | 44.717 | 1.00 | 0.00 | N |
| ATOM | 99  | C2   | C A | 4 | -30.818 | 39.414 | 43.675 | 1.00 | 0.00 | C |
| ATOM | 100 | O2   | C A | 4 | -31.541 | 38.777 | 42.900 | 1.00 | 0.00 | O |
| ATOM | 101 | N3   | C A | 4 | -29.469 | 39.446 | 43.548 | 1.00 | 0.00 | N |
| ATOM | 102 | C4   | C A | 4 | -28.713 | 40.144 | 44.404 | 1.00 | 0.00 | C |
| ATOM | 103 | N4   | C A | 4 | -27.399 | 40.142 | 44.230 | 1.00 | 0.00 | N |
| ATOM | 104 | C5   | C A | 4 | -29.295 | 40.882 | 45.485 | 1.00 | 0.00 | C |
| ATOM | 105 | C6   | C A | 4 | -30.654 | 40.839 | 45.593 | 1.00 | 0.00 | C |
| ATOM | 106 | C2'  | C A | 4 | -33.390 | 40.028 | 46.276 | 1.00 | 0.00 | C |
| ATOM | 107 | C3'  | C A | 4 | -34.664 | 40.858 | 46.200 | 1.00 | 0.00 | C |
| ATOM | 108 | O3'  | C A | 4 | -35.738 | 40.025 | 45.768 | 1.00 | 0.00 | O |
| ATOM | 109 | C4'  | C A | 4 | -34.311 | 41.927 | 45.169 | 1.00 | 0.00 | C |
| ATOM | 110 | O4'  | C A | 4 | -33.412 | 41.249 | 44.235 | 1.00 | 0.00 | O |
| ATOM | 111 | C5'  | C A | 4 | -33.618 | 43.162 | 45.694 | 1.00 | 0.00 | C |
| ATOM | 112 | O5'  | C A | 4 | -32.707 | 42.797 | 46.762 | 1.00 | 0.00 | O |
| ATOM | 113 | O1P  | C A | 4 | -33.718 | 43.891 | 48.791 | 1.00 | 0.00 | O |
| ATOM | 114 | O2P  | C A | 4 | -31.248 | 43.465 | 48.696 | 1.00 | 0.00 | O |

|      |     |      |     |   |         |        |        |      |      |   |
|------|-----|------|-----|---|---------|--------|--------|------|------|---|
| ATOM | 115 | P    | C A | 4 | -32.493 | 43.815 | 47.971 | 1.00 | 0.00 | P |
| ATOM | 116 | H5   | C A | 4 | -28.682 | 41.448 | 46.187 | 1.00 | 0.00 | H |
| ATOM | 117 | H6   | C A | 4 | -31.144 | 41.389 | 46.397 | 1.00 | 0.00 | H |
| ATOM | 118 | H1'  | C A | 4 | -33.253 | 39.220 | 44.270 | 1.00 | 0.00 | H |
| ATOM | 119 | H3'  | C A | 4 | -34.917 | 41.304 | 47.161 | 1.00 | 0.00 | H |
| ATOM | 120 | H4'  | C A | 4 | -35.247 | 42.242 | 44.708 | 1.00 | 0.00 | H |
| ATOM | 121 | H41  | C A | 4 | -26.793 | 40.672 | 44.874 | 1.00 | 0.00 | H |
| ATOM | 122 | H42  | C A | 4 | -26.982 | 39.610 | 43.452 | 1.00 | 0.00 | H |
| ATOM | 123 | H2'1 | C A | 4 | -32.677 | 40.462 | 46.976 | 1.00 | 0.00 | H |
| ATOM | 124 | H2'2 | C A | 4 | -33.597 | 39.010 | 46.608 | 1.00 | 0.00 | H |
| ATOM | 125 | H5'1 | C A | 4 | -33.064 | 43.635 | 44.883 | 1.00 | 0.00 | H |
| ATOM | 126 | H5'2 | C A | 4 | -34.366 | 43.860 | 46.071 | 1.00 | 0.00 | H |
| ATOM | 127 | C1'  | C A | 5 | -33.411 | 35.278 | 43.732 | 1.00 | 0.00 | C |
| ATOM | 128 | N1   | C A | 5 | -32.165 | 35.774 | 44.377 | 1.00 | 0.00 | N |
| ATOM | 129 | C2   | C A | 5 | -30.948 | 35.440 | 43.787 | 1.00 | 0.00 | C |
| ATOM | 130 | O2   | C A | 5 | -30.950 | 34.749 | 42.759 | 1.00 | 0.00 | O |
| ATOM | 131 | N3   | C A | 5 | -29.801 | 35.883 | 44.359 | 1.00 | 0.00 | N |
| ATOM | 132 | C4   | C A | 5 | -29.829 | 36.627 | 45.471 | 1.00 | 0.00 | C |
| ATOM | 133 | N4   | C A | 5 | -28.679 | 37.035 | 45.985 | 1.00 | 0.00 | N |
| ATOM | 134 | C5   | C A | 5 | -31.066 | 36.984 | 46.100 | 1.00 | 0.00 | C |
| ATOM | 135 | C6   | C A | 5 | -32.207 | 36.530 | 45.505 | 1.00 | 0.00 | C |
| ATOM | 136 | C2'  | C A | 5 | -34.490 | 34.861 | 44.721 | 1.00 | 0.00 | C |
| ATOM | 137 | C3'  | C A | 5 | -35.761 | 35.285 | 44.001 | 1.00 | 0.00 | C |
| ATOM | 138 | O3'  | C A | 5 | -36.150 | 34.254 | 43.095 | 1.00 | 0.00 | O |
| ATOM | 139 | C4'  | C A | 5 | -35.333 | 36.558 | 43.277 | 1.00 | 0.00 | C |
| ATOM | 140 | O4'  | C A | 5 | -33.930 | 36.326 | 42.934 | 1.00 | 0.00 | O |
| ATOM | 141 | C5'  | C A | 5 | -35.432 | 37.844 | 44.065 | 1.00 | 0.00 | C |
| ATOM | 142 | O5'  | C A | 5 | -35.085 | 37.597 | 45.452 | 1.00 | 0.00 | O |
| ATOM | 143 | O1P  | C A | 5 | -37.244 | 38.015 | 46.676 | 1.00 | 0.00 | O |
| ATOM | 144 | O2P  | C A | 5 | -35.051 | 38.348 | 47.849 | 1.00 | 0.00 | O |
| ATOM | 145 | P    | C A | 5 | -35.830 | 38.429 | 46.589 | 1.00 | 0.00 | P |
| ATOM | 146 | H5   | C A | 5 | -31.094 | 37.586 | 47.009 | 1.00 | 0.00 | H |
| ATOM | 147 | H6   | C A | 5 | -33.174 | 36.780 | 45.944 | 1.00 | 0.00 | H |
| ATOM | 148 | H1'  | C A | 5 | -33.146 | 34.453 | 43.070 | 1.00 | 0.00 | H |
| ATOM | 149 | H3'  | C A | 5 | -36.578 | 35.481 | 44.696 | 1.00 | 0.00 | H |
| ATOM | 150 | H4'  | C A | 5 | -35.976 | 36.656 | 42.402 | 1.00 | 0.00 | H |
| ATOM | 151 | H41  | C A | 5 | -28.672 | 37.611 | 46.840 | 1.00 | 0.00 | H |
| ATOM | 152 | H42  | C A | 5 | -27.791 | 36.776 | 45.532 | 1.00 | 0.00 | H |
| ATOM | 153 | H2'1 | C A | 5 | -34.391 | 35.368 | 45.680 | 1.00 | 0.00 | H |
| ATOM | 154 | H2'2 | C A | 5 | -34.481 | 33.787 | 44.915 | 1.00 | 0.00 | H |
| ATOM | 155 | H5'1 | C A | 5 | -34.747 | 38.578 | 43.639 | 1.00 | 0.00 | H |
| ATOM | 156 | H5'2 | C A | 5 | -36.451 | 38.224 | 44.002 | 1.00 | 0.00 | H |
| ATOM | 157 | C1'  | G A | 6 | -31.711 | 30.772 | 42.576 | 1.00 | 0.00 | C |
| ATOM | 158 | N1   | G A | 6 | -27.485 | 32.380 | 44.939 | 1.00 | 0.00 | N |
| ATOM | 159 | C2   | G A | 6 | -27.627 | 31.666 | 43.762 | 1.00 | 0.00 | C |
| ATOM | 160 | N2   | G A | 6 | -26.494 | 31.335 | 43.133 | 1.00 | 0.00 | N |
| ATOM | 161 | N3   | G A | 6 | -28.807 | 31.312 | 43.255 | 1.00 | 0.00 | N |
| ATOM | 162 | C4   | G A | 6 | -29.846 | 31.724 | 44.027 | 1.00 | 0.00 | C |
| ATOM | 163 | C5   | G A | 6 | -29.799 | 32.436 | 45.215 | 1.00 | 0.00 | C |
| ATOM | 164 | C6   | G A | 6 | -28.549 | 32.816 | 45.752 | 1.00 | 0.00 | C |
| ATOM | 165 | O6   | G A | 6 | -28.304 | 33.442 | 46.783 | 1.00 | 0.00 | O |
| ATOM | 166 | N7   | G A | 6 | -31.091 | 32.660 | 45.694 | 1.00 | 0.00 | N |
| ATOM | 167 | C8   | G A | 6 | -31.862 | 32.094 | 44.802 | 1.00 | 0.00 | C |
| ATOM | 168 | N9   | G A | 6 | -31.179 | 31.503 | 43.759 | 1.00 | 0.00 | N |

|      |     |      |     |   |         |        |        |      |      |   |
|------|-----|------|-----|---|---------|--------|--------|------|------|---|
| ATOM | 169 | C2'  | G A | 6 | -32.927 | 29.910 | 42.884 | 1.00 | 0.00 | C |
| ATOM | 170 | C3'  | G A | 6 | -33.746 | 30.051 | 41.611 | 1.00 | 0.00 | C |
| ATOM | 171 | O3'  | G A | 6 | -33.283 | 29.107 | 40.648 | 1.00 | 0.00 | O |
| ATOM | 172 | C4'  | G A | 6 | -33.470 | 31.492 | 41.186 | 1.00 | 0.00 | C |
| ATOM | 173 | O4'  | G A | 6 | -32.091 | 31.734 | 41.610 | 1.00 | 0.00 | O |
| ATOM | 174 | C5'  | G A | 6 | -34.356 | 32.552 | 41.795 | 1.00 | 0.00 | C |
| ATOM | 175 | O5'  | G A | 6 | -34.666 | 32.205 | 43.168 | 1.00 | 0.00 | O |
| ATOM | 176 | O1P  | G A | 6 | -37.146 | 31.780 | 43.114 | 1.00 | 0.00 | O |
| ATOM | 177 | O2P  | G A | 6 | -36.051 | 32.550 | 45.236 | 1.00 | 0.00 | O |
| ATOM | 178 | P    | G A | 6 | -36.097 | 32.596 | 43.754 | 1.00 | 0.00 | P |
| ATOM | 179 | H1   | G A | 6 | -26.526 | 32.611 | 45.242 | 1.00 | 0.00 | H |
| ATOM | 180 | H8   | G A | 6 | -32.950 | 32.088 | 44.875 | 1.00 | 0.00 | H |
| ATOM | 181 | H1'  | G A | 6 | -30.903 | 30.173 | 42.154 | 1.00 | 0.00 | H |
| ATOM | 182 | H21  | G A | 6 | -25.585 | 31.615 | 43.529 | 1.00 | 0.00 | H |
| ATOM | 183 | H3'  | G A | 6 | -34.810 | 29.890 | 41.789 | 1.00 | 0.00 | H |
| ATOM | 184 | H22  | G A | 6 | -26.531 | 30.800 | 42.253 | 1.00 | 0.00 | H |
| ATOM | 185 | H4'  | G A | 6 | -33.596 | 31.533 | 40.105 | 1.00 | 0.00 | H |
| ATOM | 186 | H2'1 | G A | 6 | -33.479 | 30.269 | 43.753 | 1.00 | 0.00 | H |
| ATOM | 187 | H2'2 | G A | 6 | -32.660 | 28.870 | 43.072 | 1.00 | 0.00 | H |
| ATOM | 188 | H5'1 | G A | 6 | -33.839 | 33.511 | 41.766 | 1.00 | 0.00 | H |
| ATOM | 189 | H5'2 | G A | 6 | -35.276 | 32.626 | 41.216 | 1.00 | 0.00 | H |
| ATOM | 190 | C1'  | C A | 7 | -28.284 | 27.197 | 42.495 | 1.00 | 0.00 | C |
| ATOM | 191 | N1   | C A | 7 | -28.658 | 27.857 | 43.776 | 1.00 | 0.00 | N |
| ATOM | 192 | C2   | C A | 7 | -27.632 | 28.367 | 44.570 | 1.00 | 0.00 | C |
| ATOM | 193 | O2   | C A | 7 | -26.462 | 28.251 | 44.182 | 1.00 | 0.00 | O |
| ATOM | 194 | N3   | C A | 7 | -27.951 | 28.972 | 45.740 | 1.00 | 0.00 | N |
| ATOM | 195 | C4   | C A | 7 | -29.226 | 29.082 | 46.134 | 1.00 | 0.00 | C |
| ATOM | 196 | N4   | C A | 7 | -29.481 | 29.685 | 47.285 | 1.00 | 0.00 | N |
| ATOM | 197 | C5   | C A | 7 | -30.301 | 28.563 | 45.340 | 1.00 | 0.00 | C |
| ATOM | 198 | C6   | C A | 7 | -29.957 | 27.961 | 44.162 | 1.00 | 0.00 | C |
| ATOM | 199 | C2'  | C A | 7 | -29.135 | 25.979 | 42.161 | 1.00 | 0.00 | C |
| ATOM | 200 | C3'  | C A | 7 | -29.241 | 26.073 | 40.647 | 1.00 | 0.00 | C |
| ATOM | 201 | O3'  | C A | 7 | -28.091 | 25.468 | 40.059 | 1.00 | 0.00 | O |
| ATOM | 202 | C4'  | C A | 7 | -29.291 | 27.579 | 40.402 | 1.00 | 0.00 | C |
| ATOM | 203 | O4'  | C A | 7 | -28.452 | 28.146 | 41.458 | 1.00 | 0.00 | O |
| ATOM | 204 | C5'  | C A | 7 | -30.656 | 28.225 | 40.471 | 1.00 | 0.00 | C |
| ATOM | 205 | O5'  | C A | 7 | -31.447 | 27.590 | 41.506 | 1.00 | 0.00 | O |
| ATOM | 206 | O1P  | C A | 7 | -33.300 | 26.472 | 40.221 | 1.00 | 0.00 | O |
| ATOM | 207 | O2P  | C A | 7 | -33.674 | 27.187 | 42.597 | 1.00 | 0.00 | O |
| ATOM | 208 | P    | C A | 7 | -33.021 | 27.450 | 41.292 | 1.00 | 0.00 | P |
| ATOM | 209 | H5   | C A | 7 | -31.341 | 28.644 | 45.659 | 1.00 | 0.00 | H |
| ATOM | 210 | H6   | C A | 7 | -30.740 | 27.558 | 43.520 | 1.00 | 0.00 | H |
| ATOM | 211 | H1'  | C A | 7 | -27.228 | 26.935 | 42.542 | 1.00 | 0.00 | H |
| ATOM | 212 | H3'  | C A | 7 | -30.140 | 25.582 | 40.271 | 1.00 | 0.00 | H |
| ATOM | 213 | H4'  | C A | 7 | -28.893 | 27.750 | 39.402 | 1.00 | 0.00 | H |
| ATOM | 214 | H41  | C A | 7 | -30.453 | 29.785 | 47.611 | 1.00 | 0.00 | H |
| ATOM | 215 | H42  | C A | 7 | -28.707 | 30.055 | 47.857 | 1.00 | 0.00 | H |
| ATOM | 216 | H2'1 | C A | 7 | -30.117 | 26.019 | 42.631 | 1.00 | 0.00 | H |
| ATOM | 217 | H2'2 | C A | 7 | -28.662 | 25.046 | 42.470 | 1.00 | 0.00 | H |
| ATOM | 218 | H5'1 | C A | 7 | -30.539 | 29.286 | 40.695 | 1.00 | 0.00 | H |
| ATOM | 219 | H5'2 | C A | 7 | -31.153 | 28.115 | 39.508 | 1.00 | 0.00 | H |
| ATOM | 220 | C1'  | A A | 8 | -24.282 | 24.823 | 44.182 | 1.00 | 0.00 | C |
| ATOM | 221 | N1   | A A | 8 | -25.617 | 26.945 | 48.661 | 1.00 | 0.00 | N |
| ATOM | 222 | C2   | A A | 8 | -24.444 | 26.789 | 48.055 | 1.00 | 0.00 | C |

|      |     |      |     |   |         |        |        |      |      |   |
|------|-----|------|-----|---|---------|--------|--------|------|------|---|
| ATOM | 223 | N3   | A A | 8 | -24.169 | 26.233 | 46.894 | 1.00 | 0.00 | N |
| ATOM | 224 | C4   | A A | 8 | -25.298 | 25.784 | 46.315 | 1.00 | 0.00 | C |
| ATOM | 225 | C5   | A A | 8 | -26.572 | 25.864 | 46.802 | 1.00 | 0.00 | C |
| ATOM | 226 | C6   | A A | 8 | -26.725 | 26.488 | 48.058 | 1.00 | 0.00 | C |
| ATOM | 227 | N6   | A A | 8 | -27.917 | 26.639 | 48.661 | 1.00 | 0.00 | N |
| ATOM | 228 | N7   | A A | 8 | -27.479 | 25.293 | 45.926 | 1.00 | 0.00 | N |
| ATOM | 229 | C8   | A A | 8 | -26.741 | 24.880 | 44.938 | 1.00 | 0.00 | C |
| ATOM | 230 | N9   | A A | 8 | -25.405 | 25.145 | 45.103 | 1.00 | 0.00 | N |
| ATOM | 231 | C2'  | A A | 8 | -24.430 | 23.480 | 43.479 | 1.00 | 0.00 | C |
| ATOM | 232 | C3'  | A A | 8 | -23.831 | 23.770 | 42.113 | 1.00 | 0.00 | C |
| ATOM | 233 | O3'  | A A | 8 | -22.416 | 23.614 | 42.181 | 1.00 | 0.00 | O |
| ATOM | 234 | C4'  | A A | 8 | -24.240 | 25.221 | 41.862 | 1.00 | 0.00 | C |
| ATOM | 235 | O4'  | A A | 8 | -24.233 | 25.832 | 43.193 | 1.00 | 0.00 | O |
| ATOM | 236 | C5'  | A A | 8 | -25.598 | 25.436 | 41.237 | 1.00 | 0.00 | C |
| ATOM | 237 | O5'  | A A | 8 | -26.534 | 24.453 | 41.748 | 1.00 | 0.00 | O |
| ATOM | 238 | O1P  | A A | 8 | -27.085 | 23.067 | 39.720 | 1.00 | 0.00 | O |
| ATOM | 239 | O2P  | A A | 8 | -28.747 | 23.274 | 41.589 | 1.00 | 0.00 | O |
| ATOM | 240 | P    | A A | 8 | -27.678 | 23.907 | 40.779 | 1.00 | 0.00 | P |
| ATOM | 241 | H2   | A A | 8 | -23.585 | 27.179 | 48.598 | 1.00 | 0.00 | H |
| ATOM | 242 | H8   | A A | 8 | -27.143 | 24.371 | 44.062 | 1.00 | 0.00 | H |
| ATOM | 243 | H1'  | A A | 8 | -23.353 | 24.866 | 44.751 | 1.00 | 0.00 | H |
| ATOM | 244 | H3'  | A A | 8 | -24.230 | 23.111 | 41.343 | 1.00 | 0.00 | H |
| ATOM | 245 | H4'  | A A | 8 | -23.494 | 25.649 | 41.194 | 1.00 | 0.00 | H |
| ATOM | 246 | H61  | A A | 8 | -27.974 | 27.104 | 49.577 | 1.00 | 0.00 | H |
| ATOM | 247 | H62  | A A | 8 | -28.772 | 26.288 | 48.205 | 1.00 | 0.00 | H |
| ATOM | 248 | H2'1 | A A | 8 | -25.471 | 23.169 | 43.398 | 1.00 | 0.00 | H |
| ATOM | 249 | H2'2 | A A | 8 | -23.888 | 22.685 | 43.990 | 1.00 | 0.00 | H |
| ATOM | 250 | H5'1 | A A | 8 | -25.948 | 26.439 | 41.482 | 1.00 | 0.00 | H |
| ATOM | 251 | H5'2 | A A | 8 | -25.515 | 25.338 | 40.156 | 1.00 | 0.00 | H |
| ATOM | 252 | C1'  | C A | 9 | -21.071 | 23.503 | 47.734 | 1.00 | 0.00 | C |
| ATOM | 253 | N1   | C A | 9 | -22.535 | 23.325 | 47.938 | 1.00 | 0.00 | N |
| ATOM | 254 | C2   | C A | 9 | -23.099 | 23.837 | 49.104 | 1.00 | 0.00 | C |
| ATOM | 255 | O2   | C A | 9 | -22.366 | 24.414 | 49.918 | 1.00 | 0.00 | O |
| ATOM | 256 | N3   | C A | 9 | -24.430 | 23.685 | 49.308 | 1.00 | 0.00 | N |
| ATOM | 257 | C4   | C A | 9 | -25.197 | 23.054 | 48.410 | 1.00 | 0.00 | C |
| ATOM | 258 | N4   | C A | 9 | -26.493 | 22.936 | 48.659 | 1.00 | 0.00 | N |
| ATOM | 259 | C5   | C A | 9 | -24.644 | 22.513 | 47.202 | 1.00 | 0.00 | C |
| ATOM | 260 | C6   | C A | 9 | -23.301 | 22.682 | 47.015 | 1.00 | 0.00 | C |
| ATOM | 261 | C2'  | C A | 9 | -20.393 | 22.308 | 47.080 | 1.00 | 0.00 | C |
| ATOM | 262 | C3'  | C A | 9 | -19.338 | 22.978 | 46.211 | 1.00 | 0.00 | C |
| ATOM | 263 | O3'  | C A | 9 | -18.181 | 23.243 | 47.000 | 1.00 | 0.00 | O |
| ATOM | 264 | C4'  | C A | 9 | -20.035 | 24.259 | 45.759 | 1.00 | 0.00 | C |
| ATOM | 265 | O4'  | C A | 9 | -20.888 | 24.626 | 46.890 | 1.00 | 0.00 | O |
| ATOM | 266 | C5'  | C A | 9 | -20.894 | 24.156 | 44.521 | 1.00 | 0.00 | C |
| ATOM | 267 | O5'  | C A | 9 | -21.563 | 22.869 | 44.495 | 1.00 | 0.00 | O |
| ATOM | 268 | O1P  | C A | 9 | -20.544 | 21.723 | 42.499 | 1.00 | 0.00 | O |
| ATOM | 269 | O2P  | C A | 9 | -22.865 | 21.123 | 43.240 | 1.00 | 0.00 | O |
| ATOM | 270 | P    | C A | 9 | -21.823 | 22.168 | 43.086 | 1.00 | 0.00 | P |
| ATOM | 271 | H5   | C A | 9 | -25.264 | 21.993 | 46.471 | 1.00 | 0.00 | H |
| ATOM | 272 | H6   | C A | 9 | -22.836 | 22.296 | 46.109 | 1.00 | 0.00 | H |
| ATOM | 273 | H1'  | C A | 9 | -20.618 | 23.731 | 48.698 | 1.00 | 0.00 | H |
| ATOM | 274 | H3'  | C A | 9 | -19.060 | 22.359 | 45.358 | 1.00 | 0.00 | H |
| ATOM | 275 | H4'  | C A | 9 | -19.253 | 24.992 | 45.561 | 1.00 | 0.00 | H |
| ATOM | 276 | H41  | C A | 9 | -27.106 | 22.457 | 47.983 | 1.00 | 0.00 | H |



|      |     |      |   |   |    |         |        |        |      |      |   |
|------|-----|------|---|---|----|---------|--------|--------|------|------|---|
| ATOM | 277 | H42  | C | A | 9  | -26.888 | 23.323 | 49.529 | 1.00 | 0.00 | H |
| ATOM | 278 | H2'1 | C | A | 9  | -21.082 | 21.717 | 46.480 | 1.00 | 0.00 | H |
| ATOM | 279 | H2'2 | C | A | 9  | -19.938 | 21.639 | 47.812 | 1.00 | 0.00 | H |
| ATOM | 280 | H5'1 | C | A | 9  | -21.635 | 24.956 | 44.530 | 1.00 | 0.00 | H |
| ATOM | 281 | H5'2 | C | A | 9  | -20.263 | 24.261 | 43.639 | 1.00 | 0.00 | H |
| ATOM | 282 | C1'  | C | A | 10 | -19.723 | 22.627 | 52.418 | 1.00 | 0.00 | C |
| ATOM | 283 | N1   | C | A | 10 | -20.950 | 22.000 | 51.855 | 1.00 | 0.00 | N |
| ATOM | 284 | C2   | C | A | 10 | -22.138 | 22.136 | 52.570 | 1.00 | 0.00 | C |
| ATOM | 285 | O2   | C | A | 10 | -22.126 | 22.767 | 53.636 | 1.00 | 0.00 | O |
| ATOM | 286 | N3   | C | A | 10 | -23.267 | 21.573 | 52.075 | 1.00 | 0.00 | N |
| ATOM | 287 | C4   | C | A | 10 | -23.249 | 20.895 | 50.920 | 1.00 | 0.00 | C |
| ATOM | 288 | N4   | C | A | 10 | -24.383 | 20.367 | 50.480 | 1.00 | 0.00 | N |
| ATOM | 289 | C5   | C | A | 10 | -22.041 | 20.736 | 50.165 | 1.00 | 0.00 | C |
| ATOM | 290 | C6   | C | A | 10 | -20.916 | 21.316 | 50.681 | 1.00 | 0.00 | C |
| ATOM | 291 | C2'  | C | A | 10 | -18.462 | 21.800 | 52.212 | 1.00 | 0.00 | C |
| ATOM | 292 | C3'  | C | A | 10 | -17.410 | 22.876 | 51.988 | 1.00 | 0.00 | C |
| ATOM | 293 | O3'  | C | A | 10 | -16.937 | 23.339 | 53.251 | 1.00 | 0.00 | O |
| ATOM | 294 | C4'  | C | A | 10 | -18.182 | 23.953 | 51.230 | 1.00 | 0.00 | C |
| ATOM | 295 | O4'  | C | A | 10 | -19.539 | 23.872 | 51.769 | 1.00 | 0.00 | O |
| ATOM | 296 | C5'  | C | A | 10 | -18.250 | 23.799 | 49.728 | 1.00 | 0.00 | C |
| ATOM | 297 | O5'  | C | A | 10 | -18.354 | 22.394 | 49.383 | 1.00 | 0.00 | O |
| ATOM | 298 | O1P  | C | A | 10 | -16.188 | 21.924 | 48.192 | 1.00 | 0.00 | O |
| ATOM | 299 | O2P  | C | A | 10 | -18.230 | 20.565 | 47.665 | 1.00 | 0.00 | O |
| ATOM | 300 | P    | C | A | 10 | -17.656 | 21.879 | 48.046 | 1.00 | 0.00 | P |
| ATOM | 301 | H5   | C | A | 10 | -22.019 | 20.180 | 49.227 | 1.00 | 0.00 | H |
| ATOM | 302 | H6   | C | A | 10 | -19.975 | 21.229 | 50.139 | 1.00 | 0.00 | H |
| ATOM | 303 | H1'  | C | A | 10 | -19.894 | 22.823 | 53.476 | 1.00 | 0.00 | H |
| ATOM | 304 | H3'  | C | A | 10 | -16.568 | 22.507 | 51.401 | 1.00 | 0.00 | H |
| ATOM | 305 | H4'  | C | A | 10 | -17.693 | 24.903 | 51.444 | 1.00 | 0.00 | H |
| ATOM | 306 | H41  | C | A | 10 | -24.397 | 19.843 | 49.593 | 1.00 | 0.00 | H |
| ATOM | 307 | H42  | C | A | 10 | -25.249 | 20.481 | 51.026 | 1.00 | 0.00 | H |
| ATOM | 308 | H2'1 | C | A | 10 | -18.537 | 21.135 | 51.353 | 1.00 | 0.00 | H |
| ATOM | 309 | H2'2 | C | A | 10 | -18.223 | 21.186 | 53.082 | 1.00 | 0.00 | H |
| ATOM | 310 | H5'1 | C | A | 10 | -19.121 | 24.337 | 49.351 | 1.00 | 0.00 | H |
| ATOM | 311 | H5'2 | C | A | 10 | -17.349 | 24.221 | 49.285 | 1.00 | 0.00 | H |
| ATOM | 312 | C1'  | T | A | 11 | -20.569 | 21.465 | 57.154 | 1.00 | 0.00 | C |
| ATOM | 313 | N1   | T | A | 11 | -21.108 | 20.605 | 56.067 | 1.00 | 0.00 | N |
| ATOM | 314 | C2   | T | A | 11 | -22.452 | 20.297 | 56.115 | 1.00 | 0.00 | C |
| ATOM | 315 | O2   | T | A | 11 | -23.190 | 20.698 | 56.999 | 1.00 | 0.00 | O |
| ATOM | 316 | N3   | T | A | 11 | -22.912 | 19.496 | 55.086 | 1.00 | 0.00 | N |
| ATOM | 317 | C4   | T | A | 11 | -22.162 | 18.988 | 54.044 | 1.00 | 0.00 | C |
| ATOM | 318 | O4   | T | A | 11 | -22.686 | 18.276 | 53.177 | 1.00 | 0.00 | O |
| ATOM | 319 | C5   | T | A | 11 | -20.769 | 19.364 | 54.079 | 1.00 | 0.00 | C |
| ATOM | 320 | C6   | T | A | 11 | -20.288 | 20.144 | 55.066 | 1.00 | 0.00 | C |
| ATOM | 321 | C7   | T | A | 11 | -19.918 | 18.836 | 52.962 | 1.00 | 0.00 | C |
| ATOM | 322 | C2'  | T | A | 11 | -19.168 | 21.077 | 57.608 | 1.00 | 0.00 | C |
| ATOM | 323 | C3'  | T | A | 11 | -18.548 | 22.429 | 57.921 | 1.00 | 0.00 | C |
| ATOM | 324 | O3'  | T | A | 11 | -18.904 | 22.813 | 59.247 | 1.00 | 0.00 | O |
| ATOM | 325 | C4'  | T | A | 11 | -19.174 | 23.341 | 56.868 | 1.00 | 0.00 | C |
| ATOM | 326 | O4'  | T | A | 11 | -20.517 | 22.793 | 56.669 | 1.00 | 0.00 | O |
| ATOM | 327 | C5'  | T | A | 11 | -18.474 | 23.404 | 55.530 | 1.00 | 0.00 | C |
| ATOM | 328 | O5'  | T | A | 11 | -17.943 | 22.098 | 55.195 | 1.00 | 0.00 | O |
| ATOM | 329 | O1P  | T | A | 11 | -15.452 | 22.454 | 55.234 | 1.00 | 0.00 | O |
| ATOM | 330 | O2P  | T | A | 11 | -16.439 | 20.662 | 53.783 | 1.00 | 0.00 | O |

|      |     |      |     |    |         |        |        |      |      |   |
|------|-----|------|-----|----|---------|--------|--------|------|------|---|
| ATOM | 331 | P    | T A | 11 | -16.573 | 22.012 | 54.383 | 1.00 | 0.00 | P |
| ATOM | 332 | H3   | T A | 11 | -23.912 | 19.255 | 55.096 | 1.00 | 0.00 | H |
| ATOM | 333 | H6   | T A | 11 | -19.231 | 20.415 | 55.072 | 1.00 | 0.00 | H |
| ATOM | 334 | H1'  | T A | 11 | -21.270 | 21.441 | 57.989 | 1.00 | 0.00 | H |
| ATOM | 335 | H3'  | T A | 11 | -17.463 | 22.411 | 57.830 | 1.00 | 0.00 | H |
| ATOM | 336 | H4'  | T A | 11 | -19.184 | 24.349 | 57.286 | 1.00 | 0.00 | H |
| ATOM | 337 | H71  | T A | 11 | -19.181 | 18.142 | 53.365 | 1.00 | 0.00 | H |
| ATOM | 338 | H72  | T A | 11 | -20.548 | 18.318 | 52.239 | 1.00 | 0.00 | H |
| ATOM | 339 | H73  | T A | 11 | -19.406 | 19.664 | 52.471 | 1.00 | 0.00 | H |
| ATOM | 340 | H2'1 | T A | 11 | -18.612 | 20.556 | 56.830 | 1.00 | 0.00 | H |
| ATOM | 341 | H2'2 | T A | 11 | -19.182 | 20.432 | 58.488 | 1.00 | 0.00 | H |
| ATOM | 342 | H5'1 | T A | 11 | -19.186 | 23.719 | 54.768 | 1.00 | 0.00 | H |
| ATOM | 343 | H5'2 | T A | 11 | -17.662 | 24.128 | 55.586 | 1.00 | 0.00 | H |
| ATOM | 344 | C1'  | A A | 12 | -23.173 | 19.372 | 60.824 | 1.00 | 0.00 | C |
| ATOM | 345 | N1   | A A | 12 | -24.868 | 16.271 | 57.101 | 1.00 | 0.00 | N |
| ATOM | 346 | C2   | A A | 12 | -25.479 | 16.875 | 58.115 | 1.00 | 0.00 | C |
| ATOM | 347 | N3   | A A | 12 | -24.980 | 17.668 | 59.041 | 1.00 | 0.00 | N |
| ATOM | 348 | C4   | A A | 12 | -23.658 | 17.825 | 58.855 | 1.00 | 0.00 | C |
| ATOM | 349 | C5   | A A | 12 | -22.885 | 17.277 | 57.871 | 1.00 | 0.00 | C |
| ATOM | 350 | C6   | A A | 12 | -23.548 | 16.449 | 56.941 | 1.00 | 0.00 | C |
| ATOM | 351 | N6   | A A | 12 | -22.918 | 15.842 | 55.920 | 1.00 | 0.00 | N |
| ATOM | 352 | N7   | A A | 12 | -21.563 | 17.666 | 57.999 | 1.00 | 0.00 | N |
| ATOM | 353 | C8   | A A | 12 | -21.563 | 18.430 | 59.051 | 1.00 | 0.00 | C |
| ATOM | 354 | N9   | A A | 12 | -22.801 | 18.575 | 59.623 | 1.00 | 0.00 | N |
| ATOM | 355 | C2'  | A A | 12 | -22.124 | 19.343 | 61.927 | 1.00 | 0.00 | C |
| ATOM | 356 | C3'  | A A | 12 | -22.223 | 20.750 | 62.495 | 1.00 | 0.00 | C |
| ATOM | 357 | O3'  | A A | 12 | -23.278 | 20.794 | 63.454 | 1.00 | 0.00 | O |
| ATOM | 358 | C4'  | A A | 12 | -22.532 | 21.595 | 61.259 | 1.00 | 0.00 | C |
| ATOM | 359 | O4'  | A A | 12 | -23.340 | 20.715 | 60.414 | 1.00 | 0.00 | O |
| ATOM | 360 | C5'  | A A | 12 | -21.343 | 22.073 | 60.461 | 1.00 | 0.00 | C |
| ATOM | 361 | O5'  | A A | 12 | -20.313 | 21.052 | 60.453 | 1.00 | 0.00 | O |
| ATOM | 362 | O1P  | A A | 12 | -18.431 | 22.114 | 61.744 | 1.00 | 0.00 | O |
| ATOM | 363 | O2P  | A A | 12 | -17.936 | 20.366 | 60.012 | 1.00 | 0.00 | O |
| ATOM | 364 | P    | A A | 12 | -18.784 | 21.504 | 60.447 | 1.00 | 0.00 | P |
| ATOM | 365 | H2   | A A | 12 | -26.550 | 16.688 | 58.191 | 1.00 | 0.00 | H |
| ATOM | 366 | H8   | A A | 12 | -20.665 | 18.911 | 59.442 | 1.00 | 0.00 | H |
| ATOM | 367 | H1'  | A A | 12 | -24.133 | 19.009 | 61.188 | 1.00 | 0.00 | H |
| ATOM | 368 | H3'  | A A | 12 | -21.294 | 21.068 | 62.966 | 1.00 | 0.00 | H |
| ATOM | 369 | H4'  | A A | 12 | -23.076 | 22.473 | 61.606 | 1.00 | 0.00 | H |
| ATOM | 370 | H61  | A A | 12 | -23.449 | 15.249 | 55.267 | 1.00 | 0.00 | H |
| ATOM | 371 | H62  | A A | 12 | -21.903 | 15.972 | 55.791 | 1.00 | 0.00 | H |
| ATOM | 372 | H2'1 | A A | 12 | -21.125 | 19.140 | 61.544 | 1.00 | 0.00 | H |
| ATOM | 373 | H2'2 | A A | 12 | -22.343 | 18.592 | 62.686 | 1.00 | 0.00 | H |
| ATOM | 374 | H5'1 | A A | 12 | -21.659 | 22.284 | 59.440 | 1.00 | 0.00 | H |
| ATOM | 375 | H5'2 | A A | 12 | -20.953 | 22.985 | 60.910 | 1.00 | 0.00 | H |
| ATOM | 376 | C1'  | G A | 13 | -26.359 | 16.045 | 62.677 | 1.00 | 0.00 | C |
| ATOM | 377 | N1   | G A | 13 | -24.901 | 13.236 | 58.676 | 1.00 | 0.00 | N |
| ATOM | 378 | C2   | G A | 13 | -26.163 | 13.435 | 59.208 | 1.00 | 0.00 | C |
| ATOM | 379 | N2   | G A | 13 | -27.170 | 12.800 | 58.595 | 1.00 | 0.00 | N |
| ATOM | 380 | N3   | G A | 13 | -26.400 | 14.207 | 60.268 | 1.00 | 0.00 | N |
| ATOM | 381 | C4   | G A | 13 | -25.266 | 14.764 | 60.766 | 1.00 | 0.00 | C |
| ATOM | 382 | C5   | G A | 13 | -23.968 | 14.619 | 60.304 | 1.00 | 0.00 | C |
| ATOM | 383 | C6   | G A | 13 | -23.715 | 13.804 | 59.177 | 1.00 | 0.00 | C |
| ATOM | 384 | O6   | G A | 13 | -22.643 | 13.554 | 58.625 | 1.00 | 0.00 | O |

|      |     |      |     |    |         |        |        |      |      |   |
|------|-----|------|-----|----|---------|--------|--------|------|------|---|
| ATOM | 385 | N7   | G A | 13 | -23.088 | 15.359 | 61.097 | 1.00 | 0.00 | N |
| ATOM | 386 | C8   | G A | 13 | -23.862 | 15.918 | 61.991 | 1.00 | 0.00 | C |
| ATOM | 387 | N9   | G A | 13 | -25.198 | 15.604 | 61.856 | 1.00 | 0.00 | N |
| ATOM | 388 | C2'  | G A | 13 | -26.053 | 16.150 | 64.165 | 1.00 | 0.00 | C |
| ATOM | 389 | C3'  | G A | 13 | -26.888 | 17.350 | 64.578 | 1.00 | 0.00 | C |
| ATOM | 390 | O3'  | G A | 13 | -28.221 | 16.922 | 64.850 | 1.00 | 0.00 | O |
| ATOM | 391 | C4'  | G A | 13 | -26.814 | 18.255 | 63.349 | 1.00 | 0.00 | C |
| ATOM | 392 | O4'  | G A | 13 | -26.749 | 17.326 | 62.221 | 1.00 | 0.00 | O |
| ATOM | 393 | C5'  | G A | 13 | -25.628 | 19.189 | 63.275 | 1.00 | 0.00 | C |
| ATOM | 394 | O5'  | G A | 13 | -24.454 | 18.536 | 63.819 | 1.00 | 0.00 | O |
| ATOM | 395 | O1P  | G A | 13 | -23.940 | 19.883 | 65.882 | 1.00 | 0.00 | O |
| ATOM | 396 | O2P  | G A | 13 | -22.099 | 18.670 | 64.685 | 1.00 | 0.00 | O |
| ATOM | 397 | P    | G A | 13 | -23.378 | 19.417 | 64.600 | 1.00 | 0.00 | P |
| ATOM | 398 | H1   | G A | 13 | -24.826 | 12.624 | 57.849 | 1.00 | 0.00 | H |
| ATOM | 399 | H8   | G A | 13 | -23.485 | 16.575 | 62.775 | 1.00 | 0.00 | H |
| ATOM | 400 | H1'  | G A | 13 | -27.186 | 15.358 | 62.496 | 1.00 | 0.00 | H |
| ATOM | 401 | H21  | G A | 13 | -26.978 | 12.208 | 57.773 | 1.00 | 0.00 | H |
| ATOM | 402 | H3'  | G A | 13 | -26.482 | 17.848 | 65.459 | 1.00 | 0.00 | H |
| ATOM | 403 | H22  | G A | 13 | -28.132 | 12.906 | 58.944 | 1.00 | 0.00 | H |
| ATOM | 404 | H4'  | G A | 13 | -27.717 | 18.863 | 63.348 | 1.00 | 0.00 | H |
| ATOM | 405 | H2'1 | G A | 13 | -24.994 | 16.318 | 64.358 | 1.00 | 0.00 | H |
| ATOM | 406 | H2'2 | G A | 13 | -26.347 | 15.253 | 64.712 | 1.00 | 0.00 | H |
| ATOM | 407 | H5'1 | G A | 13 | -25.452 | 19.461 | 62.235 | 1.00 | 0.00 | H |
| ATOM | 408 | H5'2 | G A | 13 | -25.847 | 20.090 | 63.847 | 1.00 | 0.00 | H |
| ATOM | 409 | C1'  | G A | 14 | -28.737 | 11.701 | 62.726 | 1.00 | 0.00 | C |
| ATOM | 410 | N1   | G A | 14 | -24.700 | 10.104 | 60.048 | 1.00 | 0.00 | N |
| ATOM | 411 | C2   | G A | 14 | -26.046 | 9.841  | 59.866 | 1.00 | 0.00 | C |
| ATOM | 412 | N2   | G A | 14 | -26.359 | 9.045  | 58.836 | 1.00 | 0.00 | N |
| ATOM | 413 | N3   | G A | 14 | -27.004 | 10.334 | 60.651 | 1.00 | 0.00 | N |
| ATOM | 414 | C4   | G A | 14 | -26.506 | 11.112 | 61.646 | 1.00 | 0.00 | C |
| ATOM | 415 | C5   | G A | 14 | -25.183 | 11.425 | 61.906 | 1.00 | 0.00 | C |
| ATOM | 416 | C6   | G A | 14 | -24.166 | 10.907 | 61.073 | 1.00 | 0.00 | C |
| ATOM | 417 | O6   | G A | 14 | -22.947 | 11.069 | 61.141 | 1.00 | 0.00 | O |
| ATOM | 418 | N7   | G A | 14 | -25.096 | 12.255 | 63.027 | 1.00 | 0.00 | N |
| ATOM | 419 | C8   | G A | 14 | -26.339 | 12.417 | 63.399 | 1.00 | 0.00 | C |
| ATOM | 420 | N9   | G A | 14 | -27.254 | 11.753 | 62.610 | 1.00 | 0.00 | N |
| ATOM | 421 | C2'  | G A | 14 | -29.239 | 11.656 | 64.163 | 1.00 | 0.00 | C |
| ATOM | 422 | C3'  | G A | 14 | -30.513 | 12.480 | 64.081 | 1.00 | 0.00 | C |
| ATOM | 423 | O3'  | G A | 14 | -31.585 | 11.645 | 63.648 | 1.00 | 0.00 | O |
| ATOM | 424 | C4'  | G A | 14 | -30.160 | 13.549 | 63.048 | 1.00 | 0.00 | C |
| ATOM | 425 | O4'  | G A | 14 | -29.258 | 12.869 | 62.119 | 1.00 | 0.00 | O |
| ATOM | 426 | C5'  | G A | 14 | -29.472 | 14.787 | 63.572 | 1.00 | 0.00 | C |
| ATOM | 427 | O5'  | G A | 14 | -28.564 | 14.427 | 64.643 | 1.00 | 0.00 | O |
| ATOM | 428 | O1P  | G A | 14 | -29.584 | 15.524 | 66.665 | 1.00 | 0.00 | O |
| ATOM | 429 | O2P  | G A | 14 | -27.112 | 15.105 | 66.579 | 1.00 | 0.00 | O |
| ATOM | 430 | P    | G A | 14 | -28.357 | 15.450 | 65.849 | 1.00 | 0.00 | P |
| ATOM | 431 | H1   | G A | 14 | -24.039 | 9.679  | 59.380 | 1.00 | 0.00 | H |
| ATOM | 432 | H8   | G A | 14 | -26.626 | 13.024 | 64.258 | 1.00 | 0.00 | H |
| ATOM | 433 | H1'  | G A | 14 | -29.094 | 10.841 | 62.160 | 1.00 | 0.00 | H |
| ATOM | 434 | H21  | G A | 14 | -25.613 | 8.671  | 58.232 | 1.00 | 0.00 | H |
| ATOM | 435 | H3'  | G A | 14 | -30.771 | 12.930 | 65.040 | 1.00 | 0.00 | H |
| ATOM | 436 | H22  | G A | 14 | -27.343 | 8.809  | 58.649 | 1.00 | 0.00 | H |
| ATOM | 437 | H4'  | G A | 14 | -31.095 | 13.860 | 62.582 | 1.00 | 0.00 | H |
| ATOM | 438 | H2'1 | G A | 14 | -28.528 | 12.093 | 64.863 | 1.00 | 0.00 | H |

|      |     |      |   |   |    |         |        |        |      |      |   |
|------|-----|------|---|---|----|---------|--------|--------|------|------|---|
| ATOM | 439 | H2'2 | G | A | 14 | -29.445 | 10.638 | 64.497 | 1.00 | 0.00 | H |
| ATOM | 440 | H5'1 | G | A | 14 | -28.917 | 15.258 | 62.761 | 1.00 | 0.00 | H |
| ATOM | 441 | H5'2 | G | A | 14 | -30.223 | 15.484 | 63.944 | 1.00 | 0.00 | H |
| ATOM | 442 | C1'  | A | A | 15 | -29.278 | 6.906  | 61.627 | 1.00 | 0.00 | C |
| ATOM | 443 | N1   | A | A | 15 | -24.154 | 6.980  | 61.355 | 1.00 | 0.00 | N |
| ATOM | 444 | C2   | A | A | 15 | -25.087 | 6.416  | 60.592 | 1.00 | 0.00 | C |
| ATOM | 445 | N3   | A | A | 15 | -26.397 | 6.439  | 60.718 | 1.00 | 0.00 | N |
| ATOM | 446 | C4   | A | A | 15 | -26.747 | 7.153  | 61.804 | 1.00 | 0.00 | C |
| ATOM | 447 | C5   | A | A | 15 | -25.919 | 7.789  | 62.685 | 1.00 | 0.00 | C |
| ATOM | 448 | C6   | A | A | 15 | -24.535 | 7.686  | 62.431 | 1.00 | 0.00 | C |
| ATOM | 449 | N6   | A | A | 15 | -23.602 | 8.260  | 63.210 | 1.00 | 0.00 | N |
| ATOM | 450 | N7   | A | A | 15 | -26.641 | 8.425  | 63.679 | 1.00 | 0.00 | N |
| ATOM | 451 | C8   | A | A | 15 | -27.879 | 8.159  | 63.385 | 1.00 | 0.00 | C |
| ATOM | 452 | N9   | A | A | 15 | -28.022 | 7.392  | 62.256 | 1.00 | 0.00 | N |
| ATOM | 453 | C2'  | A | A | 15 | -30.351 | 6.503  | 62.630 | 1.00 | 0.00 | C |
| ATOM | 454 | C3'  | A | A | 15 | -31.627 | 6.933  | 61.921 | 1.00 | 0.00 | C |
| ATOM | 455 | O3'  | A | A | 15 | -32.033 | 5.903  | 61.025 | 1.00 | 0.00 | O |
| ATOM | 456 | C4'  | A | A | 15 | -31.195 | 8.201  | 61.185 | 1.00 | 0.00 | C |
| ATOM | 457 | O4'  | A | A | 15 | -29.796 | 7.954  | 60.830 | 1.00 | 0.00 | O |
| ATOM | 458 | C5'  | A | A | 15 | -31.274 | 9.490  | 61.967 | 1.00 | 0.00 | C |
| ATOM | 459 | O5'  | A | A | 15 | -30.915 | 9.248  | 63.351 | 1.00 | 0.00 | O |
| ATOM | 460 | O1P  | A | A | 15 | -33.058 | 9.691  | 64.595 | 1.00 | 0.00 | O |
| ATOM | 461 | O2P  | A | A | 15 | -30.850 | 10.011 | 65.745 | 1.00 | 0.00 | O |
| ATOM | 462 | P    | A | A | 15 | -31.641 | 10.093 | 64.493 | 1.00 | 0.00 | P |
| ATOM | 463 | H2   | A | A | 15 | -24.710 | 5.853  | 59.738 | 1.00 | 0.00 | H |
| ATOM | 464 | H8   | A | A | 15 | -28.724 | 8.511  | 63.976 | 1.00 | 0.00 | H |
| ATOM | 465 | H1'  | A | A | 15 | -29.029 | 6.075  | 60.967 | 1.00 | 0.00 | H |
| ATOM | 466 | H3'  | A | A | 15 | -32.434 | 7.141  | 62.623 | 1.00 | 0.00 | H |
| ATOM | 467 | H4'  | A | A | 15 | -31.844 | 8.298  | 60.316 | 1.00 | 0.00 | H |
| ATOM | 468 | H61  | A | A | 15 | -22.604 | 8.156  | 62.978 | 1.00 | 0.00 | H |
| ATOM | 469 | H62  | A | A | 15 | -23.886 | 8.802  | 64.039 | 1.00 | 0.00 | H |
| ATOM | 470 | H2'1 | A | A | 15 | -30.236 | 7.015  | 63.585 | 1.00 | 0.00 | H |
| ATOM | 471 | H2'2 | A | A | 15 | -30.351 | 5.431  | 62.829 | 1.00 | 0.00 | H |
| ATOM | 472 | H5'1 | A | A | 15 | -30.588 | 10.216 | 61.531 | 1.00 | 0.00 | H |
| ATOM | 473 | H5'2 | A | A | 15 | -32.289 | 9.880  | 61.914 | 1.00 | 0.00 | H |
| ATOM | 474 | C1'  | C | A | 16 | -27.555 | 2.396  | 60.463 | 1.00 | 0.00 | C |
| ATOM | 475 | N1   | C | A | 16 | -27.018 | 3.126  | 61.644 | 1.00 | 0.00 | N |
| ATOM | 476 | C2   | C | A | 16 | -25.636 | 3.258  | 61.756 | 1.00 | 0.00 | C |
| ATOM | 477 | O2   | C | A | 16 | -24.916 | 2.767  | 60.877 | 1.00 | 0.00 | O |
| ATOM | 478 | N3   | C | A | 16 | -25.126 | 3.919  | 62.824 | 1.00 | 0.00 | N |
| ATOM | 479 | C4   | C | A | 16 | -25.931 | 4.440  | 63.759 | 1.00 | 0.00 | C |
| ATOM | 480 | N4   | C | A | 16 | -25.378 | 5.080  | 64.780 | 1.00 | 0.00 | N |
| ATOM | 481 | C5   | C | A | 16 | -27.356 | 4.316  | 63.673 | 1.00 | 0.00 | C |
| ATOM | 482 | C6   | C | A | 16 | -27.848 | 3.650  | 62.586 | 1.00 | 0.00 | C |
| ATOM | 483 | C2'  | C | A | 16 | -28.769 | 1.533  | 60.776 | 1.00 | 0.00 | C |
| ATOM | 484 | C3'  | C | A | 16 | -29.595 | 1.675  | 59.506 | 1.00 | 0.00 | C |
| ATOM | 485 | O3'  | C | A | 16 | -29.136 | 0.731  | 58.541 | 1.00 | 0.00 | O |
| ATOM | 486 | C4'  | C | A | 16 | -29.320 | 3.116  | 59.082 | 1.00 | 0.00 | C |
| ATOM | 487 | O4'  | C | A | 16 | -27.940 | 3.360  | 59.500 | 1.00 | 0.00 | O |
| ATOM | 488 | C5'  | C | A | 16 | -30.205 | 4.176  | 59.697 | 1.00 | 0.00 | C |
| ATOM | 489 | O5'  | C | A | 16 | -30.509 | 3.826  | 61.071 | 1.00 | 0.00 | O |
| ATOM | 490 | O1P  | C | A | 16 | -32.989 | 3.399  | 61.029 | 1.00 | 0.00 | O |
| ATOM | 491 | O2P  | C | A | 16 | -31.884 | 4.168  | 63.146 | 1.00 | 0.00 | O |
| ATOM | 492 | P    | C | A | 16 | -31.936 | 4.216  | 61.664 | 1.00 | 0.00 | P |

|      |     |      |     |    |         |        |        |      |      |   |
|------|-----|------|-----|----|---------|--------|--------|------|------|---|
| ATOM | 493 | H5   | C A | 16 | -28.015 | 4.732  | 64.436 | 1.00 | 0.00 | H |
| ATOM | 494 | H6   | C A | 16 | -28.927 | 3.536  | 62.472 | 1.00 | 0.00 | H |
| ATOM | 495 | H1'  | C A | 16 | -26.750 | 1.798  | 60.036 | 1.00 | 0.00 | H |
| ATOM | 496 | H3'  | C A | 16 | -30.658 | 1.514  | 59.692 | 1.00 | 0.00 | H |
| ATOM | 497 | H4'  | C A | 16 | -29.454 | 3.158  | 58.002 | 1.00 | 0.00 | H |
| ATOM | 498 | H41  | C A | 16 | -25.975 | 5.491  | 65.513 | 1.00 | 0.00 | H |
| ATOM | 499 | H42  | C A | 16 | -24.354 | 5.165  | 64.842 | 1.00 | 0.00 | H |
| ATOM | 500 | H2'1 | C A | 16 | -29.318 | 1.889  | 61.647 | 1.00 | 0.00 | H |
| ATOM | 501 | H2'2 | C A | 16 | -28.501 | 0.492  | 60.961 | 1.00 | 0.00 | H |
| ATOM | 502 | H5'1 | C A | 16 | -29.688 | 5.135  | 59.666 | 1.00 | 0.00 | H |
| ATOM | 503 | H5'2 | C A | 16 | -31.129 | 4.248  | 59.123 | 1.00 | 0.00 | H |
| ATOM | 504 | C1'  | G A | 17 | -24.130 | -1.178 | 60.384 | 1.00 | 0.00 | C |
| ATOM | 505 | N1   | G A | 17 | -22.367 | 1.199  | 64.539 | 1.00 | 0.00 | N |
| ATOM | 506 | C2   | G A | 17 | -21.680 | 0.668  | 63.461 | 1.00 | 0.00 | C |
| ATOM | 507 | N2   | G A | 17 | -20.347 | 0.785  | 63.496 | 1.00 | 0.00 | N |
| ATOM | 508 | N3   | G A | 17 | -22.276 | 0.070  | 62.431 | 1.00 | 0.00 | N |
| ATOM | 509 | C4   | G A | 17 | -23.628 | 0.035  | 62.566 | 1.00 | 0.00 | C |
| ATOM | 510 | C5   | G A | 17 | -24.397 | 0.533  | 63.605 | 1.00 | 0.00 | C |
| ATOM | 511 | C6   | G A | 17 | -23.766 | 1.172  | 64.697 | 1.00 | 0.00 | C |
| ATOM | 512 | O6   | G A | 17 | -24.271 | 1.672  | 65.702 | 1.00 | 0.00 | O |
| ATOM | 513 | N7   | G A | 17 | -25.751 | 0.292  | 63.362 | 1.00 | 0.00 | N |
| ATOM | 514 | C8   | G A | 17 | -25.760 | -0.326 | 62.209 | 1.00 | 0.00 | C |
| ATOM | 515 | N9   | G A | 17 | -24.508 | -0.520 | 61.663 | 1.00 | 0.00 | N |
| ATOM | 516 | C2'  | G A | 17 | -24.980 | -2.395 | 60.044 | 1.00 | 0.00 | C |
| ATOM | 517 | C3'  | G A | 17 | -25.080 | -2.301 | 58.531 | 1.00 | 0.00 | C |
| ATOM | 518 | O3'  | G A | 17 | -23.927 | -2.906 | 57.947 | 1.00 | 0.00 | O |
| ATOM | 519 | C4'  | G A | 17 | -25.127 | -0.793 | 58.287 | 1.00 | 0.00 | C |
| ATOM | 520 | O4'  | G A | 17 | -24.292 | -0.230 | 59.346 | 1.00 | 0.00 | O |
| ATOM | 521 | C5'  | G A | 17 | -26.491 | -0.147 | 58.349 | 1.00 | 0.00 | C |
| ATOM | 522 | O5'  | G A | 17 | -27.287 | -0.781 | 59.381 | 1.00 | 0.00 | O |
| ATOM | 523 | O1P  | G A | 17 | -29.134 | -1.897 | 58.085 | 1.00 | 0.00 | O |
| ATOM | 524 | O2P  | G A | 17 | -29.520 | -1.184 | 60.460 | 1.00 | 0.00 | O |
| ATOM | 525 | P    | G A | 17 | -28.860 | -0.920 | 59.158 | 1.00 | 0.00 | P |
| ATOM | 526 | H1   | G A | 17 | -21.810 | 1.647  | 65.282 | 1.00 | 0.00 | H |
| ATOM | 527 | H8   | G A | 17 | -26.677 | -0.660 | 61.723 | 1.00 | 0.00 | H |
| ATOM | 528 | H1'  | G A | 17 | -23.073 | -1.443 | 60.435 | 1.00 | 0.00 | H |
| ATOM | 529 | H21  | G A | 17 | -19.893 | 1.252  | 64.294 | 1.00 | 0.00 | H |
| ATOM | 530 | H3'  | G A | 17 | -25.977 | -2.790 | 58.149 | 1.00 | 0.00 | H |
| ATOM | 531 | H22  | G A | 17 | -19.778 | 0.408  | 62.725 | 1.00 | 0.00 | H |
| ATOM | 532 | H4'  | G A | 17 | -24.723 | -0.622 | 57.289 | 1.00 | 0.00 | H |
| ATOM | 533 | H2'1 | G A | 17 | -25.965 | -2.354 | 60.510 | 1.00 | 0.00 | H |
| ATOM | 534 | H2'2 | G A | 17 | -24.509 | -3.329 | 60.354 | 1.00 | 0.00 | H |
| ATOM | 535 | H5'1 | G A | 17 | -26.373 | 0.913  | 58.574 | 1.00 | 0.00 | H |
| ATOM | 536 | H5'2 | G A | 17 | -26.983 | -0.255 | 57.383 | 1.00 | 0.00 | H |
| ATOM | 537 | C1'  | G A | 18 | -20.127 | -3.541 | 62.092 | 1.00 | 0.00 | C |
| ATOM | 538 | N1   | G A | 18 | -21.481 | -1.438 | 66.538 | 1.00 | 0.00 | N |
| ATOM | 539 | C2   | G A | 18 | -20.229 | -1.569 | 65.962 | 1.00 | 0.00 | C |
| ATOM | 540 | N2   | G A | 18 | -19.201 | -1.075 | 66.666 | 1.00 | 0.00 | N |
| ATOM | 541 | N3   | G A | 18 | -20.021 | -2.145 | 64.781 | 1.00 | 0.00 | N |
| ATOM | 542 | C4   | G A | 18 | -21.171 | -2.593 | 64.213 | 1.00 | 0.00 | C |
| ATOM | 543 | C5   | G A | 18 | -22.460 | -2.510 | 64.714 | 1.00 | 0.00 | C |
| ATOM | 544 | C6   | G A | 18 | -22.683 | -1.894 | 65.968 | 1.00 | 0.00 | C |
| ATOM | 545 | O6   | G A | 18 | -23.743 | -1.728 | 66.572 | 1.00 | 0.00 | O |
| ATOM | 546 | N7   | G A | 18 | -23.362 | -3.093 | 63.823 | 1.00 | 0.00 | N |

|      |     |      |     |    |         |        |        |      |      |   |
|------|-----|------|-----|----|---------|--------|--------|------|------|---|
| ATOM | 547 | C8   | G A | 18 | -22.611 | -3.498 | 62.832 | 1.00 | 0.00 | C |
| ATOM | 548 | N9   | G A | 18 | -21.268 | -3.231 | 62.997 | 1.00 | 0.00 | N |
| ATOM | 549 | C2'  | G A | 18 | -20.251 | -4.884 | 61.385 | 1.00 | 0.00 | C |
| ATOM | 550 | C3'  | G A | 18 | -19.635 | -4.586 | 60.028 | 1.00 | 0.00 | C |
| ATOM | 551 | O3'  | G A | 18 | -18.219 | -4.729 | 60.115 | 1.00 | 0.00 | O |
| ATOM | 552 | C4'  | G A | 18 | -20.054 | -3.139 | 59.774 | 1.00 | 0.00 | C |
| ATOM | 553 | O4'  | G A | 18 | -20.072 | -2.531 | 61.104 | 1.00 | 0.00 | O |
| ATOM | 554 | C5'  | G A | 18 | -21.406 | -2.936 | 59.131 | 1.00 | 0.00 | C |
| ATOM | 555 | O5'  | G A | 18 | -22.339 | -3.928 | 59.625 | 1.00 | 0.00 | O |
| ATOM | 556 | O1P  | G A | 18 | -22.848 | -5.316 | 57.587 | 1.00 | 0.00 | O |
| ATOM | 557 | O2P  | G A | 18 | -24.538 | -5.129 | 59.431 | 1.00 | 0.00 | O |
| ATOM | 558 | P    | G A | 18 | -23.463 | -4.484 | 58.638 | 1.00 | 0.00 | P |
| ATOM | 559 | H1   | G A | 18 | -21.535 | -0.969 | 67.455 | 1.00 | 0.00 | H |
| ATOM | 560 | H8   | G A | 18 | -23.010 | -4.004 | 61.952 | 1.00 | 0.00 | H |
| ATOM | 561 | H1'  | G A | 18 | -19.206 | -3.491 | 62.675 | 1.00 | 0.00 | H |
| ATOM | 562 | H21  | G A | 18 | -19.372 | -0.627 | 67.579 | 1.00 | 0.00 | H |
| ATOM | 563 | H3'  | G A | 18 | -20.018 | -5.249 | 59.251 | 1.00 | 0.00 | H |
| ATOM | 564 | H22  | G A | 18 | -18.245 | -1.144 | 66.294 | 1.00 | 0.00 | H |
| ATOM | 565 | H4'  | G A | 18 | -19.303 | -2.703 | 59.116 | 1.00 | 0.00 | H |
| ATOM | 566 | H2'1 | G A | 18 | -21.288 | -5.205 | 61.288 | 1.00 | 0.00 | H |
| ATOM | 567 | H2'2 | G A | 18 | -19.710 | -5.676 | 61.903 | 1.00 | 0.00 | H |
| ATOM | 568 | H5'1 | G A | 18 | -21.769 | -1.937 | 59.370 | 1.00 | 0.00 | H |
| ATOM | 569 | H5'2 | G A | 18 | -21.305 | -3.030 | 58.050 | 1.00 | 0.00 | H |
| ATOM | 570 | C1'  | T A | 19 | -16.904 | -4.880 | 65.603 | 1.00 | 0.00 | C |
| ATOM | 571 | N1   | T A | 19 | -18.364 | -5.049 | 65.827 | 1.00 | 0.00 | N |
| ATOM | 572 | C2   | T A | 19 | -18.887 | -4.531 | 66.995 | 1.00 | 0.00 | C |
| ATOM | 573 | O2   | T A | 19 | -18.204 | -3.956 | 67.825 | 1.00 | 0.00 | O |
| ATOM | 574 | N3   | T A | 19 | -20.248 | -4.710 | 67.162 | 1.00 | 0.00 | N |
| ATOM | 575 | C4   | T A | 19 | -21.106 | -5.345 | 66.291 | 1.00 | 0.00 | C |
| ATOM | 576 | O4   | T A | 19 | -22.311 | -5.447 | 66.551 | 1.00 | 0.00 | O |
| ATOM | 577 | C5   | T A | 19 | -20.470 | -5.854 | 65.099 | 1.00 | 0.00 | C |
| ATOM | 578 | C6   | T A | 19 | -19.145 | -5.697 | 64.902 | 1.00 | 0.00 | C |
| ATOM | 579 | C7   | T A | 19 | -21.367 | -6.551 | 64.120 | 1.00 | 0.00 | C |
| ATOM | 580 | C2'  | T A | 19 | -16.241 | -6.082 | 64.940 | 1.00 | 0.00 | C |
| ATOM | 581 | C3'  | T A | 19 | -15.195 | -5.420 | 64.057 | 1.00 | 0.00 | C |
| ATOM | 582 | O3'  | T A | 19 | -14.025 | -5.162 | 64.829 | 1.00 | 0.00 | O |
| ATOM | 583 | C4'  | T A | 19 | -15.890 | -4.135 | 63.614 | 1.00 | 0.00 | C |
| ATOM | 584 | O4'  | T A | 19 | -16.723 | -3.762 | 64.756 | 1.00 | 0.00 | O |
| ATOM | 585 | C5'  | T A | 19 | -16.766 | -4.233 | 62.387 | 1.00 | 0.00 | C |
| ATOM | 586 | O5'  | T A | 19 | -17.444 | -5.514 | 62.371 | 1.00 | 0.00 | O |
| ATOM | 587 | O1P  | T A | 19 | -16.460 | -6.669 | 60.363 | 1.00 | 0.00 | O |
| ATOM | 588 | O2P  | T A | 19 | -18.774 | -7.252 | 61.137 | 1.00 | 0.00 | O |
| ATOM | 589 | P    | T A | 19 | -17.729 | -6.215 | 60.967 | 1.00 | 0.00 | P |
| ATOM | 590 | H3   | T A | 19 | -20.662 | -4.328 | 68.025 | 1.00 | 0.00 | H |
| ATOM | 591 | H6   | T A | 19 | -18.687 | -6.089 | 63.993 | 1.00 | 0.00 | H |
| ATOM | 592 | H1'  | T A | 19 | -16.435 | -4.656 | 66.561 | 1.00 | 0.00 | H |
| ATOM | 593 | H3'  | T A | 19 | -14.933 | -6.042 | 63.201 | 1.00 | 0.00 | H |
| ATOM | 594 | H4'  | T A | 19 | -15.104 | -3.407 | 63.403 | 1.00 | 0.00 | H |
| ATOM | 595 | H71  | T A | 19 | -21.093 | -7.604 | 64.062 | 1.00 | 0.00 | H |
| ATOM | 596 | H72  | T A | 19 | -22.402 | -6.464 | 64.451 | 1.00 | 0.00 | H |
| ATOM | 597 | H73  | T A | 19 | -21.261 | -6.093 | 63.136 | 1.00 | 0.00 | H |
| ATOM | 598 | H2'1 | T A | 19 | -16.945 | -6.668 | 64.351 | 1.00 | 0.00 | H |
| ATOM | 599 | H2'2 | T A | 19 | -15.782 | -6.754 | 65.666 | 1.00 | 0.00 | H |
| ATOM | 600 | H5'1 | T A | 19 | -17.500 | -3.428 | 62.405 | 1.00 | 0.00 | H |

|      |     |      |     |   |    |         |         |        |      |      |   |
|------|-----|------|-----|---|----|---------|---------|--------|------|------|---|
| ATOM | 601 | H5'2 | T   | A | 19 | -16.147 | -4.133  | 61.496 | 1.00 | 0.00 | H |
| ATOM | 602 | C01  | LNK | A | 20 | -11.188 | -7.386  | 65.757 | 0.00 | 0.00 | C |
| ATOM | 603 | O1   | LNK | A | 20 | -12.455 | -7.158  | 65.137 | 1.00 | 0.00 | O |
| ATOM | 604 | S    | LNK | A | 20 | -8.698  | -10.406 | 66.482 | 0.00 | 0.00 | S |
| ATOM | 605 | C02  | LNK | A | 20 | -10.825 | -8.879  | 65.646 | 0.00 | 0.00 | C |
| ATOM | 606 | C03  | LNK | A | 20 | -10.095 | -9.327  | 66.927 | 0.00 | 0.00 | C |
| ATOM | 607 | O1P  | LNK | A | 20 | -14.776 | -7.350  | 66.094 | 1.00 | 0.00 | O |
| ATOM | 608 | O2P  | LNK | A | 20 | -13.046 | -5.956  | 67.263 | 1.00 | 0.00 | O |
| ATOM | 609 | P    | LNK | A | 20 | -13.609 | -6.452  | 65.983 | 1.00 | 0.00 | P |
| ATOM | 610 | H01  | LNK | A | 20 | -11.240 | -7.103  | 66.809 | 0.00 | 0.00 | H |
| ATOM | 611 | H02  | LNK | A | 20 | -10.425 | -6.789  | 65.258 | 0.00 | 0.00 | H |
| ATOM | 612 | H03  | LNK | A | 20 | -10.787 | -9.875  | 67.566 | 0.00 | 0.00 | H |
| ATOM | 613 | H04  | LNK | A | 20 | -10.174 | -9.031  | 64.784 | 0.00 | 0.00 | H |
| ATOM | 614 | H05  | LNK | A | 20 | -11.735 | -9.465  | 65.522 | 0.00 | 0.00 | H |
| ATOM | 615 | H06  | LNK | A | 20 | -9.723  | -8.452  | 67.459 | 0.00 | 0.00 | H |
| ATOM | 616 | AU   | LNK | A | 20 | -8.435  | -10.686 | 67.050 |      |      |   |
| TER  |     |      |     |   |    |         |         |        |      |      |   |
| ATOM | 618 | C1'  | A   | B | 2  | -22.869 | -1.525  | 74.091 | 1.00 | 0.00 | C |
| ATOM | 619 | N1   | A   | B | 2  | -21.452 | -3.630  | 69.630 | 1.00 | 0.00 | N |
| ATOM | 620 | C2   | A   | B | 2  | -20.774 | -2.985  | 70.573 | 1.00 | 0.00 | C |
| ATOM | 621 | N3   | A   | B | 2  | -21.202 | -2.469  | 71.706 | 1.00 | 0.00 | N |
| ATOM | 622 | C4   | A   | B | 2  | -22.528 | -2.666  | 71.836 | 1.00 | 0.00 | C |
| ATOM | 623 | C5   | A   | B | 2  | -23.363 | -3.303  | 70.962 | 1.00 | 0.00 | C |
| ATOM | 624 | C6   | A   | B | 2  | -22.772 | -3.812  | 69.787 | 1.00 | 0.00 | C |
| ATOM | 625 | N6   | A   | B | 2  | -23.468 | -4.462  | 68.838 | 1.00 | 0.00 | N |
| ATOM | 626 | N7   | A   | B | 2  | -24.664 | -3.314  | 71.433 | 1.00 | 0.00 | N |
| ATOM | 627 | C8   | A   | B | 2  | -24.590 | -2.685  | 72.569 | 1.00 | 0.00 | C |
| ATOM | 628 | N9   | A   | B | 2  | -23.323 | -2.265  | 72.881 | 1.00 | 0.00 | N |
| ATOM | 629 | C2'  | A   | B | 2  | -23.866 | -0.484  | 74.583 | 1.00 | 0.00 | C |
| ATOM | 630 | C3'  | A   | B | 2  | -23.695 | -0.569  | 76.091 | 1.00 | 0.00 | C |
| ATOM | 631 | O3'  | A   | B | 2  | -22.596 | 0.249   | 76.483 | 1.00 | 0.00 | O |
| ATOM | 632 | C4'  | A   | B | 2  | -23.419 | -2.055  | 76.318 | 1.00 | 0.00 | C |
| ATOM | 633 | O4'  | A   | B | 2  | -22.678 | -2.471  | 75.125 | 1.00 | 0.00 | O |
| ATOM | 634 | C5'  | A   | B | 2  | -24.628 | -2.947  | 76.473 | 1.00 | 0.00 | C |
| ATOM | 635 | O5'  | A   | B | 2  | -25.688 | -2.491  | 75.596 | 1.00 | 0.00 | O |
| ATOM | 636 | H2   | A   | B | 2  | -19.709 | -2.867  | 70.384 | 1.00 | 0.00 | H |
| ATOM | 637 | H8   | A   | B | 2  | -25.453 | -2.509  | 73.212 | 1.00 | 0.00 | H |
| ATOM | 638 | H1'  | A   | B | 2  | -21.905 | -1.068  | 73.869 | 1.00 | 0.00 | H |
| ATOM | 639 | H3'  | A   | B | 2  | -24.591 | -0.250  | 76.623 | 1.00 | 0.00 | H |
| ATOM | 640 | H4'  | A   | B | 2  | -22.830 | -2.130  | 77.232 | 1.00 | 0.00 | H |
| ATOM | 641 | H61  | A   | B | 2  | -22.987 | -4.817  | 68.000 | 1.00 | 0.00 | H |
| ATOM | 642 | H62  | A   | B | 2  | -24.482 | -4.605  | 68.951 | 1.00 | 0.00 | H |
| ATOM | 643 | H2'1 | A   | B | 2  | -24.889 | -0.717  | 74.286 | 1.00 | 0.00 | H |
| ATOM | 644 | H2'2 | A   | B | 2  | -23.636 | 0.516   | 74.213 | 1.00 | 0.00 | H |
| ATOM | 645 | H5'1 | A   | B | 2  | -24.352 | -3.969  | 76.217 | 1.00 | 0.00 | H |
| ATOM | 646 | H5'2 | A   | B | 2  | -24.965 | -2.914  | 77.508 | 1.00 | 0.00 | H |
| ATOM | 647 | C1'  | C   | B | 3  | -19.701 | 1.468   | 71.713 | 1.00 | 0.00 | C |
| ATOM | 648 | N1   | C   | B | 3  | -20.909 | 0.943   | 71.019 | 1.00 | 0.00 | N |
| ATOM | 649 | C2   | C   | B | 3  | -20.735 | 0.331   | 69.780 | 1.00 | 0.00 | C |
| ATOM | 650 | O2   | C   | B | 3  | -19.592 | 0.247   | 69.311 | 1.00 | 0.00 | O |
| ATOM | 651 | N3   | C   | B | 3  | -21.821 | -0.154  | 69.132 | 1.00 | 0.00 | N |
| ATOM | 652 | C4   | C   | B | 3  | -23.046 | -0.048  | 69.665 | 1.00 | 0.00 | C |
| ATOM | 653 | N4   | C   | B | 3  | -24.074 | -0.542  | 68.989 | 1.00 | 0.00 | N |
| ATOM | 654 | C5   | C   | B | 3  | -23.257 | 0.582   | 70.936 | 1.00 | 0.00 | C |

|      |     |      |     |   |         |        |        |      |      |   |
|------|-----|------|-----|---|---------|--------|--------|------|------|---|
| ATOM | 655 | C6   | C B | 3 | -22.146 | 1.059  | 71.574 | 1.00 | 0.00 | C |
| ATOM | 656 | C2'  | C B | 3 | -19.937 | 2.780  | 72.449 | 1.00 | 0.00 | C |
| ATOM | 657 | C3'  | C B | 3 | -19.049 | 2.621  | 73.674 | 1.00 | 0.00 | C |
| ATOM | 658 | O3'  | C B | 3 | -17.719 | 3.011  | 73.341 | 1.00 | 0.00 | O |
| ATOM | 659 | C4'  | C B | 3 | -19.154 | 1.128  | 73.977 | 1.00 | 0.00 | C |
| ATOM | 660 | O4'  | C B | 3 | -19.297 | 0.500  | 72.663 | 1.00 | 0.00 | O |
| ATOM | 661 | C5'  | C B | 3 | -20.314 | 0.700  | 74.846 | 1.00 | 0.00 | C |
| ATOM | 662 | O5'  | C B | 3 | -21.481 | 1.503  | 74.536 | 1.00 | 0.00 | O |
| ATOM | 663 | O1P  | C B | 3 | -21.863 | 2.815  | 76.649 | 1.00 | 0.00 | O |
| ATOM | 664 | O2P  | C B | 3 | -23.790 | 2.297  | 75.128 | 1.00 | 0.00 | O |
| ATOM | 665 | P    | C B | 3 | -22.495 | 1.867  | 75.710 | 1.00 | 0.00 | P |
| ATOM | 666 | H5   | C B | 3 | -24.251 | 0.677  | 71.372 | 1.00 | 0.00 | H |
| ATOM | 667 | H6   | C B | 3 | -22.254 | 1.539  | 72.546 | 1.00 | 0.00 | H |
| ATOM | 668 | H1'  | C B | 3 | -18.902 | 1.571  | 70.978 | 1.00 | 0.00 | H |
| ATOM | 669 | H3'  | C B | 3 | -19.402 | 3.219  | 74.514 | 1.00 | 0.00 | H |
| ATOM | 670 | H4'  | C B | 3 | -18.235 | 0.843  | 74.489 | 1.00 | 0.00 | H |
| ATOM | 671 | H41  | C B | 3 | -25.026 | -0.477 | 69.379 | 1.00 | 0.00 | H |
| ATOM | 672 | H42  | C B | 3 | -23.921 | -0.993 | 68.075 | 1.00 | 0.00 | H |
| ATOM | 673 | H2'1 | C B | 3 | -20.980 | 2.915  | 72.731 | 1.00 | 0.00 | H |
| ATOM | 674 | H2'2 | C B | 3 | -19.643 | 3.646  | 71.855 | 1.00 | 0.00 | H |
| ATOM | 675 | H5'1 | C B | 3 | -20.532 | -0.352 | 74.660 | 1.00 | 0.00 | H |
| ATOM | 676 | H5'2 | C B | 3 | -20.045 | 0.830  | 75.892 | 1.00 | 0.00 | H |
| ATOM | 677 | C1'  | C B | 4 | -17.457 | 3.287  | 67.690 | 1.00 | 0.00 | C |
| ATOM | 678 | N1   | C B | 4 | -18.942 | 3.200  | 67.755 | 1.00 | 0.00 | N |
| ATOM | 679 | C2   | C B | 4 | -19.606 | 2.580  | 66.699 | 1.00 | 0.00 | C |
| ATOM | 680 | O2   | C B | 4 | -18.941 | 2.128  | 65.757 | 1.00 | 0.00 | O |
| ATOM | 681 | N3   | C B | 4 | -20.957 | 2.490  | 66.738 | 1.00 | 0.00 | N |
| ATOM | 682 | C4   | C B | 4 | -21.651 | 2.988  | 67.771 | 1.00 | 0.00 | C |
| ATOM | 683 | N4   | C B | 4 | -22.970 | 2.870  | 67.760 | 1.00 | 0.00 | N |
| ATOM | 684 | C5   | C B | 4 | -20.995 | 3.636  | 68.869 | 1.00 | 0.00 | C |
| ATOM | 685 | C6   | C B | 4 | -19.632 | 3.710  | 68.810 | 1.00 | 0.00 | C |
| ATOM | 686 | C2'  | C B | 4 | -16.895 | 4.594  | 68.232 | 1.00 | 0.00 | C |
| ATOM | 687 | C3'  | C B | 4 | -15.601 | 4.134  | 68.886 | 1.00 | 0.00 | C |
| ATOM | 688 | O3'  | C B | 4 | -14.575 | 4.067  | 67.899 | 1.00 | 0.00 | O |
| ATOM | 689 | C4'  | C B | 4 | -15.967 | 2.757  | 69.433 | 1.00 | 0.00 | C |
| ATOM | 690 | O4'  | C B | 4 | -16.930 | 2.228  | 68.466 | 1.00 | 0.00 | O |
| ATOM | 691 | C5'  | C B | 4 | -16.596 | 2.724  | 70.808 | 1.00 | 0.00 | C |
| ATOM | 692 | O5'  | C B | 4 | -17.466 | 3.873  | 70.975 | 1.00 | 0.00 | O |
| ATOM | 693 | O1P  | C B | 4 | -16.324 | 5.210  | 72.776 | 1.00 | 0.00 | O |
| ATOM | 694 | O2P  | C B | 4 | -18.809 | 5.378  | 72.472 | 1.00 | 0.00 | O |
| ATOM | 695 | P    | C B | 4 | -17.588 | 4.537  | 72.419 | 1.00 | 0.00 | P |
| ATOM | 696 | H5   | C B | 4 | -21.555 | 4.049  | 69.708 | 1.00 | 0.00 | H |
| ATOM | 697 | H6   | C B | 4 | -19.088 | 4.187  | 69.625 | 1.00 | 0.00 | H |
| ATOM | 698 | H1'  | C B | 4 | -17.151 | 3.129  | 66.656 | 1.00 | 0.00 | H |
| ATOM | 699 | H3'  | C B | 4 | -15.288 | 4.805  | 69.687 | 1.00 | 0.00 | H |
| ATOM | 700 | H4'  | C B | 4 | -15.045 | 2.177  | 69.476 | 1.00 | 0.00 | H |
| ATOM | 701 | H41  | C B | 4 | -23.528 | 3.242  | 68.543 | 1.00 | 0.00 | H |
| ATOM | 702 | H42  | C B | 4 | -23.441 | 2.406  | 66.968 | 1.00 | 0.00 | H |
| ATOM | 703 | H2'1 | C B | 4 | -17.561 | 5.062  | 68.956 | 1.00 | 0.00 | H |
| ATOM | 704 | H2'2 | C B | 4 | -16.704 | 5.321  | 67.442 | 1.00 | 0.00 | H |
| ATOM | 705 | H5'1 | C B | 4 | -17.172 | 1.806  | 70.916 | 1.00 | 0.00 | H |
| ATOM | 706 | H5'2 | C B | 4 | -15.808 | 2.746  | 71.560 | 1.00 | 0.00 | H |
| ATOM | 707 | C1'  | G B | 5 | -17.142 | 4.311  | 62.855 | 1.00 | 0.00 | C |
| ATOM | 708 | N1   | G B | 5 | -22.238 | 4.203  | 63.079 | 1.00 | 0.00 | N |



|      |     |      |     |   |         |       |        |      |      |   |
|------|-----|------|-----|---|---------|-------|--------|------|------|---|
| ATOM | 709 | C2   | G B | 5 | -21.379 | 3.683 | 62.126 | 1.00 | 0.00 | C |
| ATOM | 710 | N2   | G B | 5 | -21.955 | 3.051 | 61.096 | 1.00 | 0.00 | N |
| ATOM | 711 | N3   | G B | 5 | -20.053 | 3.784 | 62.198 | 1.00 | 0.00 | N |
| ATOM | 712 | C4   | G B | 5 | -19.645 | 4.460 | 63.304 | 1.00 | 0.00 | C |
| ATOM | 713 | C5   | G B | 5 | -20.428 | 5.016 | 64.302 | 1.00 | 0.00 | C |
| ATOM | 714 | C6   | G B | 5 | -21.835 | 4.906 | 64.230 | 1.00 | 0.00 | C |
| ATOM | 715 | O6   | G B | 5 | -22.687 | 5.330 | 65.010 | 1.00 | 0.00 | O |
| ATOM | 716 | N7   | G B | 5 | -19.619 | 5.627 | 65.263 | 1.00 | 0.00 | N |
| ATOM | 717 | C8   | G B | 5 | -18.401 | 5.425 | 64.829 | 1.00 | 0.00 | C |
| ATOM | 718 | N9   | G B | 5 | -18.336 | 4.723 | 63.643 | 1.00 | 0.00 | N |
| ATOM | 719 | C2'  | G B | 5 | -16.026 | 5.347 | 62.847 | 1.00 | 0.00 | C |
| ATOM | 720 | C3'  | G B | 5 | -14.782 | 4.473 | 62.855 | 1.00 | 0.00 | C |
| ATOM | 721 | O3'  | G B | 5 | -14.473 | 4.085 | 61.519 | 1.00 | 0.00 | O |
| ATOM | 722 | C4'  | G B | 5 | -15.206 | 3.287 | 63.719 | 1.00 | 0.00 | C |
| ATOM | 723 | O4'  | G B | 5 | -16.632 | 3.125 | 63.433 | 1.00 | 0.00 | O |
| ATOM | 724 | C5'  | G B | 5 | -15.026 | 3.443 | 65.210 | 1.00 | 0.00 | C |
| ATOM | 725 | O5'  | G B | 5 | -15.307 | 4.811 | 65.597 | 1.00 | 0.00 | O |
| ATOM | 726 | O1P  | G B | 5 | -13.075 | 5.664 | 66.388 | 1.00 | 0.00 | O |
| ATOM | 727 | O2P  | G B | 5 | -15.191 | 6.653 | 67.302 | 1.00 | 0.00 | O |
| ATOM | 728 | P    | G B | 5 | -14.478 | 5.456 | 66.798 | 1.00 | 0.00 | P |
| ATOM | 729 | H1   | G B | 5 | -23.250 | 4.064 | 62.934 | 1.00 | 0.00 | H |
| ATOM | 730 | H8   | G B | 5 | -17.516 | 5.779 | 65.356 | 1.00 | 0.00 | H |
| ATOM | 731 | H1'  | G B | 5 | -17.466 | 4.078 | 61.841 | 1.00 | 0.00 | H |
| ATOM | 732 | H21  | G B | 5 | -22.981 | 2.974 | 61.049 | 1.00 | 0.00 | H |
| ATOM | 733 | H3'  | G B | 5 | -13.924 | 4.988 | 63.289 | 1.00 | 0.00 | H |
| ATOM | 734 | H22  | G B | 5 | -21.372 | 2.644 | 60.351 | 1.00 | 0.00 | H |
| ATOM | 735 | H4'  | G B | 5 | -14.609 | 2.433 | 63.399 | 1.00 | 0.00 | H |
| ATOM | 736 | H2'1 | G B | 5 | -16.060 | 5.999 | 63.720 | 1.00 | 0.00 | H |
| ATOM | 737 | H2'2 | G B | 5 | -16.059 | 5.983 | 61.962 | 1.00 | 0.00 | H |
| ATOM | 738 | H5'1 | G B | 5 | -15.708 | 2.767 | 65.725 | 1.00 | 0.00 | H |
| ATOM | 739 | H5'2 | G B | 5 | -14.000 | 3.189 | 65.475 | 1.00 | 0.00 | H |
| ATOM | 740 | C1'  | T B | 6 | -19.010 | 5.230 | 58.364 | 1.00 | 0.00 | C |
| ATOM | 741 | N1   | T B | 6 | -19.489 | 5.998 | 59.545 | 1.00 | 0.00 | N |
| ATOM | 742 | C2   | T B | 6 | -20.853 | 6.064 | 59.742 | 1.00 | 0.00 | C |
| ATOM | 743 | O2   | T B | 6 | -21.655 | 5.528 | 58.997 | 1.00 | 0.00 | O |
| ATOM | 744 | N3   | T B | 6 | -21.253 | 6.786 | 60.853 | 1.00 | 0.00 | N |
| ATOM | 745 | C4   | T B | 6 | -20.433 | 7.431 | 61.754 | 1.00 | 0.00 | C |
| ATOM | 746 | O4   | T B | 6 | -20.908 | 8.052 | 62.711 | 1.00 | 0.00 | O |
| ATOM | 747 | C5   | T B | 6 | -19.024 | 7.304 | 61.464 | 1.00 | 0.00 | C |
| ATOM | 748 | C6   | T B | 6 | -18.597 | 6.608 | 60.393 | 1.00 | 0.00 | C |
| ATOM | 749 | C7   | T B | 6 | -18.094 | 7.989 | 62.421 | 1.00 | 0.00 | C |
| ATOM | 750 | C2'  | T B | 6 | -17.802 | 5.854 | 57.676 | 1.00 | 0.00 | C |
| ATOM | 751 | C3'  | T B | 6 | -17.021 | 4.626 | 57.234 | 1.00 | 0.00 | C |
| ATOM | 752 | O3'  | T B | 6 | -17.535 | 4.169 | 55.984 | 1.00 | 0.00 | O |
| ATOM | 753 | C4'  | T B | 6 | -17.280 | 3.632 | 58.364 | 1.00 | 0.00 | C |
| ATOM | 754 | O4'  | T B | 6 | -18.640 | 3.940 | 58.809 | 1.00 | 0.00 | O |
| ATOM | 755 | C5'  | T B | 6 | -16.353 | 3.711 | 59.555 | 1.00 | 0.00 | C |
| ATOM | 756 | O5'  | T B | 6 | -16.007 | 5.095 | 59.815 | 1.00 | 0.00 | O |
| ATOM | 757 | O1P  | T B | 6 | -13.540 | 5.180 | 59.326 | 1.00 | 0.00 | O |
| ATOM | 758 | O2P  | T B | 6 | -14.552 | 6.790 | 60.964 | 1.00 | 0.00 | O |
| ATOM | 759 | P    | T B | 6 | -14.551 | 5.430 | 60.372 | 1.00 | 0.00 | P |
| ATOM | 760 | H3   | T B | 6 | -22.268 | 6.848 | 61.024 | 1.00 | 0.00 | H |
| ATOM | 761 | H6   | T B | 6 | -17.528 | 6.527 | 60.196 | 1.00 | 0.00 | H |
| ATOM | 762 | H1'  | T B | 6 | -19.841 | 5.120 | 57.668 | 1.00 | 0.00 | H |

|      |     |      |     |   |         |        |        |      |      |   |
|------|-----|------|-----|---|---------|--------|--------|------|------|---|
| ATOM | 763 | H3'  | T B | 6 | -15.957 | 4.835  | 57.130 | 1.00 | 0.00 | H |
| ATOM | 764 | H4'  | T B | 6 | -17.187 | 2.634  | 57.935 | 1.00 | 0.00 | H |
| ATOM | 765 | H71  | T B | 6 | -17.572 | 8.796  | 61.907 | 1.00 | 0.00 | H |
| ATOM | 766 | H72  | T B | 6 | -18.665 | 8.398  | 63.255 | 1.00 | 0.00 | H |
| ATOM | 767 | H73  | T B | 6 | -17.365 | 7.270  | 62.799 | 1.00 | 0.00 | H |
| ATOM | 768 | H2'1 | T B | 6 | -17.216 | 6.474  | 58.352 | 1.00 | 0.00 | H |
| ATOM | 769 | H2'2 | T B | 6 | -18.084 | 6.472  | 56.824 | 1.00 | 0.00 | H |
| ATOM | 770 | H5'1 | T B | 6 | -16.851 | 3.286  | 60.426 | 1.00 | 0.00 | H |
| ATOM | 771 | H5'2 | T B | 6 | -15.450 | 3.140  | 59.342 | 1.00 | 0.00 | H |
| ATOM | 772 | C1'  | C B | 7 | -22.567 | 6.786  | 55.268 | 1.00 | 0.00 | C |
| ATOM | 773 | N1   | C B | 7 | -22.112 | 7.652  | 56.393 | 1.00 | 0.00 | N |
| ATOM | 774 | C2   | C B | 7 | -23.081 | 8.185  | 57.238 | 1.00 | 0.00 | C |
| ATOM | 775 | O2   | C B | 7 | -24.273 | 7.921  | 57.025 | 1.00 | 0.00 | O |
| ATOM | 776 | N3   | C B | 7 | -22.688 | 8.975  | 58.268 | 1.00 | 0.00 | N |
| ATOM | 777 | C4   | C B | 7 | -21.393 | 9.243  | 58.473 | 1.00 | 0.00 | C |
| ATOM | 778 | N4   | C B | 7 | -21.065 | 10.018 | 59.496 | 1.00 | 0.00 | N |
| ATOM | 779 | C5   | C B | 7 | -20.373 | 8.712  | 57.616 | 1.00 | 0.00 | C |
| ATOM | 780 | C6   | C B | 7 | -20.793 | 7.914  | 56.589 | 1.00 | 0.00 | C |
| ATOM | 781 | C2'  | C B | 7 | -21.770 | 6.977  | 53.986 | 1.00 | 0.00 | C |
| ATOM | 782 | C3'  | C B | 7 | -21.736 | 5.566  | 53.422 | 1.00 | 0.00 | C |
| ATOM | 783 | O3'  | C B | 7 | -22.930 | 5.329  | 52.681 | 1.00 | 0.00 | O |
| ATOM | 784 | C4'  | C B | 7 | -21.654 | 4.700  | 54.677 | 1.00 | 0.00 | C |
| ATOM | 785 | O4'  | C B | 7 | -22.423 | 5.439  | 55.677 | 1.00 | 0.00 | O |
| ATOM | 786 | C5'  | C B | 7 | -20.268 | 4.442  | 55.226 | 1.00 | 0.00 | C |
| ATOM | 787 | O5'  | C B | 7 | -19.447 | 5.624  | 55.054 | 1.00 | 0.00 | O |
| ATOM | 788 | O1P  | C B | 7 | -17.693 | 4.880  | 53.410 | 1.00 | 0.00 | O |
| ATOM | 789 | O2P  | C B | 7 | -17.181 | 6.710  | 55.047 | 1.00 | 0.00 | O |
| ATOM | 790 | P    | C B | 7 | -17.890 | 5.440  | 54.761 | 1.00 | 0.00 | P |
| ATOM | 791 | H5   | C B | 7 | -19.318 | 8.933  | 57.776 | 1.00 | 0.00 | H |
| ATOM | 792 | H6   | C B | 7 | -20.054 | 7.481  | 55.915 | 1.00 | 0.00 | H |
| ATOM | 793 | H1'  | C B | 7 | -23.628 | 6.975  | 55.102 | 1.00 | 0.00 | H |
| ATOM | 794 | H3'  | C B | 7 | -20.871 | 5.405  | 52.775 | 1.00 | 0.00 | H |
| ATOM | 795 | H4'  | C B | 7 | -22.095 | 3.735  | 54.426 | 1.00 | 0.00 | H |
| ATOM | 796 | H41  | C B | 7 | -20.074 | 10.238 | 59.679 | 1.00 | 0.00 | H |
| ATOM | 797 | H42  | C B | 7 | -21.799 | 10.401 | 60.110 | 1.00 | 0.00 | H |
| ATOM | 798 | H2'1 | C B | 7 | -20.765 | 7.353  | 54.175 | 1.00 | 0.00 | H |
| ATOM | 799 | H2'2 | C B | 7 | -22.255 | 7.669  | 53.297 | 1.00 | 0.00 | H |
| ATOM | 800 | H5'1 | C B | 7 | -20.344 | 4.196  | 56.286 | 1.00 | 0.00 | H |
| ATOM | 801 | H5'2 | C B | 7 | -19.823 | 3.604  | 54.694 | 1.00 | 0.00 | H |
| ATOM | 802 | C1'  | C B | 8 | -26.554 | 9.460  | 54.050 | 1.00 | 0.00 | C |
| ATOM | 803 | N1   | C B | 8 | -25.365 | 10.111 | 54.664 | 1.00 | 0.00 | N |
| ATOM | 804 | C2   | C B | 8 | -25.568 | 10.926 | 55.776 | 1.00 | 0.00 | C |
| ATOM | 805 | O2   | C B | 8 | -26.720 | 11.073 | 56.206 | 1.00 | 0.00 | O |
| ATOM | 806 | N3   | C B | 8 | -24.499 | 11.527 | 56.350 | 1.00 | 0.00 | N |
| ATOM | 807 | C4   | C B | 8 | -23.264 | 11.349 | 55.862 | 1.00 | 0.00 | C |
| ATOM | 808 | N4   | C B | 8 | -22.254 | 11.960 | 56.465 | 1.00 | 0.00 | N |
| ATOM | 809 | C5   | C B | 8 | -23.024 | 10.521 | 54.716 | 1.00 | 0.00 | C |
| ATOM | 810 | C6   | C B | 8 | -24.117 | 9.921  | 54.157 | 1.00 | 0.00 | C |
| ATOM | 811 | C2'  | C B | 8 | -26.500 | 9.393  | 52.529 | 1.00 | 0.00 | C |
| ATOM | 812 | C3'  | C B | 8 | -27.169 | 8.056  | 52.248 | 1.00 | 0.00 | C |
| ATOM | 813 | O3'  | C B | 8 | -28.583 | 8.237  | 52.221 | 1.00 | 0.00 | O |
| ATOM | 814 | C4'  | C B | 8 | -26.719 | 7.196  | 53.427 | 1.00 | 0.00 | C |
| ATOM | 815 | O4'  | C B | 8 | -26.622 | 8.136  | 54.544 | 1.00 | 0.00 | O |
| ATOM | 816 | C5'  | C B | 8 | -25.393 | 6.488  | 53.275 | 1.00 | 0.00 | C |

|      |     |      |     |    |         |        |        |      |      |   |
|------|-----|------|-----|----|---------|--------|--------|------|------|---|
| ATOM | 817 | O5'  | C B | 8  | -24.467 | 7.334  | 52.546 | 1.00 | 0.00 | O |
| ATOM | 818 | O1P  | C B | 8  | -24.093 | 6.072  | 50.400 | 1.00 | 0.00 | O |
| ATOM | 819 | O2P  | C B | 8  | -22.315 | 7.609  | 51.279 | 1.00 | 0.00 | O |
| ATOM | 820 | P    | C B | 8  | -23.407 | 6.649  | 51.574 | 1.00 | 0.00 | P |
| ATOM | 821 | H5   | C B | 8  | -22.022 | 10.379 | 54.311 | 1.00 | 0.00 | H |
| ATOM | 822 | H6   | C B | 8  | -23.984 | 9.276  | 53.288 | 1.00 | 0.00 | H |
| ATOM | 823 | H1'  | C B | 8  | -27.445 | 9.991  | 54.386 | 1.00 | 0.00 | H |
| ATOM | 824 | H3'  | C B | 8  | -26.841 | 7.627  | 51.301 | 1.00 | 0.00 | H |
| ATOM | 825 | H4'  | C B | 8  | -27.485 | 6.435  | 53.574 | 1.00 | 0.00 | H |
| ATOM | 826 | H41  | C B | 8  | -21.293 | 11.837 | 56.112 | 1.00 | 0.00 | H |
| ATOM | 827 | H42  | C B | 8  | -22.428 | 12.556 | 57.288 | 1.00 | 0.00 | H |
| ATOM | 828 | H2'1 | C B | 8  | -25.479 | 9.413  | 52.150 | 1.00 | 0.00 | H |
| ATOM | 829 | H2'2 | C B | 8  | -27.041 | 10.215 | 52.060 | 1.00 | 0.00 | H |
| ATOM | 830 | H5'1 | C B | 8  | -24.989 | 6.268  | 54.263 | 1.00 | 0.00 | H |
| ATOM | 831 | H5'2 | C B | 8  | -25.545 | 5.556  | 52.733 | 1.00 | 0.00 | H |
| ATOM | 832 | C1'  | T B | 9  | -29.641 | 13.304 | 54.481 | 1.00 | 0.00 | C |
| ATOM | 833 | N1   | T B | 9  | -28.177 | 13.532 | 54.355 | 1.00 | 0.00 | N |
| ATOM | 834 | C2   | T B | 9  | -27.583 | 14.352 | 55.293 | 1.00 | 0.00 | C |
| ATOM | 835 | O2   | T B | 9  | -28.208 | 14.880 | 56.195 | 1.00 | 0.00 | O |
| ATOM | 836 | N3   | T B | 9  | -26.222 | 14.535 | 55.138 | 1.00 | 0.00 | N |
| ATOM | 837 | C4   | T B | 9  | -25.426 | 13.988 | 54.154 | 1.00 | 0.00 | C |
| ATOM | 838 | O4   | T B | 9  | -24.213 | 14.228 | 54.116 | 1.00 | 0.00 | O |
| ATOM | 839 | C5   | T B | 9  | -26.135 | 13.144 | 53.221 | 1.00 | 0.00 | C |
| ATOM | 840 | C6   | T B | 9  | -27.462 | 12.943 | 53.342 | 1.00 | 0.00 | C |
| ATOM | 841 | C7   | T B | 9  | -25.306 | 12.526 | 52.135 | 1.00 | 0.00 | C |
| ATOM | 842 | C2'  | T B | 9  | -30.371 | 13.235 | 53.144 | 1.00 | 0.00 | C |
| ATOM | 843 | C3'  | T B | 9  | -31.440 | 12.188 | 53.420 | 1.00 | 0.00 | C |
| ATOM | 844 | O3'  | T B | 9  | -32.563 | 12.817 | 54.033 | 1.00 | 0.00 | O |
| ATOM | 845 | C4'  | T B | 9  | -30.731 | 11.219 | 54.364 | 1.00 | 0.00 | C |
| ATOM | 846 | O4'  | T B | 9  | -29.832 | 12.070 | 55.145 | 1.00 | 0.00 | O |
| ATOM | 847 | C5'  | T B | 9  | -29.919 | 10.122 | 53.716 | 1.00 | 0.00 | C |
| ATOM | 848 | O5'  | T B | 9  | -29.280 | 10.630 | 52.517 | 1.00 | 0.00 | O |
| ATOM | 849 | O1P  | T B | 9  | -30.394 | 9.334  | 50.670 | 1.00 | 0.00 | O |
| ATOM | 850 | O2P  | T B | 9  | -28.061 | 10.207 | 50.361 | 1.00 | 0.00 | O |
| ATOM | 851 | P    | T B | 9  | -29.084 | 9.647  | 51.277 | 1.00 | 0.00 | P |
| ATOM | 852 | H3   | T B | 9  | -25.755 | 15.140 | 55.828 | 1.00 | 0.00 | H |
| ATOM | 853 | H6   | T B | 9  | -27.975 | 12.303 | 52.624 | 1.00 | 0.00 | H |
| ATOM | 854 | H1'  | T B | 9  | -30.057 | 14.091 | 55.111 | 1.00 | 0.00 | H |
| ATOM | 855 | H3'  | T B | 9  | -31.760 | 11.686 | 52.508 | 1.00 | 0.00 | H |
| ATOM | 856 | H4'  | T B | 9  | -31.505 | 10.747 | 54.971 | 1.00 | 0.00 | H |
| ATOM | 857 | H71  | T B | 9  | -25.614 | 12.928 | 51.169 | 1.00 | 0.00 | H |
| ATOM | 858 | H72  | T B | 9  | -24.254 | 12.754 | 52.305 | 1.00 | 0.00 | H |
| ATOM | 859 | H73  | T B | 9  | -25.449 | 11.445 | 52.140 | 1.00 | 0.00 | H |
| ATOM | 860 | H2'1 | T B | 9  | -29.714 | 12.927 | 52.332 | 1.00 | 0.00 | H |
| ATOM | 861 | H2'2 | T B | 9  | -30.813 | 14.191 | 52.865 | 1.00 | 0.00 | H |
| ATOM | 862 | H5'1 | T B | 9  | -29.162 | 9.774  | 54.418 | 1.00 | 0.00 | H |
| ATOM | 863 | H5'2 | T B | 9  | -30.577 | 9.295  | 53.459 | 1.00 | 0.00 | H |
| ATOM | 864 | C1'  | A B | 10 | -30.798 | 17.961 | 55.750 | 1.00 | 0.00 | C |
| ATOM | 865 | N1   | A B | 10 | -25.775 | 18.789 | 55.104 | 1.00 | 0.00 | N |
| ATOM | 866 | C2   | A B | 10 | -26.641 | 19.195 | 56.028 | 1.00 | 0.00 | C |
| ATOM | 867 | N3   | A B | 10 | -27.927 | 18.941 | 56.137 | 1.00 | 0.00 | N |
| ATOM | 868 | C4   | A B | 10 | -28.335 | 18.157 | 55.123 | 1.00 | 0.00 | C |
| ATOM | 869 | C5   | A B | 10 | -27.577 | 17.658 | 54.099 | 1.00 | 0.00 | C |
| ATOM | 870 | C6   | A B | 10 | -26.211 | 18.007 | 54.104 | 1.00 | 0.00 | C |

|      |     |      |     |    |         |        |        |      |      |   |
|------|-----|------|-----|----|---------|--------|--------|------|------|---|
| ATOM | 871 | N6   | A B | 10 | -25.345 | 17.591 | 53.164 | 1.00 | 0.00 | N |
| ATOM | 872 | N7   | A B | 10 | -28.342 | 16.887 | 53.241 | 1.00 | 0.00 | N |
| ATOM | 873 | C8   | A B | 10 | -29.535 | 16.939 | 53.755 | 1.00 | 0.00 | C |
| ATOM | 874 | N9   | A B | 10 | -29.607 | 17.689 | 54.901 | 1.00 | 0.00 | N |
| ATOM | 875 | C2'  | A B | 10 | -32.085 | 18.150 | 54.959 | 1.00 | 0.00 | C |
| ATOM | 876 | C3'  | A B | 10 | -33.119 | 17.517 | 55.877 | 1.00 | 0.00 | C |
| ATOM | 877 | O3'  | A B | 10 | -33.534 | 18.477 | 56.846 | 1.00 | 0.00 | O |
| ATOM | 878 | C4'  | A B | 10 | -32.348 | 16.358 | 56.508 | 1.00 | 0.00 | C |
| ATOM | 879 | O4'  | A B | 10 | -30.974 | 16.852 | 56.612 | 1.00 | 0.00 | O |
| ATOM | 880 | C5'  | A B | 10 | -32.338 | 15.060 | 55.736 | 1.00 | 0.00 | C |
| ATOM | 881 | O5'  | A B | 10 | -32.278 | 15.336 | 54.313 | 1.00 | 0.00 | O |
| ATOM | 882 | O1P  | A B | 10 | -34.496 | 14.502 | 53.464 | 1.00 | 0.00 | O |
| ATOM | 883 | O2P  | A B | 10 | -32.506 | 14.553 | 51.936 | 1.00 | 0.00 | O |
| ATOM | 884 | P    | A B | 10 | -33.036 | 14.357 | 53.308 | 1.00 | 0.00 | P |
| ATOM | 885 | H2   | A B | 10 | -26.224 | 19.830 | 56.809 | 1.00 | 0.00 | H |
| ATOM | 886 | H8   | A B | 10 | -30.396 | 16.434 | 53.317 | 1.00 | 0.00 | H |
| ATOM | 887 | H1'  | A B | 10 | -30.586 | 18.835 | 56.365 | 1.00 | 0.00 | H |
| ATOM | 888 | H3'  | A B | 10 | -33.988 | 17.158 | 55.327 | 1.00 | 0.00 | H |
| ATOM | 889 | H4'  | A B | 10 | -32.805 | 16.165 | 57.478 | 1.00 | 0.00 | H |
| ATOM | 890 | H61  | A B | 10 | -24.356 | 17.872 | 53.216 | 1.00 | 0.00 | H |
| ATOM | 891 | H62  | A B | 10 | -25.672 | 16.991 | 52.392 | 1.00 | 0.00 | H |
| ATOM | 892 | H2'1 | A B | 10 | -32.055 | 17.649 | 53.992 | 1.00 | 0.00 | H |
| ATOM | 893 | H2'2 | A B | 10 | -32.308 | 19.202 | 54.777 | 1.00 | 0.00 | H |
| ATOM | 894 | H5'1 | A B | 10 | -31.469 | 14.473 | 56.033 | 1.00 | 0.00 | H |
| ATOM | 895 | H5'2 | A B | 10 | -33.243 | 14.501 | 55.963 | 1.00 | 0.00 | H |
| ATOM | 896 | C1'  | G B | 11 | -29.715 | 22.720 | 56.658 | 1.00 | 0.00 | C |
| ATOM | 897 | N1   | G B | 11 | -25.762 | 21.840 | 53.556 | 1.00 | 0.00 | N |
| ATOM | 898 | C2   | G B | 11 | -25.817 | 22.539 | 54.749 | 1.00 | 0.00 | C |
| ATOM | 899 | N2   | G B | 11 | -24.665 | 23.076 | 55.170 | 1.00 | 0.00 | N |
| ATOM | 900 | N3   | G B | 11 | -26.930 | 22.688 | 55.464 | 1.00 | 0.00 | N |
| ATOM | 901 | C4   | G B | 11 | -28.001 | 22.085 | 54.884 | 1.00 | 0.00 | C |
| ATOM | 902 | C5   | G B | 11 | -28.042 | 21.373 | 53.698 | 1.00 | 0.00 | C |
| ATOM | 903 | C6   | G B | 11 | -26.860 | 21.210 | 52.939 | 1.00 | 0.00 | C |
| ATOM | 904 | O6   | G B | 11 | -26.698 | 20.618 | 51.872 | 1.00 | 0.00 | O |
| ATOM | 905 | N7   | G B | 11 | -29.339 | 20.916 | 53.454 | 1.00 | 0.00 | N |
| ATOM | 906 | C8   | G B | 11 | -30.027 | 21.353 | 54.478 | 1.00 | 0.00 | C |
| ATOM | 907 | N9   | G B | 11 | -29.283 | 22.074 | 55.389 | 1.00 | 0.00 | N |
| ATOM | 908 | C2'  | G B | 11 | -31.100 | 23.349 | 56.585 | 1.00 | 0.00 | C |
| ATOM | 909 | C3'  | G B | 11 | -31.641 | 23.089 | 57.981 | 1.00 | 0.00 | C |
| ATOM | 910 | O3'  | G B | 11 | -31.187 | 24.117 | 58.858 | 1.00 | 0.00 | O |
| ATOM | 911 | C4'  | G B | 11 | -31.043 | 21.727 | 58.329 | 1.00 | 0.00 | C |
| ATOM | 912 | O4'  | G B | 11 | -29.741 | 21.725 | 57.662 | 1.00 | 0.00 | O |
| ATOM | 913 | C5'  | G B | 11 | -31.822 | 20.516 | 57.874 | 1.00 | 0.00 | C |
| ATOM | 914 | O5'  | G B | 11 | -32.429 | 20.779 | 56.584 | 1.00 | 0.00 | O |
| ATOM | 915 | O1P  | G B | 11 | -34.895 | 20.761 | 57.085 | 1.00 | 0.00 | O |
| ATOM | 916 | O2P  | G B | 11 | -34.076 | 20.158 | 54.792 | 1.00 | 0.00 | O |
| ATOM | 917 | P    | G B | 11 | -33.850 | 20.131 | 56.257 | 1.00 | 0.00 | P |
| ATOM | 918 | H1   | G B | 11 | -24.848 | 21.777 | 53.083 | 1.00 | 0.00 | H |
| ATOM | 919 | H8   | G B | 11 | -31.093 | 21.166 | 54.598 | 1.00 | 0.00 | H |
| ATOM | 920 | H1'  | G B | 11 | -28.964 | 23.459 | 56.938 | 1.00 | 0.00 | H |
| ATOM | 921 | H21  | G B | 11 | -23.806 | 22.953 | 54.614 | 1.00 | 0.00 | H |
| ATOM | 922 | H3'  | G B | 11 | -32.731 | 23.055 | 57.998 | 1.00 | 0.00 | H |
| ATOM | 923 | H22  | G B | 11 | -24.638 | 23.611 | 56.050 | 1.00 | 0.00 | H |
| ATOM | 924 | H4'  | G B | 11 | -30.965 | 21.684 | 59.416 | 1.00 | 0.00 | H |

|      |     |      |     |    |         |        |        |      |      |   |
|------|-----|------|-----|----|---------|--------|--------|------|------|---|
| ATOM | 925 | H2'1 | G B | 11 | -31.726 | 22.883 | 55.823 | 1.00 | 0.00 | H |
| ATOM | 926 | H2'2 | G B | 11 | -31.058 | 24.416 | 56.368 | 1.00 | 0.00 | H |
| ATOM | 927 | H5'1 | G B | 11 | -31.146 | 19.664 | 57.796 | 1.00 | 0.00 | H |
| ATOM | 928 | H5'2 | G B | 11 | -32.597 | 20.293 | 58.607 | 1.00 | 0.00 | H |
| ATOM | 929 | C1'  | G B | 12 | -27.012 | 26.842 | 56.183 | 1.00 | 0.00 | C |
| ATOM | 930 | N1   | G B | 12 | -25.629 | 24.743 | 51.743 | 1.00 | 0.00 | N |
| ATOM | 931 | C2   | G B | 12 | -24.866 | 25.406 | 52.689 | 1.00 | 0.00 | C |
| ATOM | 932 | N2   | G B | 12 | -23.560 | 25.526 | 52.414 | 1.00 | 0.00 | N |
| ATOM | 933 | N3   | G B | 12 | -25.364 | 25.906 | 53.818 | 1.00 | 0.00 | N |
| ATOM | 934 | C4   | G B | 12 | -26.703 | 25.699 | 53.927 | 1.00 | 0.00 | C |
| ATOM | 935 | C5   | G B | 12 | -27.544 | 25.055 | 53.037 | 1.00 | 0.00 | C |
| ATOM | 936 | C6   | G B | 12 | -27.015 | 24.520 | 51.840 | 1.00 | 0.00 | C |
| ATOM | 937 | O6   | G B | 12 | -27.596 | 23.921 | 50.934 | 1.00 | 0.00 | O |
| ATOM | 938 | N7   | G B | 12 | -28.853 | 25.056 | 53.522 | 1.00 | 0.00 | N |
| ATOM | 939 | C8   | G B | 12 | -28.766 | 25.683 | 54.666 | 1.00 | 0.00 | C |
| ATOM | 940 | N9   | G B | 12 | -27.492 | 26.106 | 54.982 | 1.00 | 0.00 | N |
| ATOM | 941 | C2'  | G B | 12 | -27.990 | 27.895 | 56.687 | 1.00 | 0.00 | C |
| ATOM | 942 | C3'  | G B | 12 | -27.799 | 27.811 | 58.193 | 1.00 | 0.00 | C |
| ATOM | 943 | O3'  | G B | 12 | -26.687 | 28.620 | 58.570 | 1.00 | 0.00 | O |
| ATOM | 944 | C4'  | G B | 12 | -27.534 | 26.324 | 58.419 | 1.00 | 0.00 | C |
| ATOM | 945 | O4'  | G B | 12 | -26.816 | 25.899 | 57.218 | 1.00 | 0.00 | O |
| ATOM | 946 | C5'  | G B | 12 | -28.750 | 25.444 | 58.591 | 1.00 | 0.00 | C |
| ATOM | 947 | O5'  | G B | 12 | -29.818 | 25.909 | 57.729 | 1.00 | 0.00 | O |
| ATOM | 948 | O1P  | G B | 12 | -31.572 | 26.702 | 59.351 | 1.00 | 0.00 | O |
| ATOM | 949 | O2P  | G B | 12 | -32.244 | 25.891 | 57.074 | 1.00 | 0.00 | O |
| ATOM | 950 | P    | G B | 12 | -31.326 | 25.772 | 58.233 | 1.00 | 0.00 | P |
| ATOM | 951 | H1   | G B | 12 | -25.144 | 24.387 | 50.905 | 1.00 | 0.00 | H |
| ATOM | 952 | H8   | G B | 12 | -29.625 | 25.858 | 55.315 | 1.00 | 0.00 | H |
| ATOM | 953 | H1'  | G B | 12 | -26.046 | 27.288 | 55.947 | 1.00 | 0.00 | H |
| ATOM | 954 | H21  | G B | 12 | -23.181 | 25.133 | 51.541 | 1.00 | 0.00 | H |
| ATOM | 955 | H3'  | G B | 12 | -28.685 | 28.140 | 58.737 | 1.00 | 0.00 | H |
| ATOM | 956 | H22  | G B | 12 | -22.939 | 26.012 | 53.076 | 1.00 | 0.00 | H |
| ATOM | 957 | H4'  | G B | 12 | -26.934 | 26.243 | 59.325 | 1.00 | 0.00 | H |
| ATOM | 958 | H2'1 | G B | 12 | -29.019 | 27.672 | 56.405 | 1.00 | 0.00 | H |
| ATOM | 959 | H2'2 | G B | 12 | -27.756 | 28.891 | 56.312 | 1.00 | 0.00 | H |
| ATOM | 960 | H5'1 | G B | 12 | -28.489 | 24.418 | 58.333 | 1.00 | 0.00 | H |
| ATOM | 961 | H5'2 | G B | 12 | -29.074 | 25.481 | 59.632 | 1.00 | 0.00 | H |
| ATOM | 962 | C1'  | T B | 13 | -23.856 | 29.855 | 53.846 | 1.00 | 0.00 | C |
| ATOM | 963 | N1   | T B | 13 | -25.049 | 29.325 | 53.135 | 1.00 | 0.00 | N |
| ATOM | 964 | C2   | T B | 13 | -24.838 | 28.725 | 51.909 | 1.00 | 0.00 | C |
| ATOM | 965 | O2   | T B | 13 | -23.732 | 28.622 | 51.408 | 1.00 | 0.00 | O |
| ATOM | 966 | N3   | T B | 13 | -25.974 | 28.246 | 51.284 | 1.00 | 0.00 | N |
| ATOM | 967 | C4   | T B | 13 | -27.267 | 28.314 | 51.761 | 1.00 | 0.00 | C |
| ATOM | 968 | O4   | T B | 13 | -28.208 | 27.851 | 51.107 | 1.00 | 0.00 | O |
| ATOM | 969 | C5   | T B | 13 | -27.388 | 28.957 | 53.049 | 1.00 | 0.00 | C |
| ATOM | 970 | C6   | T B | 13 | -26.301 | 29.436 | 53.688 | 1.00 | 0.00 | C |
| ATOM | 971 | C7   | T B | 13 | -28.775 | 29.052 | 53.609 | 1.00 | 0.00 | C |
| ATOM | 972 | C2'  | T B | 13 | -24.112 | 31.164 | 54.585 | 1.00 | 0.00 | C |
| ATOM | 973 | C3'  | T B | 13 | -23.238 | 31.006 | 55.820 | 1.00 | 0.00 | C |
| ATOM | 974 | O3'  | T B | 13 | -21.907 | 31.409 | 55.506 | 1.00 | 0.00 | O |
| ATOM | 975 | C4'  | T B | 13 | -23.335 | 29.512 | 56.117 | 1.00 | 0.00 | C |
| ATOM | 976 | O4'  | T B | 13 | -23.455 | 28.889 | 54.798 | 1.00 | 0.00 | O |
| ATOM | 977 | C5'  | T B | 13 | -24.503 | 29.070 | 56.969 | 1.00 | 0.00 | C |
| ATOM | 978 | O5'  | T B | 13 | -25.672 | 29.866 | 56.647 | 1.00 | 0.00 | O |

|      |      |      |     |    |         |        |        |      |      |   |
|------|------|------|-----|----|---------|--------|--------|------|------|---|
| ATOM | 979  | O1P  | T B | 13 | -26.091 | 31.167 | 58.759 | 1.00 | 0.00 | O |
| ATOM | 980  | O2P  | T B | 13 | -27.995 | 30.639 | 57.211 | 1.00 | 0.00 | O |
| ATOM | 981  | P    | T B | 13 | -26.705 | 30.217 | 57.809 | 1.00 | 0.00 | P |
| ATOM | 982  | H3   | T B | 13 | -25.842 | 27.791 | 50.369 | 1.00 | 0.00 | H |
| ATOM | 983  | H6   | T B | 13 | -26.418 | 29.917 | 54.659 | 1.00 | 0.00 | H |
| ATOM | 984  | H1'  | T B | 13 | -23.048 | 29.968 | 53.123 | 1.00 | 0.00 | H |
| ATOM | 985  | H3'  | T B | 13 | -23.607 | 31.599 | 56.657 | 1.00 | 0.00 | H |
| ATOM | 986  | H4'  | T B | 13 | -22.420 | 29.233 | 56.639 | 1.00 | 0.00 | H |
| ATOM | 987  | H71  | T B | 13 | -29.076 | 30.098 | 53.663 | 1.00 | 0.00 | H |
| ATOM | 988  | H72  | T B | 13 | -29.466 | 28.509 | 52.961 | 1.00 | 0.00 | H |
| ATOM | 989  | H73  | T B | 13 | -28.796 | 28.615 | 54.608 | 1.00 | 0.00 | H |
| ATOM | 990  | H2'1 | T B | 13 | -25.160 | 31.288 | 54.853 | 1.00 | 0.00 | H |
| ATOM | 991  | H2'2 | T B | 13 | -23.818 | 32.034 | 53.999 | 1.00 | 0.00 | H |
| ATOM | 992  | H5'1 | T B | 13 | -24.708 | 28.017 | 56.777 | 1.00 | 0.00 | H |
| ATOM | 993  | H5'2 | T B | 13 | -24.248 | 29.200 | 58.019 | 1.00 | 0.00 | H |
| ATOM | 994  | C1'  | G B | 14 | -21.613 | 31.663 | 49.802 | 1.00 | 0.00 | C |
| ATOM | 995  | N1   | G B | 14 | -25.822 | 30.040 | 47.418 | 1.00 | 0.00 | N |
| ATOM | 996  | C2   | G B | 14 | -24.495 | 29.949 | 47.037 | 1.00 | 0.00 | C |
| ATOM | 997  | N2   | G B | 14 | -24.257 | 29.348 | 45.866 | 1.00 | 0.00 | N |
| ATOM | 998  | N3   | G B | 14 | -23.486 | 30.420 | 47.768 | 1.00 | 0.00 | N |
| ATOM | 999  | C4   | G B | 14 | -23.911 | 31.003 | 48.921 | 1.00 | 0.00 | C |
| ATOM | 1000 | C5   | G B | 14 | -25.209 | 31.144 | 49.379 | 1.00 | 0.00 | C |
| ATOM | 1001 | C6   | G B | 14 | -26.281 | 30.641 | 48.606 | 1.00 | 0.00 | C |
| ATOM | 1002 | O6   | G B | 14 | -27.490 | 30.670 | 48.843 | 1.00 | 0.00 | O |
| ATOM | 1003 | N7   | G B | 14 | -25.218 | 31.805 | 50.610 | 1.00 | 0.00 | N |
| ATOM | 1004 | C8   | G B | 14 | -23.953 | 32.036 | 50.853 | 1.00 | 0.00 | C |
| ATOM | 1005 | N9   | G B | 14 | -23.098 | 31.580 | 49.871 | 1.00 | 0.00 | N |
| ATOM | 1006 | C2'  | G B | 14 | -21.045 | 32.967 | 50.346 | 1.00 | 0.00 | C |
| ATOM | 1007 | C3'  | G B | 14 | -19.750 | 32.504 | 50.994 | 1.00 | 0.00 | C |
| ATOM | 1008 | O3'  | G B | 14 | -18.729 | 32.437 | 50.003 | 1.00 | 0.00 | O |
| ATOM | 1009 | C4'  | G B | 14 | -20.119 | 31.124 | 51.539 | 1.00 | 0.00 | C |
| ATOM | 1010 | O4'  | G B | 14 | -21.085 | 30.602 | 50.574 | 1.00 | 0.00 | O |
| ATOM | 1011 | C5'  | G B | 14 | -20.741 | 31.090 | 52.915 | 1.00 | 0.00 | C |
| ATOM | 1012 | O5'  | G B | 14 | -21.609 | 32.238 | 53.089 | 1.00 | 0.00 | O |
| ATOM | 1013 | O1P  | G B | 14 | -20.459 | 33.569 | 54.890 | 1.00 | 0.00 | O |
| ATOM | 1014 | O2P  | G B | 14 | -22.944 | 33.742 | 54.595 | 1.00 | 0.00 | O |
| ATOM | 1015 | P    | G B | 14 | -21.725 | 32.900 | 54.536 | 1.00 | 0.00 | P |
| ATOM | 1016 | H1   | G B | 14 | -26.528 | 29.638 | 46.783 | 1.00 | 0.00 | H |
| ATOM | 1017 | H8   | G B | 14 | -23.607 | 32.546 | 51.753 | 1.00 | 0.00 | H |
| ATOM | 1018 | H1'  | G B | 14 | -21.310 | 31.507 | 48.766 | 1.00 | 0.00 | H |
| ATOM | 1019 | H21  | G B | 14 | -25.044 | 28.983 | 45.307 | 1.00 | 0.00 | H |
| ATOM | 1020 | H3'  | G B | 14 | -19.434 | 33.171 | 51.796 | 1.00 | 0.00 | H |
| ATOM | 1021 | H22  | G B | 14 | -23.291 | 29.251 | 45.523 | 1.00 | 0.00 | H |
| ATOM | 1022 | H4'  | G B | 14 | -19.197 | 30.543 | 51.577 | 1.00 | 0.00 | H |
| ATOM | 1023 | H2'1 | G B | 14 | -21.708 | 33.434 | 51.074 | 1.00 | 0.00 | H |
| ATOM | 1024 | H2'2 | G B | 14 | -20.857 | 33.696 | 49.559 | 1.00 | 0.00 | H |
| ATOM | 1025 | H5'1 | G B | 14 | -21.318 | 30.173 | 53.023 | 1.00 | 0.00 | H |
| ATOM | 1026 | H5'2 | G B | 14 | -19.951 | 31.108 | 53.665 | 1.00 | 0.00 | H |
| ATOM | 1027 | C1'  | C B | 15 | -21.297 | 32.687 | 44.966 | 1.00 | 0.00 | C |
| ATOM | 1028 | N1   | C B | 15 | -22.494 | 33.095 | 45.750 | 1.00 | 0.00 | N |
| ATOM | 1029 | C2   | C B | 15 | -23.749 | 32.743 | 45.257 | 1.00 | 0.00 | C |
| ATOM | 1030 | O2   | C B | 15 | -23.816 | 32.109 | 44.195 | 1.00 | 0.00 | O |
| ATOM | 1031 | N3   | C B | 15 | -24.852 | 33.105 | 45.955 | 1.00 | 0.00 | N |
| ATOM | 1032 | C4   | C B | 15 | -24.747 | 33.791 | 47.100 | 1.00 | 0.00 | C |

|      |      |      |     |    |         |        |        |      |      |   |
|------|------|------|-----|----|---------|--------|--------|------|------|---|
| ATOM | 1033 | N4   | C B | 15 | -25.858 | 34.116 | 47.744 | 1.00 | 0.00 | N |
| ATOM | 1034 | C5   | C B | 15 | -23.469 | 34.172 | 47.630 | 1.00 | 0.00 | C |
| ATOM | 1035 | C6   | C B | 15 | -22.373 | 33.792 | 46.912 | 1.00 | 0.00 | C |
| ATOM | 1036 | C2'  | C B | 15 | -20.185 | 33.727 | 44.958 | 1.00 | 0.00 | C |
| ATOM | 1037 | C3'  | C B | 15 | -18.937 | 32.857 | 44.972 | 1.00 | 0.00 | C |
| ATOM | 1038 | O3'  | C B | 15 | -18.622 | 32.467 | 43.637 | 1.00 | 0.00 | O |
| ATOM | 1039 | C4'  | C B | 15 | -19.359 | 31.671 | 45.836 | 1.00 | 0.00 | C |
| ATOM | 1040 | O4'  | C B | 15 | -20.784 | 31.504 | 45.550 | 1.00 | 0.00 | O |
| ATOM | 1041 | C5'  | C B | 15 | -19.183 | 31.832 | 47.329 | 1.00 | 0.00 | C |
| ATOM | 1042 | O5'  | C B | 15 | -19.470 | 33.200 | 47.711 | 1.00 | 0.00 | O |
| ATOM | 1043 | O1P  | C B | 15 | -17.243 | 34.063 | 48.506 | 1.00 | 0.00 | O |
| ATOM | 1044 | O2P  | C B | 15 | -19.365 | 35.048 | 49.413 | 1.00 | 0.00 | O |
| ATOM | 1045 | P    | C B | 15 | -18.647 | 33.851 | 48.912 | 1.00 | 0.00 | P |
| ATOM | 1046 | H5   | C B | 15 | -23.381 | 34.736 | 48.559 | 1.00 | 0.00 | H |
| ATOM | 1047 | H6   | C B | 15 | -21.379 | 34.052 | 47.278 | 1.00 | 0.00 | H |
| ATOM | 1048 | H1'  | C B | 15 | -21.618 | 32.449 | 43.952 | 1.00 | 0.00 | H |
| ATOM | 1049 | H3'  | C B | 15 | -18.083 | 33.377 | 45.407 | 1.00 | 0.00 | H |
| ATOM | 1050 | H4'  | C B | 15 | -18.757 | 30.819 | 45.521 | 1.00 | 0.00 | H |
| ATOM | 1051 | H41  | C B | 15 | -25.806 | 34.642 | 48.630 | 1.00 | 0.00 | H |
| ATOM | 1052 | H42  | C B | 15 | -26.776 | 33.844 | 47.360 | 1.00 | 0.00 | H |
| ATOM | 1053 | H2'1 | C B | 15 | -20.223 | 34.380 | 45.829 | 1.00 | 0.00 | H |
| ATOM | 1054 | H2'2 | C B | 15 | -20.218 | 34.360 | 44.071 | 1.00 | 0.00 | H |
| ATOM | 1055 | H5'1 | C B | 15 | -19.864 | 31.154 | 47.845 | 1.00 | 0.00 | H |
| ATOM | 1056 | H5'2 | C B | 15 | -18.157 | 31.583 | 47.597 | 1.00 | 0.00 | H |
| ATOM | 1057 | C1'  | G B | 16 | -23.188 | 33.611 | 40.484 | 1.00 | 0.00 | C |
| ATOM | 1058 | N1   | G B | 16 | -27.243 | 35.191 | 43.145 | 1.00 | 0.00 | N |
| ATOM | 1059 | C2   | G B | 16 | -27.180 | 34.428 | 41.992 | 1.00 | 0.00 | C |
| ATOM | 1060 | N2   | G B | 16 | -28.353 | 34.036 | 41.480 | 1.00 | 0.00 | N |
| ATOM | 1061 | N3   | G B | 16 | -26.037 | 34.084 | 41.400 | 1.00 | 0.00 | N |
| ATOM | 1062 | C4   | G B | 16 | -24.950 | 34.573 | 42.051 | 1.00 | 0.00 | C |
| ATOM | 1063 | C5   | G B | 16 | -24.917 | 35.344 | 43.201 | 1.00 | 0.00 | C |
| ATOM | 1064 | C6   | G B | 16 | -26.130 | 35.707 | 43.833 | 1.00 | 0.00 | C |
| ATOM | 1065 | O6   | G B | 16 | -26.303 | 36.378 | 44.850 | 1.00 | 0.00 | O |
| ATOM | 1066 | N7   | G B | 16 | -23.597 | 35.641 | 43.545 | 1.00 | 0.00 | N |
| ATOM | 1067 | C8   | G B | 16 | -22.887 | 35.052 | 42.617 | 1.00 | 0.00 | C |
| ATOM | 1068 | N9   | G B | 16 | -23.639 | 34.384 | 41.672 | 1.00 | 0.00 | N |
| ATOM | 1069 | C2'  | G B | 16 | -21.984 | 34.219 | 39.777 | 1.00 | 0.00 | C |
| ATOM | 1070 | C3'  | G B | 16 | -21.224 | 32.983 | 39.324 | 1.00 | 0.00 | C |
| ATOM | 1071 | O3'  | G B | 16 | -21.762 | 32.531 | 38.084 | 1.00 | 0.00 | O |
| ATOM | 1072 | C4'  | G B | 16 | -21.477 | 31.993 | 40.459 | 1.00 | 0.00 | C |
| ATOM | 1073 | O4'  | G B | 16 | -22.827 | 32.316 | 40.924 | 1.00 | 0.00 | O |
| ATOM | 1074 | C5'  | G B | 16 | -20.531 | 32.062 | 41.634 | 1.00 | 0.00 | C |
| ATOM | 1075 | O5'  | G B | 16 | -20.165 | 33.441 | 41.888 | 1.00 | 0.00 | O |
| ATOM | 1076 | O1P  | G B | 16 | -17.705 | 33.497 | 41.363 | 1.00 | 0.00 | O |
| ATOM | 1077 | O2P  | G B | 16 | -18.672 | 35.119 | 43.013 | 1.00 | 0.00 | O |
| ATOM | 1078 | P    | G B | 16 | -18.696 | 33.759 | 42.423 | 1.00 | 0.00 | P |
| ATOM | 1079 | H1   | G B | 16 | -28.178 | 35.396 | 43.528 | 1.00 | 0.00 | H |
| ATOM | 1080 | H8   | G B | 16 | -21.799 | 35.088 | 42.592 | 1.00 | 0.00 | H |
| ATOM | 1081 | H1'  | G B | 16 | -24.032 | 33.509 | 39.802 | 1.00 | 0.00 | H |
| ATOM | 1082 | H21  | G B | 16 | -29.232 | 34.303 | 41.945 | 1.00 | 0.00 | H |
| ATOM | 1083 | H3'  | G B | 16 | -20.158 | 33.179 | 39.204 | 1.00 | 0.00 | H |
| ATOM | 1084 | H22  | G B | 16 | -28.373 | 33.468 | 40.621 | 1.00 | 0.00 | H |
| ATOM | 1085 | H4'  | G B | 16 | -21.403 | 30.993 | 40.030 | 1.00 | 0.00 | H |
| ATOM | 1086 | H2'1 | G B | 16 | -21.380 | 34.834 | 40.444 | 1.00 | 0.00 | H |

|      |      |      |     |    |         |        |        |      |      |   |
|------|------|------|-----|----|---------|--------|--------|------|------|---|
| ATOM | 1087 | H2'2 | G B | 16 | -22.273 | 34.841 | 38.930 | 1.00 | 0.00 | H |
| ATOM | 1088 | H5'1 | G B | 16 | -21.021 | 31.643 | 42.513 | 1.00 | 0.00 | H |
| ATOM | 1089 | H5'2 | G B | 16 | -19.638 | 31.479 | 41.408 | 1.00 | 0.00 | H |
| ATOM | 1090 | C1'  | G B | 17 | -26.722 | 35.163 | 37.381 | 1.00 | 0.00 | C |
| ATOM | 1091 | N1   | G B | 17 | -28.208 | 37.963 | 41.380 | 1.00 | 0.00 | N |
| ATOM | 1092 | C2   | G B | 17 | -28.961 | 37.236 | 40.474 | 1.00 | 0.00 | C |
| ATOM | 1093 | N2   | G B | 17 | -30.287 | 37.260 | 40.658 | 1.00 | 0.00 | N |
| ATOM | 1094 | N3   | G B | 17 | -28.434 | 36.541 | 39.468 | 1.00 | 0.00 | N |
| ATOM | 1095 | C4   | G B | 17 | -27.079 | 36.636 | 39.430 | 1.00 | 0.00 | C |
| ATOM | 1096 | C5   | G B | 17 | -26.247 | 37.337 | 40.284 | 1.00 | 0.00 | C |
| ATOM | 1097 | C6   | G B | 17 | -26.804 | 38.071 | 41.355 | 1.00 | 0.00 | C |
| ATOM | 1098 | O6   | G B | 17 | -26.236 | 38.750 | 42.211 | 1.00 | 0.00 | O |
| ATOM | 1099 | N7   | G B | 17 | -24.914 | 37.176 | 39.900 | 1.00 | 0.00 | N |
| ATOM | 1100 | C8   | G B | 17 | -24.979 | 36.398 | 38.851 | 1.00 | 0.00 | C |
| ATOM | 1101 | N9   | G B | 17 | -26.261 | 36.028 | 38.502 | 1.00 | 0.00 | N |
| ATOM | 1102 | C2'  | G B | 17 | -25.925 | 35.348 | 36.098 | 1.00 | 0.00 | C |
| ATOM | 1103 | C3'  | G B | 17 | -25.897 | 33.936 | 35.534 | 1.00 | 0.00 | C |
| ATOM | 1104 | O3'  | G B | 17 | -27.093 | 33.703 | 34.795 | 1.00 | 0.00 | O |
| ATOM | 1105 | C4'  | G B | 17 | -25.817 | 33.071 | 36.791 | 1.00 | 0.00 | C |
| ATOM | 1106 | O4'  | G B | 17 | -26.583 | 33.816 | 37.790 | 1.00 | 0.00 | O |
| ATOM | 1107 | C5'  | G B | 17 | -24.435 | 32.809 | 37.339 | 1.00 | 0.00 | C |
| ATOM | 1108 | O5'  | G B | 17 | -23.607 | 33.986 | 37.166 | 1.00 | 0.00 | O |
| ATOM | 1109 | O1P  | G B | 17 | -21.859 | 33.232 | 35.519 | 1.00 | 0.00 | O |
| ATOM | 1110 | O2P  | G B | 17 | -21.335 | 35.062 | 37.154 | 1.00 | 0.00 | O |
| ATOM | 1111 | P    | G B | 17 | -22.051 | 33.794 | 36.870 | 1.00 | 0.00 | P |
| ATOM | 1112 | H1   | G B | 17 | -28.714 | 38.462 | 42.127 | 1.00 | 0.00 | H |
| ATOM | 1113 | H8   | G B | 17 | -24.098 | 36.071 | 38.299 | 1.00 | 0.00 | H |
| ATOM | 1114 | H1'  | G B | 17 | -27.781 | 35.356 | 37.215 | 1.00 | 0.00 | H |
| ATOM | 1115 | H21  | G B | 17 | -30.688 | 37.798 | 41.441 | 1.00 | 0.00 | H |
| ATOM | 1116 | H3'  | G B | 17 | -25.035 | 33.770 | 34.888 | 1.00 | 0.00 | H |
| ATOM | 1117 | H22  | G B | 17 | -30.904 | 36.742 | 40.017 | 1.00 | 0.00 | H |
| ATOM | 1118 | H4'  | G B | 17 | -26.265 | 32.109 | 36.543 | 1.00 | 0.00 | H |
| ATOM | 1119 | H2'1 | G B | 17 | -24.918 | 35.720 | 36.285 | 1.00 | 0.00 | H |
| ATOM | 1120 | H2'2 | G B | 17 | -26.406 | 36.041 | 35.408 | 1.00 | 0.00 | H |
| ATOM | 1121 | H5'1 | G B | 17 | -24.510 | 32.564 | 38.398 | 1.00 | 0.00 | H |
| ATOM | 1122 | H5'2 | G B | 17 | -23.993 | 31.966 | 36.806 | 1.00 | 0.00 | H |
| ATOM | 1123 | C1'  | C B | 18 | -30.709 | 37.836 | 36.162 | 1.00 | 0.00 | C |
| ATOM | 1124 | N1   | C B | 18 | -29.519 | 38.488 | 36.776 | 1.00 | 0.00 | N |
| ATOM | 1125 | C2   | C B | 18 | -29.724 | 39.301 | 37.889 | 1.00 | 0.00 | C |
| ATOM | 1126 | O2   | C B | 18 | -30.875 | 39.448 | 38.318 | 1.00 | 0.00 | O |
| ATOM | 1127 | N3   | C B | 18 | -28.653 | 39.903 | 38.462 | 1.00 | 0.00 | N |
| ATOM | 1128 | C4   | C B | 18 | -27.419 | 39.723 | 37.973 | 1.00 | 0.00 | C |
| ATOM | 1129 | N4   | C B | 18 | -26.409 | 40.335 | 38.575 | 1.00 | 0.00 | N |
| ATOM | 1130 | C5   | C B | 18 | -27.182 | 38.895 | 36.830 | 1.00 | 0.00 | C |
| ATOM | 1131 | C6   | C B | 18 | -28.272 | 38.298 | 36.270 | 1.00 | 0.00 | C |
| ATOM | 1132 | C2'  | C B | 18 | -30.655 | 37.769 | 34.641 | 1.00 | 0.00 | C |
| ATOM | 1133 | C3'  | C B | 18 | -31.324 | 36.432 | 34.360 | 1.00 | 0.00 | C |
| ATOM | 1134 | O3'  | C B | 18 | -32.738 | 36.613 | 34.333 | 1.00 | 0.00 | O |
| ATOM | 1135 | C4'  | C B | 18 | -30.874 | 35.572 | 35.539 | 1.00 | 0.00 | C |
| ATOM | 1136 | O4'  | C B | 18 | -30.777 | 36.512 | 36.656 | 1.00 | 0.00 | O |
| ATOM | 1137 | C5'  | C B | 18 | -29.548 | 34.864 | 35.387 | 1.00 | 0.00 | C |
| ATOM | 1138 | O5'  | C B | 18 | -28.623 | 35.710 | 34.658 | 1.00 | 0.00 | O |
| ATOM | 1139 | O1P  | C B | 18 | -28.247 | 34.448 | 32.513 | 1.00 | 0.00 | O |
| ATOM | 1140 | O2P  | C B | 18 | -26.469 | 35.986 | 33.392 | 1.00 | 0.00 | O |



|      |      |      |     |    |         |        |        |      |      |   |
|------|------|------|-----|----|---------|--------|--------|------|------|---|
| ATOM | 1141 | P    | C B | 18 | -27.561 | 35.025 | 33.686 | 1.00 | 0.00 | P |
| ATOM | 1142 | H5   | C B | 18 | -26.180 | 38.750 | 36.426 | 1.00 | 0.00 | H |
| ATOM | 1143 | H6   | C B | 18 | -28.140 | 37.655 | 35.400 | 1.00 | 0.00 | H |
| ATOM | 1144 | H1'  | C B | 18 | -31.599 | 38.367 | 36.498 | 1.00 | 0.00 | H |
| ATOM | 1145 | H3'  | C B | 18 | -30.996 | 36.003 | 33.413 | 1.00 | 0.00 | H |
| ATOM | 1146 | H4'  | C B | 18 | -31.641 | 34.811 | 35.687 | 1.00 | 0.00 | H |
| ATOM | 1147 | H41  | C B | 18 | -25.449 | 40.213 | 38.220 | 1.00 | 0.00 | H |
| ATOM | 1148 | H42  | C B | 18 | -26.583 | 40.930 | 39.397 | 1.00 | 0.00 | H |
| ATOM | 1149 | H2'1 | C B | 18 | -29.634 | 37.789 | 34.262 | 1.00 | 0.00 | H |
| ATOM | 1150 | H2'2 | C B | 18 | -31.195 | 38.591 | 34.172 | 1.00 | 0.00 | H |
| ATOM | 1151 | H5'1 | C B | 18 | -29.144 | 34.644 | 36.376 | 1.00 | 0.00 | H |
| ATOM | 1152 | H5'2 | C B | 18 | -29.700 | 33.932 | 34.846 | 1.00 | 0.00 | H |
| ATOM | 1153 | C1'  | C B | 19 | -33.784 | 41.693 | 36.607 | 1.00 | 0.00 | C |
| ATOM | 1154 | N1   | C B | 19 | -32.318 | 41.906 | 36.463 | 1.00 | 0.00 | N |
| ATOM | 1155 | C2   | C B | 19 | -31.683 | 42.727 | 37.393 | 1.00 | 0.00 | C |
| ATOM | 1156 | O2   | C B | 19 | -32.357 | 43.241 | 38.295 | 1.00 | 0.00 | O |
| ATOM | 1157 | N3   | C B | 19 | -30.349 | 42.934 | 37.279 | 1.00 | 0.00 | N |
| ATOM | 1158 | C4   | C B | 19 | -29.646 | 42.363 | 36.291 | 1.00 | 0.00 | C |
| ATOM | 1159 | N4   | C B | 19 | -28.346 | 42.598 | 36.227 | 1.00 | 0.00 | N |
| ATOM | 1160 | C5   | C B | 19 | -30.274 | 41.517 | 35.322 | 1.00 | 0.00 | C |
| ATOM | 1161 | C6   | C B | 19 | -31.616 | 41.322 | 35.457 | 1.00 | 0.00 | C |
| ATOM | 1162 | C2'  | C B | 19 | -34.527 | 41.631 | 35.281 | 1.00 | 0.00 | C |
| ATOM | 1163 | C3'  | C B | 19 | -35.603 | 40.594 | 35.570 | 1.00 | 0.00 | C |
| ATOM | 1164 | O3'  | C B | 19 | -36.712 | 41.232 | 36.198 | 1.00 | 0.00 | O |
| ATOM | 1165 | C4'  | C B | 19 | -34.892 | 39.619 | 36.505 | 1.00 | 0.00 | C |
| ATOM | 1166 | O4'  | C B | 19 | -33.975 | 40.460 | 37.275 | 1.00 | 0.00 | O |
| ATOM | 1167 | C5'  | C B | 19 | -34.097 | 38.515 | 35.848 | 1.00 | 0.00 | C |
| ATOM | 1168 | O5'  | C B | 19 | -33.469 | 39.015 | 34.641 | 1.00 | 0.00 | O |
| ATOM | 1169 | O1P  | C B | 19 | -34.618 | 37.728 | 32.809 | 1.00 | 0.00 | O |
| ATOM | 1170 | O2P  | C B | 19 | -32.282 | 38.580 | 32.470 | 1.00 | 0.00 | O |
| ATOM | 1171 | P    | C B | 19 | -33.299 | 38.030 | 33.400 | 1.00 | 0.00 | P |
| ATOM | 1172 | H5   | C B | 19 | -29.708 | 41.052 | 34.515 | 1.00 | 0.00 | H |
| ATOM | 1173 | H6   | C B | 19 | -32.137 | 40.684 | 34.743 | 1.00 | 0.00 | H |
| ATOM | 1174 | H1'  | C B | 19 | -34.182 | 42.485 | 37.243 | 1.00 | 0.00 | H |
| ATOM | 1175 | H3'  | C B | 19 | -35.940 | 40.093 | 34.662 | 1.00 | 0.00 | H |
| ATOM | 1176 | H4'  | C B | 19 | -35.662 | 39.153 | 37.122 | 1.00 | 0.00 | H |
| ATOM | 1177 | H41  | C B | 19 | -27.780 | 42.171 | 35.479 | 1.00 | 0.00 | H |
| ATOM | 1178 | H42  | C B | 19 | -27.896 | 43.208 | 36.927 | 1.00 | 0.00 | H |
| ATOM | 1179 | H2'1 | C B | 19 | -33.885 | 41.317 | 34.460 | 1.00 | 0.00 | H |
| ATOM | 1180 | H2'2 | C B | 19 | -34.965 | 42.591 | 35.007 | 1.00 | 0.00 | H |
| ATOM | 1181 | H5'1 | C B | 19 | -33.336 | 38.160 | 36.541 | 1.00 | 0.00 | H |
| ATOM | 1182 | H5'2 | C B | 19 | -34.767 | 37.692 | 35.600 | 1.00 | 0.00 | H |
| ATOM | 1183 | C1'  | T B | 20 | -34.952 | 46.336 | 37.861 | 1.00 | 0.00 | C |
| ATOM | 1184 | N1   | T B | 20 | -33.762 | 46.068 | 37.012 | 1.00 | 0.00 | N |
| ATOM | 1185 | C2   | T B | 20 | -32.566 | 46.633 | 37.406 | 1.00 | 0.00 | C |
| ATOM | 1186 | O2   | T B | 20 | -32.461 | 47.327 | 38.403 | 1.00 | 0.00 | O |
| ATOM | 1187 | N3   | T B | 20 | -31.487 | 46.358 | 36.589 | 1.00 | 0.00 | N |
| ATOM | 1188 | C4   | T B | 20 | -31.497 | 45.591 | 35.445 | 1.00 | 0.00 | C |
| ATOM | 1189 | O4   | T B | 20 | -30.461 | 45.416 | 34.791 | 1.00 | 0.00 | O |
| ATOM | 1190 | C5   | T B | 20 | -32.789 | 45.042 | 35.113 | 1.00 | 0.00 | C |
| ATOM | 1191 | C6   | T B | 20 | -33.865 | 45.289 | 35.886 | 1.00 | 0.00 | C |
| ATOM | 1192 | C7   | T B | 20 | -32.847 | 44.198 | 33.875 | 1.00 | 0.00 | C |
| ATOM | 1193 | C2'  | T B | 20 | -36.240 | 46.529 | 37.069 | 1.00 | 0.00 | C |
| ATOM | 1194 | C3'  | T B | 20 | -37.274 | 45.891 | 37.986 | 1.00 | 0.00 | C |

|      |      |      |     |    |         |        |        |      |      |   |
|------|------|------|-----|----|---------|--------|--------|------|------|---|
| ATOM | 1195 | O3'  | T B | 20 | -37.693 | 46.848 | 38.957 | 1.00 | 0.00 | O |
| ATOM | 1196 | C4'  | T B | 20 | -36.504 | 44.731 | 38.612 | 1.00 | 0.00 | C |
| ATOM | 1197 | O4'  | T B | 20 | -35.131 | 45.226 | 38.719 | 1.00 | 0.00 | O |
| ATOM | 1198 | C5'  | T B | 20 | -36.491 | 43.435 | 37.834 | 1.00 | 0.00 | C |
| ATOM | 1199 | O5'  | T B | 20 | -36.431 | 43.718 | 36.413 | 1.00 | 0.00 | O |
| ATOM | 1200 | O1P  | T B | 20 | -38.647 | 42.886 | 35.560 | 1.00 | 0.00 | O |
| ATOM | 1201 | O2P  | T B | 20 | -36.656 | 42.943 | 34.034 | 1.00 | 0.00 | O |
| ATOM | 1202 | P    | T B | 20 | -37.186 | 42.742 | 35.404 | 1.00 | 0.00 | P |
| ATOM | 1203 | H3   | T B | 20 | -30.583 | 46.768 | 36.862 | 1.00 | 0.00 | H |
| ATOM | 1204 | H6   | T B | 20 | -34.831 | 44.863 | 35.616 | 1.00 | 0.00 | H |
| ATOM | 1205 | H1'  | T B | 20 | -34.742 | 47.208 | 38.481 | 1.00 | 0.00 | H |
| ATOM | 1206 | H3'  | T B | 20 | -38.142 | 45.535 | 37.433 | 1.00 | 0.00 | H |
| ATOM | 1207 | H4'  | T B | 20 | -36.963 | 44.533 | 39.581 | 1.00 | 0.00 | H |
| ATOM | 1208 | H3T  | T B | 20 | -37.997 | 47.685 | 38.599 | 1.00 | 0.00 | H |
| ATOM | 1209 | H71  | T B | 20 | -33.468 | 44.691 | 33.127 | 1.00 | 0.00 | H |
| ATOM | 1210 | H72  | T B | 20 | -31.839 | 44.063 | 33.480 | 1.00 | 0.00 | H |
| ATOM | 1211 | H73  | T B | 20 | -33.275 | 43.224 | 34.116 | 1.00 | 0.00 | H |
| ATOM | 1212 | H2'1 | T B | 20 | -36.208 | 46.032 | 36.102 | 1.00 | 0.00 | H |
| ATOM | 1213 | H2'2 | T B | 20 | -36.463 | 47.581 | 36.891 | 1.00 | 0.00 | H |
| ATOM | 1214 | H5'1 | T B | 20 | -35.623 | 42.848 | 38.131 | 1.00 | 0.00 | H |
| ATOM | 1215 | H5'2 | T B | 20 | -37.397 | 42.875 | 38.060 | 1.00 | 0.00 | H |
| TER  |      |      |     |    |         |        |        |      |      |   |
| ATOM | 1    | C1'  | A A | 1  | -60.526 | 28.142 | 45.147 | 1.00 | 0.00 | C |
| ATOM | 2    | N1   | A A | 1  | -60.698 | 25.087 | 41.027 | 1.00 | 0.00 | N |
| ATOM | 3    | C2   | A A | 1  | -61.401 | 25.114 | 42.156 | 1.00 | 0.00 | C |
| ATOM | 4    | N3   | A A | 1  | -61.307 | 25.935 | 43.180 | 1.00 | 0.00 | N |
| ATOM | 5    | C4   | A A | 1  | -60.331 | 26.835 | 42.968 | 1.00 | 0.00 | C |
| ATOM | 6    | C5   | A A | 1  | -59.522 | 26.941 | 41.871 | 1.00 | 0.00 | C |
| ATOM | 7    | C6   | A A | 1  | -59.731 | 25.998 | 40.843 | 1.00 | 0.00 | C |
| ATOM | 8    | N6   | A A | 1  | -59.013 | 25.979 | 39.707 | 1.00 | 0.00 | N |
| ATOM | 9    | N7   | A A | 1  | -58.632 | 27.992 | 42.007 | 1.00 | 0.00 | N |
| ATOM | 10   | C8   | A A | 1  | -58.917 | 28.493 | 43.172 | 1.00 | 0.00 | C |
| ATOM | 11   | N9   | A A | 1  | -59.939 | 27.844 | 43.814 | 1.00 | 0.00 | N |
| ATOM | 12   | C2'  | A A | 1  | -59.502 | 28.585 | 46.183 | 1.00 | 0.00 | C |
| ATOM | 13   | C3'  | A A | 1  | -60.287 | 29.609 | 46.986 | 1.00 | 0.00 | C |
| ATOM | 14   | O3'  | A A | 1  | -61.052 | 28.937 | 47.984 | 1.00 | 0.00 | O |
| ATOM | 15   | C4'  | A A | 1  | -61.171 | 30.268 | 45.928 | 1.00 | 0.00 | C |
| ATOM | 16   | O4'  | A A | 1  | -61.462 | 29.190 | 44.981 | 1.00 | 0.00 | O |
| ATOM | 17   | C5'  | A A | 1  | -60.563 | 31.425 | 45.172 | 1.00 | 0.00 | C |
| ATOM | 18   | O5'  | A A | 1  | -59.152 | 31.177 | 44.946 | 1.00 | 0.00 | O |
| ATOM | 19   | H2   | A A | 1  | -62.168 | 24.345 | 42.245 | 1.00 | 0.00 | H |
| ATOM | 20   | H8   | A A | 1  | -58.393 | 29.349 | 43.598 | 1.00 | 0.00 | H |
| ATOM | 21   | H1'  | A A | 1  | -61.068 | 27.259 | 45.486 | 1.00 | 0.00 | H |
| ATOM | 22   | H3'  | A A | 1  | -59.635 | 30.342 | 47.464 | 1.00 | 0.00 | H |
| ATOM | 23   | H4'  | A A | 1  | -62.059 | 30.635 | 46.442 | 1.00 | 0.00 | H |
| ATOM | 24   | H61  | A A | 1  | -59.207 | 25.271 | 38.988 | 1.00 | 0.00 | H |
| ATOM | 25   | H62  | A A | 1  | -58.269 | 26.677 | 39.559 | 1.00 | 0.00 | H |
| ATOM | 26   | H5T  | A A | 1  | -58.547 | 31.921 | 44.948 | 1.00 | 0.00 | H |
| ATOM | 27   | H2'1 | A A | 1  | -58.619 | 29.031 | 45.728 | 1.00 | 0.00 | H |
| ATOM | 28   | H2'2 | A A | 1  | -59.167 | 27.760 | 46.813 | 1.00 | 0.00 | H |
| ATOM | 29   | H5'1 | A A | 1  | -61.075 | 31.536 | 44.216 | 1.00 | 0.00 | H |
| ATOM | 30   | H5'2 | A A | 1  | -60.688 | 32.337 | 45.752 | 1.00 | 0.00 | H |
| ATOM | 31   | C1'  | G A | 2  | -61.062 | 23.407 | 46.542 | 1.00 | 0.00 | C |
| ATOM | 32   | N1   | G A | 2  | -58.838 | 22.408 | 42.062 | 1.00 | 0.00 | N |

|      |    |      |     |   |         |        |        |      |      |   |
|------|----|------|-----|---|---------|--------|--------|------|------|---|
| ATOM | 33 | C2   | G A | 2 | -59.915 | 21.795 | 42.673 | 1.00 | 0.00 | C |
| ATOM | 34 | N2   | G A | 2 | -60.473 | 20.780 | 42.004 | 1.00 | 0.00 | N |
| ATOM | 35 | N3   | G A | 2 | -60.398 | 22.165 | 43.858 | 1.00 | 0.00 | N |
| ATOM | 36 | C4   | G A | 2 | -59.707 | 23.205 | 44.395 | 1.00 | 0.00 | C |
| ATOM | 37 | C5   | G A | 2 | -58.620 | 23.877 | 43.859 | 1.00 | 0.00 | C |
| ATOM | 38 | C6   | G A | 2 | -58.111 | 23.486 | 42.599 | 1.00 | 0.00 | C |
| ATOM | 39 | O6   | G A | 2 | -57.166 | 23.955 | 41.965 | 1.00 | 0.00 | O |
| ATOM | 40 | N7   | G A | 2 | -58.201 | 24.887 | 44.728 | 1.00 | 0.00 | N |
| ATOM | 41 | C8   | G A | 2 | -59.030 | 24.800 | 45.737 | 1.00 | 0.00 | C |
| ATOM | 42 | N9   | G A | 2 | -59.973 | 23.801 | 45.608 | 1.00 | 0.00 | N |
| ATOM | 43 | C2'  | G A | 2 | -60.672 | 23.493 | 48.011 | 1.00 | 0.00 | C |
| ATOM | 44 | C3'  | G A | 2 | -61.968 | 23.950 | 48.659 | 1.00 | 0.00 | C |
| ATOM | 45 | O3'  | G A | 2 | -62.792 | 22.814 | 48.912 | 1.00 | 0.00 | O |
| ATOM | 46 | C4'  | G A | 2 | -62.569 | 24.874 | 47.600 | 1.00 | 0.00 | C |
| ATOM | 47 | O4'  | G A | 2 | -62.152 | 24.284 | 46.329 | 1.00 | 0.00 | O |
| ATOM | 48 | C5'  | G A | 2 | -62.121 | 26.316 | 47.636 | 1.00 | 0.00 | C |
| ATOM | 49 | O5'  | G A | 2 | -60.722 | 26.385 | 48.008 | 1.00 | 0.00 | O |
| ATOM | 50 | O1P  | G A | 2 | -60.772 | 27.535 | 50.246 | 1.00 | 0.00 | O |
| ATOM | 51 | O2P  | G A | 2 | -58.745 | 27.729 | 48.781 | 1.00 | 0.00 | O |
| ATOM | 52 | P    | G A | 2 | -60.221 | 27.623 | 48.880 | 1.00 | 0.00 | P |
| ATOM | 53 | H1   | G A | 2 | -58.545 | 22.047 | 41.143 | 1.00 | 0.00 | H |
| ATOM | 54 | H8   | G A | 2 | -58.979 | 25.457 | 46.604 | 1.00 | 0.00 | H |
| ATOM | 55 | H1'  | G A | 2 | -61.387 | 22.399 | 46.283 | 1.00 | 0.00 | H |
| ATOM | 56 | H21  | G A | 2 | -60.096 | 20.499 | 41.087 | 1.00 | 0.00 | H |
| ATOM | 57 | H3'  | G A | 2 | -61.793 | 24.484 | 49.593 | 1.00 | 0.00 | H |
| ATOM | 58 | H22  | G A | 2 | -61.279 | 20.280 | 42.406 | 1.00 | 0.00 | H |
| ATOM | 59 | H4'  | G A | 2 | -63.650 | 24.857 | 47.743 | 1.00 | 0.00 | H |
| ATOM | 60 | H2'1 | G A | 2 | -59.868 | 24.209 | 48.184 | 1.00 | 0.00 | H |
| ATOM | 61 | H2'2 | G A | 2 | -60.346 | 22.531 | 48.410 | 1.00 | 0.00 | H |
| ATOM | 62 | H5'1 | G A | 2 | -62.263 | 26.759 | 46.651 | 1.00 | 0.00 | H |
| ATOM | 63 | H5'2 | G A | 2 | -62.725 | 26.860 | 48.363 | 1.00 | 0.00 | H |
| ATOM | 64 | C1'  | G A | 3 | -60.610 | 18.511 | 45.952 | 1.00 | 0.00 | C |
| ATOM | 65 | N1   | G A | 3 | -56.760 | 19.808 | 42.869 | 1.00 | 0.00 | N |
| ATOM | 66 | C2   | G A | 3 | -57.745 | 18.854 | 42.703 | 1.00 | 0.00 | C |
| ATOM | 67 | N2   | G A | 3 | -57.698 | 18.148 | 41.566 | 1.00 | 0.00 | N |
| ATOM | 68 | N3   | G A | 3 | -58.701 | 18.620 | 43.599 | 1.00 | 0.00 | N |
| ATOM | 69 | C4   | G A | 3 | -58.592 | 19.420 | 44.692 | 1.00 | 0.00 | C |
| ATOM | 70 | C5   | G A | 3 | -57.642 | 20.397 | 44.944 | 1.00 | 0.00 | C |
| ATOM | 71 | C6   | G A | 3 | -56.629 | 20.648 | 43.990 | 1.00 | 0.00 | C |
| ATOM | 72 | O6   | G A | 3 | -55.708 | 21.464 | 44.032 | 1.00 | 0.00 | O |
| ATOM | 73 | N7   | G A | 3 | -57.880 | 20.993 | 46.184 | 1.00 | 0.00 | N |
| ATOM | 74 | C8   | G A | 3 | -58.943 | 20.377 | 46.632 | 1.00 | 0.00 | C |
| ATOM | 75 | N9   | G A | 3 | -59.434 | 19.407 | 45.782 | 1.00 | 0.00 | N |
| ATOM | 76 | C2'  | G A | 3 | -60.808 | 18.022 | 47.380 | 1.00 | 0.00 | C |
| ATOM | 77 | C3'  | G A | 3 | -62.322 | 17.981 | 47.496 | 1.00 | 0.00 | C |
| ATOM | 78 | O3'  | G A | 3 | -62.799 | 16.744 | 46.973 | 1.00 | 0.00 | O |
| ATOM | 79 | C4'  | G A | 3 | -62.760 | 19.173 | 46.646 | 1.00 | 0.00 | C |
| ATOM | 80 | O4'  | G A | 3 | -61.764 | 19.238 | 45.577 | 1.00 | 0.00 | O |
| ATOM | 81 | C5'  | G A | 3 | -62.809 | 20.512 | 47.343 | 1.00 | 0.00 | C |
| ATOM | 82 | O5'  | G A | 3 | -61.722 | 20.609 | 48.296 | 1.00 | 0.00 | O |
| ATOM | 83 | O1P  | G A | 3 | -62.901 | 20.690 | 50.519 | 1.00 | 0.00 | O |
| ATOM | 84 | O2P  | G A | 3 | -60.647 | 21.758 | 50.255 | 1.00 | 0.00 | O |
| ATOM | 85 | P    | G A | 3 | -61.958 | 21.419 | 49.650 | 1.00 | 0.00 | P |
| ATOM | 86 | H1   | G A | 3 | -56.067 | 19.913 | 42.111 | 1.00 | 0.00 | H |

|      |     |      |     |   |         |        |        |      |      |   |
|------|-----|------|-----|---|---------|--------|--------|------|------|---|
| ATOM | 87  | H8   | G A | 3 | -59.402 | 20.608 | 47.593 | 1.00 | 0.00 | H |
| ATOM | 88  | H1'  | G A | 3 | -60.502 | 17.673 | 45.263 | 1.00 | 0.00 | H |
| ATOM | 89  | H21  | G A | 3 | -56.956 | 18.336 | 40.875 | 1.00 | 0.00 | H |
| ATOM | 90  | H3'  | G A | 3 | -62.657 | 18.090 | 48.528 | 1.00 | 0.00 | H |
| ATOM | 91  | H22  | G A | 3 | -58.402 | 17.420 | 41.383 | 1.00 | 0.00 | H |
| ATOM | 92  | H4'  | G A | 3 | -63.762 | 18.951 | 46.281 | 1.00 | 0.00 | H |
| ATOM | 93  | H2'1 | G A | 3 | -60.372 | 18.700 | 48.114 | 1.00 | 0.00 | H |
| ATOM | 94  | H2'2 | G A | 3 | -60.370 | 17.037 | 47.545 | 1.00 | 0.00 | H |
| ATOM | 95  | H5'1 | G A | 3 | -62.721 | 21.305 | 46.601 | 1.00 | 0.00 | H |
| ATOM | 96  | H5'2 | G A | 3 | -63.763 | 20.611 | 47.860 | 1.00 | 0.00 | H |
| ATOM | 97  | C1'  | C A | 4 | -58.528 | 14.432 | 44.065 | 1.00 | 0.00 | C |
| ATOM | 98  | N1   | C A | 4 | -57.691 | 15.469 | 44.731 | 1.00 | 0.00 | N |
| ATOM | 99  | C2   | C A | 4 | -56.583 | 15.955 | 44.040 | 1.00 | 0.00 | C |
| ATOM | 100 | O2   | C A | 4 | -56.340 | 15.509 | 42.912 | 1.00 | 0.00 | O |
| ATOM | 101 | N3   | C A | 4 | -55.810 | 16.899 | 44.629 | 1.00 | 0.00 | N |
| ATOM | 102 | C4   | C A | 4 | -56.098 | 17.360 | 45.853 | 1.00 | 0.00 | C |
| ATOM | 103 | N4   | C A | 4 | -55.310 | 18.286 | 46.379 | 1.00 | 0.00 | N |
| ATOM | 104 | C5   | C A | 4 | -57.230 | 16.877 | 46.586 | 1.00 | 0.00 | C |
| ATOM | 105 | C6   | C A | 4 | -57.997 | 15.929 | 45.974 | 1.00 | 0.00 | C |
| ATOM | 106 | C2'  | C A | 4 | -59.054 | 13.365 | 45.015 | 1.00 | 0.00 | C |
| ATOM | 107 | C3'  | C A | 4 | -60.429 | 13.073 | 44.434 | 1.00 | 0.00 | C |
| ATOM | 108 | O3'  | C A | 4 | -60.299 | 12.117 | 43.383 | 1.00 | 0.00 | O |
| ATOM | 109 | C4'  | C A | 4 | -60.878 | 14.439 | 43.920 | 1.00 | 0.00 | C |
| ATOM | 110 | O4'  | C A | 4 | -59.640 | 15.086 | 43.482 | 1.00 | 0.00 | O |
| ATOM | 111 | C5'  | C A | 4 | -61.565 | 15.339 | 44.919 | 1.00 | 0.00 | C |
| ATOM | 112 | O5'  | C A | 4 | -60.960 | 15.173 | 46.227 | 1.00 | 0.00 | O |
| ATOM | 113 | O1P  | C A | 4 | -62.805 | 14.148 | 47.597 | 1.00 | 0.00 | O |
| ATOM | 114 | O2P  | C A | 4 | -61.031 | 15.526 | 48.714 | 1.00 | 0.00 | O |
| ATOM | 115 | P    | C A | 4 | -61.883 | 15.298 | 47.521 | 1.00 | 0.00 | P |
| ATOM | 116 | H5   | C A | 4 | -57.466 | 17.246 | 47.584 | 1.00 | 0.00 | H |
| ATOM | 117 | H6   | C A | 4 | -58.871 | 15.534 | 46.490 | 1.00 | 0.00 | H |
| ATOM | 118 | H1'  | C A | 4 | -57.942 | 13.987 | 43.263 | 1.00 | 0.00 | H |
| ATOM | 119 | H3'  | C A | 4 | -61.117 | 12.690 | 45.187 | 1.00 | 0.00 | H |
| ATOM | 120 | H4'  | C A | 4 | -61.575 | 14.256 | 43.102 | 1.00 | 0.00 | H |
| ATOM | 121 | H41  | C A | 4 | -55.510 | 18.660 | 47.319 | 1.00 | 0.00 | H |
| ATOM | 122 | H42  | C A | 4 | -54.495 | 18.632 | 45.851 | 1.00 | 0.00 | H |
| ATOM | 123 | H2'1 | C A | 4 | -59.126 | 13.723 | 46.041 | 1.00 | 0.00 | H |
| ATOM | 124 | H2'2 | C A | 4 | -58.427 | 12.472 | 45.022 | 1.00 | 0.00 | H |
| ATOM | 125 | H5'1 | C A | 4 | -61.465 | 16.376 | 44.597 | 1.00 | 0.00 | H |
| ATOM | 126 | H5'2 | C A | 4 | -62.622 | 15.079 | 44.967 | 1.00 | 0.00 | H |
| ATOM | 127 | C1'  | C A | 5 | -54.791 | 11.856 | 42.085 | 1.00 | 0.00 | C |
| ATOM | 128 | N1   | C A | 5 | -54.596 | 12.619 | 43.349 | 1.00 | 0.00 | N |
| ATOM | 129 | C2   | C A | 5 | -53.517 | 13.497 | 43.420 | 1.00 | 0.00 | C |
| ATOM | 130 | O2   | C A | 5 | -52.769 | 13.608 | 42.440 | 1.00 | 0.00 | O |
| ATOM | 131 | N3   | C A | 5 | -53.323 | 14.201 | 44.563 | 1.00 | 0.00 | N |
| ATOM | 132 | C4   | C A | 5 | -54.148 | 14.060 | 45.607 | 1.00 | 0.00 | C |
| ATOM | 133 | N4   | C A | 5 | -53.914 | 14.775 | 46.696 | 1.00 | 0.00 | N |
| ATOM | 134 | C5   | C A | 5 | -55.265 | 13.163 | 45.561 | 1.00 | 0.00 | C |
| ATOM | 135 | C6   | C A | 5 | -55.442 | 12.467 | 44.401 | 1.00 | 0.00 | C |
| ATOM | 136 | C2'  | C A | 5 | -55.271 | 10.427 | 42.299 | 1.00 | 0.00 | C |
| ATOM | 137 | C3'  | C A | 5 | -56.196 | 10.223 | 41.109 | 1.00 | 0.00 | C |
| ATOM | 138 | O3'  | C A | 5 | -55.423 | 9.827  | 39.978 | 1.00 | 0.00 | O |
| ATOM | 139 | C4'  | C A | 5 | -56.823 | 11.603 | 40.925 | 1.00 | 0.00 | C |
| ATOM | 140 | O4'  | C A | 5 | -55.767 | 12.536 | 41.318 | 1.00 | 0.00 | O |

|      |     |      |     |   |         |        |        |      |      |   |
|------|-----|------|-----|---|---------|--------|--------|------|------|---|
| ATOM | 141 | C5'  | C A | 5 | -58.056 | 11.894 | 41.749 | 1.00 | 0.00 | C |
| ATOM | 142 | O5'  | C A | 5 | -57.930 | 11.277 | 43.055 | 1.00 | 0.00 | O |
| ATOM | 143 | O1P  | C A | 5 | -59.740 | 9.528  | 43.049 | 1.00 | 0.00 | O |
| ATOM | 144 | O2P  | C A | 5 | -58.976 | 10.535 | 45.216 | 1.00 | 0.00 | O |
| ATOM | 145 | P    | C A | 5 | -59.242 | 10.717 | 43.768 | 1.00 | 0.00 | P |
| ATOM | 146 | H5   | C A | 5 | -55.937 | 13.040 | 46.411 | 1.00 | 0.00 | H |
| ATOM | 147 | H6   | C A | 5 | -56.280 | 11.775 | 44.317 | 1.00 | 0.00 | H |
| ATOM | 148 | H1'  | C A | 5 | -53.854 | 11.875 | 41.528 | 1.00 | 0.00 | H |
| ATOM | 149 | H3'  | C A | 5 | -56.956 | 9.467  | 41.308 | 1.00 | 0.00 | H |
| ATOM | 150 | H4'  | C A | 5 | -57.099 | 11.688 | 39.874 | 1.00 | 0.00 | H |
| ATOM | 151 | H41  | C A | 5 | -54.534 | 14.687 | 47.514 | 1.00 | 0.00 | H |
| ATOM | 152 | H42  | C A | 5 | -53.109 | 15.419 | 46.727 | 1.00 | 0.00 | H |
| ATOM | 153 | H2'1 | C A | 5 | -55.804 | 10.306 | 43.240 | 1.00 | 0.00 | H |
| ATOM | 154 | H2'2 | C A | 5 | -54.449 | 9.710  | 42.291 | 1.00 | 0.00 | H |
| ATOM | 155 | H5'1 | C A | 5 | -58.165 | 12.974 | 41.860 | 1.00 | 0.00 | H |
| ATOM | 156 | H5'2 | C A | 5 | -58.931 | 11.497 | 41.236 | 1.00 | 0.00 | H |
| ATOM | 157 | C1'  | G A | 6 | -50.005 | 10.894 | 41.248 | 1.00 | 0.00 | C |
| ATOM | 158 | N1   | G A | 6 | -49.321 | 13.348 | 45.668 | 1.00 | 0.00 | N |
| ATOM | 159 | C2   | G A | 6 | -48.605 | 13.430 | 44.486 | 1.00 | 0.00 | C |
| ATOM | 160 | N2   | G A | 6 | -47.569 | 14.276 | 44.482 | 1.00 | 0.00 | N |
| ATOM | 161 | N3   | G A | 6 | -48.902 | 12.724 | 43.396 | 1.00 | 0.00 | N |
| ATOM | 162 | C4   | G A | 6 | -49.976 | 11.913 | 43.582 | 1.00 | 0.00 | C |
| ATOM | 163 | C5   | G A | 6 | -50.746 | 11.763 | 44.723 | 1.00 | 0.00 | C |
| ATOM | 164 | C6   | G A | 6 | -50.436 | 12.514 | 45.879 | 1.00 | 0.00 | C |
| ATOM | 165 | O6   | G A | 6 | -50.995 | 12.519 | 46.975 | 1.00 | 0.00 | O |
| ATOM | 166 | N7   | G A | 6 | -51.759 | 10.827 | 44.502 | 1.00 | 0.00 | N |
| ATOM | 167 | C8   | G A | 6 | -51.577 | 10.452 | 43.262 | 1.00 | 0.00 | C |
| ATOM | 168 | N9   | G A | 6 | -50.512 | 11.066 | 42.636 | 1.00 | 0.00 | N |
| ATOM | 169 | C2'  | G A | 6 | -50.077 | 9.459  | 40.743 | 1.00 | 0.00 | C |
| ATOM | 170 | C3'  | G A | 6 | -50.410 | 9.655  | 39.273 | 1.00 | 0.00 | C |
| ATOM | 171 | O3'  | G A | 6 | -49.206 | 9.884  | 38.545 | 1.00 | 0.00 | O |
| ATOM | 172 | C4'  | G A | 6 | -51.316 | 10.886 | 39.292 | 1.00 | 0.00 | C |
| ATOM | 173 | O4'  | G A | 6 | -50.800 | 11.696 | 40.395 | 1.00 | 0.00 | O |
| ATOM | 174 | C5'  | G A | 6 | -52.786 | 10.633 | 39.524 | 1.00 | 0.00 | C |
| ATOM | 175 | O5'  | G A | 6 | -52.956 | 9.544  | 40.465 | 1.00 | 0.00 | O |
| ATOM | 176 | O1P  | G A | 6 | -54.029 | 7.738  | 39.080 | 1.00 | 0.00 | O |
| ATOM | 177 | O2P  | G A | 6 | -54.427 | 7.823  | 41.556 | 1.00 | 0.00 | O |
| ATOM | 178 | P    | G A | 6 | -54.202 | 8.564  | 40.290 | 1.00 | 0.00 | P |
| ATOM | 179 | H1   | G A | 6 | -49.014 | 13.943 | 46.452 | 1.00 | 0.00 | H |
| ATOM | 180 | H8   | G A | 6 | -52.210 | 9.716  | 42.765 | 1.00 | 0.00 | H |
| ATOM | 181 | H1'  | G A | 6 | -48.983 | 11.271 | 41.208 | 1.00 | 0.00 | H |
| ATOM | 182 | H21  | G A | 6 | -47.348 | 14.822 | 45.327 | 1.00 | 0.00 | H |
| ATOM | 183 | H3'  | G A | 6 | -50.928 | 8.793  | 38.852 | 1.00 | 0.00 | H |
| ATOM | 184 | H22  | G A | 6 | -46.994 | 14.382 | 43.634 | 1.00 | 0.00 | H |
| ATOM | 185 | H4'  | G A | 6 | -51.210 | 11.371 | 38.322 | 1.00 | 0.00 | H |
| ATOM | 186 | H2'1 | G A | 6 | -50.848 | 8.880  | 41.251 | 1.00 | 0.00 | H |
| ATOM | 187 | H2'2 | G A | 6 | -49.133 | 8.928  | 40.869 | 1.00 | 0.00 | H |
| ATOM | 188 | H5'1 | G A | 6 | -53.248 | 11.537 | 39.920 | 1.00 | 0.00 | H |
| ATOM | 189 | H5'2 | G A | 6 | -53.260 | 10.378 | 38.576 | 1.00 | 0.00 | H |
| ATOM | 190 | C1'  | C A | 7 | -45.180 | 11.038 | 42.352 | 1.00 | 0.00 | C |
| ATOM | 191 | N1   | C A | 7 | -46.168 | 10.542 | 43.349 | 1.00 | 0.00 | N |
| ATOM | 192 | C2   | C A | 7 | -46.140 | 11.097 | 44.626 | 1.00 | 0.00 | C |
| ATOM | 193 | O2   | C A | 7 | -45.302 | 11.971 | 44.880 | 1.00 | 0.00 | O |
| ATOM | 194 | N3   | C A | 7 | -47.033 | 10.660 | 45.549 | 1.00 | 0.00 | N |

|      |     |      |     |   |         |        |        |      |      |   |
|------|-----|------|-----|---|---------|--------|--------|------|------|---|
| ATOM | 195 | C4   | C A | 7 | -47.928 | 9.711  | 45.245 | 1.00 | 0.00 | C |
| ATOM | 196 | N4   | C A | 7 | -48.778 | 9.324  | 46.183 | 1.00 | 0.00 | N |
| ATOM | 197 | C5   | C A | 7 | -47.977 | 9.119  | 43.940 | 1.00 | 0.00 | C |
| ATOM | 198 | C6   | C A | 7 | -47.072 | 9.579  | 43.025 | 1.00 | 0.00 | C |
| ATOM | 199 | C2'  | C A | 7 | -44.634 | 9.951  | 41.436 | 1.00 | 0.00 | C |
| ATOM | 200 | C3'  | C A | 7 | -44.474 | 10.697 | 40.120 | 1.00 | 0.00 | C |
| ATOM | 201 | O3'  | C A | 7 | -43.218 | 11.374 | 40.115 | 1.00 | 0.00 | O |
| ATOM | 202 | C4'  | C A | 7 | -45.653 | 11.667 | 40.134 | 1.00 | 0.00 | C |
| ATOM | 203 | O4'  | C A | 7 | -45.828 | 12.004 | 41.547 | 1.00 | 0.00 | O |
| ATOM | 204 | C5'  | C A | 7 | -46.964 | 11.137 | 39.598 | 1.00 | 0.00 | C |
| ATOM | 205 | O5'  | C A | 7 | -47.114 | 9.741  | 39.962 | 1.00 | 0.00 | O |
| ATOM | 206 | O1P  | C A | 7 | -47.036 | 8.549  | 37.746 | 1.00 | 0.00 | O |
| ATOM | 207 | O2P  | C A | 7 | -48.282 | 7.537  | 39.675 | 1.00 | 0.00 | O |
| ATOM | 208 | P    | C A | 7 | -47.863 | 8.761  | 38.952 | 1.00 | 0.00 | P |
| ATOM | 209 | H5   | C A | 7 | -48.700 | 8.342  | 43.689 | 1.00 | 0.00 | H |
| ATOM | 210 | H6   | C A | 7 | -47.075 | 9.165  | 42.016 | 1.00 | 0.00 | H |
| ATOM | 211 | H1'  | C A | 7 | -44.374 | 11.537 | 42.891 | 1.00 | 0.00 | H |
| ATOM | 212 | H3'  | C A | 7 | -44.525 | 10.025 | 39.263 | 1.00 | 0.00 | H |
| ATOM | 213 | H4'  | C A | 7 | -45.366 | 12.522 | 39.523 | 1.00 | 0.00 | H |
| ATOM | 214 | H41  | C A | 7 | -49.479 | 8.597  | 45.976 | 1.00 | 0.00 | H |
| ATOM | 215 | H42  | C A | 7 | -48.741 | 9.747  | 47.122 | 1.00 | 0.00 | H |
| ATOM | 216 | H2'1 | C A | 7 | -45.320 | 9.112  | 41.335 | 1.00 | 0.00 | H |
| ATOM | 217 | H2'2 | C A | 7 | -43.680 | 9.555  | 41.787 | 1.00 | 0.00 | H |
| ATOM | 218 | H5'1 | C A | 7 | -47.784 | 11.719 | 40.020 | 1.00 | 0.00 | H |
| ATOM | 219 | H5'2 | C A | 7 | -46.973 | 11.237 | 38.513 | 1.00 | 0.00 | H |
| ATOM | 220 | C1'  | A A | 8 | -41.323 | 11.365 | 45.439 | 1.00 | 0.00 | C |
| ATOM | 221 | N1   | A A | 8 | -44.650 | 9.504  | 48.876 | 1.00 | 0.00 | N |
| ATOM | 222 | C2   | A A | 8 | -43.735 | 10.467 | 48.941 | 1.00 | 0.00 | C |
| ATOM | 223 | N3   | A A | 8 | -42.909 | 10.901 | 48.013 | 1.00 | 0.00 | N |
| ATOM | 224 | C4   | A A | 8 | -43.086 | 10.207 | 46.873 | 1.00 | 0.00 | C |
| ATOM | 225 | C5   | A A | 8 | -43.976 | 9.195  | 46.644 | 1.00 | 0.00 | C |
| ATOM | 226 | C6   | A A | 8 | -44.804 | 8.832  | 47.725 | 1.00 | 0.00 | C |
| ATOM | 227 | N6   | A A | 8 | -45.726 | 7.856  | 47.648 | 1.00 | 0.00 | N |
| ATOM | 228 | N7   | A A | 8 | -43.871 | 8.722  | 45.347 | 1.00 | 0.00 | N |
| ATOM | 229 | C8   | A A | 8 | -42.926 | 9.448  | 44.825 | 1.00 | 0.00 | C |
| ATOM | 230 | N9   | A A | 8 | -42.404 | 10.373 | 45.692 | 1.00 | 0.00 | N |
| ATOM | 231 | C2'  | A A | 8 | -40.203 | 10.839 | 44.551 | 1.00 | 0.00 | C |
| ATOM | 232 | C3'  | A A | 8 | -39.824 | 12.077 | 43.754 | 1.00 | 0.00 | C |
| ATOM | 233 | O3'  | A A | 8 | -38.902 | 12.855 | 44.511 | 1.00 | 0.00 | O |
| ATOM | 234 | C4'  | A A | 8 | -41.164 | 12.787 | 43.569 | 1.00 | 0.00 | C |
| ATOM | 235 | O4'  | A A | 8 | -41.906 | 12.481 | 44.794 | 1.00 | 0.00 | O |
| ATOM | 236 | C5'  | A A | 8 | -41.992 | 12.358 | 42.381 | 1.00 | 0.00 | C |
| ATOM | 237 | O5'  | A A | 8 | -41.847 | 10.930 | 42.172 | 1.00 | 0.00 | O |
| ATOM | 238 | O1P  | A A | 8 | -40.665 | 10.786 | 39.954 | 1.00 | 0.00 | O |
| ATOM | 239 | O2P  | A A | 8 | -42.147 | 8.908  | 40.711 | 1.00 | 0.00 | O |
| ATOM | 240 | P    | A A | 8 | -41.879 | 10.367 | 40.680 | 1.00 | 0.00 | P |
| ATOM | 241 | H2   | A A | 8 | -43.658 | 10.971 | 49.903 | 1.00 | 0.00 | H |
| ATOM | 242 | H8   | A A | 8 | -42.582 | 9.333  | 43.798 | 1.00 | 0.00 | H |
| ATOM | 243 | H1'  | A A | 8 | -40.935 | 11.699 | 46.401 | 1.00 | 0.00 | H |
| ATOM | 244 | H3'  | A A | 8 | -39.378 | 11.823 | 42.792 | 1.00 | 0.00 | H |
| ATOM | 245 | H4'  | A A | 8 | -40.946 | 13.848 | 43.458 | 1.00 | 0.00 | H |
| ATOM | 246 | H61  | A A | 8 | -46.307 | 7.632  | 48.467 | 1.00 | 0.00 | H |
| ATOM | 247 | H62  | A A | 8 | -45.848 | 7.334  | 46.768 | 1.00 | 0.00 | H |
| ATOM | 248 | H2'1 | A A | 8 | -40.537 | 10.034 | 43.898 | 1.00 | 0.00 | H |

|      |     |      |     |    |         |        |        |      |      |   |
|------|-----|------|-----|----|---------|--------|--------|------|------|---|
| ATOM | 249 | H2'2 | A A | 8  | -39.359 | 10.465 | 45.130 | 1.00 | 0.00 | H |
| ATOM | 250 | H5'1 | A A | 8  | -43.039 | 12.597 | 42.572 | 1.00 | 0.00 | H |
| ATOM | 251 | H5'2 | A A | 8  | -41.656 | 12.896 | 41.496 | 1.00 | 0.00 | H |
| ATOM | 252 | C1'  | C A | 9  | -39.124 | 10.867 | 49.863 | 1.00 | 0.00 | C |
| ATOM | 253 | N1   | C A | 9  | -39.861 | 9.725  | 49.256 | 1.00 | 0.00 | N |
| ATOM | 254 | C2   | C A | 9  | -40.819 | 9.078  | 50.034 | 1.00 | 0.00 | C |
| ATOM | 255 | O2   | C A | 9  | -41.016 | 9.476  | 51.189 | 1.00 | 0.00 | O |
| ATOM | 256 | N3   | C A | 9  | -41.501 | 8.037  | 49.499 | 1.00 | 0.00 | N |
| ATOM | 257 | C4   | C A | 9  | -41.264 | 7.629  | 48.246 | 1.00 | 0.00 | C |
| ATOM | 258 | N4   | C A | 9  | -41.963 | 6.607  | 47.772 | 1.00 | 0.00 | N |
| ATOM | 259 | C5   | C A | 9  | -40.281 | 8.272  | 47.423 | 1.00 | 0.00 | C |
| ATOM | 260 | C6   | C A | 9  | -39.609 | 9.323  | 47.980 | 1.00 | 0.00 | C |
| ATOM | 261 | C2'  | C A | 9  | -37.656 | 10.931 | 49.465 | 1.00 | 0.00 | C |
| ATOM | 262 | C3'  | C A | 9  | -37.415 | 12.431 | 49.382 | 1.00 | 0.00 | C |
| ATOM | 263 | O3'  | C A | 9  | -37.116 | 12.930 | 50.684 | 1.00 | 0.00 | O |
| ATOM | 264 | C4'  | C A | 9  | -38.746 | 12.960 | 48.853 | 1.00 | 0.00 | C |
| ATOM | 265 | O4'  | C A | 9  | -39.747 | 12.061 | 49.429 | 1.00 | 0.00 | O |
| ATOM | 266 | C5'  | C A | 9  | -38.915 | 12.971 | 47.352 | 1.00 | 0.00 | C |
| ATOM | 267 | O5'  | C A | 9  | -38.270 | 11.806 | 46.777 | 1.00 | 0.00 | O |
| ATOM | 268 | O1P  | C A | 9  | -36.385 | 12.789 | 45.430 | 1.00 | 0.00 | O |
| ATOM | 269 | O2P  | C A | 9  | -37.383 | 10.584 | 44.768 | 1.00 | 0.00 | O |
| ATOM | 270 | P    | C A | 9  | -37.587 | 11.937 | 45.342 | 1.00 | 0.00 | P |
| ATOM | 271 | H5   | C A | 9  | -40.081 | 7.940  | 46.404 | 1.00 | 0.00 | H |
| ATOM | 272 | H6   | C A | 9  | -38.858 | 9.849  | 47.392 | 1.00 | 0.00 | H |
| ATOM | 273 | H1'  | C A | 9  | -39.233 | 10.805 | 50.946 | 1.00 | 0.00 | H |
| ATOM | 274 | H3'  | C A | 9  | -36.597 | 12.675 | 48.705 | 1.00 | 0.00 | H |
| ATOM | 275 | H4'  | C A | 9  | -38.842 | 13.986 | 49.206 | 1.00 | 0.00 | H |
| ATOM | 276 | H41  | C A | 9  | -41.802 | 6.275  | 46.810 | 1.00 | 0.00 | H |
| ATOM | 277 | H42  | C A | 9  | -42.666 | 6.145  | 48.366 | 1.00 | 0.00 | H |
| ATOM | 278 | H2'1 | C A | 9  | -37.464 | 10.446 | 48.509 | 1.00 | 0.00 | H |
| ATOM | 279 | H2'2 | C A | 9  | -37.006 | 10.464 | 50.206 | 1.00 | 0.00 | H |
| ATOM | 280 | H5'1 | C A | 9  | -39.978 | 12.960 | 47.110 | 1.00 | 0.00 | H |
| ATOM | 281 | H5'2 | C A | 9  | -38.466 | 13.878 | 46.948 | 1.00 | 0.00 | H |
| ATOM | 282 | C1'  | C A | 10 | -38.566 | 8.870  | 54.360 | 1.00 | 0.00 | C |
| ATOM | 283 | N1   | C A | 10 | -38.661 | 8.002  | 53.155 | 1.00 | 0.00 | N |
| ATOM | 284 | C2   | C A | 10 | -39.590 | 6.963  | 53.171 | 1.00 | 0.00 | C |
| ATOM | 285 | O2   | C A | 10 | -40.293 | 6.804  | 54.178 | 1.00 | 0.00 | O |
| ATOM | 286 | N3   | C A | 10 | -39.693 | 6.161  | 52.083 | 1.00 | 0.00 | N |
| ATOM | 287 | C4   | C A | 10 | -38.918 | 6.356  | 51.008 | 1.00 | 0.00 | C |
| ATOM | 288 | N4   | C A | 10 | -39.063 | 5.544  | 49.970 | 1.00 | 0.00 | N |
| ATOM | 289 | C5   | C A | 10 | -37.951 | 7.414  | 50.965 | 1.00 | 0.00 | C |
| ATOM | 290 | C6   | C A | 10 | -37.869 | 8.212  | 52.070 | 1.00 | 0.00 | C |
| ATOM | 291 | C2'  | C A | 10 | -37.144 | 9.296  | 54.698 | 1.00 | 0.00 | C |
| ATOM | 292 | C3'  | C A | 10 | -37.353 | 10.708 | 55.224 | 1.00 | 0.00 | C |
| ATOM | 293 | O3'  | C A | 10 | -37.697 | 10.647 | 56.606 | 1.00 | 0.00 | O |
| ATOM | 294 | C4'  | C A | 10 | -38.505 | 11.223 | 54.364 | 1.00 | 0.00 | C |
| ATOM | 295 | O4'  | C A | 10 | -39.325 | 10.038 | 54.110 | 1.00 | 0.00 | O |
| ATOM | 296 | C5'  | C A | 10 | -38.129 | 11.843 | 53.039 | 1.00 | 0.00 | C |
| ATOM | 297 | O5'  | C A | 10 | -37.004 | 11.129 | 52.465 | 1.00 | 0.00 | O |
| ATOM | 298 | O1P  | C A | 10 | -35.155 | 12.836 | 52.495 | 1.00 | 0.00 | O |
| ATOM | 299 | O2P  | C A | 10 | -35.143 | 11.002 | 50.782 | 1.00 | 0.00 | O |
| ATOM | 300 | P    | C A | 10 | -35.933 | 11.945 | 51.612 | 1.00 | 0.00 | P |
| ATOM | 301 | H5   | C A | 10 | -37.314 | 7.573  | 50.094 | 1.00 | 0.00 | H |
| ATOM | 302 | H6   | C A | 10 | -37.154 | 9.035  | 52.082 | 1.00 | 0.00 | H |

|      |     |      |   |   |    |         |        |        |      |      |   |
|------|-----|------|---|---|----|---------|--------|--------|------|------|---|
| ATOM | 303 | H1'  | C | A | 10 | -39.026 | 8.344  | 55.197 | 1.00 | 0.00 | H |
| ATOM | 304 | H3'  | C | A | 10 | -36.462 | 11.325 | 55.101 | 1.00 | 0.00 | H |
| ATOM | 305 | H4'  | C | A | 10 | -39.023 | 11.982 | 54.951 | 1.00 | 0.00 | H |
| ATOM | 306 | H41  | C | A | 10 | -38.481 | 5.674  | 49.130 | 1.00 | 0.00 | H |
| ATOM | 307 | H42  | C | A | 10 | -39.756 | 4.783  | 50.005 | 1.00 | 0.00 | H |
| ATOM | 308 | H2'1 | C | A | 10 | -36.491 | 9.290  | 53.827 | 1.00 | 0.00 | H |
| ATOM | 309 | H2'2 | C | A | 10 | -36.689 | 8.654  | 55.454 | 1.00 | 0.00 | H |
| ATOM | 310 | H5'1 | C | A | 10 | -38.983 | 11.789 | 52.362 | 1.00 | 0.00 | H |
| ATOM | 311 | H5'2 | C | A | 10 | -37.862 | 12.887 | 53.196 | 1.00 | 0.00 | H |
| ATOM | 312 | C1'  | T | A | 11 | -39.049 | 5.276  | 57.730 | 1.00 | 0.00 | C |
| ATOM | 313 | N1   | T | A | 11 | -38.462 | 4.975  | 56.398 | 1.00 | 0.00 | N |
| ATOM | 314 | C2   | T | A | 11 | -38.997 | 3.912  | 55.699 | 1.00 | 0.00 | C |
| ATOM | 315 | O2   | T | A | 11 | -39.912 | 3.231  | 56.131 | 1.00 | 0.00 | O |
| ATOM | 316 | N3   | T | A | 11 | -38.423 | 3.667  | 54.465 | 1.00 | 0.00 | N |
| ATOM | 317 | C4   | T | A | 11 | -37.386 | 4.372  | 53.888 | 1.00 | 0.00 | C |
| ATOM | 318 | O4   | T | A | 11 | -36.951 | 4.057  | 52.773 | 1.00 | 0.00 | O |
| ATOM | 319 | C5   | T | A | 11 | -36.893 | 5.465  | 54.692 | 1.00 | 0.00 | C |
| ATOM | 320 | C6   | T | A | 11 | -37.430 | 5.732  | 55.899 | 1.00 | 0.00 | C |
| ATOM | 321 | C7   | T | A | 11 | -35.767 | 6.260  | 54.102 | 1.00 | 0.00 | C |
| ATOM | 322 | C2'  | T | A | 11 | -38.025 | 5.718  | 58.768 | 1.00 | 0.00 | C |
| ATOM | 323 | C3'  | T | A | 11 | -38.806 | 6.746  | 59.569 | 1.00 | 0.00 | C |
| ATOM | 324 | O3'  | T | A | 11 | -39.574 | 6.077  | 60.568 | 1.00 | 0.00 | O |
| ATOM | 325 | C4'  | T | A | 11 | -39.686 | 7.405  | 58.510 | 1.00 | 0.00 | C |
| ATOM | 326 | O4'  | T | A | 11 | -39.981 | 6.328  | 57.564 | 1.00 | 0.00 | O |
| ATOM | 327 | C5'  | T | A | 11 | -39.074 | 8.560  | 57.751 | 1.00 | 0.00 | C |
| ATOM | 328 | O5'  | T | A | 11 | -37.664 | 8.306  | 57.527 | 1.00 | 0.00 | O |
| ATOM | 329 | O1P  | T | A | 11 | -36.527 | 10.086 | 58.895 | 1.00 | 0.00 | O |
| ATOM | 330 | O2P  | T | A | 11 | -35.384 | 9.137  | 56.874 | 1.00 | 0.00 | O |
| ATOM | 331 | P    | T | A | 11 | -36.652 | 9.538  | 57.531 | 1.00 | 0.00 | P |
| ATOM | 332 | H3   | T | A | 11 | -38.807 | 2.882  | 53.922 | 1.00 | 0.00 | H |
| ATOM | 333 | H6   | T | A | 11 | -37.041 | 6.563  | 56.489 | 1.00 | 0.00 | H |
| ATOM | 334 | H1'  | T | A | 11 | -39.594 | 4.396  | 58.071 | 1.00 | 0.00 | H |
| ATOM | 335 | H3'  | T | A | 11 | -38.152 | 7.474  | 60.046 | 1.00 | 0.00 | H |
| ATOM | 336 | H4'  | T | A | 11 | -40.574 | 7.777  | 59.022 | 1.00 | 0.00 | H |
| ATOM | 337 | H71  | T | A | 11 | -34.870 | 6.124  | 54.705 | 1.00 | 0.00 | H |
| ATOM | 338 | H72  | T | A | 11 | -35.575 | 5.918  | 53.084 | 1.00 | 0.00 | H |
| ATOM | 339 | H73  | T | A | 11 | -36.036 | 7.316  | 54.084 | 1.00 | 0.00 | H |
| ATOM | 340 | H2'1 | T | A | 11 | -37.140 | 6.159  | 58.312 | 1.00 | 0.00 | H |
| ATOM | 341 | H2'2 | T | A | 11 | -37.691 | 4.892  | 59.398 | 1.00 | 0.00 | H |
| ATOM | 342 | H5'1 | T | A | 11 | -39.584 | 8.672  | 56.795 | 1.00 | 0.00 | H |
| ATOM | 343 | H5'2 | T | A | 11 | -39.195 | 9.474  | 58.332 | 1.00 | 0.00 | H |
| ATOM | 344 | C1'  | A | A | 12 | -39.592 | 0.551  | 59.148 | 1.00 | 0.00 | C |
| ATOM | 345 | N1   | A | A | 12 | -37.372 | -0.474 | 54.635 | 1.00 | 0.00 | N |
| ATOM | 346 | C2   | A | A | 12 | -38.400 | -1.021 | 55.276 | 1.00 | 0.00 | C |
| ATOM | 347 | N3   | A | A | 12 | -38.925 | -0.704 | 56.441 | 1.00 | 0.00 | N |
| ATOM | 348 | C4   | A | A | 12 | -38.256 | 0.326  | 56.988 | 1.00 | 0.00 | C |
| ATOM | 349 | C5   | A | A | 12 | -37.185 | 0.994  | 56.465 | 1.00 | 0.00 | C |
| ATOM | 350 | C6   | A | A | 12 | -36.724 | 0.553  | 55.206 | 1.00 | 0.00 | C |
| ATOM | 351 | N6   | A | A | 12 | -35.682 | 1.114  | 54.569 | 1.00 | 0.00 | N |
| ATOM | 352 | N7   | A | A | 12 | -36.761 | 2.001  | 57.313 | 1.00 | 0.00 | N |
| ATOM | 353 | C8   | A | A | 12 | -37.573 | 1.920  | 58.325 | 1.00 | 0.00 | C |
| ATOM | 354 | N9   | A | A | 12 | -38.510 | 0.926  | 58.197 | 1.00 | 0.00 | N |
| ATOM | 355 | C2'  | A | A | 12 | -39.182 | 0.652  | 60.611 | 1.00 | 0.00 | C |
| ATOM | 356 | C3'  | A | A | 12 | -40.469 | 1.125  | 61.269 | 1.00 | 0.00 | C |



|      |     |      |   |   |    |         |        |        |      |      |   |
|------|-----|------|---|---|----|---------|--------|--------|------|------|---|
| ATOM | 357 | O3'  | A | A | 12 | -41.295 | -0.004 | 61.544 | 1.00 | 0.00 | O |
| ATOM | 358 | C4'  | A | A | 12 | -41.077 | 2.040  | 60.207 | 1.00 | 0.00 | C |
| ATOM | 359 | O4'  | A | A | 12 | -40.677 | 1.433  | 58.937 | 1.00 | 0.00 | O |
| ATOM | 360 | C5'  | A | A | 12 | -40.621 | 3.479  | 60.221 | 1.00 | 0.00 | C |
| ATOM | 361 | O5'  | A | A | 12 | -39.216 | 3.545  | 60.576 | 1.00 | 0.00 | O |
| ATOM | 362 | O1P  | A | A | 12 | -39.232 | 4.720  | 62.802 | 1.00 | 0.00 | O |
| ATOM | 363 | O2P  | A | A | 12 | -37.221 | 4.885  | 61.310 | 1.00 | 0.00 | O |
| ATOM | 364 | P    | A | A | 12 | -38.697 | 4.789  | 61.428 | 1.00 | 0.00 | P |
| ATOM | 365 | H2   | A | A | 12 | -38.880 | -1.853 | 54.761 | 1.00 | 0.00 | H |
| ATOM | 366 | H8   | A | A | 12 | -37.517 | 2.578  | 59.193 | 1.00 | 0.00 | H |
| ATOM | 367 | H1'  | A | A | 12 | -39.925 | -0.457 | 58.904 | 1.00 | 0.00 | H |
| ATOM | 368 | H3'  | A | A | 12 | -40.280 | 1.668  | 62.194 | 1.00 | 0.00 | H |
| ATOM | 369 | H4'  | A | A | 12 | -42.156 | 2.031  | 60.363 | 1.00 | 0.00 | H |
| ATOM | 370 | H61  | A | A | 12 | -35.387 | 0.756  | 53.650 | 1.00 | 0.00 | H |
| ATOM | 371 | H62  | A | A | 12 | -35.178 | 1.902  | 55.002 | 1.00 | 0.00 | H |
| ATOM | 372 | H2'1 | A | A | 12 | -38.373 | 1.364  | 60.767 | 1.00 | 0.00 | H |
| ATOM | 373 | H2'2 | A | A | 12 | -38.858 | -0.307 | 61.016 | 1.00 | 0.00 | H |
| ATOM | 374 | H5'1 | A | A | 12 | -40.771 | 3.911  | 59.232 | 1.00 | 0.00 | H |
| ATOM | 375 | H5'2 | A | A | 12 | -41.210 | 4.035  | 60.948 | 1.00 | 0.00 | H |
| ATOM | 376 | C1'  | G | A | 13 | -39.133 | -4.354 | 58.536 | 1.00 | 0.00 | C |
| ATOM | 377 | N1   | G | A | 13 | -35.283 | -3.056 | 55.452 | 1.00 | 0.00 | N |
| ATOM | 378 | C2   | G | A | 13 | -36.268 | -4.012 | 55.286 | 1.00 | 0.00 | C |
| ATOM | 379 | N2   | G | A | 13 | -36.221 | -4.720 | 54.149 | 1.00 | 0.00 | N |
| ATOM | 380 | N3   | G | A | 13 | -37.224 | -4.245 | 56.184 | 1.00 | 0.00 | N |
| ATOM | 381 | C4   | G | A | 13 | -37.115 | -3.445 | 57.276 | 1.00 | 0.00 | C |
| ATOM | 382 | C5   | G | A | 13 | -36.165 | -2.468 | 57.528 | 1.00 | 0.00 | C |
| ATOM | 383 | C6   | G | A | 13 | -35.151 | -2.218 | 56.574 | 1.00 | 0.00 | C |
| ATOM | 384 | O6   | G | A | 13 | -34.230 | -1.402 | 56.618 | 1.00 | 0.00 | O |
| ATOM | 385 | N7   | G | A | 13 | -36.403 | -1.873 | 58.768 | 1.00 | 0.00 | N |
| ATOM | 386 | C8   | G | A | 13 | -37.466 | -2.488 | 59.216 | 1.00 | 0.00 | C |
| ATOM | 387 | N9   | G | A | 13 | -37.956 | -3.458 | 58.366 | 1.00 | 0.00 | N |
| ATOM | 388 | C2'  | G | A | 13 | -39.331 | -4.844 | 59.964 | 1.00 | 0.00 | C |
| ATOM | 389 | C3'  | G | A | 13 | -40.845 | -4.884 | 60.080 | 1.00 | 0.00 | C |
| ATOM | 390 | O3'  | G | A | 13 | -41.322 | -6.122 | 59.557 | 1.00 | 0.00 | O |
| ATOM | 391 | C4'  | G | A | 13 | -41.283 | -3.692 | 59.230 | 1.00 | 0.00 | C |
| ATOM | 392 | O4'  | G | A | 13 | -40.287 | -3.627 | 58.160 | 1.00 | 0.00 | O |
| ATOM | 393 | C5'  | G | A | 13 | -41.332 | -2.353 | 59.927 | 1.00 | 0.00 | C |
| ATOM | 394 | O5'  | G | A | 13 | -40.245 | -2.256 | 60.880 | 1.00 | 0.00 | O |
| ATOM | 395 | O1P  | G | A | 13 | -41.423 | -2.176 | 63.103 | 1.00 | 0.00 | O |
| ATOM | 396 | O2P  | G | A | 13 | -39.170 | -1.107 | 62.839 | 1.00 | 0.00 | O |
| ATOM | 397 | P    | G | A | 13 | -40.481 | -1.446 | 62.234 | 1.00 | 0.00 | P |
| ATOM | 398 | H1   | G | A | 13 | -34.591 | -2.950 | 54.693 | 1.00 | 0.00 | H |
| ATOM | 399 | H8   | G | A | 13 | -37.925 | -2.258 | 60.177 | 1.00 | 0.00 | H |
| ATOM | 400 | H1'  | G | A | 13 | -39.025 | -5.193 | 57.847 | 1.00 | 0.00 | H |
| ATOM | 401 | H21  | G | A | 13 | -35.479 | -4.530 | 53.458 | 1.00 | 0.00 | H |
| ATOM | 402 | H3'  | G | A | 13 | -41.180 | -4.775 | 61.112 | 1.00 | 0.00 | H |
| ATOM | 403 | H22  | G | A | 13 | -36.924 | -5.447 | 53.968 | 1.00 | 0.00 | H |
| ATOM | 404 | H4'  | G | A | 13 | -42.285 | -3.915 | 58.865 | 1.00 | 0.00 | H |
| ATOM | 405 | H2'1 | G | A | 13 | -38.895 | -4.165 | 60.698 | 1.00 | 0.00 | H |
| ATOM | 406 | H2'2 | G | A | 13 | -38.893 | -5.829 | 60.129 | 1.00 | 0.00 | H |
| ATOM | 407 | H5'1 | G | A | 13 | -41.244 | -1.560 | 59.185 | 1.00 | 0.00 | H |
| ATOM | 408 | H5'2 | G | A | 13 | -42.286 | -2.254 | 60.444 | 1.00 | 0.00 | H |
| ATOM | 409 | C1'  | G | A | 14 | -37.050 | -8.433 | 56.650 | 1.00 | 0.00 | C |
| ATOM | 410 | N1   | G | A | 14 | -32.942 | -5.442 | 56.200 | 1.00 | 0.00 | N |

|      |     |      |     |    |         |         |        |      |      |   |
|------|-----|------|-----|----|---------|---------|--------|------|------|---|
| ATOM | 411 | C2   | G A | 14 | -33.470 | -6.365  | 55.315 | 1.00 | 0.00 | C |
| ATOM | 412 | N2   | G A | 14 | -32.815 | -6.512  | 54.157 | 1.00 | 0.00 | N |
| ATOM | 413 | N3   | G A | 14 | -34.564 | -7.083  | 55.565 | 1.00 | 0.00 | N |
| ATOM | 414 | C4   | G A | 14 | -35.091 | -6.810  | 56.787 | 1.00 | 0.00 | C |
| ATOM | 415 | C5   | G A | 14 | -34.632 | -5.911  | 57.735 | 1.00 | 0.00 | C |
| ATOM | 416 | C6   | G A | 14 | -33.475 | -5.146  | 57.470 | 1.00 | 0.00 | C |
| ATOM | 417 | O6   | G A | 14 | -32.918 | -4.307  | 58.178 | 1.00 | 0.00 | O |
| ATOM | 418 | N7   | G A | 14 | -35.461 | -5.933  | 58.860 | 1.00 | 0.00 | N |
| ATOM | 419 | C8   | G A | 14 | -36.375 | -6.820  | 58.563 | 1.00 | 0.00 | C |
| ATOM | 420 | N9   | G A | 14 | -36.218 | -7.397  | 57.321 | 1.00 | 0.00 | N |
| ATOM | 421 | C2'  | G A | 14 | -37.582 | -9.500  | 57.597 | 1.00 | 0.00 | C |
| ATOM | 422 | C3'  | G A | 14 | -38.953 | -9.793  | 57.009 | 1.00 | 0.00 | C |
| ATOM | 423 | O3'  | G A | 14 | -38.819 | -10.747 | 55.959 | 1.00 | 0.00 | O |
| ATOM | 424 | C4'  | G A | 14 | -39.399 | -8.425  | 56.493 | 1.00 | 0.00 | C |
| ATOM | 425 | O4'  | G A | 14 | -38.159 | -7.780  | 56.062 | 1.00 | 0.00 | O |
| ATOM | 426 | C5'  | G A | 14 | -40.091 | -7.526  | 57.490 | 1.00 | 0.00 | C |
| ATOM | 427 | O5'  | G A | 14 | -39.493 | -7.692  | 58.799 | 1.00 | 0.00 | O |
| ATOM | 428 | O1P  | G A | 14 | -41.345 | -8.718  | 60.160 | 1.00 | 0.00 | O |
| ATOM | 429 | O2P  | G A | 14 | -39.577 | -7.341  | 61.286 | 1.00 | 0.00 | O |
| ATOM | 430 | P    | G A | 14 | -40.423 | -7.569  | 60.089 | 1.00 | 0.00 | P |
| ATOM | 431 | H1   | G A | 14 | -32.094 | -4.933  | 55.907 | 1.00 | 0.00 | H |
| ATOM | 432 | H8   | G A | 14 | -37.190 | -7.080  | 59.239 | 1.00 | 0.00 | H |
| ATOM | 433 | H1'  | G A | 14 | -36.460 | -8.879  | 55.850 | 1.00 | 0.00 | H |
| ATOM | 434 | H21  | G A | 14 | -31.971 | -5.951  | 53.968 | 1.00 | 0.00 | H |
| ATOM | 435 | H3'  | G A | 14 | -39.645 | -10.175 | 57.759 | 1.00 | 0.00 | H |
| ATOM | 436 | H22  | G A | 14 | -33.155 | -7.185  | 53.456 | 1.00 | 0.00 | H |
| ATOM | 437 | H4'  | G A | 14 | -40.092 | -8.608  | 55.672 | 1.00 | 0.00 | H |
| ATOM | 438 | H2'1 | G A | 14 | -37.658 | -9.142  | 58.623 | 1.00 | 0.00 | H |
| ATOM | 439 | H2'2 | G A | 14 | -36.955 | -10.393 | 57.607 | 1.00 | 0.00 | H |
| ATOM | 440 | H5'1 | G A | 14 | -39.990 | -6.490  | 57.167 | 1.00 | 0.00 | H |
| ATOM | 441 | H5'2 | G A | 14 | -41.150 | -7.786  | 57.532 | 1.00 | 0.00 | H |
| ATOM | 442 | C1'  | A A | 15 | -33.331 | -11.025 | 54.664 | 1.00 | 0.00 | C |
| ATOM | 443 | N1   | A A | 15 | -30.398 | -7.571  | 57.074 | 1.00 | 0.00 | N |
| ATOM | 444 | C2   | A A | 15 | -30.335 | -8.114  | 55.860 | 1.00 | 0.00 | C |
| ATOM | 445 | N3   | A A | 15 | -31.129 | -9.000  | 55.298 | 1.00 | 0.00 | N |
| ATOM | 446 | C4   | A A | 15 | -32.110 | -9.352  | 56.151 | 1.00 | 0.00 | C |
| ATOM | 447 | C5   | A A | 15 | -32.313 | -8.893  | 57.421 | 1.00 | 0.00 | C |
| ATOM | 448 | C6   | A A | 15 | -31.388 | -7.941  | 57.900 | 1.00 | 0.00 | C |
| ATOM | 449 | N6   | A A | 15 | -31.461 | -7.402  | 59.129 | 1.00 | 0.00 | N |
| ATOM | 450 | N7   | A A | 15 | -33.426 | -9.482  | 57.994 | 1.00 | 0.00 | N |
| ATOM | 451 | C8   | A A | 15 | -33.868 | -10.281 | 57.068 | 1.00 | 0.00 | C |
| ATOM | 452 | N9   | A A | 15 | -33.120 | -10.254 | 55.918 | 1.00 | 0.00 | N |
| ATOM | 453 | C2'  | A A | 15 | -33.821 | -12.449 | 54.894 | 1.00 | 0.00 | C |
| ATOM | 454 | C3'  | A A | 15 | -34.756 | -12.657 | 53.713 | 1.00 | 0.00 | C |
| ATOM | 455 | O3'  | A A | 15 | -33.995 | -13.069 | 52.582 | 1.00 | 0.00 | O |
| ATOM | 456 | C4'  | A A | 15 | -35.375 | -11.273 | 53.521 | 1.00 | 0.00 | C |
| ATOM | 457 | O4'  | A A | 15 | -34.306 | -10.345 | 53.898 | 1.00 | 0.00 | O |
| ATOM | 458 | C5'  | A A | 15 | -36.598 | -10.963 | 54.350 | 1.00 | 0.00 | C |
| ATOM | 459 | O5'  | A A | 15 | -36.469 | -11.569 | 55.661 | 1.00 | 0.00 | O |
| ATOM | 460 | O1P  | A A | 15 | -38.293 | -13.304 | 55.684 | 1.00 | 0.00 | O |
| ATOM | 461 | O2P  | A A | 15 | -37.505 | -12.282 | 57.837 | 1.00 | 0.00 | O |
| ATOM | 462 | P    | A A | 15 | -37.780 | -12.112 | 56.389 | 1.00 | 0.00 | P |
| ATOM | 463 | H2   | A A | 15 | -29.506 | -7.773  | 55.241 | 1.00 | 0.00 | H |
| ATOM | 464 | H8   | A A | 15 | -34.747 | -10.912 | 57.191 | 1.00 | 0.00 | H |

|      |     |      |   |   |    |         |         |        |      |      |   |
|------|-----|------|---|---|----|---------|---------|--------|------|------|---|
| ATOM | 465 | H1'  | A | A | 15 | -32.398 | -11.020 | 54.100 | 1.00 | 0.00 | H |
| ATOM | 466 | H3'  | A | A | 15 | -35.522 | -13.403 | 53.925 | 1.00 | 0.00 | H |
| ATOM | 467 | H4'  | A | A | 15 | -35.655 | -11.195 | 52.471 | 1.00 | 0.00 | H |
| ATOM | 468 | H61  | A | A | 15 | -30.760 | -6.708  | 59.427 | 1.00 | 0.00 | H |
| ATOM | 469 | H62  | A | A | 15 | -32.217 | -7.682  | 59.770 | 1.00 | 0.00 | H |
| ATOM | 470 | H2'1 | A | A | 15 | -34.348 | -12.555 | 55.842 | 1.00 | 0.00 | H |
| ATOM | 471 | H2'2 | A | A | 15 | -33.007 | -13.173 | 54.887 | 1.00 | 0.00 | H |
| ATOM | 472 | H5'1 | A | A | 15 | -36.697 | -9.883  | 54.451 | 1.00 | 0.00 | H |
| ATOM | 473 | H5'2 | A | A | 15 | -37.480 | -11.358 | 53.848 | 1.00 | 0.00 | H |
| ATOM | 474 | C1'  | C | A | 16 | -28.527 | -11.971 | 53.831 | 1.00 | 0.00 | C |
| ATOM | 475 | N1   | C | A | 16 | -29.030 | -11.794 | 55.221 | 1.00 | 0.00 | N |
| ATOM | 476 | C2   | C | A | 16 | -28.365 | -10.890 | 56.045 | 1.00 | 0.00 | C |
| ATOM | 477 | O2   | C | A | 16 | -27.389 | -10.276 | 55.592 | 1.00 | 0.00 | O |
| ATOM | 478 | N3   | C | A | 16 | -28.806 | -10.713 | 57.315 | 1.00 | 0.00 | N |
| ATOM | 479 | C4   | C | A | 16 | -29.864 | -11.393 | 57.775 | 1.00 | 0.00 | C |
| ATOM | 480 | N4   | C | A | 16 | -30.255 | -11.178 | 59.023 | 1.00 | 0.00 | N |
| ATOM | 481 | C5   | C | A | 16 | -30.566 | -12.333 | 56.952 | 1.00 | 0.00 | C |
| ATOM | 482 | C6   | C | A | 16 | -30.107 | -12.492 | 55.675 | 1.00 | 0.00 | C |
| ATOM | 483 | C2'  | C | A | 16 | -28.598 | -13.408 | 53.331 | 1.00 | 0.00 | C |
| ATOM | 484 | C3'  | C | A | 16 | -28.937 | -13.216 | 51.861 | 1.00 | 0.00 | C |
| ATOM | 485 | O3'  | C | A | 16 | -27.735 | -12.989 | 51.129 | 1.00 | 0.00 | O |
| ATOM | 486 | C4'  | C | A | 16 | -29.844 | -11.987 | 51.880 | 1.00 | 0.00 | C |
| ATOM | 487 | O4'  | C | A | 16 | -29.327 | -11.172 | 52.979 | 1.00 | 0.00 | O |
| ATOM | 488 | C5'  | C | A | 16 | -31.315 | -12.242 | 52.117 | 1.00 | 0.00 | C |
| ATOM | 489 | O5'  | C | A | 16 | -31.477 | -13.329 | 53.062 | 1.00 | 0.00 | O |
| ATOM | 490 | O1P  | C | A | 16 | -32.553 | -15.143 | 51.687 | 1.00 | 0.00 | O |
| ATOM | 491 | O2P  | C | A | 16 | -32.942 | -15.049 | 54.163 | 1.00 | 0.00 | O |
| ATOM | 492 | P    | C | A | 16 | -32.723 | -14.312 | 52.895 | 1.00 | 0.00 | P |
| ATOM | 493 | H5   | C | A | 16 | -31.424 | -12.894 | 57.326 | 1.00 | 0.00 | H |
| ATOM | 494 | H6   | C | A | 16 | -30.613 | -13.189 | 55.008 | 1.00 | 0.00 | H |
| ATOM | 495 | H1'  | C | A | 16 | -27.507 | -11.591 | 53.786 | 1.00 | 0.00 | H |
| ATOM | 496 | H3'  | C | A | 16 | -29.455 | -14.082 | 51.447 | 1.00 | 0.00 | H |
| ATOM | 497 | H4'  | C | A | 16 | -29.744 | -11.506 | 50.907 | 1.00 | 0.00 | H |
| ATOM | 498 | H41  | C | A | 16 | -31.068 | -11.687 | 59.403 | 1.00 | 0.00 | H |
| ATOM | 499 | H42  | C | A | 16 | -29.748 | -10.505 | 59.615 | 1.00 | 0.00 | H |
| ATOM | 500 | H2'1 | C | A | 16 | -29.366 | -13.987 | 53.843 | 1.00 | 0.00 | H |
| ATOM | 501 | H2'2 | C | A | 16 | -27.652 | -13.936 | 53.456 | 1.00 | 0.00 | H |
| ATOM | 502 | H5'1 | C | A | 16 | -31.775 | -11.336 | 52.512 | 1.00 | 0.00 | H |
| ATOM | 503 | H5'2 | C | A | 16 | -31.790 | -12.502 | 51.171 | 1.00 | 0.00 | H |
| ATOM | 504 | C1'  | G | A | 17 | -23.703 | -11.828 | 54.937 | 1.00 | 0.00 | C |
| ATOM | 505 | N1   | G | A | 17 | -25.393 | -11.397 | 59.731 | 1.00 | 0.00 | N |
| ATOM | 506 | C2   | G | A | 17 | -24.367 | -10.728 | 59.087 | 1.00 | 0.00 | C |
| ATOM | 507 | N2   | G | A | 17 | -23.702 | -9.825  | 59.819 | 1.00 | 0.00 | N |
| ATOM | 508 | N3   | G | A | 17 | -24.032 | -10.941 | 57.816 | 1.00 | 0.00 | N |
| ATOM | 509 | C4   | G | A | 17 | -24.806 | -11.894 | 57.232 | 1.00 | 0.00 | C |
| ATOM | 510 | C5   | G | A | 17 | -25.846 | -12.615 | 57.794 | 1.00 | 0.00 | C |
| ATOM | 511 | C6   | G | A | 17 | -26.205 | -12.387 | 59.142 | 1.00 | 0.00 | C |
| ATOM | 512 | O6   | G | A | 17 | -27.088 | -12.921 | 59.813 | 1.00 | 0.00 | O |
| ATOM | 513 | N7   | G | A | 17 | -26.384 | -13.499 | 56.856 | 1.00 | 0.00 | N |
| ATOM | 514 | C8   | G | A | 17 | -25.672 | -13.288 | 55.779 | 1.00 | 0.00 | C |
| ATOM | 515 | N9   | G | A | 17 | -24.693 | -12.327 | 55.929 | 1.00 | 0.00 | N |
| ATOM | 516 | C2'  | G | A | 17 | -23.156 | -12.910 | 54.016 | 1.00 | 0.00 | C |
| ATOM | 517 | C3'  | G | A | 17 | -22.994 | -12.161 | 52.704 | 1.00 | 0.00 | C |
| ATOM | 518 | O3'  | G | A | 17 | -21.738 | -11.485 | 52.704 | 1.00 | 0.00 | O |

|      |     |      |     |    |         |         |        |      |      |   |
|------|-----|------|-----|----|---------|---------|--------|------|------|---|
| ATOM | 519 | C4'  | G A | 17 | -24.173 | -11.189 | 52.720 | 1.00 | 0.00 | C |
| ATOM | 520 | O4'  | G A | 17 | -24.348 | -10.858 | 54.134 | 1.00 | 0.00 | O |
| ATOM | 521 | C5'  | G A | 17 | -25.482 | -11.715 | 52.180 | 1.00 | 0.00 | C |
| ATOM | 522 | O5'  | G A | 17 | -25.635 | -13.111 | 52.538 | 1.00 | 0.00 | O |
| ATOM | 523 | O1P  | G A | 17 | -25.555 | -14.293 | 50.317 | 1.00 | 0.00 | O |
| ATOM | 524 | O2P  | G A | 17 | -26.805 | -15.314 | 52.238 | 1.00 | 0.00 | O |
| ATOM | 525 | P    | G A | 17 | -26.383 | -14.086 | 51.521 | 1.00 | 0.00 | P |
| ATOM | 526 | H1   | G A | 17 | -25.576 | -11.153 | 60.716 | 1.00 | 0.00 | H |
| ATOM | 527 | H8   | G A | 17 | -25.838 | -13.825 | 54.844 | 1.00 | 0.00 | H |
| ATOM | 528 | H1'  | G A | 17 | -22.897 | -11.333 | 55.479 | 1.00 | 0.00 | H |
| ATOM | 529 | H21  | G A | 17 | -23.968 | -9.663  | 60.801 | 1.00 | 0.00 | H |
| ATOM | 530 | H3'  | G A | 17 | -23.045 | -12.828 | 51.843 | 1.00 | 0.00 | H |
| ATOM | 531 | H22  | G A | 17 | -22.925 | -9.295  | 59.399 | 1.00 | 0.00 | H |
| ATOM | 532 | H4'  | G A | 17 | -23.884 | -10.331 | 52.115 | 1.00 | 0.00 | H |
| ATOM | 533 | H2'1 | G A | 17 | -23.845 | -13.749 | 53.911 | 1.00 | 0.00 | H |
| ATOM | 534 | H2'2 | G A | 17 | -22.204 | -13.310 | 54.367 | 1.00 | 0.00 | H |
| ATOM | 535 | H5'1 | G A | 17 | -26.302 | -11.134 | 52.602 | 1.00 | 0.00 | H |
| ATOM | 536 | H5'2 | G A | 17 | -25.490 | -11.608 | 51.095 | 1.00 | 0.00 | H |
| ATOM | 537 | C1'  | G A | 18 | -19.860 | -11.505 | 58.043 | 1.00 | 0.00 | C |
| ATOM | 538 | N1   | G A | 18 | -23.177 | -13.371 | 61.440 | 1.00 | 0.00 | N |
| ATOM | 539 | C2   | G A | 18 | -22.242 | -12.359 | 61.575 | 1.00 | 0.00 | C |
| ATOM | 540 | N2   | G A | 18 | -22.182 | -11.767 | 62.776 | 1.00 | 0.00 | N |
| ATOM | 541 | N3   | G A | 18 | -21.434 | -11.969 | 60.592 | 1.00 | 0.00 | N |
| ATOM | 542 | C4   | G A | 18 | -21.626 | -12.682 | 59.451 | 1.00 | 0.00 | C |
| ATOM | 543 | C5   | G A | 18 | -22.529 | -13.708 | 59.226 | 1.00 | 0.00 | C |
| ATOM | 544 | C6   | G A | 18 | -23.391 | -14.120 | 60.269 | 1.00 | 0.00 | C |
| ATOM | 545 | O6   | G A | 18 | -24.249 | -15.004 | 60.262 | 1.00 | 0.00 | O |
| ATOM | 546 | N7   | G A | 18 | -22.409 | -14.178 | 57.918 | 1.00 | 0.00 | N |
| ATOM | 547 | C8   | G A | 18 | -21.463 | -13.438 | 57.401 | 1.00 | 0.00 | C |
| ATOM | 548 | N9   | G A | 18 | -20.937 | -12.506 | 58.271 | 1.00 | 0.00 | N |
| ATOM | 549 | C2'  | G A | 18 | -18.726 | -12.012 | 57.164 | 1.00 | 0.00 | C |
| ATOM | 550 | C3'  | G A | 18 | -18.345 | -10.765 | 56.385 | 1.00 | 0.00 | C |
| ATOM | 551 | O3'  | G A | 18 | -17.436 | -9.987  | 57.160 | 1.00 | 0.00 | O |
| ATOM | 552 | C4'  | G A | 18 | -19.687 | -10.061 | 56.191 | 1.00 | 0.00 | C |
| ATOM | 553 | O4'  | G A | 18 | -20.441 | -10.385 | 57.403 | 1.00 | 0.00 | O |
| ATOM | 554 | C5'  | G A | 18 | -20.499 | -10.484 | 54.990 | 1.00 | 0.00 | C |
| ATOM | 555 | O5'  | G A | 18 | -20.340 | -11.907 | 54.766 | 1.00 | 0.00 | O |
| ATOM | 556 | O1P  | G A | 18 | -19.131 | -12.020 | 52.562 | 1.00 | 0.00 | O |
| ATOM | 557 | O2P  | G A | 18 | -20.609 | -13.916 | 53.280 | 1.00 | 0.00 | O |
| ATOM | 558 | P    | G A | 18 | -20.351 | -12.455 | 53.268 | 1.00 | 0.00 | P |
| ATOM | 559 | H1   | G A | 18 | -23.760 | -13.592 | 62.262 | 1.00 | 0.00 | H |
| ATOM | 560 | H8   | G A | 18 | -21.118 | -13.547 | 56.372 | 1.00 | 0.00 | H |
| ATOM | 561 | H1'  | G A | 18 | -19.486 | -11.179 | 59.014 | 1.00 | 0.00 | H |
| ATOM | 562 | H21  | G A | 18 | -22.814 | -12.073 | 63.531 | 1.00 | 0.00 | H |
| ATOM | 563 | H3'  | G A | 18 | -17.886 | -11.007 | 55.425 | 1.00 | 0.00 | H |
| ATOM | 564 | H22  | G A | 18 | -21.507 | -11.010 | 62.941 | 1.00 | 0.00 | H |
| ATOM | 565 | H4'  | G A | 18 | -19.475 | -8.997  | 56.093 | 1.00 | 0.00 | H |
| ATOM | 566 | H2'1 | G A | 18 | -19.046 | -12.814 | 56.499 | 1.00 | 0.00 | H |
| ATOM | 567 | H2'2 | G A | 18 | -17.885 | -12.388 | 57.749 | 1.00 | 0.00 | H |
| ATOM | 568 | H5'1 | G A | 18 | -21.549 | -10.253 | 55.168 | 1.00 | 0.00 | H |
| ATOM | 569 | H5'2 | G A | 18 | -20.156 | -9.933  | 54.115 | 1.00 | 0.00 | H |
| ATOM | 570 | C1'  | T A | 19 | -17.630 | -11.986 | 62.436 | 1.00 | 0.00 | C |
| ATOM | 571 | N1   | T A | 19 | -18.377 | -13.130 | 61.850 | 1.00 | 0.00 | N |
| ATOM | 572 | C2   | T A | 19 | -19.316 | -13.747 | 62.650 | 1.00 | 0.00 | C |

|      |     |      |       |    |         |         |        |      |      |   |
|------|-----|------|-------|----|---------|---------|--------|------|------|---|
| ATOM | 573 | O2   | T A   | 19 | -19.544 | -13.391 | 63.794 | 1.00 | 0.00 | O |
| ATOM | 574 | N3   | T A   | 19 | -19.987 | -14.805 | 62.065 | 1.00 | 0.00 | N |
| ATOM | 575 | C4   | T A   | 19 | -19.804 | -15.288 | 60.787 | 1.00 | 0.00 | C |
| ATOM | 576 | O4   | T A   | 19 | -20.465 | -16.247 | 60.372 | 1.00 | 0.00 | O |
| ATOM | 577 | C5   | T A   | 19 | -18.802 | -14.580 | 60.025 | 1.00 | 0.00 | C |
| ATOM | 578 | C6   | T A   | 19 | -18.129 | -13.543 | 60.563 | 1.00 | 0.00 | C |
| ATOM | 579 | C7   | T A   | 19 | -18.572 | -15.069 | 58.627 | 1.00 | 0.00 | C |
| ATOM | 580 | C2'  | T A   | 19 | -16.165 | -11.931 | 62.021 | 1.00 | 0.00 | C |
| ATOM | 581 | C3'  | T A   | 19 | -15.919 | -10.434 | 61.921 | 1.00 | 0.00 | C |
| ATOM | 582 | O3'  | T A   | 19 | -15.604 | -9.923  | 63.214 | 1.00 | 0.00 | O |
| ATOM | 583 | C4'  | T A   | 19 | -17.254 | -9.906  | 61.400 | 1.00 | 0.00 | C |
| ATOM | 584 | O4'  | T A   | 19 | -18.251 | -10.793 | 61.997 | 1.00 | 0.00 | O |
| ATOM | 585 | C5'  | T A   | 19 | -17.440 | -9.908  | 59.901 | 1.00 | 0.00 | C |
| ATOM | 586 | O5'  | T A   | 19 | -16.806 | -11.081 | 59.331 | 1.00 | 0.00 | O |
| ATOM | 587 | O1P  | T A   | 19 | -14.932 | -10.119 | 57.954 | 1.00 | 0.00 | O |
| ATOM | 588 | O2P  | T A   | 19 | -15.946 | -12.326 | 57.326 | 1.00 | 0.00 | O |
| ATOM | 589 | P    | T A   | 19 | -16.138 | -10.968 | 57.888 | 1.00 | 0.00 | P |
| ATOM | 590 | H3   | T A   | 19 | -20.697 | -15.279 | 62.642 | 1.00 | 0.00 | H |
| ATOM | 591 | H6   | T A   | 19 | -17.377 | -13.024 | 59.968 | 1.00 | 0.00 | H |
| ATOM | 592 | H1'  | T A   | 19 | -17.726 | -12.035 | 63.521 | 1.00 | 0.00 | H |
| ATOM | 593 | H3'  | T A   | 19 | -15.108 | -10.200 | 61.232 | 1.00 | 0.00 | H |
| ATOM | 594 | H4'  | T A   | 19 | -17.342 | -8.873  | 61.744 | 1.00 | 0.00 | H |
| ATOM | 595 | H71  | T A   | 19 | -17.565 | -15.479 | 58.546 | 1.00 | 0.00 | H |
| ATOM | 596 | H72  | T A   | 19 | -19.299 | -15.846 | 58.389 | 1.00 | 0.00 | H |
| ATOM | 597 | H73  | T A   | 19 | -18.683 | -14.241 | 57.926 | 1.00 | 0.00 | H |
| ATOM | 598 | H2'1 | T A   | 19 | -15.988 | -12.427 | 61.068 | 1.00 | 0.00 | H |
| ATOM | 599 | H2'2 | T A   | 19 | -15.508 | -12.393 | 62.759 | 1.00 | 0.00 | H |
| ATOM | 600 | H5'1 | T A   | 19 | -18.505 | -9.917  | 59.672 | 1.00 | 0.00 | H |
| ATOM | 601 | H5'2 | T A   | 19 | -16.991 | -9.008  | 59.483 | 1.00 | 0.00 | H |
| ATOM | 602 | C01  | LNK A | 20 | -12.388 | -9.872  | 65.088 | 0.00 | 0.00 | C |
| ATOM | 603 | O1   | LNK A | 20 | -13.176 | -10.238 | 63.952 | 1.00 | 0.00 | O |
| ATOM | 604 | S    | LNK A | 20 | -8.698  | -10.406 | 66.482 | 0.00 | 0.00 | S |
| ATOM | 605 | C02  | LNK A | 20 | -10.970 | -10.455 | 64.936 | 0.00 | 0.00 | C |
| ATOM | 606 | C03  | LNK A | 20 | -10.444 | -10.893 | 66.317 | 0.00 | 0.00 | C |
| ATOM | 607 | O1P  | LNK A | 20 | -14.540 | -12.313 | 63.538 | 1.00 | 0.00 | O |
| ATOM | 608 | O2P  | LNK A | 20 | -14.885 | -10.980 | 65.638 | 1.00 | 0.00 | O |
| ATOM | 609 | P    | LNK A | 20 | -14.563 | -10.988 | 64.189 | 1.00 | 0.00 | P |
| ATOM | 610 | H01  | LNK A | 20 | -12.848 | -10.267 | 65.993 | 0.00 | 0.00 | H |
| ATOM | 611 | H02  | LNK A | 20 | -12.328 | -8.786  | 65.155 | 0.00 | 0.00 | H |
| ATOM | 612 | H03  | LNK A | 20 | -10.530 | -11.975 | 66.412 | 0.00 | 0.00 | H |
| ATOM | 613 | H04  | LNK A | 20 | -10.308 | -9.697  | 64.518 | 0.00 | 0.00 | H |
| ATOM | 614 | H05  | LNK A | 20 | -11.001 | -11.317 | 64.270 | 0.00 | 0.00 | H |
| ATOM | 615 | H06  | LNK A | 20 | -11.031 | -10.411 | 67.098 | 0.00 | 0.00 | H |
| ATOM | 616 | AU   | LNK A | 20 | -8.435  | -10.686 | 67.050 |      |      |   |
| TER  |     |      |       |    |         |         |        |      |      |   |
| ATOM | 618 | C1'  | A B   | 2  | -25.374 | -18.096 | 67.082 | 1.00 | 0.00 | C |
| ATOM | 619 | N1   | A B   | 2  | -22.018 | -16.181 | 63.704 | 1.00 | 0.00 | N |
| ATOM | 620 | C2   | A B   | 2  | -22.326 | -15.845 | 64.952 | 1.00 | 0.00 | C |
| ATOM | 621 | N3   | A B   | 2  | -23.203 | -16.385 | 65.772 | 1.00 | 0.00 | N |
| ATOM | 622 | C4   | A B   | 2  | -23.832 | -17.412 | 65.170 | 1.00 | 0.00 | C |
| ATOM | 623 | C5   | A B   | 2  | -23.634 | -17.880 | 63.902 | 1.00 | 0.00 | C |
| ATOM | 624 | C6   | A B   | 2  | -22.660 | -17.210 | 63.130 | 1.00 | 0.00 | C |
| ATOM | 625 | N6   | A B   | 2  | -22.357 | -17.558 | 61.868 | 1.00 | 0.00 | N |
| ATOM | 626 | N7   | A B   | 2  | -24.463 | -18.954 | 63.630 | 1.00 | 0.00 | N |

|      |     |      |     |   |         |         |        |      |      |   |
|------|-----|------|-----|---|---------|---------|--------|------|------|---|
| ATOM | 627 | C8   | A B | 2 | -25.141 | -19.109 | 64.728 | 1.00 | 0.00 | C |
| ATOM | 628 | N9   | A B | 2 | -24.810 | -18.211 | 65.709 | 1.00 | 0.00 | N |
| ATOM | 629 | C2'  | A B | 2 | -26.870 | -18.372 | 67.156 | 1.00 | 0.00 | C |
| ATOM | 630 | C3'  | A B | 2 | -26.998 | -19.068 | 68.501 | 1.00 | 0.00 | C |
| ATOM | 631 | O3'  | A B | 2 | -27.096 | -18.085 | 69.529 | 1.00 | 0.00 | O |
| ATOM | 632 | C4'  | A B | 2 | -25.702 | -19.872 | 68.592 | 1.00 | 0.00 | C |
| ATOM | 633 | O4'  | A B | 2 | -24.714 | -19.044 | 67.898 | 1.00 | 0.00 | O |
| ATOM | 634 | C5'  | A B | 2 | -25.716 | -21.243 | 67.958 | 1.00 | 0.00 | C |
| ATOM | 635 | O5'  | A B | 2 | -26.516 | -21.215 | 66.749 | 1.00 | 0.00 | O |
| ATOM | 636 | H2   | A B | 2 | -21.772 | -15.000 | 65.358 | 1.00 | 0.00 | H |
| ATOM | 637 | H8   | A B | 2 | -25.902 | -19.880 | 64.856 | 1.00 | 0.00 | H |
| ATOM | 638 | H1'  | A B | 2 | -25.141 | -17.102 | 67.464 | 1.00 | 0.00 | H |
| ATOM | 639 | H3'  | A B | 2 | -27.869 | -19.721 | 68.543 | 1.00 | 0.00 | H |
| ATOM | 640 | H4'  | A B | 2 | -25.482 | -19.998 | 69.652 | 1.00 | 0.00 | H |
| ATOM | 641 | H61  | A B | 2 | -21.637 | -17.038 | 61.350 | 1.00 | 0.00 | H |
| ATOM | 642 | H62  | A B | 2 | -22.848 | -18.347 | 61.420 | 1.00 | 0.00 | H |
| ATOM | 643 | H2'1 | A B | 2 | -27.213 | -19.013 | 66.344 | 1.00 | 0.00 | H |
| ATOM | 644 | H2'2 | A B | 2 | -27.462 | -17.456 | 67.125 | 1.00 | 0.00 | H |
| ATOM | 645 | H5'1 | A B | 2 | -24.694 | -21.535 | 67.716 | 1.00 | 0.00 | H |
| ATOM | 646 | H5'2 | A B | 2 | -26.137 | -21.958 | 68.663 | 1.00 | 0.00 | H |
| ATOM | 647 | C1'  | C B | 3 | -25.476 | -13.132 | 67.189 | 1.00 | 0.00 | C |
| ATOM | 648 | N1   | C B | 3 | -25.616 | -13.863 | 65.900 | 1.00 | 0.00 | N |
| ATOM | 649 | C2   | C B | 3 | -24.787 | -13.488 | 64.844 | 1.00 | 0.00 | C |
| ATOM | 650 | O2   | C B | 3 | -23.974 | -12.571 | 65.020 | 1.00 | 0.00 | O |
| ATOM | 651 | N3   | C B | 3 | -24.899 | -14.140 | 63.662 | 1.00 | 0.00 | N |
| ATOM | 652 | C4   | C B | 3 | -25.789 | -15.128 | 63.502 | 1.00 | 0.00 | C |
| ATOM | 653 | N4   | C B | 3 | -25.853 | -15.735 | 62.324 | 1.00 | 0.00 | N |
| ATOM | 654 | C5   | C B | 3 | -26.659 | -15.533 | 64.568 | 1.00 | 0.00 | C |
| ATOM | 655 | C6   | C B | 3 | -26.525 | -14.864 | 65.753 | 1.00 | 0.00 | C |
| ATOM | 656 | C2'  | C B | 3 | -26.798 | -12.887 | 67.903 | 1.00 | 0.00 | C |
| ATOM | 657 | C3'  | C B | 3 | -26.401 | -13.027 | 69.364 | 1.00 | 0.00 | C |
| ATOM | 658 | O3'  | C B | 3 | -25.884 | -11.782 | 69.829 | 1.00 | 0.00 | O |
| ATOM | 659 | C4'  | C B | 3 | -25.333 | -14.117 | 69.323 | 1.00 | 0.00 | C |
| ATOM | 660 | O4'  | C B | 3 | -24.659 | -13.915 | 68.039 | 1.00 | 0.00 | O |
| ATOM | 661 | C5'  | C B | 3 | -25.826 | -15.543 | 69.391 | 1.00 | 0.00 | C |
| ATOM | 662 | O5'  | C B | 3 | -27.074 | -15.665 | 68.662 | 1.00 | 0.00 | O |
| ATOM | 663 | O1P  | C B | 3 | -28.749 | -16.203 | 70.462 | 1.00 | 0.00 | O |
| ATOM | 664 | O2P  | C B | 3 | -29.146 | -16.974 | 68.108 | 1.00 | 0.00 | O |
| ATOM | 665 | P    | C B | 3 | -28.174 | -16.689 | 69.192 | 1.00 | 0.00 | P |
| ATOM | 666 | H5   | C B | 3 | -27.390 | -16.331 | 64.440 | 1.00 | 0.00 | H |
| ATOM | 667 | H6   | C B | 3 | -27.159 | -15.141 | 66.595 | 1.00 | 0.00 | H |
| ATOM | 668 | H1'  | C B | 3 | -24.956 | -12.194 | 66.995 | 1.00 | 0.00 | H |
| ATOM | 669 | H3'  | C B | 3 | -27.243 | -13.324 | 69.989 | 1.00 | 0.00 | H |
| ATOM | 670 | H4'  | C B | 3 | -24.678 | -13.952 | 70.179 | 1.00 | 0.00 | H |
| ATOM | 671 | H41  | C B | 3 | -26.527 | -16.500 | 62.175 | 1.00 | 0.00 | H |
| ATOM | 672 | H42  | C B | 3 | -25.229 | -15.441 | 61.558 | 1.00 | 0.00 | H |
| ATOM | 673 | H2'1 | C B | 3 | -27.559 | -13.617 | 67.627 | 1.00 | 0.00 | H |
| ATOM | 674 | H2'2 | C B | 3 | -27.203 | -11.896 | 67.694 | 1.00 | 0.00 | H |
| ATOM | 675 | H5'1 | C B | 3 | -25.077 | -16.203 | 68.951 | 1.00 | 0.00 | H |
| ATOM | 676 | H5'2 | C B | 3 | -25.980 | -15.820 | 70.432 | 1.00 | 0.00 | H |
| ATOM | 677 | C1'  | C B | 4 | -24.852 | -8.621  | 65.244 | 1.00 | 0.00 | C |
| ATOM | 678 | N1   | C B | 4 | -25.647 | -9.653  | 64.524 | 1.00 | 0.00 | N |
| ATOM | 679 | C2   | C B | 4 | -25.329 | -9.910  | 63.192 | 1.00 | 0.00 | C |
| ATOM | 680 | O2   | C B | 4 | -24.405 | -9.276  | 62.665 | 1.00 | 0.00 | O |

|      |     |      |     |   |         |         |        |      |      |   |
|------|-----|------|-----|---|---------|---------|--------|------|------|---|
| ATOM | 681 | N3   | C B | 4 | -26.040 | -10.845 | 62.517 | 1.00 | 0.00 | N |
| ATOM | 682 | C4   | C B | 4 | -27.036 | -11.516 | 63.114 | 1.00 | 0.00 | C |
| ATOM | 683 | N4   | C B | 4 | -27.697 | -12.423 | 62.410 | 1.00 | 0.00 | N |
| ATOM | 684 | C5   | C B | 4 | -27.389 | -11.269 | 64.482 | 1.00 | 0.00 | C |
| ATOM | 685 | C6   | C B | 4 | -26.654 | -10.325 | 65.143 | 1.00 | 0.00 | C |
| ATOM | 686 | C2'  | C B | 4 | -25.675 | -7.771  | 66.202 | 1.00 | 0.00 | C |
| ATOM | 687 | C3'  | C B | 4 | -24.695 | -7.540  | 67.342 | 1.00 | 0.00 | C |
| ATOM | 688 | O3'  | C B | 4 | -23.860 | -6.429  | 67.024 | 1.00 | 0.00 | O |
| ATOM | 689 | C4'  | C B | 4 | -23.915 | -8.852  | 67.391 | 1.00 | 0.00 | C |
| ATOM | 690 | O4'  | C B | 4 | -23.858 | -9.292  | 65.996 | 1.00 | 0.00 | O |
| ATOM | 691 | C5'  | C B | 4 | -24.518 | -9.962  | 68.222 | 1.00 | 0.00 | C |
| ATOM | 692 | O5'  | C B | 4 | -25.963 | -9.932  | 68.105 | 1.00 | 0.00 | O |
| ATOM | 693 | O1P  | C B | 4 | -26.723 | -9.324  | 70.426 | 1.00 | 0.00 | O |
| ATOM | 694 | O2P  | C B | 4 | -28.223 | -10.662 | 68.924 | 1.00 | 0.00 | O |
| ATOM | 695 | P    | C B | 4 | -26.843 | -10.346 | 69.367 | 1.00 | 0.00 | P |
| ATOM | 696 | H5   | C B | 4 | -28.202 | -11.806 | 64.969 | 1.00 | 0.00 | H |
| ATOM | 697 | H6   | C B | 4 | -26.881 | -10.108 | 66.186 | 1.00 | 0.00 | H |
| ATOM | 698 | H1'  | C B | 4 | -24.349 | -7.999  | 64.503 | 1.00 | 0.00 | H |
| ATOM | 699 | H3'  | C B | 4 | -25.205 | -7.350  | 68.287 | 1.00 | 0.00 | H |
| ATOM | 700 | H4'  | C B | 4 | -22.933 | -8.623  | 67.805 | 1.00 | 0.00 | H |
| ATOM | 701 | H41  | C B | 4 | -28.465 | -12.955 | 62.845 | 1.00 | 0.00 | H |
| ATOM | 702 | H42  | C B | 4 | -27.443 | -12.597 | 61.425 | 1.00 | 0.00 | H |
| ATOM | 703 | H2'1 | C B | 4 | -26.571 | -8.286  | 66.548 | 1.00 | 0.00 | H |
| ATOM | 704 | H2'2 | C B | 4 | -25.990 | -6.829  | 65.753 | 1.00 | 0.00 | H |
| ATOM | 705 | H5'1 | C B | 4 | -24.139 | -10.920 | 67.869 | 1.00 | 0.00 | H |
| ATOM | 706 | H5'2 | C B | 4 | -24.230 | -9.823  | 69.263 | 1.00 | 0.00 | H |
| ATOM | 707 | C1'  | G B | 5 | -24.545 | -5.399  | 61.496 | 1.00 | 0.00 | C |
| ATOM | 708 | N1   | G B | 5 | -27.425 | -8.831  | 59.056 | 1.00 | 0.00 | N |
| ATOM | 709 | C2   | G B | 5 | -26.333 | -8.108  | 58.608 | 1.00 | 0.00 | C |
| ATOM | 710 | N2   | G B | 5 | -25.960 | -8.327  | 57.341 | 1.00 | 0.00 | N |
| ATOM | 711 | N3   | G B | 5 | -25.667 | -7.237  | 59.364 | 1.00 | 0.00 | N |
| ATOM | 712 | C4   | G B | 5 | -26.186 | -7.136  | 60.616 | 1.00 | 0.00 | C |
| ATOM | 713 | C5   | G B | 5 | -27.272 | -7.812  | 61.147 | 1.00 | 0.00 | C |
| ATOM | 714 | C6   | G B | 5 | -27.977 | -8.739  | 60.347 | 1.00 | 0.00 | C |
| ATOM | 715 | O6   | G B | 5 | -28.955 | -9.427  | 60.637 | 1.00 | 0.00 | O |
| ATOM | 716 | N7   | G B | 5 | -27.482 | -7.421  | 62.472 | 1.00 | 0.00 | N |
| ATOM | 717 | C8   | G B | 5 | -26.538 | -6.543  | 62.697 | 1.00 | 0.00 | C |
| ATOM | 718 | N9   | G B | 5 | -25.711 | -6.316  | 61.615 | 1.00 | 0.00 | N |
| ATOM | 719 | C2'  | G B | 5 | -24.727 | -4.077  | 62.230 | 1.00 | 0.00 | C |
| ATOM | 720 | C3'  | G B | 5 | -23.320 | -3.796  | 62.732 | 1.00 | 0.00 | C |
| ATOM | 721 | O3'  | G B | 5 | -22.574 | -3.155  | 61.701 | 1.00 | 0.00 | O |
| ATOM | 722 | C4'  | G B | 5 | -22.788 | -5.192  | 63.050 | 1.00 | 0.00 | C |
| ATOM | 723 | O4'  | G B | 5 | -23.421 | -6.054  | 62.052 | 1.00 | 0.00 | O |
| ATOM | 724 | C5'  | G B | 5 | -23.099 | -5.733  | 64.425 | 1.00 | 0.00 | C |
| ATOM | 725 | O5'  | G B | 5 | -24.424 | -5.309  | 64.830 | 1.00 | 0.00 | O |
| ATOM | 726 | O1P  | G B | 5 | -23.977 | -3.782  | 66.780 | 1.00 | 0.00 | O |
| ATOM | 727 | O2P  | G B | 5 | -26.156 | -5.015  | 66.627 | 1.00 | 0.00 | O |
| ATOM | 728 | P    | G B | 5 | -24.695 | -5.004  | 66.372 | 1.00 | 0.00 | P |
| ATOM | 729 | H1   | G B | 5 | -27.867 | -9.485  | 58.392 | 1.00 | 0.00 | H |
| ATOM | 730 | H8   | G B | 5 | -26.415 | -6.035  | 63.653 | 1.00 | 0.00 | H |
| ATOM | 731 | H1'  | G B | 5 | -24.347 | -5.233  | 60.438 | 1.00 | 0.00 | H |
| ATOM | 732 | H21  | G B | 5 | -26.478 | -9.005  | 56.763 | 1.00 | 0.00 | H |
| ATOM | 733 | H3'  | G B | 5 | -23.322 | -3.165  | 63.622 | 1.00 | 0.00 | H |
| ATOM | 734 | H22  | G B | 5 | -25.157 | -7.818  | 56.945 | 1.00 | 0.00 | H |

|      |     |      |     |   |         |        |        |      |      |   |
|------|-----|------|-----|---|---------|--------|--------|------|------|---|
| ATOM | 735 | H4'  | G B | 5 | -21.704 | -5.148 | 62.947 | 1.00 | 0.00 | H |
| ATOM | 736 | H2'1 | G B | 5 | -25.435 | -4.156 | 63.055 | 1.00 | 0.00 | H |
| ATOM | 737 | H2'2 | G B | 5 | -25.079 | -3.283 | 61.571 | 1.00 | 0.00 | H |
| ATOM | 738 | H5'1 | G B | 5 | -23.052 | -6.822 | 64.399 | 1.00 | 0.00 | H |
| ATOM | 739 | H5'2 | G B | 5 | -22.360 | -5.359 | 65.133 | 1.00 | 0.00 | H |
| ATOM | 740 | C1'  | T B | 6 | -25.473 | -3.805 | 56.903 | 1.00 | 0.00 | C |
| ATOM | 741 | N1   | T B | 6 | -26.588 | -4.255 | 57.778 | 1.00 | 0.00 | N |
| ATOM | 742 | C2   | T B | 6 | -27.462 | -5.187 | 57.256 | 1.00 | 0.00 | C |
| ATOM | 743 | O2   | T B | 6 | -27.350 | -5.639 | 56.130 | 1.00 | 0.00 | O |
| ATOM | 744 | N3   | T B | 6 | -28.482 | -5.578 | 58.105 | 1.00 | 0.00 | N |
| ATOM | 745 | C4   | T B | 6 | -28.700 | -5.129 | 59.390 | 1.00 | 0.00 | C |
| ATOM | 746 | O4   | T B | 6 | -29.653 | -5.551 | 60.054 | 1.00 | 0.00 | O |
| ATOM | 747 | C5   | T B | 6 | -27.735 | -4.158 | 59.847 | 1.00 | 0.00 | C |
| ATOM | 748 | C6   | T B | 6 | -26.727 | -3.754 | 59.049 | 1.00 | 0.00 | C |
| ATOM | 749 | C7   | T B | 6 | -27.932 | -3.644 | 61.243 | 1.00 | 0.00 | C |
| ATOM | 750 | C2'  | T B | 6 | -25.142 | -2.324 | 57.044 | 1.00 | 0.00 | C |
| ATOM | 751 | C3'  | T B | 6 | -23.631 | -2.320 | 56.870 | 1.00 | 0.00 | C |
| ATOM | 752 | O3'  | T B | 6 | -23.319 | -2.288 | 55.479 | 1.00 | 0.00 | O |
| ATOM | 753 | C4'  | T B | 6 | -23.209 | -3.631 | 57.528 | 1.00 | 0.00 | C |
| ATOM | 754 | O4'  | T B | 6 | -24.320 | -4.544 | 57.257 | 1.00 | 0.00 | O |
| ATOM | 755 | C5'  | T B | 6 | -22.972 | -3.590 | 59.020 | 1.00 | 0.00 | C |
| ATOM | 756 | O5'  | T B | 6 | -23.926 | -2.692 | 59.642 | 1.00 | 0.00 | O |
| ATOM | 757 | O1P  | T B | 6 | -22.483 | -0.821 | 60.509 | 1.00 | 0.00 | O |
| ATOM | 758 | O2P  | T B | 6 | -24.663 | -1.349 | 61.633 | 1.00 | 0.00 | O |
| ATOM | 759 | P    | T B | 6 | -23.466 | -1.845 | 60.913 | 1.00 | 0.00 | P |
| ATOM | 760 | H3   | T B | 6 | -29.146 | -6.276 | 57.739 | 1.00 | 0.00 | H |
| ATOM | 761 | H6   | T B | 6 | -26.011 | -3.020 | 59.418 | 1.00 | 0.00 | H |
| ATOM | 762 | H1'  | T B | 6 | -25.726 | -4.051 | 55.872 | 1.00 | 0.00 | H |
| ATOM | 763 | H3'  | T B | 6 | -23.167 | -1.465 | 57.363 | 1.00 | 0.00 | H |
| ATOM | 764 | H4'  | T B | 6 | -22.278 | -3.940 | 57.052 | 1.00 | 0.00 | H |
| ATOM | 765 | H71  | T B | 6 | -28.176 | -2.582 | 61.208 | 1.00 | 0.00 | H |
| ATOM | 766 | H72  | T B | 6 | -28.748 | -4.189 | 61.719 | 1.00 | 0.00 | H |
| ATOM | 767 | H73  | T B | 6 | -27.016 | -3.787 | 61.817 | 1.00 | 0.00 | H |
| ATOM | 768 | H2'1 | T B | 6 | -25.431 | -1.927 | 58.015 | 1.00 | 0.00 | H |
| ATOM | 769 | H2'2 | T B | 6 | -25.630 | -1.717 | 56.281 | 1.00 | 0.00 | H |
| ATOM | 770 | H5'1 | T B | 6 | -23.089 | -4.593 | 59.430 | 1.00 | 0.00 | H |
| ATOM | 771 | H5'2 | T B | 6 | -21.958 | -3.240 | 59.211 | 1.00 | 0.00 | H |
| ATOM | 772 | C1'  | C B | 7 | -28.148 | -3.618 | 52.723 | 1.00 | 0.00 | C |
| ATOM | 773 | N1   | C B | 7 | -28.794 | -3.387 | 54.046 | 1.00 | 0.00 | N |
| ATOM | 774 | C2   | C B | 7 | -29.940 | -4.119 | 54.349 | 1.00 | 0.00 | C |
| ATOM | 775 | O2   | C B | 7 | -30.371 | -4.927 | 53.515 | 1.00 | 0.00 | O |
| ATOM | 776 | N3   | C B | 7 | -30.543 | -3.923 | 55.547 | 1.00 | 0.00 | N |
| ATOM | 777 | C4   | C B | 7 | -30.054 | -3.041 | 56.428 | 1.00 | 0.00 | C |
| ATOM | 778 | N4   | C B | 7 | -30.681 | -2.892 | 57.584 | 1.00 | 0.00 | N |
| ATOM | 779 | C5   | C B | 7 | -28.879 | -2.270 | 56.141 | 1.00 | 0.00 | C |
| ATOM | 780 | C6   | C B | 7 | -28.285 | -2.488 | 54.930 | 1.00 | 0.00 | C |
| ATOM | 781 | C2'  | C B | 7 | -27.593 | -2.355 | 52.082 | 1.00 | 0.00 | C |
| ATOM | 782 | C3'  | C B | 7 | -26.340 | -2.874 | 51.394 | 1.00 | 0.00 | C |
| ATOM | 783 | O3'  | C B | 7 | -26.692 | -3.404 | 50.118 | 1.00 | 0.00 | O |
| ATOM | 784 | C4'  | C B | 7 | -25.849 | -3.955 | 52.353 | 1.00 | 0.00 | C |
| ATOM | 785 | O4'  | C B | 7 | -27.073 | -4.517 | 52.922 | 1.00 | 0.00 | O |
| ATOM | 786 | C5'  | C B | 7 | -24.956 | -3.496 | 53.484 | 1.00 | 0.00 | C |
| ATOM | 787 | O5'  | C B | 7 | -25.392 | -2.195 | 53.952 | 1.00 | 0.00 | O |
| ATOM | 788 | O1P  | C B | 7 | -23.474 | -0.684 | 53.344 | 1.00 | 0.00 | O |



|      |     |      |     |   |         |        |        |      |      |   |
|------|-----|------|-----|---|---------|--------|--------|------|------|---|
| ATOM | 789 | O2P  | C B | 7 | -24.955 | -0.110 | 55.284 | 1.00 | 0.00 | O |
| ATOM | 790 | P    | C B | 7 | -24.295 | -1.161 | 54.473 | 1.00 | 0.00 | P |
| ATOM | 791 | H5   | C B | 7 | -28.481 | -1.547 | 56.853 | 1.00 | 0.00 | H |
| ATOM | 792 | H6   | C B | 7 | -27.385 | -1.931 | 54.670 | 1.00 | 0.00 | H |
| ATOM | 793 | H1'  | C B | 7 | -28.874 | -4.103 | 52.070 | 1.00 | 0.00 | H |
| ATOM | 794 | H3'  | C B | 7 | -25.590 | -2.091 | 51.265 | 1.00 | 0.00 | H |
| ATOM | 795 | H4'  | C B | 7 | -25.285 | -4.674 | 51.758 | 1.00 | 0.00 | H |
| ATOM | 796 | H41  | C B | 7 | -30.323 | -2.223 | 58.282 | 1.00 | 0.00 | H |
| ATOM | 797 | H42  | C B | 7 | -31.527 | -3.446 | 57.788 | 1.00 | 0.00 | H |
| ATOM | 798 | H2'1 | C B | 7 | -27.353 | -1.588 | 52.818 | 1.00 | 0.00 | H |
| ATOM | 799 | H2'2 | C B | 7 | -28.287 | -1.915 | 51.366 | 1.00 | 0.00 | H |
| ATOM | 800 | H5'1 | C B | 7 | -25.010 | -4.219 | 54.298 | 1.00 | 0.00 | H |
| ATOM | 801 | H5'2 | C B | 7 | -23.930 | -3.433 | 53.126 | 1.00 | 0.00 | H |
| ATOM | 802 | C1'  | C B | 8 | -32.325 | -3.995 | 50.089 | 1.00 | 0.00 | C |
| ATOM | 803 | N1   | C B | 8 | -32.281 | -3.164 | 51.322 | 1.00 | 0.00 | N |
| ATOM | 804 | C2   | C B | 8 | -33.262 | -3.376 | 52.289 | 1.00 | 0.00 | C |
| ATOM | 805 | O2   | C B | 8 | -34.123 | -4.241 | 52.084 | 1.00 | 0.00 | O |
| ATOM | 806 | N3   | C B | 8 | -33.239 | -2.629 | 53.419 | 1.00 | 0.00 | N |
| ATOM | 807 | C4   | C B | 8 | -32.294 | -1.699 | 53.611 | 1.00 | 0.00 | C |
| ATOM | 808 | N4   | C B | 8 | -32.318 | -1.000 | 54.737 | 1.00 | 0.00 | N |
| ATOM | 809 | C5   | C B | 8 | -31.274 | -1.454 | 52.633 | 1.00 | 0.00 | C |
| ATOM | 810 | C6   | C B | 8 | -31.314 | -2.223 | 51.503 | 1.00 | 0.00 | C |
| ATOM | 811 | C2'  | C B | 8 | -31.944 | -3.239 | 48.823 | 1.00 | 0.00 | C |
| ATOM | 812 | C3'  | C B | 8 | -31.209 | -4.304 | 48.025 | 1.00 | 0.00 | C |
| ATOM | 813 | O3'  | C B | 8 | -32.159 | -5.089 | 47.308 | 1.00 | 0.00 | O |
| ATOM | 814 | C4'  | C B | 8 | -30.497 | -5.110 | 49.110 | 1.00 | 0.00 | C |
| ATOM | 815 | O4'  | C B | 8 | -31.407 | -5.059 | 50.255 | 1.00 | 0.00 | O |
| ATOM | 816 | C5'  | C B | 8 | -29.144 | -4.599 | 49.546 | 1.00 | 0.00 | C |
| ATOM | 817 | O5'  | C B | 8 | -29.143 | -3.148 | 49.544 | 1.00 | 0.00 | O |
| ATOM | 818 | O1P  | C B | 8 | -27.506 | -2.570 | 47.721 | 1.00 | 0.00 | O |
| ATOM | 819 | O2P  | C B | 8 | -27.881 | -0.978 | 49.624 | 1.00 | 0.00 | O |
| ATOM | 820 | P    | C B | 8 | -27.801 | -2.383 | 49.156 | 1.00 | 0.00 | P |
| ATOM | 821 | H5   | C B | 8 | -30.508 | -0.694 | 52.781 | 1.00 | 0.00 | H |
| ATOM | 822 | H6   | C B | 8 | -30.556 | -2.079 | 50.734 | 1.00 | 0.00 | H |
| ATOM | 823 | H1'  | C B | 8 | -33.324 | -4.424 | 50.002 | 1.00 | 0.00 | H |
| ATOM | 824 | H3'  | C B | 8 | -30.496 | -3.870 | 47.325 | 1.00 | 0.00 | H |
| ATOM | 825 | H4'  | C B | 8 | -30.359 | -6.117 | 48.717 | 1.00 | 0.00 | H |
| ATOM | 826 | H41  | C B | 8 | -31.600 | -0.281 | 54.911 | 1.00 | 0.00 | H |
| ATOM | 827 | H42  | C B | 8 | -33.052 | -1.176 | 55.438 | 1.00 | 0.00 | H |
| ATOM | 828 | H2'1 | C B | 8 | -31.301 | -2.384 | 49.030 | 1.00 | 0.00 | H |
| ATOM | 829 | H2'2 | C B | 8 | -32.817 | -2.869 | 48.284 | 1.00 | 0.00 | H |
| ATOM | 830 | H5'1 | C B | 8 | -28.929 | -4.965 | 50.550 | 1.00 | 0.00 | H |
| ATOM | 831 | H5'2 | C B | 8 | -28.384 | -4.968 | 48.860 | 1.00 | 0.00 | H |
| ATOM | 832 | C1'  | T B | 9 | -37.238 | -3.943 | 49.497 | 1.00 | 0.00 | C |
| ATOM | 833 | N1   | T B | 9 | -36.555 | -2.811 | 50.178 | 1.00 | 0.00 | N |
| ATOM | 834 | C2   | T B | 9 | -37.049 | -2.423 | 51.406 | 1.00 | 0.00 | C |
| ATOM | 835 | O2   | T B | 9 | -38.004 | -2.966 | 51.933 | 1.00 | 0.00 | O |
| ATOM | 836 | N3   | T B | 9 | -36.384 | -1.369 | 52.004 | 1.00 | 0.00 | N |
| ATOM | 837 | C4   | T B | 9 | -35.301 | -0.686 | 51.493 | 1.00 | 0.00 | C |
| ATOM | 838 | O4   | T B | 9 | -34.789 | 0.249  | 52.121 | 1.00 | 0.00 | O |
| ATOM | 839 | C5   | T B | 9 | -34.855 | -1.163 | 50.205 | 1.00 | 0.00 | C |
| ATOM | 840 | C6   | T B | 9 | -35.479 | -2.189 | 49.594 | 1.00 | 0.00 | C |
| ATOM | 841 | C7   | T B | 9 | -33.676 | -0.450 | 49.614 | 1.00 | 0.00 | C |
| ATOM | 842 | C2'  | T B | 9 | -37.341 | -3.779 | 47.984 | 1.00 | 0.00 | C |

|      |     |      |     |    |         |        |        |      |      |   |
|------|-----|------|-----|----|---------|--------|--------|------|------|---|
| ATOM | 843 | C3'  | T B | 9  | -37.175 | -5.211 | 47.499 | 1.00 | 0.00 | C |
| ATOM | 844 | O3'  | T B | 9  | -38.439 | -5.869 | 47.543 | 1.00 | 0.00 | O |
| ATOM | 845 | C4'  | T B | 9  | -36.181 | -5.796 | 48.499 | 1.00 | 0.00 | C |
| ATOM | 846 | O4'  | T B | 9  | -36.495 | -5.117 | 49.757 | 1.00 | 0.00 | O |
| ATOM | 847 | C5'  | T B | 9  | -34.716 | -5.592 | 48.191 | 1.00 | 0.00 | C |
| ATOM | 848 | O5'  | T B | 9  | -34.520 | -4.287 | 47.590 | 1.00 | 0.00 | O |
| ATOM | 849 | O1P  | T B | 9  | -33.768 | -4.829 | 45.251 | 1.00 | 0.00 | O |
| ATOM | 850 | O2P  | T B | 9  | -33.065 | -2.674 | 46.328 | 1.00 | 0.00 | O |
| ATOM | 851 | P    | T B | 9  | -33.384 | -4.113 | 46.485 | 1.00 | 0.00 | P |
| ATOM | 852 | H3   | T B | 9  | -36.732 | -1.063 | 52.923 | 1.00 | 0.00 | H |
| ATOM | 853 | H6   | T B | 9  | -35.124 | -2.531 | 48.622 | 1.00 | 0.00 | H |
| ATOM | 854 | H1'  | T B | 9  | -38.225 | -4.065 | 49.943 | 1.00 | 0.00 | H |
| ATOM | 855 | H3'  | T B | 9  | -36.781 | -5.252 | 46.483 | 1.00 | 0.00 | H |
| ATOM | 856 | H4'  | T B | 9  | -36.367 | -6.871 | 48.537 | 1.00 | 0.00 | H |
| ATOM | 857 | H71  | T B | 9  | -33.984 | 0.072  | 48.707 | 1.00 | 0.00 | H |
| ATOM | 858 | H72  | T B | 9  | -33.287 | 0.271  | 50.333 | 1.00 | 0.00 | H |
| ATOM | 859 | H73  | T B | 9  | -32.898 | -1.174 | 49.368 | 1.00 | 0.00 | H |
| ATOM | 860 | H2'1 | T B | 9  | -36.561 | -3.131 | 47.586 | 1.00 | 0.00 | H |
| ATOM | 861 | H2'2 | T B | 9  | -38.301 | -3.363 | 47.678 | 1.00 | 0.00 | H |
| ATOM | 862 | H5'1 | T B | 9  | -34.142 | -5.663 | 49.114 | 1.00 | 0.00 | H |
| ATOM | 863 | H5'2 | T B | 9  | -34.386 | -6.367 | 47.502 | 1.00 | 0.00 | H |
| ATOM | 864 | C1'  | A B | 10 | -41.854 | -2.601 | 50.733 | 1.00 | 0.00 | C |
| ATOM | 865 | N1   | A B | 10 | -39.506 | 1.416  | 52.898 | 1.00 | 0.00 | N |
| ATOM | 866 | C2   | A B | 10 | -40.506 | 0.636  | 53.299 | 1.00 | 0.00 | C |
| ATOM | 867 | N3   | A B | 10 | -41.062 | -0.389 | 52.690 | 1.00 | 0.00 | N |
| ATOM | 868 | C4   | A B | 10 | -40.475 | -0.598 | 51.498 | 1.00 | 0.00 | C |
| ATOM | 869 | C5   | A B | 10 | -39.444 | 0.108  | 50.943 | 1.00 | 0.00 | C |
| ATOM | 870 | C6   | A B | 10 | -38.939 | 1.182  | 51.704 | 1.00 | 0.00 | C |
| ATOM | 871 | N6   | A B | 10 | -37.928 | 1.965  | 51.287 | 1.00 | 0.00 | N |
| ATOM | 872 | N7   | A B | 10 | -39.102 | -0.400 | 49.702 | 1.00 | 0.00 | N |
| ATOM | 873 | C8   | A B | 10 | -39.928 | -1.390 | 49.532 | 1.00 | 0.00 | C |
| ATOM | 874 | N9   | A B | 10 | -40.789 | -1.573 | 50.583 | 1.00 | 0.00 | N |
| ATOM | 875 | C2'  | A B | 10 | -42.588 | -2.916 | 49.437 | 1.00 | 0.00 | C |
| ATOM | 876 | C3'  | A B | 10 | -42.857 | -4.407 | 49.579 | 1.00 | 0.00 | C |
| ATOM | 877 | O3'  | A B | 10 | -44.047 | -4.598 | 50.339 | 1.00 | 0.00 | O |
| ATOM | 878 | C4'  | A B | 10 | -41.615 | -4.906 | 50.316 | 1.00 | 0.00 | C |
| ATOM | 879 | O4'  | A B | 10 | -41.241 | -3.792 | 51.189 | 1.00 | 0.00 | O |
| ATOM | 880 | C5'  | A B | 10 | -40.426 | -5.270 | 49.459 | 1.00 | 0.00 | C |
| ATOM | 881 | O5'  | A B | 10 | -40.334 | -4.357 | 48.335 | 1.00 | 0.00 | O |
| ATOM | 882 | O1P  | A B | 10 | -40.778 | -5.836 | 46.347 | 1.00 | 0.00 | O |
| ATOM | 883 | O2P  | A B | 10 | -39.379 | -3.769 | 46.087 | 1.00 | 0.00 | O |
| ATOM | 884 | P    | A B | 10 | -39.794 | -4.910 | 46.940 | 1.00 | 0.00 | P |
| ATOM | 885 | H2   | A B | 10 | -40.924 | 0.882  | 54.274 | 1.00 | 0.00 | H |
| ATOM | 886 | H8   | A B | 10 | -39.935 | -2.015 | 48.639 | 1.00 | 0.00 | H |
| ATOM | 887 | H1'  | A B | 10 | -42.547 | -2.264 | 51.503 | 1.00 | 0.00 | H |
| ATOM | 888 | H3'  | A B | 10 | -42.963 | -4.896 | 48.611 | 1.00 | 0.00 | H |
| ATOM | 889 | H4'  | A B | 10 | -41.913 | -5.798 | 50.868 | 1.00 | 0.00 | H |
| ATOM | 890 | H61  | A B | 10 | -37.595 | 2.734  | 51.883 | 1.00 | 0.00 | H |
| ATOM | 891 | H62  | A B | 10 | -37.488 | 1.793  | 50.372 | 1.00 | 0.00 | H |
| ATOM | 892 | H2'1 | A B | 10 | -41.984 | -2.705 | 48.556 | 1.00 | 0.00 | H |
| ATOM | 893 | H2'2 | A B | 10 | -43.518 | -2.354 | 49.341 | 1.00 | 0.00 | H |
| ATOM | 894 | H5'1 | A B | 10 | -39.519 | -5.206 | 50.059 | 1.00 | 0.00 | H |
| ATOM | 895 | H5'2 | A B | 10 | -40.545 | -6.289 | 49.096 | 1.00 | 0.00 | H |
| ATOM | 896 | C1'  | G B | 11 | -45.196 | 0.412  | 52.829 | 1.00 | 0.00 | C |

|      |     |      |     |    |         |        |        |      |      |   |
|------|-----|------|-----|----|---------|--------|--------|------|------|---|
| ATOM | 897 | N1   | G B | 11 | -41.625 | 3.980  | 52.096 | 1.00 | 0.00 | N |
| ATOM | 898 | C2   | G B | 11 | -42.444 | 3.755  | 53.188 | 1.00 | 0.00 | C |
| ATOM | 899 | N2   | G B | 11 | -42.293 | 4.593  | 54.221 | 1.00 | 0.00 | N |
| ATOM | 900 | N3   | G B | 11 | -43.342 | 2.772  | 53.245 | 1.00 | 0.00 | N |
| ATOM | 901 | C4   | G B | 11 | -43.363 | 2.026  | 52.109 | 1.00 | 0.00 | C |
| ATOM | 902 | C5   | G B | 11 | -42.589 | 2.179  | 50.972 | 1.00 | 0.00 | C |
| ATOM | 903 | C6   | G B | 11 | -41.633 | 3.220  | 50.911 | 1.00 | 0.00 | C |
| ATOM | 904 | O6   | G B | 11 | -40.861 | 3.513  | 49.998 | 1.00 | 0.00 | O |
| ATOM | 905 | N7   | G B | 11 | -42.921 | 1.206  | 50.027 | 1.00 | 0.00 | N |
| ATOM | 906 | C8   | G B | 11 | -43.863 | 0.509  | 50.609 | 1.00 | 0.00 | C |
| ATOM | 907 | N9   | G B | 11 | -44.188 | 0.947  | 51.876 | 1.00 | 0.00 | N |
| ATOM | 908 | C2'  | G B | 11 | -46.477 | -0.069 | 52.161 | 1.00 | 0.00 | C |
| ATOM | 909 | C3'  | G B | 11 | -46.852 | -1.267 | 53.018 | 1.00 | 0.00 | C |
| ATOM | 910 | O3'  | G B | 11 | -47.581 | -0.817 | 54.158 | 1.00 | 0.00 | O |
| ATOM | 911 | C4'  | G B | 11 | -45.494 | -1.854 | 53.396 | 1.00 | 0.00 | C |
| ATOM | 912 | O4'  | G B | 11 | -44.615 | -0.688 | 53.501 | 1.00 | 0.00 | O |
| ATOM | 913 | C5'  | G B | 11 | -44.888 | -2.830 | 52.415 | 1.00 | 0.00 | C |
| ATOM | 914 | O5'  | G B | 11 | -45.194 | -2.418 | 51.060 | 1.00 | 0.00 | O |
| ATOM | 915 | O1P  | G B | 11 | -46.692 | -4.255 | 50.216 | 1.00 | 0.00 | O |
| ATOM | 916 | O2P  | G B | 11 | -45.296 | -2.934 | 48.604 | 1.00 | 0.00 | O |
| ATOM | 917 | P    | G B | 11 | -45.430 | -3.539 | 49.951 | 1.00 | 0.00 | P |
| ATOM | 918 | H1   | G B | 11 | -40.958 | 4.764  | 52.156 | 1.00 | 0.00 | H |
| ATOM | 919 | H8   | G B | 11 | -44.349 | -0.342 | 50.134 | 1.00 | 0.00 | H |
| ATOM | 920 | H1'  | G B | 11 | -45.409 | 1.183  | 53.571 | 1.00 | 0.00 | H |
| ATOM | 921 | H21  | G B | 11 | -41.595 | 5.349  | 54.172 | 1.00 | 0.00 | H |
| ATOM | 922 | H3'  | G B | 11 | -47.454 | -1.991 | 52.468 | 1.00 | 0.00 | H |
| ATOM | 923 | H22  | G B | 11 | -42.875 | 4.481  | 55.064 | 1.00 | 0.00 | H |
| ATOM | 924 | H4'  | G B | 11 | -45.626 | -2.374 | 54.345 | 1.00 | 0.00 | H |
| ATOM | 925 | H2'1 | G B | 11 | -46.317 | -0.359 | 51.122 | 1.00 | 0.00 | H |
| ATOM | 926 | H2'2 | G B | 11 | -47.260 | 0.689  | 52.173 | 1.00 | 0.00 | H |
| ATOM | 927 | H5'1 | G B | 11 | -43.808 | -2.856 | 52.557 | 1.00 | 0.00 | H |
| ATOM | 928 | H5'2 | G B | 11 | -45.298 | -3.823 | 52.600 | 1.00 | 0.00 | H |
| ATOM | 929 | C1'  | G B | 12 | -46.834 | 4.782  | 54.486 | 1.00 | 0.00 | C |
| ATOM | 930 | N1   | G B | 12 | -43.505 | 6.667  | 51.110 | 1.00 | 0.00 | N |
| ATOM | 931 | C2   | G B | 12 | -43.779 | 7.067  | 52.407 | 1.00 | 0.00 | C |
| ATOM | 932 | N2   | G B | 12 | -43.073 | 8.110  | 52.864 | 1.00 | 0.00 | N |
| ATOM | 933 | N3   | G B | 12 | -44.683 | 6.475  | 53.184 | 1.00 | 0.00 | N |
| ATOM | 934 | C4   | G B | 12 | -45.307 | 5.444  | 52.557 | 1.00 | 0.00 | C |
| ATOM | 935 | C5   | G B | 12 | -45.104 | 4.977  | 51.270 | 1.00 | 0.00 | C |
| ATOM | 936 | C6   | G B | 12 | -44.142 | 5.603  | 50.445 | 1.00 | 0.00 | C |
| ATOM | 937 | O6   | G B | 12 | -43.822 | 5.337  | 49.286 | 1.00 | 0.00 | O |
| ATOM | 938 | N7   | G B | 12 | -45.950 | 3.898  | 51.008 | 1.00 | 0.00 | N |
| ATOM | 939 | C8   | G B | 12 | -46.622 | 3.745  | 52.119 | 1.00 | 0.00 | C |
| ATOM | 940 | N9   | G B | 12 | -46.288 | 4.648  | 53.108 | 1.00 | 0.00 | N |
| ATOM | 941 | C2'  | G B | 12 | -48.330 | 4.519  | 54.581 | 1.00 | 0.00 | C |
| ATOM | 942 | C3'  | G B | 12 | -48.447 | 3.837  | 55.936 | 1.00 | 0.00 | C |
| ATOM | 943 | O3'  | G B | 12 | -48.526 | 4.831  | 56.955 | 1.00 | 0.00 | O |
| ATOM | 944 | C4'  | G B | 12 | -47.156 | 3.025  | 56.020 | 1.00 | 0.00 | C |
| ATOM | 945 | O4'  | G B | 12 | -46.172 | 3.839  | 55.306 | 1.00 | 0.00 | O |
| ATOM | 946 | C5'  | G B | 12 | -47.187 | 1.649  | 55.398 | 1.00 | 0.00 | C |
| ATOM | 947 | O5'  | G B | 12 | -48.002 | 1.670  | 54.200 | 1.00 | 0.00 | O |
| ATOM | 948 | O1P  | G B | 12 | -49.954 | 0.199  | 54.798 | 1.00 | 0.00 | O |
| ATOM | 949 | O2P  | G B | 12 | -49.251 | 0.437  | 52.401 | 1.00 | 0.00 | O |
| ATOM | 950 | P    | G B | 12 | -48.855 | 0.374  | 53.829 | 1.00 | 0.00 | P |

|      |      |      |     |    |         |        |        |      |      |   |
|------|------|------|-----|----|---------|--------|--------|------|------|---|
| ATOM | 951  | H1   | G B | 12 | -42.781 | 7.190  | 50.594 | 1.00 | 0.00 | H |
| ATOM | 952  | H8   | G B | 12 | -47.380 | 2.974  | 52.255 | 1.00 | 0.00 | H |
| ATOM | 953  | H1'  | G B | 12 | -46.588 | 5.778  | 54.855 | 1.00 | 0.00 | H |
| ATOM | 954  | H21  | G B | 12 | -42.372 | 8.561  | 52.257 | 1.00 | 0.00 | H |
| ATOM | 955  | H3'  | G B | 12 | -49.323 | 3.190  | 55.994 | 1.00 | 0.00 | H |
| ATOM | 956  | H22  | G B | 12 | -43.231 | 8.458  | 53.819 | 1.00 | 0.00 | H |
| ATOM | 957  | H4'  | G B | 12 | -46.924 | 2.907  | 57.077 | 1.00 | 0.00 | H |
| ATOM | 958  | H2'1 | G B | 12 | -48.688 | 3.873  | 53.780 | 1.00 | 0.00 | H |
| ATOM | 959  | H2'2 | G B | 12 | -48.916 | 5.437  | 54.548 | 1.00 | 0.00 | H |
| ATOM | 960  | H5'1 | G B | 12 | -46.170 | 1.347  | 55.147 | 1.00 | 0.00 | H |
| ATOM | 961  | H5'2 | G B | 12 | -47.604 | 0.942  | 56.115 | 1.00 | 0.00 | H |
| ATOM | 962  | C1'  | T B | 13 | -46.966 | 9.728  | 54.625 | 1.00 | 0.00 | C |
| ATOM | 963  | N1   | T B | 13 | -47.090 | 9.013  | 53.328 | 1.00 | 0.00 | N |
| ATOM | 964  | C2   | T B | 13 | -46.253 | 9.412  | 52.304 | 1.00 | 0.00 | C |
| ATOM | 965  | O2   | T B | 13 | -45.438 | 10.311 | 52.432 | 1.00 | 0.00 | O |
| ATOM | 966  | N3   | T B | 13 | -46.401 | 8.720  | 51.117 | 1.00 | 0.00 | N |
| ATOM | 967  | C4   | T B | 13 | -47.289 | 7.695  | 50.868 | 1.00 | 0.00 | C |
| ATOM | 968  | O4   | T B | 13 | -47.334 | 7.151  | 49.759 | 1.00 | 0.00 | O |
| ATOM | 969  | C5   | T B | 13 | -48.121 | 7.347  | 51.996 | 1.00 | 0.00 | C |
| ATOM | 970  | C6   | T B | 13 | -48.003 | 8.000  | 53.170 | 1.00 | 0.00 | C |
| ATOM | 971  | C7   | T B | 13 | -49.102 | 6.235  | 51.772 | 1.00 | 0.00 | C |
| ATOM | 972  | C2'  | T B | 13 | -48.298 | 9.958  | 55.330 | 1.00 | 0.00 | C |
| ATOM | 973  | C3'  | T B | 13 | -47.912 | 9.806  | 56.793 | 1.00 | 0.00 | C |
| ATOM | 974  | O3'  | T B | 13 | -47.408 | 11.049 | 57.276 | 1.00 | 0.00 | O |
| ATOM | 975  | C4'  | T B | 13 | -46.836 | 8.723  | 56.750 | 1.00 | 0.00 | C |
| ATOM | 976  | O4'  | T B | 13 | -46.153 | 8.944  | 55.475 | 1.00 | 0.00 | O |
| ATOM | 977  | C5'  | T B | 13 | -47.320 | 7.292  | 56.798 | 1.00 | 0.00 | C |
| ATOM | 978  | O5'  | T B | 13 | -48.561 | 7.170  | 56.057 | 1.00 | 0.00 | O |
| ATOM | 979  | O1P  | T B | 13 | -50.248 | 6.603  | 57.835 | 1.00 | 0.00 | O |
| ATOM | 980  | O2P  | T B | 13 | -50.619 | 5.854  | 55.469 | 1.00 | 0.00 | O |
| ATOM | 981  | P    | T B | 13 | -49.659 | 6.133  | 56.565 | 1.00 | 0.00 | P |
| ATOM | 982  | H3   | T B | 13 | -45.785 | 8.998  | 50.339 | 1.00 | 0.00 | H |
| ATOM | 983  | H6   | T B | 13 | -48.643 | 7.720  | 54.007 | 1.00 | 0.00 | H |
| ATOM | 984  | H1'  | T B | 13 | -46.451 | 10.673 | 54.448 | 1.00 | 0.00 | H |
| ATOM | 985  | H3'  | T B | 13 | -48.758 | 9.496  | 57.407 | 1.00 | 0.00 | H |
| ATOM | 986  | H4'  | T B | 13 | -46.191 | 8.883  | 57.614 | 1.00 | 0.00 | H |
| ATOM | 987  | H71  | T B | 13 | -50.117 | 6.626  | 51.835 | 1.00 | 0.00 | H |
| ATOM | 988  | H72  | T B | 13 | -48.940 | 5.801  | 50.784 | 1.00 | 0.00 | H |
| ATOM | 989  | H73  | T B | 13 | -48.961 | 5.466  | 52.533 | 1.00 | 0.00 | H |
| ATOM | 990  | H2'1 | T B | 13 | -49.049 | 9.226  | 55.039 | 1.00 | 0.00 | H |
| ATOM | 991  | H2'2 | T B | 13 | -48.707 | 10.948 | 55.129 | 1.00 | 0.00 | H |
| ATOM | 992  | H5'1 | T B | 13 | -46.563 | 6.643  | 56.359 | 1.00 | 0.00 | H |
| ATOM | 993  | H5'2 | T B | 13 | -47.483 | 7.004  | 57.835 | 1.00 | 0.00 | H |
| ATOM | 994  | C1'  | G B | 14 | -46.330 | 14.243 | 52.660 | 1.00 | 0.00 | C |
| ATOM | 995  | N1   | G B | 14 | -46.989 | 11.802 | 48.228 | 1.00 | 0.00 | N |
| ATOM | 996  | C2   | G B | 14 | -46.081 | 12.788 | 48.572 | 1.00 | 0.00 | C |
| ATOM | 997  | N2   | G B | 14 | -45.238 | 13.176 | 47.609 | 1.00 | 0.00 | N |
| ATOM | 998  | N3   | G B | 14 | -46.019 | 13.341 | 49.783 | 1.00 | 0.00 | N |
| ATOM | 999  | C4   | G B | 14 | -46.951 | 12.832 | 50.632 | 1.00 | 0.00 | C |
| ATOM | 1000 | C5   | G B | 14 | -47.897 | 11.855 | 50.376 | 1.00 | 0.00 | C |
| ATOM | 1001 | C6   | G B | 14 | -47.961 | 11.264 | 49.092 | 1.00 | 0.00 | C |
| ATOM | 1002 | O6   | G B | 14 | -48.724 | 10.390 | 48.677 | 1.00 | 0.00 | O |
| ATOM | 1003 | N7   | G B | 14 | -48.668 | 11.618 | 51.516 | 1.00 | 0.00 | N |
| ATOM | 1004 | C8   | G B | 14 | -48.174 | 12.439 | 52.407 | 1.00 | 0.00 | C |

|      |      |      |     |    |         |        |        |      |      |   |
|------|------|------|-----|----|---------|--------|--------|------|------|---|
| ATOM | 1005 | N9   | G B | 14 | -47.128 | 13.212 | 51.944 | 1.00 | 0.00 | N |
| ATOM | 1006 | C2'  | G B | 14 | -47.148 | 15.094 | 53.622 | 1.00 | 0.00 | C |
| ATOM | 1007 | C3'  | G B | 14 | -46.163 | 15.327 | 54.756 | 1.00 | 0.00 | C |
| ATOM | 1008 | O3'  | G B | 14 | -45.330 | 16.437 | 54.433 | 1.00 | 0.00 | O |
| ATOM | 1009 | C4'  | G B | 14 | -45.383 | 14.014 | 54.802 | 1.00 | 0.00 | C |
| ATOM | 1010 | O4'  | G B | 14 | -45.333 | 13.575 | 53.408 | 1.00 | 0.00 | O |
| ATOM | 1011 | C5'  | G B | 14 | -45.980 | 12.907 | 55.637 | 1.00 | 0.00 | C |
| ATOM | 1012 | O5'  | G B | 14 | -47.425 | 12.934 | 55.527 | 1.00 | 0.00 | O |
| ATOM | 1013 | O1P  | G B | 14 | -48.176 | 13.543 | 57.851 | 1.00 | 0.00 | O |
| ATOM | 1014 | O2P  | G B | 14 | -49.681 | 12.203 | 56.357 | 1.00 | 0.00 | O |
| ATOM | 1015 | P    | G B | 14 | -48.300 | 12.521 | 56.795 | 1.00 | 0.00 | P |
| ATOM | 1016 | H1   | G B | 14 | -46.949 | 11.435 | 47.265 | 1.00 | 0.00 | H |
| ATOM | 1017 | H8   | G B | 14 | -48.556 | 12.507 | 53.426 | 1.00 | 0.00 | H |
| ATOM | 1018 | H1'  | G B | 14 | -45.830 | 14.865 | 51.916 | 1.00 | 0.00 | H |
| ATOM | 1019 | H21  | G B | 14 | -45.290 | 12.741 | 46.675 | 1.00 | 0.00 | H |
| ATOM | 1020 | H3'  | G B | 14 | -46.668 | 15.517 | 55.704 | 1.00 | 0.00 | H |
| ATOM | 1021 | H22  | G B | 14 | -44.540 | 13.909 | 47.799 | 1.00 | 0.00 | H |
| ATOM | 1022 | H4'  | G B | 14 | -44.399 | 14.245 | 55.211 | 1.00 | 0.00 | H |
| ATOM | 1023 | H2'1 | G B | 14 | -48.042 | 14.579 | 53.972 | 1.00 | 0.00 | H |
| ATOM | 1024 | H2'2 | G B | 14 | -47.467 | 16.035 | 53.174 | 1.00 | 0.00 | H |
| ATOM | 1025 | H5'1 | G B | 14 | -45.602 | 11.948 | 55.284 | 1.00 | 0.00 | H |
| ATOM | 1026 | H5'2 | G B | 14 | -45.687 | 13.045 | 56.678 | 1.00 | 0.00 | H |
| ATOM | 1027 | C1'  | C B | 15 | -46.021 | 17.467 | 48.912 | 1.00 | 0.00 | C |
| ATOM | 1028 | N1   | C B | 15 | -47.185 | 16.547 | 49.025 | 1.00 | 0.00 | N |
| ATOM | 1029 | C2   | C B | 15 | -47.529 | 15.787 | 47.909 | 1.00 | 0.00 | C |
| ATOM | 1030 | O2   | C B | 15 | -46.856 | 15.907 | 46.877 | 1.00 | 0.00 | O |
| ATOM | 1031 | N3   | C B | 15 | -48.586 | 14.943 | 47.992 | 1.00 | 0.00 | N |
| ATOM | 1032 | C4   | C B | 15 | -49.294 | 14.837 | 49.122 | 1.00 | 0.00 | C |
| ATOM | 1033 | N4   | C B | 15 | -50.316 | 13.994 | 49.149 | 1.00 | 0.00 | N |
| ATOM | 1034 | C5   | C B | 15 | -48.968 | 15.610 | 50.286 | 1.00 | 0.00 | C |
| ATOM | 1035 | C6   | C B | 15 | -47.897 | 16.448 | 50.181 | 1.00 | 0.00 | C |
| ATOM | 1036 | C2'  | C B | 15 | -46.209 | 18.788 | 49.644 | 1.00 | 0.00 | C |
| ATOM | 1037 | C3'  | C B | 15 | -44.805 | 19.072 | 50.154 | 1.00 | 0.00 | C |
| ATOM | 1038 | O3'  | C B | 15 | -44.053 | 19.714 | 49.126 | 1.00 | 0.00 | O |
| ATOM | 1039 | C4'  | C B | 15 | -44.271 | 17.677 | 50.473 | 1.00 | 0.00 | C |
| ATOM | 1040 | O4'  | C B | 15 | -44.899 | 16.812 | 49.473 | 1.00 | 0.00 | O |
| ATOM | 1041 | C5'  | C B | 15 | -44.589 | 17.134 | 51.848 | 1.00 | 0.00 | C |
| ATOM | 1042 | O5'  | C B | 15 | -45.917 | 17.558 | 52.246 | 1.00 | 0.00 | O |
| ATOM | 1043 | O1P  | C B | 15 | -45.480 | 19.087 | 54.198 | 1.00 | 0.00 | O |
| ATOM | 1044 | O2P  | C B | 15 | -47.658 | 17.850 | 54.036 | 1.00 | 0.00 | O |
| ATOM | 1045 | P    | C B | 15 | -46.196 | 17.862 | 53.786 | 1.00 | 0.00 | P |
| ATOM | 1046 | H5   | C B | 15 | -49.546 | 15.530 | 51.207 | 1.00 | 0.00 | H |
| ATOM | 1047 | H6   | C B | 15 | -47.605 | 17.052 | 51.041 | 1.00 | 0.00 | H |
| ATOM | 1048 | H1'  | C B | 15 | -45.819 | 17.632 | 47.853 | 1.00 | 0.00 | H |
| ATOM | 1049 | H3'  | C B | 15 | -44.813 | 19.702 | 51.043 | 1.00 | 0.00 | H |
| ATOM | 1050 | H4'  | C B | 15 | -43.186 | 17.722 | 50.377 | 1.00 | 0.00 | H |
| ATOM | 1051 | H41  | C B | 15 | -50.877 | 13.889 | 50.008 | 1.00 | 0.00 | H |
| ATOM | 1052 | H42  | C B | 15 | -50.551 | 13.441 | 48.311 | 1.00 | 0.00 | H |
| ATOM | 1053 | H2'1 | C B | 15 | -46.921 | 18.709 | 50.465 | 1.00 | 0.00 | H |
| ATOM | 1054 | H2'2 | C B | 15 | -46.560 | 19.582 | 48.983 | 1.00 | 0.00 | H |
| ATOM | 1055 | H5'1 | C B | 15 | -44.541 | 16.046 | 51.823 | 1.00 | 0.00 | H |
| ATOM | 1056 | H5'2 | C B | 15 | -43.854 | 17.511 | 52.559 | 1.00 | 0.00 | H |
| ATOM | 1057 | C1'  | G B | 16 | -46.968 | 19.044 | 44.315 | 1.00 | 0.00 | C |
| ATOM | 1058 | N1   | G B | 16 | -51.069 | 16.041 | 44.737 | 1.00 | 0.00 | N |

|      |      |      |     |    |         |        |        |      |      |   |
|------|------|------|-----|----|---------|--------|--------|------|------|---|
| ATOM | 1059 | C2   | G B | 16 | -50.201 | 16.214 | 43.673 | 1.00 | 0.00 | C |
| ATOM | 1060 | N2   | G B | 16 | -50.462 | 15.493 | 42.576 | 1.00 | 0.00 | N |
| ATOM | 1061 | N3   | G B | 16 | -49.157 | 17.040 | 43.703 | 1.00 | 0.00 | N |
| ATOM | 1062 | C4   | G B | 16 | -49.049 | 17.694 | 44.890 | 1.00 | 0.00 | C |
| ATOM | 1063 | C5   | G B | 16 | -49.868 | 17.589 | 46.001 | 1.00 | 0.00 | C |
| ATOM | 1064 | C6   | G B | 16 | -50.975 | 16.708 | 45.972 | 1.00 | 0.00 | C |
| ATOM | 1065 | O6   | G B | 16 | -51.807 | 16.480 | 46.850 | 1.00 | 0.00 | O |
| ATOM | 1066 | N7   | G B | 16 | -49.414 | 18.433 | 47.017 | 1.00 | 0.00 | N |
| ATOM | 1067 | C8   | G B | 16 | -48.358 | 19.009 | 46.502 | 1.00 | 0.00 | C |
| ATOM | 1068 | N9   | G B | 16 | -48.073 | 18.612 | 45.211 | 1.00 | 0.00 | N |
| ATOM | 1069 | C2'  | G B | 16 | -46.624 | 20.523 | 44.434 | 1.00 | 0.00 | C |
| ATOM | 1070 | C3'  | G B | 16 | -45.116 | 20.515 | 44.240 | 1.00 | 0.00 | C |
| ATOM | 1071 | O3'  | G B | 16 | -44.824 | 20.529 | 42.845 | 1.00 | 0.00 | O |
| ATOM | 1072 | C4'  | G B | 16 | -44.694 | 19.206 | 44.906 | 1.00 | 0.00 | C |
| ATOM | 1073 | O4'  | G B | 16 | -45.816 | 18.299 | 44.659 | 1.00 | 0.00 | O |
| ATOM | 1074 | C5'  | G B | 16 | -44.436 | 19.262 | 46.393 | 1.00 | 0.00 | C |
| ATOM | 1075 | O5'  | G B | 16 | -45.372 | 20.173 | 47.020 | 1.00 | 0.00 | O |
| ATOM | 1076 | O1P  | G B | 16 | -43.904 | 22.042 | 47.847 | 1.00 | 0.00 | O |
| ATOM | 1077 | O2P  | G B | 16 | -46.071 | 21.542 | 49.007 | 1.00 | 0.00 | O |
| ATOM | 1078 | P    | G B | 16 | -44.887 | 21.030 | 48.275 | 1.00 | 0.00 | P |
| ATOM | 1079 | H1   | G B | 16 | -51.844 | 15.371 | 44.614 | 1.00 | 0.00 | H |
| ATOM | 1080 | H8   | G B | 16 | -47.757 | 19.737 | 47.044 | 1.00 | 0.00 | H |
| ATOM | 1081 | H1'  | G B | 16 | -47.238 | 18.788 | 43.290 | 1.00 | 0.00 | H |
| ATOM | 1082 | H21  | G B | 16 | -51.270 | 14.853 | 42.562 | 1.00 | 0.00 | H |
| ATOM | 1083 | H3'  | G B | 16 | -44.638 | 21.371 | 44.718 | 1.00 | 0.00 | H |
| ATOM | 1084 | H22  | G B | 16 | -49.855 | 15.578 | 41.749 | 1.00 | 0.00 | H |
| ATOM | 1085 | H4'  | G B | 16 | -43.773 | 18.886 | 44.419 | 1.00 | 0.00 | H |
| ATOM | 1086 | H2'1 | G B | 16 | -46.897 | 20.933 | 45.407 | 1.00 | 0.00 | H |
| ATOM | 1087 | H2'2 | G B | 16 | -47.119 | 21.126 | 43.673 | 1.00 | 0.00 | H |
| ATOM | 1088 | H5'1 | G B | 16 | -44.554 | 18.264 | 46.814 | 1.00 | 0.00 | H |
| ATOM | 1089 | H5'2 | G B | 16 | -43.416 | 19.606 | 46.565 | 1.00 | 0.00 | H |
| ATOM | 1090 | C1'  | G B | 17 | -49.626 | 19.247 | 40.141 | 1.00 | 0.00 | C |
| ATOM | 1091 | N1   | G B | 17 | -53.484 | 17.926 | 43.206 | 1.00 | 0.00 | N |
| ATOM | 1092 | C2   | G B | 17 | -53.162 | 17.475 | 41.938 | 1.00 | 0.00 | C |
| ATOM | 1093 | N2   | G B | 17 | -53.977 | 16.550 | 41.418 | 1.00 | 0.00 | N |
| ATOM | 1094 | N3   | G B | 17 | -52.111 | 17.910 | 41.247 | 1.00 | 0.00 | N |
| ATOM | 1095 | C4   | G B | 17 | -51.401 | 18.851 | 41.924 | 1.00 | 0.00 | C |
| ATOM | 1096 | C5   | G B | 17 | -51.648 | 19.363 | 43.186 | 1.00 | 0.00 | C |
| ATOM | 1097 | C6   | G B | 17 | -52.761 | 18.899 | 43.922 | 1.00 | 0.00 | C |
| ATOM | 1098 | O6   | G B | 17 | -53.142 | 19.229 | 45.046 | 1.00 | 0.00 | O |
| ATOM | 1099 | N7   | G B | 17 | -50.681 | 20.315 | 43.519 | 1.00 | 0.00 | N |
| ATOM | 1100 | C8   | G B | 17 | -49.895 | 20.345 | 42.474 | 1.00 | 0.00 | C |
| ATOM | 1101 | N9   | G B | 17 | -50.268 | 19.484 | 41.463 | 1.00 | 0.00 | N |
| ATOM | 1102 | C2'  | G B | 17 | -49.066 | 20.508 | 39.497 | 1.00 | 0.00 | C |
| ATOM | 1103 | C3'  | G B | 17 | -47.816 | 19.984 | 38.806 | 1.00 | 0.00 | C |
| ATOM | 1104 | O3'  | G B | 17 | -48.173 | 19.455 | 37.531 | 1.00 | 0.00 | O |
| ATOM | 1105 | C4'  | G B | 17 | -47.327 | 18.901 | 39.765 | 1.00 | 0.00 | C |
| ATOM | 1106 | O4'  | G B | 17 | -48.554 | 18.345 | 40.337 | 1.00 | 0.00 | O |
| ATOM | 1107 | C5'  | G B | 17 | -46.432 | 19.357 | 40.893 | 1.00 | 0.00 | C |
| ATOM | 1108 | O5'  | G B | 17 | -46.861 | 20.659 | 41.363 | 1.00 | 0.00 | O |
| ATOM | 1109 | O1P  | G B | 17 | -44.937 | 22.161 | 40.748 | 1.00 | 0.00 | O |
| ATOM | 1110 | O2P  | G B | 17 | -46.411 | 22.744 | 42.693 | 1.00 | 0.00 | O |
| ATOM | 1111 | P    | G B | 17 | -45.758 | 21.690 | 41.880 | 1.00 | 0.00 | P |
| ATOM | 1112 | H1   | G B | 17 | -54.317 | 17.520 | 43.659 | 1.00 | 0.00 | H |

|      |      |      |     |    |         |        |        |      |      |   |
|------|------|------|-----|----|---------|--------|--------|------|------|---|
| ATOM | 1113 | H8   | G B | 17 | -49.022 | 20.993 | 42.407 | 1.00 | 0.00 | H |
| ATOM | 1114 | H1'  | G B | 17 | -50.354 | 18.766 | 39.489 | 1.00 | 0.00 | H |
| ATOM | 1115 | H21  | G B | 17 | -54.787 | 16.214 | 41.960 | 1.00 | 0.00 | H |
| ATOM | 1116 | H3'  | G B | 17 | -47.064 | 20.762 | 38.676 | 1.00 | 0.00 | H |
| ATOM | 1117 | H22  | G B | 17 | -53.794 | 16.174 | 40.476 | 1.00 | 0.00 | H |
| ATOM | 1118 | H4'  | G B | 17 | -46.770 | 18.178 | 39.170 | 1.00 | 0.00 | H |
| ATOM | 1119 | H2'1 | G B | 17 | -48.821 | 21.274 | 40.232 | 1.00 | 0.00 | H |
| ATOM | 1120 | H2'2 | G B | 17 | -49.759 | 20.950 | 38.782 | 1.00 | 0.00 | H |
| ATOM | 1121 | H5'1 | G B | 17 | -46.487 | 18.635 | 41.707 | 1.00 | 0.00 | H |
| ATOM | 1122 | H5'2 | G B | 17 | -45.405 | 19.414 | 40.533 | 1.00 | 0.00 | H |
| ATOM | 1123 | C1'  | C B | 18 | -53.802 | 18.870 | 37.505 | 1.00 | 0.00 | C |
| ATOM | 1124 | N1   | C B | 18 | -53.757 | 19.702 | 38.739 | 1.00 | 0.00 | N |
| ATOM | 1125 | C2   | C B | 18 | -54.738 | 19.488 | 39.705 | 1.00 | 0.00 | C |
| ATOM | 1126 | O2   | C B | 18 | -55.599 | 18.623 | 39.501 | 1.00 | 0.00 | O |
| ATOM | 1127 | N3   | C B | 18 | -54.715 | 20.236 | 40.834 | 1.00 | 0.00 | N |
| ATOM | 1128 | C4   | C B | 18 | -53.769 | 21.165 | 41.026 | 1.00 | 0.00 | C |
| ATOM | 1129 | N4   | C B | 18 | -53.794 | 21.866 | 42.150 | 1.00 | 0.00 | N |
| ATOM | 1130 | C5   | C B | 18 | -52.752 | 21.407 | 40.048 | 1.00 | 0.00 | C |
| ATOM | 1131 | C6   | C B | 18 | -52.792 | 20.642 | 38.920 | 1.00 | 0.00 | C |
| ATOM | 1132 | C2'  | C B | 18 | -53.421 | 19.627 | 36.239 | 1.00 | 0.00 | C |
| ATOM | 1133 | C3'  | C B | 18 | -52.686 | 18.561 | 35.441 | 1.00 | 0.00 | C |
| ATOM | 1134 | O3'  | C B | 18 | -53.636 | 17.776 | 34.724 | 1.00 | 0.00 | O |
| ATOM | 1135 | C4'  | C B | 18 | -51.974 | 17.756 | 36.526 | 1.00 | 0.00 | C |
| ATOM | 1136 | O4'  | C B | 18 | -52.884 | 17.806 | 37.671 | 1.00 | 0.00 | O |
| ATOM | 1137 | C5'  | C B | 18 | -50.621 | 18.266 | 36.962 | 1.00 | 0.00 | C |
| ATOM | 1138 | O5'  | C B | 18 | -50.621 | 19.716 | 36.960 | 1.00 | 0.00 | O |
| ATOM | 1139 | O1P  | C B | 18 | -48.983 | 20.296 | 35.138 | 1.00 | 0.00 | O |
| ATOM | 1140 | O2P  | C B | 18 | -49.358 | 21.888 | 37.041 | 1.00 | 0.00 | O |
| ATOM | 1141 | P    | C B | 18 | -49.277 | 20.483 | 36.573 | 1.00 | 0.00 | P |
| ATOM | 1142 | H5   | C B | 18 | -51.982 | 22.165 | 40.198 | 1.00 | 0.00 | H |
| ATOM | 1143 | H6   | C B | 18 | -52.036 | 20.788 | 38.150 | 1.00 | 0.00 | H |
| ATOM | 1144 | H1'  | C B | 18 | -54.800 | 18.442 | 37.419 | 1.00 | 0.00 | H |
| ATOM | 1145 | H3'  | C B | 18 | -51.973 | 18.995 | 34.741 | 1.00 | 0.00 | H |
| ATOM | 1146 | H4'  | C B | 18 | -51.837 | 16.748 | 36.134 | 1.00 | 0.00 | H |
| ATOM | 1147 | H41  | C B | 18 | -53.077 | 22.586 | 42.324 | 1.00 | 0.00 | H |
| ATOM | 1148 | H42  | C B | 18 | -54.528 | 21.690 | 42.851 | 1.00 | 0.00 | H |
| ATOM | 1149 | H2'1 | C B | 18 | -52.778 | 20.481 | 36.447 | 1.00 | 0.00 | H |
| ATOM | 1150 | H2'2 | C B | 18 | -54.294 | 19.997 | 35.701 | 1.00 | 0.00 | H |
| ATOM | 1151 | H5'1 | C B | 18 | -50.406 | 17.900 | 37.966 | 1.00 | 0.00 | H |
| ATOM | 1152 | H5'2 | C B | 18 | -49.861 | 17.897 | 36.276 | 1.00 | 0.00 | H |
| ATOM | 1153 | C1'  | C B | 19 | -58.721 | 18.932 | 36.933 | 1.00 | 0.00 | C |
| ATOM | 1154 | N1   | C B | 19 | -58.022 | 20.065 | 37.598 | 1.00 | 0.00 | N |
| ATOM | 1155 | C2   | C B | 19 | -58.492 | 20.484 | 38.842 | 1.00 | 0.00 | C |
| ATOM | 1156 | O2   | C B | 19 | -59.463 | 19.900 | 39.340 | 1.00 | 0.00 | O |
| ATOM | 1157 | N3   | C B | 19 | -57.869 | 21.514 | 39.462 | 1.00 | 0.00 | N |
| ATOM | 1158 | C4   | C B | 19 | -56.819 | 22.125 | 38.896 | 1.00 | 0.00 | C |
| ATOM | 1159 | N4   | C B | 19 | -56.248 | 23.125 | 39.547 | 1.00 | 0.00 | N |
| ATOM | 1160 | C5   | C B | 19 | -56.318 | 21.716 | 37.620 | 1.00 | 0.00 | C |
| ATOM | 1161 | C6   | C B | 19 | -56.959 | 20.677 | 37.014 | 1.00 | 0.00 | C |
| ATOM | 1162 | C2'  | C B | 19 | -58.840 | 19.085 | 35.424 | 1.00 | 0.00 | C |
| ATOM | 1163 | C3'  | C B | 19 | -58.688 | 17.648 | 34.947 | 1.00 | 0.00 | C |
| ATOM | 1164 | O3'  | C B | 19 | -59.954 | 16.996 | 35.012 | 1.00 | 0.00 | O |
| ATOM | 1165 | C4'  | C B | 19 | -57.687 | 17.064 | 35.941 | 1.00 | 0.00 | C |
| ATOM | 1166 | O4'  | C B | 19 | -57.979 | 17.756 | 37.197 | 1.00 | 0.00 | O |

|      |      |      |     |    |         |         |        |      |      |   |
|------|------|------|-----|----|---------|---------|--------|------|------|---|
| ATOM | 1167 | C5'  | C B | 19 | -56.224 | 17.258  | 35.614 | 1.00 | 0.00 | C |
| ATOM | 1168 | O5'  | C B | 19 | -56.027 | 18.556  | 35.000 | 1.00 | 0.00 | O |
| ATOM | 1169 | O1P  | C B | 19 | -55.305 | 17.989  | 32.657 | 1.00 | 0.00 | O |
| ATOM | 1170 | O2P  | C B | 19 | -54.576 | 20.149  | 33.707 | 1.00 | 0.00 | O |
| ATOM | 1171 | P    | C B | 19 | -54.904 | 18.712  | 33.880 | 1.00 | 0.00 | P |
| ATOM | 1172 | H5   | C B | 19 | -55.466 | 22.211  | 37.154 | 1.00 | 0.00 | H |
| ATOM | 1173 | H6   | C B | 19 | -56.611 | 20.329  | 36.041 | 1.00 | 0.00 | H |
| ATOM | 1174 | H1'  | C B | 19 | -59.703 | 18.820  | 37.394 | 1.00 | 0.00 | H |
| ATOM | 1175 | H3'  | C B | 19 | -58.306 | 17.595  | 33.928 | 1.00 | 0.00 | H |
| ATOM | 1176 | H4'  | C B | 19 | -57.877 | 15.992  | 35.991 | 1.00 | 0.00 | H |
| ATOM | 1177 | H41  | C B | 19 | -55.438 | 23.613  | 39.137 | 1.00 | 0.00 | H |
| ATOM | 1178 | H42  | C B | 19 | -56.612 | 23.418  | 40.467 | 1.00 | 0.00 | H |
| ATOM | 1179 | H2'1 | C B | 19 | -58.061 | 19.724  | 35.009 | 1.00 | 0.00 | H |
| ATOM | 1180 | H2'2 | C B | 19 | -59.801 | 19.503  | 35.125 | 1.00 | 0.00 | H |
| ATOM | 1181 | H5'1 | C B | 19 | -55.640 | 17.190  | 36.531 | 1.00 | 0.00 | H |
| ATOM | 1182 | H5'2 | C B | 19 | -55.906 | 16.474  | 34.928 | 1.00 | 0.00 | H |
| ATOM | 1183 | C1'  | T B | 20 | -63.330 | 20.265  | 38.149 | 1.00 | 0.00 | C |
| ATOM | 1184 | N1   | T B | 20 | -62.268 | 21.295  | 37.999 | 1.00 | 0.00 | N |
| ATOM | 1185 | C2   | T B | 20 | -62.109 | 22.191  | 39.037 | 1.00 | 0.00 | C |
| ATOM | 1186 | O2   | T B | 20 | -62.795 | 22.163  | 40.044 | 1.00 | 0.00 | O |
| ATOM | 1187 | N3   | T B | 20 | -61.112 | 23.130  | 38.856 | 1.00 | 0.00 | N |
| ATOM | 1188 | C4   | T B | 20 | -60.284 | 23.249  | 37.761 | 1.00 | 0.00 | C |
| ATOM | 1189 | O4   | T B | 20 | -59.423 | 24.137  | 37.712 | 1.00 | 0.00 | O |
| ATOM | 1190 | C5   | T B | 20 | -60.524 | 22.270  | 36.729 | 1.00 | 0.00 | C |
| ATOM | 1191 | C6   | T B | 20 | -61.488 | 21.339  | 36.870 | 1.00 | 0.00 | C |
| ATOM | 1192 | C7   | T B | 20 | -59.645 | 22.361  | 35.518 | 1.00 | 0.00 | C |
| ATOM | 1193 | C2'  | T B | 20 | -64.067 | 19.951  | 36.852 | 1.00 | 0.00 | C |
| ATOM | 1194 | C3'  | T B | 20 | -64.332 | 18.459  | 36.991 | 1.00 | 0.00 | C |
| ATOM | 1195 | O3'  | T B | 20 | -65.523 | 18.263  | 37.751 | 1.00 | 0.00 | O |
| ATOM | 1196 | C4'  | T B | 20 | -63.089 | 17.961  | 37.725 | 1.00 | 0.00 | C |
| ATOM | 1197 | O4'  | T B | 20 | -62.716 | 19.073  | 38.599 | 1.00 | 0.00 | O |
| ATOM | 1198 | C5'  | T B | 20 | -61.899 | 17.603  | 36.865 | 1.00 | 0.00 | C |
| ATOM | 1199 | O5'  | T B | 20 | -61.812 | 18.519  | 35.743 | 1.00 | 0.00 | O |
| ATOM | 1200 | O1P  | T B | 20 | -62.256 | 17.045  | 33.752 | 1.00 | 0.00 | O |
| ATOM | 1201 | O2P  | T B | 20 | -60.861 | 19.115  | 33.495 | 1.00 | 0.00 | O |
| ATOM | 1202 | P    | T B | 20 | -61.272 | 17.972  | 34.347 | 1.00 | 0.00 | P |
| ATOM | 1203 | H3   | T B | 20 | -60.973 | 23.810  | 39.616 | 1.00 | 0.00 | H |
| ATOM | 1204 | H6   | T B | 20 | -61.651 | 20.609  | 36.077 | 1.00 | 0.00 | H |
| ATOM | 1205 | H1'  | T B | 20 | -64.023 | 20.597  | 38.921 | 1.00 | 0.00 | H |
| ATOM | 1206 | H3'  | T B | 20 | -64.439 | 17.973  | 36.022 | 1.00 | 0.00 | H |
| ATOM | 1207 | H4'  | T B | 20 | -63.383 | 17.066  | 38.274 | 1.00 | 0.00 | H |
| ATOM | 1208 | H3T  | T B | 20 | -66.293 | 18.736  | 37.431 | 1.00 | 0.00 | H |
| ATOM | 1209 | H71  | T B | 20 | -60.247 | 22.627  | 34.650 | 1.00 | 0.00 | H |
| ATOM | 1210 | H72  | T B | 20 | -58.882 | 23.125  | 35.679 | 1.00 | 0.00 | H |
| ATOM | 1211 | H73  | T B | 20 | -59.162 | 21.399  | 35.344 | 1.00 | 0.00 | H |
| ATOM | 1212 | H2'1 | T B | 20 | -63.465 | 20.167  | 35.972 | 1.00 | 0.00 | H |
| ATOM | 1213 | H2'2 | T B | 20 | -64.998 | 20.512  | 36.760 | 1.00 | 0.00 | H |
| ATOM | 1214 | H5'1 | T B | 20 | -60.991 | 17.666  | 37.464 | 1.00 | 0.00 | H |
| ATOM | 1215 | H5'2 | T B | 20 | -62.017 | 16.584  | 36.499 | 1.00 | 0.00 | H |
| TER  |      |      |     |    |         |         |        |      |      |   |
| ATOM | 1    | C1'  | A A | 1  | -64.940 | -10.344 | 28.219 | 1.00 | 0.00 | C |
| ATOM | 2    | N1   | A A | 1  | -61.806 | -10.172 | 24.159 | 1.00 | 0.00 | N |
| ATOM | 3    | C2   | A A | 1  | -62.450 | -11.171 | 24.755 | 1.00 | 0.00 | C |
| ATOM | 4    | N3   | A A | 1  | -63.249 | -11.145 | 25.801 | 1.00 | 0.00 | N |



|      |    |      |     |   |         |         |        |      |      |   |
|------|----|------|-----|---|---------|---------|--------|------|------|---|
| ATOM | 5  | C4   | A A | 1 | -63.364 | -9.889  | 26.269 | 1.00 | 0.00 | C |
| ATOM | 6  | C5   | A A | 1 | -62.771 | -8.761  | 25.776 | 1.00 | 0.00 | C |
| ATOM | 7  | C6   | A A | 1 | -61.940 | -8.930  | 24.648 | 1.00 | 0.00 | C |
| ATOM | 8  | N6   | A A | 1 | -61.292 | -7.912  | 24.055 | 1.00 | 0.00 | N |
| ATOM | 9  | N7   | A A | 1 | -63.123 | -7.647  | 26.517 | 1.00 | 0.00 | N |
| ATOM | 10 | C8   | A A | 1 | -63.912 | -8.122  | 27.436 | 1.00 | 0.00 | C |
| ATOM | 11 | N9   | A A | 1 | -64.106 | -9.475  | 27.347 | 1.00 | 0.00 | N |
| ATOM | 12 | C2'  | A A | 1 | -64.907 | -9.951  | 29.689 | 1.00 | 0.00 | C |
| ATOM | 13 | C3'  | A A | 1 | -66.329 | -10.258 | 30.131 | 1.00 | 0.00 | C |
| ATOM | 14 | O3'  | A A | 1 | -66.426 | -11.639 | 30.471 | 1.00 | 0.00 | O |
| ATOM | 15 | C4'  | A A | 1 | -67.154 | -9.908  | 28.893 | 1.00 | 0.00 | C |
| ATOM | 16 | O4'  | A A | 1 | -66.278 | -10.248 | 27.770 | 1.00 | 0.00 | O |
| ATOM | 17 | C5'  | A A | 1 | -67.578 | -8.466  | 28.756 | 1.00 | 0.00 | C |
| ATOM | 18 | O5'  | A A | 1 | -66.528 | -7.595  | 29.248 | 1.00 | 0.00 | O |
| ATOM | 19 | H2   | A A | 1 | -62.296 | -12.154 | 24.312 | 1.00 | 0.00 | H |
| ATOM | 20 | H8   | A A | 1 | -64.376 | -7.501  | 28.203 | 1.00 | 0.00 | H |
| ATOM | 21 | H1'  | A A | 1 | -64.615 | -11.376 | 28.083 | 1.00 | 0.00 | H |
| ATOM | 22 | H3'  | A A | 1 | -66.631 | -9.653  | 30.988 | 1.00 | 0.00 | H |
| ATOM | 23 | H4'  | A A | 1 | -68.055 | -10.519 | 28.931 | 1.00 | 0.00 | H |
| ATOM | 24 | H61  | A A | 1 | -60.700 | -8.089  | 23.234 | 1.00 | 0.00 | H |
| ATOM | 25 | H62  | A A | 1 | -61.392 | -6.956  | 24.425 | 1.00 | 0.00 | H |
| ATOM | 26 | H5T  | A A | 1 | -66.773 | -6.775  | 29.681 | 1.00 | 0.00 | H |
| ATOM | 27 | H2'1 | A A | 1 | -64.667 | -8.898  | 29.831 | 1.00 | 0.00 | H |
| ATOM | 28 | H2'2 | A A | 1 | -64.182 | -10.534 | 30.257 | 1.00 | 0.00 | H |
| ATOM | 29 | H5'1 | A A | 1 | -67.774 | -8.249  | 27.706 | 1.00 | 0.00 | H |
| ATOM | 30 | H5'2 | A A | 1 | -68.489 | -8.304  | 29.330 | 1.00 | 0.00 | H |
| ATOM | 31 | C1'  | G A | 2 | -61.752 | -14.148 | 28.348 | 1.00 | 0.00 | C |
| ATOM | 32 | N1   | G A | 2 | -58.809 | -11.064 | 25.548 | 1.00 | 0.00 | N |
| ATOM | 33 | C2   | G A | 2 | -59.058 | -12.416 | 25.411 | 1.00 | 0.00 | C |
| ATOM | 34 | N2   | G A | 2 | -58.440 | -13.030 | 24.395 | 1.00 | 0.00 | N |
| ATOM | 35 | N3   | G A | 2 | -59.860 | -13.103 | 26.223 | 1.00 | 0.00 | N |
| ATOM | 36 | C4   | G A | 2 | -60.396 | -12.324 | 27.199 | 1.00 | 0.00 | C |
| ATOM | 37 | C5   | G A | 2 | -60.203 | -10.969 | 27.414 | 1.00 | 0.00 | C |
| ATOM | 38 | C6   | G A | 2 | -59.354 | -10.240 | 26.549 | 1.00 | 0.00 | C |
| ATOM | 39 | O6   | G A | 2 | -59.062 | -9.044  | 26.575 | 1.00 | 0.00 | O |
| ATOM | 40 | N7   | G A | 2 | -60.935 | -10.548 | 28.526 | 1.00 | 0.00 | N |
| ATOM | 41 | C8   | G A | 2 | -61.537 | -11.634 | 28.938 | 1.00 | 0.00 | C |
| ATOM | 42 | N9   | G A | 2 | -61.259 | -12.755 | 28.183 | 1.00 | 0.00 | N |
| ATOM | 43 | C2'  | G A | 2 | -61.883 | -14.586 | 29.801 | 1.00 | 0.00 | C |
| ATOM | 44 | C3'  | G A | 2 | -63.116 | -15.472 | 29.757 | 1.00 | 0.00 | C |
| ATOM | 45 | O3'  | G A | 2 | -62.734 | -16.788 | 29.363 | 1.00 | 0.00 | O |
| ATOM | 46 | C4'  | G A | 2 | -63.990 | -14.787 | 28.707 | 1.00 | 0.00 | C |
| ATOM | 47 | O4'  | G A | 2 | -63.033 | -14.226 | 27.753 | 1.00 | 0.00 | O |
| ATOM | 48 | C5'  | G A | 2 | -64.887 | -13.677 | 29.202 | 1.00 | 0.00 | C |
| ATOM | 49 | O5'  | G A | 2 | -64.212 | -12.929 | 30.244 | 1.00 | 0.00 | O |
| ATOM | 50 | O1P  | G A | 2 | -65.592 | -13.412 | 32.293 | 1.00 | 0.00 | O |
| ATOM | 51 | O2P  | G A | 2 | -64.298 | -11.269 | 32.128 | 1.00 | 0.00 | O |
| ATOM | 52 | P    | G A | 2 | -65.080 | -12.324 | 31.438 | 1.00 | 0.00 | P |
| ATOM | 53 | H1   | G A | 2 | -58.175 | -10.627 | 24.864 | 1.00 | 0.00 | H |
| ATOM | 54 | H8   | G A | 2 | -62.201 | -11.652 | 29.802 | 1.00 | 0.00 | H |
| ATOM | 55 | H1'  | G A | 2 | -61.086 | -14.814 | 27.799 | 1.00 | 0.00 | H |
| ATOM | 56 | H21  | G A | 2 | -57.822 | -12.493 | 23.770 | 1.00 | 0.00 | H |
| ATOM | 57 | H3'  | G A | 2 | -63.622 | -15.516 | 30.722 | 1.00 | 0.00 | H |
| ATOM | 58 | H22  | G A | 2 | -58.583 | -14.038 | 24.241 | 1.00 | 0.00 | H |

|      |     |      |     |   |         |         |        |      |      |   |
|------|-----|------|-----|---|---------|---------|--------|------|------|---|
| ATOM | 59  | H4'  | G A | 2 | -64.624 | -15.558 | 28.271 | 1.00 | 0.00 | H |
| ATOM | 60  | H2'1 | G A | 2 | -62.025 | -13.741 | 30.475 | 1.00 | 0.00 | H |
| ATOM | 61  | H2'2 | G A | 2 | -61.008 | -15.138 | 30.147 | 1.00 | 0.00 | H |
| ATOM | 62  | H5'1 | G A | 2 | -65.129 | -13.015 | 28.371 | 1.00 | 0.00 | H |
| ATOM | 63  | H5'2 | G A | 2 | -65.807 | -14.110 | 29.594 | 1.00 | 0.00 | H |
| ATOM | 64  | C1'  | G A | 3 | -57.482 | -16.420 | 27.284 | 1.00 | 0.00 | C |
| ATOM | 65  | N1   | G A | 3 | -55.705 | -11.657 | 26.870 | 1.00 | 0.00 | N |
| ATOM | 66  | C2   | G A | 3 | -55.479 | -12.761 | 26.069 | 1.00 | 0.00 | C |
| ATOM | 67  | N2   | G A | 3 | -54.669 | -12.572 | 25.020 | 1.00 | 0.00 | N |
| ATOM | 68  | N3   | G A | 3 | -56.016 | -13.957 | 26.297 | 1.00 | 0.00 | N |
| ATOM | 69  | C4   | G A | 3 | -56.803 | -13.968 | 27.405 | 1.00 | 0.00 | C |
| ATOM | 70  | C5   | G A | 3 | -57.084 | -12.918 | 28.263 | 1.00 | 0.00 | C |
| ATOM | 71  | C6   | G A | 3 | -56.516 | -11.646 | 28.019 | 1.00 | 0.00 | C |
| ATOM | 72  | O6   | G A | 3 | -56.646 | -10.602 | 28.659 | 1.00 | 0.00 | O |
| ATOM | 73  | N7   | G A | 3 | -57.936 | -13.344 | 29.283 | 1.00 | 0.00 | N |
| ATOM | 74  | C8   | G A | 3 | -58.143 | -14.607 | 29.016 | 1.00 | 0.00 | C |
| ATOM | 75  | N9   | G A | 3 | -57.487 | -15.060 | 27.890 | 1.00 | 0.00 | N |
| ATOM | 76  | C2'  | G A | 3 | -57.484 | -17.548 | 28.307 | 1.00 | 0.00 | C |
| ATOM | 77  | C3'  | G A | 3 | -58.343 | -18.597 | 27.622 | 1.00 | 0.00 | C |
| ATOM | 78  | O3'  | G A | 3 | -57.530 | -19.362 | 26.735 | 1.00 | 0.00 | O |
| ATOM | 79  | C4'  | G A | 3 | -59.377 | -17.756 | 26.875 | 1.00 | 0.00 | C |
| ATOM | 80  | O4'  | G A | 3 | -58.649 | -16.545 | 26.495 | 1.00 | 0.00 | O |
| ATOM | 81  | C5'  | G A | 3 | -60.606 | -17.355 | 27.656 | 1.00 | 0.00 | C |
| ATOM | 82  | O5'  | G A | 3 | -60.246 | -17.082 | 29.033 | 1.00 | 0.00 | O |
| ATOM | 83  | O1P  | G A | 3 | -61.419 | -18.902 | 30.316 | 1.00 | 0.00 | O |
| ATOM | 84  | O2P  | G A | 3 | -60.925 | -16.706 | 31.423 | 1.00 | 0.00 | O |
| ATOM | 85  | P    | G A | 3 | -61.289 | -17.439 | 30.186 | 1.00 | 0.00 | P |
| ATOM | 86  | H1   | G A | 3 | -55.244 | -10.774 | 26.603 | 1.00 | 0.00 | H |
| ATOM | 87  | H8   | G A | 3 | -58.777 | -15.247 | 29.629 | 1.00 | 0.00 | H |
| ATOM | 88  | H1'  | G A | 3 | -56.619 | -16.495 | 26.622 | 1.00 | 0.00 | H |
| ATOM | 89  | H21  | G A | 3 | -54.258 | -11.642 | 24.848 | 1.00 | 0.00 | H |
| ATOM | 90  | H3'  | G A | 3 | -58.823 | -19.265 | 28.338 | 1.00 | 0.00 | H |
| ATOM | 91  | H22  | G A | 3 | -54.458 | -13.355 | 24.386 | 1.00 | 0.00 | H |
| ATOM | 92  | H4'  | G A | 3 | -59.704 | -18.343 | 26.018 | 1.00 | 0.00 | H |
| ATOM | 93  | H2'1 | G A | 3 | -57.917 | -17.241 | 29.259 | 1.00 | 0.00 | H |
| ATOM | 94  | H2'2 | G A | 3 | -56.481 | -17.925 | 28.510 | 1.00 | 0.00 | H |
| ATOM | 95  | H5'1 | G A | 3 | -61.042 | -16.465 | 27.205 | 1.00 | 0.00 | H |
| ATOM | 96  | H5'2 | G A | 3 | -61.333 | -18.167 | 27.619 | 1.00 | 0.00 | H |
| ATOM | 97  | C1'  | C A | 4 | -52.675 | -16.523 | 26.096 | 1.00 | 0.00 | C |
| ATOM | 98  | N1   | C A | 4 | -53.150 | -15.718 | 27.255 | 1.00 | 0.00 | N |
| ATOM | 99  | C2   | C A | 4 | -52.766 | -14.380 | 27.319 | 1.00 | 0.00 | C |
| ATOM | 100 | O2   | C A | 4 | -52.052 | -13.919 | 26.420 | 1.00 | 0.00 | O |
| ATOM | 101 | N3   | C A | 4 | -53.189 | -13.630 | 28.366 | 1.00 | 0.00 | N |
| ATOM | 102 | C4   | C A | 4 | -53.960 | -14.158 | 29.325 | 1.00 | 0.00 | C |
| ATOM | 103 | N4   | C A | 4 | -54.346 | -13.378 | 30.324 | 1.00 | 0.00 | N |
| ATOM | 104 | C5   | C A | 4 | -54.367 | -15.531 | 29.284 | 1.00 | 0.00 | C |
| ATOM | 105 | C6   | C A | 4 | -53.933 | -16.267 | 28.220 | 1.00 | 0.00 | C |
| ATOM | 106 | C2'  | C A | 4 | -52.313 | -17.958 | 26.453 | 1.00 | 0.00 | C |
| ATOM | 107 | C3'  | C A | 4 | -52.756 | -18.716 | 25.210 | 1.00 | 0.00 | C |
| ATOM | 108 | O3'  | C A | 4 | -51.716 | -18.664 | 24.235 | 1.00 | 0.00 | O |
| ATOM | 109 | C4'  | C A | 4 | -54.000 | -17.948 | 24.770 | 1.00 | 0.00 | C |
| ATOM | 110 | O4'  | C A | 4 | -53.719 | -16.561 | 25.141 | 1.00 | 0.00 | O |
| ATOM | 111 | C5'  | C A | 4 | -55.305 | -18.363 | 25.407 | 1.00 | 0.00 | C |
| ATOM | 112 | O5'  | C A | 4 | -55.080 | -18.729 | 26.792 | 1.00 | 0.00 | O |

|      |     |      |     |   |         |         |        |      |      |   |
|------|-----|------|-----|---|---------|---------|--------|------|------|---|
| ATOM | 113 | O1P  | C A | 4 | -55.590 | -21.193 | 26.835 | 1.00 | 0.00 | O |
| ATOM | 114 | O2P  | C A | 4 | -55.886 | -19.815 | 28.910 | 1.00 | 0.00 | O |
| ATOM | 115 | P    | C A | 4 | -55.961 | -19.895 | 27.431 | 1.00 | 0.00 | P |
| ATOM | 116 | H5   | C A | 4 | -54.990 | -15.967 | 30.065 | 1.00 | 0.00 | H |
| ATOM | 117 | H6   | C A | 4 | -54.221 | -17.315 | 28.143 | 1.00 | 0.00 | H |
| ATOM | 118 | H1'  | C A | 4 | -51.828 | -16.006 | 25.647 | 1.00 | 0.00 | H |
| ATOM | 119 | H3'  | C A | 4 | -52.992 | -19.757 | 25.431 | 1.00 | 0.00 | H |
| ATOM | 120 | H4'  | C A | 4 | -54.095 | -18.090 | 23.693 | 1.00 | 0.00 | H |
| ATOM | 121 | H41  | C A | 4 | -54.941 | -13.759 | 31.074 | 1.00 | 0.00 | H |
| ATOM | 122 | H42  | C A | 4 | -54.051 | -12.391 | 30.352 | 1.00 | 0.00 | H |
| ATOM | 123 | H2'1 | C A | 4 | -52.839 | -18.310 | 27.339 | 1.00 | 0.00 | H |
| ATOM | 124 | H2'2 | C A | 4 | -51.244 | -18.082 | 26.635 | 1.00 | 0.00 | H |
| ATOM | 125 | H5'1 | C A | 4 | -56.010 | -17.533 | 25.355 | 1.00 | 0.00 | H |
| ATOM | 126 | H5'2 | C A | 4 | -55.714 | -19.214 | 24.863 | 1.00 | 0.00 | H |
| ATOM | 127 | C1'  | C A | 5 | -48.096 | -14.645 | 25.921 | 1.00 | 0.00 | C |
| ATOM | 128 | N1   | C A | 5 | -48.837 | -14.710 | 27.211 | 1.00 | 0.00 | N |
| ATOM | 129 | C2   | C A | 5 | -48.931 | -13.544 | 27.967 | 1.00 | 0.00 | C |
| ATOM | 130 | O2   | C A | 5 | -48.399 | -12.509 | 27.542 | 1.00 | 0.00 | O |
| ATOM | 131 | N3   | C A | 5 | -49.603 | -13.581 | 29.144 | 1.00 | 0.00 | N |
| ATOM | 132 | C4   | C A | 5 | -50.167 | -14.714 | 29.579 | 1.00 | 0.00 | C |
| ATOM | 133 | N4   | C A | 5 | -50.814 | -14.693 | 30.734 | 1.00 | 0.00 | N |
| ATOM | 134 | C5   | C A | 5 | -50.084 | -15.928 | 28.822 | 1.00 | 0.00 | C |
| ATOM | 135 | C6   | C A | 5 | -49.407 | -15.866 | 27.640 | 1.00 | 0.00 | C |
| ATOM | 136 | C2'  | C A | 5 | -47.276 | -15.892 | 25.622 | 1.00 | 0.00 | C |
| ATOM | 137 | C3'  | C A | 5 | -47.413 | -16.006 | 24.112 | 1.00 | 0.00 | C |
| ATOM | 138 | O3'  | C A | 5 | -46.434 | -15.177 | 23.490 | 1.00 | 0.00 | O |
| ATOM | 139 | C4'  | C A | 5 | -48.834 | -15.510 | 23.861 | 1.00 | 0.00 | C |
| ATOM | 140 | O4'  | C A | 5 | -49.047 | -14.488 | 24.885 | 1.00 | 0.00 | O |
| ATOM | 141 | C5'  | C A | 5 | -49.934 | -16.541 | 23.970 | 1.00 | 0.00 | C |
| ATOM | 142 | O5'  | C A | 5 | -49.625 | -17.476 | 25.036 | 1.00 | 0.00 | O |
| ATOM | 143 | O1P  | C A | 5 | -49.270 | -19.649 | 23.818 | 1.00 | 0.00 | O |
| ATOM | 144 | O2P  | C A | 5 | -50.055 | -19.660 | 26.201 | 1.00 | 0.00 | O |
| ATOM | 145 | P    | C A | 5 | -50.070 | -18.998 | 24.873 | 1.00 | 0.00 | P |
| ATOM | 146 | H5   | C A | 5 | -50.538 | -16.855 | 29.174 | 1.00 | 0.00 | H |
| ATOM | 147 | H6   | C A | 5 | -49.321 | -16.763 | 27.026 | 1.00 | 0.00 | H |
| ATOM | 148 | H1'  | C A | 5 | -47.466 | -13.756 | 25.935 | 1.00 | 0.00 | H |
| ATOM | 149 | H3'  | C A | 5 | -47.286 | -17.033 | 23.767 | 1.00 | 0.00 | H |
| ATOM | 150 | H4'  | C A | 5 | -48.855 | -15.110 | 22.847 | 1.00 | 0.00 | H |
| ATOM | 151 | H41  | C A | 5 | -51.259 | -15.551 | 31.091 | 1.00 | 0.00 | H |
| ATOM | 152 | H42  | C A | 5 | -50.871 | -13.819 | 31.277 | 1.00 | 0.00 | H |
| ATOM | 153 | H2'1 | C A | 5 | -47.669 | -16.776 | 26.123 | 1.00 | 0.00 | H |
| ATOM | 154 | H2'2 | C A | 5 | -46.232 | -15.782 | 25.920 | 1.00 | 0.00 | H |
| ATOM | 155 | H5'1 | C A | 5 | -50.877 | -16.037 | 24.185 | 1.00 | 0.00 | H |
| ATOM | 156 | H5'2 | C A | 5 | -50.019 | -17.075 | 23.025 | 1.00 | 0.00 | H |
| ATOM | 157 | C1'  | G A | 6 | -44.422 | -11.729 | 27.511 | 1.00 | 0.00 | C |
| ATOM | 158 | N1   | G A | 6 | -46.844 | -12.076 | 31.988 | 1.00 | 0.00 | N |
| ATOM | 159 | C2   | G A | 6 | -46.269 | -10.977 | 31.372 | 1.00 | 0.00 | C |
| ATOM | 160 | N2   | G A | 6 | -46.346 | -9.820  | 32.038 | 1.00 | 0.00 | N |
| ATOM | 161 | N3   | G A | 6 | -45.664 | -11.033 | 30.186 | 1.00 | 0.00 | N |
| ATOM | 162 | C4   | G A | 6 | -45.671 | -12.285 | 29.660 | 1.00 | 0.00 | C |
| ATOM | 163 | C5   | G A | 6 | -46.216 | -13.437 | 30.203 | 1.00 | 0.00 | C |
| ATOM | 164 | C6   | G A | 6 | -46.861 | -13.380 | 31.458 | 1.00 | 0.00 | C |
| ATOM | 165 | O6   | G A | 6 | -47.399 | -14.284 | 32.097 | 1.00 | 0.00 | O |
| ATOM | 166 | N7   | G A | 6 | -46.009 | -14.519 | 29.345 | 1.00 | 0.00 | N |

|      |     |      |     |   |         |         |        |      |      |   |
|------|-----|------|-----|---|---------|---------|--------|------|------|---|
| ATOM | 167 | C8   | G A | 6 | -45.365 | -14.001 | 28.332 | 1.00 | 0.00 | C |
| ATOM | 168 | N9   | G A | 6 | -45.121 | -12.648 | 28.450 | 1.00 | 0.00 | N |
| ATOM | 169 | C2'  | G A | 6 | -43.224 | -12.358 | 26.815 | 1.00 | 0.00 | C |
| ATOM | 170 | C3'  | G A | 6 | -43.285 | -11.720 | 25.437 | 1.00 | 0.00 | C |
| ATOM | 171 | O3'  | G A | 6 | -42.634 | -10.452 | 25.477 | 1.00 | 0.00 | O |
| ATOM | 172 | C4'  | G A | 6 | -44.787 | -11.591 | 25.189 | 1.00 | 0.00 | C |
| ATOM | 173 | O4'  | G A | 6 | -45.350 | -11.341 | 26.516 | 1.00 | 0.00 | O |
| ATOM | 174 | C5'  | G A | 6 | -45.475 | -12.794 | 24.590 | 1.00 | 0.00 | C |
| ATOM | 175 | O5'  | G A | 6 | -44.888 | -14.009 | 25.119 | 1.00 | 0.00 | O |
| ATOM | 176 | O1P  | G A | 6 | -43.797 | -15.054 | 23.107 | 1.00 | 0.00 | O |
| ATOM | 177 | O2P  | G A | 6 | -44.575 | -16.500 | 25.004 | 1.00 | 0.00 | O |
| ATOM | 178 | P    | G A | 6 | -44.789 | -15.289 | 24.173 | 1.00 | 0.00 | P |
| ATOM | 179 | H1   | G A | 6 | -47.294 | -11.925 | 32.904 | 1.00 | 0.00 | H |
| ATOM | 180 | H8   | G A | 6 | -45.046 | -14.585 | 27.468 | 1.00 | 0.00 | H |
| ATOM | 181 | H1'  | G A | 6 | -44.129 | -10.835 | 28.063 | 1.00 | 0.00 | H |
| ATOM | 182 | H21  | G A | 6 | -46.819 | -9.783  | 32.953 | 1.00 | 0.00 | H |
| ATOM | 183 | H3'  | G A | 6 | -42.813 | -12.343 | 24.676 | 1.00 | 0.00 | H |
| ATOM | 184 | H22  | G A | 6 | -45.936 | -8.965  | 31.635 | 1.00 | 0.00 | H |
| ATOM | 185 | H4'  | G A | 6 | -44.924 | -10.754 | 24.505 | 1.00 | 0.00 | H |
| ATOM | 186 | H2'1 | G A | 6 | -43.304 | -13.444 | 26.753 | 1.00 | 0.00 | H |
| ATOM | 187 | H2'2 | G A | 6 | -42.284 | -12.128 | 27.318 | 1.00 | 0.00 | H |
| ATOM | 188 | H5'1 | G A | 6 | -46.535 | -12.760 | 24.835 | 1.00 | 0.00 | H |
| ATOM | 189 | H5'2 | G A | 6 | -45.358 | -12.770 | 23.506 | 1.00 | 0.00 | H |
| ATOM | 190 | C1'  | C A | 7 | -41.985 | -9.115  | 30.939 | 1.00 | 0.00 | C |
| ATOM | 191 | N1   | C A | 7 | -42.351 | -10.535 | 31.191 | 1.00 | 0.00 | N |
| ATOM | 192 | C2   | C A | 7 | -43.026 | -10.833 | 32.373 | 1.00 | 0.00 | C |
| ATOM | 193 | O2   | C A | 7 | -43.290 | -9.915  | 33.160 | 1.00 | 0.00 | O |
| ATOM | 194 | N3   | C A | 7 | -43.369 | -12.121 | 32.622 | 1.00 | 0.00 | N |
| ATOM | 195 | C4   | C A | 7 | -43.069 | -13.094 | 31.753 | 1.00 | 0.00 | C |
| ATOM | 196 | N4   | C A | 7 | -43.431 | -14.335 | 32.045 | 1.00 | 0.00 | N |
| ATOM | 197 | C5   | C A | 7 | -42.372 | -12.817 | 30.531 | 1.00 | 0.00 | C |
| ATOM | 198 | C6   | C A | 7 | -42.040 | -11.512 | 30.298 | 1.00 | 0.00 | C |
| ATOM | 199 | C2'  | C A | 7 | -40.628 | -8.940  | 30.269 | 1.00 | 0.00 | C |
| ATOM | 200 | C3'  | C A | 7 | -40.874 | -7.743  | 29.363 | 1.00 | 0.00 | C |
| ATOM | 201 | O3'  | C A | 7 | -40.691 | -6.544  | 30.113 | 1.00 | 0.00 | O |
| ATOM | 202 | C4'  | C A | 7 | -42.324 | -7.938  | 28.928 | 1.00 | 0.00 | C |
| ATOM | 203 | O4'  | C A | 7 | -42.969 | -8.561  | 30.085 | 1.00 | 0.00 | O |
| ATOM | 204 | C5'  | C A | 7 | -42.550 | -8.816  | 27.719 | 1.00 | 0.00 | C |
| ATOM | 205 | O5'  | C A | 7 | -41.597 | -9.908  | 27.721 | 1.00 | 0.00 | O |
| ATOM | 206 | O1P  | C A | 7 | -40.172 | -9.444  | 25.698 | 1.00 | 0.00 | O |
| ATOM | 207 | O2P  | C A | 7 | -40.457 | -11.797 | 26.520 | 1.00 | 0.00 | O |
| ATOM | 208 | P    | C A | 7 | -41.050 | -10.453 | 26.326 | 1.00 | 0.00 | P |
| ATOM | 209 | H5   | C A | 7 | -42.119 | -13.606 | 29.822 | 1.00 | 0.00 | H |
| ATOM | 210 | H6   | C A | 7 | -41.517 | -11.250 | 29.379 | 1.00 | 0.00 | H |
| ATOM | 211 | H1'  | C A | 7 | -42.024 | -8.578  | 31.887 | 1.00 | 0.00 | H |
| ATOM | 212 | H3'  | C A | 7 | -40.201 | -7.738  | 28.504 | 1.00 | 0.00 | H |
| ATOM | 213 | H4'  | C A | 7 | -42.721 | -6.949  | 28.700 | 1.00 | 0.00 | H |
| ATOM | 214 | H41  | C A | 7 | -43.214 | -15.102 | 31.392 | 1.00 | 0.00 | H |
| ATOM | 215 | H42  | C A | 7 | -43.929 | -14.534 | 32.924 | 1.00 | 0.00 | H |
| ATOM | 216 | H2'1 | C A | 7 | -40.334 | -9.818  | 29.695 | 1.00 | 0.00 | H |
| ATOM | 217 | H2'2 | C A | 7 | -39.834 | -8.738  | 30.989 | 1.00 | 0.00 | H |
| ATOM | 218 | H5'1 | C A | 7 | -43.566 | -9.213  | 27.748 | 1.00 | 0.00 | H |
| ATOM | 219 | H5'2 | C A | 7 | -42.424 | -8.220  | 26.815 | 1.00 | 0.00 | H |
| ATOM | 220 | C1'  | A A | 8 | -40.634 | -8.006  | 35.570 | 1.00 | 0.00 | C |

|      |     |      |     |   |         |         |        |      |      |   |
|------|-----|------|-----|---|---------|---------|--------|------|------|---|
| ATOM | 221 | N1   | A A | 8 | -41.731 | -12.941 | 36.460 | 1.00 | 0.00 | N |
| ATOM | 222 | C2   | A A | 8 | -41.985 | -11.827 | 37.141 | 1.00 | 0.00 | C |
| ATOM | 223 | N3   | A A | 8 | -41.676 | -10.581 | 36.852 | 1.00 | 0.00 | N |
| ATOM | 224 | C4   | A A | 8 | -41.003 | -10.527 | 35.687 | 1.00 | 0.00 | C |
| ATOM | 225 | C5   | A A | 8 | -40.664 | -11.571 | 34.873 | 1.00 | 0.00 | C |
| ATOM | 226 | C6   | A A | 8 | -41.061 | -12.855 | 35.301 | 1.00 | 0.00 | C |
| ATOM | 227 | N6   | A A | 8 | -40.798 | -13.974 | 34.605 | 1.00 | 0.00 | N |
| ATOM | 228 | N7   | A A | 8 | -39.975 | -11.131 | 33.756 | 1.00 | 0.00 | N |
| ATOM | 229 | C8   | A A | 8 | -39.909 | -9.842  | 33.919 | 1.00 | 0.00 | C |
| ATOM | 230 | N9   | A A | 8 | -40.514 | -9.402  | 35.069 | 1.00 | 0.00 | N |
| ATOM | 231 | C2'  | A A | 8 | -39.401 | -7.152  | 35.311 | 1.00 | 0.00 | C |
| ATOM | 232 | C3'  | A A | 8 | -40.012 | -5.788  | 35.034 | 1.00 | 0.00 | C |
| ATOM | 233 | O3'  | A A | 8 | -40.250 | -5.124  | 36.272 | 1.00 | 0.00 | O |
| ATOM | 234 | C4'  | A A | 8 | -41.310 | -6.138  | 34.308 | 1.00 | 0.00 | C |
| ATOM | 235 | O4'  | A A | 8 | -41.731 | -7.405  | 34.910 | 1.00 | 0.00 | O |
| ATOM | 236 | C5'  | A A | 8 | -41.212 | -6.322  | 32.812 | 1.00 | 0.00 | C |
| ATOM | 237 | O5'  | A A | 8 | -39.952 | -6.957  | 32.477 | 1.00 | 0.00 | O |
| ATOM | 238 | O1P  | A A | 8 | -38.728 | -5.173  | 31.189 | 1.00 | 0.00 | O |
| ATOM | 239 | O2P  | A A | 8 | -38.231 | -7.596  | 30.762 | 1.00 | 0.00 | O |
| ATOM | 240 | P    | A A | 8 | -39.232 | -6.558  | 31.110 | 1.00 | 0.00 | P |
| ATOM | 241 | H2   | A A | 8 | -42.530 | -11.966 | 38.073 | 1.00 | 0.00 | H |
| ATOM | 242 | H8   | A A | 8 | -39.420 | -9.174  | 33.210 | 1.00 | 0.00 | H |
| ATOM | 243 | H1'  | A A | 8 | -40.865 | -8.046  | 36.635 | 1.00 | 0.00 | H |
| ATOM | 244 | H3'  | A A | 8 | -39.367 | -5.170  | 34.411 | 1.00 | 0.00 | H |
| ATOM | 245 | H4'  | A A | 8 | -42.008 | -5.324  | 34.498 | 1.00 | 0.00 | H |
| ATOM | 246 | H61  | A A | 8 | -41.112 | -14.887 | 34.960 | 1.00 | 0.00 | H |
| ATOM | 247 | H62  | A A | 8 | -40.281 | -13.916 | 33.715 | 1.00 | 0.00 | H |
| ATOM | 248 | H2'1 | A A | 8 | -38.824 | -7.508  | 34.458 | 1.00 | 0.00 | H |
| ATOM | 249 | H2'2 | A A | 8 | -38.732 | -7.121  | 36.170 | 1.00 | 0.00 | H |
| ATOM | 250 | H5'1 | A A | 8 | -42.040 | -6.947  | 32.475 | 1.00 | 0.00 | H |
| ATOM | 251 | H5'2 | A A | 8 | -41.275 | -5.350  | 32.326 | 1.00 | 0.00 | H |
| ATOM | 252 | C1'  | C A | 9 | -39.838 | -9.109  | 40.347 | 1.00 | 0.00 | C |
| ATOM | 253 | N1   | C A | 9 | -39.234 | -9.942  | 39.271 | 1.00 | 0.00 | N |
| ATOM | 254 | C2   | C A | 9 | -39.421 | -11.322 | 39.330 | 1.00 | 0.00 | C |
| ATOM | 255 | O2   | C A | 9 | -40.075 | -11.795 | 40.268 | 1.00 | 0.00 | O |
| ATOM | 256 | N3   | C A | 9 | -38.879 | -12.097 | 38.360 | 1.00 | 0.00 | N |
| ATOM | 257 | C4   | C A | 9 | -38.174 | -11.555 | 37.358 | 1.00 | 0.00 | C |
| ATOM | 258 | N4   | C A | 9 | -37.670 | -12.360 | 36.434 | 1.00 | 0.00 | N |
| ATOM | 259 | C5   | C A | 9 | -37.962 | -10.139 | 37.273 | 1.00 | 0.00 | C |
| ATOM | 260 | C6   | C A | 9 | -38.521 | -9.377  | 38.259 | 1.00 | 0.00 | C |
| ATOM | 261 | C2'  | C A | 9 | -38.970 | -7.934  | 40.774 | 1.00 | 0.00 | C |
| ATOM | 262 | C3'  | C A | 9 | -40.009 | -6.863  | 41.071 | 1.00 | 0.00 | C |
| ATOM | 263 | O3'  | C A | 9 | -40.487 | -7.034  | 42.404 | 1.00 | 0.00 | O |
| ATOM | 264 | C4'  | C A | 9 | -41.090 | -7.141  | 40.030 | 1.00 | 0.00 | C |
| ATOM | 265 | O4'  | C A | 9 | -41.062 | -8.593  | 39.856 | 1.00 | 0.00 | O |
| ATOM | 266 | C5'  | C A | 9 | -40.904 | -6.490  | 38.679 | 1.00 | 0.00 | C |
| ATOM | 267 | O5'  | C A | 9 | -39.495 | -6.468  | 38.336 | 1.00 | 0.00 | O |
| ATOM | 268 | O1P  | C A | 9 | -38.934 | -4.015  | 38.326 | 1.00 | 0.00 | O |
| ATOM | 269 | O2P  | C A | 9 | -37.623 | -5.607  | 36.897 | 1.00 | 0.00 | O |
| ATOM | 270 | P    | C A | 9 | -38.928 | -5.236  | 37.497 | 1.00 | 0.00 | P |
| ATOM | 271 | H5   | C A | 9 | -37.384 | -9.694  | 36.462 | 1.00 | 0.00 | H |
| ATOM | 272 | H6   | C A | 9 | -38.395 | -8.294  | 38.233 | 1.00 | 0.00 | H |
| ATOM | 273 | H1'  | C A | 9 | -40.063 | -9.757  | 41.193 | 1.00 | 0.00 | H |
| ATOM | 274 | H3'  | C A | 9 | -39.602 | -5.859  | 40.960 | 1.00 | 0.00 | H |

|      |     |      |   |   |    |         |         |        |      |      |   |
|------|-----|------|---|---|----|---------|---------|--------|------|------|---|
| ATOM | 275 | H4'  | C | A | 9  | -42.031 | -6.780  | 40.446 | 1.00 | 0.00 | H |
| ATOM | 276 | H41  | C | A | 9  | -37.126 | -11.969 | 35.651 | 1.00 | 0.00 | H |
| ATOM | 277 | H42  | C | A | 9  | -37.821 | -13.377 | 36.499 | 1.00 | 0.00 | H |
| ATOM | 278 | H2'1 | C | A | 9  | -38.288 | -7.615  | 39.987 | 1.00 | 0.00 | H |
| ATOM | 279 | H2'2 | C | A | 9  | -38.370 | -8.162  | 41.656 | 1.00 | 0.00 | H |
| ATOM | 280 | H5'1 | C | A | 9  | -41.457 | -7.054  | 37.929 | 1.00 | 0.00 | H |
| ATOM | 281 | H5'2 | C | A | 9  | -41.289 | -5.471  | 38.717 | 1.00 | 0.00 | H |
| ATOM | 282 | C1'  | C | A | 10 | -38.805 | -12.172 | 44.099 | 1.00 | 0.00 | C |
| ATOM | 283 | N1   | C | A | 10 | -37.934 | -12.135 | 42.892 | 1.00 | 0.00 | N |
| ATOM | 284 | C2   | C | A | 10 | -37.644 | -13.342 | 42.260 | 1.00 | 0.00 | C |
| ATOM | 285 | O2   | C | A | 10 | -38.116 | -14.389 | 42.723 | 1.00 | 0.00 | O |
| ATOM | 286 | N3   | C | A | 10 | -36.853 | -13.331 | 41.159 | 1.00 | 0.00 | N |
| ATOM | 287 | C4   | C | A | 10 | -36.354 | -12.183 | 40.681 | 1.00 | 0.00 | C |
| ATOM | 288 | N4   | C | A | 10 | -35.589 | -12.229 | 39.600 | 1.00 | 0.00 | N |
| ATOM | 289 | C5   | C | A | 10 | -36.633 | -10.927 | 41.313 | 1.00 | 0.00 | C |
| ATOM | 290 | C6   | C | A | 10 | -37.436 | -10.962 | 42.418 | 1.00 | 0.00 | C |
| ATOM | 291 | C2'  | C | A | 10 | -38.394 | -11.184 | 45.182 | 1.00 | 0.00 | C |
| ATOM | 292 | C3'  | C | A | 10 | -39.740 | -10.757 | 45.747 | 1.00 | 0.00 | C |
| ATOM | 293 | O3'  | C | A | 10 | -40.158 | -11.706 | 46.727 | 1.00 | 0.00 | O |
| ATOM | 294 | C4'  | C | A | 10 | -40.643 | -10.763 | 44.517 | 1.00 | 0.00 | C |
| ATOM | 295 | O4'  | C | A | 10 | -40.121 | -11.850 | 43.689 | 1.00 | 0.00 | O |
| ATOM | 296 | C5'  | C | A | 10 | -40.663 | -9.496  | 43.693 | 1.00 | 0.00 | C |
| ATOM | 297 | O5'  | C | A | 10 | -39.338 | -8.906  | 43.669 | 1.00 | 0.00 | O |
| ATOM | 298 | O1P  | C | A | 10 | -39.642 | -6.743  | 44.920 | 1.00 | 0.00 | O |
| ATOM | 299 | O2P  | C | A | 10 | -37.842 | -6.947  | 43.184 | 1.00 | 0.00 | O |
| ATOM | 300 | P    | C | A | 10 | -39.206 | -7.317  | 43.632 | 1.00 | 0.00 | P |
| ATOM | 301 | H5   | C | A | 10 | -36.224 | -9.990  | 40.932 | 1.00 | 0.00 | H |
| ATOM | 302 | H6   | C | A | 10 | -37.683 | -10.031 | 42.928 | 1.00 | 0.00 | H |
| ATOM | 303 | H1'  | C | A | 10 | -38.813 | -13.192 | 44.482 | 1.00 | 0.00 | H |
| ATOM | 304 | H3'  | C | A | 10 | -39.696 | -9.767  | 46.201 | 1.00 | 0.00 | H |
| ATOM | 305 | H4'  | C | A | 10 | -41.658 | -10.944 | 44.870 | 1.00 | 0.00 | H |
| ATOM | 306 | H41  | C | A | 10 | -35.195 | -11.360 | 39.211 | 1.00 | 0.00 | H |
| ATOM | 307 | H42  | C | A | 10 | -35.388 | -13.133 | 39.150 | 1.00 | 0.00 | H |
| ATOM | 308 | H2'1 | C | A | 10 | -37.846 | -10.333 | 44.780 | 1.00 | 0.00 | H |
| ATOM | 309 | H2'2 | C | A | 10 | -37.769 | -11.647 | 45.948 | 1.00 | 0.00 | H |
| ATOM | 310 | H5'1 | C | A | 10 | -40.978 | -9.734  | 42.676 | 1.00 | 0.00 | H |
| ATOM | 311 | H5'2 | C | A | 10 | -41.371 | -8.795  | 44.132 | 1.00 | 0.00 | H |
| ATOM | 312 | C1'  | T | A | 11 | -36.879 | -16.266 | 46.106 | 1.00 | 0.00 | C |
| ATOM | 313 | N1   | T | A | 11 | -36.043 | -15.399 | 45.234 | 1.00 | 0.00 | N |
| ATOM | 314 | C2   | T | A | 11 | -35.368 | -16.011 | 44.198 | 1.00 | 0.00 | C |
| ATOM | 315 | O2   | T | A | 11 | -35.435 | -17.209 | 43.982 | 1.00 | 0.00 | O |
| ATOM | 316 | N3   | T | A | 11 | -34.604 | -15.168 | 43.412 | 1.00 | 0.00 | N |
| ATOM | 317 | C4   | T | A | 11 | -34.458 | -13.805 | 43.571 | 1.00 | 0.00 | C |
| ATOM | 318 | O4   | T | A | 11 | -33.740 | -13.152 | 42.803 | 1.00 | 0.00 | O |
| ATOM | 319 | C5   | T | A | 11 | -35.201 | -13.256 | 44.681 | 1.00 | 0.00 | C |
| ATOM | 320 | C6   | T | A | 11 | -35.956 | -14.048 | 45.466 | 1.00 | 0.00 | C |
| ATOM | 321 | C7   | T | A | 11 | -35.073 | -11.776 | 44.889 | 1.00 | 0.00 | C |
| ATOM | 322 | C2'  | T | A | 11 | -36.845 | -15.874 | 47.578 | 1.00 | 0.00 | C |
| ATOM | 323 | C3'  | T | A | 11 | -38.268 | -16.176 | 48.021 | 1.00 | 0.00 | C |
| ATOM | 324 | O3'  | T | A | 11 | -38.371 | -17.557 | 48.360 | 1.00 | 0.00 | O |
| ATOM | 325 | C4'  | T | A | 11 | -39.090 | -15.822 | 46.784 | 1.00 | 0.00 | C |
| ATOM | 326 | O4'  | T | A | 11 | -38.218 | -16.165 | 45.660 | 1.00 | 0.00 | O |
| ATOM | 327 | C5'  | T | A | 11 | -39.510 | -14.377 | 46.646 | 1.00 | 0.00 | C |
| ATOM | 328 | O5'  | T | A | 11 | -38.456 | -13.512 | 47.139 | 1.00 | 0.00 | O |

|      |     |      |     |    |         |         |        |      |      |   |
|------|-----|------|-----|----|---------|---------|--------|------|------|---|
| ATOM | 329 | O1P  | T A | 11 | -39.487 | -12.433 | 49.165 | 1.00 | 0.00 | O |
| ATOM | 330 | O2P  | T A | 11 | -37.683 | -11.243 | 47.891 | 1.00 | 0.00 | O |
| ATOM | 331 | P    | T A | 11 | -38.857 | -12.149 | 47.861 | 1.00 | 0.00 | P |
| ATOM | 332 | H3   | T A | 11 | -34.094 | -15.599 | 42.629 | 1.00 | 0.00 | H |
| ATOM | 333 | H6   | T A | 11 | -36.509 | -13.610 | 46.298 | 1.00 | 0.00 | H |
| ATOM | 334 | H1'  | T A | 11 | -36.558 | -17.299 | 45.970 | 1.00 | 0.00 | H |
| ATOM | 335 | H3'  | T A | 11 | -38.564 | -15.572 | 48.877 | 1.00 | 0.00 | H |
| ATOM | 336 | H4'  | T A | 11 | -39.996 | -16.430 | 46.821 | 1.00 | 0.00 | H |
| ATOM | 337 | H71  | T A | 11 | -34.568 | -11.585 | 45.836 | 1.00 | 0.00 | H |
| ATOM | 338 | H72  | T A | 11 | -34.492 | -11.343 | 44.074 | 1.00 | 0.00 | H |
| ATOM | 339 | H73  | T A | 11 | -36.064 | -11.323 | 44.909 | 1.00 | 0.00 | H |
| ATOM | 340 | H2'1 | T A | 11 | -36.600 | -14.823 | 47.719 | 1.00 | 0.00 | H |
| ATOM | 341 | H2'2 | T A | 11 | -36.119 | -16.459 | 48.145 | 1.00 | 0.00 | H |
| ATOM | 342 | H5'1 | T A | 11 | -39.706 | -14.159 | 45.597 | 1.00 | 0.00 | H |
| ATOM | 343 | H5'2 | T A | 11 | -40.420 | -14.213 | 47.223 | 1.00 | 0.00 | H |
| ATOM | 344 | C1'  | A A | 12 | -33.707 | -20.080 | 46.253 | 1.00 | 0.00 | C |
| ATOM | 345 | N1   | A A | 12 | -30.739 | -16.998 | 43.419 | 1.00 | 0.00 | N |
| ATOM | 346 | C2   | A A | 12 | -31.018 | -18.295 | 43.343 | 1.00 | 0.00 | C |
| ATOM | 347 | N3   | A A | 12 | -31.799 | -19.030 | 44.108 | 1.00 | 0.00 | N |
| ATOM | 348 | C4   | A A | 12 | -32.341 | -18.275 | 45.080 | 1.00 | 0.00 | C |
| ATOM | 349 | C5   | A A | 12 | -32.156 | -16.939 | 45.297 | 1.00 | 0.00 | C |
| ATOM | 350 | C6   | A A | 12 | -31.296 | -16.271 | 44.400 | 1.00 | 0.00 | C |
| ATOM | 351 | N6   | A A | 12 | -31.020 | -14.958 | 44.488 | 1.00 | 0.00 | N |
| ATOM | 352 | N7   | A A | 12 | -32.879 | -16.506 | 46.393 | 1.00 | 0.00 | N |
| ATOM | 353 | C8   | A A | 12 | -33.478 | -17.580 | 46.817 | 1.00 | 0.00 | C |
| ATOM | 354 | N9   | A A | 12 | -33.200 | -18.694 | 46.066 | 1.00 | 0.00 | N |
| ATOM | 355 | C2'  | A A | 12 | -33.837 | -20.493 | 47.713 | 1.00 | 0.00 | C |
| ATOM | 356 | C3'  | A A | 12 | -35.080 | -21.369 | 47.685 | 1.00 | 0.00 | C |
| ATOM | 357 | O3'  | A A | 12 | -34.709 | -22.694 | 47.309 | 1.00 | 0.00 | O |
| ATOM | 358 | C4'  | A A | 12 | -35.950 | -20.692 | 46.627 | 1.00 | 0.00 | C |
| ATOM | 359 | O4'  | A A | 12 | -34.990 | -20.153 | 45.662 | 1.00 | 0.00 | O |
| ATOM | 360 | C5'  | A A | 12 | -36.836 | -19.568 | 47.108 | 1.00 | 0.00 | C |
| ATOM | 361 | O5'  | A A | 12 | -36.152 | -18.809 | 48.137 | 1.00 | 0.00 | O |
| ATOM | 362 | O1P  | A A | 12 | -37.530 | -19.250 | 50.197 | 1.00 | 0.00 | O |
| ATOM | 363 | O2P  | A A | 12 | -36.217 | -17.121 | 49.997 | 1.00 | 0.00 | O |
| ATOM | 364 | P    | A A | 12 | -37.010 | -18.179 | 49.324 | 1.00 | 0.00 | P |
| ATOM | 365 | H2   | A A | 12 | -30.532 | -18.829 | 42.527 | 1.00 | 0.00 | H |
| ATOM | 366 | H8   | A A | 12 | -34.138 | -17.595 | 47.685 | 1.00 | 0.00 | H |
| ATOM | 367 | H1'  | A A | 12 | -33.049 | -20.759 | 45.712 | 1.00 | 0.00 | H |
| ATOM | 368 | H3'  | A A | 12 | -35.584 | -21.396 | 48.650 | 1.00 | 0.00 | H |
| ATOM | 369 | H4'  | A A | 12 | -36.592 | -21.465 | 46.204 | 1.00 | 0.00 | H |
| ATOM | 370 | H61  | A A | 12 | -30.388 | -14.518 | 43.806 | 1.00 | 0.00 | H |
| ATOM | 371 | H62  | A A | 12 | -31.443 | -14.393 | 45.240 | 1.00 | 0.00 | H |
| ATOM | 372 | H2'1 | A A | 12 | -33.970 | -19.639 | 48.375 | 1.00 | 0.00 | H |
| ATOM | 373 | H2'2 | A A | 12 | -32.968 | -21.048 | 48.064 | 1.00 | 0.00 | H |
| ATOM | 374 | H5'1 | A A | 12 | -37.073 | -18.916 | 46.267 | 1.00 | 0.00 | H |
| ATOM | 375 | H5'2 | A A | 12 | -37.758 | -19.985 | 47.509 | 1.00 | 0.00 | H |
| ATOM | 376 | C1'  | G A | 13 | -29.422 | -22.342 | 45.172 | 1.00 | 0.00 | C |
| ATOM | 377 | N1   | G A | 13 | -27.645 | -17.578 | 44.757 | 1.00 | 0.00 | N |
| ATOM | 378 | C2   | G A | 13 | -27.418 | -18.683 | 43.956 | 1.00 | 0.00 | C |
| ATOM | 379 | N2   | G A | 13 | -26.606 | -18.496 | 42.906 | 1.00 | 0.00 | N |
| ATOM | 380 | N3   | G A | 13 | -27.955 | -19.880 | 44.185 | 1.00 | 0.00 | N |
| ATOM | 381 | C4   | G A | 13 | -28.742 | -19.890 | 45.292 | 1.00 | 0.00 | C |
| ATOM | 382 | C5   | G A | 13 | -29.023 | -18.840 | 46.151 | 1.00 | 0.00 | C |

|      |     |      |     |    |         |         |        |      |      |   |
|------|-----|------|-----|----|---------|---------|--------|------|------|---|
| ATOM | 383 | C6   | G A | 13 | -28.456 | -17.568 | 45.907 | 1.00 | 0.00 | C |
| ATOM | 384 | O6   | G A | 13 | -28.585 | -16.525 | 46.549 | 1.00 | 0.00 | O |
| ATOM | 385 | N7   | G A | 13 | -29.876 | -19.266 | 47.171 | 1.00 | 0.00 | N |
| ATOM | 386 | C8   | G A | 13 | -30.083 | -20.529 | 46.904 | 1.00 | 0.00 | C |
| ATOM | 387 | N9   | G A | 13 | -29.427 | -20.982 | 45.778 | 1.00 | 0.00 | N |
| ATOM | 388 | C2'  | G A | 13 | -29.424 | -23.470 | 46.195 | 1.00 | 0.00 | C |
| ATOM | 389 | C3'  | G A | 13 | -30.283 | -24.519 | 45.510 | 1.00 | 0.00 | C |
| ATOM | 390 | O3'  | G A | 13 | -29.469 | -25.284 | 44.623 | 1.00 | 0.00 | O |
| ATOM | 391 | C4'  | G A | 13 | -31.317 | -23.678 | 44.763 | 1.00 | 0.00 | C |
| ATOM | 392 | O4'  | G A | 13 | -30.589 | -22.467 | 44.383 | 1.00 | 0.00 | O |
| ATOM | 393 | C5'  | G A | 13 | -32.546 | -23.277 | 45.544 | 1.00 | 0.00 | C |
| ATOM | 394 | O5'  | G A | 13 | -32.185 | -23.004 | 46.921 | 1.00 | 0.00 | O |
| ATOM | 395 | O1P  | G A | 13 | -33.358 | -24.824 | 48.204 | 1.00 | 0.00 | O |
| ATOM | 396 | O2P  | G A | 13 | -32.865 | -22.628 | 49.311 | 1.00 | 0.00 | O |
| ATOM | 397 | P    | G A | 13 | -33.229 | -23.361 | 48.073 | 1.00 | 0.00 | P |
| ATOM | 398 | H1   | G A | 13 | -27.186 | -16.694 | 44.489 | 1.00 | 0.00 | H |
| ATOM | 399 | H8   | G A | 13 | -30.717 | -21.170 | 47.517 | 1.00 | 0.00 | H |
| ATOM | 400 | H1'  | G A | 13 | -28.559 | -22.417 | 44.510 | 1.00 | 0.00 | H |
| ATOM | 401 | H21  | G A | 13 | -26.197 | -17.565 | 42.735 | 1.00 | 0.00 | H |
| ATOM | 402 | H3'  | G A | 13 | -30.762 | -25.187 | 46.226 | 1.00 | 0.00 | H |
| ATOM | 403 | H22  | G A | 13 | -26.395 | -19.279 | 42.275 | 1.00 | 0.00 | H |
| ATOM | 404 | H4'  | G A | 13 | -31.643 | -24.265 | 43.906 | 1.00 | 0.00 | H |
| ATOM | 405 | H2'1 | G A | 13 | -29.857 | -23.163 | 47.147 | 1.00 | 0.00 | H |
| ATOM | 406 | H2'2 | G A | 13 | -28.421 | -23.847 | 46.398 | 1.00 | 0.00 | H |
| ATOM | 407 | H5'1 | G A | 13 | -32.982 | -22.387 | 45.093 | 1.00 | 0.00 | H |
| ATOM | 408 | H5'2 | G A | 13 | -33.273 | -24.089 | 45.507 | 1.00 | 0.00 | H |
| ATOM | 409 | C1'  | G A | 14 | -24.615 | -22.445 | 43.984 | 1.00 | 0.00 | C |
| ATOM | 410 | N1   | G A | 14 | -24.550 | -17.849 | 46.198 | 1.00 | 0.00 | N |
| ATOM | 411 | C2   | G A | 14 | -23.947 | -18.281 | 45.031 | 1.00 | 0.00 | C |
| ATOM | 412 | N2   | G A | 14 | -23.228 | -17.368 | 44.366 | 1.00 | 0.00 | N |
| ATOM | 413 | N3   | G A | 14 | -24.051 | -19.525 | 44.564 | 1.00 | 0.00 | N |
| ATOM | 414 | C4   | G A | 14 | -24.809 | -20.315 | 45.368 | 1.00 | 0.00 | C |
| ATOM | 415 | C5   | G A | 14 | -25.445 | -19.973 | 46.550 | 1.00 | 0.00 | C |
| ATOM | 416 | C6   | G A | 14 | -25.338 | -18.654 | 47.044 | 1.00 | 0.00 | C |
| ATOM | 417 | O6   | G A | 14 | -25.825 | -18.163 | 48.063 | 1.00 | 0.00 | O |
| ATOM | 418 | N7   | G A | 14 | -26.122 | -21.079 | 47.070 | 1.00 | 0.00 | N |
| ATOM | 419 | C8   | G A | 14 | -25.884 | -22.032 | 46.206 | 1.00 | 0.00 | C |
| ATOM | 420 | N9   | G A | 14 | -25.092 | -21.645 | 45.145 | 1.00 | 0.00 | N |
| ATOM | 421 | C2'  | G A | 14 | -24.255 | -23.882 | 44.337 | 1.00 | 0.00 | C |
| ATOM | 422 | C3'  | G A | 14 | -24.694 | -24.634 | 43.091 | 1.00 | 0.00 | C |
| ATOM | 423 | O3'  | G A | 14 | -23.653 | -24.579 | 42.118 | 1.00 | 0.00 | O |
| ATOM | 424 | C4'  | G A | 14 | -25.937 | -23.863 | 42.649 | 1.00 | 0.00 | C |
| ATOM | 425 | O4'  | G A | 14 | -25.656 | -22.478 | 43.027 | 1.00 | 0.00 | O |
| ATOM | 426 | C5'  | G A | 14 | -27.244 | -24.280 | 43.282 | 1.00 | 0.00 | C |
| ATOM | 427 | O5'  | G A | 14 | -27.023 | -24.652 | 44.665 | 1.00 | 0.00 | O |
| ATOM | 428 | O1P  | G A | 14 | -27.534 | -27.116 | 44.696 | 1.00 | 0.00 | O |
| ATOM | 429 | O2P  | G A | 14 | -27.836 | -25.746 | 46.776 | 1.00 | 0.00 | O |
| ATOM | 430 | P    | G A | 14 | -27.906 | -25.820 | 45.296 | 1.00 | 0.00 | P |
| ATOM | 431 | H1   | G A | 14 | -24.412 | -16.864 | 46.469 | 1.00 | 0.00 | H |
| ATOM | 432 | H8   | G A | 14 | -26.275 | -23.043 | 46.316 | 1.00 | 0.00 | H |
| ATOM | 433 | H1'  | G A | 14 | -23.765 | -21.927 | 43.539 | 1.00 | 0.00 | H |
| ATOM | 434 | H21  | G A | 14 | -23.154 | -16.407 | 44.731 | 1.00 | 0.00 | H |
| ATOM | 435 | H3'  | G A | 14 | -24.932 | -25.676 | 43.305 | 1.00 | 0.00 | H |
| ATOM | 436 | H22  | G A | 14 | -22.751 | -17.626 | 43.491 | 1.00 | 0.00 | H |



|      |     |      |   |   |    |         |         |        |      |      |   |
|------|-----|------|---|---|----|---------|---------|--------|------|------|---|
| ATOM | 437 | H4'  | G | A | 14 | -26.029 | -24.000 | 41.573 | 1.00 | 0.00 | H |
| ATOM | 438 | H2'1 | G | A | 14 | -24.784 | -24.236 | 45.221 | 1.00 | 0.00 | H |
| ATOM | 439 | H2'2 | G | A | 14 | -23.187 | -24.007 | 44.521 | 1.00 | 0.00 | H |
| ATOM | 440 | H5'1 | G | A | 14 | -27.948 | -23.449 | 43.230 | 1.00 | 0.00 | H |
| ATOM | 441 | H5'2 | G | A | 14 | -27.652 | -25.129 | 42.733 | 1.00 | 0.00 | H |
| ATOM | 442 | C1'  | A | A | 15 | -20.032 | -20.585 | 43.794 | 1.00 | 0.00 | C |
| ATOM | 443 | N1   | A | A | 15 | -21.567 | -17.903 | 47.892 | 1.00 | 0.00 | N |
| ATOM | 444 | C2   | A | A | 15 | -20.863 | -17.572 | 46.812 | 1.00 | 0.00 | C |
| ATOM | 445 | N3   | A | A | 15 | -20.504 | -18.315 | 45.787 | 1.00 | 0.00 | N |
| ATOM | 446 | C4   | A | A | 15 | -20.953 | -19.574 | 45.945 | 1.00 | 0.00 | C |
| ATOM | 447 | C5   | A | A | 15 | -21.681 | -20.073 | 46.988 | 1.00 | 0.00 | C |
| ATOM | 448 | C6   | A | A | 15 | -22.001 | -19.166 | 48.020 | 1.00 | 0.00 | C |
| ATOM | 449 | N6   | A | A | 15 | -22.712 | -19.514 | 49.107 | 1.00 | 0.00 | N |
| ATOM | 450 | N7   | A | A | 15 | -21.963 | -21.415 | 46.804 | 1.00 | 0.00 | N |
| ATOM | 451 | C8   | A | A | 15 | -21.400 | -21.698 | 45.666 | 1.00 | 0.00 | C |
| ATOM | 452 | N9   | A | A | 15 | -20.768 | -20.628 | 45.084 | 1.00 | 0.00 | N |
| ATOM | 453 | C2'  | A | A | 15 | -19.225 | -21.844 | 43.504 | 1.00 | 0.00 | C |
| ATOM | 454 | C3'  | A | A | 15 | -19.366 | -21.971 | 41.995 | 1.00 | 0.00 | C |
| ATOM | 455 | O3'  | A | A | 15 | -18.381 | -21.158 | 41.365 | 1.00 | 0.00 | O |
| ATOM | 456 | C4'  | A | A | 15 | -20.784 | -21.463 | 41.742 | 1.00 | 0.00 | C |
| ATOM | 457 | O4'  | A | A | 15 | -20.983 | -20.428 | 42.759 | 1.00 | 0.00 | O |
| ATOM | 458 | C5'  | A | A | 15 | -21.894 | -22.479 | 41.864 | 1.00 | 0.00 | C |
| ATOM | 459 | O5'  | A | A | 15 | -21.593 | -23.407 | 42.938 | 1.00 | 0.00 | O |
| ATOM | 460 | O1P  | A | A | 15 | -21.264 | -25.596 | 41.739 | 1.00 | 0.00 | O |
| ATOM | 461 | O2P  | A | A | 15 | -22.044 | -25.576 | 44.124 | 1.00 | 0.00 | O |
| ATOM | 462 | P    | A | A | 15 | -22.055 | -24.927 | 42.791 | 1.00 | 0.00 | P |
| ATOM | 463 | H2   | A | A | 15 | -20.538 | -16.532 | 46.771 | 1.00 | 0.00 | H |
| ATOM | 464 | H8   | A | A | 15 | -21.426 | -22.691 | 45.217 | 1.00 | 0.00 | H |
| ATOM | 465 | H1'  | A | A | 15 | -19.391 | -19.703 | 43.797 | 1.00 | 0.00 | H |
| ATOM | 466 | H3'  | A | A | 15 | -19.252 | -23.002 | 41.659 | 1.00 | 0.00 | H |
| ATOM | 467 | H4'  | A | A | 15 | -20.802 | -21.070 | 40.726 | 1.00 | 0.00 | H |
| ATOM | 468 | H61  | A | A | 15 | -22.920 | -18.811 | 49.831 | 1.00 | 0.00 | H |
| ATOM | 469 | H62  | A | A | 15 | -23.047 | -20.482 | 49.214 | 1.00 | 0.00 | H |
| ATOM | 470 | H2'1 | A | A | 15 | -19.627 | -22.718 | 44.016 | 1.00 | 0.00 | H |
| ATOM | 471 | H2'2 | A | A | 15 | -18.180 | -21.743 | 43.798 | 1.00 | 0.00 | H |
| ATOM | 472 | H5'1 | A | A | 15 | -22.830 | -21.963 | 42.076 | 1.00 | 0.00 | H |
| ATOM | 473 | H5'2 | A | A | 15 | -21.987 | -23.021 | 40.925 | 1.00 | 0.00 | H |
| ATOM | 474 | C1'  | C | A | 16 | -16.362 | -17.650 | 45.399 | 1.00 | 0.00 | C |
| ATOM | 475 | N1   | C | A | 16 | -17.062 | -18.564 | 46.342 | 1.00 | 0.00 | N |
| ATOM | 476 | C2   | C | A | 16 | -17.560 | -18.024 | 47.525 | 1.00 | 0.00 | C |
| ATOM | 477 | O2   | C | A | 16 | -17.401 | -16.816 | 47.743 | 1.00 | 0.00 | O |
| ATOM | 478 | N3   | C | A | 16 | -18.201 | -18.840 | 48.398 | 1.00 | 0.00 | N |
| ATOM | 479 | C4   | C | A | 16 | -18.356 | -20.143 | 48.133 | 1.00 | 0.00 | C |
| ATOM | 480 | N4   | C | A | 16 | -18.995 | -20.894 | 49.020 | 1.00 | 0.00 | N |
| ATOM | 481 | C5   | C | A | 16 | -17.851 | -20.728 | 46.926 | 1.00 | 0.00 | C |
| ATOM | 482 | C6   | C | A | 16 | -17.212 | -19.887 | 46.059 | 1.00 | 0.00 | C |
| ATOM | 483 | C2'  | C | A | 16 | -15.162 | -18.282 | 44.707 | 1.00 | 0.00 | C |
| ATOM | 484 | C3'  | C | A | 16 | -15.223 | -17.650 | 43.325 | 1.00 | 0.00 | C |
| ATOM | 485 | O3'  | C | A | 16 | -14.571 | -16.383 | 43.361 | 1.00 | 0.00 | O |
| ATOM | 486 | C4'  | C | A | 16 | -16.724 | -17.522 | 43.076 | 1.00 | 0.00 | C |
| ATOM | 487 | O4'  | C | A | 16 | -17.290 | -17.268 | 44.401 | 1.00 | 0.00 | O |
| ATOM | 488 | C5'  | C | A | 16 | -17.411 | -18.730 | 42.481 | 1.00 | 0.00 | C |
| ATOM | 489 | O5'  | C | A | 16 | -16.823 | -19.942 | 43.017 | 1.00 | 0.00 | O |
| ATOM | 490 | O1P  | C | A | 16 | -15.730 | -20.997 | 41.011 | 1.00 | 0.00 | O |

|      |     |      |   |   |    |         |         |        |      |      |   |
|------|-----|------|---|---|----|---------|---------|--------|------|------|---|
| ATOM | 491 | O2P  | C | A | 16 | -16.510 | -22.433 | 42.915 | 1.00 | 0.00 | O |
| ATOM | 492 | P    | C | A | 16 | -16.723 | -21.226 | 42.078 | 1.00 | 0.00 | P |
| ATOM | 493 | H5   | C | A | 16 | -17.969 | -21.791 | 46.710 | 1.00 | 0.00 | H |
| ATOM | 494 | H6   | C | A | 16 | -16.818 | -20.283 | 45.123 | 1.00 | 0.00 | H |
| ATOM | 495 | H1'  | C | A | 16 | -16.070 | -16.753 | 45.946 | 1.00 | 0.00 | H |
| ATOM | 496 | H3'  | C | A | 16 | -14.750 | -18.279 | 42.569 | 1.00 | 0.00 | H |
| ATOM | 497 | H4'  | C | A | 16 | -16.860 | -16.690 | 42.386 | 1.00 | 0.00 | H |
| ATOM | 498 | H41  | C | A | 16 | -19.130 | -21.900 | 48.841 | 1.00 | 0.00 | H |
| ATOM | 499 | H42  | C | A | 16 | -19.355 | -20.473 | 49.889 | 1.00 | 0.00 | H |
| ATOM | 500 | H2'1 | C | A | 16 | -15.241 | -19.368 | 44.650 | 1.00 | 0.00 | H |
| ATOM | 501 | H2'2 | C | A | 16 | -14.223 | -18.048 | 45.211 | 1.00 | 0.00 | H |
| ATOM | 502 | H5'1 | C | A | 16 | -18.472 | -18.693 | 42.726 | 1.00 | 0.00 | H |
| ATOM | 503 | H5'2 | C | A | 16 | -17.292 | -18.711 | 41.398 | 1.00 | 0.00 | H |
| ATOM | 504 | C1'  | G | A | 17 | -13.924 | -15.037 | 48.827 | 1.00 | 0.00 | C |
| ATOM | 505 | N1   | G | A | 17 | -16.170 | -18.269 | 52.073 | 1.00 | 0.00 | N |
| ATOM | 506 | C2   | G | A | 17 | -15.989 | -16.900 | 52.165 | 1.00 | 0.00 | C |
| ATOM | 507 | N2   | G | A | 17 | -16.468 | -16.316 | 53.270 | 1.00 | 0.00 | N |
| ATOM | 508 | N3   | G | A | 17 | -15.379 | -16.174 | 51.230 | 1.00 | 0.00 | N |
| ATOM | 509 | C4   | G | A | 17 | -14.951 | -16.931 | 50.185 | 1.00 | 0.00 | C |
| ATOM | 510 | C5   | G | A | 17 | -15.083 | -18.298 | 50.009 | 1.00 | 0.00 | C |
| ATOM | 511 | C6   | G | A | 17 | -15.734 | -19.070 | 50.999 | 1.00 | 0.00 | C |
| ATOM | 512 | O6   | G | A | 17 | -15.946 | -20.283 | 51.025 | 1.00 | 0.00 | O |
| ATOM | 513 | N7   | G | A | 17 | -14.506 | -18.688 | 48.799 | 1.00 | 0.00 | N |
| ATOM | 514 | C8   | G | A | 17 | -14.056 | -17.569 | 48.290 | 1.00 | 0.00 | C |
| ATOM | 515 | N9   | G | A | 17 | -14.288 | -16.458 | 49.074 | 1.00 | 0.00 | N |
| ATOM | 516 | C2'  | G | A | 17 | -12.570 | -14.858 | 48.154 | 1.00 | 0.00 | C |
| ATOM | 517 | C3'  | G | A | 17 | -12.817 | -13.659 | 47.254 | 1.00 | 0.00 | C |
| ATOM | 518 | O3'  | G | A | 17 | -12.636 | -12.462 | 48.007 | 1.00 | 0.00 | O |
| ATOM | 519 | C4'  | G | A | 17 | -14.270 | -13.854 | 46.821 | 1.00 | 0.00 | C |
| ATOM | 520 | O4'  | G | A | 17 | -14.909 | -14.481 | 47.977 | 1.00 | 0.00 | O |
| ATOM | 521 | C5'  | G | A | 17 | -14.497 | -14.726 | 45.609 | 1.00 | 0.00 | C |
| ATOM | 522 | O5'  | G | A | 17 | -13.544 | -15.818 | 45.605 | 1.00 | 0.00 | O |
| ATOM | 523 | O1P  | G | A | 17 | -12.125 | -15.342 | 43.581 | 1.00 | 0.00 | O |
| ATOM | 524 | O2P  | G | A | 17 | -12.404 | -17.700 | 44.393 | 1.00 | 0.00 | O |
| ATOM | 525 | P    | G | A | 17 | -12.999 | -16.355 | 44.206 | 1.00 | 0.00 | P |
| ATOM | 526 | H1   | G | A | 17 | -16.661 | -18.737 | 52.849 | 1.00 | 0.00 | H |
| ATOM | 527 | H8   | G | A | 17 | -13.542 | -17.520 | 47.329 | 1.00 | 0.00 | H |
| ATOM | 528 | H1'  | G | A | 17 | -13.961 | -14.505 | 49.777 | 1.00 | 0.00 | H |
| ATOM | 529 | H21  | G | A | 17 | -16.941 | -16.883 | 53.988 | 1.00 | 0.00 | H |
| ATOM | 530 | H3'  | G | A | 17 | -12.149 | -13.649 | 46.393 | 1.00 | 0.00 | H |
| ATOM | 531 | H22  | G | A | 17 | -16.363 | -15.299 | 53.401 | 1.00 | 0.00 | H |
| ATOM | 532 | H4'  | G | A | 17 | -14.669 | -12.865 | 46.599 | 1.00 | 0.00 | H |
| ATOM | 533 | H2'1 | G | A | 17 | -12.277 | -15.735 | 47.576 | 1.00 | 0.00 | H |
| ATOM | 534 | H2'2 | G | A | 17 | -11.774 | -14.658 | 48.873 | 1.00 | 0.00 | H |
| ATOM | 535 | H5'1 | G | A | 17 | -15.512 | -15.123 | 45.640 | 1.00 | 0.00 | H |
| ATOM | 536 | H5'2 | G | A | 17 | -14.375 | -14.125 | 44.708 | 1.00 | 0.00 | H |
| ATOM | 537 | C1'  | G | A | 18 | -12.582 | -13.950 | 53.468 | 1.00 | 0.00 | C |
| ATOM | 538 | N1   | G | A | 18 | -13.661 | -18.861 | 54.328 | 1.00 | 0.00 | N |
| ATOM | 539 | C2   | G | A | 18 | -13.957 | -17.741 | 55.085 | 1.00 | 0.00 | C |
| ATOM | 540 | N2   | G | A | 18 | -14.627 | -17.959 | 56.225 | 1.00 | 0.00 | N |
| ATOM | 541 | N3   | G | A | 18 | -13.612 | -16.505 | 54.734 | 1.00 | 0.00 | N |
| ATOM | 542 | C4   | G | A | 18 | -12.933 | -16.471 | 53.558 | 1.00 | 0.00 | C |
| ATOM | 543 | C5   | G | A | 18 | -12.590 | -17.534 | 52.738 | 1.00 | 0.00 | C |
| ATOM | 544 | C6   | G | A | 18 | -12.960 | -18.848 | 53.108 | 1.00 | 0.00 | C |

|      |     |      |     |    |         |         |        |      |      |   |
|------|-----|------|-----|----|---------|---------|--------|------|------|---|
| ATOM | 545 | O6   | G A | 18 | -12.748 | -19.909 | 52.519 | 1.00 | 0.00 | O |
| ATOM | 546 | N7   | G A | 18 | -11.892 | -17.076 | 51.620 | 1.00 | 0.00 | N |
| ATOM | 547 | C8   | G A | 18 | -11.838 | -15.780 | 51.789 | 1.00 | 0.00 | C |
| ATOM | 548 | N9   | G A | 18 | -12.447 | -15.337 | 52.945 | 1.00 | 0.00 | N |
| ATOM | 549 | C2'  | G A | 18 | -11.356 | -13.081 | 53.226 | 1.00 | 0.00 | C |
| ATOM | 550 | C3'  | G A | 18 | -11.978 | -11.719 | 52.967 | 1.00 | 0.00 | C |
| ATOM | 551 | O3'  | G A | 18 | -12.227 | -11.073 | 54.213 | 1.00 | 0.00 | O |
| ATOM | 552 | C4'  | G A | 18 | -13.271 | -12.069 | 52.231 | 1.00 | 0.00 | C |
| ATOM | 553 | O4'  | G A | 18 | -13.681 | -13.347 | 52.813 | 1.00 | 0.00 | O |
| ATOM | 554 | C5'  | G A | 18 | -13.166 | -12.232 | 50.733 | 1.00 | 0.00 | C |
| ATOM | 555 | O5'  | G A | 18 | -11.899 | -12.849 | 50.393 | 1.00 | 0.00 | O |
| ATOM | 556 | O1P  | G A | 18 | -10.686 | -11.037 | 49.136 | 1.00 | 0.00 | O |
| ATOM | 557 | O2P  | G A | 18 | -10.165 | -13.447 | 48.676 | 1.00 | 0.00 | O |
| ATOM | 558 | P    | G A | 18 | -11.177 | -12.424 | 49.035 | 1.00 | 0.00 | P |
| ATOM | 559 | H1   | G A | 18 | -13.980 | -19.775 | 54.686 | 1.00 | 0.00 | H |
| ATOM | 560 | H8   | G A | 18 | -11.353 | -15.108 | 51.082 | 1.00 | 0.00 | H |
| ATOM | 561 | H1'  | G A | 18 | -12.816 | -14.008 | 54.532 | 1.00 | 0.00 | H |
| ATOM | 562 | H21  | G A | 18 | -14.894 | -18.920 | 56.488 | 1.00 | 0.00 | H |
| ATOM | 563 | H3'  | G A | 18 | -11.336 | -11.085 | 52.354 | 1.00 | 0.00 | H |
| ATOM | 564 | H22  | G A | 18 | -14.874 | -17.168 | 56.834 | 1.00 | 0.00 | H |
| ATOM | 565 | H4'  | G A | 18 | -13.977 | -11.264 | 52.430 | 1.00 | 0.00 | H |
| ATOM | 566 | H2'1 | G A | 18 | -10.772 | -13.419 | 52.369 | 1.00 | 0.00 | H |
| ATOM | 567 | H2'2 | G A | 18 | -10.689 | -13.056 | 54.088 | 1.00 | 0.00 | H |
| ATOM | 568 | H5'1 | G A | 18 | -13.986 | -12.858 | 50.383 | 1.00 | 0.00 | H |
| ATOM | 569 | H5'2 | G A | 18 | -13.237 | -11.253 | 50.261 | 1.00 | 0.00 | H |
| ATOM | 570 | C1'  | T A | 19 | -11.776 | -15.008 | 58.236 | 1.00 | 0.00 | C |
| ATOM | 571 | N1   | T A | 19 | -11.180 | -15.858 | 57.172 | 1.00 | 0.00 | N |
| ATOM | 572 | C2   | T A | 19 | -11.383 | -17.220 | 57.265 | 1.00 | 0.00 | C |
| ATOM | 573 | O2   | T A | 19 | -12.020 | -17.731 | 58.171 | 1.00 | 0.00 | O |
| ATOM | 574 | N3   | T A | 19 | -10.813 | -17.972 | 56.256 | 1.00 | 0.00 | N |
| ATOM | 575 | C4   | T A | 19 | -10.075 | -17.496 | 55.193 | 1.00 | 0.00 | C |
| ATOM | 576 | O4   | T A | 19 | -9.609  | -18.270 | 54.348 | 1.00 | 0.00 | O |
| ATOM | 577 | C5   | T A | 19 | -9.915  | -16.061 | 55.179 | 1.00 | 0.00 | C |
| ATOM | 578 | C6   | T A | 19 | -10.458 | -15.296 | 56.147 | 1.00 | 0.00 | C |
| ATOM | 579 | C7   | T A | 19 | -9.121  | -15.499 | 54.039 | 1.00 | 0.00 | C |
| ATOM | 580 | C2'  | T A | 19 | -10.899 | -13.831 | 58.646 | 1.00 | 0.00 | C |
| ATOM | 581 | C3'  | T A | 19 | -11.929 | -12.750 | 58.931 | 1.00 | 0.00 | C |
| ATOM | 582 | O3'  | T A | 19 | -12.407 | -12.899 | 60.266 | 1.00 | 0.00 | O |
| ATOM | 583 | C4'  | T A | 19 | -13.014 | -13.034 | 57.895 | 1.00 | 0.00 | C |
| ATOM | 584 | O4'  | T A | 19 | -12.996 | -14.489 | 57.742 | 1.00 | 0.00 | O |
| ATOM | 585 | C5'  | T A | 19 | -12.827 | -12.403 | 56.535 | 1.00 | 0.00 | C |
| ATOM | 586 | O5'  | T A | 19 | -11.419 | -12.396 | 56.188 | 1.00 | 0.00 | O |
| ATOM | 587 | O1P  | T A | 19 | -10.841 | -9.947  | 56.145 | 1.00 | 0.00 | O |
| ATOM | 588 | O2P  | T A | 19 | -9.544  | -11.568 | 54.735 | 1.00 | 0.00 | O |
| ATOM | 589 | P    | T A | 19 | -10.844 | -11.180 | 55.332 | 1.00 | 0.00 | P |
| ATOM | 590 | H3   | T A | 19 | -10.954 | -18.992 | 56.301 | 1.00 | 0.00 | H |
| ATOM | 591 | H6   | T A | 19 | -10.324 | -14.215 | 56.116 | 1.00 | 0.00 | H |
| ATOM | 592 | H1'  | T A | 19 | -12.003 | -15.642 | 59.093 | 1.00 | 0.00 | H |
| ATOM | 593 | H3'  | T A | 19 | -11.516 | -11.750 | 58.804 | 1.00 | 0.00 | H |
| ATOM | 594 | H4'  | T A | 19 | -13.952 | -12.661 | 58.308 | 1.00 | 0.00 | H |
| ATOM | 595 | H71  | T A | 19 | -8.202  | -15.054 | 54.420 | 1.00 | 0.00 | H |
| ATOM | 596 | H72  | T A | 19 | -8.874  | -16.298 | 53.339 | 1.00 | 0.00 | H |
| ATOM | 597 | H73  | T A | 19 | -9.707  | -14.735 | 53.526 | 1.00 | 0.00 | H |
| ATOM | 598 | H2'1 | T A | 19 | -10.216 | -13.530 | 57.852 | 1.00 | 0.00 | H |

|      |     |      |     |   |    |         |         |        |      |      |   |
|------|-----|------|-----|---|----|---------|---------|--------|------|------|---|
| ATOM | 599 | H2'2 | T   | A | 19 | -10.298 | -14.051 | 59.529 | 1.00 | 0.00 | H |
| ATOM | 600 | H5'1 | T   | A | 19 | -13.386 | -12.974 | 55.794 | 1.00 | 0.00 | H |
| ATOM | 601 | H5'2 | T   | A | 19 | -13.204 | -11.382 | 56.560 | 1.00 | 0.00 | H |
| ATOM | 602 | C01  | LNK | A | 20 | -10.968 | -11.754 | 63.503 | 0.00 | 0.00 | C |
| ATOM | 603 | O1   | LNK | A | 20 | -10.907 | -11.901 | 62.082 | 1.00 | 0.00 | O |
| ATOM | 604 | S    | LNK | A | 20 | -8.698  | -10.406 | 66.482 | 0.00 | 0.00 | S |
| ATOM | 605 | C02  | LNK | A | 20 | -9.661  | -11.112 | 64.007 | 0.00 | 0.00 | C |
| ATOM | 606 | C03  | LNK | A | 20 | -9.280  | -11.723 | 65.368 | 0.00 | 0.00 | C |
| ATOM | 607 | O1P  | LNK | A | 20 | -9.958  | -13.776 | 60.696 | 1.00 | 0.00 | O |
| ATOM | 608 | O2P  | LNK | A | 20 | -11.625 | -14.272 | 62.506 | 1.00 | 0.00 | O |
| ATOM | 609 | P    | LNK | A | 20 | -11.153 | -13.344 | 61.448 | 1.00 | 0.00 | P |
| ATOM | 610 | H01  | LNK | A | 20 | -11.094 | -12.732 | 63.966 | 0.00 | 0.00 | H |
| ATOM | 611 | H02  | LNK | A | 20 | -11.811 | -11.115 | 63.767 | 0.00 | 0.00 | H |
| ATOM | 612 | H03  | LNK | A | 20 | -8.487  | -12.457 | 65.228 | 0.00 | 0.00 | H |
| ATOM | 613 | H04  | LNK | A | 20 | -9.803  | -10.036 | 64.117 | 0.00 | 0.00 | H |
| ATOM | 614 | H05  | LNK | A | 20 | -8.863  | -11.300 | 63.288 | 0.00 | 0.00 | H |
| ATOM | 615 | H06  | LNK | A | 20 | -10.153 | -12.209 | 65.805 | 0.00 | 0.00 | H |
| ATOM | 616 | AU   | LNK | A | 20 | -8.435  | -10.686 | 67.050 |      |      |   |
| TER  |     |      |     |   |    |         |         |        |      |      |   |
| ATOM | 618 | C1'  | A   | B | 2  | -12.261 | -25.850 | 57.188 | 1.00 | 0.00 | C |
| ATOM | 619 | N1   | A   | B | 2  | -11.201 | -20.895 | 56.372 | 1.00 | 0.00 | N |
| ATOM | 620 | C2   | A   | B | 2  | -11.888 | -21.521 | 57.322 | 1.00 | 0.00 | C |
| ATOM | 621 | N3   | A   | B | 2  | -12.121 | -22.808 | 57.475 | 1.00 | 0.00 | N |
| ATOM | 622 | C4   | A   | B | 2  | -11.548 | -23.507 | 56.478 | 1.00 | 0.00 | C |
| ATOM | 623 | C5   | A   | B | 2  | -10.815 | -23.017 | 55.434 | 1.00 | 0.00 | C |
| ATOM | 624 | C6   | A   | B | 2  | -10.640 | -21.618 | 55.391 | 1.00 | 0.00 | C |
| ATOM | 625 | N6   | A   | B | 2  | -9.943  | -20.994 | 54.426 | 1.00 | 0.00 | N |
| ATOM | 626 | N7   | A   | B | 2  | -10.383 | -24.038 | 54.605 | 1.00 | 0.00 | N |
| ATOM | 627 | C8   | A   | B | 2  | -10.863 | -25.112 | 55.157 | 1.00 | 0.00 | C |
| ATOM | 628 | N9   | A   | B | 2  | -11.579 | -24.868 | 56.300 | 1.00 | 0.00 | N |
| ATOM | 629 | C2'  | A   | B | 2  | -12.913 | -27.004 | 56.438 | 1.00 | 0.00 | C |
| ATOM | 630 | C3'  | A   | B | 2  | -12.695 | -28.166 | 57.393 | 1.00 | 0.00 | C |
| ATOM | 631 | O3'  | A   | B | 2  | -13.733 | -28.170 | 58.370 | 1.00 | 0.00 | O |
| ATOM | 632 | C4'  | A   | B | 2  | -11.330 | -27.853 | 58.004 | 1.00 | 0.00 | C |
| ATOM | 633 | O4'  | A   | B | 2  | -11.287 | -26.390 | 58.060 | 1.00 | 0.00 | O |
| ATOM | 634 | C5'  | A   | B | 2  | -10.124 | -28.343 | 57.238 | 1.00 | 0.00 | C |
| ATOM | 635 | O5'  | A   | B | 2  | -10.369 | -28.232 | 55.813 | 1.00 | 0.00 | O |
| ATOM | 636 | H2   | A   | B | 2  | -12.322 | -20.878 | 58.085 | 1.00 | 0.00 | H |
| ATOM | 637 | H8   | A   | B | 2  | -10.711 | -26.112 | 54.750 | 1.00 | 0.00 | H |
| ATOM | 638 | H1'  | A   | B | 2  | -12.993 | -25.313 | 57.791 | 1.00 | 0.00 | H |
| ATOM | 639 | H3'  | A   | B | 2  | -12.683 | -29.125 | 56.875 | 1.00 | 0.00 | H |
| ATOM | 640 | H4'  | A   | B | 2  | -11.310 | -28.317 | 58.989 | 1.00 | 0.00 | H |
| ATOM | 641 | H61  | A   | B | 2  | -9.843  | -19.971 | 54.443 | 1.00 | 0.00 | H |
| ATOM | 642 | H62  | A   | B | 2  | -9.510  | -21.544 | 53.668 | 1.00 | 0.00 | H |
| ATOM | 643 | H2'1 | A   | B | 2  | -12.442 | -27.190 | 55.473 | 1.00 | 0.00 | H |
| ATOM | 644 | H2'2 | A   | B | 2  | -13.975 | -26.832 | 56.258 | 1.00 | 0.00 | H |
| ATOM | 645 | H5'1 | A   | B | 2  | -9.258  | -27.739 | 57.511 | 1.00 | 0.00 | H |
| ATOM | 646 | H5'2 | A   | B | 2  | -9.933  | -29.383 | 57.500 | 1.00 | 0.00 | H |
| ATOM | 647 | C1'  | C   | B | 3  | -16.289 | -23.073 | 58.036 | 1.00 | 0.00 | C |
| ATOM | 648 | N1   | C   | B | 3  | -15.537 | -22.942 | 56.758 | 1.00 | 0.00 | N |
| ATOM | 649 | C2   | C   | B | 3  | -15.154 | -21.665 | 56.353 | 1.00 | 0.00 | C |
| ATOM | 650 | O2   | C   | B | 3  | -15.452 | -20.699 | 57.068 | 1.00 | 0.00 | O |
| ATOM | 651 | N3   | C   | B | 3  | -14.470 | -21.524 | 55.193 | 1.00 | 0.00 | N |
| ATOM | 652 | C4   | C   | B | 3  | -14.163 | -22.589 | 54.441 | 1.00 | 0.00 | C |

|      |     |      |     |   |         |         |        |      |      |   |
|------|-----|------|-----|---|---------|---------|--------|------|------|---|
| ATOM | 653 | N4   | C B | 3 | -13.488 | -22.393 | 53.316 | 1.00 | 0.00 | N |
| ATOM | 654 | C5   | C B | 3 | -14.547 | -23.915 | 54.828 | 1.00 | 0.00 | C |
| ATOM | 655 | C6   | C B | 3 | -15.233 | -24.034 | 56.004 | 1.00 | 0.00 | C |
| ATOM | 656 | C2'  | C B | 3 | -17.382 | -24.133 | 57.999 | 1.00 | 0.00 | C |
| ATOM | 657 | C3'  | C B | 3 | -17.328 | -24.693 | 59.412 | 1.00 | 0.00 | C |
| ATOM | 658 | O3'  | C B | 3 | -18.112 | -23.869 | 60.272 | 1.00 | 0.00 | O |
| ATOM | 659 | C4'  | C B | 3 | -15.840 | -24.625 | 59.747 | 1.00 | 0.00 | C |
| ATOM | 660 | O4'  | C B | 3 | -15.364 | -23.434 | 59.043 | 1.00 | 0.00 | O |
| ATOM | 661 | C5'  | C B | 3 | -15.001 | -25.807 | 59.319 | 1.00 | 0.00 | C |
| ATOM | 662 | O5'  | C B | 3 | -15.478 | -26.310 | 58.046 | 1.00 | 0.00 | O |
| ATOM | 663 | O1P  | C B | 3 | -16.361 | -28.597 | 58.617 | 1.00 | 0.00 | O |
| ATOM | 664 | O2P  | C B | 3 | -15.516 | -28.120 | 56.303 | 1.00 | 0.00 | O |
| ATOM | 665 | P    | C B | 3 | -15.397 | -27.876 | 57.761 | 1.00 | 0.00 | P |
| ATOM | 666 | H5   | C B | 3 | -14.307 | -24.784 | 54.216 | 1.00 | 0.00 | H |
| ATOM | 667 | H6   | C B | 3 | -15.541 | -25.022 | 56.344 | 1.00 | 0.00 | H |
| ATOM | 668 | H1'  | C B | 3 | -16.700 | -22.096 | 58.291 | 1.00 | 0.00 | H |
| ATOM | 669 | H3'  | C B | 3 | -17.696 | -25.717 | 59.459 | 1.00 | 0.00 | H |
| ATOM | 670 | H4'  | C B | 3 | -15.762 | -24.540 | 60.831 | 1.00 | 0.00 | H |
| ATOM | 671 | H41  | C B | 3 | -13.236 | -23.196 | 52.720 | 1.00 | 0.00 | H |
| ATOM | 672 | H42  | C B | 3 | -13.214 | -21.440 | 53.038 | 1.00 | 0.00 | H |
| ATOM | 673 | H2'1 | C B | 3 | -17.184 | -24.906 | 57.258 | 1.00 | 0.00 | H |
| ATOM | 674 | H2'2 | C B | 3 | -18.362 | -23.708 | 57.777 | 1.00 | 0.00 | H |
| ATOM | 675 | H5'1 | C B | 3 | -13.961 | -25.493 | 59.224 | 1.00 | 0.00 | H |
| ATOM | 676 | H5'2 | C B | 3 | -15.072 | -26.588 | 60.073 | 1.00 | 0.00 | H |
| ATOM | 677 | C1'  | C B | 4 | -19.142 | -19.068 | 57.450 | 1.00 | 0.00 | C |
| ATOM | 678 | N1   | C B | 4 | -18.637 | -19.816 | 56.268 | 1.00 | 0.00 | N |
| ATOM | 679 | C2   | C B | 4 | -17.990 | -19.096 | 55.266 | 1.00 | 0.00 | C |
| ATOM | 680 | O2   | C B | 4 | -17.862 | -17.871 | 55.399 | 1.00 | 0.00 | O |
| ATOM | 681 | N3   | C B | 4 | -17.523 | -19.757 | 54.180 | 1.00 | 0.00 | N |
| ATOM | 682 | C4   | C B | 4 | -17.676 | -21.084 | 54.064 | 1.00 | 0.00 | C |
| ATOM | 683 | N4   | C B | 4 | -17.197 | -21.682 | 52.983 | 1.00 | 0.00 | N |
| ATOM | 684 | C5   | C B | 4 | -18.342 | -21.851 | 55.076 | 1.00 | 0.00 | C |
| ATOM | 685 | C6   | C B | 4 | -18.800 | -21.163 | 56.163 | 1.00 | 0.00 | C |
| ATOM | 686 | C2'  | C B | 4 | -20.477 | -19.578 | 57.975 | 1.00 | 0.00 | C |
| ATOM | 687 | C3'  | C B | 4 | -20.321 | -19.388 | 59.476 | 1.00 | 0.00 | C |
| ATOM | 688 | O3'  | C B | 4 | -20.664 | -18.047 | 59.817 | 1.00 | 0.00 | O |
| ATOM | 689 | C4'  | C B | 4 | -18.839 | -19.680 | 59.703 | 1.00 | 0.00 | C |
| ATOM | 690 | O4'  | C B | 4 | -18.185 | -19.201 | 58.484 | 1.00 | 0.00 | O |
| ATOM | 691 | C5'  | C B | 4 | -18.464 | -21.129 | 59.914 | 1.00 | 0.00 | C |
| ATOM | 692 | O5'  | C B | 4 | -19.294 | -21.976 | 59.080 | 1.00 | 0.00 | O |
| ATOM | 693 | O1P  | C B | 4 | -20.665 | -23.271 | 60.746 | 1.00 | 0.00 | O |
| ATOM | 694 | O2P  | C B | 4 | -20.168 | -24.257 | 58.492 | 1.00 | 0.00 | O |
| ATOM | 695 | P    | C B | 4 | -19.715 | -23.413 | 59.625 | 1.00 | 0.00 | P |
| ATOM | 696 | H5   | C B | 4 | -18.476 | -22.929 | 54.983 | 1.00 | 0.00 | H |
| ATOM | 697 | H6   | C B | 4 | -19.306 | -21.704 | 56.963 | 1.00 | 0.00 | H |
| ATOM | 698 | H1'  | C B | 4 | -19.204 | -18.012 | 57.185 | 1.00 | 0.00 | H |
| ATOM | 699 | H3'  | C B | 4 | -20.948 | -20.077 | 60.042 | 1.00 | 0.00 | H |
| ATOM | 700 | H4'  | C B | 4 | -18.539 | -19.126 | 60.593 | 1.00 | 0.00 | H |
| ATOM | 701 | H41  | C B | 4 | -17.299 | -22.701 | 52.870 | 1.00 | 0.00 | H |
| ATOM | 702 | H42  | C B | 4 | -16.721 | -21.128 | 52.255 | 1.00 | 0.00 | H |
| ATOM | 703 | H2'1 | C B | 4 | -20.648 | -20.624 | 57.724 | 1.00 | 0.00 | H |
| ATOM | 704 | H2'2 | C B | 4 | -21.320 | -19.005 | 57.588 | 1.00 | 0.00 | H |
| ATOM | 705 | H5'1 | C B | 4 | -17.415 | -21.269 | 59.654 | 1.00 | 0.00 | H |
| ATOM | 706 | H5'2 | C B | 4 | -18.612 | -21.386 | 60.962 | 1.00 | 0.00 | H |

|      |     |      |     |   |         |         |        |      |      |   |
|------|-----|------|-----|---|---------|---------|--------|------|------|---|
| ATOM | 707 | C1'  | G B | 5 | -20.800 | -15.113 | 54.974 | 1.00 | 0.00 | C |
| ATOM | 708 | N1   | G B | 5 | -19.246 | -17.732 | 50.880 | 1.00 | 0.00 | N |
| ATOM | 709 | C2   | G B | 5 | -19.108 | -16.388 | 51.180 | 1.00 | 0.00 | C |
| ATOM | 710 | N2   | G B | 5 | -18.472 | -15.643 | 50.268 | 1.00 | 0.00 | N |
| ATOM | 711 | N3   | G B | 5 | -19.566 | -15.833 | 52.302 | 1.00 | 0.00 | N |
| ATOM | 712 | C4   | G B | 5 | -20.187 | -16.734 | 53.107 | 1.00 | 0.00 | C |
| ATOM | 713 | C5   | G B | 5 | -20.376 | -18.088 | 52.888 | 1.00 | 0.00 | C |
| ATOM | 714 | C6   | G B | 5 | -19.887 | -18.679 | 51.701 | 1.00 | 0.00 | C |
| ATOM | 715 | O6   | G B | 5 | -19.957 | -19.851 | 51.332 | 1.00 | 0.00 | O |
| ATOM | 716 | N7   | G B | 5 | -21.066 | -18.658 | 53.961 | 1.00 | 0.00 | N |
| ATOM | 717 | C8   | G B | 5 | -21.266 | -17.656 | 54.778 | 1.00 | 0.00 | C |
| ATOM | 718 | N9   | G B | 5 | -20.762 | -16.453 | 54.327 | 1.00 | 0.00 | N |
| ATOM | 719 | C2'  | G B | 5 | -22.099 | -14.826 | 55.714 | 1.00 | 0.00 | C |
| ATOM | 720 | C3'  | G B | 5 | -21.614 | -14.015 | 56.905 | 1.00 | 0.00 | C |
| ATOM | 721 | O3'  | G B | 5 | -21.494 | -12.647 | 56.522 | 1.00 | 0.00 | O |
| ATOM | 722 | C4'  | G B | 5 | -20.259 | -14.648 | 57.218 | 1.00 | 0.00 | C |
| ATOM | 723 | O4'  | G B | 5 | -19.743 | -15.055 | 55.911 | 1.00 | 0.00 | O |
| ATOM | 724 | C5'  | G B | 5 | -20.275 | -15.852 | 58.129 | 1.00 | 0.00 | C |
| ATOM | 725 | O5'  | G B | 5 | -21.452 | -16.654 | 57.861 | 1.00 | 0.00 | O |
| ATOM | 726 | O1P  | G B | 5 | -22.790 | -16.455 | 59.983 | 1.00 | 0.00 | O |
| ATOM | 727 | O2P  | G B | 5 | -23.029 | -18.490 | 58.536 | 1.00 | 0.00 | O |
| ATOM | 728 | P    | G B | 5 | -22.150 | -17.423 | 59.072 | 1.00 | 0.00 | P |
| ATOM | 729 | H1   | G B | 5 | -18.849 | -18.063 | 49.988 | 1.00 | 0.00 | H |
| ATOM | 730 | H8   | G B | 5 | -21.786 | -17.760 | 55.730 | 1.00 | 0.00 | H |
| ATOM | 731 | H1'  | G B | 5 | -20.612 | -14.359 | 54.210 | 1.00 | 0.00 | H |
| ATOM | 732 | H21  | G B | 5 | -18.118 | -16.079 | 49.405 | 1.00 | 0.00 | H |
| ATOM | 733 | H3'  | G B | 5 | -22.291 | -14.094 | 57.757 | 1.00 | 0.00 | H |
| ATOM | 734 | H22  | G B | 5 | -18.339 | -14.634 | 50.429 | 1.00 | 0.00 | H |
| ATOM | 735 | H4'  | G B | 5 | -19.652 | -13.878 | 57.693 | 1.00 | 0.00 | H |
| ATOM | 736 | H2'1 | G B | 5 | -22.603 | -15.738 | 56.034 | 1.00 | 0.00 | H |
| ATOM | 737 | H2'2 | G B | 5 | -22.805 | -14.258 | 55.108 | 1.00 | 0.00 | H |
| ATOM | 738 | H5'1 | G B | 5 | -19.377 | -16.444 | 57.954 | 1.00 | 0.00 | H |
| ATOM | 739 | H5'2 | G B | 5 | -20.287 | -15.516 | 59.166 | 1.00 | 0.00 | H |
| ATOM | 740 | C1'  | T B | 6 | -21.706 | -12.473 | 50.885 | 1.00 | 0.00 | C |
| ATOM | 741 | N1   | T B | 6 | -22.158 | -13.887 | 50.979 | 1.00 | 0.00 | N |
| ATOM | 742 | C2   | T B | 6 | -21.815 | -14.728 | 49.939 | 1.00 | 0.00 | C |
| ATOM | 743 | O2   | T B | 6 | -21.173 | -14.355 | 48.973 | 1.00 | 0.00 | O |
| ATOM | 744 | N3   | T B | 6 | -22.255 | -16.033 | 50.068 | 1.00 | 0.00 | N |
| ATOM | 745 | C4   | T B | 6 | -22.988 | -16.555 | 51.112 | 1.00 | 0.00 | C |
| ATOM | 746 | O4   | T B | 6 | -23.328 | -17.743 | 51.115 | 1.00 | 0.00 | O |
| ATOM | 747 | C5   | T B | 6 | -23.296 | -15.601 | 52.151 | 1.00 | 0.00 | C |
| ATOM | 748 | C6   | T B | 6 | -22.883 | -14.321 | 52.060 | 1.00 | 0.00 | C |
| ATOM | 749 | C7   | T B | 6 | -24.090 | -16.127 | 53.310 | 1.00 | 0.00 | C |
| ATOM | 750 | C2'  | T B | 6 | -22.722 | -11.469 | 51.415 | 1.00 | 0.00 | C |
| ATOM | 751 | C3'  | T B | 6 | -21.824 | -10.413 | 52.044 | 1.00 | 0.00 | C |
| ATOM | 752 | O3'  | T B | 6 | -21.400 | -9.498  | 51.037 | 1.00 | 0.00 | O |
| ATOM | 753 | C4'  | T B | 6 | -20.667 | -11.239 | 52.601 | 1.00 | 0.00 | C |
| ATOM | 754 | O4'  | T B | 6 | -20.526 | -12.345 | 51.654 | 1.00 | 0.00 | O |
| ATOM | 755 | C5'  | T B | 6 | -20.855 | -11.811 | 53.987 | 1.00 | 0.00 | C |
| ATOM | 756 | O5'  | T B | 6 | -22.238 | -12.208 | 54.169 | 1.00 | 0.00 | O |
| ATOM | 757 | O1P  | T B | 6 | -23.067 | -10.629 | 55.944 | 1.00 | 0.00 | O |
| ATOM | 758 | O2P  | T B | 6 | -24.117 | -12.894 | 55.689 | 1.00 | 0.00 | O |
| ATOM | 759 | P    | T B | 6 | -22.895 | -12.058 | 55.615 | 1.00 | 0.00 | P |
| ATOM | 760 | H3   | T B | 6 | -22.009 | -16.682 | 49.305 | 1.00 | 0.00 | H |

|      |     |      |     |   |         |         |        |      |      |   |
|------|-----|------|-----|---|---------|---------|--------|------|------|---|
| ATOM | 761 | H6   | T B | 6 | -23.129 | -13.620 | 52.858 | 1.00 | 0.00 | H |
| ATOM | 762 | H1'  | T B | 6 | -21.454 | -12.262 | 49.846 | 1.00 | 0.00 | H |
| ATOM | 763 | H3'  | T B | 6 | -22.334 | -9.866  | 52.837 | 1.00 | 0.00 | H |
| ATOM | 764 | H4'  | T B | 6 | -19.795 | -10.585 | 52.627 | 1.00 | 0.00 | H |
| ATOM | 765 | H71  | T B | 6 | -25.068 | -15.645 | 53.329 | 1.00 | 0.00 | H |
| ATOM | 766 | H72  | T B | 6 | -24.217 | -17.204 | 53.205 | 1.00 | 0.00 | H |
| ATOM | 767 | H73  | T B | 6 | -23.562 | -15.912 | 54.240 | 1.00 | 0.00 | H |
| ATOM | 768 | H2'1 | T B | 6 | -23.393 | -11.909 | 52.150 | 1.00 | 0.00 | H |
| ATOM | 769 | H2'2 | T B | 6 | -23.336 | -11.044 | 50.621 | 1.00 | 0.00 | H |
| ATOM | 770 | H5'1 | T B | 6 | -20.203 | -12.676 | 54.109 | 1.00 | 0.00 | H |
| ATOM | 771 | H5'2 | T B | 6 | -20.589 | -11.055 | 54.724 | 1.00 | 0.00 | H |
| ATOM | 772 | C1'  | C B | 7 | -22.574 | -11.979 | 46.021 | 1.00 | 0.00 | C |
| ATOM | 773 | N1   | C B | 7 | -23.387 | -12.920 | 46.843 | 1.00 | 0.00 | N |
| ATOM | 774 | C2   | C B | 7 | -23.521 | -14.231 | 46.392 | 1.00 | 0.00 | C |
| ATOM | 775 | O2   | C B | 7 | -22.963 | -14.560 | 45.336 | 1.00 | 0.00 | O |
| ATOM | 776 | N3   | C B | 7 | -24.256 | -15.103 | 47.124 | 1.00 | 0.00 | N |
| ATOM | 777 | C4   | C B | 7 | -24.848 | -14.717 | 48.262 | 1.00 | 0.00 | C |
| ATOM | 778 | N4   | C B | 7 | -25.552 | -15.611 | 48.940 | 1.00 | 0.00 | N |
| ATOM | 779 | C5   | C B | 7 | -24.732 | -13.373 | 48.748 | 1.00 | 0.00 | C |
| ATOM | 780 | C6   | C B | 7 | -23.982 | -12.514 | 47.995 | 1.00 | 0.00 | C |
| ATOM | 781 | C2'  | C B | 7 | -23.137 | -10.566 | 45.971 | 1.00 | 0.00 | C |
| ATOM | 782 | C3'  | C B | 7 | -21.871 | -9.723  | 45.948 | 1.00 | 0.00 | C |
| ATOM | 783 | O3'  | C B | 7 | -21.403 | -9.618  | 44.606 | 1.00 | 0.00 | O |
| ATOM | 784 | C4'  | C B | 7 | -20.915 | -10.520 | 46.832 | 1.00 | 0.00 | C |
| ATOM | 785 | O4'  | C B | 7 | -21.281 | -11.916 | 46.593 | 1.00 | 0.00 | O |
| ATOM | 786 | C5'  | C B | 7 | -20.990 | -10.249 | 48.318 | 1.00 | 0.00 | C |
| ATOM | 787 | O5'  | C B | 7 | -22.365 | -10.004 | 48.701 | 1.00 | 0.00 | O |
| ATOM | 788 | O1P  | C B | 7 | -22.349 | -7.591  | 49.418 | 1.00 | 0.00 | O |
| ATOM | 789 | O2P  | C B | 7 | -24.033 | -9.176  | 50.389 | 1.00 | 0.00 | O |
| ATOM | 790 | P    | C B | 7 | -22.661 | -8.960  | 49.872 | 1.00 | 0.00 | P |
| ATOM | 791 | H5   | C B | 7 | -25.218 | -13.053 | 49.669 | 1.00 | 0.00 | H |
| ATOM | 792 | H6   | C B | 7 | -23.858 | -11.483 | 48.328 | 1.00 | 0.00 | H |
| ATOM | 793 | H1'  | C B | 7 | -22.478 | -12.398 | 45.019 | 1.00 | 0.00 | H |
| ATOM | 794 | H3'  | C B | 7 | -22.039 | -8.723  | 46.352 | 1.00 | 0.00 | H |
| ATOM | 795 | H4'  | C B | 7 | -19.904 | -10.282 | 46.502 | 1.00 | 0.00 | H |
| ATOM | 796 | H41  | C B | 7 | -26.015 | -15.341 | 49.820 | 1.00 | 0.00 | H |
| ATOM | 797 | H42  | C B | 7 | -25.636 | -16.577 | 48.588 | 1.00 | 0.00 | H |
| ATOM | 798 | H2'1 | C B | 7 | -23.752 | -10.334 | 46.839 | 1.00 | 0.00 | H |
| ATOM | 799 | H2'2 | C B | 7 | -23.745 | -10.394 | 45.083 | 1.00 | 0.00 | H |
| ATOM | 800 | H5'1 | C B | 7 | -20.604 | -11.113 | 48.859 | 1.00 | 0.00 | H |
| ATOM | 801 | H5'2 | C B | 7 | -20.381 | -9.378  | 48.553 | 1.00 | 0.00 | H |
| ATOM | 802 | C1'  | C B | 8 | -24.157 | -13.548 | 41.598 | 1.00 | 0.00 | C |
| ATOM | 803 | N1   | C B | 8 | -25.034 | -13.652 | 42.796 | 1.00 | 0.00 | N |
| ATOM | 804 | C2   | C B | 8 | -25.616 | -14.888 | 43.074 | 1.00 | 0.00 | C |
| ATOM | 805 | O2   | C B | 8 | -25.381 | -15.840 | 42.319 | 1.00 | 0.00 | O |
| ATOM | 806 | N3   | C B | 8 | -26.417 | -15.004 | 44.160 | 1.00 | 0.00 | N |
| ATOM | 807 | C4   | C B | 8 | -26.652 | -13.954 | 44.958 | 1.00 | 0.00 | C |
| ATOM | 808 | N4   | C B | 8 | -27.441 | -14.126 | 46.009 | 1.00 | 0.00 | N |
| ATOM | 809 | C5   | C B | 8 | -26.072 | -12.669 | 44.696 | 1.00 | 0.00 | C |
| ATOM | 810 | C6   | C B | 8 | -25.263 | -12.577 | 43.597 | 1.00 | 0.00 | C |
| ATOM | 811 | C2'  | C B | 8 | -24.294 | -12.228 | 40.850 | 1.00 | 0.00 | C |
| ATOM | 812 | C3'  | C B | 8 | -22.869 | -11.980 | 40.380 | 1.00 | 0.00 | C |
| ATOM | 813 | O3'  | C B | 8 | -22.650 | -12.685 | 39.160 | 1.00 | 0.00 | O |
| ATOM | 814 | C4'  | C B | 8 | -22.031 | -12.539 | 41.528 | 1.00 | 0.00 | C |

|      |     |      |     |    |         |         |        |      |      |   |
|------|-----|------|-----|----|---------|---------|--------|------|------|---|
| ATOM | 815 | O4'  | C B | 8  | -22.816 | -13.665 | 42.035 | 1.00 | 0.00 | O |
| ATOM | 816 | C5'  | C B | 8  | -21.746 | -11.595 | 42.672 | 1.00 | 0.00 | C |
| ATOM | 817 | O5'  | C B | 8  | -22.900 | -10.747 | 42.907 | 1.00 | 0.00 | O |
| ATOM | 818 | O1P  | C B | 8  | -22.066 | -8.450  | 42.304 | 1.00 | 0.00 | O |
| ATOM | 819 | O2P  | C B | 8  | -23.919 | -8.714  | 43.975 | 1.00 | 0.00 | O |
| ATOM | 820 | P    | C B | 8  | -22.663 | -9.248  | 43.393 | 1.00 | 0.00 | P |
| ATOM | 821 | H5   | C B | 8  | -26.266 | -11.810 | 45.337 | 1.00 | 0.00 | H |
| ATOM | 822 | H6   | C B | 8  | -24.793 | -11.622 | 43.361 | 1.00 | 0.00 | H |
| ATOM | 823 | H1'  | C B | 8  | -24.372 | -14.392 | 40.943 | 1.00 | 0.00 | H |
| ATOM | 824 | H3'  | C B | 8  | -22.669 | -10.921 | 40.226 | 1.00 | 0.00 | H |
| ATOM | 825 | H4'  | C B | 8  | -21.074 | -12.842 | 41.103 | 1.00 | 0.00 | H |
| ATOM | 826 | H41  | C B | 8  | -27.636 | -13.335 | 46.640 | 1.00 | 0.00 | H |
| ATOM | 827 | H42  | C B | 8  | -27.859 | -15.049 | 46.194 | 1.00 | 0.00 | H |
| ATOM | 828 | H2'1 | C B | 8  | -24.645 | -11.423 | 41.493 | 1.00 | 0.00 | H |
| ATOM | 829 | H2'2 | C B | 8  | -24.984 | -12.301 | 40.008 | 1.00 | 0.00 | H |
| ATOM | 830 | H5'1 | C B | 8  | -21.527 | -12.174 | 43.570 | 1.00 | 0.00 | H |
| ATOM | 831 | H5'2 | C B | 8  | -20.883 | -10.980 | 42.423 | 1.00 | 0.00 | H |
| ATOM | 832 | C1'  | T B | 9  | -26.902 | -16.360 | 38.590 | 1.00 | 0.00 | C |
| ATOM | 833 | N1   | T B | 9  | -27.543 | -15.604 | 39.698 | 1.00 | 0.00 | N |
| ATOM | 834 | C2   | T B | 9  | -28.375 | -16.310 | 40.544 | 1.00 | 0.00 | C |
| ATOM | 835 | O2   | T B | 9  | -28.592 | -17.501 | 40.410 | 1.00 | 0.00 | O |
| ATOM | 836 | N3   | T B | 9  | -28.948 | -15.569 | 41.561 | 1.00 | 0.00 | N |
| ATOM | 837 | C4   | T B | 9  | -28.771 | -14.223 | 41.796 | 1.00 | 0.00 | C |
| ATOM | 838 | O4   | T B | 9  | -29.343 | -13.665 | 42.741 | 1.00 | 0.00 | O |
| ATOM | 839 | C5   | T B | 9  | -27.884 | -13.570 | 40.861 | 1.00 | 0.00 | C |
| ATOM | 840 | C6   | T B | 9  | -27.307 | -14.261 | 39.859 | 1.00 | 0.00 | C |
| ATOM | 841 | C7   | T B | 9  | -27.661 | -12.104 | 41.083 | 1.00 | 0.00 | C |
| ATOM | 842 | C2'  | T B | 9  | -26.796 | -15.572 | 37.289 | 1.00 | 0.00 | C |
| ATOM | 843 | C3'  | T B | 9  | -25.468 | -16.058 | 36.731 | 1.00 | 0.00 | C |
| ATOM | 844 | O3'  | T B | 9  | -25.677 | -17.271 | 36.013 | 1.00 | 0.00 | O |
| ATOM | 845 | C4'  | T B | 9  | -24.627 | -16.266 | 37.988 | 1.00 | 0.00 | C |
| ATOM | 846 | O4'  | T B | 9  | -25.592 | -16.701 | 38.999 | 1.00 | 0.00 | O |
| ATOM | 847 | C5'  | T B | 9  | -23.889 | -15.056 | 38.512 | 1.00 | 0.00 | C |
| ATOM | 848 | O5'  | T B | 9  | -24.698 | -13.868 | 38.319 | 1.00 | 0.00 | O |
| ATOM | 849 | O1P  | T B | 9  | -23.379 | -12.531 | 36.644 | 1.00 | 0.00 | O |
| ATOM | 850 | O2P  | T B | 9  | -24.900 | -11.365 | 38.264 | 1.00 | 0.00 | O |
| ATOM | 851 | P    | T B | 9  | -23.969 | -12.487 | 37.998 | 1.00 | 0.00 | P |
| ATOM | 852 | H3   | T B | 9  | -29.570 | -16.074 | 42.207 | 1.00 | 0.00 | H |
| ATOM | 853 | H6   | T B | 9  | -26.642 | -13.747 | 39.166 | 1.00 | 0.00 | H |
| ATOM | 854 | H1'  | T B | 9  | -27.457 | -17.286 | 38.440 | 1.00 | 0.00 | H |
| ATOM | 855 | H3'  | T B | 9  | -25.011 | -15.321 | 36.070 | 1.00 | 0.00 | H |
| ATOM | 856 | H4'  | T B | 9  | -23.886 | -17.031 | 37.750 | 1.00 | 0.00 | H |
| ATOM | 857 | H71  | T B | 9  | -28.076 | -11.542 | 40.246 | 1.00 | 0.00 | H |
| ATOM | 858 | H72  | T B | 9  | -28.151 | -11.796 | 42.007 | 1.00 | 0.00 | H |
| ATOM | 859 | H73  | T B | 9  | -26.590 | -11.907 | 41.157 | 1.00 | 0.00 | H |
| ATOM | 860 | H2'1 | T B | 9  | -26.787 | -14.496 | 37.458 | 1.00 | 0.00 | H |
| ATOM | 861 | H2'2 | T B | 9  | -27.618 | -15.789 | 36.606 | 1.00 | 0.00 | H |
| ATOM | 862 | H5'1 | T B | 9  | -23.682 | -15.194 | 39.573 | 1.00 | 0.00 | H |
| ATOM | 863 | H5'2 | T B | 9  | -22.948 | -14.952 | 37.974 | 1.00 | 0.00 | H |
| ATOM | 864 | C1'  | A B | 10 | -30.857 | -19.147 | 37.485 | 1.00 | 0.00 | C |
| ATOM | 865 | N1   | A B | 10 | -33.129 | -16.388 | 41.168 | 1.00 | 0.00 | N |
| ATOM | 866 | C2   | A B | 10 | -33.159 | -17.683 | 40.867 | 1.00 | 0.00 | C |
| ATOM | 867 | N3   | A B | 10 | -32.545 | -18.331 | 39.901 | 1.00 | 0.00 | N |
| ATOM | 868 | C4   | A B | 10 | -31.809 | -17.481 | 39.163 | 1.00 | 0.00 | C |



|      |     |      |     |    |         |         |        |      |      |   |
|------|-----|------|-----|----|---------|---------|--------|------|------|---|
| ATOM | 869 | C5   | A B | 10 | -31.672 | -16.131 | 39.338 | 1.00 | 0.00 | C |
| ATOM | 870 | C6   | A B | 10 | -32.385 | -15.564 | 40.414 | 1.00 | 0.00 | C |
| ATOM | 871 | N6   | A B | 10 | -32.346 | -14.252 | 40.708 | 1.00 | 0.00 | N |
| ATOM | 872 | N7   | A B | 10 | -30.830 | -15.587 | 38.384 | 1.00 | 0.00 | N |
| ATOM | 873 | C8   | A B | 10 | -30.483 | -16.607 | 37.657 | 1.00 | 0.00 | C |
| ATOM | 874 | N9   | A B | 10 | -31.036 | -17.791 | 38.072 | 1.00 | 0.00 | N |
| ATOM | 875 | C2'  | A B | 10 | -30.776 | -19.151 | 35.965 | 1.00 | 0.00 | C |
| ATOM | 876 | C3'  | A B | 10 | -29.771 | -20.262 | 35.703 | 1.00 | 0.00 | C |
| ATOM | 877 | O3'  | A B | 10 | -30.450 | -21.516 | 35.703 | 1.00 | 0.00 | O |
| ATOM | 878 | C4'  | A B | 10 | -28.805 | -20.130 | 36.880 | 1.00 | 0.00 | C |
| ATOM | 879 | O4'  | A B | 10 | -29.647 | -19.678 | 37.989 | 1.00 | 0.00 | O |
| ATOM | 880 | C5'  | A B | 10 | -27.667 | -19.153 | 36.707 | 1.00 | 0.00 | C |
| ATOM | 881 | O5'  | A B | 10 | -28.121 | -17.998 | 35.956 | 1.00 | 0.00 | O |
| ATOM | 882 | O1P  | A B | 10 | -26.812 | -18.148 | 33.811 | 1.00 | 0.00 | O |
| ATOM | 883 | O2P  | A B | 10 | -27.603 | -15.918 | 34.646 | 1.00 | 0.00 | O |
| ATOM | 884 | P    | A B | 10 | -27.100 | -17.276 | 34.966 | 1.00 | 0.00 | P |
| ATOM | 885 | H2   | A B | 10 | -33.785 | -18.296 | 41.515 | 1.00 | 0.00 | H |
| ATOM | 886 | H8   | A B | 10 | -29.815 | -16.528 | 36.799 | 1.00 | 0.00 | H |
| ATOM | 887 | H1'  | A B | 10 | -31.673 | -19.779 | 37.834 | 1.00 | 0.00 | H |
| ATOM | 888 | H3'  | A B | 10 | -29.254 | -20.130 | 34.754 | 1.00 | 0.00 | H |
| ATOM | 889 | H4'  | A B | 10 | -28.374 | -21.117 | 37.048 | 1.00 | 0.00 | H |
| ATOM | 890 | H61  | A B | 10 | -32.884 | -13.889 | 41.507 | 1.00 | 0.00 | H |
| ATOM | 891 | H62  | A B | 10 | -31.779 | -13.613 | 40.134 | 1.00 | 0.00 | H |
| ATOM | 892 | H2'1 | A B | 10 | -30.425 | -18.199 | 35.566 | 1.00 | 0.00 | H |
| ATOM | 893 | H2'2 | A B | 10 | -31.737 | -19.369 | 35.499 | 1.00 | 0.00 | H |
| ATOM | 894 | H5'1 | A B | 10 | -27.314 | -18.837 | 37.689 | 1.00 | 0.00 | H |
| ATOM | 895 | H5'2 | A B | 10 | -26.853 | -19.641 | 36.174 | 1.00 | 0.00 | H |
| ATOM | 896 | C1'  | G B | 11 | -35.580 | -20.576 | 38.030 | 1.00 | 0.00 | C |
| ATOM | 897 | N1   | G B | 11 | -36.228 | -15.844 | 39.825 | 1.00 | 0.00 | N |
| ATOM | 898 | C2   | G B | 11 | -36.732 | -17.047 | 40.289 | 1.00 | 0.00 | C |
| ATOM | 899 | N2   | G B | 11 | -37.513 | -16.979 | 41.374 | 1.00 | 0.00 | N |
| ATOM | 900 | N3   | G B | 11 | -36.475 | -18.222 | 39.716 | 1.00 | 0.00 | N |
| ATOM | 901 | C4   | G B | 11 | -35.673 | -18.101 | 38.626 | 1.00 | 0.00 | C |
| ATOM | 902 | C5   | G B | 11 | -35.129 | -16.947 | 38.089 | 1.00 | 0.00 | C |
| ATOM | 903 | C6   | G B | 11 | -35.397 | -15.699 | 38.697 | 1.00 | 0.00 | C |
| ATOM | 904 | O6   | G B | 11 | -35.010 | -14.577 | 38.371 | 1.00 | 0.00 | O |
| ATOM | 905 | N7   | G B | 11 | -34.361 | -17.254 | 36.963 | 1.00 | 0.00 | N |
| ATOM | 906 | C8   | G B | 11 | -34.460 | -18.554 | 36.858 | 1.00 | 0.00 | C |
| ATOM | 907 | N9   | G B | 11 | -35.242 | -19.141 | 37.831 | 1.00 | 0.00 | N |
| ATOM | 908 | C2'  | G B | 11 | -35.802 | -21.340 | 36.732 | 1.00 | 0.00 | C |
| ATOM | 909 | C3'  | G B | 11 | -35.231 | -22.708 | 37.067 | 1.00 | 0.00 | C |
| ATOM | 910 | O3'  | G B | 11 | -36.229 | -23.482 | 37.728 | 1.00 | 0.00 | O |
| ATOM | 911 | C4'  | G B | 11 | -34.058 | -22.372 | 37.987 | 1.00 | 0.00 | C |
| ATOM | 912 | O4'  | G B | 11 | -34.502 | -21.183 | 38.715 | 1.00 | 0.00 | O |
| ATOM | 913 | C5'  | G B | 11 | -32.743 | -22.062 | 37.311 | 1.00 | 0.00 | C |
| ATOM | 914 | O5'  | G B | 11 | -32.983 | -21.338 | 36.079 | 1.00 | 0.00 | O |
| ATOM | 915 | O1P  | G B | 11 | -32.216 | -22.944 | 34.300 | 1.00 | 0.00 | O |
| ATOM | 916 | O2P  | G B | 11 | -32.152 | -20.474 | 33.871 | 1.00 | 0.00 | O |
| ATOM | 917 | P    | G B | 11 | -32.010 | -21.587 | 34.840 | 1.00 | 0.00 | P |
| ATOM | 918 | H1   | G B | 11 | -36.481 | -14.991 | 40.344 | 1.00 | 0.00 | H |
| ATOM | 919 | H8   | G B | 11 | -33.969 | -19.123 | 36.069 | 1.00 | 0.00 | H |
| ATOM | 920 | H1'  | G B | 11 | -36.460 | -20.634 | 38.673 | 1.00 | 0.00 | H |
| ATOM | 921 | H21  | G B | 11 | -37.704 | -16.067 | 41.813 | 1.00 | 0.00 | H |
| ATOM | 922 | H3'  | G B | 11 | -34.893 | -23.239 | 36.178 | 1.00 | 0.00 | H |

|      |     |      |     |    |         |         |        |      |      |   |
|------|-----|------|-----|----|---------|---------|--------|------|------|---|
| ATOM | 923 | H22  | G B | 11 | -37.922 | -17.838 | 41.767 | 1.00 | 0.00 | H |
| ATOM | 924 | H4'  | G B | 11 | -33.905 | -23.235 | 38.634 | 1.00 | 0.00 | H |
| ATOM | 925 | H2'1 | G B | 11 | -35.277 | -20.886 | 35.891 | 1.00 | 0.00 | H |
| ATOM | 926 | H2'2 | G B | 11 | -36.856 | -21.404 | 36.465 | 1.00 | 0.00 | H |
| ATOM | 927 | H5'1 | G B | 11 | -32.131 | -21.458 | 37.980 | 1.00 | 0.00 | H |
| ATOM | 928 | H5'2 | G B | 11 | -32.225 | -22.996 | 37.095 | 1.00 | 0.00 | H |
| ATOM | 929 | C1'  | G B | 12 | -40.320 | -19.903 | 39.301 | 1.00 | 0.00 | C |
| ATOM | 930 | N1   | G B | 12 | -39.253 | -14.984 | 38.468 | 1.00 | 0.00 | N |
| ATOM | 931 | C2   | G B | 12 | -39.981 | -15.576 | 39.486 | 1.00 | 0.00 | C |
| ATOM | 932 | N2   | G B | 12 | -40.494 | -14.745 | 40.403 | 1.00 | 0.00 | N |
| ATOM | 933 | N3   | G B | 12 | -40.179 | -16.888 | 39.581 | 1.00 | 0.00 | N |
| ATOM | 934 | C4   | G B | 12 | -39.595 | -17.574 | 38.564 | 1.00 | 0.00 | C |
| ATOM | 935 | C5   | G B | 12 | -38.856 | -17.072 | 37.508 | 1.00 | 0.00 | C |
| ATOM | 936 | C6   | G B | 12 | -38.641 | -15.679 | 37.407 | 1.00 | 0.00 | C |
| ATOM | 937 | O6   | G B | 12 | -38.020 | -15.048 | 36.551 | 1.00 | 0.00 | O |
| ATOM | 938 | N7   | G B | 12 | -38.431 | -18.111 | 36.677 | 1.00 | 0.00 | N |
| ATOM | 939 | C8   | G B | 12 | -38.912 | -19.186 | 37.245 | 1.00 | 0.00 | C |
| ATOM | 940 | N9   | G B | 12 | -39.632 | -18.942 | 38.396 | 1.00 | 0.00 | N |
| ATOM | 941 | C2'  | G B | 12 | -40.987 | -21.061 | 38.571 | 1.00 | 0.00 | C |
| ATOM | 942 | C3'  | G B | 12 | -40.775 | -22.213 | 39.542 | 1.00 | 0.00 | C |
| ATOM | 943 | O3'  | G B | 12 | -41.810 | -22.194 | 40.523 | 1.00 | 0.00 | O |
| ATOM | 944 | C4'  | G B | 12 | -39.405 | -21.903 | 40.142 | 1.00 | 0.00 | C |
| ATOM | 945 | O4'  | G B | 12 | -39.349 | -20.441 | 40.177 | 1.00 | 0.00 | O |
| ATOM | 946 | C5'  | G B | 12 | -38.206 | -22.414 | 39.378 | 1.00 | 0.00 | C |
| ATOM | 947 | O5'  | G B | 12 | -38.457 | -22.322 | 37.954 | 1.00 | 0.00 | O |
| ATOM | 948 | O1P  | G B | 12 | -38.523 | -24.728 | 37.217 | 1.00 | 0.00 | O |
| ATOM | 949 | O2P  | G B | 12 | -37.843 | -22.938 | 35.596 | 1.00 | 0.00 | O |
| ATOM | 950 | P    | G B | 12 | -37.843 | -23.437 | 36.992 | 1.00 | 0.00 | P |
| ATOM | 951 | H1   | G B | 12 | -39.152 | -13.958 | 38.489 | 1.00 | 0.00 | H |
| ATOM | 952 | H8   | G B | 12 | -38.759 | -20.189 | 36.845 | 1.00 | 0.00 | H |
| ATOM | 953 | H1'  | G B | 12 | -41.043 | -19.350 | 39.900 | 1.00 | 0.00 | H |
| ATOM | 954 | H21  | G B | 12 | -40.333 | -13.730 | 40.324 | 1.00 | 0.00 | H |
| ATOM | 955 | H3'  | G B | 12 | -40.774 | -23.178 | 39.037 | 1.00 | 0.00 | H |
| ATOM | 956 | H22  | G B | 12 | -41.048 | -15.122 | 41.184 | 1.00 | 0.00 | H |
| ATOM | 957 | H4'  | G B | 12 | -39.384 | -22.353 | 41.134 | 1.00 | 0.00 | H |
| ATOM | 958 | H2'1 | G B | 12 | -40.522 | -21.265 | 37.607 | 1.00 | 0.00 | H |
| ATOM | 959 | H2'2 | G B | 12 | -42.047 | -20.882 | 38.393 | 1.00 | 0.00 | H |
| ATOM | 960 | H5'1 | G B | 12 | -37.334 | -21.815 | 39.638 | 1.00 | 0.00 | H |
| ATOM | 961 | H5'2 | G B | 12 | -38.023 | -23.453 | 39.653 | 1.00 | 0.00 | H |
| ATOM | 962 | C1'  | T B | 13 | -44.358 | -17.172 | 40.157 | 1.00 | 0.00 | C |
| ATOM | 963 | N1   | T B | 13 | -43.607 | -17.018 | 38.883 | 1.00 | 0.00 | N |
| ATOM | 964 | C2   | T B | 13 | -43.245 | -15.737 | 38.514 | 1.00 | 0.00 | C |
| ATOM | 965 | O2   | T B | 13 | -43.518 | -14.757 | 39.185 | 1.00 | 0.00 | O |
| ATOM | 966 | N3   | T B | 13 | -42.548 | -15.640 | 37.324 | 1.00 | 0.00 | N |
| ATOM | 967 | C4   | T B | 13 | -42.194 | -16.681 | 36.492 | 1.00 | 0.00 | C |
| ATOM | 968 | O4   | T B | 13 | -41.570 | -16.471 | 35.445 | 1.00 | 0.00 | O |
| ATOM | 969 | C5   | T B | 13 | -42.614 | -17.982 | 36.960 | 1.00 | 0.00 | C |
| ATOM | 970 | C6   | T B | 13 | -43.294 | -18.114 | 38.116 | 1.00 | 0.00 | C |
| ATOM | 971 | C7   | T B | 13 | -42.247 | -19.145 | 36.088 | 1.00 | 0.00 | C |
| ATOM | 972 | C2'  | T B | 13 | -45.441 | -18.242 | 40.106 | 1.00 | 0.00 | C |
| ATOM | 973 | C3'  | T B | 13 | -45.384 | -18.818 | 41.512 | 1.00 | 0.00 | C |
| ATOM | 974 | O3'  | T B | 13 | -46.178 | -18.013 | 42.380 | 1.00 | 0.00 | O |
| ATOM | 975 | C4'  | T B | 13 | -43.897 | -18.741 | 41.851 | 1.00 | 0.00 | C |
| ATOM | 976 | O4'  | T B | 13 | -43.432 | -17.536 | 41.162 | 1.00 | 0.00 | O |

|      |      |      |     |    |         |         |        |      |      |   |
|------|------|------|-----|----|---------|---------|--------|------|------|---|
| ATOM | 977  | C5'  | T B | 13 | -43.045 | -19.909 | 41.410 | 1.00 | 0.00 | C |
| ATOM | 978  | O5'  | T B | 13 | -43.516 | -20.401 | 40.129 | 1.00 | 0.00 | O |
| ATOM | 979  | O1P  | T B | 13 | -44.378 | -22.702 | 40.671 | 1.00 | 0.00 | O |
| ATOM | 980  | O2P  | T B | 13 | -43.534 | -22.190 | 38.364 | 1.00 | 0.00 | O |
| ATOM | 981  | P    | T B | 13 | -43.419 | -21.963 | 39.825 | 1.00 | 0.00 | P |
| ATOM | 982  | H3   | T B | 13 | -42.264 | -14.695 | 37.030 | 1.00 | 0.00 | H |
| ATOM | 983  | H6   | T B | 13 | -43.601 | -19.105 | 38.449 | 1.00 | 0.00 | H |
| ATOM | 984  | H1'  | T B | 13 | -44.779 | -16.203 | 40.425 | 1.00 | 0.00 | H |
| ATOM | 985  | H3'  | T B | 13 | -45.743 | -19.847 | 41.546 | 1.00 | 0.00 | H |
| ATOM | 986  | H4'  | T B | 13 | -43.823 | -18.668 | 42.936 | 1.00 | 0.00 | H |
| ATOM | 987  | H71  | T B | 13 | -43.153 | -19.597 | 35.684 | 1.00 | 0.00 | H |
| ATOM | 988  | H72  | T B | 13 | -41.617 | -18.799 | 35.266 | 1.00 | 0.00 | H |
| ATOM | 989  | H73  | T B | 13 | -41.703 | -19.885 | 36.676 | 1.00 | 0.00 | H |
| ATOM | 990  | H2'1 | T B | 13 | -45.234 | -19.004 | 39.356 | 1.00 | 0.00 | H |
| ATOM | 991  | H2'2 | T B | 13 | -46.425 | -17.826 | 39.888 | 1.00 | 0.00 | H |
| ATOM | 992  | H5'1 | T B | 13 | -42.009 | -19.584 | 41.322 | 1.00 | 0.00 | H |
| ATOM | 993  | H5'2 | T B | 13 | -43.111 | -20.701 | 42.154 | 1.00 | 0.00 | H |
| ATOM | 994  | C1'  | G B | 14 | -47.202 | -13.146 | 39.562 | 1.00 | 0.00 | C |
| ATOM | 995  | N1   | G B | 14 | -44.775 | -12.770 | 35.090 | 1.00 | 0.00 | N |
| ATOM | 996  | C2   | G B | 14 | -45.106 | -11.787 | 36.006 | 1.00 | 0.00 | C |
| ATOM | 997  | N2   | G B | 14 | -44.743 | -10.539 | 35.689 | 1.00 | 0.00 | N |
| ATOM | 998  | N3   | G B | 14 | -45.746 | -12.032 | 37.149 | 1.00 | 0.00 | N |
| ATOM | 999  | C4   | G B | 14 | -46.041 | -13.350 | 37.304 | 1.00 | 0.00 | C |
| ATOM | 1000 | C5   | G B | 14 | -45.756 | -14.396 | 36.444 | 1.00 | 0.00 | C |
| ATOM | 1001 | C6   | G B | 14 | -45.073 | -14.139 | 35.233 | 1.00 | 0.00 | C |
| ATOM | 1002 | O6   | G B | 14 | -44.734 | -14.928 | 34.349 | 1.00 | 0.00 | O |
| ATOM | 1003 | N7   | G B | 14 | -46.231 | -15.599 | 36.971 | 1.00 | 0.00 | N |
| ATOM | 1004 | C8   | G B | 14 | -46.775 | -15.251 | 38.110 | 1.00 | 0.00 | C |
| ATOM | 1005 | N9   | G B | 14 | -46.700 | -13.900 | 38.381 | 1.00 | 0.00 | N |
| ATOM | 1006 | C2'  | G B | 14 | -48.536 | -13.655 | 40.093 | 1.00 | 0.00 | C |
| ATOM | 1007 | C3'  | G B | 14 | -48.377 | -13.459 | 41.592 | 1.00 | 0.00 | C |
| ATOM | 1008 | O3'  | G B | 14 | -48.720 | -12.116 | 41.927 | 1.00 | 0.00 | O |
| ATOM | 1009 | C4'  | G B | 14 | -46.894 | -13.749 | 41.816 | 1.00 | 0.00 | C |
| ATOM | 1010 | O4'  | G B | 14 | -46.245 | -13.274 | 40.594 | 1.00 | 0.00 | O |
| ATOM | 1011 | C5'  | G B | 14 | -46.518 | -15.195 | 42.033 | 1.00 | 0.00 | C |
| ATOM | 1012 | O5'  | G B | 14 | -47.348 | -16.047 | 41.204 | 1.00 | 0.00 | O |
| ATOM | 1013 | O1P  | G B | 14 | -48.715 | -17.337 | 42.878 | 1.00 | 0.00 | O |
| ATOM | 1014 | O2P  | G B | 14 | -48.222 | -18.332 | 40.629 | 1.00 | 0.00 | O |
| ATOM | 1015 | P    | G B | 14 | -47.767 | -17.484 | 41.757 | 1.00 | 0.00 | P |
| ATOM | 1016 | H1   | G B | 14 | -44.272 | -12.476 | 34.239 | 1.00 | 0.00 | H |
| ATOM | 1017 | H8   | G B | 14 | -47.247 | -15.966 | 38.784 | 1.00 | 0.00 | H |
| ATOM | 1018 | H1'  | G B | 14 | -47.266 | -12.091 | 39.292 | 1.00 | 0.00 | H |
| ATOM | 1019 | H21  | G B | 14 | -44.245 | -10.358 | 34.804 | 1.00 | 0.00 | H |
| ATOM | 1020 | H3'  | G B | 14 | -49.002 | -14.145 | 42.162 | 1.00 | 0.00 | H |
| ATOM | 1021 | H22  | G B | 14 | -44.963 | -9.761  | 36.327 | 1.00 | 0.00 | H |
| ATOM | 1022 | H4'  | G B | 14 | -46.593 | -13.190 | 42.703 | 1.00 | 0.00 | H |
| ATOM | 1023 | H2'1 | G B | 14 | -48.707 | -14.702 | 39.845 | 1.00 | 0.00 | H |
| ATOM | 1024 | H2'2 | G B | 14 | -49.380 | -13.085 | 39.705 | 1.00 | 0.00 | H |
| ATOM | 1025 | H5'1 | G B | 14 | -45.470 | -15.336 | 41.772 | 1.00 | 0.00 | H |
| ATOM | 1026 | H5'2 | G B | 14 | -46.663 | -15.449 | 43.083 | 1.00 | 0.00 | H |
| ATOM | 1027 | C1'  | C B | 15 | -48.860 | -9.190  | 37.086 | 1.00 | 0.00 | C |
| ATOM | 1028 | N1   | C B | 15 | -48.818 | -10.527 | 36.435 | 1.00 | 0.00 | N |
| ATOM | 1029 | C2   | C B | 15 | -48.193 | -10.630 | 35.194 | 1.00 | 0.00 | C |
| ATOM | 1030 | O2   | C B | 15 | -47.702 | -9.613  | 34.688 | 1.00 | 0.00 | O |

|      |      |      |     |    |         |         |        |      |      |   |
|------|------|------|-----|----|---------|---------|--------|------|------|---|
| ATOM | 1031 | N3   | C B | 15 | -48.144 | -11.840 | 34.584 | 1.00 | 0.00 | N |
| ATOM | 1032 | C4   | C B | 15 | -48.686 | -12.922 | 35.157 | 1.00 | 0.00 | C |
| ATOM | 1033 | N4   | C B | 15 | -48.606 | -14.080 | 34.518 | 1.00 | 0.00 | N |
| ATOM | 1034 | C5   | C B | 15 | -49.340 | -12.845 | 36.432 | 1.00 | 0.00 | C |
| ATOM | 1035 | C6   | C B | 15 | -49.373 | -11.619 | 37.028 | 1.00 | 0.00 | C |
| ATOM | 1036 | C2'  | C B | 15 | -50.162 | -8.906  | 37.822 | 1.00 | 0.00 | C |
| ATOM | 1037 | C3'  | C B | 15 | -49.681 | -8.099  | 39.018 | 1.00 | 0.00 | C |
| ATOM | 1038 | O3'  | C B | 15 | -49.561 | -6.728  | 38.641 | 1.00 | 0.00 | O |
| ATOM | 1039 | C4'  | C B | 15 | -48.328 | -8.731  | 39.333 | 1.00 | 0.00 | C |
| ATOM | 1040 | O4'  | C B | 15 | -47.805 | -9.136  | 38.028 | 1.00 | 0.00 | O |
| ATOM | 1041 | C5'  | C B | 15 | -48.346 | -9.940  | 40.241 | 1.00 | 0.00 | C |
| ATOM | 1042 | O5'  | C B | 15 | -49.522 | -10.741 | 39.965 | 1.00 | 0.00 | O |
| ATOM | 1043 | O1P  | C B | 15 | -50.869 | -10.549 | 42.084 | 1.00 | 0.00 | O |
| ATOM | 1044 | O2P  | C B | 15 | -51.102 | -12.581 | 40.630 | 1.00 | 0.00 | O |
| ATOM | 1045 | P    | C B | 15 | -50.224 | -11.515 | 41.170 | 1.00 | 0.00 | P |
| ATOM | 1046 | H5   | C B | 15 | -49.788 | -13.723 | 36.898 | 1.00 | 0.00 | H |
| ATOM | 1047 | H6   | C B | 15 | -49.854 | -11.511 | 38.002 | 1.00 | 0.00 | H |
| ATOM | 1048 | H1'  | C B | 15 | -48.669 | -8.434  | 36.324 | 1.00 | 0.00 | H |
| ATOM | 1049 | H3'  | C B | 15 | -50.361 | -8.182  | 39.866 | 1.00 | 0.00 | H |
| ATOM | 1050 | H4'  | C B | 15 | -47.723 | -7.963  | 39.815 | 1.00 | 0.00 | H |
| ATOM | 1051 | H41  | C B | 15 | -49.012 | -14.929 | 34.938 | 1.00 | 0.00 | H |
| ATOM | 1052 | H42  | C B | 15 | -48.138 | -14.132 | 33.601 | 1.00 | 0.00 | H |
| ATOM | 1053 | H2'1 | C B | 15 | -50.667 | -9.819  | 38.137 | 1.00 | 0.00 | H |
| ATOM | 1054 | H2'2 | C B | 15 | -50.866 | -8.336  | 37.215 | 1.00 | 0.00 | H |
| ATOM | 1055 | H5'1 | C B | 15 | -47.448 | -10.532 | 40.067 | 1.00 | 0.00 | H |
| ATOM | 1056 | H5'2 | C B | 15 | -48.363 | -9.607  | 41.278 | 1.00 | 0.00 | H |
| ATOM | 1057 | C1'  | G B | 16 | -49.763 | -6.570  | 32.982 | 1.00 | 0.00 | C |
| ATOM | 1058 | N1   | G B | 16 | -49.808 | -11.155 | 30.747 | 1.00 | 0.00 | N |
| ATOM | 1059 | C2   | G B | 16 | -49.241 | -9.966  | 30.323 | 1.00 | 0.00 | C |
| ATOM | 1060 | N2   | G B | 16 | -48.603 | -10.004 | 29.146 | 1.00 | 0.00 | N |
| ATOM | 1061 | N3   | G B | 16 | -49.305 | -8.831  | 31.018 | 1.00 | 0.00 | N |
| ATOM | 1062 | C4   | G B | 16 | -49.994 | -8.976  | 32.180 | 1.00 | 0.00 | C |
| ATOM | 1063 | C5   | G B | 16 | -50.596 | -10.118 | 32.680 | 1.00 | 0.00 | C |
| ATOM | 1064 | C6   | G B | 16 | -50.526 | -11.324 | 31.945 | 1.00 | 0.00 | C |
| ATOM | 1065 | O6   | G B | 16 | -50.992 | -12.430 | 32.222 | 1.00 | 0.00 | O |
| ATOM | 1066 | N7   | G B | 16 | -51.206 | -9.845  | 33.907 | 1.00 | 0.00 | N |
| ATOM | 1067 | C8   | G B | 16 | -50.958 | -8.576  | 34.107 | 1.00 | 0.00 | C |
| ATOM | 1068 | N9   | G B | 16 | -50.227 | -7.978  | 33.101 | 1.00 | 0.00 | N |
| ATOM | 1069 | C2'  | G B | 16 | -50.765 | -5.548  | 33.500 | 1.00 | 0.00 | C |
| ATOM | 1070 | C3'  | G B | 16 | -49.857 | -4.491  | 34.108 | 1.00 | 0.00 | C |
| ATOM | 1071 | O3'  | G B | 16 | -49.428 | -3.597  | 33.084 | 1.00 | 0.00 | O |
| ATOM | 1072 | C4'  | G B | 16 | -48.703 | -5.319  | 34.672 | 1.00 | 0.00 | C |
| ATOM | 1073 | O4'  | G B | 16 | -48.577 | -6.441  | 33.741 | 1.00 | 0.00 | O |
| ATOM | 1074 | C5'  | G B | 16 | -48.889 | -5.866  | 36.067 | 1.00 | 0.00 | C |
| ATOM | 1075 | O5'  | G B | 16 | -50.273 | -6.248  | 36.264 | 1.00 | 0.00 | O |
| ATOM | 1076 | O1P  | G B | 16 | -51.079 | -4.634  | 38.019 | 1.00 | 0.00 | O |
| ATOM | 1077 | O2P  | G B | 16 | -52.150 | -6.892  | 37.805 | 1.00 | 0.00 | O |
| ATOM | 1078 | P    | G B | 16 | -50.921 | -6.067  | 37.711 | 1.00 | 0.00 | P |
| ATOM | 1079 | H1   | G B | 16 | -49.695 | -11.979 | 30.137 | 1.00 | 0.00 | H |
| ATOM | 1080 | H8   | G B | 16 | -51.298 | -8.038  | 34.992 | 1.00 | 0.00 | H |
| ATOM | 1081 | H1'  | G B | 16 | -49.514 | -6.379  | 31.938 | 1.00 | 0.00 | H |
| ATOM | 1082 | H21  | G B | 16 | -48.554 | -10.885 | 28.616 | 1.00 | 0.00 | H |
| ATOM | 1083 | H3'  | G B | 16 | -50.356 | -3.926  | 34.895 | 1.00 | 0.00 | H |
| ATOM | 1084 | H22  | G B | 16 | -48.161 | -9.151  | 28.775 | 1.00 | 0.00 | H |

|      |      |      |     |    |         |         |        |      |      |   |
|------|------|------|-----|----|---------|---------|--------|------|------|---|
| ATOM | 1085 | H4'  | G B | 16 | -47.825 | -4.673  | 34.682 | 1.00 | 0.00 | H |
| ATOM | 1086 | H2'1 | G B | 16 | -51.438 | -5.970  | 34.247 | 1.00 | 0.00 | H |
| ATOM | 1087 | H2'2 | G B | 16 | -51.381 | -5.131  | 32.703 | 1.00 | 0.00 | H |
| ATOM | 1088 | H5'1 | G B | 16 | -48.245 | -6.736  | 36.199 | 1.00 | 0.00 | H |
| ATOM | 1089 | H5'2 | G B | 16 | -48.611 | -5.101  | 36.791 | 1.00 | 0.00 | H |
| ATOM | 1090 | C1'  | G B | 17 | -50.636 | -6.058  | 28.134 | 1.00 | 0.00 | C |
| ATOM | 1091 | N1   | G B | 17 | -52.395 | -10.831 | 28.526 | 1.00 | 0.00 | N |
| ATOM | 1092 | C2   | G B | 17 | -51.604 | -10.253 | 27.548 | 1.00 | 0.00 | C |
| ATOM | 1093 | N2   | G B | 17 | -51.234 | -11.053 | 26.541 | 1.00 | 0.00 | N |
| ATOM | 1094 | N3   | G B | 17 | -51.213 | -8.981  | 27.575 | 1.00 | 0.00 | N |
| ATOM | 1095 | C4   | G B | 17 | -51.686 | -8.318  | 28.663 | 1.00 | 0.00 | C |
| ATOM | 1096 | C5   | G B | 17 | -52.481 | -8.809  | 29.684 | 1.00 | 0.00 | C |
| ATOM | 1097 | C6   | G B | 17 | -52.894 | -10.160 | 29.659 | 1.00 | 0.00 | C |
| ATOM | 1098 | O6   | G B | 17 | -53.594 | -10.774 | 30.465 | 1.00 | 0.00 | O |
| ATOM | 1099 | N7   | G B | 17 | -52.748 | -7.803  | 30.615 | 1.00 | 0.00 | N |
| ATOM | 1100 | C8   | G B | 17 | -52.118 | -6.759  | 30.142 | 1.00 | 0.00 | C |
| ATOM | 1101 | N9   | G B | 17 | -51.450 | -6.993  | 28.958 | 1.00 | 0.00 | N |
| ATOM | 1102 | C2'  | G B | 17 | -51.192 | -4.642  | 28.084 | 1.00 | 0.00 | C |
| ATOM | 1103 | C3'  | G B | 17 | -49.925 | -3.803  | 28.056 | 1.00 | 0.00 | C |
| ATOM | 1104 | O3'  | G B | 17 | -49.460 | -3.701  | 26.712 | 1.00 | 0.00 | O |
| ATOM | 1105 | C4'  | G B | 17 | -48.969 | -4.603  | 28.939 | 1.00 | 0.00 | C |
| ATOM | 1106 | O4'  | G B | 17 | -49.342 | -5.998  | 28.701 | 1.00 | 0.00 | O |
| ATOM | 1107 | C5'  | G B | 17 | -49.038 | -4.330  | 30.423 | 1.00 | 0.00 | C |
| ATOM | 1108 | O5'  | G B | 17 | -50.411 | -4.080  | 30.812 | 1.00 | 0.00 | O |
| ATOM | 1109 | O1P  | G B | 17 | -50.384 | -1.666  | 31.524 | 1.00 | 0.00 | O |
| ATOM | 1110 | O2P  | G B | 17 | -52.072 | -3.243  | 32.503 | 1.00 | 0.00 | O |
| ATOM | 1111 | P    | G B | 17 | -50.699 | -3.033  | 31.981 | 1.00 | 0.00 | P |
| ATOM | 1112 | H1   | G B | 17 | -52.638 | -11.827 | 28.414 | 1.00 | 0.00 | H |
| ATOM | 1113 | H8   | G B | 17 | -52.120 | -5.789  | 30.639 | 1.00 | 0.00 | H |
| ATOM | 1114 | H1'  | G B | 17 | -50.544 | -6.478  | 27.133 | 1.00 | 0.00 | H |
| ATOM | 1115 | H21  | G B | 17 | -51.537 | -12.038 | 26.528 | 1.00 | 0.00 | H |
| ATOM | 1116 | H3'  | G B | 17 | -50.087 | -2.803  | 28.459 | 1.00 | 0.00 | H |
| ATOM | 1117 | H22  | G B | 17 | -50.647 | -10.683 | 25.780 | 1.00 | 0.00 | H |
| ATOM | 1118 | H4'  | G B | 17 | -47.958 | -4.370  | 28.605 | 1.00 | 0.00 | H |
| ATOM | 1119 | H2'1 | G B | 17 | -51.805 | -4.407  | 28.954 | 1.00 | 0.00 | H |
| ATOM | 1120 | H2'2 | G B | 17 | -51.803 | -4.468  | 27.198 | 1.00 | 0.00 | H |
| ATOM | 1121 | H5'1 | G B | 17 | -48.653 | -5.195  | 30.964 | 1.00 | 0.00 | H |
| ATOM | 1122 | H5'2 | G B | 17 | -48.424 | -3.460  | 30.655 | 1.00 | 0.00 | H |
| ATOM | 1123 | C1'  | C B | 18 | -52.218 | -7.626  | 23.710 | 1.00 | 0.00 | C |
| ATOM | 1124 | N1   | C B | 18 | -53.095 | -7.730  | 24.909 | 1.00 | 0.00 | N |
| ATOM | 1125 | C2   | C B | 18 | -53.675 | -8.966  | 25.186 | 1.00 | 0.00 | C |
| ATOM | 1126 | O2   | C B | 18 | -53.441 | -9.919  | 24.431 | 1.00 | 0.00 | O |
| ATOM | 1127 | N3   | C B | 18 | -54.477 | -9.081  | 26.272 | 1.00 | 0.00 | N |
| ATOM | 1128 | C4   | C B | 18 | -54.711 | -8.031  | 27.069 | 1.00 | 0.00 | C |
| ATOM | 1129 | N4   | C B | 18 | -55.502 | -8.202  | 28.119 | 1.00 | 0.00 | N |
| ATOM | 1130 | C5   | C B | 18 | -54.129 | -6.749  | 26.806 | 1.00 | 0.00 | C |
| ATOM | 1131 | C6   | C B | 18 | -53.324 | -6.657  | 25.710 | 1.00 | 0.00 | C |
| ATOM | 1132 | C2'  | C B | 18 | -52.355 | -6.306  | 22.962 | 1.00 | 0.00 | C |
| ATOM | 1133 | C3'  | C B | 18 | -50.930 | -6.058  | 22.492 | 1.00 | 0.00 | C |
| ATOM | 1134 | O3'  | C B | 18 | -50.710 | -6.763  | 21.272 | 1.00 | 0.00 | O |
| ATOM | 1135 | C4'  | C B | 18 | -50.092 | -6.617  | 23.640 | 1.00 | 0.00 | C |
| ATOM | 1136 | O4'  | C B | 18 | -50.877 | -7.743  | 24.147 | 1.00 | 0.00 | O |
| ATOM | 1137 | C5'  | C B | 18 | -49.807 | -5.673  | 24.784 | 1.00 | 0.00 | C |
| ATOM | 1138 | O5'  | C B | 18 | -50.960 | -4.825  | 25.019 | 1.00 | 0.00 | O |

|      |      |      |     |    |         |         |        |      |      |   |
|------|------|------|-----|----|---------|---------|--------|------|------|---|
| ATOM | 1139 | O1P  | C B | 18 | -50.127 | -2.527  | 24.417 | 1.00 | 0.00 | O |
| ATOM | 1140 | O2P  | C B | 18 | -51.980 | -2.792  | 26.088 | 1.00 | 0.00 | O |
| ATOM | 1141 | P    | C B | 18 | -50.724 | -3.326  | 25.506 | 1.00 | 0.00 | P |
| ATOM | 1142 | H5   | C B | 18 | -54.320 | -5.891  | 27.450 | 1.00 | 0.00 | H |
| ATOM | 1143 | H6   | C B | 18 | -52.856 | -5.702  | 25.472 | 1.00 | 0.00 | H |
| ATOM | 1144 | H1'  | C B | 18 | -52.433 | -8.470  | 23.056 | 1.00 | 0.00 | H |
| ATOM | 1145 | H3'  | C B | 18 | -50.730 | -4.999  | 22.338 | 1.00 | 0.00 | H |
| ATOM | 1146 | H4'  | C B | 18 | -49.135 | -6.921  | 23.216 | 1.00 | 0.00 | H |
| ATOM | 1147 | H41  | C B | 18 | -55.697 | -7.410  | 28.750 | 1.00 | 0.00 | H |
| ATOM | 1148 | H42  | C B | 18 | -55.919 | -9.124  | 28.305 | 1.00 | 0.00 | H |
| ATOM | 1149 | H2'1 | C B | 18 | -52.706 | -5.501  | 23.605 | 1.00 | 0.00 | H |
| ATOM | 1150 | H2'2 | C B | 18 | -53.045 | -6.378  | 22.121 | 1.00 | 0.00 | H |
| ATOM | 1151 | H5'1 | C B | 18 | -49.588 | -6.252  | 25.682 | 1.00 | 0.00 | H |
| ATOM | 1152 | H5'2 | C B | 18 | -48.944 | -5.058  | 24.535 | 1.00 | 0.00 | H |
| ATOM | 1153 | C1'  | C B | 19 | -54.977 | -10.446 | 20.717 | 1.00 | 0.00 | C |
| ATOM | 1154 | N1   | C B | 19 | -55.607 | -9.672  | 21.821 | 1.00 | 0.00 | N |
| ATOM | 1155 | C2   | C B | 19 | -56.452 | -10.351 | 22.697 | 1.00 | 0.00 | C |
| ATOM | 1156 | O2   | C B | 19 | -56.642 | -11.562 | 22.524 | 1.00 | 0.00 | O |
| ATOM | 1157 | N3   | C B | 19 | -57.035 | -9.663  | 23.707 | 1.00 | 0.00 | N |
| ATOM | 1158 | C4   | C B | 19 | -56.809 | -8.352  | 23.868 | 1.00 | 0.00 | C |
| ATOM | 1159 | N4   | C B | 19 | -57.404 | -7.730  | 24.872 | 1.00 | 0.00 | N |
| ATOM | 1160 | C5   | C B | 19 | -55.947 | -7.631  | 22.982 | 1.00 | 0.00 | C |
| ATOM | 1161 | C6   | C B | 19 | -55.370 | -8.343  | 21.973 | 1.00 | 0.00 | C |
| ATOM | 1162 | C2'  | C B | 19 | -54.873 | -9.677  | 19.409 | 1.00 | 0.00 | C |
| ATOM | 1163 | C3'  | C B | 19 | -53.549 | -10.179 | 18.851 | 1.00 | 0.00 | C |
| ATOM | 1164 | O3'  | C B | 19 | -53.770 | -11.401 | 18.150 | 1.00 | 0.00 | O |
| ATOM | 1165 | C4'  | C B | 19 | -52.704 | -10.378 | 20.106 | 1.00 | 0.00 | C |
| ATOM | 1166 | O4'  | C B | 19 | -53.667 | -10.791 | 21.128 | 1.00 | 0.00 | O |
| ATOM | 1167 | C5'  | C B | 19 | -51.956 | -9.166  | 20.612 | 1.00 | 0.00 | C |
| ATOM | 1168 | O5'  | C B | 19 | -52.756 | -7.975  | 20.407 | 1.00 | 0.00 | O |
| ATOM | 1169 | O1P  | C B | 19 | -51.435 | -6.670  | 18.709 | 1.00 | 0.00 | O |
| ATOM | 1170 | O2P  | C B | 19 | -52.940 | -5.471  | 20.320 | 1.00 | 0.00 | O |
| ATOM | 1171 | P    | C B | 19 | -52.018 | -6.605  | 20.064 | 1.00 | 0.00 | P |
| ATOM | 1172 | H5   | C B | 19 | -55.762 | -6.564  | 23.107 | 1.00 | 0.00 | H |
| ATOM | 1173 | H6   | C B | 19 | -54.705 | -7.835  | 21.274 | 1.00 | 0.00 | H |
| ATOM | 1174 | H1'  | C B | 19 | -55.541 | -11.370 | 20.585 | 1.00 | 0.00 | H |
| ATOM | 1175 | H3'  | C B | 19 | -53.090 | -9.454  | 18.178 | 1.00 | 0.00 | H |
| ATOM | 1176 | H4'  | C B | 19 | -51.970 | -11.150 | 19.876 | 1.00 | 0.00 | H |
| ATOM | 1177 | H41  | C B | 19 | -57.247 | -6.722  | 25.021 | 1.00 | 0.00 | H |
| ATOM | 1178 | H42  | C B | 19 | -58.025 | -8.253  | 25.509 | 1.00 | 0.00 | H |
| ATOM | 1179 | H2'1 | C B | 19 | -54.854 | -8.599  | 19.563 | 1.00 | 0.00 | H |
| ATOM | 1180 | H2'2 | C B | 19 | -55.699 | -9.898  | 18.732 | 1.00 | 0.00 | H |
| ATOM | 1181 | H5'1 | C B | 19 | -51.746 | -9.292  | 21.673 | 1.00 | 0.00 | H |
| ATOM | 1182 | H5'2 | C B | 19 | -51.016 | -9.076  | 20.069 | 1.00 | 0.00 | H |
| ATOM | 1183 | C1'  | T B | 20 | -58.918 | -13.224 | 19.597 | 1.00 | 0.00 | C |
| ATOM | 1184 | N1   | T B | 20 | -59.099 | -11.869 | 20.183 | 1.00 | 0.00 | N |
| ATOM | 1185 | C2   | T B | 20 | -59.923 | -11.765 | 21.286 | 1.00 | 0.00 | C |
| ATOM | 1186 | O2   | T B | 20 | -60.491 | -12.724 | 21.779 | 1.00 | 0.00 | O |
| ATOM | 1187 | N3   | T B | 20 | -60.063 | -10.489 | 21.797 | 1.00 | 0.00 | N |
| ATOM | 1188 | C4   | T B | 20 | -59.470 | -9.342  | 21.318 | 1.00 | 0.00 | C |
| ATOM | 1189 | O4   | T B | 20 | -59.673 | -8.249  | 21.862 | 1.00 | 0.00 | O |
| ATOM | 1190 | C5   | T B | 20 | -58.627 | -9.550  | 20.165 | 1.00 | 0.00 | C |
| ATOM | 1191 | C6   | T B | 20 | -58.467 | -10.779 | 19.639 | 1.00 | 0.00 | C |
| ATOM | 1192 | C7   | T B | 20 | -57.960 | -8.327  | 19.610 | 1.00 | 0.00 | C |

|      |      |      |     |    |         |         |        |      |      |   |
|------|------|------|-----|----|---------|---------|--------|------|------|---|
| ATOM | 1193 | C2'  | T B | 20 | -58.839 | -13.228 | 18.075 | 1.00 | 0.00 | C |
| ATOM | 1194 | C3'  | T B | 20 | -57.830 | -14.337 | 17.814 | 1.00 | 0.00 | C |
| ATOM | 1195 | O3'  | T B | 20 | -58.505 | -15.593 | 17.812 | 1.00 | 0.00 | O |
| ATOM | 1196 | C4'  | T B | 20 | -56.863 | -14.201 | 18.988 | 1.00 | 0.00 | C |
| ATOM | 1197 | O4'  | T B | 20 | -57.705 | -13.752 | 20.098 | 1.00 | 0.00 | O |
| ATOM | 1198 | C5'  | T B | 20 | -55.729 | -13.219 | 18.814 | 1.00 | 0.00 | C |
| ATOM | 1199 | O5'  | T B | 20 | -56.189 | -12.066 | 18.062 | 1.00 | 0.00 | O |
| ATOM | 1200 | O1P  | T B | 20 | -54.883 | -12.212 | 15.916 | 1.00 | 0.00 | O |
| ATOM | 1201 | O2P  | T B | 20 | -55.681 | -9.984  | 16.752 | 1.00 | 0.00 | O |
| ATOM | 1202 | P    | T B | 20 | -55.172 | -11.340 | 17.072 | 1.00 | 0.00 | P |
| ATOM | 1203 | H3   | T B | 20 | -60.672 | -10.385 | 22.621 | 1.00 | 0.00 | H |
| ATOM | 1204 | H6   | T B | 20 | -57.825 | -10.912 | 18.768 | 1.00 | 0.00 | H |
| ATOM | 1205 | H1'  | T B | 20 | -59.730 | -13.860 | 19.947 | 1.00 | 0.00 | H |
| ATOM | 1206 | H3'  | T B | 20 | -57.316 | -14.203 | 16.863 | 1.00 | 0.00 | H |
| ATOM | 1207 | H4'  | T B | 20 | -56.427 | -15.187 | 19.154 | 1.00 | 0.00 | H |
| ATOM | 1208 | H3T  | T B | 20 | -59.261 | -15.649 | 17.224 | 1.00 | 0.00 | H |
| ATOM | 1209 | H71  | T B | 20 | -58.348 | -8.122  | 18.612 | 1.00 | 0.00 | H |
| ATOM | 1210 | H72  | T B | 20 | -58.161 | -7.475  | 20.261 | 1.00 | 0.00 | H |
| ATOM | 1211 | H73  | T B | 20 | -56.883 | -8.493  | 19.554 | 1.00 | 0.00 | H |
| ATOM | 1212 | H2'1 | T B | 20 | -58.493 | -12.276 | 17.677 | 1.00 | 0.00 | H |
| ATOM | 1213 | H2'2 | T B | 20 | -59.800 | -13.449 | 17.612 | 1.00 | 0.00 | H |
| ATOM | 1214 | H5'1 | T B | 20 | -55.375 | -12.902 | 19.795 | 1.00 | 0.00 | H |
| ATOM | 1215 | H5'2 | T B | 20 | -54.915 | -13.705 | 18.279 | 1.00 | 0.00 | H |
| TER  |      |      |     |    |         |         |        |      |      |   |
| ATOM | 1    | C1'  | A A | 1  | -33.552 | -27.131 | 5.410  | 1.00 | 0.00 | C |
| ATOM | 2    | N1   | A A | 1  | -31.101 | -22.993 | 3.622  | 1.00 | 0.00 | N |
| ATOM | 3    | C2   | A A | 1  | -30.792 | -24.286 | 3.631  | 1.00 | 0.00 | C |
| ATOM | 4    | N3   | A A | 1  | -31.474 | -25.306 | 4.108  | 1.00 | 0.00 | N |
| ATOM | 5    | C4   | A A | 1  | -32.630 | -24.881 | 4.648  | 1.00 | 0.00 | C |
| ATOM | 6    | C5   | A A | 1  | -33.092 | -23.597 | 4.720  | 1.00 | 0.00 | C |
| ATOM | 7    | C6   | A A | 1  | -32.262 | -22.599 | 4.167  | 1.00 | 0.00 | C |
| ATOM | 8    | N6   | A A | 1  | -32.584 | -21.294 | 4.165  | 1.00 | 0.00 | N |
| ATOM | 9    | N7   | A A | 1  | -34.325 | -23.544 | 5.347  | 1.00 | 0.00 | N |
| ATOM | 10   | C8   | A A | 1  | -34.579 | -24.785 | 5.639  | 1.00 | 0.00 | C |
| ATOM | 11   | N9   | A A | 1  | -33.596 | -25.654 | 5.244  | 1.00 | 0.00 | N |
| ATOM | 12   | C2'  | A A | 1  | -34.133 | -27.618 | 6.731  | 1.00 | 0.00 | C |
| ATOM | 13   | C3'  | A A | 1  | -34.790 | -28.927 | 6.324  | 1.00 | 0.00 | C |
| ATOM | 14   | O3'  | A A | 1  | -33.813 | -29.965 | 6.336  | 1.00 | 0.00 | O |
| ATOM | 15   | C4'  | A A | 1  | -35.300 | -28.630 | 4.915  | 1.00 | 0.00 | C |
| ATOM | 16   | O4'  | A A | 1  | -34.309 | -27.705 | 4.362  | 1.00 | 0.00 | O |
| ATOM | 17   | C5'  | A A | 1  | -36.665 | -27.990 | 4.817  | 1.00 | 0.00 | C |
| ATOM | 18   | O5'  | A A | 1  | -36.851 | -27.058 | 5.912  | 1.00 | 0.00 | O |
| ATOM | 19   | H2   | A A | 1  | -29.834 | -24.539 | 3.176  | 1.00 | 0.00 | H |
| ATOM | 20   | H8   | A A | 1  | -35.488 | -25.104 | 6.149  | 1.00 | 0.00 | H |
| ATOM | 21   | H1'  | A A | 1  | -32.518 | -27.457 | 5.294  | 1.00 | 0.00 | H |
| ATOM | 22   | H3'  | A A | 1  | -35.611 | -29.197 | 6.991  | 1.00 | 0.00 | H |
| ATOM | 23   | H4'  | A A | 1  | -35.339 | -29.581 | 4.386  | 1.00 | 0.00 | H |
| ATOM | 24   | H61  | A A | 1  | -31.944 | -20.607 | 3.748  | 1.00 | 0.00 | H |
| ATOM | 25   | H62  | A A | 1  | -33.474 | -20.985 | 4.583  | 1.00 | 0.00 | H |
| ATOM | 26   | H5T  | A A | 1  | -37.728 | -26.954 | 6.285  | 1.00 | 0.00 | H |
| ATOM | 27   | H2'1 | A A | 1  | -34.860 | -26.921 | 7.145  | 1.00 | 0.00 | H |
| ATOM | 28   | H2'2 | A A | 1  | -33.364 | -27.779 | 7.486  | 1.00 | 0.00 | H |
| ATOM | 29   | H5'1 | A A | 1  | -36.745 | -27.463 | 3.867  | 1.00 | 0.00 | H |
| ATOM | 30   | H5'2 | A A | 1  | -37.428 | -28.766 | 4.861  | 1.00 | 0.00 | H |

|      |    |      |     |   |         |         |       |      |      |   |
|------|----|------|-----|---|---------|---------|-------|------|------|---|
| ATOM | 31 | C1'  | G A | 2 | -28.722 | -27.378 | 6.533 | 1.00 | 0.00 | C |
| ATOM | 32 | N1   | G A | 2 | -28.943 | -22.295 | 6.183 | 1.00 | 0.00 | N |
| ATOM | 33 | C2   | G A | 2 | -27.983 | -23.173 | 5.720 | 1.00 | 0.00 | C |
| ATOM | 34 | N2   | G A | 2 | -26.942 | -22.627 | 5.080 | 1.00 | 0.00 | N |
| ATOM | 35 | N3   | G A | 2 | -28.054 | -24.494 | 5.881 | 1.00 | 0.00 | N |
| ATOM | 36 | C4   | G A | 2 | -29.172 | -24.871 | 6.556 | 1.00 | 0.00 | C |
| ATOM | 37 | C5   | G A | 2 | -30.181 | -24.065 | 7.058 | 1.00 | 0.00 | C |
| ATOM | 38 | C6   | G A | 2 | -30.106 | -22.663 | 6.882 | 1.00 | 0.00 | C |
| ATOM | 39 | O6   | G A | 2 | -30.895 | -21.792 | 7.249 | 1.00 | 0.00 | O |
| ATOM | 40 | N7   | G A | 2 | -31.153 | -24.845 | 7.689 | 1.00 | 0.00 | N |
| ATOM | 41 | C8   | G A | 2 | -30.715 | -26.070 | 7.550 | 1.00 | 0.00 | C |
| ATOM | 42 | N9   | G A | 2 | -29.516 | -26.167 | 6.874 | 1.00 | 0.00 | N |
| ATOM | 43 | C2'  | G A | 2 | -28.732 | -28.445 | 7.619 | 1.00 | 0.00 | C |
| ATOM | 44 | C3'  | G A | 2 | -28.726 | -29.728 | 6.805 | 1.00 | 0.00 | C |
| ATOM | 45 | O3'  | G A | 2 | -27.382 | -30.054 | 6.455 | 1.00 | 0.00 | O |
| ATOM | 46 | C4'  | G A | 2 | -29.567 | -29.360 | 5.584 | 1.00 | 0.00 | C |
| ATOM | 47 | O4'  | G A | 2 | -29.279 | -27.944 | 5.362 | 1.00 | 0.00 | O |
| ATOM | 48 | C5'  | G A | 2 | -31.061 | -29.535 | 5.723 | 1.00 | 0.00 | C |
| ATOM | 49 | O5'  | G A | 2 | -31.473 | -29.189 | 7.069 | 1.00 | 0.00 | O |
| ATOM | 50 | O1P  | G A | 2 | -32.279 | -31.379 | 8.011 | 1.00 | 0.00 | O |
| ATOM | 51 | O2P  | G A | 2 | -33.210 | -29.220 | 8.884 | 1.00 | 0.00 | O |
| ATOM | 52 | P    | G A | 2 | -32.684 | -29.989 | 7.730 | 1.00 | 0.00 | P |
| ATOM | 53 | H1   | G A | 2 | -28.794 | -21.291 | 6.003 | 1.00 | 0.00 | H |
| ATOM | 54 | H8   | G A | 2 | -31.249 | -26.937 | 7.936 | 1.00 | 0.00 | H |
| ATOM | 55 | H1'  | G A | 2 | -27.704 | -27.065 | 6.302 | 1.00 | 0.00 | H |
| ATOM | 56 | H21  | G A | 2 | -26.893 | -21.606 | 4.957 | 1.00 | 0.00 | H |
| ATOM | 57 | H3'  | G A | 2 | -29.169 | -30.561 | 7.352 | 1.00 | 0.00 | H |
| ATOM | 58 | H22  | G A | 2 | -26.192 | -23.229 | 4.712 | 1.00 | 0.00 | H |
| ATOM | 59 | H4'  | G A | 2 | -29.232 | -29.997 | 4.766 | 1.00 | 0.00 | H |
| ATOM | 60 | H2'1 | G A | 2 | -29.617 | -28.381 | 8.253 | 1.00 | 0.00 | H |
| ATOM | 61 | H2'2 | G A | 2 | -27.858 | -28.382 | 8.269 | 1.00 | 0.00 | H |
| ATOM | 62 | H5'1 | G A | 2 | -31.565 | -28.886 | 5.006 | 1.00 | 0.00 | H |
| ATOM | 63 | H5'2 | G A | 2 | -31.322 | -30.571 | 5.511 | 1.00 | 0.00 | H |
| ATOM | 64 | C1'  | G A | 3 | -24.258 | -25.441 | 7.454 | 1.00 | 0.00 | C |
| ATOM | 65 | N1   | G A | 3 | -26.948 | -21.319 | 8.791 | 1.00 | 0.00 | N |
| ATOM | 66 | C2   | G A | 3 | -25.784 | -21.417 | 8.053 | 1.00 | 0.00 | C |
| ATOM | 67 | N2   | G A | 3 | -25.265 | -20.263 | 7.614 | 1.00 | 0.00 | N |
| ATOM | 68 | N3   | G A | 3 | -25.185 | -22.572 | 7.774 | 1.00 | 0.00 | N |
| ATOM | 69 | C4   | G A | 3 | -25.843 | -23.637 | 8.303 | 1.00 | 0.00 | C |
| ATOM | 70 | C5   | G A | 3 | -27.007 | -23.634 | 9.054 | 1.00 | 0.00 | C |
| ATOM | 71 | C6   | G A | 3 | -27.646 | -22.407 | 9.346 | 1.00 | 0.00 | C |
| ATOM | 72 | O6   | G A | 3 | -28.676 | -22.202 | 9.990 | 1.00 | 0.00 | O |
| ATOM | 73 | N7   | G A | 3 | -27.356 | -24.939 | 9.408 | 1.00 | 0.00 | N |
| ATOM | 74 | C8   | G A | 3 | -26.417 | -25.674 | 8.871 | 1.00 | 0.00 | C |
| ATOM | 75 | N9   | G A | 3 | -25.461 | -24.955 | 8.183 | 1.00 | 0.00 | N |
| ATOM | 76 | C2'  | G A | 3 | -23.561 | -26.613 | 8.131 | 1.00 | 0.00 | C |
| ATOM | 77 | C3'  | G A | 3 | -23.086 | -27.431 | 6.942 | 1.00 | 0.00 | C |
| ATOM | 78 | O3'  | G A | 3 | -21.838 | -26.912 | 6.487 | 1.00 | 0.00 | O |
| ATOM | 79 | C4'  | G A | 3 | -24.203 | -27.226 | 5.920 | 1.00 | 0.00 | C |
| ATOM | 80 | O4'  | G A | 3 | -24.674 | -25.864 | 6.169 | 1.00 | 0.00 | O |
| ATOM | 81 | C5'  | G A | 3 | -25.378 | -28.170 | 6.014 | 1.00 | 0.00 | C |
| ATOM | 82 | O5'  | G A | 3 | -25.657 | -28.470 | 7.404 | 1.00 | 0.00 | O |
| ATOM | 83 | O1P  | G A | 3 | -25.132 | -30.925 | 7.587 | 1.00 | 0.00 | O |
| ATOM | 84 | O2P  | G A | 3 | -26.811 | -29.883 | 9.132 | 1.00 | 0.00 | O |



|      |     |      |     |   |         |         |        |      |      |   |
|------|-----|------|-----|---|---------|---------|--------|------|------|---|
| ATOM | 85  | P    | G A | 3 | -26.197 | -29.923 | 7.782  | 1.00 | 0.00 | P |
| ATOM | 86  | H1   | G A | 3 | -27.334 | -20.375 | 8.947  | 1.00 | 0.00 | H |
| ATOM | 87  | H8   | G A | 3 | -26.391 | -26.760 | 8.958  | 1.00 | 0.00 | H |
| ATOM | 88  | H1'  | G A | 3 | -23.574 | -24.602 | 7.325  | 1.00 | 0.00 | H |
| ATOM | 89  | H21  | G A | 3 | -25.736 | -19.372 | 7.831  | 1.00 | 0.00 | H |
| ATOM | 90  | H3'  | G A | 3 | -22.969 | -28.486 | 7.191  | 1.00 | 0.00 | H |
| ATOM | 91  | H22  | G A | 3 | -24.398 | -20.268 | 7.060  | 1.00 | 0.00 | H |
| ATOM | 92  | H4'  | G A | 3 | -23.756 | -27.348 | 4.934  | 1.00 | 0.00 | H |
| ATOM | 93  | H2'1 | G A | 3 | -24.239 | -27.188 | 8.762  | 1.00 | 0.00 | H |
| ATOM | 94  | H2'2 | G A | 3 | -22.726 | -26.294 | 8.754  | 1.00 | 0.00 | H |
| ATOM | 95  | H5'1 | G A | 3 | -26.249 | -27.703 | 5.555  | 1.00 | 0.00 | H |
| ATOM | 96  | H5'2 | G A | 3 | -25.143 | -29.089 | 5.478  | 1.00 | 0.00 | H |
| ATOM | 97  | C1'  | C A | 4 | -21.187 | -21.833 | 8.898  | 1.00 | 0.00 | C |
| ATOM | 98  | N1   | C A | 4 | -22.327 | -22.248 | 9.764  | 1.00 | 0.00 | N |
| ATOM | 99  | C2   | C A | 4 | -23.183 | -21.255 | 10.232 | 1.00 | 0.00 | C |
| ATOM | 100 | O2   | C A | 4 | -22.966 | -20.079 | 9.915  | 1.00 | 0.00 | O |
| ATOM | 101 | N3   | C A | 4 | -24.226 | -21.612 | 11.021 | 1.00 | 0.00 | N |
| ATOM | 102 | C4   | C A | 4 | -24.435 | -22.894 | 11.348 | 1.00 | 0.00 | C |
| ATOM | 103 | N4   | C A | 4 | -25.472 | -23.186 | 12.119 | 1.00 | 0.00 | N |
| ATOM | 104 | C5   | C A | 4 | -23.568 | -23.934 | 10.881 | 1.00 | 0.00 | C |
| ATOM | 105 | C6   | C A | 4 | -22.527 | -23.553 | 10.087 | 1.00 | 0.00 | C |
| ATOM | 106 | C2'  | C A | 4 | -19.908 | -22.618 | 9.151  | 1.00 | 0.00 | C |
| ATOM | 107 | C3'  | C A | 4 | -19.317 | -22.721 | 7.753  | 1.00 | 0.00 | C |
| ATOM | 108 | O3'  | C A | 4 | -18.572 | -21.537 | 7.472  | 1.00 | 0.00 | O |
| ATOM | 109 | C4'  | C A | 4 | -20.555 | -22.846 | 6.869  | 1.00 | 0.00 | C |
| ATOM | 110 | O4'  | C A | 4 | -21.571 | -22.044 | 7.552  | 1.00 | 0.00 | O |
| ATOM | 111 | C5'  | C A | 4 | -21.098 | -24.242 | 6.670  | 1.00 | 0.00 | C |
| ATOM | 112 | O5'  | C A | 4 | -20.948 | -25.006 | 7.893  | 1.00 | 0.00 | O |
| ATOM | 113 | O1P  | C A | 4 | -19.288 | -26.791 | 7.266  | 1.00 | 0.00 | O |
| ATOM | 114 | O2P  | C A | 4 | -20.958 | -27.217 | 9.089  | 1.00 | 0.00 | O |
| ATOM | 115 | P    | C A | 4 | -20.650 | -26.570 | 7.790  | 1.00 | 0.00 | P |
| ATOM | 116 | H5   | C A | 4 | -23.731 | -24.978 | 11.149 | 1.00 | 0.00 | H |
| ATOM | 117 | H6   | C A | 4 | -21.843 | -24.310 | 9.703  | 1.00 | 0.00 | H |
| ATOM | 118 | H1'  | C A | 4 | -21.026 | -20.766 | 9.038  | 1.00 | 0.00 | H |
| ATOM | 119 | H3'  | C A | 4 | -18.667 | -23.589 | 7.648  | 1.00 | 0.00 | H |
| ATOM | 120 | H4'  | C A | 4 | -20.287 | -22.451 | 5.890  | 1.00 | 0.00 | H |
| ATOM | 121 | H41  | C A | 4 | -25.656 | -24.165 | 12.385 | 1.00 | 0.00 | H |
| ATOM | 122 | H42  | C A | 4 | -26.093 | -22.436 | 12.455 | 1.00 | 0.00 | H |
| ATOM | 123 | H2'1 | C A | 4 | -20.102 | -23.604 | 9.572  | 1.00 | 0.00 | H |
| ATOM | 124 | H2'2 | C A | 4 | -19.232 | -22.099 | 9.832  | 1.00 | 0.00 | H |
| ATOM | 125 | H5'1 | C A | 4 | -22.153 | -24.182 | 6.400  | 1.00 | 0.00 | H |
| ATOM | 126 | H5'2 | C A | 4 | -20.549 | -24.727 | 5.863  | 1.00 | 0.00 | H |
| ATOM | 127 | C1'  | C A | 5 | -20.022 | -17.724 | 11.404 | 1.00 | 0.00 | C |
| ATOM | 128 | N1   | C A | 5 | -20.647 | -18.882 | 12.101 | 1.00 | 0.00 | N |
| ATOM | 129 | C2   | C A | 5 | -21.776 | -18.641 | 12.880 | 1.00 | 0.00 | C |
| ATOM | 130 | O2   | C A | 5 | -22.211 | -17.484 | 12.964 | 1.00 | 0.00 | O |
| ATOM | 131 | N3   | C A | 5 | -22.360 | -19.682 | 13.523 | 1.00 | 0.00 | N |
| ATOM | 132 | C4   | C A | 5 | -21.867 | -20.922 | 13.415 | 1.00 | 0.00 | C |
| ATOM | 133 | N4   | C A | 5 | -22.480 | -21.902 | 14.061 | 1.00 | 0.00 | N |
| ATOM | 134 | C5   | C A | 5 | -20.706 | -21.198 | 12.621 | 1.00 | 0.00 | C |
| ATOM | 135 | C6   | C A | 5 | -20.137 | -20.135 | 11.982 | 1.00 | 0.00 | C |
| ATOM | 136 | C2'  | C A | 5 | -18.501 | -17.778 | 11.369 | 1.00 | 0.00 | C |
| ATOM | 137 | C3'  | C A | 5 | -18.194 | -17.174 | 10.007 | 1.00 | 0.00 | C |
| ATOM | 138 | O3'  | C A | 5 | -18.172 | -15.753 | 10.119 | 1.00 | 0.00 | O |

|      |     |      |     |   |         |         |        |      |      |   |
|------|-----|------|-----|---|---------|---------|--------|------|------|---|
| ATOM | 139 | C4'  | C A | 5 | -19.355 | -17.668 | 9.147  | 1.00 | 0.00 | C |
| ATOM | 140 | O4'  | C A | 5 | -20.490 | -17.721 | 10.068 | 1.00 | 0.00 | O |
| ATOM | 141 | C5'  | C A | 5 | -19.187 | -19.027 | 8.509  | 1.00 | 0.00 | C |
| ATOM | 142 | O5'  | C A | 5 | -18.474 | -19.909 | 9.413  | 1.00 | 0.00 | O |
| ATOM | 143 | O1P  | C A | 5 | -16.303 | -20.339 | 8.213  | 1.00 | 0.00 | O |
| ATOM | 144 | O2P  | C A | 5 | -17.210 | -22.042 | 9.818  | 1.00 | 0.00 | O |
| ATOM | 145 | P    | C A | 5 | -17.486 | -21.000 | 8.799  | 1.00 | 0.00 | P |
| ATOM | 146 | H5   | C A | 5 | -20.297 | -22.205 | 12.535 | 1.00 | 0.00 | H |
| ATOM | 147 | H6   | C A | 5 | -19.254 | -20.296 | 11.363 | 1.00 | 0.00 | H |
| ATOM | 148 | H1'  | C A | 5 | -20.370 | -16.810 | 11.884 | 1.00 | 0.00 | H |
| ATOM | 149 | H3'  | C A | 5 | -17.237 | -17.520 | 9.614  | 1.00 | 0.00 | H |
| ATOM | 150 | H4'  | C A | 5 | -19.488 | -16.939 | 8.347  | 1.00 | 0.00 | H |
| ATOM | 151 | H41  | C A | 5 | -22.122 | -22.866 | 13.994 | 1.00 | 0.00 | H |
| ATOM | 152 | H42  | C A | 5 | -23.314 | -21.701 | 14.632 | 1.00 | 0.00 | H |
| ATOM | 153 | H2'1 | C A | 5 | -18.120 | -18.796 | 11.446 | 1.00 | 0.00 | H |
| ATOM | 154 | H2'2 | C A | 5 | -18.048 | -17.196 | 12.173 | 1.00 | 0.00 | H |
| ATOM | 155 | H5'1 | C A | 5 | -20.171 | -19.443 | 8.288  | 1.00 | 0.00 | H |
| ATOM | 156 | H5'2 | C A | 5 | -18.627 | -18.919 | 7.580  | 1.00 | 0.00 | H |
| ATOM | 157 | C1'  | G A | 6 | -20.545 | -14.472 | 15.102 | 1.00 | 0.00 | C |
| ATOM | 158 | N1   | G A | 6 | -22.529 | -18.466 | 17.580 | 1.00 | 0.00 | N |
| ATOM | 159 | C2   | G A | 6 | -22.953 | -17.149 | 17.534 | 1.00 | 0.00 | C |
| ATOM | 160 | N2   | G A | 6 | -24.049 | -16.857 | 18.244 | 1.00 | 0.00 | N |
| ATOM | 161 | N3   | G A | 6 | -22.332 | -16.201 | 16.835 | 1.00 | 0.00 | N |
| ATOM | 162 | C4   | G A | 6 | -21.237 | -16.672 | 16.184 | 1.00 | 0.00 | C |
| ATOM | 163 | C5   | G A | 6 | -20.738 | -17.964 | 16.174 | 1.00 | 0.00 | C |
| ATOM | 164 | C6   | G A | 6 | -21.398 | -18.973 | 16.912 | 1.00 | 0.00 | C |
| ATOM | 165 | O6   | G A | 6 | -21.112 | -20.164 | 17.027 | 1.00 | 0.00 | O |
| ATOM | 166 | N7   | G A | 6 | -19.592 | -18.033 | 15.380 | 1.00 | 0.00 | N |
| ATOM | 167 | C8   | G A | 6 | -19.437 | -16.811 | 14.941 | 1.00 | 0.00 | C |
| ATOM | 168 | N9   | G A | 6 | -20.397 | -15.926 | 15.386 | 1.00 | 0.00 | N |
| ATOM | 169 | C2'  | G A | 6 | -19.221 | -13.724 | 15.027 | 1.00 | 0.00 | C |
| ATOM | 170 | C3'  | G A | 6 | -19.495 | -12.700 | 13.938 | 1.00 | 0.00 | C |
| ATOM | 171 | O3'  | G A | 6 | -20.138 | -11.565 | 14.513 | 1.00 | 0.00 | O |
| ATOM | 172 | C4'  | G A | 6 | -20.411 | -13.460 | 12.980 | 1.00 | 0.00 | C |
| ATOM | 173 | O4'  | G A | 6 | -21.191 | -14.340 | 13.851 | 1.00 | 0.00 | O |
| ATOM | 174 | C5'  | G A | 6 | -19.732 | -14.301 | 11.927 | 1.00 | 0.00 | C |
| ATOM | 175 | O5'  | G A | 6 | -18.531 | -14.901 | 12.475 | 1.00 | 0.00 | O |
| ATOM | 176 | O1P  | G A | 6 | -16.682 | -13.805 | 11.168 | 1.00 | 0.00 | O |
| ATOM | 177 | O2P  | G A | 6 | -16.348 | -16.096 | 12.133 | 1.00 | 0.00 | O |
| ATOM | 178 | P    | G A | 6 | -17.272 | -15.110 | 11.520 | 1.00 | 0.00 | P |
| ATOM | 179 | H1   | G A | 6 | -23.086 | -19.125 | 18.146 | 1.00 | 0.00 | H |
| ATOM | 180 | H8   | G A | 6 | -18.621 | -16.515 | 14.281 | 1.00 | 0.00 | H |
| ATOM | 181 | H1'  | G A | 6 | -21.195 | -14.040 | 15.864 | 1.00 | 0.00 | H |
| ATOM | 182 | H21  | G A | 6 | -24.527 | -17.597 | 18.780 | 1.00 | 0.00 | H |
| ATOM | 183 | H3'  | G A | 6 | -18.581 | -12.381 | 13.437 | 1.00 | 0.00 | H |
| ATOM | 184 | H22  | G A | 6 | -24.415 | -15.894 | 18.254 | 1.00 | 0.00 | H |
| ATOM | 185 | H4'  | G A | 6 | -21.023 | -12.717 | 12.470 | 1.00 | 0.00 | H |
| ATOM | 186 | H2'1 | G A | 6 | -18.391 | -14.378 | 14.757 | 1.00 | 0.00 | H |
| ATOM | 187 | H2'2 | G A | 6 | -18.963 | -13.242 | 15.971 | 1.00 | 0.00 | H |
| ATOM | 188 | H5'1 | G A | 6 | -20.415 | -15.082 | 11.595 | 1.00 | 0.00 | H |
| ATOM | 189 | H5'2 | G A | 6 | -19.473 | -13.670 | 11.077 | 1.00 | 0.00 | H |
| ATOM | 190 | C1'  | C A | 7 | -21.894 | -13.107 | 19.668 | 1.00 | 0.00 | C |
| ATOM | 191 | N1   | C A | 7 | -21.024 | -14.297 | 19.461 | 1.00 | 0.00 | N |
| ATOM | 192 | C2   | C A | 7 | -21.403 | -15.494 | 20.064 | 1.00 | 0.00 | C |

|      |     |      |     |   |         |         |        |      |      |   |
|------|-----|------|-----|---|---------|---------|--------|------|------|---|
| ATOM | 193 | O2   | C A | 7 | -22.438 | -15.522 | 20.741 | 1.00 | 0.00 | O |
| ATOM | 194 | N3   | C A | 7 | -20.624 | -16.590 | 19.887 | 1.00 | 0.00 | N |
| ATOM | 195 | C4   | C A | 7 | -19.508 | -16.530 | 19.150 | 1.00 | 0.00 | C |
| ATOM | 196 | N4   | C A | 7 | -18.786 | -17.631 | 19.008 | 1.00 | 0.00 | N |
| ATOM | 197 | C5   | C A | 7 | -19.091 | -15.310 | 18.522 | 1.00 | 0.00 | C |
| ATOM | 198 | C6   | C A | 7 | -19.894 | -14.221 | 18.709 | 1.00 | 0.00 | C |
| ATOM | 199 | C2'  | C A | 7 | -21.124 | -11.803 | 19.827 | 1.00 | 0.00 | C |
| ATOM | 200 | C3'  | C A | 7 | -22.041 | -10.808 | 19.133 | 1.00 | 0.00 | C |
| ATOM | 201 | O3'  | C A | 7 | -23.037 | -10.367 | 20.053 | 1.00 | 0.00 | O |
| ATOM | 202 | C4'  | C A | 7 | -22.634 | -11.630 | 17.991 | 1.00 | 0.00 | C |
| ATOM | 203 | O4'  | C A | 7 | -22.733 | -12.985 | 18.534 | 1.00 | 0.00 | O |
| ATOM | 204 | C5'  | C A | 7 | -21.829 | -11.681 | 16.712 | 1.00 | 0.00 | C |
| ATOM | 205 | O5'  | C A | 7 | -20.413 | -11.710 | 17.024 | 1.00 | 0.00 | O |
| ATOM | 206 | O1P  | C A | 7 | -19.572 | -9.514  | 16.125 | 1.00 | 0.00 | O |
| ATOM | 207 | O2P  | C A | 7 | -18.023 | -11.481 | 16.288 | 1.00 | 0.00 | O |
| ATOM | 208 | P    | C A | 7 | -19.395 | -10.978 | 16.040 | 1.00 | 0.00 | P |
| ATOM | 209 | H5   | C A | 7 | -18.180 | -15.254 | 17.925 | 1.00 | 0.00 | H |
| ATOM | 210 | H6   | C A | 7 | -19.623 | -13.272 | 18.245 | 1.00 | 0.00 | H |
| ATOM | 211 | H1'  | C A | 7 | -22.528 | -13.295 | 20.535 | 1.00 | 0.00 | H |
| ATOM | 212 | H3'  | C A | 7 | -21.492 | -9.945  | 18.754 | 1.00 | 0.00 | H |
| ATOM | 213 | H4'  | C A | 7 | -23.604 | -11.192 | 17.756 | 1.00 | 0.00 | H |
| ATOM | 214 | H41  | C A | 7 | -17.924 | -17.614 | 18.444 | 1.00 | 0.00 | H |
| ATOM | 215 | H42  | C A | 7 | -19.084 | -18.507 | 19.462 | 1.00 | 0.00 | H |
| ATOM | 216 | H2'1 | C A | 7 | -20.146 | -11.840 | 19.351 | 1.00 | 0.00 | H |
| ATOM | 217 | H2'2 | C A | 7 | -20.970 | -11.539 | 20.874 | 1.00 | 0.00 | H |
| ATOM | 218 | H5'1 | C A | 7 | -22.102 | -12.576 | 16.152 | 1.00 | 0.00 | H |
| ATOM | 219 | H5'2 | C A | 7 | -22.055 | -10.800 | 16.112 | 1.00 | 0.00 | H |
| ATOM | 220 | C1'  | A A | 8 | -22.904 | -13.920 | 24.446 | 1.00 | 0.00 | C |
| ATOM | 221 | N1   | A A | 8 | -19.780 | -17.946 | 23.829 | 1.00 | 0.00 | N |
| ATOM | 222 | C2   | A A | 8 | -20.944 | -17.799 | 24.454 | 1.00 | 0.00 | C |
| ATOM | 223 | N3   | A A | 8 | -21.702 | -16.730 | 24.573 | 1.00 | 0.00 | N |
| ATOM | 224 | C4   | A A | 8 | -21.132 | -15.685 | 23.944 | 1.00 | 0.00 | C |
| ATOM | 225 | C5   | A A | 8 | -19.948 | -15.669 | 23.261 | 1.00 | 0.00 | C |
| ATOM | 226 | C6   | A A | 8 | -19.238 | -16.886 | 23.210 | 1.00 | 0.00 | C |
| ATOM | 227 | N6   | A A | 8 | -18.061 | -17.022 | 22.575 | 1.00 | 0.00 | N |
| ATOM | 228 | N7   | A A | 8 | -19.686 | -14.412 | 22.745 | 1.00 | 0.00 | N |
| ATOM | 229 | C8   | A A | 8 | -20.706 | -13.699 | 23.126 | 1.00 | 0.00 | C |
| ATOM | 230 | N9   | A A | 8 | -21.626 | -14.406 | 23.857 | 1.00 | 0.00 | N |
| ATOM | 231 | C2'  | A A | 8 | -22.825 | -12.503 | 24.998 | 1.00 | 0.00 | C |
| ATOM | 232 | C3'  | A A | 8 | -24.207 | -11.960 | 24.674 | 1.00 | 0.00 | C |
| ATOM | 233 | O3'  | A A | 8 | -25.114 | -12.345 | 25.704 | 1.00 | 0.00 | O |
| ATOM | 234 | C4'  | A A | 8 | -24.532 | -12.629 | 23.339 | 1.00 | 0.00 | C |
| ATOM | 235 | O4'  | A A | 8 | -23.883 | -13.939 | 23.425 | 1.00 | 0.00 | O |
| ATOM | 236 | C5'  | A A | 8 | -24.038 | -11.924 | 22.098 | 1.00 | 0.00 | C |
| ATOM | 237 | O5'  | A A | 8 | -22.745 | -11.321 | 22.358 | 1.00 | 0.00 | O |
| ATOM | 238 | O1P  | A A | 8 | -23.211 | -8.853  | 22.191 | 1.00 | 0.00 | O |
| ATOM | 239 | O2P  | A A | 8 | -20.915 | -9.734  | 21.690 | 1.00 | 0.00 | O |
| ATOM | 240 | P    | A A | 8 | -22.383 | -9.943  | 21.640 | 1.00 | 0.00 | P |
| ATOM | 241 | H2   | A A | 8 | -21.327 | -18.696 | 24.939 | 1.00 | 0.00 | H |
| ATOM | 242 | H8   | A A | 8 | -20.819 | -12.641 | 22.888 | 1.00 | 0.00 | H |
| ATOM | 243 | H1'  | A A | 8 | -23.212 | -14.624 | 25.218 | 1.00 | 0.00 | H |
| ATOM | 244 | H3'  | A A | 8 | -24.208 | -10.874 | 24.580 | 1.00 | 0.00 | H |
| ATOM | 245 | H4'  | A A | 8 | -25.617 | -12.695 | 23.275 | 1.00 | 0.00 | H |
| ATOM | 246 | H61  | A A | 8 | -17.584 | -17.934 | 22.565 | 1.00 | 0.00 | H |

|      |     |      |     |    |         |         |        |      |      |   |
|------|-----|------|-----|----|---------|---------|--------|------|------|---|
| ATOM | 247 | H62  | A A | 8  | -17.637 | -16.212 | 22.099 | 1.00 | 0.00 | H |
| ATOM | 248 | H2'1 | A A | 8  | -22.045 | -11.915 | 24.517 | 1.00 | 0.00 | H |
| ATOM | 249 | H2'2 | A A | 8  | -22.634 | -12.488 | 26.071 | 1.00 | 0.00 | H |
| ATOM | 250 | H5'1 | A A | 8  | -23.950 | -12.648 | 21.288 | 1.00 | 0.00 | H |
| ATOM | 251 | H5'2 | A A | 8  | -24.753 | -11.153 | 21.814 | 1.00 | 0.00 | H |
| ATOM | 252 | C1'  | C A | 9  | -22.500 | -16.449 | 28.701 | 1.00 | 0.00 | C |
| ATOM | 253 | N1   | C A | 9  | -21.281 | -16.009 | 27.967 | 1.00 | 0.00 | N |
| ATOM | 254 | C2   | C A | 9  | -20.302 | -16.963 | 27.696 | 1.00 | 0.00 | C |
| ATOM | 255 | O2   | C A | 9  | -20.483 | -18.127 | 28.075 | 1.00 | 0.00 | O |
| ATOM | 256 | N3   | C A | 9  | -19.186 | -16.583 | 27.030 | 1.00 | 0.00 | N |
| ATOM | 257 | C4   | C A | 9  | -19.017 | -15.314 | 26.635 | 1.00 | 0.00 | C |
| ATOM | 258 | N4   | C A | 9  | -17.907 | -14.998 | 25.983 | 1.00 | 0.00 | N |
| ATOM | 259 | C5   | C A | 9  | -20.005 | -14.310 | 26.902 | 1.00 | 0.00 | C |
| ATOM | 260 | C6   | C A | 9  | -21.125 | -14.716 | 27.571 | 1.00 | 0.00 | C |
| ATOM | 261 | C2'  | C A | 9  | -23.020 | -15.422 | 29.697 | 1.00 | 0.00 | C |
| ATOM | 262 | C3'  | C A | 9  | -24.526 | -15.611 | 29.590 | 1.00 | 0.00 | C |
| ATOM | 263 | O3'  | C A | 9  | -24.924 | -16.684 | 30.440 | 1.00 | 0.00 | O |
| ATOM | 264 | C4'  | C A | 9  | -24.723 | -15.942 | 28.113 | 1.00 | 0.00 | C |
| ATOM | 265 | O4'  | C A | 9  | -23.516 | -16.683 | 27.744 | 1.00 | 0.00 | O |
| ATOM | 266 | C5'  | C A | 9  | -24.871 | -14.766 | 27.176 | 1.00 | 0.00 | C |
| ATOM | 267 | O5'  | C A | 9  | -24.012 | -13.681 | 27.612 | 1.00 | 0.00 | O |
| ATOM | 268 | O1P  | C A | 9  | -25.640 | -11.886 | 28.291 | 1.00 | 0.00 | O |
| ATOM | 269 | O2P  | C A | 9  | -23.343 | -11.260 | 27.498 | 1.00 | 0.00 | O |
| ATOM | 270 | P    | C A | 9  | -24.504 | -12.179 | 27.396 | 1.00 | 0.00 | P |
| ATOM | 271 | H5   | C A | 9  | -19.870 | -13.275 | 26.588 | 1.00 | 0.00 | H |
| ATOM | 272 | H6   | C A | 9  | -21.909 | -13.992 | 27.791 | 1.00 | 0.00 | H |
| ATOM | 273 | H1'  | C A | 9  | -22.278 | -17.395 | 29.193 | 1.00 | 0.00 | H |
| ATOM | 274 | H3'  | C A | 9  | -25.070 | -14.709 | 29.868 | 1.00 | 0.00 | H |
| ATOM | 275 | H4'  | C A | 9  | -25.630 | -16.540 | 28.040 | 1.00 | 0.00 | H |
| ATOM | 276 | H41  | C A | 9  | -17.754 | -14.030 | 25.666 | 1.00 | 0.00 | H |
| ATOM | 277 | H42  | C A | 9  | -17.197 | -15.721 | 25.794 | 1.00 | 0.00 | H |
| ATOM | 278 | H2'1 | C A | 9  | -22.729 | -14.406 | 29.435 | 1.00 | 0.00 | H |
| ATOM | 279 | H2'2 | C A | 9  | -22.666 | -15.614 | 30.711 | 1.00 | 0.00 | H |
| ATOM | 280 | H5'1 | C A | 9  | -24.593 | -15.073 | 26.167 | 1.00 | 0.00 | H |
| ATOM | 281 | H5'2 | C A | 9  | -25.909 | -14.436 | 27.177 | 1.00 | 0.00 | H |
| ATOM | 282 | C1'  | C A | 10 | -20.201 | -19.456 | 31.894 | 1.00 | 0.00 | C |
| ATOM | 283 | N1   | C A | 10 | -19.496 | -18.273 | 31.329 | 1.00 | 0.00 | N |
| ATOM | 284 | C2   | C A | 10 | -18.246 | -18.475 | 30.748 | 1.00 | 0.00 | C |
| ATOM | 285 | O2   | C A | 10 | -17.774 | -19.620 | 30.725 | 1.00 | 0.00 | O |
| ATOM | 286 | N3   | C A | 10 | -17.587 | -17.411 | 30.227 | 1.00 | 0.00 | N |
| ATOM | 287 | C4   | C A | 10 | -18.121 | -16.183 | 30.267 | 1.00 | 0.00 | C |
| ATOM | 288 | N4   | C A | 10 | -17.435 | -15.179 | 29.740 | 1.00 | 0.00 | N |
| ATOM | 289 | C5   | C A | 10 | -19.404 | -15.945 | 30.862 | 1.00 | 0.00 | C |
| ATOM | 290 | C6   | C A | 10 | -20.051 | -17.033 | 31.376 | 1.00 | 0.00 | C |
| ATOM | 291 | C2'  | C A | 10 | -20.962 | -19.160 | 33.178 | 1.00 | 0.00 | C |
| ATOM | 292 | C3'  | C A | 10 | -22.184 | -20.055 | 33.035 | 1.00 | 0.00 | C |
| ATOM | 293 | O3'  | C A | 10 | -21.860 | -21.366 | 33.492 | 1.00 | 0.00 | O |
| ATOM | 294 | C4'  | C A | 10 | -22.458 | -20.018 | 31.534 | 1.00 | 0.00 | C |
| ATOM | 295 | O4'  | C A | 10 | -21.132 | -19.904 | 30.927 | 1.00 | 0.00 | O |
| ATOM | 296 | C5'  | C A | 10 | -23.316 | -18.878 | 31.036 | 1.00 | 0.00 | C |
| ATOM | 297 | O5'  | C A | 10 | -23.022 | -17.676 | 31.791 | 1.00 | 0.00 | O |
| ATOM | 298 | O1P  | C A | 10 | -25.160 | -17.235 | 33.043 | 1.00 | 0.00 | O |
| ATOM | 299 | O2P  | C A | 10 | -23.628 | -15.334 | 32.468 | 1.00 | 0.00 | O |
| ATOM | 300 | P    | C A | 10 | -24.203 | -16.646 | 32.086 | 1.00 | 0.00 | P |

|      |     |      |   |   |    |         |         |        |      |      |   |
|------|-----|------|---|---|----|---------|---------|--------|------|------|---|
| ATOM | 301 | H5   | C | A | 10 | -19.841 | -14.946 | 30.902 | 1.00 | 0.00 | H |
| ATOM | 302 | H6   | C | A | 10 | -21.033 | -16.903 | 31.831 | 1.00 | 0.00 | H |
| ATOM | 303 | H1'  | C | A | 10 | -19.469 | -20.248 | 32.047 | 1.00 | 0.00 | H |
| ATOM | 304 | H3'  | C | A | 10 | -23.036 | -19.676 | 33.601 | 1.00 | 0.00 | H |
| ATOM | 305 | H4'  | C | A | 10 | -22.965 | -20.950 | 31.282 | 1.00 | 0.00 | H |
| ATOM | 306 | H41  | C | A | 10 | -17.824 | -14.225 | 29.756 | 1.00 | 0.00 | H |
| ATOM | 307 | H42  | C | A | 10 | -16.512 | -15.353 | 29.316 | 1.00 | 0.00 | H |
| ATOM | 308 | H2'1 | C | A | 10 | -21.247 | -18.112 | 33.260 | 1.00 | 0.00 | H |
| ATOM | 309 | H2'2 | C | A | 10 | -20.385 | -19.415 | 34.069 | 1.00 | 0.00 | H |
| ATOM | 310 | H5'1 | C | A | 10 | -23.110 | -18.709 | 29.978 | 1.00 | 0.00 | H |
| ATOM | 311 | H5'2 | C | A | 10 | -24.366 | -19.142 | 31.158 | 1.00 | 0.00 | H |
| ATOM | 312 | C1'  | T | A | 11 | -16.230 | -21.620 | 33.905 | 1.00 | 0.00 | C |
| ATOM | 313 | N1   | T | A | 11 | -16.271 | -20.143 | 33.741 | 1.00 | 0.00 | N |
| ATOM | 314 | C2   | T | A | 11 | -15.195 | -19.549 | 33.113 | 1.00 | 0.00 | C |
| ATOM | 315 | O2   | T | A | 11 | -14.238 | -20.182 | 32.701 | 1.00 | 0.00 | O |
| ATOM | 316 | N3   | T | A | 11 | -15.274 | -18.174 | 32.979 | 1.00 | 0.00 | N |
| ATOM | 317 | C4   | T | A | 11 | -16.306 | -17.366 | 33.411 | 1.00 | 0.00 | C |
| ATOM | 318 | O4   | T | A | 11 | -16.264 | -16.141 | 33.238 | 1.00 | 0.00 | O |
| ATOM | 319 | C5   | T | A | 11 | -17.385 | -18.077 | 34.055 | 1.00 | 0.00 | C |
| ATOM | 320 | C6   | T | A | 11 | -17.341 | -19.415 | 34.201 | 1.00 | 0.00 | C |
| ATOM | 321 | C7   | T | A | 11 | -18.529 | -17.236 | 34.537 | 1.00 | 0.00 | C |
| ATOM | 322 | C2'  | T | A | 11 | -16.809 | -22.107 | 35.228 | 1.00 | 0.00 | C |
| ATOM | 323 | C3'  | T | A | 11 | -17.471 | -23.414 | 34.823 | 1.00 | 0.00 | C |
| ATOM | 324 | O3'  | T | A | 11 | -16.497 | -24.456 | 34.831 | 1.00 | 0.00 | O |
| ATOM | 325 | C4'  | T | A | 11 | -17.983 | -23.114 | 33.417 | 1.00 | 0.00 | C |
| ATOM | 326 | O4'  | T | A | 11 | -16.991 | -22.193 | 32.860 | 1.00 | 0.00 | O |
| ATOM | 327 | C5'  | T | A | 11 | -19.347 | -22.470 | 33.321 | 1.00 | 0.00 | C |
| ATOM | 328 | O5'  | T | A | 11 | -19.527 | -21.539 | 34.417 | 1.00 | 0.00 | O |
| ATOM | 329 | O1P  | T | A | 11 | -21.371 | -22.583 | 35.773 | 1.00 | 0.00 | O |
| ATOM | 330 | O2P  | T | A | 11 | -21.035 | -20.098 | 35.818 | 1.00 | 0.00 | O |
| ATOM | 331 | P    | T | A | 11 | -20.982 | -21.362 | 35.043 | 1.00 | 0.00 | P |
| ATOM | 332 | H3   | T | A | 11 | -14.486 | -17.708 | 32.511 | 1.00 | 0.00 | H |
| ATOM | 333 | H6   | T | A | 11 | -18.168 | -19.931 | 34.690 | 1.00 | 0.00 | H |
| ATOM | 334 | H1'  | T | A | 11 | -15.197 | -21.949 | 33.787 | 1.00 | 0.00 | H |
| ATOM | 335 | H3'  | T | A | 11 | -18.289 | -23.681 | 35.491 | 1.00 | 0.00 | H |
| ATOM | 336 | H4'  | T | A | 11 | -18.026 | -24.065 | 32.884 | 1.00 | 0.00 | H |
| ATOM | 337 | H71  | T | A | 11 | -18.576 | -17.276 | 35.626 | 1.00 | 0.00 | H |
| ATOM | 338 | H72  | T | A | 11 | -18.382 | -16.204 | 34.218 | 1.00 | 0.00 | H |
| ATOM | 339 | H73  | T | A | 11 | -19.462 | -17.615 | 34.119 | 1.00 | 0.00 | H |
| ATOM | 340 | H2'1 | T | A | 11 | -17.532 | -21.408 | 35.644 | 1.00 | 0.00 | H |
| ATOM | 341 | H2'2 | T | A | 11 | -16.038 | -22.269 | 35.982 | 1.00 | 0.00 | H |
| ATOM | 342 | H5'1 | T | A | 11 | -19.429 | -21.942 | 32.371 | 1.00 | 0.00 | H |
| ATOM | 343 | H5'2 | T | A | 11 | -20.112 | -23.245 | 33.367 | 1.00 | 0.00 | H |
| ATOM | 344 | C1'  | A | A | 12 | -11.404 | -21.891 | 35.033 | 1.00 | 0.00 | C |
| ATOM | 345 | N1   | A | A | 12 | -11.603 | -16.776 | 34.668 | 1.00 | 0.00 | N |
| ATOM | 346 | C2   | A | A | 12 | -10.716 | -17.673 | 34.249 | 1.00 | 0.00 | C |
| ATOM | 347 | N3   | A | A | 12 | -10.728 | -18.984 | 34.374 | 1.00 | 0.00 | N |
| ATOM | 348 | C4   | A | A | 12 | -11.828 | -19.377 | 35.039 | 1.00 | 0.00 | C |
| ATOM | 349 | C5   | A | A | 12 | -12.828 | -18.589 | 35.534 | 1.00 | 0.00 | C |
| ATOM | 350 | C6   | A | A | 12 | -12.692 | -17.199 | 35.327 | 1.00 | 0.00 | C |
| ATOM | 351 | N6   | A | A | 12 | -13.595 | -16.302 | 35.757 | 1.00 | 0.00 | N |
| ATOM | 352 | N7   | A | A | 12 | -13.801 | -19.348 | 36.159 | 1.00 | 0.00 | N |
| ATOM | 353 | C8   | A | A | 12 | -13.373 | -20.569 | 36.034 | 1.00 | 0.00 | C |
| ATOM | 354 | N9   | A | A | 12 | -12.180 | -20.665 | 35.362 | 1.00 | 0.00 | N |

|      |     |      |   |   |    |         |         |        |      |      |   |
|------|-----|------|---|---|----|---------|---------|--------|------|------|---|
| ATOM | 355 | C2'  | A | A | 12 | -11.434 | -22.947 | 36.130 | 1.00 | 0.00 | C |
| ATOM | 356 | C3'  | A | A | 12 | -11.445 | -24.238 | 35.327 | 1.00 | 0.00 | C |
| ATOM | 357 | O3'  | A | A | 12 | -10.105 | -24.586 | 34.984 | 1.00 | 0.00 | O |
| ATOM | 358 | C4'  | A | A | 12 | -12.277 | -23.869 | 34.099 | 1.00 | 0.00 | C |
| ATOM | 359 | O4'  | A | A | 12 | -11.967 | -22.458 | 33.866 | 1.00 | 0.00 | O |
| ATOM | 360 | C5'  | A | A | 12 | -13.773 | -24.020 | 34.234 | 1.00 | 0.00 | C |
| ATOM | 361 | O5'  | A | A | 12 | -14.185 | -23.657 | 35.576 | 1.00 | 0.00 | O |
| ATOM | 362 | O1P  | A | A | 12 | -15.026 | -25.827 | 36.535 | 1.00 | 0.00 | O |
| ATOM | 363 | O2P  | A | A | 12 | -15.928 | -23.646 | 37.386 | 1.00 | 0.00 | O |
| ATOM | 364 | P    | A | A | 12 | -15.409 | -24.433 | 36.240 | 1.00 | 0.00 | P |
| ATOM | 365 | H2   | A | A | 12 | -9.853  | -17.264 | 33.724 | 1.00 | 0.00 | H |
| ATOM | 366 | H8   | A | A | 12 | -13.908 | -21.435 | 36.424 | 1.00 | 0.00 | H |
| ATOM | 367 | H1'  | A | A | 12 | -10.381 | -21.596 | 34.804 | 1.00 | 0.00 | H |
| ATOM | 368 | H3'  | A | A | 12 | -11.901 | -25.060 | 35.878 | 1.00 | 0.00 | H |
| ATOM | 369 | H4'  | A | A | 12 | -11.948 | -24.518 | 33.288 | 1.00 | 0.00 | H |
| ATOM | 370 | H61  | A | A | 12 | -13.449 | -15.298 | 35.578 | 1.00 | 0.00 | H |
| ATOM | 371 | H62  | A | A | 12 | -14.433 | -16.619 | 36.267 | 1.00 | 0.00 | H |
| ATOM | 372 | H2'1 | A | A | 12 | -12.320 | -22.866 | 36.759 | 1.00 | 0.00 | H |
| ATOM | 373 | H2'2 | A | A | 12 | -10.563 | -22.892 | 36.782 | 1.00 | 0.00 | H |
| ATOM | 374 | H5'1 | A | A | 12 | -14.264 | -23.370 | 33.510 | 1.00 | 0.00 | H |
| ATOM | 375 | H5'2 | A | A | 12 | -14.048 | -25.054 | 34.032 | 1.00 | 0.00 | H |
| ATOM | 376 | C1'  | G | A | 13 | -6.936  | -19.931 | 35.950 | 1.00 | 0.00 | C |
| ATOM | 377 | N1   | G | A | 13 | -9.627  | -15.808 | 37.286 | 1.00 | 0.00 | N |
| ATOM | 378 | C2   | G | A | 13 | -8.462  | -15.906 | 36.548 | 1.00 | 0.00 | C |
| ATOM | 379 | N2   | G | A | 13 | -7.941  | -14.752 | 36.109 | 1.00 | 0.00 | N |
| ATOM | 380 | N3   | G | A | 13 | -7.862  | -17.062 | 36.270 | 1.00 | 0.00 | N |
| ATOM | 381 | C4   | G | A | 13 | -8.521  | -18.126 | 36.799 | 1.00 | 0.00 | C |
| ATOM | 382 | C5   | G | A | 13 | -9.685  | -18.124 | 37.550 | 1.00 | 0.00 | C |
| ATOM | 383 | C6   | G | A | 13 | -10.324 | -16.897 | 37.842 | 1.00 | 0.00 | C |
| ATOM | 384 | O6   | G | A | 13 | -11.353 | -16.693 | 38.488 | 1.00 | 0.00 | O |
| ATOM | 385 | N7   | G | A | 13 | -10.034 | -19.428 | 37.904 | 1.00 | 0.00 | N |
| ATOM | 386 | C8   | G | A | 13 | -9.095  | -20.164 | 37.367 | 1.00 | 0.00 | C |
| ATOM | 387 | N9   | G | A | 13 | -8.139  | -19.444 | 36.679 | 1.00 | 0.00 | N |
| ATOM | 388 | C2'  | G | A | 13 | -6.239  | -21.102 | 36.627 | 1.00 | 0.00 | C |
| ATOM | 389 | C3'  | G | A | 13 | -5.764  | -21.920 | 35.438 | 1.00 | 0.00 | C |
| ATOM | 390 | O3'  | G | A | 13 | -4.516  | -21.402 | 34.983 | 1.00 | 0.00 | O |
| ATOM | 391 | C4'  | G | A | 13 | -6.881  | -21.716 | 34.416 | 1.00 | 0.00 | C |
| ATOM | 392 | O4'  | G | A | 13 | -7.352  | -20.354 | 34.665 | 1.00 | 0.00 | O |
| ATOM | 393 | C5'  | G | A | 13 | -8.056  | -22.659 | 34.510 | 1.00 | 0.00 | C |
| ATOM | 394 | O5'  | G | A | 13 | -8.335  | -22.959 | 35.900 | 1.00 | 0.00 | O |
| ATOM | 395 | O1P  | G | A | 13 | -7.810  | -25.414 | 36.083 | 1.00 | 0.00 | O |
| ATOM | 396 | O2P  | G | A | 13 | -9.489  | -24.372 | 37.628 | 1.00 | 0.00 | O |
| ATOM | 397 | P    | G | A | 13 | -8.875  | -24.412 | 36.278 | 1.00 | 0.00 | P |
| ATOM | 398 | H1   | G | A | 13 | -10.014 | -14.864 | 37.440 | 1.00 | 0.00 | H |
| ATOM | 399 | H8   | G | A | 13 | -9.068  | -21.250 | 37.453 | 1.00 | 0.00 | H |
| ATOM | 400 | H1'  | G | A | 13 | -6.252  | -19.091 | 35.821 | 1.00 | 0.00 | H |
| ATOM | 401 | H21  | G | A | 13 | -8.413  | -13.861 | 36.326 | 1.00 | 0.00 | H |
| ATOM | 402 | H3'  | G | A | 13 | -5.647  | -22.975 | 35.687 | 1.00 | 0.00 | H |
| ATOM | 403 | H22  | G | A | 13 | -7.074  | -14.757 | 35.557 | 1.00 | 0.00 | H |
| ATOM | 404 | H4'  | G | A | 13 | -6.434  | -21.837 | 33.430 | 1.00 | 0.00 | H |
| ATOM | 405 | H2'1 | G | A | 13 | -6.917  | -21.678 | 37.258 | 1.00 | 0.00 | H |
| ATOM | 406 | H2'2 | G | A | 13 | -5.404  | -20.783 | 37.250 | 1.00 | 0.00 | H |
| ATOM | 407 | H5'1 | G | A | 13 | -8.927  | -22.192 | 34.051 | 1.00 | 0.00 | H |
| ATOM | 408 | H5'2 | G | A | 13 | -7.821  | -23.578 | 33.974 | 1.00 | 0.00 | H |

|      |     |      |     |    |        |         |        |      |      |   |
|------|-----|------|-----|----|--------|---------|--------|------|------|---|
| ATOM | 409 | C1'  | G A | 14 | -3.866 | -16.323 | 37.395 | 1.00 | 0.00 | C |
| ATOM | 410 | N1   | G A | 14 | -7.917 | -14.711 | 40.044 | 1.00 | 0.00 | N |
| ATOM | 411 | C2   | G A | 14 | -7.000 | -13.992 | 39.299 | 1.00 | 0.00 | C |
| ATOM | 412 | N2   | G A | 14 | -7.184 | -12.666 | 39.255 | 1.00 | 0.00 | N |
| ATOM | 413 | N3   | G A | 14 | -5.979 | -14.550 | 38.649 | 1.00 | 0.00 | N |
| ATOM | 414 | C4   | G A | 14 | -5.942 | -15.898 | 38.809 | 1.00 | 0.00 | C |
| ATOM | 415 | C5   | G A | 14 | -6.809 | -16.697 | 39.535 | 1.00 | 0.00 | C |
| ATOM | 416 | C6   | G A | 14 | -7.893 | -16.108 | 40.221 | 1.00 | 0.00 | C |
| ATOM | 417 | O6   | G A | 14 | -8.761 | -16.643 | 40.912 | 1.00 | 0.00 | O |
| ATOM | 418 | N7   | G A | 14 | -6.418 | -18.037 | 39.446 | 1.00 | 0.00 | N |
| ATOM | 419 | C8   | G A | 14 | -5.356 | -18.007 | 38.685 | 1.00 | 0.00 | C |
| ATOM | 420 | N9   | G A | 14 | -5.003 | -16.743 | 38.260 | 1.00 | 0.00 | N |
| ATOM | 421 | C2'  | G A | 14 | -2.585 | -17.108 | 37.642 | 1.00 | 0.00 | C |
| ATOM | 422 | C3'  | G A | 14 | -1.995 | -17.203 | 36.244 | 1.00 | 0.00 | C |
| ATOM | 423 | O3'  | G A | 14 | -1.253 | -16.018 | 35.967 | 1.00 | 0.00 | O |
| ATOM | 424 | C4'  | G A | 14 | -3.236 | -17.327 | 35.360 | 1.00 | 0.00 | C |
| ATOM | 425 | O4'  | G A | 14 | -4.250 | -16.528 | 36.049 | 1.00 | 0.00 | O |
| ATOM | 426 | C5'  | G A | 14 | -3.777 | -18.722 | 35.156 | 1.00 | 0.00 | C |
| ATOM | 427 | O5'  | G A | 14 | -3.624 | -19.491 | 36.374 | 1.00 | 0.00 | O |
| ATOM | 428 | O1P  | G A | 14 | -1.963 | -21.271 | 35.737 | 1.00 | 0.00 | O |
| ATOM | 429 | O2P  | G A | 14 | -3.630 | -21.707 | 37.560 | 1.00 | 0.00 | O |
| ATOM | 430 | P    | G A | 14 | -3.324 | -21.053 | 36.264 | 1.00 | 0.00 | P |
| ATOM | 431 | H1   | G A | 14 | -8.675 | -14.183 | 40.503 | 1.00 | 0.00 | H |
| ATOM | 432 | H8   | G A | 14 | -4.797 | -18.902 | 38.412 | 1.00 | 0.00 | H |
| ATOM | 433 | H1'  | G A | 14 | -3.704 | -15.255 | 37.539 | 1.00 | 0.00 | H |
| ATOM | 434 | H21  | G A | 14 | -7.978 | -12.242 | 39.757 | 1.00 | 0.00 | H |
| ATOM | 435 | H3'  | G A | 14 | -1.345 | -18.071 | 36.133 | 1.00 | 0.00 | H |
| ATOM | 436 | H22  | G A | 14 | -6.535 | -12.074 | 38.720 | 1.00 | 0.00 | H |
| ATOM | 437 | H4'  | G A | 14 | -2.970 | -16.926 | 34.383 | 1.00 | 0.00 | H |
| ATOM | 438 | H2'1 | G A | 14 | -2.778 | -18.096 | 38.059 | 1.00 | 0.00 | H |
| ATOM | 439 | H2'2 | G A | 14 | -1.908 | -16.591 | 38.324 | 1.00 | 0.00 | H |
| ATOM | 440 | H5'1 | G A | 14 | -4.831 | -18.661 | 34.887 | 1.00 | 0.00 | H |
| ATOM | 441 | H5'2 | G A | 14 | -3.229 | -19.203 | 34.345 | 1.00 | 0.00 | H |
| ATOM | 442 | C1'  | A A | 15 | -2.680 | -12.214 | 39.886 | 1.00 | 0.00 | C |
| ATOM | 443 | N1   | A A | 15 | -6.493 | -13.685 | 42.991 | 1.00 | 0.00 | N |
| ATOM | 444 | C2   | A A | 15 | -6.143 | -12.500 | 42.496 | 1.00 | 0.00 | C |
| ATOM | 445 | N3   | A A | 15 | -5.146 | -12.190 | 41.695 | 1.00 | 0.00 | N |
| ATOM | 446 | C4   | A A | 15 | -4.432 | -13.291 | 41.393 | 1.00 | 0.00 | C |
| ATOM | 447 | C5   | A A | 15 | -4.656 | -14.570 | 41.817 | 1.00 | 0.00 | C |
| ATOM | 448 | C6   | A A | 15 | -5.762 | -14.764 | 42.671 | 1.00 | 0.00 | C |
| ATOM | 449 | N6   | A A | 15 | -6.105 | -15.965 | 43.167 | 1.00 | 0.00 | N |
| ATOM | 450 | N7   | A A | 15 | -3.714 | -15.441 | 41.299 | 1.00 | 0.00 | N |
| ATOM | 451 | C8   | A A | 15 | -2.944 | -14.677 | 40.582 | 1.00 | 0.00 | C |
| ATOM | 452 | N9   | A A | 15 | -3.320 | -13.357 | 40.590 | 1.00 | 0.00 | N |
| ATOM | 453 | C2'  | A A | 15 | -1.160 | -12.287 | 39.850 | 1.00 | 0.00 | C |
| ATOM | 454 | C3'  | A A | 15 | -0.845 | -11.695 | 38.485 | 1.00 | 0.00 | C |
| ATOM | 455 | O3'  | A A | 15 | -0.805 | -10.275 | 38.591 | 1.00 | 0.00 | O |
| ATOM | 456 | C4'  | A A | 15 | -2.014 | -12.178 | 37.627 | 1.00 | 0.00 | C |
| ATOM | 457 | O4'  | A A | 15 | -3.149 | -12.211 | 38.552 | 1.00 | 0.00 | O |
| ATOM | 458 | C5'  | A A | 15 | -1.865 | -13.542 | 36.996 | 1.00 | 0.00 | C |
| ATOM | 459 | O5'  | A A | 15 | -1.163 | -14.429 | 37.904 | 1.00 | 0.00 | O |
| ATOM | 460 | O1P  | A A | 15 | 1.001  | -14.895 | 36.706 | 1.00 | 0.00 | O |
| ATOM | 461 | O2P  | A A | 15 | 0.073  | -16.577 | 38.320 | 1.00 | 0.00 | O |
| ATOM | 462 | P    | A A | 15 | -0.191 | -15.537 | 37.296 | 1.00 | 0.00 | P |

|      |     |      |     |    |        |         |        |      |      |   |
|------|-----|------|-----|----|--------|---------|--------|------|------|---|
| ATOM | 463 | H2   | A A | 15 | -6.775 | -11.665 | 42.797 | 1.00 | 0.00 | H |
| ATOM | 464 | H8   | A A | 15 | -2.082 | -15.047 | 40.028 | 1.00 | 0.00 | H |
| ATOM | 465 | H1'  | A A | 15 | -3.015 | -11.292 | 40.361 | 1.00 | 0.00 | H |
| ATOM | 466 | H3'  | A A | 15 | 0.106  | -12.056 | 38.092 | 1.00 | 0.00 | H |
| ATOM | 467 | H4'  | A A | 15 | -2.139 | -11.451 | 36.826 | 1.00 | 0.00 | H |
| ATOM | 468 | H61  | A A | 15 | -6.924 | -16.051 | 43.785 | 1.00 | 0.00 | H |
| ATOM | 469 | H62  | A A | 15 | -5.547 | -16.798 | 42.927 | 1.00 | 0.00 | H |
| ATOM | 470 | H2'1 | A A | 15 | -0.794 | -13.311 | 39.933 | 1.00 | 0.00 | H |
| ATOM | 471 | H2'2 | A A | 15 | -0.698 | -11.708 | 40.650 | 1.00 | 0.00 | H |
| ATOM | 472 | H5'1 | A A | 15 | -2.854 | -13.945 | 36.779 | 1.00 | 0.00 | H |
| ATOM | 473 | H5'2 | A A | 15 | -1.304 | -13.447 | 36.068 | 1.00 | 0.00 | H |
| ATOM | 474 | C1'  | C A | 16 | -3.223 | -8.960  | 43.599 | 1.00 | 0.00 | C |
| ATOM | 475 | N1   | C A | 16 | -3.081 | -10.414 | 43.886 | 1.00 | 0.00 | N |
| ATOM | 476 | C2   | C A | 16 | -4.027 | -11.011 | 44.716 | 1.00 | 0.00 | C |
| ATOM | 477 | O2   | C A | 16 | -4.939 | -10.314 | 45.179 | 1.00 | 0.00 | O |
| ATOM | 478 | N3   | C A | 16 | -3.915 | -12.334 | 44.991 | 1.00 | 0.00 | N |
| ATOM | 479 | C4   | C A | 16 | -2.916 | -13.061 | 44.475 | 1.00 | 0.00 | C |
| ATOM | 480 | N4   | C A | 16 | -2.858 | -14.351 | 44.774 | 1.00 | 0.00 | N |
| ATOM | 481 | C5   | C A | 16 | -1.926 | -12.474 | 43.621 | 1.00 | 0.00 | C |
| ATOM | 482 | C6   | C A | 16 | -2.060 | -11.140 | 43.355 | 1.00 | 0.00 | C |
| ATOM | 483 | C2'  | C A | 16 | -1.897 | -8.216  | 43.528 | 1.00 | 0.00 | C |
| ATOM | 484 | C3'  | C A | 16 | -2.166 | -7.193  | 42.434 | 1.00 | 0.00 | C |
| ATOM | 485 | O3'  | C A | 16 | -2.807 | -6.056  | 43.005 | 1.00 | 0.00 | O |
| ATOM | 486 | C4'  | C A | 16 | -3.080 | -7.953  | 41.476 | 1.00 | 0.00 | C |
| ATOM | 487 | O4'  | C A | 16 | -3.866 | -8.831  | 42.344 | 1.00 | 0.00 | O |
| ATOM | 488 | C5'  | C A | 16 | -2.397 | -8.799  | 40.425 | 1.00 | 0.00 | C |
| ATOM | 489 | O5'  | C A | 16 | -1.201 | -9.399  | 40.981 | 1.00 | 0.00 | O |
| ATOM | 490 | O1P  | C A | 16 | 0.657  | -8.310  | 39.678 | 1.00 | 0.00 | O |
| ATOM | 491 | O2P  | C A | 16 | 0.981  | -10.600 | 40.648 | 1.00 | 0.00 | O |
| ATOM | 492 | P    | C A | 16 | 0.062  | -9.614  | 40.031 | 1.00 | 0.00 | P |
| ATOM | 493 | H5   | C A | 16 | -1.106 | -13.061 | 43.205 | 1.00 | 0.00 | H |
| ATOM | 494 | H6   | C A | 16 | -1.336 | -10.650 | 42.704 | 1.00 | 0.00 | H |
| ATOM | 495 | H1'  | C A | 16 | -3.876 | -8.525  | 44.356 | 1.00 | 0.00 | H |
| ATOM | 496 | H3'  | C A | 16 | -1.247 | -6.879  | 41.937 | 1.00 | 0.00 | H |
| ATOM | 497 | H4'  | C A | 16 | -3.686 | -7.209  | 40.960 | 1.00 | 0.00 | H |
| ATOM | 498 | H41  | C A | 16 | -2.100 | -14.934 | 44.389 | 1.00 | 0.00 | H |
| ATOM | 499 | H42  | C A | 16 | -3.568 | -14.771 | 45.390 | 1.00 | 0.00 | H |
| ATOM | 500 | H2'1 | C A | 16 | -1.068 | -8.872  | 43.262 | 1.00 | 0.00 | H |
| ATOM | 501 | H2'2 | C A | 16 | -1.643 | -7.732  | 44.471 | 1.00 | 0.00 | H |
| ATOM | 502 | H5'1 | C A | 16 | -3.083 | -9.579  | 40.094 | 1.00 | 0.00 | H |
| ATOM | 503 | H5'2 | C A | 16 | -2.133 | -8.169  | 39.576 | 1.00 | 0.00 | H |
| ATOM | 504 | C1'  | G A | 17 | -4.572 | -7.597  | 48.164 | 1.00 | 0.00 | C |
| ATOM | 505 | N1   | G A | 17 | -3.920 | -12.545 | 49.223 | 1.00 | 0.00 | N |
| ATOM | 506 | C2   | G A | 17 | -4.924 | -11.677 | 49.616 | 1.00 | 0.00 | C |
| ATOM | 507 | N2   | G A | 17 | -5.879 | -12.196 | 50.398 | 1.00 | 0.00 | N |
| ATOM | 508 | N3   | G A | 17 | -4.970 | -10.395 | 49.259 | 1.00 | 0.00 | N |
| ATOM | 509 | C4   | G A | 17 | -3.919 | -10.039 | 48.474 | 1.00 | 0.00 | C |
| ATOM | 510 | C5   | G A | 17 | -2.872 | -10.833 | 48.035 | 1.00 | 0.00 | C |
| ATOM | 511 | C6   | G A | 17 | -2.824 | -12.196 | 48.410 | 1.00 | 0.00 | C |
| ATOM | 512 | O6   | G A | 17 | -1.986 | -13.051 | 48.126 | 1.00 | 0.00 | O |
| ATOM | 513 | N7   | G A | 17 | -1.995 | -10.084 | 47.247 | 1.00 | 0.00 | N |
| ATOM | 514 | C8   | G A | 17 | -2.528 | -8.890  | 47.231 | 1.00 | 0.00 | C |
| ATOM | 515 | N9   | G A | 17 | -3.698 | -8.783  | 47.954 | 1.00 | 0.00 | N |
| ATOM | 516 | C2'  | G A | 17 | -3.807 | -6.290  | 48.320 | 1.00 | 0.00 | C |



|      |     |      |     |    |        |         |        |      |      |   |
|------|-----|------|-----|----|--------|---------|--------|------|------|---|
| ATOM | 517 | C3'  | G A | 17 | -4.727 | -5.298  | 47.630 | 1.00 | 0.00 | C |
| ATOM | 518 | O3'  | G A | 17 | -5.722 | -4.861  | 48.553 | 1.00 | 0.00 | O |
| ATOM | 519 | C4'  | G A | 17 | -5.321 | -6.123  | 46.489 | 1.00 | 0.00 | C |
| ATOM | 520 | O4'  | G A | 17 | -5.414 | -7.477  | 47.033 | 1.00 | 0.00 | O |
| ATOM | 521 | C5'  | G A | 17 | -4.521 | -6.169  | 45.208 | 1.00 | 0.00 | C |
| ATOM | 522 | O5'  | G A | 17 | -3.105 | -6.195  | 45.515 | 1.00 | 0.00 | O |
| ATOM | 523 | O1P  | G A | 17 | -2.275 | -3.996  | 44.614 | 1.00 | 0.00 | O |
| ATOM | 524 | O2P  | G A | 17 | -0.718 | -5.957  | 44.771 | 1.00 | 0.00 | O |
| ATOM | 525 | P    | G A | 17 | -2.093 | -5.458  | 44.527 | 1.00 | 0.00 | P |
| ATOM | 526 | H1   | G A | 17 | -3.981 | -13.521 | 49.549 | 1.00 | 0.00 | H |
| ATOM | 527 | H8   | G A | 17 | -2.085 | -8.051  | 46.693 | 1.00 | 0.00 | H |
| ATOM | 528 | H1'  | G A | 17 | -5.202 | -7.787  | 49.033 | 1.00 | 0.00 | H |
| ATOM | 529 | H21  | G A | 17 | -5.839 | -13.189 | 50.668 | 1.00 | 0.00 | H |
| ATOM | 530 | H3'  | G A | 17 | -4.184 | -4.433  | 47.248 | 1.00 | 0.00 | H |
| ATOM | 531 | H22  | G A | 17 | -6.653 | -11.602 | 50.728 | 1.00 | 0.00 | H |
| ATOM | 532 | H4'  | G A | 17 | -6.294 | -5.689  | 46.258 | 1.00 | 0.00 | H |
| ATOM | 533 | H2'1 | G A | 17 | -2.828 | -6.324  | 47.840 | 1.00 | 0.00 | H |
| ATOM | 534 | H2'2 | G A | 17 | -3.649 | -6.025  | 49.366 | 1.00 | 0.00 | H |
| ATOM | 535 | H5'1 | G A | 17 | -4.794 | -7.064  | 44.649 | 1.00 | 0.00 | H |
| ATOM | 536 | H5'2 | G A | 17 | -4.754 | -5.289  | 44.609 | 1.00 | 0.00 | H |
| ATOM | 537 | C1'  | G A | 18 | -5.571 | -8.432  | 52.942 | 1.00 | 0.00 | C |
| ATOM | 538 | N1   | G A | 18 | -2.450 | -12.418 | 52.313 | 1.00 | 0.00 | N |
| ATOM | 539 | C2   | G A | 18 | -3.658 | -12.333 | 52.983 | 1.00 | 0.00 | C |
| ATOM | 540 | N2   | G A | 18 | -4.091 | -13.460 | 53.565 | 1.00 | 0.00 | N |
| ATOM | 541 | N3   | G A | 18 | -4.376 | -11.215 | 53.065 | 1.00 | 0.00 | N |
| ATOM | 542 | C4   | G A | 18 | -3.784 | -10.172 | 52.427 | 1.00 | 0.00 | C |
| ATOM | 543 | C5   | G A | 18 | -2.581 | -10.162 | 51.738 | 1.00 | 0.00 | C |
| ATOM | 544 | C6   | G A | 18 | -1.820 | -11.351 | 51.646 | 1.00 | 0.00 | C |
| ATOM | 545 | O6   | G A | 18 | -0.740 | -11.538 | 51.085 | 1.00 | 0.00 | O |
| ATOM | 546 | N7   | G A | 18 | -2.328 | -8.888  | 51.227 | 1.00 | 0.00 | N |
| ATOM | 547 | C8   | G A | 18 | -3.361 | -8.183  | 51.609 | 1.00 | 0.00 | C |
| ATOM | 548 | N9   | G A | 18 | -4.288 | -8.893  | 52.344 | 1.00 | 0.00 | N |
| ATOM | 549 | C2'  | G A | 18 | -5.513 | -7.020  | 53.507 | 1.00 | 0.00 | C |
| ATOM | 550 | C3'  | G A | 18 | -6.902 | -6.493  | 53.192 | 1.00 | 0.00 | C |
| ATOM | 551 | O3'  | G A | 18 | -7.802 | -6.900  | 54.221 | 1.00 | 0.00 | O |
| ATOM | 552 | C4'  | G A | 18 | -7.222 | -7.154  | 51.852 | 1.00 | 0.00 | C |
| ATOM | 553 | O4'  | G A | 18 | -6.554 | -8.454  | 51.925 | 1.00 | 0.00 | O |
| ATOM | 554 | C5'  | G A | 18 | -6.740 | -6.432  | 50.617 | 1.00 | 0.00 | C |
| ATOM | 555 | O5'  | G A | 18 | -5.456 | -5.812  | 50.879 | 1.00 | 0.00 | O |
| ATOM | 556 | O1P  | G A | 18 | -5.958 | -3.349  | 50.736 | 1.00 | 0.00 | O |
| ATOM | 557 | O2P  | G A | 18 | -3.652 | -4.192  | 50.222 | 1.00 | 0.00 | O |
| ATOM | 558 | P    | G A | 18 | -5.116 | -4.422  | 50.173 | 1.00 | 0.00 | P |
| ATOM | 559 | H1   | G A | 18 | -1.975 | -13.334 | 52.303 | 1.00 | 0.00 | H |
| ATOM | 560 | H8   | G A | 18 | -3.480 | -7.126  | 51.371 | 1.00 | 0.00 | H |
| ATOM | 561 | H1'  | G A | 18 | -5.866 | -9.148  | 53.709 | 1.00 | 0.00 | H |
| ATOM | 562 | H21  | G A | 18 | -3.530 | -14.322 | 53.493 | 1.00 | 0.00 | H |
| ATOM | 563 | H3'  | G A | 18 | -6.919 | -5.406  | 53.108 | 1.00 | 0.00 | H |
| ATOM | 564 | H22  | G A | 18 | -4.981 | -13.462 | 54.080 | 1.00 | 0.00 | H |
| ATOM | 565 | H4'  | G A | 18 | -8.306 | -7.236  | 51.790 | 1.00 | 0.00 | H |
| ATOM | 566 | H2'1 | G A | 18 | -4.742 | -6.415  | 53.030 | 1.00 | 0.00 | H |
| ATOM | 567 | H2'2 | G A | 18 | -5.317 | -7.011  | 54.580 | 1.00 | 0.00 | H |
| ATOM | 568 | H5'1 | G A | 18 | -6.645 | -7.146  | 49.799 | 1.00 | 0.00 | H |
| ATOM | 569 | H5'2 | G A | 18 | -7.468 | -5.669  | 50.342 | 1.00 | 0.00 | H |
| ATOM | 570 | C1'  | T A | 19 | -5.196 | -10.924 | 57.202 | 1.00 | 0.00 | C |

|      |     |      |       |    |        |         |        |      |      |   |
|------|-----|------|-------|----|--------|---------|--------|------|------|---|
| ATOM | 571 | N1   | T A   | 19 | -3.970 | -10.506 | 56.472 | 1.00 | 0.00 | N |
| ATOM | 572 | C2   | T A   | 19 | -3.021 | -11.477 | 56.225 | 1.00 | 0.00 | C |
| ATOM | 573 | O2   | T A   | 19 | -3.156 | -12.636 | 56.578 | 1.00 | 0.00 | O |
| ATOM | 574 | N3   | T A   | 19 | -1.899 | -11.045 | 55.543 | 1.00 | 0.00 | N |
| ATOM | 575 | C4   | T A   | 19 | -1.647 | -9.763  | 55.103 | 1.00 | 0.00 | C |
| ATOM | 576 | O4   | T A   | 19 | -0.600 | -9.494  | 54.503 | 1.00 | 0.00 | O |
| ATOM | 577 | C5   | T A   | 19 | -2.695 | -8.817  | 55.407 | 1.00 | 0.00 | C |
| ATOM | 578 | C6   | T A   | 19 | -3.804 | -9.203  | 56.070 | 1.00 | 0.00 | C |
| ATOM | 579 | C7   | T A   | 19 | -2.465 | -7.409  | 54.945 | 1.00 | 0.00 | C |
| ATOM | 580 | C2'  | T A   | 19 | -5.709 | -9.882  | 58.189 | 1.00 | 0.00 | C |
| ATOM | 581 | C3'  | T A   | 19 | -7.215 | -10.054 | 58.078 | 1.00 | 0.00 | C |
| ATOM | 582 | O3'  | T A   | 19 | -7.631 | -11.115 | 58.934 | 1.00 | 0.00 | O |
| ATOM | 583 | C4'  | T A   | 19 | -7.409 | -10.393 | 56.602 | 1.00 | 0.00 | C |
| ATOM | 584 | O4'  | T A   | 19 | -6.212 | -11.153 | 56.246 | 1.00 | 0.00 | O |
| ATOM | 585 | C5'  | T A   | 19 | -7.540 | -9.223  | 55.654 | 1.00 | 0.00 | C |
| ATOM | 586 | O5'  | T A   | 19 | -6.670 | -8.146  | 56.084 | 1.00 | 0.00 | O |
| ATOM | 587 | O1P  | T A   | 19 | -8.278 | -6.326  | 56.744 | 1.00 | 0.00 | O |
| ATOM | 588 | O2P  | T A   | 19 | -5.970 | -5.736  | 55.956 | 1.00 | 0.00 | O |
| ATOM | 589 | P    | T A   | 19 | -7.141 | -6.640  | 55.855 | 1.00 | 0.00 | P |
| ATOM | 590 | H3   | T A   | 19 | -1.178 | -11.753 | 55.343 | 1.00 | 0.00 | H |
| ATOM | 591 | H6   | T A   | 19 | -4.581 | -8.471  | 56.288 | 1.00 | 0.00 | H |
| ATOM | 592 | H1'  | T A   | 19 | -4.988 | -11.869 | 57.705 | 1.00 | 0.00 | H |
| ATOM | 593 | H3'  | T A   | 19 | -7.749 | -9.142  | 58.346 | 1.00 | 0.00 | H |
| ATOM | 594 | H4'  | T A   | 19 | -8.325 | -10.982 | 56.530 | 1.00 | 0.00 | H |
| ATOM | 595 | H71  | T A   | 19 | -2.366 | -6.754  | 55.810 | 1.00 | 0.00 | H |
| ATOM | 596 | H72  | T A   | 19 | -1.551 | -7.367  | 54.351 | 1.00 | 0.00 | H |
| ATOM | 597 | H73  | T A   | 19 | -3.308 | -7.082  | 54.336 | 1.00 | 0.00 | H |
| ATOM | 598 | H2'1 | T A   | 19 | -5.402 | -8.873  | 57.919 | 1.00 | 0.00 | H |
| ATOM | 599 | H2'2 | T A   | 19 | -5.361 | -10.069 | 59.206 | 1.00 | 0.00 | H |
| ATOM | 600 | H5'1 | T A   | 19 | -7.262 | -9.542  | 54.650 | 1.00 | 0.00 | H |
| ATOM | 601 | H5'2 | T A   | 19 | -8.573 | -8.881  | 55.648 | 1.00 | 0.00 | H |
| ATOM | 602 | C01  | LNK A | 20 | -8.347 | -11.149 | 62.587 | 0.00 | 0.00 | C |
| ATOM | 603 | O1   | LNK A | 20 | -7.918 | -10.484 | 61.396 | 1.00 | 0.00 | O |
| ATOM | 604 | S    | LNK A | 20 | -8.698 | -10.406 | 66.482 | 0.00 | 0.00 | S |
| ATOM | 605 | C02  | LNK A | 20 | -8.207 | -10.192 | 63.786 | 0.00 | 0.00 | C |
| ATOM | 606 | C03  | LNK A | 20 | -7.767 | -10.988 | 65.030 | 0.00 | 0.00 | C |
| ATOM | 607 | O1P  | LNK A | 20 | -5.612 | -10.277 | 60.408 | 1.00 | 0.00 | O |
| ATOM | 608 | O2P  | LNK A | 20 | -6.527 | -12.538 | 60.999 | 1.00 | 0.00 | O |
| ATOM | 609 | P    | LNK A | 20 | -6.787 | -11.165 | 60.501 | 1.00 | 0.00 | P |
| ATOM | 610 | H01  | LNK A | 20 | -7.731 | -12.033 | 62.754 | 0.00 | 0.00 | H |
| ATOM | 611 | H02  | LNK A | 20 | -9.390 | -11.448 | 62.482 | 0.00 | 0.00 | H |
| ATOM | 612 | H03  | LNK A | 20 | -6.701 | -10.839 | 65.199 | 0.00 | 0.00 | H |
| ATOM | 613 | H04  | LNK A | 20 | -9.165 | -9.711  | 63.982 | 0.00 | 0.00 | H |
| ATOM | 614 | H05  | LNK A | 20 | -7.459 | -9.432  | 63.559 | 0.00 | 0.00 | H |
| ATOM | 615 | H06  | LNK A | 20 | -7.966 | -12.048 | 64.872 | 0.00 | 0.00 | H |
| ATOM | 616 | AU   | LNK A | 20 | -8.435 | -10.686 | 67.050 |      |      |   |
| TER  |     |      |       |    |        |         |        |      |      |   |
| ATOM | 618 | C1'  | A B   | 2  | 3.357  | -17.034 | 54.302 | 1.00 | 0.00 | C |
| ATOM | 619 | N1   | A B   | 2  | 0.181  | -13.057 | 54.965 | 1.00 | 0.00 | N |
| ATOM | 620 | C2   | A B   | 2  | 0.101  | -14.337 | 55.312 | 1.00 | 0.00 | C |
| ATOM | 621 | N3   | A B   | 2  | 0.960  | -15.313 | 55.112 | 1.00 | 0.00 | N |
| ATOM | 622 | C4   | A B   | 2  | 2.040  | -14.855 | 54.451 | 1.00 | 0.00 | C |
| ATOM | 623 | C5   | A B   | 2  | 2.274  | -13.578 | 54.027 | 1.00 | 0.00 | C |
| ATOM | 624 | C6   | A B   | 2  | 1.270  | -12.628 | 54.309 | 1.00 | 0.00 | C |

|      |     |      |     |   |        |         |        |      |      |   |
|------|-----|------|-----|---|--------|---------|--------|------|------|---|
| ATOM | 625 | N6   | A B | 2 | 1.361  | -11.335 | 53.953 | 1.00 | 0.00 | N |
| ATOM | 626 | N7   | A B | 2 | 3.496  | -13.481 | 53.383 | 1.00 | 0.00 | N |
| ATOM | 627 | C8   | A B | 2 | 3.967  | -14.692 | 53.427 | 1.00 | 0.00 | C |
| ATOM | 628 | N9   | A B | 2 | 3.140  | -15.580 | 54.064 | 1.00 | 0.00 | N |
| ATOM | 629 | C2'  | A B | 2 | 4.047  | -17.748 | 53.148 | 1.00 | 0.00 | C |
| ATOM | 630 | C3'  | A B | 2 | 4.911  | -18.765 | 53.875 | 1.00 | 0.00 | C |
| ATOM | 631 | O3'  | A B | 2 | 4.128  | -19.921 | 54.166 | 1.00 | 0.00 | O |
| ATOM | 632 | C4'  | A B | 2 | 5.326  | -18.015 | 55.141 | 1.00 | 0.00 | C |
| ATOM | 633 | O4'  | A B | 2 | 4.176  | -17.163 | 55.449 | 1.00 | 0.00 | O |
| ATOM | 634 | C5'  | A B | 2 | 6.557  | -17.147 | 55.034 | 1.00 | 0.00 | C |
| ATOM | 635 | O5'  | A B | 2 | 6.606  | -16.525 | 53.725 | 1.00 | 0.00 | O |
| ATOM | 636 | H2   | A B | 2 | -0.809 | -14.621 | 55.838 | 1.00 | 0.00 | H |
| ATOM | 637 | H8   | A B | 2 | 4.930  | -14.974 | 52.999 | 1.00 | 0.00 | H |
| ATOM | 638 | H1'  | A B | 2 | 2.392  | -17.490 | 54.524 | 1.00 | 0.00 | H |
| ATOM | 639 | H3'  | A B | 2 | 5.781  | -19.057 | 53.289 | 1.00 | 0.00 | H |
| ATOM | 640 | H4'  | A B | 2 | 5.514  | -18.768 | 55.906 | 1.00 | 0.00 | H |
| ATOM | 641 | H61  | A B | 2 | 0.601  | -10.682 | 54.186 | 1.00 | 0.00 | H |
| ATOM | 642 | H62  | A B | 2 | 2.194  | -10.999 | 53.447 | 1.00 | 0.00 | H |
| ATOM | 643 | H2'1 | A B | 2 | 4.653  | -17.072 | 52.545 | 1.00 | 0.00 | H |
| ATOM | 644 | H2'2 | A B | 2 | 3.337  | -18.236 | 52.480 | 1.00 | 0.00 | H |
| ATOM | 645 | H5'1 | A B | 2 | 6.520  | -16.378 | 55.805 | 1.00 | 0.00 | H |
| ATOM | 646 | H5'2 | A B | 2 | 7.442  | -17.763 | 55.183 | 1.00 | 0.00 | H |
| ATOM | 647 | C1'  | C B | 3 | -1.328 | -18.413 | 53.405 | 1.00 | 0.00 | C |
| ATOM | 648 | N1   | C B | 3 | -0.752 | -17.215 | 52.735 | 1.00 | 0.00 | N |
| ATOM | 649 | C2   | C B | 3 | -1.470 | -16.023 | 52.798 | 1.00 | 0.00 | C |
| ATOM | 650 | O2   | C B | 3 | -2.549 | -16.008 | 53.406 | 1.00 | 0.00 | O |
| ATOM | 651 | N3   | C B | 3 | -0.963 | -14.921 | 52.194 | 1.00 | 0.00 | N |
| ATOM | 652 | C4   | C B | 3 | 0.207  | -14.969 | 51.543 | 1.00 | 0.00 | C |
| ATOM | 653 | N4   | C B | 3 | 0.657  | -13.860 | 50.973 | 1.00 | 0.00 | N |
| ATOM | 654 | C5   | C B | 3 | 0.966  | -16.183 | 51.456 | 1.00 | 0.00 | C |
| ATOM | 655 | C6   | C B | 3 | 0.438  | -17.280 | 52.077 | 1.00 | 0.00 | C |
| ATOM | 656 | C2'  | C B | 3 | -1.105 | -19.711 | 52.642 | 1.00 | 0.00 | C |
| ATOM | 657 | C3'  | C B | 3 | -0.903 | -20.712 | 53.769 | 1.00 | 0.00 | C |
| ATOM | 658 | O3'  | C B | 3 | -2.176 | -21.163 | 54.227 | 1.00 | 0.00 | O |
| ATOM | 659 | C4'  | C B | 3 | -0.168 | -19.889 | 54.826 | 1.00 | 0.00 | C |
| ATOM | 660 | O4'  | C B | 3 | -0.706 | -18.537 | 54.670 | 1.00 | 0.00 | O |
| ATOM | 661 | C5'  | C B | 3 | 1.336  | -19.828 | 54.702 | 1.00 | 0.00 | C |
| ATOM | 662 | O5'  | C B | 3 | 1.711  | -19.788 | 53.302 | 1.00 | 0.00 | O |
| ATOM | 663 | O1P  | C B | 3 | 2.913  | -21.973 | 52.958 | 1.00 | 0.00 | O |
| ATOM | 664 | O2P  | C B | 3 | 3.469  | -19.994 | 51.518 | 1.00 | 0.00 | O |
| ATOM | 665 | P    | C B | 3 | 3.059  | -20.507 | 52.848 | 1.00 | 0.00 | P |
| ATOM | 666 | H5   | C B | 3 | 1.915  | -16.229 | 50.922 | 1.00 | 0.00 | H |
| ATOM | 667 | H6   | C B | 3 | 0.982  | -18.224 | 52.045 | 1.00 | 0.00 | H |
| ATOM | 668 | H1'  | C B | 3 | -2.391 | -18.234 | 53.570 | 1.00 | 0.00 | H |
| ATOM | 669 | H3'  | C B | 3 | -0.308 | -21.568 | 53.454 | 1.00 | 0.00 | H |
| ATOM | 670 | H4'  | C B | 3 | -0.403 | -20.333 | 55.793 | 1.00 | 0.00 | H |
| ATOM | 671 | H41  | C B | 3 | 1.556  | -13.869 | 50.469 | 1.00 | 0.00 | H |
| ATOM | 672 | H42  | C B | 3 | 0.109  | -12.989 | 51.034 | 1.00 | 0.00 | H |
| ATOM | 673 | H2'1 | C B | 3 | -0.231 | -19.664 | 51.993 | 1.00 | 0.00 | H |
| ATOM | 674 | H2'2 | C B | 3 | -1.961 | -19.978 | 52.022 | 1.00 | 0.00 | H |
| ATOM | 675 | H5'1 | C B | 3 | 1.701  | -18.932 | 55.206 | 1.00 | 0.00 | H |
| ATOM | 676 | H5'2 | C B | 3 | 1.770  | -20.707 | 55.174 | 1.00 | 0.00 | H |
| ATOM | 677 | C1'  | C B | 4 | -6.037 | -17.606 | 52.103 | 1.00 | 0.00 | C |
| ATOM | 678 | N1   | C B | 4 | -4.921 | -17.127 | 51.243 | 1.00 | 0.00 | N |

|      |     |      |     |   |         |         |        |      |      |   |
|------|-----|------|-----|---|---------|---------|--------|------|------|---|
| ATOM | 679 | C2   | C B | 4 | -4.929  | -15.791 | 50.847 | 1.00 | 0.00 | C |
| ATOM | 680 | O2   | C B | 4 | -5.856  | -15.061 | 51.224 | 1.00 | 0.00 | O |
| ATOM | 681 | N3   | C B | 4 | -3.923  | -15.334 | 50.064 | 1.00 | 0.00 | N |
| ATOM | 682 | C4   | C B | 4 | -2.933  | -16.148 | 49.670 | 1.00 | 0.00 | C |
| ATOM | 683 | N4   | C B | 4 | -1.971  | -15.649 | 48.908 | 1.00 | 0.00 | N |
| ATOM | 684 | C5   | C B | 4 | -2.901  | -17.528 | 50.058 | 1.00 | 0.00 | C |
| ATOM | 685 | C6   | C B | 4 | -3.923  | -17.965 | 50.852 | 1.00 | 0.00 | C |
| ATOM | 686 | C2'  | C B | 4 | -6.499  | -19.020 | 51.778 | 1.00 | 0.00 | C |
| ATOM | 687 | C3'  | C B | 4 | -6.853  | -19.561 | 53.155 | 1.00 | 0.00 | C |
| ATOM | 688 | O3'  | C B | 4 | -8.183  | -19.170 | 53.484 | 1.00 | 0.00 | O |
| ATOM | 689 | C4'  | C B | 4 | -5.815  | -18.899 | 54.058 | 1.00 | 0.00 | C |
| ATOM | 690 | O4'  | C B | 4 | -5.584  | -17.590 | 53.443 | 1.00 | 0.00 | O |
| ATOM | 691 | C5'  | C B | 4 | -4.488  | -19.610 | 54.191 | 1.00 | 0.00 | C |
| ATOM | 692 | O5'  | C B | 4 | -4.127  | -20.216 | 52.925 | 1.00 | 0.00 | O |
| ATOM | 693 | O1P  | C B | 4 | -4.208  | -22.683 | 53.415 | 1.00 | 0.00 | O |
| ATOM | 694 | O2P  | C B | 4 | -2.700  | -21.811 | 51.610 | 1.00 | 0.00 | O |
| ATOM | 695 | P    | C B | 4 | -3.332  | -21.597 | 52.934 | 1.00 | 0.00 | P |
| ATOM | 696 | H5   | C B | 4 | -2.102  | -18.196 | 49.735 | 1.00 | 0.00 | H |
| ATOM | 697 | H6   | C B | 4 | -3.939  | -19.004 | 51.178 | 1.00 | 0.00 | H |
| ATOM | 698 | H1'  | C B | 4 | -6.861  | -16.897 | 52.019 | 1.00 | 0.00 | H |
| ATOM | 699 | H3'  | C B | 4 | -6.775  | -20.648 | 53.198 | 1.00 | 0.00 | H |
| ATOM | 700 | H4'  | C B | 4 | -6.257  | -18.830 | 55.052 | 1.00 | 0.00 | H |
| ATOM | 701 | H41  | C B | 4 | -1.196  | -16.252 | 48.593 | 1.00 | 0.00 | H |
| ATOM | 702 | H42  | C B | 4 | -1.997  | -14.656 | 48.628 | 1.00 | 0.00 | H |
| ATOM | 703 | H2'1 | C B | 4 | -5.716  | -19.613 | 51.308 | 1.00 | 0.00 | H |
| ATOM | 704 | H2'2 | C B | 4 | -7.363  | -19.030 | 51.113 | 1.00 | 0.00 | H |
| ATOM | 705 | H5'1 | C B | 4 | -3.725  | -18.891 | 54.487 | 1.00 | 0.00 | H |
| ATOM | 706 | H5'2 | C B | 4 | -4.572  | -20.380 | 54.957 | 1.00 | 0.00 | H |
| ATOM | 707 | C1'  | G B | 5 | -9.653  | -15.117 | 49.810 | 1.00 | 0.00 | C |
| ATOM | 708 | N1   | G B | 5 | -5.880  | -13.600 | 46.729 | 1.00 | 0.00 | N |
| ATOM | 709 | C2   | G B | 5 | -6.929  | -12.877 | 47.272 | 1.00 | 0.00 | C |
| ATOM | 710 | N2   | G B | 5 | -6.979  | -11.580 | 46.949 | 1.00 | 0.00 | N |
| ATOM | 711 | N3   | G B | 5 | -7.851  | -13.409 | 48.073 | 1.00 | 0.00 | N |
| ATOM | 712 | C4   | G B | 5 | -7.648  | -14.735 | 48.286 | 1.00 | 0.00 | C |
| ATOM | 713 | C5   | G B | 5 | -6.635  | -15.536 | 47.784 | 1.00 | 0.00 | C |
| ATOM | 714 | C6   | G B | 5 | -5.654  | -14.974 | 46.938 | 1.00 | 0.00 | C |
| ATOM | 715 | O6   | G B | 5 | -4.690  | -15.517 | 46.400 | 1.00 | 0.00 | O |
| ATOM | 716 | N7   | G B | 5 | -6.787  | -16.847 | 48.242 | 1.00 | 0.00 | N |
| ATOM | 717 | C8   | G B | 5 | -7.858  | -16.800 | 48.992 | 1.00 | 0.00 | C |
| ATOM | 718 | N9   | G B | 5 | -8.439  | -15.550 | 49.066 | 1.00 | 0.00 | N |
| ATOM | 719 | C2'  | G B | 5 | -10.770 | -16.151 | 49.815 | 1.00 | 0.00 | C |
| ATOM | 720 | C3'  | G B | 5 | -11.369 | -15.964 | 51.200 | 1.00 | 0.00 | C |
| ATOM | 721 | O3'  | G B | 5 | -12.315 | -14.898 | 51.162 | 1.00 | 0.00 | O |
| ATOM | 722 | C4'  | G B | 5 | -10.150 | -15.625 | 52.055 | 1.00 | 0.00 | C |
| ATOM | 723 | O4'  | G B | 5 | -9.274  | -14.877 | 51.152 | 1.00 | 0.00 | O |
| ATOM | 724 | C5'  | G B | 5 | -9.378  | -16.794 | 52.619 | 1.00 | 0.00 | C |
| ATOM | 725 | O5'  | G B | 5 | -9.362  | -17.880 | 51.659 | 1.00 | 0.00 | O |
| ATOM | 726 | O1P  | G B | 5 | -10.702 | -19.683 | 52.794 | 1.00 | 0.00 | O |
| ATOM | 727 | O2P  | G B | 5 | -8.937  | -20.297 | 51.121 | 1.00 | 0.00 | O |
| ATOM | 728 | P    | G B | 5 | -9.387  | -19.381 | 52.197 | 1.00 | 0.00 | P |
| ATOM | 729 | H1   | G B | 5 | -5.215  | -13.092 | 46.126 | 1.00 | 0.00 | H |
| ATOM | 730 | H8   | G B | 5 | -8.260  | -17.670 | 49.510 | 1.00 | 0.00 | H |
| ATOM | 731 | H1'  | G B | 5 | -9.995  | -14.174 | 49.385 | 1.00 | 0.00 | H |
| ATOM | 732 | H21  | G B | 5 | -6.261  | -11.174 | 46.332 | 1.00 | 0.00 | H |

|      |     |      |     |   |         |         |        |      |      |   |
|------|-----|------|-----|---|---------|---------|--------|------|------|---|
| ATOM | 733 | H3'  | G B | 5 | -11.860 | -16.870 | 51.559 | 1.00 | 0.00 | H |
| ATOM | 734 | H22  | G B | 5 | -7.737  | -10.987 | 47.318 | 1.00 | 0.00 | H |
| ATOM | 735 | H4'  | G B | 5 | -10.506 | -15.026 | 52.893 | 1.00 | 0.00 | H |
| ATOM | 736 | H2'1 | G B | 5 | -10.396 | -17.166 | 49.678 | 1.00 | 0.00 | H |
| ATOM | 737 | H2'2 | G B | 5 | -11.509 | -15.966 | 49.035 | 1.00 | 0.00 | H |
| ATOM | 738 | H5'1 | G B | 5 | -8.358  | -16.478 | 52.835 | 1.00 | 0.00 | H |
| ATOM | 739 | H5'2 | G B | 5 | -9.854  | -17.126 | 53.541 | 1.00 | 0.00 | H |
| ATOM | 740 | C1'  | T B | 6 | -11.476 | -12.106 | 46.329 | 1.00 | 0.00 | C |
| ATOM | 741 | N1   | T B | 6 | -10.628 | -13.267 | 45.946 | 1.00 | 0.00 | N |
| ATOM | 742 | C2   | T B | 6 | -9.561  | -13.017 | 45.108 | 1.00 | 0.00 | C |
| ATOM | 743 | O2   | T B | 6 | -9.300  | -11.905 | 44.683 | 1.00 | 0.00 | O |
| ATOM | 744 | N3   | T B | 6 | -8.799  | -14.124 | 44.778 | 1.00 | 0.00 | N |
| ATOM | 745 | C4   | T B | 6 | -9.008  | -15.421 | 45.198 | 1.00 | 0.00 | C |
| ATOM | 746 | O4   | T B | 6 | -8.258  | -16.333 | 44.833 | 1.00 | 0.00 | O |
| ATOM | 747 | C5   | T B | 6 | -10.146 | -15.581 | 46.072 | 1.00 | 0.00 | C |
| ATOM | 748 | C6   | T B | 6 | -10.910 | -14.526 | 46.415 | 1.00 | 0.00 | C |
| ATOM | 749 | C7   | T B | 6 | -10.409 | -16.977 | 46.556 | 1.00 | 0.00 | C |
| ATOM | 750 | C2'  | T B | 6 | -12.961 | -12.435 | 46.419 | 1.00 | 0.00 | C |
| ATOM | 751 | C3'  | T B | 6 | -13.409 | -11.562 | 47.582 | 1.00 | 0.00 | C |
| ATOM | 752 | O3'  | T B | 6 | -13.697 | -10.251 | 47.099 | 1.00 | 0.00 | O |
| ATOM | 753 | C4'  | T B | 6 | -12.197 | -11.583 | 48.510 | 1.00 | 0.00 | C |
| ATOM | 754 | O4'  | T B | 6 | -11.051 | -11.663 | 47.603 | 1.00 | 0.00 | O |
| ATOM | 755 | C5'  | T B | 6 | -12.119 | -12.731 | 49.489 | 1.00 | 0.00 | C |
| ATOM | 756 | O5'  | T B | 6 | -12.631 | -13.938 | 48.869 | 1.00 | 0.00 | O |
| ATOM | 757 | O1P  | T B | 6 | -14.710 | -14.437 | 50.198 | 1.00 | 0.00 | O |
| ATOM | 758 | O2P  | T B | 6 | -13.460 | -16.301 | 49.075 | 1.00 | 0.00 | O |
| ATOM | 759 | P    | T B | 6 | -13.410 | -14.995 | 49.775 | 1.00 | 0.00 | P |
| ATOM | 760 | H3   | T B | 6 | -7.994  | -13.963 | 44.155 | 1.00 | 0.00 | H |
| ATOM | 761 | H6   | T B | 6 | -11.764 | -14.674 | 47.076 | 1.00 | 0.00 | H |
| ATOM | 762 | H1'  | T B | 6 | -11.297 | -11.302 | 45.617 | 1.00 | 0.00 | H |
| ATOM | 763 | H3'  | T B | 6 | -14.291 | -11.965 | 48.078 | 1.00 | 0.00 | H |
| ATOM | 764 | H4'  | T B | 6 | -12.222 | -10.657 | 49.085 | 1.00 | 0.00 | H |
| ATOM | 765 | H71  | T B | 6 | -11.356 | -17.330 | 46.150 | 1.00 | 0.00 | H |
| ATOM | 766 | H72  | T B | 6 | -9.604  | -17.634 | 46.227 | 1.00 | 0.00 | H |
| ATOM | 767 | H73  | T B | 6 | -10.458 | -16.981 | 47.646 | 1.00 | 0.00 | H |
| ATOM | 768 | H2'1 | T B | 6 | -13.139 | -13.489 | 46.623 | 1.00 | 0.00 | H |
| ATOM | 769 | H2'2 | T B | 6 | -13.497 | -12.182 | 45.504 | 1.00 | 0.00 | H |
| ATOM | 770 | H5'1 | T B | 6 | -11.081 | -12.881 | 49.784 | 1.00 | 0.00 | H |
| ATOM | 771 | H5'2 | T B | 6 | -12.712 | -12.490 | 50.370 | 1.00 | 0.00 | H |
| ATOM | 772 | C1'  | C B | 7 | -11.420 | -9.935  | 41.864 | 1.00 | 0.00 | C |
| ATOM | 773 | N1   | C B | 7 | -11.298 | -11.415 | 41.987 | 1.00 | 0.00 | N |
| ATOM | 774 | C2   | C B | 7 | -10.243 | -12.039 | 41.324 | 1.00 | 0.00 | C |
| ATOM | 775 | O2   | C B | 7 | -9.456  | -11.345 | 40.666 | 1.00 | 0.00 | O |
| ATOM | 776 | N3   | C B | 7 | -10.114 | -13.385 | 41.423 | 1.00 | 0.00 | N |
| ATOM | 777 | C4   | C B | 7 | -10.982 | -14.108 | 42.142 | 1.00 | 0.00 | C |
| ATOM | 778 | N4   | C B | 7 | -10.806 | -15.419 | 42.206 | 1.00 | 0.00 | N |
| ATOM | 779 | C5   | C B | 7 | -12.080 | -13.494 | 42.830 | 1.00 | 0.00 | C |
| ATOM | 780 | C6   | C B | 7 | -12.186 | -12.136 | 42.720 | 1.00 | 0.00 | C |
| ATOM | 781 | C2'  | C B | 7 | -12.857 | -9.444  | 41.764 | 1.00 | 0.00 | C |
| ATOM | 782 | C3'  | C B | 7 | -12.797 | -8.132  | 42.531 | 1.00 | 0.00 | C |
| ATOM | 783 | O3'  | C B | 7 | -12.351 | -7.099  | 41.656 | 1.00 | 0.00 | O |
| ATOM | 784 | C4'  | C B | 7 | -11.787 | -8.430  | 43.636 | 1.00 | 0.00 | C |
| ATOM | 785 | O4'  | C B | 7 | -10.840 | -9.358  | 43.019 | 1.00 | 0.00 | O |
| ATOM | 786 | C5'  | C B | 7 | -12.335 | -9.064  | 44.895 | 1.00 | 0.00 | C |

|      |     |      |     |   |         |         |        |      |      |   |
|------|-----|------|-----|---|---------|---------|--------|------|------|---|
| ATOM | 787 | O5'  | C B | 7 | -13.394 | -9.993  | 44.553 | 1.00 | 0.00 | O |
| ATOM | 788 | O1P  | C B | 7 | -15.444 | -8.934  | 45.559 | 1.00 | 0.00 | O |
| ATOM | 789 | O2P  | C B | 7 | -15.338 | -11.421 | 45.255 | 1.00 | 0.00 | O |
| ATOM | 790 | P    | C B | 7 | -14.622 | -10.160 | 45.558 | 1.00 | 0.00 | P |
| ATOM | 791 | H5   | C B | 7 | -12.792 | -14.080 | 43.410 | 1.00 | 0.00 | H |
| ATOM | 792 | H6   | C B | 7 | -13.000 | -11.622 | 43.232 | 1.00 | 0.00 | H |
| ATOM | 793 | H1'  | C B | 7 | -10.836 | -9.616  | 41.000 | 1.00 | 0.00 | H |
| ATOM | 794 | H3'  | C B | 7 | -13.768 | -7.859  | 42.948 | 1.00 | 0.00 | H |
| ATOM | 795 | H4'  | C B | 7 | -11.333 | -7.480  | 43.915 | 1.00 | 0.00 | H |
| ATOM | 796 | H41  | C B | 7 | -11.458 | -15.999 | 42.755 | 1.00 | 0.00 | H |
| ATOM | 797 | H42  | C B | 7 | -10.018 | -15.860 | 41.709 | 1.00 | 0.00 | H |
| ATOM | 798 | H2'1 | C B | 7 | -13.564 | -10.138 | 42.218 | 1.00 | 0.00 | H |
| ATOM | 799 | H2'2 | C B | 7 | -13.170 | -9.288  | 40.731 | 1.00 | 0.00 | H |
| ATOM | 800 | H5'1 | C B | 7 | -11.531 | -9.593  | 45.407 | 1.00 | 0.00 | H |
| ATOM | 801 | H5'2 | C B | 7 | -12.725 | -8.284  | 45.546 | 1.00 | 0.00 | H |
| ATOM | 802 | C1'  | C B | 8 | -10.218 | -9.644  | 37.068 | 1.00 | 0.00 | C |
| ATOM | 803 | N1   | C B | 8 | -10.871 | -10.866 | 37.612 | 1.00 | 0.00 | N |
| ATOM | 804 | C2   | C B | 8 | -10.276 | -12.098 | 37.346 | 1.00 | 0.00 | C |
| ATOM | 805 | O2   | C B | 8 | -9.236  | -12.125 | 36.675 | 1.00 | 0.00 | O |
| ATOM | 806 | N3   | C B | 8 | -10.854 | -13.222 | 37.832 | 1.00 | 0.00 | N |
| ATOM | 807 | C4   | C B | 8 | -11.980 | -13.160 | 38.556 | 1.00 | 0.00 | C |
| ATOM | 808 | N4   | C B | 8 | -12.501 | -14.291 | 39.009 | 1.00 | 0.00 | N |
| ATOM | 809 | C5   | C B | 8 | -12.619 | -11.908 | 38.842 | 1.00 | 0.00 | C |
| ATOM | 810 | C6   | C B | 8 | -12.014 | -10.787 | 38.345 | 1.00 | 0.00 | C |
| ATOM | 811 | C2'  | C B | 8 | -11.201 | -8.587  | 36.582 | 1.00 | 0.00 | C |
| ATOM | 812 | C3'  | C B | 8 | -10.489 | -7.296  | 36.957 | 1.00 | 0.00 | C |
| ATOM | 813 | O3'  | C B | 8 | -9.565  | -6.956  | 35.926 | 1.00 | 0.00 | O |
| ATOM | 814 | C4'  | C B | 8 | -9.788  | -7.662  | 38.263 | 1.00 | 0.00 | C |
| ATOM | 815 | O4'  | C B | 8 | -9.441  | -9.075  | 38.105 | 1.00 | 0.00 | O |
| ATOM | 816 | C5'  | C B | 8 | -10.598 | -7.503  | 39.528 | 1.00 | 0.00 | C |
| ATOM | 817 | O5'  | C B | 8 | -11.980 | -7.863  | 39.273 | 1.00 | 0.00 | O |
| ATOM | 818 | O1P  | C B | 8 | -13.213 | -5.688  | 39.566 | 1.00 | 0.00 | O |
| ATOM | 819 | O2P  | C B | 8 | -14.390 | -7.864  | 39.982 | 1.00 | 0.00 | O |
| ATOM | 820 | P    | C B | 8 | -13.132 | -7.081  | 40.048 | 1.00 | 0.00 | P |
| ATOM | 821 | H5   | C B | 8 | -13.538 | -11.852 | 39.423 | 1.00 | 0.00 | H |
| ATOM | 822 | H6   | C B | 8 | -12.458 | -9.811  | 38.542 | 1.00 | 0.00 | H |
| ATOM | 823 | H1'  | C B | 8 | -9.542  | -9.946  | 36.268 | 1.00 | 0.00 | H |
| ATOM | 824 | H3'  | C B | 8 | -11.188 | -6.473  | 37.102 | 1.00 | 0.00 | H |
| ATOM | 825 | H4'  | C B | 8 | -8.915  | -7.014  | 38.346 | 1.00 | 0.00 | H |
| ATOM | 826 | H41  | C B | 8 | -13.365 | -14.271 | 39.571 | 1.00 | 0.00 | H |
| ATOM | 827 | H42  | C B | 8 | -12.042 | -15.190 | 38.801 | 1.00 | 0.00 | H |
| ATOM | 828 | H2'1 | C B | 8 | -12.169 | -8.664  | 37.076 | 1.00 | 0.00 | H |
| ATOM | 829 | H2'2 | C B | 8 | -11.375 | -8.648  | 35.508 | 1.00 | 0.00 | H |
| ATOM | 830 | H5'1 | C B | 8 | -10.187 | -8.151  | 40.302 | 1.00 | 0.00 | H |
| ATOM | 831 | H5'2 | C B | 8 | -10.544 | -6.468  | 39.860 | 1.00 | 0.00 | H |
| ATOM | 832 | C1'  | T B | 9 | -8.969  | -11.531 | 32.667 | 1.00 | 0.00 | C |
| ATOM | 833 | N1   | T B | 9 | -10.154 | -12.055 | 33.396 | 1.00 | 0.00 | N |
| ATOM | 834 | C2   | T B | 9 | -10.234 | -13.422 | 33.568 | 1.00 | 0.00 | C |
| ATOM | 835 | O2   | T B | 9 | -9.385  | -14.190 | 33.149 | 1.00 | 0.00 | O |
| ATOM | 836 | N3   | T B | 9 | -11.350 | -13.866 | 34.252 | 1.00 | 0.00 | N |
| ATOM | 837 | C4   | T B | 9 | -12.366 | -13.086 | 34.761 | 1.00 | 0.00 | C |
| ATOM | 838 | O4   | T B | 9 | -13.322 | -13.599 | 35.355 | 1.00 | 0.00 | O |
| ATOM | 839 | C5   | T B | 9 | -12.194 | -11.670 | 34.533 | 1.00 | 0.00 | C |
| ATOM | 840 | C6   | T B | 9 | -11.118 | -11.202 | 33.872 | 1.00 | 0.00 | C |

|      |     |      |     |    |         |         |        |      |      |   |
|------|-----|------|-----|----|---------|---------|--------|------|------|---|
| ATOM | 841 | C7   | T B | 9  | -13.276 | -10.783 | 35.074 | 1.00 | 0.00 | C |
| ATOM | 842 | C2'  | T B | 9  | -9.282  | -10.351 | 31.752 | 1.00 | 0.00 | C |
| ATOM | 843 | C3'  | T B | 9  | -8.025  | -9.506  | 31.884 | 1.00 | 0.00 | C |
| ATOM | 844 | O3'  | T B | 9  | -7.039  | -9.988  | 30.973 | 1.00 | 0.00 | O |
| ATOM | 845 | C4'  | T B | 9  | -7.622  | -9.720  | 33.341 | 1.00 | 0.00 | C |
| ATOM | 846 | O4'  | T B | 9  | -8.026  | -11.097 | 33.627 | 1.00 | 0.00 | O |
| ATOM | 847 | C5'  | T B | 9  | -8.263  | -8.805  | 34.358 | 1.00 | 0.00 | C |
| ATOM | 848 | O5'  | T B | 9  | -9.634  | -8.533  | 33.974 | 1.00 | 0.00 | O |
| ATOM | 849 | O1P  | T B | 9  | -9.616  | -6.071  | 33.456 | 1.00 | 0.00 | O |
| ATOM | 850 | O2P  | T B | 9  | -11.732 | -7.174  | 34.232 | 1.00 | 0.00 | O |
| ATOM | 851 | P    | T B | 9  | -10.253 | -7.100  | 34.302 | 1.00 | 0.00 | P |
| ATOM | 852 | H3   | T B | 9  | -11.431 | -14.883 | 34.396 | 1.00 | 0.00 | H |
| ATOM | 853 | H6   | T B | 9  | -11.011 | -10.129 | 33.712 | 1.00 | 0.00 | H |
| ATOM | 854 | H1'  | T B | 9  | -8.521  | -12.351 | 32.105 | 1.00 | 0.00 | H |
| ATOM | 855 | H3'  | T B | 9  | -8.220  | -8.453  | 31.680 | 1.00 | 0.00 | H |
| ATOM | 856 | H4'  | T B | 9  | -6.541  | -9.573  | 33.395 | 1.00 | 0.00 | H |
| ATOM | 857 | H71  | T B | 9  | -13.798 | -10.301 | 34.247 | 1.00 | 0.00 | H |
| ATOM | 858 | H72  | T B | 9  | -13.982 | -11.380 | 35.652 | 1.00 | 0.00 | H |
| ATOM | 859 | H73  | T B | 9  | -12.833 | -10.021 | 35.717 | 1.00 | 0.00 | H |
| ATOM | 860 | H2'1 | T B | 9  | -10.165 | -9.803  | 32.075 | 1.00 | 0.00 | H |
| ATOM | 861 | H2'2 | T B | 9  | -9.447  | -10.661 | 30.721 | 1.00 | 0.00 | H |
| ATOM | 862 | H5'1 | T B | 9  | -8.242  | -9.286  | 35.336 | 1.00 | 0.00 | H |
| ATOM | 863 | H5'2 | T B | 9  | -7.702  | -7.874  | 34.404 | 1.00 | 0.00 | H |
| ATOM | 864 | C1'  | A B | 10 | -8.805  | -15.131 | 29.254 | 1.00 | 0.00 | C |
| ATOM | 865 | N1   | A B | 10 | -13.020 | -16.819 | 31.645 | 1.00 | 0.00 | N |
| ATOM | 866 | C2   | A B | 10 | -11.948 | -17.443 | 31.164 | 1.00 | 0.00 | C |
| ATOM | 867 | N3   | A B | 10 | -10.892 | -16.944 | 30.559 | 1.00 | 0.00 | N |
| ATOM | 868 | C4   | A B | 10 | -11.003 | -15.608 | 30.453 | 1.00 | 0.00 | C |
| ATOM | 869 | C5   | A B | 10 | -12.032 | -14.821 | 30.890 | 1.00 | 0.00 | C |
| ATOM | 870 | C6   | A B | 10 | -13.102 | -15.485 | 31.525 | 1.00 | 0.00 | C |
| ATOM | 871 | N6   | A B | 10 | -14.181 | -14.842 | 32.006 | 1.00 | 0.00 | N |
| ATOM | 872 | N7   | A B | 10 | -11.797 | -13.487 | 30.607 | 1.00 | 0.00 | N |
| ATOM | 873 | C8   | A B | 10 | -10.644 | -13.496 | 30.005 | 1.00 | 0.00 | C |
| ATOM | 874 | N9   | A B | 10 | -10.100 | -14.748 | 29.878 | 1.00 | 0.00 | N |
| ATOM | 875 | C2'  | A B | 10 | -8.459  | -14.318 | 28.014 | 1.00 | 0.00 | C |
| ATOM | 876 | C3'  | A B | 10 | -6.947  | -14.194 | 28.126 | 1.00 | 0.00 | C |
| ATOM | 877 | O3'  | A B | 10 | -6.339  | -15.359 | 27.574 | 1.00 | 0.00 | O |
| ATOM | 878 | C4'  | A B | 10 | -6.727  | -14.090 | 29.636 | 1.00 | 0.00 | C |
| ATOM | 879 | O4'  | A B | 10 | -7.786  | -14.920 | 30.213 | 1.00 | 0.00 | O |
| ATOM | 880 | C5'  | A B | 10 | -6.819  | -12.705 | 30.232 | 1.00 | 0.00 | C |
| ATOM | 881 | O5'  | A B | 10 | -7.852  | -11.945 | 29.554 | 1.00 | 0.00 | O |
| ATOM | 882 | O1P  | A B | 10 | -6.564  | -10.121 | 28.393 | 1.00 | 0.00 | O |
| ATOM | 883 | O2P  | A B | 10 | -8.955  | -9.744  | 29.054 | 1.00 | 0.00 | O |
| ATOM | 884 | P    | A B | 10 | -7.648  | -10.375 | 29.361 | 1.00 | 0.00 | P |
| ATOM | 885 | H2   | A B | 10 | -11.946 | -18.525 | 31.290 | 1.00 | 0.00 | H |
| ATOM | 886 | H8   | A B | 10 | -10.157 | -12.593 | 29.636 | 1.00 | 0.00 | H |
| ATOM | 887 | H1'  | A B | 10 | -8.838  | -16.196 | 29.027 | 1.00 | 0.00 | H |
| ATOM | 888 | H3'  | A B | 10 | -6.570  | -13.310 | 27.613 | 1.00 | 0.00 | H |
| ATOM | 889 | H4'  | A B | 10 | -5.728  | -14.474 | 29.836 | 1.00 | 0.00 | H |
| ATOM | 890 | H61  | A B | 10 | -14.934 | -15.375 | 32.464 | 1.00 | 0.00 | H |
| ATOM | 891 | H62  | A B | 10 | -14.253 | -13.819 | 31.917 | 1.00 | 0.00 | H |
| ATOM | 892 | H2'1 | A B | 10 | -8.937  | -13.340 | 28.012 | 1.00 | 0.00 | H |
| ATOM | 893 | H2'2 | A B | 10 | -8.746  | -14.827 | 27.092 | 1.00 | 0.00 | H |
| ATOM | 894 | H5'1 | A B | 10 | -7.059  | -12.787 | 31.292 | 1.00 | 0.00 | H |

|      |     |      |     |    |         |         |        |      |      |   |
|------|-----|------|-----|----|---------|---------|--------|------|------|---|
| ATOM | 895 | H5'2 | A B | 10 | -5.860  | -12.203 | 30.120 | 1.00 | 0.00 | H |
| ATOM | 896 | C1'  | G B | 11 | -10.483 | -19.256 | 27.060 | 1.00 | 0.00 | C |
| ATOM | 897 | N1   | G B | 11 | -14.968 | -17.809 | 29.013 | 1.00 | 0.00 | N |
| ATOM | 898 | C2   | G B | 11 | -14.391 | -19.065 | 28.949 | 1.00 | 0.00 | C |
| ATOM | 899 | N2   | G B | 11 | -15.104 | -20.069 | 29.475 | 1.00 | 0.00 | N |
| ATOM | 900 | N3   | G B | 11 | -13.197 | -19.300 | 28.407 | 1.00 | 0.00 | N |
| ATOM | 901 | C4   | G B | 11 | -12.621 | -18.170 | 27.919 | 1.00 | 0.00 | C |
| ATOM | 902 | C5   | G B | 11 | -13.122 | -16.880 | 27.933 | 1.00 | 0.00 | C |
| ATOM | 903 | C6   | G B | 11 | -14.388 | -16.628 | 28.512 | 1.00 | 0.00 | C |
| ATOM | 904 | O6   | G B | 11 | -14.995 | -15.562 | 28.618 | 1.00 | 0.00 | O |
| ATOM | 905 | N7   | G B | 11 | -12.219 | -16.004 | 27.327 | 1.00 | 0.00 | N |
| ATOM | 906 | C8   | G B | 11 | -11.220 | -16.773 | 26.975 | 1.00 | 0.00 | C |
| ATOM | 907 | N9   | G B | 11 | -11.392 | -18.103 | 27.300 | 1.00 | 0.00 | N |
| ATOM | 908 | C2'  | G B | 11 | -9.749  | -19.192 | 25.728 | 1.00 | 0.00 | C |
| ATOM | 909 | C3'  | G B | 11 | -8.398  | -19.794 | 26.080 | 1.00 | 0.00 | C |
| ATOM | 910 | O3'  | G B | 11 | -8.483  | -21.214 | 26.000 | 1.00 | 0.00 | O |
| ATOM | 911 | C4'  | G B | 11 | -8.172  | -19.309 | 27.511 | 1.00 | 0.00 | C |
| ATOM | 912 | O4'  | G B | 11 | -9.515  | -19.264 | 28.091 | 1.00 | 0.00 | O |
| ATOM | 913 | C5'  | G B | 11 | -7.533  | -17.949 | 27.666 | 1.00 | 0.00 | C |
| ATOM | 914 | O5'  | G B | 11 | -8.006  | -17.063 | 26.622 | 1.00 | 0.00 | O |
| ATOM | 915 | O1P  | G B | 11 | -5.942  | -16.617 | 25.254 | 1.00 | 0.00 | O |
| ATOM | 916 | O2P  | G B | 11 | -7.788  | -14.920 | 25.328 | 1.00 | 0.00 | O |
| ATOM | 917 | P    | G B | 11 | -7.009  | -15.965 | 26.035 | 1.00 | 0.00 | P |
| ATOM | 918 | H1   | G B | 11 | -15.894 | -17.734 | 29.460 | 1.00 | 0.00 | H |
| ATOM | 919 | H8   | G B | 11 | -10.332 | -16.396 | 26.469 | 1.00 | 0.00 | H |
| ATOM | 920 | H1'  | G B | 11 | -11.066 | -20.174 | 27.142 | 1.00 | 0.00 | H |
| ATOM | 921 | H21  | G B | 11 | -16.025 | -19.879 | 29.896 | 1.00 | 0.00 | H |
| ATOM | 922 | H3'  | G B | 11 | -7.608  | -19.441 | 25.416 | 1.00 | 0.00 | H |
| ATOM | 923 | H22  | G B | 11 | -14.732 | -21.029 | 29.457 | 1.00 | 0.00 | H |
| ATOM | 924 | H4'  | G B | 11 | -7.524  | -20.039 | 27.994 | 1.00 | 0.00 | H |
| ATOM | 925 | H2'1 | G B | 11 | -9.645  | -18.170 | 25.362 | 1.00 | 0.00 | H |
| ATOM | 926 | H2'2 | G B | 11 | -10.251 | -19.770 | 24.951 | 1.00 | 0.00 | H |
| ATOM | 927 | H5'1 | G B | 11 | -7.792  | -17.541 | 28.642 | 1.00 | 0.00 | H |
| ATOM | 928 | H5'2 | G B | 11 | -6.450  | -18.055 | 27.597 | 1.00 | 0.00 | H |
| ATOM | 929 | C1'  | G B | 12 | -13.984 | -22.529 | 25.812 | 1.00 | 0.00 | C |
| ATOM | 930 | N1   | G B | 12 | -17.123 | -18.560 | 26.459 | 1.00 | 0.00 | N |
| ATOM | 931 | C2   | G B | 12 | -17.268 | -19.881 | 26.847 | 1.00 | 0.00 | C |
| ATOM | 932 | N2   | G B | 12 | -18.402 | -20.184 | 27.493 | 1.00 | 0.00 | N |
| ATOM | 933 | N3   | G B | 12 | -16.356 | -20.821 | 26.612 | 1.00 | 0.00 | N |
| ATOM | 934 | C4   | G B | 12 | -15.278 | -20.338 | 25.943 | 1.00 | 0.00 | C |
| ATOM | 935 | C5   | G B | 12 | -15.048 | -19.043 | 25.512 | 1.00 | 0.00 | C |
| ATOM | 936 | C6   | G B | 12 | -16.014 | -18.042 | 25.765 | 1.00 | 0.00 | C |
| ATOM | 937 | O6   | G B | 12 | -15.992 | -16.849 | 25.464 | 1.00 | 0.00 | O |
| ATOM | 938 | N7   | G B | 12 | -13.816 | -18.961 | 24.860 | 1.00 | 0.00 | N |
| ATOM | 939 | C8   | G B | 12 | -13.346 | -20.180 | 24.917 | 1.00 | 0.00 | C |
| ATOM | 940 | N9   | G B | 12 | -14.178 | -21.075 | 25.559 | 1.00 | 0.00 | N |
| ATOM | 941 | C2'  | G B | 12 | -13.303 | -23.265 | 24.667 | 1.00 | 0.00 | C |
| ATOM | 942 | C3'  | G B | 12 | -12.454 | -24.288 | 25.406 | 1.00 | 0.00 | C |
| ATOM | 943 | O3'  | G B | 12 | -13.253 | -25.430 | 25.705 | 1.00 | 0.00 | O |
| ATOM | 944 | C4'  | G B | 12 | -12.032 | -23.532 | 26.664 | 1.00 | 0.00 | C |
| ATOM | 945 | O4'  | G B | 12 | -13.169 | -22.662 | 26.961 | 1.00 | 0.00 | O |
| ATOM | 946 | C5'  | G B | 12 | -10.789 | -22.682 | 26.551 | 1.00 | 0.00 | C |
| ATOM | 947 | O5'  | G B | 12 | -10.729 | -22.074 | 25.237 | 1.00 | 0.00 | O |
| ATOM | 948 | O1P  | G B | 12 | -8.709  | -23.150 | 24.190 | 1.00 | 0.00 | O |



|      |      |      |     |    |         |         |        |      |      |   |
|------|------|------|-----|----|---------|---------|--------|------|------|---|
| ATOM | 949  | O2P  | G B | 12 | -9.427  | -20.859 | 23.463 | 1.00 | 0.00 | O |
| ATOM | 950  | P    | G B | 12 | -9.302  | -21.851 | 24.559 | 1.00 | 0.00 | P |
| ATOM | 951  | H1   | G B | 12 | -17.887 | -17.907 | 26.696 | 1.00 | 0.00 | H |
| ATOM | 952  | H8   | G B | 12 | -12.383 | -20.467 | 24.495 | 1.00 | 0.00 | H |
| ATOM | 953  | H1'  | G B | 12 | -14.955 | -22.969 | 26.037 | 1.00 | 0.00 | H |
| ATOM | 954  | H21  | G B | 12 | -19.102 | -19.449 | 27.675 | 1.00 | 0.00 | H |
| ATOM | 955  | H3'  | G B | 12 | -11.587 | -24.597 | 24.823 | 1.00 | 0.00 | H |
| ATOM | 956  | H22  | G B | 12 | -18.572 | -21.149 | 27.806 | 1.00 | 0.00 | H |
| ATOM | 957  | H4'  | G B | 12 | -11.855 | -24.279 | 27.438 | 1.00 | 0.00 | H |
| ATOM | 958  | H2'1 | G B | 12 | -12.686 | -22.603 | 24.058 | 1.00 | 0.00 | H |
| ATOM | 959  | H2'2 | G B | 12 | -14.018 | -23.749 | 24.002 | 1.00 | 0.00 | H |
| ATOM | 960  | H5'1 | G B | 12 | -10.816 | -21.905 | 27.315 | 1.00 | 0.00 | H |
| ATOM | 961  | H5'2 | G B | 12 | -9.911  | -23.309 | 26.708 | 1.00 | 0.00 | H |
| ATOM | 962  | C1'  | T B | 13 | -18.640 | -23.945 | 24.910 | 1.00 | 0.00 | C |
| ATOM | 963  | N1   | T B | 13 | -18.084 | -22.737 | 24.245 | 1.00 | 0.00 | N |
| ATOM | 964  | C2   | T B | 13 | -18.823 | -21.574 | 24.329 | 1.00 | 0.00 | C |
| ATOM | 965  | O2   | T B | 13 | -19.890 | -21.513 | 24.915 | 1.00 | 0.00 | O |
| ATOM | 966  | N3   | T B | 13 | -18.269 | -20.476 | 23.699 | 1.00 | 0.00 | N |
| ATOM | 967  | C4   | T B | 13 | -17.075 | -20.439 | 23.009 | 1.00 | 0.00 | C |
| ATOM | 968  | O4   | T B | 13 | -16.681 | -19.393 | 22.480 | 1.00 | 0.00 | O |
| ATOM | 969  | C5   | T B | 13 | -16.373 | -21.701 | 22.977 | 1.00 | 0.00 | C |
| ATOM | 970  | C6   | T B | 13 | -16.883 | -22.792 | 23.581 | 1.00 | 0.00 | C |
| ATOM | 971  | C7   | T B | 13 | -15.067 | -21.708 | 22.239 | 1.00 | 0.00 | C |
| ATOM | 972  | C2'  | T B | 13 | -18.400 | -25.237 | 24.137 | 1.00 | 0.00 | C |
| ATOM | 973  | C3'  | T B | 13 | -18.182 | -26.241 | 25.258 | 1.00 | 0.00 | C |
| ATOM | 974  | O3'  | T B | 13 | -19.447 | -26.714 | 25.714 | 1.00 | 0.00 | O |
| ATOM | 975  | C4'  | T B | 13 | -17.457 | -25.415 | 26.318 | 1.00 | 0.00 | C |
| ATOM | 976  | O4'  | T B | 13 | -18.015 | -24.070 | 26.172 | 1.00 | 0.00 | O |
| ATOM | 977  | C5'  | T B | 13 | -15.953 | -25.331 | 26.192 | 1.00 | 0.00 | C |
| ATOM | 978  | O5'  | T B | 13 | -15.582 | -25.278 | 24.791 | 1.00 | 0.00 | O |
| ATOM | 979  | O1P  | T B | 13 | -14.352 | -27.442 | 24.431 | 1.00 | 0.00 | O |
| ATOM | 980  | O2P  | T B | 13 | -13.826 | -25.448 | 23.002 | 1.00 | 0.00 | O |
| ATOM | 981  | P    | T B | 13 | -14.225 | -25.975 | 24.330 | 1.00 | 0.00 | P |
| ATOM | 982  | H3   | T B | 13 | -18.801 | -19.595 | 23.750 | 1.00 | 0.00 | H |
| ATOM | 983  | H6   | T B | 13 | -16.335 | -23.733 | 23.542 | 1.00 | 0.00 | H |
| ATOM | 984  | H1'  | T B | 13 | -19.705 | -23.784 | 25.078 | 1.00 | 0.00 | H |
| ATOM | 985  | H3'  | T B | 13 | -17.576 | -27.087 | 24.935 | 1.00 | 0.00 | H |
| ATOM | 986  | H4'  | T B | 13 | -17.684 | -25.870 | 27.283 | 1.00 | 0.00 | H |
| ATOM | 987  | H71  | T B | 13 | -15.148 | -22.348 | 21.361 | 1.00 | 0.00 | H |
| ATOM | 988  | H72  | T B | 13 | -14.821 | -20.692 | 21.926 | 1.00 | 0.00 | H |
| ATOM | 989  | H73  | T B | 13 | -14.280 | -22.086 | 22.893 | 1.00 | 0.00 | H |
| ATOM | 990  | H2'1 | T B | 13 | -17.529 | -25.173 | 23.487 | 1.00 | 0.00 | H |
| ATOM | 991  | H2'2 | T B | 13 | -19.253 | -25.513 | 23.517 | 1.00 | 0.00 | H |
| ATOM | 992  | H5'1 | T B | 13 | -15.601 | -24.436 | 26.703 | 1.00 | 0.00 | H |
| ATOM | 993  | H5'2 | T B | 13 | -15.506 | -26.209 | 26.657 | 1.00 | 0.00 | H |
| ATOM | 994  | C1'  | G B | 14 | -23.359 | -23.116 | 23.606 | 1.00 | 0.00 | C |
| ATOM | 995  | N1   | G B | 14 | -21.395 | -19.104 | 21.142 | 1.00 | 0.00 | N |
| ATOM | 996  | C2   | G B | 14 | -22.545 | -19.201 | 21.905 | 1.00 | 0.00 | C |
| ATOM | 997  | N2   | G B | 14 | -23.269 | -18.083 | 22.027 | 1.00 | 0.00 | N |
| ATOM | 998  | N3   | G B | 14 | -22.940 | -20.326 | 22.500 | 1.00 | 0.00 | N |
| ATOM | 999  | C4   | G B | 14 | -22.090 | -21.361 | 22.265 | 1.00 | 0.00 | C |
| ATOM | 1000 | C5   | G B | 14 | -20.927 | -21.358 | 21.515 | 1.00 | 0.00 | C |
| ATOM | 1001 | C6   | G B | 14 | -20.504 | -20.164 | 20.886 | 1.00 | 0.00 | C |
| ATOM | 1002 | O6   | G B | 14 | -19.510 | -19.965 | 20.187 | 1.00 | 0.00 | O |

|      |      |      |     |    |         |         |        |      |      |   |
|------|------|------|-----|----|---------|---------|--------|------|------|---|
| ATOM | 1003 | N7   | G B | 14 | -20.345 | -22.628 | 21.520 | 1.00 | 0.00 | N |
| ATOM | 1004 | C8   | G B | 14 | -21.156 | -23.343 | 22.258 | 1.00 | 0.00 | C |
| ATOM | 1005 | N9   | G B | 14 | -22.241 | -22.643 | 22.745 | 1.00 | 0.00 | N |
| ATOM | 1006 | C2'  | G B | 14 | -23.822 | -24.531 | 23.288 | 1.00 | 0.00 | C |
| ATOM | 1007 | C3'  | G B | 14 | -24.179 | -25.067 | 24.665 | 1.00 | 0.00 | C |
| ATOM | 1008 | O3'  | G B | 14 | -25.509 | -24.671 | 24.990 | 1.00 | 0.00 | O |
| ATOM | 1009 | C4'  | G B | 14 | -23.141 | -24.401 | 25.567 | 1.00 | 0.00 | C |
| ATOM | 1010 | O4'  | G B | 14 | -22.909 | -23.097 | 24.947 | 1.00 | 0.00 | O |
| ATOM | 1011 | C5'  | G B | 14 | -21.817 | -25.114 | 25.707 | 1.00 | 0.00 | C |
| ATOM | 1012 | O5'  | G B | 14 | -21.453 | -25.725 | 24.444 | 1.00 | 0.00 | O |
| ATOM | 1013 | O1P  | G B | 14 | -21.538 | -28.190 | 24.944 | 1.00 | 0.00 | O |
| ATOM | 1014 | O2P  | G B | 14 | -20.025 | -27.328 | 23.138 | 1.00 | 0.00 | O |
| ATOM | 1015 | P    | G B | 14 | -20.659 | -27.108 | 24.461 | 1.00 | 0.00 | P |
| ATOM | 1016 | H1   | G B | 14 | -21.174 | -18.185 | 20.729 | 1.00 | 0.00 | H |
| ATOM | 1017 | H8   | G B | 14 | -20.989 | -24.400 | 22.469 | 1.00 | 0.00 | H |
| ATOM | 1018 | H1'  | G B | 14 | -24.182 | -22.406 | 23.519 | 1.00 | 0.00 | H |
| ATOM | 1019 | H21  | G B | 14 | -22.954 | -17.215 | 21.566 | 1.00 | 0.00 | H |
| ATOM | 1020 | H3'  | G B | 14 | -24.102 | -26.153 | 24.713 | 1.00 | 0.00 | H |
| ATOM | 1021 | H22  | G B | 14 | -24.138 | -18.089 | 22.579 | 1.00 | 0.00 | H |
| ATOM | 1022 | H4'  | G B | 14 | -23.586 | -24.327 | 26.560 | 1.00 | 0.00 | H |
| ATOM | 1023 | H2'1 | G B | 14 | -23.038 | -25.128 | 22.821 | 1.00 | 0.00 | H |
| ATOM | 1024 | H2'2 | G B | 14 | -24.684 | -24.544 | 22.621 | 1.00 | 0.00 | H |
| ATOM | 1025 | H5'1 | G B | 14 | -21.053 | -24.395 | 26.001 | 1.00 | 0.00 | H |
| ATOM | 1026 | H5'2 | G B | 14 | -21.903 | -25.880 | 26.476 | 1.00 | 0.00 | H |
| ATOM | 1027 | C1'  | C B | 15 | -26.975 | -20.627 | 21.314 | 1.00 | 0.00 | C |
| ATOM | 1028 | N1   | C B | 15 | -25.760 | -21.054 | 20.569 | 1.00 | 0.00 | N |
| ATOM | 1029 | C2   | C B | 15 | -25.078 | -20.093 | 19.826 | 1.00 | 0.00 | C |
| ATOM | 1030 | O2   | C B | 15 | -25.507 | -18.931 | 19.817 | 1.00 | 0.00 | O |
| ATOM | 1031 | N3   | C B | 15 | -23.969 | -20.461 | 19.140 | 1.00 | 0.00 | N |
| ATOM | 1032 | C4   | C B | 15 | -23.530 | -21.725 | 19.169 | 1.00 | 0.00 | C |
| ATOM | 1033 | N4   | C B | 15 | -22.439 | -22.030 | 18.483 | 1.00 | 0.00 | N |
| ATOM | 1034 | C5   | C B | 15 | -24.214 | -22.738 | 19.921 | 1.00 | 0.00 | C |
| ATOM | 1035 | C6   | C B | 15 | -25.325 | -22.342 | 20.608 | 1.00 | 0.00 | C |
| ATOM | 1036 | C2'  | C B | 15 | -28.091 | -21.662 | 21.314 | 1.00 | 0.00 | C |
| ATOM | 1037 | C3'  | C B | 15 | -28.691 | -21.484 | 22.701 | 1.00 | 0.00 | C |
| ATOM | 1038 | O3'  | C B | 15 | -29.639 | -20.418 | 22.668 | 1.00 | 0.00 | O |
| ATOM | 1039 | C4'  | C B | 15 | -27.472 | -21.145 | 23.556 | 1.00 | 0.00 | C |
| ATOM | 1040 | O4'  | C B | 15 | -26.596 | -20.393 | 22.658 | 1.00 | 0.00 | O |
| ATOM | 1041 | C5'  | C B | 15 | -26.698 | -22.318 | 24.115 | 1.00 | 0.00 | C |
| ATOM | 1042 | O5'  | C B | 15 | -26.682 | -23.398 | 23.150 | 1.00 | 0.00 | O |
| ATOM | 1043 | O1P  | C B | 15 | -28.019 | -25.209 | 24.277 | 1.00 | 0.00 | O |
| ATOM | 1044 | O2P  | C B | 15 | -26.253 | -25.814 | 22.601 | 1.00 | 0.00 | O |
| ATOM | 1045 | P    | C B | 15 | -26.703 | -24.902 | 23.680 | 1.00 | 0.00 | P |
| ATOM | 1046 | H5   | C B | 15 | -23.864 | -23.770 | 19.942 | 1.00 | 0.00 | H |
| ATOM | 1047 | H6   | C B | 15 | -25.876 | -23.075 | 21.199 | 1.00 | 0.00 | H |
| ATOM | 1048 | H1'  | C B | 15 | -27.319 | -19.682 | 20.893 | 1.00 | 0.00 | H |
| ATOM | 1049 | H3'  | C B | 15 | -29.180 | -22.391 | 23.054 | 1.00 | 0.00 | H |
| ATOM | 1050 | H4'  | C B | 15 | -27.830 | -20.553 | 24.398 | 1.00 | 0.00 | H |
| ATOM | 1051 | H41  | C B | 15 | -22.077 | -22.995 | 18.490 | 1.00 | 0.00 | H |
| ATOM | 1052 | H42  | C B | 15 | -21.950 | -21.301 | 17.941 | 1.00 | 0.00 | H |
| ATOM | 1053 | H2'1 | C B | 15 | -27.716 | -22.675 | 21.172 | 1.00 | 0.00 | H |
| ATOM | 1054 | H2'2 | C B | 15 | -28.830 | -21.475 | 20.535 | 1.00 | 0.00 | H |
| ATOM | 1055 | H5'1 | C B | 15 | -25.678 | -22.001 | 24.333 | 1.00 | 0.00 | H |
| ATOM | 1056 | H5'2 | C B | 15 | -27.174 | -22.654 | 25.036 | 1.00 | 0.00 | H |

|      |      |      |     |    |         |         |        |      |      |   |
|------|------|------|-----|----|---------|---------|--------|------|------|---|
| ATOM | 1057 | C1'  | G B | 16 | -28.778 | -17.618 | 17.819 | 1.00 | 0.00 | C |
| ATOM | 1058 | N1   | G B | 16 | -24.720 | -19.201 | 15.164 | 1.00 | 0.00 | N |
| ATOM | 1059 | C2   | G B | 16 | -25.259 | -17.933 | 15.291 | 1.00 | 0.00 | C |
| ATOM | 1060 | N2   | G B | 16 | -24.633 | -16.957 | 14.620 | 1.00 | 0.00 | N |
| ATOM | 1061 | N3   | G B | 16 | -26.334 | -17.660 | 16.029 | 1.00 | 0.00 | N |
| ATOM | 1062 | C4   | G B | 16 | -26.840 | -18.767 | 16.632 | 1.00 | 0.00 | C |
| ATOM | 1063 | C5   | G B | 16 | -26.374 | -20.069 | 16.559 | 1.00 | 0.00 | C |
| ATOM | 1064 | C6   | G B | 16 | -25.231 | -20.359 | 15.779 | 1.00 | 0.00 | C |
| ATOM | 1065 | O6   | G B | 16 | -24.672 | -21.441 | 15.593 | 1.00 | 0.00 | O |
| ATOM | 1066 | N7   | G B | 16 | -27.180 | -20.914 | 17.325 | 1.00 | 0.00 | N |
| ATOM | 1067 | C8   | G B | 16 | -28.087 | -20.116 | 17.829 | 1.00 | 0.00 | C |
| ATOM | 1068 | N9   | G B | 16 | -27.947 | -18.796 | 17.452 | 1.00 | 0.00 | N |
| ATOM | 1069 | C2'  | G B | 16 | -30.267 | -17.922 | 17.909 | 1.00 | 0.00 | C |
| ATOM | 1070 | C3'  | G B | 16 | -30.705 | -17.030 | 19.060 | 1.00 | 0.00 | C |
| ATOM | 1071 | O3'  | G B | 16 | -30.971 | -15.721 | 18.562 | 1.00 | 0.00 | O |
| ATOM | 1072 | C4'  | G B | 16 | -29.495 | -17.058 | 19.991 | 1.00 | 0.00 | C |
| ATOM | 1073 | O4'  | G B | 16 | -28.348 | -17.165 | 19.088 | 1.00 | 0.00 | O |
| ATOM | 1074 | C5'  | G B | 16 | -29.437 | -18.196 | 20.983 | 1.00 | 0.00 | C |
| ATOM | 1075 | O5'  | G B | 16 | -29.966 | -19.401 | 20.377 | 1.00 | 0.00 | O |
| ATOM | 1076 | O1P  | G B | 16 | -32.054 | -19.854 | 21.707 | 1.00 | 0.00 | O |
| ATOM | 1077 | O2P  | G B | 16 | -30.831 | -21.749 | 20.609 | 1.00 | 0.00 | O |
| ATOM | 1078 | P    | G B | 16 | -30.763 | -20.435 | 21.294 | 1.00 | 0.00 | P |
| ATOM | 1079 | H1   | G B | 16 | -23.881 | -19.304 | 14.573 | 1.00 | 0.00 | H |
| ATOM | 1080 | H8   | G B | 16 | -28.882 | -20.463 | 18.487 | 1.00 | 0.00 | H |
| ATOM | 1081 | H1'  | G B | 16 | -28.584 | -16.824 | 17.097 | 1.00 | 0.00 | H |
| ATOM | 1082 | H21  | G B | 16 | -23.801 | -17.175 | 14.054 | 1.00 | 0.00 | H |
| ATOM | 1083 | H3'  | G B | 16 | -31.595 | -17.414 | 19.559 | 1.00 | 0.00 | H |
| ATOM | 1084 | H22  | G B | 16 | -24.987 | -15.991 | 14.672 | 1.00 | 0.00 | H |
| ATOM | 1085 | H4'  | G B | 16 | -29.507 | -16.125 | 20.555 | 1.00 | 0.00 | H |
| ATOM | 1086 | H2'1 | G B | 16 | -30.462 | -18.973 | 18.125 | 1.00 | 0.00 | H |
| ATOM | 1087 | H2'2 | G B | 16 | -30.797 | -17.673 | 16.990 | 1.00 | 0.00 | H |
| ATOM | 1088 | H5'1 | G B | 16 | -28.402 | -18.357 | 21.283 | 1.00 | 0.00 | H |
| ATOM | 1089 | H5'2 | G B | 16 | -30.028 | -17.934 | 21.861 | 1.00 | 0.00 | H |
| ATOM | 1090 | C1'  | G B | 17 | -28.742 | -15.447 | 13.368 | 1.00 | 0.00 | C |
| ATOM | 1091 | N1   | G B | 17 | -26.030 | -19.552 | 12.019 | 1.00 | 0.00 | N |
| ATOM | 1092 | C2   | G B | 17 | -25.846 | -18.219 | 11.694 | 1.00 | 0.00 | C |
| ATOM | 1093 | N2   | G B | 17 | -24.801 | -17.945 | 10.904 | 1.00 | 0.00 | N |
| ATOM | 1094 | N3   | G B | 17 | -26.639 | -17.241 | 12.125 | 1.00 | 0.00 | N |
| ATOM | 1095 | C4   | G B | 17 | -27.649 | -17.702 | 12.907 | 1.00 | 0.00 | C |
| ATOM | 1096 | C5   | G B | 17 | -27.913 | -19.008 | 13.280 | 1.00 | 0.00 | C |
| ATOM | 1097 | C6   | G B | 17 | -27.070 | -20.047 | 12.827 | 1.00 | 0.00 | C |
| ATOM | 1098 | O6   | G B | 17 | -27.140 | -21.257 | 13.048 | 1.00 | 0.00 | O |
| ATOM | 1099 | N7   | G B | 17 | -29.048 | -19.059 | 14.093 | 1.00 | 0.00 | N |
| ATOM | 1100 | C8   | G B | 17 | -29.425 | -17.810 | 14.187 | 1.00 | 0.00 | C |
| ATOM | 1101 | N9   | G B | 17 | -28.626 | -16.926 | 13.493 | 1.00 | 0.00 | N |
| ATOM | 1102 | C2'  | G B | 17 | -30.178 | -14.951 | 13.271 | 1.00 | 0.00 | C |
| ATOM | 1103 | C3'  | G B | 17 | -30.113 | -13.638 | 14.035 | 1.00 | 0.00 | C |
| ATOM | 1104 | O3'  | G B | 17 | -29.666 | -12.608 | 13.157 | 1.00 | 0.00 | O |
| ATOM | 1105 | C4'  | G B | 17 | -29.100 | -13.936 | 15.138 | 1.00 | 0.00 | C |
| ATOM | 1106 | O4'  | G B | 17 | -28.158 | -14.869 | 14.520 | 1.00 | 0.00 | O |
| ATOM | 1107 | C5'  | G B | 17 | -29.646 | -14.565 | 16.398 | 1.00 | 0.00 | C |
| ATOM | 1108 | O5'  | G B | 17 | -30.708 | -15.492 | 16.063 | 1.00 | 0.00 | O |
| ATOM | 1109 | O1P  | G B | 17 | -32.752 | -14.423 | 17.072 | 1.00 | 0.00 | O |
| ATOM | 1110 | O2P  | G B | 17 | -32.656 | -16.913 | 16.775 | 1.00 | 0.00 | O |

|      |      |      |     |    |         |         |        |      |      |   |
|------|------|------|-----|----|---------|---------|--------|------|------|---|
| ATOM | 1111 | P    | G B | 17 | -31.935 | -15.651 | 17.072 | 1.00 | 0.00 | P |
| ATOM | 1112 | H1   | G B | 17 | -25.354 | -20.232 | 11.638 | 1.00 | 0.00 | H |
| ATOM | 1113 | H8   | G B | 17 | -30.295 | -17.495 | 14.763 | 1.00 | 0.00 | H |
| ATOM | 1114 | H1'  | G B | 17 | -28.160 | -15.131 | 12.503 | 1.00 | 0.00 | H |
| ATOM | 1115 | H21  | G B | 17 | -24.188 | -18.706 | 10.577 | 1.00 | 0.00 | H |
| ATOM | 1116 | H3'  | G B | 17 | -31.080 | -13.360 | 14.454 | 1.00 | 0.00 | H |
| ATOM | 1117 | H22  | G B | 17 | -24.610 | -16.972 | 10.624 | 1.00 | 0.00 | H |
| ATOM | 1118 | H4'  | G B | 17 | -28.641 | -12.987 | 15.412 | 1.00 | 0.00 | H |
| ATOM | 1119 | H2'1 | G B | 17 | -30.886 | -15.642 | 13.730 | 1.00 | 0.00 | H |
| ATOM | 1120 | H2'2 | G B | 17 | -30.494 | -14.796 | 12.240 | 1.00 | 0.00 | H |
| ATOM | 1121 | H5'1 | G B | 17 | -28.843 | -15.095 | 16.911 | 1.00 | 0.00 | H |
| ATOM | 1122 | H5'2 | G B | 17 | -30.032 | -13.782 | 17.051 | 1.00 | 0.00 | H |
| ATOM | 1123 | C1'  | C B | 18 | -27.540 | -15.155 | 8.572  | 1.00 | 0.00 | C |
| ATOM | 1124 | N1   | C B | 18 | -28.193 | -16.377 | 9.117  | 1.00 | 0.00 | N |
| ATOM | 1125 | C2   | C B | 18 | -27.597 | -17.608 | 8.851  | 1.00 | 0.00 | C |
| ATOM | 1126 | O2   | C B | 18 | -26.558 | -17.636 | 8.180  | 1.00 | 0.00 | O |
| ATOM | 1127 | N3   | C B | 18 | -28.177 | -18.732 | 9.337  | 1.00 | 0.00 | N |
| ATOM | 1128 | C4   | C B | 18 | -29.302 | -18.668 | 10.060 | 1.00 | 0.00 | C |
| ATOM | 1129 | N4   | C B | 18 | -29.824 | -19.800 | 10.512 | 1.00 | 0.00 | N |
| ATOM | 1130 | C5   | C B | 18 | -29.937 | -17.417 | 10.346 | 1.00 | 0.00 | C |
| ATOM | 1131 | C6   | C B | 18 | -29.335 | -16.299 | 9.849  | 1.00 | 0.00 | C |
| ATOM | 1132 | C2'  | C B | 18 | -28.523 | -14.098 | 8.086  | 1.00 | 0.00 | C |
| ATOM | 1133 | C3'  | C B | 18 | -27.811 | -12.807 | 8.461  | 1.00 | 0.00 | C |
| ATOM | 1134 | O3'  | C B | 18 | -26.887 | -12.466 | 7.430  | 1.00 | 0.00 | O |
| ATOM | 1135 | C4'  | C B | 18 | -27.110 | -13.173 | 9.767  | 1.00 | 0.00 | C |
| ATOM | 1136 | O4'  | C B | 18 | -26.763 | -14.585 | 9.609  | 1.00 | 0.00 | O |
| ATOM | 1137 | C5'  | C B | 18 | -27.920 | -13.013 | 11.032 | 1.00 | 0.00 | C |
| ATOM | 1138 | O5'  | C B | 18 | -29.302 | -13.374 | 10.776 | 1.00 | 0.00 | O |
| ATOM | 1139 | O1P  | C B | 18 | -30.535 | -11.199 | 11.070 | 1.00 | 0.00 | O |
| ATOM | 1140 | O2P  | C B | 18 | -31.713 | -13.375 | 11.487 | 1.00 | 0.00 | O |
| ATOM | 1141 | P    | C B | 18 | -30.455 | -12.592 | 11.553 | 1.00 | 0.00 | P |
| ATOM | 1142 | H5   | C B | 18 | -30.855 | -17.361 | 10.931 | 1.00 | 0.00 | H |
| ATOM | 1143 | H6   | C B | 18 | -29.780 | -15.324 | 10.044 | 1.00 | 0.00 | H |
| ATOM | 1144 | H1'  | C B | 18 | -26.864 | -15.457 | 7.773  | 1.00 | 0.00 | H |
| ATOM | 1145 | H3'  | C B | 18 | -28.510 | -11.984 | 8.606  | 1.00 | 0.00 | H |
| ATOM | 1146 | H4'  | C B | 18 | -26.236 | -12.526 | 9.850  | 1.00 | 0.00 | H |
| ATOM | 1147 | H41  | C B | 18 | -30.689 | -19.779 | 11.073 | 1.00 | 0.00 | H |
| ATOM | 1148 | H42  | C B | 18 | -29.365 | -20.698 | 10.305 | 1.00 | 0.00 | H |
| ATOM | 1149 | H2'1 | C B | 18 | -29.491 | -14.175 | 8.580  | 1.00 | 0.00 | H |
| ATOM | 1150 | H2'2 | C B | 18 | -28.697 | -14.159 | 7.012  | 1.00 | 0.00 | H |
| ATOM | 1151 | H5'1 | C B | 18 | -27.509 | -13.661 | 11.806 | 1.00 | 0.00 | H |
| ATOM | 1152 | H5'2 | C B | 18 | -27.866 | -11.978 | 11.364 | 1.00 | 0.00 | H |
| ATOM | 1153 | C1'  | C B | 19 | -26.295 | -17.063 | 4.175  | 1.00 | 0.00 | C |
| ATOM | 1154 | N1   | C B | 19 | -27.488 | -17.567 | 4.909  | 1.00 | 0.00 | N |
| ATOM | 1155 | C2   | C B | 19 | -27.602 | -18.943 | 5.103  | 1.00 | 0.00 | C |
| ATOM | 1156 | O2   | C B | 19 | -26.714 | -19.684 | 4.663  | 1.00 | 0.00 | O |
| ATOM | 1157 | N3   | C B | 19 | -28.681 | -19.421 | 5.769  | 1.00 | 0.00 | N |
| ATOM | 1158 | C4   | C B | 19 | -29.626 | -18.592 | 6.233  | 1.00 | 0.00 | C |
| ATOM | 1159 | N4   | C B | 19 | -30.658 | -19.113 | 6.877  | 1.00 | 0.00 | N |
| ATOM | 1160 | C5   | C B | 19 | -29.534 | -17.176 | 6.046  | 1.00 | 0.00 | C |
| ATOM | 1161 | C6   | C B | 19 | -28.440 | -16.717 | 5.375  | 1.00 | 0.00 | C |
| ATOM | 1162 | C2'  | C B | 19 | -26.593 | -15.892 | 3.251  | 1.00 | 0.00 | C |
| ATOM | 1163 | C3'  | C B | 19 | -25.326 | -15.059 | 3.376  | 1.00 | 0.00 | C |
| ATOM | 1164 | O3'  | C B | 19 | -24.344 | -15.562 | 2.473  | 1.00 | 0.00 | O |

|      |      |      |     |    |         |         |         |      |      |   |
|------|------|------|-----|----|---------|---------|---------|------|------|---|
| ATOM | 1165 | C4'  | C B | 19 | -24.927 | -15.265 | 4.836   | 1.00 | 0.00 | C |
| ATOM | 1166 | O4'  | C B | 19 | -25.350 | -16.633 | 5.137   | 1.00 | 0.00 | O |
| ATOM | 1167 | C5'  | C B | 19 | -25.561 | -14.333 | 5.843   | 1.00 | 0.00 | C |
| ATOM | 1168 | O5'  | C B | 19 | -26.928 | -14.047 | 5.455   | 1.00 | 0.00 | O |
| ATOM | 1169 | O1P  | C B | 19 | -26.878 | -11.590 | 4.913   | 1.00 | 0.00 | O |
| ATOM | 1170 | O2P  | C B | 19 | -29.008 | -12.660 | 5.695   | 1.00 | 0.00 | O |
| ATOM | 1171 | P    | C B | 19 | -27.528 | -12.604 | 5.767   | 1.00 | 0.00 | P |
| ATOM | 1172 | H5   | C B | 19 | -30.300 | -16.498 | 6.420   | 1.00 | 0.00 | H |
| ATOM | 1173 | H6   | C B | 19 | -28.325 | -15.646 | 5.210   | 1.00 | 0.00 | H |
| ATOM | 1174 | H1'  | C B | 19 | -25.858 | -17.896 | 3.623   | 1.00 | 0.00 | H |
| ATOM | 1175 | H3'  | C B | 19 | -25.508 | -14.006 | 3.163   | 1.00 | 0.00 | H |
| ATOM | 1176 | H4'  | C B | 19 | -23.847 | -15.131 | 4.892   | 1.00 | 0.00 | H |
| ATOM | 1177 | H41  | C B | 19 | -31.399 | -18.499 | 7.247   | 1.00 | 0.00 | H |
| ATOM | 1178 | H42  | C B | 19 | -30.722 | -20.134 | 7.010   | 1.00 | 0.00 | H |
| ATOM | 1179 | H2'1 | C B | 19 | -27.470 | -15.328 | 3.566   | 1.00 | 0.00 | H |
| ATOM | 1180 | H2'2 | C B | 19 | -26.759 | -16.209 | 2.221   | 1.00 | 0.00 | H |
| ATOM | 1181 | H5'1 | C B | 19 | -25.546 | -14.804 | 6.825   | 1.00 | 0.00 | H |
| ATOM | 1182 | H5'2 | C B | 19 | -24.987 | -13.408 | 5.882   | 1.00 | 0.00 | H |
| ATOM | 1183 | C1'  | T B | 20 | -26.128 | -20.641 | 0.758   | 1.00 | 0.00 | C |
| ATOM | 1184 | N1   | T B | 20 | -27.424 | -20.260 | 1.380   | 1.00 | 0.00 | N |
| ATOM | 1185 | C2   | T B | 20 | -28.194 | -21.278 | 1.904   | 1.00 | 0.00 | C |
| ATOM | 1186 | O2   | T B | 20 | -27.852 | -22.448 | 1.873   | 1.00 | 0.00 | O |
| ATOM | 1187 | N3   | T B | 20 | -29.389 | -20.880 | 2.472   | 1.00 | 0.00 | N |
| ATOM | 1188 | C4   | T B | 20 | -29.868 | -19.591 | 2.559   | 1.00 | 0.00 | C |
| ATOM | 1189 | O4   | T B | 20 | -30.960 | -19.356 | 3.092   | 1.00 | 0.00 | O |
| ATOM | 1190 | C5   | T B | 20 | -28.995 | -18.597 | 1.985   | 1.00 | 0.00 | C |
| ATOM | 1191 | C6   | T B | 20 | -27.822 | -18.947 | 1.423   | 1.00 | 0.00 | C |
| ATOM | 1192 | C7   | T B | 20 | -29.477 | -17.178 | 2.058   | 1.00 | 0.00 | C |
| ATOM | 1193 | C2'  | T B | 20 | -25.782 | -19.830 | -0.485  | 1.00 | 0.00 | C |
| ATOM | 1194 | C3'  | T B | 20 | -24.271 | -19.701 | -0.369  | 1.00 | 0.00 | C |
| ATOM | 1195 | O3'  | T B | 20 | -23.658 | -20.864 | -0.921  | 1.00 | 0.00 | O |
| ATOM | 1196 | C4'  | T B | 20 | -24.053 | -19.592 | 1.138   | 1.00 | 0.00 | C |
| ATOM | 1197 | O4'  | T B | 20 | -25.109 | -20.425 | 1.716   | 1.00 | 0.00 | O |
| ATOM | 1198 | C5'  | T B | 20 | -24.150 | -18.207 | 1.733   | 1.00 | 0.00 | C |
| ATOM | 1199 | O5'  | T B | 20 | -25.184 | -17.452 | 1.051   | 1.00 | 0.00 | O |
| ATOM | 1200 | O1P  | T B | 20 | -23.902 | -15.627 | -0.112  | 1.00 | 0.00 | O |
| ATOM | 1201 | O2P  | T B | 20 | -26.294 | -15.256 | 0.547   | 1.00 | 0.00 | O |
| ATOM | 1202 | P    | T B | 20 | -24.986 | -15.883 | 0.856   | 1.00 | 0.00 | P |
| ATOM | 1203 | H3   | T B | 20 | -29.982 | -21.621 | 2.871   | 1.00 | 0.00 | H |
| ATOM | 1204 | H6   | T B | 20 | -27.179 | -18.178 | 0.996   | 1.00 | 0.00 | H |
| ATOM | 1205 | H1'  | T B | 20 | -26.156 | -21.707 | 0.533   | 1.00 | 0.00 | H |
| ATOM | 1206 | H3'  | T B | 20 | -23.897 | -18.818 | -0.886  | 1.00 | 0.00 | H |
| ATOM | 1207 | H4'  | T B | 20 | -23.051 | -19.972 | 1.341   | 1.00 | 0.00 | H |
| ATOM | 1208 | H3T  | T B | 20 | -23.932 | -21.085 | -1.814  | 1.00 | 0.00 | H |
| ATOM | 1209 | H71  | T B | 20 | -29.668 | -16.806 | 1.052   | 1.00 | 0.00 | H |
| ATOM | 1210 | H72  | T B | 20 | -30.397 | -17.136 | 2.643   | 1.00 | 0.00 | H |
| ATOM | 1211 | H73  | T B | 20 | -28.717 | -16.559 | 2.536   | 1.00 | 0.00 | H |
| ATOM | 1212 | H2'1 | T B | 20 | -26.264 | -18.854 | -0.488  | 1.00 | 0.00 | H |
| ATOM | 1213 | H2'2 | T B | 20 | -26.068 | -20.341 | -1.404  | 1.00 | 0.00 | H |
| ATOM | 1214 | H5'1 | T B | 20 | -24.390 | -18.288 | 2.793   | 1.00 | 0.00 | H |
| ATOM | 1215 | H5'2 | T B | 20 | -23.192 | -17.702 | 1.620   | 1.00 | 0.00 | H |
| TER  |      |      |     |    |         |         |         |      |      |   |
| ATOM | 1    | C1'  | A A | 1  | 31.651  | -70.008 | 98.899  | 1.00 | 0.00 | C |
| ATOM | 2    | N1   | A A | 1  | 28.591  | -69.987 | 103.018 | 1.00 | 0.00 | N |

|      |    |      |     |   |        |         |         |      |      |   |
|------|----|------|-----|---|--------|---------|---------|------|------|---|
| ATOM | 3  | C2   | A A | 1 | 28.574 | -70.691 | 101.890 | 1.00 | 0.00 | C |
| ATOM | 4  | N3   | A A | 1 | 29.399 | -70.649 | 100.865 | 1.00 | 0.00 | N |
| ATOM | 5  | C4   | A A | 1 | 30.359 | -69.731 | 101.078 | 1.00 | 0.00 | C |
| ATOM | 6  | C5   | A A | 1 | 30.515 | -68.930 | 102.174 | 1.00 | 0.00 | C |
| ATOM | 7  | C6   | A A | 1 | 29.561 | -69.080 | 103.203 | 1.00 | 0.00 | C |
| ATOM | 8  | N6   | A A | 1 | 29.588 | -68.362 | 104.339 | 1.00 | 0.00 | N |
| ATOM | 9  | N7   | A A | 1 | 31.620 | -68.108 | 102.038 | 1.00 | 0.00 | N |
| ATOM | 10 | C8   | A A | 1 | 32.102 | -68.424 | 100.873 | 1.00 | 0.00 | C |
| ATOM | 11 | N9   | A A | 1 | 31.390 | -69.403 | 100.232 | 1.00 | 0.00 | N |
| ATOM | 12 | C2'  | A A | 1 | 32.157 | -69.014 | 97.862  | 1.00 | 0.00 | C |
| ATOM | 13 | C3'  | A A | 1 | 33.130 | -69.862 | 97.059  | 1.00 | 0.00 | C |
| ATOM | 14 | O3'  | A A | 1 | 32.410 | -70.583 | 96.061  | 1.00 | 0.00 | O |
| ATOM | 15 | C4'  | A A | 1 | 33.732 | -70.786 | 98.117  | 1.00 | 0.00 | C |
| ATOM | 16 | O4'  | A A | 1 | 32.638 | -71.008 | 99.064  | 1.00 | 0.00 | O |
| ATOM | 17 | C5'  | A A | 1 | 34.925 | -70.251 | 98.873  | 1.00 | 0.00 | C |
| ATOM | 18 | O5'  | A A | 1 | 34.766 | -68.827 | 99.099  | 1.00 | 0.00 | O |
| ATOM | 19 | H2   | A A | 1 | 27.758 | -71.408 | 101.800 | 1.00 | 0.00 | H |
| ATOM | 20 | H8   | A A | 1 | 32.989 | -67.955 | 100.447 | 1.00 | 0.00 | H |
| ATOM | 21 | H1'  | A A | 1 | 30.736 | -70.494 | 98.559  | 1.00 | 0.00 | H |
| ATOM | 22 | H3'  | A A | 1 | 33.902 | -69.257 | 96.581  | 1.00 | 0.00 | H |
| ATOM | 23 | H4'  | A A | 1 | 34.042 | -71.695 | 97.604  | 1.00 | 0.00 | H |
| ATOM | 24 | H61  | A A | 1 | 28.869 | -68.511 | 105.058 | 1.00 | 0.00 | H |
| ATOM | 25 | H62  | A A | 1 | 30.330 | -67.663 | 104.486 | 1.00 | 0.00 | H |
| ATOM | 26 | H5T  | A A | 1 | 35.547 | -68.270 | 99.097  | 1.00 | 0.00 | H |
| ATOM | 27 | H2'1 | A A | 1 | 32.658 | -68.161 | 98.317  | 1.00 | 0.00 | H |
| ATOM | 28 | H2'2 | A A | 1 | 31.355 | -68.628 | 97.233  | 1.00 | 0.00 | H |
| ATOM | 29 | H5'1 | A A | 1 | 35.003 | -70.769 | 99.829  | 1.00 | 0.00 | H |
| ATOM | 30 | H5'2 | A A | 1 | 35.827 | -70.433 | 98.293  | 1.00 | 0.00 | H |
| ATOM | 31 | C1'  | G A | 2 | 26.892 | -70.246 | 97.504  | 1.00 | 0.00 | C |
| ATOM | 32 | N1   | G A | 2 | 26.034 | -67.963 | 101.983 | 1.00 | 0.00 | N |
| ATOM | 33 | C2   | G A | 2 | 25.354 | -69.000 | 101.373 | 1.00 | 0.00 | C |
| ATOM | 34 | N2   | G A | 2 | 24.306 | -69.493 | 102.042 | 1.00 | 0.00 | N |
| ATOM | 35 | N3   | G A | 2 | 25.693 | -69.505 | 100.188 | 1.00 | 0.00 | N |
| ATOM | 36 | C4   | G A | 2 | 26.775 | -68.881 | 99.651  | 1.00 | 0.00 | C |
| ATOM | 37 | C5   | G A | 2 | 27.514 | -67.838 | 100.186 | 1.00 | 0.00 | C |
| ATOM | 38 | C6   | G A | 2 | 27.155 | -67.305 | 101.447 | 1.00 | 0.00 | C |
| ATOM | 39 | O6   | G A | 2 | 27.683 | -66.391 | 102.080 | 1.00 | 0.00 | O |
| ATOM | 40 | N7   | G A | 2 | 28.547 | -67.483 | 99.317  | 1.00 | 0.00 | N |
| ATOM | 41 | C8   | G A | 2 | 28.409 | -68.305 | 98.308  | 1.00 | 0.00 | C |
| ATOM | 42 | N9   | G A | 2 | 27.353 | -69.184 | 98.437  | 1.00 | 0.00 | N |
| ATOM | 43 | C2'  | G A | 2 | 27.001 | -69.863 | 96.034  | 1.00 | 0.00 | C |
| ATOM | 44 | C3'  | G A | 2 | 27.376 | -71.185 | 95.387  | 1.00 | 0.00 | C |
| ATOM | 45 | O3'  | G A | 2 | 26.190 | -71.936 | 95.134  | 1.00 | 0.00 | O |
| ATOM | 46 | C4'  | G A | 2 | 28.260 | -71.843 | 96.446  | 1.00 | 0.00 | C |
| ATOM | 47 | O4'  | G A | 2 | 27.698 | -71.389 | 97.717  | 1.00 | 0.00 | O |
| ATOM | 48 | C5'  | G A | 2 | 29.728 | -71.486 | 96.409  | 1.00 | 0.00 | C |
| ATOM | 49 | O5'  | G A | 2 | 29.885 | -70.094 | 96.037  | 1.00 | 0.00 | O |
| ATOM | 50 | O1P  | G A | 2 | 31.029 | -70.216 | 93.799  | 1.00 | 0.00 | O |
| ATOM | 51 | O2P  | G A | 2 | 31.350 | -68.206 | 95.264  | 1.00 | 0.00 | O |
| ATOM | 52 | P    | G A | 2 | 31.151 | -69.672 | 95.165  | 1.00 | 0.00 | P |
| ATOM | 53 | H1   | G A | 2 | 25.692 | -67.648 | 102.903 | 1.00 | 0.00 | H |
| ATOM | 54 | H8   | G A | 2 | 29.068 | -68.296 | 97.441  | 1.00 | 0.00 | H |
| ATOM | 55 | H1'  | G A | 2 | 25.865 | -70.507 | 97.763  | 1.00 | 0.00 | H |
| ATOM | 56 | H21  | G A | 2 | 24.050 | -69.099 | 102.959 | 1.00 | 0.00 | H |

|      |     |      |     |   |        |         |         |      |      |   |
|------|-----|------|-----|---|--------|---------|---------|------|------|---|
| ATOM | 57  | H3'  | G A | 2 | 27.920 | -71.043 | 94.453  | 1.00 | 0.00 | H |
| ATOM | 58  | H22  | G A | 2 | 23.757 | -70.266 | 101.639 | 1.00 | 0.00 | H |
| ATOM | 59  | H4'  | G A | 2 | 28.176 | -72.920 | 96.303  | 1.00 | 0.00 | H |
| ATOM | 60  | H2'1 | G A | 2 | 27.766 | -69.105 | 95.861  | 1.00 | 0.00 | H |
| ATOM | 61  | H2'2 | G A | 2 | 26.062 | -69.477 | 95.636  | 1.00 | 0.00 | H |
| ATOM | 62  | H5'1 | G A | 2 | 30.161 | -71.655 | 97.395  | 1.00 | 0.00 | H |
| ATOM | 63  | H5'2 | G A | 2 | 30.233 | -72.122 | 95.683  | 1.00 | 0.00 | H |
| ATOM | 64  | C1'  | G A | 3 | 22.033 | -69.488 | 98.094  | 1.00 | 0.00 | C |
| ATOM | 65  | N1   | G A | 3 | 23.570 | -65.726 | 101.176 | 1.00 | 0.00 | N |
| ATOM | 66  | C2   | G A | 3 | 22.555 | -66.649 | 101.342 | 1.00 | 0.00 | C |
| ATOM | 67  | N2   | G A | 3 | 21.854 | -66.558 | 102.480 | 1.00 | 0.00 | N |
| ATOM | 68  | N3   | G A | 3 | 22.262 | -67.589 | 100.447 | 1.00 | 0.00 | N |
| ATOM | 69  | C4   | G A | 3 | 23.068 | -67.530 | 99.353  | 1.00 | 0.00 | C |
| ATOM | 70  | C5   | G A | 3 | 24.102 | -66.644 | 99.101  | 1.00 | 0.00 | C |
| ATOM | 71  | C6   | G A | 3 | 24.416 | -65.648 | 100.055 | 1.00 | 0.00 | C |
| ATOM | 72  | O6   | G A | 3 | 25.288 | -64.780 | 100.013 | 1.00 | 0.00 | O |
| ATOM | 73  | N7   | G A | 3 | 24.681 | -66.919 | 97.861  | 1.00 | 0.00 | N |
| ATOM | 74  | C8   | G A | 3 | 24.000 | -67.941 | 97.413  | 1.00 | 0.00 | C |
| ATOM | 75  | N9   | G A | 3 | 23.001 | -68.370 | 98.263  | 1.00 | 0.00 | N |
| ATOM | 76  | C2'  | G A | 3 | 21.532 | -69.654 | 96.666  | 1.00 | 0.00 | C |
| ATOM | 77  | C3'  | G A | 3 | 21.397 | -71.163 | 96.550  | 1.00 | 0.00 | C |
| ATOM | 78  | O3'  | G A | 3 | 20.132 | -71.561 | 97.073  | 1.00 | 0.00 | O |
| ATOM | 79  | C4'  | G A | 3 | 22.559 | -71.675 | 97.400  | 1.00 | 0.00 | C |
| ATOM | 80  | O4'  | G A | 3 | 22.686 | -70.685 | 98.469  | 1.00 | 0.00 | O |
| ATOM | 81  | C5'  | G A | 3 | 23.892 | -71.808 | 96.703  | 1.00 | 0.00 | C |
| ATOM | 82  | O5'  | G A | 3 | 24.057 | -70.729 | 95.749  | 1.00 | 0.00 | O |
| ATOM | 83  | O1P  | G A | 3 | 24.063 | -71.911 | 93.527  | 1.00 | 0.00 | O |
| ATOM | 84  | O2P  | G A | 3 | 25.272 | -69.729 | 93.790  | 1.00 | 0.00 | O |
| ATOM | 85  | P    | G A | 3 | 24.851 | -71.016 | 94.396  | 1.00 | 0.00 | P |
| ATOM | 86  | H1   | G A | 3 | 23.718 | -65.041 | 101.934 | 1.00 | 0.00 | H |
| ATOM | 87  | H8   | G A | 3 | 24.202 | -68.414 | 96.453  | 1.00 | 0.00 | H |
| ATOM | 88  | H1'  | G A | 3 | 21.203 | -69.328 | 98.782  | 1.00 | 0.00 | H |
| ATOM | 89  | H21  | G A | 3 | 22.088 | -65.829 | 103.170 | 1.00 | 0.00 | H |
| ATOM | 90  | H3'  | G A | 3 | 21.485 | -71.504 | 95.518  | 1.00 | 0.00 | H |
| ATOM | 91  | H22  | G A | 3 | 21.083 | -67.215 | 102.662 | 1.00 | 0.00 | H |
| ATOM | 92  | H4'  | G A | 3 | 22.274 | -72.661 | 97.765  | 1.00 | 0.00 | H |
| ATOM | 93  | H2'1 | G A | 3 | 22.237 | -69.262 | 95.932  | 1.00 | 0.00 | H |
| ATOM | 94  | H2'2 | G A | 3 | 20.577 | -69.155 | 96.501  | 1.00 | 0.00 | H |
| ATOM | 95  | H5'1 | G A | 3 | 24.689 | -71.770 | 97.445  | 1.00 | 0.00 | H |
| ATOM | 96  | H5'2 | G A | 3 | 23.931 | -72.767 | 96.186  | 1.00 | 0.00 | H |
| ATOM | 97  | C1'  | C A | 4 | 18.093 | -67.153 | 99.981  | 1.00 | 0.00 | C |
| ATOM | 98  | N1   | C A | 4 | 19.181 | -66.383 | 99.314  | 1.00 | 0.00 | N |
| ATOM | 99  | C2   | C A | 4 | 19.735 | -65.308 | 100.005 | 1.00 | 0.00 | C |
| ATOM | 100 | O2   | C A | 4 | 19.305 | -65.037 | 101.133 | 1.00 | 0.00 | O |
| ATOM | 101 | N3   | C A | 4 | 20.725 | -64.596 | 99.416  | 1.00 | 0.00 | N |
| ATOM | 102 | C4   | C A | 4 | 21.168 | -64.913 | 98.193  | 1.00 | 0.00 | C |
| ATOM | 103 | N4   | C A | 4 | 22.141 | -64.184 | 97.666  | 1.00 | 0.00 | N |
| ATOM | 104 | C5   | C A | 4 | 20.614 | -66.012 | 97.460  | 1.00 | 0.00 | C |
| ATOM | 105 | C6   | C A | 4 | 19.620 | -66.718 | 98.072  | 1.00 | 0.00 | C |
| ATOM | 106 | C2'  | C A | 4 | 16.995 | -67.611 | 99.031  | 1.00 | 0.00 | C |
| ATOM | 107 | C3'  | C A | 4 | 16.618 | -68.966 | 99.612  | 1.00 | 0.00 | C |
| ATOM | 108 | O3'  | C A | 4 | 15.672 | -68.776 | 100.663 | 1.00 | 0.00 | O |
| ATOM | 109 | C4'  | C A | 4 | 17.952 | -69.499 | 100.126 | 1.00 | 0.00 | C |
| ATOM | 110 | O4'  | C A | 4 | 18.676 | -68.304 | 100.563 | 1.00 | 0.00 | O |

|      |     |      |     |   |        |         |         |      |      |   |
|------|-----|------|-----|---|--------|---------|---------|------|------|---|
| ATOM | 111 | C5'  | C A | 4 | 18.808 | -70.242 | 99.127  | 1.00 | 0.00 | C |
| ATOM | 112 | O5'  | C A | 4 | 18.680 | -69.627 | 97.819  | 1.00 | 0.00 | O |
| ATOM | 113 | O1P  | C A | 4 | 17.541 | -71.405 | 96.449  | 1.00 | 0.00 | O |
| ATOM | 114 | O2P  | C A | 4 | 19.028 | -69.721 | 95.332  | 1.00 | 0.00 | O |
| ATOM | 115 | P    | C A | 4 | 18.746 | -70.557 | 96.525  | 1.00 | 0.00 | P |
| ATOM | 116 | H5   | C A | 4 | 20.968 | -66.270 | 96.461  | 1.00 | 0.00 | H |
| ATOM | 117 | H6   | C A | 4 | 19.171 | -67.566 | 97.556  | 1.00 | 0.00 | H |
| ATOM | 118 | H1'  | C A | 4 | 17.685 | -66.540 | 100.783 | 1.00 | 0.00 | H |
| ATOM | 119 | H3'  | C A | 4 | 16.192 | -69.628 | 98.859  | 1.00 | 0.00 | H |
| ATOM | 120 | H4'  | C A | 4 | 17.726 | -70.183 | 100.944 | 1.00 | 0.00 | H |
| ATOM | 121 | H41  | C A | 4 | 22.501 | -64.407 | 96.726  | 1.00 | 0.00 | H |
| ATOM | 122 | H42  | C A | 4 | 22.537 | -63.393 | 98.194  | 1.00 | 0.00 | H |
| ATOM | 123 | H2'1 | C A | 4 | 17.348 | -67.706 | 98.005  | 1.00 | 0.00 | H |
| ATOM | 124 | H2'2 | C A | 4 | 16.144 | -66.930 | 99.023  | 1.00 | 0.00 | H |
| ATOM | 125 | H5'1 | C A | 4 | 19.849 | -70.207 | 99.450  | 1.00 | 0.00 | H |
| ATOM | 126 | H5'2 | C A | 4 | 18.482 | -71.280 | 99.079  | 1.00 | 0.00 | H |
| ATOM | 127 | C1'  | C A | 5 | 15.757 | -63.261 | 101.960 | 1.00 | 0.00 | C |
| ATOM | 128 | N1   | C A | 5 | 16.530 | -63.116 | 100.697 | 1.00 | 0.00 | N |
| ATOM | 129 | C2   | C A | 5 | 17.474 | -62.094 | 100.625 | 1.00 | 0.00 | C |
| ATOM | 130 | O2   | C A | 5 | 17.632 | -61.354 | 101.605 | 1.00 | 0.00 | O |
| ATOM | 131 | N3   | C A | 5 | 18.190 | -61.945 | 99.483  | 1.00 | 0.00 | N |
| ATOM | 132 | C4   | C A | 5 | 17.997 | -62.759 | 98.438  | 1.00 | 0.00 | C |
| ATOM | 133 | N4   | C A | 5 | 18.725 | -62.570 | 97.349  | 1.00 | 0.00 | N |
| ATOM | 134 | C5   | C A | 5 | 17.031 | -63.817 | 98.484  | 1.00 | 0.00 | C |
| ATOM | 135 | C6   | C A | 5 | 16.326 | -63.950 | 99.644  | 1.00 | 0.00 | C |
| ATOM | 136 | C2'  | C A | 5 | 14.301 | -63.651 | 101.747 | 1.00 | 0.00 | C |
| ATOM | 137 | C3'  | C A | 5 | 14.039 | -64.562 | 102.937 | 1.00 | 0.00 | C |
| ATOM | 138 | O3'  | C A | 5 | 13.692 | -63.765 | 104.068 | 1.00 | 0.00 | O |
| ATOM | 139 | C4'  | C A | 5 | 15.376 | -65.274 | 103.120 | 1.00 | 0.00 | C |
| ATOM | 140 | O4'  | C A | 5 | 16.374 | -64.279 | 102.728 | 1.00 | 0.00 | O |
| ATOM | 141 | C5'  | C A | 5 | 15.590 | -66.523 | 102.297 | 1.00 | 0.00 | C |
| ATOM | 142 | O5'  | C A | 5 | 14.982 | -66.359 | 100.990 | 1.00 | 0.00 | O |
| ATOM | 143 | O1P  | C A | 5 | 13.122 | -68.055 | 100.997 | 1.00 | 0.00 | O |
| ATOM | 144 | O2P  | C A | 5 | 14.176 | -67.356 | 98.830  | 1.00 | 0.00 | O |
| ATOM | 145 | P    | C A | 5 | 14.340 | -67.633 | 100.278 | 1.00 | 0.00 | P |
| ATOM | 146 | H5   | C A | 5 | 16.867 | -64.480 | 97.634  | 1.00 | 0.00 | H |
| ATOM | 147 | H6   | C A | 5 | 15.582 | -64.744 | 99.729  | 1.00 | 0.00 | H |
| ATOM | 148 | H1'  | C A | 5 | 15.835 | -62.327 | 102.517 | 1.00 | 0.00 | H |
| ATOM | 149 | H3'  | C A | 5 | 13.237 | -65.272 | 102.738 | 1.00 | 0.00 | H |
| ATOM | 150 | H4'  | C A | 5 | 15.444 | -65.554 | 104.172 | 1.00 | 0.00 | H |
| ATOM | 151 | H41  | C A | 5 | 18.598 | -63.184 | 96.531  | 1.00 | 0.00 | H |
| ATOM | 152 | H42  | C A | 5 | 19.418 | -61.808 | 97.318  | 1.00 | 0.00 | H |
| ATOM | 153 | H2'1 | C A | 5 | 14.146 | -64.176 | 100.805 | 1.00 | 0.00 | H |
| ATOM | 154 | H2'2 | C A | 5 | 13.636 | -62.786 | 101.754 | 1.00 | 0.00 | H |
| ATOM | 155 | H5'1 | C A | 5 | 16.660 | -66.700 | 102.185 | 1.00 | 0.00 | H |
| ATOM | 156 | H5'2 | C A | 5 | 15.138 | -67.371 | 102.810 | 1.00 | 0.00 | H |
| ATOM | 157 | C1'  | G A | 6 | 15.097 | -58.425 | 102.797 | 1.00 | 0.00 | C |
| ATOM | 158 | N1   | G A | 6 | 17.589 | -57.897 | 98.377  | 1.00 | 0.00 | N |
| ATOM | 159 | C2   | G A | 6 | 17.716 | -57.188 | 99.559  | 1.00 | 0.00 | C |
| ATOM | 160 | N2   | G A | 6 | 18.625 | -56.206 | 99.562  | 1.00 | 0.00 | N |
| ATOM | 161 | N3   | G A | 6 | 16.992 | -57.439 | 100.648 | 1.00 | 0.00 | N |
| ATOM | 162 | C4   | G A | 6 | 16.116 | -58.460 | 100.463 | 1.00 | 0.00 | C |
| ATOM | 163 | C5   | G A | 6 | 15.917 | -59.220 | 99.322  | 1.00 | 0.00 | C |
| ATOM | 164 | C6   | G A | 6 | 16.687 | -58.957 | 98.166  | 1.00 | 0.00 | C |



|      |     |      |     |   |        |         |         |      |      |   |
|------|-----|------|-----|---|--------|---------|---------|------|------|---|
| ATOM | 165 | O6   | G A | 6 | 16.656 | -59.516 | 97.069  | 1.00 | 0.00 | O |
| ATOM | 166 | N7   | G A | 6 | 14.920 | -60.171 | 99.543  | 1.00 | 0.00 | N |
| ATOM | 167 | C8   | G A | 6 | 14.557 | -59.967 | 100.783 | 1.00 | 0.00 | C |
| ATOM | 168 | N9   | G A | 6 | 15.237 | -58.942 | 101.408 | 1.00 | 0.00 | N |
| ATOM | 169 | C2'  | G A | 6 | 13.660 | -58.406 | 103.302 | 1.00 | 0.00 | C |
| ATOM | 170 | C3'  | G A | 6 | 13.836 | -58.751 | 104.772 | 1.00 | 0.00 | C |
| ATOM | 171 | O3'  | G A | 6 | 14.139 | -57.564 | 105.500 | 1.00 | 0.00 | O |
| ATOM | 172 | C4'  | G A | 6 | 15.007 | -59.733 | 104.753 | 1.00 | 0.00 | C |
| ATOM | 173 | O4'  | G A | 6 | 15.847 | -59.268 | 103.650 | 1.00 | 0.00 | O |
| ATOM | 174 | C5'  | G A | 6 | 14.662 | -61.184 | 104.522 | 1.00 | 0.00 | C |
| ATOM | 175 | O5'  | G A | 6 | 13.564 | -61.285 | 103.580 | 1.00 | 0.00 | O |
| ATOM | 176 | O1P  | G A | 6 | 11.695 | -62.242 | 104.965 | 1.00 | 0.00 | O |
| ATOM | 177 | O2P  | G A | 6 | 11.755 | -62.645 | 102.490 | 1.00 | 0.00 | O |
| ATOM | 178 | P    | G A | 6 | 12.508 | -62.467 | 103.755 | 1.00 | 0.00 | P |
| ATOM | 179 | H1   | G A | 6 | 18.202 | -57.627 | 97.592  | 1.00 | 0.00 | H |
| ATOM | 180 | H8   | G A | 6 | 13.783 | -60.552 | 101.280 | 1.00 | 0.00 | H |
| ATOM | 181 | H1'  | G A | 6 | 15.538 | -57.429 | 102.837 | 1.00 | 0.00 | H |
| ATOM | 182 | H21  | G A | 6 | 19.184 | -56.020 | 98.717  | 1.00 | 0.00 | H |
| ATOM | 183 | H3'  | G A | 6 | 12.942 | -59.214 | 105.193 | 1.00 | 0.00 | H |
| ATOM | 184 | H22  | G A | 6 | 18.767 | -55.639 | 100.410 | 1.00 | 0.00 | H |
| ATOM | 185 | H4'  | G A | 6 | 15.498 | -59.657 | 105.723 | 1.00 | 0.00 | H |
| ATOM | 186 | H2'1 | G A | 6 | 13.034 | -59.140 | 102.794 | 1.00 | 0.00 | H |
| ATOM | 187 | H2'2 | G A | 6 | 13.190 | -57.431 | 103.176 | 1.00 | 0.00 | H |
| ATOM | 188 | H5'1 | G A | 6 | 15.535 | -61.701 | 104.125 | 1.00 | 0.00 | H |
| ATOM | 189 | H5'2 | G A | 6 | 14.378 | -61.641 | 105.470 | 1.00 | 0.00 | H |
| ATOM | 190 | C1'  | C A | 7 | 15.543 | -53.618 | 101.692 | 1.00 | 0.00 | C |
| ATOM | 191 | N1   | C A | 7 | 14.987 | -54.574 | 100.696 | 1.00 | 0.00 | N |
| ATOM | 192 | C2   | C A | 7 | 15.542 | -54.581 | 99.418  | 1.00 | 0.00 | C |
| ATOM | 193 | O2   | C A | 7 | 16.467 | -53.799 | 99.164  | 1.00 | 0.00 | O |
| ATOM | 194 | N3   | C A | 7 | 15.050 | -55.444 | 98.496  | 1.00 | 0.00 | N |
| ATOM | 195 | C4   | C A | 7 | 14.047 | -56.278 | 98.800  | 1.00 | 0.00 | C |
| ATOM | 196 | N4   | C A | 7 | 13.607 | -57.103 | 97.861  | 1.00 | 0.00 | N |
| ATOM | 197 | C5   | C A | 7 | 13.453 | -56.290 | 100.105 | 1.00 | 0.00 | C |
| ATOM | 198 | C6   | C A | 7 | 13.968 | -55.415 | 101.019 | 1.00 | 0.00 | C |
| ATOM | 199 | C2'  | C A | 7 | 14.493 | -53.005 | 102.608 | 1.00 | 0.00 | C |
| ATOM | 200 | C3'  | C A | 7 | 15.248 | -52.892 | 103.924 | 1.00 | 0.00 | C |
| ATOM | 201 | O3'  | C A | 7 | 16.002 | -51.682 | 103.928 | 1.00 | 0.00 | O |
| ATOM | 202 | C4'  | C A | 7 | 16.141 | -54.129 | 103.910 | 1.00 | 0.00 | C |
| ATOM | 203 | O4'  | C A | 7 | 16.467 | -54.326 | 102.497 | 1.00 | 0.00 | O |
| ATOM | 204 | C5'  | C A | 7 | 15.530 | -55.405 | 104.446 | 1.00 | 0.00 | C |
| ATOM | 205 | O5'  | C A | 7 | 14.128 | -55.467 | 104.083 | 1.00 | 0.00 | O |
| ATOM | 206 | O1P  | C A | 7 | 12.943 | -55.314 | 106.298 | 1.00 | 0.00 | O |
| ATOM | 207 | O2P  | C A | 7 | 11.854 | -56.495 | 104.370 | 1.00 | 0.00 | O |
| ATOM | 208 | P    | C A | 7 | 13.103 | -56.153 | 105.093 | 1.00 | 0.00 | P |
| ATOM | 209 | H5   | C A | 7 | 12.632 | -56.963 | 100.356 | 1.00 | 0.00 | H |
| ATOM | 210 | H6   | C A | 7 | 13.556 | -55.393 | 102.028 | 1.00 | 0.00 | H |
| ATOM | 211 | H1'  | C A | 7 | 16.092 | -52.845 | 101.153 | 1.00 | 0.00 | H |
| ATOM | 212 | H3'  | C A | 7 | 14.574 | -52.901 | 104.781 | 1.00 | 0.00 | H |
| ATOM | 213 | H4'  | C A | 7 | 17.014 | -53.896 | 104.521 | 1.00 | 0.00 | H |
| ATOM | 214 | H41  | C A | 7 | 12.838 | -57.756 | 98.069  | 1.00 | 0.00 | H |
| ATOM | 215 | H42  | C A | 7 | 14.032 | -57.092 | 96.923  | 1.00 | 0.00 | H |
| ATOM | 216 | H2'1 | C A | 7 | 13.612 | -53.637 | 102.709 | 1.00 | 0.00 | H |
| ATOM | 217 | H2'2 | C A | 7 | 14.157 | -52.028 | 102.257 | 1.00 | 0.00 | H |
| ATOM | 218 | H5'1 | C A | 7 | 16.059 | -56.260 | 104.024 | 1.00 | 0.00 | H |

|      |     |      |     |   |        |         |         |      |      |   |
|------|-----|------|-----|---|--------|---------|---------|------|------|---|
| ATOM | 219 | H5'2 | C A | 7 | 15.630 | -55.420 | 105.531 | 1.00 | 0.00 | H |
| ATOM | 220 | C1'  | A A | 8 | 16.112 | -49.791 | 98.605  | 1.00 | 0.00 | C |
| ATOM | 221 | N1   | A A | 8 | 14.045 | -52.994 | 95.168  | 1.00 | 0.00 | N |
| ATOM | 222 | C2   | A A | 8 | 15.064 | -52.142 | 95.103  | 1.00 | 0.00 | C |
| ATOM | 223 | N3   | A A | 8 | 15.549 | -51.344 | 96.031  | 1.00 | 0.00 | N |
| ATOM | 224 | C4   | A A | 8 | 14.845 | -51.477 | 97.171  | 1.00 | 0.00 | C |
| ATOM | 225 | C5   | A A | 8 | 13.780 | -52.302 | 97.400  | 1.00 | 0.00 | C |
| ATOM | 226 | C6   | A A | 8 | 13.365 | -53.106 | 96.319  | 1.00 | 0.00 | C |
| ATOM | 227 | N6   | A A | 8 | 12.333 | -53.964 | 96.396  | 1.00 | 0.00 | N |
| ATOM | 228 | N7   | A A | 8 | 13.314 | -52.168 | 98.697  | 1.00 | 0.00 | N |
| ATOM | 229 | C8   | A A | 8 | 14.098 | -51.270 | 99.219  | 1.00 | 0.00 | C |
| ATOM | 230 | N9   | A A | 8 | 15.054 | -50.806 | 98.351  | 1.00 | 0.00 | N |
| ATOM | 231 | C2'  | A A | 8 | 15.657 | -48.639 | 99.492  | 1.00 | 0.00 | C |
| ATOM | 232 | C3'  | A A | 8 | 16.916 | -48.338 | 100.290 | 1.00 | 0.00 | C |
| ATOM | 233 | O3'  | A A | 8 | 17.751 | -47.467 | 99.533  | 1.00 | 0.00 | O |
| ATOM | 234 | C4'  | A A | 8 | 17.541 | -49.721 | 100.474 | 1.00 | 0.00 | C |
| ATOM | 235 | O4'  | A A | 8 | 17.189 | -50.442 | 99.249  | 1.00 | 0.00 | O |
| ATOM | 236 | C5'  | A A | 8 | 17.061 | -50.520 | 101.662 | 1.00 | 0.00 | C |
| ATOM | 237 | O5'  | A A | 8 | 15.645 | -50.286 | 101.872 | 1.00 | 0.00 | O |
| ATOM | 238 | O1P  | A A | 8 | 15.576 | -49.096 | 104.090 | 1.00 | 0.00 | O |
| ATOM | 239 | O2P  | A A | 8 | 13.608 | -50.458 | 103.332 | 1.00 | 0.00 | O |
| ATOM | 240 | P    | A A | 8 | 15.081 | -50.282 | 103.364 | 1.00 | 0.00 | P |
| ATOM | 241 | H2   | A A | 8 | 15.572 | -52.097 | 94.141  | 1.00 | 0.00 | H |
| ATOM | 242 | H8   | A A | 8 | 14.005 | -50.919 | 100.246 | 1.00 | 0.00 | H |
| ATOM | 243 | H1'  | A A | 8 | 16.469 | -49.424 | 97.642  | 1.00 | 0.00 | H |
| ATOM | 244 | H3'  | A A | 8 | 16.691 | -47.878 | 101.251 | 1.00 | 0.00 | H |
| ATOM | 245 | H4'  | A A | 8 | 18.614 | -49.570 | 100.586 | 1.00 | 0.00 | H |
| ATOM | 246 | H61  | A A | 8 | 12.073 | -54.531 | 95.578  | 1.00 | 0.00 | H |
| ATOM | 247 | H62  | A A | 8 | 11.804 | -54.054 | 97.276  | 1.00 | 0.00 | H |
| ATOM | 248 | H2'1 | A A | 8 | 14.833 | -48.922 | 100.145 | 1.00 | 0.00 | H |
| ATOM | 249 | H2'2 | A A | 8 | 15.337 | -47.773 | 98.913  | 1.00 | 0.00 | H |
| ATOM | 250 | H5'1 | A A | 8 | 17.234 | -51.580 | 101.472 | 1.00 | 0.00 | H |
| ATOM | 251 | H5'2 | A A | 8 | 17.619 | -50.218 | 102.547 | 1.00 | 0.00 | H |
| ATOM | 252 | C1'  | C A | 9 | 15.752 | -47.565 | 94.180  | 1.00 | 0.00 | C |
| ATOM | 253 | N1   | C A | 9 | 14.566 | -48.229 | 94.787  | 1.00 | 0.00 | N |
| ATOM | 254 | C2   | C A | 9 | 13.861 | -49.144 | 94.010  | 1.00 | 0.00 | C |
| ATOM | 255 | O2   | C A | 9 | 14.245 | -49.366 | 92.854  | 1.00 | 0.00 | O |
| ATOM | 256 | N3   | C A | 9 | 12.779 | -49.760 | 94.544  | 1.00 | 0.00 | N |
| ATOM | 257 | C4   | C A | 9 | 12.386 | -49.497 | 95.798  | 1.00 | 0.00 | C |
| ATOM | 258 | N4   | C A | 9 | 11.323 | -50.130 | 96.272  | 1.00 | 0.00 | N |
| ATOM | 259 | C5   | C A | 9 | 13.090 | -48.557 | 96.621  | 1.00 | 0.00 | C |
| ATOM | 260 | C6   | C A | 9 | 14.181 | -47.952 | 96.063  | 1.00 | 0.00 | C |
| ATOM | 261 | C2'  | C A | 9 | 15.908 | -46.104 | 94.578  | 1.00 | 0.00 | C |
| ATOM | 262 | C3'  | C A | 9 | 17.421 | -45.958 | 94.661  | 1.00 | 0.00 | C |
| ATOM | 263 | O3'  | C A | 9 | 17.937 | -45.690 | 93.359  | 1.00 | 0.00 | O |
| ATOM | 264 | C4'  | C A | 9 | 17.865 | -47.319 | 95.190  | 1.00 | 0.00 | C |
| ATOM | 265 | O4'  | C A | 9 | 16.905 | -48.262 | 94.614  | 1.00 | 0.00 | O |
| ATOM | 266 | C5'  | C A | 9 | 17.866 | -47.488 | 96.691  | 1.00 | 0.00 | C |
| ATOM | 267 | O5'  | C A | 9 | 16.744 | -46.771 | 97.266  | 1.00 | 0.00 | O |
| ATOM | 268 | O1P  | C A | 9 | 17.843 | -44.952 | 98.613  | 1.00 | 0.00 | O |
| ATOM | 269 | O2P  | C A | 9 | 15.580 | -45.809 | 99.275  | 1.00 | 0.00 | O |
| ATOM | 270 | P    | C A | 9 | 16.917 | -46.097 | 98.701  | 1.00 | 0.00 | P |
| ATOM | 271 | H5   | C A | 9 | 12.771 | -48.335 | 97.640  | 1.00 | 0.00 | H |
| ATOM | 272 | H6   | C A | 9 | 14.753 | -47.235 | 96.651  | 1.00 | 0.00 | H |

|      |     |      |     |    |        |         |        |      |      |   |
|------|-----|------|-----|----|--------|---------|--------|------|------|---|
| ATOM | 273 | H1'  | C A | 9  | 15.684 | -47.670 | 93.098 | 1.00 | 0.00 | H |
| ATOM | 274 | H3'  | C A | 9  | 17.716 | -45.156 | 95.338 | 1.00 | 0.00 | H |
| ATOM | 275 | H4'  | C A | 9  | 18.884 | -47.479 | 94.837 | 1.00 | 0.00 | H |
| ATOM | 276 | H41  | C A | 9  | 11.002 | -49.948 | 97.234 | 1.00 | 0.00 | H |
| ATOM | 277 | H42  | C A | 9  | 10.817 | -50.804 | 95.678 | 1.00 | 0.00 | H |
| ATOM | 278 | H2'1 | C A | 9  | 15.436 | -45.882 | 95.534 | 1.00 | 0.00 | H |
| ATOM | 279 | H2'2 | C A | 9  | 15.483 | -45.425 | 93.837 | 1.00 | 0.00 | H |
| ATOM | 280 | H5'1 | C A | 9  | 17.788 | -48.548 | 96.933 | 1.00 | 0.00 | H |
| ATOM | 281 | H5'2 | C A | 9  | 18.799 | -47.096 | 97.095 | 1.00 | 0.00 | H |
| ATOM | 282 | C1'  | C A | 10 | 13.794 | -46.883 | 89.683 | 1.00 | 0.00 | C |
| ATOM | 283 | N1   | C A | 10 | 12.922 | -46.923 | 90.889 | 1.00 | 0.00 | N |
| ATOM | 284 | C2   | C A | 10 | 11.827 | -47.785 | 90.873 | 1.00 | 0.00 | C |
| ATOM | 285 | O2   | C A | 10 | 11.624 | -48.477 | 89.866 | 1.00 | 0.00 | O |
| ATOM | 286 | N3   | C A | 10 | 11.020 | -47.838 | 91.961 | 1.00 | 0.00 | N |
| ATOM | 287 | C4   | C A | 10 | 11.263 | -47.077 | 93.036 | 1.00 | 0.00 | C |
| ATOM | 288 | N4   | C A | 10 | 10.444 | -47.170 | 94.073 | 1.00 | 0.00 | N |
| ATOM | 289 | C5   | C A | 10 | 12.380 | -46.178 | 93.078 | 1.00 | 0.00 | C |
| ATOM | 290 | C6   | C A | 10 | 13.182 | -46.146 | 91.973 | 1.00 | 0.00 | C |
| ATOM | 291 | C2'  | C A | 10 | 14.308 | -45.491 | 89.345 | 1.00 | 0.00 | C |
| ATOM | 292 | C3'  | C A | 10 | 15.705 | -45.788 | 88.819 | 1.00 | 0.00 | C |
| ATOM | 293 | O3'  | C A | 10 | 15.622 | -46.127 | 87.437 | 1.00 | 0.00 | O |
| ATOM | 294 | C4'  | C A | 10 | 16.146 | -46.970 | 89.679 | 1.00 | 0.00 | C |
| ATOM | 295 | O4'  | C A | 10 | 14.913 | -47.714 | 89.933 | 1.00 | 0.00 | O |
| ATOM | 296 | C5'  | C A | 10 | 16.788 | -46.634 | 91.004 | 1.00 | 0.00 | C |
| ATOM | 297 | O5'  | C A | 10 | 16.147 | -45.466 | 91.578 | 1.00 | 0.00 | O |
| ATOM | 298 | O1P  | C A | 10 | 17.967 | -43.728 | 91.548 | 1.00 | 0.00 | O |
| ATOM | 299 | O2P  | C A | 10 | 16.137 | -43.600 | 93.260 | 1.00 | 0.00 | O |
| ATOM | 300 | P    | C A | 10 | 17.029 | -44.448 | 92.431 | 1.00 | 0.00 | P |
| ATOM | 301 | H5   | C A | 10 | 12.579 | -45.552 | 93.949 | 1.00 | 0.00 | H |
| ATOM | 302 | H6   | C A | 10 | 14.048 | -45.484 | 91.961 | 1.00 | 0.00 | H |
| ATOM | 303 | H1'  | C A | 10 | 13.240 | -47.309 | 88.847 | 1.00 | 0.00 | H |
| ATOM | 304 | H3'  | C A | 10 | 16.376 | -44.938 | 88.942 | 1.00 | 0.00 | H |
| ATOM | 305 | H4'  | C A | 10 | 16.871 | -47.534 | 89.092 | 1.00 | 0.00 | H |
| ATOM | 306 | H41  | C A | 10 | 10.610 | -46.597 | 94.914 | 1.00 | 0.00 | H |
| ATOM | 307 | H42  | C A | 10 | 9.641  | -47.814 | 94.039 | 1.00 | 0.00 | H |
| ATOM | 308 | H2'1 | C A | 10 | 14.344 | -44.839 | 90.216 | 1.00 | 0.00 | H |
| ATOM | 309 | H2'2 | C A | 10 | 13.696 | -44.996 | 88.589 | 1.00 | 0.00 | H |
| ATOM | 310 | H5'1 | C A | 10 | 16.681 | -47.483 | 91.681 | 1.00 | 0.00 | H |
| ATOM | 311 | H5'2 | C A | 10 | 17.847 | -46.432 | 90.847 | 1.00 | 0.00 | H |
| ATOM | 312 | C1'  | T A | 11 | 10.177 | -47.140 | 86.314 | 1.00 | 0.00 | C |
| ATOM | 313 | N1   | T A | 11 | 9.914  | -46.535 | 87.646 | 1.00 | 0.00 | N |
| ATOM | 314 | C2   | T A | 11 | 8.819  | -47.002 | 88.345 | 1.00 | 0.00 | C |
| ATOM | 315 | O2   | T A | 11 | 8.082  | -47.872 | 87.913 | 1.00 | 0.00 | O |
| ATOM | 316 | N3   | T A | 11 | 8.611  | -46.414 | 89.579 | 1.00 | 0.00 | N |
| ATOM | 317 | C4   | T A | 11 | 9.379  | -45.423 | 90.156 | 1.00 | 0.00 | C |
| ATOM | 318 | O4   | T A | 11 | 9.092  | -44.969 | 91.270 | 1.00 | 0.00 | O |
| ATOM | 319 | C5   | T A | 11 | 10.500 | -45.000 | 89.351 | 1.00 | 0.00 | C |
| ATOM | 320 | C6   | T A | 11 | 10.733 | -45.553 | 88.144 | 1.00 | 0.00 | C |
| ATOM | 321 | C7   | T A | 11 | 11.365 | -43.926 | 89.941 | 1.00 | 0.00 | C |
| ATOM | 322 | C2'  | T A | 11 | 10.682 | -46.146 | 85.276 | 1.00 | 0.00 | C |
| ATOM | 323 | C3'  | T A | 11 | 11.659 | -46.990 | 84.474 | 1.00 | 0.00 | C |
| ATOM | 324 | O3'  | T A | 11 | 10.943 | -47.715 | 83.476 | 1.00 | 0.00 | O |
| ATOM | 325 | C4'  | T A | 11 | 12.262 | -47.909 | 85.534 | 1.00 | 0.00 | C |
| ATOM | 326 | O4'  | T A | 11 | 11.168 | -48.136 | 86.479 | 1.00 | 0.00 | O |

|      |     |      |     |    |        |         |        |      |      |   |
|------|-----|------|-----|----|--------|---------|--------|------|------|---|
| ATOM | 327 | C5'  | T A | 11 | 13.453 | -47.371 | 86.292 | 1.00 | 0.00 | C |
| ATOM | 328 | O5'  | T A | 11 | 13.288 | -45.948 | 86.516 | 1.00 | 0.00 | O |
| ATOM | 329 | O1P  | T A | 11 | 15.135 | -44.925 | 85.147 | 1.00 | 0.00 | O |
| ATOM | 330 | O2P  | T A | 11 | 14.260 | -43.725 | 87.169 | 1.00 | 0.00 | O |
| ATOM | 331 | P    | T A | 11 | 14.581 | -45.016 | 86.512 | 1.00 | 0.00 | P |
| ATOM | 332 | H3   | T A | 11 | 7.803  | -46.747 | 90.122 | 1.00 | 0.00 | H |
| ATOM | 333 | H6   | T A | 11 | 11.587 | -45.216 | 87.554 | 1.00 | 0.00 | H |
| ATOM | 334 | H1'  | T A | 11 | 9.264  | -47.629 | 85.973 | 1.00 | 0.00 | H |
| ATOM | 335 | H3'  | T A | 11 | 12.427 | -46.383 | 83.997 | 1.00 | 0.00 | H |
| ATOM | 336 | H4'  | T A | 11 | 12.577 | -48.820 | 85.022 | 1.00 | 0.00 | H |
| ATOM | 337 | H71  | T A | 11 | 11.286 | -43.022 | 89.337 | 1.00 | 0.00 | H |
| ATOM | 338 | H72  | T A | 11 | 11.036 | -43.713 | 90.959 | 1.00 | 0.00 | H |
| ATOM | 339 | H73  | T A | 11 | 12.402 | -44.261 | 89.959 | 1.00 | 0.00 | H |
| ATOM | 340 | H2'1 | T A | 11 | 11.178 | -45.290 | 85.731 | 1.00 | 0.00 | H |
| ATOM | 341 | H2'2 | T A | 11 | 9.878  | -45.761 | 84.646 | 1.00 | 0.00 | H |
| ATOM | 342 | H5'1 | T A | 11 | 13.532 | -47.887 | 87.248 | 1.00 | 0.00 | H |
| ATOM | 343 | H5'2 | T A | 11 | 14.357 | -47.550 | 85.711 | 1.00 | 0.00 | H |
| ATOM | 344 | C1'  | A A | 12 | 5.427  | -47.385 | 84.896 | 1.00 | 0.00 | C |
| ATOM | 345 | N1   | A A | 12 | 4.543  | -45.105 | 89.408 | 1.00 | 0.00 | N |
| ATOM | 346 | C2   | A A | 12 | 3.933  | -46.097 | 88.768 | 1.00 | 0.00 | C |
| ATOM | 347 | N3   | A A | 12 | 4.216  | -46.641 | 87.602 | 1.00 | 0.00 | N |
| ATOM | 348 | C4   | A A | 12 | 5.286  | -46.037 | 87.056 | 1.00 | 0.00 | C |
| ATOM | 349 | C5   | A A | 12 | 6.020  | -45.011 | 87.578 | 1.00 | 0.00 | C |
| ATOM | 350 | C6   | A A | 12 | 5.609  | -44.523 | 88.837 | 1.00 | 0.00 | C |
| ATOM | 351 | N6   | A A | 12 | 6.234  | -43.518 | 89.474 | 1.00 | 0.00 | N |
| ATOM | 352 | N7   | A A | 12 | 7.052  | -44.651 | 86.730 | 1.00 | 0.00 | N |
| ATOM | 353 | C8   | A A | 12 | 6.920  | -45.457 | 85.718 | 1.00 | 0.00 | C |
| ATOM | 354 | N9   | A A | 12 | 5.869  | -46.330 | 85.847 | 1.00 | 0.00 | N |
| ATOM | 355 | C2'  | A A | 12 | 5.553  | -46.983 | 83.433 | 1.00 | 0.00 | C |
| ATOM | 356 | C3'  | A A | 12 | 5.944  | -48.297 | 82.775 | 1.00 | 0.00 | C |
| ATOM | 357 | O3'  | A A | 12 | 4.766  | -49.051 | 82.500 | 1.00 | 0.00 | O |
| ATOM | 358 | C4'  | A A | 12 | 6.819  | -48.962 | 83.837 | 1.00 | 0.00 | C |
| ATOM | 359 | O4'  | A A | 12 | 6.239  | -48.523 | 85.107 | 1.00 | 0.00 | O |
| ATOM | 360 | C5'  | A A | 12 | 8.284  | -48.596 | 83.823 | 1.00 | 0.00 | C |
| ATOM | 361 | O5'  | A A | 12 | 8.439  | -47.198 | 83.468 | 1.00 | 0.00 | O |
| ATOM | 362 | O1P  | A A | 12 | 9.610  | -47.289 | 81.242 | 1.00 | 0.00 | O |
| ATOM | 363 | O2P  | A A | 12 | 9.901  | -45.292 | 82.733 | 1.00 | 0.00 | O |
| ATOM | 364 | P    | A A | 12 | 9.713  | -46.759 | 82.616 | 1.00 | 0.00 | P |
| ATOM | 365 | H2   | A A | 12 | 3.073  | -46.523 | 89.283 | 1.00 | 0.00 | H |
| ATOM | 366 | H8   | A A | 12 | 7.580  | -45.442 | 84.850 | 1.00 | 0.00 | H |
| ATOM | 367 | H1'  | A A | 12 | 4.400  | -47.655 | 85.140 | 1.00 | 0.00 | H |
| ATOM | 368 | H3'  | A A | 12 | 6.498  | -48.143 | 81.850 | 1.00 | 0.00 | H |
| ATOM | 369 | H4'  | A A | 12 | 6.743  | -50.037 | 83.681 | 1.00 | 0.00 | H |
| ATOM | 370 | H61  | A A | 12 | 5.896  | -43.201 | 90.393 | 1.00 | 0.00 | H |
| ATOM | 371 | H62  | A A | 12 | 7.053  | -43.064 | 89.041 | 1.00 | 0.00 | H |
| ATOM | 372 | H2'1 | A A | 12 | 6.315  | -46.220 | 83.276 | 1.00 | 0.00 | H |
| ATOM | 373 | H2'2 | A A | 12 | 4.617  | -46.599 | 83.027 | 1.00 | 0.00 | H |
| ATOM | 374 | H5'1 | A A | 12 | 8.706  | -48.773 | 84.812 | 1.00 | 0.00 | H |
| ATOM | 375 | H5'2 | A A | 12 | 8.802  | -49.219 | 83.095 | 1.00 | 0.00 | H |
| ATOM | 376 | C1'  | G A | 13 | 0.560  | -46.620 | 85.508 | 1.00 | 0.00 | C |
| ATOM | 377 | N1   | G A | 13 | 2.098  | -42.858 | 88.592 | 1.00 | 0.00 | N |
| ATOM | 378 | C2   | G A | 13 | 1.081  | -43.781 | 88.757 | 1.00 | 0.00 | C |
| ATOM | 379 | N2   | G A | 13 | 0.379  | -43.690 | 89.894 | 1.00 | 0.00 | N |
| ATOM | 380 | N3   | G A | 13 | 0.789  | -44.721 | 87.860 | 1.00 | 0.00 | N |

|      |     |      |     |    |        |         |        |      |      |   |
|------|-----|------|-----|----|--------|---------|--------|------|------|---|
| ATOM | 381 | C4   | G A | 13 | 1.595  | -44.662 | 86.768 | 1.00 | 0.00 | C |
| ATOM | 382 | C5   | G A | 13 | 2.629  | -43.775 | 86.515 | 1.00 | 0.00 | C |
| ATOM | 383 | C6   | G A | 13 | 2.942  | -42.780 | 87.469 | 1.00 | 0.00 | C |
| ATOM | 384 | O6   | G A | 13 | 3.814  | -41.911 | 87.425 | 1.00 | 0.00 | O |
| ATOM | 385 | N7   | G A | 13 | 3.208  | -44.051 | 85.276 | 1.00 | 0.00 | N |
| ATOM | 386 | C8   | G A | 13 | 2.527  | -45.073 | 84.828 | 1.00 | 0.00 | C |
| ATOM | 387 | N9   | G A | 13 | 1.528  | -45.502 | 85.678 | 1.00 | 0.00 | N |
| ATOM | 388 | C2'  | G A | 13 | 0.059  | -46.786 | 84.080 | 1.00 | 0.00 | C |
| ATOM | 389 | C3'  | G A | 13 | -0.076 | -48.295 | 83.965 | 1.00 | 0.00 | C |
| ATOM | 390 | O3'  | G A | 13 | -1.341 | -48.693 | 84.487 | 1.00 | 0.00 | O |
| ATOM | 391 | C4'  | G A | 13 | 1.086  | -48.807 | 84.815 | 1.00 | 0.00 | C |
| ATOM | 392 | O4'  | G A | 13 | 1.213  | -47.817 | 85.884 | 1.00 | 0.00 | O |
| ATOM | 393 | C5'  | G A | 13 | 2.419  | -48.940 | 84.117 | 1.00 | 0.00 | C |
| ATOM | 394 | O5'  | G A | 13 | 2.584  | -47.861 | 83.164 | 1.00 | 0.00 | O |
| ATOM | 395 | O1P  | G A | 13 | 2.590  | -49.043 | 80.941 | 1.00 | 0.00 | O |
| ATOM | 396 | O2P  | G A | 13 | 3.798  | -46.861 | 81.205 | 1.00 | 0.00 | O |
| ATOM | 397 | P    | G A | 13 | 3.378  | -48.148 | 81.810 | 1.00 | 0.00 | P |
| ATOM | 398 | H1   | G A | 13 | 2.247  | -42.175 | 89.350 | 1.00 | 0.00 | H |
| ATOM | 399 | H8   | G A | 13 | 2.728  | -45.546 | 83.866 | 1.00 | 0.00 | H |
| ATOM | 400 | H1'  | G A | 13 | -0.270 | -46.460 | 86.197 | 1.00 | 0.00 | H |
| ATOM | 401 | H21  | G A | 13 | 0.614  | -42.962 | 90.585 | 1.00 | 0.00 | H |
| ATOM | 402 | H3'  | G A | 13 | 0.012  | -48.636 | 82.932 | 1.00 | 0.00 | H |
| ATOM | 403 | H22  | G A | 13 | -0.392 | -44.346 | 90.076 | 1.00 | 0.00 | H |
| ATOM | 404 | H4'  | G A | 13 | 0.801  | -49.793 | 85.180 | 1.00 | 0.00 | H |
| ATOM | 405 | H2'1 | G A | 13 | 0.764  | -46.394 | 83.346 | 1.00 | 0.00 | H |
| ATOM | 406 | H2'2 | G A | 13 | -0.896 | -46.287 | 83.915 | 1.00 | 0.00 | H |
| ATOM | 407 | H5'1 | G A | 13 | 3.216  | -48.902 | 84.859 | 1.00 | 0.00 | H |
| ATOM | 408 | H5'2 | G A | 13 | 2.458  | -49.899 | 83.600 | 1.00 | 0.00 | H |
| ATOM | 409 | C1'  | G A | 14 | -3.379 | -44.285 | 87.394 | 1.00 | 0.00 | C |
| ATOM | 410 | N1   | G A | 14 | -0.137 | -40.372 | 87.843 | 1.00 | 0.00 | N |
| ATOM | 411 | C2   | G A | 14 | -1.091 | -40.841 | 88.728 | 1.00 | 0.00 | C |
| ATOM | 412 | N2   | G A | 14 | -1.197 | -40.178 | 89.887 | 1.00 | 0.00 | N |
| ATOM | 413 | N3   | G A | 14 | -1.876 | -41.888 | 88.478 | 1.00 | 0.00 | N |
| ATOM | 414 | C4   | G A | 14 | -1.637 | -42.431 | 87.257 | 1.00 | 0.00 | C |
| ATOM | 415 | C5   | G A | 14 | -0.711 | -42.030 | 86.309 | 1.00 | 0.00 | C |
| ATOM | 416 | C6   | G A | 14 | 0.125  | -40.923 | 86.574 | 1.00 | 0.00 | C |
| ATOM | 417 | O6   | G A | 14 | 0.997  | -40.420 | 85.865 | 1.00 | 0.00 | O |
| ATOM | 418 | N7   | G A | 14 | -0.785 | -42.856 | 85.183 | 1.00 | 0.00 | N |
| ATOM | 419 | C8   | G A | 14 | -1.727 | -43.713 | 85.481 | 1.00 | 0.00 | C |
| ATOM | 420 | N9   | G A | 14 | -2.293 | -43.519 | 86.723 | 1.00 | 0.00 | N |
| ATOM | 421 | C2'  | G A | 14 | -4.478 | -44.748 | 86.447 | 1.00 | 0.00 | C |
| ATOM | 422 | C3'  | G A | 14 | -4.856 | -46.098 | 87.035 | 1.00 | 0.00 | C |
| ATOM | 423 | O3'  | G A | 14 | -5.800 | -45.904 | 88.085 | 1.00 | 0.00 | O |
| ATOM | 424 | C4'  | G A | 14 | -3.520 | -46.630 | 87.551 | 1.00 | 0.00 | C |
| ATOM | 425 | O4'  | G A | 14 | -2.798 | -45.433 | 87.982 | 1.00 | 0.00 | O |
| ATOM | 426 | C5'  | G A | 14 | -2.665 | -47.377 | 86.555 | 1.00 | 0.00 | C |
| ATOM | 427 | O5'  | G A | 14 | -2.794 | -46.770 | 85.245 | 1.00 | 0.00 | O |
| ATOM | 428 | O1P  | G A | 14 | -3.934 | -48.554 | 83.885 | 1.00 | 0.00 | O |
| ATOM | 429 | O2P  | G A | 14 | -2.448 | -46.875 | 82.758 | 1.00 | 0.00 | O |
| ATOM | 430 | P    | G A | 14 | -2.729 | -47.705 | 83.955 | 1.00 | 0.00 | P |
| ATOM | 431 | H1   | G A | 14 | 0.425  | -39.558 | 88.136 | 1.00 | 0.00 | H |
| ATOM | 432 | H8   | G A | 14 | -2.039 | -44.510 | 84.805 | 1.00 | 0.00 | H |
| ATOM | 433 | H1'  | G A | 14 | -3.788 | -43.668 | 88.194 | 1.00 | 0.00 | H |
| ATOM | 434 | H21  | G A | 14 | -0.584 | -39.371 | 90.075 | 1.00 | 0.00 | H |

|      |     |      |   |   |    |        |         |        |      |      |   |
|------|-----|------|---|---|----|--------|---------|--------|------|------|---|
| ATOM | 435 | H3'  | G | A | 14 | -5.282 | -46.765 | 86.286 | 1.00 | 0.00 | H |
| ATOM | 436 | H22  | G | A | 14 | -1.889 | -40.475 | 90.588 | 1.00 | 0.00 | H |
| ATOM | 437 | H4'  | G | A | 14 | -3.745 | -47.309 | 88.373 | 1.00 | 0.00 | H |
| ATOM | 438 | H2'1 | G | A | 14 | -4.125 | -44.847 | 85.421 | 1.00 | 0.00 | H |
| ATOM | 439 | H2'2 | G | A | 14 | -5.330 | -44.067 | 86.437 | 1.00 | 0.00 | H |
| ATOM | 440 | H5'1 | G | A | 14 | -1.625 | -47.341 | 86.877 | 1.00 | 0.00 | H |
| ATOM | 441 | H5'2 | G | A | 14 | -2.991 | -48.417 | 86.513 | 1.00 | 0.00 | H |
| ATOM | 442 | C1'  | A | A | 15 | -5.733 | -40.410 | 89.379 | 1.00 | 0.00 | C |
| ATOM | 443 | N1   | A | A | 15 | -2.102 | -37.699 | 86.969 | 1.00 | 0.00 | N |
| ATOM | 444 | C2   | A | A | 15 | -2.639 | -37.603 | 88.183 | 1.00 | 0.00 | C |
| ATOM | 445 | N3   | A | A | 15 | -3.574 | -38.340 | 88.745 | 1.00 | 0.00 | N |
| ATOM | 446 | C4   | A | A | 15 | -3.987 | -39.297 | 87.893 | 1.00 | 0.00 | C |
| ATOM | 447 | C5   | A | A | 15 | -3.542 | -39.528 | 86.622 | 1.00 | 0.00 | C |
| ATOM | 448 | C6   | A | A | 15 | -2.534 | -38.665 | 86.143 | 1.00 | 0.00 | C |
| ATOM | 449 | N6   | A | A | 15 | -2.000 | -38.771 | 84.915 | 1.00 | 0.00 | N |
| ATOM | 450 | N7   | A | A | 15 | -4.199 | -40.602 | 86.050 | 1.00 | 0.00 | N |
| ATOM | 451 | C8   | A | A | 15 | -5.024 | -40.992 | 86.976 | 1.00 | 0.00 | C |
| ATOM | 452 | N9   | A | A | 15 | -4.950 | -40.248 | 88.126 | 1.00 | 0.00 | N |
| ATOM | 453 | C2'  | A | A | 15 | -7.185 | -40.810 | 89.150 | 1.00 | 0.00 | C |
| ATOM | 454 | C3'  | A | A | 15 | -7.451 | -41.730 | 90.331 | 1.00 | 0.00 | C |
| ATOM | 455 | O3'  | A | A | 15 | -7.814 | -40.944 | 91.462 | 1.00 | 0.00 | O |
| ATOM | 456 | C4'  | A | A | 15 | -6.109 | -42.434 | 90.523 | 1.00 | 0.00 | C |
| ATOM | 457 | O4'  | A | A | 15 | -5.116 | -41.426 | 90.146 | 1.00 | 0.00 | O |
| ATOM | 458 | C5'  | A | A | 15 | -5.877 | -43.674 | 89.694 | 1.00 | 0.00 | C |
| ATOM | 459 | O5'  | A | A | 15 | -6.473 | -43.508 | 88.383 | 1.00 | 0.00 | O |
| ATOM | 460 | O1P  | A | A | 15 | -8.319 | -45.219 | 88.360 | 1.00 | 0.00 | O |
| ATOM | 461 | O2P  | A | A | 15 | -7.250 | -44.497 | 86.207 | 1.00 | 0.00 | O |
| ATOM | 462 | P    | A | A | 15 | -7.097 | -44.782 | 87.655 | 1.00 | 0.00 | P |
| ATOM | 463 | H2   | A | A | 15 | -2.247 | -36.796 | 88.802 | 1.00 | 0.00 | H |
| ATOM | 464 | H8   | A | A | 15 | -5.709 | -41.831 | 86.853 | 1.00 | 0.00 | H |
| ATOM | 465 | H1'  | A | A | 15 | -5.669 | -39.479 | 89.943 | 1.00 | 0.00 | H |
| ATOM | 466 | H3'  | A | A | 15 | -8.244 | -42.448 | 90.119 | 1.00 | 0.00 | H |
| ATOM | 467 | H4'  | A | A | 15 | -6.049 | -42.718 | 91.573 | 1.00 | 0.00 | H |
| ATOM | 468 | H61  | A | A | 15 | -1.263 | -38.116 | 84.616 | 1.00 | 0.00 | H |
| ATOM | 469 | H62  | A | A | 15 | -2.327 | -39.508 | 84.273 | 1.00 | 0.00 | H |
| ATOM | 470 | H2'1 | A | A | 15 | -7.324 | -41.329 | 88.202 | 1.00 | 0.00 | H |
| ATOM | 471 | H2'2 | A | A | 15 | -7.856 | -39.951 | 89.156 | 1.00 | 0.00 | H |
| ATOM | 472 | H5'1 | A | A | 15 | -4.804 | -43.841 | 89.593 | 1.00 | 0.00 | H |
| ATOM | 473 | H5'2 | A | A | 15 | -6.326 | -44.529 | 90.196 | 1.00 | 0.00 | H |
| ATOM | 474 | C1'  | C | A | 16 | -6.376 | -35.556 | 90.212 | 1.00 | 0.00 | C |
| ATOM | 475 | N1   | C | A | 16 | -6.231 | -36.069 | 88.822 | 1.00 | 0.00 | N |
| ATOM | 476 | C2   | C | A | 16 | -5.286 | -35.462 | 87.998 | 1.00 | 0.00 | C |
| ATOM | 477 | O2   | C | A | 16 | -4.613 | -34.527 | 88.450 | 1.00 | 0.00 | O |
| ATOM | 478 | N3   | C | A | 16 | -5.138 | -35.914 | 86.728 | 1.00 | 0.00 | N |
| ATOM | 479 | C4   | C | A | 16 | -5.883 | -36.927 | 86.268 | 1.00 | 0.00 | C |
| ATOM | 480 | N4   | C | A | 16 | -5.693 | -37.331 | 85.020 | 1.00 | 0.00 | N |
| ATOM | 481 | C5   | C | A | 16 | -6.865 | -37.569 | 87.091 | 1.00 | 0.00 | C |
| ATOM | 482 | C6   | C | A | 16 | -6.995 | -37.100 | 88.368 | 1.00 | 0.00 | C |
| ATOM | 483 | C2'  | C | A | 16 | -7.814 | -35.536 | 90.712 | 1.00 | 0.00 | C |
| ATOM | 484 | C3'  | C | A | 16 | -7.643 | -35.887 | 92.182 | 1.00 | 0.00 | C |
| ATOM | 485 | O3'  | C | A | 16 | -7.342 | -34.702 | 92.914 | 1.00 | 0.00 | O |
| ATOM | 486 | C4'  | C | A | 16 | -6.475 | -36.869 | 92.164 | 1.00 | 0.00 | C |
| ATOM | 487 | O4'  | C | A | 16 | -5.629 | -36.405 | 91.064 | 1.00 | 0.00 | O |
| ATOM | 488 | C5'  | C | A | 16 | -6.821 | -38.321 | 91.926 | 1.00 | 0.00 | C |

|      |     |      |   |   |    |        |         |        |      |      |   |
|------|-----|------|---|---|----|--------|---------|--------|------|------|---|
| ATOM | 489 | O5'  | C | A | 16 | -7.916 | -38.415 | 90.981 | 1.00 | 0.00 | O |
| ATOM | 490 | O1P  | C | A | 16 | -9.793 | -39.375 | 92.357 | 1.00 | 0.00 | O |
| ATOM | 491 | O2P  | C | A | 16 | -9.724 | -39.769 | 89.881 | 1.00 | 0.00 | O |
| ATOM | 492 | P    | C | A | 16 | -8.975 | -39.596 | 91.149 | 1.00 | 0.00 | P |
| ATOM | 493 | H5   | C | A | 16 | -7.479 | -38.390 | 86.718 | 1.00 | 0.00 | H |
| ATOM | 494 | H6   | C | A | 16 | -7.723 | -37.561 | 89.036 | 1.00 | 0.00 | H |
| ATOM | 495 | H1'  | C | A | 16 | -5.933 | -34.561 | 90.256 | 1.00 | 0.00 | H |
| ATOM | 496 | H3'  | C | A | 16 | -8.541 | -36.349 | 92.596 | 1.00 | 0.00 | H |
| ATOM | 497 | H4'  | C | A | 16 | -5.988 | -36.799 | 93.136 | 1.00 | 0.00 | H |
| ATOM | 498 | H41  | C | A | 16 | -6.252 | -38.110 | 84.641 | 1.00 | 0.00 | H |
| ATOM | 499 | H42  | C | A | 16 | -4.990 | -36.867 | 84.428 | 1.00 | 0.00 | H |
| ATOM | 500 | H2'1 | C | A | 16 | -8.440 | -36.267 | 90.200 | 1.00 | 0.00 | H |
| ATOM | 501 | H2'2 | C | A | 16 | -8.282 | -34.559 | 90.587 | 1.00 | 0.00 | H |
| ATOM | 502 | H5'1 | C | A | 16 | -5.946 | -38.837 | 91.531 | 1.00 | 0.00 | H |
| ATOM | 503 | H5'2 | C | A | 16 | -7.111 | -38.779 | 92.872 | 1.00 | 0.00 | H |
| ATOM | 504 | C1'  | G | A | 17 | -5.930 | -30.751 | 89.105 | 1.00 | 0.00 | C |
| ATOM | 505 | N1   | G | A | 17 | -5.607 | -32.465 | 84.311 | 1.00 | 0.00 | N |
| ATOM | 506 | C2   | G | A | 17 | -4.874 | -31.483 | 84.955 | 1.00 | 0.00 | C |
| ATOM | 507 | N2   | G | A | 17 | -3.932 | -30.876 | 84.223 | 1.00 | 0.00 | N |
| ATOM | 508 | N3   | G | A | 17 | -5.066 | -31.135 | 86.226 | 1.00 | 0.00 | N |
| ATOM | 509 | C4   | G | A | 17 | -6.065 | -31.848 | 86.811 | 1.00 | 0.00 | C |
| ATOM | 510 | C5   | G | A | 17 | -6.851 | -32.840 | 86.249 | 1.00 | 0.00 | C |
| ATOM | 511 | C6   | G | A | 17 | -6.645 | -33.213 | 84.900 | 1.00 | 0.00 | C |
| ATOM | 512 | O6   | G | A | 17 | -7.234 | -34.061 | 84.229 | 1.00 | 0.00 | O |
| ATOM | 513 | N7   | G | A | 17 | -7.766 | -33.321 | 87.186 | 1.00 | 0.00 | N |
| ATOM | 514 | C8   | G | A | 17 | -7.511 | -32.624 | 88.264 | 1.00 | 0.00 | C |
| ATOM | 515 | N9   | G | A | 17 | -6.491 | -31.707 | 88.114 | 1.00 | 0.00 | N |
| ATOM | 516 | C2'  | G | A | 17 | -6.976 | -30.137 | 90.026 | 1.00 | 0.00 | C |
| ATOM | 517 | C3'  | G | A | 17 | -6.218 | -30.022 | 91.338 | 1.00 | 0.00 | C |
| ATOM | 518 | O3'  | G | A | 17 | -5.464 | -28.811 | 91.338 | 1.00 | 0.00 | O |
| ATOM | 519 | C4'  | G | A | 17 | -5.322 | -31.260 | 91.322 | 1.00 | 0.00 | C |
| ATOM | 520 | O4'  | G | A | 17 | -5.003 | -31.455 | 89.909 | 1.00 | 0.00 | O |
| ATOM | 521 | C5'  | G | A | 17 | -5.929 | -32.533 | 91.863 | 1.00 | 0.00 | C |
| ATOM | 522 | O5'  | G | A | 17 | -7.331 | -32.598 | 91.505 | 1.00 | 0.00 | O |
| ATOM | 523 | O1P  | G | A | 17 | -8.506 | -32.443 | 93.726 | 1.00 | 0.00 | O |
| ATOM | 524 | O2P  | G | A | 17 | -9.604 | -33.628 | 91.805 | 1.00 | 0.00 | O |
| ATOM | 525 | P    | G | A | 17 | -8.352 | -33.283 | 92.522 | 1.00 | 0.00 | P |
| ATOM | 526 | H1   | G | A | 17 | -5.374 | -32.663 | 83.327 | 1.00 | 0.00 | H |
| ATOM | 527 | H8   | G | A | 17 | -8.057 | -32.756 | 89.198 | 1.00 | 0.00 | H |
| ATOM | 528 | H1'  | G | A | 17 | -5.385 | -29.977 | 88.564 | 1.00 | 0.00 | H |
| ATOM | 529 | H21  | G | A | 17 | -3.786 | -31.152 | 83.241 | 1.00 | 0.00 | H |
| ATOM | 530 | H3'  | G | A | 17 | -6.887 | -30.031 | 92.199 | 1.00 | 0.00 | H |
| ATOM | 531 | H22  | G | A | 17 | -3.353 | -30.134 | 84.643 | 1.00 | 0.00 | H |
| ATOM | 532 | H4'  | G | A | 17 | -4.447 | -31.024 | 91.928 | 1.00 | 0.00 | H |
| ATOM | 533 | H2'1 | G | A | 17 | -7.857 | -30.771 | 90.131 | 1.00 | 0.00 | H |
| ATOM | 534 | H2'2 | G | A | 17 | -7.315 | -29.162 | 89.675 | 1.00 | 0.00 | H |
| ATOM | 535 | H5'1 | G | A | 17 | -5.401 | -33.388 | 91.441 | 1.00 | 0.00 | H |
| ATOM | 536 | H5'2 | G | A | 17 | -5.823 | -32.547 | 92.947 | 1.00 | 0.00 | H |
| ATOM | 537 | C1'  | G | A | 18 | -5.366 | -26.936 | 85.998 | 1.00 | 0.00 | C |
| ATOM | 538 | N1   | G | A | 18 | -7.438 | -30.129 | 82.602 | 1.00 | 0.00 | N |
| ATOM | 539 | C2   | G | A | 18 | -6.369 | -29.260 | 82.467 | 1.00 | 0.00 | C |
| ATOM | 540 | N2   | G | A | 18 | -5.774 | -29.237 | 81.266 | 1.00 | 0.00 | N |
| ATOM | 541 | N3   | G | A | 18 | -5.929 | -28.478 | 83.450 | 1.00 | 0.00 | N |
| ATOM | 542 | C4   | G | A | 18 | -6.652 | -28.625 | 84.591 | 1.00 | 0.00 | C |

|      |     |      |     |    |         |         |        |      |      |   |
|------|-----|------|-----|----|---------|---------|--------|------|------|---|
| ATOM | 543 | C5   | G A | 18 | -7.734  | -29.462 | 84.816 | 1.00 | 0.00 | C |
| ATOM | 544 | C6   | G A | 18 | -8.199  | -30.296 | 83.773 | 1.00 | 0.00 | C |
| ATOM | 545 | O6   | G A | 18 | -9.134  | -31.097 | 83.780 | 1.00 | 0.00 | O |
| ATOM | 546 | N7   | G A | 18 | -8.195  | -29.312 | 86.125 | 1.00 | 0.00 | N |
| ATOM | 547 | C8   | G A | 18 | -7.397  | -28.415 | 86.641 | 1.00 | 0.00 | C |
| ATOM | 548 | N9   | G A | 18 | -6.434  | -27.948 | 85.771 | 1.00 | 0.00 | N |
| ATOM | 549 | C2'  | G A | 18 | -5.802  | -25.772 | 86.877 | 1.00 | 0.00 | C |
| ATOM | 550 | C3'  | G A | 18 | -4.533  | -25.470 | 87.657 | 1.00 | 0.00 | C |
| ATOM | 551 | O3'  | G A | 18 | -3.700  | -24.612 | 86.881 | 1.00 | 0.00 | O |
| ATOM | 552 | C4'  | G A | 18 | -3.915  | -26.853 | 87.850 | 1.00 | 0.00 | C |
| ATOM | 553 | O4'  | G A | 18 | -4.285  | -27.585 | 86.639 | 1.00 | 0.00 | O |
| ATOM | 554 | C5'  | G A | 18 | -4.388  | -27.637 | 89.052 | 1.00 | 0.00 | C |
| ATOM | 555 | O5'  | G A | 18 | -5.798  | -27.390 | 89.275 | 1.00 | 0.00 | O |
| ATOM | 556 | O1P  | G A | 18 | -5.835  | -26.175 | 91.480 | 1.00 | 0.00 | O |
| ATOM | 557 | O2P  | G A | 18 | -7.820  | -27.531 | 90.762 | 1.00 | 0.00 | O |
| ATOM | 558 | P    | G A | 18 | -6.346  | -27.366 | 90.774 | 1.00 | 0.00 | P |
| ATOM | 559 | H1   | G A | 18 | -7.695  | -30.697 | 81.780 | 1.00 | 0.00 | H |
| ATOM | 560 | H8   | G A | 18 | -7.484  | -28.063 | 87.670 | 1.00 | 0.00 | H |
| ATOM | 561 | H1'  | G A | 18 | -5.018  | -26.583 | 85.027 | 1.00 | 0.00 | H |
| ATOM | 562 | H21  | G A | 18 | -6.119  | -29.849 | 80.511 | 1.00 | 0.00 | H |
| ATOM | 563 | H3'  | G A | 18 | -4.746  | -24.996 | 88.616 | 1.00 | 0.00 | H |
| ATOM | 564 | H22  | G A | 18 | -4.976  | -28.611 | 81.101 | 1.00 | 0.00 | H |
| ATOM | 565 | H4'  | G A | 18 | -2.840  | -26.709 | 87.949 | 1.00 | 0.00 | H |
| ATOM | 566 | H2'1 | G A | 18 | -6.622  | -26.041 | 87.543 | 1.00 | 0.00 | H |
| ATOM | 567 | H2'2 | G A | 18 | -6.125  | -24.909 | 86.293 | 1.00 | 0.00 | H |
| ATOM | 568 | H5'1 | G A | 18 | -4.223  | -28.699 | 88.874 | 1.00 | 0.00 | H |
| ATOM | 569 | H5'2 | G A | 18 | -3.816  | -27.329 | 89.927 | 1.00 | 0.00 | H |
| ATOM | 570 | C1'  | T A | 19 | -5.707  | -24.681 | 81.605 | 1.00 | 0.00 | C |
| ATOM | 571 | N1   | T A | 19 | -6.896  | -25.354 | 82.192 | 1.00 | 0.00 | N |
| ATOM | 572 | C2   | T A | 19 | -7.571  | -26.253 | 81.391 | 1.00 | 0.00 | C |
| ATOM | 573 | O2   | T A | 19 | -7.230  | -26.503 | 80.247 | 1.00 | 0.00 | O |
| ATOM | 574 | N3   | T A | 19 | -8.668  | -26.856 | 81.977 | 1.00 | 0.00 | N |
| ATOM | 575 | C4   | T A | 19 | -9.139  | -26.643 | 83.255 | 1.00 | 0.00 | C |
| ATOM | 576 | O4   | T A | 19 | -10.138 | -27.242 | 83.670 | 1.00 | 0.00 | O |
| ATOM | 577 | C5   | T A | 19 | -8.369  | -25.688 | 84.017 | 1.00 | 0.00 | C |
| ATOM | 578 | C6   | T A | 19 | -7.292  | -25.081 | 83.478 | 1.00 | 0.00 | C |
| ATOM | 579 | C7   | T A | 19 | -8.843  | -25.427 | 85.415 | 1.00 | 0.00 | C |
| ATOM | 580 | C2'  | T A | 19 | -5.560  | -23.222 | 82.020 | 1.00 | 0.00 | C |
| ATOM | 581 | C3'  | T A | 19 | -4.051  | -23.071 | 82.120 | 1.00 | 0.00 | C |
| ATOM | 582 | O3'  | T A | 19 | -3.521  | -22.788 | 80.827 | 1.00 | 0.00 | O |
| ATOM | 583 | C4'  | T A | 19 | -3.607  | -24.436 | 82.641 | 1.00 | 0.00 | C |
| ATOM | 584 | O4'  | T A | 19 | -4.556  | -25.375 | 82.044 | 1.00 | 0.00 | O |
| ATOM | 585 | C5'  | T A | 19 | -3.621  | -24.621 | 84.140 | 1.00 | 0.00 | C |
| ATOM | 586 | O5'  | T A | 19 | -4.752  | -23.915 | 84.710 | 1.00 | 0.00 | O |
| ATOM | 587 | O1P  | T A | 19 | -3.674  | -22.104 | 86.087 | 1.00 | 0.00 | O |
| ATOM | 588 | O2P  | T A | 19 | -5.941  | -22.978 | 86.715 | 1.00 | 0.00 | O |
| ATOM | 589 | P    | T A | 19 | -4.597  | -23.255 | 86.154 | 1.00 | 0.00 | P |
| ATOM | 590 | H3   | T A | 19 | -9.186  | -27.534 | 81.400 | 1.00 | 0.00 | H |
| ATOM | 591 | H6   | T A | 19 | -6.727  | -24.363 | 84.073 | 1.00 | 0.00 | H |
| ATOM | 592 | H1'  | T A | 19 | -5.763  | -24.774 | 80.520 | 1.00 | 0.00 | H |
| ATOM | 593 | H3'  | T A | 19 | -3.766  | -22.275 | 82.809 | 1.00 | 0.00 | H |
| ATOM | 594 | H4'  | T A | 19 | -2.583  | -24.588 | 82.297 | 1.00 | 0.00 | H |
| ATOM | 595 | H71  | T A | 19 | -9.189  | -24.396 | 85.495 | 1.00 | 0.00 | H |
| ATOM | 596 | H72  | T A | 19 | -9.664  | -26.104 | 85.652 | 1.00 | 0.00 | H |



|      |     |      |     |   |    |         |         |        |      |      |   |
|------|-----|------|-----|---|----|---------|---------|--------|------|------|---|
| ATOM | 597 | H73  | T   | A | 19 | -8.024  | -25.590 | 86.116 | 1.00 | 0.00 | H |
| ATOM | 598 | H2'1 | T   | A | 19 | -6.045  | -23.013 | 82.973 | 1.00 | 0.00 | H |
| ATOM | 599 | H2'2 | T   | A | 19 | -5.980  | -22.537 | 81.282 | 1.00 | 0.00 | H |
| ATOM | 600 | H5'1 | T   | A | 19 | -3.697  | -25.683 | 84.370 | 1.00 | 0.00 | H |
| ATOM | 601 | H5'2 | T   | A | 19 | -2.694  | -24.229 | 84.558 | 1.00 | 0.00 | H |
| ATOM | 602 | C01  | LNK | A | 20 | -3.268  | -19.582 | 78.953 | 0.00 | 0.00 | C |
| ATOM | 603 | O1   | LNK | A | 20 | -3.683  | -20.345 | 80.089 | 1.00 | 0.00 | O |
| ATOM | 604 | S    | LNK | A | 20 | -3.570  | -15.866 | 77.558 | 0.00 | 0.00 | S |
| ATOM | 605 | C02  | LNK | A | 20 | -3.762  | -18.130 | 79.104 | 0.00 | 0.00 | C |
| ATOM | 606 | C03  | LNK | A | 20 | -4.165  | -17.578 | 77.723 | 0.00 | 0.00 | C |
| ATOM | 607 | O1P  | LNK | A | 20 | -5.840  | -21.576 | 80.502 | 1.00 | 0.00 | O |
| ATOM | 608 | O2P  | LNK | A | 20 | -4.532  | -22.004 | 78.403 | 1.00 | 0.00 | O |
| ATOM | 609 | P    | LNK | A | 20 | -4.519  | -21.683 | 79.852 | 1.00 | 0.00 | P |
| ATOM | 610 | H01  | LNK | A | 20 | -3.692  | -20.017 | 78.047 | 0.00 | 0.00 | H |
| ATOM | 611 | H02  | LNK | A | 20 | -2.181  | -19.590 | 78.886 | 0.00 | 0.00 | H |
| ATOM | 612 | H03  | LNK | A | 20 | -5.251  | -17.596 | 77.629 | 0.00 | 0.00 | H |
| ATOM | 613 | H04  | LNK | A | 20 | -2.963  | -17.517 | 79.522 | 0.00 | 0.00 | H |
| ATOM | 614 | H05  | LNK | A | 20 | -4.623  | -18.107 | 79.771 | 0.00 | 0.00 | H |
| ATOM | 615 | H06  | LNK | A | 20 | -3.721  | -18.194 | 76.942 | 0.00 | 0.00 | H |
| ATOM | 616 | AU   | LNK | A | 20 | -3.833  | -15.586 | 76.990 |      |      |   |
| TER  |     |      |     |   |    |         |         |        |      |      |   |
| ATOM | 618 | C1'  | A   | B | 2  | -12.291 | -32.027 | 76.961 | 1.00 | 0.00 | C |
| ATOM | 619 | N1   | A   | B | 2  | -10.170 | -28.797 | 80.338 | 1.00 | 0.00 | N |
| ATOM | 620 | C2   | A   | B | 2  | -9.854  | -29.125 | 79.090 | 1.00 | 0.00 | C |
| ATOM | 621 | N3   | A   | B | 2  | -10.448 | -29.967 | 78.270 | 1.00 | 0.00 | N |
| ATOM | 622 | C4   | A   | B | 2  | -11.512 | -30.530 | 78.873 | 1.00 | 0.00 | C |
| ATOM | 623 | C5   | A   | B | 2  | -11.966 | -30.303 | 80.141 | 1.00 | 0.00 | C |
| ATOM | 624 | C6   | A   | B | 2  | -11.237 | -29.373 | 80.912 | 1.00 | 0.00 | C |
| ATOM | 625 | N6   | A   | B | 2  | -11.565 | -29.049 | 82.175 | 1.00 | 0.00 | N |
| ATOM | 626 | N7   | A   | B | 2  | -13.091 | -31.063 | 80.413 | 1.00 | 0.00 | N |
| ATOM | 627 | C8   | A   | B | 2  | -13.288 | -31.731 | 79.315 | 1.00 | 0.00 | C |
| ATOM | 628 | N9   | A   | B | 2  | -12.371 | -31.456 | 78.334 | 1.00 | 0.00 | N |
| ATOM | 629 | C2'  | A   | B | 2  | -12.661 | -33.502 | 76.887 | 1.00 | 0.00 | C |
| ATOM | 630 | C3'  | A   | B | 2  | -13.364 | -33.587 | 75.542 | 1.00 | 0.00 | C |
| ATOM | 631 | O3'  | A   | B | 2  | -12.389 | -33.746 | 74.514 | 1.00 | 0.00 | O |
| ATOM | 632 | C4'  | A   | B | 2  | -14.085 | -32.242 | 75.451 | 1.00 | 0.00 | C |
| ATOM | 633 | O4'  | A   | B | 2  | -13.196 | -31.308 | 76.145 | 1.00 | 0.00 | O |
| ATOM | 634 | C5'  | A   | B | 2  | -15.454 | -32.170 | 76.085 | 1.00 | 0.00 | C |
| ATOM | 635 | O5'  | A   | B | 2  | -15.476 | -32.970 | 77.294 | 1.00 | 0.00 | O |
| ATOM | 636 | H2   | A   | B | 2  | -8.976  | -28.626 | 78.685 | 1.00 | 0.00 | H |
| ATOM | 637 | H8   | A   | B | 2  | -14.105 | -32.441 | 79.187 | 1.00 | 0.00 | H |
| ATOM | 638 | H1'  | A   | B | 2  | -11.285 | -31.857 | 76.578 | 1.00 | 0.00 | H |
| ATOM | 639 | H3'  | A   | B | 2  | -14.070 | -34.415 | 75.501 | 1.00 | 0.00 | H |
| ATOM | 640 | H4'  | A   | B | 2  | -14.197 | -32.016 | 74.391 | 1.00 | 0.00 | H |
| ATOM | 641 | H61  | A   | B | 2  | -11.000 | -28.362 | 82.693 | 1.00 | 0.00 | H |
| ATOM | 642 | H62  | A   | B | 2  | -12.383 | -29.489 | 82.622 | 1.00 | 0.00 | H |
| ATOM | 643 | H2'1 | A   | B | 2  | -13.322 | -33.805 | 77.700 | 1.00 | 0.00 | H |
| ATOM | 644 | H2'2 | A   | B | 2  | -11.784 | -34.150 | 76.918 | 1.00 | 0.00 | H |
| ATOM | 645 | H5'1 | A   | B | 2  | -15.681 | -31.132 | 76.327 | 1.00 | 0.00 | H |
| ATOM | 646 | H5'2 | A   | B | 2  | -16.194 | -32.545 | 75.381 | 1.00 | 0.00 | H |
| ATOM | 647 | C1'  | C   | B | 3  | -7.344  | -32.440 | 76.853 | 1.00 | 0.00 | C |
| ATOM | 648 | N1   | C   | B | 3  | -8.082  | -32.533 | 78.143 | 1.00 | 0.00 | N |
| ATOM | 649 | C2   | C   | B | 3  | -7.656  | -31.730 | 79.198 | 1.00 | 0.00 | C |
| ATOM | 650 | O2   | C   | B | 3  | -6.690  | -30.976 | 79.022 | 1.00 | 0.00 | O |

|      |     |      |     |   |         |         |        |      |      |   |
|------|-----|------|-----|---|---------|---------|--------|------|------|---|
| ATOM | 651 | N3   | C B | 3 | -8.313  | -31.800 | 80.380 | 1.00 | 0.00 | N |
| ATOM | 652 | C4   | C B | 3 | -9.355  | -32.626 | 80.541 | 1.00 | 0.00 | C |
| ATOM | 653 | N4   | C B | 3 | -9.965  | -32.652 | 81.719 | 1.00 | 0.00 | N |
| ATOM | 654 | C5   | C B | 3 | -9.814  | -33.469 | 79.475 | 1.00 | 0.00 | C |
| ATOM | 655 | C6   | C B | 3 | -9.138  | -33.378 | 78.290 | 1.00 | 0.00 | C |
| ATOM | 656 | C2'  | C B | 3 | -7.182  | -33.775 | 76.140 | 1.00 | 0.00 | C |
| ATOM | 657 | C3'  | C B | 3 | -7.297  | -33.370 | 74.678 | 1.00 | 0.00 | C |
| ATOM | 658 | O3'  | C B | 3 | -6.022  | -32.932 | 74.214 | 1.00 | 0.00 | O |
| ATOM | 659 | C4'  | C B | 3 | -8.318  | -32.235 | 74.720 | 1.00 | 0.00 | C |
| ATOM | 660 | O4'  | C B | 3 | -8.074  | -31.576 | 76.003 | 1.00 | 0.00 | O |
| ATOM | 661 | C5'  | C B | 3 | -9.772  | -32.638 | 74.652 | 1.00 | 0.00 | C |
| ATOM | 662 | O5'  | C B | 3 | -9.972  | -33.876 | 75.381 | 1.00 | 0.00 | O |
| ATOM | 663 | O1P  | C B | 3 | -10.615 | -35.514 | 73.581 | 1.00 | 0.00 | O |
| ATOM | 664 | O2P  | C B | 3 | -11.409 | -35.861 | 75.936 | 1.00 | 0.00 | O |
| ATOM | 665 | P    | C B | 3 | -11.063 | -34.910 | 74.851 | 1.00 | 0.00 | P |
| ATOM | 666 | H5   | C B | 3 | -10.656 | -34.149 | 79.603 | 1.00 | 0.00 | H |
| ATOM | 667 | H6   | C B | 3 | -9.454  | -33.993 | 77.448 | 1.00 | 0.00 | H |
| ATOM | 668 | H1'  | C B | 3 | -6.375  | -31.980 | 77.047 | 1.00 | 0.00 | H |
| ATOM | 669 | H3'  | C B | 3 | -7.646  | -34.191 | 74.054 | 1.00 | 0.00 | H |
| ATOM | 670 | H4'  | C B | 3 | -8.112  | -31.592 | 73.864 | 1.00 | 0.00 | H |
| ATOM | 671 | H41  | C B | 3 | -10.771 | -33.277 | 81.868 | 1.00 | 0.00 | H |
| ATOM | 672 | H42  | C B | 3 | -9.633  | -32.048 | 82.484 | 1.00 | 0.00 | H |
| ATOM | 673 | H2'1 | C B | 3 | -7.958  | -34.488 | 76.416 | 1.00 | 0.00 | H |
| ATOM | 674 | H2'2 | C B | 3 | -6.219  | -34.241 | 76.349 | 1.00 | 0.00 | H |
| ATOM | 675 | H5'1 | C B | 3 | -10.384 | -31.850 | 75.092 | 1.00 | 0.00 | H |
| ATOM | 676 | H5'2 | C B | 3 | -10.058 | -32.774 | 73.610 | 1.00 | 0.00 | H |
| ATOM | 677 | C1'  | C B | 4 | -2.803  | -32.100 | 78.798 | 1.00 | 0.00 | C |
| ATOM | 678 | N1   | C B | 4 | -3.882  | -32.828 | 79.519 | 1.00 | 0.00 | N |
| ATOM | 679 | C2   | C B | 4 | -4.119  | -32.495 | 80.851 | 1.00 | 0.00 | C |
| ATOM | 680 | O2   | C B | 4 | -3.428  | -31.612 | 81.378 | 1.00 | 0.00 | O |
| ATOM | 681 | N3   | C B | 4 | -5.097  | -33.145 | 81.525 | 1.00 | 0.00 | N |
| ATOM | 682 | C4   | C B | 4 | -5.828  | -34.097 | 80.929 | 1.00 | 0.00 | C |
| ATOM | 683 | N4   | C B | 4 | -6.775  | -34.700 | 81.633 | 1.00 | 0.00 | N |
| ATOM | 684 | C5   | C B | 4 | -5.605  | -34.465 | 79.561 | 1.00 | 0.00 | C |
| ATOM | 685 | C6   | C B | 4 | -4.617  | -33.792 | 78.900 | 1.00 | 0.00 | C |
| ATOM | 686 | C2'  | C B | 4 | -2.006  | -32.975 | 77.840 | 1.00 | 0.00 | C |
| ATOM | 687 | C3'  | C B | 4 | -1.714  | -32.011 | 76.700 | 1.00 | 0.00 | C |
| ATOM | 688 | O3'  | C B | 4 | -0.553  | -31.248 | 77.018 | 1.00 | 0.00 | O |
| ATOM | 689 | C4'  | C B | 4 | -2.974  | -31.151 | 76.651 | 1.00 | 0.00 | C |
| ATOM | 690 | O4'  | C B | 4 | -3.409  | -31.066 | 78.046 | 1.00 | 0.00 | O |
| ATOM | 691 | C5'  | C B | 4 | -4.120  | -31.683 | 75.820 | 1.00 | 0.00 | C |
| ATOM | 692 | O5'  | C B | 4 | -4.180  | -33.127 | 75.938 | 1.00 | 0.00 | O |
| ATOM | 693 | O1P  | C B | 4 | -3.622  | -33.924 | 73.617 | 1.00 | 0.00 | O |
| ATOM | 694 | O2P  | C B | 4 | -5.051  | -35.337 | 75.119 | 1.00 | 0.00 | O |
| ATOM | 695 | P    | C B | 4 | -4.649  | -33.979 | 74.676 | 1.00 | 0.00 | P |
| ATOM | 696 | H5   | C B | 4 | -6.192  | -35.243 | 79.074 | 1.00 | 0.00 | H |
| ATOM | 697 | H6   | C B | 4 | -4.414  | -34.031 | 77.856 | 1.00 | 0.00 | H |
| ATOM | 698 | H1'  | C B | 4 | -2.150  | -31.637 | 79.539 | 1.00 | 0.00 | H |
| ATOM | 699 | H3'  | C B | 4 | -1.557  | -32.532 | 75.755 | 1.00 | 0.00 | H |
| ATOM | 700 | H4'  | C B | 4 | -2.684  | -30.185 | 76.237 | 1.00 | 0.00 | H |
| ATOM | 701 | H41  | C B | 4 | -7.354  | -35.433 | 81.198 | 1.00 | 0.00 | H |
| ATOM | 702 | H42  | C B | 4 | -6.933  | -34.436 | 82.618 | 1.00 | 0.00 | H |
| ATOM | 703 | H2'1 | C B | 4 | -2.576  | -33.836 | 77.495 | 1.00 | 0.00 | H |
| ATOM | 704 | H2'2 | C B | 4 | -1.086  | -33.349 | 78.290 | 1.00 | 0.00 | H |

|      |     |      |     |   |        |         |        |      |      |   |
|------|-----|------|-----|---|--------|---------|--------|------|------|---|
| ATOM | 705 | H5'1 | C B | 4 | -5.052 | -31.244 | 76.173 | 1.00 | 0.00 | H |
| ATOM | 706 | H5'2 | C B | 4 | -3.963 | -31.404 | 74.779 | 1.00 | 0.00 | H |
| ATOM | 707 | C1'  | G B | 5 | 0.433  | -31.995 | 82.546 | 1.00 | 0.00 | C |
| ATOM | 708 | N1   | G B | 5 | -3.173 | -34.654 | 84.987 | 1.00 | 0.00 | N |
| ATOM | 709 | C2   | G B | 5 | -2.383 | -33.609 | 85.435 | 1.00 | 0.00 | C |
| ATOM | 710 | N2   | G B | 5 | -2.578 | -33.223 | 86.701 | 1.00 | 0.00 | N |
| ATOM | 711 | N3   | G B | 5 | -1.472 | -32.999 | 84.678 | 1.00 | 0.00 | N |
| ATOM | 712 | C4   | G B | 5 | -1.404 | -33.524 | 83.427 | 1.00 | 0.00 | C |
| ATOM | 713 | C5   | G B | 5 | -2.147 | -34.565 | 82.895 | 1.00 | 0.00 | C |
| ATOM | 714 | C6   | G B | 5 | -3.116 | -35.211 | 83.695 | 1.00 | 0.00 | C |
| ATOM | 715 | O6   | G B | 5 | -3.864 | -36.144 | 83.406 | 1.00 | 0.00 | O |
| ATOM | 716 | N7   | G B | 5 | -1.769 | -34.799 | 81.571 | 1.00 | 0.00 | N |
| ATOM | 717 | C8   | G B | 5 | -0.834 | -33.912 | 81.345 | 1.00 | 0.00 | C |
| ATOM | 718 | N9   | G B | 5 | -0.555 | -33.101 | 82.427 | 1.00 | 0.00 | N |
| ATOM | 719 | C2'  | G B | 5 | 1.741  | -32.260 | 81.812 | 1.00 | 0.00 | C |
| ATOM | 720 | C3'  | G B | 5 | 2.110  | -30.874 | 81.310 | 1.00 | 0.00 | C |
| ATOM | 721 | O3'  | G B | 5 | 2.796  | -30.169 | 82.341 | 1.00 | 0.00 | O |
| ATOM | 722 | C4'  | G B | 5 | 0.750  | -30.255 | 80.992 | 1.00 | 0.00 | C |
| ATOM | 723 | O4'  | G B | 5 | -0.150 | -30.833 | 81.990 | 1.00 | 0.00 | O |
| ATOM | 724 | C5'  | G B | 5 | 0.190  | -30.532 | 79.617 | 1.00 | 0.00 | C |
| ATOM | 725 | O5'  | G B | 5 | 0.530  | -31.881 | 79.212 | 1.00 | 0.00 | O |
| ATOM | 726 | O1P  | G B | 5 | 2.082  | -31.531 | 77.262 | 1.00 | 0.00 | O |
| ATOM | 727 | O2P  | G B | 5 | 0.715  | -33.628 | 77.415 | 1.00 | 0.00 | O |
| ATOM | 728 | P    | G B | 5 | 0.817  | -32.171 | 77.670 | 1.00 | 0.00 | P |
| ATOM | 729 | H1   | G B | 5 | -3.853 | -35.053 | 85.651 | 1.00 | 0.00 | H |
| ATOM | 730 | H8   | G B | 5 | -0.319 | -33.822 | 80.390 | 1.00 | 0.00 | H |
| ATOM | 731 | H1'  | G B | 5 | 0.610  | -31.808 | 83.604 | 1.00 | 0.00 | H |
| ATOM | 732 | H21  | G B | 5 | -3.287 | -33.697 | 87.280 | 1.00 | 0.00 | H |
| ATOM | 733 | H3'  | G B | 5 | 2.739  | -30.915 | 80.420 | 1.00 | 0.00 | H |
| ATOM | 734 | H22  | G B | 5 | -2.020 | -32.453 | 87.097 | 1.00 | 0.00 | H |
| ATOM | 735 | H4'  | G B | 5 | 0.861  | -29.176 | 81.095 | 1.00 | 0.00 | H |
| ATOM | 736 | H2'1 | G B | 5 | 1.617  | -32.962 | 80.987 | 1.00 | 0.00 | H |
| ATOM | 737 | H2'2 | G B | 5 | 2.511  | -32.661 | 82.471 | 1.00 | 0.00 | H |
| ATOM | 738 | H5'1 | G B | 5 | -0.894 | -30.417 | 79.642 | 1.00 | 0.00 | H |
| ATOM | 739 | H5'2 | G B | 5 | 0.610  | -29.818 | 78.909 | 1.00 | 0.00 | H |
| ATOM | 740 | C1'  | T B | 6 | 1.966  | -33.021 | 87.139 | 1.00 | 0.00 | C |
| ATOM | 741 | N1   | T B | 6 | 1.447  | -34.105 | 86.264 | 1.00 | 0.00 | N |
| ATOM | 742 | C2   | T B | 6 | 0.462  | -34.919 | 86.786 | 1.00 | 0.00 | C |
| ATOM | 743 | O2   | T B | 6 | 0.018  | -34.779 | 87.913 | 1.00 | 0.00 | O |
| ATOM | 744 | N3   | T B | 6 | 0.007  | -35.913 | 85.938 | 1.00 | 0.00 | N |
| ATOM | 745 | C4   | T B | 6 | 0.442  | -36.159 | 84.653 | 1.00 | 0.00 | C |
| ATOM | 746 | O4   | T B | 6 | -0.039 | -37.084 | 83.988 | 1.00 | 0.00 | O |
| ATOM | 747 | C5   | T B | 6 | 1.471  | -35.256 | 84.195 | 1.00 | 0.00 | C |
| ATOM | 748 | C6   | T B | 6 | 1.938  | -34.276 | 84.993 | 1.00 | 0.00 | C |
| ATOM | 749 | C7   | T B | 6 | 1.972  | -35.486 | 82.800 | 1.00 | 0.00 | C |
| ATOM | 750 | C2'  | T B | 6 | 3.464  | -32.783 | 86.998 | 1.00 | 0.00 | C |
| ATOM | 751 | C3'  | T B | 6 | 3.564  | -31.275 | 87.171 | 1.00 | 0.00 | C |
| ATOM | 752 | O3'  | T B | 6 | 3.615  | -30.966 | 88.562 | 1.00 | 0.00 | O |
| ATOM | 753 | C4'  | T B | 6 | 2.281  | -30.772 | 86.514 | 1.00 | 0.00 | C |
| ATOM | 754 | O4'  | T B | 6 | 1.301  | -31.824 | 86.785 | 1.00 | 0.00 | O |
| ATOM | 755 | C5'  | T B | 6 | 2.337  | -30.539 | 85.022 | 1.00 | 0.00 | C |
| ATOM | 756 | O5'  | T B | 6 | 3.174  | -31.547 | 84.399 | 1.00 | 0.00 | O |
| ATOM | 757 | O1P  | T B | 6 | 5.131  | -30.224 | 83.533 | 1.00 | 0.00 | O |
| ATOM | 758 | O2P  | T B | 6 | 4.468  | -32.368 | 82.409 | 1.00 | 0.00 | O |

|      |     |      |     |   |        |         |        |      |      |   |
|------|-----|------|-----|---|--------|---------|--------|------|------|---|
| ATOM | 759 | P    | T B | 6 | 4.047  | -31.141 | 83.128 | 1.00 | 0.00 | P |
| ATOM | 760 | H3   | T B | 6 | -0.731 | -36.532 | 86.304 | 1.00 | 0.00 | H |
| ATOM | 761 | H6   | T B | 6 | 2.716  | -33.608 | 84.625 | 1.00 | 0.00 | H |
| ATOM | 762 | H1'  | T B | 6 | 1.704  | -33.258 | 88.170 | 1.00 | 0.00 | H |
| ATOM | 763 | H3'  | T B | 6 | 4.445  | -30.866 | 86.679 | 1.00 | 0.00 | H |
| ATOM | 764 | H4'  | T B | 6 | 2.032  | -29.823 | 86.990 | 1.00 | 0.00 | H |
| ATOM | 765 | H71  | T B | 6 | 3.017  | -35.796 | 82.835 | 1.00 | 0.00 | H |
| ATOM | 766 | H72  | T B | 6 | 1.377  | -36.266 | 82.323 | 1.00 | 0.00 | H |
| ATOM | 767 | H73  | T B | 6 | 1.886  | -34.563 | 82.225 | 1.00 | 0.00 | H |
| ATOM | 768 | H2'1 | T B | 6 | 3.843  | -33.097 | 86.027 | 1.00 | 0.00 | H |
| ATOM | 769 | H2'2 | T B | 6 | 4.040  | -33.309 | 87.761 | 1.00 | 0.00 | H |
| ATOM | 770 | H5'1 | T B | 6 | 1.329  | -30.592 | 84.612 | 1.00 | 0.00 | H |
| ATOM | 771 | H5'2 | T B | 6 | 2.750  | -29.549 | 84.831 | 1.00 | 0.00 | H |
| ATOM | 772 | C1'  | C B | 7 | 1.984  | -35.702 | 91.319 | 1.00 | 0.00 | C |
| ATOM | 773 | N1   | C B | 7 | 2.175  | -36.361 | 89.996 | 1.00 | 0.00 | N |
| ATOM | 774 | C2   | C B | 7 | 1.373  | -37.459 | 89.694 | 1.00 | 0.00 | C |
| ATOM | 775 | O2   | C B | 7 | 0.539  | -37.839 | 90.528 | 1.00 | 0.00 | O |
| ATOM | 776 | N3   | C B | 7 | 1.530  | -38.074 | 88.496 | 1.00 | 0.00 | N |
| ATOM | 777 | C4   | C B | 7 | 2.441  | -37.640 | 87.615 | 1.00 | 0.00 | C |
| ATOM | 778 | N4   | C B | 7 | 2.550  | -38.276 | 86.459 | 1.00 | 0.00 | N |
| ATOM | 779 | C5   | C B | 7 | 3.284  | -36.516 | 87.901 | 1.00 | 0.00 | C |
| ATOM | 780 | C6   | C B | 7 | 3.103  | -35.910 | 89.112 | 1.00 | 0.00 | C |
| ATOM | 781 | C2'  | C B | 7 | 3.280  | -35.227 | 91.960 | 1.00 | 0.00 | C |
| ATOM | 782 | C3'  | C B | 7 | 2.841  | -33.944 | 92.649 | 1.00 | 0.00 | C |
| ATOM | 783 | O3'  | C B | 7 | 2.290  | -34.262 | 93.924 | 1.00 | 0.00 | O |
| ATOM | 784 | C4'  | C B | 7 | 1.792  | -33.386 | 91.690 | 1.00 | 0.00 | C |
| ATOM | 785 | O4'  | C B | 7 | 1.155  | -34.573 | 91.120 | 1.00 | 0.00 | O |
| ATOM | 786 | C5'  | C B | 7 | 2.307  | -32.524 | 90.558 | 1.00 | 0.00 | C |
| ATOM | 787 | O5'  | C B | 7 | 3.577  | -33.041 | 90.090 | 1.00 | 0.00 | O |
| ATOM | 788 | O1P  | C B | 7 | 5.206  | -31.221 | 90.698 | 1.00 | 0.00 | O |
| ATOM | 789 | O2P  | C B | 7 | 5.686  | -32.736 | 88.757 | 1.00 | 0.00 | O |
| ATOM | 790 | P    | C B | 7 | 4.679  | -32.011 | 89.568 | 1.00 | 0.00 | P |
| ATOM | 791 | H5   | C B | 7 | 4.031  | -36.165 | 87.190 | 1.00 | 0.00 | H |
| ATOM | 792 | H6   | C B | 7 | 3.716  | -35.047 | 89.373 | 1.00 | 0.00 | H |
| ATOM | 793 | H1'  | C B | 7 | 1.456  | -36.396 | 91.972 | 1.00 | 0.00 | H |
| ATOM | 794 | H3'  | C B | 7 | 3.669  | -33.245 | 92.777 | 1.00 | 0.00 | H |
| ATOM | 795 | H4'  | C B | 7 | 1.110  | -32.778 | 92.284 | 1.00 | 0.00 | H |
| ATOM | 796 | H41  | C B | 7 | 3.240  | -37.961 | 85.761 | 1.00 | 0.00 | H |
| ATOM | 797 | H42  | C B | 7 | 1.944  | -39.085 | 86.255 | 1.00 | 0.00 | H |
| ATOM | 798 | H2'1 | C B | 7 | 4.060  | -35.036 | 91.224 | 1.00 | 0.00 | H |
| ATOM | 799 | H2'2 | C B | 7 | 3.675  | -35.947 | 92.677 | 1.00 | 0.00 | H |
| ATOM | 800 | H5'1 | C B | 7 | 1.582  | -32.533 | 89.744 | 1.00 | 0.00 | H |
| ATOM | 801 | H5'2 | C B | 7 | 2.434  | -31.504 | 90.916 | 1.00 | 0.00 | H |
| ATOM | 802 | C1'  | C B | 8 | 1.346  | -39.847 | 93.954 | 1.00 | 0.00 | C |
| ATOM | 803 | N1   | C B | 8 | 2.179  | -39.854 | 92.721 | 1.00 | 0.00 | N |
| ATOM | 804 | C2   | C B | 8 | 1.905  | -40.820 | 91.754 | 1.00 | 0.00 | C |
| ATOM | 805 | O2   | C B | 8 | 0.988  | -41.626 | 91.959 | 1.00 | 0.00 | O |
| ATOM | 806 | N3   | C B | 8 | 2.652  | -40.845 | 90.625 | 1.00 | 0.00 | N |
| ATOM | 807 | C4   | C B | 8 | 3.639  | -39.960 | 90.432 | 1.00 | 0.00 | C |
| ATOM | 808 | N4   | C B | 8 | 4.335  | -40.028 | 89.306 | 1.00 | 0.00 | N |
| ATOM | 809 | C5   | C B | 8 | 3.948  | -38.958 | 91.410 | 1.00 | 0.00 | C |
| ATOM | 810 | C6   | C B | 8 | 3.178  | -38.949 | 92.540 | 1.00 | 0.00 | C |
| ATOM | 811 | C2'  | C B | 8 | 2.125  | -39.514 | 95.220 | 1.00 | 0.00 | C |
| ATOM | 812 | C3'  | C B | 8 | 1.108  | -38.713 | 96.018 | 1.00 | 0.00 | C |

|      |     |      |     |    |        |         |        |      |      |   |
|------|-----|------|-----|----|--------|---------|--------|------|------|---|
| ATOM | 813 | O3'  | C B | 8  | 0.265  | -39.611 | 96.736 | 1.00 | 0.00 | O |
| ATOM | 814 | C4'  | C B | 8  | 0.349  | -37.952 | 94.933 | 1.00 | 0.00 | C |
| ATOM | 815 | O4'  | C B | 8  | 0.342  | -38.864 | 93.788 | 1.00 | 0.00 | O |
| ATOM | 816 | C5'  | C B | 8  | 0.943  | -36.633 | 94.497 | 1.00 | 0.00 | C |
| ATOM | 817 | O5'  | C B | 8  | 2.391  | -36.724 | 94.498 | 1.00 | 0.00 | O |
| ATOM | 818 | O1P  | C B | 8  | 3.071  | -35.126 | 96.321 | 1.00 | 0.00 | O |
| ATOM | 819 | O2P  | C B | 8  | 4.637  | -35.601 | 94.418 | 1.00 | 0.00 | O |
| ATOM | 820 | P    | C B | 8  | 3.239  | -35.432 | 94.886 | 1.00 | 0.00 | P |
| ATOM | 821 | H5   | C B | 8  | 4.755  | -38.240 | 91.262 | 1.00 | 0.00 | H |
| ATOM | 822 | H6   | C B | 8  | 3.370  | -38.201 | 93.309 | 1.00 | 0.00 | H |
| ATOM | 823 | H1'  | C B | 8  | 0.856  | -40.816 | 94.041 | 1.00 | 0.00 | H |
| ATOM | 824 | H3'  | C B | 8  | 1.586  | -38.028 | 96.717 | 1.00 | 0.00 | H |
| ATOM | 825 | H4'  | C B | 8  | -0.648 | -37.751 | 95.325 | 1.00 | 0.00 | H |
| ATOM | 826 | H41  | C B | 8  | 5.098  | -39.357 | 89.132 | 1.00 | 0.00 | H |
| ATOM | 827 | H42  | C B | 8  | 4.114  | -40.750 | 88.605 | 1.00 | 0.00 | H |
| ATOM | 828 | H2'1 | C B | 8  | 3.018  | -38.925 | 95.012 | 1.00 | 0.00 | H |
| ATOM | 829 | H2'2 | C B | 8  | 2.439  | -40.408 | 95.759 | 1.00 | 0.00 | H |
| ATOM | 830 | H5'1 | C B | 8  | 0.591  | -36.396 | 93.492 | 1.00 | 0.00 | H |
| ATOM | 831 | H5'2 | C B | 8  | 0.623  | -35.852 | 95.183 | 1.00 | 0.00 | H |
| ATOM | 832 | C1'  | T B | 9  | 1.091  | -44.753 | 94.547 | 1.00 | 0.00 | C |
| ATOM | 833 | N1   | T B | 9  | 2.263  | -44.142 | 93.866 | 1.00 | 0.00 | N |
| ATOM | 834 | C2   | T B | 9  | 2.619  | -44.660 | 92.637 | 1.00 | 0.00 | C |
| ATOM | 835 | O2   | T B | 9  | 2.017  | -45.579 | 92.111 | 1.00 | 0.00 | O |
| ATOM | 836 | N3   | T B | 9  | 3.713  | -44.063 | 92.040 | 1.00 | 0.00 | N |
| ATOM | 837 | C4   | T B | 9  | 4.462  | -43.024 | 92.550 | 1.00 | 0.00 | C |
| ATOM | 838 | O4   | T B | 9  | 5.427  | -42.572 | 91.922 | 1.00 | 0.00 | O |
| ATOM | 839 | C5   | T B | 9  | 4.014  | -42.549 | 93.838 | 1.00 | 0.00 | C |
| ATOM | 840 | C6   | T B | 9  | 2.951  | -43.107 | 94.449 | 1.00 | 0.00 | C |
| ATOM | 841 | C7   | T B | 9  | 4.800  | -41.417 | 94.429 | 1.00 | 0.00 | C |
| ATOM | 842 | C2'  | T B | 9  | 1.248  | -44.866 | 96.059 | 1.00 | 0.00 | C |
| ATOM | 843 | C3'  | T B | 9  | -0.171 | -44.610 | 96.545 | 1.00 | 0.00 | C |
| ATOM | 844 | O3'  | T B | 9  | -0.907 | -45.830 | 96.501 | 1.00 | 0.00 | O |
| ATOM | 845 | C4'  | T B | 9  | -0.693 | -43.582 | 95.544 | 1.00 | 0.00 | C |
| ATOM | 846 | O4'  | T B | 9  | -0.035 | -43.938 | 94.286 | 1.00 | 0.00 | O |
| ATOM | 847 | C5'  | T B | 9  | -0.397 | -42.133 | 95.853 | 1.00 | 0.00 | C |
| ATOM | 848 | O5'  | T B | 9  | 0.918  | -42.019 | 96.453 | 1.00 | 0.00 | O |
| ATOM | 849 | O1P  | T B | 9  | 0.424  | -41.234 | 98.792 | 1.00 | 0.00 | O |
| ATOM | 850 | O2P  | T B | 9  | 2.618  | -40.667 | 97.715 | 1.00 | 0.00 | O |
| ATOM | 851 | P    | T B | 9  | 1.162  | -40.896 | 97.558 | 1.00 | 0.00 | P |
| ATOM | 852 | H3   | T B | 9  | 3.996  | -44.429 | 91.120 | 1.00 | 0.00 | H |
| ATOM | 853 | H6   | T B | 9  | 2.632  | -42.732 | 95.421 | 1.00 | 0.00 | H |
| ATOM | 854 | H1'  | T B | 9  | 0.906  | -45.731 | 94.101 | 1.00 | 0.00 | H |
| ATOM | 855 | H3'  | T B | 9  | -0.187 | -44.215 | 97.560 | 1.00 | 0.00 | H |
| ATOM | 856 | H4'  | T B | 9  | -1.777 | -43.700 | 95.506 | 1.00 | 0.00 | H |
| ATOM | 857 | H71  | T B | 9  | 5.301  | -41.757 | 95.336 | 1.00 | 0.00 | H |
| ATOM | 858 | H72  | T B | 9  | 5.544  | -41.074 | 93.710 | 1.00 | 0.00 | H |
| ATOM | 859 | H73  | T B | 9  | 4.126  | -40.595 | 94.675 | 1.00 | 0.00 | H |
| ATOM | 860 | H2'1 | T B | 9  | 1.943  | -44.128 | 96.458 | 1.00 | 0.00 | H |
| ATOM | 861 | H2'2 | T B | 9  | 1.602  | -45.850 | 96.366 | 1.00 | 0.00 | H |
| ATOM | 862 | H5'1 | T B | 9  | -0.433 | -41.555 | 94.929 | 1.00 | 0.00 | H |
| ATOM | 863 | H5'2 | T B | 9  | -1.150 | -41.754 | 96.541 | 1.00 | 0.00 | H |
| ATOM | 864 | C1'  | A B | 10 | 2.140  | -49.444 | 93.311 | 1.00 | 0.00 | C |
| ATOM | 865 | N1   | A B | 10 | 6.296  | -47.353 | 91.146 | 1.00 | 0.00 | N |
| ATOM | 866 | C2   | A B | 10 | 5.454  | -48.302 | 90.745 | 1.00 | 0.00 | C |

|      |     |      |     |    |        |         |        |      |      |   |
|------|-----|------|-----|----|--------|---------|--------|------|------|---|
| ATOM | 867 | N3   | A B | 10 | 4.397  | -48.793 | 91.354 | 1.00 | 0.00 | N |
| ATOM | 868 | C4   | A B | 10 | 4.225  | -48.194 | 92.546 | 1.00 | 0.00 | C |
| ATOM | 869 | C5   | A B | 10 | 4.995  | -47.210 | 93.101 | 1.00 | 0.00 | C |
| ATOM | 870 | C6   | A B | 10 | 6.098  | -46.773 | 92.340 | 1.00 | 0.00 | C |
| ATOM | 871 | N6   | A B | 10 | 6.943  | -45.813 | 92.757 | 1.00 | 0.00 | N |
| ATOM | 872 | N7   | A B | 10 | 4.509  | -46.836 | 94.342 | 1.00 | 0.00 | N |
| ATOM | 873 | C8   | A B | 10 | 3.470  | -47.598 | 94.512 | 1.00 | 0.00 | C |
| ATOM | 874 | N9   | A B | 10 | 3.233  | -48.446 | 93.461 | 1.00 | 0.00 | N |
| ATOM | 875 | C2'  | A B | 10 | 1.779  | -50.157 | 94.607 | 1.00 | 0.00 | C |
| ATOM | 876 | C3'  | A B | 10 | 0.275  | -50.332 | 94.466 | 1.00 | 0.00 | C |
| ATOM | 877 | O3'  | A B | 10 | 0.009  | -51.508 | 93.706 | 1.00 | 0.00 | O |
| ATOM | 878 | C4'  | A B | 10 | -0.146 | -49.061 | 93.728 | 1.00 | 0.00 | C |
| ATOM | 879 | O4'  | A B | 10 | 0.989  | -48.758 | 92.856 | 1.00 | 0.00 | O |
| ATOM | 880 | C5'  | A B | 10 | -0.434 | -47.852 | 94.585 | 1.00 | 0.00 | C |
| ATOM | 881 | O5'  | A B | 10 | 0.482  | -47.817 | 95.709 | 1.00 | 0.00 | O |
| ATOM | 882 | O1P  | A B | 10 | -1.021 | -48.167 | 97.698 | 1.00 | 0.00 | O |
| ATOM | 883 | O2P  | A B | 10 | 1.129  | -46.900 | 97.957 | 1.00 | 0.00 | O |
| ATOM | 884 | P    | A B | 10 | -0.035 | -47.243 | 97.105 | 1.00 | 0.00 | P |
| ATOM | 885 | H2   | A B | 10 | 5.674  | -48.735 | 89.770 | 1.00 | 0.00 | H |
| ATOM | 886 | H8   | A B | 10 | 2.845  | -47.565 | 95.405 | 1.00 | 0.00 | H |
| ATOM | 887 | H1'  | A B | 10 | 2.432  | -50.157 | 92.541 | 1.00 | 0.00 | H |
| ATOM | 888 | H3'  | A B | 10 | -0.221 | -50.406 | 95.434 | 1.00 | 0.00 | H |
| ATOM | 889 | H4'  | A B | 10 | -1.054 | -49.303 | 93.176 | 1.00 | 0.00 | H |
| ATOM | 890 | H61  | A B | 10 | 7.732  | -45.529 | 92.160 | 1.00 | 0.00 | H |
| ATOM | 891 | H62  | A B | 10 | 6.799  | -45.363 | 93.672 | 1.00 | 0.00 | H |
| ATOM | 892 | H2'1 | A B | 10 | 2.028  | -49.567 | 95.488 | 1.00 | 0.00 | H |
| ATOM | 893 | H2'2 | A B | 10 | 2.281  | -51.121 | 94.704 | 1.00 | 0.00 | H |
| ATOM | 894 | H5'1 | A B | 10 | -0.314 | -46.950 | 93.985 | 1.00 | 0.00 | H |
| ATOM | 895 | H5'2 | A B | 10 | -1.459 | -47.906 | 94.949 | 1.00 | 0.00 | H |
| ATOM | 896 | C1'  | G B | 11 | 4.937  | -52.969 | 91.216 | 1.00 | 0.00 | C |
| ATOM | 897 | N1   | G B | 11 | 8.722  | -49.629 | 91.948 | 1.00 | 0.00 | N |
| ATOM | 898 | C2   | G B | 11 | 8.446  | -50.433 | 90.856 | 1.00 | 0.00 | C |
| ATOM | 899 | N2   | G B | 11 | 9.292  | -50.334 | 89.823 | 1.00 | 0.00 | N |
| ATOM | 900 | N3   | G B | 11 | 7.408  | -51.266 | 90.799 | 1.00 | 0.00 | N |
| ATOM | 901 | C4   | G B | 11 | 6.663  | -51.241 | 91.935 | 1.00 | 0.00 | C |
| ATOM | 902 | C5   | G B | 11 | 6.864  | -50.478 | 93.072 | 1.00 | 0.00 | C |
| ATOM | 903 | C6   | G B | 11 | 7.963  | -49.589 | 93.133 | 1.00 | 0.00 | C |
| ATOM | 904 | O6   | G B | 11 | 8.304  | -48.837 | 94.046 | 1.00 | 0.00 | O |
| ATOM | 905 | N7   | G B | 11 | 5.872  | -50.748 | 94.018 | 1.00 | 0.00 | N |
| ATOM | 906 | C8   | G B | 11 | 5.117  | -51.645 | 93.436 | 1.00 | 0.00 | C |
| ATOM | 907 | N9   | G B | 11 | 5.535  | -51.996 | 92.168 | 1.00 | 0.00 | N |
| ATOM | 908 | C2'  | G B | 11 | 4.376  | -54.217 | 91.884 | 1.00 | 0.00 | C |
| ATOM | 909 | C3'  | G B | 11 | 3.157  | -54.517 | 91.027 | 1.00 | 0.00 | C |
| ATOM | 910 | O3'  | G B | 11 | 3.561  | -55.272 | 89.887 | 1.00 | 0.00 | O |
| ATOM | 911 | C4'  | G B | 11 | 2.657  | -53.124 | 90.649 | 1.00 | 0.00 | C |
| ATOM | 912 | O4'  | G B | 11 | 3.875  | -52.320 | 90.544 | 1.00 | 0.00 | O |
| ATOM | 913 | C5'  | G B | 11 | 1.721  | -52.458 | 91.629 | 1.00 | 0.00 | C |
| ATOM | 914 | O5'  | G B | 11 | 2.113  | -52.789 | 92.985 | 1.00 | 0.00 | O |
| ATOM | 915 | O1P  | G B | 11 | 0.185  | -54.169 | 93.829 | 1.00 | 0.00 | O |
| ATOM | 916 | O2P  | G B | 11 | 1.591  | -52.859 | 95.441 | 1.00 | 0.00 | O |
| ATOM | 917 | P    | G B | 11 | 0.979  | -52.954 | 94.094 | 1.00 | 0.00 | P |
| ATOM | 918 | H1   | G B | 11 | 9.547  | -49.013 | 91.888 | 1.00 | 0.00 | H |
| ATOM | 919 | H8   | G B | 11 | 4.237  | -52.076 | 93.911 | 1.00 | 0.00 | H |
| ATOM | 920 | H1'  | G B | 11 | 5.693  | -53.230 | 90.474 | 1.00 | 0.00 | H |

|      |     |      |     |    |        |         |        |      |      |   |
|------|-----|------|-----|----|--------|---------|--------|------|------|---|
| ATOM | 921 | H21  | G B | 11 | 10.090 | -49.685 | 89.872 | 1.00 | 0.00 | H |
| ATOM | 922 | H3'  | G B | 11 | 2.397  | -55.072 | 91.577 | 1.00 | 0.00 | H |
| ATOM | 923 | H22  | G B | 11 | 9.144  | -50.908 | 88.980 | 1.00 | 0.00 | H |
| ATOM | 924 | H4'  | G B | 11 | 2.130  | -53.223 | 89.700 | 1.00 | 0.00 | H |
| ATOM | 925 | H2'1 | G B | 11 | 4.097  | -54.039 | 92.923 | 1.00 | 0.00 | H |
| ATOM | 926 | H2'2 | G B | 11 | 5.084  | -55.046 | 91.872 | 1.00 | 0.00 | H |
| ATOM | 927 | H5'1 | G B | 11 | 1.763  | -51.378 | 91.487 | 1.00 | 0.00 | H |
| ATOM | 928 | H5'2 | G B | 11 | 0.704  | -52.805 | 91.444 | 1.00 | 0.00 | H |
| ATOM | 929 | C1'  | G B | 12 | 9.196  | -54.878 | 89.558 | 1.00 | 0.00 | C |
| ATOM | 930 | N1   | G B | 12 | 11.286 | -51.674 | 92.934 | 1.00 | 0.00 | N |
| ATOM | 931 | C2   | G B | 12 | 11.668 | -51.973 | 91.637 | 1.00 | 0.00 | C |
| ATOM | 932 | N2   | G B | 12 | 12.753 | -51.333 | 91.180 | 1.00 | 0.00 | N |
| ATOM | 933 | N3   | G B | 12 | 11.020 | -52.837 | 90.860 | 1.00 | 0.00 | N |
| ATOM | 934 | C4   | G B | 12 | 9.952  | -53.396 | 91.488 | 1.00 | 0.00 | C |
| ATOM | 935 | C5   | G B | 12 | 9.499  | -53.163 | 92.775 | 1.00 | 0.00 | C |
| ATOM | 936 | C6   | G B | 12 | 10.184 | -52.242 | 93.599 | 1.00 | 0.00 | C |
| ATOM | 937 | O6   | G B | 12 | 9.938  | -51.906 | 94.758 | 1.00 | 0.00 | O |
| ATOM | 938 | N7   | G B | 12 | 8.368  | -53.940 | 93.037 | 1.00 | 0.00 | N |
| ATOM | 939 | C8   | G B | 12 | 8.174  | -54.601 | 91.925 | 1.00 | 0.00 | C |
| ATOM | 940 | N9   | G B | 12 | 9.096  | -54.325 | 90.937 | 1.00 | 0.00 | N |
| ATOM | 941 | C2'  | G B | 12 | 8.839  | -56.355 | 89.463 | 1.00 | 0.00 | C |
| ATOM | 942 | C3'  | G B | 12 | 8.151  | -56.429 | 88.109 | 1.00 | 0.00 | C |
| ATOM | 943 | O3'  | G B | 12 | 9.137  | -56.571 | 87.090 | 1.00 | 0.00 | O |
| ATOM | 944 | C4'  | G B | 12 | 7.422  | -55.090 | 88.025 | 1.00 | 0.00 | C |
| ATOM | 945 | O4'  | G B | 12 | 8.296  | -54.158 | 88.739 | 1.00 | 0.00 | O |
| ATOM | 946 | C5'  | G B | 12 | 6.046  | -55.034 | 88.647 | 1.00 | 0.00 | C |
| ATOM | 947 | O5'  | G B | 12 | 6.016  | -55.848 | 89.845 | 1.00 | 0.00 | O |
| ATOM | 948 | O1P  | G B | 12 | 4.425  | -57.705 | 89.248 | 1.00 | 0.00 | O |
| ATOM | 949 | O2P  | G B | 12 | 4.708  | -57.018 | 91.644 | 1.00 | 0.00 | O |
| ATOM | 950 | P    | G B | 12 | 4.669  | -56.619 | 90.216 | 1.00 | 0.00 | P |
| ATOM | 951 | H1   | G B | 12 | 11.853 | -50.983 | 93.450 | 1.00 | 0.00 | H |
| ATOM | 952 | H8   | G B | 12 | 7.356  | -55.309 | 91.790 | 1.00 | 0.00 | H |
| ATOM | 953 | H1'  | G B | 12 | 10.205 | -54.696 | 89.189 | 1.00 | 0.00 | H |
| ATOM | 954 | H21  | G B | 12 | 13.247 | -50.662 | 91.787 | 1.00 | 0.00 | H |
| ATOM | 955 | H3'  | G B | 12 | 7.450  | -57.262 | 88.051 | 1.00 | 0.00 | H |
| ATOM | 956 | H22  | G B | 12 | 13.090 | -51.513 | 90.225 | 1.00 | 0.00 | H |
| ATOM | 957 | H4'  | G B | 12 | 7.319  | -54.851 | 86.967 | 1.00 | 0.00 | H |
| ATOM | 958 | H2'1 | G B | 12 | 8.172  | -56.672 | 90.265 | 1.00 | 0.00 | H |
| ATOM | 959 | H2'2 | G B | 12 | 9.719  | -56.997 | 89.497 | 1.00 | 0.00 | H |
| ATOM | 960 | H5'1 | G B | 12 | 5.808  | -54.001 | 88.897 | 1.00 | 0.00 | H |
| ATOM | 961 | H5'2 | G B | 12 | 5.314  | -55.406 | 87.929 | 1.00 | 0.00 | H |
| ATOM | 962 | C1'  | T B | 13 | 14.124 | -55.320 | 89.419 | 1.00 | 0.00 | C |
| ATOM | 963 | N1   | T B | 13 | 13.402 | -55.399 | 90.717 | 1.00 | 0.00 | N |
| ATOM | 964 | C2   | T B | 13 | 13.853 | -54.588 | 91.740 | 1.00 | 0.00 | C |
| ATOM | 965 | O2   | T B | 13 | 14.801 | -53.832 | 91.612 | 1.00 | 0.00 | O |
| ATOM | 966 | N3   | T B | 13 | 13.153 | -54.693 | 92.927 | 1.00 | 0.00 | N |
| ATOM | 967 | C4   | T B | 13 | 12.074 | -55.515 | 93.177 | 1.00 | 0.00 | C |
| ATOM | 968 | O4   | T B | 13 | 11.529 | -55.525 | 94.286 | 1.00 | 0.00 | O |
| ATOM | 969 | C5   | T B | 13 | 11.675 | -56.324 | 92.048 | 1.00 | 0.00 | C |
| ATOM | 970 | C6   | T B | 13 | 12.334 | -56.247 | 90.875 | 1.00 | 0.00 | C |
| ATOM | 971 | C7   | T B | 13 | 10.503 | -57.232 | 92.272 | 1.00 | 0.00 | C |
| ATOM | 972 | C2'  | T B | 13 | 14.269 | -56.664 | 88.714 | 1.00 | 0.00 | C |
| ATOM | 973 | C3'  | T B | 13 | 14.141 | -56.269 | 87.251 | 1.00 | 0.00 | C |
| ATOM | 974 | O3'  | T B | 13 | 15.413 | -55.845 | 86.768 | 1.00 | 0.00 | O |

|      |      |      |     |    |        |         |        |      |      |   |
|------|------|------|-----|----|--------|---------|--------|------|------|---|
| ATOM | 975  | C4'  | T B | 13 | 13.128 | -55.128 | 87.294 | 1.00 | 0.00 | C |
| ATOM | 976  | O4'  | T B | 13 | 13.392 | -54.460 | 88.569 | 1.00 | 0.00 | O |
| ATOM | 977  | C5'  | T B | 13 | 11.670 | -55.521 | 87.247 | 1.00 | 0.00 | C |
| ATOM | 978  | O5'  | T B | 13 | 11.470 | -56.752 | 87.988 | 1.00 | 0.00 | O |
| ATOM | 979  | O1P  | T B | 13 | 10.798 | -58.400 | 86.210 | 1.00 | 0.00 | O |
| ATOM | 980  | O2P  | T B | 13 | 10.027 | -58.723 | 88.576 | 1.00 | 0.00 | O |
| ATOM | 981  | P    | T B | 13 | 10.366 | -57.783 | 87.480 | 1.00 | 0.00 | P |
| ATOM | 982  | H3   | T B | 13 | 13.469 | -54.095 | 93.705 | 1.00 | 0.00 | H |
| ATOM | 983  | H6   | T B | 13 | 12.014 | -56.868 | 90.038 | 1.00 | 0.00 | H |
| ATOM | 984  | H1'  | T B | 13 | 15.099 | -54.866 | 89.597 | 1.00 | 0.00 | H |
| ATOM | 985  | H3'  | T B | 13 | 13.779 | -57.095 | 86.638 | 1.00 | 0.00 | H |
| ATOM | 986  | H4'  | T B | 13 | 13.329 | -54.494 | 86.430 | 1.00 | 0.00 | H |
| ATOM | 987  | H71  | T B | 13 | 10.830 | -58.270 | 92.210 | 1.00 | 0.00 | H |
| ATOM | 988  | H72  | T B | 13 | 10.081 | -57.044 | 93.261 | 1.00 | 0.00 | H |
| ATOM | 989  | H73  | T B | 13 | 9.744  | -57.044 | 91.512 | 1.00 | 0.00 | H |
| ATOM | 990  | H2'1 | T B | 13 | 13.492 | -57.368 | 89.005 | 1.00 | 0.00 | H |
| ATOM | 991  | H2'2 | T B | 13 | 15.231 | -57.135 | 88.916 | 1.00 | 0.00 | H |
| ATOM | 992  | H5'1 | T B | 13 | 11.069 | -54.725 | 87.685 | 1.00 | 0.00 | H |
| ATOM | 993  | H5'2 | T B | 13 | 11.372 | -55.665 | 86.209 | 1.00 | 0.00 | H |
| ATOM | 994  | C1'  | G B | 14 | 18.670 | -54.969 | 91.384 | 1.00 | 0.00 | C |
| ATOM | 995  | N1   | G B | 14 | 16.192 | -55.472 | 95.816 | 1.00 | 0.00 | N |
| ATOM | 996  | C2   | G B | 14 | 17.233 | -54.628 | 95.472 | 1.00 | 0.00 | C |
| ATOM | 997  | N2   | G B | 14 | 17.674 | -53.811 | 96.435 | 1.00 | 0.00 | N |
| ATOM | 998  | N3   | G B | 14 | 17.789 | -54.601 | 94.261 | 1.00 | 0.00 | N |
| ATOM | 999  | C4   | G B | 14 | 17.222 | -55.500 | 93.412 | 1.00 | 0.00 | C |
| ATOM | 1000 | C5   | G B | 14 | 16.187 | -56.382 | 93.669 | 1.00 | 0.00 | C |
| ATOM | 1001 | C6   | G B | 14 | 15.594 | -56.409 | 94.952 | 1.00 | 0.00 | C |
| ATOM | 1002 | O6   | G B | 14 | 14.674 | -57.115 | 95.367 | 1.00 | 0.00 | O |
| ATOM | 1003 | N7   | G B | 14 | 15.902 | -57.137 | 92.528 | 1.00 | 0.00 | N |
| ATOM | 1004 | C8   | G B | 14 | 16.753 | -56.696 | 91.637 | 1.00 | 0.00 | C |
| ATOM | 1005 | N9   | G B | 14 | 17.590 | -55.701 | 92.100 | 1.00 | 0.00 | N |
| ATOM | 1006 | C2'  | G B | 14 | 19.468 | -55.838 | 90.422 | 1.00 | 0.00 | C |
| ATOM | 1007 | C3'  | G B | 14 | 19.761 | -54.870 | 89.288 | 1.00 | 0.00 | C |
| ATOM | 1008 | O3'  | G B | 14 | 20.922 | -54.109 | 89.611 | 1.00 | 0.00 | O |
| ATOM | 1009 | C4'  | G B | 14 | 18.500 | -54.009 | 89.242 | 1.00 | 0.00 | C |
| ATOM | 1010 | O4'  | G B | 14 | 18.065 | -53.932 | 90.636 | 1.00 | 0.00 | O |
| ATOM | 1011 | C5'  | G B | 14 | 17.357 | -54.536 | 88.407 | 1.00 | 0.00 | C |
| ATOM | 1012 | O5'  | G B | 14 | 17.294 | -55.980 | 88.518 | 1.00 | 0.00 | O |
| ATOM | 1013 | O1P  | G B | 14 | 17.854 | -56.768 | 86.193 | 1.00 | 0.00 | O |
| ATOM | 1014 | O2P  | G B | 14 | 16.423 | -58.186 | 87.687 | 1.00 | 0.00 | O |
| ATOM | 1015 | P    | G B | 14 | 16.826 | -56.828 | 87.250 | 1.00 | 0.00 | P |
| ATOM | 1016 | H1   | G B | 14 | 15.828 | -55.410 | 96.779 | 1.00 | 0.00 | H |
| ATOM | 1017 | H8   | G B | 14 | 16.797 | -57.081 | 90.618 | 1.00 | 0.00 | H |
| ATOM | 1018 | H1'  | G B | 14 | 19.322 | -54.509 | 92.128 | 1.00 | 0.00 | H |
| ATOM | 1019 | H21  | G B | 14 | 17.236 | -53.836 | 97.369 | 1.00 | 0.00 | H |
| ATOM | 1020 | H3'  | G B | 14 | 19.919 | -55.387 | 88.341 | 1.00 | 0.00 | H |
| ATOM | 1021 | H22  | G B | 14 | 18.449 | -53.161 | 96.245 | 1.00 | 0.00 | H |
| ATOM | 1022 | H4'  | G B | 14 | 18.792 | -53.042 | 88.833 | 1.00 | 0.00 | H |
| ATOM | 1023 | H2'1 | G B | 14 | 18.897 | -56.698 | 90.072 | 1.00 | 0.00 | H |
| ATOM | 1024 | H2'2 | G B | 14 | 20.387 | -56.216 | 90.870 | 1.00 | 0.00 | H |
| ATOM | 1025 | H5'1 | G B | 14 | 16.424 | -54.099 | 88.760 | 1.00 | 0.00 | H |
| ATOM | 1026 | H5'2 | G B | 14 | 17.514 | -54.253 | 87.366 | 1.00 | 0.00 | H |
| ATOM | 1027 | C1'  | C B | 15 | 21.907 | -54.862 | 95.132 | 1.00 | 0.00 | C |
| ATOM | 1028 | N1   | C B | 15 | 20.915 | -55.967 | 95.019 | 1.00 | 0.00 | N |



|      |      |      |     |    |        |         |         |      |      |   |
|------|------|------|-----|----|--------|---------|---------|------|------|---|
| ATOM | 1029 | C2   | C B | 15 | 20.136 | -56.262 | 96.135  | 1.00 | 0.00 | C |
| ATOM | 1030 | O2   | C B | 15 | 20.297 | -55.598 | 97.167  | 1.00 | 0.00 | O |
| ATOM | 1031 | N3   | C B | 15 | 19.227 | -57.264 | 96.053  | 1.00 | 0.00 | N |
| ATOM | 1032 | C4   | C B | 15 | 19.076 | -57.964 | 94.922  | 1.00 | 0.00 | C |
| ATOM | 1033 | N4   | C B | 15 | 18.170 | -58.931 | 94.896  | 1.00 | 0.00 | N |
| ATOM | 1034 | C5   | C B | 15 | 19.868 | -57.687 | 93.758  | 1.00 | 0.00 | C |
| ATOM | 1035 | C6   | C B | 15 | 20.772 | -56.670 | 93.863  | 1.00 | 0.00 | C |
| ATOM | 1036 | C2'  | C B | 15 | 23.214 | -55.133 | 94.400  | 1.00 | 0.00 | C |
| ATOM | 1037 | C3'  | C B | 15 | 23.584 | -53.749 | 93.890  | 1.00 | 0.00 | C |
| ATOM | 1038 | O3'  | C B | 15 | 24.273 | -53.039 | 94.918  | 1.00 | 0.00 | O |
| ATOM | 1039 | C4'  | C B | 15 | 22.226 | -53.129 | 93.571  | 1.00 | 0.00 | C |
| ATOM | 1040 | O4'  | C B | 15 | 21.324 | -53.702 | 94.570  | 1.00 | 0.00 | O |
| ATOM | 1041 | C5'  | C B | 15 | 21.664 | -53.413 | 92.196  | 1.00 | 0.00 | C |
| ATOM | 1042 | O5'  | C B | 15 | 22.004 | -54.764 | 91.798  | 1.00 | 0.00 | O |
| ATOM | 1043 | O1P  | C B | 15 | 23.557 | -54.425 | 89.846  | 1.00 | 0.00 | O |
| ATOM | 1044 | O2P  | C B | 15 | 22.186 | -56.520 | 90.008  | 1.00 | 0.00 | O |
| ATOM | 1045 | P    | C B | 15 | 22.289 | -55.062 | 90.257  | 1.00 | 0.00 | P |
| ATOM | 1046 | H5   | C B | 15 | 19.752 | -58.259 | 92.838  | 1.00 | 0.00 | H |
| ATOM | 1047 | H6   | C B | 15 | 21.393 | -56.418 | 93.003  | 1.00 | 0.00 | H |
| ATOM | 1048 | H1'  | C B | 15 | 22.084 | -54.671 | 96.191  | 1.00 | 0.00 | H |
| ATOM | 1049 | H3'  | C B | 15 | 24.213 | -53.797 | 93.001  | 1.00 | 0.00 | H |
| ATOM | 1050 | H4'  | C B | 15 | 22.339 | -52.049 | 93.667  | 1.00 | 0.00 | H |
| ATOM | 1051 | H41  | C B | 15 | 18.031 | -59.484 | 94.037  | 1.00 | 0.00 | H |
| ATOM | 1052 | H42  | C B | 15 | 17.604 | -59.130 | 95.734  | 1.00 | 0.00 | H |
| ATOM | 1053 | H2'1 | C B | 15 | 23.089 | -55.838 | 93.578  | 1.00 | 0.00 | H |
| ATOM | 1054 | H2'2 | C B | 15 | 23.983 | -55.533 | 95.061  | 1.00 | 0.00 | H |
| ATOM | 1055 | H5'1 | C B | 15 | 20.581 | -53.296 | 92.221  | 1.00 | 0.00 | H |
| ATOM | 1056 | H5'2 | C B | 15 | 22.086 | -52.703 | 91.485  | 1.00 | 0.00 | H |
| ATOM | 1057 | C1'  | G B | 16 | 23.422 | -55.906 | 99.729  | 1.00 | 0.00 | C |
| ATOM | 1058 | N1   | G B | 16 | 20.167 | -59.811 | 99.308  | 1.00 | 0.00 | N |
| ATOM | 1059 | C2   | G B | 16 | 20.394 | -58.955 | 100.371 | 1.00 | 0.00 | C |
| ATOM | 1060 | N2   | G B | 16 | 19.658 | -59.170 | 101.468 | 1.00 | 0.00 | N |
| ATOM | 1061 | N3   | G B | 16 | 21.285 | -57.964 | 100.341 | 1.00 | 0.00 | N |
| ATOM | 1062 | C4   | G B | 16 | 21.944 | -57.898 | 99.155  | 1.00 | 0.00 | C |
| ATOM | 1063 | C5   | G B | 16 | 21.787 | -58.708 | 98.044  | 1.00 | 0.00 | C |
| ATOM | 1064 | C6   | G B | 16 | 20.839 | -59.759 | 98.073  | 1.00 | 0.00 | C |
| ATOM | 1065 | O6   | G B | 16 | 20.558 | -60.575 | 97.194  | 1.00 | 0.00 | O |
| ATOM | 1066 | N7   | G B | 16 | 22.658 | -58.309 | 97.028  | 1.00 | 0.00 | N |
| ATOM | 1067 | C8   | G B | 16 | 23.299 | -57.291 | 97.542  | 1.00 | 0.00 | C |
| ATOM | 1068 | N9   | G B | 16 | 22.921 | -56.982 | 98.833  | 1.00 | 0.00 | N |
| ATOM | 1069 | C2'  | G B | 16 | 24.919 | -55.655 | 99.609  | 1.00 | 0.00 | C |
| ATOM | 1070 | C3'  | G B | 16 | 25.006 | -54.150 | 99.803  | 1.00 | 0.00 | C |
| ATOM | 1071 | O3'  | G B | 16 | 25.038 | -53.859 | 101.198 | 1.00 | 0.00 | O |
| ATOM | 1072 | C4'  | G B | 16 | 23.726 | -53.647 | 99.138  | 1.00 | 0.00 | C |
| ATOM | 1073 | O4'  | G B | 16 | 22.751 | -54.709 | 99.385  | 1.00 | 0.00 | O |
| ATOM | 1074 | C5'  | G B | 16 | 23.798 | -53.393 | 97.651  | 1.00 | 0.00 | C |
| ATOM | 1075 | O5'  | G B | 16 | 24.649 | -54.385 | 97.024  | 1.00 | 0.00 | O |
| ATOM | 1076 | O1P  | G B | 16 | 26.605 | -53.036 | 96.196  | 1.00 | 0.00 | O |
| ATOM | 1077 | O2P  | G B | 16 | 25.971 | -55.168 | 95.037  | 1.00 | 0.00 | O |
| ATOM | 1078 | P    | G B | 16 | 25.534 | -53.954 | 95.769  | 1.00 | 0.00 | P |
| ATOM | 1079 | H1   | G B | 16 | 19.450 | -60.541 | 99.431  | 1.00 | 0.00 | H |
| ATOM | 1080 | H8   | G B | 16 | 24.064 | -56.737 | 97.000  | 1.00 | 0.00 | H |
| ATOM | 1081 | H1'  | G B | 16 | 23.149 | -56.159 | 100.754 | 1.00 | 0.00 | H |
| ATOM | 1082 | H21  | G B | 16 | 18.969 | -59.936 | 101.483 | 1.00 | 0.00 | H |

|      |      |      |     |    |        |         |         |      |      |   |
|------|------|------|-----|----|--------|---------|---------|------|------|---|
| ATOM | 1083 | H3'  | G B | 16 | 25.890 | -53.726 | 99.326  | 1.00 | 0.00 | H |
| ATOM | 1084 | H22  | G B | 16 | 19.782 | -58.569 | 102.295 | 1.00 | 0.00 | H |
| ATOM | 1085 | H4'  | G B | 16 | 23.464 | -52.707 | 99.624  | 1.00 | 0.00 | H |
| ATOM | 1086 | H2'1 | G B | 16 | 25.311 | -55.953 | 98.637  | 1.00 | 0.00 | H |
| ATOM | 1087 | H2'2 | G B | 16 | 25.490 | -56.187 | 100.371 | 1.00 | 0.00 | H |
| ATOM | 1088 | H5'1 | G B | 16 | 22.795 | -53.448 | 97.229  | 1.00 | 0.00 | H |
| ATOM | 1089 | H5'2 | G B | 16 | 24.205 | -52.396 | 97.478  | 1.00 | 0.00 | H |
| ATOM | 1090 | C1'  | G B | 17 | 23.458 | -58.570 | 103.904 | 1.00 | 0.00 | C |
| ATOM | 1091 | N1   | G B | 17 | 21.897 | -62.339 | 100.838 | 1.00 | 0.00 | N |
| ATOM | 1092 | C2   | G B | 17 | 21.467 | -61.989 | 102.107 | 1.00 | 0.00 | C |
| ATOM | 1093 | N2   | G B | 17 | 20.492 | -62.744 | 102.627 | 1.00 | 0.00 | N |
| ATOM | 1094 | N3   | G B | 17 | 21.967 | -60.967 | 102.797 | 1.00 | 0.00 | N |
| ATOM | 1095 | C4   | G B | 17 | 22.950 | -60.318 | 102.120 | 1.00 | 0.00 | C |
| ATOM | 1096 | C5   | G B | 17 | 23.447 | -60.596 | 100.859 | 1.00 | 0.00 | C |
| ATOM | 1097 | C6   | G B | 17 | 22.913 | -61.678 | 100.122 | 1.00 | 0.00 | C |
| ATOM | 1098 | O6   | G B | 17 | 23.219 | -62.079 | 98.999  | 1.00 | 0.00 | O |
| ATOM | 1099 | N7   | G B | 17 | 24.456 | -59.691 | 100.526 | 1.00 | 0.00 | N |
| ATOM | 1100 | C8   | G B | 17 | 24.536 | -58.908 | 101.570 | 1.00 | 0.00 | C |
| ATOM | 1101 | N9   | G B | 17 | 23.654 | -59.226 | 102.582 | 1.00 | 0.00 | N |
| ATOM | 1102 | C2'  | G B | 17 | 24.751 | -58.091 | 104.547 | 1.00 | 0.00 | C |
| ATOM | 1103 | C3'  | G B | 17 | 24.307 | -56.811 | 105.238 | 1.00 | 0.00 | C |
| ATOM | 1104 | O3'  | G B | 17 | 23.756 | -57.133 | 106.513 | 1.00 | 0.00 | O |
| ATOM | 1105 | C4'  | G B | 17 | 23.256 | -56.255 | 104.279 | 1.00 | 0.00 | C |
| ATOM | 1106 | O4'  | G B | 17 | 22.625 | -57.444 | 103.707 | 1.00 | 0.00 | O |
| ATOM | 1107 | C5'  | G B | 17 | 23.767 | -55.390 | 103.151 | 1.00 | 0.00 | C |
| ATOM | 1108 | O5'  | G B | 17 | 25.040 | -55.899 | 102.681 | 1.00 | 0.00 | O |
| ATOM | 1109 | O1P  | G B | 17 | 26.660 | -54.074 | 103.295 | 1.00 | 0.00 | O |
| ATOM | 1110 | O2P  | G B | 17 | 27.149 | -55.582 | 101.351 | 1.00 | 0.00 | O |
| ATOM | 1111 | P    | G B | 17 | 26.138 | -54.863 | 102.164 | 1.00 | 0.00 | P |
| ATOM | 1112 | H1   | G B | 17 | 21.439 | -63.145 | 100.386 | 1.00 | 0.00 | H |
| ATOM | 1113 | H8   | G B | 17 | 25.238 | -58.078 | 101.637 | 1.00 | 0.00 | H |
| ATOM | 1114 | H1'  | G B | 17 | 22.932 | -59.267 | 104.555 | 1.00 | 0.00 | H |
| ATOM | 1115 | H21  | G B | 17 | 20.107 | -63.532 | 102.086 | 1.00 | 0.00 | H |
| ATOM | 1116 | H3'  | G B | 17 | 25.131 | -56.109 | 105.368 | 1.00 | 0.00 | H |
| ATOM | 1117 | H22  | G B | 17 | 20.129 | -62.538 | 103.569 | 1.00 | 0.00 | H |
| ATOM | 1118 | H4'  | G B | 17 | 22.570 | -55.654 | 104.874 | 1.00 | 0.00 | H |
| ATOM | 1119 | H2'1 | G B | 17 | 25.531 | -57.894 | 103.812 | 1.00 | 0.00 | H |
| ATOM | 1120 | H2'2 | G B | 17 | 25.149 | -58.810 | 105.263 | 1.00 | 0.00 | H |
| ATOM | 1121 | H5'1 | G B | 17 | 23.043 | -55.399 | 102.336 | 1.00 | 0.00 | H |
| ATOM | 1122 | H5'2 | G B | 17 | 23.889 | -54.368 | 103.510 | 1.00 | 0.00 | H |
| ATOM | 1123 | C1'  | C B | 18 | 22.819 | -62.715 | 106.540 | 1.00 | 0.00 | C |
| ATOM | 1124 | N1   | C B | 18 | 23.653 | -62.722 | 105.306 | 1.00 | 0.00 | N |
| ATOM | 1125 | C2   | C B | 18 | 23.377 | -63.688 | 104.340 | 1.00 | 0.00 | C |
| ATOM | 1126 | O2   | C B | 18 | 22.460 | -64.493 | 104.544 | 1.00 | 0.00 | O |
| ATOM | 1127 | N3   | C B | 18 | 24.125 | -63.712 | 103.211 | 1.00 | 0.00 | N |
| ATOM | 1128 | C4   | C B | 18 | 25.112 | -62.826 | 103.019 | 1.00 | 0.00 | C |
| ATOM | 1129 | N4   | C B | 18 | 25.809 | -62.895 | 101.894 | 1.00 | 0.00 | N |
| ATOM | 1130 | C5   | C B | 18 | 25.417 | -61.826 | 103.996 | 1.00 | 0.00 | C |
| ATOM | 1131 | C6   | C B | 18 | 24.651 | -61.818 | 105.124 | 1.00 | 0.00 | C |
| ATOM | 1132 | C2'  | C B | 18 | 23.599 | -62.382 | 107.805 | 1.00 | 0.00 | C |
| ATOM | 1133 | C3'  | C B | 18 | 22.581 | -61.581 | 108.603 | 1.00 | 0.00 | C |
| ATOM | 1134 | O3'  | C B | 18 | 21.738 | -62.480 | 109.321 | 1.00 | 0.00 | O |
| ATOM | 1135 | C4'  | C B | 18 | 21.822 | -60.820 | 107.519 | 1.00 | 0.00 | C |
| ATOM | 1136 | O4'  | C B | 18 | 21.815 | -61.732 | 106.374 | 1.00 | 0.00 | O |

|      |      |      |   |   |    |        |         |         |      |      |   |
|------|------|------|---|---|----|--------|---------|---------|------|------|---|
| ATOM | 1137 | C5'  | C | B | 18 | 22.416 | -59.501 | 107.082 | 1.00 | 0.00 | C |
| ATOM | 1138 | O5'  | C | B | 18 | 23.864 | -59.592 | 107.085 | 1.00 | 0.00 | O |
| ATOM | 1139 | O1P  | C | B | 18 | 24.545 | -57.994 | 108.906 | 1.00 | 0.00 | O |
| ATOM | 1140 | O2P  | C | B | 18 | 26.111 | -58.469 | 107.004 | 1.00 | 0.00 | O |
| ATOM | 1141 | P    | C | B | 18 | 24.713 | -58.300 | 107.471 | 1.00 | 0.00 | P |
| ATOM | 1142 | H5   | C | B | 18 | 26.221 | -61.106 | 103.846 | 1.00 | 0.00 | H |
| ATOM | 1143 | H6   | C | B | 18 | 24.844 | -61.073 | 105.894 | 1.00 | 0.00 | H |
| ATOM | 1144 | H1'  | C | B | 18 | 22.330 | -63.684 | 106.626 | 1.00 | 0.00 | H |
| ATOM | 1145 | H3'  | C | B | 18 | 23.059 | -60.896 | 109.303 | 1.00 | 0.00 | H |
| ATOM | 1146 | H4'  | C | B | 18 | 20.825 | -60.620 | 107.910 | 1.00 | 0.00 | H |
| ATOM | 1147 | H41  | C | B | 18 | 26.573 | -62.225 | 101.721 | 1.00 | 0.00 | H |
| ATOM | 1148 | H42  | C | B | 18 | 25.587 | -63.616 | 101.194 | 1.00 | 0.00 | H |
| ATOM | 1149 | H2'1 | C | B | 18 | 24.491 | -61.793 | 107.598 | 1.00 | 0.00 | H |
| ATOM | 1150 | H2'2 | C | B | 18 | 23.913 | -63.276 | 108.344 | 1.00 | 0.00 | H |
| ATOM | 1151 | H5'1 | C | B | 18 | 22.065 | -59.264 | 106.078 | 1.00 | 0.00 | H |
| ATOM | 1152 | H5'2 | C | B | 18 | 22.096 | -58.720 | 107.769 | 1.00 | 0.00 | H |
| ATOM | 1153 | C1'  | C | B | 19 | 22.572 | -67.627 | 107.112 | 1.00 | 0.00 | C |
| ATOM | 1154 | N1   | C | B | 19 | 23.747 | -67.001 | 106.447 | 1.00 | 0.00 | N |
| ATOM | 1155 | C2   | C | B | 19 | 24.135 | -67.497 | 105.204 | 1.00 | 0.00 | C |
| ATOM | 1156 | O2   | C | B | 19 | 23.492 | -68.430 | 104.706 | 1.00 | 0.00 | O |
| ATOM | 1157 | N3   | C | B | 19 | 25.203 | -66.940 | 104.583 | 1.00 | 0.00 | N |
| ATOM | 1158 | C4   | C | B | 19 | 25.878 | -65.930 | 105.149 | 1.00 | 0.00 | C |
| ATOM | 1159 | N4   | C | B | 19 | 26.912 | -65.422 | 104.498 | 1.00 | 0.00 | N |
| ATOM | 1160 | C5   | C | B | 19 | 25.502 | -65.404 | 106.425 | 1.00 | 0.00 | C |
| ATOM | 1161 | C6   | C | B | 19 | 24.425 | -65.978 | 107.031 | 1.00 | 0.00 | C |
| ATOM | 1162 | C2'  | C | B | 19 | 22.718 | -67.755 | 108.621 | 1.00 | 0.00 | C |
| ATOM | 1163 | C3'  | C | B | 19 | 21.293 | -67.514 | 109.098 | 1.00 | 0.00 | C |
| ATOM | 1164 | O3'  | C | B | 19 | 20.564 | -68.737 | 109.034 | 1.00 | 0.00 | O |
| ATOM | 1165 | C4'  | C | B | 19 | 20.773 | -66.478 | 108.104 | 1.00 | 0.00 | C |
| ATOM | 1166 | O4'  | C | B | 19 | 21.445 | -66.814 | 106.848 | 1.00 | 0.00 | O |
| ATOM | 1167 | C5'  | C | B | 19 | 21.058 | -65.030 | 108.431 | 1.00 | 0.00 | C |
| ATOM | 1168 | O5'  | C | B | 19 | 22.367 | -64.915 | 109.045 | 1.00 | 0.00 | O |
| ATOM | 1169 | O1P  | C | B | 19 | 21.846 | -64.158 | 111.388 | 1.00 | 0.00 | O |
| ATOM | 1170 | O2P  | C | B | 19 | 24.047 | -63.567 | 110.338 | 1.00 | 0.00 | O |
| ATOM | 1171 | P    | C | B | 19 | 22.593 | -63.804 | 110.165 | 1.00 | 0.00 | P |
| ATOM | 1172 | H5   | C | B | 19 | 26.050 | -64.585 | 106.891 | 1.00 | 0.00 | H |
| ATOM | 1173 | H6   | C | B | 19 | 24.100 | -65.609 | 108.004 | 1.00 | 0.00 | H |
| ATOM | 1174 | H1'  | C | B | 19 | 22.399 | -68.600 | 106.651 | 1.00 | 0.00 | H |
| ATOM | 1175 | H3'  | C | B | 19 | 21.264 | -67.129 | 110.118 | 1.00 | 0.00 | H |
| ATOM | 1176 | H4'  | C | B | 19 | 19.691 | -66.601 | 108.055 | 1.00 | 0.00 | H |
| ATOM | 1177 | H41  | C | B | 19 | 27.450 | -64.645 | 104.908 | 1.00 | 0.00 | H |
| ATOM | 1178 | H42  | C | B | 19 | 27.181 | -65.805 | 103.578 | 1.00 | 0.00 | H |
| ATOM | 1179 | H2'1 | C | B | 19 | 23.404 | -67.019 | 109.036 | 1.00 | 0.00 | H |
| ATOM | 1180 | H2'2 | C | B | 19 | 23.074 | -68.741 | 108.920 | 1.00 | 0.00 | H |
| ATOM | 1181 | H5'1 | C | B | 19 | 21.027 | -64.444 | 107.514 | 1.00 | 0.00 | H |
| ATOM | 1182 | H5'2 | C | B | 19 | 20.296 | -64.663 | 109.117 | 1.00 | 0.00 | H |
| ATOM | 1183 | C1'  | T | B | 20 | 23.613 | -72.311 | 105.897 | 1.00 | 0.00 | C |
| ATOM | 1184 | N1   | T | B | 20 | 24.708 | -71.316 | 106.047 | 1.00 | 0.00 | N |
| ATOM | 1185 | C2   | T | B | 20 | 25.612 | -71.214 | 105.009 | 1.00 | 0.00 | C |
| ATOM | 1186 | O2   | T | B | 20 | 25.542 | -71.897 | 104.002 | 1.00 | 0.00 | O |
| ATOM | 1187 | N3   | T | B | 20 | 26.612 | -70.277 | 105.190 | 1.00 | 0.00 | N |
| ATOM | 1188 | C4   | T | B | 20 | 26.783 | -69.459 | 106.285 | 1.00 | 0.00 | C |
| ATOM | 1189 | O4   | T | B | 20 | 27.723 | -68.655 | 106.334 | 1.00 | 0.00 | O |
| ATOM | 1190 | C5   | T | B | 20 | 25.790 | -69.637 | 107.316 | 1.00 | 0.00 | C |

|      |      |      |     |    |        |         |         |      |      |   |
|------|------|------|-----|----|--------|---------|---------|------|------|---|
| ATOM | 1191 | C6   | T B | 20 | 24.801 | -70.540 | 107.176 | 1.00 | 0.00 | C |
| ATOM | 1192 | C7   | T B | 20 | 25.937 | -68.765 | 108.527 | 1.00 | 0.00 | C |
| ATOM | 1193 | C2'  | T B | 20 | 23.254 | -73.027 | 107.194 | 1.00 | 0.00 | C |
| ATOM | 1194 | C3'  | T B | 20 | 21.749 | -73.197 | 107.055 | 1.00 | 0.00 | C |
| ATOM | 1195 | O3'  | T B | 20 | 21.478 | -74.374 | 106.295 | 1.00 | 0.00 | O |
| ATOM | 1196 | C4'  | T B | 20 | 21.329 | -71.926 | 106.322 | 1.00 | 0.00 | C |
| ATOM | 1197 | O4'  | T B | 20 | 22.463 | -71.624 | 105.447 | 1.00 | 0.00 | O |
| ATOM | 1198 | C5'  | T B | 20 | 21.046 | -70.716 | 107.182 | 1.00 | 0.00 | C |
| ATOM | 1199 | O5'  | T B | 20 | 21.966 | -70.687 | 108.303 | 1.00 | 0.00 | O |
| ATOM | 1200 | O1P  | T B | 20 | 20.467 | -71.037 | 110.294 | 1.00 | 0.00 | O |
| ATOM | 1201 | O2P  | T B | 20 | 22.621 | -69.775 | 110.550 | 1.00 | 0.00 | O |
| ATOM | 1202 | P    | T B | 20 | 21.454 | -70.113 | 109.699 | 1.00 | 0.00 | P |
| ATOM | 1203 | H3   | T B | 20 | 27.299 | -70.181 | 104.430 | 1.00 | 0.00 | H |
| ATOM | 1204 | H6   | T B | 20 | 24.062 | -70.657 | 107.968 | 1.00 | 0.00 | H |
| ATOM | 1205 | H1'  | T B | 20 | 23.902 | -73.024 | 105.125 | 1.00 | 0.00 | H |
| ATOM | 1206 | H3'  | T B | 20 | 21.257 | -73.274 | 108.024 | 1.00 | 0.00 | H |
| ATOM | 1207 | H4'  | T B | 20 | 20.417 | -72.163 | 105.772 | 1.00 | 0.00 | H |
| ATOM | 1208 | H3T  | T B | 20 | 21.901 | -75.173 | 106.616 | 1.00 | 0.00 | H |
| ATOM | 1209 | H71  | T B | 20 | 26.165 | -69.382 | 109.396 | 1.00 | 0.00 | H |
| ATOM | 1210 | H72  | T B | 20 | 26.747 | -68.052 | 108.366 | 1.00 | 0.00 | H |
| ATOM | 1211 | H73  | T B | 20 | 25.007 | -68.222 | 108.701 | 1.00 | 0.00 | H |
| ATOM | 1212 | H2'1 | T B | 20 | 23.507 | -72.440 | 108.074 | 1.00 | 0.00 | H |
| ATOM | 1213 | H2'2 | T B | 20 | 23.755 | -73.991 | 107.286 | 1.00 | 0.00 | H |
| ATOM | 1214 | H5'1 | T B | 20 | 21.166 | -69.814 | 106.582 | 1.00 | 0.00 | H |
| ATOM | 1215 | H5'2 | T B | 20 | 20.022 | -70.770 | 107.547 | 1.00 | 0.00 | H |
| TER  |      |      |     |    |        |         |         |      |      |   |
| ATOM | 1    | C1'  | A A | 1  | -7.035 | -71.996 | 115.829 | 1.00 | 0.00 | C |
| ATOM | 2    | N1   | A A | 1  | -6.667 | -68.878 | 119.888 | 1.00 | 0.00 | N |
| ATOM | 3    | C2   | A A | 1  | -7.704 | -69.459 | 119.293 | 1.00 | 0.00 | C |
| ATOM | 4    | N3   | A A | 1  | -7.729 | -70.257 | 118.247 | 1.00 | 0.00 | N |
| ATOM | 5    | C4   | A A | 1  | -6.483 | -70.451 | 117.780 | 1.00 | 0.00 | C |
| ATOM | 6    | C5   | A A | 1  | -5.319 | -69.930 | 118.272 | 1.00 | 0.00 | C |
| ATOM | 7    | C6   | A A | 1  | -5.436 | -69.090 | 119.400 | 1.00 | 0.00 | C |
| ATOM | 8    | N6   | A A | 1  | -4.380 | -68.507 | 119.993 | 1.00 | 0.00 | N |
| ATOM | 9    | N7   | A A | 1  | -4.229 | -70.351 | 117.530 | 1.00 | 0.00 | N |
| ATOM | 10   | C8   | A A | 1  | -4.753 | -71.109 | 116.612 | 1.00 | 0.00 | C |
| ATOM | 11   | N9   | A A | 1  | -6.116 | -71.218 | 116.700 | 1.00 | 0.00 | N |
| ATOM | 12   | C2'  | A A | 1  | -6.641 | -71.987 | 114.359 | 1.00 | 0.00 | C |
| ATOM | 13   | C3'  | A A | 1  | -7.037 | -73.388 | 113.917 | 1.00 | 0.00 | C |
| ATOM | 14   | O3'  | A A | 1  | -8.422 | -73.399 | 113.578 | 1.00 | 0.00 | O |
| ATOM | 15   | C4'  | A A | 1  | -6.740 | -74.233 | 115.155 | 1.00 | 0.00 | C |
| ATOM | 16   | O4'  | A A | 1  | -7.024 | -73.338 | 116.278 | 1.00 | 0.00 | O |
| ATOM | 17   | C5'  | A A | 1  | -5.326 | -74.747 | 115.293 | 1.00 | 0.00 | C |
| ATOM | 18   | O5'  | A A | 1  | -4.392 | -73.753 | 114.800 | 1.00 | 0.00 | O |
| ATOM | 19   | H2   | A A | 1  | -8.677 | -69.243 | 119.736 | 1.00 | 0.00 | H |
| ATOM | 20   | H8   | A A | 1  | -4.163 | -71.611 | 115.844 | 1.00 | 0.00 | H |
| ATOM | 21   | H1'  | A A | 1  | -8.045 | -71.607 | 115.965 | 1.00 | 0.00 | H |
| ATOM | 22   | H3'  | A A | 1  | -6.453 | -73.727 | 113.060 | 1.00 | 0.00 | H |
| ATOM | 23   | H4'  | A A | 1  | -7.406 | -75.093 | 115.118 | 1.00 | 0.00 | H |
| ATOM | 24   | H61  | A A | 1  | -4.518 | -67.905 | 120.813 | 1.00 | 0.00 | H |
| ATOM | 25   | H62  | A A | 1  | -3.431 | -68.666 | 119.622 | 1.00 | 0.00 | H |
| ATOM | 26   | H5T  | A A | 1  | -3.589 | -74.050 | 114.366 | 1.00 | 0.00 | H |
| ATOM | 27   | H2'1 | A A | 1  | -5.575 | -71.814 | 114.217 | 1.00 | 0.00 | H |
| ATOM | 28   | H2'2 | A A | 1  | -7.177 | -71.228 | 113.791 | 1.00 | 0.00 | H |

|      |    |      |     |   |         |         |         |      |      |   |
|------|----|------|-----|---|---------|---------|---------|------|------|---|
| ATOM | 29 | H5'1 | A A | 1 | -5.122  | -74.955 | 116.343 | 1.00 | 0.00 | H |
| ATOM | 30 | H5'2 | A A | 1 | -5.222  | -75.666 | 114.718 | 1.00 | 0.00 | H |
| ATOM | 31 | C1'  | G A | 2 | -10.633 | -68.575 | 115.700 | 1.00 | 0.00 | C |
| ATOM | 32 | N1   | G A | 2 | -7.370  | -65.832 | 118.499 | 1.00 | 0.00 | N |
| ATOM | 33 | C2   | G A | 2 | -8.735  | -65.994 | 118.636 | 1.00 | 0.00 | C |
| ATOM | 34 | N2   | G A | 2 | -9.308  | -65.340 | 119.652 | 1.00 | 0.00 | N |
| ATOM | 35 | N3   | G A | 2 | -9.470  | -66.752 | 117.824 | 1.00 | 0.00 | N |
| ATOM | 36 | C4   | G A | 2 | -8.727  | -67.336 | 116.848 | 1.00 | 0.00 | C |
| ATOM | 37 | C5   | G A | 2 | -7.362  | -67.229 | 116.633 | 1.00 | 0.00 | C |
| ATOM | 38 | C6   | G A | 2 | -6.581  | -66.427 | 117.498 | 1.00 | 0.00 | C |
| ATOM | 39 | O6   | G A | 2 | -5.369  | -66.210 | 117.472 | 1.00 | 0.00 | O |
| ATOM | 40 | N7   | G A | 2 | -6.988  | -67.986 | 115.521 | 1.00 | 0.00 | N |
| ATOM | 41 | C8   | G A | 2 | -8.109  | -68.519 | 115.109 | 1.00 | 0.00 | C |
| ATOM | 42 | N9   | G A | 2 | -9.211  | -68.171 | 115.864 | 1.00 | 0.00 | N |
| ATOM | 43 | C2'  | G A | 2 | -11.078 | -68.678 | 114.247 | 1.00 | 0.00 | C |
| ATOM | 44 | C3'  | G A | 2 | -12.039 | -69.854 | 114.291 | 1.00 | 0.00 | C |
| ATOM | 45 | O3'  | G A | 2 | -13.329 | -69.389 | 114.685 | 1.00 | 0.00 | O |
| ATOM | 46 | C4'  | G A | 2 | -11.409 | -70.768 | 115.341 | 1.00 | 0.00 | C |
| ATOM | 47 | O4'  | G A | 2 | -10.791 | -69.849 | 116.295 | 1.00 | 0.00 | O |
| ATOM | 48 | C5'  | G A | 2 | -10.359 | -71.734 | 114.846 | 1.00 | 0.00 | C |
| ATOM | 49 | O5'  | G A | 2 | -9.569  | -71.108 | 113.804 | 1.00 | 0.00 | O |
| ATOM | 50 | O1P  | G A | 2 | -10.138 | -72.455 | 111.756 | 1.00 | 0.00 | O |
| ATOM | 51 | O2P  | G A | 2 | -7.918  | -71.298 | 111.920 | 1.00 | 0.00 | O |
| ATOM | 52 | P    | G A | 2 | -9.021  | -72.011 | 112.611 | 1.00 | 0.00 | P |
| ATOM | 53 | H1   | G A | 2 | -6.893  | -65.225 | 119.183 | 1.00 | 0.00 | H |
| ATOM | 54 | H8   | G A | 2 | -8.170  | -69.180 | 114.245 | 1.00 | 0.00 | H |
| ATOM | 55 | H1'  | G A | 2 | -11.254 | -67.868 | 116.249 | 1.00 | 0.00 | H |
| ATOM | 56 | H21  | G A | 2 | -8.733  | -64.756 | 120.277 | 1.00 | 0.00 | H |
| ATOM | 57 | H3'  | G A | 2 | -12.115 | -70.357 | 113.327 | 1.00 | 0.00 | H |
| ATOM | 58 | H22  | G A | 2 | -10.323 | -65.419 | 119.806 | 1.00 | 0.00 | H |
| ATOM | 59 | H4'  | G A | 2 | -12.219 | -71.353 | 115.778 | 1.00 | 0.00 | H |
| ATOM | 60 | H2'1 | G A | 2 | -10.243 | -68.874 | 113.572 | 1.00 | 0.00 | H |
| ATOM | 61 | H2'2 | G A | 2 | -11.574 | -67.771 | 113.901 | 1.00 | 0.00 | H |
| ATOM | 62 | H5'1 | G A | 2 | -9.713  | -72.017 | 115.677 | 1.00 | 0.00 | H |
| ATOM | 63 | H5'2 | G A | 2 | -10.848 | -72.625 | 114.454 | 1.00 | 0.00 | H |
| ATOM | 64 | C1'  | G A | 3 | -12.632 | -64.171 | 116.763 | 1.00 | 0.00 | C |
| ATOM | 65 | N1   | G A | 3 | -7.767  | -62.697 | 117.177 | 1.00 | 0.00 | N |
| ATOM | 66 | C2   | G A | 3 | -8.853  | -62.401 | 117.977 | 1.00 | 0.00 | C |
| ATOM | 67 | N2   | G A | 3 | -8.614  | -61.604 | 119.027 | 1.00 | 0.00 | N |
| ATOM | 68 | N3   | G A | 3 | -10.081 | -62.862 | 117.750 | 1.00 | 0.00 | N |
| ATOM | 69 | C4   | G A | 3 | -10.142 | -63.647 | 116.643 | 1.00 | 0.00 | C |
| ATOM | 70 | C5   | G A | 3 | -9.111  | -63.994 | 115.784 | 1.00 | 0.00 | C |
| ATOM | 71 | C6   | G A | 3 | -7.806  | -63.507 | 116.028 | 1.00 | 0.00 | C |
| ATOM | 72 | O6   | G A | 3 | -6.772  | -63.702 | 115.388 | 1.00 | 0.00 | O |
| ATOM | 73 | N7   | G A | 3 | -9.591  | -64.817 | 114.764 | 1.00 | 0.00 | N |
| ATOM | 74 | C8   | G A | 3 | -10.864 | -64.945 | 115.031 | 1.00 | 0.00 | C |
| ATOM | 75 | N9   | G A | 3 | -11.275 | -64.262 | 116.157 | 1.00 | 0.00 | N |
| ATOM | 76 | C2'  | G A | 3 | -13.757 | -64.103 | 115.740 | 1.00 | 0.00 | C |
| ATOM | 77 | C3'  | G A | 3 | -14.858 | -64.894 | 116.425 | 1.00 | 0.00 | C |
| ATOM | 78 | O3'  | G A | 3 | -15.570 | -64.034 | 117.312 | 1.00 | 0.00 | O |
| ATOM | 79 | C4'  | G A | 3 | -14.084 | -65.978 | 117.173 | 1.00 | 0.00 | C |
| ATOM | 80 | O4'  | G A | 3 | -12.829 | -65.328 | 117.553 | 1.00 | 0.00 | O |
| ATOM | 81 | C5'  | G A | 3 | -13.761 | -67.230 | 116.391 | 1.00 | 0.00 | C |
| ATOM | 82 | O5'  | G A | 3 | -13.465 | -66.888 | 115.015 | 1.00 | 0.00 | O |

|      |     |      |     |   |         |         |         |      |      |   |
|------|-----|------|-----|---|---------|---------|---------|------|------|---|
| ATOM | 83  | O1P  | G A | 3 | -15.356 | -67.945 | 113.733 | 1.00 | 0.00 | O |
| ATOM | 84  | O2P  | G A | 3 | -13.134 | -67.589 | 112.625 | 1.00 | 0.00 | O |
| ATOM | 85  | P    | G A | 3 | -13.888 | -67.907 | 113.862 | 1.00 | 0.00 | P |
| ATOM | 86  | H1   | G A | 3 | -6.856  | -62.292 | 117.444 | 1.00 | 0.00 | H |
| ATOM | 87  | H8   | G A | 3 | -11.542 | -65.537 | 114.419 | 1.00 | 0.00 | H |
| ATOM | 88  | H1'  | G A | 3 | -12.652 | -63.305 | 117.425 | 1.00 | 0.00 | H |
| ATOM | 89  | H21  | G A | 3 | -7.661  | -61.253 | 119.199 | 1.00 | 0.00 | H |
| ATOM | 90  | H3'  | G A | 3 | -15.555 | -65.330 | 115.709 | 1.00 | 0.00 | H |
| ATOM | 91  | H22  | G A | 3 | -9.382  | -61.345 | 119.660 | 1.00 | 0.00 | H |
| ATOM | 92  | H4'  | G A | 3 | -14.690 | -66.268 | 118.030 | 1.00 | 0.00 | H |
| ATOM | 93  | H2'1 | G A | 3 | -13.478 | -64.554 | 114.788 | 1.00 | 0.00 | H |
| ATOM | 94  | H2'2 | G A | 3 | -14.071 | -63.078 | 115.538 | 1.00 | 0.00 | H |
| ATOM | 95  | H5'1 | G A | 3 | -12.899 | -67.721 | 116.843 | 1.00 | 0.00 | H |
| ATOM | 96  | H5'2 | G A | 3 | -14.616 | -67.905 | 116.429 | 1.00 | 0.00 | H |
| ATOM | 97  | C1'  | C A | 4 | -12.433 | -59.366 | 117.951 | 1.00 | 0.00 | C |
| ATOM | 98  | N1   | C A | 4 | -11.659 | -59.892 | 116.792 | 1.00 | 0.00 | N |
| ATOM | 99  | C2   | C A | 4 | -10.300 | -59.593 | 116.728 | 1.00 | 0.00 | C |
| ATOM | 100 | O2   | C A | 4 | -9.794  | -58.909 | 117.627 | 1.00 | 0.00 | O |
| ATOM | 101 | N3   | C A | 4 | -9.578  | -60.061 | 115.681 | 1.00 | 0.00 | N |
| ATOM | 102 | C4   | C A | 4 | -10.154 | -60.797 | 114.722 | 1.00 | 0.00 | C |
| ATOM | 103 | N4   | C A | 4 | -9.399  | -61.233 | 113.723 | 1.00 | 0.00 | N |
| ATOM | 104 | C5   | C A | 4 | -11.549 | -61.117 | 114.763 | 1.00 | 0.00 | C |
| ATOM | 105 | C6   | C A | 4 | -12.256 | -60.639 | 115.826 | 1.00 | 0.00 | C |
| ATOM | 106 | C2'  | C A | 4 | -13.841 | -58.915 | 117.594 | 1.00 | 0.00 | C |
| ATOM | 107 | C3'  | C A | 4 | -14.626 | -59.310 | 118.836 | 1.00 | 0.00 | C |
| ATOM | 108 | O3'  | C A | 4 | -14.509 | -58.275 | 119.811 | 1.00 | 0.00 | O |
| ATOM | 109 | C4'  | C A | 4 | -13.938 | -60.599 | 119.277 | 1.00 | 0.00 | C |
| ATOM | 110 | O4'  | C A | 4 | -12.535 | -60.406 | 118.906 | 1.00 | 0.00 | O |
| ATOM | 111 | C5'  | C A | 4 | -14.433 | -61.876 | 118.640 | 1.00 | 0.00 | C |
| ATOM | 112 | O5'  | C A | 4 | -14.785 | -61.629 | 117.255 | 1.00 | 0.00 | O |
| ATOM | 113 | O1P  | C A | 4 | -17.276 | -61.983 | 117.213 | 1.00 | 0.00 | O |
| ATOM | 114 | O2P  | C A | 4 | -15.920 | -62.365 | 115.137 | 1.00 | 0.00 | O |
| ATOM | 115 | P    | C A | 4 | -16.004 | -62.435 | 116.617 | 1.00 | 0.00 | P |
| ATOM | 116 | H5   | C A | 4 | -12.023 | -61.713 | 113.981 | 1.00 | 0.00 | H |
| ATOM | 117 | H6   | C A | 4 | -13.320 | -60.859 | 115.904 | 1.00 | 0.00 | H |
| ATOM | 118 | H1'  | C A | 4 | -11.864 | -58.554 | 118.400 | 1.00 | 0.00 | H |
| ATOM | 119 | H3'  | C A | 4 | -15.679 | -59.480 | 118.616 | 1.00 | 0.00 | H |
| ATOM | 120 | H4'  | C A | 4 | -14.086 | -60.685 | 120.354 | 1.00 | 0.00 | H |
| ATOM | 121 | H41  | C A | 4 | -9.816  | -61.803 | 112.973 | 1.00 | 0.00 | H |
| ATOM | 122 | H42  | C A | 4 | -8.396  | -61.000 | 113.694 | 1.00 | 0.00 | H |
| ATOM | 123 | H2'1 | C A | 4 | -14.226 | -59.418 | 116.707 | 1.00 | 0.00 | H |
| ATOM | 124 | H2'2 | C A | 4 | -13.898 | -57.841 | 117.412 | 1.00 | 0.00 | H |
| ATOM | 125 | H5'1 | C A | 4 | -13.650 | -62.632 | 118.692 | 1.00 | 0.00 | H |
| ATOM | 126 | H5'2 | C A | 4 | -15.309 | -62.231 | 119.184 | 1.00 | 0.00 | H |
| ATOM | 127 | C1'  | C A | 5 | -10.271 | -54.914 | 118.125 | 1.00 | 0.00 | C |
| ATOM | 128 | N1   | C A | 5 | -10.382 | -55.651 | 116.836 | 1.00 | 0.00 | N |
| ATOM | 129 | C2   | C A | 5 | -9.224  | -55.818 | 116.079 | 1.00 | 0.00 | C |
| ATOM | 130 | O2   | C A | 5 | -8.159  | -55.351 | 116.504 | 1.00 | 0.00 | O |
| ATOM | 131 | N3   | C A | 5 | -9.304  | -56.486 | 114.902 | 1.00 | 0.00 | N |
| ATOM | 132 | C4   | C A | 5 | -10.470 | -56.978 | 114.467 | 1.00 | 0.00 | C |
| ATOM | 133 | N4   | C A | 5 | -10.490 | -57.625 | 113.312 | 1.00 | 0.00 | N |
| ATOM | 134 | C5   | C A | 5 | -11.677 | -56.819 | 115.224 | 1.00 | 0.00 | C |
| ATOM | 135 | C6   | C A | 5 | -11.572 | -56.147 | 116.407 | 1.00 | 0.00 | C |
| ATOM | 136 | C2'  | C A | 5 | -11.464 | -54.018 | 118.424 | 1.00 | 0.00 | C |

|      |     |      |     |   |         |         |         |      |      |   |
|------|-----|------|-----|---|---------|---------|---------|------|------|---|
| ATOM | 137 | C3'  | C A | 5 | -11.586 | -54.147 | 119.934 | 1.00 | 0.00 | C |
| ATOM | 138 | O3'  | C A | 5 | -10.697 | -53.222 | 120.556 | 1.00 | 0.00 | O |
| ATOM | 139 | C4'  | C A | 5 | -11.181 | -55.597 | 120.185 | 1.00 | 0.00 | C |
| ATOM | 140 | O4'  | C A | 5 | -10.174 | -55.874 | 119.162 | 1.00 | 0.00 | O |
| ATOM | 141 | C5'  | C A | 5 | -12.278 | -56.630 | 120.076 | 1.00 | 0.00 | C |
| ATOM | 142 | O5'  | C A | 5 | -13.193 | -56.263 | 119.010 | 1.00 | 0.00 | O |
| ATOM | 143 | O1P  | C A | 5 | -15.339 | -55.772 | 120.228 | 1.00 | 0.00 | O |
| ATOM | 144 | O2P  | C A | 5 | -15.399 | -56.556 | 117.845 | 1.00 | 0.00 | O |
| ATOM | 145 | P    | C A | 5 | -14.739 | -56.611 | 119.173 | 1.00 | 0.00 | P |
| ATOM | 146 | H5   | C A | 5 | -12.630 | -57.214 | 114.873 | 1.00 | 0.00 | H |
| ATOM | 147 | H6   | C A | 5 | -12.462 | -56.004 | 117.020 | 1.00 | 0.00 | H |
| ATOM | 148 | H1'  | C A | 5 | -9.344  | -54.341 | 118.110 | 1.00 | 0.00 | H |
| ATOM | 149 | H3'  | C A | 5 | -12.603 | -53.956 | 120.278 | 1.00 | 0.00 | H |
| ATOM | 150 | H4'  | C A | 5 | -10.782 | -55.643 | 121.200 | 1.00 | 0.00 | H |
| ATOM | 151 | H41  | C A | 5 | -11.374 | -58.015 | 112.955 | 1.00 | 0.00 | H |
| ATOM | 152 | H42  | C A | 5 | -9.621  | -57.737 | 112.768 | 1.00 | 0.00 | H |
| ATOM | 153 | H2'1 | C A | 5 | -12.371 | -54.355 | 117.922 | 1.00 | 0.00 | H |
| ATOM | 154 | H2'2 | C A | 5 | -11.289 | -52.983 | 118.126 | 1.00 | 0.00 | H |
| ATOM | 155 | H5'1 | C A | 5 | -11.835 | -57.603 | 119.862 | 1.00 | 0.00 | H |
| ATOM | 156 | H5'2 | C A | 5 | -12.816 | -56.681 | 121.021 | 1.00 | 0.00 | H |
| ATOM | 157 | C1'  | G A | 6 | -7.130  | -51.431 | 116.534 | 1.00 | 0.00 | C |
| ATOM | 158 | N1   | G A | 6 | -7.628  | -53.826 | 112.058 | 1.00 | 0.00 | N |
| ATOM | 159 | C2   | G A | 6 | -6.496  | -53.322 | 112.674 | 1.00 | 0.00 | C |
| ATOM | 160 | N2   | G A | 6 | -5.346  | -53.473 | 112.007 | 1.00 | 0.00 | N |
| ATOM | 161 | N3   | G A | 6 | -6.513  | -52.714 | 113.859 | 1.00 | 0.00 | N |
| ATOM | 162 | C4   | G A | 6 | -7.764  | -52.643 | 114.385 | 1.00 | 0.00 | C |
| ATOM | 163 | C5   | G A | 6 | -8.948  | -53.114 | 113.843 | 1.00 | 0.00 | C |
| ATOM | 164 | C6   | G A | 6 | -8.931  | -53.762 | 112.587 | 1.00 | 0.00 | C |
| ATOM | 165 | O6   | G A | 6 | -9.867  | -54.242 | 111.948 | 1.00 | 0.00 | O |
| ATOM | 166 | N7   | G A | 6 | -10.014 | -52.840 | 114.701 | 1.00 | 0.00 | N |
| ATOM | 167 | C8   | G A | 6 | -9.457  | -52.230 | 115.714 | 1.00 | 0.00 | C |
| ATOM | 168 | N9   | G A | 6 | -8.091  | -52.071 | 115.595 | 1.00 | 0.00 | N |
| ATOM | 169 | C2'  | G A | 6 | -7.683  | -50.196 | 117.230 | 1.00 | 0.00 | C |
| ATOM | 170 | C3'  | G A | 6 | -7.049  | -50.297 | 118.608 | 1.00 | 0.00 | C |
| ATOM | 171 | O3'  | G A | 6 | -5.744  | -49.726 | 118.567 | 1.00 | 0.00 | O |
| ATOM | 172 | C4'  | G A | 6 | -7.015  | -51.804 | 118.856 | 1.00 | 0.00 | C |
| ATOM | 173 | O4'  | G A | 6 | -6.802  | -52.381 | 117.530 | 1.00 | 0.00 | O |
| ATOM | 174 | C5'  | G A | 6 | -8.259  | -52.414 | 119.456 | 1.00 | 0.00 | C |
| ATOM | 175 | O5'  | G A | 6 | -9.435  | -51.753 | 118.926 | 1.00 | 0.00 | O |
| ATOM | 176 | O1P  | G A | 6 | -10.409 | -50.598 | 120.939 | 1.00 | 0.00 | O |
| ATOM | 177 | O2P  | G A | 6 | -11.901 | -51.285 | 119.041 | 1.00 | 0.00 | O |
| ATOM | 178 | P    | G A | 6 | -10.706 | -51.573 | 119.872 | 1.00 | 0.00 | P |
| ATOM | 179 | H1   | G A | 6 | -7.506  | -54.286 | 111.142 | 1.00 | 0.00 | H |
| ATOM | 180 | H8   | G A | 6 | -10.020 | -51.875 | 116.577 | 1.00 | 0.00 | H |
| ATOM | 181 | H1'  | G A | 6 | -6.219  | -51.195 | 115.982 | 1.00 | 0.00 | H |
| ATOM | 182 | H21  | G A | 6 | -5.339  | -53.946 | 111.093 | 1.00 | 0.00 | H |
| ATOM | 183 | H3'  | G A | 6 | -7.642  | -49.787 | 119.370 | 1.00 | 0.00 | H |
| ATOM | 184 | H22  | G A | 6 | -4.467  | -53.116 | 112.410 | 1.00 | 0.00 | H |
| ATOM | 185 | H4'  | G A | 6 | -6.188  | -51.993 | 119.540 | 1.00 | 0.00 | H |
| ATOM | 186 | H2'1 | G A | 6 | -8.772  | -50.208 | 117.292 | 1.00 | 0.00 | H |
| ATOM | 187 | H2'2 | G A | 6 | -7.394  | -49.273 | 116.727 | 1.00 | 0.00 | H |
| ATOM | 188 | H5'1 | G A | 6 | -8.291  | -53.476 | 119.211 | 1.00 | 0.00 | H |
| ATOM | 189 | H5'2 | G A | 6 | -8.228  | -52.299 | 120.540 | 1.00 | 0.00 | H |
| ATOM | 190 | C1'  | C A | 7 | -4.368  | -49.163 | 113.106 | 1.00 | 0.00 | C |

|      |     |      |     |   |         |         |         |      |      |   |
|------|-----|------|-----|---|---------|---------|---------|------|------|---|
| ATOM | 191 | N1   | C A | 7 | -5.808  | -49.440 | 112.854 | 1.00 | 0.00 | N |
| ATOM | 192 | C2   | C A | 7 | -6.149  | -50.094 | 111.672 | 1.00 | 0.00 | C |
| ATOM | 193 | O2   | C A | 7 | -5.249  | -50.415 | 110.885 | 1.00 | 0.00 | O |
| ATOM | 194 | N3   | C A | 7 | -7.455  | -50.357 | 111.423 | 1.00 | 0.00 | N |
| ATOM | 195 | C4   | C A | 7 | -8.408  | -49.996 | 112.292 | 1.00 | 0.00 | C |
| ATOM | 196 | N4   | C A | 7 | -9.669  | -50.279 | 112.000 | 1.00 | 0.00 | N |
| ATOM | 197 | C5   | C A | 7 | -8.088  | -49.318 | 113.515 | 1.00 | 0.00 | C |
| ATOM | 198 | C6   | C A | 7 | -6.764  | -49.068 | 113.747 | 1.00 | 0.00 | C |
| ATOM | 199 | C2'  | C A | 7 | -4.109  | -47.821 | 113.775 | 1.00 | 0.00 | C |
| ATOM | 200 | C3'  | C A | 7 | -2.929  | -48.140 | 114.681 | 1.00 | 0.00 | C |
| ATOM | 201 | O3'  | C A | 7 | -1.721  | -48.033 | 113.931 | 1.00 | 0.00 | O |
| ATOM | 202 | C4'  | C A | 7 | -3.214  | -49.575 | 115.117 | 1.00 | 0.00 | C |
| ATOM | 203 | O4'  | C A | 7 | -3.878  | -50.180 | 113.961 | 1.00 | 0.00 | O |
| ATOM | 204 | C5'  | C A | 7 | -4.106  | -49.745 | 116.326 | 1.00 | 0.00 | C |
| ATOM | 205 | O5'  | C A | 7 | -5.136  | -48.726 | 116.324 | 1.00 | 0.00 | O |
| ATOM | 206 | O1P  | C A | 7 | -4.582  | -47.333 | 118.346 | 1.00 | 0.00 | O |
| ATOM | 207 | O2P  | C A | 7 | -6.949  | -47.469 | 117.525 | 1.00 | 0.00 | O |
| ATOM | 208 | P    | C A | 7 | -5.644  | -48.146 | 117.719 | 1.00 | 0.00 | P |
| ATOM | 209 | H5   | C A | 7 | -8.859  | -49.015 | 114.223 | 1.00 | 0.00 | H |
| ATOM | 210 | H6   | C A | 7 | -6.470  | -48.561 | 114.666 | 1.00 | 0.00 | H |
| ATOM | 211 | H1'  | C A | 7 | -3.836  | -49.236 | 112.158 | 1.00 | 0.00 | H |
| ATOM | 212 | H3'  | C A | 7 | -2.882  | -47.469 | 115.540 | 1.00 | 0.00 | H |
| ATOM | 213 | H4'  | C A | 7 | -2.253  | -50.034 | 115.345 | 1.00 | 0.00 | H |
| ATOM | 214 | H41  | C A | 7 | -10.420 | -50.015 | 112.653 | 1.00 | 0.00 | H |
| ATOM | 215 | H42  | C A | 7 | -9.899  | -50.764 | 111.121 | 1.00 | 0.00 | H |
| ATOM | 216 | H2'1 | C A | 7 | -4.967  | -47.472 | 114.350 | 1.00 | 0.00 | H |
| ATOM | 217 | H2'2 | C A | 7 | -3.857  | -47.040 | 113.056 | 1.00 | 0.00 | H |
| ATOM | 218 | H5'1 | C A | 7 | -4.564  | -50.735 | 116.297 | 1.00 | 0.00 | H |
| ATOM | 219 | H5'2 | C A | 7 | -3.502  | -49.657 | 117.229 | 1.00 | 0.00 | H |
| ATOM | 220 | C1'  | A A | 8 | -3.177  | -47.886 | 108.474 | 1.00 | 0.00 | C |
| ATOM | 221 | N1   | A A | 8 | -8.171  | -48.671 | 107.585 | 1.00 | 0.00 | N |
| ATOM | 222 | C2   | A A | 8 | -7.076  | -48.995 | 106.904 | 1.00 | 0.00 | C |
| ATOM | 223 | N3   | A A | 8 | -5.813  | -48.763 | 107.192 | 1.00 | 0.00 | N |
| ATOM | 224 | C4   | A A | 8 | -5.717  | -48.095 | 108.357 | 1.00 | 0.00 | C |
| ATOM | 225 | C5   | A A | 8 | -6.736  | -47.691 | 109.172 | 1.00 | 0.00 | C |
| ATOM | 226 | C6   | A A | 8 | -8.043  | -48.007 | 108.744 | 1.00 | 0.00 | C |
| ATOM | 227 | N6   | A A | 8 | -9.143  | -47.674 | 109.440 | 1.00 | 0.00 | N |
| ATOM | 228 | N7   | A A | 8 | -6.254  | -47.030 | 110.288 | 1.00 | 0.00 | N |
| ATOM | 229 | C8   | A A | 8 | -4.963  | -47.046 | 110.125 | 1.00 | 0.00 | C |
| ATOM | 230 | N9   | A A | 8 | -4.562  | -47.678 | 108.976 | 1.00 | 0.00 | N |
| ATOM | 231 | C2'  | A A | 8 | -2.248  | -46.708 | 108.734 | 1.00 | 0.00 | C |
| ATOM | 232 | C3'  | A A | 8 | -0.924  | -47.404 | 109.010 | 1.00 | 0.00 | C |
| ATOM | 233 | O3'  | A A | 8 | -0.277  | -47.683 | 107.772 | 1.00 | 0.00 | O |
| ATOM | 234 | C4'  | A A | 8 | -1.355  | -48.678 | 109.737 | 1.00 | 0.00 | C |
| ATOM | 235 | O4'  | A A | 8 | -2.646  | -49.018 | 109.134 | 1.00 | 0.00 | O |
| ATOM | 236 | C5'  | A A | 8 | -1.532  | -48.568 | 111.233 | 1.00 | 0.00 | C |
| ATOM | 237 | O5'  | A A | 8 | -2.087  | -47.270 | 111.567 | 1.00 | 0.00 | O |
| ATOM | 238 | O1P  | A A | 8 | -0.230  | -46.160 | 112.855 | 1.00 | 0.00 | O |
| ATOM | 239 | O2P  | A A | 8 | -2.617  | -45.512 | 113.282 | 1.00 | 0.00 | O |
| ATOM | 240 | P    | A A | 8 | -1.644  | -46.577 | 112.933 | 1.00 | 0.00 | P |
| ATOM | 241 | H2   | A A | 8 | -7.249  | -49.529 | 105.971 | 1.00 | 0.00 | H |
| ATOM | 242 | H8   | A A | 8 | -4.266  | -46.600 | 110.833 | 1.00 | 0.00 | H |
| ATOM | 243 | H1'  | A A | 8 | -3.232  | -48.113 | 107.410 | 1.00 | 0.00 | H |
| ATOM | 244 | H3'  | A A | 8 | -0.267  | -46.799 | 109.633 | 1.00 | 0.00 | H |



|      |     |      |     |    |         |         |         |      |      |   |
|------|-----|------|-----|----|---------|---------|---------|------|------|---|
| ATOM | 245 | H4'  | A A | 8  | -0.586  | -49.425 | 109.546 | 1.00 | 0.00 | H |
| ATOM | 246 | H61  | A A | 8  | -10.075 | -47.931 | 109.084 | 1.00 | 0.00 | H |
| ATOM | 247 | H62  | A A | 8  | -9.054  | -47.162 | 110.330 | 1.00 | 0.00 | H |
| ATOM | 248 | H2'1 | A A | 8  | -2.567  | -46.110 | 109.586 | 1.00 | 0.00 | H |
| ATOM | 249 | H2'2 | A A | 8  | -2.174  | -46.042 | 107.873 | 1.00 | 0.00 | H |
| ATOM | 250 | H5'1 | A A | 8  | -2.208  | -49.355 | 111.570 | 1.00 | 0.00 | H |
| ATOM | 251 | H5'2 | A A | 8  | -0.566  | -48.691 | 111.718 | 1.00 | 0.00 | H |
| ATOM | 252 | C1'  | C A | 9  | -4.229  | -47.022 | 103.698 | 1.00 | 0.00 | C |
| ATOM | 253 | N1   | C A | 9  | -5.022  | -46.367 | 104.774 | 1.00 | 0.00 | N |
| ATOM | 254 | C2   | C A | 9  | -6.410  | -46.466 | 104.715 | 1.00 | 0.00 | C |
| ATOM | 255 | O2   | C A | 9  | -6.924  | -47.091 | 103.777 | 1.00 | 0.00 | O |
| ATOM | 256 | N3   | C A | 9  | -7.150  | -45.878 | 105.685 | 1.00 | 0.00 | N |
| ATOM | 257 | C4   | C A | 9  | -6.565  | -45.208 | 106.686 | 1.00 | 0.00 | C |
| ATOM | 258 | N4   | C A | 9  | -7.337  | -44.654 | 107.610 | 1.00 | 0.00 | N |
| ATOM | 259 | C5   | C A | 9  | -5.139  | -45.085 | 106.771 | 1.00 | 0.00 | C |
| ATOM | 260 | C6   | C A | 9  | -4.413  | -45.691 | 105.785 | 1.00 | 0.00 | C |
| ATOM | 261 | C2'  | C A | 9  | -3.002  | -46.229 | 103.270 | 1.00 | 0.00 | C |
| ATOM | 262 | C3'  | C A | 9  | -1.997  | -47.334 | 102.973 | 1.00 | 0.00 | C |
| ATOM | 263 | O3'  | C A | 9  | -2.199  | -47.801 | 101.641 | 1.00 | 0.00 | O |
| ATOM | 264 | C4'  | C A | 9  | -2.342  | -48.396 | 104.014 | 1.00 | 0.00 | C |
| ATOM | 265 | O4'  | C A | 9  | -3.791  | -48.276 | 104.189 | 1.00 | 0.00 | O |
| ATOM | 266 | C5'  | C A | 9  | -1.681  | -48.250 | 105.365 | 1.00 | 0.00 | C |
| ATOM | 267 | O5'  | C A | 9  | -1.572  | -46.845 | 105.708 | 1.00 | 0.00 | O |
| ATOM | 268 | O1P  | C A | 9  | 0.912   | -46.439 | 105.719 | 1.00 | 0.00 | O |
| ATOM | 269 | O2P  | C A | 9  | -0.594  | -45.030 | 107.148 | 1.00 | 0.00 | O |
| ATOM | 270 | P    | C A | 9  | -0.306  | -46.357 | 106.547 | 1.00 | 0.00 | P |
| ATOM | 271 | H5   | C A | 9  | -4.658  | -44.536 | 107.582 | 1.00 | 0.00 | H |
| ATOM | 272 | H6   | C A | 9  | -3.325  | -45.632 | 105.811 | 1.00 | 0.00 | H |
| ATOM | 273 | H1'  | C A | 9  | -4.890  | -47.207 | 102.851 | 1.00 | 0.00 | H |
| ATOM | 274 | H3'  | C A | 9  | -0.970  | -46.991 | 103.085 | 1.00 | 0.00 | H |
| ATOM | 275 | H4'  | C A | 9  | -2.041  | -49.357 | 103.599 | 1.00 | 0.00 | H |
| ATOM | 276 | H41  | C A | 9  | -6.912  | -44.136 | 108.393 | 1.00 | 0.00 | H |
| ATOM | 277 | H42  | C A | 9  | -8.362  | -44.741 | 107.545 | 1.00 | 0.00 | H |
| ATOM | 278 | H2'1 | C A | 9  | -2.640  | -45.569 | 104.057 | 1.00 | 0.00 | H |
| ATOM | 279 | H2'2 | C A | 9  | -3.192  | -45.616 | 102.389 | 1.00 | 0.00 | H |
| ATOM | 280 | H5'1 | C A | 9  | -2.279  | -48.767 | 106.116 | 1.00 | 0.00 | H |
| ATOM | 281 | H5'2 | C A | 9  | -0.689  | -48.698 | 105.327 | 1.00 | 0.00 | H |
| ATOM | 282 | C1'  | C A | 10 | -7.221  | -45.799 | 99.946  | 1.00 | 0.00 | C |
| ATOM | 283 | N1   | C A | 10 | -7.129  | -44.932 | 101.152 | 1.00 | 0.00 | N |
| ATOM | 284 | C2   | C A | 10 | -8.315  | -44.567 | 101.784 | 1.00 | 0.00 | C |
| ATOM | 285 | O2   | C A | 10 | -9.390  | -44.973 | 101.321 | 1.00 | 0.00 | O |
| ATOM | 286 | N3   | C A | 10 | -8.255  | -43.778 | 102.885 | 1.00 | 0.00 | N |
| ATOM | 287 | C4   | C A | 10 | -7.078  | -43.353 | 103.363 | 1.00 | 0.00 | C |
| ATOM | 288 | N4   | C A | 10 | -7.075  | -42.586 | 104.444 | 1.00 | 0.00 | N |
| ATOM | 289 | C5   | C A | 10 | -5.841  | -43.709 | 102.731 | 1.00 | 0.00 | C |
| ATOM | 290 | C6   | C A | 10 | -5.926  | -44.509 | 101.626 | 1.00 | 0.00 | C |
| ATOM | 291 | C2'  | C A | 10 | -6.209  | -45.451 | 98.863  | 1.00 | 0.00 | C |
| ATOM | 292 | C3'  | C A | 10 | -5.867  | -46.822 | 98.297  | 1.00 | 0.00 | C |
| ATOM | 293 | O3'  | C A | 10 | -6.840  | -47.179 | 97.318  | 1.00 | 0.00 | O |
| ATOM | 294 | C4'  | C A | 10 | -5.929  | -47.723 | 99.528  | 1.00 | 0.00 | C |
| ATOM | 295 | O4'  | C A | 10 | -6.982  | -47.134 | 100.355 | 1.00 | 0.00 | O |
| ATOM | 296 | C5'  | C A | 10 | -4.667  | -47.821 | 100.352 | 1.00 | 0.00 | C |
| ATOM | 297 | O5'  | C A | 10 | -3.995  | -46.536 | 100.375 | 1.00 | 0.00 | O |
| ATOM | 298 | O1P  | C A | 10 | -1.856  | -46.975 | 99.125  | 1.00 | 0.00 | O |

|      |     |      |   |   |    |         |         |         |      |      |   |
|------|-----|------|---|---|----|---------|---------|---------|------|------|---|
| ATOM | 299 | O2P  | C | A | 10 | -1.946  | -45.166 | 100.860 | 1.00 | 0.00 | O |
| ATOM | 300 | P    | C | A | 10 | -2.401  | -46.505 | 100.412 | 1.00 | 0.00 | P |
| ATOM | 301 | H5   | C | A | 10 | -4.881  | -43.361 | 103.112 | 1.00 | 0.00 | H |
| ATOM | 302 | H6   | C | A | 10 | -5.014  | -44.814 | 101.116 | 1.00 | 0.00 | H |
| ATOM | 303 | H1'  | C | A | 10 | -8.240  | -45.743 | 99.563  | 1.00 | 0.00 | H |
| ATOM | 304 | H3'  | C | A | 10 | -4.877  | -46.841 | 97.844  | 1.00 | 0.00 | H |
| ATOM | 305 | H4'  | C | A | 10 | -6.174  | -48.725 | 99.175  | 1.00 | 0.00 | H |
| ATOM | 306 | H41  | C | A | 10 | -6.184  | -42.247 | 104.832 | 1.00 | 0.00 | H |
| ATOM | 307 | H42  | C | A | 10 | -7.966  | -42.329 | 104.894 | 1.00 | 0.00 | H |
| ATOM | 308 | H2'1 | C | A | 10 | -5.325  | -44.958 | 99.263  | 1.00 | 0.00 | H |
| ATOM | 309 | H2'2 | C | A | 10 | -6.631  | -44.799 | 98.096  | 1.00 | 0.00 | H |
| ATOM | 310 | H5'1 | C | A | 10 | -4.924  | -48.120 | 101.369 | 1.00 | 0.00 | H |
| ATOM | 311 | H5'2 | C | A | 10 | -4.011  | -48.573 | 99.913  | 1.00 | 0.00 | H |
| ATOM | 312 | C1'  | T | A | 11 | -11.186 | -43.621 | 97.939  | 1.00 | 0.00 | C |
| ATOM | 313 | N1   | T | A | 11 | -10.268 | -42.841 | 98.810  | 1.00 | 0.00 | N |
| ATOM | 314 | C2   | T | A | 11 | -10.836 | -42.129 | 99.847  | 1.00 | 0.00 | C |
| ATOM | 315 | O2   | T | A | 11 | -12.036 | -42.120 | 100.062 | 1.00 | 0.00 | O |
| ATOM | 316 | N3   | T | A | 11 | -9.947  | -41.419 | 100.632 | 1.00 | 0.00 | N |
| ATOM | 317 | C4   | T | A | 11 | -8.577  | -41.359 | 100.472 | 1.00 | 0.00 | C |
| ATOM | 318 | O4   | T | A | 11 | -7.880  | -40.682 | 101.240 | 1.00 | 0.00 | O |
| ATOM | 319 | C5   | T | A | 11 | -8.076  | -42.134 | 99.363  | 1.00 | 0.00 | C |
| ATOM | 320 | C6   | T | A | 11 | -8.914  | -42.839 | 98.579  | 1.00 | 0.00 | C |
| ATOM | 321 | C7   | T | A | 11 | -6.592  | -42.100 | 99.154  | 1.00 | 0.00 | C |
| ATOM | 322 | C2'  | T | A | 11 | -10.793 | -43.611 | 96.467  | 1.00 | 0.00 | C |
| ATOM | 323 | C3'  | T | A | 11 | -11.183 | -45.012 | 96.024  | 1.00 | 0.00 | C |
| ATOM | 324 | O3'  | T | A | 11 | -12.568 | -45.029 | 95.686  | 1.00 | 0.00 | O |
| ATOM | 325 | C4'  | T | A | 11 | -10.882 | -45.855 | 97.261  | 1.00 | 0.00 | C |
| ATOM | 326 | O4'  | T | A | 11 | -11.169 | -44.964 | 98.385  | 1.00 | 0.00 | O |
| ATOM | 327 | C5'  | T | A | 11 | -9.466  | -46.365 | 97.399  | 1.00 | 0.00 | C |
| ATOM | 328 | O5'  | T | A | 11 | -8.537  | -45.368 | 96.906  | 1.00 | 0.00 | O |
| ATOM | 329 | O1P  | T | A | 11 | -7.525  | -46.464 | 94.879  | 1.00 | 0.00 | O |
| ATOM | 330 | O2P  | T | A | 11 | -6.223  | -44.738 | 96.153  | 1.00 | 0.00 | O |
| ATOM | 331 | P    | T | A | 11 | -7.201  | -45.854 | 96.183  | 1.00 | 0.00 | P |
| ATOM | 332 | H3   | T | A | 11 | -10.345 | -40.882 | 101.415 | 1.00 | 0.00 | H |
| ATOM | 333 | H6   | T | A | 11 | -8.513  | -43.418 | 97.745  | 1.00 | 0.00 | H |
| ATOM | 334 | H1'  | T | A | 11 | -12.197 | -43.236 | 98.074  | 1.00 | 0.00 | H |
| ATOM | 335 | H3'  | T | A | 11 | -10.599 | -45.347 | 95.167  | 1.00 | 0.00 | H |
| ATOM | 336 | H4'  | T | A | 11 | -11.545 | -46.721 | 97.224  | 1.00 | 0.00 | H |
| ATOM | 337 | H71  | T | A | 11 | -6.369  | -41.608 | 98.208  | 1.00 | 0.00 | H |
| ATOM | 338 | H72  | T | A | 11 | -6.123  | -41.547 | 99.970  | 1.00 | 0.00 | H |
| ATOM | 339 | H73  | T | A | 11 | -6.202  | -43.118 | 99.136  | 1.00 | 0.00 | H |
| ATOM | 340 | H2'1 | T | A | 11 | -9.728  | -43.433 | 96.325  | 1.00 | 0.00 | H |
| ATOM | 341 | H2'2 | T | A | 11 | -11.331 | -42.851 | 95.900  | 1.00 | 0.00 | H |
| ATOM | 342 | H5'1 | T | A | 11 | -9.261  | -46.575 | 98.448  | 1.00 | 0.00 | H |
| ATOM | 343 | H5'2 | T | A | 11 | -9.359  | -47.284 | 96.822  | 1.00 | 0.00 | H |
| ATOM | 344 | C1'  | A | A | 12 | -14.793 | -40.215 | 97.791  | 1.00 | 0.00 | C |
| ATOM | 345 | N1   | A | A | 12 | -11.531 | -37.446 | 100.625 | 1.00 | 0.00 | N |
| ATOM | 346 | C2   | A | A | 12 | -12.843 | -37.645 | 100.701 | 1.00 | 0.00 | C |
| ATOM | 347 | N3   | A | A | 12 | -13.626 | -38.377 | 99.936  | 1.00 | 0.00 | N |
| ATOM | 348 | C4   | A | A | 12 | -12.906 | -38.965 | 98.964  | 1.00 | 0.00 | C |
| ATOM | 349 | C5   | A | A | 12 | -11.561 | -38.864 | 98.747  | 1.00 | 0.00 | C |
| ATOM | 350 | C6   | A | A | 12 | -10.840 | -38.048 | 99.644  | 1.00 | 0.00 | C |
| ATOM | 351 | N6   | A | A | 12 | -9.513  | -37.855 | 99.556  | 1.00 | 0.00 | N |
| ATOM | 352 | N7   | A | A | 12 | -11.174 | -39.614 | 97.651  | 1.00 | 0.00 | N |

|      |     |      |   |   |    |         |         |         |      |      |   |
|------|-----|------|---|---|----|---------|---------|---------|------|------|---|
| ATOM | 353 | C8   | A | A | 12 | -12.284 | -40.144 | 97.227  | 1.00 | 0.00 | C |
| ATOM | 354 | N9   | A | A | 12 | -13.378 | -39.797 | 97.978  | 1.00 | 0.00 | N |
| ATOM | 355 | C2'  | A | A | 12 | -15.214 | -40.320 | 96.332  | 1.00 | 0.00 | C |
| ATOM | 356 | C3'  | A | A | 12 | -16.166 | -41.505 | 96.359  | 1.00 | 0.00 | C |
| ATOM | 357 | O3'  | A | A | 12 | -17.466 | -41.052 | 96.735  | 1.00 | 0.00 | O |
| ATOM | 358 | C4'  | A | A | 12 | -15.545 | -42.416 | 97.417  | 1.00 | 0.00 | C |
| ATOM | 359 | O4'  | A | A | 12 | -14.946 | -41.491 | 98.382  | 1.00 | 0.00 | O |
| ATOM | 360 | C5'  | A | A | 12 | -14.479 | -43.370 | 96.937  | 1.00 | 0.00 | C |
| ATOM | 361 | O5'  | A | A | 12 | -13.678 | -42.736 | 95.907  | 1.00 | 0.00 | O |
| ATOM | 362 | O1P  | A | A | 12 | -14.205 | -44.084 | 93.847  | 1.00 | 0.00 | O |
| ATOM | 363 | O2P  | A | A | 12 | -11.997 | -42.907 | 94.047  | 1.00 | 0.00 | O |
| ATOM | 364 | P    | A | A | 12 | -13.104 | -43.632 | 94.720  | 1.00 | 0.00 | P |
| ATOM | 365 | H2   | A | A | 12 | -13.345 | -37.125 | 101.516 | 1.00 | 0.00 | H |
| ATOM | 366 | H8   | A | A | 12 | -12.341 | -40.802 | 96.360  | 1.00 | 0.00 | H |
| ATOM | 367 | H1'  | A | A | 12 | -15.430 | -39.516 | 98.332  | 1.00 | 0.00 | H |
| ATOM | 368 | H3'  | A | A | 12 | -16.225 | -42.006 | 95.395  | 1.00 | 0.00 | H |
| ATOM | 369 | H4'  | A | A | 12 | -16.357 | -43.007 | 97.840  | 1.00 | 0.00 | H |
| ATOM | 370 | H61  | A | A | 12 | -9.034  | -37.252 | 100.238 | 1.00 | 0.00 | H |
| ATOM | 371 | H62  | A | A | 12 | -8.975  | -38.313 | 98.804  | 1.00 | 0.00 | H |
| ATOM | 372 | H2'1 | A | A | 12 | -14.369 | -40.506 | 95.669  | 1.00 | 0.00 | H |
| ATOM | 373 | H2'2 | A | A | 12 | -15.714 | -39.418 | 95.980  | 1.00 | 0.00 | H |
| ATOM | 374 | H5'1 | A | A | 12 | -13.843 | -43.648 | 97.778  | 1.00 | 0.00 | H |
| ATOM | 375 | H5'2 | A | A | 12 | -14.953 | -44.265 | 96.536  | 1.00 | 0.00 | H |
| ATOM | 376 | C1'  | G | A | 13 | -16.782 | -35.797 | 98.871  | 1.00 | 0.00 | C |
| ATOM | 377 | N1   | G | A | 13 | -11.916 | -34.323 | 99.286  | 1.00 | 0.00 | N |
| ATOM | 378 | C2   | G | A | 13 | -13.004 | -34.027 | 100.087 | 1.00 | 0.00 | C |
| ATOM | 379 | N2   | G | A | 13 | -12.766 | -33.228 | 101.137 | 1.00 | 0.00 | N |
| ATOM | 380 | N3   | G | A | 13 | -14.232 | -34.488 | 99.858  | 1.00 | 0.00 | N |
| ATOM | 381 | C4   | G | A | 13 | -14.292 | -35.272 | 98.750  | 1.00 | 0.00 | C |
| ATOM | 382 | C5   | G | A | 13 | -13.262 | -35.620 | 97.892  | 1.00 | 0.00 | C |
| ATOM | 383 | C6   | G | A | 13 | -11.956 | -35.132 | 98.137  | 1.00 | 0.00 | C |
| ATOM | 384 | O6   | G | A | 13 | -10.924 | -35.327 | 97.494  | 1.00 | 0.00 | O |
| ATOM | 385 | N7   | G | A | 13 | -13.741 | -36.443 | 96.872  | 1.00 | 0.00 | N |
| ATOM | 386 | C8   | G | A | 13 | -15.014 | -36.571 | 97.140  | 1.00 | 0.00 | C |
| ATOM | 387 | N9   | G | A | 13 | -15.425 | -35.887 | 98.266  | 1.00 | 0.00 | N |
| ATOM | 388 | C2'  | G | A | 13 | -17.907 | -35.728 | 97.849  | 1.00 | 0.00 | C |
| ATOM | 389 | C3'  | G | A | 13 | -19.009 | -36.520 | 98.534  | 1.00 | 0.00 | C |
| ATOM | 390 | O3'  | G | A | 13 | -19.721 | -35.660 | 99.421  | 1.00 | 0.00 | O |
| ATOM | 391 | C4'  | G | A | 13 | -18.235 | -37.604 | 99.281  | 1.00 | 0.00 | C |
| ATOM | 392 | O4'  | G | A | 13 | -16.980 | -36.954 | 99.661  | 1.00 | 0.00 | O |
| ATOM | 393 | C5'  | G | A | 13 | -17.911 | -38.856 | 98.500  | 1.00 | 0.00 | C |
| ATOM | 394 | O5'  | G | A | 13 | -17.616 | -38.514 | 97.124  | 1.00 | 0.00 | O |
| ATOM | 395 | O1P  | G | A | 13 | -19.507 | -39.571 | 95.841  | 1.00 | 0.00 | O |
| ATOM | 396 | O2P  | G | A | 13 | -17.284 | -39.215 | 94.733  | 1.00 | 0.00 | O |
| ATOM | 397 | P    | G | A | 13 | -18.038 | -39.533 | 95.971  | 1.00 | 0.00 | P |
| ATOM | 398 | H1   | G | A | 13 | -11.004 | -33.920 | 99.554  | 1.00 | 0.00 | H |
| ATOM | 399 | H8   | G | A | 13 | -15.693 | -37.163 | 96.527  | 1.00 | 0.00 | H |
| ATOM | 400 | H1'  | G | A | 13 | -16.803 | -34.931 | 99.534  | 1.00 | 0.00 | H |
| ATOM | 401 | H21  | G | A | 13 | -11.811 | -32.878 | 101.308 | 1.00 | 0.00 | H |
| ATOM | 402 | H3'  | G | A | 13 | -19.706 | -36.956 | 97.818  | 1.00 | 0.00 | H |
| ATOM | 403 | H22  | G | A | 13 | -13.534 | -32.969 | 101.768 | 1.00 | 0.00 | H |
| ATOM | 404 | H4'  | G | A | 13 | -18.840 | -37.893 | 100.139 | 1.00 | 0.00 | H |
| ATOM | 405 | H2'1 | G | A | 13 | -17.629 | -36.180 | 96.896  | 1.00 | 0.00 | H |
| ATOM | 406 | H2'2 | G | A | 13 | -18.221 | -34.703 | 97.646  | 1.00 | 0.00 | H |

|      |     |      |     |    |         |         |         |      |      |   |
|------|-----|------|-----|----|---------|---------|---------|------|------|---|
| ATOM | 407 | H5'1 | G A | 13 | -17.050 | -39.347 | 98.951  | 1.00 | 0.00 | H |
| ATOM | 408 | H5'2 | G A | 13 | -18.767 | -39.531 | 98.536  | 1.00 | 0.00 | H |
| ATOM | 409 | C1'  | G A | 14 | -16.583 | -30.992 | 100.059 | 1.00 | 0.00 | C |
| ATOM | 410 | N1   | G A | 14 | -11.992 | -31.217 | 97.844  | 1.00 | 0.00 | N |
| ATOM | 411 | C2   | G A | 14 | -12.386 | -30.588 | 99.012  | 1.00 | 0.00 | C |
| ATOM | 412 | N2   | G A | 14 | -11.430 | -29.927 | 99.676  | 1.00 | 0.00 | N |
| ATOM | 413 | N3   | G A | 14 | -13.633 | -30.614 | 99.478  | 1.00 | 0.00 | N |
| ATOM | 414 | C4   | G A | 14 | -14.469 | -31.321 | 98.674  | 1.00 | 0.00 | C |
| ATOM | 415 | C5   | G A | 14 | -14.167 | -31.977 | 97.493  | 1.00 | 0.00 | C |
| ATOM | 416 | C6   | G A | 14 | -12.845 | -31.953 | 96.999  | 1.00 | 0.00 | C |
| ATOM | 417 | O6   | G A | 14 | -12.386 | -32.469 | 95.980  | 1.00 | 0.00 | O |
| ATOM | 418 | N7   | G A | 14 | -15.314 | -32.583 | 96.974  | 1.00 | 0.00 | N |
| ATOM | 419 | C8   | G A | 14 | -16.250 | -32.285 | 97.837  | 1.00 | 0.00 | C |
| ATOM | 420 | N9   | G A | 14 | -15.814 | -31.519 | 98.898  | 1.00 | 0.00 | N |
| ATOM | 421 | C2'  | G A | 14 | -17.994 | -30.543 | 99.707  | 1.00 | 0.00 | C |
| ATOM | 422 | C3'  | G A | 14 | -18.773 | -30.934 | 100.952 | 1.00 | 0.00 | C |
| ATOM | 423 | O3'  | G A | 14 | -18.653 | -29.898 | 101.925 | 1.00 | 0.00 | O |
| ATOM | 424 | C4'  | G A | 14 | -18.082 | -32.223 | 101.394 | 1.00 | 0.00 | C |
| ATOM | 425 | O4'  | G A | 14 | -16.681 | -32.029 | 101.016 | 1.00 | 0.00 | O |
| ATOM | 426 | C5'  | G A | 14 | -18.579 | -33.501 | 100.761 | 1.00 | 0.00 | C |
| ATOM | 427 | O5'  | G A | 14 | -18.936 | -33.258 | 99.379  | 1.00 | 0.00 | O |
| ATOM | 428 | O1P  | G A | 14 | -21.427 | -33.613 | 99.347  | 1.00 | 0.00 | O |
| ATOM | 429 | O2P  | G A | 14 | -20.080 | -34.000 | 97.267  | 1.00 | 0.00 | O |
| ATOM | 430 | P    | G A | 14 | -20.158 | -34.065 | 98.747  | 1.00 | 0.00 | P |
| ATOM | 431 | H1   | G A | 14 | -11.000 | -31.141 | 97.574  | 1.00 | 0.00 | H |
| ATOM | 432 | H8   | G A | 14 | -17.284 | -32.613 | 97.728  | 1.00 | 0.00 | H |
| ATOM | 433 | H1'  | G A | 14 | -16.012 | -30.177 | 100.503 | 1.00 | 0.00 | H |
| ATOM | 434 | H21  | G A | 14 | -10.465 | -29.914 | 99.311  | 1.00 | 0.00 | H |
| ATOM | 435 | H3'  | G A | 14 | -19.826 | -31.107 | 100.738 | 1.00 | 0.00 | H |
| ATOM | 436 | H22  | G A | 14 | -11.656 | -29.435 | 100.551 | 1.00 | 0.00 | H |
| ATOM | 437 | H4'  | G A | 14 | -18.224 | -32.306 | 102.471 | 1.00 | 0.00 | H |
| ATOM | 438 | H2'1 | G A | 14 | -18.381 | -31.049 | 98.823  | 1.00 | 0.00 | H |
| ATOM | 439 | H2'2 | G A | 14 | -18.053 | -29.470 | 99.523  | 1.00 | 0.00 | H |
| ATOM | 440 | H5'1 | G A | 14 | -17.795 | -34.255 | 100.813 | 1.00 | 0.00 | H |
| ATOM | 441 | H5'2 | G A | 14 | -19.453 | -33.856 | 101.311 | 1.00 | 0.00 | H |
| ATOM | 442 | C1'  | A A | 15 | -14.439 | -26.536 | 100.249 | 1.00 | 0.00 | C |
| ATOM | 443 | N1   | A A | 15 | -11.859 | -28.237 | 96.150  | 1.00 | 0.00 | N |
| ATOM | 444 | C2   | A A | 15 | -11.484 | -27.555 | 97.230  | 1.00 | 0.00 | C |
| ATOM | 445 | N3   | A A | 15 | -12.203 | -27.149 | 98.255  | 1.00 | 0.00 | N |
| ATOM | 446 | C4   | A A | 15 | -13.487 | -27.518 | 98.097  | 1.00 | 0.00 | C |
| ATOM | 447 | C5   | A A | 15 | -14.032 | -28.214 | 97.055  | 1.00 | 0.00 | C |
| ATOM | 448 | C6   | A A | 15 | -13.147 | -28.591 | 96.022  | 1.00 | 0.00 | C |
| ATOM | 449 | N6   | A A | 15 | -13.538 | -29.278 | 94.936  | 1.00 | 0.00 | N |
| ATOM | 450 | N7   | A A | 15 | -15.389 | -28.412 | 97.239  | 1.00 | 0.00 | N |
| ATOM | 451 | C8   | A A | 15 | -15.636 | -27.832 | 98.376  | 1.00 | 0.00 | C |
| ATOM | 452 | N9   | A A | 15 | -14.528 | -27.268 | 98.957  | 1.00 | 0.00 | N |
| ATOM | 453 | C2'  | A A | 15 | -15.645 | -25.651 | 100.538 | 1.00 | 0.00 | C |
| ATOM | 454 | C3'  | A A | 15 | -15.780 | -25.783 | 102.047 | 1.00 | 0.00 | C |
| ATOM | 455 | O3'  | A A | 15 | -14.907 | -24.852 | 102.678 | 1.00 | 0.00 | O |
| ATOM | 456 | C4'  | A A | 15 | -15.362 | -27.231 | 102.301 | 1.00 | 0.00 | C |
| ATOM | 457 | O4'  | A A | 15 | -14.341 | -27.494 | 101.284 | 1.00 | 0.00 | O |
| ATOM | 458 | C5'  | A A | 15 | -16.446 | -28.275 | 102.178 | 1.00 | 0.00 | C |
| ATOM | 459 | O5'  | A A | 15 | -17.354 | -27.916 | 101.105 | 1.00 | 0.00 | O |
| ATOM | 460 | O1P  | A A | 15 | -19.518 | -27.450 | 102.303 | 1.00 | 0.00 | O |

|      |     |      |     |    |         |         |         |      |      |   |
|------|-----|------|-----|----|---------|---------|---------|------|------|---|
| ATOM | 461 | O2P  | A A | 15 | -19.546 | -28.231 | 99.918  | 1.00 | 0.00 | O |
| ATOM | 462 | P    | A A | 15 | -18.899 | -28.282 | 101.252 | 1.00 | 0.00 | P |
| ATOM | 463 | H2   | A A | 15 | -10.425 | -27.295 | 97.272  | 1.00 | 0.00 | H |
| ATOM | 464 | H8   | A A | 15 | -16.628 | -27.796 | 98.826  | 1.00 | 0.00 | H |
| ATOM | 465 | H1'  | A A | 15 | -13.518 | -25.951 | 100.245 | 1.00 | 0.00 | H |
| ATOM | 466 | H3'  | A A | 15 | -16.802 | -25.606 | 102.383 | 1.00 | 0.00 | H |
| ATOM | 467 | H4'  | A A | 15 | -14.971 | -27.273 | 103.317 | 1.00 | 0.00 | H |
| ATOM | 468 | H61  | A A | 15 | -12.849 | -29.531 | 94.212  | 1.00 | 0.00 | H |
| ATOM | 469 | H62  | A A | 15 | -14.526 | -29.552 | 94.828  | 1.00 | 0.00 | H |
| ATOM | 470 | H2'1 | A A | 15 | -16.543 | -25.998 | 100.027 | 1.00 | 0.00 | H |
| ATOM | 471 | H2'2 | A A | 15 | -15.478 | -24.616 | 100.244 | 1.00 | 0.00 | H |
| ATOM | 472 | H5'1 | A A | 15 | -15.990 | -29.241 | 101.967 | 1.00 | 0.00 | H |
| ATOM | 473 | H5'2 | A A | 15 | -16.993 | -28.334 | 103.117 | 1.00 | 0.00 | H |
| ATOM | 474 | C1'  | C A | 16 | -11.279 | -23.057 | 98.643  | 1.00 | 0.00 | C |
| ATOM | 475 | N1   | C A | 16 | -12.236 | -23.699 | 97.700  | 1.00 | 0.00 | N |
| ATOM | 476 | C2   | C A | 16 | -11.729 | -24.230 | 96.516  | 1.00 | 0.00 | C |
| ATOM | 477 | O2   | C A | 16 | -10.512 | -24.146 | 96.299  | 1.00 | 0.00 | O |
| ATOM | 478 | N3   | C A | 16 | -12.583 | -24.818 | 95.644  | 1.00 | 0.00 | N |
| ATOM | 479 | C4   | C A | 16 | -13.893 | -24.892 | 95.908  | 1.00 | 0.00 | C |
| ATOM | 480 | N4   | C A | 16 | -14.682 | -25.482 | 95.022  | 1.00 | 0.00 | N |
| ATOM | 481 | C5   | C A | 16 | -14.445 | -24.350 | 97.116  | 1.00 | 0.00 | C |
| ATOM | 482 | C6   | C A | 16 | -13.565 | -23.766 | 97.983  | 1.00 | 0.00 | C |
| ATOM | 483 | C2'  | C A | 16 | -11.834 | -21.819 | 99.334  | 1.00 | 0.00 | C |
| ATOM | 484 | C3'  | C A | 16 | -11.207 | -21.920 | 100.716 | 1.00 | 0.00 | C |
| ATOM | 485 | O3'  | C A | 16 | -9.902  | -21.350 | 100.681 | 1.00 | 0.00 | O |
| ATOM | 486 | C4'  | C A | 16 | -11.174 | -23.426 | 100.965 | 1.00 | 0.00 | C |
| ATOM | 487 | O4'  | C A | 16 | -10.956 | -24.008 | 99.641  | 1.00 | 0.00 | O |
| ATOM | 488 | C5'  | C A | 16 | -12.422 | -24.036 | 101.560 | 1.00 | 0.00 | C |
| ATOM | 489 | O5'  | C A | 16 | -13.595 | -23.373 | 101.024 | 1.00 | 0.00 | O |
| ATOM | 490 | O1P  | C A | 16 | -14.581 | -22.216 | 103.031 | 1.00 | 0.00 | O |
| ATOM | 491 | O2P  | C A | 16 | -16.062 | -22.905 | 101.127 | 1.00 | 0.00 | O |
| ATOM | 492 | P    | C A | 16 | -14.872 | -23.193 | 101.964 | 1.00 | 0.00 | P |
| ATOM | 493 | H5   | C A | 16 | -15.514 | -24.401 | 97.332  | 1.00 | 0.00 | H |
| ATOM | 494 | H6   | C A | 16 | -13.935 | -23.347 | 98.918  | 1.00 | 0.00 | H |
| ATOM | 495 | H1'  | C A | 16 | -10.366 | -22.822 | 98.096  | 1.00 | 0.00 | H |
| ATOM | 496 | H3'  | C A | 16 | -11.806 | -21.408 | 101.472 | 1.00 | 0.00 | H |
| ATOM | 497 | H4'  | C A | 16 | -10.353 | -23.614 | 101.656 | 1.00 | 0.00 | H |
| ATOM | 498 | H41  | C A | 16 | -15.695 | -25.553 | 95.202  | 1.00 | 0.00 | H |
| ATOM | 499 | H42  | C A | 16 | -14.285 | -25.868 | 94.153  | 1.00 | 0.00 | H |
| ATOM | 500 | H2'1 | C A | 16 | -12.924 | -21.831 | 99.391  | 1.00 | 0.00 | H |
| ATOM | 501 | H2'2 | C A | 16 | -11.543 | -20.897 | 98.831  | 1.00 | 0.00 | H |
| ATOM | 502 | H5'1 | C A | 16 | -12.453 | -25.098 | 101.316 | 1.00 | 0.00 | H |
| ATOM | 503 | H5'2 | C A | 16 | -12.396 | -23.919 | 102.644 | 1.00 | 0.00 | H |
| ATOM | 504 | C1'  | G A | 17 | -8.520  | -20.789 | 95.215  | 1.00 | 0.00 | C |
| ATOM | 505 | N1   | G A | 17 | -11.886 | -22.828 | 91.969  | 1.00 | 0.00 | N |
| ATOM | 506 | C2   | G A | 17 | -10.508 | -22.733 | 91.877  | 1.00 | 0.00 | C |
| ATOM | 507 | N2   | G A | 17 | -9.955  | -23.248 | 90.771  | 1.00 | 0.00 | N |
| ATOM | 508 | N3   | G A | 17 | -9.745  | -22.170 | 92.811  | 1.00 | 0.00 | N |
| ATOM | 509 | C4   | G A | 17 | -10.473 | -21.695 | 93.856  | 1.00 | 0.00 | C |
| ATOM | 510 | C5   | G A | 17 | -11.846 | -21.740 | 94.032  | 1.00 | 0.00 | C |
| ATOM | 511 | C6   | G A | 17 | -12.658 | -22.342 | 93.042  | 1.00 | 0.00 | C |
| ATOM | 512 | O6   | G A | 17 | -13.881 | -22.478 | 93.017  | 1.00 | 0.00 | O |
| ATOM | 513 | N7   | G A | 17 | -12.199 | -21.140 | 95.242  | 1.00 | 0.00 | N |
| ATOM | 514 | C8   | G A | 17 | -11.055 | -20.762 | 95.752  | 1.00 | 0.00 | C |

|      |     |      |     |    |         |         |         |      |      |   |
|------|-----|------|-----|----|---------|---------|---------|------|------|---|
| ATOM | 515 | N9   | G A | 17 | -9.960  | -21.063 | 94.967  | 1.00 | 0.00 | N |
| ATOM | 516 | C2'  | G A | 17 | -8.255  | -19.448 | 95.886  | 1.00 | 0.00 | C |
| ATOM | 517 | C3'  | G A | 17 | -7.074  | -19.771 | 96.787  | 1.00 | 0.00 | C |
| ATOM | 518 | O3'  | G A | 17 | -5.868  | -19.664 | 96.034  | 1.00 | 0.00 | O |
| ATOM | 519 | C4'  | G A | 17 | -7.360  | -21.208 | 97.220  | 1.00 | 0.00 | C |
| ATOM | 520 | O4'  | G A | 17 | -8.025  | -21.807 | 96.064  | 1.00 | 0.00 | O |
| ATOM | 521 | C5'  | G A | 17 | -8.244  | -21.379 | 98.432  | 1.00 | 0.00 | C |
| ATOM | 522 | O5'  | G A | 17 | -9.274  | -20.360 | 98.436  | 1.00 | 0.00 | O |
| ATOM | 523 | O1P  | G A | 17 | -8.711  | -18.973 | 100.459 | 1.00 | 0.00 | O |
| ATOM | 524 | O2P  | G A | 17 | -11.082 | -19.104 | 99.648  | 1.00 | 0.00 | O |
| ATOM | 525 | P    | G A | 17 | -9.775  | -19.782 | 99.836  | 1.00 | 0.00 | P |
| ATOM | 526 | H1   | G A | 17 | -12.383 | -23.289 | 91.192  | 1.00 | 0.00 | H |
| ATOM | 527 | H8   | G A | 17 | -10.972 | -20.251 | 96.712  | 1.00 | 0.00 | H |
| ATOM | 528 | H1'  | G A | 17 | -7.990  | -20.859 | 94.264  | 1.00 | 0.00 | H |
| ATOM | 529 | H21  | G A | 17 | -10.551 | -23.685 | 90.054  | 1.00 | 0.00 | H |
| ATOM | 530 | H3'  | G A | 17 | -7.022  | -19.103 | 97.648  | 1.00 | 0.00 | H |
| ATOM | 531 | H22  | G A | 17 | -8.935  | -23.207 | 90.640  | 1.00 | 0.00 | H |
| ATOM | 532 | H4'  | G A | 17 | -6.398  | -21.668 | 97.442  | 1.00 | 0.00 | H |
| ATOM | 533 | H2'1 | G A | 17 | -9.111  | -19.101 | 96.464  | 1.00 | 0.00 | H |
| ATOM | 534 | H2'2 | G A | 17 | -8.006  | -18.667 | 95.168  | 1.00 | 0.00 | H |
| ATOM | 535 | H5'1 | G A | 17 | -8.704  | -22.368 | 98.402  | 1.00 | 0.00 | H |
| ATOM | 536 | H5'2 | G A | 17 | -7.637  | -21.296 | 99.333  | 1.00 | 0.00 | H |
| ATOM | 537 | C1'  | G A | 18 | -7.349  | -19.518 | 90.573  | 1.00 | 0.00 | C |
| ATOM | 538 | N1   | G A | 18 | -12.319 | -20.287 | 89.713  | 1.00 | 0.00 | N |
| ATOM | 539 | C2   | G A | 18 | -11.220 | -20.652 | 88.956  | 1.00 | 0.00 | C |
| ATOM | 540 | N2   | G A | 18 | -11.480 | -21.307 | 87.816  | 1.00 | 0.00 | N |
| ATOM | 541 | N3   | G A | 18 | -9.965  | -20.386 | 89.306  | 1.00 | 0.00 | N |
| ATOM | 542 | C4   | G A | 18 | -9.888  | -19.710 | 90.484  | 1.00 | 0.00 | C |
| ATOM | 543 | C5   | G A | 18 | -10.928 | -19.301 | 91.303  | 1.00 | 0.00 | C |
| ATOM | 544 | C6   | G A | 18 | -12.262 | -19.588 | 90.932  | 1.00 | 0.00 | C |
| ATOM | 545 | O6   | G A | 18 | -13.307 | -19.310 | 91.522  | 1.00 | 0.00 | O |
| ATOM | 546 | N7   | G A | 18 | -10.426 | -18.633 | 92.421  | 1.00 | 0.00 | N |
| ATOM | 547 | C8   | G A | 18 | -9.130  | -18.661 | 92.251  | 1.00 | 0.00 | C |
| ATOM | 548 | N9   | G A | 18 | -8.726  | -19.297 | 91.096  | 1.00 | 0.00 | N |
| ATOM | 549 | C2'  | G A | 18 | -6.406  | -18.349 | 90.815  | 1.00 | 0.00 | C |
| ATOM | 550 | C3'  | G A | 18 | -5.085  | -19.056 | 91.073  | 1.00 | 0.00 | C |
| ATOM | 551 | O3'  | G A | 18 | -4.457  | -19.345 | 89.828  | 1.00 | 0.00 | O |
| ATOM | 552 | C4'  | G A | 18 | -5.516  | -20.323 | 91.810  | 1.00 | 0.00 | C |
| ATOM | 553 | O4'  | G A | 18 | -6.817  | -20.653 | 91.228  | 1.00 | 0.00 | O |
| ATOM | 554 | C5'  | G A | 18 | -5.672  | -20.208 | 93.308  | 1.00 | 0.00 | C |
| ATOM | 555 | O5'  | G A | 18 | -6.209  | -18.905 | 93.647  | 1.00 | 0.00 | O |
| ATOM | 556 | O1P  | G A | 18 | -4.324  | -17.808 | 94.904  | 1.00 | 0.00 | O |
| ATOM | 557 | O2P  | G A | 18 | -6.696  | -17.137 | 95.364  | 1.00 | 0.00 | O |
| ATOM | 558 | P    | G A | 18 | -5.739  | -18.211 | 95.005  | 1.00 | 0.00 | P |
| ATOM | 559 | H1   | G A | 18 | -13.251 | -20.548 | 89.356  | 1.00 | 0.00 | H |
| ATOM | 560 | H8   | G A | 18 | -8.428  | -18.219 | 92.959  | 1.00 | 0.00 | H |
| ATOM | 561 | H1'  | G A | 18 | -7.423  | -19.748 | 89.509  | 1.00 | 0.00 | H |
| ATOM | 562 | H21  | G A | 18 | -12.455 | -21.513 | 87.553  | 1.00 | 0.00 | H |
| ATOM | 563 | H3'  | G A | 18 | -4.413  | -18.454 | 91.687  | 1.00 | 0.00 | H |
| ATOM | 564 | H22  | G A | 18 | -10.706 | -21.605 | 87.208  | 1.00 | 0.00 | H |
| ATOM | 565 | H4'  | G A | 18 | -4.756  | -21.078 | 91.611  | 1.00 | 0.00 | H |
| ATOM | 566 | H2'1 | G A | 18 | -6.707  | -17.746 | 91.671  | 1.00 | 0.00 | H |
| ATOM | 567 | H2'2 | G A | 18 | -6.339  | -17.685 | 89.952  | 1.00 | 0.00 | H |
| ATOM | 568 | H5'1 | G A | 18 | -6.348  | -20.988 | 93.658  | 1.00 | 0.00 | H |

|      |     |      |     |   |    |         |         |        |      |      |   |
|------|-----|------|-----|---|----|---------|---------|--------|------|------|---|
| ATOM | 569 | H5'2 | G   | A | 18 | -4.699  | -20.341 | 93.781 | 1.00 | 0.00 | H |
| ATOM | 570 | C1'  | T   | A | 19 | -8.355  | -18.648 | 85.805 | 1.00 | 0.00 | C |
| ATOM | 571 | N1   | T   | A | 19 | -9.166  | -18.000 | 86.868 | 1.00 | 0.00 | N |
| ATOM | 572 | C2   | T   | A | 19 | -10.539 | -18.117 | 86.776 | 1.00 | 0.00 | C |
| ATOM | 573 | O2   | T   | A | 19 | -11.088 | -18.721 | 85.870 | 1.00 | 0.00 | O |
| ATOM | 574 | N3   | T   | A | 19 | -11.254 | -17.500 | 87.786 | 1.00 | 0.00 | N |
| ATOM | 575 | C4   | T   | A | 19 | -10.732 | -16.793 | 88.848 | 1.00 | 0.00 | C |
| ATOM | 576 | O4   | T   | A | 19 | -11.475 | -16.280 | 89.692 | 1.00 | 0.00 | O |
| ATOM | 577 | C5   | T   | A | 19 | -9.290  | -16.723 | 88.861 | 1.00 | 0.00 | C |
| ATOM | 578 | C6   | T   | A | 19 | -8.560  | -17.314 | 87.893 | 1.00 | 0.00 | C |
| ATOM | 579 | C7   | T   | A | 19 | -8.678  | -15.966 | 90.001 | 1.00 | 0.00 | C |
| ATOM | 580 | C2'  | T   | A | 19 | -7.126  | -17.846 | 85.395 | 1.00 | 0.00 | C |
| ATOM | 581 | C3'  | T   | A | 19 | -6.113  | -18.942 | 85.109 | 1.00 | 0.00 | C |
| ATOM | 582 | O3'  | T   | A | 19 | -6.291  | -19.410 | 83.774 | 1.00 | 0.00 | O |
| ATOM | 583 | C4'  | T   | A | 19 | -6.464  | -20.007 | 86.146 | 1.00 | 0.00 | C |
| ATOM | 584 | O4'  | T   | A | 19 | -7.914  | -19.898 | 86.299 | 1.00 | 0.00 | O |
| ATOM | 585 | C5'  | T   | A | 19 | -5.821  | -19.860 | 87.506 | 1.00 | 0.00 | C |
| ATOM | 586 | O5'  | T   | A | 19 | -5.727  | -18.455 | 87.853 | 1.00 | 0.00 | O |
| ATOM | 587 | O1P  | T   | A | 19 | -3.246  | -18.031 | 87.895 | 1.00 | 0.00 | O |
| ATOM | 588 | O2P  | T   | A | 19 | -4.783  | -16.635 | 89.305 | 1.00 | 0.00 | O |
| ATOM | 589 | P    | T   | A | 19 | -4.477  | -17.957 | 88.708 | 1.00 | 0.00 | P |
| ATOM | 590 | H3   | T   | A | 19 | -12.280 | -17.578 | 87.740 | 1.00 | 0.00 | H |
| ATOM | 591 | H6   | T   | A | 19 | -7.473  | -17.249 | 87.925 | 1.00 | 0.00 | H |
| ATOM | 592 | H1'  | T   | A | 19 | -9.003  | -18.835 | 84.948 | 1.00 | 0.00 | H |
| ATOM | 593 | H3'  | T   | A | 19 | -5.087  | -18.593 | 85.236 | 1.00 | 0.00 | H |
| ATOM | 594 | H4'  | T   | A | 19 | -6.149  | -20.968 | 85.733 | 1.00 | 0.00 | H |
| ATOM | 595 | H71  | T   | A | 19 | -8.177  | -15.078 | 89.620 | 1.00 | 0.00 | H |
| ATOM | 596 | H72  | T   | A | 19 | -9.460  | -15.669 | 90.701 | 1.00 | 0.00 | H |
| ATOM | 597 | H73  | T   | A | 19 | -7.953  | -16.600 | 90.514 | 1.00 | 0.00 | H |
| ATOM | 598 | H2'1 | T   | A | 19 | -6.782  | -17.184 | 86.187 | 1.00 | 0.00 | H |
| ATOM | 599 | H2'2 | T   | A | 19 | -7.308  | -17.233 | 84.511 | 1.00 | 0.00 | H |
| ATOM | 600 | H5'1 | T   | A | 19 | -6.426  | -20.382 | 88.247 | 1.00 | 0.00 | H |
| ATOM | 601 | H5'2 | T   | A | 19 | -4.826  | -20.300 | 87.481 | 1.00 | 0.00 | H |
| ATOM | 602 | C01  | LNK | A | 20 | -5.057  | -18.046 | 80.538 | 0.00 | 0.00 | C |
| ATOM | 603 | O1   | LNK | A | 20 | -5.200  | -17.977 | 81.958 | 1.00 | 0.00 | O |
| ATOM | 604 | S    | LNK | A | 20 | -3.570  | -15.866 | 77.558 | 0.00 | 0.00 | S |
| ATOM | 605 | C02  | LNK | A | 20 | -4.335  | -16.783 | 80.034 | 0.00 | 0.00 | C |
| ATOM | 606 | C03  | LNK | A | 20 | -4.921  | -16.365 | 78.672 | 0.00 | 0.00 | C |
| ATOM | 607 | O1P  | LNK | A | 20 | -7.012  | -16.911 | 83.345 | 1.00 | 0.00 | O |
| ATOM | 608 | O2P  | LNK | A | 20 | -7.611  | -18.544 | 81.535 | 1.00 | 0.00 | O |
| ATOM | 609 | P    | LNK | A | 20 | -6.657  | -18.130 | 82.593 | 1.00 | 0.00 | P |
| ATOM | 610 | H01  | LNK | A | 20 | -6.042  | -18.111 | 80.074 | 0.00 | 0.00 | H |
| ATOM | 611 | H02  | LNK | A | 20 | -4.473  | -18.928 | 80.274 | 0.00 | 0.00 | H |
| ATOM | 612 | H03  | LNK | A | 20 | -5.604  | -15.526 | 78.812 | 0.00 | 0.00 | H |
| ATOM | 613 | H04  | LNK | A | 20 | -3.270  | -16.992 | 79.924 | 0.00 | 0.00 | H |
| ATOM | 614 | H05  | LNK | A | 20 | -4.472  | -15.974 | 80.752 | 0.00 | 0.00 | H |
| ATOM | 615 | H06  | LNK | A | 20 | -5.460  | -17.204 | 78.235 | 0.00 | 0.00 | H |
| ATOM | 616 | AU   | LNK | A | 20 | -3.833  | -15.586 | 76.990 |      |      |   |
| TER  |     |      |     |   |    |         |         |        |      |      |   |
| ATOM | 618 | C1'  | A   | B | 2  | -19.206 | -18.452 | 86.853 | 1.00 | 0.00 | C |
| ATOM | 619 | N1   | A   | B | 2  | -14.195 | -17.705 | 87.669 | 1.00 | 0.00 | N |
| ATOM | 620 | C2   | A   | B | 2  | -14.864 | -18.351 | 86.719 | 1.00 | 0.00 | C |
| ATOM | 621 | N3   | A   | B | 2  | -16.161 | -18.503 | 86.566 | 1.00 | 0.00 | N |
| ATOM | 622 | C4   | A   | B | 2  | -16.823 | -17.886 | 87.563 | 1.00 | 0.00 | C |

|      |     |      |     |   |         |         |        |      |      |   |
|------|-----|------|-----|---|---------|---------|--------|------|------|---|
| ATOM | 623 | C5   | A B | 2 | -16.289 | -17.186 | 88.607 | 1.00 | 0.00 | C |
| ATOM | 624 | C6   | A B | 2 | -14.881 | -17.098 | 88.650 | 1.00 | 0.00 | C |
| ATOM | 625 | N6   | A B | 2 | -14.215 | -16.443 | 89.615 | 1.00 | 0.00 | N |
| ATOM | 626 | N7   | A B | 2 | -17.280 | -16.690 | 89.436 | 1.00 | 0.00 | N |
| ATOM | 627 | C8   | A B | 2 | -18.382 | -17.101 | 88.884 | 1.00 | 0.00 | C |
| ATOM | 628 | N9   | A B | 2 | -18.183 | -17.832 | 87.741 | 1.00 | 0.00 | N |
| ATOM | 629 | C2'  | A B | 2 | -20.399 | -19.030 | 87.604 | 1.00 | 0.00 | C |
| ATOM | 630 | C3'  | A B | 2 | -21.546 | -18.739 | 86.648 | 1.00 | 0.00 | C |
| ATOM | 631 | O3'  | A B | 2 | -21.615 | -19.775 | 85.671 | 1.00 | 0.00 | O |
| ATOM | 632 | C4'  | A B | 2 | -21.147 | -17.396 | 86.037 | 1.00 | 0.00 | C |
| ATOM | 633 | O4'  | A B | 2 | -19.684 | -17.445 | 85.982 | 1.00 | 0.00 | O |
| ATOM | 634 | C5'  | A B | 2 | -21.561 | -16.162 | 86.803 | 1.00 | 0.00 | C |
| ATOM | 635 | O5'  | A B | 2 | -21.466 | -16.413 | 88.228 | 1.00 | 0.00 | O |
| ATOM | 636 | H2   | A B | 2 | -14.248 | -18.824 | 85.956 | 1.00 | 0.00 | H |
| ATOM | 637 | H8   | A B | 2 | -19.371 | -16.888 | 89.291 | 1.00 | 0.00 | H |
| ATOM | 638 | H1'  | A B | 2 | -18.716 | -19.215 | 86.250 | 1.00 | 0.00 | H |
| ATOM | 639 | H3'  | A B | 2 | -22.502 | -18.668 | 87.167 | 1.00 | 0.00 | H |
| ATOM | 640 | H4'  | A B | 2 | -21.609 | -17.348 | 85.052 | 1.00 | 0.00 | H |
| ATOM | 641 | H61  | A B | 2 | -13.187 | -16.406 | 89.598 | 1.00 | 0.00 | H |
| ATOM | 642 | H62  | A B | 2 | -14.736 | -15.976 | 90.372 | 1.00 | 0.00 | H |
| ATOM | 643 | H2'1 | A B | 2 | -20.555 | -18.548 | 88.568 | 1.00 | 0.00 | H |
| ATOM | 644 | H2'2 | A B | 2 | -20.295 | -20.101 | 87.783 | 1.00 | 0.00 | H |
| ATOM | 645 | H5'1 | A B | 2 | -20.904 | -15.336 | 86.531 | 1.00 | 0.00 | H |
| ATOM | 646 | H5'2 | A B | 2 | -22.586 | -15.906 | 86.541 | 1.00 | 0.00 | H |
| ATOM | 647 | C1'  | C B | 3 | -16.689 | -22.646 | 86.006 | 1.00 | 0.00 | C |
| ATOM | 648 | N1   | C B | 3 | -16.510 | -21.904 | 87.284 | 1.00 | 0.00 | N |
| ATOM | 649 | C2   | C B | 3 | -15.211 | -21.601 | 87.689 | 1.00 | 0.00 | C |
| ATOM | 650 | O2   | C B | 3 | -14.265 | -21.959 | 86.974 | 1.00 | 0.00 | O |
| ATOM | 651 | N3   | C B | 3 | -15.028 | -20.927 | 88.848 | 1.00 | 0.00 | N |
| ATOM | 652 | C4   | C B | 3 | -16.071 | -20.554 | 89.601 | 1.00 | 0.00 | C |
| ATOM | 653 | N4   | C B | 3 | -15.834 | -19.893 | 90.725 | 1.00 | 0.00 | N |
| ATOM | 654 | C5   | C B | 3 | -17.419 | -20.855 | 89.213 | 1.00 | 0.00 | C |
| ATOM | 655 | C6   | C B | 3 | -17.580 | -21.532 | 88.038 | 1.00 | 0.00 | C |
| ATOM | 656 | C2'  | C B | 3 | -17.815 | -23.670 | 86.043 | 1.00 | 0.00 | C |
| ATOM | 657 | C3'  | C B | 3 | -18.370 | -23.581 | 84.630 | 1.00 | 0.00 | C |
| ATOM | 658 | O3'  | C B | 3 | -17.597 | -24.415 | 83.770 | 1.00 | 0.00 | O |
| ATOM | 659 | C4'  | C B | 3 | -18.210 | -22.100 | 84.295 | 1.00 | 0.00 | C |
| ATOM | 660 | O4'  | C B | 3 | -16.990 | -21.700 | 84.999 | 1.00 | 0.00 | O |
| ATOM | 661 | C5'  | C B | 3 | -19.336 | -21.189 | 84.723 | 1.00 | 0.00 | C |
| ATOM | 662 | O5'  | C B | 3 | -19.868 | -21.633 | 85.996 | 1.00 | 0.00 | O |
| ATOM | 663 | O1P  | C B | 3 | -22.206 | -22.371 | 85.425 | 1.00 | 0.00 | O |
| ATOM | 664 | O2P  | C B | 3 | -21.677 | -21.558 | 87.739 | 1.00 | 0.00 | O |
| ATOM | 665 | P    | C B | 3 | -21.426 | -21.454 | 86.281 | 1.00 | 0.00 | P |
| ATOM | 666 | H5   | C B | 3 | -18.271 | -20.559 | 89.826 | 1.00 | 0.00 | H |
| ATOM | 667 | H6   | C B | 3 | -18.586 | -21.777 | 87.697 | 1.00 | 0.00 | H |
| ATOM | 668 | H1'  | C B | 3 | -15.739 | -23.118 | 85.750 | 1.00 | 0.00 | H |
| ATOM | 669 | H3'  | C B | 3 | -19.416 | -23.884 | 84.583 | 1.00 | 0.00 | H |
| ATOM | 670 | H4'  | C B | 3 | -18.119 | -22.028 | 83.211 | 1.00 | 0.00 | H |
| ATOM | 671 | H41  | C B | 3 | -16.619 | -19.591 | 91.321 | 1.00 | 0.00 | H |
| ATOM | 672 | H42  | C B | 3 | -14.864 | -19.679 | 91.003 | 1.00 | 0.00 | H |
| ATOM | 673 | H2'1 | C B | 3 | -18.574 | -23.424 | 86.784 | 1.00 | 0.00 | H |
| ATOM | 674 | H2'2 | C B | 3 | -17.452 | -24.675 | 86.265 | 1.00 | 0.00 | H |
| ATOM | 675 | H5'1 | C B | 3 | -18.957 | -20.171 | 84.817 | 1.00 | 0.00 | H |
| ATOM | 676 | H5'2 | C B | 3 | -20.120 | -21.211 | 83.969 | 1.00 | 0.00 | H |



|      |     |      |     |   |         |         |        |      |      |   |
|------|-----|------|-----|---|---------|---------|--------|------|------|---|
| ATOM | 677 | C1'  | C B | 4 | -12.870 | -25.745 | 86.592 | 1.00 | 0.00 | C |
| ATOM | 678 | N1   | C B | 4 | -13.585 | -25.193 | 87.774 | 1.00 | 0.00 | N |
| ATOM | 679 | C2   | C B | 4 | -12.825 | -24.593 | 88.776 | 1.00 | 0.00 | C |
| ATOM | 680 | O2   | C B | 4 | -11.595 | -24.543 | 88.643 | 1.00 | 0.00 | O |
| ATOM | 681 | N3   | C B | 4 | -13.456 | -24.085 | 89.861 | 1.00 | 0.00 | N |
| ATOM | 682 | C4   | C B | 4 | -14.790 | -24.155 | 89.978 | 1.00 | 0.00 | C |
| ATOM | 683 | N4   | C B | 4 | -15.357 | -23.639 | 91.059 | 1.00 | 0.00 | N |
| ATOM | 684 | C5   | C B | 4 | -15.598 | -24.770 | 88.966 | 1.00 | 0.00 | C |
| ATOM | 685 | C6   | C B | 4 | -14.939 | -25.272 | 87.878 | 1.00 | 0.00 | C |
| ATOM | 686 | C2'  | C B | 4 | -13.463 | -27.045 | 86.067 | 1.00 | 0.00 | C |
| ATOM | 687 | C3'  | C B | 4 | -13.264 | -26.901 | 84.566 | 1.00 | 0.00 | C |
| ATOM | 688 | O3'  | C B | 4 | -11.947 | -27.328 | 84.225 | 1.00 | 0.00 | O |
| ATOM | 689 | C4'  | C B | 4 | -13.462 | -25.404 | 84.339 | 1.00 | 0.00 | C |
| ATOM | 690 | O4'  | C B | 4 | -12.943 | -24.781 | 85.557 | 1.00 | 0.00 | O |
| ATOM | 691 | C5'  | C B | 4 | -14.884 | -24.939 | 84.128 | 1.00 | 0.00 | C |
| ATOM | 692 | O5'  | C B | 4 | -15.781 | -25.714 | 84.962 | 1.00 | 0.00 | O |
| ATOM | 693 | O1P  | C B | 4 | -17.160 | -27.001 | 83.297 | 1.00 | 0.00 | O |
| ATOM | 694 | O2P  | C B | 4 | -18.113 | -26.443 | 85.551 | 1.00 | 0.00 | O |
| ATOM | 695 | P    | C B | 4 | -17.243 | -26.044 | 84.417 | 1.00 | 0.00 | P |
| ATOM | 696 | H5   | C B | 4 | -16.681 | -24.837 | 89.059 | 1.00 | 0.00 | H |
| ATOM | 697 | H6   | C B | 4 | -15.511 | -25.743 | 87.080 | 1.00 | 0.00 | H |
| ATOM | 698 | H1'  | C B | 4 | -11.820 | -25.873 | 86.857 | 1.00 | 0.00 | H |
| ATOM | 699 | H3'  | C B | 4 | -13.991 | -27.484 | 84.001 | 1.00 | 0.00 | H |
| ATOM | 700 | H4'  | C B | 4 | -12.890 | -25.140 | 83.449 | 1.00 | 0.00 | H |
| ATOM | 701 | H41  | C B | 4 | -16.380 | -23.676 | 91.172 | 1.00 | 0.00 | H |
| ATOM | 702 | H42  | C B | 4 | -14.774 | -23.198 | 91.787 | 1.00 | 0.00 | H |
| ATOM | 703 | H2'1 | C B | 4 | -14.518 | -27.151 | 86.319 | 1.00 | 0.00 | H |
| ATOM | 704 | H2'2 | C B | 4 | -12.944 | -27.922 | 86.453 | 1.00 | 0.00 | H |
| ATOM | 705 | H5'1 | C B | 4 | -14.958 | -23.882 | 84.387 | 1.00 | 0.00 | H |
| ATOM | 706 | H5'2 | C B | 4 | -15.150 | -25.071 | 83.080 | 1.00 | 0.00 | H |
| ATOM | 707 | C1'  | G B | 5 | -9.026  | -27.647 | 89.068 | 1.00 | 0.00 | C |
| ATOM | 708 | N1   | G B | 5 | -11.543 | -25.931 | 93.161 | 1.00 | 0.00 | N |
| ATOM | 709 | C2   | G B | 5 | -10.192 | -25.878 | 92.861 | 1.00 | 0.00 | C |
| ATOM | 710 | N2   | G B | 5 | -9.408  | -25.290 | 93.774 | 1.00 | 0.00 | N |
| ATOM | 711 | N3   | G B | 5 | -9.668  | -26.369 | 91.740 | 1.00 | 0.00 | N |
| ATOM | 712 | C4   | G B | 5 | -10.605 | -26.933 | 90.935 | 1.00 | 0.00 | C |
| ATOM | 713 | C5   | G B | 5 | -11.969 | -27.037 | 91.153 | 1.00 | 0.00 | C |
| ATOM | 714 | C6   | G B | 5 | -12.528 | -26.512 | 92.341 | 1.00 | 0.00 | C |
| ATOM | 715 | O6   | G B | 5 | -13.702 | -26.508 | 92.711 | 1.00 | 0.00 | O |
| ATOM | 716 | N7   | G B | 5 | -12.581 | -27.690 | 90.081 | 1.00 | 0.00 | N |
| ATOM | 717 | C8   | G B | 5 | -11.594 | -27.953 | 89.264 | 1.00 | 0.00 | C |
| ATOM | 718 | N9   | G B | 5 | -10.361 | -27.525 | 89.716 | 1.00 | 0.00 | N |
| ATOM | 719 | C2'  | G B | 5 | -8.822  | -28.962 | 88.328 | 1.00 | 0.00 | C |
| ATOM | 720 | C3'  | G B | 5 | -7.982  | -28.529 | 87.137 | 1.00 | 0.00 | C |
| ATOM | 721 | O3'  | G B | 5 | -6.610  | -28.495 | 87.520 | 1.00 | 0.00 | O |
| ATOM | 722 | C4'  | G B | 5 | -8.529  | -27.137 | 86.824 | 1.00 | 0.00 | C |
| ATOM | 723 | O4'  | G B | 5 | -8.902  | -26.595 | 88.131 | 1.00 | 0.00 | O |
| ATOM | 724 | C5'  | G B | 5 | -9.731  | -27.077 | 85.913 | 1.00 | 0.00 | C |
| ATOM | 725 | O5'  | G B | 5 | -10.606 | -28.202 | 86.181 | 1.00 | 0.00 | O |
| ATOM | 726 | O1P  | G B | 5 | -10.491 | -29.550 | 84.059 | 1.00 | 0.00 | O |
| ATOM | 727 | O2P  | G B | 5 | -12.537 | -29.660 | 85.506 | 1.00 | 0.00 | O |
| ATOM | 728 | P    | G B | 5 | -11.417 | -28.849 | 84.971 | 1.00 | 0.00 | P |
| ATOM | 729 | H1   | G B | 5 | -11.848 | -25.515 | 94.053 | 1.00 | 0.00 | H |
| ATOM | 730 | H8   | G B | 5 | -11.730 | -28.466 | 88.313 | 1.00 | 0.00 | H |

|      |     |      |     |   |         |         |        |      |      |   |
|------|-----|------|-----|---|---------|---------|--------|------|------|---|
| ATOM | 731 | H1'  | G B | 5 | -8.263  | -27.507 | 89.832 | 1.00 | 0.00 | H |
| ATOM | 732 | H21  | G B | 5 | -9.822  | -24.909 | 94.637 | 1.00 | 0.00 | H |
| ATOM | 733 | H3'  | G B | 5 | -8.103  | -29.199 | 86.286 | 1.00 | 0.00 | H |
| ATOM | 734 | H22  | G B | 5 | -8.394  | -25.221 | 93.613 | 1.00 | 0.00 | H |
| ATOM | 735 | H4'  | G B | 5 | -7.722  | -26.580 | 86.348 | 1.00 | 0.00 | H |
| ATOM | 736 | H2'1 | G B | 5 | -9.764  | -29.408 | 88.008 | 1.00 | 0.00 | H |
| ATOM | 737 | H2'2 | G B | 5 | -8.298  | -29.701 | 88.935 | 1.00 | 0.00 | H |
| ATOM | 738 | H5'1 | G B | 5 | -10.266 | -26.144 | 86.088 | 1.00 | 0.00 | H |
| ATOM | 739 | H5'2 | G B | 5 | -9.397  | -27.110 | 84.876 | 1.00 | 0.00 | H |
| ATOM | 740 | C1'  | T B | 6 | -6.448  | -28.716 | 93.157 | 1.00 | 0.00 | C |
| ATOM | 741 | N1   | T B | 6 | -7.888  | -29.078 | 93.063 | 1.00 | 0.00 | N |
| ATOM | 742 | C2   | T B | 6 | -8.705  | -28.684 | 94.104 | 1.00 | 0.00 | C |
| ATOM | 743 | O2   | T B | 6 | -8.294  | -28.066 | 95.070 | 1.00 | 0.00 | O |
| ATOM | 744 | N3   | T B | 6 | -10.036 | -29.041 | 93.975 | 1.00 | 0.00 | N |
| ATOM | 745 | C4   | T B | 6 | -10.603 | -29.739 | 92.930 | 1.00 | 0.00 | C |
| ATOM | 746 | O4   | T B | 6 | -11.810 | -30.005 | 92.928 | 1.00 | 0.00 | O |
| ATOM | 747 | C5   | T B | 6 | -9.670  | -30.107 | 91.892 | 1.00 | 0.00 | C |
| ATOM | 748 | C6   | T B | 6 | -8.367  | -29.776 | 91.982 | 1.00 | 0.00 | C |
| ATOM | 749 | C7   | T B | 6 | -10.245 | -30.867 | 90.732 | 1.00 | 0.00 | C |
| ATOM | 750 | C2'  | T B | 6 | -5.509  | -29.794 | 92.627 | 1.00 | 0.00 | C |
| ATOM | 751 | C3'  | T B | 6 | -4.401  | -28.964 | 91.998 | 1.00 | 0.00 | C |
| ATOM | 752 | O3'  | T B | 6 | -3.460  | -28.597 | 93.005 | 1.00 | 0.00 | O |
| ATOM | 753 | C4'  | T B | 6 | -5.151  | -27.757 | 91.441 | 1.00 | 0.00 | C |
| ATOM | 754 | O4'  | T B | 6 | -6.247  | -27.546 | 92.388 | 1.00 | 0.00 | O |
| ATOM | 755 | C5'  | T B | 6 | -5.735  | -27.909 | 90.055 | 1.00 | 0.00 | C |
| ATOM | 756 | O5'  | T B | 6 | -6.218  | -29.264 | 89.873 | 1.00 | 0.00 | O |
| ATOM | 757 | O1P  | T B | 6 | -4.694  | -30.192 | 88.098 | 1.00 | 0.00 | O |
| ATOM | 758 | O2P  | T B | 6 | -7.020  | -31.097 | 88.354 | 1.00 | 0.00 | O |
| ATOM | 759 | P    | T B | 6 | -6.110  | -29.929 | 88.428 | 1.00 | 0.00 | P |
| ATOM | 760 | H3   | T B | 6 | -10.668 | -28.755 | 94.738 | 1.00 | 0.00 | H |
| ATOM | 761 | H6   | T B | 6 | -7.682  | -30.065 | 91.184 | 1.00 | 0.00 | H |
| ATOM | 762 | H1'  | T B | 6 | -6.223  | -28.478 | 94.196 | 1.00 | 0.00 | H |
| ATOM | 763 | H3'  | T B | 6 | -3.885  | -29.507 | 91.206 | 1.00 | 0.00 | H |
| ATOM | 764 | H4'  | T B | 6 | -4.444  | -26.928 | 91.415 | 1.00 | 0.00 | H |
| ATOM | 765 | H71  | T B | 6 | -9.825  | -31.873 | 90.713 | 1.00 | 0.00 | H |
| ATOM | 766 | H72  | T B | 6 | -11.328 | -30.926 | 90.838 | 1.00 | 0.00 | H |
| ATOM | 767 | H73  | T B | 6 | -9.997  | -30.354 | 89.802 | 1.00 | 0.00 | H |
| ATOM | 768 | H2'1 | T B | 6 | -5.991  | -30.436 | 91.893 | 1.00 | 0.00 | H |
| ATOM | 769 | H2'2 | T B | 6 | -5.124  | -30.433 | 93.421 | 1.00 | 0.00 | H |
| ATOM | 770 | H5'1 | T B | 6 | -6.557  | -27.204 | 89.932 | 1.00 | 0.00 | H |
| ATOM | 771 | H5'2 | T B | 6 | -4.963  | -27.692 | 89.318 | 1.00 | 0.00 | H |
| ATOM | 772 | C1'  | C B | 7 | -6.010  | -29.613 | 98.022 | 1.00 | 0.00 | C |
| ATOM | 773 | N1   | C B | 7 | -6.999  | -30.366 | 97.199 | 1.00 | 0.00 | N |
| ATOM | 774 | C2   | C B | 7 | -8.316  | -30.417 | 97.651 | 1.00 | 0.00 | C |
| ATOM | 775 | O2   | C B | 7 | -8.609  | -29.839 | 98.707 | 1.00 | 0.00 | O |
| ATOM | 776 | N3   | C B | 7 | -9.233  | -31.096 | 96.918 | 1.00 | 0.00 | N |
| ATOM | 777 | C4   | C B | 7 | -8.885  | -31.711 | 95.780 | 1.00 | 0.00 | C |
| ATOM | 778 | N4   | C B | 7 | -9.822  | -32.358 | 95.103 | 1.00 | 0.00 | N |
| ATOM | 779 | C5   | C B | 7 | -7.536  | -31.680 | 95.295 | 1.00 | 0.00 | C |
| ATOM | 780 | C6   | C B | 7 | -6.632  | -30.985 | 96.046 | 1.00 | 0.00 | C |
| ATOM | 781 | C2'  | C B | 7 | -4.634  | -30.263 | 98.072 | 1.00 | 0.00 | C |
| ATOM | 782 | C3'  | C B | 7 | -3.714  | -29.053 | 98.094 | 1.00 | 0.00 | C |
| ATOM | 783 | O3'  | C B | 7 | -3.579  | -28.593 | 99.436 | 1.00 | 0.00 | O |
| ATOM | 784 | C4'  | C B | 7 | -4.449  | -28.050 | 97.210 | 1.00 | 0.00 | C |

|      |     |      |     |   |         |         |         |      |      |   |
|------|-----|------|-----|---|---------|---------|---------|------|------|---|
| ATOM | 785 | O4'  | C B | 7 | -5.866  | -28.327 | 97.449  | 1.00 | 0.00 | O |
| ATOM | 786 | C5'  | C B | 7 | -4.183  | -28.140 | 95.724  | 1.00 | 0.00 | C |
| ATOM | 787 | O5'  | C B | 7 | -4.025  | -29.529 | 95.340  | 1.00 | 0.00 | O |
| ATOM | 788 | O1P  | C B | 7 | -1.617  | -29.665 | 94.623  | 1.00 | 0.00 | O |
| ATOM | 789 | O2P  | C B | 7 | -3.304  | -31.246 | 93.654  | 1.00 | 0.00 | O |
| ATOM | 790 | P    | C B | 7 | -3.003  | -29.890 | 94.170  | 1.00 | 0.00 | P |
| ATOM | 791 | H5   | C B | 7 | -7.248  | -32.185 | 94.373  | 1.00 | 0.00 | H |
| ATOM | 792 | H6   | C B | 7 | -5.596  | -30.926 | 95.714  | 1.00 | 0.00 | H |
| ATOM | 793 | H1'  | C B | 7 | -6.422  | -29.491 | 99.023  | 1.00 | 0.00 | H |
| ATOM | 794 | H3'  | C B | 7 | -2.726  | -29.283 | 97.690  | 1.00 | 0.00 | H |
| ATOM | 795 | H4'  | C B | 7 | -4.148  | -27.055 | 97.539  | 1.00 | 0.00 | H |
| ATOM | 796 | H41  | C B | 7 | -9.582  | -32.837 | 94.223  | 1.00 | 0.00 | H |
| ATOM | 797 | H42  | C B | 7 | -10.790 | -32.381 | 95.456  | 1.00 | 0.00 | H |
| ATOM | 798 | H2'1 | C B | 7 | -4.442  | -30.892 | 97.203  | 1.00 | 0.00 | H |
| ATOM | 799 | H2'2 | C B | 7 | -4.501  | -30.881 | 98.959  | 1.00 | 0.00 | H |
| ATOM | 800 | H5'1 | C B | 7 | -5.022  | -27.702 | 95.183  | 1.00 | 0.00 | H |
| ATOM | 801 | H5'2 | C B | 7 | -3.276  | -27.588 | 95.489  | 1.00 | 0.00 | H |
| ATOM | 802 | C1'  | C B | 8 | -7.674  | -31.094 | 102.444 | 1.00 | 0.00 | C |
| ATOM | 803 | N1   | C B | 8 | -7.834  | -31.962 | 101.246 | 1.00 | 0.00 | N |
| ATOM | 804 | C2   | C B | 8 | -9.103  | -32.466 | 100.969 | 1.00 | 0.00 | C |
| ATOM | 805 | O2   | C B | 8 | -10.039 | -32.172 | 101.724 | 1.00 | 0.00 | O |
| ATOM | 806 | N3   | C B | 8 | -9.270  | -33.258 | 99.883  | 1.00 | 0.00 | N |
| ATOM | 807 | C4   | C B | 8 | -8.237  | -33.559 | 99.086  | 1.00 | 0.00 | C |
| ATOM | 808 | N4   | C B | 8 | -8.457  | -34.336 | 98.034  | 1.00 | 0.00 | N |
| ATOM | 809 | C5   | C B | 8 | -6.918  | -33.061 | 99.347  | 1.00 | 0.00 | C |
| ATOM | 810 | C6   | C B | 8 | -6.775  | -32.259 | 100.445 | 1.00 | 0.00 | C |
| ATOM | 811 | C2'  | C B | 8 | -6.366  | -31.313 | 103.193 | 1.00 | 0.00 | C |
| ATOM | 812 | C3'  | C B | 8 | -6.029  | -29.907 | 103.663 | 1.00 | 0.00 | C |
| ATOM | 813 | O3'  | C B | 8 | -6.718  | -29.644 | 104.882 | 1.00 | 0.00 | O |
| ATOM | 814 | C4'  | C B | 8 | -6.534  | -29.035 | 102.514 | 1.00 | 0.00 | C |
| ATOM | 815 | O4'  | C B | 8 | -7.707  | -29.748 | 102.008 | 1.00 | 0.00 | O |
| ATOM | 816 | C5'  | C B | 8 | -5.574  | -28.810 | 101.370 | 1.00 | 0.00 | C |
| ATOM | 817 | O5'  | C B | 8 | -4.801  | -30.015 | 101.135 | 1.00 | 0.00 | O |
| ATOM | 818 | O1P  | C B | 8 | -2.455  | -29.328 | 101.739 | 1.00 | 0.00 | O |
| ATOM | 819 | O2P  | C B | 8 | -2.836  | -31.160 | 100.067 | 1.00 | 0.00 | O |
| ATOM | 820 | P    | C B | 8 | -3.290  | -29.873 | 100.649 | 1.00 | 0.00 | P |
| ATOM | 821 | H5   | C B | 8 | -6.073  | -33.308 | 98.705  | 1.00 | 0.00 | H |
| ATOM | 822 | H6   | C B | 8 | -5.793  | -31.849 | 100.681 | 1.00 | 0.00 | H |
| ATOM | 823 | H1'  | C B | 8 | -8.530  | -31.255 | 103.099 | 1.00 | 0.00 | H |
| ATOM | 824 | H3'  | C B | 8 | -4.958  | -29.774 | 103.816 | 1.00 | 0.00 | H |
| ATOM | 825 | H4'  | C B | 8 | -6.776  | -28.062 | 102.939 | 1.00 | 0.00 | H |
| ATOM | 826 | H41  | C B | 8 | -7.680  | -34.581 | 97.403  | 1.00 | 0.00 | H |
| ATOM | 827 | H42  | C B | 8 | -9.405  | -34.696 | 97.849  | 1.00 | 0.00 | H |
| ATOM | 828 | H2'1 | C B | 8 | -5.584  | -31.715 | 102.549 | 1.00 | 0.00 | H |
| ATOM | 829 | H2'2 | C B | 8 | -6.481  | -31.997 | 104.034 | 1.00 | 0.00 | H |
| ATOM | 830 | H5'1 | C B | 8 | -6.139  | -28.556 | 100.472 | 1.00 | 0.00 | H |
| ATOM | 831 | H5'2 | C B | 8 | -4.906  | -27.987 | 101.619 | 1.00 | 0.00 | H |
| ATOM | 832 | C1'  | T B | 9 | -10.653 | -33.657 | 105.453 | 1.00 | 0.00 | C |
| ATOM | 833 | N1   | T B | 9 | -9.939  | -34.344 | 104.345 | 1.00 | 0.00 | N |
| ATOM | 834 | C2   | T B | 9 | -10.695 | -35.130 | 103.499 | 1.00 | 0.00 | C |
| ATOM | 835 | O2   | T B | 9 | -11.898 | -35.272 | 103.633 | 1.00 | 0.00 | O |
| ATOM | 836 | N3   | T B | 9 | -9.993  | -35.749 | 102.483 | 1.00 | 0.00 | N |
| ATOM | 837 | C4   | T B | 9 | -8.638  | -35.656 | 102.247 | 1.00 | 0.00 | C |
| ATOM | 838 | O4   | T B | 9 | -8.117  | -36.262 | 101.303 | 1.00 | 0.00 | O |

|      |     |      |     |    |         |         |         |      |      |   |
|------|-----|------|-----|----|---------|---------|---------|------|------|---|
| ATOM | 839 | C5   | T B | 9  | -7.931  | -34.812 | 103.182 | 1.00 | 0.00 | C |
| ATOM | 840 | C6   | T B | 9  | -8.584  | -34.193 | 104.184 | 1.00 | 0.00 | C |
| ATOM | 841 | C7   | T B | 9  | -6.454  | -34.681 | 102.960 | 1.00 | 0.00 | C |
| ATOM | 842 | C2'  | T B | 9  | -9.860  | -33.600 | 106.754 | 1.00 | 0.00 | C |
| ATOM | 843 | C3'  | T B | 9  | -10.261 | -32.243 | 107.312 | 1.00 | 0.00 | C |
| ATOM | 844 | O3'  | T B | 9  | -11.485 | -32.376 | 108.030 | 1.00 | 0.00 | O |
| ATOM | 845 | C4'  | T B | 9  | -10.416 | -31.392 | 106.055 | 1.00 | 0.00 | C |
| ATOM | 846 | O4'  | T B | 9  | -10.911 | -32.327 | 105.044 | 1.00 | 0.00 | O |
| ATOM | 847 | C5'  | T B | 9  | -9.163  | -30.731 | 105.531 | 1.00 | 0.00 | C |
| ATOM | 848 | O5'  | T B | 9  | -8.027  | -31.613 | 105.724 | 1.00 | 0.00 | O |
| ATOM | 849 | O1P  | T B | 9  | -6.610  | -30.381 | 107.398 | 1.00 | 0.00 | O |
| ATOM | 850 | O2P  | T B | 9  | -5.542  | -31.972 | 105.778 | 1.00 | 0.00 | O |
| ATOM | 851 | P    | T B | 9  | -6.604  | -30.972 | 106.044 | 1.00 | 0.00 | P |
| ATOM | 852 | H3   | T B | 9  | -10.535 | -36.338 | 101.836 | 1.00 | 0.00 | H |
| ATOM | 853 | H6   | T B | 9  | -8.029  | -33.561 | 104.877 | 1.00 | 0.00 | H |
| ATOM | 854 | H1'  | T B | 9  | -11.612 | -34.153 | 105.603 | 1.00 | 0.00 | H |
| ATOM | 855 | H3'  | T B | 9  | -9.497  | -31.834 | 107.972 | 1.00 | 0.00 | H |
| ATOM | 856 | H4'  | T B | 9  | -11.133 | -30.604 | 106.293 | 1.00 | 0.00 | H |
| ATOM | 857 | H71  | T B | 9  | -5.918  | -35.131 | 103.796 | 1.00 | 0.00 | H |
| ATOM | 858 | H72  | T B | 9  | -6.177  | -35.189 | 102.036 | 1.00 | 0.00 | H |
| ATOM | 859 | H73  | T B | 9  | -6.189  | -33.626 | 102.886 | 1.00 | 0.00 | H |
| ATOM | 860 | H2'1 | T B | 9  | -8.785  | -33.658 | 106.586 | 1.00 | 0.00 | H |
| ATOM | 861 | H2'2 | T B | 9  | -10.128 | -34.406 | 107.437 | 1.00 | 0.00 | H |
| ATOM | 862 | H5'1 | T B | 9  | -9.287  | -30.517 | 104.469 | 1.00 | 0.00 | H |
| ATOM | 863 | H5'2 | T B | 9  | -9.000  | -29.799 | 106.068 | 1.00 | 0.00 | H |
| ATOM | 864 | C1'  | A B | 10 | -13.683 | -37.429 | 106.558 | 1.00 | 0.00 | C |
| ATOM | 865 | N1   | A B | 10 | -11.072 | -39.870 | 102.876 | 1.00 | 0.00 | N |
| ATOM | 866 | C2   | A B | 10 | -12.367 | -39.819 | 103.177 | 1.00 | 0.00 | C |
| ATOM | 867 | N3   | A B | 10 | -12.974 | -39.164 | 104.142 | 1.00 | 0.00 | N |
| ATOM | 868 | C4   | A B | 10 | -12.080 | -38.484 | 104.881 | 1.00 | 0.00 | C |
| ATOM | 869 | C5   | A B | 10 | -10.724 | -38.432 | 104.705 | 1.00 | 0.00 | C |
| ATOM | 870 | C6   | A B | 10 | -10.203 | -39.179 | 103.629 | 1.00 | 0.00 | C |
| ATOM | 871 | N6   | A B | 10 | -8.892  | -39.222 | 103.336 | 1.00 | 0.00 | N |
| ATOM | 872 | N7   | A B | 10 | -10.128 | -37.625 | 105.659 | 1.00 | 0.00 | N |
| ATOM | 873 | C8   | A B | 10 | -11.124 | -37.214 | 106.386 | 1.00 | 0.00 | C |
| ATOM | 874 | N9   | A B | 10 | -12.340 | -37.692 | 105.972 | 1.00 | 0.00 | N |
| ATOM | 875 | C2'  | A B | 10 | -13.681 | -37.347 | 108.078 | 1.00 | 0.00 | C |
| ATOM | 876 | C3'  | A B | 10 | -14.727 | -36.275 | 108.341 | 1.00 | 0.00 | C |
| ATOM | 877 | O3'  | A B | 10 | -16.021 | -36.874 | 108.341 | 1.00 | 0.00 | O |
| ATOM | 878 | C4'  | A B | 10 | -14.535 | -35.319 | 107.163 | 1.00 | 0.00 | C |
| ATOM | 879 | O4'  | A B | 10 | -14.137 | -36.187 | 106.054 | 1.00 | 0.00 | O |
| ATOM | 880 | C5'  | A B | 10 | -13.488 | -34.244 | 107.336 | 1.00 | 0.00 | C |
| ATOM | 881 | O5'  | A B | 10 | -12.364 | -34.770 | 108.087 | 1.00 | 0.00 | O |
| ATOM | 882 | O1P  | A B | 10 | -12.431 | -33.454 | 110.232 | 1.00 | 0.00 | O |
| ATOM | 883 | O2P  | A B | 10 | -10.255 | -34.383 | 109.397 | 1.00 | 0.00 | O |
| ATOM | 884 | P    | A B | 10 | -11.579 | -33.796 | 109.077 | 1.00 | 0.00 | P |
| ATOM | 885 | H2   | A B | 10 | -13.017 | -40.405 | 102.529 | 1.00 | 0.00 | H |
| ATOM | 886 | H8   | A B | 10 | -11.004 | -36.554 | 107.245 | 1.00 | 0.00 | H |
| ATOM | 887 | H1'  | A B | 10 | -14.365 | -38.204 | 106.210 | 1.00 | 0.00 | H |
| ATOM | 888 | H3'  | A B | 10 | -14.563 | -35.767 | 109.290 | 1.00 | 0.00 | H |
| ATOM | 889 | H4'  | A B | 10 | -15.493 | -34.827 | 106.996 | 1.00 | 0.00 | H |
| ATOM | 890 | H61  | A B | 10 | -8.563  | -39.782 | 102.537 | 1.00 | 0.00 | H |
| ATOM | 891 | H62  | A B | 10 | -8.217  | -38.697 | 103.909 | 1.00 | 0.00 | H |
| ATOM | 892 | H2'1 | A B | 10 | -12.709 | -37.057 | 108.478 | 1.00 | 0.00 | H |

|      |     |      |     |    |         |         |         |      |      |   |
|------|-----|------|-----|----|---------|---------|---------|------|------|---|
| ATOM | 893 | H2'2 | A B | 10 | -13.959 | -38.293 | 108.545 | 1.00 | 0.00 | H |
| ATOM | 894 | H5'1 | A B | 10 | -13.150 | -33.912 | 106.354 | 1.00 | 0.00 | H |
| ATOM | 895 | H5'2 | A B | 10 | -13.925 | -33.401 | 107.869 | 1.00 | 0.00 | H |
| ATOM | 896 | C1'  | G B | 11 | -15.405 | -42.053 | 106.014 | 1.00 | 0.00 | C |
| ATOM | 897 | N1   | G B | 11 | -10.723 | -42.997 | 104.220 | 1.00 | 0.00 | N |
| ATOM | 898 | C2   | G B | 11 | -11.956 | -43.424 | 103.756 | 1.00 | 0.00 | C |
| ATOM | 899 | N2   | G B | 11 | -11.937 | -44.208 | 102.671 | 1.00 | 0.00 | N |
| ATOM | 900 | N3   | G B | 11 | -13.113 | -43.093 | 104.328 | 1.00 | 0.00 | N |
| ATOM | 901 | C4   | G B | 11 | -12.942 | -42.301 | 105.418 | 1.00 | 0.00 | C |
| ATOM | 902 | C5   | G B | 11 | -11.755 | -41.830 | 105.955 | 1.00 | 0.00 | C |
| ATOM | 903 | C6   | G B | 11 | -10.527 | -42.176 | 105.347 | 1.00 | 0.00 | C |
| ATOM | 904 | O6   | G B | 11 | -9.382  | -41.860 | 105.672 | 1.00 | 0.00 | O |
| ATOM | 905 | N7   | G B | 11 | -12.013 | -41.045 | 107.081 | 1.00 | 0.00 | N |
| ATOM | 906 | C8   | G B | 11 | -13.317 | -41.062 | 107.187 | 1.00 | 0.00 | C |
| ATOM | 907 | N9   | G B | 11 | -13.952 | -41.805 | 106.213 | 1.00 | 0.00 | N |
| ATOM | 908 | C2'  | G B | 11 | -16.181 | -42.226 | 107.312 | 1.00 | 0.00 | C |
| ATOM | 909 | C3'  | G B | 11 | -17.511 | -41.570 | 106.977 | 1.00 | 0.00 | C |
| ATOM | 910 | O3'  | G B | 11 | -18.346 | -42.518 | 106.316 | 1.00 | 0.00 | O |
| ATOM | 911 | C4'  | G B | 11 | -17.102 | -40.421 | 106.058 | 1.00 | 0.00 | C |
| ATOM | 912 | O4'  | G B | 11 | -15.943 | -40.939 | 105.329 | 1.00 | 0.00 | O |
| ATOM | 913 | C5'  | G B | 11 | -16.711 | -39.128 | 106.733 | 1.00 | 0.00 | C |
| ATOM | 914 | O5'  | G B | 11 | -16.003 | -39.413 | 107.965 | 1.00 | 0.00 | O |
| ATOM | 915 | O1P  | G B | 11 | -17.557 | -38.546 | 109.744 | 1.00 | 0.00 | O |
| ATOM | 916 | O2P  | G B | 11 | -15.087 | -38.638 | 110.172 | 1.00 | 0.00 | O |
| ATOM | 917 | P    | G B | 11 | -16.191 | -38.426 | 109.204 | 1.00 | 0.00 | P |
| ATOM | 918 | H1   | G B | 11 | -9.887  | -43.303 | 103.700 | 1.00 | 0.00 | H |
| ATOM | 919 | H8   | G B | 11 | -13.855 | -40.536 | 107.975 | 1.00 | 0.00 | H |
| ATOM | 920 | H1'  | G B | 11 | -15.518 | -42.927 | 105.372 | 1.00 | 0.00 | H |
| ATOM | 921 | H21  | G B | 11 | -11.039 | -44.456 | 102.231 | 1.00 | 0.00 | H |
| ATOM | 922 | H3'  | G B | 11 | -18.020 | -41.199 | 107.866 | 1.00 | 0.00 | H |
| ATOM | 923 | H22  | G B | 11 | -12.820 | -44.563 | 102.277 | 1.00 | 0.00 | H |
| ATOM | 924 | H4'  | G B | 11 | -17.954 | -40.214 | 105.410 | 1.00 | 0.00 | H |
| ATOM | 925 | H2'1 | G B | 11 | -15.696 | -41.731 | 108.153 | 1.00 | 0.00 | H |
| ATOM | 926 | H2'2 | G B | 11 | -16.312 | -43.274 | 107.580 | 1.00 | 0.00 | H |
| ATOM | 927 | H5'1 | G B | 11 | -16.070 | -38.555 | 106.064 | 1.00 | 0.00 | H |
| ATOM | 928 | H5'2 | G B | 11 | -17.610 | -38.552 | 106.949 | 1.00 | 0.00 | H |
| ATOM | 929 | C1'  | G B | 12 | -15.032 | -46.826 | 104.744 | 1.00 | 0.00 | C |
| ATOM | 930 | N1   | G B | 12 | -10.054 | -46.069 | 105.577 | 1.00 | 0.00 | N |
| ATOM | 931 | C2   | G B | 12 | -10.691 | -46.758 | 104.559 | 1.00 | 0.00 | C |
| ATOM | 932 | N2   | G B | 12 | -9.895  | -47.323 | 103.642 | 1.00 | 0.00 | N |
| ATOM | 933 | N3   | G B | 12 | -12.014 | -46.874 | 104.463 | 1.00 | 0.00 | N |
| ATOM | 934 | C4   | G B | 12 | -12.662 | -46.248 | 105.481 | 1.00 | 0.00 | C |
| ATOM | 935 | C5   | G B | 12 | -12.113 | -45.542 | 106.537 | 1.00 | 0.00 | C |
| ATOM | 936 | C6   | G B | 12 | -10.710 | -45.415 | 106.637 | 1.00 | 0.00 | C |
| ATOM | 937 | O6   | G B | 12 | -10.041 | -44.835 | 107.494 | 1.00 | 0.00 | O |
| ATOM | 938 | N7   | G B | 12 | -13.124 | -45.053 | 107.368 | 1.00 | 0.00 | N |
| ATOM | 939 | C8   | G B | 12 | -14.227 | -45.465 | 106.800 | 1.00 | 0.00 | C |
| ATOM | 940 | N9   | G B | 12 | -14.028 | -46.199 | 105.648 | 1.00 | 0.00 | N |
| ATOM | 941 | C2'  | G B | 12 | -16.229 | -47.418 | 105.474 | 1.00 | 0.00 | C |
| ATOM | 942 | C3'  | G B | 12 | -17.365 | -47.135 | 104.503 | 1.00 | 0.00 | C |
| ATOM | 943 | O3'  | G B | 12 | -17.411 | -48.169 | 103.523 | 1.00 | 0.00 | O |
| ATOM | 944 | C4'  | G B | 12 | -16.970 | -45.787 | 103.903 | 1.00 | 0.00 | C |
| ATOM | 945 | O4'  | G B | 12 | -15.508 | -45.822 | 103.867 | 1.00 | 0.00 | O |
| ATOM | 946 | C5'  | G B | 12 | -17.405 | -44.559 | 104.667 | 1.00 | 0.00 | C |

|      |      |      |     |    |         |         |         |      |      |   |
|------|------|------|-----|----|---------|---------|---------|------|------|---|
| ATOM | 947  | O5'  | G B | 12 | -17.328 | -44.814 | 106.092 | 1.00 | 0.00 | O |
| ATOM | 948  | O1P  | G B | 12 | -19.733 | -44.729 | 106.828 | 1.00 | 0.00 | O |
| ATOM | 949  | O2P  | G B | 12 | -17.904 | -44.162 | 108.450 | 1.00 | 0.00 | O |
| ATOM | 950  | P    | G B | 12 | -18.403 | -44.132 | 107.053 | 1.00 | 0.00 | P |
| ATOM | 951  | H1   | G B | 12 | -9.024  | -46.033 | 105.555 | 1.00 | 0.00 | H |
| ATOM | 952  | H8   | G B | 12 | -15.219 | -45.249 | 107.200 | 1.00 | 0.00 | H |
| ATOM | 953  | H1'  | G B | 12 | -14.525 | -47.581 | 104.145 | 1.00 | 0.00 | H |
| ATOM | 954  | H21  | G B | 12 | -8.872  | -47.226 | 103.720 | 1.00 | 0.00 | H |
| ATOM | 955  | H3'  | G B | 12 | -18.328 | -47.073 | 105.008 | 1.00 | 0.00 | H |
| ATOM | 956  | H22  | G B | 12 | -10.306 | -47.853 | 102.861 | 1.00 | 0.00 | H |
| ATOM | 957  | H4'  | G B | 12 | -17.418 | -45.738 | 102.912 | 1.00 | 0.00 | H |
| ATOM | 958  | H2'1 | G B | 12 | -16.403 | -46.941 | 106.439 | 1.00 | 0.00 | H |
| ATOM | 959  | H2'2 | G B | 12 | -16.117 | -48.488 | 105.653 | 1.00 | 0.00 | H |
| ATOM | 960  | H5'1 | G B | 12 | -16.752 | -43.726 | 104.407 | 1.00 | 0.00 | H |
| ATOM | 961  | H5'2 | G B | 12 | -18.430 | -44.311 | 104.391 | 1.00 | 0.00 | H |
| ATOM | 962  | C1'  | T B | 13 | -12.559 | -51.027 | 103.889 | 1.00 | 0.00 | C |
| ATOM | 963  | N1   | T B | 13 | -12.358 | -50.287 | 105.163 | 1.00 | 0.00 | N |
| ATOM | 964  | C2   | T B | 13 | -11.057 | -50.006 | 105.531 | 1.00 | 0.00 | C |
| ATOM | 965  | O2   | T B | 13 | -10.096 | -50.340 | 104.860 | 1.00 | 0.00 | O |
| ATOM | 966  | N3   | T B | 13 | -10.917 | -49.316 | 106.721 | 1.00 | 0.00 | N |
| ATOM | 967  | C4   | T B | 13 | -11.934 | -48.898 | 107.554 | 1.00 | 0.00 | C |
| ATOM | 968  | O4   | T B | 13 | -11.685 | -48.288 | 108.600 | 1.00 | 0.00 | O |
| ATOM | 969  | C5   | T B | 13 | -13.258 | -49.236 | 107.085 | 1.00 | 0.00 | C |
| ATOM | 970  | C6   | T B | 13 | -13.432 | -49.906 | 105.929 | 1.00 | 0.00 | C |
| ATOM | 971  | C7   | T B | 13 | -14.396 | -48.797 | 107.958 | 1.00 | 0.00 | C |
| ATOM | 972  | C2'  | T B | 13 | -13.695 | -52.041 | 103.939 | 1.00 | 0.00 | C |
| ATOM | 973  | C3'  | T B | 13 | -14.267 | -51.948 | 102.533 | 1.00 | 0.00 | C |
| ATOM | 974  | O3'  | T B | 13 | -13.513 | -52.791 | 101.665 | 1.00 | 0.00 | O |
| ATOM | 975  | C4'  | T B | 13 | -14.096 | -50.470 | 102.195 | 1.00 | 0.00 | C |
| ATOM | 976  | O4'  | T B | 13 | -12.865 | -50.081 | 102.883 | 1.00 | 0.00 | O |
| ATOM | 977  | C5'  | T B | 13 | -15.208 | -49.546 | 102.636 | 1.00 | 0.00 | C |
| ATOM | 978  | O5'  | T B | 13 | -15.730 | -49.984 | 103.916 | 1.00 | 0.00 | O |
| ATOM | 979  | O1P  | T B | 13 | -18.079 | -50.700 | 103.375 | 1.00 | 0.00 | O |
| ATOM | 980  | O2P  | T B | 13 | -17.515 | -49.889 | 105.681 | 1.00 | 0.00 | O |
| ATOM | 981  | P    | T B | 13 | -17.282 | -49.790 | 104.220 | 1.00 | 0.00 | P |
| ATOM | 982  | H3   | T B | 13 | -9.955  | -49.092 | 107.016 | 1.00 | 0.00 | H |
| ATOM | 983  | H6   | T B | 13 | -14.441 | -50.150 | 105.597 | 1.00 | 0.00 | H |
| ATOM | 984  | H1'  | T B | 13 | -11.618 | -51.508 | 103.621 | 1.00 | 0.00 | H |
| ATOM | 985  | H3'  | T B | 13 | -15.316 | -52.242 | 102.500 | 1.00 | 0.00 | H |
| ATOM | 986  | H4'  | T B | 13 | -14.018 | -50.400 | 101.109 | 1.00 | 0.00 | H |
| ATOM | 987  | H71  | T B | 13 | -14.903 | -49.672 | 108.362 | 1.00 | 0.00 | H |
| ATOM | 988  | H72  | T B | 13 | -14.011 | -48.189 | 108.779 | 1.00 | 0.00 | H |
| ATOM | 989  | H73  | T B | 13 | -15.100 | -48.207 | 107.370 | 1.00 | 0.00 | H |
| ATOM | 990  | H2'1 | T B | 13 | -14.442 | -51.786 | 104.690 | 1.00 | 0.00 | H |
| ATOM | 991  | H2'2 | T B | 13 | -13.341 | -53.049 | 104.159 | 1.00 | 0.00 | H |
| ATOM | 992  | H5'1 | T B | 13 | -14.819 | -48.532 | 102.724 | 1.00 | 0.00 | H |
| ATOM | 993  | H5'2 | T B | 13 | -16.003 | -49.562 | 101.892 | 1.00 | 0.00 | H |
| ATOM | 994  | C1'  | G B | 14 | -8.720  | -54.119 | 104.484 | 1.00 | 0.00 | C |
| ATOM | 995  | N1   | G B | 14 | -8.191  | -51.719 | 108.955 | 1.00 | 0.00 | N |
| ATOM | 996  | C2   | G B | 14 | -7.231  | -52.111 | 108.039 | 1.00 | 0.00 | C |
| ATOM | 997  | N2   | G B | 14 | -5.963  | -51.828 | 108.356 | 1.00 | 0.00 | N |
| ATOM | 998  | N3   | G B | 14 | -7.516  | -52.735 | 106.897 | 1.00 | 0.00 | N |
| ATOM | 999  | C4   | G B | 14 | -8.850  | -52.947 | 106.742 | 1.00 | 0.00 | C |
| ATOM | 1000 | C5   | G B | 14 | -9.877  | -52.596 | 107.602 | 1.00 | 0.00 | C |

|      |      |      |     |    |         |         |         |      |      |   |
|------|------|------|-----|----|---------|---------|---------|------|------|---|
| ATOM | 1001 | C6   | G B | 14 | -9.577  | -51.930 | 108.813 | 1.00 | 0.00 | C |
| ATOM | 1002 | O6   | G B | 14 | -10.343 | -51.542 | 109.696 | 1.00 | 0.00 | O |
| ATOM | 1003 | N7   | G B | 14 | -11.107 | -52.996 | 107.074 | 1.00 | 0.00 | N |
| ATOM | 1004 | C8   | G B | 14 | -10.793 | -53.560 | 105.937 | 1.00 | 0.00 | C |
| ATOM | 1005 | N9   | G B | 14 | -9.440  | -53.570 | 105.665 | 1.00 | 0.00 | N |
| ATOM | 1006 | C2'  | G B | 14 | -9.311  | -55.418 | 103.954 | 1.00 | 0.00 | C |
| ATOM | 1007 | C3'  | G B | 14 | -9.105  | -55.271 | 102.454 | 1.00 | 0.00 | C |
| ATOM | 1008 | O3'  | G B | 14 | -7.787  | -55.699 | 102.119 | 1.00 | 0.00 | O |
| ATOM | 1009 | C4'  | G B | 14 | -9.302  | -53.773 | 102.230 | 1.00 | 0.00 | C |
| ATOM | 1010 | O4'  | G B | 14 | -8.787  | -53.155 | 103.451 | 1.00 | 0.00 | O |
| ATOM | 1011 | C5'  | G B | 14 | -10.722 | -53.308 | 102.012 | 1.00 | 0.00 | C |
| ATOM | 1012 | O5'  | G B | 14 | -11.625 | -54.081 | 102.842 | 1.00 | 0.00 | O |
| ATOM | 1013 | O1P  | G B | 14 | -12.998 | -55.365 | 101.168 | 1.00 | 0.00 | O |
| ATOM | 1014 | O2P  | G B | 14 | -13.959 | -54.811 | 103.418 | 1.00 | 0.00 | O |
| ATOM | 1015 | P    | G B | 14 | -13.084 | -54.410 | 102.288 | 1.00 | 0.00 | P |
| ATOM | 1016 | H1   | G B | 14 | -7.867  | -51.235 | 109.807 | 1.00 | 0.00 | H |
| ATOM | 1017 | H8   | G B | 14 | -11.537 | -53.986 | 105.262 | 1.00 | 0.00 | H |
| ATOM | 1018 | H1'  | G B | 14 | -7.672  | -54.248 | 104.753 | 1.00 | 0.00 | H |
| ATOM | 1019 | H21  | G B | 14 | -5.751  | -51.341 | 109.241 | 1.00 | 0.00 | H |
| ATOM | 1020 | H3'  | G B | 14 | -9.830  | -55.853 | 101.884 | 1.00 | 0.00 | H |
| ATOM | 1021 | H22  | G B | 14 | -5.200  | -52.096 | 107.719 | 1.00 | 0.00 | H |
| ATOM | 1022 | H4'  | G B | 14 | -8.725  | -53.508 | 101.343 | 1.00 | 0.00 | H |
| ATOM | 1023 | H2'1 | G B | 14 | -10.367 | -55.523 | 104.201 | 1.00 | 0.00 | H |
| ATOM | 1024 | H2'2 | G B | 14 | -8.796  | -56.296 | 104.341 | 1.00 | 0.00 | H |
| ATOM | 1025 | H5'1 | G B | 14 | -10.796 | -52.252 | 102.274 | 1.00 | 0.00 | H |
| ATOM | 1026 | H5'2 | G B | 14 | -10.984 | -53.437 | 100.962 | 1.00 | 0.00 | H |
| ATOM | 1027 | C1'  | C B | 15 | -4.875  | -56.021 | 106.960 | 1.00 | 0.00 | C |
| ATOM | 1028 | N1   | C B | 15 | -6.207  | -55.896 | 107.611 | 1.00 | 0.00 | N |
| ATOM | 1029 | C2   | C B | 15 | -6.271  | -55.265 | 108.852 | 1.00 | 0.00 | C |
| ATOM | 1030 | O2   | C B | 15 | -5.224  | -54.838 | 109.358 | 1.00 | 0.00 | O |
| ATOM | 1031 | N3   | C B | 15 | -7.475  | -55.139 | 109.462 | 1.00 | 0.00 | N |
| ATOM | 1032 | C4   | C B | 15 | -8.588  | -55.613 | 108.889 | 1.00 | 0.00 | C |
| ATOM | 1033 | N4   | C B | 15 | -9.739  | -55.460 | 109.527 | 1.00 | 0.00 | N |
| ATOM | 1034 | C5   | C B | 15 | -8.554  | -56.271 | 107.614 | 1.00 | 0.00 | C |
| ATOM | 1035 | C6   | C B | 15 | -7.331  | -56.380 | 107.018 | 1.00 | 0.00 | C |
| ATOM | 1036 | C2'  | C B | 15 | -4.674  | -57.339 | 106.224 | 1.00 | 0.00 | C |
| ATOM | 1037 | C3'  | C B | 15 | -3.838  | -56.910 | 105.028 | 1.00 | 0.00 | C |
| ATOM | 1038 | O3'  | C B | 15 | -2.463  | -56.875 | 105.405 | 1.00 | 0.00 | O |
| ATOM | 1039 | C4'  | C B | 15 | -4.384  | -55.519 | 104.712 | 1.00 | 0.00 | C |
| ATOM | 1040 | O4'  | C B | 15 | -4.755  | -54.972 | 106.018 | 1.00 | 0.00 | O |
| ATOM | 1041 | C5'  | C B | 15 | -5.592  | -55.462 | 103.805 | 1.00 | 0.00 | C |
| ATOM | 1042 | O5'  | C B | 15 | -6.465  | -56.585 | 104.080 | 1.00 | 0.00 | O |
| ATOM | 1043 | O1P  | C B | 15 | -6.358  | -57.941 | 101.963 | 1.00 | 0.00 | O |
| ATOM | 1044 | O2P  | C B | 15 | -8.400  | -58.046 | 103.417 | 1.00 | 0.00 | O |
| ATOM | 1045 | P    | C B | 15 | -7.281  | -57.237 | 102.876 | 1.00 | 0.00 | P |
| ATOM | 1046 | H5   | C B | 15 | -9.458  | -56.662 | 107.148 | 1.00 | 0.00 | H |
| ATOM | 1047 | H6   | C B | 15 | -7.255  | -56.867 | 106.045 | 1.00 | 0.00 | H |
| ATOM | 1048 | H1'  | C B | 15 | -4.108  | -55.878 | 107.722 | 1.00 | 0.00 | H |
| ATOM | 1049 | H3'  | C B | 15 | -3.963  | -57.582 | 104.180 | 1.00 | 0.00 | H |
| ATOM | 1050 | H4'  | C B | 15 | -3.580  | -54.964 | 104.230 | 1.00 | 0.00 | H |
| ATOM | 1051 | H41  | C B | 15 | -10.613 | -55.812 | 109.108 | 1.00 | 0.00 | H |
| ATOM | 1052 | H42  | C B | 15 | -9.761  | -54.989 | 110.444 | 1.00 | 0.00 | H |
| ATOM | 1053 | H2'1 | C B | 15 | -5.616  | -57.785 | 105.909 | 1.00 | 0.00 | H |
| ATOM | 1054 | H2'2 | C B | 15 | -4.149  | -58.077 | 106.832 | 1.00 | 0.00 | H |

|      |      |      |   |   |    |        |         |         |      |      |   |
|------|------|------|---|---|----|--------|---------|---------|------|------|---|
| ATOM | 1055 | H5'1 | C | B | 15 | -6.126 | -54.527 | 103.978 | 1.00 | 0.00 | H |
| ATOM | 1056 | H5'2 | C | B | 15 | -5.261 | -55.499 | 102.767 | 1.00 | 0.00 | H |
| ATOM | 1057 | C1'  | G | B | 16 | -2.317 | -57.086 | 111.063 | 1.00 | 0.00 | C |
| ATOM | 1058 | N1   | G | B | 16 | -6.896 | -56.842 | 113.300 | 1.00 | 0.00 | N |
| ATOM | 1059 | C2   | G | B | 16 | -5.673 | -56.352 | 113.723 | 1.00 | 0.00 | C |
| ATOM | 1060 | N2   | G | B | 16 | -5.670 | -55.711 | 114.899 | 1.00 | 0.00 | N |
| ATOM | 1061 | N3   | G | B | 16 | -4.545 | -56.487 | 113.028 | 1.00 | 0.00 | N |
| ATOM | 1062 | C4   | G | B | 16 | -4.732 | -57.166 | 111.866 | 1.00 | 0.00 | C |
| ATOM | 1063 | C5   | G | B | 16 | -5.910 | -57.695 | 111.365 | 1.00 | 0.00 | C |
| ATOM | 1064 | C6   | G | B | 16 | -7.109 | -57.548 | 112.102 | 1.00 | 0.00 | C |
| ATOM | 1065 | O6   | G | B | 16 | -8.243 | -57.945 | 111.825 | 1.00 | 0.00 | O |
| ATOM | 1066 | N7   | G | B | 16 | -5.676 | -58.321 | 110.140 | 1.00 | 0.00 | N |
| ATOM | 1067 | C8   | G | B | 16 | -4.393 | -58.153 | 109.938 | 1.00 | 0.00 | C |
| ATOM | 1068 | N9   | G | B | 16 | -3.751 | -57.461 | 110.945 | 1.00 | 0.00 | N |
| ATOM | 1069 | C2'  | G | B | 16 | -1.359 | -58.151 | 110.545 | 1.00 | 0.00 | C |
| ATOM | 1070 | C3'  | G | B | 16 | -0.248 | -57.310 | 109.937 | 1.00 | 0.00 | C |
| ATOM | 1071 | O3'  | G | B | 16 | 0.671  | -56.939 | 110.961 | 1.00 | 0.00 | O |
| ATOM | 1072 | C4'  | G | B | 16 | -1.002 | -56.107 | 109.373 | 1.00 | 0.00 | C |
| ATOM | 1073 | O4'  | G | B | 16 | -2.114 | -55.910 | 110.304 | 1.00 | 0.00 | O |
| ATOM | 1074 | C5'  | G | B | 16 | -1.560 | -56.258 | 107.978 | 1.00 | 0.00 | C |
| ATOM | 1075 | O5'  | G | B | 16 | -2.027 | -57.616 | 107.781 | 1.00 | 0.00 | O |
| ATOM | 1076 | O1P  | G | B | 16 | -0.468 | -58.522 | 106.027 | 1.00 | 0.00 | O |
| ATOM | 1077 | O2P  | G | B | 16 | -2.788 | -59.449 | 106.241 | 1.00 | 0.00 | O |
| ATOM | 1078 | P    | G | B | 16 | -1.888 | -58.274 | 106.335 | 1.00 | 0.00 | P |
| ATOM | 1079 | H1   | G | B | 16 | -7.710 | -56.679 | 113.909 | 1.00 | 0.00 | H |
| ATOM | 1080 | H8   | G | B | 16 | -3.878 | -58.527 | 109.054 | 1.00 | 0.00 | H |
| ATOM | 1081 | H1'  | G | B | 16 | -2.110 | -56.850 | 112.108 | 1.00 | 0.00 | H |
| ATOM | 1082 | H21  | G | B | 16 | -6.547 | -55.608 | 115.430 | 1.00 | 0.00 | H |
| ATOM | 1083 | H3'  | G | B | 16 | 0.285  | -57.844 | 109.151 | 1.00 | 0.00 | H |
| ATOM | 1084 | H22  | G | B | 16 | -4.792 | -55.325 | 115.270 | 1.00 | 0.00 | H |
| ATOM | 1085 | H4'  | G | B | 16 | -0.302 | -55.271 | 109.364 | 1.00 | 0.00 | H |
| ATOM | 1086 | H2'1 | G | B | 16 | -1.823 | -58.795 | 109.798 | 1.00 | 0.00 | H |
| ATOM | 1087 | H2'2 | G | B | 16 | -0.982 | -58.791 | 111.343 | 1.00 | 0.00 | H |
| ATOM | 1088 | H5'1 | G | B | 16 | -2.387 | -55.561 | 107.846 | 1.00 | 0.00 | H |
| ATOM | 1089 | H5'2 | G | B | 16 | -0.778 | -56.029 | 107.254 | 1.00 | 0.00 | H |
| ATOM | 1090 | C1'  | G | B | 17 | -1.860 | -57.988 | 115.912 | 1.00 | 0.00 | C |
| ATOM | 1091 | N1   | G | B | 17 | -6.734 | -59.445 | 115.520 | 1.00 | 0.00 | N |
| ATOM | 1092 | C2   | G | B | 17 | -6.108 | -58.691 | 116.498 | 1.00 | 0.00 | C |
| ATOM | 1093 | N2   | G | B | 17 | -6.883 | -58.273 | 117.505 | 1.00 | 0.00 | N |
| ATOM | 1094 | N3   | G | B | 17 | -4.813 | -58.381 | 116.471 | 1.00 | 0.00 | N |
| ATOM | 1095 | C4   | G | B | 17 | -4.182 | -58.896 | 115.383 | 1.00 | 0.00 | C |
| ATOM | 1096 | C5   | G | B | 17 | -4.721 | -59.658 | 114.362 | 1.00 | 0.00 | C |
| ATOM | 1097 | C6   | G | B | 17 | -6.096 | -59.985 | 114.387 | 1.00 | 0.00 | C |
| ATOM | 1098 | O6   | G | B | 17 | -6.752 | -60.645 | 113.582 | 1.00 | 0.00 | O |
| ATOM | 1099 | N7   | G | B | 17 | -3.735 | -59.987 | 113.431 | 1.00 | 0.00 | N |
| ATOM | 1100 | C8   | G | B | 17 | -2.653 | -59.424 | 113.903 | 1.00 | 0.00 | C |
| ATOM | 1101 | N9   | G | B | 17 | -2.844 | -58.743 | 115.088 | 1.00 | 0.00 | N |
| ATOM | 1102 | C2'  | G | B | 17 | -0.482 | -58.634 | 115.962 | 1.00 | 0.00 | C |
| ATOM | 1103 | C3'  | G | B | 17 | 0.435  | -57.420 | 115.990 | 1.00 | 0.00 | C |
| ATOM | 1104 | O3'  | G | B | 17 | 0.567  | -56.962 | 117.333 | 1.00 | 0.00 | O |
| ATOM | 1105 | C4'  | G | B | 17 | -0.303 | -56.416 | 115.107 | 1.00 | 0.00 | C |
| ATOM | 1106 | O4'  | G | B | 17 | -1.719 | -56.702 | 115.344 | 1.00 | 0.00 | O |
| ATOM | 1107 | C5'  | G | B | 17 | -0.036 | -56.502 | 113.623 | 1.00 | 0.00 | C |
| ATOM | 1108 | O5'  | G | B | 17 | 0.128  | -57.889 | 113.234 | 1.00 | 0.00 | O |



|      |      |      |     |    |        |         |         |      |      |   |
|------|------|------|-----|----|--------|---------|---------|------|------|---|
| ATOM | 1109 | O1P  | G B | 17 | 2.539  | -58.013 | 112.521 | 1.00 | 0.00 | O |
| ATOM | 1110 | O2P  | G B | 17 | 0.859  | -59.599 | 111.542 | 1.00 | 0.00 | O |
| ATOM | 1111 | P    | G B | 17 | 1.154  | -58.243 | 112.065 | 1.00 | 0.00 | P |
| ATOM | 1112 | H1   | G B | 17 | -7.744 | -59.624 | 115.632 | 1.00 | 0.00 | H |
| ATOM | 1113 | H8   | G B | 17 | -1.685 | -59.487 | 113.408 | 1.00 | 0.00 | H |
| ATOM | 1114 | H1'  | G B | 17 | -2.273 | -57.870 | 116.913 | 1.00 | 0.00 | H |
| ATOM | 1115 | H21  | G B | 17 | -7.885 | -58.513 | 117.518 | 1.00 | 0.00 | H |
| ATOM | 1116 | H3'  | G B | 17 | 1.423  | -57.646 | 115.587 | 1.00 | 0.00 | H |
| ATOM | 1117 | H22  | G B | 17 | -6.477 | -57.709 | 118.266 | 1.00 | 0.00 | H |
| ATOM | 1118 | H4'  | G B | 17 | -0.007 | -55.423 | 115.441 | 1.00 | 0.00 | H |
| ATOM | 1119 | H2'1 | G B | 17 | -0.286 | -59.259 | 115.092 | 1.00 | 0.00 | H |
| ATOM | 1120 | H2'2 | G B | 17 | -0.347 | -59.253 | 116.848 | 1.00 | 0.00 | H |
| ATOM | 1121 | H5'1 | G B | 17 | -0.874 | -56.065 | 113.081 | 1.00 | 0.00 | H |
| ATOM | 1122 | H5'2 | G B | 17 | 0.871  | -55.945 | 113.390 | 1.00 | 0.00 | H |
| ATOM | 1123 | C1'  | C B | 18 | -3.523 | -59.468 | 120.336 | 1.00 | 0.00 | C |
| ATOM | 1124 | N1   | C B | 18 | -3.683 | -60.337 | 119.137 | 1.00 | 0.00 | N |
| ATOM | 1125 | C2   | C B | 18 | -4.953 | -60.839 | 118.860 | 1.00 | 0.00 | C |
| ATOM | 1126 | O2   | C B | 18 | -5.889 | -60.546 | 119.615 | 1.00 | 0.00 | O |
| ATOM | 1127 | N3   | C B | 18 | -5.119 | -61.632 | 117.774 | 1.00 | 0.00 | N |
| ATOM | 1128 | C4   | C B | 18 | -4.085 | -61.932 | 116.977 | 1.00 | 0.00 | C |
| ATOM | 1129 | N4   | C B | 18 | -4.305 | -62.710 | 115.928 | 1.00 | 0.00 | N |
| ATOM | 1130 | C5   | C B | 18 | -2.769 | -61.432 | 117.240 | 1.00 | 0.00 | C |
| ATOM | 1131 | C6   | C B | 18 | -2.626 | -60.634 | 118.336 | 1.00 | 0.00 | C |
| ATOM | 1132 | C2'  | C B | 18 | -2.216 | -59.688 | 121.084 | 1.00 | 0.00 | C |
| ATOM | 1133 | C3'  | C B | 18 | -1.878 | -58.282 | 121.554 | 1.00 | 0.00 | C |
| ATOM | 1134 | O3'  | C B | 18 | -2.568 | -58.019 | 122.774 | 1.00 | 0.00 | O |
| ATOM | 1135 | C4'  | C B | 18 | -2.384 | -57.410 | 120.406 | 1.00 | 0.00 | C |
| ATOM | 1136 | O4'  | C B | 18 | -3.557 | -58.123 | 119.899 | 1.00 | 0.00 | O |
| ATOM | 1137 | C5'  | C B | 18 | -1.424 | -57.185 | 119.261 | 1.00 | 0.00 | C |
| ATOM | 1138 | O5'  | C B | 18 | -0.651 | -58.390 | 119.027 | 1.00 | 0.00 | O |
| ATOM | 1139 | O1P  | C B | 18 | 1.695  | -57.702 | 119.630 | 1.00 | 0.00 | O |
| ATOM | 1140 | O2P  | C B | 18 | 1.316  | -59.535 | 117.957 | 1.00 | 0.00 | O |
| ATOM | 1141 | P    | C B | 18 | 0.861  | -58.248 | 118.540 | 1.00 | 0.00 | P |
| ATOM | 1142 | H5   | C B | 18 | -1.925 | -61.676 | 116.595 | 1.00 | 0.00 | H |
| ATOM | 1143 | H6   | C B | 18 | -1.644 | -60.227 | 118.575 | 1.00 | 0.00 | H |
| ATOM | 1144 | H1'  | C B | 18 | -4.380 | -59.630 | 120.990 | 1.00 | 0.00 | H |
| ATOM | 1145 | H3'  | C B | 18 | -0.808 | -58.148 | 121.707 | 1.00 | 0.00 | H |
| ATOM | 1146 | H4'  | C B | 18 | -2.627 | -56.436 | 120.830 | 1.00 | 0.00 | H |
| ATOM | 1147 | H41  | C B | 18 | -3.527 | -62.955 | 115.297 | 1.00 | 0.00 | H |
| ATOM | 1148 | H42  | C B | 18 | -5.252 | -63.069 | 115.741 | 1.00 | 0.00 | H |
| ATOM | 1149 | H2'1 | C B | 18 | -1.434 | -60.089 | 120.441 | 1.00 | 0.00 | H |
| ATOM | 1150 | H2'2 | C B | 18 | -2.331 | -60.372 | 121.925 | 1.00 | 0.00 | H |
| ATOM | 1151 | H5'1 | C B | 18 | -1.989 | -56.930 | 118.364 | 1.00 | 0.00 | H |
| ATOM | 1152 | H5'2 | C B | 18 | -0.756 | -56.362 | 119.510 | 1.00 | 0.00 | H |
| ATOM | 1153 | C1'  | C B | 19 | -6.512 | -62.044 | 123.329 | 1.00 | 0.00 | C |
| ATOM | 1154 | N1   | C B | 19 | -5.779 | -62.722 | 122.226 | 1.00 | 0.00 | N |
| ATOM | 1155 | C2   | C B | 19 | -6.510 | -63.523 | 121.350 | 1.00 | 0.00 | C |
| ATOM | 1156 | O2   | C B | 19 | -7.731 | -63.637 | 121.523 | 1.00 | 0.00 | O |
| ATOM | 1157 | N3   | C B | 19 | -5.859 | -64.148 | 120.340 | 1.00 | 0.00 | N |
| ATOM | 1158 | C4   | C B | 19 | -4.537 | -64.005 | 120.179 | 1.00 | 0.00 | C |
| ATOM | 1159 | N4   | C B | 19 | -3.954 | -64.638 | 119.174 | 1.00 | 0.00 | N |
| ATOM | 1160 | C5   | C B | 19 | -3.763 | -63.191 | 121.065 | 1.00 | 0.00 | C |
| ATOM | 1161 | C6   | C B | 19 | -4.437 | -62.570 | 122.073 | 1.00 | 0.00 | C |
| ATOM | 1162 | C2'  | C B | 19 | -5.737 | -61.989 | 124.637 | 1.00 | 0.00 | C |



|      |    |      |     |   |         |         |         |      |      |   |
|------|----|------|-----|---|---------|---------|---------|------|------|---|
| ATOM | 1  | C1'  | A A | 1 | -21.819 | -39.614 | 138.635 | 1.00 | 0.00 | C |
| ATOM | 2  | N1   | A A | 1 | -17.534 | -37.427 | 140.422 | 1.00 | 0.00 | N |
| ATOM | 3  | C2   | A A | 1 | -18.805 | -37.036 | 140.414 | 1.00 | 0.00 | C |
| ATOM | 4  | N3   | A A | 1 | -19.866 | -37.653 | 139.937 | 1.00 | 0.00 | N |
| ATOM | 5  | C4   | A A | 1 | -19.515 | -38.834 | 139.397 | 1.00 | 0.00 | C |
| ATOM | 6  | C5   | A A | 1 | -18.262 | -39.375 | 139.324 | 1.00 | 0.00 | C |
| ATOM | 7  | C6   | A A | 1 | -17.214 | -38.609 | 139.877 | 1.00 | 0.00 | C |
| ATOM | 8  | N6   | A A | 1 | -15.931 | -39.013 | 139.878 | 1.00 | 0.00 | N |
| ATOM | 9  | N7   | A A | 1 | -18.286 | -40.609 | 138.698 | 1.00 | 0.00 | N |
| ATOM | 10 | C8   | A A | 1 | -19.541 | -40.785 | 138.405 | 1.00 | 0.00 | C |
| ATOM | 11 | N9   | A A | 1 | -20.347 | -39.749 | 138.800 | 1.00 | 0.00 | N |
| ATOM | 12 | C2'  | A A | 1 | -22.340 | -40.162 | 137.314 | 1.00 | 0.00 | C |
| ATOM | 13 | C3'  | A A | 1 | -23.689 | -40.736 | 137.721 | 1.00 | 0.00 | C |
| ATOM | 14 | O3'  | A A | 1 | -24.663 | -39.696 | 137.709 | 1.00 | 0.00 | O |
| ATOM | 15 | C4'  | A A | 1 | -23.423 | -41.263 | 139.130 | 1.00 | 0.00 | C |
| ATOM | 16 | O4'  | A A | 1 | -22.438 | -40.332 | 139.683 | 1.00 | 0.00 | O |
| ATOM | 17 | C5'  | A A | 1 | -22.871 | -42.666 | 139.228 | 1.00 | 0.00 | C |
| ATOM | 18 | O5'  | A A | 1 | -21.953 | -42.910 | 138.132 | 1.00 | 0.00 | O |
| ATOM | 19 | H2   | A A | 1 | -18.997 | -36.065 | 140.868 | 1.00 | 0.00 | H |
| ATOM | 20 | H8   | A A | 1 | -19.917 | -41.672 | 137.896 | 1.00 | 0.00 | H |
| ATOM | 21 | H1'  | A A | 1 | -22.078 | -38.561 | 138.751 | 1.00 | 0.00 | H |
| ATOM | 22 | H3'  | A A | 1 | -24.009 | -41.538 | 137.054 | 1.00 | 0.00 | H |
| ATOM | 23 | H4'  | A A | 1 | -24.375 | -41.242 | 139.659 | 1.00 | 0.00 | H |
| ATOM | 24 | H61  | A A | 1 | -15.206 | -38.417 | 140.295 | 1.00 | 0.00 | H |
| ATOM | 25 | H62  | A A | 1 | -15.679 | -39.921 | 139.461 | 1.00 | 0.00 | H |
| ATOM | 26 | H5T  | A A | 1 | -21.903 | -43.793 | 137.760 | 1.00 | 0.00 | H |
| ATOM | 27 | H2'1 | A A | 1 | -21.691 | -40.932 | 136.900 | 1.00 | 0.00 | H |
| ATOM | 28 | H2'2 | A A | 1 | -22.453 | -39.385 | 136.558 | 1.00 | 0.00 | H |
| ATOM | 29 | H5'1 | A A | 1 | -22.349 | -42.778 | 140.178 | 1.00 | 0.00 | H |
| ATOM | 30 | H5'2 | A A | 1 | -23.693 | -43.378 | 139.184 | 1.00 | 0.00 | H |
| ATOM | 31 | C1'  | G A | 2 | -21.761 | -34.777 | 137.511 | 1.00 | 0.00 | C |
| ATOM | 32 | N1   | G A | 2 | -16.702 | -35.316 | 137.861 | 1.00 | 0.00 | N |
| ATOM | 33 | C2   | G A | 2 | -17.519 | -34.303 | 138.323 | 1.00 | 0.00 | C |
| ATOM | 34 | N2   | G A | 2 | -16.909 | -33.299 | 138.963 | 1.00 | 0.00 | N |
| ATOM | 35 | N3   | G A | 2 | -18.841 | -34.291 | 138.163 | 1.00 | 0.00 | N |
| ATOM | 36 | C4   | G A | 2 | -19.289 | -35.384 | 137.487 | 1.00 | 0.00 | C |
| ATOM | 37 | C5   | G A | 2 | -18.547 | -36.441 | 136.986 | 1.00 | 0.00 | C |
| ATOM | 38 | C6   | G A | 2 | -17.143 | -36.454 | 137.162 | 1.00 | 0.00 | C |
| ATOM | 39 | O6   | G A | 2 | -16.324 | -37.296 | 136.795 | 1.00 | 0.00 | O |
| ATOM | 40 | N7   | G A | 2 | -19.385 | -37.363 | 136.355 | 1.00 | 0.00 | N |
| ATOM | 41 | C8   | G A | 2 | -20.581 | -36.848 | 136.494 | 1.00 | 0.00 | C |
| ATOM | 42 | N9   | G A | 2 | -20.603 | -35.645 | 137.170 | 1.00 | 0.00 | N |
| ATOM | 43 | C2'  | G A | 2 | -22.828 | -34.719 | 136.425 | 1.00 | 0.00 | C |
| ATOM | 44 | C3'  | G A | 2 | -24.107 | -34.633 | 137.238 | 1.00 | 0.00 | C |
| ATOM | 45 | O3'  | G A | 2 | -24.348 | -33.272 | 137.589 | 1.00 | 0.00 | O |
| ATOM | 46 | C4'  | G A | 2 | -23.793 | -35.496 | 138.460 | 1.00 | 0.00 | C |
| ATOM | 47 | O4'  | G A | 2 | -22.361 | -35.297 | 138.682 | 1.00 | 0.00 | O |
| ATOM | 48 | C5'  | G A | 2 | -24.060 | -36.976 | 138.321 | 1.00 | 0.00 | C |
| ATOM | 49 | O5'  | G A | 2 | -23.741 | -37.409 | 136.976 | 1.00 | 0.00 | O |
| ATOM | 50 | O1P  | G A | 2 | -25.979 | -38.076 | 136.034 | 1.00 | 0.00 | O |
| ATOM | 51 | O2P  | G A | 2 | -23.881 | -39.140 | 135.161 | 1.00 | 0.00 | O |
| ATOM | 52 | P    | G A | 2 | -24.616 | -38.568 | 136.315 | 1.00 | 0.00 | P |
| ATOM | 53 | H1   | G A | 2 | -15.691 | -35.230 | 138.041 | 1.00 | 0.00 | H |
| ATOM | 54 | H8   | G A | 2 | -21.480 | -37.327 | 136.108 | 1.00 | 0.00 | H |

|      |     |      |     |   |         |         |         |      |      |   |
|------|-----|------|-----|---|---------|---------|---------|------|------|---|
| ATOM | 55  | H1'  | G A | 2 | -21.385 | -33.780 | 137.741 | 1.00 | 0.00 | H |
| ATOM | 56  | H21  | G A | 2 | -15.886 | -33.314 | 139.086 | 1.00 | 0.00 | H |
| ATOM | 57  | H3'  | G A | 2 | -24.967 | -35.023 | 136.692 | 1.00 | 0.00 | H |
| ATOM | 58  | H22  | G A | 2 | -17.462 | -32.512 | 139.331 | 1.00 | 0.00 | H |
| ATOM | 59  | H4'  | G A | 2 | -24.407 | -35.122 | 139.278 | 1.00 | 0.00 | H |
| ATOM | 60  | H2'1 | G A | 2 | -22.819 | -35.607 | 135.791 | 1.00 | 0.00 | H |
| ATOM | 61  | H2'2 | G A | 2 | -22.709 | -33.852 | 135.775 | 1.00 | 0.00 | H |
| ATOM | 62  | H5'1 | G A | 2 | -23.445 | -37.519 | 139.038 | 1.00 | 0.00 | H |
| ATOM | 63  | H5'2 | G A | 2 | -25.112 | -37.171 | 138.533 | 1.00 | 0.00 | H |
| ATOM | 64  | C1'  | G A | 3 | -19.549 | -30.443 | 136.589 | 1.00 | 0.00 | C |
| ATOM | 65  | N1   | G A | 3 | -15.604 | -33.387 | 135.252 | 1.00 | 0.00 | N |
| ATOM | 66  | C2   | G A | 3 | -15.628 | -32.220 | 135.991 | 1.00 | 0.00 | C |
| ATOM | 67  | N2   | G A | 3 | -14.444 | -31.774 | 136.429 | 1.00 | 0.00 | N |
| ATOM | 68  | N3   | G A | 3 | -16.743 | -31.548 | 136.269 | 1.00 | 0.00 | N |
| ATOM | 69  | C4   | G A | 3 | -17.847 | -32.139 | 135.740 | 1.00 | 0.00 | C |
| ATOM | 70  | C5   | G A | 3 | -17.917 | -33.301 | 134.989 | 1.00 | 0.00 | C |
| ATOM | 71  | C6   | G A | 3 | -16.734 | -34.016 | 134.697 | 1.00 | 0.00 | C |
| ATOM | 72  | O6   | G A | 3 | -16.593 | -35.057 | 134.054 | 1.00 | 0.00 | O |
| ATOM | 73  | N7   | G A | 3 | -19.242 | -33.567 | 134.636 | 1.00 | 0.00 | N |
| ATOM | 74  | C8   | G A | 3 | -19.917 | -32.584 | 135.173 | 1.00 | 0.00 | C |
| ATOM | 75  | N9   | G A | 3 | -19.139 | -31.675 | 135.859 | 1.00 | 0.00 | N |
| ATOM | 76  | C2'  | G A | 3 | -20.674 | -29.675 | 135.912 | 1.00 | 0.00 | C |
| ATOM | 77  | C3'  | G A | 3 | -21.461 | -29.149 | 137.101 | 1.00 | 0.00 | C |
| ATOM | 78  | O3'  | G A | 3 | -20.864 | -27.936 | 137.557 | 1.00 | 0.00 | O |
| ATOM | 79  | C4'  | G A | 3 | -21.326 | -30.276 | 138.124 | 1.00 | 0.00 | C |
| ATOM | 80  | O4'  | G A | 3 | -19.996 | -30.832 | 137.874 | 1.00 | 0.00 | O |
| ATOM | 81  | C5'  | G A | 3 | -22.342 | -31.391 | 138.030 | 1.00 | 0.00 | C |
| ATOM | 82  | O5'  | G A | 3 | -22.659 | -31.650 | 136.639 | 1.00 | 0.00 | O |
| ATOM | 83  | O1P  | G A | 3 | -25.076 | -30.971 | 136.456 | 1.00 | 0.00 | O |
| ATOM | 84  | O2P  | G A | 3 | -24.142 | -32.713 | 134.911 | 1.00 | 0.00 | O |
| ATOM | 85  | P    | G A | 3 | -24.143 | -32.097 | 136.261 | 1.00 | 0.00 | P |
| ATOM | 86  | H1   | G A | 3 | -14.686 | -33.832 | 135.096 | 1.00 | 0.00 | H |
| ATOM | 87  | H8   | G A | 3 | -20.998 | -32.490 | 135.086 | 1.00 | 0.00 | H |
| ATOM | 88  | H1'  | G A | 3 | -18.667 | -29.814 | 136.718 | 1.00 | 0.00 | H |
| ATOM | 89  | H21  | G A | 3 | -13.584 | -32.300 | 136.212 | 1.00 | 0.00 | H |
| ATOM | 90  | H3'  | G A | 3 | -22.506 | -28.965 | 136.852 | 1.00 | 0.00 | H |
| ATOM | 91  | H22  | G A | 3 | -14.394 | -30.908 | 136.983 | 1.00 | 0.00 | H |
| ATOM | 92  | H4'  | G A | 3 | -21.419 | -29.822 | 139.110 | 1.00 | 0.00 | H |
| ATOM | 93  | H2'1 | G A | 3 | -21.291 | -30.315 | 135.281 | 1.00 | 0.00 | H |
| ATOM | 94  | H2'2 | G A | 3 | -20.303 | -28.861 | 135.288 | 1.00 | 0.00 | H |
| ATOM | 95  | H5'1 | G A | 3 | -21.930 | -32.289 | 138.489 | 1.00 | 0.00 | H |
| ATOM | 96  | H5'2 | G A | 3 | -23.245 | -31.097 | 138.565 | 1.00 | 0.00 | H |
| ATOM | 97  | C1'  | C A | 4 | -15.755 | -27.606 | 135.144 | 1.00 | 0.00 | C |
| ATOM | 98  | N1   | C A | 4 | -16.241 | -28.717 | 134.278 | 1.00 | 0.00 | N |
| ATOM | 99  | C2   | C A | 4 | -15.303 | -29.634 | 133.810 | 1.00 | 0.00 | C |
| ATOM | 100 | O2   | C A | 4 | -14.116 | -29.491 | 134.127 | 1.00 | 0.00 | O |
| ATOM | 101 | N3   | C A | 4 | -15.726 | -30.652 | 133.022 | 1.00 | 0.00 | N |
| ATOM | 102 | C4   | C A | 4 | -17.017 | -30.780 | 132.695 | 1.00 | 0.00 | C |
| ATOM | 103 | N4   | C A | 4 | -17.374 | -31.797 | 131.924 | 1.00 | 0.00 | N |
| ATOM | 104 | C5   | C A | 4 | -18.002 | -29.850 | 133.162 | 1.00 | 0.00 | C |
| ATOM | 105 | C6   | C A | 4 | -17.556 | -28.834 | 133.956 | 1.00 | 0.00 | C |
| ATOM | 106 | C2'  | C A | 4 | -16.458 | -26.279 | 134.891 | 1.00 | 0.00 | C |
| ATOM | 107 | C3'  | C A | 4 | -16.523 | -25.683 | 136.290 | 1.00 | 0.00 | C |
| ATOM | 108 | O3'  | C A | 4 | -15.295 | -25.014 | 136.570 | 1.00 | 0.00 | O |

|      |     |      |     |   |         |         |         |      |      |   |
|------|-----|------|-----|---|---------|---------|---------|------|------|---|
| ATOM | 109 | C4'  | C A | 4 | -16.726 | -26.911 | 137.173 | 1.00 | 0.00 | C |
| ATOM | 110 | O4'  | C A | 4 | -15.989 | -27.975 | 136.491 | 1.00 | 0.00 | O |
| ATOM | 111 | C5'  | C A | 4 | -18.153 | -27.365 | 137.373 | 1.00 | 0.00 | C |
| ATOM | 112 | O5'  | C A | 4 | -18.907 | -27.168 | 136.149 | 1.00 | 0.00 | O |
| ATOM | 113 | O1P  | C A | 4 | -20.584 | -25.399 | 136.776 | 1.00 | 0.00 | O |
| ATOM | 114 | O2P  | C A | 4 | -21.113 | -27.039 | 134.954 | 1.00 | 0.00 | O |
| ATOM | 115 | P    | C A | 4 | -20.448 | -26.772 | 136.252 | 1.00 | 0.00 | P |
| ATOM | 116 | H5   | C A | 4 | -19.054 | -29.948 | 132.894 | 1.00 | 0.00 | H |
| ATOM | 117 | H6   | C A | 4 | -18.268 | -28.104 | 134.340 | 1.00 | 0.00 | H |
| ATOM | 118 | H1'  | C A | 4 | -14.679 | -27.511 | 135.004 | 1.00 | 0.00 | H |
| ATOM | 119 | H3'  | C A | 4 | -17.349 | -24.980 | 136.395 | 1.00 | 0.00 | H |
| ATOM | 120 | H4'  | C A | 4 | -16.315 | -26.668 | 138.152 | 1.00 | 0.00 | H |
| ATOM | 121 | H41  | C A | 4 | -18.363 | -31.920 | 131.657 | 1.00 | 0.00 | H |
| ATOM | 122 | H42  | C A | 4 | -16.665 | -32.465 | 131.589 | 1.00 | 0.00 | H |
| ATOM | 123 | H2'1 | C A | 4 | -17.454 | -26.411 | 134.471 | 1.00 | 0.00 | H |
| ATOM | 124 | H2'2 | C A | 4 | -15.898 | -25.637 | 134.210 | 1.00 | 0.00 | H |
| ATOM | 125 | H5'1 | C A | 4 | -18.159 | -28.421 | 137.643 | 1.00 | 0.00 | H |
| ATOM | 126 | H5'2 | C A | 4 | -18.603 | -26.787 | 138.180 | 1.00 | 0.00 | H |
| ATOM | 127 | C1'  | C A | 5 | -11.581 | -26.700 | 132.638 | 1.00 | 0.00 | C |
| ATOM | 128 | N1   | C A | 5 | -12.775 | -27.251 | 131.942 | 1.00 | 0.00 | N |
| ATOM | 129 | C2   | C A | 5 | -12.606 | -28.393 | 131.162 | 1.00 | 0.00 | C |
| ATOM | 130 | O2   | C A | 5 | -11.479 | -28.901 | 131.079 | 1.00 | 0.00 | O |
| ATOM | 131 | N3   | C A | 5 | -13.682 | -28.912 | 130.520 | 1.00 | 0.00 | N |
| ATOM | 132 | C4   | C A | 5 | -14.888 | -28.342 | 130.627 | 1.00 | 0.00 | C |
| ATOM | 133 | N4   | C A | 5 | -15.905 | -28.892 | 129.981 | 1.00 | 0.00 | N |
| ATOM | 134 | C5   | C A | 5 | -15.091 | -27.166 | 131.420 | 1.00 | 0.00 | C |
| ATOM | 135 | C6   | C A | 5 | -13.995 | -26.664 | 132.060 | 1.00 | 0.00 | C |
| ATOM | 136 | C2'  | C A | 5 | -11.539 | -25.179 | 132.673 | 1.00 | 0.00 | C |
| ATOM | 137 | C3'  | C A | 5 | -10.918 | -24.911 | 134.035 | 1.00 | 0.00 | C |
| ATOM | 138 | O3'  | C A | 5 | -9.497  | -24.978 | 133.922 | 1.00 | 0.00 | O |
| ATOM | 139 | C4'  | C A | 5 | -11.483 | -26.038 | 134.894 | 1.00 | 0.00 | C |
| ATOM | 140 | O4'  | C A | 5 | -11.607 | -27.168 | 133.974 | 1.00 | 0.00 | O |
| ATOM | 141 | C5'  | C A | 5 | -12.828 | -25.785 | 135.534 | 1.00 | 0.00 | C |
| ATOM | 142 | O5'  | C A | 5 | -13.664 | -25.018 | 134.630 | 1.00 | 0.00 | O |
| ATOM | 143 | O1P  | C A | 5 | -13.958 | -22.824 | 135.828 | 1.00 | 0.00 | O |
| ATOM | 144 | O2P  | C A | 5 | -15.714 | -23.623 | 134.224 | 1.00 | 0.00 | O |
| ATOM | 145 | P    | C A | 5 | -14.691 | -23.964 | 135.243 | 1.00 | 0.00 | P |
| ATOM | 146 | H5   | C A | 5 | -16.071 | -26.694 | 131.507 | 1.00 | 0.00 | H |
| ATOM | 147 | H6   | C A | 5 | -14.100 | -25.772 | 132.680 | 1.00 | 0.00 | H |
| ATOM | 148 | H1'  | C A | 5 | -10.690 | -27.106 | 132.158 | 1.00 | 0.00 | H |
| ATOM | 149 | H3'  | C A | 5 | -11.202 | -23.934 | 134.428 | 1.00 | 0.00 | H |
| ATOM | 150 | H4'  | C A | 5 | -10.764 | -26.216 | 135.695 | 1.00 | 0.00 | H |
| ATOM | 151 | H41  | C A | 5 | -16.845 | -28.474 | 130.048 | 1.00 | 0.00 | H |
| ATOM | 152 | H42  | C A | 5 | -15.757 | -29.736 | 129.411 | 1.00 | 0.00 | H |
| ATOM | 153 | H2'1 | C A | 5 | -12.530 | -24.735 | 132.596 | 1.00 | 0.00 | H |
| ATOM | 154 | H2'2 | C A | 5 | -10.930 | -24.763 | 131.868 | 1.00 | 0.00 | H |
| ATOM | 155 | H5'1 | C A | 5 | -13.305 | -26.741 | 135.754 | 1.00 | 0.00 | H |
| ATOM | 156 | H5'2 | C A | 5 | -12.685 | -25.233 | 136.462 | 1.00 | 0.00 | H |
| ATOM | 157 | C1'  | G A | 6 | -8.368  | -27.427 | 128.940 | 1.00 | 0.00 | C |
| ATOM | 158 | N1   | G A | 6 | -12.479 | -29.157 | 126.463 | 1.00 | 0.00 | N |
| ATOM | 159 | C2   | G A | 6 | -11.191 | -29.663 | 126.508 | 1.00 | 0.00 | C |
| ATOM | 160 | N2   | G A | 6 | -10.969 | -30.775 | 125.799 | 1.00 | 0.00 | N |
| ATOM | 161 | N3   | G A | 6 | -10.205 | -29.102 | 127.207 | 1.00 | 0.00 | N |
| ATOM | 162 | C4   | G A | 6 | -10.607 | -27.980 | 127.858 | 1.00 | 0.00 | C |

|      |     |      |     |   |         |         |         |      |      |   |
|------|-----|------|-----|---|---------|---------|---------|------|------|---|
| ATOM | 163 | C5   | G A | 6 | -11.866 | -27.401 | 127.868 | 1.00 | 0.00 | C |
| ATOM | 164 | C6   | G A | 6 | -12.914 | -27.997 | 127.131 | 1.00 | 0.00 | C |
| ATOM | 165 | O6   | G A | 6 | -14.085 | -27.636 | 127.015 | 1.00 | 0.00 | O |
| ATOM | 166 | N7   | G A | 6 | -11.863 | -26.253 | 128.662 | 1.00 | 0.00 | N |
| ATOM | 167 | C8   | G A | 6 | -10.633 | -26.175 | 129.101 | 1.00 | 0.00 | C |
| ATOM | 168 | N9   | G A | 6 | -9.810  | -27.189 | 128.656 | 1.00 | 0.00 | N |
| ATOM | 169 | C2'  | G A | 6 | -7.539  | -26.152 | 129.014 | 1.00 | 0.00 | C |
| ATOM | 170 | C3'  | G A | 6 | -6.534  | -26.491 | 130.104 | 1.00 | 0.00 | C |
| ATOM | 171 | O3'  | G A | 6 | -5.441  | -27.204 | 129.530 | 1.00 | 0.00 | O |
| ATOM | 172 | C4'  | G A | 6 | -7.350  | -27.357 | 131.062 | 1.00 | 0.00 | C |
| ATOM | 173 | O4'  | G A | 6 | -8.277  | -28.080 | 130.191 | 1.00 | 0.00 | O |
| ATOM | 174 | C5'  | G A | 6 | -8.146  | -26.626 | 132.115 | 1.00 | 0.00 | C |
| ATOM | 175 | O5'  | G A | 6 | -8.670  | -25.390 | 131.566 | 1.00 | 0.00 | O |
| ATOM | 176 | O1P  | G A | 6 | -7.460  | -23.614 | 132.874 | 1.00 | 0.00 | O |
| ATOM | 177 | O2P  | G A | 6 | -9.726  | -23.136 | 131.909 | 1.00 | 0.00 | O |
| ATOM | 178 | P    | G A | 6 | -8.800  | -24.120 | 132.521 | 1.00 | 0.00 | P |
| ATOM | 179 | H1   | G A | 6 | -13.172 | -29.672 | 125.897 | 1.00 | 0.00 | H |
| ATOM | 180 | H8   | G A | 6 | -10.287 | -25.379 | 129.761 | 1.00 | 0.00 | H |
| ATOM | 181 | H1'  | G A | 6 | -7.978  | -28.103 | 128.178 | 1.00 | 0.00 | H |
| ATOM | 182 | H21  | G A | 6 | -11.737 | -31.205 | 125.263 | 1.00 | 0.00 | H |
| ATOM | 183 | H3'  | G A | 6 | -6.157  | -25.598 | 130.605 | 1.00 | 0.00 | H |
| ATOM | 184 | H22  | G A | 6 | -10.031 | -31.200 | 125.788 | 1.00 | 0.00 | H |
| ATOM | 185 | H4'  | G A | 6 | -6.646  | -28.014 | 131.572 | 1.00 | 0.00 | H |
| ATOM | 186 | H2'1 | G A | 6 | -8.140  | -25.283 | 129.284 | 1.00 | 0.00 | H |
| ATOM | 187 | H2'2 | G A | 6 | -7.042  | -25.926 | 128.071 | 1.00 | 0.00 | H |
| ATOM | 188 | H5'1 | G A | 6 | -8.969  | -27.259 | 132.446 | 1.00 | 0.00 | H |
| ATOM | 189 | H5'2 | G A | 6 | -7.501  | -26.407 | 132.965 | 1.00 | 0.00 | H |
| ATOM | 190 | C1'  | C A | 7 | -7.091  | -28.861 | 124.374 | 1.00 | 0.00 | C |
| ATOM | 191 | N1   | C A | 7 | -8.224  | -27.916 | 124.581 | 1.00 | 0.00 | N |
| ATOM | 192 | C2   | C A | 7 | -9.443  | -28.220 | 123.979 | 1.00 | 0.00 | C |
| ATOM | 193 | O2   | C A | 7 | -9.535  | -29.252 | 123.301 | 1.00 | 0.00 | O |
| ATOM | 194 | N3   | C A | 7 | -10.487 | -27.374 | 124.155 | 1.00 | 0.00 | N |
| ATOM | 195 | C4   | C A | 7 | -10.358 | -26.264 | 124.893 | 1.00 | 0.00 | C |
| ATOM | 196 | N4   | C A | 7 | -11.411 | -25.474 | 125.034 | 1.00 | 0.00 | N |
| ATOM | 197 | C5   | C A | 7 | -9.114  | -25.924 | 125.520 | 1.00 | 0.00 | C |
| ATOM | 198 | C6   | C A | 7 | -8.076  | -26.794 | 125.333 | 1.00 | 0.00 | C |
| ATOM | 199 | C2'  | C A | 7 | -5.741  | -28.174 | 124.215 | 1.00 | 0.00 | C |
| ATOM | 200 | C3'  | C A | 7 | -4.806  | -29.151 | 124.909 | 1.00 | 0.00 | C |
| ATOM | 201 | O3'  | C A | 7 | -4.429  | -30.173 | 123.988 | 1.00 | 0.00 | O |
| ATOM | 202 | C4'  | C A | 7 | -5.664  | -29.690 | 126.051 | 1.00 | 0.00 | C |
| ATOM | 203 | O4'  | C A | 7 | -7.022  | -29.704 | 125.509 | 1.00 | 0.00 | O |
| ATOM | 204 | C5'  | C A | 7 | -5.663  | -28.884 | 127.330 | 1.00 | 0.00 | C |
| ATOM | 205 | O5'  | C A | 7 | -5.603  | -27.470 | 127.017 | 1.00 | 0.00 | O |
| ATOM | 206 | O1P  | C A | 7 | -3.360  | -26.768 | 127.917 | 1.00 | 0.00 | O |
| ATOM | 207 | O2P  | C A | 7 | -5.225  | -25.098 | 127.753 | 1.00 | 0.00 | O |
| ATOM | 208 | P    | C A | 7 | -4.809  | -26.499 | 128.002 | 1.00 | 0.00 | P |
| ATOM | 209 | H5   | C A | 7 | -9.001  | -25.018 | 126.117 | 1.00 | 0.00 | H |
| ATOM | 210 | H6   | C A | 7 | -7.113  | -26.583 | 125.797 | 1.00 | 0.00 | H |
| ATOM | 211 | H1'  | C A | 7 | -7.319  | -29.481 | 123.508 | 1.00 | 0.00 | H |
| ATOM | 212 | H3'  | C A | 7 | -3.910  | -28.657 | 125.288 | 1.00 | 0.00 | H |
| ATOM | 213 | H4'  | C A | 7 | -5.288  | -30.686 | 126.287 | 1.00 | 0.00 | H |
| ATOM | 214 | H41  | C A | 7 | -11.340 | -24.614 | 125.598 | 1.00 | 0.00 | H |
| ATOM | 215 | H42  | C A | 7 | -12.304 | -25.717 | 124.580 | 1.00 | 0.00 | H |
| ATOM | 216 | H2'1 | C A | 7 | -5.717  | -27.194 | 124.691 | 1.00 | 0.00 | H |

|      |     |      |   |   |   |         |         |         |      |      |   |
|------|-----|------|---|---|---|---------|---------|---------|------|------|---|
| ATOM | 217 | H2'2 | C | A | 7 | -5.467  | -28.036 | 123.168 | 1.00 | 0.00 | H |
| ATOM | 218 | H5'1 | C | A | 7 | -6.573  | -29.100 | 127.890 | 1.00 | 0.00 | H |
| ATOM | 219 | H5'2 | C | A | 7 | -4.798  | -29.165 | 127.930 | 1.00 | 0.00 | H |
| ATOM | 220 | C1'  | A | A | 8 | -7.966  | -29.817 | 119.597 | 1.00 | 0.00 | C |
| ATOM | 221 | N1   | A | A | 8 | -11.788 | -26.447 | 120.213 | 1.00 | 0.00 | N |
| ATOM | 222 | C2   | A | A | 8 | -11.715 | -27.618 | 119.588 | 1.00 | 0.00 | C |
| ATOM | 223 | N3   | A | A | 8 | -10.695 | -28.442 | 119.469 | 1.00 | 0.00 | N |
| ATOM | 224 | C4   | A | A | 8 | -9.616  | -27.939 | 120.098 | 1.00 | 0.00 | C |
| ATOM | 225 | C5   | A | A | 8 | -9.526  | -26.758 | 120.781 | 1.00 | 0.00 | C |
| ATOM | 226 | C6   | A | A | 8 | -10.696 | -25.973 | 120.832 | 1.00 | 0.00 | C |
| ATOM | 227 | N6   | A | A | 8 | -10.757 | -24.789 | 121.467 | 1.00 | 0.00 | N |
| ATOM | 228 | N7   | A | A | 8 | -8.254  | -26.575 | 121.297 | 1.00 | 0.00 | N |
| ATOM | 229 | C8   | A | A | 8 | -7.607  | -27.637 | 120.916 | 1.00 | 0.00 | C |
| ATOM | 230 | N9   | A | A | 8 | -8.371  | -28.512 | 120.185 | 1.00 | 0.00 | N |
| ATOM | 231 | C2'  | A | A | 8 | -6.547  | -29.828 | 119.044 | 1.00 | 0.00 | C |
| ATOM | 232 | C3'  | A | A | 8 | -6.091  | -31.241 | 119.368 | 1.00 | 0.00 | C |
| ATOM | 233 | O3'  | A | A | 8 | -6.533  | -32.122 | 118.339 | 1.00 | 0.00 | O |
| ATOM | 234 | C4'  | A | A | 8 | -6.779  | -31.523 | 120.703 | 1.00 | 0.00 | C |
| ATOM | 235 | O4'  | A | A | 8 | -8.046  | -30.793 | 120.617 | 1.00 | 0.00 | O |
| ATOM | 236 | C5'  | A | A | 8 | -6.045  | -31.075 | 121.944 | 1.00 | 0.00 | C |
| ATOM | 237 | O5'  | A | A | 8 | -5.362  | -29.822 | 121.684 | 1.00 | 0.00 | O |
| ATOM | 238 | O1P  | A | A | 8 | -2.928  | -30.441 | 121.851 | 1.00 | 0.00 | O |
| ATOM | 239 | O2P  | A | A | 8 | -3.664  | -28.095 | 122.351 | 1.00 | 0.00 | O |
| ATOM | 240 | P    | A | A | 8 | -3.964  | -29.546 | 122.402 | 1.00 | 0.00 | P |
| ATOM | 241 | H2   | A | A | 8 | -12.633 | -27.945 | 119.104 | 1.00 | 0.00 | H |
| ATOM | 242 | H8   | A | A | 8 | -6.559  | -27.817 | 121.153 | 1.00 | 0.00 | H |
| ATOM | 243 | H1'  | A | A | 8 | -8.688  | -30.080 | 118.824 | 1.00 | 0.00 | H |
| ATOM | 244 | H3'  | A | A | 8 | -5.008  | -31.310 | 119.463 | 1.00 | 0.00 | H |
| ATOM | 245 | H4'  | A | A | 8 | -6.914  | -32.602 | 120.768 | 1.00 | 0.00 | H |
| ATOM | 246 | H61  | A | A | 8 | -11.637 | -24.256 | 121.477 | 1.00 | 0.00 | H |
| ATOM | 247 | H62  | A | A | 8 | -9.922  | -24.417 | 121.943 | 1.00 | 0.00 | H |
| ATOM | 248 | H2'1 | A | A | 8 | -5.911  | -29.086 | 119.525 | 1.00 | 0.00 | H |
| ATOM | 249 | H2'2 | A | A | 8 | -6.520  | -29.638 | 117.972 | 1.00 | 0.00 | H |
| ATOM | 250 | H5'1 | A | A | 8 | -6.762  | -30.941 | 122.754 | 1.00 | 0.00 | H |
| ATOM | 251 | H5'2 | A | A | 8 | -5.321  | -31.836 | 122.228 | 1.00 | 0.00 | H |
| ATOM | 252 | C1'  | C | A | 9 | -10.465 | -29.256 | 115.341 | 1.00 | 0.00 | C |
| ATOM | 253 | N1   | C | A | 9 | -9.950  | -28.067 | 116.075 | 1.00 | 0.00 | N |
| ATOM | 254 | C2   | C | A | 9 | -10.840 | -27.030 | 116.346 | 1.00 | 0.00 | C |
| ATOM | 255 | O2   | C | A | 9 | -12.014 | -27.138 | 115.967 | 1.00 | 0.00 | O |
| ATOM | 256 | N3   | C | A | 9 | -10.390 | -25.940 | 117.012 | 1.00 | 0.00 | N |
| ATOM | 257 | C4   | C | A | 9 | -9.114  | -25.851 | 117.407 | 1.00 | 0.00 | C |
| ATOM | 258 | N4   | C | A | 9 | -8.729  | -24.763 | 118.058 | 1.00 | 0.00 | N |
| ATOM | 259 | C5   | C | A | 9 | -8.173  | -26.901 | 117.140 | 1.00 | 0.00 | C |
| ATOM | 260 | C6   | C | A | 9 | -8.650  | -27.993 | 116.470 | 1.00 | 0.00 | C |
| ATOM | 261 | C2'  | C | A | 9 | -9.473  | -29.839 | 114.346 | 1.00 | 0.00 | C |
| ATOM | 262 | C3'  | C | A | 9 | -9.756  | -31.331 | 114.452 | 1.00 | 0.00 | C |
| ATOM | 263 | O3'  | C | A | 9 | -10.852 | -31.661 | 113.603 | 1.00 | 0.00 | O |
| ATOM | 264 | C4'  | C | A | 9 | -10.097 | -31.506 | 115.930 | 1.00 | 0.00 | C |
| ATOM | 265 | O4'  | C | A | 9 | -10.763 | -30.256 | 116.299 | 1.00 | 0.00 | O |
| ATOM | 266 | C5'  | C | A | 9 | -8.934  | -31.728 | 116.867 | 1.00 | 0.00 | C |
| ATOM | 267 | O5'  | C | A | 9 | -7.797  | -30.939 | 116.431 | 1.00 | 0.00 | O |
| ATOM | 268 | O1P  | C | A | 9 | -6.108  | -32.677 | 115.752 | 1.00 | 0.00 | O |
| ATOM | 269 | O2P  | C | A | 9 | -5.339  | -30.423 | 116.544 | 1.00 | 0.00 | O |
| ATOM | 270 | P    | C | A | 9 | -6.329  | -31.524 | 116.647 | 1.00 | 0.00 | P |

|      |     |      |     |    |         |         |         |      |      |   |
|------|-----|------|-----|----|---------|---------|---------|------|------|---|
| ATOM | 271 | H5   | C A | 9  | -7.131  | -26.830 | 117.454 | 1.00 | 0.00 | H |
| ATOM | 272 | H6   | C A | 9  | -7.976  | -28.820 | 116.251 | 1.00 | 0.00 | H |
| ATOM | 273 | H1'  | C A | 9  | -11.395 | -28.976 | 114.849 | 1.00 | 0.00 | H |
| ATOM | 274 | H3'  | C A | 9  | -8.889  | -31.931 | 114.174 | 1.00 | 0.00 | H |
| ATOM | 275 | H4'  | C A | 9  | -10.753 | -32.374 | 116.003 | 1.00 | 0.00 | H |
| ATOM | 276 | H41  | C A | 9  | -7.752  | -24.671 | 118.375 | 1.00 | 0.00 | H |
| ATOM | 277 | H42  | C A | 9  | -9.405  | -24.009 | 118.247 | 1.00 | 0.00 | H |
| ATOM | 278 | H2'1 | C A | 9  | -8.441  | -29.613 | 114.607 | 1.00 | 0.00 | H |
| ATOM | 279 | H2'2 | C A | 9  | -9.642  | -29.474 | 113.331 | 1.00 | 0.00 | H |
| ATOM | 280 | H5'1 | C A | 9  | -9.223  | -31.431 | 117.876 | 1.00 | 0.00 | H |
| ATOM | 281 | H5'2 | C A | 9  | -8.671  | -32.785 | 116.866 | 1.00 | 0.00 | H |
| ATOM | 282 | C1'  | C A | 10 | -13.322 | -26.773 | 112.148 | 1.00 | 0.00 | C |
| ATOM | 283 | N1   | C A | 10 | -12.097 | -26.144 | 112.713 | 1.00 | 0.00 | N |
| ATOM | 284 | C2   | C A | 10 | -12.220 | -24.883 | 113.294 | 1.00 | 0.00 | C |
| ATOM | 285 | O2   | C A | 10 | -13.333 | -24.341 | 113.316 | 1.00 | 0.00 | O |
| ATOM | 286 | N3   | C A | 10 | -11.117 | -24.293 | 113.814 | 1.00 | 0.00 | N |
| ATOM | 287 | C4   | C A | 10 | -9.925  | -24.903 | 113.774 | 1.00 | 0.00 | C |
| ATOM | 288 | N4   | C A | 10 | -8.879  | -24.281 | 114.301 | 1.00 | 0.00 | N |
| ATOM | 289 | C5   | C A | 10 | -9.768  | -26.198 | 113.180 | 1.00 | 0.00 | C |
| ATOM | 290 | C6   | C A | 10 | -10.894 | -26.776 | 112.666 | 1.00 | 0.00 | C |
| ATOM | 291 | C2'  | C A | 10 | -13.074 | -27.552 | 110.864 | 1.00 | 0.00 | C |
| ATOM | 292 | C3'  | C A | 10 | -14.045 | -28.715 | 111.007 | 1.00 | 0.00 | C |
| ATOM | 293 | O3'  | C A | 10 | -15.333 | -28.310 | 110.550 | 1.00 | 0.00 | O |
| ATOM | 294 | C4'  | C A | 10 | -14.025 | -28.991 | 112.509 | 1.00 | 0.00 | C |
| ATOM | 295 | O4'  | C A | 10 | -13.828 | -27.675 | 113.115 | 1.00 | 0.00 | O |
| ATOM | 296 | C5'  | C A | 10 | -12.941 | -29.919 | 113.007 | 1.00 | 0.00 | C |
| ATOM | 297 | O5'  | C A | 10 | -11.723 | -29.701 | 112.251 | 1.00 | 0.00 | O |
| ATOM | 298 | O1P  | C A | 10 | -11.417 | -31.862 | 111.000 | 1.00 | 0.00 | O |
| ATOM | 299 | O2P  | C A | 10 | -9.423  | -30.453 | 111.574 | 1.00 | 0.00 | O |
| ATOM | 300 | P    | C A | 10 | -10.770 | -30.944 | 111.957 | 1.00 | 0.00 | P |
| ATOM | 301 | H5   | C A | 10 | -8.799  | -26.697 | 113.139 | 1.00 | 0.00 | H |
| ATOM | 302 | H6   | C A | 10 | -10.826 | -27.764 | 112.211 | 1.00 | 0.00 | H |
| ATOM | 303 | H1'  | C A | 10 | -14.067 | -25.993 | 111.995 | 1.00 | 0.00 | H |
| ATOM | 304 | H3'  | C A | 10 | -13.719 | -29.589 | 110.441 | 1.00 | 0.00 | H |
| ATOM | 305 | H4'  | C A | 10 | -14.986 | -29.438 | 112.761 | 1.00 | 0.00 | H |
| ATOM | 306 | H41  | C A | 10 | -7.952  | -24.730 | 114.286 | 1.00 | 0.00 | H |
| ATOM | 307 | H42  | C A | 10 | -8.995  | -23.349 | 114.725 | 1.00 | 0.00 | H |
| ATOM | 308 | H2'1 | C A | 10 | -12.047 | -27.902 | 110.782 | 1.00 | 0.00 | H |
| ATOM | 309 | H2'2 | C A | 10 | -13.292 | -26.961 | 109.973 | 1.00 | 0.00 | H |
| ATOM | 310 | H5'1 | C A | 10 | -12.759 | -29.723 | 114.065 | 1.00 | 0.00 | H |
| ATOM | 311 | H5'2 | C A | 10 | -13.270 | -30.950 | 112.885 | 1.00 | 0.00 | H |
| ATOM | 312 | C1'  | T A | 11 | -15.233 | -22.675 | 110.136 | 1.00 | 0.00 | C |
| ATOM | 313 | N1   | T A | 11 | -13.761 | -22.808 | 110.301 | 1.00 | 0.00 | N |
| ATOM | 314 | C2   | T A | 11 | -13.100 | -21.772 | 110.929 | 1.00 | 0.00 | C |
| ATOM | 315 | O2   | T A | 11 | -13.673 | -20.777 | 111.340 | 1.00 | 0.00 | O |
| ATOM | 316 | N3   | T A | 11 | -11.734 | -21.936 | 111.062 | 1.00 | 0.00 | N |
| ATOM | 317 | C4   | T A | 11 | -10.992 | -23.017 | 110.630 | 1.00 | 0.00 | C |
| ATOM | 318 | O4   | T A | 11 | -9.766  | -23.052 | 110.804 | 1.00 | 0.00 | O |
| ATOM | 319 | C5   | T A | 11 | -11.769 | -24.049 | 109.987 | 1.00 | 0.00 | C |
| ATOM | 320 | C6   | T A | 11 | -13.102 | -23.922 | 109.841 | 1.00 | 0.00 | C |
| ATOM | 321 | C7   | T A | 11 | -11.001 | -25.245 | 109.505 | 1.00 | 0.00 | C |
| ATOM | 322 | C2'  | T A | 11 | -15.755 | -23.222 | 108.814 | 1.00 | 0.00 | C |
| ATOM | 323 | C3'  | T A | 11 | -17.101 | -23.801 | 109.219 | 1.00 | 0.00 | C |
| ATOM | 324 | O3'  | T A | 11 | -18.080 | -22.764 | 109.211 | 1.00 | 0.00 | O |



|      |     |      |     |    |         |         |         |      |      |   |
|------|-----|------|-----|----|---------|---------|---------|------|------|---|
| ATOM | 325 | C4'  | T A | 11 | -16.834 | -24.331 | 110.625 | 1.00 | 0.00 | C |
| ATOM | 326 | O4'  | T A | 11 | -15.852 | -23.398 | 111.182 | 1.00 | 0.00 | O |
| ATOM | 327 | C5'  | T A | 11 | -16.277 | -25.733 | 110.722 | 1.00 | 0.00 | C |
| ATOM | 328 | O5'  | T A | 11 | -15.359 | -25.970 | 109.625 | 1.00 | 0.00 | O |
| ATOM | 329 | O1P  | T A | 11 | -16.517 | -27.746 | 108.269 | 1.00 | 0.00 | O |
| ATOM | 330 | O2P  | T A | 11 | -14.015 | -27.566 | 108.224 | 1.00 | 0.00 | O |
| ATOM | 331 | P    | T A | 11 | -15.273 | -27.434 | 108.999 | 1.00 | 0.00 | P |
| ATOM | 332 | H3   | T A | 11 | -11.218 | -21.179 | 111.531 | 1.00 | 0.00 | H |
| ATOM | 333 | H6   | T A | 11 | -13.668 | -24.715 | 109.351 | 1.00 | 0.00 | H |
| ATOM | 334 | H1'  | T A | 11 | -15.496 | -21.623 | 110.254 | 1.00 | 0.00 | H |
| ATOM | 335 | H3'  | T A | 11 | -17.419 | -24.600 | 108.551 | 1.00 | 0.00 | H |
| ATOM | 336 | H4'  | T A | 11 | -17.786 | -24.314 | 111.158 | 1.00 | 0.00 | H |
| ATOM | 337 | H71  | T A | 11 | -11.045 | -25.289 | 108.417 | 1.00 | 0.00 | H |
| ATOM | 338 | H72  | T A | 11 | -9.962  | -25.162 | 109.824 | 1.00 | 0.00 | H |
| ATOM | 339 | H73  | T A | 11 | -11.439 | -26.152 | 109.922 | 1.00 | 0.00 | H |
| ATOM | 340 | H2'1 | T A | 11 | -15.103 | -23.988 | 108.398 | 1.00 | 0.00 | H |
| ATOM | 341 | H2'2 | T A | 11 | -15.868 | -22.442 | 108.059 | 1.00 | 0.00 | H |
| ATOM | 342 | H5'1 | T A | 11 | -15.754 | -25.846 | 111.671 | 1.00 | 0.00 | H |
| ATOM | 343 | H5'2 | T A | 11 | -17.098 | -26.447 | 110.675 | 1.00 | 0.00 | H |
| ATOM | 344 | C1'  | A A | 12 | -15.201 | -17.842 | 109.008 | 1.00 | 0.00 | C |
| ATOM | 345 | N1   | A A | 12 | -10.107 | -18.360 | 109.373 | 1.00 | 0.00 | N |
| ATOM | 346 | C2   | A A | 12 | -10.947 | -17.420 | 109.792 | 1.00 | 0.00 | C |
| ATOM | 347 | N3   | A A | 12 | -12.257 | -17.349 | 109.667 | 1.00 | 0.00 | N |
| ATOM | 348 | C4   | A A | 12 | -12.718 | -18.423 | 109.002 | 1.00 | 0.00 | C |
| ATOM | 349 | C5   | A A | 12 | -11.993 | -19.470 | 108.507 | 1.00 | 0.00 | C |
| ATOM | 350 | C6   | A A | 12 | -10.599 | -19.421 | 108.714 | 1.00 | 0.00 | C |
| ATOM | 351 | N6   | A A | 12 | -9.759  | -20.379 | 108.283 | 1.00 | 0.00 | N |
| ATOM | 352 | N7   | A A | 12 | -12.813 | -20.394 | 107.883 | 1.00 | 0.00 | N |
| ATOM | 353 | C8   | A A | 12 | -14.005 | -19.889 | 108.008 | 1.00 | 0.00 | C |
| ATOM | 354 | N9   | A A | 12 | -14.025 | -18.693 | 108.679 | 1.00 | 0.00 | N |
| ATOM | 355 | C2'  | A A | 12 | -16.257 | -17.806 | 107.911 | 1.00 | 0.00 | C |
| ATOM | 356 | C3'  | A A | 12 | -17.546 | -17.735 | 108.714 | 1.00 | 0.00 | C |
| ATOM | 357 | O3'  | A A | 12 | -17.808 | -16.375 | 109.057 | 1.00 | 0.00 | O |
| ATOM | 358 | C4'  | A A | 12 | -17.229 | -18.588 | 109.942 | 1.00 | 0.00 | C |
| ATOM | 359 | O4'  | A A | 12 | -15.801 | -18.368 | 110.175 | 1.00 | 0.00 | O |
| ATOM | 360 | C5'  | A A | 12 | -17.474 | -20.072 | 109.808 | 1.00 | 0.00 | C |
| ATOM | 361 | O5'  | A A | 12 | -17.137 | -20.506 | 108.465 | 1.00 | 0.00 | O |
| ATOM | 362 | O1P  | A A | 12 | -19.356 | -21.209 | 107.508 | 1.00 | 0.00 | O |
| ATOM | 363 | O2P  | A A | 12 | -17.236 | -22.247 | 106.655 | 1.00 | 0.00 | O |
| ATOM | 364 | P    | A A | 12 | -17.988 | -21.680 | 107.802 | 1.00 | 0.00 | P |
| ATOM | 365 | H2   | A A | 12 | -10.485 | -16.584 | 110.318 | 1.00 | 0.00 | H |
| ATOM | 366 | H8   | A A | 12 | -14.903 | -20.370 | 107.617 | 1.00 | 0.00 | H |
| ATOM | 367 | H1'  | A A | 12 | -14.841 | -16.840 | 109.236 | 1.00 | 0.00 | H |
| ATOM | 368 | H3'  | A A | 12 | -18.394 | -18.138 | 108.164 | 1.00 | 0.00 | H |
| ATOM | 369 | H4'  | A A | 12 | -17.856 | -18.219 | 110.753 | 1.00 | 0.00 | H |
| ATOM | 370 | H61  | A A | 12 | -8.749  | -20.296 | 108.463 | 1.00 | 0.00 | H |
| ATOM | 371 | H62  | A A | 12 | -10.129 | -21.196 | 107.775 | 1.00 | 0.00 | H |
| ATOM | 372 | H2'1 | A A | 12 | -16.231 | -18.694 | 107.282 | 1.00 | 0.00 | H |
| ATOM | 373 | H2'2 | A A | 12 | -16.146 | -16.939 | 107.259 | 1.00 | 0.00 | H |
| ATOM | 374 | H5'1 | A A | 12 | -16.857 | -20.603 | 110.531 | 1.00 | 0.00 | H |
| ATOM | 375 | H5'2 | A A | 12 | -18.523 | -20.282 | 110.010 | 1.00 | 0.00 | H |
| ATOM | 376 | C1'  | G A | 13 | -12.963 | -13.506 | 108.091 | 1.00 | 0.00 | C |
| ATOM | 377 | N1   | G A | 13 | -9.018  | -16.451 | 106.754 | 1.00 | 0.00 | N |
| ATOM | 378 | C2   | G A | 13 | -9.042  | -15.280 | 107.492 | 1.00 | 0.00 | C |

|      |     |      |     |    |         |         |         |      |      |   |
|------|-----|------|-----|----|---------|---------|---------|------|------|---|
| ATOM | 379 | N2   | G A | 13 | -7.858  | -14.834 | 107.931 | 1.00 | 0.00 | N |
| ATOM | 380 | N3   | G A | 13 | -10.159 | -14.610 | 107.770 | 1.00 | 0.00 | N |
| ATOM | 381 | C4   | G A | 13 | -11.262 | -15.200 | 107.241 | 1.00 | 0.00 | C |
| ATOM | 382 | C5   | G A | 13 | -11.332 | -16.363 | 106.491 | 1.00 | 0.00 | C |
| ATOM | 383 | C6   | G A | 13 | -10.148 | -17.078 | 106.198 | 1.00 | 0.00 | C |
| ATOM | 384 | O6   | G A | 13 | -10.009 | -18.118 | 105.553 | 1.00 | 0.00 | O |
| ATOM | 385 | N7   | G A | 13 | -12.657 | -16.629 | 106.137 | 1.00 | 0.00 | N |
| ATOM | 386 | C8   | G A | 13 | -13.331 | -15.645 | 106.674 | 1.00 | 0.00 | C |
| ATOM | 387 | N9   | G A | 13 | -12.554 | -14.737 | 107.361 | 1.00 | 0.00 | N |
| ATOM | 388 | C2'  | G A | 13 | -14.089 | -12.737 | 107.413 | 1.00 | 0.00 | C |
| ATOM | 389 | C3'  | G A | 13 | -14.875 | -12.211 | 108.602 | 1.00 | 0.00 | C |
| ATOM | 390 | O3'  | G A | 13 | -14.279 | -10.998 | 109.058 | 1.00 | 0.00 | O |
| ATOM | 391 | C4'  | G A | 13 | -14.741 | -13.338 | 109.625 | 1.00 | 0.00 | C |
| ATOM | 392 | O4'  | G A | 13 | -13.411 | -13.894 | 109.375 | 1.00 | 0.00 | O |
| ATOM | 393 | C5'  | G A | 13 | -15.757 | -14.453 | 109.531 | 1.00 | 0.00 | C |
| ATOM | 394 | O5'  | G A | 13 | -16.074 | -14.712 | 108.141 | 1.00 | 0.00 | O |
| ATOM | 395 | O1P  | G A | 13 | -18.491 | -14.033 | 107.957 | 1.00 | 0.00 | O |
| ATOM | 396 | O2P  | G A | 13 | -17.557 | -15.775 | 106.413 | 1.00 | 0.00 | O |
| ATOM | 397 | P    | G A | 13 | -17.558 | -15.159 | 107.762 | 1.00 | 0.00 | P |
| ATOM | 398 | H1   | G A | 13 | -8.100  | -16.896 | 106.600 | 1.00 | 0.00 | H |
| ATOM | 399 | H8   | G A | 13 | -14.414 | -15.551 | 106.587 | 1.00 | 0.00 | H |
| ATOM | 400 | H1'  | G A | 13 | -12.082 | -12.876 | 108.219 | 1.00 | 0.00 | H |
| ATOM | 401 | H21  | G A | 13 | -6.999  | -15.361 | 107.714 | 1.00 | 0.00 | H |
| ATOM | 402 | H3'  | G A | 13 | -15.921 | -12.027 | 108.353 | 1.00 | 0.00 | H |
| ATOM | 403 | H22  | G A | 13 | -7.809  | -13.967 | 108.483 | 1.00 | 0.00 | H |
| ATOM | 404 | H4'  | G A | 13 | -14.834 | -12.885 | 110.610 | 1.00 | 0.00 | H |
| ATOM | 405 | H2'1 | G A | 13 | -14.705 | -13.377 | 106.782 | 1.00 | 0.00 | H |
| ATOM | 406 | H2'2 | G A | 13 | -13.718 | -11.923 | 106.790 | 1.00 | 0.00 | H |
| ATOM | 407 | H5'1 | G A | 13 | -15.345 | -15.351 | 109.990 | 1.00 | 0.00 | H |
| ATOM | 408 | H5'2 | G A | 13 | -16.659 | -14.160 | 110.067 | 1.00 | 0.00 | H |
| ATOM | 409 | C1'  | G A | 14 | -9.170  | -10.668 | 106.644 | 1.00 | 0.00 | C |
| ATOM | 410 | N1   | G A | 14 | -7.816  | -14.812 | 103.996 | 1.00 | 0.00 | N |
| ATOM | 411 | C2   | G A | 14 | -7.040  | -13.942 | 104.741 | 1.00 | 0.00 | C |
| ATOM | 412 | N2   | G A | 14 | -5.729  | -14.210 | 104.785 | 1.00 | 0.00 | N |
| ATOM | 413 | N3   | G A | 14 | -7.534  | -12.889 | 105.391 | 1.00 | 0.00 | N |
| ATOM | 414 | C4   | G A | 14 | -8.877  | -12.767 | 105.231 | 1.00 | 0.00 | C |
| ATOM | 415 | C5   | G A | 14 | -9.729  | -13.582 | 104.505 | 1.00 | 0.00 | C |
| ATOM | 416 | C6   | G A | 14 | -9.208  | -14.702 | 103.819 | 1.00 | 0.00 | C |
| ATOM | 417 | O6   | G A | 14 | -9.797  | -15.535 | 103.129 | 1.00 | 0.00 | O |
| ATOM | 418 | N7   | G A | 14 | -11.041 | -13.108 | 104.594 | 1.00 | 0.00 | N |
| ATOM | 419 | C8   | G A | 14 | -10.944 | -12.049 | 105.355 | 1.00 | 0.00 | C |
| ATOM | 420 | N9   | G A | 14 | -9.662  | -11.776 | 105.781 | 1.00 | 0.00 | N |
| ATOM | 421 | C2'  | G A | 14 | -9.873  | -9.340  | 106.398 | 1.00 | 0.00 | C |
| ATOM | 422 | C3'  | G A | 14 | -9.931  | -8.746  | 107.795 | 1.00 | 0.00 | C |
| ATOM | 423 | O3'  | G A | 14 | -8.701  | -8.079  | 108.072 | 1.00 | 0.00 | O |
| ATOM | 424 | C4'  | G A | 14 | -10.132 | -9.976  | 108.679 | 1.00 | 0.00 | C |
| ATOM | 425 | O4'  | G A | 14 | -9.399  | -11.038 | 107.992 | 1.00 | 0.00 | O |
| ATOM | 426 | C5'  | G A | 14 | -11.559 | -10.428 | 108.884 | 1.00 | 0.00 | C |
| ATOM | 427 | O5'  | G A | 14 | -12.317 | -10.228 | 107.665 | 1.00 | 0.00 | O |
| ATOM | 428 | O1P  | G A | 14 | -13.988 | -8.458  | 108.302 | 1.00 | 0.00 | O |
| ATOM | 429 | O2P  | G A | 14 | -14.529 | -10.096 | 106.480 | 1.00 | 0.00 | O |
| ATOM | 430 | P    | G A | 14 | -13.857 | -9.830  | 107.776 | 1.00 | 0.00 | P |
| ATOM | 431 | H1   | G A | 14 | -7.337  | -15.602 | 103.538 | 1.00 | 0.00 | H |
| ATOM | 432 | H8   | G A | 14 | -11.803 | -11.435 | 105.628 | 1.00 | 0.00 | H |

|      |     |      |     |    |         |         |         |      |      |   |
|------|-----|------|-----|----|---------|---------|---------|------|------|---|
| ATOM | 433 | H1'  | G A | 14 | -8.094  | -10.574 | 106.500 | 1.00 | 0.00 | H |
| ATOM | 434 | H21  | G A | 14 | -5.355  | -15.028 | 104.283 | 1.00 | 0.00 | H |
| ATOM | 435 | H3'  | G A | 14 | -10.756 | -8.042  | 107.906 | 1.00 | 0.00 | H |
| ATOM | 436 | H22  | G A | 14 | -5.097  | -13.598 | 105.320 | 1.00 | 0.00 | H |
| ATOM | 437 | H4'  | G A | 14 | -9.716  | -9.735  | 109.657 | 1.00 | 0.00 | H |
| ATOM | 438 | H2'1 | G A | 14 | -10.871 | -9.472  | 105.981 | 1.00 | 0.00 | H |
| ATOM | 439 | H2'2 | G A | 14 | -9.315  | -8.697  | 105.715 | 1.00 | 0.00 | H |
| ATOM | 440 | H5'1 | G A | 14 | -11.564 | -11.484 | 109.152 | 1.00 | 0.00 | H |
| ATOM | 441 | H5'2 | G A | 14 | -12.004 | -9.850  | 109.694 | 1.00 | 0.00 | H |
| ATOM | 442 | C1'  | A A | 15 | -4.995  | -9.743  | 104.153 | 1.00 | 0.00 | C |
| ATOM | 443 | N1   | A A | 15 | -6.702  | -13.456 | 101.049 | 1.00 | 0.00 | N |
| ATOM | 444 | C2   | A A | 15 | -5.498  | -13.181 | 101.544 | 1.00 | 0.00 | C |
| ATOM | 445 | N3   | A A | 15 | -5.126  | -12.205 | 102.345 | 1.00 | 0.00 | N |
| ATOM | 446 | C4   | A A | 15 | -6.180  | -11.424 | 102.646 | 1.00 | 0.00 | C |
| ATOM | 447 | C5   | A A | 15 | -7.471  | -11.567 | 102.223 | 1.00 | 0.00 | C |
| ATOM | 448 | C6   | A A | 15 | -7.733  | -12.659 | 101.368 | 1.00 | 0.00 | C |
| ATOM | 449 | N6   | A A | 15 | -8.954  | -12.926 | 100.874 | 1.00 | 0.00 | N |
| ATOM | 450 | N7   | A A | 15 | -8.280  | -10.572 | 102.741 | 1.00 | 0.00 | N |
| ATOM | 451 | C8   | A A | 15 | -7.470  | -9.851  | 103.457 | 1.00 | 0.00 | C |
| ATOM | 452 | N9   | A A | 15 | -6.176  | -10.309 | 103.450 | 1.00 | 0.00 | N |
| ATOM | 453 | C2'  | A A | 15 | -4.973  | -8.221  | 104.189 | 1.00 | 0.00 | C |
| ATOM | 454 | C3'  | A A | 15 | -4.362  | -7.943  | 105.554 | 1.00 | 0.00 | C |
| ATOM | 455 | O3'  | A A | 15 | -2.943  | -7.992  | 105.449 | 1.00 | 0.00 | O |
| ATOM | 456 | C4'  | A A | 15 | -4.917  | -9.080  | 106.412 | 1.00 | 0.00 | C |
| ATOM | 457 | O4'  | A A | 15 | -5.022  | -10.211 | 105.488 | 1.00 | 0.00 | O |
| ATOM | 458 | C5'  | A A | 15 | -6.268  | -8.846  | 107.043 | 1.00 | 0.00 | C |
| ATOM | 459 | O5'  | A A | 15 | -7.110  | -8.090  | 106.136 | 1.00 | 0.00 | O |
| ATOM | 460 | O1P  | A A | 15 | -7.439  | -5.900  | 107.334 | 1.00 | 0.00 | O |
| ATOM | 461 | O2P  | A A | 15 | -9.177  | -6.721  | 105.719 | 1.00 | 0.00 | O |
| ATOM | 462 | P    | A A | 15 | -8.155  | -7.049  | 106.743 | 1.00 | 0.00 | P |
| ATOM | 463 | H2   | A A | 15 | -4.705  | -13.865 | 101.242 | 1.00 | 0.00 | H |
| ATOM | 464 | H8   | A A | 15 | -7.784  | -8.968  | 104.012 | 1.00 | 0.00 | H |
| ATOM | 465 | H1'  | A A | 15 | -4.096  | -10.135 | 103.678 | 1.00 | 0.00 | H |
| ATOM | 466 | H3'  | A A | 15 | -4.662  | -6.972  | 105.946 | 1.00 | 0.00 | H |
| ATOM | 467 | H4'  | A A | 15 | -4.200  | -9.250  | 107.213 | 1.00 | 0.00 | H |
| ATOM | 468 | H61  | A A | 15 | -9.092  | -13.738 | 100.256 | 1.00 | 0.00 | H |
| ATOM | 469 | H62  | A A | 15 | -9.751  | -12.317 | 101.112 | 1.00 | 0.00 | H |
| ATOM | 470 | H2'1 | A A | 15 | -5.972  | -7.792  | 104.106 | 1.00 | 0.00 | H |
| ATOM | 471 | H2'2 | A A | 15 | -4.366  | -7.796  | 103.389 | 1.00 | 0.00 | H |
| ATOM | 472 | H5'1 | A A | 15 | -6.733  | -9.807  | 107.260 | 1.00 | 0.00 | H |
| ATOM | 473 | H5'2 | A A | 15 | -6.139  | -8.292  | 107.971 | 1.00 | 0.00 | H |
| ATOM | 474 | C1'  | C A | 16 | -1.782  | -10.490 | 100.441 | 1.00 | 0.00 | C |
| ATOM | 475 | N1   | C A | 16 | -3.224  | -10.256 | 100.154 | 1.00 | 0.00 | N |
| ATOM | 476 | C2   | C A | 16 | -3.879  | -11.163 | 99.323  | 1.00 | 0.00 | C |
| ATOM | 477 | O2   | C A | 16 | -3.241  | -12.117 | 98.861  | 1.00 | 0.00 | O |
| ATOM | 478 | N3   | C A | 16 | -5.192  | -10.968 | 99.049  | 1.00 | 0.00 | N |
| ATOM | 479 | C4   | C A | 16 | -5.856  | -9.925  | 99.564  | 1.00 | 0.00 | C |
| ATOM | 480 | N4   | C A | 16 | -7.140  | -9.787  | 99.266  | 1.00 | 0.00 | N |
| ATOM | 481 | C5   | C A | 16 | -5.207  | -8.974  | 100.418 | 1.00 | 0.00 | C |
| ATOM | 482 | C6   | C A | 16 | -3.885  | -9.192  | 100.685 | 1.00 | 0.00 | C |
| ATOM | 483 | C2'  | C A | 16 | -0.957  | -9.213  | 100.511 | 1.00 | 0.00 | C |
| ATOM | 484 | C3'  | C A | 16 | 0.048   | -9.545  | 101.605 | 1.00 | 0.00 | C |
| ATOM | 485 | O3'  | C A | 16 | 1.143   | -10.257 | 101.034 | 1.00 | 0.00 | O |
| ATOM | 486 | C4'  | C A | 16 | -0.768  | -10.410 | 102.563 | 1.00 | 0.00 | C |

|      |     |      |   |   |    |        |         |         |      |      |   |
|------|-----|------|---|---|----|--------|---------|---------|------|------|---|
| ATOM | 487 | O4'  | C | A | 16 | -1.693 | -11.139 | 101.696 | 1.00 | 0.00 | O |
| ATOM | 488 | C5'  | C | A | 16 | -1.569 | -9.675  | 103.614 | 1.00 | 0.00 | C |
| ATOM | 489 | O5'  | C | A | 16 | -2.093 | -8.443  | 103.058 | 1.00 | 0.00 | O |
| ATOM | 490 | O1P  | C | A | 16 | -0.889 | -6.657  | 104.361 | 1.00 | 0.00 | O |
| ATOM | 491 | O2P  | C | A | 16 | -3.155 | -6.190  | 103.391 | 1.00 | 0.00 | O |
| ATOM | 492 | P    | C | A | 16 | -2.228 | -7.170  | 104.008 | 1.00 | 0.00 | P |
| ATOM | 493 | H5   | C | A | 16 | -5.742 | -8.119  | 100.834 | 1.00 | 0.00 | H |
| ATOM | 494 | H6   | C | A | 16 | -3.350 | -8.500  | 101.335 | 1.00 | 0.00 | H |
| ATOM | 495 | H1'  | C | A | 16 | -1.389 | -11.168 | 99.684  | 1.00 | 0.00 | H |
| ATOM | 496 | H3'  | C | A | 16 | 0.419  | -8.648  | 102.102 | 1.00 | 0.00 | H |
| ATOM | 497 | H4'  | C | A | 16 | -0.063 | -11.061 | 103.079 | 1.00 | 0.00 | H |
| ATOM | 498 | H41  | C | A | 16 | -7.674 | -8.993  | 99.650  | 1.00 | 0.00 | H |
| ATOM | 499 | H42  | C | A | 16 | -7.603 | -10.469 | 98.650  | 1.00 | 0.00 | H |
| ATOM | 500 | H2'1 | C | A | 16 | -1.558 | -8.344  | 100.777 | 1.00 | 0.00 | H |
| ATOM | 501 | H2'2 | C | A | 16 | -0.457 | -8.990  | 99.568  | 1.00 | 0.00 | H |
| ATOM | 502 | H5'1 | C | A | 16 | -2.390 | -10.310 | 103.946 | 1.00 | 0.00 | H |
| ATOM | 503 | H5'2 | C | A | 16 | -0.923 | -9.450  | 104.463 | 1.00 | 0.00 | H |
| ATOM | 504 | C1'  | G | A | 17 | -0.507 | -11.921 | 95.876  | 1.00 | 0.00 | C |
| ATOM | 505 | N1   | G | A | 17 | -5.404 | -10.961 | 94.817  | 1.00 | 0.00 | N |
| ATOM | 506 | C2   | G | A | 17 | -4.601 | -12.017 | 94.423  | 1.00 | 0.00 | C |
| ATOM | 507 | N2   | G | A | 17 | -5.179 | -12.938 | 93.642  | 1.00 | 0.00 | N |
| ATOM | 508 | N3   | G | A | 17 | -3.324 | -12.144 | 94.780  | 1.00 | 0.00 | N |
| ATOM | 509 | C4   | G | A | 17 | -2.903 | -11.117 | 95.565  | 1.00 | 0.00 | C |
| ATOM | 510 | C5   | G | A | 17 | -3.630 | -10.022 | 96.004  | 1.00 | 0.00 | C |
| ATOM | 511 | C6   | G | A | 17 | -4.986 | -9.889  | 95.629  | 1.00 | 0.00 | C |
| ATOM | 512 | O6   | G | A | 17 | -5.787 | -8.998  | 95.914  | 1.00 | 0.00 | O |
| ATOM | 513 | N7   | G | A | 17 | -2.827 | -9.194  | 96.791  | 1.00 | 0.00 | N |
| ATOM | 514 | C8   | G | A | 17 | -1.668 | -9.801  | 96.808  | 1.00 | 0.00 | C |
| ATOM | 515 | N9   | G | A | 17 | -1.635 | -10.975 | 96.085  | 1.00 | 0.00 | N |
| ATOM | 516 | C2'  | G | A | 17 | 0.846  | -11.240 | 95.719  | 1.00 | 0.00 | C |
| ATOM | 517 | C3'  | G | A | 17 | 1.778  | -12.221 | 96.410  | 1.00 | 0.00 | C |
| ATOM | 518 | O3'  | G | A | 17 | 2.152  | -13.241 | 95.485  | 1.00 | 0.00 | O |
| ATOM | 519 | C4'  | G | A | 17 | 0.917  | -12.762 | 97.551  | 1.00 | 0.00 | C |
| ATOM | 520 | O4'  | G | A | 17 | -0.439 | -12.769 | 97.007  | 1.00 | 0.00 | O |
| ATOM | 521 | C5'  | G | A | 17 | 0.922  | -11.960 | 98.831  | 1.00 | 0.00 | C |
| ATOM | 522 | O5'  | G | A | 17 | 0.985  | -10.545 | 98.524  | 1.00 | 0.00 | O |
| ATOM | 523 | O1P  | G | A | 17 | 3.232  | -9.855  | 99.425  | 1.00 | 0.00 | O |
| ATOM | 524 | O2P  | G | A | 17 | 1.373  | -8.177  | 99.268  | 1.00 | 0.00 | O |
| ATOM | 525 | P    | G | A | 17 | 1.784  | -9.582  | 99.512  | 1.00 | 0.00 | P |
| ATOM | 526 | H1   | G | A | 17 | -6.382 | -10.961 | 94.490  | 1.00 | 0.00 | H |
| ATOM | 527 | H8   | G | A | 17 | -0.803 | -9.411  | 97.346  | 1.00 | 0.00 | H |
| ATOM | 528 | H1'  | G | A | 17 | -0.735 | -12.539 | 95.006  | 1.00 | 0.00 | H |
| ATOM | 529 | H21  | G | A | 17 | -6.168 | -12.835 | 93.372  | 1.00 | 0.00 | H |
| ATOM | 530 | H3'  | G | A | 17 | 2.676  | -11.732 | 96.791  | 1.00 | 0.00 | H |
| ATOM | 531 | H22  | G | A | 17 | -4.634 | -13.747 | 93.313  | 1.00 | 0.00 | H |
| ATOM | 532 | H4'  | G | A | 17 | 1.290  | -13.760 | 97.781  | 1.00 | 0.00 | H |
| ATOM | 533 | H2'1 | G | A | 17 | 0.873  | -10.261 | 96.199  | 1.00 | 0.00 | H |
| ATOM | 534 | H2'2 | G | A | 17 | 1.120  | -11.100 | 94.673  | 1.00 | 0.00 | H |
| ATOM | 535 | H5'1 | G | A | 17 | 0.012  | -12.176 | 99.390  | 1.00 | 0.00 | H |
| ATOM | 536 | H5'2 | G | A | 17 | 1.786  | -12.248 | 99.430  | 1.00 | 0.00 | H |
| ATOM | 537 | C1'  | G | A | 18 | -1.403 | -12.868 | 91.098  | 1.00 | 0.00 | C |
| ATOM | 538 | N1   | G | A | 18 | -5.184 | -9.502  | 91.726  | 1.00 | 0.00 | N |
| ATOM | 539 | C2   | G | A | 18 | -5.175 | -10.713 | 91.056  | 1.00 | 0.00 | C |
| ATOM | 540 | N2   | G | A | 18 | -6.328 | -11.075 | 90.475  | 1.00 | 0.00 | N |

|      |     |      |     |    |        |         |        |      |      |   |
|------|-----|------|-----|----|--------|---------|--------|------|------|---|
| ATOM | 541 | N3   | G A | 18 | -4.105 | -11.499 | 90.974 | 1.00 | 0.00 | N |
| ATOM | 542 | C4   | G A | 18 | -3.027 | -10.974 | 91.613 | 1.00 | 0.00 | C |
| ATOM | 543 | C5   | G A | 18 | -2.942 | -9.775  | 92.302 | 1.00 | 0.00 | C |
| ATOM | 544 | C6   | G A | 18 | -4.081 | -8.941  | 92.393 | 1.00 | 0.00 | C |
| ATOM | 545 | O6   | G A | 18 | -4.200 | -7.851  | 92.954 | 1.00 | 0.00 | O |
| ATOM | 546 | N7   | G A | 18 | -1.655 | -9.602  | 92.812 | 1.00 | 0.00 | N |
| ATOM | 547 | C8   | G A | 18 | -1.016 | -10.677 | 92.430 | 1.00 | 0.00 | C |
| ATOM | 548 | N9   | G A | 18 | -1.783 | -11.558 | 91.696 | 1.00 | 0.00 | N |
| ATOM | 549 | C2'  | G A | 18 | 0.010  | -12.897 | 90.532 | 1.00 | 0.00 | C |
| ATOM | 550 | C3'  | G A | 18 | 0.448  | -14.318 | 90.847 | 1.00 | 0.00 | C |
| ATOM | 551 | O3'  | G A | 18 | -0.014 | -15.190 | 89.818 | 1.00 | 0.00 | O |
| ATOM | 552 | C4'  | G A | 18 | -0.232 | -14.595 | 92.187 | 1.00 | 0.00 | C |
| ATOM | 553 | O4'  | G A | 18 | -1.486 | -13.847 | 92.114 | 1.00 | 0.00 | O |
| ATOM | 554 | C5'  | G A | 18 | 0.521  | -14.159 | 93.423 | 1.00 | 0.00 | C |
| ATOM | 555 | O5'  | G A | 18 | 1.219  | -12.917 | 93.160 | 1.00 | 0.00 | O |
| ATOM | 556 | O1P  | G A | 18 | 3.646  | -13.572 | 93.303 | 1.00 | 0.00 | O |
| ATOM | 557 | O2P  | G A | 18 | 2.950  | -11.217 | 93.817 | 1.00 | 0.00 | O |
| ATOM | 558 | P    | G A | 18 | 2.628  | -12.665 | 93.866 | 1.00 | 0.00 | P |
| ATOM | 559 | H1   | G A | 18 | -6.069 | -8.971  | 91.736 | 1.00 | 0.00 | H |
| ATOM | 560 | H8   | G A | 18 | 0.032  | -10.863 | 92.669 | 1.00 | 0.00 | H |
| ATOM | 561 | H1'  | G A | 18 | -2.136 | -13.117 | 90.330 | 1.00 | 0.00 | H |
| ATOM | 562 | H21  | G A | 18 | -7.154 | -10.461 | 90.547 | 1.00 | 0.00 | H |
| ATOM | 563 | H3'  | G A | 18 | 1.533  | -14.402 | 90.931 | 1.00 | 0.00 | H |
| ATOM | 564 | H22  | G A | 18 | -6.386 | -11.962 | 89.960 | 1.00 | 0.00 | H |
| ATOM | 565 | H4'  | G A | 18 | -0.380 | -15.672 | 92.250 | 1.00 | 0.00 | H |
| ATOM | 566 | H2'1 | G A | 18 | 0.662  | -12.166 | 91.009 | 1.00 | 0.00 | H |
| ATOM | 567 | H2'2 | G A | 18 | 0.031  | -12.703 | 89.459 | 1.00 | 0.00 | H |
| ATOM | 568 | H5'1 | G A | 18 | -0.186 | -14.019 | 94.240 | 1.00 | 0.00 | H |
| ATOM | 569 | H5'2 | G A | 18 | 1.236  | -14.934 | 93.697 | 1.00 | 0.00 | H |
| ATOM | 570 | C1'  | T A | 19 | -3.867 | -12.337 | 86.837 | 1.00 | 0.00 | C |
| ATOM | 571 | N1   | T A | 19 | -3.372 | -11.140 | 87.567 | 1.00 | 0.00 | N |
| ATOM | 572 | C2   | T A | 19 | -4.282 | -10.132 | 87.815 | 1.00 | 0.00 | C |
| ATOM | 573 | O2   | T A | 19 | -5.447 | -10.193 | 87.461 | 1.00 | 0.00 | O |
| ATOM | 574 | N3   | T A | 19 | -3.780 | -9.038  | 88.496 | 1.00 | 0.00 | N |
| ATOM | 575 | C4   | T A | 19 | -2.486 | -8.868  | 88.936 | 1.00 | 0.00 | C |
| ATOM | 576 | O4   | T A | 19 | -2.151 | -7.839  | 89.536 | 1.00 | 0.00 | O |
| ATOM | 577 | C5   | T A | 19 | -1.607 | -9.972  | 88.632 | 1.00 | 0.00 | C |
| ATOM | 578 | C6   | T A | 19 | -2.062 | -11.055 | 87.969 | 1.00 | 0.00 | C |
| ATOM | 579 | C7   | T A | 19 | -0.187 | -9.831  | 89.094 | 1.00 | 0.00 | C |
| ATOM | 580 | C2'  | T A | 19 | -2.859 | -12.914 | 85.850 | 1.00 | 0.00 | C |
| ATOM | 581 | C3'  | T A | 19 | -3.125 | -14.407 | 85.962 | 1.00 | 0.00 | C |
| ATOM | 582 | O3'  | T A | 19 | -4.210 | -14.756 | 85.106 | 1.00 | 0.00 | O |
| ATOM | 583 | C4'  | T A | 19 | -3.475 | -14.579 | 87.438 | 1.00 | 0.00 | C |
| ATOM | 584 | O4'  | T A | 19 | -4.159 | -13.336 | 87.794 | 1.00 | 0.00 | O |
| ATOM | 585 | C5'  | T A | 19 | -2.316 | -14.782 | 88.385 | 1.00 | 0.00 | C |
| ATOM | 586 | O5'  | T A | 19 | -1.187 | -13.982 | 87.955 | 1.00 | 0.00 | O |
| ATOM | 587 | O1P  | T A | 19 | 0.529  | -15.702 | 87.296 | 1.00 | 0.00 | O |
| ATOM | 588 | O2P  | T A | 19 | 1.262  | -13.436 | 88.083 | 1.00 | 0.00 | O |
| ATOM | 589 | P    | T A | 19 | 0.287  | -14.547 | 88.184 | 1.00 | 0.00 | P |
| ATOM | 590 | H3   | T A | 19 | -4.442 | -8.274  | 88.696 | 1.00 | 0.00 | H |
| ATOM | 591 | H6   | T A | 19 | -1.380 | -11.878 | 87.752 | 1.00 | 0.00 | H |
| ATOM | 592 | H1'  | T A | 19 | -4.796 | -12.070 | 86.334 | 1.00 | 0.00 | H |
| ATOM | 593 | H3'  | T A | 19 | -2.249 | -14.997 | 85.693 | 1.00 | 0.00 | H |
| ATOM | 594 | H4'  | T A | 19 | -4.120 | -15.457 | 87.510 | 1.00 | 0.00 | H |

|      |     |      |       |    |         |         |        |      |      |   |
|------|-----|------|-------|----|---------|---------|--------|------|------|---|
| ATOM | 595 | H71  | T A   | 19 | 0.473   | -9.773  | 88.229 | 1.00 | 0.00 | H |
| ATOM | 596 | H72  | T A   | 19 | -0.088  | -8.922  | 89.687 | 1.00 | 0.00 | H |
| ATOM | 597 | H73  | T A   | 19 | 0.086   | -10.694 | 89.703 | 1.00 | 0.00 | H |
| ATOM | 598 | H2'1 | T A   | 19 | -1.832  | -12.672 | 86.120 | 1.00 | 0.00 | H |
| ATOM | 599 | H2'2 | T A   | 19 | -3.024  | -12.555 | 84.833 | 1.00 | 0.00 | H |
| ATOM | 600 | H5'1 | T A   | 19 | -2.617  | -14.485 | 89.389 | 1.00 | 0.00 | H |
| ATOM | 601 | H5'2 | T A   | 19 | -2.039  | -15.836 | 88.391 | 1.00 | 0.00 | H |
| ATOM | 602 | C01  | LNK A | 20 | -4.289  | -15.469 | 81.453 | 0.00 | 0.00 | C |
| ATOM | 603 | O1   | LNK A | 20 | -3.599  | -15.082 | 82.643 | 1.00 | 0.00 | O |
| ATOM | 604 | S    | LNK A | 20 | -3.570  | -15.866 | 77.558 | 0.00 | 0.00 | S |
| ATOM | 605 | C02  | LNK A | 20 | -3.325  | -15.388 | 80.254 | 0.00 | 0.00 | C |
| ATOM | 606 | C03  | LNK A | 20 | -4.093  | -14.900 | 79.010 | 0.00 | 0.00 | C |
| ATOM | 607 | O1P  | LNK A | 20 | -3.247  | -12.793 | 83.631 | 1.00 | 0.00 | O |
| ATOM | 608 | O2P  | LNK A | 20 | -5.562  | -13.565 | 83.040 | 1.00 | 0.00 | O |
| ATOM | 609 | P    | LNK A | 20 | -4.208  | -13.911 | 83.539 | 1.00 | 0.00 | P |
| ATOM | 610 | H01  | LNK A | 20 | -5.132  | -14.798 | 81.286 | 0.00 | 0.00 | H |
| ATOM | 611 | H02  | LNK A | 20 | -4.653  | -16.490 | 81.558 | 0.00 | 0.00 | H |
| ATOM | 612 | H03  | LNK A | 20 | -3.877  | -13.846 | 78.841 | 0.00 | 0.00 | H |
| ATOM | 613 | H04  | LNK A | 20 | -2.906  | -16.376 | 80.058 | 0.00 | 0.00 | H |
| ATOM | 614 | H05  | LNK A | 20 | -2.521  | -14.690 | 80.482 | 0.00 | 0.00 | H |
| ATOM | 615 | H06  | LNK A | 20 | -5.163  | -15.032 | 79.167 | 0.00 | 0.00 | H |
| ATOM | 616 | AU   | LNK A | 20 | -3.833  | -15.586 | 76.990 |      |      |   |
| TER  |     |      |       |    |         |         |        |      |      |   |
| ATOM | 618 | C1'  | A B   | 2  | -9.428  | -3.417  | 89.736 | 1.00 | 0.00 | C |
| ATOM | 619 | N1   | A B   | 2  | -5.658  | -6.836  | 89.073 | 1.00 | 0.00 | N |
| ATOM | 620 | C2   | A B   | 2  | -6.941  | -6.837  | 88.727 | 1.00 | 0.00 | C |
| ATOM | 621 | N3   | A B   | 2  | -7.861  | -5.917  | 88.927 | 1.00 | 0.00 | N |
| ATOM | 622 | C4   | A B   | 2  | -7.335  | -4.868  | 89.587 | 1.00 | 0.00 | C |
| ATOM | 623 | C5   | A B   | 2  | -6.046  | -4.715  | 90.012 | 1.00 | 0.00 | C |
| ATOM | 624 | C6   | A B   | 2  | -5.162  | -5.777  | 89.730 | 1.00 | 0.00 | C |
| ATOM | 625 | N6   | A B   | 2  | -3.865  | -5.766  | 90.086 | 1.00 | 0.00 | N |
| ATOM | 626 | N7   | A B   | 2  | -5.873  | -3.502  | 90.656 | 1.00 | 0.00 | N |
| ATOM | 627 | C8   | A B   | 2  | -7.052  | -2.954  | 90.611 | 1.00 | 0.00 | C |
| ATOM | 628 | N9   | A B   | 2  | -7.990  | -3.725  | 89.975 | 1.00 | 0.00 | N |
| ATOM | 629 | C2'  | A B   | 2  | -10.097 | -2.683  | 90.891 | 1.00 | 0.00 | C |
| ATOM | 630 | C3'  | A B   | 2  | -11.058 | -1.757  | 90.163 | 1.00 | 0.00 | C |
| ATOM | 631 | O3'  | A B   | 2  | -12.260 | -2.466  | 89.872 | 1.00 | 0.00 | O |
| ATOM | 632 | C4'  | A B   | 2  | -10.283 | -1.390  | 88.898 | 1.00 | 0.00 | C |
| ATOM | 633 | O4'  | A B   | 2  | -9.505  | -2.592  | 88.590 | 1.00 | 0.00 | O |
| ATOM | 634 | C5'  | A B   | 2  | -9.339  | -0.216  | 89.005 | 1.00 | 0.00 | C |
| ATOM | 635 | O5'  | A B   | 2  | -8.716  | -0.207  | 90.313 | 1.00 | 0.00 | O |
| ATOM | 636 | H2   | A B   | 2  | -7.281  | -7.726  | 88.201 | 1.00 | 0.00 | H |
| ATOM | 637 | H8   | A B   | 2  | -7.273  | -1.976  | 91.039 | 1.00 | 0.00 | H |
| ATOM | 638 | H1'  | A B   | 2  | -9.944  | -4.351  | 89.516 | 1.00 | 0.00 | H |
| ATOM | 639 | H3'  | A B   | 2  | -11.295 | -0.870  | 90.750 | 1.00 | 0.00 | H |
| ATOM | 640 | H4'  | A B   | 2  | -11.023 | -1.155  | 88.133 | 1.00 | 0.00 | H |
| ATOM | 641 | H61  | A B   | 2  | -3.261  | -6.566  | 89.852 | 1.00 | 0.00 | H |
| ATOM | 642 | H62  | A B   | 2  | -3.477  | -4.957  | 90.591 | 1.00 | 0.00 | H |
| ATOM | 643 | H2'1 | A B   | 2  | -9.384  | -2.121  | 91.494 | 1.00 | 0.00 | H |
| ATOM | 644 | H2'2 | A B   | 2  | -10.629 | -3.362  | 91.559 | 1.00 | 0.00 | H |
| ATOM | 645 | H5'1 | A B   | 2  | -8.575  | -0.302  | 88.233 | 1.00 | 0.00 | H |
| ATOM | 646 | H5'2 | A B   | 2  | -9.899  | 0.706   | 88.856 | 1.00 | 0.00 | H |
| ATOM | 647 | C1'  | C B   | 3  | -11.097 | -8.006  | 90.634 | 1.00 | 0.00 | C |
| ATOM | 648 | N1   | C B   | 3  | -9.866  | -7.506  | 91.305 | 1.00 | 0.00 | N |

|      |     |      |     |   |         |         |        |      |      |   |
|------|-----|------|-----|---|---------|---------|--------|------|------|---|
| ATOM | 649 | C2   | C B | 3 | -8.722  | -8.298  | 91.241 | 1.00 | 0.00 | C |
| ATOM | 650 | O2   | C B | 3 | -8.774  | -9.375  | 90.633 | 1.00 | 0.00 | O |
| ATOM | 651 | N3   | C B | 3 | -7.590  | -7.861  | 91.845 | 1.00 | 0.00 | N |
| ATOM | 652 | C4   | C B | 3 | -7.564  | -6.690  | 92.496 | 1.00 | 0.00 | C |
| ATOM | 653 | N4   | C B | 3 | -6.429  | -6.310  | 93.067 | 1.00 | 0.00 | N |
| ATOM | 654 | C5   | C B | 3 | -8.728  | -5.857  | 92.583 | 1.00 | 0.00 | C |
| ATOM | 655 | C6   | C B | 3 | -9.856  | -6.315  | 91.962 | 1.00 | 0.00 | C |
| ATOM | 656 | C2'  | C B | 3 | -12.379 | -7.701  | 91.398 | 1.00 | 0.00 | C |
| ATOM | 657 | C3'  | C B | 3 | -13.365 | -7.438  | 90.270 | 1.00 | 0.00 | C |
| ATOM | 658 | O3'  | C B | 3 | -13.896 | -8.679  | 89.813 | 1.00 | 0.00 | O |
| ATOM | 659 | C4'  | C B | 3 | -12.498 | -6.757  | 89.213 | 1.00 | 0.00 | C |
| ATOM | 660 | O4'  | C B | 3 | -11.182 | -7.378  | 89.369 | 1.00 | 0.00 | O |
| ATOM | 661 | C5'  | C B | 3 | -12.343 | -5.259  | 89.337 | 1.00 | 0.00 | C |
| ATOM | 662 | O5'  | C B | 3 | -12.279 | -4.886  | 90.737 | 1.00 | 0.00 | O |
| ATOM | 663 | O1P  | C B | 3 | -14.384 | -3.550  | 91.081 | 1.00 | 0.00 | O |
| ATOM | 664 | O2P  | C B | 3 | -12.375 | -3.120  | 92.521 | 1.00 | 0.00 | O |
| ATOM | 665 | P    | C B | 3 | -12.913 | -3.496  | 91.191 | 1.00 | 0.00 | P |
| ATOM | 666 | H5   | C B | 3 | -8.715  | -4.907  | 93.116 | 1.00 | 0.00 | H |
| ATOM | 667 | H6   | C B | 3 | -10.764 | -5.713  | 91.994 | 1.00 | 0.00 | H |
| ATOM | 668 | H1'  | C B | 3 | -10.986 | -9.078  | 90.470 | 1.00 | 0.00 | H |
| ATOM | 669 | H3'  | C B | 3 | -14.183 | -6.790  | 90.586 | 1.00 | 0.00 | H |
| ATOM | 670 | H4'  | C B | 3 | -12.956 | -6.963  | 88.246 | 1.00 | 0.00 | H |
| ATOM | 671 | H41  | C B | 3 | -6.382  | -5.412  | 93.570 | 1.00 | 0.00 | H |
| ATOM | 672 | H42  | C B | 3 | -5.594  | -6.911  | 93.005 | 1.00 | 0.00 | H |
| ATOM | 673 | H2'1 | C B | 3 | -12.278 | -6.833  | 92.047 | 1.00 | 0.00 | H |
| ATOM | 674 | H2'2 | C B | 3 | -12.700 | -8.539  | 92.018 | 1.00 | 0.00 | H |
| ATOM | 675 | H5'1 | C B | 3 | -11.427 | -4.950  | 88.833 | 1.00 | 0.00 | H |
| ATOM | 676 | H5'2 | C B | 3 | -13.193 | -4.770  | 88.865 | 1.00 | 0.00 | H |
| ATOM | 677 | C1'  | C B | 4 | -10.588 | -12.757 | 91.937 | 1.00 | 0.00 | C |
| ATOM | 678 | N1   | C B | 4 | -10.040 | -11.672 | 92.797 | 1.00 | 0.00 | N |
| ATOM | 679 | C2   | C B | 4 | -8.707  | -11.764 | 93.193 | 1.00 | 0.00 | C |
| ATOM | 680 | O2   | C B | 4 | -8.037  | -12.735 | 92.815 | 1.00 | 0.00 | O |
| ATOM | 681 | N3   | C B | 4 | -8.188  | -10.788 | 93.976 | 1.00 | 0.00 | N |
| ATOM | 682 | C4   | C B | 4 | -8.938  | -9.749  | 94.369 | 1.00 | 0.00 | C |
| ATOM | 683 | N4   | C B | 4 | -8.379  | -8.821  | 95.131 | 1.00 | 0.00 | N |
| ATOM | 684 | C5   | C B | 4 | -10.313 | -9.631  | 93.982 | 1.00 | 0.00 | C |
| ATOM | 685 | C6   | C B | 4 | -10.813 | -10.624 | 93.188 | 1.00 | 0.00 | C |
| ATOM | 686 | C2'  | C B | 4 | -12.028 | -13.129 | 92.263 | 1.00 | 0.00 | C |
| ATOM | 687 | C3'  | C B | 4 | -12.591 | -13.448 | 90.886 | 1.00 | 0.00 | C |
| ATOM | 688 | O3'  | C B | 4 | -12.284 | -14.800 | 90.556 | 1.00 | 0.00 | O |
| ATOM | 689 | C4'  | C B | 4 | -11.864 | -12.455 | 89.983 | 1.00 | 0.00 | C |
| ATOM | 690 | O4'  | C B | 4 | -10.544 | -12.306 | 90.597 | 1.00 | 0.00 | O |
| ATOM | 691 | C5'  | C B | 4 | -12.491 | -11.085 | 89.848 | 1.00 | 0.00 | C |
| ATOM | 692 | O5'  | C B | 4 | -13.073 | -10.687 | 91.116 | 1.00 | 0.00 | O |
| ATOM | 693 | O1P  | C B | 4 | -15.541 | -10.612 | 90.625 | 1.00 | 0.00 | O |
| ATOM | 694 | O2P  | C B | 4 | -14.576 | -9.162  | 92.430 | 1.00 | 0.00 | O |
| ATOM | 695 | P    | C B | 4 | -14.402 | -9.806  | 91.105 | 1.00 | 0.00 | P |
| ATOM | 696 | H5   | C B | 4 | -10.929 | -8.791  | 94.305 | 1.00 | 0.00 | H |
| ATOM | 697 | H6   | C B | 4 | -11.852 | -10.574 | 92.862 | 1.00 | 0.00 | H |
| ATOM | 698 | H1'  | C B | 4 | -9.932  | -13.623 | 92.021 | 1.00 | 0.00 | H |
| ATOM | 699 | H3'  | C B | 4 | -13.671 | -13.302 | 90.843 | 1.00 | 0.00 | H |
| ATOM | 700 | H4'  | C B | 4 | -11.824 | -12.900 | 88.989 | 1.00 | 0.00 | H |
| ATOM | 701 | H41  | C B | 4 | -8.932  | -8.010  | 95.446 | 1.00 | 0.00 | H |
| ATOM | 702 | H42  | C B | 4 | -7.390  | -8.909  | 95.411 | 1.00 | 0.00 | H |

|      |     |      |     |   |         |         |        |      |      |   |
|------|-----|------|-----|---|---------|---------|--------|------|------|---|
| ATOM | 703 | H2'1 | C B | 4 | -12.571 | -12.310 | 92.733 | 1.00 | 0.00 | H |
| ATOM | 704 | H2'2 | C B | 4 | -12.092 | -13.991 | 92.927 | 1.00 | 0.00 | H |
| ATOM | 705 | H5'1 | C B | 4 | -11.725 | -10.369 | 89.553 | 1.00 | 0.00 | H |
| ATOM | 706 | H5'2 | C B | 4 | -13.265 | -11.121 | 89.082 | 1.00 | 0.00 | H |
| ATOM | 707 | C1'  | G B | 5 | -8.330  | -16.521 | 94.230 | 1.00 | 0.00 | C |
| ATOM | 708 | N1   | G B | 5 | -6.580  | -12.850 | 97.311 | 1.00 | 0.00 | N |
| ATOM | 709 | C2   | G B | 5 | -5.925  | -13.943 | 96.768 | 1.00 | 0.00 | C |
| ATOM | 710 | N2   | G B | 5 | -4.632  | -14.074 | 97.090 | 1.00 | 0.00 | N |
| ATOM | 711 | N3   | G B | 5 | -6.513  | -14.829 | 95.968 | 1.00 | 0.00 | N |
| ATOM | 712 | C4   | G B | 5 | -7.824  | -14.543 | 95.754 | 1.00 | 0.00 | C |
| ATOM | 713 | C5   | G B | 5 | -8.559  | -13.482 | 96.256 | 1.00 | 0.00 | C |
| ATOM | 714 | C6   | G B | 5 | -7.936  | -12.538 | 97.102 | 1.00 | 0.00 | C |
| ATOM | 715 | O6   | G B | 5 | -8.418  | -11.541 | 97.640 | 1.00 | 0.00 | O |
| ATOM | 716 | N7   | G B | 5 | -9.877  | -13.552 | 95.797 | 1.00 | 0.00 | N |
| ATOM | 717 | C8   | G B | 5 | -9.898  | -14.625 | 95.049 | 1.00 | 0.00 | C |
| ATOM | 718 | N9   | G B | 5 | -8.687  | -15.282 | 94.974 | 1.00 | 0.00 | N |
| ATOM | 719 | C2'  | G B | 5 | -9.433  | -17.571 | 94.225 | 1.00 | 0.00 | C |
| ATOM | 720 | C3'  | G B | 5 | -9.284  | -18.181 | 92.840 | 1.00 | 0.00 | C |
| ATOM | 721 | O3'  | G B | 5 | -8.279  | -19.191 | 92.879 | 1.00 | 0.00 | O |
| ATOM | 722 | C4'  | G B | 5 | -8.869  | -16.985 | 91.986 | 1.00 | 0.00 | C |
| ATOM | 723 | O4'  | G B | 5 | -8.067  | -16.158 | 92.888 | 1.00 | 0.00 | O |
| ATOM | 724 | C5'  | G B | 5 | -9.987  | -16.142 | 91.422 | 1.00 | 0.00 | C |
| ATOM | 725 | O5'  | G B | 5 | -11.070 | -16.058 | 92.382 | 1.00 | 0.00 | O |
| ATOM | 726 | O1P  | G B | 5 | -12.953 | -17.282 | 91.246 | 1.00 | 0.00 | O |
| ATOM | 727 | O2P  | G B | 5 | -13.456 | -15.482 | 92.919 | 1.00 | 0.00 | O |
| ATOM | 728 | P    | G B | 5 | -12.570 | -15.988 | 91.844 | 1.00 | 0.00 | P |
| ATOM | 729 | H1   | G B | 5 | -6.031  | -12.218 | 97.914 | 1.00 | 0.00 | H |
| ATOM | 730 | H8   | G B | 5 | -10.791 | -14.970 | 94.530 | 1.00 | 0.00 | H |
| ATOM | 731 | H1'  | G B | 5 | -7.411  | -16.922 | 94.656 | 1.00 | 0.00 | H |
| ATOM | 732 | H21  | G B | 5 | -4.183  | -13.382 | 97.708 | 1.00 | 0.00 | H |
| ATOM | 733 | H3'  | G B | 5 | -10.218 | -18.614 | 92.482 | 1.00 | 0.00 | H |
| ATOM | 734 | H22  | G B | 5 | -4.088  | -14.867 | 96.722 | 1.00 | 0.00 | H |
| ATOM | 735 | H4'  | G B | 5 | -8.294  | -17.379 | 91.148 | 1.00 | 0.00 | H |
| ATOM | 736 | H2'1 | G B | 5 | -10.422 | -17.134 | 94.363 | 1.00 | 0.00 | H |
| ATOM | 737 | H2'2 | G B | 5 | -9.295  | -18.319 | 95.006 | 1.00 | 0.00 | H |
| ATOM | 738 | H5'1 | G B | 5 | -9.608  | -15.143 | 91.206 | 1.00 | 0.00 | H |
| ATOM | 739 | H5'2 | G B | 5 | -10.348 | -16.596 | 90.499 | 1.00 | 0.00 | H |
| ATOM | 740 | C1'  | T B | 6 | -5.440  | -18.529 | 97.711 | 1.00 | 0.00 | C |
| ATOM | 741 | N1   | T B | 6 | -6.545  | -17.610 | 98.095 | 1.00 | 0.00 | N |
| ATOM | 742 | C2   | T B | 6 | -6.228  | -16.560 | 98.933 | 1.00 | 0.00 | C |
| ATOM | 743 | O2   | T B | 6 | -5.102  | -16.370 | 99.357 | 1.00 | 0.00 | O |
| ATOM | 744 | N3   | T B | 6 | -7.286  | -15.730 | 99.262 | 1.00 | 0.00 | N |
| ATOM | 745 | C4   | T B | 6 | -8.593  | -15.857 | 98.842 | 1.00 | 0.00 | C |
| ATOM | 746 | O4   | T B | 6 | -9.456  | -15.052 | 99.207 | 1.00 | 0.00 | O |
| ATOM | 747 | C5   | T B | 6 | -8.824  | -16.983 | 97.969 | 1.00 | 0.00 | C |
| ATOM | 748 | C6   | T B | 6 | -7.820  | -17.812 | 97.625 | 1.00 | 0.00 | C |
| ATOM | 749 | C7   | T B | 6 | -10.233 | -17.158 | 97.485 | 1.00 | 0.00 | C |
| ATOM | 750 | C2'  | T B | 6 | -5.861  | -19.991 | 97.622 | 1.00 | 0.00 | C |
| ATOM | 751 | C3'  | T B | 6 | -5.018  | -20.492 | 96.459 | 1.00 | 0.00 | C |
| ATOM | 752 | O3'  | T B | 6 | -3.728  | -20.862 | 96.942 | 1.00 | 0.00 | O |
| ATOM | 753 | C4'  | T B | 6 | -4.963  | -19.281 | 95.531 | 1.00 | 0.00 | C |
| ATOM | 754 | O4'  | T B | 6 | -4.971  | -18.132 | 96.437 | 1.00 | 0.00 | O |
| ATOM | 755 | C5'  | T B | 6 | -6.105  | -19.132 | 94.552 | 1.00 | 0.00 | C |
| ATOM | 756 | O5'  | T B | 6 | -7.341  | -19.567 | 95.171 | 1.00 | 0.00 | O |



|      |     |      |     |   |         |         |         |      |      |   |
|------|-----|------|-----|---|---------|---------|---------|------|------|---|
| ATOM | 757 | O1P  | T B | 6 | -7.969  | -21.611 | 93.844  | 1.00 | 0.00 | O |
| ATOM | 758 | O2P  | T B | 6 | -9.751  | -20.245 | 94.966  | 1.00 | 0.00 | O |
| ATOM | 759 | P    | T B | 6 | -8.444  | -20.278 | 94.266  | 1.00 | 0.00 | P |
| ATOM | 760 | H3   | T B | 6 | -7.075  | -14.936 | 99.885  | 1.00 | 0.00 | H |
| ATOM | 761 | H6   | T B | 6 | -8.021  | -18.655 | 96.965  | 1.00 | 0.00 | H |
| ATOM | 762 | H1'  | T B | 6 | -4.626  | -18.401 | 98.424  | 1.00 | 0.00 | H |
| ATOM | 763 | H3'  | T B | 6 | -5.475  | -21.348 | 95.964  | 1.00 | 0.00 | H |
| ATOM | 764 | H4'  | T B | 6 | -4.040  | -19.365 | 94.956  | 1.00 | 0.00 | H |
| ATOM | 765 | H71  | T B | 6 | -10.646 | -18.082 | 97.891  | 1.00 | 0.00 | H |
| ATOM | 766 | H72  | T B | 6 | -10.840 | -16.314 | 97.814  | 1.00 | 0.00 | H |
| ATOM | 767 | H73  | T B | 6 | -10.241 | -17.207 | 96.395  | 1.00 | 0.00 | H |
| ATOM | 768 | H2'1 | T B | 6 | -6.924  | -20.102 | 97.417  | 1.00 | 0.00 | H |
| ATOM | 769 | H2'2 | T B | 6 | -5.642  | -20.541 | 98.536  | 1.00 | 0.00 | H |
| ATOM | 770 | H5'1 | T B | 6 | -6.189  | -18.086 | 94.256  | 1.00 | 0.00 | H |
| ATOM | 771 | H5'2 | T B | 6 | -5.900  | -19.739 | 93.671  | 1.00 | 0.00 | H |
| ATOM | 772 | C1'  | C B | 7 | -3.269  | -18.609 | 102.176 | 1.00 | 0.00 | C |
| ATOM | 773 | N1   | C B | 7 | -4.739  | -18.394 | 102.054 | 1.00 | 0.00 | N |
| ATOM | 774 | C2   | C B | 7 | -5.295  | -17.303 | 102.716 | 1.00 | 0.00 | C |
| ATOM | 775 | O2   | C B | 7 | -4.553  | -16.559 | 103.374 | 1.00 | 0.00 | O |
| ATOM | 776 | N3   | C B | 7 | -6.630  | -17.089 | 102.617 | 1.00 | 0.00 | N |
| ATOM | 777 | C4   | C B | 7 | -7.407  | -17.910 | 101.899 | 1.00 | 0.00 | C |
| ATOM | 778 | N4   | C B | 7 | -8.704  | -17.652 | 101.834 | 1.00 | 0.00 | N |
| ATOM | 779 | C5   | C B | 7 | -6.863  | -19.044 | 101.211 | 1.00 | 0.00 | C |
| ATOM | 780 | C6   | C B | 7 | -5.514  | -19.235 | 101.320 | 1.00 | 0.00 | C |
| ATOM | 781 | C2'  | C B | 7 | -2.870  | -20.074 | 102.276 | 1.00 | 0.00 | C |
| ATOM | 782 | C3'  | C B | 7 | -1.557  | -20.097 | 101.510 | 1.00 | 0.00 | C |
| ATOM | 783 | O3'  | C B | 7 | -0.498  | -19.716 | 102.384 | 1.00 | 0.00 | O |
| ATOM | 784 | C4'  | C B | 7 | -1.791  | -19.069 | 100.405 | 1.00 | 0.00 | C |
| ATOM | 785 | O4'  | C B | 7 | -2.658  | -18.066 | 101.021 | 1.00 | 0.00 | O |
| ATOM | 786 | C5'  | C B | 7 | -2.457  | -19.577 | 99.145  | 1.00 | 0.00 | C |
| ATOM | 787 | O5'  | C B | 7 | -3.451  | -20.576 | 99.488  | 1.00 | 0.00 | O |
| ATOM | 788 | O1P  | C B | 7 | -2.523  | -22.688 | 98.482  | 1.00 | 0.00 | O |
| ATOM | 789 | O2P  | C B | 7 | -4.999  | -22.426 | 98.785  | 1.00 | 0.00 | O |
| ATOM | 790 | P    | C B | 7 | -3.694  | -21.790 | 98.483  | 1.00 | 0.00 | P |
| ATOM | 791 | H5   | C B | 7 | -7.492  | -19.718 | 100.631 | 1.00 | 0.00 | H |
| ATOM | 792 | H6   | C B | 7 | -5.053  | -20.080 | 100.809 | 1.00 | 0.00 | H |
| ATOM | 793 | H1'  | C B | 7 | -2.914  | -18.046 | 103.040 | 1.00 | 0.00 | H |
| ATOM | 794 | H3'  | C B | 7 | -1.345  | -21.083 | 101.093 | 1.00 | 0.00 | H |
| ATOM | 795 | H4'  | C B | 7 | -0.813  | -18.676 | 100.126 | 1.00 | 0.00 | H |
| ATOM | 796 | H41  | C B | 7 | -9.325  | -18.266 | 101.285 | 1.00 | 0.00 | H |
| ATOM | 797 | H42  | C B | 7 | -9.095  | -16.837 | 102.331 | 1.00 | 0.00 | H |
| ATOM | 798 | H2'1 | C B | 7 | -3.606  | -20.736 | 101.822 | 1.00 | 0.00 | H |
| ATOM | 799 | H2'2 | C B | 7 | -2.733  | -20.395 | 103.309 | 1.00 | 0.00 | H |
| ATOM | 800 | H5'1 | C B | 7 | -2.935  | -18.741 | 98.633  | 1.00 | 0.00 | H |
| ATOM | 801 | H5'2 | C B | 7 | -1.704  | -20.015 | 98.494  | 1.00 | 0.00 | H |
| ATOM | 802 | C1'  | C B | 8 | -2.903  | -17.426 | 106.972 | 1.00 | 0.00 | C |
| ATOM | 803 | N1   | C B | 8 | -4.163  | -18.001 | 106.428 | 1.00 | 0.00 | N |
| ATOM | 804 | C2   | C B | 8 | -5.355  | -17.331 | 106.695 | 1.00 | 0.00 | C |
| ATOM | 805 | O2   | C B | 8 | -5.318  | -16.291 | 107.366 | 1.00 | 0.00 | O |
| ATOM | 806 | N3   | C B | 8 | -6.513  | -17.837 | 106.208 | 1.00 | 0.00 | N |
| ATOM | 807 | C4   | C B | 8 | -6.522  | -18.965 | 105.485 | 1.00 | 0.00 | C |
| ATOM | 808 | N4   | C B | 8 | -7.684  | -19.414 | 105.032 | 1.00 | 0.00 | N |
| ATOM | 809 | C5   | C B | 8 | -5.313  | -19.680 | 105.199 | 1.00 | 0.00 | C |
| ATOM | 810 | C6   | C B | 8 | -4.157  | -19.148 | 105.696 | 1.00 | 0.00 | C |

|      |     |      |     |    |        |         |         |      |      |   |
|------|-----|------|-----|----|--------|---------|---------|------|------|---|
| ATOM | 811 | C2'  | C B | 8  | -1.910 | -18.474 | 107.459 | 1.00 | 0.00 | C |
| ATOM | 812 | C3'  | C B | 8  | -0.577 | -17.844 | 107.084 | 1.00 | 0.00 | C |
| ATOM | 813 | O3'  | C B | 8  | -0.179 | -16.943 | 108.114 | 1.00 | 0.00 | O |
| ATOM | 814 | C4'  | C B | 8  | -0.898 | -17.122 | 105.777 | 1.00 | 0.00 | C |
| ATOM | 815 | O4'  | C B | 8  | -2.286 | -16.687 | 105.935 | 1.00 | 0.00 | O |
| ATOM | 816 | C5'  | C B | 8  | -0.790 | -17.941 | 104.512 | 1.00 | 0.00 | C |
| ATOM | 817 | O5'  | C B | 8  | -1.237 | -19.298 | 104.768 | 1.00 | 0.00 | O |
| ATOM | 818 | O1P  | C B | 8  | 0.858  | -20.664 | 104.475 | 1.00 | 0.00 | O |
| ATOM | 819 | O2P  | C B | 8  | -1.388 | -21.703 | 104.058 | 1.00 | 0.00 | O |
| ATOM | 820 | P    | C B | 8  | -0.528 | -20.496 | 103.993 | 1.00 | 0.00 | P |
| ATOM | 821 | H5   | C B | 8  | -5.316 | -20.602 | 104.617 | 1.00 | 0.00 | H |
| ATOM | 822 | H6   | C B | 8  | -3.210 | -19.652 | 105.498 | 1.00 | 0.00 | H |
| ATOM | 823 | H1'  | C B | 8  | -3.162 | -16.733 | 107.772 | 1.00 | 0.00 | H |
| ATOM | 824 | H3'  | C B | 8  | 0.201  | -18.594 | 106.938 | 1.00 | 0.00 | H |
| ATOM | 825 | H4'  | C B | 8  | -0.197 | -16.292 | 105.694 | 1.00 | 0.00 | H |
| ATOM | 826 | H41  | C B | 8  | -7.719 | -20.278 | 104.470 | 1.00 | 0.00 | H |
| ATOM | 827 | H42  | C B | 8  | -8.553 | -18.899 | 105.240 | 1.00 | 0.00 | H |
| ATOM | 828 | H2'1 | C B | 8  | -2.047 | -19.435 | 106.965 | 1.00 | 0.00 | H |
| ATOM | 829 | H2'2 | C B | 8  | -1.982 | -18.644 | 108.533 | 1.00 | 0.00 | H |
| ATOM | 830 | H5'1 | C B | 8  | -1.411 | -17.490 | 103.739 | 1.00 | 0.00 | H |
| ATOM | 831 | H5'2 | C B | 8  | 0.247  | -17.952 | 104.180 | 1.00 | 0.00 | H |
| ATOM | 832 | C1'  | T B | 9  | -4.707 | -16.061 | 111.373 | 1.00 | 0.00 | C |
| ATOM | 833 | N1   | T B | 9  | -5.306 | -17.211 | 110.644 | 1.00 | 0.00 | N |
| ATOM | 834 | C2   | T B | 9  | -6.675 | -17.205 | 110.472 | 1.00 | 0.00 | C |
| ATOM | 835 | O2   | T B | 9  | -7.387 | -16.310 | 110.891 | 1.00 | 0.00 | O |
| ATOM | 836 | N3   | T B | 9  | -7.188 | -18.291 | 109.789 | 1.00 | 0.00 | N |
| ATOM | 837 | C4   | T B | 9  | -6.473 | -19.354 | 109.280 | 1.00 | 0.00 | C |
| ATOM | 838 | O4   | T B | 9  | -7.046 | -20.276 | 108.686 | 1.00 | 0.00 | O |
| ATOM | 839 | C5   | T B | 9  | -5.049 | -19.271 | 109.507 | 1.00 | 0.00 | C |
| ATOM | 840 | C6   | T B | 9  | -4.514 | -18.226 | 110.169 | 1.00 | 0.00 | C |
| ATOM | 841 | C7   | T B | 9  | -4.232 | -20.407 | 108.966 | 1.00 | 0.00 | C |
| ATOM | 842 | C2'  | T B | 9  | -3.550 | -16.447 | 112.288 | 1.00 | 0.00 | C |
| ATOM | 843 | C3'  | T B | 9  | -2.627 | -15.245 | 112.156 | 1.00 | 0.00 | C |
| ATOM | 844 | O3'  | T B | 9  | -3.046 | -14.232 | 113.067 | 1.00 | 0.00 | O |
| ATOM | 845 | C4'  | T B | 9  | -2.816 | -14.830 | 110.699 | 1.00 | 0.00 | C |
| ATOM | 846 | O4'  | T B | 9  | -4.216 | -15.147 | 110.412 | 1.00 | 0.00 | O |
| ATOM | 847 | C5'  | T B | 9  | -1.943 | -15.527 | 109.682 | 1.00 | 0.00 | C |
| ATOM | 848 | O5'  | T B | 9  | -1.757 | -16.913 | 110.066 | 1.00 | 0.00 | O |
| ATOM | 849 | O1P  | T B | 9  | 0.701  | -17.049 | 110.585 | 1.00 | 0.00 | O |
| ATOM | 850 | O2P  | T B | 9  | -0.533 | -19.092 | 109.808 | 1.00 | 0.00 | O |
| ATOM | 851 | P    | T B | 9  | -0.366 | -17.621 | 109.738 | 1.00 | 0.00 | P |
| ATOM | 852 | H3   | T B | 9  | -8.208 | -18.308 | 109.645 | 1.00 | 0.00 | H |
| ATOM | 853 | H6   | T B | 9  | -3.437 | -18.188 | 110.329 | 1.00 | 0.00 | H |
| ATOM | 854 | H1'  | T B | 9  | -5.498 | -15.563 | 111.935 | 1.00 | 0.00 | H |
| ATOM | 855 | H3'  | T B | 9  | -1.589 | -15.507 | 112.359 | 1.00 | 0.00 | H |
| ATOM | 856 | H4'  | T B | 9  | -2.602 | -13.761 | 110.645 | 1.00 | 0.00 | H |
| ATOM | 857 | H71  | T B | 9  | -3.783 | -20.958 | 109.794 | 1.00 | 0.00 | H |
| ATOM | 858 | H72  | T B | 9  | -4.871 | -21.074 | 108.389 | 1.00 | 0.00 | H |
| ATOM | 859 | H73  | T B | 9  | -3.443 | -20.013 | 108.324 | 1.00 | 0.00 | H |
| ATOM | 860 | H2'1 | T B | 9  | -3.058 | -17.363 | 111.965 | 1.00 | 0.00 | H |
| ATOM | 861 | H2'2 | T B | 9  | -3.870 | -16.592 | 113.320 | 1.00 | 0.00 | H |
| ATOM | 862 | H5'1 | T B | 9  | -2.421 | -15.476 | 108.704 | 1.00 | 0.00 | H |
| ATOM | 863 | H5'2 | T B | 9  | -0.978 | -15.027 | 109.636 | 1.00 | 0.00 | H |
| ATOM | 864 | C1'  | A B | 10 | -8.290 | -15.671 | 114.787 | 1.00 | 0.00 | C |

|      |     |      |     |    |         |         |         |      |      |   |
|------|-----|------|-----|----|---------|---------|---------|------|------|---|
| ATOM | 865 | N1   | A B | 10 | -10.239 | -19.772 | 112.396 | 1.00 | 0.00 | N |
| ATOM | 866 | C2   | A B | 10 | -10.795 | -18.664 | 112.877 | 1.00 | 0.00 | C |
| ATOM | 867 | N3   | A B | 10 | -10.232 | -17.641 | 113.482 | 1.00 | 0.00 | N |
| ATOM | 868 | C4   | A B | 10 | -8.905  | -17.835 | 113.588 | 1.00 | 0.00 | C |
| ATOM | 869 | C5   | A B | 10 | -8.183  | -18.912 | 113.150 | 1.00 | 0.00 | C |
| ATOM | 870 | C6   | A B | 10 | -8.913  | -19.938 | 112.516 | 1.00 | 0.00 | C |
| ATOM | 871 | N6   | A B | 10 | -8.340  | -21.055 | 112.035 | 1.00 | 0.00 | N |
| ATOM | 872 | N7   | A B | 10 | -6.837  | -18.760 | 113.434 | 1.00 | 0.00 | N |
| ATOM | 873 | C8   | A B | 10 | -6.773  | -17.609 | 114.036 | 1.00 | 0.00 | C |
| ATOM | 874 | N9   | A B | 10 | -7.989  | -16.987 | 114.162 | 1.00 | 0.00 | N |
| ATOM | 875 | C2'  | A B | 10 | -7.457  | -15.376 | 116.027 | 1.00 | 0.00 | C |
| ATOM | 876 | C3'  | A B | 10 | -7.238  | -13.875 | 115.913 | 1.00 | 0.00 | C |
| ATOM | 877 | O3'  | A B | 10 | -8.363  | -13.195 | 116.466 | 1.00 | 0.00 | O |
| ATOM | 878 | C4'  | A B | 10 | -7.120  | -13.663 | 114.404 | 1.00 | 0.00 | C |
| ATOM | 879 | O4'  | A B | 10 | -8.015  | -14.667 | 113.827 | 1.00 | 0.00 | O |
| ATOM | 880 | C5'  | A B | 10 | -5.744  | -13.841 | 113.807 | 1.00 | 0.00 | C |
| ATOM | 881 | O5'  | A B | 10 | -5.051  | -14.919 | 114.486 | 1.00 | 0.00 | O |
| ATOM | 882 | O1P  | A B | 10 | -3.149  | -13.749 | 115.647 | 1.00 | 0.00 | O |
| ATOM | 883 | O2P  | A B | 10 | -2.923  | -16.159 | 114.986 | 1.00 | 0.00 | O |
| ATOM | 884 | P    | A B | 10 | -3.471  | -14.815 | 114.679 | 1.00 | 0.00 | P |
| ATOM | 885 | H2   | A B | 10 | -11.875 | -18.593 | 112.751 | 1.00 | 0.00 | H |
| ATOM | 886 | H8   | A B | 10 | -5.842  | -17.179 | 114.404 | 1.00 | 0.00 | H |
| ATOM | 887 | H1'  | A B | 10 | -9.355  | -15.637 | 115.014 | 1.00 | 0.00 | H |
| ATOM | 888 | H3'  | A B | 10 | -6.332  | -13.555 | 116.427 | 1.00 | 0.00 | H |
| ATOM | 889 | H4'  | A B | 10 | -7.441  | -12.641 | 114.203 | 1.00 | 0.00 | H |
| ATOM | 890 | H61  | A B | 10 | -8.918  | -21.773 | 111.577 | 1.00 | 0.00 | H |
| ATOM | 891 | H62  | A B | 10 | -7.322  | -21.191 | 112.124 | 1.00 | 0.00 | H |
| ATOM | 892 | H2'1 | A B | 10 | -6.511  | -15.915 | 116.029 | 1.00 | 0.00 | H |
| ATOM | 893 | H2'2 | A B | 10 | -7.982  | -15.631 | 116.948 | 1.00 | 0.00 | H |
| ATOM | 894 | H5'1 | A B | 10 | -5.841  | -14.076 | 112.748 | 1.00 | 0.00 | H |
| ATOM | 895 | H5'2 | A B | 10 | -5.183  | -12.916 | 113.920 | 1.00 | 0.00 | H |
| ATOM | 896 | C1'  | G B | 11 | -12.512 | -17.087 | 116.980 | 1.00 | 0.00 | C |
| ATOM | 897 | N1   | G B | 11 | -11.350 | -21.654 | 115.029 | 1.00 | 0.00 | N |
| ATOM | 898 | C2   | G B | 11 | -12.567 | -20.999 | 115.092 | 1.00 | 0.00 | C |
| ATOM | 899 | N2   | G B | 11 | -13.613 | -21.648 | 114.567 | 1.00 | 0.00 | N |
| ATOM | 900 | N3   | G B | 11 | -12.726 | -19.793 | 115.634 | 1.00 | 0.00 | N |
| ATOM | 901 | C4   | G B | 11 | -11.562 | -19.289 | 116.122 | 1.00 | 0.00 | C |
| ATOM | 902 | C5   | G B | 11 | -10.306 | -19.870 | 116.108 | 1.00 | 0.00 | C |
| ATOM | 903 | C6   | G B | 11 | -10.135 | -21.149 | 115.530 | 1.00 | 0.00 | C |
| ATOM | 904 | O6   | G B | 11 | -9.109  | -21.822 | 115.423 | 1.00 | 0.00 | O |
| ATOM | 905 | N7   | G B | 11 | -9.376  | -19.023 | 116.714 | 1.00 | 0.00 | N |
| ATOM | 906 | C8   | G B | 11 | -10.080 | -17.978 | 117.065 | 1.00 | 0.00 | C |
| ATOM | 907 | N9   | G B | 11 | -11.418 | -18.066 | 116.741 | 1.00 | 0.00 | N |
| ATOM | 908 | C2'  | G B | 11 | -12.402 | -16.358 | 118.313 | 1.00 | 0.00 | C |
| ATOM | 909 | C3'  | G B | 11 | -12.918 | -14.972 | 117.961 | 1.00 | 0.00 | C |
| ATOM | 910 | O3'  | G B | 11 | -14.341 | -14.968 | 118.041 | 1.00 | 0.00 | O |
| ATOM | 911 | C4'  | G B | 11 | -12.420 | -14.778 | 116.530 | 1.00 | 0.00 | C |
| ATOM | 912 | O4'  | G B | 11 | -12.459 | -16.120 | 115.950 | 1.00 | 0.00 | O |
| ATOM | 913 | C5'  | G B | 11 | -11.023 | -14.224 | 116.375 | 1.00 | 0.00 | C |
| ATOM | 914 | O5'  | G B | 11 | -10.167 | -14.753 | 117.419 | 1.00 | 0.00 | O |
| ATOM | 915 | O1P  | G B | 11 | -9.593  | -12.720 | 118.787 | 1.00 | 0.00 | O |
| ATOM | 916 | O2P  | G B | 11 | -8.016  | -14.669 | 118.712 | 1.00 | 0.00 | O |
| ATOM | 917 | P    | G B | 11 | -9.008  | -13.825 | 118.005 | 1.00 | 0.00 | P |
| ATOM | 918 | H1   | G B | 11 | -11.333 | -22.583 | 114.581 | 1.00 | 0.00 | H |

|      |     |      |     |    |         |         |         |      |      |   |
|------|-----|------|-----|----|---------|---------|---------|------|------|---|
| ATOM | 919 | H8   | G B | 11 | -9.647  | -17.116 | 117.571 | 1.00 | 0.00 | H |
| ATOM | 920 | H1'  | G B | 11 | -13.464 | -17.611 | 116.899 | 1.00 | 0.00 | H |
| ATOM | 921 | H21  | G B | 11 | -13.482 | -22.579 | 114.145 | 1.00 | 0.00 | H |
| ATOM | 922 | H3'  | G B | 11 | -12.516 | -14.205 | 118.624 | 1.00 | 0.00 | H |
| ATOM | 923 | H22  | G B | 11 | -14.548 | -21.216 | 114.584 | 1.00 | 0.00 | H |
| ATOM | 924 | H4'  | G B | 11 | -13.109 | -14.084 | 116.046 | 1.00 | 0.00 | H |
| ATOM | 925 | H2'1 | G B | 11 | -11.376 | -16.318 | 118.679 | 1.00 | 0.00 | H |
| ATOM | 926 | H2'2 | G B | 11 | -13.010 | -16.822 | 119.089 | 1.00 | 0.00 | H |
| ATOM | 927 | H5'1 | G B | 11 | -10.632 | -14.509 | 115.398 | 1.00 | 0.00 | H |
| ATOM | 928 | H5'2 | G B | 11 | -11.060 | -13.137 | 116.443 | 1.00 | 0.00 | H |
| ATOM | 929 | C1'  | G B | 12 | -15.998 | -20.375 | 118.229 | 1.00 | 0.00 | C |
| ATOM | 930 | N1   | G B | 12 | -12.234 | -23.758 | 117.583 | 1.00 | 0.00 | N |
| ATOM | 931 | C2   | G B | 12 | -13.561 | -23.820 | 117.195 | 1.00 | 0.00 | C |
| ATOM | 932 | N2   | G B | 12 | -13.935 | -24.933 | 116.549 | 1.00 | 0.00 | N |
| ATOM | 933 | N3   | G B | 12 | -14.443 | -22.850 | 117.429 | 1.00 | 0.00 | N |
| ATOM | 934 | C4   | G B | 12 | -13.892 | -21.803 | 118.099 | 1.00 | 0.00 | C |
| ATOM | 935 | C5   | G B | 12 | -12.586 | -21.655 | 118.529 | 1.00 | 0.00 | C |
| ATOM | 936 | C6   | G B | 12 | -11.648 | -22.683 | 118.277 | 1.00 | 0.00 | C |
| ATOM | 937 | O6   | G B | 12 | -10.455 | -22.735 | 118.578 | 1.00 | 0.00 | O |
| ATOM | 938 | N7   | G B | 12 | -12.427 | -20.431 | 119.181 | 1.00 | 0.00 | N |
| ATOM | 939 | C8   | G B | 12 | -13.615 | -19.886 | 119.124 | 1.00 | 0.00 | C |
| ATOM | 940 | N9   | G B | 12 | -14.560 | -20.659 | 118.483 | 1.00 | 0.00 | N |
| ATOM | 941 | C2'  | G B | 12 | -16.690 | -19.649 | 119.375 | 1.00 | 0.00 | C |
| ATOM | 942 | C3'  | G B | 12 | -17.658 | -18.738 | 118.636 | 1.00 | 0.00 | C |
| ATOM | 943 | O3'  | G B | 12 | -18.848 | -19.464 | 118.336 | 1.00 | 0.00 | O |
| ATOM | 944 | C4'  | G B | 12 | -16.878 | -18.364 | 117.377 | 1.00 | 0.00 | C |
| ATOM | 945 | O4'  | G B | 12 | -16.080 | -19.553 | 117.081 | 1.00 | 0.00 | O |
| ATOM | 946 | C5'  | G B | 12 | -15.950 | -17.177 | 117.490 | 1.00 | 0.00 | C |
| ATOM | 947 | O5'  | G B | 12 | -15.340 | -17.155 | 118.804 | 1.00 | 0.00 | O |
| ATOM | 948 | O1P  | G B | 12 | -16.287 | -15.071 | 119.851 | 1.00 | 0.00 | O |
| ATOM | 949 | O2P  | G B | 12 | -14.045 | -15.932 | 120.577 | 1.00 | 0.00 | O |
| ATOM | 950 | P    | G B | 12 | -15.028 | -15.744 | 119.482 | 1.00 | 0.00 | P |
| ATOM | 951 | H1   | G B | 12 | -11.631 | -24.560 | 117.346 | 1.00 | 0.00 | H |
| ATOM | 952 | H8   | G B | 12 | -13.840 | -18.906 | 119.546 | 1.00 | 0.00 | H |
| ATOM | 953 | H1'  | G B | 12 | -16.498 | -21.317 | 118.005 | 1.00 | 0.00 | H |
| ATOM | 954 | H21  | G B | 12 | -13.246 | -25.676 | 116.367 | 1.00 | 0.00 | H |
| ATOM | 955 | H3'  | G B | 12 | -17.912 | -17.852 | 119.219 | 1.00 | 0.00 | H |
| ATOM | 956 | H22  | G B | 12 | -14.910 | -25.041 | 116.236 | 1.00 | 0.00 | H |
| ATOM | 957 | H4'  | G B | 12 | -17.612 | -18.140 | 116.604 | 1.00 | 0.00 | H |
| ATOM | 958 | H2'1 | G B | 12 | -15.991 | -19.075 | 119.983 | 1.00 | 0.00 | H |
| ATOM | 959 | H2'2 | G B | 12 | -17.218 | -20.333 | 120.040 | 1.00 | 0.00 | H |
| ATOM | 960 | H5'1 | G B | 12 | -15.177 | -17.253 | 116.726 | 1.00 | 0.00 | H |
| ATOM | 961 | H5'2 | G B | 12 | -16.521 | -16.261 | 117.334 | 1.00 | 0.00 | H |
| ATOM | 962 | C1'  | T B | 13 | -17.703 | -24.933 | 119.132 | 1.00 | 0.00 | C |
| ATOM | 963 | N1   | T B | 13 | -16.463 | -24.453 | 119.796 | 1.00 | 0.00 | N |
| ATOM | 964 | C2   | T B | 13 | -15.348 | -25.265 | 119.713 | 1.00 | 0.00 | C |
| ATOM | 965 | O2   | T B | 13 | -15.354 | -26.333 | 119.127 | 1.00 | 0.00 | O |
| ATOM | 966 | N3   | T B | 13 | -14.218 | -24.780 | 120.343 | 1.00 | 0.00 | N |
| ATOM | 967 | C4   | T B | 13 | -14.106 | -23.590 | 121.033 | 1.00 | 0.00 | C |
| ATOM | 968 | O4   | T B | 13 | -13.037 | -23.263 | 121.561 | 1.00 | 0.00 | O |
| ATOM | 969 | C5   | T B | 13 | -15.321 | -22.810 | 121.065 | 1.00 | 0.00 | C |
| ATOM | 970 | C6   | T B | 13 | -16.443 | -23.252 | 120.461 | 1.00 | 0.00 | C |
| ATOM | 971 | C7   | T B | 13 | -15.247 | -21.507 | 121.802 | 1.00 | 0.00 | C |
| ATOM | 972 | C2'  | T B | 13 | -18.978 | -24.612 | 119.905 | 1.00 | 0.00 | C |

|      |      |      |     |    |         |         |         |      |      |   |
|------|------|------|-----|----|---------|---------|---------|------|------|---|
| ATOM | 973  | C3'  | T B | 13 | -19.966 | -24.332 | 118.783 | 1.00 | 0.00 | C |
| ATOM | 974  | O3'  | T B | 13 | -20.518 | -25.565 | 118.327 | 1.00 | 0.00 | O |
| ATOM | 975  | C4'  | T B | 13 | -19.097 | -23.660 | 117.724 | 1.00 | 0.00 | C |
| ATOM | 976  | O4'  | T B | 13 | -17.790 | -24.302 | 117.870 | 1.00 | 0.00 | O |
| ATOM | 977  | C5'  | T B | 13 | -18.919 | -22.164 | 117.849 | 1.00 | 0.00 | C |
| ATOM | 978  | O5'  | T B | 13 | -18.842 | -21.797 | 119.251 | 1.00 | 0.00 | O |
| ATOM | 979  | O1P  | T B | 13 | -20.925 | -20.433 | 119.611 | 1.00 | 0.00 | O |
| ATOM | 980  | O2P  | T B | 13 | -18.901 | -20.034 | 121.039 | 1.00 | 0.00 | O |
| ATOM | 981  | P    | T B | 13 | -19.452 | -20.398 | 119.712 | 1.00 | 0.00 | P |
| ATOM | 982  | H3   | T B | 13 | -13.372 | -25.366 | 120.292 | 1.00 | 0.00 | H |
| ATOM | 983  | H6   | T B | 13 | -17.348 | -22.645 | 120.499 | 1.00 | 0.00 | H |
| ATOM | 984  | H1'  | T B | 13 | -17.610 | -26.006 | 118.965 | 1.00 | 0.00 | H |
| ATOM | 985  | H3'  | T B | 13 | -20.772 | -23.674 | 119.107 | 1.00 | 0.00 | H |
| ATOM | 986  | H4'  | T B | 13 | -19.564 | -23.858 | 116.759 | 1.00 | 0.00 | H |
| ATOM | 987  | H71  | T B | 13 | -15.890 | -21.548 | 122.681 | 1.00 | 0.00 | H |
| ATOM | 988  | H72  | T B | 13 | -14.217 | -21.325 | 122.115 | 1.00 | 0.00 | H |
| ATOM | 989  | H73  | T B | 13 | -15.575 | -20.699 | 121.148 | 1.00 | 0.00 | H |
| ATOM | 990  | H2'1 | T B | 13 | -18.859 | -23.746 | 120.555 | 1.00 | 0.00 | H |
| ATOM | 991  | H2'2 | T B | 13 | -19.306 | -25.445 | 120.525 | 1.00 | 0.00 | H |
| ATOM | 992  | H5'1 | T B | 13 | -18.003 | -21.869 | 117.339 | 1.00 | 0.00 | H |
| ATOM | 993  | H5'2 | T B | 13 | -19.766 | -21.664 | 117.384 | 1.00 | 0.00 | H |
| ATOM | 994  | C1'  | G B | 14 | -17.173 | -29.694 | 120.436 | 1.00 | 0.00 | C |
| ATOM | 995  | N1   | G B | 14 | -13.045 | -27.986 | 122.900 | 1.00 | 0.00 | N |
| ATOM | 996  | C2   | G B | 14 | -13.214 | -29.127 | 122.137 | 1.00 | 0.00 | C |
| ATOM | 997  | N2   | G B | 14 | -12.143 | -29.920 | 122.016 | 1.00 | 0.00 | N |
| ATOM | 998  | N3   | G B | 14 | -14.361 | -29.451 | 121.543 | 1.00 | 0.00 | N |
| ATOM | 999  | C4   | G B | 14 | -15.341 | -28.538 | 121.778 | 1.00 | 0.00 | C |
| ATOM | 1000 | C5   | G B | 14 | -15.265 | -27.377 | 122.527 | 1.00 | 0.00 | C |
| ATOM | 1001 | C6   | G B | 14 | -14.047 | -27.030 | 123.156 | 1.00 | 0.00 | C |
| ATOM | 1002 | O6   | G B | 14 | -13.786 | -26.050 | 123.855 | 1.00 | 0.00 | O |
| ATOM | 1003 | N7   | G B | 14 | -16.497 | -26.717 | 122.522 | 1.00 | 0.00 | N |
| ATOM | 1004 | C8   | G B | 14 | -17.261 | -27.482 | 121.784 | 1.00 | 0.00 | C |
| ATOM | 1005 | N9   | G B | 14 | -16.630 | -28.608 | 121.298 | 1.00 | 0.00 | N |
| ATOM | 1006 | C2'  | G B | 14 | -18.614 | -30.068 | 120.755 | 1.00 | 0.00 | C |
| ATOM | 1007 | C3'  | G B | 14 | -19.171 | -30.391 | 119.378 | 1.00 | 0.00 | C |
| ATOM | 1008 | O3'  | G B | 14 | -18.860 | -31.743 | 119.053 | 1.00 | 0.00 | O |
| ATOM | 1009 | C4'  | G B | 14 | -18.441 | -29.396 | 118.476 | 1.00 | 0.00 | C |
| ATOM | 1010 | O4'  | G B | 14 | -17.125 | -29.246 | 119.096 | 1.00 | 0.00 | O |
| ATOM | 1011 | C5'  | G B | 14 | -19.070 | -28.030 | 118.336 | 1.00 | 0.00 | C |
| ATOM | 1012 | O5'  | G B | 14 | -19.656 | -27.629 | 119.599 | 1.00 | 0.00 | O |
| ATOM | 1013 | O1P  | G B | 14 | -22.123 | -27.558 | 119.098 | 1.00 | 0.00 | O |
| ATOM | 1014 | O2P  | G B | 14 | -21.167 | -26.103 | 120.904 | 1.00 | 0.00 | O |
| ATOM | 1015 | P    | G B | 14 | -20.988 | -26.750 | 119.582 | 1.00 | 0.00 | P |
| ATOM | 1016 | H1   | G B | 14 | -12.114 | -27.823 | 123.313 | 1.00 | 0.00 | H |
| ATOM | 1017 | H8   | G B | 14 | -18.305 | -27.248 | 121.574 | 1.00 | 0.00 | H |
| ATOM | 1018 | H1'  | G B | 14 | -16.516 | -30.561 | 120.524 | 1.00 | 0.00 | H |
| ATOM | 1019 | H21  | G B | 14 | -11.257 | -29.660 | 122.477 | 1.00 | 0.00 | H |
| ATOM | 1020 | H3'  | G B | 14 | -20.250 | -30.246 | 119.330 | 1.00 | 0.00 | H |
| ATOM | 1021 | H22  | G B | 14 | -12.204 | -30.787 | 121.464 | 1.00 | 0.00 | H |
| ATOM | 1022 | H4'  | G B | 14 | -18.396 | -29.845 | 117.483 | 1.00 | 0.00 | H |
| ATOM | 1023 | H2'1 | G B | 14 | -19.160 | -29.248 | 121.221 | 1.00 | 0.00 | H |
| ATOM | 1024 | H2'2 | G B | 14 | -18.681 | -30.927 | 121.422 | 1.00 | 0.00 | H |
| ATOM | 1025 | H5'1 | G B | 14 | -18.304 | -27.314 | 118.042 | 1.00 | 0.00 | H |
| ATOM | 1026 | H5'2 | G B | 14 | -19.840 | -28.069 | 117.567 | 1.00 | 0.00 | H |

|      |      |      |     |    |         |         |         |      |      |   |
|------|------|------|-----|----|---------|---------|---------|------|------|---|
| ATOM | 1027 | C1'  | C B | 15 | -14.915 | -33.460 | 122.729 | 1.00 | 0.00 | C |
| ATOM | 1028 | N1   | C B | 15 | -15.265 | -32.220 | 123.474 | 1.00 | 0.00 | N |
| ATOM | 1029 | C2   | C B | 15 | -14.263 | -31.599 | 124.216 | 1.00 | 0.00 | C |
| ATOM | 1030 | O2   | C B | 15 | -13.130 | -32.100 | 124.226 | 1.00 | 0.00 | O |
| ATOM | 1031 | N3   | C B | 15 | -14.560 | -30.469 | 124.902 | 1.00 | 0.00 | N |
| ATOM | 1032 | C4   | C B | 15 | -15.795 | -29.952 | 124.873 | 1.00 | 0.00 | C |
| ATOM | 1033 | N4   | C B | 15 | -16.030 | -28.844 | 125.559 | 1.00 | 0.00 | N |
| ATOM | 1034 | C5   | C B | 15 | -16.849 | -30.572 | 124.122 | 1.00 | 0.00 | C |
| ATOM | 1035 | C6   | C B | 15 | -16.524 | -31.705 | 123.436 | 1.00 | 0.00 | C |
| ATOM | 1036 | C2'  | C B | 15 | -16.019 | -34.508 | 122.729 | 1.00 | 0.00 | C |
| ATOM | 1037 | C3'  | C B | 15 | -15.877 | -35.118 | 121.343 | 1.00 | 0.00 | C |
| ATOM | 1038 | O3'  | C B | 15 | -14.875 | -36.131 | 121.376 | 1.00 | 0.00 | O |
| ATOM | 1039 | C4'  | C B | 15 | -15.463 | -33.923 | 120.487 | 1.00 | 0.00 | C |
| ATOM | 1040 | O4'  | C B | 15 | -14.659 | -33.096 | 121.385 | 1.00 | 0.00 | O |
| ATOM | 1041 | C5'  | C B | 15 | -16.585 | -33.077 | 119.928 | 1.00 | 0.00 | C |
| ATOM | 1042 | O5'  | C B | 15 | -17.662 | -32.993 | 120.893 | 1.00 | 0.00 | O |
| ATOM | 1043 | O1P  | C B | 15 | -19.553 | -34.213 | 119.767 | 1.00 | 0.00 | O |
| ATOM | 1044 | O2P  | C B | 15 | -20.046 | -32.413 | 121.443 | 1.00 | 0.00 | O |
| ATOM | 1045 | P    | C B | 15 | -19.165 | -32.920 | 120.364 | 1.00 | 0.00 | P |
| ATOM | 1046 | H5   | C B | 15 | -17.857 | -30.156 | 124.102 | 1.00 | 0.00 | H |
| ATOM | 1047 | H6   | C B | 15 | -17.289 | -32.209 | 122.844 | 1.00 | 0.00 | H |
| ATOM | 1048 | H1'  | C B | 15 | -13.993 | -33.862 | 123.150 | 1.00 | 0.00 | H |
| ATOM | 1049 | H3'  | C B | 15 | -16.815 | -35.549 | 120.990 | 1.00 | 0.00 | H |
| ATOM | 1050 | H4'  | C B | 15 | -14.895 | -34.318 | 119.645 | 1.00 | 0.00 | H |
| ATOM | 1051 | H41  | C B | 15 | -16.972 | -28.422 | 125.552 | 1.00 | 0.00 | H |
| ATOM | 1052 | H42  | C B | 15 | -15.272 | -28.401 | 126.101 | 1.00 | 0.00 | H |
| ATOM | 1053 | H2'1 | C B | 15 | -17.006 | -34.070 | 122.871 | 1.00 | 0.00 | H |
| ATOM | 1054 | H2'2 | C B | 15 | -15.877 | -35.257 | 123.509 | 1.00 | 0.00 | H |
| ATOM | 1055 | H5'1 | C B | 15 | -16.205 | -32.078 | 119.710 | 1.00 | 0.00 | H |
| ATOM | 1056 | H5'2 | C B | 15 | -16.951 | -33.531 | 119.008 | 1.00 | 0.00 | H |
| ATOM | 1057 | C1'  | G B | 16 | -12.025 | -35.447 | 126.225 | 1.00 | 0.00 | C |
| ATOM | 1058 | N1   | G B | 16 | -13.350 | -31.298 | 128.879 | 1.00 | 0.00 | N |
| ATOM | 1059 | C2   | G B | 16 | -12.118 | -31.914 | 128.752 | 1.00 | 0.00 | C |
| ATOM | 1060 | N2   | G B | 16 | -11.105 | -31.351 | 129.423 | 1.00 | 0.00 | N |
| ATOM | 1061 | N3   | G B | 16 | -11.914 | -33.005 | 128.014 | 1.00 | 0.00 | N |
| ATOM | 1062 | C4   | G B | 16 | -13.051 | -33.441 | 127.411 | 1.00 | 0.00 | C |
| ATOM | 1063 | C5   | G B | 16 | -14.321 | -32.894 | 127.484 | 1.00 | 0.00 | C |
| ATOM | 1064 | C6   | G B | 16 | -14.538 | -31.734 | 128.265 | 1.00 | 0.00 | C |
| ATOM | 1065 | O6   | G B | 16 | -15.582 | -31.109 | 128.450 | 1.00 | 0.00 | O |
| ATOM | 1066 | N7   | G B | 16 | -15.214 | -33.646 | 126.718 | 1.00 | 0.00 | N |
| ATOM | 1067 | C8   | G B | 16 | -14.475 | -34.600 | 126.214 | 1.00 | 0.00 | C |
| ATOM | 1068 | N9   | G B | 16 | -13.148 | -34.544 | 126.592 | 1.00 | 0.00 | N |
| ATOM | 1069 | C2'  | G B | 16 | -12.422 | -36.915 | 126.134 | 1.00 | 0.00 | C |
| ATOM | 1070 | C3'  | G B | 16 | -11.559 | -37.407 | 124.984 | 1.00 | 0.00 | C |
| ATOM | 1071 | O3'  | G B | 16 | -10.270 | -37.755 | 125.482 | 1.00 | 0.00 | O |
| ATOM | 1072 | C4'  | G B | 16 | -11.512 | -36.198 | 124.052 | 1.00 | 0.00 | C |
| ATOM | 1073 | O4'  | G B | 16 | -11.547 | -35.046 | 124.955 | 1.00 | 0.00 | O |
| ATOM | 1074 | C5'  | G B | 16 | -12.643 | -36.070 | 123.060 | 1.00 | 0.00 | C |
| ATOM | 1075 | O5'  | G B | 16 | -13.880 | -36.522 | 123.666 | 1.00 | 0.00 | O |
| ATOM | 1076 | O1P  | G B | 16 | -14.463 | -38.577 | 122.337 | 1.00 | 0.00 | O |
| ATOM | 1077 | O2P  | G B | 16 | -16.277 | -37.237 | 123.434 | 1.00 | 0.00 | O |
| ATOM | 1078 | P    | G B | 16 | -14.962 | -37.252 | 122.749 | 1.00 | 0.00 | P |
| ATOM | 1079 | H1   | G B | 16 | -13.400 | -30.454 | 129.469 | 1.00 | 0.00 | H |
| ATOM | 1080 | H8   | G B | 16 | -14.872 | -35.372 | 125.557 | 1.00 | 0.00 | H |

|      |      |      |     |    |         |         |         |      |      |   |
|------|------|------|-----|----|---------|---------|---------|------|------|---|
| ATOM | 1081 | H1'  | G B | 16 | -11.221 | -35.303 | 126.946 | 1.00 | 0.00 | H |
| ATOM | 1082 | H21  | G B | 16 | -11.270 | -30.507 | 129.989 | 1.00 | 0.00 | H |
| ATOM | 1083 | H3'  | G B | 16 | -11.998 | -38.271 | 124.484 | 1.00 | 0.00 | H |
| ATOM | 1084 | H22  | G B | 16 | -10.163 | -31.765 | 129.371 | 1.00 | 0.00 | H |
| ATOM | 1085 | H4'  | G B | 16 | -10.581 | -36.268 | 123.488 | 1.00 | 0.00 | H |
| ATOM | 1086 | H2'1 | G B | 16 | -13.483 | -37.044 | 125.918 | 1.00 | 0.00 | H |
| ATOM | 1087 | H2'2 | G B | 16 | -12.207 | -37.458 | 127.054 | 1.00 | 0.00 | H |
| ATOM | 1088 | H5'1 | G B | 16 | -12.740 | -35.026 | 122.761 | 1.00 | 0.00 | H |
| ATOM | 1089 | H5'2 | G B | 16 | -12.419 | -36.676 | 122.183 | 1.00 | 0.00 | H |
| ATOM | 1090 | C1'  | G B | 17 | -9.855  | -35.547 | 130.675 | 1.00 | 0.00 | C |
| ATOM | 1091 | N1   | G B | 17 | -13.783 | -32.581 | 132.025 | 1.00 | 0.00 | N |
| ATOM | 1092 | C2   | G B | 17 | -12.441 | -32.482 | 132.348 | 1.00 | 0.00 | C |
| ATOM | 1093 | N2   | G B | 17 | -12.101 | -31.456 | 133.139 | 1.00 | 0.00 | N |
| ATOM | 1094 | N3   | G B | 17 | -11.514 | -33.335 | 131.918 | 1.00 | 0.00 | N |
| ATOM | 1095 | C4   | G B | 17 | -12.038 | -34.315 | 131.136 | 1.00 | 0.00 | C |
| ATOM | 1096 | C5   | G B | 17 | -13.358 | -34.496 | 130.763 | 1.00 | 0.00 | C |
| ATOM | 1097 | C6   | G B | 17 | -14.342 | -33.589 | 131.215 | 1.00 | 0.00 | C |
| ATOM | 1098 | O6   | G B | 17 | -15.554 | -33.583 | 130.995 | 1.00 | 0.00 | O |
| ATOM | 1099 | N7   | G B | 17 | -13.479 | -35.625 | 129.951 | 1.00 | 0.00 | N |
| ATOM | 1100 | C8   | G B | 17 | -12.257 | -36.080 | 129.856 | 1.00 | 0.00 | C |
| ATOM | 1101 | N9   | G B | 17 | -11.324 | -35.338 | 130.550 | 1.00 | 0.00 | N |
| ATOM | 1102 | C2'  | G B | 17 | -9.451  | -37.011 | 130.772 | 1.00 | 0.00 | C |
| ATOM | 1103 | C3'  | G B | 17 | -8.136  | -37.029 | 130.009 | 1.00 | 0.00 | C |
| ATOM | 1104 | O3'  | G B | 17 | -7.080  | -36.647 | 130.886 | 1.00 | 0.00 | O |
| ATOM | 1105 | C4'  | G B | 17 | -8.371  | -35.999 | 128.905 | 1.00 | 0.00 | C |
| ATOM | 1106 | O4'  | G B | 17 | -9.242  | -35.000 | 129.523 | 1.00 | 0.00 | O |
| ATOM | 1107 | C5'  | G B | 17 | -9.033  | -36.504 | 127.645 | 1.00 | 0.00 | C |
| ATOM | 1108 | O5'  | G B | 17 | -10.024 | -37.507 | 127.980 | 1.00 | 0.00 | O |
| ATOM | 1109 | O1P  | G B | 17 | -9.086  | -39.614 | 126.973 | 1.00 | 0.00 | O |
| ATOM | 1110 | O2P  | G B | 17 | -11.565 | -39.362 | 127.269 | 1.00 | 0.00 | O |
| ATOM | 1111 | P    | G B | 17 | -10.260 | -38.721 | 126.972 | 1.00 | 0.00 | P |
| ATOM | 1112 | H1   | G B | 17 | -14.419 | -31.864 | 132.406 | 1.00 | 0.00 | H |
| ATOM | 1113 | H8   | G B | 17 | -11.997 | -36.968 | 129.281 | 1.00 | 0.00 | H |
| ATOM | 1114 | H1'  | G B | 17 | -9.504  | -34.986 | 131.540 | 1.00 | 0.00 | H |
| ATOM | 1115 | H21  | G B | 17 | -12.823 | -30.797 | 133.466 | 1.00 | 0.00 | H |
| ATOM | 1116 | H3'  | G B | 17 | -7.920  | -38.012 | 129.589 | 1.00 | 0.00 | H |
| ATOM | 1117 | H22  | G B | 17 | -11.118 | -31.327 | 133.419 | 1.00 | 0.00 | H |
| ATOM | 1118 | H4'  | G B | 17 | -7.394  | -35.600 | 128.631 | 1.00 | 0.00 | H |
| ATOM | 1119 | H2'1 | G B | 17 | -10.184 | -37.674 | 130.314 | 1.00 | 0.00 | H |
| ATOM | 1120 | H2'2 | G B | 17 | -9.316  | -37.336 | 131.803 | 1.00 | 0.00 | H |
| ATOM | 1121 | H5'1 | G B | 17 | -9.511  | -35.670 | 127.133 | 1.00 | 0.00 | H |
| ATOM | 1122 | H5'2 | G B | 17 | -8.275  | -36.939 | 126.993 | 1.00 | 0.00 | H |
| ATOM | 1123 | C1'  | C B | 18 | -9.488  | -34.365 | 135.471 | 1.00 | 0.00 | C |
| ATOM | 1124 | N1   | C B | 18 | -10.749 | -34.941 | 134.927 | 1.00 | 0.00 | N |
| ATOM | 1125 | C2   | C B | 18 | -11.940 | -34.267 | 135.193 | 1.00 | 0.00 | C |
| ATOM | 1126 | O2   | C B | 18 | -11.903 | -33.229 | 135.864 | 1.00 | 0.00 | O |
| ATOM | 1127 | N3   | C B | 18 | -13.099 | -34.776 | 134.706 | 1.00 | 0.00 | N |
| ATOM | 1128 | C4   | C B | 18 | -13.105 | -35.903 | 133.983 | 1.00 | 0.00 | C |
| ATOM | 1129 | N4   | C B | 18 | -14.267 | -36.353 | 133.531 | 1.00 | 0.00 | N |
| ATOM | 1130 | C5   | C B | 18 | -11.897 | -36.615 | 133.698 | 1.00 | 0.00 | C |
| ATOM | 1131 | C6   | C B | 18 | -10.743 | -36.085 | 134.195 | 1.00 | 0.00 | C |
| ATOM | 1132 | C2'  | C B | 18 | -8.495  | -35.412 | 135.957 | 1.00 | 0.00 | C |
| ATOM | 1133 | C3'  | C B | 18 | -7.162  | -34.783 | 135.582 | 1.00 | 0.00 | C |
| ATOM | 1134 | O3'  | C B | 18 | -6.764  | -33.881 | 136.613 | 1.00 | 0.00 | O |

|      |      |      |     |    |         |         |         |      |      |   |
|------|------|------|-----|----|---------|---------|---------|------|------|---|
| ATOM | 1135 | C4'  | C B | 18 | -7.483  | -34.060 | 134.276 | 1.00 | 0.00 | C |
| ATOM | 1136 | O4'  | C B | 18 | -8.871  | -33.625 | 134.434 | 1.00 | 0.00 | O |
| ATOM | 1137 | C5'  | C B | 18 | -7.375  | -34.879 | 133.011 | 1.00 | 0.00 | C |
| ATOM | 1138 | O5'  | C B | 18 | -7.821  | -36.235 | 133.267 | 1.00 | 0.00 | O |
| ATOM | 1139 | O1P  | C B | 18 | -5.729  | -37.602 | 132.973 | 1.00 | 0.00 | O |
| ATOM | 1140 | O2P  | C B | 18 | -7.975  | -38.642 | 132.557 | 1.00 | 0.00 | O |
| ATOM | 1141 | P    | C B | 18 | -7.114  | -37.435 | 132.491 | 1.00 | 0.00 | P |
| ATOM | 1142 | H5   | C B | 18 | -11.898 | -37.535 | 133.113 | 1.00 | 0.00 | H |
| ATOM | 1143 | H6   | C B | 18 | -9.797  | -36.590 | 134.000 | 1.00 | 0.00 | H |
| ATOM | 1144 | H1'  | C B | 18 | -9.748  | -33.671 | 136.270 | 1.00 | 0.00 | H |
| ATOM | 1145 | H3'  | C B | 18 | -6.384  | -35.532 | 135.436 | 1.00 | 0.00 | H |
| ATOM | 1146 | H4'  | C B | 18 | -6.782  | -33.229 | 134.193 | 1.00 | 0.00 | H |
| ATOM | 1147 | H41  | C B | 18 | -14.301 | -37.218 | 132.971 | 1.00 | 0.00 | H |
| ATOM | 1148 | H42  | C B | 18 | -15.135 | -35.839 | 133.738 | 1.00 | 0.00 | H |
| ATOM | 1149 | H2'1 | C B | 18 | -8.633  | -36.373 | 135.463 | 1.00 | 0.00 | H |
| ATOM | 1150 | H2'2 | C B | 18 | -8.567  | -35.582 | 137.031 | 1.00 | 0.00 | H |
| ATOM | 1151 | H5'1 | C B | 18 | -7.997  | -34.427 | 132.237 | 1.00 | 0.00 | H |
| ATOM | 1152 | H5'2 | C B | 18 | -6.339  | -34.889 | 132.678 | 1.00 | 0.00 | H |
| ATOM | 1153 | C1'  | C B | 19 | -11.315 | -33.002 | 139.868 | 1.00 | 0.00 | C |
| ATOM | 1154 | N1   | C B | 19 | -11.892 | -34.161 | 139.134 | 1.00 | 0.00 | N |
| ATOM | 1155 | C2   | C B | 19 | -13.272 | -34.189 | 138.940 | 1.00 | 0.00 | C |
| ATOM | 1156 | O2   | C B | 19 | -13.956 | -33.256 | 139.380 | 1.00 | 0.00 | O |
| ATOM | 1157 | N3   | C B | 19 | -13.817 | -35.235 | 138.275 | 1.00 | 0.00 | N |
| ATOM | 1158 | C4   | C B | 19 | -13.050 | -36.231 | 137.810 | 1.00 | 0.00 | C |
| ATOM | 1159 | N4   | C B | 19 | -13.634 | -37.228 | 137.167 | 1.00 | 0.00 | N |
| ATOM | 1160 | C5   | C B | 19 | -11.631 | -36.227 | 137.997 | 1.00 | 0.00 | C |
| ATOM | 1161 | C6   | C B | 19 | -11.104 | -35.164 | 138.668 | 1.00 | 0.00 | C |
| ATOM | 1162 | C2'  | C B | 19 | -10.164 | -33.373 | 140.792 | 1.00 | 0.00 | C |
| ATOM | 1163 | C3'  | C B | 19 | -9.254  | -32.160 | 140.666 | 1.00 | 0.00 | C |
| ATOM | 1164 | O3'  | C B | 19 | -9.694  | -31.148 | 141.568 | 1.00 | 0.00 | O |
| ATOM | 1165 | C4'  | C B | 19 | -9.434  | -31.751 | 139.207 | 1.00 | 0.00 | C |
| ATOM | 1166 | O4'  | C B | 19 | -10.826 | -32.085 | 138.906 | 1.00 | 0.00 | O |
| ATOM | 1167 | C5'  | C B | 19 | -8.544  | -32.441 | 138.199 | 1.00 | 0.00 | C |
| ATOM | 1168 | O5'  | C B | 19 | -8.344  | -33.823 | 138.588 | 1.00 | 0.00 | O |
| ATOM | 1169 | O1P  | C B | 19 | -5.889  | -33.927 | 139.129 | 1.00 | 0.00 | O |
| ATOM | 1170 | O2P  | C B | 19 | -7.091  | -35.987 | 138.348 | 1.00 | 0.00 | O |
| ATOM | 1171 | P    | C B | 19 | -6.942  | -34.512 | 138.276 | 1.00 | 0.00 | P |
| ATOM | 1172 | H5   | C B | 19 | -11.001 | -37.035 | 137.624 | 1.00 | 0.00 | H |
| ATOM | 1173 | H6   | C B | 19 | -10.027 | -35.118 | 138.833 | 1.00 | 0.00 | H |
| ATOM | 1174 | H1'  | C B | 19 | -12.119 | -32.513 | 140.420 | 1.00 | 0.00 | H |
| ATOM | 1175 | H3'  | C B | 19 | -8.214  | -32.408 | 140.879 | 1.00 | 0.00 | H |
| ATOM | 1176 | H4'  | C B | 19 | -9.232  | -30.680 | 139.151 | 1.00 | 0.00 | H |
| ATOM | 1177 | H41  | C B | 19 | -13.068 | -38.006 | 136.797 | 1.00 | 0.00 | H |
| ATOM | 1178 | H42  | C B | 19 | -14.657 | -37.228 | 137.033 | 1.00 | 0.00 | H |
| ATOM | 1179 | H2'1 | C B | 19 | -9.657  | -34.283 | 140.477 | 1.00 | 0.00 | H |
| ATOM | 1180 | H2'2 | C B | 19 | -10.492 | -33.519 | 141.822 | 1.00 | 0.00 | H |
| ATOM | 1181 | H5'1 | C B | 19 | -9.013  | -32.397 | 137.218 | 1.00 | 0.00 | H |
| ATOM | 1182 | H5'2 | C B | 19 | -7.584  | -31.927 | 138.160 | 1.00 | 0.00 | H |
| ATOM | 1183 | C1'  | T B | 20 | -14.874 | -32.610 | 143.284 | 1.00 | 0.00 | C |
| ATOM | 1184 | N1   | T B | 20 | -14.576 | -33.927 | 142.663 | 1.00 | 0.00 | N |
| ATOM | 1185 | C2   | T B | 20 | -15.640 | -34.632 | 142.139 | 1.00 | 0.00 | C |
| ATOM | 1186 | O2   | T B | 20 | -16.786 | -34.218 | 142.170 | 1.00 | 0.00 | O |
| ATOM | 1187 | N3   | T B | 20 | -15.318 | -35.850 | 141.572 | 1.00 | 0.00 | N |
| ATOM | 1188 | C4   | T B | 20 | -14.062 | -36.409 | 141.485 | 1.00 | 0.00 | C |



|      |      |      |     |    |         |         |         |      |      |   |
|------|------|------|-----|----|---------|---------|---------|------|------|---|
| ATOM | 1189 | O4   | T B | 20 | -13.897 | -37.514 | 140.952 | 1.00 | 0.00 | O |
| ATOM | 1190 | C5   | T B | 20 | -13.014 | -35.600 | 142.058 | 1.00 | 0.00 | C |
| ATOM | 1191 | C6   | T B | 20 | -13.290 | -34.407 | 142.621 | 1.00 | 0.00 | C |
| ATOM | 1192 | C7   | T B | 20 | -11.629 | -36.170 | 141.985 | 1.00 | 0.00 | C |
| ATOM | 1193 | C2'  | T B | 20 | -14.043 | -32.316 | 144.528 | 1.00 | 0.00 | C |
| ATOM | 1194 | C3'  | T B | 20 | -13.820 | -30.815 | 144.412 | 1.00 | 0.00 | C |
| ATOM | 1195 | O3'  | T B | 20 | -14.942 | -30.130 | 144.964 | 1.00 | 0.00 | O |
| ATOM | 1196 | C4'  | T B | 20 | -13.698 | -30.605 | 142.905 | 1.00 | 0.00 | C |
| ATOM | 1197 | O4'  | T B | 20 | -14.595 | -31.607 | 142.328 | 1.00 | 0.00 | O |
| ATOM | 1198 | C5'  | T B | 20 | -12.321 | -30.789 | 142.309 | 1.00 | 0.00 | C |
| ATOM | 1199 | O5'  | T B | 20 | -11.633 | -31.868 | 142.992 | 1.00 | 0.00 | O |
| ATOM | 1200 | O1P  | T B | 20 | -9.731  | -30.703 | 144.154 | 1.00 | 0.00 | O |
| ATOM | 1201 | O2P  | T B | 20 | -9.511  | -33.114 | 143.496 | 1.00 | 0.00 | O |
| ATOM | 1202 | P    | T B | 20 | -10.054 | -31.770 | 143.187 | 1.00 | 0.00 | P |
| ATOM | 1203 | H3   | T B | 20 | -16.095 | -36.395 | 141.173 | 1.00 | 0.00 | H |
| ATOM | 1204 | H6   | T B | 20 | -12.482 | -33.813 | 143.047 | 1.00 | 0.00 | H |
| ATOM | 1205 | H1'  | T B | 20 | -15.940 | -32.571 | 143.510 | 1.00 | 0.00 | H |
| ATOM | 1206 | H3'  | T B | 20 | -12.915 | -30.498 | 144.928 | 1.00 | 0.00 | H |
| ATOM | 1207 | H4'  | T B | 20 | -14.014 | -29.581 | 142.702 | 1.00 | 0.00 | H |
| ATOM | 1208 | H3T  | T B | 20 | -15.180 | -30.391 | 145.857 | 1.00 | 0.00 | H |
| ATOM | 1209 | H71  | T B | 20 | -11.270 | -36.384 | 142.991 | 1.00 | 0.00 | H |
| ATOM | 1210 | H72  | T B | 20 | -11.645 | -37.091 | 141.400 | 1.00 | 0.00 | H |
| ATOM | 1211 | H73  | T B | 20 | -10.962 | -35.450 | 141.508 | 1.00 | 0.00 | H |
| ATOM | 1212 | H2'1 | T B | 20 | -13.100 | -32.858 | 144.532 | 1.00 | 0.00 | H |
| ATOM | 1213 | H2'2 | T B | 20 | -14.571 | -32.569 | 145.448 | 1.00 | 0.00 | H |
| ATOM | 1214 | H5'1 | T B | 20 | -12.417 | -31.024 | 141.250 | 1.00 | 0.00 | H |
| ATOM | 1215 | H5'2 | T B | 20 | -11.757 | -29.864 | 142.422 | 1.00 | 0.00 | H |
| TER  |      |      |     |    |         |         |         |      |      |   |
| ATOM | 1    | C1'  | A A | 1  | 2.086   | -5.242  | 144.509 | 1.00 | 0.00 | C |
| ATOM | 2    | N1   | A A | 1  | 6.857   | -7.085  | 144.085 | 1.00 | 0.00 | N |
| ATOM | 3    | C2   | A A | 1  | 6.372   | -5.847  | 144.130 | 1.00 | 0.00 | C |
| ATOM | 4    | N3   | A A | 1  | 5.125   | -5.441  | 144.244 | 1.00 | 0.00 | N |
| ATOM | 5    | C4   | A A | 1  | 4.295   | -6.496  | 144.312 | 1.00 | 0.00 | C |
| ATOM | 6    | C5   | A A | 1  | 4.631   | -7.821  | 144.278 | 1.00 | 0.00 | C |
| ATOM | 7    | C6   | A A | 1  | 6.004   | -8.118  | 144.156 | 1.00 | 0.00 | C |
| ATOM | 8    | N6   | A A | 1  | 6.483   | -9.373  | 144.110 | 1.00 | 0.00 | N |
| ATOM | 9    | N7   | A A | 1  | 3.507   | -8.623  | 144.373 | 1.00 | 0.00 | N |
| ATOM | 10   | C8   | A A | 1  | 2.526   | -7.775  | 144.460 | 1.00 | 0.00 | C |
| ATOM | 11   | N9   | A A | 1  | 2.927   | -6.465  | 144.431 | 1.00 | 0.00 | N |
| ATOM | 12   | C2'  | A A | 1  | 0.759   | -5.362  | 143.772 | 1.00 | 0.00 | C |
| ATOM | 13   | C3'  | A A | 1  | -0.173  | -4.559  | 144.665 | 1.00 | 0.00 | C |
| ATOM | 14   | O3'  | A A | 1  | -0.073  | -3.178  | 144.325 | 1.00 | 0.00 | O |
| ATOM | 15   | C4'  | A A | 1  | 0.364   | -4.848  | 146.066 | 1.00 | 0.00 | C |
| ATOM | 16   | O4'  | A A | 1  | 1.807   | -4.997  | 145.874 | 1.00 | 0.00 | O |
| ATOM | 17   | C5'  | A A | 1  | -0.165  | -6.089  | 146.744 | 1.00 | 0.00 | C |
| ATOM | 18   | O5'  | A A | 1  | -0.356  | -7.141  | 145.764 | 1.00 | 0.00 | O |
| ATOM | 19   | H2   | A A | 1  | 7.116   | -5.053  | 144.064 | 1.00 | 0.00 | H |
| ATOM | 20   | H8   | A A | 1  | 1.482   | -8.078  | 144.547 | 1.00 | 0.00 | H |
| ATOM | 21   | H1'  | A A | 1  | 2.668   | -4.403  | 144.130 | 1.00 | 0.00 | H |
| ATOM | 22   | H3'  | A A | 1  | -1.211  | -4.880  | 144.569 | 1.00 | 0.00 | H |
| ATOM | 23   | H4'  | A A | 1  | 0.103   | -3.991  | 146.687 | 1.00 | 0.00 | H |
| ATOM | 24   | H61  | A A | 1  | 7.494   | -9.535  | 144.022 | 1.00 | 0.00 | H |
| ATOM | 25   | H62  | A A | 1  | 5.833   | -10.172 | 144.165 | 1.00 | 0.00 | H |
| ATOM | 26   | H5T  | A A | 1  | -1.082  | -7.755  | 145.883 | 1.00 | 0.00 | H |

|      |    |      |     |   |        |        |         |      |      |   |
|------|----|------|-----|---|--------|--------|---------|------|------|---|
| ATOM | 27 | H2'1 | A A | 1 | 0.427  | -6.396 | 143.683 | 1.00 | 0.00 | H |
| ATOM | 28 | H2'2 | A A | 1 | 0.804  | -4.942 | 142.767 | 1.00 | 0.00 | H |
| ATOM | 29 | H5'1 | A A | 1 | 0.549  | -6.415 | 147.501 | 1.00 | 0.00 | H |
| ATOM | 30 | H5'2 | A A | 1 | -1.114 | -5.857 | 147.225 | 1.00 | 0.00 | H |
| ATOM | 31 | C1'  | G A | 2 | 4.633  | -2.650 | 141.126 | 1.00 | 0.00 | C |
| ATOM | 32 | N1   | G A | 2 | 7.370  | -6.933 | 140.706 | 1.00 | 0.00 | N |
| ATOM | 33 | C2   | G A | 2 | 7.786  | -5.616 | 140.748 | 1.00 | 0.00 | C |
| ATOM | 34 | N2   | G A | 2 | 9.105  | -5.412 | 140.665 | 1.00 | 0.00 | N |
| ATOM | 35 | N3   | G A | 2 | 6.952  | -4.584 | 140.864 | 1.00 | 0.00 | N |
| ATOM | 36 | C4   | G A | 2 | 5.652  | -4.975 | 140.928 | 1.00 | 0.00 | C |
| ATOM | 37 | C5   | G A | 2 | 5.144  | -6.264 | 140.892 | 1.00 | 0.00 | C |
| ATOM | 38 | C6   | G A | 2 | 6.031  | -7.360 | 140.773 | 1.00 | 0.00 | C |
| ATOM | 39 | O6   | G A | 2 | 5.775  | -8.563 | 140.726 | 1.00 | 0.00 | O |
| ATOM | 40 | N7   | G A | 2 | 3.751  | -6.237 | 140.986 | 1.00 | 0.00 | N |
| ATOM | 41 | C8   | G A | 2 | 3.465  | -4.963 | 141.078 | 1.00 | 0.00 | C |
| ATOM | 42 | N9   | G A | 2 | 4.568  | -4.134 | 141.049 | 1.00 | 0.00 | N |
| ATOM | 43 | C2'  | G A | 2 | 3.502  | -1.946 | 140.390 | 1.00 | 0.00 | C |
| ATOM | 44 | C3'  | G A | 2 | 3.240  | -0.744 | 141.281 | 1.00 | 0.00 | C |
| ATOM | 45 | O3'  | G A | 2 | 4.151  | 0.299  | 140.942 | 1.00 | 0.00 | O |
| ATOM | 46 | C4'  | G A | 2 | 3.494  | -1.299 | 142.682 | 1.00 | 0.00 | C |
| ATOM | 47 | O4'  | G A | 2 | 4.557  | -2.285 | 142.492 | 1.00 | 0.00 | O |
| ATOM | 48 | C5'  | G A | 2 | 2.324  | -1.972 | 143.360 | 1.00 | 0.00 | C |
| ATOM | 49 | O5'  | G A | 2 | 1.541  | -2.697 | 142.379 | 1.00 | 0.00 | O |
| ATOM | 50 | O1P  | G A | 2 | -0.650 | -1.460 | 142.356 | 1.00 | 0.00 | O |
| ATOM | 51 | O2P  | G A | 2 | -0.576 | -3.891 | 141.745 | 1.00 | 0.00 | O |
| ATOM | 52 | P    | G A | 2 | -0.039 | -2.785 | 142.574 | 1.00 | 0.00 | P |
| ATOM | 53 | H1   | G A | 2 | 8.096  | -7.658 | 140.618 | 1.00 | 0.00 | H |
| ATOM | 54 | H8   | G A | 2 | 2.447  | -4.589 | 141.167 | 1.00 | 0.00 | H |
| ATOM | 55 | H1'  | G A | 2 | 5.604  | -2.329 | 140.747 | 1.00 | 0.00 | H |
| ATOM | 56 | H21  | G A | 2 | 9.746  | -6.215 | 140.577 | 1.00 | 0.00 | H |
| ATOM | 57 | H3'  | G A | 2 | 2.218  | -0.376 | 141.183 | 1.00 | 0.00 | H |
| ATOM | 58 | H22  | G A | 2 | 9.480  | -4.453 | 140.689 | 1.00 | 0.00 | H |
| ATOM | 59 | H4'  | G A | 2 | 3.801  | -0.457 | 143.304 | 1.00 | 0.00 | H |
| ATOM | 60 | H2'1 | G A | 2 | 2.615  | -2.573 | 140.299 | 1.00 | 0.00 | H |
| ATOM | 61 | H2'2 | G A | 2 | 3.791  | -1.639 | 139.383 | 1.00 | 0.00 | H |
| ATOM | 62 | H5'1 | G A | 2 | 2.697  | -2.661 | 144.117 | 1.00 | 0.00 | H |
| ATOM | 63 | H5'2 | G A | 2 | 1.705  | -1.213 | 143.841 | 1.00 | 0.00 | H |
| ATOM | 64 | C1'  | G A | 3 | 8.200  | -2.033 | 137.747 | 1.00 | 0.00 | C |
| ATOM | 65 | N1   | G A | 3 | 7.896  | -7.106 | 137.326 | 1.00 | 0.00 | N |
| ATOM | 66 | C2   | G A | 3 | 9.006  | -6.286 | 137.368 | 1.00 | 0.00 | C |
| ATOM | 67 | N2   | G A | 3 | 10.195 | -6.896 | 137.284 | 1.00 | 0.00 | N |
| ATOM | 68 | N3   | G A | 3 | 8.938  | -4.962 | 137.484 | 1.00 | 0.00 | N |
| ATOM | 69 | C4   | G A | 3 | 7.657  | -4.513 | 137.549 | 1.00 | 0.00 | C |
| ATOM | 70 | C5   | G A | 3 | 6.489  | -5.258 | 137.512 | 1.00 | 0.00 | C |
| ATOM | 71 | C6   | G A | 3 | 6.562  | -6.665 | 137.394 | 1.00 | 0.00 | C |
| ATOM | 72 | O6   | G A | 3 | 5.647  | -7.488 | 137.345 | 1.00 | 0.00 | O |
| ATOM | 73 | N7   | G A | 3 | 5.378  | -4.417 | 137.605 | 1.00 | 0.00 | N |
| ATOM | 74 | C8   | G A | 3 | 5.895  | -3.220 | 137.697 | 1.00 | 0.00 | C |
| ATOM | 75 | N9   | G A | 3 | 7.274  | -3.196 | 137.669 | 1.00 | 0.00 | N |
| ATOM | 76 | C2'  | G A | 3 | 7.698  | -0.799 | 137.010 | 1.00 | 0.00 | C |
| ATOM | 77 | C3'  | G A | 3 | 8.193  | 0.328  | 137.901 | 1.00 | 0.00 | C |
| ATOM | 78 | O3'  | G A | 3 | 9.542  | 0.635  | 137.562 | 1.00 | 0.00 | O |
| ATOM | 79 | C4'  | G A | 3 | 8.073  | -0.270 | 139.302 | 1.00 | 0.00 | C |
| ATOM | 80 | O4'  | G A | 3 | 8.352  | -1.693 | 139.111 | 1.00 | 0.00 | O |

|      |     |      |     |   |        |        |         |      |      |   |
|------|-----|------|-----|---|--------|--------|---------|------|------|---|
| ATOM | 81  | C5'  | G A | 3 | 6.731  | -0.128 | 139.979 | 1.00 | 0.00 | C |
| ATOM | 82  | O5'  | G A | 3 | 5.671  | -0.253 | 139.000 | 1.00 | 0.00 | O |
| ATOM | 83  | O1P  | G A | 3 | 4.624  | 2.036  | 138.976 | 1.00 | 0.00 | O |
| ATOM | 84  | O2P  | G A | 3 | 3.256  | 0.025  | 138.365 | 1.00 | 0.00 | O |
| ATOM | 85  | P    | G A | 3 | 4.340  | 0.605  | 139.193 | 1.00 | 0.00 | P |
| ATOM | 86  | H1   | G A | 3 | 8.058  | -8.122 | 137.239 | 1.00 | 0.00 | H |
| ATOM | 87  | H8   | G A | 3 | 5.290  | -2.318 | 137.787 | 1.00 | 0.00 | H |
| ATOM | 88  | H1'  | G A | 3 | 9.173  | -2.346 | 137.368 | 1.00 | 0.00 | H |
| ATOM | 89  | H21  | G A | 3 | 10.241 | -7.923 | 137.197 | 1.00 | 0.00 | H |
| ATOM | 90  | H3'  | G A | 3 | 7.582  | 1.226  | 137.803 | 1.00 | 0.00 | H |
| ATOM | 91  | H22  | G A | 3 | 11.061 | -6.341 | 137.307 | 1.00 | 0.00 | H |
| ATOM | 92  | H4'  | G A | 3 | 8.814  | 0.229  | 139.924 | 1.00 | 0.00 | H |
| ATOM | 93  | H2'1 | G A | 3 | 6.612  | -0.784 | 136.918 | 1.00 | 0.00 | H |
| ATOM | 94  | H2'2 | G A | 3 | 8.111  | -0.721 | 136.004 | 1.00 | 0.00 | H |
| ATOM | 95  | H5'1 | G A | 3 | 6.628  | -0.905 | 140.736 | 1.00 | 0.00 | H |
| ATOM | 96  | H5'2 | G A | 3 | 6.675  | 0.849  | 140.460 | 1.00 | 0.00 | H |
| ATOM | 97  | C1'  | C A | 4 | 11.449 | -3.631 | 134.367 | 1.00 | 0.00 | C |
| ATOM | 98  | N1   | C A | 4 | 10.017 | -4.035 | 134.289 | 1.00 | 0.00 | N |
| ATOM | 99  | C2   | C A | 4 | 9.727  | -5.392 | 134.171 | 1.00 | 0.00 | C |
| ATOM | 100 | O2   | C A | 4 | 10.663 | -6.201 | 134.135 | 1.00 | 0.00 | O |
| ATOM | 101 | N3   | C A | 4 | 8.431  | -5.779 | 134.099 | 1.00 | 0.00 | N |
| ATOM | 102 | C4   | C A | 4 | 7.440  | -4.878 | 134.138 | 1.00 | 0.00 | C |
| ATOM | 103 | N4   | C A | 4 | 6.191  | -5.313 | 134.068 | 1.00 | 0.00 | N |
| ATOM | 104 | C5   | C A | 4 | 7.709  | -3.476 | 134.258 | 1.00 | 0.00 | C |
| ATOM | 105 | C6   | C A | 4 | 9.021  | -3.109 | 134.331 | 1.00 | 0.00 | C |
| ATOM | 106 | C2'  | C A | 4 | 11.764 | -2.340 | 133.625 | 1.00 | 0.00 | C |
| ATOM | 107 | C3'  | C A | 4 | 12.824 | -1.712 | 134.518 | 1.00 | 0.00 | C |
| ATOM | 108 | O3'  | C A | 4 | 14.100 | -2.253 | 134.180 | 1.00 | 0.00 | O |
| ATOM | 109 | C4'  | C A | 4 | 12.375 | -2.122 | 135.918 | 1.00 | 0.00 | C |
| ATOM | 110 | O4'  | C A | 4 | 11.768 | -3.441 | 135.733 | 1.00 | 0.00 | O |
| ATOM | 111 | C5'  | C A | 4 | 11.369 | -1.219 | 136.592 | 1.00 | 0.00 | C |
| ATOM | 112 | O5'  | C A | 4 | 10.436 | -0.704 | 135.608 | 1.00 | 0.00 | O |
| ATOM | 113 | O1P  | C A | 4 | 10.926 | 1.764  | 135.577 | 1.00 | 0.00 | O |
| ATOM | 114 | O2P  | C A | 4 | 8.639  | 0.932  | 134.966 | 1.00 | 0.00 | O |
| ATOM | 115 | P    | C A | 4 | 9.858  | 0.770  | 135.797 | 1.00 | 0.00 | P |
| ATOM | 116 | H5   | C A | 4 | 6.907  | -2.739 | 134.286 | 1.00 | 0.00 | H |
| ATOM | 117 | H6   | C A | 4 | 9.276  | -2.054 | 134.427 | 1.00 | 0.00 | H |
| ATOM | 118 | H1'  | C A | 4 | 12.054 | -4.455 | 133.992 | 1.00 | 0.00 | H |
| ATOM | 119 | H3'  | C A | 4 | 12.853 | -0.628 | 134.415 | 1.00 | 0.00 | H |
| ATOM | 120 | H4'  | C A | 4 | 13.269 | -2.149 | 136.542 | 1.00 | 0.00 | H |
| ATOM | 121 | H41  | C A | 4 | 5.409  | -4.641 | 134.098 | 1.00 | 0.00 | H |
| ATOM | 122 | H42  | C A | 4 | 5.998  | -6.322 | 133.981 | 1.00 | 0.00 | H |
| ATOM | 123 | H2'1 | C A | 4 | 10.892 | -1.693 | 133.531 | 1.00 | 0.00 | H |
| ATOM | 124 | H2'2 | C A | 4 | 12.147 | -2.522 | 132.620 | 1.00 | 0.00 | H |
| ATOM | 125 | H5'1 | C A | 4 | 10.828 | -1.786 | 137.350 | 1.00 | 0.00 | H |
| ATOM | 126 | H5'2 | C A | 4 | 11.894 | -0.393 | 137.070 | 1.00 | 0.00 | H |
| ATOM | 127 | C1'  | C A | 5 | 13.137 | -6.833 | 130.987 | 1.00 | 0.00 | C |
| ATOM | 128 | N1   | C A | 5 | 11.742 | -6.318 | 130.909 | 1.00 | 0.00 | N |
| ATOM | 129 | C2   | C A | 5 | 10.710 | -7.246 | 130.791 | 1.00 | 0.00 | C |
| ATOM | 130 | O2   | C A | 5 | 10.990 | -8.452 | 130.756 | 1.00 | 0.00 | O |
| ATOM | 131 | N3   | C A | 5 | 9.433  | -6.796 | 130.718 | 1.00 | 0.00 | N |
| ATOM | 132 | C4   | C A | 5 | 9.160  | -5.487 | 130.758 | 1.00 | 0.00 | C |
| ATOM | 133 | N4   | C A | 5 | 7.895  | -5.104 | 130.688 | 1.00 | 0.00 | N |
| ATOM | 134 | C5   | C A | 5 | 10.203 | -4.510 | 130.878 | 1.00 | 0.00 | C |

|      |     |      |     |   |        |         |         |      |      |   |
|------|-----|------|-----|---|--------|---------|---------|------|------|---|
| ATOM | 135 | C6   | C A | 5 | 11.479 | -4.985  | 130.952 | 1.00 | 0.00 | C |
| ATOM | 136 | C2'  | C A | 5 | 14.151 | -5.972  | 130.246 | 1.00 | 0.00 | C |
| ATOM | 137 | C3'  | C A | 5 | 15.377 | -6.089  | 131.138 | 1.00 | 0.00 | C |
| ATOM | 138 | O3'  | C A | 5 | 16.090 | -7.276  | 130.800 | 1.00 | 0.00 | O |
| ATOM | 139 | C4'  | C A | 5 | 14.772 | -6.158  | 132.539 | 1.00 | 0.00 | C |
| ATOM | 140 | O4'  | C A | 5 | 13.507 | -6.867  | 132.353 | 1.00 | 0.00 | O |
| ATOM | 141 | C5'  | C A | 5 | 14.490 | -4.834  | 133.212 | 1.00 | 0.00 | C |
| ATOM | 142 | O5'  | C A | 5 | 14.038 | -3.870  | 132.228 | 1.00 | 0.00 | O |
| ATOM | 143 | O1P  | C A | 5 | 15.885 | -2.161  | 132.197 | 1.00 | 0.00 | O |
| ATOM | 144 | O2P  | C A | 5 | 13.546 | -1.491  | 131.586 | 1.00 | 0.00 | O |
| ATOM | 145 | P    | C A | 5 | 14.436 | -2.338  | 132.417 | 1.00 | 0.00 | P |
| ATOM | 146 | H5   | C A | 5 | 9.987  | -3.442  | 130.905 | 1.00 | 0.00 | H |
| ATOM | 147 | H6   | C A | 5 | 12.306 | -4.281  | 131.047 | 1.00 | 0.00 | H |
| ATOM | 148 | H1'  | C A | 5 | 13.143 | -7.856  | 130.612 | 1.00 | 0.00 | H |
| ATOM | 149 | H3'  | C A | 5 | 16.039 | -5.229  | 131.035 | 1.00 | 0.00 | H |
| ATOM | 150 | H4'  | C A | 5 | 15.480 | -6.703  | 133.163 | 1.00 | 0.00 | H |
| ATOM | 151 | H41  | C A | 5 | 7.657  | -4.102  | 130.718 | 1.00 | 0.00 | H |
| ATOM | 152 | H42  | C A | 5 | 7.147  | -5.809  | 130.601 | 1.00 | 0.00 | H |
| ATOM | 153 | H2'1 | C A | 5 | 13.826 | -4.938  | 130.152 | 1.00 | 0.00 | H |
| ATOM | 154 | H2'2 | C A | 5 | 14.353 | -6.347  | 129.241 | 1.00 | 0.00 | H |
| ATOM | 155 | H5'1 | C A | 5 | 13.718 | -4.977  | 133.971 | 1.00 | 0.00 | H |
| ATOM | 156 | H5'2 | C A | 5 | 15.400 | -4.475  | 133.690 | 1.00 | 0.00 | H |
| ATOM | 157 | C1'  | G A | 6 | 12.619 | -10.416 | 127.607 | 1.00 | 0.00 | C |
| ATOM | 158 | N1   | G A | 6 | 7.886  | -8.559  | 127.187 | 1.00 | 0.00 | N |
| ATOM | 159 | C2   | G A | 6 | 8.325  | -9.871  | 127.228 | 1.00 | 0.00 | C |
| ATOM | 160 | N2   | G A | 6 | 7.379  | -10.812 | 127.144 | 1.00 | 0.00 | N |
| ATOM | 161 | N3   | G A | 6 | 9.607  | -10.214 | 127.345 | 1.00 | 0.00 | N |
| ATOM | 162 | C4   | G A | 6 | 10.428 | -9.133  | 127.409 | 1.00 | 0.00 | C |
| ATOM | 163 | C5   | G A | 6 | 10.081 | -7.793  | 127.372 | 1.00 | 0.00 | C |
| ATOM | 164 | C6   | G A | 6 | 8.721  | -7.426  | 127.253 | 1.00 | 0.00 | C |
| ATOM | 165 | O6   | G A | 6 | 8.221  | -6.303  | 127.203 | 1.00 | 0.00 | O |
| ATOM | 166 | N7   | G A | 6 | 11.224 | -6.995  | 127.465 | 1.00 | 0.00 | N |
| ATOM | 167 | C8   | G A | 6 | 12.203 | -7.857  | 127.557 | 1.00 | 0.00 | C |
| ATOM | 168 | N9   | G A | 6 | 11.800 | -9.177  | 127.529 | 1.00 | 0.00 | N |
| ATOM | 169 | C2'  | G A | 6 | 13.948 | -10.320 | 126.870 | 1.00 | 0.00 | C |
| ATOM | 170 | C3'  | G A | 6 | 14.867 | -11.140 | 127.762 | 1.00 | 0.00 | C |
| ATOM | 171 | O3'  | G A | 6 | 14.743 | -12.519 | 127.423 | 1.00 | 0.00 | O |
| ATOM | 172 | C4'  | G A | 6 | 14.335 | -10.840 | 129.163 | 1.00 | 0.00 | C |
| ATOM | 173 | O4'  | G A | 6 | 12.895 | -10.666 | 128.973 | 1.00 | 0.00 | O |
| ATOM | 174 | C5'  | G A | 6 | 14.886 | -9.608  | 129.839 | 1.00 | 0.00 | C |
| ATOM | 175 | O5'  | G A | 6 | 15.094 | -8.560  | 128.860 | 1.00 | 0.00 | O |
| ATOM | 176 | O1P  | G A | 6 | 17.594 | -8.273  | 128.836 | 1.00 | 0.00 | O |
| ATOM | 177 | O2P  | G A | 6 | 16.105 | -6.348  | 128.224 | 1.00 | 0.00 | O |
| ATOM | 178 | P    | G A | 6 | 16.321 | -7.559  | 129.054 | 1.00 | 0.00 | P |
| ATOM | 179 | H1   | G A | 6 | 6.871  | -8.399  | 127.103 | 1.00 | 0.00 | H |
| ATOM | 180 | H8   | G A | 6 | 13.249 | -7.561  | 127.646 | 1.00 | 0.00 | H |
| ATOM | 181 | H1'  | G A | 6 | 12.021 | -11.245 | 127.228 | 1.00 | 0.00 | H |
| ATOM | 182 | H21  | G A | 6 | 6.389  | -10.539 | 127.058 | 1.00 | 0.00 | H |
| ATOM | 183 | H3'  | G A | 6 | 15.909 | -10.836 | 127.664 | 1.00 | 0.00 | H |
| ATOM | 184 | H22  | G A | 6 | 7.640  | -11.808 | 127.166 | 1.00 | 0.00 | H |
| ATOM | 185 | H4'  | G A | 6 | 14.581 | -11.700 | 129.785 | 1.00 | 0.00 | H |
| ATOM | 186 | H2'1 | G A | 6 | 14.297 | -9.292  | 126.779 | 1.00 | 0.00 | H |
| ATOM | 187 | H2'2 | G A | 6 | 13.895 | -10.738 | 125.864 | 1.00 | 0.00 | H |
| ATOM | 188 | H5'1 | G A | 6 | 14.180 | -9.268  | 130.597 | 1.00 | 0.00 | H |

|      |     |      |     |   |        |         |         |      |      |   |
|------|-----|------|-----|---|--------|---------|---------|------|------|---|
| ATOM | 189 | H5'2 | G A | 6 | 15.832 | -9.855  | 130.321 | 1.00 | 0.00 | H |
| ATOM | 190 | C1'  | C A | 7 | 10.097 | -13.013 | 124.228 | 1.00 | 0.00 | C |
| ATOM | 191 | N1   | C A | 7 | 10.156 | -11.527 | 124.149 | 1.00 | 0.00 | N |
| ATOM | 192 | C2   | C A | 7 | 8.954  | -10.833 | 124.031 | 1.00 | 0.00 | C |
| ATOM | 193 | O2   | C A | 7 | 7.895  | -11.471 | 123.996 | 1.00 | 0.00 | O |
| ATOM | 194 | N3   | C A | 7 | 8.986  | -9.478  | 123.959 | 1.00 | 0.00 | N |
| ATOM | 195 | C4   | C A | 7 | 10.148 | -8.814  | 123.999 | 1.00 | 0.00 | C |
| ATOM | 196 | N4   | C A | 7 | 10.121 | -7.493  | 123.928 | 1.00 | 0.00 | N |
| ATOM | 197 | C5   | C A | 7 | 11.400 | -9.503  | 124.116 | 1.00 | 0.00 | C |
| ATOM | 198 | C6   | C A | 7 | 11.344 | -10.867 | 124.193 | 1.00 | 0.00 | C |
| ATOM | 199 | C2'  | C A | 7 | 11.228 | -13.712 | 123.487 | 1.00 | 0.00 | C |
| ATOM | 200 | C3'  | C A | 7 | 11.496 | -14.914 | 124.380 | 1.00 | 0.00 | C |
| ATOM | 201 | O3'  | C A | 7 | 10.587 | -15.961 | 124.042 | 1.00 | 0.00 | O |
| ATOM | 202 | C4'  | C A | 7 | 11.244 | -14.360 | 125.780 | 1.00 | 0.00 | C |
| ATOM | 203 | O4'  | C A | 7 | 10.178 | -13.375 | 125.593 | 1.00 | 0.00 | O |
| ATOM | 204 | C5'  | C A | 7 | 12.415 | -13.681 | 126.454 | 1.00 | 0.00 | C |
| ATOM | 205 | O5'  | C A | 7 | 13.194 | -12.954 | 125.469 | 1.00 | 0.00 | O |
| ATOM | 206 | O1P  | C A | 7 | 15.390 | -14.184 | 125.439 | 1.00 | 0.00 | O |
| ATOM | 207 | O2P  | C A | 7 | 15.302 | -11.752 | 124.827 | 1.00 | 0.00 | O |
| ATOM | 208 | P    | C A | 7 | 14.774 | -12.859 | 125.658 | 1.00 | 0.00 | P |
| ATOM | 209 | H5   | C A | 7 | 12.350 | -8.968  | 124.143 | 1.00 | 0.00 | H |
| ATOM | 210 | H6   | C A | 7 | 12.269 | -11.435 | 124.290 | 1.00 | 0.00 | H |
| ATOM | 211 | H1'  | C A | 7 | 9.125  | -13.335 | 123.853 | 1.00 | 0.00 | H |
| ATOM | 212 | H3'  | C A | 7 | 12.519 | -15.277 | 124.277 | 1.00 | 0.00 | H |
| ATOM | 213 | H4'  | C A | 7 | 10.944 | -15.201 | 126.404 | 1.00 | 0.00 | H |
| ATOM | 214 | H41  | C A | 7 | 11.001 | -6.956  | 123.959 | 1.00 | 0.00 | H |
| ATOM | 215 | H42  | C A | 7 | 9.222  | -6.997  | 123.841 | 1.00 | 0.00 | H |
| ATOM | 216 | H2'1 | C A | 7 | 12.112 | -13.083 | 123.393 | 1.00 | 0.00 | H |
| ATOM | 217 | H2'2 | C A | 7 | 10.936 | -14.021 | 122.482 | 1.00 | 0.00 | H |
| ATOM | 218 | H5'1 | C A | 7 | 12.041 | -12.991 | 127.212 | 1.00 | 0.00 | H |
| ATOM | 219 | H5'2 | C A | 7 | 13.039 | -14.436 | 126.932 | 1.00 | 0.00 | H |
| ATOM | 220 | C1'  | A A | 8 | 6.535  | -13.654 | 120.850 | 1.00 | 0.00 | C |
| ATOM | 221 | N1   | A A | 8 | 6.813  | -8.546  | 120.425 | 1.00 | 0.00 | N |
| ATOM | 222 | C2   | A A | 8 | 5.786  | -9.390  | 120.471 | 1.00 | 0.00 | C |
| ATOM | 223 | N3   | A A | 8 | 5.783  | -10.701 | 120.585 | 1.00 | 0.00 | N |
| ATOM | 224 | C4   | A A | 8 | 7.046  | -11.163 | 120.652 | 1.00 | 0.00 | C |
| ATOM | 225 | C5   | A A | 8 | 8.202  | -10.434 | 120.618 | 1.00 | 0.00 | C |
| ATOM | 226 | C6   | A A | 8 | 8.060  | -9.038  | 120.496 | 1.00 | 0.00 | C |
| ATOM | 227 | N6   | A A | 8 | 9.106  | -8.194  | 120.450 | 1.00 | 0.00 | N |
| ATOM | 228 | N7   | A A | 8 | 9.313  | -11.256 | 120.715 | 1.00 | 0.00 | N |
| ATOM | 229 | C8   | A A | 8 | 8.810  | -12.453 | 120.800 | 1.00 | 0.00 | C |
| ATOM | 230 | N9   | A A | 8 | 7.439  | -12.474 | 120.771 | 1.00 | 0.00 | N |
| ATOM | 231 | C2'  | A A | 8 | 7.059  | -14.879 | 120.113 | 1.00 | 0.00 | C |
| ATOM | 232 | C3'  | A A | 8 | 6.583  | -16.013 | 121.007 | 1.00 | 0.00 | C |
| ATOM | 233 | O3'  | A A | 8 | 5.240  | -16.343 | 120.665 | 1.00 | 0.00 | O |
| ATOM | 234 | C4'  | A A | 8 | 6.692  | -15.413 | 122.407 | 1.00 | 0.00 | C |
| ATOM | 235 | O4'  | A A | 8 | 6.388  | -13.993 | 122.215 | 1.00 | 0.00 | O |
| ATOM | 236 | C5'  | A A | 8 | 8.036  | -15.533 | 123.085 | 1.00 | 0.00 | C |
| ATOM | 237 | O5'  | A A | 8 | 9.095  | -15.388 | 122.105 | 1.00 | 0.00 | O |
| ATOM | 238 | O1P  | A A | 8 | 10.181 | -17.659 | 122.082 | 1.00 | 0.00 | O |
| ATOM | 239 | O2P  | A A | 8 | 11.515 | -15.623 | 121.471 | 1.00 | 0.00 | O |
| ATOM | 240 | P    | A A | 8 | 10.440 | -16.223 | 122.300 | 1.00 | 0.00 | P |
| ATOM | 241 | H2   | A A | 8 | 4.802  | -8.928  | 120.404 | 1.00 | 0.00 | H |
| ATOM | 242 | H8   | A A | 8 | 9.418  | -13.352 | 120.886 | 1.00 | 0.00 | H |

|      |     |      |     |    |        |         |         |      |      |   |
|------|-----|------|-----|----|--------|---------|---------|------|------|---|
| ATOM | 243 | H1'  | A A | 8  | 5.556  | -13.359 | 120.471 | 1.00 | 0.00 | H |
| ATOM | 244 | H3'  | A A | 8  | 7.209  | -16.901 | 120.910 | 1.00 | 0.00 | H |
| ATOM | 245 | H4'  | A A | 8  | 5.958  | -15.924 | 123.028 | 1.00 | 0.00 | H |
| ATOM | 246 | H61  | A A | 8  | 8.947  | -7.182  | 120.363 | 1.00 | 0.00 | H |
| ATOM | 247 | H62  | A A | 8  | 10.066 | -8.565  | 120.502 | 1.00 | 0.00 | H |
| ATOM | 248 | H2'1 | A A | 8  | 8.145  | -14.874 | 120.024 | 1.00 | 0.00 | H |
| ATOM | 249 | H2'2 | A A | 8  | 6.646  | -14.964 | 119.108 | 1.00 | 0.00 | H |
| ATOM | 250 | H5'1 | A A | 8  | 8.125  | -14.752 | 123.841 | 1.00 | 0.00 | H |
| ATOM | 251 | H5'2 | A A | 8  | 8.110  | -16.508 | 123.565 | 1.00 | 0.00 | H |
| ATOM | 252 | C1'  | C A | 9  | 3.280  | -12.032 | 117.469 | 1.00 | 0.00 | C |
| ATOM | 253 | N1   | C A | 9  | 4.711  | -11.629 | 117.390 | 1.00 | 0.00 | N |
| ATOM | 254 | C2   | C A | 9  | 5.002  | -10.271 | 117.271 | 1.00 | 0.00 | C |
| ATOM | 255 | O2   | C A | 9  | 4.066  | -9.462  | 117.236 | 1.00 | 0.00 | O |
| ATOM | 256 | N3   | C A | 9  | 6.298  | -9.884  | 117.199 | 1.00 | 0.00 | N |
| ATOM | 257 | C4   | C A | 9  | 7.289  | -10.784 | 117.239 | 1.00 | 0.00 | C |
| ATOM | 258 | N4   | C A | 9  | 8.539  | -10.349 | 117.169 | 1.00 | 0.00 | N |
| ATOM | 259 | C5   | C A | 9  | 7.021  | -12.188 | 117.356 | 1.00 | 0.00 | C |
| ATOM | 260 | C6   | C A | 9  | 5.707  | -12.556 | 117.433 | 1.00 | 0.00 | C |
| ATOM | 261 | C2'  | C A | 9  | 2.965  | -13.324 | 116.727 | 1.00 | 0.00 | C |
| ATOM | 262 | C3'  | C A | 9  | 1.905  | -13.951 | 117.620 | 1.00 | 0.00 | C |
| ATOM | 263 | O3'  | C A | 9  | 0.629  | -13.410 | 117.283 | 1.00 | 0.00 | O |
| ATOM | 264 | C4'  | C A | 9  | 2.354  | -13.541 | 119.021 | 1.00 | 0.00 | C |
| ATOM | 265 | O4'  | C A | 9  | 2.961  | -12.222 | 118.834 | 1.00 | 0.00 | O |
| ATOM | 266 | C5'  | C A | 9  | 3.360  | -14.443 | 119.694 | 1.00 | 0.00 | C |
| ATOM | 267 | O5'  | C A | 9  | 4.293  | -14.959 | 118.710 | 1.00 | 0.00 | O |
| ATOM | 268 | O1P  | C A | 9  | 3.803  | -17.427 | 118.679 | 1.00 | 0.00 | O |
| ATOM | 269 | O2P  | C A | 9  | 6.090  | -16.595 | 118.068 | 1.00 | 0.00 | O |
| ATOM | 270 | P    | C A | 9  | 4.871  | -16.433 | 118.899 | 1.00 | 0.00 | P |
| ATOM | 271 | H5   | C A | 9  | 7.824  | -12.924 | 117.384 | 1.00 | 0.00 | H |
| ATOM | 272 | H6   | C A | 9  | 5.452  | -13.610 | 117.531 | 1.00 | 0.00 | H |
| ATOM | 273 | H1'  | C A | 9  | 2.674  | -11.208 | 117.093 | 1.00 | 0.00 | H |
| ATOM | 274 | H3'  | C A | 9  | 1.876  | -15.035 | 117.518 | 1.00 | 0.00 | H |
| ATOM | 275 | H4'  | C A | 9  | 1.461  | -13.514 | 119.644 | 1.00 | 0.00 | H |
| ATOM | 276 | H41  | C A | 9  | 9.321  | -11.020 | 117.200 | 1.00 | 0.00 | H |
| ATOM | 277 | H42  | C A | 9  | 8.729  | -9.341  | 117.081 | 1.00 | 0.00 | H |
| ATOM | 278 | H2'1 | C A | 9  | 3.836  | -13.971 | 116.633 | 1.00 | 0.00 | H |
| ATOM | 279 | H2'2 | C A | 9  | 2.582  | -13.141 | 115.723 | 1.00 | 0.00 | H |
| ATOM | 280 | H5'1 | C A | 9  | 3.901  | -13.876 | 120.452 | 1.00 | 0.00 | H |
| ATOM | 281 | H5'2 | C A | 9  | 2.835  | -15.270 | 120.173 | 1.00 | 0.00 | H |
| ATOM | 282 | C1'  | C A | 10 | 1.592  | -8.831  | 114.088 | 1.00 | 0.00 | C |
| ATOM | 283 | N1   | C A | 10 | 2.986  | -9.346  | 114.010 | 1.00 | 0.00 | N |
| ATOM | 284 | C2   | C A | 10 | 4.019  | -8.418  | 113.891 | 1.00 | 0.00 | C |
| ATOM | 285 | O2   | C A | 10 | 3.739  | -7.212  | 113.856 | 1.00 | 0.00 | O |
| ATOM | 286 | N3   | C A | 10 | 5.296  | -8.866  | 113.819 | 1.00 | 0.00 | N |
| ATOM | 287 | C4   | C A | 10 | 5.569  | -10.177 | 113.859 | 1.00 | 0.00 | C |
| ATOM | 288 | N4   | C A | 10 | 6.836  | -10.560 | 113.789 | 1.00 | 0.00 | N |
| ATOM | 289 | C5   | C A | 10 | 4.526  | -11.155 | 113.977 | 1.00 | 0.00 | C |
| ATOM | 290 | C6   | C A | 10 | 3.248  | -10.679 | 114.053 | 1.00 | 0.00 | C |
| ATOM | 291 | C2'  | C A | 10 | 0.578  | -9.691  | 113.347 | 1.00 | 0.00 | C |
| ATOM | 292 | C3'  | C A | 10 | -0.649 | -9.575  | 114.240 | 1.00 | 0.00 | C |
| ATOM | 293 | O3'  | C A | 10 | -1.362 | -8.387  | 113.902 | 1.00 | 0.00 | O |
| ATOM | 294 | C4'  | C A | 10 | -0.044 | -9.507  | 115.640 | 1.00 | 0.00 | C |
| ATOM | 295 | O4'  | C A | 10 | 1.222  | -8.796  | 115.454 | 1.00 | 0.00 | O |
| ATOM | 296 | C5'  | C A | 10 | 0.239  | -10.829 | 116.314 | 1.00 | 0.00 | C |

|      |     |      |   |   |    |        |         |         |      |      |   |
|------|-----|------|---|---|----|--------|---------|---------|------|------|---|
| ATOM | 297 | O5'  | C | A | 10 | 0.691  | -11.794 | 115.330 | 1.00 | 0.00 | O |
| ATOM | 298 | O1P  | C | A | 10 | -1.157 | -13.502 | 115.299 | 1.00 | 0.00 | O |
| ATOM | 299 | O2P  | C | A | 10 | 1.183  | -14.173 | 114.689 | 1.00 | 0.00 | O |
| ATOM | 300 | P    | C | A | 10 | 0.292  | -13.326 | 115.519 | 1.00 | 0.00 | P |
| ATOM | 301 | H5   | C | A | 10 | 4.743  | -12.223 | 114.004 | 1.00 | 0.00 | H |
| ATOM | 302 | H6   | C | A | 10 | 2.422  | -11.384 | 114.151 | 1.00 | 0.00 | H |
| ATOM | 303 | H1'  | C | A | 10 | 1.585  | -7.807  | 113.713 | 1.00 | 0.00 | H |
| ATOM | 304 | H3'  | C | A | 10 | -1.311 | -10.435 | 114.137 | 1.00 | 0.00 | H |
| ATOM | 305 | H4'  | C | A | 10 | -0.752 | -8.960  | 116.264 | 1.00 | 0.00 | H |
| ATOM | 306 | H41  | C | A | 10 | 7.073  | -11.562 | 113.820 | 1.00 | 0.00 | H |
| ATOM | 307 | H42  | C | A | 10 | 7.582  | -9.856  | 113.701 | 1.00 | 0.00 | H |
| ATOM | 308 | H2'1 | C | A | 10 | 0.902  | -10.726 | 113.253 | 1.00 | 0.00 | H |
| ATOM | 309 | H2'2 | C | A | 10 | 0.375  | -9.318  | 112.342 | 1.00 | 0.00 | H |
| ATOM | 310 | H5'1 | C | A | 10 | 1.011  | -10.687 | 117.072 | 1.00 | 0.00 | H |
| ATOM | 311 | H5'2 | C | A | 10 | -0.671 | -11.188 | 116.792 | 1.00 | 0.00 | H |
| ATOM | 312 | C1'  | T | A | 11 | 2.085  | -5.247  | 110.709 | 1.00 | 0.00 | C |
| ATOM | 313 | N1   | T | A | 11 | 2.927  | -6.469  | 110.628 | 1.00 | 0.00 | N |
| ATOM | 314 | C2   | T | A | 11 | 4.290  | -6.288  | 110.509 | 1.00 | 0.00 | C |
| ATOM | 315 | O2   | T | A | 11 | 4.809  | -5.184  | 110.469 | 1.00 | 0.00 | O |
| ATOM | 316 | N3   | T | A | 11 | 5.037  | -7.449  | 110.438 | 1.00 | 0.00 | N |
| ATOM | 317 | C4   | T | A | 11 | 4.551  | -8.741  | 110.471 | 1.00 | 0.00 | C |
| ATOM | 318 | O4   | T | A | 11 | 5.320  | -9.708  | 110.397 | 1.00 | 0.00 | O |
| ATOM | 319 | C5   | T | A | 11 | 3.116  | -8.830  | 110.598 | 1.00 | 0.00 | C |
| ATOM | 320 | C6   | T | A | 11 | 2.358  | -7.718  | 110.671 | 1.00 | 0.00 | C |
| ATOM | 321 | C7   | T | A | 11 | 2.544  | -10.216 | 110.640 | 1.00 | 0.00 | C |
| ATOM | 322 | C2'  | T | A | 11 | 0.757  | -5.366  | 109.971 | 1.00 | 0.00 | C |
| ATOM | 323 | C3'  | T | A | 11 | -0.177 | -4.567  | 110.864 | 1.00 | 0.00 | C |
| ATOM | 324 | O3'  | T | A | 11 | -0.080 | -3.184  | 110.528 | 1.00 | 0.00 | O |
| ATOM | 325 | C4'  | T | A | 11 | 0.358  | -4.860  | 112.263 | 1.00 | 0.00 | C |
| ATOM | 326 | O4'  | T | A | 11 | 1.802  | -5.006  | 112.074 | 1.00 | 0.00 | O |
| ATOM | 327 | C5'  | T | A | 11 | -0.169 | -6.105  | 112.939 | 1.00 | 0.00 | C |
| ATOM | 328 | O5'  | T | A | 11 | -0.356 | -7.153  | 111.955 | 1.00 | 0.00 | O |
| ATOM | 329 | O1P  | T | A | 11 | -2.850 | -7.488  | 111.927 | 1.00 | 0.00 | O |
| ATOM | 330 | O2P  | T | A | 11 | -1.324 | -9.381  | 111.311 | 1.00 | 0.00 | O |
| ATOM | 331 | P    | T | A | 11 | -1.563 | -8.177  | 112.144 | 1.00 | 0.00 | P |
| ATOM | 332 | H3   | T | A | 11 | 6.057  | -7.341  | 110.353 | 1.00 | 0.00 | H |
| ATOM | 333 | H6   | T | A | 11 | 1.275  | -7.810  | 110.766 | 1.00 | 0.00 | H |
| ATOM | 334 | H1'  | T | A | 11 | 2.665  | -4.405  | 110.333 | 1.00 | 0.00 | H |
| ATOM | 335 | H3'  | T | A | 11 | -1.212 | -4.890  | 110.764 | 1.00 | 0.00 | H |
| ATOM | 336 | H4'  | T | A | 11 | 0.095  | -4.006  | 112.889 | 1.00 | 0.00 | H |
| ATOM | 337 | H71  | T | A | 11 | 1.934  | -10.385 | 109.754 | 1.00 | 0.00 | H |
| ATOM | 338 | H72  | T | A | 11 | 3.356  | -10.943 | 110.666 | 1.00 | 0.00 | H |
| ATOM | 339 | H73  | T | A | 11 | 1.928  | -10.330 | 111.532 | 1.00 | 0.00 | H |
| ATOM | 340 | H2'1 | T | A | 11 | 0.429  | -6.400  | 109.877 | 1.00 | 0.00 | H |
| ATOM | 341 | H2'2 | T | A | 11 | 0.803  | -4.945  | 108.965 | 1.00 | 0.00 | H |
| ATOM | 342 | H5'1 | T | A | 11 | 0.544  | -6.433  | 113.694 | 1.00 | 0.00 | H |
| ATOM | 343 | H5'2 | T | A | 11 | -1.121 | -5.876  | 113.418 | 1.00 | 0.00 | H |
| ATOM | 344 | C1'  | A | A | 12 | 4.613  | -2.637  | 107.329 | 1.00 | 0.00 | C |
| ATOM | 345 | N1   | A | A | 12 | 7.390  | -6.933  | 106.906 | 1.00 | 0.00 | N |
| ATOM | 346 | C2   | A | A | 12 | 7.724  | -5.647  | 106.950 | 1.00 | 0.00 | C |
| ATOM | 347 | N3   | A | A | 12 | 6.954  | -4.585  | 107.064 | 1.00 | 0.00 | N |
| ATOM | 348 | C4   | A | A | 12 | 5.663  | -4.952  | 107.132 | 1.00 | 0.00 | C |
| ATOM | 349 | C5   | A | A | 12 | 5.155  | -6.220  | 107.099 | 1.00 | 0.00 | C |
| ATOM | 350 | C6   | A | A | 12 | 6.093  | -7.269  | 106.976 | 1.00 | 0.00 | C |

|      |     |      |   |   |    |        |        |         |      |      |   |
|------|-----|------|---|---|----|--------|--------|---------|------|------|---|
| ATOM | 351 | N6   | A | A | 12 | 5.741  | -8.565 | 106.931 | 1.00 | 0.00 | N |
| ATOM | 352 | N7   | A | A | 12 | 3.776  | -6.210 | 107.195 | 1.00 | 0.00 | N |
| ATOM | 353 | C8   | A | A | 12 | 3.478  | -4.947 | 107.279 | 1.00 | 0.00 | C |
| ATOM | 354 | N9   | A | A | 12 | 4.574  | -4.123 | 107.249 | 1.00 | 0.00 | N |
| ATOM | 355 | C2'  | A | A | 12 | 3.468  | -1.955 | 106.592 | 1.00 | 0.00 | C |
| ATOM | 356 | C3'  | A | A | 12 | 3.186  | -0.757 | 107.485 | 1.00 | 0.00 | C |
| ATOM | 357 | O3'  | A | A | 12 | 4.079  | 0.301  | 107.143 | 1.00 | 0.00 | O |
| ATOM | 358 | C4'  | A | A | 12 | 3.451  | -1.307 | 108.886 | 1.00 | 0.00 | C |
| ATOM | 359 | O4'  | A | A | 12 | 4.531  | -2.275 | 108.694 | 1.00 | 0.00 | O |
| ATOM | 360 | C5'  | A | A | 12 | 2.294  | -1.999 | 109.564 | 1.00 | 0.00 | C |
| ATOM | 361 | O5'  | A | A | 12 | 1.522  | -2.739 | 108.584 | 1.00 | 0.00 | O |
| ATOM | 362 | O1P  | A | A | 12 | -0.692 | -1.540 | 108.560 | 1.00 | 0.00 | O |
| ATOM | 363 | O2P  | A | A | 12 | -0.575 | -3.971 | 107.950 | 1.00 | 0.00 | O |
| ATOM | 364 | P    | A | A | 12 | -0.057 | -2.854 | 108.779 | 1.00 | 0.00 | P |
| ATOM | 365 | H2   | A | A | 12 | 8.793  | -5.442 | 106.884 | 1.00 | 0.00 | H |
| ATOM | 366 | H8   | A | A | 12 | 2.456  | -4.576 | 107.365 | 1.00 | 0.00 | H |
| ATOM | 367 | H1'  | A | A | 12 | 5.577  | -2.301 | 106.949 | 1.00 | 0.00 | H |
| ATOM | 368 | H3'  | A | A | 12 | 2.159  | -0.407 | 107.388 | 1.00 | 0.00 | H |
| ATOM | 369 | H4'  | A | A | 12 | 3.743  | -0.460 | 109.507 | 1.00 | 0.00 | H |
| ATOM | 370 | H61  | A | A | 12 | 6.465  | -9.292 | 106.843 | 1.00 | 0.00 | H |
| ATOM | 371 | H62  | A | A | 12 | 4.746  | -8.831 | 106.983 | 1.00 | 0.00 | H |
| ATOM | 372 | H2'1 | A | A | 12 | 2.593  | -2.596 | 106.502 | 1.00 | 0.00 | H |
| ATOM | 373 | H2'2 | A | A | 12 | 3.752  | -1.644 | 105.587 | 1.00 | 0.00 | H |
| ATOM | 374 | H5'1 | A | A | 12 | 2.680  | -2.682 | 110.320 | 1.00 | 0.00 | H |
| ATOM | 375 | H5'2 | A | A | 12 | 1.661  | -1.254 | 110.044 | 1.00 | 0.00 | H |
| ATOM | 376 | C1'  | G | A | 13 | 8.197  | -2.038 | 103.947 | 1.00 | 0.00 | C |
| ATOM | 377 | N1   | G | A | 13 | 7.893  | -7.112 | 103.527 | 1.00 | 0.00 | N |
| ATOM | 378 | C2   | G | A | 13 | 9.005  | -6.291 | 103.568 | 1.00 | 0.00 | C |
| ATOM | 379 | N2   | G | A | 13 | 10.196 | -6.901 | 103.483 | 1.00 | 0.00 | N |
| ATOM | 380 | N3   | G | A | 13 | 8.935  | -4.966 | 103.683 | 1.00 | 0.00 | N |
| ATOM | 381 | C4   | G | A | 13 | 7.655  | -4.518 | 103.749 | 1.00 | 0.00 | C |
| ATOM | 382 | C5   | G | A | 13 | 6.487  | -5.263 | 103.712 | 1.00 | 0.00 | C |
| ATOM | 383 | C6   | G | A | 13 | 6.560  | -6.670 | 103.593 | 1.00 | 0.00 | C |
| ATOM | 384 | O6   | G | A | 13 | 5.644  | -7.492 | 103.543 | 1.00 | 0.00 | O |
| ATOM | 385 | N7   | G | A | 13 | 5.376  | -4.422 | 103.805 | 1.00 | 0.00 | N |
| ATOM | 386 | C8   | G | A | 13 | 5.892  | -3.224 | 103.897 | 1.00 | 0.00 | C |
| ATOM | 387 | N9   | G | A | 13 | 7.272  | -3.201 | 103.868 | 1.00 | 0.00 | N |
| ATOM | 388 | C2'  | G | A | 13 | 7.696  | -0.803 | 103.209 | 1.00 | 0.00 | C |
| ATOM | 389 | C3'  | G | A | 13 | 8.190  | 0.323  | 104.101 | 1.00 | 0.00 | C |
| ATOM | 390 | O3'  | G | A | 13 | 9.541  | 0.631  | 103.761 | 1.00 | 0.00 | O |
| ATOM | 391 | C4'  | G | A | 13 | 8.070  | -0.275 | 105.502 | 1.00 | 0.00 | C |
| ATOM | 392 | O4'  | G | A | 13 | 8.350  | -1.699 | 105.312 | 1.00 | 0.00 | O |
| ATOM | 393 | C5'  | G | A | 13 | 6.728  | -0.132 | 106.180 | 1.00 | 0.00 | C |
| ATOM | 394 | O5'  | G | A | 13 | 5.668  | -0.258 | 105.200 | 1.00 | 0.00 | O |
| ATOM | 395 | O1P  | G | A | 13 | 4.622  | 2.031  | 105.175 | 1.00 | 0.00 | O |
| ATOM | 396 | O2P  | G | A | 13 | 3.253  | 0.020  | 104.565 | 1.00 | 0.00 | O |
| ATOM | 397 | P    | G | A | 13 | 4.338  | 0.600  | 105.394 | 1.00 | 0.00 | P |
| ATOM | 398 | H1   | G | A | 13 | 8.056  | -8.128 | 103.442 | 1.00 | 0.00 | H |
| ATOM | 399 | H8   | G | A | 13 | 5.288  | -2.322 | 103.986 | 1.00 | 0.00 | H |
| ATOM | 400 | H1'  | G | A | 13 | 9.171  | -2.351 | 103.567 | 1.00 | 0.00 | H |
| ATOM | 401 | H21  | G | A | 13 | 10.240 | -7.928 | 103.397 | 1.00 | 0.00 | H |
| ATOM | 402 | H3'  | G | A | 13 | 7.580  | 1.221  | 104.003 | 1.00 | 0.00 | H |
| ATOM | 403 | H22  | G | A | 13 | 11.059 | -6.345 | 103.505 | 1.00 | 0.00 | H |
| ATOM | 404 | H4'  | G | A | 13 | 8.813  | 0.225  | 106.124 | 1.00 | 0.00 | H |



|      |     |      |     |    |        |        |         |      |      |   |
|------|-----|------|-----|----|--------|--------|---------|------|------|---|
| ATOM | 405 | H2'1 | G A | 13 | 6.609  | -0.789 | 103.118 | 1.00 | 0.00 | H |
| ATOM | 406 | H2'2 | G A | 13 | 8.110  | -0.725 | 102.203 | 1.00 | 0.00 | H |
| ATOM | 407 | H5'1 | G A | 13 | 6.625  | -0.909 | 106.937 | 1.00 | 0.00 | H |
| ATOM | 408 | H5'2 | G A | 13 | 6.672  | 0.844  | 106.660 | 1.00 | 0.00 | H |
| ATOM | 409 | C1'  | G A | 14 | 11.445 | -3.636 | 100.566 | 1.00 | 0.00 | C |
| ATOM | 410 | N1   | G A | 14 | 8.217  | -7.563 | 100.147 | 1.00 | 0.00 | N |
| ATOM | 411 | C2   | G A | 14 | 9.599  | -7.551 | 100.188 | 1.00 | 0.00 | C |
| ATOM | 412 | N2   | G A | 14 | 10.202 | -8.743 | 100.103 | 1.00 | 0.00 | N |
| ATOM | 413 | N3   | G A | 14 | 10.323 | -6.438 | 100.304 | 1.00 | 0.00 | N |
| ATOM | 414 | C4   | G A | 14 | 9.548  | -5.324 | 100.368 | 1.00 | 0.00 | C |
| ATOM | 415 | C5   | G A | 14 | 8.166  | -5.240 | 100.332 | 1.00 | 0.00 | C |
| ATOM | 416 | C6   | G A | 14 | 7.397  | -6.419 | 100.213 | 1.00 | 0.00 | C |
| ATOM | 417 | O6   | G A | 14 | 6.174  | -6.549 | 100.163 | 1.00 | 0.00 | O |
| ATOM | 418 | N7   | G A | 14 | 7.762  | -3.906 | 100.425 | 1.00 | 0.00 | N |
| ATOM | 419 | C8   | G A | 14 | 8.884  | -3.241 | 100.516 | 1.00 | 0.00 | C |
| ATOM | 420 | N9   | G A | 14 | 10.013 | -4.032 | 100.488 | 1.00 | 0.00 | N |
| ATOM | 421 | C2'  | G A | 14 | 11.764 | -2.342 | 99.829  | 1.00 | 0.00 | C |
| ATOM | 422 | C3'  | G A | 14 | 12.828 | -1.722 | 100.721 | 1.00 | 0.00 | C |
| ATOM | 423 | O3'  | G A | 14 | 14.100 | -2.266 | 100.381 | 1.00 | 0.00 | O |
| ATOM | 424 | C4'  | G A | 14 | 12.378 | -2.136 | 102.122 | 1.00 | 0.00 | C |
| ATOM | 425 | O4'  | G A | 14 | 11.768 | -3.451 | 101.931 | 1.00 | 0.00 | O |
| ATOM | 426 | C5'  | G A | 14 | 11.376 | -1.231 | 102.799 | 1.00 | 0.00 | C |
| ATOM | 427 | O5'  | G A | 14 | 10.445 | -0.710 | 101.819 | 1.00 | 0.00 | O |
| ATOM | 428 | O1P  | G A | 14 | 10.944 | 1.757  | 101.795 | 1.00 | 0.00 | O |
| ATOM | 429 | O2P  | G A | 14 | 8.654  | 0.936  | 101.184 | 1.00 | 0.00 | O |
| ATOM | 430 | P    | G A | 14 | 9.873  | 0.767  | 102.013 | 1.00 | 0.00 | P |
| ATOM | 431 | H1   | G A | 14 | 7.751  | -8.480 | 100.062 | 1.00 | 0.00 | H |
| ATOM | 432 | H8   | G A | 14 | 8.924  | -2.155 | 100.606 | 1.00 | 0.00 | H |
| ATOM | 433 | H1'  | G A | 14 | 12.048 | -4.461 | 100.187 | 1.00 | 0.00 | H |
| ATOM | 434 | H21  | G A | 14 | 9.637  | -9.601 | 100.017 | 1.00 | 0.00 | H |
| ATOM | 435 | H3'  | G A | 14 | 12.860 | -0.637 | 100.623 | 1.00 | 0.00 | H |
| ATOM | 436 | H22  | G A | 14 | 11.229 | -8.802 | 100.125 | 1.00 | 0.00 | H |
| ATOM | 437 | H4'  | G A | 14 | 13.272 | -2.167 | 102.744 | 1.00 | 0.00 | H |
| ATOM | 438 | H2'1 | G A | 14 | 10.894 | -1.693 | 99.738  | 1.00 | 0.00 | H |
| ATOM | 439 | H2'2 | G A | 14 | 12.146 | -2.523 | 98.823  | 1.00 | 0.00 | H |
| ATOM | 440 | H5'1 | G A | 14 | 10.836 | -1.799 | 103.556 | 1.00 | 0.00 | H |
| ATOM | 441 | H5'2 | G A | 14 | 11.905 | -0.407 | 103.280 | 1.00 | 0.00 | H |
| ATOM | 442 | C1'  | A A | 15 | 13.155 | -6.825 | 97.189  | 1.00 | 0.00 | C |
| ATOM | 443 | N1   | A A | 15 | 8.211  | -8.138 | 96.765  | 1.00 | 0.00 | N |
| ATOM | 444 | C2   | A A | 15 | 9.332  | -8.855 | 96.810  | 1.00 | 0.00 | C |
| ATOM | 445 | N3   | A A | 15 | 10.579 | -8.452 | 96.924  | 1.00 | 0.00 | N |
| ATOM | 446 | C4   | A A | 15 | 10.628 | -7.108 | 96.992  | 1.00 | 0.00 | C |
| ATOM | 447 | C5   | A A | 15 | 9.580  | -6.234 | 96.958  | 1.00 | 0.00 | C |
| ATOM | 448 | C6   | A A | 15 | 8.293  | -6.801 | 96.836  | 1.00 | 0.00 | C |
| ATOM | 449 | N6   | A A | 15 | 7.169  | -6.065 | 96.790  | 1.00 | 0.00 | N |
| ATOM | 450 | N7   | A A | 15 | 10.016 | -4.924 | 97.053  | 1.00 | 0.00 | N |
| ATOM | 451 | C8   | A A | 15 | 11.310 | -5.032 | 97.138  | 1.00 | 0.00 | C |
| ATOM | 452 | N9   | A A | 15 | 11.755 | -6.330 | 97.110  | 1.00 | 0.00 | N |
| ATOM | 453 | C2'  | A A | 15 | 14.159 | -5.948 | 96.451  | 1.00 | 0.00 | C |
| ATOM | 454 | C3'  | A A | 15 | 15.385 | -6.051 | 97.344  | 1.00 | 0.00 | C |
| ATOM | 455 | O3'  | A A | 15 | 16.114 | -7.225 | 97.003  | 1.00 | 0.00 | O |
| ATOM | 456 | C4'  | A A | 15 | 14.780 | -6.131 | 98.745  | 1.00 | 0.00 | C |
| ATOM | 457 | O4'  | A A | 15 | 13.524 | -6.859 | 98.554  | 1.00 | 0.00 | O |
| ATOM | 458 | C5'  | A A | 15 | 14.478 | -4.817 | 99.423  | 1.00 | 0.00 | C |

|      |     |      |   |   |    |        |         |         |      |      |   |
|------|-----|------|---|---|----|--------|---------|---------|------|------|---|
| ATOM | 459 | O5'  | A | A | 15 | 14.014 | -3.854  | 98.443  | 1.00 | 0.00 | O |
| ATOM | 460 | O1P  | A | A | 15 | 15.838 | -2.120  | 98.420  | 1.00 | 0.00 | O |
| ATOM | 461 | O2P  | A | A | 15 | 13.490 | -1.479  | 97.809  | 1.00 | 0.00 | O |
| ATOM | 462 | P    | A | A | 15 | 14.391 | -2.317  | 98.638  | 1.00 | 0.00 | P |
| ATOM | 463 | H2   | A | A | 15 | 9.196  | -9.934  | 96.744  | 1.00 | 0.00 | H |
| ATOM | 464 | H8   | A | A | 15 | 11.977 | -4.176  | 97.224  | 1.00 | 0.00 | H |
| ATOM | 465 | H1'  | A | A | 15 | 13.176 | -7.847  | 96.810  | 1.00 | 0.00 | H |
| ATOM | 466 | H3'  | A | A | 15 | 16.035 | -5.181  | 97.247  | 1.00 | 0.00 | H |
| ATOM | 467 | H4'  | A | A | 15 | 15.494 | -6.671  | 99.367  | 1.00 | 0.00 | H |
| ATOM | 468 | H61  | A | A | 15 | 6.255  | -6.532  | 96.703  | 1.00 | 0.00 | H |
| ATOM | 469 | H62  | A | A | 15 | 7.224  | -5.038  | 96.842  | 1.00 | 0.00 | H |
| ATOM | 470 | H2'1 | A | A | 15 | 13.817 | -4.917  | 96.361  | 1.00 | 0.00 | H |
| ATOM | 471 | H2'2 | A | A | 15 | 14.368 | -6.314  | 95.447  | 1.00 | 0.00 | H |
| ATOM | 472 | H5'1 | A | A | 15 | 13.709 | -4.973  | 100.179 | 1.00 | 0.00 | H |
| ATOM | 473 | H5'2 | A | A | 15 | 15.382 | -4.445  | 99.903  | 1.00 | 0.00 | H |
| ATOM | 474 | C1'  | C | A | 16 | 12.617 | -10.422 | 93.807  | 1.00 | 0.00 | C |
| ATOM | 475 | N1   | C | A | 16 | 11.792 | -9.185  | 93.729  | 1.00 | 0.00 | N |
| ATOM | 476 | C2   | C | A | 16 | 10.412 | -9.328  | 93.611  | 1.00 | 0.00 | C |
| ATOM | 477 | O2   | C | A | 16 | 9.931  | -10.469 | 93.575  | 1.00 | 0.00 | O |
| ATOM | 478 | N3   | C | A | 16 | 9.642  | -8.215  | 93.538  | 1.00 | 0.00 | N |
| ATOM | 479 | C4   | C | A | 16 | 10.193 | -6.995  | 93.579  | 1.00 | 0.00 | C |
| ATOM | 480 | N4   | C | A | 16 | 9.392  | -5.941  | 93.508  | 1.00 | 0.00 | N |
| ATOM | 481 | C5   | C | A | 16 | 11.610 | -6.816  | 93.696  | 1.00 | 0.00 | C |
| ATOM | 482 | C6   | C | A | 16 | 12.366 | -7.952  | 93.772  | 1.00 | 0.00 | C |
| ATOM | 483 | C2'  | C | A | 16 | 13.944 | -10.323 | 93.066  | 1.00 | 0.00 | C |
| ATOM | 484 | C3'  | C | A | 16 | 14.867 | -11.137 | 93.959  | 1.00 | 0.00 | C |
| ATOM | 485 | O3'  | C | A | 16 | 14.748 | -12.517 | 93.621  | 1.00 | 0.00 | O |
| ATOM | 486 | C4'  | C | A | 16 | 14.337 | -10.836 | 95.360  | 1.00 | 0.00 | C |
| ATOM | 487 | O4'  | C | A | 16 | 12.897 | -10.667 | 95.173  | 1.00 | 0.00 | O |
| ATOM | 488 | C5'  | C | A | 16 | 14.887 | -9.599  | 96.033  | 1.00 | 0.00 | C |
| ATOM | 489 | O5'  | C | A | 16 | 15.088 | -8.555  | 95.049  | 1.00 | 0.00 | O |
| ATOM | 490 | O1P  | C | A | 16 | 17.588 | -8.257  | 95.017  | 1.00 | 0.00 | O |
| ATOM | 491 | O2P  | C | A | 16 | 16.090 | -6.341  | 94.406  | 1.00 | 0.00 | O |
| ATOM | 492 | P    | C | A | 16 | 16.312 | -7.548  | 95.238  | 1.00 | 0.00 | P |
| ATOM | 493 | H5   | C | A | 16 | 12.063 | -5.824  | 93.722  | 1.00 | 0.00 | H |
| ATOM | 494 | H6   | C | A | 16 | 13.448 | -7.868  | 93.870  | 1.00 | 0.00 | H |
| ATOM | 495 | H1'  | C | A | 16 | 12.021 | -11.254 | 93.433  | 1.00 | 0.00 | H |
| ATOM | 496 | H3'  | C | A | 16 | 15.908 | -10.828 | 93.856  | 1.00 | 0.00 | H |
| ATOM | 497 | H4'  | C | A | 16 | 14.590 | -11.693 | 95.984  | 1.00 | 0.00 | H |
| ATOM | 498 | H41  | C | A | 16 | 9.789  | -4.989  | 93.539  | 1.00 | 0.00 | H |
| ATOM | 499 | H42  | C | A | 16 | 8.374  | -6.070  | 93.421  | 1.00 | 0.00 | H |
| ATOM | 500 | H2'1 | C | A | 16 | 14.289 | -9.294  | 92.972  | 1.00 | 0.00 | H |
| ATOM | 501 | H2'2 | C | A | 16 | 13.888 | -10.743 | 92.062  | 1.00 | 0.00 | H |
| ATOM | 502 | H5'1 | C | A | 16 | 14.179 | -9.262  | 96.791  | 1.00 | 0.00 | H |
| ATOM | 503 | H5'2 | C | A | 16 | 15.835 | -9.844  | 96.511  | 1.00 | 0.00 | H |
| ATOM | 504 | C1'  | G | A | 17 | 10.094 | -13.016 | 90.428  | 1.00 | 0.00 | C |
| ATOM | 505 | N1   | G | A | 17 | 7.357  | -8.732  | 90.008  | 1.00 | 0.00 | N |
| ATOM | 506 | C2   | G | A | 17 | 6.942  | -10.052 | 90.048  | 1.00 | 0.00 | C |
| ATOM | 507 | N2   | G | A | 17 | 5.621  | -10.256 | 89.964  | 1.00 | 0.00 | N |
| ATOM | 508 | N3   | G | A | 17 | 7.775  | -11.083 | 90.165  | 1.00 | 0.00 | N |
| ATOM | 509 | C4   | G | A | 17 | 9.075  | -10.690 | 90.229  | 1.00 | 0.00 | C |
| ATOM | 510 | C5   | G | A | 17 | 9.583  | -9.403  | 90.193  | 1.00 | 0.00 | C |
| ATOM | 511 | C6   | G | A | 17 | 8.699  | -8.307  | 90.073  | 1.00 | 0.00 | C |
| ATOM | 512 | O6   | G | A | 17 | 8.953  | -7.103  | 90.023  | 1.00 | 0.00 | O |

|      |     |      |     |    |        |         |        |      |      |   |
|------|-----|------|-----|----|--------|---------|--------|------|------|---|
| ATOM | 513 | N7   | G A | 17 | 10.977 | -9.430  | 90.286 | 1.00 | 0.00 | N |
| ATOM | 514 | C8   | G A | 17 | 11.262 | -10.703 | 90.377 | 1.00 | 0.00 | C |
| ATOM | 515 | N9   | G A | 17 | 10.159 | -11.532 | 90.349 | 1.00 | 0.00 | N |
| ATOM | 516 | C2'  | G A | 17 | 11.225 | -13.721 | 89.691 | 1.00 | 0.00 | C |
| ATOM | 517 | C3'  | G A | 17 | 11.488 | -14.922 | 90.583 | 1.00 | 0.00 | C |
| ATOM | 518 | O3'  | G A | 17 | 10.577 | -15.966 | 90.243 | 1.00 | 0.00 | O |
| ATOM | 519 | C4'  | G A | 17 | 11.233 | -14.367 | 91.984 | 1.00 | 0.00 | C |
| ATOM | 520 | O4'  | G A | 17 | 10.170 | -13.380 | 91.793 | 1.00 | 0.00 | O |
| ATOM | 521 | C5'  | G A | 17 | 12.403 | -13.694 | 92.661 | 1.00 | 0.00 | C |
| ATOM | 522 | O5'  | G A | 17 | 13.187 | -12.969 | 91.680 | 1.00 | 0.00 | O |
| ATOM | 523 | O1P  | G A | 17 | 15.379 | -14.206 | 91.657 | 1.00 | 0.00 | O |
| ATOM | 524 | O2P  | G A | 17 | 15.304 | -11.774 | 91.045 | 1.00 | 0.00 | O |
| ATOM | 525 | P    | G A | 17 | 14.767 | -12.881 | 91.874 | 1.00 | 0.00 | P |
| ATOM | 526 | H1   | G A | 17 | 6.629  | -8.006  | 89.922 | 1.00 | 0.00 | H |
| ATOM | 527 | H8   | G A | 17 | 12.283 | -11.077 | 90.467 | 1.00 | 0.00 | H |
| ATOM | 528 | H1'  | G A | 17 | 9.123  | -13.336 | 90.049 | 1.00 | 0.00 | H |
| ATOM | 529 | H21  | G A | 17 | 4.981  | -9.453  | 89.877 | 1.00 | 0.00 | H |
| ATOM | 530 | H3'  | G A | 17 | 12.510 | -15.289 | 90.485 | 1.00 | 0.00 | H |
| ATOM | 531 | H22  | G A | 17 | 5.247  | -11.216 | 89.986 | 1.00 | 0.00 | H |
| ATOM | 532 | H4'  | G A | 17 | 10.927 | -15.207 | 92.606 | 1.00 | 0.00 | H |
| ATOM | 533 | H2'1 | G A | 17 | 12.112 | -13.093 | 89.600 | 1.00 | 0.00 | H |
| ATOM | 534 | H2'2 | G A | 17 | 10.936 | -14.027 | 88.685 | 1.00 | 0.00 | H |
| ATOM | 535 | H5'1 | G A | 17 | 12.030 | -13.004 | 93.418 | 1.00 | 0.00 | H |
| ATOM | 536 | H5'2 | G A | 17 | 13.022 | -14.451 | 93.142 | 1.00 | 0.00 | H |
| ATOM | 537 | C1'  | G A | 18 | 6.528  | -13.634 | 87.048 | 1.00 | 0.00 | C |
| ATOM | 538 | N1   | G A | 18 | 6.832  | -8.559  | 86.628 | 1.00 | 0.00 | N |
| ATOM | 539 | C2   | G A | 18 | 5.719  | -9.382  | 86.668 | 1.00 | 0.00 | C |
| ATOM | 540 | N2   | G A | 18 | 4.530  | -8.771  | 86.584 | 1.00 | 0.00 | N |
| ATOM | 541 | N3   | G A | 18 | 5.788  | -10.706 | 86.785 | 1.00 | 0.00 | N |
| ATOM | 542 | C4   | G A | 18 | 7.070  | -11.153 | 86.849 | 1.00 | 0.00 | C |
| ATOM | 543 | C5   | G A | 18 | 8.238  | -10.410 | 86.813 | 1.00 | 0.00 | C |
| ATOM | 544 | C6   | G A | 18 | 8.165  | -9.002  | 86.693 | 1.00 | 0.00 | C |
| ATOM | 545 | O6   | G A | 18 | 9.081  | -8.180  | 86.643 | 1.00 | 0.00 | O |
| ATOM | 546 | N7   | G A | 18 | 9.348  | -11.249 | 86.905 | 1.00 | 0.00 | N |
| ATOM | 547 | C8   | G A | 18 | 8.832  | -12.447 | 86.998 | 1.00 | 0.00 | C |
| ATOM | 548 | N9   | G A | 18 | 7.453  | -12.471 | 86.970 | 1.00 | 0.00 | N |
| ATOM | 549 | C2'  | G A | 18 | 7.029  | -14.868 | 86.312 | 1.00 | 0.00 | C |
| ATOM | 550 | C3'  | G A | 18 | 6.534  | -15.994 | 87.204 | 1.00 | 0.00 | C |
| ATOM | 551 | O3'  | G A | 18 | 5.184  | -16.302 | 86.864 | 1.00 | 0.00 | O |
| ATOM | 552 | C4'  | G A | 18 | 6.654  | -15.396 | 88.605 | 1.00 | 0.00 | C |
| ATOM | 553 | O4'  | G A | 18 | 6.375  | -13.972 | 88.413 | 1.00 | 0.00 | O |
| ATOM | 554 | C5'  | G A | 18 | 7.997  | -15.538 | 89.282 | 1.00 | 0.00 | C |
| ATOM | 555 | O5'  | G A | 18 | 9.057  | -15.414 | 88.301 | 1.00 | 0.00 | O |
| ATOM | 556 | O1P  | G A | 18 | 10.103 | -17.702 | 88.277 | 1.00 | 0.00 | O |
| ATOM | 557 | O2P  | G A | 18 | 11.473 | -15.691 | 87.666 | 1.00 | 0.00 | O |
| ATOM | 558 | P    | G A | 18 | 10.388 | -16.271 | 88.495 | 1.00 | 0.00 | P |
| ATOM | 559 | H1   | G A | 18 | 6.669  | -7.544  | 86.543 | 1.00 | 0.00 | H |
| ATOM | 560 | H8   | G A | 18 | 9.437  | -13.350 | 87.088 | 1.00 | 0.00 | H |
| ATOM | 561 | H1'  | G A | 18 | 5.555  | -13.321 | 86.669 | 1.00 | 0.00 | H |
| ATOM | 562 | H21  | G A | 18 | 4.485  | -7.744  | 86.497 | 1.00 | 0.00 | H |
| ATOM | 563 | H3'  | G A | 18 | 7.146  | -16.892 | 87.106 | 1.00 | 0.00 | H |
| ATOM | 564 | H22  | G A | 18 | 3.665  | -9.326  | 86.605 | 1.00 | 0.00 | H |
| ATOM | 565 | H4'  | G A | 18 | 5.912  | -15.896 | 89.226 | 1.00 | 0.00 | H |
| ATOM | 566 | H2'1 | G A | 18 | 8.115  | -14.882 | 86.220 | 1.00 | 0.00 | H |

|      |     |      |       |    |        |         |        |      |      |   |
|------|-----|------|-------|----|--------|---------|--------|------|------|---|
| ATOM | 567 | H2'2 | G A   | 18 | 6.615  | -14.946 | 85.305 | 1.00 | 0.00 | H |
| ATOM | 568 | H5'1 | G A   | 18 | 8.100  | -14.761 | 90.039 | 1.00 | 0.00 | H |
| ATOM | 569 | H5'2 | G A   | 18 | 8.053  | -16.514 | 89.762 | 1.00 | 0.00 | H |
| ATOM | 570 | C1'  | T A   | 19 | 3.271  | -12.059 | 83.670 | 1.00 | 0.00 | C |
| ATOM | 571 | N1   | T A   | 19 | 4.693  | -11.634 | 83.589 | 1.00 | 0.00 | N |
| ATOM | 572 | C2   | T A   | 19 | 4.943  | -10.283 | 83.470 | 1.00 | 0.00 | C |
| ATOM | 573 | O2   | T A   | 19 | 4.053  | -9.449  | 83.430 | 1.00 | 0.00 | O |
| ATOM | 574 | N3   | T A   | 19 | 6.278  | -9.933  | 83.398 | 1.00 | 0.00 | N |
| ATOM | 575 | C4   | T A   | 19 | 7.356  | -10.792 | 83.431 | 1.00 | 0.00 | C |
| ATOM | 576 | O4   | T A   | 19 | 8.512  | -10.360 | 83.357 | 1.00 | 0.00 | O |
| ATOM | 577 | C5   | T A   | 19 | 6.997  | -12.185 | 83.557 | 1.00 | 0.00 | C |
| ATOM | 578 | C6   | T A   | 19 | 5.705  | -12.563 | 83.631 | 1.00 | 0.00 | C |
| ATOM | 579 | C7   | T A   | 19 | 8.138  | -13.156 | 83.601 | 1.00 | 0.00 | C |
| ATOM | 580 | C2'  | T A   | 19 | 2.974  | -13.358 | 82.931 | 1.00 | 0.00 | C |
| ATOM | 581 | C3'  | T A   | 19 | 1.924  | -13.999 | 83.825 | 1.00 | 0.00 | C |
| ATOM | 582 | O3'  | T A   | 19 | 0.640  | -13.478 | 83.489 | 1.00 | 0.00 | O |
| ATOM | 583 | C4'  | T A   | 19 | 2.370  | -13.580 | 85.224 | 1.00 | 0.00 | C |
| ATOM | 584 | O4'  | T A   | 19 | 2.954  | -12.253 | 85.035 | 1.00 | 0.00 | O |
| ATOM | 585 | C5'  | T A   | 19 | 3.390  | -14.467 | 85.899 | 1.00 | 0.00 | C |
| ATOM | 586 | O5'  | T A   | 19 | 4.329  | -14.969 | 84.915 | 1.00 | 0.00 | O |
| ATOM | 587 | O1P  | T A   | 19 | 3.876  | -17.444 | 84.888 | 1.00 | 0.00 | O |
| ATOM | 588 | O2P  | T A   | 19 | 6.149  | -16.577 | 84.273 | 1.00 | 0.00 | O |
| ATOM | 589 | P    | T A   | 19 | 4.930  | -16.433 | 85.104 | 1.00 | 0.00 | P |
| ATOM | 590 | H3   | T A   | 19 | 6.490  | -8.928  | 83.314 | 1.00 | 0.00 | H |
| ATOM | 591 | H6   | T A   | 19 | 5.459  | -13.621 | 83.726 | 1.00 | 0.00 | H |
| ATOM | 592 | H1'  | T A   | 19 | 2.649  | -11.246 | 83.294 | 1.00 | 0.00 | H |
| ATOM | 593 | H3'  | T A   | 19 | 1.912  | -15.084 | 83.725 | 1.00 | 0.00 | H |
| ATOM | 594 | H4'  | T A   | 19 | 1.476  | -13.567 | 85.851 | 1.00 | 0.00 | H |
| ATOM | 595 | H71  | T A   | 19 | 8.111  | -13.790 | 82.714 | 1.00 | 0.00 | H |
| ATOM | 596 | H72  | T A   | 19 | 9.081  | -12.609 | 83.626 | 1.00 | 0.00 | H |
| ATOM | 597 | H73  | T A   | 19 | 8.056  | -13.779 | 84.493 | 1.00 | 0.00 | H |
| ATOM | 598 | H2'1 | T A   | 19 | 3.856  | -13.989 | 82.838 | 1.00 | 0.00 | H |
| ATOM | 599 | H2'2 | T A   | 19 | 2.587  | -13.183 | 81.926 | 1.00 | 0.00 | H |
| ATOM | 600 | H5'1 | T A   | 19 | 3.922  | -13.890 | 86.655 | 1.00 | 0.00 | H |
| ATOM | 601 | H5'2 | T A   | 19 | 2.879  | -15.300 | 86.379 | 1.00 | 0.00 | H |
| ATOM | 602 | C01  | LNK A | 20 | -1.733 | -14.427 | 80.783 | 0.00 | 0.00 | C |
| ATOM | 603 | O1   | LNK A | 20 | -0.479 | -14.557 | 81.459 | 1.00 | 0.00 | O |
| ATOM | 604 | S    | LNK A | 20 | -3.570 | -15.866 | 77.558 | 0.00 | 0.00 | S |
| ATOM | 605 | C02  | LNK A | 20 | -1.743 | -15.343 | 79.544 | 0.00 | 0.00 | C |
| ATOM | 606 | C03  | LNK A | 20 | -2.508 | -14.650 | 78.399 | 0.00 | 0.00 | C |
| ATOM | 607 | O1P  | LNK A | 20 | 1.692  | -13.341 | 81.075 | 1.00 | 0.00 | O |
| ATOM | 608 | O2P  | LNK A | 20 | -0.432 | -12.045 | 81.415 | 1.00 | 0.00 | O |
| ATOM | 609 | P    | LNK A | 20 | 0.379  | -13.243 | 81.744 | 1.00 | 0.00 | P |
| ATOM | 610 | H01  | LNK A | 20 | -1.873 | -13.392 | 80.471 | 0.00 | 0.00 | H |
| ATOM | 611 | H02  | LNK A | 20 | -2.541 | -14.716 | 81.454 | 0.00 | 0.00 | H |
| ATOM | 612 | H03  | LNK A | 20 | -1.797 | -14.234 | 77.686 | 0.00 | 0.00 | H |
| ATOM | 613 | H04  | LNK A | 20 | -2.233 | -16.284 | 79.792 | 0.00 | 0.00 | H |
| ATOM | 614 | H05  | LNK A | 20 | -0.719 | -15.539 | 79.228 | 0.00 | 0.00 | H |
| ATOM | 615 | H06  | LNK A | 20 | -3.125 | -13.850 | 78.807 | 0.00 | 0.00 | H |
| ATOM | 616 | AU   | LNK A | 20 | -3.833 | -15.586 | 76.990 |      |      |   |
| TER  |     |      |       |    |        |         |        |      |      |   |
| ATOM | 618 | C1'  | A B   | 2  | 7.268  | -1.958  | 82.726 | 1.00 | 0.00 | C |
| ATOM | 619 | N1   | A B   | 2  | 6.904  | -7.060  | 83.147 | 1.00 | 0.00 | N |
| ATOM | 620 | C2   | A B   | 2  | 5.991  | -6.096  | 83.106 | 1.00 | 0.00 | C |

|      |     |      |     |   |        |        |        |      |      |   |
|------|-----|------|-----|---|--------|--------|--------|------|------|---|
| ATOM | 621 | N3   | A B | 2 | 6.153  | -4.794 | 82.992 | 1.00 | 0.00 | N |
| ATOM | 622 | C4   | A B | 2 | 7.463  | -4.493 | 82.921 | 1.00 | 0.00 | C |
| ATOM | 623 | C5   | A B | 2 | 8.519  | -5.360 | 82.951 | 1.00 | 0.00 | C |
| ATOM | 624 | C6   | A B | 2 | 8.203  | -6.731 | 83.073 | 1.00 | 0.00 | C |
| ATOM | 625 | N6   | A B | 2 | 9.135  | -7.698 | 83.115 | 1.00 | 0.00 | N |
| ATOM | 626 | N7   | A B | 2 | 9.723  | -4.685 | 82.852 | 1.00 | 0.00 | N |
| ATOM | 627 | C8   | A B | 2 | 9.374  | -3.436 | 82.769 | 1.00 | 0.00 | C |
| ATOM | 628 | N9   | A B | 2 | 8.017  | -3.242 | 82.801 | 1.00 | 0.00 | N |
| ATOM | 629 | C2'  | A B | 2 | 7.944  | -0.809 | 83.462 | 1.00 | 0.00 | C |
| ATOM | 630 | C3'  | A B | 2 | 7.611  | 0.377  | 82.572 | 1.00 | 0.00 | C |
| ATOM | 631 | O3'  | A B | 2 | 6.320  | 0.874  | 82.916 | 1.00 | 0.00 | O |
| ATOM | 632 | C4'  | A B | 2 | 7.642  | -0.231 | 81.171 | 1.00 | 0.00 | C |
| ATOM | 633 | O4'  | A B | 2 | 7.163  | -1.602 | 81.362 | 1.00 | 0.00 | O |
| ATOM | 634 | C5'  | A B | 2 | 8.988  | -0.280 | 80.488 | 1.00 | 0.00 | C |
| ATOM | 635 | O5'  | A B | 2 | 10.023 | -0.557 | 81.465 | 1.00 | 0.00 | O |
| ATOM | 636 | H2   | A B | 2 | 4.957  | -6.429 | 83.174 | 1.00 | 0.00 | H |
| ATOM | 637 | H8   | A B | 2 | 10.092 | -2.620 | 82.683 | 1.00 | 0.00 | H |
| ATOM | 638 | H1'  | A B | 2 | 6.261  | -2.128 | 83.108 | 1.00 | 0.00 | H |
| ATOM | 639 | H3'  | A B | 2 | 8.343  | 1.179  | 82.668 | 1.00 | 0.00 | H |
| ATOM | 640 | H4'  | A B | 2 | 6.976  | 0.369  | 80.551 | 1.00 | 0.00 | H |
| ATOM | 641 | H61  | A B | 2 | 8.851  | -8.682 | 83.202 | 1.00 | 0.00 | H |
| ATOM | 642 | H62  | A B | 2 | 10.135 | -7.451 | 83.060 | 1.00 | 0.00 | H |
| ATOM | 643 | H2'1 | A B | 2 | 9.021  | -0.950 | 83.549 | 1.00 | 0.00 | H |
| ATOM | 644 | H2'2 | A B | 2 | 7.547  | -0.673 | 84.470 | 1.00 | 0.00 | H |
| ATOM | 645 | H5'1 | A B | 2 | 8.977  | -1.064 | 79.731 | 1.00 | 0.00 | H |
| ATOM | 646 | H5'2 | A B | 2 | 9.180  | 0.679  | 80.009 | 1.00 | 0.00 | H |
| ATOM | 647 | C1'  | C B | 3 | 3.837  | -3.160 | 86.110 | 1.00 | 0.00 | C |
| ATOM | 648 | N1   | C B | 3 | 5.206  | -3.738 | 86.184 | 1.00 | 0.00 | N |
| ATOM | 649 | C2   | C B | 3 | 5.324  | -5.122 | 86.304 | 1.00 | 0.00 | C |
| ATOM | 650 | O2   | C B | 3 | 4.294  | -5.808 | 86.342 | 1.00 | 0.00 | O |
| ATOM | 651 | N3   | C B | 3 | 6.562  | -5.668 | 86.374 | 1.00 | 0.00 | N |
| ATOM | 652 | C4   | C B | 3 | 7.658  | -4.900 | 86.331 | 1.00 | 0.00 | C |
| ATOM | 653 | N4   | C B | 3 | 8.844  | -5.488 | 86.399 | 1.00 | 0.00 | N |
| ATOM | 654 | C5   | C B | 3 | 7.568  | -3.473 | 86.213 | 1.00 | 0.00 | C |
| ATOM | 655 | C6   | C B | 3 | 6.309  | -2.944 | 86.139 | 1.00 | 0.00 | C |
| ATOM | 656 | C2'  | C B | 3 | 3.687  | -1.838 | 86.849 | 1.00 | 0.00 | C |
| ATOM | 657 | C3'  | C B | 3 | 2.713  | -1.083 | 85.958 | 1.00 | 0.00 | C |
| ATOM | 658 | O3'  | C B | 3 | 1.380  | -1.460 | 86.299 | 1.00 | 0.00 | O |
| ATOM | 659 | C4'  | C B | 3 | 3.104  | -1.547 | 84.558 | 1.00 | 0.00 | C |
| ATOM | 660 | O4'  | C B | 3 | 3.541  | -2.932 | 84.744 | 1.00 | 0.00 | O |
| ATOM | 661 | C5'  | C B | 3 | 4.214  | -0.778 | 83.881 | 1.00 | 0.00 | C |
| ATOM | 662 | O5'  | C B | 3 | 5.206  | -0.383 | 84.862 | 1.00 | 0.00 | O |
| ATOM | 663 | O1P  | C B | 3 | 5.029  | 2.127  | 84.892 | 1.00 | 0.00 | O |
| ATOM | 664 | O2P  | C B | 3 | 7.194  | 1.015  | 85.499 | 1.00 | 0.00 | O |
| ATOM | 665 | P    | C B | 3 | 5.963  | 1.006  | 84.671 | 1.00 | 0.00 | P |
| ATOM | 666 | H5   | C B | 3 | 8.457  | -2.843 | 86.185 | 1.00 | 0.00 | H |
| ATOM | 667 | H6   | C B | 3 | 6.190  | -1.865 | 86.041 | 1.00 | 0.00 | H |
| ATOM | 668 | H1'  | C B | 3 | 3.132  | -3.901 | 86.486 | 1.00 | 0.00 | H |
| ATOM | 669 | H3'  | C B | 3 | 2.820  | -0.003 | 86.060 | 1.00 | 0.00 | H |
| ATOM | 670 | H4'  | C B | 3 | 2.214  | -1.461 | 83.934 | 1.00 | 0.00 | H |
| ATOM | 671 | H41  | C B | 3 | 9.704  | -4.921 | 86.366 | 1.00 | 0.00 | H |
| ATOM | 672 | H42  | C B | 3 | 8.907  | -6.514 | 86.487 | 1.00 | 0.00 | H |
| ATOM | 673 | H2'1 | C B | 3 | 4.634  | -1.306 | 86.942 | 1.00 | 0.00 | H |
| ATOM | 674 | H2'2 | C B | 3 | 3.286  | -1.970 | 87.855 | 1.00 | 0.00 | H |

|      |     |      |     |   |        |         |        |      |      |   |
|------|-----|------|-----|---|--------|---------|--------|------|------|---|
| ATOM | 675 | H5'1 | C B | 3 | 4.678  | -1.410  | 83.122 | 1.00 | 0.00 | H |
| ATOM | 676 | H5'2 | C B | 3 | 3.797  | 0.107   | 83.404 | 1.00 | 0.00 | H |
| ATOM | 677 | C1'  | C B | 4 | 1.760  | -6.124  | 89.489 | 1.00 | 0.00 | C |
| ATOM | 678 | N1   | C B | 4 | 3.208  | -5.787  | 89.564 | 1.00 | 0.00 | N |
| ATOM | 679 | C2   | C B | 4 | 4.117  | -6.837  | 89.684 | 1.00 | 0.00 | C |
| ATOM | 680 | O2   | C B | 4 | 3.688  | -7.998  | 89.723 | 1.00 | 0.00 | O |
| ATOM | 681 | N3   | C B | 4 | 5.440  | -6.554  | 89.755 | 1.00 | 0.00 | N |
| ATOM | 682 | C4   | C B | 4 | 5.876  | -5.286  | 89.711 | 1.00 | 0.00 | C |
| ATOM | 683 | N4   | C B | 4 | 7.180  | -5.064  | 89.780 | 1.00 | 0.00 | N |
| ATOM | 684 | C5   | C B | 4 | 4.963  | -4.185  | 89.593 | 1.00 | 0.00 | C |
| ATOM | 685 | C6   | C B | 4 | 3.635  | -4.497  | 89.519 | 1.00 | 0.00 | C |
| ATOM | 686 | C2'  | C B | 4 | 0.863  | -5.142  | 90.231 | 1.00 | 0.00 | C |
| ATOM | 687 | C3'  | C B | 4 | -0.369 | -5.105  | 89.340 | 1.00 | 0.00 | C |
| ATOM | 688 | O3'  | C B | 4 | -1.226 | -6.193  | 89.679 | 1.00 | 0.00 | O |
| ATOM | 689 | C4'  | C B | 4 | 0.220  | -5.251  | 87.938 | 1.00 | 0.00 | C |
| ATOM | 690 | O4'  | C B | 4 | 1.387  | -6.114  | 88.124 | 1.00 | 0.00 | O |
| ATOM | 691 | C5'  | C B | 4 | 0.667  | -3.975  | 87.261 | 1.00 | 0.00 | C |
| ATOM | 692 | O5'  | C B | 4 | 1.237  | -3.073  | 88.243 | 1.00 | 0.00 | O |
| ATOM | 693 | O1P  | C B | 4 | -0.383 | -1.147  | 88.273 | 1.00 | 0.00 | O |
| ATOM | 694 | O2P  | C B | 4 | 2.023  | -0.773  | 88.880 | 1.00 | 0.00 | O |
| ATOM | 695 | P    | C B | 4 | 1.033  | -1.504  | 88.052 | 1.00 | 0.00 | P |
| ATOM | 696 | H5   | C B | 4 | 5.312  | -3.154  | 89.565 | 1.00 | 0.00 | H |
| ATOM | 697 | H6   | C B | 4 | 2.904  | -3.695  | 89.422 | 1.00 | 0.00 | H |
| ATOM | 698 | H1'  | C B | 4 | 1.625  | -7.138  | 89.867 | 1.00 | 0.00 | H |
| ATOM | 699 | H3'  | C B | 4 | -0.917 | -4.168  | 89.440 | 1.00 | 0.00 | H |
| ATOM | 700 | H4'  | C B | 4 | -0.550 | -5.705  | 87.315 | 1.00 | 0.00 | H |
| ATOM | 701 | H41  | C B | 4 | 7.542  | -4.100  | 89.746 | 1.00 | 0.00 | H |
| ATOM | 702 | H42  | C B | 4 | 7.834  | -5.857  | 89.867 | 1.00 | 0.00 | H |
| ATOM | 703 | H2'1 | C B | 4 | 1.316  | -4.155  | 90.322 | 1.00 | 0.00 | H |
| ATOM | 704 | H2'2 | C B | 4 | 0.616  | -5.485  | 91.235 | 1.00 | 0.00 | H |
| ATOM | 705 | H5'1 | C B | 4 | 1.412  | -4.214  | 86.503 | 1.00 | 0.00 | H |
| ATOM | 706 | H5'2 | C B | 4 | -0.192 | -3.506  | 86.784 | 1.00 | 0.00 | H |
| ATOM | 707 | C1'  | G B | 5 | 1.825  | -9.742  | 92.870 | 1.00 | 0.00 | C |
| ATOM | 708 | N1   | G B | 5 | 6.754  | -8.492  | 93.286 | 1.00 | 0.00 | N |
| ATOM | 709 | C2   | G B | 5 | 6.153  | -9.738  | 93.248 | 1.00 | 0.00 | C |
| ATOM | 710 | N2   | G B | 5 | 6.975  | -10.792 | 93.335 | 1.00 | 0.00 | N |
| ATOM | 711 | N3   | G B | 5 | 4.839  | -9.919  | 93.133 | 1.00 | 0.00 | N |
| ATOM | 712 | C4   | G B | 5 | 4.160  | -8.744  | 93.065 | 1.00 | 0.00 | C |
| ATOM | 713 | C5   | G B | 5 | 4.673  | -7.458  | 93.100 | 1.00 | 0.00 | C |
| ATOM | 714 | C6   | G B | 5 | 6.068  | -7.265  | 93.218 | 1.00 | 0.00 | C |
| ATOM | 715 | O6   | G B | 5 | 6.704  | -6.213  | 93.266 | 1.00 | 0.00 | O |
| ATOM | 716 | N7   | G B | 5 | 3.638  | -6.523  | 93.004 | 1.00 | 0.00 | N |
| ATOM | 717 | C8   | G B | 5 | 2.557  | -7.255  | 92.915 | 1.00 | 0.00 | C |
| ATOM | 718 | N9   | G B | 5 | 2.794  | -8.615  | 92.946 | 1.00 | 0.00 | N |
| ATOM | 719 | C2'  | G B | 5 | 0.519  | -9.479  | 93.607 | 1.00 | 0.00 | C |
| ATOM | 720 | C3'  | G B | 5 | -0.495 | -10.179 | 92.716 | 1.00 | 0.00 | C |
| ATOM | 721 | O3'  | G B | 5 | -0.545 | -11.561 | 93.060 | 1.00 | 0.00 | O |
| ATOM | 722 | C4'  | G B | 5 | 0.069  | -9.950  | 91.315 | 1.00 | 0.00 | C |
| ATOM | 723 | O4'  | G B | 5 | 1.519  | -9.959  | 91.506 | 1.00 | 0.00 | O |
| ATOM | 724 | C5'  | G B | 5 | -0.323 | -8.660  | 90.635 | 1.00 | 0.00 | C |
| ATOM | 725 | O5'  | G B | 5 | -0.398 | -7.594  | 91.612 | 1.00 | 0.00 | O |
| ATOM | 726 | O1P  | G B | 5 | -2.842 | -6.994  | 91.635 | 1.00 | 0.00 | O |
| ATOM | 727 | O2P  | G B | 5 | -1.122 | -5.272  | 92.242 | 1.00 | 0.00 | O |
| ATOM | 728 | P    | G B | 5 | -1.489 | -6.448  | 91.417 | 1.00 | 0.00 | P |

|      |     |      |     |   |        |         |         |      |      |   |
|------|-----|------|-----|---|--------|---------|---------|------|------|---|
| ATOM | 729 | H1   | G B | 5 | 7.781  | -8.461  | 93.372  | 1.00 | 0.00 | H |
| ATOM | 730 | H8   | G B | 5 | 1.558  | -6.830  | 92.824  | 1.00 | 0.00 | H |
| ATOM | 731 | H1'  | G B | 5 | 2.313  | -10.639 | 93.250  | 1.00 | 0.00 | H |
| ATOM | 732 | H21  | G B | 5 | 7.992  | -10.645 | 93.420  | 1.00 | 0.00 | H |
| ATOM | 733 | H3'  | G B | 5 | -1.492 | -9.746  | 92.813  | 1.00 | 0.00 | H |
| ATOM | 734 | H22  | G B | 5 | 6.592  | -11.747 | 93.317  | 1.00 | 0.00 | H |
| ATOM | 735 | H4'  | G B | 5 | -0.283 | -10.774 | 90.694  | 1.00 | 0.00 | H |
| ATOM | 736 | H2'1 | G B | 5 | 0.301  | -8.414  | 93.696  | 1.00 | 0.00 | H |
| ATOM | 737 | H2'2 | G B | 5 | 0.519  | -9.899  | 94.613  | 1.00 | 0.00 | H |
| ATOM | 738 | H5'1 | G B | 5 | 0.423  | -8.415  | 89.878  | 1.00 | 0.00 | H |
| ATOM | 739 | H5'2 | G B | 5 | -1.293 | -8.789  | 90.154  | 1.00 | 0.00 | H |
| ATOM | 740 | C1'  | T B | 6 | 3.983  | -12.646 | 96.248  | 1.00 | 0.00 | C |
| ATOM | 741 | N1   | T B | 6 | 4.133  | -11.168 | 96.326  | 1.00 | 0.00 | N |
| ATOM | 742 | C2   | T B | 6 | 5.415  | -10.671 | 96.445  | 1.00 | 0.00 | C |
| ATOM | 743 | O2   | T B | 6 | 6.400  | -11.387 | 96.487  | 1.00 | 0.00 | O |
| ATOM | 744 | N3   | T B | 6 | 5.507  | -9.292  | 96.513  | 1.00 | 0.00 | N |
| ATOM | 745 | C4   | T B | 6 | 4.461  | -8.395  | 96.476  | 1.00 | 0.00 | C |
| ATOM | 746 | O4   | T B | 6 | 4.669  | -7.179  | 96.549  | 1.00 | 0.00 | O |
| ATOM | 747 | C5   | T B | 6 | 3.162  | -9.009  | 96.350  | 1.00 | 0.00 | C |
| ATOM | 748 | C6   | T B | 6 | 3.032  | -10.349 | 96.280  | 1.00 | 0.00 | C |
| ATOM | 749 | C7   | T B | 6 | 1.993  | -8.069  | 96.303  | 1.00 | 0.00 | C |
| ATOM | 750 | C2'  | T B | 6 | 2.761  | -13.178 | 96.987  | 1.00 | 0.00 | C |
| ATOM | 751 | C3'  | T B | 6 | 2.329  | -14.331 | 96.095  | 1.00 | 0.00 | C |
| ATOM | 752 | O3'  | T B | 6 | 3.080  | -15.495 | 96.436  | 1.00 | 0.00 | O |
| ATOM | 753 | C4'  | T B | 6 | 2.658  | -13.820 | 94.695  | 1.00 | 0.00 | C |
| ATOM | 754 | O4'  | T B | 6 | 3.852  | -12.996 | 94.884  | 1.00 | 0.00 | O |
| ATOM | 755 | C5'  | T B | 6 | 1.598  | -12.984 | 94.016  | 1.00 | 0.00 | C |
| ATOM | 756 | O5'  | T B | 6 | 0.928  | -12.153 | 94.998  | 1.00 | 0.00 | O |
| ATOM | 757 | O1P  | T B | 6 | -1.419 | -13.061 | 95.025  | 1.00 | 0.00 | O |
| ATOM | 758 | O2P  | T B | 6 | -0.993 | -10.665 | 95.634  | 1.00 | 0.00 | O |
| ATOM | 759 | P    | T B | 6 | -0.623 | -11.838 | 94.806  | 1.00 | 0.00 | P |
| ATOM | 760 | H3   | T B | 6 | 6.455  | -8.896  | 96.598  | 1.00 | 0.00 | H |
| ATOM | 761 | H6   | T B | 6 | 2.039  | -10.788 | 96.184  | 1.00 | 0.00 | H |
| ATOM | 762 | H1'  | T B | 6 | 4.897  | -13.103 | 96.626  | 1.00 | 0.00 | H |
| ATOM | 763 | H3'  | T B | 6 | 1.265  | -14.547 | 96.195  | 1.00 | 0.00 | H |
| ATOM | 764 | H4'  | T B | 6 | 2.840  | -14.696 | 94.071  | 1.00 | 0.00 | H |
| ATOM | 765 | H71  | T B | 6 | 1.375  | -8.213  | 97.190  | 1.00 | 0.00 | H |
| ATOM | 766 | H72  | T B | 6 | 2.355  | -7.041  | 96.276  | 1.00 | 0.00 | H |
| ATOM | 767 | H73  | T B | 6 | 1.399  | -8.269  | 95.411  | 1.00 | 0.00 | H |
| ATOM | 768 | H2'1 | T B | 6 | 1.975  | -12.431 | 97.078  | 1.00 | 0.00 | H |
| ATOM | 769 | H2'2 | T B | 6 | 3.004  | -13.524 | 97.992  | 1.00 | 0.00 | H |
| ATOM | 770 | H5'1 | T B | 6 | 2.066  | -12.355 | 93.259  | 1.00 | 0.00 | H |
| ATOM | 771 | H5'2 | T B | 6 | 0.875  | -13.644 | 93.538  | 1.00 | 0.00 | H |
| ATOM | 772 | C1'  | C B | 7 | 7.465  | -13.693 | 99.630  | 1.00 | 0.00 | C |
| ATOM | 773 | N1   | C B | 7 | 6.697  | -12.418 | 99.704  | 1.00 | 0.00 | N |
| ATOM | 774 | C2   | C B | 7 | 7.415  | -11.230 | 99.824  | 1.00 | 0.00 | C |
| ATOM | 775 | O2   | C B | 7 | 8.652  | -11.280 | 99.862  | 1.00 | 0.00 | O |
| ATOM | 776 | N3   | C B | 7 | 6.735  | -10.059 | 99.894  | 1.00 | 0.00 | N |
| ATOM | 777 | C4   | C B | 7 | 5.397  | -10.037 | 99.852  | 1.00 | 0.00 | C |
| ATOM | 778 | N4   | C B | 7 | 4.784  | -8.866  | 99.921  | 1.00 | 0.00 | N |
| ATOM | 779 | C5   | C B | 7 | 4.631  | -11.244 | 99.734  | 1.00 | 0.00 | C |
| ATOM | 780 | C6   | C B | 7 | 5.338  | -12.411 | 99.660  | 1.00 | 0.00 | C |
| ATOM | 781 | C2'  | C B | 7 | 6.809  | -14.848 | 100.371 | 1.00 | 0.00 | C |
| ATOM | 782 | C3'  | C B | 7 | 7.155  | -16.031 | 99.480  | 1.00 | 0.00 | C |

|      |     |      |     |   |        |         |         |      |      |   |
|------|-----|------|-----|---|--------|---------|---------|------|------|---|
| ATOM | 783 | O3'  | C B | 7 | 8.454  | -16.510 | 99.820  | 1.00 | 0.00 | O |
| ATOM | 784 | C4'  | C B | 7 | 7.110  | -15.426 | 98.080  | 1.00 | 0.00 | C |
| ATOM | 785 | O4'  | C B | 7 | 7.571  | -14.051 | 98.265  | 1.00 | 0.00 | O |
| ATOM | 786 | C5'  | C B | 7 | 5.759  | -15.397 | 97.402  | 1.00 | 0.00 | C |
| ATOM | 787 | O5'  | C B | 7 | 4.726  | -15.134 | 98.385  | 1.00 | 0.00 | O |
| ATOM | 788 | O1P  | C B | 7 | 3.393  | -17.267 | 98.415  | 1.00 | 0.00 | O |
| ATOM | 789 | O2P  | C B | 7 | 2.296  | -15.096 | 99.022  | 1.00 | 0.00 | O |
| ATOM | 790 | P    | C B | 7 | 3.295  | -15.812 | 98.193  | 1.00 | 0.00 | P |
| ATOM | 791 | H5   | C B | 7 | 3.542  | -11.231 | 99.705  | 1.00 | 0.00 | H |
| ATOM | 792 | H6   | C B | 7 | 4.801  | -13.354 | 99.562  | 1.00 | 0.00 | H |
| ATOM | 793 | H1'  | C B | 7 | 8.471  | -13.506 | 100.007 | 1.00 | 0.00 | H |
| ATOM | 794 | H3'  | C B | 7 | 6.433  | -16.844 | 99.581  | 1.00 | 0.00 | H |
| ATOM | 795 | H4'  | C B | 7 | 7.779  | -16.020 | 97.456  | 1.00 | 0.00 | H |
| ATOM | 796 | H41  | C B | 7 | 3.755  | -8.820  | 99.886  | 1.00 | 0.00 | H |
| ATOM | 797 | H42  | C B | 7 | 5.336  | -7.998  | 100.007 | 1.00 | 0.00 | H |
| ATOM | 798 | H2'1 | C B | 7 | 5.731  | -14.722 | 100.463 | 1.00 | 0.00 | H |
| ATOM | 799 | H2'2 | C B | 7 | 7.211  | -14.976 | 101.376 | 1.00 | 0.00 | H |
| ATOM | 800 | H5'1 | C B | 7 | 5.756  | -14.613 | 96.644  | 1.00 | 0.00 | H |
| ATOM | 801 | H5'2 | C B | 7 | 5.577  | -16.359 | 96.926  | 1.00 | 0.00 | H |
| ATOM | 802 | C1'  | C B | 8 | 10.888 | -12.512 | 103.010 | 1.00 | 0.00 | C |
| ATOM | 803 | N1   | C B | 8 | 9.520  | -11.933 | 103.085 | 1.00 | 0.00 | N |
| ATOM | 804 | C2   | C B | 8 | 9.401  | -10.549 | 103.205 | 1.00 | 0.00 | C |
| ATOM | 805 | O2   | C B | 8 | 10.431 | -9.864  | 103.243 | 1.00 | 0.00 | O |
| ATOM | 806 | N3   | C B | 8 | 8.163  | -10.003 | 103.275 | 1.00 | 0.00 | N |
| ATOM | 807 | C4   | C B | 8 | 7.067  | -10.772 | 103.232 | 1.00 | 0.00 | C |
| ATOM | 808 | N4   | C B | 8 | 5.881  | -10.183 | 103.301 | 1.00 | 0.00 | N |
| ATOM | 809 | C5   | C B | 8 | 7.156  | -12.198 | 103.114 | 1.00 | 0.00 | C |
| ATOM | 810 | C6   | C B | 8 | 8.415  | -12.727 | 103.040 | 1.00 | 0.00 | C |
| ATOM | 811 | C2'  | C B | 8 | 11.038 | -13.834 | 103.751 | 1.00 | 0.00 | C |
| ATOM | 812 | C3'  | C B | 8 | 12.012 | -14.589 | 102.860 | 1.00 | 0.00 | C |
| ATOM | 813 | O3'  | C B | 8 | 13.344 | -14.211 | 103.200 | 1.00 | 0.00 | O |
| ATOM | 814 | C4'  | C B | 8 | 11.621 | -14.124 | 101.459 | 1.00 | 0.00 | C |
| ATOM | 815 | O4'  | C B | 8 | 11.183 | -12.740 | 101.645 | 1.00 | 0.00 | O |
| ATOM | 816 | C5'  | C B | 8 | 10.511 | -14.894 | 100.782 | 1.00 | 0.00 | C |
| ATOM | 817 | O5'  | C B | 8 | 9.518  | -15.289 | 101.764 | 1.00 | 0.00 | O |
| ATOM | 818 | O1P  | C B | 8 | 9.696  | -17.800 | 101.794 | 1.00 | 0.00 | O |
| ATOM | 819 | O2P  | C B | 8 | 7.531  | -16.687 | 102.401 | 1.00 | 0.00 | O |
| ATOM | 820 | P    | C B | 8 | 8.762  | -16.678 | 101.574 | 1.00 | 0.00 | P |
| ATOM | 821 | H5   | C B | 8 | 6.268  | -12.829 | 103.086 | 1.00 | 0.00 | H |
| ATOM | 822 | H6   | C B | 8 | 8.534  | -13.806 | 102.942 | 1.00 | 0.00 | H |
| ATOM | 823 | H1'  | C B | 8 | 11.593 | -11.771 | 103.387 | 1.00 | 0.00 | H |
| ATOM | 824 | H3'  | C B | 8 | 11.905 | -15.668 | 102.962 | 1.00 | 0.00 | H |
| ATOM | 825 | H4'  | C B | 8 | 12.511 | -14.212 | 100.836 | 1.00 | 0.00 | H |
| ATOM | 826 | H41  | C B | 8 | 5.022  | -10.751 | 103.266 | 1.00 | 0.00 | H |
| ATOM | 827 | H42  | C B | 8 | 5.818  | -9.158  | 103.387 | 1.00 | 0.00 | H |
| ATOM | 828 | H2'1 | C B | 8 | 10.092 | -14.366 | 103.844 | 1.00 | 0.00 | H |
| ATOM | 829 | H2'2 | C B | 8 | 11.439 | -13.701 | 104.756 | 1.00 | 0.00 | H |
| ATOM | 830 | H5'1 | C B | 8 | 10.047 | -14.263 | 100.024 | 1.00 | 0.00 | H |
| ATOM | 831 | H5'2 | C B | 8 | 10.928 | -15.779 | 100.305 | 1.00 | 0.00 | H |
| ATOM | 832 | C1'  | T B | 9 | 12.982 | -9.562  | 106.387 | 1.00 | 0.00 | C |
| ATOM | 833 | N1   | T B | 9 | 11.530 | -9.876  | 106.465 | 1.00 | 0.00 | N |
| ATOM | 834 | C2   | T B | 9 | 10.661 | -8.811  | 106.584 | 1.00 | 0.00 | C |
| ATOM | 835 | O2   | T B | 9 | 11.039 | -7.654  | 106.627 | 1.00 | 0.00 | O |
| ATOM | 836 | N3   | T B | 9 | 9.322  | -9.148  | 106.652 | 1.00 | 0.00 | N |



|      |     |      |     |    |        |         |         |      |      |   |
|------|-----|------|-----|----|--------|---------|---------|------|------|---|
| ATOM | 837 | C4   | T B | 9  | 8.792  | -10.420 | 106.616 | 1.00 | 0.00 | C |
| ATOM | 838 | O4   | T B | 9  | 7.570  | -10.599 | 106.690 | 1.00 | 0.00 | O |
| ATOM | 839 | C5   | T B | 9  | 9.778  | -11.468 | 106.490 | 1.00 | 0.00 | C |
| ATOM | 840 | C6   | T B | 9  | 11.091 | -11.176 | 106.420 | 1.00 | 0.00 | C |
| ATOM | 841 | C7   | T B | 9  | 9.244  | -12.868 | 106.443 | 1.00 | 0.00 | C |
| ATOM | 842 | C2'  | T B | 9  | 13.868 | -10.560 | 107.126 | 1.00 | 0.00 | C |
| ATOM | 843 | C3'  | T B | 9  | 15.097 | -10.614 | 106.233 | 1.00 | 0.00 | C |
| ATOM | 844 | O3'  | T B | 9  | 15.971 | -9.540  | 106.574 | 1.00 | 0.00 | O |
| ATOM | 845 | C4'  | T B | 9  | 14.508 | -10.460 | 104.833 | 1.00 | 0.00 | C |
| ATOM | 846 | O4'  | T B | 9  | 13.355 | -9.577  | 105.024 | 1.00 | 0.00 | O |
| ATOM | 847 | C5'  | T B | 9  | 14.041 | -11.726 | 104.155 | 1.00 | 0.00 | C |
| ATOM | 848 | O5'  | T B | 9  | 13.459 | -12.621 | 105.137 | 1.00 | 0.00 | O |
| ATOM | 849 | O1P  | T B | 9  | 15.047 | -14.571 | 105.164 | 1.00 | 0.00 | O |
| ATOM | 850 | O2P  | T B | 9  | 12.637 | -14.907 | 105.774 | 1.00 | 0.00 | O |
| ATOM | 851 | P    | T B | 9  | 13.636 | -14.193 | 104.945 | 1.00 | 0.00 | P |
| ATOM | 852 | H3   | T B | 9  | 8.652  | -8.370  | 106.738 | 1.00 | 0.00 | H |
| ATOM | 853 | H6   | T B | 9  | 11.816 | -11.984 | 106.325 | 1.00 | 0.00 | H |
| ATOM | 854 | H1'  | T B | 9  | 13.134 | -8.551  | 106.765 | 1.00 | 0.00 | H |
| ATOM | 855 | H3'  | T B | 9  | 15.630 | -11.560 | 106.333 | 1.00 | 0.00 | H |
| ATOM | 856 | H4'  | T B | 9  | 15.286 | -10.016 | 104.210 | 1.00 | 0.00 | H |
| ATOM | 857 | H71  | T B | 9  | 9.573  | -13.412 | 107.330 | 1.00 | 0.00 | H |
| ATOM | 858 | H72  | T B | 9  | 8.155  | -12.843 | 106.416 | 1.00 | 0.00 | H |
| ATOM | 859 | H73  | T B | 9  | 9.618  | -13.371 | 105.551 | 1.00 | 0.00 | H |
| ATOM | 860 | H2'1 | T B | 9  | 13.398 | -11.538 | 107.217 | 1.00 | 0.00 | H |
| ATOM | 861 | H2'2 | T B | 9  | 14.120 | -10.222 | 108.132 | 1.00 | 0.00 | H |
| ATOM | 862 | H5'1 | T B | 9  | 13.298 | -11.476 | 103.399 | 1.00 | 0.00 | H |
| ATOM | 863 | H5'2 | T B | 9  | 14.891 | -12.209 | 103.678 | 1.00 | 0.00 | H |
| ATOM | 864 | C1'  | A B | 10 | 12.925 | -5.928  | 109.767 | 1.00 | 0.00 | C |
| ATOM | 865 | N1   | A B | 10 | 7.961  | -7.159  | 110.187 | 1.00 | 0.00 | N |
| ATOM | 866 | C2   | A B | 10 | 8.597  | -5.991  | 110.145 | 1.00 | 0.00 | C |
| ATOM | 867 | N3   | A B | 10 | 9.884  | -5.745  | 110.032 | 1.00 | 0.00 | N |
| ATOM | 868 | C4   | A B | 10 | 10.575 | -6.897  | 109.961 | 1.00 | 0.00 | C |
| ATOM | 869 | C5   | A B | 10 | 10.076 | -8.170  | 109.990 | 1.00 | 0.00 | C |
| ATOM | 870 | C6   | A B | 10 | 8.677  | -8.291  | 110.113 | 1.00 | 0.00 | C |
| ATOM | 871 | N6   | A B | 10 | 8.045  | -9.478  | 110.156 | 1.00 | 0.00 | N |
| ATOM | 872 | N7   | A B | 10 | 11.091 | -9.106  | 109.892 | 1.00 | 0.00 | N |
| ATOM | 873 | C8   | A B | 10 | 12.171 | -8.387  | 109.810 | 1.00 | 0.00 | C |
| ATOM | 874 | N9   | A B | 10 | 11.936 | -7.037  | 109.842 | 1.00 | 0.00 | N |
| ATOM | 875 | C2'  | A B | 10 | 14.226 | -6.217  | 110.503 | 1.00 | 0.00 | C |
| ATOM | 876 | C3'  | A B | 10 | 15.253 | -5.533  | 109.612 | 1.00 | 0.00 | C |
| ATOM | 877 | O3'  | A B | 10 | 15.326 | -4.152  | 109.956 | 1.00 | 0.00 | O |
| ATOM | 878 | C4'  | A B | 10 | 14.683 | -5.750  | 108.211 | 1.00 | 0.00 | C |
| ATOM | 879 | O4'  | A B | 10 | 13.232 | -5.717  | 108.402 | 1.00 | 0.00 | O |
| ATOM | 880 | C5'  | A B | 10 | 15.053 | -7.045  | 107.528 | 1.00 | 0.00 | C |
| ATOM | 881 | O5'  | A B | 10 | 15.109 | -8.116  | 108.506 | 1.00 | 0.00 | O |
| ATOM | 882 | O1P  | A B | 10 | 17.543 | -8.757  | 108.528 | 1.00 | 0.00 | O |
| ATOM | 883 | O2P  | A B | 10 | 15.793 | -10.450 | 109.134 | 1.00 | 0.00 | O |
| ATOM | 884 | P    | A B | 10 | 16.181 | -9.280  | 108.308 | 1.00 | 0.00 | P |
| ATOM | 885 | H2   | A B | 10 | 7.959  | -5.112  | 110.214 | 1.00 | 0.00 | H |
| ATOM | 886 | H8   | A B | 10 | 13.169 | -8.818  | 109.724 | 1.00 | 0.00 | H |
| ATOM | 887 | H1'  | A B | 10 | 12.453 | -5.024  | 110.148 | 1.00 | 0.00 | H |
| ATOM | 888 | H3'  | A B | 10 | 16.241 | -5.983  | 109.709 | 1.00 | 0.00 | H |
| ATOM | 889 | H4'  | A B | 10 | 15.050 | -4.931  | 107.591 | 1.00 | 0.00 | H |
| ATOM | 890 | H61  | A B | 10 | 7.021  | -9.511  | 110.242 | 1.00 | 0.00 | H |

|      |     |      |     |    |        |         |         |      |      |   |
|------|-----|------|-----|----|--------|---------|---------|------|------|---|
| ATOM | 891 | H62  | A B | 10 | 8.587  | -10.352 | 110.100 | 1.00 | 0.00 | H |
| ATOM | 892 | H2'1 | A B | 10 | 14.426 | -7.284  | 110.590 | 1.00 | 0.00 | H |
| ATOM | 893 | H2'2 | A B | 10 | 14.234 | -5.797  | 111.509 | 1.00 | 0.00 | H |
| ATOM | 894 | H5'1 | A B | 10 | 14.304 | -7.278  | 106.772 | 1.00 | 0.00 | H |
| ATOM | 895 | H5'2 | A B | 10 | 16.024 | -6.934  | 107.050 | 1.00 | 0.00 | H |
| ATOM | 896 | C1'  | G B | 11 | 10.723 | -3.037  | 113.148 | 1.00 | 0.00 | C |
| ATOM | 897 | N1   | G B | 11 | 7.471  | -6.944  | 113.566 | 1.00 | 0.00 | N |
| ATOM | 898 | C2   | G B | 11 | 7.224  | -5.583  | 113.528 | 1.00 | 0.00 | C |
| ATOM | 899 | N2   | G B | 11 | 5.939  | -5.215  | 113.614 | 1.00 | 0.00 | N |
| ATOM | 900 | N3   | G B | 11 | 8.181  | -4.664  | 113.412 | 1.00 | 0.00 | N |
| ATOM | 901 | C4   | G B | 11 | 9.421  | -5.216  | 113.344 | 1.00 | 0.00 | C |
| ATOM | 902 | C5   | G B | 11 | 9.762  | -6.557  | 113.379 | 1.00 | 0.00 | C |
| ATOM | 903 | C6   | G B | 11 | 8.747  | -7.535  | 113.499 | 1.00 | 0.00 | C |
| ATOM | 904 | O6   | G B | 11 | 8.851  | -8.760  | 113.546 | 1.00 | 0.00 | O |
| ATOM | 905 | N7   | G B | 11 | 11.148 | -6.705  | 113.283 | 1.00 | 0.00 | N |
| ATOM | 906 | C8   | G B | 11 | 11.591 | -5.478  | 113.194 | 1.00 | 0.00 | C |
| ATOM | 907 | N9   | G B | 11 | 10.603 | -4.517  | 113.225 | 1.00 | 0.00 | N |
| ATOM | 908 | C2'  | G B | 11 | 11.934 | -2.481  | 113.885 | 1.00 | 0.00 | C |
| ATOM | 909 | C3'  | G B | 11 | 12.344 | -1.320  | 112.994 | 1.00 | 0.00 | C |
| ATOM | 910 | O3'  | G B | 11 | 11.572 | -0.172  | 113.337 | 1.00 | 0.00 | O |
| ATOM | 911 | C4'  | G B | 11 | 12.021 | -1.836  | 111.593 | 1.00 | 0.00 | C |
| ATOM | 912 | O4'  | G B | 11 | 10.842 | -2.682  | 111.785 | 1.00 | 0.00 | O |
| ATOM | 913 | C5'  | G B | 11 | 13.097 | -2.650  | 110.913 | 1.00 | 0.00 | C |
| ATOM | 914 | O5'  | G B | 11 | 13.784 | -3.469  | 111.891 | 1.00 | 0.00 | O |
| ATOM | 915 | O1P  | G B | 11 | 16.113 | -2.517  | 111.914 | 1.00 | 0.00 | O |
| ATOM | 916 | O2P  | G B | 11 | 15.735 | -4.921  | 112.521 | 1.00 | 0.00 | O |
| ATOM | 917 | P    | G B | 11 | 15.341 | -3.754  | 111.695 | 1.00 | 0.00 | P |
| ATOM | 918 | H1   | G B | 11 | 6.658  | -7.572  | 113.651 | 1.00 | 0.00 | H |
| ATOM | 919 | H8   | G B | 11 | 12.649 | -5.236  | 113.103 | 1.00 | 0.00 | H |
| ATOM | 920 | H1'  | G B | 11 | 9.800  | -2.598  | 113.529 | 1.00 | 0.00 | H |
| ATOM | 921 | H21  | G B | 11 | 5.204  | -5.931  | 113.701 | 1.00 | 0.00 | H |
| ATOM | 922 | H3'  | G B | 11 | 13.404 | -1.084  | 113.091 | 1.00 | 0.00 | H |
| ATOM | 923 | H22  | G B | 11 | 5.688  | -4.216  | 113.594 | 1.00 | 0.00 | H |
| ATOM | 924 | H4'  | G B | 11 | 11.822 | -0.963  | 110.972 | 1.00 | 0.00 | H |
| ATOM | 925 | H2'1 | G B | 11 | 12.736 | -3.215  | 113.974 | 1.00 | 0.00 | H |
| ATOM | 926 | H2'2 | G B | 11 | 11.687 | -2.142  | 114.891 | 1.00 | 0.00 | H |
| ATOM | 927 | H5'1 | G B | 11 | 12.639 | -3.287  | 110.157 | 1.00 | 0.00 | H |
| ATOM | 928 | H5'2 | G B | 11 | 13.805 | -1.976  | 110.433 | 1.00 | 0.00 | H |
| ATOM | 929 | C1'  | G B | 12 | 7.263  | -1.977  | 116.528 | 1.00 | 0.00 | C |
| ATOM | 930 | N1   | G B | 12 | 6.928  | -7.051  | 116.946 | 1.00 | 0.00 | N |
| ATOM | 931 | C2   | G B | 12 | 5.928  | -6.094  | 116.908 | 1.00 | 0.00 | C |
| ATOM | 932 | N2   | G B | 12 | 4.671  | -6.551  | 116.995 | 1.00 | 0.00 | N |
| ATOM | 933 | N3   | G B | 12 | 6.163  | -4.789  | 116.792 | 1.00 | 0.00 | N |
| ATOM | 934 | C4   | G B | 12 | 7.490  | -4.507  | 116.724 | 1.00 | 0.00 | C |
| ATOM | 935 | C5   | G B | 12 | 8.555  | -5.390  | 116.759 | 1.00 | 0.00 | C |
| ATOM | 936 | C6   | G B | 12 | 8.307  | -6.777  | 116.878 | 1.00 | 0.00 | C |
| ATOM | 937 | O6   | G B | 12 | 9.111  | -7.708  | 116.927 | 1.00 | 0.00 | O |
| ATOM | 938 | N7   | G B | 12 | 9.762  | -4.696  | 116.664 | 1.00 | 0.00 | N |
| ATOM | 939 | C8   | G B | 12 | 9.401  | -3.443  | 116.573 | 1.00 | 0.00 | C |
| ATOM | 940 | N9   | G B | 12 | 8.035  | -3.247  | 116.604 | 1.00 | 0.00 | N |
| ATOM | 941 | C2'  | G B | 12 | 7.916  | -0.817  | 117.265 | 1.00 | 0.00 | C |
| ATOM | 942 | C3'  | G B | 12 | 7.564  | 0.365   | 116.374 | 1.00 | 0.00 | C |
| ATOM | 943 | O3'  | G B | 12 | 6.264  | 0.839   | 116.717 | 1.00 | 0.00 | O |
| ATOM | 944 | C4'  | G B | 12 | 7.606  | -0.243  | 114.973 | 1.00 | 0.00 | C |

|      |     |      |     |    |        |        |         |      |      |   |
|------|-----|------|-----|----|--------|--------|---------|------|------|---|
| ATOM | 945 | O4'  | G B | 12 | 7.151  | -1.620 | 115.164 | 1.00 | 0.00 | O |
| ATOM | 946 | C5'  | G B | 12 | 8.955  | -0.270 | 114.293 | 1.00 | 0.00 | C |
| ATOM | 947 | O5'  | G B | 12 | 9.992  | -0.528 | 115.271 | 1.00 | 0.00 | O |
| ATOM | 948 | O1P  | G B | 12 | 11.317 | 1.611  | 115.294 | 1.00 | 0.00 | O |
| ATOM | 949 | O2P  | G B | 12 | 12.426 | -0.556 | 115.901 | 1.00 | 0.00 | O |
| ATOM | 950 | P    | G B | 12 | 11.420 | 0.156  | 115.075 | 1.00 | 0.00 | P |
| ATOM | 951 | H1   | G B | 12 | 6.639  | -8.038 | 117.032 | 1.00 | 0.00 | H |
| ATOM | 952 | H8   | G B | 12 | 10.113 | -2.623 | 116.483 | 1.00 | 0.00 | H |
| ATOM | 953 | H1'  | G B | 12 | 6.258  | -2.165 | 116.909 | 1.00 | 0.00 | H |
| ATOM | 954 | H21  | G B | 12 | 4.498  | -7.564 | 117.080 | 1.00 | 0.00 | H |
| ATOM | 955 | H3'  | G B | 12 | 8.283  | 1.179  | 116.471 | 1.00 | 0.00 | H |
| ATOM | 956 | H22  | G B | 12 | 3.883  | -5.891 | 116.975 | 1.00 | 0.00 | H |
| ATOM | 957 | H4'  | G B | 12 | 6.933  | 0.345  | 114.352 | 1.00 | 0.00 | H |
| ATOM | 958 | H2'1 | G B | 12 | 8.995  | -0.939 | 117.354 | 1.00 | 0.00 | H |
| ATOM | 959 | H2'2 | G B | 12 | 7.518  | -0.686 | 118.271 | 1.00 | 0.00 | H |
| ATOM | 960 | H5'1 | G B | 12 | 8.958  | -1.055 | 113.536 | 1.00 | 0.00 | H |
| ATOM | 961 | H5'2 | G B | 12 | 9.132  | 0.692  | 113.813 | 1.00 | 0.00 | H |
| ATOM | 962 | C1'  | T B | 13 | 3.834  | -3.131 | 119.907 | 1.00 | 0.00 | C |
| ATOM | 963 | N1   | T B | 13 | 5.192  | -3.730 | 119.985 | 1.00 | 0.00 | N |
| ATOM | 964 | C2   | T B | 13 | 5.271  | -5.104 | 120.104 | 1.00 | 0.00 | C |
| ATOM | 965 | O2   | T B | 13 | 4.283  | -5.819 | 120.147 | 1.00 | 0.00 | O |
| ATOM | 966 | N3   | T B | 13 | 6.552  | -5.619 | 120.172 | 1.00 | 0.00 | N |
| ATOM | 967 | C4   | T B | 13 | 7.729  | -4.902 | 120.135 | 1.00 | 0.00 | C |
| ATOM | 968 | O4   | T B | 13 | 8.822  | -5.474 | 120.209 | 1.00 | 0.00 | O |
| ATOM | 969 | C5   | T B | 13 | 7.547  | -3.475 | 120.009 | 1.00 | 0.00 | C |
| ATOM | 970 | C6   | T B | 13 | 6.312  | -2.938 | 119.938 | 1.00 | 0.00 | C |
| ATOM | 971 | C7   | T B | 13 | 8.801  | -2.653 | 119.963 | 1.00 | 0.00 | C |
| ATOM | 972 | C2'  | T B | 13 | 3.704  | -1.804 | 120.646 | 1.00 | 0.00 | C |
| ATOM | 973 | C3'  | T B | 13 | 2.741  | -1.038 | 119.753 | 1.00 | 0.00 | C |
| ATOM | 974 | O3'  | T B | 13 | 1.403  | -1.393 | 120.094 | 1.00 | 0.00 | O |
| ATOM | 975 | C4'  | T B | 13 | 3.126  | -1.511 | 118.353 | 1.00 | 0.00 | C |
| ATOM | 976 | O4'  | T B | 13 | 3.541  | -2.901 | 118.543 | 1.00 | 0.00 | O |
| ATOM | 977 | C5'  | T B | 13 | 4.248  | -0.759 | 117.674 | 1.00 | 0.00 | C |
| ATOM | 978 | O5'  | T B | 13 | 5.246  | -0.378 | 118.656 | 1.00 | 0.00 | O |
| ATOM | 979 | O1P  | T B | 13 | 5.107  | 2.134  | 118.682 | 1.00 | 0.00 | O |
| ATOM | 980 | O2P  | T B | 13 | 7.255  | 0.990  | 119.292 | 1.00 | 0.00 | O |
| ATOM | 981 | P    | T B | 13 | 6.025  | 0.999  | 118.463 | 1.00 | 0.00 | P |
| ATOM | 982 | H3   | T B | 13 | 6.636  | -6.642 | 120.258 | 1.00 | 0.00 | H |
| ATOM | 983 | H6   | T B | 13 | 6.201  | -1.857 | 119.844 | 1.00 | 0.00 | H |
| ATOM | 984 | H1'  | T B | 13 | 3.116  | -3.860 | 120.285 | 1.00 | 0.00 | H |
| ATOM | 985 | H3'  | T B | 13 | 2.865  | 0.041  | 119.852 | 1.00 | 0.00 | H |
| ATOM | 986 | H4'  | T B | 13 | 2.237  | -1.411 | 117.730 | 1.00 | 0.00 | H |
| ATOM | 987 | H71  | T B | 13 | 8.856  | -2.021 | 120.849 | 1.00 | 0.00 | H |
| ATOM | 988 | H72  | T B | 13 | 9.668  | -3.315 | 119.934 | 1.00 | 0.00 | H |
| ATOM | 989 | H73  | T B | 13 | 8.794  | -2.027 | 119.070 | 1.00 | 0.00 | H |
| ATOM | 990 | H2'1 | T B | 13 | 4.659  | -1.289 | 120.736 | 1.00 | 0.00 | H |
| ATOM | 991 | H2'2 | T B | 13 | 3.300  | -1.928 | 121.651 | 1.00 | 0.00 | H |
| ATOM | 992 | H5'1 | T B | 13 | 4.702  | -1.399 | 116.918 | 1.00 | 0.00 | H |
| ATOM | 993 | H5'2 | T B | 13 | 3.845  | 0.132  | 117.197 | 1.00 | 0.00 | H |
| ATOM | 994 | C1'  | G B | 14 | 1.764  | -6.119 | 123.289 | 1.00 | 0.00 | C |
| ATOM | 995 | N1   | G B | 14 | 6.486  | -8.005 | 123.707 | 1.00 | 0.00 | N |
| ATOM | 996 | C2   | G B | 14 | 5.268  | -8.661 | 123.669 | 1.00 | 0.00 | C |
| ATOM | 997 | N2   | G B | 14 | 5.313  | -9.995 | 123.754 | 1.00 | 0.00 | N |
| ATOM | 998 | N3   | G B | 14 | 4.098  | -8.034 | 123.553 | 1.00 | 0.00 | N |

|      |      |      |     |    |        |         |         |      |      |   |
|------|------|------|-----|----|--------|---------|---------|------|------|---|
| ATOM | 999  | C4   | G B | 14 | 4.240  | -6.683  | 123.484 | 1.00 | 0.00 | C |
| ATOM | 1000 | C5   | G B | 14 | 5.409  | -5.944  | 123.519 | 1.00 | 0.00 | C |
| ATOM | 1001 | C6   | G B | 14 | 6.653  | -6.609  | 123.638 | 1.00 | 0.00 | C |
| ATOM | 1002 | O6   | G B | 14 | 7.787  | -6.131  | 123.686 | 1.00 | 0.00 | O |
| ATOM | 1003 | N7   | G B | 14 | 5.123  | -4.581  | 123.424 | 1.00 | 0.00 | N |
| ATOM | 1004 | C8   | G B | 14 | 3.818  | -4.539  | 123.334 | 1.00 | 0.00 | C |
| ATOM | 1005 | N9   | G B | 14 | 3.209  | -5.777  | 123.365 | 1.00 | 0.00 | N |
| ATOM | 1006 | C2'  | G B | 14 | 0.862  | -5.138  | 124.026 | 1.00 | 0.00 | C |
| ATOM | 1007 | C3'  | G B | 14 | -0.370 | -5.108  | 123.136 | 1.00 | 0.00 | C |
| ATOM | 1008 | O3'  | G B | 14 | -1.222 | -6.198  | 123.478 | 1.00 | 0.00 | O |
| ATOM | 1009 | C4'  | G B | 14 | 0.222  | -5.256  | 121.735 | 1.00 | 0.00 | C |
| ATOM | 1010 | O4'  | G B | 14 | 1.390  | -6.114  | 121.925 | 1.00 | 0.00 | O |
| ATOM | 1011 | C5'  | G B | 14 | 0.662  | -3.982  | 121.054 | 1.00 | 0.00 | C |
| ATOM | 1012 | O5'  | G B | 14 | 1.230  | -3.075  | 122.032 | 1.00 | 0.00 | O |
| ATOM | 1013 | O1P  | G B | 14 | -0.396 | -1.153  | 122.055 | 1.00 | 0.00 | O |
| ATOM | 1014 | O2P  | G B | 14 | 2.008  | -0.770  | 122.661 | 1.00 | 0.00 | O |
| ATOM | 1015 | P    | G B | 14 | 1.019  | -1.506  | 121.836 | 1.00 | 0.00 | P |
| ATOM | 1016 | H1   | G B | 14 | 7.335  | -8.585  | 123.791 | 1.00 | 0.00 | H |
| ATOM | 1017 | H8   | G B | 14 | 3.260  | -3.606  | 123.244 | 1.00 | 0.00 | H |
| ATOM | 1018 | H1'  | G B | 14 | 1.632  | -7.133  | 123.669 | 1.00 | 0.00 | H |
| ATOM | 1019 | H21  | G B | 14 | 6.223  | -10.473 | 123.841 | 1.00 | 0.00 | H |
| ATOM | 1020 | H3'  | G B | 14 | -0.922 | -4.172  | 123.232 | 1.00 | 0.00 | H |
| ATOM | 1021 | H22  | G B | 14 | 4.442  | -10.543 | 123.736 | 1.00 | 0.00 | H |
| ATOM | 1022 | H4'  | G B | 14 | -0.548 | -5.716  | 121.114 | 1.00 | 0.00 | H |
| ATOM | 1023 | H2'1 | G B | 14 | 1.311  | -4.149  | 124.116 | 1.00 | 0.00 | H |
| ATOM | 1024 | H2'2 | G B | 14 | 0.616  | -5.477  | 125.032 | 1.00 | 0.00 | H |
| ATOM | 1025 | H5'1 | G B | 14 | 1.408  | -4.221  | 120.297 | 1.00 | 0.00 | H |
| ATOM | 1026 | H5'2 | G B | 14 | -0.198 | -3.516  | 120.574 | 1.00 | 0.00 | H |
| ATOM | 1027 | C1'  | C B | 15 | 1.827  | -9.739  | 126.670 | 1.00 | 0.00 | C |
| ATOM | 1028 | N1   | C B | 15 | 2.800  | -8.616  | 126.745 | 1.00 | 0.00 | N |
| ATOM | 1029 | C2   | C B | 15 | 4.153  | -8.930  | 126.865 | 1.00 | 0.00 | C |
| ATOM | 1030 | O2   | C B | 15 | 4.486  | -10.121 | 126.902 | 1.00 | 0.00 | O |
| ATOM | 1031 | N3   | C B | 15 | 5.055  | -7.921  | 126.934 | 1.00 | 0.00 | N |
| ATOM | 1032 | C4   | C B | 15 | 4.663  | -6.643  | 126.891 | 1.00 | 0.00 | C |
| ATOM | 1033 | N4   | C B | 15 | 5.588  | -5.697  | 126.960 | 1.00 | 0.00 | N |
| ATOM | 1034 | C5   | C B | 15 | 3.277  | -6.288  | 126.774 | 1.00 | 0.00 | C |
| ATOM | 1035 | C6   | C B | 15 | 2.388  | -7.319  | 126.700 | 1.00 | 0.00 | C |
| ATOM | 1036 | C2'  | C B | 15 | 0.524  | -9.472  | 127.410 | 1.00 | 0.00 | C |
| ATOM | 1037 | C3'  | C B | 15 | -0.496 | -10.166 | 126.521 | 1.00 | 0.00 | C |
| ATOM | 1038 | O3'  | C B | 15 | -0.551 | -11.550 | 126.860 | 1.00 | 0.00 | O |
| ATOM | 1039 | C4'  | C B | 15 | 0.066  | -9.938  | 125.119 | 1.00 | 0.00 | C |
| ATOM | 1040 | O4'  | C B | 15 | 1.518  | -9.950  | 125.305 | 1.00 | 0.00 | O |
| ATOM | 1041 | C5'  | C B | 15 | -0.322 | -8.643  | 124.441 | 1.00 | 0.00 | C |
| ATOM | 1042 | O5'  | C B | 15 | -0.391 | -7.579  | 125.424 | 1.00 | 0.00 | O |
| ATOM | 1043 | O1P  | C B | 15 | -2.834 | -6.971  | 125.454 | 1.00 | 0.00 | O |
| ATOM | 1044 | O2P  | C B | 15 | -1.107 | -5.254  | 126.061 | 1.00 | 0.00 | O |
| ATOM | 1045 | P    | C B | 15 | -1.478 | -6.428  | 125.233 | 1.00 | 0.00 | P |
| ATOM | 1046 | H5   | C B | 15 | 2.953  | -5.248  | 126.744 | 1.00 | 0.00 | H |
| ATOM | 1047 | H6   | C B | 15 | 1.324  | -7.101  | 126.602 | 1.00 | 0.00 | H |
| ATOM | 1048 | H1'  | C B | 15 | 2.314  | -10.638 | 127.047 | 1.00 | 0.00 | H |
| ATOM | 1049 | H3'  | C B | 15 | -1.489 | -9.729  | 126.621 | 1.00 | 0.00 | H |
| ATOM | 1050 | H4'  | C B | 15 | -0.291 | -10.758 | 124.496 | 1.00 | 0.00 | H |
| ATOM | 1051 | H41  | C B | 15 | 5.314  | -4.703  | 126.926 | 1.00 | 0.00 | H |
| ATOM | 1052 | H42  | C B | 15 | 6.582  | -5.953  | 127.047 | 1.00 | 0.00 | H |

|      |      |      |     |    |        |         |         |      |      |   |
|------|------|------|-----|----|--------|---------|---------|------|------|---|
| ATOM | 1053 | H2'1 | C B | 15 | 0.311  | -8.408  | 127.503 | 1.00 | 0.00 | H |
| ATOM | 1054 | H2'2 | C B | 15 | 0.525  | -9.894  | 128.417 | 1.00 | 0.00 | H |
| ATOM | 1055 | H5'1 | C B | 15 | 0.422  | -8.398  | 123.684 | 1.00 | 0.00 | H |
| ATOM | 1056 | H5'2 | C B | 15 | -1.294 | -8.767  | 123.965 | 1.00 | 0.00 | H |
| ATOM | 1057 | C1'  | G B | 16 | 4.005  | -12.627 | 130.050 | 1.00 | 0.00 | C |
| ATOM | 1058 | N1   | G B | 16 | 7.257  | -8.720  | 130.466 | 1.00 | 0.00 | N |
| ATOM | 1059 | C2   | G B | 16 | 7.505  | -10.081 | 130.428 | 1.00 | 0.00 | C |
| ATOM | 1060 | N2   | G B | 16 | 8.789  | -10.450 | 130.515 | 1.00 | 0.00 | N |
| ATOM | 1061 | N3   | G B | 16 | 6.548  | -11.000 | 130.313 | 1.00 | 0.00 | N |
| ATOM | 1062 | C4   | G B | 16 | 5.307  | -10.448 | 130.245 | 1.00 | 0.00 | C |
| ATOM | 1063 | C5   | G B | 16 | 4.966  | -9.107  | 130.280 | 1.00 | 0.00 | C |
| ATOM | 1064 | C6   | G B | 16 | 5.982  | -8.130  | 130.398 | 1.00 | 0.00 | C |
| ATOM | 1065 | O6   | G B | 16 | 5.878  | -6.904  | 130.446 | 1.00 | 0.00 | O |
| ATOM | 1066 | N7   | G B | 16 | 3.580  | -8.959  | 130.184 | 1.00 | 0.00 | N |
| ATOM | 1067 | C8   | G B | 16 | 3.136  | -10.186 | 130.095 | 1.00 | 0.00 | C |
| ATOM | 1068 | N9   | G B | 16 | 4.126  | -11.147 | 130.126 | 1.00 | 0.00 | N |
| ATOM | 1069 | C2'  | G B | 16 | 2.794  | -13.183 | 130.788 | 1.00 | 0.00 | C |
| ATOM | 1070 | C3'  | G B | 16 | 2.384  | -14.344 | 129.897 | 1.00 | 0.00 | C |
| ATOM | 1071 | O3'  | G B | 16 | 3.157  | -15.492 | 130.240 | 1.00 | 0.00 | O |
| ATOM | 1072 | C4'  | G B | 16 | 2.707  | -13.828 | 128.495 | 1.00 | 0.00 | C |
| ATOM | 1073 | O4'  | G B | 16 | 3.886  | -12.982 | 128.686 | 1.00 | 0.00 | O |
| ATOM | 1074 | C5'  | G B | 16 | 1.632  | -13.014 | 127.815 | 1.00 | 0.00 | C |
| ATOM | 1075 | O5'  | G B | 16 | 0.944  | -12.196 | 128.793 | 1.00 | 0.00 | O |
| ATOM | 1076 | O1P  | G B | 16 | -1.386 | -13.147 | 128.817 | 1.00 | 0.00 | O |
| ATOM | 1077 | O2P  | G B | 16 | -1.007 | -10.743 | 129.423 | 1.00 | 0.00 | O |
| ATOM | 1078 | P    | G B | 16 | -0.614 | -11.911 | 128.597 | 1.00 | 0.00 | P |
| ATOM | 1079 | H1   | G B | 16 | 8.071  | -8.091  | 130.551 | 1.00 | 0.00 | H |
| ATOM | 1080 | H8   | G B | 16 | 2.078  | -10.428 | 130.004 | 1.00 | 0.00 | H |
| ATOM | 1081 | H1'  | G B | 16 | 4.928  | -13.066 | 130.430 | 1.00 | 0.00 | H |
| ATOM | 1082 | H21  | G B | 16 | 9.525  | -9.733  | 130.600 | 1.00 | 0.00 | H |
| ATOM | 1083 | H3'  | G B | 16 | 1.324  | -14.580 | 129.994 | 1.00 | 0.00 | H |
| ATOM | 1084 | H22  | G B | 16 | 9.039  | -11.448 | 130.495 | 1.00 | 0.00 | H |
| ATOM | 1085 | H4'  | G B | 16 | 2.907  | -14.702 | 127.875 | 1.00 | 0.00 | H |
| ATOM | 1086 | H2'1 | G B | 16 | 1.992  | -12.448 | 130.876 | 1.00 | 0.00 | H |
| ATOM | 1087 | H2'2 | G B | 16 | 3.041  | -13.522 | 131.794 | 1.00 | 0.00 | H |
| ATOM | 1088 | H5'1 | G B | 16 | 2.090  | -12.378 | 127.058 | 1.00 | 0.00 | H |
| ATOM | 1089 | H5'2 | G B | 16 | 0.923  | -13.689 | 127.336 | 1.00 | 0.00 | H |
| ATOM | 1090 | C1'  | G B | 17 | 7.467  | -13.686 | 133.430 | 1.00 | 0.00 | C |
| ATOM | 1091 | N1   | G B | 17 | 7.801  | -8.613  | 133.846 | 1.00 | 0.00 | N |
| ATOM | 1092 | C2   | G B | 17 | 8.801  | -9.569  | 133.809 | 1.00 | 0.00 | C |
| ATOM | 1093 | N2   | G B | 17 | 10.055 | -9.112  | 133.894 | 1.00 | 0.00 | N |
| ATOM | 1094 | N3   | G B | 17 | 8.567  | -10.874 | 133.692 | 1.00 | 0.00 | N |
| ATOM | 1095 | C4   | G B | 17 | 7.239  | -11.157 | 133.626 | 1.00 | 0.00 | C |
| ATOM | 1096 | C5   | G B | 17 | 6.174  | -10.272 | 133.659 | 1.00 | 0.00 | C |
| ATOM | 1097 | C6   | G B | 17 | 6.422  | -8.887  | 133.778 | 1.00 | 0.00 | C |
| ATOM | 1098 | O6   | G B | 17 | 5.618  | -7.955  | 133.825 | 1.00 | 0.00 | O |
| ATOM | 1099 | N7   | G B | 17 | 4.966  | -10.967 | 133.565 | 1.00 | 0.00 | N |
| ATOM | 1100 | C8   | G B | 17 | 5.329  | -12.220 | 133.475 | 1.00 | 0.00 | C |
| ATOM | 1101 | N9   | G B | 17 | 6.694  | -12.416 | 133.506 | 1.00 | 0.00 | N |
| ATOM | 1102 | C2'  | G B | 17 | 6.812  | -14.846 | 134.167 | 1.00 | 0.00 | C |
| ATOM | 1103 | C3'  | G B | 17 | 7.164  | -16.028 | 133.276 | 1.00 | 0.00 | C |
| ATOM | 1104 | O3'  | G B | 17 | 8.464  | -16.503 | 133.620 | 1.00 | 0.00 | O |
| ATOM | 1105 | C4'  | G B | 17 | 7.122  | -15.421 | 131.875 | 1.00 | 0.00 | C |
| ATOM | 1106 | O4'  | G B | 17 | 7.577  | -14.043 | 132.066 | 1.00 | 0.00 | O |

|      |      |      |     |    |        |         |         |      |      |   |
|------|------|------|-----|----|--------|---------|---------|------|------|---|
| ATOM | 1107 | C5'  | G B | 17 | 5.773  | -15.394 | 131.195 | 1.00 | 0.00 | C |
| ATOM | 1108 | O5'  | G B | 17 | 4.736  | -15.135 | 132.174 | 1.00 | 0.00 | O |
| ATOM | 1109 | O1P  | G B | 17 | 3.412  | -17.275 | 132.197 | 1.00 | 0.00 | O |
| ATOM | 1110 | O2P  | G B | 17 | 2.303  | -15.108 | 132.803 | 1.00 | 0.00 | O |
| ATOM | 1111 | P    | G B | 17 | 3.308  | -15.819 | 131.978 | 1.00 | 0.00 | P |
| ATOM | 1112 | H1   | G B | 17 | 8.089  | -7.626  | 133.932 | 1.00 | 0.00 | H |
| ATOM | 1113 | H8   | G B | 17 | 4.616  | -13.039 | 133.384 | 1.00 | 0.00 | H |
| ATOM | 1114 | H1'  | G B | 17 | 8.470  | -13.498 | 133.810 | 1.00 | 0.00 | H |
| ATOM | 1115 | H21  | G B | 17 | 10.230 | -8.100  | 133.980 | 1.00 | 0.00 | H |
| ATOM | 1116 | H3'  | G B | 17 | 6.445  | -16.842 | 133.373 | 1.00 | 0.00 | H |
| ATOM | 1117 | H22  | G B | 17 | 10.846 | -9.773  | 133.874 | 1.00 | 0.00 | H |
| ATOM | 1118 | H4'  | G B | 17 | 7.796  | -16.009 | 131.254 | 1.00 | 0.00 | H |
| ATOM | 1119 | H2'1 | G B | 17 | 5.733  | -14.724 | 134.256 | 1.00 | 0.00 | H |
| ATOM | 1120 | H2'2 | G B | 17 | 7.211  | -14.975 | 135.173 | 1.00 | 0.00 | H |
| ATOM | 1121 | H5'1 | G B | 17 | 5.770  | -14.610 | 130.439 | 1.00 | 0.00 | H |
| ATOM | 1122 | H5'2 | G B | 17 | 5.597  | -16.356 | 130.716 | 1.00 | 0.00 | H |
| ATOM | 1123 | C1'  | C B | 18 | 10.890 | -12.507 | 136.810 | 1.00 | 0.00 | C |
| ATOM | 1124 | N1   | C B | 18 | 9.520  | -11.929 | 136.884 | 1.00 | 0.00 | N |
| ATOM | 1125 | C2   | C B | 18 | 9.403  | -10.545 | 137.003 | 1.00 | 0.00 | C |
| ATOM | 1126 | O2   | C B | 18 | 10.433 | -9.859  | 137.041 | 1.00 | 0.00 | O |
| ATOM | 1127 | N3   | C B | 18 | 8.166  | -10.000 | 137.074 | 1.00 | 0.00 | N |
| ATOM | 1128 | C4   | C B | 18 | 7.070  | -10.769 | 137.030 | 1.00 | 0.00 | C |
| ATOM | 1129 | N4   | C B | 18 | 5.885  | -10.181 | 137.102 | 1.00 | 0.00 | N |
| ATOM | 1130 | C5   | C B | 18 | 7.162  | -12.193 | 136.912 | 1.00 | 0.00 | C |
| ATOM | 1131 | C6   | C B | 18 | 8.417  | -12.721 | 136.840 | 1.00 | 0.00 | C |
| ATOM | 1132 | C2'  | C B | 18 | 11.040 | -13.830 | 137.551 | 1.00 | 0.00 | C |
| ATOM | 1133 | C3'  | C B | 18 | 12.015 | -14.584 | 136.660 | 1.00 | 0.00 | C |
| ATOM | 1134 | O3'  | C B | 18 | 13.347 | -14.206 | 137.000 | 1.00 | 0.00 | O |
| ATOM | 1135 | C4'  | C B | 18 | 11.622 | -14.120 | 135.259 | 1.00 | 0.00 | C |
| ATOM | 1136 | O4'  | C B | 18 | 11.186 | -12.736 | 135.445 | 1.00 | 0.00 | O |
| ATOM | 1137 | C5'  | C B | 18 | 10.513 | -14.890 | 134.582 | 1.00 | 0.00 | C |
| ATOM | 1138 | O5'  | C B | 18 | 9.521  | -15.284 | 135.564 | 1.00 | 0.00 | O |
| ATOM | 1139 | O1P  | C B | 18 | 9.697  | -17.795 | 135.594 | 1.00 | 0.00 | O |
| ATOM | 1140 | O2P  | C B | 18 | 7.532  | -16.682 | 136.201 | 1.00 | 0.00 | O |
| ATOM | 1141 | P    | C B | 18 | 8.762  | -16.673 | 135.373 | 1.00 | 0.00 | P |
| ATOM | 1142 | H5   | C B | 18 | 6.273  | -12.824 | 136.880 | 1.00 | 0.00 | H |
| ATOM | 1143 | H6   | C B | 18 | 8.536  | -13.800 | 136.745 | 1.00 | 0.00 | H |
| ATOM | 1144 | H1'  | C B | 18 | 11.594 | -11.766 | 137.186 | 1.00 | 0.00 | H |
| ATOM | 1145 | H3'  | C B | 18 | 11.908 | -15.664 | 136.761 | 1.00 | 0.00 | H |
| ATOM | 1146 | H4'  | C B | 18 | 12.513 | -14.206 | 134.636 | 1.00 | 0.00 | H |
| ATOM | 1147 | H41  | C B | 18 | 5.025  | -10.749 | 137.069 | 1.00 | 0.00 | H |
| ATOM | 1148 | H42  | C B | 18 | 5.822  | -9.157  | 137.188 | 1.00 | 0.00 | H |
| ATOM | 1149 | H2'1 | C B | 18 | 10.093 | -14.361 | 137.643 | 1.00 | 0.00 | H |
| ATOM | 1150 | H2'2 | C B | 18 | 11.440 | -13.696 | 138.556 | 1.00 | 0.00 | H |
| ATOM | 1151 | H5'1 | C B | 18 | 10.049 | -14.259 | 133.824 | 1.00 | 0.00 | H |
| ATOM | 1152 | H5'2 | C B | 18 | 10.930 | -15.774 | 134.105 | 1.00 | 0.00 | H |
| ATOM | 1153 | C1'  | C B | 19 | 12.967 | -9.543  | 140.190 | 1.00 | 0.00 | C |
| ATOM | 1154 | N1   | C B | 19 | 11.519 | -9.878  | 140.264 | 1.00 | 0.00 | N |
| ATOM | 1155 | C2   | C B | 19 | 10.609 | -8.828  | 140.383 | 1.00 | 0.00 | C |
| ATOM | 1156 | O2   | C B | 19 | 11.040 | -7.668  | 140.420 | 1.00 | 0.00 | O |
| ATOM | 1157 | N3   | C B | 19 | 9.288  | -9.114  | 140.454 | 1.00 | 0.00 | N |
| ATOM | 1158 | C4   | C B | 19 | 8.854  | -10.381 | 140.411 | 1.00 | 0.00 | C |
| ATOM | 1159 | N4   | C B | 19 | 7.552  | -10.603 | 140.482 | 1.00 | 0.00 | N |
| ATOM | 1160 | C5   | C B | 19 | 9.766  | -11.477 | 140.291 | 1.00 | 0.00 | C |

|      |      |      |     |    |        |         |         |      |      |   |
|------|------|------|-----|----|--------|---------|---------|------|------|---|
| ATOM | 1161 | C6   | C B | 19 | 11.091 | -11.167 | 140.221 | 1.00 | 0.00 | C |
| ATOM | 1162 | C2'  | C B | 19 | 13.863 | -10.523 | 140.931 | 1.00 | 0.00 | C |
| ATOM | 1163 | C3'  | C B | 19 | 15.096 | -10.561 | 140.039 | 1.00 | 0.00 | C |
| ATOM | 1164 | O3'  | C B | 19 | 15.953 | -9.474  | 140.378 | 1.00 | 0.00 | O |
| ATOM | 1165 | C4'  | C B | 19 | 14.507 | -10.416 | 138.638 | 1.00 | 0.00 | C |
| ATOM | 1166 | O4'  | C B | 19 | 13.340 | -9.554  | 138.824 | 1.00 | 0.00 | O |
| ATOM | 1167 | C5'  | C B | 19 | 14.060 | -11.692 | 137.962 | 1.00 | 0.00 | C |
| ATOM | 1168 | O5'  | C B | 19 | 13.491 | -12.593 | 138.943 | 1.00 | 0.00 | O |
| ATOM | 1169 | O1P  | C B | 19 | 15.110 | -14.520 | 138.974 | 1.00 | 0.00 | O |
| ATOM | 1170 | O2P  | C B | 19 | 12.703 | -14.893 | 139.581 | 1.00 | 0.00 | O |
| ATOM | 1171 | P    | C B | 19 | 13.695 | -14.163 | 138.753 | 1.00 | 0.00 | P |
| ATOM | 1172 | H5   | C B | 19 | 9.419  | -12.510 | 140.258 | 1.00 | 0.00 | H |
| ATOM | 1173 | H6   | C B | 19 | 11.824 | -11.969 | 140.126 | 1.00 | 0.00 | H |
| ATOM | 1174 | H1'  | C B | 19 | 13.101 | -8.528  | 140.566 | 1.00 | 0.00 | H |
| ATOM | 1175 | H3'  | C B | 19 | 15.643 | -11.498 | 140.140 | 1.00 | 0.00 | H |
| ATOM | 1176 | H4'  | C B | 19 | 15.277 | -9.962  | 138.015 | 1.00 | 0.00 | H |
| ATOM | 1177 | H41  | C B | 19 | 7.189  | -11.567 | 140.450 | 1.00 | 0.00 | H |
| ATOM | 1178 | H42  | C B | 19 | 6.897  | -9.810  | 140.569 | 1.00 | 0.00 | H |
| ATOM | 1179 | H2'1 | C B | 19 | 13.411 | -11.511 | 141.023 | 1.00 | 0.00 | H |
| ATOM | 1180 | H2'2 | C B | 19 | 14.110 | -10.181 | 141.935 | 1.00 | 0.00 | H |
| ATOM | 1181 | H5'1 | C B | 19 | 13.315 | -11.453 | 137.203 | 1.00 | 0.00 | H |
| ATOM | 1182 | H5'2 | C B | 19 | 14.919 | -12.161 | 137.485 | 1.00 | 0.00 | H |
| ATOM | 1183 | C1'  | T B | 20 | 12.927 | -5.924  | 143.567 | 1.00 | 0.00 | C |
| ATOM | 1184 | N1   | T B | 20 | 11.938 | -7.032  | 143.645 | 1.00 | 0.00 | N |
| ATOM | 1185 | C2   | T B | 20 | 10.608 | -6.681  | 143.763 | 1.00 | 0.00 | C |
| ATOM | 1186 | O2   | T B | 20 | 10.232 | -5.522  | 143.805 | 1.00 | 0.00 | O |
| ATOM | 1187 | N3   | T B | 20 | 9.724  | -7.740  | 143.833 | 1.00 | 0.00 | N |
| ATOM | 1188 | C4   | T B | 20 | 10.042 | -9.081  | 143.795 | 1.00 | 0.00 | C |
| ATOM | 1189 | O4   | T B | 20 | 9.158  | -9.944  | 143.867 | 1.00 | 0.00 | O |
| ATOM | 1190 | C5   | T B | 20 | 11.454 | -9.349  | 143.669 | 1.00 | 0.00 | C |
| ATOM | 1191 | C6   | T B | 20 | 12.346 | -8.342  | 143.599 | 1.00 | 0.00 | C |
| ATOM | 1192 | C7   | T B | 20 | 11.847 | -10.795 | 143.623 | 1.00 | 0.00 | C |
| ATOM | 1193 | C2'  | T B | 20 | 14.229 | -6.212  | 144.305 | 1.00 | 0.00 | C |
| ATOM | 1194 | C3'  | T B | 20 | 15.257 | -5.533  | 143.413 | 1.00 | 0.00 | C |
| ATOM | 1195 | O3'  | T B | 20 | 15.333 | -4.150  | 143.754 | 1.00 | 0.00 | O |
| ATOM | 1196 | C4'  | T B | 20 | 14.688 | -5.753  | 142.013 | 1.00 | 0.00 | C |
| ATOM | 1197 | O4'  | T B | 20 | 13.238 | -5.718  | 142.203 | 1.00 | 0.00 | O |
| ATOM | 1198 | C5'  | T B | 20 | 15.055 | -7.052  | 141.335 | 1.00 | 0.00 | C |
| ATOM | 1199 | O5'  | T B | 20 | 15.109 | -8.119  | 142.317 | 1.00 | 0.00 | O |
| ATOM | 1200 | O1P  | T B | 20 | 17.542 | -8.763  | 142.343 | 1.00 | 0.00 | O |
| ATOM | 1201 | O2P  | T B | 20 | 15.790 | -10.453 | 142.953 | 1.00 | 0.00 | O |
| ATOM | 1202 | P    | T B | 20 | 16.178 | -9.285  | 142.124 | 1.00 | 0.00 | P |
| ATOM | 1203 | H3   | T B | 20 | 8.726  | -7.506  | 143.922 | 1.00 | 0.00 | H |
| ATOM | 1204 | H6   | T B | 20 | 13.408 | -8.569  | 143.504 | 1.00 | 0.00 | H |
| ATOM | 1205 | H1'  | T B | 20 | 12.456 | -5.017  | 143.944 | 1.00 | 0.00 | H |
| ATOM | 1206 | H3'  | T B | 20 | 16.243 | -5.983  | 143.513 | 1.00 | 0.00 | H |
| ATOM | 1207 | H4'  | T B | 20 | 15.057 | -4.938  | 141.390 | 1.00 | 0.00 | H |
| ATOM | 1208 | H3T  | T B | 20 | 15.488 | -3.967  | 144.682 | 1.00 | 0.00 | H |
| ATOM | 1209 | H71  | T B | 20 | 12.432 | -11.042 | 144.509 | 1.00 | 0.00 | H |
| ATOM | 1210 | H72  | T B | 20 | 10.950 | -11.416 | 143.596 | 1.00 | 0.00 | H |
| ATOM | 1211 | H73  | T B | 20 | 12.444 | -10.983 | 142.731 | 1.00 | 0.00 | H |
| ATOM | 1212 | H2'1 | T B | 20 | 14.425 | -7.278  | 144.397 | 1.00 | 0.00 | H |
| ATOM | 1213 | H2'2 | T B | 20 | 14.235 | -5.789  | 145.311 | 1.00 | 0.00 | H |
| ATOM | 1214 | H5'1 | T B | 20 | 14.307 | -7.286  | 140.577 | 1.00 | 0.00 | H |

|      |      |      |     |    |        |         |         |      |      |   |
|------|------|------|-----|----|--------|---------|---------|------|------|---|
| ATOM | 1215 | H5'2 | T B | 20 | 16.027 | -6.943  | 140.857 | 1.00 | 0.00 | H |
| TER  |      |      |     |    |        |         |         |      |      |   |
| ATOM | 1    | C1'  | A A | 1  | 40.772 | -3.255  | 127.578 | 1.00 | 0.00 | C |
| ATOM | 2    | N1   | A A | 1  | 42.114 | -8.194  | 127.215 | 1.00 | 0.00 | N |
| ATOM | 3    | C2   | A A | 1  | 42.650 | -7.079  | 126.726 | 1.00 | 0.00 | C |
| ATOM | 4    | N3   | A A | 1  | 42.253 | -5.832  | 126.862 | 1.00 | 0.00 | N |
| ATOM | 5    | C4   | A A | 1  | 41.136 | -5.776  | 127.611 | 1.00 | 0.00 | C |
| ATOM | 6    | C5   | A A | 1  | 40.465 | -6.821  | 128.181 | 1.00 | 0.00 | C |
| ATOM | 7    | C6   | A A | 1  | 41.001 | -8.108  | 127.958 | 1.00 | 0.00 | C |
| ATOM | 8    | N6   | A A | 1  | 40.449 | -9.228  | 128.456 | 1.00 | 0.00 | N |
| ATOM | 9    | N7   | A A | 1  | 39.357 | -6.380  | 128.882 | 1.00 | 0.00 | N |
| ATOM | 10   | C8   | A A | 1  | 39.380 | -5.090  | 128.720 | 1.00 | 0.00 | C |
| ATOM | 11   | N9   | A A | 1  | 40.433 | -4.651  | 127.961 | 1.00 | 0.00 | N |
| ATOM | 12   | C2'  | A A | 1  | 39.557 | -2.389  | 127.276 | 1.00 | 0.00 | C |
| ATOM | 13   | C3'  | A A | 1  | 39.994 | -1.033  | 127.807 | 1.00 | 0.00 | C |
| ATOM | 14   | O3'  | A A | 1  | 40.758 | -0.363  | 126.807 | 1.00 | 0.00 | O |
| ATOM | 15   | C4'  | A A | 1  | 40.835 | -1.400  | 129.029 | 1.00 | 0.00 | C |
| ATOM | 16   | O4'  | A A | 1  | 41.469 | -2.668  | 128.660 | 1.00 | 0.00 | O |
| ATOM | 17   | C5'  | A A | 1  | 40.086 | -1.593  | 130.325 | 1.00 | 0.00 | C |
| ATOM | 18   | O5'  | A A | 1  | 38.802 | -2.215  | 130.064 | 1.00 | 0.00 | O |
| ATOM | 19   | H2   | A A | 1  | 43.549 | -7.219  | 126.128 | 1.00 | 0.00 | H |
| ATOM | 20   | H8   | A A | 1  | 38.633 | -4.421  | 129.149 | 1.00 | 0.00 | H |
| ATOM | 21   | H1'  | A A | 1  | 41.449 | -3.290  | 126.724 | 1.00 | 0.00 | H |
| ATOM | 22   | H3'  | A A | 1  | 39.143 | -0.410  | 128.089 | 1.00 | 0.00 | H |
| ATOM | 23   | H4'  | A A | 1  | 41.551 | -0.592  | 129.173 | 1.00 | 0.00 | H |
| ATOM | 24   | H61  | A A | 1  | 40.881 | -10.141 | 128.266 | 1.00 | 0.00 | H |
| ATOM | 25   | H62  | A A | 1  | 39.595 | -9.168  | 129.029 | 1.00 | 0.00 | H |
| ATOM | 26   | H5T  | A A | 1  | 38.053 | -1.976  | 130.613 | 1.00 | 0.00 | H |
| ATOM | 27   | H2'1 | A A | 1  | 38.660 | -2.742  | 127.783 | 1.00 | 0.00 | H |
| ATOM | 28   | H2'2 | A A | 1  | 39.336 | -2.343  | 126.209 | 1.00 | 0.00 | H |
| ATOM | 29   | H5'1 | A A | 1  | 40.674 | -2.228  | 130.987 | 1.00 | 0.00 | H |
| ATOM | 30   | H5'2 | A A | 1  | 39.936 | -0.625  | 130.799 | 1.00 | 0.00 | H |
| ATOM | 31   | C1'  | G A | 2  | 42.157 | -4.321  | 122.931 | 1.00 | 0.00 | C |
| ATOM | 32   | N1   | G A | 2  | 40.773 | -9.065  | 124.190 | 1.00 | 0.00 | N |
| ATOM | 33   | C2   | G A | 2  | 41.875 | -8.622  | 123.485 | 1.00 | 0.00 | C |
| ATOM | 34   | N2   | G A | 2  | 42.720 | -9.566  | 123.055 | 1.00 | 0.00 | N |
| ATOM | 35   | N3   | G A | 2  | 42.116 | -7.337  | 123.227 | 1.00 | 0.00 | N |
| ATOM | 36   | C4   | G A | 2  | 41.154 | -6.520  | 123.731 | 1.00 | 0.00 | C |
| ATOM | 37   | C5   | G A | 2  | 40.020 | -6.874  | 124.445 | 1.00 | 0.00 | C |
| ATOM | 38   | C6   | G A | 2  | 39.767 | -8.238  | 124.721 | 1.00 | 0.00 | C |
| ATOM | 39   | O6   | G A | 2  | 38.828 | -8.744  | 125.335 | 1.00 | 0.00 | O |
| ATOM | 40   | N7   | G A | 2  | 39.287 | -5.734  | 124.781 | 1.00 | 0.00 | N |
| ATOM | 41   | C8   | G A | 2  | 39.984 | -4.749  | 124.276 | 1.00 | 0.00 | C |
| ATOM | 42   | N9   | G A | 2  | 41.132 | -5.147  | 123.622 | 1.00 | 0.00 | N |
| ATOM | 43   | C2'  | G A | 2  | 41.580 | -3.129  | 122.177 | 1.00 | 0.00 | C |
| ATOM | 44   | C3'  | G A | 2  | 42.655 | -2.075  | 122.377 | 1.00 | 0.00 | C |
| ATOM | 45   | O3'  | G A | 2  | 43.670 | -2.247  | 121.391 | 1.00 | 0.00 | O |
| ATOM | 46   | C4'  | G A | 2  | 43.165 | -2.372  | 123.787 | 1.00 | 0.00 | C |
| ATOM | 47   | O4'  | G A | 2  | 43.045 | -3.825  | 123.914 | 1.00 | 0.00 | O |
| ATOM | 48   | C5'  | G A | 2  | 42.411 | -1.724  | 124.923 | 1.00 | 0.00 | C |
| ATOM | 49   | O5'  | G A | 2  | 40.996 | -1.683  | 124.613 | 1.00 | 0.00 | O |
| ATOM | 50   | O1P  | G A | 2  | 40.517 | 0.779   | 124.400 | 1.00 | 0.00 | O |
| ATOM | 51   | O2P  | G A | 2  | 38.692 | -0.799  | 125.089 | 1.00 | 0.00 | O |
| ATOM | 52   | P    | G A | 2  | 40.132 | -0.445  | 125.129 | 1.00 | 0.00 | P |



|      |     |      |     |   |        |         |         |      |      |   |
|------|-----|------|-----|---|--------|---------|---------|------|------|---|
| ATOM | 53  | H1   | G A | 2 | 40.682 | -10.081 | 124.338 | 1.00 | 0.00 | H |
| ATOM | 54  | H8   | G A | 2 | 39.684 | -3.705  | 124.364 | 1.00 | 0.00 | H |
| ATOM | 55  | H1'  | G A | 2 | 42.724 | -4.968  | 122.262 | 1.00 | 0.00 | H |
| ATOM | 56  | H21  | G A | 2 | 42.529 | -10.557 | 123.259 | 1.00 | 0.00 | H |
| ATOM | 57  | H3'  | G A | 2 | 42.253 | -1.064  | 122.309 | 1.00 | 0.00 | H |
| ATOM | 58  | H22  | G A | 2 | 43.559 | -9.299  | 122.521 | 1.00 | 0.00 | H |
| ATOM | 59  | H4'  | G A | 2 | 44.196 | -2.024  | 123.830 | 1.00 | 0.00 | H |
| ATOM | 60  | H2'1 | G A | 2 | 40.624 | -2.805  | 122.588 | 1.00 | 0.00 | H |
| ATOM | 61  | H2'2 | G A | 2 | 41.426 | -3.345  | 121.119 | 1.00 | 0.00 | H |
| ATOM | 62  | H5'1 | G A | 2 | 42.572 | -2.299  | 125.834 | 1.00 | 0.00 | H |
| ATOM | 63  | H5'2 | G A | 2 | 42.787 | -0.711  | 125.069 | 1.00 | 0.00 | H |
| ATOM | 64  | C1'  | G A | 3 | 42.864 | -7.350  | 119.077 | 1.00 | 0.00 | C |
| ATOM | 65  | N1   | G A | 3 | 39.231 | -10.136 | 121.325 | 1.00 | 0.00 | N |
| ATOM | 66  | C2   | G A | 3 | 40.416 | -10.534 | 120.733 | 1.00 | 0.00 | C |
| ATOM | 67  | N2   | G A | 3 | 40.663 | -11.850 | 120.737 | 1.00 | 0.00 | N |
| ATOM | 68  | N3   | G A | 3 | 41.281 | -9.688  | 120.180 | 1.00 | 0.00 | N |
| ATOM | 69  | C4   | G A | 3 | 40.866 | -8.397  | 120.260 | 1.00 | 0.00 | C |
| ATOM | 70  | C5   | G A | 3 | 39.702 | -7.908  | 120.829 | 1.00 | 0.00 | C |
| ATOM | 71  | C6   | G A | 3 | 38.783 | -8.806  | 121.420 | 1.00 | 0.00 | C |
| ATOM | 72  | O6   | G A | 3 | 37.708 | -8.567  | 121.970 | 1.00 | 0.00 | O |
| ATOM | 73  | N7   | G A | 3 | 39.650 | -6.519  | 120.702 | 1.00 | 0.00 | N |
| ATOM | 74  | C8   | G A | 3 | 40.758 | -6.216  | 120.079 | 1.00 | 0.00 | C |
| ATOM | 75  | N9   | G A | 3 | 41.550 | -7.305  | 119.775 | 1.00 | 0.00 | N |
| ATOM | 76  | C2'  | G A | 3 | 42.988 | -6.351  | 117.934 | 1.00 | 0.00 | C |
| ATOM | 77  | C3'  | G A | 3 | 44.448 | -5.942  | 118.026 | 1.00 | 0.00 | C |
| ATOM | 78  | O3'  | G A | 3 | 45.245 | -6.892  | 117.322 | 1.00 | 0.00 | O |
| ATOM | 79  | C4'  | G A | 3 | 44.716 | -5.967  | 119.530 | 1.00 | 0.00 | C |
| ATOM | 80  | O4'  | G A | 3 | 43.868 | -7.051  | 120.028 | 1.00 | 0.00 | O |
| ATOM | 81  | C5'  | G A | 3 | 44.384 | -4.706  | 120.291 | 1.00 | 0.00 | C |
| ATOM | 82  | O5'  | G A | 3 | 43.193 | -4.094  | 119.734 | 1.00 | 0.00 | O |
| ATOM | 83  | O1P  | G A | 3 | 44.043 | -1.930  | 118.770 | 1.00 | 0.00 | O |
| ATOM | 84  | O2P  | G A | 3 | 41.660 | -2.114  | 119.530 | 1.00 | 0.00 | O |
| ATOM | 85  | P    | G A | 3 | 43.078 | -2.503  | 119.726 | 1.00 | 0.00 | P |
| ATOM | 86  | H1   | G A | 3 | 38.632 | -10.871 | 121.729 | 1.00 | 0.00 | H |
| ATOM | 87  | H8   | G A | 3 | 41.034 | -5.194  | 119.820 | 1.00 | 0.00 | H |
| ATOM | 88  | H1'  | G A | 3 | 43.028 | -8.368  | 118.725 | 1.00 | 0.00 | H |
| ATOM | 89  | H21  | G A | 3 | 39.989 | -12.499 | 121.169 | 1.00 | 0.00 | H |
| ATOM | 90  | H3'  | G A | 3 | 44.622 | -4.948  | 117.612 | 1.00 | 0.00 | H |
| ATOM | 91  | H22  | G A | 3 | 41.527 | -12.211 | 120.309 | 1.00 | 0.00 | H |
| ATOM | 92  | H4'  | G A | 3 | 45.779 | -6.164  | 119.659 | 1.00 | 0.00 | H |
| ATOM | 93  | H2'1 | G A | 3 | 42.327 | -5.493  | 118.063 | 1.00 | 0.00 | H |
| ATOM | 94  | H2'2 | G A | 3 | 42.759 | -6.798  | 116.967 | 1.00 | 0.00 | H |
| ATOM | 95  | H5'1 | G A | 3 | 44.216 | -4.953  | 121.338 | 1.00 | 0.00 | H |
| ATOM | 96  | H5'2 | G A | 3 | 45.223 | -4.013  | 120.217 | 1.00 | 0.00 | H |
| ATOM | 97  | C1'  | C A | 4 | 41.974 | -11.418 | 116.396 | 1.00 | 0.00 | C |
| ATOM | 98  | N1   | C A | 4 | 40.856 | -10.526 | 116.811 | 1.00 | 0.00 | N |
| ATOM | 99  | C2   | C A | 4 | 39.762 | -11.108 | 117.448 | 1.00 | 0.00 | C |
| ATOM | 100 | O2   | C A | 4 | 39.762 | -12.330 | 117.641 | 1.00 | 0.00 | O |
| ATOM | 101 | N3   | C A | 4 | 38.734 | -10.313 | 117.835 | 1.00 | 0.00 | N |
| ATOM | 102 | C4   | C A | 4 | 38.762 | -8.993  | 117.610 | 1.00 | 0.00 | C |
| ATOM | 103 | N4   | C A | 4 | 37.730 | -8.264  | 118.011 | 1.00 | 0.00 | N |
| ATOM | 104 | C5   | C A | 4 | 39.873 | -8.371  | 116.955 | 1.00 | 0.00 | C |
| ATOM | 105 | C6   | C A | 4 | 40.898 | -9.188  | 116.578 | 1.00 | 0.00 | C |
| ATOM | 106 | C2'  | C A | 4 | 42.601 | -11.036 | 115.062 | 1.00 | 0.00 | C |

|      |     |      |     |   |        |         |         |      |      |   |
|------|-----|------|-----|---|--------|---------|---------|------|------|---|
| ATOM | 107 | C3'  | C A | 4 | 44.067 | -11.368 | 115.294 | 1.00 | 0.00 | C |
| ATOM | 108 | O3'  | C A | 4 | 44.280 | -12.754 | 115.031 | 1.00 | 0.00 | O |
| ATOM | 109 | C4'  | C A | 4 | 44.265 | -11.022 | 116.767 | 1.00 | 0.00 | C |
| ATOM | 110 | O4'  | C A | 4 | 42.979 | -11.338 | 117.389 | 1.00 | 0.00 | O |
| ATOM | 111 | C5'  | C A | 4 | 44.610 | -9.585  | 117.079 | 1.00 | 0.00 | C |
| ATOM | 112 | O5'  | C A | 4 | 43.901 | -8.703  | 116.172 | 1.00 | 0.00 | O |
| ATOM | 113 | O1P  | C A | 4 | 45.743 | -7.657  | 114.813 | 1.00 | 0.00 | O |
| ATOM | 114 | O2P  | C A | 4 | 43.587 | -6.424  | 115.161 | 1.00 | 0.00 | O |
| ATOM | 115 | P    | C A | 4 | 44.608 | -7.351  | 115.705 | 1.00 | 0.00 | P |
| ATOM | 116 | H5   | C A | 4 | 39.898 | -7.297  | 116.765 | 1.00 | 0.00 | H |
| ATOM | 117 | H6   | C A | 4 | 41.768 | -8.760  | 116.080 | 1.00 | 0.00 | H |
| ATOM | 118 | H1'  | C A | 4 | 41.603 | -12.441 | 116.375 | 1.00 | 0.00 | H |
| ATOM | 119 | H3'  | C A | 4 | 44.724 | -10.775 | 114.657 | 1.00 | 0.00 | H |
| ATOM | 120 | H4'  | C A | 4 | 45.080 | -11.647 | 117.133 | 1.00 | 0.00 | H |
| ATOM | 121 | H41  | C A | 4 | 37.727 | -7.246  | 117.852 | 1.00 | 0.00 | H |
| ATOM | 122 | H42  | C A | 4 | 36.931 | -8.714  | 118.481 | 1.00 | 0.00 | H |
| ATOM | 123 | H2'1 | C A | 4 | 42.466 | -9.981  | 114.828 | 1.00 | 0.00 | H |
| ATOM | 124 | H2'2 | C A | 4 | 42.188 | -11.611 | 114.231 | 1.00 | 0.00 | H |
| ATOM | 125 | H5'1 | C A | 4 | 44.327 | -9.362  | 118.107 | 1.00 | 0.00 | H |
| ATOM | 126 | H5'2 | C A | 4 | 45.685 | -9.442  | 116.965 | 1.00 | 0.00 | H |
| ATOM | 127 | C1'  | C A | 5 | 39.164 | -15.180 | 114.823 | 1.00 | 0.00 | C |
| ATOM | 128 | N1   | C A | 5 | 38.654 | -13.782 | 114.769 | 1.00 | 0.00 | N |
| ATOM | 129 | C2   | C A | 5 | 37.409 | -13.522 | 115.336 | 1.00 | 0.00 | C |
| ATOM | 130 | O2   | C A | 5 | 36.780 | -14.454 | 115.857 | 1.00 | 0.00 | O |
| ATOM | 131 | N3   | C A | 5 | 36.926 | -12.256 | 115.300 | 1.00 | 0.00 | N |
| ATOM | 132 | C4   | C A | 5 | 37.627 | -11.268 | 114.730 | 1.00 | 0.00 | C |
| ATOM | 133 | N4   | C A | 5 | 37.110 | -10.050 | 114.725 | 1.00 | 0.00 | N |
| ATOM | 134 | C5   | C A | 5 | 38.910 | -11.509 | 114.138 | 1.00 | 0.00 | C |
| ATOM | 135 | C6   | C A | 5 | 39.376 | -12.789 | 114.189 | 1.00 | 0.00 | C |
| ATOM | 136 | C2'  | C A | 5 | 39.916 | -15.606 | 113.569 | 1.00 | 0.00 | C |
| ATOM | 137 | C3'  | C A | 5 | 41.002 | -16.503 | 114.142 | 1.00 | 0.00 | C |
| ATOM | 138 | O3'  | C A | 5 | 40.480 | -17.819 | 114.312 | 1.00 | 0.00 | O |
| ATOM | 139 | C4'  | C A | 5 | 41.329 | -15.834 | 115.473 | 1.00 | 0.00 | C |
| ATOM | 140 | O4'  | C A | 5 | 40.055 | -15.272 | 115.919 | 1.00 | 0.00 | O |
| ATOM | 141 | C5'  | C A | 5 | 42.358 | -14.728 | 115.434 | 1.00 | 0.00 | C |
| ATOM | 142 | O5'  | C A | 5 | 42.211 | -13.966 | 114.208 | 1.00 | 0.00 | O |
| ATOM | 143 | O1P  | C A | 5 | 44.346 | -14.444 | 112.966 | 1.00 | 0.00 | O |
| ATOM | 144 | O2P  | C A | 5 | 43.120 | -12.292 | 112.570 | 1.00 | 0.00 | O |
| ATOM | 145 | P    | C A | 5 | 43.516 | -13.359 | 113.522 | 1.00 | 0.00 | P |
| ATOM | 146 | H5   | C A | 5 | 39.483 | -10.709 | 113.668 | 1.00 | 0.00 | H |
| ATOM | 147 | H6   | C A | 5 | 40.350 | -13.020 | 113.757 | 1.00 | 0.00 | H |
| ATOM | 148 | H1'  | C A | 5 | 38.322 | -15.843 | 115.019 | 1.00 | 0.00 | H |
| ATOM | 149 | H3'  | C A | 5 | 41.879 | -16.546 | 113.495 | 1.00 | 0.00 | H |
| ATOM | 150 | H4'  | C A | 5 | 41.707 | -16.614 | 116.135 | 1.00 | 0.00 | H |
| ATOM | 151 | H41  | C A | 5 | 37.629 | -9.271  | 114.294 | 1.00 | 0.00 | H |
| ATOM | 152 | H42  | C A | 5 | 36.187 | -9.880  | 115.150 | 1.00 | 0.00 | H |
| ATOM | 153 | H2'1 | C A | 5 | 40.343 | -14.759 | 113.035 | 1.00 | 0.00 | H |
| ATOM | 154 | H2'2 | C A | 5 | 39.278 | -16.150 | 112.870 | 1.00 | 0.00 | H |
| ATOM | 155 | H5'1 | C A | 5 | 42.213 | -14.073 | 116.294 | 1.00 | 0.00 | H |
| ATOM | 156 | H5'2 | C A | 5 | 43.355 | -15.165 | 115.479 | 1.00 | 0.00 | H |
| ATOM | 157 | C1'  | G A | 6 | 34.846 | -17.410 | 113.870 | 1.00 | 0.00 | C |
| ATOM | 158 | N1   | G A | 6 | 33.104 | -12.628 | 113.506 | 1.00 | 0.00 | N |
| ATOM | 159 | C2   | G A | 6 | 32.537 | -13.736 | 114.114 | 1.00 | 0.00 | C |
| ATOM | 160 | N2   | G A | 6 | 31.349 | -13.546 | 114.698 | 1.00 | 0.00 | N |

|      |     |      |     |   |        |         |         |      |      |   |
|------|-----|------|-----|---|--------|---------|---------|------|------|---|
| ATOM | 161 | N3   | G A | 6 | 33.113 | -14.938 | 114.133 | 1.00 | 0.00 | N |
| ATOM | 162 | C4   | G A | 6 | 34.307 | -14.950 | 113.487 | 1.00 | 0.00 | C |
| ATOM | 163 | C5   | G A | 6 | 34.946 | -13.898 | 112.851 | 1.00 | 0.00 | C |
| ATOM | 164 | C6   | G A | 6 | 34.340 | -12.622 | 112.832 | 1.00 | 0.00 | C |
| ATOM | 165 | O6   | G A | 6 | 34.745 | -11.577 | 112.325 | 1.00 | 0.00 | O |
| ATOM | 166 | N7   | G A | 6 | 36.158 | -14.327 | 112.307 | 1.00 | 0.00 | N |
| ATOM | 167 | C8   | G A | 6 | 36.217 | -15.594 | 112.626 | 1.00 | 0.00 | C |
| ATOM | 168 | N9   | G A | 6 | 35.128 | -16.047 | 113.342 | 1.00 | 0.00 | N |
| ATOM | 169 | C2'  | G A | 6 | 35.291 | -18.531 | 112.942 | 1.00 | 0.00 | C |
| ATOM | 170 | C3'  | G A | 6 | 35.752 | -19.594 | 113.926 | 1.00 | 0.00 | C |
| ATOM | 171 | O3'  | G A | 6 | 34.625 | -20.356 | 114.355 | 1.00 | 0.00 | O |
| ATOM | 172 | C4'  | G A | 6 | 36.357 | -18.768 | 115.059 | 1.00 | 0.00 | C |
| ATOM | 173 | O4'  | G A | 6 | 35.544 | -17.552 | 115.092 | 1.00 | 0.00 | O |
| ATOM | 174 | C5'  | G A | 6 | 37.807 | -18.377 | 114.906 | 1.00 | 0.00 | C |
| ATOM | 175 | O5'  | G A | 6 | 38.093 | -18.092 | 113.514 | 1.00 | 0.00 | O |
| ATOM | 176 | O1P  | G A | 6 | 39.698 | -19.917 | 112.863 | 1.00 | 0.00 | O |
| ATOM | 177 | O2P  | G A | 6 | 39.761 | -17.710 | 111.672 | 1.00 | 0.00 | O |
| ATOM | 178 | P    | G A | 6 | 39.536 | -18.453 | 112.937 | 1.00 | 0.00 | P |
| ATOM | 179 | H1   | G A | 6 | 32.579 | -11.741 | 113.553 | 1.00 | 0.00 | H |
| ATOM | 180 | H8   | G A | 6 | 37.052 | -16.238 | 112.350 | 1.00 | 0.00 | H |
| ATOM | 181 | H1'  | G A | 6 | 33.778 | -17.479 | 114.083 | 1.00 | 0.00 | H |
| ATOM | 182 | H21  | G A | 6 | 30.912 | -12.613 | 114.683 | 1.00 | 0.00 | H |
| ATOM | 183 | H3'  | G A | 6 | 36.493 | -20.264 | 113.488 | 1.00 | 0.00 | H |
| ATOM | 184 | H22  | G A | 6 | 30.874 | -14.331 | 115.166 | 1.00 | 0.00 | H |
| ATOM | 185 | H4'  | G A | 6 | 36.267 | -19.364 | 115.967 | 1.00 | 0.00 | H |
| ATOM | 186 | H2'1 | G A | 6 | 36.103 | -18.224 | 112.281 | 1.00 | 0.00 | H |
| ATOM | 187 | H2'2 | G A | 6 | 34.479 | -18.897 | 112.313 | 1.00 | 0.00 | H |
| ATOM | 188 | H5'1 | G A | 6 | 38.006 | -17.494 | 115.511 | 1.00 | 0.00 | H |
| ATOM | 189 | H5'2 | G A | 6 | 38.437 | -19.197 | 115.251 | 1.00 | 0.00 | H |
| ATOM | 190 | C1'  | C A | 7 | 30.008 | -17.467 | 112.813 | 1.00 | 0.00 | C |
| ATOM | 191 | N1   | C A | 7 | 30.951 | -16.661 | 111.991 | 1.00 | 0.00 | N |
| ATOM | 192 | C2   | C A | 7 | 30.645 | -15.319 | 111.778 | 1.00 | 0.00 | C |
| ATOM | 193 | O2   | C A | 7 | 29.611 | -14.854 | 112.274 | 1.00 | 0.00 | O |
| ATOM | 194 | N3   | C A | 7 | 31.491 | -14.567 | 111.032 | 1.00 | 0.00 | N |
| ATOM | 195 | C4   | C A | 7 | 32.603 | -15.097 | 110.507 | 1.00 | 0.00 | C |
| ATOM | 196 | N4   | C A | 7 | 33.396 | -14.315 | 109.789 | 1.00 | 0.00 | N |
| ATOM | 197 | C5   | C A | 7 | 32.941 | -16.476 | 110.707 | 1.00 | 0.00 | C |
| ATOM | 198 | C6   | C A | 7 | 32.076 | -17.214 | 111.465 | 1.00 | 0.00 | C |
| ATOM | 199 | C2'  | C A | 7 | 29.830 | -18.897 | 112.319 | 1.00 | 0.00 | C |
| ATOM | 200 | C3'  | C A | 7 | 29.673 | -19.666 | 113.623 | 1.00 | 0.00 | C |
| ATOM | 201 | O3'  | C A | 7 | 28.310 | -19.608 | 114.038 | 1.00 | 0.00 | O |
| ATOM | 202 | C4'  | C A | 7 | 30.601 | -18.914 | 114.574 | 1.00 | 0.00 | C |
| ATOM | 203 | O4'  | C A | 7 | 30.522 | -17.521 | 114.131 | 1.00 | 0.00 | O |
| ATOM | 204 | C5'  | C A | 7 | 32.051 | -19.340 | 114.574 | 1.00 | 0.00 | C |
| ATOM | 205 | O5'  | C A | 7 | 32.457 | -19.695 | 113.229 | 1.00 | 0.00 | O |
| ATOM | 206 | O1P  | C A | 7 | 32.916 | -22.165 | 113.391 | 1.00 | 0.00 | O |
| ATOM | 207 | O2P  | C A | 7 | 34.107 | -20.777 | 111.674 | 1.00 | 0.00 | O |
| ATOM | 208 | P    | C A | 7 | 33.521 | -20.866 | 113.032 | 1.00 | 0.00 | P |
| ATOM | 209 | H5   | C A | 7 | 33.841 | -16.915 | 110.276 | 1.00 | 0.00 | H |
| ATOM | 210 | H6   | C A | 7 | 32.294 | -18.265 | 111.652 | 1.00 | 0.00 | H |
| ATOM | 211 | H1'  | C A | 7 | 29.052 | -16.944 | 112.849 | 1.00 | 0.00 | H |
| ATOM | 212 | H3'  | C A | 7 | 29.975 | -20.709 | 113.518 | 1.00 | 0.00 | H |
| ATOM | 213 | H4'  | C A | 7 | 30.210 | -19.064 | 115.580 | 1.00 | 0.00 | H |
| ATOM | 214 | H41  | C A | 7 | 34.259 | -14.698 | 109.375 | 1.00 | 0.00 | H |

|      |     |      |     |   |        |         |         |      |      |   |
|------|-----|------|-----|---|--------|---------|---------|------|------|---|
| ATOM | 215 | H42  | C A | 7 | 33.152 | -13.326 | 109.643 | 1.00 | 0.00 | H |
| ATOM | 216 | H2'1 | C A | 7 | 30.691 | -19.249 | 111.752 | 1.00 | 0.00 | H |
| ATOM | 217 | H2'2 | C A | 7 | 28.950 | -19.008 | 111.683 | 1.00 | 0.00 | H |
| ATOM | 218 | H5'1 | C A | 7 | 32.667 | -18.517 | 114.940 | 1.00 | 0.00 | H |
| ATOM | 219 | H5'2 | C A | 7 | 32.172 | -20.199 | 115.233 | 1.00 | 0.00 | H |
| ATOM | 220 | C1'  | A A | 8 | 25.824 | -15.559 | 110.981 | 1.00 | 0.00 | C |
| ATOM | 221 | N1   | A A | 8 | 29.030 | -12.870 | 108.008 | 1.00 | 0.00 | N |
| ATOM | 222 | C2   | A A | 8 | 27.925 | -12.537 | 108.669 | 1.00 | 0.00 | C |
| ATOM | 223 | N3   | A A | 8 | 27.145 | -13.281 | 109.423 | 1.00 | 0.00 | N |
| ATOM | 224 | C4   | A A | 8 | 27.608 | -14.545 | 109.466 | 1.00 | 0.00 | C |
| ATOM | 225 | C5   | A A | 8 | 28.719 | -15.045 | 108.848 | 1.00 | 0.00 | C |
| ATOM | 226 | C6   | A A | 8 | 29.468 | -14.136 | 108.072 | 1.00 | 0.00 | C |
| ATOM | 227 | N6   | A A | 8 | 30.583 | -14.484 | 107.407 | 1.00 | 0.00 | N |
| ATOM | 228 | N7   | A A | 8 | 28.882 | -16.392 | 109.124 | 1.00 | 0.00 | N |
| ATOM | 229 | C8   | A A | 8 | 27.872 | -16.676 | 109.893 | 1.00 | 0.00 | C |
| ATOM | 230 | N9   | A A | 8 | 27.056 | -15.602 | 110.147 | 1.00 | 0.00 | N |
| ATOM | 231 | C2'  | A A | 8 | 24.964 | -16.810 | 110.872 | 1.00 | 0.00 | C |
| ATOM | 232 | C3'  | A A | 8 | 24.424 | -16.948 | 112.286 | 1.00 | 0.00 | C |
| ATOM | 233 | O3'  | A A | 8 | 23.268 | -16.127 | 112.426 | 1.00 | 0.00 | O |
| ATOM | 234 | C4'  | A A | 8 | 25.588 | -16.456 | 113.144 | 1.00 | 0.00 | C |
| ATOM | 235 | O4'  | A A | 8 | 26.224 | -15.417 | 112.330 | 1.00 | 0.00 | O |
| ATOM | 236 | C5'  | A A | 8 | 26.630 | -17.485 | 113.515 | 1.00 | 0.00 | C |
| ATOM | 237 | O5'  | A A | 8 | 26.827 | -18.403 | 112.409 | 1.00 | 0.00 | O |
| ATOM | 238 | O1P  | A A | 8 | 25.987 | -20.595 | 113.318 | 1.00 | 0.00 | O |
| ATOM | 239 | O2P  | A A | 8 | 27.740 | -20.569 | 111.522 | 1.00 | 0.00 | O |
| ATOM | 240 | P    | A A | 8 | 27.166 | -19.929 | 112.731 | 1.00 | 0.00 | P |
| ATOM | 241 | H2   | A A | 8 | 27.623 | -11.495 | 108.574 | 1.00 | 0.00 | H |
| ATOM | 242 | H8   | A A | 8 | 27.690 | -17.671 | 110.298 | 1.00 | 0.00 | H |
| ATOM | 243 | H1'  | A A | 8 | 25.258 | -14.670 | 110.704 | 1.00 | 0.00 | H |
| ATOM | 244 | H3'  | A A | 8 | 24.166 | -17.979 | 112.526 | 1.00 | 0.00 | H |
| ATOM | 245 | H4'  | A A | 8 | 25.159 | -16.070 | 114.068 | 1.00 | 0.00 | H |
| ATOM | 246 | H61  | A A | 8 | 31.095 | -13.782 | 106.856 | 1.00 | 0.00 | H |
| ATOM | 247 | H62  | A A | 8 | 30.924 | -15.456 | 107.449 | 1.00 | 0.00 | H |
| ATOM | 248 | H2'1 | A A | 8 | 25.544 | -17.686 | 110.582 | 1.00 | 0.00 | H |
| ATOM | 249 | H2'2 | A A | 8 | 24.158 | -16.695 | 110.148 | 1.00 | 0.00 | H |
| ATOM | 250 | H5'1 | A A | 8 | 27.567 | -16.977 | 113.743 | 1.00 | 0.00 | H |
| ATOM | 251 | H5'2 | A A | 8 | 26.295 | -18.034 | 114.393 | 1.00 | 0.00 | H |
| ATOM | 252 | C1'  | C A | 9 | 23.261 | -12.574 | 107.950 | 1.00 | 0.00 | C |
| ATOM | 253 | N1   | C A | 9 | 24.299 | -13.490 | 107.404 | 1.00 | 0.00 | N |
| ATOM | 254 | C2   | C A | 9 | 25.273 | -12.948 | 106.567 | 1.00 | 0.00 | C |
| ATOM | 255 | O2   | C A | 9 | 25.235 | -11.738 | 106.313 | 1.00 | 0.00 | O |
| ATOM | 256 | N3   | C A | 9 | 26.227 | -13.766 | 106.059 | 1.00 | 0.00 | N |
| ATOM | 257 | C4   | C A | 9 | 26.241 | -15.073 | 106.351 | 1.00 | 0.00 | C |
| ATOM | 258 | N4   | C A | 9 | 27.199 | -15.826 | 105.831 | 1.00 | 0.00 | N |
| ATOM | 259 | C5   | C A | 9 | 25.249 | -15.659 | 107.206 | 1.00 | 0.00 | C |
| ATOM | 260 | C6   | C A | 9 | 24.301 | -14.816 | 107.710 | 1.00 | 0.00 | C |
| ATOM | 261 | C2'  | C A | 9 | 21.875 | -13.197 | 108.035 | 1.00 | 0.00 | C |
| ATOM | 262 | C3'  | C A | 9 | 21.324 | -12.575 | 109.309 | 1.00 | 0.00 | C |
| ATOM | 263 | O3'  | C A | 9 | 20.765 | -11.299 | 109.001 | 1.00 | 0.00 | O |
| ATOM | 264 | C4'  | C A | 9 | 22.561 | -12.464 | 110.195 | 1.00 | 0.00 | C |
| ATOM | 265 | O4'  | C A | 9 | 23.656 | -12.207 | 109.260 | 1.00 | 0.00 | O |
| ATOM | 266 | C5'  | C A | 9 | 22.907 | -13.681 | 111.021 | 1.00 | 0.00 | C |
| ATOM | 267 | O5'  | C A | 9 | 22.607 | -14.884 | 110.268 | 1.00 | 0.00 | O |
| ATOM | 268 | O1P  | C A | 9 | 20.733 | -15.939 | 111.575 | 1.00 | 0.00 | O |

|      |     |      |     |    |        |         |         |      |      |   |
|------|-----|------|-----|----|--------|---------|---------|------|------|---|
| ATOM | 269 | O2P  | C A | 9  | 22.264 | -17.373 | 110.197 | 1.00 | 0.00 | O |
| ATOM | 270 | P    | C A | 9  | 22.094 | -16.174 | 111.054 | 1.00 | 0.00 | P |
| ATOM | 271 | H5   | C A | 9  | 25.254 | -16.724 | 107.442 | 1.00 | 0.00 | H |
| ATOM | 272 | H6   | C A | 9  | 23.531 | -15.213 | 108.372 | 1.00 | 0.00 | H |
| ATOM | 273 | H1'  | C A | 9  | 23.247 | -11.672 | 107.340 | 1.00 | 0.00 | H |
| ATOM | 274 | H3'  | C A | 9  | 20.561 | -13.200 | 109.771 | 1.00 | 0.00 | H |
| ATOM | 275 | H4'  | C A | 9  | 22.386 | -11.635 | 110.882 | 1.00 | 0.00 | H |
| ATOM | 276 | H41  | C A | 9  | 27.235 | -16.834 | 106.041 | 1.00 | 0.00 | H |
| ATOM | 277 | H42  | C A | 9  | 27.908 | -15.403 | 105.214 | 1.00 | 0.00 | H |
| ATOM | 278 | H2'1 | C A | 9  | 21.913 | -14.283 | 108.110 | 1.00 | 0.00 | H |
| ATOM | 279 | H2'2 | C A | 9  | 21.257 | -12.950 | 107.171 | 1.00 | 0.00 | H |
| ATOM | 280 | H5'1 | C A | 9  | 23.967 | -13.657 | 111.270 | 1.00 | 0.00 | H |
| ATOM | 281 | H5'2 | C A | 9  | 22.323 | -13.668 | 111.940 | 1.00 | 0.00 | H |
| ATOM | 282 | C1'  | C A | 10 | 22.606 | -9.914  | 103.825 | 1.00 | 0.00 | C |
| ATOM | 283 | N1   | C A | 10 | 23.037 | -11.337 | 103.746 | 1.00 | 0.00 | N |
| ATOM | 284 | C2   | C A | 10 | 24.161 | -11.636 | 102.980 | 1.00 | 0.00 | C |
| ATOM | 285 | O2   | C A | 10 | 24.752 | -10.716 | 102.399 | 1.00 | 0.00 | O |
| ATOM | 286 | N3   | C A | 10 | 24.571 | -12.926 | 102.895 | 1.00 | 0.00 | N |
| ATOM | 287 | C4   | C A | 10 | 23.910 | -13.902 | 103.533 | 1.00 | 0.00 | C |
| ATOM | 288 | N4   | C A | 10 | 24.355 | -15.144 | 103.418 | 1.00 | 0.00 | N |
| ATOM | 289 | C5   | C A | 10 | 22.748 | -13.623 | 104.325 | 1.00 | 0.00 | C |
| ATOM | 290 | C6   | C A | 10 | 22.357 | -12.316 | 104.400 | 1.00 | 0.00 | C |
| ATOM | 291 | C2'  | C A | 10 | 21.095 | -9.730  | 103.829 | 1.00 | 0.00 | C |
| ATOM | 292 | C3'  | C A | 10 | 20.924 | -8.541  | 104.762 | 1.00 | 0.00 | C |
| ATOM | 293 | O3'  | C A | 10 | 21.100 | -7.335  | 104.021 | 1.00 | 0.00 | O |
| ATOM | 294 | C4'  | C A | 10 | 22.032 | -8.753  | 105.790 | 1.00 | 0.00 | C |
| ATOM | 295 | O4'  | C A | 10 | 23.116 | -9.377  | 105.031 | 1.00 | 0.00 | O |
| ATOM | 296 | C5'  | C A | 10 | 21.695 | -9.640  | 106.967 | 1.00 | 0.00 | C |
| ATOM | 297 | O5'  | C A | 10 | 20.833 | -10.724 | 106.533 | 1.00 | 0.00 | O |
| ATOM | 298 | O1P  | C A | 10 | 18.665 | -10.255 | 107.724 | 1.00 | 0.00 | O |
| ATOM | 299 | O2P  | C A | 10 | 19.265 | -12.607 | 107.089 | 1.00 | 0.00 | O |
| ATOM | 300 | P    | C A | 10 | 19.721 | -11.269 | 107.538 | 1.00 | 0.00 | P |
| ATOM | 301 | H5   | C A | 10 | 22.202 | -14.414 | 104.840 | 1.00 | 0.00 | H |
| ATOM | 302 | H6   | C A | 10 | 21.483 | -12.054 | 104.996 | 1.00 | 0.00 | H |
| ATOM | 303 | H1'  | C A | 10 | 23.064 | -9.373  | 102.997 | 1.00 | 0.00 | H |
| ATOM | 304 | H3'  | C A | 10 | 19.942 | -8.532  | 105.235 | 1.00 | 0.00 | H |
| ATOM | 305 | H4'  | C A | 10 | 22.294 | -7.771  | 106.181 | 1.00 | 0.00 | H |
| ATOM | 306 | H41  | C A | 10 | 23.867 | -15.913 | 103.901 | 1.00 | 0.00 | H |
| ATOM | 307 | H42  | C A | 10 | 25.188 | -15.342 | 102.846 | 1.00 | 0.00 | H |
| ATOM | 308 | H2'1 | C A | 10 | 20.572 | -10.607 | 104.206 | 1.00 | 0.00 | H |
| ATOM | 309 | H2'2 | C A | 10 | 20.702 | -9.514  | 102.833 | 1.00 | 0.00 | H |
| ATOM | 310 | H5'1 | C A | 10 | 22.616 | -10.048 | 107.385 | 1.00 | 0.00 | H |
| ATOM | 311 | H5'2 | C A | 10 | 21.188 | -9.048  | 107.727 | 1.00 | 0.00 | H |
| ATOM | 312 | C1'  | T A | 11 | 23.447 | -8.766  | 99.084  | 1.00 | 0.00 | C |
| ATOM | 313 | N1   | T A | 11 | 23.109 | -10.164 | 99.464  | 1.00 | 0.00 | N |
| ATOM | 314 | C2   | T A | 11 | 23.945 | -11.161 | 99.007  | 1.00 | 0.00 | C |
| ATOM | 315 | O2   | T A | 11 | 24.927 | -10.937 | 98.319  | 1.00 | 0.00 | O |
| ATOM | 316 | N3   | T A | 11 | 23.595 | -12.444 | 99.385  | 1.00 | 0.00 | N |
| ATOM | 317 | C4   | T A | 11 | 22.508 | -12.806 | 100.155 | 1.00 | 0.00 | C |
| ATOM | 318 | O4   | T A | 11 | 22.292 | -13.994 | 100.426 | 1.00 | 0.00 | O |
| ATOM | 319 | C5   | T A | 11 | 21.692 | -11.695 | 100.585 | 1.00 | 0.00 | C |
| ATOM | 320 | C6   | T A | 11 | 22.005 | -10.432 | 100.236 | 1.00 | 0.00 | C |
| ATOM | 321 | C7   | T A | 11 | 20.501 | -12.042 | 101.427 | 1.00 | 0.00 | C |
| ATOM | 322 | C2'  | T A | 11 | 22.231 | -7.900  | 98.779  | 1.00 | 0.00 | C |

|      |     |      |     |    |        |         |         |      |      |   |
|------|-----|------|-----|----|--------|---------|---------|------|------|---|
| ATOM | 323 | C3'  | T A | 11 | 22.665 | -6.544  | 99.314  | 1.00 | 0.00 | C |
| ATOM | 324 | O3'  | T A | 11 | 23.432 | -5.870  | 98.319  | 1.00 | 0.00 | O |
| ATOM | 325 | C4'  | T A | 11 | 23.502 | -6.914  | 100.536 | 1.00 | 0.00 | C |
| ATOM | 326 | O4'  | T A | 11 | 24.139 | -8.179  | 100.169 | 1.00 | 0.00 | O |
| ATOM | 327 | C5'  | T A | 11 | 22.750 | -7.111  | 101.832 | 1.00 | 0.00 | C |
| ATOM | 328 | O5'  | T A | 11 | 21.468 | -7.733  | 101.564 | 1.00 | 0.00 | O |
| ATOM | 329 | O1P  | T A | 11 | 19.810 | -5.948  | 102.195 | 1.00 | 0.00 | O |
| ATOM | 330 | O2P  | T A | 11 | 19.160 | -8.368  | 102.328 | 1.00 | 0.00 | O |
| ATOM | 331 | P    | T A | 11 | 20.219 | -7.339  | 102.472 | 1.00 | 0.00 | P |
| ATOM | 332 | H3   | T A | 11 | 24.205 | -13.207 | 99.061  | 1.00 | 0.00 | H |
| ATOM | 333 | H6   | T A | 11 | 21.374 | -9.609  | 100.574 | 1.00 | 0.00 | H |
| ATOM | 334 | H1'  | T A | 11 | 24.126 | -8.799  | 98.232  | 1.00 | 0.00 | H |
| ATOM | 335 | H3'  | T A | 11 | 21.813 | -5.926  | 99.592  | 1.00 | 0.00 | H |
| ATOM | 336 | H4'  | T A | 11 | 24.218 | -6.104  | 100.687 | 1.00 | 0.00 | H |
| ATOM | 337 | H71  | T A | 11 | 19.588 | -11.799 | 100.883 | 1.00 | 0.00 | H |
| ATOM | 338 | H72  | T A | 11 | 20.515 | -13.109 | 101.655 | 1.00 | 0.00 | H |
| ATOM | 339 | H73  | T A | 11 | 20.532 | -11.472 | 102.356 | 1.00 | 0.00 | H |
| ATOM | 340 | H2'1 | T A | 11 | 21.335 | -8.257  | 99.282  | 1.00 | 0.00 | H |
| ATOM | 341 | H2'2 | T A | 11 | 22.013 | -7.855  | 97.711  | 1.00 | 0.00 | H |
| ATOM | 342 | H5'1 | T A | 11 | 23.337 | -7.745  | 102.495 | 1.00 | 0.00 | H |
| ATOM | 343 | H5'2 | T A | 11 | 22.595 | -6.142  | 102.307 | 1.00 | 0.00 | H |
| ATOM | 344 | C1'  | A A | 12 | 24.833 | -9.807  | 94.434  | 1.00 | 0.00 | C |
| ATOM | 345 | N1   | A A | 12 | 23.464 | -14.591 | 95.688  | 1.00 | 0.00 | N |
| ATOM | 346 | C2   | A A | 12 | 24.500 | -14.100 | 95.016  | 1.00 | 0.00 | C |
| ATOM | 347 | N3   | A A | 12 | 24.796 | -12.849 | 94.730  | 1.00 | 0.00 | N |
| ATOM | 348 | C4   | A A | 12 | 23.855 | -12.025 | 95.224  | 1.00 | 0.00 | C |
| ATOM | 349 | C5   | A A | 12 | 22.736 | -12.366 | 95.929  | 1.00 | 0.00 | C |
| ATOM | 350 | C6   | A A | 12 | 22.541 | -13.743 | 96.169  | 1.00 | 0.00 | C |
| ATOM | 351 | N6   | A A | 12 | 21.488 | -14.228 | 96.849  | 1.00 | 0.00 | N |
| ATOM | 352 | N7   | A A | 12 | 22.001 | -11.247 | 96.273  | 1.00 | 0.00 | N |
| ATOM | 353 | C8   | A A | 12 | 22.681 | -10.259 | 95.769  | 1.00 | 0.00 | C |
| ATOM | 354 | N9   | A A | 12 | 23.822 | -10.656 | 95.119  | 1.00 | 0.00 | N |
| ATOM | 355 | C2'  | A A | 12 | 24.235 | -8.618  | 93.693  | 1.00 | 0.00 | C |
| ATOM | 356 | C3'  | A A | 12 | 25.296 | -7.549  | 93.900  | 1.00 | 0.00 | C |
| ATOM | 357 | O3'  | A A | 12 | 26.310 | -7.699  | 92.908  | 1.00 | 0.00 | O |
| ATOM | 358 | C4'  | A A | 12 | 25.816 | -7.852  | 95.305  | 1.00 | 0.00 | C |
| ATOM | 359 | O4'  | A A | 12 | 25.717 | -9.308  | 95.419  | 1.00 | 0.00 | O |
| ATOM | 360 | C5'  | A A | 12 | 25.056 | -7.224  | 96.449  | 1.00 | 0.00 | C |
| ATOM | 361 | O5'  | A A | 12 | 23.639 | -7.202  | 96.145  | 1.00 | 0.00 | O |
| ATOM | 362 | O1P  | A A | 12 | 23.124 | -4.745  | 95.955  | 1.00 | 0.00 | O |
| ATOM | 363 | O2P  | A A | 12 | 21.324 | -6.356  | 96.636  | 1.00 | 0.00 | O |
| ATOM | 364 | P    | A A | 12 | 22.760 | -5.982  | 96.675  | 1.00 | 0.00 | P |
| ATOM | 365 | H2   | A A | 12 | 25.210 | -14.841 | 94.650  | 1.00 | 0.00 | H |
| ATOM | 366 | H8   | A A | 12 | 22.376 | -9.216  | 95.855  | 1.00 | 0.00 | H |
| ATOM | 367 | H1'  | A A | 12 | 25.407 | -10.440 | 93.758  | 1.00 | 0.00 | H |
| ATOM | 368 | H3'  | A A | 12 | 24.882 | -6.543  | 93.843  | 1.00 | 0.00 | H |
| ATOM | 369 | H4'  | A A | 12 | 26.843 | -7.489  | 95.348  | 1.00 | 0.00 | H |
| ATOM | 370 | H61  | A A | 12 | 21.394 | -15.241 | 96.999  | 1.00 | 0.00 | H |
| ATOM | 371 | H62  | A A | 12 | 20.774 | -13.582 | 97.220  | 1.00 | 0.00 | H |
| ATOM | 372 | H2'1 | A A | 12 | 23.277 | -8.310  | 94.109  | 1.00 | 0.00 | H |
| ATOM | 373 | H2'2 | A A | 12 | 24.082 | -8.826  | 92.635  | 1.00 | 0.00 | H |
| ATOM | 374 | H5'1 | A A | 12 | 25.229 | -7.807  | 97.354  | 1.00 | 0.00 | H |
| ATOM | 375 | H5'2 | A A | 12 | 25.416 | -6.209  | 96.604  | 1.00 | 0.00 | H |
| ATOM | 376 | C1'  | G A | 13 | 25.540 | -12.860 | 90.583  | 1.00 | 0.00 | C |

|      |     |      |     |    |        |         |        |      |      |   |
|------|-----|------|-----|----|--------|---------|--------|------|------|---|
| ATOM | 377 | N1   | G A | 13 | 21.907 | -15.648 | 92.832 | 1.00 | 0.00 | N |
| ATOM | 378 | C2   | G A | 13 | 23.091 | -16.046 | 92.239 | 1.00 | 0.00 | C |
| ATOM | 379 | N2   | G A | 13 | 23.340 | -17.363 | 92.240 | 1.00 | 0.00 | N |
| ATOM | 380 | N3   | G A | 13 | 23.957 | -15.199 | 91.685 | 1.00 | 0.00 | N |
| ATOM | 381 | C4   | G A | 13 | 23.542 | -13.909 | 91.766 | 1.00 | 0.00 | C |
| ATOM | 382 | C5   | G A | 13 | 22.377 | -13.419 | 92.335 | 1.00 | 0.00 | C |
| ATOM | 383 | C6   | G A | 13 | 21.459 | -14.317 | 92.926 | 1.00 | 0.00 | C |
| ATOM | 384 | O6   | G A | 13 | 20.382 | -14.077 | 93.475 | 1.00 | 0.00 | O |
| ATOM | 385 | N7   | G A | 13 | 22.325 | -12.030 | 92.209 | 1.00 | 0.00 | N |
| ATOM | 386 | C8   | G A | 13 | 23.434 | -11.727 | 91.585 | 1.00 | 0.00 | C |
| ATOM | 387 | N9   | G A | 13 | 24.225 | -12.815 | 91.281 | 1.00 | 0.00 | N |
| ATOM | 388 | C2'  | G A | 13 | 25.663 | -11.862 | 89.441 | 1.00 | 0.00 | C |
| ATOM | 389 | C3'  | G A | 13 | 27.123 | -11.453 | 89.532 | 1.00 | 0.00 | C |
| ATOM | 390 | O3'  | G A | 13 | 27.920 | -12.403 | 88.827 | 1.00 | 0.00 | O |
| ATOM | 391 | C4'  | G A | 13 | 27.391 | -11.478 | 91.036 | 1.00 | 0.00 | C |
| ATOM | 392 | O4'  | G A | 13 | 26.543 | -12.561 | 91.534 | 1.00 | 0.00 | O |
| ATOM | 393 | C5'  | G A | 13 | 27.059 | -10.216 | 91.797 | 1.00 | 0.00 | C |
| ATOM | 394 | O5'  | G A | 13 | 25.868 | -9.606  | 91.240 | 1.00 | 0.00 | O |
| ATOM | 395 | O1P  | G A | 13 | 26.718 | -7.442  | 90.276 | 1.00 | 0.00 | O |
| ATOM | 396 | O2P  | G A | 13 | 24.335 | -7.625  | 91.036 | 1.00 | 0.00 | O |
| ATOM | 397 | P    | G A | 13 | 25.753 | -8.015  | 91.232 | 1.00 | 0.00 | P |
| ATOM | 398 | H1   | G A | 13 | 21.308 | -16.383 | 93.238 | 1.00 | 0.00 | H |
| ATOM | 399 | H8   | G A | 13 | 23.710 | -10.704 | 91.326 | 1.00 | 0.00 | H |
| ATOM | 400 | H1'  | G A | 13 | 25.704 | -13.879 | 90.231 | 1.00 | 0.00 | H |
| ATOM | 401 | H21  | G A | 13 | 22.665 | -18.011 | 92.674 | 1.00 | 0.00 | H |
| ATOM | 402 | H3'  | G A | 13 | 27.297 | -10.460 | 89.117 | 1.00 | 0.00 | H |
| ATOM | 403 | H22  | G A | 13 | 24.202 | -17.723 | 91.811 | 1.00 | 0.00 | H |
| ATOM | 404 | H4'  | G A | 13 | 28.454 | -11.675 | 91.165 | 1.00 | 0.00 | H |
| ATOM | 405 | H2'1 | G A | 13 | 25.002 | -11.004 | 89.569 | 1.00 | 0.00 | H |
| ATOM | 406 | H2'2 | G A | 13 | 25.434 | -12.309 | 88.473 | 1.00 | 0.00 | H |
| ATOM | 407 | H5'1 | G A | 13 | 26.891 | -10.464 | 92.844 | 1.00 | 0.00 | H |
| ATOM | 408 | H5'2 | G A | 13 | 27.898 | -9.524  | 91.723 | 1.00 | 0.00 | H |
| ATOM | 409 | C1'  | G A | 14 | 24.649 | -16.928 | 87.902 | 1.00 | 0.00 | C |
| ATOM | 410 | N1   | G A | 14 | 20.072 | -16.719 | 90.146 | 1.00 | 0.00 | N |
| ATOM | 411 | C2   | G A | 14 | 20.894 | -17.804 | 89.905 | 1.00 | 0.00 | C |
| ATOM | 412 | N2   | G A | 14 | 20.434 | -18.994 | 90.314 | 1.00 | 0.00 | N |
| ATOM | 413 | N3   | G A | 14 | 22.080 | -17.712 | 89.304 | 1.00 | 0.00 | N |
| ATOM | 414 | C4   | G A | 14 | 22.380 | -16.436 | 88.951 | 1.00 | 0.00 | C |
| ATOM | 415 | C5   | G A | 14 | 21.622 | -15.293 | 89.147 | 1.00 | 0.00 | C |
| ATOM | 416 | C6   | G A | 14 | 20.367 | -15.389 | 89.787 | 1.00 | 0.00 | C |
| ATOM | 417 | O6   | G A | 14 | 19.557 | -14.499 | 90.049 | 1.00 | 0.00 | O |
| ATOM | 418 | N7   | G A | 14 | 22.291 | -14.178 | 88.635 | 1.00 | 0.00 | N |
| ATOM | 419 | C8   | G A | 14 | 23.408 | -14.668 | 88.160 | 1.00 | 0.00 | C |
| ATOM | 420 | N9   | G A | 14 | 23.534 | -16.033 | 88.314 | 1.00 | 0.00 | N |
| ATOM | 421 | C2'  | G A | 14 | 25.280 | -16.547 | 86.570 | 1.00 | 0.00 | C |
| ATOM | 422 | C3'  | G A | 14 | 26.744 | -16.886 | 86.804 | 1.00 | 0.00 | C |
| ATOM | 423 | O3'  | G A | 14 | 26.953 | -18.272 | 86.542 | 1.00 | 0.00 | O |
| ATOM | 424 | C4'  | G A | 14 | 26.940 | -16.542 | 88.280 | 1.00 | 0.00 | C |
| ATOM | 425 | O4'  | G A | 14 | 25.651 | -16.854 | 88.898 | 1.00 | 0.00 | O |
| ATOM | 426 | C5'  | G A | 14 | 27.290 | -15.106 | 88.592 | 1.00 | 0.00 | C |
| ATOM | 427 | O5'  | G A | 14 | 26.587 | -14.221 | 87.685 | 1.00 | 0.00 | O |
| ATOM | 428 | O1P  | G A | 14 | 28.437 | -13.183 | 86.331 | 1.00 | 0.00 | O |
| ATOM | 429 | O2P  | G A | 14 | 26.286 | -11.940 | 86.676 | 1.00 | 0.00 | O |
| ATOM | 430 | P    | G A | 14 | 27.302 | -12.873 | 87.221 | 1.00 | 0.00 | P |

|      |     |      |     |    |        |         |        |      |      |   |
|------|-----|------|-----|----|--------|---------|--------|------|------|---|
| ATOM | 431 | H1   | G A | 14 | 19.176 | -16.897 | 90.624 | 1.00 | 0.00 | H |
| ATOM | 432 | H8   | G A | 14 | 24.170 | -14.052 | 87.684 | 1.00 | 0.00 | H |
| ATOM | 433 | H1'  | G A | 14 | 24.274 | -17.952 | 87.878 | 1.00 | 0.00 | H |
| ATOM | 434 | H21  | G A | 14 | 19.518 | -19.058 | 90.781 | 1.00 | 0.00 | H |
| ATOM | 435 | H3'  | G A | 14 | 27.406 | -16.296 | 86.170 | 1.00 | 0.00 | H |
| ATOM | 436 | H22  | G A | 14 | 20.997 | -19.843 | 90.162 | 1.00 | 0.00 | H |
| ATOM | 437 | H4'  | G A | 14 | 27.750 | -17.170 | 88.646 | 1.00 | 0.00 | H |
| ATOM | 438 | H2'1 | G A | 14 | 25.150 | -15.491 | 86.337 | 1.00 | 0.00 | H |
| ATOM | 439 | H2'2 | G A | 14 | 24.868 | -17.120 | 85.738 | 1.00 | 0.00 | H |
| ATOM | 440 | H5'1 | G A | 14 | 27.005 | -14.884 | 89.621 | 1.00 | 0.00 | H |
| ATOM | 441 | H5'2 | G A | 14 | 28.366 | -14.968 | 88.482 | 1.00 | 0.00 | H |
| ATOM | 442 | C1'  | A A | 15 | 21.860 | -20.699 | 86.320 | 1.00 | 0.00 | C |
| ATOM | 443 | N1   | A A | 15 | 17.968 | -17.601 | 87.584 | 1.00 | 0.00 | N |
| ATOM | 444 | C2   | A A | 15 | 18.176 | -18.903 | 87.762 | 1.00 | 0.00 | C |
| ATOM | 445 | N3   | A A | 15 | 19.208 | -19.642 | 87.413 | 1.00 | 0.00 | N |
| ATOM | 446 | C4   | A A | 15 | 20.130 | -18.886 | 86.788 | 1.00 | 0.00 | C |
| ATOM | 447 | C5   | A A | 15 | 20.069 | -17.547 | 86.524 | 1.00 | 0.00 | C |
| ATOM | 448 | C6   | A A | 15 | 18.906 | -16.875 | 86.957 | 1.00 | 0.00 | C |
| ATOM | 449 | N6   | A A | 15 | 18.708 | -15.559 | 86.769 | 1.00 | 0.00 | N |
| ATOM | 450 | N7   | A A | 15 | 21.206 | -17.115 | 85.864 | 1.00 | 0.00 | N |
| ATOM | 451 | C8   | A A | 15 | 21.921 | -18.194 | 85.739 | 1.00 | 0.00 | C |
| ATOM | 452 | N9   | A A | 15 | 21.333 | -19.310 | 86.278 | 1.00 | 0.00 | N |
| ATOM | 453 | C2'  | A A | 15 | 22.618 | -21.107 | 85.063 | 1.00 | 0.00 | C |
| ATOM | 454 | C3'  | A A | 15 | 23.714 | -21.997 | 85.629 | 1.00 | 0.00 | C |
| ATOM | 455 | O3'  | A A | 15 | 23.206 | -23.318 | 85.788 | 1.00 | 0.00 | O |
| ATOM | 456 | C4'  | A A | 15 | 24.033 | -21.334 | 86.968 | 1.00 | 0.00 | C |
| ATOM | 457 | O4'  | A A | 15 | 22.750 | -20.790 | 87.416 | 1.00 | 0.00 | O |
| ATOM | 458 | C5'  | A A | 15 | 25.048 | -20.217 | 86.940 | 1.00 | 0.00 | C |
| ATOM | 459 | O5'  | A A | 15 | 24.894 | -19.445 | 85.721 | 1.00 | 0.00 | O |
| ATOM | 460 | O1P  | A A | 15 | 27.037 | -19.889 | 84.477 | 1.00 | 0.00 | O |
| ATOM | 461 | O2P  | A A | 15 | 25.787 | -17.747 | 84.098 | 1.00 | 0.00 | O |
| ATOM | 462 | P    | A A | 15 | 26.193 | -18.817 | 85.041 | 1.00 | 0.00 | P |
| ATOM | 463 | H2   | A A | 15 | 17.374 | -19.435 | 88.275 | 1.00 | 0.00 | H |
| ATOM | 464 | H8   | A A | 15 | 22.896 | -18.211 | 85.251 | 1.00 | 0.00 | H |
| ATOM | 465 | H1'  | A A | 15 | 21.025 | -21.374 | 86.508 | 1.00 | 0.00 | H |
| ATOM | 466 | H3'  | A A | 15 | 24.593 | -22.023 | 84.984 | 1.00 | 0.00 | H |
| ATOM | 467 | H4'  | A A | 15 | 24.416 | -22.116 | 87.623 | 1.00 | 0.00 | H |
| ATOM | 468 | H61  | A A | 15 | 17.841 | -15.117 | 87.107 | 1.00 | 0.00 | H |
| ATOM | 469 | H62  | A A | 15 | 19.422 | -14.995 | 86.287 | 1.00 | 0.00 | H |
| ATOM | 470 | H2'1 | A A | 15 | 23.035 | -20.249 | 84.537 | 1.00 | 0.00 | H |
| ATOM | 471 | H2'2 | A A | 15 | 21.989 | -21.651 | 84.358 | 1.00 | 0.00 | H |
| ATOM | 472 | H5'1 | A A | 15 | 24.894 | -19.572 | 87.805 | 1.00 | 0.00 | H |
| ATOM | 473 | H5'2 | A A | 15 | 26.049 | -20.642 | 86.982 | 1.00 | 0.00 | H |
| ATOM | 474 | C1'  | C A | 16 | 17.520 | -22.921 | 85.376 | 1.00 | 0.00 | C |
| ATOM | 475 | N1   | C A | 16 | 17.797 | -21.556 | 84.852 | 1.00 | 0.00 | N |
| ATOM | 476 | C2   | C A | 16 | 16.854 | -20.561 | 85.093 | 1.00 | 0.00 | C |
| ATOM | 477 | O2   | C A | 16 | 15.831 | -20.849 | 85.728 | 1.00 | 0.00 | O |
| ATOM | 478 | N3   | C A | 16 | 17.087 | -19.310 | 84.623 | 1.00 | 0.00 | N |
| ATOM | 479 | C4   | C A | 16 | 18.203 | -19.031 | 83.938 | 1.00 | 0.00 | C |
| ATOM | 480 | N4   | C A | 16 | 18.381 | -17.790 | 83.506 | 1.00 | 0.00 | N |
| ATOM | 481 | C5   | C A | 16 | 19.190 | -20.035 | 83.671 | 1.00 | 0.00 | C |
| ATOM | 482 | C6   | C A | 16 | 18.937 | -21.287 | 84.157 | 1.00 | 0.00 | C |
| ATOM | 483 | C2'  | C A | 16 | 17.965 | -24.040 | 84.444 | 1.00 | 0.00 | C |
| ATOM | 484 | C3'  | C A | 16 | 18.432 | -25.104 | 85.425 | 1.00 | 0.00 | C |



|      |     |      |   |   |    |        |         |        |      |      |   |
|------|-----|------|---|---|----|--------|---------|--------|------|------|---|
| ATOM | 485 | O3'  | C | A | 16 | 17.308 | -25.869 | 85.855 | 1.00 | 0.00 | O |
| ATOM | 486 | C4'  | C | A | 16 | 19.038 | -24.279 | 86.558 | 1.00 | 0.00 | C |
| ATOM | 487 | O4'  | C | A | 16 | 18.224 | -23.064 | 86.596 | 1.00 | 0.00 | O |
| ATOM | 488 | C5'  | C | A | 16 | 20.488 | -23.884 | 86.399 | 1.00 | 0.00 | C |
| ATOM | 489 | O5'  | C | A | 16 | 20.768 | -23.596 | 85.005 | 1.00 | 0.00 | O |
| ATOM | 490 | O1P  | C | A | 16 | 22.375 | -25.416 | 84.344 | 1.00 | 0.00 | O |
| ATOM | 491 | O2P  | C | A | 16 | 22.427 | -23.205 | 83.159 | 1.00 | 0.00 | O |
| ATOM | 492 | P    | C | A | 16 | 22.208 | -23.952 | 84.423 | 1.00 | 0.00 | P |
| ATOM | 493 | H5   | C | A | 16 | 20.097 | -19.812 | 83.107 | 1.00 | 0.00 | H |
| ATOM | 494 | H6   | C | A | 16 | 19.662 | -22.082 | 83.987 | 1.00 | 0.00 | H |
| ATOM | 495 | H1'  | C | A | 16 | 16.454 | -22.993 | 85.594 | 1.00 | 0.00 | H |
| ATOM | 496 | H3'  | C | A | 16 | 19.174 | -25.769 | 84.980 | 1.00 | 0.00 | H |
| ATOM | 497 | H4'  | C | A | 16 | 18.955 | -24.878 | 87.464 | 1.00 | 0.00 | H |
| ATOM | 498 | H41  | C | A | 16 | 19.232 | -17.546 | 82.978 | 1.00 | 0.00 | H |
| ATOM | 499 | H42  | C | A | 16 | 17.670 | -17.069 | 83.696 | 1.00 | 0.00 | H |
| ATOM | 500 | H2'1 | C | A | 16 | 18.773 | -23.730 | 83.781 | 1.00 | 0.00 | H |
| ATOM | 501 | H2'2 | C | A | 16 | 17.149 | -24.405 | 83.818 | 1.00 | 0.00 | H |
| ATOM | 502 | H5'1 | C | A | 16 | 20.686 | -23.002 | 87.006 | 1.00 | 0.00 | H |
| ATOM | 503 | H5'2 | C | A | 16 | 21.121 | -24.704 | 86.739 | 1.00 | 0.00 | H |
| ATOM | 504 | C1'  | G | A | 17 | 12.683 | -22.978 | 84.319 | 1.00 | 0.00 | C |
| ATOM | 505 | N1   | G | A | 17 | 13.636 | -18.369 | 82.350 | 1.00 | 0.00 | N |
| ATOM | 506 | C2   | G | A | 17 | 12.575 | -18.801 | 83.127 | 1.00 | 0.00 | C |
| ATOM | 507 | N2   | G | A | 17 | 11.644 | -17.884 | 83.415 | 1.00 | 0.00 | N |
| ATOM | 508 | N3   | G | A | 17 | 12.454 | -20.048 | 83.579 | 1.00 | 0.00 | N |
| ATOM | 509 | C4   | G | A | 17 | 13.484 | -20.844 | 83.184 | 1.00 | 0.00 | C |
| ATOM | 510 | C5   | G | A | 17 | 14.579 | -20.502 | 82.409 | 1.00 | 0.00 | C |
| ATOM | 511 | C6   | G | A | 17 | 14.711 | -19.178 | 81.931 | 1.00 | 0.00 | C |
| ATOM | 512 | O6   | G | A | 17 | 15.601 | -18.686 | 81.236 | 1.00 | 0.00 | O |
| ATOM | 513 | N7   | G | A | 17 | 15.409 | -21.610 | 82.229 | 1.00 | 0.00 | N |
| ATOM | 514 | C8   | G | A | 17 | 14.805 | -22.566 | 82.890 | 1.00 | 0.00 | C |
| ATOM | 515 | N9   | G | A | 17 | 13.629 | -22.177 | 83.497 | 1.00 | 0.00 | N |
| ATOM | 516 | C2'  | G | A | 17 | 12.505 | -24.409 | 83.830 | 1.00 | 0.00 | C |
| ATOM | 517 | C3'  | G | A | 17 | 12.343 | -25.174 | 85.134 | 1.00 | 0.00 | C |
| ATOM | 518 | O3'  | G | A | 17 | 10.981 | -25.112 | 85.548 | 1.00 | 0.00 | O |
| ATOM | 519 | C4'  | G | A | 17 | 13.271 | -24.419 | 86.086 | 1.00 | 0.00 | C |
| ATOM | 520 | O4'  | G | A | 17 | 13.194 | -23.029 | 85.637 | 1.00 | 0.00 | O |
| ATOM | 521 | C5'  | G | A | 17 | 14.719 | -24.847 | 86.092 | 1.00 | 0.00 | C |
| ATOM | 522 | O5'  | G | A | 17 | 15.129 | -25.207 | 84.749 | 1.00 | 0.00 | O |
| ATOM | 523 | O1P  | G | A | 17 | 15.582 | -27.677 | 84.923 | 1.00 | 0.00 | O |
| ATOM | 524 | O2P  | G | A | 17 | 16.781 | -26.298 | 83.203 | 1.00 | 0.00 | O |
| ATOM | 525 | P    | G | A | 17 | 16.191 | -26.381 | 84.560 | 1.00 | 0.00 | P |
| ATOM | 526 | H1   | G | A | 17 | 13.639 | -17.381 | 82.057 | 1.00 | 0.00 | H |
| ATOM | 527 | H8   | G | A | 17 | 15.199 | -23.581 | 82.954 | 1.00 | 0.00 | H |
| ATOM | 528 | H1'  | G | A | 17 | 11.728 | -22.454 | 84.349 | 1.00 | 0.00 | H |
| ATOM | 529 | H21  | G | A | 17 | 11.745 | -16.921 | 83.065 | 1.00 | 0.00 | H |
| ATOM | 530 | H3'  | G | A | 17 | 12.645 | -26.216 | 85.037 | 1.00 | 0.00 | H |
| ATOM | 531 | H22  | G | A | 17 | 10.827 | -18.142 | 83.988 | 1.00 | 0.00 | H |
| ATOM | 532 | H4'  | G | A | 17 | 12.877 | -24.563 | 87.091 | 1.00 | 0.00 | H |
| ATOM | 533 | H2'1 | G | A | 17 | 13.368 | -24.764 | 83.266 | 1.00 | 0.00 | H |
| ATOM | 534 | H2'2 | G | A | 17 | 11.627 | -24.522 | 83.192 | 1.00 | 0.00 | H |
| ATOM | 535 | H5'1 | G | A | 17 | 15.333 | -24.024 | 86.456 | 1.00 | 0.00 | H |
| ATOM | 536 | H5'2 | G | A | 17 | 14.836 | -25.703 | 86.756 | 1.00 | 0.00 | H |
| ATOM | 537 | C1'  | G | A | 18 | 8.511  | -21.052 | 82.474 | 1.00 | 0.00 | C |
| ATOM | 538 | N1   | G | A | 18 | 11.713 | -18.401 | 79.516 | 1.00 | 0.00 | N |

|      |     |      |     |    |        |         |        |      |      |   |
|------|-----|------|-----|----|--------|---------|--------|------|------|---|
| ATOM | 539 | C2   | G A | 18 | 10.571 | -17.990 | 80.180 | 1.00 | 0.00 | C |
| ATOM | 540 | N2   | G A | 18 | 10.235 | -16.701 | 80.034 | 1.00 | 0.00 | N |
| ATOM | 541 | N3   | G A | 18 | 9.824  | -18.798 | 80.928 | 1.00 | 0.00 | N |
| ATOM | 542 | C4   | G A | 18 | 10.306 | -20.068 | 80.958 | 1.00 | 0.00 | C |
| ATOM | 543 | C5   | G A | 18 | 11.432 | -20.570 | 80.326 | 1.00 | 0.00 | C |
| ATOM | 544 | C6   | G A | 18 | 12.229 | -19.710 | 79.534 | 1.00 | 0.00 | C |
| ATOM | 545 | O6   | G A | 18 | 13.254 | -19.967 | 78.901 | 1.00 | 0.00 | O |
| ATOM | 546 | N7   | G A | 18 | 11.580 | -21.928 | 80.608 | 1.00 | 0.00 | N |
| ATOM | 547 | C8   | G A | 18 | 10.565 | -22.202 | 81.388 | 1.00 | 0.00 | C |
| ATOM | 548 | N9   | G A | 18 | 9.745  | -21.122 | 81.644 | 1.00 | 0.00 | N |
| ATOM | 549 | C2'  | G A | 18 | 7.632  | -22.290 | 82.373 | 1.00 | 0.00 | C |
| ATOM | 550 | C3'  | G A | 18 | 7.086  | -22.408 | 83.786 | 1.00 | 0.00 | C |
| ATOM | 551 | O3'  | G A | 18 | 5.941  | -21.569 | 83.917 | 1.00 | 0.00 | O |
| ATOM | 552 | C4'  | G A | 18 | 8.255  | -21.926 | 84.645 | 1.00 | 0.00 | C |
| ATOM | 553 | O4'  | G A | 18 | 8.907  | -20.905 | 83.824 | 1.00 | 0.00 | O |
| ATOM | 554 | C5'  | G A | 18 | 9.281  | -22.967 | 85.025 | 1.00 | 0.00 | C |
| ATOM | 555 | O5'  | G A | 18 | 9.467  | -23.898 | 83.930 | 1.00 | 0.00 | O |
| ATOM | 556 | O1P  | G A | 18 | 8.592  | -26.069 | 84.853 | 1.00 | 0.00 | O |
| ATOM | 557 | O2P  | G A | 18 | 10.348 | -26.085 | 83.063 | 1.00 | 0.00 | O |
| ATOM | 558 | P    | G A | 18 | 9.781  | -25.426 | 84.264 | 1.00 | 0.00 | P |
| ATOM | 559 | H1   | G A | 18 | 12.225 | -17.693 | 78.967 | 1.00 | 0.00 | H |
| ATOM | 560 | H8   | G A | 18 | 10.381 | -23.194 | 81.798 | 1.00 | 0.00 | H |
| ATOM | 561 | H1'  | G A | 18 | 7.958  | -20.156 | 82.187 | 1.00 | 0.00 | H |
| ATOM | 562 | H21  | G A | 18 | 10.821 | -16.080 | 79.455 | 1.00 | 0.00 | H |
| ATOM | 563 | H3'  | G A | 18 | 6.812  | -23.434 | 84.035 | 1.00 | 0.00 | H |
| ATOM | 564 | H22  | G A | 18 | 9.395  | -16.334 | 80.499 | 1.00 | 0.00 | H |
| ATOM | 565 | H4'  | G A | 18 | 7.829  | -21.526 | 85.564 | 1.00 | 0.00 | H |
| ATOM | 566 | H2'1 | G A | 18 | 8.200  | -23.178 | 82.092 | 1.00 | 0.00 | H |
| ATOM | 567 | H2'2 | G A | 18 | 6.829  | -22.171 | 81.645 | 1.00 | 0.00 | H |
| ATOM | 568 | H5'1 | G A | 18 | 10.224 | -22.473 | 85.253 | 1.00 | 0.00 | H |
| ATOM | 569 | H5'2 | G A | 18 | 8.935  | -23.503 | 85.909 | 1.00 | 0.00 | H |
| ATOM | 570 | C1'  | T A | 19 | 5.919  | -18.091 | 79.470 | 1.00 | 0.00 | C |
| ATOM | 571 | N1   | T A | 19 | 6.964  | -18.989 | 78.913 | 1.00 | 0.00 | N |
| ATOM | 572 | C2   | T A | 19 | 7.910  | -18.419 | 78.086 | 1.00 | 0.00 | C |
| ATOM | 573 | O2   | T A | 19 | 7.912  | -17.231 | 77.807 | 1.00 | 0.00 | O |
| ATOM | 574 | N3   | T A | 19 | 8.863  | -19.288 | 77.591 | 1.00 | 0.00 | N |
| ATOM | 575 | C4   | T A | 19 | 8.949  | -20.642 | 77.840 | 1.00 | 0.00 | C |
| ATOM | 576 | O4   | T A | 19 | 9.849  | -21.323 | 77.334 | 1.00 | 0.00 | O |
| ATOM | 577 | C5   | T A | 19 | 7.918  | -21.149 | 78.714 | 1.00 | 0.00 | C |
| ATOM | 578 | C6   | T A | 19 | 6.973  | -20.329 | 79.216 | 1.00 | 0.00 | C |
| ATOM | 579 | C7   | T A | 19 | 7.974  | -22.616 | 79.014 | 1.00 | 0.00 | C |
| ATOM | 580 | C2'  | T A | 19 | 4.539  | -18.733 | 79.557 | 1.00 | 0.00 | C |
| ATOM | 581 | C3'  | T A | 19 | 3.986  | -18.128 | 80.837 | 1.00 | 0.00 | C |
| ATOM | 582 | O3'  | T A | 19 | 3.410  | -16.857 | 80.542 | 1.00 | 0.00 | O |
| ATOM | 583 | C4'  | T A | 19 | 5.226  | -18.009 | 81.719 | 1.00 | 0.00 | C |
| ATOM | 584 | O4'  | T A | 19 | 6.313  | -17.731 | 80.781 | 1.00 | 0.00 | O |
| ATOM | 585 | C5'  | T A | 19 | 5.591  | -19.228 | 82.534 | 1.00 | 0.00 | C |
| ATOM | 586 | O5'  | T A | 19 | 5.304  | -20.428 | 81.773 | 1.00 | 0.00 | O |
| ATOM | 587 | O1P  | T A | 19 | 3.448  | -21.516 | 83.079 | 1.00 | 0.00 | O |
| ATOM | 588 | O2P  | T A | 19 | 4.991  | -22.920 | 81.683 | 1.00 | 0.00 | O |
| ATOM | 589 | P    | T A | 19 | 4.810  | -21.731 | 82.550 | 1.00 | 0.00 | P |
| ATOM | 590 | H3   | T A | 19 | 9.583  | -18.885 | 76.973 | 1.00 | 0.00 | H |
| ATOM | 591 | H6   | T A | 19 | 6.204  | -20.735 | 79.874 | 1.00 | 0.00 | H |
| ATOM | 592 | H1'  | T A | 19 | 5.890  | -17.184 | 78.867 | 1.00 | 0.00 | H |

|      |     |      |       |    |        |         |        |      |      |   |
|------|-----|------|-------|----|--------|---------|--------|------|------|---|
| ATOM | 593 | H3'  | T A   | 19 | 3.234  | -18.767 | 81.298 | 1.00 | 0.00 | H |
| ATOM | 594 | H4'  | T A   | 19 | 5.043  | -17.188 | 82.414 | 1.00 | 0.00 | H |
| ATOM | 595 | H71  | T A   | 19 | 7.099  | -23.108 | 78.590 | 1.00 | 0.00 | H |
| ATOM | 596 | H72  | T A   | 19 | 8.877  | -23.043 | 78.577 | 1.00 | 0.00 | H |
| ATOM | 597 | H73  | T A   | 19 | 7.986  | -22.769 | 80.094 | 1.00 | 0.00 | H |
| ATOM | 598 | H2'1 | T A   | 19 | 4.594  | -19.820 | 79.622 | 1.00 | 0.00 | H |
| ATOM | 599 | H2'2 | T A   | 19 | 3.914  | -18.488 | 78.697 | 1.00 | 0.00 | H |
| ATOM | 600 | H5'1 | T A   | 19 | 6.652  | -19.192 | 82.779 | 1.00 | 0.00 | H |
| ATOM | 601 | H5'2 | T A   | 19 | 5.010  | -19.229 | 83.455 | 1.00 | 0.00 | H |
| ATOM | 602 | C01  | LNK A | 20 | 0.056  | -15.962 | 79.197 | 0.00 | 0.00 | C |
| ATOM | 603 | O1   | LNK A | 20 | 1.038  | -16.925 | 79.588 | 1.00 | 0.00 | O |
| ATOM | 604 | S    | LNK A | 20 | -3.570 | -15.866 | 77.558 | 0.00 | 0.00 | S |
| ATOM | 605 | C02  | LNK A | 20 | -1.170 | -16.690 | 78.614 | 0.00 | 0.00 | C |
| ATOM | 606 | C03  | LNK A | 20 | -1.753 | -15.865 | 77.452 | 0.00 | 0.00 | C |
| ATOM | 607 | O1P  | LNK A | 20 | 2.863  | -18.005 | 78.233 | 1.00 | 0.00 | O |
| ATOM | 608 | O2P  | LNK A | 20 | 2.648  | -15.505 | 78.282 | 1.00 | 0.00 | O |
| ATOM | 609 | P    | LNK A | 20 | 2.516  | -16.795 | 79.004 | 1.00 | 0.00 | P |
| ATOM | 610 | H01  | LNK A | 20 | 0.477  | -15.298 | 78.443 | 0.00 | 0.00 | H |
| ATOM | 611 | H02  | LNK A | 20 | -0.248 | -15.379 | 80.067 | 0.00 | 0.00 | H |
| ATOM | 612 | H03  | LNK A | 20 | -1.444 | -16.304 | 76.503 | 0.00 | 0.00 | H |
| ATOM | 613 | H04  | LNK A | 20 | -1.927 | -16.809 | 79.391 | 0.00 | 0.00 | H |
| ATOM | 614 | H05  | LNK A | 20 | -0.870 | -17.672 | 78.247 | 0.00 | 0.00 | H |
| ATOM | 615 | H06  | LNK A | 20 | -1.386 | -14.840 | 77.515 | 0.00 | 0.00 | H |
| ATOM | 616 | AU   | LNK A | 20 | -3.833 | -15.586 | 76.990 |      |      |   |
| TER  |     |      |       |    |        |         |        |      |      |   |
| ATOM | 618 | C1'  | A B   | 2  | 14.183 | -15.533 | 72.833 | 1.00 | 0.00 | C |
| ATOM | 619 | N1   | A B   | 2  | 10.929 | -18.153 | 75.816 | 1.00 | 0.00 | N |
| ATOM | 620 | C2   | A B   | 2  | 11.000 | -16.870 | 75.475 | 1.00 | 0.00 | C |
| ATOM | 621 | N3   | A B   | 2  | 11.867 | -16.259 | 74.696 | 1.00 | 0.00 | N |
| ATOM | 622 | C4   | A B   | 2  | 12.775 | -17.136 | 74.230 | 1.00 | 0.00 | C |
| ATOM | 623 | C5   | A B   | 2  | 12.841 | -18.477 | 74.485 | 1.00 | 0.00 | C |
| ATOM | 624 | C6   | A B   | 2  | 11.847 | -19.005 | 75.336 | 1.00 | 0.00 | C |
| ATOM | 625 | N6   | A B   | 2  | 11.784 | -20.304 | 75.675 | 1.00 | 0.00 | N |
| ATOM | 626 | N7   | A B   | 2  | 13.912 | -19.058 | 73.828 | 1.00 | 0.00 | N |
| ATOM | 627 | C8   | A B   | 2  | 14.468 | -18.065 | 73.201 | 1.00 | 0.00 | C |
| ATOM | 628 | N9   | A B   | 2  | 13.831 | -16.867 | 73.395 | 1.00 | 0.00 | N |
| ATOM | 629 | C2'  | A B   | 2  | 15.682 | -15.282 | 72.746 | 1.00 | 0.00 | C |
| ATOM | 630 | C3'  | A B   | 2  | 15.793 | -14.471 | 71.466 | 1.00 | 0.00 | C |
| ATOM | 631 | O3'  | A B   | 2  | 15.546 | -13.098 | 71.759 | 1.00 | 0.00 | O |
| ATOM | 632 | C4'  | A B   | 2  | 14.704 | -15.077 | 70.583 | 1.00 | 0.00 | C |
| ATOM | 633 | O4'  | A B   | 2  | 13.651 | -15.464 | 71.525 | 1.00 | 0.00 | O |
| ATOM | 634 | C5'  | A B   | 2  | 15.095 | -16.288 | 69.770 | 1.00 | 0.00 | C |
| ATOM | 635 | O5'  | A B   | 2  | 16.012 | -17.115 | 70.532 | 1.00 | 0.00 | O |
| ATOM | 636 | H2   | A B   | 2  | 10.230 | -16.231 | 75.902 | 1.00 | 0.00 | H |
| ATOM | 637 | H8   | A B   | 2  | 15.358 | -18.173 | 72.579 | 1.00 | 0.00 | H |
| ATOM | 638 | H1'  | A B   | 2  | 13.693 | -14.770 | 73.437 | 1.00 | 0.00 | H |
| ATOM | 639 | H3'  | A B   | 2  | 16.775 | -14.570 | 71.002 | 1.00 | 0.00 | H |
| ATOM | 640 | H4'  | A B   | 2  | 14.388 | -14.298 | 69.890 | 1.00 | 0.00 | H |
| ATOM | 641 | H61  | A B   | 2  | 11.037 | -20.638 | 76.297 | 1.00 | 0.00 | H |
| ATOM | 642 | H62  | A B   | 2  | 12.488 | -20.964 | 75.310 | 1.00 | 0.00 | H |
| ATOM | 643 | H2'1 | A B   | 2  | 16.254 | -16.207 | 72.680 | 1.00 | 0.00 | H |
| ATOM | 644 | H2'2 | A B   | 2  | 16.058 | -14.723 | 73.604 | 1.00 | 0.00 | H |
| ATOM | 645 | H5'1 | A B   | 2  | 14.199 | -16.860 | 69.527 | 1.00 | 0.00 | H |
| ATOM | 646 | H5'2 | A B   | 2  | 15.573 | -15.960 | 68.848 | 1.00 | 0.00 | H |

|      |     |      |     |   |        |         |        |      |      |   |
|------|-----|------|-----|---|--------|---------|--------|------|------|---|
| ATOM | 647 | C1'  | C B | 3 | 13.180 | -12.953 | 76.955 | 1.00 | 0.00 | C |
| ATOM | 648 | N1   | C B | 3 | 13.634 | -14.368 | 77.042 | 1.00 | 0.00 | N |
| ATOM | 649 | C2   | C B | 3 | 12.880 | -15.250 | 77.814 | 1.00 | 0.00 | C |
| ATOM | 650 | O2   | C B | 3 | 11.870 | -14.824 | 78.390 | 1.00 | 0.00 | O |
| ATOM | 651 | N3   | C B | 3 | 13.276 | -16.541 | 77.906 | 1.00 | 0.00 | N |
| ATOM | 652 | C4   | C B | 3 | 14.374 | -16.972 | 77.271 | 1.00 | 0.00 | C |
| ATOM | 653 | N4   | C B | 3 | 14.713 | -18.249 | 77.394 | 1.00 | 0.00 | N |
| ATOM | 654 | C5   | C B | 3 | 15.173 | -16.088 | 76.474 | 1.00 | 0.00 | C |
| ATOM | 655 | C6   | C B | 3 | 14.752 | -14.791 | 76.391 | 1.00 | 0.00 | C |
| ATOM | 656 | C2'  | C B | 3 | 14.320 | -11.943 | 76.946 | 1.00 | 0.00 | C |
| ATOM | 657 | C3'  | C B | 3 | 13.786 | -10.872 | 76.007 | 1.00 | 0.00 | C |
| ATOM | 658 | O3'  | C B | 3 | 12.955 | -9.976  | 76.742 | 1.00 | 0.00 | O |
| ATOM | 659 | C4'  | C B | 3 | 12.996 | -11.683 | 74.983 | 1.00 | 0.00 | C |
| ATOM | 660 | O4'  | C B | 3 | 12.457 | -12.807 | 75.749 | 1.00 | 0.00 | O |
| ATOM | 661 | C5'  | C B | 3 | 13.777 | -12.227 | 73.810 | 1.00 | 0.00 | C |
| ATOM | 662 | O5'  | C B | 3 | 15.101 | -12.625 | 74.246 | 1.00 | 0.00 | O |
| ATOM | 663 | O1P  | C B | 3 | 16.619 | -11.015 | 73.047 | 1.00 | 0.00 | O |
| ATOM | 664 | O2P  | C B | 3 | 17.461 | -13.289 | 73.695 | 1.00 | 0.00 | O |
| ATOM | 665 | P    | C B | 3 | 16.325 | -12.450 | 73.242 | 1.00 | 0.00 | P |
| ATOM | 666 | H5   | C B | 3 | 16.071 | -16.432 | 75.961 | 1.00 | 0.00 | H |
| ATOM | 667 | H6   | C B | 3 | 15.323 | -14.082 | 75.792 | 1.00 | 0.00 | H |
| ATOM | 668 | H1'  | C B | 3 | 12.496 | -12.763 | 77.783 | 1.00 | 0.00 | H |
| ATOM | 669 | H3'  | C B | 3 | 14.589 | -10.311 | 75.531 | 1.00 | 0.00 | H |
| ATOM | 670 | H4'  | C B | 3 | 12.221 | -11.026 | 74.587 | 1.00 | 0.00 | H |
| ATOM | 671 | H41  | C B | 3 | 15.552 | -18.607 | 76.912 | 1.00 | 0.00 | H |
| ATOM | 672 | H42  | C B | 3 | 14.139 | -18.882 | 77.968 | 1.00 | 0.00 | H |
| ATOM | 673 | H2'1 | C B | 3 | 15.249 | -12.370 | 76.574 | 1.00 | 0.00 | H |
| ATOM | 674 | H2'2 | C B | 3 | 14.519 | -11.537 | 77.939 | 1.00 | 0.00 | H |
| ATOM | 675 | H5'1 | C B | 3 | 13.251 | -13.088 | 73.397 | 1.00 | 0.00 | H |
| ATOM | 676 | H5'2 | C B | 3 | 13.859 | -11.457 | 73.046 | 1.00 | 0.00 | H |
| ATOM | 677 | C1'  | C B | 4 | 11.828 | -12.480 | 81.696 | 1.00 | 0.00 | C |
| ATOM | 678 | N1   | C B | 4 | 12.911 | -13.423 | 81.309 | 1.00 | 0.00 | N |
| ATOM | 679 | C2   | C B | 4 | 12.823 | -14.739 | 81.758 | 1.00 | 0.00 | C |
| ATOM | 680 | O2   | C B | 4 | 11.854 | -15.068 | 82.456 | 1.00 | 0.00 | O |
| ATOM | 681 | N3   | C B | 4 | 13.799 | -15.614 | 81.419 | 1.00 | 0.00 | N |
| ATOM | 682 | C4   | C B | 4 | 14.836 | -15.229 | 80.661 | 1.00 | 0.00 | C |
| ATOM | 683 | N4   | C B | 4 | 15.762 | -16.126 | 80.355 | 1.00 | 0.00 | N |
| ATOM | 684 | C5   | C B | 4 | 14.956 | -13.880 | 80.189 | 1.00 | 0.00 | C |
| ATOM | 685 | C6   | C B | 4 | 13.958 | -13.018 | 80.540 | 1.00 | 0.00 | C |
| ATOM | 686 | C2'  | C B | 4 | 12.320 | -11.072 | 82.003 | 1.00 | 0.00 | C |
| ATOM | 687 | C3'  | C B | 4 | 11.181 | -10.215 | 81.474 | 1.00 | 0.00 | C |
| ATOM | 688 | O3'  | C B | 4 | 10.168 | -10.112 | 82.472 | 1.00 | 0.00 | O |
| ATOM | 689 | C4'  | C B | 4 | 10.708 | -10.997 | 80.250 | 1.00 | 0.00 | C |
| ATOM | 690 | O4'  | C B | 4 | 10.920 | -12.400 | 80.613 | 1.00 | 0.00 | O |
| ATOM | 691 | C5'  | C B | 4 | 11.432 | -10.719 | 78.953 | 1.00 | 0.00 | C |
| ATOM | 692 | O5'  | C B | 4 | 12.838 | -10.486 | 79.218 | 1.00 | 0.00 | O |
| ATOM | 693 | O1P  | C B | 4 | 13.156 | -8.069  | 78.592 | 1.00 | 0.00 | O |
| ATOM | 694 | O2P  | C B | 4 | 15.086 | -9.667  | 78.449 | 1.00 | 0.00 | O |
| ATOM | 695 | P    | C B | 4 | 13.626 | -9.440  | 78.310 | 1.00 | 0.00 | P |
| ATOM | 696 | H5   | C B | 4 | 15.802 | -13.560 | 79.579 | 1.00 | 0.00 | H |
| ATOM | 697 | H6   | C B | 4 | 14.001 | -11.983 | 80.198 | 1.00 | 0.00 | H |
| ATOM | 698 | H1'  | C B | 4 | 11.295 | -12.902 | 82.548 | 1.00 | 0.00 | H |
| ATOM | 699 | H3'  | C B | 4 | 11.517 | -9.216  | 81.195 | 1.00 | 0.00 | H |
| ATOM | 700 | H4'  | C B | 4 | 9.656  | -10.750 | 80.103 | 1.00 | 0.00 | H |

|      |     |      |     |   |        |         |        |      |      |   |
|------|-----|------|-----|---|--------|---------|--------|------|------|---|
| ATOM | 701 | H41  | C B | 4 | 16.568 | -15.857 | 79.772 | 1.00 | 0.00 | H |
| ATOM | 702 | H42  | C B | 4 | 15.675 | -17.095 | 80.698 | 1.00 | 0.00 | H |
| ATOM | 703 | H2'1 | C B | 4 | 13.257 | -10.842 | 81.498 | 1.00 | 0.00 | H |
| ATOM | 704 | H2'2 | C B | 4 | 12.475 | -10.912 | 83.071 | 1.00 | 0.00 | H |
| ATOM | 705 | H5'1 | C B | 4 | 11.319 | -11.575 | 78.289 | 1.00 | 0.00 | H |
| ATOM | 706 | H5'2 | C B | 4 | 10.995 | -9.839  | 78.483 | 1.00 | 0.00 | H |
| ATOM | 707 | C1'  | G B | 5 | 11.284 | -14.090 | 86.347 | 1.00 | 0.00 | C |
| ATOM | 708 | N1   | G B | 5 | 15.124 | -17.215 | 85.112 | 1.00 | 0.00 | N |
| ATOM | 709 | C2   | G B | 5 | 13.964 | -17.471 | 85.822 | 1.00 | 0.00 | C |
| ATOM | 710 | N2   | G B | 5 | 13.806 | -18.725 | 86.262 | 1.00 | 0.00 | N |
| ATOM | 711 | N3   | G B | 5 | 13.034 | -16.548 | 86.071 | 1.00 | 0.00 | N |
| ATOM | 712 | C4   | G B | 5 | 13.362 | -15.334 | 85.556 | 1.00 | 0.00 | C |
| ATOM | 713 | C5   | G B | 5 | 14.495 | -14.986 | 84.842 | 1.00 | 0.00 | C |
| ATOM | 714 | C6   | G B | 5 | 15.480 | -15.964 | 84.573 | 1.00 | 0.00 | C |
| ATOM | 715 | O6   | G B | 5 | 16.542 | -15.849 | 83.962 | 1.00 | 0.00 | O |
| ATOM | 716 | N7   | G B | 5 | 14.450 | -13.634 | 84.495 | 1.00 | 0.00 | N |
| ATOM | 717 | C8   | G B | 5 | 13.317 | -13.215 | 84.995 | 1.00 | 0.00 | C |
| ATOM | 718 | N9   | G B | 5 | 12.599 | -14.191 | 85.657 | 1.00 | 0.00 | N |
| ATOM | 719 | C2'  | G B | 5 | 11.081 | -12.777 | 87.091 | 1.00 | 0.00 | C |
| ATOM | 720 | C3'  | G B | 5 | 9.596  | -12.523 | 86.888 | 1.00 | 0.00 | C |
| ATOM | 721 | O3'  | G B | 5 | 8.860  | -13.235 | 87.880 | 1.00 | 0.00 | O |
| ATOM | 722 | C4'  | G B | 5 | 9.347  | -13.068 | 85.482 | 1.00 | 0.00 | C |
| ATOM | 723 | O4'  | G B | 5 | 10.272 | -14.196 | 85.366 | 1.00 | 0.00 | O |
| ATOM | 724 | C5'  | G B | 5 | 9.599  | -12.115 | 84.339 | 1.00 | 0.00 | C |
| ATOM | 725 | O5'  | G B | 5 | 10.738 | -11.273 | 84.644 | 1.00 | 0.00 | O |
| ATOM | 726 | O1P  | G B | 5 | 9.731  | -8.975  | 84.838 | 1.00 | 0.00 | O |
| ATOM | 727 | O2P  | G B | 5 | 12.130 | -9.240  | 84.152 | 1.00 | 0.00 | O |
| ATOM | 728 | P    | G B | 5 | 10.745 | -9.768  | 84.116 | 1.00 | 0.00 | P |
| ATOM | 729 | H1   | G B | 5 | 15.776 | -18.001 | 84.968 | 1.00 | 0.00 | H |
| ATOM | 730 | H8   | G B | 5 | 12.969 | -12.187 | 84.901 | 1.00 | 0.00 | H |
| ATOM | 731 | H1'  | G B | 5 | 11.186 | -14.940 | 87.022 | 1.00 | 0.00 | H |
| ATOM | 732 | H21  | G B | 5 | 14.526 | -19.433 | 86.063 | 1.00 | 0.00 | H |
| ATOM | 733 | H3'  | G B | 5 | 9.351  | -11.462 | 86.947 | 1.00 | 0.00 | H |
| ATOM | 734 | H22  | G B | 5 | 12.965 | -18.980 | 86.800 | 1.00 | 0.00 | H |
| ATOM | 735 | H4'  | G B | 5 | 8.301  | -13.371 | 85.441 | 1.00 | 0.00 | H |
| ATOM | 736 | H2'1 | G B | 5 | 11.682 | -11.969 | 86.675 | 1.00 | 0.00 | H |
| ATOM | 737 | H2'2 | G B | 5 | 11.329 | -12.858 | 88.149 | 1.00 | 0.00 | H |
| ATOM | 738 | H5'1 | G B | 5 | 9.795  | -12.688 | 83.433 | 1.00 | 0.00 | H |
| ATOM | 739 | H5'2 | G B | 5 | 8.714  | -11.496 | 84.187 | 1.00 | 0.00 | H |
| ATOM | 740 | C1'  | T B | 6 | 12.397 | -16.951 | 90.231 | 1.00 | 0.00 | C |
| ATOM | 741 | N1   | T B | 6 | 13.467 | -16.195 | 89.527 | 1.00 | 0.00 | N |
| ATOM | 742 | C2   | T B | 6 | 14.582 | -16.906 | 89.127 | 1.00 | 0.00 | C |
| ATOM | 743 | O2   | T B | 6 | 14.711 | -18.100 | 89.331 | 1.00 | 0.00 | O |
| ATOM | 744 | N3   | T B | 6 | 15.550 | -16.164 | 88.476 | 1.00 | 0.00 | N |
| ATOM | 745 | C4   | T B | 6 | 15.506 | -14.814 | 88.199 | 1.00 | 0.00 | C |
| ATOM | 746 | O4   | T B | 6 | 16.439 | -14.258 | 87.611 | 1.00 | 0.00 | O |
| ATOM | 747 | C5   | T B | 6 | 14.303 | -14.159 | 88.654 | 1.00 | 0.00 | C |
| ATOM | 748 | C6   | T B | 6 | 13.337 | -14.849 | 89.291 | 1.00 | 0.00 | C |
| ATOM | 749 | C7   | T B | 6 | 14.210 | -12.688 | 88.371 | 1.00 | 0.00 | C |
| ATOM | 750 | C2'  | T B | 6 | 11.736 | -16.168 | 91.359 | 1.00 | 0.00 | C |
| ATOM | 751 | C3'  | T B | 6 | 10.293 | -16.643 | 91.268 | 1.00 | 0.00 | C |
| ATOM | 752 | O3'  | T B | 6 | 10.154 | -17.863 | 91.993 | 1.00 | 0.00 | O |
| ATOM | 753 | C4'  | T B | 6 | 10.091 | -16.835 | 89.767 | 1.00 | 0.00 | C |
| ATOM | 754 | O4'  | T B | 6 | 11.400 | -17.273 | 89.282 | 1.00 | 0.00 | O |

|      |     |      |     |   |        |         |        |      |      |   |
|------|-----|------|-----|---|--------|---------|--------|------|------|---|
| ATOM | 755 | C5'  | T B | 6 | 9.670  | -15.614 | 88.983 | 1.00 | 0.00 | C |
| ATOM | 756 | O5'  | T B | 6 | 10.320 | -14.436 | 89.526 | 1.00 | 0.00 | O |
| ATOM | 757 | O1P  | T B | 6 | 8.406  | -13.095 | 90.460 | 1.00 | 0.00 | O |
| ATOM | 758 | O2P  | T B | 6 | 10.494 | -11.935 | 89.689 | 1.00 | 0.00 | O |
| ATOM | 759 | P    | T B | 6 | 9.533  | -13.049 | 89.506 | 1.00 | 0.00 | P |
| ATOM | 760 | H3   | T B | 6 | 16.392 | -16.673 | 88.164 | 1.00 | 0.00 | H |
| ATOM | 761 | H6   | T B | 6 | 12.437 | -14.331 | 89.625 | 1.00 | 0.00 | H |
| ATOM | 762 | H1'  | T B | 6 | 12.823 | -17.883 | 90.601 | 1.00 | 0.00 | H |
| ATOM | 763 | H3'  | T B | 6 | 9.596  | -15.906 | 91.667 | 1.00 | 0.00 | H |
| ATOM | 764 | H4'  | T B | 6 | 9.316  | -17.592 | 89.646 | 1.00 | 0.00 | H |
| ATOM | 765 | H71  | T B | 6 | 14.217 | -12.136 | 89.311 | 1.00 | 0.00 | H |
| ATOM | 766 | H72  | T B | 6 | 15.060 | -12.381 | 87.762 | 1.00 | 0.00 | H |
| ATOM | 767 | H73  | T B | 6 | 13.284 | -12.479 | 87.834 | 1.00 | 0.00 | H |
| ATOM | 768 | H2'1 | T B | 6 | 11.810 | -15.092 | 91.214 | 1.00 | 0.00 | H |
| ATOM | 769 | H2'2 | T B | 6 | 12.168 | -16.400 | 92.332 | 1.00 | 0.00 | H |
| ATOM | 770 | H5'1 | T B | 6 | 9.952  | -15.744 | 87.939 | 1.00 | 0.00 | H |
| ATOM | 771 | H5'2 | T B | 6 | 8.589  | -15.502 | 89.051 | 1.00 | 0.00 | H |
| ATOM | 772 | C1'  | C B | 7 | 15.459 | -19.781 | 92.928 | 1.00 | 0.00 | C |
| ATOM | 773 | N1   | C B | 7 | 15.871 | -18.413 | 92.502 | 1.00 | 0.00 | N |
| ATOM | 774 | C2   | C B | 7 | 17.104 | -18.272 | 91.868 | 1.00 | 0.00 | C |
| ATOM | 775 | O2   | C B | 7 | 17.801 | -19.279 | 91.684 | 1.00 | 0.00 | O |
| ATOM | 776 | N3   | C B | 7 | 17.498 | -17.037 | 91.472 | 1.00 | 0.00 | N |
| ATOM | 777 | C4   | C B | 7 | 16.722 | -15.966 | 91.686 | 1.00 | 0.00 | C |
| ATOM | 778 | N4   | C B | 7 | 17.155 | -14.783 | 91.276 | 1.00 | 0.00 | N |
| ATOM | 779 | C5   | C B | 7 | 15.452 | -16.081 | 92.340 | 1.00 | 0.00 | C |
| ATOM | 780 | C6   | C B | 7 | 15.074 | -17.336 | 92.726 | 1.00 | 0.00 | C |
| ATOM | 781 | C2'  | C B | 7 | 14.724 | -19.812 | 94.260 | 1.00 | 0.00 | C |
| ATOM | 782 | C3'  | C B | 7 | 13.710 | -20.922 | 94.035 | 1.00 | 0.00 | C |
| ATOM | 783 | O3'  | C B | 7 | 14.323 | -22.179 | 94.308 | 1.00 | 0.00 | O |
| ATOM | 784 | C4'  | C B | 7 | 13.353 | -20.763 | 92.559 | 1.00 | 0.00 | C |
| ATOM | 785 | O4'  | C B | 7 | 14.591 | -20.296 | 91.936 | 1.00 | 0.00 | O |
| ATOM | 786 | C5'  | C B | 7 | 12.250 | -19.780 | 92.237 | 1.00 | 0.00 | C |
| ATOM | 787 | O5'  | C B | 7 | 12.329 | -18.645 | 93.134 | 1.00 | 0.00 | O |
| ATOM | 788 | O1P  | C B | 7 | 10.216 | -18.824 | 94.489 | 1.00 | 0.00 | O |
| ATOM | 789 | O2P  | C B | 7 | 11.285 | -16.585 | 94.125 | 1.00 | 0.00 | O |
| ATOM | 790 | P    | C B | 7 | 10.976 | -17.933 | 93.592 | 1.00 | 0.00 | P |
| ATOM | 791 | H5   | C B | 7 | 14.821 | -15.211 | 92.523 | 1.00 | 0.00 | H |
| ATOM | 792 | H6   | C B | 7 | 14.112 | -17.475 | 93.220 | 1.00 | 0.00 | H |
| ATOM | 793 | H1'  | C B | 7 | 16.348 | -20.411 | 92.957 | 1.00 | 0.00 | H |
| ATOM | 794 | H3'  | C B | 7 | 12.828 | -20.805 | 94.668 | 1.00 | 0.00 | H |
| ATOM | 795 | H4'  | C B | 7 | 13.038 | -21.743 | 92.201 | 1.00 | 0.00 | H |
| ATOM | 796 | H41  | C B | 7 | 16.576 | -13.944 | 91.425 | 1.00 | 0.00 | H |
| ATOM | 797 | H42  | C B | 7 | 18.070 | -14.703 | 90.807 | 1.00 | 0.00 | H |
| ATOM | 798 | H2'1 | C B | 7 | 14.233 | -18.866 | 94.485 | 1.00 | 0.00 | H |
| ATOM | 799 | H2'2 | C B | 7 | 15.388 | -20.043 | 95.094 | 1.00 | 0.00 | H |
| ATOM | 800 | H5'1 | C B | 7 | 12.360 | -19.444 | 91.206 | 1.00 | 0.00 | H |
| ATOM | 801 | H5'2 | C B | 7 | 11.286 | -20.274 | 92.352 | 1.00 | 0.00 | H |
| ATOM | 802 | C1'  | C B | 8 | 19.909 | -21.265 | 94.519 | 1.00 | 0.00 | C |
| ATOM | 803 | N1   | C B | 8 | 19.532 | -19.825 | 94.560 | 1.00 | 0.00 | N |
| ATOM | 804 | C2   | C B | 8 | 20.409 | -18.904 | 93.990 | 1.00 | 0.00 | C |
| ATOM | 805 | O2   | C B | 8 | 21.457 | -19.318 | 93.478 | 1.00 | 0.00 | O |
| ATOM | 806 | N3   | C B | 8 | 20.085 | -17.589 | 94.016 | 1.00 | 0.00 | N |
| ATOM | 807 | C4   | C B | 8 | 18.943 | -17.173 | 94.578 | 1.00 | 0.00 | C |
| ATOM | 808 | N4   | C B | 8 | 18.674 | -15.875 | 94.572 | 1.00 | 0.00 | N |

|      |     |      |     |   |        |         |        |      |      |   |
|------|-----|------|-----|---|--------|---------|--------|------|------|---|
| ATOM | 809 | C5   | C B | 8 | 18.022 | -18.095 | 95.177 | 1.00 | 0.00 | C |
| ATOM | 810 | C6   | C B | 8 | 18.368 | -19.417 | 95.134 | 1.00 | 0.00 | C |
| ATOM | 811 | C2'  | C B | 8 | 19.529 | -22.034 | 95.778 | 1.00 | 0.00 | C |
| ATOM | 812 | C3'  | C B | 8 | 19.149 | -23.395 | 95.215 | 1.00 | 0.00 | C |
| ATOM | 813 | O3'  | C B | 8 | 20.328 | -24.180 | 95.053 | 1.00 | 0.00 | O |
| ATOM | 814 | C4'  | C B | 8 | 18.503 | -23.041 | 93.877 | 1.00 | 0.00 | C |
| ATOM | 815 | O4'  | C B | 8 | 19.232 | -21.856 | 93.425 | 1.00 | 0.00 | O |
| ATOM | 816 | C5'  | C B | 8 | 17.028 | -22.718 | 93.909 | 1.00 | 0.00 | C |
| ATOM | 817 | O5'  | C B | 8 | 16.710 | -21.998 | 95.128 | 1.00 | 0.00 | O |
| ATOM | 818 | O1P  | C B | 8 | 15.222 | -23.599 | 96.377 | 1.00 | 0.00 | O |
| ATOM | 819 | O2P  | C B | 8 | 15.003 | -21.128 | 96.753 | 1.00 | 0.00 | O |
| ATOM | 820 | P    | C B | 8 | 15.290 | -22.237 | 95.811 | 1.00 | 0.00 | P |
| ATOM | 821 | H5   | C B | 8 | 17.096 | -17.761 | 95.643 | 1.00 | 0.00 | H |
| ATOM | 822 | H6   | C B | 8 | 17.697 | -20.158 | 95.570 | 1.00 | 0.00 | H |
| ATOM | 823 | H1'  | C B | 8 | 20.979 | -21.332 | 94.329 | 1.00 | 0.00 | H |
| ATOM | 824 | H3'  | C B | 8 | 18.450 | -23.923 | 95.862 | 1.00 | 0.00 | H |
| ATOM | 825 | H4'  | C B | 8 | 18.639 | -23.902 | 93.222 | 1.00 | 0.00 | H |
| ATOM | 826 | H41  | C B | 8 | 17.801 | -15.528 | 94.996 | 1.00 | 0.00 | H |
| ATOM | 827 | H42  | C B | 8 | 19.338 | -15.213 | 94.144 | 1.00 | 0.00 | H |
| ATOM | 828 | H2'1 | C B | 8 | 18.694 | -21.577 | 96.306 | 1.00 | 0.00 | H |
| ATOM | 829 | H2'2 | C B | 8 | 20.360 | -22.111 | 96.480 | 1.00 | 0.00 | H |
| ATOM | 830 | H5'1 | C B | 8 | 16.776 | -22.103 | 93.044 | 1.00 | 0.00 | H |
| ATOM | 831 | H5'2 | C B | 8 | 16.457 | -23.644 | 93.869 | 1.00 | 0.00 | H |
| ATOM | 832 | C1'  | T B | 9 | 24.725 | -20.659 | 95.481 | 1.00 | 0.00 | C |
| ATOM | 833 | N1   | T B | 9 | 23.732 | -19.675 | 95.987 | 1.00 | 0.00 | N |
| ATOM | 834 | C2   | T B | 9 | 23.975 | -18.341 | 95.723 | 1.00 | 0.00 | C |
| ATOM | 835 | O2   | T B | 9 | 24.953 | -17.961 | 95.105 | 1.00 | 0.00 | O |
| ATOM | 836 | N3   | T B | 9 | 23.026 | -17.461 | 96.209 | 1.00 | 0.00 | N |
| ATOM | 837 | C4   | T B | 9 | 21.892 | -17.788 | 96.920 | 1.00 | 0.00 | C |
| ATOM | 838 | O4   | T B | 9 | 21.114 | -16.908 | 97.309 | 1.00 | 0.00 | O |
| ATOM | 839 | C5   | T B | 9 | 21.722 | -19.205 | 97.146 | 1.00 | 0.00 | C |
| ATOM | 840 | C6   | T B | 9 | 22.626 | -20.091 | 96.685 | 1.00 | 0.00 | C |
| ATOM | 841 | C7   | T B | 9 | 20.498 | -19.604 | 97.914 | 1.00 | 0.00 | C |
| ATOM | 842 | C2'  | T B | 9 | 24.974 | -21.825 | 96.431 | 1.00 | 0.00 | C |
| ATOM | 843 | C3'  | T B | 9 | 25.187 | -22.980 | 95.466 | 1.00 | 0.00 | C |
| ATOM | 844 | O3'  | T B | 9 | 26.549 | -22.994 | 95.046 | 1.00 | 0.00 | O |
| ATOM | 845 | C4'  | T B | 9 | 24.231 | -22.649 | 94.323 | 1.00 | 0.00 | C |
| ATOM | 846 | O4'  | T B | 9 | 24.231 | -21.187 | 94.265 | 1.00 | 0.00 | O |
| ATOM | 847 | C5'  | T B | 9 | 22.806 | -23.128 | 94.478 | 1.00 | 0.00 | C |
| ATOM | 848 | O5'  | T B | 9 | 22.404 | -23.026 | 95.867 | 1.00 | 0.00 | O |
| ATOM | 849 | O1P  | T B | 9 | 22.082 | -25.424 | 96.558 | 1.00 | 0.00 | O |
| ATOM | 850 | O2P  | T B | 9 | 20.797 | -23.602 | 97.710 | 1.00 | 0.00 | O |
| ATOM | 851 | P    | T B | 9 | 21.402 | -24.116 | 96.458 | 1.00 | 0.00 | P |
| ATOM | 852 | H3   | T B | 9 | 23.184 | -16.462 | 96.022 | 1.00 | 0.00 | H |
| ATOM | 853 | H6   | T B | 9 | 22.477 | -21.154 | 96.869 | 1.00 | 0.00 | H |
| ATOM | 854 | H1'  | T B | 9 | 25.653 | -20.129 | 95.262 | 1.00 | 0.00 | H |
| ATOM | 855 | H3'  | T B | 9 | 24.939 | -23.940 | 95.920 | 1.00 | 0.00 | H |
| ATOM | 856 | H4'  | T B | 9 | 24.642 | -23.111 | 93.423 | 1.00 | 0.00 | H |
| ATOM | 857 | H71  | T B | 9 | 20.793 | -20.038 | 98.869 | 1.00 | 0.00 | H |
| ATOM | 858 | H72  | T B | 9 | 19.875 | -18.727 | 98.090 | 1.00 | 0.00 | H |
| ATOM | 859 | H73  | T B | 9 | 19.933 | -20.341 | 97.339 | 1.00 | 0.00 | H |
| ATOM | 860 | H2'1 | T B | 9 | 24.127 | -22.008 | 97.090 | 1.00 | 0.00 | H |
| ATOM | 861 | H2'2 | T B | 9 | 25.850 | -21.665 | 97.060 | 1.00 | 0.00 | H |
| ATOM | 862 | H5'1 | T B | 9 | 22.153 | -22.514 | 93.858 | 1.00 | 0.00 | H |

|      |     |      |     |    |        |         |         |      |      |   |
|------|-----|------|-----|----|--------|---------|---------|------|------|---|
| ATOM | 863 | H5'2 | T B | 9  | 22.741 | -24.164 | 94.151  | 1.00 | 0.00 | H |
| ATOM | 864 | C1'  | A B | 10 | 28.747 | -17.943 | 96.519  | 1.00 | 0.00 | C |
| ATOM | 865 | N1   | A B | 10 | 25.329 | -14.642 | 98.458  | 1.00 | 0.00 | N |
| ATOM | 866 | C2   | A B | 10 | 26.418 | -14.475 | 97.713  | 1.00 | 0.00 | C |
| ATOM | 867 | N3   | A B | 10 | 27.256 | -15.374 | 97.244  | 1.00 | 0.00 | N |
| ATOM | 868 | C4   | A B | 10 | 26.880 | -16.607 | 97.626  | 1.00 | 0.00 | C |
| ATOM | 869 | C5   | A B | 10 | 25.796 | -16.948 | 98.387  | 1.00 | 0.00 | C |
| ATOM | 870 | C6   | A B | 10 | 24.978 | -15.885 | 98.823  | 1.00 | 0.00 | C |
| ATOM | 871 | N6   | A B | 10 | 23.879 | -16.068 | 99.577  | 1.00 | 0.00 | N |
| ATOM | 872 | N7   | A B | 10 | 25.729 | -18.317 | 98.576  | 1.00 | 0.00 | N |
| ATOM | 873 | C8   | A B | 10 | 26.765 | -18.771 | 97.936  | 1.00 | 0.00 | C |
| ATOM | 874 | N9   | A B | 10 | 27.510 | -17.791 | 97.332  | 1.00 | 0.00 | N |
| ATOM | 875 | C2'  | A B | 10 | 29.687 | -19.026 | 97.031  | 1.00 | 0.00 | C |
| ATOM | 876 | C3'  | A B | 10 | 30.255 | -19.591 | 95.738  | 1.00 | 0.00 | C |
| ATOM | 877 | O3'  | A B | 10 | 31.357 | -18.786 | 95.321  | 1.00 | 0.00 | O |
| ATOM | 878 | C4'  | A B | 10 | 29.072 | -19.492 | 94.776  | 1.00 | 0.00 | C |
| ATOM | 879 | O4'  | A B | 10 | 28.359 | -18.287 | 95.203  | 1.00 | 0.00 | O |
| ATOM | 880 | C5'  | A B | 10 | 28.107 | -20.653 | 94.778  | 1.00 | 0.00 | C |
| ATOM | 881 | O5'  | A B | 10 | 27.955 | -21.162 | 96.128  | 1.00 | 0.00 | O |
| ATOM | 882 | O1P  | A B | 10 | 28.953 | -23.470 | 95.993  | 1.00 | 0.00 | O |
| ATOM | 883 | O2P  | A B | 10 | 27.178 | -22.967 | 97.694  | 1.00 | 0.00 | O |
| ATOM | 884 | P    | A B | 10 | 27.725 | -22.727 | 96.336  | 1.00 | 0.00 | P |
| ATOM | 885 | H2   | A B | 10 | 26.650 | -13.442 | 97.454  | 1.00 | 0.00 | H |
| ATOM | 886 | H8   | A B | 10 | 27.018 | -19.830 | 97.884  | 1.00 | 0.00 | H |
| ATOM | 887 | H1'  | A B | 10 | 29.250 | -16.977 | 96.480  | 1.00 | 0.00 | H |
| ATOM | 888 | H3'  | A B | 10 | 30.583 | -20.623 | 95.852  | 1.00 | 0.00 | H |
| ATOM | 889 | H4'  | A B | 10 | 29.488 | -19.406 | 93.771  | 1.00 | 0.00 | H |
| ATOM | 890 | H61  | A B | 10 | 23.315 | -15.257 | 99.867  | 1.00 | 0.00 | H |
| ATOM | 891 | H62  | A B | 10 | 23.604 | -17.018 | 99.863  | 1.00 | 0.00 | H |
| ATOM | 892 | H2'1 | A B | 10 | 29.163 | -19.794 | 97.601  | 1.00 | 0.00 | H |
| ATOM | 893 | H2'2 | A B | 10 | 30.475 | -18.624 | 97.667  | 1.00 | 0.00 | H |
| ATOM | 894 | H5'1 | A B | 10 | 27.141 | -20.316 | 94.402  | 1.00 | 0.00 | H |
| ATOM | 895 | H5'2 | A B | 10 | 28.489 | -21.439 | 94.129  | 1.00 | 0.00 | H |
| ATOM | 896 | C1'  | G B | 11 | 31.066 | -13.953 | 98.350  | 1.00 | 0.00 | C |
| ATOM | 897 | N1   | G B | 11 | 26.916 | -13.576 | 101.295 | 1.00 | 0.00 | N |
| ATOM | 898 | C2   | G B | 11 | 27.625 | -12.591 | 100.628 | 1.00 | 0.00 | C |
| ATOM | 899 | N2   | G B | 11 | 27.168 | -11.341 | 100.766 | 1.00 | 0.00 | N |
| ATOM | 900 | N3   | G B | 11 | 28.702 | -12.837 | 99.883  | 1.00 | 0.00 | N |
| ATOM | 901 | C4   | G B | 11 | 29.025 | -14.156 | 99.861  | 1.00 | 0.00 | C |
| ATOM | 902 | C5   | G B | 11 | 28.382 | -15.205 | 100.497 | 1.00 | 0.00 | C |
| ATOM | 903 | C6   | G B | 11 | 27.237 | -14.948 | 101.285 | 1.00 | 0.00 | C |
| ATOM | 904 | O6   | G B | 11 | 26.537 | -15.737 | 101.919 | 1.00 | 0.00 | O |
| ATOM | 905 | N7   | G B | 11 | 29.033 | -16.409 | 100.220 | 1.00 | 0.00 | N |
| ATOM | 906 | C8   | G B | 11 | 30.026 | -16.061 | 99.443  | 1.00 | 0.00 | C |
| ATOM | 907 | N9   | G B | 11 | 30.089 | -14.708 | 99.180  | 1.00 | 0.00 | N |
| ATOM | 908 | C2'  | G B | 11 | 32.493 | -14.473 | 98.457  | 1.00 | 0.00 | C |
| ATOM | 909 | C3'  | G B | 11 | 33.013 | -14.267 | 97.044  | 1.00 | 0.00 | C |
| ATOM | 910 | O3'  | G B | 11 | 33.479 | -12.927 | 96.908  | 1.00 | 0.00 | O |
| ATOM | 911 | C4'  | G B | 11 | 31.780 | -14.539 | 96.184  | 1.00 | 0.00 | C |
| ATOM | 912 | O4'  | G B | 11 | 30.661 | -14.064 | 96.999  | 1.00 | 0.00 | O |
| ATOM | 913 | C5'  | G B | 11 | 31.527 | -15.980 | 95.810  | 1.00 | 0.00 | C |
| ATOM | 914 | O5'  | G B | 11 | 31.900 | -16.846 | 96.911  | 1.00 | 0.00 | O |
| ATOM | 915 | O1P  | G B | 11 | 33.856 | -18.140 | 95.999  | 1.00 | 0.00 | O |
| ATOM | 916 | O2P  | G B | 11 | 32.414 | -19.142 | 97.790  | 1.00 | 0.00 | O |



|      |     |      |     |    |        |         |         |      |      |   |
|------|-----|------|-----|----|--------|---------|---------|------|------|---|
| ATOM | 917 | P    | G B | 11 | 32.510 | -18.283 | 96.586  | 1.00 | 0.00 | P |
| ATOM | 918 | H1   | G B | 11 | 26.092 | -13.283 | 101.839 | 1.00 | 0.00 | H |
| ATOM | 919 | H8   | G B | 11 | 30.741 | -16.777 | 99.040  | 1.00 | 0.00 | H |
| ATOM | 920 | H1'  | G B | 11 | 31.011 | -12.900 | 98.630  | 1.00 | 0.00 | H |
| ATOM | 921 | H21  | G B | 11 | 26.333 | -11.160 | 101.341 | 1.00 | 0.00 | H |
| ATOM | 922 | H3'  | G B | 11 | 33.821 | -14.956 | 96.801  | 1.00 | 0.00 | H |
| ATOM | 923 | H22  | G B | 11 | 27.652 | -10.562 | 100.299 | 1.00 | 0.00 | H |
| ATOM | 924 | H4'  | G B | 11 | 31.905 | -13.972 | 95.262  | 1.00 | 0.00 | H |
| ATOM | 925 | H2'1 | G B | 11 | 32.529 | -15.524 | 98.744  | 1.00 | 0.00 | H |
| ATOM | 926 | H2'2 | G B | 11 | 33.082 | -13.914 | 99.183  | 1.00 | 0.00 | H |
| ATOM | 927 | H5'1 | G B | 11 | 30.470 | -16.110 | 95.581  | 1.00 | 0.00 | H |
| ATOM | 928 | H5'2 | G B | 11 | 32.119 | -16.228 | 94.929  | 1.00 | 0.00 | H |
| ATOM | 929 | C1'  | G B | 12 | 31.489 | -10.030 | 101.343 | 1.00 | 0.00 | C |
| ATOM | 930 | N1   | G B | 12 | 28.269 | -12.655 | 104.304 | 1.00 | 0.00 | N |
| ATOM | 931 | C2   | G B | 12 | 28.288 | -11.308 | 103.986 | 1.00 | 0.00 | C |
| ATOM | 932 | N2   | G B | 12 | 27.319 | -10.561 | 104.533 | 1.00 | 0.00 | N |
| ATOM | 933 | N3   | G B | 12 | 29.196 | -10.753 | 103.189 | 1.00 | 0.00 | N |
| ATOM | 934 | C4   | G B | 12 | 30.104 | -11.655 | 102.733 | 1.00 | 0.00 | C |
| ATOM | 935 | C5   | G B | 12 | 30.167 | -13.012 | 102.996 | 1.00 | 0.00 | C |
| ATOM | 936 | C6   | G B | 12 | 29.201 | -13.604 | 103.840 | 1.00 | 0.00 | C |
| ATOM | 937 | O6   | G B | 12 | 29.091 | -14.779 | 104.191 | 1.00 | 0.00 | O |
| ATOM | 938 | N7   | G B | 12 | 31.255 | -13.584 | 102.333 | 1.00 | 0.00 | N |
| ATOM | 939 | C8   | G B | 12 | 31.802 | -12.579 | 101.699 | 1.00 | 0.00 | C |
| ATOM | 940 | N9   | G B | 12 | 31.161 | -11.373 | 101.893 | 1.00 | 0.00 | N |
| ATOM | 941 | C2'  | G B | 12 | 32.984 | -9.753  | 101.255 | 1.00 | 0.00 | C |
| ATOM | 942 | C3'  | G B | 12 | 33.081 | -8.930  | 99.980  | 1.00 | 0.00 | C |
| ATOM | 943 | O3'  | G B | 12 | 32.814 | -7.562  | 100.285 | 1.00 | 0.00 | O |
| ATOM | 944 | C4'  | G B | 12 | 31.998 | -9.546  | 99.096  | 1.00 | 0.00 | C |
| ATOM | 945 | O4'  | G B | 12 | 30.955 | -9.956  | 100.036 | 1.00 | 0.00 | O |
| ATOM | 946 | C5'  | G B | 12 | 32.405 | -10.745 | 98.273  | 1.00 | 0.00 | C |
| ATOM | 947 | O5'  | G B | 12 | 33.337 | -11.562 | 99.025  | 1.00 | 0.00 | O |
| ATOM | 948 | O1P  | G B | 12 | 35.476 | -11.364 | 97.713  | 1.00 | 0.00 | O |
| ATOM | 949 | O2P  | G B | 12 | 35.037 | -13.411 | 99.096  | 1.00 | 0.00 | O |
| ATOM | 950 | P    | G B | 12 | 34.492 | -12.331 | 98.238  | 1.00 | 0.00 | P |
| ATOM | 951 | H1   | G B | 12 | 27.517 | -12.988 | 104.926 | 1.00 | 0.00 | H |
| ATOM | 952 | H8   | G B | 12 | 32.688 | -12.683 | 101.072 | 1.00 | 0.00 | H |
| ATOM | 953 | H1'  | G B | 12 | 30.988 | -9.279  | 101.954 | 1.00 | 0.00 | H |
| ATOM | 954 | H21  | G B | 12 | 26.617 | -11.000 | 105.147 | 1.00 | 0.00 | H |
| ATOM | 955 | H3'  | G B | 12 | 34.062 | -9.011  | 99.514  | 1.00 | 0.00 | H |
| ATOM | 956 | H22  | G B | 12 | 27.279 | -9.551  | 104.339 | 1.00 | 0.00 | H |
| ATOM | 957 | H4'  | G B | 12 | 31.668 | -8.767  | 98.408  | 1.00 | 0.00 | H |
| ATOM | 958 | H2'1 | G B | 12 | 33.570 | -10.669 | 101.181 | 1.00 | 0.00 | H |
| ATOM | 959 | H2'2 | G B | 12 | 33.353 | -9.196  | 102.116 | 1.00 | 0.00 | H |
| ATOM | 960 | H5'1 | G B | 12 | 31.519 | -11.329 | 98.027  | 1.00 | 0.00 | H |
| ATOM | 961 | H5'2 | G B | 12 | 32.877 | -10.403 | 97.351  | 1.00 | 0.00 | H |
| ATOM | 962 | C1'  | T B | 13 | 30.517 | -7.424  | 105.437 | 1.00 | 0.00 | C |
| ATOM | 963 | N1   | T B | 13 | 30.952 | -8.842  | 105.539 | 1.00 | 0.00 | N |
| ATOM | 964 | C2   | T B | 13 | 30.180 | -9.687  | 106.313 | 1.00 | 0.00 | C |
| ATOM | 965 | O2   | T B | 13 | 29.180 | -9.311  | 106.900 | 1.00 | 0.00 | O |
| ATOM | 966 | N3   | T B | 13 | 30.621 | -10.995 | 106.379 | 1.00 | 0.00 | N |
| ATOM | 967 | C4   | T B | 13 | 31.736 | -11.519 | 105.760 | 1.00 | 0.00 | C |
| ATOM | 968 | O4   | T B | 13 | 32.035 | -12.711 | 105.895 | 1.00 | 0.00 | O |
| ATOM | 969 | C5   | T B | 13 | 32.480 | -10.562 | 104.972 | 1.00 | 0.00 | C |
| ATOM | 970 | C6   | T B | 13 | 32.079 | -9.279  | 104.884 | 1.00 | 0.00 | C |

|      |      |      |     |    |        |         |         |      |      |   |
|------|------|------|-----|----|--------|---------|---------|------|------|---|
| ATOM | 971  | C7   | T B | 13 | 33.699 | -11.089 | 104.277 | 1.00 | 0.00 | C |
| ATOM | 972  | C2'  | T B | 13 | 31.668 | -6.428  | 105.421 | 1.00 | 0.00 | C |
| ATOM | 973  | C3'  | T B | 13 | 31.149 | -5.359  | 104.471 | 1.00 | 0.00 | C |
| ATOM | 974  | O3'  | T B | 13 | 30.330 | -4.446  | 105.197 | 1.00 | 0.00 | O |
| ATOM | 975  | C4'  | T B | 13 | 30.350 | -6.169  | 103.452 | 1.00 | 0.00 | C |
| ATOM | 976  | O4'  | T B | 13 | 29.797 | -7.280  | 104.229 | 1.00 | 0.00 | O |
| ATOM | 977  | C5'  | T B | 13 | 31.126 | -6.735  | 102.285 | 1.00 | 0.00 | C |
| ATOM | 978  | O5'  | T B | 13 | 32.445 | -7.146  | 102.728 | 1.00 | 0.00 | O |
| ATOM | 979  | O1P  | T B | 13 | 33.984 | -5.566  | 101.517 | 1.00 | 0.00 | O |
| ATOM | 980  | O2P  | T B | 13 | 34.798 | -7.843  | 102.187 | 1.00 | 0.00 | O |
| ATOM | 981  | P    | T B | 13 | 33.673 | -6.995  | 101.723 | 1.00 | 0.00 | P |
| ATOM | 982  | H3   | T B | 13 | 30.059 | -11.645 | 106.947 | 1.00 | 0.00 | H |
| ATOM | 983  | H6   | T B | 13 | 32.655 | -8.575  | 104.285 | 1.00 | 0.00 | H |
| ATOM | 984  | H1'  | T B | 13 | 29.833 | -7.217  | 106.261 | 1.00 | 0.00 | H |
| ATOM | 985  | H3'  | T B | 13 | 31.960 | -4.812  | 103.990 | 1.00 | 0.00 | H |
| ATOM | 986  | H4'  | T B | 13 | 29.585 | -5.506  | 103.051 | 1.00 | 0.00 | H |
| ATOM | 987  | H71  | T B | 13 | 34.589 | -10.619 | 104.697 | 1.00 | 0.00 | H |
| ATOM | 988  | H72  | T B | 13 | 33.760 | -12.170 | 104.417 | 1.00 | 0.00 | H |
| ATOM | 989  | H73  | T B | 13 | 33.638 | -10.863 | 103.211 | 1.00 | 0.00 | H |
| ATOM | 990  | H2'1 | T B | 13 | 32.593 | -6.870  | 105.053 | 1.00 | 0.00 | H |
| ATOM | 991  | H2'2 | T B | 13 | 31.873 | -6.014  | 106.408 | 1.00 | 0.00 | H |
| ATOM | 992  | H5'1 | T B | 13 | 30.590 | -7.592  | 101.879 | 1.00 | 0.00 | H |
| ATOM | 993  | H5'2 | T B | 13 | 31.220 | -5.972  | 101.514 | 1.00 | 0.00 | H |
| ATOM | 994  | C1'  | G B | 14 | 29.153 | -6.969  | 110.190 | 1.00 | 0.00 | C |
| ATOM | 995  | N1   | G B | 14 | 30.870 | -11.759 | 110.567 | 1.00 | 0.00 | N |
| ATOM | 996  | C2   | G B | 14 | 29.733 | -11.178 | 111.102 | 1.00 | 0.00 | C |
| ATOM | 997  | N2   | G B | 14 | 28.950 | -11.979 | 111.833 | 1.00 | 0.00 | N |
| ATOM | 998  | N3   | G B | 14 | 29.403 | -9.900  | 110.917 | 1.00 | 0.00 | N |
| ATOM | 999  | C4   | G B | 14 | 30.312 | -9.237  | 110.155 | 1.00 | 0.00 | C |
| ATOM | 1000 | C5   | G B | 14 | 31.473 | -9.731  | 109.586 | 1.00 | 0.00 | C |
| ATOM | 1001 | C6   | G B | 14 | 31.823 | -11.087 | 109.777 | 1.00 | 0.00 | C |
| ATOM | 1002 | O6   | G B | 14 | 32.804 | -11.704 | 109.357 | 1.00 | 0.00 | O |
| ATOM | 1003 | N7   | G B | 14 | 32.132 | -8.723  | 108.878 | 1.00 | 0.00 | N |
| ATOM | 1004 | C8   | G B | 14 | 31.364 | -7.674  | 109.035 | 1.00 | 0.00 | C |
| ATOM | 1005 | N9   | G B | 14 | 30.240 | -7.908  | 109.800 | 1.00 | 0.00 | N |
| ATOM | 1006 | C2'  | G B | 14 | 29.640 | -5.558  | 110.495 | 1.00 | 0.00 | C |
| ATOM | 1007 | C3'  | G B | 14 | 28.497 | -4.706  | 109.968 | 1.00 | 0.00 | C |
| ATOM | 1008 | O3'  | G B | 14 | 27.487 | -4.608  | 110.970 | 1.00 | 0.00 | O |
| ATOM | 1009 | C4'  | G B | 14 | 28.024 | -5.492  | 108.747 | 1.00 | 0.00 | C |
| ATOM | 1010 | O4'  | G B | 14 | 28.243 | -6.892  | 109.111 | 1.00 | 0.00 | O |
| ATOM | 1011 | C5'  | G B | 14 | 28.742 | -5.211  | 107.449 | 1.00 | 0.00 | C |
| ATOM | 1012 | O5'  | G B | 14 | 30.148 | -4.973  | 107.708 | 1.00 | 0.00 | O |
| ATOM | 1013 | O1P  | G B | 14 | 30.456 | -2.555  | 107.081 | 1.00 | 0.00 | O |
| ATOM | 1014 | O2P  | G B | 14 | 32.390 | -4.145  | 106.932 | 1.00 | 0.00 | O |
| ATOM | 1015 | P    | G B | 14 | 30.931 | -3.923  | 106.796 | 1.00 | 0.00 | P |
| ATOM | 1016 | H1   | G B | 14 | 31.030 | -12.758 | 110.764 | 1.00 | 0.00 | H |
| ATOM | 1017 | H8   | G B | 14 | 31.594 | -6.701  | 108.600 | 1.00 | 0.00 | H |
| ATOM | 1018 | H1'  | G B | 14 | 28.625 | -7.394  | 111.045 | 1.00 | 0.00 | H |
| ATOM | 1019 | H21  | G B | 14 | 29.211 | -12.968 | 111.969 | 1.00 | 0.00 | H |
| ATOM | 1020 | H3'  | G B | 14 | 28.828 | -3.707  | 109.689 | 1.00 | 0.00 | H |
| ATOM | 1021 | H22  | G B | 14 | 28.091 | -11.607 | 112.262 | 1.00 | 0.00 | H |
| ATOM | 1022 | H4'  | G B | 14 | 26.970 | -5.249  | 108.603 | 1.00 | 0.00 | H |
| ATOM | 1023 | H2'1 | G B | 14 | 30.576 | -5.326  | 109.988 | 1.00 | 0.00 | H |
| ATOM | 1024 | H2'2 | G B | 14 | 29.797 | -5.397  | 111.561 | 1.00 | 0.00 | H |

|      |      |      |     |    |        |         |         |      |      |   |
|------|------|------|-----|----|--------|---------|---------|------|------|---|
| ATOM | 1025 | H5'1 | G B | 14 | 28.630 | -6.067  | 106.785 | 1.00 | 0.00 | H |
| ATOM | 1026 | H5'2 | G B | 14 | 28.301 | -4.333  | 106.978 | 1.00 | 0.00 | H |
| ATOM | 1027 | C1'  | C B | 15 | 28.608 | -8.580  | 114.841 | 1.00 | 0.00 | C |
| ATOM | 1028 | N1   | C B | 15 | 29.923 | -8.687  | 114.153 | 1.00 | 0.00 | N |
| ATOM | 1029 | C2   | C B | 15 | 30.558 | -9.927  | 114.148 | 1.00 | 0.00 | C |
| ATOM | 1030 | O2   | C B | 15 | 30.008 | -10.881 | 114.713 | 1.00 | 0.00 | O |
| ATOM | 1031 | N3   | C B | 15 | 31.757 | -10.045 | 113.525 | 1.00 | 0.00 | N |
| ATOM | 1032 | C4   | C B | 15 | 32.327 | -8.994  | 112.924 | 1.00 | 0.00 | C |
| ATOM | 1033 | N4   | C B | 15 | 33.498 | -9.167  | 112.328 | 1.00 | 0.00 | N |
| ATOM | 1034 | C5   | C B | 15 | 31.698 | -7.704  | 112.917 | 1.00 | 0.00 | C |
| ATOM | 1035 | C6   | C B | 15 | 30.492 | -7.610  | 113.546 | 1.00 | 0.00 | C |
| ATOM | 1036 | C2'  | C B | 15 | 28.411 | -7.267  | 115.587 | 1.00 | 0.00 | C |
| ATOM | 1037 | C3'  | C B | 15 | 26.927 | -7.006  | 115.382 | 1.00 | 0.00 | C |
| ATOM | 1038 | O3'  | C B | 15 | 26.185 | -7.714  | 116.373 | 1.00 | 0.00 | O |
| ATOM | 1039 | C4'  | C B | 15 | 26.677 | -7.548  | 113.977 | 1.00 | 0.00 | C |
| ATOM | 1040 | O4'  | C B | 15 | 27.596 | -8.679  | 113.857 | 1.00 | 0.00 | O |
| ATOM | 1041 | C5'  | C B | 15 | 26.934 | -6.594  | 112.833 | 1.00 | 0.00 | C |
| ATOM | 1042 | O5'  | C B | 15 | 28.078 | -5.759  | 113.141 | 1.00 | 0.00 | O |
| ATOM | 1043 | O1P  | C B | 15 | 27.081 | -3.455  | 113.337 | 1.00 | 0.00 | O |
| ATOM | 1044 | O2P  | C B | 15 | 29.479 | -3.729  | 112.652 | 1.00 | 0.00 | O |
| ATOM | 1045 | P    | C B | 15 | 28.093 | -4.253  | 112.614 | 1.00 | 0.00 | P |
| ATOM | 1046 | H5   | C B | 15 | 32.163 | -6.844  | 112.434 | 1.00 | 0.00 | H |
| ATOM | 1047 | H6   | C B | 15 | 29.971 | -6.651  | 113.562 | 1.00 | 0.00 | H |
| ATOM | 1048 | H1'  | C B | 15 | 28.507 | -9.431  | 115.515 | 1.00 | 0.00 | H |
| ATOM | 1049 | H3'  | C B | 15 | 26.688 | -5.944  | 115.442 | 1.00 | 0.00 | H |
| ATOM | 1050 | H4'  | C B | 15 | 25.628 | -7.844  | 113.933 | 1.00 | 0.00 | H |
| ATOM | 1051 | H41  | C B | 15 | 33.957 | -8.375  | 111.855 | 1.00 | 0.00 | H |
| ATOM | 1052 | H42  | C B | 15 | 33.949 | -10.094 | 112.337 | 1.00 | 0.00 | H |
| ATOM | 1053 | H2'1 | C B | 15 | 29.016 | -6.461  | 115.173 | 1.00 | 0.00 | H |
| ATOM | 1054 | H2'2 | C B | 15 | 28.658 | -7.350  | 116.646 | 1.00 | 0.00 | H |
| ATOM | 1055 | H5'1 | C B | 15 | 27.130 | -7.167  | 111.926 | 1.00 | 0.00 | H |
| ATOM | 1056 | H5'2 | C B | 15 | 26.053 | -5.971  | 112.683 | 1.00 | 0.00 | H |
| ATOM | 1057 | C1'  | G B | 16 | 29.744 | -11.447 | 118.716 | 1.00 | 0.00 | C |
| ATOM | 1058 | N1   | G B | 16 | 34.320 | -11.687 | 116.475 | 1.00 | 0.00 | N |
| ATOM | 1059 | C2   | G B | 16 | 33.572 | -12.684 | 117.077 | 1.00 | 0.00 | C |
| ATOM | 1060 | N2   | G B | 16 | 34.118 | -13.907 | 117.084 | 1.00 | 0.00 | N |
| ATOM | 1061 | N3   | G B | 16 | 32.376 | -12.478 | 117.627 | 1.00 | 0.00 | N |
| ATOM | 1062 | C4   | G B | 16 | 31.983 | -11.180 | 117.533 | 1.00 | 0.00 | C |
| ATOM | 1063 | C5   | G B | 16 | 32.663 | -10.121 | 116.957 | 1.00 | 0.00 | C |
| ATOM | 1064 | C6   | G B | 16 | 33.930 | -10.339 | 116.370 | 1.00 | 0.00 | C |
| ATOM | 1065 | O6   | G B | 16 | 34.678 | -9.533  | 115.815 | 1.00 | 0.00 | O |
| ATOM | 1066 | N7   | G B | 16 | 31.914 | -8.947  | 117.072 | 1.00 | 0.00 | N |
| ATOM | 1067 | C8   | G B | 16 | 30.829 | -9.325  | 117.699 | 1.00 | 0.00 | C |
| ATOM | 1068 | N9   | G B | 16 | 30.798 | -10.668 | 118.014 | 1.00 | 0.00 | N |
| ATOM | 1069 | C2'  | G B | 16 | 29.072 | -10.687 | 119.851 | 1.00 | 0.00 | C |
| ATOM | 1070 | C3'  | G B | 16 | 27.638 | -11.184 | 119.763 | 1.00 | 0.00 | C |
| ATOM | 1071 | O3'  | G B | 16 | 27.523 | -12.412 | 120.477 | 1.00 | 0.00 | O |
| ATOM | 1072 | C4'  | G B | 16 | 27.435 | -11.368 | 118.260 | 1.00 | 0.00 | C |
| ATOM | 1073 | O4'  | G B | 16 | 28.750 | -11.781 | 117.767 | 1.00 | 0.00 | O |
| ATOM | 1074 | C5'  | G B | 16 | 26.990 | -10.149 | 117.488 | 1.00 | 0.00 | C |
| ATOM | 1075 | O5'  | G B | 16 | 27.620 | -8.965  | 118.036 | 1.00 | 0.00 | O |
| ATOM | 1076 | O1P  | G B | 16 | 25.688 | -7.662  | 118.986 | 1.00 | 0.00 | O |
| ATOM | 1077 | O2P  | G B | 16 | 27.752 | -6.462  | 118.219 | 1.00 | 0.00 | O |
| ATOM | 1078 | P    | G B | 16 | 26.808 | -7.591  | 118.031 | 1.00 | 0.00 | P |

|      |      |      |     |    |        |         |         |      |      |   |
|------|------|------|-----|----|--------|---------|---------|------|------|---|
| ATOM | 1079 | H1   | G B | 16 | 35.231 | -11.954 | 116.072 | 1.00 | 0.00 | H |
| ATOM | 1080 | H8   | G B | 16 | 30.020 | -8.639  | 117.949 | 1.00 | 0.00 | H |
| ATOM | 1081 | H1'  | G B | 16 | 30.187 | -12.376 | 119.076 | 1.00 | 0.00 | H |
| ATOM | 1082 | H21  | G B | 16 | 35.041 | -14.061 | 116.654 | 1.00 | 0.00 | H |
| ATOM | 1083 | H3'  | G B | 16 | 26.929 | -10.462 | 120.169 | 1.00 | 0.00 | H |
| ATOM | 1084 | H22  | G B | 16 | 33.612 | -14.692 | 117.518 | 1.00 | 0.00 | H |
| ATOM | 1085 | H4'  | G B | 16 | 26.673 | -12.138 | 118.135 | 1.00 | 0.00 | H |
| ATOM | 1086 | H2'1 | G B | 16 | 29.127 | -9.607  | 119.715 | 1.00 | 0.00 | H |
| ATOM | 1087 | H2'2 | G B | 16 | 29.513 | -10.917 | 120.821 | 1.00 | 0.00 | H |
| ATOM | 1088 | H5'1 | G B | 16 | 27.272 | -10.265 | 116.441 | 1.00 | 0.00 | H |
| ATOM | 1089 | H5'2 | G B | 16 | 25.907 | -10.057 | 117.560 | 1.00 | 0.00 | H |
| ATOM | 1090 | C1'  | G B | 17 | 32.785 | -14.268 | 121.422 | 1.00 | 0.00 | C |
| ATOM | 1091 | N1   | G B | 17 | 36.432 | -11.506 | 119.164 | 1.00 | 0.00 | N |
| ATOM | 1092 | C2   | G B | 17 | 36.375 | -12.866 | 119.417 | 1.00 | 0.00 | C |
| ATOM | 1093 | N2   | G B | 17 | 37.431 | -13.584 | 119.016 | 1.00 | 0.00 | N |
| ATOM | 1094 | N3   | G B | 17 | 35.347 | -13.460 | 120.019 | 1.00 | 0.00 | N |
| ATOM | 1095 | C4   | G B | 17 | 34.371 | -12.579 | 120.363 | 1.00 | 0.00 | C |
| ATOM | 1096 | C5   | G B | 17 | 34.342 | -11.211 | 120.156 | 1.00 | 0.00 | C |
| ATOM | 1097 | C6   | G B | 17 | 35.431 | -10.579 | 119.513 | 1.00 | 0.00 | C |
| ATOM | 1098 | O6   | G B | 17 | 35.589 | -9.389  | 119.243 | 1.00 | 0.00 | O |
| ATOM | 1099 | N7   | G B | 17 | 33.157 | -10.671 | 120.659 | 1.00 | 0.00 | N |
| ATOM | 1100 | C8   | G B | 17 | 32.518 | -11.705 | 121.142 | 1.00 | 0.00 | C |
| ATOM | 1101 | N9   | G B | 17 | 33.192 | -12.900 | 121.000 | 1.00 | 0.00 | N |
| ATOM | 1102 | C2'  | G B | 17 | 32.045 | -14.304 | 122.752 | 1.00 | 0.00 | C |
| ATOM | 1103 | C3'  | G B | 17 | 31.036 | -15.418 | 122.525 | 1.00 | 0.00 | C |
| ATOM | 1104 | O3'  | G B | 17 | 31.654 | -16.673 | 122.799 | 1.00 | 0.00 | O |
| ATOM | 1105 | C4'  | G B | 17 | 30.682 | -15.259 | 121.048 | 1.00 | 0.00 | C |
| ATOM | 1106 | O4'  | G B | 17 | 31.921 | -14.787 | 120.429 | 1.00 | 0.00 | O |
| ATOM | 1107 | C5'  | G B | 17 | 29.577 | -14.281 | 120.724 | 1.00 | 0.00 | C |
| ATOM | 1108 | O5'  | G B | 17 | 29.648 | -13.146 | 121.620 | 1.00 | 0.00 | O |
| ATOM | 1109 | O1P  | G B | 17 | 27.533 | -13.336 | 122.971 | 1.00 | 0.00 | O |
| ATOM | 1110 | O2P  | G B | 17 | 28.594 | -11.091 | 122.612 | 1.00 | 0.00 | O |
| ATOM | 1111 | P    | G B | 17 | 28.292 | -12.441 | 122.076 | 1.00 | 0.00 | P |
| ATOM | 1112 | H1   | G B | 17 | 37.272 | -11.146 | 118.687 | 1.00 | 0.00 | H |
| ATOM | 1113 | H8   | G B | 17 | 31.539 | -11.630 | 121.614 | 1.00 | 0.00 | H |
| ATOM | 1114 | H1'  | G B | 17 | 33.675 | -14.894 | 121.452 | 1.00 | 0.00 | H |
| ATOM | 1115 | H21  | G B | 17 | 38.222 | -13.119 | 118.547 | 1.00 | 0.00 | H |
| ATOM | 1116 | H3'  | G B | 17 | 30.153 | -15.305 | 123.155 | 1.00 | 0.00 | H |
| ATOM | 1117 | H22  | G B | 17 | 37.451 | -14.601 | 119.176 | 1.00 | 0.00 | H |
| ATOM | 1118 | H4'  | G B | 17 | 30.373 | -16.240 | 120.687 | 1.00 | 0.00 | H |
| ATOM | 1119 | H2'1 | G B | 17 | 31.550 | -13.359 | 122.976 | 1.00 | 0.00 | H |
| ATOM | 1120 | H2'2 | G B | 17 | 32.707 | -14.532 | 123.588 | 1.00 | 0.00 | H |
| ATOM | 1121 | H5'1 | G B | 17 | 29.688 | -13.945 | 119.692 | 1.00 | 0.00 | H |
| ATOM | 1122 | H5'2 | G B | 17 | 28.614 | -14.780 | 120.836 | 1.00 | 0.00 | H |
| ATOM | 1123 | C1'  | C B | 18 | 37.234 | -15.753 | 123.014 | 1.00 | 0.00 | C |
| ATOM | 1124 | N1   | C B | 18 | 36.856 | -14.313 | 123.054 | 1.00 | 0.00 | N |
| ATOM | 1125 | C2   | C B | 18 | 37.734 | -13.394 | 122.483 | 1.00 | 0.00 | C |
| ATOM | 1126 | O2   | C B | 18 | 38.782 | -13.807 | 121.971 | 1.00 | 0.00 | O |
| ATOM | 1127 | N3   | C B | 18 | 37.409 | -12.079 | 122.510 | 1.00 | 0.00 | N |
| ATOM | 1128 | C4   | C B | 18 | 36.267 | -11.664 | 123.073 | 1.00 | 0.00 | C |
| ATOM | 1129 | N4   | C B | 18 | 35.999 | -10.365 | 123.068 | 1.00 | 0.00 | N |
| ATOM | 1130 | C5   | C B | 18 | 35.348 | -12.587 | 123.668 | 1.00 | 0.00 | C |
| ATOM | 1131 | C6   | C B | 18 | 35.694 | -13.905 | 123.627 | 1.00 | 0.00 | C |
| ATOM | 1132 | C2'  | C B | 18 | 36.854 | -16.523 | 124.272 | 1.00 | 0.00 | C |

|      |      |      |     |    |        |         |         |      |      |   |
|------|------|------|-----|----|--------|---------|---------|------|------|---|
| ATOM | 1133 | C3'  | C B | 18 | 36.474 | -17.884 | 123.710 | 1.00 | 0.00 | C |
| ATOM | 1134 | O3'  | C B | 18 | 37.653 | -18.669 | 123.547 | 1.00 | 0.00 | O |
| ATOM | 1135 | C4'  | C B | 18 | 35.828 | -17.530 | 122.372 | 1.00 | 0.00 | C |
| ATOM | 1136 | O4'  | C B | 18 | 36.557 | -16.344 | 121.920 | 1.00 | 0.00 | O |
| ATOM | 1137 | C5'  | C B | 18 | 34.353 | -17.206 | 122.403 | 1.00 | 0.00 | C |
| ATOM | 1138 | O5'  | C B | 18 | 34.035 | -16.487 | 123.622 | 1.00 | 0.00 | O |
| ATOM | 1139 | O1P  | C B | 18 | 32.546 | -18.087 | 124.872 | 1.00 | 0.00 | O |
| ATOM | 1140 | O2P  | C B | 18 | 32.328 | -15.616 | 125.247 | 1.00 | 0.00 | O |
| ATOM | 1141 | P    | C B | 18 | 32.615 | -16.725 | 124.305 | 1.00 | 0.00 | P |
| ATOM | 1142 | H5   | C B | 18 | 34.420 | -12.253 | 124.130 | 1.00 | 0.00 | H |
| ATOM | 1143 | H6   | C B | 18 | 35.024 | -14.645 | 124.065 | 1.00 | 0.00 | H |
| ATOM | 1144 | H1'  | C B | 18 | 38.304 | -15.820 | 122.823 | 1.00 | 0.00 | H |
| ATOM | 1145 | H3'  | C B | 18 | 35.775 | -18.412 | 124.356 | 1.00 | 0.00 | H |
| ATOM | 1146 | H4'  | C B | 18 | 35.964 | -18.390 | 121.716 | 1.00 | 0.00 | H |
| ATOM | 1147 | H41  | C B | 18 | 35.126 | -10.019 | 123.493 | 1.00 | 0.00 | H |
| ATOM | 1148 | H42  | C B | 18 | 36.661 | -9.704  | 122.640 | 1.00 | 0.00 | H |
| ATOM | 1149 | H2'1 | C B | 18 | 36.019 | -16.065 | 124.800 | 1.00 | 0.00 | H |
| ATOM | 1150 | H2'2 | C B | 18 | 37.684 | -16.600 | 124.975 | 1.00 | 0.00 | H |
| ATOM | 1151 | H5'1 | C B | 18 | 34.101 | -16.592 | 121.538 | 1.00 | 0.00 | H |
| ATOM | 1152 | H5'2 | C B | 18 | 33.782 | -18.132 | 122.364 | 1.00 | 0.00 | H |
| ATOM | 1153 | C1'  | C B | 19 | 42.051 | -15.125 | 123.973 | 1.00 | 0.00 | C |
| ATOM | 1154 | N1   | C B | 19 | 41.045 | -14.157 | 124.486 | 1.00 | 0.00 | N |
| ATOM | 1155 | C2   | C B | 19 | 41.255 | -12.801 | 124.237 | 1.00 | 0.00 | C |
| ATOM | 1156 | O2   | C B | 19 | 42.262 | -12.461 | 123.603 | 1.00 | 0.00 | O |
| ATOM | 1157 | N3   | C B | 19 | 40.350 | -11.905 | 124.697 | 1.00 | 0.00 | N |
| ATOM | 1158 | C4   | C B | 19 | 39.269 | -12.306 | 125.380 | 1.00 | 0.00 | C |
| ATOM | 1159 | N4   | C B | 19 | 38.418 | -11.387 | 125.805 | 1.00 | 0.00 | N |
| ATOM | 1160 | C5   | C B | 19 | 39.031 | -13.691 | 125.650 | 1.00 | 0.00 | C |
| ATOM | 1161 | C6   | C B | 19 | 39.953 | -14.576 | 125.178 | 1.00 | 0.00 | C |
| ATOM | 1162 | C2'  | C B | 19 | 42.318 | -16.290 | 124.914 | 1.00 | 0.00 | C |
| ATOM | 1163 | C3'  | C B | 19 | 42.544 | -17.438 | 123.941 | 1.00 | 0.00 | C |
| ATOM | 1164 | O3'  | C B | 19 | 43.905 | -17.430 | 123.516 | 1.00 | 0.00 | O |
| ATOM | 1165 | C4'  | C B | 19 | 41.581 | -17.114 | 122.802 | 1.00 | 0.00 | C |
| ATOM | 1166 | O4'  | C B | 19 | 41.559 | -15.651 | 122.754 | 1.00 | 0.00 | O |
| ATOM | 1167 | C5'  | C B | 19 | 40.163 | -17.612 | 122.959 | 1.00 | 0.00 | C |
| ATOM | 1168 | O5'  | C B | 19 | 39.763 | -17.525 | 124.349 | 1.00 | 0.00 | O |
| ATOM | 1169 | O1P  | C B | 19 | 39.477 | -19.932 | 125.025 | 1.00 | 0.00 | O |
| ATOM | 1170 | O2P  | C B | 19 | 38.169 | -18.136 | 126.193 | 1.00 | 0.00 | O |
| ATOM | 1171 | P    | C B | 19 | 38.779 | -18.633 | 124.935 | 1.00 | 0.00 | P |
| ATOM | 1172 | H5   | C B | 19 | 38.155 | -14.022 | 126.208 | 1.00 | 0.00 | H |
| ATOM | 1173 | H6   | C B | 19 | 39.812 | -15.642 | 125.359 | 1.00 | 0.00 | H |
| ATOM | 1174 | H1'  | C B | 19 | 42.969 | -14.578 | 123.755 | 1.00 | 0.00 | H |
| ATOM | 1175 | H3'  | C B | 19 | 42.311 | -18.404 | 124.391 | 1.00 | 0.00 | H |
| ATOM | 1176 | H4'  | C B | 19 | 41.994 | -17.563 | 121.899 | 1.00 | 0.00 | H |
| ATOM | 1177 | H41  | C B | 19 | 37.577 | -11.667 | 126.332 | 1.00 | 0.00 | H |
| ATOM | 1178 | H42  | C B | 19 | 38.593 | -10.390 | 125.609 | 1.00 | 0.00 | H |
| ATOM | 1179 | H2'1 | C B | 19 | 41.476 | -16.490 | 125.574 | 1.00 | 0.00 | H |
| ATOM | 1180 | H2'2 | C B | 19 | 43.195 | -16.122 | 125.542 | 1.00 | 0.00 | H |
| ATOM | 1181 | H5'1 | C B | 19 | 39.500 | -17.004 | 122.345 | 1.00 | 0.00 | H |
| ATOM | 1182 | H5'2 | C B | 19 | 40.111 | -18.647 | 122.625 | 1.00 | 0.00 | H |
| ATOM | 1183 | C1'  | T B | 20 | 46.072 | -12.432 | 125.014 | 1.00 | 0.00 | C |
| ATOM | 1184 | N1   | T B | 20 | 44.836 | -12.279 | 125.828 | 1.00 | 0.00 | N |
| ATOM | 1185 | C2   | T B | 20 | 44.358 | -10.996 | 126.011 | 1.00 | 0.00 | C |
| ATOM | 1186 | O2   | T B | 20 | 44.905 | -10.014 | 125.539 | 1.00 | 0.00 | O |

|      |      |      |     |    |        |         |         |      |      |   |
|------|------|------|-----|----|--------|---------|---------|------|------|---|
| ATOM | 1187 | N3   | T B | 20 | 43.210 | -10.900 | 126.773 | 1.00 | 0.00 | N |
| ATOM | 1188 | C4   | T B | 20 | 42.517 | -11.941 | 127.350 | 1.00 | 0.00 | C |
| ATOM | 1189 | O4   | T B | 20 | 41.495 | -11.730 | 128.016 | 1.00 | 0.00 | O |
| ATOM | 1190 | C5   | T B | 20 | 43.091 | -13.242 | 127.104 | 1.00 | 0.00 | C |
| ATOM | 1191 | C6   | T B | 20 | 44.210 | -13.375 | 126.366 | 1.00 | 0.00 | C |
| ATOM | 1192 | C7   | T B | 20 | 42.368 | -14.405 | 127.714 | 1.00 | 0.00 | C |
| ATOM | 1193 | C2'  | T B | 20 | 47.013 | -13.515 | 125.528 | 1.00 | 0.00 | C |
| ATOM | 1194 | C3'  | T B | 20 | 47.578 | -14.082 | 124.234 | 1.00 | 0.00 | C |
| ATOM | 1195 | O3'  | T B | 20 | 48.681 | -13.282 | 123.814 | 1.00 | 0.00 | O |
| ATOM | 1196 | C4'  | T B | 20 | 46.394 | -13.987 | 123.274 | 1.00 | 0.00 | C |
| ATOM | 1197 | O4'  | T B | 20 | 45.682 | -12.781 | 123.700 | 1.00 | 0.00 | O |
| ATOM | 1198 | C5'  | T B | 20 | 45.428 | -15.147 | 123.283 | 1.00 | 0.00 | C |
| ATOM | 1199 | O5'  | T B | 20 | 45.280 | -15.653 | 124.635 | 1.00 | 0.00 | O |
| ATOM | 1200 | O1P  | T B | 20 | 46.277 | -17.960 | 124.506 | 1.00 | 0.00 | O |
| ATOM | 1201 | O2P  | T B | 20 | 44.505 | -17.451 | 126.209 | 1.00 | 0.00 | O |
| ATOM | 1202 | P    | T B | 20 | 45.049 | -17.216 | 124.849 | 1.00 | 0.00 | P |
| ATOM | 1203 | H3   | T B | 20 | 42.833 | -9.954  | 126.923 | 1.00 | 0.00 | H |
| ATOM | 1204 | H6   | T B | 20 | 44.625 | -14.368 | 126.193 | 1.00 | 0.00 | H |
| ATOM | 1205 | H1'  | T B | 20 | 46.575 | -11.467 | 124.969 | 1.00 | 0.00 | H |
| ATOM | 1206 | H3'  | T B | 20 | 47.907 | -15.114 | 124.352 | 1.00 | 0.00 | H |
| ATOM | 1207 | H4'  | T B | 20 | 46.808 | -13.907 | 122.268 | 1.00 | 0.00 | H |
| ATOM | 1208 | H3T  | T B | 20 | 49.363 | -13.146 | 124.475 | 1.00 | 0.00 | H |
| ATOM | 1209 | H71  | T B | 20 | 43.000 | -14.870 | 128.471 | 1.00 | 0.00 | H |
| ATOM | 1210 | H72  | T B | 20 | 41.443 | -14.058 | 128.176 | 1.00 | 0.00 | H |
| ATOM | 1211 | H73  | T B | 20 | 42.133 | -15.136 | 126.938 | 1.00 | 0.00 | H |
| ATOM | 1212 | H2'1 | T B | 20 | 46.491 | -14.279 | 126.100 | 1.00 | 0.00 | H |
| ATOM | 1213 | H2'2 | T B | 20 | 47.802 | -13.110 | 126.161 | 1.00 | 0.00 | H |
| ATOM | 1214 | H5'1 | T B | 20 | 44.461 | -14.812 | 122.907 | 1.00 | 0.00 | H |
| ATOM | 1215 | H5'2 | T B | 20 | 45.810 | -15.935 | 122.636 | 1.00 | 0.00 | H |
| TER  |      |      |     |    |        |         |         |      |      |   |
| ATOM | 1    | C1'  | A A | 1  | 55.554 | -35.637 | 104.773 | 1.00 | 0.00 | C |
| ATOM | 2    | N1   | A A | 1  | 52.981 | -39.646 | 106.681 | 1.00 | 0.00 | N |
| ATOM | 3    | C2   | A A | 1  | 53.751 | -39.501 | 105.607 | 1.00 | 0.00 | C |
| ATOM | 4    | N3   | A A | 1  | 54.390 | -38.435 | 105.172 | 1.00 | 0.00 | N |
| ATOM | 5    | C4   | A A | 1  | 54.168 | -37.393 | 105.993 | 1.00 | 0.00 | C |
| ATOM | 6    | C5   | A A | 1  | 53.408 | -37.376 | 107.128 | 1.00 | 0.00 | C |
| ATOM | 7    | C6   | A A | 1  | 52.780 | -38.589 | 107.482 | 1.00 | 0.00 | C |
| ATOM | 8    | N6   | A A | 1  | 52.002 | -38.723 | 108.571 | 1.00 | 0.00 | N |
| ATOM | 9    | N7   | A A | 1  | 53.414 | -36.122 | 107.714 | 1.00 | 0.00 | N |
| ATOM | 10   | C8   | A A | 1  | 54.169 | -35.414 | 106.927 | 1.00 | 0.00 | C |
| ATOM | 11   | N9   | A A | 1  | 54.664 | -36.119 | 105.862 | 1.00 | 0.00 | N |
| ATOM | 12   | C2'  | A A | 1  | 55.256 | -34.214 | 104.321 | 1.00 | 0.00 | C |
| ATOM | 13   | C3'  | A A | 1  | 56.645 | -33.685 | 104.004 | 1.00 | 0.00 | C |
| ATOM | 14   | O3'  | A A | 1  | 57.000 | -34.065 | 102.676 | 1.00 | 0.00 | O |
| ATOM | 15   | C4'  | A A | 1  | 57.519 | -34.370 | 105.053 | 1.00 | 0.00 | C |
| ATOM | 16   | O4'  | A A | 1  | 56.883 | -35.673 | 105.256 | 1.00 | 0.00 | O |
| ATOM | 17   | C5'  | A A | 1  | 57.630 | -33.674 | 106.390 | 1.00 | 0.00 | C |
| ATOM | 18   | O5'  | A A | 1  | 56.363 | -33.058 | 106.731 | 1.00 | 0.00 | O |
| ATOM | 19   | H2   | A A | 1  | 53.871 | -40.397 | 104.996 | 1.00 | 0.00 | H |
| ATOM | 20   | H8   | A A | 1  | 54.388 | -34.360 | 107.099 | 1.00 | 0.00 | H |
| ATOM | 21   | H1'  | A A | 1  | 55.482 | -36.336 | 103.939 | 1.00 | 0.00 | H |
| ATOM | 22   | H3'  | A A | 1  | 56.700 | -32.599 | 104.094 | 1.00 | 0.00 | H |
| ATOM | 23   | H4'  | A A | 1  | 58.520 | -34.443 | 104.632 | 1.00 | 0.00 | H |
| ATOM | 24   | H61  | A A | 1  | 51.568 | -39.629 | 108.784 | 1.00 | 0.00 | H |

|      |    |      |     |   |        |         |         |      |      |   |
|------|----|------|-----|---|--------|---------|---------|------|------|---|
| ATOM | 25 | H62  | A A | 1 | 51.843 | -37.914 | 109.189 | 1.00 | 0.00 | H |
| ATOM | 26 | H5T  | A A | 1 | 56.368 | -32.234 | 107.220 | 1.00 | 0.00 | H |
| ATOM | 27 | H2'1 | A A | 1 | 54.775 | -33.625 | 105.100 | 1.00 | 0.00 | H |
| ATOM | 28 | H2'2 | A A | 1 | 54.612 | -34.186 | 103.442 | 1.00 | 0.00 | H |
| ATOM | 29 | H5'1 | A A | 1 | 57.902 | -34.405 | 107.151 | 1.00 | 0.00 | H |
| ATOM | 30 | H5'2 | A A | 1 | 58.406 | -32.912 | 106.333 | 1.00 | 0.00 | H |
| ATOM | 31 | C1'  | G A | 2 | 53.286 | -38.119 | 101.119 | 1.00 | 0.00 | C |
| ATOM | 32 | N1   | G A | 2 | 50.106 | -39.580 | 104.829 | 1.00 | 0.00 | N |
| ATOM | 33 | C2   | G A | 2 | 50.659 | -40.313 | 103.797 | 1.00 | 0.00 | C |
| ATOM | 34 | N2   | G A | 2 | 50.320 | -41.607 | 103.744 | 1.00 | 0.00 | N |
| ATOM | 35 | N3   | G A | 2 | 51.487 | -39.798 | 102.889 | 1.00 | 0.00 | N |
| ATOM | 36 | C4   | G A | 2 | 51.715 | -38.473 | 103.093 | 1.00 | 0.00 | C |
| ATOM | 37 | C5   | G A | 2 | 51.204 | -37.661 | 104.092 | 1.00 | 0.00 | C |
| ATOM | 38 | C6   | G A | 2 | 50.329 | -38.211 | 105.058 | 1.00 | 0.00 | C |
| ATOM | 39 | O6   | G A | 2 | 49.781 | -37.658 | 106.012 | 1.00 | 0.00 | O |
| ATOM | 40 | N7   | G A | 2 | 51.685 | -36.357 | 103.947 | 1.00 | 0.00 | N |
| ATOM | 41 | C8   | G A | 2 | 52.455 | -36.420 | 102.891 | 1.00 | 0.00 | C |
| ATOM | 42 | N9   | G A | 2 | 52.523 | -37.672 | 102.316 | 1.00 | 0.00 | N |
| ATOM | 43 | C2'  | G A | 2 | 53.330 | -37.088 | 99.999  | 1.00 | 0.00 | C |
| ATOM | 44 | C3'  | G A | 2 | 54.724 | -37.296 | 99.430  | 1.00 | 0.00 | C |
| ATOM | 45 | O3'  | G A | 2 | 54.690 | -38.365 | 98.486  | 1.00 | 0.00 | O |
| ATOM | 46 | C4'  | G A | 2 | 55.548 | -37.645 | 100.668 | 1.00 | 0.00 | C |
| ATOM | 47 | O4'  | G A | 2 | 54.616 | -38.376 | 101.526 | 1.00 | 0.00 | O |
| ATOM | 48 | C5'  | G A | 2 | 56.113 | -36.481 | 101.447 | 1.00 | 0.00 | C |
| ATOM | 49 | O5'  | G A | 2 | 55.168 | -35.382 | 101.442 | 1.00 | 0.00 | O |
| ATOM | 50 | O1P  | G A | 2 | 56.357 | -33.600 | 100.121 | 1.00 | 0.00 | O |
| ATOM | 51 | O2P  | G A | 2 | 54.656 | -32.956 | 101.849 | 1.00 | 0.00 | O |
| ATOM | 52 | P    | G A | 2 | 55.728 | -33.889 | 101.424 | 1.00 | 0.00 | P |
| ATOM | 53 | H1   | G A | 2 | 49.480 | -40.075 | 105.480 | 1.00 | 0.00 | H |
| ATOM | 54 | H8   | G A | 2 | 52.995 | -35.558 | 102.500 | 1.00 | 0.00 | H |
| ATOM | 55 | H1'  | G A | 2 | 52.855 | -39.057 | 100.770 | 1.00 | 0.00 | H |
| ATOM | 56 | H21  | G A | 2 | 49.681 | -42.000 | 104.449 | 1.00 | 0.00 | H |
| ATOM | 57 | H3'  | G A | 2 | 55.105 | -36.397 | 98.945  | 1.00 | 0.00 | H |
| ATOM | 58 | H22  | G A | 2 | 50.698 | -42.206 | 102.997 | 1.00 | 0.00 | H |
| ATOM | 59 | H4'  | G A | 2 | 56.384 | -38.256 | 100.329 | 1.00 | 0.00 | H |
| ATOM | 60 | H2'1 | G A | 2 | 53.199 | -36.070 | 100.369 | 1.00 | 0.00 | H |
| ATOM | 61 | H2'2 | G A | 2 | 52.562 | -37.264 | 99.244  | 1.00 | 0.00 | H |
| ATOM | 62 | H5'1 | G A | 2 | 56.303 | -36.796 | 102.474 | 1.00 | 0.00 | H |
| ATOM | 63 | H5'2 | G A | 2 | 57.050 | -36.165 | 100.991 | 1.00 | 0.00 | H |
| ATOM | 64 | C1'  | G A | 3 | 49.781 | -41.077 | 99.251  | 1.00 | 0.00 | C |
| ATOM | 65 | N1   | G A | 3 | 47.069 | -39.446 | 103.251 | 1.00 | 0.00 | N |
| ATOM | 66 | C2   | G A | 3 | 47.189 | -40.716 | 102.720 | 1.00 | 0.00 | C |
| ATOM | 67 | N2   | G A | 3 | 46.493 | -41.681 | 103.334 | 1.00 | 0.00 | N |
| ATOM | 68 | N3   | G A | 3 | 47.944 | -41.002 | 101.661 | 1.00 | 0.00 | N |
| ATOM | 69 | C4   | G A | 3 | 48.572 | -39.905 | 101.162 | 1.00 | 0.00 | C |
| ATOM | 70 | C5   | G A | 3 | 48.508 | -38.601 | 101.624 | 1.00 | 0.00 | C |
| ATOM | 71 | C6   | G A | 3 | 47.710 | -38.298 | 102.751 | 1.00 | 0.00 | C |
| ATOM | 72 | O6   | G A | 3 | 47.529 | -37.212 | 103.304 | 1.00 | 0.00 | O |
| ATOM | 73 | N7   | G A | 3 | 49.301 | -37.769 | 100.831 | 1.00 | 0.00 | N |
| ATOM | 74 | C8   | G A | 3 | 49.811 | -38.576 | 99.937  | 1.00 | 0.00 | C |
| ATOM | 75 | N9   | G A | 3 | 49.414 | -39.891 | 100.072 | 1.00 | 0.00 | N |
| ATOM | 76 | C2'  | G A | 3 | 49.905 | -40.779 | 97.763  | 1.00 | 0.00 | C |
| ATOM | 77 | C3'  | G A | 3 | 51.051 | -41.687 | 97.350  | 1.00 | 0.00 | C |
| ATOM | 78 | O3'  | G A | 3 | 50.539 | -42.990 | 97.078  | 1.00 | 0.00 | O |

|      |     |      |     |   |        |         |         |      |      |   |
|------|-----|------|-----|---|--------|---------|---------|------|------|---|
| ATOM | 79  | C4'  | G A | 3 | 51.958 | -41.669 | 98.579  | 1.00 | 0.00 | C |
| ATOM | 80  | O4'  | G A | 3 | 51.035 | -41.547 | 99.707  | 1.00 | 0.00 | O |
| ATOM | 81  | C5'  | G A | 3 | 52.964 | -40.545 | 98.652  | 1.00 | 0.00 | C |
| ATOM | 82  | O5'  | G A | 3 | 52.386 | -39.333 | 98.109  | 1.00 | 0.00 | O |
| ATOM | 83  | O1P  | G A | 3 | 53.764 | -38.904 | 96.046  | 1.00 | 0.00 | O |
| ATOM | 84  | O2P  | G A | 3 | 52.668 | -36.991 | 97.242  | 1.00 | 0.00 | O |
| ATOM | 85  | P    | G A | 3 | 53.334 | -38.314 | 97.328  | 1.00 | 0.00 | P |
| ATOM | 86  | H1   | G A | 3 | 46.461 | -39.331 | 104.076 | 1.00 | 0.00 | H |
| ATOM | 87  | H8   | G A | 3 | 50.490 | -38.241 | 99.153  | 1.00 | 0.00 | H |
| ATOM | 88  | H1'  | G A | 3 | 49.044 | -41.860 | 99.432  | 1.00 | 0.00 | H |
| ATOM | 89  | H21  | G A | 3 | 45.913 | -41.452 | 104.155 | 1.00 | 0.00 | H |
| ATOM | 90  | H3'  | G A | 3 | 51.573 | -41.313 | 96.470  | 1.00 | 0.00 | H |
| ATOM | 91  | H22  | G A | 3 | 46.539 | -42.648 | 102.986 | 1.00 | 0.00 | H |
| ATOM | 92  | H4'  | G A | 3 | 52.509 | -42.609 | 98.580  | 1.00 | 0.00 | H |
| ATOM | 93  | H2'1 | G A | 3 | 50.139 | -39.732 | 97.570  | 1.00 | 0.00 | H |
| ATOM | 94  | H2'2 | G A | 3 | 48.992 | -41.015 | 97.216  | 1.00 | 0.00 | H |
| ATOM | 95  | H5'1 | G A | 3 | 53.247 | -40.386 | 99.692  | 1.00 | 0.00 | H |
| ATOM | 96  | H5'2 | G A | 3 | 53.850 | -40.820 | 98.081  | 1.00 | 0.00 | H |
| ATOM | 97  | C1'  | C A | 4 | 45.296 | -43.180 | 99.203  | 1.00 | 0.00 | C |
| ATOM | 98  | N1   | C A | 4 | 45.437 | -41.701 | 99.324  | 1.00 | 0.00 | N |
| ATOM | 99  | C2   | C A | 4 | 44.766 | -41.067 | 100.365 | 1.00 | 0.00 | C |
| ATOM | 100 | O2   | C A | 4 | 44.084 | -41.748 | 101.141 | 1.00 | 0.00 | O |
| ATOM | 101 | N3   | C A | 4 | 44.881 | -39.722 | 100.493 | 1.00 | 0.00 | N |
| ATOM | 102 | C4   | C A | 4 | 45.626 | -39.010 | 99.636  | 1.00 | 0.00 | C |
| ATOM | 103 | N4   | C A | 4 | 45.706 | -37.700 | 99.810  | 1.00 | 0.00 | N |
| ATOM | 104 | C5   | C A | 4 | 46.325 | -39.639 | 98.556  | 1.00 | 0.00 | C |
| ATOM | 105 | C6   | C A | 4 | 46.197 | -40.992 | 98.448  | 1.00 | 0.00 | C |
| ATOM | 106 | C2'  | C A | 4 | 45.217 | -43.672 | 97.765  | 1.00 | 0.00 | C |
| ATOM | 107 | C3'  | C A | 4 | 45.964 | -44.994 | 97.841  | 1.00 | 0.00 | C |
| ATOM | 108 | O3'  | C A | 4 | 45.066 | -46.015 | 98.273  | 1.00 | 0.00 | O |
| ATOM | 109 | C4'  | C A | 4 | 47.054 | -44.711 | 98.872  | 1.00 | 0.00 | C |
| ATOM | 110 | O4'  | C A | 4 | 46.433 | -43.770 | 99.805  | 1.00 | 0.00 | O |
| ATOM | 111 | C5'  | C A | 4 | 48.330 | -44.096 | 98.346  | 1.00 | 0.00 | C |
| ATOM | 112 | O5'  | C A | 4 | 48.023 | -43.164 | 97.279  | 1.00 | 0.00 | O |
| ATOM | 113 | O1P  | C A | 4 | 49.051 | -44.242 | 95.250  | 1.00 | 0.00 | O |
| ATOM | 114 | O2P  | C A | 4 | 48.780 | -41.750 | 95.344  | 1.00 | 0.00 | O |
| ATOM | 115 | P    | C A | 4 | 49.053 | -43.015 | 96.070  | 1.00 | 0.00 | P |
| ATOM | 116 | H5   | C A | 4 | 46.928 | -39.063 | 97.853  | 1.00 | 0.00 | H |
| ATOM | 117 | H6   | C A | 4 | 46.715 | -41.515 | 97.644  | 1.00 | 0.00 | H |
| ATOM | 118 | H1'  | C A | 4 | 44.419 | -43.484 | 99.770  | 1.00 | 0.00 | H |
| ATOM | 119 | H3'  | C A | 4 | 46.394 | -45.276 | 96.879  | 1.00 | 0.00 | H |
| ATOM | 120 | H4'  | C A | 4 | 47.309 | -45.664 | 99.333  | 1.00 | 0.00 | H |
| ATOM | 121 | H41  | C A | 4 | 46.273 | -37.129 | 99.166  | 1.00 | 0.00 | H |
| ATOM | 122 | H42  | C A | 4 | 45.201 | -37.250 | 100.587 | 1.00 | 0.00 | H |
| ATOM | 123 | H2'1 | C A | 4 | 45.694 | -42.987 | 97.065  | 1.00 | 0.00 | H |
| ATOM | 124 | H2'2 | C A | 4 | 44.187 | -43.814 | 97.433  | 1.00 | 0.00 | H |
| ATOM | 125 | H5'1 | C A | 4 | 48.837 | -43.572 | 99.158  | 1.00 | 0.00 | H |
| ATOM | 126 | H5'2 | C A | 4 | 48.979 | -44.886 | 97.970  | 1.00 | 0.00 | H |
| ATOM | 127 | C1'  | C A | 5 | 40.475 | -43.394 | 100.310 | 1.00 | 0.00 | C |
| ATOM | 128 | N1   | C A | 5 | 41.048 | -42.181 | 99.664  | 1.00 | 0.00 | N |
| ATOM | 129 | C2   | C A | 5 | 40.791 | -40.946 | 100.254 | 1.00 | 0.00 | C |
| ATOM | 130 | O2   | C A | 5 | 40.101 | -40.905 | 101.282 | 1.00 | 0.00 | O |
| ATOM | 131 | N3   | C A | 5 | 41.304 | -39.829 | 99.681  | 1.00 | 0.00 | N |
| ATOM | 132 | C4   | C A | 5 | 42.046 | -39.904 | 98.569  | 1.00 | 0.00 | C |



|      |     |      |     |   |        |         |         |      |      |   |
|------|-----|------|-----|---|--------|---------|---------|------|------|---|
| ATOM | 133 | N4   | C A | 5 | 42.525 | -38.782 | 98.055  | 1.00 | 0.00 | N |
| ATOM | 134 | C5   | C A | 5 | 42.325 | -41.162 | 97.941  | 1.00 | 0.00 | C |
| ATOM | 135 | C6   | C A | 5 | 41.800 | -42.272 | 98.536  | 1.00 | 0.00 | C |
| ATOM | 136 | C2'  | C A | 5 | 39.991 | -44.445 | 99.320  | 1.00 | 0.00 | C |
| ATOM | 137 | C3'  | C A | 5 | 40.333 | -45.740 | 100.041 | 1.00 | 0.00 | C |
| ATOM | 138 | O3'  | C A | 5 | 39.281 | -46.064 | 100.946 | 1.00 | 0.00 | O |
| ATOM | 139 | C4'  | C A | 5 | 41.632 | -45.393 | 100.764 | 1.00 | 0.00 | C |
| ATOM | 140 | O4'  | C A | 5 | 41.488 | -43.978 | 101.107 | 1.00 | 0.00 | O |
| ATOM | 141 | C5'  | C A | 5 | 42.908 | -45.572 | 99.976  | 1.00 | 0.00 | C |
| ATOM | 142 | O5'  | C A | 5 | 42.683 | -45.210 | 98.589  | 1.00 | 0.00 | O |
| ATOM | 143 | O1P  | C A | 5 | 42.965 | -47.392 | 97.366  | 1.00 | 0.00 | O |
| ATOM | 144 | O2P  | C A | 5 | 43.435 | -45.224 | 96.192  | 1.00 | 0.00 | O |
| ATOM | 145 | P    | C A | 5 | 43.468 | -46.007 | 97.452  | 1.00 | 0.00 | P |
| ATOM | 146 | H5   | C A | 5 | 42.923 | -41.228 | 97.032  | 1.00 | 0.00 | H |
| ATOM | 147 | H6   | C A | 5 | 41.988 | -43.252 | 98.097  | 1.00 | 0.00 | H |
| ATOM | 148 | H1'  | C A | 5 | 39.668 | -43.078 | 100.971 | 1.00 | 0.00 | H |
| ATOM | 149 | H3'  | C A | 5 | 40.478 | -46.568 | 99.345  | 1.00 | 0.00 | H |
| ATOM | 150 | H4'  | C A | 5 | 41.688 | -46.041 | 101.640 | 1.00 | 0.00 | H |
| ATOM | 151 | H41  | C A | 5 | 43.100 | -38.812 | 97.201  | 1.00 | 0.00 | H |
| ATOM | 152 | H42  | C A | 5 | 42.322 | -37.879 | 98.508  | 1.00 | 0.00 | H |
| ATOM | 153 | H2'1 | C A | 5 | 40.503 | -44.378 | 98.361  | 1.00 | 0.00 | H |
| ATOM | 154 | H2'2 | C A | 5 | 38.920 | -44.369 | 99.127  | 1.00 | 0.00 | H |
| ATOM | 155 | H5'1 | C A | 5 | 43.685 | -44.935 | 100.402 | 1.00 | 0.00 | H |
| ATOM | 156 | H5'2 | C A | 5 | 43.224 | -46.613 | 100.039 | 1.00 | 0.00 | H |
| ATOM | 157 | C1'  | G A | 6 | 36.085 | -41.414 | 101.465 | 1.00 | 0.00 | C |
| ATOM | 158 | N1   | G A | 6 | 37.954 | -37.298 | 99.101  | 1.00 | 0.00 | N |
| ATOM | 159 | C2   | G A | 6 | 37.233 | -37.395 | 100.278 | 1.00 | 0.00 | C |
| ATOM | 160 | N2   | G A | 6 | 36.973 | -36.243 | 100.908 | 1.00 | 0.00 | N |
| ATOM | 161 | N3   | G A | 6 | 36.806 | -38.550 | 100.785 | 1.00 | 0.00 | N |
| ATOM | 162 | C4   | G A | 6 | 37.151 | -39.613 | 100.014 | 1.00 | 0.00 | C |
| ATOM | 163 | C5   | G A | 6 | 37.864 | -39.612 | 98.826  | 1.00 | 0.00 | C |
| ATOM | 164 | C6   | G A | 6 | 38.322 | -38.387 | 98.288  | 1.00 | 0.00 | C |
| ATOM | 165 | O6   | G A | 6 | 38.962 | -38.183 | 97.258  | 1.00 | 0.00 | O |
| ATOM | 166 | N7   | G A | 6 | 38.007 | -40.915 | 98.347  | 1.00 | 0.00 | N |
| ATOM | 167 | C8   | G A | 6 | 37.393 | -41.649 | 99.239  | 1.00 | 0.00 | C |
| ATOM | 168 | N9   | G A | 6 | 36.847 | -40.930 | 100.282 | 1.00 | 0.00 | N |
| ATOM | 169 | C2'  | G A | 6 | 35.148 | -42.574 | 101.158 | 1.00 | 0.00 | C |
| ATOM | 170 | C3'  | G A | 6 | 35.236 | -43.401 | 102.430 | 1.00 | 0.00 | C |
| ATOM | 171 | O3'  | G A | 6 | 34.323 | -42.878 | 103.393 | 1.00 | 0.00 | O |
| ATOM | 172 | C4'  | G A | 6 | 36.692 | -43.216 | 102.855 | 1.00 | 0.00 | C |
| ATOM | 173 | O4'  | G A | 6 | 37.020 | -41.854 | 102.431 | 1.00 | 0.00 | O |
| ATOM | 174 | C5'  | G A | 6 | 37.695 | -44.165 | 102.247 | 1.00 | 0.00 | C |
| ATOM | 175 | O5'  | G A | 6 | 37.329 | -44.455 | 100.874 | 1.00 | 0.00 | O |
| ATOM | 176 | O1P  | G A | 6 | 36.748 | -46.902 | 100.927 | 1.00 | 0.00 | O |
| ATOM | 177 | O2P  | G A | 6 | 37.585 | -45.858 | 98.806  | 1.00 | 0.00 | O |
| ATOM | 178 | P    | G A | 6 | 37.629 | -45.907 | 100.288 | 1.00 | 0.00 | P |
| ATOM | 179 | H1   | G A | 6 | 38.245 | -36.355 | 98.798  | 1.00 | 0.00 | H |
| ATOM | 180 | H8   | G A | 6 | 37.319 | -42.734 | 99.166  | 1.00 | 0.00 | H |
| ATOM | 181 | H1'  | G A | 6 | 35.537 | -40.571 | 101.887 | 1.00 | 0.00 | H |
| ATOM | 182 | H21  | G A | 6 | 37.310 | -35.353 | 100.511 | 1.00 | 0.00 | H |
| ATOM | 183 | H3'  | G A | 6 | 35.010 | -44.452 | 102.252 | 1.00 | 0.00 | H |
| ATOM | 184 | H22  | G A | 6 | 36.438 | -36.247 | 101.788 | 1.00 | 0.00 | H |
| ATOM | 185 | H4'  | G A | 6 | 36.726 | -43.343 | 103.936 | 1.00 | 0.00 | H |
| ATOM | 186 | H2'1 | G A | 6 | 35.471 | -43.148 | 100.289 | 1.00 | 0.00 | H |

|      |     |      |     |   |        |         |         |      |      |   |
|------|-----|------|-----|---|--------|---------|---------|------|------|---|
| ATOM | 187 | H2'2 | G A | 6 | 34.126 | -42.243 | 100.969 | 1.00 | 0.00 | H |
| ATOM | 188 | H5'1 | G A | 6 | 38.684 | -43.711 | 102.276 | 1.00 | 0.00 | H |
| ATOM | 189 | H5'2 | G A | 6 | 37.710 | -45.089 | 102.826 | 1.00 | 0.00 | H |
| ATOM | 190 | C1'  | C A | 7 | 32.731 | -37.771 | 101.546 | 1.00 | 0.00 | C |
| ATOM | 191 | N1   | C A | 7 | 33.367 | -38.185 | 100.265 | 1.00 | 0.00 | N |
| ATOM | 192 | C2   | C A | 7 | 33.939 | -37.193 | 99.471  | 1.00 | 0.00 | C |
| ATOM | 193 | O2   | C A | 7 | 33.897 | -36.019 | 99.858  | 1.00 | 0.00 | O |
| ATOM | 194 | N3   | C A | 7 | 34.524 | -37.550 | 98.301  | 1.00 | 0.00 | N |
| ATOM | 195 | C4   | C A | 7 | 34.552 | -38.829 | 97.907  | 1.00 | 0.00 | C |
| ATOM | 196 | N4   | C A | 7 | 35.139 | -39.121 | 96.756  | 1.00 | 0.00 | N |
| ATOM | 197 | C5   | C A | 7 | 33.967 | -39.869 | 98.701  | 1.00 | 0.00 | C |
| ATOM | 198 | C6   | C A | 7 | 33.389 | -39.488 | 99.878  | 1.00 | 0.00 | C |
| ATOM | 199 | C2'  | C A | 7 | 31.462 | -38.544 | 101.879 | 1.00 | 0.00 | C |
| ATOM | 200 | C3'  | C A | 7 | 31.549 | -38.654 | 103.394 | 1.00 | 0.00 | C |
| ATOM | 201 | O3'  | C A | 7 | 31.018 | -37.469 | 103.982 | 1.00 | 0.00 | O |
| ATOM | 202 | C4'  | C A | 7 | 33.049 | -38.798 | 103.639 | 1.00 | 0.00 | C |
| ATOM | 203 | O4'  | C A | 7 | 33.667 | -37.996 | 102.583 | 1.00 | 0.00 | O |
| ATOM | 204 | C5'  | C A | 7 | 33.609 | -40.201 | 103.570 | 1.00 | 0.00 | C |
| ATOM | 205 | O5'  | C A | 7 | 32.925 | -40.952 | 102.534 | 1.00 | 0.00 | O |
| ATOM | 206 | O1P  | C A | 7 | 31.692 | -42.731 | 103.821 | 1.00 | 0.00 | O |
| ATOM | 207 | O2P  | C A | 7 | 32.383 | -43.149 | 101.445 | 1.00 | 0.00 | O |
| ATOM | 208 | P    | C A | 7 | 32.686 | -42.513 | 102.749 | 1.00 | 0.00 | P |
| ATOM | 209 | H5   | C A | 7 | 33.983 | -40.912 | 98.383  | 1.00 | 0.00 | H |
| ATOM | 210 | H6   | C A | 7 | 32.937 | -40.244 | 100.521 | 1.00 | 0.00 | H |
| ATOM | 211 | H1'  | C A | 7 | 32.535 | -36.699 | 101.498 | 1.00 | 0.00 | H |
| ATOM | 212 | H3'  | C A | 7 | 31.003 | -39.520 | 103.770 | 1.00 | 0.00 | H |
| ATOM | 213 | H4'  | C A | 7 | 33.244 | -38.412 | 104.640 | 1.00 | 0.00 | H |
| ATOM | 214 | H41  | C A | 7 | 35.178 | -40.098 | 96.430  | 1.00 | 0.00 | H |
| ATOM | 215 | H42  | C A | 7 | 35.557 | -38.373 | 96.184  | 1.00 | 0.00 | H |
| ATOM | 216 | H2'1 | C A | 7 | 31.441 | -39.525 | 101.410 | 1.00 | 0.00 | H |
| ATOM | 217 | H2'2 | C A | 7 | 30.561 | -38.012 | 101.570 | 1.00 | 0.00 | H |
| ATOM | 218 | H5'1 | C A | 7 | 34.675 | -40.151 | 103.346 | 1.00 | 0.00 | H |
| ATOM | 219 | H5'2 | C A | 7 | 33.468 | -40.691 | 104.533 | 1.00 | 0.00 | H |
| ATOM | 220 | C1'  | A A | 8 | 30.613 | -33.626 | 99.858  | 1.00 | 0.00 | C |
| ATOM | 221 | N1   | A A | 8 | 32.647 | -35.093 | 95.379  | 1.00 | 0.00 | N |
| ATOM | 222 | C2   | A A | 8 | 32.564 | -33.913 | 95.986  | 1.00 | 0.00 | C |
| ATOM | 223 | N3   | A A | 8 | 32.027 | -33.603 | 97.146  | 1.00 | 0.00 | N |
| ATOM | 224 | C4   | A A | 8 | 31.508 | -34.702 | 97.725  | 1.00 | 0.00 | C |
| ATOM | 225 | C5   | A A | 8 | 31.508 | -35.979 | 97.238  | 1.00 | 0.00 | C |
| ATOM | 226 | C6   | A A | 8 | 32.121 | -36.170 | 95.983  | 1.00 | 0.00 | C |
| ATOM | 227 | N6   | A A | 8 | 32.197 | -37.369 | 95.379  | 1.00 | 0.00 | N |
| ATOM | 228 | N7   | A A | 8 | 30.882 | -36.848 | 98.114  | 1.00 | 0.00 | N |
| ATOM | 229 | C8   | A A | 8 | 30.515 | -36.085 | 99.103  | 1.00 | 0.00 | C |
| ATOM | 230 | N9   | A A | 8 | 30.864 | -34.769 | 98.937  | 1.00 | 0.00 | N |
| ATOM | 231 | C2'  | A A | 8 | 29.263 | -33.691 | 100.561 | 1.00 | 0.00 | C |
| ATOM | 232 | C3'  | A A | 8 | 29.591 | -33.110 | 101.927 | 1.00 | 0.00 | C |
| ATOM | 233 | O3'  | A A | 8 | 29.524 | -31.688 | 101.859 | 1.00 | 0.00 | O |
| ATOM | 234 | C4'  | A A | 8 | 31.013 | -33.610 | 102.178 | 1.00 | 0.00 | C |
| ATOM | 235 | O4'  | A A | 8 | 31.624 | -33.642 | 100.847 | 1.00 | 0.00 | O |
| ATOM | 236 | C5'  | A A | 8 | 31.142 | -34.979 | 102.803 | 1.00 | 0.00 | C |
| ATOM | 237 | O5'  | A A | 8 | 30.103 | -35.851 | 102.293 | 1.00 | 0.00 | O |
| ATOM | 238 | O1P  | A A | 8 | 28.685 | -36.313 | 104.321 | 1.00 | 0.00 | O |
| ATOM | 239 | O2P  | A A | 8 | 28.787 | -37.986 | 102.453 | 1.00 | 0.00 | O |
| ATOM | 240 | P    | A A | 8 | 29.486 | -36.958 | 103.263 | 1.00 | 0.00 | P |

|      |     |      |     |    |        |         |         |      |      |   |
|------|-----|------|-----|----|--------|---------|---------|------|------|---|
| ATOM | 241 | H2   | A A | 8  | 33.007 | -33.080 | 95.441  | 1.00 | 0.00 | H |
| ATOM | 242 | H8   | A A | 8  | 29.982 | -36.455 | 99.979  | 1.00 | 0.00 | H |
| ATOM | 243 | H1'  | A A | 8  | 30.714 | -32.703 | 99.290  | 1.00 | 0.00 | H |
| ATOM | 244 | H3'  | A A | 8  | 28.907 | -33.467 | 102.697 | 1.00 | 0.00 | H |
| ATOM | 245 | H4'  | A A | 8  | 31.486 | -32.892 | 102.846 | 1.00 | 0.00 | H |
| ATOM | 246 | H61  | A A | 8  | 32.658 | -37.456 | 94.463  | 1.00 | 0.00 | H |
| ATOM | 247 | H62  | A A | 8  | 31.793 | -38.201 | 95.835  | 1.00 | 0.00 | H |
| ATOM | 248 | H2'1 | A A | 8  | 28.888 | -34.709 | 100.642 | 1.00 | 0.00 | H |
| ATOM | 249 | H2'2 | A A | 8  | 28.503 | -33.100 | 100.050 | 1.00 | 0.00 | H |
| ATOM | 250 | H5'1 | A A | 8  | 32.121 | -35.391 | 102.559 | 1.00 | 0.00 | H |
| ATOM | 251 | H5'2 | A A | 8  | 31.050 | -34.890 | 103.885 | 1.00 | 0.00 | H |
| ATOM | 252 | C1'  | C A | 9  | 29.497 | -30.340 | 96.306  | 1.00 | 0.00 | C |
| ATOM | 253 | N1   | C A | 9  | 29.227 | -31.790 | 96.103  | 1.00 | 0.00 | N |
| ATOM | 254 | C2   | C A | 9  | 29.703 | -32.386 | 94.936  | 1.00 | 0.00 | C |
| ATOM | 255 | O2   | C A | 9  | 30.324 | -31.690 | 94.122  | 1.00 | 0.00 | O |
| ATOM | 256 | N3   | C A | 9  | 29.468 | -33.703 | 94.732  | 1.00 | 0.00 | N |
| ATOM | 257 | C4   | C A | 9  | 28.789 | -34.430 | 95.630  | 1.00 | 0.00 | C |
| ATOM | 258 | N4   | C A | 9  | 28.591 | -35.717 | 95.382  | 1.00 | 0.00 | N |
| ATOM | 259 | C5   | C A | 9  | 28.285 | -33.844 | 96.838  | 1.00 | 0.00 | C |
| ATOM | 260 | C6   | C A | 9  | 28.537 | -32.515 | 97.026  | 1.00 | 0.00 | C |
| ATOM | 261 | C2'  | C A | 9  | 28.347 | -29.588 | 96.960  | 1.00 | 0.00 | C |
| ATOM | 262 | C3'  | C A | 9  | 29.082 | -28.578 | 97.829  | 1.00 | 0.00 | C |
| ATOM | 263 | O3'  | C A | 9  | 29.419 | -27.440 | 97.039  | 1.00 | 0.00 | O |
| ATOM | 264 | C4'  | C A | 9  | 30.317 | -29.352 | 98.280  | 1.00 | 0.00 | C |
| ATOM | 265 | O4'  | C A | 9  | 30.628 | -30.228 | 97.149  | 1.00 | 0.00 | O |
| ATOM | 266 | C5'  | C A | 9  | 30.160 | -30.203 | 99.519  | 1.00 | 0.00 | C |
| ATOM | 267 | O5'  | C A | 9  | 28.833 | -30.790 | 99.545  | 1.00 | 0.00 | O |
| ATOM | 268 | O1P  | C A | 9  | 27.754 | -29.702 | 101.541 | 1.00 | 0.00 | O |
| ATOM | 269 | O2P  | C A | 9  | 27.009 | -31.981 | 100.800 | 1.00 | 0.00 | O |
| ATOM | 270 | P    | C A | 9  | 28.117 | -31.006 | 100.954 | 1.00 | 0.00 | P |
| ATOM | 271 | H5   | C A | 9  | 27.727 | -34.430 | 97.569  | 1.00 | 0.00 | H |
| ATOM | 272 | H6   | C A | 9  | 28.182 | -32.025 | 97.932  | 1.00 | 0.00 | H |
| ATOM | 273 | H1'  | C A | 9  | 29.753 | -29.903 | 95.342  | 1.00 | 0.00 | H |
| ATOM | 274 | H3'  | C A | 9  | 28.482 | -28.261 | 98.681  | 1.00 | 0.00 | H |
| ATOM | 275 | H4'  | C A | 9  | 31.097 | -28.619 | 98.479  | 1.00 | 0.00 | H |
| ATOM | 276 | H41  | C A | 9  | 28.075 | -36.298 | 96.058  | 1.00 | 0.00 | H |
| ATOM | 277 | H42  | C A | 9  | 28.953 | -36.135 | 94.512  | 1.00 | 0.00 | H |
| ATOM | 278 | H2'1 | C A | 9  | 27.714 | -30.239 | 97.560  | 1.00 | 0.00 | H |
| ATOM | 279 | H2'2 | C A | 9  | 27.708 | -29.092 | 96.228  | 1.00 | 0.00 | H |
| ATOM | 280 | H5'1 | C A | 9  | 30.912 | -30.993 | 99.510  | 1.00 | 0.00 | H |
| ATOM | 281 | H5'2 | C A | 9  | 30.304 | -29.581 | 100.401 | 1.00 | 0.00 | H |
| ATOM | 282 | C1'  | C A | 10 | 28.707 | -28.940 | 91.622  | 1.00 | 0.00 | C |
| ATOM | 283 | N1   | C A | 10 | 28.004 | -30.125 | 92.185  | 1.00 | 0.00 | N |
| ATOM | 284 | C2   | C A | 10 | 28.066 | -31.320 | 91.470  | 1.00 | 0.00 | C |
| ATOM | 285 | O2   | C A | 10 | 28.696 | -31.348 | 90.405  | 1.00 | 0.00 | O |
| ATOM | 286 | N3   | C A | 10 | 27.433 | -32.411 | 91.966  | 1.00 | 0.00 | N |
| ATOM | 287 | C4   | C A | 10 | 26.757 | -32.351 | 93.121  | 1.00 | 0.00 | C |
| ATOM | 288 | N4   | C A | 10 | 26.159 | -33.449 | 93.561  | 1.00 | 0.00 | N |
| ATOM | 289 | C5   | C A | 10 | 26.674 | -31.134 | 93.875  | 1.00 | 0.00 | C |
| ATOM | 290 | C6   | C A | 10 | 27.324 | -30.049 | 93.359  | 1.00 | 0.00 | C |
| ATOM | 291 | C2'  | C A | 10 | 27.961 | -27.630 | 91.828  | 1.00 | 0.00 | C |
| ATOM | 292 | C3'  | C A | 10 | 29.100 | -26.648 | 92.052  | 1.00 | 0.00 | C |
| ATOM | 293 | O3'  | C A | 10 | 29.592 | -26.206 | 90.789  | 1.00 | 0.00 | O |
| ATOM | 294 | C4'  | C A | 10 | 30.127 | -27.486 | 92.810  | 1.00 | 0.00 | C |

|      |     |      |   |   |    |        |         |        |      |      |   |
|------|-----|------|---|---|----|--------|---------|--------|------|------|---|
| ATOM | 295 | O4'  | C | A | 10 | 29.961 | -28.835 | 92.270 | 1.00 | 0.00 | O |
| ATOM | 296 | C5'  | C | A | 10 | 29.968 | -27.544 | 94.312 | 1.00 | 0.00 | C |
| ATOM | 297 | O5'  | C | A | 10 | 28.561 | -27.559 | 94.657 | 1.00 | 0.00 | O |
| ATOM | 298 | O1P  | C | A | 10 | 28.226 | -25.368 | 95.847 | 1.00 | 0.00 | O |
| ATOM | 299 | O2P  | C | A | 10 | 26.743 | -27.320 | 96.374 | 1.00 | 0.00 | O |
| ATOM | 300 | P    | C | A | 10 | 28.089 | -26.830 | 95.994 | 1.00 | 0.00 | P |
| ATOM | 301 | H5   | C | A | 10 | 26.120 | -31.078 | 94.814 | 1.00 | 0.00 | H |
| ATOM | 302 | H6   | C | A | 10 | 27.296 | -29.104 | 93.901 | 1.00 | 0.00 | H |
| ATOM | 303 | H1'  | C | A | 10 | 28.891 | -29.123 | 90.564 | 1.00 | 0.00 | H |
| ATOM | 304 | H3'  | C | A | 10 | 28.785 | -25.784 | 92.639 | 1.00 | 0.00 | H |
| ATOM | 305 | H4'  | C | A | 10 | 31.106 | -27.057 | 92.595 | 1.00 | 0.00 | H |
| ATOM | 306 | H41  | C | A | 10 | 25.635 | -33.430 | 94.447 | 1.00 | 0.00 | H |
| ATOM | 307 | H42  | C | A | 10 | 26.218 | -34.321 | 93.014 | 1.00 | 0.00 | H |
| ATOM | 308 | H2'1 | C | A | 10 | 27.292 | -27.663 | 92.687 | 1.00 | 0.00 | H |
| ATOM | 309 | H2'2 | C | A | 10 | 27.363 | -27.353 | 90.957 | 1.00 | 0.00 | H |
| ATOM | 310 | H5'1 | C | A | 10 | 30.451 | -28.446 | 94.689 | 1.00 | 0.00 | H |
| ATOM | 311 | H5'2 | C | A | 10 | 30.447 | -26.671 | 94.755 | 1.00 | 0.00 | H |
| ATOM | 312 | C1'  | T | A | 11 | 27.494 | -29.713 | 86.886 | 1.00 | 0.00 | C |
| ATOM | 313 | N1   | T | A | 11 | 26.602 | -30.196 | 87.973 | 1.00 | 0.00 | N |
| ATOM | 314 | C2   | T | A | 11 | 26.210 | -31.518 | 87.925 | 1.00 | 0.00 | C |
| ATOM | 315 | O2   | T | A | 11 | 26.563 | -32.281 | 87.042 | 1.00 | 0.00 | O |
| ATOM | 316 | N3   | T | A | 11 | 25.381 | -31.927 | 88.955 | 1.00 | 0.00 | N |
| ATOM | 317 | C4   | T | A | 11 | 24.922 | -31.147 | 89.997 | 1.00 | 0.00 | C |
| ATOM | 318 | O4   | T | A | 11 | 24.178 | -31.624 | 90.863 | 1.00 | 0.00 | O |
| ATOM | 319 | C5   | T | A | 11 | 25.385 | -29.780 | 89.961 | 1.00 | 0.00 | C |
| ATOM | 320 | C6   | T | A | 11 | 26.193 | -29.349 | 88.974 | 1.00 | 0.00 | C |
| ATOM | 321 | C7   | T | A | 11 | 24.911 | -28.898 | 91.078 | 1.00 | 0.00 | C |
| ATOM | 322 | C2'  | T | A | 11 | 27.194 | -28.289 | 86.432 | 1.00 | 0.00 | C |
| ATOM | 323 | C3'  | T | A | 11 | 28.583 | -27.756 | 86.119 | 1.00 | 0.00 | C |
| ATOM | 324 | O3'  | T | A | 11 | 28.943 | -28.136 | 84.792 | 1.00 | 0.00 | O |
| ATOM | 325 | C4'  | T | A | 11 | 29.453 | -28.438 | 87.171 | 1.00 | 0.00 | C |
| ATOM | 326 | O4'  | T | A | 11 | 28.822 | -29.744 | 87.371 | 1.00 | 0.00 | O |
| ATOM | 327 | C5'  | T | A | 11 | 29.560 | -27.743 | 88.509 | 1.00 | 0.00 | C |
| ATOM | 328 | O5'  | T | A | 11 | 28.290 | -27.131 | 88.845 | 1.00 | 0.00 | O |
| ATOM | 329 | O1P  | T | A | 11 | 28.802 | -24.668 | 88.805 | 1.00 | 0.00 | O |
| ATOM | 330 | O2P  | T | A | 11 | 26.952 | -25.540 | 90.256 | 1.00 | 0.00 | O |
| ATOM | 331 | P    | T | A | 11 | 28.291 | -25.759 | 89.656 | 1.00 | 0.00 | P |
| ATOM | 332 | H3   | T | A | 11 | 25.078 | -32.909 | 88.944 | 1.00 | 0.00 | H |
| ATOM | 333 | H6   | T | A | 11 | 26.531 | -28.312 | 88.968 | 1.00 | 0.00 | H |
| ATOM | 334 | H1'  | T | A | 11 | 27.426 | -30.411 | 86.051 | 1.00 | 0.00 | H |
| ATOM | 335 | H3'  | T | A | 11 | 28.633 | -26.672 | 86.209 | 1.00 | 0.00 | H |
| ATOM | 336 | H4'  | T | A | 11 | 30.458 | -28.512 | 86.753 | 1.00 | 0.00 | H |
| ATOM | 337 | H71  | T | A | 11 | 24.263 | -28.118 | 90.675 | 1.00 | 0.00 | H |
| ATOM | 338 | H72  | T | A | 11 | 24.355 | -29.493 | 91.801 | 1.00 | 0.00 | H |
| ATOM | 339 | H73  | T | A | 11 | 25.769 | -28.439 | 91.570 | 1.00 | 0.00 | H |
| ATOM | 340 | H2'1 | T | A | 11 | 26.709 | -27.702 | 87.209 | 1.00 | 0.00 | H |
| ATOM | 341 | H2'2 | T | A | 11 | 26.551 | -28.263 | 85.552 | 1.00 | 0.00 | H |
| ATOM | 342 | H5'1 | T | A | 11 | 29.831 | -28.473 | 89.272 | 1.00 | 0.00 | H |
| ATOM | 343 | H5'2 | T | A | 11 | 30.335 | -26.979 | 88.454 | 1.00 | 0.00 | H |
| ATOM | 344 | C1'  | A | A | 12 | 25.241 | -32.181 | 83.217 | 1.00 | 0.00 | C |
| ATOM | 345 | N1   | A | A | 12 | 22.041 | -33.677 | 86.940 | 1.00 | 0.00 | N |
| ATOM | 346 | C2   | A | A | 12 | 22.604 | -34.325 | 85.926 | 1.00 | 0.00 | C |
| ATOM | 347 | N3   | A | A | 12 | 23.427 | -33.877 | 85.000 | 1.00 | 0.00 | N |
| ATOM | 348 | C4   | A | A | 12 | 23.666 | -32.567 | 85.185 | 1.00 | 0.00 | C |

|      |     |      |   |   |    |        |         |        |      |      |   |
|------|-----|------|---|---|----|--------|---------|--------|------|------|---|
| ATOM | 349 | C5   | A | A | 12 | 23.169 | -31.761 | 86.169 | 1.00 | 0.00 | C |
| ATOM | 350 | C6   | A | A | 12 | 22.300 | -32.370 | 87.100 | 1.00 | 0.00 | C |
| ATOM | 351 | N6   | A | A | 12 | 21.735 | -31.704 | 88.121 | 1.00 | 0.00 | N |
| ATOM | 352 | N7   | A | A | 12 | 23.639 | -30.466 | 86.041 | 1.00 | 0.00 | N |
| ATOM | 353 | C8   | A | A | 12 | 24.402 | -30.514 | 84.990 | 1.00 | 0.00 | C |
| ATOM | 354 | N9   | A | A | 12 | 24.469 | -31.759 | 84.417 | 1.00 | 0.00 | N |
| ATOM | 355 | C2'  | A | A | 12 | 25.278 | -31.133 | 82.113 | 1.00 | 0.00 | C |
| ATOM | 356 | C3'  | A | A | 12 | 26.676 | -31.319 | 81.546 | 1.00 | 0.00 | C |
| ATOM | 357 | O3'  | A | A | 12 | 26.654 | -32.375 | 80.587 | 1.00 | 0.00 | O |
| ATOM | 358 | C4'  | A | A | 12 | 27.500 | -31.680 | 82.781 | 1.00 | 0.00 | C |
| ATOM | 359 | O4'  | A | A | 12 | 26.571 | -32.432 | 83.626 | 1.00 | 0.00 | O |
| ATOM | 360 | C5'  | A | A | 12 | 28.052 | -30.523 | 83.579 | 1.00 | 0.00 | C |
| ATOM | 361 | O5'  | A | A | 12 | 27.098 | -29.431 | 83.587 | 1.00 | 0.00 | O |
| ATOM | 362 | O1P  | A | A | 12 | 28.275 | -27.619 | 82.296 | 1.00 | 0.00 | O |
| ATOM | 363 | O2P  | A | A | 12 | 26.562 | -27.016 | 84.028 | 1.00 | 0.00 | O |
| ATOM | 364 | P    | A | A | 12 | 27.644 | -27.934 | 83.592 | 1.00 | 0.00 | P |
| ATOM | 365 | H2   | A | A | 12 | 22.350 | -35.382 | 85.850 | 1.00 | 0.00 | H |
| ATOM | 366 | H8   | A | A | 12 | 24.938 | -29.649 | 84.598 | 1.00 | 0.00 | H |
| ATOM | 367 | H1'  | A | A | 12 | 24.819 | -33.117 | 82.852 | 1.00 | 0.00 | H |
| ATOM | 368 | H3'  | A | A | 12 | 27.051 | -30.411 | 81.074 | 1.00 | 0.00 | H |
| ATOM | 369 | H4'  | A | A | 12 | 28.342 | -32.278 | 82.435 | 1.00 | 0.00 | H |
| ATOM | 370 | H61  | A | A | 12 | 21.109 | -32.197 | 88.774 | 1.00 | 0.00 | H |
| ATOM | 371 | H62  | A | A | 12 | 21.927 | -30.699 | 88.249 | 1.00 | 0.00 | H |
| ATOM | 372 | H2'1 | A | A | 12 | 25.139 | -30.122 | 82.497 | 1.00 | 0.00 | H |
| ATOM | 373 | H2'2 | A | A | 12 | 24.515 | -31.303 | 81.354 | 1.00 | 0.00 | H |
| ATOM | 374 | H5'1 | A | A | 12 | 28.242 | -30.853 | 84.600 | 1.00 | 0.00 | H |
| ATOM | 375 | H5'2 | A | A | 12 | 28.986 | -30.192 | 83.130 | 1.00 | 0.00 | H |
| ATOM | 376 | C1'  | G | A | 13 | 21.721 | -35.151 | 81.363 | 1.00 | 0.00 | C |
| ATOM | 377 | N1   | G | A | 13 | 19.009 | -33.521 | 85.365 | 1.00 | 0.00 | N |
| ATOM | 378 | C2   | G | A | 13 | 19.129 | -34.791 | 84.833 | 1.00 | 0.00 | C |
| ATOM | 379 | N2   | G | A | 13 | 18.432 | -35.757 | 85.446 | 1.00 | 0.00 | N |
| ATOM | 380 | N3   | G | A | 13 | 19.883 | -35.077 | 83.773 | 1.00 | 0.00 | N |
| ATOM | 381 | C4   | G | A | 13 | 20.511 | -33.980 | 83.275 | 1.00 | 0.00 | C |
| ATOM | 382 | C5   | G | A | 13 | 20.448 | -32.675 | 83.736 | 1.00 | 0.00 | C |
| ATOM | 383 | C6   | G | A | 13 | 19.650 | -32.372 | 84.864 | 1.00 | 0.00 | C |
| ATOM | 384 | O6   | G | A | 13 | 19.468 | -31.286 | 85.415 | 1.00 | 0.00 | O |
| ATOM | 385 | N7   | G | A | 13 | 21.241 | -31.844 | 82.944 | 1.00 | 0.00 | N |
| ATOM | 386 | C8   | G | A | 13 | 21.751 | -32.651 | 82.050 | 1.00 | 0.00 | C |
| ATOM | 387 | N9   | G | A | 13 | 21.354 | -33.966 | 82.185 | 1.00 | 0.00 | N |
| ATOM | 388 | C2'  | G | A | 13 | 21.844 | -34.854 | 79.876 | 1.00 | 0.00 | C |
| ATOM | 389 | C3'  | G | A | 13 | 22.990 | -35.762 | 79.464 | 1.00 | 0.00 | C |
| ATOM | 390 | O3'  | G | A | 13 | 22.479 | -37.065 | 79.191 | 1.00 | 0.00 | O |
| ATOM | 391 | C4'  | G | A | 13 | 23.898 | -35.744 | 80.692 | 1.00 | 0.00 | C |
| ATOM | 392 | O4'  | G | A | 13 | 22.975 | -35.621 | 81.820 | 1.00 | 0.00 | O |
| ATOM | 393 | C5'  | G | A | 13 | 24.904 | -34.620 | 80.765 | 1.00 | 0.00 | C |
| ATOM | 394 | O5'  | G | A | 13 | 24.326 | -33.407 | 80.222 | 1.00 | 0.00 | O |
| ATOM | 395 | O1P  | G | A | 13 | 25.703 | -32.979 | 78.159 | 1.00 | 0.00 | O |
| ATOM | 396 | O2P  | G | A | 13 | 24.607 | -31.065 | 79.356 | 1.00 | 0.00 | O |
| ATOM | 397 | P    | G | A | 13 | 25.273 | -32.389 | 79.441 | 1.00 | 0.00 | P |
| ATOM | 398 | H1   | G | A | 13 | 18.403 | -33.407 | 86.192 | 1.00 | 0.00 | H |
| ATOM | 399 | H8   | G | A | 13 | 22.430 | -32.317 | 81.266 | 1.00 | 0.00 | H |
| ATOM | 400 | H1'  | G | A | 13 | 20.983 | -35.934 | 81.545 | 1.00 | 0.00 | H |
| ATOM | 401 | H21  | G | A | 13 | 17.852 | -35.528 | 86.268 | 1.00 | 0.00 | H |
| ATOM | 402 | H3'  | G | A | 13 | 23.512 | -35.388 | 78.583 | 1.00 | 0.00 | H |

|      |     |      |   |   |    |        |         |        |      |      |   |
|------|-----|------|---|---|----|--------|---------|--------|------|------|---|
| ATOM | 403 | H22  | G | A | 13 | 18.477 | -36.723 | 85.098 | 1.00 | 0.00 | H |
| ATOM | 404 | H4'  | G | A | 13 | 24.448 | -36.684 | 80.693 | 1.00 | 0.00 | H |
| ATOM | 405 | H2'1 | G | A | 13 | 22.079 | -33.806 | 79.682 | 1.00 | 0.00 | H |
| ATOM | 406 | H2'2 | G | A | 13 | 20.932 | -35.090 | 79.329 | 1.00 | 0.00 | H |
| ATOM | 407 | H5'1 | G | A | 13 | 25.186 | -34.461 | 81.805 | 1.00 | 0.00 | H |
| ATOM | 408 | H5'2 | G | A | 13 | 25.790 | -34.895 | 80.194 | 1.00 | 0.00 | H |
| ATOM | 409 | C1'  | G | A | 14 | 17.236 | -37.253 | 81.316 | 1.00 | 0.00 | C |
| ATOM | 410 | N1   | G | A | 14 | 15.895 | -33.123 | 83.994 | 1.00 | 0.00 | N |
| ATOM | 411 | C2   | G | A | 14 | 15.549 | -34.449 | 84.175 | 1.00 | 0.00 | C |
| ATOM | 412 | N2   | G | A | 14 | 14.734 | -34.712 | 85.205 | 1.00 | 0.00 | N |
| ATOM | 413 | N3   | G | A | 14 | 15.980 | -35.437 | 83.391 | 1.00 | 0.00 | N |
| ATOM | 414 | C4   | G | A | 14 | 16.788 | -34.989 | 82.396 | 1.00 | 0.00 | C |
| ATOM | 415 | C5   | G | A | 14 | 17.183 | -33.688 | 82.136 | 1.00 | 0.00 | C |
| ATOM | 416 | C6   | G | A | 14 | 16.731 | -32.641 | 82.967 | 1.00 | 0.00 | C |
| ATOM | 417 | O6   | G | A | 14 | 16.968 | -31.434 | 82.900 | 1.00 | 0.00 | O |
| ATOM | 418 | N7   | G | A | 14 | 18.018 | -33.653 | 81.014 | 1.00 | 0.00 | N |
| ATOM | 419 | C8   | G | A | 14 | 18.102 | -34.904 | 80.643 | 1.00 | 0.00 | C |
| ATOM | 420 | N9   | G | A | 14 | 17.380 | -35.775 | 81.432 | 1.00 | 0.00 | N |
| ATOM | 421 | C2'  | G | A | 14 | 17.160 | -37.750 | 79.879 | 1.00 | 0.00 | C |
| ATOM | 422 | C3'  | G | A | 14 | 17.902 | -39.075 | 79.960 | 1.00 | 0.00 | C |
| ATOM | 423 | O3'  | G | A | 14 | 17.002 | -40.091 | 80.394 | 1.00 | 0.00 | O |
| ATOM | 424 | C4'  | G | A | 14 | 18.992 | -38.789 | 80.994 | 1.00 | 0.00 | C |
| ATOM | 425 | O4'  | G | A | 14 | 18.369 | -37.845 | 81.922 | 1.00 | 0.00 | O |
| ATOM | 426 | C5'  | G | A | 14 | 20.270 | -38.179 | 80.470 | 1.00 | 0.00 | C |
| ATOM | 427 | O5'  | G | A | 14 | 19.968 | -37.252 | 79.399 | 1.00 | 0.00 | O |
| ATOM | 428 | O1P  | G | A | 14 | 20.999 | -38.338 | 77.377 | 1.00 | 0.00 | O |
| ATOM | 429 | O2P  | G | A | 14 | 20.734 | -35.845 | 77.462 | 1.00 | 0.00 | O |
| ATOM | 430 | P    | G | A | 14 | 21.000 | -37.109 | 78.192 | 1.00 | 0.00 | P |
| ATOM | 431 | H1   | G | A | 14 | 15.513 | -32.436 | 84.662 | 1.00 | 0.00 | H |
| ATOM | 432 | H8   | G | A | 14 | 18.689 | -35.229 | 79.784 | 1.00 | 0.00 | H |
| ATOM | 433 | H1'  | G | A | 14 | 16.355 | -37.555 | 81.882 | 1.00 | 0.00 | H |
| ATOM | 434 | H21  | G | A | 14 | 14.409 | -33.943 | 85.810 | 1.00 | 0.00 | H |
| ATOM | 435 | H3'  | G | A | 14 | 18.335 | -39.360 | 79.001 | 1.00 | 0.00 | H |
| ATOM | 436 | H22  | G | A | 14 | 14.437 | -35.679 | 85.393 | 1.00 | 0.00 | H |
| ATOM | 437 | H4'  | G | A | 14 | 19.243 | -39.741 | 81.460 | 1.00 | 0.00 | H |
| ATOM | 438 | H2'1 | G | A | 14 | 17.640 | -37.069 | 79.178 | 1.00 | 0.00 | H |
| ATOM | 439 | H2'2 | G | A | 14 | 16.131 | -37.892 | 79.545 | 1.00 | 0.00 | H |
| ATOM | 440 | H5'1 | G | A | 14 | 20.775 | -37.656 | 81.281 | 1.00 | 0.00 | H |
| ATOM | 441 | H5'2 | G | A | 14 | 20.919 | -38.973 | 80.098 | 1.00 | 0.00 | H |
| ATOM | 442 | C1'  | A | A | 15 | 12.416 | -37.492 | 82.415 | 1.00 | 0.00 | C |
| ATOM | 443 | N1   | A | A | 15 | 12.812 | -32.382 | 82.686 | 1.00 | 0.00 | N |
| ATOM | 444 | C2   | A | A | 15 | 12.190 | -33.277 | 83.450 | 1.00 | 0.00 | C |
| ATOM | 445 | N3   | A | A | 15 | 12.131 | -34.586 | 83.324 | 1.00 | 0.00 | N |
| ATOM | 446 | C4   | A | A | 15 | 12.822 | -34.981 | 82.238 | 1.00 | 0.00 | C |
| ATOM | 447 | C5   | A | A | 15 | 13.508 | -34.194 | 81.357 | 1.00 | 0.00 | C |
| ATOM | 448 | C6   | A | A | 15 | 13.493 | -32.807 | 81.611 | 1.00 | 0.00 | C |
| ATOM | 449 | N6   | A | A | 15 | 14.123 | -31.911 | 80.831 | 1.00 | 0.00 | N |
| ATOM | 450 | N7   | A | A | 15 | 14.098 | -34.954 | 80.362 | 1.00 | 0.00 | N |
| ATOM | 451 | C8   | A | A | 15 | 13.755 | -36.173 | 80.657 | 1.00 | 0.00 | C |
| ATOM | 452 | N9   | A | A | 15 | 12.980 | -36.268 | 81.786 | 1.00 | 0.00 | N |
| ATOM | 453 | C2'  | A | A | 15 | 11.947 | -38.537 | 81.413 | 1.00 | 0.00 | C |
| ATOM | 454 | C3'  | A | A | 15 | 12.296 | -39.837 | 82.122 | 1.00 | 0.00 | C |
| ATOM | 455 | O3'  | A | A | 15 | 11.242 | -40.177 | 83.018 | 1.00 | 0.00 | O |
| ATOM | 456 | C4'  | A | A | 15 | 13.589 | -39.486 | 82.857 | 1.00 | 0.00 | C |

|      |     |      |   |   |    |        |         |        |      |      |   |
|------|-----|------|---|---|----|--------|---------|--------|------|------|---|
| ATOM | 457 | O4'  | A | A | 15 | 13.429 | -38.074 | 83.212 | 1.00 | 0.00 | O |
| ATOM | 458 | C5'  | A | A | 15 | 14.871 | -39.646 | 82.075 | 1.00 | 0.00 | C |
| ATOM | 459 | O5'  | A | A | 15 | 14.651 | -39.272 | 80.690 | 1.00 | 0.00 | O |
| ATOM | 460 | O1P  | A | A | 15 | 14.959 | -41.438 | 79.447 | 1.00 | 0.00 | O |
| ATOM | 461 | O2P  | A | A | 15 | 15.416 | -39.256 | 78.297 | 1.00 | 0.00 | O |
| ATOM | 462 | P    | A | A | 15 | 15.449 | -40.049 | 79.550 | 1.00 | 0.00 | P |
| ATOM | 463 | H2   | A | A | 15 | 11.653 | -32.867 | 84.304 | 1.00 | 0.00 | H |
| ATOM | 464 | H8   | A | A | 15 | 14.053 | -37.038 | 80.065 | 1.00 | 0.00 | H |
| ATOM | 465 | H1'  | A | A | 15 | 11.603 | -37.191 | 83.075 | 1.00 | 0.00 | H |
| ATOM | 466 | H3'  | A | A | 15 | 12.453 | -40.656 | 81.420 | 1.00 | 0.00 | H |
| ATOM | 467 | H4'  | A | A | 15 | 13.645 | -40.139 | 83.727 | 1.00 | 0.00 | H |
| ATOM | 468 | H61  | A | A | 15 | 14.082 | -30.909 | 81.063 | 1.00 | 0.00 | H |
| ATOM | 469 | H62  | A | A | 15 | 14.647 | -32.230 | 80.002 | 1.00 | 0.00 | H |
| ATOM | 470 | H2'1 | A | A | 15 | 12.465 | -38.455 | 80.457 | 1.00 | 0.00 | H |
| ATOM | 471 | H2'2 | A | A | 15 | 10.877 | -38.469 | 81.214 | 1.00 | 0.00 | H |
| ATOM | 472 | H5'1 | A | A | 15 | 15.638 | -39.006 | 82.511 | 1.00 | 0.00 | H |
| ATOM | 473 | H5'2 | A | A | 15 | 15.195 | -40.684 | 82.128 | 1.00 | 0.00 | H |
| ATOM | 474 | C1'  | C | A | 16 | 8.023  | -35.489 | 83.579 | 1.00 | 0.00 | C |
| ATOM | 475 | N1   | C | A | 16 | 8.786  | -34.998 | 82.398 | 1.00 | 0.00 | N |
| ATOM | 476 | C2   | C | A | 16 | 9.005  | -33.627 | 82.286 | 1.00 | 0.00 | C |
| ATOM | 477 | O2   | C | A | 16 | 8.559  | -32.878 | 83.165 | 1.00 | 0.00 | O |
| ATOM | 478 | N3   | C | A | 16 | 9.696  | -33.160 | 81.217 | 1.00 | 0.00 | N |
| ATOM | 479 | C4   | C | A | 16 | 10.165 | -33.996 | 80.283 | 1.00 | 0.00 | C |
| ATOM | 480 | N4   | C | A | 16 | 10.838 | -33.484 | 79.262 | 1.00 | 0.00 | N |
| ATOM | 481 | C5   | C | A | 16 | 9.952  | -35.411 | 80.369 | 1.00 | 0.00 | C |
| ATOM | 482 | C6   | C | A | 16 | 9.256  | -35.860 | 81.456 | 1.00 | 0.00 | C |
| ATOM | 483 | C2'  | C | A | 16 | 7.085  | -36.646 | 83.266 | 1.00 | 0.00 | C |
| ATOM | 484 | C3'  | C | A | 16 | 7.176  | -37.479 | 84.537 | 1.00 | 0.00 | C |
| ATOM | 485 | O3'  | C | A | 16 | 6.263  | -36.962 | 85.500 | 1.00 | 0.00 | O |
| ATOM | 486 | C4'  | C | A | 16 | 8.631  | -37.296 | 84.960 | 1.00 | 0.00 | C |
| ATOM | 487 | O4'  | C | A | 16 | 8.961  | -35.932 | 84.542 | 1.00 | 0.00 | O |
| ATOM | 488 | C5'  | C | A | 16 | 9.634  | -38.245 | 84.345 | 1.00 | 0.00 | C |
| ATOM | 489 | O5'  | C | A | 16 | 9.265  | -38.526 | 82.972 | 1.00 | 0.00 | O |
| ATOM | 490 | O1P  | C | A | 16 | 8.684  | -40.975 | 83.014 | 1.00 | 0.00 | O |
| ATOM | 491 | O2P  | C | A | 16 | 9.520  | -39.920 | 80.897 | 1.00 | 0.00 | O |
| ATOM | 492 | P    | C | A | 16 | 9.565  | -39.975 | 82.378 | 1.00 | 0.00 | P |
| ATOM | 493 | H5   | C | A | 16 | 10.326 | -36.095 | 79.606 | 1.00 | 0.00 | H |
| ATOM | 494 | H6   | C | A | 16 | 9.075  | -36.929 | 81.570 | 1.00 | 0.00 | H |
| ATOM | 495 | H1'  | C | A | 16 | 7.477  | -34.647 | 84.006 | 1.00 | 0.00 | H |
| ATOM | 496 | H3'  | C | A | 16 | 6.948  | -38.530 | 84.350 | 1.00 | 0.00 | H |
| ATOM | 497 | H4'  | C | A | 16 | 8.666  | -37.431 | 86.040 | 1.00 | 0.00 | H |
| ATOM | 498 | H41  | C | A | 16 | 11.211 | -34.106 | 78.529 | 1.00 | 0.00 | H |
| ATOM | 499 | H42  | C | A | 16 | 10.988 | -32.468 | 79.200 | 1.00 | 0.00 | H |
| ATOM | 500 | H2'1 | C | A | 16 | 7.408  | -37.216 | 82.395 | 1.00 | 0.00 | H |
| ATOM | 501 | H2'2 | C | A | 16 | 6.064  | -36.313 | 83.081 | 1.00 | 0.00 | H |
| ATOM | 502 | H5'1 | C | A | 16 | 10.624 | -37.788 | 84.376 | 1.00 | 0.00 | H |
| ATOM | 503 | H5'2 | C | A | 16 | 9.648  | -39.171 | 84.919 | 1.00 | 0.00 | H |
| ATOM | 504 | C1'  | G | A | 17 | 4.671  | -31.845 | 83.658 | 1.00 | 0.00 | C |
| ATOM | 505 | N1   | G | A | 17 | 7.154  | -30.236 | 79.502 | 1.00 | 0.00 | N |
| ATOM | 506 | C2   | G | A | 17 | 6.668  | -29.517 | 80.581 | 1.00 | 0.00 | C |
| ATOM | 507 | N2   | G | A | 17 | 6.868  | -28.194 | 80.545 | 1.00 | 0.00 | N |
| ATOM | 508 | N3   | G | A | 17 | 6.033  | -30.074 | 81.610 | 1.00 | 0.00 | N |
| ATOM | 509 | C4   | G | A | 17 | 5.913  | -31.422 | 81.476 | 1.00 | 0.00 | C |
| ATOM | 510 | C5   | G | A | 17 | 6.362  | -32.221 | 80.437 | 1.00 | 0.00 | C |

|      |     |      |     |    |       |         |        |      |      |   |
|------|-----|------|-----|----|-------|---------|--------|------|------|---|
| ATOM | 511 | C6   | G A | 17 | 7.040 | -31.631 | 79.345 | 1.00 | 0.00 | C |
| ATOM | 512 | O6   | G A | 17 | 7.507 | -32.166 | 78.339 | 1.00 | 0.00 | O |
| ATOM | 513 | N7   | G A | 17 | 6.037 | -33.557 | 80.680 | 1.00 | 0.00 | N |
| ATOM | 514 | C8   | G A | 17 | 5.419 | -33.526 | 81.832 | 1.00 | 0.00 | C |
| ATOM | 515 | N9   | G A | 17 | 5.305 | -32.265 | 82.379 | 1.00 | 0.00 | N |
| ATOM | 516 | C2'  | G A | 17 | 3.404 | -32.617 | 83.998 | 1.00 | 0.00 | C |
| ATOM | 517 | C3'  | G A | 17 | 3.491 | -32.723 | 85.511 | 1.00 | 0.00 | C |
| ATOM | 518 | O3'  | G A | 17 | 2.961 | -31.535 | 86.095 | 1.00 | 0.00 | O |
| ATOM | 519 | C4'  | G A | 17 | 4.993 | -32.865 | 85.755 | 1.00 | 0.00 | C |
| ATOM | 520 | O4'  | G A | 17 | 5.608 | -32.066 | 84.695 | 1.00 | 0.00 | O |
| ATOM | 521 | C5'  | G A | 17 | 5.553 | -34.267 | 85.693 | 1.00 | 0.00 | C |
| ATOM | 522 | O5'  | G A | 17 | 4.870 | -35.022 | 84.661 | 1.00 | 0.00 | O |
| ATOM | 523 | O1P  | G A | 17 | 3.640 | -36.795 | 85.957 | 1.00 | 0.00 | O |
| ATOM | 524 | O2P  | G A | 17 | 4.328 | -37.224 | 83.583 | 1.00 | 0.00 | O |
| ATOM | 525 | P    | G A | 17 | 4.632 | -36.583 | 84.885 | 1.00 | 0.00 | P |
| ATOM | 526 | H1   | G A | 17 | 7.637 | -29.709 | 78.759 | 1.00 | 0.00 | H |
| ATOM | 527 | H8   | G A | 17 | 5.029 | -34.421 | 82.319 | 1.00 | 0.00 | H |
| ATOM | 528 | H1'  | G A | 17 | 4.474 | -30.774 | 83.606 | 1.00 | 0.00 | H |
| ATOM | 529 | H21  | G A | 17 | 7.362 | -27.770 | 79.747 | 1.00 | 0.00 | H |
| ATOM | 530 | H3'  | G A | 17 | 2.948 | -33.587 | 85.893 | 1.00 | 0.00 | H |
| ATOM | 531 | H22  | G A | 17 | 6.528 | -27.601 | 81.316 | 1.00 | 0.00 | H |
| ATOM | 532 | H4'  | G A | 17 | 5.190 | -32.472 | 86.753 | 1.00 | 0.00 | H |
| ATOM | 533 | H2'1 | G A | 17 | 3.382 | -33.603 | 83.532 | 1.00 | 0.00 | H |
| ATOM | 534 | H2'2 | G A | 17 | 2.501 | -32.090 | 83.688 | 1.00 | 0.00 | H |
| ATOM | 535 | H5'1 | G A | 17 | 6.618 | -34.216 | 85.469 | 1.00 | 0.00 | H |
| ATOM | 536 | H5'2 | G A | 17 | 5.414 | -34.751 | 86.659 | 1.00 | 0.00 | H |
| ATOM | 537 | C1'  | G A | 18 | 2.564 | -27.702 | 81.949 | 1.00 | 0.00 | C |
| ATOM | 538 | N1   | G A | 18 | 4.579 | -29.186 | 77.503 | 1.00 | 0.00 | N |
| ATOM | 539 | C2   | G A | 18 | 4.526 | -27.929 | 78.079 | 1.00 | 0.00 | C |
| ATOM | 540 | N2   | G A | 18 | 5.083 | -26.933 | 77.375 | 1.00 | 0.00 | N |
| ATOM | 541 | N3   | G A | 18 | 3.965 | -27.684 | 79.261 | 1.00 | 0.00 | N |
| ATOM | 542 | C4   | G A | 18 | 3.445 | -28.804 | 79.828 | 1.00 | 0.00 | C |
| ATOM | 543 | C5   | G A | 18 | 3.446 | -30.096 | 79.327 | 1.00 | 0.00 | C |
| ATOM | 544 | C6   | G A | 18 | 4.047 | -30.358 | 78.073 | 1.00 | 0.00 | C |
| ATOM | 545 | O6   | G A | 18 | 4.146 | -31.426 | 77.470 | 1.00 | 0.00 | O |
| ATOM | 546 | N7   | G A | 18 | 2.808 | -30.960 | 80.219 | 1.00 | 0.00 | N |
| ATOM | 547 | C8   | G A | 18 | 2.451 | -30.185 | 81.210 | 1.00 | 0.00 | C |
| ATOM | 548 | N9   | G A | 18 | 2.802 | -28.861 | 81.044 | 1.00 | 0.00 | N |
| ATOM | 549 | C2'  | G A | 18 | 1.217 | -27.742 | 82.657 | 1.00 | 0.00 | C |
| ATOM | 550 | C3'  | G A | 18 | 1.552 | -27.147 | 84.013 | 1.00 | 0.00 | C |
| ATOM | 551 | O3'  | G A | 18 | 1.499 | -25.724 | 83.926 | 1.00 | 0.00 | O |
| ATOM | 552 | C4'  | G A | 18 | 2.970 | -27.655 | 84.268 | 1.00 | 0.00 | C |
| ATOM | 553 | O4'  | G A | 18 | 3.576 | -27.711 | 82.937 | 1.00 | 0.00 | O |
| ATOM | 554 | C5'  | G A | 18 | 3.089 | -29.016 | 84.910 | 1.00 | 0.00 | C |
| ATOM | 555 | O5'  | G A | 18 | 2.039 | -29.886 | 84.416 | 1.00 | 0.00 | O |
| ATOM | 556 | O1P  | G A | 18 | 0.623 | -30.306 | 86.455 | 1.00 | 0.00 | O |
| ATOM | 557 | O2P  | G A | 18 | 0.703 | -32.005 | 84.611 | 1.00 | 0.00 | O |
| ATOM | 558 | P    | G A | 18 | 1.414 | -30.973 | 85.404 | 1.00 | 0.00 | P |
| ATOM | 559 | H1   | G A | 18 | 5.043 | -29.270 | 76.586 | 1.00 | 0.00 | H |
| ATOM | 560 | H8   | G A | 18 | 1.921 | -30.551 | 82.089 | 1.00 | 0.00 | H |
| ATOM | 561 | H1'  | G A | 18 | 2.672 | -26.788 | 81.366 | 1.00 | 0.00 | H |
| ATOM | 562 | H21  | G A | 18 | 5.519 | -27.133 | 76.462 | 1.00 | 0.00 | H |
| ATOM | 563 | H3'  | G A | 18 | 0.867 | -27.486 | 84.791 | 1.00 | 0.00 | H |
| ATOM | 564 | H22  | G A | 18 | 5.075 | -25.975 | 77.747 | 1.00 | 0.00 | H |



|      |     |      |     |   |    |        |         |        |      |      |   |
|------|-----|------|-----|---|----|--------|---------|--------|------|------|---|
| ATOM | 565 | H4'  | G   | A | 18 | 3.453  | -26.933 | 84.924 | 1.00 | 0.00 | H |
| ATOM | 566 | H2'1 | G   | A | 18 | 0.831  | -28.757 | 82.754 | 1.00 | 0.00 | H |
| ATOM | 567 | H2'2 | G   | A | 18 | 0.459  | -27.153 | 82.139 | 1.00 | 0.00 | H |
| ATOM | 568 | H5'1 | G   | A | 18 | 4.063  | -29.442 | 84.671 | 1.00 | 0.00 | H |
| ATOM | 569 | H5'2 | G   | A | 18 | 3.001  | -28.910 | 85.991 | 1.00 | 0.00 | H |
| ATOM | 570 | C1'  | T   | A | 19 | 1.430  | -24.403 | 78.438 | 1.00 | 0.00 | C |
| ATOM | 571 | N1   | T   | A | 19 | 1.170  | -25.849 | 78.214 | 1.00 | 0.00 | N |
| ATOM | 572 | C2   | T   | A | 19 | 1.653  | -26.403 | 77.046 | 1.00 | 0.00 | C |
| ATOM | 573 | O2   | T   | A | 19 | 2.271  | -25.758 | 76.216 | 1.00 | 0.00 | O |
| ATOM | 574 | N3   | T   | A | 19 | 1.390  | -27.750 | 76.880 | 1.00 | 0.00 | N |
| ATOM | 575 | C4   | T   | A | 19 | 0.702  | -28.567 | 77.751 | 1.00 | 0.00 | C |
| ATOM | 576 | O4   | T   | A | 19 | 0.525  | -29.763 | 77.491 | 1.00 | 0.00 | O |
| ATOM | 577 | C5   | T   | A | 19 | 0.235  | -27.900 | 78.943 | 1.00 | 0.00 | C |
| ATOM | 578 | C6   | T   | A | 19 | 0.474  | -26.588 | 79.140 | 1.00 | 0.00 | C |
| ATOM | 579 | C7   | T   | A | 19 | -0.518 | -28.751 | 79.922 | 1.00 | 0.00 | C |
| ATOM | 580 | C2'  | T   | A | 19 | 0.273  | -23.665 | 79.102 | 1.00 | 0.00 | C |
| ATOM | 581 | C3'  | T   | A | 19 | 0.999  | -22.663 | 79.983 | 1.00 | 0.00 | C |
| ATOM | 582 | O3'  | T   | A | 19 | 1.330  | -21.511 | 79.211 | 1.00 | 0.00 | O |
| ATOM | 583 | C4'  | T   | A | 19 | 2.238  | -23.437 | 80.427 | 1.00 | 0.00 | C |
| ATOM | 584 | O4'  | T   | A | 19 | 2.557  | -24.292 | 79.285 | 1.00 | 0.00 | O |
| ATOM | 585 | C5'  | T   | A | 19 | 2.085  | -24.305 | 81.655 | 1.00 | 0.00 | C |
| ATOM | 586 | O5'  | T   | A | 19 | 0.764  | -24.901 | 81.670 | 1.00 | 0.00 | O |
| ATOM | 587 | O1P  | T   | A | 19 | -0.328 | -23.846 | 83.678 | 1.00 | 0.00 | O |
| ATOM | 588 | O2P  | T   | A | 19 | -1.055 | -26.120 | 82.904 | 1.00 | 0.00 | O |
| ATOM | 589 | P    | T   | A | 19 | 0.046  | -25.142 | 83.074 | 1.00 | 0.00 | P |
| ATOM | 590 | H3   | T   | A | 19 | 1.745  | -28.187 | 76.017 | 1.00 | 0.00 | H |
| ATOM | 591 | H6   | T   | A | 19 | 0.111  | -26.106 | 80.048 | 1.00 | 0.00 | H |
| ATOM | 592 | H1'  | T   | A | 19 | 1.684  | -23.949 | 77.479 | 1.00 | 0.00 | H |
| ATOM | 593 | H3'  | T   | A | 19 | 0.394  | -22.363 | 80.840 | 1.00 | 0.00 | H |
| ATOM | 594 | H4'  | T   | A | 19 | 3.014  | -22.699 | 80.637 | 1.00 | 0.00 | H |
| ATOM | 595 | H71  | T   | A | 19 | -1.551 | -28.411 | 79.980 | 1.00 | 0.00 | H |
| ATOM | 596 | H72  | T   | A | 19 | -0.496 | -29.790 | 79.591 | 1.00 | 0.00 | H |
| ATOM | 597 | H73  | T   | A | 19 | -0.054 | -28.675 | 80.905 | 1.00 | 0.00 | H |
| ATOM | 598 | H2'1 | T   | A | 19 | -0.356 | -24.332 | 79.690 | 1.00 | 0.00 | H |
| ATOM | 599 | H2'2 | T   | A | 19 | -0.370 | -23.165 | 78.375 | 1.00 | 0.00 | H |
| ATOM | 600 | H5'1 | T   | A | 19 | 2.843  | -25.088 | 81.636 | 1.00 | 0.00 | H |
| ATOM | 601 | H5'2 | T   | A | 19 | 2.224  | -23.694 | 82.545 | 1.00 | 0.00 | H |
| ATOM | 602 | C01  | LNK | A | 20 | -0.712 | -18.540 | 78.283 | 0.00 | 0.00 | C |
| ATOM | 603 | O1   | LNK | A | 20 | -0.564 | -19.820 | 78.904 | 1.00 | 0.00 | O |
| ATOM | 604 | S    | LNK | A | 20 | -3.570 | -15.866 | 77.558 | 0.00 | 0.00 | S |
| ATOM | 605 | C02  | LNK | A | 20 | -2.179 | -18.084 | 78.395 | 0.00 | 0.00 | C |
| ATOM | 606 | C03  | LNK | A | 20 | -2.581 | -17.328 | 77.113 | 0.00 | 0.00 | C |
| ATOM | 607 | O1P  | LNK | A | 20 | -0.901 | -22.124 | 77.947 | 1.00 | 0.00 | O |
| ATOM | 608 | O2P  | LNK | A | 20 | 0.598  | -20.485 | 76.778 | 1.00 | 0.00 | O |
| ATOM | 609 | P    | LNK | A | 20 | 0.067  | -21.016 | 78.058 | 1.00 | 0.00 | P |
| ATOM | 610 | H01  | LNK | A | 20 | -0.433 | -18.610 | 77.231 | 0.00 | 0.00 | H |
| ATOM | 611 | H02  | LNK | A | 20 | -0.068 | -17.816 | 78.782 | 0.00 | 0.00 | H |
| ATOM | 612 | H03  | LNK | A | 20 | -3.171 | -17.984 | 76.474 | 0.00 | 0.00 | H |
| ATOM | 613 | H04  | LNK | A | 20 | -2.291 | -17.426 | 79.256 | 0.00 | 0.00 | H |
| ATOM | 614 | H05  | LNK | A | 20 | -2.822 | -18.956 | 78.518 | 0.00 | 0.00 | H |
| ATOM | 615 | H06  | LNK | A | 20 | -1.684 | -17.012 | 76.582 | 0.00 | 0.00 | H |
| ATOM | 616 | AU   | LNK | A | 20 | -3.833 | -15.586 | 76.990 |      |      |   |
| TER  |     |      |     |   |    |        |         |        |      |      |   |
| ATOM | 618 | C1'  | A   | B | 2  | 4.404  | -30.568 | 69.951 | 1.00 | 0.00 | C |

|      |     |      |     |   |       |         |        |      |      |   |
|------|-----|------|-----|---|-------|---------|--------|------|------|---|
| ATOM | 619 | N1   | A B | 2 | 2.393 | -29.021 | 74.412 | 1.00 | 0.00 | N |
| ATOM | 620 | C2   | A B | 2 | 3.077 | -28.385 | 73.468 | 1.00 | 0.00 | C |
| ATOM | 621 | N3   | A B | 2 | 3.566 | -28.844 | 72.336 | 1.00 | 0.00 | N |
| ATOM | 622 | C4   | A B | 2 | 3.287 | -30.155 | 72.206 | 1.00 | 0.00 | C |
| ATOM | 623 | C5   | A B | 2 | 2.598 | -30.948 | 73.079 | 1.00 | 0.00 | C |
| ATOM | 624 | C6   | A B | 2 | 2.127 | -30.327 | 74.255 | 1.00 | 0.00 | C |
| ATOM | 625 | N6   | A B | 2 | 1.435 | -30.980 | 75.204 | 1.00 | 0.00 | N |
| ATOM | 626 | N7   | A B | 2 | 2.505 | -32.247 | 72.608 | 1.00 | 0.00 | N |
| ATOM | 627 | C8   | A B | 2 | 3.138 | -32.212 | 71.473 | 1.00 | 0.00 | C |
| ATOM | 628 | N9   | A B | 2 | 3.637 | -30.974 | 71.161 | 1.00 | 0.00 | N |
| ATOM | 629 | C2'  | A B | 2 | 5.380 | -31.628 | 69.459 | 1.00 | 0.00 | C |
| ATOM | 630 | C3'  | A B | 2 | 5.306 | -31.452 | 67.951 | 1.00 | 0.00 | C |
| ATOM | 631 | O3'  | A B | 2 | 6.192 | -30.406 | 67.558 | 1.00 | 0.00 | O |
| ATOM | 632 | C4'  | A B | 2 | 3.840 | -31.083 | 67.724 | 1.00 | 0.00 | C |
| ATOM | 633 | O4'  | A B | 2 | 3.471 | -30.318 | 68.916 | 1.00 | 0.00 | O |
| ATOM | 634 | C5'  | A B | 2 | 2.874 | -32.234 | 67.569 | 1.00 | 0.00 | C |
| ATOM | 635 | O5'  | A B | 2 | 3.262 | -33.321 | 68.446 | 1.00 | 0.00 | O |
| ATOM | 636 | H2   | A B | 2 | 3.263 | -27.329 | 73.658 | 1.00 | 0.00 | H |
| ATOM | 637 | H8   | A B | 2 | 3.259 | -33.084 | 70.830 | 1.00 | 0.00 | H |
| ATOM | 638 | H1'  | A B | 2 | 4.920 | -29.633 | 70.172 | 1.00 | 0.00 | H |
| ATOM | 639 | H3'  | A B | 2 | 5.568 | -32.366 | 67.419 | 1.00 | 0.00 | H |
| ATOM | 640 | H4'  | A B | 2 | 3.802 | -30.491 | 66.810 | 1.00 | 0.00 | H |
| ATOM | 641 | H61  | A B | 2 | 1.111 | -30.478 | 76.042 | 1.00 | 0.00 | H |
| ATOM | 642 | H62  | A B | 2 | 1.229 | -31.984 | 75.091 | 1.00 | 0.00 | H |
| ATOM | 643 | H2'1 | A B | 2 | 5.083 | -32.634 | 69.756 | 1.00 | 0.00 | H |
| ATOM | 644 | H2'2 | A B | 2 | 6.392 | -31.462 | 69.828 | 1.00 | 0.00 | H |
| ATOM | 645 | H5'1 | A B | 2 | 1.871 | -31.895 | 67.825 | 1.00 | 0.00 | H |
| ATOM | 646 | H5'2 | A B | 2 | 2.885 | -32.572 | 66.534 | 1.00 | 0.00 | H |
| ATOM | 647 | C1'  | C B | 3 | 7.590 | -27.593 | 72.328 | 1.00 | 0.00 | C |
| ATOM | 648 | N1   | C B | 3 | 6.990 | -28.765 | 73.022 | 1.00 | 0.00 | N |
| ATOM | 649 | C2   | C B | 3 | 6.390 | -28.554 | 74.261 | 1.00 | 0.00 | C |
| ATOM | 650 | O2   | C B | 3 | 6.379 | -27.407 | 74.730 | 1.00 | 0.00 | O |
| ATOM | 651 | N3   | C B | 3 | 5.838 | -29.608 | 74.910 | 1.00 | 0.00 | N |
| ATOM | 652 | C4   | C B | 3 | 5.867 | -30.836 | 74.376 | 1.00 | 0.00 | C |
| ATOM | 653 | N4   | C B | 3 | 5.309 | -31.830 | 75.053 | 1.00 | 0.00 | N |
| ATOM | 654 | C5   | C B | 3 | 6.483 | -31.086 | 73.105 | 1.00 | 0.00 | C |
| ATOM | 655 | C6   | C B | 3 | 7.028 | -30.008 | 72.467 | 1.00 | 0.00 | C |
| ATOM | 656 | C2'  | C B | 3 | 8.884 | -27.911 | 71.592 | 1.00 | 0.00 | C |
| ATOM | 657 | C3'  | C B | 3 | 8.782 | -27.016 | 70.367 | 1.00 | 0.00 | C |
| ATOM | 658 | O3'  | C B | 3 | 9.254 | -25.712 | 70.700 | 1.00 | 0.00 | O |
| ATOM | 659 | C4'  | C B | 3 | 7.284 | -27.027 | 70.063 | 1.00 | 0.00 | C |
| ATOM | 660 | O4'  | C B | 3 | 6.650 | -27.130 | 71.378 | 1.00 | 0.00 | O |
| ATOM | 661 | C5'  | C B | 3 | 6.785 | -28.157 | 69.195 | 1.00 | 0.00 | C |
| ATOM | 662 | O5'  | C B | 3 | 7.513 | -29.372 | 69.505 | 1.00 | 0.00 | O |
| ATOM | 663 | O1P  | C B | 3 | 8.798 | -29.836 | 67.391 | 1.00 | 0.00 | O |
| ATOM | 664 | O2P  | C B | 3 | 8.160 | -31.727 | 68.913 | 1.00 | 0.00 | O |
| ATOM | 665 | P    | C B | 3 | 7.812 | -30.407 | 68.332 | 1.00 | 0.00 | P |
| ATOM | 666 | H5   | C B | 3 | 6.515 | -32.085 | 72.670 | 1.00 | 0.00 | H |
| ATOM | 667 | H6   | C B | 3 | 7.500 | -30.146 | 71.495 | 1.00 | 0.00 | H |
| ATOM | 668 | H1'  | C B | 3 | 7.742 | -26.802 | 73.063 | 1.00 | 0.00 | H |
| ATOM | 669 | H3'  | C B | 3 | 9.356 | -27.404 | 69.527 | 1.00 | 0.00 | H |
| ATOM | 670 | H4'  | C B | 3 | 7.058 | -26.091 | 69.552 | 1.00 | 0.00 | H |
| ATOM | 671 | H41  | C B | 3 | 5.314 | -32.785 | 74.663 | 1.00 | 0.00 | H |
| ATOM | 672 | H42  | C B | 3 | 4.869 | -31.650 | 75.968 | 1.00 | 0.00 | H |

|      |     |      |     |   |        |         |        |      |      |   |
|------|-----|------|-----|---|--------|---------|--------|------|------|---|
| ATOM | 673 | H2'1 | C B | 3 | 8.953  | -28.961 | 71.310 | 1.00 | 0.00 | H |
| ATOM | 674 | H2'2 | C B | 3 | 9.767  | -27.672 | 72.186 | 1.00 | 0.00 | H |
| ATOM | 675 | H5'1 | C B | 3 | 5.720  | -28.308 | 69.382 | 1.00 | 0.00 | H |
| ATOM | 676 | H5'2 | C B | 3 | 6.932  | -27.897 | 68.149 | 1.00 | 0.00 | H |
| ATOM | 677 | C1'  | C B | 4 | 9.546  | -25.468 | 76.350 | 1.00 | 0.00 | C |
| ATOM | 678 | N1   | C B | 4 | 9.366  | -26.943 | 76.286 | 1.00 | 0.00 | N |
| ATOM | 679 | C2   | C B | 4 | 8.705  | -27.568 | 77.342 | 1.00 | 0.00 | C |
| ATOM | 680 | O2   | C B | 4 | 8.297  | -26.875 | 78.285 | 1.00 | 0.00 | O |
| ATOM | 681 | N3   | C B | 4 | 8.531  | -28.910 | 77.304 | 1.00 | 0.00 | N |
| ATOM | 682 | C4   | C B | 4 | 8.985  | -29.634 | 76.271 | 1.00 | 0.00 | C |
| ATOM | 683 | N4   | C B | 4 | 8.784  | -30.944 | 76.281 | 1.00 | 0.00 | N |
| ATOM | 684 | C5   | C B | 4 | 9.672  | -29.020 | 75.172 | 1.00 | 0.00 | C |
| ATOM | 685 | C6   | C B | 4 | 9.832  | -27.665 | 75.230 | 1.00 | 0.00 | C |
| ATOM | 686 | C2'  | C B | 4 | 10.885 | -24.988 | 75.808 | 1.00 | 0.00 | C |
| ATOM | 687 | C3'  | C B | 4 | 10.508 | -23.668 | 75.154 | 1.00 | 0.00 | C |
| ATOM | 688 | O3'  | C B | 4 | 10.506 | -22.640 | 76.141 | 1.00 | 0.00 | O |
| ATOM | 689 | C4'  | C B | 4 | 9.110  | -23.947 | 74.607 | 1.00 | 0.00 | C |
| ATOM | 690 | O4'  | C B | 4 | 8.522  | -24.876 | 75.574 | 1.00 | 0.00 | O |
| ATOM | 691 | C5'  | C B | 4 | 9.039  | -24.573 | 73.233 | 1.00 | 0.00 | C |
| ATOM | 692 | O5'  | C B | 4 | 10.129 | -25.513 | 73.065 | 1.00 | 0.00 | O |
| ATOM | 693 | O1P  | C B | 4 | 11.536 | -24.458 | 71.265 | 1.00 | 0.00 | O |
| ATOM | 694 | O2P  | C B | 4 | 11.548 | -26.948 | 71.569 | 1.00 | 0.00 | O |
| ATOM | 695 | P    | C B | 4 | 10.785 | -25.678 | 71.622 | 1.00 | 0.00 | P |
| ATOM | 696 | H5   | C B | 4 | 10.050 | -29.605 | 74.333 | 1.00 | 0.00 | H |
| ATOM | 697 | H6   | C B | 4 | 10.342 | -27.152 | 74.416 | 1.00 | 0.00 | H |
| ATOM | 698 | H1'  | C B | 4 | 9.408  | -25.152 | 77.385 | 1.00 | 0.00 | H |
| ATOM | 699 | H3'  | C B | 4 | 11.197 | -23.398 | 74.353 | 1.00 | 0.00 | H |
| ATOM | 700 | H4'  | C B | 4 | 8.589  | -22.990 | 74.564 | 1.00 | 0.00 | H |
| ATOM | 701 | H41  | C B | 4 | 9.120  | -31.524 | 75.498 | 1.00 | 0.00 | H |
| ATOM | 702 | H42  | C B | 4 | 8.291  | -31.384 | 77.074 | 1.00 | 0.00 | H |
| ATOM | 703 | H2'1 | C B | 4 | 11.311 | -25.682 | 75.085 | 1.00 | 0.00 | H |
| ATOM | 704 | H2'2 | C B | 4 | 11.623 | -24.844 | 76.598 | 1.00 | 0.00 | H |
| ATOM | 705 | H5'1 | C B | 4 | 8.086  | -25.090 | 73.124 | 1.00 | 0.00 | H |
| ATOM | 706 | H5'2 | C B | 4 | 9.109  | -23.789 | 72.480 | 1.00 | 0.00 | H |
| ATOM | 707 | C1'  | G B | 5 | 10.589 | -25.216 | 81.185 | 1.00 | 0.00 | C |
| ATOM | 708 | N1   | G B | 5 | 10.160 | -30.295 | 80.962 | 1.00 | 0.00 | N |
| ATOM | 709 | C2   | G B | 5 | 9.695  | -29.405 | 81.915 | 1.00 | 0.00 | C |
| ATOM | 710 | N2   | G B | 5 | 9.030  | -29.941 | 82.945 | 1.00 | 0.00 | N |
| ATOM | 711 | N3   | G B | 5 | 9.879  | -28.088 | 81.843 | 1.00 | 0.00 | N |
| ATOM | 712 | C4   | G B | 5 | 10.580 | -27.724 | 80.738 | 1.00 | 0.00 | C |
| ATOM | 713 | C5   | G B | 5 | 11.086 | -28.541 | 79.739 | 1.00 | 0.00 | C |
| ATOM | 714 | C6   | G B | 5 | 10.888 | -29.937 | 79.811 | 1.00 | 0.00 | C |
| ATOM | 715 | O6   | G B | 5 | 11.257 | -30.814 | 79.032 | 1.00 | 0.00 | O |
| ATOM | 716 | N7   | G B | 5 | 11.747 | -27.772 | 78.778 | 1.00 | 0.00 | N |
| ATOM | 717 | C8   | G B | 5 | 11.620 | -26.544 | 79.211 | 1.00 | 0.00 | C |
| ATOM | 718 | N9   | G B | 5 | 10.925 | -26.434 | 80.398 | 1.00 | 0.00 | N |
| ATOM | 719 | C2'  | G B | 5 | 11.692 | -24.168 | 81.194 | 1.00 | 0.00 | C |
| ATOM | 720 | C3'  | G B | 5 | 10.898 | -22.872 | 81.185 | 1.00 | 0.00 | C |
| ATOM | 721 | O3'  | G B | 5 | 10.530 | -22.538 | 82.521 | 1.00 | 0.00 | O |
| ATOM | 722 | C4'  | G B | 5 | 9.688  | -23.220 | 80.322 | 1.00 | 0.00 | C |
| ATOM | 723 | O4'  | G B | 5 | 9.437  | -24.633 | 80.607 | 1.00 | 0.00 | O |
| ATOM | 724 | C5'  | G B | 5 | 9.854  | -23.050 | 78.830 | 1.00 | 0.00 | C |
| ATOM | 725 | O5'  | G B | 5 | 11.202 | -23.417 | 78.443 | 1.00 | 0.00 | O |
| ATOM | 726 | O1P  | G B | 5 | 12.194 | -21.243 | 77.651 | 1.00 | 0.00 | O |

|      |     |      |     |   |        |         |        |      |      |   |
|------|-----|------|-----|---|--------|---------|--------|------|------|---|
| ATOM | 727 | O2P  | G B | 5 | 13.048 | -23.418 | 76.738 | 1.00 | 0.00 | O |
| ATOM | 728 | P    | G B | 5 | 11.897 | -22.629 | 77.243 | 1.00 | 0.00 | P |
| ATOM | 729 | H1   | G B | 5 | 9.958  | -31.296 | 81.108 | 1.00 | 0.00 | H |
| ATOM | 730 | H8   | G B | 5 | 12.030 | -25.682 | 78.685 | 1.00 | 0.00 | H |
| ATOM | 731 | H1'  | G B | 5 | 10.335 | -25.525 | 82.199 | 1.00 | 0.00 | H |
| ATOM | 732 | H21  | G B | 5 | 8.887  | -30.960 | 82.993 | 1.00 | 0.00 | H |
| ATOM | 733 | H3'  | G B | 5 | 11.466 | -22.047 | 80.750 | 1.00 | 0.00 | H |
| ATOM | 734 | H22  | G B | 5 | 8.660  | -29.333 | 83.690 | 1.00 | 0.00 | H |
| ATOM | 735 | H4'  | G B | 5 | 8.872  | -22.571 | 80.641 | 1.00 | 0.00 | H |
| ATOM | 736 | H2'1 | G B | 5 | 12.341 | -24.242 | 80.320 | 1.00 | 0.00 | H |
| ATOM | 737 | H2'2 | G B | 5 | 12.325 | -24.240 | 82.079 | 1.00 | 0.00 | H |
| ATOM | 738 | H5'1 | G B | 5 | 9.137  | -23.688 | 78.315 | 1.00 | 0.00 | H |
| ATOM | 739 | H5'2 | G B | 5 | 9.666  | -22.011 | 78.565 | 1.00 | 0.00 | H |
| ATOM | 740 | C1'  | T B | 6 | 11.389 | -27.138 | 85.677 | 1.00 | 0.00 | C |
| ATOM | 741 | N1   | T B | 6 | 12.125 | -27.664 | 84.495 | 1.00 | 0.00 | N |
| ATOM | 742 | C2   | T B | 6 | 12.105 | -29.029 | 84.299 | 1.00 | 0.00 | C |
| ATOM | 743 | O2   | T B | 6 | 11.520 | -29.796 | 85.043 | 1.00 | 0.00 | O |
| ATOM | 744 | N3   | T B | 6 | 12.801 | -29.475 | 83.188 | 1.00 | 0.00 | N |
| ATOM | 745 | C4   | T B | 6 | 13.497 | -28.696 | 82.287 | 1.00 | 0.00 | C |
| ATOM | 746 | O4   | T B | 6 | 14.085 | -29.210 | 81.330 | 1.00 | 0.00 | O |
| ATOM | 747 | C5   | T B | 6 | 13.457 | -27.282 | 82.577 | 1.00 | 0.00 | C |
| ATOM | 748 | C6   | T B | 6 | 12.790 | -26.813 | 83.648 | 1.00 | 0.00 | C |
| ATOM | 749 | C7   | T B | 6 | 14.200 | -26.397 | 81.619 | 1.00 | 0.00 | C |
| ATOM | 750 | C2'  | T B | 6 | 12.087 | -25.971 | 86.364 | 1.00 | 0.00 | C |
| ATOM | 751 | C3'  | T B | 6 | 10.910 | -25.114 | 86.806 | 1.00 | 0.00 | C |
| ATOM | 752 | O3'  | T B | 6 | 10.422 | -25.598 | 88.056 | 1.00 | 0.00 | O |
| ATOM | 753 | C4'  | T B | 6 | 9.903  | -25.310 | 85.677 | 1.00 | 0.00 | C |
| ATOM | 754 | O4'  | T B | 6 | 10.124 | -26.687 | 85.232 | 1.00 | 0.00 | O |
| ATOM | 755 | C5'  | T B | 6 | 10.039 | -24.391 | 84.486 | 1.00 | 0.00 | C |
| ATOM | 756 | O5'  | T B | 6 | 11.442 | -24.133 | 84.225 | 1.00 | 0.00 | O |
| ATOM | 757 | O1P  | T B | 6 | 11.682 | -21.675 | 84.714 | 1.00 | 0.00 | O |
| ATOM | 758 | O2P  | T B | 6 | 13.225 | -22.786 | 83.077 | 1.00 | 0.00 | O |
| ATOM | 759 | P    | T B | 6 | 11.868 | -22.700 | 83.668 | 1.00 | 0.00 | P |
| ATOM | 760 | H3   | T B | 6 | 12.799 | -30.491 | 83.018 | 1.00 | 0.00 | H |
| ATOM | 761 | H6   | T B | 6 | 12.776 | -25.740 | 83.844 | 1.00 | 0.00 | H |
| ATOM | 762 | H1'  | T B | 6 | 11.227 | -27.960 | 86.372 | 1.00 | 0.00 | H |
| ATOM | 763 | H3'  | T B | 6 | 11.186 | -24.065 | 86.909 | 1.00 | 0.00 | H |
| ATOM | 764 | H4'  | T B | 6 | 8.912  | -25.155 | 86.105 | 1.00 | 0.00 | H |
| ATOM | 765 | H71  | T B | 6 | 15.037 | -25.927 | 82.133 | 1.00 | 0.00 | H |
| ATOM | 766 | H72  | T B | 6 | 14.571 | -26.993 | 80.786 | 1.00 | 0.00 | H |
| ATOM | 767 | H73  | T B | 6 | 13.527 | -25.625 | 81.241 | 1.00 | 0.00 | H |
| ATOM | 768 | H2'1 | T B | 6 | 12.743 | -25.426 | 85.688 | 1.00 | 0.00 | H |
| ATOM | 769 | H2'2 | T B | 6 | 12.686 | -26.292 | 87.217 | 1.00 | 0.00 | H |
| ATOM | 770 | H5'1 | T B | 6 | 9.584  | -24.861 | 83.615 | 1.00 | 0.00 | H |
| ATOM | 771 | H5'2 | T B | 6 | 9.526  | -23.454 | 84.698 | 1.00 | 0.00 | H |
| ATOM | 772 | C1'  | C B | 7 | 12.719 | -30.785 | 88.773 | 1.00 | 0.00 | C |
| ATOM | 773 | N1   | C B | 7 | 13.611 | -30.385 | 87.648 | 1.00 | 0.00 | N |
| ATOM | 774 | C2   | C B | 7 | 14.083 | -31.387 | 86.803 | 1.00 | 0.00 | C |
| ATOM | 775 | O2   | C B | 7 | 13.744 | -32.559 | 87.017 | 1.00 | 0.00 | O |
| ATOM | 776 | N3   | C B | 7 | 14.895 | -31.044 | 85.773 | 1.00 | 0.00 | N |
| ATOM | 777 | C4   | C B | 7 | 15.244 | -29.767 | 85.568 | 1.00 | 0.00 | C |
| ATOM | 778 | N4   | C B | 7 | 16.038 | -29.490 | 84.545 | 1.00 | 0.00 | N |
| ATOM | 779 | C5   | C B | 7 | 14.778 | -28.716 | 86.424 | 1.00 | 0.00 | C |
| ATOM | 780 | C6   | C B | 7 | 13.956 | -29.086 | 87.451 | 1.00 | 0.00 | C |

|      |     |      |     |   |        |         |        |      |      |   |
|------|-----|------|-----|---|--------|---------|--------|------|------|---|
| ATOM | 781 | C2'  | C B | 7 | 12.959 | -30.002 | 90.055 | 1.00 | 0.00 | C |
| ATOM | 782 | C3'  | C B | 7 | 11.552 | -29.879 | 90.619 | 1.00 | 0.00 | C |
| ATOM | 783 | O3'  | C B | 7 | 11.241 | -31.056 | 91.360 | 1.00 | 0.00 | O |
| ATOM | 784 | C4'  | C B | 7 | 10.693 | -29.742 | 89.364 | 1.00 | 0.00 | C |
| ATOM | 785 | O4'  | C B | 7 | 11.383 | -30.557 | 88.365 | 1.00 | 0.00 | O |
| ATOM | 786 | C5'  | C B | 7 | 10.523 | -28.344 | 88.815 | 1.00 | 0.00 | C |
| ATOM | 787 | O5'  | C B | 7 | 11.755 | -27.598 | 88.986 | 1.00 | 0.00 | O |
| ATOM | 788 | O1P  | C B | 7 | 11.122 | -25.800 | 90.631 | 1.00 | 0.00 | O |
| ATOM | 789 | O2P  | C B | 7 | 12.981 | -25.405 | 88.994 | 1.00 | 0.00 | O |
| ATOM | 790 | P    | C B | 7 | 11.669 | -26.032 | 89.279 | 1.00 | 0.00 | P |
| ATOM | 791 | H5   | C B | 7 | 15.065 | -27.678 | 86.264 | 1.00 | 0.00 | H |
| ATOM | 792 | H6   | C B | 7 | 13.569 | -28.321 | 88.126 | 1.00 | 0.00 | H |
| ATOM | 793 | H1'  | C B | 7 | 12.841 | -31.856 | 88.939 | 1.00 | 0.00 | H |
| ATOM | 794 | H3'  | C B | 7 | 11.447 | -29.006 | 91.265 | 1.00 | 0.00 | H |
| ATOM | 795 | H4'  | C B | 7 | 9.704  | -30.122 | 89.615 | 1.00 | 0.00 | H |
| ATOM | 796 | H41  | C B | 7 | 16.319 | -28.515 | 84.362 | 1.00 | 0.00 | H |
| ATOM | 797 | H42  | C B | 7 | 16.374 | -30.246 | 83.931 | 1.00 | 0.00 | H |
| ATOM | 798 | H2'1 | C B | 7 | 13.398 | -29.022 | 89.866 | 1.00 | 0.00 | H |
| ATOM | 799 | H2'2 | C B | 7 | 13.620 | -30.528 | 90.744 | 1.00 | 0.00 | H |
| ATOM | 800 | H5'1 | C B | 7 | 10.273 | -28.405 | 87.755 | 1.00 | 0.00 | H |
| ATOM | 801 | H5'2 | C B | 7 | 9.715  | -27.847 | 89.348 | 1.00 | 0.00 | H |
| ATOM | 802 | C1'  | C B | 8 | 15.137 | -34.932 | 89.992 | 1.00 | 0.00 | C |
| ATOM | 803 | N1   | C B | 8 | 15.862 | -33.786 | 89.377 | 1.00 | 0.00 | N |
| ATOM | 804 | C2   | C B | 8 | 16.662 | -34.040 | 88.265 | 1.00 | 0.00 | C |
| ATOM | 805 | O2   | C B | 8 | 16.736 | -35.199 | 87.836 | 1.00 | 0.00 | O |
| ATOM | 806 | N3   | C B | 8 | 17.329 | -33.011 | 87.691 | 1.00 | 0.00 | N |
| ATOM | 807 | C4   | C B | 8 | 17.229 | -31.767 | 88.178 | 1.00 | 0.00 | C |
| ATOM | 808 | N4   | C B | 8 | 17.902 | -30.797 | 87.575 | 1.00 | 0.00 | N |
| ATOM | 809 | C5   | C B | 8 | 16.418 | -31.475 | 89.325 | 1.00 | 0.00 | C |
| ATOM | 810 | C6   | C B | 8 | 15.750 | -32.529 | 89.884 | 1.00 | 0.00 | C |
| ATOM | 811 | C2'  | C B | 8 | 15.073 | -34.874 | 91.512 | 1.00 | 0.00 | C |
| ATOM | 812 | C3'  | C B | 8 | 13.697 | -35.457 | 91.794 | 1.00 | 0.00 | C |
| ATOM | 813 | O3'  | C B | 8 | 13.789 | -36.879 | 91.821 | 1.00 | 0.00 | O |
| ATOM | 814 | C4'  | C B | 8 | 12.867 | -34.954 | 90.615 | 1.00 | 0.00 | C |
| ATOM | 815 | O4'  | C B | 8 | 13.812 | -34.916 | 89.497 | 1.00 | 0.00 | O |
| ATOM | 816 | C5'  | C B | 8 | 12.244 | -33.587 | 90.766 | 1.00 | 0.00 | C |
| ATOM | 817 | O5'  | C B | 8 | 13.146 | -32.715 | 91.495 | 1.00 | 0.00 | O |
| ATOM | 818 | O1P  | C B | 8 | 11.910 | -32.262 | 93.641 | 1.00 | 0.00 | O |
| ATOM | 819 | O2P  | C B | 8 | 13.556 | -30.585 | 92.761 | 1.00 | 0.00 | O |
| ATOM | 820 | P    | C B | 8 | 12.529 | -31.614 | 92.467 | 1.00 | 0.00 | P |
| ATOM | 821 | H5   | C B | 8 | 16.338 | -30.467 | 89.730 | 1.00 | 0.00 | H |
| ATOM | 822 | H6   | C B | 8 | 15.115 | -32.355 | 90.753 | 1.00 | 0.00 | H |
| ATOM | 823 | H1'  | C B | 8 | 15.611 | -35.854 | 89.656 | 1.00 | 0.00 | H |
| ATOM | 824 | H3'  | C B | 8 | 13.290 | -35.103 | 92.741 | 1.00 | 0.00 | H |
| ATOM | 825 | H4'  | C B | 8 | 12.059 | -35.671 | 90.467 | 1.00 | 0.00 | H |
| ATOM | 826 | H41  | C B | 8 | 17.839 | -29.831 | 87.929 | 1.00 | 0.00 | H |
| ATOM | 827 | H42  | C B | 8 | 18.485 | -31.009 | 86.753 | 1.00 | 0.00 | H |
| ATOM | 828 | H2'1 | C B | 8 | 15.158 | -33.856 | 91.891 | 1.00 | 0.00 | H |
| ATOM | 829 | H2'2 | C B | 8 | 15.859 | -35.465 | 91.982 | 1.00 | 0.00 | H |
| ATOM | 830 | H5'1 | C B | 8 | 12.049 | -33.169 | 89.778 | 1.00 | 0.00 | H |
| ATOM | 831 | H5'2 | C B | 8 | 11.305 | -33.679 | 91.308 | 1.00 | 0.00 | H |
| ATOM | 832 | C1'  | T B | 9 | 18.780 | -38.254 | 89.560 | 1.00 | 0.00 | C |
| ATOM | 833 | N1   | T B | 9 | 19.098 | -36.807 | 89.687 | 1.00 | 0.00 | N |
| ATOM | 834 | C2   | T B | 9 | 19.954 | -36.266 | 88.749 | 1.00 | 0.00 | C |

|      |     |      |     |    |        |         |        |      |      |   |
|------|-----|------|-----|----|--------|---------|--------|------|------|---|
| ATOM | 835 | O2   | T B | 9  | 20.443 | -36.923 | 87.846 | 1.00 | 0.00 | O |
| ATOM | 836 | N3   | T B | 9  | 20.222 | -34.919 | 88.903 | 1.00 | 0.00 | N |
| ATOM | 837 | C4   | T B | 9  | 19.727 | -34.090 | 89.887 | 1.00 | 0.00 | C |
| ATOM | 838 | O4   | T B | 9  | 20.042 | -32.895 | 89.926 | 1.00 | 0.00 | O |
| ATOM | 839 | C5   | T B | 9  | 18.841 | -34.745 | 90.820 | 1.00 | 0.00 | C |
| ATOM | 840 | C6   | T B | 9  | 18.556 | -36.056 | 90.700 | 1.00 | 0.00 | C |
| ATOM | 841 | C7   | T B | 9  | 18.276 | -33.878 | 91.906 | 1.00 | 0.00 | C |
| ATOM | 842 | C2'  | T B | 9  | 18.665 | -38.978 | 90.898 | 1.00 | 0.00 | C |
| ATOM | 843 | C3'  | T B | 9  | 17.553 | -39.978 | 90.622 | 1.00 | 0.00 | C |
| ATOM | 844 | O3'  | T B | 9  | 18.110 | -41.139 | 90.009 | 1.00 | 0.00 | O |
| ATOM | 845 | C4'  | T B | 9  | 16.631 | -39.211 | 89.679 | 1.00 | 0.00 | C |
| ATOM | 846 | O4'  | T B | 9  | 17.536 | -38.368 | 88.897 | 1.00 | 0.00 | O |
| ATOM | 847 | C5'  | T B | 9  | 15.587 | -38.331 | 90.327 | 1.00 | 0.00 | C |
| ATOM | 848 | O5'  | T B | 9  | 16.134 | -37.726 | 91.525 | 1.00 | 0.00 | O |
| ATOM | 849 | O1P  | T B | 9  | 14.770 | -38.755 | 93.372 | 1.00 | 0.00 | O |
| ATOM | 850 | O2P  | T B | 9  | 15.788 | -36.482 | 93.681 | 1.00 | 0.00 | O |
| ATOM | 851 | P    | T B | 9  | 15.165 | -37.468 | 92.765 | 1.00 | 0.00 | P |
| ATOM | 852 | H3   | T B | 9  | 20.856 | -34.491 | 88.213 | 1.00 | 0.00 | H |
| ATOM | 853 | H6   | T B | 9  | 17.885 | -36.528 | 91.417 | 1.00 | 0.00 | H |
| ATOM | 854 | H1'  | T B | 9  | 19.538 | -38.719 | 88.930 | 1.00 | 0.00 | H |
| ATOM | 855 | H3'  | T B | 9  | 17.032 | -40.268 | 91.535 | 1.00 | 0.00 | H |
| ATOM | 856 | H4'  | T B | 9  | 16.110 | -39.954 | 89.072 | 1.00 | 0.00 | H |
| ATOM | 857 | H71  | T B | 9  | 18.657 | -34.211 | 92.872 | 1.00 | 0.00 | H |
| ATOM | 858 | H72  | T B | 9  | 18.569 | -32.842 | 91.736 | 1.00 | 0.00 | H |
| ATOM | 859 | H73  | T B | 9  | 17.187 | -33.953 | 91.901 | 1.00 | 0.00 | H |
| ATOM | 860 | H2'1 | T B | 9  | 18.399 | -38.303 | 91.710 | 1.00 | 0.00 | H |
| ATOM | 861 | H2'2 | T B | 9  | 19.591 | -39.479 | 91.177 | 1.00 | 0.00 | H |
| ATOM | 862 | H5'1 | T B | 9  | 15.287 | -37.554 | 89.624 | 1.00 | 0.00 | H |
| ATOM | 863 | H5'2 | T B | 9  | 14.720 | -38.936 | 90.583 | 1.00 | 0.00 | H |
| ATOM | 864 | C1'  | A B | 10 | 23.355 | -39.701 | 88.291 | 1.00 | 0.00 | C |
| ATOM | 865 | N1   | A B | 10 | 24.496 | -34.740 | 88.937 | 1.00 | 0.00 | N |
| ATOM | 866 | C2   | A B | 10 | 24.847 | -35.630 | 88.013 | 1.00 | 0.00 | C |
| ATOM | 867 | N3   | A B | 10 | 24.512 | -36.898 | 87.905 | 1.00 | 0.00 | N |
| ATOM | 868 | C4   | A B | 10 | 23.704 | -37.255 | 88.919 | 1.00 | 0.00 | C |
| ATOM | 869 | C5   | A B | 10 | 23.255 | -36.468 | 89.942 | 1.00 | 0.00 | C |
| ATOM | 870 | C6   | A B | 10 | 23.688 | -35.126 | 89.936 | 1.00 | 0.00 | C |
| ATOM | 871 | N6   | A B | 10 | 23.328 | -34.236 | 90.878 | 1.00 | 0.00 | N |
| ATOM | 872 | N7   | A B | 10 | 22.437 | -37.182 | 90.801 | 1.00 | 0.00 | N |
| ATOM | 873 | C8   | A B | 10 | 22.414 | -38.376 | 90.286 | 1.00 | 0.00 | C |
| ATOM | 874 | N9   | A B | 10 | 23.158 | -38.496 | 89.141 | 1.00 | 0.00 | N |
| ATOM | 875 | C2'  | A B | 10 | 23.462 | -40.997 | 89.083 | 1.00 | 0.00 | C |
| ATOM | 876 | C3'  | A B | 10 | 22.767 | -41.990 | 88.165 | 1.00 | 0.00 | C |
| ATOM | 877 | O3'  | A B | 10 | 23.698 | -42.465 | 87.196 | 1.00 | 0.00 | O |
| ATOM | 878 | C4'  | A B | 10 | 21.657 | -41.147 | 87.533 | 1.00 | 0.00 | C |
| ATOM | 879 | O4'  | A B | 10 | 22.237 | -39.807 | 87.430 | 1.00 | 0.00 | O |
| ATOM | 880 | C5'  | A B | 10 | 20.363 | -41.056 | 88.307 | 1.00 | 0.00 | C |
| ATOM | 881 | O5'  | A B | 10 | 20.642 | -41.013 | 89.730 | 1.00 | 0.00 | O |
| ATOM | 882 | O1P  | A B | 10 | 19.671 | -43.174 | 90.578 | 1.00 | 0.00 | O |
| ATOM | 883 | O2P  | A B | 10 | 19.846 | -41.192 | 92.106 | 1.00 | 0.00 | O |
| ATOM | 884 | P    | A B | 10 | 19.617 | -41.708 | 90.734 | 1.00 | 0.00 | P |
| ATOM | 885 | H2   | A B | 10 | 25.507 | -35.254 | 87.232 | 1.00 | 0.00 | H |
| ATOM | 886 | H8   | A B | 10 | 21.857 | -39.204 | 90.725 | 1.00 | 0.00 | H |
| ATOM | 887 | H1'  | A B | 10 | 24.240 | -39.544 | 87.676 | 1.00 | 0.00 | H |
| ATOM | 888 | H3'  | A B | 10 | 22.352 | -42.835 | 88.715 | 1.00 | 0.00 | H |

|      |     |      |     |    |        |         |        |      |      |   |
|------|-----|------|-----|----|--------|---------|--------|------|------|---|
| ATOM | 889 | H4'  | A B | 10 | 21.437 | -41.592 | 86.564 | 1.00 | 0.00 | H |
| ATOM | 890 | H61  | A B | 10 | 23.670 | -33.266 | 90.825 | 1.00 | 0.00 | H |
| ATOM | 891 | H62  | A B | 10 | 22.709 | -34.523 | 91.649 | 1.00 | 0.00 | H |
| ATOM | 892 | H2'1 | A B | 10 | 22.964 | -40.936 | 90.049 | 1.00 | 0.00 | H |
| ATOM | 893 | H2'2 | A B | 10 | 24.499 | -41.286 | 89.265 | 1.00 | 0.00 | H |
| ATOM | 894 | H5'1 | A B | 10 | 19.832 | -40.152 | 88.009 | 1.00 | 0.00 | H |
| ATOM | 895 | H5'2 | A B | 10 | 19.748 | -41.924 | 88.079 | 1.00 | 0.00 | H |
| ATOM | 896 | C1'  | G B | 11 | 28.173 | -38.920 | 87.384 | 1.00 | 0.00 | C |
| ATOM | 897 | N1   | G B | 11 | 27.542 | -34.919 | 90.485 | 1.00 | 0.00 | N |
| ATOM | 898 | C2   | G B | 11 | 28.237 | -35.017 | 89.292 | 1.00 | 0.00 | C |
| ATOM | 899 | N2   | G B | 11 | 28.845 | -33.901 | 88.870 | 1.00 | 0.00 | N |
| ATOM | 900 | N3   | G B | 11 | 28.316 | -36.138 | 88.576 | 1.00 | 0.00 | N |
| ATOM | 901 | C4   | G B | 11 | 27.646 | -37.168 | 89.157 | 1.00 | 0.00 | C |
| ATOM | 902 | C5   | G B | 11 | 26.933 | -37.165 | 90.343 | 1.00 | 0.00 | C |
| ATOM | 903 | C6   | G B | 11 | 26.844 | -35.974 | 91.102 | 1.00 | 0.00 | C |
| ATOM | 904 | O6   | G B | 11 | 26.264 | -35.776 | 92.169 | 1.00 | 0.00 | O |
| ATOM | 905 | N7   | G B | 11 | 26.396 | -38.430 | 90.587 | 1.00 | 0.00 | N |
| ATOM | 906 | C8   | G B | 11 | 26.789 | -39.145 | 89.563 | 1.00 | 0.00 | C |
| ATOM | 907 | N9   | G B | 11 | 27.555 | -38.447 | 88.652 | 1.00 | 0.00 | N |
| ATOM | 908 | C2'  | G B | 11 | 28.713 | -40.341 | 87.456 | 1.00 | 0.00 | C |
| ATOM | 909 | C3'  | G B | 11 | 28.419 | -40.865 | 86.060 | 1.00 | 0.00 | C |
| ATOM | 910 | O3'  | G B | 11 | 29.473 | -40.476 | 85.183 | 1.00 | 0.00 | O |
| ATOM | 911 | C4'  | G B | 11 | 27.097 | -40.183 | 85.712 | 1.00 | 0.00 | C |
| ATOM | 912 | O4'  | G B | 11 | 27.177 | -38.883 | 86.379 | 1.00 | 0.00 | O |
| ATOM | 913 | C5'  | G B | 11 | 25.839 | -40.884 | 86.168 | 1.00 | 0.00 | C |
| ATOM | 914 | O5'  | G B | 11 | 26.065 | -41.506 | 87.457 | 1.00 | 0.00 | O |
| ATOM | 915 | O1P  | G B | 11 | 25.892 | -43.966 | 86.957 | 1.00 | 0.00 | O |
| ATOM | 916 | O2P  | G B | 11 | 25.341 | -43.111 | 89.250 | 1.00 | 0.00 | O |
| ATOM | 917 | P    | G B | 11 | 25.330 | -42.883 | 87.785 | 1.00 | 0.00 | P |
| ATOM | 918 | H1   | G B | 11 | 27.537 | -34.002 | 90.957 | 1.00 | 0.00 | H |
| ATOM | 919 | H8   | G B | 11 | 26.535 | -40.197 | 89.443 | 1.00 | 0.00 | H |
| ATOM | 920 | H1'  | G B | 11 | 28.957 | -38.216 | 87.102 | 1.00 | 0.00 | H |
| ATOM | 921 | H21  | G B | 11 | 28.776 | -33.037 | 89.427 | 1.00 | 0.00 | H |
| ATOM | 922 | H3'  | G B | 11 | 28.317 | -41.951 | 86.044 | 1.00 | 0.00 | H |
| ATOM | 923 | H22  | G B | 11 | 29.381 | -33.908 | 87.991 | 1.00 | 0.00 | H |
| ATOM | 924 | H4'  | G B | 11 | 27.059 | -40.102 | 84.626 | 1.00 | 0.00 | H |
| ATOM | 925 | H2'1 | G B | 11 | 28.208 | -40.936 | 88.218 | 1.00 | 0.00 | H |
| ATOM | 926 | H2'2 | G B | 11 | 29.782 | -40.366 | 87.674 | 1.00 | 0.00 | H |
| ATOM | 927 | H5'1 | G B | 11 | 25.032 | -40.156 | 86.245 | 1.00 | 0.00 | H |
| ATOM | 928 | H5'2 | G B | 11 | 25.569 | -41.643 | 85.434 | 1.00 | 0.00 | H |
| ATOM | 929 | C1'  | G B | 12 | 32.456 | -36.480 | 87.858 | 1.00 | 0.00 | C |
| ATOM | 930 | N1   | G B | 12 | 30.448 | -34.967 | 92.297 | 1.00 | 0.00 | N |
| ATOM | 931 | C2   | G B | 12 | 31.158 | -34.248 | 91.350 | 1.00 | 0.00 | C |
| ATOM | 932 | N2   | G B | 12 | 31.360 | -32.952 | 91.625 | 1.00 | 0.00 | N |
| ATOM | 933 | N3   | G B | 12 | 31.625 | -34.777 | 90.223 | 1.00 | 0.00 | N |
| ATOM | 934 | C4   | G B | 12 | 31.335 | -36.099 | 90.114 | 1.00 | 0.00 | C |
| ATOM | 935 | C5   | G B | 12 | 30.640 | -36.898 | 91.004 | 1.00 | 0.00 | C |
| ATOM | 936 | C6   | G B | 12 | 30.138 | -36.337 | 92.201 | 1.00 | 0.00 | C |
| ATOM | 937 | O6   | G B | 12 | 29.505 | -36.878 | 93.106 | 1.00 | 0.00 | O |
| ATOM | 938 | N7   | G B | 12 | 30.558 | -38.205 | 90.520 | 1.00 | 0.00 | N |
| ATOM | 939 | C8   | G B | 12 | 31.189 | -38.159 | 89.375 | 1.00 | 0.00 | C |
| ATOM | 940 | N9   | G B | 12 | 31.691 | -36.912 | 89.059 | 1.00 | 0.00 | N |
| ATOM | 941 | C2'  | G B | 12 | 33.445 | -37.522 | 87.354 | 1.00 | 0.00 | C |
| ATOM | 942 | C3'  | G B | 12 | 33.373 | -37.327 | 85.847 | 1.00 | 0.00 | C |

|      |     |      |   |   |    |        |         |        |      |      |   |
|------|-----|------|---|---|----|--------|---------|--------|------|------|---|
| ATOM | 943 | O3'  | G | B | 12 | 34.250 | -36.268 | 85.471 | 1.00 | 0.00 | O |
| ATOM | 944 | C4'  | G | B | 12 | 31.905 | -36.969 | 85.622 | 1.00 | 0.00 | C |
| ATOM | 945 | O4'  | G | B | 12 | 31.527 | -36.225 | 86.822 | 1.00 | 0.00 | O |
| ATOM | 946 | C5'  | G | B | 12 | 30.951 | -38.127 | 85.450 | 1.00 | 0.00 | C |
| ATOM | 947 | O5'  | G | B | 12 | 31.348 | -39.222 | 86.312 | 1.00 | 0.00 | O |
| ATOM | 948 | O1P  | G | B | 12 | 32.029 | -41.022 | 84.691 | 1.00 | 0.00 | O |
| ATOM | 949 | O2P  | G | B | 12 | 31.179 | -41.642 | 86.967 | 1.00 | 0.00 | O |
| ATOM | 950 | P    | G | B | 12 | 31.117 | -40.718 | 85.809 | 1.00 | 0.00 | P |
| ATOM | 951 | H1   | G | B | 12 | 30.123 | -34.461 | 93.136 | 1.00 | 0.00 | H |
| ATOM | 952 | H8   | G | B | 12 | 31.310 | -39.026 | 88.726 | 1.00 | 0.00 | H |
| ATOM | 953 | H1'  | G | B | 12 | 32.961 | -35.544 | 88.093 | 1.00 | 0.00 | H |
| ATOM | 954 | H21  | G | B | 12 | 30.991 | -32.549 | 92.500 | 1.00 | 0.00 | H |
| ATOM | 955 | H3'  | G | B | 12 | 33.645 | -38.231 | 85.304 | 1.00 | 0.00 | H |
| ATOM | 956 | H22  | G | B | 12 | 31.882 | -32.363 | 90.964 | 1.00 | 0.00 | H |
| ATOM | 957 | H4'  | G | B | 12 | 31.862 | -36.365 | 84.716 | 1.00 | 0.00 | H |
| ATOM | 958 | H2'1 | G | B | 12 | 33.158 | -38.536 | 87.636 | 1.00 | 0.00 | H |
| ATOM | 959 | H2'2 | G | B | 12 | 34.454 | -37.352 | 87.728 | 1.00 | 0.00 | H |
| ATOM | 960 | H5'1 | G | B | 12 | 29.943 | -37.802 | 85.708 | 1.00 | 0.00 | H |
| ATOM | 961 | H5'2 | G | B | 12 | 30.968 | -38.452 | 84.409 | 1.00 | 0.00 | H |
| ATOM | 962 | C1'  | T | B | 13 | 35.661 | -33.519 | 90.194 | 1.00 | 0.00 | C |
| ATOM | 963 | N1   | T | B | 13 | 35.058 | -34.677 | 90.905 | 1.00 | 0.00 | N |
| ATOM | 964 | C2   | T | B | 13 | 34.472 | -34.428 | 92.131 | 1.00 | 0.00 | C |
| ATOM | 965 | O2   | T | B | 13 | 34.439 | -33.318 | 92.631 | 1.00 | 0.00 | O |
| ATOM | 966 | N3   | T | B | 13 | 33.922 | -35.531 | 92.756 | 1.00 | 0.00 | N |
| ATOM | 967 | C4   | T | B | 13 | 33.909 | -36.826 | 92.279 | 1.00 | 0.00 | C |
| ATOM | 968 | O4   | T | B | 13 | 33.388 | -37.737 | 92.934 | 1.00 | 0.00 | O |
| ATOM | 969 | C5   | T | B | 13 | 34.543 | -36.987 | 90.992 | 1.00 | 0.00 | C |
| ATOM | 970 | C6   | T | B | 13 | 35.089 | -35.933 | 90.353 | 1.00 | 0.00 | C |
| ATOM | 971 | C7   | T | B | 13 | 34.551 | -38.378 | 90.432 | 1.00 | 0.00 | C |
| ATOM | 972 | C2'  | T | B | 13 | 36.951 | -33.856 | 89.455 | 1.00 | 0.00 | C |
| ATOM | 973 | C3'  | T | B | 13 | 36.849 | -32.976 | 88.220 | 1.00 | 0.00 | C |
| ATOM | 974 | O3'  | T | B | 13 | 37.335 | -31.673 | 88.534 | 1.00 | 0.00 | O |
| ATOM | 975 | C4'  | T | B | 13 | 35.351 | -32.978 | 87.923 | 1.00 | 0.00 | C |
| ATOM | 976 | O4'  | T | B | 13 | 34.722 | -33.059 | 89.242 | 1.00 | 0.00 | O |
| ATOM | 977 | C5'  | T | B | 13 | 34.837 | -34.116 | 87.072 | 1.00 | 0.00 | C |
| ATOM | 978 | O5'  | T | B | 13 | 35.558 | -35.333 | 87.393 | 1.00 | 0.00 | O |
| ATOM | 979 | O1P  | T | B | 13 | 36.830 | -35.833 | 85.282 | 1.00 | 0.00 | O |
| ATOM | 980 | O2P  | T | B | 13 | 36.184 | -37.700 | 86.829 | 1.00 | 0.00 | O |
| ATOM | 981 | P    | T | B | 13 | 35.844 | -36.385 | 86.231 | 1.00 | 0.00 | P |
| ATOM | 982 | H3   | T | B | 13 | 33.477 | -35.371 | 93.671 | 1.00 | 0.00 | H |
| ATOM | 983 | H6   | T | B | 13 | 35.562 | -36.080 | 89.382 | 1.00 | 0.00 | H |
| ATOM | 984 | H1'  | T | B | 13 | 35.824 | -32.719 | 90.917 | 1.00 | 0.00 | H |
| ATOM | 985 | H3'  | T | B | 13 | 37.417 | -33.380 | 87.383 | 1.00 | 0.00 | H |
| ATOM | 986 | H4'  | T | B | 13 | 35.131 | -32.047 | 87.400 | 1.00 | 0.00 | H |
| ATOM | 987 | H71  | T | B | 13 | 35.576 | -38.744 | 90.377 | 1.00 | 0.00 | H |
| ATOM | 988 | H72  | T | B | 13 | 33.966 | -39.034 | 91.080 | 1.00 | 0.00 | H |
| ATOM | 989 | H73  | T | B | 13 | 34.113 | -38.373 | 89.433 | 1.00 | 0.00 | H |
| ATOM | 990 | H2'1 | T | B | 13 | 37.010 | -34.910 | 89.187 | 1.00 | 0.00 | H |
| ATOM | 991 | H2'2 | T | B | 13 | 37.839 | -33.617 | 90.041 | 1.00 | 0.00 | H |
| ATOM | 992 | H5'1 | T | B | 13 | 33.774 | -34.254 | 87.263 | 1.00 | 0.00 | H |
| ATOM | 993 | H5'2 | T | B | 13 | 34.983 | -33.870 | 86.021 | 1.00 | 0.00 | H |
| ATOM | 994 | C1'  | G | B | 14 | 37.606 | -31.394 | 94.238 | 1.00 | 0.00 | C |
| ATOM | 995 | N1   | G | B | 14 | 35.723 | -35.492 | 96.622 | 1.00 | 0.00 | N |
| ATOM | 996 | C2   | G | B | 14 | 35.715 | -34.162 | 97.003 | 1.00 | 0.00 | C |



|      |      |      |     |    |        |         |         |      |      |   |
|------|------|------|-----|----|--------|---------|---------|------|------|---|
| ATOM | 997  | N2   | G B | 14 | 35.131 | -33.886 | 98.174  | 1.00 | 0.00 | N |
| ATOM | 998  | N3   | G B | 14 | 36.249 | -33.184 | 96.271  | 1.00 | 0.00 | N |
| ATOM | 999  | C4   | G B | 14 | 36.803 | -33.645 | 95.119  | 1.00 | 0.00 | C |
| ATOM | 1000 | C5   | G B | 14 | 36.863 | -34.950 | 94.661  | 1.00 | 0.00 | C |
| ATOM | 1001 | C6   | G B | 14 | 36.294 | -35.988 | 95.434  | 1.00 | 0.00 | C |
| ATOM | 1002 | O6   | G B | 14 | 36.247 | -37.196 | 95.198  | 1.00 | 0.00 | O |
| ATOM | 1003 | N7   | G B | 14 | 37.522 | -35.001 | 93.430  | 1.00 | 0.00 | N |
| ATOM | 1004 | C8   | G B | 14 | 37.832 | -33.753 | 93.187  | 1.00 | 0.00 | C |
| ATOM | 1005 | N9   | G B | 14 | 37.430 | -32.870 | 94.169  | 1.00 | 0.00 | N |
| ATOM | 1006 | C2'  | G B | 14 | 38.943 | -30.909 | 93.693  | 1.00 | 0.00 | C |
| ATOM | 1007 | C3'  | G B | 14 | 38.562 | -29.588 | 93.045  | 1.00 | 0.00 | C |
| ATOM | 1008 | O3'  | G B | 14 | 38.559 | -28.564 | 94.037  | 1.00 | 0.00 | O |
| ATOM | 1009 | C4'  | G B | 14 | 37.163 | -29.869 | 92.500  | 1.00 | 0.00 | C |
| ATOM | 1010 | O4'  | G B | 14 | 36.581 | -30.800 | 93.466  | 1.00 | 0.00 | O |
| ATOM | 1011 | C5'  | G B | 14 | 37.089 | -30.488 | 91.124  | 1.00 | 0.00 | C |
| ATOM | 1012 | O5'  | G B | 14 | 38.180 | -31.426 | 90.950  | 1.00 | 0.00 | O |
| ATOM | 1013 | O1P  | G B | 14 | 39.581 | -30.362 | 89.150  | 1.00 | 0.00 | O |
| ATOM | 1014 | O2P  | G B | 14 | 39.598 | -32.854 | 89.445  | 1.00 | 0.00 | O |
| ATOM | 1015 | P    | G B | 14 | 38.833 | -31.584 | 89.504  | 1.00 | 0.00 | P |
| ATOM | 1016 | H1   | G B | 14 | 35.277 | -36.171 | 97.258  | 1.00 | 0.00 | H |
| ATOM | 1017 | H8   | G B | 14 | 38.362 | -33.439 | 92.287  | 1.00 | 0.00 | H |
| ATOM | 1018 | H1'  | G B | 14 | 37.469 | -31.081 | 95.274  | 1.00 | 0.00 | H |
| ATOM | 1019 | H21  | G B | 14 | 34.717 | -34.649 | 98.733  | 1.00 | 0.00 | H |
| ATOM | 1020 | H3'  | G B | 14 | 39.248 | -29.314 | 92.243  | 1.00 | 0.00 | H |
| ATOM | 1021 | H22  | G B | 14 | 35.094 | -32.916 | 98.517  | 1.00 | 0.00 | H |
| ATOM | 1022 | H4'  | G B | 14 | 36.640 | -28.912 | 92.463  | 1.00 | 0.00 | H |
| ATOM | 1023 | H2'1 | G B | 14 | 39.368 | -31.600 | 92.965  | 1.00 | 0.00 | H |
| ATOM | 1024 | H2'2 | G B | 14 | 39.683 | -30.766 | 94.481  | 1.00 | 0.00 | H |
| ATOM | 1025 | H5'1 | G B | 14 | 36.138 | -31.006 | 91.016  | 1.00 | 0.00 | H |
| ATOM | 1026 | H5'2 | G B | 14 | 37.156 | -29.701 | 90.374  | 1.00 | 0.00 | H |
| ATOM | 1027 | C1'  | C B | 15 | 38.649 | -31.142 | 99.073  | 1.00 | 0.00 | C |
| ATOM | 1028 | N1   | C B | 15 | 38.981 | -32.362 | 98.289  | 1.00 | 0.00 | N |
| ATOM | 1029 | C2   | C B | 15 | 38.551 | -33.592 | 98.783  | 1.00 | 0.00 | C |
| ATOM | 1030 | O2   | C B | 15 | 37.914 | -33.619 | 99.845  | 1.00 | 0.00 | O |
| ATOM | 1031 | N3   | C B | 15 | 38.843 | -34.716 | 98.085  | 1.00 | 0.00 | N |
| ATOM | 1032 | C4   | C B | 15 | 39.534 | -34.655 | 96.940  | 1.00 | 0.00 | C |
| ATOM | 1033 | N4   | C B | 15 | 39.789 | -35.784 | 96.296  | 1.00 | 0.00 | N |
| ATOM | 1034 | C5   | C B | 15 | 39.994 | -33.404 | 96.409  | 1.00 | 0.00 | C |
| ATOM | 1035 | C6   | C B | 15 | 39.683 | -32.285 | 97.127  | 1.00 | 0.00 | C |
| ATOM | 1036 | C2'  | C B | 15 | 39.756 | -30.098 | 99.082  | 1.00 | 0.00 | C |
| ATOM | 1037 | C3'  | C B | 15 | 38.967 | -28.796 | 99.067  | 1.00 | 0.00 | C |
| ATOM | 1038 | O3'  | C B | 15 | 38.596 | -28.458 | 100.403 | 1.00 | 0.00 | O |
| ATOM | 1039 | C4'  | C B | 15 | 37.756 | -29.145 | 98.203  | 1.00 | 0.00 | C |
| ATOM | 1040 | O4'  | C B | 15 | 37.499 | -30.556 | 98.490  | 1.00 | 0.00 | O |
| ATOM | 1041 | C5'  | C B | 15 | 37.928 | -28.979 | 96.710  | 1.00 | 0.00 | C |
| ATOM | 1042 | O5'  | C B | 15 | 39.275 | -29.350 | 96.328  | 1.00 | 0.00 | O |
| ATOM | 1043 | O1P  | C B | 15 | 40.277 | -27.182 | 95.533  | 1.00 | 0.00 | O |
| ATOM | 1044 | O2P  | C B | 15 | 41.126 | -29.362 | 94.626  | 1.00 | 0.00 | O |
| ATOM | 1045 | P    | C B | 15 | 39.976 | -28.570 | 95.127  | 1.00 | 0.00 | P |
| ATOM | 1046 | H5   | C B | 15 | 40.562 | -33.350 | 95.481  | 1.00 | 0.00 | H |
| ATOM | 1047 | H6   | C B | 15 | 40.006 | -31.310 | 96.761  | 1.00 | 0.00 | H |
| ATOM | 1048 | H1'  | C B | 15 | 38.392 | -31.447 | 100.088 | 1.00 | 0.00 | H |
| ATOM | 1049 | H3'  | C B | 15 | 39.538 | -27.977 | 98.632  | 1.00 | 0.00 | H |
| ATOM | 1050 | H4'  | C B | 15 | 36.944 | -28.490 | 98.518  | 1.00 | 0.00 | H |

|      |      |      |   |   |    |        |         |         |      |      |   |
|------|------|------|---|---|----|--------|---------|---------|------|------|---|
| ATOM | 1051 | H41  | C | B | 15 | 40.316 | -35.766 | 95.411  | 1.00 | 0.00 | H |
| ATOM | 1052 | H42  | C | B | 15 | 39.459 | -36.683 | 96.680  | 1.00 | 0.00 | H |
| ATOM | 1053 | H2'1 | C | B | 15 | 40.406 | -30.176 | 98.211  | 1.00 | 0.00 | H |
| ATOM | 1054 | H2'2 | C | B | 15 | 40.386 | -30.169 | 99.968  | 1.00 | 0.00 | H |
| ATOM | 1055 | H5'1 | C | B | 15 | 37.209 | -29.616 | 96.195  | 1.00 | 0.00 | H |
| ATOM | 1056 | H5'2 | C | B | 15 | 37.743 | -27.939 | 96.442  | 1.00 | 0.00 | H |
| ATOM | 1057 | C1'  | G | B | 16 | 39.452 | -33.086 | 103.555 | 1.00 | 0.00 | C |
| ATOM | 1058 | N1   | G | B | 16 | 40.774 | -37.233 | 100.895 | 1.00 | 0.00 | N |
| ATOM | 1059 | C2   | G | B | 16 | 40.018 | -37.121 | 102.048 | 1.00 | 0.00 | C |
| ATOM | 1060 | N2   | G | B | 16 | 39.552 | -38.268 | 102.561 | 1.00 | 0.00 | N |
| ATOM | 1061 | N3   | G | B | 16 | 39.746 | -35.960 | 102.641 | 1.00 | 0.00 | N |
| ATOM | 1062 | C4   | G | B | 16 | 40.301 | -34.906 | 101.989 | 1.00 | 0.00 | C |
| ATOM | 1063 | C5   | G | B | 16 | 41.073 | -34.922 | 100.839 | 1.00 | 0.00 | C |
| ATOM | 1064 | C6   | G | B | 16 | 41.359 | -36.154 | 100.207 | 1.00 | 0.00 | C |
| ATOM | 1065 | O6   | G | B | 16 | 42.019 | -36.369 | 99.189  | 1.00 | 0.00 | O |
| ATOM | 1066 | N7   | G | B | 16 | 41.453 | -33.623 | 100.494 | 1.00 | 0.00 | N |
| ATOM | 1067 | C8   | G | B | 16 | 40.910 | -32.877 | 101.423 | 1.00 | 0.00 | C |
| ATOM | 1068 | N9   | G | B | 16 | 40.195 | -33.585 | 102.367 | 1.00 | 0.00 | N |
| ATOM | 1069 | C2'  | G | B | 16 | 40.135 | -31.923 | 104.262 | 1.00 | 0.00 | C |
| ATOM | 1070 | C3'  | G | B | 16 | 38.949 | -31.086 | 104.715 | 1.00 | 0.00 | C |
| ATOM | 1071 | O3'  | G | B | 16 | 38.464 | -31.595 | 105.955 | 1.00 | 0.00 | O |
| ATOM | 1072 | C4'  | G | B | 16 | 37.945 | -31.277 | 103.581 | 1.00 | 0.00 | C |
| ATOM | 1073 | O4'  | G | B | 16 | 38.182 | -32.645 | 103.116 | 1.00 | 0.00 | O |
| ATOM | 1074 | C5'  | G | B | 16 | 38.073 | -30.338 | 102.405 | 1.00 | 0.00 | C |
| ATOM | 1075 | O5'  | G | B | 16 | 39.472 | -30.059 | 102.151 | 1.00 | 0.00 | O |
| ATOM | 1076 | O1P  | G | B | 16 | 39.683 | -27.607 | 102.676 | 1.00 | 0.00 | O |
| ATOM | 1077 | O2P  | G | B | 16 | 41.241 | -28.675 | 101.026 | 1.00 | 0.00 | O |
| ATOM | 1078 | P    | G | B | 16 | 39.882 | -28.613 | 101.617 | 1.00 | 0.00 | P |
| ATOM | 1079 | H1   | G | B | 16 | 40.921 | -38.180 | 100.512 | 1.00 | 0.00 | H |
| ATOM | 1080 | H8   | G | B | 16 | 41.013 | -31.793 | 101.448 | 1.00 | 0.00 | H |
| ATOM | 1081 | H1'  | G | B | 16 | 39.298 | -33.923 | 104.238 | 1.00 | 0.00 | H |
| ATOM | 1082 | H21  | G | B | 16 | 39.764 | -39.162 | 102.095 | 1.00 | 0.00 | H |
| ATOM | 1083 | H3'  | G | B | 16 | 39.212 | -30.035 | 104.835 | 1.00 | 0.00 | H |
| ATOM | 1084 | H22  | G | B | 16 | 38.984 | -38.252 | 103.420 | 1.00 | 0.00 | H |
| ATOM | 1085 | H4'  | G | B | 16 | 36.952 | -31.140 | 104.010 | 1.00 | 0.00 | H |
| ATOM | 1086 | H2'1 | G | B | 16 | 40.787 | -31.359 | 103.595 | 1.00 | 0.00 | H |
| ATOM | 1087 | H2'2 | G | B | 16 | 40.737 | -32.250 | 105.110 | 1.00 | 0.00 | H |
| ATOM | 1088 | H5'1 | G | B | 16 | 37.623 | -30.800 | 101.527 | 1.00 | 0.00 | H |
| ATOM | 1089 | H5'2 | G | B | 16 | 37.547 | -29.410 | 102.631 | 1.00 | 0.00 | H |
| ATOM | 1090 | C1'  | G | B | 17 | 40.780 | -36.710 | 106.659 | 1.00 | 0.00 | C |
| ATOM | 1091 | N1   | G | B | 17 | 43.480 | -38.369 | 102.661 | 1.00 | 0.00 | N |
| ATOM | 1092 | C2   | G | B | 17 | 42.708 | -39.076 | 103.567 | 1.00 | 0.00 | C |
| ATOM | 1093 | N2   | G | B | 17 | 42.649 | -40.400 | 103.383 | 1.00 | 0.00 | N |
| ATOM | 1094 | N3   | G | B | 17 | 42.048 | -38.506 | 104.572 | 1.00 | 0.00 | N |
| ATOM | 1095 | C4   | G | B | 17 | 42.227 | -37.160 | 104.610 | 1.00 | 0.00 | C |
| ATOM | 1096 | C5   | G | B | 17 | 42.979 | -36.373 | 103.756 | 1.00 | 0.00 | C |
| ATOM | 1097 | C6   | G | B | 17 | 43.677 | -36.976 | 102.686 | 1.00 | 0.00 | C |
| ATOM | 1098 | O6   | G | B | 17 | 44.390 | -36.451 | 101.829 | 1.00 | 0.00 | O |
| ATOM | 1099 | N7   | G | B | 17 | 42.902 | -35.032 | 104.139 | 1.00 | 0.00 | N |
| ATOM | 1100 | C8   | G | B | 17 | 42.122 | -35.049 | 105.189 | 1.00 | 0.00 | C |
| ATOM | 1101 | N9   | G | B | 17 | 41.672 | -36.305 | 105.538 | 1.00 | 0.00 | N |
| ATOM | 1102 | C2'  | G | B | 17 | 41.015 | -35.927 | 107.943 | 1.00 | 0.00 | C |
| ATOM | 1103 | C3'  | G | B | 17 | 39.607 | -35.810 | 108.505 | 1.00 | 0.00 | C |
| ATOM | 1104 | O3'  | G | B | 17 | 39.300 | -36.989 | 109.245 | 1.00 | 0.00 | O |

|      |      |      |     |    |        |         |         |      |      |   |
|------|------|------|-----|----|--------|---------|---------|------|------|---|
| ATOM | 1105 | C4'  | G B | 17 | 38.749 | -35.676 | 107.249 | 1.00 | 0.00 | C |
| ATOM | 1106 | O4'  | G B | 17 | 39.444 | -36.487 | 106.250 | 1.00 | 0.00 | O |
| ATOM | 1107 | C5'  | G B | 17 | 38.574 | -34.280 | 106.702 | 1.00 | 0.00 | C |
| ATOM | 1108 | O5'  | G B | 17 | 39.801 | -33.528 | 106.874 | 1.00 | 0.00 | O |
| ATOM | 1109 | O1P  | G B | 17 | 39.157 | -31.735 | 108.520 | 1.00 | 0.00 | O |
| ATOM | 1110 | O2P  | G B | 17 | 41.017 | -31.328 | 106.885 | 1.00 | 0.00 | O |
| ATOM | 1111 | P    | G B | 17 | 39.706 | -31.962 | 107.170 | 1.00 | 0.00 | P |
| ATOM | 1112 | H1   | G B | 17 | 43.947 | -38.905 | 101.913 | 1.00 | 0.00 | H |
| ATOM | 1113 | H8   | G B | 17 | 41.851 | -34.148 | 105.740 | 1.00 | 0.00 | H |
| ATOM | 1114 | H1'  | G B | 17 | 40.906 | -37.779 | 106.825 | 1.00 | 0.00 | H |
| ATOM | 1115 | H21  | G B | 17 | 43.160 | -40.835 | 102.600 | 1.00 | 0.00 | H |
| ATOM | 1116 | H3'  | G B | 17 | 39.496 | -34.939 | 109.152 | 1.00 | 0.00 | H |
| ATOM | 1117 | H22  | G B | 17 | 42.093 | -40.983 | 104.024 | 1.00 | 0.00 | H |
| ATOM | 1118 | H4'  | G B | 17 | 37.761 | -36.062 | 107.498 | 1.00 | 0.00 | H |
| ATOM | 1119 | H2'1 | G B | 17 | 41.449 | -34.944 | 107.754 | 1.00 | 0.00 | H |
| ATOM | 1120 | H2'2 | G B | 17 | 41.676 | -36.450 | 108.632 | 1.00 | 0.00 | H |
| ATOM | 1121 | H5'1 | G B | 17 | 38.324 | -34.339 | 105.642 | 1.00 | 0.00 | H |
| ATOM | 1122 | H5'2 | G B | 17 | 37.761 | -33.786 | 107.233 | 1.00 | 0.00 | H |
| ATOM | 1123 | C1'  | C B | 18 | 43.198 | -40.857 | 107.879 | 1.00 | 0.00 | C |
| ATOM | 1124 | N1   | C B | 18 | 43.922 | -39.710 | 107.264 | 1.00 | 0.00 | N |
| ATOM | 1125 | C2   | C B | 18 | 44.721 | -39.965 | 106.151 | 1.00 | 0.00 | C |
| ATOM | 1126 | O2   | C B | 18 | 44.796 | -41.123 | 105.722 | 1.00 | 0.00 | O |
| ATOM | 1127 | N3   | C B | 18 | 45.389 | -38.935 | 105.578 | 1.00 | 0.00 | N |
| ATOM | 1128 | C4   | C B | 18 | 45.287 | -37.693 | 106.067 | 1.00 | 0.00 | C |
| ATOM | 1129 | N4   | C B | 18 | 45.962 | -36.723 | 105.465 | 1.00 | 0.00 | N |
| ATOM | 1130 | C5   | C B | 18 | 44.476 | -37.403 | 107.210 | 1.00 | 0.00 | C |
| ATOM | 1131 | C6   | C B | 18 | 43.811 | -38.454 | 107.769 | 1.00 | 0.00 | C |
| ATOM | 1132 | C2'  | C B | 18 | 43.134 | -40.799 | 109.399 | 1.00 | 0.00 | C |
| ATOM | 1133 | C3'  | C B | 18 | 41.757 | -41.382 | 109.681 | 1.00 | 0.00 | C |
| ATOM | 1134 | O3'  | C B | 18 | 41.849 | -42.805 | 109.708 | 1.00 | 0.00 | O |
| ATOM | 1135 | C4'  | C B | 18 | 40.928 | -40.880 | 108.501 | 1.00 | 0.00 | C |
| ATOM | 1136 | O4'  | C B | 18 | 41.871 | -40.842 | 107.384 | 1.00 | 0.00 | O |
| ATOM | 1137 | C5'  | C B | 18 | 40.304 | -39.512 | 108.653 | 1.00 | 0.00 | C |
| ATOM | 1138 | O5'  | C B | 18 | 41.207 | -38.641 | 109.382 | 1.00 | 0.00 | O |
| ATOM | 1139 | O1P  | C B | 18 | 39.971 | -38.187 | 111.528 | 1.00 | 0.00 | O |
| ATOM | 1140 | O2P  | C B | 18 | 41.617 | -36.509 | 110.649 | 1.00 | 0.00 | O |
| ATOM | 1141 | P    | C B | 18 | 40.589 | -37.538 | 110.355 | 1.00 | 0.00 | P |
| ATOM | 1142 | H5   | C B | 18 | 44.393 | -36.394 | 107.614 | 1.00 | 0.00 | H |
| ATOM | 1143 | H6   | C B | 18 | 43.178 | -38.281 | 108.639 | 1.00 | 0.00 | H |
| ATOM | 1144 | H1'  | C B | 18 | 43.671 | -41.779 | 107.542 | 1.00 | 0.00 | H |
| ATOM | 1145 | H3'  | C B | 18 | 41.351 | -41.028 | 110.628 | 1.00 | 0.00 | H |
| ATOM | 1146 | H4'  | C B | 18 | 40.120 | -41.597 | 108.353 | 1.00 | 0.00 | H |
| ATOM | 1147 | H41  | C B | 18 | 45.900 | -35.757 | 105.819 | 1.00 | 0.00 | H |
| ATOM | 1148 | H42  | C B | 18 | 46.544 | -36.934 | 104.642 | 1.00 | 0.00 | H |
| ATOM | 1149 | H2'1 | C B | 18 | 43.218 | -39.781 | 109.778 | 1.00 | 0.00 | H |
| ATOM | 1150 | H2'2 | C B | 18 | 43.920 | -41.390 | 109.868 | 1.00 | 0.00 | H |
| ATOM | 1151 | H5'1 | C B | 18 | 40.109 | -39.095 | 107.665 | 1.00 | 0.00 | H |
| ATOM | 1152 | H5'2 | C B | 18 | 39.365 | -39.605 | 109.196 | 1.00 | 0.00 | H |
| ATOM | 1153 | C1'  | C B | 19 | 46.854 | -44.168 | 107.434 | 1.00 | 0.00 | C |
| ATOM | 1154 | N1   | C B | 19 | 47.158 | -42.718 | 107.578 | 1.00 | 0.00 | N |
| ATOM | 1155 | C2   | C B | 19 | 48.018 | -42.136 | 106.647 | 1.00 | 0.00 | C |
| ATOM | 1156 | O2   | C B | 19 | 48.488 | -42.842 | 105.745 | 1.00 | 0.00 | O |
| ATOM | 1157 | N3   | C B | 19 | 48.307 | -40.817 | 106.761 | 1.00 | 0.00 | N |
| ATOM | 1158 | C4   | C B | 19 | 47.782 | -40.081 | 107.749 | 1.00 | 0.00 | C |

|      |      |      |     |    |        |         |         |      |      |   |
|------|------|------|-----|----|--------|---------|---------|------|------|---|
| ATOM | 1159 | N4   | C B | 19 | 48.098 | -38.797 | 107.813 | 1.00 | 0.00 | N |
| ATOM | 1160 | C5   | C B | 19 | 46.899 | -40.654 | 108.719 | 1.00 | 0.00 | C |
| ATOM | 1161 | C6   | C B | 19 | 46.620 | -41.981 | 108.584 | 1.00 | 0.00 | C |
| ATOM | 1162 | C2'  | C B | 19 | 46.745 | -44.906 | 108.760 | 1.00 | 0.00 | C |
| ATOM | 1163 | C3'  | C B | 19 | 45.643 | -45.915 | 108.472 | 1.00 | 0.00 | C |
| ATOM | 1164 | O3'  | C B | 19 | 46.211 | -47.062 | 107.844 | 1.00 | 0.00 | O |
| ATOM | 1165 | C4'  | C B | 19 | 44.714 | -45.144 | 107.535 | 1.00 | 0.00 | C |
| ATOM | 1166 | O4'  | C B | 19 | 45.611 | -44.281 | 106.766 | 1.00 | 0.00 | O |
| ATOM | 1167 | C5'  | C B | 19 | 43.662 | -44.281 | 108.194 | 1.00 | 0.00 | C |
| ATOM | 1168 | O5'  | C B | 19 | 44.201 | -43.685 | 109.400 | 1.00 | 0.00 | O |
| ATOM | 1169 | O1P  | C B | 19 | 42.845 | -44.751 | 111.232 | 1.00 | 0.00 | O |
| ATOM | 1170 | O2P  | C B | 19 | 43.841 | -42.474 | 111.570 | 1.00 | 0.00 | O |
| ATOM | 1171 | P    | C B | 19 | 43.229 | -43.454 | 110.641 | 1.00 | 0.00 | P |
| ATOM | 1172 | H5   | C B | 19 | 46.470 | -40.059 | 109.525 | 1.00 | 0.00 | H |
| ATOM | 1173 | H6   | C B | 19 | 45.950 | -42.461 | 109.297 | 1.00 | 0.00 | H |
| ATOM | 1174 | H1'  | C B | 19 | 47.619 | -44.615 | 106.798 | 1.00 | 0.00 | H |
| ATOM | 1175 | H3'  | C B | 19 | 45.122 | -46.219 | 109.379 | 1.00 | 0.00 | H |
| ATOM | 1176 | H4'  | C B | 19 | 44.201 | -45.882 | 106.919 | 1.00 | 0.00 | H |
| ATOM | 1177 | H41  | C B | 19 | 47.707 | -38.206 | 108.561 | 1.00 | 0.00 | H |
| ATOM | 1178 | H42  | C B | 19 | 48.736 | -38.387 | 107.113 | 1.00 | 0.00 | H |
| ATOM | 1179 | H2'1 | C B | 19 | 46.472 | -44.245 | 109.581 | 1.00 | 0.00 | H |
| ATOM | 1180 | H2'2 | C B | 19 | 47.676 | -45.404 | 109.034 | 1.00 | 0.00 | H |
| ATOM | 1181 | H5'1 | C B | 19 | 43.356 | -43.500 | 107.500 | 1.00 | 0.00 | H |
| ATOM | 1182 | H5'2 | C B | 19 | 42.799 | -44.898 | 108.440 | 1.00 | 0.00 | H |
| ATOM | 1183 | C1'  | T B | 20 | 51.415 | -45.626 | 106.179 | 1.00 | 0.00 | C |
| ATOM | 1184 | N1   | T B | 20 | 51.222 | -44.421 | 107.029 | 1.00 | 0.00 | N |
| ATOM | 1185 | C2   | T B | 20 | 51.861 | -43.263 | 106.634 | 1.00 | 0.00 | C |
| ATOM | 1186 | O2   | T B | 20 | 52.560 | -43.202 | 105.637 | 1.00 | 0.00 | O |
| ATOM | 1187 | N3   | T B | 20 | 51.654 | -42.168 | 107.451 | 1.00 | 0.00 | N |
| ATOM | 1188 | C4   | T B | 20 | 50.887 | -42.130 | 108.595 | 1.00 | 0.00 | C |
| ATOM | 1189 | O4   | T B | 20 | 50.777 | -41.085 | 109.250 | 1.00 | 0.00 | O |
| ATOM | 1190 | C5   | T B | 20 | 50.259 | -43.386 | 108.927 | 1.00 | 0.00 | C |
| ATOM | 1191 | C6   | T B | 20 | 50.437 | -44.474 | 108.154 | 1.00 | 0.00 | C |
| ATOM | 1192 | C7   | T B | 20 | 49.413 | -43.390 | 110.166 | 1.00 | 0.00 | C |
| ATOM | 1193 | C2'  | T B | 20 | 51.526 | -46.923 | 106.971 | 1.00 | 0.00 | C |
| ATOM | 1194 | C3'  | T B | 20 | 50.825 | -47.914 | 106.055 | 1.00 | 0.00 | C |
| ATOM | 1195 | O3'  | T B | 20 | 51.753 | -48.393 | 105.085 | 1.00 | 0.00 | O |
| ATOM | 1196 | C4'  | T B | 20 | 49.715 | -47.074 | 105.429 | 1.00 | 0.00 | C |
| ATOM | 1197 | O4'  | T B | 20 | 50.295 | -45.734 | 105.322 | 1.00 | 0.00 | O |
| ATOM | 1198 | C5'  | T B | 20 | 48.423 | -46.980 | 106.207 | 1.00 | 0.00 | C |
| ATOM | 1199 | O5'  | T B | 20 | 48.708 | -46.937 | 107.628 | 1.00 | 0.00 | O |
| ATOM | 1200 | O1P  | T B | 20 | 47.740 | -49.096 | 108.482 | 1.00 | 0.00 | O |
| ATOM | 1201 | O2P  | T B | 20 | 47.921 | -47.113 | 110.007 | 1.00 | 0.00 | O |
| ATOM | 1202 | P    | T B | 20 | 47.687 | -47.629 | 108.637 | 1.00 | 0.00 | P |
| ATOM | 1203 | H3   | T B | 20 | 52.120 | -41.292 | 107.178 | 1.00 | 0.00 | H |
| ATOM | 1204 | H6   | T B | 20 | 49.952 | -45.412 | 108.425 | 1.00 | 0.00 | H |
| ATOM | 1205 | H1'  | T B | 20 | 52.298 | -45.470 | 105.560 | 1.00 | 0.00 | H |
| ATOM | 1206 | H3'  | T B | 20 | 50.415 | -48.759 | 106.608 | 1.00 | 0.00 | H |
| ATOM | 1207 | H4'  | T B | 20 | 49.488 | -47.520 | 104.460 | 1.00 | 0.00 | H |
| ATOM | 1208 | H3T  | T B | 20 | 52.569 | -48.750 | 105.442 | 1.00 | 0.00 | H |
| ATOM | 1209 | H71  | T B | 20 | 49.866 | -44.041 | 110.914 | 1.00 | 0.00 | H |
| ATOM | 1210 | H72  | T B | 20 | 49.341 | -42.376 | 110.561 | 1.00 | 0.00 | H |
| ATOM | 1211 | H73  | T B | 20 | 48.414 | -43.755 | 109.924 | 1.00 | 0.00 | H |
| ATOM | 1212 | H2'1 | T B | 20 | 51.031 | -46.859 | 107.939 | 1.00 | 0.00 | H |
