# Supplementary material
Source: PubMed Central journal article supplement (PMC1224651)
Supplement: pnas_0506290102_2.pdf [file pnas_0506290102_2.pdf]

Table 2. REMARK model depicted in Fig.

|      |    |     |     |   |         |         |        |
|------|----|-----|-----|---|---------|---------|--------|
| ATOM | 1  | AUC | SPH | 1 | -6.134  | -13.136 | 72.020 |
| ATOM | 2  | AU  | SPH | 1 | -8.435  | -10.686 | 67.050 |
| ATOM | 3  | AU  | SPH | 1 | -9.237  | -9.832  | 68.089 |
| ATOM | 4  | AU  | SPH | 1 | -9.828  | -9.203  | 69.396 |
| ATOM | 5  | AU  | SPH | 1 | -10.167 | -8.842  | 70.882 |
| ATOM | 6  | AU  | SPH | 1 | -10.231 | -8.774  | 72.446 |
| ATOM | 7  | AU  | SPH | 1 | -10.016 | -9.003  | 73.980 |
| ATOM | 8  | AU  | SPH | 1 | -9.536  | -9.513  | 75.381 |
| ATOM | 9  | AU  | SPH | 1 | -8.825  | -10.271 | 76.553 |
| ATOM | 10 | AU  | SPH | 1 | -7.930  | -11.224 | 77.416 |
| ATOM | 11 | AU  | SPH | 1 | -6.913  | -12.307 | 77.911 |
| ATOM | 12 | AU  | SPH | 1 | -5.842  | -13.446 | 78.005 |
| ATOM | 13 | AU  | SPH | 1 | -4.792  | -14.565 | 77.691 |
| ATOM | 14 | AU  | SPH | 1 | -3.833  | -15.586 | 76.990 |
| ATOM | 15 | AU  | SPH | 1 | -8.435  | -10.686 | 67.050 |
| ATOM | 16 | AU  | SPH | 1 | -9.500  | -10.139 | 68.060 |
| ATOM | 17 | AU  | SPH | 1 | -10.336 | -9.796  | 69.339 |
| ATOM | 18 | AU  | SPH | 1 | -10.885 | -9.681  | 70.801 |
| ATOM | 19 | AU  | SPH | 1 | -11.111 | -9.801  | 72.347 |
| ATOM | 20 | AU  | SPH | 1 | -10.997 | -10.149 | 73.870 |
| ATOM | 21 | AU  | SPH | 1 | -10.552 | -10.700 | 75.267 |
| ATOM | 22 | AU  | SPH | 1 | -9.806  | -11.417 | 76.442 |
| ATOM | 23 | AU  | SPH | 1 | -8.810  | -12.251 | 77.317 |
| ATOM | 24 | AU  | SPH | 1 | -7.631  | -13.146 | 77.830 |
| ATOM | 25 | AU  | SPH | 1 | -6.350  | -14.040 | 77.947 |
| ATOM | 26 | AU  | SPH | 1 | -5.055  | -14.872 | 77.661 |
| ATOM | 27 | AU  | SPH | 1 | -3.833  | -15.586 | 76.990 |
| ATOM | 28 | AU  | SPH | 1 | -8.435  | -10.686 | 67.050 |
| ATOM | 29 | AU  | SPH | 1 | -9.685  | -10.489 | 67.973 |
| ATOM | 30 | AU  | SPH | 1 | -10.693 | -10.472 | 69.171 |
| ATOM | 31 | AU  | SPH | 1 | -11.391 | -10.637 | 70.564 |
| ATOM | 32 | AU  | SPH | 1 | -11.730 | -10.973 | 72.056 |
| ATOM | 33 | AU  | SPH | 1 | -11.688 | -11.455 | 73.545 |
| ATOM | 34 | AU  | SPH | 1 | -11.267 | -12.052 | 74.931 |
| ATOM | 35 | AU  | SPH | 1 | -10.497 | -12.723 | 76.118 |
| ATOM | 36 | AU  | SPH | 1 | -9.429  | -13.423 | 77.026 |
| ATOM | 37 | AU  | SPH | 1 | -8.137  | -14.102 | 77.593 |
| ATOM | 38 | AU  | SPH | 1 | -6.708  | -14.716 | 77.780 |
| ATOM | 39 | AU  | SPH | 1 | -5.240  | -15.222 | 77.574 |
| ATOM | 40 | AU  | SPH | 1 | -3.833  | -15.586 | 76.990 |
| ATOM | 41 | AU  | SPH | 1 | -8.435  | -10.686 | 67.050 |
| ATOM | 42 | AU  | SPH | 1 | -9.780  | -10.858 | 67.834 |
| ATOM | 43 | AU  | SPH | 1 | -10.876 | -11.186 | 68.904 |
| ATOM | 44 | AU  | SPH | 1 | -11.649 | -11.646 | 70.186 |
| ATOM | 45 | AU  | SPH | 1 | -12.046 | -12.208 | 71.593 |
| ATOM | 46 | AU  | SPH | 1 | -12.041 | -12.833 | 73.029 |
| ATOM | 47 | AU  | SPH | 1 | -11.632 | -13.479 | 74.397 |
| ATOM | 48 | AU  | SPH | 1 | -10.849 | -14.101 | 75.602 |
| ATOM | 49 | AU  | SPH | 1 | -9.745  | -14.658 | 76.563 |
| ATOM | 50 | AU  | SPH | 1 | -8.395  | -15.111 | 77.215 |
| ATOM | 51 | AU  | SPH | 1 | -6.890  | -15.429 | 77.512 |
| ATOM | 52 | AU  | SPH | 1 | -5.334  | -15.591 | 77.436 |

|      |     |    |     |   |         |         |        |
|------|-----|----|-----|---|---------|---------|--------|
| ATOM | 53  | AU | SPH | 1 | -3.833  | -15.586 | 76.990 |
| ATOM | 54  | AU | SPH | 1 | -8.435  | -10.686 | 67.050 |
| ATOM | 55  | AU | SPH | 1 | -9.777  | -11.221 | 67.654 |
| ATOM | 56  | AU | SPH | 1 | -10.871 | -11.887 | 68.556 |
| ATOM | 57  | AU | SPH | 1 | -11.642 | -12.638 | 69.694 |
| ATOM | 58  | AU | SPH | 1 | -12.038 | -13.423 | 70.990 |
| ATOM | 59  | AU | SPH | 1 | -12.031 | -14.188 | 72.357 |
| ATOM | 60  | AU | SPH | 1 | -11.623 | -14.882 | 73.701 |
| ATOM | 61  | AU | SPH | 1 | -10.840 | -15.456 | 74.930 |
| ATOM | 62  | AU | SPH | 1 | -9.737  | -15.873 | 75.960 |
| ATOM | 63  | AU | SPH | 1 | -8.388  | -16.103 | 76.723 |
| ATOM | 64  | AU | SPH | 1 | -6.886  | -16.131 | 77.164 |
| ATOM | 65  | AU | SPH | 1 | -5.332  | -15.954 | 77.256 |
| ATOM | 66  | AU | SPH | 1 | -3.833  | -15.586 | 76.990 |
| ATOM | 67  | AU | SPH | 1 | -8.435  | -10.686 | 67.050 |
| ATOM | 68  | AU | SPH | 1 | -9.678  | -11.554 | 67.445 |
| ATOM | 69  | AU | SPH | 1 | -10.679 | -12.529 | 68.151 |
| ATOM | 70  | AU | SPH | 1 | -11.371 | -13.546 | 69.121 |
| ATOM | 71  | AU | SPH | 1 | -11.706 | -14.535 | 70.288 |
| ATOM | 72  | AU | SPH | 1 | -11.661 | -15.429 | 71.574 |
| ATOM | 73  | AU | SPH | 1 | -11.239 | -16.166 | 72.890 |
| ATOM | 74  | AU | SPH | 1 | -10.470 | -16.697 | 74.147 |
| ATOM | 75  | AU | SPH | 1 | -9.405  | -16.985 | 75.258 |
| ATOM | 76  | AU | SPH | 1 | -8.117  | -17.011 | 76.149 |
| ATOM | 77  | AU | SPH | 1 | -6.694  | -16.773 | 76.759 |
| ATOM | 78  | AU | SPH | 1 | -5.233  | -16.287 | 77.046 |
| ATOM | 79  | AU | SPH | 1 | -3.833  | -15.586 | 76.990 |
| ATOM | 80  | AU | SPH | 1 | -8.435  | -10.686 | 67.050 |
| ATOM | 81  | AU | SPH | 1 | -9.489  | -11.833 | 67.219 |
| ATOM | 82  | AU | SPH | 1 | -10.313 | -13.068 | 67.716 |
| ATOM | 83  | AU | SPH | 1 | -10.854 | -14.308 | 68.506 |
| ATOM | 84  | AU | SPH | 1 | -11.072 | -15.468 | 69.535 |
| ATOM | 85  | AU | SPH | 1 | -10.954 | -16.469 | 70.734 |
| ATOM | 86  | AU | SPH | 1 | -10.507 | -17.243 | 72.020 |
| ATOM | 87  | AU | SPH | 1 | -9.763  | -17.738 | 73.306 |
| ATOM | 88  | AU | SPH | 1 | -8.771  | -17.918 | 74.505 |
| ATOM | 89  | AU | SPH | 1 | -7.599  | -17.773 | 75.534 |
| ATOM | 90  | AU | SPH | 1 | -6.328  | -17.311 | 76.324 |
| ATOM | 91  | AU | SPH | 1 | -5.043  | -16.566 | 76.821 |
| ATOM | 92  | AU | SPH | 1 | -3.833  | -15.586 | 76.990 |
| ATOM | 93  | AU | SPH | 1 | -8.435  | -10.686 | 67.050 |
| ATOM | 94  | AU | SPH | 1 | -9.222  | -12.039 | 66.994 |
| ATOM | 95  | AU | SPH | 1 | -9.799  | -13.467 | 67.281 |
| ATOM | 96  | AU | SPH | 1 | -10.125 | -14.872 | 67.891 |
| ATOM | 97  | AU | SPH | 1 | -10.180 | -16.159 | 68.782 |
| ATOM | 98  | AU | SPH | 1 | -9.959  | -17.240 | 69.893 |
| ATOM | 99  | AU | SPH | 1 | -9.478  | -18.041 | 71.150 |
| ATOM | 100 | AU | SPH | 1 | -8.768  | -18.508 | 72.466 |
| ATOM | 101 | AU | SPH | 1 | -7.879  | -18.609 | 73.752 |
| ATOM | 102 | AU | SPH | 1 | -6.871  | -18.337 | 74.919 |
| ATOM | 103 | AU | SPH | 1 | -5.813  | -17.710 | 75.889 |
| ATOM | 104 | AU | SPH | 1 | -4.777  | -16.772 | 76.595 |
| ATOM | 105 | AU | SPH | 1 | -3.833  | -15.586 | 76.990 |
| ATOM | 106 | AU | SPH | 1 | -8.435  | -10.686 | 67.050 |

|      |     |    |     |   |        |         |        |
|------|-----|----|-----|---|--------|---------|--------|
| ATOM | 107 | AU | SPH | 1 | -8.897 | -12.159 | 66.784 |
| ATOM | 108 | AU | SPH | 1 | -9.170 | -13.699 | 66.876 |
| ATOM | 109 | AU | SPH | 1 | -9.236 | -15.200 | 67.317 |
| ATOM | 110 | AU | SPH | 1 | -9.091 | -16.560 | 68.080 |
| ATOM | 111 | AU | SPH | 1 | -8.745 | -17.687 | 69.110 |
| ATOM | 112 | AU | SPH | 1 | -8.220 | -18.505 | 70.339 |
| ATOM | 113 | AU | SPH | 1 | -7.554 | -18.956 | 71.683 |
| ATOM | 114 | AU | SPH | 1 | -6.790 | -19.010 | 73.050 |
| ATOM | 115 | AU | SPH | 1 | -5.982 | -18.665 | 74.346 |
| ATOM | 116 | AU | SPH | 1 | -5.184 | -17.942 | 75.484 |
| ATOM | 117 | AU | SPH | 1 | -4.451 | -16.892 | 76.386 |
| ATOM | 118 | AU | SPH | 1 | -3.833 | -15.586 | 76.990 |
| ATOM | 119 | AU | SPH | 1 | -8.435 | -10.686 | 67.050 |
| ATOM | 120 | AU | SPH | 1 | -8.534 | -12.184 | 66.604 |
| ATOM | 121 | AU | SPH | 1 | -8.470 | -13.747 | 66.528 |
| ATOM | 122 | AU | SPH | 1 | -8.247 | -15.269 | 66.825 |
| ATOM | 123 | AU | SPH | 1 | -7.879 | -16.645 | 67.477 |
| ATOM | 124 | AU | SPH | 1 | -7.393 | -17.782 | 68.438 |
| ATOM | 125 | AU | SPH | 1 | -6.821 | -18.602 | 69.643 |
| ATOM | 126 | AU | SPH | 1 | -6.202 | -19.050 | 71.011 |
| ATOM | 127 | AU | SPH | 1 | -5.578 | -19.095 | 72.447 |
| ATOM | 128 | AU | SPH | 1 | -4.992 | -18.734 | 73.854 |
| ATOM | 129 | AU | SPH | 1 | -4.485 | -17.991 | 75.136 |
| ATOM | 130 | AU | SPH | 1 | -4.089 | -16.917 | 76.206 |
| ATOM | 131 | AU | SPH | 1 | -3.833 | -15.586 | 76.990 |
| ATOM | 132 | AU | SPH | 1 | -8.435 | -10.686 | 67.050 |
| ATOM | 133 | AU | SPH | 1 | -8.160 | -12.113 | 66.466 |
| ATOM | 134 | AU | SPH | 1 | -7.747 | -13.610 | 66.260 |
| ATOM | 135 | AU | SPH | 1 | -7.224 | -15.074 | 66.447 |
| ATOM | 136 | AU | SPH | 1 | -6.626 | -16.407 | 67.014 |
| ATOM | 137 | AU | SPH | 1 | -5.996 | -17.516 | 67.922 |
| ATOM | 138 | AU | SPH | 1 | -5.374 | -18.327 | 69.109 |
| ATOM | 139 | AU | SPH | 1 | -4.804 | -18.784 | 70.495 |
| ATOM | 140 | AU | SPH | 1 | -4.325 | -18.857 | 71.984 |
| ATOM | 141 | AU | SPH | 1 | -3.970 | -18.539 | 73.476 |
| ATOM | 142 | AU | SPH | 1 | -3.761 | -17.853 | 74.869 |
| ATOM | 143 | AU | SPH | 1 | -3.715 | -16.846 | 76.067 |
| ATOM | 144 | AU | SPH | 1 | -3.833 | -15.586 | 76.990 |
| ATOM | 145 | AU | SPH | 1 | -8.435 | -10.686 | 67.050 |
| ATOM | 146 | AU | SPH | 1 | -7.799 | -11.950 | 66.379 |
| ATOM | 147 | AU | SPH | 1 | -7.049 | -13.295 | 66.093 |
| ATOM | 148 | AU | SPH | 1 | -6.238 | -14.630 | 66.210 |
| ATOM | 149 | AU | SPH | 1 | -5.419 | -15.862 | 66.723 |
| ATOM | 150 | AU | SPH | 1 | -4.648 | -16.909 | 67.598 |
| ATOM | 151 | AU | SPH | 1 | -3.979 | -17.698 | 68.773 |
| ATOM | 152 | AU | SPH | 1 | -3.457 | -18.177 | 70.170 |
| ATOM | 153 | AU | SPH | 1 | -3.118 | -18.312 | 71.693 |
| ATOM | 154 | AU | SPH | 1 | -2.983 | -18.095 | 73.239 |
| ATOM | 155 | AU | SPH | 1 | -3.064 | -17.539 | 74.701 |
| ATOM | 156 | AU | SPH | 1 | -3.354 | -16.683 | 75.980 |
| ATOM | 157 | AU | SPH | 1 | -3.833 | -15.586 | 76.990 |
| ATOM | 158 | AU | SPH | 1 | -8.435 | -10.686 | 67.050 |
| ATOM | 159 | AU | SPH | 1 | -7.476 | -11.707 | 66.349 |
| ATOM | 160 | AU | SPH | 1 | -6.426 | -12.826 | 66.035 |

|      |     |    |     |   |        |         |        |
|------|-----|----|-----|---|--------|---------|--------|
| ATOM | 161 | AU | SPH | 1 | -5.355 | -13.965 | 66.129 |
| ATOM | 162 | AU | SPH | 1 | -4.338 | -15.048 | 66.624 |
| ATOM | 163 | AU | SPH | 1 | -3.443 | -16.001 | 67.487 |
| ATOM | 164 | AU | SPH | 1 | -2.732 | -16.759 | 68.659 |
| ATOM | 165 | AU | SPH | 1 | -2.252 | -17.269 | 70.060 |
| ATOM | 166 | AU | SPH | 1 | -2.037 | -17.498 | 71.594 |
| ATOM | 167 | AU | SPH | 1 | -2.101 | -17.430 | 73.158 |
| ATOM | 168 | AU | SPH | 1 | -2.440 | -17.069 | 74.644 |
| ATOM | 169 | AU | SPH | 1 | -3.031 | -16.440 | 75.951 |
| ATOM | 170 | AU | SPH | 1 | -3.833 | -15.586 | 76.990 |
| ATOM | 171 | AU | SPH | 1 | -8.435 | -10.686 | 67.050 |
| ATOM | 172 | AU | SPH | 1 | -7.213 | -11.400 | 66.379 |
| ATOM | 173 | AU | SPH | 1 | -5.918 | -12.232 | 66.093 |
| ATOM | 174 | AU | SPH | 1 | -4.637 | -13.126 | 66.210 |
| ATOM | 175 | AU | SPH | 1 | -3.458 | -14.021 | 66.723 |
| ATOM | 176 | AU | SPH | 1 | -2.462 | -14.855 | 67.598 |
| ATOM | 177 | AU | SPH | 1 | -1.716 | -15.572 | 68.773 |
| ATOM | 178 | AU | SPH | 1 | -1.271 | -16.123 | 70.170 |
| ATOM | 179 | AU | SPH | 1 | -1.157 | -16.471 | 71.693 |
| ATOM | 180 | AU | SPH | 1 | -1.383 | -16.591 | 73.239 |
| ATOM | 181 | AU | SPH | 1 | -1.932 | -16.476 | 74.701 |
| ATOM | 182 | AU | SPH | 1 | -2.768 | -16.133 | 75.980 |
| ATOM | 183 | AU | SPH | 1 | -3.833 | -15.586 | 76.990 |
| ATOM | 184 | AU | SPH | 1 | -8.435 | -10.686 | 67.050 |
| ATOM | 185 | AU | SPH | 1 | -7.028 | -11.050 | 66.466 |
| ATOM | 186 | AU | SPH | 1 | -5.560 | -11.556 | 66.260 |
| ATOM | 187 | AU | SPH | 1 | -4.131 | -12.170 | 66.447 |
| ATOM | 188 | AU | SPH | 1 | -2.839 | -12.849 | 67.014 |
| ATOM | 189 | AU | SPH | 1 | -1.771 | -13.549 | 67.922 |
| ATOM | 190 | AU | SPH | 1 | -1.001 | -14.220 | 69.109 |
| ATOM | 191 | AU | SPH | 1 | -0.580 | -14.817 | 70.495 |
| ATOM | 192 | AU | SPH | 1 | -0.538 | -15.299 | 71.984 |
| ATOM | 193 | AU | SPH | 1 | -0.877 | -15.635 | 73.476 |
| ATOM | 194 | AU | SPH | 1 | -1.575 | -15.800 | 74.869 |
| ATOM | 195 | AU | SPH | 1 | -2.583 | -15.783 | 76.067 |
| ATOM | 196 | AU | SPH | 1 | -3.833 | -15.586 | 76.990 |
| ATOM | 197 | AU | SPH | 1 | -8.435 | -10.686 | 67.050 |
| ATOM | 198 | AU | SPH | 1 | -6.934 | -10.681 | 66.604 |
| ATOM | 199 | AU | SPH | 1 | -5.378 | -10.843 | 66.528 |
| ATOM | 200 | AU | SPH | 1 | -3.873 | -11.161 | 66.825 |
| ATOM | 201 | AU | SPH | 1 | -2.523 | -11.614 | 67.477 |
| ATOM | 202 | AU | SPH | 1 | -1.419 | -12.171 | 68.438 |
| ATOM | 203 | AU | SPH | 1 | -0.636 | -12.793 | 69.643 |
| ATOM | 204 | AU | SPH | 1 | -0.227 | -13.439 | 71.011 |
| ATOM | 205 | AU | SPH | 1 | -0.222 | -14.064 | 72.447 |
| ATOM | 206 | AU | SPH | 1 | -0.619 | -14.626 | 73.854 |
| ATOM | 207 | AU | SPH | 1 | -1.392 | -15.086 | 75.136 |
| ATOM | 208 | AU | SPH | 1 | -2.488 | -15.414 | 76.206 |
| ATOM | 209 | AU | SPH | 1 | -3.833 | -15.586 | 76.990 |
| ATOM | 210 | AU | SPH | 1 | -8.435 | -10.686 | 67.050 |
| ATOM | 211 | AU | SPH | 1 | -6.936 | -10.318 | 66.784 |
| ATOM | 212 | AU | SPH | 1 | -5.382 | -10.141 | 66.876 |
| ATOM | 213 | AU | SPH | 1 | -3.880 | -10.169 | 67.317 |
| ATOM | 214 | AU | SPH | 1 | -2.531 | -10.399 | 68.080 |

|      |     |    |     |   |        |         |        |
|------|-----|----|-----|---|--------|---------|--------|
| ATOM | 215 | AU | SPH | 1 | -1.428 | -10.816 | 69.110 |
| ATOM | 216 | AU | SPH | 1 | -0.645 | -11.390 | 70.339 |
| ATOM | 217 | AU | SPH | 1 | -0.237 | -12.084 | 71.683 |
| ATOM | 218 | AU | SPH | 1 | -0.230 | -12.849 | 73.050 |
| ATOM | 219 | AU | SPH | 1 | -0.626 | -13.634 | 74.346 |
| ATOM | 220 | AU | SPH | 1 | -1.397 | -14.385 | 75.484 |
| ATOM | 221 | AU | SPH | 1 | -2.491 | -15.051 | 76.386 |
| ATOM | 222 | AU | SPH | 1 | -3.833 | -15.586 | 76.990 |
| ATOM | 223 | AU | SPH | 1 | -8.435 | -10.686 | 67.050 |
| ATOM | 224 | AU | SPH | 1 | -7.035 | -9.985  | 66.994 |
| ATOM | 225 | AU | SPH | 1 | -5.574 | -9.499  | 67.281 |
| ATOM | 226 | AU | SPH | 1 | -4.151 | -9.261  | 67.891 |
| ATOM | 227 | AU | SPH | 1 | -2.863 | -9.287  | 68.782 |
| ATOM | 228 | AU | SPH | 1 | -1.798 | -9.575  | 69.893 |
| ATOM | 229 | AU | SPH | 1 | -1.029 | -10.106 | 71.150 |
| ATOM | 230 | AU | SPH | 1 | -0.607 | -10.843 | 72.466 |
| ATOM | 231 | AU | SPH | 1 | -0.562 | -11.737 | 73.752 |
| ATOM | 232 | AU | SPH | 1 | -0.897 | -12.726 | 74.919 |
| ATOM | 233 | AU | SPH | 1 | -1.589 | -13.743 | 75.889 |
| ATOM | 234 | AU | SPH | 1 | -2.590 | -14.718 | 76.595 |
| ATOM | 235 | AU | SPH | 1 | -3.833 | -15.586 | 76.990 |
| ATOM | 236 | AU | SPH | 1 | -8.435 | -10.686 | 67.050 |
| ATOM | 237 | AU | SPH | 1 | -7.225 | -9.706  | 67.219 |
| ATOM | 238 | AU | SPH | 1 | -5.940 | -8.961  | 67.716 |
| ATOM | 239 | AU | SPH | 1 | -4.669 | -8.499  | 68.506 |
| ATOM | 240 | AU | SPH | 1 | -3.497 | -8.354  | 69.535 |
| ATOM | 241 | AU | SPH | 1 | -2.505 | -8.534  | 70.734 |
| ATOM | 242 | AU | SPH | 1 | -1.761 | -9.029  | 72.020 |
| ATOM | 243 | AU | SPH | 1 | -1.314 | -9.803  | 73.306 |
| ATOM | 244 | AU | SPH | 1 | -1.196 | -10.804 | 74.505 |
| ATOM | 245 | AU | SPH | 1 | -1.414 | -11.964 | 75.534 |
| ATOM | 246 | AU | SPH | 1 | -1.955 | -13.204 | 76.324 |
| ATOM | 247 | AU | SPH | 1 | -2.779 | -14.439 | 76.821 |
| ATOM | 248 | AU | SPH | 1 | -3.833 | -15.586 | 76.990 |
| ATOM | 249 | AU | SPH | 1 | -8.435 | -10.686 | 67.050 |
| ATOM | 250 | AU | SPH | 1 | -7.491 | -9.500  | 67.445 |
| ATOM | 251 | AU | SPH | 1 | -6.455 | -8.562  | 68.151 |
| ATOM | 252 | AU | SPH | 1 | -5.397 | -7.935  | 69.121 |
| ATOM | 253 | AU | SPH | 1 | -4.389 | -7.663  | 70.288 |
| ATOM | 254 | AU | SPH | 1 | -3.500 | -7.764  | 71.574 |
| ATOM | 255 | AU | SPH | 1 | -2.790 | -8.231  | 72.890 |
| ATOM | 256 | AU | SPH | 1 | -2.309 | -9.032  | 74.147 |
| ATOM | 257 | AU | SPH | 1 | -2.088 | -10.113 | 75.258 |
| ATOM | 258 | AU | SPH | 1 | -2.143 | -11.400 | 76.149 |
| ATOM | 259 | AU | SPH | 1 | -2.469 | -12.805 | 76.759 |
| ATOM | 260 | AU | SPH | 1 | -3.046 | -14.233 | 77.046 |
| ATOM | 261 | AU | SPH | 1 | -3.833 | -15.586 | 76.990 |
| ATOM | 262 | AU | SPH | 1 | -8.435 | -10.686 | 67.050 |
| ATOM | 263 | AU | SPH | 1 | -7.817 | -9.380  | 67.654 |
| ATOM | 264 | AU | SPH | 1 | -7.084 | -8.330  | 68.556 |
| ATOM | 265 | AU | SPH | 1 | -6.286 | -7.607  | 69.694 |
| ATOM | 266 | AU | SPH | 1 | -5.478 | -7.262  | 70.990 |
| ATOM | 267 | AU | SPH | 1 | -4.714 | -7.316  | 72.357 |
| ATOM | 268 | AU | SPH | 1 | -4.048 | -7.767  | 73.701 |

|      |     |     |     |   |        |         |        |      |      |   |
|------|-----|-----|-----|---|--------|---------|--------|------|------|---|
| ATOM | 269 | AU  | SPH | 1 | -3.523 | -8.585  | 74.930 |      |      |   |
| ATOM | 270 | AU  | SPH | 1 | -3.177 | -9.712  | 75.960 |      |      |   |
| ATOM | 271 | AU  | SPH | 1 | -3.032 | -11.072 | 76.723 |      |      |   |
| ATOM | 272 | AU  | SPH | 1 | -3.098 | -12.573 | 77.164 |      |      |   |
| ATOM | 273 | AU  | SPH | 1 | -3.371 | -14.113 | 77.256 |      |      |   |
| ATOM | 274 | AU  | SPH | 1 | -3.833 | -15.586 | 76.990 |      |      |   |
| ATOM | 275 | AU  | SPH | 1 | -8.435 | -10.686 | 67.050 |      |      |   |
| ATOM | 276 | AU  | SPH | 1 | -8.179 | -9.355  | 67.834 |      |      |   |
| ATOM | 277 | AU  | SPH | 1 | -7.783 | -8.281  | 68.904 |      |      |   |
| ATOM | 278 | AU  | SPH | 1 | -7.276 | -7.538  | 70.186 |      |      |   |
| ATOM | 279 | AU  | SPH | 1 | -6.690 | -7.177  | 71.593 |      |      |   |
| ATOM | 280 | AU  | SPH | 1 | -6.066 | -7.222  | 73.029 |      |      |   |
| ATOM | 281 | AU  | SPH | 1 | -5.447 | -7.670  | 74.397 |      |      |   |
| ATOM | 282 | AU  | SPH | 1 | -4.875 | -8.490  | 75.602 |      |      |   |
| ATOM | 283 | AU  | SPH | 1 | -4.389 | -9.627  | 76.563 |      |      |   |
| ATOM | 284 | AU  | SPH | 1 | -4.021 | -11.003 | 77.215 |      |      |   |
| ATOM | 285 | AU  | SPH | 1 | -3.798 | -12.525 | 77.512 |      |      |   |
| ATOM | 286 | AU  | SPH | 1 | -3.734 | -14.088 | 77.436 |      |      |   |
| ATOM | 287 | AU  | SPH | 1 | -3.833 | -15.586 | 76.990 |      |      |   |
| ATOM | 288 | AU  | SPH | 1 | -8.435 | -10.686 | 67.050 |      |      |   |
| ATOM | 289 | AU  | SPH | 1 | -8.553 | -9.426  | 67.973 |      |      |   |
| ATOM | 290 | AU  | SPH | 1 | -8.507 | -8.419  | 69.171 |      |      |   |
| ATOM | 291 | AU  | SPH | 1 | -8.298 | -7.733  | 70.564 |      |      |   |
| ATOM | 292 | AU  | SPH | 1 | -7.943 | -7.415  | 72.056 |      |      |   |
| ATOM | 293 | AU  | SPH | 1 | -7.464 | -7.488  | 73.545 |      |      |   |
| ATOM | 294 | AU  | SPH | 1 | -6.894 | -7.945  | 74.931 |      |      |   |
| ATOM | 295 | AU  | SPH | 1 | -6.272 | -8.756  | 76.118 |      |      |   |
| ATOM | 296 | AU  | SPH | 1 | -5.642 | -9.865  | 77.026 |      |      |   |
| ATOM | 297 | AU  | SPH | 1 | -5.044 | -11.198 | 77.593 |      |      |   |
| ATOM | 298 | AU  | SPH | 1 | -4.521 | -12.662 | 77.780 |      |      |   |
| ATOM | 299 | AU  | SPH | 1 | -4.108 | -14.159 | 77.574 |      |      |   |
| ATOM | 300 | AU  | SPH | 1 | -3.833 | -15.586 | 76.990 |      |      |   |
| ATOM | 301 | AU  | SPH | 1 | -8.435 | -10.686 | 67.050 |      |      |   |
| ATOM | 302 | AU  | SPH | 1 | -8.914 | -9.589  | 68.060 |      |      |   |
| ATOM | 303 | AU  | SPH | 1 | -9.204 | -8.733  | 69.339 |      |      |   |
| ATOM | 304 | AU  | SPH | 1 | -9.285 | -8.177  | 70.801 |      |      |   |
| ATOM | 305 | AU  | SPH | 1 | -9.150 | -7.960  | 72.347 |      |      |   |
| ATOM | 306 | AU  | SPH | 1 | -8.811 | -8.095  | 73.870 |      |      |   |
| ATOM | 307 | AU  | SPH | 1 | -8.289 | -8.574  | 75.267 |      |      |   |
| ATOM | 308 | AU  | SPH | 1 | -7.620 | -9.363  | 76.442 |      |      |   |
| ATOM | 309 | AU  | SPH | 1 | -6.849 | -10.410 | 77.317 |      |      |   |
| ATOM | 310 | AU  | SPH | 1 | -6.030 | -11.642 | 77.830 |      |      |   |
| ATOM | 311 | AU  | SPH | 1 | -5.219 | -12.977 | 77.947 |      |      |   |
| ATOM | 312 | AU  | SPH | 1 | -4.469 | -14.322 | 77.661 |      |      |   |
| ATOM | 313 | AU  | SPH | 1 | -3.833 | -15.586 | 76.990 |      |      |   |
| TER  |     |     |     |   |        |         |        |      |      |   |
| ATOM | 1   | C1' | A A | 1 | 2.250  | -5.432  | -0.471 | 1.00 | 0.00 | C |
| ATOM | 2   | N1  | A A | 1 | 0.711  | -0.555  | -0.047 | 1.00 | 0.00 | N |
| ATOM | 3   | C2  | A A | 1 | 1.916  | -1.116  | -0.092 | 1.00 | 0.00 | C |
| ATOM | 4   | N3  | A A | 1 | 2.243  | -2.386  | -0.206 | 1.00 | 0.00 | N |
| ATOM | 5   | C4  | A A | 1 | 1.137  | -3.148  | -0.274 | 1.00 | 0.00 | C |
| ATOM | 6   | C5  | A A | 1 | -0.164 | -2.730  | -0.240 | 1.00 | 0.00 | C |
| ATOM | 7   | C6  | A A | 1 | -0.374 | -1.340  | -0.118 | 1.00 | 0.00 | C |
| ATOM | 8   | N6  | A A | 1 | -1.597 | -0.784  | -0.072 | 1.00 | 0.00 | N |

|      |    |      |     |   |        |        |        |      |      |   |
|------|----|------|-----|---|--------|--------|--------|------|------|---|
| ATOM | 9  | N7   | A A | 1 | -1.035 | -3.801 | -0.335 | 1.00 | 0.00 | N |
| ATOM | 10 | C8   | A A | 1 | -0.250 | -4.834 | -0.421 | 1.00 | 0.00 | C |
| ATOM | 11 | N9   | A A | 1 | 1.082  | -4.515 | -0.392 | 1.00 | 0.00 | N |
| ATOM | 12 | C2'  | A A | 1 | 2.047  | -6.749 | 0.266  | 1.00 | 0.00 | C |
| ATOM | 13 | C3'  | A A | 1 | 2.791  | -7.729 | -0.627 | 1.00 | 0.00 | C |
| ATOM | 14 | O3'  | A A | 1 | 4.175  | -7.716 | -0.286 | 1.00 | 0.00 | O |
| ATOM | 15 | C4'  | A A | 1 | 2.536  | -7.175 | -2.028 | 1.00 | 0.00 | C |
| ATOM | 16 | O4'  | A A | 1 | 2.477  | -5.725 | -1.836 | 1.00 | 0.00 | O |
| ATOM | 17 | C5'  | A A | 1 | 1.264  | -7.625 | -2.706 | 1.00 | 0.00 | C |
| ATOM | 18 | O5'  | A A | 1 | 0.202  | -7.749 | -1.726 | 1.00 | 0.00 | O |
| ATOM | 19 | H2   | A A | 1 | 2.755  | -0.424 | -0.026 | 1.00 | 0.00 | H |
| ATOM | 20 | H8   | A A | 1 | -0.617 | -5.857 | -0.509 | 1.00 | 0.00 | H |
| ATOM | 21 | H1'  | A A | 1 | 3.125  | -4.903 | -0.092 | 1.00 | 0.00 | H |
| ATOM | 22 | H3'  | A A | 1 | 2.405  | -8.745 | -0.530 | 1.00 | 0.00 | H |
| ATOM | 23 | H4'  | A A | 1 | 3.374  | -7.489 | -2.649 | 1.00 | 0.00 | H |
| ATOM | 24 | H61  | A A | 1 | -1.695 | 0.235  | 0.016  | 1.00 | 0.00 | H |
| ATOM | 25 | H62  | A A | 1 | -2.434 | -1.382 | -0.126 | 1.00 | 0.00 | H |
| ATOM | 26 | H5T  | A A | 1 | -0.457 | -8.436 | -1.844 | 1.00 | 0.00 | H |
| ATOM | 27 | H2'1 | A A | 1 | 0.995  | -7.015 | 0.356  | 1.00 | 0.00 | H |
| ATOM | 28 | H2'2 | A A | 1 | 2.469  | -6.730 | 1.271  | 1.00 | 0.00 | H |
| ATOM | 29 | H5'1 | A A | 1 | 0.983  | -6.892 | -3.462 | 1.00 | 0.00 | H |
| ATOM | 30 | H5'2 | A A | 1 | 1.435  | -8.587 | -3.186 | 1.00 | 0.00 | H |
| ATOM | 31 | C1'  | G A | 2 | 4.998  | -3.052 | 2.911  | 1.00 | 0.00 | C |
| ATOM | 32 | N1   | G A | 2 | 0.895  | -0.052 | 3.332  | 1.00 | 0.00 | N |
| ATOM | 33 | C2   | G A | 2 | 2.235  | 0.281  | 3.290  | 1.00 | 0.00 | C |
| ATOM | 34 | N2   | G A | 2 | 2.522  | 1.585  | 3.373  | 1.00 | 0.00 | N |
| ATOM | 35 | N3   | G A | 2 | 3.213  | -0.616 | 3.174  | 1.00 | 0.00 | N |
| ATOM | 36 | C4   | G A | 2 | 2.741  | -1.889 | 3.109  | 1.00 | 0.00 | C |
| ATOM | 37 | C5   | G A | 2 | 1.423  | -2.315 | 3.146  | 1.00 | 0.00 | C |
| ATOM | 38 | C6   | G A | 2 | 0.385  | -1.361 | 3.265  | 1.00 | 0.00 | C |
| ATOM | 39 | O6   | G A | 2 | -0.832 | -1.541 | 3.312  | 1.00 | 0.00 | O |
| ATOM | 40 | N7   | G A | 2 | 1.363  | -3.707 | 3.053  | 1.00 | 0.00 | N |
| ATOM | 41 | C8   | G A | 2 | 2.616  | -4.072 | 2.961  | 1.00 | 0.00 | C |
| ATOM | 42 | N9   | G A | 2 | 3.513  | -3.024 | 2.989  | 1.00 | 0.00 | N |
| ATOM | 43 | C2'  | G A | 2 | 5.630  | -4.225 | 3.648  | 1.00 | 0.00 | C |
| ATOM | 44 | C3'  | G A | 2 | 6.813  | -4.562 | 2.756  | 1.00 | 0.00 | C |
| ATOM | 45 | O3'  | G A | 2 | 7.911  | -3.718 | 3.096  | 1.00 | 0.00 | O |
| ATOM | 46 | C4'  | G A | 2 | 6.275  | -4.273 | 1.355  | 1.00 | 0.00 | C |
| ATOM | 47 | O4'  | G A | 2 | 5.357  | -3.151 | 1.546  | 1.00 | 0.00 | O |
| ATOM | 48 | C5'  | G A | 2 | 5.530  | -5.399 | 0.678  | 1.00 | 0.00 | C |
| ATOM | 49 | O5'  | G A | 2 | 4.757  | -6.135 | 1.658  | 1.00 | 0.00 | O |
| ATOM | 50 | O1P  | G A | 2 | 5.854  | -8.400 | 1.682  | 1.00 | 0.00 | O |
| ATOM | 51 | O2P  | G A | 2 | 3.432  | -8.173 | 2.293  | 1.00 | 0.00 | O |
| ATOM | 52 | P    | G A | 2 | 4.570  | -7.707 | 1.464  | 1.00 | 0.00 | P |
| ATOM | 53 | H1   | G A | 2 | 0.217  | 0.719  | 3.420  | 1.00 | 0.00 | H |
| ATOM | 54 | H8   | G A | 2 | 2.925  | -5.113 | 2.871  | 1.00 | 0.00 | H |
| ATOM | 55 | H1'  | G A | 2 | 5.378  | -2.103 | 3.290  | 1.00 | 0.00 | H |
| ATOM | 56 | H21  | G A | 2 | 1.761  | 2.274  | 3.461  | 1.00 | 0.00 | H |
| ATOM | 57 | H3'  | G A | 2 | 7.115  | -5.605 | 2.854  | 1.00 | 0.00 | H |
| ATOM | 58 | H22  | G A | 2 | 3.503  | 1.898  | 3.349  | 1.00 | 0.00 | H |
| ATOM | 59 | H4'  | G A | 2 | 7.133  | -4.020 | 0.733  | 1.00 | 0.00 | H |
| ATOM | 60 | H2'1 | G A | 2 | 4.948  | -5.071 | 3.739  | 1.00 | 0.00 | H |
| ATOM | 61 | H2'2 | G A | 2 | 5.954  | -3.956 | 4.654  | 1.00 | 0.00 | H |
| ATOM | 62 | H5'1 | G A | 2 | 4.865  | -4.983 | -0.079 | 1.00 | 0.00 | H |

|      |     |      |     |   |        |        |        |      |      |   |
|------|-----|------|-----|---|--------|--------|--------|------|------|---|
| ATOM | 63  | H5'2 | G A | 2 | 6.247  | -6.064 | 0.197  | 1.00 | 0.00 | H |
| ATOM | 64  | C1'  | G A | 3 | 5.838  | 0.469  | 6.291  | 1.00 | 0.00 | C |
| ATOM | 65  | N1   | G A | 3 | 0.755  | 0.484  | 6.712  | 1.00 | 0.00 | N |
| ATOM | 66  | C2   | G A | 3 | 1.644  | 1.541  | 6.670  | 1.00 | 0.00 | C |
| ATOM | 67  | N2   | G A | 3 | 1.109  | 2.766  | 6.754  | 1.00 | 0.00 | N |
| ATOM | 68  | N3   | G A | 3 | 2.961  | 1.390  | 6.554  | 1.00 | 0.00 | N |
| ATOM | 69  | C4   | G A | 3 | 3.328  | 0.083  | 6.489  | 1.00 | 0.00 | C |
| ATOM | 70  | C5   | G A | 3 | 2.512  | -1.036 | 6.526  | 1.00 | 0.00 | C |
| ATOM | 71  | C6   | G A | 3 | 1.112  | -0.875 | 6.645  | 1.00 | 0.00 | C |
| ATOM | 72  | O6   | G A | 3 | 0.233  | -1.736 | 6.693  | 1.00 | 0.00 | O |
| ATOM | 73  | N7   | G A | 3 | 3.281  | -2.197 | 6.433  | 1.00 | 0.00 | N |
| ATOM | 74  | C8   | G A | 3 | 4.509  | -1.757 | 6.341  | 1.00 | 0.00 | C |
| ATOM | 75  | N9   | G A | 3 | 4.619  | -0.382 | 6.369  | 1.00 | 0.00 | N |
| ATOM | 76  | C2'  | G A | 3 | 7.038  | -0.109 | 7.028  | 1.00 | 0.00 | C |
| ATOM | 77  | C3'  | G A | 3 | 8.193  | 0.314  | 6.136  | 1.00 | 0.00 | C |
| ATOM | 78  | O3'  | G A | 3 | 8.585  | 1.642  | 6.476  | 1.00 | 0.00 | O |
| ATOM | 79  | C4'  | G A | 3 | 7.589  | 0.232  | 4.735  | 1.00 | 0.00 | C |
| ATOM | 80  | O4'  | G A | 3 | 6.186  | 0.600  | 4.926  | 1.00 | 0.00 | O |
| ATOM | 81  | C5'  | G A | 3 | 7.647  | -1.117 | 4.058  | 1.00 | 0.00 | C |
| ATOM | 82  | O5'  | G A | 3 | 7.455  | -2.167 | 5.038  | 1.00 | 0.00 | O |
| ATOM | 83  | O1P  | G A | 3 | 9.674  | -3.355 | 5.062  | 1.00 | 0.00 | O |
| ATOM | 84  | O2P  | G A | 3 | 7.581  | -4.595 | 5.673  | 1.00 | 0.00 | O |
| ATOM | 85  | P    | G A | 3 | 8.228  | -3.549 | 4.844  | 1.00 | 0.00 | P |
| ATOM | 86  | H1   | G A | 3 | -0.248 | 0.710  | 6.799  | 1.00 | 0.00 | H |
| ATOM | 87  | H8   | G A | 3 | 5.371  | -2.417 | 6.251  | 1.00 | 0.00 | H |
| ATOM | 88  | H1'  | G A | 3 | 5.587  | 1.460  | 6.670  | 1.00 | 0.00 | H |
| ATOM | 89  | H21  | G A | 3 | 0.088  | 2.876  | 6.841  | 1.00 | 0.00 | H |
| ATOM | 90  | H3'  | G A | 3 | 9.051  | -0.352 | 6.234  | 1.00 | 0.00 | H |
| ATOM | 91  | H22  | G A | 3 | 1.718  | 3.595  | 6.731  | 1.00 | 0.00 | H |
| ATOM | 92  | H4'  | G A | 3 | 8.134  | 0.941  | 4.113  | 1.00 | 0.00 | H |
| ATOM | 93  | H2'1 | G A | 3 | 6.984  | -1.194 | 7.119  | 1.00 | 0.00 | H |
| ATOM | 94  | H2'2 | G A | 3 | 7.142  | 0.299  | 8.034  | 1.00 | 0.00 | H |
| ATOM | 95  | H5'1 | G A | 3 | 6.865  | -1.171 | 3.301  | 1.00 | 0.00 | H |
| ATOM | 96  | H5'2 | G A | 3 | 8.618  | -1.234 | 3.577  | 1.00 | 0.00 | H |
| ATOM | 97  | C1'  | C A | 4 | 4.447  | 3.812  | 9.671  | 1.00 | 0.00 | C |
| ATOM | 98  | N1   | C A | 4 | 3.955  | 2.408  | 9.749  | 1.00 | 0.00 | N |
| ATOM | 99  | C2   | C A | 4 | 2.582  | 2.205  | 9.867  | 1.00 | 0.00 | C |
| ATOM | 100 | O2   | C A | 4 | 1.833  | 3.189  | 9.903  | 1.00 | 0.00 | O |
| ATOM | 101 | N3   | C A | 4 | 2.115  | 0.935  | 9.939  | 1.00 | 0.00 | N |
| ATOM | 102 | C4   | C A | 4 | 2.951  | -0.110 | 9.899  | 1.00 | 0.00 | C |
| ATOM | 103 | N4   | C A | 4 | 2.439  | -1.330 | 9.970  | 1.00 | 0.00 | N |
| ATOM | 104 | C5   | C A | 4 | 4.367  | 0.071  | 9.780  | 1.00 | 0.00 | C |
| ATOM | 105 | C6   | C A | 4 | 4.816  | 1.357  | 9.706  | 1.00 | 0.00 | C |
| ATOM | 106 | C2'  | C A | 4 | 5.756  | 4.045  | 10.412 | 1.00 | 0.00 | C |
| ATOM | 107 | C3'  | C A | 4 | 6.449  | 5.064  | 9.519  | 1.00 | 0.00 | C |
| ATOM | 108 | O3'  | C A | 4 | 5.989  | 6.371  | 9.857  | 1.00 | 0.00 | O |
| ATOM | 109 | C4'  | C A | 4 | 6.011  | 4.642  | 8.119  | 1.00 | 0.00 | C |
| ATOM | 110 | O4'  | C A | 4 | 4.657  | 4.119  | 8.305  | 1.00 | 0.00 | O |
| ATOM | 111 | C5'  | C A | 4 | 6.849  | 3.581  | 7.445  | 1.00 | 0.00 | C |
| ATOM | 112 | O5'  | C A | 4 | 7.305  | 2.618  | 8.429  | 1.00 | 0.00 | O |
| ATOM | 113 | O1P  | C A | 4 | 9.799  | 2.952  | 8.460  | 1.00 | 0.00 | O |
| ATOM | 114 | O2P  | C A | 4 | 8.825  | 0.722  | 9.071  | 1.00 | 0.00 | O |
| ATOM | 115 | P    | C A | 4 | 8.740  | 1.948  | 8.240  | 1.00 | 0.00 | P |
| ATOM | 116 | H5   | C A | 4 | 5.052  | -0.777 | 9.752  | 1.00 | 0.00 | H |



|      |     |      |     |   |        |        |        |      |      |   |
|------|-----|------|-----|---|--------|--------|--------|------|------|---|
| ATOM | 117 | H6   | C A | 4 | 5.885  | 1.545  | 9.610  | 1.00 | 0.00 | H |
| ATOM | 118 | H1'  | C A | 4 | 3.663  | 4.468  | 10.046 | 1.00 | 0.00 | H |
| ATOM | 119 | H3'  | C A | 4 | 7.533  | 5.025  | 9.622  | 1.00 | 0.00 | H |
| ATOM | 120 | H4'  | C A | 4 | 6.041  | 5.535  | 7.495  | 1.00 | 0.00 | H |
| ATOM | 121 | H41  | C A | 4 | 3.060  | -2.152 | 9.940  | 1.00 | 0.00 | H |
| ATOM | 122 | H42  | C A | 4 | 1.420  | -1.458 | 10.057 | 1.00 | 0.00 | H |
| ATOM | 123 | H2'1 | C A | 4 | 6.347  | 3.135  | 10.506 | 1.00 | 0.00 | H |
| ATOM | 124 | H2'2 | C A | 4 | 5.598  | 4.439  | 11.417 | 1.00 | 0.00 | H |
| ATOM | 125 | H5'1 | C A | 4 | 6.249  | 3.077  | 6.687  | 1.00 | 0.00 | H |
| ATOM | 126 | H5'2 | C A | 4 | 7.707  | 4.053  | 6.967  | 1.00 | 0.00 | H |
| ATOM | 127 | C1'  | C A | 5 | 1.358  | 5.698  | 13.051 | 1.00 | 0.00 | C |
| ATOM | 128 | N1   | C A | 5 | 1.785  | 4.274  | 13.129 | 1.00 | 0.00 | N |
| ATOM | 129 | C2   | C A | 5 | 0.794  | 3.302  | 13.247 | 1.00 | 0.00 | C |
| ATOM | 130 | O2   | C A | 5 | -0.392 | 3.657  | 13.283 | 1.00 | 0.00 | O |
| ATOM | 131 | N3   | C A | 5 | 1.162  | 1.999  | 13.319 | 1.00 | 0.00 | N |
| ATOM | 132 | C4   | C A | 5 | 2.452  | 1.645  | 13.279 | 1.00 | 0.00 | C |
| ATOM | 133 | N4   | C A | 5 | 2.755  | 0.358  | 13.350 | 1.00 | 0.00 | N |
| ATOM | 134 | C5   | C A | 5 | 3.492  | 2.624  | 13.160 | 1.00 | 0.00 | C |
| ATOM | 135 | C6   | C A | 5 | 3.098  | 3.928  | 13.086 | 1.00 | 0.00 | C |
| ATOM | 136 | C2'  | C A | 5 | 2.280  | 6.656  | 13.792 | 1.00 | 0.00 | C |
| ATOM | 137 | C3'  | C A | 5 | 2.241  | 7.887  | 12.899 | 1.00 | 0.00 | C |
| ATOM | 138 | O3'  | C A | 5 | 1.101  | 8.674  | 13.237 | 1.00 | 0.00 | O |
| ATOM | 139 | C4'  | C A | 5 | 2.135  | 7.288  | 11.499 | 1.00 | 0.00 | C |
| ATOM | 140 | O4'  | C A | 5 | 1.347  | 6.070  | 11.685 | 1.00 | 0.00 | O |
| ATOM | 141 | C5'  | C A | 5 | 3.437  | 6.923  | 10.825 | 1.00 | 0.00 | C |
| ATOM | 142 | O5'  | C A | 5 | 4.372  | 6.411  | 11.809 | 1.00 | 0.00 | O |
| ATOM | 143 | O1P  | C A | 5 | 6.193  | 8.148  | 11.840 | 1.00 | 0.00 | O |
| ATOM | 144 | O2P  | C A | 5 | 6.715  | 5.771  | 12.451 | 1.00 | 0.00 | O |
| ATOM | 145 | P    | C A | 5 | 5.926  | 6.713  | 11.620 | 1.00 | 0.00 | P |
| ATOM | 146 | H5   | C A | 5 | 4.545  | 2.341  | 13.132 | 1.00 | 0.00 | H |
| ATOM | 147 | H6   | C A | 5 | 3.853  | 4.709  | 12.990 | 1.00 | 0.00 | H |
| ATOM | 148 | H1'  | C A | 5 | 0.337  | 5.768  | 13.426 | 1.00 | 0.00 | H |
| ATOM | 149 | H3'  | C A | 5 | 3.141  | 8.494  | 13.002 | 1.00 | 0.00 | H |
| ATOM | 150 | H4'  | C A | 5 | 1.635  | 8.029  | 10.875 | 1.00 | 0.00 | H |
| ATOM | 151 | H41  | C A | 5 | 3.740  | 0.058  | 13.320 | 1.00 | 0.00 | H |
| ATOM | 152 | H42  | C A | 5 | 2.005  | -0.344 | 13.437 | 1.00 | 0.00 | H |
| ATOM | 153 | H2'1 | C A | 5 | 3.293  | 6.267  | 13.886 | 1.00 | 0.00 | H |
| ATOM | 154 | H2'2 | C A | 5 | 1.920  | 6.882  | 14.797 | 1.00 | 0.00 | H |
| ATOM | 155 | H5'1 | C A | 5 | 3.247  | 6.162  | 10.067 | 1.00 | 0.00 | H |
| ATOM | 156 | H5'2 | C A | 5 | 3.853  | 7.809  | 10.347 | 1.00 | 0.00 | H |
| ATOM | 157 | C1'  | G A | 6 | -2.250 | 5.407  | 16.431 | 1.00 | 0.00 | C |
| ATOM | 158 | N1   | G A | 6 | -0.693 | 0.567  | 16.851 | 1.00 | 0.00 | N |
| ATOM | 159 | C2   | G A | 6 | -1.975 | 1.087  | 16.810 | 1.00 | 0.00 | C |
| ATOM | 160 | N2   | G A | 6 | -2.974 | 0.201  | 16.895 | 1.00 | 0.00 | N |
| ATOM | 161 | N3   | G A | 6 | -2.237 | 2.388  | 16.694 | 1.00 | 0.00 | N |
| ATOM | 162 | C4   | G A | 6 | -1.107 | 3.139  | 16.629 | 1.00 | 0.00 | C |
| ATOM | 163 | C5   | G A | 6 | 0.209  | 2.709  | 16.666 | 1.00 | 0.00 | C |
| ATOM | 164 | C6   | G A | 6 | 0.489  | 1.329  | 16.785 | 1.00 | 0.00 | C |
| ATOM | 165 | O6   | G A | 6 | 1.579  | 0.759  | 16.835 | 1.00 | 0.00 | O |
| ATOM | 166 | N7   | G A | 6 | 1.076  | 3.799  | 16.573 | 1.00 | 0.00 | N |
| ATOM | 167 | C8   | G A | 6 | 0.278  | 4.831  | 16.481 | 1.00 | 0.00 | C |
| ATOM | 168 | N9   | G A | 6 | -1.064 | 4.511  | 16.509 | 1.00 | 0.00 | N |
| ATOM | 169 | C2'  | G A | 6 | -2.071 | 6.727  | 17.168 | 1.00 | 0.00 | C |
| ATOM | 170 | C3'  | G A | 6 | -2.831 | 7.695  | 16.276 | 1.00 | 0.00 | C |

|      |     |      |     |   |        |        |        |      |      |   |
|------|-----|------|-----|---|--------|--------|--------|------|------|---|
| ATOM | 171 | O3'  | G A | 6 | -4.215 | 7.658  | 16.616 | 1.00 | 0.00 | O |
| ATOM | 172 | C4'  | G A | 6 | -2.565 | 7.146  | 14.875 | 1.00 | 0.00 | C |
| ATOM | 173 | O4'  | G A | 6 | -2.482 | 5.698  | 15.066 | 1.00 | 0.00 | O |
| ATOM | 174 | C5'  | G A | 6 | -1.301 | 7.618  | 14.198 | 1.00 | 0.00 | C |
| ATOM | 175 | O5'  | G A | 6 | -0.242 | 7.760  | 15.178 | 1.00 | 0.00 | O |
| ATOM | 176 | O1P  | G A | 6 | 0.201  | 10.237 | 15.202 | 1.00 | 0.00 | O |
| ATOM | 177 | O2P  | G A | 6 | 2.028  | 8.630  | 15.813 | 1.00 | 0.00 | O |
| ATOM | 178 | P    | G A | 6 | 0.833  | 8.922  | 14.984 | 1.00 | 0.00 | P |
| ATOM | 179 | H1   | G A | 6 | -0.598 | -0.457 | 16.936 | 1.00 | 0.00 | H |
| ATOM | 180 | H8   | G A | 6 | 0.639  | 5.856  | 16.391 | 1.00 | 0.00 | H |
| ATOM | 181 | H1'  | G A | 6 | -3.115 | 4.862  | 16.810 | 1.00 | 0.00 | H |
| ATOM | 182 | H21  | G A | 6 | -2.764 | -0.804 | 16.981 | 1.00 | 0.00 | H |
| ATOM | 183 | H3'  | G A | 6 | -2.463 | 8.717  | 16.374 | 1.00 | 0.00 | H |
| ATOM | 184 | H22  | G A | 6 | -3.952 | 0.524  | 16.873 | 1.00 | 0.00 | H |
| ATOM | 185 | H4'  | G A | 6 | -3.408 | 7.445  | 14.253 | 1.00 | 0.00 | H |
| ATOM | 186 | H2'1 | G A | 6 | -1.022 | 7.011  | 17.259 | 1.00 | 0.00 | H |
| ATOM | 187 | H2'2 | G A | 6 | -2.491 | 6.700  | 18.174 | 1.00 | 0.00 | H |
| ATOM | 188 | H5'1 | G A | 6 | -1.007 | 6.892  | 13.441 | 1.00 | 0.00 | H |
| ATOM | 189 | H5'2 | G A | 6 | -1.489 | 8.578  | 13.717 | 1.00 | 0.00 | H |
| ATOM | 190 | C1'  | C A | 7 | -4.999 | 3.052  | 19.811 | 1.00 | 0.00 | C |
| ATOM | 191 | N1   | C A | 7 | -3.513 | 3.018  | 19.889 | 1.00 | 0.00 | N |
| ATOM | 192 | C2   | C A | 7 | -2.895 | 1.775  | 20.007 | 1.00 | 0.00 | C |
| ATOM | 193 | O2   | C A | 7 | -3.599 | 0.758  | 20.043 | 1.00 | 0.00 | O |
| ATOM | 194 | N3   | C A | 7 | -1.542 | 1.722  | 20.079 | 1.00 | 0.00 | N |
| ATOM | 195 | C4   | C A | 7 | -0.806 | 2.840  | 20.039 | 1.00 | 0.00 | C |
| ATOM | 196 | N4   | C A | 7 | 0.512  | 2.730  | 20.110 | 1.00 | 0.00 | N |
| ATOM | 197 | C5   | C A | 7 | -1.415 | 4.133  | 19.922 | 1.00 | 0.00 | C |
| ATOM | 198 | C6   | C A | 7 | -2.779 | 4.162  | 19.846 | 1.00 | 0.00 | C |
| ATOM | 199 | C2'  | C A | 7 | -5.626 | 4.225  | 20.552 | 1.00 | 0.00 | C |
| ATOM | 200 | C3'  | C A | 7 | -6.809 | 4.568  | 19.659 | 1.00 | 0.00 | C |
| ATOM | 201 | O3'  | C A | 7 | -7.910 | 3.727  | 19.997 | 1.00 | 0.00 | O |
| ATOM | 202 | C4'  | C A | 7 | -6.272 | 4.282  | 18.259 | 1.00 | 0.00 | C |
| ATOM | 203 | O4'  | C A | 7 | -5.356 | 3.156  | 18.445 | 1.00 | 0.00 | O |
| ATOM | 204 | C5'  | C A | 7 | -5.521 | 5.408  | 17.585 | 1.00 | 0.00 | C |
| ATOM | 205 | O5'  | C A | 7 | -4.747 | 6.139  | 18.569 | 1.00 | 0.00 | O |
| ATOM | 206 | O1P  | C A | 7 | -5.836 | 8.408  | 18.600 | 1.00 | 0.00 | O |
| ATOM | 207 | O2P  | C A | 7 | -3.414 | 8.169  | 19.211 | 1.00 | 0.00 | O |
| ATOM | 208 | P    | C A | 7 | -4.553 | 7.710  | 18.380 | 1.00 | 0.00 | P |
| ATOM | 209 | H5   | C A | 7 | -0.821 | 5.047  | 19.895 | 1.00 | 0.00 | H |
| ATOM | 210 | H6   | C A | 7 | -3.288 | 5.121  | 19.748 | 1.00 | 0.00 | H |
| ATOM | 211 | H1'  | C A | 7 | -5.382 | 2.103  | 20.186 | 1.00 | 0.00 | H |
| ATOM | 212 | H3'  | C A | 7 | -7.107 | 5.612  | 19.762 | 1.00 | 0.00 | H |
| ATOM | 213 | H4'  | C A | 7 | -7.131 | 4.035  | 17.635 | 1.00 | 0.00 | H |
| ATOM | 214 | H41  | C A | 7 | 1.102  | 3.574  | 20.079 | 1.00 | 0.00 | H |
| ATOM | 215 | H42  | C A | 7 | 0.949  | 1.801  | 20.197 | 1.00 | 0.00 | H |
| ATOM | 216 | H2'1 | C A | 7 | -4.943 | 5.068  | 20.646 | 1.00 | 0.00 | H |
| ATOM | 217 | H2'2 | C A | 7 | -5.952 | 3.953  | 21.557 | 1.00 | 0.00 | H |
| ATOM | 218 | H5'1 | C A | 7 | -4.856 | 4.992  | 16.827 | 1.00 | 0.00 | H |
| ATOM | 219 | H5'2 | C A | 7 | -6.235 | 6.078  | 17.107 | 1.00 | 0.00 | H |
| ATOM | 220 | C1'  | A A | 8 | -5.862 | -0.462 | 23.189 | 1.00 | 0.00 | C |
| ATOM | 221 | N1   | A A | 8 | -0.747 | -0.505 | 23.614 | 1.00 | 0.00 | N |
| ATOM | 222 | C2   | A A | 8 | -1.653 | -1.477 | 23.568 | 1.00 | 0.00 | C |
| ATOM | 223 | N3   | A A | 8 | -2.962 | -1.397 | 23.454 | 1.00 | 0.00 | N |
| ATOM | 224 | C4   | A A | 8 | -3.344 | -0.108 | 23.386 | 1.00 | 0.00 | C |

|      |     |      |     |   |        |        |        |      |      |   |
|------|-----|------|-----|---|--------|--------|--------|------|------|---|
| ATOM | 225 | C5   | A A | 8 | -2.545 | 1.000  | 23.420 | 1.00 | 0.00 | C |
| ATOM | 226 | C6   | A A | 8 | -1.159 | 0.770  | 23.542 | 1.00 | 0.00 | C |
| ATOM | 227 | N6   | A A | 8 | -0.252 | 1.761  | 23.588 | 1.00 | 0.00 | N |
| ATOM | 228 | N7   | A A | 8 | -3.294 | 2.160  | 23.324 | 1.00 | 0.00 | N |
| ATOM | 229 | C8   | A A | 8 | -4.520 | 1.733  | 23.239 | 1.00 | 0.00 | C |
| ATOM | 230 | N9   | A A | 8 | -4.628 | 0.366  | 23.268 | 1.00 | 0.00 | N |
| ATOM | 231 | C2'  | A A | 8 | -7.052 | 0.138  | 23.926 | 1.00 | 0.00 | C |
| ATOM | 232 | C3'  | A A | 8 | -8.214 | -0.266 | 23.033 | 1.00 | 0.00 | C |
| ATOM | 233 | O3'  | A A | 8 | -8.628 | -1.586 | 23.374 | 1.00 | 0.00 | O |
| ATOM | 234 | C4'  | A A | 8 | -7.608 | -0.195 | 21.632 | 1.00 | 0.00 | C |
| ATOM | 235 | O4'  | A A | 8 | -6.210 | -0.587 | 21.824 | 1.00 | 0.00 | O |
| ATOM | 236 | C5'  | A A | 8 | -7.644 | 1.154  | 20.954 | 1.00 | 0.00 | C |
| ATOM | 237 | O5'  | A A | 8 | -7.432 | 2.202  | 21.934 | 1.00 | 0.00 | O |
| ATOM | 238 | O1P  | A A | 8 | -9.631 | 3.428  | 21.957 | 1.00 | 0.00 | O |
| ATOM | 239 | O2P  | A A | 8 | -7.515 | 4.632  | 22.568 | 1.00 | 0.00 | O |
| ATOM | 240 | P    | A A | 8 | -8.181 | 3.597  | 21.739 | 1.00 | 0.00 | P |
| ATOM | 241 | H2   | A A | 8 | -1.254 | -2.488 | 23.634 | 1.00 | 0.00 | H |
| ATOM | 242 | H8   | A A | 8 | -5.380 | 2.397  | 23.153 | 1.00 | 0.00 | H |
| ATOM | 243 | H1'  | A A | 8 | -5.629 | -1.457 | 23.568 | 1.00 | 0.00 | H |
| ATOM | 244 | H3'  | A A | 8 | -9.060 | 0.414  | 23.130 | 1.00 | 0.00 | H |
| ATOM | 245 | H4'  | A A | 8 | -8.165 | -0.895 | 21.011 | 1.00 | 0.00 | H |
| ATOM | 246 | H61  | A A | 8 | 0.749  | 1.539  | 23.675 | 1.00 | 0.00 | H |
| ATOM | 247 | H62  | A A | 8 | -0.561 | 2.743  | 23.536 | 1.00 | 0.00 | H |
| ATOM | 248 | H2'1 | A A | 8 | -6.979 | 1.221  | 24.016 | 1.00 | 0.00 | H |
| ATOM | 249 | H2'2 | A A | 8 | -7.163 | -0.269 | 24.931 | 1.00 | 0.00 | H |
| ATOM | 250 | H5'1 | A A | 8 | -6.859 | 1.194  | 20.198 | 1.00 | 0.00 | H |
| ATOM | 251 | H5'2 | A A | 8 | -8.612 | 1.289  | 20.474 | 1.00 | 0.00 | H |
| ATOM | 252 | C1'  | C A | 9 | -4.447 | -3.812 | 26.571 | 1.00 | 0.00 | C |
| ATOM | 253 | N1   | C A | 9 | -3.955 | -2.409 | 26.649 | 1.00 | 0.00 | N |
| ATOM | 254 | C2   | C A | 9 | -2.582 | -2.204 | 26.767 | 1.00 | 0.00 | C |
| ATOM | 255 | O2   | C A | 9 | -1.833 | -3.189 | 26.803 | 1.00 | 0.00 | O |
| ATOM | 256 | N3   | C A | 9 | -2.114 | -0.935 | 26.839 | 1.00 | 0.00 | N |
| ATOM | 257 | C4   | C A | 9 | -2.950 | 0.111  | 26.799 | 1.00 | 0.00 | C |
| ATOM | 258 | N4   | C A | 9 | -2.438 | 1.331  | 26.870 | 1.00 | 0.00 | N |
| ATOM | 259 | C5   | C A | 9 | -4.368 | -0.069 | 26.682 | 1.00 | 0.00 | C |
| ATOM | 260 | C6   | C A | 9 | -4.817 | -1.357 | 26.606 | 1.00 | 0.00 | C |
| ATOM | 261 | C2'  | C A | 9 | -5.756 | -4.045 | 27.312 | 1.00 | 0.00 | C |
| ATOM | 262 | C3'  | C A | 9 | -6.449 | -5.064 | 26.419 | 1.00 | 0.00 | C |
| ATOM | 263 | O3'  | C A | 9 | -5.989 | -6.371 | 26.757 | 1.00 | 0.00 | O |
| ATOM | 264 | C4'  | C A | 9 | -6.011 | -4.642 | 25.019 | 1.00 | 0.00 | C |
| ATOM | 265 | O4'  | C A | 9 | -4.657 | -4.119 | 25.205 | 1.00 | 0.00 | O |
| ATOM | 266 | C5'  | C A | 9 | -6.849 | -3.581 | 24.345 | 1.00 | 0.00 | C |
| ATOM | 267 | O5'  | C A | 9 | -7.305 | -2.618 | 25.329 | 1.00 | 0.00 | O |
| ATOM | 268 | O1P  | C A | 9 | -9.799 | -2.952 | 25.360 | 1.00 | 0.00 | O |
| ATOM | 269 | O2P  | C A | 9 | -8.825 | -0.722 | 25.971 | 1.00 | 0.00 | O |
| ATOM | 270 | P    | C A | 9 | -8.740 | -1.948 | 25.140 | 1.00 | 0.00 | P |
| ATOM | 271 | H5   | C A | 9 | -5.053 | 0.779  | 26.655 | 1.00 | 0.00 | H |
| ATOM | 272 | H6   | C A | 9 | -5.886 | -1.545 | 26.508 | 1.00 | 0.00 | H |
| ATOM | 273 | H1'  | C A | 9 | -3.663 | -4.469 | 26.946 | 1.00 | 0.00 | H |
| ATOM | 274 | H3'  | C A | 9 | -7.533 | -5.025 | 26.522 | 1.00 | 0.00 | H |
| ATOM | 275 | H4'  | C A | 9 | -6.041 | -5.535 | 24.395 | 1.00 | 0.00 | H |
| ATOM | 276 | H41  | C A | 9 | -3.059 | 2.153  | 26.839 | 1.00 | 0.00 | H |
| ATOM | 277 | H42  | C A | 9 | -1.419 | 1.458  | 26.957 | 1.00 | 0.00 | H |
| ATOM | 278 | H2'1 | C A | 9 | -6.347 | -3.135 | 27.406 | 1.00 | 0.00 | H |

|      |     |      |   |   |    |        |         |        |      |      |   |
|------|-----|------|---|---|----|--------|---------|--------|------|------|---|
| ATOM | 279 | H2'2 | C | A | 9  | -5.598 | -4.439  | 28.317 | 1.00 | 0.00 | H |
| ATOM | 280 | H5'1 | C | A | 9  | -6.249 | -3.077  | 23.587 | 1.00 | 0.00 | H |
| ATOM | 281 | H5'2 | C | A | 9  | -7.707 | -4.053  | 23.867 | 1.00 | 0.00 | H |
| ATOM | 282 | C1'  | C | A | 10 | -1.358 | -5.698  | 29.951 | 1.00 | 0.00 | C |
| ATOM | 283 | N1   | C | A | 10 | -1.785 | -4.274  | 30.029 | 1.00 | 0.00 | N |
| ATOM | 284 | C2   | C | A | 10 | -0.794 | -3.302  | 30.147 | 1.00 | 0.00 | C |
| ATOM | 285 | O2   | C | A | 10 | 0.392  | -3.657  | 30.183 | 1.00 | 0.00 | O |
| ATOM | 286 | N3   | C | A | 10 | -1.161 | -1.999  | 30.219 | 1.00 | 0.00 | N |
| ATOM | 287 | C4   | C | A | 10 | -2.452 | -1.644  | 30.179 | 1.00 | 0.00 | C |
| ATOM | 288 | N4   | C | A | 10 | -2.755 | -0.356  | 30.250 | 1.00 | 0.00 | N |
| ATOM | 289 | C5   | C | A | 10 | -3.493 | -2.623  | 30.062 | 1.00 | 0.00 | C |
| ATOM | 290 | C6   | C | A | 10 | -3.099 | -3.929  | 29.986 | 1.00 | 0.00 | C |
| ATOM | 291 | C2'  | C | A | 10 | -2.280 | -6.656  | 30.692 | 1.00 | 0.00 | C |
| ATOM | 292 | C3'  | C | A | 10 | -2.241 | -7.887  | 29.799 | 1.00 | 0.00 | C |
| ATOM | 293 | O3'  | C | A | 10 | -1.101 | -8.674  | 30.137 | 1.00 | 0.00 | O |
| ATOM | 294 | C4'  | C | A | 10 | -2.135 | -7.288  | 28.399 | 1.00 | 0.00 | C |
| ATOM | 295 | O4'  | C | A | 10 | -1.347 | -6.070  | 28.585 | 1.00 | 0.00 | O |
| ATOM | 296 | C5'  | C | A | 10 | -3.437 | -6.922  | 27.725 | 1.00 | 0.00 | C |
| ATOM | 297 | O5'  | C | A | 10 | -4.372 | -6.411  | 28.709 | 1.00 | 0.00 | O |
| ATOM | 298 | O1P  | C | A | 10 | -6.193 | -8.148  | 28.740 | 1.00 | 0.00 | O |
| ATOM | 299 | O2P  | C | A | 10 | -6.715 | -5.771  | 29.351 | 1.00 | 0.00 | O |
| ATOM | 300 | P    | C | A | 10 | -5.926 | -6.713  | 28.520 | 1.00 | 0.00 | P |
| ATOM | 301 | H5   | C | A | 10 | -4.546 | -2.340  | 30.035 | 1.00 | 0.00 | H |
| ATOM | 302 | H6   | C | A | 10 | -3.854 | -4.709  | 29.888 | 1.00 | 0.00 | H |
| ATOM | 303 | H1'  | C | A | 10 | -0.337 | -5.769  | 30.326 | 1.00 | 0.00 | H |
| ATOM | 304 | H3'  | C | A | 10 | -3.141 | -8.494  | 29.902 | 1.00 | 0.00 | H |
| ATOM | 305 | H4'  | C | A | 10 | -1.635 | -8.029  | 27.775 | 1.00 | 0.00 | H |
| ATOM | 306 | H41  | C | A | 10 | -3.740 | -0.056  | 30.219 | 1.00 | 0.00 | H |
| ATOM | 307 | H42  | C | A | 10 | -2.005 | 0.345   | 30.337 | 1.00 | 0.00 | H |
| ATOM | 308 | H2'1 | C | A | 10 | -3.293 | -6.267  | 30.786 | 1.00 | 0.00 | H |
| ATOM | 309 | H2'2 | C | A | 10 | -1.920 | -6.882  | 31.697 | 1.00 | 0.00 | H |
| ATOM | 310 | H5'1 | C | A | 10 | -3.247 | -6.161  | 26.967 | 1.00 | 0.00 | H |
| ATOM | 311 | H5'2 | C | A | 10 | -3.853 | -7.808  | 27.247 | 1.00 | 0.00 | H |
| ATOM | 312 | C1'  | T | A | 11 | 2.250  | -5.431  | 33.329 | 1.00 | 0.00 | C |
| ATOM | 313 | N1   | T | A | 11 | 1.083  | -4.513  | 33.410 | 1.00 | 0.00 | N |
| ATOM | 314 | C2   | T | A | 11 | 1.350  | -3.164  | 33.529 | 1.00 | 0.00 | C |
| ATOM | 315 | O2   | T | A | 11 | 2.483  | -2.716  | 33.569 | 1.00 | 0.00 | O |
| ATOM | 316 | N3   | T | A | 11 | 0.237  | -2.346  | 33.600 | 1.00 | 0.00 | N |
| ATOM | 317 | C4   | T | A | 11 | -1.082 | -2.750  | 33.567 | 1.00 | 0.00 | C |
| ATOM | 318 | O4   | T | A | 11 | -1.999 | -1.922  | 33.642 | 1.00 | 0.00 | O |
| ATOM | 319 | C5   | T | A | 11 | -1.261 | -4.177  | 33.441 | 1.00 | 0.00 | C |
| ATOM | 320 | C6   | T | A | 11 | -0.199 | -5.003  | 33.368 | 1.00 | 0.00 | C |
| ATOM | 321 | C7   | T | A | 11 | -2.680 | -4.660  | 33.398 | 1.00 | 0.00 | C |
| ATOM | 322 | C2'  | T | A | 11 | 2.048  | -6.748  | 34.068 | 1.00 | 0.00 | C |
| ATOM | 323 | C3'  | T | A | 11 | 2.787  | -7.731  | 33.174 | 1.00 | 0.00 | C |
| ATOM | 324 | O3'  | T | A | 11 | 4.173  | -7.720  | 33.510 | 1.00 | 0.00 | O |
| ATOM | 325 | C4'  | T | A | 11 | 2.528  | -7.178  | 31.775 | 1.00 | 0.00 | C |
| ATOM | 326 | O4'  | T | A | 11 | 2.473  | -5.728  | 31.964 | 1.00 | 0.00 | O |
| ATOM | 327 | C5'  | T | A | 11 | 1.252  | -7.626  | 31.100 | 1.00 | 0.00 | C |
| ATOM | 328 | O5'  | T | A | 11 | 0.195  | -7.747  | 32.084 | 1.00 | 0.00 | O |
| ATOM | 329 | O1P  | T | A | 11 | -0.296 | -10.215 | 32.112 | 1.00 | 0.00 | O |
| ATOM | 330 | O2P  | T | A | 11 | -2.090 | -8.573  | 32.727 | 1.00 | 0.00 | O |
| ATOM | 331 | P    | T | A | 11 | -0.903 | -8.888  | 31.895 | 1.00 | 0.00 | P |
| ATOM | 332 | H3   | T | A | 11 | 0.409  | -1.335  | 33.685 | 1.00 | 0.00 | H |

|      |     |      |   |   |    |        |        |        |      |      |   |
|------|-----|------|---|---|----|--------|--------|--------|------|------|---|
| ATOM | 333 | H6   | T | A | 11 | -0.359 | -6.078 | 33.273 | 1.00 | 0.00 | H |
| ATOM | 334 | H1'  | T | A | 11 | 3.127  | -4.904 | 33.705 | 1.00 | 0.00 | H |
| ATOM | 335 | H3'  | T | A | 11 | 2.400  | -8.744 | 33.275 | 1.00 | 0.00 | H |
| ATOM | 336 | H4'  | T | A | 11 | 3.364  | -7.494 | 31.149 | 1.00 | 0.00 | H |
| ATOM | 337 | H71  | T | A | 11 | -2.887 | -5.259 | 34.285 | 1.00 | 0.00 | H |
| ATOM | 338 | H72  | T | A | 11 | -3.355 | -3.804 | 33.373 | 1.00 | 0.00 | H |
| ATOM | 339 | H73  | T | A | 11 | -2.832 | -5.268 | 32.506 | 1.00 | 0.00 | H |
| ATOM | 340 | H2'1 | T | A | 11 | 0.996  | -7.011 | 34.162 | 1.00 | 0.00 | H |
| ATOM | 341 | H2'2 | T | A | 11 | 2.472  | -6.728 | 35.073 | 1.00 | 0.00 | H |
| ATOM | 342 | H5'1 | T | A | 11 | 0.970  | -6.894 | 30.344 | 1.00 | 0.00 | H |
| ATOM | 343 | H5'2 | T | A | 11 | 1.421  | -8.590 | 30.621 | 1.00 | 0.00 | H |
| ATOM | 344 | C1'  | A | A | 12 | 5.014  | -3.071 | 36.709 | 1.00 | 0.00 | C |
| ATOM | 345 | N1   | A | A | 12 | 0.901  | -0.030 | 37.133 | 1.00 | 0.00 | N |
| ATOM | 346 | C2   | A | A | 12 | 2.205  | 0.223  | 37.088 | 1.00 | 0.00 | C |
| ATOM | 347 | N3   | A | A | 12 | 3.217  | -0.612 | 36.974 | 1.00 | 0.00 | N |
| ATOM | 348 | C4   | A | A | 12 | 2.769  | -1.878 | 36.906 | 1.00 | 0.00 | C |
| ATOM | 349 | C5   | A | A | 12 | 1.472  | -2.305 | 36.940 | 1.00 | 0.00 | C |
| ATOM | 350 | C6   | A | A | 12 | 0.485  | -1.304 | 37.062 | 1.00 | 0.00 | C |
| ATOM | 351 | N6   | A | A | 12 | -0.831 | -1.573 | 37.108 | 1.00 | 0.00 | N |
| ATOM | 352 | N7   | A | A | 12 | 1.396  | -3.683 | 36.844 | 1.00 | 0.00 | N |
| ATOM | 353 | C8   | A | A | 12 | 2.638  | -4.059 | 36.759 | 1.00 | 0.00 | C |
| ATOM | 354 | N9   | A | A | 12 | 3.529  | -3.016 | 36.788 | 1.00 | 0.00 | N |
| ATOM | 355 | C2'  | A | A | 12 | 5.623  | -4.256 | 37.446 | 1.00 | 0.00 | C |
| ATOM | 356 | C3'  | A | A | 12 | 6.801  | -4.613 | 36.553 | 1.00 | 0.00 | C |
| ATOM | 357 | O3'  | A | A | 12 | 7.913  | -3.788 | 36.894 | 1.00 | 0.00 | O |
| ATOM | 358 | C4'  | A | A | 12 | 6.269  | -4.314 | 35.152 | 1.00 | 0.00 | C |
| ATOM | 359 | O4'  | A | A | 12 | 5.369  | -3.176 | 35.344 | 1.00 | 0.00 | O |
| ATOM | 360 | C5'  | A | A | 12 | 5.505  | -5.426 | 34.474 | 1.00 | 0.00 | C |
| ATOM | 361 | O5'  | A | A | 12 | 4.718  | -6.150 | 35.454 | 1.00 | 0.00 | O |
| ATOM | 362 | O1P  | A | A | 12 | 5.776  | -8.434 | 35.477 | 1.00 | 0.00 | O |
| ATOM | 363 | O2P  | A | A | 12 | 3.357  | -8.165 | 36.088 | 1.00 | 0.00 | O |
| ATOM | 364 | P    | A | A | 12 | 4.504  | -7.718 | 35.259 | 1.00 | 0.00 | P |
| ATOM | 365 | H2   | A | A | 12 | 2.477  | 1.276  | 37.154 | 1.00 | 0.00 | H |
| ATOM | 366 | H8   | A | A | 12 | 2.944  | -5.102 | 36.673 | 1.00 | 0.00 | H |
| ATOM | 367 | H1'  | A | A | 12 | 5.410  | -2.130 | 37.088 | 1.00 | 0.00 | H |
| ATOM | 368 | H3'  | A | A | 12 | 7.086  | -5.660 | 36.650 | 1.00 | 0.00 | H |
| ATOM | 369 | H4'  | A | A | 12 | 7.132  | -4.076 | 34.531 | 1.00 | 0.00 | H |
| ATOM | 370 | H61  | A | A | 12 | -1.511 | -0.805 | 37.195 | 1.00 | 0.00 | H |
| ATOM | 371 | H62  | A | A | 12 | -1.159 | -2.549 | 37.056 | 1.00 | 0.00 | H |
| ATOM | 372 | H2'1 | A | A | 12 | 4.928  | -5.090 | 37.536 | 1.00 | 0.00 | H |
| ATOM | 373 | H2'2 | A | A | 12 | 5.952  | -3.993 | 38.451 | 1.00 | 0.00 | H |
| ATOM | 374 | H5'1 | A | A | 12 | 4.847  | -4.998 | 33.718 | 1.00 | 0.00 | H |
| ATOM | 375 | H5'2 | A | A | 12 | 6.209  | -6.104 | 33.994 | 1.00 | 0.00 | H |
| ATOM | 376 | C1'  | G | A | 13 | 5.838  | 0.469  | 40.091 | 1.00 | 0.00 | C |
| ATOM | 377 | N1   | G | A | 13 | 0.754  | 0.484  | 40.511 | 1.00 | 0.00 | N |
| ATOM | 378 | C2   | G | A | 13 | 1.644  | 1.542  | 40.470 | 1.00 | 0.00 | C |
| ATOM | 379 | N2   | G | A | 13 | 1.110  | 2.768  | 40.555 | 1.00 | 0.00 | N |
| ATOM | 380 | N3   | G | A | 13 | 2.962  | 1.390  | 40.354 | 1.00 | 0.00 | N |
| ATOM | 381 | C4   | G | A | 13 | 3.328  | 0.083  | 40.289 | 1.00 | 0.00 | C |
| ATOM | 382 | C5   | G | A | 13 | 2.512  | -1.036 | 40.326 | 1.00 | 0.00 | C |
| ATOM | 383 | C6   | G | A | 13 | 1.112  | -0.875 | 40.445 | 1.00 | 0.00 | C |
| ATOM | 384 | O6   | G | A | 13 | 0.234  | -1.737 | 40.495 | 1.00 | 0.00 | O |
| ATOM | 385 | N7   | G | A | 13 | 3.281  | -2.197 | 40.233 | 1.00 | 0.00 | N |
| ATOM | 386 | C8   | G | A | 13 | 4.509  | -1.757 | 40.141 | 1.00 | 0.00 | C |

|      |     |      |     |    |        |        |        |      |      |   |
|------|-----|------|-----|----|--------|--------|--------|------|------|---|
| ATOM | 387 | N9   | G A | 13 | 4.619  | -0.382 | 40.169 | 1.00 | 0.00 | N |
| ATOM | 388 | C2'  | G A | 13 | 7.038  | -0.109 | 40.828 | 1.00 | 0.00 | C |
| ATOM | 389 | C3'  | G A | 13 | 8.193  | 0.314  | 39.936 | 1.00 | 0.00 | C |
| ATOM | 390 | O3'  | G A | 13 | 8.585  | 1.642  | 40.276 | 1.00 | 0.00 | O |
| ATOM | 391 | C4'  | G A | 13 | 7.589  | 0.232  | 38.535 | 1.00 | 0.00 | C |
| ATOM | 392 | O4'  | G A | 13 | 6.186  | 0.600  | 38.726 | 1.00 | 0.00 | O |
| ATOM | 393 | C5'  | G A | 13 | 7.647  | -1.117 | 37.858 | 1.00 | 0.00 | C |
| ATOM | 394 | O5'  | G A | 13 | 7.455  | -2.167 | 38.838 | 1.00 | 0.00 | O |
| ATOM | 395 | O1P  | G A | 13 | 9.674  | -3.355 | 38.862 | 1.00 | 0.00 | O |
| ATOM | 396 | O2P  | G A | 13 | 7.581  | -4.595 | 39.473 | 1.00 | 0.00 | O |
| ATOM | 397 | P    | G A | 13 | 8.228  | -3.549 | 38.644 | 1.00 | 0.00 | P |
| ATOM | 398 | H1   | G A | 13 | -0.249 | 0.710  | 40.596 | 1.00 | 0.00 | H |
| ATOM | 399 | H8   | G A | 13 | 5.372  | -2.417 | 40.051 | 1.00 | 0.00 | H |
| ATOM | 400 | H1'  | G A | 13 | 5.587  | 1.460  | 40.470 | 1.00 | 0.00 | H |
| ATOM | 401 | H21  | G A | 13 | 0.088  | 2.877  | 40.641 | 1.00 | 0.00 | H |
| ATOM | 402 | H3'  | G A | 13 | 9.051  | -0.352 | 40.034 | 1.00 | 0.00 | H |
| ATOM | 403 | H22  | G A | 13 | 1.719  | 3.596  | 40.533 | 1.00 | 0.00 | H |
| ATOM | 404 | H4'  | G A | 13 | 8.134  | 0.941  | 37.913 | 1.00 | 0.00 | H |
| ATOM | 405 | H2'1 | G A | 13 | 6.984  | -1.194 | 40.919 | 1.00 | 0.00 | H |
| ATOM | 406 | H2'2 | G A | 13 | 7.142  | 0.299  | 41.834 | 1.00 | 0.00 | H |
| ATOM | 407 | H5'1 | G A | 13 | 6.865  | -1.171 | 37.101 | 1.00 | 0.00 | H |
| ATOM | 408 | H5'2 | G A | 13 | 8.618  | -1.234 | 37.377 | 1.00 | 0.00 | H |
| ATOM | 409 | C1'  | G A | 14 | 4.447  | 3.811  | 43.471 | 1.00 | 0.00 | C |
| ATOM | 410 | N1   | G A | 14 | 0.325  | 0.835  | 43.891 | 1.00 | 0.00 | N |
| ATOM | 411 | C2   | G A | 14 | 0.424  | 2.214  | 43.850 | 1.00 | 0.00 | C |
| ATOM | 412 | N2   | G A | 14 | -0.728 | 2.891  | 43.935 | 1.00 | 0.00 | N |
| ATOM | 413 | N3   | G A | 14 | 1.580  | 2.866  | 43.734 | 1.00 | 0.00 | N |
| ATOM | 414 | C4   | G A | 14 | 2.643  | 2.023  | 43.669 | 1.00 | 0.00 | C |
| ATOM | 415 | C5   | G A | 14 | 2.640  | 0.639  | 43.706 | 1.00 | 0.00 | C |
| ATOM | 416 | C6   | G A | 14 | 1.415  | -0.054 | 43.825 | 1.00 | 0.00 | C |
| ATOM | 417 | O6   | G A | 14 | 1.209  | -1.267 | 43.875 | 1.00 | 0.00 | O |
| ATOM | 418 | N7   | G A | 14 | 3.947  | 0.152  | 43.613 | 1.00 | 0.00 | N |
| ATOM | 419 | C8   | G A | 14 | 4.681  | 1.230  | 43.521 | 1.00 | 0.00 | C |
| ATOM | 420 | N9   | G A | 14 | 3.961  | 2.406  | 43.549 | 1.00 | 0.00 | N |
| ATOM | 421 | C2'  | G A | 14 | 5.758  | 4.048  | 44.208 | 1.00 | 0.00 | C |
| ATOM | 422 | C3'  | G A | 14 | 6.444  | 5.070  | 43.316 | 1.00 | 0.00 | C |
| ATOM | 423 | O3'  | G A | 14 | 5.981  | 6.375  | 43.656 | 1.00 | 0.00 | O |
| ATOM | 424 | C4'  | G A | 14 | 6.003  | 4.648  | 41.915 | 1.00 | 0.00 | C |
| ATOM | 425 | O4'  | G A | 14 | 4.652  | 4.121  | 42.106 | 1.00 | 0.00 | O |
| ATOM | 426 | C5'  | G A | 14 | 6.843  | 3.591  | 41.238 | 1.00 | 0.00 | C |
| ATOM | 427 | O5'  | G A | 14 | 7.305  | 2.629  | 42.218 | 1.00 | 0.00 | O |
| ATOM | 428 | O1P  | G A | 14 | 9.798  | 2.972  | 42.242 | 1.00 | 0.00 | O |
| ATOM | 429 | O2P  | G A | 14 | 8.834  | 0.738  | 42.853 | 1.00 | 0.00 | O |
| ATOM | 430 | P    | G A | 14 | 8.742  | 1.965  | 42.024 | 1.00 | 0.00 | P |
| ATOM | 431 | H1   | G A | 14 | -0.619 | 0.428  | 43.976 | 1.00 | 0.00 | H |
| ATOM | 432 | H8   | G A | 14 | 5.767  | 1.202  | 43.431 | 1.00 | 0.00 | H |
| ATOM | 433 | H1'  | G A | 14 | 3.662  | 4.465  | 43.850 | 1.00 | 0.00 | H |
| ATOM | 434 | H21  | G A | 14 | -1.619 | 2.380  | 44.021 | 1.00 | 0.00 | H |
| ATOM | 435 | H3'  | G A | 14 | 7.529  | 5.035  | 43.414 | 1.00 | 0.00 | H |
| ATOM | 436 | H22  | G A | 14 | -0.723 | 3.920  | 43.913 | 1.00 | 0.00 | H |
| ATOM | 437 | H4'  | G A | 14 | 6.027  | 5.542  | 41.293 | 1.00 | 0.00 | H |
| ATOM | 438 | H2'1 | G A | 14 | 6.352  | 3.139  | 44.299 | 1.00 | 0.00 | H |
| ATOM | 439 | H2'2 | G A | 14 | 5.602  | 4.440  | 45.214 | 1.00 | 0.00 | H |
| ATOM | 440 | H5'1 | G A | 14 | 6.242  | 3.087  | 40.481 | 1.00 | 0.00 | H |

|      |     |      |   |   |    |        |        |        |      |      |   |
|------|-----|------|---|---|----|--------|--------|--------|------|------|---|
| ATOM | 441 | H5'2 | G | A | 14 | 7.698  | 4.067  | 40.757 | 1.00 | 0.00 | H |
| ATOM | 442 | C1'  | A | A | 15 | 1.372  | 5.717  | 46.849 | 1.00 | 0.00 | C |
| ATOM | 443 | N1   | A | A | 15 | -0.249 | 0.866  | 47.273 | 1.00 | 0.00 | N |
| ATOM | 444 | C2   | A | A | 15 | -0.894 | 2.029  | 47.228 | 1.00 | 0.00 | C |
| ATOM | 445 | N3   | A | A | 15 | -0.413 | 3.249  | 47.114 | 1.00 | 0.00 | N |
| ATOM | 446 | C4   | A | A | 15 | 0.931  | 3.214  | 47.046 | 1.00 | 0.00 | C |
| ATOM | 447 | C5   | A | A | 15 | 1.738  | 2.112  | 47.080 | 1.00 | 0.00 | C |
| ATOM | 448 | C6   | A | A | 15 | 1.091  | 0.864  | 47.202 | 1.00 | 0.00 | C |
| ATOM | 449 | N6   | A | A | 15 | 1.754  | -0.304 | 47.248 | 1.00 | 0.00 | N |
| ATOM | 450 | N7   | A | A | 15 | 3.072  | 2.466  | 46.984 | 1.00 | 0.00 | N |
| ATOM | 451 | C8   | A | A | 15 | 3.045  | 3.763  | 46.899 | 1.00 | 0.00 | C |
| ATOM | 452 | N9   | A | A | 15 | 1.778  | 4.289  | 46.928 | 1.00 | 0.00 | N |
| ATOM | 453 | C2'  | A | A | 15 | 2.310  | 6.664  | 47.586 | 1.00 | 0.00 | C |
| ATOM | 454 | C3'  | A | A | 15 | 2.285  | 7.895  | 46.693 | 1.00 | 0.00 | C |
| ATOM | 455 | O3'  | A | A | 15 | 1.158  | 8.696  | 47.034 | 1.00 | 0.00 | O |
| ATOM | 456 | C4'  | A | A | 15 | 2.166  | 7.296  | 45.292 | 1.00 | 0.00 | C |
| ATOM | 457 | O4'  | A | A | 15 | 1.361  | 6.088  | 45.484 | 1.00 | 0.00 | O |
| ATOM | 458 | C5'  | A | A | 15 | 3.459  | 6.912  | 44.614 | 1.00 | 0.00 | C |
| ATOM | 459 | O5'  | A | A | 15 | 4.391  | 6.388  | 45.594 | 1.00 | 0.00 | O |
| ATOM | 460 | O1P  | A | A | 15 | 6.236  | 8.100  | 45.617 | 1.00 | 0.00 | O |
| ATOM | 461 | O2P  | A | A | 15 | 6.728  | 5.716  | 46.228 | 1.00 | 0.00 | O |
| ATOM | 462 | P    | A | A | 15 | 5.949  | 6.668  | 45.399 | 1.00 | 0.00 | P |
| ATOM | 463 | H2   | A | A | 15 | -1.980 | 1.961  | 47.294 | 1.00 | 0.00 | H |
| ATOM | 464 | H8   | A | A | 15 | 3.942  | 4.376  | 46.813 | 1.00 | 0.00 | H |
| ATOM | 465 | H1'  | A | A | 15 | 0.354  | 5.803  | 47.228 | 1.00 | 0.00 | H |
| ATOM | 466 | H3'  | A | A | 15 | 3.194  | 8.489  | 46.790 | 1.00 | 0.00 | H |
| ATOM | 467 | H4'  | A | A | 15 | 1.672  | 8.042  | 44.671 | 1.00 | 0.00 | H |
| ATOM | 468 | H61  | A | A | 15 | 1.232  | -1.188 | 47.335 | 1.00 | 0.00 | H |
| ATOM | 469 | H62  | A | A | 15 | 2.783  | -0.314 | 47.196 | 1.00 | 0.00 | H |
| ATOM | 470 | H2'1 | A | A | 15 | 3.318  | 6.259  | 47.676 | 1.00 | 0.00 | H |
| ATOM | 471 | H2'2 | A | A | 15 | 1.958  | 6.896  | 48.591 | 1.00 | 0.00 | H |
| ATOM | 472 | H5'1 | A | A | 15 | 3.255  | 6.154  | 43.858 | 1.00 | 0.00 | H |
| ATOM | 473 | H5'2 | A | A | 15 | 3.886  | 7.791  | 44.134 | 1.00 | 0.00 | H |
| ATOM | 474 | C1'  | C | A | 16 | -2.251 | 5.407  | 50.231 | 1.00 | 0.00 | C |
| ATOM | 475 | N1   | C | A | 16 | -1.069 | 4.506  | 50.309 | 1.00 | 0.00 | N |
| ATOM | 476 | C2   | C | A | 16 | -1.298 | 3.137  | 50.427 | 1.00 | 0.00 | C |
| ATOM | 477 | O2   | C | A | 16 | -2.466 | 2.729  | 50.463 | 1.00 | 0.00 | O |
| ATOM | 478 | N3   | C | A | 16 | -0.235 | 2.299  | 50.500 | 1.00 | 0.00 | N |
| ATOM | 479 | C4   | C | A | 16 | 1.017  | 2.772  | 50.459 | 1.00 | 0.00 | C |
| ATOM | 480 | N4   | C | A | 16 | 2.019  | 1.907  | 50.530 | 1.00 | 0.00 | N |
| ATOM | 481 | C5   | C | A | 16 | 1.284  | 4.175  | 50.342 | 1.00 | 0.00 | C |
| ATOM | 482 | C6   | C | A | 16 | 0.198  | 5.001  | 50.266 | 1.00 | 0.00 | C |
| ATOM | 483 | C2'  | C | A | 16 | -2.069 | 6.724  | 50.972 | 1.00 | 0.00 | C |
| ATOM | 484 | C3'  | C | A | 16 | -2.824 | 7.697  | 50.079 | 1.00 | 0.00 | C |
| ATOM | 485 | O3'  | C | A | 16 | -4.208 | 7.665  | 50.417 | 1.00 | 0.00 | O |
| ATOM | 486 | C4'  | C | A | 16 | -2.557 | 7.150  | 48.679 | 1.00 | 0.00 | C |
| ATOM | 487 | O4'  | C | A | 16 | -2.478 | 5.701  | 48.865 | 1.00 | 0.00 | O |
| ATOM | 488 | C5'  | C | A | 16 | -1.288 | 7.620  | 48.005 | 1.00 | 0.00 | C |
| ATOM | 489 | O5'  | C | A | 16 | -0.232 | 7.756  | 48.989 | 1.00 | 0.00 | O |
| ATOM | 490 | O1P  | C | A | 16 | 0.221  | 10.232 | 49.020 | 1.00 | 0.00 | O |
| ATOM | 491 | O2P  | C | A | 16 | 2.040  | 8.616  | 49.631 | 1.00 | 0.00 | O |
| ATOM | 492 | P    | C | A | 16 | 0.848  | 8.914  | 48.800 | 1.00 | 0.00 | P |
| ATOM | 493 | H5   | C | A | 16 | 2.303  | 4.565  | 50.316 | 1.00 | 0.00 | H |
| ATOM | 494 | H6   | C | A | 16 | 0.350  | 6.076  | 50.168 | 1.00 | 0.00 | H |

|      |     |      |   |   |    |        |        |        |      |      |   |
|------|-----|------|---|---|----|--------|--------|--------|------|------|---|
| ATOM | 495 | H1'  | C | A | 16 | -3.119 | 4.864  | 50.606 | 1.00 | 0.00 | H |
| ATOM | 496 | H3'  | C | A | 16 | -2.450 | 8.717  | 50.182 | 1.00 | 0.00 | H |
| ATOM | 497 | H4'  | C | A | 16 | -3.396 | 7.456  | 48.055 | 1.00 | 0.00 | H |
| ATOM | 498 | H41  | C | A | 16 | 2.993  | 2.244  | 50.499 | 1.00 | 0.00 | H |
| ATOM | 499 | H42  | C | A | 16 | 1.826  | 0.899  | 50.617 | 1.00 | 0.00 | H |
| ATOM | 500 | H2'1 | C | A | 16 | -1.020 | 7.005  | 51.066 | 1.00 | 0.00 | H |
| ATOM | 501 | H2'2 | C | A | 16 | -2.492 | 6.696  | 51.977 | 1.00 | 0.00 | H |
| ATOM | 502 | H5'1 | C | A | 16 | -0.996 | 6.893  | 47.247 | 1.00 | 0.00 | H |
| ATOM | 503 | H5'2 | C | A | 16 | -1.472 | 8.582  | 47.527 | 1.00 | 0.00 | H |
| ATOM | 504 | C1'  | G | A | 17 | -4.998 | 3.052  | 53.611 | 1.00 | 0.00 | C |
| ATOM | 505 | N1   | G | A | 17 | -0.894 | 0.051  | 54.031 | 1.00 | 0.00 | N |
| ATOM | 506 | C2   | G | A | 17 | -2.237 | -0.281 | 53.990 | 1.00 | 0.00 | C |
| ATOM | 507 | N2   | G | A | 17 | -2.524 | -1.586 | 54.075 | 1.00 | 0.00 | N |
| ATOM | 508 | N3   | G | A | 17 | -3.214 | 0.616  | 53.874 | 1.00 | 0.00 | N |
| ATOM | 509 | C4   | G | A | 17 | -2.741 | 1.889  | 53.809 | 1.00 | 0.00 | C |
| ATOM | 510 | C5   | G | A | 17 | -1.424 | 2.315  | 53.846 | 1.00 | 0.00 | C |
| ATOM | 511 | C6   | G | A | 17 | -0.385 | 1.363  | 53.965 | 1.00 | 0.00 | C |
| ATOM | 512 | O6   | G | A | 17 | 0.832  | 1.542  | 54.015 | 1.00 | 0.00 | O |
| ATOM | 513 | N7   | G | A | 17 | -1.363 | 3.707  | 53.753 | 1.00 | 0.00 | N |
| ATOM | 514 | C8   | G | A | 17 | -2.616 | 4.072  | 53.661 | 1.00 | 0.00 | C |
| ATOM | 515 | N9   | G | A | 17 | -3.513 | 3.024  | 53.689 | 1.00 | 0.00 | N |
| ATOM | 516 | C2'  | G | A | 17 | -5.630 | 4.225  | 54.348 | 1.00 | 0.00 | C |
| ATOM | 517 | C3'  | G | A | 17 | -6.813 | 4.562  | 53.456 | 1.00 | 0.00 | C |
| ATOM | 518 | O3'  | G | A | 17 | -7.911 | 3.718  | 53.796 | 1.00 | 0.00 | O |
| ATOM | 519 | C4'  | G | A | 17 | -6.275 | 4.273  | 52.055 | 1.00 | 0.00 | C |
| ATOM | 520 | O4'  | G | A | 17 | -5.357 | 3.151  | 52.246 | 1.00 | 0.00 | O |
| ATOM | 521 | C5'  | G | A | 17 | -5.530 | 5.399  | 51.378 | 1.00 | 0.00 | C |
| ATOM | 522 | O5'  | G | A | 17 | -4.757 | 6.135  | 52.358 | 1.00 | 0.00 | O |
| ATOM | 523 | O1P  | G | A | 17 | -5.855 | 8.400  | 52.382 | 1.00 | 0.00 | O |
| ATOM | 524 | O2P  | G | A | 17 | -3.432 | 8.173  | 52.993 | 1.00 | 0.00 | O |
| ATOM | 525 | P    | G | A | 17 | -4.570 | 7.707  | 52.164 | 1.00 | 0.00 | P |
| ATOM | 526 | H1   | G | A | 17 | -0.216 | -0.721 | 54.116 | 1.00 | 0.00 | H |
| ATOM | 527 | H8   | G | A | 17 | -2.925 | 5.114  | 53.571 | 1.00 | 0.00 | H |
| ATOM | 528 | H1'  | G | A | 17 | -5.378 | 2.103  | 53.990 | 1.00 | 0.00 | H |
| ATOM | 529 | H21  | G | A | 17 | -1.763 | -2.275 | 54.161 | 1.00 | 0.00 | H |
| ATOM | 530 | H3'  | G | A | 17 | -7.115 | 5.605  | 53.554 | 1.00 | 0.00 | H |
| ATOM | 531 | H22  | G | A | 17 | -3.505 | -1.899 | 54.053 | 1.00 | 0.00 | H |
| ATOM | 532 | H4'  | G | A | 17 | -7.133 | 4.020  | 51.433 | 1.00 | 0.00 | H |
| ATOM | 533 | H2'1 | G | A | 17 | -4.948 | 5.071  | 54.439 | 1.00 | 0.00 | H |
| ATOM | 534 | H2'2 | G | A | 17 | -5.954 | 3.956  | 55.354 | 1.00 | 0.00 | H |
| ATOM | 535 | H5'1 | G | A | 17 | -4.865 | 4.983  | 50.621 | 1.00 | 0.00 | H |
| ATOM | 536 | H5'2 | G | A | 17 | -6.247 | 6.064  | 50.897 | 1.00 | 0.00 | H |
| ATOM | 537 | C1'  | G | A | 18 | -5.838 | -0.469 | 56.991 | 1.00 | 0.00 | C |
| ATOM | 538 | N1   | G | A | 18 | -0.754 | -0.484 | 57.411 | 1.00 | 0.00 | N |
| ATOM | 539 | C2   | G | A | 18 | -1.645 | -1.542 | 57.370 | 1.00 | 0.00 | C |
| ATOM | 540 | N2   | G | A | 18 | -1.110 | -2.768 | 57.455 | 1.00 | 0.00 | N |
| ATOM | 541 | N3   | G | A | 18 | -2.962 | -1.390 | 57.254 | 1.00 | 0.00 | N |
| ATOM | 542 | C4   | G | A | 18 | -3.328 | -0.083 | 57.189 | 1.00 | 0.00 | C |
| ATOM | 543 | C5   | G | A | 18 | -2.512 | 1.036  | 57.226 | 1.00 | 0.00 | C |
| ATOM | 544 | C6   | G | A | 18 | -1.112 | 0.875  | 57.345 | 1.00 | 0.00 | C |
| ATOM | 545 | O6   | G | A | 18 | -0.234 | 1.737  | 57.395 | 1.00 | 0.00 | O |
| ATOM | 546 | N7   | G | A | 18 | -3.281 | 2.197  | 57.133 | 1.00 | 0.00 | N |
| ATOM | 547 | C8   | G | A | 18 | -4.509 | 1.757  | 57.041 | 1.00 | 0.00 | C |
| ATOM | 548 | N9   | G | A | 18 | -4.619 | 0.382  | 57.069 | 1.00 | 0.00 | N |



|      |     |      |       |    |        |        |        |      |      |   |
|------|-----|------|-------|----|--------|--------|--------|------|------|---|
| ATOM | 549 | C2'  | G A   | 18 | -7.038 | 0.109  | 57.728 | 1.00 | 0.00 | C |
| ATOM | 550 | C3'  | G A   | 18 | -8.193 | -0.314 | 56.836 | 1.00 | 0.00 | C |
| ATOM | 551 | O3'  | G A   | 18 | -8.585 | -1.642 | 57.176 | 1.00 | 0.00 | O |
| ATOM | 552 | C4'  | G A   | 18 | -7.589 | -0.232 | 55.435 | 1.00 | 0.00 | C |
| ATOM | 553 | O4'  | G A   | 18 | -6.186 | -0.600 | 55.626 | 1.00 | 0.00 | O |
| ATOM | 554 | C5'  | G A   | 18 | -7.647 | 1.117  | 54.758 | 1.00 | 0.00 | C |
| ATOM | 555 | O5'  | G A   | 18 | -7.455 | 2.167  | 55.738 | 1.00 | 0.00 | O |
| ATOM | 556 | O1P  | G A   | 18 | -9.674 | 3.355  | 55.762 | 1.00 | 0.00 | O |
| ATOM | 557 | O2P  | G A   | 18 | -7.581 | 4.595  | 56.373 | 1.00 | 0.00 | O |
| ATOM | 558 | P    | G A   | 18 | -8.228 | 3.549  | 55.544 | 1.00 | 0.00 | P |
| ATOM | 559 | H1   | G A   | 18 | 0.249  | -0.710 | 57.496 | 1.00 | 0.00 | H |
| ATOM | 560 | H8   | G A   | 18 | -5.372 | 2.417  | 56.951 | 1.00 | 0.00 | H |
| ATOM | 561 | H1'  | G A   | 18 | -5.587 | -1.460 | 57.370 | 1.00 | 0.00 | H |
| ATOM | 562 | H21  | G A   | 18 | -0.088 | -2.877 | 57.541 | 1.00 | 0.00 | H |
| ATOM | 563 | H3'  | G A   | 18 | -9.051 | 0.352  | 56.934 | 1.00 | 0.00 | H |
| ATOM | 564 | H22  | G A   | 18 | -1.719 | -3.596 | 57.433 | 1.00 | 0.00 | H |
| ATOM | 565 | H4'  | G A   | 18 | -8.134 | -0.941 | 54.813 | 1.00 | 0.00 | H |
| ATOM | 566 | H2'1 | G A   | 18 | -6.984 | 1.194  | 57.819 | 1.00 | 0.00 | H |
| ATOM | 567 | H2'2 | G A   | 18 | -7.142 | -0.299 | 58.734 | 1.00 | 0.00 | H |
| ATOM | 568 | H5'1 | G A   | 18 | -6.865 | 1.171  | 54.001 | 1.00 | 0.00 | H |
| ATOM | 569 | H5'2 | G A   | 18 | -8.618 | 1.234  | 54.277 | 1.00 | 0.00 | H |
| ATOM | 570 | C1'  | T A   | 19 | -4.470 | -3.818 | 60.369 | 1.00 | 0.00 | C |
| ATOM | 571 | N1   | T A   | 19 | -3.957 | -2.425 | 60.450 | 1.00 | 0.00 | N |
| ATOM | 572 | C2   | T A   | 19 | -2.592 | -2.261 | 60.569 | 1.00 | 0.00 | C |
| ATOM | 573 | O2   | T A   | 19 | -1.816 | -3.201 | 60.609 | 1.00 | 0.00 | O |
| ATOM | 574 | N3   | T A   | 19 | -2.159 | -0.950 | 60.640 | 1.00 | 0.00 | N |
| ATOM | 575 | C4   | T A   | 19 | -2.949 | 0.179  | 60.607 | 1.00 | 0.00 | C |
| ATOM | 576 | O4   | T A   | 19 | -2.446 | 1.306  | 60.682 | 1.00 | 0.00 | O |
| ATOM | 577 | C5   | T A   | 19 | -4.362 | -0.091 | 60.481 | 1.00 | 0.00 | C |
| ATOM | 578 | C6   | T A   | 19 | -4.820 | -1.357 | 60.408 | 1.00 | 0.00 | C |
| ATOM | 579 | C7   | T A   | 19 | -5.260 | 1.109  | 60.438 | 1.00 | 0.00 | C |
| ATOM | 580 | C2'  | T A   | 19 | -5.785 | -4.033 | 61.108 | 1.00 | 0.00 | C |
| ATOM | 581 | C3'  | T A   | 19 | -6.491 | -5.040 | 60.214 | 1.00 | 0.00 | C |
| ATOM | 582 | O3'  | T A   | 19 | -6.052 | -6.354 | 60.550 | 1.00 | 0.00 | O |
| ATOM | 583 | C4'  | T A   | 19 | -6.045 | -4.622 | 58.815 | 1.00 | 0.00 | C |
| ATOM | 584 | O4'  | T A   | 19 | -4.684 | -4.122 | 59.004 | 1.00 | 0.00 | O |
| ATOM | 585 | C5'  | T A   | 19 | -6.866 | -3.548 | 58.140 | 1.00 | 0.00 | C |
| ATOM | 586 | O5'  | T A   | 19 | -7.308 | -2.579 | 59.124 | 1.00 | 0.00 | O |
| ATOM | 587 | O1P  | T A   | 19 | -9.807 | -2.876 | 59.152 | 1.00 | 0.00 | O |
| ATOM | 588 | O2P  | T A   | 19 | -8.799 | -0.662 | 59.767 | 1.00 | 0.00 | O |
| ATOM | 589 | P    | T A   | 19 | -8.732 | -1.887 | 58.935 | 1.00 | 0.00 | P |
| ATOM | 590 | H3   | T A   | 19 | -1.143 | -0.802 | 60.725 | 1.00 | 0.00 | H |
| ATOM | 591 | H6   | T A   | 19 | -5.891 | -1.536 | 60.313 | 1.00 | 0.00 | H |
| ATOM | 592 | H1'  | T A   | 19 | -3.697 | -4.489 | 60.745 | 1.00 | 0.00 | H |
| ATOM | 593 | H3'  | T A   | 19 | -7.575 | -4.984 | 60.315 | 1.00 | 0.00 | H |
| ATOM | 594 | H4'  | T A   | 19 | -6.088 | -5.515 | 58.189 | 1.00 | 0.00 | H |
| ATOM | 595 | H71  | T A   | 19 | -5.893 | 1.121  | 61.325 | 1.00 | 0.00 | H |
| ATOM | 596 | H72  | T A   | 19 | -4.654 | 2.015  | 60.413 | 1.00 | 0.00 | H |
| ATOM | 597 | H73  | T A   | 19 | -5.886 | 1.066  | 59.546 | 1.00 | 0.00 | H |
| ATOM | 598 | H2'1 | T A   | 19 | -6.360 | -3.113 | 61.202 | 1.00 | 0.00 | H |
| ATOM | 599 | H2'2 | T A   | 19 | -5.635 | -4.430 | 62.113 | 1.00 | 0.00 | H |
| ATOM | 600 | H5'1 | T A   | 19 | -6.257 | -3.053 | 57.384 | 1.00 | 0.00 | H |
| ATOM | 601 | H5'2 | T A   | 19 | -7.730 | -4.006 | 57.661 | 1.00 | 0.00 | H |
| ATOM | 602 | C01  | LNK A | 20 | -7.147 | -8.663 | 63.257 | 0.00 | 0.00 | C |

|      |     |      |     |   |    |        |         |        |      |      |   |
|------|-----|------|-----|---|----|--------|---------|--------|------|------|---|
| ATOM | 603 | O1   | LNK | A | 20 | -7.198 | -7.404  | 62.581 | 1.00 | 0.00 | O |
| ATOM | 604 | S    | LNK | A | 20 | -8.698 | -10.406 | 66.482 | 0.00 | 0.00 | S |
| ATOM | 605 | C02  | LNK | A | 20 | -8.061 | -8.616  | 64.496 | 0.00 | 0.00 | C |
| ATOM | 606 | C03  | LNK | A | 20 | -7.418 | -9.423  | 65.640 | 0.00 | 0.00 | C |
| ATOM | 607 | O1P  | LNK | A | 20 | -5.848 | -5.314  | 62.964 | 1.00 | 0.00 | O |
| ATOM | 608 | O2P  | LNK | A | 20 | -4.688 | -7.514  | 62.625 | 1.00 | 0.00 | O |
| ATOM | 609 | P    | LNK | A | 20 | -5.833 | -6.630  | 62.295 | 1.00 | 0.00 | P |
| ATOM | 610 | H01  | LNK | A | 20 | -6.123 | -8.868  | 63.569 | 0.00 | 0.00 | H |
| ATOM | 611 | H02  | LNK | A | 20 | -7.487 | -9.451  | 62.585 | 0.00 | 0.00 | H |
| ATOM | 612 | H03  | LNK | A | 20 | -6.958 | -8.739  | 66.353 | 0.00 | 0.00 | H |
| ATOM | 613 | H04  | LNK | A | 20 | -9.032 | -9.046  | 64.248 | 0.00 | 0.00 | H |
| ATOM | 614 | H05  | LNK | A | 20 | -8.193 | -7.581  | 64.811 | 0.00 | 0.00 | H |
| ATOM | 615 | H06  | LNK | A | 20 | -6.658 | -10.089 | 65.232 | 0.00 | 0.00 | H |
| ATOM | 616 | AU   | LNK | A | 20 | -8.435 | -10.686 | 67.050 |      |      |   |
| TER  |     |      |     |   |    |        |         |        |      |      |   |
| ATOM | 618 | C1'  | A   | B | 2  | 5.862  | -0.463  | 61.311 | 1.00 | 0.00 | C |
| ATOM | 619 | N1   | A   | B | 2  | 0.747  | -0.505  | 60.891 | 1.00 | 0.00 | N |
| ATOM | 620 | C2   | A   | B | 2  | 1.652  | -1.477  | 60.933 | 1.00 | 0.00 | C |
| ATOM | 621 | N3   | A   | B | 2  | 2.961  | -1.397  | 61.046 | 1.00 | 0.00 | N |
| ATOM | 622 | C4   | A   | B | 2  | 3.344  | -0.108  | 61.117 | 1.00 | 0.00 | C |
| ATOM | 623 | C5   | A   | B | 2  | 2.545  | 0.999   | 61.087 | 1.00 | 0.00 | C |
| ATOM | 624 | C6   | A   | B | 2  | 1.158  | 0.770   | 60.965 | 1.00 | 0.00 | C |
| ATOM | 625 | N6   | A   | B | 2  | 0.251  | 1.761   | 60.923 | 1.00 | 0.00 | N |
| ATOM | 626 | N7   | A   | B | 2  | 3.294  | 2.159   | 61.186 | 1.00 | 0.00 | N |
| ATOM | 627 | C8   | A   | B | 2  | 4.519  | 1.732   | 61.268 | 1.00 | 0.00 | C |
| ATOM | 628 | N9   | A   | B | 2  | 4.627  | 0.366   | 61.236 | 1.00 | 0.00 | N |
| ATOM | 629 | C2'  | A   | B | 2  | 7.051  | 0.140   | 60.575 | 1.00 | 0.00 | C |
| ATOM | 630 | C3'  | A   | B | 2  | 8.214  | -0.266  | 61.465 | 1.00 | 0.00 | C |
| ATOM | 631 | O3'  | A   | B | 2  | 8.628  | -1.586  | 61.121 | 1.00 | 0.00 | O |
| ATOM | 632 | C4'  | A   | B | 2  | 7.609  | -0.198  | 62.867 | 1.00 | 0.00 | C |
| ATOM | 633 | O4'  | A   | B | 2  | 6.211  | -0.590  | 62.676 | 1.00 | 0.00 | O |
| ATOM | 634 | C5'  | A   | B | 2  | 7.645  | 1.149   | 63.549 | 1.00 | 0.00 | C |
| ATOM | 635 | O5'  | A   | B | 2  | 7.433  | 2.199   | 62.572 | 1.00 | 0.00 | O |
| ATOM | 636 | H2   | A   | B | 2  | 1.254  | -2.488  | 60.864 | 1.00 | 0.00 | H |
| ATOM | 637 | H8   | A   | B | 2  | 5.379  | 2.397   | 61.354 | 1.00 | 0.00 | H |
| ATOM | 638 | H1'  | A   | B | 2  | 5.629  | -1.457  | 60.929 | 1.00 | 0.00 | H |
| ATOM | 639 | H3'  | A   | B | 2  | 9.060  | 0.414   | 61.369 | 1.00 | 0.00 | H |
| ATOM | 640 | H4'  | A   | B | 2  | 8.167  | -0.900  | 63.486 | 1.00 | 0.00 | H |
| ATOM | 641 | H61  | A   | B | 2  | -0.750 | 1.539   | 60.836 | 1.00 | 0.00 | H |
| ATOM | 642 | H62  | A   | B | 2  | 0.560  | 2.743   | 60.978 | 1.00 | 0.00 | H |
| ATOM | 643 | H2'1 | A   | B | 2  | 6.978  | 1.224   | 60.488 | 1.00 | 0.00 | H |
| ATOM | 644 | H2'2 | A   | B | 2  | 7.162  | -0.264  | 59.568 | 1.00 | 0.00 | H |
| ATOM | 645 | H5'1 | A   | B | 2  | 6.862  | 1.187   | 64.306 | 1.00 | 0.00 | H |
| ATOM | 646 | H5'2 | A   | B | 2  | 8.614  | 1.281   | 64.028 | 1.00 | 0.00 | H |
| ATOM | 647 | C1'  | C   | B | 3  | 4.447  | -3.812  | 57.929 | 1.00 | 0.00 | C |
| ATOM | 648 | N1   | C   | B | 3  | 3.955  | -2.409  | 57.854 | 1.00 | 0.00 | N |
| ATOM | 649 | C2   | C   | B | 3  | 2.582  | -2.204  | 57.734 | 1.00 | 0.00 | C |
| ATOM | 650 | O2   | C   | B | 3  | 1.833  | -3.189  | 57.696 | 1.00 | 0.00 | O |
| ATOM | 651 | N3   | C   | B | 3  | 2.114  | -0.935  | 57.664 | 1.00 | 0.00 | N |
| ATOM | 652 | C4   | C   | B | 3  | 2.950  | 0.111   | 57.707 | 1.00 | 0.00 | C |
| ATOM | 653 | N4   | C   | B | 3  | 2.437  | 1.332   | 57.638 | 1.00 | 0.00 | N |
| ATOM | 654 | C5   | C   | B | 3  | 4.368  | -0.068  | 57.825 | 1.00 | 0.00 | C |
| ATOM | 655 | C6   | C   | B | 3  | 4.817  | -1.357  | 57.899 | 1.00 | 0.00 | C |
| ATOM | 656 | C2'  | C   | B | 3  | 5.757  | -4.044  | 57.188 | 1.00 | 0.00 | C |

|      |     |      |     |   |        |        |        |      |      |   |
|------|-----|------|-----|---|--------|--------|--------|------|------|---|
| ATOM | 657 | C3'  | C B | 3 | 6.449  | -5.064 | 58.079 | 1.00 | 0.00 | C |
| ATOM | 658 | O3'  | C B | 3 | 5.989  | -6.370 | 57.739 | 1.00 | 0.00 | O |
| ATOM | 659 | C4'  | C B | 3 | 6.010  | -4.644 | 59.480 | 1.00 | 0.00 | C |
| ATOM | 660 | O4'  | C B | 3 | 4.656  | -4.121 | 59.294 | 1.00 | 0.00 | O |
| ATOM | 661 | C5'  | C B | 3 | 6.848  | -3.585 | 60.157 | 1.00 | 0.00 | C |
| ATOM | 662 | O5'  | C B | 3 | 7.304  | -2.620 | 59.175 | 1.00 | 0.00 | O |
| ATOM | 663 | O1P  | C B | 3 | 9.799  | -2.954 | 59.145 | 1.00 | 0.00 | O |
| ATOM | 664 | O2P  | C B | 3 | 8.824  | -0.723 | 58.538 | 1.00 | 0.00 | O |
| ATOM | 665 | P    | C B | 3 | 8.738  | -1.951 | 59.366 | 1.00 | 0.00 | P |
| ATOM | 666 | H5   | C B | 3 | 5.053  | 0.779  | 57.853 | 1.00 | 0.00 | H |
| ATOM | 667 | H6   | C B | 3 | 5.886  | -1.544 | 57.997 | 1.00 | 0.00 | H |
| ATOM | 668 | H1'  | C B | 3 | 3.663  | -4.469 | 57.552 | 1.00 | 0.00 | H |
| ATOM | 669 | H3'  | C B | 3 | 7.533  | -5.025 | 57.978 | 1.00 | 0.00 | H |
| ATOM | 670 | H4'  | C B | 3 | 6.040  | -5.538 | 60.103 | 1.00 | 0.00 | H |
| ATOM | 671 | H41  | C B | 3 | 3.058  | 2.154  | 57.672 | 1.00 | 0.00 | H |
| ATOM | 672 | H42  | C B | 3 | 1.418  | 1.459  | 57.551 | 1.00 | 0.00 | H |
| ATOM | 673 | H2'1 | C B | 3 | 6.347  | -3.133 | 57.096 | 1.00 | 0.00 | H |
| ATOM | 674 | H2'2 | C B | 3 | 5.599  | -4.436 | 56.183 | 1.00 | 0.00 | H |
| ATOM | 675 | H5'1 | C B | 3 | 6.247  | -3.082 | 60.915 | 1.00 | 0.00 | H |
| ATOM | 676 | H5'2 | C B | 3 | 7.705  | -4.057 | 60.634 | 1.00 | 0.00 | H |
| ATOM | 677 | C1'  | C B | 4 | 1.358  | -5.698 | 54.549 | 1.00 | 0.00 | C |
| ATOM | 678 | N1   | C B | 4 | 1.784  | -4.274 | 54.474 | 1.00 | 0.00 | N |
| ATOM | 679 | C2   | C B | 4 | 0.794  | -3.301 | 54.354 | 1.00 | 0.00 | C |
| ATOM | 680 | O2   | C B | 4 | -0.392 | -3.657 | 54.316 | 1.00 | 0.00 | O |
| ATOM | 681 | N3   | C B | 4 | 1.160  | -1.999 | 54.284 | 1.00 | 0.00 | N |
| ATOM | 682 | C4   | C B | 4 | 2.452  | -1.644 | 54.327 | 1.00 | 0.00 | C |
| ATOM | 683 | N4   | C B | 4 | 2.755  | -0.356 | 54.258 | 1.00 | 0.00 | N |
| ATOM | 684 | C5   | C B | 4 | 3.493  | -2.623 | 54.445 | 1.00 | 0.00 | C |
| ATOM | 685 | C6   | C B | 4 | 3.099  | -3.929 | 54.519 | 1.00 | 0.00 | C |
| ATOM | 686 | C2'  | C B | 4 | 2.281  | -6.655 | 53.808 | 1.00 | 0.00 | C |
| ATOM | 687 | C3'  | C B | 4 | 2.241  | -7.887 | 54.699 | 1.00 | 0.00 | C |
| ATOM | 688 | O3'  | C B | 4 | 1.102  | -8.674 | 54.359 | 1.00 | 0.00 | O |
| ATOM | 689 | C4'  | C B | 4 | 2.133  | -7.290 | 56.100 | 1.00 | 0.00 | C |
| ATOM | 690 | O4'  | C B | 4 | 1.344  | -6.071 | 55.914 | 1.00 | 0.00 | O |
| ATOM | 691 | C5'  | C B | 4 | 3.434  | -6.924 | 56.777 | 1.00 | 0.00 | C |
| ATOM | 692 | O5'  | C B | 4 | 4.370  | -6.412 | 55.795 | 1.00 | 0.00 | O |
| ATOM | 693 | O1P  | C B | 4 | 6.191  | -8.149 | 55.765 | 1.00 | 0.00 | O |
| ATOM | 694 | O2P  | C B | 4 | 6.714  | -5.771 | 55.158 | 1.00 | 0.00 | O |
| ATOM | 695 | P    | C B | 4 | 5.923  | -6.714 | 55.986 | 1.00 | 0.00 | P |
| ATOM | 696 | H5   | C B | 4 | 4.545  | -2.340 | 54.473 | 1.00 | 0.00 | H |
| ATOM | 697 | H6   | C B | 4 | 3.854  | -4.709 | 54.617 | 1.00 | 0.00 | H |
| ATOM | 698 | H1'  | C B | 4 | 0.337  | -5.769 | 54.172 | 1.00 | 0.00 | H |
| ATOM | 699 | H3'  | C B | 4 | 3.142  | -8.493 | 54.598 | 1.00 | 0.00 | H |
| ATOM | 700 | H4'  | C B | 4 | 1.631  | -8.031 | 56.723 | 1.00 | 0.00 | H |
| ATOM | 701 | H41  | C B | 4 | 3.740  | -0.055 | 54.292 | 1.00 | 0.00 | H |
| ATOM | 702 | H42  | C B | 4 | 2.005  | 0.347  | 54.171 | 1.00 | 0.00 | H |
| ATOM | 703 | H2'1 | C B | 4 | 3.294  | -6.265 | 53.716 | 1.00 | 0.00 | H |
| ATOM | 704 | H2'2 | C B | 4 | 1.923  | -6.880 | 52.803 | 1.00 | 0.00 | H |
| ATOM | 705 | H5'1 | C B | 4 | 3.242  | -6.165 | 57.535 | 1.00 | 0.00 | H |
| ATOM | 706 | H5'2 | C B | 4 | 3.849  | -7.811 | 57.254 | 1.00 | 0.00 | H |
| ATOM | 707 | C1'  | G B | 5 | -2.250 | -5.407 | 51.169 | 1.00 | 0.00 | C |
| ATOM | 708 | N1   | G B | 5 | -0.693 | -0.566 | 50.752 | 1.00 | 0.00 | N |
| ATOM | 709 | C2   | G B | 5 | -1.975 | -1.087 | 50.790 | 1.00 | 0.00 | C |
| ATOM | 710 | N2   | G B | 5 | -2.974 | -0.201 | 50.704 | 1.00 | 0.00 | N |

|      |     |      |     |   |        |         |        |      |      |   |
|------|-----|------|-----|---|--------|---------|--------|------|------|---|
| ATOM | 711 | N3   | G B | 5 | -2.237 | -2.388  | 50.906 | 1.00 | 0.00 | N |
| ATOM | 712 | C4   | G B | 5 | -1.107 | -3.139  | 50.974 | 1.00 | 0.00 | C |
| ATOM | 713 | C5   | G B | 5 | 0.209  | -2.708  | 50.939 | 1.00 | 0.00 | C |
| ATOM | 714 | C6   | G B | 5 | 0.489  | -1.328  | 50.820 | 1.00 | 0.00 | C |
| ATOM | 715 | O6   | G B | 5 | 1.579  | -0.759  | 50.772 | 1.00 | 0.00 | O |
| ATOM | 716 | N7   | G B | 5 | 1.076  | -3.799  | 51.034 | 1.00 | 0.00 | N |
| ATOM | 717 | C8   | G B | 5 | 0.278  | -4.832  | 51.124 | 1.00 | 0.00 | C |
| ATOM | 718 | N9   | G B | 5 | -1.064 | -4.511  | 51.093 | 1.00 | 0.00 | N |
| ATOM | 719 | C2'  | G B | 5 | -2.069 | -6.727  | 50.432 | 1.00 | 0.00 | C |
| ATOM | 720 | C3'  | G B | 5 | -2.831 | -7.695  | 51.323 | 1.00 | 0.00 | C |
| ATOM | 721 | O3'  | G B | 5 | -4.214 | -7.658  | 50.980 | 1.00 | 0.00 | O |
| ATOM | 722 | C4'  | G B | 5 | -2.568 | -7.146  | 52.724 | 1.00 | 0.00 | C |
| ATOM | 723 | O4'  | G B | 5 | -2.485 | -5.698  | 52.533 | 1.00 | 0.00 | O |
| ATOM | 724 | C5'  | G B | 5 | -1.305 | -7.618  | 53.404 | 1.00 | 0.00 | C |
| ATOM | 725 | O5'  | G B | 5 | -0.245 | -7.760  | 52.426 | 1.00 | 0.00 | O |
| ATOM | 726 | O1P  | G B | 5 | 0.200  | -10.237 | 52.403 | 1.00 | 0.00 | O |
| ATOM | 727 | O2P  | G B | 5 | 2.027  | -8.629  | 51.796 | 1.00 | 0.00 | O |
| ATOM | 728 | P    | G B | 5 | 0.831  | -8.921  | 52.622 | 1.00 | 0.00 | P |
| ATOM | 729 | H1   | G B | 5 | -0.598 | 0.457   | 50.667 | 1.00 | 0.00 | H |
| ATOM | 730 | H8   | G B | 5 | 0.639  | -5.856  | 51.214 | 1.00 | 0.00 | H |
| ATOM | 731 | H1'  | G B | 5 | -3.114 | -4.863  | 50.789 | 1.00 | 0.00 | H |
| ATOM | 732 | H21  | G B | 5 | -2.764 | 0.804   | 50.618 | 1.00 | 0.00 | H |
| ATOM | 733 | H3'  | G B | 5 | -2.462 | -8.717  | 51.226 | 1.00 | 0.00 | H |
| ATOM | 734 | H22  | G B | 5 | -3.952 | -0.524  | 50.723 | 1.00 | 0.00 | H |
| ATOM | 735 | H4'  | G B | 5 | -3.412 | -7.445  | 53.345 | 1.00 | 0.00 | H |
| ATOM | 736 | H2'1 | G B | 5 | -1.020 | -7.011  | 50.343 | 1.00 | 0.00 | H |
| ATOM | 737 | H2'2 | G B | 5 | -2.488 | -6.700  | 49.426 | 1.00 | 0.00 | H |
| ATOM | 738 | H5'1 | G B | 5 | -1.013 | -6.890  | 54.161 | 1.00 | 0.00 | H |
| ATOM | 739 | H5'2 | G B | 5 | -1.494 | -8.578  | 53.884 | 1.00 | 0.00 | H |
| ATOM | 740 | C1'  | T B | 6 | -5.013 | -3.071  | 47.791 | 1.00 | 0.00 | C |
| ATOM | 741 | N1   | T B | 6 | -3.529 | -3.014  | 47.713 | 1.00 | 0.00 | N |
| ATOM | 742 | C2   | T B | 6 | -2.952 | -1.766  | 47.594 | 1.00 | 0.00 | C |
| ATOM | 743 | O2   | T B | 6 | -3.605 | -0.738  | 47.551 | 1.00 | 0.00 | O |
| ATOM | 744 | N3   | T B | 6 | -1.570 | -1.760  | 47.526 | 1.00 | 0.00 | N |
| ATOM | 745 | C4   | T B | 6 | -0.740 | -2.860  | 47.562 | 1.00 | 0.00 | C |
| ATOM | 746 | O4   | T B | 6 | 0.487  | -2.730  | 47.489 | 1.00 | 0.00 | O |
| ATOM | 747 | C5   | T B | 6 | -1.435 | -4.119  | 47.689 | 1.00 | 0.00 | C |
| ATOM | 748 | C6   | T B | 6 | -2.780 | -4.164  | 47.759 | 1.00 | 0.00 | C |
| ATOM | 749 | C7   | T B | 6 | -0.570 | -5.344  | 47.735 | 1.00 | 0.00 | C |
| ATOM | 750 | C2'  | T B | 6 | -5.621 | -4.257  | 47.052 | 1.00 | 0.00 | C |
| ATOM | 751 | C3'  | T B | 6 | -6.799 | -4.616  | 47.945 | 1.00 | 0.00 | C |
| ATOM | 752 | O3'  | T B | 6 | -7.913 | -3.794  | 47.604 | 1.00 | 0.00 | O |
| ATOM | 753 | C4'  | T B | 6 | -6.268 | -4.319  | 49.345 | 1.00 | 0.00 | C |
| ATOM | 754 | O4'  | T B | 6 | -5.370 | -3.179  | 49.155 | 1.00 | 0.00 | O |
| ATOM | 755 | C5'  | T B | 6 | -5.500 | -5.430  | 50.023 | 1.00 | 0.00 | C |
| ATOM | 756 | O5'  | T B | 6 | -4.713 | -6.151  | 49.041 | 1.00 | 0.00 | O |
| ATOM | 757 | O1P  | T B | 6 | -5.767 | -8.436  | 49.015 | 1.00 | 0.00 | O |
| ATOM | 758 | O2P  | T B | 6 | -3.348 | -8.162  | 48.405 | 1.00 | 0.00 | O |
| ATOM | 759 | P    | T B | 6 | -4.495 | -7.719  | 49.234 | 1.00 | 0.00 | P |
| ATOM | 760 | H3   | T B | 6 | -1.115 | -0.839  | 47.440 | 1.00 | 0.00 | H |
| ATOM | 761 | H6   | T B | 6 | -3.281 | -5.127  | 47.854 | 1.00 | 0.00 | H |
| ATOM | 762 | H1'  | T B | 6 | -5.412 | -2.130  | 47.413 | 1.00 | 0.00 | H |
| ATOM | 763 | H3'  | T B | 6 | -7.081 | -5.664  | 47.845 | 1.00 | 0.00 | H |
| ATOM | 764 | H4'  | T B | 6 | -7.131 | -4.083  | 49.968 | 1.00 | 0.00 | H |

|      |     |      |     |   |        |        |        |      |      |   |
|------|-----|------|-----|---|--------|--------|--------|------|------|---|
| ATOM | 765 | H71  | T B | 6 | -0.753 | -5.952 | 46.849 | 1.00 | 0.00 | H |
| ATOM | 766 | H72  | T B | 6 | 0.479  | -5.048 | 47.763 | 1.00 | 0.00 | H |
| ATOM | 767 | H73  | T B | 6 | -0.807 | -5.924 | 48.628 | 1.00 | 0.00 | H |
| ATOM | 768 | H2'1 | T B | 6 | -4.924 | -5.088 | 46.961 | 1.00 | 0.00 | H |
| ATOM | 769 | H2'2 | T B | 6 | -5.951 | -3.993 | 46.047 | 1.00 | 0.00 | H |
| ATOM | 770 | H5'1 | T B | 6 | -4.843 | -5.002 | 50.780 | 1.00 | 0.00 | H |
| ATOM | 771 | H5'2 | T B | 6 | -6.204 | -6.110 | 50.501 | 1.00 | 0.00 | H |
| ATOM | 772 | C1'  | C B | 7 | -5.839 | 0.470  | 44.409 | 1.00 | 0.00 | C |
| ATOM | 773 | N1   | C B | 7 | -4.615 | -0.377 | 44.334 | 1.00 | 0.00 | N |
| ATOM | 774 | C2   | C B | 7 | -3.385 | 0.265  | 44.214 | 1.00 | 0.00 | C |
| ATOM | 775 | O2   | C B | 7 | -3.357 | 1.503  | 44.176 | 1.00 | 0.00 | O |
| ATOM | 776 | N3   | C B | 7 | -2.259 | -0.487 | 44.144 | 1.00 | 0.00 | N |
| ATOM | 777 | C4   | C B | 7 | -2.321 | -1.824 | 44.187 | 1.00 | 0.00 | C |
| ATOM | 778 | N4   | C B | 7 | -1.190 | -2.509 | 44.118 | 1.00 | 0.00 | N |
| ATOM | 779 | C5   | C B | 7 | -3.574 | -2.512 | 44.305 | 1.00 | 0.00 | C |
| ATOM | 780 | C6   | C B | 7 | -4.694 | -1.733 | 44.379 | 1.00 | 0.00 | C |
| ATOM | 781 | C2'  | C B | 7 | -7.034 | -0.112 | 43.668 | 1.00 | 0.00 | C |
| ATOM | 782 | C3'  | C B | 7 | -8.193 | 0.307  | 44.559 | 1.00 | 0.00 | C |
| ATOM | 783 | O3'  | C B | 7 | -8.589 | 1.633  | 44.219 | 1.00 | 0.00 | O |
| ATOM | 784 | C4'  | C B | 7 | -7.592 | 0.225  | 45.960 | 1.00 | 0.00 | C |
| ATOM | 785 | O4'  | C B | 7 | -6.190 | 0.598  | 45.774 | 1.00 | 0.00 | O |
| ATOM | 786 | C5'  | C B | 7 | -7.647 | -1.126 | 46.637 | 1.00 | 0.00 | C |
| ATOM | 787 | O5'  | C B | 7 | -7.449 | -2.173 | 45.655 | 1.00 | 0.00 | O |
| ATOM | 788 | O1P  | C B | 7 | -9.663 | -3.370 | 45.625 | 1.00 | 0.00 | O |
| ATOM | 789 | O2P  | C B | 7 | -7.564 | -4.601 | 45.018 | 1.00 | 0.00 | O |
| ATOM | 790 | P    | C B | 7 | -8.216 | -3.559 | 45.846 | 1.00 | 0.00 | P |
| ATOM | 791 | H5   | C B | 7 | -3.629 | -3.600 | 44.333 | 1.00 | 0.00 | H |
| ATOM | 792 | H6   | C B | 7 | -5.669 | -2.210 | 44.477 | 1.00 | 0.00 | H |
| ATOM | 793 | H1'  | C B | 7 | -5.590 | 1.462  | 44.032 | 1.00 | 0.00 | H |
| ATOM | 794 | H3'  | C B | 7 | -9.049 | -0.363 | 44.458 | 1.00 | 0.00 | H |
| ATOM | 795 | H4'  | C B | 7 | -8.142 | 0.930  | 46.583 | 1.00 | 0.00 | H |
| ATOM | 796 | H41  | C B | 7 | -1.209 | -3.539 | 44.152 | 1.00 | 0.00 | H |
| ATOM | 797 | H42  | C B | 7 | -0.290 | -2.013 | 44.031 | 1.00 | 0.00 | H |
| ATOM | 798 | H2'1 | C B | 7 | -6.976 | -1.196 | 43.576 | 1.00 | 0.00 | H |
| ATOM | 799 | H2'2 | C B | 7 | -7.137 | 0.297  | 42.663 | 1.00 | 0.00 | H |
| ATOM | 800 | H5'1 | C B | 7 | -6.865 | -1.178 | 47.395 | 1.00 | 0.00 | H |
| ATOM | 801 | H5'2 | C B | 7 | -8.618 | -1.247 | 47.114 | 1.00 | 0.00 | H |
| ATOM | 802 | C1'  | C B | 8 | -4.447 | 3.812  | 41.029 | 1.00 | 0.00 | C |
| ATOM | 803 | N1   | C B | 8 | -3.955 | 2.409  | 40.954 | 1.00 | 0.00 | N |
| ATOM | 804 | C2   | C B | 8 | -2.582 | 2.204  | 40.834 | 1.00 | 0.00 | C |
| ATOM | 805 | O2   | C B | 8 | -1.833 | 3.189  | 40.796 | 1.00 | 0.00 | O |
| ATOM | 806 | N3   | C B | 8 | -2.114 | 0.935  | 40.764 | 1.00 | 0.00 | N |
| ATOM | 807 | C4   | C B | 8 | -2.950 | -0.111 | 40.807 | 1.00 | 0.00 | C |
| ATOM | 808 | N4   | C B | 8 | -2.437 | -1.331 | 40.738 | 1.00 | 0.00 | N |
| ATOM | 809 | C5   | C B | 8 | -4.368 | 0.068  | 40.925 | 1.00 | 0.00 | C |
| ATOM | 810 | C6   | C B | 8 | -4.817 | 1.357  | 40.999 | 1.00 | 0.00 | C |
| ATOM | 811 | C2'  | C B | 8 | -5.757 | 4.044  | 40.288 | 1.00 | 0.00 | C |
| ATOM | 812 | C3'  | C B | 8 | -6.449 | 5.064  | 41.179 | 1.00 | 0.00 | C |
| ATOM | 813 | O3'  | C B | 8 | -5.989 | 6.370  | 40.839 | 1.00 | 0.00 | O |
| ATOM | 814 | C4'  | C B | 8 | -6.010 | 4.644  | 42.580 | 1.00 | 0.00 | C |
| ATOM | 815 | O4'  | C B | 8 | -4.656 | 4.121  | 42.394 | 1.00 | 0.00 | O |
| ATOM | 816 | C5'  | C B | 8 | -6.848 | 3.585  | 43.257 | 1.00 | 0.00 | C |
| ATOM | 817 | O5'  | C B | 8 | -7.304 | 2.619  | 42.275 | 1.00 | 0.00 | O |
| ATOM | 818 | O1P  | C B | 8 | -9.799 | 2.954  | 42.245 | 1.00 | 0.00 | O |

|      |     |      |     |    |        |        |        |      |      |   |
|------|-----|------|-----|----|--------|--------|--------|------|------|---|
| ATOM | 819 | O2P  | C B | 8  | -8.824 | 0.723  | 41.638 | 1.00 | 0.00 | O |
| ATOM | 820 | P    | C B | 8  | -8.738 | 1.951  | 42.466 | 1.00 | 0.00 | P |
| ATOM | 821 | H5   | C B | 8  | -5.053 | -0.779 | 40.953 | 1.00 | 0.00 | H |
| ATOM | 822 | H6   | C B | 8  | -5.886 | 1.544  | 41.097 | 1.00 | 0.00 | H |
| ATOM | 823 | H1'  | C B | 8  | -3.663 | 4.469  | 40.652 | 1.00 | 0.00 | H |
| ATOM | 824 | H3'  | C B | 8  | -7.533 | 5.025  | 41.078 | 1.00 | 0.00 | H |
| ATOM | 825 | H4'  | C B | 8  | -6.041 | 5.538  | 43.203 | 1.00 | 0.00 | H |
| ATOM | 826 | H41  | C B | 8  | -3.058 | -2.153 | 40.772 | 1.00 | 0.00 | H |
| ATOM | 827 | H42  | C B | 8  | -1.418 | -1.458 | 40.651 | 1.00 | 0.00 | H |
| ATOM | 828 | H2'1 | C B | 8  | -6.347 | 3.133  | 40.196 | 1.00 | 0.00 | H |
| ATOM | 829 | H2'2 | C B | 8  | -5.599 | 4.436  | 39.283 | 1.00 | 0.00 | H |
| ATOM | 830 | H5'1 | C B | 8  | -6.247 | 3.082  | 44.015 | 1.00 | 0.00 | H |
| ATOM | 831 | H5'2 | C B | 8  | -7.705 | 4.057  | 43.734 | 1.00 | 0.00 | H |
| ATOM | 832 | C1'  | T B | 9  | -1.372 | 5.716  | 37.651 | 1.00 | 0.00 | C |
| ATOM | 833 | N1   | T B | 9  | -1.776 | 4.287  | 37.573 | 1.00 | 0.00 | N |
| ATOM | 834 | C2   | T B | 9  | -0.768 | 3.352  | 37.454 | 1.00 | 0.00 | C |
| ATOM | 835 | O2   | T B | 9  | 0.411  | 3.657  | 37.411 | 1.00 | 0.00 | O |
| ATOM | 836 | N3   | T B | 9  | -1.188 | 2.037  | 37.386 | 1.00 | 0.00 | N |
| ATOM | 837 | C4   | T B | 9  | -2.491 | 1.588  | 37.422 | 1.00 | 0.00 | C |
| ATOM | 838 | O4   | T B | 9  | -2.746 | 0.380  | 37.349 | 1.00 | 0.00 | O |
| ATOM | 839 | C5   | T B | 9  | -3.475 | 2.638  | 37.549 | 1.00 | 0.00 | C |
| ATOM | 840 | C6   | T B | 9  | -3.101 | 3.930  | 37.619 | 1.00 | 0.00 | C |
| ATOM | 841 | C7   | T B | 9  | -4.906 | 2.193  | 37.595 | 1.00 | 0.00 | C |
| ATOM | 842 | C2'  | T B | 9  | -2.312 | 6.662  | 36.912 | 1.00 | 0.00 | C |
| ATOM | 843 | C3'  | T B | 9  | -2.289 | 7.893  | 37.805 | 1.00 | 0.00 | C |
| ATOM | 844 | O3'  | T B | 9  | -1.163 | 8.698  | 37.464 | 1.00 | 0.00 | O |
| ATOM | 845 | C4'  | T B | 9  | -2.171 | 7.295  | 39.205 | 1.00 | 0.00 | C |
| ATOM | 846 | O4'  | T B | 9  | -1.363 | 6.090  | 39.015 | 1.00 | 0.00 | O |
| ATOM | 847 | C5'  | T B | 9  | -3.465 | 6.909  | 39.883 | 1.00 | 0.00 | C |
| ATOM | 848 | O5'  | T B | 9  | -4.394 | 6.384  | 38.901 | 1.00 | 0.00 | O |
| ATOM | 849 | O1P  | T B | 9  | -6.241 | 8.092  | 38.875 | 1.00 | 0.00 | O |
| ATOM | 850 | O2P  | T B | 9  | -6.728 | 5.707  | 38.265 | 1.00 | 0.00 | O |
| ATOM | 851 | P    | T B | 9  | -5.952 | 6.660  | 39.094 | 1.00 | 0.00 | P |
| ATOM | 852 | H3   | T B | 9  | -0.454 | 1.320  | 37.300 | 1.00 | 0.00 | H |
| ATOM | 853 | H6   | T B | 9  | -3.862 | 4.705  | 37.714 | 1.00 | 0.00 | H |
| ATOM | 854 | H1'  | T B | 9  | -0.353 | 5.805  | 37.273 | 1.00 | 0.00 | H |
| ATOM | 855 | H3'  | T B | 9  | -3.199 | 8.484  | 37.705 | 1.00 | 0.00 | H |
| ATOM | 856 | H4'  | T B | 9  | -1.679 | 8.044  | 39.828 | 1.00 | 0.00 | H |
| ATOM | 857 | H71  | T B | 9  | -5.428 | 2.555  | 36.709 | 1.00 | 0.00 | H |
| ATOM | 858 | H72  | T B | 9  | -4.949 | 1.104  | 37.623 | 1.00 | 0.00 | H |
| ATOM | 859 | H73  | T B | 9  | -5.384 | 2.598  | 38.488 | 1.00 | 0.00 | H |
| ATOM | 860 | H2'1 | T B | 9  | -3.318 | 6.256  | 36.821 | 1.00 | 0.00 | H |
| ATOM | 861 | H2'2 | T B | 9  | -1.959 | 6.893  | 35.907 | 1.00 | 0.00 | H |
| ATOM | 862 | H5'1 | T B | 9  | -3.261 | 6.152  | 40.640 | 1.00 | 0.00 | H |
| ATOM | 863 | H5'2 | T B | 9  | -3.893 | 7.788  | 40.361 | 1.00 | 0.00 | H |
| ATOM | 864 | C1'  | A B | 10 | 2.251  | 5.431  | 34.271 | 1.00 | 0.00 | C |
| ATOM | 865 | N1   | A B | 10 | 0.711  | 0.554  | 33.851 | 1.00 | 0.00 | N |
| ATOM | 866 | C2   | A B | 10 | 1.916  | 1.116  | 33.893 | 1.00 | 0.00 | C |
| ATOM | 867 | N3   | A B | 10 | 2.243  | 2.385  | 34.006 | 1.00 | 0.00 | N |
| ATOM | 868 | C4   | A B | 10 | 1.137  | 3.147  | 34.077 | 1.00 | 0.00 | C |
| ATOM | 869 | C5   | A B | 10 | -0.165 | 2.729  | 34.047 | 1.00 | 0.00 | C |
| ATOM | 870 | C6   | A B | 10 | -0.374 | 1.340  | 33.925 | 1.00 | 0.00 | C |
| ATOM | 871 | N6   | A B | 10 | -1.598 | 0.784  | 33.883 | 1.00 | 0.00 | N |
| ATOM | 872 | N7   | A B | 10 | -1.036 | 3.800  | 34.146 | 1.00 | 0.00 | N |

|      |     |      |     |    |        |        |        |      |      |   |
|------|-----|------|-----|----|--------|--------|--------|------|------|---|
| ATOM | 873 | C8   | A B | 10 | -0.251 | 4.833  | 34.228 | 1.00 | 0.00 | C |
| ATOM | 874 | N9   | A B | 10 | 1.082  | 4.514  | 34.196 | 1.00 | 0.00 | N |
| ATOM | 875 | C2'  | A B | 10 | 2.045  | 6.748  | 33.535 | 1.00 | 0.00 | C |
| ATOM | 876 | C3'  | A B | 10 | 2.791  | 7.730  | 34.425 | 1.00 | 0.00 | C |
| ATOM | 877 | O3'  | A B | 10 | 4.174  | 7.716  | 34.081 | 1.00 | 0.00 | O |
| ATOM | 878 | C4'  | A B | 10 | 2.540  | 7.175  | 35.827 | 1.00 | 0.00 | C |
| ATOM | 879 | O4'  | A B | 10 | 2.481  | 5.725  | 35.636 | 1.00 | 0.00 | O |
| ATOM | 880 | C5'  | A B | 10 | 1.270  | 7.625  | 36.509 | 1.00 | 0.00 | C |
| ATOM | 881 | O5'  | A B | 10 | 0.205  | 7.748  | 35.532 | 1.00 | 0.00 | O |
| ATOM | 882 | O1P  | A B | 10 | -0.282 | 10.218 | 35.510 | 1.00 | 0.00 | O |
| ATOM | 883 | O2P  | A B | 10 | -2.082 | 8.578  | 34.904 | 1.00 | 0.00 | O |
| ATOM | 884 | P    | A B | 10 | -0.890 | 8.891  | 35.729 | 1.00 | 0.00 | P |
| ATOM | 885 | H2   | A B | 10 | 2.754  | 0.423  | 33.824 | 1.00 | 0.00 | H |
| ATOM | 886 | H8   | A B | 10 | -0.618 | 5.856  | 34.314 | 1.00 | 0.00 | H |
| ATOM | 887 | H1'  | A B | 10 | 3.124  | 4.903  | 33.889 | 1.00 | 0.00 | H |
| ATOM | 888 | H3'  | A B | 10 | 2.404  | 8.744  | 34.329 | 1.00 | 0.00 | H |
| ATOM | 889 | H4'  | A B | 10 | 3.380  | 7.489  | 36.446 | 1.00 | 0.00 | H |
| ATOM | 890 | H61  | A B | 10 | -1.695 | -0.237 | 33.796 | 1.00 | 0.00 | H |
| ATOM | 891 | H62  | A B | 10 | -2.436 | 1.380  | 33.938 | 1.00 | 0.00 | H |
| ATOM | 892 | H2'1 | A B | 10 | 0.992  | 7.014  | 33.448 | 1.00 | 0.00 | H |
| ATOM | 893 | H2'2 | A B | 10 | 2.464  | 6.730  | 32.528 | 1.00 | 0.00 | H |
| ATOM | 894 | H5'1 | A B | 10 | 0.991  | 6.892  | 37.266 | 1.00 | 0.00 | H |
| ATOM | 895 | H5'2 | A B | 10 | 1.442  | 8.587  | 36.988 | 1.00 | 0.00 | H |
| ATOM | 896 | C1'  | G B | 11 | 4.998  | 3.052  | 30.889 | 1.00 | 0.00 | C |
| ATOM | 897 | N1   | G B | 11 | 0.894  | 0.051  | 30.472 | 1.00 | 0.00 | N |
| ATOM | 898 | C2   | G B | 11 | 2.237  | -0.281 | 30.510 | 1.00 | 0.00 | C |
| ATOM | 899 | N2   | G B | 11 | 2.524  | -1.586 | 30.424 | 1.00 | 0.00 | N |
| ATOM | 900 | N3   | G B | 11 | 3.214  | 0.617  | 30.626 | 1.00 | 0.00 | N |
| ATOM | 901 | C4   | G B | 11 | 2.741  | 1.889  | 30.694 | 1.00 | 0.00 | C |
| ATOM | 902 | C5   | G B | 11 | 1.424  | 2.314  | 30.659 | 1.00 | 0.00 | C |
| ATOM | 903 | C6   | G B | 11 | 0.385  | 1.362  | 30.540 | 1.00 | 0.00 | C |
| ATOM | 904 | O6   | G B | 11 | -0.832 | 1.542  | 30.492 | 1.00 | 0.00 | O |
| ATOM | 905 | N7   | G B | 11 | 1.363  | 3.706  | 30.754 | 1.00 | 0.00 | N |
| ATOM | 906 | C8   | G B | 11 | 2.616  | 4.072  | 30.844 | 1.00 | 0.00 | C |
| ATOM | 907 | N9   | G B | 11 | 3.513  | 3.024  | 30.813 | 1.00 | 0.00 | N |
| ATOM | 908 | C2'  | G B | 11 | 5.628  | 4.226  | 30.152 | 1.00 | 0.00 | C |
| ATOM | 909 | C3'  | G B | 11 | 6.813  | 4.562  | 31.043 | 1.00 | 0.00 | C |
| ATOM | 910 | O3'  | G B | 11 | 7.910  | 3.719  | 30.700 | 1.00 | 0.00 | O |
| ATOM | 911 | C4'  | G B | 11 | 6.278  | 4.272  | 32.444 | 1.00 | 0.00 | C |
| ATOM | 912 | O4'  | G B | 11 | 5.359  | 3.149  | 32.253 | 1.00 | 0.00 | O |
| ATOM | 913 | C5'  | G B | 11 | 5.533  | 5.396  | 33.124 | 1.00 | 0.00 | C |
| ATOM | 914 | O5'  | G B | 11 | 4.759  | 6.134  | 32.146 | 1.00 | 0.00 | O |
| ATOM | 915 | O1P  | G B | 11 | 5.855  | 8.399  | 32.123 | 1.00 | 0.00 | O |
| ATOM | 916 | O2P  | G B | 11 | 3.432  | 8.172  | 31.516 | 1.00 | 0.00 | O |
| ATOM | 917 | P    | G B | 11 | 4.572  | 7.706  | 32.342 | 1.00 | 0.00 | P |
| ATOM | 918 | H1   | G B | 11 | 0.216  | -0.721 | 30.387 | 1.00 | 0.00 | H |
| ATOM | 919 | H8   | G B | 11 | 2.924  | 5.113  | 30.934 | 1.00 | 0.00 | H |
| ATOM | 920 | H1'  | G B | 11 | 5.378  | 2.103  | 30.509 | 1.00 | 0.00 | H |
| ATOM | 921 | H21  | G B | 11 | 1.763  | -2.275 | 30.338 | 1.00 | 0.00 | H |
| ATOM | 922 | H3'  | G B | 11 | 7.115  | 5.605  | 30.946 | 1.00 | 0.00 | H |
| ATOM | 923 | H22  | G B | 11 | 3.505  | -1.899 | 30.443 | 1.00 | 0.00 | H |
| ATOM | 924 | H4'  | G B | 11 | 7.137  | 4.018  | 33.065 | 1.00 | 0.00 | H |
| ATOM | 925 | H2'1 | G B | 11 | 4.946  | 5.072  | 30.063 | 1.00 | 0.00 | H |
| ATOM | 926 | H2'2 | G B | 11 | 5.951  | 3.958  | 29.146 | 1.00 | 0.00 | H |

|      |     |      |     |    |        |        |        |      |      |   |
|------|-----|------|-----|----|--------|--------|--------|------|------|---|
| ATOM | 927 | H5'1 | G B | 11 | 4.869  | 4.979  | 33.881 | 1.00 | 0.00 | H |
| ATOM | 928 | H5'2 | G B | 11 | 6.251  | 6.061  | 33.604 | 1.00 | 0.00 | H |
| ATOM | 929 | C1'  | G B | 12 | 5.838  | -0.469 | 27.509 | 1.00 | 0.00 | C |
| ATOM | 930 | N1   | G B | 12 | 0.753  | -0.484 | 27.092 | 1.00 | 0.00 | N |
| ATOM | 931 | C2   | G B | 12 | 1.645  | -1.542 | 27.130 | 1.00 | 0.00 | C |
| ATOM | 932 | N2   | G B | 12 | 1.110  | -2.767 | 27.044 | 1.00 | 0.00 | N |
| ATOM | 933 | N3   | G B | 12 | 2.962  | -1.390 | 27.246 | 1.00 | 0.00 | N |
| ATOM | 934 | C4   | G B | 12 | 3.327  | -0.083 | 27.313 | 1.00 | 0.00 | C |
| ATOM | 935 | C5   | G B | 12 | 2.512  | 1.035  | 27.279 | 1.00 | 0.00 | C |
| ATOM | 936 | C6   | G B | 12 | 1.113  | 0.875  | 27.160 | 1.00 | 0.00 | C |
| ATOM | 937 | O6   | G B | 12 | 0.234  | 1.736  | 27.112 | 1.00 | 0.00 | O |
| ATOM | 938 | N7   | G B | 12 | 3.281  | 2.197  | 27.374 | 1.00 | 0.00 | N |
| ATOM | 939 | C8   | G B | 12 | 4.509  | 1.757  | 27.464 | 1.00 | 0.00 | C |
| ATOM | 940 | N9   | G B | 12 | 4.619  | 0.382  | 27.433 | 1.00 | 0.00 | N |
| ATOM | 941 | C2'  | G B | 12 | 7.037  | 0.111  | 26.772 | 1.00 | 0.00 | C |
| ATOM | 942 | C3'  | G B | 12 | 8.194  | -0.314 | 27.663 | 1.00 | 0.00 | C |
| ATOM | 943 | O3'  | G B | 12 | 8.586  | -1.641 | 27.320 | 1.00 | 0.00 | O |
| ATOM | 944 | C4'  | G B | 12 | 7.590  | -0.234 | 29.064 | 1.00 | 0.00 | C |
| ATOM | 945 | O4'  | G B | 12 | 6.187  | -0.602 | 28.873 | 1.00 | 0.00 | O |
| ATOM | 946 | C5'  | G B | 12 | 7.648  | 1.113  | 29.744 | 1.00 | 0.00 | C |
| ATOM | 947 | O5'  | G B | 12 | 7.455  | 2.165  | 28.766 | 1.00 | 0.00 | O |
| ATOM | 948 | O1P  | G B | 12 | 9.674  | 3.353  | 28.743 | 1.00 | 0.00 | O |
| ATOM | 949 | O2P  | G B | 12 | 7.580  | 4.595  | 28.136 | 1.00 | 0.00 | O |
| ATOM | 950 | P    | G B | 12 | 8.228  | 3.547  | 28.962 | 1.00 | 0.00 | P |
| ATOM | 951 | H1   | G B | 12 | -0.250 | -0.710 | 27.007 | 1.00 | 0.00 | H |
| ATOM | 952 | H8   | G B | 12 | 5.372  | 2.417  | 27.555 | 1.00 | 0.00 | H |
| ATOM | 953 | H1'  | G B | 12 | 5.587  | -1.459 | 27.129 | 1.00 | 0.00 | H |
| ATOM | 954 | H21  | G B | 12 | 0.089  | -2.877 | 26.958 | 1.00 | 0.00 | H |
| ATOM | 955 | H3'  | G B | 12 | 9.051  | 0.352  | 27.566 | 1.00 | 0.00 | H |
| ATOM | 956 | H22  | G B | 12 | 1.720  | -3.596 | 27.063 | 1.00 | 0.00 | H |
| ATOM | 957 | H4'  | G B | 12 | 8.135  | -0.944 | 29.685 | 1.00 | 0.00 | H |
| ATOM | 958 | H2'1 | G B | 12 | 6.983  | 1.196  | 26.683 | 1.00 | 0.00 | H |
| ATOM | 959 | H2'2 | G B | 12 | 7.141  | -0.295 | 25.766 | 1.00 | 0.00 | H |
| ATOM | 960 | H5'1 | G B | 12 | 6.866  | 1.166  | 30.501 | 1.00 | 0.00 | H |
| ATOM | 961 | H5'2 | G B | 12 | 8.620  | 1.230  | 30.224 | 1.00 | 0.00 | H |
| ATOM | 962 | C1'  | T B | 13 | 4.470  | -3.818 | 24.131 | 1.00 | 0.00 | C |
| ATOM | 963 | N1   | T B | 13 | 3.957  | -2.425 | 24.053 | 1.00 | 0.00 | N |
| ATOM | 964 | C2   | T B | 13 | 2.591  | -2.261 | 23.934 | 1.00 | 0.00 | C |
| ATOM | 965 | O2   | T B | 13 | 1.816  | -3.201 | 23.891 | 1.00 | 0.00 | O |
| ATOM | 966 | N3   | T B | 13 | 2.158  | -0.950 | 23.866 | 1.00 | 0.00 | N |
| ATOM | 967 | C4   | T B | 13 | 2.948  | 0.180  | 23.902 | 1.00 | 0.00 | C |
| ATOM | 968 | O4   | T B | 13 | 2.445  | 1.307  | 23.829 | 1.00 | 0.00 | O |
| ATOM | 969 | C5   | T B | 13 | 4.361  | -0.091 | 24.029 | 1.00 | 0.00 | C |
| ATOM | 970 | C6   | T B | 13 | 4.819  | -1.357 | 24.099 | 1.00 | 0.00 | C |
| ATOM | 971 | C7   | T B | 13 | 5.259  | 1.109  | 24.075 | 1.00 | 0.00 | C |
| ATOM | 972 | C2'  | T B | 13 | 5.786  | -4.031 | 23.392 | 1.00 | 0.00 | C |
| ATOM | 973 | C3'  | T B | 13 | 6.491  | -5.040 | 24.285 | 1.00 | 0.00 | C |
| ATOM | 974 | O3'  | T B | 13 | 6.053  | -6.353 | 23.944 | 1.00 | 0.00 | O |
| ATOM | 975 | C4'  | T B | 13 | 6.044  | -4.626 | 25.685 | 1.00 | 0.00 | C |
| ATOM | 976 | O4'  | T B | 13 | 4.682  | -4.125 | 25.495 | 1.00 | 0.00 | O |
| ATOM | 977 | C5'  | T B | 13 | 6.864  | -3.553 | 26.363 | 1.00 | 0.00 | C |
| ATOM | 978 | O5'  | T B | 13 | 7.307  | -2.582 | 25.381 | 1.00 | 0.00 | O |
| ATOM | 979 | O1P  | T B | 13 | 9.805  | -2.878 | 25.355 | 1.00 | 0.00 | O |
| ATOM | 980 | O2P  | T B | 13 | 8.798  | -0.662 | 24.745 | 1.00 | 0.00 | O |



|      |      |      |     |    |        |        |        |      |      |   |
|------|------|------|-----|----|--------|--------|--------|------|------|---|
| ATOM | 981  | P    | T B | 13 | 8.730  | -1.890 | 25.574 | 1.00 | 0.00 | P |
| ATOM | 982  | H3   | T B | 13 | 1.142  | -0.802 | 23.780 | 1.00 | 0.00 | H |
| ATOM | 983  | H6   | T B | 13 | 5.890  | -1.536 | 24.194 | 1.00 | 0.00 | H |
| ATOM | 984  | H1'  | T B | 13 | 3.698  | -4.489 | 23.753 | 1.00 | 0.00 | H |
| ATOM | 985  | H3'  | T B | 13 | 7.575  | -4.984 | 24.185 | 1.00 | 0.00 | H |
| ATOM | 986  | H4'  | T B | 13 | 6.087  | -5.520 | 26.308 | 1.00 | 0.00 | H |
| ATOM | 987  | H71  | T B | 13 | 5.893  | 1.124  | 23.189 | 1.00 | 0.00 | H |
| ATOM | 988  | H72  | T B | 13 | 4.653  | 2.016  | 24.103 | 1.00 | 0.00 | H |
| ATOM | 989  | H73  | T B | 13 | 5.884  | 1.063  | 24.968 | 1.00 | 0.00 | H |
| ATOM | 990  | H2'1 | T B | 13 | 6.361  | -3.111 | 23.301 | 1.00 | 0.00 | H |
| ATOM | 991  | H2'2 | T B | 13 | 5.637  | -4.426 | 22.387 | 1.00 | 0.00 | H |
| ATOM | 992  | H5'1 | T B | 13 | 6.254  | -3.061 | 27.120 | 1.00 | 0.00 | H |
| ATOM | 993  | H5'2 | T B | 13 | 7.728  | -4.012 | 26.841 | 1.00 | 0.00 | H |
| ATOM | 994  | C1'  | G B | 14 | 1.358  | -5.697 | 20.749 | 1.00 | 0.00 | C |
| ATOM | 995  | N1   | G B | 14 | -0.228 | -0.866 | 20.332 | 1.00 | 0.00 | N |
| ATOM | 996  | C2   | G B | 14 | -0.959 | -2.040 | 20.370 | 1.00 | 0.00 | C |
| ATOM | 997  | N2   | G B | 14 | -2.288 | -1.911 | 20.284 | 1.00 | 0.00 | N |
| ATOM | 998  | N3   | G B | 14 | -0.407 | -3.247 | 20.486 | 1.00 | 0.00 | N |
| ATOM | 999  | C4   | G B | 14 | 0.950  | -3.190 | 20.554 | 1.00 | 0.00 | C |
| ATOM | 1000 | C5   | G B | 14 | 1.761  | -2.069 | 20.519 | 1.00 | 0.00 | C |
| ATOM | 1001 | C6   | G B | 14 | 1.176  | -0.787 | 20.400 | 1.00 | 0.00 | C |
| ATOM | 1002 | O6   | G B | 14 | 1.724  | 0.315  | 20.352 | 1.00 | 0.00 | O |
| ATOM | 1003 | N7   | G B | 14 | 3.104  | -2.441 | 20.614 | 1.00 | 0.00 | N |
| ATOM | 1004 | C8   | G B | 14 | 3.064  | -3.746 | 20.704 | 1.00 | 0.00 | C |
| ATOM | 1005 | N9   | G B | 14 | 1.790  | -4.275 | 20.673 | 1.00 | 0.00 | N |
| ATOM | 1006 | C2'  | G B | 14 | 2.280  | -6.659 | 20.012 | 1.00 | 0.00 | C |
| ATOM | 1007 | C3'  | G B | 14 | 2.233  | -7.890 | 20.903 | 1.00 | 0.00 | C |
| ATOM | 1008 | O3'  | G B | 14 | 1.092  | -8.672 | 20.560 | 1.00 | 0.00 | O |
| ATOM | 1009 | C4'  | G B | 14 | 2.123  | -7.290 | 22.304 | 1.00 | 0.00 | C |
| ATOM | 1010 | O4'  | G B | 14 | 1.339  | -6.070 | 22.113 | 1.00 | 0.00 | O |
| ATOM | 1011 | C5'  | G B | 14 | 3.422  | -6.930 | 22.984 | 1.00 | 0.00 | C |
| ATOM | 1012 | O5'  | G B | 14 | 4.363  | -6.421 | 22.006 | 1.00 | 0.00 | O |
| ATOM | 1013 | O1P  | G B | 14 | 6.179  | -8.164 | 21.983 | 1.00 | 0.00 | O |
| ATOM | 1014 | O2P  | G B | 14 | 6.712  | -5.789 | 21.376 | 1.00 | 0.00 | O |
| ATOM | 1015 | P    | G B | 14 | 5.916  | -6.729 | 22.202 | 1.00 | 0.00 | P |
| ATOM | 1016 | H1   | G B | 14 | -0.753 | 0.018  | 20.247 | 1.00 | 0.00 | H |
| ATOM | 1017 | H8   | G B | 14 | 3.960  | -4.361 | 20.795 | 1.00 | 0.00 | H |
| ATOM | 1018 | H1'  | G B | 14 | 0.338  | -5.765 | 20.369 | 1.00 | 0.00 | H |
| ATOM | 1019 | H21  | G B | 14 | -2.708 | -0.973 | 20.198 | 1.00 | 0.00 | H |
| ATOM | 1020 | H3'  | G B | 14 | 3.132  | -8.499 | 20.806 | 1.00 | 0.00 | H |
| ATOM | 1021 | H22  | G B | 14 | -2.889 | -2.747 | 20.303 | 1.00 | 0.00 | H |
| ATOM | 1022 | H4'  | G B | 14 | 1.616  | -8.029 | 22.925 | 1.00 | 0.00 | H |
| ATOM | 1023 | H2'1 | G B | 14 | 3.295  | -6.272 | 19.923 | 1.00 | 0.00 | H |
| ATOM | 1024 | H2'2 | G B | 14 | 1.926  | -6.883 | 19.006 | 1.00 | 0.00 | H |
| ATOM | 1025 | H5'1 | G B | 14 | 3.231  | -6.170 | 23.741 | 1.00 | 0.00 | H |
| ATOM | 1026 | H5'2 | G B | 14 | 3.833  | -7.818 | 23.464 | 1.00 | 0.00 | H |
| ATOM | 1027 | C1'  | C B | 15 | -2.251 | -5.407 | 17.369 | 1.00 | 0.00 | C |
| ATOM | 1028 | N1   | C B | 15 | -1.069 | -4.506 | 17.294 | 1.00 | 0.00 | N |
| ATOM | 1029 | C2   | C B | 15 | -1.298 | -3.137 | 17.174 | 1.00 | 0.00 | C |
| ATOM | 1030 | O2   | C B | 15 | -2.466 | -2.729 | 17.136 | 1.00 | 0.00 | O |
| ATOM | 1031 | N3   | C B | 15 | -0.235 | -2.299 | 17.104 | 1.00 | 0.00 | N |
| ATOM | 1032 | C4   | C B | 15 | 1.017  | -2.771 | 17.147 | 1.00 | 0.00 | C |
| ATOM | 1033 | N4   | C B | 15 | 2.019  | -1.907 | 17.078 | 1.00 | 0.00 | N |
| ATOM | 1034 | C5   | C B | 15 | 1.284  | -4.176 | 17.265 | 1.00 | 0.00 | C |

|      |      |      |     |    |        |         |        |      |      |   |
|------|------|------|-----|----|--------|---------|--------|------|------|---|
| ATOM | 1035 | C6   | C B | 15 | 0.198  | -4.999  | 17.339 | 1.00 | 0.00 | C |
| ATOM | 1036 | C2'  | C B | 15 | -2.067 | -6.724  | 16.628 | 1.00 | 0.00 | C |
| ATOM | 1037 | C3'  | C B | 15 | -2.823 | -7.698  | 17.519 | 1.00 | 0.00 | C |
| ATOM | 1038 | O3'  | C B | 15 | -4.208 | -7.666  | 17.179 | 1.00 | 0.00 | O |
| ATOM | 1039 | C4'  | C B | 15 | -2.560 | -7.151  | 18.920 | 1.00 | 0.00 | C |
| ATOM | 1040 | O4'  | C B | 15 | -2.481 | -5.702  | 18.734 | 1.00 | 0.00 | O |
| ATOM | 1041 | C5'  | C B | 15 | -1.292 | -7.620  | 19.597 | 1.00 | 0.00 | C |
| ATOM | 1042 | O5'  | C B | 15 | -0.235 | -7.756  | 18.615 | 1.00 | 0.00 | O |
| ATOM | 1043 | O1P  | C B | 15 | 0.219  | -10.232 | 18.585 | 1.00 | 0.00 | O |
| ATOM | 1044 | O2P  | C B | 15 | 2.040  | -8.616  | 17.978 | 1.00 | 0.00 | O |
| ATOM | 1045 | P    | C B | 15 | 0.846  | -8.913  | 18.806 | 1.00 | 0.00 | P |
| ATOM | 1046 | H5   | C B | 15 | 2.302  | -4.564  | 17.294 | 1.00 | 0.00 | H |
| ATOM | 1047 | H6   | C B | 15 | 0.350  | -6.075  | 17.436 | 1.00 | 0.00 | H |
| ATOM | 1048 | H1'  | C B | 15 | -3.118 | -4.864  | 16.992 | 1.00 | 0.00 | H |
| ATOM | 1049 | H3'  | C B | 15 | -2.450 | -8.717  | 17.418 | 1.00 | 0.00 | H |
| ATOM | 1050 | H4'  | C B | 15 | -3.401 | -7.456  | 19.543 | 1.00 | 0.00 | H |
| ATOM | 1051 | H41  | C B | 15 | 2.993  | -2.243  | 17.112 | 1.00 | 0.00 | H |
| ATOM | 1052 | H42  | C B | 15 | 1.825  | -0.898  | 16.991 | 1.00 | 0.00 | H |
| ATOM | 1053 | H2'1 | C B | 15 | -1.018 | -7.004  | 16.536 | 1.00 | 0.00 | H |
| ATOM | 1054 | H2'2 | C B | 15 | -2.488 | -6.696  | 15.623 | 1.00 | 0.00 | H |
| ATOM | 1055 | H5'1 | C B | 15 | -1.001 | -6.893  | 20.355 | 1.00 | 0.00 | H |
| ATOM | 1056 | H5'2 | C B | 15 | -1.477 | -8.582  | 20.074 | 1.00 | 0.00 | H |
| ATOM | 1057 | C1'  | G B | 16 | -4.998 | -3.052  | 13.989 | 1.00 | 0.00 | C |
| ATOM | 1058 | N1   | G B | 16 | -0.894 | -0.051  | 13.572 | 1.00 | 0.00 | N |
| ATOM | 1059 | C2   | G B | 16 | -2.237 | 0.281   | 13.610 | 1.00 | 0.00 | C |
| ATOM | 1060 | N2   | G B | 16 | -2.524 | 1.586   | 13.524 | 1.00 | 0.00 | N |
| ATOM | 1061 | N3   | G B | 16 | -3.214 | -0.617  | 13.726 | 1.00 | 0.00 | N |
| ATOM | 1062 | C4   | G B | 16 | -2.741 | -1.889  | 13.794 | 1.00 | 0.00 | C |
| ATOM | 1063 | C5   | G B | 16 | -1.424 | -2.314  | 13.759 | 1.00 | 0.00 | C |
| ATOM | 1064 | C6   | G B | 16 | -0.385 | -1.361  | 13.640 | 1.00 | 0.00 | C |
| ATOM | 1065 | O6   | G B | 16 | 0.832  | -1.542  | 13.593 | 1.00 | 0.00 | O |
| ATOM | 1066 | N7   | G B | 16 | -1.363 | -3.706  | 13.854 | 1.00 | 0.00 | N |
| ATOM | 1067 | C8   | G B | 16 | -2.616 | -4.072  | 13.944 | 1.00 | 0.00 | C |
| ATOM | 1068 | N9   | G B | 16 | -3.513 | -3.024  | 13.913 | 1.00 | 0.00 | N |
| ATOM | 1069 | C2'  | G B | 16 | -5.628 | -4.226  | 13.252 | 1.00 | 0.00 | C |
| ATOM | 1070 | C3'  | G B | 16 | -6.813 | -4.562  | 14.143 | 1.00 | 0.00 | C |
| ATOM | 1071 | O3'  | G B | 16 | -7.910 | -3.719  | 13.800 | 1.00 | 0.00 | O |
| ATOM | 1072 | C4'  | G B | 16 | -6.278 | -4.272  | 15.544 | 1.00 | 0.00 | C |
| ATOM | 1073 | O4'  | G B | 16 | -5.359 | -3.149  | 15.353 | 1.00 | 0.00 | O |
| ATOM | 1074 | C5'  | G B | 16 | -5.533 | -5.396  | 16.224 | 1.00 | 0.00 | C |
| ATOM | 1075 | O5'  | G B | 16 | -4.759 | -6.134  | 15.246 | 1.00 | 0.00 | O |
| ATOM | 1076 | O1P  | G B | 16 | -5.855 | -8.399  | 15.223 | 1.00 | 0.00 | O |
| ATOM | 1077 | O2P  | G B | 16 | -3.432 | -8.172  | 14.616 | 1.00 | 0.00 | O |
| ATOM | 1078 | P    | G B | 16 | -4.572 | -7.706  | 15.442 | 1.00 | 0.00 | P |
| ATOM | 1079 | H1   | G B | 16 | -0.216 | 0.721   | 13.487 | 1.00 | 0.00 | H |
| ATOM | 1080 | H8   | G B | 16 | -2.924 | -5.113  | 14.035 | 1.00 | 0.00 | H |
| ATOM | 1081 | H1'  | G B | 16 | -5.378 | -2.103  | 13.609 | 1.00 | 0.00 | H |
| ATOM | 1082 | H21  | G B | 16 | -1.763 | 2.275   | 13.438 | 1.00 | 0.00 | H |
| ATOM | 1083 | H3'  | G B | 16 | -7.115 | -5.605  | 14.046 | 1.00 | 0.00 | H |
| ATOM | 1084 | H22  | G B | 16 | -3.505 | 1.898   | 13.544 | 1.00 | 0.00 | H |
| ATOM | 1085 | H4'  | G B | 16 | -7.137 | -4.018  | 16.165 | 1.00 | 0.00 | H |
| ATOM | 1086 | H2'1 | G B | 16 | -4.946 | -5.072  | 13.163 | 1.00 | 0.00 | H |
| ATOM | 1087 | H2'2 | G B | 16 | -5.951 | -3.958  | 12.246 | 1.00 | 0.00 | H |
| ATOM | 1088 | H5'1 | G B | 16 | -4.869 | -4.979  | 16.981 | 1.00 | 0.00 | H |

|      |      |      |     |    |        |        |        |      |      |   |
|------|------|------|-----|----|--------|--------|--------|------|------|---|
| ATOM | 1089 | H5'2 | G B | 16 | -6.251 | -6.061 | 16.704 | 1.00 | 0.00 | H |
| ATOM | 1090 | C1'  | G B | 17 | -5.838 | 0.469  | 10.609 | 1.00 | 0.00 | C |
| ATOM | 1091 | N1   | G B | 17 | -0.753 | 0.484  | 10.192 | 1.00 | 0.00 | N |
| ATOM | 1092 | C2   | G B | 17 | -1.645 | 1.542  | 10.230 | 1.00 | 0.00 | C |
| ATOM | 1093 | N2   | G B | 17 | -1.110 | 2.766  | 10.144 | 1.00 | 0.00 | N |
| ATOM | 1094 | N3   | G B | 17 | -2.962 | 1.390  | 10.346 | 1.00 | 0.00 | N |
| ATOM | 1095 | C4   | G B | 17 | -3.327 | 0.083  | 10.413 | 1.00 | 0.00 | C |
| ATOM | 1096 | C5   | G B | 17 | -2.512 | -1.035 | 10.379 | 1.00 | 0.00 | C |
| ATOM | 1097 | C6   | G B | 17 | -1.113 | -0.875 | 10.260 | 1.00 | 0.00 | C |
| ATOM | 1098 | O6   | G B | 17 | -0.234 | -1.736 | 10.213 | 1.00 | 0.00 | O |
| ATOM | 1099 | N7   | G B | 17 | -3.281 | -2.197 | 10.474 | 1.00 | 0.00 | N |
| ATOM | 1100 | C8   | G B | 17 | -4.509 | -1.757 | 10.564 | 1.00 | 0.00 | C |
| ATOM | 1101 | N9   | G B | 17 | -4.619 | -0.382 | 10.533 | 1.00 | 0.00 | N |
| ATOM | 1102 | C2'  | G B | 17 | -7.037 | -0.111 | 9.872  | 1.00 | 0.00 | C |
| ATOM | 1103 | C3'  | G B | 17 | -8.194 | 0.314  | 10.763 | 1.00 | 0.00 | C |
| ATOM | 1104 | O3'  | G B | 17 | -8.586 | 1.641  | 10.420 | 1.00 | 0.00 | O |
| ATOM | 1105 | C4'  | G B | 17 | -7.590 | 0.234  | 12.164 | 1.00 | 0.00 | C |
| ATOM | 1106 | O4'  | G B | 17 | -6.187 | 0.602  | 11.973 | 1.00 | 0.00 | O |
| ATOM | 1107 | C5'  | G B | 17 | -7.648 | -1.113 | 12.844 | 1.00 | 0.00 | C |
| ATOM | 1108 | O5'  | G B | 17 | -7.455 | -2.165 | 11.866 | 1.00 | 0.00 | O |
| ATOM | 1109 | O1P  | G B | 17 | -9.674 | -3.353 | 11.843 | 1.00 | 0.00 | O |
| ATOM | 1110 | O2P  | G B | 17 | -7.580 | -4.595 | 11.236 | 1.00 | 0.00 | O |
| ATOM | 1111 | P    | G B | 17 | -8.228 | -3.547 | 12.062 | 1.00 | 0.00 | P |
| ATOM | 1112 | H1   | G B | 17 | 0.250  | 0.710  | 10.106 | 1.00 | 0.00 | H |
| ATOM | 1113 | H8   | G B | 17 | -5.371 | -2.417 | 10.655 | 1.00 | 0.00 | H |
| ATOM | 1114 | H1'  | G B | 17 | -5.587 | 1.459  | 10.229 | 1.00 | 0.00 | H |
| ATOM | 1115 | H21  | G B | 17 | -0.089 | 2.877  | 10.058 | 1.00 | 0.00 | H |
| ATOM | 1116 | H3'  | G B | 17 | -9.051 | -0.352 | 10.666 | 1.00 | 0.00 | H |
| ATOM | 1117 | H22  | G B | 17 | -1.720 | 3.596  | 10.164 | 1.00 | 0.00 | H |
| ATOM | 1118 | H4'  | G B | 17 | -8.135 | 0.944  | 12.785 | 1.00 | 0.00 | H |
| ATOM | 1119 | H2'1 | G B | 17 | -6.983 | -1.196 | 9.783  | 1.00 | 0.00 | H |
| ATOM | 1120 | H2'2 | G B | 17 | -7.141 | 0.295  | 8.866  | 1.00 | 0.00 | H |
| ATOM | 1121 | H5'1 | G B | 17 | -6.866 | -1.166 | 13.601 | 1.00 | 0.00 | H |
| ATOM | 1122 | H5'2 | G B | 17 | -8.620 | -1.230 | 13.324 | 1.00 | 0.00 | H |
| ATOM | 1123 | C1'  | C B | 18 | -4.447 | 3.812  | 7.229  | 1.00 | 0.00 | C |
| ATOM | 1124 | N1   | C B | 18 | -3.955 | 2.408  | 7.154  | 1.00 | 0.00 | N |
| ATOM | 1125 | C2   | C B | 18 | -2.582 | 2.205  | 7.035  | 1.00 | 0.00 | C |
| ATOM | 1126 | O2   | C B | 18 | -1.833 | 3.189  | 6.997  | 1.00 | 0.00 | O |
| ATOM | 1127 | N3   | C B | 18 | -2.115 | 0.935  | 6.964  | 1.00 | 0.00 | N |
| ATOM | 1128 | C4   | C B | 18 | -2.952 | -0.110 | 7.008  | 1.00 | 0.00 | C |
| ATOM | 1129 | N4   | C B | 18 | -2.439 | -1.330 | 6.937  | 1.00 | 0.00 | N |
| ATOM | 1130 | C5   | C B | 18 | -4.367 | 0.071  | 7.127  | 1.00 | 0.00 | C |
| ATOM | 1131 | C6   | C B | 18 | -4.815 | 1.357  | 7.199  | 1.00 | 0.00 | C |
| ATOM | 1132 | C2'  | C B | 18 | -5.757 | 4.044  | 6.488  | 1.00 | 0.00 | C |
| ATOM | 1133 | C3'  | C B | 18 | -6.449 | 5.064  | 7.379  | 1.00 | 0.00 | C |
| ATOM | 1134 | O3'  | C B | 18 | -5.989 | 6.370  | 7.039  | 1.00 | 0.00 | O |
| ATOM | 1135 | C4'  | C B | 18 | -6.010 | 4.644  | 8.780  | 1.00 | 0.00 | C |
| ATOM | 1136 | O4'  | C B | 18 | -4.656 | 4.121  | 8.594  | 1.00 | 0.00 | O |
| ATOM | 1137 | C5'  | C B | 18 | -6.848 | 3.585  | 9.457  | 1.00 | 0.00 | C |
| ATOM | 1138 | O5'  | C B | 18 | -7.304 | 2.620  | 8.475  | 1.00 | 0.00 | O |
| ATOM | 1139 | O1P  | C B | 18 | -9.799 | 2.953  | 8.445  | 1.00 | 0.00 | O |
| ATOM | 1140 | O2P  | C B | 18 | -8.824 | 0.722  | 7.838  | 1.00 | 0.00 | O |
| ATOM | 1141 | P    | C B | 18 | -8.738 | 1.950  | 8.666  | 1.00 | 0.00 | P |
| ATOM | 1142 | H5   | C B | 18 | -5.052 | -0.776 | 7.159  | 1.00 | 0.00 | H |

|      |      |      |     |    |        |        |        |      |      |   |
|------|------|------|-----|----|--------|--------|--------|------|------|---|
| ATOM | 1143 | H6   | C B | 18 | -5.884 | 1.544  | 7.294  | 1.00 | 0.00 | H |
| ATOM | 1144 | H1'  | C B | 18 | -3.663 | 4.468  | 6.852  | 1.00 | 0.00 | H |
| ATOM | 1145 | H3'  | C B | 18 | -7.533 | 5.025  | 7.278  | 1.00 | 0.00 | H |
| ATOM | 1146 | H4'  | C B | 18 | -6.040 | 5.538  | 9.403  | 1.00 | 0.00 | H |
| ATOM | 1147 | H41  | C B | 18 | -3.061 | -2.152 | 6.970  | 1.00 | 0.00 | H |
| ATOM | 1148 | H42  | C B | 18 | -1.421 | -1.457 | 6.851  | 1.00 | 0.00 | H |
| ATOM | 1149 | H2'1 | C B | 18 | -6.347 | 3.133  | 6.396  | 1.00 | 0.00 | H |
| ATOM | 1150 | H2'2 | C B | 18 | -5.599 | 4.435  | 5.483  | 1.00 | 0.00 | H |
| ATOM | 1151 | H5'1 | C B | 18 | -6.247 | 3.082  | 10.215 | 1.00 | 0.00 | H |
| ATOM | 1152 | H5'2 | C B | 18 | -7.705 | 4.057  | 9.934  | 1.00 | 0.00 | H |
| ATOM | 1153 | C1'  | C B | 19 | -1.358 | 5.698  | 3.849  | 1.00 | 0.00 | C |
| ATOM | 1154 | N1   | C B | 19 | -1.784 | 4.274  | 3.774  | 1.00 | 0.00 | N |
| ATOM | 1155 | C2   | C B | 19 | -0.793 | 3.301  | 3.655  | 1.00 | 0.00 | C |
| ATOM | 1156 | O2   | C B | 19 | 0.392  | 3.657  | 3.618  | 1.00 | 0.00 | O |
| ATOM | 1157 | N3   | C B | 19 | -1.161 | 1.999  | 3.585  | 1.00 | 0.00 | N |
| ATOM | 1158 | C4   | C B | 19 | -2.453 | 1.646  | 3.628  | 1.00 | 0.00 | C |
| ATOM | 1159 | N4   | C B | 19 | -2.756 | 0.360  | 3.557  | 1.00 | 0.00 | N |
| ATOM | 1160 | C5   | C B | 19 | -3.490 | 2.625  | 3.748  | 1.00 | 0.00 | C |
| ATOM | 1161 | C6   | C B | 19 | -3.097 | 3.928  | 3.818  | 1.00 | 0.00 | C |
| ATOM | 1162 | C2'  | C B | 19 | -2.281 | 6.654  | 3.108  | 1.00 | 0.00 | C |
| ATOM | 1163 | C3'  | C B | 19 | -2.241 | 7.887  | 3.999  | 1.00 | 0.00 | C |
| ATOM | 1164 | O3'  | C B | 19 | -1.102 | 8.674  | 3.659  | 1.00 | 0.00 | O |
| ATOM | 1165 | C4'  | C B | 19 | -2.133 | 7.290  | 5.400  | 1.00 | 0.00 | C |
| ATOM | 1166 | O4'  | C B | 19 | -1.345 | 6.071  | 5.214  | 1.00 | 0.00 | O |
| ATOM | 1167 | C5'  | C B | 19 | -3.434 | 6.924  | 6.077  | 1.00 | 0.00 | C |
| ATOM | 1168 | O5'  | C B | 19 | -4.370 | 6.412  | 5.095  | 1.00 | 0.00 | O |
| ATOM | 1169 | O1P  | C B | 19 | -6.191 | 8.149  | 5.065  | 1.00 | 0.00 | O |
| ATOM | 1170 | O2P  | C B | 19 | -6.714 | 5.771  | 4.458  | 1.00 | 0.00 | O |
| ATOM | 1171 | P    | C B | 19 | -5.923 | 6.714  | 5.286  | 1.00 | 0.00 | P |
| ATOM | 1172 | H5   | C B | 19 | -4.542 | 2.343  | 3.781  | 1.00 | 0.00 | H |
| ATOM | 1173 | H6   | C B | 19 | -3.852 | 4.709  | 3.912  | 1.00 | 0.00 | H |
| ATOM | 1174 | H1'  | C B | 19 | -0.337 | 5.768  | 3.472  | 1.00 | 0.00 | H |
| ATOM | 1175 | H3'  | C B | 19 | -3.142 | 8.492  | 3.898  | 1.00 | 0.00 | H |
| ATOM | 1176 | H4'  | C B | 19 | -1.631 | 8.031  | 6.023  | 1.00 | 0.00 | H |
| ATOM | 1177 | H41  | C B | 19 | -3.741 | 0.059  | 3.589  | 1.00 | 0.00 | H |
| ATOM | 1178 | H42  | C B | 19 | -2.006 | -0.343 | 3.470  | 1.00 | 0.00 | H |
| ATOM | 1179 | H2'1 | C B | 19 | -3.294 | 6.265  | 3.016  | 1.00 | 0.00 | H |
| ATOM | 1180 | H2'2 | C B | 19 | -1.923 | 6.879  | 2.103  | 1.00 | 0.00 | H |
| ATOM | 1181 | H5'1 | C B | 19 | -3.242 | 6.166  | 6.835  | 1.00 | 0.00 | H |
| ATOM | 1182 | H5'2 | C B | 19 | -3.849 | 7.811  | 6.554  | 1.00 | 0.00 | H |
| ATOM | 1183 | C1'  | T B | 20 | 2.250  | 5.431  | 0.471  | 1.00 | 0.00 | C |
| ATOM | 1184 | N1   | T B | 20 | 1.083  | 4.513  | 0.393  | 1.00 | 0.00 | N |
| ATOM | 1185 | C2   | T B | 20 | 1.349  | 3.164  | 0.274  | 1.00 | 0.00 | C |
| ATOM | 1186 | O2   | T B | 20 | 2.482  | 2.716  | 0.232  | 1.00 | 0.00 | O |
| ATOM | 1187 | N3   | T B | 20 | 0.236  | 2.348  | 0.205  | 1.00 | 0.00 | N |
| ATOM | 1188 | C4   | T B | 20 | -1.081 | 2.750  | 0.243  | 1.00 | 0.00 | C |
| ATOM | 1189 | O4   | T B | 20 | -1.998 | 1.922  | 0.171  | 1.00 | 0.00 | O |
| ATOM | 1190 | C5   | T B | 20 | -1.260 | 4.176  | 0.369  | 1.00 | 0.00 | C |
| ATOM | 1191 | C6   | T B | 20 | -0.199 | 5.003  | 0.439  | 1.00 | 0.00 | C |
| ATOM | 1192 | C7   | T B | 20 | -2.679 | 4.659  | 0.415  | 1.00 | 0.00 | C |
| ATOM | 1193 | C2'  | T B | 20 | 2.045  | 6.748  | -0.268 | 1.00 | 0.00 | C |
| ATOM | 1194 | C3'  | T B | 20 | 2.787  | 7.731  | 0.625  | 1.00 | 0.00 | C |
| ATOM | 1195 | O3'  | T B | 20 | 4.172  | 7.721  | 0.284  | 1.00 | 0.00 | O |
| ATOM | 1196 | C4'  | T B | 20 | 2.532  | 7.178  | 2.025  | 1.00 | 0.00 | C |

|      |      |      |     |    |        |        |        |      |      |   |
|------|------|------|-----|----|--------|--------|--------|------|------|---|
| ATOM | 1197 | O4'  | T B | 20 | 2.476  | 5.728  | 1.835  | 1.00 | 0.00 | O |
| ATOM | 1198 | C5'  | T B | 20 | 1.258  | 7.626  | 2.703  | 1.00 | 0.00 | C |
| ATOM | 1199 | O5'  | T B | 20 | 0.197  | 7.747  | 1.721  | 1.00 | 0.00 | O |
| ATOM | 1200 | O1P  | T B | 20 | -0.293 | 10.215 | 1.695  | 1.00 | 0.00 | O |
| ATOM | 1201 | O2P  | T B | 20 | -2.089 | 8.572  | 1.085  | 1.00 | 0.00 | O |
| ATOM | 1202 | P    | T B | 20 | -0.900 | 8.887  | 1.914  | 1.00 | 0.00 | P |
| ATOM | 1203 | H3   | T B | 20 | 0.408  | 1.337  | 0.117  | 1.00 | 0.00 | H |
| ATOM | 1204 | H6   | T B | 20 | -0.359 | 6.077  | 0.534  | 1.00 | 0.00 | H |
| ATOM | 1205 | H1'  | T B | 20 | 3.126  | 4.904  | 0.093  | 1.00 | 0.00 | H |
| ATOM | 1206 | H3'  | T B | 20 | 2.399  | 8.744  | 0.525  | 1.00 | 0.00 | H |
| ATOM | 1207 | H4'  | T B | 20 | 3.369  | 7.495  | 2.648  | 1.00 | 0.00 | H |
| ATOM | 1208 | H3T  | T B | 20 | 4.364  | 7.864  | -0.645 | 1.00 | 0.00 | H |
| ATOM | 1209 | H71  | T B | 20 | -2.889 | 5.258  | -0.471 | 1.00 | 0.00 | H |
| ATOM | 1210 | H72  | T B | 20 | -3.354 | 3.802  | 0.443  | 1.00 | 0.00 | H |
| ATOM | 1211 | H73  | T B | 20 | -2.829 | 5.267  | 1.308  | 1.00 | 0.00 | H |
| ATOM | 1212 | H2'1 | T B | 20 | 0.993  | 7.011  | -0.359 | 1.00 | 0.00 | H |
| ATOM | 1213 | H2'2 | T B | 20 | 2.467  | 6.728  | -1.273 | 1.00 | 0.00 | H |
| ATOM | 1214 | H5'1 | T B | 20 | 0.978  | 6.894  | 3.460  | 1.00 | 0.00 | H |
| ATOM | 1215 | H5'2 | T B | 20 | 1.428  | 8.589  | 3.181  | 1.00 | 0.00 | H |
| TER  |      |      |     |    |        |        |        |      |      |   |
| ATOM | 1    | C1'  | A A | 1  | 6.665  | 33.054 | 16.457 | 1.00 | 0.00 | C |
| ATOM | 2    | N1   | A A | 1  | 1.819  | 34.704 | 16.821 | 1.00 | 0.00 | N |
| ATOM | 3    | C2   | A A | 1  | 2.965  | 35.169 | 17.309 | 1.00 | 0.00 | C |
| ATOM | 4    | N3   | A A | 1  | 4.185  | 34.694 | 17.174 | 1.00 | 0.00 | N |
| ATOM | 5    | C4   | A A | 1  | 4.170  | 33.577 | 16.425 | 1.00 | 0.00 | C |
| ATOM | 6    | C5   | A A | 1  | 3.085  | 32.972 | 15.855 | 1.00 | 0.00 | C |
| ATOM | 7    | C6   | A A | 1  | 1.835  | 33.588 | 16.077 | 1.00 | 0.00 | C |
| ATOM | 8    | N6   | A A | 1  | 0.682  | 33.108 | 15.580 | 1.00 | 0.00 | N |
| ATOM | 9    | N7   | A A | 1  | 3.456  | 31.838 | 15.154 | 1.00 | 0.00 | N |
| ATOM | 10   | C8   | A A | 1  | 4.745  | 31.781 | 15.316 | 1.00 | 0.00 | C |
| ATOM | 11   | N9   | A A | 1  | 5.250  | 32.803 | 16.075 | 1.00 | 0.00 | N |
| ATOM | 12   | C2'  | A A | 1  | 7.452  | 31.787 | 16.760 | 1.00 | 0.00 | C |
| ATOM | 13   | C3'  | A A | 1  | 8.833  | 32.138 | 16.228 | 1.00 | 0.00 | C |
| ATOM | 14   | O3'  | A A | 1  | 9.550  | 32.860 | 17.227 | 1.00 | 0.00 | O |
| ATOM | 15   | C4'  | A A | 1  | 8.519  | 33.001 | 15.007 | 1.00 | 0.00 | C |
| ATOM | 16   | O4'  | A A | 1  | 7.294  | 33.713 | 15.375 | 1.00 | 0.00 | O |
| ATOM | 17   | C5'  | A A | 1  | 8.279  | 32.265 | 13.710 | 1.00 | 0.00 | C |
| ATOM | 18   | O5'  | A A | 1  | 7.578  | 31.023 | 13.972 | 1.00 | 0.00 | O |
| ATOM | 19   | H2   | A A | 1  | 2.883  | 36.076 | 17.908 | 1.00 | 0.00 | H |
| ATOM | 20   | H8   | A A | 1  | 5.366  | 30.993 | 14.887 | 1.00 | 0.00 | H |
| ATOM | 21   | H1'  | A A | 1  | 6.672  | 33.732 | 17.311 | 1.00 | 0.00 | H |
| ATOM | 22   | H3'  | A A | 1  | 9.401  | 31.250 | 15.947 | 1.00 | 0.00 | H |
| ATOM | 23   | H4'  | A A | 1  | 9.370  | 33.665 | 14.862 | 1.00 | 0.00 | H |
| ATOM | 24   | H61  | A A | 1  | -0.202 | 33.595 | 15.770 | 1.00 | 0.00 | H |
| ATOM | 25   | H62  | A A | 1  | 0.688  | 32.251 | 15.008 | 1.00 | 0.00 | H |
| ATOM | 26   | H5T  | A A | 1  | 7.770  | 30.260 | 13.423 | 1.00 | 0.00 | H |
| ATOM | 27   | H2'1 | A A | 1  | 7.043  | 30.914 | 16.253 | 1.00 | 0.00 | H |
| ATOM | 28   | H2'2 | A A | 1  | 7.484  | 31.564 | 17.826 | 1.00 | 0.00 | H |
| ATOM | 29   | H5'1 | A A | 1  | 7.682  | 32.892 | 13.048 | 1.00 | 0.00 | H |
| ATOM | 30   | H5'2 | A A | 1  | 9.236  | 32.054 | 13.236 | 1.00 | 0.00 | H |
| ATOM | 31   | C1'  | G A | 2  | 5.688  | 34.504 | 21.105 | 1.00 | 0.00 | C |
| ATOM | 32   | N1   | G A | 2  | 0.866  | 33.421 | 19.846 | 1.00 | 0.00 | N |
| ATOM | 33   | C2   | G A | 2  | 1.378  | 34.492 | 20.552 | 1.00 | 0.00 | C |
| ATOM | 34   | N2   | G A | 2  | 0.489  | 35.395 | 20.981 | 1.00 | 0.00 | N |

|      |    |      |     |   |        |        |        |      |      |   |
|------|----|------|-----|---|--------|--------|--------|------|------|---|
| ATOM | 35 | N3   | G A | 2 | 2.675  | 34.652 | 20.809 | 1.00 | 0.00 | N |
| ATOM | 36 | C4   | G A | 2 | 3.430  | 33.641 | 20.305 | 1.00 | 0.00 | C |
| ATOM | 37 | C5   | G A | 2 | 3.006  | 32.531 | 19.591 | 1.00 | 0.00 | C |
| ATOM | 38 | C6   | G A | 2 | 1.628  | 32.365 | 19.315 | 1.00 | 0.00 | C |
| ATOM | 39 | O6   | G A | 2 | 1.064  | 31.458 | 18.701 | 1.00 | 0.00 | O |
| ATOM | 40 | N7   | G A | 2 | 4.097  | 31.727 | 19.255 | 1.00 | 0.00 | N |
| ATOM | 41 | C8   | G A | 2 | 5.124  | 32.361 | 19.760 | 1.00 | 0.00 | C |
| ATOM | 42 | N9   | G A | 2 | 4.799  | 33.532 | 20.414 | 1.00 | 0.00 | N |
| ATOM | 43 | C2'  | G A | 2 | 6.840  | 33.854 | 21.859 | 1.00 | 0.00 | C |
| ATOM | 44 | C3'  | G A | 2 | 7.961  | 34.860 | 21.658 | 1.00 | 0.00 | C |
| ATOM | 45 | O3'  | G A | 2 | 7.853  | 35.884 | 22.645 | 1.00 | 0.00 | O |
| ATOM | 46 | C4'  | G A | 2 | 7.695  | 35.387 | 20.248 | 1.00 | 0.00 | C |
| ATOM | 47 | O4'  | G A | 2 | 6.239  | 35.360 | 20.122 | 1.00 | 0.00 | O |
| ATOM | 48 | C5'  | G A | 2 | 8.296  | 34.594 | 19.112 | 1.00 | 0.00 | C |
| ATOM | 49 | O5'  | G A | 2 | 8.247  | 33.179 | 19.422 | 1.00 | 0.00 | O |
| ATOM | 50 | O1P  | G A | 2 | 10.674 | 32.547 | 19.635 | 1.00 | 0.00 | O |
| ATOM | 51 | O2P  | G A | 2 | 8.985  | 30.825 | 18.946 | 1.00 | 0.00 | O |
| ATOM | 52 | P    | G A | 2 | 9.428  | 32.240 | 18.907 | 1.00 | 0.00 | P |
| ATOM | 53 | H1   | G A | 2 | -0.154 | 33.393 | 19.699 | 1.00 | 0.00 | H |
| ATOM | 54 | H8   | G A | 2 | 6.147  | 31.997 | 19.673 | 1.00 | 0.00 | H |
| ATOM | 55 | H1'  | G A | 2 | 5.077  | 35.110 | 21.774 | 1.00 | 0.00 | H |
| ATOM | 56 | H21  | G A | 2 | -0.513 | 35.266 | 20.778 | 1.00 | 0.00 | H |
| ATOM | 57 | H3'  | G A | 2 | 8.945  | 34.396 | 21.725 | 1.00 | 0.00 | H |
| ATOM | 58 | H22  | G A | 2 | 0.807  | 36.216 | 21.515 | 1.00 | 0.00 | H |
| ATOM | 59 | H4'  | G A | 2 | 8.107  | 36.395 | 20.205 | 1.00 | 0.00 | H |
| ATOM | 60 | H2'1 | G A | 2 | 7.105  | 32.879 | 21.448 | 1.00 | 0.00 | H |
| ATOM | 61 | H2'2 | G A | 2 | 6.616  | 33.714 | 22.917 | 1.00 | 0.00 | H |
| ATOM | 62 | H5'1 | G A | 2 | 7.731  | 34.791 | 18.201 | 1.00 | 0.00 | H |
| ATOM | 63 | H5'2 | G A | 2 | 9.330  | 34.905 | 18.966 | 1.00 | 0.00 | H |
| ATOM | 64 | C1'  | G A | 3 | 2.710  | 35.400 | 24.959 | 1.00 | 0.00 | C |
| ATOM | 65 | N1   | G A | 3 | -0.299 | 31.950 | 22.711 | 1.00 | 0.00 | N |
| ATOM | 66 | C2   | G A | 3 | -0.622 | 33.155 | 23.304 | 1.00 | 0.00 | C |
| ATOM | 67 | N2   | G A | 3 | -1.920 | 33.486 | 23.300 | 1.00 | 0.00 | N |
| ATOM | 68 | N3   | G A | 3 | 0.276  | 33.967 | 23.856 | 1.00 | 0.00 | N |
| ATOM | 69 | C4   | G A | 3 | 1.539  | 33.472 | 23.777 | 1.00 | 0.00 | C |
| ATOM | 70 | C5   | G A | 3 | 1.954  | 32.279 | 23.207 | 1.00 | 0.00 | C |
| ATOM | 71 | C6   | G A | 3 | 1.000  | 31.419 | 22.616 | 1.00 | 0.00 | C |
| ATOM | 72 | O6   | G A | 3 | 1.171  | 30.330 | 22.066 | 1.00 | 0.00 | O |
| ATOM | 73 | N7   | G A | 3 | 3.337  | 32.140 | 23.334 | 1.00 | 0.00 | N |
| ATOM | 74 | C8   | G A | 3 | 3.709  | 33.227 | 23.957 | 1.00 | 0.00 | C |
| ATOM | 75 | N9   | G A | 3 | 2.673  | 34.086 | 24.261 | 1.00 | 0.00 | N |
| ATOM | 76 | C2'  | G A | 3 | 3.715  | 35.460 | 26.101 | 1.00 | 0.00 | C |
| ATOM | 77 | C3'  | G A | 3 | 4.214  | 36.892 | 26.010 | 1.00 | 0.00 | C |
| ATOM | 78 | O3'  | G A | 3 | 3.316  | 37.747 | 26.714 | 1.00 | 0.00 | O |
| ATOM | 79 | C4'  | G A | 3 | 4.206  | 37.161 | 24.506 | 1.00 | 0.00 | C |
| ATOM | 80 | O4'  | G A | 3 | 3.071  | 36.383 | 24.008 | 1.00 | 0.00 | O |
| ATOM | 81 | C5'  | G A | 3 | 5.444  | 36.750 | 23.745 | 1.00 | 0.00 | C |
| ATOM | 82 | O5'  | G A | 3 | 5.979  | 35.524 | 24.301 | 1.00 | 0.00 | O |
| ATOM | 83 | O1P  | G A | 3 | 8.192  | 36.237 | 25.265 | 1.00 | 0.00 | O |
| ATOM | 84 | O2P  | G A | 3 | 7.859  | 33.870 | 24.506 | 1.00 | 0.00 | O |
| ATOM | 85 | P    | G A | 3 | 7.560  | 35.309 | 24.309 | 1.00 | 0.00 | P |
| ATOM | 86 | H1   | G A | 3 | -1.071 | 31.397 | 22.308 | 1.00 | 0.00 | H |
| ATOM | 87 | H8   | G A | 3 | 4.746  | 33.438 | 24.215 | 1.00 | 0.00 | H |
| ATOM | 88 | H1'  | G A | 3 | 1.704  | 35.628 | 25.311 | 1.00 | 0.00 | H |

|      |     |      |     |   |        |        |        |      |      |   |
|------|-----|------|-----|---|--------|--------|--------|------|------|---|
| ATOM | 89  | H21  | G A | 3 | -2.610 | 32.854 | 22.868 | 1.00 | 0.00 | H |
| ATOM | 90  | H3'  | G A | 3 | 5.217  | 37.003 | 26.424 | 1.00 | 0.00 | H |
| ATOM | 91  | H22  | G A | 3 | -2.226 | 34.370 | 23.728 | 1.00 | 0.00 | H |
| ATOM | 92  | H4'  | G A | 3 | 4.076  | 38.235 | 24.376 | 1.00 | 0.00 | H |
| ATOM | 93  | H2'1 | G A | 3 | 4.529  | 34.747 | 25.973 | 1.00 | 0.00 | H |
| ATOM | 94  | H2'2 | G A | 3 | 3.254  | 35.261 | 27.069 | 1.00 | 0.00 | H |
| ATOM | 95  | H5'1 | G A | 3 | 5.186  | 36.599 | 22.697 | 1.00 | 0.00 | H |
| ATOM | 96  | H5'2 | G A | 3 | 6.188  | 37.544 | 23.818 | 1.00 | 0.00 | H |
| ATOM | 97  | C1'  | C A | 4 | -1.406 | 34.767 | 27.641 | 1.00 | 0.00 | C |
| ATOM | 98  | N1   | C A | 4 | -0.586 | 33.595 | 27.225 | 1.00 | 0.00 | N |
| ATOM | 99  | C2   | C A | 4 | -1.235 | 32.540 | 26.588 | 1.00 | 0.00 | C |
| ATOM | 100 | O2   | C A | 4 | -2.455 | 32.617 | 26.395 | 1.00 | 0.00 | O |
| ATOM | 101 | N3   | C A | 4 | -0.507 | 31.464 | 26.202 | 1.00 | 0.00 | N |
| ATOM | 102 | C4   | C A | 4 | 0.812  | 31.409 | 26.427 | 1.00 | 0.00 | C |
| ATOM | 103 | N4   | C A | 4 | 1.475  | 30.334 | 26.025 | 1.00 | 0.00 | N |
| ATOM | 104 | C5   | C A | 4 | 1.503  | 32.479 | 27.082 | 1.00 | 0.00 | C |
| ATOM | 105 | C6   | C A | 4 | 0.752  | 33.553 | 27.459 | 1.00 | 0.00 | C |
| ATOM | 106 | C2'  | C A | 4 | -0.985 | 35.368 | 28.974 | 1.00 | 0.00 | C |
| ATOM | 107 | C3'  | C A | 4 | -1.224 | 36.853 | 28.743 | 1.00 | 0.00 | C |
| ATOM | 108 | O3'  | C A | 4 | -2.594 | 37.152 | 29.005 | 1.00 | 0.00 | O |
| ATOM | 109 | C4'  | C A | 4 | -0.867 | 37.029 | 27.269 | 1.00 | 0.00 | C |
| ATOM | 110 | O4'  | C A | 4 | -1.264 | 35.765 | 26.647 | 1.00 | 0.00 | O |
| ATOM | 111 | C5'  | C A | 4 | 0.589  | 37.283 | 26.957 | 1.00 | 0.00 | C |
| ATOM | 112 | O5'  | C A | 4 | 1.425  | 36.520 | 27.864 | 1.00 | 0.00 | O |
| ATOM | 113 | O1P  | C A | 4 | 2.584  | 38.293 | 29.222 | 1.00 | 0.00 | O |
| ATOM | 114 | O2P  | C A | 4 | 3.680  | 36.063 | 28.875 | 1.00 | 0.00 | O |
| ATOM | 115 | P    | C A | 4 | 2.818  | 37.141 | 28.330 | 1.00 | 0.00 | P |
| ATOM | 116 | H5   | C A | 4 | 2.577  | 32.436 | 27.271 | 1.00 | 0.00 | H |
| ATOM | 117 | H6   | C A | 4 | 1.234  | 34.394 | 27.957 | 1.00 | 0.00 | H |
| ATOM | 118 | H1'  | C A | 4 | -2.451 | 34.461 | 27.662 | 1.00 | 0.00 | H |
| ATOM | 119 | H3'  | C A | 4 | -0.592 | 37.471 | 29.379 | 1.00 | 0.00 | H |
| ATOM | 120 | H4'  | C A | 4 | -1.439 | 37.882 | 26.904 | 1.00 | 0.00 | H |
| ATOM | 121 | H41  | C A | 4 | 2.491  | 30.267 | 26.184 | 1.00 | 0.00 | H |
| ATOM | 122 | H42  | C A | 4 | 0.976  | 29.565 | 25.556 | 1.00 | 0.00 | H |
| ATOM | 123 | H2'1 | C A | 4 | 0.060  | 35.168 | 29.208 | 1.00 | 0.00 | H |
| ATOM | 124 | H2'2 | C A | 4 | -1.585 | 34.993 | 29.805 | 1.00 | 0.00 | H |
| ATOM | 125 | H5'1 | C A | 4 | 0.794  | 36.986 | 25.929 | 1.00 | 0.00 | H |
| ATOM | 126 | H5'2 | C A | 4 | 0.799  | 38.347 | 27.071 | 1.00 | 0.00 | H |
| ATOM | 127 | C1'  | C A | 5 | -5.337 | 32.199 | 29.215 | 1.00 | 0.00 | C |
| ATOM | 128 | N1   | C A | 5 | -3.974 | 31.602 | 29.267 | 1.00 | 0.00 | N |
| ATOM | 129 | C2   | C A | 5 | -3.792 | 30.343 | 28.700 | 1.00 | 0.00 | C |
| ATOM | 130 | O2   | C A | 5 | -4.762 | 29.774 | 28.181 | 1.00 | 0.00 | O |
| ATOM | 131 | N3   | C A | 5 | -2.558 | 29.782 | 28.737 | 1.00 | 0.00 | N |
| ATOM | 132 | C4   | C A | 5 | -1.529 | 30.419 | 29.307 | 1.00 | 0.00 | C |
| ATOM | 133 | N4   | C A | 5 | -0.345 | 29.827 | 29.312 | 1.00 | 0.00 | N |
| ATOM | 134 | C5   | C A | 5 | -1.688 | 31.715 | 29.899 | 1.00 | 0.00 | C |
| ATOM | 135 | C6   | C A | 5 | -2.937 | 32.261 | 29.847 | 1.00 | 0.00 | C |
| ATOM | 136 | C2'  | C A | 5 | -5.715 | 32.976 | 30.468 | 1.00 | 0.00 | C |
| ATOM | 137 | C3'  | C A | 5 | -6.542 | 34.116 | 29.896 | 1.00 | 0.00 | C |
| ATOM | 138 | O3'  | C A | 5 | -7.888 | 33.678 | 29.725 | 1.00 | 0.00 | O |
| ATOM | 139 | C4'  | C A | 5 | -5.854 | 34.401 | 28.564 | 1.00 | 0.00 | C |
| ATOM | 140 | O4'  | C A | 5 | -5.373 | 33.094 | 28.118 | 1.00 | 0.00 | O |
| ATOM | 141 | C5'  | C A | 5 | -4.685 | 35.358 | 28.603 | 1.00 | 0.00 | C |
| ATOM | 142 | O5'  | C A | 5 | -3.933 | 35.164 | 29.829 | 1.00 | 0.00 | O |

|      |     |      |     |   |         |        |        |      |      |   |
|------|-----|------|-----|---|---------|--------|--------|------|------|---|
| ATOM | 143 | O1P  | C A | 5 | -4.277  | 37.325 | 31.071 | 1.00 | 0.00 | O |
| ATOM | 144 | O2P  | C A | 5 | -2.205  | 35.966 | 31.466 | 1.00 | 0.00 | O |
| ATOM | 145 | P    | C A | 5 | -3.246  | 36.428 | 30.515 | 1.00 | 0.00 | P |
| ATOM | 146 | H5   | C A | 5 | -0.854  | 32.237 | 30.369 | 1.00 | 0.00 | H |
| ATOM | 147 | H6   | C A | 5 | -3.107  | 33.247 | 30.281 | 1.00 | 0.00 | H |
| ATOM | 148 | H1'  | C A | 5 | -6.051  | 31.399 | 29.019 | 1.00 | 0.00 | H |
| ATOM | 149 | H3'  | C A | 5 | -6.529  | 34.994 | 30.543 | 1.00 | 0.00 | H |
| ATOM | 150 | H4'  | C A | 5 | -6.609  | 34.827 | 27.902 | 1.00 | 0.00 | H |
| ATOM | 151 | H41  | C A | 5 | 0.465   | 30.296 | 29.743 | 1.00 | 0.00 | H |
| ATOM | 152 | H42  | C A | 5 | -0.233  | 28.894 | 28.887 | 1.00 | 0.00 | H |
| ATOM | 153 | H2'1 | C A | 5 | -4.842  | 33.349 | 31.003 | 1.00 | 0.00 | H |
| ATOM | 154 | H2'2 | C A | 5 | -6.297  | 32.374 | 31.168 | 1.00 | 0.00 | H |
| ATOM | 155 | H5'1 | C A | 5 | -4.041  | 35.173 | 27.743 | 1.00 | 0.00 | H |
| ATOM | 156 | H5'2 | C A | 5 | -5.059  | 36.380 | 28.558 | 1.00 | 0.00 | H |
| ATOM | 157 | C1'  | G A | 6 | -7.833  | 28.029 | 30.168 | 1.00 | 0.00 | C |
| ATOM | 158 | N1   | G A | 6 | -3.171  | 25.990 | 30.531 | 1.00 | 0.00 | N |
| ATOM | 159 | C2   | G A | 6 | -4.312  | 25.495 | 29.924 | 1.00 | 0.00 | C |
| ATOM | 160 | N2   | G A | 6 | -4.196  | 24.297 | 29.339 | 1.00 | 0.00 | N |
| ATOM | 161 | N3   | G A | 6 | -5.475  | 26.144 | 29.904 | 1.00 | 0.00 | N |
| ATOM | 162 | C4   | G A | 6 | -5.411  | 27.337 | 30.551 | 1.00 | 0.00 | C |
| ATOM | 163 | C5   | G A | 6 | -4.322  | 27.909 | 31.186 | 1.00 | 0.00 | C |
| ATOM | 164 | C6   | G A | 6 | -3.086  | 27.223 | 31.205 | 1.00 | 0.00 | C |
| ATOM | 165 | O6   | G A | 6 | -2.017  | 27.562 | 31.713 | 1.00 | 0.00 | O |
| ATOM | 166 | N7   | G A | 6 | -4.674  | 29.145 | 31.730 | 1.00 | 0.00 | N |
| ATOM | 167 | C8   | G A | 6 | -5.934  | 29.284 | 31.412 | 1.00 | 0.00 | C |
| ATOM | 168 | N9   | G A | 6 | -6.455  | 28.225 | 30.695 | 1.00 | 0.00 | N |
| ATOM | 169 | C2'  | G A | 6 | -8.924  | 28.544 | 31.096 | 1.00 | 0.00 | C |
| ATOM | 170 | C3'  | G A | 6 | -9.956  | 29.070 | 30.112 | 1.00 | 0.00 | C |
| ATOM | 171 | O3'  | G A | 6 | -10.787 | 27.994 | 29.684 | 1.00 | 0.00 | O |
| ATOM | 172 | C4'  | G A | 6 | -9.094  | 29.622 | 28.978 | 1.00 | 0.00 | C |
| ATOM | 173 | O4'  | G A | 6 | -7.932  | 28.735 | 28.946 | 1.00 | 0.00 | O |
| ATOM | 174 | C5'  | G A | 6 | -8.613  | 31.045 | 29.132 | 1.00 | 0.00 | C |
| ATOM | 175 | O5'  | G A | 6 | -8.309  | 31.313 | 30.524 | 1.00 | 0.00 | O |
| ATOM | 176 | O1P  | G A | 6 | -10.031 | 33.029 | 31.175 | 1.00 | 0.00 | O |
| ATOM | 177 | O2P  | G A | 6 | -7.823  | 32.953 | 32.365 | 1.00 | 0.00 | O |
| ATOM | 178 | P    | G A | 6 | -8.580  | 32.775 | 31.101 | 1.00 | 0.00 | P |
| ATOM | 179 | H1   | G A | 6 | -2.318  | 25.411 | 30.484 | 1.00 | 0.00 | H |
| ATOM | 180 | H8   | G A | 6 | -6.525  | 30.157 | 31.688 | 1.00 | 0.00 | H |
| ATOM | 181 | H1'  | G A | 6 | -7.969  | 26.968 | 29.955 | 1.00 | 0.00 | H |
| ATOM | 182 | H21  | G A | 6 | -3.293  | 23.802 | 29.355 | 1.00 | 0.00 | H |
| ATOM | 183 | H3'  | G A | 6 | -10.578 | 29.853 | 30.550 | 1.00 | 0.00 | H |
| ATOM | 184 | H22  | G A | 6 | -5.010  | 23.871 | 28.872 | 1.00 | 0.00 | H |
| ATOM | 185 | H4'  | G A | 6 | -9.694  | 29.570 | 28.070 | 1.00 | 0.00 | H |
| ATOM | 186 | H2'1 | G A | 6 | -8.566  | 29.335 | 31.757 | 1.00 | 0.00 | H |
| ATOM | 187 | H2'2 | G A | 6 | -9.339  | 27.756 | 31.725 | 1.00 | 0.00 | H |
| ATOM | 188 | H5'1 | G A | 6 | -7.719  | 31.189 | 28.526 | 1.00 | 0.00 | H |
| ATOM | 189 | H5'2 | G A | 6 | -9.391  | 31.726 | 28.787 | 1.00 | 0.00 | H |
| ATOM | 190 | C1'  | C A | 7 | -8.194  | 23.204 | 31.225 | 1.00 | 0.00 | C |
| ATOM | 191 | N1   | C A | 7 | -7.330  | 24.095 | 32.046 | 1.00 | 0.00 | N |
| ATOM | 192 | C2   | C A | 7 | -6.010  | 23.706 | 32.260 | 1.00 | 0.00 | C |
| ATOM | 193 | O2   | C A | 7 | -5.611  | 22.644 | 31.764 | 1.00 | 0.00 | O |
| ATOM | 194 | N3   | C A | 7 | -5.205  | 24.503 | 33.005 | 1.00 | 0.00 | N |
| ATOM | 195 | C4   | C A | 7 | -5.665  | 25.646 | 33.531 | 1.00 | 0.00 | C |
| ATOM | 196 | N4   | C A | 7 | -4.835  | 26.388 | 34.249 | 1.00 | 0.00 | N |



|      |     |      |     |   |         |        |        |      |      |   |
|------|-----|------|-----|---|---------|--------|--------|------|------|---|
| ATOM | 197 | C5   | C A | 7 | -7.020  | 26.070 | 33.331 | 1.00 | 0.00 | C |
| ATOM | 198 | C6   | C A | 7 | -7.811  | 25.253 | 32.573 | 1.00 | 0.00 | C |
| ATOM | 199 | C2'  | C A | 7 | -9.631  | 23.116 | 31.719 | 1.00 | 0.00 | C |
| ATOM | 200 | C3'  | C A | 7 | -10.409 | 23.008 | 30.416 | 1.00 | 0.00 | C |
| ATOM | 201 | O3'  | C A | 7 | -10.437 | 21.644 | 30.000 | 1.00 | 0.00 | O |
| ATOM | 202 | C4'  | C A | 7 | -9.601  | 23.886 | 29.464 | 1.00 | 0.00 | C |
| ATOM | 203 | O4'  | C A | 7 | -8.216  | 23.722 | 29.907 | 1.00 | 0.00 | O |
| ATOM | 204 | C5'  | C A | 7 | -9.935  | 25.361 | 29.465 | 1.00 | 0.00 | C |
| ATOM | 205 | O5'  | C A | 7 | -10.264 | 25.789 | 30.810 | 1.00 | 0.00 | O |
| ATOM | 206 | O1P  | C A | 7 | -12.700 | 26.401 | 30.648 | 1.00 | 0.00 | O |
| ATOM | 207 | O2P  | C A | 7 | -11.240 | 27.503 | 32.365 | 1.00 | 0.00 | O |
| ATOM | 208 | P    | C A | 7 | -11.366 | 26.924 | 31.006 | 1.00 | 0.00 | P |
| ATOM | 209 | H5   | C A | 7 | -7.402  | 26.996 | 33.762 | 1.00 | 0.00 | H |
| ATOM | 210 | H6   | C A | 7 | -8.847  | 25.536 | 32.386 | 1.00 | 0.00 | H |
| ATOM | 211 | H1'  | C A | 7 | -7.732  | 22.218 | 31.190 | 1.00 | 0.00 | H |
| ATOM | 212 | H3'  | C A | 7 | -11.431 | 23.375 | 30.520 | 1.00 | 0.00 | H |
| ATOM | 213 | H4'  | C A | 7 | -9.775  | 23.506 | 28.458 | 1.00 | 0.00 | H |
| ATOM | 214 | H41  | C A | 7 | -5.162  | 27.273 | 34.662 | 1.00 | 0.00 | H |
| ATOM | 215 | H42  | C A | 7 | -3.862  | 26.082 | 34.394 | 1.00 | 0.00 | H |
| ATOM | 216 | H2'1 | C A | 7 | -9.929  | 23.998 | 32.286 | 1.00 | 0.00 | H |
| ATOM | 217 | H2'2 | C A | 7 | -9.798  | 22.246 | 32.355 | 1.00 | 0.00 | H |
| ATOM | 218 | H5'1 | C A | 7 | -9.075  | 25.923 | 29.098 | 1.00 | 0.00 | H |
| ATOM | 219 | H5'2 | C A | 7 | -10.784 | 25.535 | 28.805 | 1.00 | 0.00 | H |
| ATOM | 220 | C1'  | A A | 8 | -6.551  | 18.909 | 33.057 | 1.00 | 0.00 | C |
| ATOM | 221 | N1   | A A | 8 | -3.666  | 21.940 | 36.030 | 1.00 | 0.00 | N |
| ATOM | 222 | C2   | A A | 8 | -3.403  | 20.817 | 35.368 | 1.00 | 0.00 | C |
| ATOM | 223 | N3   | A A | 8 | -4.195  | 20.084 | 34.615 | 1.00 | 0.00 | N |
| ATOM | 224 | C4   | A A | 8 | -5.427  | 20.626 | 34.572 | 1.00 | 0.00 | C |
| ATOM | 225 | C5   | A A | 8 | -5.857  | 21.766 | 35.190 | 1.00 | 0.00 | C |
| ATOM | 226 | C6   | A A | 8 | -4.903  | 22.457 | 35.966 | 1.00 | 0.00 | C |
| ATOM | 227 | N6   | A A | 8 | -5.180  | 23.591 | 36.631 | 1.00 | 0.00 | N |
| ATOM | 228 | N7   | A A | 8 | -7.191  | 22.012 | 34.915 | 1.00 | 0.00 | N |
| ATOM | 229 | C8   | A A | 8 | -7.538  | 21.022 | 34.145 | 1.00 | 0.00 | C |
| ATOM | 230 | N9   | A A | 8 | -6.518  | 20.141 | 33.891 | 1.00 | 0.00 | N |
| ATOM | 231 | C2'  | A A | 8 | -7.855  | 18.130 | 33.167 | 1.00 | 0.00 | C |
| ATOM | 232 | C3'  | A A | 8 | -8.026  | 17.599 | 31.752 | 1.00 | 0.00 | C |
| ATOM | 233 | O3'  | A A | 8 | -7.279  | 16.393 | 31.613 | 1.00 | 0.00 | O |
| ATOM | 234 | C4'  | A A | 8 | -7.462  | 18.730 | 30.893 | 1.00 | 0.00 | C |
| ATOM | 235 | O4'  | A A | 8 | -6.385  | 19.298 | 31.708 | 1.00 | 0.00 | O |
| ATOM | 236 | C5'  | A A | 8 | -8.424  | 19.834 | 30.523 | 1.00 | 0.00 | C |
| ATOM | 237 | O5'  | A A | 8 | -9.327  | 20.089 | 31.629 | 1.00 | 0.00 | O |
| ATOM | 238 | O1P  | A A | 8 | -11.568 | 19.388 | 30.721 | 1.00 | 0.00 | O |
| ATOM | 239 | O2P  | A A | 8 | -11.431 | 21.136 | 32.517 | 1.00 | 0.00 | O |
| ATOM | 240 | P    | A A | 8 | -10.828 | 20.522 | 31.308 | 1.00 | 0.00 | P |
| ATOM | 241 | H2   | A A | 8 | -2.383  | 20.449 | 35.464 | 1.00 | 0.00 | H |
| ATOM | 242 | H8   | A A | 8 | -8.542  | 20.903 | 33.740 | 1.00 | 0.00 | H |
| ATOM | 243 | H1'  | A A | 8 | -5.700  | 18.288 | 33.334 | 1.00 | 0.00 | H |
| ATOM | 244 | H3'  | A A | 8 | -9.071  | 17.406 | 31.512 | 1.00 | 0.00 | H |
| ATOM | 245 | H4'  | A A | 8 | -7.103  | 18.277 | 29.970 | 1.00 | 0.00 | H |
| ATOM | 246 | H61  | A A | 8 | -4.446  | 24.058 | 37.181 | 1.00 | 0.00 | H |
| ATOM | 247 | H62  | A A | 8 | -6.128  | 23.993 | 36.589 | 1.00 | 0.00 | H |
| ATOM | 248 | H2'1 | A A | 8 | -8.692  | 18.763 | 33.457 | 1.00 | 0.00 | H |
| ATOM | 249 | H2'2 | A A | 8 | -7.790  | 17.317 | 33.891 | 1.00 | 0.00 | H |
| ATOM | 250 | H5'1 | A A | 8 | -7.858  | 20.738 | 30.295 | 1.00 | 0.00 | H |

|      |     |      |     |    |        |        |        |      |      |   |
|------|-----|------|-----|----|--------|--------|--------|------|------|---|
| ATOM | 251 | H5'2 | A A | 8  | -8.993 | 19.534 | 29.645 | 1.00 | 0.00 | H |
| ATOM | 252 | C1'  | C A | 9  | -3.733 | 16.164 | 36.088 | 1.00 | 0.00 | C |
| ATOM | 253 | N1   | C A | 9  | -4.582 | 17.258 | 36.634 | 1.00 | 0.00 | N |
| ATOM | 254 | C2   | C A | 9  | -3.981 | 18.196 | 37.471 | 1.00 | 0.00 | C |
| ATOM | 255 | O2   | C A | 9  | -2.774 | 18.082 | 37.724 | 1.00 | 0.00 | O |
| ATOM | 256 | N3   | C A | 9  | -4.736 | 19.199 | 37.978 | 1.00 | 0.00 | N |
| ATOM | 257 | C4   | C A | 9  | -6.040 | 19.295 | 37.687 | 1.00 | 0.00 | C |
| ATOM | 258 | N4   | C A | 9  | -6.731 | 20.298 | 38.208 | 1.00 | 0.00 | N |
| ATOM | 259 | C5   | C A | 9  | -6.687 | 18.342 | 36.832 | 1.00 | 0.00 | C |
| ATOM | 260 | C6   | C A | 9  | -5.905 | 17.342 | 36.328 | 1.00 | 0.00 | C |
| ATOM | 261 | C2'  | C A | 9  | -4.442 | 14.820 | 36.004 | 1.00 | 0.00 | C |
| ATOM | 262 | C3'  | C A | 9  | -3.855 | 14.230 | 34.729 | 1.00 | 0.00 | C |
| ATOM | 263 | O3'  | C A | 9  | -2.617 | 13.593 | 35.037 | 1.00 | 0.00 | O |
| ATOM | 264 | C4'  | C A | 9  | -3.667 | 15.458 | 33.842 | 1.00 | 0.00 | C |
| ATOM | 265 | O4'  | C A | 9  | -3.343 | 16.536 | 34.778 | 1.00 | 0.00 | O |
| ATOM | 266 | C5'  | C A | 9  | -4.861 | 15.880 | 33.018 | 1.00 | 0.00 | C |
| ATOM | 267 | O5'  | C A | 9  | -6.080 | 15.657 | 33.771 | 1.00 | 0.00 | O |
| ATOM | 268 | O1P  | C A | 9  | -7.251 | 13.853 | 32.464 | 1.00 | 0.00 | O |
| ATOM | 269 | O2P  | C A | 9  | -8.586 | 15.470 | 33.842 | 1.00 | 0.00 | O |
| ATOM | 270 | P    | C A | 9  | -7.399 | 15.225 | 32.985 | 1.00 | 0.00 | P |
| ATOM | 271 | H5   | C A | 9  | -7.750 | 18.413 | 36.596 | 1.00 | 0.00 | H |
| ATOM | 272 | H6   | C A | 9  | -6.350 | 16.599 | 35.667 | 1.00 | 0.00 | H |
| ATOM | 273 | H1'  | C A | 9  | -2.833 | 16.094 | 36.698 | 1.00 | 0.00 | H |
| ATOM | 274 | H3'  | C A | 9  | -4.528 | 13.509 | 34.267 | 1.00 | 0.00 | H |
| ATOM | 275 | H4'  | C A | 9  | -2.852 | 15.231 | 33.155 | 1.00 | 0.00 | H |
| ATOM | 276 | H41  | C A | 9  | -7.735 | 20.397 | 37.997 | 1.00 | 0.00 | H |
| ATOM | 277 | H42  | C A | 9  | -6.264 | 20.980 | 38.824 | 1.00 | 0.00 | H |
| ATOM | 278 | H2'1 | C A | 9  | -5.524 | 14.926 | 35.928 | 1.00 | 0.00 | H |
| ATOM | 279 | H2'2 | C A | 9  | -4.234 | 14.188 | 36.868 | 1.00 | 0.00 | H |
| ATOM | 280 | H5'1 | C A | 9  | -4.770 | 16.937 | 32.768 | 1.00 | 0.00 | H |
| ATOM | 281 | H5'2 | C A | 9  | -4.884 | 15.296 | 32.098 | 1.00 | 0.00 | H |
| ATOM | 282 | C1'  | C A | 10 | -1.119 | 15.344 | 40.213 | 1.00 | 0.00 | C |
| ATOM | 283 | N1   | C A | 10 | -2.512 | 15.862 | 40.292 | 1.00 | 0.00 | N |
| ATOM | 284 | C2   | C A | 10 | -2.740 | 17.003 | 41.058 | 1.00 | 0.00 | C |
| ATOM | 285 | O2   | C A | 10 | -1.784 | 17.536 | 41.638 | 1.00 | 0.00 | O |
| ATOM | 286 | N3   | C A | 10 | -4.001 | 17.493 | 41.143 | 1.00 | 0.00 | N |
| ATOM | 287 | C4   | C A | 10 | -5.016 | 16.895 | 40.505 | 1.00 | 0.00 | C |
| ATOM | 288 | N4   | C A | 10 | -6.229 | 17.417 | 40.620 | 1.00 | 0.00 | N |
| ATOM | 289 | C5   | C A | 10 | -4.812 | 15.717 | 39.714 | 1.00 | 0.00 | C |
| ATOM | 290 | C6   | C A | 10 | -3.532 | 15.245 | 39.638 | 1.00 | 0.00 | C |
| ATOM | 291 | C2'  | C A | 10 | -1.030 | 13.824 | 40.209 | 1.00 | 0.00 | C |
| ATOM | 292 | C3'  | C A | 10 | 0.146  | 13.578 | 39.275 | 1.00 | 0.00 | C |
| ATOM | 293 | O3'  | C A | 10 | 1.360  | 13.678 | 40.016 | 1.00 | 0.00 | O |
| ATOM | 294 | C4'  | C A | 10 | 0.003  | 14.697 | 38.247 | 1.00 | 0.00 | C |
| ATOM | 295 | O4'  | C A | 10 | -0.550 | 15.818 | 39.006 | 1.00 | 0.00 | O |
| ATOM | 296 | C5'  | C A | 10 | -0.904 | 14.417 | 37.071 | 1.00 | 0.00 | C |
| ATOM | 297 | O5'  | C A | 10 | -2.038 | 13.624 | 37.505 | 1.00 | 0.00 | O |
| ATOM | 298 | O1P  | C A | 10 | -1.707 | 11.432 | 36.315 | 1.00 | 0.00 | O |
| ATOM | 299 | O2P  | C A | 10 | -4.016 | 12.178 | 36.950 | 1.00 | 0.00 | O |
| ATOM | 300 | P    | C A | 10 | -2.652 | 12.550 | 36.500 | 1.00 | 0.00 | P |
| ATOM | 301 | H5   | C A | 10 | -5.635 | 15.223 | 39.197 | 1.00 | 0.00 | H |
| ATOM | 302 | H6   | C A | 10 | -3.325 | 14.357 | 39.042 | 1.00 | 0.00 | H |
| ATOM | 303 | H1'  | C A | 10 | -0.550 | 15.767 | 41.041 | 1.00 | 0.00 | H |
| ATOM | 304 | H3'  | C A | 10 | 0.093  | 12.598 | 38.802 | 1.00 | 0.00 | H |

|      |     |      |   |   |    |        |        |        |      |      |   |
|------|-----|------|---|---|----|--------|--------|--------|------|------|---|
| ATOM | 305 | H4'  | C | A | 10 | 1.001  | 14.897 | 37.856 | 1.00 | 0.00 | H |
| ATOM | 306 | H41  | C | A | 10 | -7.026 | 16.978 | 40.138 | 1.00 | 0.00 | H |
| ATOM | 307 | H42  | C | A | 10 | -6.373 | 18.262 | 41.192 | 1.00 | 0.00 | H |
| ATOM | 308 | H2'1 | C | A | 10 | -1.938 | 13.356 | 39.832 | 1.00 | 0.00 | H |
| ATOM | 309 | H2'2 | C | A | 10 | -0.839 | 13.418 | 41.204 | 1.00 | 0.00 | H |
| ATOM | 310 | H5'1 | C | A | 10 | -1.253 | 15.362 | 36.654 | 1.00 | 0.00 | H |
| ATOM | 311 | H5'2 | C | A | 10 | -0.344 | 13.874 | 36.310 | 1.00 | 0.00 | H |
| ATOM | 312 | C1'  | T | A | 11 | 0.080  | 16.112 | 44.953 | 1.00 | 0.00 | C |
| ATOM | 313 | N1   | T | A | 11 | -1.335 | 15.861 | 44.573 | 1.00 | 0.00 | N |
| ATOM | 314 | C2   | T | A | 11 | -2.279 | 16.759 | 45.030 | 1.00 | 0.00 | C |
| ATOM | 315 | O2   | T | A | 11 | -1.993 | 17.724 | 45.718 | 1.00 | 0.00 | O |
| ATOM | 316 | N3   | T | A | 11 | -3.582 | 16.489 | 44.653 | 1.00 | 0.00 | N |
| ATOM | 317 | C4   | T | A | 11 | -4.010 | 15.427 | 43.883 | 1.00 | 0.00 | C |
| ATOM | 318 | O4   | T | A | 11 | -5.210 | 15.286 | 43.612 | 1.00 | 0.00 | O |
| ATOM | 319 | C5   | T | A | 11 | -2.953 | 14.543 | 43.453 | 1.00 | 0.00 | C |
| ATOM | 320 | C6   | T | A | 11 | -1.673 | 14.777 | 43.801 | 1.00 | 0.00 | C |
| ATOM | 321 | C7   | T | A | 11 | -3.374 | 13.376 | 42.611 | 1.00 | 0.00 | C |
| ATOM | 322 | C2'  | T | A | 11 | 0.868  | 14.844 | 45.258 | 1.00 | 0.00 | C |
| ATOM | 323 | C3'  | T | A | 11 | 2.248  | 15.191 | 44.723 | 1.00 | 0.00 | C |
| ATOM | 324 | O3'  | T | A | 11 | 2.969  | 15.915 | 45.718 | 1.00 | 0.00 | O |
| ATOM | 325 | C4'  | T | A | 11 | 1.932  | 16.049 | 43.501 | 1.00 | 0.00 | C |
| ATOM | 326 | O4'  | T | A | 11 | 0.710  | 16.765 | 43.868 | 1.00 | 0.00 | O |
| ATOM | 327 | C5'  | T | A | 11 | 1.688  | 15.311 | 42.205 | 1.00 | 0.00 | C |
| ATOM | 328 | O5'  | T | A | 11 | 0.987  | 14.071 | 42.473 | 1.00 | 0.00 | O |
| ATOM | 329 | O1P  | T | A | 11 | 2.664  | 12.304 | 41.843 | 1.00 | 0.00 | O |
| ATOM | 330 | O2P  | T | A | 11 | 0.208  | 11.807 | 41.709 | 1.00 | 0.00 | O |
| ATOM | 331 | P    | T | A | 11 | 1.302  | 12.799 | 41.565 | 1.00 | 0.00 | P |
| ATOM | 332 | H3   | T | A | 11 | -4.304 | 17.146 | 44.978 | 1.00 | 0.00 | H |
| ATOM | 333 | H6   | T | A | 11 | -0.890 | 14.095 | 43.464 | 1.00 | 0.00 | H |
| ATOM | 334 | H1'  | T | A | 11 | 0.091  | 16.791 | 45.806 | 1.00 | 0.00 | H |
| ATOM | 335 | H3'  | T | A | 11 | 2.813  | 14.302 | 44.445 | 1.00 | 0.00 | H |
| ATOM | 336 | H4'  | T | A | 11 | 2.785  | 16.713 | 43.350 | 1.00 | 0.00 | H |
| ATOM | 337 | H71  | T | A | 11 | -3.189 | 12.450 | 43.155 | 1.00 | 0.00 | H |
| ATOM | 338 | H72  | T | A | 11 | -4.438 | 13.457 | 42.383 | 1.00 | 0.00 | H |
| ATOM | 339 | H73  | T | A | 11 | -2.804 | 13.372 | 41.682 | 1.00 | 0.00 | H |
| ATOM | 340 | H2'1 | T | A | 11 | 0.456  | 13.971 | 44.755 | 1.00 | 0.00 | H |
| ATOM | 341 | H2'2 | T | A | 11 | 0.900  | 14.623 | 46.326 | 1.00 | 0.00 | H |
| ATOM | 342 | H5'1 | T | A | 11 | 1.092  | 15.937 | 41.542 | 1.00 | 0.00 | H |
| ATOM | 343 | H5'2 | T | A | 11 | 2.646  | 15.097 | 41.730 | 1.00 | 0.00 | H |
| ATOM | 344 | C1'  | A | A | 12 | -0.871 | 17.560 | 49.604 | 1.00 | 0.00 | C |
| ATOM | 345 | N1   | A | A | 12 | -5.732 | 16.494 | 48.350 | 1.00 | 0.00 | N |
| ATOM | 346 | C2   | A | A | 12 | -5.176 | 17.497 | 49.021 | 1.00 | 0.00 | C |
| ATOM | 347 | N3   | A | A | 12 | -3.909 | 17.714 | 49.308 | 1.00 | 0.00 | N |
| ATOM | 348 | C4   | A | A | 12 | -3.146 | 16.723 | 48.814 | 1.00 | 0.00 | C |
| ATOM | 349 | C5   | A | A | 12 | -3.557 | 15.628 | 48.109 | 1.00 | 0.00 | C |
| ATOM | 350 | C6   | A | A | 12 | -4.943 | 15.520 | 47.869 | 1.00 | 0.00 | C |
| ATOM | 351 | N6   | A | A | 12 | -5.493 | 14.499 | 47.189 | 1.00 | 0.00 | N |
| ATOM | 352 | N7   | A | A | 12 | -2.485 | 14.824 | 47.764 | 1.00 | 0.00 | N |
| ATOM | 353 | C8   | A | A | 12 | -1.457 | 15.441 | 48.268 | 1.00 | 0.00 | C |
| ATOM | 354 | N9   | A | A | 12 | -1.781 | 16.604 | 48.919 | 1.00 | 0.00 | N |
| ATOM | 355 | C2'  | A | A | 12 | 0.278  | 16.889 | 50.344 | 1.00 | 0.00 | C |
| ATOM | 356 | C3'  | A | A | 12 | 1.412  | 17.881 | 50.137 | 1.00 | 0.00 | C |
| ATOM | 357 | O3'  | A | A | 12 | 1.327  | 18.902 | 51.129 | 1.00 | 0.00 | O |
| ATOM | 358 | C4'  | A | A | 12 | 1.142  | 18.418 | 48.732 | 1.00 | 0.00 | C |

|      |     |      |   |   |    |         |        |        |      |      |   |
|------|-----|------|---|---|----|---------|--------|--------|------|------|---|
| ATOM | 359 | O4'  | A | A | 12 | -0.318  | 18.410 | 48.618 | 1.00 | 0.00 | O |
| ATOM | 360 | C5'  | A | A | 12 | 1.720   | 17.621 | 47.588 | 1.00 | 0.00 | C |
| ATOM | 361 | O5'  | A | A | 12 | 1.654   | 16.204 | 47.892 | 1.00 | 0.00 | O |
| ATOM | 362 | O1P  | A | A | 12 | 4.074   | 15.536 | 48.082 | 1.00 | 0.00 | O |
| ATOM | 363 | O2P  | A | A | 12 | 2.353   | 13.841 | 47.401 | 1.00 | 0.00 | O |
| ATOM | 364 | P    | A | A | 12 | 2.817   | 15.250 | 47.363 | 1.00 | 0.00 | P |
| ATOM | 365 | H2   | A | A | 12 | -5.871  | 18.252 | 49.388 | 1.00 | 0.00 | H |
| ATOM | 366 | H8   | A | A | 12 | -0.435  | 15.071 | 48.182 | 1.00 | 0.00 | H |
| ATOM | 367 | H1'  | A | A | 12 | -1.466  | 18.173 | 50.280 | 1.00 | 0.00 | H |
| ATOM | 368 | H3'  | A | A | 12 | 2.389   | 17.404 | 50.194 | 1.00 | 0.00 | H |
| ATOM | 369 | H4'  | A | A | 12 | 1.568   | 19.420 | 48.690 | 1.00 | 0.00 | H |
| ATOM | 370 | H61  | A | A | 12 | -6.511  | 14.469 | 47.039 | 1.00 | 0.00 | H |
| ATOM | 371 | H62  | A | A | 12 | -4.894  | 13.746 | 46.818 | 1.00 | 0.00 | H |
| ATOM | 372 | H2'1 | A | A | 12 | 0.525   | 15.913 | 49.928 | 1.00 | 0.00 | H |
| ATOM | 373 | H2'2 | A | A | 12 | 0.062   | 16.749 | 51.403 | 1.00 | 0.00 | H |
| ATOM | 374 | H5'1 | A | A | 12 | 1.149   | 17.829 | 46.683 | 1.00 | 0.00 | H |
| ATOM | 375 | H5'2 | A | A | 12 | 2.757   | 17.916 | 47.433 | 1.00 | 0.00 | H |
| ATOM | 376 | C1'  | G | A | 13 | -3.873  | 18.457 | 53.455 | 1.00 | 0.00 | C |
| ATOM | 377 | N1   | G | A | 13 | -6.883  | 15.006 | 51.206 | 1.00 | 0.00 | N |
| ATOM | 378 | C2   | G | A | 13 | -7.206  | 16.213 | 51.800 | 1.00 | 0.00 | C |
| ATOM | 379 | N2   | G | A | 13 | -8.505  | 16.544 | 51.798 | 1.00 | 0.00 | N |
| ATOM | 380 | N3   | G | A | 13 | -6.307  | 17.024 | 52.353 | 1.00 | 0.00 | N |
| ATOM | 381 | C4   | G | A | 13 | -5.044  | 16.528 | 52.273 | 1.00 | 0.00 | C |
| ATOM | 382 | C5   | G | A | 13 | -4.629  | 15.336 | 51.703 | 1.00 | 0.00 | C |
| ATOM | 383 | C6   | G | A | 13 | -5.584  | 14.475 | 51.112 | 1.00 | 0.00 | C |
| ATOM | 384 | O6   | G | A | 13 | -5.411  | 13.386 | 50.564 | 1.00 | 0.00 | O |
| ATOM | 385 | N7   | G | A | 13 | -3.246  | 15.196 | 51.830 | 1.00 | 0.00 | N |
| ATOM | 386 | C8   | G | A | 13 | -2.874  | 16.284 | 52.453 | 1.00 | 0.00 | C |
| ATOM | 387 | N9   | G | A | 13 | -3.911  | 17.142 | 52.757 | 1.00 | 0.00 | N |
| ATOM | 388 | C2'  | G | A | 13 | -2.869  | 18.517 | 54.597 | 1.00 | 0.00 | C |
| ATOM | 389 | C3'  | G | A | 13 | -2.369  | 19.949 | 54.506 | 1.00 | 0.00 | C |
| ATOM | 390 | O3'  | G | A | 13 | -3.267  | 20.804 | 55.210 | 1.00 | 0.00 | O |
| ATOM | 391 | C4'  | G | A | 13 | -2.377  | 20.218 | 53.002 | 1.00 | 0.00 | C |
| ATOM | 392 | O4'  | G | A | 13 | -3.512  | 19.440 | 52.504 | 1.00 | 0.00 | O |
| ATOM | 393 | C5'  | G | A | 13 | -1.139  | 19.807 | 52.241 | 1.00 | 0.00 | C |
| ATOM | 394 | O5'  | G | A | 13 | -0.605  | 18.581 | 52.797 | 1.00 | 0.00 | O |
| ATOM | 395 | O1P  | G | A | 13 | 1.609   | 19.294 | 53.761 | 1.00 | 0.00 | O |
| ATOM | 396 | O2P  | G | A | 13 | 1.276   | 16.926 | 53.002 | 1.00 | 0.00 | O |
| ATOM | 397 | P    | G | A | 13 | 0.976   | 18.366 | 52.805 | 1.00 | 0.00 | P |
| ATOM | 398 | H1   | G | A | 13 | -7.655  | 14.454 | 50.800 | 1.00 | 0.00 | H |
| ATOM | 399 | H8   | G | A | 13 | -1.837  | 16.495 | 52.712 | 1.00 | 0.00 | H |
| ATOM | 400 | H1'  | G | A | 13 | -4.880  | 18.685 | 53.807 | 1.00 | 0.00 | H |
| ATOM | 401 | H21  | G | A | 13 | -9.194  | 15.911 | 51.364 | 1.00 | 0.00 | H |
| ATOM | 402 | H3'  | G | A | 13 | -1.366  | 20.060 | 54.920 | 1.00 | 0.00 | H |
| ATOM | 403 | H22  | G | A | 13 | -8.810  | 17.427 | 52.226 | 1.00 | 0.00 | H |
| ATOM | 404 | H4'  | G | A | 13 | -2.508  | 21.291 | 52.872 | 1.00 | 0.00 | H |
| ATOM | 405 | H2'1 | G | A | 13 | -2.054  | 17.804 | 54.469 | 1.00 | 0.00 | H |
| ATOM | 406 | H2'2 | G | A | 13 | -3.330  | 18.317 | 55.565 | 1.00 | 0.00 | H |
| ATOM | 407 | H5'1 | G | A | 13 | -1.397  | 19.655 | 51.193 | 1.00 | 0.00 | H |
| ATOM | 408 | H5'2 | G | A | 13 | -0.395  | 20.600 | 52.314 | 1.00 | 0.00 | H |
| ATOM | 409 | C1'  | G | A | 14 | -7.989  | 17.823 | 56.137 | 1.00 | 0.00 | C |
| ATOM | 410 | N1   | G | A | 14 | -8.067  | 13.242 | 53.893 | 1.00 | 0.00 | N |
| ATOM | 411 | C2   | G | A | 14 | -9.099  | 14.131 | 54.134 | 1.00 | 0.00 | C |
| ATOM | 412 | N2   | G | A | 14 | -10.315 | 13.747 | 53.726 | 1.00 | 0.00 | N |

|      |     |      |     |    |         |        |        |      |      |   |
|------|-----|------|-----|----|---------|--------|--------|------|------|---|
| ATOM | 413 | N3   | G A | 14 | -8.932  | 15.308 | 54.735 | 1.00 | 0.00 | N |
| ATOM | 414 | C4   | G A | 14 | -7.639  | 15.528 | 55.087 | 1.00 | 0.00 | C |
| ATOM | 415 | C5   | G A | 14 | -6.547  | 14.700 | 54.891 | 1.00 | 0.00 | C |
| ATOM | 416 | C6   | G A | 14 | -6.721  | 13.453 | 54.251 | 1.00 | 0.00 | C |
| ATOM | 417 | O6   | G A | 14 | -5.884  | 12.589 | 53.990 | 1.00 | 0.00 | O |
| ATOM | 418 | N7   | G A | 14 | -5.392  | 15.298 | 55.403 | 1.00 | 0.00 | N |
| ATOM | 419 | C8   | G A | 14 | -5.811  | 16.442 | 55.878 | 1.00 | 0.00 | C |
| ATOM | 420 | N9   | G A | 14 | -7.165  | 16.654 | 55.724 | 1.00 | 0.00 | N |
| ATOM | 421 | C2'  | G A | 14 | -7.569  | 18.430 | 57.468 | 1.00 | 0.00 | C |
| ATOM | 422 | C3'  | G A | 14 | -7.815  | 19.912 | 57.235 | 1.00 | 0.00 | C |
| ATOM | 423 | O3'  | G A | 14 | -9.185  | 20.207 | 57.497 | 1.00 | 0.00 | O |
| ATOM | 424 | C4'  | G A | 14 | -7.459  | 20.086 | 55.759 | 1.00 | 0.00 | C |
| ATOM | 425 | O4'  | G A | 14 | -7.852  | 18.819 | 55.141 | 1.00 | 0.00 | O |
| ATOM | 426 | C5'  | G A | 14 | -6.004  | 20.345 | 55.446 | 1.00 | 0.00 | C |
| ATOM | 427 | O5'  | G A | 14 | -5.165  | 19.588 | 56.352 | 1.00 | 0.00 | O |
| ATOM | 428 | O1P  | G A | 14 | -4.013  | 21.369 | 57.706 | 1.00 | 0.00 | O |
| ATOM | 429 | O2P  | G A | 14 | -2.907  | 19.144 | 57.363 | 1.00 | 0.00 | O |
| ATOM | 430 | P    | G A | 14 | -3.775  | 20.216 | 56.817 | 1.00 | 0.00 | P |
| ATOM | 431 | H1   | G A | 14 | -8.301  | 12.359 | 53.414 | 1.00 | 0.00 | H |
| ATOM | 432 | H8   | G A | 14 | -5.148  | 17.165 | 56.354 | 1.00 | 0.00 | H |
| ATOM | 433 | H1'  | G A | 14 | -9.033  | 17.513 | 56.160 | 1.00 | 0.00 | H |
| ATOM | 434 | H21  | G A | 14 | -10.436 | 12.836 | 53.258 | 1.00 | 0.00 | H |
| ATOM | 435 | H3'  | G A | 14 | -7.184  | 20.535 | 57.867 | 1.00 | 0.00 | H |
| ATOM | 436 | H22  | G A | 14 | -11.127 | 14.361 | 53.877 | 1.00 | 0.00 | H |
| ATOM | 437 | H4'  | G A | 14 | -8.036  | 20.935 | 55.392 | 1.00 | 0.00 | H |
| ATOM | 438 | H2'1 | G A | 14 | -6.523  | 18.234 | 57.701 | 1.00 | 0.00 | H |
| ATOM | 439 | H2'2 | G A | 14 | -8.166  | 18.055 | 58.300 | 1.00 | 0.00 | H |
| ATOM | 440 | H5'1 | G A | 14 | -5.801  | 20.047 | 54.418 | 1.00 | 0.00 | H |
| ATOM | 441 | H5'2 | G A | 14 | -5.799  | 21.411 | 55.556 | 1.00 | 0.00 | H |
| ATOM | 442 | C1'  | A A | 15 | -11.927 | 15.277 | 57.719 | 1.00 | 0.00 | C |
| ATOM | 443 | N1   | A A | 15 | -9.079  | 11.198 | 56.455 | 1.00 | 0.00 | N |
| ATOM | 444 | C2   | A A | 15 | -10.366 | 11.487 | 56.276 | 1.00 | 0.00 | C |
| ATOM | 445 | N3   | A A | 15 | -11.039 | 12.563 | 56.626 | 1.00 | 0.00 | N |
| ATOM | 446 | C4   | A A | 15 | -10.227 | 13.436 | 57.251 | 1.00 | 0.00 | C |
| ATOM | 447 | C5   | A A | 15 | -8.894  | 13.292 | 57.514 | 1.00 | 0.00 | C |
| ATOM | 448 | C6   | A A | 15 | -8.295  | 12.089 | 57.082 | 1.00 | 0.00 | C |
| ATOM | 449 | N6   | A A | 15 | -6.995  | 11.808 | 57.270 | 1.00 | 0.00 | N |
| ATOM | 450 | N7   | A A | 15 | -8.391  | 14.399 | 58.174 | 1.00 | 0.00 | N |
| ATOM | 451 | C8   | A A | 15 | -9.422  | 15.181 | 58.300 | 1.00 | 0.00 | C |
| ATOM | 452 | N9   | A A | 15 | -10.573 | 14.663 | 57.761 | 1.00 | 0.00 | N |
| ATOM | 453 | C2'  | A A | 15 | -12.286 | 16.059 | 58.976 | 1.00 | 0.00 | C |
| ATOM | 454 | C3'  | A A | 15 | -13.106 | 17.209 | 58.411 | 1.00 | 0.00 | C |
| ATOM | 455 | O3'  | A A | 15 | -14.456 | 16.785 | 58.251 | 1.00 | 0.00 | O |
| ATOM | 456 | C4'  | A A | 15 | -12.425 | 17.486 | 57.071 | 1.00 | 0.00 | C |
| ATOM | 457 | O4'  | A A | 15 | -11.963 | 16.170 | 56.623 | 1.00 | 0.00 | O |
| ATOM | 458 | C5'  | A A | 15 | -11.245 | 18.428 | 57.099 | 1.00 | 0.00 | C |
| ATOM | 459 | O5'  | A A | 15 | -10.485 | 18.227 | 58.318 | 1.00 | 0.00 | O |
| ATOM | 460 | O1P  | A A | 15 | -10.793 | 20.393 | 59.562 | 1.00 | 0.00 | O |
| ATOM | 461 | O2P  | A A | 15 | -8.733  | 19.010 | 59.940 | 1.00 | 0.00 | O |
| ATOM | 462 | P    | A A | 15 | -9.776  | 19.483 | 58.998 | 1.00 | 0.00 | P |
| ATOM | 463 | H2   | A A | 15 | -10.948 | 10.720 | 55.764 | 1.00 | 0.00 | H |
| ATOM | 464 | H8   | A A | 15 | -9.379  | 16.155 | 58.787 | 1.00 | 0.00 | H |
| ATOM | 465 | H1'  | A A | 15 | -12.653 | 14.486 | 57.531 | 1.00 | 0.00 | H |
| ATOM | 466 | H3'  | A A | 15 | -13.076 | 18.088 | 59.055 | 1.00 | 0.00 | H |

|      |     |      |   |   |    |         |        |        |      |      |   |
|------|-----|------|---|---|----|---------|--------|--------|------|------|---|
| ATOM | 467 | H4'  | A | A | 15 | -13.181 | 17.917 | 56.416 | 1.00 | 0.00 | H |
| ATOM | 468 | H61  | A | A | 15 | -6.608  | 10.915 | 56.931 | 1.00 | 0.00 | H |
| ATOM | 469 | H62  | A | A | 15 | -6.386  | 12.486 | 57.752 | 1.00 | 0.00 | H |
| ATOM | 470 | H2'1 | A | A | 15 | -11.403 | 16.422 | 59.502 | 1.00 | 0.00 | H |
| ATOM | 471 | H2'2 | A | A | 15 | -12.868 | 15.466 | 59.680 | 1.00 | 0.00 | H |
| ATOM | 472 | H5'1 | A | A | 15 | -10.612 | 18.234 | 56.234 | 1.00 | 0.00 | H |
| ATOM | 473 | H5'2 | A | A | 15 | -11.606 | 19.454 | 57.057 | 1.00 | 0.00 | H |
| ATOM | 474 | C1'  | C | A | 16 | -14.417 | 11.085 | 58.663 | 1.00 | 0.00 | C |
| ATOM | 475 | N1   | C | A | 16 | -13.037 | 11.276 | 59.188 | 1.00 | 0.00 | N |
| ATOM | 476 | C2   | C | A | 16 | -12.102 | 10.272 | 58.947 | 1.00 | 0.00 | C |
| ATOM | 477 | O2   | C | A | 16 | -12.455 | 9.269  | 58.312 | 1.00 | 0.00 | O |
| ATOM | 478 | N3   | C | A | 16 | -10.840 | 10.426 | 59.417 | 1.00 | 0.00 | N |
| ATOM | 479 | C4   | C | A | 16 | -10.490 | 11.522 | 60.101 | 1.00 | 0.00 | C |
| ATOM | 480 | N4   | C | A | 16 | -9.241  | 11.622 | 60.533 | 1.00 | 0.00 | N |
| ATOM | 481 | C5   | C | A | 16 | -11.431 | 12.570 | 60.368 | 1.00 | 0.00 | C |
| ATOM | 482 | C6   | C | A | 16 | -12.696 | 12.396 | 59.882 | 1.00 | 0.00 | C |
| ATOM | 483 | C2'  | C | A | 16 | -15.505 | 11.598 | 59.596 | 1.00 | 0.00 | C |
| ATOM | 484 | C3'  | C | A | 16 | -16.538 | 12.131 | 58.615 | 1.00 | 0.00 | C |
| ATOM | 485 | O3'  | C | A | 16 | -17.372 | 11.059 | 58.185 | 1.00 | 0.00 | O |
| ATOM | 486 | C4'  | C | A | 16 | -15.677 | 12.684 | 57.482 | 1.00 | 0.00 | C |
| ATOM | 487 | O4'  | C | A | 16 | -14.515 | 11.796 | 57.443 | 1.00 | 0.00 | O |
| ATOM | 488 | C5'  | C | A | 16 | -15.192 | 14.107 | 57.641 | 1.00 | 0.00 | C |
| ATOM | 489 | O5'  | C | A | 16 | -14.886 | 14.368 | 59.034 | 1.00 | 0.00 | O |
| ATOM | 490 | O1P  | C | A | 16 | -16.602 | 16.087 | 59.696 | 1.00 | 0.00 | O |
| ATOM | 491 | O2P  | C | A | 16 | -14.392 | 16.000 | 60.880 | 1.00 | 0.00 | O |
| ATOM | 492 | P    | C | A | 16 | -15.151 | 15.829 | 59.617 | 1.00 | 0.00 | P |
| ATOM | 493 | H5   | C | A | 16 | -11.152 | 13.462 | 60.932 | 1.00 | 0.00 | H |
| ATOM | 494 | H6   | C | A | 16 | -13.445 | 13.169 | 60.052 | 1.00 | 0.00 | H |
| ATOM | 495 | H1'  | C | A | 16 | -14.556 | 10.026 | 58.446 | 1.00 | 0.00 | H |
| ATOM | 496 | H3'  | C | A | 16 | -17.155 | 12.914 | 59.060 | 1.00 | 0.00 | H |
| ATOM | 497 | H4'  | C | A | 16 | -16.280 | 12.640 | 56.576 | 1.00 | 0.00 | H |
| ATOM | 498 | H41  | C | A | 16 | -8.945  | 12.457 | 61.061 | 1.00 | 0.00 | H |
| ATOM | 499 | H42  | C | A | 16 | -8.567  | 10.867 | 60.343 | 1.00 | 0.00 | H |
| ATOM | 500 | H2'1 | C | A | 16 | -15.145 | 12.386 | 60.259 | 1.00 | 0.00 | H |
| ATOM | 501 | H2'2 | C | A | 16 | -15.921 | 10.808 | 60.222 | 1.00 | 0.00 | H |
| ATOM | 502 | H5'1 | C | A | 16 | -14.298 | 14.250 | 57.033 | 1.00 | 0.00 | H |
| ATOM | 503 | H5'2 | C | A | 16 | -15.970 | 14.791 | 57.300 | 1.00 | 0.00 | H |
| ATOM | 504 | C1'  | G | A | 17 | -14.777 | 6.262  | 59.721 | 1.00 | 0.00 | C |
| ATOM | 505 | N1   | G | A | 17 | -10.117 | 6.923  | 61.689 | 1.00 | 0.00 | N |
| ATOM | 506 | C2   | G | A | 17 | -10.615 | 5.892  | 60.912 | 1.00 | 0.00 | C |
| ATOM | 507 | N2   | G | A | 17 | -9.758  | 4.904  | 60.624 | 1.00 | 0.00 | N |
| ATOM | 508 | N3   | G | A | 17 | -11.867 | 5.849  | 60.460 | 1.00 | 0.00 | N |
| ATOM | 509 | C4   | G | A | 17 | -12.596 | 6.926  | 60.855 | 1.00 | 0.00 | C |
| ATOM | 510 | C5   | G | A | 17 | -12.187 | 7.998  | 61.631 | 1.00 | 0.00 | C |
| ATOM | 511 | C6   | G | A | 17 | -10.856 | 8.047  | 62.108 | 1.00 | 0.00 | C |
| ATOM | 512 | O6   | G | A | 17 | -10.310 | 8.904  | 62.803 | 1.00 | 0.00 | O |
| ATOM | 513 | N7   | G | A | 17 | -13.241 | 8.895  | 61.811 | 1.00 | 0.00 | N |
| ATOM | 514 | C8   | G | A | 17 | -14.232 | 8.354  | 61.150 | 1.00 | 0.00 | C |
| ATOM | 515 | N9   | G | A | 17 | -13.918 | 7.155  | 60.543 | 1.00 | 0.00 | N |
| ATOM | 516 | C2'  | G | A | 17 | -16.216 | 6.172  | 60.210 | 1.00 | 0.00 | C |
| ATOM | 517 | C3'  | G | A | 17 | -16.989 | 6.060  | 58.906 | 1.00 | 0.00 | C |
| ATOM | 518 | O3'  | G | A | 17 | -17.014 | 4.696  | 58.493 | 1.00 | 0.00 | O |
| ATOM | 519 | C4'  | G | A | 17 | -16.178 | 6.938  | 57.954 | 1.00 | 0.00 | C |
| ATOM | 520 | O4'  | G | A | 17 | -14.796 | 6.774  | 58.402 | 1.00 | 0.00 | O |

|      |     |      |     |    |         |        |        |      |      |   |
|------|-----|------|-----|----|---------|--------|--------|------|------|---|
| ATOM | 521 | C5'  | G A | 17 | -16.515 | 8.410  | 57.949 | 1.00 | 0.00 | C |
| ATOM | 522 | O5'  | G A | 17 | -16.848 | 8.842  | 59.291 | 1.00 | 0.00 | O |
| ATOM | 523 | O1P  | G A | 17 | -19.284 | 9.450  | 59.118 | 1.00 | 0.00 | O |
| ATOM | 524 | O2P  | G A | 17 | -17.833 | 10.560 | 60.838 | 1.00 | 0.00 | O |
| ATOM | 525 | P    | G A | 17 | -17.954 | 9.976  | 59.479 | 1.00 | 0.00 | P |
| ATOM | 526 | H1   | G A | 17 | -9.131  | 6.863  | 61.982 | 1.00 | 0.00 | H |
| ATOM | 527 | H8   | G A | 17 | -15.221 | 8.809  | 61.086 | 1.00 | 0.00 | H |
| ATOM | 528 | H1'  | G A | 17 | -14.314 | 5.275  | 59.691 | 1.00 | 0.00 | H |
| ATOM | 529 | H21  | G A | 17 | -8.790  | 4.946  | 60.974 | 1.00 | 0.00 | H |
| ATOM | 530 | H3'  | G A | 17 | -18.012 | 6.427  | 59.004 | 1.00 | 0.00 | H |
| ATOM | 531 | H22  | G A | 17 | -10.067 | 4.106  | 60.052 | 1.00 | 0.00 | H |
| ATOM | 532 | H4'  | G A | 17 | -16.348 | 6.554  | 56.949 | 1.00 | 0.00 | H |
| ATOM | 533 | H2'1 | G A | 17 | -16.516 | 7.056  | 60.774 | 1.00 | 0.00 | H |
| ATOM | 534 | H2'2 | G A | 17 | -16.384 | 5.304  | 60.848 | 1.00 | 0.00 | H |
| ATOM | 535 | H5'1 | G A | 17 | -15.655 | 8.972  | 57.583 | 1.00 | 0.00 | H |
| ATOM | 536 | H5'2 | G A | 17 | -17.361 | 8.581  | 57.284 | 1.00 | 0.00 | H |
| ATOM | 537 | C1'  | G A | 18 | -13.116 | 1.976  | 61.566 | 1.00 | 0.00 | C |
| ATOM | 538 | N1   | G A | 18 | -10.270 | 5.006  | 64.523 | 1.00 | 0.00 | N |
| ATOM | 539 | C2   | G A | 18 | -9.931  | 3.840  | 63.860 | 1.00 | 0.00 | C |
| ATOM | 540 | N2   | G A | 18 | -8.665  | 3.424  | 64.006 | 1.00 | 0.00 | N |
| ATOM | 541 | N3   | G A | 18 | -10.784 | 3.145  | 63.112 | 1.00 | 0.00 | N |
| ATOM | 542 | C4   | G A | 18 | -12.022 | 3.706  | 63.082 | 1.00 | 0.00 | C |
| ATOM | 543 | C5   | G A | 18 | -12.451 | 4.862  | 63.714 | 1.00 | 0.00 | C |
| ATOM | 544 | C6   | G A | 18 | -11.543 | 5.603  | 64.506 | 1.00 | 0.00 | C |
| ATOM | 545 | O6   | G A | 18 | -11.735 | 6.642  | 65.138 | 1.00 | 0.00 | O |
| ATOM | 546 | N7   | G A | 18 | -13.798 | 5.094  | 63.431 | 1.00 | 0.00 | N |
| ATOM | 547 | C8   | G A | 18 | -14.134 | 4.099  | 62.652 | 1.00 | 0.00 | C |
| ATOM | 548 | N9   | G A | 18 | -13.109 | 3.213  | 62.395 | 1.00 | 0.00 | N |
| ATOM | 549 | C2'  | G A | 18 | -14.407 | 1.177  | 61.667 | 1.00 | 0.00 | C |
| ATOM | 550 | C3'  | G A | 18 | -14.559 | 0.639  | 60.254 | 1.00 | 0.00 | C |
| ATOM | 551 | O3'  | G A | 18 | -13.794 | -0.556 | 60.123 | 1.00 | 0.00 | O |
| ATOM | 552 | C4'  | G A | 18 | -14.005 | 1.776  | 59.396 | 1.00 | 0.00 | C |
| ATOM | 553 | O4'  | G A | 18 | -12.945 | 2.362  | 60.216 | 1.00 | 0.00 | O |
| ATOM | 554 | C5'  | G A | 18 | -14.980 | 2.865  | 59.015 | 1.00 | 0.00 | C |
| ATOM | 555 | O5'  | G A | 18 | -15.896 | 3.109  | 60.111 | 1.00 | 0.00 | O |
| ATOM | 556 | O1P  | G A | 18 | -18.119 | 2.372  | 59.188 | 1.00 | 0.00 | O |
| ATOM | 557 | O2P  | G A | 18 | -18.024 | 4.126  | 60.978 | 1.00 | 0.00 | O |
| ATOM | 558 | P    | G A | 18 | -17.402 | 3.518  | 59.777 | 1.00 | 0.00 | P |
| ATOM | 559 | H1   | G A | 18 | -9.531  | 5.473  | 65.072 | 1.00 | 0.00 | H |
| ATOM | 560 | H8   | G A | 18 | -15.137 | 3.978  | 62.242 | 1.00 | 0.00 | H |
| ATOM | 561 | H1'  | G A | 18 | -12.257 | 1.369  | 61.853 | 1.00 | 0.00 | H |
| ATOM | 562 | H21  | G A | 18 | -8.009  | 3.970  | 64.584 | 1.00 | 0.00 | H |
| ATOM | 563 | H3'  | G A | 18 | -15.601 | 0.431  | 60.005 | 1.00 | 0.00 | H |
| ATOM | 564 | H22  | G A | 18 | -8.351  | 2.563  | 63.540 | 1.00 | 0.00 | H |
| ATOM | 565 | H4'  | G A | 18 | -13.633 | 1.325  | 58.476 | 1.00 | 0.00 | H |
| ATOM | 566 | H2'1 | G A | 18 | -15.257 | 1.799  | 61.948 | 1.00 | 0.00 | H |
| ATOM | 567 | H2'2 | G A | 18 | -14.338 | 0.368  | 62.395 | 1.00 | 0.00 | H |
| ATOM | 568 | H5'1 | G A | 18 | -14.427 | 3.776  | 58.786 | 1.00 | 0.00 | H |
| ATOM | 569 | H5'2 | G A | 18 | -15.537 | 2.554  | 58.131 | 1.00 | 0.00 | H |
| ATOM | 570 | C1'  | T A | 19 | -10.324 | -0.796 | 64.569 | 1.00 | 0.00 | C |
| ATOM | 571 | N1   | T A | 19 | -11.154 | 0.303  | 65.127 | 1.00 | 0.00 | N |
| ATOM | 572 | C2   | T A | 19 | -10.525 | 1.212  | 65.954 | 1.00 | 0.00 | C |
| ATOM | 573 | O2   | T A | 19 | -9.340  | 1.139  | 66.232 | 1.00 | 0.00 | O |
| ATOM | 574 | N3   | T A | 19 | -11.334 | 2.218  | 66.450 | 1.00 | 0.00 | N |

|      |     |      |       |    |         |         |        |      |      |   |
|------|-----|------|-------|----|---------|---------|--------|------|------|---|
| ATOM | 575 | C4   | T A   | 19 | -12.679 | 2.388   | 66.201 | 1.00 | 0.00 | C |
| ATOM | 576 | O4   | T A   | 19 | -13.301 | 3.329   | 66.706 | 1.00 | 0.00 | O |
| ATOM | 577 | C5   | T A   | 19 | -13.250 | 1.391   | 65.327 | 1.00 | 0.00 | C |
| ATOM | 578 | C6   | T A   | 19 | -12.491 | 0.396   | 64.824 | 1.00 | 0.00 | C |
| ATOM | 579 | C7   | T A   | 19 | -14.711 | 1.538   | 65.026 | 1.00 | 0.00 | C |
| ATOM | 580 | C2'  | T A   | 19 | -11.051 | -2.133  | 64.483 | 1.00 | 0.00 | C |
| ATOM | 581 | C3'  | T A   | 19 | -10.481 | -2.723  | 63.204 | 1.00 | 0.00 | C |
| ATOM | 582 | O3'  | T A   | 19 | -9.249  | -3.378  | 63.498 | 1.00 | 0.00 | O |
| ATOM | 583 | C4'  | T A   | 19 | -10.285 | -1.493  | 62.321 | 1.00 | 0.00 | C |
| ATOM | 584 | O4'  | T A   | 19 | -9.939  | -0.426  | 63.259 | 1.00 | 0.00 | O |
| ATOM | 585 | C5'  | T A   | 19 | -11.479 | -1.053  | 61.506 | 1.00 | 0.00 | C |
| ATOM | 586 | O5'  | T A   | 19 | -12.695 | -1.263  | 62.267 | 1.00 | 0.00 | O |
| ATOM | 587 | O1P  | T A   | 19 | -13.898 | -3.048  | 60.962 | 1.00 | 0.00 | O |
| ATOM | 588 | O2P  | T A   | 19 | -15.201 | -1.420  | 62.358 | 1.00 | 0.00 | O |
| ATOM | 589 | P    | T A   | 19 | -14.026 | -1.675  | 61.491 | 1.00 | 0.00 | P |
| ATOM | 590 | H3   | T A   | 19 | -10.885 | 2.911   | 67.066 | 1.00 | 0.00 | H |
| ATOM | 591 | H6   | T A   | 19 | -12.944 | -0.345  | 64.166 | 1.00 | 0.00 | H |
| ATOM | 592 | H1'  | T A   | 19 | -9.420  | -0.882  | 65.173 | 1.00 | 0.00 | H |
| ATOM | 593 | H3'  | T A   | 19 | -11.167 | -3.434  | 62.742 | 1.00 | 0.00 | H |
| ATOM | 594 | H4'  | T A   | 19 | -9.477  | -1.728  | 61.625 | 1.00 | 0.00 | H |
| ATOM | 595 | H71  | T A   | 19 | -15.256 | 0.696   | 65.451 | 1.00 | 0.00 | H |
| ATOM | 596 | H72  | T A   | 19 | -15.080 | 2.467   | 65.463 | 1.00 | 0.00 | H |
| ATOM | 597 | H73  | T A   | 19 | -14.862 | 1.560   | 63.946 | 1.00 | 0.00 | H |
| ATOM | 598 | H2'1 | T A   | 19 | -12.131 | -2.011  | 64.418 | 1.00 | 0.00 | H |
| ATOM | 599 | H2'2 | T A   | 19 | -10.845 | -2.772  | 65.343 | 1.00 | 0.00 | H |
| ATOM | 600 | H5'1 | T A   | 19 | -11.376 | 0.004   | 61.261 | 1.00 | 0.00 | H |
| ATOM | 601 | H5'2 | T A   | 19 | -11.517 | -1.632  | 60.585 | 1.00 | 0.00 | H |
| ATOM | 602 | C01  | LNK A | 20 | -8.567  | -6.781  | 64.842 | 0.00 | 0.00 | C |
| ATOM | 603 | O1   | LNK A | 20 | -9.466  | -5.741  | 64.451 | 1.00 | 0.00 | O |
| ATOM | 604 | S    | LNK A | 20 | -8.698  | -10.406 | 66.482 | 0.00 | 0.00 | S |
| ATOM | 605 | C02  | LNK A | 20 | -9.370  | -7.959  | 65.426 | 0.00 | 0.00 | C |
| ATOM | 606 | C03  | LNK A | 20 | -8.582  | -8.592  | 66.588 | 0.00 | 0.00 | C |
| ATOM | 607 | O1P  | LNK A | 20 | -10.430 | -3.851  | 65.807 | 1.00 | 0.00 | O |
| ATOM | 608 | O2P  | LNK A | 20 | -7.948  | -4.223  | 65.757 | 1.00 | 0.00 | O |
| ATOM | 609 | P    | LNK A | 20 | -9.244  | -4.273  | 65.036 | 1.00 | 0.00 | P |
| ATOM | 610 | H01  | LNK A | 20 | -7.877  | -6.403  | 65.597 | 0.00 | 0.00 | H |
| ATOM | 611 | H02  | LNK A | 20 | -8.004  | -7.121  | 63.973 | 0.00 | 0.00 | H |
| ATOM | 612 | H03  | LNK A | 20 | -9.001  | -8.257  | 67.537 | 0.00 | 0.00 | H |
| ATOM | 613 | H04  | LNK A | 20 | -9.537  | -8.706  | 64.649 | 0.00 | 0.00 | H |
| ATOM | 614 | H05  | LNK A | 20 | -10.331 | -7.598  | 65.793 | 0.00 | 0.00 | H |
| ATOM | 615 | H06  | LNK A | 20 | -7.537  | -8.291  | 66.525 | 0.00 | 0.00 | H |
| ATOM | 616 | AU   | LNK A | 20 | -8.435  | -10.686 | 67.050 |      |      |   |
| TER  |     |      |       |    |         |         |        |      |      |   |
| ATOM | 618 | C1'  | A B   | 2  | -7.251  | 7.291   | 71.205 | 1.00 | 0.00 | C |
| ATOM | 619 | N1   | A B   | 2  | -10.070 | 4.209   | 68.223 | 1.00 | 0.00 | N |
| ATOM | 620 | C2   | A B   | 2  | -8.785  | 4.199   | 68.564 | 1.00 | 0.00 | C |
| ATOM | 621 | N3   | A B   | 2  | -8.120  | 5.025   | 69.343 | 1.00 | 0.00 | N |
| ATOM | 622 | C4   | A B   | 2  | -8.940  | 5.986   | 69.809 | 1.00 | 0.00 | C |
| ATOM | 623 | C5   | A B   | 2  | -10.273 | 6.137   | 69.555 | 1.00 | 0.00 | C |
| ATOM | 624 | C6   | A B   | 2  | -10.863 | 5.178   | 68.704 | 1.00 | 0.00 | C |
| ATOM | 625 | N6   | A B   | 2  | -12.163 | 5.197   | 68.365 | 1.00 | 0.00 | N |
| ATOM | 626 | N7   | A B   | 2  | -10.786 | 7.242   | 70.211 | 1.00 | 0.00 | N |
| ATOM | 627 | C8   | A B   | 2  | -9.760  | 7.735   | 70.839 | 1.00 | 0.00 | C |
| ATOM | 628 | N9   | A B   | 2  | -8.605  | 7.023   | 70.644 | 1.00 | 0.00 | N |



|      |     |      |     |   |         |        |        |      |      |   |
|------|-----|------|-----|---|---------|--------|--------|------|------|---|
| ATOM | 629 | C2'  | A B | 2 | -6.906  | 8.772  | 71.292 | 1.00 | 0.00 | C |
| ATOM | 630 | C3'  | A B | 2 | -6.089  | 8.832  | 72.573 | 1.00 | 0.00 | C |
| ATOM | 631 | O3'  | A B | 2 | -4.734  | 8.499  | 72.280 | 1.00 | 0.00 | O |
| ATOM | 632 | C4'  | A B | 2 | -6.763  | 7.782  | 73.456 | 1.00 | 0.00 | C |
| ATOM | 633 | O4'  | A B | 2 | -7.216  | 6.756  | 72.514 | 1.00 | 0.00 | O |
| ATOM | 634 | C5'  | A B | 2 | -7.947  | 8.249  | 74.269 | 1.00 | 0.00 | C |
| ATOM | 635 | O5'  | A B | 2 | -8.714  | 9.216  | 73.508 | 1.00 | 0.00 | O |
| ATOM | 636 | H2   | A B | 2 | -8.196  | 3.389  | 68.137 | 1.00 | 0.00 | H |
| ATOM | 637 | H8   | A B | 2 | -9.812  | 8.629  | 71.460 | 1.00 | 0.00 | H |
| ATOM | 638 | H1'  | A B | 2 | -6.520  | 6.754  | 70.602 | 1.00 | 0.00 | H |
| ATOM | 639 | H3'  | A B | 2 | -6.126  | 9.818  | 73.036 | 1.00 | 0.00 | H |
| ATOM | 640 | H4'  | A B | 2 | -6.005  | 7.419  | 74.149 | 1.00 | 0.00 | H |
| ATOM | 641 | H61  | A B | 2 | -12.544 | 4.472  | 67.743 | 1.00 | 0.00 | H |
| ATOM | 642 | H62  | A B | 2 | -12.778 | 5.940  | 68.730 | 1.00 | 0.00 | H |
| ATOM | 643 | H2'1 | A B | 2 | -7.793  | 9.401  | 71.358 | 1.00 | 0.00 | H |
| ATOM | 644 | H2'2 | A B | 2 | -6.324  | 9.112  | 70.435 | 1.00 | 0.00 | H |
| ATOM | 645 | H5'1 | A B | 2 | -8.574  | 7.392  | 74.512 | 1.00 | 0.00 | H |
| ATOM | 646 | H5'2 | A B | 2 | -7.590  | 8.705  | 75.191 | 1.00 | 0.00 | H |
| ATOM | 647 | C1'  | C B | 3 | -4.739  | 6.129  | 67.083 | 1.00 | 0.00 | C |
| ATOM | 648 | N1   | C B | 3 | -6.123  | 6.670  | 66.996 | 1.00 | 0.00 | N |
| ATOM | 649 | C2   | C B | 3 | -7.051  | 5.973  | 66.225 | 1.00 | 0.00 | C |
| ATOM | 650 | O2   | C B | 3 | -6.689  | 4.938  | 65.648 | 1.00 | 0.00 | O |
| ATOM | 651 | N3   | C B | 3 | -8.315  | 6.449  | 66.133 | 1.00 | 0.00 | N |
| ATOM | 652 | C4   | C B | 3 | -8.676  | 7.572  | 66.768 | 1.00 | 0.00 | C |
| ATOM | 653 | N4   | C B | 3 | -9.928  | 7.991  | 66.646 | 1.00 | 0.00 | N |
| ATOM | 654 | C5   | C B | 3 | -7.743  | 8.314  | 67.565 | 1.00 | 0.00 | C |
| ATOM | 655 | C6   | C B | 3 | -6.475  | 7.812  | 67.647 | 1.00 | 0.00 | C |
| ATOM | 656 | C2'  | C B | 3 | -3.659  | 7.202  | 67.092 | 1.00 | 0.00 | C |
| ATOM | 657 | C3'  | C B | 3 | -2.624  | 6.602  | 68.031 | 1.00 | 0.00 | C |
| ATOM | 658 | O3'  | C B | 3 | -1.783  | 5.717  | 67.296 | 1.00 | 0.00 | O |
| ATOM | 659 | C4'  | C B | 3 | -3.483  | 5.865  | 69.056 | 1.00 | 0.00 | C |
| ATOM | 660 | O4'  | C B | 3 | -4.640  | 5.398  | 68.290 | 1.00 | 0.00 | O |
| ATOM | 661 | C5'  | C B | 3 | -3.977  | 6.679  | 70.229 | 1.00 | 0.00 | C |
| ATOM | 662 | O5'  | C B | 3 | -4.292  | 8.025  | 69.792 | 1.00 | 0.00 | O |
| ATOM | 663 | O1P  | C B | 3 | -2.589  | 9.440  | 70.991 | 1.00 | 0.00 | O |
| ATOM | 664 | O2P  | C B | 3 | -4.805  | 10.423 | 70.343 | 1.00 | 0.00 | O |
| ATOM | 665 | P    | C B | 3 | -4.039  | 9.236  | 70.797 | 1.00 | 0.00 | P |
| ATOM | 666 | H5   | C B | 3 | -8.030  | 9.232  | 68.078 | 1.00 | 0.00 | H |
| ATOM | 667 | H6   | C B | 3 | -5.732  | 8.337  | 68.247 | 1.00 | 0.00 | H |
| ATOM | 668 | H1'  | C B | 3 | -4.593  | 5.433  | 66.256 | 1.00 | 0.00 | H |
| ATOM | 669 | H3'  | C B | 3 | -2.014  | 7.369  | 68.508 | 1.00 | 0.00 | H |
| ATOM | 670 | H4'  | C B | 3 | -2.876  | 5.050  | 69.451 | 1.00 | 0.00 | H |
| ATOM | 671 | H41  | C B | 3 | -10.233 | 8.850  | 67.127 | 1.00 | 0.00 | H |
| ATOM | 672 | H42  | C B | 3 | -10.597 | 7.457  | 66.071 | 1.00 | 0.00 | H |
| ATOM | 673 | H2'1 | C B | 3 | -4.028  | 8.157  | 67.465 | 1.00 | 0.00 | H |
| ATOM | 674 | H2'2 | C B | 3 | -3.242  | 7.376  | 66.099 | 1.00 | 0.00 | H |
| ATOM | 675 | H5'1 | C B | 3 | -4.869  | 6.208  | 70.642 | 1.00 | 0.00 | H |
| ATOM | 676 | H5'2 | C B | 3 | -3.203  | 6.712  | 70.993 | 1.00 | 0.00 | H |
| ATOM | 677 | C1'  | C B | 4 | -4.352  | 4.749  | 62.343 | 1.00 | 0.00 | C |
| ATOM | 678 | N1   | C B | 4 | -5.226  | 5.889  | 62.730 | 1.00 | 0.00 | N |
| ATOM | 679 | C2   | C B | 4 | -6.545  | 5.884  | 62.280 | 1.00 | 0.00 | C |
| ATOM | 680 | O2   | C B | 4 | -6.934  | 4.938  | 61.582 | 1.00 | 0.00 | O |
| ATOM | 681 | N3   | C B | 4 | -7.357  | 6.913  | 62.621 | 1.00 | 0.00 | N |
| ATOM | 682 | C4   | C B | 4 | -6.907  | 7.924  | 63.377 | 1.00 | 0.00 | C |

|      |     |      |     |   |         |       |        |      |      |   |
|------|-----|------|-----|---|---------|-------|--------|------|------|---|
| ATOM | 683 | N4   | C B | 4 | -7.745  | 8.904 | 63.684 | 1.00 | 0.00 | N |
| ATOM | 684 | C5   | C B | 4 | -5.554  | 7.959 | 63.851 | 1.00 | 0.00 | C |
| ATOM | 685 | C6   | C B | 4 | -4.755  | 6.908 | 63.498 | 1.00 | 0.00 | C |
| ATOM | 686 | C2'  | C B | 4 | -2.917  | 5.152 | 62.035 | 1.00 | 0.00 | C |
| ATOM | 687 | C3'  | C B | 4 | -2.133  | 3.961 | 62.565 | 1.00 | 0.00 | C |
| ATOM | 688 | O3'  | C B | 4 | -2.094  | 2.944 | 61.566 | 1.00 | 0.00 | O |
| ATOM | 689 | C4'  | C B | 4 | -2.943  | 3.538 | 63.788 | 1.00 | 0.00 | C |
| ATOM | 690 | O4'  | C B | 4 | -4.329  | 3.838 | 63.426 | 1.00 | 0.00 | O |
| ATOM | 691 | C5'  | C B | 4 | -2.620  | 4.243 | 65.085 | 1.00 | 0.00 | C |
| ATOM | 692 | O5'  | C B | 4 | -2.299  | 5.632 | 64.820 | 1.00 | 0.00 | O |
| ATOM | 693 | O1P  | C B | 4 | 0.133   | 5.798 | 65.445 | 1.00 | 0.00 | O |
| ATOM | 694 | O2P  | C B | 4 | -1.341  | 7.824 | 65.589 | 1.00 | 0.00 | O |
| ATOM | 695 | P    | C B | 4 | -1.205  | 6.353 | 65.728 | 1.00 | 0.00 | P |
| ATOM | 696 | H5   | C B | 4 | -5.181  | 8.782 | 64.459 | 1.00 | 0.00 | H |
| ATOM | 697 | H6   | C B | 4 | -3.721  | 6.887 | 63.840 | 1.00 | 0.00 | H |
| ATOM | 698 | H1'  | C B | 4 | -4.808  | 4.244 | 61.490 | 1.00 | 0.00 | H |
| ATOM | 699 | H3'  | C B | 4 | -1.115  | 4.234 | 62.843 | 1.00 | 0.00 | H |
| ATOM | 700 | H4'  | C B | 4 | -2.763  | 2.472 | 63.935 | 1.00 | 0.00 | H |
| ATOM | 701 | H41  | C B | 4 | -7.426  | 9.692 | 64.267 | 1.00 | 0.00 | H |
| ATOM | 702 | H42  | C B | 4 | -8.717  | 8.878 | 63.341 | 1.00 | 0.00 | H |
| ATOM | 703 | H2'1 | C B | 4 | -2.628  | 6.073 | 62.540 | 1.00 | 0.00 | H |
| ATOM | 704 | H2'2 | C B | 4 | -2.747  | 5.295 | 60.968 | 1.00 | 0.00 | H |
| ATOM | 705 | H5'1 | C B | 4 | -3.482  | 4.183 | 65.750 | 1.00 | 0.00 | H |
| ATOM | 706 | H5'2 | C B | 4 | -1.769  | 3.752 | 65.555 | 1.00 | 0.00 | H |
| ATOM | 707 | C1'  | G B | 5 | -5.995  | 4.307 | 57.692 | 1.00 | 0.00 | C |
| ATOM | 708 | N1   | G B | 5 | -8.872  | 8.335 | 58.927 | 1.00 | 0.00 | N |
| ATOM | 709 | C2   | G B | 5 | -9.200  | 7.193 | 58.217 | 1.00 | 0.00 | C |
| ATOM | 710 | N2   | G B | 5 | -10.462 | 7.114 | 57.777 | 1.00 | 0.00 | N |
| ATOM | 711 | N3   | G B | 5 | -8.338  | 6.208 | 57.969 | 1.00 | 0.00 | N |
| ATOM | 712 | C4   | G B | 5 | -7.106  | 6.458 | 58.483 | 1.00 | 0.00 | C |
| ATOM | 713 | C5   | G B | 5 | -6.687  | 7.568 | 59.198 | 1.00 | 0.00 | C |
| ATOM | 714 | C6   | G B | 5 | -7.601  | 8.612 | 59.466 | 1.00 | 0.00 | C |
| ATOM | 715 | O6   | G B | 5 | -7.420  | 9.665 | 60.077 | 1.00 | 0.00 | O |
| ATOM | 716 | N7   | G B | 5 | -5.340  | 7.438 | 59.544 | 1.00 | 0.00 | N |
| ATOM | 717 | C8   | G B | 5 | -4.993  | 6.281 | 59.043 | 1.00 | 0.00 | C |
| ATOM | 718 | N9   | G B | 5 | -6.013  | 5.626 | 58.381 | 1.00 | 0.00 | N |
| ATOM | 719 | C2'  | G B | 5 | -4.697  | 4.022 | 56.948 | 1.00 | 0.00 | C |
| ATOM | 720 | C3'  | G B | 5 | -4.537  | 2.524 | 57.151 | 1.00 | 0.00 | C |
| ATOM | 721 | O3'  | G B | 5 | -5.293  | 1.834 | 56.159 | 1.00 | 0.00 | O |
| ATOM | 722 | C4'  | G B | 5 | -5.096  | 2.310 | 58.556 | 1.00 | 0.00 | C |
| ATOM | 723 | O4'  | G B | 5 | -6.164  | 3.303 | 58.674 | 1.00 | 0.00 | O |
| ATOM | 724 | C5'  | G B | 5 | -4.129  | 2.501 | 59.700 | 1.00 | 0.00 | C |
| ATOM | 725 | O5'  | G B | 5 | -3.217  | 3.586 | 59.395 | 1.00 | 0.00 | O |
| ATOM | 726 | O1P  | G B | 5 | -0.987  | 2.436 | 59.200 | 1.00 | 0.00 | O |
| ATOM | 727 | O2P  | G B | 5 | -1.100  | 4.846 | 59.887 | 1.00 | 0.00 | O |
| ATOM | 728 | P    | G B | 5 | -1.715  | 3.498 | 59.923 | 1.00 | 0.00 | P |
| ATOM | 729 | H1   | G B | 5 | -9.615  | 9.035 | 59.071 | 1.00 | 0.00 | H |
| ATOM | 730 | H8   | G B | 5 | -3.989  | 5.869 | 59.137 | 1.00 | 0.00 | H |
| ATOM | 731 | H1'  | G B | 5 | -6.849  | 4.263 | 57.017 | 1.00 | 0.00 | H |
| ATOM | 732 | H21  | G B | 5 | -11.124 | 7.878 | 57.976 | 1.00 | 0.00 | H |
| ATOM | 733 | H3'  | G B | 5 | -3.494  | 2.212 | 57.091 | 1.00 | 0.00 | H |
| ATOM | 734 | H22  | G B | 5 | -10.769 | 6.292 | 57.239 | 1.00 | 0.00 | H |
| ATOM | 735 | H4'  | G B | 5 | -5.463  | 1.285 | 58.598 | 1.00 | 0.00 | H |
| ATOM | 736 | H2'1 | G B | 5 | -3.852  | 4.571 | 57.364 | 1.00 | 0.00 | H |

|      |     |      |     |   |         |        |        |      |      |   |
|------|-----|------|-----|---|---------|--------|--------|------|------|---|
| ATOM | 737 | H2'2 | G B | 5 | -4.763  | 4.274  | 55.889 | 1.00 | 0.00 | H |
| ATOM | 738 | H5'1 | G B | 5 | -4.688  | 2.733  | 60.606 | 1.00 | 0.00 | H |
| ATOM | 739 | H5'2 | G B | 5 | -3.567  | 1.579  | 59.851 | 1.00 | 0.00 | H |
| ATOM | 740 | C1'  | T B | 6 | -8.780  | 5.597  | 53.808 | 1.00 | 0.00 | C |
| ATOM | 741 | N1   | T B | 6 | -7.959  | 6.618  | 54.513 | 1.00 | 0.00 | N |
| ATOM | 742 | C2   | T B | 6 | -8.598  | 7.775  | 54.911 | 1.00 | 0.00 | C |
| ATOM | 743 | O2   | T B | 6 | -9.782  | 7.979  | 54.708 | 1.00 | 0.00 | O |
| ATOM | 744 | N3   | T B | 6 | -7.797  | 8.695  | 55.563 | 1.00 | 0.00 | N |
| ATOM | 745 | C4   | T B | 6 | -6.453  | 8.566  | 55.840 | 1.00 | 0.00 | C |
| ATOM | 746 | O4   | T B | 6 | -5.838  | 9.463  | 56.428 | 1.00 | 0.00 | O |
| ATOM | 747 | C5   | T B | 6 | -5.874  | 7.324  | 55.385 | 1.00 | 0.00 | C |
| ATOM | 748 | C6   | T B | 6 | -6.623  | 6.403  | 54.748 | 1.00 | 0.00 | C |
| ATOM | 749 | C7   | T B | 6 | -4.412  | 7.139  | 55.668 | 1.00 | 0.00 | C |
| ATOM | 750 | C2'  | T B | 6 | -8.041  | 4.887  | 52.680 | 1.00 | 0.00 | C |
| ATOM | 751 | C3'  | T B | 6 | -8.605  | 3.478  | 52.771 | 1.00 | 0.00 | C |
| ATOM | 752 | O3'  | T B | 6 | -9.832  | 3.416  | 52.047 | 1.00 | 0.00 | O |
| ATOM | 753 | C4'  | T B | 6 | -8.810  | 3.288  | 54.272 | 1.00 | 0.00 | C |
| ATOM | 754 | O4'  | T B | 6 | -9.165  | 4.623  | 54.758 | 1.00 | 0.00 | O |
| ATOM | 755 | C5'  | T B | 6 | -7.617  | 2.791  | 55.056 | 1.00 | 0.00 | C |
| ATOM | 756 | O5'  | T B | 6 | -6.401  | 3.366  | 54.514 | 1.00 | 0.00 | O |
| ATOM | 757 | O1P  | T B | 6 | -5.182  | 1.372  | 53.579 | 1.00 | 0.00 | O |
| ATOM | 758 | O2P  | T B | 6 | -3.894  | 3.384  | 54.349 | 1.00 | 0.00 | O |
| ATOM | 759 | P    | T B | 6 | -5.066  | 2.494  | 54.533 | 1.00 | 0.00 | P |
| ATOM | 760 | H3   | T B | 6 | -8.252  | 9.567  | 55.874 | 1.00 | 0.00 | H |
| ATOM | 761 | H6   | T B | 6 | -6.163  | 5.473  | 54.414 | 1.00 | 0.00 | H |
| ATOM | 762 | H1'  | T B | 6 | -9.684  | 6.081  | 53.439 | 1.00 | 0.00 | H |
| ATOM | 763 | H3'  | T B | 6 | -7.914  | 2.736  | 52.371 | 1.00 | 0.00 | H |
| ATOM | 764 | H4'  | T B | 6 | -9.614  | 2.562  | 54.393 | 1.00 | 0.00 | H |
| ATOM | 765 | H71  | T B | 6 | -3.861  | 7.111  | 54.728 | 1.00 | 0.00 | H |
| ATOM | 766 | H72  | T B | 6 | -4.052  | 7.968  | 56.277 | 1.00 | 0.00 | H |
| ATOM | 767 | H73  | T B | 6 | -4.261  | 6.201  | 56.204 | 1.00 | 0.00 | H |
| ATOM | 768 | H2'1 | T B | 6 | -6.963  | 4.894  | 52.825 | 1.00 | 0.00 | H |
| ATOM | 769 | H2'2 | T B | 6 | -8.245  | 5.334  | 51.707 | 1.00 | 0.00 | H |
| ATOM | 770 | H5'1 | T B | 6 | -7.728  | 3.081  | 56.101 | 1.00 | 0.00 | H |
| ATOM | 771 | H5'2 | T B | 6 | -7.573  | 1.705  | 54.987 | 1.00 | 0.00 | H |
| ATOM | 772 | C1'  | C B | 7 | -11.413 | 8.831  | 51.111 | 1.00 | 0.00 | C |
| ATOM | 773 | N1   | C B | 7 | -10.022 | 9.156  | 51.537 | 1.00 | 0.00 | N |
| ATOM | 774 | C2   | C B | 7 | -9.804  | 10.377 | 52.171 | 1.00 | 0.00 | C |
| ATOM | 775 | O2   | C B | 7 | -10.766 | 11.136 | 52.355 | 1.00 | 0.00 | O |
| ATOM | 776 | N3   | C B | 7 | -8.546  | 10.693 | 52.566 | 1.00 | 0.00 | N |
| ATOM | 777 | C4   | C B | 7 | -7.526  | 9.852  | 52.353 | 1.00 | 0.00 | C |
| ATOM | 778 | N4   | C B | 7 | -6.319  | 10.210 | 52.763 | 1.00 | 0.00 | N |
| ATOM | 779 | C5   | C B | 7 | -7.721  | 8.591  | 51.698 | 1.00 | 0.00 | C |
| ATOM | 780 | C6   | C B | 7 | -8.997  | 8.292  | 51.314 | 1.00 | 0.00 | C |
| ATOM | 781 | C2'  | C B | 7 | -11.491 | 8.099  | 49.779 | 1.00 | 0.00 | C |
| ATOM | 782 | C3'  | C B | 7 | -12.662 | 7.156  | 50.005 | 1.00 | 0.00 | C |
| ATOM | 783 | O3'  | C B | 7 | -13.878 | 7.847  | 49.731 | 1.00 | 0.00 | O |
| ATOM | 784 | C4'  | C B | 7 | -12.525 | 6.790  | 51.480 | 1.00 | 0.00 | C |
| ATOM | 785 | O4'  | C B | 7 | -11.982 | 7.997  | 52.103 | 1.00 | 0.00 | O |
| ATOM | 786 | C5'  | C B | 7 | -11.614 | 5.627  | 51.803 | 1.00 | 0.00 | C |
| ATOM | 787 | O5'  | C B | 7 | -10.476 | 5.635  | 50.906 | 1.00 | 0.00 | O |
| ATOM | 788 | O1P  | C B | 7 | -10.787 | 3.537  | 49.551 | 1.00 | 0.00 | O |
| ATOM | 789 | O2P  | C B | 7 | -8.486  | 4.465  | 49.914 | 1.00 | 0.00 | O |
| ATOM | 790 | P    | C B | 7 | -9.850  | 4.241  | 50.448 | 1.00 | 0.00 | P |

|      |     |      |     |   |         |        |        |      |      |   |
|------|-----|------|-----|---|---------|--------|--------|------|------|---|
| ATOM | 791 | H5   | C B | 7 | -6.892  | 7.907  | 51.516 | 1.00 | 0.00 | H |
| ATOM | 792 | H6   | C B | 7 | -9.196  | 7.342  | 50.819 | 1.00 | 0.00 | H |
| ATOM | 793 | H1'  | C B | 7 | -11.986 | 9.757  | 51.083 | 1.00 | 0.00 | H |
| ATOM | 794 | H3'  | C B | 7 | -12.601 | 6.269  | 49.372 | 1.00 | 0.00 | H |
| ATOM | 795 | H4'  | C B | 7 | -13.523 | 6.537  | 51.839 | 1.00 | 0.00 | H |
| ATOM | 796 | H41  | C B | 7 | -5.517  | 9.580  | 52.614 | 1.00 | 0.00 | H |
| ATOM | 797 | H42  | C B | 7 | -6.181  | 11.118 | 53.231 | 1.00 | 0.00 | H |
| ATOM | 798 | H2'1 | C B | 7 | -10.577 | 7.550  | 49.555 | 1.00 | 0.00 | H |
| ATOM | 799 | H2'2 | C B | 7 | -11.679 | 8.775  | 48.946 | 1.00 | 0.00 | H |
| ATOM | 800 | H5'1 | C B | 7 | -11.271 | 5.717  | 52.834 | 1.00 | 0.00 | H |
| ATOM | 801 | H5'2 | C B | 7 | -12.167 | 4.697  | 51.688 | 1.00 | 0.00 | H |
| ATOM | 802 | C1'  | C B | 8 | -12.615 | 13.364 | 49.520 | 1.00 | 0.00 | C |
| ATOM | 803 | N1   | C B | 8 | -11.202 | 12.898 | 49.480 | 1.00 | 0.00 | N |
| ATOM | 804 | C2   | C B | 8 | -10.228 | 13.716 | 50.049 | 1.00 | 0.00 | C |
| ATOM | 805 | O2   | C B | 8 | -10.575 | 14.788 | 50.561 | 1.00 | 0.00 | O |
| ATOM | 806 | N3   | C B | 8 | -8.936  | 13.310 | 50.023 | 1.00 | 0.00 | N |
| ATOM | 807 | C4   | C B | 8 | -8.592  | 12.144 | 49.460 | 1.00 | 0.00 | C |
| ATOM | 808 | N4   | C B | 8 | -7.313  | 11.794 | 49.466 | 1.00 | 0.00 | N |
| ATOM | 809 | C5   | C B | 8 | -9.570  | 11.283 | 48.862 | 1.00 | 0.00 | C |
| ATOM | 810 | C6   | C B | 8 | -10.868 | 11.711 | 48.905 | 1.00 | 0.00 | C |
| ATOM | 811 | C2'  | C B | 8 | -13.407 | 13.034 | 48.262 | 1.00 | 0.00 | C |
| ATOM | 812 | C3'  | C B | 8 | -14.789 | 12.740 | 48.824 | 1.00 | 0.00 | C |
| ATOM | 813 | O3'  | C B | 8 | -15.498 | 13.966 | 48.986 | 1.00 | 0.00 | O |
| ATOM | 814 | C4'  | C B | 8 | -14.476 | 12.073 | 50.162 | 1.00 | 0.00 | C |
| ATOM | 815 | O4'  | C B | 8 | -13.247 | 12.727 | 50.614 | 1.00 | 0.00 | O |
| ATOM | 816 | C5'  | C B | 8 | -14.246 | 10.580 | 50.131 | 1.00 | 0.00 | C |
| ATOM | 817 | O5'  | C B | 8 | -13.547 | 10.218 | 48.912 | 1.00 | 0.00 | O |
| ATOM | 818 | O1P  | C B | 8 | -15.239 | 8.834  | 47.662 | 1.00 | 0.00 | O |
| ATOM | 819 | O2P  | C B | 8 | -12.786 | 8.460  | 47.287 | 1.00 | 0.00 | O |
| ATOM | 820 | P    | C B | 8 | -13.875 | 8.816  | 48.229 | 1.00 | 0.00 | P |
| ATOM | 821 | H5   | C B | 8 | -9.295  | 10.337 | 48.397 | 1.00 | 0.00 | H |
| ATOM | 822 | H6   | C B | 8 | -11.649 | 11.087 | 48.470 | 1.00 | 0.00 | H |
| ATOM | 823 | H1'  | C B | 8 | -12.615 | 14.437 | 49.711 | 1.00 | 0.00 | H |
| ATOM | 824 | H3'  | C B | 8 | -15.360 | 12.075 | 48.177 | 1.00 | 0.00 | H |
| ATOM | 825 | H4'  | C B | 8 | -15.326 | 12.263 | 50.817 | 1.00 | 0.00 | H |
| ATOM | 826 | H41  | C B | 8 | -7.022  | 10.901 | 49.042 | 1.00 | 0.00 | H |
| ATOM | 827 | H42  | C B | 8 | -6.611  | 12.415 | 49.894 | 1.00 | 0.00 | H |
| ATOM | 828 | H2'1 | C B | 8 | -13.002 | 12.171 | 47.733 | 1.00 | 0.00 | H |
| ATOM | 829 | H2'2 | C B | 8 | -13.432 | 13.867 | 47.559 | 1.00 | 0.00 | H |
| ATOM | 830 | H5'1 | C B | 8 | -13.648 | 10.291 | 50.996 | 1.00 | 0.00 | H |
| ATOM | 831 | H5'2 | C B | 8 | -15.206 | 10.069 | 50.171 | 1.00 | 0.00 | H |
| ATOM | 832 | C1'  | T B | 9 | -11.708 | 18.133 | 48.558 | 1.00 | 0.00 | C |
| ATOM | 833 | N1   | T B | 9 | -10.788 | 17.081 | 48.052 | 1.00 | 0.00 | N |
| ATOM | 834 | C2   | T B | 9 | -9.443  | 17.239 | 48.316 | 1.00 | 0.00 | C |
| ATOM | 835 | O2   | T B | 9 | -9.001  | 18.192 | 48.934 | 1.00 | 0.00 | O |
| ATOM | 836 | N3   | T B | 9 | -8.624  | 16.238 | 47.829 | 1.00 | 0.00 | N |
| ATOM | 837 | C4   | T B | 9 | -9.021  | 15.125 | 47.119 | 1.00 | 0.00 | C |
| ATOM | 838 | O4   | T B | 9 | -8.192  | 14.294 | 46.730 | 1.00 | 0.00 | O |
| ATOM | 839 | C5   | T B | 9 | -10.446 | 15.045 | 46.893 | 1.00 | 0.00 | C |
| ATOM | 840 | C6   | T B | 9 | -11.273 | 16.003 | 47.354 | 1.00 | 0.00 | C |
| ATOM | 841 | C7   | T B | 9 | -10.921 | 13.848 | 46.126 | 1.00 | 0.00 | C |
| ATOM | 842 | C2'  | T B | 9 | -12.856 | 18.455 | 47.608 | 1.00 | 0.00 | C |
| ATOM | 843 | C3'  | T B | 9 | -13.997 | 18.740 | 48.573 | 1.00 | 0.00 | C |
| ATOM | 844 | O3'  | T B | 9 | -13.925 | 20.100 | 48.994 | 1.00 | 0.00 | O |

|      |     |      |     |    |         |        |        |      |      |   |
|------|-----|------|-----|----|---------|--------|--------|------|------|---|
| ATOM | 845 | C4'  | T B | 9  | -13.726 | 17.765 | 49.716 | 1.00 | 0.00 | C |
| ATOM | 846 | O4'  | T B | 9  | -12.266 | 17.673 | 49.774 | 1.00 | 0.00 | O |
| ATOM | 847 | C5'  | T B | 9  | -14.293 | 16.373 | 49.562 | 1.00 | 0.00 | C |
| ATOM | 848 | O5'  | T B | 9  | -14.217 | 15.965 | 48.172 | 1.00 | 0.00 | O |
| ATOM | 849 | O1P  | T B | 9  | -16.630 | 15.794 | 47.482 | 1.00 | 0.00 | O |
| ATOM | 850 | O2P  | T B | 9  | -14.893 | 14.397 | 46.330 | 1.00 | 0.00 | O |
| ATOM | 851 | P    | T B | 9  | -15.367 | 15.034 | 47.582 | 1.00 | 0.00 | P |
| ATOM | 852 | H3   | T B | 9  | -7.616  | 16.331 | 48.016 | 1.00 | 0.00 | H |
| ATOM | 853 | H6   | T B | 9  | -12.344 | 15.921 | 47.170 | 1.00 | 0.00 | H |
| ATOM | 854 | H1'  | T B | 9  | -11.121 | 19.026 | 48.776 | 1.00 | 0.00 | H |
| ATOM | 855 | H3'  | T B | 9  | -14.969 | 18.553 | 48.119 | 1.00 | 0.00 | H |
| ATOM | 856 | H4'  | T B | 9  | -14.161 | 18.204 | 50.616 | 1.00 | 0.00 | H |
| ATOM | 857 | H71  | T B | 9  | -11.336 | 14.169 | 45.170 | 1.00 | 0.00 | H |
| ATOM | 858 | H72  | T B | 9  | -10.085 | 13.171 | 45.950 | 1.00 | 0.00 | H |
| ATOM | 859 | H73  | T B | 9  | -11.692 | 13.331 | 46.699 | 1.00 | 0.00 | H |
| ATOM | 860 | H2'1 | T B | 9  | -13.093 | 17.621 | 46.949 | 1.00 | 0.00 | H |
| ATOM | 861 | H2'2 | T B | 9  | -12.642 | 19.319 | 46.979 | 1.00 | 0.00 | H |
| ATOM | 862 | H5'1 | T B | 9  | -13.721 | 15.682 | 50.181 | 1.00 | 0.00 | H |
| ATOM | 863 | H5'2 | T B | 9  | -15.331 | 16.373 | 49.889 | 1.00 | 0.00 | H |
| ATOM | 864 | C1'  | A B | 10 | -8.745  | 21.977 | 47.519 | 1.00 | 0.00 | C |
| ATOM | 865 | N1   | A B | 10 | -5.666  | 18.358 | 45.580 | 1.00 | 0.00 | N |
| ATOM | 866 | C2   | A B | 10 | -5.430  | 19.435 | 46.325 | 1.00 | 0.00 | C |
| ATOM | 867 | N3   | A B | 10 | -6.275  | 20.327 | 46.795 | 1.00 | 0.00 | N |
| ATOM | 868 | C4   | A B | 10 | -7.529  | 20.030 | 46.412 | 1.00 | 0.00 | C |
| ATOM | 869 | C5   | A B | 10 | -7.937  | 18.969 | 45.651 | 1.00 | 0.00 | C |
| ATOM | 870 | C6   | A B | 10 | -6.928  | 18.086 | 45.215 | 1.00 | 0.00 | C |
| ATOM | 871 | N6   | A B | 10 | -7.180  | 17.001 | 44.462 | 1.00 | 0.00 | N |
| ATOM | 872 | N7   | A B | 10 | -9.308  | 18.987 | 45.463 | 1.00 | 0.00 | N |
| ATOM | 873 | C8   | A B | 10 | -9.696  | 20.050 | 46.103 | 1.00 | 0.00 | C |
| ATOM | 874 | N9   | A B | 10 | -8.672  | 20.732 | 46.707 | 1.00 | 0.00 | N |
| ATOM | 875 | C2'  | A B | 10 | -9.768  | 22.982 | 47.008 | 1.00 | 0.00 | C |
| ATOM | 876 | C3'  | A B | 10 | -10.295 | 23.586 | 48.300 | 1.00 | 0.00 | C |
| ATOM | 877 | O3'  | A B | 10 | -9.423  | 24.634 | 48.717 | 1.00 | 0.00 | O |
| ATOM | 878 | C4'  | A B | 10 | -10.270 | 22.399 | 49.263 | 1.00 | 0.00 | C |
| ATOM | 879 | O4'  | A B | 10 | -9.113  | 21.611 | 48.836 | 1.00 | 0.00 | O |
| ATOM | 880 | C5'  | A B | 10 | -11.490 | 21.508 | 49.261 | 1.00 | 0.00 | C |
| ATOM | 881 | O5'  | A B | 10 | -12.008 | 21.389 | 47.911 | 1.00 | 0.00 | O |
| ATOM | 882 | O1P  | A B | 10 | -14.248 | 22.529 | 48.046 | 1.00 | 0.00 | O |
| ATOM | 883 | O2P  | A B | 10 | -13.858 | 20.726 | 46.345 | 1.00 | 0.00 | O |
| ATOM | 884 | P    | A B | 10 | -13.584 | 21.257 | 47.703 | 1.00 | 0.00 | P |
| ATOM | 885 | H2   | A B | 10 | -4.385  | 19.601 | 46.583 | 1.00 | 0.00 | H |
| ATOM | 886 | H8   | A B | 10 | -10.737 | 20.370 | 46.154 | 1.00 | 0.00 | H |
| ATOM | 887 | H1'  | A B | 10 | -7.750  | 22.418 | 47.558 | 1.00 | 0.00 | H |
| ATOM | 888 | H3'  | A B | 10 | -11.305 | 23.978 | 48.186 | 1.00 | 0.00 | H |
| ATOM | 889 | H4'  | A B | 10 | -10.159 | 22.808 | 50.267 | 1.00 | 0.00 | H |
| ATOM | 890 | H61  | A B | 10 | -6.406  | 16.387 | 44.172 | 1.00 | 0.00 | H |
| ATOM | 891 | H62  | A B | 10 | -8.145  | 16.785 | 44.176 | 1.00 | 0.00 | H |
| ATOM | 892 | H2'1 | A B | 10 | -10.567 | 22.508 | 46.438 | 1.00 | 0.00 | H |
| ATOM | 893 | H2'2 | A B | 10 | -9.317  | 23.744 | 46.370 | 1.00 | 0.00 | H |
| ATOM | 894 | H5'1 | A B | 10 | -11.214 | 20.522 | 49.636 | 1.00 | 0.00 | H |
| ATOM | 895 | H5'2 | A B | 10 | -12.250 | 21.939 | 49.910 | 1.00 | 0.00 | H |
| ATOM | 896 | C1'  | G B | 11 | -4.618  | 24.040 | 45.688 | 1.00 | 0.00 | C |
| ATOM | 897 | N1   | G B | 11 | -4.503  | 19.875 | 42.743 | 1.00 | 0.00 | N |
| ATOM | 898 | C2   | G B | 11 | -3.476  | 20.521 | 43.410 | 1.00 | 0.00 | C |

|      |     |      |     |    |        |        |        |      |      |   |
|------|-----|------|-----|----|--------|--------|--------|------|------|---|
| ATOM | 899 | N2   | G B | 11 | -2.256 | 19.986 | 43.271 | 1.00 | 0.00 | N |
| ATOM | 900 | N3   | G B | 11 | -3.653 | 21.611 | 44.155 | 1.00 | 0.00 | N |
| ATOM | 901 | C4   | G B | 11 | -4.949 | 22.017 | 44.177 | 1.00 | 0.00 | C |
| ATOM | 902 | C5   | G B | 11 | -6.036 | 21.440 | 43.542 | 1.00 | 0.00 | C |
| ATOM | 903 | C6   | G B | 11 | -5.851 | 20.281 | 42.754 | 1.00 | 0.00 | C |
| ATOM | 904 | O6   | G B | 11 | -6.683 | 19.632 | 42.119 | 1.00 | 0.00 | O |
| ATOM | 905 | N7   | G B | 11 | -7.197 | 22.166 | 43.817 | 1.00 | 0.00 | N |
| ATOM | 906 | C8   | G B | 11 | -6.787 | 23.135 | 44.595 | 1.00 | 0.00 | C |
| ATOM | 907 | N9   | G B | 11 | -5.433 | 23.112 | 44.858 | 1.00 | 0.00 | N |
| ATOM | 908 | C2'  | G B | 11 | -5.047 | 25.497 | 45.580 | 1.00 | 0.00 | C |
| ATOM | 909 | C3'  | G B | 11 | -4.809 | 26.003 | 46.994 | 1.00 | 0.00 | C |
| ATOM | 910 | O3'  | G B | 11 | -3.442 | 26.384 | 47.129 | 1.00 | 0.00 | O |
| ATOM | 911 | C4'  | G B | 11 | -5.158 | 24.790 | 47.853 | 1.00 | 0.00 | C |
| ATOM | 912 | O4'  | G B | 11 | -4.754 | 23.643 | 47.038 | 1.00 | 0.00 | O |
| ATOM | 913 | C5'  | G B | 11 | -6.612 | 24.629 | 48.228 | 1.00 | 0.00 | C |
| ATOM | 914 | O5'  | G B | 11 | -7.452 | 25.055 | 47.127 | 1.00 | 0.00 | O |
| ATOM | 915 | O1P  | G B | 11 | -8.621 | 27.088 | 48.039 | 1.00 | 0.00 | O |
| ATOM | 916 | O2P  | G B | 11 | -9.712 | 25.711 | 46.248 | 1.00 | 0.00 | O |
| ATOM | 917 | P    | G B | 11 | -8.848 | 25.754 | 47.453 | 1.00 | 0.00 | P |
| ATOM | 918 | H1   | G B | 11 | -4.261 | 19.034 | 42.198 | 1.00 | 0.00 | H |
| ATOM | 919 | H8   | G B | 11 | -7.456 | 23.894 | 44.999 | 1.00 | 0.00 | H |
| ATOM | 920 | H1'  | G B | 11 | -3.571 | 23.919 | 45.407 | 1.00 | 0.00 | H |
| ATOM | 921 | H21  | G B | 11 | -2.128 | 19.141 | 42.697 | 1.00 | 0.00 | H |
| ATOM | 922 | H3'  | G B | 11 | -5.446 | 26.853 | 47.237 | 1.00 | 0.00 | H |
| ATOM | 923 | H22  | G B | 11 | -1.448 | 20.421 | 43.739 | 1.00 | 0.00 | H |
| ATOM | 924 | H4'  | G B | 11 | -4.584 | 24.879 | 48.776 | 1.00 | 0.00 | H |
| ATOM | 925 | H2'1 | G B | 11 | -6.094 | 25.599 | 45.294 | 1.00 | 0.00 | H |
| ATOM | 926 | H2'2 | G B | 11 | -4.453 | 26.051 | 44.854 | 1.00 | 0.00 | H |
| ATOM | 927 | H5'1 | G B | 11 | -6.808 | 23.582 | 48.458 | 1.00 | 0.00 | H |
| ATOM | 928 | H5'2 | G B | 11 | -6.822 | 25.235 | 49.109 | 1.00 | 0.00 | H |
| ATOM | 929 | C1'  | G B | 12 | -0.676 | 24.217 | 42.694 | 1.00 | 0.00 | C |
| ATOM | 930 | N1   | G B | 12 | -3.500 | 21.167 | 39.734 | 1.00 | 0.00 | N |
| ATOM | 931 | C2   | G B | 12 | -2.154 | 21.101 | 40.051 | 1.00 | 0.00 | C |
| ATOM | 932 | N2   | G B | 12 | -1.469 | 20.088 | 39.505 | 1.00 | 0.00 | N |
| ATOM | 933 | N3   | G B | 12 | -1.542 | 21.973 | 40.849 | 1.00 | 0.00 | N |
| ATOM | 934 | C4   | G B | 12 | -2.386 | 22.936 | 41.305 | 1.00 | 0.00 | C |
| ATOM | 935 | C5   | G B | 12 | -3.736 | 23.084 | 41.041 | 1.00 | 0.00 | C |
| ATOM | 936 | C6   | G B | 12 | -4.388 | 22.156 | 40.198 | 1.00 | 0.00 | C |
| ATOM | 937 | O6   | G B | 12 | -5.568 | 22.121 | 39.847 | 1.00 | 0.00 | O |
| ATOM | 938 | N7   | G B | 12 | -4.238 | 24.206 | 41.705 | 1.00 | 0.00 | N |
| ATOM | 939 | C8   | G B | 12 | -3.201 | 24.689 | 42.338 | 1.00 | 0.00 | C |
| ATOM | 940 | N9   | G B | 12 | -2.038 | 23.972 | 42.144 | 1.00 | 0.00 | N |
| ATOM | 941 | C2'  | G B | 12 | -0.307 | 25.691 | 42.782 | 1.00 | 0.00 | C |
| ATOM | 942 | C3'  | G B | 12 | 0.522  | 25.736 | 44.057 | 1.00 | 0.00 | C |
| ATOM | 943 | O3'  | G B | 12 | 1.869  | 25.384 | 43.752 | 1.00 | 0.00 | O |
| ATOM | 944 | C4'  | G B | 12 | -0.161 | 24.694 | 44.942 | 1.00 | 0.00 | C |
| ATOM | 945 | O4'  | G B | 12 | -0.636 | 23.678 | 44.002 | 1.00 | 0.00 | O |
| ATOM | 946 | C5'  | G B | 12 | -1.332 | 25.176 | 45.764 | 1.00 | 0.00 | C |
| ATOM | 947 | O5'  | G B | 12 | -2.090 | 26.157 | 45.012 | 1.00 | 0.00 | O |
| ATOM | 948 | O1P  | G B | 12 | -1.758 | 28.279 | 46.324 | 1.00 | 0.00 | O |
| ATOM | 949 | O2P  | G B | 12 | -3.829 | 27.970 | 44.941 | 1.00 | 0.00 | O |
| ATOM | 950 | P    | G B | 12 | -2.784 | 27.359 | 45.799 | 1.00 | 0.00 | P |
| ATOM | 951 | H1   | G B | 12 | -3.879 | 20.437 | 39.112 | 1.00 | 0.00 | H |
| ATOM | 952 | H8   | G B | 12 | -3.249 | 25.580 | 42.965 | 1.00 | 0.00 | H |

|      |      |      |     |    |        |        |        |      |      |   |
|------|------|------|-----|----|--------|--------|--------|------|------|---|
| ATOM | 953  | H1'  | G B | 12 | 0.041  | 23.669 | 42.084 | 1.00 | 0.00 | H |
| ATOM | 954  | H21  | G B | 12 | -1.950 | 19.414 | 38.891 | 1.00 | 0.00 | H |
| ATOM | 955  | H3'  | G B | 12 | 0.502  | 26.720 | 44.523 | 1.00 | 0.00 | H |
| ATOM | 956  | H22  | G B | 12 | -0.463 | 19.985 | 39.698 | 1.00 | 0.00 | H |
| ATOM | 957  | H4'  | G B | 12 | 0.595  | 24.317 | 45.629 | 1.00 | 0.00 | H |
| ATOM | 958  | H2'1 | G B | 12 | -1.184 | 26.334 | 42.856 | 1.00 | 0.00 | H |
| ATOM | 959  | H2'2 | G B | 12 | 0.272  | 26.025 | 41.921 | 1.00 | 0.00 | H |
| ATOM | 960  | H5'1 | G B | 12 | -1.970 | 24.328 | 46.010 | 1.00 | 0.00 | H |
| ATOM | 961  | H5'2 | G B | 12 | -0.961 | 25.625 | 46.686 | 1.00 | 0.00 | H |
| ATOM | 962  | C1'  | T B | 13 | 1.862  | 23.082 | 38.599 | 1.00 | 0.00 | C |
| ATOM | 963  | N1   | T B | 13 | 0.474  | 23.606 | 38.498 | 1.00 | 0.00 | N |
| ATOM | 964  | C2   | T B | 13 | -0.417 | 22.888 | 37.724 | 1.00 | 0.00 | C |
| ATOM | 965  | O2   | T B | 13 | -0.105 | 21.866 | 37.138 | 1.00 | 0.00 | O |
| ATOM | 966  | N3   | T B | 13 | -1.695 | 23.411 | 37.659 | 1.00 | 0.00 | N |
| ATOM | 967  | C4   | T B | 13 | -2.148 | 24.557 | 38.278 | 1.00 | 0.00 | C |
| ATOM | 968  | O4   | T B | 13 | -3.319 | 24.929 | 38.143 | 1.00 | 0.00 | O |
| ATOM | 969  | C5   | T B | 13 | -1.146 | 25.238 | 39.065 | 1.00 | 0.00 | C |
| ATOM | 970  | C6   | T B | 13 | 0.110  | 24.757 | 39.153 | 1.00 | 0.00 | C |
| ATOM | 971  | C7   | T B | 13 | -1.595 | 26.489 | 39.760 | 1.00 | 0.00 | C |
| ATOM | 972  | C2'  | T B | 13 | 2.930  | 24.169 | 38.616 | 1.00 | 0.00 | C |
| ATOM | 973  | C3'  | T B | 13 | 3.963  | 23.584 | 39.566 | 1.00 | 0.00 | C |
| ATOM | 974  | O3'  | T B | 13 | 4.823  | 22.709 | 38.840 | 1.00 | 0.00 | O |
| ATOM | 975  | C4'  | T B | 13 | 3.105  | 22.838 | 40.584 | 1.00 | 0.00 | C |
| ATOM | 976  | O4'  | T B | 13 | 1.962  | 22.355 | 39.808 | 1.00 | 0.00 | O |
| ATOM | 977  | C5'  | T B | 13 | 2.589  | 23.648 | 41.751 | 1.00 | 0.00 | C |
| ATOM | 978  | O5'  | T B | 13 | 2.262  | 24.990 | 41.309 | 1.00 | 0.00 | O |
| ATOM | 979  | O1P  | T B | 13 | 3.935  | 26.426 | 42.519 | 1.00 | 0.00 | O |
| ATOM | 980  | O2P  | T B | 13 | 1.713  | 27.381 | 41.850 | 1.00 | 0.00 | O |
| ATOM | 981  | P    | T B | 13 | 2.490  | 26.206 | 42.313 | 1.00 | 0.00 | P |
| ATOM | 982  | H3   | T B | 13 | -2.379 | 22.891 | 37.090 | 1.00 | 0.00 | H |
| ATOM | 983  | H6   | T B | 13 | 0.848  | 25.289 | 39.752 | 1.00 | 0.00 | H |
| ATOM | 984  | H1'  | T B | 13 | 2.026  | 22.387 | 37.776 | 1.00 | 0.00 | H |
| ATOM | 985  | H3'  | T B | 13 | 4.560  | 24.359 | 40.046 | 1.00 | 0.00 | H |
| ATOM | 986  | H4'  | T B | 13 | 3.719  | 22.031 | 40.986 | 1.00 | 0.00 | H |
| ATOM | 987  | H71  | T B | 13 | -1.071 | 27.347 | 39.340 | 1.00 | 0.00 | H |
| ATOM | 988  | H72  | T B | 13 | -2.670 | 26.617 | 39.621 | 1.00 | 0.00 | H |
| ATOM | 989  | H73  | T B | 13 | -1.374 | 26.414 | 40.825 | 1.00 | 0.00 | H |
| ATOM | 990  | H2'1 | T B | 13 | 2.545  | 25.119 | 38.984 | 1.00 | 0.00 | H |
| ATOM | 991  | H2'2 | T B | 13 | 3.354  | 24.348 | 37.628 | 1.00 | 0.00 | H |
| ATOM | 992  | H5'1 | T B | 13 | 1.700  | 23.166 | 42.157 | 1.00 | 0.00 | H |
| ATOM | 993  | H5'2 | T B | 13 | 3.357  | 23.693 | 42.522 | 1.00 | 0.00 | H |
| ATOM | 994  | C1'  | G B | 14 | 2.231  | 21.693 | 33.847 | 1.00 | 0.00 | C |
| ATOM | 995  | N1   | G B | 14 | -2.442 | 23.706 | 33.470 | 1.00 | 0.00 | N |
| ATOM | 996  | C2   | G B | 14 | -1.934 | 22.535 | 32.936 | 1.00 | 0.00 | C |
| ATOM | 997  | N2   | G B | 14 | -2.782 | 21.804 | 32.204 | 1.00 | 0.00 | N |
| ATOM | 998  | N3   | G B | 14 | -0.680 | 22.126 | 33.120 | 1.00 | 0.00 | N |
| ATOM | 999  | C4   | G B | 14 | 0.040  | 22.992 | 33.882 | 1.00 | 0.00 | C |
| ATOM | 1000 | C5   | G B | 14 | -0.380 | 24.182 | 34.451 | 1.00 | 0.00 | C |
| ATOM | 1001 | C6   | G B | 14 | -1.713 | 24.616 | 34.260 | 1.00 | 0.00 | C |
| ATOM | 1002 | O6   | G B | 14 | -2.266 | 25.633 | 34.680 | 1.00 | 0.00 | O |
| ATOM | 1003 | N7   | G B | 14 | 0.668  | 24.776 | 35.159 | 1.00 | 0.00 | N |
| ATOM | 1004 | C8   | G B | 14 | 1.665  | 23.944 | 35.001 | 1.00 | 0.00 | C |
| ATOM | 1005 | N9   | G B | 14 | 1.362  | 22.836 | 34.236 | 1.00 | 0.00 | N |
| ATOM | 1006 | C2'  | G B | 14 | 3.668  | 22.090 | 33.541 | 1.00 | 0.00 | C |

|      |      |      |     |    |        |        |        |      |      |   |
|------|------|------|-----|----|--------|--------|--------|------|------|---|
| ATOM | 1007 | C3'  | G B | 14 | 4.447  | 20.895 | 34.068 | 1.00 | 0.00 | C |
| ATOM | 1008 | O3'  | G B | 14 | 4.482  | 19.882 | 33.066 | 1.00 | 0.00 | O |
| ATOM | 1009 | C4'  | G B | 14 | 3.634  | 20.473 | 35.290 | 1.00 | 0.00 | C |
| ATOM | 1010 | O4'  | G B | 14 | 2.251  | 20.779 | 34.926 | 1.00 | 0.00 | O |
| ATOM | 1011 | C5'  | G B | 14 | 3.960  | 21.172 | 36.588 | 1.00 | 0.00 | C |
| ATOM | 1012 | O5'  | G B | 14 | 4.285  | 22.561 | 36.329 | 1.00 | 0.00 | O |
| ATOM | 1013 | O1P  | G B | 14 | 6.718  | 22.716 | 36.956 | 1.00 | 0.00 | O |
| ATOM | 1014 | O2P  | G B | 14 | 5.252  | 24.746 | 37.104 | 1.00 | 0.00 | O |
| ATOM | 1015 | P    | G B | 14 | 5.383  | 23.275 | 37.240 | 1.00 | 0.00 | P |
| ATOM | 1016 | H1   | G B | 14 | -3.430 | 23.929 | 33.274 | 1.00 | 0.00 | H |
| ATOM | 1017 | H8   | G B | 14 | 2.651  | 24.112 | 35.437 | 1.00 | 0.00 | H |
| ATOM | 1018 | H1'  | G B | 14 | 1.774  | 21.192 | 32.993 | 1.00 | 0.00 | H |
| ATOM | 1019 | H21  | G B | 14 | -3.753 | 22.126 | 32.069 | 1.00 | 0.00 | H |
| ATOM | 1020 | H3'  | G B | 14 | 5.466  | 21.163 | 34.347 | 1.00 | 0.00 | H |
| ATOM | 1021 | H22  | G B | 14 | -2.466 | 20.923 | 31.775 | 1.00 | 0.00 | H |
| ATOM | 1022 | H4'  | G B | 14 | 3.810  | 19.406 | 35.433 | 1.00 | 0.00 | H |
| ATOM | 1023 | H2'1 | G B | 14 | 3.960  | 23.009 | 34.049 | 1.00 | 0.00 | H |
| ATOM | 1024 | H2'2 | G B | 14 | 3.840  | 22.237 | 32.475 | 1.00 | 0.00 | H |
| ATOM | 1025 | H5'1 | G B | 14 | 3.098  | 21.114 | 37.252 | 1.00 | 0.00 | H |
| ATOM | 1026 | H5'2 | G B | 14 | 4.809  | 20.676 | 37.058 | 1.00 | 0.00 | H |
| ATOM | 1027 | C1'  | C B | 15 | 0.588  | 21.250 | 29.195 | 1.00 | 0.00 | C |
| ATOM | 1028 | N1   | C B | 15 | 0.564  | 22.568 | 29.884 | 1.00 | 0.00 | N |
| ATOM | 1029 | C2   | C B | 15 | -0.633 | 23.281 | 29.889 | 1.00 | 0.00 | C |
| ATOM | 1030 | O2   | C B | 15 | -1.621 | 22.791 | 29.325 | 1.00 | 0.00 | O |
| ATOM | 1031 | N3   | C B | 15 | -0.677 | 24.484 | 30.512 | 1.00 | 0.00 | N |
| ATOM | 1032 | C4   | C B | 15 | 0.408  | 24.987 | 31.112 | 1.00 | 0.00 | C |
| ATOM | 1033 | N4   | C B | 15 | 0.309  | 26.166 | 31.709 | 1.00 | 0.00 | N |
| ATOM | 1034 | C5   | C B | 15 | 1.657  | 24.279 | 31.120 | 1.00 | 0.00 | C |
| ATOM | 1035 | C6   | C B | 15 | 1.674  | 23.068 | 30.491 | 1.00 | 0.00 | C |
| ATOM | 1036 | C2'  | C B | 15 | 1.886  | 20.971 | 28.450 | 1.00 | 0.00 | C |
| ATOM | 1037 | C3'  | C B | 15 | 2.054  | 19.473 | 28.655 | 1.00 | 0.00 | C |
| ATOM | 1038 | O3'  | C B | 15 | 1.300  | 18.777 | 27.664 | 1.00 | 0.00 | O |
| ATOM | 1039 | C4'  | C B | 15 | 1.497  | 19.257 | 30.060 | 1.00 | 0.00 | C |
| ATOM | 1040 | O4'  | C B | 15 | 0.425  | 20.246 | 30.180 | 1.00 | 0.00 | O |
| ATOM | 1041 | C5'  | C B | 15 | 2.465  | 19.455 | 31.204 | 1.00 | 0.00 | C |
| ATOM | 1042 | O5'  | C B | 15 | 3.371  | 20.543 | 30.896 | 1.00 | 0.00 | O |
| ATOM | 1043 | O1P  | C B | 15 | 5.607  | 19.404 | 30.699 | 1.00 | 0.00 | O |
| ATOM | 1044 | O2P  | C B | 15 | 5.484  | 21.815 | 31.384 | 1.00 | 0.00 | O |
| ATOM | 1045 | P    | C B | 15 | 4.874  | 20.463 | 31.422 | 1.00 | 0.00 | P |
| ATOM | 1046 | H5   | C B | 15 | 2.543  | 24.689 | 31.603 | 1.00 | 0.00 | H |
| ATOM | 1047 | H6   | C B | 15 | 2.598  | 22.489 | 30.476 | 1.00 | 0.00 | H |
| ATOM | 1048 | H1'  | C B | 15 | -0.268 | 21.201 | 28.521 | 1.00 | 0.00 | H |
| ATOM | 1049 | H3'  | C B | 15 | 3.098  | 19.167 | 28.595 | 1.00 | 0.00 | H |
| ATOM | 1050 | H4'  | C B | 15 | 1.136  | 18.230 | 30.104 | 1.00 | 0.00 | H |
| ATOM | 1051 | H41  | C B | 15 | 1.128  | 26.576 | 32.182 | 1.00 | 0.00 | H |
| ATOM | 1052 | H42  | C B | 15 | -0.588 | 26.674 | 31.700 | 1.00 | 0.00 | H |
| ATOM | 1053 | H2'1 | C B | 15 | 2.728  | 21.524 | 28.864 | 1.00 | 0.00 | H |
| ATOM | 1054 | H2'2 | C B | 15 | 1.818  | 21.222 | 27.391 | 1.00 | 0.00 | H |
| ATOM | 1055 | H5'1 | C B | 15 | 1.906  | 19.685 | 32.111 | 1.00 | 0.00 | H |
| ATOM | 1056 | H5'2 | C B | 15 | 3.032  | 18.536 | 31.355 | 1.00 | 0.00 | H |
| ATOM | 1057 | C1'  | G B | 16 | -2.203 | 22.562 | 25.322 | 1.00 | 0.00 | C |
| ATOM | 1058 | N1   | G B | 16 | -2.156 | 27.145 | 27.563 | 1.00 | 0.00 | N |
| ATOM | 1059 | C2   | G B | 16 | -3.197 | 26.461 | 26.960 | 1.00 | 0.00 | C |
| ATOM | 1060 | N2   | G B | 16 | -4.384 | 27.082 | 26.954 | 1.00 | 0.00 | N |



|      |      |      |     |    |        |        |        |      |      |   |
|------|------|------|-----|----|--------|--------|--------|------|------|---|
| ATOM | 1061 | N3   | G B | 16 | -3.066 | 25.255 | 26.411 | 1.00 | 0.00 | N |
| ATOM | 1062 | C4   | G B | 16 | -1.796 | 24.781 | 26.503 | 1.00 | 0.00 | C |
| ATOM | 1063 | C5   | G B | 16 | -0.695 | 25.392 | 27.080 | 1.00 | 0.00 | C |
| ATOM | 1064 | C6   | G B | 16 | -0.835 | 26.672 | 27.667 | 1.00 | 0.00 | C |
| ATOM | 1065 | O6   | G B | 16 | 0.017  | 27.368 | 28.222 | 1.00 | 0.00 | O |
| ATOM | 1066 | N7   | G B | 16 | 0.429  | 24.572 | 26.964 | 1.00 | 0.00 | N |
| ATOM | 1067 | C8   | G B | 16 | -0.016 | 23.512 | 26.338 | 1.00 | 0.00 | C |
| ATOM | 1068 | N9   | G B | 16 | -1.359 | 23.566 | 26.023 | 1.00 | 0.00 | N |
| ATOM | 1069 | C2'  | G B | 16 | -1.486 | 21.844 | 24.186 | 1.00 | 0.00 | C |
| ATOM | 1070 | C3'  | G B | 16 | -2.072 | 20.444 | 24.275 | 1.00 | 0.00 | C |
| ATOM | 1071 | O3'  | G B | 16 | -3.305 | 20.407 | 23.561 | 1.00 | 0.00 | O |
| ATOM | 1072 | C4'  | G B | 16 | -2.269 | 20.253 | 25.778 | 1.00 | 0.00 | C |
| ATOM | 1073 | O4'  | G B | 16 | -2.598 | 21.591 | 26.271 | 1.00 | 0.00 | O |
| ATOM | 1074 | C5'  | G B | 16 | -1.080 | 19.733 | 26.550 | 1.00 | 0.00 | C |
| ATOM | 1075 | O5'  | G B | 16 | 0.142  | 20.287 | 26.001 | 1.00 | 0.00 | O |
| ATOM | 1076 | O1P  | G B | 16 | 1.320  | 18.277 | 25.051 | 1.00 | 0.00 | O |
| ATOM | 1077 | O2P  | G B | 16 | 2.647  | 20.262 | 25.818 | 1.00 | 0.00 | O |
| ATOM | 1078 | P    | G B | 16 | 1.462  | 19.391 | 26.006 | 1.00 | 0.00 | P |
| ATOM | 1079 | H1   | G B | 16 | -2.364 | 28.071 | 27.964 | 1.00 | 0.00 | H |
| ATOM | 1080 | H8   | G B | 16 | 0.618  | 22.662 | 26.087 | 1.00 | 0.00 | H |
| ATOM | 1081 | H1'  | G B | 16 | -3.102 | 23.064 | 24.961 | 1.00 | 0.00 | H |
| ATOM | 1082 | H21  | G B | 16 | -4.479 | 28.014 | 27.383 | 1.00 | 0.00 | H |
| ATOM | 1083 | H3'  | G B | 16 | -1.397 | 19.692 | 23.868 | 1.00 | 0.00 | H |
| ATOM | 1084 | H22  | G B | 16 | -5.198 | 26.627 | 26.519 | 1.00 | 0.00 | H |
| ATOM | 1085 | H4'  | G B | 16 | -3.085 | 19.541 | 25.902 | 1.00 | 0.00 | H |
| ATOM | 1086 | H2'1 | G B | 16 | -0.405 | 21.831 | 24.323 | 1.00 | 0.00 | H |
| ATOM | 1087 | H2'2 | G B | 16 | -1.689 | 22.299 | 23.216 | 1.00 | 0.00 | H |
| ATOM | 1088 | H5'1 | G B | 16 | -1.178 | 20.021 | 27.596 | 1.00 | 0.00 | H |
| ATOM | 1089 | H5'2 | G B | 16 | -1.056 | 18.645 | 26.478 | 1.00 | 0.00 | H |
| ATOM | 1090 | C1'  | G B | 17 | -4.828 | 25.774 | 22.616 | 1.00 | 0.00 | C |
| ATOM | 1091 | N1   | G B | 17 | -1.842 | 29.241 | 24.872 | 1.00 | 0.00 | N |
| ATOM | 1092 | C2   | G B | 17 | -3.203 | 29.270 | 24.620 | 1.00 | 0.00 | C |
| ATOM | 1093 | N2   | G B | 17 | -3.853 | 30.369 | 25.021 | 1.00 | 0.00 | N |
| ATOM | 1094 | N3   | G B | 17 | -3.860 | 28.281 | 24.018 | 1.00 | 0.00 | N |
| ATOM | 1095 | C4   | G B | 17 | -3.042 | 27.252 | 23.674 | 1.00 | 0.00 | C |
| ATOM | 1096 | C5   | G B | 17 | -1.679 | 27.137 | 23.881 | 1.00 | 0.00 | C |
| ATOM | 1097 | C6   | G B | 17 | -0.980 | 28.184 | 24.524 | 1.00 | 0.00 | C |
| ATOM | 1098 | O6   | G B | 17 | 0.218  | 28.267 | 24.794 | 1.00 | 0.00 | O |
| ATOM | 1099 | N7   | G B | 17 | -1.214 | 25.921 | 23.378 | 1.00 | 0.00 | N |
| ATOM | 1100 | C8   | G B | 17 | -2.286 | 25.347 | 22.896 | 1.00 | 0.00 | C |
| ATOM | 1101 | N9   | G B | 17 | -3.437 | 26.095 | 23.037 | 1.00 | 0.00 | N |
| ATOM | 1102 | C2'  | G B | 17 | -4.910 | 25.039 | 21.285 | 1.00 | 0.00 | C |
| ATOM | 1103 | C3'  | G B | 17 | -6.086 | 24.101 | 21.513 | 1.00 | 0.00 | C |
| ATOM | 1104 | O3'  | G B | 17 | -7.300 | 24.796 | 21.239 | 1.00 | 0.00 | O |
| ATOM | 1105 | C4'  | G B | 17 | -5.949 | 23.738 | 22.990 | 1.00 | 0.00 | C |
| ATOM | 1106 | O4'  | G B | 17 | -5.399 | 24.945 | 23.608 | 1.00 | 0.00 | O |
| ATOM | 1107 | C5'  | G B | 17 | -5.043 | 22.574 | 23.314 | 1.00 | 0.00 | C |
| ATOM | 1108 | O5'  | G B | 17 | -3.904 | 22.574 | 22.417 | 1.00 | 0.00 | O |
| ATOM | 1109 | O1P  | G B | 17 | -4.227 | 20.474 | 21.067 | 1.00 | 0.00 | O |
| ATOM | 1110 | O2P  | G B | 17 | -1.920 | 21.392 | 21.426 | 1.00 | 0.00 | O |
| ATOM | 1111 | P    | G B | 17 | -3.286 | 21.176 | 21.961 | 1.00 | 0.00 | P |
| ATOM | 1112 | H1   | G B | 17 | -1.430 | 30.057 | 25.351 | 1.00 | 0.00 | H |
| ATOM | 1113 | H8   | G B | 17 | -2.273 | 24.366 | 22.423 | 1.00 | 0.00 | H |
| ATOM | 1114 | H1'  | G B | 17 | -5.398 | 26.702 | 22.585 | 1.00 | 0.00 | H |

|      |      |      |     |    |        |        |        |      |      |   |
|------|------|------|-----|----|--------|--------|--------|------|------|---|
| ATOM | 1115 | H21  | G B | 17 | -3.339 | 31.129 | 25.490 | 1.00 | 0.00 | H |
| ATOM | 1116 | H3'  | G B | 17 | -6.028 | 23.213 | 20.883 | 1.00 | 0.00 | H |
| ATOM | 1117 | H22  | G B | 17 | -4.867 | 30.453 | 24.861 | 1.00 | 0.00 | H |
| ATOM | 1118 | H4'  | G B | 17 | -6.947 | 23.492 | 23.350 | 1.00 | 0.00 | H |
| ATOM | 1119 | H2'1 | G B | 17 | -3.999 | 24.485 | 21.061 | 1.00 | 0.00 | H |
| ATOM | 1120 | H2'2 | G B | 17 | -5.097 | 25.714 | 20.450 | 1.00 | 0.00 | H |
| ATOM | 1121 | H5'1 | G B | 17 | -4.699 | 22.663 | 24.345 | 1.00 | 0.00 | H |
| ATOM | 1122 | H5'2 | G B | 17 | -5.600 | 21.644 | 23.202 | 1.00 | 0.00 | H |
| ATOM | 1123 | C1'  | C B | 18 | -6.032 | 30.307 | 21.024 | 1.00 | 0.00 | C |
| ATOM | 1124 | N1   | C B | 18 | -4.618 | 29.840 | 20.984 | 1.00 | 0.00 | N |
| ATOM | 1125 | C2   | C B | 18 | -3.645 | 30.659 | 21.554 | 1.00 | 0.00 | C |
| ATOM | 1126 | O2   | C B | 18 | -3.991 | 31.731 | 22.066 | 1.00 | 0.00 | O |
| ATOM | 1127 | N3   | C B | 18 | -2.353 | 30.252 | 21.527 | 1.00 | 0.00 | N |
| ATOM | 1128 | C4   | C B | 18 | -2.010 | 29.086 | 20.964 | 1.00 | 0.00 | C |
| ATOM | 1129 | N4   | C B | 18 | -0.732 | 28.737 | 20.968 | 1.00 | 0.00 | N |
| ATOM | 1130 | C5   | C B | 18 | -2.989 | 28.227 | 20.369 | 1.00 | 0.00 | C |
| ATOM | 1131 | C6   | C B | 18 | -4.283 | 28.655 | 20.410 | 1.00 | 0.00 | C |
| ATOM | 1132 | C2'  | C B | 18 | -6.823 | 29.977 | 19.766 | 1.00 | 0.00 | C |
| ATOM | 1133 | C3'  | C B | 18 | -8.205 | 29.683 | 20.328 | 1.00 | 0.00 | C |
| ATOM | 1134 | O3'  | C B | 18 | -8.914 | 30.910 | 20.490 | 1.00 | 0.00 | O |
| ATOM | 1135 | C4'  | C B | 18 | -7.892 | 29.017 | 21.666 | 1.00 | 0.00 | C |
| ATOM | 1136 | O4'  | C B | 18 | -6.663 | 29.670 | 22.118 | 1.00 | 0.00 | O |
| ATOM | 1137 | C5'  | C B | 18 | -7.662 | 27.524 | 21.635 | 1.00 | 0.00 | C |
| ATOM | 1138 | O5'  | C B | 18 | -6.964 | 27.162 | 20.416 | 1.00 | 0.00 | O |
| ATOM | 1139 | O1P  | C B | 18 | -8.655 | 25.777 | 19.166 | 1.00 | 0.00 | O |
| ATOM | 1140 | O2P  | C B | 18 | -6.202 | 25.402 | 18.790 | 1.00 | 0.00 | O |
| ATOM | 1141 | P    | C B | 18 | -7.291 | 25.759 | 19.733 | 1.00 | 0.00 | P |
| ATOM | 1142 | H5   | C B | 18 | -2.714 | 27.279 | 19.907 | 1.00 | 0.00 | H |
| ATOM | 1143 | H6   | C B | 18 | -5.064 | 28.034 | 19.972 | 1.00 | 0.00 | H |
| ATOM | 1144 | H1'  | C B | 18 | -6.030 | 31.380 | 21.215 | 1.00 | 0.00 | H |
| ATOM | 1145 | H3'  | C B | 18 | -8.776 | 29.018 | 19.681 | 1.00 | 0.00 | H |
| ATOM | 1146 | H4'  | C B | 18 | -8.742 | 29.207 | 22.322 | 1.00 | 0.00 | H |
| ATOM | 1147 | H41  | C B | 18 | -0.441 | 27.844 | 20.543 | 1.00 | 0.00 | H |
| ATOM | 1148 | H42  | C B | 18 | -0.030 | 29.357 | 21.397 | 1.00 | 0.00 | H |
| ATOM | 1149 | H2'1 | C B | 18 | -6.419 | 29.115 | 19.237 | 1.00 | 0.00 | H |
| ATOM | 1150 | H2'2 | C B | 18 | -6.848 | 30.810 | 19.063 | 1.00 | 0.00 | H |
| ATOM | 1151 | H5'1 | C B | 18 | -7.065 | 27.235 | 22.500 | 1.00 | 0.00 | H |
| ATOM | 1152 | H5'2 | C B | 18 | -8.622 | 27.012 | 21.675 | 1.00 | 0.00 | H |
| ATOM | 1153 | C1'  | C B | 19 | -5.102 | 35.076 | 20.065 | 1.00 | 0.00 | C |
| ATOM | 1154 | N1   | C B | 19 | -4.199 | 34.011 | 19.551 | 1.00 | 0.00 | N |
| ATOM | 1155 | C2   | C B | 19 | -2.833 | 34.136 | 19.800 | 1.00 | 0.00 | C |
| ATOM | 1156 | O2   | C B | 19 | -2.429 | 35.120 | 20.434 | 1.00 | 0.00 | O |
| ATOM | 1157 | N3   | C B | 19 | -1.995 | 33.176 | 19.340 | 1.00 | 0.00 | N |
| ATOM | 1158 | C4   | C B | 19 | -2.463 | 32.123 | 18.657 | 1.00 | 0.00 | C |
| ATOM | 1159 | N4   | C B | 19 | -1.600 | 31.215 | 18.232 | 1.00 | 0.00 | N |
| ATOM | 1160 | C5   | C B | 19 | -3.860 | 31.972 | 18.386 | 1.00 | 0.00 | C |
| ATOM | 1161 | C6   | C B | 19 | -4.685 | 32.948 | 18.859 | 1.00 | 0.00 | C |
| ATOM | 1162 | C2'  | C B | 19 | -6.248 | 35.415 | 19.123 | 1.00 | 0.00 | C |
| ATOM | 1163 | C3'  | C B | 19 | -7.380 | 35.714 | 20.096 | 1.00 | 0.00 | C |
| ATOM | 1164 | O3'  | C B | 19 | -7.286 | 37.071 | 20.521 | 1.00 | 0.00 | O |
| ATOM | 1165 | C4'  | C B | 19 | -7.115 | 34.732 | 21.235 | 1.00 | 0.00 | C |
| ATOM | 1166 | O4'  | C B | 19 | -5.657 | 34.618 | 21.283 | 1.00 | 0.00 | O |
| ATOM | 1167 | C5'  | C B | 19 | -7.702 | 33.348 | 21.079 | 1.00 | 0.00 | C |
| ATOM | 1168 | O5'  | C B | 19 | -7.641 | 32.943 | 19.688 | 1.00 | 0.00 | O |

|      |      |      |     |    |         |        |        |      |      |   |
|------|------|------|-----|----|---------|--------|--------|------|------|---|
| ATOM | 1169 | O1P  | C B | 19 | -10.061 | 32.808 | 19.013 | 1.00 | 0.00 | O |
| ATOM | 1170 | O2P  | C B | 19 | -8.351  | 31.391 | 17.845 | 1.00 | 0.00 | O |
| ATOM | 1171 | P    | C B | 19 | -8.809  | 32.031 | 19.102 | 1.00 | 0.00 | P |
| ATOM | 1172 | H5   | C B | 19 | -4.246  | 31.118 | 17.829 | 1.00 | 0.00 | H |
| ATOM | 1173 | H6   | C B | 19 | -5.758  | 32.874 | 18.679 | 1.00 | 0.00 | H |
| ATOM | 1174 | H1'  | C B | 19 | -4.499  | 35.958 | 20.282 | 1.00 | 0.00 | H |
| ATOM | 1175 | H3'  | C B | 19 | -8.358  | 35.541 | 19.647 | 1.00 | 0.00 | H |
| ATOM | 1176 | H4'  | C B | 19 | -7.539  | 35.173 | 22.138 | 1.00 | 0.00 | H |
| ATOM | 1177 | H41  | C B | 19 | -1.931  | 30.394 | 17.705 | 1.00 | 0.00 | H |
| ATOM | 1178 | H42  | C B | 19 | -0.593  | 31.328 | 18.428 | 1.00 | 0.00 | H |
| ATOM | 1179 | H2'1 | C B | 19 | -6.501  | 34.587 | 18.463 | 1.00 | 0.00 | H |
| ATOM | 1180 | H2'2 | C B | 19 | -6.026  | 36.279 | 18.496 | 1.00 | 0.00 | H |
| ATOM | 1181 | H5'1 | C B | 19 | -7.137  | 32.648 | 21.693 | 1.00 | 0.00 | H |
| ATOM | 1182 | H5'2 | C B | 19 | -8.739  | 33.361 | 21.413 | 1.00 | 0.00 | H |
| ATOM | 1183 | C1'  | T B | 20 | -2.162  | 38.919 | 19.022 | 1.00 | 0.00 | C |
| ATOM | 1184 | N1   | T B | 20 | -2.086  | 37.677 | 18.209 | 1.00 | 0.00 | N |
| ATOM | 1185 | C2   | T B | 20 | -0.837  | 37.120 | 18.025 | 1.00 | 0.00 | C |
| ATOM | 1186 | O2   | T B | 20 | 0.177   | 37.604 | 18.497 | 1.00 | 0.00 | O |
| ATOM | 1187 | N3   | T B | 20 | -0.813  | 35.967 | 17.263 | 1.00 | 0.00 | N |
| ATOM | 1188 | C4   | T B | 20 | -1.895  | 35.341 | 16.686 | 1.00 | 0.00 | C |
| ATOM | 1189 | O4   | T B | 20 | -1.748  | 34.308 | 16.020 | 1.00 | 0.00 | O |
| ATOM | 1190 | C5   | T B | 20 | -3.157  | 35.995 | 16.933 | 1.00 | 0.00 | C |
| ATOM | 1191 | C6   | T B | 20 | -3.220  | 37.121 | 17.671 | 1.00 | 0.00 | C |
| ATOM | 1192 | C7   | T B | 20 | -4.364  | 35.347 | 16.323 | 1.00 | 0.00 | C |
| ATOM | 1193 | C2'  | T B | 20 | -3.184  | 39.927 | 18.509 | 1.00 | 0.00 | C |
| ATOM | 1194 | C3'  | T B | 20 | -3.714  | 40.527 | 19.802 | 1.00 | 0.00 | C |
| ATOM | 1195 | O3'  | T B | 20 | -2.846  | 41.577 | 20.223 | 1.00 | 0.00 | O |
| ATOM | 1196 | C4'  | T B | 20 | -3.693  | 39.340 | 20.762 | 1.00 | 0.00 | C |
| ATOM | 1197 | O4'  | T B | 20 | -2.535  | 38.553 | 20.337 | 1.00 | 0.00 | O |
| ATOM | 1198 | C5'  | T B | 20 | -4.913  | 38.447 | 20.754 | 1.00 | 0.00 | C |
| ATOM | 1199 | O5'  | T B | 20 | -5.426  | 38.332 | 19.402 | 1.00 | 0.00 | O |
| ATOM | 1200 | O1P  | T B | 20 | -7.666  | 39.472 | 19.531 | 1.00 | 0.00 | O |
| ATOM | 1201 | O2P  | T B | 20 | -7.270  | 37.671 | 17.829 | 1.00 | 0.00 | O |
| ATOM | 1202 | P    | T B | 20 | -7.000  | 38.199 | 19.188 | 1.00 | 0.00 | P |
| ATOM | 1203 | H3   | T B | 20 | 0.108   | 35.531 | 17.113 | 1.00 | 0.00 | H |
| ATOM | 1204 | H6   | T B | 20 | -4.185  | 37.597 | 17.844 | 1.00 | 0.00 | H |
| ATOM | 1205 | H1'  | T B | 20 | -1.167  | 39.361 | 19.067 | 1.00 | 0.00 | H |
| ATOM | 1206 | H3'  | T B | 20 | -4.724  | 40.920 | 19.684 | 1.00 | 0.00 | H |
| ATOM | 1207 | H4'  | T B | 20 | -3.587  | 39.747 | 21.768 | 1.00 | 0.00 | H |
| ATOM | 1208 | H3T  | T B | 20 | -2.668  | 42.249 | 19.562 | 1.00 | 0.00 | H |
| ATOM | 1209 | H71  | T B | 20 | -4.789  | 36.007 | 15.566 | 1.00 | 0.00 | H |
| ATOM | 1210 | H72  | T B | 20 | -4.075  | 34.402 | 15.861 | 1.00 | 0.00 | H |
| ATOM | 1211 | H73  | T B | 20 | -5.108  | 35.158 | 17.098 | 1.00 | 0.00 | H |
| ATOM | 1212 | H2'1 | T B | 20 | -3.979  | 39.454 | 17.936 | 1.00 | 0.00 | H |
| ATOM | 1213 | H2'2 | T B | 20 | -2.730  | 40.689 | 17.875 | 1.00 | 0.00 | H |
| ATOM | 1214 | H5'1 | T B | 20 | -4.638  | 37.462 | 21.129 | 1.00 | 0.00 | H |
| ATOM | 1215 | H5'2 | T B | 20 | -5.674  | 38.878 | 21.401 | 1.00 | 0.00 | H |
| TER  |      |      |     |    |         |        |        |      |      |   |
| ATOM | 1    | C1'  | A A | 1  | -24.723 | 49.842 | 39.266 | 1.00 | 0.00 | C |
| ATOM | 2    | N1   | A A | 1  | -28.886 | 47.525 | 37.358 | 1.00 | 0.00 | N |
| ATOM | 3    | C2   | A A | 1  | -28.694 | 48.284 | 38.433 | 1.00 | 0.00 | C |
| ATOM | 4    | N3   | A A | 1  | -27.590 | 48.855 | 38.867 | 1.00 | 0.00 | N |
| ATOM | 5    | C4   | A A | 1  | -26.563 | 48.569 | 38.046 | 1.00 | 0.00 | C |
| ATOM | 6    | C5   | A A | 1  | -26.594 | 47.808 | 36.911 | 1.00 | 0.00 | C |

|      |    |      |     |   |         |        |        |      |      |   |
|------|----|------|-----|---|---------|--------|--------|------|------|---|
| ATOM | 7  | C6   | A A | 1 | -27.844 | 47.257 | 36.558 | 1.00 | 0.00 | C |
| ATOM | 8  | N6   | A A | 1 | -28.026 | 46.489 | 35.469 | 1.00 | 0.00 | N |
| ATOM | 9  | N7   | A A | 1 | -25.342 | 47.735 | 36.325 | 1.00 | 0.00 | N |
| ATOM | 10 | C8   | A A | 1 | -24.588 | 48.444 | 37.112 | 1.00 | 0.00 | C |
| ATOM | 11 | N9   | A A | 1 | -25.261 | 48.983 | 38.178 | 1.00 | 0.00 | N |
| ATOM | 12 | C2'  | A A | 1 | -23.322 | 49.454 | 39.718 | 1.00 | 0.00 | C |
| ATOM | 13 | C3'  | A A | 1 | -22.706 | 50.808 | 40.035 | 1.00 | 0.00 | C |
| ATOM | 14 | O3'  | A A | 1 | -23.063 | 51.186 | 41.362 | 1.00 | 0.00 | O |
| ATOM | 15 | C4'  | A A | 1 | -23.335 | 51.722 | 38.985 | 1.00 | 0.00 | C |
| ATOM | 16 | O4'  | A A | 1 | -24.676 | 51.170 | 38.783 | 1.00 | 0.00 | O |
| ATOM | 17 | C5'  | A A | 1 | -22.634 | 51.790 | 37.649 | 1.00 | 0.00 | C |
| ATOM | 18 | O5'  | A A | 1 | -22.099 | 50.486 | 37.308 | 1.00 | 0.00 | O |
| ATOM | 19 | H2   | A A | 1 | -29.579 | 48.460 | 39.043 | 1.00 | 0.00 | H |
| ATOM | 20 | H8   | A A | 1 | -23.523 | 48.597 | 36.940 | 1.00 | 0.00 | H |
| ATOM | 21 | H1'  | A A | 1 | -25.425 | 49.813 | 40.100 | 1.00 | 0.00 | H |
| ATOM | 22 | H3'  | A A | 1 | -21.619 | 50.794 | 39.944 | 1.00 | 0.00 | H |
| ATOM | 23 | H4'  | A A | 1 | -23.346 | 52.726 | 39.407 | 1.00 | 0.00 | H |
| ATOM | 24 | H61  | A A | 1 | -28.958 | 46.113 | 35.256 | 1.00 | 0.00 | H |
| ATOM | 25 | H62  | A A | 1 | -27.229 | 46.280 | 34.850 | 1.00 | 0.00 | H |
| ATOM | 26 | H5T  | A A | 1 | -21.275 | 50.439 | 36.818 | 1.00 | 0.00 | H |
| ATOM | 27 | H2'1 | A A | 1 | -22.764 | 48.937 | 38.939 | 1.00 | 0.00 | H |
| ATOM | 28 | H2'2 | A A | 1 | -23.334 | 48.809 | 40.597 | 1.00 | 0.00 | H |
| ATOM | 29 | H5'1 | A A | 1 | -23.347 | 52.106 | 36.887 | 1.00 | 0.00 | H |
| ATOM | 30 | H5'2 | A A | 1 | -21.825 | 52.516 | 37.705 | 1.00 | 0.00 | H |
| ATOM | 31 | C1'  | G A | 2 | -27.342 | 47.733 | 42.920 | 1.00 | 0.00 | C |
| ATOM | 32 | N1   | G A | 2 | -29.001 | 44.651 | 39.211 | 1.00 | 0.00 | N |
| ATOM | 33 | C2   | G A | 2 | -29.697 | 45.249 | 40.243 | 1.00 | 0.00 | C |
| ATOM | 34 | N2   | G A | 2 | -31.009 | 44.992 | 40.297 | 1.00 | 0.00 | N |
| ATOM | 35 | N3   | G A | 2 | -29.131 | 46.043 | 41.151 | 1.00 | 0.00 | N |
| ATOM | 36 | C4   | G A | 2 | -27.794 | 46.188 | 40.948 | 1.00 | 0.00 | C |
| ATOM | 37 | C5   | G A | 2 | -27.016 | 45.627 | 39.948 | 1.00 | 0.00 | C |
| ATOM | 38 | C6   | G A | 2 | -27.620 | 44.788 | 38.982 | 1.00 | 0.00 | C |
| ATOM | 39 | O6   | G A | 2 | -27.103 | 44.207 | 38.028 | 1.00 | 0.00 | O |
| ATOM | 40 | N7   | G A | 2 | -25.685 | 46.024 | 40.092 | 1.00 | 0.00 | N |
| ATOM | 41 | C8   | G A | 2 | -25.699 | 46.797 | 41.148 | 1.00 | 0.00 | C |
| ATOM | 42 | N9   | G A | 2 | -26.944 | 46.944 | 41.724 | 1.00 | 0.00 | N |
| ATOM | 43 | C2'  | G A | 2 | -26.311 | 47.713 | 44.041 | 1.00 | 0.00 | C |
| ATOM | 44 | C3'  | G A | 2 | -26.430 | 49.116 | 44.610 | 1.00 | 0.00 | C |
| ATOM | 45 | O3'  | G A | 2 | -27.499 | 49.150 | 45.553 | 1.00 | 0.00 | O |
| ATOM | 46 | C4'  | G A | 2 | -26.727 | 49.961 | 43.371 | 1.00 | 0.00 | C |
| ATOM | 47 | O4'  | G A | 2 | -27.516 | 49.077 | 42.513 | 1.00 | 0.00 | O |
| ATOM | 48 | C5'  | G A | 2 | -25.530 | 50.451 | 42.591 | 1.00 | 0.00 | C |
| ATOM | 49 | O5'  | G A | 2 | -24.493 | 49.439 | 42.597 | 1.00 | 0.00 | O |
| ATOM | 50 | O1P  | G A | 2 | -22.639 | 50.515 | 43.918 | 1.00 | 0.00 | O |
| ATOM | 51 | O2P  | G A | 2 | -22.104 | 48.776 | 42.190 | 1.00 | 0.00 | O |
| ATOM | 52 | P    | G A | 2 | -22.967 | 49.905 | 42.615 | 1.00 | 0.00 | P |
| ATOM | 53 | H1   | G A | 2 | -29.535 | 44.057 | 38.560 | 1.00 | 0.00 | H |
| ATOM | 54 | H8   | G A | 2 | -24.805 | 47.282 | 41.539 | 1.00 | 0.00 | H |
| ATOM | 55 | H1'  | G A | 2 | -28.305 | 47.361 | 43.270 | 1.00 | 0.00 | H |
| ATOM | 56 | H21  | G A | 2 | -31.442 | 44.379 | 39.591 | 1.00 | 0.00 | H |
| ATOM | 57 | H3'  | G A | 2 | -25.509 | 49.441 | 45.095 | 1.00 | 0.00 | H |
| ATOM | 58 | H22  | G A | 2 | -31.584 | 45.407 | 41.044 | 1.00 | 0.00 | H |
| ATOM | 59 | H4'  | G A | 2 | -27.284 | 50.834 | 43.710 | 1.00 | 0.00 | H |
| ATOM | 60 | H2'1 | G A | 2 | -25.303 | 47.519 | 43.671 | 1.00 | 0.00 | H |

|      |     |      |     |   |         |        |        |      |      |   |
|------|-----|------|-----|---|---------|--------|--------|------|------|---|
| ATOM | 61  | H2'2 | G A | 2 | -26.534 | 46.957 | 44.795 | 1.00 | 0.00 | H |
| ATOM | 62  | H5'1 | G A | 2 | -25.833 | 50.662 | 41.566 | 1.00 | 0.00 | H |
| ATOM | 63  | H5'2 | G A | 2 | -25.156 | 51.367 | 43.049 | 1.00 | 0.00 | H |
| ATOM | 64  | C1'  | G A | 3 | -30.514 | 44.421 | 44.790 | 1.00 | 0.00 | C |
| ATOM | 65  | N1   | G A | 3 | -29.057 | 41.612 | 40.790 | 1.00 | 0.00 | N |
| ATOM | 66  | C2   | G A | 3 | -30.317 | 41.812 | 41.320 | 1.00 | 0.00 | C |
| ATOM | 67  | N2   | G A | 3 | -31.323 | 41.177 | 40.706 | 1.00 | 0.00 | N |
| ATOM | 68  | N3   | G A | 3 | -30.555 | 42.582 | 42.379 | 1.00 | 0.00 | N |
| ATOM | 69  | C4   | G A | 3 | -29.421 | 43.140 | 42.878 | 1.00 | 0.00 | C |
| ATOM | 70  | C5   | G A | 3 | -28.123 | 42.995 | 42.416 | 1.00 | 0.00 | C |
| ATOM | 71  | C6   | G A | 3 | -27.870 | 42.180 | 41.289 | 1.00 | 0.00 | C |
| ATOM | 72  | O6   | G A | 3 | -26.799 | 41.931 | 40.735 | 1.00 | 0.00 | O |
| ATOM | 73  | N7   | G A | 3 | -27.243 | 43.735 | 43.209 | 1.00 | 0.00 | N |
| ATOM | 74  | C8   | G A | 3 | -28.017 | 44.294 | 44.103 | 1.00 | 0.00 | C |
| ATOM | 75  | N9   | G A | 3 | -29.353 | 43.980 | 43.968 | 1.00 | 0.00 | N |
| ATOM | 76  | C2'  | G A | 3 | -30.208 | 44.526 | 46.277 | 1.00 | 0.00 | C |
| ATOM | 77  | C3'  | G A | 3 | -31.043 | 45.726 | 46.690 | 1.00 | 0.00 | C |
| ATOM | 78  | O3'  | G A | 3 | -32.376 | 45.298 | 46.962 | 1.00 | 0.00 | O |
| ATOM | 79  | C4'  | G A | 3 | -30.969 | 46.631 | 45.461 | 1.00 | 0.00 | C |
| ATOM | 80  | O4'  | G A | 3 | -30.904 | 45.702 | 44.333 | 1.00 | 0.00 | O |
| ATOM | 81  | C5'  | G A | 3 | -29.783 | 47.565 | 45.387 | 1.00 | 0.00 | C |
| ATOM | 82  | O5'  | G A | 3 | -28.609 | 46.912 | 45.931 | 1.00 | 0.00 | O |
| ATOM | 83  | O1P  | G A | 3 | -28.095 | 48.259 | 47.994 | 1.00 | 0.00 | O |
| ATOM | 84  | O2P  | G A | 3 | -26.254 | 47.046 | 46.797 | 1.00 | 0.00 | O |
| ATOM | 85  | P    | G A | 3 | -27.533 | 47.793 | 46.712 | 1.00 | 0.00 | P |
| ATOM | 86  | H1   | G A | 3 | -28.981 | 40.998 | 39.964 | 1.00 | 0.00 | H |
| ATOM | 87  | H8   | G A | 3 | -27.640 | 44.951 | 44.886 | 1.00 | 0.00 | H |
| ATOM | 88  | H1'  | G A | 3 | -31.341 | 43.734 | 44.608 | 1.00 | 0.00 | H |
| ATOM | 89  | H21  | G A | 3 | -31.132 | 40.584 | 39.885 | 1.00 | 0.00 | H |
| ATOM | 90  | H3'  | G A | 3 | -30.637 | 46.224 | 47.571 | 1.00 | 0.00 | H |
| ATOM | 91  | H22  | G A | 3 | -32.286 | 41.283 | 41.054 | 1.00 | 0.00 | H |
| ATOM | 92  | H4'  | G A | 3 | -31.873 | 47.239 | 45.460 | 1.00 | 0.00 | H |
| ATOM | 93  | H2'1 | G A | 3 | -29.149 | 44.694 | 46.471 | 1.00 | 0.00 | H |
| ATOM | 94  | H2'2 | G A | 3 | -30.502 | 43.629 | 46.824 | 1.00 | 0.00 | H |
| ATOM | 95  | H5'1 | G A | 3 | -29.607 | 47.837 | 44.347 | 1.00 | 0.00 | H |
| ATOM | 96  | H5'2 | G A | 3 | -30.002 | 48.466 | 45.960 | 1.00 | 0.00 | H |
| ATOM | 97  | C1'  | C A | 4 | -32.893 | 40.077 | 44.838 | 1.00 | 0.00 | C |
| ATOM | 98  | N1   | C A | 4 | -31.409 | 40.125 | 44.717 | 1.00 | 0.00 | N |
| ATOM | 99  | C2   | C A | 4 | -30.818 | 39.414 | 43.675 | 1.00 | 0.00 | C |
| ATOM | 100 | O2   | C A | 4 | -31.541 | 38.777 | 42.900 | 1.00 | 0.00 | O |
| ATOM | 101 | N3   | C A | 4 | -29.469 | 39.446 | 43.548 | 1.00 | 0.00 | N |
| ATOM | 102 | C4   | C A | 4 | -28.713 | 40.144 | 44.404 | 1.00 | 0.00 | C |
| ATOM | 103 | N4   | C A | 4 | -27.399 | 40.142 | 44.230 | 1.00 | 0.00 | N |
| ATOM | 104 | C5   | C A | 4 | -29.295 | 40.882 | 45.485 | 1.00 | 0.00 | C |
| ATOM | 105 | C6   | C A | 4 | -30.654 | 40.839 | 45.593 | 1.00 | 0.00 | C |
| ATOM | 106 | C2'  | C A | 4 | -33.390 | 40.028 | 46.276 | 1.00 | 0.00 | C |
| ATOM | 107 | C3'  | C A | 4 | -34.664 | 40.858 | 46.200 | 1.00 | 0.00 | C |
| ATOM | 108 | O3'  | C A | 4 | -35.738 | 40.025 | 45.768 | 1.00 | 0.00 | O |
| ATOM | 109 | C4'  | C A | 4 | -34.311 | 41.927 | 45.169 | 1.00 | 0.00 | C |
| ATOM | 110 | O4'  | C A | 4 | -33.412 | 41.249 | 44.235 | 1.00 | 0.00 | O |
| ATOM | 111 | C5'  | C A | 4 | -33.618 | 43.162 | 45.694 | 1.00 | 0.00 | C |
| ATOM | 112 | O5'  | C A | 4 | -32.707 | 42.797 | 46.762 | 1.00 | 0.00 | O |
| ATOM | 113 | O1P  | C A | 4 | -33.718 | 43.891 | 48.791 | 1.00 | 0.00 | O |
| ATOM | 114 | O2P  | C A | 4 | -31.248 | 43.465 | 48.696 | 1.00 | 0.00 | O |

|      |     |      |     |   |         |        |        |      |      |   |
|------|-----|------|-----|---|---------|--------|--------|------|------|---|
| ATOM | 115 | P    | C A | 4 | -32.493 | 43.815 | 47.971 | 1.00 | 0.00 | P |
| ATOM | 116 | H5   | C A | 4 | -28.682 | 41.448 | 46.187 | 1.00 | 0.00 | H |
| ATOM | 117 | H6   | C A | 4 | -31.144 | 41.389 | 46.397 | 1.00 | 0.00 | H |
| ATOM | 118 | H1'  | C A | 4 | -33.253 | 39.220 | 44.270 | 1.00 | 0.00 | H |
| ATOM | 119 | H3'  | C A | 4 | -34.917 | 41.304 | 47.161 | 1.00 | 0.00 | H |
| ATOM | 120 | H4'  | C A | 4 | -35.247 | 42.242 | 44.708 | 1.00 | 0.00 | H |
| ATOM | 121 | H41  | C A | 4 | -26.793 | 40.672 | 44.874 | 1.00 | 0.00 | H |
| ATOM | 122 | H42  | C A | 4 | -26.982 | 39.610 | 43.452 | 1.00 | 0.00 | H |
| ATOM | 123 | H2'1 | C A | 4 | -32.677 | 40.462 | 46.976 | 1.00 | 0.00 | H |
| ATOM | 124 | H2'2 | C A | 4 | -33.597 | 39.010 | 46.608 | 1.00 | 0.00 | H |
| ATOM | 125 | H5'1 | C A | 4 | -33.064 | 43.635 | 44.883 | 1.00 | 0.00 | H |
| ATOM | 126 | H5'2 | C A | 4 | -34.366 | 43.860 | 46.071 | 1.00 | 0.00 | H |
| ATOM | 127 | C1'  | C A | 5 | -33.411 | 35.278 | 43.732 | 1.00 | 0.00 | C |
| ATOM | 128 | N1   | C A | 5 | -32.165 | 35.774 | 44.377 | 1.00 | 0.00 | N |
| ATOM | 129 | C2   | C A | 5 | -30.948 | 35.440 | 43.787 | 1.00 | 0.00 | C |
| ATOM | 130 | O2   | C A | 5 | -30.950 | 34.749 | 42.759 | 1.00 | 0.00 | O |
| ATOM | 131 | N3   | C A | 5 | -29.801 | 35.883 | 44.359 | 1.00 | 0.00 | N |
| ATOM | 132 | C4   | C A | 5 | -29.829 | 36.627 | 45.471 | 1.00 | 0.00 | C |
| ATOM | 133 | N4   | C A | 5 | -28.679 | 37.035 | 45.985 | 1.00 | 0.00 | N |
| ATOM | 134 | C5   | C A | 5 | -31.066 | 36.984 | 46.100 | 1.00 | 0.00 | C |
| ATOM | 135 | C6   | C A | 5 | -32.207 | 36.530 | 45.505 | 1.00 | 0.00 | C |
| ATOM | 136 | C2'  | C A | 5 | -34.490 | 34.861 | 44.721 | 1.00 | 0.00 | C |
| ATOM | 137 | C3'  | C A | 5 | -35.761 | 35.285 | 44.001 | 1.00 | 0.00 | C |
| ATOM | 138 | O3'  | C A | 5 | -36.150 | 34.254 | 43.095 | 1.00 | 0.00 | O |
| ATOM | 139 | C4'  | C A | 5 | -35.333 | 36.558 | 43.277 | 1.00 | 0.00 | C |
| ATOM | 140 | O4'  | C A | 5 | -33.930 | 36.326 | 42.934 | 1.00 | 0.00 | O |
| ATOM | 141 | C5'  | C A | 5 | -35.432 | 37.844 | 44.065 | 1.00 | 0.00 | C |
| ATOM | 142 | O5'  | C A | 5 | -35.085 | 37.597 | 45.452 | 1.00 | 0.00 | O |
| ATOM | 143 | O1P  | C A | 5 | -37.244 | 38.015 | 46.676 | 1.00 | 0.00 | O |
| ATOM | 144 | O2P  | C A | 5 | -35.051 | 38.348 | 47.849 | 1.00 | 0.00 | O |
| ATOM | 145 | P    | C A | 5 | -35.830 | 38.429 | 46.589 | 1.00 | 0.00 | P |
| ATOM | 146 | H5   | C A | 5 | -31.094 | 37.586 | 47.009 | 1.00 | 0.00 | H |
| ATOM | 147 | H6   | C A | 5 | -33.174 | 36.780 | 45.944 | 1.00 | 0.00 | H |
| ATOM | 148 | H1'  | C A | 5 | -33.146 | 34.453 | 43.070 | 1.00 | 0.00 | H |
| ATOM | 149 | H3'  | C A | 5 | -36.578 | 35.481 | 44.696 | 1.00 | 0.00 | H |
| ATOM | 150 | H4'  | C A | 5 | -35.976 | 36.656 | 42.402 | 1.00 | 0.00 | H |
| ATOM | 151 | H41  | C A | 5 | -28.672 | 37.611 | 46.840 | 1.00 | 0.00 | H |
| ATOM | 152 | H42  | C A | 5 | -27.791 | 36.776 | 45.532 | 1.00 | 0.00 | H |
| ATOM | 153 | H2'1 | C A | 5 | -34.391 | 35.368 | 45.680 | 1.00 | 0.00 | H |
| ATOM | 154 | H2'2 | C A | 5 | -34.481 | 33.787 | 44.915 | 1.00 | 0.00 | H |
| ATOM | 155 | H5'1 | C A | 5 | -34.747 | 38.578 | 43.639 | 1.00 | 0.00 | H |
| ATOM | 156 | H5'2 | C A | 5 | -36.451 | 38.224 | 44.002 | 1.00 | 0.00 | H |
| ATOM | 157 | C1'  | G A | 6 | -31.711 | 30.772 | 42.576 | 1.00 | 0.00 | C |
| ATOM | 158 | N1   | G A | 6 | -27.485 | 32.380 | 44.939 | 1.00 | 0.00 | N |
| ATOM | 159 | C2   | G A | 6 | -27.627 | 31.666 | 43.762 | 1.00 | 0.00 | C |
| ATOM | 160 | N2   | G A | 6 | -26.494 | 31.335 | 43.133 | 1.00 | 0.00 | N |
| ATOM | 161 | N3   | G A | 6 | -28.807 | 31.312 | 43.255 | 1.00 | 0.00 | N |
| ATOM | 162 | C4   | G A | 6 | -29.846 | 31.724 | 44.027 | 1.00 | 0.00 | C |
| ATOM | 163 | C5   | G A | 6 | -29.799 | 32.436 | 45.215 | 1.00 | 0.00 | C |
| ATOM | 164 | C6   | G A | 6 | -28.549 | 32.816 | 45.752 | 1.00 | 0.00 | C |
| ATOM | 165 | O6   | G A | 6 | -28.304 | 33.442 | 46.783 | 1.00 | 0.00 | O |
| ATOM | 166 | N7   | G A | 6 | -31.091 | 32.660 | 45.694 | 1.00 | 0.00 | N |
| ATOM | 167 | C8   | G A | 6 | -31.862 | 32.094 | 44.802 | 1.00 | 0.00 | C |
| ATOM | 168 | N9   | G A | 6 | -31.179 | 31.503 | 43.759 | 1.00 | 0.00 | N |

|      |     |      |     |   |         |        |        |      |      |   |
|------|-----|------|-----|---|---------|--------|--------|------|------|---|
| ATOM | 169 | C2'  | G A | 6 | -32.927 | 29.910 | 42.884 | 1.00 | 0.00 | C |
| ATOM | 170 | C3'  | G A | 6 | -33.746 | 30.051 | 41.611 | 1.00 | 0.00 | C |
| ATOM | 171 | O3'  | G A | 6 | -33.283 | 29.107 | 40.648 | 1.00 | 0.00 | O |
| ATOM | 172 | C4'  | G A | 6 | -33.470 | 31.492 | 41.186 | 1.00 | 0.00 | C |
| ATOM | 173 | O4'  | G A | 6 | -32.091 | 31.734 | 41.610 | 1.00 | 0.00 | O |
| ATOM | 174 | C5'  | G A | 6 | -34.356 | 32.552 | 41.795 | 1.00 | 0.00 | C |
| ATOM | 175 | O5'  | G A | 6 | -34.666 | 32.205 | 43.168 | 1.00 | 0.00 | O |
| ATOM | 176 | O1P  | G A | 6 | -37.146 | 31.780 | 43.114 | 1.00 | 0.00 | O |
| ATOM | 177 | O2P  | G A | 6 | -36.051 | 32.550 | 45.236 | 1.00 | 0.00 | O |
| ATOM | 178 | P    | G A | 6 | -36.097 | 32.596 | 43.754 | 1.00 | 0.00 | P |
| ATOM | 179 | H1   | G A | 6 | -26.526 | 32.611 | 45.242 | 1.00 | 0.00 | H |
| ATOM | 180 | H8   | G A | 6 | -32.950 | 32.088 | 44.875 | 1.00 | 0.00 | H |
| ATOM | 181 | H1'  | G A | 6 | -30.903 | 30.173 | 42.154 | 1.00 | 0.00 | H |
| ATOM | 182 | H21  | G A | 6 | -25.585 | 31.615 | 43.529 | 1.00 | 0.00 | H |
| ATOM | 183 | H3'  | G A | 6 | -34.810 | 29.890 | 41.789 | 1.00 | 0.00 | H |
| ATOM | 184 | H22  | G A | 6 | -26.531 | 30.800 | 42.253 | 1.00 | 0.00 | H |
| ATOM | 185 | H4'  | G A | 6 | -33.596 | 31.533 | 40.105 | 1.00 | 0.00 | H |
| ATOM | 186 | H2'1 | G A | 6 | -33.479 | 30.269 | 43.753 | 1.00 | 0.00 | H |
| ATOM | 187 | H2'2 | G A | 6 | -32.660 | 28.870 | 43.072 | 1.00 | 0.00 | H |
| ATOM | 188 | H5'1 | G A | 6 | -33.839 | 33.511 | 41.766 | 1.00 | 0.00 | H |
| ATOM | 189 | H5'2 | G A | 6 | -35.276 | 32.626 | 41.216 | 1.00 | 0.00 | H |
| ATOM | 190 | C1'  | C A | 7 | -28.284 | 27.197 | 42.495 | 1.00 | 0.00 | C |
| ATOM | 191 | N1   | C A | 7 | -28.658 | 27.857 | 43.776 | 1.00 | 0.00 | N |
| ATOM | 192 | C2   | C A | 7 | -27.632 | 28.367 | 44.570 | 1.00 | 0.00 | C |
| ATOM | 193 | O2   | C A | 7 | -26.462 | 28.251 | 44.182 | 1.00 | 0.00 | O |
| ATOM | 194 | N3   | C A | 7 | -27.951 | 28.972 | 45.740 | 1.00 | 0.00 | N |
| ATOM | 195 | C4   | C A | 7 | -29.226 | 29.082 | 46.134 | 1.00 | 0.00 | C |
| ATOM | 196 | N4   | C A | 7 | -29.481 | 29.685 | 47.285 | 1.00 | 0.00 | N |
| ATOM | 197 | C5   | C A | 7 | -30.301 | 28.563 | 45.340 | 1.00 | 0.00 | C |
| ATOM | 198 | C6   | C A | 7 | -29.957 | 27.961 | 44.162 | 1.00 | 0.00 | C |
| ATOM | 199 | C2'  | C A | 7 | -29.135 | 25.979 | 42.161 | 1.00 | 0.00 | C |
| ATOM | 200 | C3'  | C A | 7 | -29.241 | 26.073 | 40.647 | 1.00 | 0.00 | C |
| ATOM | 201 | O3'  | C A | 7 | -28.091 | 25.468 | 40.059 | 1.00 | 0.00 | O |
| ATOM | 202 | C4'  | C A | 7 | -29.291 | 27.579 | 40.402 | 1.00 | 0.00 | C |
| ATOM | 203 | O4'  | C A | 7 | -28.452 | 28.146 | 41.458 | 1.00 | 0.00 | O |
| ATOM | 204 | C5'  | C A | 7 | -30.656 | 28.225 | 40.471 | 1.00 | 0.00 | C |
| ATOM | 205 | O5'  | C A | 7 | -31.447 | 27.590 | 41.506 | 1.00 | 0.00 | O |
| ATOM | 206 | O1P  | C A | 7 | -33.300 | 26.472 | 40.221 | 1.00 | 0.00 | O |
| ATOM | 207 | O2P  | C A | 7 | -33.674 | 27.187 | 42.597 | 1.00 | 0.00 | O |
| ATOM | 208 | P    | C A | 7 | -33.021 | 27.450 | 41.292 | 1.00 | 0.00 | P |
| ATOM | 209 | H5   | C A | 7 | -31.341 | 28.644 | 45.659 | 1.00 | 0.00 | H |
| ATOM | 210 | H6   | C A | 7 | -30.740 | 27.558 | 43.520 | 1.00 | 0.00 | H |
| ATOM | 211 | H1'  | C A | 7 | -27.228 | 26.935 | 42.542 | 1.00 | 0.00 | H |
| ATOM | 212 | H3'  | C A | 7 | -30.140 | 25.582 | 40.271 | 1.00 | 0.00 | H |
| ATOM | 213 | H4'  | C A | 7 | -28.893 | 27.750 | 39.402 | 1.00 | 0.00 | H |
| ATOM | 214 | H41  | C A | 7 | -30.453 | 29.785 | 47.611 | 1.00 | 0.00 | H |
| ATOM | 215 | H42  | C A | 7 | -28.707 | 30.055 | 47.857 | 1.00 | 0.00 | H |
| ATOM | 216 | H2'1 | C A | 7 | -30.117 | 26.019 | 42.631 | 1.00 | 0.00 | H |
| ATOM | 217 | H2'2 | C A | 7 | -28.662 | 25.046 | 42.470 | 1.00 | 0.00 | H |
| ATOM | 218 | H5'1 | C A | 7 | -30.539 | 29.286 | 40.695 | 1.00 | 0.00 | H |
| ATOM | 219 | H5'2 | C A | 7 | -31.153 | 28.115 | 39.508 | 1.00 | 0.00 | H |
| ATOM | 220 | C1'  | A A | 8 | -24.282 | 24.823 | 44.182 | 1.00 | 0.00 | C |
| ATOM | 221 | N1   | A A | 8 | -25.617 | 26.945 | 48.661 | 1.00 | 0.00 | N |
| ATOM | 222 | C2   | A A | 8 | -24.444 | 26.789 | 48.055 | 1.00 | 0.00 | C |

|      |     |      |     |   |         |        |        |      |      |   |
|------|-----|------|-----|---|---------|--------|--------|------|------|---|
| ATOM | 223 | N3   | A A | 8 | -24.169 | 26.233 | 46.894 | 1.00 | 0.00 | N |
| ATOM | 224 | C4   | A A | 8 | -25.298 | 25.784 | 46.315 | 1.00 | 0.00 | C |
| ATOM | 225 | C5   | A A | 8 | -26.572 | 25.864 | 46.802 | 1.00 | 0.00 | C |
| ATOM | 226 | C6   | A A | 8 | -26.725 | 26.488 | 48.058 | 1.00 | 0.00 | C |
| ATOM | 227 | N6   | A A | 8 | -27.917 | 26.639 | 48.661 | 1.00 | 0.00 | N |
| ATOM | 228 | N7   | A A | 8 | -27.479 | 25.293 | 45.926 | 1.00 | 0.00 | N |
| ATOM | 229 | C8   | A A | 8 | -26.741 | 24.880 | 44.938 | 1.00 | 0.00 | C |
| ATOM | 230 | N9   | A A | 8 | -25.405 | 25.145 | 45.103 | 1.00 | 0.00 | N |
| ATOM | 231 | C2'  | A A | 8 | -24.430 | 23.480 | 43.479 | 1.00 | 0.00 | C |
| ATOM | 232 | C3'  | A A | 8 | -23.831 | 23.770 | 42.113 | 1.00 | 0.00 | C |
| ATOM | 233 | O3'  | A A | 8 | -22.416 | 23.614 | 42.181 | 1.00 | 0.00 | O |
| ATOM | 234 | C4'  | A A | 8 | -24.240 | 25.221 | 41.862 | 1.00 | 0.00 | C |
| ATOM | 235 | O4'  | A A | 8 | -24.233 | 25.832 | 43.193 | 1.00 | 0.00 | O |
| ATOM | 236 | C5'  | A A | 8 | -25.598 | 25.436 | 41.237 | 1.00 | 0.00 | C |
| ATOM | 237 | O5'  | A A | 8 | -26.534 | 24.453 | 41.748 | 1.00 | 0.00 | O |
| ATOM | 238 | O1P  | A A | 8 | -27.085 | 23.067 | 39.720 | 1.00 | 0.00 | O |
| ATOM | 239 | O2P  | A A | 8 | -28.747 | 23.274 | 41.589 | 1.00 | 0.00 | O |
| ATOM | 240 | P    | A A | 8 | -27.678 | 23.907 | 40.779 | 1.00 | 0.00 | P |
| ATOM | 241 | H2   | A A | 8 | -23.585 | 27.179 | 48.598 | 1.00 | 0.00 | H |
| ATOM | 242 | H8   | A A | 8 | -27.143 | 24.371 | 44.062 | 1.00 | 0.00 | H |
| ATOM | 243 | H1'  | A A | 8 | -23.353 | 24.866 | 44.751 | 1.00 | 0.00 | H |
| ATOM | 244 | H3'  | A A | 8 | -24.230 | 23.111 | 41.343 | 1.00 | 0.00 | H |
| ATOM | 245 | H4'  | A A | 8 | -23.494 | 25.649 | 41.194 | 1.00 | 0.00 | H |
| ATOM | 246 | H61  | A A | 8 | -27.974 | 27.104 | 49.577 | 1.00 | 0.00 | H |
| ATOM | 247 | H62  | A A | 8 | -28.772 | 26.288 | 48.205 | 1.00 | 0.00 | H |
| ATOM | 248 | H2'1 | A A | 8 | -25.471 | 23.169 | 43.398 | 1.00 | 0.00 | H |
| ATOM | 249 | H2'2 | A A | 8 | -23.888 | 22.685 | 43.990 | 1.00 | 0.00 | H |
| ATOM | 250 | H5'1 | A A | 8 | -25.948 | 26.439 | 41.482 | 1.00 | 0.00 | H |
| ATOM | 251 | H5'2 | A A | 8 | -25.515 | 25.338 | 40.156 | 1.00 | 0.00 | H |
| ATOM | 252 | C1'  | C A | 9 | -21.071 | 23.503 | 47.734 | 1.00 | 0.00 | C |
| ATOM | 253 | N1   | C A | 9 | -22.535 | 23.325 | 47.938 | 1.00 | 0.00 | N |
| ATOM | 254 | C2   | C A | 9 | -23.099 | 23.837 | 49.104 | 1.00 | 0.00 | C |
| ATOM | 255 | O2   | C A | 9 | -22.366 | 24.414 | 49.918 | 1.00 | 0.00 | O |
| ATOM | 256 | N3   | C A | 9 | -24.430 | 23.685 | 49.308 | 1.00 | 0.00 | N |
| ATOM | 257 | C4   | C A | 9 | -25.197 | 23.054 | 48.410 | 1.00 | 0.00 | C |
| ATOM | 258 | N4   | C A | 9 | -26.493 | 22.936 | 48.659 | 1.00 | 0.00 | N |
| ATOM | 259 | C5   | C A | 9 | -24.644 | 22.513 | 47.202 | 1.00 | 0.00 | C |
| ATOM | 260 | C6   | C A | 9 | -23.301 | 22.682 | 47.015 | 1.00 | 0.00 | C |
| ATOM | 261 | C2'  | C A | 9 | -20.393 | 22.308 | 47.080 | 1.00 | 0.00 | C |
| ATOM | 262 | C3'  | C A | 9 | -19.338 | 22.978 | 46.211 | 1.00 | 0.00 | C |
| ATOM | 263 | O3'  | C A | 9 | -18.181 | 23.243 | 47.000 | 1.00 | 0.00 | O |
| ATOM | 264 | C4'  | C A | 9 | -20.035 | 24.259 | 45.759 | 1.00 | 0.00 | C |
| ATOM | 265 | O4'  | C A | 9 | -20.888 | 24.626 | 46.890 | 1.00 | 0.00 | O |
| ATOM | 266 | C5'  | C A | 9 | -20.894 | 24.156 | 44.521 | 1.00 | 0.00 | C |
| ATOM | 267 | O5'  | C A | 9 | -21.563 | 22.869 | 44.495 | 1.00 | 0.00 | O |
| ATOM | 268 | O1P  | C A | 9 | -20.544 | 21.723 | 42.499 | 1.00 | 0.00 | O |
| ATOM | 269 | O2P  | C A | 9 | -22.865 | 21.123 | 43.240 | 1.00 | 0.00 | O |
| ATOM | 270 | P    | C A | 9 | -21.823 | 22.168 | 43.086 | 1.00 | 0.00 | P |
| ATOM | 271 | H5   | C A | 9 | -25.264 | 21.993 | 46.471 | 1.00 | 0.00 | H |
| ATOM | 272 | H6   | C A | 9 | -22.836 | 22.296 | 46.109 | 1.00 | 0.00 | H |
| ATOM | 273 | H1'  | C A | 9 | -20.618 | 23.731 | 48.698 | 1.00 | 0.00 | H |
| ATOM | 274 | H3'  | C A | 9 | -19.060 | 22.359 | 45.358 | 1.00 | 0.00 | H |
| ATOM | 275 | H4'  | C A | 9 | -19.253 | 24.992 | 45.561 | 1.00 | 0.00 | H |
| ATOM | 276 | H41  | C A | 9 | -27.106 | 22.457 | 47.983 | 1.00 | 0.00 | H |



|      |     |      |     |    |         |        |        |      |      |   |
|------|-----|------|-----|----|---------|--------|--------|------|------|---|
| ATOM | 277 | H42  | C A | 9  | -26.888 | 23.323 | 49.529 | 1.00 | 0.00 | H |
| ATOM | 278 | H2'1 | C A | 9  | -21.082 | 21.717 | 46.480 | 1.00 | 0.00 | H |
| ATOM | 279 | H2'2 | C A | 9  | -19.938 | 21.639 | 47.812 | 1.00 | 0.00 | H |
| ATOM | 280 | H5'1 | C A | 9  | -21.635 | 24.956 | 44.530 | 1.00 | 0.00 | H |
| ATOM | 281 | H5'2 | C A | 9  | -20.263 | 24.261 | 43.639 | 1.00 | 0.00 | H |
| ATOM | 282 | C1'  | C A | 10 | -19.723 | 22.627 | 52.418 | 1.00 | 0.00 | C |
| ATOM | 283 | N1   | C A | 10 | -20.950 | 22.000 | 51.855 | 1.00 | 0.00 | N |
| ATOM | 284 | C2   | C A | 10 | -22.138 | 22.136 | 52.570 | 1.00 | 0.00 | C |
| ATOM | 285 | O2   | C A | 10 | -22.126 | 22.767 | 53.636 | 1.00 | 0.00 | O |
| ATOM | 286 | N3   | C A | 10 | -23.267 | 21.573 | 52.075 | 1.00 | 0.00 | N |
| ATOM | 287 | C4   | C A | 10 | -23.249 | 20.895 | 50.920 | 1.00 | 0.00 | C |
| ATOM | 288 | N4   | C A | 10 | -24.383 | 20.367 | 50.480 | 1.00 | 0.00 | N |
| ATOM | 289 | C5   | C A | 10 | -22.041 | 20.736 | 50.165 | 1.00 | 0.00 | C |
| ATOM | 290 | C6   | C A | 10 | -20.916 | 21.316 | 50.681 | 1.00 | 0.00 | C |
| ATOM | 291 | C2'  | C A | 10 | -18.462 | 21.800 | 52.212 | 1.00 | 0.00 | C |
| ATOM | 292 | C3'  | C A | 10 | -17.410 | 22.876 | 51.988 | 1.00 | 0.00 | C |
| ATOM | 293 | O3'  | C A | 10 | -16.937 | 23.339 | 53.251 | 1.00 | 0.00 | O |
| ATOM | 294 | C4'  | C A | 10 | -18.182 | 23.953 | 51.230 | 1.00 | 0.00 | C |
| ATOM | 295 | O4'  | C A | 10 | -19.539 | 23.872 | 51.769 | 1.00 | 0.00 | O |
| ATOM | 296 | C5'  | C A | 10 | -18.250 | 23.799 | 49.728 | 1.00 | 0.00 | C |
| ATOM | 297 | O5'  | C A | 10 | -18.354 | 22.394 | 49.383 | 1.00 | 0.00 | O |
| ATOM | 298 | O1P  | C A | 10 | -16.188 | 21.924 | 48.192 | 1.00 | 0.00 | O |
| ATOM | 299 | O2P  | C A | 10 | -18.230 | 20.565 | 47.665 | 1.00 | 0.00 | O |
| ATOM | 300 | P    | C A | 10 | -17.656 | 21.879 | 48.046 | 1.00 | 0.00 | P |
| ATOM | 301 | H5   | C A | 10 | -22.019 | 20.180 | 49.227 | 1.00 | 0.00 | H |
| ATOM | 302 | H6   | C A | 10 | -19.975 | 21.229 | 50.139 | 1.00 | 0.00 | H |
| ATOM | 303 | H1'  | C A | 10 | -19.894 | 22.823 | 53.476 | 1.00 | 0.00 | H |
| ATOM | 304 | H3'  | C A | 10 | -16.568 | 22.507 | 51.401 | 1.00 | 0.00 | H |
| ATOM | 305 | H4'  | C A | 10 | -17.693 | 24.903 | 51.444 | 1.00 | 0.00 | H |
| ATOM | 306 | H41  | C A | 10 | -24.397 | 19.843 | 49.593 | 1.00 | 0.00 | H |
| ATOM | 307 | H42  | C A | 10 | -25.249 | 20.481 | 51.026 | 1.00 | 0.00 | H |
| ATOM | 308 | H2'1 | C A | 10 | -18.537 | 21.135 | 51.353 | 1.00 | 0.00 | H |
| ATOM | 309 | H2'2 | C A | 10 | -18.223 | 21.186 | 53.082 | 1.00 | 0.00 | H |
| ATOM | 310 | H5'1 | C A | 10 | -19.121 | 24.337 | 49.351 | 1.00 | 0.00 | H |
| ATOM | 311 | H5'2 | C A | 10 | -17.349 | 24.221 | 49.285 | 1.00 | 0.00 | H |
| ATOM | 312 | C1'  | T A | 11 | -20.569 | 21.465 | 57.154 | 1.00 | 0.00 | C |
| ATOM | 313 | N1   | T A | 11 | -21.108 | 20.605 | 56.067 | 1.00 | 0.00 | N |
| ATOM | 314 | C2   | T A | 11 | -22.452 | 20.297 | 56.115 | 1.00 | 0.00 | C |
| ATOM | 315 | O2   | T A | 11 | -23.190 | 20.698 | 56.999 | 1.00 | 0.00 | O |
| ATOM | 316 | N3   | T A | 11 | -22.912 | 19.496 | 55.086 | 1.00 | 0.00 | N |
| ATOM | 317 | C4   | T A | 11 | -22.162 | 18.988 | 54.044 | 1.00 | 0.00 | C |
| ATOM | 318 | O4   | T A | 11 | -22.686 | 18.276 | 53.177 | 1.00 | 0.00 | O |
| ATOM | 319 | C5   | T A | 11 | -20.769 | 19.364 | 54.079 | 1.00 | 0.00 | C |
| ATOM | 320 | C6   | T A | 11 | -20.288 | 20.144 | 55.066 | 1.00 | 0.00 | C |
| ATOM | 321 | C7   | T A | 11 | -19.918 | 18.836 | 52.962 | 1.00 | 0.00 | C |
| ATOM | 322 | C2'  | T A | 11 | -19.168 | 21.077 | 57.608 | 1.00 | 0.00 | C |
| ATOM | 323 | C3'  | T A | 11 | -18.548 | 22.429 | 57.921 | 1.00 | 0.00 | C |
| ATOM | 324 | O3'  | T A | 11 | -18.904 | 22.813 | 59.247 | 1.00 | 0.00 | O |
| ATOM | 325 | C4'  | T A | 11 | -19.174 | 23.341 | 56.868 | 1.00 | 0.00 | C |
| ATOM | 326 | O4'  | T A | 11 | -20.517 | 22.793 | 56.669 | 1.00 | 0.00 | O |
| ATOM | 327 | C5'  | T A | 11 | -18.474 | 23.404 | 55.530 | 1.00 | 0.00 | C |
| ATOM | 328 | O5'  | T A | 11 | -17.943 | 22.098 | 55.195 | 1.00 | 0.00 | O |
| ATOM | 329 | O1P  | T A | 11 | -15.452 | 22.454 | 55.234 | 1.00 | 0.00 | O |
| ATOM | 330 | O2P  | T A | 11 | -16.439 | 20.662 | 53.783 | 1.00 | 0.00 | O |

|      |     |      |     |    |         |        |        |      |      |   |
|------|-----|------|-----|----|---------|--------|--------|------|------|---|
| ATOM | 331 | P    | T A | 11 | -16.573 | 22.012 | 54.383 | 1.00 | 0.00 | P |
| ATOM | 332 | H3   | T A | 11 | -23.912 | 19.255 | 55.096 | 1.00 | 0.00 | H |
| ATOM | 333 | H6   | T A | 11 | -19.231 | 20.415 | 55.072 | 1.00 | 0.00 | H |
| ATOM | 334 | H1'  | T A | 11 | -21.270 | 21.441 | 57.989 | 1.00 | 0.00 | H |
| ATOM | 335 | H3'  | T A | 11 | -17.463 | 22.411 | 57.830 | 1.00 | 0.00 | H |
| ATOM | 336 | H4'  | T A | 11 | -19.184 | 24.349 | 57.286 | 1.00 | 0.00 | H |
| ATOM | 337 | H71  | T A | 11 | -19.181 | 18.142 | 53.365 | 1.00 | 0.00 | H |
| ATOM | 338 | H72  | T A | 11 | -20.548 | 18.318 | 52.239 | 1.00 | 0.00 | H |
| ATOM | 339 | H73  | T A | 11 | -19.406 | 19.664 | 52.471 | 1.00 | 0.00 | H |
| ATOM | 340 | H2'1 | T A | 11 | -18.612 | 20.556 | 56.830 | 1.00 | 0.00 | H |
| ATOM | 341 | H2'2 | T A | 11 | -19.182 | 20.432 | 58.488 | 1.00 | 0.00 | H |
| ATOM | 342 | H5'1 | T A | 11 | -19.186 | 23.719 | 54.768 | 1.00 | 0.00 | H |
| ATOM | 343 | H5'2 | T A | 11 | -17.662 | 24.128 | 55.586 | 1.00 | 0.00 | H |
| ATOM | 344 | C1'  | A A | 12 | -23.173 | 19.372 | 60.824 | 1.00 | 0.00 | C |
| ATOM | 345 | N1   | A A | 12 | -24.868 | 16.271 | 57.101 | 1.00 | 0.00 | N |
| ATOM | 346 | C2   | A A | 12 | -25.479 | 16.875 | 58.115 | 1.00 | 0.00 | C |
| ATOM | 347 | N3   | A A | 12 | -24.980 | 17.668 | 59.041 | 1.00 | 0.00 | N |
| ATOM | 348 | C4   | A A | 12 | -23.658 | 17.825 | 58.855 | 1.00 | 0.00 | C |
| ATOM | 349 | C5   | A A | 12 | -22.885 | 17.277 | 57.871 | 1.00 | 0.00 | C |
| ATOM | 350 | C6   | A A | 12 | -23.548 | 16.449 | 56.941 | 1.00 | 0.00 | C |
| ATOM | 351 | N6   | A A | 12 | -22.918 | 15.842 | 55.920 | 1.00 | 0.00 | N |
| ATOM | 352 | N7   | A A | 12 | -21.563 | 17.666 | 57.999 | 1.00 | 0.00 | N |
| ATOM | 353 | C8   | A A | 12 | -21.563 | 18.430 | 59.051 | 1.00 | 0.00 | C |
| ATOM | 354 | N9   | A A | 12 | -22.801 | 18.575 | 59.623 | 1.00 | 0.00 | N |
| ATOM | 355 | C2'  | A A | 12 | -22.124 | 19.343 | 61.927 | 1.00 | 0.00 | C |
| ATOM | 356 | C3'  | A A | 12 | -22.223 | 20.750 | 62.495 | 1.00 | 0.00 | C |
| ATOM | 357 | O3'  | A A | 12 | -23.278 | 20.794 | 63.454 | 1.00 | 0.00 | O |
| ATOM | 358 | C4'  | A A | 12 | -22.532 | 21.595 | 61.259 | 1.00 | 0.00 | C |
| ATOM | 359 | O4'  | A A | 12 | -23.340 | 20.715 | 60.414 | 1.00 | 0.00 | O |
| ATOM | 360 | C5'  | A A | 12 | -21.343 | 22.073 | 60.461 | 1.00 | 0.00 | C |
| ATOM | 361 | O5'  | A A | 12 | -20.313 | 21.052 | 60.453 | 1.00 | 0.00 | O |
| ATOM | 362 | O1P  | A A | 12 | -18.431 | 22.114 | 61.744 | 1.00 | 0.00 | O |
| ATOM | 363 | O2P  | A A | 12 | -17.936 | 20.366 | 60.012 | 1.00 | 0.00 | O |
| ATOM | 364 | P    | A A | 12 | -18.784 | 21.504 | 60.447 | 1.00 | 0.00 | P |
| ATOM | 365 | H2   | A A | 12 | -26.550 | 16.688 | 58.191 | 1.00 | 0.00 | H |
| ATOM | 366 | H8   | A A | 12 | -20.665 | 18.911 | 59.442 | 1.00 | 0.00 | H |
| ATOM | 367 | H1'  | A A | 12 | -24.133 | 19.009 | 61.188 | 1.00 | 0.00 | H |
| ATOM | 368 | H3'  | A A | 12 | -21.294 | 21.068 | 62.966 | 1.00 | 0.00 | H |
| ATOM | 369 | H4'  | A A | 12 | -23.076 | 22.473 | 61.606 | 1.00 | 0.00 | H |
| ATOM | 370 | H61  | A A | 12 | -23.449 | 15.249 | 55.267 | 1.00 | 0.00 | H |
| ATOM | 371 | H62  | A A | 12 | -21.903 | 15.972 | 55.791 | 1.00 | 0.00 | H |
| ATOM | 372 | H2'1 | A A | 12 | -21.125 | 19.140 | 61.544 | 1.00 | 0.00 | H |
| ATOM | 373 | H2'2 | A A | 12 | -22.343 | 18.592 | 62.686 | 1.00 | 0.00 | H |
| ATOM | 374 | H5'1 | A A | 12 | -21.659 | 22.284 | 59.440 | 1.00 | 0.00 | H |
| ATOM | 375 | H5'2 | A A | 12 | -20.953 | 22.985 | 60.910 | 1.00 | 0.00 | H |
| ATOM | 376 | C1'  | G A | 13 | -26.359 | 16.045 | 62.677 | 1.00 | 0.00 | C |
| ATOM | 377 | N1   | G A | 13 | -24.901 | 13.236 | 58.676 | 1.00 | 0.00 | N |
| ATOM | 378 | C2   | G A | 13 | -26.163 | 13.435 | 59.208 | 1.00 | 0.00 | C |
| ATOM | 379 | N2   | G A | 13 | -27.170 | 12.800 | 58.595 | 1.00 | 0.00 | N |
| ATOM | 380 | N3   | G A | 13 | -26.400 | 14.207 | 60.268 | 1.00 | 0.00 | N |
| ATOM | 381 | C4   | G A | 13 | -25.266 | 14.764 | 60.766 | 1.00 | 0.00 | C |
| ATOM | 382 | C5   | G A | 13 | -23.968 | 14.619 | 60.304 | 1.00 | 0.00 | C |
| ATOM | 383 | C6   | G A | 13 | -23.715 | 13.804 | 59.177 | 1.00 | 0.00 | C |
| ATOM | 384 | O6   | G A | 13 | -22.643 | 13.554 | 58.625 | 1.00 | 0.00 | O |

|      |     |      |     |    |         |        |        |      |      |   |
|------|-----|------|-----|----|---------|--------|--------|------|------|---|
| ATOM | 385 | N7   | G A | 13 | -23.088 | 15.359 | 61.097 | 1.00 | 0.00 | N |
| ATOM | 386 | C8   | G A | 13 | -23.862 | 15.918 | 61.991 | 1.00 | 0.00 | C |
| ATOM | 387 | N9   | G A | 13 | -25.198 | 15.604 | 61.856 | 1.00 | 0.00 | N |
| ATOM | 388 | C2'  | G A | 13 | -26.053 | 16.150 | 64.165 | 1.00 | 0.00 | C |
| ATOM | 389 | C3'  | G A | 13 | -26.888 | 17.350 | 64.578 | 1.00 | 0.00 | C |
| ATOM | 390 | O3'  | G A | 13 | -28.221 | 16.922 | 64.850 | 1.00 | 0.00 | O |
| ATOM | 391 | C4'  | G A | 13 | -26.814 | 18.255 | 63.349 | 1.00 | 0.00 | C |
| ATOM | 392 | O4'  | G A | 13 | -26.749 | 17.326 | 62.221 | 1.00 | 0.00 | O |
| ATOM | 393 | C5'  | G A | 13 | -25.628 | 19.189 | 63.275 | 1.00 | 0.00 | C |
| ATOM | 394 | O5'  | G A | 13 | -24.454 | 18.536 | 63.819 | 1.00 | 0.00 | O |
| ATOM | 395 | O1P  | G A | 13 | -23.940 | 19.883 | 65.882 | 1.00 | 0.00 | O |
| ATOM | 396 | O2P  | G A | 13 | -22.099 | 18.670 | 64.685 | 1.00 | 0.00 | O |
| ATOM | 397 | P    | G A | 13 | -23.378 | 19.417 | 64.600 | 1.00 | 0.00 | P |
| ATOM | 398 | H1   | G A | 13 | -24.826 | 12.624 | 57.849 | 1.00 | 0.00 | H |
| ATOM | 399 | H8   | G A | 13 | -23.485 | 16.575 | 62.775 | 1.00 | 0.00 | H |
| ATOM | 400 | H1'  | G A | 13 | -27.186 | 15.358 | 62.496 | 1.00 | 0.00 | H |
| ATOM | 401 | H21  | G A | 13 | -26.978 | 12.208 | 57.773 | 1.00 | 0.00 | H |
| ATOM | 402 | H3'  | G A | 13 | -26.482 | 17.848 | 65.459 | 1.00 | 0.00 | H |
| ATOM | 403 | H22  | G A | 13 | -28.132 | 12.906 | 58.944 | 1.00 | 0.00 | H |
| ATOM | 404 | H4'  | G A | 13 | -27.717 | 18.863 | 63.348 | 1.00 | 0.00 | H |
| ATOM | 405 | H2'1 | G A | 13 | -24.994 | 16.318 | 64.358 | 1.00 | 0.00 | H |
| ATOM | 406 | H2'2 | G A | 13 | -26.347 | 15.253 | 64.712 | 1.00 | 0.00 | H |
| ATOM | 407 | H5'1 | G A | 13 | -25.452 | 19.461 | 62.235 | 1.00 | 0.00 | H |
| ATOM | 408 | H5'2 | G A | 13 | -25.847 | 20.090 | 63.847 | 1.00 | 0.00 | H |
| ATOM | 409 | C1'  | G A | 14 | -28.737 | 11.701 | 62.726 | 1.00 | 0.00 | C |
| ATOM | 410 | N1   | G A | 14 | -24.700 | 10.104 | 60.048 | 1.00 | 0.00 | N |
| ATOM | 411 | C2   | G A | 14 | -26.046 | 9.841  | 59.866 | 1.00 | 0.00 | C |
| ATOM | 412 | N2   | G A | 14 | -26.359 | 9.045  | 58.836 | 1.00 | 0.00 | N |
| ATOM | 413 | N3   | G A | 14 | -27.004 | 10.334 | 60.651 | 1.00 | 0.00 | N |
| ATOM | 414 | C4   | G A | 14 | -26.506 | 11.112 | 61.646 | 1.00 | 0.00 | C |
| ATOM | 415 | C5   | G A | 14 | -25.183 | 11.425 | 61.906 | 1.00 | 0.00 | C |
| ATOM | 416 | C6   | G A | 14 | -24.166 | 10.907 | 61.073 | 1.00 | 0.00 | C |
| ATOM | 417 | O6   | G A | 14 | -22.947 | 11.069 | 61.141 | 1.00 | 0.00 | O |
| ATOM | 418 | N7   | G A | 14 | -25.096 | 12.255 | 63.027 | 1.00 | 0.00 | N |
| ATOM | 419 | C8   | G A | 14 | -26.339 | 12.417 | 63.399 | 1.00 | 0.00 | C |
| ATOM | 420 | N9   | G A | 14 | -27.254 | 11.753 | 62.610 | 1.00 | 0.00 | N |
| ATOM | 421 | C2'  | G A | 14 | -29.239 | 11.656 | 64.163 | 1.00 | 0.00 | C |
| ATOM | 422 | C3'  | G A | 14 | -30.513 | 12.480 | 64.081 | 1.00 | 0.00 | C |
| ATOM | 423 | O3'  | G A | 14 | -31.585 | 11.645 | 63.648 | 1.00 | 0.00 | O |
| ATOM | 424 | C4'  | G A | 14 | -30.160 | 13.549 | 63.048 | 1.00 | 0.00 | C |
| ATOM | 425 | O4'  | G A | 14 | -29.258 | 12.869 | 62.119 | 1.00 | 0.00 | O |
| ATOM | 426 | C5'  | G A | 14 | -29.472 | 14.787 | 63.572 | 1.00 | 0.00 | C |
| ATOM | 427 | O5'  | G A | 14 | -28.564 | 14.427 | 64.643 | 1.00 | 0.00 | O |
| ATOM | 428 | O1P  | G A | 14 | -29.584 | 15.524 | 66.665 | 1.00 | 0.00 | O |
| ATOM | 429 | O2P  | G A | 14 | -27.112 | 15.105 | 66.579 | 1.00 | 0.00 | O |
| ATOM | 430 | P    | G A | 14 | -28.357 | 15.450 | 65.849 | 1.00 | 0.00 | P |
| ATOM | 431 | H1   | G A | 14 | -24.039 | 9.679  | 59.380 | 1.00 | 0.00 | H |
| ATOM | 432 | H8   | G A | 14 | -26.626 | 13.024 | 64.258 | 1.00 | 0.00 | H |
| ATOM | 433 | H1'  | G A | 14 | -29.094 | 10.841 | 62.160 | 1.00 | 0.00 | H |
| ATOM | 434 | H21  | G A | 14 | -25.613 | 8.671  | 58.232 | 1.00 | 0.00 | H |
| ATOM | 435 | H3'  | G A | 14 | -30.771 | 12.930 | 65.040 | 1.00 | 0.00 | H |
| ATOM | 436 | H22  | G A | 14 | -27.343 | 8.809  | 58.649 | 1.00 | 0.00 | H |
| ATOM | 437 | H4'  | G A | 14 | -31.095 | 13.860 | 62.582 | 1.00 | 0.00 | H |
| ATOM | 438 | H2'1 | G A | 14 | -28.528 | 12.093 | 64.863 | 1.00 | 0.00 | H |

|      |     |      |   |   |    |         |        |        |      |      |   |
|------|-----|------|---|---|----|---------|--------|--------|------|------|---|
| ATOM | 439 | H2'2 | G | A | 14 | -29.445 | 10.638 | 64.497 | 1.00 | 0.00 | H |
| ATOM | 440 | H5'1 | G | A | 14 | -28.917 | 15.258 | 62.761 | 1.00 | 0.00 | H |
| ATOM | 441 | H5'2 | G | A | 14 | -30.223 | 15.484 | 63.944 | 1.00 | 0.00 | H |
| ATOM | 442 | C1'  | A | A | 15 | -29.278 | 6.906  | 61.627 | 1.00 | 0.00 | C |
| ATOM | 443 | N1   | A | A | 15 | -24.154 | 6.980  | 61.355 | 1.00 | 0.00 | N |
| ATOM | 444 | C2   | A | A | 15 | -25.087 | 6.416  | 60.592 | 1.00 | 0.00 | C |
| ATOM | 445 | N3   | A | A | 15 | -26.397 | 6.439  | 60.718 | 1.00 | 0.00 | N |
| ATOM | 446 | C4   | A | A | 15 | -26.747 | 7.153  | 61.804 | 1.00 | 0.00 | C |
| ATOM | 447 | C5   | A | A | 15 | -25.919 | 7.789  | 62.685 | 1.00 | 0.00 | C |
| ATOM | 448 | C6   | A | A | 15 | -24.535 | 7.686  | 62.431 | 1.00 | 0.00 | C |
| ATOM | 449 | N6   | A | A | 15 | -23.602 | 8.260  | 63.210 | 1.00 | 0.00 | N |
| ATOM | 450 | N7   | A | A | 15 | -26.641 | 8.425  | 63.679 | 1.00 | 0.00 | N |
| ATOM | 451 | C8   | A | A | 15 | -27.879 | 8.159  | 63.385 | 1.00 | 0.00 | C |
| ATOM | 452 | N9   | A | A | 15 | -28.022 | 7.392  | 62.256 | 1.00 | 0.00 | N |
| ATOM | 453 | C2'  | A | A | 15 | -30.351 | 6.503  | 62.630 | 1.00 | 0.00 | C |
| ATOM | 454 | C3'  | A | A | 15 | -31.627 | 6.933  | 61.921 | 1.00 | 0.00 | C |
| ATOM | 455 | O3'  | A | A | 15 | -32.033 | 5.903  | 61.025 | 1.00 | 0.00 | O |
| ATOM | 456 | C4'  | A | A | 15 | -31.195 | 8.201  | 61.185 | 1.00 | 0.00 | C |
| ATOM | 457 | O4'  | A | A | 15 | -29.796 | 7.954  | 60.830 | 1.00 | 0.00 | O |
| ATOM | 458 | C5'  | A | A | 15 | -31.274 | 9.490  | 61.967 | 1.00 | 0.00 | C |
| ATOM | 459 | O5'  | A | A | 15 | -30.915 | 9.248  | 63.351 | 1.00 | 0.00 | O |
| ATOM | 460 | O1P  | A | A | 15 | -33.058 | 9.691  | 64.595 | 1.00 | 0.00 | O |
| ATOM | 461 | O2P  | A | A | 15 | -30.850 | 10.011 | 65.745 | 1.00 | 0.00 | O |
| ATOM | 462 | P    | A | A | 15 | -31.641 | 10.093 | 64.493 | 1.00 | 0.00 | P |
| ATOM | 463 | H2   | A | A | 15 | -24.710 | 5.853  | 59.738 | 1.00 | 0.00 | H |
| ATOM | 464 | H8   | A | A | 15 | -28.724 | 8.511  | 63.976 | 1.00 | 0.00 | H |
| ATOM | 465 | H1'  | A | A | 15 | -29.029 | 6.075  | 60.967 | 1.00 | 0.00 | H |
| ATOM | 466 | H3'  | A | A | 15 | -32.434 | 7.141  | 62.623 | 1.00 | 0.00 | H |
| ATOM | 467 | H4'  | A | A | 15 | -31.844 | 8.298  | 60.316 | 1.00 | 0.00 | H |
| ATOM | 468 | H61  | A | A | 15 | -22.604 | 8.156  | 62.978 | 1.00 | 0.00 | H |
| ATOM | 469 | H62  | A | A | 15 | -23.886 | 8.802  | 64.039 | 1.00 | 0.00 | H |
| ATOM | 470 | H2'1 | A | A | 15 | -30.236 | 7.015  | 63.585 | 1.00 | 0.00 | H |
| ATOM | 471 | H2'2 | A | A | 15 | -30.351 | 5.431  | 62.829 | 1.00 | 0.00 | H |
| ATOM | 472 | H5'1 | A | A | 15 | -30.588 | 10.216 | 61.531 | 1.00 | 0.00 | H |
| ATOM | 473 | H5'2 | A | A | 15 | -32.289 | 9.880  | 61.914 | 1.00 | 0.00 | H |
| ATOM | 474 | C1'  | C | A | 16 | -27.555 | 2.396  | 60.463 | 1.00 | 0.00 | C |
| ATOM | 475 | N1   | C | A | 16 | -27.018 | 3.126  | 61.644 | 1.00 | 0.00 | N |
| ATOM | 476 | C2   | C | A | 16 | -25.636 | 3.258  | 61.756 | 1.00 | 0.00 | C |
| ATOM | 477 | O2   | C | A | 16 | -24.916 | 2.767  | 60.877 | 1.00 | 0.00 | O |
| ATOM | 478 | N3   | C | A | 16 | -25.126 | 3.919  | 62.824 | 1.00 | 0.00 | N |
| ATOM | 479 | C4   | C | A | 16 | -25.931 | 4.440  | 63.759 | 1.00 | 0.00 | C |
| ATOM | 480 | N4   | C | A | 16 | -25.378 | 5.080  | 64.780 | 1.00 | 0.00 | N |
| ATOM | 481 | C5   | C | A | 16 | -27.356 | 4.316  | 63.673 | 1.00 | 0.00 | C |
| ATOM | 482 | C6   | C | A | 16 | -27.848 | 3.650  | 62.586 | 1.00 | 0.00 | C |
| ATOM | 483 | C2'  | C | A | 16 | -28.769 | 1.533  | 60.776 | 1.00 | 0.00 | C |
| ATOM | 484 | C3'  | C | A | 16 | -29.595 | 1.675  | 59.506 | 1.00 | 0.00 | C |
| ATOM | 485 | O3'  | C | A | 16 | -29.136 | 0.731  | 58.541 | 1.00 | 0.00 | O |
| ATOM | 486 | C4'  | C | A | 16 | -29.320 | 3.116  | 59.082 | 1.00 | 0.00 | C |
| ATOM | 487 | O4'  | C | A | 16 | -27.940 | 3.360  | 59.500 | 1.00 | 0.00 | O |
| ATOM | 488 | C5'  | C | A | 16 | -30.205 | 4.176  | 59.697 | 1.00 | 0.00 | C |
| ATOM | 489 | O5'  | C | A | 16 | -30.509 | 3.826  | 61.071 | 1.00 | 0.00 | O |
| ATOM | 490 | O1P  | C | A | 16 | -32.989 | 3.399  | 61.029 | 1.00 | 0.00 | O |
| ATOM | 491 | O2P  | C | A | 16 | -31.884 | 4.168  | 63.146 | 1.00 | 0.00 | O |
| ATOM | 492 | P    | C | A | 16 | -31.936 | 4.216  | 61.664 | 1.00 | 0.00 | P |

|      |     |      |     |    |         |        |        |      |      |   |
|------|-----|------|-----|----|---------|--------|--------|------|------|---|
| ATOM | 493 | H5   | C A | 16 | -28.015 | 4.732  | 64.436 | 1.00 | 0.00 | H |
| ATOM | 494 | H6   | C A | 16 | -28.927 | 3.536  | 62.472 | 1.00 | 0.00 | H |
| ATOM | 495 | H1'  | C A | 16 | -26.750 | 1.798  | 60.036 | 1.00 | 0.00 | H |
| ATOM | 496 | H3'  | C A | 16 | -30.658 | 1.514  | 59.692 | 1.00 | 0.00 | H |
| ATOM | 497 | H4'  | C A | 16 | -29.454 | 3.158  | 58.002 | 1.00 | 0.00 | H |
| ATOM | 498 | H41  | C A | 16 | -25.975 | 5.491  | 65.513 | 1.00 | 0.00 | H |
| ATOM | 499 | H42  | C A | 16 | -24.354 | 5.165  | 64.842 | 1.00 | 0.00 | H |
| ATOM | 500 | H2'1 | C A | 16 | -29.318 | 1.889  | 61.647 | 1.00 | 0.00 | H |
| ATOM | 501 | H2'2 | C A | 16 | -28.501 | 0.492  | 60.961 | 1.00 | 0.00 | H |
| ATOM | 502 | H5'1 | C A | 16 | -29.688 | 5.135  | 59.666 | 1.00 | 0.00 | H |
| ATOM | 503 | H5'2 | C A | 16 | -31.129 | 4.248  | 59.123 | 1.00 | 0.00 | H |
| ATOM | 504 | C1'  | G A | 17 | -24.130 | -1.178 | 60.384 | 1.00 | 0.00 | C |
| ATOM | 505 | N1   | G A | 17 | -22.367 | 1.199  | 64.539 | 1.00 | 0.00 | N |
| ATOM | 506 | C2   | G A | 17 | -21.680 | 0.668  | 63.461 | 1.00 | 0.00 | C |
| ATOM | 507 | N2   | G A | 17 | -20.347 | 0.785  | 63.496 | 1.00 | 0.00 | N |
| ATOM | 508 | N3   | G A | 17 | -22.276 | 0.070  | 62.431 | 1.00 | 0.00 | N |
| ATOM | 509 | C4   | G A | 17 | -23.628 | 0.035  | 62.566 | 1.00 | 0.00 | C |
| ATOM | 510 | C5   | G A | 17 | -24.397 | 0.533  | 63.605 | 1.00 | 0.00 | C |
| ATOM | 511 | C6   | G A | 17 | -23.766 | 1.172  | 64.697 | 1.00 | 0.00 | C |
| ATOM | 512 | O6   | G A | 17 | -24.271 | 1.672  | 65.702 | 1.00 | 0.00 | O |
| ATOM | 513 | N7   | G A | 17 | -25.751 | 0.292  | 63.362 | 1.00 | 0.00 | N |
| ATOM | 514 | C8   | G A | 17 | -25.760 | -0.326 | 62.209 | 1.00 | 0.00 | C |
| ATOM | 515 | N9   | G A | 17 | -24.508 | -0.520 | 61.663 | 1.00 | 0.00 | N |
| ATOM | 516 | C2'  | G A | 17 | -24.980 | -2.395 | 60.044 | 1.00 | 0.00 | C |
| ATOM | 517 | C3'  | G A | 17 | -25.080 | -2.301 | 58.531 | 1.00 | 0.00 | C |
| ATOM | 518 | O3'  | G A | 17 | -23.927 | -2.906 | 57.947 | 1.00 | 0.00 | O |
| ATOM | 519 | C4'  | G A | 17 | -25.127 | -0.793 | 58.287 | 1.00 | 0.00 | C |
| ATOM | 520 | O4'  | G A | 17 | -24.292 | -0.230 | 59.346 | 1.00 | 0.00 | O |
| ATOM | 521 | C5'  | G A | 17 | -26.491 | -0.147 | 58.349 | 1.00 | 0.00 | C |
| ATOM | 522 | O5'  | G A | 17 | -27.287 | -0.781 | 59.381 | 1.00 | 0.00 | O |
| ATOM | 523 | O1P  | G A | 17 | -29.134 | -1.897 | 58.085 | 1.00 | 0.00 | O |
| ATOM | 524 | O2P  | G A | 17 | -29.520 | -1.184 | 60.460 | 1.00 | 0.00 | O |
| ATOM | 525 | P    | G A | 17 | -28.860 | -0.920 | 59.158 | 1.00 | 0.00 | P |
| ATOM | 526 | H1   | G A | 17 | -21.810 | 1.647  | 65.282 | 1.00 | 0.00 | H |
| ATOM | 527 | H8   | G A | 17 | -26.677 | -0.660 | 61.723 | 1.00 | 0.00 | H |
| ATOM | 528 | H1'  | G A | 17 | -23.073 | -1.443 | 60.435 | 1.00 | 0.00 | H |
| ATOM | 529 | H21  | G A | 17 | -19.893 | 1.252  | 64.294 | 1.00 | 0.00 | H |
| ATOM | 530 | H3'  | G A | 17 | -25.977 | -2.790 | 58.149 | 1.00 | 0.00 | H |
| ATOM | 531 | H22  | G A | 17 | -19.778 | 0.408  | 62.725 | 1.00 | 0.00 | H |
| ATOM | 532 | H4'  | G A | 17 | -24.723 | -0.622 | 57.289 | 1.00 | 0.00 | H |
| ATOM | 533 | H2'1 | G A | 17 | -25.965 | -2.354 | 60.510 | 1.00 | 0.00 | H |
| ATOM | 534 | H2'2 | G A | 17 | -24.509 | -3.329 | 60.354 | 1.00 | 0.00 | H |
| ATOM | 535 | H5'1 | G A | 17 | -26.373 | 0.913  | 58.574 | 1.00 | 0.00 | H |
| ATOM | 536 | H5'2 | G A | 17 | -26.983 | -0.255 | 57.383 | 1.00 | 0.00 | H |
| ATOM | 537 | C1'  | G A | 18 | -20.127 | -3.541 | 62.092 | 1.00 | 0.00 | C |
| ATOM | 538 | N1   | G A | 18 | -21.481 | -1.438 | 66.538 | 1.00 | 0.00 | N |
| ATOM | 539 | C2   | G A | 18 | -20.229 | -1.569 | 65.962 | 1.00 | 0.00 | C |
| ATOM | 540 | N2   | G A | 18 | -19.201 | -1.075 | 66.666 | 1.00 | 0.00 | N |
| ATOM | 541 | N3   | G A | 18 | -20.021 | -2.145 | 64.781 | 1.00 | 0.00 | N |
| ATOM | 542 | C4   | G A | 18 | -21.171 | -2.593 | 64.213 | 1.00 | 0.00 | C |
| ATOM | 543 | C5   | G A | 18 | -22.460 | -2.510 | 64.714 | 1.00 | 0.00 | C |
| ATOM | 544 | C6   | G A | 18 | -22.683 | -1.894 | 65.968 | 1.00 | 0.00 | C |
| ATOM | 545 | O6   | G A | 18 | -23.743 | -1.728 | 66.572 | 1.00 | 0.00 | O |
| ATOM | 546 | N7   | G A | 18 | -23.362 | -3.093 | 63.823 | 1.00 | 0.00 | N |

|      |     |      |     |    |         |        |        |      |      |   |
|------|-----|------|-----|----|---------|--------|--------|------|------|---|
| ATOM | 547 | C8   | G A | 18 | -22.611 | -3.498 | 62.832 | 1.00 | 0.00 | C |
| ATOM | 548 | N9   | G A | 18 | -21.268 | -3.231 | 62.997 | 1.00 | 0.00 | N |
| ATOM | 549 | C2'  | G A | 18 | -20.251 | -4.884 | 61.385 | 1.00 | 0.00 | C |
| ATOM | 550 | C3'  | G A | 18 | -19.635 | -4.586 | 60.028 | 1.00 | 0.00 | C |
| ATOM | 551 | O3'  | G A | 18 | -18.219 | -4.729 | 60.115 | 1.00 | 0.00 | O |
| ATOM | 552 | C4'  | G A | 18 | -20.054 | -3.139 | 59.774 | 1.00 | 0.00 | C |
| ATOM | 553 | O4'  | G A | 18 | -20.072 | -2.531 | 61.104 | 1.00 | 0.00 | O |
| ATOM | 554 | C5'  | G A | 18 | -21.406 | -2.936 | 59.131 | 1.00 | 0.00 | C |
| ATOM | 555 | O5'  | G A | 18 | -22.339 | -3.928 | 59.625 | 1.00 | 0.00 | O |
| ATOM | 556 | O1P  | G A | 18 | -22.848 | -5.316 | 57.587 | 1.00 | 0.00 | O |
| ATOM | 557 | O2P  | G A | 18 | -24.538 | -5.129 | 59.431 | 1.00 | 0.00 | O |
| ATOM | 558 | P    | G A | 18 | -23.463 | -4.484 | 58.638 | 1.00 | 0.00 | P |
| ATOM | 559 | H1   | G A | 18 | -21.535 | -0.969 | 67.455 | 1.00 | 0.00 | H |
| ATOM | 560 | H8   | G A | 18 | -23.010 | -4.004 | 61.952 | 1.00 | 0.00 | H |
| ATOM | 561 | H1'  | G A | 18 | -19.206 | -3.491 | 62.675 | 1.00 | 0.00 | H |
| ATOM | 562 | H21  | G A | 18 | -19.372 | -0.627 | 67.579 | 1.00 | 0.00 | H |
| ATOM | 563 | H3'  | G A | 18 | -20.018 | -5.249 | 59.251 | 1.00 | 0.00 | H |
| ATOM | 564 | H22  | G A | 18 | -18.245 | -1.144 | 66.294 | 1.00 | 0.00 | H |
| ATOM | 565 | H4'  | G A | 18 | -19.303 | -2.703 | 59.116 | 1.00 | 0.00 | H |
| ATOM | 566 | H2'1 | G A | 18 | -21.288 | -5.205 | 61.288 | 1.00 | 0.00 | H |
| ATOM | 567 | H2'2 | G A | 18 | -19.710 | -5.676 | 61.903 | 1.00 | 0.00 | H |
| ATOM | 568 | H5'1 | G A | 18 | -21.769 | -1.937 | 59.370 | 1.00 | 0.00 | H |
| ATOM | 569 | H5'2 | G A | 18 | -21.305 | -3.030 | 58.050 | 1.00 | 0.00 | H |
| ATOM | 570 | C1'  | T A | 19 | -16.904 | -4.880 | 65.603 | 1.00 | 0.00 | C |
| ATOM | 571 | N1   | T A | 19 | -18.364 | -5.049 | 65.827 | 1.00 | 0.00 | N |
| ATOM | 572 | C2   | T A | 19 | -18.887 | -4.531 | 66.995 | 1.00 | 0.00 | C |
| ATOM | 573 | O2   | T A | 19 | -18.204 | -3.956 | 67.825 | 1.00 | 0.00 | O |
| ATOM | 574 | N3   | T A | 19 | -20.248 | -4.710 | 67.162 | 1.00 | 0.00 | N |
| ATOM | 575 | C4   | T A | 19 | -21.106 | -5.345 | 66.291 | 1.00 | 0.00 | C |
| ATOM | 576 | O4   | T A | 19 | -22.311 | -5.447 | 66.551 | 1.00 | 0.00 | O |
| ATOM | 577 | C5   | T A | 19 | -20.470 | -5.854 | 65.099 | 1.00 | 0.00 | C |
| ATOM | 578 | C6   | T A | 19 | -19.145 | -5.697 | 64.902 | 1.00 | 0.00 | C |
| ATOM | 579 | C7   | T A | 19 | -21.367 | -6.551 | 64.120 | 1.00 | 0.00 | C |
| ATOM | 580 | C2'  | T A | 19 | -16.241 | -6.082 | 64.940 | 1.00 | 0.00 | C |
| ATOM | 581 | C3'  | T A | 19 | -15.195 | -5.420 | 64.057 | 1.00 | 0.00 | C |
| ATOM | 582 | O3'  | T A | 19 | -14.025 | -5.162 | 64.829 | 1.00 | 0.00 | O |
| ATOM | 583 | C4'  | T A | 19 | -15.890 | -4.135 | 63.614 | 1.00 | 0.00 | C |
| ATOM | 584 | O4'  | T A | 19 | -16.723 | -3.762 | 64.756 | 1.00 | 0.00 | O |
| ATOM | 585 | C5'  | T A | 19 | -16.766 | -4.233 | 62.387 | 1.00 | 0.00 | C |
| ATOM | 586 | O5'  | T A | 19 | -17.444 | -5.514 | 62.371 | 1.00 | 0.00 | O |
| ATOM | 587 | O1P  | T A | 19 | -16.460 | -6.669 | 60.363 | 1.00 | 0.00 | O |
| ATOM | 588 | O2P  | T A | 19 | -18.774 | -7.252 | 61.137 | 1.00 | 0.00 | O |
| ATOM | 589 | P    | T A | 19 | -17.729 | -6.215 | 60.967 | 1.00 | 0.00 | P |
| ATOM | 590 | H3   | T A | 19 | -20.662 | -4.328 | 68.025 | 1.00 | 0.00 | H |
| ATOM | 591 | H6   | T A | 19 | -18.687 | -6.089 | 63.993 | 1.00 | 0.00 | H |
| ATOM | 592 | H1'  | T A | 19 | -16.435 | -4.656 | 66.561 | 1.00 | 0.00 | H |
| ATOM | 593 | H3'  | T A | 19 | -14.933 | -6.042 | 63.201 | 1.00 | 0.00 | H |
| ATOM | 594 | H4'  | T A | 19 | -15.104 | -3.407 | 63.403 | 1.00 | 0.00 | H |
| ATOM | 595 | H71  | T A | 19 | -21.093 | -7.604 | 64.062 | 1.00 | 0.00 | H |
| ATOM | 596 | H72  | T A | 19 | -22.402 | -6.464 | 64.451 | 1.00 | 0.00 | H |
| ATOM | 597 | H73  | T A | 19 | -21.261 | -6.093 | 63.136 | 1.00 | 0.00 | H |
| ATOM | 598 | H2'1 | T A | 19 | -16.945 | -6.668 | 64.351 | 1.00 | 0.00 | H |
| ATOM | 599 | H2'2 | T A | 19 | -15.782 | -6.754 | 65.666 | 1.00 | 0.00 | H |
| ATOM | 600 | H5'1 | T A | 19 | -17.500 | -3.428 | 62.405 | 1.00 | 0.00 | H |

|      |     |      |     |   |    |         |         |        |      |      |   |
|------|-----|------|-----|---|----|---------|---------|--------|------|------|---|
| ATOM | 601 | H5'2 | T   | A | 19 | -16.147 | -4.133  | 61.496 | 1.00 | 0.00 | H |
| ATOM | 602 | C01  | LNK | A | 20 | -11.188 | -7.386  | 65.757 | 0.00 | 0.00 | C |
| ATOM | 603 | O1   | LNK | A | 20 | -12.455 | -7.158  | 65.137 | 1.00 | 0.00 | O |
| ATOM | 604 | S    | LNK | A | 20 | -8.698  | -10.406 | 66.482 | 0.00 | 0.00 | S |
| ATOM | 605 | C02  | LNK | A | 20 | -10.825 | -8.879  | 65.646 | 0.00 | 0.00 | C |
| ATOM | 606 | C03  | LNK | A | 20 | -10.095 | -9.327  | 66.927 | 0.00 | 0.00 | C |
| ATOM | 607 | O1P  | LNK | A | 20 | -14.776 | -7.350  | 66.094 | 1.00 | 0.00 | O |
| ATOM | 608 | O2P  | LNK | A | 20 | -13.046 | -5.956  | 67.263 | 1.00 | 0.00 | O |
| ATOM | 609 | P    | LNK | A | 20 | -13.609 | -6.452  | 65.983 | 1.00 | 0.00 | P |
| ATOM | 610 | H01  | LNK | A | 20 | -11.240 | -7.103  | 66.809 | 0.00 | 0.00 | H |
| ATOM | 611 | H02  | LNK | A | 20 | -10.425 | -6.789  | 65.258 | 0.00 | 0.00 | H |
| ATOM | 612 | H03  | LNK | A | 20 | -10.787 | -9.875  | 67.566 | 0.00 | 0.00 | H |
| ATOM | 613 | H04  | LNK | A | 20 | -10.174 | -9.031  | 64.784 | 0.00 | 0.00 | H |
| ATOM | 614 | H05  | LNK | A | 20 | -11.735 | -9.465  | 65.522 | 0.00 | 0.00 | H |
| ATOM | 615 | H06  | LNK | A | 20 | -9.723  | -8.452  | 67.459 | 0.00 | 0.00 | H |
| ATOM | 616 | AU   | LNK | A | 20 | -8.435  | -10.686 | 67.050 |      |      |   |
| TER  |     |      |     |   |    |         |         |        |      |      |   |
| ATOM | 618 | C1'  | A   | B | 2  | -22.869 | -1.525  | 74.091 | 1.00 | 0.00 | C |
| ATOM | 619 | N1   | A   | B | 2  | -21.452 | -3.630  | 69.630 | 1.00 | 0.00 | N |
| ATOM | 620 | C2   | A   | B | 2  | -20.774 | -2.985  | 70.573 | 1.00 | 0.00 | C |
| ATOM | 621 | N3   | A   | B | 2  | -21.202 | -2.469  | 71.706 | 1.00 | 0.00 | N |
| ATOM | 622 | C4   | A   | B | 2  | -22.528 | -2.666  | 71.836 | 1.00 | 0.00 | C |
| ATOM | 623 | C5   | A   | B | 2  | -23.363 | -3.303  | 70.962 | 1.00 | 0.00 | C |
| ATOM | 624 | C6   | A   | B | 2  | -22.772 | -3.812  | 69.787 | 1.00 | 0.00 | C |
| ATOM | 625 | N6   | A   | B | 2  | -23.468 | -4.462  | 68.838 | 1.00 | 0.00 | N |
| ATOM | 626 | N7   | A   | B | 2  | -24.664 | -3.314  | 71.433 | 1.00 | 0.00 | N |
| ATOM | 627 | C8   | A   | B | 2  | -24.590 | -2.685  | 72.569 | 1.00 | 0.00 | C |
| ATOM | 628 | N9   | A   | B | 2  | -23.323 | -2.265  | 72.881 | 1.00 | 0.00 | N |
| ATOM | 629 | C2'  | A   | B | 2  | -23.866 | -0.484  | 74.583 | 1.00 | 0.00 | C |
| ATOM | 630 | C3'  | A   | B | 2  | -23.695 | -0.569  | 76.091 | 1.00 | 0.00 | C |
| ATOM | 631 | O3'  | A   | B | 2  | -22.596 | 0.249   | 76.483 | 1.00 | 0.00 | O |
| ATOM | 632 | C4'  | A   | B | 2  | -23.419 | -2.055  | 76.318 | 1.00 | 0.00 | C |
| ATOM | 633 | O4'  | A   | B | 2  | -22.678 | -2.471  | 75.125 | 1.00 | 0.00 | O |
| ATOM | 634 | C5'  | A   | B | 2  | -24.628 | -2.947  | 76.473 | 1.00 | 0.00 | C |
| ATOM | 635 | O5'  | A   | B | 2  | -25.688 | -2.491  | 75.596 | 1.00 | 0.00 | O |
| ATOM | 636 | H2   | A   | B | 2  | -19.709 | -2.867  | 70.384 | 1.00 | 0.00 | H |
| ATOM | 637 | H8   | A   | B | 2  | -25.453 | -2.509  | 73.212 | 1.00 | 0.00 | H |
| ATOM | 638 | H1'  | A   | B | 2  | -21.905 | -1.068  | 73.869 | 1.00 | 0.00 | H |
| ATOM | 639 | H3'  | A   | B | 2  | -24.591 | -0.250  | 76.623 | 1.00 | 0.00 | H |
| ATOM | 640 | H4'  | A   | B | 2  | -22.830 | -2.130  | 77.232 | 1.00 | 0.00 | H |
| ATOM | 641 | H61  | A   | B | 2  | -22.987 | -4.817  | 68.000 | 1.00 | 0.00 | H |
| ATOM | 642 | H62  | A   | B | 2  | -24.482 | -4.605  | 68.951 | 1.00 | 0.00 | H |
| ATOM | 643 | H2'1 | A   | B | 2  | -24.889 | -0.717  | 74.286 | 1.00 | 0.00 | H |
| ATOM | 644 | H2'2 | A   | B | 2  | -23.636 | 0.516   | 74.213 | 1.00 | 0.00 | H |
| ATOM | 645 | H5'1 | A   | B | 2  | -24.352 | -3.969  | 76.217 | 1.00 | 0.00 | H |
| ATOM | 646 | H5'2 | A   | B | 2  | -24.965 | -2.914  | 77.508 | 1.00 | 0.00 | H |
| ATOM | 647 | C1'  | C   | B | 3  | -19.701 | 1.468   | 71.713 | 1.00 | 0.00 | C |
| ATOM | 648 | N1   | C   | B | 3  | -20.909 | 0.943   | 71.019 | 1.00 | 0.00 | N |
| ATOM | 649 | C2   | C   | B | 3  | -20.735 | 0.331   | 69.780 | 1.00 | 0.00 | C |
| ATOM | 650 | O2   | C   | B | 3  | -19.592 | 0.247   | 69.311 | 1.00 | 0.00 | O |
| ATOM | 651 | N3   | C   | B | 3  | -21.821 | -0.154  | 69.132 | 1.00 | 0.00 | N |
| ATOM | 652 | C4   | C   | B | 3  | -23.046 | -0.048  | 69.665 | 1.00 | 0.00 | C |
| ATOM | 653 | N4   | C   | B | 3  | -24.074 | -0.542  | 68.989 | 1.00 | 0.00 | N |
| ATOM | 654 | C5   | C   | B | 3  | -23.257 | 0.582   | 70.936 | 1.00 | 0.00 | C |

|      |     |      |     |   |         |        |        |      |      |   |
|------|-----|------|-----|---|---------|--------|--------|------|------|---|
| ATOM | 655 | C6   | C B | 3 | -22.146 | 1.059  | 71.574 | 1.00 | 0.00 | C |
| ATOM | 656 | C2'  | C B | 3 | -19.937 | 2.780  | 72.449 | 1.00 | 0.00 | C |
| ATOM | 657 | C3'  | C B | 3 | -19.049 | 2.621  | 73.674 | 1.00 | 0.00 | C |
| ATOM | 658 | O3'  | C B | 3 | -17.719 | 3.011  | 73.341 | 1.00 | 0.00 | O |
| ATOM | 659 | C4'  | C B | 3 | -19.154 | 1.128  | 73.977 | 1.00 | 0.00 | C |
| ATOM | 660 | O4'  | C B | 3 | -19.297 | 0.500  | 72.663 | 1.00 | 0.00 | O |
| ATOM | 661 | C5'  | C B | 3 | -20.314 | 0.700  | 74.846 | 1.00 | 0.00 | C |
| ATOM | 662 | O5'  | C B | 3 | -21.481 | 1.503  | 74.536 | 1.00 | 0.00 | O |
| ATOM | 663 | O1P  | C B | 3 | -21.863 | 2.815  | 76.649 | 1.00 | 0.00 | O |
| ATOM | 664 | O2P  | C B | 3 | -23.790 | 2.297  | 75.128 | 1.00 | 0.00 | O |
| ATOM | 665 | P    | C B | 3 | -22.495 | 1.867  | 75.710 | 1.00 | 0.00 | P |
| ATOM | 666 | H5   | C B | 3 | -24.251 | 0.677  | 71.372 | 1.00 | 0.00 | H |
| ATOM | 667 | H6   | C B | 3 | -22.254 | 1.539  | 72.546 | 1.00 | 0.00 | H |
| ATOM | 668 | H1'  | C B | 3 | -18.902 | 1.571  | 70.978 | 1.00 | 0.00 | H |
| ATOM | 669 | H3'  | C B | 3 | -19.402 | 3.219  | 74.514 | 1.00 | 0.00 | H |
| ATOM | 670 | H4'  | C B | 3 | -18.235 | 0.843  | 74.489 | 1.00 | 0.00 | H |
| ATOM | 671 | H41  | C B | 3 | -25.026 | -0.477 | 69.379 | 1.00 | 0.00 | H |
| ATOM | 672 | H42  | C B | 3 | -23.921 | -0.993 | 68.075 | 1.00 | 0.00 | H |
| ATOM | 673 | H2'1 | C B | 3 | -20.980 | 2.915  | 72.731 | 1.00 | 0.00 | H |
| ATOM | 674 | H2'2 | C B | 3 | -19.643 | 3.646  | 71.855 | 1.00 | 0.00 | H |
| ATOM | 675 | H5'1 | C B | 3 | -20.532 | -0.352 | 74.660 | 1.00 | 0.00 | H |
| ATOM | 676 | H5'2 | C B | 3 | -20.045 | 0.830  | 75.892 | 1.00 | 0.00 | H |
| ATOM | 677 | C1'  | C B | 4 | -17.457 | 3.287  | 67.690 | 1.00 | 0.00 | C |
| ATOM | 678 | N1   | C B | 4 | -18.942 | 3.200  | 67.755 | 1.00 | 0.00 | N |
| ATOM | 679 | C2   | C B | 4 | -19.606 | 2.580  | 66.699 | 1.00 | 0.00 | C |
| ATOM | 680 | O2   | C B | 4 | -18.941 | 2.128  | 65.757 | 1.00 | 0.00 | O |
| ATOM | 681 | N3   | C B | 4 | -20.957 | 2.490  | 66.738 | 1.00 | 0.00 | N |
| ATOM | 682 | C4   | C B | 4 | -21.651 | 2.988  | 67.771 | 1.00 | 0.00 | C |
| ATOM | 683 | N4   | C B | 4 | -22.970 | 2.870  | 67.760 | 1.00 | 0.00 | N |
| ATOM | 684 | C5   | C B | 4 | -20.995 | 3.636  | 68.869 | 1.00 | 0.00 | C |
| ATOM | 685 | C6   | C B | 4 | -19.632 | 3.710  | 68.810 | 1.00 | 0.00 | C |
| ATOM | 686 | C2'  | C B | 4 | -16.895 | 4.594  | 68.232 | 1.00 | 0.00 | C |
| ATOM | 687 | C3'  | C B | 4 | -15.601 | 4.134  | 68.886 | 1.00 | 0.00 | C |
| ATOM | 688 | O3'  | C B | 4 | -14.575 | 4.067  | 67.899 | 1.00 | 0.00 | O |
| ATOM | 689 | C4'  | C B | 4 | -15.967 | 2.757  | 69.433 | 1.00 | 0.00 | C |
| ATOM | 690 | O4'  | C B | 4 | -16.930 | 2.228  | 68.466 | 1.00 | 0.00 | O |
| ATOM | 691 | C5'  | C B | 4 | -16.596 | 2.724  | 70.808 | 1.00 | 0.00 | C |
| ATOM | 692 | O5'  | C B | 4 | -17.466 | 3.873  | 70.975 | 1.00 | 0.00 | O |
| ATOM | 693 | O1P  | C B | 4 | -16.324 | 5.210  | 72.776 | 1.00 | 0.00 | O |
| ATOM | 694 | O2P  | C B | 4 | -18.809 | 5.378  | 72.472 | 1.00 | 0.00 | O |
| ATOM | 695 | P    | C B | 4 | -17.588 | 4.537  | 72.419 | 1.00 | 0.00 | P |
| ATOM | 696 | H5   | C B | 4 | -21.555 | 4.049  | 69.708 | 1.00 | 0.00 | H |
| ATOM | 697 | H6   | C B | 4 | -19.088 | 4.187  | 69.625 | 1.00 | 0.00 | H |
| ATOM | 698 | H1'  | C B | 4 | -17.151 | 3.129  | 66.656 | 1.00 | 0.00 | H |
| ATOM | 699 | H3'  | C B | 4 | -15.288 | 4.805  | 69.687 | 1.00 | 0.00 | H |
| ATOM | 700 | H4'  | C B | 4 | -15.045 | 2.177  | 69.476 | 1.00 | 0.00 | H |
| ATOM | 701 | H41  | C B | 4 | -23.528 | 3.242  | 68.543 | 1.00 | 0.00 | H |
| ATOM | 702 | H42  | C B | 4 | -23.441 | 2.406  | 66.968 | 1.00 | 0.00 | H |
| ATOM | 703 | H2'1 | C B | 4 | -17.561 | 5.062  | 68.956 | 1.00 | 0.00 | H |
| ATOM | 704 | H2'2 | C B | 4 | -16.704 | 5.321  | 67.442 | 1.00 | 0.00 | H |
| ATOM | 705 | H5'1 | C B | 4 | -17.172 | 1.806  | 70.916 | 1.00 | 0.00 | H |
| ATOM | 706 | H5'2 | C B | 4 | -15.808 | 2.746  | 71.560 | 1.00 | 0.00 | H |
| ATOM | 707 | C1'  | G B | 5 | -17.142 | 4.311  | 62.855 | 1.00 | 0.00 | C |
| ATOM | 708 | N1   | G B | 5 | -22.238 | 4.203  | 63.079 | 1.00 | 0.00 | N |



|      |     |      |     |   |         |       |        |      |      |   |
|------|-----|------|-----|---|---------|-------|--------|------|------|---|
| ATOM | 709 | C2   | G B | 5 | -21.379 | 3.683 | 62.126 | 1.00 | 0.00 | C |
| ATOM | 710 | N2   | G B | 5 | -21.955 | 3.051 | 61.096 | 1.00 | 0.00 | N |
| ATOM | 711 | N3   | G B | 5 | -20.053 | 3.784 | 62.198 | 1.00 | 0.00 | N |
| ATOM | 712 | C4   | G B | 5 | -19.645 | 4.460 | 63.304 | 1.00 | 0.00 | C |
| ATOM | 713 | C5   | G B | 5 | -20.428 | 5.016 | 64.302 | 1.00 | 0.00 | C |
| ATOM | 714 | C6   | G B | 5 | -21.835 | 4.906 | 64.230 | 1.00 | 0.00 | C |
| ATOM | 715 | O6   | G B | 5 | -22.687 | 5.330 | 65.010 | 1.00 | 0.00 | O |
| ATOM | 716 | N7   | G B | 5 | -19.619 | 5.627 | 65.263 | 1.00 | 0.00 | N |
| ATOM | 717 | C8   | G B | 5 | -18.401 | 5.425 | 64.829 | 1.00 | 0.00 | C |
| ATOM | 718 | N9   | G B | 5 | -18.336 | 4.723 | 63.643 | 1.00 | 0.00 | N |
| ATOM | 719 | C2'  | G B | 5 | -16.026 | 5.347 | 62.847 | 1.00 | 0.00 | C |
| ATOM | 720 | C3'  | G B | 5 | -14.782 | 4.473 | 62.855 | 1.00 | 0.00 | C |
| ATOM | 721 | O3'  | G B | 5 | -14.473 | 4.085 | 61.519 | 1.00 | 0.00 | O |
| ATOM | 722 | C4'  | G B | 5 | -15.206 | 3.287 | 63.719 | 1.00 | 0.00 | C |
| ATOM | 723 | O4'  | G B | 5 | -16.632 | 3.125 | 63.433 | 1.00 | 0.00 | O |
| ATOM | 724 | C5'  | G B | 5 | -15.026 | 3.443 | 65.210 | 1.00 | 0.00 | C |
| ATOM | 725 | O5'  | G B | 5 | -15.307 | 4.811 | 65.597 | 1.00 | 0.00 | O |
| ATOM | 726 | O1P  | G B | 5 | -13.075 | 5.664 | 66.388 | 1.00 | 0.00 | O |
| ATOM | 727 | O2P  | G B | 5 | -15.191 | 6.653 | 67.302 | 1.00 | 0.00 | O |
| ATOM | 728 | P    | G B | 5 | -14.478 | 5.456 | 66.798 | 1.00 | 0.00 | P |
| ATOM | 729 | H1   | G B | 5 | -23.250 | 4.064 | 62.934 | 1.00 | 0.00 | H |
| ATOM | 730 | H8   | G B | 5 | -17.516 | 5.779 | 65.356 | 1.00 | 0.00 | H |
| ATOM | 731 | H1'  | G B | 5 | -17.466 | 4.078 | 61.841 | 1.00 | 0.00 | H |
| ATOM | 732 | H21  | G B | 5 | -22.981 | 2.974 | 61.049 | 1.00 | 0.00 | H |
| ATOM | 733 | H3'  | G B | 5 | -13.924 | 4.988 | 63.289 | 1.00 | 0.00 | H |
| ATOM | 734 | H22  | G B | 5 | -21.372 | 2.644 | 60.351 | 1.00 | 0.00 | H |
| ATOM | 735 | H4'  | G B | 5 | -14.609 | 2.433 | 63.399 | 1.00 | 0.00 | H |
| ATOM | 736 | H2'1 | G B | 5 | -16.060 | 5.999 | 63.720 | 1.00 | 0.00 | H |
| ATOM | 737 | H2'2 | G B | 5 | -16.059 | 5.983 | 61.962 | 1.00 | 0.00 | H |
| ATOM | 738 | H5'1 | G B | 5 | -15.708 | 2.767 | 65.725 | 1.00 | 0.00 | H |
| ATOM | 739 | H5'2 | G B | 5 | -14.000 | 3.189 | 65.475 | 1.00 | 0.00 | H |
| ATOM | 740 | C1'  | T B | 6 | -19.010 | 5.230 | 58.364 | 1.00 | 0.00 | C |
| ATOM | 741 | N1   | T B | 6 | -19.489 | 5.998 | 59.545 | 1.00 | 0.00 | N |
| ATOM | 742 | C2   | T B | 6 | -20.853 | 6.064 | 59.742 | 1.00 | 0.00 | C |
| ATOM | 743 | O2   | T B | 6 | -21.655 | 5.528 | 58.997 | 1.00 | 0.00 | O |
| ATOM | 744 | N3   | T B | 6 | -21.253 | 6.786 | 60.853 | 1.00 | 0.00 | N |
| ATOM | 745 | C4   | T B | 6 | -20.433 | 7.431 | 61.754 | 1.00 | 0.00 | C |
| ATOM | 746 | O4   | T B | 6 | -20.908 | 8.052 | 62.711 | 1.00 | 0.00 | O |
| ATOM | 747 | C5   | T B | 6 | -19.024 | 7.304 | 61.464 | 1.00 | 0.00 | C |
| ATOM | 748 | C6   | T B | 6 | -18.597 | 6.608 | 60.393 | 1.00 | 0.00 | C |
| ATOM | 749 | C7   | T B | 6 | -18.094 | 7.989 | 62.421 | 1.00 | 0.00 | C |
| ATOM | 750 | C2'  | T B | 6 | -17.802 | 5.854 | 57.676 | 1.00 | 0.00 | C |
| ATOM | 751 | C3'  | T B | 6 | -17.021 | 4.626 | 57.234 | 1.00 | 0.00 | C |
| ATOM | 752 | O3'  | T B | 6 | -17.535 | 4.169 | 55.984 | 1.00 | 0.00 | O |
| ATOM | 753 | C4'  | T B | 6 | -17.280 | 3.632 | 58.364 | 1.00 | 0.00 | C |
| ATOM | 754 | O4'  | T B | 6 | -18.640 | 3.940 | 58.809 | 1.00 | 0.00 | O |
| ATOM | 755 | C5'  | T B | 6 | -16.353 | 3.711 | 59.555 | 1.00 | 0.00 | C |
| ATOM | 756 | O5'  | T B | 6 | -16.007 | 5.095 | 59.815 | 1.00 | 0.00 | O |
| ATOM | 757 | O1P  | T B | 6 | -13.540 | 5.180 | 59.326 | 1.00 | 0.00 | O |
| ATOM | 758 | O2P  | T B | 6 | -14.552 | 6.790 | 60.964 | 1.00 | 0.00 | O |
| ATOM | 759 | P    | T B | 6 | -14.551 | 5.430 | 60.372 | 1.00 | 0.00 | P |
| ATOM | 760 | H3   | T B | 6 | -22.268 | 6.848 | 61.024 | 1.00 | 0.00 | H |
| ATOM | 761 | H6   | T B | 6 | -17.528 | 6.527 | 60.196 | 1.00 | 0.00 | H |
| ATOM | 762 | H1'  | T B | 6 | -19.841 | 5.120 | 57.668 | 1.00 | 0.00 | H |

|      |     |      |     |   |         |        |        |      |      |   |
|------|-----|------|-----|---|---------|--------|--------|------|------|---|
| ATOM | 763 | H3'  | T B | 6 | -15.957 | 4.835  | 57.130 | 1.00 | 0.00 | H |
| ATOM | 764 | H4'  | T B | 6 | -17.187 | 2.634  | 57.935 | 1.00 | 0.00 | H |
| ATOM | 765 | H71  | T B | 6 | -17.572 | 8.796  | 61.907 | 1.00 | 0.00 | H |
| ATOM | 766 | H72  | T B | 6 | -18.665 | 8.398  | 63.255 | 1.00 | 0.00 | H |
| ATOM | 767 | H73  | T B | 6 | -17.365 | 7.270  | 62.799 | 1.00 | 0.00 | H |
| ATOM | 768 | H2'1 | T B | 6 | -17.216 | 6.474  | 58.352 | 1.00 | 0.00 | H |
| ATOM | 769 | H2'2 | T B | 6 | -18.084 | 6.472  | 56.824 | 1.00 | 0.00 | H |
| ATOM | 770 | H5'1 | T B | 6 | -16.851 | 3.286  | 60.426 | 1.00 | 0.00 | H |
| ATOM | 771 | H5'2 | T B | 6 | -15.450 | 3.140  | 59.342 | 1.00 | 0.00 | H |
| ATOM | 772 | C1'  | C B | 7 | -22.567 | 6.786  | 55.268 | 1.00 | 0.00 | C |
| ATOM | 773 | N1   | C B | 7 | -22.112 | 7.652  | 56.393 | 1.00 | 0.00 | N |
| ATOM | 774 | C2   | C B | 7 | -23.081 | 8.185  | 57.238 | 1.00 | 0.00 | C |
| ATOM | 775 | O2   | C B | 7 | -24.273 | 7.921  | 57.025 | 1.00 | 0.00 | O |
| ATOM | 776 | N3   | C B | 7 | -22.688 | 8.975  | 58.268 | 1.00 | 0.00 | N |
| ATOM | 777 | C4   | C B | 7 | -21.393 | 9.243  | 58.473 | 1.00 | 0.00 | C |
| ATOM | 778 | N4   | C B | 7 | -21.065 | 10.018 | 59.496 | 1.00 | 0.00 | N |
| ATOM | 779 | C5   | C B | 7 | -20.373 | 8.712  | 57.616 | 1.00 | 0.00 | C |
| ATOM | 780 | C6   | C B | 7 | -20.793 | 7.914  | 56.589 | 1.00 | 0.00 | C |
| ATOM | 781 | C2'  | C B | 7 | -21.770 | 6.977  | 53.986 | 1.00 | 0.00 | C |
| ATOM | 782 | C3'  | C B | 7 | -21.736 | 5.566  | 53.422 | 1.00 | 0.00 | C |
| ATOM | 783 | O3'  | C B | 7 | -22.930 | 5.329  | 52.681 | 1.00 | 0.00 | O |
| ATOM | 784 | C4'  | C B | 7 | -21.654 | 4.700  | 54.677 | 1.00 | 0.00 | C |
| ATOM | 785 | O4'  | C B | 7 | -22.423 | 5.439  | 55.677 | 1.00 | 0.00 | O |
| ATOM | 786 | C5'  | C B | 7 | -20.268 | 4.442  | 55.226 | 1.00 | 0.00 | C |
| ATOM | 787 | O5'  | C B | 7 | -19.447 | 5.624  | 55.054 | 1.00 | 0.00 | O |
| ATOM | 788 | O1P  | C B | 7 | -17.693 | 4.880  | 53.410 | 1.00 | 0.00 | O |
| ATOM | 789 | O2P  | C B | 7 | -17.181 | 6.710  | 55.047 | 1.00 | 0.00 | O |
| ATOM | 790 | P    | C B | 7 | -17.890 | 5.440  | 54.761 | 1.00 | 0.00 | P |
| ATOM | 791 | H5   | C B | 7 | -19.318 | 8.933  | 57.776 | 1.00 | 0.00 | H |
| ATOM | 792 | H6   | C B | 7 | -20.054 | 7.481  | 55.915 | 1.00 | 0.00 | H |
| ATOM | 793 | H1'  | C B | 7 | -23.628 | 6.975  | 55.102 | 1.00 | 0.00 | H |
| ATOM | 794 | H3'  | C B | 7 | -20.871 | 5.405  | 52.775 | 1.00 | 0.00 | H |
| ATOM | 795 | H4'  | C B | 7 | -22.095 | 3.735  | 54.426 | 1.00 | 0.00 | H |
| ATOM | 796 | H41  | C B | 7 | -20.074 | 10.238 | 59.679 | 1.00 | 0.00 | H |
| ATOM | 797 | H42  | C B | 7 | -21.799 | 10.401 | 60.110 | 1.00 | 0.00 | H |
| ATOM | 798 | H2'1 | C B | 7 | -20.765 | 7.353  | 54.175 | 1.00 | 0.00 | H |
| ATOM | 799 | H2'2 | C B | 7 | -22.255 | 7.669  | 53.297 | 1.00 | 0.00 | H |
| ATOM | 800 | H5'1 | C B | 7 | -20.344 | 4.196  | 56.286 | 1.00 | 0.00 | H |
| ATOM | 801 | H5'2 | C B | 7 | -19.823 | 3.604  | 54.694 | 1.00 | 0.00 | H |
| ATOM | 802 | C1'  | C B | 8 | -26.554 | 9.460  | 54.050 | 1.00 | 0.00 | C |
| ATOM | 803 | N1   | C B | 8 | -25.365 | 10.111 | 54.664 | 1.00 | 0.00 | N |
| ATOM | 804 | C2   | C B | 8 | -25.568 | 10.926 | 55.776 | 1.00 | 0.00 | C |
| ATOM | 805 | O2   | C B | 8 | -26.720 | 11.073 | 56.206 | 1.00 | 0.00 | O |
| ATOM | 806 | N3   | C B | 8 | -24.499 | 11.527 | 56.350 | 1.00 | 0.00 | N |
| ATOM | 807 | C4   | C B | 8 | -23.264 | 11.349 | 55.862 | 1.00 | 0.00 | C |
| ATOM | 808 | N4   | C B | 8 | -22.254 | 11.960 | 56.465 | 1.00 | 0.00 | N |
| ATOM | 809 | C5   | C B | 8 | -23.024 | 10.521 | 54.716 | 1.00 | 0.00 | C |
| ATOM | 810 | C6   | C B | 8 | -24.117 | 9.921  | 54.157 | 1.00 | 0.00 | C |
| ATOM | 811 | C2'  | C B | 8 | -26.500 | 9.393  | 52.529 | 1.00 | 0.00 | C |
| ATOM | 812 | C3'  | C B | 8 | -27.169 | 8.056  | 52.248 | 1.00 | 0.00 | C |
| ATOM | 813 | O3'  | C B | 8 | -28.583 | 8.237  | 52.221 | 1.00 | 0.00 | O |
| ATOM | 814 | C4'  | C B | 8 | -26.719 | 7.196  | 53.427 | 1.00 | 0.00 | C |
| ATOM | 815 | O4'  | C B | 8 | -26.622 | 8.136  | 54.544 | 1.00 | 0.00 | O |
| ATOM | 816 | C5'  | C B | 8 | -25.393 | 6.488  | 53.275 | 1.00 | 0.00 | C |

|      |     |      |     |    |         |        |        |      |      |   |
|------|-----|------|-----|----|---------|--------|--------|------|------|---|
| ATOM | 817 | O5'  | C B | 8  | -24.467 | 7.334  | 52.546 | 1.00 | 0.00 | O |
| ATOM | 818 | O1P  | C B | 8  | -24.093 | 6.072  | 50.400 | 1.00 | 0.00 | O |
| ATOM | 819 | O2P  | C B | 8  | -22.315 | 7.609  | 51.279 | 1.00 | 0.00 | O |
| ATOM | 820 | P    | C B | 8  | -23.407 | 6.649  | 51.574 | 1.00 | 0.00 | P |
| ATOM | 821 | H5   | C B | 8  | -22.022 | 10.379 | 54.311 | 1.00 | 0.00 | H |
| ATOM | 822 | H6   | C B | 8  | -23.984 | 9.276  | 53.288 | 1.00 | 0.00 | H |
| ATOM | 823 | H1'  | C B | 8  | -27.445 | 9.991  | 54.386 | 1.00 | 0.00 | H |
| ATOM | 824 | H3'  | C B | 8  | -26.841 | 7.627  | 51.301 | 1.00 | 0.00 | H |
| ATOM | 825 | H4'  | C B | 8  | -27.485 | 6.435  | 53.574 | 1.00 | 0.00 | H |
| ATOM | 826 | H41  | C B | 8  | -21.293 | 11.837 | 56.112 | 1.00 | 0.00 | H |
| ATOM | 827 | H42  | C B | 8  | -22.428 | 12.556 | 57.288 | 1.00 | 0.00 | H |
| ATOM | 828 | H2'1 | C B | 8  | -25.479 | 9.413  | 52.150 | 1.00 | 0.00 | H |
| ATOM | 829 | H2'2 | C B | 8  | -27.041 | 10.215 | 52.060 | 1.00 | 0.00 | H |
| ATOM | 830 | H5'1 | C B | 8  | -24.989 | 6.268  | 54.263 | 1.00 | 0.00 | H |
| ATOM | 831 | H5'2 | C B | 8  | -25.545 | 5.556  | 52.733 | 1.00 | 0.00 | H |
| ATOM | 832 | C1'  | T B | 9  | -29.641 | 13.304 | 54.481 | 1.00 | 0.00 | C |
| ATOM | 833 | N1   | T B | 9  | -28.177 | 13.532 | 54.355 | 1.00 | 0.00 | N |
| ATOM | 834 | C2   | T B | 9  | -27.583 | 14.352 | 55.293 | 1.00 | 0.00 | C |
| ATOM | 835 | O2   | T B | 9  | -28.208 | 14.880 | 56.195 | 1.00 | 0.00 | O |
| ATOM | 836 | N3   | T B | 9  | -26.222 | 14.535 | 55.138 | 1.00 | 0.00 | N |
| ATOM | 837 | C4   | T B | 9  | -25.426 | 13.988 | 54.154 | 1.00 | 0.00 | C |
| ATOM | 838 | O4   | T B | 9  | -24.213 | 14.228 | 54.116 | 1.00 | 0.00 | O |
| ATOM | 839 | C5   | T B | 9  | -26.135 | 13.144 | 53.221 | 1.00 | 0.00 | C |
| ATOM | 840 | C6   | T B | 9  | -27.462 | 12.943 | 53.342 | 1.00 | 0.00 | C |
| ATOM | 841 | C7   | T B | 9  | -25.306 | 12.526 | 52.135 | 1.00 | 0.00 | C |
| ATOM | 842 | C2'  | T B | 9  | -30.371 | 13.235 | 53.144 | 1.00 | 0.00 | C |
| ATOM | 843 | C3'  | T B | 9  | -31.440 | 12.188 | 53.420 | 1.00 | 0.00 | C |
| ATOM | 844 | O3'  | T B | 9  | -32.563 | 12.817 | 54.033 | 1.00 | 0.00 | O |
| ATOM | 845 | C4'  | T B | 9  | -30.731 | 11.219 | 54.364 | 1.00 | 0.00 | C |
| ATOM | 846 | O4'  | T B | 9  | -29.832 | 12.070 | 55.145 | 1.00 | 0.00 | O |
| ATOM | 847 | C5'  | T B | 9  | -29.919 | 10.122 | 53.716 | 1.00 | 0.00 | C |
| ATOM | 848 | O5'  | T B | 9  | -29.280 | 10.630 | 52.517 | 1.00 | 0.00 | O |
| ATOM | 849 | O1P  | T B | 9  | -30.394 | 9.334  | 50.670 | 1.00 | 0.00 | O |
| ATOM | 850 | O2P  | T B | 9  | -28.061 | 10.207 | 50.361 | 1.00 | 0.00 | O |
| ATOM | 851 | P    | T B | 9  | -29.084 | 9.647  | 51.277 | 1.00 | 0.00 | P |
| ATOM | 852 | H3   | T B | 9  | -25.755 | 15.140 | 55.828 | 1.00 | 0.00 | H |
| ATOM | 853 | H6   | T B | 9  | -27.975 | 12.303 | 52.624 | 1.00 | 0.00 | H |
| ATOM | 854 | H1'  | T B | 9  | -30.057 | 14.091 | 55.111 | 1.00 | 0.00 | H |
| ATOM | 855 | H3'  | T B | 9  | -31.760 | 11.686 | 52.508 | 1.00 | 0.00 | H |
| ATOM | 856 | H4'  | T B | 9  | -31.505 | 10.747 | 54.971 | 1.00 | 0.00 | H |
| ATOM | 857 | H71  | T B | 9  | -25.614 | 12.928 | 51.169 | 1.00 | 0.00 | H |
| ATOM | 858 | H72  | T B | 9  | -24.254 | 12.754 | 52.305 | 1.00 | 0.00 | H |
| ATOM | 859 | H73  | T B | 9  | -25.449 | 11.445 | 52.140 | 1.00 | 0.00 | H |
| ATOM | 860 | H2'1 | T B | 9  | -29.714 | 12.927 | 52.332 | 1.00 | 0.00 | H |
| ATOM | 861 | H2'2 | T B | 9  | -30.813 | 14.191 | 52.865 | 1.00 | 0.00 | H |
| ATOM | 862 | H5'1 | T B | 9  | -29.162 | 9.774  | 54.418 | 1.00 | 0.00 | H |
| ATOM | 863 | H5'2 | T B | 9  | -30.577 | 9.295  | 53.459 | 1.00 | 0.00 | H |
| ATOM | 864 | C1'  | A B | 10 | -30.798 | 17.961 | 55.750 | 1.00 | 0.00 | C |
| ATOM | 865 | N1   | A B | 10 | -25.775 | 18.789 | 55.104 | 1.00 | 0.00 | N |
| ATOM | 866 | C2   | A B | 10 | -26.641 | 19.195 | 56.028 | 1.00 | 0.00 | C |
| ATOM | 867 | N3   | A B | 10 | -27.927 | 18.941 | 56.137 | 1.00 | 0.00 | N |
| ATOM | 868 | C4   | A B | 10 | -28.335 | 18.157 | 55.123 | 1.00 | 0.00 | C |
| ATOM | 869 | C5   | A B | 10 | -27.577 | 17.658 | 54.099 | 1.00 | 0.00 | C |
| ATOM | 870 | C6   | A B | 10 | -26.211 | 18.007 | 54.104 | 1.00 | 0.00 | C |

|      |     |      |     |    |         |        |        |      |      |   |
|------|-----|------|-----|----|---------|--------|--------|------|------|---|
| ATOM | 871 | N6   | A B | 10 | -25.345 | 17.591 | 53.164 | 1.00 | 0.00 | N |
| ATOM | 872 | N7   | A B | 10 | -28.342 | 16.887 | 53.241 | 1.00 | 0.00 | N |
| ATOM | 873 | C8   | A B | 10 | -29.535 | 16.939 | 53.755 | 1.00 | 0.00 | C |
| ATOM | 874 | N9   | A B | 10 | -29.607 | 17.689 | 54.901 | 1.00 | 0.00 | N |
| ATOM | 875 | C2'  | A B | 10 | -32.085 | 18.150 | 54.959 | 1.00 | 0.00 | C |
| ATOM | 876 | C3'  | A B | 10 | -33.119 | 17.517 | 55.877 | 1.00 | 0.00 | C |
| ATOM | 877 | O3'  | A B | 10 | -33.534 | 18.477 | 56.846 | 1.00 | 0.00 | O |
| ATOM | 878 | C4'  | A B | 10 | -32.348 | 16.358 | 56.508 | 1.00 | 0.00 | C |
| ATOM | 879 | O4'  | A B | 10 | -30.974 | 16.852 | 56.612 | 1.00 | 0.00 | O |
| ATOM | 880 | C5'  | A B | 10 | -32.338 | 15.060 | 55.736 | 1.00 | 0.00 | C |
| ATOM | 881 | O5'  | A B | 10 | -32.278 | 15.336 | 54.313 | 1.00 | 0.00 | O |
| ATOM | 882 | O1P  | A B | 10 | -34.496 | 14.502 | 53.464 | 1.00 | 0.00 | O |
| ATOM | 883 | O2P  | A B | 10 | -32.506 | 14.553 | 51.936 | 1.00 | 0.00 | O |
| ATOM | 884 | P    | A B | 10 | -33.036 | 14.357 | 53.308 | 1.00 | 0.00 | P |
| ATOM | 885 | H2   | A B | 10 | -26.224 | 19.830 | 56.809 | 1.00 | 0.00 | H |
| ATOM | 886 | H8   | A B | 10 | -30.396 | 16.434 | 53.317 | 1.00 | 0.00 | H |
| ATOM | 887 | H1'  | A B | 10 | -30.586 | 18.835 | 56.365 | 1.00 | 0.00 | H |
| ATOM | 888 | H3'  | A B | 10 | -33.988 | 17.158 | 55.327 | 1.00 | 0.00 | H |
| ATOM | 889 | H4'  | A B | 10 | -32.805 | 16.165 | 57.478 | 1.00 | 0.00 | H |
| ATOM | 890 | H61  | A B | 10 | -24.356 | 17.872 | 53.216 | 1.00 | 0.00 | H |
| ATOM | 891 | H62  | A B | 10 | -25.672 | 16.991 | 52.392 | 1.00 | 0.00 | H |
| ATOM | 892 | H2'1 | A B | 10 | -32.055 | 17.649 | 53.992 | 1.00 | 0.00 | H |
| ATOM | 893 | H2'2 | A B | 10 | -32.308 | 19.202 | 54.777 | 1.00 | 0.00 | H |
| ATOM | 894 | H5'1 | A B | 10 | -31.469 | 14.473 | 56.033 | 1.00 | 0.00 | H |
| ATOM | 895 | H5'2 | A B | 10 | -33.243 | 14.501 | 55.963 | 1.00 | 0.00 | H |
| ATOM | 896 | C1'  | G B | 11 | -29.715 | 22.720 | 56.658 | 1.00 | 0.00 | C |
| ATOM | 897 | N1   | G B | 11 | -25.762 | 21.840 | 53.556 | 1.00 | 0.00 | N |
| ATOM | 898 | C2   | G B | 11 | -25.817 | 22.539 | 54.749 | 1.00 | 0.00 | C |
| ATOM | 899 | N2   | G B | 11 | -24.665 | 23.076 | 55.170 | 1.00 | 0.00 | N |
| ATOM | 900 | N3   | G B | 11 | -26.930 | 22.688 | 55.464 | 1.00 | 0.00 | N |
| ATOM | 901 | C4   | G B | 11 | -28.001 | 22.085 | 54.884 | 1.00 | 0.00 | C |
| ATOM | 902 | C5   | G B | 11 | -28.042 | 21.373 | 53.698 | 1.00 | 0.00 | C |
| ATOM | 903 | C6   | G B | 11 | -26.860 | 21.210 | 52.939 | 1.00 | 0.00 | C |
| ATOM | 904 | O6   | G B | 11 | -26.698 | 20.618 | 51.872 | 1.00 | 0.00 | O |
| ATOM | 905 | N7   | G B | 11 | -29.339 | 20.916 | 53.454 | 1.00 | 0.00 | N |
| ATOM | 906 | C8   | G B | 11 | -30.027 | 21.353 | 54.478 | 1.00 | 0.00 | C |
| ATOM | 907 | N9   | G B | 11 | -29.283 | 22.074 | 55.389 | 1.00 | 0.00 | N |
| ATOM | 908 | C2'  | G B | 11 | -31.100 | 23.349 | 56.585 | 1.00 | 0.00 | C |
| ATOM | 909 | C3'  | G B | 11 | -31.641 | 23.089 | 57.981 | 1.00 | 0.00 | C |
| ATOM | 910 | O3'  | G B | 11 | -31.187 | 24.117 | 58.858 | 1.00 | 0.00 | O |
| ATOM | 911 | C4'  | G B | 11 | -31.043 | 21.727 | 58.329 | 1.00 | 0.00 | C |
| ATOM | 912 | O4'  | G B | 11 | -29.741 | 21.725 | 57.662 | 1.00 | 0.00 | O |
| ATOM | 913 | C5'  | G B | 11 | -31.822 | 20.516 | 57.874 | 1.00 | 0.00 | C |
| ATOM | 914 | O5'  | G B | 11 | -32.429 | 20.779 | 56.584 | 1.00 | 0.00 | O |
| ATOM | 915 | O1P  | G B | 11 | -34.895 | 20.761 | 57.085 | 1.00 | 0.00 | O |
| ATOM | 916 | O2P  | G B | 11 | -34.076 | 20.158 | 54.792 | 1.00 | 0.00 | O |
| ATOM | 917 | P    | G B | 11 | -33.850 | 20.131 | 56.257 | 1.00 | 0.00 | P |
| ATOM | 918 | H1   | G B | 11 | -24.848 | 21.777 | 53.083 | 1.00 | 0.00 | H |
| ATOM | 919 | H8   | G B | 11 | -31.093 | 21.166 | 54.598 | 1.00 | 0.00 | H |
| ATOM | 920 | H1'  | G B | 11 | -28.964 | 23.459 | 56.938 | 1.00 | 0.00 | H |
| ATOM | 921 | H21  | G B | 11 | -23.806 | 22.953 | 54.614 | 1.00 | 0.00 | H |
| ATOM | 922 | H3'  | G B | 11 | -32.731 | 23.055 | 57.998 | 1.00 | 0.00 | H |
| ATOM | 923 | H22  | G B | 11 | -24.638 | 23.611 | 56.050 | 1.00 | 0.00 | H |
| ATOM | 924 | H4'  | G B | 11 | -30.965 | 21.684 | 59.416 | 1.00 | 0.00 | H |

|      |     |      |     |    |         |        |        |      |      |   |
|------|-----|------|-----|----|---------|--------|--------|------|------|---|
| ATOM | 925 | H2'1 | G B | 11 | -31.726 | 22.883 | 55.823 | 1.00 | 0.00 | H |
| ATOM | 926 | H2'2 | G B | 11 | -31.058 | 24.416 | 56.368 | 1.00 | 0.00 | H |
| ATOM | 927 | H5'1 | G B | 11 | -31.146 | 19.664 | 57.796 | 1.00 | 0.00 | H |
| ATOM | 928 | H5'2 | G B | 11 | -32.597 | 20.293 | 58.607 | 1.00 | 0.00 | H |
| ATOM | 929 | C1'  | G B | 12 | -27.012 | 26.842 | 56.183 | 1.00 | 0.00 | C |
| ATOM | 930 | N1   | G B | 12 | -25.629 | 24.743 | 51.743 | 1.00 | 0.00 | N |
| ATOM | 931 | C2   | G B | 12 | -24.866 | 25.406 | 52.689 | 1.00 | 0.00 | C |
| ATOM | 932 | N2   | G B | 12 | -23.560 | 25.526 | 52.414 | 1.00 | 0.00 | N |
| ATOM | 933 | N3   | G B | 12 | -25.364 | 25.906 | 53.818 | 1.00 | 0.00 | N |
| ATOM | 934 | C4   | G B | 12 | -26.703 | 25.699 | 53.927 | 1.00 | 0.00 | C |
| ATOM | 935 | C5   | G B | 12 | -27.544 | 25.055 | 53.037 | 1.00 | 0.00 | C |
| ATOM | 936 | C6   | G B | 12 | -27.015 | 24.520 | 51.840 | 1.00 | 0.00 | C |
| ATOM | 937 | O6   | G B | 12 | -27.596 | 23.921 | 50.934 | 1.00 | 0.00 | O |
| ATOM | 938 | N7   | G B | 12 | -28.853 | 25.056 | 53.522 | 1.00 | 0.00 | N |
| ATOM | 939 | C8   | G B | 12 | -28.766 | 25.683 | 54.666 | 1.00 | 0.00 | C |
| ATOM | 940 | N9   | G B | 12 | -27.492 | 26.106 | 54.982 | 1.00 | 0.00 | N |
| ATOM | 941 | C2'  | G B | 12 | -27.990 | 27.895 | 56.687 | 1.00 | 0.00 | C |
| ATOM | 942 | C3'  | G B | 12 | -27.799 | 27.811 | 58.193 | 1.00 | 0.00 | C |
| ATOM | 943 | O3'  | G B | 12 | -26.687 | 28.620 | 58.570 | 1.00 | 0.00 | O |
| ATOM | 944 | C4'  | G B | 12 | -27.534 | 26.324 | 58.419 | 1.00 | 0.00 | C |
| ATOM | 945 | O4'  | G B | 12 | -26.816 | 25.899 | 57.218 | 1.00 | 0.00 | O |
| ATOM | 946 | C5'  | G B | 12 | -28.750 | 25.444 | 58.591 | 1.00 | 0.00 | C |
| ATOM | 947 | O5'  | G B | 12 | -29.818 | 25.909 | 57.729 | 1.00 | 0.00 | O |
| ATOM | 948 | O1P  | G B | 12 | -31.572 | 26.702 | 59.351 | 1.00 | 0.00 | O |
| ATOM | 949 | O2P  | G B | 12 | -32.244 | 25.891 | 57.074 | 1.00 | 0.00 | O |
| ATOM | 950 | P    | G B | 12 | -31.326 | 25.772 | 58.233 | 1.00 | 0.00 | P |
| ATOM | 951 | H1   | G B | 12 | -25.144 | 24.387 | 50.905 | 1.00 | 0.00 | H |
| ATOM | 952 | H8   | G B | 12 | -29.625 | 25.858 | 55.315 | 1.00 | 0.00 | H |
| ATOM | 953 | H1'  | G B | 12 | -26.046 | 27.288 | 55.947 | 1.00 | 0.00 | H |
| ATOM | 954 | H21  | G B | 12 | -23.181 | 25.133 | 51.541 | 1.00 | 0.00 | H |
| ATOM | 955 | H3'  | G B | 12 | -28.685 | 28.140 | 58.737 | 1.00 | 0.00 | H |
| ATOM | 956 | H22  | G B | 12 | -22.939 | 26.012 | 53.076 | 1.00 | 0.00 | H |
| ATOM | 957 | H4'  | G B | 12 | -26.934 | 26.243 | 59.325 | 1.00 | 0.00 | H |
| ATOM | 958 | H2'1 | G B | 12 | -29.019 | 27.672 | 56.405 | 1.00 | 0.00 | H |
| ATOM | 959 | H2'2 | G B | 12 | -27.756 | 28.891 | 56.312 | 1.00 | 0.00 | H |
| ATOM | 960 | H5'1 | G B | 12 | -28.489 | 24.418 | 58.333 | 1.00 | 0.00 | H |
| ATOM | 961 | H5'2 | G B | 12 | -29.074 | 25.481 | 59.632 | 1.00 | 0.00 | H |
| ATOM | 962 | C1'  | T B | 13 | -23.856 | 29.855 | 53.846 | 1.00 | 0.00 | C |
| ATOM | 963 | N1   | T B | 13 | -25.049 | 29.325 | 53.135 | 1.00 | 0.00 | N |
| ATOM | 964 | C2   | T B | 13 | -24.838 | 28.725 | 51.909 | 1.00 | 0.00 | C |
| ATOM | 965 | O2   | T B | 13 | -23.732 | 28.622 | 51.408 | 1.00 | 0.00 | O |
| ATOM | 966 | N3   | T B | 13 | -25.974 | 28.246 | 51.284 | 1.00 | 0.00 | N |
| ATOM | 967 | C4   | T B | 13 | -27.267 | 28.314 | 51.761 | 1.00 | 0.00 | C |
| ATOM | 968 | O4   | T B | 13 | -28.208 | 27.851 | 51.107 | 1.00 | 0.00 | O |
| ATOM | 969 | C5   | T B | 13 | -27.388 | 28.957 | 53.049 | 1.00 | 0.00 | C |
| ATOM | 970 | C6   | T B | 13 | -26.301 | 29.436 | 53.688 | 1.00 | 0.00 | C |
| ATOM | 971 | C7   | T B | 13 | -28.775 | 29.052 | 53.609 | 1.00 | 0.00 | C |
| ATOM | 972 | C2'  | T B | 13 | -24.112 | 31.164 | 54.585 | 1.00 | 0.00 | C |
| ATOM | 973 | C3'  | T B | 13 | -23.238 | 31.006 | 55.820 | 1.00 | 0.00 | C |
| ATOM | 974 | O3'  | T B | 13 | -21.907 | 31.409 | 55.506 | 1.00 | 0.00 | O |
| ATOM | 975 | C4'  | T B | 13 | -23.335 | 29.512 | 56.117 | 1.00 | 0.00 | C |
| ATOM | 976 | O4'  | T B | 13 | -23.455 | 28.889 | 54.798 | 1.00 | 0.00 | O |
| ATOM | 977 | C5'  | T B | 13 | -24.503 | 29.070 | 56.969 | 1.00 | 0.00 | C |
| ATOM | 978 | O5'  | T B | 13 | -25.672 | 29.866 | 56.647 | 1.00 | 0.00 | O |

|      |      |      |     |    |         |        |        |      |      |   |
|------|------|------|-----|----|---------|--------|--------|------|------|---|
| ATOM | 979  | O1P  | T B | 13 | -26.091 | 31.167 | 58.759 | 1.00 | 0.00 | O |
| ATOM | 980  | O2P  | T B | 13 | -27.995 | 30.639 | 57.211 | 1.00 | 0.00 | O |
| ATOM | 981  | P    | T B | 13 | -26.705 | 30.217 | 57.809 | 1.00 | 0.00 | P |
| ATOM | 982  | H3   | T B | 13 | -25.842 | 27.791 | 50.369 | 1.00 | 0.00 | H |
| ATOM | 983  | H6   | T B | 13 | -26.418 | 29.917 | 54.659 | 1.00 | 0.00 | H |
| ATOM | 984  | H1'  | T B | 13 | -23.048 | 29.968 | 53.123 | 1.00 | 0.00 | H |
| ATOM | 985  | H3'  | T B | 13 | -23.607 | 31.599 | 56.657 | 1.00 | 0.00 | H |
| ATOM | 986  | H4'  | T B | 13 | -22.420 | 29.233 | 56.639 | 1.00 | 0.00 | H |
| ATOM | 987  | H71  | T B | 13 | -29.076 | 30.098 | 53.663 | 1.00 | 0.00 | H |
| ATOM | 988  | H72  | T B | 13 | -29.466 | 28.509 | 52.961 | 1.00 | 0.00 | H |
| ATOM | 989  | H73  | T B | 13 | -28.796 | 28.615 | 54.608 | 1.00 | 0.00 | H |
| ATOM | 990  | H2'1 | T B | 13 | -25.160 | 31.288 | 54.853 | 1.00 | 0.00 | H |
| ATOM | 991  | H2'2 | T B | 13 | -23.818 | 32.034 | 53.999 | 1.00 | 0.00 | H |
| ATOM | 992  | H5'1 | T B | 13 | -24.708 | 28.017 | 56.777 | 1.00 | 0.00 | H |
| ATOM | 993  | H5'2 | T B | 13 | -24.248 | 29.200 | 58.019 | 1.00 | 0.00 | H |
| ATOM | 994  | C1'  | G B | 14 | -21.613 | 31.663 | 49.802 | 1.00 | 0.00 | C |
| ATOM | 995  | N1   | G B | 14 | -25.822 | 30.040 | 47.418 | 1.00 | 0.00 | N |
| ATOM | 996  | C2   | G B | 14 | -24.495 | 29.949 | 47.037 | 1.00 | 0.00 | C |
| ATOM | 997  | N2   | G B | 14 | -24.257 | 29.348 | 45.866 | 1.00 | 0.00 | N |
| ATOM | 998  | N3   | G B | 14 | -23.486 | 30.420 | 47.768 | 1.00 | 0.00 | N |
| ATOM | 999  | C4   | G B | 14 | -23.911 | 31.003 | 48.921 | 1.00 | 0.00 | C |
| ATOM | 1000 | C5   | G B | 14 | -25.209 | 31.144 | 49.379 | 1.00 | 0.00 | C |
| ATOM | 1001 | C6   | G B | 14 | -26.281 | 30.641 | 48.606 | 1.00 | 0.00 | C |
| ATOM | 1002 | O6   | G B | 14 | -27.490 | 30.670 | 48.843 | 1.00 | 0.00 | O |
| ATOM | 1003 | N7   | G B | 14 | -25.218 | 31.805 | 50.610 | 1.00 | 0.00 | N |
| ATOM | 1004 | C8   | G B | 14 | -23.953 | 32.036 | 50.853 | 1.00 | 0.00 | C |
| ATOM | 1005 | N9   | G B | 14 | -23.098 | 31.580 | 49.871 | 1.00 | 0.00 | N |
| ATOM | 1006 | C2'  | G B | 14 | -21.045 | 32.967 | 50.346 | 1.00 | 0.00 | C |
| ATOM | 1007 | C3'  | G B | 14 | -19.750 | 32.504 | 50.994 | 1.00 | 0.00 | C |
| ATOM | 1008 | O3'  | G B | 14 | -18.729 | 32.437 | 50.003 | 1.00 | 0.00 | O |
| ATOM | 1009 | C4'  | G B | 14 | -20.119 | 31.124 | 51.539 | 1.00 | 0.00 | C |
| ATOM | 1010 | O4'  | G B | 14 | -21.085 | 30.602 | 50.574 | 1.00 | 0.00 | O |
| ATOM | 1011 | C5'  | G B | 14 | -20.741 | 31.090 | 52.915 | 1.00 | 0.00 | C |
| ATOM | 1012 | O5'  | G B | 14 | -21.609 | 32.238 | 53.089 | 1.00 | 0.00 | O |
| ATOM | 1013 | O1P  | G B | 14 | -20.459 | 33.569 | 54.890 | 1.00 | 0.00 | O |
| ATOM | 1014 | O2P  | G B | 14 | -22.944 | 33.742 | 54.595 | 1.00 | 0.00 | O |
| ATOM | 1015 | P    | G B | 14 | -21.725 | 32.900 | 54.536 | 1.00 | 0.00 | P |
| ATOM | 1016 | H1   | G B | 14 | -26.528 | 29.638 | 46.783 | 1.00 | 0.00 | H |
| ATOM | 1017 | H8   | G B | 14 | -23.607 | 32.546 | 51.753 | 1.00 | 0.00 | H |
| ATOM | 1018 | H1'  | G B | 14 | -21.310 | 31.507 | 48.766 | 1.00 | 0.00 | H |
| ATOM | 1019 | H21  | G B | 14 | -25.044 | 28.983 | 45.307 | 1.00 | 0.00 | H |
| ATOM | 1020 | H3'  | G B | 14 | -19.434 | 33.171 | 51.796 | 1.00 | 0.00 | H |
| ATOM | 1021 | H22  | G B | 14 | -23.291 | 29.251 | 45.523 | 1.00 | 0.00 | H |
| ATOM | 1022 | H4'  | G B | 14 | -19.197 | 30.543 | 51.577 | 1.00 | 0.00 | H |
| ATOM | 1023 | H2'1 | G B | 14 | -21.708 | 33.434 | 51.074 | 1.00 | 0.00 | H |
| ATOM | 1024 | H2'2 | G B | 14 | -20.857 | 33.696 | 49.559 | 1.00 | 0.00 | H |
| ATOM | 1025 | H5'1 | G B | 14 | -21.318 | 30.173 | 53.023 | 1.00 | 0.00 | H |
| ATOM | 1026 | H5'2 | G B | 14 | -19.951 | 31.108 | 53.665 | 1.00 | 0.00 | H |
| ATOM | 1027 | C1'  | C B | 15 | -21.297 | 32.687 | 44.966 | 1.00 | 0.00 | C |
| ATOM | 1028 | N1   | C B | 15 | -22.494 | 33.095 | 45.750 | 1.00 | 0.00 | N |
| ATOM | 1029 | C2   | C B | 15 | -23.749 | 32.743 | 45.257 | 1.00 | 0.00 | C |
| ATOM | 1030 | O2   | C B | 15 | -23.816 | 32.109 | 44.195 | 1.00 | 0.00 | O |
| ATOM | 1031 | N3   | C B | 15 | -24.852 | 33.105 | 45.955 | 1.00 | 0.00 | N |
| ATOM | 1032 | C4   | C B | 15 | -24.747 | 33.791 | 47.100 | 1.00 | 0.00 | C |

|      |      |      |     |    |         |        |        |      |      |   |
|------|------|------|-----|----|---------|--------|--------|------|------|---|
| ATOM | 1033 | N4   | C B | 15 | -25.858 | 34.116 | 47.744 | 1.00 | 0.00 | N |
| ATOM | 1034 | C5   | C B | 15 | -23.469 | 34.172 | 47.630 | 1.00 | 0.00 | C |
| ATOM | 1035 | C6   | C B | 15 | -22.373 | 33.792 | 46.912 | 1.00 | 0.00 | C |
| ATOM | 1036 | C2'  | C B | 15 | -20.185 | 33.727 | 44.958 | 1.00 | 0.00 | C |
| ATOM | 1037 | C3'  | C B | 15 | -18.937 | 32.857 | 44.972 | 1.00 | 0.00 | C |
| ATOM | 1038 | O3'  | C B | 15 | -18.622 | 32.467 | 43.637 | 1.00 | 0.00 | O |
| ATOM | 1039 | C4'  | C B | 15 | -19.359 | 31.671 | 45.836 | 1.00 | 0.00 | C |
| ATOM | 1040 | O4'  | C B | 15 | -20.784 | 31.504 | 45.550 | 1.00 | 0.00 | O |
| ATOM | 1041 | C5'  | C B | 15 | -19.183 | 31.832 | 47.329 | 1.00 | 0.00 | C |
| ATOM | 1042 | O5'  | C B | 15 | -19.470 | 33.200 | 47.711 | 1.00 | 0.00 | O |
| ATOM | 1043 | O1P  | C B | 15 | -17.243 | 34.063 | 48.506 | 1.00 | 0.00 | O |
| ATOM | 1044 | O2P  | C B | 15 | -19.365 | 35.048 | 49.413 | 1.00 | 0.00 | O |
| ATOM | 1045 | P    | C B | 15 | -18.647 | 33.851 | 48.912 | 1.00 | 0.00 | P |
| ATOM | 1046 | H5   | C B | 15 | -23.381 | 34.736 | 48.559 | 1.00 | 0.00 | H |
| ATOM | 1047 | H6   | C B | 15 | -21.379 | 34.052 | 47.278 | 1.00 | 0.00 | H |
| ATOM | 1048 | H1'  | C B | 15 | -21.618 | 32.449 | 43.952 | 1.00 | 0.00 | H |
| ATOM | 1049 | H3'  | C B | 15 | -18.083 | 33.377 | 45.407 | 1.00 | 0.00 | H |
| ATOM | 1050 | H4'  | C B | 15 | -18.757 | 30.819 | 45.521 | 1.00 | 0.00 | H |
| ATOM | 1051 | H41  | C B | 15 | -25.806 | 34.642 | 48.630 | 1.00 | 0.00 | H |
| ATOM | 1052 | H42  | C B | 15 | -26.776 | 33.844 | 47.360 | 1.00 | 0.00 | H |
| ATOM | 1053 | H2'1 | C B | 15 | -20.223 | 34.380 | 45.829 | 1.00 | 0.00 | H |
| ATOM | 1054 | H2'2 | C B | 15 | -20.218 | 34.360 | 44.071 | 1.00 | 0.00 | H |
| ATOM | 1055 | H5'1 | C B | 15 | -19.864 | 31.154 | 47.845 | 1.00 | 0.00 | H |
| ATOM | 1056 | H5'2 | C B | 15 | -18.157 | 31.583 | 47.597 | 1.00 | 0.00 | H |
| ATOM | 1057 | C1'  | G B | 16 | -23.188 | 33.611 | 40.484 | 1.00 | 0.00 | C |
| ATOM | 1058 | N1   | G B | 16 | -27.243 | 35.191 | 43.145 | 1.00 | 0.00 | N |
| ATOM | 1059 | C2   | G B | 16 | -27.180 | 34.428 | 41.992 | 1.00 | 0.00 | C |
| ATOM | 1060 | N2   | G B | 16 | -28.353 | 34.036 | 41.480 | 1.00 | 0.00 | N |
| ATOM | 1061 | N3   | G B | 16 | -26.037 | 34.084 | 41.400 | 1.00 | 0.00 | N |
| ATOM | 1062 | C4   | G B | 16 | -24.950 | 34.573 | 42.051 | 1.00 | 0.00 | C |
| ATOM | 1063 | C5   | G B | 16 | -24.917 | 35.344 | 43.201 | 1.00 | 0.00 | C |
| ATOM | 1064 | C6   | G B | 16 | -26.130 | 35.707 | 43.833 | 1.00 | 0.00 | C |
| ATOM | 1065 | O6   | G B | 16 | -26.303 | 36.378 | 44.850 | 1.00 | 0.00 | O |
| ATOM | 1066 | N7   | G B | 16 | -23.597 | 35.641 | 43.545 | 1.00 | 0.00 | N |
| ATOM | 1067 | C8   | G B | 16 | -22.887 | 35.052 | 42.617 | 1.00 | 0.00 | C |
| ATOM | 1068 | N9   | G B | 16 | -23.639 | 34.384 | 41.672 | 1.00 | 0.00 | N |
| ATOM | 1069 | C2'  | G B | 16 | -21.984 | 34.219 | 39.777 | 1.00 | 0.00 | C |
| ATOM | 1070 | C3'  | G B | 16 | -21.224 | 32.983 | 39.324 | 1.00 | 0.00 | C |
| ATOM | 1071 | O3'  | G B | 16 | -21.762 | 32.531 | 38.084 | 1.00 | 0.00 | O |
| ATOM | 1072 | C4'  | G B | 16 | -21.477 | 31.993 | 40.459 | 1.00 | 0.00 | C |
| ATOM | 1073 | O4'  | G B | 16 | -22.827 | 32.316 | 40.924 | 1.00 | 0.00 | O |
| ATOM | 1074 | C5'  | G B | 16 | -20.531 | 32.062 | 41.634 | 1.00 | 0.00 | C |
| ATOM | 1075 | O5'  | G B | 16 | -20.165 | 33.441 | 41.888 | 1.00 | 0.00 | O |
| ATOM | 1076 | O1P  | G B | 16 | -17.705 | 33.497 | 41.363 | 1.00 | 0.00 | O |
| ATOM | 1077 | O2P  | G B | 16 | -18.672 | 35.119 | 43.013 | 1.00 | 0.00 | O |
| ATOM | 1078 | P    | G B | 16 | -18.696 | 33.759 | 42.423 | 1.00 | 0.00 | P |
| ATOM | 1079 | H1   | G B | 16 | -28.178 | 35.396 | 43.528 | 1.00 | 0.00 | H |
| ATOM | 1080 | H8   | G B | 16 | -21.799 | 35.088 | 42.592 | 1.00 | 0.00 | H |
| ATOM | 1081 | H1'  | G B | 16 | -24.032 | 33.509 | 39.802 | 1.00 | 0.00 | H |
| ATOM | 1082 | H21  | G B | 16 | -29.232 | 34.303 | 41.945 | 1.00 | 0.00 | H |
| ATOM | 1083 | H3'  | G B | 16 | -20.158 | 33.179 | 39.204 | 1.00 | 0.00 | H |
| ATOM | 1084 | H22  | G B | 16 | -28.373 | 33.468 | 40.621 | 1.00 | 0.00 | H |
| ATOM | 1085 | H4'  | G B | 16 | -21.403 | 30.993 | 40.030 | 1.00 | 0.00 | H |
| ATOM | 1086 | H2'1 | G B | 16 | -21.380 | 34.834 | 40.444 | 1.00 | 0.00 | H |

|      |      |      |     |    |         |        |        |      |      |   |
|------|------|------|-----|----|---------|--------|--------|------|------|---|
| ATOM | 1087 | H2'2 | G B | 16 | -22.273 | 34.841 | 38.930 | 1.00 | 0.00 | H |
| ATOM | 1088 | H5'1 | G B | 16 | -21.021 | 31.643 | 42.513 | 1.00 | 0.00 | H |
| ATOM | 1089 | H5'2 | G B | 16 | -19.638 | 31.479 | 41.408 | 1.00 | 0.00 | H |
| ATOM | 1090 | C1'  | G B | 17 | -26.722 | 35.163 | 37.381 | 1.00 | 0.00 | C |
| ATOM | 1091 | N1   | G B | 17 | -28.208 | 37.963 | 41.380 | 1.00 | 0.00 | N |
| ATOM | 1092 | C2   | G B | 17 | -28.961 | 37.236 | 40.474 | 1.00 | 0.00 | C |
| ATOM | 1093 | N2   | G B | 17 | -30.287 | 37.260 | 40.658 | 1.00 | 0.00 | N |
| ATOM | 1094 | N3   | G B | 17 | -28.434 | 36.541 | 39.468 | 1.00 | 0.00 | N |
| ATOM | 1095 | C4   | G B | 17 | -27.079 | 36.636 | 39.430 | 1.00 | 0.00 | C |
| ATOM | 1096 | C5   | G B | 17 | -26.247 | 37.337 | 40.284 | 1.00 | 0.00 | C |
| ATOM | 1097 | C6   | G B | 17 | -26.804 | 38.071 | 41.355 | 1.00 | 0.00 | C |
| ATOM | 1098 | O6   | G B | 17 | -26.236 | 38.750 | 42.211 | 1.00 | 0.00 | O |
| ATOM | 1099 | N7   | G B | 17 | -24.914 | 37.176 | 39.900 | 1.00 | 0.00 | N |
| ATOM | 1100 | C8   | G B | 17 | -24.979 | 36.398 | 38.851 | 1.00 | 0.00 | C |
| ATOM | 1101 | N9   | G B | 17 | -26.261 | 36.028 | 38.502 | 1.00 | 0.00 | N |
| ATOM | 1102 | C2'  | G B | 17 | -25.925 | 35.348 | 36.098 | 1.00 | 0.00 | C |
| ATOM | 1103 | C3'  | G B | 17 | -25.897 | 33.936 | 35.534 | 1.00 | 0.00 | C |
| ATOM | 1104 | O3'  | G B | 17 | -27.093 | 33.703 | 34.795 | 1.00 | 0.00 | O |
| ATOM | 1105 | C4'  | G B | 17 | -25.817 | 33.071 | 36.791 | 1.00 | 0.00 | C |
| ATOM | 1106 | O4'  | G B | 17 | -26.583 | 33.816 | 37.790 | 1.00 | 0.00 | O |
| ATOM | 1107 | C5'  | G B | 17 | -24.435 | 32.809 | 37.339 | 1.00 | 0.00 | C |
| ATOM | 1108 | O5'  | G B | 17 | -23.607 | 33.986 | 37.166 | 1.00 | 0.00 | O |
| ATOM | 1109 | O1P  | G B | 17 | -21.859 | 33.232 | 35.519 | 1.00 | 0.00 | O |
| ATOM | 1110 | O2P  | G B | 17 | -21.335 | 35.062 | 37.154 | 1.00 | 0.00 | O |
| ATOM | 1111 | P    | G B | 17 | -22.051 | 33.794 | 36.870 | 1.00 | 0.00 | P |
| ATOM | 1112 | H1   | G B | 17 | -28.714 | 38.462 | 42.127 | 1.00 | 0.00 | H |
| ATOM | 1113 | H8   | G B | 17 | -24.098 | 36.071 | 38.299 | 1.00 | 0.00 | H |
| ATOM | 1114 | H1'  | G B | 17 | -27.781 | 35.356 | 37.215 | 1.00 | 0.00 | H |
| ATOM | 1115 | H21  | G B | 17 | -30.688 | 37.798 | 41.441 | 1.00 | 0.00 | H |
| ATOM | 1116 | H3'  | G B | 17 | -25.035 | 33.770 | 34.888 | 1.00 | 0.00 | H |
| ATOM | 1117 | H22  | G B | 17 | -30.904 | 36.742 | 40.017 | 1.00 | 0.00 | H |
| ATOM | 1118 | H4'  | G B | 17 | -26.265 | 32.109 | 36.543 | 1.00 | 0.00 | H |
| ATOM | 1119 | H2'1 | G B | 17 | -24.918 | 35.720 | 36.285 | 1.00 | 0.00 | H |
| ATOM | 1120 | H2'2 | G B | 17 | -26.406 | 36.041 | 35.408 | 1.00 | 0.00 | H |
| ATOM | 1121 | H5'1 | G B | 17 | -24.510 | 32.564 | 38.398 | 1.00 | 0.00 | H |
| ATOM | 1122 | H5'2 | G B | 17 | -23.993 | 31.966 | 36.806 | 1.00 | 0.00 | H |
| ATOM | 1123 | C1'  | C B | 18 | -30.709 | 37.836 | 36.162 | 1.00 | 0.00 | C |
| ATOM | 1124 | N1   | C B | 18 | -29.519 | 38.488 | 36.776 | 1.00 | 0.00 | N |
| ATOM | 1125 | C2   | C B | 18 | -29.724 | 39.301 | 37.889 | 1.00 | 0.00 | C |
| ATOM | 1126 | O2   | C B | 18 | -30.875 | 39.448 | 38.318 | 1.00 | 0.00 | O |
| ATOM | 1127 | N3   | C B | 18 | -28.653 | 39.903 | 38.462 | 1.00 | 0.00 | N |
| ATOM | 1128 | C4   | C B | 18 | -27.419 | 39.723 | 37.973 | 1.00 | 0.00 | C |
| ATOM | 1129 | N4   | C B | 18 | -26.409 | 40.335 | 38.575 | 1.00 | 0.00 | N |
| ATOM | 1130 | C5   | C B | 18 | -27.182 | 38.895 | 36.830 | 1.00 | 0.00 | C |
| ATOM | 1131 | C6   | C B | 18 | -28.272 | 38.298 | 36.270 | 1.00 | 0.00 | C |
| ATOM | 1132 | C2'  | C B | 18 | -30.655 | 37.769 | 34.641 | 1.00 | 0.00 | C |
| ATOM | 1133 | C3'  | C B | 18 | -31.324 | 36.432 | 34.360 | 1.00 | 0.00 | C |
| ATOM | 1134 | O3'  | C B | 18 | -32.738 | 36.613 | 34.333 | 1.00 | 0.00 | O |
| ATOM | 1135 | C4'  | C B | 18 | -30.874 | 35.572 | 35.539 | 1.00 | 0.00 | C |
| ATOM | 1136 | O4'  | C B | 18 | -30.777 | 36.512 | 36.656 | 1.00 | 0.00 | O |
| ATOM | 1137 | C5'  | C B | 18 | -29.548 | 34.864 | 35.387 | 1.00 | 0.00 | C |
| ATOM | 1138 | O5'  | C B | 18 | -28.623 | 35.710 | 34.658 | 1.00 | 0.00 | O |
| ATOM | 1139 | O1P  | C B | 18 | -28.247 | 34.448 | 32.513 | 1.00 | 0.00 | O |
| ATOM | 1140 | O2P  | C B | 18 | -26.469 | 35.986 | 33.392 | 1.00 | 0.00 | O |



|      |      |      |     |    |         |        |        |      |      |   |
|------|------|------|-----|----|---------|--------|--------|------|------|---|
| ATOM | 1141 | P    | C B | 18 | -27.561 | 35.025 | 33.686 | 1.00 | 0.00 | P |
| ATOM | 1142 | H5   | C B | 18 | -26.180 | 38.750 | 36.426 | 1.00 | 0.00 | H |
| ATOM | 1143 | H6   | C B | 18 | -28.140 | 37.655 | 35.400 | 1.00 | 0.00 | H |
| ATOM | 1144 | H1'  | C B | 18 | -31.599 | 38.367 | 36.498 | 1.00 | 0.00 | H |
| ATOM | 1145 | H3'  | C B | 18 | -30.996 | 36.003 | 33.413 | 1.00 | 0.00 | H |
| ATOM | 1146 | H4'  | C B | 18 | -31.641 | 34.811 | 35.687 | 1.00 | 0.00 | H |
| ATOM | 1147 | H41  | C B | 18 | -25.449 | 40.213 | 38.220 | 1.00 | 0.00 | H |
| ATOM | 1148 | H42  | C B | 18 | -26.583 | 40.930 | 39.397 | 1.00 | 0.00 | H |
| ATOM | 1149 | H2'1 | C B | 18 | -29.634 | 37.789 | 34.262 | 1.00 | 0.00 | H |
| ATOM | 1150 | H2'2 | C B | 18 | -31.195 | 38.591 | 34.172 | 1.00 | 0.00 | H |
| ATOM | 1151 | H5'1 | C B | 18 | -29.144 | 34.644 | 36.376 | 1.00 | 0.00 | H |
| ATOM | 1152 | H5'2 | C B | 18 | -29.700 | 33.932 | 34.846 | 1.00 | 0.00 | H |
| ATOM | 1153 | C1'  | C B | 19 | -33.784 | 41.693 | 36.607 | 1.00 | 0.00 | C |
| ATOM | 1154 | N1   | C B | 19 | -32.318 | 41.906 | 36.463 | 1.00 | 0.00 | N |
| ATOM | 1155 | C2   | C B | 19 | -31.683 | 42.727 | 37.393 | 1.00 | 0.00 | C |
| ATOM | 1156 | O2   | C B | 19 | -32.357 | 43.241 | 38.295 | 1.00 | 0.00 | O |
| ATOM | 1157 | N3   | C B | 19 | -30.349 | 42.934 | 37.279 | 1.00 | 0.00 | N |
| ATOM | 1158 | C4   | C B | 19 | -29.646 | 42.363 | 36.291 | 1.00 | 0.00 | C |
| ATOM | 1159 | N4   | C B | 19 | -28.346 | 42.598 | 36.227 | 1.00 | 0.00 | N |
| ATOM | 1160 | C5   | C B | 19 | -30.274 | 41.517 | 35.322 | 1.00 | 0.00 | C |
| ATOM | 1161 | C6   | C B | 19 | -31.616 | 41.322 | 35.457 | 1.00 | 0.00 | C |
| ATOM | 1162 | C2'  | C B | 19 | -34.527 | 41.631 | 35.281 | 1.00 | 0.00 | C |
| ATOM | 1163 | C3'  | C B | 19 | -35.603 | 40.594 | 35.570 | 1.00 | 0.00 | C |
| ATOM | 1164 | O3'  | C B | 19 | -36.712 | 41.232 | 36.198 | 1.00 | 0.00 | O |
| ATOM | 1165 | C4'  | C B | 19 | -34.892 | 39.619 | 36.505 | 1.00 | 0.00 | C |
| ATOM | 1166 | O4'  | C B | 19 | -33.975 | 40.460 | 37.275 | 1.00 | 0.00 | O |
| ATOM | 1167 | C5'  | C B | 19 | -34.097 | 38.515 | 35.848 | 1.00 | 0.00 | C |
| ATOM | 1168 | O5'  | C B | 19 | -33.469 | 39.015 | 34.641 | 1.00 | 0.00 | O |
| ATOM | 1169 | O1P  | C B | 19 | -34.618 | 37.728 | 32.809 | 1.00 | 0.00 | O |
| ATOM | 1170 | O2P  | C B | 19 | -32.282 | 38.580 | 32.470 | 1.00 | 0.00 | O |
| ATOM | 1171 | P    | C B | 19 | -33.299 | 38.030 | 33.400 | 1.00 | 0.00 | P |
| ATOM | 1172 | H5   | C B | 19 | -29.708 | 41.052 | 34.515 | 1.00 | 0.00 | H |
| ATOM | 1173 | H6   | C B | 19 | -32.137 | 40.684 | 34.743 | 1.00 | 0.00 | H |
| ATOM | 1174 | H1'  | C B | 19 | -34.182 | 42.485 | 37.243 | 1.00 | 0.00 | H |
| ATOM | 1175 | H3'  | C B | 19 | -35.940 | 40.093 | 34.662 | 1.00 | 0.00 | H |
| ATOM | 1176 | H4'  | C B | 19 | -35.662 | 39.153 | 37.122 | 1.00 | 0.00 | H |
| ATOM | 1177 | H41  | C B | 19 | -27.780 | 42.171 | 35.479 | 1.00 | 0.00 | H |
| ATOM | 1178 | H42  | C B | 19 | -27.896 | 43.208 | 36.927 | 1.00 | 0.00 | H |
| ATOM | 1179 | H2'1 | C B | 19 | -33.885 | 41.317 | 34.460 | 1.00 | 0.00 | H |
| ATOM | 1180 | H2'2 | C B | 19 | -34.965 | 42.591 | 35.007 | 1.00 | 0.00 | H |
| ATOM | 1181 | H5'1 | C B | 19 | -33.336 | 38.160 | 36.541 | 1.00 | 0.00 | H |
| ATOM | 1182 | H5'2 | C B | 19 | -34.767 | 37.692 | 35.600 | 1.00 | 0.00 | H |
| ATOM | 1183 | C1'  | T B | 20 | -34.952 | 46.336 | 37.861 | 1.00 | 0.00 | C |
| ATOM | 1184 | N1   | T B | 20 | -33.762 | 46.068 | 37.012 | 1.00 | 0.00 | N |
| ATOM | 1185 | C2   | T B | 20 | -32.566 | 46.633 | 37.406 | 1.00 | 0.00 | C |
| ATOM | 1186 | O2   | T B | 20 | -32.461 | 47.327 | 38.403 | 1.00 | 0.00 | O |
| ATOM | 1187 | N3   | T B | 20 | -31.487 | 46.358 | 36.589 | 1.00 | 0.00 | N |
| ATOM | 1188 | C4   | T B | 20 | -31.497 | 45.591 | 35.445 | 1.00 | 0.00 | C |
| ATOM | 1189 | O4   | T B | 20 | -30.461 | 45.416 | 34.791 | 1.00 | 0.00 | O |
| ATOM | 1190 | C5   | T B | 20 | -32.789 | 45.042 | 35.113 | 1.00 | 0.00 | C |
| ATOM | 1191 | C6   | T B | 20 | -33.865 | 45.289 | 35.886 | 1.00 | 0.00 | C |
| ATOM | 1192 | C7   | T B | 20 | -32.847 | 44.198 | 33.875 | 1.00 | 0.00 | C |
| ATOM | 1193 | C2'  | T B | 20 | -36.240 | 46.529 | 37.069 | 1.00 | 0.00 | C |
| ATOM | 1194 | C3'  | T B | 20 | -37.274 | 45.891 | 37.986 | 1.00 | 0.00 | C |

|      |      |      |     |    |         |        |        |      |      |   |
|------|------|------|-----|----|---------|--------|--------|------|------|---|
| ATOM | 1195 | O3'  | T B | 20 | -37.693 | 46.848 | 38.957 | 1.00 | 0.00 | O |
| ATOM | 1196 | C4'  | T B | 20 | -36.504 | 44.731 | 38.612 | 1.00 | 0.00 | C |
| ATOM | 1197 | O4'  | T B | 20 | -35.131 | 45.226 | 38.719 | 1.00 | 0.00 | O |
| ATOM | 1198 | C5'  | T B | 20 | -36.491 | 43.435 | 37.834 | 1.00 | 0.00 | C |
| ATOM | 1199 | O5'  | T B | 20 | -36.431 | 43.718 | 36.413 | 1.00 | 0.00 | O |
| ATOM | 1200 | O1P  | T B | 20 | -38.647 | 42.886 | 35.560 | 1.00 | 0.00 | O |
| ATOM | 1201 | O2P  | T B | 20 | -36.656 | 42.943 | 34.034 | 1.00 | 0.00 | O |
| ATOM | 1202 | P    | T B | 20 | -37.186 | 42.742 | 35.404 | 1.00 | 0.00 | P |
| ATOM | 1203 | H3   | T B | 20 | -30.583 | 46.768 | 36.862 | 1.00 | 0.00 | H |
| ATOM | 1204 | H6   | T B | 20 | -34.831 | 44.863 | 35.616 | 1.00 | 0.00 | H |
| ATOM | 1205 | H1'  | T B | 20 | -34.742 | 47.208 | 38.481 | 1.00 | 0.00 | H |
| ATOM | 1206 | H3'  | T B | 20 | -38.142 | 45.535 | 37.433 | 1.00 | 0.00 | H |
| ATOM | 1207 | H4'  | T B | 20 | -36.963 | 44.533 | 39.581 | 1.00 | 0.00 | H |
| ATOM | 1208 | H3T  | T B | 20 | -37.997 | 47.685 | 38.599 | 1.00 | 0.00 | H |
| ATOM | 1209 | H71  | T B | 20 | -33.468 | 44.691 | 33.127 | 1.00 | 0.00 | H |
| ATOM | 1210 | H72  | T B | 20 | -31.839 | 44.063 | 33.480 | 1.00 | 0.00 | H |
| ATOM | 1211 | H73  | T B | 20 | -33.275 | 43.224 | 34.116 | 1.00 | 0.00 | H |
| ATOM | 1212 | H2'1 | T B | 20 | -36.208 | 46.032 | 36.102 | 1.00 | 0.00 | H |
| ATOM | 1213 | H2'2 | T B | 20 | -36.463 | 47.581 | 36.891 | 1.00 | 0.00 | H |
| ATOM | 1214 | H5'1 | T B | 20 | -35.623 | 42.848 | 38.131 | 1.00 | 0.00 | H |
| ATOM | 1215 | H5'2 | T B | 20 | -37.397 | 42.875 | 38.060 | 1.00 | 0.00 | H |
| TER  |      |      |     |    |         |        |        |      |      |   |
| ATOM | 1    | C1'  | A A | 1  | -60.526 | 28.142 | 45.147 | 1.00 | 0.00 | C |
| ATOM | 2    | N1   | A A | 1  | -60.698 | 25.087 | 41.027 | 1.00 | 0.00 | N |
| ATOM | 3    | C2   | A A | 1  | -61.401 | 25.114 | 42.156 | 1.00 | 0.00 | C |
| ATOM | 4    | N3   | A A | 1  | -61.307 | 25.935 | 43.180 | 1.00 | 0.00 | N |
| ATOM | 5    | C4   | A A | 1  | -60.331 | 26.835 | 42.968 | 1.00 | 0.00 | C |
| ATOM | 6    | C5   | A A | 1  | -59.522 | 26.941 | 41.871 | 1.00 | 0.00 | C |
| ATOM | 7    | C6   | A A | 1  | -59.731 | 25.998 | 40.843 | 1.00 | 0.00 | C |
| ATOM | 8    | N6   | A A | 1  | -59.013 | 25.979 | 39.707 | 1.00 | 0.00 | N |
| ATOM | 9    | N7   | A A | 1  | -58.632 | 27.992 | 42.007 | 1.00 | 0.00 | N |
| ATOM | 10   | C8   | A A | 1  | -58.917 | 28.493 | 43.172 | 1.00 | 0.00 | C |
| ATOM | 11   | N9   | A A | 1  | -59.939 | 27.844 | 43.814 | 1.00 | 0.00 | N |
| ATOM | 12   | C2'  | A A | 1  | -59.502 | 28.585 | 46.183 | 1.00 | 0.00 | C |
| ATOM | 13   | C3'  | A A | 1  | -60.287 | 29.609 | 46.986 | 1.00 | 0.00 | C |
| ATOM | 14   | O3'  | A A | 1  | -61.052 | 28.937 | 47.984 | 1.00 | 0.00 | O |
| ATOM | 15   | C4'  | A A | 1  | -61.171 | 30.268 | 45.928 | 1.00 | 0.00 | C |
| ATOM | 16   | O4'  | A A | 1  | -61.462 | 29.190 | 44.981 | 1.00 | 0.00 | O |
| ATOM | 17   | C5'  | A A | 1  | -60.563 | 31.425 | 45.172 | 1.00 | 0.00 | C |
| ATOM | 18   | O5'  | A A | 1  | -59.152 | 31.177 | 44.946 | 1.00 | 0.00 | O |
| ATOM | 19   | H2   | A A | 1  | -62.168 | 24.345 | 42.245 | 1.00 | 0.00 | H |
| ATOM | 20   | H8   | A A | 1  | -58.393 | 29.349 | 43.598 | 1.00 | 0.00 | H |
| ATOM | 21   | H1'  | A A | 1  | -61.068 | 27.259 | 45.486 | 1.00 | 0.00 | H |
| ATOM | 22   | H3'  | A A | 1  | -59.635 | 30.342 | 47.464 | 1.00 | 0.00 | H |
| ATOM | 23   | H4'  | A A | 1  | -62.059 | 30.635 | 46.442 | 1.00 | 0.00 | H |
| ATOM | 24   | H61  | A A | 1  | -59.207 | 25.271 | 38.988 | 1.00 | 0.00 | H |
| ATOM | 25   | H62  | A A | 1  | -58.269 | 26.677 | 39.559 | 1.00 | 0.00 | H |
| ATOM | 26   | H5T  | A A | 1  | -58.547 | 31.921 | 44.948 | 1.00 | 0.00 | H |
| ATOM | 27   | H2'1 | A A | 1  | -58.619 | 29.031 | 45.728 | 1.00 | 0.00 | H |
| ATOM | 28   | H2'2 | A A | 1  | -59.167 | 27.760 | 46.813 | 1.00 | 0.00 | H |
| ATOM | 29   | H5'1 | A A | 1  | -61.075 | 31.536 | 44.216 | 1.00 | 0.00 | H |
| ATOM | 30   | H5'2 | A A | 1  | -60.688 | 32.337 | 45.752 | 1.00 | 0.00 | H |
| ATOM | 31   | C1'  | G A | 2  | -61.062 | 23.407 | 46.542 | 1.00 | 0.00 | C |
| ATOM | 32   | N1   | G A | 2  | -58.838 | 22.408 | 42.062 | 1.00 | 0.00 | N |

|      |    |      |     |   |         |        |        |      |      |   |
|------|----|------|-----|---|---------|--------|--------|------|------|---|
| ATOM | 33 | C2   | G A | 2 | -59.915 | 21.795 | 42.673 | 1.00 | 0.00 | C |
| ATOM | 34 | N2   | G A | 2 | -60.473 | 20.780 | 42.004 | 1.00 | 0.00 | N |
| ATOM | 35 | N3   | G A | 2 | -60.398 | 22.165 | 43.858 | 1.00 | 0.00 | N |
| ATOM | 36 | C4   | G A | 2 | -59.707 | 23.205 | 44.395 | 1.00 | 0.00 | C |
| ATOM | 37 | C5   | G A | 2 | -58.620 | 23.877 | 43.859 | 1.00 | 0.00 | C |
| ATOM | 38 | C6   | G A | 2 | -58.111 | 23.486 | 42.599 | 1.00 | 0.00 | C |
| ATOM | 39 | O6   | G A | 2 | -57.166 | 23.955 | 41.965 | 1.00 | 0.00 | O |
| ATOM | 40 | N7   | G A | 2 | -58.201 | 24.887 | 44.728 | 1.00 | 0.00 | N |
| ATOM | 41 | C8   | G A | 2 | -59.030 | 24.800 | 45.737 | 1.00 | 0.00 | C |
| ATOM | 42 | N9   | G A | 2 | -59.973 | 23.801 | 45.608 | 1.00 | 0.00 | N |
| ATOM | 43 | C2'  | G A | 2 | -60.672 | 23.493 | 48.011 | 1.00 | 0.00 | C |
| ATOM | 44 | C3'  | G A | 2 | -61.968 | 23.950 | 48.659 | 1.00 | 0.00 | C |
| ATOM | 45 | O3'  | G A | 2 | -62.792 | 22.814 | 48.912 | 1.00 | 0.00 | O |
| ATOM | 46 | C4'  | G A | 2 | -62.569 | 24.874 | 47.600 | 1.00 | 0.00 | C |
| ATOM | 47 | O4'  | G A | 2 | -62.152 | 24.284 | 46.329 | 1.00 | 0.00 | O |
| ATOM | 48 | C5'  | G A | 2 | -62.121 | 26.316 | 47.636 | 1.00 | 0.00 | C |
| ATOM | 49 | O5'  | G A | 2 | -60.722 | 26.385 | 48.008 | 1.00 | 0.00 | O |
| ATOM | 50 | O1P  | G A | 2 | -60.772 | 27.535 | 50.246 | 1.00 | 0.00 | O |
| ATOM | 51 | O2P  | G A | 2 | -58.745 | 27.729 | 48.781 | 1.00 | 0.00 | O |
| ATOM | 52 | P    | G A | 2 | -60.221 | 27.623 | 48.880 | 1.00 | 0.00 | P |
| ATOM | 53 | H1   | G A | 2 | -58.545 | 22.047 | 41.143 | 1.00 | 0.00 | H |
| ATOM | 54 | H8   | G A | 2 | -58.979 | 25.457 | 46.604 | 1.00 | 0.00 | H |
| ATOM | 55 | H1'  | G A | 2 | -61.387 | 22.399 | 46.283 | 1.00 | 0.00 | H |
| ATOM | 56 | H21  | G A | 2 | -60.096 | 20.499 | 41.087 | 1.00 | 0.00 | H |
| ATOM | 57 | H3'  | G A | 2 | -61.793 | 24.484 | 49.593 | 1.00 | 0.00 | H |
| ATOM | 58 | H22  | G A | 2 | -61.279 | 20.280 | 42.406 | 1.00 | 0.00 | H |
| ATOM | 59 | H4'  | G A | 2 | -63.650 | 24.857 | 47.743 | 1.00 | 0.00 | H |
| ATOM | 60 | H2'1 | G A | 2 | -59.868 | 24.209 | 48.184 | 1.00 | 0.00 | H |
| ATOM | 61 | H2'2 | G A | 2 | -60.346 | 22.531 | 48.410 | 1.00 | 0.00 | H |
| ATOM | 62 | H5'1 | G A | 2 | -62.263 | 26.759 | 46.651 | 1.00 | 0.00 | H |
| ATOM | 63 | H5'2 | G A | 2 | -62.725 | 26.860 | 48.363 | 1.00 | 0.00 | H |
| ATOM | 64 | C1'  | G A | 3 | -60.610 | 18.511 | 45.952 | 1.00 | 0.00 | C |
| ATOM | 65 | N1   | G A | 3 | -56.760 | 19.808 | 42.869 | 1.00 | 0.00 | N |
| ATOM | 66 | C2   | G A | 3 | -57.745 | 18.854 | 42.703 | 1.00 | 0.00 | C |
| ATOM | 67 | N2   | G A | 3 | -57.698 | 18.148 | 41.566 | 1.00 | 0.00 | N |
| ATOM | 68 | N3   | G A | 3 | -58.701 | 18.620 | 43.599 | 1.00 | 0.00 | N |
| ATOM | 69 | C4   | G A | 3 | -58.592 | 19.420 | 44.692 | 1.00 | 0.00 | C |
| ATOM | 70 | C5   | G A | 3 | -57.642 | 20.397 | 44.944 | 1.00 | 0.00 | C |
| ATOM | 71 | C6   | G A | 3 | -56.629 | 20.648 | 43.990 | 1.00 | 0.00 | C |
| ATOM | 72 | O6   | G A | 3 | -55.708 | 21.464 | 44.032 | 1.00 | 0.00 | O |
| ATOM | 73 | N7   | G A | 3 | -57.880 | 20.993 | 46.184 | 1.00 | 0.00 | N |
| ATOM | 74 | C8   | G A | 3 | -58.943 | 20.377 | 46.632 | 1.00 | 0.00 | C |
| ATOM | 75 | N9   | G A | 3 | -59.434 | 19.407 | 45.782 | 1.00 | 0.00 | N |
| ATOM | 76 | C2'  | G A | 3 | -60.808 | 18.022 | 47.380 | 1.00 | 0.00 | C |
| ATOM | 77 | C3'  | G A | 3 | -62.322 | 17.981 | 47.496 | 1.00 | 0.00 | C |
| ATOM | 78 | O3'  | G A | 3 | -62.799 | 16.744 | 46.973 | 1.00 | 0.00 | O |
| ATOM | 79 | C4'  | G A | 3 | -62.760 | 19.173 | 46.646 | 1.00 | 0.00 | C |
| ATOM | 80 | O4'  | G A | 3 | -61.764 | 19.238 | 45.577 | 1.00 | 0.00 | O |
| ATOM | 81 | C5'  | G A | 3 | -62.809 | 20.512 | 47.343 | 1.00 | 0.00 | C |
| ATOM | 82 | O5'  | G A | 3 | -61.722 | 20.609 | 48.296 | 1.00 | 0.00 | O |
| ATOM | 83 | O1P  | G A | 3 | -62.901 | 20.690 | 50.519 | 1.00 | 0.00 | O |
| ATOM | 84 | O2P  | G A | 3 | -60.647 | 21.758 | 50.255 | 1.00 | 0.00 | O |
| ATOM | 85 | P    | G A | 3 | -61.958 | 21.419 | 49.650 | 1.00 | 0.00 | P |
| ATOM | 86 | H1   | G A | 3 | -56.067 | 19.913 | 42.111 | 1.00 | 0.00 | H |

|      |     |      |     |   |         |        |        |      |      |   |
|------|-----|------|-----|---|---------|--------|--------|------|------|---|
| ATOM | 87  | H8   | G A | 3 | -59.402 | 20.608 | 47.593 | 1.00 | 0.00 | H |
| ATOM | 88  | H1'  | G A | 3 | -60.502 | 17.673 | 45.263 | 1.00 | 0.00 | H |
| ATOM | 89  | H21  | G A | 3 | -56.956 | 18.336 | 40.875 | 1.00 | 0.00 | H |
| ATOM | 90  | H3'  | G A | 3 | -62.657 | 18.090 | 48.528 | 1.00 | 0.00 | H |
| ATOM | 91  | H22  | G A | 3 | -58.402 | 17.420 | 41.383 | 1.00 | 0.00 | H |
| ATOM | 92  | H4'  | G A | 3 | -63.762 | 18.951 | 46.281 | 1.00 | 0.00 | H |
| ATOM | 93  | H2'1 | G A | 3 | -60.372 | 18.700 | 48.114 | 1.00 | 0.00 | H |
| ATOM | 94  | H2'2 | G A | 3 | -60.370 | 17.037 | 47.545 | 1.00 | 0.00 | H |
| ATOM | 95  | H5'1 | G A | 3 | -62.721 | 21.305 | 46.601 | 1.00 | 0.00 | H |
| ATOM | 96  | H5'2 | G A | 3 | -63.763 | 20.611 | 47.860 | 1.00 | 0.00 | H |
| ATOM | 97  | C1'  | C A | 4 | -58.528 | 14.432 | 44.065 | 1.00 | 0.00 | C |
| ATOM | 98  | N1   | C A | 4 | -57.691 | 15.469 | 44.731 | 1.00 | 0.00 | N |
| ATOM | 99  | C2   | C A | 4 | -56.583 | 15.955 | 44.040 | 1.00 | 0.00 | C |
| ATOM | 100 | O2   | C A | 4 | -56.340 | 15.509 | 42.912 | 1.00 | 0.00 | O |
| ATOM | 101 | N3   | C A | 4 | -55.810 | 16.899 | 44.629 | 1.00 | 0.00 | N |
| ATOM | 102 | C4   | C A | 4 | -56.098 | 17.360 | 45.853 | 1.00 | 0.00 | C |
| ATOM | 103 | N4   | C A | 4 | -55.310 | 18.286 | 46.379 | 1.00 | 0.00 | N |
| ATOM | 104 | C5   | C A | 4 | -57.230 | 16.877 | 46.586 | 1.00 | 0.00 | C |
| ATOM | 105 | C6   | C A | 4 | -57.997 | 15.929 | 45.974 | 1.00 | 0.00 | C |
| ATOM | 106 | C2'  | C A | 4 | -59.054 | 13.365 | 45.015 | 1.00 | 0.00 | C |
| ATOM | 107 | C3'  | C A | 4 | -60.429 | 13.073 | 44.434 | 1.00 | 0.00 | C |
| ATOM | 108 | O3'  | C A | 4 | -60.299 | 12.117 | 43.383 | 1.00 | 0.00 | O |
| ATOM | 109 | C4'  | C A | 4 | -60.878 | 14.439 | 43.920 | 1.00 | 0.00 | C |
| ATOM | 110 | O4'  | C A | 4 | -59.640 | 15.086 | 43.482 | 1.00 | 0.00 | O |
| ATOM | 111 | C5'  | C A | 4 | -61.565 | 15.339 | 44.919 | 1.00 | 0.00 | C |
| ATOM | 112 | O5'  | C A | 4 | -60.960 | 15.173 | 46.227 | 1.00 | 0.00 | O |
| ATOM | 113 | O1P  | C A | 4 | -62.805 | 14.148 | 47.597 | 1.00 | 0.00 | O |
| ATOM | 114 | O2P  | C A | 4 | -61.031 | 15.526 | 48.714 | 1.00 | 0.00 | O |
| ATOM | 115 | P    | C A | 4 | -61.883 | 15.298 | 47.521 | 1.00 | 0.00 | P |
| ATOM | 116 | H5   | C A | 4 | -57.466 | 17.246 | 47.584 | 1.00 | 0.00 | H |
| ATOM | 117 | H6   | C A | 4 | -58.871 | 15.534 | 46.490 | 1.00 | 0.00 | H |
| ATOM | 118 | H1'  | C A | 4 | -57.942 | 13.987 | 43.263 | 1.00 | 0.00 | H |
| ATOM | 119 | H3'  | C A | 4 | -61.117 | 12.690 | 45.187 | 1.00 | 0.00 | H |
| ATOM | 120 | H4'  | C A | 4 | -61.575 | 14.256 | 43.102 | 1.00 | 0.00 | H |
| ATOM | 121 | H41  | C A | 4 | -55.510 | 18.660 | 47.319 | 1.00 | 0.00 | H |
| ATOM | 122 | H42  | C A | 4 | -54.495 | 18.632 | 45.851 | 1.00 | 0.00 | H |
| ATOM | 123 | H2'1 | C A | 4 | -59.126 | 13.723 | 46.041 | 1.00 | 0.00 | H |
| ATOM | 124 | H2'2 | C A | 4 | -58.427 | 12.472 | 45.022 | 1.00 | 0.00 | H |
| ATOM | 125 | H5'1 | C A | 4 | -61.465 | 16.376 | 44.597 | 1.00 | 0.00 | H |
| ATOM | 126 | H5'2 | C A | 4 | -62.622 | 15.079 | 44.967 | 1.00 | 0.00 | H |
| ATOM | 127 | C1'  | C A | 5 | -54.791 | 11.856 | 42.085 | 1.00 | 0.00 | C |
| ATOM | 128 | N1   | C A | 5 | -54.596 | 12.619 | 43.349 | 1.00 | 0.00 | N |
| ATOM | 129 | C2   | C A | 5 | -53.517 | 13.497 | 43.420 | 1.00 | 0.00 | C |
| ATOM | 130 | O2   | C A | 5 | -52.769 | 13.608 | 42.440 | 1.00 | 0.00 | O |
| ATOM | 131 | N3   | C A | 5 | -53.323 | 14.201 | 44.563 | 1.00 | 0.00 | N |
| ATOM | 132 | C4   | C A | 5 | -54.148 | 14.060 | 45.607 | 1.00 | 0.00 | C |
| ATOM | 133 | N4   | C A | 5 | -53.914 | 14.775 | 46.696 | 1.00 | 0.00 | N |
| ATOM | 134 | C5   | C A | 5 | -55.265 | 13.163 | 45.561 | 1.00 | 0.00 | C |
| ATOM | 135 | C6   | C A | 5 | -55.442 | 12.467 | 44.401 | 1.00 | 0.00 | C |
| ATOM | 136 | C2'  | C A | 5 | -55.271 | 10.427 | 42.299 | 1.00 | 0.00 | C |
| ATOM | 137 | C3'  | C A | 5 | -56.196 | 10.223 | 41.109 | 1.00 | 0.00 | C |
| ATOM | 138 | O3'  | C A | 5 | -55.423 | 9.827  | 39.978 | 1.00 | 0.00 | O |
| ATOM | 139 | C4'  | C A | 5 | -56.823 | 11.603 | 40.925 | 1.00 | 0.00 | C |
| ATOM | 140 | O4'  | C A | 5 | -55.767 | 12.536 | 41.318 | 1.00 | 0.00 | O |

|      |     |      |     |   |         |        |        |      |      |   |
|------|-----|------|-----|---|---------|--------|--------|------|------|---|
| ATOM | 141 | C5'  | C A | 5 | -58.056 | 11.894 | 41.749 | 1.00 | 0.00 | C |
| ATOM | 142 | O5'  | C A | 5 | -57.930 | 11.277 | 43.055 | 1.00 | 0.00 | O |
| ATOM | 143 | O1P  | C A | 5 | -59.740 | 9.528  | 43.049 | 1.00 | 0.00 | O |
| ATOM | 144 | O2P  | C A | 5 | -58.976 | 10.535 | 45.216 | 1.00 | 0.00 | O |
| ATOM | 145 | P    | C A | 5 | -59.242 | 10.717 | 43.768 | 1.00 | 0.00 | P |
| ATOM | 146 | H5   | C A | 5 | -55.937 | 13.040 | 46.411 | 1.00 | 0.00 | H |
| ATOM | 147 | H6   | C A | 5 | -56.280 | 11.775 | 44.317 | 1.00 | 0.00 | H |
| ATOM | 148 | H1'  | C A | 5 | -53.854 | 11.875 | 41.528 | 1.00 | 0.00 | H |
| ATOM | 149 | H3'  | C A | 5 | -56.956 | 9.467  | 41.308 | 1.00 | 0.00 | H |
| ATOM | 150 | H4'  | C A | 5 | -57.099 | 11.688 | 39.874 | 1.00 | 0.00 | H |
| ATOM | 151 | H41  | C A | 5 | -54.534 | 14.687 | 47.514 | 1.00 | 0.00 | H |
| ATOM | 152 | H42  | C A | 5 | -53.109 | 15.419 | 46.727 | 1.00 | 0.00 | H |
| ATOM | 153 | H2'1 | C A | 5 | -55.804 | 10.306 | 43.240 | 1.00 | 0.00 | H |
| ATOM | 154 | H2'2 | C A | 5 | -54.449 | 9.710  | 42.291 | 1.00 | 0.00 | H |
| ATOM | 155 | H5'1 | C A | 5 | -58.165 | 12.974 | 41.860 | 1.00 | 0.00 | H |
| ATOM | 156 | H5'2 | C A | 5 | -58.931 | 11.497 | 41.236 | 1.00 | 0.00 | H |
| ATOM | 157 | C1'  | G A | 6 | -50.005 | 10.894 | 41.248 | 1.00 | 0.00 | C |
| ATOM | 158 | N1   | G A | 6 | -49.321 | 13.348 | 45.668 | 1.00 | 0.00 | N |
| ATOM | 159 | C2   | G A | 6 | -48.605 | 13.430 | 44.486 | 1.00 | 0.00 | C |
| ATOM | 160 | N2   | G A | 6 | -47.569 | 14.276 | 44.482 | 1.00 | 0.00 | N |
| ATOM | 161 | N3   | G A | 6 | -48.902 | 12.724 | 43.396 | 1.00 | 0.00 | N |
| ATOM | 162 | C4   | G A | 6 | -49.976 | 11.913 | 43.582 | 1.00 | 0.00 | C |
| ATOM | 163 | C5   | G A | 6 | -50.746 | 11.763 | 44.723 | 1.00 | 0.00 | C |
| ATOM | 164 | C6   | G A | 6 | -50.436 | 12.514 | 45.879 | 1.00 | 0.00 | C |
| ATOM | 165 | O6   | G A | 6 | -50.995 | 12.519 | 46.975 | 1.00 | 0.00 | O |
| ATOM | 166 | N7   | G A | 6 | -51.759 | 10.827 | 44.502 | 1.00 | 0.00 | N |
| ATOM | 167 | C8   | G A | 6 | -51.577 | 10.452 | 43.262 | 1.00 | 0.00 | C |
| ATOM | 168 | N9   | G A | 6 | -50.512 | 11.066 | 42.636 | 1.00 | 0.00 | N |
| ATOM | 169 | C2'  | G A | 6 | -50.077 | 9.459  | 40.743 | 1.00 | 0.00 | C |
| ATOM | 170 | C3'  | G A | 6 | -50.410 | 9.655  | 39.273 | 1.00 | 0.00 | C |
| ATOM | 171 | O3'  | G A | 6 | -49.206 | 9.884  | 38.545 | 1.00 | 0.00 | O |
| ATOM | 172 | C4'  | G A | 6 | -51.316 | 10.886 | 39.292 | 1.00 | 0.00 | C |
| ATOM | 173 | O4'  | G A | 6 | -50.800 | 11.696 | 40.395 | 1.00 | 0.00 | O |
| ATOM | 174 | C5'  | G A | 6 | -52.786 | 10.633 | 39.524 | 1.00 | 0.00 | C |
| ATOM | 175 | O5'  | G A | 6 | -52.956 | 9.544  | 40.465 | 1.00 | 0.00 | O |
| ATOM | 176 | O1P  | G A | 6 | -54.029 | 7.738  | 39.080 | 1.00 | 0.00 | O |
| ATOM | 177 | O2P  | G A | 6 | -54.427 | 7.823  | 41.556 | 1.00 | 0.00 | O |
| ATOM | 178 | P    | G A | 6 | -54.202 | 8.564  | 40.290 | 1.00 | 0.00 | P |
| ATOM | 179 | H1   | G A | 6 | -49.014 | 13.943 | 46.452 | 1.00 | 0.00 | H |
| ATOM | 180 | H8   | G A | 6 | -52.210 | 9.716  | 42.765 | 1.00 | 0.00 | H |
| ATOM | 181 | H1'  | G A | 6 | -48.983 | 11.271 | 41.208 | 1.00 | 0.00 | H |
| ATOM | 182 | H21  | G A | 6 | -47.348 | 14.822 | 45.327 | 1.00 | 0.00 | H |
| ATOM | 183 | H3'  | G A | 6 | -50.928 | 8.793  | 38.852 | 1.00 | 0.00 | H |
| ATOM | 184 | H22  | G A | 6 | -46.994 | 14.382 | 43.634 | 1.00 | 0.00 | H |
| ATOM | 185 | H4'  | G A | 6 | -51.210 | 11.371 | 38.322 | 1.00 | 0.00 | H |
| ATOM | 186 | H2'1 | G A | 6 | -50.848 | 8.880  | 41.251 | 1.00 | 0.00 | H |
| ATOM | 187 | H2'2 | G A | 6 | -49.133 | 8.928  | 40.869 | 1.00 | 0.00 | H |
| ATOM | 188 | H5'1 | G A | 6 | -53.248 | 11.537 | 39.920 | 1.00 | 0.00 | H |
| ATOM | 189 | H5'2 | G A | 6 | -53.260 | 10.378 | 38.576 | 1.00 | 0.00 | H |
| ATOM | 190 | C1'  | C A | 7 | -45.180 | 11.038 | 42.352 | 1.00 | 0.00 | C |
| ATOM | 191 | N1   | C A | 7 | -46.168 | 10.542 | 43.349 | 1.00 | 0.00 | N |
| ATOM | 192 | C2   | C A | 7 | -46.140 | 11.097 | 44.626 | 1.00 | 0.00 | C |
| ATOM | 193 | O2   | C A | 7 | -45.302 | 11.971 | 44.880 | 1.00 | 0.00 | O |
| ATOM | 194 | N3   | C A | 7 | -47.033 | 10.660 | 45.549 | 1.00 | 0.00 | N |

|      |     |      |     |   |         |        |        |      |      |   |
|------|-----|------|-----|---|---------|--------|--------|------|------|---|
| ATOM | 195 | C4   | C A | 7 | -47.928 | 9.711  | 45.245 | 1.00 | 0.00 | C |
| ATOM | 196 | N4   | C A | 7 | -48.778 | 9.324  | 46.183 | 1.00 | 0.00 | N |
| ATOM | 197 | C5   | C A | 7 | -47.977 | 9.119  | 43.940 | 1.00 | 0.00 | C |
| ATOM | 198 | C6   | C A | 7 | -47.072 | 9.579  | 43.025 | 1.00 | 0.00 | C |
| ATOM | 199 | C2'  | C A | 7 | -44.634 | 9.951  | 41.436 | 1.00 | 0.00 | C |
| ATOM | 200 | C3'  | C A | 7 | -44.474 | 10.697 | 40.120 | 1.00 | 0.00 | C |
| ATOM | 201 | O3'  | C A | 7 | -43.218 | 11.374 | 40.115 | 1.00 | 0.00 | O |
| ATOM | 202 | C4'  | C A | 7 | -45.653 | 11.667 | 40.134 | 1.00 | 0.00 | C |
| ATOM | 203 | O4'  | C A | 7 | -45.828 | 12.004 | 41.547 | 1.00 | 0.00 | O |
| ATOM | 204 | C5'  | C A | 7 | -46.964 | 11.137 | 39.598 | 1.00 | 0.00 | C |
| ATOM | 205 | O5'  | C A | 7 | -47.114 | 9.741  | 39.962 | 1.00 | 0.00 | O |
| ATOM | 206 | O1P  | C A | 7 | -47.036 | 8.549  | 37.746 | 1.00 | 0.00 | O |
| ATOM | 207 | O2P  | C A | 7 | -48.282 | 7.537  | 39.675 | 1.00 | 0.00 | O |
| ATOM | 208 | P    | C A | 7 | -47.863 | 8.761  | 38.952 | 1.00 | 0.00 | P |
| ATOM | 209 | H5   | C A | 7 | -48.700 | 8.342  | 43.689 | 1.00 | 0.00 | H |
| ATOM | 210 | H6   | C A | 7 | -47.075 | 9.165  | 42.016 | 1.00 | 0.00 | H |
| ATOM | 211 | H1'  | C A | 7 | -44.374 | 11.537 | 42.891 | 1.00 | 0.00 | H |
| ATOM | 212 | H3'  | C A | 7 | -44.525 | 10.025 | 39.263 | 1.00 | 0.00 | H |
| ATOM | 213 | H4'  | C A | 7 | -45.366 | 12.522 | 39.523 | 1.00 | 0.00 | H |
| ATOM | 214 | H41  | C A | 7 | -49.479 | 8.597  | 45.976 | 1.00 | 0.00 | H |
| ATOM | 215 | H42  | C A | 7 | -48.741 | 9.747  | 47.122 | 1.00 | 0.00 | H |
| ATOM | 216 | H2'1 | C A | 7 | -45.320 | 9.112  | 41.335 | 1.00 | 0.00 | H |
| ATOM | 217 | H2'2 | C A | 7 | -43.680 | 9.555  | 41.787 | 1.00 | 0.00 | H |
| ATOM | 218 | H5'1 | C A | 7 | -47.784 | 11.719 | 40.020 | 1.00 | 0.00 | H |
| ATOM | 219 | H5'2 | C A | 7 | -46.973 | 11.237 | 38.513 | 1.00 | 0.00 | H |
| ATOM | 220 | C1'  | A A | 8 | -41.323 | 11.365 | 45.439 | 1.00 | 0.00 | C |
| ATOM | 221 | N1   | A A | 8 | -44.650 | 9.504  | 48.876 | 1.00 | 0.00 | N |
| ATOM | 222 | C2   | A A | 8 | -43.735 | 10.467 | 48.941 | 1.00 | 0.00 | C |
| ATOM | 223 | N3   | A A | 8 | -42.909 | 10.901 | 48.013 | 1.00 | 0.00 | N |
| ATOM | 224 | C4   | A A | 8 | -43.086 | 10.207 | 46.873 | 1.00 | 0.00 | C |
| ATOM | 225 | C5   | A A | 8 | -43.976 | 9.195  | 46.644 | 1.00 | 0.00 | C |
| ATOM | 226 | C6   | A A | 8 | -44.804 | 8.832  | 47.725 | 1.00 | 0.00 | C |
| ATOM | 227 | N6   | A A | 8 | -45.726 | 7.856  | 47.648 | 1.00 | 0.00 | N |
| ATOM | 228 | N7   | A A | 8 | -43.871 | 8.722  | 45.347 | 1.00 | 0.00 | N |
| ATOM | 229 | C8   | A A | 8 | -42.926 | 9.448  | 44.825 | 1.00 | 0.00 | C |
| ATOM | 230 | N9   | A A | 8 | -42.404 | 10.373 | 45.692 | 1.00 | 0.00 | N |
| ATOM | 231 | C2'  | A A | 8 | -40.203 | 10.839 | 44.551 | 1.00 | 0.00 | C |
| ATOM | 232 | C3'  | A A | 8 | -39.824 | 12.077 | 43.754 | 1.00 | 0.00 | C |
| ATOM | 233 | O3'  | A A | 8 | -38.902 | 12.855 | 44.511 | 1.00 | 0.00 | O |
| ATOM | 234 | C4'  | A A | 8 | -41.164 | 12.787 | 43.569 | 1.00 | 0.00 | C |
| ATOM | 235 | O4'  | A A | 8 | -41.906 | 12.481 | 44.794 | 1.00 | 0.00 | O |
| ATOM | 236 | C5'  | A A | 8 | -41.992 | 12.358 | 42.381 | 1.00 | 0.00 | C |
| ATOM | 237 | O5'  | A A | 8 | -41.847 | 10.930 | 42.172 | 1.00 | 0.00 | O |
| ATOM | 238 | O1P  | A A | 8 | -40.665 | 10.786 | 39.954 | 1.00 | 0.00 | O |
| ATOM | 239 | O2P  | A A | 8 | -42.147 | 8.908  | 40.711 | 1.00 | 0.00 | O |
| ATOM | 240 | P    | A A | 8 | -41.879 | 10.367 | 40.680 | 1.00 | 0.00 | P |
| ATOM | 241 | H2   | A A | 8 | -43.658 | 10.971 | 49.903 | 1.00 | 0.00 | H |
| ATOM | 242 | H8   | A A | 8 | -42.582 | 9.333  | 43.798 | 1.00 | 0.00 | H |
| ATOM | 243 | H1'  | A A | 8 | -40.935 | 11.699 | 46.401 | 1.00 | 0.00 | H |
| ATOM | 244 | H3'  | A A | 8 | -39.378 | 11.823 | 42.792 | 1.00 | 0.00 | H |
| ATOM | 245 | H4'  | A A | 8 | -40.946 | 13.848 | 43.458 | 1.00 | 0.00 | H |
| ATOM | 246 | H61  | A A | 8 | -46.307 | 7.632  | 48.467 | 1.00 | 0.00 | H |
| ATOM | 247 | H62  | A A | 8 | -45.848 | 7.334  | 46.768 | 1.00 | 0.00 | H |
| ATOM | 248 | H2'1 | A A | 8 | -40.537 | 10.034 | 43.898 | 1.00 | 0.00 | H |

|      |     |      |     |    |         |        |        |      |      |   |
|------|-----|------|-----|----|---------|--------|--------|------|------|---|
| ATOM | 249 | H2'2 | A A | 8  | -39.359 | 10.465 | 45.130 | 1.00 | 0.00 | H |
| ATOM | 250 | H5'1 | A A | 8  | -43.039 | 12.597 | 42.572 | 1.00 | 0.00 | H |
| ATOM | 251 | H5'2 | A A | 8  | -41.656 | 12.896 | 41.496 | 1.00 | 0.00 | H |
| ATOM | 252 | C1'  | C A | 9  | -39.124 | 10.867 | 49.863 | 1.00 | 0.00 | C |
| ATOM | 253 | N1   | C A | 9  | -39.861 | 9.725  | 49.256 | 1.00 | 0.00 | N |
| ATOM | 254 | C2   | C A | 9  | -40.819 | 9.078  | 50.034 | 1.00 | 0.00 | C |
| ATOM | 255 | O2   | C A | 9  | -41.016 | 9.476  | 51.189 | 1.00 | 0.00 | O |
| ATOM | 256 | N3   | C A | 9  | -41.501 | 8.037  | 49.499 | 1.00 | 0.00 | N |
| ATOM | 257 | C4   | C A | 9  | -41.264 | 7.629  | 48.246 | 1.00 | 0.00 | C |
| ATOM | 258 | N4   | C A | 9  | -41.963 | 6.607  | 47.772 | 1.00 | 0.00 | N |
| ATOM | 259 | C5   | C A | 9  | -40.281 | 8.272  | 47.423 | 1.00 | 0.00 | C |
| ATOM | 260 | C6   | C A | 9  | -39.609 | 9.323  | 47.980 | 1.00 | 0.00 | C |
| ATOM | 261 | C2'  | C A | 9  | -37.656 | 10.931 | 49.465 | 1.00 | 0.00 | C |
| ATOM | 262 | C3'  | C A | 9  | -37.415 | 12.431 | 49.382 | 1.00 | 0.00 | C |
| ATOM | 263 | O3'  | C A | 9  | -37.116 | 12.930 | 50.684 | 1.00 | 0.00 | O |
| ATOM | 264 | C4'  | C A | 9  | -38.746 | 12.960 | 48.853 | 1.00 | 0.00 | C |
| ATOM | 265 | O4'  | C A | 9  | -39.747 | 12.061 | 49.429 | 1.00 | 0.00 | O |
| ATOM | 266 | C5'  | C A | 9  | -38.915 | 12.971 | 47.352 | 1.00 | 0.00 | C |
| ATOM | 267 | O5'  | C A | 9  | -38.270 | 11.806 | 46.777 | 1.00 | 0.00 | O |
| ATOM | 268 | O1P  | C A | 9  | -36.385 | 12.789 | 45.430 | 1.00 | 0.00 | O |
| ATOM | 269 | O2P  | C A | 9  | -37.383 | 10.584 | 44.768 | 1.00 | 0.00 | O |
| ATOM | 270 | P    | C A | 9  | -37.587 | 11.937 | 45.342 | 1.00 | 0.00 | P |
| ATOM | 271 | H5   | C A | 9  | -40.081 | 7.940  | 46.404 | 1.00 | 0.00 | H |
| ATOM | 272 | H6   | C A | 9  | -38.858 | 9.849  | 47.392 | 1.00 | 0.00 | H |
| ATOM | 273 | H1'  | C A | 9  | -39.233 | 10.805 | 50.946 | 1.00 | 0.00 | H |
| ATOM | 274 | H3'  | C A | 9  | -36.597 | 12.675 | 48.705 | 1.00 | 0.00 | H |
| ATOM | 275 | H4'  | C A | 9  | -38.842 | 13.986 | 49.206 | 1.00 | 0.00 | H |
| ATOM | 276 | H41  | C A | 9  | -41.802 | 6.275  | 46.810 | 1.00 | 0.00 | H |
| ATOM | 277 | H42  | C A | 9  | -42.666 | 6.145  | 48.366 | 1.00 | 0.00 | H |
| ATOM | 278 | H2'1 | C A | 9  | -37.464 | 10.446 | 48.509 | 1.00 | 0.00 | H |
| ATOM | 279 | H2'2 | C A | 9  | -37.006 | 10.464 | 50.206 | 1.00 | 0.00 | H |
| ATOM | 280 | H5'1 | C A | 9  | -39.978 | 12.960 | 47.110 | 1.00 | 0.00 | H |
| ATOM | 281 | H5'2 | C A | 9  | -38.466 | 13.878 | 46.948 | 1.00 | 0.00 | H |
| ATOM | 282 | C1'  | C A | 10 | -38.566 | 8.870  | 54.360 | 1.00 | 0.00 | C |
| ATOM | 283 | N1   | C A | 10 | -38.661 | 8.002  | 53.155 | 1.00 | 0.00 | N |
| ATOM | 284 | C2   | C A | 10 | -39.590 | 6.963  | 53.171 | 1.00 | 0.00 | C |
| ATOM | 285 | O2   | C A | 10 | -40.293 | 6.804  | 54.178 | 1.00 | 0.00 | O |
| ATOM | 286 | N3   | C A | 10 | -39.693 | 6.161  | 52.083 | 1.00 | 0.00 | N |
| ATOM | 287 | C4   | C A | 10 | -38.918 | 6.356  | 51.008 | 1.00 | 0.00 | C |
| ATOM | 288 | N4   | C A | 10 | -39.063 | 5.544  | 49.970 | 1.00 | 0.00 | N |
| ATOM | 289 | C5   | C A | 10 | -37.951 | 7.414  | 50.965 | 1.00 | 0.00 | C |
| ATOM | 290 | C6   | C A | 10 | -37.869 | 8.212  | 52.070 | 1.00 | 0.00 | C |
| ATOM | 291 | C2'  | C A | 10 | -37.144 | 9.296  | 54.698 | 1.00 | 0.00 | C |
| ATOM | 292 | C3'  | C A | 10 | -37.353 | 10.708 | 55.224 | 1.00 | 0.00 | C |
| ATOM | 293 | O3'  | C A | 10 | -37.697 | 10.647 | 56.606 | 1.00 | 0.00 | O |
| ATOM | 294 | C4'  | C A | 10 | -38.505 | 11.223 | 54.364 | 1.00 | 0.00 | C |
| ATOM | 295 | O4'  | C A | 10 | -39.325 | 10.038 | 54.110 | 1.00 | 0.00 | O |
| ATOM | 296 | C5'  | C A | 10 | -38.129 | 11.843 | 53.039 | 1.00 | 0.00 | C |
| ATOM | 297 | O5'  | C A | 10 | -37.004 | 11.129 | 52.465 | 1.00 | 0.00 | O |
| ATOM | 298 | O1P  | C A | 10 | -35.155 | 12.836 | 52.495 | 1.00 | 0.00 | O |
| ATOM | 299 | O2P  | C A | 10 | -35.143 | 11.002 | 50.782 | 1.00 | 0.00 | O |
| ATOM | 300 | P    | C A | 10 | -35.933 | 11.945 | 51.612 | 1.00 | 0.00 | P |
| ATOM | 301 | H5   | C A | 10 | -37.314 | 7.573  | 50.094 | 1.00 | 0.00 | H |
| ATOM | 302 | H6   | C A | 10 | -37.154 | 9.035  | 52.082 | 1.00 | 0.00 | H |

|      |     |      |   |   |    |         |        |        |      |      |   |
|------|-----|------|---|---|----|---------|--------|--------|------|------|---|
| ATOM | 303 | H1'  | C | A | 10 | -39.026 | 8.344  | 55.197 | 1.00 | 0.00 | H |
| ATOM | 304 | H3'  | C | A | 10 | -36.462 | 11.325 | 55.101 | 1.00 | 0.00 | H |
| ATOM | 305 | H4'  | C | A | 10 | -39.023 | 11.982 | 54.951 | 1.00 | 0.00 | H |
| ATOM | 306 | H41  | C | A | 10 | -38.481 | 5.674  | 49.130 | 1.00 | 0.00 | H |
| ATOM | 307 | H42  | C | A | 10 | -39.756 | 4.783  | 50.005 | 1.00 | 0.00 | H |
| ATOM | 308 | H2'1 | C | A | 10 | -36.491 | 9.290  | 53.827 | 1.00 | 0.00 | H |
| ATOM | 309 | H2'2 | C | A | 10 | -36.689 | 8.654  | 55.454 | 1.00 | 0.00 | H |
| ATOM | 310 | H5'1 | C | A | 10 | -38.983 | 11.789 | 52.362 | 1.00 | 0.00 | H |
| ATOM | 311 | H5'2 | C | A | 10 | -37.862 | 12.887 | 53.196 | 1.00 | 0.00 | H |
| ATOM | 312 | C1'  | T | A | 11 | -39.049 | 5.276  | 57.730 | 1.00 | 0.00 | C |
| ATOM | 313 | N1   | T | A | 11 | -38.462 | 4.975  | 56.398 | 1.00 | 0.00 | N |
| ATOM | 314 | C2   | T | A | 11 | -38.997 | 3.912  | 55.699 | 1.00 | 0.00 | C |
| ATOM | 315 | O2   | T | A | 11 | -39.912 | 3.231  | 56.131 | 1.00 | 0.00 | O |
| ATOM | 316 | N3   | T | A | 11 | -38.423 | 3.667  | 54.465 | 1.00 | 0.00 | N |
| ATOM | 317 | C4   | T | A | 11 | -37.386 | 4.372  | 53.888 | 1.00 | 0.00 | C |
| ATOM | 318 | O4   | T | A | 11 | -36.951 | 4.057  | 52.773 | 1.00 | 0.00 | O |
| ATOM | 319 | C5   | T | A | 11 | -36.893 | 5.465  | 54.692 | 1.00 | 0.00 | C |
| ATOM | 320 | C6   | T | A | 11 | -37.430 | 5.732  | 55.899 | 1.00 | 0.00 | C |
| ATOM | 321 | C7   | T | A | 11 | -35.767 | 6.260  | 54.102 | 1.00 | 0.00 | C |
| ATOM | 322 | C2'  | T | A | 11 | -38.025 | 5.718  | 58.768 | 1.00 | 0.00 | C |
| ATOM | 323 | C3'  | T | A | 11 | -38.806 | 6.746  | 59.569 | 1.00 | 0.00 | C |
| ATOM | 324 | O3'  | T | A | 11 | -39.574 | 6.077  | 60.568 | 1.00 | 0.00 | O |
| ATOM | 325 | C4'  | T | A | 11 | -39.686 | 7.405  | 58.510 | 1.00 | 0.00 | C |
| ATOM | 326 | O4'  | T | A | 11 | -39.981 | 6.328  | 57.564 | 1.00 | 0.00 | O |
| ATOM | 327 | C5'  | T | A | 11 | -39.074 | 8.560  | 57.751 | 1.00 | 0.00 | C |
| ATOM | 328 | O5'  | T | A | 11 | -37.664 | 8.306  | 57.527 | 1.00 | 0.00 | O |
| ATOM | 329 | O1P  | T | A | 11 | -36.527 | 10.086 | 58.895 | 1.00 | 0.00 | O |
| ATOM | 330 | O2P  | T | A | 11 | -35.384 | 9.137  | 56.874 | 1.00 | 0.00 | O |
| ATOM | 331 | P    | T | A | 11 | -36.652 | 9.538  | 57.531 | 1.00 | 0.00 | P |
| ATOM | 332 | H3   | T | A | 11 | -38.807 | 2.882  | 53.922 | 1.00 | 0.00 | H |
| ATOM | 333 | H6   | T | A | 11 | -37.041 | 6.563  | 56.489 | 1.00 | 0.00 | H |
| ATOM | 334 | H1'  | T | A | 11 | -39.594 | 4.396  | 58.071 | 1.00 | 0.00 | H |
| ATOM | 335 | H3'  | T | A | 11 | -38.152 | 7.474  | 60.046 | 1.00 | 0.00 | H |
| ATOM | 336 | H4'  | T | A | 11 | -40.574 | 7.777  | 59.022 | 1.00 | 0.00 | H |
| ATOM | 337 | H71  | T | A | 11 | -34.870 | 6.124  | 54.705 | 1.00 | 0.00 | H |
| ATOM | 338 | H72  | T | A | 11 | -35.575 | 5.918  | 53.084 | 1.00 | 0.00 | H |
| ATOM | 339 | H73  | T | A | 11 | -36.036 | 7.316  | 54.084 | 1.00 | 0.00 | H |
| ATOM | 340 | H2'1 | T | A | 11 | -37.140 | 6.159  | 58.312 | 1.00 | 0.00 | H |
| ATOM | 341 | H2'2 | T | A | 11 | -37.691 | 4.892  | 59.398 | 1.00 | 0.00 | H |
| ATOM | 342 | H5'1 | T | A | 11 | -39.584 | 8.672  | 56.795 | 1.00 | 0.00 | H |
| ATOM | 343 | H5'2 | T | A | 11 | -39.195 | 9.474  | 58.332 | 1.00 | 0.00 | H |
| ATOM | 344 | C1'  | A | A | 12 | -39.592 | 0.551  | 59.148 | 1.00 | 0.00 | C |
| ATOM | 345 | N1   | A | A | 12 | -37.372 | -0.474 | 54.635 | 1.00 | 0.00 | N |
| ATOM | 346 | C2   | A | A | 12 | -38.400 | -1.021 | 55.276 | 1.00 | 0.00 | C |
| ATOM | 347 | N3   | A | A | 12 | -38.925 | -0.704 | 56.441 | 1.00 | 0.00 | N |
| ATOM | 348 | C4   | A | A | 12 | -38.256 | 0.326  | 56.988 | 1.00 | 0.00 | C |
| ATOM | 349 | C5   | A | A | 12 | -37.185 | 0.994  | 56.465 | 1.00 | 0.00 | C |
| ATOM | 350 | C6   | A | A | 12 | -36.724 | 0.553  | 55.206 | 1.00 | 0.00 | C |
| ATOM | 351 | N6   | A | A | 12 | -35.682 | 1.114  | 54.569 | 1.00 | 0.00 | N |
| ATOM | 352 | N7   | A | A | 12 | -36.761 | 2.001  | 57.313 | 1.00 | 0.00 | N |
| ATOM | 353 | C8   | A | A | 12 | -37.573 | 1.920  | 58.325 | 1.00 | 0.00 | C |
| ATOM | 354 | N9   | A | A | 12 | -38.510 | 0.926  | 58.197 | 1.00 | 0.00 | N |
| ATOM | 355 | C2'  | A | A | 12 | -39.182 | 0.652  | 60.611 | 1.00 | 0.00 | C |
| ATOM | 356 | C3'  | A | A | 12 | -40.469 | 1.125  | 61.269 | 1.00 | 0.00 | C |



|      |     |      |   |   |    |         |        |        |      |      |   |
|------|-----|------|---|---|----|---------|--------|--------|------|------|---|
| ATOM | 357 | O3'  | A | A | 12 | -41.295 | -0.004 | 61.544 | 1.00 | 0.00 | O |
| ATOM | 358 | C4'  | A | A | 12 | -41.077 | 2.040  | 60.207 | 1.00 | 0.00 | C |
| ATOM | 359 | O4'  | A | A | 12 | -40.677 | 1.433  | 58.937 | 1.00 | 0.00 | O |
| ATOM | 360 | C5'  | A | A | 12 | -40.621 | 3.479  | 60.221 | 1.00 | 0.00 | C |
| ATOM | 361 | O5'  | A | A | 12 | -39.216 | 3.545  | 60.576 | 1.00 | 0.00 | O |
| ATOM | 362 | O1P  | A | A | 12 | -39.232 | 4.720  | 62.802 | 1.00 | 0.00 | O |
| ATOM | 363 | O2P  | A | A | 12 | -37.221 | 4.885  | 61.310 | 1.00 | 0.00 | O |
| ATOM | 364 | P    | A | A | 12 | -38.697 | 4.789  | 61.428 | 1.00 | 0.00 | P |
| ATOM | 365 | H2   | A | A | 12 | -38.880 | -1.853 | 54.761 | 1.00 | 0.00 | H |
| ATOM | 366 | H8   | A | A | 12 | -37.517 | 2.578  | 59.193 | 1.00 | 0.00 | H |
| ATOM | 367 | H1'  | A | A | 12 | -39.925 | -0.457 | 58.904 | 1.00 | 0.00 | H |
| ATOM | 368 | H3'  | A | A | 12 | -40.280 | 1.668  | 62.194 | 1.00 | 0.00 | H |
| ATOM | 369 | H4'  | A | A | 12 | -42.156 | 2.031  | 60.363 | 1.00 | 0.00 | H |
| ATOM | 370 | H61  | A | A | 12 | -35.387 | 0.756  | 53.650 | 1.00 | 0.00 | H |
| ATOM | 371 | H62  | A | A | 12 | -35.178 | 1.902  | 55.002 | 1.00 | 0.00 | H |
| ATOM | 372 | H2'1 | A | A | 12 | -38.373 | 1.364  | 60.767 | 1.00 | 0.00 | H |
| ATOM | 373 | H2'2 | A | A | 12 | -38.858 | -0.307 | 61.016 | 1.00 | 0.00 | H |
| ATOM | 374 | H5'1 | A | A | 12 | -40.771 | 3.911  | 59.232 | 1.00 | 0.00 | H |
| ATOM | 375 | H5'2 | A | A | 12 | -41.210 | 4.035  | 60.948 | 1.00 | 0.00 | H |
| ATOM | 376 | C1'  | G | A | 13 | -39.133 | -4.354 | 58.536 | 1.00 | 0.00 | C |
| ATOM | 377 | N1   | G | A | 13 | -35.283 | -3.056 | 55.452 | 1.00 | 0.00 | N |
| ATOM | 378 | C2   | G | A | 13 | -36.268 | -4.012 | 55.286 | 1.00 | 0.00 | C |
| ATOM | 379 | N2   | G | A | 13 | -36.221 | -4.720 | 54.149 | 1.00 | 0.00 | N |
| ATOM | 380 | N3   | G | A | 13 | -37.224 | -4.245 | 56.184 | 1.00 | 0.00 | N |
| ATOM | 381 | C4   | G | A | 13 | -37.115 | -3.445 | 57.276 | 1.00 | 0.00 | C |
| ATOM | 382 | C5   | G | A | 13 | -36.165 | -2.468 | 57.528 | 1.00 | 0.00 | C |
| ATOM | 383 | C6   | G | A | 13 | -35.151 | -2.218 | 56.574 | 1.00 | 0.00 | C |
| ATOM | 384 | O6   | G | A | 13 | -34.230 | -1.402 | 56.618 | 1.00 | 0.00 | O |
| ATOM | 385 | N7   | G | A | 13 | -36.403 | -1.873 | 58.768 | 1.00 | 0.00 | N |
| ATOM | 386 | C8   | G | A | 13 | -37.466 | -2.488 | 59.216 | 1.00 | 0.00 | C |
| ATOM | 387 | N9   | G | A | 13 | -37.956 | -3.458 | 58.366 | 1.00 | 0.00 | N |
| ATOM | 388 | C2'  | G | A | 13 | -39.331 | -4.844 | 59.964 | 1.00 | 0.00 | C |
| ATOM | 389 | C3'  | G | A | 13 | -40.845 | -4.884 | 60.080 | 1.00 | 0.00 | C |
| ATOM | 390 | O3'  | G | A | 13 | -41.322 | -6.122 | 59.557 | 1.00 | 0.00 | O |
| ATOM | 391 | C4'  | G | A | 13 | -41.283 | -3.692 | 59.230 | 1.00 | 0.00 | C |
| ATOM | 392 | O4'  | G | A | 13 | -40.287 | -3.627 | 58.160 | 1.00 | 0.00 | O |
| ATOM | 393 | C5'  | G | A | 13 | -41.332 | -2.353 | 59.927 | 1.00 | 0.00 | C |
| ATOM | 394 | O5'  | G | A | 13 | -40.245 | -2.256 | 60.880 | 1.00 | 0.00 | O |
| ATOM | 395 | O1P  | G | A | 13 | -41.423 | -2.176 | 63.103 | 1.00 | 0.00 | O |
| ATOM | 396 | O2P  | G | A | 13 | -39.170 | -1.107 | 62.839 | 1.00 | 0.00 | O |
| ATOM | 397 | P    | G | A | 13 | -40.481 | -1.446 | 62.234 | 1.00 | 0.00 | P |
| ATOM | 398 | H1   | G | A | 13 | -34.591 | -2.950 | 54.693 | 1.00 | 0.00 | H |
| ATOM | 399 | H8   | G | A | 13 | -37.925 | -2.258 | 60.177 | 1.00 | 0.00 | H |
| ATOM | 400 | H1'  | G | A | 13 | -39.025 | -5.193 | 57.847 | 1.00 | 0.00 | H |
| ATOM | 401 | H21  | G | A | 13 | -35.479 | -4.530 | 53.458 | 1.00 | 0.00 | H |
| ATOM | 402 | H3'  | G | A | 13 | -41.180 | -4.775 | 61.112 | 1.00 | 0.00 | H |
| ATOM | 403 | H22  | G | A | 13 | -36.924 | -5.447 | 53.968 | 1.00 | 0.00 | H |
| ATOM | 404 | H4'  | G | A | 13 | -42.285 | -3.915 | 58.865 | 1.00 | 0.00 | H |
| ATOM | 405 | H2'1 | G | A | 13 | -38.895 | -4.165 | 60.698 | 1.00 | 0.00 | H |
| ATOM | 406 | H2'2 | G | A | 13 | -38.893 | -5.829 | 60.129 | 1.00 | 0.00 | H |
| ATOM | 407 | H5'1 | G | A | 13 | -41.244 | -1.560 | 59.185 | 1.00 | 0.00 | H |
| ATOM | 408 | H5'2 | G | A | 13 | -42.286 | -2.254 | 60.444 | 1.00 | 0.00 | H |
| ATOM | 409 | C1'  | G | A | 14 | -37.050 | -8.433 | 56.650 | 1.00 | 0.00 | C |
| ATOM | 410 | N1   | G | A | 14 | -32.942 | -5.442 | 56.200 | 1.00 | 0.00 | N |

|      |     |      |     |    |         |         |        |      |      |   |
|------|-----|------|-----|----|---------|---------|--------|------|------|---|
| ATOM | 411 | C2   | G A | 14 | -33.470 | -6.365  | 55.315 | 1.00 | 0.00 | C |
| ATOM | 412 | N2   | G A | 14 | -32.815 | -6.512  | 54.157 | 1.00 | 0.00 | N |
| ATOM | 413 | N3   | G A | 14 | -34.564 | -7.083  | 55.565 | 1.00 | 0.00 | N |
| ATOM | 414 | C4   | G A | 14 | -35.091 | -6.810  | 56.787 | 1.00 | 0.00 | C |
| ATOM | 415 | C5   | G A | 14 | -34.632 | -5.911  | 57.735 | 1.00 | 0.00 | C |
| ATOM | 416 | C6   | G A | 14 | -33.475 | -5.146  | 57.470 | 1.00 | 0.00 | C |
| ATOM | 417 | O6   | G A | 14 | -32.918 | -4.307  | 58.178 | 1.00 | 0.00 | O |
| ATOM | 418 | N7   | G A | 14 | -35.461 | -5.933  | 58.860 | 1.00 | 0.00 | N |
| ATOM | 419 | C8   | G A | 14 | -36.375 | -6.820  | 58.563 | 1.00 | 0.00 | C |
| ATOM | 420 | N9   | G A | 14 | -36.218 | -7.397  | 57.321 | 1.00 | 0.00 | N |
| ATOM | 421 | C2'  | G A | 14 | -37.582 | -9.500  | 57.597 | 1.00 | 0.00 | C |
| ATOM | 422 | C3'  | G A | 14 | -38.953 | -9.793  | 57.009 | 1.00 | 0.00 | C |
| ATOM | 423 | O3'  | G A | 14 | -38.819 | -10.747 | 55.959 | 1.00 | 0.00 | O |
| ATOM | 424 | C4'  | G A | 14 | -39.399 | -8.425  | 56.493 | 1.00 | 0.00 | C |
| ATOM | 425 | O4'  | G A | 14 | -38.159 | -7.780  | 56.062 | 1.00 | 0.00 | O |
| ATOM | 426 | C5'  | G A | 14 | -40.091 | -7.526  | 57.490 | 1.00 | 0.00 | C |
| ATOM | 427 | O5'  | G A | 14 | -39.493 | -7.692  | 58.799 | 1.00 | 0.00 | O |
| ATOM | 428 | O1P  | G A | 14 | -41.345 | -8.718  | 60.160 | 1.00 | 0.00 | O |
| ATOM | 429 | O2P  | G A | 14 | -39.577 | -7.341  | 61.286 | 1.00 | 0.00 | O |
| ATOM | 430 | P    | G A | 14 | -40.423 | -7.569  | 60.089 | 1.00 | 0.00 | P |
| ATOM | 431 | H1   | G A | 14 | -32.094 | -4.933  | 55.907 | 1.00 | 0.00 | H |
| ATOM | 432 | H8   | G A | 14 | -37.190 | -7.080  | 59.239 | 1.00 | 0.00 | H |
| ATOM | 433 | H1'  | G A | 14 | -36.460 | -8.879  | 55.850 | 1.00 | 0.00 | H |
| ATOM | 434 | H21  | G A | 14 | -31.971 | -5.951  | 53.968 | 1.00 | 0.00 | H |
| ATOM | 435 | H3'  | G A | 14 | -39.645 | -10.175 | 57.759 | 1.00 | 0.00 | H |
| ATOM | 436 | H22  | G A | 14 | -33.155 | -7.185  | 53.456 | 1.00 | 0.00 | H |
| ATOM | 437 | H4'  | G A | 14 | -40.092 | -8.608  | 55.672 | 1.00 | 0.00 | H |
| ATOM | 438 | H2'1 | G A | 14 | -37.658 | -9.142  | 58.623 | 1.00 | 0.00 | H |
| ATOM | 439 | H2'2 | G A | 14 | -36.955 | -10.393 | 57.607 | 1.00 | 0.00 | H |
| ATOM | 440 | H5'1 | G A | 14 | -39.990 | -6.490  | 57.167 | 1.00 | 0.00 | H |
| ATOM | 441 | H5'2 | G A | 14 | -41.150 | -7.786  | 57.532 | 1.00 | 0.00 | H |
| ATOM | 442 | C1'  | A A | 15 | -33.331 | -11.025 | 54.664 | 1.00 | 0.00 | C |
| ATOM | 443 | N1   | A A | 15 | -30.398 | -7.571  | 57.074 | 1.00 | 0.00 | N |
| ATOM | 444 | C2   | A A | 15 | -30.335 | -8.114  | 55.860 | 1.00 | 0.00 | C |
| ATOM | 445 | N3   | A A | 15 | -31.129 | -9.000  | 55.298 | 1.00 | 0.00 | N |
| ATOM | 446 | C4   | A A | 15 | -32.110 | -9.352  | 56.151 | 1.00 | 0.00 | C |
| ATOM | 447 | C5   | A A | 15 | -32.313 | -8.893  | 57.421 | 1.00 | 0.00 | C |
| ATOM | 448 | C6   | A A | 15 | -31.388 | -7.941  | 57.900 | 1.00 | 0.00 | C |
| ATOM | 449 | N6   | A A | 15 | -31.461 | -7.402  | 59.129 | 1.00 | 0.00 | N |
| ATOM | 450 | N7   | A A | 15 | -33.426 | -9.482  | 57.994 | 1.00 | 0.00 | N |
| ATOM | 451 | C8   | A A | 15 | -33.868 | -10.281 | 57.068 | 1.00 | 0.00 | C |
| ATOM | 452 | N9   | A A | 15 | -33.120 | -10.254 | 55.918 | 1.00 | 0.00 | N |
| ATOM | 453 | C2'  | A A | 15 | -33.821 | -12.449 | 54.894 | 1.00 | 0.00 | C |
| ATOM | 454 | C3'  | A A | 15 | -34.756 | -12.657 | 53.713 | 1.00 | 0.00 | C |
| ATOM | 455 | O3'  | A A | 15 | -33.995 | -13.069 | 52.582 | 1.00 | 0.00 | O |
| ATOM | 456 | C4'  | A A | 15 | -35.375 | -11.273 | 53.521 | 1.00 | 0.00 | C |
| ATOM | 457 | O4'  | A A | 15 | -34.306 | -10.345 | 53.898 | 1.00 | 0.00 | O |
| ATOM | 458 | C5'  | A A | 15 | -36.598 | -10.963 | 54.350 | 1.00 | 0.00 | C |
| ATOM | 459 | O5'  | A A | 15 | -36.469 | -11.569 | 55.661 | 1.00 | 0.00 | O |
| ATOM | 460 | O1P  | A A | 15 | -38.293 | -13.304 | 55.684 | 1.00 | 0.00 | O |
| ATOM | 461 | O2P  | A A | 15 | -37.505 | -12.282 | 57.837 | 1.00 | 0.00 | O |
| ATOM | 462 | P    | A A | 15 | -37.780 | -12.112 | 56.389 | 1.00 | 0.00 | P |
| ATOM | 463 | H2   | A A | 15 | -29.506 | -7.773  | 55.241 | 1.00 | 0.00 | H |
| ATOM | 464 | H8   | A A | 15 | -34.747 | -10.912 | 57.191 | 1.00 | 0.00 | H |

|      |     |      |   |   |    |         |         |        |      |      |   |
|------|-----|------|---|---|----|---------|---------|--------|------|------|---|
| ATOM | 465 | H1'  | A | A | 15 | -32.398 | -11.020 | 54.100 | 1.00 | 0.00 | H |
| ATOM | 466 | H3'  | A | A | 15 | -35.522 | -13.403 | 53.925 | 1.00 | 0.00 | H |
| ATOM | 467 | H4'  | A | A | 15 | -35.655 | -11.195 | 52.471 | 1.00 | 0.00 | H |
| ATOM | 468 | H61  | A | A | 15 | -30.760 | -6.708  | 59.427 | 1.00 | 0.00 | H |
| ATOM | 469 | H62  | A | A | 15 | -32.217 | -7.682  | 59.770 | 1.00 | 0.00 | H |
| ATOM | 470 | H2'1 | A | A | 15 | -34.348 | -12.555 | 55.842 | 1.00 | 0.00 | H |
| ATOM | 471 | H2'2 | A | A | 15 | -33.007 | -13.173 | 54.887 | 1.00 | 0.00 | H |
| ATOM | 472 | H5'1 | A | A | 15 | -36.697 | -9.883  | 54.451 | 1.00 | 0.00 | H |
| ATOM | 473 | H5'2 | A | A | 15 | -37.480 | -11.358 | 53.848 | 1.00 | 0.00 | H |
| ATOM | 474 | C1'  | C | A | 16 | -28.527 | -11.971 | 53.831 | 1.00 | 0.00 | C |
| ATOM | 475 | N1   | C | A | 16 | -29.030 | -11.794 | 55.221 | 1.00 | 0.00 | N |
| ATOM | 476 | C2   | C | A | 16 | -28.365 | -10.890 | 56.045 | 1.00 | 0.00 | C |
| ATOM | 477 | O2   | C | A | 16 | -27.389 | -10.276 | 55.592 | 1.00 | 0.00 | O |
| ATOM | 478 | N3   | C | A | 16 | -28.806 | -10.713 | 57.315 | 1.00 | 0.00 | N |
| ATOM | 479 | C4   | C | A | 16 | -29.864 | -11.393 | 57.775 | 1.00 | 0.00 | C |
| ATOM | 480 | N4   | C | A | 16 | -30.255 | -11.178 | 59.023 | 1.00 | 0.00 | N |
| ATOM | 481 | C5   | C | A | 16 | -30.566 | -12.333 | 56.952 | 1.00 | 0.00 | C |
| ATOM | 482 | C6   | C | A | 16 | -30.107 | -12.492 | 55.675 | 1.00 | 0.00 | C |
| ATOM | 483 | C2'  | C | A | 16 | -28.598 | -13.408 | 53.331 | 1.00 | 0.00 | C |
| ATOM | 484 | C3'  | C | A | 16 | -28.937 | -13.216 | 51.861 | 1.00 | 0.00 | C |
| ATOM | 485 | O3'  | C | A | 16 | -27.735 | -12.989 | 51.129 | 1.00 | 0.00 | O |
| ATOM | 486 | C4'  | C | A | 16 | -29.844 | -11.987 | 51.880 | 1.00 | 0.00 | C |
| ATOM | 487 | O4'  | C | A | 16 | -29.327 | -11.172 | 52.979 | 1.00 | 0.00 | O |
| ATOM | 488 | C5'  | C | A | 16 | -31.315 | -12.242 | 52.117 | 1.00 | 0.00 | C |
| ATOM | 489 | O5'  | C | A | 16 | -31.477 | -13.329 | 53.062 | 1.00 | 0.00 | O |
| ATOM | 490 | O1P  | C | A | 16 | -32.553 | -15.143 | 51.687 | 1.00 | 0.00 | O |
| ATOM | 491 | O2P  | C | A | 16 | -32.942 | -15.049 | 54.163 | 1.00 | 0.00 | O |
| ATOM | 492 | P    | C | A | 16 | -32.723 | -14.312 | 52.895 | 1.00 | 0.00 | P |
| ATOM | 493 | H5   | C | A | 16 | -31.424 | -12.894 | 57.326 | 1.00 | 0.00 | H |
| ATOM | 494 | H6   | C | A | 16 | -30.613 | -13.189 | 55.008 | 1.00 | 0.00 | H |
| ATOM | 495 | H1'  | C | A | 16 | -27.507 | -11.591 | 53.786 | 1.00 | 0.00 | H |
| ATOM | 496 | H3'  | C | A | 16 | -29.455 | -14.082 | 51.447 | 1.00 | 0.00 | H |
| ATOM | 497 | H4'  | C | A | 16 | -29.744 | -11.506 | 50.907 | 1.00 | 0.00 | H |
| ATOM | 498 | H41  | C | A | 16 | -31.068 | -11.687 | 59.403 | 1.00 | 0.00 | H |
| ATOM | 499 | H42  | C | A | 16 | -29.748 | -10.505 | 59.615 | 1.00 | 0.00 | H |
| ATOM | 500 | H2'1 | C | A | 16 | -29.366 | -13.987 | 53.843 | 1.00 | 0.00 | H |
| ATOM | 501 | H2'2 | C | A | 16 | -27.652 | -13.936 | 53.456 | 1.00 | 0.00 | H |
| ATOM | 502 | H5'1 | C | A | 16 | -31.775 | -11.336 | 52.512 | 1.00 | 0.00 | H |
| ATOM | 503 | H5'2 | C | A | 16 | -31.790 | -12.502 | 51.171 | 1.00 | 0.00 | H |
| ATOM | 504 | C1'  | G | A | 17 | -23.703 | -11.828 | 54.937 | 1.00 | 0.00 | C |
| ATOM | 505 | N1   | G | A | 17 | -25.393 | -11.397 | 59.731 | 1.00 | 0.00 | N |
| ATOM | 506 | C2   | G | A | 17 | -24.367 | -10.728 | 59.087 | 1.00 | 0.00 | C |
| ATOM | 507 | N2   | G | A | 17 | -23.702 | -9.825  | 59.819 | 1.00 | 0.00 | N |
| ATOM | 508 | N3   | G | A | 17 | -24.032 | -10.941 | 57.816 | 1.00 | 0.00 | N |
| ATOM | 509 | C4   | G | A | 17 | -24.806 | -11.894 | 57.232 | 1.00 | 0.00 | C |
| ATOM | 510 | C5   | G | A | 17 | -25.846 | -12.615 | 57.794 | 1.00 | 0.00 | C |
| ATOM | 511 | C6   | G | A | 17 | -26.205 | -12.387 | 59.142 | 1.00 | 0.00 | C |
| ATOM | 512 | O6   | G | A | 17 | -27.088 | -12.921 | 59.813 | 1.00 | 0.00 | O |
| ATOM | 513 | N7   | G | A | 17 | -26.384 | -13.499 | 56.856 | 1.00 | 0.00 | N |
| ATOM | 514 | C8   | G | A | 17 | -25.672 | -13.288 | 55.779 | 1.00 | 0.00 | C |
| ATOM | 515 | N9   | G | A | 17 | -24.693 | -12.327 | 55.929 | 1.00 | 0.00 | N |
| ATOM | 516 | C2'  | G | A | 17 | -23.156 | -12.910 | 54.016 | 1.00 | 0.00 | C |
| ATOM | 517 | C3'  | G | A | 17 | -22.994 | -12.161 | 52.704 | 1.00 | 0.00 | C |
| ATOM | 518 | O3'  | G | A | 17 | -21.738 | -11.485 | 52.704 | 1.00 | 0.00 | O |

|      |     |      |     |    |         |         |        |      |      |   |
|------|-----|------|-----|----|---------|---------|--------|------|------|---|
| ATOM | 519 | C4'  | G A | 17 | -24.173 | -11.189 | 52.720 | 1.00 | 0.00 | C |
| ATOM | 520 | O4'  | G A | 17 | -24.348 | -10.858 | 54.134 | 1.00 | 0.00 | O |
| ATOM | 521 | C5'  | G A | 17 | -25.482 | -11.715 | 52.180 | 1.00 | 0.00 | C |
| ATOM | 522 | O5'  | G A | 17 | -25.635 | -13.111 | 52.538 | 1.00 | 0.00 | O |
| ATOM | 523 | O1P  | G A | 17 | -25.555 | -14.293 | 50.317 | 1.00 | 0.00 | O |
| ATOM | 524 | O2P  | G A | 17 | -26.805 | -15.314 | 52.238 | 1.00 | 0.00 | O |
| ATOM | 525 | P    | G A | 17 | -26.383 | -14.086 | 51.521 | 1.00 | 0.00 | P |
| ATOM | 526 | H1   | G A | 17 | -25.576 | -11.153 | 60.716 | 1.00 | 0.00 | H |
| ATOM | 527 | H8   | G A | 17 | -25.838 | -13.825 | 54.844 | 1.00 | 0.00 | H |
| ATOM | 528 | H1'  | G A | 17 | -22.897 | -11.333 | 55.479 | 1.00 | 0.00 | H |
| ATOM | 529 | H21  | G A | 17 | -23.968 | -9.663  | 60.801 | 1.00 | 0.00 | H |
| ATOM | 530 | H3'  | G A | 17 | -23.045 | -12.828 | 51.843 | 1.00 | 0.00 | H |
| ATOM | 531 | H22  | G A | 17 | -22.925 | -9.295  | 59.399 | 1.00 | 0.00 | H |
| ATOM | 532 | H4'  | G A | 17 | -23.884 | -10.331 | 52.115 | 1.00 | 0.00 | H |
| ATOM | 533 | H2'1 | G A | 17 | -23.845 | -13.749 | 53.911 | 1.00 | 0.00 | H |
| ATOM | 534 | H2'2 | G A | 17 | -22.204 | -13.310 | 54.367 | 1.00 | 0.00 | H |
| ATOM | 535 | H5'1 | G A | 17 | -26.302 | -11.134 | 52.602 | 1.00 | 0.00 | H |
| ATOM | 536 | H5'2 | G A | 17 | -25.490 | -11.608 | 51.095 | 1.00 | 0.00 | H |
| ATOM | 537 | C1'  | G A | 18 | -19.860 | -11.505 | 58.043 | 1.00 | 0.00 | C |
| ATOM | 538 | N1   | G A | 18 | -23.177 | -13.371 | 61.440 | 1.00 | 0.00 | N |
| ATOM | 539 | C2   | G A | 18 | -22.242 | -12.359 | 61.575 | 1.00 | 0.00 | C |
| ATOM | 540 | N2   | G A | 18 | -22.182 | -11.767 | 62.776 | 1.00 | 0.00 | N |
| ATOM | 541 | N3   | G A | 18 | -21.434 | -11.969 | 60.592 | 1.00 | 0.00 | N |
| ATOM | 542 | C4   | G A | 18 | -21.626 | -12.682 | 59.451 | 1.00 | 0.00 | C |
| ATOM | 543 | C5   | G A | 18 | -22.529 | -13.708 | 59.226 | 1.00 | 0.00 | C |
| ATOM | 544 | C6   | G A | 18 | -23.391 | -14.120 | 60.269 | 1.00 | 0.00 | C |
| ATOM | 545 | O6   | G A | 18 | -24.249 | -15.004 | 60.262 | 1.00 | 0.00 | O |
| ATOM | 546 | N7   | G A | 18 | -22.409 | -14.178 | 57.918 | 1.00 | 0.00 | N |
| ATOM | 547 | C8   | G A | 18 | -21.463 | -13.438 | 57.401 | 1.00 | 0.00 | C |
| ATOM | 548 | N9   | G A | 18 | -20.937 | -12.506 | 58.271 | 1.00 | 0.00 | N |
| ATOM | 549 | C2'  | G A | 18 | -18.726 | -12.012 | 57.164 | 1.00 | 0.00 | C |
| ATOM | 550 | C3'  | G A | 18 | -18.345 | -10.765 | 56.385 | 1.00 | 0.00 | C |
| ATOM | 551 | O3'  | G A | 18 | -17.436 | -9.987  | 57.160 | 1.00 | 0.00 | O |
| ATOM | 552 | C4'  | G A | 18 | -19.687 | -10.061 | 56.191 | 1.00 | 0.00 | C |
| ATOM | 553 | O4'  | G A | 18 | -20.441 | -10.385 | 57.403 | 1.00 | 0.00 | O |
| ATOM | 554 | C5'  | G A | 18 | -20.499 | -10.484 | 54.990 | 1.00 | 0.00 | C |
| ATOM | 555 | O5'  | G A | 18 | -20.340 | -11.907 | 54.766 | 1.00 | 0.00 | O |
| ATOM | 556 | O1P  | G A | 18 | -19.131 | -12.020 | 52.562 | 1.00 | 0.00 | O |
| ATOM | 557 | O2P  | G A | 18 | -20.609 | -13.916 | 53.280 | 1.00 | 0.00 | O |
| ATOM | 558 | P    | G A | 18 | -20.351 | -12.455 | 53.268 | 1.00 | 0.00 | P |
| ATOM | 559 | H1   | G A | 18 | -23.760 | -13.592 | 62.262 | 1.00 | 0.00 | H |
| ATOM | 560 | H8   | G A | 18 | -21.118 | -13.547 | 56.372 | 1.00 | 0.00 | H |
| ATOM | 561 | H1'  | G A | 18 | -19.486 | -11.179 | 59.014 | 1.00 | 0.00 | H |
| ATOM | 562 | H21  | G A | 18 | -22.814 | -12.073 | 63.531 | 1.00 | 0.00 | H |
| ATOM | 563 | H3'  | G A | 18 | -17.886 | -11.007 | 55.425 | 1.00 | 0.00 | H |
| ATOM | 564 | H22  | G A | 18 | -21.507 | -11.010 | 62.941 | 1.00 | 0.00 | H |
| ATOM | 565 | H4'  | G A | 18 | -19.475 | -8.997  | 56.093 | 1.00 | 0.00 | H |
| ATOM | 566 | H2'1 | G A | 18 | -19.046 | -12.814 | 56.499 | 1.00 | 0.00 | H |
| ATOM | 567 | H2'2 | G A | 18 | -17.885 | -12.388 | 57.749 | 1.00 | 0.00 | H |
| ATOM | 568 | H5'1 | G A | 18 | -21.549 | -10.253 | 55.168 | 1.00 | 0.00 | H |
| ATOM | 569 | H5'2 | G A | 18 | -20.156 | -9.933  | 54.115 | 1.00 | 0.00 | H |
| ATOM | 570 | C1'  | T A | 19 | -17.630 | -11.986 | 62.436 | 1.00 | 0.00 | C |
| ATOM | 571 | N1   | T A | 19 | -18.377 | -13.130 | 61.850 | 1.00 | 0.00 | N |
| ATOM | 572 | C2   | T A | 19 | -19.316 | -13.747 | 62.650 | 1.00 | 0.00 | C |

|      |     |      |       |    |         |         |        |      |      |   |
|------|-----|------|-------|----|---------|---------|--------|------|------|---|
| ATOM | 573 | O2   | T A   | 19 | -19.544 | -13.391 | 63.794 | 1.00 | 0.00 | O |
| ATOM | 574 | N3   | T A   | 19 | -19.987 | -14.805 | 62.065 | 1.00 | 0.00 | N |
| ATOM | 575 | C4   | T A   | 19 | -19.804 | -15.288 | 60.787 | 1.00 | 0.00 | C |
| ATOM | 576 | O4   | T A   | 19 | -20.465 | -16.247 | 60.372 | 1.00 | 0.00 | O |
| ATOM | 577 | C5   | T A   | 19 | -18.802 | -14.580 | 60.025 | 1.00 | 0.00 | C |
| ATOM | 578 | C6   | T A   | 19 | -18.129 | -13.543 | 60.563 | 1.00 | 0.00 | C |
| ATOM | 579 | C7   | T A   | 19 | -18.572 | -15.069 | 58.627 | 1.00 | 0.00 | C |
| ATOM | 580 | C2'  | T A   | 19 | -16.165 | -11.931 | 62.021 | 1.00 | 0.00 | C |
| ATOM | 581 | C3'  | T A   | 19 | -15.919 | -10.434 | 61.921 | 1.00 | 0.00 | C |
| ATOM | 582 | O3'  | T A   | 19 | -15.604 | -9.923  | 63.214 | 1.00 | 0.00 | O |
| ATOM | 583 | C4'  | T A   | 19 | -17.254 | -9.906  | 61.400 | 1.00 | 0.00 | C |
| ATOM | 584 | O4'  | T A   | 19 | -18.251 | -10.793 | 61.997 | 1.00 | 0.00 | O |
| ATOM | 585 | C5'  | T A   | 19 | -17.440 | -9.908  | 59.901 | 1.00 | 0.00 | C |
| ATOM | 586 | O5'  | T A   | 19 | -16.806 | -11.081 | 59.331 | 1.00 | 0.00 | O |
| ATOM | 587 | O1P  | T A   | 19 | -14.932 | -10.119 | 57.954 | 1.00 | 0.00 | O |
| ATOM | 588 | O2P  | T A   | 19 | -15.946 | -12.326 | 57.326 | 1.00 | 0.00 | O |
| ATOM | 589 | P    | T A   | 19 | -16.138 | -10.968 | 57.888 | 1.00 | 0.00 | P |
| ATOM | 590 | H3   | T A   | 19 | -20.697 | -15.279 | 62.642 | 1.00 | 0.00 | H |
| ATOM | 591 | H6   | T A   | 19 | -17.377 | -13.024 | 59.968 | 1.00 | 0.00 | H |
| ATOM | 592 | H1'  | T A   | 19 | -17.726 | -12.035 | 63.521 | 1.00 | 0.00 | H |
| ATOM | 593 | H3'  | T A   | 19 | -15.108 | -10.200 | 61.232 | 1.00 | 0.00 | H |
| ATOM | 594 | H4'  | T A   | 19 | -17.342 | -8.873  | 61.744 | 1.00 | 0.00 | H |
| ATOM | 595 | H71  | T A   | 19 | -17.565 | -15.479 | 58.546 | 1.00 | 0.00 | H |
| ATOM | 596 | H72  | T A   | 19 | -19.299 | -15.846 | 58.389 | 1.00 | 0.00 | H |
| ATOM | 597 | H73  | T A   | 19 | -18.683 | -14.241 | 57.926 | 1.00 | 0.00 | H |
| ATOM | 598 | H2'1 | T A   | 19 | -15.988 | -12.427 | 61.068 | 1.00 | 0.00 | H |
| ATOM | 599 | H2'2 | T A   | 19 | -15.508 | -12.393 | 62.759 | 1.00 | 0.00 | H |
| ATOM | 600 | H5'1 | T A   | 19 | -18.505 | -9.917  | 59.672 | 1.00 | 0.00 | H |
| ATOM | 601 | H5'2 | T A   | 19 | -16.991 | -9.008  | 59.483 | 1.00 | 0.00 | H |
| ATOM | 602 | C01  | LNK A | 20 | -12.388 | -9.872  | 65.088 | 0.00 | 0.00 | C |
| ATOM | 603 | O1   | LNK A | 20 | -13.176 | -10.238 | 63.952 | 1.00 | 0.00 | O |
| ATOM | 604 | S    | LNK A | 20 | -8.698  | -10.406 | 66.482 | 0.00 | 0.00 | S |
| ATOM | 605 | C02  | LNK A | 20 | -10.970 | -10.455 | 64.936 | 0.00 | 0.00 | C |
| ATOM | 606 | C03  | LNK A | 20 | -10.444 | -10.893 | 66.317 | 0.00 | 0.00 | C |
| ATOM | 607 | O1P  | LNK A | 20 | -14.540 | -12.313 | 63.538 | 1.00 | 0.00 | O |
| ATOM | 608 | O2P  | LNK A | 20 | -14.885 | -10.980 | 65.638 | 1.00 | 0.00 | O |
| ATOM | 609 | P    | LNK A | 20 | -14.563 | -10.988 | 64.189 | 1.00 | 0.00 | P |
| ATOM | 610 | H01  | LNK A | 20 | -12.848 | -10.267 | 65.993 | 0.00 | 0.00 | H |
| ATOM | 611 | H02  | LNK A | 20 | -12.328 | -8.786  | 65.155 | 0.00 | 0.00 | H |
| ATOM | 612 | H03  | LNK A | 20 | -10.530 | -11.975 | 66.412 | 0.00 | 0.00 | H |
| ATOM | 613 | H04  | LNK A | 20 | -10.308 | -9.697  | 64.518 | 0.00 | 0.00 | H |
| ATOM | 614 | H05  | LNK A | 20 | -11.001 | -11.317 | 64.270 | 0.00 | 0.00 | H |
| ATOM | 615 | H06  | LNK A | 20 | -11.031 | -10.411 | 67.098 | 0.00 | 0.00 | H |
| ATOM | 616 | AU   | LNK A | 20 | -8.435  | -10.686 | 67.050 |      |      |   |
| TER  |     |      |       |    |         |         |        |      |      |   |
| ATOM | 618 | C1'  | A B   | 2  | -25.374 | -18.096 | 67.082 | 1.00 | 0.00 | C |
| ATOM | 619 | N1   | A B   | 2  | -22.018 | -16.181 | 63.704 | 1.00 | 0.00 | N |
| ATOM | 620 | C2   | A B   | 2  | -22.326 | -15.845 | 64.952 | 1.00 | 0.00 | C |
| ATOM | 621 | N3   | A B   | 2  | -23.203 | -16.385 | 65.772 | 1.00 | 0.00 | N |
| ATOM | 622 | C4   | A B   | 2  | -23.832 | -17.412 | 65.170 | 1.00 | 0.00 | C |
| ATOM | 623 | C5   | A B   | 2  | -23.634 | -17.880 | 63.902 | 1.00 | 0.00 | C |
| ATOM | 624 | C6   | A B   | 2  | -22.660 | -17.210 | 63.130 | 1.00 | 0.00 | C |
| ATOM | 625 | N6   | A B   | 2  | -22.357 | -17.558 | 61.868 | 1.00 | 0.00 | N |
| ATOM | 626 | N7   | A B   | 2  | -24.463 | -18.954 | 63.630 | 1.00 | 0.00 | N |

|      |     |      |     |   |         |         |        |      |      |   |
|------|-----|------|-----|---|---------|---------|--------|------|------|---|
| ATOM | 627 | C8   | A B | 2 | -25.141 | -19.109 | 64.728 | 1.00 | 0.00 | C |
| ATOM | 628 | N9   | A B | 2 | -24.810 | -18.211 | 65.709 | 1.00 | 0.00 | N |
| ATOM | 629 | C2'  | A B | 2 | -26.870 | -18.372 | 67.156 | 1.00 | 0.00 | C |
| ATOM | 630 | C3'  | A B | 2 | -26.998 | -19.068 | 68.501 | 1.00 | 0.00 | C |
| ATOM | 631 | O3'  | A B | 2 | -27.096 | -18.085 | 69.529 | 1.00 | 0.00 | O |
| ATOM | 632 | C4'  | A B | 2 | -25.702 | -19.872 | 68.592 | 1.00 | 0.00 | C |
| ATOM | 633 | O4'  | A B | 2 | -24.714 | -19.044 | 67.898 | 1.00 | 0.00 | O |
| ATOM | 634 | C5'  | A B | 2 | -25.716 | -21.243 | 67.958 | 1.00 | 0.00 | C |
| ATOM | 635 | O5'  | A B | 2 | -26.516 | -21.215 | 66.749 | 1.00 | 0.00 | O |
| ATOM | 636 | H2   | A B | 2 | -21.772 | -15.000 | 65.358 | 1.00 | 0.00 | H |
| ATOM | 637 | H8   | A B | 2 | -25.902 | -19.880 | 64.856 | 1.00 | 0.00 | H |
| ATOM | 638 | H1'  | A B | 2 | -25.141 | -17.102 | 67.464 | 1.00 | 0.00 | H |
| ATOM | 639 | H3'  | A B | 2 | -27.869 | -19.721 | 68.543 | 1.00 | 0.00 | H |
| ATOM | 640 | H4'  | A B | 2 | -25.482 | -19.998 | 69.652 | 1.00 | 0.00 | H |
| ATOM | 641 | H61  | A B | 2 | -21.637 | -17.038 | 61.350 | 1.00 | 0.00 | H |
| ATOM | 642 | H62  | A B | 2 | -22.848 | -18.347 | 61.420 | 1.00 | 0.00 | H |
| ATOM | 643 | H2'1 | A B | 2 | -27.213 | -19.013 | 66.344 | 1.00 | 0.00 | H |
| ATOM | 644 | H2'2 | A B | 2 | -27.462 | -17.456 | 67.125 | 1.00 | 0.00 | H |
| ATOM | 645 | H5'1 | A B | 2 | -24.694 | -21.535 | 67.716 | 1.00 | 0.00 | H |
| ATOM | 646 | H5'2 | A B | 2 | -26.137 | -21.958 | 68.663 | 1.00 | 0.00 | H |
| ATOM | 647 | C1'  | C B | 3 | -25.476 | -13.132 | 67.189 | 1.00 | 0.00 | C |
| ATOM | 648 | N1   | C B | 3 | -25.616 | -13.863 | 65.900 | 1.00 | 0.00 | N |
| ATOM | 649 | C2   | C B | 3 | -24.787 | -13.488 | 64.844 | 1.00 | 0.00 | C |
| ATOM | 650 | O2   | C B | 3 | -23.974 | -12.571 | 65.020 | 1.00 | 0.00 | O |
| ATOM | 651 | N3   | C B | 3 | -24.899 | -14.140 | 63.662 | 1.00 | 0.00 | N |
| ATOM | 652 | C4   | C B | 3 | -25.789 | -15.128 | 63.502 | 1.00 | 0.00 | C |
| ATOM | 653 | N4   | C B | 3 | -25.853 | -15.735 | 62.324 | 1.00 | 0.00 | N |
| ATOM | 654 | C5   | C B | 3 | -26.659 | -15.533 | 64.568 | 1.00 | 0.00 | C |
| ATOM | 655 | C6   | C B | 3 | -26.525 | -14.864 | 65.753 | 1.00 | 0.00 | C |
| ATOM | 656 | C2'  | C B | 3 | -26.798 | -12.887 | 67.903 | 1.00 | 0.00 | C |
| ATOM | 657 | C3'  | C B | 3 | -26.401 | -13.027 | 69.364 | 1.00 | 0.00 | C |
| ATOM | 658 | O3'  | C B | 3 | -25.884 | -11.782 | 69.829 | 1.00 | 0.00 | O |
| ATOM | 659 | C4'  | C B | 3 | -25.333 | -14.117 | 69.323 | 1.00 | 0.00 | C |
| ATOM | 660 | O4'  | C B | 3 | -24.659 | -13.915 | 68.039 | 1.00 | 0.00 | O |
| ATOM | 661 | C5'  | C B | 3 | -25.826 | -15.543 | 69.391 | 1.00 | 0.00 | C |
| ATOM | 662 | O5'  | C B | 3 | -27.074 | -15.665 | 68.662 | 1.00 | 0.00 | O |
| ATOM | 663 | O1P  | C B | 3 | -28.749 | -16.203 | 70.462 | 1.00 | 0.00 | O |
| ATOM | 664 | O2P  | C B | 3 | -29.146 | -16.974 | 68.108 | 1.00 | 0.00 | O |
| ATOM | 665 | P    | C B | 3 | -28.174 | -16.689 | 69.192 | 1.00 | 0.00 | P |
| ATOM | 666 | H5   | C B | 3 | -27.390 | -16.331 | 64.440 | 1.00 | 0.00 | H |
| ATOM | 667 | H6   | C B | 3 | -27.159 | -15.141 | 66.595 | 1.00 | 0.00 | H |
| ATOM | 668 | H1'  | C B | 3 | -24.956 | -12.194 | 66.995 | 1.00 | 0.00 | H |
| ATOM | 669 | H3'  | C B | 3 | -27.243 | -13.324 | 69.989 | 1.00 | 0.00 | H |
| ATOM | 670 | H4'  | C B | 3 | -24.678 | -13.952 | 70.179 | 1.00 | 0.00 | H |
| ATOM | 671 | H41  | C B | 3 | -26.527 | -16.500 | 62.175 | 1.00 | 0.00 | H |
| ATOM | 672 | H42  | C B | 3 | -25.229 | -15.441 | 61.558 | 1.00 | 0.00 | H |
| ATOM | 673 | H2'1 | C B | 3 | -27.559 | -13.617 | 67.627 | 1.00 | 0.00 | H |
| ATOM | 674 | H2'2 | C B | 3 | -27.203 | -11.896 | 67.694 | 1.00 | 0.00 | H |
| ATOM | 675 | H5'1 | C B | 3 | -25.077 | -16.203 | 68.951 | 1.00 | 0.00 | H |
| ATOM | 676 | H5'2 | C B | 3 | -25.980 | -15.820 | 70.432 | 1.00 | 0.00 | H |
| ATOM | 677 | C1'  | C B | 4 | -24.852 | -8.621  | 65.244 | 1.00 | 0.00 | C |
| ATOM | 678 | N1   | C B | 4 | -25.647 | -9.653  | 64.524 | 1.00 | 0.00 | N |
| ATOM | 679 | C2   | C B | 4 | -25.329 | -9.910  | 63.192 | 1.00 | 0.00 | C |
| ATOM | 680 | O2   | C B | 4 | -24.405 | -9.276  | 62.665 | 1.00 | 0.00 | O |

|      |     |      |     |   |         |         |        |      |      |   |
|------|-----|------|-----|---|---------|---------|--------|------|------|---|
| ATOM | 681 | N3   | C B | 4 | -26.040 | -10.845 | 62.517 | 1.00 | 0.00 | N |
| ATOM | 682 | C4   | C B | 4 | -27.036 | -11.516 | 63.114 | 1.00 | 0.00 | C |
| ATOM | 683 | N4   | C B | 4 | -27.697 | -12.423 | 62.410 | 1.00 | 0.00 | N |
| ATOM | 684 | C5   | C B | 4 | -27.389 | -11.269 | 64.482 | 1.00 | 0.00 | C |
| ATOM | 685 | C6   | C B | 4 | -26.654 | -10.325 | 65.143 | 1.00 | 0.00 | C |
| ATOM | 686 | C2'  | C B | 4 | -25.675 | -7.771  | 66.202 | 1.00 | 0.00 | C |
| ATOM | 687 | C3'  | C B | 4 | -24.695 | -7.540  | 67.342 | 1.00 | 0.00 | C |
| ATOM | 688 | O3'  | C B | 4 | -23.860 | -6.429  | 67.024 | 1.00 | 0.00 | O |
| ATOM | 689 | C4'  | C B | 4 | -23.915 | -8.852  | 67.391 | 1.00 | 0.00 | C |
| ATOM | 690 | O4'  | C B | 4 | -23.858 | -9.292  | 65.996 | 1.00 | 0.00 | O |
| ATOM | 691 | C5'  | C B | 4 | -24.518 | -9.962  | 68.222 | 1.00 | 0.00 | C |
| ATOM | 692 | O5'  | C B | 4 | -25.963 | -9.932  | 68.105 | 1.00 | 0.00 | O |
| ATOM | 693 | O1P  | C B | 4 | -26.723 | -9.324  | 70.426 | 1.00 | 0.00 | O |
| ATOM | 694 | O2P  | C B | 4 | -28.223 | -10.662 | 68.924 | 1.00 | 0.00 | O |
| ATOM | 695 | P    | C B | 4 | -26.843 | -10.346 | 69.367 | 1.00 | 0.00 | P |
| ATOM | 696 | H5   | C B | 4 | -28.202 | -11.806 | 64.969 | 1.00 | 0.00 | H |
| ATOM | 697 | H6   | C B | 4 | -26.881 | -10.108 | 66.186 | 1.00 | 0.00 | H |
| ATOM | 698 | H1'  | C B | 4 | -24.349 | -7.999  | 64.503 | 1.00 | 0.00 | H |
| ATOM | 699 | H3'  | C B | 4 | -25.205 | -7.350  | 68.287 | 1.00 | 0.00 | H |
| ATOM | 700 | H4'  | C B | 4 | -22.933 | -8.623  | 67.805 | 1.00 | 0.00 | H |
| ATOM | 701 | H41  | C B | 4 | -28.465 | -12.955 | 62.845 | 1.00 | 0.00 | H |
| ATOM | 702 | H42  | C B | 4 | -27.443 | -12.597 | 61.425 | 1.00 | 0.00 | H |
| ATOM | 703 | H2'1 | C B | 4 | -26.571 | -8.286  | 66.548 | 1.00 | 0.00 | H |
| ATOM | 704 | H2'2 | C B | 4 | -25.990 | -6.829  | 65.753 | 1.00 | 0.00 | H |
| ATOM | 705 | H5'1 | C B | 4 | -24.139 | -10.920 | 67.869 | 1.00 | 0.00 | H |
| ATOM | 706 | H5'2 | C B | 4 | -24.230 | -9.823  | 69.263 | 1.00 | 0.00 | H |
| ATOM | 707 | C1'  | G B | 5 | -24.545 | -5.399  | 61.496 | 1.00 | 0.00 | C |
| ATOM | 708 | N1   | G B | 5 | -27.425 | -8.831  | 59.056 | 1.00 | 0.00 | N |
| ATOM | 709 | C2   | G B | 5 | -26.333 | -8.108  | 58.608 | 1.00 | 0.00 | C |
| ATOM | 710 | N2   | G B | 5 | -25.960 | -8.327  | 57.341 | 1.00 | 0.00 | N |
| ATOM | 711 | N3   | G B | 5 | -25.667 | -7.237  | 59.364 | 1.00 | 0.00 | N |
| ATOM | 712 | C4   | G B | 5 | -26.186 | -7.136  | 60.616 | 1.00 | 0.00 | C |
| ATOM | 713 | C5   | G B | 5 | -27.272 | -7.812  | 61.147 | 1.00 | 0.00 | C |
| ATOM | 714 | C6   | G B | 5 | -27.977 | -8.739  | 60.347 | 1.00 | 0.00 | C |
| ATOM | 715 | O6   | G B | 5 | -28.955 | -9.427  | 60.637 | 1.00 | 0.00 | O |
| ATOM | 716 | N7   | G B | 5 | -27.482 | -7.421  | 62.472 | 1.00 | 0.00 | N |
| ATOM | 717 | C8   | G B | 5 | -26.538 | -6.543  | 62.697 | 1.00 | 0.00 | C |
| ATOM | 718 | N9   | G B | 5 | -25.711 | -6.316  | 61.615 | 1.00 | 0.00 | N |
| ATOM | 719 | C2'  | G B | 5 | -24.727 | -4.077  | 62.230 | 1.00 | 0.00 | C |
| ATOM | 720 | C3'  | G B | 5 | -23.320 | -3.796  | 62.732 | 1.00 | 0.00 | C |
| ATOM | 721 | O3'  | G B | 5 | -22.574 | -3.155  | 61.701 | 1.00 | 0.00 | O |
| ATOM | 722 | C4'  | G B | 5 | -22.788 | -5.192  | 63.050 | 1.00 | 0.00 | C |
| ATOM | 723 | O4'  | G B | 5 | -23.421 | -6.054  | 62.052 | 1.00 | 0.00 | O |
| ATOM | 724 | C5'  | G B | 5 | -23.099 | -5.733  | 64.425 | 1.00 | 0.00 | C |
| ATOM | 725 | O5'  | G B | 5 | -24.424 | -5.309  | 64.830 | 1.00 | 0.00 | O |
| ATOM | 726 | O1P  | G B | 5 | -23.977 | -3.782  | 66.780 | 1.00 | 0.00 | O |
| ATOM | 727 | O2P  | G B | 5 | -26.156 | -5.015  | 66.627 | 1.00 | 0.00 | O |
| ATOM | 728 | P    | G B | 5 | -24.695 | -5.004  | 66.372 | 1.00 | 0.00 | P |
| ATOM | 729 | H1   | G B | 5 | -27.867 | -9.485  | 58.392 | 1.00 | 0.00 | H |
| ATOM | 730 | H8   | G B | 5 | -26.415 | -6.035  | 63.653 | 1.00 | 0.00 | H |
| ATOM | 731 | H1'  | G B | 5 | -24.347 | -5.233  | 60.438 | 1.00 | 0.00 | H |
| ATOM | 732 | H21  | G B | 5 | -26.478 | -9.005  | 56.763 | 1.00 | 0.00 | H |
| ATOM | 733 | H3'  | G B | 5 | -23.322 | -3.165  | 63.622 | 1.00 | 0.00 | H |
| ATOM | 734 | H22  | G B | 5 | -25.157 | -7.818  | 56.945 | 1.00 | 0.00 | H |

|      |     |      |     |   |         |        |        |      |      |   |
|------|-----|------|-----|---|---------|--------|--------|------|------|---|
| ATOM | 735 | H4'  | G B | 5 | -21.704 | -5.148 | 62.947 | 1.00 | 0.00 | H |
| ATOM | 736 | H2'1 | G B | 5 | -25.435 | -4.156 | 63.055 | 1.00 | 0.00 | H |
| ATOM | 737 | H2'2 | G B | 5 | -25.079 | -3.283 | 61.571 | 1.00 | 0.00 | H |
| ATOM | 738 | H5'1 | G B | 5 | -23.052 | -6.822 | 64.399 | 1.00 | 0.00 | H |
| ATOM | 739 | H5'2 | G B | 5 | -22.360 | -5.359 | 65.133 | 1.00 | 0.00 | H |
| ATOM | 740 | C1'  | T B | 6 | -25.473 | -3.805 | 56.903 | 1.00 | 0.00 | C |
| ATOM | 741 | N1   | T B | 6 | -26.588 | -4.255 | 57.778 | 1.00 | 0.00 | N |
| ATOM | 742 | C2   | T B | 6 | -27.462 | -5.187 | 57.256 | 1.00 | 0.00 | C |
| ATOM | 743 | O2   | T B | 6 | -27.350 | -5.639 | 56.130 | 1.00 | 0.00 | O |
| ATOM | 744 | N3   | T B | 6 | -28.482 | -5.578 | 58.105 | 1.00 | 0.00 | N |
| ATOM | 745 | C4   | T B | 6 | -28.700 | -5.129 | 59.390 | 1.00 | 0.00 | C |
| ATOM | 746 | O4   | T B | 6 | -29.653 | -5.551 | 60.054 | 1.00 | 0.00 | O |
| ATOM | 747 | C5   | T B | 6 | -27.735 | -4.158 | 59.847 | 1.00 | 0.00 | C |
| ATOM | 748 | C6   | T B | 6 | -26.727 | -3.754 | 59.049 | 1.00 | 0.00 | C |
| ATOM | 749 | C7   | T B | 6 | -27.932 | -3.644 | 61.243 | 1.00 | 0.00 | C |
| ATOM | 750 | C2'  | T B | 6 | -25.142 | -2.324 | 57.044 | 1.00 | 0.00 | C |
| ATOM | 751 | C3'  | T B | 6 | -23.631 | -2.320 | 56.870 | 1.00 | 0.00 | C |
| ATOM | 752 | O3'  | T B | 6 | -23.319 | -2.288 | 55.479 | 1.00 | 0.00 | O |
| ATOM | 753 | C4'  | T B | 6 | -23.209 | -3.631 | 57.528 | 1.00 | 0.00 | C |
| ATOM | 754 | O4'  | T B | 6 | -24.320 | -4.544 | 57.257 | 1.00 | 0.00 | O |
| ATOM | 755 | C5'  | T B | 6 | -22.972 | -3.590 | 59.020 | 1.00 | 0.00 | C |
| ATOM | 756 | O5'  | T B | 6 | -23.926 | -2.692 | 59.642 | 1.00 | 0.00 | O |
| ATOM | 757 | O1P  | T B | 6 | -22.483 | -0.821 | 60.509 | 1.00 | 0.00 | O |
| ATOM | 758 | O2P  | T B | 6 | -24.663 | -1.349 | 61.633 | 1.00 | 0.00 | O |
| ATOM | 759 | P    | T B | 6 | -23.466 | -1.845 | 60.913 | 1.00 | 0.00 | P |
| ATOM | 760 | H3   | T B | 6 | -29.146 | -6.276 | 57.739 | 1.00 | 0.00 | H |
| ATOM | 761 | H6   | T B | 6 | -26.011 | -3.020 | 59.418 | 1.00 | 0.00 | H |
| ATOM | 762 | H1'  | T B | 6 | -25.726 | -4.051 | 55.872 | 1.00 | 0.00 | H |
| ATOM | 763 | H3'  | T B | 6 | -23.167 | -1.465 | 57.363 | 1.00 | 0.00 | H |
| ATOM | 764 | H4'  | T B | 6 | -22.278 | -3.940 | 57.052 | 1.00 | 0.00 | H |
| ATOM | 765 | H71  | T B | 6 | -28.176 | -2.582 | 61.208 | 1.00 | 0.00 | H |
| ATOM | 766 | H72  | T B | 6 | -28.748 | -4.189 | 61.719 | 1.00 | 0.00 | H |
| ATOM | 767 | H73  | T B | 6 | -27.016 | -3.787 | 61.817 | 1.00 | 0.00 | H |
| ATOM | 768 | H2'1 | T B | 6 | -25.431 | -1.927 | 58.015 | 1.00 | 0.00 | H |
| ATOM | 769 | H2'2 | T B | 6 | -25.630 | -1.717 | 56.281 | 1.00 | 0.00 | H |
| ATOM | 770 | H5'1 | T B | 6 | -23.089 | -4.593 | 59.430 | 1.00 | 0.00 | H |
| ATOM | 771 | H5'2 | T B | 6 | -21.958 | -3.240 | 59.211 | 1.00 | 0.00 | H |
| ATOM | 772 | C1'  | C B | 7 | -28.148 | -3.618 | 52.723 | 1.00 | 0.00 | C |
| ATOM | 773 | N1   | C B | 7 | -28.794 | -3.387 | 54.046 | 1.00 | 0.00 | N |
| ATOM | 774 | C2   | C B | 7 | -29.940 | -4.119 | 54.349 | 1.00 | 0.00 | C |
| ATOM | 775 | O2   | C B | 7 | -30.371 | -4.927 | 53.515 | 1.00 | 0.00 | O |
| ATOM | 776 | N3   | C B | 7 | -30.543 | -3.923 | 55.547 | 1.00 | 0.00 | N |
| ATOM | 777 | C4   | C B | 7 | -30.054 | -3.041 | 56.428 | 1.00 | 0.00 | C |
| ATOM | 778 | N4   | C B | 7 | -30.681 | -2.892 | 57.584 | 1.00 | 0.00 | N |
| ATOM | 779 | C5   | C B | 7 | -28.879 | -2.270 | 56.141 | 1.00 | 0.00 | C |
| ATOM | 780 | C6   | C B | 7 | -28.285 | -2.488 | 54.930 | 1.00 | 0.00 | C |
| ATOM | 781 | C2'  | C B | 7 | -27.593 | -2.355 | 52.082 | 1.00 | 0.00 | C |
| ATOM | 782 | C3'  | C B | 7 | -26.340 | -2.874 | 51.394 | 1.00 | 0.00 | C |
| ATOM | 783 | O3'  | C B | 7 | -26.692 | -3.404 | 50.118 | 1.00 | 0.00 | O |
| ATOM | 784 | C4'  | C B | 7 | -25.849 | -3.955 | 52.353 | 1.00 | 0.00 | C |
| ATOM | 785 | O4'  | C B | 7 | -27.073 | -4.517 | 52.922 | 1.00 | 0.00 | O |
| ATOM | 786 | C5'  | C B | 7 | -24.956 | -3.496 | 53.484 | 1.00 | 0.00 | C |
| ATOM | 787 | O5'  | C B | 7 | -25.392 | -2.195 | 53.952 | 1.00 | 0.00 | O |
| ATOM | 788 | O1P  | C B | 7 | -23.474 | -0.684 | 53.344 | 1.00 | 0.00 | O |



|      |     |      |     |   |         |        |        |      |      |   |
|------|-----|------|-----|---|---------|--------|--------|------|------|---|
| ATOM | 789 | O2P  | C B | 7 | -24.955 | -0.110 | 55.284 | 1.00 | 0.00 | O |
| ATOM | 790 | P    | C B | 7 | -24.295 | -1.161 | 54.473 | 1.00 | 0.00 | P |
| ATOM | 791 | H5   | C B | 7 | -28.481 | -1.547 | 56.853 | 1.00 | 0.00 | H |
| ATOM | 792 | H6   | C B | 7 | -27.385 | -1.931 | 54.670 | 1.00 | 0.00 | H |
| ATOM | 793 | H1'  | C B | 7 | -28.874 | -4.103 | 52.070 | 1.00 | 0.00 | H |
| ATOM | 794 | H3'  | C B | 7 | -25.590 | -2.091 | 51.265 | 1.00 | 0.00 | H |
| ATOM | 795 | H4'  | C B | 7 | -25.285 | -4.674 | 51.758 | 1.00 | 0.00 | H |
| ATOM | 796 | H41  | C B | 7 | -30.323 | -2.223 | 58.282 | 1.00 | 0.00 | H |
| ATOM | 797 | H42  | C B | 7 | -31.527 | -3.446 | 57.788 | 1.00 | 0.00 | H |
| ATOM | 798 | H2'1 | C B | 7 | -27.353 | -1.588 | 52.818 | 1.00 | 0.00 | H |
| ATOM | 799 | H2'2 | C B | 7 | -28.287 | -1.915 | 51.366 | 1.00 | 0.00 | H |
| ATOM | 800 | H5'1 | C B | 7 | -25.010 | -4.219 | 54.298 | 1.00 | 0.00 | H |
| ATOM | 801 | H5'2 | C B | 7 | -23.930 | -3.433 | 53.126 | 1.00 | 0.00 | H |
| ATOM | 802 | C1'  | C B | 8 | -32.325 | -3.995 | 50.089 | 1.00 | 0.00 | C |
| ATOM | 803 | N1   | C B | 8 | -32.281 | -3.164 | 51.322 | 1.00 | 0.00 | N |
| ATOM | 804 | C2   | C B | 8 | -33.262 | -3.376 | 52.289 | 1.00 | 0.00 | C |
| ATOM | 805 | O2   | C B | 8 | -34.123 | -4.241 | 52.084 | 1.00 | 0.00 | O |
| ATOM | 806 | N3   | C B | 8 | -33.239 | -2.629 | 53.419 | 1.00 | 0.00 | N |
| ATOM | 807 | C4   | C B | 8 | -32.294 | -1.699 | 53.611 | 1.00 | 0.00 | C |
| ATOM | 808 | N4   | C B | 8 | -32.318 | -1.000 | 54.737 | 1.00 | 0.00 | N |
| ATOM | 809 | C5   | C B | 8 | -31.274 | -1.454 | 52.633 | 1.00 | 0.00 | C |
| ATOM | 810 | C6   | C B | 8 | -31.314 | -2.223 | 51.503 | 1.00 | 0.00 | C |
| ATOM | 811 | C2'  | C B | 8 | -31.944 | -3.239 | 48.823 | 1.00 | 0.00 | C |
| ATOM | 812 | C3'  | C B | 8 | -31.209 | -4.304 | 48.025 | 1.00 | 0.00 | C |
| ATOM | 813 | O3'  | C B | 8 | -32.159 | -5.089 | 47.308 | 1.00 | 0.00 | O |
| ATOM | 814 | C4'  | C B | 8 | -30.497 | -5.110 | 49.110 | 1.00 | 0.00 | C |
| ATOM | 815 | O4'  | C B | 8 | -31.407 | -5.059 | 50.255 | 1.00 | 0.00 | O |
| ATOM | 816 | C5'  | C B | 8 | -29.144 | -4.599 | 49.546 | 1.00 | 0.00 | C |
| ATOM | 817 | O5'  | C B | 8 | -29.143 | -3.148 | 49.544 | 1.00 | 0.00 | O |
| ATOM | 818 | O1P  | C B | 8 | -27.506 | -2.570 | 47.721 | 1.00 | 0.00 | O |
| ATOM | 819 | O2P  | C B | 8 | -27.881 | -0.978 | 49.624 | 1.00 | 0.00 | O |
| ATOM | 820 | P    | C B | 8 | -27.801 | -2.383 | 49.156 | 1.00 | 0.00 | P |
| ATOM | 821 | H5   | C B | 8 | -30.508 | -0.694 | 52.781 | 1.00 | 0.00 | H |
| ATOM | 822 | H6   | C B | 8 | -30.556 | -2.079 | 50.734 | 1.00 | 0.00 | H |
| ATOM | 823 | H1'  | C B | 8 | -33.324 | -4.424 | 50.002 | 1.00 | 0.00 | H |
| ATOM | 824 | H3'  | C B | 8 | -30.496 | -3.870 | 47.325 | 1.00 | 0.00 | H |
| ATOM | 825 | H4'  | C B | 8 | -30.359 | -6.117 | 48.717 | 1.00 | 0.00 | H |
| ATOM | 826 | H41  | C B | 8 | -31.600 | -0.281 | 54.911 | 1.00 | 0.00 | H |
| ATOM | 827 | H42  | C B | 8 | -33.052 | -1.176 | 55.438 | 1.00 | 0.00 | H |
| ATOM | 828 | H2'1 | C B | 8 | -31.301 | -2.384 | 49.030 | 1.00 | 0.00 | H |
| ATOM | 829 | H2'2 | C B | 8 | -32.817 | -2.869 | 48.284 | 1.00 | 0.00 | H |
| ATOM | 830 | H5'1 | C B | 8 | -28.929 | -4.965 | 50.550 | 1.00 | 0.00 | H |
| ATOM | 831 | H5'2 | C B | 8 | -28.384 | -4.968 | 48.860 | 1.00 | 0.00 | H |
| ATOM | 832 | C1'  | T B | 9 | -37.238 | -3.943 | 49.497 | 1.00 | 0.00 | C |
| ATOM | 833 | N1   | T B | 9 | -36.555 | -2.811 | 50.178 | 1.00 | 0.00 | N |
| ATOM | 834 | C2   | T B | 9 | -37.049 | -2.423 | 51.406 | 1.00 | 0.00 | C |
| ATOM | 835 | O2   | T B | 9 | -38.004 | -2.966 | 51.933 | 1.00 | 0.00 | O |
| ATOM | 836 | N3   | T B | 9 | -36.384 | -1.369 | 52.004 | 1.00 | 0.00 | N |
| ATOM | 837 | C4   | T B | 9 | -35.301 | -0.686 | 51.493 | 1.00 | 0.00 | C |
| ATOM | 838 | O4   | T B | 9 | -34.789 | 0.249  | 52.121 | 1.00 | 0.00 | O |
| ATOM | 839 | C5   | T B | 9 | -34.855 | -1.163 | 50.205 | 1.00 | 0.00 | C |
| ATOM | 840 | C6   | T B | 9 | -35.479 | -2.189 | 49.594 | 1.00 | 0.00 | C |
| ATOM | 841 | C7   | T B | 9 | -33.676 | -0.450 | 49.614 | 1.00 | 0.00 | C |
| ATOM | 842 | C2'  | T B | 9 | -37.341 | -3.779 | 47.984 | 1.00 | 0.00 | C |

|      |     |      |     |    |         |        |        |      |      |   |
|------|-----|------|-----|----|---------|--------|--------|------|------|---|
| ATOM | 843 | C3'  | T B | 9  | -37.175 | -5.211 | 47.499 | 1.00 | 0.00 | C |
| ATOM | 844 | O3'  | T B | 9  | -38.439 | -5.869 | 47.543 | 1.00 | 0.00 | O |
| ATOM | 845 | C4'  | T B | 9  | -36.181 | -5.796 | 48.499 | 1.00 | 0.00 | C |
| ATOM | 846 | O4'  | T B | 9  | -36.495 | -5.117 | 49.757 | 1.00 | 0.00 | O |
| ATOM | 847 | C5'  | T B | 9  | -34.716 | -5.592 | 48.191 | 1.00 | 0.00 | C |
| ATOM | 848 | O5'  | T B | 9  | -34.520 | -4.287 | 47.590 | 1.00 | 0.00 | O |
| ATOM | 849 | O1P  | T B | 9  | -33.768 | -4.829 | 45.251 | 1.00 | 0.00 | O |
| ATOM | 850 | O2P  | T B | 9  | -33.065 | -2.674 | 46.328 | 1.00 | 0.00 | O |
| ATOM | 851 | P    | T B | 9  | -33.384 | -4.113 | 46.485 | 1.00 | 0.00 | P |
| ATOM | 852 | H3   | T B | 9  | -36.732 | -1.063 | 52.923 | 1.00 | 0.00 | H |
| ATOM | 853 | H6   | T B | 9  | -35.124 | -2.531 | 48.622 | 1.00 | 0.00 | H |
| ATOM | 854 | H1'  | T B | 9  | -38.225 | -4.065 | 49.943 | 1.00 | 0.00 | H |
| ATOM | 855 | H3'  | T B | 9  | -36.781 | -5.252 | 46.483 | 1.00 | 0.00 | H |
| ATOM | 856 | H4'  | T B | 9  | -36.367 | -6.871 | 48.537 | 1.00 | 0.00 | H |
| ATOM | 857 | H71  | T B | 9  | -33.984 | 0.072  | 48.707 | 1.00 | 0.00 | H |
| ATOM | 858 | H72  | T B | 9  | -33.287 | 0.271  | 50.333 | 1.00 | 0.00 | H |
| ATOM | 859 | H73  | T B | 9  | -32.898 | -1.174 | 49.368 | 1.00 | 0.00 | H |
| ATOM | 860 | H2'1 | T B | 9  | -36.561 | -3.131 | 47.586 | 1.00 | 0.00 | H |
| ATOM | 861 | H2'2 | T B | 9  | -38.301 | -3.363 | 47.678 | 1.00 | 0.00 | H |
| ATOM | 862 | H5'1 | T B | 9  | -34.142 | -5.663 | 49.114 | 1.00 | 0.00 | H |
| ATOM | 863 | H5'2 | T B | 9  | -34.386 | -6.367 | 47.502 | 1.00 | 0.00 | H |
| ATOM | 864 | C1'  | A B | 10 | -41.854 | -2.601 | 50.733 | 1.00 | 0.00 | C |
| ATOM | 865 | N1   | A B | 10 | -39.506 | 1.416  | 52.898 | 1.00 | 0.00 | N |
| ATOM | 866 | C2   | A B | 10 | -40.506 | 0.636  | 53.299 | 1.00 | 0.00 | C |
| ATOM | 867 | N3   | A B | 10 | -41.062 | -0.389 | 52.690 | 1.00 | 0.00 | N |
| ATOM | 868 | C4   | A B | 10 | -40.475 | -0.598 | 51.498 | 1.00 | 0.00 | C |
| ATOM | 869 | C5   | A B | 10 | -39.444 | 0.108  | 50.943 | 1.00 | 0.00 | C |
| ATOM | 870 | C6   | A B | 10 | -38.939 | 1.182  | 51.704 | 1.00 | 0.00 | C |
| ATOM | 871 | N6   | A B | 10 | -37.928 | 1.965  | 51.287 | 1.00 | 0.00 | N |
| ATOM | 872 | N7   | A B | 10 | -39.102 | -0.400 | 49.702 | 1.00 | 0.00 | N |
| ATOM | 873 | C8   | A B | 10 | -39.928 | -1.390 | 49.532 | 1.00 | 0.00 | C |
| ATOM | 874 | N9   | A B | 10 | -40.789 | -1.573 | 50.583 | 1.00 | 0.00 | N |
| ATOM | 875 | C2'  | A B | 10 | -42.588 | -2.916 | 49.437 | 1.00 | 0.00 | C |
| ATOM | 876 | C3'  | A B | 10 | -42.857 | -4.407 | 49.579 | 1.00 | 0.00 | C |
| ATOM | 877 | O3'  | A B | 10 | -44.047 | -4.598 | 50.339 | 1.00 | 0.00 | O |
| ATOM | 878 | C4'  | A B | 10 | -41.615 | -4.906 | 50.316 | 1.00 | 0.00 | C |
| ATOM | 879 | O4'  | A B | 10 | -41.241 | -3.792 | 51.189 | 1.00 | 0.00 | O |
| ATOM | 880 | C5'  | A B | 10 | -40.426 | -5.270 | 49.459 | 1.00 | 0.00 | C |
| ATOM | 881 | O5'  | A B | 10 | -40.334 | -4.357 | 48.335 | 1.00 | 0.00 | O |
| ATOM | 882 | O1P  | A B | 10 | -40.778 | -5.836 | 46.347 | 1.00 | 0.00 | O |
| ATOM | 883 | O2P  | A B | 10 | -39.379 | -3.769 | 46.087 | 1.00 | 0.00 | O |
| ATOM | 884 | P    | A B | 10 | -39.794 | -4.910 | 46.940 | 1.00 | 0.00 | P |
| ATOM | 885 | H2   | A B | 10 | -40.924 | 0.882  | 54.274 | 1.00 | 0.00 | H |
| ATOM | 886 | H8   | A B | 10 | -39.935 | -2.015 | 48.639 | 1.00 | 0.00 | H |
| ATOM | 887 | H1'  | A B | 10 | -42.547 | -2.264 | 51.503 | 1.00 | 0.00 | H |
| ATOM | 888 | H3'  | A B | 10 | -42.963 | -4.896 | 48.611 | 1.00 | 0.00 | H |
| ATOM | 889 | H4'  | A B | 10 | -41.913 | -5.798 | 50.868 | 1.00 | 0.00 | H |
| ATOM | 890 | H61  | A B | 10 | -37.595 | 2.734  | 51.883 | 1.00 | 0.00 | H |
| ATOM | 891 | H62  | A B | 10 | -37.488 | 1.793  | 50.372 | 1.00 | 0.00 | H |
| ATOM | 892 | H2'1 | A B | 10 | -41.984 | -2.705 | 48.556 | 1.00 | 0.00 | H |
| ATOM | 893 | H2'2 | A B | 10 | -43.518 | -2.354 | 49.341 | 1.00 | 0.00 | H |
| ATOM | 894 | H5'1 | A B | 10 | -39.519 | -5.206 | 50.059 | 1.00 | 0.00 | H |
| ATOM | 895 | H5'2 | A B | 10 | -40.545 | -6.289 | 49.096 | 1.00 | 0.00 | H |
| ATOM | 896 | C1'  | G B | 11 | -45.196 | 0.412  | 52.829 | 1.00 | 0.00 | C |

|      |     |      |     |    |         |        |        |      |      |   |
|------|-----|------|-----|----|---------|--------|--------|------|------|---|
| ATOM | 897 | N1   | G B | 11 | -41.625 | 3.980  | 52.096 | 1.00 | 0.00 | N |
| ATOM | 898 | C2   | G B | 11 | -42.444 | 3.755  | 53.188 | 1.00 | 0.00 | C |
| ATOM | 899 | N2   | G B | 11 | -42.293 | 4.593  | 54.221 | 1.00 | 0.00 | N |
| ATOM | 900 | N3   | G B | 11 | -43.342 | 2.772  | 53.245 | 1.00 | 0.00 | N |
| ATOM | 901 | C4   | G B | 11 | -43.363 | 2.026  | 52.109 | 1.00 | 0.00 | C |
| ATOM | 902 | C5   | G B | 11 | -42.589 | 2.179  | 50.972 | 1.00 | 0.00 | C |
| ATOM | 903 | C6   | G B | 11 | -41.633 | 3.220  | 50.911 | 1.00 | 0.00 | C |
| ATOM | 904 | O6   | G B | 11 | -40.861 | 3.513  | 49.998 | 1.00 | 0.00 | O |
| ATOM | 905 | N7   | G B | 11 | -42.921 | 1.206  | 50.027 | 1.00 | 0.00 | N |
| ATOM | 906 | C8   | G B | 11 | -43.863 | 0.509  | 50.609 | 1.00 | 0.00 | C |
| ATOM | 907 | N9   | G B | 11 | -44.188 | 0.947  | 51.876 | 1.00 | 0.00 | N |
| ATOM | 908 | C2'  | G B | 11 | -46.477 | -0.069 | 52.161 | 1.00 | 0.00 | C |
| ATOM | 909 | C3'  | G B | 11 | -46.852 | -1.267 | 53.018 | 1.00 | 0.00 | C |
| ATOM | 910 | O3'  | G B | 11 | -47.581 | -0.817 | 54.158 | 1.00 | 0.00 | O |
| ATOM | 911 | C4'  | G B | 11 | -45.494 | -1.854 | 53.396 | 1.00 | 0.00 | C |
| ATOM | 912 | O4'  | G B | 11 | -44.615 | -0.688 | 53.501 | 1.00 | 0.00 | O |
| ATOM | 913 | C5'  | G B | 11 | -44.888 | -2.830 | 52.415 | 1.00 | 0.00 | C |
| ATOM | 914 | O5'  | G B | 11 | -45.194 | -2.418 | 51.060 | 1.00 | 0.00 | O |
| ATOM | 915 | O1P  | G B | 11 | -46.692 | -4.255 | 50.216 | 1.00 | 0.00 | O |
| ATOM | 916 | O2P  | G B | 11 | -45.296 | -2.934 | 48.604 | 1.00 | 0.00 | O |
| ATOM | 917 | P    | G B | 11 | -45.430 | -3.539 | 49.951 | 1.00 | 0.00 | P |
| ATOM | 918 | H1   | G B | 11 | -40.958 | 4.764  | 52.156 | 1.00 | 0.00 | H |
| ATOM | 919 | H8   | G B | 11 | -44.349 | -0.342 | 50.134 | 1.00 | 0.00 | H |
| ATOM | 920 | H1'  | G B | 11 | -45.409 | 1.183  | 53.571 | 1.00 | 0.00 | H |
| ATOM | 921 | H21  | G B | 11 | -41.595 | 5.349  | 54.172 | 1.00 | 0.00 | H |
| ATOM | 922 | H3'  | G B | 11 | -47.454 | -1.991 | 52.468 | 1.00 | 0.00 | H |
| ATOM | 923 | H22  | G B | 11 | -42.875 | 4.481  | 55.064 | 1.00 | 0.00 | H |
| ATOM | 924 | H4'  | G B | 11 | -45.626 | -2.374 | 54.345 | 1.00 | 0.00 | H |
| ATOM | 925 | H2'1 | G B | 11 | -46.317 | -0.359 | 51.122 | 1.00 | 0.00 | H |
| ATOM | 926 | H2'2 | G B | 11 | -47.260 | 0.689  | 52.173 | 1.00 | 0.00 | H |
| ATOM | 927 | H5'1 | G B | 11 | -43.808 | -2.856 | 52.557 | 1.00 | 0.00 | H |
| ATOM | 928 | H5'2 | G B | 11 | -45.298 | -3.823 | 52.600 | 1.00 | 0.00 | H |
| ATOM | 929 | C1'  | G B | 12 | -46.834 | 4.782  | 54.486 | 1.00 | 0.00 | C |
| ATOM | 930 | N1   | G B | 12 | -43.505 | 6.667  | 51.110 | 1.00 | 0.00 | N |
| ATOM | 931 | C2   | G B | 12 | -43.779 | 7.067  | 52.407 | 1.00 | 0.00 | C |
| ATOM | 932 | N2   | G B | 12 | -43.073 | 8.110  | 52.864 | 1.00 | 0.00 | N |
| ATOM | 933 | N3   | G B | 12 | -44.683 | 6.475  | 53.184 | 1.00 | 0.00 | N |
| ATOM | 934 | C4   | G B | 12 | -45.307 | 5.444  | 52.557 | 1.00 | 0.00 | C |
| ATOM | 935 | C5   | G B | 12 | -45.104 | 4.977  | 51.270 | 1.00 | 0.00 | C |
| ATOM | 936 | C6   | G B | 12 | -44.142 | 5.603  | 50.445 | 1.00 | 0.00 | C |
| ATOM | 937 | O6   | G B | 12 | -43.822 | 5.337  | 49.286 | 1.00 | 0.00 | O |
| ATOM | 938 | N7   | G B | 12 | -45.950 | 3.898  | 51.008 | 1.00 | 0.00 | N |
| ATOM | 939 | C8   | G B | 12 | -46.622 | 3.745  | 52.119 | 1.00 | 0.00 | C |
| ATOM | 940 | N9   | G B | 12 | -46.288 | 4.648  | 53.108 | 1.00 | 0.00 | N |
| ATOM | 941 | C2'  | G B | 12 | -48.330 | 4.519  | 54.581 | 1.00 | 0.00 | C |
| ATOM | 942 | C3'  | G B | 12 | -48.447 | 3.837  | 55.936 | 1.00 | 0.00 | C |
| ATOM | 943 | O3'  | G B | 12 | -48.526 | 4.831  | 56.955 | 1.00 | 0.00 | O |
| ATOM | 944 | C4'  | G B | 12 | -47.156 | 3.025  | 56.020 | 1.00 | 0.00 | C |
| ATOM | 945 | O4'  | G B | 12 | -46.172 | 3.839  | 55.306 | 1.00 | 0.00 | O |
| ATOM | 946 | C5'  | G B | 12 | -47.187 | 1.649  | 55.398 | 1.00 | 0.00 | C |
| ATOM | 947 | O5'  | G B | 12 | -48.002 | 1.670  | 54.200 | 1.00 | 0.00 | O |
| ATOM | 948 | O1P  | G B | 12 | -49.954 | 0.199  | 54.798 | 1.00 | 0.00 | O |
| ATOM | 949 | O2P  | G B | 12 | -49.251 | 0.437  | 52.401 | 1.00 | 0.00 | O |
| ATOM | 950 | P    | G B | 12 | -48.855 | 0.374  | 53.829 | 1.00 | 0.00 | P |

|      |      |      |     |    |         |        |        |      |      |   |
|------|------|------|-----|----|---------|--------|--------|------|------|---|
| ATOM | 951  | H1   | G B | 12 | -42.781 | 7.190  | 50.594 | 1.00 | 0.00 | H |
| ATOM | 952  | H8   | G B | 12 | -47.380 | 2.974  | 52.255 | 1.00 | 0.00 | H |
| ATOM | 953  | H1'  | G B | 12 | -46.588 | 5.778  | 54.855 | 1.00 | 0.00 | H |
| ATOM | 954  | H21  | G B | 12 | -42.372 | 8.561  | 52.257 | 1.00 | 0.00 | H |
| ATOM | 955  | H3'  | G B | 12 | -49.323 | 3.190  | 55.994 | 1.00 | 0.00 | H |
| ATOM | 956  | H22  | G B | 12 | -43.231 | 8.458  | 53.819 | 1.00 | 0.00 | H |
| ATOM | 957  | H4'  | G B | 12 | -46.924 | 2.907  | 57.077 | 1.00 | 0.00 | H |
| ATOM | 958  | H2'1 | G B | 12 | -48.688 | 3.873  | 53.780 | 1.00 | 0.00 | H |
| ATOM | 959  | H2'2 | G B | 12 | -48.916 | 5.437  | 54.548 | 1.00 | 0.00 | H |
| ATOM | 960  | H5'1 | G B | 12 | -46.170 | 1.347  | 55.147 | 1.00 | 0.00 | H |
| ATOM | 961  | H5'2 | G B | 12 | -47.604 | 0.942  | 56.115 | 1.00 | 0.00 | H |
| ATOM | 962  | C1'  | T B | 13 | -46.966 | 9.728  | 54.625 | 1.00 | 0.00 | C |
| ATOM | 963  | N1   | T B | 13 | -47.090 | 9.013  | 53.328 | 1.00 | 0.00 | N |
| ATOM | 964  | C2   | T B | 13 | -46.253 | 9.412  | 52.304 | 1.00 | 0.00 | C |
| ATOM | 965  | O2   | T B | 13 | -45.438 | 10.311 | 52.432 | 1.00 | 0.00 | O |
| ATOM | 966  | N3   | T B | 13 | -46.401 | 8.720  | 51.117 | 1.00 | 0.00 | N |
| ATOM | 967  | C4   | T B | 13 | -47.289 | 7.695  | 50.868 | 1.00 | 0.00 | C |
| ATOM | 968  | O4   | T B | 13 | -47.334 | 7.151  | 49.759 | 1.00 | 0.00 | O |
| ATOM | 969  | C5   | T B | 13 | -48.121 | 7.347  | 51.996 | 1.00 | 0.00 | C |
| ATOM | 970  | C6   | T B | 13 | -48.003 | 8.000  | 53.170 | 1.00 | 0.00 | C |
| ATOM | 971  | C7   | T B | 13 | -49.102 | 6.235  | 51.772 | 1.00 | 0.00 | C |
| ATOM | 972  | C2'  | T B | 13 | -48.298 | 9.958  | 55.330 | 1.00 | 0.00 | C |
| ATOM | 973  | C3'  | T B | 13 | -47.912 | 9.806  | 56.793 | 1.00 | 0.00 | C |
| ATOM | 974  | O3'  | T B | 13 | -47.408 | 11.049 | 57.276 | 1.00 | 0.00 | O |
| ATOM | 975  | C4'  | T B | 13 | -46.836 | 8.723  | 56.750 | 1.00 | 0.00 | C |
| ATOM | 976  | O4'  | T B | 13 | -46.153 | 8.944  | 55.475 | 1.00 | 0.00 | O |
| ATOM | 977  | C5'  | T B | 13 | -47.320 | 7.292  | 56.798 | 1.00 | 0.00 | C |
| ATOM | 978  | O5'  | T B | 13 | -48.561 | 7.170  | 56.057 | 1.00 | 0.00 | O |
| ATOM | 979  | O1P  | T B | 13 | -50.248 | 6.603  | 57.835 | 1.00 | 0.00 | O |
| ATOM | 980  | O2P  | T B | 13 | -50.619 | 5.854  | 55.469 | 1.00 | 0.00 | O |
| ATOM | 981  | P    | T B | 13 | -49.659 | 6.133  | 56.565 | 1.00 | 0.00 | P |
| ATOM | 982  | H3   | T B | 13 | -45.785 | 8.998  | 50.339 | 1.00 | 0.00 | H |
| ATOM | 983  | H6   | T B | 13 | -48.643 | 7.720  | 54.007 | 1.00 | 0.00 | H |
| ATOM | 984  | H1'  | T B | 13 | -46.451 | 10.673 | 54.448 | 1.00 | 0.00 | H |
| ATOM | 985  | H3'  | T B | 13 | -48.758 | 9.496  | 57.407 | 1.00 | 0.00 | H |
| ATOM | 986  | H4'  | T B | 13 | -46.191 | 8.883  | 57.614 | 1.00 | 0.00 | H |
| ATOM | 987  | H71  | T B | 13 | -50.117 | 6.626  | 51.835 | 1.00 | 0.00 | H |
| ATOM | 988  | H72  | T B | 13 | -48.940 | 5.801  | 50.784 | 1.00 | 0.00 | H |
| ATOM | 989  | H73  | T B | 13 | -48.961 | 5.466  | 52.533 | 1.00 | 0.00 | H |
| ATOM | 990  | H2'1 | T B | 13 | -49.049 | 9.226  | 55.039 | 1.00 | 0.00 | H |
| ATOM | 991  | H2'2 | T B | 13 | -48.707 | 10.948 | 55.129 | 1.00 | 0.00 | H |
| ATOM | 992  | H5'1 | T B | 13 | -46.563 | 6.643  | 56.359 | 1.00 | 0.00 | H |
| ATOM | 993  | H5'2 | T B | 13 | -47.483 | 7.004  | 57.835 | 1.00 | 0.00 | H |
| ATOM | 994  | C1'  | G B | 14 | -46.330 | 14.243 | 52.660 | 1.00 | 0.00 | C |
| ATOM | 995  | N1   | G B | 14 | -46.989 | 11.802 | 48.228 | 1.00 | 0.00 | N |
| ATOM | 996  | C2   | G B | 14 | -46.081 | 12.788 | 48.572 | 1.00 | 0.00 | C |
| ATOM | 997  | N2   | G B | 14 | -45.238 | 13.176 | 47.609 | 1.00 | 0.00 | N |
| ATOM | 998  | N3   | G B | 14 | -46.019 | 13.341 | 49.783 | 1.00 | 0.00 | N |
| ATOM | 999  | C4   | G B | 14 | -46.951 | 12.832 | 50.632 | 1.00 | 0.00 | C |
| ATOM | 1000 | C5   | G B | 14 | -47.897 | 11.855 | 50.376 | 1.00 | 0.00 | C |
| ATOM | 1001 | C6   | G B | 14 | -47.961 | 11.264 | 49.092 | 1.00 | 0.00 | C |
| ATOM | 1002 | O6   | G B | 14 | -48.724 | 10.390 | 48.677 | 1.00 | 0.00 | O |
| ATOM | 1003 | N7   | G B | 14 | -48.668 | 11.618 | 51.516 | 1.00 | 0.00 | N |
| ATOM | 1004 | C8   | G B | 14 | -48.174 | 12.439 | 52.407 | 1.00 | 0.00 | C |

|      |      |      |     |    |         |        |        |      |      |   |
|------|------|------|-----|----|---------|--------|--------|------|------|---|
| ATOM | 1005 | N9   | G B | 14 | -47.128 | 13.212 | 51.944 | 1.00 | 0.00 | N |
| ATOM | 1006 | C2'  | G B | 14 | -47.148 | 15.094 | 53.622 | 1.00 | 0.00 | C |
| ATOM | 1007 | C3'  | G B | 14 | -46.163 | 15.327 | 54.756 | 1.00 | 0.00 | C |
| ATOM | 1008 | O3'  | G B | 14 | -45.330 | 16.437 | 54.433 | 1.00 | 0.00 | O |
| ATOM | 1009 | C4'  | G B | 14 | -45.383 | 14.014 | 54.802 | 1.00 | 0.00 | C |
| ATOM | 1010 | O4'  | G B | 14 | -45.333 | 13.575 | 53.408 | 1.00 | 0.00 | O |
| ATOM | 1011 | C5'  | G B | 14 | -45.980 | 12.907 | 55.637 | 1.00 | 0.00 | C |
| ATOM | 1012 | O5'  | G B | 14 | -47.425 | 12.934 | 55.527 | 1.00 | 0.00 | O |
| ATOM | 1013 | O1P  | G B | 14 | -48.176 | 13.543 | 57.851 | 1.00 | 0.00 | O |
| ATOM | 1014 | O2P  | G B | 14 | -49.681 | 12.203 | 56.357 | 1.00 | 0.00 | O |
| ATOM | 1015 | P    | G B | 14 | -48.300 | 12.521 | 56.795 | 1.00 | 0.00 | P |
| ATOM | 1016 | H1   | G B | 14 | -46.949 | 11.435 | 47.265 | 1.00 | 0.00 | H |
| ATOM | 1017 | H8   | G B | 14 | -48.556 | 12.507 | 53.426 | 1.00 | 0.00 | H |
| ATOM | 1018 | H1'  | G B | 14 | -45.830 | 14.865 | 51.916 | 1.00 | 0.00 | H |
| ATOM | 1019 | H21  | G B | 14 | -45.290 | 12.741 | 46.675 | 1.00 | 0.00 | H |
| ATOM | 1020 | H3'  | G B | 14 | -46.668 | 15.517 | 55.704 | 1.00 | 0.00 | H |
| ATOM | 1021 | H22  | G B | 14 | -44.540 | 13.909 | 47.799 | 1.00 | 0.00 | H |
| ATOM | 1022 | H4'  | G B | 14 | -44.399 | 14.245 | 55.211 | 1.00 | 0.00 | H |
| ATOM | 1023 | H2'1 | G B | 14 | -48.042 | 14.579 | 53.972 | 1.00 | 0.00 | H |
| ATOM | 1024 | H2'2 | G B | 14 | -47.467 | 16.035 | 53.174 | 1.00 | 0.00 | H |
| ATOM | 1025 | H5'1 | G B | 14 | -45.602 | 11.948 | 55.284 | 1.00 | 0.00 | H |
| ATOM | 1026 | H5'2 | G B | 14 | -45.687 | 13.045 | 56.678 | 1.00 | 0.00 | H |
| ATOM | 1027 | C1'  | C B | 15 | -46.021 | 17.467 | 48.912 | 1.00 | 0.00 | C |
| ATOM | 1028 | N1   | C B | 15 | -47.185 | 16.547 | 49.025 | 1.00 | 0.00 | N |
| ATOM | 1029 | C2   | C B | 15 | -47.529 | 15.787 | 47.909 | 1.00 | 0.00 | C |
| ATOM | 1030 | O2   | C B | 15 | -46.856 | 15.907 | 46.877 | 1.00 | 0.00 | O |
| ATOM | 1031 | N3   | C B | 15 | -48.586 | 14.943 | 47.992 | 1.00 | 0.00 | N |
| ATOM | 1032 | C4   | C B | 15 | -49.294 | 14.837 | 49.122 | 1.00 | 0.00 | C |
| ATOM | 1033 | N4   | C B | 15 | -50.316 | 13.994 | 49.149 | 1.00 | 0.00 | N |
| ATOM | 1034 | C5   | C B | 15 | -48.968 | 15.610 | 50.286 | 1.00 | 0.00 | C |
| ATOM | 1035 | C6   | C B | 15 | -47.897 | 16.448 | 50.181 | 1.00 | 0.00 | C |
| ATOM | 1036 | C2'  | C B | 15 | -46.209 | 18.788 | 49.644 | 1.00 | 0.00 | C |
| ATOM | 1037 | C3'  | C B | 15 | -44.805 | 19.072 | 50.154 | 1.00 | 0.00 | C |
| ATOM | 1038 | O3'  | C B | 15 | -44.053 | 19.714 | 49.126 | 1.00 | 0.00 | O |
| ATOM | 1039 | C4'  | C B | 15 | -44.271 | 17.677 | 50.473 | 1.00 | 0.00 | C |
| ATOM | 1040 | O4'  | C B | 15 | -44.899 | 16.812 | 49.473 | 1.00 | 0.00 | O |
| ATOM | 1041 | C5'  | C B | 15 | -44.589 | 17.134 | 51.848 | 1.00 | 0.00 | C |
| ATOM | 1042 | O5'  | C B | 15 | -45.917 | 17.558 | 52.246 | 1.00 | 0.00 | O |
| ATOM | 1043 | O1P  | C B | 15 | -45.480 | 19.087 | 54.198 | 1.00 | 0.00 | O |
| ATOM | 1044 | O2P  | C B | 15 | -47.658 | 17.850 | 54.036 | 1.00 | 0.00 | O |
| ATOM | 1045 | P    | C B | 15 | -46.196 | 17.862 | 53.786 | 1.00 | 0.00 | P |
| ATOM | 1046 | H5   | C B | 15 | -49.546 | 15.530 | 51.207 | 1.00 | 0.00 | H |
| ATOM | 1047 | H6   | C B | 15 | -47.605 | 17.052 | 51.041 | 1.00 | 0.00 | H |
| ATOM | 1048 | H1'  | C B | 15 | -45.819 | 17.632 | 47.853 | 1.00 | 0.00 | H |
| ATOM | 1049 | H3'  | C B | 15 | -44.813 | 19.702 | 51.043 | 1.00 | 0.00 | H |
| ATOM | 1050 | H4'  | C B | 15 | -43.186 | 17.722 | 50.377 | 1.00 | 0.00 | H |
| ATOM | 1051 | H41  | C B | 15 | -50.877 | 13.889 | 50.008 | 1.00 | 0.00 | H |
| ATOM | 1052 | H42  | C B | 15 | -50.551 | 13.441 | 48.311 | 1.00 | 0.00 | H |
| ATOM | 1053 | H2'1 | C B | 15 | -46.921 | 18.709 | 50.465 | 1.00 | 0.00 | H |
| ATOM | 1054 | H2'2 | C B | 15 | -46.560 | 19.582 | 48.983 | 1.00 | 0.00 | H |
| ATOM | 1055 | H5'1 | C B | 15 | -44.541 | 16.046 | 51.823 | 1.00 | 0.00 | H |
| ATOM | 1056 | H5'2 | C B | 15 | -43.854 | 17.511 | 52.559 | 1.00 | 0.00 | H |
| ATOM | 1057 | C1'  | G B | 16 | -46.968 | 19.044 | 44.315 | 1.00 | 0.00 | C |
| ATOM | 1058 | N1   | G B | 16 | -51.069 | 16.041 | 44.737 | 1.00 | 0.00 | N |

|      |      |      |     |    |         |        |        |      |      |   |
|------|------|------|-----|----|---------|--------|--------|------|------|---|
| ATOM | 1059 | C2   | G B | 16 | -50.201 | 16.214 | 43.673 | 1.00 | 0.00 | C |
| ATOM | 1060 | N2   | G B | 16 | -50.462 | 15.493 | 42.576 | 1.00 | 0.00 | N |
| ATOM | 1061 | N3   | G B | 16 | -49.157 | 17.040 | 43.703 | 1.00 | 0.00 | N |
| ATOM | 1062 | C4   | G B | 16 | -49.049 | 17.694 | 44.890 | 1.00 | 0.00 | C |
| ATOM | 1063 | C5   | G B | 16 | -49.868 | 17.589 | 46.001 | 1.00 | 0.00 | C |
| ATOM | 1064 | C6   | G B | 16 | -50.975 | 16.708 | 45.972 | 1.00 | 0.00 | C |
| ATOM | 1065 | O6   | G B | 16 | -51.807 | 16.480 | 46.850 | 1.00 | 0.00 | O |
| ATOM | 1066 | N7   | G B | 16 | -49.414 | 18.433 | 47.017 | 1.00 | 0.00 | N |
| ATOM | 1067 | C8   | G B | 16 | -48.358 | 19.009 | 46.502 | 1.00 | 0.00 | C |
| ATOM | 1068 | N9   | G B | 16 | -48.073 | 18.612 | 45.211 | 1.00 | 0.00 | N |
| ATOM | 1069 | C2'  | G B | 16 | -46.624 | 20.523 | 44.434 | 1.00 | 0.00 | C |
| ATOM | 1070 | C3'  | G B | 16 | -45.116 | 20.515 | 44.240 | 1.00 | 0.00 | C |
| ATOM | 1071 | O3'  | G B | 16 | -44.824 | 20.529 | 42.845 | 1.00 | 0.00 | O |
| ATOM | 1072 | C4'  | G B | 16 | -44.694 | 19.206 | 44.906 | 1.00 | 0.00 | C |
| ATOM | 1073 | O4'  | G B | 16 | -45.816 | 18.299 | 44.659 | 1.00 | 0.00 | O |
| ATOM | 1074 | C5'  | G B | 16 | -44.436 | 19.262 | 46.393 | 1.00 | 0.00 | C |
| ATOM | 1075 | O5'  | G B | 16 | -45.372 | 20.173 | 47.020 | 1.00 | 0.00 | O |
| ATOM | 1076 | O1P  | G B | 16 | -43.904 | 22.042 | 47.847 | 1.00 | 0.00 | O |
| ATOM | 1077 | O2P  | G B | 16 | -46.071 | 21.542 | 49.007 | 1.00 | 0.00 | O |
| ATOM | 1078 | P    | G B | 16 | -44.887 | 21.030 | 48.275 | 1.00 | 0.00 | P |
| ATOM | 1079 | H1   | G B | 16 | -51.844 | 15.371 | 44.614 | 1.00 | 0.00 | H |
| ATOM | 1080 | H8   | G B | 16 | -47.757 | 19.737 | 47.044 | 1.00 | 0.00 | H |
| ATOM | 1081 | H1'  | G B | 16 | -47.238 | 18.788 | 43.290 | 1.00 | 0.00 | H |
| ATOM | 1082 | H21  | G B | 16 | -51.270 | 14.853 | 42.562 | 1.00 | 0.00 | H |
| ATOM | 1083 | H3'  | G B | 16 | -44.638 | 21.371 | 44.718 | 1.00 | 0.00 | H |
| ATOM | 1084 | H22  | G B | 16 | -49.855 | 15.578 | 41.749 | 1.00 | 0.00 | H |
| ATOM | 1085 | H4'  | G B | 16 | -43.773 | 18.886 | 44.419 | 1.00 | 0.00 | H |
| ATOM | 1086 | H2'1 | G B | 16 | -46.897 | 20.933 | 45.407 | 1.00 | 0.00 | H |
| ATOM | 1087 | H2'2 | G B | 16 | -47.119 | 21.126 | 43.673 | 1.00 | 0.00 | H |
| ATOM | 1088 | H5'1 | G B | 16 | -44.554 | 18.264 | 46.814 | 1.00 | 0.00 | H |
| ATOM | 1089 | H5'2 | G B | 16 | -43.416 | 19.606 | 46.565 | 1.00 | 0.00 | H |
| ATOM | 1090 | C1'  | G B | 17 | -49.626 | 19.247 | 40.141 | 1.00 | 0.00 | C |
| ATOM | 1091 | N1   | G B | 17 | -53.484 | 17.926 | 43.206 | 1.00 | 0.00 | N |
| ATOM | 1092 | C2   | G B | 17 | -53.162 | 17.475 | 41.938 | 1.00 | 0.00 | C |
| ATOM | 1093 | N2   | G B | 17 | -53.977 | 16.550 | 41.418 | 1.00 | 0.00 | N |
| ATOM | 1094 | N3   | G B | 17 | -52.111 | 17.910 | 41.247 | 1.00 | 0.00 | N |
| ATOM | 1095 | C4   | G B | 17 | -51.401 | 18.851 | 41.924 | 1.00 | 0.00 | C |
| ATOM | 1096 | C5   | G B | 17 | -51.648 | 19.363 | 43.186 | 1.00 | 0.00 | C |
| ATOM | 1097 | C6   | G B | 17 | -52.761 | 18.899 | 43.922 | 1.00 | 0.00 | C |
| ATOM | 1098 | O6   | G B | 17 | -53.142 | 19.229 | 45.046 | 1.00 | 0.00 | O |
| ATOM | 1099 | N7   | G B | 17 | -50.681 | 20.315 | 43.519 | 1.00 | 0.00 | N |
| ATOM | 1100 | C8   | G B | 17 | -49.895 | 20.345 | 42.474 | 1.00 | 0.00 | C |
| ATOM | 1101 | N9   | G B | 17 | -50.268 | 19.484 | 41.463 | 1.00 | 0.00 | N |
| ATOM | 1102 | C2'  | G B | 17 | -49.066 | 20.508 | 39.497 | 1.00 | 0.00 | C |
| ATOM | 1103 | C3'  | G B | 17 | -47.816 | 19.984 | 38.806 | 1.00 | 0.00 | C |
| ATOM | 1104 | O3'  | G B | 17 | -48.173 | 19.455 | 37.531 | 1.00 | 0.00 | O |
| ATOM | 1105 | C4'  | G B | 17 | -47.327 | 18.901 | 39.765 | 1.00 | 0.00 | C |
| ATOM | 1106 | O4'  | G B | 17 | -48.554 | 18.345 | 40.337 | 1.00 | 0.00 | O |
| ATOM | 1107 | C5'  | G B | 17 | -46.432 | 19.357 | 40.893 | 1.00 | 0.00 | C |
| ATOM | 1108 | O5'  | G B | 17 | -46.861 | 20.659 | 41.363 | 1.00 | 0.00 | O |
| ATOM | 1109 | O1P  | G B | 17 | -44.937 | 22.161 | 40.748 | 1.00 | 0.00 | O |
| ATOM | 1110 | O2P  | G B | 17 | -46.411 | 22.744 | 42.693 | 1.00 | 0.00 | O |
| ATOM | 1111 | P    | G B | 17 | -45.758 | 21.690 | 41.880 | 1.00 | 0.00 | P |
| ATOM | 1112 | H1   | G B | 17 | -54.317 | 17.520 | 43.659 | 1.00 | 0.00 | H |

|      |      |      |     |    |         |        |        |      |      |   |
|------|------|------|-----|----|---------|--------|--------|------|------|---|
| ATOM | 1113 | H8   | G B | 17 | -49.022 | 20.993 | 42.407 | 1.00 | 0.00 | H |
| ATOM | 1114 | H1'  | G B | 17 | -50.354 | 18.766 | 39.489 | 1.00 | 0.00 | H |
| ATOM | 1115 | H21  | G B | 17 | -54.787 | 16.214 | 41.960 | 1.00 | 0.00 | H |
| ATOM | 1116 | H3'  | G B | 17 | -47.064 | 20.762 | 38.676 | 1.00 | 0.00 | H |
| ATOM | 1117 | H22  | G B | 17 | -53.794 | 16.174 | 40.476 | 1.00 | 0.00 | H |
| ATOM | 1118 | H4'  | G B | 17 | -46.770 | 18.178 | 39.170 | 1.00 | 0.00 | H |
| ATOM | 1119 | H2'1 | G B | 17 | -48.821 | 21.274 | 40.232 | 1.00 | 0.00 | H |
| ATOM | 1120 | H2'2 | G B | 17 | -49.759 | 20.950 | 38.782 | 1.00 | 0.00 | H |
| ATOM | 1121 | H5'1 | G B | 17 | -46.487 | 18.635 | 41.707 | 1.00 | 0.00 | H |
| ATOM | 1122 | H5'2 | G B | 17 | -45.405 | 19.414 | 40.533 | 1.00 | 0.00 | H |
| ATOM | 1123 | C1'  | C B | 18 | -53.802 | 18.870 | 37.505 | 1.00 | 0.00 | C |
| ATOM | 1124 | N1   | C B | 18 | -53.757 | 19.702 | 38.739 | 1.00 | 0.00 | N |
| ATOM | 1125 | C2   | C B | 18 | -54.738 | 19.488 | 39.705 | 1.00 | 0.00 | C |
| ATOM | 1126 | O2   | C B | 18 | -55.599 | 18.623 | 39.501 | 1.00 | 0.00 | O |
| ATOM | 1127 | N3   | C B | 18 | -54.715 | 20.236 | 40.834 | 1.00 | 0.00 | N |
| ATOM | 1128 | C4   | C B | 18 | -53.769 | 21.165 | 41.026 | 1.00 | 0.00 | C |
| ATOM | 1129 | N4   | C B | 18 | -53.794 | 21.866 | 42.150 | 1.00 | 0.00 | N |
| ATOM | 1130 | C5   | C B | 18 | -52.752 | 21.407 | 40.048 | 1.00 | 0.00 | C |
| ATOM | 1131 | C6   | C B | 18 | -52.792 | 20.642 | 38.920 | 1.00 | 0.00 | C |
| ATOM | 1132 | C2'  | C B | 18 | -53.421 | 19.627 | 36.239 | 1.00 | 0.00 | C |
| ATOM | 1133 | C3'  | C B | 18 | -52.686 | 18.561 | 35.441 | 1.00 | 0.00 | C |
| ATOM | 1134 | O3'  | C B | 18 | -53.636 | 17.776 | 34.724 | 1.00 | 0.00 | O |
| ATOM | 1135 | C4'  | C B | 18 | -51.974 | 17.756 | 36.526 | 1.00 | 0.00 | C |
| ATOM | 1136 | O4'  | C B | 18 | -52.884 | 17.806 | 37.671 | 1.00 | 0.00 | O |
| ATOM | 1137 | C5'  | C B | 18 | -50.621 | 18.266 | 36.962 | 1.00 | 0.00 | C |
| ATOM | 1138 | O5'  | C B | 18 | -50.621 | 19.716 | 36.960 | 1.00 | 0.00 | O |
| ATOM | 1139 | O1P  | C B | 18 | -48.983 | 20.296 | 35.138 | 1.00 | 0.00 | O |
| ATOM | 1140 | O2P  | C B | 18 | -49.358 | 21.888 | 37.041 | 1.00 | 0.00 | O |
| ATOM | 1141 | P    | C B | 18 | -49.277 | 20.483 | 36.573 | 1.00 | 0.00 | P |
| ATOM | 1142 | H5   | C B | 18 | -51.982 | 22.165 | 40.198 | 1.00 | 0.00 | H |
| ATOM | 1143 | H6   | C B | 18 | -52.036 | 20.788 | 38.150 | 1.00 | 0.00 | H |
| ATOM | 1144 | H1'  | C B | 18 | -54.800 | 18.442 | 37.419 | 1.00 | 0.00 | H |
| ATOM | 1145 | H3'  | C B | 18 | -51.973 | 18.995 | 34.741 | 1.00 | 0.00 | H |
| ATOM | 1146 | H4'  | C B | 18 | -51.837 | 16.748 | 36.134 | 1.00 | 0.00 | H |
| ATOM | 1147 | H41  | C B | 18 | -53.077 | 22.586 | 42.324 | 1.00 | 0.00 | H |
| ATOM | 1148 | H42  | C B | 18 | -54.528 | 21.690 | 42.851 | 1.00 | 0.00 | H |
| ATOM | 1149 | H2'1 | C B | 18 | -52.778 | 20.481 | 36.447 | 1.00 | 0.00 | H |
| ATOM | 1150 | H2'2 | C B | 18 | -54.294 | 19.997 | 35.701 | 1.00 | 0.00 | H |
| ATOM | 1151 | H5'1 | C B | 18 | -50.406 | 17.900 | 37.966 | 1.00 | 0.00 | H |
| ATOM | 1152 | H5'2 | C B | 18 | -49.861 | 17.897 | 36.276 | 1.00 | 0.00 | H |
| ATOM | 1153 | C1'  | C B | 19 | -58.721 | 18.932 | 36.933 | 1.00 | 0.00 | C |
| ATOM | 1154 | N1   | C B | 19 | -58.022 | 20.065 | 37.598 | 1.00 | 0.00 | N |
| ATOM | 1155 | C2   | C B | 19 | -58.492 | 20.484 | 38.842 | 1.00 | 0.00 | C |
| ATOM | 1156 | O2   | C B | 19 | -59.463 | 19.900 | 39.340 | 1.00 | 0.00 | O |
| ATOM | 1157 | N3   | C B | 19 | -57.869 | 21.514 | 39.462 | 1.00 | 0.00 | N |
| ATOM | 1158 | C4   | C B | 19 | -56.819 | 22.125 | 38.896 | 1.00 | 0.00 | C |
| ATOM | 1159 | N4   | C B | 19 | -56.248 | 23.125 | 39.547 | 1.00 | 0.00 | N |
| ATOM | 1160 | C5   | C B | 19 | -56.318 | 21.716 | 37.620 | 1.00 | 0.00 | C |
| ATOM | 1161 | C6   | C B | 19 | -56.959 | 20.677 | 37.014 | 1.00 | 0.00 | C |
| ATOM | 1162 | C2'  | C B | 19 | -58.840 | 19.085 | 35.424 | 1.00 | 0.00 | C |
| ATOM | 1163 | C3'  | C B | 19 | -58.688 | 17.648 | 34.947 | 1.00 | 0.00 | C |
| ATOM | 1164 | O3'  | C B | 19 | -59.954 | 16.996 | 35.012 | 1.00 | 0.00 | O |
| ATOM | 1165 | C4'  | C B | 19 | -57.687 | 17.064 | 35.941 | 1.00 | 0.00 | C |
| ATOM | 1166 | O4'  | C B | 19 | -57.979 | 17.756 | 37.197 | 1.00 | 0.00 | O |

|      |      |      |     |    |         |         |        |      |      |   |
|------|------|------|-----|----|---------|---------|--------|------|------|---|
| ATOM | 1167 | C5'  | C B | 19 | -56.224 | 17.258  | 35.614 | 1.00 | 0.00 | C |
| ATOM | 1168 | O5'  | C B | 19 | -56.027 | 18.556  | 35.000 | 1.00 | 0.00 | O |
| ATOM | 1169 | O1P  | C B | 19 | -55.305 | 17.989  | 32.657 | 1.00 | 0.00 | O |
| ATOM | 1170 | O2P  | C B | 19 | -54.576 | 20.149  | 33.707 | 1.00 | 0.00 | O |
| ATOM | 1171 | P    | C B | 19 | -54.904 | 18.712  | 33.880 | 1.00 | 0.00 | P |
| ATOM | 1172 | H5   | C B | 19 | -55.466 | 22.211  | 37.154 | 1.00 | 0.00 | H |
| ATOM | 1173 | H6   | C B | 19 | -56.611 | 20.329  | 36.041 | 1.00 | 0.00 | H |
| ATOM | 1174 | H1'  | C B | 19 | -59.703 | 18.820  | 37.394 | 1.00 | 0.00 | H |
| ATOM | 1175 | H3'  | C B | 19 | -58.306 | 17.595  | 33.928 | 1.00 | 0.00 | H |
| ATOM | 1176 | H4'  | C B | 19 | -57.877 | 15.992  | 35.991 | 1.00 | 0.00 | H |
| ATOM | 1177 | H41  | C B | 19 | -55.438 | 23.613  | 39.137 | 1.00 | 0.00 | H |
| ATOM | 1178 | H42  | C B | 19 | -56.612 | 23.418  | 40.467 | 1.00 | 0.00 | H |
| ATOM | 1179 | H2'1 | C B | 19 | -58.061 | 19.724  | 35.009 | 1.00 | 0.00 | H |
| ATOM | 1180 | H2'2 | C B | 19 | -59.801 | 19.503  | 35.125 | 1.00 | 0.00 | H |
| ATOM | 1181 | H5'1 | C B | 19 | -55.640 | 17.190  | 36.531 | 1.00 | 0.00 | H |
| ATOM | 1182 | H5'2 | C B | 19 | -55.906 | 16.474  | 34.928 | 1.00 | 0.00 | H |
| ATOM | 1183 | C1'  | T B | 20 | -63.330 | 20.265  | 38.149 | 1.00 | 0.00 | C |
| ATOM | 1184 | N1   | T B | 20 | -62.268 | 21.295  | 37.999 | 1.00 | 0.00 | N |
| ATOM | 1185 | C2   | T B | 20 | -62.109 | 22.191  | 39.037 | 1.00 | 0.00 | C |
| ATOM | 1186 | O2   | T B | 20 | -62.795 | 22.163  | 40.044 | 1.00 | 0.00 | O |
| ATOM | 1187 | N3   | T B | 20 | -61.112 | 23.130  | 38.856 | 1.00 | 0.00 | N |
| ATOM | 1188 | C4   | T B | 20 | -60.284 | 23.249  | 37.761 | 1.00 | 0.00 | C |
| ATOM | 1189 | O4   | T B | 20 | -59.423 | 24.137  | 37.712 | 1.00 | 0.00 | O |
| ATOM | 1190 | C5   | T B | 20 | -60.524 | 22.270  | 36.729 | 1.00 | 0.00 | C |
| ATOM | 1191 | C6   | T B | 20 | -61.488 | 21.339  | 36.870 | 1.00 | 0.00 | C |
| ATOM | 1192 | C7   | T B | 20 | -59.645 | 22.361  | 35.518 | 1.00 | 0.00 | C |
| ATOM | 1193 | C2'  | T B | 20 | -64.067 | 19.951  | 36.852 | 1.00 | 0.00 | C |
| ATOM | 1194 | C3'  | T B | 20 | -64.332 | 18.459  | 36.991 | 1.00 | 0.00 | C |
| ATOM | 1195 | O3'  | T B | 20 | -65.523 | 18.263  | 37.751 | 1.00 | 0.00 | O |
| ATOM | 1196 | C4'  | T B | 20 | -63.089 | 17.961  | 37.725 | 1.00 | 0.00 | C |
| ATOM | 1197 | O4'  | T B | 20 | -62.716 | 19.073  | 38.599 | 1.00 | 0.00 | O |
| ATOM | 1198 | C5'  | T B | 20 | -61.899 | 17.603  | 36.865 | 1.00 | 0.00 | C |
| ATOM | 1199 | O5'  | T B | 20 | -61.812 | 18.519  | 35.743 | 1.00 | 0.00 | O |
| ATOM | 1200 | O1P  | T B | 20 | -62.256 | 17.045  | 33.752 | 1.00 | 0.00 | O |
| ATOM | 1201 | O2P  | T B | 20 | -60.861 | 19.115  | 33.495 | 1.00 | 0.00 | O |
| ATOM | 1202 | P    | T B | 20 | -61.272 | 17.972  | 34.347 | 1.00 | 0.00 | P |
| ATOM | 1203 | H3   | T B | 20 | -60.973 | 23.810  | 39.616 | 1.00 | 0.00 | H |
| ATOM | 1204 | H6   | T B | 20 | -61.651 | 20.609  | 36.077 | 1.00 | 0.00 | H |
| ATOM | 1205 | H1'  | T B | 20 | -64.023 | 20.597  | 38.921 | 1.00 | 0.00 | H |
| ATOM | 1206 | H3'  | T B | 20 | -64.439 | 17.973  | 36.022 | 1.00 | 0.00 | H |
| ATOM | 1207 | H4'  | T B | 20 | -63.383 | 17.066  | 38.274 | 1.00 | 0.00 | H |
| ATOM | 1208 | H3T  | T B | 20 | -66.293 | 18.736  | 37.431 | 1.00 | 0.00 | H |
| ATOM | 1209 | H71  | T B | 20 | -60.247 | 22.627  | 34.650 | 1.00 | 0.00 | H |
| ATOM | 1210 | H72  | T B | 20 | -58.882 | 23.125  | 35.679 | 1.00 | 0.00 | H |
| ATOM | 1211 | H73  | T B | 20 | -59.162 | 21.399  | 35.344 | 1.00 | 0.00 | H |
| ATOM | 1212 | H2'1 | T B | 20 | -63.465 | 20.167  | 35.972 | 1.00 | 0.00 | H |
| ATOM | 1213 | H2'2 | T B | 20 | -64.998 | 20.512  | 36.760 | 1.00 | 0.00 | H |
| ATOM | 1214 | H5'1 | T B | 20 | -60.991 | 17.666  | 37.464 | 1.00 | 0.00 | H |
| ATOM | 1215 | H5'2 | T B | 20 | -62.017 | 16.584  | 36.499 | 1.00 | 0.00 | H |
| TER  |      |      |     |    |         |         |        |      |      |   |
| ATOM | 1    | C1'  | A A | 1  | -64.940 | -10.344 | 28.219 | 1.00 | 0.00 | C |
| ATOM | 2    | N1   | A A | 1  | -61.806 | -10.172 | 24.159 | 1.00 | 0.00 | N |
| ATOM | 3    | C2   | A A | 1  | -62.450 | -11.171 | 24.755 | 1.00 | 0.00 | C |
| ATOM | 4    | N3   | A A | 1  | -63.249 | -11.145 | 25.801 | 1.00 | 0.00 | N |



|      |    |      |     |   |         |         |        |      |      |   |
|------|----|------|-----|---|---------|---------|--------|------|------|---|
| ATOM | 5  | C4   | A A | 1 | -63.364 | -9.889  | 26.269 | 1.00 | 0.00 | C |
| ATOM | 6  | C5   | A A | 1 | -62.771 | -8.761  | 25.776 | 1.00 | 0.00 | C |
| ATOM | 7  | C6   | A A | 1 | -61.940 | -8.930  | 24.648 | 1.00 | 0.00 | C |
| ATOM | 8  | N6   | A A | 1 | -61.292 | -7.912  | 24.055 | 1.00 | 0.00 | N |
| ATOM | 9  | N7   | A A | 1 | -63.123 | -7.647  | 26.517 | 1.00 | 0.00 | N |
| ATOM | 10 | C8   | A A | 1 | -63.912 | -8.122  | 27.436 | 1.00 | 0.00 | C |
| ATOM | 11 | N9   | A A | 1 | -64.106 | -9.475  | 27.347 | 1.00 | 0.00 | N |
| ATOM | 12 | C2'  | A A | 1 | -64.907 | -9.951  | 29.689 | 1.00 | 0.00 | C |
| ATOM | 13 | C3'  | A A | 1 | -66.329 | -10.258 | 30.131 | 1.00 | 0.00 | C |
| ATOM | 14 | O3'  | A A | 1 | -66.426 | -11.639 | 30.471 | 1.00 | 0.00 | O |
| ATOM | 15 | C4'  | A A | 1 | -67.154 | -9.908  | 28.893 | 1.00 | 0.00 | C |
| ATOM | 16 | O4'  | A A | 1 | -66.278 | -10.248 | 27.770 | 1.00 | 0.00 | O |
| ATOM | 17 | C5'  | A A | 1 | -67.578 | -8.466  | 28.756 | 1.00 | 0.00 | C |
| ATOM | 18 | O5'  | A A | 1 | -66.528 | -7.595  | 29.248 | 1.00 | 0.00 | O |
| ATOM | 19 | H2   | A A | 1 | -62.296 | -12.154 | 24.312 | 1.00 | 0.00 | H |
| ATOM | 20 | H8   | A A | 1 | -64.376 | -7.501  | 28.203 | 1.00 | 0.00 | H |
| ATOM | 21 | H1'  | A A | 1 | -64.615 | -11.376 | 28.083 | 1.00 | 0.00 | H |
| ATOM | 22 | H3'  | A A | 1 | -66.631 | -9.653  | 30.988 | 1.00 | 0.00 | H |
| ATOM | 23 | H4'  | A A | 1 | -68.055 | -10.519 | 28.931 | 1.00 | 0.00 | H |
| ATOM | 24 | H61  | A A | 1 | -60.700 | -8.089  | 23.234 | 1.00 | 0.00 | H |
| ATOM | 25 | H62  | A A | 1 | -61.392 | -6.956  | 24.425 | 1.00 | 0.00 | H |
| ATOM | 26 | H5T  | A A | 1 | -66.773 | -6.775  | 29.681 | 1.00 | 0.00 | H |
| ATOM | 27 | H2'1 | A A | 1 | -64.667 | -8.898  | 29.831 | 1.00 | 0.00 | H |
| ATOM | 28 | H2'2 | A A | 1 | -64.182 | -10.534 | 30.257 | 1.00 | 0.00 | H |
| ATOM | 29 | H5'1 | A A | 1 | -67.774 | -8.249  | 27.706 | 1.00 | 0.00 | H |
| ATOM | 30 | H5'2 | A A | 1 | -68.489 | -8.304  | 29.330 | 1.00 | 0.00 | H |
| ATOM | 31 | C1'  | G A | 2 | -61.752 | -14.148 | 28.348 | 1.00 | 0.00 | C |
| ATOM | 32 | N1   | G A | 2 | -58.809 | -11.064 | 25.548 | 1.00 | 0.00 | N |
| ATOM | 33 | C2   | G A | 2 | -59.058 | -12.416 | 25.411 | 1.00 | 0.00 | C |
| ATOM | 34 | N2   | G A | 2 | -58.440 | -13.030 | 24.395 | 1.00 | 0.00 | N |
| ATOM | 35 | N3   | G A | 2 | -59.860 | -13.103 | 26.223 | 1.00 | 0.00 | N |
| ATOM | 36 | C4   | G A | 2 | -60.396 | -12.324 | 27.199 | 1.00 | 0.00 | C |
| ATOM | 37 | C5   | G A | 2 | -60.203 | -10.969 | 27.414 | 1.00 | 0.00 | C |
| ATOM | 38 | C6   | G A | 2 | -59.354 | -10.240 | 26.549 | 1.00 | 0.00 | C |
| ATOM | 39 | O6   | G A | 2 | -59.062 | -9.044  | 26.575 | 1.00 | 0.00 | O |
| ATOM | 40 | N7   | G A | 2 | -60.935 | -10.548 | 28.526 | 1.00 | 0.00 | N |
| ATOM | 41 | C8   | G A | 2 | -61.537 | -11.634 | 28.938 | 1.00 | 0.00 | C |
| ATOM | 42 | N9   | G A | 2 | -61.259 | -12.755 | 28.183 | 1.00 | 0.00 | N |
| ATOM | 43 | C2'  | G A | 2 | -61.883 | -14.586 | 29.801 | 1.00 | 0.00 | C |
| ATOM | 44 | C3'  | G A | 2 | -63.116 | -15.472 | 29.757 | 1.00 | 0.00 | C |
| ATOM | 45 | O3'  | G A | 2 | -62.734 | -16.788 | 29.363 | 1.00 | 0.00 | O |
| ATOM | 46 | C4'  | G A | 2 | -63.990 | -14.787 | 28.707 | 1.00 | 0.00 | C |
| ATOM | 47 | O4'  | G A | 2 | -63.033 | -14.226 | 27.753 | 1.00 | 0.00 | O |
| ATOM | 48 | C5'  | G A | 2 | -64.887 | -13.677 | 29.202 | 1.00 | 0.00 | C |
| ATOM | 49 | O5'  | G A | 2 | -64.212 | -12.929 | 30.244 | 1.00 | 0.00 | O |
| ATOM | 50 | O1P  | G A | 2 | -65.592 | -13.412 | 32.293 | 1.00 | 0.00 | O |
| ATOM | 51 | O2P  | G A | 2 | -64.298 | -11.269 | 32.128 | 1.00 | 0.00 | O |
| ATOM | 52 | P    | G A | 2 | -65.080 | -12.324 | 31.438 | 1.00 | 0.00 | P |
| ATOM | 53 | H1   | G A | 2 | -58.175 | -10.627 | 24.864 | 1.00 | 0.00 | H |
| ATOM | 54 | H8   | G A | 2 | -62.201 | -11.652 | 29.802 | 1.00 | 0.00 | H |
| ATOM | 55 | H1'  | G A | 2 | -61.086 | -14.814 | 27.799 | 1.00 | 0.00 | H |
| ATOM | 56 | H21  | G A | 2 | -57.822 | -12.493 | 23.770 | 1.00 | 0.00 | H |
| ATOM | 57 | H3'  | G A | 2 | -63.622 | -15.516 | 30.722 | 1.00 | 0.00 | H |
| ATOM | 58 | H22  | G A | 2 | -58.583 | -14.038 | 24.241 | 1.00 | 0.00 | H |

|      |     |      |     |   |         |         |        |      |      |   |
|------|-----|------|-----|---|---------|---------|--------|------|------|---|
| ATOM | 59  | H4'  | G A | 2 | -64.624 | -15.558 | 28.271 | 1.00 | 0.00 | H |
| ATOM | 60  | H2'1 | G A | 2 | -62.025 | -13.741 | 30.475 | 1.00 | 0.00 | H |
| ATOM | 61  | H2'2 | G A | 2 | -61.008 | -15.138 | 30.147 | 1.00 | 0.00 | H |
| ATOM | 62  | H5'1 | G A | 2 | -65.129 | -13.015 | 28.371 | 1.00 | 0.00 | H |
| ATOM | 63  | H5'2 | G A | 2 | -65.807 | -14.110 | 29.594 | 1.00 | 0.00 | H |
| ATOM | 64  | C1'  | G A | 3 | -57.482 | -16.420 | 27.284 | 1.00 | 0.00 | C |
| ATOM | 65  | N1   | G A | 3 | -55.705 | -11.657 | 26.870 | 1.00 | 0.00 | N |
| ATOM | 66  | C2   | G A | 3 | -55.479 | -12.761 | 26.069 | 1.00 | 0.00 | C |
| ATOM | 67  | N2   | G A | 3 | -54.669 | -12.572 | 25.020 | 1.00 | 0.00 | N |
| ATOM | 68  | N3   | G A | 3 | -56.016 | -13.957 | 26.297 | 1.00 | 0.00 | N |
| ATOM | 69  | C4   | G A | 3 | -56.803 | -13.968 | 27.405 | 1.00 | 0.00 | C |
| ATOM | 70  | C5   | G A | 3 | -57.084 | -12.918 | 28.263 | 1.00 | 0.00 | C |
| ATOM | 71  | C6   | G A | 3 | -56.516 | -11.646 | 28.019 | 1.00 | 0.00 | C |
| ATOM | 72  | O6   | G A | 3 | -56.646 | -10.602 | 28.659 | 1.00 | 0.00 | O |
| ATOM | 73  | N7   | G A | 3 | -57.936 | -13.344 | 29.283 | 1.00 | 0.00 | N |
| ATOM | 74  | C8   | G A | 3 | -58.143 | -14.607 | 29.016 | 1.00 | 0.00 | C |
| ATOM | 75  | N9   | G A | 3 | -57.487 | -15.060 | 27.890 | 1.00 | 0.00 | N |
| ATOM | 76  | C2'  | G A | 3 | -57.484 | -17.548 | 28.307 | 1.00 | 0.00 | C |
| ATOM | 77  | C3'  | G A | 3 | -58.343 | -18.597 | 27.622 | 1.00 | 0.00 | C |
| ATOM | 78  | O3'  | G A | 3 | -57.530 | -19.362 | 26.735 | 1.00 | 0.00 | O |
| ATOM | 79  | C4'  | G A | 3 | -59.377 | -17.756 | 26.875 | 1.00 | 0.00 | C |
| ATOM | 80  | O4'  | G A | 3 | -58.649 | -16.545 | 26.495 | 1.00 | 0.00 | O |
| ATOM | 81  | C5'  | G A | 3 | -60.606 | -17.355 | 27.656 | 1.00 | 0.00 | C |
| ATOM | 82  | O5'  | G A | 3 | -60.246 | -17.082 | 29.033 | 1.00 | 0.00 | O |
| ATOM | 83  | O1P  | G A | 3 | -61.419 | -18.902 | 30.316 | 1.00 | 0.00 | O |
| ATOM | 84  | O2P  | G A | 3 | -60.925 | -16.706 | 31.423 | 1.00 | 0.00 | O |
| ATOM | 85  | P    | G A | 3 | -61.289 | -17.439 | 30.186 | 1.00 | 0.00 | P |
| ATOM | 86  | H1   | G A | 3 | -55.244 | -10.774 | 26.603 | 1.00 | 0.00 | H |
| ATOM | 87  | H8   | G A | 3 | -58.777 | -15.247 | 29.629 | 1.00 | 0.00 | H |
| ATOM | 88  | H1'  | G A | 3 | -56.619 | -16.495 | 26.622 | 1.00 | 0.00 | H |
| ATOM | 89  | H21  | G A | 3 | -54.258 | -11.642 | 24.848 | 1.00 | 0.00 | H |
| ATOM | 90  | H3'  | G A | 3 | -58.823 | -19.265 | 28.338 | 1.00 | 0.00 | H |
| ATOM | 91  | H22  | G A | 3 | -54.458 | -13.355 | 24.386 | 1.00 | 0.00 | H |
| ATOM | 92  | H4'  | G A | 3 | -59.704 | -18.343 | 26.018 | 1.00 | 0.00 | H |
| ATOM | 93  | H2'1 | G A | 3 | -57.917 | -17.241 | 29.259 | 1.00 | 0.00 | H |
| ATOM | 94  | H2'2 | G A | 3 | -56.481 | -17.925 | 28.510 | 1.00 | 0.00 | H |
| ATOM | 95  | H5'1 | G A | 3 | -61.042 | -16.465 | 27.205 | 1.00 | 0.00 | H |
| ATOM | 96  | H5'2 | G A | 3 | -61.333 | -18.167 | 27.619 | 1.00 | 0.00 | H |
| ATOM | 97  | C1'  | C A | 4 | -52.675 | -16.523 | 26.096 | 1.00 | 0.00 | C |
| ATOM | 98  | N1   | C A | 4 | -53.150 | -15.718 | 27.255 | 1.00 | 0.00 | N |
| ATOM | 99  | C2   | C A | 4 | -52.766 | -14.380 | 27.319 | 1.00 | 0.00 | C |
| ATOM | 100 | O2   | C A | 4 | -52.052 | -13.919 | 26.420 | 1.00 | 0.00 | O |
| ATOM | 101 | N3   | C A | 4 | -53.189 | -13.630 | 28.366 | 1.00 | 0.00 | N |
| ATOM | 102 | C4   | C A | 4 | -53.960 | -14.158 | 29.325 | 1.00 | 0.00 | C |
| ATOM | 103 | N4   | C A | 4 | -54.346 | -13.378 | 30.324 | 1.00 | 0.00 | N |
| ATOM | 104 | C5   | C A | 4 | -54.367 | -15.531 | 29.284 | 1.00 | 0.00 | C |
| ATOM | 105 | C6   | C A | 4 | -53.933 | -16.267 | 28.220 | 1.00 | 0.00 | C |
| ATOM | 106 | C2'  | C A | 4 | -52.313 | -17.958 | 26.453 | 1.00 | 0.00 | C |
| ATOM | 107 | C3'  | C A | 4 | -52.756 | -18.716 | 25.210 | 1.00 | 0.00 | C |
| ATOM | 108 | O3'  | C A | 4 | -51.716 | -18.664 | 24.235 | 1.00 | 0.00 | O |
| ATOM | 109 | C4'  | C A | 4 | -54.000 | -17.948 | 24.770 | 1.00 | 0.00 | C |
| ATOM | 110 | O4'  | C A | 4 | -53.719 | -16.561 | 25.141 | 1.00 | 0.00 | O |
| ATOM | 111 | C5'  | C A | 4 | -55.305 | -18.363 | 25.407 | 1.00 | 0.00 | C |
| ATOM | 112 | O5'  | C A | 4 | -55.080 | -18.729 | 26.792 | 1.00 | 0.00 | O |

|      |     |      |     |   |         |         |        |      |      |   |
|------|-----|------|-----|---|---------|---------|--------|------|------|---|
| ATOM | 113 | O1P  | C A | 4 | -55.590 | -21.193 | 26.835 | 1.00 | 0.00 | O |
| ATOM | 114 | O2P  | C A | 4 | -55.886 | -19.815 | 28.910 | 1.00 | 0.00 | O |
| ATOM | 115 | P    | C A | 4 | -55.961 | -19.895 | 27.431 | 1.00 | 0.00 | P |
| ATOM | 116 | H5   | C A | 4 | -54.990 | -15.967 | 30.065 | 1.00 | 0.00 | H |
| ATOM | 117 | H6   | C A | 4 | -54.221 | -17.315 | 28.143 | 1.00 | 0.00 | H |
| ATOM | 118 | H1'  | C A | 4 | -51.828 | -16.006 | 25.647 | 1.00 | 0.00 | H |
| ATOM | 119 | H3'  | C A | 4 | -52.992 | -19.757 | 25.431 | 1.00 | 0.00 | H |
| ATOM | 120 | H4'  | C A | 4 | -54.095 | -18.090 | 23.693 | 1.00 | 0.00 | H |
| ATOM | 121 | H41  | C A | 4 | -54.941 | -13.759 | 31.074 | 1.00 | 0.00 | H |
| ATOM | 122 | H42  | C A | 4 | -54.051 | -12.391 | 30.352 | 1.00 | 0.00 | H |
| ATOM | 123 | H2'1 | C A | 4 | -52.839 | -18.310 | 27.339 | 1.00 | 0.00 | H |
| ATOM | 124 | H2'2 | C A | 4 | -51.244 | -18.082 | 26.635 | 1.00 | 0.00 | H |
| ATOM | 125 | H5'1 | C A | 4 | -56.010 | -17.533 | 25.355 | 1.00 | 0.00 | H |
| ATOM | 126 | H5'2 | C A | 4 | -55.714 | -19.214 | 24.863 | 1.00 | 0.00 | H |
| ATOM | 127 | C1'  | C A | 5 | -48.096 | -14.645 | 25.921 | 1.00 | 0.00 | C |
| ATOM | 128 | N1   | C A | 5 | -48.837 | -14.710 | 27.211 | 1.00 | 0.00 | N |
| ATOM | 129 | C2   | C A | 5 | -48.931 | -13.544 | 27.967 | 1.00 | 0.00 | C |
| ATOM | 130 | O2   | C A | 5 | -48.399 | -12.509 | 27.542 | 1.00 | 0.00 | O |
| ATOM | 131 | N3   | C A | 5 | -49.603 | -13.581 | 29.144 | 1.00 | 0.00 | N |
| ATOM | 132 | C4   | C A | 5 | -50.167 | -14.714 | 29.579 | 1.00 | 0.00 | C |
| ATOM | 133 | N4   | C A | 5 | -50.814 | -14.693 | 30.734 | 1.00 | 0.00 | N |
| ATOM | 134 | C5   | C A | 5 | -50.084 | -15.928 | 28.822 | 1.00 | 0.00 | C |
| ATOM | 135 | C6   | C A | 5 | -49.407 | -15.866 | 27.640 | 1.00 | 0.00 | C |
| ATOM | 136 | C2'  | C A | 5 | -47.276 | -15.892 | 25.622 | 1.00 | 0.00 | C |
| ATOM | 137 | C3'  | C A | 5 | -47.413 | -16.006 | 24.112 | 1.00 | 0.00 | C |
| ATOM | 138 | O3'  | C A | 5 | -46.434 | -15.177 | 23.490 | 1.00 | 0.00 | O |
| ATOM | 139 | C4'  | C A | 5 | -48.834 | -15.510 | 23.861 | 1.00 | 0.00 | C |
| ATOM | 140 | O4'  | C A | 5 | -49.047 | -14.488 | 24.885 | 1.00 | 0.00 | O |
| ATOM | 141 | C5'  | C A | 5 | -49.934 | -16.541 | 23.970 | 1.00 | 0.00 | C |
| ATOM | 142 | O5'  | C A | 5 | -49.625 | -17.476 | 25.036 | 1.00 | 0.00 | O |
| ATOM | 143 | O1P  | C A | 5 | -49.270 | -19.649 | 23.818 | 1.00 | 0.00 | O |
| ATOM | 144 | O2P  | C A | 5 | -50.055 | -19.660 | 26.201 | 1.00 | 0.00 | O |
| ATOM | 145 | P    | C A | 5 | -50.070 | -18.998 | 24.873 | 1.00 | 0.00 | P |
| ATOM | 146 | H5   | C A | 5 | -50.538 | -16.855 | 29.174 | 1.00 | 0.00 | H |
| ATOM | 147 | H6   | C A | 5 | -49.321 | -16.763 | 27.026 | 1.00 | 0.00 | H |
| ATOM | 148 | H1'  | C A | 5 | -47.466 | -13.756 | 25.935 | 1.00 | 0.00 | H |
| ATOM | 149 | H3'  | C A | 5 | -47.286 | -17.033 | 23.767 | 1.00 | 0.00 | H |
| ATOM | 150 | H4'  | C A | 5 | -48.855 | -15.110 | 22.847 | 1.00 | 0.00 | H |
| ATOM | 151 | H41  | C A | 5 | -51.259 | -15.551 | 31.091 | 1.00 | 0.00 | H |
| ATOM | 152 | H42  | C A | 5 | -50.871 | -13.819 | 31.277 | 1.00 | 0.00 | H |
| ATOM | 153 | H2'1 | C A | 5 | -47.669 | -16.776 | 26.123 | 1.00 | 0.00 | H |
| ATOM | 154 | H2'2 | C A | 5 | -46.232 | -15.782 | 25.920 | 1.00 | 0.00 | H |
| ATOM | 155 | H5'1 | C A | 5 | -50.877 | -16.037 | 24.185 | 1.00 | 0.00 | H |
| ATOM | 156 | H5'2 | C A | 5 | -50.019 | -17.075 | 23.025 | 1.00 | 0.00 | H |
| ATOM | 157 | C1'  | G A | 6 | -44.422 | -11.729 | 27.511 | 1.00 | 0.00 | C |
| ATOM | 158 | N1   | G A | 6 | -46.844 | -12.076 | 31.988 | 1.00 | 0.00 | N |
| ATOM | 159 | C2   | G A | 6 | -46.269 | -10.977 | 31.372 | 1.00 | 0.00 | C |
| ATOM | 160 | N2   | G A | 6 | -46.346 | -9.820  | 32.038 | 1.00 | 0.00 | N |
| ATOM | 161 | N3   | G A | 6 | -45.664 | -11.033 | 30.186 | 1.00 | 0.00 | N |
| ATOM | 162 | C4   | G A | 6 | -45.671 | -12.285 | 29.660 | 1.00 | 0.00 | C |
| ATOM | 163 | C5   | G A | 6 | -46.216 | -13.437 | 30.203 | 1.00 | 0.00 | C |
| ATOM | 164 | C6   | G A | 6 | -46.861 | -13.380 | 31.458 | 1.00 | 0.00 | C |
| ATOM | 165 | O6   | G A | 6 | -47.399 | -14.284 | 32.097 | 1.00 | 0.00 | O |
| ATOM | 166 | N7   | G A | 6 | -46.009 | -14.519 | 29.345 | 1.00 | 0.00 | N |

|      |     |      |     |   |         |         |        |      |      |   |
|------|-----|------|-----|---|---------|---------|--------|------|------|---|
| ATOM | 167 | C8   | G A | 6 | -45.365 | -14.001 | 28.332 | 1.00 | 0.00 | C |
| ATOM | 168 | N9   | G A | 6 | -45.121 | -12.648 | 28.450 | 1.00 | 0.00 | N |
| ATOM | 169 | C2'  | G A | 6 | -43.224 | -12.358 | 26.815 | 1.00 | 0.00 | C |
| ATOM | 170 | C3'  | G A | 6 | -43.285 | -11.720 | 25.437 | 1.00 | 0.00 | C |
| ATOM | 171 | O3'  | G A | 6 | -42.634 | -10.452 | 25.477 | 1.00 | 0.00 | O |
| ATOM | 172 | C4'  | G A | 6 | -44.787 | -11.591 | 25.189 | 1.00 | 0.00 | C |
| ATOM | 173 | O4'  | G A | 6 | -45.350 | -11.341 | 26.516 | 1.00 | 0.00 | O |
| ATOM | 174 | C5'  | G A | 6 | -45.475 | -12.794 | 24.590 | 1.00 | 0.00 | C |
| ATOM | 175 | O5'  | G A | 6 | -44.888 | -14.009 | 25.119 | 1.00 | 0.00 | O |
| ATOM | 176 | O1P  | G A | 6 | -43.797 | -15.054 | 23.107 | 1.00 | 0.00 | O |
| ATOM | 177 | O2P  | G A | 6 | -44.575 | -16.500 | 25.004 | 1.00 | 0.00 | O |
| ATOM | 178 | P    | G A | 6 | -44.789 | -15.289 | 24.173 | 1.00 | 0.00 | P |
| ATOM | 179 | H1   | G A | 6 | -47.294 | -11.925 | 32.904 | 1.00 | 0.00 | H |
| ATOM | 180 | H8   | G A | 6 | -45.046 | -14.585 | 27.468 | 1.00 | 0.00 | H |
| ATOM | 181 | H1'  | G A | 6 | -44.129 | -10.835 | 28.063 | 1.00 | 0.00 | H |
| ATOM | 182 | H21  | G A | 6 | -46.819 | -9.783  | 32.953 | 1.00 | 0.00 | H |
| ATOM | 183 | H3'  | G A | 6 | -42.813 | -12.343 | 24.676 | 1.00 | 0.00 | H |
| ATOM | 184 | H22  | G A | 6 | -45.936 | -8.965  | 31.635 | 1.00 | 0.00 | H |
| ATOM | 185 | H4'  | G A | 6 | -44.924 | -10.754 | 24.505 | 1.00 | 0.00 | H |
| ATOM | 186 | H2'1 | G A | 6 | -43.304 | -13.444 | 26.753 | 1.00 | 0.00 | H |
| ATOM | 187 | H2'2 | G A | 6 | -42.284 | -12.128 | 27.318 | 1.00 | 0.00 | H |
| ATOM | 188 | H5'1 | G A | 6 | -46.535 | -12.760 | 24.835 | 1.00 | 0.00 | H |
| ATOM | 189 | H5'2 | G A | 6 | -45.358 | -12.770 | 23.506 | 1.00 | 0.00 | H |
| ATOM | 190 | C1'  | C A | 7 | -41.985 | -9.115  | 30.939 | 1.00 | 0.00 | C |
| ATOM | 191 | N1   | C A | 7 | -42.351 | -10.535 | 31.191 | 1.00 | 0.00 | N |
| ATOM | 192 | C2   | C A | 7 | -43.026 | -10.833 | 32.373 | 1.00 | 0.00 | C |
| ATOM | 193 | O2   | C A | 7 | -43.290 | -9.915  | 33.160 | 1.00 | 0.00 | O |
| ATOM | 194 | N3   | C A | 7 | -43.369 | -12.121 | 32.622 | 1.00 | 0.00 | N |
| ATOM | 195 | C4   | C A | 7 | -43.069 | -13.094 | 31.753 | 1.00 | 0.00 | C |
| ATOM | 196 | N4   | C A | 7 | -43.431 | -14.335 | 32.045 | 1.00 | 0.00 | N |
| ATOM | 197 | C5   | C A | 7 | -42.372 | -12.817 | 30.531 | 1.00 | 0.00 | C |
| ATOM | 198 | C6   | C A | 7 | -42.040 | -11.512 | 30.298 | 1.00 | 0.00 | C |
| ATOM | 199 | C2'  | C A | 7 | -40.628 | -8.940  | 30.269 | 1.00 | 0.00 | C |
| ATOM | 200 | C3'  | C A | 7 | -40.874 | -7.743  | 29.363 | 1.00 | 0.00 | C |
| ATOM | 201 | O3'  | C A | 7 | -40.691 | -6.544  | 30.113 | 1.00 | 0.00 | O |
| ATOM | 202 | C4'  | C A | 7 | -42.324 | -7.938  | 28.928 | 1.00 | 0.00 | C |
| ATOM | 203 | O4'  | C A | 7 | -42.969 | -8.561  | 30.085 | 1.00 | 0.00 | O |
| ATOM | 204 | C5'  | C A | 7 | -42.550 | -8.816  | 27.719 | 1.00 | 0.00 | C |
| ATOM | 205 | O5'  | C A | 7 | -41.597 | -9.908  | 27.721 | 1.00 | 0.00 | O |
| ATOM | 206 | O1P  | C A | 7 | -40.172 | -9.444  | 25.698 | 1.00 | 0.00 | O |
| ATOM | 207 | O2P  | C A | 7 | -40.457 | -11.797 | 26.520 | 1.00 | 0.00 | O |
| ATOM | 208 | P    | C A | 7 | -41.050 | -10.453 | 26.326 | 1.00 | 0.00 | P |
| ATOM | 209 | H5   | C A | 7 | -42.119 | -13.606 | 29.822 | 1.00 | 0.00 | H |
| ATOM | 210 | H6   | C A | 7 | -41.517 | -11.250 | 29.379 | 1.00 | 0.00 | H |
| ATOM | 211 | H1'  | C A | 7 | -42.024 | -8.578  | 31.887 | 1.00 | 0.00 | H |
| ATOM | 212 | H3'  | C A | 7 | -40.201 | -7.738  | 28.504 | 1.00 | 0.00 | H |
| ATOM | 213 | H4'  | C A | 7 | -42.721 | -6.949  | 28.700 | 1.00 | 0.00 | H |
| ATOM | 214 | H41  | C A | 7 | -43.214 | -15.102 | 31.392 | 1.00 | 0.00 | H |
| ATOM | 215 | H42  | C A | 7 | -43.929 | -14.534 | 32.924 | 1.00 | 0.00 | H |
| ATOM | 216 | H2'1 | C A | 7 | -40.334 | -9.818  | 29.695 | 1.00 | 0.00 | H |
| ATOM | 217 | H2'2 | C A | 7 | -39.834 | -8.738  | 30.989 | 1.00 | 0.00 | H |
| ATOM | 218 | H5'1 | C A | 7 | -43.566 | -9.213  | 27.748 | 1.00 | 0.00 | H |
| ATOM | 219 | H5'2 | C A | 7 | -42.424 | -8.220  | 26.815 | 1.00 | 0.00 | H |
| ATOM | 220 | C1'  | A A | 8 | -40.634 | -8.006  | 35.570 | 1.00 | 0.00 | C |

|      |     |      |     |   |         |         |        |      |      |   |
|------|-----|------|-----|---|---------|---------|--------|------|------|---|
| ATOM | 221 | N1   | A A | 8 | -41.731 | -12.941 | 36.460 | 1.00 | 0.00 | N |
| ATOM | 222 | C2   | A A | 8 | -41.985 | -11.827 | 37.141 | 1.00 | 0.00 | C |
| ATOM | 223 | N3   | A A | 8 | -41.676 | -10.581 | 36.852 | 1.00 | 0.00 | N |
| ATOM | 224 | C4   | A A | 8 | -41.003 | -10.527 | 35.687 | 1.00 | 0.00 | C |
| ATOM | 225 | C5   | A A | 8 | -40.664 | -11.571 | 34.873 | 1.00 | 0.00 | C |
| ATOM | 226 | C6   | A A | 8 | -41.061 | -12.855 | 35.301 | 1.00 | 0.00 | C |
| ATOM | 227 | N6   | A A | 8 | -40.798 | -13.974 | 34.605 | 1.00 | 0.00 | N |
| ATOM | 228 | N7   | A A | 8 | -39.975 | -11.131 | 33.756 | 1.00 | 0.00 | N |
| ATOM | 229 | C8   | A A | 8 | -39.909 | -9.842  | 33.919 | 1.00 | 0.00 | C |
| ATOM | 230 | N9   | A A | 8 | -40.514 | -9.402  | 35.069 | 1.00 | 0.00 | N |
| ATOM | 231 | C2'  | A A | 8 | -39.401 | -7.152  | 35.311 | 1.00 | 0.00 | C |
| ATOM | 232 | C3'  | A A | 8 | -40.012 | -5.788  | 35.034 | 1.00 | 0.00 | C |
| ATOM | 233 | O3'  | A A | 8 | -40.250 | -5.124  | 36.272 | 1.00 | 0.00 | O |
| ATOM | 234 | C4'  | A A | 8 | -41.310 | -6.138  | 34.308 | 1.00 | 0.00 | C |
| ATOM | 235 | O4'  | A A | 8 | -41.731 | -7.405  | 34.910 | 1.00 | 0.00 | O |
| ATOM | 236 | C5'  | A A | 8 | -41.212 | -6.322  | 32.812 | 1.00 | 0.00 | C |
| ATOM | 237 | O5'  | A A | 8 | -39.952 | -6.957  | 32.477 | 1.00 | 0.00 | O |
| ATOM | 238 | O1P  | A A | 8 | -38.728 | -5.173  | 31.189 | 1.00 | 0.00 | O |
| ATOM | 239 | O2P  | A A | 8 | -38.231 | -7.596  | 30.762 | 1.00 | 0.00 | O |
| ATOM | 240 | P    | A A | 8 | -39.232 | -6.558  | 31.110 | 1.00 | 0.00 | P |
| ATOM | 241 | H2   | A A | 8 | -42.530 | -11.966 | 38.073 | 1.00 | 0.00 | H |
| ATOM | 242 | H8   | A A | 8 | -39.420 | -9.174  | 33.210 | 1.00 | 0.00 | H |
| ATOM | 243 | H1'  | A A | 8 | -40.865 | -8.046  | 36.635 | 1.00 | 0.00 | H |
| ATOM | 244 | H3'  | A A | 8 | -39.367 | -5.170  | 34.411 | 1.00 | 0.00 | H |
| ATOM | 245 | H4'  | A A | 8 | -42.008 | -5.324  | 34.498 | 1.00 | 0.00 | H |
| ATOM | 246 | H61  | A A | 8 | -41.112 | -14.887 | 34.960 | 1.00 | 0.00 | H |
| ATOM | 247 | H62  | A A | 8 | -40.281 | -13.916 | 33.715 | 1.00 | 0.00 | H |
| ATOM | 248 | H2'1 | A A | 8 | -38.824 | -7.508  | 34.458 | 1.00 | 0.00 | H |
| ATOM | 249 | H2'2 | A A | 8 | -38.732 | -7.121  | 36.170 | 1.00 | 0.00 | H |
| ATOM | 250 | H5'1 | A A | 8 | -42.040 | -6.947  | 32.475 | 1.00 | 0.00 | H |
| ATOM | 251 | H5'2 | A A | 8 | -41.275 | -5.350  | 32.326 | 1.00 | 0.00 | H |
| ATOM | 252 | C1'  | C A | 9 | -39.838 | -9.109  | 40.347 | 1.00 | 0.00 | C |
| ATOM | 253 | N1   | C A | 9 | -39.234 | -9.942  | 39.271 | 1.00 | 0.00 | N |
| ATOM | 254 | C2   | C A | 9 | -39.421 | -11.322 | 39.330 | 1.00 | 0.00 | C |
| ATOM | 255 | O2   | C A | 9 | -40.075 | -11.795 | 40.268 | 1.00 | 0.00 | O |
| ATOM | 256 | N3   | C A | 9 | -38.879 | -12.097 | 38.360 | 1.00 | 0.00 | N |
| ATOM | 257 | C4   | C A | 9 | -38.174 | -11.555 | 37.358 | 1.00 | 0.00 | C |
| ATOM | 258 | N4   | C A | 9 | -37.670 | -12.360 | 36.434 | 1.00 | 0.00 | N |
| ATOM | 259 | C5   | C A | 9 | -37.962 | -10.139 | 37.273 | 1.00 | 0.00 | C |
| ATOM | 260 | C6   | C A | 9 | -38.521 | -9.377  | 38.259 | 1.00 | 0.00 | C |
| ATOM | 261 | C2'  | C A | 9 | -38.970 | -7.934  | 40.774 | 1.00 | 0.00 | C |
| ATOM | 262 | C3'  | C A | 9 | -40.009 | -6.863  | 41.071 | 1.00 | 0.00 | C |
| ATOM | 263 | O3'  | C A | 9 | -40.487 | -7.034  | 42.404 | 1.00 | 0.00 | O |
| ATOM | 264 | C4'  | C A | 9 | -41.090 | -7.141  | 40.030 | 1.00 | 0.00 | C |
| ATOM | 265 | O4'  | C A | 9 | -41.062 | -8.593  | 39.856 | 1.00 | 0.00 | O |
| ATOM | 266 | C5'  | C A | 9 | -40.904 | -6.490  | 38.679 | 1.00 | 0.00 | C |
| ATOM | 267 | O5'  | C A | 9 | -39.495 | -6.468  | 38.336 | 1.00 | 0.00 | O |
| ATOM | 268 | O1P  | C A | 9 | -38.934 | -4.015  | 38.326 | 1.00 | 0.00 | O |
| ATOM | 269 | O2P  | C A | 9 | -37.623 | -5.607  | 36.897 | 1.00 | 0.00 | O |
| ATOM | 270 | P    | C A | 9 | -38.928 | -5.236  | 37.497 | 1.00 | 0.00 | P |
| ATOM | 271 | H5   | C A | 9 | -37.384 | -9.694  | 36.462 | 1.00 | 0.00 | H |
| ATOM | 272 | H6   | C A | 9 | -38.395 | -8.294  | 38.233 | 1.00 | 0.00 | H |
| ATOM | 273 | H1'  | C A | 9 | -40.063 | -9.757  | 41.193 | 1.00 | 0.00 | H |
| ATOM | 274 | H3'  | C A | 9 | -39.602 | -5.859  | 40.960 | 1.00 | 0.00 | H |

|      |     |      |   |   |    |         |         |        |      |      |   |
|------|-----|------|---|---|----|---------|---------|--------|------|------|---|
| ATOM | 275 | H4'  | C | A | 9  | -42.031 | -6.780  | 40.446 | 1.00 | 0.00 | H |
| ATOM | 276 | H41  | C | A | 9  | -37.126 | -11.969 | 35.651 | 1.00 | 0.00 | H |
| ATOM | 277 | H42  | C | A | 9  | -37.821 | -13.377 | 36.499 | 1.00 | 0.00 | H |
| ATOM | 278 | H2'1 | C | A | 9  | -38.288 | -7.615  | 39.987 | 1.00 | 0.00 | H |
| ATOM | 279 | H2'2 | C | A | 9  | -38.370 | -8.162  | 41.656 | 1.00 | 0.00 | H |
| ATOM | 280 | H5'1 | C | A | 9  | -41.457 | -7.054  | 37.929 | 1.00 | 0.00 | H |
| ATOM | 281 | H5'2 | C | A | 9  | -41.289 | -5.471  | 38.717 | 1.00 | 0.00 | H |
| ATOM | 282 | C1'  | C | A | 10 | -38.805 | -12.172 | 44.099 | 1.00 | 0.00 | C |
| ATOM | 283 | N1   | C | A | 10 | -37.934 | -12.135 | 42.892 | 1.00 | 0.00 | N |
| ATOM | 284 | C2   | C | A | 10 | -37.644 | -13.342 | 42.260 | 1.00 | 0.00 | C |
| ATOM | 285 | O2   | C | A | 10 | -38.116 | -14.389 | 42.723 | 1.00 | 0.00 | O |
| ATOM | 286 | N3   | C | A | 10 | -36.853 | -13.331 | 41.159 | 1.00 | 0.00 | N |
| ATOM | 287 | C4   | C | A | 10 | -36.354 | -12.183 | 40.681 | 1.00 | 0.00 | C |
| ATOM | 288 | N4   | C | A | 10 | -35.589 | -12.229 | 39.600 | 1.00 | 0.00 | N |
| ATOM | 289 | C5   | C | A | 10 | -36.633 | -10.927 | 41.313 | 1.00 | 0.00 | C |
| ATOM | 290 | C6   | C | A | 10 | -37.436 | -10.962 | 42.418 | 1.00 | 0.00 | C |
| ATOM | 291 | C2'  | C | A | 10 | -38.394 | -11.184 | 45.182 | 1.00 | 0.00 | C |
| ATOM | 292 | C3'  | C | A | 10 | -39.740 | -10.757 | 45.747 | 1.00 | 0.00 | C |
| ATOM | 293 | O3'  | C | A | 10 | -40.158 | -11.706 | 46.727 | 1.00 | 0.00 | O |
| ATOM | 294 | C4'  | C | A | 10 | -40.643 | -10.763 | 44.517 | 1.00 | 0.00 | C |
| ATOM | 295 | O4'  | C | A | 10 | -40.121 | -11.850 | 43.689 | 1.00 | 0.00 | O |
| ATOM | 296 | C5'  | C | A | 10 | -40.663 | -9.496  | 43.693 | 1.00 | 0.00 | C |
| ATOM | 297 | O5'  | C | A | 10 | -39.338 | -8.906  | 43.669 | 1.00 | 0.00 | O |
| ATOM | 298 | O1P  | C | A | 10 | -39.642 | -6.743  | 44.920 | 1.00 | 0.00 | O |
| ATOM | 299 | O2P  | C | A | 10 | -37.842 | -6.947  | 43.184 | 1.00 | 0.00 | O |
| ATOM | 300 | P    | C | A | 10 | -39.206 | -7.317  | 43.632 | 1.00 | 0.00 | P |
| ATOM | 301 | H5   | C | A | 10 | -36.224 | -9.990  | 40.932 | 1.00 | 0.00 | H |
| ATOM | 302 | H6   | C | A | 10 | -37.683 | -10.031 | 42.928 | 1.00 | 0.00 | H |
| ATOM | 303 | H1'  | C | A | 10 | -38.813 | -13.192 | 44.482 | 1.00 | 0.00 | H |
| ATOM | 304 | H3'  | C | A | 10 | -39.696 | -9.767  | 46.201 | 1.00 | 0.00 | H |
| ATOM | 305 | H4'  | C | A | 10 | -41.658 | -10.944 | 44.870 | 1.00 | 0.00 | H |
| ATOM | 306 | H41  | C | A | 10 | -35.195 | -11.360 | 39.211 | 1.00 | 0.00 | H |
| ATOM | 307 | H42  | C | A | 10 | -35.388 | -13.133 | 39.150 | 1.00 | 0.00 | H |
| ATOM | 308 | H2'1 | C | A | 10 | -37.846 | -10.333 | 44.780 | 1.00 | 0.00 | H |
| ATOM | 309 | H2'2 | C | A | 10 | -37.769 | -11.647 | 45.948 | 1.00 | 0.00 | H |
| ATOM | 310 | H5'1 | C | A | 10 | -40.978 | -9.734  | 42.676 | 1.00 | 0.00 | H |
| ATOM | 311 | H5'2 | C | A | 10 | -41.371 | -8.795  | 44.132 | 1.00 | 0.00 | H |
| ATOM | 312 | C1'  | T | A | 11 | -36.879 | -16.266 | 46.106 | 1.00 | 0.00 | C |
| ATOM | 313 | N1   | T | A | 11 | -36.043 | -15.399 | 45.234 | 1.00 | 0.00 | N |
| ATOM | 314 | C2   | T | A | 11 | -35.368 | -16.011 | 44.198 | 1.00 | 0.00 | C |
| ATOM | 315 | O2   | T | A | 11 | -35.435 | -17.209 | 43.982 | 1.00 | 0.00 | O |
| ATOM | 316 | N3   | T | A | 11 | -34.604 | -15.168 | 43.412 | 1.00 | 0.00 | N |
| ATOM | 317 | C4   | T | A | 11 | -34.458 | -13.805 | 43.571 | 1.00 | 0.00 | C |
| ATOM | 318 | O4   | T | A | 11 | -33.740 | -13.152 | 42.803 | 1.00 | 0.00 | O |
| ATOM | 319 | C5   | T | A | 11 | -35.201 | -13.256 | 44.681 | 1.00 | 0.00 | C |
| ATOM | 320 | C6   | T | A | 11 | -35.956 | -14.048 | 45.466 | 1.00 | 0.00 | C |
| ATOM | 321 | C7   | T | A | 11 | -35.073 | -11.776 | 44.889 | 1.00 | 0.00 | C |
| ATOM | 322 | C2'  | T | A | 11 | -36.845 | -15.874 | 47.578 | 1.00 | 0.00 | C |
| ATOM | 323 | C3'  | T | A | 11 | -38.268 | -16.176 | 48.021 | 1.00 | 0.00 | C |
| ATOM | 324 | O3'  | T | A | 11 | -38.371 | -17.557 | 48.360 | 1.00 | 0.00 | O |
| ATOM | 325 | C4'  | T | A | 11 | -39.090 | -15.822 | 46.784 | 1.00 | 0.00 | C |
| ATOM | 326 | O4'  | T | A | 11 | -38.218 | -16.165 | 45.660 | 1.00 | 0.00 | O |
| ATOM | 327 | C5'  | T | A | 11 | -39.510 | -14.377 | 46.646 | 1.00 | 0.00 | C |
| ATOM | 328 | O5'  | T | A | 11 | -38.456 | -13.512 | 47.139 | 1.00 | 0.00 | O |

|      |     |      |     |    |         |         |        |      |      |   |
|------|-----|------|-----|----|---------|---------|--------|------|------|---|
| ATOM | 329 | O1P  | T A | 11 | -39.487 | -12.433 | 49.165 | 1.00 | 0.00 | O |
| ATOM | 330 | O2P  | T A | 11 | -37.683 | -11.243 | 47.891 | 1.00 | 0.00 | O |
| ATOM | 331 | P    | T A | 11 | -38.857 | -12.149 | 47.861 | 1.00 | 0.00 | P |
| ATOM | 332 | H3   | T A | 11 | -34.094 | -15.599 | 42.629 | 1.00 | 0.00 | H |
| ATOM | 333 | H6   | T A | 11 | -36.509 | -13.610 | 46.298 | 1.00 | 0.00 | H |
| ATOM | 334 | H1'  | T A | 11 | -36.558 | -17.299 | 45.970 | 1.00 | 0.00 | H |
| ATOM | 335 | H3'  | T A | 11 | -38.564 | -15.572 | 48.877 | 1.00 | 0.00 | H |
| ATOM | 336 | H4'  | T A | 11 | -39.996 | -16.430 | 46.821 | 1.00 | 0.00 | H |
| ATOM | 337 | H71  | T A | 11 | -34.568 | -11.585 | 45.836 | 1.00 | 0.00 | H |
| ATOM | 338 | H72  | T A | 11 | -34.492 | -11.343 | 44.074 | 1.00 | 0.00 | H |
| ATOM | 339 | H73  | T A | 11 | -36.064 | -11.323 | 44.909 | 1.00 | 0.00 | H |
| ATOM | 340 | H2'1 | T A | 11 | -36.600 | -14.823 | 47.719 | 1.00 | 0.00 | H |
| ATOM | 341 | H2'2 | T A | 11 | -36.119 | -16.459 | 48.145 | 1.00 | 0.00 | H |
| ATOM | 342 | H5'1 | T A | 11 | -39.706 | -14.159 | 45.597 | 1.00 | 0.00 | H |
| ATOM | 343 | H5'2 | T A | 11 | -40.420 | -14.213 | 47.223 | 1.00 | 0.00 | H |
| ATOM | 344 | C1'  | A A | 12 | -33.707 | -20.080 | 46.253 | 1.00 | 0.00 | C |
| ATOM | 345 | N1   | A A | 12 | -30.739 | -16.998 | 43.419 | 1.00 | 0.00 | N |
| ATOM | 346 | C2   | A A | 12 | -31.018 | -18.295 | 43.343 | 1.00 | 0.00 | C |
| ATOM | 347 | N3   | A A | 12 | -31.799 | -19.030 | 44.108 | 1.00 | 0.00 | N |
| ATOM | 348 | C4   | A A | 12 | -32.341 | -18.275 | 45.080 | 1.00 | 0.00 | C |
| ATOM | 349 | C5   | A A | 12 | -32.156 | -16.939 | 45.297 | 1.00 | 0.00 | C |
| ATOM | 350 | C6   | A A | 12 | -31.296 | -16.271 | 44.400 | 1.00 | 0.00 | C |
| ATOM | 351 | N6   | A A | 12 | -31.020 | -14.958 | 44.488 | 1.00 | 0.00 | N |
| ATOM | 352 | N7   | A A | 12 | -32.879 | -16.506 | 46.393 | 1.00 | 0.00 | N |
| ATOM | 353 | C8   | A A | 12 | -33.478 | -17.580 | 46.817 | 1.00 | 0.00 | C |
| ATOM | 354 | N9   | A A | 12 | -33.200 | -18.694 | 46.066 | 1.00 | 0.00 | N |
| ATOM | 355 | C2'  | A A | 12 | -33.837 | -20.493 | 47.713 | 1.00 | 0.00 | C |
| ATOM | 356 | C3'  | A A | 12 | -35.080 | -21.369 | 47.685 | 1.00 | 0.00 | C |
| ATOM | 357 | O3'  | A A | 12 | -34.709 | -22.694 | 47.309 | 1.00 | 0.00 | O |
| ATOM | 358 | C4'  | A A | 12 | -35.950 | -20.692 | 46.627 | 1.00 | 0.00 | C |
| ATOM | 359 | O4'  | A A | 12 | -34.990 | -20.153 | 45.662 | 1.00 | 0.00 | O |
| ATOM | 360 | C5'  | A A | 12 | -36.836 | -19.568 | 47.108 | 1.00 | 0.00 | C |
| ATOM | 361 | O5'  | A A | 12 | -36.152 | -18.809 | 48.137 | 1.00 | 0.00 | O |
| ATOM | 362 | O1P  | A A | 12 | -37.530 | -19.250 | 50.197 | 1.00 | 0.00 | O |
| ATOM | 363 | O2P  | A A | 12 | -36.217 | -17.121 | 49.997 | 1.00 | 0.00 | O |
| ATOM | 364 | P    | A A | 12 | -37.010 | -18.179 | 49.324 | 1.00 | 0.00 | P |
| ATOM | 365 | H2   | A A | 12 | -30.532 | -18.829 | 42.527 | 1.00 | 0.00 | H |
| ATOM | 366 | H8   | A A | 12 | -34.138 | -17.595 | 47.685 | 1.00 | 0.00 | H |
| ATOM | 367 | H1'  | A A | 12 | -33.049 | -20.759 | 45.712 | 1.00 | 0.00 | H |
| ATOM | 368 | H3'  | A A | 12 | -35.584 | -21.396 | 48.650 | 1.00 | 0.00 | H |
| ATOM | 369 | H4'  | A A | 12 | -36.592 | -21.465 | 46.204 | 1.00 | 0.00 | H |
| ATOM | 370 | H61  | A A | 12 | -30.388 | -14.518 | 43.806 | 1.00 | 0.00 | H |
| ATOM | 371 | H62  | A A | 12 | -31.443 | -14.393 | 45.240 | 1.00 | 0.00 | H |
| ATOM | 372 | H2'1 | A A | 12 | -33.970 | -19.639 | 48.375 | 1.00 | 0.00 | H |
| ATOM | 373 | H2'2 | A A | 12 | -32.968 | -21.048 | 48.064 | 1.00 | 0.00 | H |
| ATOM | 374 | H5'1 | A A | 12 | -37.073 | -18.916 | 46.267 | 1.00 | 0.00 | H |
| ATOM | 375 | H5'2 | A A | 12 | -37.758 | -19.985 | 47.509 | 1.00 | 0.00 | H |
| ATOM | 376 | C1'  | G A | 13 | -29.422 | -22.342 | 45.172 | 1.00 | 0.00 | C |
| ATOM | 377 | N1   | G A | 13 | -27.645 | -17.578 | 44.757 | 1.00 | 0.00 | N |
| ATOM | 378 | C2   | G A | 13 | -27.418 | -18.683 | 43.956 | 1.00 | 0.00 | C |
| ATOM | 379 | N2   | G A | 13 | -26.606 | -18.496 | 42.906 | 1.00 | 0.00 | N |
| ATOM | 380 | N3   | G A | 13 | -27.955 | -19.880 | 44.185 | 1.00 | 0.00 | N |
| ATOM | 381 | C4   | G A | 13 | -28.742 | -19.890 | 45.292 | 1.00 | 0.00 | C |
| ATOM | 382 | C5   | G A | 13 | -29.023 | -18.840 | 46.151 | 1.00 | 0.00 | C |

|      |     |      |     |    |         |         |        |      |      |   |
|------|-----|------|-----|----|---------|---------|--------|------|------|---|
| ATOM | 383 | C6   | G A | 13 | -28.456 | -17.568 | 45.907 | 1.00 | 0.00 | C |
| ATOM | 384 | O6   | G A | 13 | -28.585 | -16.525 | 46.549 | 1.00 | 0.00 | O |
| ATOM | 385 | N7   | G A | 13 | -29.876 | -19.266 | 47.171 | 1.00 | 0.00 | N |
| ATOM | 386 | C8   | G A | 13 | -30.083 | -20.529 | 46.904 | 1.00 | 0.00 | C |
| ATOM | 387 | N9   | G A | 13 | -29.427 | -20.982 | 45.778 | 1.00 | 0.00 | N |
| ATOM | 388 | C2'  | G A | 13 | -29.424 | -23.470 | 46.195 | 1.00 | 0.00 | C |
| ATOM | 389 | C3'  | G A | 13 | -30.283 | -24.519 | 45.510 | 1.00 | 0.00 | C |
| ATOM | 390 | O3'  | G A | 13 | -29.469 | -25.284 | 44.623 | 1.00 | 0.00 | O |
| ATOM | 391 | C4'  | G A | 13 | -31.317 | -23.678 | 44.763 | 1.00 | 0.00 | C |
| ATOM | 392 | O4'  | G A | 13 | -30.589 | -22.467 | 44.383 | 1.00 | 0.00 | O |
| ATOM | 393 | C5'  | G A | 13 | -32.546 | -23.277 | 45.544 | 1.00 | 0.00 | C |
| ATOM | 394 | O5'  | G A | 13 | -32.185 | -23.004 | 46.921 | 1.00 | 0.00 | O |
| ATOM | 395 | O1P  | G A | 13 | -33.358 | -24.824 | 48.204 | 1.00 | 0.00 | O |
| ATOM | 396 | O2P  | G A | 13 | -32.865 | -22.628 | 49.311 | 1.00 | 0.00 | O |
| ATOM | 397 | P    | G A | 13 | -33.229 | -23.361 | 48.073 | 1.00 | 0.00 | P |
| ATOM | 398 | H1   | G A | 13 | -27.186 | -16.694 | 44.489 | 1.00 | 0.00 | H |
| ATOM | 399 | H8   | G A | 13 | -30.717 | -21.170 | 47.517 | 1.00 | 0.00 | H |
| ATOM | 400 | H1'  | G A | 13 | -28.559 | -22.417 | 44.510 | 1.00 | 0.00 | H |
| ATOM | 401 | H21  | G A | 13 | -26.197 | -17.565 | 42.735 | 1.00 | 0.00 | H |
| ATOM | 402 | H3'  | G A | 13 | -30.762 | -25.187 | 46.226 | 1.00 | 0.00 | H |
| ATOM | 403 | H22  | G A | 13 | -26.395 | -19.279 | 42.275 | 1.00 | 0.00 | H |
| ATOM | 404 | H4'  | G A | 13 | -31.643 | -24.265 | 43.906 | 1.00 | 0.00 | H |
| ATOM | 405 | H2'1 | G A | 13 | -29.857 | -23.163 | 47.147 | 1.00 | 0.00 | H |
| ATOM | 406 | H2'2 | G A | 13 | -28.421 | -23.847 | 46.398 | 1.00 | 0.00 | H |
| ATOM | 407 | H5'1 | G A | 13 | -32.982 | -22.387 | 45.093 | 1.00 | 0.00 | H |
| ATOM | 408 | H5'2 | G A | 13 | -33.273 | -24.089 | 45.507 | 1.00 | 0.00 | H |
| ATOM | 409 | C1'  | G A | 14 | -24.615 | -22.445 | 43.984 | 1.00 | 0.00 | C |
| ATOM | 410 | N1   | G A | 14 | -24.550 | -17.849 | 46.198 | 1.00 | 0.00 | N |
| ATOM | 411 | C2   | G A | 14 | -23.947 | -18.281 | 45.031 | 1.00 | 0.00 | C |
| ATOM | 412 | N2   | G A | 14 | -23.228 | -17.368 | 44.366 | 1.00 | 0.00 | N |
| ATOM | 413 | N3   | G A | 14 | -24.051 | -19.525 | 44.564 | 1.00 | 0.00 | N |
| ATOM | 414 | C4   | G A | 14 | -24.809 | -20.315 | 45.368 | 1.00 | 0.00 | C |
| ATOM | 415 | C5   | G A | 14 | -25.445 | -19.973 | 46.550 | 1.00 | 0.00 | C |
| ATOM | 416 | C6   | G A | 14 | -25.338 | -18.654 | 47.044 | 1.00 | 0.00 | C |
| ATOM | 417 | O6   | G A | 14 | -25.825 | -18.163 | 48.063 | 1.00 | 0.00 | O |
| ATOM | 418 | N7   | G A | 14 | -26.122 | -21.079 | 47.070 | 1.00 | 0.00 | N |
| ATOM | 419 | C8   | G A | 14 | -25.884 | -22.032 | 46.206 | 1.00 | 0.00 | C |
| ATOM | 420 | N9   | G A | 14 | -25.092 | -21.645 | 45.145 | 1.00 | 0.00 | N |
| ATOM | 421 | C2'  | G A | 14 | -24.255 | -23.882 | 44.337 | 1.00 | 0.00 | C |
| ATOM | 422 | C3'  | G A | 14 | -24.694 | -24.634 | 43.091 | 1.00 | 0.00 | C |
| ATOM | 423 | O3'  | G A | 14 | -23.653 | -24.579 | 42.118 | 1.00 | 0.00 | O |
| ATOM | 424 | C4'  | G A | 14 | -25.937 | -23.863 | 42.649 | 1.00 | 0.00 | C |
| ATOM | 425 | O4'  | G A | 14 | -25.656 | -22.478 | 43.027 | 1.00 | 0.00 | O |
| ATOM | 426 | C5'  | G A | 14 | -27.244 | -24.280 | 43.282 | 1.00 | 0.00 | C |
| ATOM | 427 | O5'  | G A | 14 | -27.023 | -24.652 | 44.665 | 1.00 | 0.00 | O |
| ATOM | 428 | O1P  | G A | 14 | -27.534 | -27.116 | 44.696 | 1.00 | 0.00 | O |
| ATOM | 429 | O2P  | G A | 14 | -27.836 | -25.746 | 46.776 | 1.00 | 0.00 | O |
| ATOM | 430 | P    | G A | 14 | -27.906 | -25.820 | 45.296 | 1.00 | 0.00 | P |
| ATOM | 431 | H1   | G A | 14 | -24.412 | -16.864 | 46.469 | 1.00 | 0.00 | H |
| ATOM | 432 | H8   | G A | 14 | -26.275 | -23.043 | 46.316 | 1.00 | 0.00 | H |
| ATOM | 433 | H1'  | G A | 14 | -23.765 | -21.927 | 43.539 | 1.00 | 0.00 | H |
| ATOM | 434 | H21  | G A | 14 | -23.154 | -16.407 | 44.731 | 1.00 | 0.00 | H |
| ATOM | 435 | H3'  | G A | 14 | -24.932 | -25.676 | 43.305 | 1.00 | 0.00 | H |
| ATOM | 436 | H22  | G A | 14 | -22.751 | -17.626 | 43.491 | 1.00 | 0.00 | H |



|      |     |      |   |   |    |         |         |        |      |      |   |
|------|-----|------|---|---|----|---------|---------|--------|------|------|---|
| ATOM | 437 | H4'  | G | A | 14 | -26.029 | -24.000 | 41.573 | 1.00 | 0.00 | H |
| ATOM | 438 | H2'1 | G | A | 14 | -24.784 | -24.236 | 45.221 | 1.00 | 0.00 | H |
| ATOM | 439 | H2'2 | G | A | 14 | -23.187 | -24.007 | 44.521 | 1.00 | 0.00 | H |
| ATOM | 440 | H5'1 | G | A | 14 | -27.948 | -23.449 | 43.230 | 1.00 | 0.00 | H |
| ATOM | 441 | H5'2 | G | A | 14 | -27.652 | -25.129 | 42.733 | 1.00 | 0.00 | H |
| ATOM | 442 | C1'  | A | A | 15 | -20.032 | -20.585 | 43.794 | 1.00 | 0.00 | C |
| ATOM | 443 | N1   | A | A | 15 | -21.567 | -17.903 | 47.892 | 1.00 | 0.00 | N |
| ATOM | 444 | C2   | A | A | 15 | -20.863 | -17.572 | 46.812 | 1.00 | 0.00 | C |
| ATOM | 445 | N3   | A | A | 15 | -20.504 | -18.315 | 45.787 | 1.00 | 0.00 | N |
| ATOM | 446 | C4   | A | A | 15 | -20.953 | -19.574 | 45.945 | 1.00 | 0.00 | C |
| ATOM | 447 | C5   | A | A | 15 | -21.681 | -20.073 | 46.988 | 1.00 | 0.00 | C |
| ATOM | 448 | C6   | A | A | 15 | -22.001 | -19.166 | 48.020 | 1.00 | 0.00 | C |
| ATOM | 449 | N6   | A | A | 15 | -22.712 | -19.514 | 49.107 | 1.00 | 0.00 | N |
| ATOM | 450 | N7   | A | A | 15 | -21.963 | -21.415 | 46.804 | 1.00 | 0.00 | N |
| ATOM | 451 | C8   | A | A | 15 | -21.400 | -21.698 | 45.666 | 1.00 | 0.00 | C |
| ATOM | 452 | N9   | A | A | 15 | -20.768 | -20.628 | 45.084 | 1.00 | 0.00 | N |
| ATOM | 453 | C2'  | A | A | 15 | -19.225 | -21.844 | 43.504 | 1.00 | 0.00 | C |
| ATOM | 454 | C3'  | A | A | 15 | -19.366 | -21.971 | 41.995 | 1.00 | 0.00 | C |
| ATOM | 455 | O3'  | A | A | 15 | -18.381 | -21.158 | 41.365 | 1.00 | 0.00 | O |
| ATOM | 456 | C4'  | A | A | 15 | -20.784 | -21.463 | 41.742 | 1.00 | 0.00 | C |
| ATOM | 457 | O4'  | A | A | 15 | -20.983 | -20.428 | 42.759 | 1.00 | 0.00 | O |
| ATOM | 458 | C5'  | A | A | 15 | -21.894 | -22.479 | 41.864 | 1.00 | 0.00 | C |
| ATOM | 459 | O5'  | A | A | 15 | -21.593 | -23.407 | 42.938 | 1.00 | 0.00 | O |
| ATOM | 460 | O1P  | A | A | 15 | -21.264 | -25.596 | 41.739 | 1.00 | 0.00 | O |
| ATOM | 461 | O2P  | A | A | 15 | -22.044 | -25.576 | 44.124 | 1.00 | 0.00 | O |
| ATOM | 462 | P    | A | A | 15 | -22.055 | -24.927 | 42.791 | 1.00 | 0.00 | P |
| ATOM | 463 | H2   | A | A | 15 | -20.538 | -16.532 | 46.771 | 1.00 | 0.00 | H |
| ATOM | 464 | H8   | A | A | 15 | -21.426 | -22.691 | 45.217 | 1.00 | 0.00 | H |
| ATOM | 465 | H1'  | A | A | 15 | -19.391 | -19.703 | 43.797 | 1.00 | 0.00 | H |
| ATOM | 466 | H3'  | A | A | 15 | -19.252 | -23.002 | 41.659 | 1.00 | 0.00 | H |
| ATOM | 467 | H4'  | A | A | 15 | -20.802 | -21.070 | 40.726 | 1.00 | 0.00 | H |
| ATOM | 468 | H61  | A | A | 15 | -22.920 | -18.811 | 49.831 | 1.00 | 0.00 | H |
| ATOM | 469 | H62  | A | A | 15 | -23.047 | -20.482 | 49.214 | 1.00 | 0.00 | H |
| ATOM | 470 | H2'1 | A | A | 15 | -19.627 | -22.718 | 44.016 | 1.00 | 0.00 | H |
| ATOM | 471 | H2'2 | A | A | 15 | -18.180 | -21.743 | 43.798 | 1.00 | 0.00 | H |
| ATOM | 472 | H5'1 | A | A | 15 | -22.830 | -21.963 | 42.076 | 1.00 | 0.00 | H |
| ATOM | 473 | H5'2 | A | A | 15 | -21.987 | -23.021 | 40.925 | 1.00 | 0.00 | H |
| ATOM | 474 | C1'  | C | A | 16 | -16.362 | -17.650 | 45.399 | 1.00 | 0.00 | C |
| ATOM | 475 | N1   | C | A | 16 | -17.062 | -18.564 | 46.342 | 1.00 | 0.00 | N |
| ATOM | 476 | C2   | C | A | 16 | -17.560 | -18.024 | 47.525 | 1.00 | 0.00 | C |
| ATOM | 477 | O2   | C | A | 16 | -17.401 | -16.816 | 47.743 | 1.00 | 0.00 | O |
| ATOM | 478 | N3   | C | A | 16 | -18.201 | -18.840 | 48.398 | 1.00 | 0.00 | N |
| ATOM | 479 | C4   | C | A | 16 | -18.356 | -20.143 | 48.133 | 1.00 | 0.00 | C |
| ATOM | 480 | N4   | C | A | 16 | -18.995 | -20.894 | 49.020 | 1.00 | 0.00 | N |
| ATOM | 481 | C5   | C | A | 16 | -17.851 | -20.728 | 46.926 | 1.00 | 0.00 | C |
| ATOM | 482 | C6   | C | A | 16 | -17.212 | -19.887 | 46.059 | 1.00 | 0.00 | C |
| ATOM | 483 | C2'  | C | A | 16 | -15.162 | -18.282 | 44.707 | 1.00 | 0.00 | C |
| ATOM | 484 | C3'  | C | A | 16 | -15.223 | -17.650 | 43.325 | 1.00 | 0.00 | C |
| ATOM | 485 | O3'  | C | A | 16 | -14.571 | -16.383 | 43.361 | 1.00 | 0.00 | O |
| ATOM | 486 | C4'  | C | A | 16 | -16.724 | -17.522 | 43.076 | 1.00 | 0.00 | C |
| ATOM | 487 | O4'  | C | A | 16 | -17.290 | -17.268 | 44.401 | 1.00 | 0.00 | O |
| ATOM | 488 | C5'  | C | A | 16 | -17.411 | -18.730 | 42.481 | 1.00 | 0.00 | C |
| ATOM | 489 | O5'  | C | A | 16 | -16.823 | -19.942 | 43.017 | 1.00 | 0.00 | O |
| ATOM | 490 | O1P  | C | A | 16 | -15.730 | -20.997 | 41.011 | 1.00 | 0.00 | O |

|      |     |      |   |   |    |         |         |        |      |      |   |
|------|-----|------|---|---|----|---------|---------|--------|------|------|---|
| ATOM | 491 | O2P  | C | A | 16 | -16.510 | -22.433 | 42.915 | 1.00 | 0.00 | O |
| ATOM | 492 | P    | C | A | 16 | -16.723 | -21.226 | 42.078 | 1.00 | 0.00 | P |
| ATOM | 493 | H5   | C | A | 16 | -17.969 | -21.791 | 46.710 | 1.00 | 0.00 | H |
| ATOM | 494 | H6   | C | A | 16 | -16.818 | -20.283 | 45.123 | 1.00 | 0.00 | H |
| ATOM | 495 | H1'  | C | A | 16 | -16.070 | -16.753 | 45.946 | 1.00 | 0.00 | H |
| ATOM | 496 | H3'  | C | A | 16 | -14.750 | -18.279 | 42.569 | 1.00 | 0.00 | H |
| ATOM | 497 | H4'  | C | A | 16 | -16.860 | -16.690 | 42.386 | 1.00 | 0.00 | H |
| ATOM | 498 | H41  | C | A | 16 | -19.130 | -21.900 | 48.841 | 1.00 | 0.00 | H |
| ATOM | 499 | H42  | C | A | 16 | -19.355 | -20.473 | 49.889 | 1.00 | 0.00 | H |
| ATOM | 500 | H2'1 | C | A | 16 | -15.241 | -19.368 | 44.650 | 1.00 | 0.00 | H |
| ATOM | 501 | H2'2 | C | A | 16 | -14.223 | -18.048 | 45.211 | 1.00 | 0.00 | H |
| ATOM | 502 | H5'1 | C | A | 16 | -18.472 | -18.693 | 42.726 | 1.00 | 0.00 | H |
| ATOM | 503 | H5'2 | C | A | 16 | -17.292 | -18.711 | 41.398 | 1.00 | 0.00 | H |
| ATOM | 504 | C1'  | G | A | 17 | -13.924 | -15.037 | 48.827 | 1.00 | 0.00 | C |
| ATOM | 505 | N1   | G | A | 17 | -16.170 | -18.269 | 52.073 | 1.00 | 0.00 | N |
| ATOM | 506 | C2   | G | A | 17 | -15.989 | -16.900 | 52.165 | 1.00 | 0.00 | C |
| ATOM | 507 | N2   | G | A | 17 | -16.468 | -16.316 | 53.270 | 1.00 | 0.00 | N |
| ATOM | 508 | N3   | G | A | 17 | -15.379 | -16.174 | 51.230 | 1.00 | 0.00 | N |
| ATOM | 509 | C4   | G | A | 17 | -14.951 | -16.931 | 50.185 | 1.00 | 0.00 | C |
| ATOM | 510 | C5   | G | A | 17 | -15.083 | -18.298 | 50.009 | 1.00 | 0.00 | C |
| ATOM | 511 | C6   | G | A | 17 | -15.734 | -19.070 | 50.999 | 1.00 | 0.00 | C |
| ATOM | 512 | O6   | G | A | 17 | -15.946 | -20.283 | 51.025 | 1.00 | 0.00 | O |
| ATOM | 513 | N7   | G | A | 17 | -14.506 | -18.688 | 48.799 | 1.00 | 0.00 | N |
| ATOM | 514 | C8   | G | A | 17 | -14.056 | -17.569 | 48.290 | 1.00 | 0.00 | C |
| ATOM | 515 | N9   | G | A | 17 | -14.288 | -16.458 | 49.074 | 1.00 | 0.00 | N |
| ATOM | 516 | C2'  | G | A | 17 | -12.570 | -14.858 | 48.154 | 1.00 | 0.00 | C |
| ATOM | 517 | C3'  | G | A | 17 | -12.817 | -13.659 | 47.254 | 1.00 | 0.00 | C |
| ATOM | 518 | O3'  | G | A | 17 | -12.636 | -12.462 | 48.007 | 1.00 | 0.00 | O |
| ATOM | 519 | C4'  | G | A | 17 | -14.270 | -13.854 | 46.821 | 1.00 | 0.00 | C |
| ATOM | 520 | O4'  | G | A | 17 | -14.909 | -14.481 | 47.977 | 1.00 | 0.00 | O |
| ATOM | 521 | C5'  | G | A | 17 | -14.497 | -14.726 | 45.609 | 1.00 | 0.00 | C |
| ATOM | 522 | O5'  | G | A | 17 | -13.544 | -15.818 | 45.605 | 1.00 | 0.00 | O |
| ATOM | 523 | O1P  | G | A | 17 | -12.125 | -15.342 | 43.581 | 1.00 | 0.00 | O |
| ATOM | 524 | O2P  | G | A | 17 | -12.404 | -17.700 | 44.393 | 1.00 | 0.00 | O |
| ATOM | 525 | P    | G | A | 17 | -12.999 | -16.355 | 44.206 | 1.00 | 0.00 | P |
| ATOM | 526 | H1   | G | A | 17 | -16.661 | -18.737 | 52.849 | 1.00 | 0.00 | H |
| ATOM | 527 | H8   | G | A | 17 | -13.542 | -17.520 | 47.329 | 1.00 | 0.00 | H |
| ATOM | 528 | H1'  | G | A | 17 | -13.961 | -14.505 | 49.777 | 1.00 | 0.00 | H |
| ATOM | 529 | H21  | G | A | 17 | -16.941 | -16.883 | 53.988 | 1.00 | 0.00 | H |
| ATOM | 530 | H3'  | G | A | 17 | -12.149 | -13.649 | 46.393 | 1.00 | 0.00 | H |
| ATOM | 531 | H22  | G | A | 17 | -16.363 | -15.299 | 53.401 | 1.00 | 0.00 | H |
| ATOM | 532 | H4'  | G | A | 17 | -14.669 | -12.865 | 46.599 | 1.00 | 0.00 | H |
| ATOM | 533 | H2'1 | G | A | 17 | -12.277 | -15.735 | 47.576 | 1.00 | 0.00 | H |
| ATOM | 534 | H2'2 | G | A | 17 | -11.774 | -14.658 | 48.873 | 1.00 | 0.00 | H |
| ATOM | 535 | H5'1 | G | A | 17 | -15.512 | -15.123 | 45.640 | 1.00 | 0.00 | H |
| ATOM | 536 | H5'2 | G | A | 17 | -14.375 | -14.125 | 44.708 | 1.00 | 0.00 | H |
| ATOM | 537 | C1'  | G | A | 18 | -12.582 | -13.950 | 53.468 | 1.00 | 0.00 | C |
| ATOM | 538 | N1   | G | A | 18 | -13.661 | -18.861 | 54.328 | 1.00 | 0.00 | N |
| ATOM | 539 | C2   | G | A | 18 | -13.957 | -17.741 | 55.085 | 1.00 | 0.00 | C |
| ATOM | 540 | N2   | G | A | 18 | -14.627 | -17.959 | 56.225 | 1.00 | 0.00 | N |
| ATOM | 541 | N3   | G | A | 18 | -13.612 | -16.505 | 54.734 | 1.00 | 0.00 | N |
| ATOM | 542 | C4   | G | A | 18 | -12.933 | -16.471 | 53.558 | 1.00 | 0.00 | C |
| ATOM | 543 | C5   | G | A | 18 | -12.590 | -17.534 | 52.738 | 1.00 | 0.00 | C |
| ATOM | 544 | C6   | G | A | 18 | -12.960 | -18.848 | 53.108 | 1.00 | 0.00 | C |

|      |     |      |     |    |         |         |        |      |      |   |
|------|-----|------|-----|----|---------|---------|--------|------|------|---|
| ATOM | 545 | O6   | G A | 18 | -12.748 | -19.909 | 52.519 | 1.00 | 0.00 | O |
| ATOM | 546 | N7   | G A | 18 | -11.892 | -17.076 | 51.620 | 1.00 | 0.00 | N |
| ATOM | 547 | C8   | G A | 18 | -11.838 | -15.780 | 51.789 | 1.00 | 0.00 | C |
| ATOM | 548 | N9   | G A | 18 | -12.447 | -15.337 | 52.945 | 1.00 | 0.00 | N |
| ATOM | 549 | C2'  | G A | 18 | -11.356 | -13.081 | 53.226 | 1.00 | 0.00 | C |
| ATOM | 550 | C3'  | G A | 18 | -11.978 | -11.719 | 52.967 | 1.00 | 0.00 | C |
| ATOM | 551 | O3'  | G A | 18 | -12.227 | -11.073 | 54.213 | 1.00 | 0.00 | O |
| ATOM | 552 | C4'  | G A | 18 | -13.271 | -12.069 | 52.231 | 1.00 | 0.00 | C |
| ATOM | 553 | O4'  | G A | 18 | -13.681 | -13.347 | 52.813 | 1.00 | 0.00 | O |
| ATOM | 554 | C5'  | G A | 18 | -13.166 | -12.232 | 50.733 | 1.00 | 0.00 | C |
| ATOM | 555 | O5'  | G A | 18 | -11.899 | -12.849 | 50.393 | 1.00 | 0.00 | O |
| ATOM | 556 | O1P  | G A | 18 | -10.686 | -11.037 | 49.136 | 1.00 | 0.00 | O |
| ATOM | 557 | O2P  | G A | 18 | -10.165 | -13.447 | 48.676 | 1.00 | 0.00 | O |
| ATOM | 558 | P    | G A | 18 | -11.177 | -12.424 | 49.035 | 1.00 | 0.00 | P |
| ATOM | 559 | H1   | G A | 18 | -13.980 | -19.775 | 54.686 | 1.00 | 0.00 | H |
| ATOM | 560 | H8   | G A | 18 | -11.353 | -15.108 | 51.082 | 1.00 | 0.00 | H |
| ATOM | 561 | H1'  | G A | 18 | -12.816 | -14.008 | 54.532 | 1.00 | 0.00 | H |
| ATOM | 562 | H21  | G A | 18 | -14.894 | -18.920 | 56.488 | 1.00 | 0.00 | H |
| ATOM | 563 | H3'  | G A | 18 | -11.336 | -11.085 | 52.354 | 1.00 | 0.00 | H |
| ATOM | 564 | H22  | G A | 18 | -14.874 | -17.168 | 56.834 | 1.00 | 0.00 | H |
| ATOM | 565 | H4'  | G A | 18 | -13.977 | -11.264 | 52.430 | 1.00 | 0.00 | H |
| ATOM | 566 | H2'1 | G A | 18 | -10.772 | -13.419 | 52.369 | 1.00 | 0.00 | H |
| ATOM | 567 | H2'2 | G A | 18 | -10.689 | -13.056 | 54.088 | 1.00 | 0.00 | H |
| ATOM | 568 | H5'1 | G A | 18 | -13.986 | -12.858 | 50.383 | 1.00 | 0.00 | H |
| ATOM | 569 | H5'2 | G A | 18 | -13.237 | -11.253 | 50.261 | 1.00 | 0.00 | H |
| ATOM | 570 | C1'  | T A | 19 | -11.776 | -15.008 | 58.236 | 1.00 | 0.00 | C |
| ATOM | 571 | N1   | T A | 19 | -11.180 | -15.858 | 57.172 | 1.00 | 0.00 | N |
| ATOM | 572 | C2   | T A | 19 | -11.383 | -17.220 | 57.265 | 1.00 | 0.00 | C |
| ATOM | 573 | O2   | T A | 19 | -12.020 | -17.731 | 58.171 | 1.00 | 0.00 | O |
| ATOM | 574 | N3   | T A | 19 | -10.813 | -17.972 | 56.256 | 1.00 | 0.00 | N |
| ATOM | 575 | C4   | T A | 19 | -10.075 | -17.496 | 55.193 | 1.00 | 0.00 | C |
| ATOM | 576 | O4   | T A | 19 | -9.609  | -18.270 | 54.348 | 1.00 | 0.00 | O |
| ATOM | 577 | C5   | T A | 19 | -9.915  | -16.061 | 55.179 | 1.00 | 0.00 | C |
| ATOM | 578 | C6   | T A | 19 | -10.458 | -15.296 | 56.147 | 1.00 | 0.00 | C |
| ATOM | 579 | C7   | T A | 19 | -9.121  | -15.499 | 54.039 | 1.00 | 0.00 | C |
| ATOM | 580 | C2'  | T A | 19 | -10.899 | -13.831 | 58.646 | 1.00 | 0.00 | C |
| ATOM | 581 | C3'  | T A | 19 | -11.929 | -12.750 | 58.931 | 1.00 | 0.00 | C |
| ATOM | 582 | O3'  | T A | 19 | -12.407 | -12.899 | 60.266 | 1.00 | 0.00 | O |
| ATOM | 583 | C4'  | T A | 19 | -13.014 | -13.034 | 57.895 | 1.00 | 0.00 | C |
| ATOM | 584 | O4'  | T A | 19 | -12.996 | -14.489 | 57.742 | 1.00 | 0.00 | O |
| ATOM | 585 | C5'  | T A | 19 | -12.827 | -12.403 | 56.535 | 1.00 | 0.00 | C |
| ATOM | 586 | O5'  | T A | 19 | -11.419 | -12.396 | 56.188 | 1.00 | 0.00 | O |
| ATOM | 587 | O1P  | T A | 19 | -10.841 | -9.947  | 56.145 | 1.00 | 0.00 | O |
| ATOM | 588 | O2P  | T A | 19 | -9.544  | -11.568 | 54.735 | 1.00 | 0.00 | O |
| ATOM | 589 | P    | T A | 19 | -10.844 | -11.180 | 55.332 | 1.00 | 0.00 | P |
| ATOM | 590 | H3   | T A | 19 | -10.954 | -18.992 | 56.301 | 1.00 | 0.00 | H |
| ATOM | 591 | H6   | T A | 19 | -10.324 | -14.215 | 56.116 | 1.00 | 0.00 | H |
| ATOM | 592 | H1'  | T A | 19 | -12.003 | -15.642 | 59.093 | 1.00 | 0.00 | H |
| ATOM | 593 | H3'  | T A | 19 | -11.516 | -11.750 | 58.804 | 1.00 | 0.00 | H |
| ATOM | 594 | H4'  | T A | 19 | -13.952 | -12.661 | 58.308 | 1.00 | 0.00 | H |
| ATOM | 595 | H71  | T A | 19 | -8.202  | -15.054 | 54.420 | 1.00 | 0.00 | H |
| ATOM | 596 | H72  | T A | 19 | -8.874  | -16.298 | 53.339 | 1.00 | 0.00 | H |
| ATOM | 597 | H73  | T A | 19 | -9.707  | -14.735 | 53.526 | 1.00 | 0.00 | H |
| ATOM | 598 | H2'1 | T A | 19 | -10.216 | -13.530 | 57.852 | 1.00 | 0.00 | H |

|      |     |      |     |   |    |         |         |        |      |      |   |
|------|-----|------|-----|---|----|---------|---------|--------|------|------|---|
| ATOM | 599 | H2'2 | T   | A | 19 | -10.298 | -14.051 | 59.529 | 1.00 | 0.00 | H |
| ATOM | 600 | H5'1 | T   | A | 19 | -13.386 | -12.974 | 55.794 | 1.00 | 0.00 | H |
| ATOM | 601 | H5'2 | T   | A | 19 | -13.204 | -11.382 | 56.560 | 1.00 | 0.00 | H |
| ATOM | 602 | C01  | LNK | A | 20 | -10.968 | -11.754 | 63.503 | 0.00 | 0.00 | C |
| ATOM | 603 | O1   | LNK | A | 20 | -10.907 | -11.901 | 62.082 | 1.00 | 0.00 | O |
| ATOM | 604 | S    | LNK | A | 20 | -8.698  | -10.406 | 66.482 | 0.00 | 0.00 | S |
| ATOM | 605 | C02  | LNK | A | 20 | -9.661  | -11.112 | 64.007 | 0.00 | 0.00 | C |
| ATOM | 606 | C03  | LNK | A | 20 | -9.280  | -11.723 | 65.368 | 0.00 | 0.00 | C |
| ATOM | 607 | O1P  | LNK | A | 20 | -9.958  | -13.776 | 60.696 | 1.00 | 0.00 | O |
| ATOM | 608 | O2P  | LNK | A | 20 | -11.625 | -14.272 | 62.506 | 1.00 | 0.00 | O |
| ATOM | 609 | P    | LNK | A | 20 | -11.153 | -13.344 | 61.448 | 1.00 | 0.00 | P |
| ATOM | 610 | H01  | LNK | A | 20 | -11.094 | -12.732 | 63.966 | 0.00 | 0.00 | H |
| ATOM | 611 | H02  | LNK | A | 20 | -11.811 | -11.115 | 63.767 | 0.00 | 0.00 | H |
| ATOM | 612 | H03  | LNK | A | 20 | -8.487  | -12.457 | 65.228 | 0.00 | 0.00 | H |
| ATOM | 613 | H04  | LNK | A | 20 | -9.803  | -10.036 | 64.117 | 0.00 | 0.00 | H |
| ATOM | 614 | H05  | LNK | A | 20 | -8.863  | -11.300 | 63.288 | 0.00 | 0.00 | H |
| ATOM | 615 | H06  | LNK | A | 20 | -10.153 | -12.209 | 65.805 | 0.00 | 0.00 | H |
| ATOM | 616 | AU   | LNK | A | 20 | -8.435  | -10.686 | 67.050 |      |      |   |
| TER  |     |      |     |   |    |         |         |        |      |      |   |
| ATOM | 618 | C1'  | A   | B | 2  | -12.261 | -25.850 | 57.188 | 1.00 | 0.00 | C |
| ATOM | 619 | N1   | A   | B | 2  | -11.201 | -20.895 | 56.372 | 1.00 | 0.00 | N |
| ATOM | 620 | C2   | A   | B | 2  | -11.888 | -21.521 | 57.322 | 1.00 | 0.00 | C |
| ATOM | 621 | N3   | A   | B | 2  | -12.121 | -22.808 | 57.475 | 1.00 | 0.00 | N |
| ATOM | 622 | C4   | A   | B | 2  | -11.548 | -23.507 | 56.478 | 1.00 | 0.00 | C |
| ATOM | 623 | C5   | A   | B | 2  | -10.815 | -23.017 | 55.434 | 1.00 | 0.00 | C |
| ATOM | 624 | C6   | A   | B | 2  | -10.640 | -21.618 | 55.391 | 1.00 | 0.00 | C |
| ATOM | 625 | N6   | A   | B | 2  | -9.943  | -20.994 | 54.426 | 1.00 | 0.00 | N |
| ATOM | 626 | N7   | A   | B | 2  | -10.383 | -24.038 | 54.605 | 1.00 | 0.00 | N |
| ATOM | 627 | C8   | A   | B | 2  | -10.863 | -25.112 | 55.157 | 1.00 | 0.00 | C |
| ATOM | 628 | N9   | A   | B | 2  | -11.579 | -24.868 | 56.300 | 1.00 | 0.00 | N |
| ATOM | 629 | C2'  | A   | B | 2  | -12.913 | -27.004 | 56.438 | 1.00 | 0.00 | C |
| ATOM | 630 | C3'  | A   | B | 2  | -12.695 | -28.166 | 57.393 | 1.00 | 0.00 | C |
| ATOM | 631 | O3'  | A   | B | 2  | -13.733 | -28.170 | 58.370 | 1.00 | 0.00 | O |
| ATOM | 632 | C4'  | A   | B | 2  | -11.330 | -27.853 | 58.004 | 1.00 | 0.00 | C |
| ATOM | 633 | O4'  | A   | B | 2  | -11.287 | -26.390 | 58.060 | 1.00 | 0.00 | O |
| ATOM | 634 | C5'  | A   | B | 2  | -10.124 | -28.343 | 57.238 | 1.00 | 0.00 | C |
| ATOM | 635 | O5'  | A   | B | 2  | -10.369 | -28.232 | 55.813 | 1.00 | 0.00 | O |
| ATOM | 636 | H2   | A   | B | 2  | -12.322 | -20.878 | 58.085 | 1.00 | 0.00 | H |
| ATOM | 637 | H8   | A   | B | 2  | -10.711 | -26.112 | 54.750 | 1.00 | 0.00 | H |
| ATOM | 638 | H1'  | A   | B | 2  | -12.993 | -25.313 | 57.791 | 1.00 | 0.00 | H |
| ATOM | 639 | H3'  | A   | B | 2  | -12.683 | -29.125 | 56.875 | 1.00 | 0.00 | H |
| ATOM | 640 | H4'  | A   | B | 2  | -11.310 | -28.317 | 58.989 | 1.00 | 0.00 | H |
| ATOM | 641 | H61  | A   | B | 2  | -9.843  | -19.971 | 54.443 | 1.00 | 0.00 | H |
| ATOM | 642 | H62  | A   | B | 2  | -9.510  | -21.544 | 53.668 | 1.00 | 0.00 | H |
| ATOM | 643 | H2'1 | A   | B | 2  | -12.442 | -27.190 | 55.473 | 1.00 | 0.00 | H |
| ATOM | 644 | H2'2 | A   | B | 2  | -13.975 | -26.832 | 56.258 | 1.00 | 0.00 | H |
| ATOM | 645 | H5'1 | A   | B | 2  | -9.258  | -27.739 | 57.511 | 1.00 | 0.00 | H |
| ATOM | 646 | H5'2 | A   | B | 2  | -9.933  | -29.383 | 57.500 | 1.00 | 0.00 | H |
| ATOM | 647 | C1'  | C   | B | 3  | -16.289 | -23.073 | 58.036 | 1.00 | 0.00 | C |
| ATOM | 648 | N1   | C   | B | 3  | -15.537 | -22.942 | 56.758 | 1.00 | 0.00 | N |
| ATOM | 649 | C2   | C   | B | 3  | -15.154 | -21.665 | 56.353 | 1.00 | 0.00 | C |
| ATOM | 650 | O2   | C   | B | 3  | -15.452 | -20.699 | 57.068 | 1.00 | 0.00 | O |
| ATOM | 651 | N3   | C   | B | 3  | -14.470 | -21.524 | 55.193 | 1.00 | 0.00 | N |
| ATOM | 652 | C4   | C   | B | 3  | -14.163 | -22.589 | 54.441 | 1.00 | 0.00 | C |

|      |     |      |     |   |         |         |        |      |      |   |
|------|-----|------|-----|---|---------|---------|--------|------|------|---|
| ATOM | 653 | N4   | C B | 3 | -13.488 | -22.393 | 53.316 | 1.00 | 0.00 | N |
| ATOM | 654 | C5   | C B | 3 | -14.547 | -23.915 | 54.828 | 1.00 | 0.00 | C |
| ATOM | 655 | C6   | C B | 3 | -15.233 | -24.034 | 56.004 | 1.00 | 0.00 | C |
| ATOM | 656 | C2'  | C B | 3 | -17.382 | -24.133 | 57.999 | 1.00 | 0.00 | C |
| ATOM | 657 | C3'  | C B | 3 | -17.328 | -24.693 | 59.412 | 1.00 | 0.00 | C |
| ATOM | 658 | O3'  | C B | 3 | -18.112 | -23.869 | 60.272 | 1.00 | 0.00 | O |
| ATOM | 659 | C4'  | C B | 3 | -15.840 | -24.625 | 59.747 | 1.00 | 0.00 | C |
| ATOM | 660 | O4'  | C B | 3 | -15.364 | -23.434 | 59.043 | 1.00 | 0.00 | O |
| ATOM | 661 | C5'  | C B | 3 | -15.001 | -25.807 | 59.319 | 1.00 | 0.00 | C |
| ATOM | 662 | O5'  | C B | 3 | -15.478 | -26.310 | 58.046 | 1.00 | 0.00 | O |
| ATOM | 663 | O1P  | C B | 3 | -16.361 | -28.597 | 58.617 | 1.00 | 0.00 | O |
| ATOM | 664 | O2P  | C B | 3 | -15.516 | -28.120 | 56.303 | 1.00 | 0.00 | O |
| ATOM | 665 | P    | C B | 3 | -15.397 | -27.876 | 57.761 | 1.00 | 0.00 | P |
| ATOM | 666 | H5   | C B | 3 | -14.307 | -24.784 | 54.216 | 1.00 | 0.00 | H |
| ATOM | 667 | H6   | C B | 3 | -15.541 | -25.022 | 56.344 | 1.00 | 0.00 | H |
| ATOM | 668 | H1'  | C B | 3 | -16.700 | -22.096 | 58.291 | 1.00 | 0.00 | H |
| ATOM | 669 | H3'  | C B | 3 | -17.696 | -25.717 | 59.459 | 1.00 | 0.00 | H |
| ATOM | 670 | H4'  | C B | 3 | -15.762 | -24.540 | 60.831 | 1.00 | 0.00 | H |
| ATOM | 671 | H41  | C B | 3 | -13.236 | -23.196 | 52.720 | 1.00 | 0.00 | H |
| ATOM | 672 | H42  | C B | 3 | -13.214 | -21.440 | 53.038 | 1.00 | 0.00 | H |
| ATOM | 673 | H2'1 | C B | 3 | -17.184 | -24.906 | 57.258 | 1.00 | 0.00 | H |
| ATOM | 674 | H2'2 | C B | 3 | -18.362 | -23.708 | 57.777 | 1.00 | 0.00 | H |
| ATOM | 675 | H5'1 | C B | 3 | -13.961 | -25.493 | 59.224 | 1.00 | 0.00 | H |
| ATOM | 676 | H5'2 | C B | 3 | -15.072 | -26.588 | 60.073 | 1.00 | 0.00 | H |
| ATOM | 677 | C1'  | C B | 4 | -19.142 | -19.068 | 57.450 | 1.00 | 0.00 | C |
| ATOM | 678 | N1   | C B | 4 | -18.637 | -19.816 | 56.268 | 1.00 | 0.00 | N |
| ATOM | 679 | C2   | C B | 4 | -17.990 | -19.096 | 55.266 | 1.00 | 0.00 | C |
| ATOM | 680 | O2   | C B | 4 | -17.862 | -17.871 | 55.399 | 1.00 | 0.00 | O |
| ATOM | 681 | N3   | C B | 4 | -17.523 | -19.757 | 54.180 | 1.00 | 0.00 | N |
| ATOM | 682 | C4   | C B | 4 | -17.676 | -21.084 | 54.064 | 1.00 | 0.00 | C |
| ATOM | 683 | N4   | C B | 4 | -17.197 | -21.682 | 52.983 | 1.00 | 0.00 | N |
| ATOM | 684 | C5   | C B | 4 | -18.342 | -21.851 | 55.076 | 1.00 | 0.00 | C |
| ATOM | 685 | C6   | C B | 4 | -18.800 | -21.163 | 56.163 | 1.00 | 0.00 | C |
| ATOM | 686 | C2'  | C B | 4 | -20.477 | -19.578 | 57.975 | 1.00 | 0.00 | C |
| ATOM | 687 | C3'  | C B | 4 | -20.321 | -19.388 | 59.476 | 1.00 | 0.00 | C |
| ATOM | 688 | O3'  | C B | 4 | -20.664 | -18.047 | 59.817 | 1.00 | 0.00 | O |
| ATOM | 689 | C4'  | C B | 4 | -18.839 | -19.680 | 59.703 | 1.00 | 0.00 | C |
| ATOM | 690 | O4'  | C B | 4 | -18.185 | -19.201 | 58.484 | 1.00 | 0.00 | O |
| ATOM | 691 | C5'  | C B | 4 | -18.464 | -21.129 | 59.914 | 1.00 | 0.00 | C |
| ATOM | 692 | O5'  | C B | 4 | -19.294 | -21.976 | 59.080 | 1.00 | 0.00 | O |
| ATOM | 693 | O1P  | C B | 4 | -20.665 | -23.271 | 60.746 | 1.00 | 0.00 | O |
| ATOM | 694 | O2P  | C B | 4 | -20.168 | -24.257 | 58.492 | 1.00 | 0.00 | O |
| ATOM | 695 | P    | C B | 4 | -19.715 | -23.413 | 59.625 | 1.00 | 0.00 | P |
| ATOM | 696 | H5   | C B | 4 | -18.476 | -22.929 | 54.983 | 1.00 | 0.00 | H |
| ATOM | 697 | H6   | C B | 4 | -19.306 | -21.704 | 56.963 | 1.00 | 0.00 | H |
| ATOM | 698 | H1'  | C B | 4 | -19.204 | -18.012 | 57.185 | 1.00 | 0.00 | H |
| ATOM | 699 | H3'  | C B | 4 | -20.948 | -20.077 | 60.042 | 1.00 | 0.00 | H |
| ATOM | 700 | H4'  | C B | 4 | -18.539 | -19.126 | 60.593 | 1.00 | 0.00 | H |
| ATOM | 701 | H41  | C B | 4 | -17.299 | -22.701 | 52.870 | 1.00 | 0.00 | H |
| ATOM | 702 | H42  | C B | 4 | -16.721 | -21.128 | 52.255 | 1.00 | 0.00 | H |
| ATOM | 703 | H2'1 | C B | 4 | -20.648 | -20.624 | 57.724 | 1.00 | 0.00 | H |
| ATOM | 704 | H2'2 | C B | 4 | -21.320 | -19.005 | 57.588 | 1.00 | 0.00 | H |
| ATOM | 705 | H5'1 | C B | 4 | -17.415 | -21.269 | 59.654 | 1.00 | 0.00 | H |
| ATOM | 706 | H5'2 | C B | 4 | -18.612 | -21.386 | 60.962 | 1.00 | 0.00 | H |

|      |     |      |     |   |         |         |        |      |      |   |
|------|-----|------|-----|---|---------|---------|--------|------|------|---|
| ATOM | 707 | C1'  | G B | 5 | -20.800 | -15.113 | 54.974 | 1.00 | 0.00 | C |
| ATOM | 708 | N1   | G B | 5 | -19.246 | -17.732 | 50.880 | 1.00 | 0.00 | N |
| ATOM | 709 | C2   | G B | 5 | -19.108 | -16.388 | 51.180 | 1.00 | 0.00 | C |
| ATOM | 710 | N2   | G B | 5 | -18.472 | -15.643 | 50.268 | 1.00 | 0.00 | N |
| ATOM | 711 | N3   | G B | 5 | -19.566 | -15.833 | 52.302 | 1.00 | 0.00 | N |
| ATOM | 712 | C4   | G B | 5 | -20.187 | -16.734 | 53.107 | 1.00 | 0.00 | C |
| ATOM | 713 | C5   | G B | 5 | -20.376 | -18.088 | 52.888 | 1.00 | 0.00 | C |
| ATOM | 714 | C6   | G B | 5 | -19.887 | -18.679 | 51.701 | 1.00 | 0.00 | C |
| ATOM | 715 | O6   | G B | 5 | -19.957 | -19.851 | 51.332 | 1.00 | 0.00 | O |
| ATOM | 716 | N7   | G B | 5 | -21.066 | -18.658 | 53.961 | 1.00 | 0.00 | N |
| ATOM | 717 | C8   | G B | 5 | -21.266 | -17.656 | 54.778 | 1.00 | 0.00 | C |
| ATOM | 718 | N9   | G B | 5 | -20.762 | -16.453 | 54.327 | 1.00 | 0.00 | N |
| ATOM | 719 | C2'  | G B | 5 | -22.099 | -14.826 | 55.714 | 1.00 | 0.00 | C |
| ATOM | 720 | C3'  | G B | 5 | -21.614 | -14.015 | 56.905 | 1.00 | 0.00 | C |
| ATOM | 721 | O3'  | G B | 5 | -21.494 | -12.647 | 56.522 | 1.00 | 0.00 | O |
| ATOM | 722 | C4'  | G B | 5 | -20.259 | -14.648 | 57.218 | 1.00 | 0.00 | C |
| ATOM | 723 | O4'  | G B | 5 | -19.743 | -15.055 | 55.911 | 1.00 | 0.00 | O |
| ATOM | 724 | C5'  | G B | 5 | -20.275 | -15.852 | 58.129 | 1.00 | 0.00 | C |
| ATOM | 725 | O5'  | G B | 5 | -21.452 | -16.654 | 57.861 | 1.00 | 0.00 | O |
| ATOM | 726 | O1P  | G B | 5 | -22.790 | -16.455 | 59.983 | 1.00 | 0.00 | O |
| ATOM | 727 | O2P  | G B | 5 | -23.029 | -18.490 | 58.536 | 1.00 | 0.00 | O |
| ATOM | 728 | P    | G B | 5 | -22.150 | -17.423 | 59.072 | 1.00 | 0.00 | P |
| ATOM | 729 | H1   | G B | 5 | -18.849 | -18.063 | 49.988 | 1.00 | 0.00 | H |
| ATOM | 730 | H8   | G B | 5 | -21.786 | -17.760 | 55.730 | 1.00 | 0.00 | H |
| ATOM | 731 | H1'  | G B | 5 | -20.612 | -14.359 | 54.210 | 1.00 | 0.00 | H |
| ATOM | 732 | H21  | G B | 5 | -18.118 | -16.079 | 49.405 | 1.00 | 0.00 | H |
| ATOM | 733 | H3'  | G B | 5 | -22.291 | -14.094 | 57.757 | 1.00 | 0.00 | H |
| ATOM | 734 | H22  | G B | 5 | -18.339 | -14.634 | 50.429 | 1.00 | 0.00 | H |
| ATOM | 735 | H4'  | G B | 5 | -19.652 | -13.878 | 57.693 | 1.00 | 0.00 | H |
| ATOM | 736 | H2'1 | G B | 5 | -22.603 | -15.738 | 56.034 | 1.00 | 0.00 | H |
| ATOM | 737 | H2'2 | G B | 5 | -22.805 | -14.258 | 55.108 | 1.00 | 0.00 | H |
| ATOM | 738 | H5'1 | G B | 5 | -19.377 | -16.444 | 57.954 | 1.00 | 0.00 | H |
| ATOM | 739 | H5'2 | G B | 5 | -20.287 | -15.516 | 59.166 | 1.00 | 0.00 | H |
| ATOM | 740 | C1'  | T B | 6 | -21.706 | -12.473 | 50.885 | 1.00 | 0.00 | C |
| ATOM | 741 | N1   | T B | 6 | -22.158 | -13.887 | 50.979 | 1.00 | 0.00 | N |
| ATOM | 742 | C2   | T B | 6 | -21.815 | -14.728 | 49.939 | 1.00 | 0.00 | C |
| ATOM | 743 | O2   | T B | 6 | -21.173 | -14.355 | 48.973 | 1.00 | 0.00 | O |
| ATOM | 744 | N3   | T B | 6 | -22.255 | -16.033 | 50.068 | 1.00 | 0.00 | N |
| ATOM | 745 | C4   | T B | 6 | -22.988 | -16.555 | 51.112 | 1.00 | 0.00 | C |
| ATOM | 746 | O4   | T B | 6 | -23.328 | -17.743 | 51.115 | 1.00 | 0.00 | O |
| ATOM | 747 | C5   | T B | 6 | -23.296 | -15.601 | 52.151 | 1.00 | 0.00 | C |
| ATOM | 748 | C6   | T B | 6 | -22.883 | -14.321 | 52.060 | 1.00 | 0.00 | C |
| ATOM | 749 | C7   | T B | 6 | -24.090 | -16.127 | 53.310 | 1.00 | 0.00 | C |
| ATOM | 750 | C2'  | T B | 6 | -22.722 | -11.469 | 51.415 | 1.00 | 0.00 | C |
| ATOM | 751 | C3'  | T B | 6 | -21.824 | -10.413 | 52.044 | 1.00 | 0.00 | C |
| ATOM | 752 | O3'  | T B | 6 | -21.400 | -9.498  | 51.037 | 1.00 | 0.00 | O |
| ATOM | 753 | C4'  | T B | 6 | -20.667 | -11.239 | 52.601 | 1.00 | 0.00 | C |
| ATOM | 754 | O4'  | T B | 6 | -20.526 | -12.345 | 51.654 | 1.00 | 0.00 | O |
| ATOM | 755 | C5'  | T B | 6 | -20.855 | -11.811 | 53.987 | 1.00 | 0.00 | C |
| ATOM | 756 | O5'  | T B | 6 | -22.238 | -12.208 | 54.169 | 1.00 | 0.00 | O |
| ATOM | 757 | O1P  | T B | 6 | -23.067 | -10.629 | 55.944 | 1.00 | 0.00 | O |
| ATOM | 758 | O2P  | T B | 6 | -24.117 | -12.894 | 55.689 | 1.00 | 0.00 | O |
| ATOM | 759 | P    | T B | 6 | -22.895 | -12.058 | 55.615 | 1.00 | 0.00 | P |
| ATOM | 760 | H3   | T B | 6 | -22.009 | -16.682 | 49.305 | 1.00 | 0.00 | H |

|      |     |      |     |   |         |         |        |      |      |   |
|------|-----|------|-----|---|---------|---------|--------|------|------|---|
| ATOM | 761 | H6   | T B | 6 | -23.129 | -13.620 | 52.858 | 1.00 | 0.00 | H |
| ATOM | 762 | H1'  | T B | 6 | -21.454 | -12.262 | 49.846 | 1.00 | 0.00 | H |
| ATOM | 763 | H3'  | T B | 6 | -22.334 | -9.866  | 52.837 | 1.00 | 0.00 | H |
| ATOM | 764 | H4'  | T B | 6 | -19.795 | -10.585 | 52.627 | 1.00 | 0.00 | H |
| ATOM | 765 | H71  | T B | 6 | -25.068 | -15.645 | 53.329 | 1.00 | 0.00 | H |
| ATOM | 766 | H72  | T B | 6 | -24.217 | -17.204 | 53.205 | 1.00 | 0.00 | H |
| ATOM | 767 | H73  | T B | 6 | -23.562 | -15.912 | 54.240 | 1.00 | 0.00 | H |
| ATOM | 768 | H2'1 | T B | 6 | -23.393 | -11.909 | 52.150 | 1.00 | 0.00 | H |
| ATOM | 769 | H2'2 | T B | 6 | -23.336 | -11.044 | 50.621 | 1.00 | 0.00 | H |
| ATOM | 770 | H5'1 | T B | 6 | -20.203 | -12.676 | 54.109 | 1.00 | 0.00 | H |
| ATOM | 771 | H5'2 | T B | 6 | -20.589 | -11.055 | 54.724 | 1.00 | 0.00 | H |
| ATOM | 772 | C1'  | C B | 7 | -22.574 | -11.979 | 46.021 | 1.00 | 0.00 | C |
| ATOM | 773 | N1   | C B | 7 | -23.387 | -12.920 | 46.843 | 1.00 | 0.00 | N |
| ATOM | 774 | C2   | C B | 7 | -23.521 | -14.231 | 46.392 | 1.00 | 0.00 | C |
| ATOM | 775 | O2   | C B | 7 | -22.963 | -14.560 | 45.336 | 1.00 | 0.00 | O |
| ATOM | 776 | N3   | C B | 7 | -24.256 | -15.103 | 47.124 | 1.00 | 0.00 | N |
| ATOM | 777 | C4   | C B | 7 | -24.848 | -14.717 | 48.262 | 1.00 | 0.00 | C |
| ATOM | 778 | N4   | C B | 7 | -25.552 | -15.611 | 48.940 | 1.00 | 0.00 | N |
| ATOM | 779 | C5   | C B | 7 | -24.732 | -13.373 | 48.748 | 1.00 | 0.00 | C |
| ATOM | 780 | C6   | C B | 7 | -23.982 | -12.514 | 47.995 | 1.00 | 0.00 | C |
| ATOM | 781 | C2'  | C B | 7 | -23.137 | -10.566 | 45.971 | 1.00 | 0.00 | C |
| ATOM | 782 | C3'  | C B | 7 | -21.871 | -9.723  | 45.948 | 1.00 | 0.00 | C |
| ATOM | 783 | O3'  | C B | 7 | -21.403 | -9.618  | 44.606 | 1.00 | 0.00 | O |
| ATOM | 784 | C4'  | C B | 7 | -20.915 | -10.520 | 46.832 | 1.00 | 0.00 | C |
| ATOM | 785 | O4'  | C B | 7 | -21.281 | -11.916 | 46.593 | 1.00 | 0.00 | O |
| ATOM | 786 | C5'  | C B | 7 | -20.990 | -10.249 | 48.318 | 1.00 | 0.00 | C |
| ATOM | 787 | O5'  | C B | 7 | -22.365 | -10.004 | 48.701 | 1.00 | 0.00 | O |
| ATOM | 788 | O1P  | C B | 7 | -22.349 | -7.591  | 49.418 | 1.00 | 0.00 | O |
| ATOM | 789 | O2P  | C B | 7 | -24.033 | -9.176  | 50.389 | 1.00 | 0.00 | O |
| ATOM | 790 | P    | C B | 7 | -22.661 | -8.960  | 49.872 | 1.00 | 0.00 | P |
| ATOM | 791 | H5   | C B | 7 | -25.218 | -13.053 | 49.669 | 1.00 | 0.00 | H |
| ATOM | 792 | H6   | C B | 7 | -23.858 | -11.483 | 48.328 | 1.00 | 0.00 | H |
| ATOM | 793 | H1'  | C B | 7 | -22.478 | -12.398 | 45.019 | 1.00 | 0.00 | H |
| ATOM | 794 | H3'  | C B | 7 | -22.039 | -8.723  | 46.352 | 1.00 | 0.00 | H |
| ATOM | 795 | H4'  | C B | 7 | -19.904 | -10.282 | 46.502 | 1.00 | 0.00 | H |
| ATOM | 796 | H41  | C B | 7 | -26.015 | -15.341 | 49.820 | 1.00 | 0.00 | H |
| ATOM | 797 | H42  | C B | 7 | -25.636 | -16.577 | 48.588 | 1.00 | 0.00 | H |
| ATOM | 798 | H2'1 | C B | 7 | -23.752 | -10.334 | 46.839 | 1.00 | 0.00 | H |
| ATOM | 799 | H2'2 | C B | 7 | -23.745 | -10.394 | 45.083 | 1.00 | 0.00 | H |
| ATOM | 800 | H5'1 | C B | 7 | -20.604 | -11.113 | 48.859 | 1.00 | 0.00 | H |
| ATOM | 801 | H5'2 | C B | 7 | -20.381 | -9.378  | 48.553 | 1.00 | 0.00 | H |
| ATOM | 802 | C1'  | C B | 8 | -24.157 | -13.548 | 41.598 | 1.00 | 0.00 | C |
| ATOM | 803 | N1   | C B | 8 | -25.034 | -13.652 | 42.796 | 1.00 | 0.00 | N |
| ATOM | 804 | C2   | C B | 8 | -25.616 | -14.888 | 43.074 | 1.00 | 0.00 | C |
| ATOM | 805 | O2   | C B | 8 | -25.381 | -15.840 | 42.319 | 1.00 | 0.00 | O |
| ATOM | 806 | N3   | C B | 8 | -26.417 | -15.004 | 44.160 | 1.00 | 0.00 | N |
| ATOM | 807 | C4   | C B | 8 | -26.652 | -13.954 | 44.958 | 1.00 | 0.00 | C |
| ATOM | 808 | N4   | C B | 8 | -27.441 | -14.126 | 46.009 | 1.00 | 0.00 | N |
| ATOM | 809 | C5   | C B | 8 | -26.072 | -12.669 | 44.696 | 1.00 | 0.00 | C |
| ATOM | 810 | C6   | C B | 8 | -25.263 | -12.577 | 43.597 | 1.00 | 0.00 | C |
| ATOM | 811 | C2'  | C B | 8 | -24.294 | -12.228 | 40.850 | 1.00 | 0.00 | C |
| ATOM | 812 | C3'  | C B | 8 | -22.869 | -11.980 | 40.380 | 1.00 | 0.00 | C |
| ATOM | 813 | O3'  | C B | 8 | -22.650 | -12.685 | 39.160 | 1.00 | 0.00 | O |
| ATOM | 814 | C4'  | C B | 8 | -22.031 | -12.539 | 41.528 | 1.00 | 0.00 | C |

|      |     |      |     |    |         |         |        |      |      |   |
|------|-----|------|-----|----|---------|---------|--------|------|------|---|
| ATOM | 815 | O4'  | C B | 8  | -22.816 | -13.665 | 42.035 | 1.00 | 0.00 | O |
| ATOM | 816 | C5'  | C B | 8  | -21.746 | -11.595 | 42.672 | 1.00 | 0.00 | C |
| ATOM | 817 | O5'  | C B | 8  | -22.900 | -10.747 | 42.907 | 1.00 | 0.00 | O |
| ATOM | 818 | O1P  | C B | 8  | -22.066 | -8.450  | 42.304 | 1.00 | 0.00 | O |
| ATOM | 819 | O2P  | C B | 8  | -23.919 | -8.714  | 43.975 | 1.00 | 0.00 | O |
| ATOM | 820 | P    | C B | 8  | -22.663 | -9.248  | 43.393 | 1.00 | 0.00 | P |
| ATOM | 821 | H5   | C B | 8  | -26.266 | -11.810 | 45.337 | 1.00 | 0.00 | H |
| ATOM | 822 | H6   | C B | 8  | -24.793 | -11.622 | 43.361 | 1.00 | 0.00 | H |
| ATOM | 823 | H1'  | C B | 8  | -24.372 | -14.392 | 40.943 | 1.00 | 0.00 | H |
| ATOM | 824 | H3'  | C B | 8  | -22.669 | -10.921 | 40.226 | 1.00 | 0.00 | H |
| ATOM | 825 | H4'  | C B | 8  | -21.074 | -12.842 | 41.103 | 1.00 | 0.00 | H |
| ATOM | 826 | H41  | C B | 8  | -27.636 | -13.335 | 46.640 | 1.00 | 0.00 | H |
| ATOM | 827 | H42  | C B | 8  | -27.859 | -15.049 | 46.194 | 1.00 | 0.00 | H |
| ATOM | 828 | H2'1 | C B | 8  | -24.645 | -11.423 | 41.493 | 1.00 | 0.00 | H |
| ATOM | 829 | H2'2 | C B | 8  | -24.984 | -12.301 | 40.008 | 1.00 | 0.00 | H |
| ATOM | 830 | H5'1 | C B | 8  | -21.527 | -12.174 | 43.570 | 1.00 | 0.00 | H |
| ATOM | 831 | H5'2 | C B | 8  | -20.883 | -10.980 | 42.423 | 1.00 | 0.00 | H |
| ATOM | 832 | C1'  | T B | 9  | -26.902 | -16.360 | 38.590 | 1.00 | 0.00 | C |
| ATOM | 833 | N1   | T B | 9  | -27.543 | -15.604 | 39.698 | 1.00 | 0.00 | N |
| ATOM | 834 | C2   | T B | 9  | -28.375 | -16.310 | 40.544 | 1.00 | 0.00 | C |
| ATOM | 835 | O2   | T B | 9  | -28.592 | -17.501 | 40.410 | 1.00 | 0.00 | O |
| ATOM | 836 | N3   | T B | 9  | -28.948 | -15.569 | 41.561 | 1.00 | 0.00 | N |
| ATOM | 837 | C4   | T B | 9  | -28.771 | -14.223 | 41.796 | 1.00 | 0.00 | C |
| ATOM | 838 | O4   | T B | 9  | -29.343 | -13.665 | 42.741 | 1.00 | 0.00 | O |
| ATOM | 839 | C5   | T B | 9  | -27.884 | -13.570 | 40.861 | 1.00 | 0.00 | C |
| ATOM | 840 | C6   | T B | 9  | -27.307 | -14.261 | 39.859 | 1.00 | 0.00 | C |
| ATOM | 841 | C7   | T B | 9  | -27.661 | -12.104 | 41.083 | 1.00 | 0.00 | C |
| ATOM | 842 | C2'  | T B | 9  | -26.796 | -15.572 | 37.289 | 1.00 | 0.00 | C |
| ATOM | 843 | C3'  | T B | 9  | -25.468 | -16.058 | 36.731 | 1.00 | 0.00 | C |
| ATOM | 844 | O3'  | T B | 9  | -25.677 | -17.271 | 36.013 | 1.00 | 0.00 | O |
| ATOM | 845 | C4'  | T B | 9  | -24.627 | -16.266 | 37.988 | 1.00 | 0.00 | C |
| ATOM | 846 | O4'  | T B | 9  | -25.592 | -16.701 | 38.999 | 1.00 | 0.00 | O |
| ATOM | 847 | C5'  | T B | 9  | -23.889 | -15.056 | 38.512 | 1.00 | 0.00 | C |
| ATOM | 848 | O5'  | T B | 9  | -24.698 | -13.868 | 38.319 | 1.00 | 0.00 | O |
| ATOM | 849 | O1P  | T B | 9  | -23.379 | -12.531 | 36.644 | 1.00 | 0.00 | O |
| ATOM | 850 | O2P  | T B | 9  | -24.900 | -11.365 | 38.264 | 1.00 | 0.00 | O |
| ATOM | 851 | P    | T B | 9  | -23.969 | -12.487 | 37.998 | 1.00 | 0.00 | P |
| ATOM | 852 | H3   | T B | 9  | -29.570 | -16.074 | 42.207 | 1.00 | 0.00 | H |
| ATOM | 853 | H6   | T B | 9  | -26.642 | -13.747 | 39.166 | 1.00 | 0.00 | H |
| ATOM | 854 | H1'  | T B | 9  | -27.457 | -17.286 | 38.440 | 1.00 | 0.00 | H |
| ATOM | 855 | H3'  | T B | 9  | -25.011 | -15.321 | 36.070 | 1.00 | 0.00 | H |
| ATOM | 856 | H4'  | T B | 9  | -23.886 | -17.031 | 37.750 | 1.00 | 0.00 | H |
| ATOM | 857 | H71  | T B | 9  | -28.076 | -11.542 | 40.246 | 1.00 | 0.00 | H |
| ATOM | 858 | H72  | T B | 9  | -28.151 | -11.796 | 42.007 | 1.00 | 0.00 | H |
| ATOM | 859 | H73  | T B | 9  | -26.590 | -11.907 | 41.157 | 1.00 | 0.00 | H |
| ATOM | 860 | H2'1 | T B | 9  | -26.787 | -14.496 | 37.458 | 1.00 | 0.00 | H |
| ATOM | 861 | H2'2 | T B | 9  | -27.618 | -15.789 | 36.606 | 1.00 | 0.00 | H |
| ATOM | 862 | H5'1 | T B | 9  | -23.682 | -15.194 | 39.573 | 1.00 | 0.00 | H |
| ATOM | 863 | H5'2 | T B | 9  | -22.948 | -14.952 | 37.974 | 1.00 | 0.00 | H |
| ATOM | 864 | C1'  | A B | 10 | -30.857 | -19.147 | 37.485 | 1.00 | 0.00 | C |
| ATOM | 865 | N1   | A B | 10 | -33.129 | -16.388 | 41.168 | 1.00 | 0.00 | N |
| ATOM | 866 | C2   | A B | 10 | -33.159 | -17.683 | 40.867 | 1.00 | 0.00 | C |
| ATOM | 867 | N3   | A B | 10 | -32.545 | -18.331 | 39.901 | 1.00 | 0.00 | N |
| ATOM | 868 | C4   | A B | 10 | -31.809 | -17.481 | 39.163 | 1.00 | 0.00 | C |



|      |     |      |     |    |         |         |        |      |      |   |
|------|-----|------|-----|----|---------|---------|--------|------|------|---|
| ATOM | 869 | C5   | A B | 10 | -31.672 | -16.131 | 39.338 | 1.00 | 0.00 | C |
| ATOM | 870 | C6   | A B | 10 | -32.385 | -15.564 | 40.414 | 1.00 | 0.00 | C |
| ATOM | 871 | N6   | A B | 10 | -32.346 | -14.252 | 40.708 | 1.00 | 0.00 | N |
| ATOM | 872 | N7   | A B | 10 | -30.830 | -15.587 | 38.384 | 1.00 | 0.00 | N |
| ATOM | 873 | C8   | A B | 10 | -30.483 | -16.607 | 37.657 | 1.00 | 0.00 | C |
| ATOM | 874 | N9   | A B | 10 | -31.036 | -17.791 | 38.072 | 1.00 | 0.00 | N |
| ATOM | 875 | C2'  | A B | 10 | -30.776 | -19.151 | 35.965 | 1.00 | 0.00 | C |
| ATOM | 876 | C3'  | A B | 10 | -29.771 | -20.262 | 35.703 | 1.00 | 0.00 | C |
| ATOM | 877 | O3'  | A B | 10 | -30.450 | -21.516 | 35.703 | 1.00 | 0.00 | O |
| ATOM | 878 | C4'  | A B | 10 | -28.805 | -20.130 | 36.880 | 1.00 | 0.00 | C |
| ATOM | 879 | O4'  | A B | 10 | -29.647 | -19.678 | 37.989 | 1.00 | 0.00 | O |
| ATOM | 880 | C5'  | A B | 10 | -27.667 | -19.153 | 36.707 | 1.00 | 0.00 | C |
| ATOM | 881 | O5'  | A B | 10 | -28.121 | -17.998 | 35.956 | 1.00 | 0.00 | O |
| ATOM | 882 | O1P  | A B | 10 | -26.812 | -18.148 | 33.811 | 1.00 | 0.00 | O |
| ATOM | 883 | O2P  | A B | 10 | -27.603 | -15.918 | 34.646 | 1.00 | 0.00 | O |
| ATOM | 884 | P    | A B | 10 | -27.100 | -17.276 | 34.966 | 1.00 | 0.00 | P |
| ATOM | 885 | H2   | A B | 10 | -33.785 | -18.296 | 41.515 | 1.00 | 0.00 | H |
| ATOM | 886 | H8   | A B | 10 | -29.815 | -16.528 | 36.799 | 1.00 | 0.00 | H |
| ATOM | 887 | H1'  | A B | 10 | -31.673 | -19.779 | 37.834 | 1.00 | 0.00 | H |
| ATOM | 888 | H3'  | A B | 10 | -29.254 | -20.130 | 34.754 | 1.00 | 0.00 | H |
| ATOM | 889 | H4'  | A B | 10 | -28.374 | -21.117 | 37.048 | 1.00 | 0.00 | H |
| ATOM | 890 | H61  | A B | 10 | -32.884 | -13.889 | 41.507 | 1.00 | 0.00 | H |
| ATOM | 891 | H62  | A B | 10 | -31.779 | -13.613 | 40.134 | 1.00 | 0.00 | H |
| ATOM | 892 | H2'1 | A B | 10 | -30.425 | -18.199 | 35.566 | 1.00 | 0.00 | H |
| ATOM | 893 | H2'2 | A B | 10 | -31.737 | -19.369 | 35.499 | 1.00 | 0.00 | H |
| ATOM | 894 | H5'1 | A B | 10 | -27.314 | -18.837 | 37.689 | 1.00 | 0.00 | H |
| ATOM | 895 | H5'2 | A B | 10 | -26.853 | -19.641 | 36.174 | 1.00 | 0.00 | H |
| ATOM | 896 | C1'  | G B | 11 | -35.580 | -20.576 | 38.030 | 1.00 | 0.00 | C |
| ATOM | 897 | N1   | G B | 11 | -36.228 | -15.844 | 39.825 | 1.00 | 0.00 | N |
| ATOM | 898 | C2   | G B | 11 | -36.732 | -17.047 | 40.289 | 1.00 | 0.00 | C |
| ATOM | 899 | N2   | G B | 11 | -37.513 | -16.979 | 41.374 | 1.00 | 0.00 | N |
| ATOM | 900 | N3   | G B | 11 | -36.475 | -18.222 | 39.716 | 1.00 | 0.00 | N |
| ATOM | 901 | C4   | G B | 11 | -35.673 | -18.101 | 38.626 | 1.00 | 0.00 | C |
| ATOM | 902 | C5   | G B | 11 | -35.129 | -16.947 | 38.089 | 1.00 | 0.00 | C |
| ATOM | 903 | C6   | G B | 11 | -35.397 | -15.699 | 38.697 | 1.00 | 0.00 | C |
| ATOM | 904 | O6   | G B | 11 | -35.010 | -14.577 | 38.371 | 1.00 | 0.00 | O |
| ATOM | 905 | N7   | G B | 11 | -34.361 | -17.254 | 36.963 | 1.00 | 0.00 | N |
| ATOM | 906 | C8   | G B | 11 | -34.460 | -18.554 | 36.858 | 1.00 | 0.00 | C |
| ATOM | 907 | N9   | G B | 11 | -35.242 | -19.141 | 37.831 | 1.00 | 0.00 | N |
| ATOM | 908 | C2'  | G B | 11 | -35.802 | -21.340 | 36.732 | 1.00 | 0.00 | C |
| ATOM | 909 | C3'  | G B | 11 | -35.231 | -22.708 | 37.067 | 1.00 | 0.00 | C |
| ATOM | 910 | O3'  | G B | 11 | -36.229 | -23.482 | 37.728 | 1.00 | 0.00 | O |
| ATOM | 911 | C4'  | G B | 11 | -34.058 | -22.372 | 37.987 | 1.00 | 0.00 | C |
| ATOM | 912 | O4'  | G B | 11 | -34.502 | -21.183 | 38.715 | 1.00 | 0.00 | O |
| ATOM | 913 | C5'  | G B | 11 | -32.743 | -22.062 | 37.311 | 1.00 | 0.00 | C |
| ATOM | 914 | O5'  | G B | 11 | -32.983 | -21.338 | 36.079 | 1.00 | 0.00 | O |
| ATOM | 915 | O1P  | G B | 11 | -32.216 | -22.944 | 34.300 | 1.00 | 0.00 | O |
| ATOM | 916 | O2P  | G B | 11 | -32.152 | -20.474 | 33.871 | 1.00 | 0.00 | O |
| ATOM | 917 | P    | G B | 11 | -32.010 | -21.587 | 34.840 | 1.00 | 0.00 | P |
| ATOM | 918 | H1   | G B | 11 | -36.481 | -14.991 | 40.344 | 1.00 | 0.00 | H |
| ATOM | 919 | H8   | G B | 11 | -33.969 | -19.123 | 36.069 | 1.00 | 0.00 | H |
| ATOM | 920 | H1'  | G B | 11 | -36.460 | -20.634 | 38.673 | 1.00 | 0.00 | H |
| ATOM | 921 | H21  | G B | 11 | -37.704 | -16.067 | 41.813 | 1.00 | 0.00 | H |
| ATOM | 922 | H3'  | G B | 11 | -34.893 | -23.239 | 36.178 | 1.00 | 0.00 | H |

|      |     |      |     |    |         |         |        |      |      |   |
|------|-----|------|-----|----|---------|---------|--------|------|------|---|
| ATOM | 923 | H22  | G B | 11 | -37.922 | -17.838 | 41.767 | 1.00 | 0.00 | H |
| ATOM | 924 | H4'  | G B | 11 | -33.905 | -23.235 | 38.634 | 1.00 | 0.00 | H |
| ATOM | 925 | H2'1 | G B | 11 | -35.277 | -20.886 | 35.891 | 1.00 | 0.00 | H |
| ATOM | 926 | H2'2 | G B | 11 | -36.856 | -21.404 | 36.465 | 1.00 | 0.00 | H |
| ATOM | 927 | H5'1 | G B | 11 | -32.131 | -21.458 | 37.980 | 1.00 | 0.00 | H |
| ATOM | 928 | H5'2 | G B | 11 | -32.225 | -22.996 | 37.095 | 1.00 | 0.00 | H |
| ATOM | 929 | C1'  | G B | 12 | -40.320 | -19.903 | 39.301 | 1.00 | 0.00 | C |
| ATOM | 930 | N1   | G B | 12 | -39.253 | -14.984 | 38.468 | 1.00 | 0.00 | N |
| ATOM | 931 | C2   | G B | 12 | -39.981 | -15.576 | 39.486 | 1.00 | 0.00 | C |
| ATOM | 932 | N2   | G B | 12 | -40.494 | -14.745 | 40.403 | 1.00 | 0.00 | N |
| ATOM | 933 | N3   | G B | 12 | -40.179 | -16.888 | 39.581 | 1.00 | 0.00 | N |
| ATOM | 934 | C4   | G B | 12 | -39.595 | -17.574 | 38.564 | 1.00 | 0.00 | C |
| ATOM | 935 | C5   | G B | 12 | -38.856 | -17.072 | 37.508 | 1.00 | 0.00 | C |
| ATOM | 936 | C6   | G B | 12 | -38.641 | -15.679 | 37.407 | 1.00 | 0.00 | C |
| ATOM | 937 | O6   | G B | 12 | -38.020 | -15.048 | 36.551 | 1.00 | 0.00 | O |
| ATOM | 938 | N7   | G B | 12 | -38.431 | -18.111 | 36.677 | 1.00 | 0.00 | N |
| ATOM | 939 | C8   | G B | 12 | -38.912 | -19.186 | 37.245 | 1.00 | 0.00 | C |
| ATOM | 940 | N9   | G B | 12 | -39.632 | -18.942 | 38.396 | 1.00 | 0.00 | N |
| ATOM | 941 | C2'  | G B | 12 | -40.987 | -21.061 | 38.571 | 1.00 | 0.00 | C |
| ATOM | 942 | C3'  | G B | 12 | -40.775 | -22.213 | 39.542 | 1.00 | 0.00 | C |
| ATOM | 943 | O3'  | G B | 12 | -41.810 | -22.194 | 40.523 | 1.00 | 0.00 | O |
| ATOM | 944 | C4'  | G B | 12 | -39.405 | -21.903 | 40.142 | 1.00 | 0.00 | C |
| ATOM | 945 | O4'  | G B | 12 | -39.349 | -20.441 | 40.177 | 1.00 | 0.00 | O |
| ATOM | 946 | C5'  | G B | 12 | -38.206 | -22.414 | 39.378 | 1.00 | 0.00 | C |
| ATOM | 947 | O5'  | G B | 12 | -38.457 | -22.322 | 37.954 | 1.00 | 0.00 | O |
| ATOM | 948 | O1P  | G B | 12 | -38.523 | -24.728 | 37.217 | 1.00 | 0.00 | O |
| ATOM | 949 | O2P  | G B | 12 | -37.843 | -22.938 | 35.596 | 1.00 | 0.00 | O |
| ATOM | 950 | P    | G B | 12 | -37.843 | -23.437 | 36.992 | 1.00 | 0.00 | P |
| ATOM | 951 | H1   | G B | 12 | -39.152 | -13.958 | 38.489 | 1.00 | 0.00 | H |
| ATOM | 952 | H8   | G B | 12 | -38.759 | -20.189 | 36.845 | 1.00 | 0.00 | H |
| ATOM | 953 | H1'  | G B | 12 | -41.043 | -19.350 | 39.900 | 1.00 | 0.00 | H |
| ATOM | 954 | H21  | G B | 12 | -40.333 | -13.730 | 40.324 | 1.00 | 0.00 | H |
| ATOM | 955 | H3'  | G B | 12 | -40.774 | -23.178 | 39.037 | 1.00 | 0.00 | H |
| ATOM | 956 | H22  | G B | 12 | -41.048 | -15.122 | 41.184 | 1.00 | 0.00 | H |
| ATOM | 957 | H4'  | G B | 12 | -39.384 | -22.353 | 41.134 | 1.00 | 0.00 | H |
| ATOM | 958 | H2'1 | G B | 12 | -40.522 | -21.265 | 37.607 | 1.00 | 0.00 | H |
| ATOM | 959 | H2'2 | G B | 12 | -42.047 | -20.882 | 38.393 | 1.00 | 0.00 | H |
| ATOM | 960 | H5'1 | G B | 12 | -37.334 | -21.815 | 39.638 | 1.00 | 0.00 | H |
| ATOM | 961 | H5'2 | G B | 12 | -38.023 | -23.453 | 39.653 | 1.00 | 0.00 | H |
| ATOM | 962 | C1'  | T B | 13 | -44.358 | -17.172 | 40.157 | 1.00 | 0.00 | C |
| ATOM | 963 | N1   | T B | 13 | -43.607 | -17.018 | 38.883 | 1.00 | 0.00 | N |
| ATOM | 964 | C2   | T B | 13 | -43.245 | -15.737 | 38.514 | 1.00 | 0.00 | C |
| ATOM | 965 | O2   | T B | 13 | -43.518 | -14.757 | 39.185 | 1.00 | 0.00 | O |
| ATOM | 966 | N3   | T B | 13 | -42.548 | -15.640 | 37.324 | 1.00 | 0.00 | N |
| ATOM | 967 | C4   | T B | 13 | -42.194 | -16.681 | 36.492 | 1.00 | 0.00 | C |
| ATOM | 968 | O4   | T B | 13 | -41.570 | -16.471 | 35.445 | 1.00 | 0.00 | O |
| ATOM | 969 | C5   | T B | 13 | -42.614 | -17.982 | 36.960 | 1.00 | 0.00 | C |
| ATOM | 970 | C6   | T B | 13 | -43.294 | -18.114 | 38.116 | 1.00 | 0.00 | C |
| ATOM | 971 | C7   | T B | 13 | -42.247 | -19.145 | 36.088 | 1.00 | 0.00 | C |
| ATOM | 972 | C2'  | T B | 13 | -45.441 | -18.242 | 40.106 | 1.00 | 0.00 | C |
| ATOM | 973 | C3'  | T B | 13 | -45.384 | -18.818 | 41.512 | 1.00 | 0.00 | C |
| ATOM | 974 | O3'  | T B | 13 | -46.178 | -18.013 | 42.380 | 1.00 | 0.00 | O |
| ATOM | 975 | C4'  | T B | 13 | -43.897 | -18.741 | 41.851 | 1.00 | 0.00 | C |
| ATOM | 976 | O4'  | T B | 13 | -43.432 | -17.536 | 41.162 | 1.00 | 0.00 | O |

|      |      |      |     |    |         |         |        |      |      |   |
|------|------|------|-----|----|---------|---------|--------|------|------|---|
| ATOM | 977  | C5'  | T B | 13 | -43.045 | -19.909 | 41.410 | 1.00 | 0.00 | C |
| ATOM | 978  | O5'  | T B | 13 | -43.516 | -20.401 | 40.129 | 1.00 | 0.00 | O |
| ATOM | 979  | O1P  | T B | 13 | -44.378 | -22.702 | 40.671 | 1.00 | 0.00 | O |
| ATOM | 980  | O2P  | T B | 13 | -43.534 | -22.190 | 38.364 | 1.00 | 0.00 | O |
| ATOM | 981  | P    | T B | 13 | -43.419 | -21.963 | 39.825 | 1.00 | 0.00 | P |
| ATOM | 982  | H3   | T B | 13 | -42.264 | -14.695 | 37.030 | 1.00 | 0.00 | H |
| ATOM | 983  | H6   | T B | 13 | -43.601 | -19.105 | 38.449 | 1.00 | 0.00 | H |
| ATOM | 984  | H1'  | T B | 13 | -44.779 | -16.203 | 40.425 | 1.00 | 0.00 | H |
| ATOM | 985  | H3'  | T B | 13 | -45.743 | -19.847 | 41.546 | 1.00 | 0.00 | H |
| ATOM | 986  | H4'  | T B | 13 | -43.823 | -18.668 | 42.936 | 1.00 | 0.00 | H |
| ATOM | 987  | H71  | T B | 13 | -43.153 | -19.597 | 35.684 | 1.00 | 0.00 | H |
| ATOM | 988  | H72  | T B | 13 | -41.617 | -18.799 | 35.266 | 1.00 | 0.00 | H |
| ATOM | 989  | H73  | T B | 13 | -41.703 | -19.885 | 36.676 | 1.00 | 0.00 | H |
| ATOM | 990  | H2'1 | T B | 13 | -45.234 | -19.004 | 39.356 | 1.00 | 0.00 | H |
| ATOM | 991  | H2'2 | T B | 13 | -46.425 | -17.826 | 39.888 | 1.00 | 0.00 | H |
| ATOM | 992  | H5'1 | T B | 13 | -42.009 | -19.584 | 41.322 | 1.00 | 0.00 | H |
| ATOM | 993  | H5'2 | T B | 13 | -43.111 | -20.701 | 42.154 | 1.00 | 0.00 | H |
| ATOM | 994  | C1'  | G B | 14 | -47.202 | -13.146 | 39.562 | 1.00 | 0.00 | C |
| ATOM | 995  | N1   | G B | 14 | -44.775 | -12.770 | 35.090 | 1.00 | 0.00 | N |
| ATOM | 996  | C2   | G B | 14 | -45.106 | -11.787 | 36.006 | 1.00 | 0.00 | C |
| ATOM | 997  | N2   | G B | 14 | -44.743 | -10.539 | 35.689 | 1.00 | 0.00 | N |
| ATOM | 998  | N3   | G B | 14 | -45.746 | -12.032 | 37.149 | 1.00 | 0.00 | N |
| ATOM | 999  | C4   | G B | 14 | -46.041 | -13.350 | 37.304 | 1.00 | 0.00 | C |
| ATOM | 1000 | C5   | G B | 14 | -45.756 | -14.396 | 36.444 | 1.00 | 0.00 | C |
| ATOM | 1001 | C6   | G B | 14 | -45.073 | -14.139 | 35.233 | 1.00 | 0.00 | C |
| ATOM | 1002 | O6   | G B | 14 | -44.734 | -14.928 | 34.349 | 1.00 | 0.00 | O |
| ATOM | 1003 | N7   | G B | 14 | -46.231 | -15.599 | 36.971 | 1.00 | 0.00 | N |
| ATOM | 1004 | C8   | G B | 14 | -46.775 | -15.251 | 38.110 | 1.00 | 0.00 | C |
| ATOM | 1005 | N9   | G B | 14 | -46.700 | -13.900 | 38.381 | 1.00 | 0.00 | N |
| ATOM | 1006 | C2'  | G B | 14 | -48.536 | -13.655 | 40.093 | 1.00 | 0.00 | C |
| ATOM | 1007 | C3'  | G B | 14 | -48.377 | -13.459 | 41.592 | 1.00 | 0.00 | C |
| ATOM | 1008 | O3'  | G B | 14 | -48.720 | -12.116 | 41.927 | 1.00 | 0.00 | O |
| ATOM | 1009 | C4'  | G B | 14 | -46.894 | -13.749 | 41.816 | 1.00 | 0.00 | C |
| ATOM | 1010 | O4'  | G B | 14 | -46.245 | -13.274 | 40.594 | 1.00 | 0.00 | O |
| ATOM | 1011 | C5'  | G B | 14 | -46.518 | -15.195 | 42.033 | 1.00 | 0.00 | C |
| ATOM | 1012 | O5'  | G B | 14 | -47.348 | -16.047 | 41.204 | 1.00 | 0.00 | O |
| ATOM | 1013 | O1P  | G B | 14 | -48.715 | -17.337 | 42.878 | 1.00 | 0.00 | O |
| ATOM | 1014 | O2P  | G B | 14 | -48.222 | -18.332 | 40.629 | 1.00 | 0.00 | O |
| ATOM | 1015 | P    | G B | 14 | -47.767 | -17.484 | 41.757 | 1.00 | 0.00 | P |
| ATOM | 1016 | H1   | G B | 14 | -44.272 | -12.476 | 34.239 | 1.00 | 0.00 | H |
| ATOM | 1017 | H8   | G B | 14 | -47.247 | -15.966 | 38.784 | 1.00 | 0.00 | H |
| ATOM | 1018 | H1'  | G B | 14 | -47.266 | -12.091 | 39.292 | 1.00 | 0.00 | H |
| ATOM | 1019 | H21  | G B | 14 | -44.245 | -10.358 | 34.804 | 1.00 | 0.00 | H |
| ATOM | 1020 | H3'  | G B | 14 | -49.002 | -14.145 | 42.162 | 1.00 | 0.00 | H |
| ATOM | 1021 | H22  | G B | 14 | -44.963 | -9.761  | 36.327 | 1.00 | 0.00 | H |
| ATOM | 1022 | H4'  | G B | 14 | -46.593 | -13.190 | 42.703 | 1.00 | 0.00 | H |
| ATOM | 1023 | H2'1 | G B | 14 | -48.707 | -14.702 | 39.845 | 1.00 | 0.00 | H |
| ATOM | 1024 | H2'2 | G B | 14 | -49.380 | -13.085 | 39.705 | 1.00 | 0.00 | H |
| ATOM | 1025 | H5'1 | G B | 14 | -45.470 | -15.336 | 41.772 | 1.00 | 0.00 | H |
| ATOM | 1026 | H5'2 | G B | 14 | -46.663 | -15.449 | 43.083 | 1.00 | 0.00 | H |
| ATOM | 1027 | C1'  | C B | 15 | -48.860 | -9.190  | 37.086 | 1.00 | 0.00 | C |
| ATOM | 1028 | N1   | C B | 15 | -48.818 | -10.527 | 36.435 | 1.00 | 0.00 | N |
| ATOM | 1029 | C2   | C B | 15 | -48.193 | -10.630 | 35.194 | 1.00 | 0.00 | C |
| ATOM | 1030 | O2   | C B | 15 | -47.702 | -9.613  | 34.688 | 1.00 | 0.00 | O |

|      |      |      |     |    |         |         |        |      |      |   |
|------|------|------|-----|----|---------|---------|--------|------|------|---|
| ATOM | 1031 | N3   | C B | 15 | -48.144 | -11.840 | 34.584 | 1.00 | 0.00 | N |
| ATOM | 1032 | C4   | C B | 15 | -48.686 | -12.922 | 35.157 | 1.00 | 0.00 | C |
| ATOM | 1033 | N4   | C B | 15 | -48.606 | -14.080 | 34.518 | 1.00 | 0.00 | N |
| ATOM | 1034 | C5   | C B | 15 | -49.340 | -12.845 | 36.432 | 1.00 | 0.00 | C |
| ATOM | 1035 | C6   | C B | 15 | -49.373 | -11.619 | 37.028 | 1.00 | 0.00 | C |
| ATOM | 1036 | C2'  | C B | 15 | -50.162 | -8.906  | 37.822 | 1.00 | 0.00 | C |
| ATOM | 1037 | C3'  | C B | 15 | -49.681 | -8.099  | 39.018 | 1.00 | 0.00 | C |
| ATOM | 1038 | O3'  | C B | 15 | -49.561 | -6.728  | 38.641 | 1.00 | 0.00 | O |
| ATOM | 1039 | C4'  | C B | 15 | -48.328 | -8.731  | 39.333 | 1.00 | 0.00 | C |
| ATOM | 1040 | O4'  | C B | 15 | -47.805 | -9.136  | 38.028 | 1.00 | 0.00 | O |
| ATOM | 1041 | C5'  | C B | 15 | -48.346 | -9.940  | 40.241 | 1.00 | 0.00 | C |
| ATOM | 1042 | O5'  | C B | 15 | -49.522 | -10.741 | 39.965 | 1.00 | 0.00 | O |
| ATOM | 1043 | O1P  | C B | 15 | -50.869 | -10.549 | 42.084 | 1.00 | 0.00 | O |
| ATOM | 1044 | O2P  | C B | 15 | -51.102 | -12.581 | 40.630 | 1.00 | 0.00 | O |
| ATOM | 1045 | P    | C B | 15 | -50.224 | -11.515 | 41.170 | 1.00 | 0.00 | P |
| ATOM | 1046 | H5   | C B | 15 | -49.788 | -13.723 | 36.898 | 1.00 | 0.00 | H |
| ATOM | 1047 | H6   | C B | 15 | -49.854 | -11.511 | 38.002 | 1.00 | 0.00 | H |
| ATOM | 1048 | H1'  | C B | 15 | -48.669 | -8.434  | 36.324 | 1.00 | 0.00 | H |
| ATOM | 1049 | H3'  | C B | 15 | -50.361 | -8.182  | 39.866 | 1.00 | 0.00 | H |
| ATOM | 1050 | H4'  | C B | 15 | -47.723 | -7.963  | 39.815 | 1.00 | 0.00 | H |
| ATOM | 1051 | H41  | C B | 15 | -49.012 | -14.929 | 34.938 | 1.00 | 0.00 | H |
| ATOM | 1052 | H42  | C B | 15 | -48.138 | -14.132 | 33.601 | 1.00 | 0.00 | H |
| ATOM | 1053 | H2'1 | C B | 15 | -50.667 | -9.819  | 38.137 | 1.00 | 0.00 | H |
| ATOM | 1054 | H2'2 | C B | 15 | -50.866 | -8.336  | 37.215 | 1.00 | 0.00 | H |
| ATOM | 1055 | H5'1 | C B | 15 | -47.448 | -10.532 | 40.067 | 1.00 | 0.00 | H |
| ATOM | 1056 | H5'2 | C B | 15 | -48.363 | -9.607  | 41.278 | 1.00 | 0.00 | H |
| ATOM | 1057 | C1'  | G B | 16 | -49.763 | -6.570  | 32.982 | 1.00 | 0.00 | C |
| ATOM | 1058 | N1   | G B | 16 | -49.808 | -11.155 | 30.747 | 1.00 | 0.00 | N |
| ATOM | 1059 | C2   | G B | 16 | -49.241 | -9.966  | 30.323 | 1.00 | 0.00 | C |
| ATOM | 1060 | N2   | G B | 16 | -48.603 | -10.004 | 29.146 | 1.00 | 0.00 | N |
| ATOM | 1061 | N3   | G B | 16 | -49.305 | -8.831  | 31.018 | 1.00 | 0.00 | N |
| ATOM | 1062 | C4   | G B | 16 | -49.994 | -8.976  | 32.180 | 1.00 | 0.00 | C |
| ATOM | 1063 | C5   | G B | 16 | -50.596 | -10.118 | 32.680 | 1.00 | 0.00 | C |
| ATOM | 1064 | C6   | G B | 16 | -50.526 | -11.324 | 31.945 | 1.00 | 0.00 | C |
| ATOM | 1065 | O6   | G B | 16 | -50.992 | -12.430 | 32.222 | 1.00 | 0.00 | O |
| ATOM | 1066 | N7   | G B | 16 | -51.206 | -9.845  | 33.907 | 1.00 | 0.00 | N |
| ATOM | 1067 | C8   | G B | 16 | -50.958 | -8.576  | 34.107 | 1.00 | 0.00 | C |
| ATOM | 1068 | N9   | G B | 16 | -50.227 | -7.978  | 33.101 | 1.00 | 0.00 | N |
| ATOM | 1069 | C2'  | G B | 16 | -50.765 | -5.548  | 33.500 | 1.00 | 0.00 | C |
| ATOM | 1070 | C3'  | G B | 16 | -49.857 | -4.491  | 34.108 | 1.00 | 0.00 | C |
| ATOM | 1071 | O3'  | G B | 16 | -49.428 | -3.597  | 33.084 | 1.00 | 0.00 | O |
| ATOM | 1072 | C4'  | G B | 16 | -48.703 | -5.319  | 34.672 | 1.00 | 0.00 | C |
| ATOM | 1073 | O4'  | G B | 16 | -48.577 | -6.441  | 33.741 | 1.00 | 0.00 | O |
| ATOM | 1074 | C5'  | G B | 16 | -48.889 | -5.866  | 36.067 | 1.00 | 0.00 | C |
| ATOM | 1075 | O5'  | G B | 16 | -50.273 | -6.248  | 36.264 | 1.00 | 0.00 | O |
| ATOM | 1076 | O1P  | G B | 16 | -51.079 | -4.634  | 38.019 | 1.00 | 0.00 | O |
| ATOM | 1077 | O2P  | G B | 16 | -52.150 | -6.892  | 37.805 | 1.00 | 0.00 | O |
| ATOM | 1078 | P    | G B | 16 | -50.921 | -6.067  | 37.711 | 1.00 | 0.00 | P |
| ATOM | 1079 | H1   | G B | 16 | -49.695 | -11.979 | 30.137 | 1.00 | 0.00 | H |
| ATOM | 1080 | H8   | G B | 16 | -51.298 | -8.038  | 34.992 | 1.00 | 0.00 | H |
| ATOM | 1081 | H1'  | G B | 16 | -49.514 | -6.379  | 31.938 | 1.00 | 0.00 | H |
| ATOM | 1082 | H21  | G B | 16 | -48.554 | -10.885 | 28.616 | 1.00 | 0.00 | H |
| ATOM | 1083 | H3'  | G B | 16 | -50.356 | -3.926  | 34.895 | 1.00 | 0.00 | H |
| ATOM | 1084 | H22  | G B | 16 | -48.161 | -9.151  | 28.775 | 1.00 | 0.00 | H |

|      |      |      |     |    |         |         |        |      |      |   |
|------|------|------|-----|----|---------|---------|--------|------|------|---|
| ATOM | 1085 | H4'  | G B | 16 | -47.825 | -4.673  | 34.682 | 1.00 | 0.00 | H |
| ATOM | 1086 | H2'1 | G B | 16 | -51.438 | -5.970  | 34.247 | 1.00 | 0.00 | H |
| ATOM | 1087 | H2'2 | G B | 16 | -51.381 | -5.131  | 32.703 | 1.00 | 0.00 | H |
| ATOM | 1088 | H5'1 | G B | 16 | -48.245 | -6.736  | 36.199 | 1.00 | 0.00 | H |
| ATOM | 1089 | H5'2 | G B | 16 | -48.611 | -5.101  | 36.791 | 1.00 | 0.00 | H |
| ATOM | 1090 | C1'  | G B | 17 | -50.636 | -6.058  | 28.134 | 1.00 | 0.00 | C |
| ATOM | 1091 | N1   | G B | 17 | -52.395 | -10.831 | 28.526 | 1.00 | 0.00 | N |
| ATOM | 1092 | C2   | G B | 17 | -51.604 | -10.253 | 27.548 | 1.00 | 0.00 | C |
| ATOM | 1093 | N2   | G B | 17 | -51.234 | -11.053 | 26.541 | 1.00 | 0.00 | N |
| ATOM | 1094 | N3   | G B | 17 | -51.213 | -8.981  | 27.575 | 1.00 | 0.00 | N |
| ATOM | 1095 | C4   | G B | 17 | -51.686 | -8.318  | 28.663 | 1.00 | 0.00 | C |
| ATOM | 1096 | C5   | G B | 17 | -52.481 | -8.809  | 29.684 | 1.00 | 0.00 | C |
| ATOM | 1097 | C6   | G B | 17 | -52.894 | -10.160 | 29.659 | 1.00 | 0.00 | C |
| ATOM | 1098 | O6   | G B | 17 | -53.594 | -10.774 | 30.465 | 1.00 | 0.00 | O |
| ATOM | 1099 | N7   | G B | 17 | -52.748 | -7.803  | 30.615 | 1.00 | 0.00 | N |
| ATOM | 1100 | C8   | G B | 17 | -52.118 | -6.759  | 30.142 | 1.00 | 0.00 | C |
| ATOM | 1101 | N9   | G B | 17 | -51.450 | -6.993  | 28.958 | 1.00 | 0.00 | N |
| ATOM | 1102 | C2'  | G B | 17 | -51.192 | -4.642  | 28.084 | 1.00 | 0.00 | C |
| ATOM | 1103 | C3'  | G B | 17 | -49.925 | -3.803  | 28.056 | 1.00 | 0.00 | C |
| ATOM | 1104 | O3'  | G B | 17 | -49.460 | -3.701  | 26.712 | 1.00 | 0.00 | O |
| ATOM | 1105 | C4'  | G B | 17 | -48.969 | -4.603  | 28.939 | 1.00 | 0.00 | C |
| ATOM | 1106 | O4'  | G B | 17 | -49.342 | -5.998  | 28.701 | 1.00 | 0.00 | O |
| ATOM | 1107 | C5'  | G B | 17 | -49.038 | -4.330  | 30.423 | 1.00 | 0.00 | C |
| ATOM | 1108 | O5'  | G B | 17 | -50.411 | -4.080  | 30.812 | 1.00 | 0.00 | O |
| ATOM | 1109 | O1P  | G B | 17 | -50.384 | -1.666  | 31.524 | 1.00 | 0.00 | O |
| ATOM | 1110 | O2P  | G B | 17 | -52.072 | -3.243  | 32.503 | 1.00 | 0.00 | O |
| ATOM | 1111 | P    | G B | 17 | -50.699 | -3.033  | 31.981 | 1.00 | 0.00 | P |
| ATOM | 1112 | H1   | G B | 17 | -52.638 | -11.827 | 28.414 | 1.00 | 0.00 | H |
| ATOM | 1113 | H8   | G B | 17 | -52.120 | -5.789  | 30.639 | 1.00 | 0.00 | H |
| ATOM | 1114 | H1'  | G B | 17 | -50.544 | -6.478  | 27.133 | 1.00 | 0.00 | H |
| ATOM | 1115 | H21  | G B | 17 | -51.537 | -12.038 | 26.528 | 1.00 | 0.00 | H |
| ATOM | 1116 | H3'  | G B | 17 | -50.087 | -2.803  | 28.459 | 1.00 | 0.00 | H |
| ATOM | 1117 | H22  | G B | 17 | -50.647 | -10.683 | 25.780 | 1.00 | 0.00 | H |
| ATOM | 1118 | H4'  | G B | 17 | -47.958 | -4.370  | 28.605 | 1.00 | 0.00 | H |
| ATOM | 1119 | H2'1 | G B | 17 | -51.805 | -4.407  | 28.954 | 1.00 | 0.00 | H |
| ATOM | 1120 | H2'2 | G B | 17 | -51.803 | -4.468  | 27.198 | 1.00 | 0.00 | H |
| ATOM | 1121 | H5'1 | G B | 17 | -48.653 | -5.195  | 30.964 | 1.00 | 0.00 | H |
| ATOM | 1122 | H5'2 | G B | 17 | -48.424 | -3.460  | 30.655 | 1.00 | 0.00 | H |
| ATOM | 1123 | C1'  | C B | 18 | -52.218 | -7.626  | 23.710 | 1.00 | 0.00 | C |
| ATOM | 1124 | N1   | C B | 18 | -53.095 | -7.730  | 24.909 | 1.00 | 0.00 | N |
| ATOM | 1125 | C2   | C B | 18 | -53.675 | -8.966  | 25.186 | 1.00 | 0.00 | C |
| ATOM | 1126 | O2   | C B | 18 | -53.441 | -9.919  | 24.431 | 1.00 | 0.00 | O |
| ATOM | 1127 | N3   | C B | 18 | -54.477 | -9.081  | 26.272 | 1.00 | 0.00 | N |
| ATOM | 1128 | C4   | C B | 18 | -54.711 | -8.031  | 27.069 | 1.00 | 0.00 | C |
| ATOM | 1129 | N4   | C B | 18 | -55.502 | -8.202  | 28.119 | 1.00 | 0.00 | N |
| ATOM | 1130 | C5   | C B | 18 | -54.129 | -6.749  | 26.806 | 1.00 | 0.00 | C |
| ATOM | 1131 | C6   | C B | 18 | -53.324 | -6.657  | 25.710 | 1.00 | 0.00 | C |
| ATOM | 1132 | C2'  | C B | 18 | -52.355 | -6.306  | 22.962 | 1.00 | 0.00 | C |
| ATOM | 1133 | C3'  | C B | 18 | -50.930 | -6.058  | 22.492 | 1.00 | 0.00 | C |
| ATOM | 1134 | O3'  | C B | 18 | -50.710 | -6.763  | 21.272 | 1.00 | 0.00 | O |
| ATOM | 1135 | C4'  | C B | 18 | -50.092 | -6.617  | 23.640 | 1.00 | 0.00 | C |
| ATOM | 1136 | O4'  | C B | 18 | -50.877 | -7.743  | 24.147 | 1.00 | 0.00 | O |
| ATOM | 1137 | C5'  | C B | 18 | -49.807 | -5.673  | 24.784 | 1.00 | 0.00 | C |
| ATOM | 1138 | O5'  | C B | 18 | -50.960 | -4.825  | 25.019 | 1.00 | 0.00 | O |

|      |      |      |     |    |         |         |        |      |      |   |
|------|------|------|-----|----|---------|---------|--------|------|------|---|
| ATOM | 1139 | O1P  | C B | 18 | -50.127 | -2.527  | 24.417 | 1.00 | 0.00 | O |
| ATOM | 1140 | O2P  | C B | 18 | -51.980 | -2.792  | 26.088 | 1.00 | 0.00 | O |
| ATOM | 1141 | P    | C B | 18 | -50.724 | -3.326  | 25.506 | 1.00 | 0.00 | P |
| ATOM | 1142 | H5   | C B | 18 | -54.320 | -5.891  | 27.450 | 1.00 | 0.00 | H |
| ATOM | 1143 | H6   | C B | 18 | -52.856 | -5.702  | 25.472 | 1.00 | 0.00 | H |
| ATOM | 1144 | H1'  | C B | 18 | -52.433 | -8.470  | 23.056 | 1.00 | 0.00 | H |
| ATOM | 1145 | H3'  | C B | 18 | -50.730 | -4.999  | 22.338 | 1.00 | 0.00 | H |
| ATOM | 1146 | H4'  | C B | 18 | -49.135 | -6.921  | 23.216 | 1.00 | 0.00 | H |
| ATOM | 1147 | H41  | C B | 18 | -55.697 | -7.410  | 28.750 | 1.00 | 0.00 | H |
| ATOM | 1148 | H42  | C B | 18 | -55.919 | -9.124  | 28.305 | 1.00 | 0.00 | H |
| ATOM | 1149 | H2'1 | C B | 18 | -52.706 | -5.501  | 23.605 | 1.00 | 0.00 | H |
| ATOM | 1150 | H2'2 | C B | 18 | -53.045 | -6.378  | 22.121 | 1.00 | 0.00 | H |
| ATOM | 1151 | H5'1 | C B | 18 | -49.588 | -6.252  | 25.682 | 1.00 | 0.00 | H |
| ATOM | 1152 | H5'2 | C B | 18 | -48.944 | -5.058  | 24.535 | 1.00 | 0.00 | H |
| ATOM | 1153 | C1'  | C B | 19 | -54.977 | -10.446 | 20.717 | 1.00 | 0.00 | C |
| ATOM | 1154 | N1   | C B | 19 | -55.607 | -9.672  | 21.821 | 1.00 | 0.00 | N |
| ATOM | 1155 | C2   | C B | 19 | -56.452 | -10.351 | 22.697 | 1.00 | 0.00 | C |
| ATOM | 1156 | O2   | C B | 19 | -56.642 | -11.562 | 22.524 | 1.00 | 0.00 | O |
| ATOM | 1157 | N3   | C B | 19 | -57.035 | -9.663  | 23.707 | 1.00 | 0.00 | N |
| ATOM | 1158 | C4   | C B | 19 | -56.809 | -8.352  | 23.868 | 1.00 | 0.00 | C |
| ATOM | 1159 | N4   | C B | 19 | -57.404 | -7.730  | 24.872 | 1.00 | 0.00 | N |
| ATOM | 1160 | C5   | C B | 19 | -55.947 | -7.631  | 22.982 | 1.00 | 0.00 | C |
| ATOM | 1161 | C6   | C B | 19 | -55.370 | -8.343  | 21.973 | 1.00 | 0.00 | C |
| ATOM | 1162 | C2'  | C B | 19 | -54.873 | -9.677  | 19.409 | 1.00 | 0.00 | C |
| ATOM | 1163 | C3'  | C B | 19 | -53.549 | -10.179 | 18.851 | 1.00 | 0.00 | C |
| ATOM | 1164 | O3'  | C B | 19 | -53.770 | -11.401 | 18.150 | 1.00 | 0.00 | O |
| ATOM | 1165 | C4'  | C B | 19 | -52.704 | -10.378 | 20.106 | 1.00 | 0.00 | C |
| ATOM | 1166 | O4'  | C B | 19 | -53.667 | -10.791 | 21.128 | 1.00 | 0.00 | O |
| ATOM | 1167 | C5'  | C B | 19 | -51.956 | -9.166  | 20.612 | 1.00 | 0.00 | C |
| ATOM | 1168 | O5'  | C B | 19 | -52.756 | -7.975  | 20.407 | 1.00 | 0.00 | O |
| ATOM | 1169 | O1P  | C B | 19 | -51.435 | -6.670  | 18.709 | 1.00 | 0.00 | O |
| ATOM | 1170 | O2P  | C B | 19 | -52.940 | -5.471  | 20.320 | 1.00 | 0.00 | O |
| ATOM | 1171 | P    | C B | 19 | -52.018 | -6.605  | 20.064 | 1.00 | 0.00 | P |
| ATOM | 1172 | H5   | C B | 19 | -55.762 | -6.564  | 23.107 | 1.00 | 0.00 | H |
| ATOM | 1173 | H6   | C B | 19 | -54.705 | -7.835  | 21.274 | 1.00 | 0.00 | H |
| ATOM | 1174 | H1'  | C B | 19 | -55.541 | -11.370 | 20.585 | 1.00 | 0.00 | H |
| ATOM | 1175 | H3'  | C B | 19 | -53.090 | -9.454  | 18.178 | 1.00 | 0.00 | H |
| ATOM | 1176 | H4'  | C B | 19 | -51.970 | -11.150 | 19.876 | 1.00 | 0.00 | H |
| ATOM | 1177 | H41  | C B | 19 | -57.247 | -6.722  | 25.021 | 1.00 | 0.00 | H |
| ATOM | 1178 | H42  | C B | 19 | -58.025 | -8.253  | 25.509 | 1.00 | 0.00 | H |
| ATOM | 1179 | H2'1 | C B | 19 | -54.854 | -8.599  | 19.563 | 1.00 | 0.00 | H |
| ATOM | 1180 | H2'2 | C B | 19 | -55.699 | -9.898  | 18.732 | 1.00 | 0.00 | H |
| ATOM | 1181 | H5'1 | C B | 19 | -51.746 | -9.292  | 21.673 | 1.00 | 0.00 | H |
| ATOM | 1182 | H5'2 | C B | 19 | -51.016 | -9.076  | 20.069 | 1.00 | 0.00 | H |
| ATOM | 1183 | C1'  | T B | 20 | -58.918 | -13.224 | 19.597 | 1.00 | 0.00 | C |
| ATOM | 1184 | N1   | T B | 20 | -59.099 | -11.869 | 20.183 | 1.00 | 0.00 | N |
| ATOM | 1185 | C2   | T B | 20 | -59.923 | -11.765 | 21.286 | 1.00 | 0.00 | C |
| ATOM | 1186 | O2   | T B | 20 | -60.491 | -12.724 | 21.779 | 1.00 | 0.00 | O |
| ATOM | 1187 | N3   | T B | 20 | -60.063 | -10.489 | 21.797 | 1.00 | 0.00 | N |
| ATOM | 1188 | C4   | T B | 20 | -59.470 | -9.342  | 21.318 | 1.00 | 0.00 | C |
| ATOM | 1189 | O4   | T B | 20 | -59.673 | -8.249  | 21.862 | 1.00 | 0.00 | O |
| ATOM | 1190 | C5   | T B | 20 | -58.627 | -9.550  | 20.165 | 1.00 | 0.00 | C |
| ATOM | 1191 | C6   | T B | 20 | -58.467 | -10.779 | 19.639 | 1.00 | 0.00 | C |
| ATOM | 1192 | C7   | T B | 20 | -57.960 | -8.327  | 19.610 | 1.00 | 0.00 | C |

|      |      |      |     |    |         |         |        |      |      |   |
|------|------|------|-----|----|---------|---------|--------|------|------|---|
| ATOM | 1193 | C2'  | T B | 20 | -58.839 | -13.228 | 18.075 | 1.00 | 0.00 | C |
| ATOM | 1194 | C3'  | T B | 20 | -57.830 | -14.337 | 17.814 | 1.00 | 0.00 | C |
| ATOM | 1195 | O3'  | T B | 20 | -58.505 | -15.593 | 17.812 | 1.00 | 0.00 | O |
| ATOM | 1196 | C4'  | T B | 20 | -56.863 | -14.201 | 18.988 | 1.00 | 0.00 | C |
| ATOM | 1197 | O4'  | T B | 20 | -57.705 | -13.752 | 20.098 | 1.00 | 0.00 | O |
| ATOM | 1198 | C5'  | T B | 20 | -55.729 | -13.219 | 18.814 | 1.00 | 0.00 | C |
| ATOM | 1199 | O5'  | T B | 20 | -56.189 | -12.066 | 18.062 | 1.00 | 0.00 | O |
| ATOM | 1200 | O1P  | T B | 20 | -54.883 | -12.212 | 15.916 | 1.00 | 0.00 | O |
| ATOM | 1201 | O2P  | T B | 20 | -55.681 | -9.984  | 16.752 | 1.00 | 0.00 | O |
| ATOM | 1202 | P    | T B | 20 | -55.172 | -11.340 | 17.072 | 1.00 | 0.00 | P |
| ATOM | 1203 | H3   | T B | 20 | -60.672 | -10.385 | 22.621 | 1.00 | 0.00 | H |
| ATOM | 1204 | H6   | T B | 20 | -57.825 | -10.912 | 18.768 | 1.00 | 0.00 | H |
| ATOM | 1205 | H1'  | T B | 20 | -59.730 | -13.860 | 19.947 | 1.00 | 0.00 | H |
| ATOM | 1206 | H3'  | T B | 20 | -57.316 | -14.203 | 16.863 | 1.00 | 0.00 | H |
| ATOM | 1207 | H4'  | T B | 20 | -56.427 | -15.187 | 19.154 | 1.00 | 0.00 | H |
| ATOM | 1208 | H3T  | T B | 20 | -59.261 | -15.649 | 17.224 | 1.00 | 0.00 | H |
| ATOM | 1209 | H71  | T B | 20 | -58.348 | -8.122  | 18.612 | 1.00 | 0.00 | H |
| ATOM | 1210 | H72  | T B | 20 | -58.161 | -7.475  | 20.261 | 1.00 | 0.00 | H |
| ATOM | 1211 | H73  | T B | 20 | -56.883 | -8.493  | 19.554 | 1.00 | 0.00 | H |
| ATOM | 1212 | H2'1 | T B | 20 | -58.493 | -12.276 | 17.677 | 1.00 | 0.00 | H |
| ATOM | 1213 | H2'2 | T B | 20 | -59.800 | -13.449 | 17.612 | 1.00 | 0.00 | H |
| ATOM | 1214 | H5'1 | T B | 20 | -55.375 | -12.902 | 19.795 | 1.00 | 0.00 | H |
| ATOM | 1215 | H5'2 | T B | 20 | -54.915 | -13.705 | 18.279 | 1.00 | 0.00 | H |
| TER  |      |      |     |    |         |         |        |      |      |   |
| ATOM | 1    | C1'  | A A | 1  | -33.552 | -27.131 | 5.410  | 1.00 | 0.00 | C |
| ATOM | 2    | N1   | A A | 1  | -31.101 | -22.993 | 3.622  | 1.00 | 0.00 | N |
| ATOM | 3    | C2   | A A | 1  | -30.792 | -24.286 | 3.631  | 1.00 | 0.00 | C |
| ATOM | 4    | N3   | A A | 1  | -31.474 | -25.306 | 4.108  | 1.00 | 0.00 | N |
| ATOM | 5    | C4   | A A | 1  | -32.630 | -24.881 | 4.648  | 1.00 | 0.00 | C |
| ATOM | 6    | C5   | A A | 1  | -33.092 | -23.597 | 4.720  | 1.00 | 0.00 | C |
| ATOM | 7    | C6   | A A | 1  | -32.262 | -22.599 | 4.167  | 1.00 | 0.00 | C |
| ATOM | 8    | N6   | A A | 1  | -32.584 | -21.294 | 4.165  | 1.00 | 0.00 | N |
| ATOM | 9    | N7   | A A | 1  | -34.325 | -23.544 | 5.347  | 1.00 | 0.00 | N |
| ATOM | 10   | C8   | A A | 1  | -34.579 | -24.785 | 5.639  | 1.00 | 0.00 | C |
| ATOM | 11   | N9   | A A | 1  | -33.596 | -25.654 | 5.244  | 1.00 | 0.00 | N |
| ATOM | 12   | C2'  | A A | 1  | -34.133 | -27.618 | 6.731  | 1.00 | 0.00 | C |
| ATOM | 13   | C3'  | A A | 1  | -34.790 | -28.927 | 6.324  | 1.00 | 0.00 | C |
| ATOM | 14   | O3'  | A A | 1  | -33.813 | -29.965 | 6.336  | 1.00 | 0.00 | O |
| ATOM | 15   | C4'  | A A | 1  | -35.300 | -28.630 | 4.915  | 1.00 | 0.00 | C |
| ATOM | 16   | O4'  | A A | 1  | -34.309 | -27.705 | 4.362  | 1.00 | 0.00 | O |
| ATOM | 17   | C5'  | A A | 1  | -36.665 | -27.990 | 4.817  | 1.00 | 0.00 | C |
| ATOM | 18   | O5'  | A A | 1  | -36.851 | -27.058 | 5.912  | 1.00 | 0.00 | O |
| ATOM | 19   | H2   | A A | 1  | -29.834 | -24.539 | 3.176  | 1.00 | 0.00 | H |
| ATOM | 20   | H8   | A A | 1  | -35.488 | -25.104 | 6.149  | 1.00 | 0.00 | H |
| ATOM | 21   | H1'  | A A | 1  | -32.518 | -27.457 | 5.294  | 1.00 | 0.00 | H |
| ATOM | 22   | H3'  | A A | 1  | -35.611 | -29.197 | 6.991  | 1.00 | 0.00 | H |
| ATOM | 23   | H4'  | A A | 1  | -35.339 | -29.581 | 4.386  | 1.00 | 0.00 | H |
| ATOM | 24   | H61  | A A | 1  | -31.944 | -20.607 | 3.748  | 1.00 | 0.00 | H |
| ATOM | 25   | H62  | A A | 1  | -33.474 | -20.985 | 4.583  | 1.00 | 0.00 | H |
| ATOM | 26   | H5T  | A A | 1  | -37.728 | -26.954 | 6.285  | 1.00 | 0.00 | H |
| ATOM | 27   | H2'1 | A A | 1  | -34.860 | -26.921 | 7.145  | 1.00 | 0.00 | H |
| ATOM | 28   | H2'2 | A A | 1  | -33.364 | -27.779 | 7.486  | 1.00 | 0.00 | H |
| ATOM | 29   | H5'1 | A A | 1  | -36.745 | -27.463 | 3.867  | 1.00 | 0.00 | H |
| ATOM | 30   | H5'2 | A A | 1  | -37.428 | -28.766 | 4.861  | 1.00 | 0.00 | H |

|      |    |      |     |   |         |         |       |      |      |   |
|------|----|------|-----|---|---------|---------|-------|------|------|---|
| ATOM | 31 | C1'  | G A | 2 | -28.722 | -27.378 | 6.533 | 1.00 | 0.00 | C |
| ATOM | 32 | N1   | G A | 2 | -28.943 | -22.295 | 6.183 | 1.00 | 0.00 | N |
| ATOM | 33 | C2   | G A | 2 | -27.983 | -23.173 | 5.720 | 1.00 | 0.00 | C |
| ATOM | 34 | N2   | G A | 2 | -26.942 | -22.627 | 5.080 | 1.00 | 0.00 | N |
| ATOM | 35 | N3   | G A | 2 | -28.054 | -24.494 | 5.881 | 1.00 | 0.00 | N |
| ATOM | 36 | C4   | G A | 2 | -29.172 | -24.871 | 6.556 | 1.00 | 0.00 | C |
| ATOM | 37 | C5   | G A | 2 | -30.181 | -24.065 | 7.058 | 1.00 | 0.00 | C |
| ATOM | 38 | C6   | G A | 2 | -30.106 | -22.663 | 6.882 | 1.00 | 0.00 | C |
| ATOM | 39 | O6   | G A | 2 | -30.895 | -21.792 | 7.249 | 1.00 | 0.00 | O |
| ATOM | 40 | N7   | G A | 2 | -31.153 | -24.845 | 7.689 | 1.00 | 0.00 | N |
| ATOM | 41 | C8   | G A | 2 | -30.715 | -26.070 | 7.550 | 1.00 | 0.00 | C |
| ATOM | 42 | N9   | G A | 2 | -29.516 | -26.167 | 6.874 | 1.00 | 0.00 | N |
| ATOM | 43 | C2'  | G A | 2 | -28.732 | -28.445 | 7.619 | 1.00 | 0.00 | C |
| ATOM | 44 | C3'  | G A | 2 | -28.726 | -29.728 | 6.805 | 1.00 | 0.00 | C |
| ATOM | 45 | O3'  | G A | 2 | -27.382 | -30.054 | 6.455 | 1.00 | 0.00 | O |
| ATOM | 46 | C4'  | G A | 2 | -29.567 | -29.360 | 5.584 | 1.00 | 0.00 | C |
| ATOM | 47 | O4'  | G A | 2 | -29.279 | -27.944 | 5.362 | 1.00 | 0.00 | O |
| ATOM | 48 | C5'  | G A | 2 | -31.061 | -29.535 | 5.723 | 1.00 | 0.00 | C |
| ATOM | 49 | O5'  | G A | 2 | -31.473 | -29.189 | 7.069 | 1.00 | 0.00 | O |
| ATOM | 50 | O1P  | G A | 2 | -32.279 | -31.379 | 8.011 | 1.00 | 0.00 | O |
| ATOM | 51 | O2P  | G A | 2 | -33.210 | -29.220 | 8.884 | 1.00 | 0.00 | O |
| ATOM | 52 | P    | G A | 2 | -32.684 | -29.989 | 7.730 | 1.00 | 0.00 | P |
| ATOM | 53 | H1   | G A | 2 | -28.794 | -21.291 | 6.003 | 1.00 | 0.00 | H |
| ATOM | 54 | H8   | G A | 2 | -31.249 | -26.937 | 7.936 | 1.00 | 0.00 | H |
| ATOM | 55 | H1'  | G A | 2 | -27.704 | -27.065 | 6.302 | 1.00 | 0.00 | H |
| ATOM | 56 | H21  | G A | 2 | -26.893 | -21.606 | 4.957 | 1.00 | 0.00 | H |
| ATOM | 57 | H3'  | G A | 2 | -29.169 | -30.561 | 7.352 | 1.00 | 0.00 | H |
| ATOM | 58 | H22  | G A | 2 | -26.192 | -23.229 | 4.712 | 1.00 | 0.00 | H |
| ATOM | 59 | H4'  | G A | 2 | -29.232 | -29.997 | 4.766 | 1.00 | 0.00 | H |
| ATOM | 60 | H2'1 | G A | 2 | -29.617 | -28.381 | 8.253 | 1.00 | 0.00 | H |
| ATOM | 61 | H2'2 | G A | 2 | -27.858 | -28.382 | 8.269 | 1.00 | 0.00 | H |
| ATOM | 62 | H5'1 | G A | 2 | -31.565 | -28.886 | 5.006 | 1.00 | 0.00 | H |
| ATOM | 63 | H5'2 | G A | 2 | -31.322 | -30.571 | 5.511 | 1.00 | 0.00 | H |
| ATOM | 64 | C1'  | G A | 3 | -24.258 | -25.441 | 7.454 | 1.00 | 0.00 | C |
| ATOM | 65 | N1   | G A | 3 | -26.948 | -21.319 | 8.791 | 1.00 | 0.00 | N |
| ATOM | 66 | C2   | G A | 3 | -25.784 | -21.417 | 8.053 | 1.00 | 0.00 | C |
| ATOM | 67 | N2   | G A | 3 | -25.265 | -20.263 | 7.614 | 1.00 | 0.00 | N |
| ATOM | 68 | N3   | G A | 3 | -25.185 | -22.572 | 7.774 | 1.00 | 0.00 | N |
| ATOM | 69 | C4   | G A | 3 | -25.843 | -23.637 | 8.303 | 1.00 | 0.00 | C |
| ATOM | 70 | C5   | G A | 3 | -27.007 | -23.634 | 9.054 | 1.00 | 0.00 | C |
| ATOM | 71 | C6   | G A | 3 | -27.646 | -22.407 | 9.346 | 1.00 | 0.00 | C |
| ATOM | 72 | O6   | G A | 3 | -28.676 | -22.202 | 9.990 | 1.00 | 0.00 | O |
| ATOM | 73 | N7   | G A | 3 | -27.356 | -24.939 | 9.408 | 1.00 | 0.00 | N |
| ATOM | 74 | C8   | G A | 3 | -26.417 | -25.674 | 8.871 | 1.00 | 0.00 | C |
| ATOM | 75 | N9   | G A | 3 | -25.461 | -24.955 | 8.183 | 1.00 | 0.00 | N |
| ATOM | 76 | C2'  | G A | 3 | -23.561 | -26.613 | 8.131 | 1.00 | 0.00 | C |
| ATOM | 77 | C3'  | G A | 3 | -23.086 | -27.431 | 6.942 | 1.00 | 0.00 | C |
| ATOM | 78 | O3'  | G A | 3 | -21.838 | -26.912 | 6.487 | 1.00 | 0.00 | O |
| ATOM | 79 | C4'  | G A | 3 | -24.203 | -27.226 | 5.920 | 1.00 | 0.00 | C |
| ATOM | 80 | O4'  | G A | 3 | -24.674 | -25.864 | 6.169 | 1.00 | 0.00 | O |
| ATOM | 81 | C5'  | G A | 3 | -25.378 | -28.170 | 6.014 | 1.00 | 0.00 | C |
| ATOM | 82 | O5'  | G A | 3 | -25.657 | -28.470 | 7.404 | 1.00 | 0.00 | O |
| ATOM | 83 | O1P  | G A | 3 | -25.132 | -30.925 | 7.587 | 1.00 | 0.00 | O |
| ATOM | 84 | O2P  | G A | 3 | -26.811 | -29.883 | 9.132 | 1.00 | 0.00 | O |



|      |     |      |     |   |         |         |        |      |      |   |
|------|-----|------|-----|---|---------|---------|--------|------|------|---|
| ATOM | 85  | P    | G A | 3 | -26.197 | -29.923 | 7.782  | 1.00 | 0.00 | P |
| ATOM | 86  | H1   | G A | 3 | -27.334 | -20.375 | 8.947  | 1.00 | 0.00 | H |
| ATOM | 87  | H8   | G A | 3 | -26.391 | -26.760 | 8.958  | 1.00 | 0.00 | H |
| ATOM | 88  | H1'  | G A | 3 | -23.574 | -24.602 | 7.325  | 1.00 | 0.00 | H |
| ATOM | 89  | H21  | G A | 3 | -25.736 | -19.372 | 7.831  | 1.00 | 0.00 | H |
| ATOM | 90  | H3'  | G A | 3 | -22.969 | -28.486 | 7.191  | 1.00 | 0.00 | H |
| ATOM | 91  | H22  | G A | 3 | -24.398 | -20.268 | 7.060  | 1.00 | 0.00 | H |
| ATOM | 92  | H4'  | G A | 3 | -23.756 | -27.348 | 4.934  | 1.00 | 0.00 | H |
| ATOM | 93  | H2'1 | G A | 3 | -24.239 | -27.188 | 8.762  | 1.00 | 0.00 | H |
| ATOM | 94  | H2'2 | G A | 3 | -22.726 | -26.294 | 8.754  | 1.00 | 0.00 | H |
| ATOM | 95  | H5'1 | G A | 3 | -26.249 | -27.703 | 5.555  | 1.00 | 0.00 | H |
| ATOM | 96  | H5'2 | G A | 3 | -25.143 | -29.089 | 5.478  | 1.00 | 0.00 | H |
| ATOM | 97  | C1'  | C A | 4 | -21.187 | -21.833 | 8.898  | 1.00 | 0.00 | C |
| ATOM | 98  | N1   | C A | 4 | -22.327 | -22.248 | 9.764  | 1.00 | 0.00 | N |
| ATOM | 99  | C2   | C A | 4 | -23.183 | -21.255 | 10.232 | 1.00 | 0.00 | C |
| ATOM | 100 | O2   | C A | 4 | -22.966 | -20.079 | 9.915  | 1.00 | 0.00 | O |
| ATOM | 101 | N3   | C A | 4 | -24.226 | -21.612 | 11.021 | 1.00 | 0.00 | N |
| ATOM | 102 | C4   | C A | 4 | -24.435 | -22.894 | 11.348 | 1.00 | 0.00 | C |
| ATOM | 103 | N4   | C A | 4 | -25.472 | -23.186 | 12.119 | 1.00 | 0.00 | N |
| ATOM | 104 | C5   | C A | 4 | -23.568 | -23.934 | 10.881 | 1.00 | 0.00 | C |
| ATOM | 105 | C6   | C A | 4 | -22.527 | -23.553 | 10.087 | 1.00 | 0.00 | C |
| ATOM | 106 | C2'  | C A | 4 | -19.908 | -22.618 | 9.151  | 1.00 | 0.00 | C |
| ATOM | 107 | C3'  | C A | 4 | -19.317 | -22.721 | 7.753  | 1.00 | 0.00 | C |
| ATOM | 108 | O3'  | C A | 4 | -18.572 | -21.537 | 7.472  | 1.00 | 0.00 | O |
| ATOM | 109 | C4'  | C A | 4 | -20.555 | -22.846 | 6.869  | 1.00 | 0.00 | C |
| ATOM | 110 | O4'  | C A | 4 | -21.571 | -22.044 | 7.552  | 1.00 | 0.00 | O |
| ATOM | 111 | C5'  | C A | 4 | -21.098 | -24.242 | 6.670  | 1.00 | 0.00 | C |
| ATOM | 112 | O5'  | C A | 4 | -20.948 | -25.006 | 7.893  | 1.00 | 0.00 | O |
| ATOM | 113 | O1P  | C A | 4 | -19.288 | -26.791 | 7.266  | 1.00 | 0.00 | O |
| ATOM | 114 | O2P  | C A | 4 | -20.958 | -27.217 | 9.089  | 1.00 | 0.00 | O |
| ATOM | 115 | P    | C A | 4 | -20.650 | -26.570 | 7.790  | 1.00 | 0.00 | P |
| ATOM | 116 | H5   | C A | 4 | -23.731 | -24.978 | 11.149 | 1.00 | 0.00 | H |
| ATOM | 117 | H6   | C A | 4 | -21.843 | -24.310 | 9.703  | 1.00 | 0.00 | H |
| ATOM | 118 | H1'  | C A | 4 | -21.026 | -20.766 | 9.038  | 1.00 | 0.00 | H |
| ATOM | 119 | H3'  | C A | 4 | -18.667 | -23.589 | 7.648  | 1.00 | 0.00 | H |
| ATOM | 120 | H4'  | C A | 4 | -20.287 | -22.451 | 5.890  | 1.00 | 0.00 | H |
| ATOM | 121 | H41  | C A | 4 | -25.656 | -24.165 | 12.385 | 1.00 | 0.00 | H |
| ATOM | 122 | H42  | C A | 4 | -26.093 | -22.436 | 12.455 | 1.00 | 0.00 | H |
| ATOM | 123 | H2'1 | C A | 4 | -20.102 | -23.604 | 9.572  | 1.00 | 0.00 | H |
| ATOM | 124 | H2'2 | C A | 4 | -19.232 | -22.099 | 9.832  | 1.00 | 0.00 | H |
| ATOM | 125 | H5'1 | C A | 4 | -22.153 | -24.182 | 6.400  | 1.00 | 0.00 | H |
| ATOM | 126 | H5'2 | C A | 4 | -20.549 | -24.727 | 5.863  | 1.00 | 0.00 | H |
| ATOM | 127 | C1'  | C A | 5 | -20.022 | -17.724 | 11.404 | 1.00 | 0.00 | C |
| ATOM | 128 | N1   | C A | 5 | -20.647 | -18.882 | 12.101 | 1.00 | 0.00 | N |
| ATOM | 129 | C2   | C A | 5 | -21.776 | -18.641 | 12.880 | 1.00 | 0.00 | C |
| ATOM | 130 | O2   | C A | 5 | -22.211 | -17.484 | 12.964 | 1.00 | 0.00 | O |
| ATOM | 131 | N3   | C A | 5 | -22.360 | -19.682 | 13.523 | 1.00 | 0.00 | N |
| ATOM | 132 | C4   | C A | 5 | -21.867 | -20.922 | 13.415 | 1.00 | 0.00 | C |
| ATOM | 133 | N4   | C A | 5 | -22.480 | -21.902 | 14.061 | 1.00 | 0.00 | N |
| ATOM | 134 | C5   | C A | 5 | -20.706 | -21.198 | 12.621 | 1.00 | 0.00 | C |
| ATOM | 135 | C6   | C A | 5 | -20.137 | -20.135 | 11.982 | 1.00 | 0.00 | C |
| ATOM | 136 | C2'  | C A | 5 | -18.501 | -17.778 | 11.369 | 1.00 | 0.00 | C |
| ATOM | 137 | C3'  | C A | 5 | -18.194 | -17.174 | 10.007 | 1.00 | 0.00 | C |
| ATOM | 138 | O3'  | C A | 5 | -18.172 | -15.753 | 10.119 | 1.00 | 0.00 | O |

|      |     |      |     |   |         |         |        |      |      |   |
|------|-----|------|-----|---|---------|---------|--------|------|------|---|
| ATOM | 139 | C4'  | C A | 5 | -19.355 | -17.668 | 9.147  | 1.00 | 0.00 | C |
| ATOM | 140 | O4'  | C A | 5 | -20.490 | -17.721 | 10.068 | 1.00 | 0.00 | O |
| ATOM | 141 | C5'  | C A | 5 | -19.187 | -19.027 | 8.509  | 1.00 | 0.00 | C |
| ATOM | 142 | O5'  | C A | 5 | -18.474 | -19.909 | 9.413  | 1.00 | 0.00 | O |
| ATOM | 143 | O1P  | C A | 5 | -16.303 | -20.339 | 8.213  | 1.00 | 0.00 | O |
| ATOM | 144 | O2P  | C A | 5 | -17.210 | -22.042 | 9.818  | 1.00 | 0.00 | O |
| ATOM | 145 | P    | C A | 5 | -17.486 | -21.000 | 8.799  | 1.00 | 0.00 | P |
| ATOM | 146 | H5   | C A | 5 | -20.297 | -22.205 | 12.535 | 1.00 | 0.00 | H |
| ATOM | 147 | H6   | C A | 5 | -19.254 | -20.296 | 11.363 | 1.00 | 0.00 | H |
| ATOM | 148 | H1'  | C A | 5 | -20.370 | -16.810 | 11.884 | 1.00 | 0.00 | H |
| ATOM | 149 | H3'  | C A | 5 | -17.237 | -17.520 | 9.614  | 1.00 | 0.00 | H |
| ATOM | 150 | H4'  | C A | 5 | -19.488 | -16.939 | 8.347  | 1.00 | 0.00 | H |
| ATOM | 151 | H41  | C A | 5 | -22.122 | -22.866 | 13.994 | 1.00 | 0.00 | H |
| ATOM | 152 | H42  | C A | 5 | -23.314 | -21.701 | 14.632 | 1.00 | 0.00 | H |
| ATOM | 153 | H2'1 | C A | 5 | -18.120 | -18.796 | 11.446 | 1.00 | 0.00 | H |
| ATOM | 154 | H2'2 | C A | 5 | -18.048 | -17.196 | 12.173 | 1.00 | 0.00 | H |
| ATOM | 155 | H5'1 | C A | 5 | -20.171 | -19.443 | 8.288  | 1.00 | 0.00 | H |
| ATOM | 156 | H5'2 | C A | 5 | -18.627 | -18.919 | 7.580  | 1.00 | 0.00 | H |
| ATOM | 157 | C1'  | G A | 6 | -20.545 | -14.472 | 15.102 | 1.00 | 0.00 | C |
| ATOM | 158 | N1   | G A | 6 | -22.529 | -18.466 | 17.580 | 1.00 | 0.00 | N |
| ATOM | 159 | C2   | G A | 6 | -22.953 | -17.149 | 17.534 | 1.00 | 0.00 | C |
| ATOM | 160 | N2   | G A | 6 | -24.049 | -16.857 | 18.244 | 1.00 | 0.00 | N |
| ATOM | 161 | N3   | G A | 6 | -22.332 | -16.201 | 16.835 | 1.00 | 0.00 | N |
| ATOM | 162 | C4   | G A | 6 | -21.237 | -16.672 | 16.184 | 1.00 | 0.00 | C |
| ATOM | 163 | C5   | G A | 6 | -20.738 | -17.964 | 16.174 | 1.00 | 0.00 | C |
| ATOM | 164 | C6   | G A | 6 | -21.398 | -18.973 | 16.912 | 1.00 | 0.00 | C |
| ATOM | 165 | O6   | G A | 6 | -21.112 | -20.164 | 17.027 | 1.00 | 0.00 | O |
| ATOM | 166 | N7   | G A | 6 | -19.592 | -18.033 | 15.380 | 1.00 | 0.00 | N |
| ATOM | 167 | C8   | G A | 6 | -19.437 | -16.811 | 14.941 | 1.00 | 0.00 | C |
| ATOM | 168 | N9   | G A | 6 | -20.397 | -15.926 | 15.386 | 1.00 | 0.00 | N |
| ATOM | 169 | C2'  | G A | 6 | -19.221 | -13.724 | 15.027 | 1.00 | 0.00 | C |
| ATOM | 170 | C3'  | G A | 6 | -19.495 | -12.700 | 13.938 | 1.00 | 0.00 | C |
| ATOM | 171 | O3'  | G A | 6 | -20.138 | -11.565 | 14.513 | 1.00 | 0.00 | O |
| ATOM | 172 | C4'  | G A | 6 | -20.411 | -13.460 | 12.980 | 1.00 | 0.00 | C |
| ATOM | 173 | O4'  | G A | 6 | -21.191 | -14.340 | 13.851 | 1.00 | 0.00 | O |
| ATOM | 174 | C5'  | G A | 6 | -19.732 | -14.301 | 11.927 | 1.00 | 0.00 | C |
| ATOM | 175 | O5'  | G A | 6 | -18.531 | -14.901 | 12.475 | 1.00 | 0.00 | O |
| ATOM | 176 | O1P  | G A | 6 | -16.682 | -13.805 | 11.168 | 1.00 | 0.00 | O |
| ATOM | 177 | O2P  | G A | 6 | -16.348 | -16.096 | 12.133 | 1.00 | 0.00 | O |
| ATOM | 178 | P    | G A | 6 | -17.272 | -15.110 | 11.520 | 1.00 | 0.00 | P |
| ATOM | 179 | H1   | G A | 6 | -23.086 | -19.125 | 18.146 | 1.00 | 0.00 | H |
| ATOM | 180 | H8   | G A | 6 | -18.621 | -16.515 | 14.281 | 1.00 | 0.00 | H |
| ATOM | 181 | H1'  | G A | 6 | -21.195 | -14.040 | 15.864 | 1.00 | 0.00 | H |
| ATOM | 182 | H21  | G A | 6 | -24.527 | -17.597 | 18.780 | 1.00 | 0.00 | H |
| ATOM | 183 | H3'  | G A | 6 | -18.581 | -12.381 | 13.437 | 1.00 | 0.00 | H |
| ATOM | 184 | H22  | G A | 6 | -24.415 | -15.894 | 18.254 | 1.00 | 0.00 | H |
| ATOM | 185 | H4'  | G A | 6 | -21.023 | -12.717 | 12.470 | 1.00 | 0.00 | H |
| ATOM | 186 | H2'1 | G A | 6 | -18.391 | -14.378 | 14.757 | 1.00 | 0.00 | H |
| ATOM | 187 | H2'2 | G A | 6 | -18.963 | -13.242 | 15.971 | 1.00 | 0.00 | H |
| ATOM | 188 | H5'1 | G A | 6 | -20.415 | -15.082 | 11.595 | 1.00 | 0.00 | H |
| ATOM | 189 | H5'2 | G A | 6 | -19.473 | -13.670 | 11.077 | 1.00 | 0.00 | H |
| ATOM | 190 | C1'  | C A | 7 | -21.894 | -13.107 | 19.668 | 1.00 | 0.00 | C |
| ATOM | 191 | N1   | C A | 7 | -21.024 | -14.297 | 19.461 | 1.00 | 0.00 | N |
| ATOM | 192 | C2   | C A | 7 | -21.403 | -15.494 | 20.064 | 1.00 | 0.00 | C |

|      |     |      |     |   |         |         |        |      |      |   |
|------|-----|------|-----|---|---------|---------|--------|------|------|---|
| ATOM | 193 | O2   | C A | 7 | -22.438 | -15.522 | 20.741 | 1.00 | 0.00 | O |
| ATOM | 194 | N3   | C A | 7 | -20.624 | -16.590 | 19.887 | 1.00 | 0.00 | N |
| ATOM | 195 | C4   | C A | 7 | -19.508 | -16.530 | 19.150 | 1.00 | 0.00 | C |
| ATOM | 196 | N4   | C A | 7 | -18.786 | -17.631 | 19.008 | 1.00 | 0.00 | N |
| ATOM | 197 | C5   | C A | 7 | -19.091 | -15.310 | 18.522 | 1.00 | 0.00 | C |
| ATOM | 198 | C6   | C A | 7 | -19.894 | -14.221 | 18.709 | 1.00 | 0.00 | C |
| ATOM | 199 | C2'  | C A | 7 | -21.124 | -11.803 | 19.827 | 1.00 | 0.00 | C |
| ATOM | 200 | C3'  | C A | 7 | -22.041 | -10.808 | 19.133 | 1.00 | 0.00 | C |
| ATOM | 201 | O3'  | C A | 7 | -23.037 | -10.367 | 20.053 | 1.00 | 0.00 | O |
| ATOM | 202 | C4'  | C A | 7 | -22.634 | -11.630 | 17.991 | 1.00 | 0.00 | C |
| ATOM | 203 | O4'  | C A | 7 | -22.733 | -12.985 | 18.534 | 1.00 | 0.00 | O |
| ATOM | 204 | C5'  | C A | 7 | -21.829 | -11.681 | 16.712 | 1.00 | 0.00 | C |
| ATOM | 205 | O5'  | C A | 7 | -20.413 | -11.710 | 17.024 | 1.00 | 0.00 | O |
| ATOM | 206 | O1P  | C A | 7 | -19.572 | -9.514  | 16.125 | 1.00 | 0.00 | O |
| ATOM | 207 | O2P  | C A | 7 | -18.023 | -11.481 | 16.288 | 1.00 | 0.00 | O |
| ATOM | 208 | P    | C A | 7 | -19.395 | -10.978 | 16.040 | 1.00 | 0.00 | P |
| ATOM | 209 | H5   | C A | 7 | -18.180 | -15.254 | 17.925 | 1.00 | 0.00 | H |
| ATOM | 210 | H6   | C A | 7 | -19.623 | -13.272 | 18.245 | 1.00 | 0.00 | H |
| ATOM | 211 | H1'  | C A | 7 | -22.528 | -13.295 | 20.535 | 1.00 | 0.00 | H |
| ATOM | 212 | H3'  | C A | 7 | -21.492 | -9.945  | 18.754 | 1.00 | 0.00 | H |
| ATOM | 213 | H4'  | C A | 7 | -23.604 | -11.192 | 17.756 | 1.00 | 0.00 | H |
| ATOM | 214 | H41  | C A | 7 | -17.924 | -17.614 | 18.444 | 1.00 | 0.00 | H |
| ATOM | 215 | H42  | C A | 7 | -19.084 | -18.507 | 19.462 | 1.00 | 0.00 | H |
| ATOM | 216 | H2'1 | C A | 7 | -20.146 | -11.840 | 19.351 | 1.00 | 0.00 | H |
| ATOM | 217 | H2'2 | C A | 7 | -20.970 | -11.539 | 20.874 | 1.00 | 0.00 | H |
| ATOM | 218 | H5'1 | C A | 7 | -22.102 | -12.576 | 16.152 | 1.00 | 0.00 | H |
| ATOM | 219 | H5'2 | C A | 7 | -22.055 | -10.800 | 16.112 | 1.00 | 0.00 | H |
| ATOM | 220 | C1'  | A A | 8 | -22.904 | -13.920 | 24.446 | 1.00 | 0.00 | C |
| ATOM | 221 | N1   | A A | 8 | -19.780 | -17.946 | 23.829 | 1.00 | 0.00 | N |
| ATOM | 222 | C2   | A A | 8 | -20.944 | -17.799 | 24.454 | 1.00 | 0.00 | C |
| ATOM | 223 | N3   | A A | 8 | -21.702 | -16.730 | 24.573 | 1.00 | 0.00 | N |
| ATOM | 224 | C4   | A A | 8 | -21.132 | -15.685 | 23.944 | 1.00 | 0.00 | C |
| ATOM | 225 | C5   | A A | 8 | -19.948 | -15.669 | 23.261 | 1.00 | 0.00 | C |
| ATOM | 226 | C6   | A A | 8 | -19.238 | -16.886 | 23.210 | 1.00 | 0.00 | C |
| ATOM | 227 | N6   | A A | 8 | -18.061 | -17.022 | 22.575 | 1.00 | 0.00 | N |
| ATOM | 228 | N7   | A A | 8 | -19.686 | -14.412 | 22.745 | 1.00 | 0.00 | N |
| ATOM | 229 | C8   | A A | 8 | -20.706 | -13.699 | 23.126 | 1.00 | 0.00 | C |
| ATOM | 230 | N9   | A A | 8 | -21.626 | -14.406 | 23.857 | 1.00 | 0.00 | N |
| ATOM | 231 | C2'  | A A | 8 | -22.825 | -12.503 | 24.998 | 1.00 | 0.00 | C |
| ATOM | 232 | C3'  | A A | 8 | -24.207 | -11.960 | 24.674 | 1.00 | 0.00 | C |
| ATOM | 233 | O3'  | A A | 8 | -25.114 | -12.345 | 25.704 | 1.00 | 0.00 | O |
| ATOM | 234 | C4'  | A A | 8 | -24.532 | -12.629 | 23.339 | 1.00 | 0.00 | C |
| ATOM | 235 | O4'  | A A | 8 | -23.883 | -13.939 | 23.425 | 1.00 | 0.00 | O |
| ATOM | 236 | C5'  | A A | 8 | -24.038 | -11.924 | 22.098 | 1.00 | 0.00 | C |
| ATOM | 237 | O5'  | A A | 8 | -22.745 | -11.321 | 22.358 | 1.00 | 0.00 | O |
| ATOM | 238 | O1P  | A A | 8 | -23.211 | -8.853  | 22.191 | 1.00 | 0.00 | O |
| ATOM | 239 | O2P  | A A | 8 | -20.915 | -9.734  | 21.690 | 1.00 | 0.00 | O |
| ATOM | 240 | P    | A A | 8 | -22.383 | -9.943  | 21.640 | 1.00 | 0.00 | P |
| ATOM | 241 | H2   | A A | 8 | -21.327 | -18.696 | 24.939 | 1.00 | 0.00 | H |
| ATOM | 242 | H8   | A A | 8 | -20.819 | -12.641 | 22.888 | 1.00 | 0.00 | H |
| ATOM | 243 | H1'  | A A | 8 | -23.212 | -14.624 | 25.218 | 1.00 | 0.00 | H |
| ATOM | 244 | H3'  | A A | 8 | -24.208 | -10.874 | 24.580 | 1.00 | 0.00 | H |
| ATOM | 245 | H4'  | A A | 8 | -25.617 | -12.695 | 23.275 | 1.00 | 0.00 | H |
| ATOM | 246 | H61  | A A | 8 | -17.584 | -17.934 | 22.565 | 1.00 | 0.00 | H |

|      |     |      |     |    |         |         |        |      |      |   |
|------|-----|------|-----|----|---------|---------|--------|------|------|---|
| ATOM | 247 | H62  | A A | 8  | -17.637 | -16.212 | 22.099 | 1.00 | 0.00 | H |
| ATOM | 248 | H2'1 | A A | 8  | -22.045 | -11.915 | 24.517 | 1.00 | 0.00 | H |
| ATOM | 249 | H2'2 | A A | 8  | -22.634 | -12.488 | 26.071 | 1.00 | 0.00 | H |
| ATOM | 250 | H5'1 | A A | 8  | -23.950 | -12.648 | 21.288 | 1.00 | 0.00 | H |
| ATOM | 251 | H5'2 | A A | 8  | -24.753 | -11.153 | 21.814 | 1.00 | 0.00 | H |
| ATOM | 252 | C1'  | C A | 9  | -22.500 | -16.449 | 28.701 | 1.00 | 0.00 | C |
| ATOM | 253 | N1   | C A | 9  | -21.281 | -16.009 | 27.967 | 1.00 | 0.00 | N |
| ATOM | 254 | C2   | C A | 9  | -20.302 | -16.963 | 27.696 | 1.00 | 0.00 | C |
| ATOM | 255 | O2   | C A | 9  | -20.483 | -18.127 | 28.075 | 1.00 | 0.00 | O |
| ATOM | 256 | N3   | C A | 9  | -19.186 | -16.583 | 27.030 | 1.00 | 0.00 | N |
| ATOM | 257 | C4   | C A | 9  | -19.017 | -15.314 | 26.635 | 1.00 | 0.00 | C |
| ATOM | 258 | N4   | C A | 9  | -17.907 | -14.998 | 25.983 | 1.00 | 0.00 | N |
| ATOM | 259 | C5   | C A | 9  | -20.005 | -14.310 | 26.902 | 1.00 | 0.00 | C |
| ATOM | 260 | C6   | C A | 9  | -21.125 | -14.716 | 27.571 | 1.00 | 0.00 | C |
| ATOM | 261 | C2'  | C A | 9  | -23.020 | -15.422 | 29.697 | 1.00 | 0.00 | C |
| ATOM | 262 | C3'  | C A | 9  | -24.526 | -15.611 | 29.590 | 1.00 | 0.00 | C |
| ATOM | 263 | O3'  | C A | 9  | -24.924 | -16.684 | 30.440 | 1.00 | 0.00 | O |
| ATOM | 264 | C4'  | C A | 9  | -24.723 | -15.942 | 28.113 | 1.00 | 0.00 | C |
| ATOM | 265 | O4'  | C A | 9  | -23.516 | -16.683 | 27.744 | 1.00 | 0.00 | O |
| ATOM | 266 | C5'  | C A | 9  | -24.871 | -14.766 | 27.176 | 1.00 | 0.00 | C |
| ATOM | 267 | O5'  | C A | 9  | -24.012 | -13.681 | 27.612 | 1.00 | 0.00 | O |
| ATOM | 268 | O1P  | C A | 9  | -25.640 | -11.886 | 28.291 | 1.00 | 0.00 | O |
| ATOM | 269 | O2P  | C A | 9  | -23.343 | -11.260 | 27.498 | 1.00 | 0.00 | O |
| ATOM | 270 | P    | C A | 9  | -24.504 | -12.179 | 27.396 | 1.00 | 0.00 | P |
| ATOM | 271 | H5   | C A | 9  | -19.870 | -13.275 | 26.588 | 1.00 | 0.00 | H |
| ATOM | 272 | H6   | C A | 9  | -21.909 | -13.992 | 27.791 | 1.00 | 0.00 | H |
| ATOM | 273 | H1'  | C A | 9  | -22.278 | -17.395 | 29.193 | 1.00 | 0.00 | H |
| ATOM | 274 | H3'  | C A | 9  | -25.070 | -14.709 | 29.868 | 1.00 | 0.00 | H |
| ATOM | 275 | H4'  | C A | 9  | -25.630 | -16.540 | 28.040 | 1.00 | 0.00 | H |
| ATOM | 276 | H41  | C A | 9  | -17.754 | -14.030 | 25.666 | 1.00 | 0.00 | H |
| ATOM | 277 | H42  | C A | 9  | -17.197 | -15.721 | 25.794 | 1.00 | 0.00 | H |
| ATOM | 278 | H2'1 | C A | 9  | -22.729 | -14.406 | 29.435 | 1.00 | 0.00 | H |
| ATOM | 279 | H2'2 | C A | 9  | -22.666 | -15.614 | 30.711 | 1.00 | 0.00 | H |
| ATOM | 280 | H5'1 | C A | 9  | -24.593 | -15.073 | 26.167 | 1.00 | 0.00 | H |
| ATOM | 281 | H5'2 | C A | 9  | -25.909 | -14.436 | 27.177 | 1.00 | 0.00 | H |
| ATOM | 282 | C1'  | C A | 10 | -20.201 | -19.456 | 31.894 | 1.00 | 0.00 | C |
| ATOM | 283 | N1   | C A | 10 | -19.496 | -18.273 | 31.329 | 1.00 | 0.00 | N |
| ATOM | 284 | C2   | C A | 10 | -18.246 | -18.475 | 30.748 | 1.00 | 0.00 | C |
| ATOM | 285 | O2   | C A | 10 | -17.774 | -19.620 | 30.725 | 1.00 | 0.00 | O |
| ATOM | 286 | N3   | C A | 10 | -17.587 | -17.411 | 30.227 | 1.00 | 0.00 | N |
| ATOM | 287 | C4   | C A | 10 | -18.121 | -16.183 | 30.267 | 1.00 | 0.00 | C |
| ATOM | 288 | N4   | C A | 10 | -17.435 | -15.179 | 29.740 | 1.00 | 0.00 | N |
| ATOM | 289 | C5   | C A | 10 | -19.404 | -15.945 | 30.862 | 1.00 | 0.00 | C |
| ATOM | 290 | C6   | C A | 10 | -20.051 | -17.033 | 31.376 | 1.00 | 0.00 | C |
| ATOM | 291 | C2'  | C A | 10 | -20.962 | -19.160 | 33.178 | 1.00 | 0.00 | C |
| ATOM | 292 | C3'  | C A | 10 | -22.184 | -20.055 | 33.035 | 1.00 | 0.00 | C |
| ATOM | 293 | O3'  | C A | 10 | -21.860 | -21.366 | 33.492 | 1.00 | 0.00 | O |
| ATOM | 294 | C4'  | C A | 10 | -22.458 | -20.018 | 31.534 | 1.00 | 0.00 | C |
| ATOM | 295 | O4'  | C A | 10 | -21.132 | -19.904 | 30.927 | 1.00 | 0.00 | O |
| ATOM | 296 | C5'  | C A | 10 | -23.316 | -18.878 | 31.036 | 1.00 | 0.00 | C |
| ATOM | 297 | O5'  | C A | 10 | -23.022 | -17.676 | 31.791 | 1.00 | 0.00 | O |
| ATOM | 298 | O1P  | C A | 10 | -25.160 | -17.235 | 33.043 | 1.00 | 0.00 | O |
| ATOM | 299 | O2P  | C A | 10 | -23.628 | -15.334 | 32.468 | 1.00 | 0.00 | O |
| ATOM | 300 | P    | C A | 10 | -24.203 | -16.646 | 32.086 | 1.00 | 0.00 | P |

|      |     |      |   |   |    |         |         |        |      |      |   |
|------|-----|------|---|---|----|---------|---------|--------|------|------|---|
| ATOM | 301 | H5   | C | A | 10 | -19.841 | -14.946 | 30.902 | 1.00 | 0.00 | H |
| ATOM | 302 | H6   | C | A | 10 | -21.033 | -16.903 | 31.831 | 1.00 | 0.00 | H |
| ATOM | 303 | H1'  | C | A | 10 | -19.469 | -20.248 | 32.047 | 1.00 | 0.00 | H |
| ATOM | 304 | H3'  | C | A | 10 | -23.036 | -19.676 | 33.601 | 1.00 | 0.00 | H |
| ATOM | 305 | H4'  | C | A | 10 | -22.965 | -20.950 | 31.282 | 1.00 | 0.00 | H |
| ATOM | 306 | H41  | C | A | 10 | -17.824 | -14.225 | 29.756 | 1.00 | 0.00 | H |
| ATOM | 307 | H42  | C | A | 10 | -16.512 | -15.353 | 29.316 | 1.00 | 0.00 | H |
| ATOM | 308 | H2'1 | C | A | 10 | -21.247 | -18.112 | 33.260 | 1.00 | 0.00 | H |
| ATOM | 309 | H2'2 | C | A | 10 | -20.385 | -19.415 | 34.069 | 1.00 | 0.00 | H |
| ATOM | 310 | H5'1 | C | A | 10 | -23.110 | -18.709 | 29.978 | 1.00 | 0.00 | H |
| ATOM | 311 | H5'2 | C | A | 10 | -24.366 | -19.142 | 31.158 | 1.00 | 0.00 | H |
| ATOM | 312 | C1'  | T | A | 11 | -16.230 | -21.620 | 33.905 | 1.00 | 0.00 | C |
| ATOM | 313 | N1   | T | A | 11 | -16.271 | -20.143 | 33.741 | 1.00 | 0.00 | N |
| ATOM | 314 | C2   | T | A | 11 | -15.195 | -19.549 | 33.113 | 1.00 | 0.00 | C |
| ATOM | 315 | O2   | T | A | 11 | -14.238 | -20.182 | 32.701 | 1.00 | 0.00 | O |
| ATOM | 316 | N3   | T | A | 11 | -15.274 | -18.174 | 32.979 | 1.00 | 0.00 | N |
| ATOM | 317 | C4   | T | A | 11 | -16.306 | -17.366 | 33.411 | 1.00 | 0.00 | C |
| ATOM | 318 | O4   | T | A | 11 | -16.264 | -16.141 | 33.238 | 1.00 | 0.00 | O |
| ATOM | 319 | C5   | T | A | 11 | -17.385 | -18.077 | 34.055 | 1.00 | 0.00 | C |
| ATOM | 320 | C6   | T | A | 11 | -17.341 | -19.415 | 34.201 | 1.00 | 0.00 | C |
| ATOM | 321 | C7   | T | A | 11 | -18.529 | -17.236 | 34.537 | 1.00 | 0.00 | C |
| ATOM | 322 | C2'  | T | A | 11 | -16.809 | -22.107 | 35.228 | 1.00 | 0.00 | C |
| ATOM | 323 | C3'  | T | A | 11 | -17.471 | -23.414 | 34.823 | 1.00 | 0.00 | C |
| ATOM | 324 | O3'  | T | A | 11 | -16.497 | -24.456 | 34.831 | 1.00 | 0.00 | O |
| ATOM | 325 | C4'  | T | A | 11 | -17.983 | -23.114 | 33.417 | 1.00 | 0.00 | C |
| ATOM | 326 | O4'  | T | A | 11 | -16.991 | -22.193 | 32.860 | 1.00 | 0.00 | O |
| ATOM | 327 | C5'  | T | A | 11 | -19.347 | -22.470 | 33.321 | 1.00 | 0.00 | C |
| ATOM | 328 | O5'  | T | A | 11 | -19.527 | -21.539 | 34.417 | 1.00 | 0.00 | O |
| ATOM | 329 | O1P  | T | A | 11 | -21.371 | -22.583 | 35.773 | 1.00 | 0.00 | O |
| ATOM | 330 | O2P  | T | A | 11 | -21.035 | -20.098 | 35.818 | 1.00 | 0.00 | O |
| ATOM | 331 | P    | T | A | 11 | -20.982 | -21.362 | 35.043 | 1.00 | 0.00 | P |
| ATOM | 332 | H3   | T | A | 11 | -14.486 | -17.708 | 32.511 | 1.00 | 0.00 | H |
| ATOM | 333 | H6   | T | A | 11 | -18.168 | -19.931 | 34.690 | 1.00 | 0.00 | H |
| ATOM | 334 | H1'  | T | A | 11 | -15.197 | -21.949 | 33.787 | 1.00 | 0.00 | H |
| ATOM | 335 | H3'  | T | A | 11 | -18.289 | -23.681 | 35.491 | 1.00 | 0.00 | H |
| ATOM | 336 | H4'  | T | A | 11 | -18.026 | -24.065 | 32.884 | 1.00 | 0.00 | H |
| ATOM | 337 | H71  | T | A | 11 | -18.576 | -17.276 | 35.626 | 1.00 | 0.00 | H |
| ATOM | 338 | H72  | T | A | 11 | -18.382 | -16.204 | 34.218 | 1.00 | 0.00 | H |
| ATOM | 339 | H73  | T | A | 11 | -19.462 | -17.615 | 34.119 | 1.00 | 0.00 | H |
| ATOM | 340 | H2'1 | T | A | 11 | -17.532 | -21.408 | 35.644 | 1.00 | 0.00 | H |
| ATOM | 341 | H2'2 | T | A | 11 | -16.038 | -22.269 | 35.982 | 1.00 | 0.00 | H |
| ATOM | 342 | H5'1 | T | A | 11 | -19.429 | -21.942 | 32.371 | 1.00 | 0.00 | H |
| ATOM | 343 | H5'2 | T | A | 11 | -20.112 | -23.245 | 33.367 | 1.00 | 0.00 | H |
| ATOM | 344 | C1'  | A | A | 12 | -11.404 | -21.891 | 35.033 | 1.00 | 0.00 | C |
| ATOM | 345 | N1   | A | A | 12 | -11.603 | -16.776 | 34.668 | 1.00 | 0.00 | N |
| ATOM | 346 | C2   | A | A | 12 | -10.716 | -17.673 | 34.249 | 1.00 | 0.00 | C |
| ATOM | 347 | N3   | A | A | 12 | -10.728 | -18.984 | 34.374 | 1.00 | 0.00 | N |
| ATOM | 348 | C4   | A | A | 12 | -11.828 | -19.377 | 35.039 | 1.00 | 0.00 | C |
| ATOM | 349 | C5   | A | A | 12 | -12.828 | -18.589 | 35.534 | 1.00 | 0.00 | C |
| ATOM | 350 | C6   | A | A | 12 | -12.692 | -17.199 | 35.327 | 1.00 | 0.00 | C |
| ATOM | 351 | N6   | A | A | 12 | -13.595 | -16.302 | 35.757 | 1.00 | 0.00 | N |
| ATOM | 352 | N7   | A | A | 12 | -13.801 | -19.348 | 36.159 | 1.00 | 0.00 | N |
| ATOM | 353 | C8   | A | A | 12 | -13.373 | -20.569 | 36.034 | 1.00 | 0.00 | C |
| ATOM | 354 | N9   | A | A | 12 | -12.180 | -20.665 | 35.362 | 1.00 | 0.00 | N |

|      |     |      |   |   |    |         |         |        |      |      |   |
|------|-----|------|---|---|----|---------|---------|--------|------|------|---|
| ATOM | 355 | C2'  | A | A | 12 | -11.434 | -22.947 | 36.130 | 1.00 | 0.00 | C |
| ATOM | 356 | C3'  | A | A | 12 | -11.445 | -24.238 | 35.327 | 1.00 | 0.00 | C |
| ATOM | 357 | O3'  | A | A | 12 | -10.105 | -24.586 | 34.984 | 1.00 | 0.00 | O |
| ATOM | 358 | C4'  | A | A | 12 | -12.277 | -23.869 | 34.099 | 1.00 | 0.00 | C |
| ATOM | 359 | O4'  | A | A | 12 | -11.967 | -22.458 | 33.866 | 1.00 | 0.00 | O |
| ATOM | 360 | C5'  | A | A | 12 | -13.773 | -24.020 | 34.234 | 1.00 | 0.00 | C |
| ATOM | 361 | O5'  | A | A | 12 | -14.185 | -23.657 | 35.576 | 1.00 | 0.00 | O |
| ATOM | 362 | O1P  | A | A | 12 | -15.026 | -25.827 | 36.535 | 1.00 | 0.00 | O |
| ATOM | 363 | O2P  | A | A | 12 | -15.928 | -23.646 | 37.386 | 1.00 | 0.00 | O |
| ATOM | 364 | P    | A | A | 12 | -15.409 | -24.433 | 36.240 | 1.00 | 0.00 | P |
| ATOM | 365 | H2   | A | A | 12 | -9.853  | -17.264 | 33.724 | 1.00 | 0.00 | H |
| ATOM | 366 | H8   | A | A | 12 | -13.908 | -21.435 | 36.424 | 1.00 | 0.00 | H |
| ATOM | 367 | H1'  | A | A | 12 | -10.381 | -21.596 | 34.804 | 1.00 | 0.00 | H |
| ATOM | 368 | H3'  | A | A | 12 | -11.901 | -25.060 | 35.878 | 1.00 | 0.00 | H |
| ATOM | 369 | H4'  | A | A | 12 | -11.948 | -24.518 | 33.288 | 1.00 | 0.00 | H |
| ATOM | 370 | H61  | A | A | 12 | -13.449 | -15.298 | 35.578 | 1.00 | 0.00 | H |
| ATOM | 371 | H62  | A | A | 12 | -14.433 | -16.619 | 36.267 | 1.00 | 0.00 | H |
| ATOM | 372 | H2'1 | A | A | 12 | -12.320 | -22.866 | 36.759 | 1.00 | 0.00 | H |
| ATOM | 373 | H2'2 | A | A | 12 | -10.563 | -22.892 | 36.782 | 1.00 | 0.00 | H |
| ATOM | 374 | H5'1 | A | A | 12 | -14.264 | -23.370 | 33.510 | 1.00 | 0.00 | H |
| ATOM | 375 | H5'2 | A | A | 12 | -14.048 | -25.054 | 34.032 | 1.00 | 0.00 | H |
| ATOM | 376 | C1'  | G | A | 13 | -6.936  | -19.931 | 35.950 | 1.00 | 0.00 | C |
| ATOM | 377 | N1   | G | A | 13 | -9.627  | -15.808 | 37.286 | 1.00 | 0.00 | N |
| ATOM | 378 | C2   | G | A | 13 | -8.462  | -15.906 | 36.548 | 1.00 | 0.00 | C |
| ATOM | 379 | N2   | G | A | 13 | -7.941  | -14.752 | 36.109 | 1.00 | 0.00 | N |
| ATOM | 380 | N3   | G | A | 13 | -7.862  | -17.062 | 36.270 | 1.00 | 0.00 | N |
| ATOM | 381 | C4   | G | A | 13 | -8.521  | -18.126 | 36.799 | 1.00 | 0.00 | C |
| ATOM | 382 | C5   | G | A | 13 | -9.685  | -18.124 | 37.550 | 1.00 | 0.00 | C |
| ATOM | 383 | C6   | G | A | 13 | -10.324 | -16.897 | 37.842 | 1.00 | 0.00 | C |
| ATOM | 384 | O6   | G | A | 13 | -11.353 | -16.693 | 38.488 | 1.00 | 0.00 | O |
| ATOM | 385 | N7   | G | A | 13 | -10.034 | -19.428 | 37.904 | 1.00 | 0.00 | N |
| ATOM | 386 | C8   | G | A | 13 | -9.095  | -20.164 | 37.367 | 1.00 | 0.00 | C |
| ATOM | 387 | N9   | G | A | 13 | -8.139  | -19.444 | 36.679 | 1.00 | 0.00 | N |
| ATOM | 388 | C2'  | G | A | 13 | -6.239  | -21.102 | 36.627 | 1.00 | 0.00 | C |
| ATOM | 389 | C3'  | G | A | 13 | -5.764  | -21.920 | 35.438 | 1.00 | 0.00 | C |
| ATOM | 390 | O3'  | G | A | 13 | -4.516  | -21.402 | 34.983 | 1.00 | 0.00 | O |
| ATOM | 391 | C4'  | G | A | 13 | -6.881  | -21.716 | 34.416 | 1.00 | 0.00 | C |
| ATOM | 392 | O4'  | G | A | 13 | -7.352  | -20.354 | 34.665 | 1.00 | 0.00 | O |
| ATOM | 393 | C5'  | G | A | 13 | -8.056  | -22.659 | 34.510 | 1.00 | 0.00 | C |
| ATOM | 394 | O5'  | G | A | 13 | -8.335  | -22.959 | 35.900 | 1.00 | 0.00 | O |
| ATOM | 395 | O1P  | G | A | 13 | -7.810  | -25.414 | 36.083 | 1.00 | 0.00 | O |
| ATOM | 396 | O2P  | G | A | 13 | -9.489  | -24.372 | 37.628 | 1.00 | 0.00 | O |
| ATOM | 397 | P    | G | A | 13 | -8.875  | -24.412 | 36.278 | 1.00 | 0.00 | P |
| ATOM | 398 | H1   | G | A | 13 | -10.014 | -14.864 | 37.440 | 1.00 | 0.00 | H |
| ATOM | 399 | H8   | G | A | 13 | -9.068  | -21.250 | 37.453 | 1.00 | 0.00 | H |
| ATOM | 400 | H1'  | G | A | 13 | -6.252  | -19.091 | 35.821 | 1.00 | 0.00 | H |
| ATOM | 401 | H21  | G | A | 13 | -8.413  | -13.861 | 36.326 | 1.00 | 0.00 | H |
| ATOM | 402 | H3'  | G | A | 13 | -5.647  | -22.975 | 35.687 | 1.00 | 0.00 | H |
| ATOM | 403 | H22  | G | A | 13 | -7.074  | -14.757 | 35.557 | 1.00 | 0.00 | H |
| ATOM | 404 | H4'  | G | A | 13 | -6.434  | -21.837 | 33.430 | 1.00 | 0.00 | H |
| ATOM | 405 | H2'1 | G | A | 13 | -6.917  | -21.678 | 37.258 | 1.00 | 0.00 | H |
| ATOM | 406 | H2'2 | G | A | 13 | -5.404  | -20.783 | 37.250 | 1.00 | 0.00 | H |
| ATOM | 407 | H5'1 | G | A | 13 | -8.927  | -22.192 | 34.051 | 1.00 | 0.00 | H |
| ATOM | 408 | H5'2 | G | A | 13 | -7.821  | -23.578 | 33.974 | 1.00 | 0.00 | H |

|      |     |      |     |    |        |         |        |      |      |   |
|------|-----|------|-----|----|--------|---------|--------|------|------|---|
| ATOM | 409 | C1'  | G A | 14 | -3.866 | -16.323 | 37.395 | 1.00 | 0.00 | C |
| ATOM | 410 | N1   | G A | 14 | -7.917 | -14.711 | 40.044 | 1.00 | 0.00 | N |
| ATOM | 411 | C2   | G A | 14 | -7.000 | -13.992 | 39.299 | 1.00 | 0.00 | C |
| ATOM | 412 | N2   | G A | 14 | -7.184 | -12.666 | 39.255 | 1.00 | 0.00 | N |
| ATOM | 413 | N3   | G A | 14 | -5.979 | -14.550 | 38.649 | 1.00 | 0.00 | N |
| ATOM | 414 | C4   | G A | 14 | -5.942 | -15.898 | 38.809 | 1.00 | 0.00 | C |
| ATOM | 415 | C5   | G A | 14 | -6.809 | -16.697 | 39.535 | 1.00 | 0.00 | C |
| ATOM | 416 | C6   | G A | 14 | -7.893 | -16.108 | 40.221 | 1.00 | 0.00 | C |
| ATOM | 417 | O6   | G A | 14 | -8.761 | -16.643 | 40.912 | 1.00 | 0.00 | O |
| ATOM | 418 | N7   | G A | 14 | -6.418 | -18.037 | 39.446 | 1.00 | 0.00 | N |
| ATOM | 419 | C8   | G A | 14 | -5.356 | -18.007 | 38.685 | 1.00 | 0.00 | C |
| ATOM | 420 | N9   | G A | 14 | -5.003 | -16.743 | 38.260 | 1.00 | 0.00 | N |
| ATOM | 421 | C2'  | G A | 14 | -2.585 | -17.108 | 37.642 | 1.00 | 0.00 | C |
| ATOM | 422 | C3'  | G A | 14 | -1.995 | -17.203 | 36.244 | 1.00 | 0.00 | C |
| ATOM | 423 | O3'  | G A | 14 | -1.253 | -16.018 | 35.967 | 1.00 | 0.00 | O |
| ATOM | 424 | C4'  | G A | 14 | -3.236 | -17.327 | 35.360 | 1.00 | 0.00 | C |
| ATOM | 425 | O4'  | G A | 14 | -4.250 | -16.528 | 36.049 | 1.00 | 0.00 | O |
| ATOM | 426 | C5'  | G A | 14 | -3.777 | -18.722 | 35.156 | 1.00 | 0.00 | C |
| ATOM | 427 | O5'  | G A | 14 | -3.624 | -19.491 | 36.374 | 1.00 | 0.00 | O |
| ATOM | 428 | O1P  | G A | 14 | -1.963 | -21.271 | 35.737 | 1.00 | 0.00 | O |
| ATOM | 429 | O2P  | G A | 14 | -3.630 | -21.707 | 37.560 | 1.00 | 0.00 | O |
| ATOM | 430 | P    | G A | 14 | -3.324 | -21.053 | 36.264 | 1.00 | 0.00 | P |
| ATOM | 431 | H1   | G A | 14 | -8.675 | -14.183 | 40.503 | 1.00 | 0.00 | H |
| ATOM | 432 | H8   | G A | 14 | -4.797 | -18.902 | 38.412 | 1.00 | 0.00 | H |
| ATOM | 433 | H1'  | G A | 14 | -3.704 | -15.255 | 37.539 | 1.00 | 0.00 | H |
| ATOM | 434 | H21  | G A | 14 | -7.978 | -12.242 | 39.757 | 1.00 | 0.00 | H |
| ATOM | 435 | H3'  | G A | 14 | -1.345 | -18.071 | 36.133 | 1.00 | 0.00 | H |
| ATOM | 436 | H22  | G A | 14 | -6.535 | -12.074 | 38.720 | 1.00 | 0.00 | H |
| ATOM | 437 | H4'  | G A | 14 | -2.970 | -16.926 | 34.383 | 1.00 | 0.00 | H |
| ATOM | 438 | H2'1 | G A | 14 | -2.778 | -18.096 | 38.059 | 1.00 | 0.00 | H |
| ATOM | 439 | H2'2 | G A | 14 | -1.908 | -16.591 | 38.324 | 1.00 | 0.00 | H |
| ATOM | 440 | H5'1 | G A | 14 | -4.831 | -18.661 | 34.887 | 1.00 | 0.00 | H |
| ATOM | 441 | H5'2 | G A | 14 | -3.229 | -19.203 | 34.345 | 1.00 | 0.00 | H |
| ATOM | 442 | C1'  | A A | 15 | -2.680 | -12.214 | 39.886 | 1.00 | 0.00 | C |
| ATOM | 443 | N1   | A A | 15 | -6.493 | -13.685 | 42.991 | 1.00 | 0.00 | N |
| ATOM | 444 | C2   | A A | 15 | -6.143 | -12.500 | 42.496 | 1.00 | 0.00 | C |
| ATOM | 445 | N3   | A A | 15 | -5.146 | -12.190 | 41.695 | 1.00 | 0.00 | N |
| ATOM | 446 | C4   | A A | 15 | -4.432 | -13.291 | 41.393 | 1.00 | 0.00 | C |
| ATOM | 447 | C5   | A A | 15 | -4.656 | -14.570 | 41.817 | 1.00 | 0.00 | C |
| ATOM | 448 | C6   | A A | 15 | -5.762 | -14.764 | 42.671 | 1.00 | 0.00 | C |
| ATOM | 449 | N6   | A A | 15 | -6.105 | -15.965 | 43.167 | 1.00 | 0.00 | N |
| ATOM | 450 | N7   | A A | 15 | -3.714 | -15.441 | 41.299 | 1.00 | 0.00 | N |
| ATOM | 451 | C8   | A A | 15 | -2.944 | -14.677 | 40.582 | 1.00 | 0.00 | C |
| ATOM | 452 | N9   | A A | 15 | -3.320 | -13.357 | 40.590 | 1.00 | 0.00 | N |
| ATOM | 453 | C2'  | A A | 15 | -1.160 | -12.287 | 39.850 | 1.00 | 0.00 | C |
| ATOM | 454 | C3'  | A A | 15 | -0.845 | -11.695 | 38.485 | 1.00 | 0.00 | C |
| ATOM | 455 | O3'  | A A | 15 | -0.805 | -10.275 | 38.591 | 1.00 | 0.00 | O |
| ATOM | 456 | C4'  | A A | 15 | -2.014 | -12.178 | 37.627 | 1.00 | 0.00 | C |
| ATOM | 457 | O4'  | A A | 15 | -3.149 | -12.211 | 38.552 | 1.00 | 0.00 | O |
| ATOM | 458 | C5'  | A A | 15 | -1.865 | -13.542 | 36.996 | 1.00 | 0.00 | C |
| ATOM | 459 | O5'  | A A | 15 | -1.163 | -14.429 | 37.904 | 1.00 | 0.00 | O |
| ATOM | 460 | O1P  | A A | 15 | 1.001  | -14.895 | 36.706 | 1.00 | 0.00 | O |
| ATOM | 461 | O2P  | A A | 15 | 0.073  | -16.577 | 38.320 | 1.00 | 0.00 | O |
| ATOM | 462 | P    | A A | 15 | -0.191 | -15.537 | 37.296 | 1.00 | 0.00 | P |

|      |     |      |     |    |        |         |        |      |      |   |
|------|-----|------|-----|----|--------|---------|--------|------|------|---|
| ATOM | 463 | H2   | A A | 15 | -6.775 | -11.665 | 42.797 | 1.00 | 0.00 | H |
| ATOM | 464 | H8   | A A | 15 | -2.082 | -15.047 | 40.028 | 1.00 | 0.00 | H |
| ATOM | 465 | H1'  | A A | 15 | -3.015 | -11.292 | 40.361 | 1.00 | 0.00 | H |
| ATOM | 466 | H3'  | A A | 15 | 0.106  | -12.056 | 38.092 | 1.00 | 0.00 | H |
| ATOM | 467 | H4'  | A A | 15 | -2.139 | -11.451 | 36.826 | 1.00 | 0.00 | H |
| ATOM | 468 | H61  | A A | 15 | -6.924 | -16.051 | 43.785 | 1.00 | 0.00 | H |
| ATOM | 469 | H62  | A A | 15 | -5.547 | -16.798 | 42.927 | 1.00 | 0.00 | H |
| ATOM | 470 | H2'1 | A A | 15 | -0.794 | -13.311 | 39.933 | 1.00 | 0.00 | H |
| ATOM | 471 | H2'2 | A A | 15 | -0.698 | -11.708 | 40.650 | 1.00 | 0.00 | H |
| ATOM | 472 | H5'1 | A A | 15 | -2.854 | -13.945 | 36.779 | 1.00 | 0.00 | H |
| ATOM | 473 | H5'2 | A A | 15 | -1.304 | -13.447 | 36.068 | 1.00 | 0.00 | H |
| ATOM | 474 | C1'  | C A | 16 | -3.223 | -8.960  | 43.599 | 1.00 | 0.00 | C |
| ATOM | 475 | N1   | C A | 16 | -3.081 | -10.414 | 43.886 | 1.00 | 0.00 | N |
| ATOM | 476 | C2   | C A | 16 | -4.027 | -11.011 | 44.716 | 1.00 | 0.00 | C |
| ATOM | 477 | O2   | C A | 16 | -4.939 | -10.314 | 45.179 | 1.00 | 0.00 | O |
| ATOM | 478 | N3   | C A | 16 | -3.915 | -12.334 | 44.991 | 1.00 | 0.00 | N |
| ATOM | 479 | C4   | C A | 16 | -2.916 | -13.061 | 44.475 | 1.00 | 0.00 | C |
| ATOM | 480 | N4   | C A | 16 | -2.858 | -14.351 | 44.774 | 1.00 | 0.00 | N |
| ATOM | 481 | C5   | C A | 16 | -1.926 | -12.474 | 43.621 | 1.00 | 0.00 | C |
| ATOM | 482 | C6   | C A | 16 | -2.060 | -11.140 | 43.355 | 1.00 | 0.00 | C |
| ATOM | 483 | C2'  | C A | 16 | -1.897 | -8.216  | 43.528 | 1.00 | 0.00 | C |
| ATOM | 484 | C3'  | C A | 16 | -2.166 | -7.193  | 42.434 | 1.00 | 0.00 | C |
| ATOM | 485 | O3'  | C A | 16 | -2.807 | -6.056  | 43.005 | 1.00 | 0.00 | O |
| ATOM | 486 | C4'  | C A | 16 | -3.080 | -7.953  | 41.476 | 1.00 | 0.00 | C |
| ATOM | 487 | O4'  | C A | 16 | -3.866 | -8.831  | 42.344 | 1.00 | 0.00 | O |
| ATOM | 488 | C5'  | C A | 16 | -2.397 | -8.799  | 40.425 | 1.00 | 0.00 | C |
| ATOM | 489 | O5'  | C A | 16 | -1.201 | -9.399  | 40.981 | 1.00 | 0.00 | O |
| ATOM | 490 | O1P  | C A | 16 | 0.657  | -8.310  | 39.678 | 1.00 | 0.00 | O |
| ATOM | 491 | O2P  | C A | 16 | 0.981  | -10.600 | 40.648 | 1.00 | 0.00 | O |
| ATOM | 492 | P    | C A | 16 | 0.062  | -9.614  | 40.031 | 1.00 | 0.00 | P |
| ATOM | 493 | H5   | C A | 16 | -1.106 | -13.061 | 43.205 | 1.00 | 0.00 | H |
| ATOM | 494 | H6   | C A | 16 | -1.336 | -10.650 | 42.704 | 1.00 | 0.00 | H |
| ATOM | 495 | H1'  | C A | 16 | -3.876 | -8.525  | 44.356 | 1.00 | 0.00 | H |
| ATOM | 496 | H3'  | C A | 16 | -1.247 | -6.879  | 41.937 | 1.00 | 0.00 | H |
| ATOM | 497 | H4'  | C A | 16 | -3.686 | -7.209  | 40.960 | 1.00 | 0.00 | H |
| ATOM | 498 | H41  | C A | 16 | -2.100 | -14.934 | 44.389 | 1.00 | 0.00 | H |
| ATOM | 499 | H42  | C A | 16 | -3.568 | -14.771 | 45.390 | 1.00 | 0.00 | H |
| ATOM | 500 | H2'1 | C A | 16 | -1.068 | -8.872  | 43.262 | 1.00 | 0.00 | H |
| ATOM | 501 | H2'2 | C A | 16 | -1.643 | -7.732  | 44.471 | 1.00 | 0.00 | H |
| ATOM | 502 | H5'1 | C A | 16 | -3.083 | -9.579  | 40.094 | 1.00 | 0.00 | H |
| ATOM | 503 | H5'2 | C A | 16 | -2.133 | -8.169  | 39.576 | 1.00 | 0.00 | H |
| ATOM | 504 | C1'  | G A | 17 | -4.572 | -7.597  | 48.164 | 1.00 | 0.00 | C |
| ATOM | 505 | N1   | G A | 17 | -3.920 | -12.545 | 49.223 | 1.00 | 0.00 | N |
| ATOM | 506 | C2   | G A | 17 | -4.924 | -11.677 | 49.616 | 1.00 | 0.00 | C |
| ATOM | 507 | N2   | G A | 17 | -5.879 | -12.196 | 50.398 | 1.00 | 0.00 | N |
| ATOM | 508 | N3   | G A | 17 | -4.970 | -10.395 | 49.259 | 1.00 | 0.00 | N |
| ATOM | 509 | C4   | G A | 17 | -3.919 | -10.039 | 48.474 | 1.00 | 0.00 | C |
| ATOM | 510 | C5   | G A | 17 | -2.872 | -10.833 | 48.035 | 1.00 | 0.00 | C |
| ATOM | 511 | C6   | G A | 17 | -2.824 | -12.196 | 48.410 | 1.00 | 0.00 | C |
| ATOM | 512 | O6   | G A | 17 | -1.986 | -13.051 | 48.126 | 1.00 | 0.00 | O |
| ATOM | 513 | N7   | G A | 17 | -1.995 | -10.084 | 47.247 | 1.00 | 0.00 | N |
| ATOM | 514 | C8   | G A | 17 | -2.528 | -8.890  | 47.231 | 1.00 | 0.00 | C |
| ATOM | 515 | N9   | G A | 17 | -3.698 | -8.783  | 47.954 | 1.00 | 0.00 | N |
| ATOM | 516 | C2'  | G A | 17 | -3.807 | -6.290  | 48.320 | 1.00 | 0.00 | C |



|      |     |      |   |   |    |        |         |        |      |      |   |
|------|-----|------|---|---|----|--------|---------|--------|------|------|---|
| ATOM | 517 | C3'  | G | A | 17 | -4.727 | -5.298  | 47.630 | 1.00 | 0.00 | C |
| ATOM | 518 | O3'  | G | A | 17 | -5.722 | -4.861  | 48.553 | 1.00 | 0.00 | O |
| ATOM | 519 | C4'  | G | A | 17 | -5.321 | -6.123  | 46.489 | 1.00 | 0.00 | C |
| ATOM | 520 | O4'  | G | A | 17 | -5.414 | -7.477  | 47.033 | 1.00 | 0.00 | O |
| ATOM | 521 | C5'  | G | A | 17 | -4.521 | -6.169  | 45.208 | 1.00 | 0.00 | C |
| ATOM | 522 | O5'  | G | A | 17 | -3.105 | -6.195  | 45.515 | 1.00 | 0.00 | O |
| ATOM | 523 | O1P  | G | A | 17 | -2.275 | -3.996  | 44.614 | 1.00 | 0.00 | O |
| ATOM | 524 | O2P  | G | A | 17 | -0.718 | -5.957  | 44.771 | 1.00 | 0.00 | O |
| ATOM | 525 | P    | G | A | 17 | -2.093 | -5.458  | 44.527 | 1.00 | 0.00 | P |
| ATOM | 526 | H1   | G | A | 17 | -3.981 | -13.521 | 49.549 | 1.00 | 0.00 | H |
| ATOM | 527 | H8   | G | A | 17 | -2.085 | -8.051  | 46.693 | 1.00 | 0.00 | H |
| ATOM | 528 | H1'  | G | A | 17 | -5.202 | -7.787  | 49.033 | 1.00 | 0.00 | H |
| ATOM | 529 | H21  | G | A | 17 | -5.839 | -13.189 | 50.668 | 1.00 | 0.00 | H |
| ATOM | 530 | H3'  | G | A | 17 | -4.184 | -4.433  | 47.248 | 1.00 | 0.00 | H |
| ATOM | 531 | H22  | G | A | 17 | -6.653 | -11.602 | 50.728 | 1.00 | 0.00 | H |
| ATOM | 532 | H4'  | G | A | 17 | -6.294 | -5.689  | 46.258 | 1.00 | 0.00 | H |
| ATOM | 533 | H2'1 | G | A | 17 | -2.828 | -6.324  | 47.840 | 1.00 | 0.00 | H |
| ATOM | 534 | H2'2 | G | A | 17 | -3.649 | -6.025  | 49.366 | 1.00 | 0.00 | H |
| ATOM | 535 | H5'1 | G | A | 17 | -4.794 | -7.064  | 44.649 | 1.00 | 0.00 | H |
| ATOM | 536 | H5'2 | G | A | 17 | -4.754 | -5.289  | 44.609 | 1.00 | 0.00 | H |
| ATOM | 537 | C1'  | G | A | 18 | -5.571 | -8.432  | 52.942 | 1.00 | 0.00 | C |
| ATOM | 538 | N1   | G | A | 18 | -2.450 | -12.418 | 52.313 | 1.00 | 0.00 | N |
| ATOM | 539 | C2   | G | A | 18 | -3.658 | -12.333 | 52.983 | 1.00 | 0.00 | C |
| ATOM | 540 | N2   | G | A | 18 | -4.091 | -13.460 | 53.565 | 1.00 | 0.00 | N |
| ATOM | 541 | N3   | G | A | 18 | -4.376 | -11.215 | 53.065 | 1.00 | 0.00 | N |
| ATOM | 542 | C4   | G | A | 18 | -3.784 | -10.172 | 52.427 | 1.00 | 0.00 | C |
| ATOM | 543 | C5   | G | A | 18 | -2.581 | -10.162 | 51.738 | 1.00 | 0.00 | C |
| ATOM | 544 | C6   | G | A | 18 | -1.820 | -11.351 | 51.646 | 1.00 | 0.00 | C |
| ATOM | 545 | O6   | G | A | 18 | -0.740 | -11.538 | 51.085 | 1.00 | 0.00 | O |
| ATOM | 546 | N7   | G | A | 18 | -2.328 | -8.888  | 51.227 | 1.00 | 0.00 | N |
| ATOM | 547 | C8   | G | A | 18 | -3.361 | -8.183  | 51.609 | 1.00 | 0.00 | C |
| ATOM | 548 | N9   | G | A | 18 | -4.288 | -8.893  | 52.344 | 1.00 | 0.00 | N |
| ATOM | 549 | C2'  | G | A | 18 | -5.513 | -7.020  | 53.507 | 1.00 | 0.00 | C |
| ATOM | 550 | C3'  | G | A | 18 | -6.902 | -6.493  | 53.192 | 1.00 | 0.00 | C |
| ATOM | 551 | O3'  | G | A | 18 | -7.802 | -6.900  | 54.221 | 1.00 | 0.00 | O |
| ATOM | 552 | C4'  | G | A | 18 | -7.222 | -7.154  | 51.852 | 1.00 | 0.00 | C |
| ATOM | 553 | O4'  | G | A | 18 | -6.554 | -8.454  | 51.925 | 1.00 | 0.00 | O |
| ATOM | 554 | C5'  | G | A | 18 | -6.740 | -6.432  | 50.617 | 1.00 | 0.00 | C |
| ATOM | 555 | O5'  | G | A | 18 | -5.456 | -5.812  | 50.879 | 1.00 | 0.00 | O |
| ATOM | 556 | O1P  | G | A | 18 | -5.958 | -3.349  | 50.736 | 1.00 | 0.00 | O |
| ATOM | 557 | O2P  | G | A | 18 | -3.652 | -4.192  | 50.222 | 1.00 | 0.00 | O |
| ATOM | 558 | P    | G | A | 18 | -5.116 | -4.422  | 50.173 | 1.00 | 0.00 | P |
| ATOM | 559 | H1   | G | A | 18 | -1.975 | -13.334 | 52.303 | 1.00 | 0.00 | H |
| ATOM | 560 | H8   | G | A | 18 | -3.480 | -7.126  | 51.371 | 1.00 | 0.00 | H |
| ATOM | 561 | H1'  | G | A | 18 | -5.866 | -9.148  | 53.709 | 1.00 | 0.00 | H |
| ATOM | 562 | H21  | G | A | 18 | -3.530 | -14.322 | 53.493 | 1.00 | 0.00 | H |
| ATOM | 563 | H3'  | G | A | 18 | -6.919 | -5.406  | 53.108 | 1.00 | 0.00 | H |
| ATOM | 564 | H22  | G | A | 18 | -4.981 | -13.462 | 54.080 | 1.00 | 0.00 | H |
| ATOM | 565 | H4'  | G | A | 18 | -8.306 | -7.236  | 51.790 | 1.00 | 0.00 | H |
| ATOM | 566 | H2'1 | G | A | 18 | -4.742 | -6.415  | 53.030 | 1.00 | 0.00 | H |
| ATOM | 567 | H2'2 | G | A | 18 | -5.317 | -7.011  | 54.580 | 1.00 | 0.00 | H |
| ATOM | 568 | H5'1 | G | A | 18 | -6.645 | -7.146  | 49.799 | 1.00 | 0.00 | H |
| ATOM | 569 | H5'2 | G | A | 18 | -7.468 | -5.669  | 50.342 | 1.00 | 0.00 | H |
| ATOM | 570 | C1'  | T | A | 19 | -5.196 | -10.924 | 57.202 | 1.00 | 0.00 | C |

|      |     |      |       |    |        |         |        |      |      |   |
|------|-----|------|-------|----|--------|---------|--------|------|------|---|
| ATOM | 571 | N1   | T A   | 19 | -3.970 | -10.506 | 56.472 | 1.00 | 0.00 | N |
| ATOM | 572 | C2   | T A   | 19 | -3.021 | -11.477 | 56.225 | 1.00 | 0.00 | C |
| ATOM | 573 | O2   | T A   | 19 | -3.156 | -12.636 | 56.578 | 1.00 | 0.00 | O |
| ATOM | 574 | N3   | T A   | 19 | -1.899 | -11.045 | 55.543 | 1.00 | 0.00 | N |
| ATOM | 575 | C4   | T A   | 19 | -1.647 | -9.763  | 55.103 | 1.00 | 0.00 | C |
| ATOM | 576 | O4   | T A   | 19 | -0.600 | -9.494  | 54.503 | 1.00 | 0.00 | O |
| ATOM | 577 | C5   | T A   | 19 | -2.695 | -8.817  | 55.407 | 1.00 | 0.00 | C |
| ATOM | 578 | C6   | T A   | 19 | -3.804 | -9.203  | 56.070 | 1.00 | 0.00 | C |
| ATOM | 579 | C7   | T A   | 19 | -2.465 | -7.409  | 54.945 | 1.00 | 0.00 | C |
| ATOM | 580 | C2'  | T A   | 19 | -5.709 | -9.882  | 58.189 | 1.00 | 0.00 | C |
| ATOM | 581 | C3'  | T A   | 19 | -7.215 | -10.054 | 58.078 | 1.00 | 0.00 | C |
| ATOM | 582 | O3'  | T A   | 19 | -7.631 | -11.115 | 58.934 | 1.00 | 0.00 | O |
| ATOM | 583 | C4'  | T A   | 19 | -7.409 | -10.393 | 56.602 | 1.00 | 0.00 | C |
| ATOM | 584 | O4'  | T A   | 19 | -6.212 | -11.153 | 56.246 | 1.00 | 0.00 | O |
| ATOM | 585 | C5'  | T A   | 19 | -7.540 | -9.223  | 55.654 | 1.00 | 0.00 | C |
| ATOM | 586 | O5'  | T A   | 19 | -6.670 | -8.146  | 56.084 | 1.00 | 0.00 | O |
| ATOM | 587 | O1P  | T A   | 19 | -8.278 | -6.326  | 56.744 | 1.00 | 0.00 | O |
| ATOM | 588 | O2P  | T A   | 19 | -5.970 | -5.736  | 55.956 | 1.00 | 0.00 | O |
| ATOM | 589 | P    | T A   | 19 | -7.141 | -6.640  | 55.855 | 1.00 | 0.00 | P |
| ATOM | 590 | H3   | T A   | 19 | -1.178 | -11.753 | 55.343 | 1.00 | 0.00 | H |
| ATOM | 591 | H6   | T A   | 19 | -4.581 | -8.471  | 56.288 | 1.00 | 0.00 | H |
| ATOM | 592 | H1'  | T A   | 19 | -4.988 | -11.869 | 57.705 | 1.00 | 0.00 | H |
| ATOM | 593 | H3'  | T A   | 19 | -7.749 | -9.142  | 58.346 | 1.00 | 0.00 | H |
| ATOM | 594 | H4'  | T A   | 19 | -8.325 | -10.982 | 56.530 | 1.00 | 0.00 | H |
| ATOM | 595 | H71  | T A   | 19 | -2.366 | -6.754  | 55.810 | 1.00 | 0.00 | H |
| ATOM | 596 | H72  | T A   | 19 | -1.551 | -7.367  | 54.351 | 1.00 | 0.00 | H |
| ATOM | 597 | H73  | T A   | 19 | -3.308 | -7.082  | 54.336 | 1.00 | 0.00 | H |
| ATOM | 598 | H2'1 | T A   | 19 | -5.402 | -8.873  | 57.919 | 1.00 | 0.00 | H |
| ATOM | 599 | H2'2 | T A   | 19 | -5.361 | -10.069 | 59.206 | 1.00 | 0.00 | H |
| ATOM | 600 | H5'1 | T A   | 19 | -7.262 | -9.542  | 54.650 | 1.00 | 0.00 | H |
| ATOM | 601 | H5'2 | T A   | 19 | -8.573 | -8.881  | 55.648 | 1.00 | 0.00 | H |
| ATOM | 602 | C01  | LNK A | 20 | -8.347 | -11.149 | 62.587 | 0.00 | 0.00 | C |
| ATOM | 603 | O1   | LNK A | 20 | -7.918 | -10.484 | 61.396 | 1.00 | 0.00 | O |
| ATOM | 604 | S    | LNK A | 20 | -8.698 | -10.406 | 66.482 | 0.00 | 0.00 | S |
| ATOM | 605 | C02  | LNK A | 20 | -8.207 | -10.192 | 63.786 | 0.00 | 0.00 | C |
| ATOM | 606 | C03  | LNK A | 20 | -7.767 | -10.988 | 65.030 | 0.00 | 0.00 | C |
| ATOM | 607 | O1P  | LNK A | 20 | -5.612 | -10.277 | 60.408 | 1.00 | 0.00 | O |
| ATOM | 608 | O2P  | LNK A | 20 | -6.527 | -12.538 | 60.999 | 1.00 | 0.00 | O |
| ATOM | 609 | P    | LNK A | 20 | -6.787 | -11.165 | 60.501 | 1.00 | 0.00 | P |
| ATOM | 610 | H01  | LNK A | 20 | -7.731 | -12.033 | 62.754 | 0.00 | 0.00 | H |
| ATOM | 611 | H02  | LNK A | 20 | -9.390 | -11.448 | 62.482 | 0.00 | 0.00 | H |
| ATOM | 612 | H03  | LNK A | 20 | -6.701 | -10.839 | 65.199 | 0.00 | 0.00 | H |
| ATOM | 613 | H04  | LNK A | 20 | -9.165 | -9.711  | 63.982 | 0.00 | 0.00 | H |
| ATOM | 614 | H05  | LNK A | 20 | -7.459 | -9.432  | 63.559 | 0.00 | 0.00 | H |
| ATOM | 615 | H06  | LNK A | 20 | -7.966 | -12.048 | 64.872 | 0.00 | 0.00 | H |
| ATOM | 616 | AU   | LNK A | 20 | -8.435 | -10.686 | 67.050 |      |      |   |
| TER  |     |      |       |    |        |         |        |      |      |   |
| ATOM | 618 | C1'  | A B   | 2  | 3.357  | -17.034 | 54.302 | 1.00 | 0.00 | C |
| ATOM | 619 | N1   | A B   | 2  | 0.181  | -13.057 | 54.965 | 1.00 | 0.00 | N |
| ATOM | 620 | C2   | A B   | 2  | 0.101  | -14.337 | 55.312 | 1.00 | 0.00 | C |
| ATOM | 621 | N3   | A B   | 2  | 0.960  | -15.313 | 55.112 | 1.00 | 0.00 | N |
| ATOM | 622 | C4   | A B   | 2  | 2.040  | -14.855 | 54.451 | 1.00 | 0.00 | C |
| ATOM | 623 | C5   | A B   | 2  | 2.274  | -13.578 | 54.027 | 1.00 | 0.00 | C |
| ATOM | 624 | C6   | A B   | 2  | 1.270  | -12.628 | 54.309 | 1.00 | 0.00 | C |

|      |     |      |     |   |        |         |        |      |      |   |
|------|-----|------|-----|---|--------|---------|--------|------|------|---|
| ATOM | 625 | N6   | A B | 2 | 1.361  | -11.335 | 53.953 | 1.00 | 0.00 | N |
| ATOM | 626 | N7   | A B | 2 | 3.496  | -13.481 | 53.383 | 1.00 | 0.00 | N |
| ATOM | 627 | C8   | A B | 2 | 3.967  | -14.692 | 53.427 | 1.00 | 0.00 | C |
| ATOM | 628 | N9   | A B | 2 | 3.140  | -15.580 | 54.064 | 1.00 | 0.00 | N |
| ATOM | 629 | C2'  | A B | 2 | 4.047  | -17.748 | 53.148 | 1.00 | 0.00 | C |
| ATOM | 630 | C3'  | A B | 2 | 4.911  | -18.765 | 53.875 | 1.00 | 0.00 | C |
| ATOM | 631 | O3'  | A B | 2 | 4.128  | -19.921 | 54.166 | 1.00 | 0.00 | O |
| ATOM | 632 | C4'  | A B | 2 | 5.326  | -18.015 | 55.141 | 1.00 | 0.00 | C |
| ATOM | 633 | O4'  | A B | 2 | 4.176  | -17.163 | 55.449 | 1.00 | 0.00 | O |
| ATOM | 634 | C5'  | A B | 2 | 6.557  | -17.147 | 55.034 | 1.00 | 0.00 | C |
| ATOM | 635 | O5'  | A B | 2 | 6.606  | -16.525 | 53.725 | 1.00 | 0.00 | O |
| ATOM | 636 | H2   | A B | 2 | -0.809 | -14.621 | 55.838 | 1.00 | 0.00 | H |
| ATOM | 637 | H8   | A B | 2 | 4.930  | -14.974 | 52.999 | 1.00 | 0.00 | H |
| ATOM | 638 | H1'  | A B | 2 | 2.392  | -17.490 | 54.524 | 1.00 | 0.00 | H |
| ATOM | 639 | H3'  | A B | 2 | 5.781  | -19.057 | 53.289 | 1.00 | 0.00 | H |
| ATOM | 640 | H4'  | A B | 2 | 5.514  | -18.768 | 55.906 | 1.00 | 0.00 | H |
| ATOM | 641 | H61  | A B | 2 | 0.601  | -10.682 | 54.186 | 1.00 | 0.00 | H |
| ATOM | 642 | H62  | A B | 2 | 2.194  | -10.999 | 53.447 | 1.00 | 0.00 | H |
| ATOM | 643 | H2'1 | A B | 2 | 4.653  | -17.072 | 52.545 | 1.00 | 0.00 | H |
| ATOM | 644 | H2'2 | A B | 2 | 3.337  | -18.236 | 52.480 | 1.00 | 0.00 | H |
| ATOM | 645 | H5'1 | A B | 2 | 6.520  | -16.378 | 55.805 | 1.00 | 0.00 | H |
| ATOM | 646 | H5'2 | A B | 2 | 7.442  | -17.763 | 55.183 | 1.00 | 0.00 | H |
| ATOM | 647 | C1'  | C B | 3 | -1.328 | -18.413 | 53.405 | 1.00 | 0.00 | C |
| ATOM | 648 | N1   | C B | 3 | -0.752 | -17.215 | 52.735 | 1.00 | 0.00 | N |
| ATOM | 649 | C2   | C B | 3 | -1.470 | -16.023 | 52.798 | 1.00 | 0.00 | C |
| ATOM | 650 | O2   | C B | 3 | -2.549 | -16.008 | 53.406 | 1.00 | 0.00 | O |
| ATOM | 651 | N3   | C B | 3 | -0.963 | -14.921 | 52.194 | 1.00 | 0.00 | N |
| ATOM | 652 | C4   | C B | 3 | 0.207  | -14.969 | 51.543 | 1.00 | 0.00 | C |
| ATOM | 653 | N4   | C B | 3 | 0.657  | -13.860 | 50.973 | 1.00 | 0.00 | N |
| ATOM | 654 | C5   | C B | 3 | 0.966  | -16.183 | 51.456 | 1.00 | 0.00 | C |
| ATOM | 655 | C6   | C B | 3 | 0.438  | -17.280 | 52.077 | 1.00 | 0.00 | C |
| ATOM | 656 | C2'  | C B | 3 | -1.105 | -19.711 | 52.642 | 1.00 | 0.00 | C |
| ATOM | 657 | C3'  | C B | 3 | -0.903 | -20.712 | 53.769 | 1.00 | 0.00 | C |
| ATOM | 658 | O3'  | C B | 3 | -2.176 | -21.163 | 54.227 | 1.00 | 0.00 | O |
| ATOM | 659 | C4'  | C B | 3 | -0.168 | -19.889 | 54.826 | 1.00 | 0.00 | C |
| ATOM | 660 | O4'  | C B | 3 | -0.706 | -18.537 | 54.670 | 1.00 | 0.00 | O |
| ATOM | 661 | C5'  | C B | 3 | 1.336  | -19.828 | 54.702 | 1.00 | 0.00 | C |
| ATOM | 662 | O5'  | C B | 3 | 1.711  | -19.788 | 53.302 | 1.00 | 0.00 | O |
| ATOM | 663 | O1P  | C B | 3 | 2.913  | -21.973 | 52.958 | 1.00 | 0.00 | O |
| ATOM | 664 | O2P  | C B | 3 | 3.469  | -19.994 | 51.518 | 1.00 | 0.00 | O |
| ATOM | 665 | P    | C B | 3 | 3.059  | -20.507 | 52.848 | 1.00 | 0.00 | P |
| ATOM | 666 | H5   | C B | 3 | 1.915  | -16.229 | 50.922 | 1.00 | 0.00 | H |
| ATOM | 667 | H6   | C B | 3 | 0.982  | -18.224 | 52.045 | 1.00 | 0.00 | H |
| ATOM | 668 | H1'  | C B | 3 | -2.391 | -18.234 | 53.570 | 1.00 | 0.00 | H |
| ATOM | 669 | H3'  | C B | 3 | -0.308 | -21.568 | 53.454 | 1.00 | 0.00 | H |
| ATOM | 670 | H4'  | C B | 3 | -0.403 | -20.333 | 55.793 | 1.00 | 0.00 | H |
| ATOM | 671 | H41  | C B | 3 | 1.556  | -13.869 | 50.469 | 1.00 | 0.00 | H |
| ATOM | 672 | H42  | C B | 3 | 0.109  | -12.989 | 51.034 | 1.00 | 0.00 | H |
| ATOM | 673 | H2'1 | C B | 3 | -0.231 | -19.664 | 51.993 | 1.00 | 0.00 | H |
| ATOM | 674 | H2'2 | C B | 3 | -1.961 | -19.978 | 52.022 | 1.00 | 0.00 | H |
| ATOM | 675 | H5'1 | C B | 3 | 1.701  | -18.932 | 55.206 | 1.00 | 0.00 | H |
| ATOM | 676 | H5'2 | C B | 3 | 1.770  | -20.707 | 55.174 | 1.00 | 0.00 | H |
| ATOM | 677 | C1'  | C B | 4 | -6.037 | -17.606 | 52.103 | 1.00 | 0.00 | C |
| ATOM | 678 | N1   | C B | 4 | -4.921 | -17.127 | 51.243 | 1.00 | 0.00 | N |

|      |     |      |     |   |         |         |        |      |      |   |
|------|-----|------|-----|---|---------|---------|--------|------|------|---|
| ATOM | 679 | C2   | C B | 4 | -4.929  | -15.791 | 50.847 | 1.00 | 0.00 | C |
| ATOM | 680 | O2   | C B | 4 | -5.856  | -15.061 | 51.224 | 1.00 | 0.00 | O |
| ATOM | 681 | N3   | C B | 4 | -3.923  | -15.334 | 50.064 | 1.00 | 0.00 | N |
| ATOM | 682 | C4   | C B | 4 | -2.933  | -16.148 | 49.670 | 1.00 | 0.00 | C |
| ATOM | 683 | N4   | C B | 4 | -1.971  | -15.649 | 48.908 | 1.00 | 0.00 | N |
| ATOM | 684 | C5   | C B | 4 | -2.901  | -17.528 | 50.058 | 1.00 | 0.00 | C |
| ATOM | 685 | C6   | C B | 4 | -3.923  | -17.965 | 50.852 | 1.00 | 0.00 | C |
| ATOM | 686 | C2'  | C B | 4 | -6.499  | -19.020 | 51.778 | 1.00 | 0.00 | C |
| ATOM | 687 | C3'  | C B | 4 | -6.853  | -19.561 | 53.155 | 1.00 | 0.00 | C |
| ATOM | 688 | O3'  | C B | 4 | -8.183  | -19.170 | 53.484 | 1.00 | 0.00 | O |
| ATOM | 689 | C4'  | C B | 4 | -5.815  | -18.899 | 54.058 | 1.00 | 0.00 | C |
| ATOM | 690 | O4'  | C B | 4 | -5.584  | -17.590 | 53.443 | 1.00 | 0.00 | O |
| ATOM | 691 | C5'  | C B | 4 | -4.488  | -19.610 | 54.191 | 1.00 | 0.00 | C |
| ATOM | 692 | O5'  | C B | 4 | -4.127  | -20.216 | 52.925 | 1.00 | 0.00 | O |
| ATOM | 693 | O1P  | C B | 4 | -4.208  | -22.683 | 53.415 | 1.00 | 0.00 | O |
| ATOM | 694 | O2P  | C B | 4 | -2.700  | -21.811 | 51.610 | 1.00 | 0.00 | O |
| ATOM | 695 | P    | C B | 4 | -3.332  | -21.597 | 52.934 | 1.00 | 0.00 | P |
| ATOM | 696 | H5   | C B | 4 | -2.102  | -18.196 | 49.735 | 1.00 | 0.00 | H |
| ATOM | 697 | H6   | C B | 4 | -3.939  | -19.004 | 51.178 | 1.00 | 0.00 | H |
| ATOM | 698 | H1'  | C B | 4 | -6.861  | -16.897 | 52.019 | 1.00 | 0.00 | H |
| ATOM | 699 | H3'  | C B | 4 | -6.775  | -20.648 | 53.198 | 1.00 | 0.00 | H |
| ATOM | 700 | H4'  | C B | 4 | -6.257  | -18.830 | 55.052 | 1.00 | 0.00 | H |
| ATOM | 701 | H41  | C B | 4 | -1.196  | -16.252 | 48.593 | 1.00 | 0.00 | H |
| ATOM | 702 | H42  | C B | 4 | -1.997  | -14.656 | 48.628 | 1.00 | 0.00 | H |
| ATOM | 703 | H2'1 | C B | 4 | -5.716  | -19.613 | 51.308 | 1.00 | 0.00 | H |
| ATOM | 704 | H2'2 | C B | 4 | -7.363  | -19.030 | 51.113 | 1.00 | 0.00 | H |
| ATOM | 705 | H5'1 | C B | 4 | -3.725  | -18.891 | 54.487 | 1.00 | 0.00 | H |
| ATOM | 706 | H5'2 | C B | 4 | -4.572  | -20.380 | 54.957 | 1.00 | 0.00 | H |
| ATOM | 707 | C1'  | G B | 5 | -9.653  | -15.117 | 49.810 | 1.00 | 0.00 | C |
| ATOM | 708 | N1   | G B | 5 | -5.880  | -13.600 | 46.729 | 1.00 | 0.00 | N |
| ATOM | 709 | C2   | G B | 5 | -6.929  | -12.877 | 47.272 | 1.00 | 0.00 | C |
| ATOM | 710 | N2   | G B | 5 | -6.979  | -11.580 | 46.949 | 1.00 | 0.00 | N |
| ATOM | 711 | N3   | G B | 5 | -7.851  | -13.409 | 48.073 | 1.00 | 0.00 | N |
| ATOM | 712 | C4   | G B | 5 | -7.648  | -14.735 | 48.286 | 1.00 | 0.00 | C |
| ATOM | 713 | C5   | G B | 5 | -6.635  | -15.536 | 47.784 | 1.00 | 0.00 | C |
| ATOM | 714 | C6   | G B | 5 | -5.654  | -14.974 | 46.938 | 1.00 | 0.00 | C |
| ATOM | 715 | O6   | G B | 5 | -4.690  | -15.517 | 46.400 | 1.00 | 0.00 | O |
| ATOM | 716 | N7   | G B | 5 | -6.787  | -16.847 | 48.242 | 1.00 | 0.00 | N |
| ATOM | 717 | C8   | G B | 5 | -7.858  | -16.800 | 48.992 | 1.00 | 0.00 | C |
| ATOM | 718 | N9   | G B | 5 | -8.439  | -15.550 | 49.066 | 1.00 | 0.00 | N |
| ATOM | 719 | C2'  | G B | 5 | -10.770 | -16.151 | 49.815 | 1.00 | 0.00 | C |
| ATOM | 720 | C3'  | G B | 5 | -11.369 | -15.964 | 51.200 | 1.00 | 0.00 | C |
| ATOM | 721 | O3'  | G B | 5 | -12.315 | -14.898 | 51.162 | 1.00 | 0.00 | O |
| ATOM | 722 | C4'  | G B | 5 | -10.150 | -15.625 | 52.055 | 1.00 | 0.00 | C |
| ATOM | 723 | O4'  | G B | 5 | -9.274  | -14.877 | 51.152 | 1.00 | 0.00 | O |
| ATOM | 724 | C5'  | G B | 5 | -9.378  | -16.794 | 52.619 | 1.00 | 0.00 | C |
| ATOM | 725 | O5'  | G B | 5 | -9.362  | -17.880 | 51.659 | 1.00 | 0.00 | O |
| ATOM | 726 | O1P  | G B | 5 | -10.702 | -19.683 | 52.794 | 1.00 | 0.00 | O |
| ATOM | 727 | O2P  | G B | 5 | -8.937  | -20.297 | 51.121 | 1.00 | 0.00 | O |
| ATOM | 728 | P    | G B | 5 | -9.387  | -19.381 | 52.197 | 1.00 | 0.00 | P |
| ATOM | 729 | H1   | G B | 5 | -5.215  | -13.092 | 46.126 | 1.00 | 0.00 | H |
| ATOM | 730 | H8   | G B | 5 | -8.260  | -17.670 | 49.510 | 1.00 | 0.00 | H |
| ATOM | 731 | H1'  | G B | 5 | -9.995  | -14.174 | 49.385 | 1.00 | 0.00 | H |
| ATOM | 732 | H21  | G B | 5 | -6.261  | -11.174 | 46.332 | 1.00 | 0.00 | H |

|      |     |      |     |   |         |         |        |      |      |   |
|------|-----|------|-----|---|---------|---------|--------|------|------|---|
| ATOM | 733 | H3'  | G B | 5 | -11.860 | -16.870 | 51.559 | 1.00 | 0.00 | H |
| ATOM | 734 | H22  | G B | 5 | -7.737  | -10.987 | 47.318 | 1.00 | 0.00 | H |
| ATOM | 735 | H4'  | G B | 5 | -10.506 | -15.026 | 52.893 | 1.00 | 0.00 | H |
| ATOM | 736 | H2'1 | G B | 5 | -10.396 | -17.166 | 49.678 | 1.00 | 0.00 | H |
| ATOM | 737 | H2'2 | G B | 5 | -11.509 | -15.966 | 49.035 | 1.00 | 0.00 | H |
| ATOM | 738 | H5'1 | G B | 5 | -8.358  | -16.478 | 52.835 | 1.00 | 0.00 | H |
| ATOM | 739 | H5'2 | G B | 5 | -9.854  | -17.126 | 53.541 | 1.00 | 0.00 | H |
| ATOM | 740 | C1'  | T B | 6 | -11.476 | -12.106 | 46.329 | 1.00 | 0.00 | C |
| ATOM | 741 | N1   | T B | 6 | -10.628 | -13.267 | 45.946 | 1.00 | 0.00 | N |
| ATOM | 742 | C2   | T B | 6 | -9.561  | -13.017 | 45.108 | 1.00 | 0.00 | C |
| ATOM | 743 | O2   | T B | 6 | -9.300  | -11.905 | 44.683 | 1.00 | 0.00 | O |
| ATOM | 744 | N3   | T B | 6 | -8.799  | -14.124 | 44.778 | 1.00 | 0.00 | N |
| ATOM | 745 | C4   | T B | 6 | -9.008  | -15.421 | 45.198 | 1.00 | 0.00 | C |
| ATOM | 746 | O4   | T B | 6 | -8.258  | -16.333 | 44.833 | 1.00 | 0.00 | O |
| ATOM | 747 | C5   | T B | 6 | -10.146 | -15.581 | 46.072 | 1.00 | 0.00 | C |
| ATOM | 748 | C6   | T B | 6 | -10.910 | -14.526 | 46.415 | 1.00 | 0.00 | C |
| ATOM | 749 | C7   | T B | 6 | -10.409 | -16.977 | 46.556 | 1.00 | 0.00 | C |
| ATOM | 750 | C2'  | T B | 6 | -12.961 | -12.435 | 46.419 | 1.00 | 0.00 | C |
| ATOM | 751 | C3'  | T B | 6 | -13.409 | -11.562 | 47.582 | 1.00 | 0.00 | C |
| ATOM | 752 | O3'  | T B | 6 | -13.697 | -10.251 | 47.099 | 1.00 | 0.00 | O |
| ATOM | 753 | C4'  | T B | 6 | -12.197 | -11.583 | 48.510 | 1.00 | 0.00 | C |
| ATOM | 754 | O4'  | T B | 6 | -11.051 | -11.663 | 47.603 | 1.00 | 0.00 | O |
| ATOM | 755 | C5'  | T B | 6 | -12.119 | -12.731 | 49.489 | 1.00 | 0.00 | C |
| ATOM | 756 | O5'  | T B | 6 | -12.631 | -13.938 | 48.869 | 1.00 | 0.00 | O |
| ATOM | 757 | O1P  | T B | 6 | -14.710 | -14.437 | 50.198 | 1.00 | 0.00 | O |
| ATOM | 758 | O2P  | T B | 6 | -13.460 | -16.301 | 49.075 | 1.00 | 0.00 | O |
| ATOM | 759 | P    | T B | 6 | -13.410 | -14.995 | 49.775 | 1.00 | 0.00 | P |
| ATOM | 760 | H3   | T B | 6 | -7.994  | -13.963 | 44.155 | 1.00 | 0.00 | H |
| ATOM | 761 | H6   | T B | 6 | -11.764 | -14.674 | 47.076 | 1.00 | 0.00 | H |
| ATOM | 762 | H1'  | T B | 6 | -11.297 | -11.302 | 45.617 | 1.00 | 0.00 | H |
| ATOM | 763 | H3'  | T B | 6 | -14.291 | -11.965 | 48.078 | 1.00 | 0.00 | H |
| ATOM | 764 | H4'  | T B | 6 | -12.222 | -10.657 | 49.085 | 1.00 | 0.00 | H |
| ATOM | 765 | H71  | T B | 6 | -11.356 | -17.330 | 46.150 | 1.00 | 0.00 | H |
| ATOM | 766 | H72  | T B | 6 | -9.604  | -17.634 | 46.227 | 1.00 | 0.00 | H |
| ATOM | 767 | H73  | T B | 6 | -10.458 | -16.981 | 47.646 | 1.00 | 0.00 | H |
| ATOM | 768 | H2'1 | T B | 6 | -13.139 | -13.489 | 46.623 | 1.00 | 0.00 | H |
| ATOM | 769 | H2'2 | T B | 6 | -13.497 | -12.182 | 45.504 | 1.00 | 0.00 | H |
| ATOM | 770 | H5'1 | T B | 6 | -11.081 | -12.881 | 49.784 | 1.00 | 0.00 | H |
| ATOM | 771 | H5'2 | T B | 6 | -12.712 | -12.490 | 50.370 | 1.00 | 0.00 | H |
| ATOM | 772 | C1'  | C B | 7 | -11.420 | -9.935  | 41.864 | 1.00 | 0.00 | C |
| ATOM | 773 | N1   | C B | 7 | -11.298 | -11.415 | 41.987 | 1.00 | 0.00 | N |
| ATOM | 774 | C2   | C B | 7 | -10.243 | -12.039 | 41.324 | 1.00 | 0.00 | C |
| ATOM | 775 | O2   | C B | 7 | -9.456  | -11.345 | 40.666 | 1.00 | 0.00 | O |
| ATOM | 776 | N3   | C B | 7 | -10.114 | -13.385 | 41.423 | 1.00 | 0.00 | N |
| ATOM | 777 | C4   | C B | 7 | -10.982 | -14.108 | 42.142 | 1.00 | 0.00 | C |
| ATOM | 778 | N4   | C B | 7 | -10.806 | -15.419 | 42.206 | 1.00 | 0.00 | N |
| ATOM | 779 | C5   | C B | 7 | -12.080 | -13.494 | 42.830 | 1.00 | 0.00 | C |
| ATOM | 780 | C6   | C B | 7 | -12.186 | -12.136 | 42.720 | 1.00 | 0.00 | C |
| ATOM | 781 | C2'  | C B | 7 | -12.857 | -9.444  | 41.764 | 1.00 | 0.00 | C |
| ATOM | 782 | C3'  | C B | 7 | -12.797 | -8.132  | 42.531 | 1.00 | 0.00 | C |
| ATOM | 783 | O3'  | C B | 7 | -12.351 | -7.099  | 41.656 | 1.00 | 0.00 | O |
| ATOM | 784 | C4'  | C B | 7 | -11.787 | -8.430  | 43.636 | 1.00 | 0.00 | C |
| ATOM | 785 | O4'  | C B | 7 | -10.840 | -9.358  | 43.019 | 1.00 | 0.00 | O |
| ATOM | 786 | C5'  | C B | 7 | -12.335 | -9.064  | 44.895 | 1.00 | 0.00 | C |

|      |     |      |     |   |         |         |        |      |      |   |
|------|-----|------|-----|---|---------|---------|--------|------|------|---|
| ATOM | 787 | O5'  | C B | 7 | -13.394 | -9.993  | 44.553 | 1.00 | 0.00 | O |
| ATOM | 788 | O1P  | C B | 7 | -15.444 | -8.934  | 45.559 | 1.00 | 0.00 | O |
| ATOM | 789 | O2P  | C B | 7 | -15.338 | -11.421 | 45.255 | 1.00 | 0.00 | O |
| ATOM | 790 | P    | C B | 7 | -14.622 | -10.160 | 45.558 | 1.00 | 0.00 | P |
| ATOM | 791 | H5   | C B | 7 | -12.792 | -14.080 | 43.410 | 1.00 | 0.00 | H |
| ATOM | 792 | H6   | C B | 7 | -13.000 | -11.622 | 43.232 | 1.00 | 0.00 | H |
| ATOM | 793 | H1'  | C B | 7 | -10.836 | -9.616  | 41.000 | 1.00 | 0.00 | H |
| ATOM | 794 | H3'  | C B | 7 | -13.768 | -7.859  | 42.948 | 1.00 | 0.00 | H |
| ATOM | 795 | H4'  | C B | 7 | -11.333 | -7.480  | 43.915 | 1.00 | 0.00 | H |
| ATOM | 796 | H41  | C B | 7 | -11.458 | -15.999 | 42.755 | 1.00 | 0.00 | H |
| ATOM | 797 | H42  | C B | 7 | -10.018 | -15.860 | 41.709 | 1.00 | 0.00 | H |
| ATOM | 798 | H2'1 | C B | 7 | -13.564 | -10.138 | 42.218 | 1.00 | 0.00 | H |
| ATOM | 799 | H2'2 | C B | 7 | -13.170 | -9.288  | 40.731 | 1.00 | 0.00 | H |
| ATOM | 800 | H5'1 | C B | 7 | -11.531 | -9.593  | 45.407 | 1.00 | 0.00 | H |
| ATOM | 801 | H5'2 | C B | 7 | -12.725 | -8.284  | 45.546 | 1.00 | 0.00 | H |
| ATOM | 802 | C1'  | C B | 8 | -10.218 | -9.644  | 37.068 | 1.00 | 0.00 | C |
| ATOM | 803 | N1   | C B | 8 | -10.871 | -10.866 | 37.612 | 1.00 | 0.00 | N |
| ATOM | 804 | C2   | C B | 8 | -10.276 | -12.098 | 37.346 | 1.00 | 0.00 | C |
| ATOM | 805 | O2   | C B | 8 | -9.236  | -12.125 | 36.675 | 1.00 | 0.00 | O |
| ATOM | 806 | N3   | C B | 8 | -10.854 | -13.222 | 37.832 | 1.00 | 0.00 | N |
| ATOM | 807 | C4   | C B | 8 | -11.980 | -13.160 | 38.556 | 1.00 | 0.00 | C |
| ATOM | 808 | N4   | C B | 8 | -12.501 | -14.291 | 39.009 | 1.00 | 0.00 | N |
| ATOM | 809 | C5   | C B | 8 | -12.619 | -11.908 | 38.842 | 1.00 | 0.00 | C |
| ATOM | 810 | C6   | C B | 8 | -12.014 | -10.787 | 38.345 | 1.00 | 0.00 | C |
| ATOM | 811 | C2'  | C B | 8 | -11.201 | -8.587  | 36.582 | 1.00 | 0.00 | C |
| ATOM | 812 | C3'  | C B | 8 | -10.489 | -7.296  | 36.957 | 1.00 | 0.00 | C |
| ATOM | 813 | O3'  | C B | 8 | -9.565  | -6.956  | 35.926 | 1.00 | 0.00 | O |
| ATOM | 814 | C4'  | C B | 8 | -9.788  | -7.662  | 38.263 | 1.00 | 0.00 | C |
| ATOM | 815 | O4'  | C B | 8 | -9.441  | -9.075  | 38.105 | 1.00 | 0.00 | O |
| ATOM | 816 | C5'  | C B | 8 | -10.598 | -7.503  | 39.528 | 1.00 | 0.00 | C |
| ATOM | 817 | O5'  | C B | 8 | -11.980 | -7.863  | 39.273 | 1.00 | 0.00 | O |
| ATOM | 818 | O1P  | C B | 8 | -13.213 | -5.688  | 39.566 | 1.00 | 0.00 | O |
| ATOM | 819 | O2P  | C B | 8 | -14.390 | -7.864  | 39.982 | 1.00 | 0.00 | O |
| ATOM | 820 | P    | C B | 8 | -13.132 | -7.081  | 40.048 | 1.00 | 0.00 | P |
| ATOM | 821 | H5   | C B | 8 | -13.538 | -11.852 | 39.423 | 1.00 | 0.00 | H |
| ATOM | 822 | H6   | C B | 8 | -12.458 | -9.811  | 38.542 | 1.00 | 0.00 | H |
| ATOM | 823 | H1'  | C B | 8 | -9.542  | -9.946  | 36.268 | 1.00 | 0.00 | H |
| ATOM | 824 | H3'  | C B | 8 | -11.188 | -6.473  | 37.102 | 1.00 | 0.00 | H |
| ATOM | 825 | H4'  | C B | 8 | -8.915  | -7.014  | 38.346 | 1.00 | 0.00 | H |
| ATOM | 826 | H41  | C B | 8 | -13.365 | -14.271 | 39.571 | 1.00 | 0.00 | H |
| ATOM | 827 | H42  | C B | 8 | -12.042 | -15.190 | 38.801 | 1.00 | 0.00 | H |
| ATOM | 828 | H2'1 | C B | 8 | -12.169 | -8.664  | 37.076 | 1.00 | 0.00 | H |
| ATOM | 829 | H2'2 | C B | 8 | -11.375 | -8.648  | 35.508 | 1.00 | 0.00 | H |
| ATOM | 830 | H5'1 | C B | 8 | -10.187 | -8.151  | 40.302 | 1.00 | 0.00 | H |
| ATOM | 831 | H5'2 | C B | 8 | -10.544 | -6.468  | 39.860 | 1.00 | 0.00 | H |
| ATOM | 832 | C1'  | T B | 9 | -8.969  | -11.531 | 32.667 | 1.00 | 0.00 | C |
| ATOM | 833 | N1   | T B | 9 | -10.154 | -12.055 | 33.396 | 1.00 | 0.00 | N |
| ATOM | 834 | C2   | T B | 9 | -10.234 | -13.422 | 33.568 | 1.00 | 0.00 | C |
| ATOM | 835 | O2   | T B | 9 | -9.385  | -14.190 | 33.149 | 1.00 | 0.00 | O |
| ATOM | 836 | N3   | T B | 9 | -11.350 | -13.866 | 34.252 | 1.00 | 0.00 | N |
| ATOM | 837 | C4   | T B | 9 | -12.366 | -13.086 | 34.761 | 1.00 | 0.00 | C |
| ATOM | 838 | O4   | T B | 9 | -13.322 | -13.599 | 35.355 | 1.00 | 0.00 | O |
| ATOM | 839 | C5   | T B | 9 | -12.194 | -11.670 | 34.533 | 1.00 | 0.00 | C |
| ATOM | 840 | C6   | T B | 9 | -11.118 | -11.202 | 33.872 | 1.00 | 0.00 | C |

|      |     |      |     |    |         |         |        |      |      |   |
|------|-----|------|-----|----|---------|---------|--------|------|------|---|
| ATOM | 841 | C7   | T B | 9  | -13.276 | -10.783 | 35.074 | 1.00 | 0.00 | C |
| ATOM | 842 | C2'  | T B | 9  | -9.282  | -10.351 | 31.752 | 1.00 | 0.00 | C |
| ATOM | 843 | C3'  | T B | 9  | -8.025  | -9.506  | 31.884 | 1.00 | 0.00 | C |
| ATOM | 844 | O3'  | T B | 9  | -7.039  | -9.988  | 30.973 | 1.00 | 0.00 | O |
| ATOM | 845 | C4'  | T B | 9  | -7.622  | -9.720  | 33.341 | 1.00 | 0.00 | C |
| ATOM | 846 | O4'  | T B | 9  | -8.026  | -11.097 | 33.627 | 1.00 | 0.00 | O |
| ATOM | 847 | C5'  | T B | 9  | -8.263  | -8.805  | 34.358 | 1.00 | 0.00 | C |
| ATOM | 848 | O5'  | T B | 9  | -9.634  | -8.533  | 33.974 | 1.00 | 0.00 | O |
| ATOM | 849 | O1P  | T B | 9  | -9.616  | -6.071  | 33.456 | 1.00 | 0.00 | O |
| ATOM | 850 | O2P  | T B | 9  | -11.732 | -7.174  | 34.232 | 1.00 | 0.00 | O |
| ATOM | 851 | P    | T B | 9  | -10.253 | -7.100  | 34.302 | 1.00 | 0.00 | P |
| ATOM | 852 | H3   | T B | 9  | -11.431 | -14.883 | 34.396 | 1.00 | 0.00 | H |
| ATOM | 853 | H6   | T B | 9  | -11.011 | -10.129 | 33.712 | 1.00 | 0.00 | H |
| ATOM | 854 | H1'  | T B | 9  | -8.521  | -12.351 | 32.105 | 1.00 | 0.00 | H |
| ATOM | 855 | H3'  | T B | 9  | -8.220  | -8.453  | 31.680 | 1.00 | 0.00 | H |
| ATOM | 856 | H4'  | T B | 9  | -6.541  | -9.573  | 33.395 | 1.00 | 0.00 | H |
| ATOM | 857 | H71  | T B | 9  | -13.798 | -10.301 | 34.247 | 1.00 | 0.00 | H |
| ATOM | 858 | H72  | T B | 9  | -13.982 | -11.380 | 35.652 | 1.00 | 0.00 | H |
| ATOM | 859 | H73  | T B | 9  | -12.833 | -10.021 | 35.717 | 1.00 | 0.00 | H |
| ATOM | 860 | H2'1 | T B | 9  | -10.165 | -9.803  | 32.075 | 1.00 | 0.00 | H |
| ATOM | 861 | H2'2 | T B | 9  | -9.447  | -10.661 | 30.721 | 1.00 | 0.00 | H |
| ATOM | 862 | H5'1 | T B | 9  | -8.242  | -9.286  | 35.336 | 1.00 | 0.00 | H |
| ATOM | 863 | H5'2 | T B | 9  | -7.702  | -7.874  | 34.404 | 1.00 | 0.00 | H |
| ATOM | 864 | C1'  | A B | 10 | -8.805  | -15.131 | 29.254 | 1.00 | 0.00 | C |
| ATOM | 865 | N1   | A B | 10 | -13.020 | -16.819 | 31.645 | 1.00 | 0.00 | N |
| ATOM | 866 | C2   | A B | 10 | -11.948 | -17.443 | 31.164 | 1.00 | 0.00 | C |
| ATOM | 867 | N3   | A B | 10 | -10.892 | -16.944 | 30.559 | 1.00 | 0.00 | N |
| ATOM | 868 | C4   | A B | 10 | -11.003 | -15.608 | 30.453 | 1.00 | 0.00 | C |
| ATOM | 869 | C5   | A B | 10 | -12.032 | -14.821 | 30.890 | 1.00 | 0.00 | C |
| ATOM | 870 | C6   | A B | 10 | -13.102 | -15.485 | 31.525 | 1.00 | 0.00 | C |
| ATOM | 871 | N6   | A B | 10 | -14.181 | -14.842 | 32.006 | 1.00 | 0.00 | N |
| ATOM | 872 | N7   | A B | 10 | -11.797 | -13.487 | 30.607 | 1.00 | 0.00 | N |
| ATOM | 873 | C8   | A B | 10 | -10.644 | -13.496 | 30.005 | 1.00 | 0.00 | C |
| ATOM | 874 | N9   | A B | 10 | -10.100 | -14.748 | 29.878 | 1.00 | 0.00 | N |
| ATOM | 875 | C2'  | A B | 10 | -8.459  | -14.318 | 28.014 | 1.00 | 0.00 | C |
| ATOM | 876 | C3'  | A B | 10 | -6.947  | -14.194 | 28.126 | 1.00 | 0.00 | C |
| ATOM | 877 | O3'  | A B | 10 | -6.339  | -15.359 | 27.574 | 1.00 | 0.00 | O |
| ATOM | 878 | C4'  | A B | 10 | -6.727  | -14.090 | 29.636 | 1.00 | 0.00 | C |
| ATOM | 879 | O4'  | A B | 10 | -7.786  | -14.920 | 30.213 | 1.00 | 0.00 | O |
| ATOM | 880 | C5'  | A B | 10 | -6.819  | -12.705 | 30.232 | 1.00 | 0.00 | C |
| ATOM | 881 | O5'  | A B | 10 | -7.852  | -11.945 | 29.554 | 1.00 | 0.00 | O |
| ATOM | 882 | O1P  | A B | 10 | -6.564  | -10.121 | 28.393 | 1.00 | 0.00 | O |
| ATOM | 883 | O2P  | A B | 10 | -8.955  | -9.744  | 29.054 | 1.00 | 0.00 | O |
| ATOM | 884 | P    | A B | 10 | -7.648  | -10.375 | 29.361 | 1.00 | 0.00 | P |
| ATOM | 885 | H2   | A B | 10 | -11.946 | -18.525 | 31.290 | 1.00 | 0.00 | H |
| ATOM | 886 | H8   | A B | 10 | -10.157 | -12.593 | 29.636 | 1.00 | 0.00 | H |
| ATOM | 887 | H1'  | A B | 10 | -8.838  | -16.196 | 29.027 | 1.00 | 0.00 | H |
| ATOM | 888 | H3'  | A B | 10 | -6.570  | -13.310 | 27.613 | 1.00 | 0.00 | H |
| ATOM | 889 | H4'  | A B | 10 | -5.728  | -14.474 | 29.836 | 1.00 | 0.00 | H |
| ATOM | 890 | H61  | A B | 10 | -14.934 | -15.375 | 32.464 | 1.00 | 0.00 | H |
| ATOM | 891 | H62  | A B | 10 | -14.253 | -13.819 | 31.917 | 1.00 | 0.00 | H |
| ATOM | 892 | H2'1 | A B | 10 | -8.937  | -13.340 | 28.012 | 1.00 | 0.00 | H |
| ATOM | 893 | H2'2 | A B | 10 | -8.746  | -14.827 | 27.092 | 1.00 | 0.00 | H |
| ATOM | 894 | H5'1 | A B | 10 | -7.059  | -12.787 | 31.292 | 1.00 | 0.00 | H |

|      |     |      |     |    |         |         |        |      |      |   |
|------|-----|------|-----|----|---------|---------|--------|------|------|---|
| ATOM | 895 | H5'2 | A B | 10 | -5.860  | -12.203 | 30.120 | 1.00 | 0.00 | H |
| ATOM | 896 | C1'  | G B | 11 | -10.483 | -19.256 | 27.060 | 1.00 | 0.00 | C |
| ATOM | 897 | N1   | G B | 11 | -14.968 | -17.809 | 29.013 | 1.00 | 0.00 | N |
| ATOM | 898 | C2   | G B | 11 | -14.391 | -19.065 | 28.949 | 1.00 | 0.00 | C |
| ATOM | 899 | N2   | G B | 11 | -15.104 | -20.069 | 29.475 | 1.00 | 0.00 | N |
| ATOM | 900 | N3   | G B | 11 | -13.197 | -19.300 | 28.407 | 1.00 | 0.00 | N |
| ATOM | 901 | C4   | G B | 11 | -12.621 | -18.170 | 27.919 | 1.00 | 0.00 | C |
| ATOM | 902 | C5   | G B | 11 | -13.122 | -16.880 | 27.933 | 1.00 | 0.00 | C |
| ATOM | 903 | C6   | G B | 11 | -14.388 | -16.628 | 28.512 | 1.00 | 0.00 | C |
| ATOM | 904 | O6   | G B | 11 | -14.995 | -15.562 | 28.618 | 1.00 | 0.00 | O |
| ATOM | 905 | N7   | G B | 11 | -12.219 | -16.004 | 27.327 | 1.00 | 0.00 | N |
| ATOM | 906 | C8   | G B | 11 | -11.220 | -16.773 | 26.975 | 1.00 | 0.00 | C |
| ATOM | 907 | N9   | G B | 11 | -11.392 | -18.103 | 27.300 | 1.00 | 0.00 | N |
| ATOM | 908 | C2'  | G B | 11 | -9.749  | -19.192 | 25.728 | 1.00 | 0.00 | C |
| ATOM | 909 | C3'  | G B | 11 | -8.398  | -19.794 | 26.080 | 1.00 | 0.00 | C |
| ATOM | 910 | O3'  | G B | 11 | -8.483  | -21.214 | 26.000 | 1.00 | 0.00 | O |
| ATOM | 911 | C4'  | G B | 11 | -8.172  | -19.309 | 27.511 | 1.00 | 0.00 | C |
| ATOM | 912 | O4'  | G B | 11 | -9.515  | -19.264 | 28.091 | 1.00 | 0.00 | O |
| ATOM | 913 | C5'  | G B | 11 | -7.533  | -17.949 | 27.666 | 1.00 | 0.00 | C |
| ATOM | 914 | O5'  | G B | 11 | -8.006  | -17.063 | 26.622 | 1.00 | 0.00 | O |
| ATOM | 915 | O1P  | G B | 11 | -5.942  | -16.617 | 25.254 | 1.00 | 0.00 | O |
| ATOM | 916 | O2P  | G B | 11 | -7.788  | -14.920 | 25.328 | 1.00 | 0.00 | O |
| ATOM | 917 | P    | G B | 11 | -7.009  | -15.965 | 26.035 | 1.00 | 0.00 | P |
| ATOM | 918 | H1   | G B | 11 | -15.894 | -17.734 | 29.460 | 1.00 | 0.00 | H |
| ATOM | 919 | H8   | G B | 11 | -10.332 | -16.396 | 26.469 | 1.00 | 0.00 | H |
| ATOM | 920 | H1'  | G B | 11 | -11.066 | -20.174 | 27.142 | 1.00 | 0.00 | H |
| ATOM | 921 | H21  | G B | 11 | -16.025 | -19.879 | 29.896 | 1.00 | 0.00 | H |
| ATOM | 922 | H3'  | G B | 11 | -7.608  | -19.441 | 25.416 | 1.00 | 0.00 | H |
| ATOM | 923 | H22  | G B | 11 | -14.732 | -21.029 | 29.457 | 1.00 | 0.00 | H |
| ATOM | 924 | H4'  | G B | 11 | -7.524  | -20.039 | 27.994 | 1.00 | 0.00 | H |
| ATOM | 925 | H2'1 | G B | 11 | -9.645  | -18.170 | 25.362 | 1.00 | 0.00 | H |
| ATOM | 926 | H2'2 | G B | 11 | -10.251 | -19.770 | 24.951 | 1.00 | 0.00 | H |
| ATOM | 927 | H5'1 | G B | 11 | -7.792  | -17.541 | 28.642 | 1.00 | 0.00 | H |
| ATOM | 928 | H5'2 | G B | 11 | -6.450  | -18.055 | 27.597 | 1.00 | 0.00 | H |
| ATOM | 929 | C1'  | G B | 12 | -13.984 | -22.529 | 25.812 | 1.00 | 0.00 | C |
| ATOM | 930 | N1   | G B | 12 | -17.123 | -18.560 | 26.459 | 1.00 | 0.00 | N |
| ATOM | 931 | C2   | G B | 12 | -17.268 | -19.881 | 26.847 | 1.00 | 0.00 | C |
| ATOM | 932 | N2   | G B | 12 | -18.402 | -20.184 | 27.493 | 1.00 | 0.00 | N |
| ATOM | 933 | N3   | G B | 12 | -16.356 | -20.821 | 26.612 | 1.00 | 0.00 | N |
| ATOM | 934 | C4   | G B | 12 | -15.278 | -20.338 | 25.943 | 1.00 | 0.00 | C |
| ATOM | 935 | C5   | G B | 12 | -15.048 | -19.043 | 25.512 | 1.00 | 0.00 | C |
| ATOM | 936 | C6   | G B | 12 | -16.014 | -18.042 | 25.765 | 1.00 | 0.00 | C |
| ATOM | 937 | O6   | G B | 12 | -15.992 | -16.849 | 25.464 | 1.00 | 0.00 | O |
| ATOM | 938 | N7   | G B | 12 | -13.816 | -18.961 | 24.860 | 1.00 | 0.00 | N |
| ATOM | 939 | C8   | G B | 12 | -13.346 | -20.180 | 24.917 | 1.00 | 0.00 | C |
| ATOM | 940 | N9   | G B | 12 | -14.178 | -21.075 | 25.559 | 1.00 | 0.00 | N |
| ATOM | 941 | C2'  | G B | 12 | -13.303 | -23.265 | 24.667 | 1.00 | 0.00 | C |
| ATOM | 942 | C3'  | G B | 12 | -12.454 | -24.288 | 25.406 | 1.00 | 0.00 | C |
| ATOM | 943 | O3'  | G B | 12 | -13.253 | -25.430 | 25.705 | 1.00 | 0.00 | O |
| ATOM | 944 | C4'  | G B | 12 | -12.032 | -23.532 | 26.664 | 1.00 | 0.00 | C |
| ATOM | 945 | O4'  | G B | 12 | -13.169 | -22.662 | 26.961 | 1.00 | 0.00 | O |
| ATOM | 946 | C5'  | G B | 12 | -10.789 | -22.682 | 26.551 | 1.00 | 0.00 | C |
| ATOM | 947 | O5'  | G B | 12 | -10.729 | -22.074 | 25.237 | 1.00 | 0.00 | O |
| ATOM | 948 | O1P  | G B | 12 | -8.709  | -23.150 | 24.190 | 1.00 | 0.00 | O |



|      |      |      |     |    |         |         |        |      |      |   |
|------|------|------|-----|----|---------|---------|--------|------|------|---|
| ATOM | 949  | O2P  | G B | 12 | -9.427  | -20.859 | 23.463 | 1.00 | 0.00 | O |
| ATOM | 950  | P    | G B | 12 | -9.302  | -21.851 | 24.559 | 1.00 | 0.00 | P |
| ATOM | 951  | H1   | G B | 12 | -17.887 | -17.907 | 26.696 | 1.00 | 0.00 | H |
| ATOM | 952  | H8   | G B | 12 | -12.383 | -20.467 | 24.495 | 1.00 | 0.00 | H |
| ATOM | 953  | H1'  | G B | 12 | -14.955 | -22.969 | 26.037 | 1.00 | 0.00 | H |
| ATOM | 954  | H21  | G B | 12 | -19.102 | -19.449 | 27.675 | 1.00 | 0.00 | H |
| ATOM | 955  | H3'  | G B | 12 | -11.587 | -24.597 | 24.823 | 1.00 | 0.00 | H |
| ATOM | 956  | H22  | G B | 12 | -18.572 | -21.149 | 27.806 | 1.00 | 0.00 | H |
| ATOM | 957  | H4'  | G B | 12 | -11.855 | -24.279 | 27.438 | 1.00 | 0.00 | H |
| ATOM | 958  | H2'1 | G B | 12 | -12.686 | -22.603 | 24.058 | 1.00 | 0.00 | H |
| ATOM | 959  | H2'2 | G B | 12 | -14.018 | -23.749 | 24.002 | 1.00 | 0.00 | H |
| ATOM | 960  | H5'1 | G B | 12 | -10.816 | -21.905 | 27.315 | 1.00 | 0.00 | H |
| ATOM | 961  | H5'2 | G B | 12 | -9.911  | -23.309 | 26.708 | 1.00 | 0.00 | H |
| ATOM | 962  | C1'  | T B | 13 | -18.640 | -23.945 | 24.910 | 1.00 | 0.00 | C |
| ATOM | 963  | N1   | T B | 13 | -18.084 | -22.737 | 24.245 | 1.00 | 0.00 | N |
| ATOM | 964  | C2   | T B | 13 | -18.823 | -21.574 | 24.329 | 1.00 | 0.00 | C |
| ATOM | 965  | O2   | T B | 13 | -19.890 | -21.513 | 24.915 | 1.00 | 0.00 | O |
| ATOM | 966  | N3   | T B | 13 | -18.269 | -20.476 | 23.699 | 1.00 | 0.00 | N |
| ATOM | 967  | C4   | T B | 13 | -17.075 | -20.439 | 23.009 | 1.00 | 0.00 | C |
| ATOM | 968  | O4   | T B | 13 | -16.681 | -19.393 | 22.480 | 1.00 | 0.00 | O |
| ATOM | 969  | C5   | T B | 13 | -16.373 | -21.701 | 22.977 | 1.00 | 0.00 | C |
| ATOM | 970  | C6   | T B | 13 | -16.883 | -22.792 | 23.581 | 1.00 | 0.00 | C |
| ATOM | 971  | C7   | T B | 13 | -15.067 | -21.708 | 22.239 | 1.00 | 0.00 | C |
| ATOM | 972  | C2'  | T B | 13 | -18.400 | -25.237 | 24.137 | 1.00 | 0.00 | C |
| ATOM | 973  | C3'  | T B | 13 | -18.182 | -26.241 | 25.258 | 1.00 | 0.00 | C |
| ATOM | 974  | O3'  | T B | 13 | -19.447 | -26.714 | 25.714 | 1.00 | 0.00 | O |
| ATOM | 975  | C4'  | T B | 13 | -17.457 | -25.415 | 26.318 | 1.00 | 0.00 | C |
| ATOM | 976  | O4'  | T B | 13 | -18.015 | -24.070 | 26.172 | 1.00 | 0.00 | O |
| ATOM | 977  | C5'  | T B | 13 | -15.953 | -25.331 | 26.192 | 1.00 | 0.00 | C |
| ATOM | 978  | O5'  | T B | 13 | -15.582 | -25.278 | 24.791 | 1.00 | 0.00 | O |
| ATOM | 979  | O1P  | T B | 13 | -14.352 | -27.442 | 24.431 | 1.00 | 0.00 | O |
| ATOM | 980  | O2P  | T B | 13 | -13.826 | -25.448 | 23.002 | 1.00 | 0.00 | O |
| ATOM | 981  | P    | T B | 13 | -14.225 | -25.975 | 24.330 | 1.00 | 0.00 | P |
| ATOM | 982  | H3   | T B | 13 | -18.801 | -19.595 | 23.750 | 1.00 | 0.00 | H |
| ATOM | 983  | H6   | T B | 13 | -16.335 | -23.733 | 23.542 | 1.00 | 0.00 | H |
| ATOM | 984  | H1'  | T B | 13 | -19.705 | -23.784 | 25.078 | 1.00 | 0.00 | H |
| ATOM | 985  | H3'  | T B | 13 | -17.576 | -27.087 | 24.935 | 1.00 | 0.00 | H |
| ATOM | 986  | H4'  | T B | 13 | -17.684 | -25.870 | 27.283 | 1.00 | 0.00 | H |
| ATOM | 987  | H71  | T B | 13 | -15.148 | -22.348 | 21.361 | 1.00 | 0.00 | H |
| ATOM | 988  | H72  | T B | 13 | -14.821 | -20.692 | 21.926 | 1.00 | 0.00 | H |
| ATOM | 989  | H73  | T B | 13 | -14.280 | -22.086 | 22.893 | 1.00 | 0.00 | H |
| ATOM | 990  | H2'1 | T B | 13 | -17.529 | -25.173 | 23.487 | 1.00 | 0.00 | H |
| ATOM | 991  | H2'2 | T B | 13 | -19.253 | -25.513 | 23.517 | 1.00 | 0.00 | H |
| ATOM | 992  | H5'1 | T B | 13 | -15.601 | -24.436 | 26.703 | 1.00 | 0.00 | H |
| ATOM | 993  | H5'2 | T B | 13 | -15.506 | -26.209 | 26.657 | 1.00 | 0.00 | H |
| ATOM | 994  | C1'  | G B | 14 | -23.359 | -23.116 | 23.606 | 1.00 | 0.00 | C |
| ATOM | 995  | N1   | G B | 14 | -21.395 | -19.104 | 21.142 | 1.00 | 0.00 | N |
| ATOM | 996  | C2   | G B | 14 | -22.545 | -19.201 | 21.905 | 1.00 | 0.00 | C |
| ATOM | 997  | N2   | G B | 14 | -23.269 | -18.083 | 22.027 | 1.00 | 0.00 | N |
| ATOM | 998  | N3   | G B | 14 | -22.940 | -20.326 | 22.500 | 1.00 | 0.00 | N |
| ATOM | 999  | C4   | G B | 14 | -22.090 | -21.361 | 22.265 | 1.00 | 0.00 | C |
| ATOM | 1000 | C5   | G B | 14 | -20.927 | -21.358 | 21.515 | 1.00 | 0.00 | C |
| ATOM | 1001 | C6   | G B | 14 | -20.504 | -20.164 | 20.886 | 1.00 | 0.00 | C |
| ATOM | 1002 | O6   | G B | 14 | -19.510 | -19.965 | 20.187 | 1.00 | 0.00 | O |

|      |      |      |     |    |         |         |        |      |      |   |
|------|------|------|-----|----|---------|---------|--------|------|------|---|
| ATOM | 1003 | N7   | G B | 14 | -20.345 | -22.628 | 21.520 | 1.00 | 0.00 | N |
| ATOM | 1004 | C8   | G B | 14 | -21.156 | -23.343 | 22.258 | 1.00 | 0.00 | C |
| ATOM | 1005 | N9   | G B | 14 | -22.241 | -22.643 | 22.745 | 1.00 | 0.00 | N |
| ATOM | 1006 | C2'  | G B | 14 | -23.822 | -24.531 | 23.288 | 1.00 | 0.00 | C |
| ATOM | 1007 | C3'  | G B | 14 | -24.179 | -25.067 | 24.665 | 1.00 | 0.00 | C |
| ATOM | 1008 | O3'  | G B | 14 | -25.509 | -24.671 | 24.990 | 1.00 | 0.00 | O |
| ATOM | 1009 | C4'  | G B | 14 | -23.141 | -24.401 | 25.567 | 1.00 | 0.00 | C |
| ATOM | 1010 | O4'  | G B | 14 | -22.909 | -23.097 | 24.947 | 1.00 | 0.00 | O |
| ATOM | 1011 | C5'  | G B | 14 | -21.817 | -25.114 | 25.707 | 1.00 | 0.00 | C |
| ATOM | 1012 | O5'  | G B | 14 | -21.453 | -25.725 | 24.444 | 1.00 | 0.00 | O |
| ATOM | 1013 | O1P  | G B | 14 | -21.538 | -28.190 | 24.944 | 1.00 | 0.00 | O |
| ATOM | 1014 | O2P  | G B | 14 | -20.025 | -27.328 | 23.138 | 1.00 | 0.00 | O |
| ATOM | 1015 | P    | G B | 14 | -20.659 | -27.108 | 24.461 | 1.00 | 0.00 | P |
| ATOM | 1016 | H1   | G B | 14 | -21.174 | -18.185 | 20.729 | 1.00 | 0.00 | H |
| ATOM | 1017 | H8   | G B | 14 | -20.989 | -24.400 | 22.469 | 1.00 | 0.00 | H |
| ATOM | 1018 | H1'  | G B | 14 | -24.182 | -22.406 | 23.519 | 1.00 | 0.00 | H |
| ATOM | 1019 | H21  | G B | 14 | -22.954 | -17.215 | 21.566 | 1.00 | 0.00 | H |
| ATOM | 1020 | H3'  | G B | 14 | -24.102 | -26.153 | 24.713 | 1.00 | 0.00 | H |
| ATOM | 1021 | H22  | G B | 14 | -24.138 | -18.089 | 22.579 | 1.00 | 0.00 | H |
| ATOM | 1022 | H4'  | G B | 14 | -23.586 | -24.327 | 26.560 | 1.00 | 0.00 | H |
| ATOM | 1023 | H2'1 | G B | 14 | -23.038 | -25.128 | 22.821 | 1.00 | 0.00 | H |
| ATOM | 1024 | H2'2 | G B | 14 | -24.684 | -24.544 | 22.621 | 1.00 | 0.00 | H |
| ATOM | 1025 | H5'1 | G B | 14 | -21.053 | -24.395 | 26.001 | 1.00 | 0.00 | H |
| ATOM | 1026 | H5'2 | G B | 14 | -21.903 | -25.880 | 26.476 | 1.00 | 0.00 | H |
| ATOM | 1027 | C1'  | C B | 15 | -26.975 | -20.627 | 21.314 | 1.00 | 0.00 | C |
| ATOM | 1028 | N1   | C B | 15 | -25.760 | -21.054 | 20.569 | 1.00 | 0.00 | N |
| ATOM | 1029 | C2   | C B | 15 | -25.078 | -20.093 | 19.826 | 1.00 | 0.00 | C |
| ATOM | 1030 | O2   | C B | 15 | -25.507 | -18.931 | 19.817 | 1.00 | 0.00 | O |
| ATOM | 1031 | N3   | C B | 15 | -23.969 | -20.461 | 19.140 | 1.00 | 0.00 | N |
| ATOM | 1032 | C4   | C B | 15 | -23.530 | -21.725 | 19.169 | 1.00 | 0.00 | C |
| ATOM | 1033 | N4   | C B | 15 | -22.439 | -22.030 | 18.483 | 1.00 | 0.00 | N |
| ATOM | 1034 | C5   | C B | 15 | -24.214 | -22.738 | 19.921 | 1.00 | 0.00 | C |
| ATOM | 1035 | C6   | C B | 15 | -25.325 | -22.342 | 20.608 | 1.00 | 0.00 | C |
| ATOM | 1036 | C2'  | C B | 15 | -28.091 | -21.662 | 21.314 | 1.00 | 0.00 | C |
| ATOM | 1037 | C3'  | C B | 15 | -28.691 | -21.484 | 22.701 | 1.00 | 0.00 | C |
| ATOM | 1038 | O3'  | C B | 15 | -29.639 | -20.418 | 22.668 | 1.00 | 0.00 | O |
| ATOM | 1039 | C4'  | C B | 15 | -27.472 | -21.145 | 23.556 | 1.00 | 0.00 | C |
| ATOM | 1040 | O4'  | C B | 15 | -26.596 | -20.393 | 22.658 | 1.00 | 0.00 | O |
| ATOM | 1041 | C5'  | C B | 15 | -26.698 | -22.318 | 24.115 | 1.00 | 0.00 | C |
| ATOM | 1042 | O5'  | C B | 15 | -26.682 | -23.398 | 23.150 | 1.00 | 0.00 | O |
| ATOM | 1043 | O1P  | C B | 15 | -28.019 | -25.209 | 24.277 | 1.00 | 0.00 | O |
| ATOM | 1044 | O2P  | C B | 15 | -26.253 | -25.814 | 22.601 | 1.00 | 0.00 | O |
| ATOM | 1045 | P    | C B | 15 | -26.703 | -24.902 | 23.680 | 1.00 | 0.00 | P |
| ATOM | 1046 | H5   | C B | 15 | -23.864 | -23.770 | 19.942 | 1.00 | 0.00 | H |
| ATOM | 1047 | H6   | C B | 15 | -25.876 | -23.075 | 21.199 | 1.00 | 0.00 | H |
| ATOM | 1048 | H1'  | C B | 15 | -27.319 | -19.682 | 20.893 | 1.00 | 0.00 | H |
| ATOM | 1049 | H3'  | C B | 15 | -29.180 | -22.391 | 23.054 | 1.00 | 0.00 | H |
| ATOM | 1050 | H4'  | C B | 15 | -27.830 | -20.553 | 24.398 | 1.00 | 0.00 | H |
| ATOM | 1051 | H41  | C B | 15 | -22.077 | -22.995 | 18.490 | 1.00 | 0.00 | H |
| ATOM | 1052 | H42  | C B | 15 | -21.950 | -21.301 | 17.941 | 1.00 | 0.00 | H |
| ATOM | 1053 | H2'1 | C B | 15 | -27.716 | -22.675 | 21.172 | 1.00 | 0.00 | H |
| ATOM | 1054 | H2'2 | C B | 15 | -28.830 | -21.475 | 20.535 | 1.00 | 0.00 | H |
| ATOM | 1055 | H5'1 | C B | 15 | -25.678 | -22.001 | 24.333 | 1.00 | 0.00 | H |
| ATOM | 1056 | H5'2 | C B | 15 | -27.174 | -22.654 | 25.036 | 1.00 | 0.00 | H |

|      |      |      |     |    |         |         |        |      |      |   |
|------|------|------|-----|----|---------|---------|--------|------|------|---|
| ATOM | 1057 | C1'  | G B | 16 | -28.778 | -17.618 | 17.819 | 1.00 | 0.00 | C |
| ATOM | 1058 | N1   | G B | 16 | -24.720 | -19.201 | 15.164 | 1.00 | 0.00 | N |
| ATOM | 1059 | C2   | G B | 16 | -25.259 | -17.933 | 15.291 | 1.00 | 0.00 | C |
| ATOM | 1060 | N2   | G B | 16 | -24.633 | -16.957 | 14.620 | 1.00 | 0.00 | N |
| ATOM | 1061 | N3   | G B | 16 | -26.334 | -17.660 | 16.029 | 1.00 | 0.00 | N |
| ATOM | 1062 | C4   | G B | 16 | -26.840 | -18.767 | 16.632 | 1.00 | 0.00 | C |
| ATOM | 1063 | C5   | G B | 16 | -26.374 | -20.069 | 16.559 | 1.00 | 0.00 | C |
| ATOM | 1064 | C6   | G B | 16 | -25.231 | -20.359 | 15.779 | 1.00 | 0.00 | C |
| ATOM | 1065 | O6   | G B | 16 | -24.672 | -21.441 | 15.593 | 1.00 | 0.00 | O |
| ATOM | 1066 | N7   | G B | 16 | -27.180 | -20.914 | 17.325 | 1.00 | 0.00 | N |
| ATOM | 1067 | C8   | G B | 16 | -28.087 | -20.116 | 17.829 | 1.00 | 0.00 | C |
| ATOM | 1068 | N9   | G B | 16 | -27.947 | -18.796 | 17.452 | 1.00 | 0.00 | N |
| ATOM | 1069 | C2'  | G B | 16 | -30.267 | -17.922 | 17.909 | 1.00 | 0.00 | C |
| ATOM | 1070 | C3'  | G B | 16 | -30.705 | -17.030 | 19.060 | 1.00 | 0.00 | C |
| ATOM | 1071 | O3'  | G B | 16 | -30.971 | -15.721 | 18.562 | 1.00 | 0.00 | O |
| ATOM | 1072 | C4'  | G B | 16 | -29.495 | -17.058 | 19.991 | 1.00 | 0.00 | C |
| ATOM | 1073 | O4'  | G B | 16 | -28.348 | -17.165 | 19.088 | 1.00 | 0.00 | O |
| ATOM | 1074 | C5'  | G B | 16 | -29.437 | -18.196 | 20.983 | 1.00 | 0.00 | C |
| ATOM | 1075 | O5'  | G B | 16 | -29.966 | -19.401 | 20.377 | 1.00 | 0.00 | O |
| ATOM | 1076 | O1P  | G B | 16 | -32.054 | -19.854 | 21.707 | 1.00 | 0.00 | O |
| ATOM | 1077 | O2P  | G B | 16 | -30.831 | -21.749 | 20.609 | 1.00 | 0.00 | O |
| ATOM | 1078 | P    | G B | 16 | -30.763 | -20.435 | 21.294 | 1.00 | 0.00 | P |
| ATOM | 1079 | H1   | G B | 16 | -23.881 | -19.304 | 14.573 | 1.00 | 0.00 | H |
| ATOM | 1080 | H8   | G B | 16 | -28.882 | -20.463 | 18.487 | 1.00 | 0.00 | H |
| ATOM | 1081 | H1'  | G B | 16 | -28.584 | -16.824 | 17.097 | 1.00 | 0.00 | H |
| ATOM | 1082 | H21  | G B | 16 | -23.801 | -17.175 | 14.054 | 1.00 | 0.00 | H |
| ATOM | 1083 | H3'  | G B | 16 | -31.595 | -17.414 | 19.559 | 1.00 | 0.00 | H |
| ATOM | 1084 | H22  | G B | 16 | -24.987 | -15.991 | 14.672 | 1.00 | 0.00 | H |
| ATOM | 1085 | H4'  | G B | 16 | -29.507 | -16.125 | 20.555 | 1.00 | 0.00 | H |
| ATOM | 1086 | H2'1 | G B | 16 | -30.462 | -18.973 | 18.125 | 1.00 | 0.00 | H |
| ATOM | 1087 | H2'2 | G B | 16 | -30.797 | -17.673 | 16.990 | 1.00 | 0.00 | H |
| ATOM | 1088 | H5'1 | G B | 16 | -28.402 | -18.357 | 21.283 | 1.00 | 0.00 | H |
| ATOM | 1089 | H5'2 | G B | 16 | -30.028 | -17.934 | 21.861 | 1.00 | 0.00 | H |
| ATOM | 1090 | C1'  | G B | 17 | -28.742 | -15.447 | 13.368 | 1.00 | 0.00 | C |
| ATOM | 1091 | N1   | G B | 17 | -26.030 | -19.552 | 12.019 | 1.00 | 0.00 | N |
| ATOM | 1092 | C2   | G B | 17 | -25.846 | -18.219 | 11.694 | 1.00 | 0.00 | C |
| ATOM | 1093 | N2   | G B | 17 | -24.801 | -17.945 | 10.904 | 1.00 | 0.00 | N |
| ATOM | 1094 | N3   | G B | 17 | -26.639 | -17.241 | 12.125 | 1.00 | 0.00 | N |
| ATOM | 1095 | C4   | G B | 17 | -27.649 | -17.702 | 12.907 | 1.00 | 0.00 | C |
| ATOM | 1096 | C5   | G B | 17 | -27.913 | -19.008 | 13.280 | 1.00 | 0.00 | C |
| ATOM | 1097 | C6   | G B | 17 | -27.070 | -20.047 | 12.827 | 1.00 | 0.00 | C |
| ATOM | 1098 | O6   | G B | 17 | -27.140 | -21.257 | 13.048 | 1.00 | 0.00 | O |
| ATOM | 1099 | N7   | G B | 17 | -29.048 | -19.059 | 14.093 | 1.00 | 0.00 | N |
| ATOM | 1100 | C8   | G B | 17 | -29.425 | -17.810 | 14.187 | 1.00 | 0.00 | C |
| ATOM | 1101 | N9   | G B | 17 | -28.626 | -16.926 | 13.493 | 1.00 | 0.00 | N |
| ATOM | 1102 | C2'  | G B | 17 | -30.178 | -14.951 | 13.271 | 1.00 | 0.00 | C |
| ATOM | 1103 | C3'  | G B | 17 | -30.113 | -13.638 | 14.035 | 1.00 | 0.00 | C |
| ATOM | 1104 | O3'  | G B | 17 | -29.666 | -12.608 | 13.157 | 1.00 | 0.00 | O |
| ATOM | 1105 | C4'  | G B | 17 | -29.100 | -13.936 | 15.138 | 1.00 | 0.00 | C |
| ATOM | 1106 | O4'  | G B | 17 | -28.158 | -14.869 | 14.520 | 1.00 | 0.00 | O |
| ATOM | 1107 | C5'  | G B | 17 | -29.646 | -14.565 | 16.398 | 1.00 | 0.00 | C |
| ATOM | 1108 | O5'  | G B | 17 | -30.708 | -15.492 | 16.063 | 1.00 | 0.00 | O |
| ATOM | 1109 | O1P  | G B | 17 | -32.752 | -14.423 | 17.072 | 1.00 | 0.00 | O |
| ATOM | 1110 | O2P  | G B | 17 | -32.656 | -16.913 | 16.775 | 1.00 | 0.00 | O |

|      |      |      |     |    |         |         |        |      |      |   |
|------|------|------|-----|----|---------|---------|--------|------|------|---|
| ATOM | 1111 | P    | G B | 17 | -31.935 | -15.651 | 17.072 | 1.00 | 0.00 | P |
| ATOM | 1112 | H1   | G B | 17 | -25.354 | -20.232 | 11.638 | 1.00 | 0.00 | H |
| ATOM | 1113 | H8   | G B | 17 | -30.295 | -17.495 | 14.763 | 1.00 | 0.00 | H |
| ATOM | 1114 | H1'  | G B | 17 | -28.160 | -15.131 | 12.503 | 1.00 | 0.00 | H |
| ATOM | 1115 | H21  | G B | 17 | -24.188 | -18.706 | 10.577 | 1.00 | 0.00 | H |
| ATOM | 1116 | H3'  | G B | 17 | -31.080 | -13.360 | 14.454 | 1.00 | 0.00 | H |
| ATOM | 1117 | H22  | G B | 17 | -24.610 | -16.972 | 10.624 | 1.00 | 0.00 | H |
| ATOM | 1118 | H4'  | G B | 17 | -28.641 | -12.987 | 15.412 | 1.00 | 0.00 | H |
| ATOM | 1119 | H2'1 | G B | 17 | -30.886 | -15.642 | 13.730 | 1.00 | 0.00 | H |
| ATOM | 1120 | H2'2 | G B | 17 | -30.494 | -14.796 | 12.240 | 1.00 | 0.00 | H |
| ATOM | 1121 | H5'1 | G B | 17 | -28.843 | -15.095 | 16.911 | 1.00 | 0.00 | H |
| ATOM | 1122 | H5'2 | G B | 17 | -30.032 | -13.782 | 17.051 | 1.00 | 0.00 | H |
| ATOM | 1123 | C1'  | C B | 18 | -27.540 | -15.155 | 8.572  | 1.00 | 0.00 | C |
| ATOM | 1124 | N1   | C B | 18 | -28.193 | -16.377 | 9.117  | 1.00 | 0.00 | N |
| ATOM | 1125 | C2   | C B | 18 | -27.597 | -17.608 | 8.851  | 1.00 | 0.00 | C |
| ATOM | 1126 | O2   | C B | 18 | -26.558 | -17.636 | 8.180  | 1.00 | 0.00 | O |
| ATOM | 1127 | N3   | C B | 18 | -28.177 | -18.732 | 9.337  | 1.00 | 0.00 | N |
| ATOM | 1128 | C4   | C B | 18 | -29.302 | -18.668 | 10.060 | 1.00 | 0.00 | C |
| ATOM | 1129 | N4   | C B | 18 | -29.824 | -19.800 | 10.512 | 1.00 | 0.00 | N |
| ATOM | 1130 | C5   | C B | 18 | -29.937 | -17.417 | 10.346 | 1.00 | 0.00 | C |
| ATOM | 1131 | C6   | C B | 18 | -29.335 | -16.299 | 9.849  | 1.00 | 0.00 | C |
| ATOM | 1132 | C2'  | C B | 18 | -28.523 | -14.098 | 8.086  | 1.00 | 0.00 | C |
| ATOM | 1133 | C3'  | C B | 18 | -27.811 | -12.807 | 8.461  | 1.00 | 0.00 | C |
| ATOM | 1134 | O3'  | C B | 18 | -26.887 | -12.466 | 7.430  | 1.00 | 0.00 | O |
| ATOM | 1135 | C4'  | C B | 18 | -27.110 | -13.173 | 9.767  | 1.00 | 0.00 | C |
| ATOM | 1136 | O4'  | C B | 18 | -26.763 | -14.585 | 9.609  | 1.00 | 0.00 | O |
| ATOM | 1137 | C5'  | C B | 18 | -27.920 | -13.013 | 11.032 | 1.00 | 0.00 | C |
| ATOM | 1138 | O5'  | C B | 18 | -29.302 | -13.374 | 10.776 | 1.00 | 0.00 | O |
| ATOM | 1139 | O1P  | C B | 18 | -30.535 | -11.199 | 11.070 | 1.00 | 0.00 | O |
| ATOM | 1140 | O2P  | C B | 18 | -31.713 | -13.375 | 11.487 | 1.00 | 0.00 | O |
| ATOM | 1141 | P    | C B | 18 | -30.455 | -12.592 | 11.553 | 1.00 | 0.00 | P |
| ATOM | 1142 | H5   | C B | 18 | -30.855 | -17.361 | 10.931 | 1.00 | 0.00 | H |
| ATOM | 1143 | H6   | C B | 18 | -29.780 | -15.324 | 10.044 | 1.00 | 0.00 | H |
| ATOM | 1144 | H1'  | C B | 18 | -26.864 | -15.457 | 7.773  | 1.00 | 0.00 | H |
| ATOM | 1145 | H3'  | C B | 18 | -28.510 | -11.984 | 8.606  | 1.00 | 0.00 | H |
| ATOM | 1146 | H4'  | C B | 18 | -26.236 | -12.526 | 9.850  | 1.00 | 0.00 | H |
| ATOM | 1147 | H41  | C B | 18 | -30.689 | -19.779 | 11.073 | 1.00 | 0.00 | H |
| ATOM | 1148 | H42  | C B | 18 | -29.365 | -20.698 | 10.305 | 1.00 | 0.00 | H |
| ATOM | 1149 | H2'1 | C B | 18 | -29.491 | -14.175 | 8.580  | 1.00 | 0.00 | H |
| ATOM | 1150 | H2'2 | C B | 18 | -28.697 | -14.159 | 7.012  | 1.00 | 0.00 | H |
| ATOM | 1151 | H5'1 | C B | 18 | -27.509 | -13.661 | 11.806 | 1.00 | 0.00 | H |
| ATOM | 1152 | H5'2 | C B | 18 | -27.866 | -11.978 | 11.364 | 1.00 | 0.00 | H |
| ATOM | 1153 | C1'  | C B | 19 | -26.295 | -17.063 | 4.175  | 1.00 | 0.00 | C |
| ATOM | 1154 | N1   | C B | 19 | -27.488 | -17.567 | 4.909  | 1.00 | 0.00 | N |
| ATOM | 1155 | C2   | C B | 19 | -27.602 | -18.943 | 5.103  | 1.00 | 0.00 | C |
| ATOM | 1156 | O2   | C B | 19 | -26.714 | -19.684 | 4.663  | 1.00 | 0.00 | O |
| ATOM | 1157 | N3   | C B | 19 | -28.681 | -19.421 | 5.769  | 1.00 | 0.00 | N |
| ATOM | 1158 | C4   | C B | 19 | -29.626 | -18.592 | 6.233  | 1.00 | 0.00 | C |
| ATOM | 1159 | N4   | C B | 19 | -30.658 | -19.113 | 6.877  | 1.00 | 0.00 | N |
| ATOM | 1160 | C5   | C B | 19 | -29.534 | -17.176 | 6.046  | 1.00 | 0.00 | C |
| ATOM | 1161 | C6   | C B | 19 | -28.440 | -16.717 | 5.375  | 1.00 | 0.00 | C |
| ATOM | 1162 | C2'  | C B | 19 | -26.593 | -15.892 | 3.251  | 1.00 | 0.00 | C |
| ATOM | 1163 | C3'  | C B | 19 | -25.326 | -15.059 | 3.376  | 1.00 | 0.00 | C |
| ATOM | 1164 | O3'  | C B | 19 | -24.344 | -15.562 | 2.473  | 1.00 | 0.00 | O |

|      |      |      |     |    |         |         |        |      |      |   |
|------|------|------|-----|----|---------|---------|--------|------|------|---|
| ATOM | 1165 | C4'  | C B | 19 | -24.927 | -15.265 | 4.836  | 1.00 | 0.00 | C |
| ATOM | 1166 | O4'  | C B | 19 | -25.350 | -16.633 | 5.137  | 1.00 | 0.00 | O |
| ATOM | 1167 | C5'  | C B | 19 | -25.561 | -14.333 | 5.843  | 1.00 | 0.00 | C |
| ATOM | 1168 | O5'  | C B | 19 | -26.928 | -14.047 | 5.455  | 1.00 | 0.00 | O |
| ATOM | 1169 | O1P  | C B | 19 | -26.878 | -11.590 | 4.913  | 1.00 | 0.00 | O |
| ATOM | 1170 | O2P  | C B | 19 | -29.008 | -12.660 | 5.695  | 1.00 | 0.00 | O |
| ATOM | 1171 | P    | C B | 19 | -27.528 | -12.604 | 5.767  | 1.00 | 0.00 | P |
| ATOM | 1172 | H5   | C B | 19 | -30.300 | -16.498 | 6.420  | 1.00 | 0.00 | H |
| ATOM | 1173 | H6   | C B | 19 | -28.325 | -15.646 | 5.210  | 1.00 | 0.00 | H |
| ATOM | 1174 | H1'  | C B | 19 | -25.858 | -17.896 | 3.623  | 1.00 | 0.00 | H |
| ATOM | 1175 | H3'  | C B | 19 | -25.508 | -14.006 | 3.163  | 1.00 | 0.00 | H |
| ATOM | 1176 | H4'  | C B | 19 | -23.847 | -15.131 | 4.892  | 1.00 | 0.00 | H |
| ATOM | 1177 | H41  | C B | 19 | -31.399 | -18.499 | 7.247  | 1.00 | 0.00 | H |
| ATOM | 1178 | H42  | C B | 19 | -30.722 | -20.134 | 7.010  | 1.00 | 0.00 | H |
| ATOM | 1179 | H2'1 | C B | 19 | -27.470 | -15.328 | 3.566  | 1.00 | 0.00 | H |
| ATOM | 1180 | H2'2 | C B | 19 | -26.759 | -16.209 | 2.221  | 1.00 | 0.00 | H |
| ATOM | 1181 | H5'1 | C B | 19 | -25.546 | -14.804 | 6.825  | 1.00 | 0.00 | H |
| ATOM | 1182 | H5'2 | C B | 19 | -24.987 | -13.408 | 5.882  | 1.00 | 0.00 | H |
| ATOM | 1183 | C1'  | T B | 20 | -26.128 | -20.641 | 0.758  | 1.00 | 0.00 | C |
| ATOM | 1184 | N1   | T B | 20 | -27.424 | -20.260 | 1.380  | 1.00 | 0.00 | N |
| ATOM | 1185 | C2   | T B | 20 | -28.194 | -21.278 | 1.904  | 1.00 | 0.00 | C |
| ATOM | 1186 | O2   | T B | 20 | -27.852 | -22.448 | 1.873  | 1.00 | 0.00 | O |
| ATOM | 1187 | N3   | T B | 20 | -29.389 | -20.880 | 2.472  | 1.00 | 0.00 | N |
| ATOM | 1188 | C4   | T B | 20 | -29.868 | -19.591 | 2.559  | 1.00 | 0.00 | C |
| ATOM | 1189 | O4   | T B | 20 | -30.960 | -19.356 | 3.092  | 1.00 | 0.00 | O |
| ATOM | 1190 | C5   | T B | 20 | -28.995 | -18.597 | 1.985  | 1.00 | 0.00 | C |
| ATOM | 1191 | C6   | T B | 20 | -27.822 | -18.947 | 1.423  | 1.00 | 0.00 | C |
| ATOM | 1192 | C7   | T B | 20 | -29.477 | -17.178 | 2.058  | 1.00 | 0.00 | C |
| ATOM | 1193 | C2'  | T B | 20 | -25.782 | -19.830 | -0.485 | 1.00 | 0.00 | C |
| ATOM | 1194 | C3'  | T B | 20 | -24.271 | -19.701 | -0.369 | 1.00 | 0.00 | C |
| ATOM | 1195 | O3'  | T B | 20 | -23.658 | -20.864 | -0.921 | 1.00 | 0.00 | O |
| ATOM | 1196 | C4'  | T B | 20 | -24.053 | -19.592 | 1.138  | 1.00 | 0.00 | C |
| ATOM | 1197 | O4'  | T B | 20 | -25.109 | -20.425 | 1.716  | 1.00 | 0.00 | O |
| ATOM | 1198 | C5'  | T B | 20 | -24.150 | -18.207 | 1.733  | 1.00 | 0.00 | C |
| ATOM | 1199 | O5'  | T B | 20 | -25.184 | -17.452 | 1.051  | 1.00 | 0.00 | O |
| ATOM | 1200 | O1P  | T B | 20 | -23.902 | -15.627 | -0.112 | 1.00 | 0.00 | O |
| ATOM | 1201 | O2P  | T B | 20 | -26.294 | -15.256 | 0.547  | 1.00 | 0.00 | O |
| ATOM | 1202 | P    | T B | 20 | -24.986 | -15.883 | 0.856  | 1.00 | 0.00 | P |
| ATOM | 1203 | H3   | T B | 20 | -29.982 | -21.621 | 2.871  | 1.00 | 0.00 | H |
| ATOM | 1204 | H6   | T B | 20 | -27.179 | -18.178 | 0.996  | 1.00 | 0.00 | H |
| ATOM | 1205 | H1'  | T B | 20 | -26.156 | -21.707 | 0.533  | 1.00 | 0.00 | H |
| ATOM | 1206 | H3'  | T B | 20 | -23.897 | -18.818 | -0.886 | 1.00 | 0.00 | H |
| ATOM | 1207 | H4'  | T B | 20 | -23.051 | -19.972 | 1.341  | 1.00 | 0.00 | H |
| ATOM | 1208 | H3T  | T B | 20 | -23.932 | -21.085 | -1.814 | 1.00 | 0.00 | H |
| ATOM | 1209 | H71  | T B | 20 | -29.668 | -16.806 | 1.052  | 1.00 | 0.00 | H |
| ATOM | 1210 | H72  | T B | 20 | -30.397 | -17.136 | 2.643  | 1.00 | 0.00 | H |
| ATOM | 1211 | H73  | T B | 20 | -28.717 | -16.559 | 2.536  | 1.00 | 0.00 | H |
| ATOM | 1212 | H2'1 | T B | 20 | -26.264 | -18.854 | -0.488 | 1.00 | 0.00 | H |
| ATOM | 1213 | H2'2 | T B | 20 | -26.068 | -20.341 | -1.404 | 1.00 | 0.00 | H |
| ATOM | 1214 | H5'1 | T B | 20 | -24.390 | -18.288 | 2.793  | 1.00 | 0.00 | H |
| ATOM | 1215 | H5'2 | T B | 20 | -23.192 | -17.702 | 1.620  | 1.00 | 0.00 | H |
| TER  |      |      |     |    |         |         |        |      |      |   |
| ATOM | 1    | C1'  | A A | 1  | -17.347 | -85.394 | 65.888 | 1.00 | 0.00 | C |
| ATOM | 2    | N1   | A A | 1  | -22.171 | -84.698 | 67.494 | 1.00 | 0.00 | N |

|      |    |      |     |   |         |         |        |      |      |   |
|------|----|------|-----|---|---------|---------|--------|------|------|---|
| ATOM | 3  | C2   | A A | 1 | -21.634 | -84.804 | 66.282 | 1.00 | 0.00 | C |
| ATOM | 4  | N3   | A A | 1 | -20.377 | -84.986 | 65.938 | 1.00 | 0.00 | N |
| ATOM | 5  | C4   | A A | 1 | -19.599 | -85.059 | 67.032 | 1.00 | 0.00 | C |
| ATOM | 6  | C5   | A A | 1 | -19.992 | -84.968 | 68.339 | 1.00 | 0.00 | C |
| ATOM | 7  | C6   | A A | 1 | -21.371 | -84.775 | 68.568 | 1.00 | 0.00 | C |
| ATOM | 8  | N6   | A A | 1 | -21.903 | -84.668 | 69.798 | 1.00 | 0.00 | N |
| ATOM | 9  | N7   | A A | 1 | -18.912 | -85.088 | 69.194 | 1.00 | 0.00 | N |
| ATOM | 10 | C8   | A A | 1 | -17.898 | -85.245 | 68.395 | 1.00 | 0.00 | C |
| ATOM | 11 | N9   | A A | 1 | -18.239 | -85.239 | 67.069 | 1.00 | 0.00 | N |
| ATOM | 12 | C2'  | A A | 1 | -15.994 | -84.714 | 66.048 | 1.00 | 0.00 | C |
| ATOM | 13 | C3'  | A A | 1 | -15.070 | -85.673 | 65.315 | 1.00 | 0.00 | C |
| ATOM | 14 | O3'  | A A | 1 | -15.091 | -85.372 | 63.922 | 1.00 | 0.00 | O |
| ATOM | 15 | C4'  | A A | 1 | -15.684 | -87.039 | 65.620 | 1.00 | 0.00 | C |
| ATOM | 16 | O4'  | A A | 1 | -17.122 | -86.777 | 65.697 | 1.00 | 0.00 | O |
| ATOM | 17 | C5'  | A A | 1 | -15.243 | -87.701 | 66.903 | 1.00 | 0.00 | C |
| ATOM | 18 | O5'  | A A | 1 | -15.055 | -86.698 | 67.934 | 1.00 | 0.00 | O |
| ATOM | 19 | H2   | A A | 1 | -22.337 | -84.729 | 65.453 | 1.00 | 0.00 | H |
| ATOM | 20 | H8   | A A | 1 | -16.874 | -85.371 | 68.748 | 1.00 | 0.00 | H |
| ATOM | 21 | H1'  | A A | 1 | -17.873 | -85.016 | 65.012 | 1.00 | 0.00 | H |
| ATOM | 22 | H3'  | A A | 1 | -14.044 | -85.613 | 65.681 | 1.00 | 0.00 | H |
| ATOM | 23 | H4'  | A A | 1 | -15.414 | -87.698 | 64.795 | 1.00 | 0.00 | H |
| ATOM | 24 | H61  | A A | 1 | -22.915 | -84.529 | 69.910 | 1.00 | 0.00 | H |
| ATOM | 25 | H62  | A A | 1 | -21.293 | -84.726 | 70.626 | 1.00 | 0.00 | H |
| ATOM | 26 | H5T  | A A | 1 | -14.363 | -86.829 | 68.585 | 1.00 | 0.00 | H |
| ATOM | 27 | H2'1 | A A | 1 | -15.705 | -84.607 | 67.093 | 1.00 | 0.00 | H |
| ATOM | 28 | H2'2 | A A | 1 | -15.974 | -83.722 | 65.597 | 1.00 | 0.00 | H |
| ATOM | 29 | H5'1 | A A | 1 | -16.005 | -88.413 | 67.218 | 1.00 | 0.00 | H |
| ATOM | 30 | H5'2 | A A | 1 | -14.308 | -88.230 | 66.731 | 1.00 | 0.00 | H |
| ATOM | 31 | C1'  | G A | 2 | -19.616 | -81.984 | 63.082 | 1.00 | 0.00 | C |
| ATOM | 32 | N1   | G A | 2 | -22.520 | -81.306 | 67.219 | 1.00 | 0.00 | N |
| ATOM | 33 | C2   | G A | 2 | -22.878 | -81.370 | 65.887 | 1.00 | 0.00 | C |
| ATOM | 34 | N2   | G A | 2 | -24.181 | -81.234 | 65.619 | 1.00 | 0.00 | N |
| ATOM | 35 | N3   | G A | 2 | -22.005 | -81.556 | 64.898 | 1.00 | 0.00 | N |
| ATOM | 36 | C4   | G A | 2 | -20.728 | -81.667 | 65.351 | 1.00 | 0.00 | C |
| ATOM | 37 | C5   | G A | 2 | -20.277 | -81.613 | 66.660 | 1.00 | 0.00 | C |
| ATOM | 38 | C6   | G A | 2 | -21.206 | -81.420 | 67.710 | 1.00 | 0.00 | C |
| ATOM | 39 | O6   | G A | 2 | -21.003 | -81.346 | 68.922 | 1.00 | 0.00 | O |
| ATOM | 40 | N7   | G A | 2 | -18.890 | -81.769 | 66.700 | 1.00 | 0.00 | N |
| ATOM | 41 | C8   | G A | 2 | -18.552 | -81.914 | 65.444 | 1.00 | 0.00 | C |
| ATOM | 42 | N9   | G A | 2 | -19.614 | -81.862 | 64.564 | 1.00 | 0.00 | N |
| ATOM | 43 | C2'  | G A | 2 | -18.421 | -81.321 | 62.410 | 1.00 | 0.00 | C |
| ATOM | 44 | C3'  | G A | 2 | -18.147 | -82.261 | 61.248 | 1.00 | 0.00 | C |
| ATOM | 45 | O3'  | G A | 2 | -18.993 | -81.913 | 60.154 | 1.00 | 0.00 | O |
| ATOM | 46 | C4'  | G A | 2 | -18.491 | -83.631 | 61.831 | 1.00 | 0.00 | C |
| ATOM | 47 | O4'  | G A | 2 | -19.586 | -83.362 | 62.762 | 1.00 | 0.00 | O |
| ATOM | 48 | C5'  | G A | 2 | -17.385 | -84.339 | 62.577 | 1.00 | 0.00 | C |
| ATOM | 49 | O5'  | G A | 2 | -16.590 | -83.373 | 63.309 | 1.00 | 0.00 | O |
| ATOM | 50 | O1P  | G A | 2 | -14.346 | -83.487 | 62.175 | 1.00 | 0.00 | O |
| ATOM | 51 | O2P  | G A | 2 | -14.502 | -82.797 | 64.581 | 1.00 | 0.00 | O |
| ATOM | 52 | P    | G A | 2 | -15.026 | -83.635 | 63.476 | 1.00 | 0.00 | P |
| ATOM | 53 | H1   | G A | 2 | -23.274 | -81.162 | 67.907 | 1.00 | 0.00 | H |
| ATOM | 54 | H8   | G A | 2 | -17.522 | -82.062 | 65.121 | 1.00 | 0.00 | H |
| ATOM | 55 | H1'  | G A | 2 | -20.552 | -81.572 | 62.707 | 1.00 | 0.00 | H |
| ATOM | 56 | H21  | G A | 2 | -24.852 | -81.092 | 66.388 | 1.00 | 0.00 | H |

|      |     |      |     |   |         |         |        |      |      |   |
|------|-----|------|-----|---|---------|---------|--------|------|------|---|
| ATOM | 57  | H3'  | G A | 2 | -17.106 | -82.221 | 60.926 | 1.00 | 0.00 | H |
| ATOM | 58  | H22  | G A | 2 | -24.513 | -81.271 | 64.644 | 1.00 | 0.00 | H |
| ATOM | 59  | H4'  | G A | 2 | -18.788 | -84.265 | 60.996 | 1.00 | 0.00 | H |
| ATOM | 60  | H2'1 | G A | 2 | -17.560 | -81.250 | 63.075 | 1.00 | 0.00 | H |
| ATOM | 61  | H2'2 | G A | 2 | -18.649 | -80.313 | 62.061 | 1.00 | 0.00 | H |
| ATOM | 62  | H5'1 | G A | 2 | -17.824 | -85.056 | 63.271 | 1.00 | 0.00 | H |
| ATOM | 63  | H5'2 | G A | 2 | -16.756 | -84.871 | 61.864 | 1.00 | 0.00 | H |
| ATOM | 64  | C1'  | G A | 3 | -22.990 | -78.467 | 62.201 | 1.00 | 0.00 | C |
| ATOM | 65  | N1   | G A | 3 | -22.895 | -77.902 | 67.269 | 1.00 | 0.00 | N |
| ATOM | 66  | C2   | G A | 3 | -23.969 | -77.919 | 66.399 | 1.00 | 0.00 | C |
| ATOM | 67  | N2   | G A | 3 | -25.179 | -77.763 | 66.952 | 1.00 | 0.00 | N |
| ATOM | 68  | N3   | G A | 3 | -23.847 | -78.080 | 65.084 | 1.00 | 0.00 | N |
| ATOM | 69  | C4   | G A | 3 | -22.551 | -78.216 | 64.698 | 1.00 | 0.00 | C |
| ATOM | 70  | C5   | G A | 3 | -21.417 | -78.209 | 65.494 | 1.00 | 0.00 | C |
| ATOM | 71  | C6   | G A | 3 | -21.547 | -78.043 | 66.892 | 1.00 | 0.00 | C |
| ATOM | 72  | O6   | G A | 3 | -20.670 | -78.010 | 67.755 | 1.00 | 0.00 | O |
| ATOM | 73  | N7   | G A | 3 | -20.275 | -78.378 | 64.709 | 1.00 | 0.00 | N |
| ATOM | 74  | C8   | G A | 3 | -20.741 | -78.484 | 63.491 | 1.00 | 0.00 | C |
| ATOM | 75  | N9   | G A | 3 | -22.115 | -78.395 | 63.403 | 1.00 | 0.00 | N |
| ATOM | 76  | C2'  | G A | 3 | -22.400 | -77.793 | 60.971 | 1.00 | 0.00 | C |
| ATOM | 77  | C3'  | G A | 3 | -22.884 | -78.697 | 59.849 | 1.00 | 0.00 | C |
| ATOM | 78  | O3'  | G A | 3 | -24.202 | -78.306 | 59.469 | 1.00 | 0.00 | O |
| ATOM | 79  | C4'  | G A | 3 | -22.857 | -80.082 | 60.493 | 1.00 | 0.00 | C |
| ATOM | 80  | O4'  | G A | 3 | -23.190 | -79.834 | 61.895 | 1.00 | 0.00 | O |
| ATOM | 81  | C5'  | G A | 3 | -21.542 | -80.823 | 60.433 | 1.00 | 0.00 | C |
| ATOM | 82  | O5'  | G A | 3 | -20.444 | -79.888 | 60.579 | 1.00 | 0.00 | O |
| ATOM | 83  | O1P  | G A | 3 | -19.296 | -79.983 | 58.341 | 1.00 | 0.00 | O |
| ATOM | 84  | O2P  | G A | 3 | -17.992 | -79.372 | 60.394 | 1.00 | 0.00 | O |
| ATOM | 85  | P    | G A | 3 | -19.087 | -80.169 | 59.789 | 1.00 | 0.00 | P |
| ATOM | 86  | H1   | G A | 3 | -23.099 | -77.776 | 68.273 | 1.00 | 0.00 | H |
| ATOM | 87  | H8   | G A | 3 | -20.101 | -78.630 | 62.622 | 1.00 | 0.00 | H |
| ATOM | 88  | H1'  | G A | 3 | -23.958 | -78.035 | 62.457 | 1.00 | 0.00 | H |
| ATOM | 89  | H21  | G A | 3 | -25.267 | -77.641 | 67.971 | 1.00 | 0.00 | H |
| ATOM | 90  | H3'  | G A | 3 | -22.230 | -78.654 | 58.978 | 1.00 | 0.00 | H |
| ATOM | 91  | H22  | G A | 3 | -26.019 | -77.764 | 66.357 | 1.00 | 0.00 | H |
| ATOM | 92  | H4'  | G A | 3 | -23.603 | -80.685 | 59.978 | 1.00 | 0.00 | H |
| ATOM | 93  | H2'1 | G A | 3 | -21.311 | -77.751 | 61.004 | 1.00 | 0.00 | H |
| ATOM | 94  | H2'2 | G A | 3 | -22.762 | -76.772 | 60.844 | 1.00 | 0.00 | H |
| ATOM | 95  | H5'1 | G A | 3 | -21.509 | -81.559 | 61.235 | 1.00 | 0.00 | H |
| ATOM | 96  | H5'2 | G A | 3 | -21.464 | -81.336 | 59.474 | 1.00 | 0.00 | H |
| ATOM | 97  | C1'  | C A | 4 | -26.147 | -74.896 | 63.547 | 1.00 | 0.00 | C |
| ATOM | 98  | N1   | C A | 4 | -24.732 | -74.870 | 64.014 | 1.00 | 0.00 | N |
| ATOM | 99  | C2   | C A | 4 | -24.500 | -74.723 | 65.379 | 1.00 | 0.00 | C |
| ATOM | 100 | O2   | C A | 4 | -25.468 | -74.619 | 66.143 | 1.00 | 0.00 | O |
| ATOM | 101 | N3   | C A | 4 | -23.220 | -74.697 | 65.823 | 1.00 | 0.00 | N |
| ATOM | 102 | C4   | C A | 4 | -22.193 | -74.810 | 64.971 | 1.00 | 0.00 | C |
| ATOM | 103 | N4   | C A | 4 | -20.962 | -74.782 | 65.461 | 1.00 | 0.00 | N |
| ATOM | 104 | C5   | C A | 4 | -22.404 | -74.960 | 63.563 | 1.00 | 0.00 | C |
| ATOM | 105 | C6   | C A | 4 | -23.700 | -74.987 | 63.137 | 1.00 | 0.00 | C |
| ATOM | 106 | C2'  | C A | 4 | -26.368 | -74.182 | 62.221 | 1.00 | 0.00 | C |
| ATOM | 107 | C3'  | C A | 4 | -27.440 | -75.046 | 61.571 | 1.00 | 0.00 | C |
| ATOM | 108 | O3'  | C A | 4 | -28.722 | -74.634 | 62.042 | 1.00 | 0.00 | O |
| ATOM | 109 | C4'  | C A | 4 | -27.076 | -76.451 | 62.043 | 1.00 | 0.00 | C |
| ATOM | 110 | O4'  | C A | 4 | -26.521 | -76.251 | 63.382 | 1.00 | 0.00 | O |

|      |     |      |     |   |         |         |        |      |      |   |
|------|-----|------|-----|---|---------|---------|--------|------|------|---|
| ATOM | 111 | C5'  | C A | 4 | -26.062 | -77.198 | 61.208 | 1.00 | 0.00 | C |
| ATOM | 112 | O5'  | C A | 4 | -25.063 | -76.273 | 60.708 | 1.00 | 0.00 | O |
| ATOM | 113 | O1P  | C A | 4 | -25.439 | -76.298 | 58.220 | 1.00 | 0.00 | O |
| ATOM | 114 | O2P  | C A | 4 | -23.166 | -75.765 | 59.139 | 1.00 | 0.00 | O |
| ATOM | 115 | P    | C A | 4 | -24.428 | -76.534 | 59.268 | 1.00 | 0.00 | P |
| ATOM | 116 | H5   | C A | 4 | -21.571 | -75.048 | 62.865 | 1.00 | 0.00 | H |
| ATOM | 117 | H6   | C A | 4 | -23.911 | -75.104 | 62.075 | 1.00 | 0.00 | H |
| ATOM | 118 | H1'  | C A | 4 | -26.771 | -74.468 | 64.330 | 1.00 | 0.00 | H |
| ATOM | 119 | H3'  | C A | 4 | -27.415 | -74.976 | 60.484 | 1.00 | 0.00 | H |
| ATOM | 120 | H4'  | C A | 4 | -27.997 | -77.033 | 62.046 | 1.00 | 0.00 | H |
| ATOM | 121 | H41  | C A | 4 | -20.153 | -74.868 | 64.828 | 1.00 | 0.00 | H |
| ATOM | 122 | H42  | C A | 4 | -20.812 | -74.672 | 66.475 | 1.00 | 0.00 | H |
| ATOM | 123 | H2'1 | C A | 4 | -25.466 | -74.148 | 61.613 | 1.00 | 0.00 | H |
| ATOM | 124 | H2'2 | C A | 4 | -26.712 | -73.156 | 62.356 | 1.00 | 0.00 | H |
| ATOM | 125 | H5'1 | C A | 4 | -25.584 | -77.961 | 61.821 | 1.00 | 0.00 | H |
| ATOM | 126 | H5'2 | C A | 4 | -26.571 | -77.677 | 60.372 | 1.00 | 0.00 | H |
| ATOM | 127 | C1'  | C A | 5 | -27.819 | -71.344 | 66.566 | 1.00 | 0.00 | C |
| ATOM | 128 | N1   | C A | 5 | -26.401 | -71.346 | 66.114 | 1.00 | 0.00 | N |
| ATOM | 129 | C2   | C A | 5 | -25.407 | -71.245 | 67.085 | 1.00 | 0.00 | C |
| ATOM | 130 | O2   | C A | 5 | -25.739 | -71.159 | 68.275 | 1.00 | 0.00 | O |
| ATOM | 131 | N3   | C A | 5 | -24.108 | -71.245 | 66.694 | 1.00 | 0.00 | N |
| ATOM | 132 | C4   | C A | 5 | -23.780 | -71.338 | 65.400 | 1.00 | 0.00 | C |
| ATOM | 133 | N4   | C A | 5 | -22.496 | -71.337 | 65.074 | 1.00 | 0.00 | N |
| ATOM | 134 | C5   | C A | 5 | -24.781 | -71.441 | 64.380 | 1.00 | 0.00 | C |
| ATOM | 135 | C6   | C A | 5 | -26.080 | -71.442 | 64.797 | 1.00 | 0.00 | C |
| ATOM | 136 | C2'  | C A | 5 | -28.758 | -70.586 | 65.639 | 1.00 | 0.00 | C |
| ATOM | 137 | C3'  | C A | 5 | -30.028 | -71.418 | 65.724 | 1.00 | 0.00 | C |
| ATOM | 138 | O3'  | C A | 5 | -30.778 | -71.012 | 66.866 | 1.00 | 0.00 | O |
| ATOM | 139 | C4'  | C A | 5 | -29.493 | -72.841 | 65.861 | 1.00 | 0.00 | C |
| ATOM | 140 | O4'  | C A | 5 | -28.254 | -72.691 | 66.623 | 1.00 | 0.00 | O |
| ATOM | 141 | C5'  | C A | 5 | -29.183 | -73.569 | 64.574 | 1.00 | 0.00 | C |
| ATOM | 142 | O5'  | C A | 5 | -28.642 | -72.637 | 63.602 | 1.00 | 0.00 | O |
| ATOM | 143 | O1P  | C A | 5 | -30.408 | -72.576 | 61.810 | 1.00 | 0.00 | O |
| ATOM | 144 | O2P  | C A | 5 | -28.015 | -72.093 | 61.231 | 1.00 | 0.00 | O |
| ATOM | 145 | P    | C A | 5 | -28.980 | -72.856 | 62.059 | 1.00 | 0.00 | P |
| ATOM | 146 | H5   | C A | 5 | -24.519 | -71.512 | 63.324 | 1.00 | 0.00 | H |
| ATOM | 147 | H6   | C A | 5 | -26.878 | -71.523 | 64.058 | 1.00 | 0.00 | H |
| ATOM | 148 | H1'  | C A | 5 | -27.853 | -70.938 | 67.577 | 1.00 | 0.00 | H |
| ATOM | 149 | H3'  | C A | 5 | -30.645 | -71.313 | 64.832 | 1.00 | 0.00 | H |
| ATOM | 150 | H4'  | C A | 5 | -30.253 | -73.415 | 66.391 | 1.00 | 0.00 | H |
| ATOM | 151 | H41  | C A | 5 | -22.216 | -71.409 | 64.086 | 1.00 | 0.00 | H |
| ATOM | 152 | H42  | C A | 5 | -21.778 | -71.261 | 65.810 | 1.00 | 0.00 | H |
| ATOM | 153 | H2'1 | C A | 5 | -28.383 | -70.539 | 64.617 | 1.00 | 0.00 | H |
| ATOM | 154 | H2'2 | C A | 5 | -28.930 | -69.561 | 65.973 | 1.00 | 0.00 | H |
| ATOM | 155 | H5'1 | C A | 5 | -28.454 | -74.356 | 64.773 | 1.00 | 0.00 | H |
| ATOM | 156 | H5'2 | C A | 5 | -30.097 | -74.016 | 64.186 | 1.00 | 0.00 | H |
| ATOM | 157 | C1'  | G A | 6 | -27.307 | -67.880 | 70.069 | 1.00 | 0.00 | C |
| ATOM | 158 | N1   | G A | 6 | -22.481 | -67.733 | 68.421 | 1.00 | 0.00 | N |
| ATOM | 159 | C2   | G A | 6 | -22.980 | -67.713 | 69.712 | 1.00 | 0.00 | C |
| ATOM | 160 | N2   | G A | 6 | -22.073 | -67.641 | 70.693 | 1.00 | 0.00 | N |
| ATOM | 161 | N3   | G A | 6 | -24.280 | -67.760 | 69.999 | 1.00 | 0.00 | N |
| ATOM | 162 | C4   | G A | 6 | -25.053 | -67.822 | 68.883 | 1.00 | 0.00 | C |
| ATOM | 163 | C5   | G A | 6 | -24.645 | -67.843 | 67.560 | 1.00 | 0.00 | C |
| ATOM | 164 | C6   | G A | 6 | -23.266 | -67.797 | 67.254 | 1.00 | 0.00 | C |



|      |     |      |     |   |         |         |        |      |      |   |
|------|-----|------|-----|---|---------|---------|--------|------|------|---|
| ATOM | 165 | O6   | G A | 6 | -22.714 | -67.804 | 66.154 | 1.00 | 0.00 | O |
| ATOM | 166 | N7   | G A | 6 | -25.753 | -67.909 | 66.714 | 1.00 | 0.00 | N |
| ATOM | 167 | C8   | G A | 6 | -26.774 | -67.930 | 67.531 | 1.00 | 0.00 | C |
| ATOM | 168 | N9   | G A | 6 | -26.430 | -67.878 | 68.866 | 1.00 | 0.00 | N |
| ATOM | 169 | C2'  | G A | 6 | -28.594 | -67.088 | 69.890 | 1.00 | 0.00 | C |
| ATOM | 170 | C3'  | G A | 6 | -29.589 | -67.911 | 70.691 | 1.00 | 0.00 | C |
| ATOM | 171 | O3'  | G A | 6 | -29.512 | -67.534 | 72.064 | 1.00 | 0.00 | O |
| ATOM | 172 | C4'  | G A | 6 | -29.111 | -69.343 | 70.457 | 1.00 | 0.00 | C |
| ATOM | 173 | O4'  | G A | 6 | -27.657 | -69.223 | 70.345 | 1.00 | 0.00 | O |
| ATOM | 174 | C5'  | G A | 6 | -29.636 | -70.033 | 69.222 | 1.00 | 0.00 | C |
| ATOM | 175 | O5'  | G A | 6 | -29.751 | -69.078 | 68.137 | 1.00 | 0.00 | O |
| ATOM | 176 | O1P  | G A | 6 | -32.232 | -68.950 | 67.734 | 1.00 | 0.00 | O |
| ATOM | 177 | O2P  | G A | 6 | -30.631 | -68.468 | 65.864 | 1.00 | 0.00 | O |
| ATOM | 178 | P    | G A | 6 | -30.940 | -69.248 | 67.087 | 1.00 | 0.00 | P |
| ATOM | 179 | H1   | G A | 6 | -21.456 | -67.699 | 68.307 | 1.00 | 0.00 | H |
| ATOM | 180 | H8   | G A | 6 | -27.809 | -67.982 | 67.190 | 1.00 | 0.00 | H |
| ATOM | 181 | H1'  | G A | 6 | -26.730 | -67.503 | 70.913 | 1.00 | 0.00 | H |
| ATOM | 182 | H21  | G A | 6 | -21.069 | -67.608 | 70.465 | 1.00 | 0.00 | H |
| ATOM | 183 | H3'  | G A | 6 | -30.612 | -67.776 | 70.337 | 1.00 | 0.00 | H |
| ATOM | 184 | H22  | G A | 6 | -22.380 | -67.620 | 71.677 | 1.00 | 0.00 | H |
| ATOM | 185 | H4'  | G A | 6 | -29.423 | -69.926 | 71.323 | 1.00 | 0.00 | H |
| ATOM | 186 | H2'1 | G A | 6 | -28.892 | -67.013 | 68.843 | 1.00 | 0.00 | H |
| ATOM | 187 | H2'2 | G A | 6 | -28.513 | -66.072 | 70.280 | 1.00 | 0.00 | H |
| ATOM | 188 | H5'1 | G A | 6 | -28.951 | -70.832 | 68.938 | 1.00 | 0.00 | H |
| ATOM | 189 | H5'2 | G A | 6 | -30.614 | -70.463 | 69.439 | 1.00 | 0.00 | H |
| ATOM | 190 | C1'  | C A | 7 | -24.749 | -64.538 | 72.679 | 1.00 | 0.00 | C |
| ATOM | 191 | N1   | C A | 7 | -24.738 | -64.504 | 71.191 | 1.00 | 0.00 | N |
| ATOM | 192 | C2   | C A | 7 | -23.502 | -64.462 | 70.549 | 1.00 | 0.00 | C |
| ATOM | 193 | O2   | C A | 7 | -22.472 | -64.454 | 71.235 | 1.00 | 0.00 | O |
| ATOM | 194 | N3   | C A | 7 | -23.470 | -64.431 | 69.194 | 1.00 | 0.00 | N |
| ATOM | 195 | C4   | C A | 7 | -24.601 | -64.440 | 68.478 | 1.00 | 0.00 | C |
| ATOM | 196 | N4   | C A | 7 | -24.511 | -64.411 | 67.157 | 1.00 | 0.00 | N |
| ATOM | 197 | C5   | C A | 7 | -25.887 | -64.478 | 69.111 | 1.00 | 0.00 | C |
| ATOM | 198 | C6   | C A | 7 | -25.896 | -64.514 | 70.477 | 1.00 | 0.00 | C |
| ATOM | 199 | C2'  | C A | 7 | -25.875 | -63.725 | 73.303 | 1.00 | 0.00 | C |
| ATOM | 200 | C3'  | C A | 7 | -26.238 | -64.567 | 74.517 | 1.00 | 0.00 | C |
| ATOM | 201 | O3'  | C A | 7 | -25.363 | -64.238 | 75.594 | 1.00 | 0.00 | O |
| ATOM | 202 | C4'  | C A | 7 | -26.027 | -65.994 | 74.016 | 1.00 | 0.00 | C |
| ATOM | 203 | O4'  | C A | 7 | -24.910 | -65.887 | 73.077 | 1.00 | 0.00 | O |
| ATOM | 204 | C5'  | C A | 7 | -27.197 | -66.635 | 73.304 | 1.00 | 0.00 | C |
| ATOM | 205 | O5'  | C A | 7 | -27.895 | -65.640 | 72.514 | 1.00 | 0.00 | O |
| ATOM | 206 | O1P  | C A | 7 | -30.140 | -65.472 | 73.638 | 1.00 | 0.00 | O |
| ATOM | 207 | O2P  | C A | 7 | -29.916 | -64.942 | 71.196 | 1.00 | 0.00 | O |
| ATOM | 208 | P    | C A | 7 | -29.476 | -65.761 | 72.351 | 1.00 | 0.00 | P |
| ATOM | 209 | H5   | C A | 7 | -26.812 | -64.479 | 68.533 | 1.00 | 0.00 | H |
| ATOM | 210 | H6   | C A | 7 | -26.849 | -64.552 | 71.004 | 1.00 | 0.00 | H |
| ATOM | 211 | H1'  | C A | 7 | -23.777 | -64.197 | 73.035 | 1.00 | 0.00 | H |
| ATOM | 212 | H3'  | C A | 7 | -27.271 | -64.407 | 74.829 | 1.00 | 0.00 | H |
| ATOM | 213 | H4'  | C A | 7 | -25.794 | -66.604 | 74.889 | 1.00 | 0.00 | H |
| ATOM | 214 | H41  | C A | 7 | -25.366 | -64.420 | 66.582 | 1.00 | 0.00 | H |
| ATOM | 215 | H42  | C A | 7 | -23.587 | -64.381 | 66.702 | 1.00 | 0.00 | H |
| ATOM | 216 | H2'1 | C A | 7 | -26.725 | -63.611 | 72.631 | 1.00 | 0.00 | H |
| ATOM | 217 | H2'2 | C A | 7 | -25.551 | -62.725 | 73.595 | 1.00 | 0.00 | H |
| ATOM | 218 | H5'1 | C A | 7 | -26.828 | -67.430 | 72.655 | 1.00 | 0.00 | H |

|      |     |      |     |   |         |         |        |      |      |   |
|------|-----|------|-----|---|---------|---------|--------|------|------|---|
| ATOM | 219 | H5'2 | C A | 7 | -27.875 | -67.060 | 74.043 | 1.00 | 0.00 | H |
| ATOM | 220 | C1'  | A A | 8 | -21.067 | -61.306 | 73.385 | 1.00 | 0.00 | C |
| ATOM | 221 | N1   | A A | 8 | -21.095 | -61.029 | 68.259 | 1.00 | 0.00 | N |
| ATOM | 222 | C2   | A A | 8 | -20.110 | -61.095 | 69.150 | 1.00 | 0.00 | C |
| ATOM | 223 | N3   | A A | 8 | -20.172 | -61.167 | 70.463 | 1.00 | 0.00 | N |
| ATOM | 224 | C4   | A A | 8 | -21.456 | -61.164 | 70.868 | 1.00 | 0.00 | C |
| ATOM | 225 | C5   | A A | 8 | -22.575 | -61.101 | 70.087 | 1.00 | 0.00 | C |
| ATOM | 226 | C6   | A A | 8 | -22.365 | -61.029 | 68.694 | 1.00 | 0.00 | C |
| ATOM | 227 | N6   | A A | 8 | -23.368 | -60.962 | 67.803 | 1.00 | 0.00 | N |
| ATOM | 228 | N7   | A A | 8 | -23.725 | -61.121 | 70.857 | 1.00 | 0.00 | N |
| ATOM | 229 | C8   | A A | 8 | -23.281 | -61.191 | 72.078 | 1.00 | 0.00 | C |
| ATOM | 230 | N9   | A A | 8 | -21.912 | -61.223 | 72.163 | 1.00 | 0.00 | N |
| ATOM | 231 | C2'  | A A | 8 | -21.611 | -60.508 | 74.562 | 1.00 | 0.00 | C |
| ATOM | 232 | C3'  | A A | 8 | -21.229 | -61.385 | 75.743 | 1.00 | 0.00 | C |
| ATOM | 233 | O3'  | A A | 8 | -19.887 | -61.095 | 76.125 | 1.00 | 0.00 | O |
| ATOM | 234 | C4'  | A A | 8 | -21.375 | -62.798 | 75.180 | 1.00 | 0.00 | C |
| ATOM | 235 | O4'  | A A | 8 | -21.000 | -62.664 | 73.770 | 1.00 | 0.00 | O |
| ATOM | 236 | C5'  | A A | 8 | -22.754 | -63.411 | 75.258 | 1.00 | 0.00 | C |
| ATOM | 237 | O5'  | A A | 8 | -23.758 | -62.389 | 75.034 | 1.00 | 0.00 | O |
| ATOM | 238 | O1P  | A A | 8 | -24.943 | -62.246 | 77.251 | 1.00 | 0.00 | O |
| ATOM | 239 | O2P  | A A | 8 | -26.155 | -61.639 | 75.138 | 1.00 | 0.00 | O |
| ATOM | 240 | P    | A A | 8 | -25.148 | -62.497 | 75.811 | 1.00 | 0.00 | P |
| ATOM | 241 | H2   | A A | 8 | -19.105 | -61.088 | 68.733 | 1.00 | 0.00 | H |
| ATOM | 242 | H8   | A A | 8 | -23.933 | -61.221 | 72.951 | 1.00 | 0.00 | H |
| ATOM | 243 | H1'  | A A | 8 | -20.060 | -60.981 | 73.125 | 1.00 | 0.00 | H |
| ATOM | 244 | H3'  | A A | 8 | -21.888 | -61.232 | 76.597 | 1.00 | 0.00 | H |
| ATOM | 245 | H4'  | A A | 8 | -20.695 | -63.435 | 75.743 | 1.00 | 0.00 | H |
| ATOM | 246 | H61  | A A | 8 | -23.160 | -60.915 | 66.796 | 1.00 | 0.00 | H |
| ATOM | 247 | H62  | A A | 8 | -24.346 | -60.959 | 68.129 | 1.00 | 0.00 | H |
| ATOM | 248 | H2'1 | A A | 8 | -22.690 | -60.369 | 74.504 | 1.00 | 0.00 | H |
| ATOM | 249 | H2'2 | A A | 8 | -21.156 | -59.520 | 74.637 | 1.00 | 0.00 | H |
| ATOM | 250 | H5'1 | A A | 8 | -22.843 | -64.186 | 74.496 | 1.00 | 0.00 | H |
| ATOM | 251 | H5'2 | A A | 8 | -22.894 | -63.856 | 76.241 | 1.00 | 0.00 | H |
| ATOM | 252 | C1'  | C A | 9 | -17.589 | -58.126 | 71.817 | 1.00 | 0.00 | C |
| ATOM | 253 | N1   | C A | 9 | -18.996 | -57.997 | 71.346 | 1.00 | 0.00 | N |
| ATOM | 254 | C2   | C A | 9 | -19.219 | -57.908 | 69.973 | 1.00 | 0.00 | C |
| ATOM | 255 | O2   | C A | 9 | -18.247 | -57.940 | 69.208 | 1.00 | 0.00 | O |
| ATOM | 256 | N3   | C A | 9 | -20.492 | -57.790 | 69.524 | 1.00 | 0.00 | N |
| ATOM | 257 | C4   | C A | 9 | -21.523 | -57.757 | 70.378 | 1.00 | 0.00 | C |
| ATOM | 258 | N4   | C A | 9 | -22.748 | -57.643 | 69.884 | 1.00 | 0.00 | N |
| ATOM | 259 | C5   | C A | 9 | -21.324 | -57.842 | 71.796 | 1.00 | 0.00 | C |
| ATOM | 260 | C6   | C A | 9 | -20.033 | -57.966 | 72.226 | 1.00 | 0.00 | C |
| ATOM | 261 | C2'  | C A | 9 | -17.299 | -57.360 | 73.100 | 1.00 | 0.00 | C |
| ATOM | 262 | C3'  | C A | 9 | -16.310 | -58.280 | 73.802 | 1.00 | 0.00 | C |
| ATOM | 263 | O3'  | C A | 9 | -14.997 | -58.017 | 73.311 | 1.00 | 0.00 | O |
| ATOM | 264 | C4'  | C A | 9 | -16.805 | -59.670 | 73.412 | 1.00 | 0.00 | C |
| ATOM | 265 | O4'  | C A | 9 | -17.342 | -59.499 | 72.062 | 1.00 | 0.00 | O |
| ATOM | 266 | C5'  | C A | 9 | -17.881 | -60.270 | 74.286 | 1.00 | 0.00 | C |
| ATOM | 267 | O5'  | C A | 9 | -18.789 | -59.229 | 74.729 | 1.00 | 0.00 | O |
| ATOM | 268 | O1P  | C A | 9 | -18.410 | -59.143 | 77.215 | 1.00 | 0.00 | O |
| ATOM | 269 | O2P  | C A | 9 | -20.626 | -58.456 | 76.260 | 1.00 | 0.00 | O |
| ATOM | 270 | P    | C A | 9 | -19.441 | -59.345 | 76.180 | 1.00 | 0.00 | P |
| ATOM | 271 | H5   | C A | 9 | -22.160 | -57.810 | 72.495 | 1.00 | 0.00 | H |
| ATOM | 272 | H6   | C A | 9 | -19.831 | -58.042 | 73.294 | 1.00 | 0.00 | H |

|      |     |      |     |    |         |         |        |      |      |   |
|------|-----|------|-----|----|---------|---------|--------|------|------|---|
| ATOM | 273 | H1'  | C A | 9  | -16.930 | -57.805 | 71.011 | 1.00 | 0.00 | H |
| ATOM | 274 | H3'  | C A | 9  | -16.325 | -58.144 | 74.883 | 1.00 | 0.00 | H |
| ATOM | 275 | H4'  | C A | 9  | -15.941 | -60.335 | 73.445 | 1.00 | 0.00 | H |
| ATOM | 276 | H41  | C A | 9  | -23.559 | -57.618 | 70.519 | 1.00 | 0.00 | H |
| ATOM | 277 | H42  | C A | 9  | -22.888 | -57.580 | 68.865 | 1.00 | 0.00 | H |
| ATOM | 278 | H2'1 | C A | 9  | -18.193 | -57.207 | 73.702 | 1.00 | 0.00 | H |
| ATOM | 279 | H2'2 | C A | 9  | -16.861 | -56.380 | 72.906 | 1.00 | 0.00 | H |
| ATOM | 280 | H5'1 | C A | 9  | -18.430 | -61.020 | 73.717 | 1.00 | 0.00 | H |
| ATOM | 281 | H5'2 | C A | 9  | -17.417 | -60.745 | 75.150 | 1.00 | 0.00 | H |
| ATOM | 282 | C1'  | C A | 10 | -15.603 | -54.928 | 68.600 | 1.00 | 0.00 | C |
| ATOM | 283 | N1   | C A | 10 | -17.014 | -54.771 | 69.047 | 1.00 | 0.00 | N |
| ATOM | 284 | C2   | C A | 10 | -17.997 | -54.636 | 68.069 | 1.00 | 0.00 | C |
| ATOM | 285 | O2   | C A | 10 | -17.662 | -54.650 | 66.877 | 1.00 | 0.00 | O |
| ATOM | 286 | N3   | C A | 10 | -19.289 | -54.492 | 68.455 | 1.00 | 0.00 | N |
| ATOM | 287 | C4   | C A | 10 | -19.622 | -54.479 | 69.753 | 1.00 | 0.00 | C |
| ATOM | 288 | N4   | C A | 10 | -20.900 | -54.339 | 70.075 | 1.00 | 0.00 | N |
| ATOM | 289 | C5   | C A | 10 | -18.631 | -54.612 | 70.781 | 1.00 | 0.00 | C |
| ATOM | 290 | C6   | C A | 10 | -17.338 | -54.760 | 70.368 | 1.00 | 0.00 | C |
| ATOM | 291 | C2'  | C A | 10 | -14.596 | -54.207 | 69.484 | 1.00 | 0.00 | C |
| ATOM | 292 | C3'  | C A | 10 | -13.408 | -55.157 | 69.451 | 1.00 | 0.00 | C |
| ATOM | 293 | O3'  | C A | 10 | -12.627 | -54.889 | 68.289 | 1.00 | 0.00 | O |
| ATOM | 294 | C4'  | C A | 10 | -14.074 | -56.530 | 69.396 | 1.00 | 0.00 | C |
| ATOM | 295 | O4'  | C A | 10 | -15.295 | -56.310 | 68.623 | 1.00 | 0.00 | O |
| ATOM | 296 | C5'  | C A | 10 | -14.447 | -57.149 | 70.723 | 1.00 | 0.00 | C |
| ATOM | 297 | O5'  | C A | 10 | -14.895 | -56.116 | 71.637 | 1.00 | 0.00 | O |
| ATOM | 298 | O1P  | C A | 10 | -13.127 | -56.115 | 73.427 | 1.00 | 0.00 | O |
| ATOM | 299 | O2P  | C A | 10 | -15.463 | -55.378 | 73.970 | 1.00 | 0.00 | O |
| ATOM | 300 | P    | C A | 10 | -14.575 | -56.274 | 73.190 | 1.00 | 0.00 | P |
| ATOM | 301 | H5   | C A | 10 | -18.897 | -54.596 | 71.838 | 1.00 | 0.00 | H |
| ATOM | 302 | H6   | C A | 10 | -16.550 | -54.873 | 71.112 | 1.00 | 0.00 | H |
| ATOM | 303 | H1'  | C A | 10 | -15.533 | -54.586 | 67.567 | 1.00 | 0.00 | H |
| ATOM | 304 | H3'  | C A | 10 | -12.781 | -55.058 | 70.337 | 1.00 | 0.00 | H |
| ATOM | 305 | H4'  | C A | 10 | -13.371 | -57.202 | 68.902 | 1.00 | 0.00 | H |
| ATOM | 306 | H41  | C A | 10 | -21.184 | -54.328 | 71.065 | 1.00 | 0.00 | H |
| ATOM | 307 | H42  | C A | 10 | -21.609 | -54.240 | 69.334 | 1.00 | 0.00 | H |
| ATOM | 308 | H2'1 | C A | 10 | -14.962 | -54.066 | 70.500 | 1.00 | 0.00 | H |
| ATOM | 309 | H2'2 | C A | 10 | -14.330 | -53.224 | 69.091 | 1.00 | 0.00 | H |
| ATOM | 310 | H5'1 | C A | 10 | -15.246 | -57.875 | 70.567 | 1.00 | 0.00 | H |
| ATOM | 311 | H5'2 | C A | 10 | -13.577 | -57.656 | 71.138 | 1.00 | 0.00 | H |
| ATOM | 312 | C1'  | T A | 11 | -15.777 | -51.645 | 64.899 | 1.00 | 0.00 | C |
| ATOM | 313 | N1   | T A | 11 | -16.669 | -51.488 | 66.078 | 1.00 | 0.00 | N |
| ATOM | 314 | C2   | T A | 11 | -18.016 | -51.313 | 65.830 | 1.00 | 0.00 | C |
| ATOM | 315 | O2   | T A | 11 | -18.481 | -51.285 | 64.704 | 1.00 | 0.00 | O |
| ATOM | 316 | N3   | T A | 11 | -18.810 | -51.172 | 66.954 | 1.00 | 0.00 | N |
| ATOM | 317 | C4   | T A | 11 | -18.384 | -51.187 | 68.266 | 1.00 | 0.00 | C |
| ATOM | 318 | O4   | T A | 11 | -19.192 | -51.047 | 69.194 | 1.00 | 0.00 | O |
| ATOM | 319 | C5   | T A | 11 | -16.962 | -51.375 | 68.425 | 1.00 | 0.00 | C |
| ATOM | 320 | C6   | T A | 11 | -16.159 | -51.517 | 67.353 | 1.00 | 0.00 | C |
| ATOM | 321 | C7   | T A | 11 | -16.456 | -51.400 | 69.837 | 1.00 | 0.00 | C |
| ATOM | 322 | C2'  | T A | 11 | -14.423 | -50.964 | 65.058 | 1.00 | 0.00 | C |
| ATOM | 323 | C3'  | T A | 11 | -13.496 | -51.923 | 64.329 | 1.00 | 0.00 | C |
| ATOM | 324 | O3'  | T A | 11 | -13.516 | -51.627 | 62.935 | 1.00 | 0.00 | O |
| ATOM | 325 | C4'  | T A | 11 | -14.109 | -53.287 | 64.638 | 1.00 | 0.00 | C |
| ATOM | 326 | O4'  | T A | 11 | -15.547 | -53.029 | 64.711 | 1.00 | 0.00 | O |

|      |     |      |     |    |         |         |        |      |      |   |
|------|-----|------|-----|----|---------|---------|--------|------|------|---|
| ATOM | 327 | C5'  | T A | 11 | -13.670 | -53.946 | 65.926 | 1.00 | 0.00 | C |
| ATOM | 328 | O5'  | T A | 11 | -13.485 | -52.939 | 66.952 | 1.00 | 0.00 | O |
| ATOM | 329 | O1P  | T A | 11 | -11.010 | -53.013 | 67.401 | 1.00 | 0.00 | O |
| ATOM | 330 | O2P  | T A | 11 | -12.590 | -52.270 | 69.203 | 1.00 | 0.00 | O |
| ATOM | 331 | P    | T A | 11 | -12.335 | -53.150 | 68.036 | 1.00 | 0.00 | P |
| ATOM | 332 | H3   | T A | 11 | -19.818 | -51.045 | 66.796 | 1.00 | 0.00 | H |
| ATOM | 333 | H6   | T A | 11 | -15.087 | -51.657 | 67.498 | 1.00 | 0.00 | H |
| ATOM | 334 | H1'  | T A | 11 | -16.301 | -51.270 | 64.020 | 1.00 | 0.00 | H |
| ATOM | 335 | H3'  | T A | 11 | -12.473 | -51.859 | 64.697 | 1.00 | 0.00 | H |
| ATOM | 336 | H4'  | T A | 11 | -13.837 | -53.951 | 63.816 | 1.00 | 0.00 | H |
| ATOM | 337 | H71  | T A | 11 | -15.813 | -50.536 | 70.008 | 1.00 | 0.00 | H |
| ATOM | 338 | H72  | T A | 11 | -17.300 | -51.365 | 70.526 | 1.00 | 0.00 | H |
| ATOM | 339 | H73  | T A | 11 | -15.888 | -52.315 | 70.005 | 1.00 | 0.00 | H |
| ATOM | 340 | H2'1 | T A | 11 | -14.138 | -50.852 | 66.102 | 1.00 | 0.00 | H |
| ATOM | 341 | H2'2 | T A | 11 | -14.404 | -49.971 | 64.605 | 1.00 | 0.00 | H |
| ATOM | 342 | H5'1 | T A | 11 | -14.432 | -54.658 | 66.242 | 1.00 | 0.00 | H |
| ATOM | 343 | H5'2 | T A | 11 | -12.733 | -54.474 | 65.755 | 1.00 | 0.00 | H |
| ATOM | 344 | C1'  | A A | 12 | -18.026 | -48.238 | 62.076 | 1.00 | 0.00 | C |
| ATOM | 345 | N1   | A A | 12 | -20.970 | -47.555 | 66.224 | 1.00 | 0.00 | N |
| ATOM | 346 | C2   | A A | 12 | -21.248 | -47.625 | 64.927 | 1.00 | 0.00 | C |
| ATOM | 347 | N3   | A A | 12 | -20.437 | -47.807 | 63.905 | 1.00 | 0.00 | N |
| ATOM | 348 | C4   | A A | 12 | -19.168 | -47.922 | 64.334 | 1.00 | 0.00 | C |
| ATOM | 349 | C5   | A A | 12 | -18.717 | -47.871 | 65.622 | 1.00 | 0.00 | C |
| ATOM | 350 | C6   | A A | 12 | -19.694 | -47.674 | 66.621 | 1.00 | 0.00 | C |
| ATOM | 351 | N6   | A A | 12 | -19.400 | -47.603 | 67.931 | 1.00 | 0.00 | N |
| ATOM | 352 | N7   | A A | 12 | -17.344 | -48.029 | 65.678 | 1.00 | 0.00 | N |
| ATOM | 353 | C8   | A A | 12 | -16.994 | -48.167 | 64.433 | 1.00 | 0.00 | C |
| ATOM | 354 | N9   | A A | 12 | -18.051 | -48.114 | 63.559 | 1.00 | 0.00 | N |
| ATOM | 355 | C2'  | A A | 12 | -16.819 | -47.575 | 61.427 | 1.00 | 0.00 | C |
| ATOM | 356 | C3'  | A A | 12 | -16.524 | -48.517 | 60.270 | 1.00 | 0.00 | C |
| ATOM | 357 | O3'  | A A | 12 | -17.352 | -48.170 | 59.162 | 1.00 | 0.00 | O |
| ATOM | 358 | C4'  | A A | 12 | -16.879 | -49.887 | 60.847 | 1.00 | 0.00 | C |
| ATOM | 359 | O4'  | A A | 12 | -17.990 | -49.616 | 61.760 | 1.00 | 0.00 | O |
| ATOM | 360 | C5'  | A A | 12 | -15.786 | -50.594 | 61.613 | 1.00 | 0.00 | C |
| ATOM | 361 | O5'  | A A | 12 | -15.004 | -49.628 | 62.359 | 1.00 | 0.00 | O |
| ATOM | 362 | O1P  | A A | 12 | -12.740 | -49.742 | 61.263 | 1.00 | 0.00 | O |
| ATOM | 363 | O2P  | A A | 12 | -12.937 | -49.050 | 63.667 | 1.00 | 0.00 | O |
| ATOM | 364 | P    | A A | 12 | -13.443 | -49.890 | 62.553 | 1.00 | 0.00 | P |
| ATOM | 365 | H2   | A A | 12 | -22.302 | -47.517 | 64.670 | 1.00 | 0.00 | H |
| ATOM | 366 | H8   | A A | 12 | -15.962 | -48.311 | 64.113 | 1.00 | 0.00 | H |
| ATOM | 367 | H1'  | A A | 12 | -18.955 | -47.827 | 61.685 | 1.00 | 0.00 | H |
| ATOM | 368 | H3'  | A A | 12 | -15.479 | -48.478 | 59.965 | 1.00 | 0.00 | H |
| ATOM | 369 | H4'  | A A | 12 | -17.161 | -50.520 | 60.007 | 1.00 | 0.00 | H |
| ATOM | 370 | H61  | A A | 12 | -20.151 | -47.461 | 68.621 | 1.00 | 0.00 | H |
| ATOM | 371 | H62  | A A | 12 | -18.421 | -47.691 | 68.244 | 1.00 | 0.00 | H |
| ATOM | 372 | H2'1 | A A | 12 | -15.969 | -47.505 | 62.105 | 1.00 | 0.00 | H |
| ATOM | 373 | H2'2 | A A | 12 | -17.040 | -46.569 | 61.073 | 1.00 | 0.00 | H |
| ATOM | 374 | H5'1 | A A | 12 | -16.237 | -51.310 | 62.299 | 1.00 | 0.00 | H |
| ATOM | 375 | H5'2 | A A | 12 | -15.144 | -51.126 | 60.912 | 1.00 | 0.00 | H |
| ATOM | 376 | C1'  | G A | 13 | -21.419 | -44.718 | 61.212 | 1.00 | 0.00 | C |
| ATOM | 377 | N1   | G A | 13 | -21.324 | -44.154 | 66.281 | 1.00 | 0.00 | N |
| ATOM | 378 | C2   | G A | 13 | -22.398 | -44.170 | 65.410 | 1.00 | 0.00 | C |
| ATOM | 379 | N2   | G A | 13 | -23.609 | -44.013 | 65.961 | 1.00 | 0.00 | N |
| ATOM | 380 | N3   | G A | 13 | -22.275 | -44.331 | 64.094 | 1.00 | 0.00 | N |

|      |     |      |     |    |         |         |        |      |      |   |
|------|-----|------|-----|----|---------|---------|--------|------|------|---|
| ATOM | 381 | C4   | G A | 13 | -20.979 | -44.467 | 63.708 | 1.00 | 0.00 | C |
| ATOM | 382 | C5   | G A | 13 | -19.846 | -44.460 | 64.504 | 1.00 | 0.00 | C |
| ATOM | 383 | C6   | G A | 13 | -19.976 | -44.294 | 65.903 | 1.00 | 0.00 | C |
| ATOM | 384 | O6   | G A | 13 | -19.097 | -44.259 | 66.765 | 1.00 | 0.00 | O |
| ATOM | 385 | N7   | G A | 13 | -18.704 | -44.629 | 63.720 | 1.00 | 0.00 | N |
| ATOM | 386 | C8   | G A | 13 | -19.169 | -44.735 | 62.502 | 1.00 | 0.00 | C |
| ATOM | 387 | N9   | G A | 13 | -20.543 | -44.646 | 62.414 | 1.00 | 0.00 | N |
| ATOM | 388 | C2'  | G A | 13 | -20.828 | -44.044 | 59.982 | 1.00 | 0.00 | C |
| ATOM | 389 | C3'  | G A | 13 | -21.313 | -44.948 | 58.860 | 1.00 | 0.00 | C |
| ATOM | 390 | O3'  | G A | 13 | -22.630 | -44.557 | 58.480 | 1.00 | 0.00 | O |
| ATOM | 391 | C4'  | G A | 13 | -21.285 | -46.333 | 59.504 | 1.00 | 0.00 | C |
| ATOM | 392 | O4'  | G A | 13 | -21.619 | -46.085 | 60.906 | 1.00 | 0.00 | O |
| ATOM | 393 | C5'  | G A | 13 | -19.970 | -47.074 | 59.443 | 1.00 | 0.00 | C |
| ATOM | 394 | O5'  | G A | 13 | -18.873 | -46.139 | 59.589 | 1.00 | 0.00 | O |
| ATOM | 395 | O1P  | G A | 13 | -17.724 | -46.234 | 57.351 | 1.00 | 0.00 | O |
| ATOM | 396 | O2P  | G A | 13 | -16.420 | -45.623 | 59.405 | 1.00 | 0.00 | O |
| ATOM | 397 | P    | G A | 13 | -17.515 | -46.420 | 58.800 | 1.00 | 0.00 | P |
| ATOM | 398 | H1   | G A | 13 | -21.528 | -44.030 | 67.285 | 1.00 | 0.00 | H |
| ATOM | 399 | H8   | G A | 13 | -18.530 | -44.881 | 61.632 | 1.00 | 0.00 | H |
| ATOM | 400 | H1'  | G A | 13 | -22.386 | -44.286 | 61.468 | 1.00 | 0.00 | H |
| ATOM | 401 | H21  | G A | 13 | -23.696 | -43.892 | 66.982 | 1.00 | 0.00 | H |
| ATOM | 402 | H3'  | G A | 13 | -20.658 | -44.905 | 57.989 | 1.00 | 0.00 | H |
| ATOM | 403 | H22  | G A | 13 | -24.448 | -44.013 | 65.367 | 1.00 | 0.00 | H |
| ATOM | 404 | H4'  | G A | 13 | -22.032 | -46.936 | 58.989 | 1.00 | 0.00 | H |
| ATOM | 405 | H2'1 | G A | 13 | -19.739 | -44.002 | 60.015 | 1.00 | 0.00 | H |
| ATOM | 406 | H2'2 | G A | 13 | -21.191 | -43.023 | 59.855 | 1.00 | 0.00 | H |
| ATOM | 407 | H5'1 | G A | 13 | -19.938 | -47.810 | 60.246 | 1.00 | 0.00 | H |
| ATOM | 408 | H5'2 | G A | 13 | -19.893 | -47.588 | 58.485 | 1.00 | 0.00 | H |
| ATOM | 409 | C1'  | G A | 14 | -24.575 | -41.147 | 62.558 | 1.00 | 0.00 | C |
| ATOM | 410 | N1   | G A | 14 | -21.510 | -40.750 | 66.617 | 1.00 | 0.00 | N |
| ATOM | 411 | C2   | G A | 14 | -22.891 | -40.729 | 66.541 | 1.00 | 0.00 | C |
| ATOM | 412 | N2   | G A | 14 | -23.543 | -40.580 | 67.701 | 1.00 | 0.00 | N |
| ATOM | 413 | N3   | G A | 14 | -23.568 | -40.847 | 65.400 | 1.00 | 0.00 | N |
| ATOM | 414 | C4   | G A | 14 | -22.748 | -40.982 | 64.326 | 1.00 | 0.00 | C |
| ATOM | 415 | C5   | G A | 14 | -21.364 | -41.010 | 64.305 | 1.00 | 0.00 | C |
| ATOM | 416 | C6   | G A | 14 | -20.644 | -40.889 | 65.515 | 1.00 | 0.00 | C |
| ATOM | 417 | O6   | G A | 14 | -19.427 | -40.890 | 65.699 | 1.00 | 0.00 | O |
| ATOM | 418 | N7   | G A | 14 | -20.905 | -41.163 | 62.994 | 1.00 | 0.00 | N |
| ATOM | 419 | C8   | G A | 14 | -21.999 | -41.225 | 62.280 | 1.00 | 0.00 | C |
| ATOM | 420 | N9   | G A | 14 | -23.159 | -41.121 | 63.018 | 1.00 | 0.00 | N |
| ATOM | 421 | C2'  | G A | 14 | -24.800 | -40.437 | 61.230 | 1.00 | 0.00 | C |
| ATOM | 422 | C3'  | G A | 14 | -25.875 | -41.299 | 60.587 | 1.00 | 0.00 | C |
| ATOM | 423 | O3'  | G A | 14 | -27.154 | -40.885 | 61.061 | 1.00 | 0.00 | O |
| ATOM | 424 | C4'  | G A | 14 | -25.511 | -42.706 | 61.062 | 1.00 | 0.00 | C |
| ATOM | 425 | O4'  | G A | 14 | -24.951 | -42.501 | 62.398 | 1.00 | 0.00 | O |
| ATOM | 426 | C5'  | G A | 14 | -24.501 | -43.455 | 60.225 | 1.00 | 0.00 | C |
| ATOM | 427 | O5'  | G A | 14 | -23.503 | -42.535 | 59.719 | 1.00 | 0.00 | O |
| ATOM | 428 | O1P  | G A | 14 | -23.889 | -42.566 | 57.232 | 1.00 | 0.00 | O |
| ATOM | 429 | O2P  | G A | 14 | -21.612 | -42.033 | 58.141 | 1.00 | 0.00 | O |
| ATOM | 430 | P    | G A | 14 | -22.874 | -42.801 | 58.277 | 1.00 | 0.00 | P |
| ATOM | 431 | H1   | G A | 14 | -21.083 | -40.657 | 67.551 | 1.00 | 0.00 | H |
| ATOM | 432 | H8   | G A | 14 | -21.994 | -41.347 | 61.197 | 1.00 | 0.00 | H |
| ATOM | 433 | H1'  | G A | 14 | -25.196 | -40.715 | 63.342 | 1.00 | 0.00 | H |
| ATOM | 434 | H21  | G A | 14 | -23.012 | -40.492 | 68.581 | 1.00 | 0.00 | H |

|      |     |      |   |   |    |         |         |        |      |      |   |
|------|-----|------|---|---|----|---------|---------|--------|------|------|---|
| ATOM | 435 | H3'  | G | A | 14 | -25.854 | -41.234 | 59.499 | 1.00 | 0.00 | H |
| ATOM | 436 | H22  | G | A | 14 | -24.571 | -40.553 | 67.714 | 1.00 | 0.00 | H |
| ATOM | 437 | H4'  | G | A | 14 | -26.433 | -43.285 | 61.071 | 1.00 | 0.00 | H |
| ATOM | 438 | H2'1 | G | A | 14 | -23.899 | -40.406 | 60.619 | 1.00 | 0.00 | H |
| ATOM | 439 | H2'2 | G | A | 14 | -25.142 | -39.410 | 61.363 | 1.00 | 0.00 | H |
| ATOM | 440 | H5'1 | G | A | 14 | -24.022 | -44.218 | 60.840 | 1.00 | 0.00 | H |
| ATOM | 441 | H5'2 | G | A | 14 | -25.014 | -43.937 | 59.392 | 1.00 | 0.00 | H |
| ATOM | 442 | C1'  | A | A | 15 | -26.267 | -37.597 | 65.563 | 1.00 | 0.00 | C |
| ATOM | 443 | N1   | A | A | 15 | -21.373 | -37.355 | 67.092 | 1.00 | 0.00 | N |
| ATOM | 444 | C2   | A | A | 15 | -22.526 | -37.327 | 67.757 | 1.00 | 0.00 | C |
| ATOM | 445 | N3   | A | A | 15 | -23.758 | -37.397 | 67.299 | 1.00 | 0.00 | N |
| ATOM | 446 | C4   | A | A | 15 | -23.750 | -37.505 | 65.957 | 1.00 | 0.00 | C |
| ATOM | 447 | C5   | A | A | 15 | -22.662 | -37.546 | 65.132 | 1.00 | 0.00 | C |
| ATOM | 448 | C6   | A | A | 15 | -21.398 | -37.464 | 65.755 | 1.00 | 0.00 | C |
| ATOM | 449 | N6   | A | A | 15 | -20.241 | -37.492 | 65.071 | 1.00 | 0.00 | N |
| ATOM | 450 | N7   | A | A | 15 | -23.044 | -37.663 | 63.807 | 1.00 | 0.00 | N |
| ATOM | 451 | C8   | A | A | 15 | -24.343 | -37.686 | 63.858 | 1.00 | 0.00 | C |
| ATOM | 452 | N9   | A | A | 15 | -24.844 | -37.597 | 65.132 | 1.00 | 0.00 | N |
| ATOM | 453 | C2'  | A | A | 15 | -27.195 | -36.843 | 64.620 | 1.00 | 0.00 | C |
| ATOM | 454 | C3'  | A | A | 15 | -28.466 | -37.676 | 64.691 | 1.00 | 0.00 | C |
| ATOM | 455 | O3'  | A | A | 15 | -29.230 | -37.266 | 65.821 | 1.00 | 0.00 | O |
| ATOM | 456 | C4'  | A | A | 15 | -27.930 | -39.100 | 64.841 | 1.00 | 0.00 | C |
| ATOM | 457 | O4'  | A | A | 15 | -26.701 | -38.942 | 65.620 | 1.00 | 0.00 | O |
| ATOM | 458 | C5'  | A | A | 15 | -27.601 | -39.832 | 63.563 | 1.00 | 0.00 | C |
| ATOM | 459 | O5'  | A | A | 15 | -27.049 | -38.904 | 62.594 | 1.00 | 0.00 | O |
| ATOM | 460 | O1P  | A | A | 15 | -28.790 | -38.854 | 60.777 | 1.00 | 0.00 | O |
| ATOM | 461 | O2P  | A | A | 15 | -26.390 | -38.370 | 60.229 | 1.00 | 0.00 | O |
| ATOM | 462 | P    | A | A | 15 | -27.365 | -39.130 | 61.047 | 1.00 | 0.00 | P |
| ATOM | 463 | H2   | A | A | 15 | -22.435 | -37.234 | 68.839 | 1.00 | 0.00 | H |
| ATOM | 464 | H8   | A | A | 15 | -24.975 | -37.769 | 62.974 | 1.00 | 0.00 | H |
| ATOM | 465 | H1'  | A | A | 15 | -26.317 | -37.185 | 66.571 | 1.00 | 0.00 | H |
| ATOM | 466 | H3'  | A | A | 15 | -29.070 | -37.577 | 63.790 | 1.00 | 0.00 | H |
| ATOM | 467 | H4'  | A | A | 15 | -28.695 | -39.671 | 65.365 | 1.00 | 0.00 | H |
| ATOM | 468 | H61  | A | A | 15 | -19.345 | -37.432 | 65.576 | 1.00 | 0.00 | H |
| ATOM | 469 | H62  | A | A | 15 | -20.252 | -37.574 | 64.044 | 1.00 | 0.00 | H |
| ATOM | 470 | H2'1 | A | A | 15 | -26.804 | -36.801 | 63.603 | 1.00 | 0.00 | H |
| ATOM | 471 | H2'2 | A | A | 15 | -27.374 | -35.819 | 64.946 | 1.00 | 0.00 | H |
| ATOM | 472 | H5'1 | A | A | 15 | -26.876 | -40.617 | 63.776 | 1.00 | 0.00 | H |
| ATOM | 473 | H5'2 | A | A | 15 | -28.509 | -40.282 | 63.164 | 1.00 | 0.00 | H |
| ATOM | 474 | C1'  | C | A | 16 | -25.736 | -34.131 | 69.080 | 1.00 | 0.00 | C |
| ATOM | 475 | N1   | C | A | 16 | -24.853 | -34.130 | 67.882 | 1.00 | 0.00 | N |
| ATOM | 476 | C2   | C | A | 16 | -23.476 | -34.070 | 68.085 | 1.00 | 0.00 | C |
| ATOM | 477 | O2   | C | A | 16 | -23.047 | -34.020 | 69.245 | 1.00 | 0.00 | O |
| ATOM | 478 | N3   | C | A | 16 | -22.655 | -34.066 | 67.007 | 1.00 | 0.00 | N |
| ATOM | 479 | C4   | C | A | 16 | -23.151 | -34.121 | 65.764 | 1.00 | 0.00 | C |
| ATOM | 480 | N4   | C | A | 16 | -22.302 | -34.119 | 64.747 | 1.00 | 0.00 | N |
| ATOM | 481 | C5   | C | A | 16 | -24.563 | -34.179 | 65.524 | 1.00 | 0.00 | C |
| ATOM | 482 | C6   | C | A | 16 | -25.372 | -34.185 | 66.625 | 1.00 | 0.00 | C |
| ATOM | 483 | C2'  | C | A | 16 | -27.020 | -33.335 | 68.898 | 1.00 | 0.00 | C |
| ATOM | 484 | C3'  | C | A | 16 | -28.020 | -34.159 | 69.695 | 1.00 | 0.00 | C |
| ATOM | 485 | O3'  | C | A | 16 | -27.948 | -33.784 | 71.068 | 1.00 | 0.00 | O |
| ATOM | 486 | C4'  | C | A | 16 | -27.543 | -35.591 | 69.460 | 1.00 | 0.00 | C |
| ATOM | 487 | O4'  | C | A | 16 | -26.089 | -35.475 | 69.352 | 1.00 | 0.00 | O |
| ATOM | 488 | C5'  | C | A | 16 | -28.067 | -36.278 | 68.219 | 1.00 | 0.00 | C |

|      |     |      |   |   |    |         |         |        |      |      |   |
|------|-----|------|---|---|----|---------|---------|--------|------|------|---|
| ATOM | 489 | O5'  | C | A | 16 | -28.175 | -35.319 | 67.137 | 1.00 | 0.00 | O |
| ATOM | 490 | O1P  | C | A | 16 | -30.655 | -35.184 | 66.724 | 1.00 | 0.00 | O |
| ATOM | 491 | O2P  | C | A | 16 | -29.045 | -34.702 | 64.862 | 1.00 | 0.00 | O |
| ATOM | 492 | P    | C | A | 16 | -29.360 | -35.484 | 66.082 | 1.00 | 0.00 | P |
| ATOM | 493 | H5   | C | A | 16 | -24.972 | -34.216 | 64.513 | 1.00 | 0.00 | H |
| ATOM | 494 | H6   | C | A | 16 | -26.453 | -34.237 | 66.494 | 1.00 | 0.00 | H |
| ATOM | 495 | H1'  | C | A | 16 | -25.161 | -33.758 | 69.928 | 1.00 | 0.00 | H |
| ATOM | 496 | H3'  | C | A | 16 | -29.040 | -34.019 | 69.335 | 1.00 | 0.00 | H |
| ATOM | 497 | H4'  | C | A | 16 | -27.863 | -36.175 | 70.322 | 1.00 | 0.00 | H |
| ATOM | 498 | H41  | C | A | 16 | -22.657 | -34.162 | 63.780 | 1.00 | 0.00 | H |
| ATOM | 499 | H42  | C | A | 16 | -21.288 | -34.074 | 64.921 | 1.00 | 0.00 | H |
| ATOM | 500 | H2'1 | C | A | 16 | -27.315 | -33.258 | 67.852 | 1.00 | 0.00 | H |
| ATOM | 501 | H2'2 | C | A | 16 | -26.938 | -32.321 | 69.291 | 1.00 | 0.00 | H |
| ATOM | 502 | H5'1 | C | A | 16 | -27.381 | -37.077 | 67.938 | 1.00 | 0.00 | H |
| ATOM | 503 | H5'2 | C | A | 16 | -29.046 | -36.704 | 68.433 | 1.00 | 0.00 | H |
| ATOM | 504 | C1'  | G | A | 17 | -23.178 | -30.789 | 71.688 | 1.00 | 0.00 | C |
| ATOM | 505 | N1   | G | A | 17 | -20.234 | -30.627 | 67.525 | 1.00 | 0.00 | N |
| ATOM | 506 | C2   | G | A | 17 | -19.880 | -30.646 | 68.863 | 1.00 | 0.00 | C |
| ATOM | 507 | N2   | G | A | 17 | -18.568 | -30.614 | 69.126 | 1.00 | 0.00 | N |
| ATOM | 508 | N3   | G | A | 17 | -20.764 | -30.692 | 69.858 | 1.00 | 0.00 | N |
| ATOM | 509 | C4   | G | A | 17 | -22.047 | -30.710 | 69.408 | 1.00 | 0.00 | C |
| ATOM | 510 | C5   | G | A | 17 | -22.494 | -30.691 | 68.097 | 1.00 | 0.00 | C |
| ATOM | 511 | C6   | G | A | 17 | -21.556 | -30.646 | 67.040 | 1.00 | 0.00 | C |
| ATOM | 512 | O6   | G | A | 17 | -21.754 | -30.623 | 65.825 | 1.00 | 0.00 | O |
| ATOM | 513 | N7   | G | A | 17 | -23.890 | -30.720 | 68.062 | 1.00 | 0.00 | N |
| ATOM | 514 | C8   | G | A | 17 | -24.237 | -30.759 | 69.323 | 1.00 | 0.00 | C |
| ATOM | 515 | N9   | G | A | 17 | -23.173 | -30.755 | 70.201 | 1.00 | 0.00 | N |
| ATOM | 516 | C2'  | G | A | 17 | -24.304 | -29.980 | 72.318 | 1.00 | 0.00 | C |
| ATOM | 517 | C3'  | G | A | 17 | -24.661 | -30.821 | 73.532 | 1.00 | 0.00 | C |
| ATOM | 518 | O3'  | G | A | 17 | -23.783 | -30.490 | 74.605 | 1.00 | 0.00 | O |
| ATOM | 519 | C4'  | G | A | 17 | -24.447 | -32.249 | 73.030 | 1.00 | 0.00 | C |
| ATOM | 520 | O4'  | G | A | 17 | -23.334 | -32.137 | 72.089 | 1.00 | 0.00 | O |
| ATOM | 521 | C5'  | G | A | 17 | -25.616 | -32.893 | 72.324 | 1.00 | 0.00 | C |
| ATOM | 522 | O5'  | G | A | 17 | -26.320 | -31.902 | 71.535 | 1.00 | 0.00 | O |
| ATOM | 523 | O1P  | G | A | 17 | -28.561 | -31.740 | 72.668 | 1.00 | 0.00 | O |
| ATOM | 524 | O2P  | G | A | 17 | -28.349 | -31.210 | 70.225 | 1.00 | 0.00 | O |
| ATOM | 525 | P    | G | A | 17 | -27.902 | -32.027 | 71.379 | 1.00 | 0.00 | P |
| ATOM | 526 | H1   | G | A | 17 | -19.471 | -30.598 | 66.832 | 1.00 | 0.00 | H |
| ATOM | 527 | H8   | G | A | 17 | -25.276 | -30.791 | 69.651 | 1.00 | 0.00 | H |
| ATOM | 528 | H1'  | G | A | 17 | -22.206 | -30.444 | 72.041 | 1.00 | 0.00 | H |
| ATOM | 529 | H21  | G | A | 17 | -17.889 | -30.582 | 68.352 | 1.00 | 0.00 | H |
| ATOM | 530 | H3'  | G | A | 17 | -25.693 | -30.666 | 73.848 | 1.00 | 0.00 | H |
| ATOM | 531 | H22  | G | A | 17 | -18.239 | -30.623 | 70.102 | 1.00 | 0.00 | H |
| ATOM | 532 | H4'  | G | A | 17 | -24.208 | -32.857 | 73.902 | 1.00 | 0.00 | H |
| ATOM | 533 | H2'1 | G | A | 17 | -25.157 | -29.869 | 71.647 | 1.00 | 0.00 | H |
| ATOM | 534 | H2'2 | G | A | 17 | -23.983 | -28.979 | 72.608 | 1.00 | 0.00 | H |
| ATOM | 535 | H5'1 | G | A | 17 | -25.248 | -33.688 | 71.675 | 1.00 | 0.00 | H |
| ATOM | 536 | H5'2 | G | A | 17 | -26.290 | -33.322 | 73.065 | 1.00 | 0.00 | H |
| ATOM | 537 | C1'  | G | A | 18 | -19.489 | -27.556 | 72.371 | 1.00 | 0.00 | C |
| ATOM | 538 | N1   | G | A | 18 | -19.545 | -27.282 | 67.278 | 1.00 | 0.00 | N |
| ATOM | 539 | C2   | G | A | 18 | -18.474 | -27.347 | 68.152 | 1.00 | 0.00 | C |
| ATOM | 540 | N2   | G | A | 18 | -17.255 | -27.335 | 67.595 | 1.00 | 0.00 | N |
| ATOM | 541 | N3   | G | A | 18 | -18.608 | -27.418 | 69.474 | 1.00 | 0.00 | N |
| ATOM | 542 | C4   | G | A | 18 | -19.910 | -27.411 | 69.863 | 1.00 | 0.00 | C |

|      |     |      |     |    |         |         |        |      |      |   |
|------|-----|------|-----|----|---------|---------|--------|------|------|---|
| ATOM | 543 | C5   | G A | 18 | -21.040 | -27.345 | 69.065 | 1.00 | 0.00 | C |
| ATOM | 544 | C6   | G A | 18 | -20.899 | -27.274 | 67.660 | 1.00 | 0.00 | C |
| ATOM | 545 | O6   | G A | 18 | -21.773 | -27.208 | 66.795 | 1.00 | 0.00 | O |
| ATOM | 546 | N7   | G A | 18 | -22.191 | -27.361 | 69.855 | 1.00 | 0.00 | N |
| ATOM | 547 | C8   | G A | 18 | -21.734 | -27.439 | 71.078 | 1.00 | 0.00 | C |
| ATOM | 548 | N9   | G A | 18 | -20.357 | -27.472 | 71.165 | 1.00 | 0.00 | N |
| ATOM | 549 | C2'  | G A | 18 | -20.011 | -26.758 | 73.559 | 1.00 | 0.00 | C |
| ATOM | 550 | C3'  | G A | 18 | -19.610 | -27.636 | 74.732 | 1.00 | 0.00 | C |
| ATOM | 551 | O3'  | G A | 18 | -18.260 | -27.348 | 75.092 | 1.00 | 0.00 | O |
| ATOM | 552 | C4'  | G A | 18 | -19.767 | -29.048 | 74.171 | 1.00 | 0.00 | C |
| ATOM | 553 | O4'  | G A | 18 | -19.416 | -28.915 | 72.757 | 1.00 | 0.00 | O |
| ATOM | 554 | C5'  | G A | 18 | -21.145 | -29.659 | 74.271 | 1.00 | 0.00 | C |
| ATOM | 555 | O5'  | G A | 18 | -22.152 | -28.637 | 74.067 | 1.00 | 0.00 | O |
| ATOM | 556 | O1P  | G A | 18 | -23.298 | -28.494 | 76.304 | 1.00 | 0.00 | O |
| ATOM | 557 | O2P  | G A | 18 | -24.545 | -27.885 | 74.214 | 1.00 | 0.00 | O |
| ATOM | 558 | P    | G A | 18 | -23.527 | -28.744 | 74.868 | 1.00 | 0.00 | P |
| ATOM | 559 | H1   | G A | 18 | -19.333 | -27.236 | 66.269 | 1.00 | 0.00 | H |
| ATOM | 560 | H8   | G A | 18 | -22.382 | -27.473 | 71.954 | 1.00 | 0.00 | H |
| ATOM | 561 | H1'  | G A | 18 | -18.486 | -27.231 | 72.093 | 1.00 | 0.00 | H |
| ATOM | 562 | H21  | G A | 18 | -17.161 | -27.283 | 66.569 | 1.00 | 0.00 | H |
| ATOM | 563 | H3'  | G A | 18 | -20.255 | -27.482 | 75.598 | 1.00 | 0.00 | H |
| ATOM | 564 | H22  | G A | 18 | -16.419 | -27.378 | 68.191 | 1.00 | 0.00 | H |
| ATOM | 565 | H4'  | G A | 18 | -19.078 | -29.687 | 74.722 | 1.00 | 0.00 | H |
| ATOM | 566 | H2'1 | G A | 18 | -21.091 | -26.618 | 73.520 | 1.00 | 0.00 | H |
| ATOM | 567 | H2'2 | G A | 18 | -19.555 | -25.770 | 73.626 | 1.00 | 0.00 | H |
| ATOM | 568 | H5'1 | G A | 18 | -21.248 | -30.435 | 73.512 | 1.00 | 0.00 | H |
| ATOM | 569 | H5'2 | G A | 18 | -21.267 | -30.106 | 75.257 | 1.00 | 0.00 | H |
| ATOM | 570 | C1'  | T A | 19 | -16.012 | -24.379 | 70.850 | 1.00 | 0.00 | C |
| ATOM | 571 | N1   | T A | 19 | -17.408 | -24.247 | 70.358 | 1.00 | 0.00 | N |
| ATOM | 572 | C2   | T A | 19 | -17.591 | -24.160 | 68.993 | 1.00 | 0.00 | C |
| ATOM | 573 | O2   | T A | 19 | -16.664 | -24.186 | 68.201 | 1.00 | 0.00 | O |
| ATOM | 574 | N3   | T A | 19 | -18.904 | -24.039 | 68.580 | 1.00 | 0.00 | N |
| ATOM | 575 | C4   | T A | 19 | -20.020 | -23.997 | 69.389 | 1.00 | 0.00 | C |
| ATOM | 576 | O4   | T A | 19 | -21.151 | -23.883 | 68.902 | 1.00 | 0.00 | O |
| ATOM | 577 | C5   | T A | 19 | -19.731 | -24.095 | 70.800 | 1.00 | 0.00 | C |
| ATOM | 578 | C6   | T A | 19 | -18.462 | -24.214 | 71.239 | 1.00 | 0.00 | C |
| ATOM | 579 | C7   | T A | 19 | -20.915 | -24.056 | 71.719 | 1.00 | 0.00 | C |
| ATOM | 580 | C2'  | T A | 19 | -15.739 | -23.614 | 72.140 | 1.00 | 0.00 | C |
| ATOM | 581 | C3'  | T A | 19 | -14.763 | -24.534 | 72.855 | 1.00 | 0.00 | C |
| ATOM | 582 | O3'  | T A | 19 | -13.442 | -24.272 | 72.385 | 1.00 | 0.00 | O |
| ATOM | 583 | C4'  | T A | 19 | -15.253 | -25.924 | 72.457 | 1.00 | 0.00 | C |
| ATOM | 584 | O4'  | T A | 19 | -15.768 | -25.750 | 71.099 | 1.00 | 0.00 | O |
| ATOM | 585 | C5'  | T A | 19 | -16.342 | -26.524 | 73.315 | 1.00 | 0.00 | C |
| ATOM | 586 | O5'  | T A | 19 | -17.257 | -25.483 | 73.744 | 1.00 | 0.00 | O |
| ATOM | 587 | O1P  | T A | 19 | -16.914 | -25.398 | 76.235 | 1.00 | 0.00 | O |
| ATOM | 588 | O2P  | T A | 19 | -19.115 | -24.709 | 75.246 | 1.00 | 0.00 | O |
| ATOM | 589 | P    | T A | 19 | -17.931 | -25.599 | 75.184 | 1.00 | 0.00 | P |
| ATOM | 590 | H3   | T A | 19 | -19.066 | -23.977 | 67.564 | 1.00 | 0.00 | H |
| ATOM | 591 | H6   | T A | 19 | -18.268 | -24.287 | 72.310 | 1.00 | 0.00 | H |
| ATOM | 592 | H1'  | T A | 19 | -15.338 | -24.057 | 70.056 | 1.00 | 0.00 | H |
| ATOM | 593 | H3'  | T A | 19 | -14.795 | -24.399 | 73.936 | 1.00 | 0.00 | H |
| ATOM | 594 | H4'  | T A | 19 | -14.389 | -26.589 | 72.504 | 1.00 | 0.00 | H |
| ATOM | 595 | H71  | T A | 19 | -20.875 | -23.152 | 72.325 | 1.00 | 0.00 | H |
| ATOM | 596 | H72  | T A | 19 | -21.832 | -24.056 | 71.128 | 1.00 | 0.00 | H |



|      |     |      |     |   |    |         |         |        |      |      |   |
|------|-----|------|-----|---|----|---------|---------|--------|------|------|---|
| ATOM | 597 | H73  | T   | A | 19 | -20.903 | -24.931 | 72.370 | 1.00 | 0.00 | H |
| ATOM | 598 | H2'1 | T   | A | 19 | -16.644 | -23.460 | 72.727 | 1.00 | 0.00 | H |
| ATOM | 599 | H2'2 | T   | A | 19 | -15.299 | -22.633 | 71.954 | 1.00 | 0.00 | H |
| ATOM | 600 | H5'1 | T   | A | 19 | -16.883 | -27.273 | 72.736 | 1.00 | 0.00 | H |
| ATOM | 601 | H5'2 | T   | A | 19 | -15.892 | -26.999 | 74.185 | 1.00 | 0.00 | H |
| ATOM | 602 | C01  | LNK | A | 20 | -10.991 | -21.647 | 73.362 | 0.00 | 0.00 | C |
| ATOM | 603 | O1   | LNK | A | 20 | -12.279 | -22.261 | 73.453 | 1.00 | 0.00 | O |
| ATOM | 604 | S    | LNK | A | 20 | -9.073  | -18.464 | 74.789 | 0.00 | 0.00 | S |
| ATOM | 605 | C02  | LNK | A | 20 | -10.964 | -20.381 | 74.240 | 0.00 | 0.00 | C |
| ATOM | 606 | C03  | LNK | A | 20 | -10.116 | -19.295 | 73.551 | 0.00 | 0.00 | C |
| ATOM | 607 | O1P  | LNK | A | 20 | -14.372 | -21.819 | 72.127 | 1.00 | 0.00 | O |
| ATOM | 608 | O2P  | LNK | A | 20 | -12.211 | -22.294 | 70.942 | 1.00 | 0.00 | O |
| ATOM | 609 | P    | LNK | A | 20 | -13.089 | -22.549 | 72.110 | 1.00 | 0.00 | P |
| ATOM | 610 | H01  | LNK | A | 20 | -10.790 | -21.374 | 72.326 | 0.00 | 0.00 | H |
| ATOM | 611 | H02  | LNK | A | 20 | -10.229 | -22.345 | 73.709 | 0.00 | 0.00 | H |
| ATOM | 612 | H03  | LNK | A | 20 | -10.774 | -18.564 | 73.081 | 0.00 | 0.00 | H |
| ATOM | 613 | H04  | LNK | A | 20 | -10.529 | -20.622 | 75.211 | 0.00 | 0.00 | H |
| ATOM | 614 | H05  | LNK | A | 20 | -11.981 | -20.015 | 74.380 | 0.00 | 0.00 | H |
| ATOM | 615 | H06  | LNK | A | 20 | -9.484  | -19.756 | 72.792 | 0.00 | 0.00 | H |
| ATOM | 616 | AU   | LNK | A | 20 | -8.771  | -17.918 | 74.505 |      |      |   |
| TER  |     |      |     |   |    |         |         |        |      |      |   |
| ATOM | 618 | C1'  | A   | B | 2  | -19.502 | -23.575 | 60.552 | 1.00 | 0.00 | C |
| ATOM | 619 | N1   | A   | B | 2  | -19.389 | -23.851 | 65.675 | 1.00 | 0.00 | N |
| ATOM | 620 | C2   | A   | B | 2  | -18.432 | -23.880 | 64.754 | 1.00 | 0.00 | C |
| ATOM | 621 | N3   | A   | B | 2  | -18.530 | -23.801 | 63.443 | 1.00 | 0.00 | N |
| ATOM | 622 | C4   | A   | B | 2  | -19.821 | -23.680 | 63.080 | 1.00 | 0.00 | C |
| ATOM | 623 | C5   | A   | B | 2  | -20.914 | -23.636 | 63.897 | 1.00 | 0.00 | C |
| ATOM | 624 | C6   | A   | B | 2  | -20.666 | -23.729 | 65.283 | 1.00 | 0.00 | C |
| ATOM | 625 | N6   | A   | B | 2  | -21.642 | -23.698 | 66.207 | 1.00 | 0.00 | N |
| ATOM | 626 | N7   | A   | B | 2  | -22.081 | -23.503 | 63.165 | 1.00 | 0.00 | N |
| ATOM | 627 | C8   | A   | B | 2  | -21.672 | -23.477 | 61.931 | 1.00 | 0.00 | C |
| ATOM | 628 | N9   | A   | B | 2  | -20.311 | -23.576 | 61.802 | 1.00 | 0.00 | N |
| ATOM | 629 | C2'  | A   | B | 2  | -20.159 | -24.315 | 59.395 | 1.00 | 0.00 | C |
| ATOM | 630 | C3'  | A   | B | 2  | -19.733 | -23.479 | 58.200 | 1.00 | 0.00 | C |
| ATOM | 631 | O3'  | A   | B | 2  | -18.438 | -23.896 | 57.774 | 1.00 | 0.00 | O |
| ATOM | 632 | C4'  | A   | B | 2  | -19.725 | -22.059 | 58.764 | 1.00 | 0.00 | C |
| ATOM | 633 | O4'  | A   | B | 2  | -19.318 | -22.228 | 60.161 | 1.00 | 0.00 | O |
| ATOM | 634 | C5'  | A   | B | 2  | -21.039 | -21.315 | 58.730 | 1.00 | 0.00 | C |
| ATOM | 635 | O5'  | A   | B | 2  | -22.130 | -22.236 | 58.988 | 1.00 | 0.00 | O |
| ATOM | 636 | H2   | A   | B | 2  | -17.418 | -23.985 | 65.137 | 1.00 | 0.00 | H |
| ATOM | 637 | H8   | A   | B | 2  | -22.348 | -23.384 | 61.080 | 1.00 | 0.00 | H |
| ATOM | 638 | H1'  | A   | B | 2  | -18.523 | -23.996 | 60.779 | 1.00 | 0.00 | H |
| ATOM | 639 | H3'  | A   | B | 2  | -20.432 | -23.567 | 57.368 | 1.00 | 0.00 | H |
| ATOM | 640 | H4'  | A   | B | 2  | -19.005 | -21.489 | 58.177 | 1.00 | 0.00 | H |
| ATOM | 641 | H61  | A   | B | 2  | -21.406 | -23.767 | 67.206 | 1.00 | 0.00 | H |
| ATOM | 642 | H62  | A   | B | 2  | -22.625 | -23.606 | 65.913 | 1.00 | 0.00 | H |
| ATOM | 643 | H2'1 | A   | B | 2  | -21.245 | -24.349 | 59.488 | 1.00 | 0.00 | H |
| ATOM | 644 | H2'2 | A   | B | 2  | -19.804 | -25.343 | 59.307 | 1.00 | 0.00 | H |
| ATOM | 645 | H5'1 | A   | B | 2  | -21.028 | -20.535 | 59.491 | 1.00 | 0.00 | H |
| ATOM | 646 | H5'2 | A   | B | 2  | -21.166 | -20.858 | 57.750 | 1.00 | 0.00 | H |
| ATOM | 647 | C1'  | C   | B | 3  | -16.289 | -27.069 | 62.010 | 1.00 | 0.00 | C |
| ATOM | 648 | N1   | C   | B | 3  | -17.685 | -27.064 | 62.527 | 1.00 | 0.00 | N |
| ATOM | 649 | C2   | C   | B | 3  | -17.871 | -27.135 | 63.906 | 1.00 | 0.00 | C |
| ATOM | 650 | O2   | C   | B | 3  | -16.876 | -27.198 | 64.639 | 1.00 | 0.00 | O |

|      |     |      |     |   |         |         |        |      |      |   |
|------|-----|------|-----|---|---------|---------|--------|------|------|---|
| ATOM | 651 | N3   | C B | 3 | -19.133 | -27.132 | 64.396 | 1.00 | 0.00 | N |
| ATOM | 652 | C4   | C B | 3 | -20.191 | -27.064 | 63.577 | 1.00 | 0.00 | C |
| ATOM | 653 | N4   | C B | 3 | -21.405 | -27.061 | 64.112 | 1.00 | 0.00 | N |
| ATOM | 654 | C5   | C B | 3 | -20.032 | -26.995 | 62.153 | 1.00 | 0.00 | C |
| ATOM | 655 | C6   | C B | 3 | -18.749 | -26.994 | 61.681 | 1.00 | 0.00 | C |
| ATOM | 656 | C2'  | C B | 3 | -16.115 | -27.857 | 60.719 | 1.00 | 0.00 | C |
| ATOM | 657 | C3'  | C B | 3 | -15.067 | -27.035 | 59.984 | 1.00 | 0.00 | C |
| ATOM | 658 | O3'  | C B | 3 | -13.770 | -27.423 | 60.433 | 1.00 | 0.00 | O |
| ATOM | 659 | C4'  | C B | 3 | -15.414 | -25.604 | 60.389 | 1.00 | 0.00 | C |
| ATOM | 660 | O4'  | C B | 3 | -15.921 | -25.726 | 61.756 | 1.00 | 0.00 | O |
| ATOM | 661 | C5'  | C B | 3 | -16.455 | -24.902 | 59.549 | 1.00 | 0.00 | C |
| ATOM | 662 | O5'  | C B | 3 | -17.472 | -25.850 | 59.138 | 1.00 | 0.00 | O |
| ATOM | 663 | O1P  | C B | 3 | -17.184 | -25.967 | 56.639 | 1.00 | 0.00 | O |
| ATOM | 664 | O2P  | C B | 3 | -19.423 | -26.440 | 57.668 | 1.00 | 0.00 | O |
| ATOM | 665 | P    | C B | 3 | -18.157 | -25.669 | 57.710 | 1.00 | 0.00 | P |
| ATOM | 666 | H5   | C B | 3 | -20.889 | -26.946 | 61.482 | 1.00 | 0.00 | H |
| ATOM | 667 | H6   | C B | 3 | -18.576 | -26.935 | 60.607 | 1.00 | 0.00 | H |
| ATOM | 668 | H1'  | C B | 3 | -15.636 | -27.454 | 62.794 | 1.00 | 0.00 | H |
| ATOM | 669 | H3'  | C B | 3 | -15.130 | -27.165 | 58.904 | 1.00 | 0.00 | H |
| ATOM | 670 | H4'  | C B | 3 | -14.492 | -25.025 | 60.326 | 1.00 | 0.00 | H |
| ATOM | 671 | H41  | C B | 3 | -22.235 | -27.006 | 63.503 | 1.00 | 0.00 | H |
| ATOM | 672 | H42  | C B | 3 | -21.517 | -27.112 | 65.135 | 1.00 | 0.00 | H |
| ATOM | 673 | H2'1 | C B | 3 | -17.040 | -27.923 | 60.147 | 1.00 | 0.00 | H |
| ATOM | 674 | H2'2 | C B | 3 | -15.767 | -28.874 | 60.899 | 1.00 | 0.00 | H |
| ATOM | 675 | H5'1 | C B | 3 | -16.911 | -24.104 | 60.136 | 1.00 | 0.00 | H |
| ATOM | 676 | H5'2 | C B | 3 | -15.976 | -24.472 | 58.671 | 1.00 | 0.00 | H |
| ATOM | 677 | C1'  | C B | 4 | -14.508 | -30.444 | 65.165 | 1.00 | 0.00 | C |
| ATOM | 678 | N1   | C B | 4 | -15.941 | -30.465 | 64.765 | 1.00 | 0.00 | N |
| ATOM | 679 | C2   | C B | 4 | -16.901 | -30.511 | 65.774 | 1.00 | 0.00 | C |
| ATOM | 680 | O2   | C B | 4 | -16.526 | -30.531 | 66.955 | 1.00 | 0.00 | O |
| ATOM | 681 | N3   | C B | 4 | -18.211 | -30.530 | 65.431 | 1.00 | 0.00 | N |
| ATOM | 682 | C4   | C B | 4 | -18.586 | -30.507 | 64.145 | 1.00 | 0.00 | C |
| ATOM | 683 | N4   | C B | 4 | -19.881 | -30.524 | 63.865 | 1.00 | 0.00 | N |
| ATOM | 684 | C5   | C B | 4 | -17.622 | -30.465 | 63.085 | 1.00 | 0.00 | C |
| ATOM | 685 | C6   | C B | 4 | -16.307 | -30.441 | 63.455 | 1.00 | 0.00 | C |
| ATOM | 686 | C2'  | C B | 4 | -13.603 | -31.256 | 64.249 | 1.00 | 0.00 | C |
| ATOM | 687 | C3'  | C B | 4 | -12.330 | -30.423 | 64.243 | 1.00 | 0.00 | C |
| ATOM | 688 | O3'  | C B | 4 | -11.540 | -30.767 | 65.378 | 1.00 | 0.00 | O |
| ATOM | 689 | C4'  | C B | 4 | -12.859 | -28.993 | 64.319 | 1.00 | 0.00 | C |
| ATOM | 690 | O4'  | C B | 4 | -14.071 | -29.099 | 65.133 | 1.00 | 0.00 | O |
| ATOM | 691 | C5'  | C B | 4 | -13.216 | -28.337 | 63.005 | 1.00 | 0.00 | C |
| ATOM | 692 | O5'  | C B | 4 | -13.790 | -29.320 | 62.107 | 1.00 | 0.00 | O |
| ATOM | 693 | O1P  | C B | 4 | -12.089 | -29.483 | 60.259 | 1.00 | 0.00 | O |
| ATOM | 694 | O2P  | C B | 4 | -14.501 | -29.992 | 59.793 | 1.00 | 0.00 | O |
| ATOM | 695 | P    | C B | 4 | -13.507 | -29.187 | 60.544 | 1.00 | 0.00 | P |
| ATOM | 696 | H5   | C B | 4 | -17.922 | -30.453 | 62.037 | 1.00 | 0.00 | H |
| ATOM | 697 | H6   | C B | 4 | -15.537 | -30.401 | 62.685 | 1.00 | 0.00 | H |
| ATOM | 698 | H1'  | C B | 4 | -14.436 | -30.795 | 66.196 | 1.00 | 0.00 | H |
| ATOM | 699 | H3'  | C B | 4 | -11.746 | -30.578 | 63.335 | 1.00 | 0.00 | H |
| ATOM | 700 | H4'  | C B | 4 | -12.081 | -28.391 | 64.791 | 1.00 | 0.00 | H |
| ATOM | 701 | H41  | C B | 4 | -20.198 | -30.504 | 62.884 | 1.00 | 0.00 | H |
| ATOM | 702 | H42  | C B | 4 | -20.574 | -30.556 | 64.629 | 1.00 | 0.00 | H |
| ATOM | 703 | H2'1 | C B | 4 | -14.014 | -31.358 | 63.245 | 1.00 | 0.00 | H |
| ATOM | 704 | H2'2 | C B | 4 | -13.418 | -32.259 | 64.632 | 1.00 | 0.00 | H |

|      |     |      |     |   |         |         |        |      |      |   |
|------|-----|------|-----|---|---------|---------|--------|------|------|---|
| ATOM | 705 | H5'1 | C B | 4 | -13.936 | -27.539 | 63.187 | 1.00 | 0.00 | H |
| ATOM | 706 | H5'2 | C B | 4 | -12.316 | -27.914 | 62.562 | 1.00 | 0.00 | H |
| ATOM | 707 | C1'  | G B | 5 | -14.892 | -33.703 | 68.875 | 1.00 | 0.00 | C |
| ATOM | 708 | N1   | G B | 5 | -19.774 | -33.936 | 67.410 | 1.00 | 0.00 | N |
| ATOM | 709 | C2   | G B | 5 | -19.229 | -33.886 | 68.682 | 1.00 | 0.00 | C |
| ATOM | 710 | N2   | G B | 5 | -20.100 | -33.902 | 69.697 | 1.00 | 0.00 | N |
| ATOM | 711 | N3   | G B | 5 | -17.919 | -33.824 | 68.919 | 1.00 | 0.00 | N |
| ATOM | 712 | C4   | G B | 5 | -17.186 | -33.824 | 67.775 | 1.00 | 0.00 | C |
| ATOM | 713 | C5   | G B | 5 | -17.641 | -33.876 | 66.468 | 1.00 | 0.00 | C |
| ATOM | 714 | C6   | G B | 5 | -19.030 | -33.938 | 66.214 | 1.00 | 0.00 | C |
| ATOM | 715 | O6   | G B | 5 | -19.620 | -33.990 | 65.136 | 1.00 | 0.00 | O |
| ATOM | 716 | N7   | G B | 5 | -16.563 | -33.857 | 65.581 | 1.00 | 0.00 | N |
| ATOM | 717 | C8   | G B | 5 | -15.513 | -33.793 | 66.359 | 1.00 | 0.00 | C |
| ATOM | 718 | N9   | G B | 5 | -15.811 | -33.771 | 67.706 | 1.00 | 0.00 | N |
| ATOM | 719 | C2'  | G B | 5 | -13.611 | -34.506 | 68.694 | 1.00 | 0.00 | C |
| ATOM | 720 | C3'  | G B | 5 | -12.589 | -33.640 | 69.414 | 1.00 | 0.00 | C |
| ATOM | 721 | O3'  | G B | 5 | -12.617 | -33.942 | 70.807 | 1.00 | 0.00 | O |
| ATOM | 722 | C4'  | G B | 5 | -13.077 | -32.223 | 69.119 | 1.00 | 0.00 | C |
| ATOM | 723 | O4'  | G B | 5 | -14.533 | -32.348 | 69.065 | 1.00 | 0.00 | O |
| ATOM | 724 | C5'  | G B | 5 | -12.596 | -31.602 | 67.829 | 1.00 | 0.00 | C |
| ATOM | 725 | O5'  | G B | 5 | -12.519 | -32.616 | 66.796 | 1.00 | 0.00 | O |
| ATOM | 726 | O1P  | G B | 5 | -10.054 | -32.768 | 66.311 | 1.00 | 0.00 | O |
| ATOM | 727 | O2P  | G B | 5 | -11.720 | -33.350 | 64.529 | 1.00 | 0.00 | O |
| ATOM | 728 | P    | G B | 5 | -11.369 | -32.505 | 65.696 | 1.00 | 0.00 | P |
| ATOM | 729 | H1   | G B | 5 | -20.801 | -33.976 | 67.335 | 1.00 | 0.00 | H |
| ATOM | 730 | H8   | G B | 5 | -14.492 | -33.761 | 65.979 | 1.00 | 0.00 | H |
| ATOM | 731 | H1'  | G B | 5 | -15.437 | -34.032 | 69.758 | 1.00 | 0.00 | H |
| ATOM | 732 | H21  | G B | 5 | -21.111 | -33.947 | 69.506 | 1.00 | 0.00 | H |
| ATOM | 733 | H3'  | G B | 5 | -11.579 | -33.796 | 69.031 | 1.00 | 0.00 | H |
| ATOM | 734 | H22  | G B | 5 | -19.759 | -33.870 | 70.669 | 1.00 | 0.00 | H |
| ATOM | 735 | H4'  | G B | 5 | -12.734 | -31.593 | 69.939 | 1.00 | 0.00 | H |
| ATOM | 736 | H2'1 | G B | 5 | -13.350 | -34.638 | 67.644 | 1.00 | 0.00 | H |
| ATOM | 737 | H2'2 | G B | 5 | -13.677 | -35.497 | 69.143 | 1.00 | 0.00 | H |
| ATOM | 738 | H5'1 | G B | 5 | -13.293 | -30.820 | 67.527 | 1.00 | 0.00 | H |
| ATOM | 739 | H5'2 | G B | 5 | -11.612 | -31.163 | 67.988 | 1.00 | 0.00 | H |
| ATOM | 740 | C1'  | T B | 6 | -17.333 | -36.887 | 71.773 | 1.00 | 0.00 | C |
| ATOM | 741 | N1   | T B | 6 | -17.420 | -37.005 | 70.294 | 1.00 | 0.00 | N |
| ATOM | 742 | C2   | T B | 6 | -18.682 | -37.082 | 69.741 | 1.00 | 0.00 | C |
| ATOM | 743 | O2   | T B | 6 | -19.699 | -37.058 | 70.411 | 1.00 | 0.00 | O |
| ATOM | 744 | N3   | T B | 6 | -18.715 | -37.188 | 68.362 | 1.00 | 0.00 | N |
| ATOM | 745 | C4   | T B | 6 | -17.630 | -37.228 | 67.513 | 1.00 | 0.00 | C |
| ATOM | 746 | O4   | T B | 6 | -17.785 | -37.330 | 66.291 | 1.00 | 0.00 | O |
| ATOM | 747 | C5   | T B | 6 | -16.354 | -37.140 | 68.183 | 1.00 | 0.00 | C |
| ATOM | 748 | C6   | T B | 6 | -16.282 | -37.034 | 69.525 | 1.00 | 0.00 | C |
| ATOM | 749 | C7   | T B | 6 | -15.144 | -37.177 | 67.297 | 1.00 | 0.00 | C |
| ATOM | 750 | C2'  | T B | 6 | -16.172 | -37.664 | 72.383 | 1.00 | 0.00 | C |
| ATOM | 751 | C3'  | T B | 6 | -15.751 | -36.755 | 73.529 | 1.00 | 0.00 | C |
| ATOM | 752 | O3'  | T B | 6 | -16.568 | -37.026 | 74.665 | 1.00 | 0.00 | O |
| ATOM | 753 | C4'  | T B | 6 | -15.992 | -35.359 | 72.962 | 1.00 | 0.00 | C |
| ATOM | 754 | O4'  | T B | 6 | -17.155 | -35.520 | 72.089 | 1.00 | 0.00 | O |
| ATOM | 755 | C5'  | T B | 6 | -14.864 | -34.756 | 72.156 | 1.00 | 0.00 | C |
| ATOM | 756 | O5'  | T B | 6 | -14.204 | -35.793 | 71.387 | 1.00 | 0.00 | O |
| ATOM | 757 | O1P  | T B | 6 | -11.904 | -35.896 | 72.403 | 1.00 | 0.00 | O |
| ATOM | 758 | O2P  | T B | 6 | -12.249 | -36.561 | 70.008 | 1.00 | 0.00 | O |

|      |     |      |     |   |         |         |        |      |      |   |
|------|-----|------|-----|---|---------|---------|--------|------|------|---|
| ATOM | 759 | P    | T B | 6 | -12.633 | -35.680 | 71.137 | 1.00 | 0.00 | P |
| ATOM | 760 | H3   | T B | 6 | -19.647 | -37.244 | 67.924 | 1.00 | 0.00 | H |
| ATOM | 761 | H6   | T B | 6 | -15.307 | -36.970 | 70.007 | 1.00 | 0.00 | H |
| ATOM | 762 | H1'  | T B | 6 | -18.283 | -37.209 | 72.199 | 1.00 | 0.00 | H |
| ATOM | 763 | H3'  | T B | 6 | -14.704 | -36.896 | 73.796 | 1.00 | 0.00 | H |
| ATOM | 764 | H4'  | T B | 6 | -16.183 | -34.701 | 73.810 | 1.00 | 0.00 | H |
| ATOM | 765 | H71  | T B | 6 | -14.575 | -38.085 | 67.496 | 1.00 | 0.00 | H |
| ATOM | 766 | H72  | T B | 6 | -15.457 | -37.165 | 66.253 | 1.00 | 0.00 | H |
| ATOM | 767 | H73  | T B | 6 | -14.519 | -36.306 | 67.499 | 1.00 | 0.00 | H |
| ATOM | 768 | H2'1 | T B | 6 | -15.358 | -37.813 | 71.676 | 1.00 | 0.00 | H |
| ATOM | 769 | H2'2 | T B | 6 | -16.476 | -38.645 | 72.747 | 1.00 | 0.00 | H |
| ATOM | 770 | H5'1 | T B | 6 | -15.268 | -33.999 | 71.484 | 1.00 | 0.00 | H |
| ATOM | 771 | H5'2 | T B | 6 | -14.150 | -34.290 | 72.835 | 1.00 | 0.00 | H |
| ATOM | 772 | C1'  | C B | 7 | -21.012 | -40.074 | 72.756 | 1.00 | 0.00 | C |
| ATOM | 773 | N1   | C B | 7 | -20.191 | -40.224 | 71.521 | 1.00 | 0.00 | N |
| ATOM | 774 | C2   | C B | 7 | -20.860 | -40.349 | 70.306 | 1.00 | 0.00 | C |
| ATOM | 775 | O2   | C B | 7 | -22.099 | -40.329 | 70.299 | 1.00 | 0.00 | O |
| ATOM | 776 | N3   | C B | 7 | -20.132 | -40.486 | 69.170 | 1.00 | 0.00 | N |
| ATOM | 777 | C4   | C B | 7 | -18.793 | -40.504 | 69.209 | 1.00 | 0.00 | C |
| ATOM | 778 | N4   | C B | 7 | -18.133 | -40.637 | 68.069 | 1.00 | 0.00 | N |
| ATOM | 779 | C5   | C B | 7 | -18.079 | -40.383 | 70.446 | 1.00 | 0.00 | C |
| ATOM | 780 | C6   | C B | 7 | -18.833 | -40.241 | 71.576 | 1.00 | 0.00 | C |
| ATOM | 781 | C2'  | C B | 7 | -20.444 | -40.808 | 73.962 | 1.00 | 0.00 | C |
| ATOM | 782 | C3'  | C B | 7 | -20.801 | -39.865 | 75.102 | 1.00 | 0.00 | C |
| ATOM | 783 | O3'  | C B | 7 | -22.134 | -40.131 | 75.529 | 1.00 | 0.00 | O |
| ATOM | 784 | C4'  | C B | 7 | -20.664 | -38.487 | 74.459 | 1.00 | 0.00 | C |
| ATOM | 785 | O4'  | C B | 7 | -21.070 | -38.696 | 73.069 | 1.00 | 0.00 | O |
| ATOM | 786 | C5'  | C B | 7 | -19.282 | -37.873 | 74.472 | 1.00 | 0.00 | C |
| ATOM | 787 | O5'  | C B | 7 | -18.286 | -38.909 | 74.285 | 1.00 | 0.00 | O |
| ATOM | 788 | O1P  | C B | 7 | -17.052 | -38.932 | 76.479 | 1.00 | 0.00 | O |
| ATOM | 789 | O2P  | C B | 7 | -15.888 | -39.656 | 74.379 | 1.00 | 0.00 | O |
| ATOM | 790 | P    | C B | 7 | -16.879 | -38.761 | 75.024 | 1.00 | 0.00 | P |
| ATOM | 791 | H5   | C B | 7 | -16.990 | -40.404 | 70.483 | 1.00 | 0.00 | H |
| ATOM | 792 | H6   | C B | 7 | -18.335 | -40.137 | 72.540 | 1.00 | 0.00 | H |
| ATOM | 793 | H1'  | C B | 7 | -22.025 | -40.411 | 72.534 | 1.00 | 0.00 | H |
| ATOM | 794 | H3'  | C B | 7 | -20.121 | -39.973 | 75.949 | 1.00 | 0.00 | H |
| ATOM | 795 | H4'  | C B | 7 | -21.330 | -37.817 | 75.002 | 1.00 | 0.00 | H |
| ATOM | 796 | H41  | C B | 7 | -17.102 | -40.651 | 68.070 | 1.00 | 0.00 | H |
| ATOM | 797 | H42  | C B | 7 | -18.648 | -40.727 | 67.180 | 1.00 | 0.00 | H |
| ATOM | 798 | H2'1 | C B | 7 | -19.367 | -40.952 | 73.889 | 1.00 | 0.00 | H |
| ATOM | 799 | H2'2 | C B | 7 | -20.897 | -41.789 | 74.101 | 1.00 | 0.00 | H |
| ATOM | 800 | H5'1 | C B | 7 | -19.209 | -37.141 | 73.667 | 1.00 | 0.00 | H |
| ATOM | 801 | H5'2 | C B | 7 | -19.122 | -37.375 | 75.426 | 1.00 | 0.00 | H |
| ATOM | 802 | C1'  | C B | 8 | -24.532 | -43.332 | 71.518 | 1.00 | 0.00 | C |
| ATOM | 803 | N1   | C B | 8 | -23.143 | -43.487 | 71.006 | 1.00 | 0.00 | N |
| ATOM | 804 | C2   | C B | 8 | -22.968 | -43.655 | 69.634 | 1.00 | 0.00 | C |
| ATOM | 805 | O2   | C B | 8 | -23.967 | -43.668 | 68.902 | 1.00 | 0.00 | O |
| ATOM | 806 | N3   | C B | 8 | -21.712 | -43.798 | 69.147 | 1.00 | 0.00 | N |
| ATOM | 807 | C4   | C B | 8 | -20.650 | -43.781 | 69.964 | 1.00 | 0.00 | C |
| ATOM | 808 | N4   | C B | 8 | -19.444 | -43.921 | 69.434 | 1.00 | 0.00 | N |
| ATOM | 809 | C5   | C B | 8 | -20.799 | -43.614 | 71.381 | 1.00 | 0.00 | C |
| ATOM | 810 | C6   | C B | 8 | -22.075 | -43.467 | 71.849 | 1.00 | 0.00 | C |
| ATOM | 811 | C2'  | C B | 8 | -24.775 | -44.024 | 72.853 | 1.00 | 0.00 | C |
| ATOM | 812 | C3'  | C B | 8 | -25.740 | -43.066 | 73.535 | 1.00 | 0.00 | C |

|      |     |      |     |    |         |         |        |      |      |   |
|------|-----|------|-----|----|---------|---------|--------|------|------|---|
| ATOM | 813 | O3'  | C B | 8  | -27.068 | -43.358 | 73.107 | 1.00 | 0.00 | O |
| ATOM | 814 | C4'  | C B | 8  | -25.263 | -41.700 | 73.049 | 1.00 | 0.00 | C |
| ATOM | 815 | O4'  | C B | 8  | -24.773 | -41.949 | 71.692 | 1.00 | 0.00 | O |
| ATOM | 816 | C5'  | C B | 8  | -24.159 | -41.050 | 73.849 | 1.00 | 0.00 | C |
| ATOM | 817 | O5'  | C B | 8  | -23.232 | -42.063 | 74.318 | 1.00 | 0.00 | O |
| ATOM | 818 | O1P  | C B | 8  | -23.523 | -42.006 | 76.818 | 1.00 | 0.00 | O |
| ATOM | 819 | O2P  | C B | 8  | -21.341 | -42.744 | 75.824 | 1.00 | 0.00 | O |
| ATOM | 820 | P    | C B | 8  | -22.530 | -41.862 | 75.734 | 1.00 | 0.00 | P |
| ATOM | 821 | H5   | C B | 8  | -19.939 | -43.606 | 72.051 | 1.00 | 0.00 | H |
| ATOM | 822 | H6   | C B | 8  | -22.238 | -43.330 | 72.917 | 1.00 | 0.00 | H |
| ATOM | 823 | H1'  | C B | 8  | -25.219 | -43.700 | 70.757 | 1.00 | 0.00 | H |
| ATOM | 824 | H3'  | C B | 8  | -25.686 | -43.138 | 74.621 | 1.00 | 0.00 | H |
| ATOM | 825 | H4'  | C B | 8  | -26.126 | -41.035 | 73.076 | 1.00 | 0.00 | H |
| ATOM | 826 | H41  | C B | 8  | -18.611 | -43.908 | 70.040 | 1.00 | 0.00 | H |
| ATOM | 827 | H42  | C B | 8  | -19.339 | -44.043 | 68.416 | 1.00 | 0.00 | H |
| ATOM | 828 | H2'1 | C B | 8  | -23.859 | -44.142 | 73.431 | 1.00 | 0.00 | H |
| ATOM | 829 | H2'2 | C B | 8  | -25.216 | -45.013 | 72.731 | 1.00 | 0.00 | H |
| ATOM | 830 | H5'1 | C B | 8  | -23.632 | -40.334 | 73.218 | 1.00 | 0.00 | H |
| ATOM | 831 | H5'2 | C B | 8  | -24.593 | -40.527 | 74.699 | 1.00 | 0.00 | H |
| ATOM | 832 | C1'  | T B | 9  | -26.645 | -46.703 | 68.575 | 1.00 | 0.00 | C |
| ATOM | 833 | N1   | T B | 9  | -25.214 | -46.836 | 68.958 | 1.00 | 0.00 | N |
| ATOM | 834 | C2   | T B | 9  | -24.304 | -47.028 | 67.939 | 1.00 | 0.00 | C |
| ATOM | 835 | O2   | T B | 9  | -24.631 | -47.090 | 66.766 | 1.00 | 0.00 | O |
| ATOM | 836 | N3   | T B | 9  | -22.986 | -47.146 | 68.339 | 1.00 | 0.00 | N |
| ATOM | 837 | C4   | T B | 9  | -22.513 | -47.094 | 69.633 | 1.00 | 0.00 | C |
| ATOM | 838 | O4   | T B | 9  | -21.305 | -47.216 | 69.870 | 1.00 | 0.00 | O |
| ATOM | 839 | C5   | T B | 9  | -23.538 | -46.890 | 70.630 | 1.00 | 0.00 | C |
| ATOM | 840 | C6   | T B | 9  | -24.832 | -46.770 | 70.275 | 1.00 | 0.00 | C |
| ATOM | 841 | C7   | T B | 9  | -23.066 | -46.824 | 72.051 | 1.00 | 0.00 | C |
| ATOM | 842 | C2'  | T B | 9  | -27.607 | -47.370 | 69.552 | 1.00 | 0.00 | C |
| ATOM | 843 | C3'  | T B | 9  | -28.796 | -46.421 | 69.523 | 1.00 | 0.00 | C |
| ATOM | 844 | O3'  | T B | 9  | -29.636 | -46.756 | 68.420 | 1.00 | 0.00 | O |
| ATOM | 845 | C4'  | T B | 9  | -28.135 | -45.054 | 69.354 | 1.00 | 0.00 | C |
| ATOM | 846 | O4'  | T B | 9  | -26.955 | -45.324 | 68.532 | 1.00 | 0.00 | O |
| ATOM | 847 | C5'  | T B | 9  | -27.695 | -44.359 | 70.621 | 1.00 | 0.00 | C |
| ATOM | 848 | O5'  | T B | 9  | -27.200 | -45.337 | 71.570 | 1.00 | 0.00 | O |
| ATOM | 849 | O1P  | T B | 9  | -28.875 | -45.231 | 73.444 | 1.00 | 0.00 | O |
| ATOM | 850 | O2P  | T B | 9  | -26.512 | -45.938 | 73.910 | 1.00 | 0.00 | O |
| ATOM | 851 | P    | T B | 9  | -27.439 | -45.087 | 73.126 | 1.00 | 0.00 | P |
| ATOM | 852 | H3   | T B | 9  | -22.287 | -47.286 | 67.596 | 1.00 | 0.00 | H |
| ATOM | 853 | H6   | T B | 9  | -25.588 | -46.617 | 71.045 | 1.00 | 0.00 | H |
| ATOM | 854 | H1'  | T B | 9  | -26.769 | -47.105 | 67.569 | 1.00 | 0.00 | H |
| ATOM | 855 | H3'  | T B | 9  | -29.375 | -46.467 | 70.445 | 1.00 | 0.00 | H |
| ATOM | 856 | H4'  | T B | 9  | -28.863 | -44.411 | 68.856 | 1.00 | 0.00 | H |
| ATOM | 857 | H71  | T B | 9  | -23.460 | -47.677 | 72.605 | 1.00 | 0.00 | H |
| ATOM | 858 | H72  | T B | 9  | -21.976 | -46.846 | 72.075 | 1.00 | 0.00 | H |
| ATOM | 859 | H73  | T B | 9  | -23.421 | -45.900 | 72.509 | 1.00 | 0.00 | H |
| ATOM | 860 | H2'1 | T B | 9  | -27.188 | -47.451 | 70.553 | 1.00 | 0.00 | H |
| ATOM | 861 | H2'2 | T B | 9  | -27.891 | -48.372 | 69.232 | 1.00 | 0.00 | H |
| ATOM | 862 | H5'1 | T B | 9  | -26.908 | -43.644 | 70.383 | 1.00 | 0.00 | H |
| ATOM | 863 | H5'2 | T B | 9  | -28.544 | -43.828 | 71.049 | 1.00 | 0.00 | H |
| ATOM | 864 | C1'  | A B | 10 | -26.581 | -50.194 | 65.048 | 1.00 | 0.00 | C |
| ATOM | 865 | N1   | A B | 10 | -21.703 | -50.799 | 66.520 | 1.00 | 0.00 | N |
| ATOM | 866 | C2   | A B | 10 | -22.283 | -50.765 | 65.324 | 1.00 | 0.00 | C |

|      |     |      |     |    |         |         |        |      |      |   |
|------|-----|------|-----|----|---------|---------|--------|------|------|---|
| ATOM | 867 | N3   | A B | 10 | -23.551 | -50.602 | 65.014 | 1.00 | 0.00 | N |
| ATOM | 868 | C4   | A B | 10 | -24.290 | -50.464 | 66.130 | 1.00 | 0.00 | C |
| ATOM | 869 | C5   | A B | 10 | -23.850 | -50.476 | 67.425 | 1.00 | 0.00 | C |
| ATOM | 870 | C6   | A B | 10 | -22.465 | -50.657 | 67.615 | 1.00 | 0.00 | C |
| ATOM | 871 | N6   | A B | 10 | -21.890 | -50.691 | 68.831 | 1.00 | 0.00 | N |
| ATOM | 872 | N7   | A B | 10 | -24.900 | -50.302 | 68.311 | 1.00 | 0.00 | N |
| ATOM | 873 | C8   | A B | 10 | -25.942 | -50.194 | 67.540 | 1.00 | 0.00 | C |
| ATOM | 874 | N9   | A B | 10 | -25.648 | -50.279 | 66.204 | 1.00 | 0.00 | N |
| ATOM | 875 | C2'  | A B | 10 | -27.927 | -50.862 | 65.297 | 1.00 | 0.00 | C |
| ATOM | 876 | C3'  | A B | 10 | -28.880 | -49.948 | 64.542 | 1.00 | 0.00 | C |
| ATOM | 877 | O3'  | A B | 10 | -28.907 | -50.332 | 63.169 | 1.00 | 0.00 | O |
| ATOM | 878 | C4'  | A B | 10 | -28.256 | -48.567 | 64.743 | 1.00 | 0.00 | C |
| ATOM | 879 | O4'  | A B | 10 | -26.816 | -48.824 | 64.783 | 1.00 | 0.00 | O |
| ATOM | 880 | C5'  | A B | 10 | -28.651 | -47.829 | 65.999 | 1.00 | 0.00 | C |
| ATOM | 881 | O5'  | A B | 10 | -28.801 | -48.768 | 67.094 | 1.00 | 0.00 | O |
| ATOM | 882 | O1P  | A B | 10 | -31.260 | -48.660 | 67.622 | 1.00 | 0.00 | O |
| ATOM | 883 | O2P  | A B | 10 | -29.618 | -49.291 | 69.412 | 1.00 | 0.00 | O |
| ATOM | 884 | P    | A B | 10 | -29.914 | -48.487 | 68.202 | 1.00 | 0.00 | P |
| ATOM | 885 | H2   | A B | 10 | -21.609 | -50.890 | 64.477 | 1.00 | 0.00 | H |
| ATOM | 886 | H8   | A B | 10 | -26.953 | -50.050 | 67.921 | 1.00 | 0.00 | H |
| ATOM | 887 | H1'  | A B | 10 | -26.087 | -50.625 | 64.178 | 1.00 | 0.00 | H |
| ATOM | 888 | H3'  | A B | 10 | -29.890 | -49.985 | 64.948 | 1.00 | 0.00 | H |
| ATOM | 889 | H4'  | A B | 10 | -28.556 | -47.958 | 63.890 | 1.00 | 0.00 | H |
| ATOM | 890 | H61  | A B | 10 | -20.873 | -50.823 | 68.913 | 1.00 | 0.00 | H |
| ATOM | 891 | H62  | A B | 10 | -22.468 | -50.584 | 69.676 | 1.00 | 0.00 | H |
| ATOM | 892 | H2'1 | A B | 10 | -28.178 | -50.906 | 66.357 | 1.00 | 0.00 | H |
| ATOM | 893 | H2'2 | A B | 10 | -27.964 | -51.880 | 64.908 | 1.00 | 0.00 | H |
| ATOM | 894 | H5'1 | A B | 10 | -27.879 | -47.099 | 66.244 | 1.00 | 0.00 | H |
| ATOM | 895 | H5'2 | A B | 10 | -29.593 | -47.310 | 65.829 | 1.00 | 0.00 | H |
| ATOM | 896 | C1'  | G B | 11 | -24.411 | -53.761 | 62.363 | 1.00 | 0.00 | C |
| ATOM | 897 | N1   | G B | 11 | -21.361 | -54.202 | 66.428 | 1.00 | 0.00 | N |
| ATOM | 898 | C2   | G B | 11 | -21.051 | -54.218 | 65.079 | 1.00 | 0.00 | C |
| ATOM | 899 | N2   | G B | 11 | -19.757 | -54.373 | 64.773 | 1.00 | 0.00 | N |
| ATOM | 900 | N3   | G B | 11 | -21.960 | -54.087 | 64.114 | 1.00 | 0.00 | N |
| ATOM | 901 | C4   | G B | 11 | -23.219 | -53.946 | 64.605 | 1.00 | 0.00 | C |
| ATOM | 902 | C5   | G B | 11 | -23.622 | -53.924 | 65.930 | 1.00 | 0.00 | C |
| ATOM | 903 | C6   | G B | 11 | -22.658 | -54.058 | 66.956 | 1.00 | 0.00 | C |
| ATOM | 904 | O6   | G B | 11 | -22.818 | -54.063 | 68.177 | 1.00 | 0.00 | O |
| ATOM | 905 | N7   | G B | 11 | -25.006 | -53.762 | 66.011 | 1.00 | 0.00 | N |
| ATOM | 906 | C8   | G B | 11 | -25.390 | -53.690 | 64.762 | 1.00 | 0.00 | C |
| ATOM | 907 | N9   | G B | 11 | -24.361 | -53.796 | 63.849 | 1.00 | 0.00 | N |
| ATOM | 908 | C2'  | G B | 11 | -25.629 | -54.460 | 61.774 | 1.00 | 0.00 | C |
| ATOM | 909 | C3'  | G B | 11 | -25.944 | -53.588 | 60.569 | 1.00 | 0.00 | C |
| ATOM | 910 | O3'  | G B | 11 | -25.138 | -54.002 | 59.469 | 1.00 | 0.00 | O |
| ATOM | 911 | C4'  | G B | 11 | -25.580 | -52.188 | 61.058 | 1.00 | 0.00 | C |
| ATOM | 912 | O4'  | G B | 11 | -24.451 | -52.405 | 61.964 | 1.00 | 0.00 | O |
| ATOM | 913 | C5'  | G B | 11 | -26.658 | -51.435 | 61.801 | 1.00 | 0.00 | C |
| ATOM | 914 | O5'  | G B | 11 | -27.427 | -52.355 | 62.615 | 1.00 | 0.00 | O |
| ATOM | 915 | O1P  | G B | 11 | -29.710 | -52.302 | 61.558 | 1.00 | 0.00 | O |
| ATOM | 916 | O2P  | G B | 11 | -29.468 | -52.850 | 63.994 | 1.00 | 0.00 | O |
| ATOM | 917 | P    | G B | 11 | -28.984 | -52.080 | 62.822 | 1.00 | 0.00 | P |
| ATOM | 918 | H1   | G B | 11 | -20.582 | -54.304 | 67.095 | 1.00 | 0.00 | H |
| ATOM | 919 | H8   | G B | 11 | -26.431 | -53.560 | 64.468 | 1.00 | 0.00 | H |
| ATOM | 920 | H1'  | G B | 11 | -23.488 | -54.196 | 61.979 | 1.00 | 0.00 | H |

|      |     |      |     |    |         |         |        |      |      |   |
|------|-----|------|-----|----|---------|---------|--------|------|------|---|
| ATOM | 921 | H21  | G B | 11 | -19.059 | -54.470 | 65.525 | 1.00 | 0.00 | H |
| ATOM | 922 | H3'  | G B | 11 | -26.996 | -53.645 | 60.287 | 1.00 | 0.00 | H |
| ATOM | 923 | H22  | G B | 11 | -19.461 | -54.397 | 63.787 | 1.00 | 0.00 | H |
| ATOM | 924 | H4'  | G B | 11 | -25.313 | -51.604 | 60.177 | 1.00 | 0.00 | H |
| ATOM | 925 | H2'1 | G B | 11 | -26.466 | -54.490 | 62.472 | 1.00 | 0.00 | H |
| ATOM | 926 | H2'2 | G B | 11 | -25.414 | -55.486 | 61.476 | 1.00 | 0.00 | H |
| ATOM | 927 | H5'1 | G B | 11 | -26.195 | -50.680 | 62.436 | 1.00 | 0.00 | H |
| ATOM | 928 | H5'2 | G B | 11 | -27.313 | -50.945 | 61.080 | 1.00 | 0.00 | H |
| ATOM | 929 | C1'  | G B | 12 | -21.067 | -57.326 | 61.565 | 1.00 | 0.00 | C |
| ATOM | 930 | N1   | G B | 12 | -20.981 | -57.598 | 66.659 | 1.00 | 0.00 | N |
| ATOM | 931 | C2   | G B | 12 | -19.938 | -57.635 | 65.749 | 1.00 | 0.00 | C |
| ATOM | 932 | N2   | G B | 12 | -18.709 | -57.763 | 66.266 | 1.00 | 0.00 | N |
| ATOM | 933 | N3   | G B | 12 | -20.108 | -57.550 | 64.432 | 1.00 | 0.00 | N |
| ATOM | 934 | C4   | G B | 12 | -21.417 | -57.432 | 64.086 | 1.00 | 0.00 | C |
| ATOM | 935 | C5   | G B | 12 | -22.521 | -57.390 | 64.920 | 1.00 | 0.00 | C |
| ATOM | 936 | C6   | G B | 12 | -22.342 | -57.476 | 66.319 | 1.00 | 0.00 | C |
| ATOM | 937 | O6   | G B | 12 | -23.188 | -57.459 | 67.213 | 1.00 | 0.00 | O |
| ATOM | 938 | N7   | G B | 12 | -23.690 | -57.262 | 64.168 | 1.00 | 0.00 | N |
| ATOM | 939 | C8   | G B | 12 | -23.268 | -57.228 | 62.931 | 1.00 | 0.00 | C |
| ATOM | 940 | N9   | G B | 12 | -21.899 | -57.327 | 62.799 | 1.00 | 0.00 | N |
| ATOM | 941 | C2'  | G B | 12 | -21.701 | -58.068 | 60.398 | 1.00 | 0.00 | C |
| ATOM | 942 | C3'  | G B | 12 | -21.256 | -57.232 | 59.208 | 1.00 | 0.00 | C |
| ATOM | 943 | O3'  | G B | 12 | -19.954 | -57.648 | 58.805 | 1.00 | 0.00 | O |
| ATOM | 944 | C4'  | G B | 12 | -21.260 | -55.812 | 59.772 | 1.00 | 0.00 | C |
| ATOM | 945 | O4'  | G B | 12 | -20.877 | -55.980 | 61.174 | 1.00 | 0.00 | O |
| ATOM | 946 | C5'  | G B | 12 | -22.575 | -55.071 | 59.716 | 1.00 | 0.00 | C |
| ATOM | 947 | O5'  | G B | 12 | -23.668 | -55.993 | 59.955 | 1.00 | 0.00 | O |
| ATOM | 948 | O1P  | G B | 12 | -24.895 | -56.023 | 57.757 | 1.00 | 0.00 | O |
| ATOM | 949 | O2P  | G B | 12 | -26.126 | -56.511 | 59.888 | 1.00 | 0.00 | O |
| ATOM | 950 | P    | G B | 12 | -25.052 | -55.754 | 59.199 | 1.00 | 0.00 | P |
| ATOM | 951 | H1   | G B | 12 | -20.741 | -57.665 | 67.660 | 1.00 | 0.00 | H |
| ATOM | 952 | H8   | G B | 12 | -23.939 | -57.131 | 62.076 | 1.00 | 0.00 | H |
| ATOM | 953 | H1'  | G B | 12 | -20.091 | -57.744 | 61.811 | 1.00 | 0.00 | H |
| ATOM | 954 | H21  | G B | 12 | -18.585 | -57.825 | 67.287 | 1.00 | 0.00 | H |
| ATOM | 955 | H3'  | G B | 12 | -21.941 | -57.322 | 58.365 | 1.00 | 0.00 | H |
| ATOM | 956 | H22  | G B | 12 | -17.891 | -57.801 | 65.642 | 1.00 | 0.00 | H |
| ATOM | 957 | H4'  | G B | 12 | -20.532 | -55.241 | 59.198 | 1.00 | 0.00 | H |
| ATOM | 958 | H2'1 | G B | 12 | -22.788 | -58.105 | 60.472 | 1.00 | 0.00 | H |
| ATOM | 959 | H2'2 | G B | 12 | -21.345 | -59.095 | 60.316 | 1.00 | 0.00 | H |
| ATOM | 960 | H5'1 | G B | 12 | -22.579 | -54.290 | 60.477 | 1.00 | 0.00 | H |
| ATOM | 961 | H5'2 | G B | 12 | -22.687 | -54.614 | 58.733 | 1.00 | 0.00 | H |
| ATOM | 962 | C1'  | T B | 13 | -17.855 | -60.817 | 62.976 | 1.00 | 0.00 | C |
| ATOM | 963 | N1   | T B | 13 | -19.240 | -60.815 | 63.514 | 1.00 | 0.00 | N |
| ATOM | 964 | C2   | T B | 13 | -19.386 | -60.887 | 64.885 | 1.00 | 0.00 | C |
| ATOM | 965 | O2   | T B | 13 | -18.435 | -60.952 | 65.646 | 1.00 | 0.00 | O |
| ATOM | 966 | N3   | T B | 13 | -20.690 | -60.881 | 65.341 | 1.00 | 0.00 | N |
| ATOM | 967 | C4   | T B | 13 | -21.831 | -60.814 | 64.569 | 1.00 | 0.00 | C |
| ATOM | 968 | O4   | T B | 13 | -22.951 | -60.820 | 65.093 | 1.00 | 0.00 | O |
| ATOM | 969 | C5   | T B | 13 | -21.580 | -60.740 | 63.149 | 1.00 | 0.00 | C |
| ATOM | 970 | C6   | T B | 13 | -20.320 | -60.743 | 62.668 | 1.00 | 0.00 | C |
| ATOM | 971 | C7   | T B | 13 | -22.792 | -60.664 | 62.270 | 1.00 | 0.00 | C |
| ATOM | 972 | C2'  | T B | 13 | -17.700 | -61.602 | 61.679 | 1.00 | 0.00 | C |
| ATOM | 973 | C3'  | T B | 13 | -16.663 | -60.778 | 60.932 | 1.00 | 0.00 | C |
| ATOM | 974 | O3'  | T B | 13 | -15.360 | -61.168 | 61.358 | 1.00 | 0.00 | O |

|      |      |      |     |    |         |         |        |      |      |   |
|------|------|------|-----|----|---------|---------|--------|------|------|---|
| ATOM | 975  | C4'  | T B | 13 | -17.003 | -59.348 | 61.344 | 1.00 | 0.00 | C |
| ATOM | 976  | O4'  | T B | 13 | -17.488 | -59.475 | 62.719 | 1.00 | 0.00 | O |
| ATOM | 977  | C5'  | T B | 13 | -18.058 | -58.644 | 60.522 | 1.00 | 0.00 | C |
| ATOM | 978  | O5'  | T B | 13 | -19.081 | -59.591 | 60.124 | 1.00 | 0.00 | O |
| ATOM | 979  | O1P  | T B | 13 | -18.831 | -59.702 | 57.624 | 1.00 | 0.00 | O |
| ATOM | 980  | O2P  | T B | 13 | -21.055 | -60.179 | 58.684 | 1.00 | 0.00 | O |
| ATOM | 981  | P    | T B | 13 | -19.789 | -59.407 | 58.708 | 1.00 | 0.00 | P |
| ATOM | 982  | H3   | T B | 13 | -20.824 | -60.931 | 66.362 | 1.00 | 0.00 | H |
| ATOM | 983  | H6   | T B | 13 | -20.156 | -60.687 | 61.592 | 1.00 | 0.00 | H |
| ATOM | 984  | H1'  | T B | 13 | -17.188 | -61.204 | 63.748 | 1.00 | 0.00 | H |
| ATOM | 985  | H3'  | T B | 13 | -16.743 | -60.906 | 59.852 | 1.00 | 0.00 | H |
| ATOM | 986  | H4'  | T B | 13 | -16.082 | -58.769 | 61.268 | 1.00 | 0.00 | H |
| ATOM | 987  | H71  | T B | 13 | -22.860 | -61.566 | 61.662 | 1.00 | 0.00 | H |
| ATOM | 988  | H72  | T B | 13 | -23.686 | -60.576 | 62.889 | 1.00 | 0.00 | H |
| ATOM | 989  | H73  | T B | 13 | -22.716 | -59.792 | 61.618 | 1.00 | 0.00 | H |
| ATOM | 990  | H2'1 | T B | 13 | -18.633 | -61.666 | 61.122 | 1.00 | 0.00 | H |
| ATOM | 991  | H2'2 | T B | 13 | -17.349 | -62.620 | 61.851 | 1.00 | 0.00 | H |
| ATOM | 992  | H5'1 | T B | 13 | -18.503 | -57.848 | 61.118 | 1.00 | 0.00 | H |
| ATOM | 993  | H5'2 | T B | 13 | -17.593 | -58.213 | 59.637 | 1.00 | 0.00 | H |
| ATOM | 994  | C1'  | G B | 14 | -16.080 | -64.193 | 66.155 | 1.00 | 0.00 | C |
| ATOM | 995  | N1   | G B | 14 | -20.896 | -64.338 | 67.831 | 1.00 | 0.00 | N |
| ATOM | 996  | C2   | G B | 14 | -19.709 | -64.334 | 68.541 | 1.00 | 0.00 | C |
| ATOM | 997  | N2   | G B | 14 | -19.818 | -64.376 | 69.874 | 1.00 | 0.00 | N |
| ATOM | 998  | N3   | G B | 14 | -18.508 | -64.291 | 67.966 | 1.00 | 0.00 | N |
| ATOM | 999  | C4   | G B | 14 | -18.586 | -64.259 | 66.609 | 1.00 | 0.00 | C |
| ATOM | 1000 | C5   | G B | 14 | -19.721 | -64.264 | 65.818 | 1.00 | 0.00 | C |
| ATOM | 1001 | C6   | G B | 14 | -20.997 | -64.306 | 66.427 | 1.00 | 0.00 | C |
| ATOM | 1002 | O6   | G B | 14 | -22.110 | -64.318 | 65.899 | 1.00 | 0.00 | O |
| ATOM | 1003 | N7   | G B | 14 | -19.369 | -64.225 | 64.467 | 1.00 | 0.00 | N |
| ATOM | 1004 | C8   | G B | 14 | -18.061 | -64.195 | 64.483 | 1.00 | 0.00 | C |
| ATOM | 1005 | N9   | G B | 14 | -17.511 | -64.215 | 65.748 | 1.00 | 0.00 | N |
| ATOM | 1006 | C2'  | G B | 14 | -15.170 | -65.001 | 65.239 | 1.00 | 0.00 | C |
| ATOM | 1007 | C3'  | G B | 14 | -13.898 | -64.168 | 65.240 | 1.00 | 0.00 | C |
| ATOM | 1008 | O3'  | G B | 14 | -13.113 | -64.514 | 66.377 | 1.00 | 0.00 | O |
| ATOM | 1009 | C4'  | G B | 14 | -14.430 | -62.737 | 65.318 | 1.00 | 0.00 | C |
| ATOM | 1010 | O4'  | G B | 14 | -15.644 | -62.848 | 66.128 | 1.00 | 0.00 | O |
| ATOM | 1011 | C5'  | G B | 14 | -14.781 | -62.078 | 64.006 | 1.00 | 0.00 | C |
| ATOM | 1012 | O5'  | G B | 14 | -15.352 | -63.058 | 63.103 | 1.00 | 0.00 | O |
| ATOM | 1013 | O1P  | G B | 14 | -13.644 | -63.214 | 61.260 | 1.00 | 0.00 | O |
| ATOM | 1014 | O2P  | G B | 14 | -16.054 | -63.724 | 60.784 | 1.00 | 0.00 | O |
| ATOM | 1015 | P    | G B | 14 | -15.063 | -62.921 | 61.540 | 1.00 | 0.00 | P |
| ATOM | 1016 | H1   | G B | 14 | -21.774 | -64.366 | 68.373 | 1.00 | 0.00 | H |
| ATOM | 1017 | H8   | G B | 14 | -17.458 | -64.159 | 63.575 | 1.00 | 0.00 | H |
| ATOM | 1018 | H1'  | G B | 14 | -16.012 | -64.547 | 67.184 | 1.00 | 0.00 | H |
| ATOM | 1019 | H21  | G B | 14 | -20.752 | -64.406 | 70.312 | 1.00 | 0.00 | H |
| ATOM | 1020 | H3'  | G B | 14 | -13.310 | -64.319 | 64.334 | 1.00 | 0.00 | H |
| ATOM | 1021 | H22  | G B | 14 | -18.972 | -64.379 | 70.460 | 1.00 | 0.00 | H |
| ATOM | 1022 | H4'  | G B | 14 | -13.654 | -62.138 | 65.795 | 1.00 | 0.00 | H |
| ATOM | 1023 | H2'1 | G B | 14 | -15.578 | -65.100 | 64.233 | 1.00 | 0.00 | H |
| ATOM | 1024 | H2'2 | G B | 14 | -14.987 | -66.006 | 65.618 | 1.00 | 0.00 | H |
| ATOM | 1025 | H5'1 | G B | 14 | -15.502 | -61.281 | 64.187 | 1.00 | 0.00 | H |
| ATOM | 1026 | H5'2 | G B | 14 | -13.879 | -61.653 | 63.567 | 1.00 | 0.00 | H |
| ATOM | 1027 | C1'  | C B | 15 | -16.463 | -67.452 | 69.865 | 1.00 | 0.00 | C |
| ATOM | 1028 | N1   | C B | 15 | -17.387 | -67.518 | 68.701 | 1.00 | 0.00 | N |



|      |      |      |     |    |         |         |        |      |      |   |
|------|------|------|-----|----|---------|---------|--------|------|------|---|
| ATOM | 1029 | C2   | C B | 15 | -18.756 | -67.567 | 68.956 | 1.00 | 0.00 | C |
| ATOM | 1030 | O2   | C B | 15 | -19.145 | -67.553 | 70.131 | 1.00 | 0.00 | O |
| ATOM | 1031 | N3   | C B | 15 | -19.615 | -67.628 | 67.909 | 1.00 | 0.00 | N |
| ATOM | 1032 | C4   | C B | 15 | -19.164 | -67.643 | 66.649 | 1.00 | 0.00 | C |
| ATOM | 1033 | N4   | C B | 15 | -20.048 | -67.700 | 65.663 | 1.00 | 0.00 | N |
| ATOM | 1034 | C5   | C B | 15 | -17.760 | -67.599 | 66.355 | 1.00 | 0.00 | C |
| ATOM | 1035 | C6   | C B | 15 | -16.915 | -67.532 | 67.425 | 1.00 | 0.00 | C |
| ATOM | 1036 | C2'  | C B | 15 | -15.185 | -68.259 | 69.681 | 1.00 | 0.00 | C |
| ATOM | 1037 | C3'  | C B | 15 | -14.158 | -67.393 | 70.395 | 1.00 | 0.00 | C |
| ATOM | 1038 | O3'  | C B | 15 | -14.181 | -67.692 | 71.790 | 1.00 | 0.00 | O |
| ATOM | 1039 | C4'  | C B | 15 | -14.643 | -65.976 | 70.100 | 1.00 | 0.00 | C |
| ATOM | 1040 | O4'  | C B | 15 | -16.101 | -66.096 | 70.050 | 1.00 | 0.00 | O |
| ATOM | 1041 | C5'  | C B | 15 | -14.166 | -65.359 | 68.805 | 1.00 | 0.00 | C |
| ATOM | 1042 | O5'  | C B | 15 | -14.095 | -66.376 | 67.775 | 1.00 | 0.00 | O |
| ATOM | 1043 | O1P  | C B | 15 | -11.631 | -66.535 | 67.282 | 1.00 | 0.00 | O |
| ATOM | 1044 | O2P  | C B | 15 | -13.306 | -67.117 | 65.506 | 1.00 | 0.00 | O |
| ATOM | 1045 | P    | C B | 15 | -12.949 | -66.270 | 66.671 | 1.00 | 0.00 | P |
| ATOM | 1046 | H5   | C B | 15 | -17.389 | -67.617 | 65.331 | 1.00 | 0.00 | H |
| ATOM | 1047 | H6   | C B | 15 | -15.839 | -67.490 | 67.253 | 1.00 | 0.00 | H |
| ATOM | 1048 | H1'  | C B | 15 | -17.007 | -67.778 | 70.752 | 1.00 | 0.00 | H |
| ATOM | 1049 | H3'  | C B | 15 | -13.151 | -67.553 | 70.008 | 1.00 | 0.00 | H |
| ATOM | 1050 | H4'  | C B | 15 | -14.295 | -65.345 | 70.917 | 1.00 | 0.00 | H |
| ATOM | 1051 | H41  | C B | 15 | -19.728 | -67.709 | 64.683 | 1.00 | 0.00 | H |
| ATOM | 1052 | H42  | C B | 15 | -21.056 | -67.734 | 65.876 | 1.00 | 0.00 | H |
| ATOM | 1053 | H2'1 | C B | 15 | -14.928 | -68.394 | 68.631 | 1.00 | 0.00 | H |
| ATOM | 1054 | H2'2 | C B | 15 | -15.252 | -69.249 | 70.132 | 1.00 | 0.00 | H |
| ATOM | 1055 | H5'1 | C B | 15 | -14.862 | -64.576 | 68.504 | 1.00 | 0.00 | H |
| ATOM | 1056 | H5'2 | C B | 15 | -13.180 | -64.922 | 68.961 | 1.00 | 0.00 | H |
| ATOM | 1057 | C1'  | G B | 16 | -18.923 | -70.638 | 72.748 | 1.00 | 0.00 | C |
| ATOM | 1058 | N1   | G B | 16 | -22.013 | -71.030 | 68.708 | 1.00 | 0.00 | N |
| ATOM | 1059 | C2   | G B | 16 | -22.319 | -70.938 | 70.054 | 1.00 | 0.00 | C |
| ATOM | 1060 | N2   | G B | 16 | -23.621 | -70.955 | 70.365 | 1.00 | 0.00 | N |
| ATOM | 1061 | N3   | G B | 16 | -21.399 | -70.837 | 71.013 | 1.00 | 0.00 | N |
| ATOM | 1062 | C4   | G B | 16 | -20.134 | -70.842 | 70.517 | 1.00 | 0.00 | C |
| ATOM | 1063 | C5   | G B | 16 | -19.735 | -70.935 | 69.195 | 1.00 | 0.00 | C |
| ATOM | 1064 | C6   | G B | 16 | -20.710 | -71.038 | 68.176 | 1.00 | 0.00 | C |
| ATOM | 1065 | O6   | G B | 16 | -20.553 | -71.128 | 66.958 | 1.00 | 0.00 | O |
| ATOM | 1066 | N7   | G B | 16 | -18.341 | -70.907 | 69.108 | 1.00 | 0.00 | N |
| ATOM | 1067 | C8   | G B | 16 | -17.949 | -70.799 | 70.352 | 1.00 | 0.00 | C |
| ATOM | 1068 | N9   | G B | 16 | -18.981 | -70.755 | 71.267 | 1.00 | 0.00 | N |
| ATOM | 1069 | C2'  | G B | 16 | -17.774 | -71.411 | 73.380 | 1.00 | 0.00 | C |
| ATOM | 1070 | C3'  | G B | 16 | -17.376 | -70.503 | 74.533 | 1.00 | 0.00 | C |
| ATOM | 1071 | O3'  | G B | 16 | -18.215 | -70.775 | 75.653 | 1.00 | 0.00 | O |
| ATOM | 1072 | C4'  | G B | 16 | -17.610 | -69.106 | 73.962 | 1.00 | 0.00 | C |
| ATOM | 1073 | O4'  | G B | 16 | -18.757 | -69.270 | 73.067 | 1.00 | 0.00 | O |
| ATOM | 1074 | C5'  | G B | 16 | -16.469 | -68.501 | 73.179 | 1.00 | 0.00 | C |
| ATOM | 1075 | O5'  | G B | 16 | -15.791 | -69.534 | 72.422 | 1.00 | 0.00 | O |
| ATOM | 1076 | O1P  | G B | 16 | -13.511 | -69.633 | 73.481 | 1.00 | 0.00 | O |
| ATOM | 1077 | O2P  | G B | 16 | -13.808 | -70.297 | 71.081 | 1.00 | 0.00 | O |
| ATOM | 1078 | P    | G B | 16 | -14.215 | -69.418 | 72.204 | 1.00 | 0.00 | P |
| ATOM | 1079 | H1   | G B | 16 | -22.800 | -71.098 | 68.045 | 1.00 | 0.00 | H |
| ATOM | 1080 | H8   | G B | 16 | -16.900 | -70.748 | 70.640 | 1.00 | 0.00 | H |
| ATOM | 1081 | H1'  | G B | 16 | -19.882 | -70.962 | 73.155 | 1.00 | 0.00 | H |
| ATOM | 1082 | H21  | G B | 16 | -24.327 | -71.030 | 69.618 | 1.00 | 0.00 | H |

|      |      |      |     |    |         |         |        |      |      |   |
|------|------|------|-----|----|---------|---------|--------|------|------|---|
| ATOM | 1083 | H3'  | G B | 16 | -16.333 | -70.641 | 74.820 | 1.00 | 0.00 | H |
| ATOM | 1084 | H22  | G B | 16 | -23.914 | -70.892 | 71.350 | 1.00 | 0.00 | H |
| ATOM | 1085 | H4'  | G B | 16 | -17.820 | -68.450 | 74.806 | 1.00 | 0.00 | H |
| ATOM | 1086 | H2'1 | G B | 16 | -16.945 | -71.559 | 72.687 | 1.00 | 0.00 | H |
| ATOM | 1087 | H2'2 | G B | 16 | -18.083 | -72.394 | 73.737 | 1.00 | 0.00 | H |
| ATOM | 1088 | H5'1 | G B | 16 | -16.862 | -67.745 | 72.500 | 1.00 | 0.00 | H |
| ATOM | 1089 | H5'2 | G B | 16 | -15.770 | -68.033 | 73.872 | 1.00 | 0.00 | H |
| ATOM | 1090 | C1'  | G B | 17 | -22.582 | -73.824 | 73.744 | 1.00 | 0.00 | C |
| ATOM | 1091 | N1   | G B | 17 | -22.707 | -74.384 | 68.674 | 1.00 | 0.00 | N |
| ATOM | 1092 | C2   | G B | 17 | -23.746 | -74.271 | 69.582 | 1.00 | 0.00 | C |
| ATOM | 1093 | N2   | G B | 17 | -24.982 | -74.314 | 69.070 | 1.00 | 0.00 | N |
| ATOM | 1094 | N3   | G B | 17 | -23.565 | -74.125 | 70.893 | 1.00 | 0.00 | N |
| ATOM | 1095 | C4   | G B | 17 | -22.250 | -74.109 | 71.234 | 1.00 | 0.00 | C |
| ATOM | 1096 | C5   | G B | 17 | -21.150 | -74.219 | 70.402 | 1.00 | 0.00 | C |
| ATOM | 1097 | C6   | G B | 17 | -21.340 | -74.370 | 69.010 | 1.00 | 0.00 | C |
| ATOM | 1098 | O6   | G B | 17 | -20.498 | -74.482 | 68.119 | 1.00 | 0.00 | O |
| ATOM | 1099 | N7   | G B | 17 | -19.971 | -74.156 | 71.149 | 1.00 | 0.00 | N |
| ATOM | 1100 | C8   | G B | 17 | -20.385 | -74.011 | 72.381 | 1.00 | 0.00 | C |
| ATOM | 1101 | N9   | G B | 17 | -21.758 | -73.974 | 72.514 | 1.00 | 0.00 | N |
| ATOM | 1102 | C2'  | G B | 17 | -22.016 | -74.552 | 74.955 | 1.00 | 0.00 | C |
| ATOM | 1103 | C3'  | G B | 17 | -22.379 | -73.610 | 76.092 | 1.00 | 0.00 | C |
| ATOM | 1104 | O3'  | G B | 17 | -23.713 | -73.879 | 76.515 | 1.00 | 0.00 | O |
| ATOM | 1105 | C4'  | G B | 17 | -22.244 | -72.232 | 75.446 | 1.00 | 0.00 | C |
| ATOM | 1106 | O4'  | G B | 17 | -22.646 | -72.445 | 74.055 | 1.00 | 0.00 | O |
| ATOM | 1107 | C5'  | G B | 17 | -20.866 | -71.615 | 75.462 | 1.00 | 0.00 | C |
| ATOM | 1108 | O5'  | G B | 17 | -19.865 | -72.646 | 75.280 | 1.00 | 0.00 | O |
| ATOM | 1109 | O1P  | G B | 17 | -18.640 | -72.662 | 77.479 | 1.00 | 0.00 | O |
| ATOM | 1110 | O2P  | G B | 17 | -17.465 | -73.386 | 75.384 | 1.00 | 0.00 | O |
| ATOM | 1111 | P    | G B | 17 | -18.461 | -72.493 | 76.025 | 1.00 | 0.00 | P |
| ATOM | 1112 | H1   | G B | 17 | -22.954 | -74.488 | 67.678 | 1.00 | 0.00 | H |
| ATOM | 1113 | H8   | G B | 17 | -19.706 | -73.926 | 73.229 | 1.00 | 0.00 | H |
| ATOM | 1114 | H1'  | G B | 17 | -23.593 | -74.164 | 73.521 | 1.00 | 0.00 | H |
| ATOM | 1115 | H21  | G B | 17 | -25.115 | -74.424 | 68.054 | 1.00 | 0.00 | H |
| ATOM | 1116 | H3'  | G B | 17 | -21.703 | -73.714 | 76.940 | 1.00 | 0.00 | H |
| ATOM | 1117 | H22  | G B | 17 | -25.799 | -74.238 | 69.693 | 1.00 | 0.00 | H |
| ATOM | 1118 | H4'  | G B | 17 | -22.915 | -71.563 | 75.984 | 1.00 | 0.00 | H |
| ATOM | 1119 | H2'1 | G B | 17 | -20.938 | -74.694 | 74.885 | 1.00 | 0.00 | H |
| ATOM | 1120 | H2'2 | G B | 17 | -22.467 | -75.535 | 75.095 | 1.00 | 0.00 | H |
| ATOM | 1121 | H5'1 | G B | 17 | -20.792 | -70.884 | 74.657 | 1.00 | 0.00 | H |
| ATOM | 1122 | H5'2 | G B | 17 | -20.710 | -71.113 | 76.417 | 1.00 | 0.00 | H |
| ATOM | 1123 | C1'  | C B | 18 | -26.103 | -77.081 | 72.508 | 1.00 | 0.00 | C |
| ATOM | 1124 | N1   | C B | 18 | -24.713 | -77.236 | 71.995 | 1.00 | 0.00 | N |
| ATOM | 1125 | C2   | C B | 18 | -24.540 | -77.403 | 70.623 | 1.00 | 0.00 | C |
| ATOM | 1126 | O2   | C B | 18 | -25.538 | -77.416 | 69.892 | 1.00 | 0.00 | O |
| ATOM | 1127 | N3   | C B | 18 | -23.283 | -77.547 | 70.138 | 1.00 | 0.00 | N |
| ATOM | 1128 | C4   | C B | 18 | -22.223 | -77.528 | 70.956 | 1.00 | 0.00 | C |
| ATOM | 1129 | N4   | C B | 18 | -21.017 | -77.671 | 70.425 | 1.00 | 0.00 | N |
| ATOM | 1130 | C5   | C B | 18 | -22.373 | -77.361 | 72.369 | 1.00 | 0.00 | C |
| ATOM | 1131 | C6   | C B | 18 | -23.646 | -77.216 | 72.836 | 1.00 | 0.00 | C |
| ATOM | 1132 | C2'  | C B | 18 | -26.346 | -77.773 | 73.842 | 1.00 | 0.00 | C |
| ATOM | 1133 | C3'  | C B | 18 | -27.311 | -76.815 | 74.525 | 1.00 | 0.00 | C |
| ATOM | 1134 | O3'  | C B | 18 | -28.639 | -77.107 | 74.096 | 1.00 | 0.00 | O |
| ATOM | 1135 | C4'  | C B | 18 | -26.834 | -75.449 | 74.038 | 1.00 | 0.00 | C |
| ATOM | 1136 | O4'  | C B | 18 | -26.344 | -75.698 | 72.682 | 1.00 | 0.00 | O |

|      |      |      |     |    |         |         |        |      |      |   |
|------|------|------|-----|----|---------|---------|--------|------|------|---|
| ATOM | 1137 | C5'  | C B | 18 | -25.730 | -74.799 | 74.838 | 1.00 | 0.00 | C |
| ATOM | 1138 | O5'  | C B | 18 | -24.804 | -75.811 | 75.307 | 1.00 | 0.00 | O |
| ATOM | 1139 | O1P  | C B | 18 | -25.094 | -75.755 | 77.807 | 1.00 | 0.00 | O |
| ATOM | 1140 | O2P  | C B | 18 | -22.911 | -76.493 | 76.814 | 1.00 | 0.00 | O |
| ATOM | 1141 | P    | C B | 18 | -24.101 | -75.611 | 76.724 | 1.00 | 0.00 | P |
| ATOM | 1142 | H5   | C B | 18 | -21.513 | -77.349 | 73.039 | 1.00 | 0.00 | H |
| ATOM | 1143 | H6   | C B | 18 | -23.809 | -77.082 | 73.905 | 1.00 | 0.00 | H |
| ATOM | 1144 | H1'  | C B | 18 | -26.790 | -77.449 | 71.746 | 1.00 | 0.00 | H |
| ATOM | 1145 | H3'  | C B | 18 | -27.258 | -76.887 | 75.610 | 1.00 | 0.00 | H |
| ATOM | 1146 | H4'  | C B | 18 | -27.698 | -74.784 | 74.064 | 1.00 | 0.00 | H |
| ATOM | 1147 | H41  | C B | 18 | -20.183 | -77.659 | 71.032 | 1.00 | 0.00 | H |
| ATOM | 1148 | H42  | C B | 18 | -20.912 | -77.792 | 69.408 | 1.00 | 0.00 | H |
| ATOM | 1149 | H2'1 | C B | 18 | -25.430 | -77.890 | 74.420 | 1.00 | 0.00 | H |
| ATOM | 1150 | H2'2 | C B | 18 | -26.786 | -78.762 | 73.720 | 1.00 | 0.00 | H |
| ATOM | 1151 | H5'1 | C B | 18 | -25.203 | -74.082 | 74.207 | 1.00 | 0.00 | H |
| ATOM | 1152 | H5'2 | C B | 18 | -26.164 | -74.276 | 75.689 | 1.00 | 0.00 | H |
| ATOM | 1153 | C1'  | C B | 19 | -28.199 | -80.455 | 69.550 | 1.00 | 0.00 | C |
| ATOM | 1154 | N1   | C B | 19 | -26.772 | -80.585 | 69.955 | 1.00 | 0.00 | N |
| ATOM | 1155 | C2   | C B | 19 | -25.824 | -80.778 | 68.952 | 1.00 | 0.00 | C |
| ATOM | 1156 | O2   | C B | 19 | -26.202 | -80.832 | 67.774 | 1.00 | 0.00 | O |
| ATOM | 1157 | N3   | C B | 19 | -24.520 | -80.898 | 69.300 | 1.00 | 0.00 | N |
| ATOM | 1158 | C4   | C B | 19 | -24.142 | -80.835 | 70.585 | 1.00 | 0.00 | C |
| ATOM | 1159 | N4   | C B | 19 | -22.856 | -80.958 | 70.869 | 1.00 | 0.00 | N |
| ATOM | 1160 | C5   | C B | 19 | -25.096 | -80.640 | 71.634 | 1.00 | 0.00 | C |
| ATOM | 1161 | C6   | C B | 19 | -26.401 | -80.520 | 71.260 | 1.00 | 0.00 | C |
| ATOM | 1162 | C2'  | C B | 19 | -29.171 | -81.124 | 70.510 | 1.00 | 0.00 | C |
| ATOM | 1163 | C3'  | C B | 19 | -30.362 | -80.177 | 70.464 | 1.00 | 0.00 | C |
| ATOM | 1164 | O3'  | C B | 19 | -31.184 | -80.512 | 69.349 | 1.00 | 0.00 | O |
| ATOM | 1165 | C4'  | C B | 19 | -29.703 | -78.810 | 70.305 | 1.00 | 0.00 | C |
| ATOM | 1166 | O4'  | C B | 19 | -28.508 | -79.075 | 69.503 | 1.00 | 0.00 | O |
| ATOM | 1167 | C5'  | C B | 19 | -29.283 | -78.114 | 71.580 | 1.00 | 0.00 | C |
| ATOM | 1168 | O5'  | C B | 19 | -28.800 | -79.092 | 72.536 | 1.00 | 0.00 | O |
| ATOM | 1169 | O1P  | C B | 19 | -30.504 | -78.988 | 74.385 | 1.00 | 0.00 | O |
| ATOM | 1170 | O2P  | C B | 19 | -28.148 | -79.691 | 74.886 | 1.00 | 0.00 | O |
| ATOM | 1171 | P    | C B | 19 | -29.066 | -78.843 | 74.087 | 1.00 | 0.00 | P |
| ATOM | 1172 | H5   | C B | 19 | -24.794 | -80.590 | 72.679 | 1.00 | 0.00 | H |
| ATOM | 1173 | H6   | C B | 19 | -27.164 | -80.368 | 72.025 | 1.00 | 0.00 | H |
| ATOM | 1174 | H1'  | C B | 19 | -28.304 | -80.857 | 68.542 | 1.00 | 0.00 | H |
| ATOM | 1175 | H3'  | C B | 19 | -30.955 | -80.224 | 71.377 | 1.00 | 0.00 | H |
| ATOM | 1176 | H4'  | C B | 19 | -30.423 | -78.167 | 69.798 | 1.00 | 0.00 | H |
| ATOM | 1177 | H41  | C B | 19 | -22.536 | -80.912 | 71.847 | 1.00 | 0.00 | H |
| ATOM | 1178 | H42  | C B | 19 | -22.171 | -81.099 | 70.110 | 1.00 | 0.00 | H |
| ATOM | 1179 | H2'1 | C B | 19 | -28.769 | -81.205 | 71.519 | 1.00 | 0.00 | H |
| ATOM | 1180 | H2'2 | C B | 19 | -29.449 | -82.127 | 70.185 | 1.00 | 0.00 | H |
| ATOM | 1181 | H5'1 | C B | 19 | -28.494 | -77.398 | 71.353 | 1.00 | 0.00 | H |
| ATOM | 1182 | H5'2 | C B | 19 | -30.139 | -77.584 | 71.995 | 1.00 | 0.00 | H |
| ATOM | 1183 | C1'  | T B | 20 | -28.153 | -83.943 | 66.039 | 1.00 | 0.00 | C |
| ATOM | 1184 | N1   | T B | 20 | -27.219 | -84.031 | 67.192 | 1.00 | 0.00 | N |
| ATOM | 1185 | C2   | T B | 20 | -25.882 | -84.221 | 66.908 | 1.00 | 0.00 | C |
| ATOM | 1186 | O2   | T B | 20 | -25.456 | -84.316 | 65.769 | 1.00 | 0.00 | O |
| ATOM | 1187 | N3   | T B | 20 | -25.050 | -84.296 | 68.009 | 1.00 | 0.00 | N |
| ATOM | 1188 | C4   | T B | 20 | -25.427 | -84.202 | 69.331 | 1.00 | 0.00 | C |
| ATOM | 1189 | O4   | T B | 20 | -24.587 | -84.287 | 70.236 | 1.00 | 0.00 | O |
| ATOM | 1190 | C5   | T B | 20 | -26.842 | -84.004 | 69.529 | 1.00 | 0.00 | C |

|      |      |      |     |    |         |         |        |      |      |   |
|------|------|------|-----|----|---------|---------|--------|------|------|---|
| ATOM | 1191 | C6   | T B | 20 | -27.683 | -83.926 | 68.480 | 1.00 | 0.00 | C |
| ATOM | 1192 | C7   | T B | 20 | -27.297 | -83.895 | 70.954 | 1.00 | 0.00 | C |
| ATOM | 1193 | C2'  | T B | 20 | -29.499 | -84.614 | 66.287 | 1.00 | 0.00 | C |
| ATOM | 1194 | C3'  | T B | 20 | -30.452 | -83.697 | 65.535 | 1.00 | 0.00 | C |
| ATOM | 1195 | O3'  | T B | 20 | -30.483 | -84.077 | 64.161 | 1.00 | 0.00 | O |
| ATOM | 1196 | C4'  | T B | 20 | -29.830 | -82.318 | 65.740 | 1.00 | 0.00 | C |
| ATOM | 1197 | O4'  | T B | 20 | -28.390 | -82.574 | 65.778 | 1.00 | 0.00 | O |
| ATOM | 1198 | C5'  | T B | 20 | -30.224 | -81.583 | 67.001 | 1.00 | 0.00 | C |
| ATOM | 1199 | O5'  | T B | 20 | -30.371 | -82.528 | 68.092 | 1.00 | 0.00 | O |
| ATOM | 1200 | O1P  | T B | 20 | -32.829 | -82.424 | 68.623 | 1.00 | 0.00 | O |
| ATOM | 1201 | O2P  | T B | 20 | -31.185 | -83.059 | 70.409 | 1.00 | 0.00 | O |
| ATOM | 1202 | P    | T B | 20 | -31.482 | -82.250 | 69.201 | 1.00 | 0.00 | P |
| ATOM | 1203 | H3   | T B | 20 | -24.048 | -84.437 | 67.823 | 1.00 | 0.00 | H |
| ATOM | 1204 | H6   | T B | 20 | -28.749 | -83.776 | 68.655 | 1.00 | 0.00 | H |
| ATOM | 1205 | H1'  | T B | 20 | -27.660 | -84.370 | 65.166 | 1.00 | 0.00 | H |
| ATOM | 1206 | H3'  | T B | 20 | -31.462 | -83.738 | 65.942 | 1.00 | 0.00 | H |
| ATOM | 1207 | H4'  | T B | 20 | -30.133 | -81.705 | 64.890 | 1.00 | 0.00 | H |
| ATOM | 1208 | H3T  | T B | 20 | -30.672 | -85.004 | 63.998 | 1.00 | 0.00 | H |
| ATOM | 1209 | H71  | T B | 20 | -27.933 | -84.746 | 71.200 | 1.00 | 0.00 | H |
| ATOM | 1210 | H72  | T B | 20 | -26.428 | -83.888 | 71.614 | 1.00 | 0.00 | H |
| ATOM | 1211 | H73  | T B | 20 | -27.860 | -82.971 | 71.088 | 1.00 | 0.00 | H |
| ATOM | 1212 | H2'1 | T B | 20 | -29.747 | -84.662 | 67.345 | 1.00 | 0.00 | H |
| ATOM | 1213 | H2'2 | T B | 20 | -29.533 | -85.630 | 65.894 | 1.00 | 0.00 | H |
| ATOM | 1214 | H5'1 | T B | 20 | -29.453 | -80.854 | 67.246 | 1.00 | 0.00 | H |
| ATOM | 1215 | H5'2 | T B | 20 | -31.166 | -81.066 | 66.833 | 1.00 | 0.00 | H |
| TER  |      |      |     |    |         |         |        |      |      |   |
| ATOM | 1    | C1'  | A A | 1  | -55.077 | -66.809 | 61.610 | 1.00 | 0.00 | C |
| ATOM | 2    | N1   | A A | 1  | -56.622 | -66.230 | 66.470 | 1.00 | 0.00 | N |
| ATOM | 3    | C2   | A A | 1  | -57.084 | -65.754 | 65.318 | 1.00 | 0.00 | C |
| ATOM | 4    | N3   | A A | 1  | -56.637 | -65.946 | 64.095 | 1.00 | 0.00 | N |
| ATOM | 5    | C4   | A A | 1  | -55.556 | -66.746 | 64.113 | 1.00 | 0.00 | C |
| ATOM | 6    | C5   | A A | 1  | -54.959 | -67.312 | 65.205 | 1.00 | 0.00 | C |
| ATOM | 7    | C6   | A A | 1  | -55.542 | -67.026 | 66.457 | 1.00 | 0.00 | C |
| ATOM | 8    | N6   | A A | 1  | -55.065 | -67.512 | 67.616 | 1.00 | 0.00 | N |
| ATOM | 9    | N7   | A A | 1  | -53.866 | -68.076 | 64.836 | 1.00 | 0.00 | N |
| ATOM | 10   | C8   | A A | 1  | -53.824 | -67.954 | 63.542 | 1.00 | 0.00 | C |
| ATOM | 11   | N9   | A A | 1  | -54.819 | -67.162 | 63.032 | 1.00 | 0.00 | N |
| ATOM | 12   | C2'  | A A | 1  | -53.811 | -66.589 | 60.794 | 1.00 | 0.00 | C |
| ATOM | 13   | C3'  | A A | 1  | -54.211 | -67.143 | 59.435 | 1.00 | 0.00 | C |
| ATOM | 14   | O3'  | A A | 1  | -54.898 | -66.132 | 58.701 | 1.00 | 0.00 | O |
| ATOM | 15   | C4'  | A A | 1  | -55.124 | -68.312 | 59.799 | 1.00 | 0.00 | C |
| ATOM | 16   | O4'  | A A | 1  | -55.796 | -67.877 | 61.024 | 1.00 | 0.00 | O |
| ATOM | 17   | C5'  | A A | 1  | -54.445 | -69.635 | 60.065 | 1.00 | 0.00 | C |
| ATOM | 18   | O5'  | A A | 1  | -53.180 | -69.412 | 60.737 | 1.00 | 0.00 | O |
| ATOM | 19   | H2   | A A | 1  | -57.960 | -65.111 | 65.397 | 1.00 | 0.00 | H |
| ATOM | 20   | H8   | A A | 1  | -53.068 | -68.437 | 62.921 | 1.00 | 0.00 | H |
| ATOM | 21   | H1'  | A A | 1  | -55.714 | -65.925 | 61.589 | 1.00 | 0.00 | H |
| ATOM | 22   | H3'  | A A | 1  | -53.347 | -67.481 | 58.861 | 1.00 | 0.00 | H |
| ATOM | 23   | H4'  | A A | 1  | -55.809 | -68.450 | 58.963 | 1.00 | 0.00 | H |
| ATOM | 24   | H61  | A A | 1  | -55.527 | -67.274 | 68.502 | 1.00 | 0.00 | H |
| ATOM | 25   | H62  | A A | 1  | -54.236 | -68.124 | 67.613 | 1.00 | 0.00 | H |
| ATOM | 26   | H5T  | A A | 1  | -52.447 | -70.002 | 60.549 | 1.00 | 0.00 | H |
| ATOM | 27   | H2'1 | A A | 1  | -52.955 | -67.124 | 61.203 | 1.00 | 0.00 | H |
| ATOM | 28   | H2'2 | A A | 1  | -53.539 | -65.536 | 60.727 | 1.00 | 0.00 | H |

|      |    |      |     |   |         |         |        |      |      |   |
|------|----|------|-----|---|---------|---------|--------|------|------|---|
| ATOM | 29 | H5'1 | A A | 1 | -55.091 | -70.250 | 60.691 | 1.00 | 0.00 | H |
| ATOM | 30 | H5'2 | A A | 1 | -54.273 | -70.146 | 59.119 | 1.00 | 0.00 | H |
| ATOM | 31 | C1'  | G A | 2 | -56.291 | -62.072 | 62.474 | 1.00 | 0.00 | C |
| ATOM | 32 | N1   | G A | 2 | -55.183 | -63.243 | 67.313 | 1.00 | 0.00 | N |
| ATOM | 33 | C2   | G A | 2 | -56.229 | -62.502 | 66.798 | 1.00 | 0.00 | C |
| ATOM | 34 | N2   | G A | 2 | -57.095 | -62.006 | 67.689 | 1.00 | 0.00 | N |
| ATOM | 35 | N3   | G A | 2 | -56.400 | -62.275 | 65.497 | 1.00 | 0.00 | N |
| ATOM | 36 | C4   | G A | 2 | -55.427 | -62.848 | 64.740 | 1.00 | 0.00 | C |
| ATOM | 37 | C5   | G A | 2 | -54.344 | -63.601 | 65.167 | 1.00 | 0.00 | C |
| ATOM | 38 | C6   | G A | 2 | -54.166 | -63.845 | 66.549 | 1.00 | 0.00 | C |
| ATOM | 39 | O6   | G A | 2 | -53.279 | -64.484 | 67.116 | 1.00 | 0.00 | O |
| ATOM | 40 | N7   | G A | 2 | -53.576 | -64.005 | 64.073 | 1.00 | 0.00 | N |
| ATOM | 41 | C8   | G A | 2 | -54.204 | -63.500 | 63.042 | 1.00 | 0.00 | C |
| ATOM | 42 | N9   | G A | 2 | -55.337 | -62.783 | 63.367 | 1.00 | 0.00 | N |
| ATOM | 43 | C2'  | G A | 2 | -55.628 | -61.383 | 61.290 | 1.00 | 0.00 | C |
| ATOM | 44 | C3'  | G A | 2 | -56.662 | -61.568 | 60.192 | 1.00 | 0.00 | C |
| ATOM | 45 | O3'  | G A | 2 | -57.636 | -60.532 | 60.288 | 1.00 | 0.00 | O |
| ATOM | 46 | C4'  | G A | 2 | -57.249 | -62.944 | 60.508 | 1.00 | 0.00 | C |
| ATOM | 47 | O4'  | G A | 2 | -57.202 | -63.029 | 61.966 | 1.00 | 0.00 | O |
| ATOM | 48 | C5'  | G A | 2 | -56.520 | -64.132 | 59.928 | 1.00 | 0.00 | C |
| ATOM | 49 | O5'  | G A | 2 | -55.092 | -63.888 | 59.944 | 1.00 | 0.00 | O |
| ATOM | 50 | O1P  | G A | 2 | -54.494 | -63.774 | 57.502 | 1.00 | 0.00 | O |
| ATOM | 51 | O2P  | G A | 2 | -52.776 | -64.495 | 59.182 | 1.00 | 0.00 | O |
| ATOM | 52 | P    | G A | 2 | -54.199 | -64.480 | 58.764 | 1.00 | 0.00 | P |
| ATOM | 53 | H1   | G A | 2 | -55.144 | -63.362 | 68.336 | 1.00 | 0.00 | H |
| ATOM | 54 | H8   | G A | 2 | -53.862 | -63.633 | 62.017 | 1.00 | 0.00 | H |
| ATOM | 55 | H1'  | G A | 2 | -56.855 | -61.359 | 63.075 | 1.00 | 0.00 | H |
| ATOM | 56 | H21  | G A | 2 | -56.958 | -62.187 | 68.694 | 1.00 | 0.00 | H |
| ATOM | 57 | H3'  | G A | 2 | -56.212 | -61.551 | 59.199 | 1.00 | 0.00 | H |
| ATOM | 58 | H22  | G A | 2 | -57.896 | -61.444 | 67.369 | 1.00 | 0.00 | H |
| ATOM | 59 | H4'  | G A | 2 | -58.265 | -62.951 | 60.114 | 1.00 | 0.00 | H |
| ATOM | 60 | H2'1 | G A | 2 | -54.678 | -61.847 | 61.022 | 1.00 | 0.00 | H |
| ATOM | 61 | H2'2 | G A | 2 | -55.435 | -60.327 | 61.481 | 1.00 | 0.00 | H |
| ATOM | 62 | H5'1 | G A | 2 | -56.749 | -65.017 | 60.522 | 1.00 | 0.00 | H |
| ATOM | 63 | H5'2 | G A | 2 | -56.856 | -64.293 | 58.904 | 1.00 | 0.00 | H |
| ATOM | 64 | C1'  | G A | 3 | -56.954 | -58.097 | 65.353 | 1.00 | 0.00 | C |
| ATOM | 65 | N1   | G A | 3 | -53.560 | -60.418 | 68.369 | 1.00 | 0.00 | N |
| ATOM | 66 | C2   | G A | 3 | -54.730 | -59.761 | 68.694 | 1.00 | 0.00 | C |
| ATOM | 67 | N2   | G A | 3 | -55.038 | -59.712 | 69.997 | 1.00 | 0.00 | N |
| ATOM | 68 | N3   | G A | 3 | -55.531 | -59.197 | 67.794 | 1.00 | 0.00 | N |
| ATOM | 69 | C4   | G A | 3 | -55.063 | -59.335 | 66.526 | 1.00 | 0.00 | C |
| ATOM | 70 | C5   | G A | 3 | -53.905 | -59.972 | 66.108 | 1.00 | 0.00 | C |
| ATOM | 71 | C6   | G A | 3 | -53.057 | -60.575 | 67.065 | 1.00 | 0.00 | C |
| ATOM | 72 | O6   | G A | 3 | -51.998 | -61.180 | 66.892 | 1.00 | 0.00 | O |
| ATOM | 73 | N7   | G A | 3 | -53.785 | -59.891 | 64.720 | 1.00 | 0.00 | N |
| ATOM | 74 | C8   | G A | 3 | -54.848 | -59.228 | 64.348 | 1.00 | 0.00 | C |
| ATOM | 75 | N9   | G A | 3 | -55.674 | -58.855 | 65.388 | 1.00 | 0.00 | N |
| ATOM | 76 | C2'  | G A | 3 | -56.979 | -56.983 | 64.316 | 1.00 | 0.00 | C |
| ATOM | 77 | C3'  | G A | 3 | -58.422 | -57.021 | 63.843 | 1.00 | 0.00 | C |
| ATOM | 78 | O3'  | G A | 3 | -59.228 | -56.252 | 64.734 | 1.00 | 0.00 | O |
| ATOM | 79 | C4'  | G A | 3 | -58.761 | -58.510 | 63.899 | 1.00 | 0.00 | C |
| ATOM | 80 | O4'  | G A | 3 | -57.987 | -59.011 | 65.036 | 1.00 | 0.00 | O |
| ATOM | 81 | C5'  | G A | 3 | -58.408 | -59.324 | 62.678 | 1.00 | 0.00 | C |
| ATOM | 82 | O5'  | G A | 3 | -57.167 | -58.842 | 62.107 | 1.00 | 0.00 | O |

|      |     |      |     |   |         |         |        |      |      |   |
|------|-----|------|-----|---|---------|---------|--------|------|------|---|
| ATOM | 83  | O1P  | G A | 3 | -57.873 | -57.909 | 59.878 | 1.00 | 0.00 | O |
| ATOM | 84  | O2P  | G A | 3 | -55.539 | -58.768 | 60.195 | 1.00 | 0.00 | O |
| ATOM | 85  | P    | G A | 3 | -56.980 | -58.889 | 60.523 | 1.00 | 0.00 | P |
| ATOM | 86  | H1   | G A | 3 | -53.013 | -60.825 | 69.144 | 1.00 | 0.00 | H |
| ATOM | 87  | H8   | G A | 3 | -55.065 | -58.990 | 63.307 | 1.00 | 0.00 | H |
| ATOM | 88  | H1'  | G A | 3 | -57.148 | -57.707 | 66.351 | 1.00 | 0.00 | H |
| ATOM | 89  | H21  | G A | 3 | -54.415 | -60.153 | 70.689 | 1.00 | 0.00 | H |
| ATOM | 90  | H3'  | G A | 3 | -58.532 | -56.631 | 62.830 | 1.00 | 0.00 | H |
| ATOM | 91  | H22  | G A | 3 | -55.895 | -59.234 | 70.305 | 1.00 | 0.00 | H |
| ATOM | 92  | H4'  | G A | 3 | -59.837 | -58.585 | 64.051 | 1.00 | 0.00 | H |
| ATOM | 93  | H2'1 | G A | 3 | -56.287 | -57.167 | 63.494 | 1.00 | 0.00 | H |
| ATOM | 94  | H2'2 | G A | 3 | -56.727 | -56.013 | 64.745 | 1.00 | 0.00 | H |
| ATOM | 95  | H5'1 | G A | 3 | -58.301 | -60.370 | 62.964 | 1.00 | 0.00 | H |
| ATOM | 96  | H5'2 | G A | 3 | -59.210 | -59.235 | 61.945 | 1.00 | 0.00 | H |
| ATOM | 97  | C1'  | C A | 4 | -56.125 | -55.332 | 69.377 | 1.00 | 0.00 | C |
| ATOM | 98  | N1   | C A | 4 | -54.988 | -55.826 | 68.551 | 1.00 | 0.00 | N |
| ATOM | 99  | C2   | C A | 4 | -53.952 | -56.493 | 69.201 | 1.00 | 0.00 | C |
| ATOM | 100 | O2   | C A | 4 | -54.017 | -56.647 | 70.427 | 1.00 | 0.00 | O |
| ATOM | 101 | N3   | C A | 4 | -52.909 | -56.950 | 68.467 | 1.00 | 0.00 | N |
| ATOM | 102 | C4   | C A | 4 | -52.866 | -56.765 | 67.141 | 1.00 | 0.00 | C |
| ATOM | 103 | N4   | C A | 4 | -51.823 | -57.236 | 66.473 | 1.00 | 0.00 | N |
| ATOM | 104 | C5   | C A | 4 | -53.917 | -56.080 | 66.449 | 1.00 | 0.00 | C |
| ATOM | 105 | C6   | C A | 4 | -54.959 | -55.632 | 67.206 | 1.00 | 0.00 | C |
| ATOM | 106 | C2'  | C A | 4 | -56.670 | -53.985 | 68.927 | 1.00 | 0.00 | C |
| ATOM | 107 | C3'  | C A | 4 | -58.160 | -54.139 | 69.197 | 1.00 | 0.00 | C |
| ATOM | 108 | O3'  | C A | 4 | -58.422 | -53.824 | 70.564 | 1.00 | 0.00 | O |
| ATOM | 109 | C4'  | C A | 4 | -58.411 | -55.613 | 68.887 | 1.00 | 0.00 | C |
| ATOM | 110 | O4'  | C A | 4 | -57.170 | -56.282 | 69.281 | 1.00 | 0.00 | O |
| ATOM | 111 | C5'  | C A | 4 | -58.705 | -55.954 | 67.445 | 1.00 | 0.00 | C |
| ATOM | 112 | O5'  | C A | 4 | -57.915 | -55.108 | 66.570 | 1.00 | 0.00 | O |
| ATOM | 113 | O1P  | C A | 4 | -59.643 | -53.701 | 65.401 | 1.00 | 0.00 | O |
| ATOM | 114 | O2P  | C A | 4 | -57.452 | -54.184 | 64.279 | 1.00 | 0.00 | O |
| ATOM | 115 | P    | C A | 4 | -58.538 | -54.653 | 65.174 | 1.00 | 0.00 | P |
| ATOM | 116 | H5   | C A | 4 | -53.884 | -55.924 | 65.369 | 1.00 | 0.00 | H |
| ATOM | 117 | H6   | C A | 4 | -55.784 | -55.109 | 66.724 | 1.00 | 0.00 | H |
| ATOM | 118 | H1'  | C A | 4 | -55.799 | -55.296 | 70.416 | 1.00 | 0.00 | H |
| ATOM | 119 | H3'  | C A | 4 | -58.759 | -53.493 | 68.557 | 1.00 | 0.00 | H |
| ATOM | 120 | H4'  | C A | 4 | -59.269 | -55.921 | 69.483 | 1.00 | 0.00 | H |
| ATOM | 121 | H41  | C A | 4 | -51.767 | -57.109 | 65.452 | 1.00 | 0.00 | H |
| ATOM | 122 | H42  | C A | 4 | -51.068 | -57.726 | 66.973 | 1.00 | 0.00 | H |
| ATOM | 123 | H2'1 | C A | 4 | -56.478 | -53.790 | 67.873 | 1.00 | 0.00 | H |
| ATOM | 124 | H2'2 | C A | 4 | -56.247 | -53.156 | 69.497 | 1.00 | 0.00 | H |
| ATOM | 125 | H5'1 | C A | 4 | -58.459 | -57.000 | 67.265 | 1.00 | 0.00 | H |
| ATOM | 126 | H5'2 | C A | 4 | -59.766 | -55.796 | 67.249 | 1.00 | 0.00 | H |
| ATOM | 127 | C1'  | C A | 5 | -53.417 | -53.769 | 73.218 | 1.00 | 0.00 | C |
| ATOM | 128 | N1   | C A | 5 | -52.842 | -53.784 | 71.845 | 1.00 | 0.00 | N |
| ATOM | 129 | C2   | C A | 5 | -51.615 | -54.415 | 71.659 | 1.00 | 0.00 | C |
| ATOM | 130 | O2   | C A | 5 | -51.053 | -54.932 | 72.634 | 1.00 | 0.00 | O |
| ATOM | 131 | N3   | C A | 5 | -51.074 | -54.439 | 70.415 | 1.00 | 0.00 | N |
| ATOM | 132 | C4   | C A | 5 | -51.702 | -53.869 | 69.380 | 1.00 | 0.00 | C |
| ATOM | 133 | N4   | C A | 5 | -51.132 | -53.926 | 68.187 | 1.00 | 0.00 | N |
| ATOM | 134 | C5   | C A | 5 | -52.966 | -53.213 | 69.543 | 1.00 | 0.00 | C |
| ATOM | 135 | C6   | C A | 5 | -53.492 | -53.203 | 70.802 | 1.00 | 0.00 | C |
| ATOM | 136 | C2'  | C A | 5 | -54.128 | -52.471 | 73.572 | 1.00 | 0.00 | C |

|      |     |      |     |   |         |         |        |      |      |   |
|------|-----|------|-----|---|---------|---------|--------|------|------|---|
| ATOM | 137 | C3'  | C A | 5 | -55.279 | -52.965 | 74.434 | 1.00 | 0.00 | C |
| ATOM | 138 | O3'  | C A | 5 | -54.825 | -53.118 | 75.777 | 1.00 | 0.00 | O |
| ATOM | 139 | C4'  | C A | 5 | -55.637 | -54.301 | 73.790 | 1.00 | 0.00 | C |
| ATOM | 140 | O4'  | C A | 5 | -54.361 | -54.821 | 73.301 | 1.00 | 0.00 | O |
| ATOM | 141 | C5'  | C A | 5 | -56.612 | -54.250 | 72.636 | 1.00 | 0.00 | C |
| ATOM | 142 | O5'  | C A | 5 | -56.375 | -53.057 | 71.845 | 1.00 | 0.00 | O |
| ATOM | 143 | O1P  | C A | 5 | -58.469 | -51.705 | 72.188 | 1.00 | 0.00 | O |
| ATOM | 144 | O2P  | C A | 5 | -57.130 | -51.434 | 70.084 | 1.00 | 0.00 | O |
| ATOM | 145 | P    | C A | 5 | -57.617 | -52.332 | 71.159 | 1.00 | 0.00 | P |
| ATOM | 146 | H5   | C A | 5 | -53.481 | -52.743 | 68.704 | 1.00 | 0.00 | H |
| ATOM | 147 | H6   | C A | 5 | -54.454 | -52.719 | 70.975 | 1.00 | 0.00 | H |
| ATOM | 148 | H1'  | C A | 5 | -52.614 | -53.982 | 73.924 | 1.00 | 0.00 | H |
| ATOM | 149 | H3'  | C A | 5 | -56.126 | -52.278 | 74.416 | 1.00 | 0.00 | H |
| ATOM | 150 | H4'  | C A | 5 | -56.080 | -54.920 | 74.571 | 1.00 | 0.00 | H |
| ATOM | 151 | H41  | C A | 5 | -51.595 | -53.497 | 67.373 | 1.00 | 0.00 | H |
| ATOM | 152 | H42  | C A | 5 | -50.222 | -54.397 | 68.072 | 1.00 | 0.00 | H |
| ATOM | 153 | H2'1 | C A | 5 | -54.491 | -51.944 | 72.690 | 1.00 | 0.00 | H |
| ATOM | 154 | H2'2 | C A | 5 | -53.484 | -51.784 | 74.123 | 1.00 | 0.00 | H |
| ATOM | 155 | H5'1 | C A | 5 | -56.479 | -55.136 | 72.015 | 1.00 | 0.00 | H |
| ATOM | 156 | H5'2 | C A | 5 | -57.628 | -54.237 | 73.028 | 1.00 | 0.00 | H |
| ATOM | 157 | C1'  | G A | 6 | -49.164 | -52.942 | 75.617 | 1.00 | 0.00 | C |
| ATOM | 158 | N1   | G A | 6 | -47.193 | -52.808 | 70.913 | 1.00 | 0.00 | N |
| ATOM | 159 | C2   | G A | 6 | -46.706 | -53.405 | 72.063 | 1.00 | 0.00 | C |
| ATOM | 160 | N2   | G A | 6 | -45.539 | -54.049 | 71.945 | 1.00 | 0.00 | N |
| ATOM | 161 | N3   | G A | 6 | -47.335 | -53.362 | 73.237 | 1.00 | 0.00 | N |
| ATOM | 162 | C4   | G A | 6 | -48.498 | -52.661 | 73.173 | 1.00 | 0.00 | C |
| ATOM | 163 | C5   | G A | 6 | -49.059 | -52.032 | 72.076 | 1.00 | 0.00 | C |
| ATOM | 164 | C6   | G A | 6 | -48.394 | -52.080 | 70.829 | 1.00 | 0.00 | C |
| ATOM | 165 | O6   | G A | 6 | -48.728 | -51.587 | 69.751 | 1.00 | 0.00 | O |
| ATOM | 166 | N7   | G A | 6 | -50.262 | -51.420 | 72.432 | 1.00 | 0.00 | N |
| ATOM | 167 | C8   | G A | 6 | -50.393 | -51.695 | 73.703 | 1.00 | 0.00 | C |
| ATOM | 168 | N9   | G A | 6 | -49.359 | -52.446 | 74.227 | 1.00 | 0.00 | N |
| ATOM | 169 | C2'  | G A | 6 | -49.616 | -51.961 | 76.688 | 1.00 | 0.00 | C |
| ATOM | 170 | C3'  | G A | 6 | -50.168 | -52.889 | 77.757 | 1.00 | 0.00 | C |
| ATOM | 171 | O3'  | G A | 6 | -49.099 | -53.343 | 78.583 | 1.00 | 0.00 | O |
| ATOM | 172 | C4'  | G A | 6 | -50.788 | -54.020 | 76.938 | 1.00 | 0.00 | C |
| ATOM | 173 | O4'  | G A | 6 | -49.924 | -54.127 | 75.763 | 1.00 | 0.00 | O |
| ATOM | 174 | C5'  | G A | 6 | -52.210 | -53.813 | 76.476 | 1.00 | 0.00 | C |
| ATOM | 175 | O5'  | G A | 6 | -52.419 | -52.419 | 76.136 | 1.00 | 0.00 | O |
| ATOM | 176 | O1P  | G A | 6 | -54.072 | -51.639 | 77.866 | 1.00 | 0.00 | O |
| ATOM | 177 | O2P  | G A | 6 | -53.980 | -50.518 | 75.623 | 1.00 | 0.00 | O |
| ATOM | 178 | P    | G A | 6 | -53.847 | -51.767 | 76.414 | 1.00 | 0.00 | P |
| ATOM | 179 | H1   | G A | 6 | -46.632 | -52.907 | 70.053 | 1.00 | 0.00 | H |
| ATOM | 180 | H8   | G A | 6 | -51.241 | -51.362 | 74.300 | 1.00 | 0.00 | H |
| ATOM | 181 | H1'  | G A | 6 | -48.111 | -53.201 | 75.741 | 1.00 | 0.00 | H |
| ATOM | 182 | H21  | G A | 6 | -45.060 | -54.082 | 71.034 | 1.00 | 0.00 | H |
| ATOM | 183 | H3'  | G A | 6 | -50.919 | -52.397 | 78.379 | 1.00 | 0.00 | H |
| ATOM | 184 | H22  | G A | 6 | -45.121 | -54.512 | 72.765 | 1.00 | 0.00 | H |
| ATOM | 185 | H4'  | G A | 6 | -50.767 | -54.912 | 77.563 | 1.00 | 0.00 | H |
| ATOM | 186 | H2'1 | G A | 6 | -50.381 | -51.274 | 76.324 | 1.00 | 0.00 | H |
| ATOM | 187 | H2'2 | G A | 6 | -48.792 | -51.358 | 77.072 | 1.00 | 0.00 | H |
| ATOM | 188 | H5'1 | G A | 6 | -52.398 | -54.437 | 75.602 | 1.00 | 0.00 | H |
| ATOM | 189 | H5'2 | G A | 6 | -52.893 | -54.103 | 77.275 | 1.00 | 0.00 | H |
| ATOM | 190 | C1'  | C A | 7 | -44.289 | -52.103 | 75.867 | 1.00 | 0.00 | C |

|      |     |      |     |   |         |         |        |      |      |   |
|------|-----|------|-----|---|---------|---------|--------|------|------|---|
| ATOM | 191 | N1   | C A | 7 | -45.156 | -51.266 | 74.995 | 1.00 | 0.00 | N |
| ATOM | 192 | C2   | C A | 7 | -44.781 | -51.109 | 73.663 | 1.00 | 0.00 | C |
| ATOM | 193 | O2   | C A | 7 | -43.750 | -51.665 | 73.261 | 1.00 | 0.00 | O |
| ATOM | 194 | N3   | C A | 7 | -45.557 | -50.350 | 72.849 | 1.00 | 0.00 | N |
| ATOM | 195 | C4   | C A | 7 | -46.666 | -49.758 | 73.312 | 1.00 | 0.00 | C |
| ATOM | 196 | N4   | C A | 7 | -47.388 | -49.030 | 72.474 | 1.00 | 0.00 | N |
| ATOM | 197 | C5   | C A | 7 | -47.074 | -49.899 | 74.679 | 1.00 | 0.00 | C |
| ATOM | 198 | C6   | C A | 7 | -46.280 | -50.672 | 75.479 | 1.00 | 0.00 | C |
| ATOM | 199 | C2'  | C A | 7 | -44.153 | -51.573 | 77.288 | 1.00 | 0.00 | C |
| ATOM | 200 | C3'  | C A | 7 | -44.092 | -52.857 | 78.102 | 1.00 | 0.00 | C |
| ATOM | 201 | O3'  | C A | 7 | -42.748 | -53.336 | 78.120 | 1.00 | 0.00 | O |
| ATOM | 202 | C4'  | C A | 7 | -45.027 | -53.790 | 77.336 | 1.00 | 0.00 | C |
| ATOM | 203 | O4'  | C A | 7 | -44.867 | -53.394 | 75.937 | 1.00 | 0.00 | O |
| ATOM | 204 | C5'  | C A | 7 | -46.494 | -53.710 | 77.694 | 1.00 | 0.00 | C |
| ATOM | 205 | O5'  | C A | 7 | -46.853 | -52.337 | 77.991 | 1.00 | 0.00 | O |
| ATOM | 206 | O1P  | C A | 7 | -47.429 | -52.401 | 80.440 | 1.00 | 0.00 | O |
| ATOM | 207 | O2P  | C A | 7 | -48.476 | -50.676 | 78.949 | 1.00 | 0.00 | O |
| ATOM | 208 | P    | C A | 7 | -47.958 | -52.057 | 79.105 | 1.00 | 0.00 | P |
| ATOM | 209 | H5   | C A | 7 | -47.972 | -49.415 | 75.064 | 1.00 | 0.00 | H |
| ATOM | 210 | H6   | C A | 7 | -46.553 | -50.816 | 76.524 | 1.00 | 0.00 | H |
| ATOM | 211 | H1'  | C A | 7 | -43.314 | -52.198 | 75.391 | 1.00 | 0.00 | H |
| ATOM | 212 | H3'  | C A | 7 | -44.435 | -52.707 | 79.126 | 1.00 | 0.00 | H |
| ATOM | 213 | H4'  | C A | 7 | -44.691 | -54.807 | 77.534 | 1.00 | 0.00 | H |
| ATOM | 214 | H41  | C A | 7 | -48.247 | -48.567 | 72.803 | 1.00 | 0.00 | H |
| ATOM | 215 | H42  | C A | 7 | -47.093 | -48.927 | 71.492 | 1.00 | 0.00 | H |
| ATOM | 216 | H2'1 | C A | 7 | -45.002 | -50.957 | 77.583 | 1.00 | 0.00 | H |
| ATOM | 217 | H2'2 | C A | 7 | -43.251 | -50.974 | 77.422 | 1.00 | 0.00 | H |
| ATOM | 218 | H5'1 | C A | 7 | -47.088 | -54.074 | 76.855 | 1.00 | 0.00 | H |
| ATOM | 219 | H5'2 | C A | 7 | -46.684 | -54.337 | 78.565 | 1.00 | 0.00 | H |
| ATOM | 220 | C1'  | A A | 8 | -39.943 | -50.523 | 74.102 | 1.00 | 0.00 | C |
| ATOM | 221 | N1   | A A | 8 | -42.883 | -47.494 | 71.181 | 1.00 | 0.00 | N |
| ATOM | 222 | C2   | A A | 8 | -41.797 | -48.215 | 70.919 | 1.00 | 0.00 | C |
| ATOM | 223 | N3   | A A | 8 | -41.086 | -48.979 | 71.720 | 1.00 | 0.00 | N |
| ATOM | 224 | C4   | A A | 8 | -41.608 | -48.961 | 72.962 | 1.00 | 0.00 | C |
| ATOM | 225 | C5   | A A | 8 | -42.710 | -48.279 | 73.392 | 1.00 | 0.00 | C |
| ATOM | 226 | C6   | A A | 8 | -43.381 | -47.498 | 72.427 | 1.00 | 0.00 | C |
| ATOM | 227 | N6   | A A | 8 | -44.478 | -46.773 | 72.703 | 1.00 | 0.00 | N |
| ATOM | 228 | N7   | A A | 8 | -42.945 | -48.504 | 74.738 | 1.00 | 0.00 | N |
| ATOM | 229 | C8   | A A | 8 | -41.986 | -49.309 | 75.091 | 1.00 | 0.00 | C |
| ATOM | 230 | N9   | A A | 8 | -41.136 | -49.633 | 74.064 | 1.00 | 0.00 | N |
| ATOM | 231 | C2'  | A A | 8 | -39.137 | -50.412 | 75.389 | 1.00 | 0.00 | C |
| ATOM | 232 | C3'  | A A | 8 | -38.669 | -51.845 | 75.592 | 1.00 | 0.00 | C |
| ATOM | 233 | O3'  | A A | 8 | -37.485 | -52.062 | 74.830 | 1.00 | 0.00 | O |
| ATOM | 234 | C4'  | A A | 8 | -39.849 | -52.666 | 75.072 | 1.00 | 0.00 | C |
| ATOM | 235 | O4'  | A A | 8 | -40.397 | -51.856 | 73.981 | 1.00 | 0.00 | O |
| ATOM | 236 | C5'  | A A | 8 | -40.952 | -52.956 | 76.063 | 1.00 | 0.00 | C |
| ATOM | 237 | O5'  | A A | 8 | -41.139 | -51.814 | 76.937 | 1.00 | 0.00 | O |
| ATOM | 238 | O1P  | A A | 8 | -40.441 | -52.690 | 79.192 | 1.00 | 0.00 | O |
| ATOM | 239 | O2P  | A A | 8 | -42.106 | -50.818 | 79.031 | 1.00 | 0.00 | O |
| ATOM | 240 | P    | A A | 8 | -41.560 | -52.072 | 78.454 | 1.00 | 0.00 | P |
| ATOM | 241 | H2   | A A | 8 | -41.443 | -48.166 | 69.891 | 1.00 | 0.00 | H |
| ATOM | 242 | H8   | A A | 8 | -41.868 | -49.690 | 76.104 | 1.00 | 0.00 | H |
| ATOM | 243 | H1'  | A A | 8 | -39.325 | -50.300 | 73.233 | 1.00 | 0.00 | H |
| ATOM | 244 | H3'  | A A | 8 | -38.469 | -52.064 | 76.641 | 1.00 | 0.00 | H |



|      |     |      |     |    |         |         |        |      |      |   |
|------|-----|------|-----|----|---------|---------|--------|------|------|---|
| ATOM | 245 | H4'  | A A | 8  | -39.446 | -53.619 | 74.733 | 1.00 | 0.00 | H |
| ATOM | 246 | H61  | A A | 8  | -44.931 | -46.223 | 71.961 | 1.00 | 0.00 | H |
| ATOM | 247 | H62  | A A | 8  | -44.864 | -46.769 | 73.659 | 1.00 | 0.00 | H |
| ATOM | 248 | H2'1 | A A | 8  | -39.741 | -50.069 | 76.227 | 1.00 | 0.00 | H |
| ATOM | 249 | H2'2 | A A | 8  | -38.293 | -49.730 | 75.289 | 1.00 | 0.00 | H |
| ATOM | 250 | H5'1 | A A | 8  | -41.875 | -53.157 | 75.519 | 1.00 | 0.00 | H |
| ATOM | 251 | H5'2 | A A | 8  | -40.683 | -53.831 | 76.652 | 1.00 | 0.00 | H |
| ATOM | 252 | C1'  | C A | 9  | -37.111 | -47.706 | 71.151 | 1.00 | 0.00 | C |
| ATOM | 253 | N1   | C A | 9  | -38.163 | -47.085 | 72.002 | 1.00 | 0.00 | N |
| ATOM | 254 | C2   | C A | 9  | -39.072 | -46.222 | 71.392 | 1.00 | 0.00 | C |
| ATOM | 255 | O2   | C A | 9  | -38.967 | -46.009 | 70.177 | 1.00 | 0.00 | O |
| ATOM | 256 | N3   | C A | 9  | -40.036 | -45.647 | 72.148 | 1.00 | 0.00 | N |
| ATOM | 257 | C4   | C A | 9  | -40.123 | -45.896 | 73.462 | 1.00 | 0.00 | C |
| ATOM | 258 | N4   | C A | 9  | -41.088 | -45.309 | 74.153 | 1.00 | 0.00 | N |
| ATOM | 259 | C5   | C A | 9  | -39.199 | -46.776 | 74.118 | 1.00 | 0.00 | C |
| ATOM | 260 | C6   | C A | 9  | -38.238 | -47.349 | 73.334 | 1.00 | 0.00 | C |
| ATOM | 261 | C2'  | C A | 9  | -35.760 | -47.832 | 71.841 | 1.00 | 0.00 | C |
| ATOM | 262 | C3'  | C A | 9  | -35.240 | -49.150 | 71.282 | 1.00 | 0.00 | C |
| ATOM | 263 | O3'  | C A | 9  | -34.612 | -48.908 | 70.025 | 1.00 | 0.00 | O |
| ATOM | 264 | C4'  | C A | 9  | -36.511 | -49.983 | 71.140 | 1.00 | 0.00 | C |
| ATOM | 265 | O4'  | C A | 9  | -37.550 | -49.007 | 70.806 | 1.00 | 0.00 | O |
| ATOM | 266 | C5'  | C A | 9  | -36.950 | -50.752 | 72.364 | 1.00 | 0.00 | C |
| ATOM | 267 | O5'  | C A | 9  | -36.670 | -49.976 | 73.557 | 1.00 | 0.00 | O |
| ATOM | 268 | O1P  | C A | 9  | -34.909 | -51.332 | 74.736 | 1.00 | 0.00 | O |
| ATOM | 269 | O2P  | C A | 9  | -36.436 | -49.843 | 76.056 | 1.00 | 0.00 | O |
| ATOM | 270 | P    | C A | 9  | -36.252 | -50.744 | 74.891 | 1.00 | 0.00 | P |
| ATOM | 271 | H5   | C A | 9  | -39.262 | -46.978 | 75.188 | 1.00 | 0.00 | H |
| ATOM | 272 | H6   | C A | 9  | -37.518 | -48.031 | 73.786 | 1.00 | 0.00 | H |
| ATOM | 273 | H1'  | C A | 9  | -37.028 | -47.125 | 70.233 | 1.00 | 0.00 | H |
| ATOM | 274 | H3'  | C A | 9  | -34.530 | -49.626 | 71.956 | 1.00 | 0.00 | H |
| ATOM | 275 | H4'  | C A | 9  | -36.331 | -50.703 | 70.342 | 1.00 | 0.00 | H |
| ATOM | 276 | H41  | C A | 9  | -41.179 | -45.487 | 75.165 | 1.00 | 0.00 | H |
| ATOM | 277 | H42  | C A | 9  | -41.749 | -44.675 | 73.680 | 1.00 | 0.00 | H |
| ATOM | 278 | H2'1 | C A | 9  | -35.850 | -47.872 | 72.926 | 1.00 | 0.00 | H |
| ATOM | 279 | H2'2 | C A | 9  | -35.092 | -47.005 | 71.597 | 1.00 | 0.00 | H |
| ATOM | 280 | H5'1 | C A | 9  | -38.019 | -50.955 | 72.298 | 1.00 | 0.00 | H |
| ATOM | 281 | H5'2 | C A | 9  | -36.409 | -51.698 | 72.404 | 1.00 | 0.00 | H |
| ATOM | 282 | C1'  | C A | 10 | -36.146 | -43.700 | 68.405 | 1.00 | 0.00 | C |
| ATOM | 283 | N1   | C A | 10 | -36.635 | -43.557 | 69.803 | 1.00 | 0.00 | N |
| ATOM | 284 | C2   | C A | 10 | -37.735 | -42.732 | 70.027 | 1.00 | 0.00 | C |
| ATOM | 285 | O2   | C A | 10 | -38.258 | -42.155 | 69.064 | 1.00 | 0.00 | O |
| ATOM | 286 | N3   | C A | 10 | -38.198 | -42.588 | 71.293 | 1.00 | 0.00 | N |
| ATOM | 287 | C4   | C A | 10 | -37.613 | -43.224 | 72.316 | 1.00 | 0.00 | C |
| ATOM | 288 | N4   | C A | 10 | -38.107 | -43.050 | 73.534 | 1.00 | 0.00 | N |
| ATOM | 289 | C5   | C A | 10 | -36.477 | -44.075 | 72.116 | 1.00 | 0.00 | C |
| ATOM | 290 | C6   | C A | 10 | -36.031 | -44.210 | 70.832 | 1.00 | 0.00 | C |
| ATOM | 291 | C2'  | C A | 10 | -34.630 | -43.778 | 68.291 | 1.00 | 0.00 | C |
| ATOM | 292 | C3'  | C A | 10 | -34.448 | -44.755 | 67.139 | 1.00 | 0.00 | C |
| ATOM | 293 | O3'  | C A | 10 | -34.535 | -44.045 | 65.906 | 1.00 | 0.00 | O |
| ATOM | 294 | C4'  | C A | 10 | -35.611 | -45.725 | 67.330 | 1.00 | 0.00 | C |
| ATOM | 295 | O4'  | C A | 10 | -36.686 | -44.899 | 67.879 | 1.00 | 0.00 | O |
| ATOM | 296 | C5'  | C A | 10 | -35.370 | -46.887 | 68.267 | 1.00 | 0.00 | C |
| ATOM | 297 | O5'  | C A | 10 | -34.538 | -46.458 | 69.374 | 1.00 | 0.00 | O |
| ATOM | 298 | O1P  | C A | 10 | -32.410 | -47.759 | 69.043 | 1.00 | 0.00 | O |

|      |     |      |   |   |    |         |         |        |      |      |   |
|------|-----|------|---|---|----|---------|---------|--------|------|------|---|
| ATOM | 299 | O2P  | C | A | 10 | -33.085 | -47.024 | 71.344 | 1.00 | 0.00 | O |
| ATOM | 300 | P    | C | A | 10 | -33.501 | -47.495 | 70.000 | 1.00 | 0.00 | P |
| ATOM | 301 | H5   | C | A | 10 | -35.993 | -44.591 | 72.946 | 1.00 | 0.00 | H |
| ATOM | 302 | H6   | C | A | 10 | -35.176 | -44.852 | 70.628 | 1.00 | 0.00 | H |
| ATOM | 303 | H1'  | C | A | 10 | -36.540 | -42.869 | 67.819 | 1.00 | 0.00 | H |
| ATOM | 304 | H3'  | C | A | 10 | -33.491 | -45.272 | 67.190 | 1.00 | 0.00 | H |
| ATOM | 305 | H4'  | C | A | 10 | -35.847 | -46.135 | 66.348 | 1.00 | 0.00 | H |
| ATOM | 306 | H41  | C | A | 10 | -37.677 | -43.530 | 74.337 | 1.00 | 0.00 | H |
| ATOM | 307 | H42  | C | A | 10 | -38.922 | -42.436 | 73.675 | 1.00 | 0.00 | H |
| ATOM | 308 | H2'1 | C | A | 10 | -34.164 | -44.150 | 69.202 | 1.00 | 0.00 | H |
| ATOM | 309 | H2'2 | C | A | 10 | -34.182 | -42.809 | 68.064 | 1.00 | 0.00 | H |
| ATOM | 310 | H5'1 | C | A | 10 | -36.327 | -47.249 | 68.643 | 1.00 | 0.00 | H |
| ATOM | 311 | H5'2 | C | A | 10 | -34.873 | -47.688 | 67.720 | 1.00 | 0.00 | H |
| ATOM | 312 | C1'  | T | A | 11 | -36.714 | -38.965 | 67.080 | 1.00 | 0.00 | C |
| ATOM | 313 | N1   | T | A | 11 | -36.456 | -39.316 | 68.502 | 1.00 | 0.00 | N |
| ATOM | 314 | C2   | T | A | 11 | -37.315 | -38.790 | 69.446 | 1.00 | 0.00 | C |
| ATOM | 315 | O2   | T | A | 11 | -38.252 | -38.066 | 69.156 | 1.00 | 0.00 | O |
| ATOM | 316 | N3   | T | A | 11 | -37.040 | -39.142 | 70.755 | 1.00 | 0.00 | N |
| ATOM | 317 | C4   | T | A | 11 | -36.007 | -39.949 | 71.188 | 1.00 | 0.00 | C |
| ATOM | 318 | O4   | T | A | 11 | -35.858 | -40.192 | 72.393 | 1.00 | 0.00 | O |
| ATOM | 319 | C5   | T | A | 11 | -35.163 | -40.450 | 70.130 | 1.00 | 0.00 | C |
| ATOM | 320 | C6   | T | A | 11 | -35.403 | -40.128 | 68.844 | 1.00 | 0.00 | C |
| ATOM | 321 | C7   | T | A | 11 | -34.029 | -41.334 | 70.556 | 1.00 | 0.00 | C |
| ATOM | 322 | C2'  | T | A | 11 | -35.448 | -38.742 | 66.263 | 1.00 | 0.00 | C |
| ATOM | 323 | C3'  | T | A | 11 | -35.843 | -39.300 | 64.905 | 1.00 | 0.00 | C |
| ATOM | 324 | O3'  | T | A | 11 | -36.533 | -38.293 | 64.167 | 1.00 | 0.00 | O |
| ATOM | 325 | C4'  | T | A | 11 | -36.752 | -40.470 | 65.271 | 1.00 | 0.00 | C |
| ATOM | 326 | O4'  | T | A | 11 | -37.428 | -40.036 | 66.493 | 1.00 | 0.00 | O |
| ATOM | 327 | C5'  | T | A | 11 | -36.070 | -41.792 | 65.541 | 1.00 | 0.00 | C |
| ATOM | 328 | O5'  | T | A | 11 | -34.807 | -41.563 | 66.213 | 1.00 | 0.00 | O |
| ATOM | 329 | O1P  | T | A | 11 | -33.101 | -42.323 | 64.526 | 1.00 | 0.00 | O |
| ATOM | 330 | O2P  | T | A | 11 | -32.568 | -42.410 | 66.977 | 1.00 | 0.00 | O |
| ATOM | 331 | P    | T | A | 11 | -33.584 | -42.538 | 65.904 | 1.00 | 0.00 | P |
| ATOM | 332 | H3   | T | A | 11 | -37.668 | -38.767 | 71.478 | 1.00 | 0.00 | H |
| ATOM | 333 | H6   | T | A | 11 | -34.752 | -40.519 | 68.060 | 1.00 | 0.00 | H |
| ATOM | 334 | H1'  | T | A | 11 | -37.353 | -38.082 | 67.055 | 1.00 | 0.00 | H |
| ATOM | 335 | H3'  | T | A | 11 | -34.978 | -39.635 | 64.334 | 1.00 | 0.00 | H |
| ATOM | 336 | H4'  | T | A | 11 | -37.437 | -40.614 | 64.434 | 1.00 | 0.00 | H |
| ATOM | 337 | H71  | T | A | 11 | -33.082 | -40.839 | 70.340 | 1.00 | 0.00 | H |
| ATOM | 338 | H72  | T | A | 11 | -34.102 | -41.527 | 71.628 | 1.00 | 0.00 | H |
| ATOM | 339 | H73  | T | A | 11 | -34.079 | -42.278 | 70.014 | 1.00 | 0.00 | H |
| ATOM | 340 | H2'1 | T | A | 11 | -34.592 | -39.274 | 66.675 | 1.00 | 0.00 | H |
| ATOM | 341 | H2'2 | T | A | 11 | -35.178 | -37.687 | 66.196 | 1.00 | 0.00 | H |
| ATOM | 342 | H5'1 | T | A | 11 | -36.716 | -42.408 | 66.166 | 1.00 | 0.00 | H |
| ATOM | 343 | H5'2 | T | A | 11 | -35.896 | -42.304 | 64.593 | 1.00 | 0.00 | H |
| ATOM | 344 | C1'  | A | A | 12 | -37.927 | -34.226 | 67.918 | 1.00 | 0.00 | C |
| ATOM | 345 | N1   | A | A | 12 | -36.835 | -35.390 | 72.796 | 1.00 | 0.00 | N |
| ATOM | 346 | C2   | A | A | 12 | -37.815 | -34.688 | 72.237 | 1.00 | 0.00 | C |
| ATOM | 347 | N3   | A | A | 12 | -38.041 | -34.428 | 70.966 | 1.00 | 0.00 | N |
| ATOM | 348 | C4   | A | A | 12 | -37.088 | -34.989 | 70.201 | 1.00 | 0.00 | C |
| ATOM | 349 | C5   | A | A | 12 | -36.020 | -35.733 | 70.615 | 1.00 | 0.00 | C |
| ATOM | 350 | C6   | A | A | 12 | -35.898 | -35.938 | 72.005 | 1.00 | 0.00 | C |
| ATOM | 351 | N6   | A | A | 12 | -34.901 | -36.649 | 72.558 | 1.00 | 0.00 | N |
| ATOM | 352 | N7   | A | A | 12 | -35.252 | -36.146 | 69.541 | 1.00 | 0.00 | N |

|      |     |      |   |   |    |         |         |        |      |      |   |
|------|-----|------|---|---|----|---------|---------|--------|------|------|---|
| ATOM | 353 | C8   | A | A | 12 | -35.863 | -35.643 | 68.508 | 1.00 | 0.00 | C |
| ATOM | 354 | N9   | A | A | 12 | -36.988 | -34.929 | 68.832 | 1.00 | 0.00 | N |
| ATOM | 355 | C2'  | A | A | 12 | -37.243 | -33.551 | 66.737 | 1.00 | 0.00 | C |
| ATOM | 356 | C3'  | A | A | 12 | -38.264 | -33.744 | 65.626 | 1.00 | 0.00 | C |
| ATOM | 357 | O3'  | A | A | 12 | -39.236 | -32.703 | 65.699 | 1.00 | 0.00 | O |
| ATOM | 358 | C4'  | A | A | 12 | -38.860 | -35.114 | 65.946 | 1.00 | 0.00 | C |
| ATOM | 359 | O4'  | A | A | 12 | -38.832 | -35.186 | 67.408 | 1.00 | 0.00 | O |
| ATOM | 360 | C5'  | A | A | 12 | -38.128 | -36.310 | 65.389 | 1.00 | 0.00 | C |
| ATOM | 361 | O5'  | A | A | 12 | -36.697 | -36.071 | 65.423 | 1.00 | 0.00 | O |
| ATOM | 362 | O1P  | A | A | 12 | -36.064 | -35.981 | 62.988 | 1.00 | 0.00 | O |
| ATOM | 363 | O2P  | A | A | 12 | -34.372 | -36.692 | 64.700 | 1.00 | 0.00 | O |
| ATOM | 364 | P    | A | A | 12 | -35.790 | -36.677 | 64.260 | 1.00 | 0.00 | P |
| ATOM | 365 | H2   | A | A | 12 | -38.540 | -34.267 | 72.933 | 1.00 | 0.00 | H |
| ATOM | 366 | H8   | A | A | 12 | -35.515 | -35.775 | 67.483 | 1.00 | 0.00 | H |
| ATOM | 367 | H1'  | A | A | 12 | -38.498 | -33.505 | 68.503 | 1.00 | 0.00 | H |
| ATOM | 368 | H3'  | A | A | 12 | -37.802 | -33.737 | 64.640 | 1.00 | 0.00 | H |
| ATOM | 369 | H4'  | A | A | 12 | -39.871 | -35.121 | 65.538 | 1.00 | 0.00 | H |
| ATOM | 370 | H61  | A | A | 12 | -34.859 | -36.772 | 73.580 | 1.00 | 0.00 | H |
| ATOM | 371 | H62  | A | A | 12 | -34.176 | -37.072 | 71.958 | 1.00 | 0.00 | H |
| ATOM | 372 | H2'1 | A | A | 12 | -36.292 | -34.019 | 66.487 | 1.00 | 0.00 | H |
| ATOM | 373 | H2'2 | A | A | 12 | -37.050 | -32.494 | 66.920 | 1.00 | 0.00 | H |
| ATOM | 374 | H5'1 | A | A | 12 | -38.368 | -37.187 | 65.989 | 1.00 | 0.00 | H |
| ATOM | 375 | H5'2 | A | A | 12 | -38.448 | -36.480 | 64.362 | 1.00 | 0.00 | H |
| ATOM | 376 | C1'  | G | A | 13 | -38.591 | -30.253 | 70.821 | 1.00 | 0.00 | C |
| ATOM | 377 | N1   | G | A | 13 | -35.196 | -32.575 | 73.838 | 1.00 | 0.00 | N |
| ATOM | 378 | C2   | G | A | 13 | -36.368 | -31.916 | 74.163 | 1.00 | 0.00 | C |
| ATOM | 379 | N2   | G | A | 13 | -36.675 | -31.866 | 75.467 | 1.00 | 0.00 | N |
| ATOM | 380 | N3   | G | A | 13 | -37.168 | -31.351 | 73.262 | 1.00 | 0.00 | N |
| ATOM | 381 | C4   | G | A | 13 | -36.699 | -31.491 | 71.994 | 1.00 | 0.00 | C |
| ATOM | 382 | C5   | G | A | 13 | -35.542 | -32.127 | 71.576 | 1.00 | 0.00 | C |
| ATOM | 383 | C6   | G | A | 13 | -34.693 | -32.731 | 72.534 | 1.00 | 0.00 | C |
| ATOM | 384 | O6   | G | A | 13 | -33.633 | -33.334 | 72.359 | 1.00 | 0.00 | O |
| ATOM | 385 | N7   | G | A | 13 | -35.421 | -32.047 | 70.188 | 1.00 | 0.00 | N |
| ATOM | 386 | C8   | G | A | 13 | -36.485 | -31.384 | 69.816 | 1.00 | 0.00 | C |
| ATOM | 387 | N9   | G | A | 13 | -37.309 | -31.011 | 70.857 | 1.00 | 0.00 | N |
| ATOM | 388 | C2'  | G | A | 13 | -38.616 | -29.139 | 69.785 | 1.00 | 0.00 | C |
| ATOM | 389 | C3'  | G | A | 13 | -40.059 | -29.176 | 69.311 | 1.00 | 0.00 | C |
| ATOM | 390 | O3'  | G | A | 13 | -40.864 | -28.408 | 70.202 | 1.00 | 0.00 | O |
| ATOM | 391 | C4'  | G | A | 13 | -40.397 | -30.665 | 69.368 | 1.00 | 0.00 | C |
| ATOM | 392 | O4'  | G | A | 13 | -39.623 | -31.167 | 70.504 | 1.00 | 0.00 | O |
| ATOM | 393 | C5'  | G | A | 13 | -40.044 | -31.480 | 68.146 | 1.00 | 0.00 | C |
| ATOM | 394 | O5'  | G | A | 13 | -38.803 | -30.997 | 67.576 | 1.00 | 0.00 | O |
| ATOM | 395 | O1P  | G | A | 13 | -39.510 | -30.064 | 65.346 | 1.00 | 0.00 | O |
| ATOM | 396 | O2P  | G | A | 13 | -37.174 | -30.924 | 65.663 | 1.00 | 0.00 | O |
| ATOM | 397 | P    | G | A | 13 | -38.616 | -31.044 | 65.992 | 1.00 | 0.00 | P |
| ATOM | 398 | H1   | G | A | 13 | -34.649 | -32.984 | 74.613 | 1.00 | 0.00 | H |
| ATOM | 399 | H8   | G | A | 13 | -36.702 | -31.145 | 68.775 | 1.00 | 0.00 | H |
| ATOM | 400 | H1'  | G | A | 13 | -38.785 | -29.862 | 71.820 | 1.00 | 0.00 | H |
| ATOM | 401 | H21  | G | A | 13 | -36.051 | -32.309 | 76.158 | 1.00 | 0.00 | H |
| ATOM | 402 | H3'  | G | A | 13 | -40.168 | -28.786 | 68.298 | 1.00 | 0.00 | H |
| ATOM | 403 | H22  | G | A | 13 | -37.532 | -31.388 | 75.774 | 1.00 | 0.00 | H |
| ATOM | 404 | H4'  | G | A | 13 | -41.473 | -30.741 | 69.520 | 1.00 | 0.00 | H |
| ATOM | 405 | H2'1 | G | A | 13 | -37.924 | -29.323 | 68.962 | 1.00 | 0.00 | H |
| ATOM | 406 | H2'2 | G | A | 13 | -38.363 | -28.168 | 70.214 | 1.00 | 0.00 | H |

|      |     |      |     |    |         |         |        |      |      |   |
|------|-----|------|-----|----|---------|---------|--------|------|------|---|
| ATOM | 407 | H5'1 | G A | 13 | -39.937 | -32.526 | 68.432 | 1.00 | 0.00 | H |
| ATOM | 408 | H5'2 | G A | 13 | -40.846 | -31.391 | 67.413 | 1.00 | 0.00 | H |
| ATOM | 409 | C1'  | G A | 14 | -37.760 | -27.488 | 74.845 | 1.00 | 0.00 | C |
| ATOM | 410 | N1   | G A | 14 | -33.288 | -29.941 | 74.914 | 1.00 | 0.00 | N |
| ATOM | 411 | C2   | G A | 14 | -34.146 | -29.630 | 75.953 | 1.00 | 0.00 | C |
| ATOM | 412 | N2   | G A | 14 | -33.760 | -30.020 | 77.174 | 1.00 | 0.00 | N |
| ATOM | 413 | N3   | G A | 14 | -35.297 | -28.979 | 75.788 | 1.00 | 0.00 | N |
| ATOM | 414 | C4   | G A | 14 | -35.523 | -28.654 | 74.489 | 1.00 | 0.00 | C |
| ATOM | 415 | C5   | G A | 14 | -34.725 | -28.920 | 73.390 | 1.00 | 0.00 | C |
| ATOM | 416 | C6   | G A | 14 | -33.506 | -29.612 | 73.562 | 1.00 | 0.00 | C |
| ATOM | 417 | O6   | G A | 14 | -32.670 | -29.937 | 72.719 | 1.00 | 0.00 | O |
| ATOM | 418 | N7   | G A | 14 | -35.318 | -28.413 | 72.230 | 1.00 | 0.00 | N |
| ATOM | 419 | C8   | G A | 14 | -36.432 | -27.873 | 72.654 | 1.00 | 0.00 | C |
| ATOM | 420 | N9   | G A | 14 | -36.626 | -27.978 | 74.015 | 1.00 | 0.00 | N |
| ATOM | 421 | C2'  | G A | 14 | -38.312 | -26.142 | 74.397 | 1.00 | 0.00 | C |
| ATOM | 422 | C3'  | G A | 14 | -39.799 | -26.298 | 74.674 | 1.00 | 0.00 | C |
| ATOM | 423 | O3'  | G A | 14 | -40.057 | -25.984 | 76.040 | 1.00 | 0.00 | O |
| ATOM | 424 | C4'  | G A | 14 | -40.047 | -27.774 | 74.364 | 1.00 | 0.00 | C |
| ATOM | 425 | O4'  | G A | 14 | -38.804 | -28.439 | 74.754 | 1.00 | 0.00 | O |
| ATOM | 426 | C5'  | G A | 14 | -40.346 | -28.116 | 72.923 | 1.00 | 0.00 | C |
| ATOM | 427 | O5'  | G A | 14 | -39.563 | -27.270 | 72.046 | 1.00 | 0.00 | O |
| ATOM | 428 | O1P  | G A | 14 | -41.299 | -25.868 | 70.884 | 1.00 | 0.00 | O |
| ATOM | 429 | O2P  | G A | 14 | -39.113 | -26.346 | 69.752 | 1.00 | 0.00 | O |
| ATOM | 430 | P    | G A | 14 | -40.193 | -26.816 | 70.653 | 1.00 | 0.00 | P |
| ATOM | 431 | H1   | G A | 14 | -32.424 | -30.454 | 75.148 | 1.00 | 0.00 | H |
| ATOM | 432 | H8   | G A | 14 | -37.143 | -27.383 | 71.989 | 1.00 | 0.00 | H |
| ATOM | 433 | H1'  | G A | 14 | -37.431 | -27.450 | 75.883 | 1.00 | 0.00 | H |
| ATOM | 434 | H21  | G A | 14 | -32.870 | -30.527 | 77.294 | 1.00 | 0.00 | H |
| ATOM | 435 | H3'  | G A | 14 | -40.403 | -25.656 | 74.035 | 1.00 | 0.00 | H |
| ATOM | 436 | H22  | G A | 14 | -34.352 | -29.818 | 77.991 | 1.00 | 0.00 | H |
| ATOM | 437 | H4'  | G A | 14 | -40.902 | -28.084 | 74.965 | 1.00 | 0.00 | H |
| ATOM | 438 | H2'1 | G A | 14 | -38.124 | -25.948 | 73.341 | 1.00 | 0.00 | H |
| ATOM | 439 | H2'2 | G A | 14 | -37.888 | -25.312 | 74.963 | 1.00 | 0.00 | H |
| ATOM | 440 | H5'1 | G A | 14 | -40.100 | -29.162 | 72.745 | 1.00 | 0.00 | H |
| ATOM | 441 | H5'2 | G A | 14 | -41.410 | -27.962 | 72.732 | 1.00 | 0.00 | H |
| ATOM | 442 | C1'  | A A | 15 | -35.074 | -25.916 | 78.693 | 1.00 | 0.00 | C |
| ATOM | 443 | N1   | A A | 15 | -31.109 | -27.450 | 75.817 | 1.00 | 0.00 | N |
| ATOM | 444 | C2   | A A | 15 | -31.383 | -27.579 | 77.113 | 1.00 | 0.00 | C |
| ATOM | 445 | N3   | A A | 15 | -32.430 | -27.160 | 77.793 | 1.00 | 0.00 | N |
| ATOM | 446 | C4   | A A | 15 | -33.287 | -26.518 | 76.978 | 1.00 | 0.00 | C |
| ATOM | 447 | C5   | A A | 15 | -33.155 | -26.300 | 75.635 | 1.00 | 0.00 | C |
| ATOM | 448 | C6   | A A | 15 | -31.984 | -26.805 | 75.030 | 1.00 | 0.00 | C |
| ATOM | 449 | N6   | A A | 15 | -31.718 | -26.667 | 73.720 | 1.00 | 0.00 | N |
| ATOM | 450 | N7   | A A | 15 | -34.239 | -25.603 | 75.132 | 1.00 | 0.00 | N |
| ATOM | 451 | C8   | A A | 15 | -34.996 | -25.411 | 76.171 | 1.00 | 0.00 | C |
| ATOM | 452 | N9   | A A | 15 | -34.483 | -25.941 | 77.329 | 1.00 | 0.00 | N |
| ATOM | 453 | C2'  | A A | 15 | -35.790 | -24.614 | 79.028 | 1.00 | 0.00 | C |
| ATOM | 454 | C3'  | A A | 15 | -36.951 | -25.100 | 79.883 | 1.00 | 0.00 | C |
| ATOM | 455 | O3'  | A A | 15 | -36.511 | -25.242 | 81.230 | 1.00 | 0.00 | O |
| ATOM | 456 | C4'  | A A | 15 | -37.302 | -26.445 | 79.246 | 1.00 | 0.00 | C |
| ATOM | 457 | O4'  | A A | 15 | -36.016 | -26.967 | 78.776 | 1.00 | 0.00 | O |
| ATOM | 458 | C5'  | A A | 15 | -38.262 | -26.406 | 78.081 | 1.00 | 0.00 | C |
| ATOM | 459 | O5'  | A A | 15 | -38.018 | -25.220 | 77.283 | 1.00 | 0.00 | O |
| ATOM | 460 | O1P  | A A | 15 | -40.118 | -23.867 | 77.590 | 1.00 | 0.00 | O |

|      |     |      |   |   |    |         |         |        |      |      |   |
|------|-----|------|---|---|----|---------|---------|--------|------|------|---|
| ATOM | 461 | O2P  | A | A | 15 | -38.756 | -23.613 | 75.497 | 1.00 | 0.00 | O |
| ATOM | 462 | P    | A | A | 15 | -39.253 | -24.502 | 76.575 | 1.00 | 0.00 | P |
| ATOM | 463 | H2   | A | A | 15 | -30.631 | -28.110 | 77.697 | 1.00 | 0.00 | H |
| ATOM | 464 | H8   | A | A | 15 | -35.946 | -24.880 | 76.130 | 1.00 | 0.00 | H |
| ATOM | 465 | H1'  | A | A | 15 | -34.280 | -26.120 | 79.411 | 1.00 | 0.00 | H |
| ATOM | 466 | H3'  | A | A | 15 | -37.799 | -24.417 | 79.848 | 1.00 | 0.00 | H |
| ATOM | 467 | H4'  | A | A | 15 | -37.749 | -27.057 | 80.028 | 1.00 | 0.00 | H |
| ATOM | 468 | H61  | A | A | 15 | -30.848 | -27.059 | 73.329 | 1.00 | 0.00 | H |
| ATOM | 469 | H62  | A | A | 15 | -32.383 | -26.172 | 73.109 | 1.00 | 0.00 | H |
| ATOM | 470 | H2'1 | A | A | 15 | -36.144 | -24.096 | 78.136 | 1.00 | 0.00 | H |
| ATOM | 471 | H2'2 | A | A | 15 | -35.155 | -23.922 | 79.579 | 1.00 | 0.00 | H |
| ATOM | 472 | H5'1 | A | A | 15 | -38.120 | -27.297 | 77.471 | 1.00 | 0.00 | H |
| ATOM | 473 | H5'2 | A | A | 15 | -39.282 | -26.389 | 78.460 | 1.00 | 0.00 | H |
| ATOM | 474 | C1'  | C | A | 16 | -30.799 | -25.099 | 81.086 | 1.00 | 0.00 | C |
| ATOM | 475 | N1   | C | A | 16 | -30.990 | -24.605 | 79.694 | 1.00 | 0.00 | N |
| ATOM | 476 | C2   | C | A | 16 | -30.015 | -24.920 | 78.750 | 1.00 | 0.00 | C |
| ATOM | 477 | O2   | C | A | 16 | -29.037 | -25.591 | 79.105 | 1.00 | 0.00 | O |
| ATOM | 478 | N3   | C | A | 16 | -30.169 | -24.479 | 77.478 | 1.00 | 0.00 | N |
| ATOM | 479 | C4   | C | A | 16 | -31.238 | -23.754 | 77.126 | 1.00 | 0.00 | C |
| ATOM | 480 | N4   | C | A | 16 | -31.340 | -23.354 | 75.867 | 1.00 | 0.00 | N |
| ATOM | 481 | C5   | C | A | 16 | -32.256 | -23.412 | 78.076 | 1.00 | 0.00 | C |
| ATOM | 482 | C6   | C | A | 16 | -32.082 | -23.869 | 79.351 | 1.00 | 0.00 | C |
| ATOM | 483 | C2'  | C | A | 16 | -31.249 | -24.112 | 82.154 | 1.00 | 0.00 | C |
| ATOM | 484 | C3'  | C | A | 16 | -31.809 | -25.037 | 83.224 | 1.00 | 0.00 | C |
| ATOM | 485 | O3'  | C | A | 16 | -30.743 | -25.493 | 84.053 | 1.00 | 0.00 | O |
| ATOM | 486 | C4'  | C | A | 16 | -32.429 | -26.167 | 82.406 | 1.00 | 0.00 | C |
| ATOM | 487 | O4'  | C | A | 16 | -31.564 | -26.281 | 81.231 | 1.00 | 0.00 | O |
| ATOM | 488 | C5'  | C | A | 16 | -33.851 | -25.955 | 81.940 | 1.00 | 0.00 | C |
| ATOM | 489 | O5'  | C | A | 16 | -34.053 | -24.561 | 81.597 | 1.00 | 0.00 | O |
| ATOM | 490 | O1P  | C | A | 16 | -35.708 | -23.770 | 83.321 | 1.00 | 0.00 | O |
| ATOM | 491 | O2P  | C | A | 16 | -35.606 | -22.655 | 81.076 | 1.00 | 0.00 | O |
| ATOM | 492 | P    | C | A | 16 | -35.480 | -23.903 | 81.869 | 1.00 | 0.00 | P |
| ATOM | 493 | H5   | C | A | 16 | -33.126 | -22.815 | 77.795 | 1.00 | 0.00 | H |
| ATOM | 494 | H6   | C | A | 16 | -32.833 | -23.642 | 80.108 | 1.00 | 0.00 | H |
| ATOM | 495 | H1'  | C | A | 16 | -29.749 | -25.362 | 81.214 | 1.00 | 0.00 | H |
| ATOM | 496 | H3'  | C | A | 16 | -32.559 | -24.539 | 83.840 | 1.00 | 0.00 | H |
| ATOM | 497 | H4'  | C | A | 16 | -32.416 | -27.057 | 83.034 | 1.00 | 0.00 | H |
| ATOM | 498 | H41  | C | A | 16 | -32.155 | -22.796 | 75.569 | 1.00 | 0.00 | H |
| ATOM | 499 | H42  | C | A | 16 | -30.607 | -23.598 | 75.186 | 1.00 | 0.00 | H |
| ATOM | 500 | H2'1 | C | A | 16 | -32.012 | -23.424 | 81.788 | 1.00 | 0.00 | H |
| ATOM | 501 | H2'2 | C | A | 16 | -30.423 | -23.513 | 82.539 | 1.00 | 0.00 | H |
| ATOM | 502 | H5'1 | C | A | 16 | -34.038 | -26.581 | 81.066 | 1.00 | 0.00 | H |
| ATOM | 503 | H5'2 | C | A | 16 | -34.537 | -26.242 | 82.738 | 1.00 | 0.00 | H |
| ATOM | 504 | C1'  | G | A | 17 | -25.927 | -24.259 | 81.336 | 1.00 | 0.00 | C |
| ATOM | 505 | N1   | G | A | 17 | -26.578 | -22.396 | 76.631 | 1.00 | 0.00 | N |
| ATOM | 506 | C2   | G | A | 17 | -25.575 | -23.206 | 77.135 | 1.00 | 0.00 | C |
| ATOM | 507 | N2   | G | A | 17 | -24.617 | -23.564 | 76.271 | 1.00 | 0.00 | N |
| ATOM | 508 | N3   | G | A | 17 | -25.531 | -23.623 | 78.399 | 1.00 | 0.00 | N |
| ATOM | 509 | C4   | G | A | 17 | -26.576 | -23.158 | 79.133 | 1.00 | 0.00 | C |
| ATOM | 510 | C5   | G | A | 17 | -27.618 | -22.344 | 78.719 | 1.00 | 0.00 | C |
| ATOM | 511 | C6   | G | A | 17 | -27.668 | -21.903 | 77.376 | 1.00 | 0.00 | C |
| ATOM | 512 | O6   | G | A | 17 | -28.501 | -21.185 | 76.824 | 1.00 | 0.00 | O |
| ATOM | 513 | N7   | G | A | 17 | -28.486 | -22.092 | 79.782 | 1.00 | 0.00 | N |
| ATOM | 514 | C8   | G | A | 17 | -27.959 | -22.749 | 80.783 | 1.00 | 0.00 | C |

|      |     |      |     |    |         |         |        |      |      |   |
|------|-----|------|-----|----|---------|---------|--------|------|------|---|
| ATOM | 515 | N9   | G A | 17 | -26.796 | -23.421 | 80.468 | 1.00 | 0.00 | N |
| ATOM | 516 | C2'  | G A | 17 | -25.789 | -23.734 | 82.758 | 1.00 | 0.00 | C |
| ATOM | 517 | C3'  | G A | 17 | -25.724 | -25.019 | 83.567 | 1.00 | 0.00 | C |
| ATOM | 518 | O3'  | G A | 17 | -24.380 | -25.495 | 83.582 | 1.00 | 0.00 | O |
| ATOM | 519 | C4'  | G A | 17 | -26.659 | -25.952 | 82.799 | 1.00 | 0.00 | C |
| ATOM | 520 | O4'  | G A | 17 | -26.499 | -25.551 | 81.401 | 1.00 | 0.00 | O |
| ATOM | 521 | C5'  | G A | 17 | -28.124 | -25.878 | 83.160 | 1.00 | 0.00 | C |
| ATOM | 522 | O5'  | G A | 17 | -28.487 | -24.508 | 83.460 | 1.00 | 0.00 | O |
| ATOM | 523 | O1P  | G A | 17 | -29.059 | -24.583 | 85.910 | 1.00 | 0.00 | O |
| ATOM | 524 | O2P  | G A | 17 | -30.113 | -22.855 | 84.427 | 1.00 | 0.00 | O |
| ATOM | 525 | P    | G A | 17 | -29.591 | -24.236 | 84.579 | 1.00 | 0.00 | P |
| ATOM | 526 | H1   | G A | 17 | -26.522 | -22.134 | 75.636 | 1.00 | 0.00 | H |
| ATOM | 527 | H8   | G A | 17 | -28.399 | -22.764 | 81.781 | 1.00 | 0.00 | H |
| ATOM | 528 | H1'  | G A | 17 | -24.950 | -24.349 | 80.858 | 1.00 | 0.00 | H |
| ATOM | 529 | H21  | G A | 17 | -24.660 | -23.240 | 75.294 | 1.00 | 0.00 | H |
| ATOM | 530 | H3'  | G A | 17 | -26.067 | -24.875 | 84.592 | 1.00 | 0.00 | H |
| ATOM | 531 | H22  | G A | 17 | -23.841 | -24.164 | 76.583 | 1.00 | 0.00 | H |
| ATOM | 532 | H4'  | G A | 17 | -26.319 | -26.968 | 82.992 | 1.00 | 0.00 | H |
| ATOM | 533 | H2'1 | G A | 17 | -26.640 | -23.121 | 83.056 | 1.00 | 0.00 | H |
| ATOM | 534 | H2'2 | G A | 17 | -24.889 | -23.133 | 82.893 | 1.00 | 0.00 | H |
| ATOM | 535 | H5'1 | G A | 17 | -28.717 | -26.241 | 82.320 | 1.00 | 0.00 | H |
| ATOM | 536 | H5'2 | G A | 17 | -28.310 | -26.510 | 84.027 | 1.00 | 0.00 | H |
| ATOM | 537 | C1'  | G A | 18 | -21.590 | -22.665 | 79.551 | 1.00 | 0.00 | C |
| ATOM | 538 | N1   | G A | 18 | -24.529 | -19.652 | 76.670 | 1.00 | 0.00 | N |
| ATOM | 539 | C2   | G A | 18 | -23.401 | -20.378 | 76.331 | 1.00 | 0.00 | C |
| ATOM | 540 | N2   | G A | 18 | -23.001 | -20.288 | 75.055 | 1.00 | 0.00 | N |
| ATOM | 541 | N3   | G A | 18 | -22.727 | -21.133 | 77.195 | 1.00 | 0.00 | N |
| ATOM | 542 | C4   | G A | 18 | -23.266 | -21.102 | 78.442 | 1.00 | 0.00 | C |
| ATOM | 543 | C5   | G A | 18 | -24.384 | -20.404 | 78.871 | 1.00 | 0.00 | C |
| ATOM | 544 | C6   | G A | 18 | -25.103 | -19.604 | 77.953 | 1.00 | 0.00 | C |
| ATOM | 545 | O6   | G A | 18 | -26.108 | -18.919 | 78.143 | 1.00 | 0.00 | O |
| ATOM | 546 | N7   | G A | 18 | -24.605 | -20.637 | 80.229 | 1.00 | 0.00 | N |
| ATOM | 547 | C8   | G A | 18 | -23.641 | -21.452 | 80.572 | 1.00 | 0.00 | C |
| ATOM | 548 | N9   | G A | 18 | -22.787 | -21.780 | 79.540 | 1.00 | 0.00 | N |
| ATOM | 549 | C2'  | G A | 18 | -20.764 | -22.565 | 80.826 | 1.00 | 0.00 | C |
| ATOM | 550 | C3'  | G A | 18 | -20.290 | -23.997 | 81.010 | 1.00 | 0.00 | C |
| ATOM | 551 | O3'  | G A | 18 | -19.116 | -24.206 | 80.230 | 1.00 | 0.00 | O |
| ATOM | 552 | C4'  | G A | 18 | -21.475 | -24.816 | 80.500 | 1.00 | 0.00 | C |
| ATOM | 553 | O4'  | G A | 18 | -22.041 | -24.000 | 79.426 | 1.00 | 0.00 | O |
| ATOM | 554 | C5'  | G A | 18 | -22.563 | -25.118 | 81.503 | 1.00 | 0.00 | C |
| ATOM | 555 | O5'  | G A | 18 | -22.740 | -23.986 | 82.391 | 1.00 | 0.00 | O |
| ATOM | 556 | O1P  | G A | 18 | -22.007 | -24.879 | 84.628 | 1.00 | 0.00 | O |
| ATOM | 557 | O2P  | G A | 18 | -23.677 | -23.012 | 84.509 | 1.00 | 0.00 | O |
| ATOM | 558 | P    | G A | 18 | -23.137 | -24.257 | 83.913 | 1.00 | 0.00 | P |
| ATOM | 559 | H1   | G A | 18 | -24.983 | -19.103 | 75.923 | 1.00 | 0.00 | H |
| ATOM | 560 | H8   | G A | 18 | -23.522 | -21.839 | 81.584 | 1.00 | 0.00 | H |
| ATOM | 561 | H1'  | G A | 18 | -20.985 | -22.432 | 78.674 | 1.00 | 0.00 | H |
| ATOM | 562 | H21  | G A | 18 | -23.531 | -19.704 | 74.391 | 1.00 | 0.00 | H |
| ATOM | 563 | H3'  | G A | 18 | -20.075 | -24.226 | 82.055 | 1.00 | 0.00 | H |
| ATOM | 564 | H22  | G A | 18 | -22.169 | -20.803 | 74.741 | 1.00 | 0.00 | H |
| ATOM | 565 | H4'  | G A | 18 | -21.074 | -25.767 | 80.148 | 1.00 | 0.00 | H |
| ATOM | 566 | H2'1 | G A | 18 | -21.357 | -22.231 | 81.677 | 1.00 | 0.00 | H |
| ATOM | 567 | H2'2 | G A | 18 | -19.923 | -21.878 | 80.722 | 1.00 | 0.00 | H |
| ATOM | 568 | H5'1 | G A | 18 | -23.493 | -25.319 | 80.972 | 1.00 | 0.00 | H |

|      |     |      |     |   |    |         |         |        |      |      |   |
|------|-----|------|-----|---|----|---------|---------|--------|------|------|---|
| ATOM | 569 | H5'2 | G   | A | 18 | -22.284 | -25.999 | 82.081 | 1.00 | 0.00 | H |
| ATOM | 570 | C1'  | T   | A | 19 | -18.731 | -19.877 | 76.628 | 1.00 | 0.00 | C |
| ATOM | 571 | N1   | T   | A | 19 | -19.788 | -19.244 | 77.459 | 1.00 | 0.00 | N |
| ATOM | 572 | C2   | T   | A | 19 | -20.668 | -18.394 | 76.821 | 1.00 | 0.00 | C |
| ATOM | 573 | O2   | T   | A | 19 | -20.604 | -18.153 | 75.627 | 1.00 | 0.00 | O |
| ATOM | 574 | N3   | T   | A | 19 | -21.636 | -17.828 | 77.631 | 1.00 | 0.00 | N |
| ATOM | 575 | C4   | T   | A | 19 | -21.793 | -18.031 | 78.986 | 1.00 | 0.00 | C |
| ATOM | 576 | O4   | T   | A | 19 | -22.699 | -17.464 | 79.608 | 1.00 | 0.00 | O |
| ATOM | 577 | C5   | T   | A | 19 | -20.828 | -18.934 | 79.566 | 1.00 | 0.00 | C |
| ATOM | 578 | C6   | T   | A | 19 | -19.871 | -19.504 | 78.805 | 1.00 | 0.00 | C |
| ATOM | 579 | C7   | T   | A | 19 | -20.963 | -19.186 | 81.037 | 1.00 | 0.00 | C |
| ATOM | 580 | C2'  | T   | A | 19 | -17.387 | -20.005 | 77.335 | 1.00 | 0.00 | C |
| ATOM | 581 | C3'  | T   | A | 19 | -16.867 | -21.326 | 76.793 | 1.00 | 0.00 | C |
| ATOM | 582 | O3'  | T   | A | 19 | -16.221 | -21.098 | 75.542 | 1.00 | 0.00 | O |
| ATOM | 583 | C4'  | T   | A | 19 | -18.140 | -22.155 | 76.643 | 1.00 | 0.00 | C |
| ATOM | 584 | O4'  | T   | A | 19 | -19.168 | -21.178 | 76.287 | 1.00 | 0.00 | O |
| ATOM | 585 | C5'  | T   | A | 19 | -18.596 | -22.914 | 77.867 | 1.00 | 0.00 | C |
| ATOM | 586 | O5'  | T   | A | 19 | -18.329 | -22.130 | 79.057 | 1.00 | 0.00 | O |
| ATOM | 587 | O1P  | T   | A | 19 | -16.586 | -23.482 | 80.268 | 1.00 | 0.00 | O |
| ATOM | 588 | O2P  | T   | A | 19 | -18.124 | -21.975 | 81.556 | 1.00 | 0.00 | O |
| ATOM | 589 | P    | T   | A | 19 | -17.931 | -22.886 | 80.403 | 1.00 | 0.00 | P |
| ATOM | 590 | H3   | T   | A | 19 | -22.307 | -17.193 | 77.176 | 1.00 | 0.00 | H |
| ATOM | 591 | H6   | T   | A | 19 | -19.154 | -20.183 | 79.265 | 1.00 | 0.00 | H |
| ATOM | 592 | H1'  | T   | A | 19 | -18.633 | -19.303 | 75.705 | 1.00 | 0.00 | H |
| ATOM | 593 | H3'  | T   | A | 19 | -16.166 | -21.801 | 77.480 | 1.00 | 0.00 | H |
| ATOM | 594 | H4'  | T   | A | 19 | -17.952 | -22.884 | 75.852 | 1.00 | 0.00 | H |
| ATOM | 595 | H71  | T   | A | 19 | -20.093 | -18.786 | 81.555 | 1.00 | 0.00 | H |
| ATOM | 596 | H72  | T   | A | 19 | -21.864 | -18.695 | 81.408 | 1.00 | 0.00 | H |
| ATOM | 597 | H73  | T   | A | 19 | -21.033 | -20.259 | 81.220 | 1.00 | 0.00 | H |
| ATOM | 598 | H2'1 | T   | A | 19 | -17.492 | -20.033 | 78.418 | 1.00 | 0.00 | H |
| ATOM | 599 | H2'2 | T   | A | 19 | -16.712 | -19.182 | 77.093 | 1.00 | 0.00 | H |
| ATOM | 600 | H5'1 | T   | A | 19 | -19.665 | -23.112 | 77.789 | 1.00 | 0.00 | H |
| ATOM | 601 | H5'2 | T   | A | 19 | -18.060 | -23.860 | 77.923 | 1.00 | 0.00 | H |
| ATOM | 602 | C01  | LNK | A | 20 | -12.772 | -19.935 | 74.766 | 0.00 | 0.00 | C |
| ATOM | 603 | O1   | LNK | A | 20 | -13.813 | -20.251 | 75.693 | 1.00 | 0.00 | O |
| ATOM | 604 | S    | LNK | A | 20 | -9.073  | -18.464 | 74.789 | 0.00 | 0.00 | S |
| ATOM | 605 | C02  | LNK | A | 20 | -11.554 | -19.385 | 75.532 | 0.00 | 0.00 | C |
| ATOM | 606 | C03  | LNK | A | 20 | -10.882 | -18.277 | 74.700 | 0.00 | 0.00 | C |
| ATOM | 607 | O1P  | LNK | A | 20 | -15.620 | -18.781 | 76.647 | 1.00 | 0.00 | O |
| ATOM | 608 | O2P  | LNK | A | 20 | -15.295 | -18.919 | 74.162 | 1.00 | 0.00 | O |
| ATOM | 609 | P    | LNK | A | 20 | -15.256 | -19.605 | 75.478 | 1.00 | 0.00 | P |
| ATOM | 610 | H01  | LNK | A | 20 | -13.126 | -19.183 | 74.060 | 0.00 | 0.00 | H |
| ATOM | 611 | H02  | LNK | A | 20 | -12.483 | -20.835 | 74.223 | 0.00 | 0.00 | H |
| ATOM | 612 | H03  | LNK | A | 20 | -11.165 | -17.301 | 75.096 | 0.00 | 0.00 | H |
| ATOM | 613 | H04  | LNK | A | 20 | -10.841 | -20.191 | 75.709 | 0.00 | 0.00 | H |
| ATOM | 614 | H05  | LNK | A | 20 | -11.880 | -18.974 | 76.488 | 0.00 | 0.00 | H |
| ATOM | 615 | H06  | LNK | A | 20 | -11.204 | -18.355 | 73.662 | 0.00 | 0.00 | H |
| ATOM | 616 | AU   | LNK | A | 20 | -8.771  | -17.918 | 74.505 |      |      |   |
| TER  |     |      |     |   |    |         |         |        |      |      |   |
| ATOM | 618 | C1'  | A   | B | 2  | -26.554 | -12.958 | 73.494 | 1.00 | 0.00 | C |
| ATOM | 619 | N1   | A   | B | 2  | -23.564 | -16.000 | 76.349 | 1.00 | 0.00 | N |
| ATOM | 620 | C2   | A   | B | 2  | -23.561 | -15.697 | 75.054 | 1.00 | 0.00 | C |
| ATOM | 621 | N3   | A   | B | 2  | -24.362 | -14.899 | 74.380 | 1.00 | 0.00 | N |
| ATOM | 622 | C4   | A   | B | 2  | -25.285 | -14.365 | 75.202 | 1.00 | 0.00 | C |

|      |     |      |     |   |         |         |        |      |      |   |
|------|-----|------|-----|---|---------|---------|--------|------|------|---|
| ATOM | 623 | C5   | A B | 2 | -25.424 | -14.574 | 76.544 | 1.00 | 0.00 | C |
| ATOM | 624 | C6   | A B | 2 | -24.496 | -15.452 | 77.143 | 1.00 | 0.00 | C |
| ATOM | 625 | N6   | A B | 2 | -24.507 | -15.753 | 78.453 | 1.00 | 0.00 | N |
| ATOM | 626 | N7   | A B | 2 | -26.488 | -13.852 | 77.056 | 1.00 | 0.00 | N |
| ATOM | 627 | C8   | A B | 2 | -26.970 | -13.231 | 76.020 | 1.00 | 0.00 | C |
| ATOM | 628 | N9   | A B | 2 | -26.288 | -13.492 | 74.860 | 1.00 | 0.00 | N |
| ATOM | 629 | C2'  | A B | 2 | -28.035 | -12.812 | 73.171 | 1.00 | 0.00 | C |
| ATOM | 630 | C3'  | A B | 2 | -28.050 | -11.553 | 72.318 | 1.00 | 0.00 | C |
| ATOM | 631 | O3'  | A B | 2 | -27.755 | -11.900 | 70.967 | 1.00 | 0.00 | O |
| ATOM | 632 | C4'  | A B | 2 | -26.948 | -10.701 | 72.949 | 1.00 | 0.00 | C |
| ATOM | 633 | O4'  | A B | 2 | -25.959 | -11.677 | 73.412 | 1.00 | 0.00 | O |
| ATOM | 634 | C5'  | A B | 2 | -27.356 | -9.834  | 74.116 | 1.00 | 0.00 | C |
| ATOM | 635 | O5'  | A B | 2 | -28.343 | -10.527 | 74.921 | 1.00 | 0.00 | O |
| ATOM | 636 | H2   | A B | 2 | -22.783 | -16.178 | 74.465 | 1.00 | 0.00 | H |
| ATOM | 637 | H8   | A B | 2 | -27.833 | -12.568 | 76.068 | 1.00 | 0.00 | H |
| ATOM | 638 | H1'  | A B | 2 | -26.058 | -13.606 | 72.773 | 1.00 | 0.00 | H |
| ATOM | 639 | H3'  | A B | 2 | -29.012 | -11.043 | 72.358 | 1.00 | 0.00 | H |
| ATOM | 640 | H4'  | A B | 2 | -26.567 | -10.048 | 72.165 | 1.00 | 0.00 | H |
| ATOM | 641 | H61  | A B | 2 | -23.805 | -16.397 | 78.840 | 1.00 | 0.00 | H |
| ATOM | 642 | H62  | A B | 2 | -25.222 | -15.336 | 79.069 | 1.00 | 0.00 | H |
| ATOM | 643 | H2'1 | A B | 2 | -28.644 | -12.691 | 74.066 | 1.00 | 0.00 | H |
| ATOM | 644 | H2'2 | A B | 2 | -28.425 | -13.668 | 72.620 | 1.00 | 0.00 | H |
| ATOM | 645 | H5'1 | A B | 2 | -26.478 | -9.614  | 74.722 | 1.00 | 0.00 | H |
| ATOM | 646 | H5'2 | A B | 2 | -27.775 | -8.902  | 73.740 | 1.00 | 0.00 | H |
| ATOM | 647 | C1'  | C B | 3 | -25.629 | -17.200 | 71.086 | 1.00 | 0.00 | C |
| ATOM | 648 | N1   | C B | 3 | -26.149 | -17.222 | 72.480 | 1.00 | 0.00 | N |
| ATOM | 649 | C2   | C B | 3 | -25.473 | -17.998 | 73.419 | 1.00 | 0.00 | C |
| ATOM | 650 | O2   | C B | 3 | -24.472 | -18.633 | 73.057 | 1.00 | 0.00 | O |
| ATOM | 651 | N3   | C B | 3 | -25.930 | -18.032 | 74.693 | 1.00 | 0.00 | N |
| ATOM | 652 | C4   | C B | 3 | -27.015 | -17.335 | 75.053 | 1.00 | 0.00 | C |
| ATOM | 653 | N4   | C B | 3 | -27.417 | -17.401 | 76.315 | 1.00 | 0.00 | N |
| ATOM | 654 | C5   | C B | 3 | -27.736 | -16.531 | 74.109 | 1.00 | 0.00 | C |
| ATOM | 655 | C6   | C B | 3 | -27.253 | -16.509 | 72.832 | 1.00 | 0.00 | C |
| ATOM | 656 | C2'  | C B | 3 | -26.720 | -17.172 | 70.023 | 1.00 | 0.00 | C |
| ATOM | 657 | C3'  | C B | 3 | -26.095 | -16.292 | 68.952 | 1.00 | 0.00 | C |
| ATOM | 658 | O3'  | C B | 3 | -25.260 | -17.091 | 68.118 | 1.00 | 0.00 | O |
| ATOM | 659 | C4'  | C B | 3 | -25.296 | -15.278 | 69.768 | 1.00 | 0.00 | C |
| ATOM | 660 | O4'  | C B | 3 | -24.845 | -16.032 | 70.939 | 1.00 | 0.00 | O |
| ATOM | 661 | C5'  | C B | 3 | -26.046 | -14.055 | 70.241 | 1.00 | 0.00 | C |
| ATOM | 662 | O5'  | C B | 3 | -27.405 | -14.419 | 70.591 | 1.00 | 0.00 | O |
| ATOM | 663 | O1P  | C B | 3 | -28.793 | -13.204 | 68.877 | 1.00 | 0.00 | O |
| ATOM | 664 | O2P  | C B | 3 | -29.765 | -13.741 | 71.126 | 1.00 | 0.00 | O |
| ATOM | 665 | P    | C B | 3 | -28.572 | -13.366 | 70.328 | 1.00 | 0.00 | P |
| ATOM | 666 | H5   | C B | 3 | -28.624 | -15.967 | 74.396 | 1.00 | 0.00 | H |
| ATOM | 667 | H6   | C B | 3 | -27.763 | -15.906 | 72.080 | 1.00 | 0.00 | H |
| ATOM | 668 | H1'  | C B | 3 | -24.975 | -18.063 | 70.952 | 1.00 | 0.00 | H |
| ATOM | 669 | H3'  | C B | 3 | -26.850 | -15.797 | 68.341 | 1.00 | 0.00 | H |
| ATOM | 670 | H4'  | C B | 3 | -24.475 | -14.939 | 69.137 | 1.00 | 0.00 | H |
| ATOM | 671 | H41  | C B | 3 | -28.248 | -16.872 | 76.620 | 1.00 | 0.00 | H |
| ATOM | 672 | H42  | C B | 3 | -26.899 | -17.981 | 76.992 | 1.00 | 0.00 | H |
| ATOM | 673 | H2'1 | C B | 3 | -27.650 | -16.744 | 70.397 | 1.00 | 0.00 | H |
| ATOM | 674 | H2'2 | C B | 3 | -26.947 | -18.167 | 69.639 | 1.00 | 0.00 | H |
| ATOM | 675 | H5'1 | C B | 3 | -25.541 | -13.639 | 71.113 | 1.00 | 0.00 | H |
| ATOM | 676 | H5'2 | C B | 3 | -26.057 | -13.312 | 69.445 | 1.00 | 0.00 | H |



|      |     |      |     |   |         |         |        |      |      |   |
|------|-----|------|-----|---|---------|---------|--------|------|------|---|
| ATOM | 677 | C1'  | C B | 4 | -24.478 | -22.009 | 70.815 | 1.00 | 0.00 | C |
| ATOM | 678 | N1   | C B | 4 | -25.583 | -21.544 | 71.696 | 1.00 | 0.00 | N |
| ATOM | 679 | C2   | C B | 4 | -25.576 | -21.956 | 73.027 | 1.00 | 0.00 | C |
| ATOM | 680 | O2   | C B | 4 | -24.657 | -22.686 | 73.421 | 1.00 | 0.00 | O |
| ATOM | 681 | N3   | C B | 4 | -26.573 | -21.544 | 73.845 | 1.00 | 0.00 | N |
| ATOM | 682 | C4   | C B | 4 | -27.556 | -20.754 | 73.390 | 1.00 | 0.00 | C |
| ATOM | 683 | N4   | C B | 4 | -28.506 | -20.378 | 74.235 | 1.00 | 0.00 | N |
| ATOM | 684 | C5   | C B | 4 | -27.593 | -20.318 | 72.025 | 1.00 | 0.00 | C |
| ATOM | 685 | C6   | C B | 4 | -26.574 | -20.743 | 71.219 | 1.00 | 0.00 | C |
| ATOM | 686 | C2'  | C B | 4 | -24.921 | -22.338 | 69.396 | 1.00 | 0.00 | C |
| ATOM | 687 | C3'  | C B | 4 | -23.720 | -21.887 | 68.578 | 1.00 | 0.00 | C |
| ATOM | 688 | O3'  | C B | 4 | -22.752 | -22.934 | 68.551 | 1.00 | 0.00 | O |
| ATOM | 689 | C4'  | C B | 4 | -23.227 | -20.663 | 69.345 | 1.00 | 0.00 | C |
| ATOM | 690 | O4'  | C B | 4 | -23.518 | -20.971 | 70.745 | 1.00 | 0.00 | O |
| ATOM | 691 | C5'  | C B | 4 | -23.876 | -19.344 | 68.995 | 1.00 | 0.00 | C |
| ATOM | 692 | O5'  | C B | 4 | -25.281 | -19.553 | 68.705 | 1.00 | 0.00 | O |
| ATOM | 693 | O1P  | C B | 4 | -25.461 | -18.990 | 66.259 | 1.00 | 0.00 | O |
| ATOM | 694 | O2P  | C B | 4 | -27.452 | -18.709 | 67.761 | 1.00 | 0.00 | O |
| ATOM | 695 | P    | C B | 4 | -25.979 | -18.643 | 67.597 | 1.00 | 0.00 | P |
| ATOM | 696 | H5   | C B | 4 | -28.393 | -19.683 | 71.647 | 1.00 | 0.00 | H |
| ATOM | 697 | H6   | C B | 4 | -26.555 | -20.432 | 70.175 | 1.00 | 0.00 | H |
| ATOM | 698 | H1'  | C B | 4 | -24.006 | -22.871 | 71.287 | 1.00 | 0.00 | H |
| ATOM | 699 | H3'  | C B | 4 | -23.998 | -21.626 | 67.557 | 1.00 | 0.00 | H |
| ATOM | 700 | H4'  | C B | 4 | -22.158 | -20.571 | 69.143 | 1.00 | 0.00 | H |
| ATOM | 701 | H41  | C B | 4 | -29.271 | -19.768 | 73.912 | 1.00 | 0.00 | H |
| ATOM | 702 | H42  | C B | 4 | -28.478 | -20.694 | 75.216 | 1.00 | 0.00 | H |
| ATOM | 703 | H2'1 | C B | 4 | -25.822 | -21.799 | 69.108 | 1.00 | 0.00 | H |
| ATOM | 704 | H2'2 | C B | 4 | -25.116 | -23.402 | 69.260 | 1.00 | 0.00 | H |
| ATOM | 705 | H5'1 | C B | 4 | -23.770 | -18.658 | 69.836 | 1.00 | 0.00 | H |
| ATOM | 706 | H5'2 | C B | 4 | -23.379 | -18.922 | 68.123 | 1.00 | 0.00 | H |
| ATOM | 707 | C1'  | G B | 5 | -24.224 | -26.627 | 72.586 | 1.00 | 0.00 | C |
| ATOM | 708 | N1   | G B | 5 | -28.139 | -25.123 | 75.491 | 1.00 | 0.00 | N |
| ATOM | 709 | C2   | G B | 5 | -27.025 | -25.876 | 75.821 | 1.00 | 0.00 | C |
| ATOM | 710 | N2   | G B | 5 | -26.944 | -26.283 | 77.094 | 1.00 | 0.00 | N |
| ATOM | 711 | N3   | G B | 5 | -26.068 | -26.194 | 74.951 | 1.00 | 0.00 | N |
| ATOM | 712 | C4   | G B | 5 | -26.316 | -25.704 | 73.708 | 1.00 | 0.00 | C |
| ATOM | 713 | C5   | G B | 5 | -27.399 | -24.950 | 73.287 | 1.00 | 0.00 | C |
| ATOM | 714 | C6   | G B | 5 | -28.413 | -24.608 | 74.209 | 1.00 | 0.00 | C |
| ATOM | 715 | O6   | G B | 5 | -29.439 | -23.953 | 74.028 | 1.00 | 0.00 | O |
| ATOM | 716 | N7   | G B | 5 | -27.277 | -24.649 | 71.928 | 1.00 | 0.00 | N |
| ATOM | 717 | C8   | G B | 5 | -26.150 | -25.214 | 71.577 | 1.00 | 0.00 | C |
| ATOM | 718 | N9   | G B | 5 | -25.509 | -25.876 | 72.605 | 1.00 | 0.00 | N |
| ATOM | 719 | C2'  | G B | 5 | -23.997 | -27.420 | 71.306 | 1.00 | 0.00 | C |
| ATOM | 720 | C3'  | G B | 5 | -22.494 | -27.292 | 71.115 | 1.00 | 0.00 | C |
| ATOM | 721 | O3'  | G B | 5 | -21.838 | -28.294 | 71.889 | 1.00 | 0.00 | O |
| ATOM | 722 | C4'  | G B | 5 | -22.205 | -25.884 | 71.629 | 1.00 | 0.00 | C |
| ATOM | 723 | O4'  | G B | 5 | -23.173 | -25.689 | 72.710 | 1.00 | 0.00 | O |
| ATOM | 724 | C5'  | G B | 5 | -22.360 | -24.760 | 70.633 | 1.00 | 0.00 | C |
| ATOM | 725 | O5'  | G B | 5 | -23.474 | -25.039 | 69.748 | 1.00 | 0.00 | O |
| ATOM | 726 | O1P  | G B | 5 | -22.374 | -25.352 | 67.506 | 1.00 | 0.00 | O |
| ATOM | 727 | O2P  | G B | 5 | -24.747 | -24.549 | 67.638 | 1.00 | 0.00 | O |
| ATOM | 728 | P    | G B | 5 | -23.388 | -24.559 | 68.230 | 1.00 | 0.00 | P |
| ATOM | 729 | H1   | G B | 5 | -28.818 | -24.925 | 76.241 | 1.00 | 0.00 | H |
| ATOM | 730 | H8   | G B | 5 | -25.752 | -25.168 | 70.564 | 1.00 | 0.00 | H |

|      |     |      |     |   |         |         |        |      |      |   |
|------|-----|------|-----|---|---------|---------|--------|------|------|---|
| ATOM | 731 | H1'  | G B | 5 | -24.196 | -27.279 | 73.458 | 1.00 | 0.00 | H |
| ATOM | 732 | H21  | G B | 5 | -27.686 | -26.029 | 77.762 | 1.00 | 0.00 | H |
| ATOM | 733 | H3'  | G B | 5 | -22.204 | -27.397 | 70.070 | 1.00 | 0.00 | H |
| ATOM | 734 | H22  | G B | 5 | -26.143 | -26.850 | 77.403 | 1.00 | 0.00 | H |
| ATOM | 735 | H4'  | G B | 5 | -21.173 | -25.879 | 71.978 | 1.00 | 0.00 | H |
| ATOM | 736 | H2'1 | G B | 5 | -24.541 | -27.003 | 70.458 | 1.00 | 0.00 | H |
| ATOM | 737 | H2'2 | G B | 5 | -24.297 | -28.464 | 71.407 | 1.00 | 0.00 | H |
| ATOM | 738 | H5'1 | G B | 5 | -22.540 | -23.828 | 71.169 | 1.00 | 0.00 | H |
| ATOM | 739 | H5'2 | G B | 5 | -21.442 | -24.668 | 70.051 | 1.00 | 0.00 | H |
| ATOM | 740 | C1'  | T B | 6 | -25.644 | -30.365 | 75.504 | 1.00 | 0.00 | C |
| ATOM | 741 | N1   | T B | 6 | -26.645 | -29.637 | 74.680 | 1.00 | 0.00 | N |
| ATOM | 742 | C2   | T B | 6 | -27.771 | -29.167 | 75.326 | 1.00 | 0.00 | C |
| ATOM | 743 | O2   | T B | 6 | -27.963 | -29.326 | 76.518 | 1.00 | 0.00 | O |
| ATOM | 744 | N3   | T B | 6 | -28.674 | -28.495 | 74.521 | 1.00 | 0.00 | N |
| ATOM | 745 | C4   | T B | 6 | -28.556 | -28.263 | 73.167 | 1.00 | 0.00 | C |
| ATOM | 746 | O4   | T B | 6 | -29.435 | -27.651 | 72.550 | 1.00 | 0.00 | O |
| ATOM | 747 | C5   | T B | 6 | -27.347 | -28.792 | 72.582 | 1.00 | 0.00 | C |
| ATOM | 748 | C6   | T B | 6 | -26.443 | -29.450 | 73.334 | 1.00 | 0.00 | C |
| ATOM | 749 | C7   | T B | 6 | -27.175 | -28.560 | 71.109 | 1.00 | 0.00 | C |
| ATOM | 750 | C2'  | T B | 6 | -25.000 | -31.546 | 74.787 | 1.00 | 0.00 | C |
| ATOM | 751 | C3'  | T B | 6 | -23.579 | -31.505 | 75.325 | 1.00 | 0.00 | C |
| ATOM | 752 | O3'  | T B | 6 | -23.529 | -32.196 | 76.571 | 1.00 | 0.00 | O |
| ATOM | 753 | C4'  | T B | 6 | -23.315 | -30.009 | 75.483 | 1.00 | 0.00 | C |
| ATOM | 754 | O4'  | T B | 6 | -24.620 | -29.451 | 75.845 | 1.00 | 0.00 | O |
| ATOM | 755 | C5'  | T B | 6 | -22.804 | -29.284 | 74.259 | 1.00 | 0.00 | C |
| ATOM | 756 | O5'  | T B | 6 | -23.425 | -29.833 | 73.069 | 1.00 | 0.00 | O |
| ATOM | 757 | O1P  | T B | 6 | -21.498 | -30.895 | 71.846 | 1.00 | 0.00 | O |
| ATOM | 758 | O2P  | T B | 6 | -23.495 | -30.068 | 70.569 | 1.00 | 0.00 | O |
| ATOM | 759 | P    | T B | 6 | -22.577 | -29.893 | 71.720 | 1.00 | 0.00 | P |
| ATOM | 760 | H3   | T B | 6 | -29.522 | -28.131 | 74.981 | 1.00 | 0.00 | H |
| ATOM | 761 | H6   | T B | 6 | -25.538 | -29.840 | 72.869 | 1.00 | 0.00 | H |
| ATOM | 762 | H1'  | T B | 6 | -26.128 | -30.685 | 76.426 | 1.00 | 0.00 | H |
| ATOM | 763 | H3'  | T B | 6 | -22.868 | -31.959 | 74.634 | 1.00 | 0.00 | H |
| ATOM | 764 | H4'  | T B | 6 | -22.570 | -29.900 | 76.271 | 1.00 | 0.00 | H |
| ATOM | 765 | H71  | T B | 6 | -27.200 | -29.515 | 70.586 | 1.00 | 0.00 | H |
| ATOM | 766 | H72  | T B | 6 | -27.981 | -27.923 | 70.745 | 1.00 | 0.00 | H |
| ATOM | 767 | H73  | T B | 6 | -26.216 | -28.073 | 70.927 | 1.00 | 0.00 | H |
| ATOM | 768 | H2'1 | T B | 6 | -25.019 | -31.431 | 73.705 | 1.00 | 0.00 | H |
| ATOM | 769 | H2'2 | T B | 6 | -25.488 | -32.490 | 75.027 | 1.00 | 0.00 | H |
| ATOM | 770 | H5'1 | T B | 6 | -23.043 | -28.224 | 74.344 | 1.00 | 0.00 | H |
| ATOM | 771 | H5'2 | T B | 6 | -21.723 | -29.405 | 74.200 | 1.00 | 0.00 | H |
| ATOM | 772 | C1'  | C B | 7 | -28.952 | -32.831 | 78.267 | 1.00 | 0.00 | C |
| ATOM | 773 | N1   | C B | 7 | -29.282 | -32.430 | 76.870 | 1.00 | 0.00 | N |
| ATOM | 774 | C2   | C B | 7 | -30.476 | -31.746 | 76.654 | 1.00 | 0.00 | C |
| ATOM | 775 | O2   | C B | 7 | -31.208 | -31.499 | 77.622 | 1.00 | 0.00 | O |
| ATOM | 776 | N3   | C B | 7 | -30.795 | -31.372 | 75.390 | 1.00 | 0.00 | N |
| ATOM | 777 | C4   | C B | 7 | -29.983 | -31.654 | 74.363 | 1.00 | 0.00 | C |
| ATOM | 778 | N4   | C B | 7 | -30.343 | -31.262 | 73.151 | 1.00 | 0.00 | N |
| ATOM | 779 | C5   | C B | 7 | -28.751 | -32.361 | 74.556 | 1.00 | 0.00 | C |
| ATOM | 780 | C6   | C B | 7 | -28.447 | -32.722 | 75.838 | 1.00 | 0.00 | C |
| ATOM | 781 | C2'  | C B | 7 | -28.282 | -34.193 | 78.372 | 1.00 | 0.00 | C |
| ATOM | 782 | C3'  | C B | 7 | -27.309 | -33.979 | 79.521 | 1.00 | 0.00 | C |
| ATOM | 783 | O3'  | C B | 7 | -27.990 | -34.185 | 80.755 | 1.00 | 0.00 | O |
| ATOM | 784 | C4'  | C B | 7 | -26.877 | -32.527 | 79.335 | 1.00 | 0.00 | C |

|      |     |      |     |   |         |         |        |      |      |   |
|------|-----|------|-----|---|---------|---------|--------|------|------|---|
| ATOM | 785 | O4'  | C B | 7 | -28.063 | -31.864 | 78.793 | 1.00 | 0.00 | O |
| ATOM | 786 | C5'  | C B | 7 | -25.717 | -32.285 | 78.396 | 1.00 | 0.00 | C |
| ATOM | 787 | O5'  | C B | 7 | -25.786 | -33.213 | 77.285 | 1.00 | 0.00 | O |
| ATOM | 788 | O1P  | C B | 7 | -23.749 | -34.655 | 77.601 | 1.00 | 0.00 | O |
| ATOM | 789 | O2P  | C B | 7 | -24.699 | -34.315 | 75.306 | 1.00 | 0.00 | O |
| ATOM | 790 | P    | C B | 7 | -24.427 | -33.753 | 76.650 | 1.00 | 0.00 | P |
| ATOM | 791 | H5   | C B | 7 | -28.091 | -32.599 | 73.722 | 1.00 | 0.00 | H |
| ATOM | 792 | H6   | C B | 7 | -27.518 | -33.256 | 76.036 | 1.00 | 0.00 | H |
| ATOM | 793 | H1'  | C B | 7 | -29.868 | -32.799 | 78.856 | 1.00 | 0.00 | H |
| ATOM | 794 | H3'  | C B | 7 | -26.453 | -34.654 | 79.464 | 1.00 | 0.00 | H |
| ATOM | 795 | H4'  | C B | 7 | -26.590 | -32.152 | 80.317 | 1.00 | 0.00 | H |
| ATOM | 796 | H41  | C B | 7 | -29.735 | -31.463 | 72.343 | 1.00 | 0.00 | H |
| ATOM | 797 | H42  | C B | 7 | -31.231 | -30.756 | 73.014 | 1.00 | 0.00 | H |
| ATOM | 798 | H2'1 | C B | 7 | -27.760 | -34.469 | 77.457 | 1.00 | 0.00 | H |
| ATOM | 799 | H2'2 | C B | 7 | -28.992 | -34.988 | 78.596 | 1.00 | 0.00 | H |
| ATOM | 800 | H5'1 | C B | 7 | -25.765 | -31.261 | 78.024 | 1.00 | 0.00 | H |
| ATOM | 801 | H5'2 | C B | 7 | -24.783 | -32.428 | 78.936 | 1.00 | 0.00 | H |
| ATOM | 802 | C1'  | C B | 8 | -33.532 | -34.172 | 79.590 | 1.00 | 0.00 | C |
| ATOM | 803 | N1   | C B | 8 | -33.094 | -34.275 | 78.171 | 1.00 | 0.00 | N |
| ATOM | 804 | C2   | C B | 8 | -33.902 | -33.696 | 77.194 | 1.00 | 0.00 | C |
| ATOM | 805 | O2   | C B | 8 | -34.942 | -33.124 | 77.544 | 1.00 | 0.00 | O |
| ATOM | 806 | N3   | C B | 8 | -33.520 | -33.778 | 75.897 | 1.00 | 0.00 | N |
| ATOM | 807 | C4   | C B | 8 | -32.388 | -34.404 | 75.551 | 1.00 | 0.00 | C |
| ATOM | 808 | N4   | C B | 8 | -32.061 | -34.451 | 74.266 | 1.00 | 0.00 | N |
| ATOM | 809 | C5   | C B | 8 | -31.539 | -35.014 | 76.531 | 1.00 | 0.00 | C |
| ATOM | 810 | C6   | C B | 8 | -31.941 | -34.914 | 77.834 | 1.00 | 0.00 | C |
| ATOM | 811 | C2'  | C B | 8 | -33.247 | -35.422 | 80.412 | 1.00 | 0.00 | C |
| ATOM | 812 | C3'  | C B | 8 | -32.903 | -34.835 | 81.772 | 1.00 | 0.00 | C |
| ATOM | 813 | O3'  | C B | 8 | -34.107 | -34.595 | 82.496 | 1.00 | 0.00 | O |
| ATOM | 814 | C4'  | C B | 8 | -32.180 | -33.539 | 81.410 | 1.00 | 0.00 | C |
| ATOM | 815 | O4'  | C B | 8 | -32.834 | -33.092 | 80.179 | 1.00 | 0.00 | O |
| ATOM | 816 | C5'  | C B | 8 | -30.695 | -33.647 | 81.156 | 1.00 | 0.00 | C |
| ATOM | 817 | O5'  | C B | 8 | -30.402 | -34.901 | 80.487 | 1.00 | 0.00 | O |
| ATOM | 818 | O1P  | C B | 8 | -29.048 | -36.166 | 82.192 | 1.00 | 0.00 | O |
| ATOM | 819 | O2P  | C B | 8 | -28.735 | -36.628 | 79.746 | 1.00 | 0.00 | O |
| ATOM | 820 | P    | C B | 8 | -29.028 | -35.639 | 80.812 | 1.00 | 0.00 | P |
| ATOM | 821 | H5   | C B | 8 | -30.620 | -35.531 | 76.255 | 1.00 | 0.00 | H |
| ATOM | 822 | H6   | C B | 8 | -31.324 | -35.355 | 78.618 | 1.00 | 0.00 | H |
| ATOM | 823 | H1'  | C B | 8 | -34.595 | -33.931 | 79.601 | 1.00 | 0.00 | H |
| ATOM | 824 | H3'  | C B | 8 | -32.259 | -35.496 | 82.351 | 1.00 | 0.00 | H |
| ATOM | 825 | H4'  | C B | 8 | -32.324 | -32.852 | 82.243 | 1.00 | 0.00 | H |
| ATOM | 826 | H41  | C B | 8 | -31.194 | -34.925 | 73.973 | 1.00 | 0.00 | H |
| ATOM | 827 | H42  | C B | 8 | -32.674 | -34.015 | 73.562 | 1.00 | 0.00 | H |
| ATOM | 828 | H2'1 | C B | 8 | -32.417 | -36.002 | 80.009 | 1.00 | 0.00 | H |
| ATOM | 829 | H2'2 | C B | 8 | -34.111 | -36.084 | 80.472 | 1.00 | 0.00 | H |
| ATOM | 830 | H5'1 | C B | 8 | -30.376 | -32.814 | 80.528 | 1.00 | 0.00 | H |
| ATOM | 831 | H5'2 | C B | 8 | -30.165 | -33.603 | 82.106 | 1.00 | 0.00 | H |
| ATOM | 832 | C1'  | T B | 9 | -38.356 | -34.935 | 78.789 | 1.00 | 0.00 | C |
| ATOM | 833 | N1   | T B | 9 | -37.345 | -35.516 | 77.867 | 1.00 | 0.00 | N |
| ATOM | 834 | C2   | T B | 9 | -37.515 | -35.283 | 76.518 | 1.00 | 0.00 | C |
| ATOM | 835 | O2   | T B | 9 | -38.446 | -34.634 | 76.074 | 1.00 | 0.00 | O |
| ATOM | 836 | N3   | T B | 9 | -36.552 | -35.840 | 75.697 | 1.00 | 0.00 | N |
| ATOM | 837 | C4   | T B | 9 | -35.467 | -36.589 | 76.097 | 1.00 | 0.00 | C |
| ATOM | 838 | O4   | T B | 9 | -34.669 | -37.040 | 75.266 | 1.00 | 0.00 | O |

|      |     |      |     |    |         |         |        |      |      |   |
|------|-----|------|-----|----|---------|---------|--------|------|------|---|
| ATOM | 839 | C5   | T B | 9  | -35.372 | -36.778 | 77.526 | 1.00 | 0.00 | C |
| ATOM | 840 | C6   | T B | 9  | -36.293 | -36.249 | 78.355 | 1.00 | 0.00 | C |
| ATOM | 841 | C7   | T B | 9  | -34.204 | -37.587 | 78.004 | 1.00 | 0.00 | C |
| ATOM | 842 | C2'  | T B | 9  | -38.702 | -35.836 | 79.970 | 1.00 | 0.00 | C |
| ATOM | 843 | C3'  | T B | 9  | -38.921 | -34.826 | 81.086 | 1.00 | 0.00 | C |
| ATOM | 844 | O3'  | T B | 9  | -40.261 | -34.344 | 81.024 | 1.00 | 0.00 | O |
| ATOM | 845 | C4'  | T B | 9  | -37.899 | -33.738 | 80.766 | 1.00 | 0.00 | C |
| ATOM | 846 | O4'  | T B | 9  | -37.830 | -33.726 | 79.304 | 1.00 | 0.00 | O |
| ATOM | 847 | C5'  | T B | 9  | -36.506 | -33.941 | 81.315 | 1.00 | 0.00 | C |
| ATOM | 848 | O5'  | T B | 9  | -36.164 | -35.351 | 81.273 | 1.00 | 0.00 | O |
| ATOM | 849 | O1P  | T B | 9  | -35.983 | -35.979 | 83.702 | 1.00 | 0.00 | O |
| ATOM | 850 | O2P  | T B | 9  | -34.672 | -37.244 | 81.977 | 1.00 | 0.00 | O |
| ATOM | 851 | P    | T B | 9  | -35.242 | -35.951 | 82.424 | 1.00 | 0.00 | P |
| ATOM | 852 | H3   | T B | 9  | -36.654 | -35.677 | 74.686 | 1.00 | 0.00 | H |
| ATOM | 853 | H6   | T B | 9  | -36.200 | -36.407 | 79.429 | 1.00 | 0.00 | H |
| ATOM | 854 | H1'  | T B | 9  | -39.248 | -34.692 | 78.211 | 1.00 | 0.00 | H |
| ATOM | 855 | H3'  | T B | 9  | -38.738 | -35.261 | 82.068 | 1.00 | 0.00 | H |
| ATOM | 856 | H4'  | T B | 9  | -38.288 | -32.807 | 81.182 | 1.00 | 0.00 | H |
| ATOM | 857 | H71  | T B | 9  | -34.561 | -38.515 | 78.452 | 1.00 | 0.00 | H |
| ATOM | 858 | H72  | T B | 9  | -33.550 | -37.818 | 77.162 | 1.00 | 0.00 | H |
| ATOM | 859 | H73  | T B | 9  | -33.647 | -37.017 | 78.749 | 1.00 | 0.00 | H |
| ATOM | 860 | H2'1 | T B | 9  | -37.895 | -36.526 | 80.212 | 1.00 | 0.00 | H |
| ATOM | 861 | H2'2 | T B | 9  | -39.598 | -36.429 | 79.788 | 1.00 | 0.00 | H |
| ATOM | 862 | H5'1 | T B | 9  | -35.797 | -33.372 | 80.713 | 1.00 | 0.00 | H |
| ATOM | 863 | H5'2 | T B | 9  | -36.472 | -33.585 | 82.342 | 1.00 | 0.00 | H |
| ATOM | 864 | C1'  | A B | 10 | -42.296 | -35.876 | 75.921 | 1.00 | 0.00 | C |
| ATOM | 865 | N1   | A B | 10 | -38.826 | -38.070 | 72.841 | 1.00 | 0.00 | N |
| ATOM | 866 | C2   | A B | 10 | -39.872 | -37.282 | 72.601 | 1.00 | 0.00 | C |
| ATOM | 867 | N3   | A B | 10 | -40.726 | -36.747 | 73.447 | 1.00 | 0.00 | N |
| ATOM | 868 | C4   | A B | 10 | -40.425 | -37.107 | 74.706 | 1.00 | 0.00 | C |
| ATOM | 869 | C5   | A B | 10 | -39.393 | -37.905 | 75.119 | 1.00 | 0.00 | C |
| ATOM | 870 | C6   | A B | 10 | -38.549 | -38.411 | 74.109 | 1.00 | 0.00 | C |
| ATOM | 871 | N6   | A B | 10 | -37.496 | -39.207 | 74.365 | 1.00 | 0.00 | N |
| ATOM | 872 | N7   | A B | 10 | -39.396 | -38.053 | 76.495 | 1.00 | 0.00 | N |
| ATOM | 873 | C8   | A B | 10 | -40.421 | -37.353 | 76.882 | 1.00 | 0.00 | C |
| ATOM | 874 | N9   | A B | 10 | -41.092 | -36.747 | 75.852 | 1.00 | 0.00 | N |
| ATOM | 875 | C2'  | A B | 10 | -43.306 | -36.310 | 76.975 | 1.00 | 0.00 | C |
| ATOM | 876 | C3'  | A B | 10 | -43.840 | -34.976 | 77.474 | 1.00 | 0.00 | C |
| ATOM | 877 | O3'  | A B | 10 | -44.882 | -34.536 | 76.607 | 1.00 | 0.00 | O |
| ATOM | 878 | C4'  | A B | 10 | -42.610 | -34.071 | 77.401 | 1.00 | 0.00 | C |
| ATOM | 879 | O4'  | A B | 10 | -41.863 | -34.568 | 76.244 | 1.00 | 0.00 | O |
| ATOM | 880 | C5'  | A B | 10 | -41.698 | -34.080 | 78.606 | 1.00 | 0.00 | C |
| ATOM | 881 | O5'  | A B | 10 | -41.633 | -35.419 | 79.161 | 1.00 | 0.00 | O |
| ATOM | 882 | O1P  | A B | 10 | -42.726 | -35.167 | 81.415 | 1.00 | 0.00 | O |
| ATOM | 883 | O2P  | A B | 10 | -41.011 | -36.961 | 81.045 | 1.00 | 0.00 | O |
| ATOM | 884 | P    | A B | 10 | -41.483 | -35.588 | 80.740 | 1.00 | 0.00 | P |
| ATOM | 885 | H2   | A B | 10 | -40.044 | -37.046 | 71.552 | 1.00 | 0.00 | H |
| ATOM | 886 | H8   | A B | 10 | -40.719 | -37.258 | 77.926 | 1.00 | 0.00 | H |
| ATOM | 887 | H1'  | A B | 10 | -42.753 | -35.845 | 74.933 | 1.00 | 0.00 | H |
| ATOM | 888 | H3'  | A B | 10 | -44.218 | -35.043 | 78.493 | 1.00 | 0.00 | H |
| ATOM | 889 | H4'  | A B | 10 | -42.973 | -33.053 | 77.268 | 1.00 | 0.00 | H |
| ATOM | 890 | H61  | A B | 10 | -36.910 | -39.547 | 73.590 | 1.00 | 0.00 | H |
| ATOM | 891 | H62  | A B | 10 | -37.277 | -39.475 | 75.334 | 1.00 | 0.00 | H |
| ATOM | 892 | H2'1 | A B | 10 | -42.845 | -36.879 | 77.783 | 1.00 | 0.00 | H |

|      |     |      |     |    |         |         |        |      |      |   |
|------|-----|------|-----|----|---------|---------|--------|------|------|---|
| ATOM | 893 | H2'2 | A B | 10 | -44.104 | -36.924 | 76.555 | 1.00 | 0.00 | H |
| ATOM | 894 | H5'1 | A B | 10 | -40.701 | -33.760 | 78.303 | 1.00 | 0.00 | H |
| ATOM | 895 | H5'2 | A B | 10 | -42.085 | -33.391 | 79.354 | 1.00 | 0.00 | H |
| ATOM | 896 | C1'  | G B | 11 | -44.515 | -37.725 | 71.884 | 1.00 | 0.00 | C |
| ATOM | 897 | N1   | G B | 11 | -40.494 | -40.864 | 71.787 | 1.00 | 0.00 | N |
| ATOM | 898 | C2   | G B | 11 | -41.126 | -40.197 | 70.752 | 1.00 | 0.00 | C |
| ATOM | 899 | N2   | G B | 11 | -40.620 | -40.396 | 69.528 | 1.00 | 0.00 | N |
| ATOM | 900 | N3   | G B | 11 | -42.177 | -39.397 | 70.925 | 1.00 | 0.00 | N |
| ATOM | 901 | C4   | G B | 11 | -42.559 | -39.319 | 72.226 | 1.00 | 0.00 | C |
| ATOM | 902 | C5   | G B | 11 | -41.993 | -39.949 | 73.321 | 1.00 | 0.00 | C |
| ATOM | 903 | C6   | G B | 11 | -40.875 | -40.796 | 73.141 | 1.00 | 0.00 | C |
| ATOM | 904 | O6   | G B | 11 | -40.242 | -41.437 | 73.980 | 1.00 | 0.00 | O |
| ATOM | 905 | N7   | G B | 11 | -42.685 | -39.608 | 74.486 | 1.00 | 0.00 | N |
| ATOM | 906 | C8   | G B | 11 | -43.623 | -38.797 | 74.069 | 1.00 | 0.00 | C |
| ATOM | 907 | N9   | G B | 11 | -43.612 | -38.574 | 72.708 | 1.00 | 0.00 | N |
| ATOM | 908 | C2'  | G B | 11 | -45.968 | -37.752 | 72.340 | 1.00 | 0.00 | C |
| ATOM | 909 | C3'  | G B | 11 | -46.411 | -36.323 | 72.069 | 1.00 | 0.00 | C |
| ATOM | 910 | O3'  | G B | 11 | -46.810 | -36.209 | 70.705 | 1.00 | 0.00 | O |
| ATOM | 911 | C4'  | G B | 11 | -45.154 | -35.512 | 72.372 | 1.00 | 0.00 | C |
| ATOM | 912 | O4'  | G B | 11 | -44.053 | -36.392 | 71.974 | 1.00 | 0.00 | O |
| ATOM | 913 | C5'  | G B | 11 | -44.950 | -35.104 | 73.812 | 1.00 | 0.00 | C |
| ATOM | 914 | O5'  | G B | 11 | -45.412 | -36.160 | 74.691 | 1.00 | 0.00 | O |
| ATOM | 915 | O1P  | G B | 11 | -47.379 | -35.120 | 75.866 | 1.00 | 0.00 | O |
| ATOM | 916 | O2P  | G B | 11 | -46.068 | -36.942 | 76.986 | 1.00 | 0.00 | O |
| ATOM | 917 | P    | G B | 11 | -46.070 | -35.762 | 76.088 | 1.00 | 0.00 | P |
| ATOM | 918 | H1   | G B | 11 | -39.684 | -41.455 | 71.547 | 1.00 | 0.00 | H |
| ATOM | 919 | H8   | G B | 11 | -44.351 | -38.339 | 74.738 | 1.00 | 0.00 | H |
| ATOM | 920 | H1'  | G B | 11 | -44.426 | -38.041 | 70.844 | 1.00 | 0.00 | H |
| ATOM | 921 | H21  | G B | 11 | -39.805 | -41.012 | 69.403 | 1.00 | 0.00 | H |
| ATOM | 922 | H3'  | G B | 11 | -47.238 | -36.022 | 72.712 | 1.00 | 0.00 | H |
| ATOM | 923 | H22  | G B | 11 | -41.047 | -39.931 | 68.713 | 1.00 | 0.00 | H |
| ATOM | 924 | H4'  | G B | 11 | -45.210 | -34.603 | 71.773 | 1.00 | 0.00 | H |
| ATOM | 925 | H2'1 | G B | 11 | -46.064 | -38.003 | 73.396 | 1.00 | 0.00 | H |
| ATOM | 926 | H2'2 | G B | 11 | -46.565 | -38.468 | 71.776 | 1.00 | 0.00 | H |
| ATOM | 927 | H5'1 | G B | 11 | -43.890 | -34.918 | 73.984 | 1.00 | 0.00 | H |
| ATOM | 928 | H5'2 | G B | 11 | -45.510 | -34.190 | 74.006 | 1.00 | 0.00 | H |
| ATOM | 929 | C1'  | G B | 12 | -44.901 | -40.818 | 68.035 | 1.00 | 0.00 | C |
| ATOM | 930 | N1   | G B | 12 | -41.942 | -43.837 | 70.894 | 1.00 | 0.00 | N |
| ATOM | 931 | C2   | G B | 12 | -41.885 | -43.562 | 69.538 | 1.00 | 0.00 | C |
| ATOM | 932 | N2   | G B | 12 | -40.911 | -44.174 | 68.853 | 1.00 | 0.00 | N |
| ATOM | 933 | N3   | G B | 12 | -42.730 | -42.741 | 68.917 | 1.00 | 0.00 | N |
| ATOM | 934 | C4   | G B | 12 | -43.656 | -42.217 | 69.763 | 1.00 | 0.00 | C |
| ATOM | 935 | C5   | G B | 12 | -43.792 | -42.435 | 71.123 | 1.00 | 0.00 | C |
| ATOM | 936 | C6   | G B | 12 | -42.893 | -43.302 | 71.784 | 1.00 | 0.00 | C |
| ATOM | 937 | O6   | G B | 12 | -42.853 | -43.620 | 72.973 | 1.00 | 0.00 | O |
| ATOM | 938 | N7   | G B | 12 | -44.873 | -41.705 | 71.623 | 1.00 | 0.00 | N |
| ATOM | 939 | C8   | G B | 12 | -45.344 | -41.080 | 70.576 | 1.00 | 0.00 | C |
| ATOM | 940 | N9   | G B | 12 | -44.658 | -41.340 | 69.408 | 1.00 | 0.00 | N |
| ATOM | 941 | C2'  | G B | 12 | -46.375 | -40.672 | 67.687 | 1.00 | 0.00 | C |
| ATOM | 942 | C3'  | G B | 12 | -46.376 | -39.420 | 66.822 | 1.00 | 0.00 | C |
| ATOM | 943 | O3'  | G B | 12 | -46.062 | -39.779 | 65.479 | 1.00 | 0.00 | O |
| ATOM | 944 | C4'  | G B | 12 | -45.282 | -38.566 | 67.462 | 1.00 | 0.00 | C |
| ATOM | 945 | O4'  | G B | 12 | -44.302 | -39.539 | 67.948 | 1.00 | 0.00 | O |
| ATOM | 946 | C5'  | G B | 12 | -45.704 | -37.689 | 68.616 | 1.00 | 0.00 | C |

|      |      |      |     |    |         |         |        |      |      |   |
|------|------|------|-----|----|---------|---------|--------|------|------|---|
| ATOM | 947  | O5'  | G B | 12 | -46.706 | -38.372 | 69.412 | 1.00 | 0.00 | O |
| ATOM | 948  | O1P  | G B | 12 | -48.770 | -36.972 | 69.076 | 1.00 | 0.00 | O |
| ATOM | 949  | O2P  | G B | 12 | -48.489 | -38.308 | 71.181 | 1.00 | 0.00 | O |
| ATOM | 950  | P    | G B | 12 | -47.857 | -37.510 | 70.102 | 1.00 | 0.00 | P |
| ATOM | 951  | H1   | G B | 12 | -41.235 | -44.481 | 71.279 | 1.00 | 0.00 | H |
| ATOM | 952  | H8   | G B | 12 | -46.204 | -40.410 | 70.621 | 1.00 | 0.00 | H |
| ATOM | 953  | H1'  | G B | 12 | -44.395 | -41.473 | 67.327 | 1.00 | 0.00 | H |
| ATOM | 954  | H21  | G B | 12 | -40.258 | -44.805 | 69.341 | 1.00 | 0.00 | H |
| ATOM | 955  | H3'  | G B | 12 | -47.337 | -38.908 | 66.845 | 1.00 | 0.00 | H |
| ATOM | 956  | H22  | G B | 12 | -40.817 | -44.015 | 67.840 | 1.00 | 0.00 | H |
| ATOM | 957  | H4'  | G B | 12 | -44.887 | -37.919 | 66.680 | 1.00 | 0.00 | H |
| ATOM | 958  | H2'1 | G B | 12 | -46.999 | -40.543 | 68.572 | 1.00 | 0.00 | H |
| ATOM | 959  | H2'2 | G B | 12 | -46.759 | -41.532 | 67.139 | 1.00 | 0.00 | H |
| ATOM | 960  | H5'1 | G B | 12 | -44.835 | -37.465 | 69.233 | 1.00 | 0.00 | H |
| ATOM | 961  | H5'2 | G B | 12 | -46.116 | -36.758 | 68.226 | 1.00 | 0.00 | H |
| ATOM | 962  | C1'  | T B | 13 | -44.003 | -45.033 | 65.599 | 1.00 | 0.00 | C |
| ATOM | 963  | N1   | T B | 13 | -44.506 | -45.069 | 66.998 | 1.00 | 0.00 | N |
| ATOM | 964  | C2   | T B | 13 | -43.809 | -45.851 | 67.899 | 1.00 | 0.00 | C |
| ATOM | 965  | O2   | T B | 13 | -42.821 | -46.493 | 67.588 | 1.00 | 0.00 | O |
| ATOM | 966  | N3   | T B | 13 | -44.312 | -45.854 | 69.187 | 1.00 | 0.00 | N |
| ATOM | 967  | C4   | T B | 13 | -45.420 | -45.170 | 69.641 | 1.00 | 0.00 | C |
| ATOM | 968  | O4   | T B | 13 | -45.777 | -45.254 | 70.821 | 1.00 | 0.00 | O |
| ATOM | 969  | C5   | T B | 13 | -46.081 | -44.380 | 68.627 | 1.00 | 0.00 | C |
| ATOM | 970  | C6   | T B | 13 | -45.619 | -44.351 | 67.362 | 1.00 | 0.00 | C |
| ATOM | 971  | C7   | T B | 13 | -47.290 | -43.615 | 69.076 | 1.00 | 0.00 | C |
| ATOM | 972  | C2'  | T B | 13 | -45.106 | -44.995 | 64.549 | 1.00 | 0.00 | C |
| ATOM | 973  | C3'  | T B | 13 | -44.496 | -44.103 | 63.479 | 1.00 | 0.00 | C |
| ATOM | 974  | O3'  | T B | 13 | -43.671 | -44.894 | 62.627 | 1.00 | 0.00 | O |
| ATOM | 975  | C4'  | T B | 13 | -43.689 | -43.097 | 64.295 | 1.00 | 0.00 | C |
| ATOM | 976  | O4'  | T B | 13 | -43.222 | -43.862 | 65.452 | 1.00 | 0.00 | O |
| ATOM | 977  | C5'  | T B | 13 | -44.434 | -41.879 | 64.790 | 1.00 | 0.00 | C |
| ATOM | 978  | O5'  | T B | 13 | -45.789 | -42.248 | 65.151 | 1.00 | 0.00 | O |
| ATOM | 979  | O1P  | T B | 13 | -47.197 | -41.020 | 63.467 | 1.00 | 0.00 | O |
| ATOM | 980  | O2P  | T B | 13 | -48.142 | -41.580 | 65.723 | 1.00 | 0.00 | O |
| ATOM | 981  | P    | T B | 13 | -46.961 | -41.195 | 64.914 | 1.00 | 0.00 | P |
| ATOM | 982  | H3   | T B | 13 | -43.807 | -46.428 | 69.879 | 1.00 | 0.00 | H |
| ATOM | 983  | H6   | T B | 13 | -46.135 | -43.749 | 66.615 | 1.00 | 0.00 | H |
| ATOM | 984  | H1'  | T B | 13 | -43.350 | -45.892 | 65.448 | 1.00 | 0.00 | H |
| ATOM | 985  | H3'  | T B | 13 | -45.258 | -43.605 | 62.881 | 1.00 | 0.00 | H |
| ATOM | 986  | H4'  | T B | 13 | -42.875 | -42.751 | 63.656 | 1.00 | 0.00 | H |
| ATOM | 987  | H71  | T B | 13 | -48.176 | -44.009 | 68.579 | 1.00 | 0.00 | H |
| ATOM | 988  | H72  | T B | 13 | -47.405 | -43.717 | 70.157 | 1.00 | 0.00 | H |
| ATOM | 989  | H73  | T B | 13 | -47.170 | -42.561 | 68.823 | 1.00 | 0.00 | H |
| ATOM | 990  | H2'1 | T B | 13 | -46.031 | -44.572 | 64.939 | 1.00 | 0.00 | H |
| ATOM | 991  | H2'2 | T B | 13 | -45.339 | -45.985 | 64.157 | 1.00 | 0.00 | H |
| ATOM | 992  | H5'1 | T B | 13 | -43.918 | -41.471 | 65.658 | 1.00 | 0.00 | H |
| ATOM | 993  | H5'2 | T B | 13 | -44.457 | -41.129 | 64.000 | 1.00 | 0.00 | H |
| ATOM | 994  | C1'  | G B | 14 | -42.843 | -49.853 | 65.347 | 1.00 | 0.00 | C |
| ATOM | 995  | N1   | G B | 14 | -44.788 | -50.002 | 70.061 | 1.00 | 0.00 | N |
| ATOM | 996  | C2   | G B | 14 | -43.652 | -50.605 | 69.550 | 1.00 | 0.00 | C |
| ATOM | 997  | N2   | G B | 14 | -42.941 | -51.346 | 70.407 | 1.00 | 0.00 | N |
| ATOM | 998  | N3   | G B | 14 | -43.257 | -50.476 | 68.285 | 1.00 | 0.00 | N |
| ATOM | 999  | C4   | G B | 14 | -44.100 | -49.695 | 67.557 | 1.00 | 0.00 | C |
| ATOM | 1000 | C5   | G B | 14 | -45.254 | -49.059 | 67.979 | 1.00 | 0.00 | C |

|      |      |      |     |    |         |         |        |      |      |   |
|------|------|------|-----|----|---------|---------|--------|------|------|---|
| ATOM | 1001 | C6   | G B | 14 | -45.673 | -49.191 | 69.324 | 1.00 | 0.00 | C |
| ATOM | 1002 | O6   | G B | 14 | -46.659 | -48.708 | 69.881 | 1.00 | 0.00 | O |
| ATOM | 1003 | N7   | G B | 14 | -45.833 | -48.354 | 66.921 | 1.00 | 0.00 | N |
| ATOM | 1004 | C8   | G B | 14 | -45.027 | -48.579 | 65.916 | 1.00 | 0.00 | C |
| ATOM | 1005 | N9   | G B | 14 | -43.951 | -49.386 | 66.223 | 1.00 | 0.00 | N |
| ATOM | 1006 | C2'  | G B | 14 | -43.279 | -50.181 | 63.926 | 1.00 | 0.00 | C |
| ATOM | 1007 | C3'  | G B | 14 | -42.075 | -49.733 | 63.113 | 1.00 | 0.00 | C |
| ATOM | 1008 | O3'  | G B | 14 | -41.110 | -50.782 | 63.090 | 1.00 | 0.00 | O |
| ATOM | 1009 | C4'  | G B | 14 | -41.582 | -48.510 | 63.882 | 1.00 | 0.00 | C |
| ATOM | 1010 | O4'  | G B | 14 | -41.880 | -48.819 | 65.280 | 1.00 | 0.00 | O |
| ATOM | 1011 | C5'  | G B | 14 | -42.226 | -47.190 | 63.530 | 1.00 | 0.00 | C |
| ATOM | 1012 | O5'  | G B | 14 | -43.631 | -47.393 | 63.236 | 1.00 | 0.00 | O |
| ATOM | 1013 | O1P  | G B | 14 | -43.799 | -46.829 | 60.788 | 1.00 | 0.00 | O |
| ATOM | 1014 | O2P  | G B | 14 | -45.794 | -46.544 | 62.282 | 1.00 | 0.00 | O |
| ATOM | 1015 | P    | G B | 14 | -44.321 | -46.481 | 62.123 | 1.00 | 0.00 | P |
| ATOM | 1016 | H1   | G B | 14 | -45.002 | -50.159 | 71.058 | 1.00 | 0.00 | H |
| ATOM | 1017 | H8   | G B | 14 | -45.192 | -48.164 | 64.920 | 1.00 | 0.00 | H |
| ATOM | 1018 | H1'  | G B | 14 | -42.374 | -50.716 | 65.820 | 1.00 | 0.00 | H |
| ATOM | 1019 | H21  | G B | 14 | -43.252 | -51.438 | 71.387 | 1.00 | 0.00 | H |
| ATOM | 1020 | H3'  | G B | 14 | -42.347 | -49.471 | 62.090 | 1.00 | 0.00 | H |
| ATOM | 1021 | H22  | G B | 14 | -42.087 | -51.824 | 70.089 | 1.00 | 0.00 | H |
| ATOM | 1022 | H4'  | G B | 14 | -40.513 | -48.422 | 63.685 | 1.00 | 0.00 | H |
| ATOM | 1023 | H2'1 | G B | 14 | -44.178 | -49.639 | 63.634 | 1.00 | 0.00 | H |
| ATOM | 1024 | H2'2 | G B | 14 | -43.478 | -51.243 | 63.788 | 1.00 | 0.00 | H |
| ATOM | 1025 | H5'1 | G B | 14 | -42.121 | -46.505 | 64.371 | 1.00 | 0.00 | H |
| ATOM | 1026 | H5'2 | G B | 14 | -41.723 | -46.768 | 62.660 | 1.00 | 0.00 | H |
| ATOM | 1027 | C1'  | C B | 15 | -42.587 | -54.472 | 67.118 | 1.00 | 0.00 | C |
| ATOM | 1028 | N1   | C B | 15 | -43.871 | -53.722 | 67.143 | 1.00 | 0.00 | N |
| ATOM | 1029 | C2   | C B | 15 | -44.562 | -53.649 | 68.351 | 1.00 | 0.00 | C |
| ATOM | 1030 | O2   | C B | 15 | -44.081 | -54.207 | 69.347 | 1.00 | 0.00 | O |
| ATOM | 1031 | N3   | C B | 15 | -45.734 | -52.969 | 68.397 | 1.00 | 0.00 | N |
| ATOM | 1032 | C4   | C B | 15 | -46.227 | -52.377 | 67.303 | 1.00 | 0.00 | C |
| ATOM | 1033 | N4   | C B | 15 | -47.376 | -51.723 | 67.404 | 1.00 | 0.00 | N |
| ATOM | 1034 | C5   | C B | 15 | -45.542 | -52.438 | 66.043 | 1.00 | 0.00 | C |
| ATOM | 1035 | C6   | C B | 15 | -44.362 | -53.124 | 66.024 | 1.00 | 0.00 | C |
| ATOM | 1036 | C2'  | C B | 15 | -42.366 | -55.266 | 65.838 | 1.00 | 0.00 | C |
| ATOM | 1037 | C3'  | C B | 15 | -40.864 | -55.137 | 65.639 | 1.00 | 0.00 | C |
| ATOM | 1038 | O3'  | C B | 15 | -40.201 | -56.137 | 66.411 | 1.00 | 0.00 | O |
| ATOM | 1039 | C4'  | C B | 15 | -40.573 | -53.728 | 66.151 | 1.00 | 0.00 | C |
| ATOM | 1040 | O4'  | C B | 15 | -41.536 | -53.531 | 67.236 | 1.00 | 0.00 | O |
| ATOM | 1041 | C5'  | C B | 15 | -40.734 | -52.604 | 65.154 | 1.00 | 0.00 | C |
| ATOM | 1042 | O5'  | C B | 15 | -41.852 | -52.886 | 64.275 | 1.00 | 0.00 | O |
| ATOM | 1043 | O1P  | C B | 15 | -40.763 | -53.200 | 62.027 | 1.00 | 0.00 | O |
| ATOM | 1044 | O2P  | C B | 15 | -43.137 | -52.399 | 62.170 | 1.00 | 0.00 | O |
| ATOM | 1045 | P    | C B | 15 | -41.774 | -52.408 | 62.756 | 1.00 | 0.00 | P |
| ATOM | 1046 | H5   | C B | 15 | -45.945 | -51.962 | 65.150 | 1.00 | 0.00 | H |
| ATOM | 1047 | H6   | C B | 15 | -43.801 | -53.192 | 65.092 | 1.00 | 0.00 | H |
| ATOM | 1048 | H1'  | C B | 15 | -42.555 | -55.123 | 67.992 | 1.00 | 0.00 | H |
| ATOM | 1049 | H3'  | C B | 15 | -40.579 | -55.241 | 64.593 | 1.00 | 0.00 | H |
| ATOM | 1050 | H4'  | C B | 15 | -39.539 | -53.722 | 66.494 | 1.00 | 0.00 | H |
| ATOM | 1051 | H41  | C B | 15 | -47.778 | -51.255 | 66.578 | 1.00 | 0.00 | H |
| ATOM | 1052 | H42  | C B | 15 | -47.867 | -51.683 | 68.309 | 1.00 | 0.00 | H |
| ATOM | 1053 | H2'1 | C B | 15 | -42.914 | -54.851 | 64.993 | 1.00 | 0.00 | H |
| ATOM | 1054 | H2'2 | C B | 15 | -42.665 | -56.310 | 65.941 | 1.00 | 0.00 | H |

|      |      |       |     |    |         |         |        |      |      |   |
|------|------|-------|-----|----|---------|---------|--------|------|------|---|
| ATOM | 1055 | H5 '1 | C B | 15 | -40.912 | -51.672 | 65.690 | 1.00 | 0.00 | H |
| ATOM | 1056 | H5 '2 | C B | 15 | -39.820 | -52.513 | 64.568 | 1.00 | 0.00 | H |
| ATOM | 1057 | C1 '  | G B | 16 | -44.028 | -58.198 | 70.042 | 1.00 | 0.00 | C |
| ATOM | 1058 | N1    | G B | 16 | -48.502 | -55.747 | 70.005 | 1.00 | 0.00 | N |
| ATOM | 1059 | C2    | G B | 16 | -47.829 | -56.351 | 71.051 | 1.00 | 0.00 | C |
| ATOM | 1060 | N2    | G B | 16 | -48.428 | -56.294 | 72.248 | 1.00 | 0.00 | N |
| ATOM | 1061 | N3    | G B | 16 | -46.652 | -56.960 | 70.917 | 1.00 | 0.00 | N |
| ATOM | 1062 | C4    | G B | 16 | -46.197 | -56.926 | 69.637 | 1.00 | 0.00 | C |
| ATOM | 1063 | C5    | G B | 16 | -46.800 | -56.353 | 68.530 | 1.00 | 0.00 | C |
| ATOM | 1064 | C6    | G B | 16 | -48.049 | -55.703 | 68.674 | 1.00 | 0.00 | C |
| ATOM | 1065 | O6    | G B | 16 | -48.733 | -55.140 | 67.817 | 1.00 | 0.00 | O |
| ATOM | 1066 | N7    | G B | 16 | -46.006 | -56.539 | 67.396 | 1.00 | 0.00 | N |
| ATOM | 1067 | C8    | G B | 16 | -44.969 | -57.201 | 67.842 | 1.00 | 0.00 | C |
| ATOM | 1068 | N9    | G B | 16 | -45.014 | -57.475 | 69.195 | 1.00 | 0.00 | N |
| ATOM | 1069 | C2 '  | G B | 16 | -43.377 | -59.387 | 69.347 | 1.00 | 0.00 | C |
| ATOM | 1070 | C3 '  | G B | 16 | -41.964 | -59.347 | 69.907 | 1.00 | 0.00 | C |
| ATOM | 1071 | O3 '  | G B | 16 | -41.938 | -60.026 | 71.160 | 1.00 | 0.00 | O |
| ATOM | 1072 | C4 '  | G B | 16 | -41.700 | -57.850 | 70.057 | 1.00 | 0.00 | C |
| ATOM | 1073 | O4 '  | G B | 16 | -43.007 | -57.285 | 70.393 | 1.00 | 0.00 | O |
| ATOM | 1074 | C5 '  | G B | 16 | -41.166 | -57.137 | 68.838 | 1.00 | 0.00 | C |
| ATOM | 1075 | O5 '  | G B | 16 | -41.766 | -57.694 | 67.641 | 1.00 | 0.00 | O |
| ATOM | 1076 | O1P   | G B | 16 | -39.824 | -58.770 | 66.459 | 1.00 | 0.00 | O |
| ATOM | 1077 | O2P   | G B | 16 | -41.794 | -57.949 | 65.143 | 1.00 | 0.00 | O |
| ATOM | 1078 | P     | G B | 16 | -40.894 | -57.769 | 66.307 | 1.00 | 0.00 | P |
| ATOM | 1079 | H1    | G B | 16 | -49.405 | -55.297 | 70.216 | 1.00 | 0.00 | H |
| ATOM | 1080 | H8    | G B | 16 | -44.143 | -57.510 | 67.202 | 1.00 | 0.00 | H |
| ATOM | 1081 | H1 '  | G B | 16 | -44.531 | -58.510 | 70.959 | 1.00 | 0.00 | H |
| ATOM | 1082 | H21   | G B | 16 | -49.338 | -55.819 | 72.346 | 1.00 | 0.00 | H |
| ATOM | 1083 | H3 '  | G B | 16 | -41.244 | -59.808 | 69.232 | 1.00 | 0.00 | H |
| ATOM | 1084 | H22   | G B | 16 | -47.980 | -56.727 | 73.067 | 1.00 | 0.00 | H |
| ATOM | 1085 | H4 '  | G B | 16 | -40.969 | -57.736 | 70.857 | 1.00 | 0.00 | H |
| ATOM | 1086 | H2 '1 | G B | 16 | -43.377 | -59.281 | 68.262 | 1.00 | 0.00 | H |
| ATOM | 1087 | H2 '2 | G B | 16 | -43.873 | -60.328 | 69.586 | 1.00 | 0.00 | H |
| ATOM | 1088 | H5 '1 | G B | 16 | -41.403 | -56.076 | 68.910 | 1.00 | 0.00 | H |
| ATOM | 1089 | H5 '2 | G B | 16 | -40.083 | -57.261 | 68.798 | 1.00 | 0.00 | H |
| ATOM | 1090 | C1 '  | G B | 17 | -47.316 | -60.675 | 72.797 | 1.00 | 0.00 | C |
| ATOM | 1091 | N1    | G B | 17 | -50.726 | -58.344 | 69.804 | 1.00 | 0.00 | N |
| ATOM | 1092 | C2    | G B | 17 | -50.743 | -58.556 | 71.172 | 1.00 | 0.00 | C |
| ATOM | 1093 | N2    | G B | 17 | -51.811 | -58.085 | 71.828 | 1.00 | 0.00 | N |
| ATOM | 1094 | N3    | G B | 17 | -49.772 | -59.184 | 71.830 | 1.00 | 0.00 | N |
| ATOM | 1095 | C4    | G B | 17 | -48.774 | -59.600 | 71.006 | 1.00 | 0.00 | C |
| ATOM | 1096 | C5    | G B | 17 | -48.674 | -59.437 | 69.635 | 1.00 | 0.00 | C |
| ATOM | 1097 | C6    | G B | 17 | -49.702 | -58.766 | 68.935 | 1.00 | 0.00 | C |
| ATOM | 1098 | O6    | G B | 17 | -49.794 | -58.526 | 67.731 | 1.00 | 0.00 | O |
| ATOM | 1099 | N7    | G B | 17 | -47.491 | -60.010 | 69.166 | 1.00 | 0.00 | N |
| ATOM | 1100 | C8    | G B | 17 | -46.921 | -60.487 | 70.242 | 1.00 | 0.00 | C |
| ATOM | 1101 | N9    | G B | 17 | -47.641 | -60.279 | 71.400 | 1.00 | 0.00 | N |
| ATOM | 1102 | C2 '  | G B | 17 | -46.642 | -62.036 | 72.906 | 1.00 | 0.00 | C |
| ATOM | 1103 | C3 '  | G B | 17 | -45.674 | -61.819 | 74.060 | 1.00 | 0.00 | C |
| ATOM | 1104 | O3 '  | G B | 17 | -46.359 | -62.025 | 75.292 | 1.00 | 0.00 | O |
| ATOM | 1105 | C4 '  | G B | 17 | -45.245 | -60.365 | 73.874 | 1.00 | 0.00 | C |
| ATOM | 1106 | O4 '  | G B | 17 | -46.432 | -59.707 | 73.325 | 1.00 | 0.00 | O |
| ATOM | 1107 | C5 '  | G B | 17 | -44.083 | -60.122 | 72.939 | 1.00 | 0.00 | C |
| ATOM | 1108 | O5 '  | G B | 17 | -44.145 | -61.050 | 71.827 | 1.00 | 0.00 | O |



|      |      |      |     |    |         |         |        |      |      |   |
|------|------|------|-----|----|---------|---------|--------|------|------|---|
| ATOM | 1109 | O1P  | G B | 17 | -42.105 | -62.487 | 72.155 | 1.00 | 0.00 | O |
| ATOM | 1110 | O2P  | G B | 17 | -43.046 | -62.151 | 69.854 | 1.00 | 0.00 | O |
| ATOM | 1111 | P    | G B | 17 | -42.781 | -61.588 | 71.200 | 1.00 | 0.00 | P |
| ATOM | 1112 | H1   | G B | 17 | -51.526 | -57.839 | 69.391 | 1.00 | 0.00 | H |
| ATOM | 1113 | H8   | G B | 17 | -45.964 | -61.006 | 70.226 | 1.00 | 0.00 | H |
| ATOM | 1114 | H1'  | G B | 17 | -48.234 | -60.646 | 73.383 | 1.00 | 0.00 | H |
| ATOM | 1115 | H21  | G B | 17 | -52.557 | -57.596 | 71.313 | 1.00 | 0.00 | H |
| ATOM | 1116 | H3'  | G B | 17 | -44.817 | -62.491 | 74.006 | 1.00 | 0.00 | H |
| ATOM | 1117 | H22  | G B | 17 | -51.884 | -58.212 | 72.847 | 1.00 | 0.00 | H |
| ATOM | 1118 | H4'  | G B | 17 | -44.965 | -59.988 | 74.856 | 1.00 | 0.00 | H |
| ATOM | 1119 | H2'1 | G B | 17 | -46.115 | -62.311 | 71.993 | 1.00 | 0.00 | H |
| ATOM | 1120 | H2'2 | G B | 17 | -47.352 | -62.832 | 73.129 | 1.00 | 0.00 | H |
| ATOM | 1121 | H5'1 | G B | 17 | -44.130 | -59.098 | 72.567 | 1.00 | 0.00 | H |
| ATOM | 1122 | H5'2 | G B | 17 | -43.150 | -60.261 | 73.484 | 1.00 | 0.00 | H |
| ATOM | 1123 | C1'  | C B | 18 | -51.896 | -62.017 | 74.121 | 1.00 | 0.00 | C |
| ATOM | 1124 | N1   | C B | 18 | -51.456 | -62.119 | 72.702 | 1.00 | 0.00 | N |
| ATOM | 1125 | C2   | C B | 18 | -52.265 | -61.539 | 71.726 | 1.00 | 0.00 | C |
| ATOM | 1126 | O2   | C B | 18 | -53.306 | -60.968 | 72.074 | 1.00 | 0.00 | O |
| ATOM | 1127 | N3   | C B | 18 | -51.883 | -61.622 | 70.429 | 1.00 | 0.00 | N |
| ATOM | 1128 | C4   | C B | 18 | -50.750 | -62.249 | 70.084 | 1.00 | 0.00 | C |
| ATOM | 1129 | N4   | C B | 18 | -50.424 | -62.297 | 68.800 | 1.00 | 0.00 | N |
| ATOM | 1130 | C5   | C B | 18 | -49.903 | -62.855 | 71.065 | 1.00 | 0.00 | C |
| ATOM | 1131 | C6   | C B | 18 | -50.305 | -62.757 | 72.364 | 1.00 | 0.00 | C |
| ATOM | 1132 | C2'  | C B | 18 | -51.611 | -63.266 | 74.943 | 1.00 | 0.00 | C |
| ATOM | 1133 | C3'  | C B | 18 | -51.266 | -62.679 | 76.303 | 1.00 | 0.00 | C |
| ATOM | 1134 | O3'  | C B | 18 | -52.472 | -62.440 | 77.027 | 1.00 | 0.00 | O |
| ATOM | 1135 | C4'  | C B | 18 | -50.545 | -61.383 | 75.941 | 1.00 | 0.00 | C |
| ATOM | 1136 | O4'  | C B | 18 | -51.198 | -60.936 | 74.710 | 1.00 | 0.00 | O |
| ATOM | 1137 | C5'  | C B | 18 | -49.059 | -61.491 | 75.687 | 1.00 | 0.00 | C |
| ATOM | 1138 | O5'  | C B | 18 | -48.766 | -62.745 | 75.019 | 1.00 | 0.00 | O |
| ATOM | 1139 | O1P  | C B | 18 | -47.411 | -64.010 | 76.723 | 1.00 | 0.00 | O |
| ATOM | 1140 | O2P  | C B | 18 | -47.098 | -64.473 | 74.277 | 1.00 | 0.00 | O |
| ATOM | 1141 | P    | C B | 18 | -47.391 | -63.484 | 75.343 | 1.00 | 0.00 | P |
| ATOM | 1142 | H5   | C B | 18 | -48.982 | -63.369 | 70.789 | 1.00 | 0.00 | H |
| ATOM | 1143 | H6   | C B | 18 | -49.692 | -63.202 | 73.148 | 1.00 | 0.00 | H |
| ATOM | 1144 | H1'  | C B | 18 | -52.959 | -61.776 | 74.131 | 1.00 | 0.00 | H |
| ATOM | 1145 | H3'  | C B | 18 | -50.622 | -63.340 | 76.882 | 1.00 | 0.00 | H |
| ATOM | 1146 | H4'  | C B | 18 | -50.689 | -60.695 | 76.774 | 1.00 | 0.00 | H |
| ATOM | 1147 | H41  | C B | 18 | -49.557 | -62.772 | 68.507 | 1.00 | 0.00 | H |
| ATOM | 1148 | H42  | C B | 18 | -51.036 | -61.860 | 68.096 | 1.00 | 0.00 | H |
| ATOM | 1149 | H2'1 | C B | 18 | -50.781 | -63.846 | 74.541 | 1.00 | 0.00 | H |
| ATOM | 1150 | H2'2 | C B | 18 | -52.475 | -63.928 | 75.003 | 1.00 | 0.00 | H |
| ATOM | 1151 | H5'1 | C B | 18 | -48.741 | -60.658 | 75.060 | 1.00 | 0.00 | H |
| ATOM | 1152 | H5'2 | C B | 18 | -48.529 | -61.448 | 76.637 | 1.00 | 0.00 | H |
| ATOM | 1153 | C1'  | C B | 19 | -56.720 | -62.777 | 73.298 | 1.00 | 0.00 | C |
| ATOM | 1154 | N1   | C B | 19 | -55.696 | -63.366 | 72.393 | 1.00 | 0.00 | N |
| ATOM | 1155 | C2   | C B | 19 | -55.834 | -63.150 | 71.023 | 1.00 | 0.00 | C |
| ATOM | 1156 | O2   | C B | 19 | -56.794 | -62.482 | 70.617 | 1.00 | 0.00 | O |
| ATOM | 1157 | N3   | C B | 19 | -54.911 | -63.678 | 70.183 | 1.00 | 0.00 | N |
| ATOM | 1158 | C4   | C B | 19 | -53.883 | -64.397 | 70.653 | 1.00 | 0.00 | C |
| ATOM | 1159 | N4   | C B | 19 | -53.011 | -64.888 | 69.789 | 1.00 | 0.00 | N |
| ATOM | 1160 | C5   | C B | 19 | -53.720 | -64.634 | 72.055 | 1.00 | 0.00 | C |
| ATOM | 1161 | C6   | C B | 19 | -54.658 | -64.093 | 72.882 | 1.00 | 0.00 | C |
| ATOM | 1162 | C2'  | C B | 19 | -57.082 | -63.669 | 74.477 | 1.00 | 0.00 | C |



|      |    |      |     |   |         |         |        |      |      |   |
|------|----|------|-----|---|---------|---------|--------|------|------|---|
| ATOM | 1  | C1'  | A A | 1 | -70.227 | -42.352 | 92.588 | 1.00 | 0.00 | C |
| ATOM | 2  | N1   | A A | 1 | -67.928 | -44.248 | 96.766 | 1.00 | 0.00 | N |
| ATOM | 3  | C2   | A A | 1 | -68.640 | -43.144 | 96.555 | 1.00 | 0.00 | C |
| ATOM | 4  | N3   | A A | 1 | -69.209 | -42.716 | 95.449 | 1.00 | 0.00 | N |
| ATOM | 5  | C4   | A A | 1 | -68.980 | -43.578 | 94.442 | 1.00 | 0.00 | C |
| ATOM | 6  | C5   | A A | 1 | -68.272 | -44.746 | 94.493 | 1.00 | 0.00 | C |
| ATOM | 7  | C6   | A A | 1 | -67.716 | -45.089 | 95.744 | 1.00 | 0.00 | C |
| ATOM | 8  | N6   | A A | 1 | -66.997 | -46.207 | 95.945 | 1.00 | 0.00 | N |
| ATOM | 9  | N7   | A A | 1 | -68.249 | -45.370 | 93.258 | 1.00 | 0.00 | N |
| ATOM | 10 | C8   | A A | 1 | -68.934 | -44.573 | 92.493 | 1.00 | 0.00 | C |
| ATOM | 11 | N9   | A A | 1 | -69.411 | -43.464 | 93.143 | 1.00 | 0.00 | N |
| ATOM | 12 | C2'  | A A | 1 | -69.844 | -41.959 | 91.168 | 1.00 | 0.00 | C |
| ATOM | 13 | C3'  | A A | 1 | -71.192 | -41.597 | 90.565 | 1.00 | 0.00 | C |
| ATOM | 14 | O3'  | A A | 1 | -71.502 | -40.244 | 90.889 | 1.00 | 0.00 | O |
| ATOM | 15 | C4'  | A A | 1 | -72.143 | -42.584 | 91.239 | 1.00 | 0.00 | C |
| ATOM | 16 | O4'  | A A | 1 | -71.577 | -42.774 | 92.577 | 1.00 | 0.00 | O |
| ATOM | 17 | C5'  | A A | 1 | -72.285 | -43.935 | 90.579 | 1.00 | 0.00 | C |
| ATOM | 18 | O5'  | A A | 1 | -71.008 | -44.352 | 90.033 | 1.00 | 0.00 | O |
| ATOM | 19 | H2   | A A | 1 | -68.772 | -42.502 | 97.425 | 1.00 | 0.00 | H |
| ATOM | 20 | H8   | A A | 1 | -69.113 | -44.768 | 91.436 | 1.00 | 0.00 | H |
| ATOM | 21 | H1'  | A A | 1 | -70.147 | -41.501 | 93.264 | 1.00 | 0.00 | H |
| ATOM | 22 | H3'  | A A | 1 | -71.202 | -41.719 | 89.481 | 1.00 | 0.00 | H |
| ATOM | 23 | H4'  | A A | 1 | -73.126 | -42.115 | 91.255 | 1.00 | 0.00 | H |
| ATOM | 24 | H61  | A A | 1 | -66.614 | -46.411 | 96.877 | 1.00 | 0.00 | H |
| ATOM | 25 | H62  | A A | 1 | -66.831 | -46.858 | 95.163 | 1.00 | 0.00 | H |
| ATOM | 26 | H5T  | A A | 1 | -70.999 | -44.867 | 89.223 | 1.00 | 0.00 | H |
| ATOM | 27 | H2'1 | A A | 1 | -69.373 | -42.777 | 90.625 | 1.00 | 0.00 | H |
| ATOM | 28 | H2'2 | A A | 1 | -69.158 | -41.112 | 91.144 | 1.00 | 0.00 | H |
| ATOM | 29 | H5'1 | A A | 1 | -72.624 | -44.661 | 91.319 | 1.00 | 0.00 | H |
| ATOM | 30 | H5'2 | A A | 1 | -73.022 | -43.868 | 89.781 | 1.00 | 0.00 | H |
| ATOM | 31 | C1'  | G A | 2 | -67.905 | -38.728 | 95.064 | 1.00 | 0.00 | C |
| ATOM | 32 | N1   | G A | 2 | -64.970 | -42.529 | 96.780 | 1.00 | 0.00 | N |
| ATOM | 33 | C2   | G A | 2 | -65.507 | -41.451 | 97.455 | 1.00 | 0.00 | C |
| ATOM | 34 | N2   | G A | 2 | -65.224 | -41.372 | 98.761 | 1.00 | 0.00 | N |
| ATOM | 35 | N3   | G A | 2 | -66.267 | -40.523 | 96.876 | 1.00 | 0.00 | N |
| ATOM | 36 | C4   | G A | 2 | -66.445 | -40.757 | 95.548 | 1.00 | 0.00 | C |
| ATOM | 37 | C5   | G A | 2 | -65.945 | -41.804 | 94.791 | 1.00 | 0.00 | C |
| ATOM | 38 | C6   | G A | 2 | -65.142 | -42.791 | 95.409 | 1.00 | 0.00 | C |
| ATOM | 39 | O6   | G A | 2 | -64.615 | -43.786 | 94.910 | 1.00 | 0.00 | O |
| ATOM | 40 | N7   | G A | 2 | -66.359 | -41.680 | 93.463 | 1.00 | 0.00 | N |
| ATOM | 41 | C8   | G A | 2 | -67.081 | -40.589 | 93.458 | 1.00 | 0.00 | C |
| ATOM | 42 | N9   | G A | 2 | -67.179 | -39.971 | 94.688 | 1.00 | 0.00 | N |
| ATOM | 43 | C2'  | G A | 2 | -67.851 | -37.639 | 94.000 | 1.00 | 0.00 | C |
| ATOM | 44 | C3'  | G A | 2 | -69.224 | -37.002 | 94.125 | 1.00 | 0.00 | C |
| ATOM | 45 | O3'  | G A | 2 | -69.195 | -36.028 | 95.167 | 1.00 | 0.00 | O |
| ATOM | 46 | C4'  | G A | 2 | -70.120 | -38.191 | 94.472 | 1.00 | 0.00 | C |
| ATOM | 47 | O4'  | G A | 2 | -69.263 | -39.067 | 95.272 | 1.00 | 0.00 | O |
| ATOM | 48 | C5'  | G A | 2 | -70.667 | -38.981 | 93.307 | 1.00 | 0.00 | C |
| ATOM | 49 | O5'  | G A | 2 | -69.674 | -39.052 | 92.254 | 1.00 | 0.00 | O |
| ATOM | 50 | O1P  | G A | 2 | -70.720 | -37.735 | 90.380 | 1.00 | 0.00 | O |
| ATOM | 51 | O2P  | G A | 2 | -69.073 | -39.558 | 89.867 | 1.00 | 0.00 | O |
| ATOM | 52 | P    | G A | 2 | -70.166 | -39.056 | 90.736 | 1.00 | 0.00 | P |
| ATOM | 53 | H1   | G A | 2 | -64.397 | -43.192 | 97.323 | 1.00 | 0.00 | H |
| ATOM | 54 | H8   | G A | 2 | -67.564 | -40.201 | 92.561 | 1.00 | 0.00 | H |

|      |     |      |     |   |         |         |         |      |      |   |
|------|-----|------|-----|---|---------|---------|---------|------|------|---|
| ATOM | 55  | H1'  | G A | 2 | -67.500 | -38.369 | 96.010  | 1.00 | 0.00 | H |
| ATOM | 56  | H21  | G A | 2 | -64.637 | -42.093 | 99.204  | 1.00 | 0.00 | H |
| ATOM | 57  | H3'  | G A | 2 | -69.542 | -36.529 | 93.196  | 1.00 | 0.00 | H |
| ATOM | 58  | H22  | G A | 2 | -65.594 | -40.590 | 99.320  | 1.00 | 0.00 | H |
| ATOM | 59  | H4'  | G A | 2 | -70.966 | -37.796 | 95.033  | 1.00 | 0.00 | H |
| ATOM | 60  | H2'1 | G A | 2 | -67.692 | -38.047 | 93.000  | 1.00 | 0.00 | H |
| ATOM | 61  | H2'2 | G A | 2 | -67.057 | -36.916 | 94.189  | 1.00 | 0.00 | H |
| ATOM | 62  | H5'1 | G A | 2 | -70.920 | -39.986 | 93.643  | 1.00 | 0.00 | H |
| ATOM | 63  | H5'2 | G A | 2 | -71.567 | -38.491 | 92.935  | 1.00 | 0.00 | H |
| ATOM | 64  | C1'  | G A | 3 | -64.454 | -36.927 | 98.125  | 1.00 | 0.00 | C |
| ATOM | 65  | N1   | G A | 3 | -61.860 | -41.094 | 96.740  | 1.00 | 0.00 | N |
| ATOM | 66  | C2   | G A | 3 | -62.013 | -40.520 | 97.987  | 1.00 | 0.00 | C |
| ATOM | 67  | N2   | G A | 3 | -61.389 | -41.134 | 99.000  | 1.00 | 0.00 | N |
| ATOM | 68  | N3   | G A | 3 | -62.728 | -39.419 | 98.207  | 1.00 | 0.00 | N |
| ATOM | 69  | C4   | G A | 3 | -63.283 | -38.927 | 97.068  | 1.00 | 0.00 | C |
| ATOM | 70  | C5   | G A | 3 | -63.182 | -39.432 | 95.782  | 1.00 | 0.00 | C |
| ATOM | 71  | C6   | G A | 3 | -62.425 | -40.603 | 95.548  | 1.00 | 0.00 | C |
| ATOM | 72  | O6   | G A | 3 | -62.221 | -41.198 | 94.490  | 1.00 | 0.00 | O |
| ATOM | 73  | N7   | G A | 3 | -63.900 | -38.631 | 94.891  | 1.00 | 0.00 | N |
| ATOM | 74  | C8   | G A | 3 | -64.403 | -37.690 | 95.648  | 1.00 | 0.00 | C |
| ATOM | 75  | N9   | G A | 3 | -64.072 | -37.801 | 96.982  | 1.00 | 0.00 | N |
| ATOM | 76  | C2'  | G A | 3 | -64.495 | -35.446 | 97.777  | 1.00 | 0.00 | C |
| ATOM | 77  | C3'  | G A | 3 | -65.659 | -34.953 | 98.620  | 1.00 | 0.00 | C |
| ATOM | 78  | O3'  | G A | 3 | -65.196 | -34.664 | 99.937  | 1.00 | 0.00 | O |
| ATOM | 79  | C4'  | G A | 3 | -66.622 | -36.140 | 98.596  | 1.00 | 0.00 | C |
| ATOM | 80  | O4'  | G A | 3 | -65.748 | -37.312 | 98.549  | 1.00 | 0.00 | O |
| ATOM | 81  | C5'  | G A | 3 | -67.579 | -36.204 | 97.428  | 1.00 | 0.00 | C |
| ATOM | 82  | O5'  | G A | 3 | -66.922 | -35.725 | 96.229  | 1.00 | 0.00 | O |
| ATOM | 83  | O1P  | G A | 3 | -68.181 | -33.616 | 95.676  | 1.00 | 0.00 | O |
| ATOM | 84  | O2P  | G A | 3 | -67.058 | -34.921 | 93.852  | 1.00 | 0.00 | O |
| ATOM | 85  | P    | G A | 3 | -67.785 | -34.934 | 95.145  | 1.00 | 0.00 | P |
| ATOM | 86  | H1   | G A | 3 | -61.287 | -41.950 | 96.678  | 1.00 | 0.00 | H |
| ATOM | 87  | H8   | G A | 3 | -65.030 | -36.888 | 95.259  | 1.00 | 0.00 | H |
| ATOM | 88  | H1'  | G A | 3 | -63.761 | -37.117 | 98.946  | 1.00 | 0.00 | H |
| ATOM | 89  | H21  | G A | 3 | -60.839 | -41.987 | 98.824  | 1.00 | 0.00 | H |
| ATOM | 90  | H3'  | G A | 3 | -66.123 | -34.062 | 98.196  | 1.00 | 0.00 | H |
| ATOM | 91  | H22  | G A | 3 | -61.462 | -40.754 | 99.954  | 1.00 | 0.00 | H |
| ATOM | 92  | H4'  | G A | 3 | -67.213 | -36.087 | 99.510  | 1.00 | 0.00 | H |
| ATOM | 93  | H2'1 | G A | 3 | -64.672 | -35.274 | 96.716  | 1.00 | 0.00 | H |
| ATOM | 94  | H2'2 | G A | 3 | -63.568 | -34.933 | 98.041  | 1.00 | 0.00 | H |
| ATOM | 95  | H5'1 | G A | 3 | -67.902 | -37.234 | 97.287  | 1.00 | 0.00 | H |
| ATOM | 96  | H5'2 | G A | 3 | -68.448 | -35.583 | 97.645  | 1.00 | 0.00 | H |
| ATOM | 97  | C1'  | C A | 4 | -60.071 | -37.015 | 100.430 | 1.00 | 0.00 | C |
| ATOM | 98  | N1   | C A | 4 | -60.151 | -37.176 | 98.951  | 1.00 | 0.00 | N |
| ATOM | 99  | C2   | C A | 4 | -59.499 | -38.267 | 98.380  | 1.00 | 0.00 | C |
| ATOM | 100 | O2   | C A | 4 | -58.886 | -39.050 | 99.114  | 1.00 | 0.00 | O |
| ATOM | 101 | N3   | C A | 4 | -59.561 | -38.430 | 97.036  | 1.00 | 0.00 | N |
| ATOM | 102 | C4   | C A | 4 | -60.232 | -37.564 | 96.266  | 1.00 | 0.00 | C |
| ATOM | 103 | N4   | C A | 4 | -60.261 | -37.775 | 94.958  | 1.00 | 0.00 | N |
| ATOM | 104 | C5   | C A | 4 | -60.908 | -36.434 | 96.829  | 1.00 | 0.00 | C |
| ATOM | 105 | C6   | C A | 4 | -60.836 | -36.289 | 98.183  | 1.00 | 0.00 | C |
| ATOM | 106 | C2'  | C A | 4 | -59.946 | -35.567 | 100.884 | 1.00 | 0.00 | C |
| ATOM | 107 | C3'  | C A | 4 | -60.756 | -35.568 | 102.173 | 1.00 | 0.00 | C |
| ATOM | 108 | O3'  | C A | 4 | -59.925 | -36.008 | 103.246 | 1.00 | 0.00 | O |

|      |     |      |     |   |         |         |         |      |      |   |
|------|-----|------|-----|---|---------|---------|---------|------|------|---|
| ATOM | 109 | C4'  | C A | 4 | -61.878 | -36.557 | 101.868 | 1.00 | 0.00 | C |
| ATOM | 110 | O4'  | C A | 4 | -61.260 | -37.547 | 100.986 | 1.00 | 0.00 | O |
| ATOM | 111 | C5'  | C A | 4 | -63.099 | -35.995 | 101.180 | 1.00 | 0.00 | C |
| ATOM | 112 | O5'  | C A | 4 | -62.701 | -34.971 | 100.233 | 1.00 | 0.00 | O |
| ATOM | 113 | O1P  | C A | 4 | -63.682 | -32.865 | 101.202 | 1.00 | 0.00 | O |
| ATOM | 114 | O2P  | C A | 4 | -63.304 | -33.051 | 98.729  | 1.00 | 0.00 | O |
| ATOM | 115 | P    | C A | 4 | -63.666 | -33.723 | 100.000 | 1.00 | 0.00 | P |
| ATOM | 116 | H5   | C A | 4 | -61.452 | -35.724 | 96.205  | 1.00 | 0.00 | H |
| ATOM | 117 | H6   | C A | 4 | -61.340 | -35.447 | 98.658  | 1.00 | 0.00 | H |
| ATOM | 118 | H1'  | C A | 4 | -59.235 | -37.612 | 100.793 | 1.00 | 0.00 | H |
| ATOM | 119 | H3'  | C A | 4 | -61.152 | -34.580 | 102.405 | 1.00 | 0.00 | H |
| ATOM | 120 | H4'  | C A | 4 | -62.197 | -36.976 | 102.822 | 1.00 | 0.00 | H |
| ATOM | 121 | H41  | C A | 4 | -60.771 | -37.125 | 94.342  | 1.00 | 0.00 | H |
| ATOM | 122 | H42  | C A | 4 | -59.774 | -38.589 | 94.556  | 1.00 | 0.00 | H |
| ATOM | 123 | H2'1 | C A | 4 | -60.360 | -34.868 | 100.158 | 1.00 | 0.00 | H |
| ATOM | 124 | H2'2 | C A | 4 | -58.910 | -35.278 | 101.065 | 1.00 | 0.00 | H |
| ATOM | 125 | H5'1 | C A | 4 | -63.619 | -36.798 | 100.658 | 1.00 | 0.00 | H |
| ATOM | 126 | H5'2 | C A | 4 | -63.766 | -35.564 | 101.928 | 1.00 | 0.00 | H |
| ATOM | 127 | C1'  | C A | 5 | -55.320 | -38.330 | 100.902 | 1.00 | 0.00 | C |
| ATOM | 128 | N1   | C A | 5 | -55.807 | -37.698 | 99.646  | 1.00 | 0.00 | N |
| ATOM | 129 | C2   | C A | 5 | -55.523 | -38.338 | 98.441  | 1.00 | 0.00 | C |
| ATOM | 130 | O2   | C A | 5 | -54.880 | -39.397 | 98.462  | 1.00 | 0.00 | O |
| ATOM | 131 | N3   | C A | 5 | -55.959 | -37.778 | 97.285  | 1.00 | 0.00 | N |
| ATOM | 132 | C4   | C A | 5 | -56.650 | -36.632 | 97.293  | 1.00 | 0.00 | C |
| ATOM | 133 | N4   | C A | 5 | -57.054 | -36.133 | 96.135  | 1.00 | 0.00 | N |
| ATOM | 134 | C5   | C A | 5 | -56.955 | -35.952 | 98.517  | 1.00 | 0.00 | C |
| ATOM | 135 | C6   | C A | 5 | -56.509 | -36.535 | 99.667  | 1.00 | 0.00 | C |
| ATOM | 136 | C2'  | C A | 5 | -54.838 | -37.331 | 101.944 | 1.00 | 0.00 | C |
| ATOM | 137 | C3'  | C A | 5 | -55.273 | -37.994 | 103.243 | 1.00 | 0.00 | C |
| ATOM | 138 | O3'  | C A | 5 | -54.278 | -38.936 | 103.641 | 1.00 | 0.00 | O |
| ATOM | 139 | C4'  | C A | 5 | -56.585 | -38.670 | 102.857 | 1.00 | 0.00 | C |
| ATOM | 140 | O4'  | C A | 5 | -56.395 | -39.063 | 101.461 | 1.00 | 0.00 | O |
| ATOM | 141 | C5'  | C A | 5 | -57.832 | -37.819 | 102.954 | 1.00 | 0.00 | C |
| ATOM | 142 | O5'  | C A | 5 | -57.526 | -36.456 | 102.562 | 1.00 | 0.00 | O |
| ATOM | 143 | O1P  | C A | 5 | -57.849 | -35.153 | 104.691 | 1.00 | 0.00 | O |
| ATOM | 144 | O2P  | C A | 5 | -58.166 | -34.028 | 102.471 | 1.00 | 0.00 | O |
| ATOM | 145 | P    | C A | 5 | -58.291 | -35.260 | 103.287 | 1.00 | 0.00 | P |
| ATOM | 146 | H5   | C A | 5 | -57.514 | -35.016 | 98.528  | 1.00 | 0.00 | H |
| ATOM | 147 | H6   | C A | 5 | -56.721 | -36.058 | 100.625 | 1.00 | 0.00 | H |
| ATOM | 148 | H1'  | C A | 5 | -54.531 | -39.037 | 100.643 | 1.00 | 0.00 | H |
| ATOM | 149 | H3'  | C A | 5 | -55.422 | -37.268 | 104.042 | 1.00 | 0.00 | H |
| ATOM | 150 | H4'  | C A | 5 | -56.713 | -39.520 | 103.527 | 1.00 | 0.00 | H |
| ATOM | 151 | H41  | C A | 5 | -57.590 | -35.252 | 96.113  | 1.00 | 0.00 | H |
| ATOM | 152 | H42  | C A | 5 | -56.832 | -36.622 | 95.257  | 1.00 | 0.00 | H |
| ATOM | 153 | H2'1 | C A | 5 | -55.302 | -36.353 | 101.826 | 1.00 | 0.00 | H |
| ATOM | 154 | H2'2 | C A | 5 | -53.757 | -37.188 | 101.912 | 1.00 | 0.00 | H |
| ATOM | 155 | H5'1 | C A | 5 | -58.597 | -38.230 | 102.294 | 1.00 | 0.00 | H |
| ATOM | 156 | H5'2 | C A | 5 | -58.196 | -37.836 | 103.980 | 1.00 | 0.00 | H |
| ATOM | 157 | C1'  | G A | 6 | -50.903 | -39.744 | 99.163  | 1.00 | 0.00 | C |
| ATOM | 158 | N1   | G A | 6 | -52.474 | -37.430 | 94.896  | 1.00 | 0.00 | N |
| ATOM | 159 | C2   | G A | 6 | -51.814 | -38.635 | 95.061  | 1.00 | 0.00 | C |
| ATOM | 160 | N2   | G A | 6 | -51.532 | -39.310 | 93.942  | 1.00 | 0.00 | N |
| ATOM | 161 | N3   | G A | 6 | -51.463 | -39.124 | 96.249  | 1.00 | 0.00 | N |
| ATOM | 162 | C4   | G A | 6 | -51.820 | -38.304 | 97.272  | 1.00 | 0.00 | C |

|      |     |      |     |   |         |         |         |      |      |   |
|------|-----|------|-----|---|---------|---------|---------|------|------|---|
| ATOM | 163 | C5   | G A | 6 | -52.477 | -37.086 | 97.202  | 1.00 | 0.00 | C |
| ATOM | 164 | C6   | G A | 6 | -52.853 | -36.567 | 95.943  | 1.00 | 0.00 | C |
| ATOM | 165 | O6   | G A | 6 | -53.435 | -35.515 | 95.678  | 1.00 | 0.00 | O |
| ATOM | 166 | N7   | G A | 6 | -52.655 | -36.560 | 98.483  | 1.00 | 0.00 | N |
| ATOM | 167 | C8   | G A | 6 | -52.118 | -37.455 | 99.270  | 1.00 | 0.00 | C |
| ATOM | 168 | N9   | G A | 6 | -51.588 | -38.544 | 98.609  | 1.00 | 0.00 | N |
| ATOM | 169 | C2'  | G A | 6 | -50.007 | -39.443 | 100.355 | 1.00 | 0.00 | C |
| ATOM | 170 | C3'  | G A | 6 | -50.192 | -40.684 | 101.213 | 1.00 | 0.00 | C |
| ATOM | 171 | O3'  | G A | 6 | -49.302 | -41.703 | 100.763 | 1.00 | 0.00 | O |
| ATOM | 172 | C4'  | G A | 6 | -51.656 | -41.048 | 100.973 | 1.00 | 0.00 | C |
| ATOM | 173 | O4'  | G A | 6 | -51.902 | -40.653 | 99.587  | 1.00 | 0.00 | O |
| ATOM | 174 | C5'  | G A | 6 | -52.671 | -40.365 | 101.858 | 1.00 | 0.00 | C |
| ATOM | 175 | O5'  | G A | 6 | -52.255 | -39.002 | 102.122 | 1.00 | 0.00 | O |
| ATOM | 176 | O1P  | G A | 6 | -51.789 | -39.005 | 104.596 | 1.00 | 0.00 | O |
| ATOM | 177 | O2P  | G A | 6 | -52.479 | -36.881 | 103.452 | 1.00 | 0.00 | O |
| ATOM | 178 | P    | G A | 6 | -52.593 | -38.358 | 103.542 | 1.00 | 0.00 | P |
| ATOM | 179 | H1   | G A | 6 | -52.708 | -37.144 | 93.933  | 1.00 | 0.00 | H |
| ATOM | 180 | H8   | G A | 6 | -52.089 | -37.352 | 100.355 | 1.00 | 0.00 | H |
| ATOM | 181 | H1'  | G A | 6 | -50.339 | -40.217 | 98.358  | 1.00 | 0.00 | H |
| ATOM | 182 | H21  | G A | 6 | -51.810 | -38.928 | 93.026  | 1.00 | 0.00 | H |
| ATOM | 183 | H3'  | G A | 6 | -50.004 | -40.483 | 102.269 | 1.00 | 0.00 | H |
| ATOM | 184 | H22  | G A | 6 | -51.038 | -40.213 | 93.996  | 1.00 | 0.00 | H |
| ATOM | 185 | H4'  | G A | 6 | -51.745 | -42.122 | 101.132 | 1.00 | 0.00 | H |
| ATOM | 186 | H2'1 | G A | 6 | -50.315 | -38.543 | 100.887 | 1.00 | 0.00 | H |
| ATOM | 187 | H2'2 | G A | 6 | -48.964 | -39.312 | 100.066 | 1.00 | 0.00 | H |
| ATOM | 188 | H5'1 | G A | 6 | -53.639 | -40.364 | 101.358 | 1.00 | 0.00 | H |
| ATOM | 189 | H5'2 | G A | 6 | -52.755 | -40.914 | 102.796 | 1.00 | 0.00 | H |
| ATOM | 190 | C1'  | C A | 7 | -47.397 | -40.091 | 95.682  | 1.00 | 0.00 | C |
| ATOM | 191 | N1   | C A | 7 | -47.990 | -38.770 | 96.029  | 1.00 | 0.00 | N |
| ATOM | 192 | C2   | C A | 7 | -48.481 | -37.983 | 94.988  | 1.00 | 0.00 | C |
| ATOM | 193 | O2   | C A | 7 | -48.404 | -38.409 | 93.829  | 1.00 | 0.00 | O |
| ATOM | 194 | N3   | C A | 7 | -49.025 | -36.777 | 95.283  | 1.00 | 0.00 | N |
| ATOM | 195 | C4   | C A | 7 | -49.094 | -36.342 | 96.547  | 1.00 | 0.00 | C |
| ATOM | 196 | N4   | C A | 7 | -49.638 | -35.157 | 96.779  | 1.00 | 0.00 | N |
| ATOM | 197 | C5   | C A | 7 | -48.594 | -37.129 | 97.637  | 1.00 | 0.00 | C |
| ATOM | 198 | C6   | C A | 7 | -48.053 | -38.343 | 97.317  | 1.00 | 0.00 | C |
| ATOM | 199 | C2'  | C A | 7 | -46.181 | -40.457 | 96.522  | 1.00 | 0.00 | C |
| ATOM | 200 | C3'  | C A | 7 | -46.344 | -41.962 | 96.674  | 1.00 | 0.00 | C |
| ATOM | 201 | O3'  | C A | 7 | -45.787 | -42.610 | 95.532  | 1.00 | 0.00 | O |
| ATOM | 202 | C4'  | C A | 7 | -47.858 | -42.134 | 96.756  | 1.00 | 0.00 | C |
| ATOM | 203 | O4'  | C A | 7 | -48.390 | -41.077 | 95.895  | 1.00 | 0.00 | O |
| ATOM | 204 | C5'  | C A | 7 | -48.476 | -41.996 | 98.128  | 1.00 | 0.00 | C |
| ATOM | 205 | O5'  | C A | 7 | -47.780 | -40.970 | 98.878  | 1.00 | 0.00 | O |
| ATOM | 206 | O1P  | C A | 7 | -46.690 | -42.253 | 100.750 | 1.00 | 0.00 | O |
| ATOM | 207 | O2P  | C A | 7 | -47.287 | -39.836 | 101.065 | 1.00 | 0.00 | O |
| ATOM | 208 | P    | C A | 7 | -47.622 | -41.145 | 100.455 | 1.00 | 0.00 | P |
| ATOM | 209 | H5   | C A | 7 | -48.641 | -36.777 | 98.668  | 1.00 | 0.00 | H |
| ATOM | 210 | H6   | C A | 7 | -47.667 | -38.981 | 98.112  | 1.00 | 0.00 | H |
| ATOM | 211 | H1'  | C A | 7 | -47.152 | -40.086 | 94.621  | 1.00 | 0.00 | H |
| ATOM | 212 | H3'  | C A | 7 | -45.855 | -42.335 | 97.575  | 1.00 | 0.00 | H |
| ATOM | 213 | H4'  | C A | 7 | -48.083 | -43.136 | 96.390  | 1.00 | 0.00 | H |
| ATOM | 214 | H41  | C A | 7 | -49.706 | -34.799 | 97.742  | 1.00 | 0.00 | H |
| ATOM | 215 | H42  | C A | 7 | -49.995 | -34.591 | 95.994  | 1.00 | 0.00 | H |
| ATOM | 216 | H2'1 | C A | 7 | -46.182 | -39.958 | 97.490  | 1.00 | 0.00 | H |

|      |     |      |   |   |   |         |         |        |      |      |   |
|------|-----|------|---|---|---|---------|---------|--------|------|------|---|
| ATOM | 217 | H2'2 | C | A | 7 | -45.243 | -40.206 | 96.025 | 1.00 | 0.00 | H |
| ATOM | 218 | H5'1 | C | A | 7 | -49.527 | -41.726 | 98.022 | 1.00 | 0.00 | H |
| ATOM | 219 | H5'2 | C | A | 7 | -48.402 | -42.949 | 98.652 | 1.00 | 0.00 | H |
| ATOM | 220 | C1'  | A | A | 8 | -45.019 | -38.632 | 91.594 | 1.00 | 0.00 | C |
| ATOM | 221 | N1   | A | A | 8 | -46.906 | -34.022 | 92.832 | 1.00 | 0.00 | N |
| ATOM | 222 | C2   | A | A | 8 | -46.799 | -34.668 | 91.674 | 1.00 | 0.00 | C |
| ATOM | 223 | N3   | A | A | 8 | -46.303 | -35.861 | 91.424 | 1.00 | 0.00 | N |
| ATOM | 224 | C4   | A | A | 8 | -45.861 | -36.428 | 92.562 | 1.00 | 0.00 | C |
| ATOM | 225 | C5   | A | A | 8 | -45.896 | -35.902 | 93.823 | 1.00 | 0.00 | C |
| ATOM | 226 | C6   | A | A | 8 | -46.458 | -34.614 | 93.949 | 1.00 | 0.00 | C |
| ATOM | 227 | N6   | A | A | 8 | -46.560 | -33.971 | 95.125 | 1.00 | 0.00 | N |
| ATOM | 228 | N7   | A | A | 8 | -45.350 | -36.777 | 94.746 | 1.00 | 0.00 | N |
| ATOM | 229 | C8   | A | A | 8 | -44.997 | -37.804 | 94.030 | 1.00 | 0.00 | C |
| ATOM | 230 | N9   | A | A | 8 | -45.278 | -37.665 | 92.694 | 1.00 | 0.00 | N |
| ATOM | 231 | C2'  | A | A | 8 | -43.707 | -39.393 | 91.740 | 1.00 | 0.00 | C |
| ATOM | 232 | C3'  | A | A | 8 | -44.071 | -40.760 | 91.186 | 1.00 | 0.00 | C |
| ATOM | 233 | O3'  | A | A | 8 | -43.937 | -40.740 | 89.768 | 1.00 | 0.00 | O |
| ATOM | 234 | C4'  | A | A | 8 | -45.525 | -40.931 | 91.626 | 1.00 | 0.00 | C |
| ATOM | 235 | O4'  | A | A | 8 | -46.073 | -39.573 | 91.590 | 1.00 | 0.00 | O |
| ATOM | 236 | C5'  | A | A | 8 | -45.745 | -41.506 | 93.005 | 1.00 | 0.00 | C |
| ATOM | 237 | O5'  | A | A | 8 | -44.722 | -41.015 | 93.910 | 1.00 | 0.00 | O |
| ATOM | 238 | O1P  | A | A | 8 | -43.423 | -43.090 | 94.497 | 1.00 | 0.00 | O |
| ATOM | 239 | O2P  | A | A | 8 | -43.513 | -41.167 | 96.107 | 1.00 | 0.00 | O |
| ATOM | 240 | P    | A | A | 8 | -44.202 | -41.976 | 95.072 | 1.00 | 0.00 | P |
| ATOM | 241 | H2   | A | A | 8 | -47.179 | -34.132 | 90.806 | 1.00 | 0.00 | H |
| ATOM | 242 | H8   | A | A | 8 | -44.522 | -38.691 | 94.449 | 1.00 | 0.00 | H |
| ATOM | 243 | H1'  | A | A | 8 | -45.052 | -38.088 | 90.649 | 1.00 | 0.00 | H |
| ATOM | 244 | H3'  | A | A | 8 | -43.442 | -41.548 | 91.597 | 1.00 | 0.00 | H |
| ATOM | 245 | H4'  | A | A | 8 | -45.997 | -41.599 | 90.907 | 1.00 | 0.00 | H |
| ATOM | 246 | H61  | A | A | 8 | -46.981 | -33.033 | 95.163 | 1.00 | 0.00 | H |
| ATOM | 247 | H62  | A | A | 8 | -46.215 | -34.418 | 95.987 | 1.00 | 0.00 | H |
| ATOM | 248 | H2'1 | A | A | 8 | -43.382 | -39.459 | 92.778 | 1.00 | 0.00 | H |
| ATOM | 249 | H2'2 | A | A | 8 | -42.899 | -38.935 | 91.171 | 1.00 | 0.00 | H |
| ATOM | 250 | H5'1 | A | A | 8 | -46.729 | -41.204 | 93.364 | 1.00 | 0.00 | H |
| ATOM | 251 | H5'2 | A | A | 8 | -45.698 | -42.592 | 92.952 | 1.00 | 0.00 | H |
| ATOM | 252 | C1'  | C | A | 9 | -43.592 | -35.239 | 88.259 | 1.00 | 0.00 | C |
| ATOM | 253 | N1   | C | A | 9 | -43.379 | -35.002 | 89.713 | 1.00 | 0.00 | N |
| ATOM | 254 | C2   | C | A | 9 | -43.826 | -33.797 | 90.251 | 1.00 | 0.00 | C |
| ATOM | 255 | O2   | C | A | 9 | -44.377 | -32.978 | 89.504 | 1.00 | 0.00 | O |
| ATOM | 256 | N3   | C | A | 9 | -43.641 | -33.563 | 91.573 | 1.00 | 0.00 | N |
| ATOM | 257 | C4   | C | A | 9 | -43.039 | -34.467 | 92.355 | 1.00 | 0.00 | C |
| ATOM | 258 | N4   | C | A | 9 | -42.887 | -34.187 | 93.642 | 1.00 | 0.00 | N |
| ATOM | 259 | C5   | C | A | 9 | -42.565 | -35.715 | 91.829 | 1.00 | 0.00 | C |
| ATOM | 260 | C6   | C | A | 9 | -42.766 | -35.932 | 90.495 | 1.00 | 0.00 | C |
| ATOM | 261 | C2'  | C | A | 9 | -42.441 | -35.967 | 87.581 | 1.00 | 0.00 | C |
| ATOM | 262 | C3'  | C | A | 9 | -43.169 | -36.833 | 86.563 | 1.00 | 0.00 | C |
| ATOM | 263 | O3'  | C | A | 9 | -43.418 | -36.066 | 85.388 | 1.00 | 0.00 | O |
| ATOM | 264 | C4'  | C | A | 9 | -44.457 | -37.205 | 87.294 | 1.00 | 0.00 | C |
| ATOM | 265 | O4'  | C | A | 9 | -44.756 | -36.034 | 88.119 | 1.00 | 0.00 | O |
| ATOM | 266 | C5'  | C | A | 9 | -44.397 | -38.421 | 88.187 | 1.00 | 0.00 | C |
| ATOM | 267 | O5'  | C | A | 9 | -43.101 | -38.489 | 88.835 | 1.00 | 0.00 | O |
| ATOM | 268 | O1P  | C | A | 9 | -42.067 | -40.564 | 87.856 | 1.00 | 0.00 | O |
| ATOM | 269 | O2P  | C | A | 9 | -41.392 | -39.787 | 90.145 | 1.00 | 0.00 | O |
| ATOM | 270 | P    | C | A | 9 | -42.462 | -39.921 | 89.125 | 1.00 | 0.00 | P |

|      |     |      |     |    |         |         |        |      |      |   |
|------|-----|------|-----|----|---------|---------|--------|------|------|---|
| ATOM | 271 | H5   | C A | 9  | -42.068 | -36.451 | 92.462 | 1.00 | 0.00 | H |
| ATOM | 272 | H6   | C A | 9  | -42.431 | -36.868 | 90.051 | 1.00 | 0.00 | H |
| ATOM | 273 | H1'  | C A | 9  | -43.783 | -34.278 | 87.782 | 1.00 | 0.00 | H |
| ATOM | 274 | H3'  | C A | 9  | -42.596 | -37.722 | 86.300 | 1.00 | 0.00 | H |
| ATOM | 275 | H4'  | C A | 9  | -45.212 | -37.390 | 86.530 | 1.00 | 0.00 | H |
| ATOM | 276 | H41  | C A | 9  | -42.429 | -34.867 | 94.266 | 1.00 | 0.00 | H |
| ATOM | 277 | H42  | C A | 9  | -43.226 | -33.289 | 94.017 | 1.00 | 0.00 | H |
| ATOM | 278 | H2'1 | C A | 9  | -41.866 | -36.574 | 88.277 | 1.00 | 0.00 | H |
| ATOM | 279 | H2'2 | C A | 9  | -41.747 | -35.281 | 87.094 | 1.00 | 0.00 | H |
| ATOM | 280 | H5'1 | C A | 9  | -45.182 | -38.354 | 88.940 | 1.00 | 0.00 | H |
| ATOM | 281 | H5'2 | C A | 9  | -44.554 | -39.315 | 87.584 | 1.00 | 0.00 | H |
| ATOM | 282 | C1'  | C A | 10 | -42.523 | -30.641 | 86.760 | 1.00 | 0.00 | C |
| ATOM | 283 | N1   | C A | 10 | -41.902 | -31.198 | 87.993 | 1.00 | 0.00 | N |
| ATOM | 284 | C2   | C A | 10 | -41.983 | -30.444 | 89.161 | 1.00 | 0.00 | C |
| ATOM | 285 | O2   | C A | 10 | -42.564 | -29.350 | 89.129 | 1.00 | 0.00 | O |
| ATOM | 286 | N3   | C A | 10 | -41.424 | -30.932 | 90.295 | 1.00 | 0.00 | N |
| ATOM | 287 | C4   | C A | 10 | -40.801 | -32.118 | 90.300 | 1.00 | 0.00 | C |
| ATOM | 288 | N4   | C A | 10 | -40.274 | -32.550 | 91.437 | 1.00 | 0.00 | N |
| ATOM | 289 | C5   | C A | 10 | -40.698 | -32.914 | 89.112 | 1.00 | 0.00 | C |
| ATOM | 290 | C6   | C A | 10 | -41.274 | -32.403 | 87.982 | 1.00 | 0.00 | C |
| ATOM | 291 | C2'  | C A | 10 | -41.729 | -30.922 | 85.492 | 1.00 | 0.00 | C |
| ATOM | 292 | C3'  | C A | 10 | -42.833 | -31.125 | 84.465 | 1.00 | 0.00 | C |
| ATOM | 293 | O3'  | C A | 10 | -43.245 | -29.855 | 83.963 | 1.00 | 0.00 | O |
| ATOM | 294 | C4'  | C A | 10 | -43.930 | -31.809 | 85.277 | 1.00 | 0.00 | C |
| ATOM | 295 | O4'  | C A | 10 | -43.800 | -31.236 | 86.616 | 1.00 | 0.00 | O |
| ATOM | 296 | C5'  | C A | 10 | -43.845 | -33.314 | 85.386 | 1.00 | 0.00 | C |
| ATOM | 297 | O5'  | C A | 10 | -42.456 | -33.722 | 85.477 | 1.00 | 0.00 | O |
| ATOM | 298 | O1P  | C A | 10 | -42.080 | -34.995 | 83.339 | 1.00 | 0.00 | O |
| ATOM | 299 | O2P  | C A | 10 | -40.711 | -35.526 | 85.373 | 1.00 | 0.00 | O |
| ATOM | 300 | P    | C A | 10 | -42.016 | -35.101 | 84.810 | 1.00 | 0.00 | P |
| ATOM | 301 | H5   | C A | 10 | -40.187 | -33.877 | 89.108 | 1.00 | 0.00 | H |
| ATOM | 302 | H6   | C A | 10 | -41.229 | -32.975 | 87.056 | 1.00 | 0.00 | H |
| ATOM | 303 | H1'  | C A | 10 | -42.667 | -29.571 | 86.903 | 1.00 | 0.00 | H |
| ATOM | 304 | H3'  | C A | 10 | -42.507 | -31.752 | 83.635 | 1.00 | 0.00 | H |
| ATOM | 305 | H4'  | C A | 10 | -44.878 | -31.565 | 84.797 | 1.00 | 0.00 | H |
| ATOM | 306 | H41  | C A | 10 | -39.791 | -33.460 | 91.469 | 1.00 | 0.00 | H |
| ATOM | 307 | H42  | C A | 10 | -40.347 | -31.975 | 92.289 | 1.00 | 0.00 | H |
| ATOM | 308 | H2'1 | C A | 10 | -41.104 | -31.809 | 85.582 | 1.00 | 0.00 | H |
| ATOM | 309 | H2'2 | C A | 10 | -41.080 | -30.089 | 85.218 | 1.00 | 0.00 | H |
| ATOM | 310 | H5'1 | C A | 10 | -44.384 | -33.640 | 86.276 | 1.00 | 0.00 | H |
| ATOM | 311 | H5'2 | C A | 10 | -44.303 | -33.762 | 84.505 | 1.00 | 0.00 | H |
| ATOM | 312 | C1'  | T A | 11 | -41.128 | -25.943 | 87.448 | 1.00 | 0.00 | C |
| ATOM | 313 | N1   | T A | 11 | -40.310 | -27.053 | 88.005 | 1.00 | 0.00 | N |
| ATOM | 314 | C2   | T A | 11 | -39.976 | -26.982 | 89.341 | 1.00 | 0.00 | C |
| ATOM | 315 | O2   | T A | 11 | -40.322 | -26.059 | 90.060 | 1.00 | 0.00 | O |
| ATOM | 316 | N3   | T A | 11 | -39.216 | -28.034 | 89.818 | 1.00 | 0.00 | N |
| ATOM | 317 | C4   | T A | 11 | -38.770 | -29.119 | 89.091 | 1.00 | 0.00 | C |
| ATOM | 318 | O4   | T A | 11 | -38.090 | -30.003 | 89.628 | 1.00 | 0.00 | O |
| ATOM | 319 | C5   | T A | 11 | -39.169 | -29.106 | 87.704 | 1.00 | 0.00 | C |
| ATOM | 320 | C6   | T A | 11 | -39.910 | -28.098 | 87.207 | 1.00 | 0.00 | C |
| ATOM | 321 | C7   | T A | 11 | -38.708 | -30.271 | 86.877 | 1.00 | 0.00 | C |
| ATOM | 322 | C2'  | T A | 11 | -40.744 | -25.548 | 86.028 | 1.00 | 0.00 | C |
| ATOM | 323 | C3'  | T A | 11 | -42.091 | -25.189 | 85.422 | 1.00 | 0.00 | C |
| ATOM | 324 | O3'  | T A | 11 | -42.406 | -23.837 | 85.745 | 1.00 | 0.00 | O |



|      |     |      |     |    |         |         |        |      |      |   |
|------|-----|------|-----|----|---------|---------|--------|------|------|---|
| ATOM | 325 | C4'  | T A | 11 | -43.039 | -26.180 | 86.093 | 1.00 | 0.00 | C |
| ATOM | 326 | O4'  | T A | 11 | -42.477 | -26.366 | 87.432 | 1.00 | 0.00 | O |
| ATOM | 327 | C5'  | T A | 11 | -43.177 | -27.533 | 85.434 | 1.00 | 0.00 | C |
| ATOM | 328 | O5'  | T A | 11 | -41.897 | -27.944 | 84.891 | 1.00 | 0.00 | O |
| ATOM | 329 | O1P  | T A | 11 | -42.295 | -27.959 | 82.406 | 1.00 | 0.00 | O |
| ATOM | 330 | O2P  | T A | 11 | -40.555 | -29.464 | 83.406 | 1.00 | 0.00 | O |
| ATOM | 331 | P    | T A | 11 | -41.874 | -28.798 | 83.544 | 1.00 | 0.00 | P |
| ATOM | 332 | H3   | T A | 11 | -38.957 | -28.006 | 90.813 | 1.00 | 0.00 | H |
| ATOM | 333 | H6   | T A | 11 | -40.199 | -28.109 | 86.155 | 1.00 | 0.00 | H |
| ATOM | 334 | H1'  | T A | 11 | -41.052 | -25.090 | 88.124 | 1.00 | 0.00 | H |
| ATOM | 335 | H3'  | T A | 11 | -42.096 | -25.312 | 84.340 | 1.00 | 0.00 | H |
| ATOM | 336 | H4'  | T A | 11 | -44.026 | -25.715 | 86.107 | 1.00 | 0.00 | H |
| ATOM | 337 | H71  | T A | 11 | -38.009 | -29.922 | 86.117 | 1.00 | 0.00 | H |
| ATOM | 338 | H72  | T A | 11 | -38.213 | -30.999 | 87.520 | 1.00 | 0.00 | H |
| ATOM | 339 | H73  | T A | 11 | -39.567 | -30.737 | 86.393 | 1.00 | 0.00 | H |
| ATOM | 340 | H2'1 | T A | 11 | -40.269 | -26.365 | 85.487 | 1.00 | 0.00 | H |
| ATOM | 341 | H2'2 | T A | 11 | -40.058 | -24.699 | 86.006 | 1.00 | 0.00 | H |
| ATOM | 342 | H5'1 | T A | 11 | -43.514 | -28.259 | 86.173 | 1.00 | 0.00 | H |
| ATOM | 343 | H5'2 | T A | 11 | -43.912 | -27.466 | 84.632 | 1.00 | 0.00 | H |
| ATOM | 344 | C1'  | A A | 12 | -38.820 | -22.303 | 89.909 | 1.00 | 0.00 | C |
| ATOM | 345 | N1   | A A | 12 | -35.866 | -26.117 | 91.661 | 1.00 | 0.00 | N |
| ATOM | 346 | C2   | A A | 12 | -36.412 | -25.059 | 92.252 | 1.00 | 0.00 | C |
| ATOM | 347 | N3   | A A | 12 | -37.169 | -24.112 | 91.739 | 1.00 | 0.00 | N |
| ATOM | 348 | C4   | A A | 12 | -37.358 | -24.328 | 90.426 | 1.00 | 0.00 | C |
| ATOM | 349 | C5   | A A | 12 | -36.870 | -25.358 | 89.673 | 1.00 | 0.00 | C |
| ATOM | 350 | C6   | A A | 12 | -36.075 | -26.306 | 90.350 | 1.00 | 0.00 | C |
| ATOM | 351 | N6   | A A | 12 | -35.527 | -27.372 | 89.740 | 1.00 | 0.00 | N |
| ATOM | 352 | N7   | A A | 12 | -37.276 | -25.249 | 88.355 | 1.00 | 0.00 | N |
| ATOM | 353 | C8   | A A | 12 | -37.991 | -24.163 | 88.336 | 1.00 | 0.00 | C |
| ATOM | 354 | N9   | A A | 12 | -38.087 | -23.550 | 89.559 | 1.00 | 0.00 | N |
| ATOM | 355 | C2'  | A A | 12 | -38.759 | -21.233 | 88.828 | 1.00 | 0.00 | C |
| ATOM | 356 | C3'  | A A | 12 | -40.136 | -20.597 | 88.933 | 1.00 | 0.00 | C |
| ATOM | 357 | O3'  | A A | 12 | -40.117 | -19.607 | 89.960 | 1.00 | 0.00 | O |
| ATOM | 358 | C4'  | A A | 12 | -41.032 | -21.782 | 89.292 | 1.00 | 0.00 | C |
| ATOM | 359 | O4'  | A A | 12 | -40.178 | -22.644 | 90.110 | 1.00 | 0.00 | O |
| ATOM | 360 | C5'  | A A | 12 | -41.567 | -22.590 | 88.135 | 1.00 | 0.00 | C |
| ATOM | 361 | O5'  | A A | 12 | -40.566 | -22.676 | 87.089 | 1.00 | 0.00 | O |
| ATOM | 362 | O1P  | A A | 12 | -41.600 | -21.390 | 85.188 | 1.00 | 0.00 | O |
| ATOM | 363 | O2P  | A A | 12 | -39.944 | -23.216 | 84.715 | 1.00 | 0.00 | O |
| ATOM | 364 | P    | A A | 12 | -41.045 | -22.704 | 85.568 | 1.00 | 0.00 | P |
| ATOM | 365 | H2   | A A | 12 | -36.202 | -24.962 | 93.317 | 1.00 | 0.00 | H |
| ATOM | 366 | H8   | A A | 12 | -38.469 | -23.776 | 87.435 | 1.00 | 0.00 | H |
| ATOM | 367 | H1'  | A A | 12 | -38.424 | -21.929 | 90.852 | 1.00 | 0.00 | H |
| ATOM | 368 | H3'  | A A | 12 | -40.448 | -20.138 | 87.996 | 1.00 | 0.00 | H |
| ATOM | 369 | H4'  | A A | 12 | -41.883 | -21.379 | 89.840 | 1.00 | 0.00 | H |
| ATOM | 370 | H61  | A A | 12 | -34.956 | -28.037 | 90.280 | 1.00 | 0.00 | H |
| ATOM | 371 | H62  | A A | 12 | -35.681 | -27.524 | 88.731 | 1.00 | 0.00 | H |
| ATOM | 372 | H2'1 | A A | 12 | -38.592 | -21.653 | 87.837 | 1.00 | 0.00 | H |
| ATOM | 373 | H2'2 | A A | 12 | -37.970 | -20.504 | 89.012 | 1.00 | 0.00 | H |
| ATOM | 374 | H5'1 | A A | 12 | -41.820 | -23.591 | 88.484 | 1.00 | 0.00 | H |
| ATOM | 375 | H5'2 | A A | 12 | -42.464 | -22.110 | 87.747 | 1.00 | 0.00 | H |
| ATOM | 376 | C1'  | G A | 13 | -35.355 | -20.518 | 92.985 | 1.00 | 0.00 | C |
| ATOM | 377 | N1   | G A | 13 | -32.761 | -24.687 | 91.599 | 1.00 | 0.00 | N |
| ATOM | 378 | C2   | G A | 13 | -32.913 | -24.110 | 92.848 | 1.00 | 0.00 | C |

|      |     |      |     |    |         |         |        |      |      |   |
|------|-----|------|-----|----|---------|---------|--------|------|------|---|
| ATOM | 379 | N2   | G A | 13 | -32.289 | -24.723 | 93.861 | 1.00 | 0.00 | N |
| ATOM | 380 | N3   | G A | 13 | -33.631 | -23.009 | 93.066 | 1.00 | 0.00 | N |
| ATOM | 381 | C4   | G A | 13 | -34.184 | -22.517 | 91.927 | 1.00 | 0.00 | C |
| ATOM | 382 | C5   | G A | 13 | -34.083 | -23.023 | 90.641 | 1.00 | 0.00 | C |
| ATOM | 383 | C6   | G A | 13 | -33.326 | -24.193 | 90.408 | 1.00 | 0.00 | C |
| ATOM | 384 | O6   | G A | 13 | -33.121 | -24.787 | 89.349 | 1.00 | 0.00 | O |
| ATOM | 385 | N7   | G A | 13 | -34.801 | -22.221 | 89.750 | 1.00 | 0.00 | N |
| ATOM | 386 | C8   | G A | 13 | -35.304 | -21.280 | 90.507 | 1.00 | 0.00 | C |
| ATOM | 387 | N9   | G A | 13 | -34.973 | -21.392 | 91.841 | 1.00 | 0.00 | N |
| ATOM | 388 | C2'  | G A | 13 | -35.396 | -19.036 | 92.637 | 1.00 | 0.00 | C |
| ATOM | 389 | C3'  | G A | 13 | -36.561 | -18.544 | 93.479 | 1.00 | 0.00 | C |
| ATOM | 390 | O3'  | G A | 13 | -36.097 | -18.254 | 94.796 | 1.00 | 0.00 | O |
| ATOM | 391 | C4'  | G A | 13 | -37.523 | -19.730 | 93.456 | 1.00 | 0.00 | C |
| ATOM | 392 | O4'  | G A | 13 | -36.649 | -20.902 | 93.409 | 1.00 | 0.00 | O |
| ATOM | 393 | C5'  | G A | 13 | -38.480 | -19.794 | 92.288 | 1.00 | 0.00 | C |
| ATOM | 394 | O5'  | G A | 13 | -37.824 | -19.315 | 91.088 | 1.00 | 0.00 | O |
| ATOM | 395 | O1P  | G A | 13 | -39.082 | -17.206 | 90.536 | 1.00 | 0.00 | O |
| ATOM | 396 | O2P  | G A | 13 | -37.959 | -18.511 | 88.711 | 1.00 | 0.00 | O |
| ATOM | 397 | P    | G A | 13 | -38.686 | -18.524 | 90.004 | 1.00 | 0.00 | P |
| ATOM | 398 | H1   | G A | 13 | -32.190 | -25.543 | 91.538 | 1.00 | 0.00 | H |
| ATOM | 399 | H8   | G A | 13 | -35.931 | -20.477 | 90.118 | 1.00 | 0.00 | H |
| ATOM | 400 | H1'  | G A | 13 | -34.663 | -20.708 | 93.805 | 1.00 | 0.00 | H |
| ATOM | 401 | H21  | G A | 13 | -31.740 | -25.577 | 93.684 | 1.00 | 0.00 | H |
| ATOM | 402 | H3'  | G A | 13 | -37.024 | -17.652 | 93.056 | 1.00 | 0.00 | H |
| ATOM | 403 | H22  | G A | 13 | -32.362 | -24.342 | 94.814 | 1.00 | 0.00 | H |
| ATOM | 404 | H4'  | G A | 13 | -38.114 | -19.677 | 94.368 | 1.00 | 0.00 | H |
| ATOM | 405 | H2'1 | G A | 13 | -35.574 | -18.866 | 91.576 | 1.00 | 0.00 | H |
| ATOM | 406 | H2'2 | G A | 13 | -34.470 | -18.524 | 92.900 | 1.00 | 0.00 | H |
| ATOM | 407 | H5'1 | G A | 13 | -38.803 | -20.825 | 92.147 | 1.00 | 0.00 | H |
| ATOM | 408 | H5'2 | G A | 13 | -39.350 | -19.174 | 92.505 | 1.00 | 0.00 | H |
| ATOM | 409 | C1'  | G A | 14 | -30.972 | -20.606 | 95.289 | 1.00 | 0.00 | C |
| ATOM | 410 | N1   | G A | 14 | -29.573 | -23.469 | 91.306 | 1.00 | 0.00 | N |
| ATOM | 411 | C2   | G A | 14 | -29.295 | -23.625 | 92.653 | 1.00 | 0.00 | C |
| ATOM | 412 | N2   | G A | 14 | -28.542 | -24.682 | 92.982 | 1.00 | 0.00 | N |
| ATOM | 413 | N3   | G A | 14 | -29.734 | -22.791 | 93.595 | 1.00 | 0.00 | N |
| ATOM | 414 | C4   | G A | 14 | -30.473 | -21.775 | 93.081 | 1.00 | 0.00 | C |
| ATOM | 415 | C5   | G A | 14 | -30.797 | -21.538 | 91.756 | 1.00 | 0.00 | C |
| ATOM | 416 | C6   | G A | 14 | -30.337 | -22.423 | 90.756 | 1.00 | 0.00 | C |
| ATOM | 417 | O6   | G A | 14 | -30.517 | -22.383 | 89.538 | 1.00 | 0.00 | O |
| ATOM | 418 | N7   | G A | 14 | -31.576 | -20.383 | 91.650 | 1.00 | 0.00 | N |
| ATOM | 419 | C8   | G A | 14 | -31.698 | -19.968 | 92.884 | 1.00 | 0.00 | C |
| ATOM | 420 | N9   | G A | 14 | -31.056 | -20.761 | 93.811 | 1.00 | 0.00 | N |
| ATOM | 421 | C2'  | G A | 14 | -30.851 | -19.159 | 95.748 | 1.00 | 0.00 | C |
| ATOM | 422 | C3'  | G A | 14 | -31.656 | -19.165 | 97.037 | 1.00 | 0.00 | C |
| ATOM | 423 | O3'  | G A | 14 | -30.823 | -19.606 | 98.107 | 1.00 | 0.00 | O |
| ATOM | 424 | C4'  | G A | 14 | -32.777 | -20.157 | 96.732 | 1.00 | 0.00 | C |
| ATOM | 425 | O4'  | G A | 14 | -32.157 | -21.142 | 95.846 | 1.00 | 0.00 | O |
| ATOM | 426 | C5'  | G A | 14 | -34.002 | -19.595 | 96.049 | 1.00 | 0.00 | C |
| ATOM | 427 | O5'  | G A | 14 | -33.609 | -18.568 | 95.104 | 1.00 | 0.00 | O |
| ATOM | 428 | O1P  | G A | 14 | -34.592 | -16.469 | 96.083 | 1.00 | 0.00 | O |
| ATOM | 429 | O2P  | G A | 14 | -34.221 | -16.645 | 93.608 | 1.00 | 0.00 | O |
| ATOM | 430 | P    | G A | 14 | -34.578 | -17.322 | 94.879 | 1.00 | 0.00 | P |
| ATOM | 431 | H1   | G A | 14 | -29.191 | -24.175 | 90.658 | 1.00 | 0.00 | H |
| ATOM | 432 | H8   | G A | 14 | -32.259 | -19.074 | 93.156 | 1.00 | 0.00 | H |

|      |     |      |     |    |         |         |        |      |      |   |
|------|-----|------|-----|----|---------|---------|--------|------|------|---|
| ATOM | 433 | H1'  | G A | 14 | -30.133 | -21.201 | 95.648 | 1.00 | 0.00 | H |
| ATOM | 434 | H21  | G A | 14 | -28.210 | -25.324 | 92.248 | 1.00 | 0.00 | H |
| ATOM | 435 | H3'  | G A | 14 | -32.056 | -18.179 | 97.274 | 1.00 | 0.00 | H |
| ATOM | 436 | H22  | G A | 14 | -28.298 | -24.852 | 93.968 | 1.00 | 0.00 | H |
| ATOM | 437 | H4'  | G A | 14 | -33.093 | -20.581 | 97.685 | 1.00 | 0.00 | H |
| ATOM | 438 | H2'1 | G A | 14 | -31.268 | -18.459 | 95.024 | 1.00 | 0.00 | H |
| ATOM | 439 | H2'2 | G A | 14 | -29.815 | -18.867 | 95.927 | 1.00 | 0.00 | H |
| ATOM | 440 | H5'1 | G A | 14 | -34.520 | -20.398 | 95.526 | 1.00 | 0.00 | H |
| ATOM | 441 | H5'2 | G A | 14 | -34.667 | -19.169 | 96.800 | 1.00 | 0.00 | H |
| ATOM | 442 | C1'  | A A | 15 | -26.224 | -21.913 | 95.783 | 1.00 | 0.00 | C |
| ATOM | 443 | N1   | A A | 15 | -26.402 | -22.327 | 90.671 | 1.00 | 0.00 | N |
| ATOM | 444 | C2   | A A | 15 | -25.857 | -23.089 | 91.617 | 1.00 | 0.00 | C |
| ATOM | 445 | N3   | A A | 15 | -25.851 | -22.924 | 92.923 | 1.00 | 0.00 | N |
| ATOM | 446 | C4   | A A | 15 | -26.508 | -21.796 | 93.252 | 1.00 | 0.00 | C |
| ATOM | 447 | C5   | A A | 15 | -27.117 | -20.910 | 92.409 | 1.00 | 0.00 | C |
| ATOM | 448 | C6   | A A | 15 | -27.050 | -21.208 | 91.032 | 1.00 | 0.00 | C |
| ATOM | 449 | N6   | A A | 15 | -27.604 | -20.430 | 90.086 | 1.00 | 0.00 | N |
| ATOM | 450 | N7   | A A | 15 | -27.693 | -19.868 | 93.112 | 1.00 | 0.00 | N |
| ATOM | 451 | C8   | A A | 15 | -27.419 | -20.138 | 94.354 | 1.00 | 0.00 | C |
| ATOM | 452 | N9   | A A | 15 | -26.703 | -21.298 | 94.517 | 1.00 | 0.00 | N |
| ATOM | 453 | C2'  | A A | 15 | -25.756 | -20.900 | 96.820 | 1.00 | 0.00 | C |
| ATOM | 454 | C3'  | A A | 15 | -26.196 | -21.551 | 98.123 | 1.00 | 0.00 | C |
| ATOM | 455 | O3'  | A A | 15 | -25.202 | -22.483 | 98.538 | 1.00 | 0.00 | O |
| ATOM | 456 | C4'  | A A | 15 | -27.504 | -22.239 | 97.733 | 1.00 | 0.00 | C |
| ATOM | 457 | O4'  | A A | 15 | -27.299 | -22.645 | 96.341 | 1.00 | 0.00 | O |
| ATOM | 458 | C5'  | A A | 15 | -28.754 | -21.395 | 97.810 | 1.00 | 0.00 | C |
| ATOM | 459 | O5'  | A A | 15 | -28.454 | -20.035 | 97.407 | 1.00 | 0.00 | O |
| ATOM | 460 | O1P  | A A | 15 | -28.801 | -18.711 | 99.520 | 1.00 | 0.00 | O |
| ATOM | 461 | O2P  | A A | 15 | -29.106 | -17.610 | 97.285 | 1.00 | 0.00 | O |
| ATOM | 462 | P    | A A | 15 | -29.232 | -18.834 | 98.113 | 1.00 | 0.00 | P |
| ATOM | 463 | H2   | A A | 15 | -25.341 | -23.978 | 91.256 | 1.00 | 0.00 | H |
| ATOM | 464 | H8   | A A | 15 | -27.728 | -19.508 | 95.187 | 1.00 | 0.00 | H |
| ATOM | 465 | H1'  | A A | 15 | -25.430 | -22.618 | 95.540 | 1.00 | 0.00 | H |
| ATOM | 466 | H3'  | A A | 15 | -26.357 | -20.817 | 98.912 | 1.00 | 0.00 | H |
| ATOM | 467 | H4'  | A A | 15 | -27.630 | -23.083 | 98.409 | 1.00 | 0.00 | H |
| ATOM | 468 | H61  | A A | 15 | -27.528 | -20.695 | 89.094 | 1.00 | 0.00 | H |
| ATOM | 469 | H62  | A A | 15 | -28.101 | -19.569 | 90.355 | 1.00 | 0.00 | H |
| ATOM | 470 | H2'1 | A A | 15 | -26.225 | -19.925 | 96.685 | 1.00 | 0.00 | H |
| ATOM | 471 | H2'2 | A A | 15 | -24.676 | -20.751 | 96.796 | 1.00 | 0.00 | H |
| ATOM | 472 | H5'1 | A A | 15 | -29.512 | -21.816 | 97.149 | 1.00 | 0.00 | H |
| ATOM | 473 | H5'2 | A A | 15 | -29.128 | -21.401 | 98.833 | 1.00 | 0.00 | H |
| ATOM | 474 | C1'  | C A | 16 | -21.805 | -23.336 | 94.021 | 1.00 | 0.00 | C |
| ATOM | 475 | N1   | C A | 16 | -22.488 | -22.138 | 93.462 | 1.00 | 0.00 | N |
| ATOM | 476 | C2   | C A | 16 | -22.639 | -22.059 | 92.080 | 1.00 | 0.00 | C |
| ATOM | 477 | O2   | C A | 16 | -22.203 | -22.980 | 91.378 | 1.00 | 0.00 | O |
| ATOM | 478 | N3   | C A | 16 | -23.259 | -20.976 | 91.550 | 1.00 | 0.00 | N |
| ATOM | 479 | C4   | C A | 16 | -23.722 | -19.995 | 92.335 | 1.00 | 0.00 | C |
| ATOM | 480 | N4   | C A | 16 | -24.323 | -18.961 | 91.763 | 1.00 | 0.00 | N |
| ATOM | 481 | C5   | C A | 16 | -23.577 | -20.046 | 93.760 | 1.00 | 0.00 | C |
| ATOM | 482 | C6   | C A | 16 | -22.953 | -21.149 | 94.273 | 1.00 | 0.00 | C |
| ATOM | 483 | C2'  | C A | 16 | -20.907 | -23.029 | 95.211 | 1.00 | 0.00 | C |
| ATOM | 484 | C3'  | C A | 16 | -21.093 | -24.267 | 96.076 | 1.00 | 0.00 | C |
| ATOM | 485 | O3'  | C A | 16 | -20.203 | -25.288 | 95.630 | 1.00 | 0.00 | O |
| ATOM | 486 | C4'  | C A | 16 | -22.557 | -24.631 | 95.838 | 1.00 | 0.00 | C |

|      |     |      |   |   |    |         |         |        |      |      |   |
|------|-----|------|---|---|----|---------|---------|--------|------|------|---|
| ATOM | 487 | O4'  | C | A | 16 | -22.805 | -24.241 | 94.450 | 1.00 | 0.00 | O |
| ATOM | 488 | C5'  | C | A | 16 | -23.571 | -23.942 | 96.721 | 1.00 | 0.00 | C |
| ATOM | 489 | O5'  | C | A | 16 | -23.152 | -22.578 | 96.979 | 1.00 | 0.00 | O |
| ATOM | 490 | O1P  | C | A | 16 | -22.684 | -22.569 | 99.452 | 1.00 | 0.00 | O |
| ATOM | 491 | O2P  | C | A | 16 | -23.373 | -20.450 | 98.298 | 1.00 | 0.00 | O |
| ATOM | 492 | P    | C | A | 16 | -23.489 | -21.927 | 98.395 | 1.00 | 0.00 | P |
| ATOM | 493 | H5   | C | A | 16 | -23.945 | -19.246 | 94.403 | 1.00 | 0.00 | H |
| ATOM | 494 | H6   | C | A | 16 | -22.825 | -21.237 | 95.352 | 1.00 | 0.00 | H |
| ATOM | 495 | H1'  | C | A | 16 | -21.241 | -23.813 | 93.220 | 1.00 | 0.00 | H |
| ATOM | 496 | H3'  | C | A | 16 | -20.905 | -24.059 | 97.131 | 1.00 | 0.00 | H |
| ATOM | 497 | H4'  | C | A | 16 | -22.646 | -25.703 | 96.004 | 1.00 | 0.00 | H |
| ATOM | 498 | H41  | C | A | 16 | -24.689 | -18.193 | 92.345 | 1.00 | 0.00 | H |
| ATOM | 499 | H42  | C | A | 16 | -24.423 | -18.925 | 90.739 | 1.00 | 0.00 | H |
| ATOM | 500 | H2'1 | C | A | 16 | -21.212 | -22.127 | 95.740 | 1.00 | 0.00 | H |
| ATOM | 501 | H2'2 | C | A | 16 | -19.863 | -22.901 | 94.921 | 1.00 | 0.00 | H |
| ATOM | 502 | H5'1 | C | A | 16 | -24.539 | -23.942 | 96.221 | 1.00 | 0.00 | H |
| ATOM | 503 | H5'2 | C | A | 16 | -23.653 | -24.485 | 97.663 | 1.00 | 0.00 | H |
| ATOM | 504 | C1'  | G | A | 17 | -18.299 | -23.680 | 90.542 | 1.00 | 0.00 | C |
| ATOM | 505 | N1   | G | A | 17 | -20.511 | -19.470 | 88.697 | 1.00 | 0.00 | N |
| ATOM | 506 | C2   | G | A | 17 | -20.043 | -20.591 | 88.034 | 1.00 | 0.00 | C |
| ATOM | 507 | N2   | G | A | 17 | -20.182 | -20.588 | 86.702 | 1.00 | 0.00 | N |
| ATOM | 508 | N3   | G | A | 17 | -19.484 | -21.630 | 88.650 | 1.00 | 0.00 | N |
| ATOM | 509 | C4   | G | A | 17 | -19.418 | -21.459 | 89.996 | 1.00 | 0.00 | C |
| ATOM | 510 | C5   | G | A | 17 | -19.854 | -20.376 | 90.743 | 1.00 | 0.00 | C |
| ATOM | 511 | C6   | G | A | 17 | -20.452 | -19.274 | 90.091 | 1.00 | 0.00 | C |
| ATOM | 512 | O6   | G | A | 17 | -20.896 | -18.232 | 90.574 | 1.00 | 0.00 | O |
| ATOM | 513 | N7   | G | A | 17 | -19.600 | -20.592 | 92.099 | 1.00 | 0.00 | N |
| ATOM | 514 | C8   | G | A | 17 | -19.037 | -21.772 | 92.132 | 1.00 | 0.00 | C |
| ATOM | 515 | N9   | G | A | 17 | -18.890 | -22.362 | 90.893 | 1.00 | 0.00 | N |
| ATOM | 516 | C2'  | G | A | 17 | -17.085 | -24.053 | 91.382 | 1.00 | 0.00 | C |
| ATOM | 517 | C3'  | G | A | 17 | -17.247 | -25.556 | 91.527 | 1.00 | 0.00 | C |
| ATOM | 518 | O3'  | G | A | 17 | -16.690 | -26.201 | 90.382 | 1.00 | 0.00 | O |
| ATOM | 519 | C4'  | G | A | 17 | -18.764 | -25.728 | 91.606 | 1.00 | 0.00 | C |
| ATOM | 520 | O4'  | G | A | 17 | -19.292 | -24.668 | 90.750 | 1.00 | 0.00 | O |
| ATOM | 521 | C5'  | G | A | 17 | -19.382 | -25.597 | 92.978 | 1.00 | 0.00 | C |
| ATOM | 522 | O5'  | G | A | 17 | -18.687 | -24.573 | 93.733 | 1.00 | 0.00 | O |
| ATOM | 523 | O1P  | G | A | 17 | -17.600 | -25.867 | 95.599 | 1.00 | 0.00 | O |
| ATOM | 524 | O2P  | G | A | 17 | -18.194 | -23.451 | 95.927 | 1.00 | 0.00 | O |
| ATOM | 525 | P    | G | A | 17 | -18.530 | -24.758 | 95.310 | 1.00 | 0.00 | P |
| ATOM | 526 | H1   | G | A | 17 | -20.934 | -18.723 | 88.126 | 1.00 | 0.00 | H |
| ATOM | 527 | H8   | G | A | 17 | -18.709 | -22.246 | 93.057 | 1.00 | 0.00 | H |
| ATOM | 528 | H1'  | G | A | 17 | -18.051 | -23.672 | 89.480 | 1.00 | 0.00 | H |
| ATOM | 529 | H21  | G | A | 17 | -20.620 | -19.783 | 86.233 | 1.00 | 0.00 | H |
| ATOM | 530 | H3'  | G | A | 17 | -16.761 | -25.935 | 92.427 | 1.00 | 0.00 | H |
| ATOM | 531 | H22  | G | A | 17 | -19.852 | -21.392 | 86.150 | 1.00 | 0.00 | H |
| ATOM | 532 | H4'  | G | A | 17 | -18.988 | -26.728 | 91.234 | 1.00 | 0.00 | H |
| ATOM | 533 | H2'1 | G | A | 17 | -17.086 | -23.557 | 92.353 | 1.00 | 0.00 | H |
| ATOM | 534 | H2'2 | G | A | 17 | -16.146 | -23.800 | 90.887 | 1.00 | 0.00 | H |
| ATOM | 535 | H5'1 | G | A | 17 | -20.432 | -25.325 | 92.871 | 1.00 | 0.00 | H |
| ATOM | 536 | H5'2 | G | A | 17 | -19.310 | -26.552 | 93.496 | 1.00 | 0.00 | H |
| ATOM | 537 | C1'  | G | A | 18 | -15.931 | -22.200 | 86.453 | 1.00 | 0.00 | C |
| ATOM | 538 | N1   | G | A | 18 | -17.801 | -17.623 | 87.710 | 1.00 | 0.00 | N |
| ATOM | 539 | C2   | G | A | 18 | -17.719 | -18.240 | 86.474 | 1.00 | 0.00 | C |
| ATOM | 540 | N2   | G | A | 18 | -18.198 | -17.543 | 85.434 | 1.00 | 0.00 | N |

|      |     |      |     |    |         |         |        |      |      |   |
|------|-----|------|-----|----|---------|---------|--------|------|------|---|
| ATOM | 541 | N3   | G A | 18 | -17.202 | -19.452 | 86.291 | 1.00 | 0.00 | N |
| ATOM | 542 | C4   | G A | 18 | -16.761 | -20.008 | 87.450 | 1.00 | 0.00 | C |
| ATOM | 543 | C5   | G A | 18 | -16.797 | -19.467 | 88.725 | 1.00 | 0.00 | C |
| ATOM | 544 | C6   | G A | 18 | -17.350 | -18.180 | 88.921 | 1.00 | 0.00 | C |
| ATOM | 545 | O6   | G A | 18 | -17.469 | -17.538 | 89.965 | 1.00 | 0.00 | O |
| ATOM | 546 | N7   | G A | 18 | -16.240 | -20.358 | 89.643 | 1.00 | 0.00 | N |
| ATOM | 547 | C8   | G A | 18 | -15.895 | -21.388 | 88.914 | 1.00 | 0.00 | C |
| ATOM | 548 | N9   | G A | 18 | -16.178 | -21.249 | 87.572 | 1.00 | 0.00 | N |
| ATOM | 549 | C2'  | G A | 18 | -14.620 | -22.965 | 86.575 | 1.00 | 0.00 | C |
| ATOM | 550 | C3'  | G A | 18 | -14.992 | -24.324 | 86.004 | 1.00 | 0.00 | C |
| ATOM | 551 | O3'  | G A | 18 | -14.870 | -24.284 | 84.584 | 1.00 | 0.00 | O |
| ATOM | 552 | C4'  | G A | 18 | -16.441 | -24.498 | 86.454 | 1.00 | 0.00 | C |
| ATOM | 553 | O4'  | G A | 18 | -16.986 | -23.140 | 86.443 | 1.00 | 0.00 | O |
| ATOM | 554 | C5'  | G A | 18 | -16.650 | -25.092 | 87.828 | 1.00 | 0.00 | C |
| ATOM | 555 | O5'  | G A | 18 | -15.620 | -24.618 | 88.729 | 1.00 | 0.00 | O |
| ATOM | 556 | O1P  | G A | 18 | -14.319 | -26.704 | 89.275 | 1.00 | 0.00 | O |
| ATOM | 557 | O2P  | G A | 18 | -14.390 | -24.806 | 90.913 | 1.00 | 0.00 | O |
| ATOM | 558 | P    | G A | 18 | -15.090 | -25.598 | 89.872 | 1.00 | 0.00 | P |
| ATOM | 559 | H1   | G A | 18 | -18.225 | -16.684 | 87.745 | 1.00 | 0.00 | H |
| ATOM | 560 | H8   | G A | 18 | -15.424 | -22.279 | 89.331 | 1.00 | 0.00 | H |
| ATOM | 561 | H1'  | G A | 18 | -15.970 | -21.642 | 85.516 | 1.00 | 0.00 | H |
| ATOM | 562 | H21  | G A | 18 | -18.599 | -16.606 | 85.585 | 1.00 | 0.00 | H |
| ATOM | 563 | H3'  | G A | 18 | -14.359 | -25.120 | 86.399 | 1.00 | 0.00 | H |
| ATOM | 564 | H22  | G A | 18 | -18.163 | -17.945 | 84.488 | 1.00 | 0.00 | H |
| ATOM | 565 | H4'  | G A | 18 | -16.921 | -25.155 | 85.730 | 1.00 | 0.00 | H |
| ATOM | 566 | H2'1 | G A | 18 | -14.286 | -23.048 | 87.609 | 1.00 | 0.00 | H |
| ATOM | 567 | H2'2 | G A | 18 | -13.815 | -22.501 | 86.007 | 1.00 | 0.00 | H |
| ATOM | 568 | H5'1 | G A | 18 | -17.630 | -24.796 | 88.200 | 1.00 | 0.00 | H |
| ATOM | 569 | H5'2 | G A | 18 | -16.608 | -26.178 | 87.757 | 1.00 | 0.00 | H |
| ATOM | 570 | C1'  | T A | 19 | -14.487 | -18.849 | 83.107 | 1.00 | 0.00 | C |
| ATOM | 571 | N1   | T A | 19 | -14.282 | -18.591 | 84.557 | 1.00 | 0.00 | N |
| ATOM | 572 | C2   | T A | 19 | -14.736 | -17.386 | 85.054 | 1.00 | 0.00 | C |
| ATOM | 573 | O2   | T A | 19 | -15.284 | -16.550 | 84.356 | 1.00 | 0.00 | O |
| ATOM | 574 | N3   | T A | 19 | -14.525 | -17.189 | 86.406 | 1.00 | 0.00 | N |
| ATOM | 575 | C4   | T A | 19 | -13.916 | -18.064 | 87.279 | 1.00 | 0.00 | C |
| ATOM | 576 | O4   | T A | 19 | -13.781 | -17.775 | 88.474 | 1.00 | 0.00 | O |
| ATOM | 577 | C5   | T A | 19 | -13.475 | -19.296 | 86.670 | 1.00 | 0.00 | C |
| ATOM | 578 | C6   | T A | 19 | -13.664 | -19.523 | 85.354 | 1.00 | 0.00 | C |
| ATOM | 579 | C7   | T A | 19 | -12.808 | -20.281 | 87.583 | 1.00 | 0.00 | C |
| ATOM | 580 | C2'  | T A | 19 | -13.329 | -19.586 | 82.444 | 1.00 | 0.00 | C |
| ATOM | 581 | C3'  | T A | 19 | -14.050 | -20.466 | 81.435 | 1.00 | 0.00 | C |
| ATOM | 582 | O3'  | T A | 19 | -14.293 | -19.717 | 80.248 | 1.00 | 0.00 | O |
| ATOM | 583 | C4'  | T A | 19 | -15.342 | -20.829 | 82.164 | 1.00 | 0.00 | C |
| ATOM | 584 | O4'  | T A | 19 | -15.647 | -19.647 | 82.969 | 1.00 | 0.00 | O |
| ATOM | 585 | C5'  | T A | 19 | -15.285 | -22.033 | 83.074 | 1.00 | 0.00 | C |
| ATOM | 586 | O5'  | T A | 19 | -13.995 | -22.090 | 83.731 | 1.00 | 0.00 | O |
| ATOM | 587 | O1P  | T A | 19 | -12.952 | -24.178 | 82.787 | 1.00 | 0.00 | O |
| ATOM | 588 | O2P  | T A | 19 | -12.293 | -23.366 | 85.068 | 1.00 | 0.00 | O |
| ATOM | 589 | P    | T A | 19 | -13.355 | -23.517 | 84.045 | 1.00 | 0.00 | P |
| ATOM | 590 | H3   | T A | 19 | -14.859 | -16.298 | 86.801 | 1.00 | 0.00 | H |
| ATOM | 591 | H6   | T A | 19 | -13.323 | -20.462 | 84.916 | 1.00 | 0.00 | H |
| ATOM | 592 | H1'  | T A | 19 | -14.675 | -17.895 | 82.614 | 1.00 | 0.00 | H |
| ATOM | 593 | H3'  | T A | 19 | -13.473 | -21.358 | 81.188 | 1.00 | 0.00 | H |
| ATOM | 594 | H4'  | T A | 19 | -16.093 | -21.028 | 81.396 | 1.00 | 0.00 | H |

|      |     |      |       |    |         |         |        |      |      |   |
|------|-----|------|-------|----|---------|---------|--------|------|------|---|
| ATOM | 595 | H71  | T A   | 19 | -11.764 | -20.396 | 87.294 | 1.00 | 0.00 | H |
| ATOM | 596 | H72  | T A   | 19 | -12.861 | -19.917 | 88.610 | 1.00 | 0.00 | H |
| ATOM | 597 | H73  | T A   | 19 | -13.313 | -21.245 | 87.514 | 1.00 | 0.00 | H |
| ATOM | 598 | H2'1 | T A   | 19 | -12.759 | -20.182 | 83.155 | 1.00 | 0.00 | H |
| ATOM | 599 | H2'2 | T A   | 19 | -12.633 | -18.906 | 81.953 | 1.00 | 0.00 | H |
| ATOM | 600 | H5'1 | T A   | 19 | -16.076 | -21.957 | 83.820 | 1.00 | 0.00 | H |
| ATOM | 601 | H5'2 | T A   | 19 | -15.438 | -22.936 | 82.483 | 1.00 | 0.00 | H |
| ATOM | 602 | C01  | LNK A | 20 | -12.079 | -18.976 | 77.349 | 0.00 | 0.00 | C |
| ATOM | 603 | O1   | LNK A | 20 | -12.313 | -19.548 | 78.637 | 1.00 | 0.00 | O |
| ATOM | 604 | S    | LNK A | 20 | -9.073  | -18.464 | 74.789 | 0.00 | 0.00 | S |
| ATOM | 605 | C02  | LNK A | 20 | -10.599 | -19.167 | 76.965 | 0.00 | 0.00 | C |
| ATOM | 606 | C03  | LNK A | 20 | -10.105 | -17.930 | 76.190 | 0.00 | 0.00 | C |
| ATOM | 607 | O1P  | LNK A | 20 | -12.035 | -18.535 | 80.925 | 1.00 | 0.00 | O |
| ATOM | 608 | O2P  | LNK A | 20 | -13.404 | -17.352 | 79.185 | 1.00 | 0.00 | O |
| ATOM | 609 | P    | LNK A | 20 | -12.958 | -18.637 | 79.777 | 1.00 | 0.00 | P |
| ATOM | 610 | H01  | LNK A | 20 | -12.311 | -17.910 | 77.374 | 0.00 | 0.00 | H |
| ATOM | 611 | H02  | LNK A | 20 | -12.711 | -19.467 | 76.610 | 0.00 | 0.00 | H |
| ATOM | 612 | H03  | LNK A | 20 | -9.516  | -17.298 | 76.854 | 0.00 | 0.00 | H |
| ATOM | 613 | H04  | LNK A | 20 | -10.499 | -20.053 | 76.337 | 0.00 | 0.00 | H |
| ATOM | 614 | H05  | LNK A | 20 | -10.003 | -19.292 | 77.868 | 0.00 | 0.00 | H |
| ATOM | 615 | H06  | LNK A | 20 | -10.961 | -17.368 | 75.817 | 0.00 | 0.00 | H |
| ATOM | 616 | AU   | LNK A | 20 | -8.771  | -17.918 | 74.505 |      |      |   |
| TER  |     |      |       |    |         |         |        |      |      |   |
| ATOM | 618 | C1'  | A B   | 2  | -17.338 | -10.046 | 88.875 | 1.00 | 0.00 | C |
| ATOM | 619 | N1   | A B   | 2  | -15.468 | -14.640 | 87.555 | 1.00 | 0.00 | N |
| ATOM | 620 | C2   | A B   | 2  | -16.080 | -13.687 | 86.860 | 1.00 | 0.00 | C |
| ATOM | 621 | N3   | A B   | 2  | -16.535 | -12.519 | 87.263 | 1.00 | 0.00 | N |
| ATOM | 622 | C4   | A B   | 2  | -16.309 | -12.361 | 88.581 | 1.00 | 0.00 | C |
| ATOM | 623 | C5   | A B   | 2  | -15.699 | -13.240 | 89.431 | 1.00 | 0.00 | C |
| ATOM | 624 | C6   | A B   | 2  | -15.256 | -14.454 | 88.867 | 1.00 | 0.00 | C |
| ATOM | 625 | N6   | A B   | 2  | -14.638 | -15.412 | 89.579 | 1.00 | 0.00 | N |
| ATOM | 626 | N7   | A B   | 2  | -15.643 | -12.733 | 90.717 | 1.00 | 0.00 | N |
| ATOM | 627 | C8   | A B   | 2  | -16.220 | -11.571 | 90.621 | 1.00 | 0.00 | C |
| ATOM | 628 | N9   | A B   | 2  | -16.647 | -11.276 | 89.352 | 1.00 | 0.00 | N |
| ATOM | 629 | C2'  | A B   | 2  | -18.337 | -9.478  | 89.874 | 1.00 | 0.00 | C |
| ATOM | 630 | C3'  | A B   | 2  | -18.185 | -7.981  | 89.658 | 1.00 | 0.00 | C |
| ATOM | 631 | O3'  | A B   | 2  | -19.003 | -7.582  | 88.561 | 1.00 | 0.00 | O |
| ATOM | 632 | C4'  | A B   | 2  | -16.695 | -7.832  | 89.351 | 1.00 | 0.00 | C |
| ATOM | 633 | O4'  | A B   | 2  | -16.348 | -9.064  | 88.638 | 1.00 | 0.00 | O |
| ATOM | 634 | C5'  | A B   | 2  | -15.776 | -7.684  | 90.540 | 1.00 | 0.00 | C |
| ATOM | 635 | O5'  | A B   | 2  | -16.253 | -8.509  | 91.633 | 1.00 | 0.00 | O |
| ATOM | 636 | H2   | A B   | 2  | -16.226 | -13.901 | 85.803 | 1.00 | 0.00 | H |
| ATOM | 637 | H8   | A B   | 2  | -16.350 | -10.896 | 91.467 | 1.00 | 0.00 | H |
| ATOM | 638 | H1'  | A B   | 2  | -17.822 | -10.274 | 87.925 | 1.00 | 0.00 | H |
| ATOM | 639 | H3'  | A B   | 2  | -18.463 | -7.409  | 90.543 | 1.00 | 0.00 | H |
| ATOM | 640 | H4'  | A B   | 2  | -16.588 | -6.939  | 88.734 | 1.00 | 0.00 | H |
| ATOM | 641 | H61  | A B   | 2  | -14.331 | -16.279 | 89.117 | 1.00 | 0.00 | H |
| ATOM | 642 | H62  | A B   | 2  | -14.472 | -15.277 | 90.587 | 1.00 | 0.00 | H |
| ATOM | 643 | H2'1 | A B   | 2  | -18.100 | -9.756  | 90.901 | 1.00 | 0.00 | H |
| ATOM | 644 | H2'2 | A B   | 2  | -19.357 | -9.807  | 89.671 | 1.00 | 0.00 | H |
| ATOM | 645 | H5'1 | A B   | 2  | -14.772 | -7.996  | 90.255 | 1.00 | 0.00 | H |
| ATOM | 646 | H5'2 | A B   | 2  | -15.755 | -6.640  | 90.847 | 1.00 | 0.00 | H |
| ATOM | 647 | C1'  | C B   | 3  | -20.494 | -12.370 | 85.827 | 1.00 | 0.00 | C |
| ATOM | 648 | N1   | C B   | 3  | -19.980 | -13.053 | 87.046 | 1.00 | 0.00 | N |

|      |     |      |     |   |         |         |        |      |      |   |
|------|-----|------|-----|---|---------|---------|--------|------|------|---|
| ATOM | 649 | C2   | C B | 3 | -19.430 | -14.324 | 86.899 | 1.00 | 0.00 | C |
| ATOM | 650 | O2   | C B | 3 | -19.388 | -14.829 | 85.769 | 1.00 | 0.00 | O |
| ATOM | 651 | N3   | C B | 3 | -18.956 | -14.963 | 87.995 | 1.00 | 0.00 | N |
| ATOM | 652 | C4   | C B | 3 | -19.016 | -14.391 | 89.206 | 1.00 | 0.00 | C |
| ATOM | 653 | N4   | C B | 3 | -18.536 | -15.060 | 90.245 | 1.00 | 0.00 | N |
| ATOM | 654 | C5   | C B | 3 | -19.582 | -13.086 | 89.390 | 1.00 | 0.00 | C |
| ATOM | 655 | C6   | C B | 3 | -20.049 | -12.459 | 88.268 | 1.00 | 0.00 | C |
| ATOM | 656 | C2'  | C B | 3 | -21.766 | -11.567 | 86.063 | 1.00 | 0.00 | C |
| ATOM | 657 | C3'  | C B | 3 | -21.566 | -10.376 | 85.137 | 1.00 | 0.00 | C |
| ATOM | 658 | O3'  | C B | 3 | -21.994 | -10.729 | 83.824 | 1.00 | 0.00 | O |
| ATOM | 659 | C4'  | C B | 3 | -20.059 | -10.141 | 85.209 | 1.00 | 0.00 | C |
| ATOM | 660 | O4'  | C B | 3 | -19.490 | -11.479 | 85.380 | 1.00 | 0.00 | O |
| ATOM | 661 | C5'  | C B | 3 | -19.570 | -9.261  | 86.336 | 1.00 | 0.00 | C |
| ATOM | 662 | O5'  | C B | 3 | -20.366 | -9.499  | 87.524 | 1.00 | 0.00 | O |
| ATOM | 663 | O1P  | C B | 3 | -21.571 | -7.317  | 87.866 | 1.00 | 0.00 | O |
| ATOM | 664 | O2P  | C B | 3 | -21.091 | -8.805  | 89.828 | 1.00 | 0.00 | O |
| ATOM | 665 | P    | C B | 3 | -20.657 | -8.281  | 88.509 | 1.00 | 0.00 | P |
| ATOM | 666 | H5   | C B | 3 | -19.639 | -12.618 | 90.372 | 1.00 | 0.00 | H |
| ATOM | 667 | H6   | C B | 3 | -20.481 | -11.462 | 88.356 | 1.00 | 0.00 | H |
| ATOM | 668 | H1'  | C B | 3 | -20.645 | -13.122 | 85.052 | 1.00 | 0.00 | H |
| ATOM | 669 | H3'  | C B | 3 | -22.118 | -9.500  | 85.475 | 1.00 | 0.00 | H |
| ATOM | 670 | H4'  | C B | 3 | -19.767 | -9.669  | 84.271 | 1.00 | 0.00 | H |
| ATOM | 671 | H41  | C B | 3 | -18.565 | -14.640 | 91.186 | 1.00 | 0.00 | H |
| ATOM | 672 | H42  | C B | 3 | -18.130 | -15.998 | 90.111 | 1.00 | 0.00 | H |
| ATOM | 673 | H2'1 | C B | 3 | -21.869 | -11.249 | 87.099 | 1.00 | 0.00 | H |
| ATOM | 674 | H2'2 | C B | 3 | -22.664 | -12.128 | 85.801 | 1.00 | 0.00 | H |
| ATOM | 675 | H5'1 | C B | 3 | -18.524 | -9.489  | 86.542 | 1.00 | 0.00 | H |
| ATOM | 676 | H5'2 | C B | 3 | -19.656 | -8.218  | 86.038 | 1.00 | 0.00 | H |
| ATOM | 677 | C1'  | C B | 4 | -22.537 | -16.365 | 83.732 | 1.00 | 0.00 | C |
| ATOM | 678 | N1   | C B | 4 | -22.421 | -16.262 | 85.213 | 1.00 | 0.00 | N |
| ATOM | 679 | C2   | C B | 4 | -21.839 | -17.327 | 85.897 | 1.00 | 0.00 | C |
| ATOM | 680 | O2   | C B | 4 | -21.443 | -18.308 | 85.253 | 1.00 | 0.00 | O |
| ATOM | 681 | N3   | C B | 4 | -21.724 | -17.254 | 87.245 | 1.00 | 0.00 | N |
| ATOM | 682 | C4   | C B | 4 | -22.161 | -16.179 | 87.916 | 1.00 | 0.00 | C |
| ATOM | 683 | N4   | C B | 4 | -22.020 | -16.158 | 89.233 | 1.00 | 0.00 | N |
| ATOM | 684 | C5   | C B | 4 | -22.768 | -15.071 | 87.239 | 1.00 | 0.00 | C |
| ATOM | 685 | C6   | C B | 4 | -22.869 | -15.165 | 85.880 | 1.00 | 0.00 | C |
| ATOM | 686 | C2'  | C B | 4 | -23.828 | -15.779 | 83.176 | 1.00 | 0.00 | C |
| ATOM | 687 | C3'  | C B | 4 | -23.361 | -15.184 | 81.856 | 1.00 | 0.00 | C |
| ATOM | 688 | O3'  | C B | 4 | -23.358 | -16.202 | 80.858 | 1.00 | 0.00 | O |
| ATOM | 689 | C4'  | C B | 4 | -21.953 | -14.692 | 82.183 | 1.00 | 0.00 | C |
| ATOM | 690 | O4'  | C B | 4 | -21.453 | -15.655 | 83.165 | 1.00 | 0.00 | O |
| ATOM | 691 | C5'  | C B | 4 | -21.845 | -13.303 | 82.771 | 1.00 | 0.00 | C |
| ATOM | 692 | O5'  | C B | 4 | -22.970 | -13.058 | 83.655 | 1.00 | 0.00 | O |
| ATOM | 693 | O1P  | C B | 4 | -24.242 | -11.229 | 82.482 | 1.00 | 0.00 | O |
| ATOM | 694 | O2P  | C B | 4 | -24.380 | -11.454 | 84.978 | 1.00 | 0.00 | O |
| ATOM | 695 | P    | C B | 4 | -23.564 | -11.581 | 83.745 | 1.00 | 0.00 | P |
| ATOM | 696 | H5   | C B | 4 | -23.132 | -14.198 | 87.781 | 1.00 | 0.00 | H |
| ATOM | 697 | H6   | C B | 4 | -23.317 | -14.345 | 85.320 | 1.00 | 0.00 | H |
| ATOM | 698 | H1'  | C B | 4 | -22.433 | -17.414 | 83.454 | 1.00 | 0.00 | H |
| ATOM | 699 | H3'  | C B | 4 | -23.999 | -14.362 | 81.531 | 1.00 | 0.00 | H |
| ATOM | 700 | H4'  | C B | 4 | -21.388 | -14.703 | 81.251 | 1.00 | 0.00 | H |
| ATOM | 701 | H41  | C B | 4 | -22.345 | -15.343 | 89.774 | 1.00 | 0.00 | H |
| ATOM | 702 | H42  | C B | 4 | -21.585 | -16.957 | 89.719 | 1.00 | 0.00 | H |

|      |     |      |     |   |         |         |        |      |      |   |
|------|-----|------|-----|---|---------|---------|--------|------|------|---|
| ATOM | 703 | H2'1 | C B | 4 | -24.249 | -15.015 | 83.828 | 1.00 | 0.00 | H |
| ATOM | 704 | H2'2 | C B | 4 | -24.594 | -16.539 | 83.020 | 1.00 | 0.00 | H |
| ATOM | 705 | H5'1 | C B | 4 | -20.913 | -13.222 | 83.329 | 1.00 | 0.00 | H |
| ATOM | 706 | H5'2 | C B | 4 | -21.846 | -12.574 | 81.962 | 1.00 | 0.00 | H |
| ATOM | 707 | C1'  | G B | 5 | -23.790 | -21.154 | 83.576 | 1.00 | 0.00 | C |
| ATOM | 708 | N1   | G B | 5 | -23.582 | -20.790 | 88.660 | 1.00 | 0.00 | N |
| ATOM | 709 | C2   | G B | 5 | -23.122 | -21.791 | 87.821 | 1.00 | 0.00 | C |
| ATOM | 710 | N2   | G B | 5 | -22.529 | -22.833 | 88.417 | 1.00 | 0.00 | N |
| ATOM | 711 | N3   | G B | 5 | -23.243 | -21.752 | 86.496 | 1.00 | 0.00 | N |
| ATOM | 712 | C4   | G B | 5 | -23.874 | -20.627 | 86.066 | 1.00 | 0.00 | C |
| ATOM | 713 | C5   | G B | 5 | -24.369 | -19.583 | 86.829 | 1.00 | 0.00 | C |
| ATOM | 714 | C6   | G B | 5 | -24.238 | -19.620 | 88.235 | 1.00 | 0.00 | C |
| ATOM | 715 | O6   | G B | 5 | -24.610 | -18.797 | 89.071 | 1.00 | 0.00 | O |
| ATOM | 716 | N7   | G B | 5 | -24.949 | -18.617 | 86.002 | 1.00 | 0.00 | N |
| ATOM | 717 | C8   | G B | 5 | -24.789 | -19.095 | 84.794 | 1.00 | 0.00 | C |
| ATOM | 718 | N9   | G B | 5 | -24.144 | -20.314 | 84.753 | 1.00 | 0.00 | N |
| ATOM | 719 | C2'  | G B | 5 | -24.845 | -21.145 | 82.477 | 1.00 | 0.00 | C |
| ATOM | 720 | C3'  | G B | 5 | -23.994 | -21.214 | 81.220 | 1.00 | 0.00 | C |
| ATOM | 721 | O3'  | G B | 5 | -23.674 | -22.575 | 80.943 | 1.00 | 0.00 | O |
| ATOM | 722 | C4'  | G B | 5 | -22.762 | -20.395 | 81.599 | 1.00 | 0.00 | C |
| ATOM | 723 | O4'  | G B | 5 | -22.588 | -20.647 | 83.030 | 1.00 | 0.00 | O |
| ATOM | 724 | C5'  | G B | 5 | -22.852 | -18.904 | 81.378 | 1.00 | 0.00 | C |
| ATOM | 725 | O5'  | G B | 5 | -24.195 | -18.445 | 81.670 | 1.00 | 0.00 | O |
| ATOM | 726 | O1P  | G B | 5 | -25.050 | -17.679 | 79.430 | 1.00 | 0.00 | O |
| ATOM | 727 | O2P  | G B | 5 | -25.957 | -16.659 | 81.534 | 1.00 | 0.00 | O |
| ATOM | 728 | P    | G B | 5 | -24.798 | -17.239 | 80.816 | 1.00 | 0.00 | P |
| ATOM | 729 | H1   | G B | 5 | -23.432 | -20.913 | 89.674 | 1.00 | 0.00 | H |
| ATOM | 730 | H8   | G B | 5 | -25.134 | -18.577 | 83.900 | 1.00 | 0.00 | H |
| ATOM | 731 | H1'  | G B | 5 | -23.599 | -22.168 | 83.925 | 1.00 | 0.00 | H |
| ATOM | 732 | H21  | G B | 5 | -22.436 | -22.854 | 89.442 | 1.00 | 0.00 | H |
| ATOM | 733 | H3'  | G B | 5 | -24.503 | -20.781 | 80.358 | 1.00 | 0.00 | H |
| ATOM | 734 | H22  | G B | 5 | -22.167 | -23.612 | 87.849 | 1.00 | 0.00 | H |
| ATOM | 735 | H4'  | G B | 5 | -21.934 | -20.771 | 80.997 | 1.00 | 0.00 | H |
| ATOM | 736 | H2'1 | G B | 5 | -25.455 | -20.242 | 82.496 | 1.00 | 0.00 | H |
| ATOM | 737 | H2'2 | G B | 5 | -25.521 | -21.998 | 82.547 | 1.00 | 0.00 | H |
| ATOM | 738 | H5'1 | G B | 5 | -22.140 | -18.402 | 82.033 | 1.00 | 0.00 | H |
| ATOM | 739 | H5'2 | G B | 5 | -22.604 | -18.680 | 80.340 | 1.00 | 0.00 | H |
| ATOM | 740 | C1'  | T B | 6 | -24.884 | -25.542 | 85.589 | 1.00 | 0.00 | C |
| ATOM | 741 | N1   | T B | 6 | -25.588 | -24.313 | 86.046 | 1.00 | 0.00 | N |
| ATOM | 742 | C2   | T B | 6 | -25.620 | -24.074 | 87.404 | 1.00 | 0.00 | C |
| ATOM | 743 | O2   | T B | 6 | -25.105 | -24.821 | 88.219 | 1.00 | 0.00 | O |
| ATOM | 744 | N3   | T B | 6 | -26.283 | -22.920 | 87.783 | 1.00 | 0.00 | N |
| ATOM | 745 | C4   | T B | 6 | -26.900 | -22.013 | 86.948 | 1.00 | 0.00 | C |
| ATOM | 746 | O4   | T B | 6 | -27.467 | -21.015 | 87.405 | 1.00 | 0.00 | O |
| ATOM | 747 | C5   | T B | 6 | -26.811 | -22.349 | 85.546 | 1.00 | 0.00 | C |
| ATOM | 748 | C6   | T B | 6 | -26.173 | -23.463 | 85.139 | 1.00 | 0.00 | C |
| ATOM | 749 | C7   | T B | 6 | -27.467 | -21.387 | 84.600 | 1.00 | 0.00 | C |
| ATOM | 750 | C2'  | T B | 6 | -25.561 | -26.234 | 84.412 | 1.00 | 0.00 | C |
| ATOM | 751 | C3'  | T B | 6 | -24.369 | -26.755 | 83.624 | 1.00 | 0.00 | C |
| ATOM | 752 | O3'  | T B | 6 | -23.961 | -28.010 | 84.167 | 1.00 | 0.00 | O |
| ATOM | 753 | C4'  | T B | 6 | -23.319 | -25.666 | 83.834 | 1.00 | 0.00 | C |
| ATOM | 754 | O4'  | T B | 6 | -23.582 | -25.169 | 85.185 | 1.00 | 0.00 | O |
| ATOM | 755 | C5'  | T B | 6 | -23.359 | -24.500 | 82.874 | 1.00 | 0.00 | C |
| ATOM | 756 | O5'  | T B | 6 | -24.735 | -24.185 | 82.543 | 1.00 | 0.00 | O |



|      |     |      |     |   |         |         |        |      |      |   |
|------|-----|------|-----|---|---------|---------|--------|------|------|---|
| ATOM | 757 | O1P  | T B | 6 | -24.886 | -24.739 | 80.093 | 1.00 | 0.00 | O |
| ATOM | 758 | O2P  | T B | 6 | -26.400 | -22.999 | 81.083 | 1.00 | 0.00 | O |
| ATOM | 759 | P    | T B | 6 | -25.069 | -23.654 | 81.077 | 1.00 | 0.00 | P |
| ATOM | 760 | H3   | T B | 6 | -26.319 | -22.717 | 88.794 | 1.00 | 0.00 | H |
| ATOM | 761 | H6   | T B | 6 | -26.121 | -23.694 | 84.075 | 1.00 | 0.00 | H |
| ATOM | 762 | H1'  | T B | 6 | -24.792 | -26.218 | 86.438 | 1.00 | 0.00 | H |
| ATOM | 763 | H3'  | T B | 6 | -24.601 | -26.880 | 82.567 | 1.00 | 0.00 | H |
| ATOM | 764 | H4'  | T B | 6 | -22.343 | -26.144 | 83.737 | 1.00 | 0.00 | H |
| ATOM | 765 | H71  | T B | 6 | -28.306 | -21.878 | 84.106 | 1.00 | 0.00 | H |
| ATOM | 766 | H72  | T B | 6 | -27.827 | -20.519 | 85.153 | 1.00 | 0.00 | H |
| ATOM | 767 | H73  | T B | 6 | -26.744 | -21.065 | 83.848 | 1.00 | 0.00 | H |
| ATOM | 768 | H2'1 | T B | 6 | -26.159 | -25.547 | 83.817 | 1.00 | 0.00 | H |
| ATOM | 769 | H2'2 | T B | 6 | -26.212 | -27.048 | 84.729 | 1.00 | 0.00 | H |
| ATOM | 770 | H5'1 | T B | 6 | -22.885 | -23.636 | 83.339 | 1.00 | 0.00 | H |
| ATOM | 771 | H5'2 | T B | 6 | -22.814 | -24.765 | 81.968 | 1.00 | 0.00 | H |
| ATOM | 772 | C1'  | C B | 7 | -26.519 | -28.459 | 89.260 | 1.00 | 0.00 | C |
| ATOM | 773 | N1   | C B | 7 | -27.340 | -27.308 | 88.787 | 1.00 | 0.00 | N |
| ATOM | 774 | C2   | C B | 7 | -27.816 | -26.411 | 89.739 | 1.00 | 0.00 | C |
| ATOM | 775 | O2   | C B | 7 | -27.541 | -26.603 | 90.932 | 1.00 | 0.00 | O |
| ATOM | 776 | N3   | C B | 7 | -28.564 | -25.357 | 89.329 | 1.00 | 0.00 | N |
| ATOM | 777 | C4   | C B | 7 | -28.845 | -25.177 | 88.033 | 1.00 | 0.00 | C |
| ATOM | 778 | N4   | C B | 7 | -29.577 | -24.128 | 87.688 | 1.00 | 0.00 | N |
| ATOM | 779 | C5   | C B | 7 | -28.372 | -26.086 | 87.030 | 1.00 | 0.00 | C |
| ATOM | 780 | C6   | C B | 7 | -27.616 | -27.137 | 87.467 | 1.00 | 0.00 | C |
| ATOM | 781 | C2'  | C B | 7 | -26.784 | -29.753 | 88.504 | 1.00 | 0.00 | C |
| ATOM | 782 | C3'  | C B | 7 | -25.401 | -30.383 | 88.464 | 1.00 | 0.00 | C |
| ATOM | 783 | O3'  | C B | 7 | -25.178 | -31.100 | 89.675 | 1.00 | 0.00 | O |
| ATOM | 784 | C4'  | C B | 7 | -24.479 | -29.173 | 88.331 | 1.00 | 0.00 | C |
| ATOM | 785 | O4'  | C B | 7 | -25.157 | -28.118 | 89.082 | 1.00 | 0.00 | O |
| ATOM | 786 | C5'  | C B | 7 | -24.221 | -28.676 | 86.925 | 1.00 | 0.00 | C |
| ATOM | 787 | O5'  | C B | 7 | -25.424 | -28.816 | 86.129 | 1.00 | 0.00 | O |
| ATOM | 788 | O1P  | C B | 7 | -24.788 | -30.542 | 84.412 | 1.00 | 0.00 | O |
| ATOM | 789 | O2P  | C B | 7 | -26.549 | -28.836 | 83.882 | 1.00 | 0.00 | O |
| ATOM | 790 | P    | C B | 7 | -25.281 | -29.161 | 84.578 | 1.00 | 0.00 | P |
| ATOM | 791 | H5   | C B | 7 | -28.604 | -25.946 | 85.975 | 1.00 | 0.00 | H |
| ATOM | 792 | H6   | C B | 7 | -27.228 | -27.852 | 86.741 | 1.00 | 0.00 | H |
| ATOM | 793 | H1'  | C B | 7 | -26.697 | -28.586 | 90.328 | 1.00 | 0.00 | H |
| ATOM | 794 | H3'  | C B | 7 | -25.286 | -31.061 | 87.615 | 1.00 | 0.00 | H |
| ATOM | 795 | H4'  | C B | 7 | -23.519 | -29.456 | 88.763 | 1.00 | 0.00 | H |
| ATOM | 796 | H41  | C B | 7 | -29.806 | -23.963 | 86.696 | 1.00 | 0.00 | H |
| ATOM | 797 | H42  | C B | 7 | -29.918 | -23.476 | 88.410 | 1.00 | 0.00 | H |
| ATOM | 798 | H2'1 | C B | 7 | -27.168 | -29.575 | 87.500 | 1.00 | 0.00 | H |
| ATOM | 799 | H2'2 | C B | 7 | -27.498 | -30.394 | 89.020 | 1.00 | 0.00 | H |
| ATOM | 800 | H5'1 | C B | 7 | -23.924 | -27.627 | 86.966 | 1.00 | 0.00 | H |
| ATOM | 801 | H5'2 | C B | 7 | -23.416 | -29.260 | 86.482 | 1.00 | 0.00 | H |
| ATOM | 802 | C1'  | C B | 8 | -29.176 | -29.436 | 93.324 | 1.00 | 0.00 | C |
| ATOM | 803 | N1   | C B | 8 | -29.818 | -28.826 | 92.129 | 1.00 | 0.00 | N |
| ATOM | 804 | C2   | C B | 8 | -30.577 | -27.672 | 92.312 | 1.00 | 0.00 | C |
| ATOM | 805 | O2   | C B | 8 | -30.684 | -27.203 | 93.453 | 1.00 | 0.00 | O |
| ATOM | 806 | N3   | C B | 8 | -31.170 | -27.101 | 91.237 | 1.00 | 0.00 | N |
| ATOM | 807 | C4   | C B | 8 | -31.036 | -27.632 | 90.014 | 1.00 | 0.00 | C |
| ATOM | 808 | N4   | C B | 8 | -31.637 | -27.029 | 88.997 | 1.00 | 0.00 | N |
| ATOM | 809 | C5   | C B | 8 | -30.267 | -28.822 | 89.794 | 1.00 | 0.00 | C |
| ATOM | 810 | C6   | C B | 8 | -29.674 | -29.377 | 90.893 | 1.00 | 0.00 | C |

|      |     |      |     |    |         |         |        |      |      |   |
|------|-----|------|-----|----|---------|---------|--------|------|------|---|
| ATOM | 811 | C2'  | C B | 8  | -29.180 | -30.959 | 93.314 | 1.00 | 0.00 | C |
| ATOM | 812 | C3'  | C B | 8  | -27.846 | -31.284 | 93.969 | 1.00 | 0.00 | C |
| ATOM | 813 | O3'  | C B | 8  | -28.003 | -31.262 | 95.386 | 1.00 | 0.00 | O |
| ATOM | 814 | C4'  | C B | 8  | -26.941 | -30.160 | 93.470 | 1.00 | 0.00 | C |
| ATOM | 815 | O4'  | C B | 8  | -27.829 | -29.003 | 93.356 | 1.00 | 0.00 | O |
| ATOM | 816 | C5'  | C B | 8  | -26.264 | -30.382 | 92.138 | 1.00 | 0.00 | C |
| ATOM | 817 | O5'  | C B | 8  | -27.159 | -31.097 | 91.248 | 1.00 | 0.00 | O |
| ATOM | 818 | O1P  | C B | 8  | -26.005 | -33.310 | 90.916 | 1.00 | 0.00 | O |
| ATOM | 819 | O2P  | C B | 8  | -27.531 | -32.410 | 89.138 | 1.00 | 0.00 | O |
| ATOM | 820 | P    | C B | 8  | -26.539 | -32.130 | 90.205 | 1.00 | 0.00 | P |
| ATOM | 821 | H5   | C B | 8  | -30.162 | -29.261 | 88.802 | 1.00 | 0.00 | H |
| ATOM | 822 | H6   | C B | 8  | -29.073 | -30.279 | 90.775 | 1.00 | 0.00 | H |
| ATOM | 823 | H1'  | C B | 8  | -29.675 | -29.050 | 94.214 | 1.00 | 0.00 | H |
| ATOM | 824 | H3'  | C B | 8  | -27.468 | -32.259 | 93.662 | 1.00 | 0.00 | H |
| ATOM | 825 | H4'  | C B | 8  | -26.160 | -30.027 | 94.219 | 1.00 | 0.00 | H |
| ATOM | 826 | H41  | C B | 8  | -31.547 | -27.415 | 88.045 | 1.00 | 0.00 | H |
| ATOM | 827 | H42  | C B | 8  | -32.190 | -26.175 | 89.156 | 1.00 | 0.00 | H |
| ATOM | 828 | H2'1 | C B | 8  | -29.236 | -31.366 | 92.305 | 1.00 | 0.00 | H |
| ATOM | 829 | H2'2 | C B | 8  | -30.014 | -31.374 | 93.882 | 1.00 | 0.00 | H |
| ATOM | 830 | H5'1 | C B | 8  | -26.005 | -29.418 | 91.702 | 1.00 | 0.00 | H |
| ATOM | 831 | H5'2 | C B | 8  | -25.356 | -30.963 | 92.290 | 1.00 | 0.00 | H |
| ATOM | 832 | C1'  | T B | 9  | -32.940 | -28.737 | 96.460 | 1.00 | 0.00 | C |
| ATOM | 833 | N1   | T B | 9  | -33.200 | -28.894 | 95.004 | 1.00 | 0.00 | N |
| ATOM | 834 | C2   | T B | 9  | -33.986 | -27.936 | 94.396 | 1.00 | 0.00 | C |
| ATOM | 835 | O2   | T B | 9  | -34.460 | -26.992 | 95.003 | 1.00 | 0.00 | O |
| ATOM | 836 | N3   | T B | 9  | -34.200 | -28.121 | 93.044 | 1.00 | 0.00 | N |
| ATOM | 837 | C4   | T B | 9  | -33.713 | -29.151 | 92.268 | 1.00 | 0.00 | C |
| ATOM | 838 | O4   | T B | 9  | -33.976 | -29.213 | 91.061 | 1.00 | 0.00 | O |
| ATOM | 839 | C5   | T B | 9  | -32.901 | -30.102 | 92.990 | 1.00 | 0.00 | C |
| ATOM | 840 | C6   | T B | 9  | -32.671 | -29.953 | 94.309 | 1.00 | 0.00 | C |
| ATOM | 841 | C7   | T B | 9  | -32.349 | -31.239 | 92.183 | 1.00 | 0.00 | C |
| ATOM | 842 | C2'  | T B | 9  | -32.921 | -30.054 | 97.227 | 1.00 | 0.00 | C |
| ATOM | 843 | C3'  | T B | 9  | -31.843 | -29.798 | 98.271 | 1.00 | 0.00 | C |
| ATOM | 844 | O3'  | T B | 9  | -32.423 | -29.124 | 99.385 | 1.00 | 0.00 | O |
| ATOM | 845 | C4'  | T B | 9  | -30.844 | -28.921 | 97.518 | 1.00 | 0.00 | C |
| ATOM | 846 | O4'  | T B | 9  | -31.674 | -28.127 | 96.611 | 1.00 | 0.00 | O |
| ATOM | 847 | C5'  | T B | 9  | -29.793 | -29.642 | 96.708 | 1.00 | 0.00 | C |
| ATOM | 848 | O5'  | T B | 9  | -30.367 | -30.834 | 96.113 | 1.00 | 0.00 | O |
| ATOM | 849 | O1P  | T B | 9  | -29.139 | -32.707 | 97.259 | 1.00 | 0.00 | O |
| ATOM | 850 | O2P  | T B | 9  | -30.067 | -33.041 | 94.951 | 1.00 | 0.00 | O |
| ATOM | 851 | P    | T B | 9  | -29.447 | -32.124 | 95.937 | 1.00 | 0.00 | P |
| ATOM | 852 | H3   | T B | 9  | -34.780 | -27.416 | 92.567 | 1.00 | 0.00 | H |
| ATOM | 853 | H6   | T B | 9  | -32.056 | -30.686 | 94.833 | 1.00 | 0.00 | H |
| ATOM | 854 | H1'  | T B | 9  | -33.690 | -28.059 | 96.870 | 1.00 | 0.00 | H |
| ATOM | 855 | H3'  | T B | 9  | -31.378 | -30.723 | 98.609 | 1.00 | 0.00 | H |
| ATOM | 856 | H4'  | T B | 9  | -30.331 | -28.315 | 98.267 | 1.00 | 0.00 | H |
| ATOM | 857 | H71  | T B | 9  | -32.790 | -32.176 | 92.526 | 1.00 | 0.00 | H |
| ATOM | 858 | H72  | T B | 9  | -32.588 | -31.089 | 91.130 | 1.00 | 0.00 | H |
| ATOM | 859 | H73  | T B | 9  | -31.267 | -31.281 | 92.308 | 1.00 | 0.00 | H |
| ATOM | 860 | H2'1 | T B | 9  | -32.662 | -30.898 | 96.589 | 1.00 | 0.00 | H |
| ATOM | 861 | H2'2 | T B | 9  | -33.881 | -30.276 | 97.693 | 1.00 | 0.00 | H |
| ATOM | 862 | H5'1 | T B | 9  | -29.426 | -28.979 | 95.925 | 1.00 | 0.00 | H |
| ATOM | 863 | H5'2 | T B | 9  | -28.967 | -29.919 | 97.360 | 1.00 | 0.00 | H |
| ATOM | 864 | C1'  | A B | 10 | -37.512 | -27.218 | 97.655 | 1.00 | 0.00 | C |

|      |     |      |     |    |         |         |         |      |      |   |
|------|-----|------|-----|----|---------|---------|---------|------|------|---|
| ATOM | 865 | N1   | A B | 10 | -38.458 | -27.967 | 92.667  | 1.00 | 0.00 | N |
| ATOM | 866 | C2   | A B | 10 | -38.805 | -27.001 | 93.513  | 1.00 | 0.00 | C |
| ATOM | 867 | N3   | A B | 10 | -38.524 | -26.867 | 94.790  | 1.00 | 0.00 | N |
| ATOM | 868 | C4   | A B | 10 | -37.781 | -27.905 | 95.215  | 1.00 | 0.00 | C |
| ATOM | 869 | C5   | A B | 10 | -37.343 | -28.973 | 94.479  | 1.00 | 0.00 | C |
| ATOM | 870 | C6   | A B | 10 | -37.716 | -28.990 | 93.120  | 1.00 | 0.00 | C |
| ATOM | 871 | N6   | A B | 10 | -37.359 | -29.973 | 92.275  | 1.00 | 0.00 | N |
| ATOM | 872 | N7   | A B | 10 | -36.599 | -29.844 | 95.256  | 1.00 | 0.00 | N |
| ATOM | 873 | C8   | A B | 10 | -36.606 | -29.294 | 96.435  | 1.00 | 0.00 | C |
| ATOM | 874 | N9   | A B | 10 | -37.301 | -28.113 | 96.485  | 1.00 | 0.00 | N |
| ATOM | 875 | C2'  | A B | 10 | -37.715 | -27.962 | 98.968  | 1.00 | 0.00 | C |
| ATOM | 876 | C3'  | A B | 10 | -37.022 | -27.046 | 99.964  | 1.00 | 0.00 | C |
| ATOM | 877 | O3'  | A B | 10 | -37.928 | -26.022 | 100.366 | 1.00 | 0.00 | O |
| ATOM | 878 | C4'  | A B | 10 | -35.848 | -26.493 | 99.156  | 1.00 | 0.00 | C |
| ATOM | 879 | O4'  | A B | 10 | -36.361 | -26.405 | 97.788  | 1.00 | 0.00 | O |
| ATOM | 880 | C5'  | A B | 10 | -34.588 | -27.325 | 99.147  | 1.00 | 0.00 | C |
| ATOM | 881 | O5'  | A B | 10 | -34.931 | -28.734 | 99.133  | 1.00 | 0.00 | O |
| ATOM | 882 | O1P  | A B | 10 | -34.098 | -29.558 | 101.361 | 1.00 | 0.00 | O |
| ATOM | 883 | O2P  | A B | 10 | -34.255 | -31.138 | 99.418  | 1.00 | 0.00 | O |
| ATOM | 884 | P    | A B | 10 | -33.986 | -29.762 | 99.904  | 1.00 | 0.00 | P |
| ATOM | 885 | H2   | A B | 10 | -39.410 | -26.203 | 93.083  | 1.00 | 0.00 | H |
| ATOM | 886 | H8   | A B | 10 | -36.107 | -29.731 | 97.300  | 1.00 | 0.00 | H |
| ATOM | 887 | H1'  | A B | 10 | -38.360 | -26.569 | 97.440  | 1.00 | 0.00 | H |
| ATOM | 888 | H3'  | A B | 10 | -36.673 | -27.587 | 100.843 | 1.00 | 0.00 | H |
| ATOM | 889 | H4'  | A B | 10 | -35.602 | -25.520 | 99.581  | 1.00 | 0.00 | H |
| ATOM | 890 | H61  | A B | 10 | -37.655 | -29.936 | 91.290  | 1.00 | 0.00 | H |
| ATOM | 891 | H62  | A B | 10 | -36.790 | -30.763 | 92.614  | 1.00 | 0.00 | H |
| ATOM | 892 | H2'1 | A B | 10 | -37.260 | -28.952 | 98.958  | 1.00 | 0.00 | H |
| ATOM | 893 | H2'2 | A B | 10 | -38.770 | -28.088 | 99.213  | 1.00 | 0.00 | H |
| ATOM | 894 | H5'1 | A B | 10 | -34.003 | -27.080 | 98.260  | 1.00 | 0.00 | H |
| ATOM | 895 | H5'2 | A B | 10 | -34.003 | -27.098 | 100.036 | 1.00 | 0.00 | H |
| ATOM | 896 | C1'  | G B | 11 | -42.242 | -26.119 | 96.624  | 1.00 | 0.00 | C |
| ATOM | 897 | N1   | G B | 11 | -41.577 | -29.370 | 92.750  | 1.00 | 0.00 | N |
| ATOM | 898 | C2   | G B | 11 | -42.219 | -28.144 | 92.781  | 1.00 | 0.00 | C |
| ATOM | 899 | N2   | G B | 11 | -42.756 | -27.732 | 91.626  | 1.00 | 0.00 | N |
| ATOM | 900 | N3   | G B | 11 | -42.315 | -27.392 | 93.875  | 1.00 | 0.00 | N |
| ATOM | 901 | C4   | G B | 11 | -41.721 | -27.969 | 94.953  | 1.00 | 0.00 | C |
| ATOM | 902 | C5   | G B | 11 | -41.064 | -29.185 | 95.017  | 1.00 | 0.00 | C |
| ATOM | 903 | C6   | G B | 11 | -40.957 | -29.984 | 93.855  | 1.00 | 0.00 | C |
| ATOM | 904 | O6   | G B | 11 | -40.419 | -31.082 | 93.714  | 1.00 | 0.00 | O |
| ATOM | 905 | N7   | G B | 11 | -40.596 | -29.413 | 96.313  | 1.00 | 0.00 | N |
| ATOM | 906 | C8   | G B | 11 | -40.973 | -28.351 | 96.977  | 1.00 | 0.00 | C |
| ATOM | 907 | N9   | G B | 11 | -41.664 | -27.429 | 96.219  | 1.00 | 0.00 | N |
| ATOM | 908 | C2'  | G B | 11 | -42.849 | -26.123 | 98.021  | 1.00 | 0.00 | C |
| ATOM | 909 | C3'  | G B | 11 | -42.515 | -24.726 | 98.516  | 1.00 | 0.00 | C |
| ATOM | 910 | O3'  | G B | 11 | -43.509 | -23.815 | 98.054  | 1.00 | 0.00 | O |
| ATOM | 911 | C4'  | G B | 11 | -41.149 | -24.459 | 97.886  | 1.00 | 0.00 | C |
| ATOM | 912 | O4'  | G B | 11 | -41.201 | -25.162 | 96.604  | 1.00 | 0.00 | O |
| ATOM | 913 | C5'  | G B | 11 | -39.947 | -24.948 | 98.658  | 1.00 | 0.00 | C |
| ATOM | 914 | O5'  | G B | 11 | -40.259 | -26.207 | 99.307  | 1.00 | 0.00 | O |
| ATOM | 915 | O1P  | G B | 11 | -40.174 | -25.637 | 101.757 | 1.00 | 0.00 | O |
| ATOM | 916 | O2P  | G B | 11 | -39.693 | -27.978 | 100.995 | 1.00 | 0.00 | O |
| ATOM | 917 | P    | G B | 11 | -39.602 | -26.523 | 100.726 | 1.00 | 0.00 | P |
| ATOM | 918 | H1   | G B | 11 | -41.553 | -29.871 | 91.849  | 1.00 | 0.00 | H |

|      |     |      |     |    |         |         |        |      |      |   |
|------|-----|------|-----|----|---------|---------|--------|------|------|---|
| ATOM | 919 | H8   | G B | 11 | -40.761 | -28.209 | 98.036 | 1.00 | 0.00 | H |
| ATOM | 920 | H1'  | G B | 11 | -42.980 | -25.826 | 95.877 | 1.00 | 0.00 | H |
| ATOM | 921 | H21  | G B | 11 | -42.674 | -28.317 | 90.782 | 1.00 | 0.00 | H |
| ATOM | 922 | H3'  | G B | 11 | -42.461 | -24.679 | 99.605 | 1.00 | 0.00 | H |
| ATOM | 923 | H22  | G B | 11 | -43.250 | -26.829 | 91.582 | 1.00 | 0.00 | H |
| ATOM | 924 | H4'  | G B | 11 | -41.057 | -23.378 | 97.776 | 1.00 | 0.00 | H |
| ATOM | 925 | H2'1 | G B | 11 | -42.408 | -26.888 | 98.661 | 1.00 | 0.00 | H |
| ATOM | 926 | H2'2 | G B | 11 | -43.926 | -26.290 | 98.003 | 1.00 | 0.00 | H |
| ATOM | 927 | H5'1 | G B | 11 | -39.112 | -25.085 | 97.971 | 1.00 | 0.00 | H |
| ATOM | 928 | H5'2 | G B | 11 | -39.676 | -24.205 | 99.408 | 1.00 | 0.00 | H |
| ATOM | 929 | C1'  | G B | 12 | -46.429 | -26.476 | 94.004 | 1.00 | 0.00 | C |
| ATOM | 930 | N1   | G B | 12 | -44.563 | -31.048 | 92.717 | 1.00 | 0.00 | N |
| ATOM | 931 | C2   | G B | 12 | -45.195 | -30.094 | 91.938 | 1.00 | 0.00 | C |
| ATOM | 932 | N2   | G B | 12 | -45.351 | -30.400 | 90.643 | 1.00 | 0.00 | N |
| ATOM | 933 | N3   | G B | 12 | -45.633 | -28.929 | 92.411 | 1.00 | 0.00 | N |
| ATOM | 934 | C4   | G B | 12 | -45.398 | -28.792 | 93.742 | 1.00 | 0.00 | C |
| ATOM | 935 | C5   | G B | 12 | -44.781 | -29.686 | 94.598 | 1.00 | 0.00 | C |
| ATOM | 936 | C6   | G B | 12 | -44.312 | -30.922 | 94.096 | 1.00 | 0.00 | C |
| ATOM | 937 | O6   | G B | 12 | -43.745 | -31.838 | 94.693 | 1.00 | 0.00 | O |
| ATOM | 938 | N7   | G B | 12 | -44.736 | -29.165 | 95.893 | 1.00 | 0.00 | N |
| ATOM | 939 | C8   | G B | 12 | -45.311 | -27.996 | 95.782 | 1.00 | 0.00 | C |
| ATOM | 940 | N9   | G B | 12 | -45.741 | -27.697 | 94.507 | 1.00 | 0.00 | N |
| ATOM | 941 | C2'  | G B | 12 | -47.440 | -25.896 | 94.984 | 1.00 | 0.00 | C |
| ATOM | 942 | C3'  | G B | 12 | -47.289 | -24.402 | 94.748 | 1.00 | 0.00 | C |
| ATOM | 943 | O3'  | G B | 12 | -48.100 | -24.019 | 93.638 | 1.00 | 0.00 | O |
| ATOM | 944 | C4'  | G B | 12 | -45.798 | -24.253 | 94.452 | 1.00 | 0.00 | C |
| ATOM | 945 | O4'  | G B | 12 | -45.442 | -25.493 | 93.762 | 1.00 | 0.00 | O |
| ATOM | 946 | C5'  | G B | 12 | -44.890 | -24.088 | 95.648 | 1.00 | 0.00 | C |
| ATOM | 947 | O5'  | G B | 12 | -45.376 | -24.897 | 96.748 | 1.00 | 0.00 | O |
| ATOM | 948 | O1P  | G B | 12 | -46.061 | -23.190 | 98.466 | 1.00 | 0.00 | O |
| ATOM | 949 | O2P  | G B | 12 | -45.345 | -25.482 | 99.191 | 1.00 | 0.00 | O |
| ATOM | 950 | P    | G B | 12 | -45.189 | -24.357 | 98.238 | 1.00 | 0.00 | P |
| ATOM | 951 | H1   | G B | 12 | -44.255 | -31.915 | 92.251 | 1.00 | 0.00 | H |
| ATOM | 952 | H8   | G B | 12 | -45.440 | -27.315 | 96.625 | 1.00 | 0.00 | H |
| ATOM | 953 | H1'  | G B | 12 | -46.902 | -26.719 | 93.053 | 1.00 | 0.00 | H |
| ATOM | 954 | H21  | G B | 12 | -45.006 | -31.301 | 90.283 | 1.00 | 0.00 | H |
| ATOM | 955 | H3'  | G B | 12 | -47.577 | -23.818 | 95.622 | 1.00 | 0.00 | H |
| ATOM | 956 | H22  | G B | 12 | -45.817 | -29.734 | 90.011 | 1.00 | 0.00 | H |
| ATOM | 957 | H4'  | G B | 12 | -45.686 | -23.370 | 93.824 | 1.00 | 0.00 | H |
| ATOM | 958 | H2'1 | G B | 12 | -47.212 | -26.159 | 96.017 | 1.00 | 0.00 | H |
| ATOM | 959 | H2'2 | G B | 12 | -48.456 | -26.230 | 94.777 | 1.00 | 0.00 | H |
| ATOM | 960 | H5'1 | G B | 12 | -43.882 | -24.401 | 95.378 | 1.00 | 0.00 | H |
| ATOM | 961 | H5'2 | G B | 12 | -44.873 | -23.038 | 95.942 | 1.00 | 0.00 | H |
| ATOM | 962 | C1'  | T B | 13 | -49.603 | -28.758 | 90.967 | 1.00 | 0.00 | C |
| ATOM | 963 | N1   | T B | 13 | -49.085 | -29.459 | 92.172 | 1.00 | 0.00 | N |
| ATOM | 964 | C2   | T B | 13 | -48.547 | -30.717 | 91.987 | 1.00 | 0.00 | C |
| ATOM | 965 | O2   | T B | 13 | -48.487 | -31.254 | 90.895 | 1.00 | 0.00 | O |
| ATOM | 966 | N3   | T B | 13 | -48.077 | -31.332 | 93.133 | 1.00 | 0.00 | N |
| ATOM | 967 | C4   | T B | 13 | -48.100 | -30.815 | 94.412 | 1.00 | 0.00 | C |
| ATOM | 968 | O4   | T B | 13 | -47.651 | -31.463 | 95.364 | 1.00 | 0.00 | O |
| ATOM | 969 | C5   | T B | 13 | -48.680 | -29.496 | 94.506 | 1.00 | 0.00 | C |
| ATOM | 970 | C6   | T B | 13 | -49.148 | -28.866 | 93.409 | 1.00 | 0.00 | C |
| ATOM | 971 | C7   | T B | 13 | -48.725 | -28.893 | 95.877 | 1.00 | 0.00 | C |
| ATOM | 972 | C2'  | T B | 13 | -50.871 | -27.952 | 91.223 | 1.00 | 0.00 | C |

|      |      |      |     |    |         |         |        |      |      |   |
|------|------|------|-----|----|---------|---------|--------|------|------|---|
| ATOM | 973  | C3'  | T B | 13 | -50.671 | -26.751 | 90.311 | 1.00 | 0.00 | C |
| ATOM | 974  | O3'  | T B | 13 | -51.112 | -27.083 | 88.996 | 1.00 | 0.00 | O |
| ATOM | 975  | C4'  | T B | 13 | -49.164 | -26.522 | 90.375 | 1.00 | 0.00 | C |
| ATOM | 976  | O4'  | T B | 13 | -48.601 | -27.864 | 90.523 | 1.00 | 0.00 | O |
| ATOM | 977  | C5'  | T B | 13 | -48.662 | -25.658 | 91.510 | 1.00 | 0.00 | C |
| ATOM | 978  | O5'  | T B | 13 | -49.451 | -25.909 | 92.701 | 1.00 | 0.00 | O |
| ATOM | 979  | O1P  | T B | 13 | -50.645 | -23.727 | 93.079 | 1.00 | 0.00 | O |
| ATOM | 980  | O2P  | T B | 13 | -50.156 | -25.244 | 95.018 | 1.00 | 0.00 | O |
| ATOM | 981  | P    | T B | 13 | -49.730 | -24.703 | 93.705 | 1.00 | 0.00 | P |
| ATOM | 982  | H3   | T B | 13 | -47.668 | -32.270 | 93.020 | 1.00 | 0.00 | H |
| ATOM | 983  | H6   | T B | 13 | -49.581 | -27.871 | 93.505 | 1.00 | 0.00 | H |
| ATOM | 984  | H1'  | T B | 13 | -49.764 | -29.498 | 90.183 | 1.00 | 0.00 | H |
| ATOM | 985  | H3'  | T B | 13 | -51.218 | -25.877 | 90.665 | 1.00 | 0.00 | H |
| ATOM | 986  | H4'  | T B | 13 | -48.877 | -26.040 | 89.440 | 1.00 | 0.00 | H |
| ATOM | 987  | H71  | T B | 13 | -49.761 | -28.781 | 96.194 | 1.00 | 0.00 | H |
| ATOM | 988  | H72  | T B | 13 | -48.200 | -29.545 | 96.578 | 1.00 | 0.00 | H |
| ATOM | 989  | H73  | T B | 13 | -48.241 | -27.915 | 95.862 | 1.00 | 0.00 | H |
| ATOM | 990  | H2'1 | T B | 13 | -50.964 | -27.648 | 92.265 | 1.00 | 0.00 | H |
| ATOM | 991  | H2'2 | T B | 13 | -51.773 | -28.504 | 90.961 | 1.00 | 0.00 | H |
| ATOM | 992  | H5'1 | T B | 13 | -47.616 | -25.894 | 91.703 | 1.00 | 0.00 | H |
| ATOM | 993  | H5'2 | T B | 13 | -48.748 | -24.611 | 91.226 | 1.00 | 0.00 | H |
| ATOM | 994  | C1'  | G B | 14 | -51.636 | -32.775 | 88.874 | 1.00 | 0.00 | C |
| ATOM | 995  | N1   | G B | 14 | -50.052 | -35.112 | 93.123 | 1.00 | 0.00 | N |
| ATOM | 996  | C2   | G B | 14 | -50.002 | -35.534 | 91.807 | 1.00 | 0.00 | C |
| ATOM | 997  | N2   | G B | 14 | -49.460 | -36.739 | 91.593 | 1.00 | 0.00 | N |
| ATOM | 998  | N3   | G B | 14 | -50.456 | -34.811 | 90.785 | 1.00 | 0.00 | N |
| ATOM | 999  | C4   | G B | 14 | -50.977 | -33.620 | 91.185 | 1.00 | 0.00 | C |
| ATOM | 1000 | C5   | G B | 14 | -51.074 | -33.119 | 92.472 | 1.00 | 0.00 | C |
| ATOM | 1001 | C6   | G B | 14 | -50.588 | -33.884 | 93.557 | 1.00 | 0.00 | C |
| ATOM | 1002 | O6   | G B | 14 | -50.585 | -33.612 | 94.759 | 1.00 | 0.00 | O |
| ATOM | 1003 | N7   | G B | 14 | -51.677 | -31.859 | 92.455 | 1.00 | 0.00 | N |
| ATOM | 1004 | C8   | G B | 14 | -51.918 | -31.641 | 91.188 | 1.00 | 0.00 | C |
| ATOM | 1005 | N9   | G B | 14 | -51.524 | -32.668 | 90.354 | 1.00 | 0.00 | N |
| ATOM | 1006 | C2'  | G B | 14 | -52.923 | -32.187 | 88.311 | 1.00 | 0.00 | C |
| ATOM | 1007 | C3'  | G B | 14 | -52.454 | -31.598 | 86.991 | 1.00 | 0.00 | C |
| ATOM | 1008 | O3'  | G B | 14 | -52.451 | -32.620 | 85.998 | 1.00 | 0.00 | O |
| ATOM | 1009 | C4'  | G B | 14 | -51.044 | -31.108 | 87.321 | 1.00 | 0.00 | C |
| ATOM | 1010 | O4'  | G B | 14 | -50.550 | -32.069 | 88.306 | 1.00 | 0.00 | O |
| ATOM | 1011 | C5'  | G B | 14 | -50.935 | -29.718 | 87.902 | 1.00 | 0.00 | C |
| ATOM | 1012 | O5'  | G B | 14 | -52.058 | -29.466 | 88.783 | 1.00 | 0.00 | O |
| ATOM | 1013 | O1P  | G B | 14 | -53.324 | -27.638 | 87.603 | 1.00 | 0.00 | O |
| ATOM | 1014 | O2P  | G B | 14 | -53.466 | -27.854 | 90.098 | 1.00 | 0.00 | O |
| ATOM | 1015 | P    | G B | 14 | -52.650 | -27.987 | 88.867 | 1.00 | 0.00 | P |
| ATOM | 1016 | H1   | G B | 14 | -49.667 | -35.745 | 93.841 | 1.00 | 0.00 | H |
| ATOM | 1017 | H8   | G B | 14 | -52.392 | -30.729 | 90.824 | 1.00 | 0.00 | H |
| ATOM | 1018 | H1'  | G B | 14 | -51.534 | -33.825 | 88.599 | 1.00 | 0.00 | H |
| ATOM | 1019 | H21  | G B | 14 | -49.108 | -37.291 | 92.390 | 1.00 | 0.00 | H |
| ATOM | 1020 | H3'  | G B | 14 | -53.088 | -30.775 | 86.662 | 1.00 | 0.00 | H |
| ATOM | 1021 | H22  | G B | 14 | -49.396 | -37.113 | 90.636 | 1.00 | 0.00 | H |
| ATOM | 1022 | H4'  | G B | 14 | -50.478 | -31.124 | 86.389 | 1.00 | 0.00 | H |
| ATOM | 1023 | H2'1 | G B | 14 | -53.344 | -31.419 | 88.960 | 1.00 | 0.00 | H |
| ATOM | 1024 | H2'2 | G B | 14 | -53.691 | -32.944 | 88.158 | 1.00 | 0.00 | H |
| ATOM | 1025 | H5'1 | G B | 14 | -50.004 | -29.637 | 88.460 | 1.00 | 0.00 | H |
| ATOM | 1026 | H5'2 | G B | 14 | -50.932 | -28.991 | 87.090 | 1.00 | 0.00 | H |

|      |      |      |     |    |         |         |        |      |      |   |
|------|------|------|-----|----|---------|---------|--------|------|------|---|
| ATOM | 1027 | C1'  | C B | 15 | -52.889 | -37.565 | 88.716 | 1.00 | 0.00 | C |
| ATOM | 1028 | N1   | C B | 15 | -53.239 | -36.729 | 89.896 | 1.00 | 0.00 | N |
| ATOM | 1029 | C2   | C B | 15 | -52.888 | -37.202 | 91.159 | 1.00 | 0.00 | C |
| ATOM | 1030 | O2   | C B | 15 | -52.303 | -38.290 | 91.247 | 1.00 | 0.00 | O |
| ATOM | 1031 | N3   | C B | 15 | -53.198 | -36.456 | 92.247 | 1.00 | 0.00 | N |
| ATOM | 1032 | C4   | C B | 15 | -53.832 | -35.284 | 92.120 | 1.00 | 0.00 | C |
| ATOM | 1033 | N4   | C B | 15 | -54.107 | -34.594 | 93.217 | 1.00 | 0.00 | N |
| ATOM | 1034 | C5   | C B | 15 | -54.210 | -34.773 | 90.833 | 1.00 | 0.00 | C |
| ATOM | 1035 | C6   | C B | 15 | -53.884 | -35.539 | 89.753 | 1.00 | 0.00 | C |
| ATOM | 1036 | C2'  | C B | 15 | -53.948 | -37.555 | 87.622 | 1.00 | 0.00 | C |
| ATOM | 1037 | C3'  | C B | 15 | -53.101 | -37.618 | 86.360 | 1.00 | 0.00 | C |
| ATOM | 1038 | O3'  | C B | 15 | -52.779 | -38.978 | 86.078 | 1.00 | 0.00 | O |
| ATOM | 1039 | C4'  | C B | 15 | -51.869 | -36.799 | 86.737 | 1.00 | 0.00 | C |
| ATOM | 1040 | O4'  | C B | 15 | -51.690 | -37.052 | 88.167 | 1.00 | 0.00 | O |
| ATOM | 1041 | C5'  | C B | 15 | -51.963 | -35.306 | 86.520 | 1.00 | 0.00 | C |
| ATOM | 1042 | O5'  | C B | 15 | -53.307 | -34.852 | 86.818 | 1.00 | 0.00 | O |
| ATOM | 1043 | O1P  | C B | 15 | -54.171 | -34.081 | 84.583 | 1.00 | 0.00 | O |
| ATOM | 1044 | O2P  | C B | 15 | -55.075 | -33.068 | 86.694 | 1.00 | 0.00 | O |
| ATOM | 1045 | P    | C B | 15 | -53.915 | -33.645 | 85.971 | 1.00 | 0.00 | P |
| ATOM | 1046 | H5   | C B | 15 | -54.732 | -33.821 | 90.727 | 1.00 | 0.00 | H |
| ATOM | 1047 | H6   | C B | 15 | -54.144 | -35.190 | 88.753 | 1.00 | 0.00 | H |
| ATOM | 1048 | H1'  | C B | 15 | -52.693 | -38.579 | 89.063 | 1.00 | 0.00 | H |
| ATOM | 1049 | H3'  | C B | 15 | -53.615 | -37.183 | 85.502 | 1.00 | 0.00 | H |
| ATOM | 1050 | H4'  | C B | 15 | -51.043 | -37.170 | 86.131 | 1.00 | 0.00 | H |
| ATOM | 1051 | H41  | C B | 15 | -54.592 | -33.686 | 93.147 | 1.00 | 0.00 | H |
| ATOM | 1052 | H42  | C B | 15 | -53.837 | -34.964 | 94.141 | 1.00 | 0.00 | H |
| ATOM | 1053 | H2'1 | C B | 15 | -54.559 | -36.654 | 87.645 | 1.00 | 0.00 | H |
| ATOM | 1054 | H2'2 | C B | 15 | -54.621 | -38.410 | 87.691 | 1.00 | 0.00 | H |
| ATOM | 1055 | H5'1 | C B | 15 | -51.250 | -34.803 | 87.175 | 1.00 | 0.00 | H |
| ATOM | 1056 | H5'2 | C B | 15 | -51.720 | -35.079 | 85.483 | 1.00 | 0.00 | H |
| ATOM | 1057 | C1'  | G B | 16 | -53.987 | -41.943 | 90.752 | 1.00 | 0.00 | C |
| ATOM | 1058 | N1   | G B | 16 | -55.370 | -39.096 | 94.753 | 1.00 | 0.00 | N |
| ATOM | 1059 | C2   | G B | 16 | -54.662 | -40.285 | 94.711 | 1.00 | 0.00 | C |
| ATOM | 1060 | N2   | G B | 16 | -54.274 | -40.781 | 95.892 | 1.00 | 0.00 | N |
| ATOM | 1061 | N3   | G B | 16 | -54.366 | -40.925 | 93.581 | 1.00 | 0.00 | N |
| ATOM | 1062 | C4   | G B | 16 | -54.844 | -40.283 | 92.483 | 1.00 | 0.00 | C |
| ATOM | 1063 | C5   | G B | 16 | -55.561 | -39.099 | 92.429 | 1.00 | 0.00 | C |
| ATOM | 1064 | C6   | G B | 16 | -55.873 | -38.416 | 93.629 | 1.00 | 0.00 | C |
| ATOM | 1065 | O6   | G B | 16 | -56.493 | -37.364 | 93.783 | 1.00 | 0.00 | O |
| ATOM | 1066 | N7   | G B | 16 | -55.865 | -38.779 | 91.105 | 1.00 | 0.00 | N |
| ATOM | 1067 | C8   | G B | 16 | -55.333 | -39.754 | 90.413 | 1.00 | 0.00 | C |
| ATOM | 1068 | N9   | G B | 16 | -54.696 | -40.707 | 91.181 | 1.00 | 0.00 | N |
| ATOM | 1069 | C2'  | G B | 16 | -54.649 | -42.654 | 89.580 | 1.00 | 0.00 | C |
| ATOM | 1070 | C3'  | G B | 16 | -53.449 | -43.186 | 88.813 | 1.00 | 0.00 | C |
| ATOM | 1071 | O3'  | G B | 16 | -53.045 | -44.430 | 89.380 | 1.00 | 0.00 | O |
| ATOM | 1072 | C4'  | G B | 16 | -52.403 | -42.092 | 89.017 | 1.00 | 0.00 | C |
| ATOM | 1073 | O4'  | G B | 16 | -52.680 | -41.574 | 90.357 | 1.00 | 0.00 | O |
| ATOM | 1074 | C5'  | G B | 16 | -52.434 | -40.943 | 88.038 | 1.00 | 0.00 | C |
| ATOM | 1075 | O5'  | G B | 16 | -53.806 | -40.635 | 87.687 | 1.00 | 0.00 | O |
| ATOM | 1076 | O1P  | G B | 16 | -53.930 | -41.226 | 85.245 | 1.00 | 0.00 | O |
| ATOM | 1077 | O2P  | G B | 16 | -55.456 | -39.475 | 86.190 | 1.00 | 0.00 | O |
| ATOM | 1078 | P    | G B | 16 | -54.124 | -40.127 | 86.209 | 1.00 | 0.00 | P |
| ATOM | 1079 | H1   | G B | 16 | -55.540 | -38.677 | 95.680 | 1.00 | 0.00 | H |
| ATOM | 1080 | H8   | G B | 16 | -55.389 | -39.808 | 89.327 | 1.00 | 0.00 | H |

|      |      |      |     |    |         |         |         |      |      |   |
|------|------|------|-----|----|---------|---------|---------|------|------|---|
| ATOM | 1081 | H1'  | G B | 16 | -53.902 | -42.604 | 91.614  | 1.00 | 0.00 | H |
| ATOM | 1082 | H21  | G B | 16 | -54.503 | -40.279 | 96.762  | 1.00 | 0.00 | H |
| ATOM | 1083 | H3'  | G B | 16 | -53.669 | -43.327 | 87.754  | 1.00 | 0.00 | H |
| ATOM | 1084 | H22  | G B | 16 | -53.746 | -41.665 | 95.928  | 1.00 | 0.00 | H |
| ATOM | 1085 | H4'  | G B | 16 | -51.425 | -42.570 | 88.939  | 1.00 | 0.00 | H |
| ATOM | 1086 | H2'1 | G B | 16 | -55.242 | -41.977 | 88.967  | 1.00 | 0.00 | H |
| ATOM | 1087 | H2'2 | G B | 16 | -55.304 | -43.462 | 89.903  | 1.00 | 0.00 | H |
| ATOM | 1088 | H5'1 | G B | 16 | -51.966 | -40.071 | 88.495  | 1.00 | 0.00 | H |
| ATOM | 1089 | H5'2 | G B | 16 | -51.878 | -41.221 | 87.142  | 1.00 | 0.00 | H |
| ATOM | 1090 | C1'  | G B | 17 | -55.619 | -44.867 | 94.401  | 1.00 | 0.00 | C |
| ATOM | 1091 | N1   | G B | 17 | -58.203 | -40.701 | 95.815  | 1.00 | 0.00 | N |
| ATOM | 1092 | C2   | G B | 17 | -57.506 | -41.618 | 96.582  | 1.00 | 0.00 | C |
| ATOM | 1093 | N2   | G B | 17 | -57.498 | -41.395 | 97.902  | 1.00 | 0.00 | N |
| ATOM | 1094 | N3   | G B | 17 | -56.868 | -42.670 | 96.073  | 1.00 | 0.00 | N |
| ATOM | 1095 | C4   | G B | 17 | -56.988 | -42.742 | 94.722  | 1.00 | 0.00 | C |
| ATOM | 1096 | C5   | G B | 17 | -57.664 | -41.880 | 93.876  | 1.00 | 0.00 | C |
| ATOM | 1097 | C6   | G B | 17 | -58.337 | -40.760 | 94.414  | 1.00 | 0.00 | C |
| ATOM | 1098 | O6   | G B | 17 | -58.985 | -39.890 | 93.832  | 1.00 | 0.00 | O |
| ATOM | 1099 | N7   | G B | 17 | -57.544 | -42.309 | 92.553  | 1.00 | 0.00 | N |
| ATOM | 1100 | C8   | G B | 17 | -56.815 | -43.391 | 92.636  | 1.00 | 0.00 | C |
| ATOM | 1101 | N9   | G B | 17 | -56.439 | -43.721 | 93.921  | 1.00 | 0.00 | N |
| ATOM | 1102 | C2'  | G B | 17 | -55.877 | -46.162 | 93.645  | 1.00 | 0.00 | C |
| ATOM | 1103 | C3'  | G B | 17 | -54.494 | -46.793 | 93.610  | 1.00 | 0.00 | C |
| ATOM | 1104 | O3'  | G B | 17 | -54.274 | -47.507 | 94.823  | 1.00 | 0.00 | O |
| ATOM | 1105 | C4'  | G B | 17 | -53.573 | -45.581 | 93.479  | 1.00 | 0.00 | C |
| ATOM | 1106 | O4'  | G B | 17 | -54.257 | -44.526 | 94.228  | 1.00 | 0.00 | O |
| ATOM | 1107 | C5'  | G B | 17 | -53.310 | -45.085 | 92.078  | 1.00 | 0.00 | C |
| ATOM | 1108 | O5'  | G B | 17 | -54.508 | -45.226 | 91.274  | 1.00 | 0.00 | O |
| ATOM | 1109 | O1P  | G B | 17 | -53.863 | -46.956 | 89.563  | 1.00 | 0.00 | O |
| ATOM | 1110 | O2P  | G B | 17 | -55.624 | -45.252 | 89.022  | 1.00 | 0.00 | O |
| ATOM | 1111 | P    | G B | 17 | -54.358 | -45.575 | 89.725  | 1.00 | 0.00 | P |
| ATOM | 1112 | H1   | G B | 17 | -58.658 | -39.917 | 96.307  | 1.00 | 0.00 | H |
| ATOM | 1113 | H8   | G B | 17 | -56.530 | -43.983 | 91.766  | 1.00 | 0.00 | H |
| ATOM | 1114 | H1'  | G B | 17 | -55.801 | -44.994 | 95.467  | 1.00 | 0.00 | H |
| ATOM | 1115 | H21  | G B | 17 | -57.992 | -40.577 | 98.289  | 1.00 | 0.00 | H |
| ATOM | 1116 | H3'  | G B | 17 | -54.373 | -47.470 | 92.765  | 1.00 | 0.00 | H |
| ATOM | 1117 | H22  | G B | 17 | -56.999 | -42.042 | 98.529  | 1.00 | 0.00 | H |
| ATOM | 1118 | H4'  | G B | 17 | -52.616 | -45.861 | 93.918  | 1.00 | 0.00 | H |
| ATOM | 1119 | H2'1 | G B | 17 | -56.258 | -45.987 | 92.639  | 1.00 | 0.00 | H |
| ATOM | 1120 | H2'2 | G B | 17 | -56.593 | -46.805 | 94.157  | 1.00 | 0.00 | H |
| ATOM | 1121 | H5'1 | G B | 17 | -53.015 | -44.037 | 92.118  | 1.00 | 0.00 | H |
| ATOM | 1122 | H5'2 | G B | 17 | -52.501 | -45.669 | 91.638  | 1.00 | 0.00 | H |
| ATOM | 1123 | C1'  | C B | 18 | -58.275 | -45.845 | 98.465  | 1.00 | 0.00 | C |
| ATOM | 1124 | N1   | C B | 18 | -58.918 | -45.236 | 97.268  | 1.00 | 0.00 | N |
| ATOM | 1125 | C2   | C B | 18 | -59.675 | -44.080 | 97.454  | 1.00 | 0.00 | C |
| ATOM | 1126 | O2   | C B | 18 | -59.781 | -43.612 | 98.594  | 1.00 | 0.00 | O |
| ATOM | 1127 | N3   | C B | 18 | -60.269 | -43.510 | 96.376  | 1.00 | 0.00 | N |
| ATOM | 1128 | C4   | C B | 18 | -60.133 | -44.042 | 95.154  | 1.00 | 0.00 | C |
| ATOM | 1129 | N4   | C B | 18 | -60.734 | -43.441 | 94.137  | 1.00 | 0.00 | N |
| ATOM | 1130 | C5   | C B | 18 | -59.364 | -45.229 | 94.938  | 1.00 | 0.00 | C |
| ATOM | 1131 | C6   | C B | 18 | -58.774 | -45.785 | 96.034  | 1.00 | 0.00 | C |
| ATOM | 1132 | C2'  | C B | 18 | -58.279 | -47.369 | 98.454  | 1.00 | 0.00 | C |
| ATOM | 1133 | C3'  | C B | 18 | -56.945 | -47.693 | 99.109  | 1.00 | 0.00 | C |
| ATOM | 1134 | O3'  | C B | 18 | -57.102 | -47.671 | 100.526 | 1.00 | 0.00 | O |

|      |      |      |     |    |         |         |         |      |      |   |
|------|------|------|-----|----|---------|---------|---------|------|------|---|
| ATOM | 1135 | C4'  | C B | 18 | -56.039 | -46.569 | 98.611  | 1.00 | 0.00 | C |
| ATOM | 1136 | O4'  | C B | 18 | -56.928 | -45.412 | 98.497  | 1.00 | 0.00 | O |
| ATOM | 1137 | C5'  | C B | 18 | -55.363 | -46.792 | 97.278  | 1.00 | 0.00 | C |
| ATOM | 1138 | O5'  | C B | 18 | -56.258 | -47.506 | 96.389  | 1.00 | 0.00 | O |
| ATOM | 1139 | O1P  | C B | 18 | -55.104 | -49.718 | 96.055  | 1.00 | 0.00 | O |
| ATOM | 1140 | O2P  | C B | 18 | -56.631 | -48.819 | 94.278  | 1.00 | 0.00 | O |
| ATOM | 1141 | P    | C B | 18 | -55.638 | -48.539 | 95.345  | 1.00 | 0.00 | P |
| ATOM | 1142 | H5   | C B | 18 | -59.255 | -45.668 | 93.946  | 1.00 | 0.00 | H |
| ATOM | 1143 | H6   | C B | 18 | -58.175 | -46.688 | 95.917  | 1.00 | 0.00 | H |
| ATOM | 1144 | H1'  | C B | 18 | -58.774 | -45.460 | 99.353  | 1.00 | 0.00 | H |
| ATOM | 1145 | H3'  | C B | 18 | -56.567 | -48.668 | 98.802  | 1.00 | 0.00 | H |
| ATOM | 1146 | H4'  | C B | 18 | -55.259 | -46.435 | 99.361  | 1.00 | 0.00 | H |
| ATOM | 1147 | H41  | C B | 18 | -60.646 | -43.829 | 93.186  | 1.00 | 0.00 | H |
| ATOM | 1148 | H42  | C B | 18 | -61.287 | -42.587 | 94.297  | 1.00 | 0.00 | H |
| ATOM | 1149 | H2'1 | C B | 18 | -58.335 | -47.775 | 97.445  | 1.00 | 0.00 | H |
| ATOM | 1150 | H2'2 | C B | 18 | -59.113 | -47.783 | 99.021  | 1.00 | 0.00 | H |
| ATOM | 1151 | H5'1 | C B | 18 | -55.104 | -45.826 | 96.842  | 1.00 | 0.00 | H |
| ATOM | 1152 | H5'2 | C B | 18 | -54.454 | -47.372 | 97.431  | 1.00 | 0.00 | H |
| ATOM | 1153 | C1'  | C B | 19 | -62.052 | -45.132 | 101.588 | 1.00 | 0.00 | C |
| ATOM | 1154 | N1   | C B | 19 | -62.297 | -45.308 | 100.131 | 1.00 | 0.00 | N |
| ATOM | 1155 | C2   | C B | 19 | -63.085 | -44.359 | 99.482  | 1.00 | 0.00 | C |
| ATOM | 1156 | O2   | C B | 19 | -63.545 | -43.415 | 100.138 | 1.00 | 0.00 | O |
| ATOM | 1157 | N3   | C B | 19 | -63.321 | -44.501 | 98.156  | 1.00 | 0.00 | N |
| ATOM | 1158 | C4   | C B | 19 | -62.809 | -45.534 | 97.473  | 1.00 | 0.00 | C |
| ATOM | 1159 | N4   | C B | 19 | -63.070 | -45.624 | 96.179  | 1.00 | 0.00 | N |
| ATOM | 1160 | C5   | C B | 19 | -61.998 | -46.524 | 98.115  | 1.00 | 0.00 | C |
| ATOM | 1161 | C6   | C B | 19 | -61.773 | -46.360 | 99.449  | 1.00 | 0.00 | C |
| ATOM | 1162 | C2'  | C B | 19 | -62.038 | -46.438 | 102.368 | 1.00 | 0.00 | C |
| ATOM | 1163 | C3'  | C B | 19 | -60.970 | -46.168 | 103.418 | 1.00 | 0.00 | C |
| ATOM | 1164 | O3'  | C B | 19 | -61.558 | -45.479 | 104.519 | 1.00 | 0.00 | O |
| ATOM | 1165 | C4'  | C B | 19 | -59.965 | -45.300 | 102.665 | 1.00 | 0.00 | C |
| ATOM | 1166 | O4'  | C B | 19 | -60.786 | -44.518 | 101.739 | 1.00 | 0.00 | O |
| ATOM | 1167 | C5'  | C B | 19 | -58.907 | -46.031 | 101.871 | 1.00 | 0.00 | C |
| ATOM | 1168 | O5'  | C B | 19 | -59.474 | -47.230 | 101.287 | 1.00 | 0.00 | O |
| ATOM | 1169 | O1P  | C B | 19 | -58.253 | -49.087 | 102.468 | 1.00 | 0.00 | O |
| ATOM | 1170 | O2P  | C B | 19 | -59.161 | -49.452 | 100.157 | 1.00 | 0.00 | O |
| ATOM | 1171 | P    | C B | 19 | -58.551 | -48.520 | 101.137 | 1.00 | 0.00 | P |
| ATOM | 1172 | H5   | C B | 19 | -61.581 | -47.367 | 97.565  | 1.00 | 0.00 | H |
| ATOM | 1173 | H6   | C B | 19 | -61.160 | -47.088 | 99.980  | 1.00 | 0.00 | H |
| ATOM | 1174 | H1'  | C B | 19 | -62.806 | -44.449 | 101.980 | 1.00 | 0.00 | H |
| ATOM | 1175 | H3'  | C B | 19 | -60.506 | -47.088 | 103.774 | 1.00 | 0.00 | H |
| ATOM | 1176 | H4'  | C B | 19 | -59.458 | -44.684 | 103.408 | 1.00 | 0.00 | H |
| ATOM | 1177 | H41  | C B | 19 | -62.688 | -46.407 | 95.628  | 1.00 | 0.00 | H |
| ATOM | 1178 | H42  | C B | 19 | -63.654 | -44.909 | 95.719  | 1.00 | 0.00 | H |
| ATOM | 1179 | H2'1 | C B | 19 | -61.774 | -47.291 | 101.746 | 1.00 | 0.00 | H |
| ATOM | 1180 | H2'2 | C B | 19 | -63.002 | -46.654 | 102.830 | 1.00 | 0.00 | H |
| ATOM | 1181 | H5'1 | C B | 19 | -58.534 | -45.377 | 101.084 | 1.00 | 0.00 | H |
| ATOM | 1182 | H5'2 | C B | 19 | -58.085 | -46.298 | 102.535 | 1.00 | 0.00 | H |
| ATOM | 1183 | C1'  | T B | 20 | -66.610 | -43.629 | 102.795 | 1.00 | 0.00 | C |
| ATOM | 1184 | N1   | T B | 20 | -66.403 | -44.523 | 101.626 | 1.00 | 0.00 | N |
| ATOM | 1185 | C2   | T B | 20 | -66.970 | -44.137 | 100.428 | 1.00 | 0.00 | C |
| ATOM | 1186 | O2   | T B | 20 | -67.619 | -43.112 | 100.305 | 1.00 | 0.00 | O |
| ATOM | 1187 | N3   | T B | 20 | -66.752 | -44.997 | 99.369  | 1.00 | 0.00 | N |
| ATOM | 1188 | C4   | T B | 20 | -66.039 | -46.175 | 99.400  | 1.00 | 0.00 | C |



|      |      |      |     |    |         |         |         |      |      |   |
|------|------|------|-----|----|---------|---------|---------|------|------|---|
| ATOM | 1189 | O4   | T B | 20 | -65.913 | -46.865 | 98.381  | 1.00 | 0.00 | O |
| ATOM | 1190 | C5   | T B | 20 | -65.484 | -46.495 | 100.692 | 1.00 | 0.00 | C |
| ATOM | 1191 | C6   | T B | 20 | -65.675 | -45.681 | 101.749 | 1.00 | 0.00 | C |
| ATOM | 1192 | C7   | T B | 20 | -64.697 | -47.769 | 100.773 | 1.00 | 0.00 | C |
| ATOM | 1193 | C2'  | T B | 20 | -66.817 | -44.374 | 104.108 | 1.00 | 0.00 | C |
| ATOM | 1194 | C3'  | T B | 20 | -66.119 | -43.459 | 105.104 | 1.00 | 0.00 | C |
| ATOM | 1195 | O3'  | T B | 20 | -67.022 | -42.432 | 105.510 | 1.00 | 0.00 | O |
| ATOM | 1196 | C4'  | T B | 20 | -64.945 | -42.910 | 104.298 | 1.00 | 0.00 | C |
| ATOM | 1197 | O4'  | T B | 20 | -65.458 | -42.819 | 102.930 | 1.00 | 0.00 | O |
| ATOM | 1198 | C5'  | T B | 20 | -63.687 | -43.748 | 104.286 | 1.00 | 0.00 | C |
| ATOM | 1199 | O5'  | T B | 20 | -64.036 | -45.156 | 104.272 | 1.00 | 0.00 | O |
| ATOM | 1200 | O1P  | T B | 20 | -63.206 | -45.983 | 106.499 | 1.00 | 0.00 | O |
| ATOM | 1201 | O2P  | T B | 20 | -63.369 | -47.561 | 104.554 | 1.00 | 0.00 | O |
| ATOM | 1202 | P    | T B | 20 | -63.095 | -46.187 | 105.041 | 1.00 | 0.00 | P |
| ATOM | 1203 | H3   | T B | 20 | -67.165 | -44.730 | 98.464  | 1.00 | 0.00 | H |
| ATOM | 1204 | H6   | T B | 20 | -65.245 | -45.943 | 102.715 | 1.00 | 0.00 | H |
| ATOM | 1205 | H1'  | T B | 20 | -67.456 | -42.975 | 102.581 | 1.00 | 0.00 | H |
| ATOM | 1206 | H3'  | T B | 20 | -65.773 | -44.003 | 105.982 | 1.00 | 0.00 | H |
| ATOM | 1207 | H4'  | T B | 20 | -64.694 | -41.939 | 104.725 | 1.00 | 0.00 | H |
| ATOM | 1208 | H3T  | T B | 20 | -67.869 | -42.742 | 105.838 | 1.00 | 0.00 | H |
| ATOM | 1209 | H71  | T B | 20 | -65.213 | -48.475 | 101.423 | 1.00 | 0.00 | H |
| ATOM | 1210 | H72  | T B | 20 | -64.599 | -48.199 | 99.775  | 1.00 | 0.00 | H |
| ATOM | 1211 | H73  | T B | 20 | -63.706 | -47.562 | 101.177 | 1.00 | 0.00 | H |
| ATOM | 1212 | H2'1 | T B | 20 | -66.366 | -45.364 | 104.097 | 1.00 | 0.00 | H |
| ATOM | 1213 | H2'2 | T B | 20 | -67.872 | -44.496 | 104.354 | 1.00 | 0.00 | H |
| ATOM | 1214 | H5'1 | T B | 20 | -63.102 | -43.504 | 103.400 | 1.00 | 0.00 | H |
| ATOM | 1215 | H5'2 | T B | 20 | -63.101 | -43.523 | 105.176 | 1.00 | 0.00 | H |
| TER  |      |      |     |    |         |         |         |      |      |   |
| ATOM | 1    | C1'  | A A | 1  | -47.647 | -36.480 | 127.843 | 1.00 | 0.00 | C |
| ATOM | 2    | N1   | A A | 1  | -44.784 | -40.733 | 128.086 | 1.00 | 0.00 | N |
| ATOM | 3    | C2   | A A | 1  | -44.746 | -39.584 | 128.756 | 1.00 | 0.00 | C |
| ATOM | 4    | N3   | A A | 1  | -45.520 | -38.526 | 128.645 | 1.00 | 0.00 | N |
| ATOM | 5    | C4   | A A | 1  | -46.446 | -38.723 | 127.691 | 1.00 | 0.00 | C |
| ATOM | 6    | C5   | A A | 1  | -46.617 | -39.837 | 126.916 | 1.00 | 0.00 | C |
| ATOM | 7    | C6   | A A | 1  | -45.720 | -40.901 | 127.140 | 1.00 | 0.00 | C |
| ATOM | 8    | N6   | A A | 1  | -45.766 | -42.057 | 126.455 | 1.00 | 0.00 | N |
| ATOM | 9    | N7   | A A | 1  | -47.676 | -39.677 | 126.040 | 1.00 | 0.00 | N |
| ATOM | 10   | C8   | A A | 1  | -48.118 | -38.482 | 126.299 | 1.00 | 0.00 | C |
| ATOM | 11   | N9   | A A | 1  | -47.421 | -37.842 | 127.291 | 1.00 | 0.00 | N |
| ATOM | 12   | C2'  | A A | 1  | -48.059 | -35.454 | 126.797 | 1.00 | 0.00 | C |
| ATOM | 13   | C3'  | A A | 1  | -49.031 | -34.582 | 127.575 | 1.00 | 0.00 | C |
| ATOM | 14   | O3'  | A A | 1  | -48.300 | -33.595 | 128.299 | 1.00 | 0.00 | O |
| ATOM | 15   | C4'  | A A | 1  | -49.722 | -35.582 | 128.500 | 1.00 | 0.00 | C |
| ATOM | 16   | O4'  | A A | 1  | -48.685 | -36.570 | 128.801 | 1.00 | 0.00 | O |
| ATOM | 17   | C5'  | A A | 1  | -50.924 | -36.300 | 127.933 | 1.00 | 0.00 | C |
| ATOM | 18   | O5'  | A A | 1  | -50.712 | -36.578 | 126.526 | 1.00 | 0.00 | O |
| ATOM | 19   | H2   | A A | 1  | -43.960 | -39.510 | 129.507 | 1.00 | 0.00 | H |
| ATOM | 20   | H8   | A A | 1  | -48.962 | -38.031 | 125.777 | 1.00 | 0.00 | H |
| ATOM | 21   | H1'  | A A | 1  | -46.739 | -36.168 | 128.361 | 1.00 | 0.00 | H |
| ATOM | 22   | H3'  | A A | 1  | -49.752 | -34.089 | 126.921 | 1.00 | 0.00 | H |
| ATOM | 23   | H4'  | A A | 1  | -50.049 | -35.027 | 129.378 | 1.00 | 0.00 | H |
| ATOM | 24   | H61  | A A | 1  | -45.089 | -42.803 | 126.658 | 1.00 | 0.00 | H |
| ATOM | 25   | H62  | A A | 1  | -46.483 | -42.193 | 125.727 | 1.00 | 0.00 | H |
| ATOM | 26   | H5T  | A A | 1  | -51.465 | -36.558 | 125.933 | 1.00 | 0.00 | H |

|      |    |      |     |   |         |         |         |      |      |   |
|------|----|------|-----|---|---------|---------|---------|------|------|---|
| ATOM | 27 | H2'1 | A A | 1 | -48.541 | -35.913 | 125.935 | 1.00 | 0.00 | H |
| ATOM | 28 | H2'2 | A A | 1 | -47.212 | -34.874 | 126.430 | 1.00 | 0.00 | H |
| ATOM | 29 | H5'1 | A A | 1 | -51.070 | -37.235 | 128.475 | 1.00 | 0.00 | H |
| ATOM | 30 | H5'2 | A A | 1 | -51.806 | -35.675 | 128.056 | 1.00 | 0.00 | H |
| ATOM | 31 | C1'  | G A | 2 | -42.843 | -35.295 | 128.261 | 1.00 | 0.00 | C |
| ATOM | 32 | N1   | G A | 2 | -42.093 | -39.878 | 126.153 | 1.00 | 0.00 | N |
| ATOM | 33 | C2   | G A | 2 | -41.433 | -39.266 | 127.201 | 1.00 | 0.00 | C |
| ATOM | 34 | N2   | G A | 2 | -40.441 | -39.966 | 127.762 | 1.00 | 0.00 | N |
| ATOM | 35 | N3   | G A | 2 | -41.739 | -38.052 | 127.655 | 1.00 | 0.00 | N |
| ATOM | 36 | C4   | G A | 2 | -42.765 | -37.487 | 126.966 | 1.00 | 0.00 | C |
| ATOM | 37 | C5   | G A | 2 | -43.481 | -38.021 | 125.906 | 1.00 | 0.00 | C |
| ATOM | 38 | C6   | G A | 2 | -43.158 | -39.312 | 125.428 | 1.00 | 0.00 | C |
| ATOM | 39 | O6   | G A | 2 | -43.672 | -39.950 | 124.510 | 1.00 | 0.00 | O |
| ATOM | 40 | N7   | G A | 2 | -44.456 | -37.118 | 125.479 | 1.00 | 0.00 | N |
| ATOM | 41 | C8   | G A | 2 | -44.308 | -36.091 | 126.276 | 1.00 | 0.00 | C |
| ATOM | 42 | N9   | G A | 2 | -43.299 | -36.240 | 127.206 | 1.00 | 0.00 | N |
| ATOM | 43 | C2'  | G A | 2 | -42.868 | -33.835 | 127.829 | 1.00 | 0.00 | C |
| ATOM | 44 | C3'  | G A | 2 | -43.271 | -33.130 | 129.113 | 1.00 | 0.00 | C |
| ATOM | 45 | O3'  | G A | 2 | -42.110 | -32.907 | 129.911 | 1.00 | 0.00 | O |
| ATOM | 46 | C4'  | G A | 2 | -44.233 | -34.127 | 129.760 | 1.00 | 0.00 | C |
| ATOM | 47 | O4'  | G A | 2 | -43.710 | -35.435 | 129.371 | 1.00 | 0.00 | O |
| ATOM | 48 | C5'  | G A | 2 | -45.679 | -34.036 | 129.335 | 1.00 | 0.00 | C |
| ATOM | 49 | O5'  | G A | 2 | -45.755 | -33.701 | 127.927 | 1.00 | 0.00 | O |
| ATOM | 50 | O1P  | G A | 2 | -46.799 | -31.411 | 127.930 | 1.00 | 0.00 | O |
| ATOM | 51 | O2P  | G A | 2 | -47.097 | -32.922 | 125.950 | 1.00 | 0.00 | O |
| ATOM | 52 | P    | G A | 2 | -46.960 | -32.786 | 127.421 | 1.00 | 0.00 | P |
| ATOM | 53 | H1   | G A | 2 | -41.781 | -40.821 | 125.881 | 1.00 | 0.00 | H |
| ATOM | 54 | H8   | G A | 2 | -44.925 | -35.196 | 126.211 | 1.00 | 0.00 | H |
| ATOM | 55 | H1'  | G A | 2 | -41.843 | -35.591 | 128.577 | 1.00 | 0.00 | H |
| ATOM | 56 | H21  | G A | 2 | -40.210 | -40.906 | 127.407 | 1.00 | 0.00 | H |
| ATOM | 57 | H3'  | G A | 2 | -43.764 | -32.177 | 128.920 | 1.00 | 0.00 | H |
| ATOM | 58 | H22  | G A | 2 | -39.909 | -39.565 | 128.548 | 1.00 | 0.00 | H |
| ATOM | 59 | H4'  | G A | 2 | -44.190 | -33.954 | 130.836 | 1.00 | 0.00 | H |
| ATOM | 60 | H2'1 | G A | 2 | -43.589 | -33.652 | 127.033 | 1.00 | 0.00 | H |
| ATOM | 61 | H2'2 | G A | 2 | -41.894 | -33.491 | 127.476 | 1.00 | 0.00 | H |
| ATOM | 62 | H5'1 | G A | 2 | -46.165 | -34.994 | 129.513 | 1.00 | 0.00 | H |
| ATOM | 63 | H5'2 | G A | 2 | -46.178 | -33.267 | 129.926 | 1.00 | 0.00 | H |
| ATOM | 64 | C1'  | G A | 3 | -37.989 | -36.127 | 127.746 | 1.00 | 0.00 | C |
| ATOM | 65 | N1   | G A | 3 | -39.496 | -39.254 | 124.010 | 1.00 | 0.00 | N |
| ATOM | 66 | C2   | G A | 3 | -38.533 | -39.436 | 124.983 | 1.00 | 0.00 | C |
| ATOM | 67 | N2   | G A | 3 | -37.882 | -40.606 | 124.958 | 1.00 | 0.00 | N |
| ATOM | 68 | N3   | G A | 3 | -38.241 | -38.525 | 125.909 | 1.00 | 0.00 | N |
| ATOM | 69 | C4   | G A | 3 | -38.991 | -37.400 | 125.781 | 1.00 | 0.00 | C |
| ATOM | 70 | C5   | G A | 3 | -39.972 | -37.129 | 124.840 | 1.00 | 0.00 | C |
| ATOM | 71 | C6   | G A | 3 | -40.285 | -38.099 | 123.860 | 1.00 | 0.00 | C |
| ATOM | 72 | O6   | G A | 3 | -41.114 | -38.045 | 122.951 | 1.00 | 0.00 | O |
| ATOM | 73 | N7   | G A | 3 | -40.505 | -35.856 | 125.052 | 1.00 | 0.00 | N |
| ATOM | 74 | C8   | G A | 3 | -39.850 | -35.408 | 126.091 | 1.00 | 0.00 | C |
| ATOM | 75 | N9   | G A | 3 | -38.912 | -36.288 | 126.590 | 1.00 | 0.00 | N |
| ATOM | 76 | C2'  | G A | 3 | -37.430 | -34.718 | 127.894 | 1.00 | 0.00 | C |
| ATOM | 77 | C3'  | G A | 3 | -37.357 | -34.561 | 129.403 | 1.00 | 0.00 | C |
| ATOM | 78 | O3'  | G A | 3 | -36.138 | -35.128 | 129.875 | 1.00 | 0.00 | O |
| ATOM | 79 | C4'  | G A | 3 | -38.580 | -35.342 | 129.885 | 1.00 | 0.00 | C |
| ATOM | 80 | O4'  | G A | 3 | -38.712 | -36.434 | 128.922 | 1.00 | 0.00 | O |

|      |     |      |     |   |         |         |         |      |      |   |
|------|-----|------|-----|---|---------|---------|---------|------|------|---|
| ATOM | 81  | C5'  | G A | 3 | -39.884 | -34.581 | 129.936 | 1.00 | 0.00 | C |
| ATOM | 82  | O5'  | G A | 3 | -39.955 | -33.656 | 128.823 | 1.00 | 0.00 | O |
| ATOM | 83  | O1P  | G A | 3 | -39.912 | -31.399 | 129.938 | 1.00 | 0.00 | O |
| ATOM | 84  | O2P  | G A | 3 | -41.031 | -31.677 | 127.710 | 1.00 | 0.00 | O |
| ATOM | 85  | P    | G A | 3 | -40.697 | -32.259 | 129.033 | 1.00 | 0.00 | P |
| ATOM | 86  | H1   | G A | 3 | -39.648 | -40.025 | 123.341 | 1.00 | 0.00 | H |
| ATOM | 87  | H8   | G A | 3 | -40.028 | -34.424 | 126.525 | 1.00 | 0.00 | H |
| ATOM | 88  | H1'  | G A | 3 | -37.186 | -36.857 | 127.645 | 1.00 | 0.00 | H |
| ATOM | 89  | H21  | G A | 3 | -38.115 | -41.308 | 124.240 | 1.00 | 0.00 | H |
| ATOM | 90  | H3'  | G A | 3 | -37.412 | -33.516 | 129.710 | 1.00 | 0.00 | H |
| ATOM | 91  | H22  | G A | 3 | -37.151 | -40.803 | 125.655 | 1.00 | 0.00 | H |
| ATOM | 92  | H4'  | G A | 3 | -38.357 | -35.688 | 130.894 | 1.00 | 0.00 | H |
| ATOM | 93  | H2'1 | G A | 3 | -38.081 | -33.966 | 127.448 | 1.00 | 0.00 | H |
| ATOM | 94  | H2'2 | G A | 3 | -36.447 | -34.612 | 127.436 | 1.00 | 0.00 | H |
| ATOM | 95  | H5'1 | G A | 3 | -40.712 | -35.287 | 129.883 | 1.00 | 0.00 | H |
| ATOM | 96  | H5'2 | G A | 3 | -39.942 | -34.033 | 130.876 | 1.00 | 0.00 | H |
| ATOM | 97  | C1'  | C A | 4 | -34.039 | -38.262 | 125.654 | 1.00 | 0.00 | C |
| ATOM | 98  | N1   | C A | 4 | -35.059 | -37.572 | 124.815 | 1.00 | 0.00 | N |
| ATOM | 99  | C2   | C A | 4 | -35.596 | -38.271 | 123.736 | 1.00 | 0.00 | C |
| ATOM | 100 | O2   | C A | 4 | -35.207 | -39.425 | 123.518 | 1.00 | 0.00 | O |
| ATOM | 101 | N3   | C A | 4 | -36.525 | -37.660 | 122.961 | 1.00 | 0.00 | N |
| ATOM | 102 | C4   | C A | 4 | -36.924 | -36.408 | 123.221 | 1.00 | 0.00 | C |
| ATOM | 103 | N4   | C A | 4 | -37.838 | -35.862 | 122.433 | 1.00 | 0.00 | N |
| ATOM | 104 | C5   | C A | 4 | -36.387 | -35.667 | 124.323 | 1.00 | 0.00 | C |
| ATOM | 105 | C6   | C A | 4 | -35.455 | -36.301 | 125.092 | 1.00 | 0.00 | C |
| ATOM | 106 | C2'  | C A | 4 | -32.920 | -37.348 | 126.134 | 1.00 | 0.00 | C |
| ATOM | 107 | C3'  | C A | 4 | -32.631 | -37.903 | 127.521 | 1.00 | 0.00 | C |
| ATOM | 108 | O3'  | C A | 4 | -31.728 | -39.001 | 127.406 | 1.00 | 0.00 | O |
| ATOM | 109 | C4'  | C A | 4 | -34.011 | -38.339 | 128.007 | 1.00 | 0.00 | C |
| ATOM | 110 | O4'  | C A | 4 | -34.700 | -38.782 | 126.793 | 1.00 | 0.00 | O |
| ATOM | 111 | C5'  | C A | 4 | -34.852 | -37.280 | 128.679 | 1.00 | 0.00 | C |
| ATOM | 112 | O5'  | C A | 4 | -34.636 | -35.999 | 128.033 | 1.00 | 0.00 | O |
| ATOM | 113 | O1P  | C A | 4 | -33.516 | -34.627 | 129.820 | 1.00 | 0.00 | O |
| ATOM | 114 | O2P  | C A | 4 | -34.872 | -33.497 | 128.037 | 1.00 | 0.00 | O |
| ATOM | 115 | P    | C A | 4 | -34.684 | -34.675 | 128.920 | 1.00 | 0.00 | P |
| ATOM | 116 | H5   | C A | 4 | -36.705 | -34.646 | 124.535 | 1.00 | 0.00 | H |
| ATOM | 117 | H6   | C A | 4 | -35.021 | -35.779 | 125.944 | 1.00 | 0.00 | H |
| ATOM | 118 | H1'  | C A | 4 | -33.643 | -39.100 | 125.084 | 1.00 | 0.00 | H |
| ATOM | 119 | H3'  | C A | 4 | -32.202 | -37.150 | 128.180 | 1.00 | 0.00 | H |
| ATOM | 120 | H4'  | C A | 4 | -33.854 | -39.145 | 128.724 | 1.00 | 0.00 | H |
| ATOM | 121 | H41  | C A | 4 | -38.164 | -34.900 | 122.611 | 1.00 | 0.00 | H |
| ATOM | 122 | H42  | C A | 4 | -38.223 | -36.396 | 121.640 | 1.00 | 0.00 | H |
| ATOM | 123 | H2'1 | C A | 4 | -33.229 | -36.305 | 126.182 | 1.00 | 0.00 | H |
| ATOM | 124 | H2'2 | C A | 4 | -32.039 | -37.401 | 125.493 | 1.00 | 0.00 | H |
| ATOM | 125 | H5'1 | C A | 4 | -35.904 | -37.556 | 128.605 | 1.00 | 0.00 | H |
| ATOM | 126 | H5'2 | C A | 4 | -34.571 | -37.214 | 129.730 | 1.00 | 0.00 | H |
| ATOM | 127 | C1'  | C A | 5 | -31.625 | -40.466 | 121.935 | 1.00 | 0.00 | C |
| ATOM | 128 | N1   | C A | 5 | -32.332 | -39.174 | 121.715 | 1.00 | 0.00 | N |
| ATOM | 129 | C2   | C A | 5 | -33.224 | -39.092 | 120.649 | 1.00 | 0.00 | C |
| ATOM | 130 | O2   | C A | 5 | -33.394 | -40.087 | 119.932 | 1.00 | 0.00 | O |
| ATOM | 131 | N3   | C A | 5 | -33.878 | -37.924 | 120.433 | 1.00 | 0.00 | N |
| ATOM | 132 | C4   | C A | 5 | -33.674 | -36.864 | 121.225 | 1.00 | 0.00 | C |
| ATOM | 133 | N4   | C A | 5 | -34.341 | -35.750 | 120.971 | 1.00 | 0.00 | N |
| ATOM | 134 | C5   | C A | 5 | -32.760 | -36.921 | 122.328 | 1.00 | 0.00 | C |

|      |     |      |     |   |         |         |         |      |      |   |
|------|-----|------|-----|---|---------|---------|---------|------|------|---|
| ATOM | 135 | C6   | C A | 5 | -32.116 | -38.107 | 122.528 | 1.00 | 0.00 | C |
| ATOM | 136 | C2'  | C A | 5 | -30.179 | -40.306 | 122.385 | 1.00 | 0.00 | C |
| ATOM | 137 | C3'  | C A | 5 | -30.014 | -41.478 | 123.341 | 1.00 | 0.00 | C |
| ATOM | 138 | O3'  | C A | 5 | -29.685 | -42.647 | 122.595 | 1.00 | 0.00 | O |
| ATOM | 139 | C4'  | C A | 5 | -31.390 | -41.579 | 123.995 | 1.00 | 0.00 | C |
| ATOM | 140 | O4'  | C A | 5 | -32.322 | -41.172 | 122.944 | 1.00 | 0.00 | O |
| ATOM | 141 | C5'  | C A | 5 | -31.621 | -40.707 | 125.208 | 1.00 | 0.00 | C |
| ATOM | 142 | O5'  | C A | 5 | -30.946 | -39.436 | 125.034 | 1.00 | 0.00 | O |
| ATOM | 143 | O1P  | C A | 5 | -29.167 | -39.472 | 126.815 | 1.00 | 0.00 | O |
| ATOM | 144 | O2P  | C A | 5 | -30.086 | -37.283 | 126.004 | 1.00 | 0.00 | O |
| ATOM | 145 | P    | C A | 5 | -30.330 | -38.713 | 126.315 | 1.00 | 0.00 | P |
| ATOM | 146 | H5   | C A | 5 | -32.586 | -36.059 | 122.973 | 1.00 | 0.00 | H |
| ATOM | 147 | H6   | C A | 5 | -31.414 | -38.199 | 123.356 | 1.00 | 0.00 | H |
| ATOM | 148 | H1'  | C A | 5 | -31.686 | -41.048 | 121.015 | 1.00 | 0.00 | H |
| ATOM | 149 | H3'  | C A | 5 | -29.237 | -41.293 | 124.082 | 1.00 | 0.00 | H |
| ATOM | 150 | H4'  | C A | 5 | -31.519 | -42.616 | 124.303 | 1.00 | 0.00 | H |
| ATOM | 151 | H41  | C A | 5 | -34.204 | -34.920 | 121.565 | 1.00 | 0.00 | H |
| ATOM | 152 | H42  | C A | 5 | -34.997 | -35.712 | 120.176 | 1.00 | 0.00 | H |
| ATOM | 153 | H2'1 | C A | 5 | -30.005 | -39.357 | 122.888 | 1.00 | 0.00 | H |
| ATOM | 154 | H2'2 | C A | 5 | -29.478 | -40.371 | 121.552 | 1.00 | 0.00 | H |
| ATOM | 155 | H5'1 | C A | 5 | -32.692 | -40.542 | 125.332 | 1.00 | 0.00 | H |
| ATOM | 156 | H5'2 | C A | 5 | -31.232 | -41.213 | 126.091 | 1.00 | 0.00 | H |
| ATOM | 157 | C1'  | G A | 6 | -30.788 | -41.483 | 117.160 | 1.00 | 0.00 | C |
| ATOM | 158 | N1   | G A | 6 | -33.045 | -36.974 | 116.387 | 1.00 | 0.00 | N |
| ATOM | 159 | C2   | G A | 6 | -33.195 | -38.171 | 115.708 | 1.00 | 0.00 | C |
| ATOM | 160 | N2   | G A | 6 | -34.058 | -38.165 | 114.686 | 1.00 | 0.00 | N |
| ATOM | 161 | N3   | G A | 6 | -32.535 | -39.284 | 116.025 | 1.00 | 0.00 | N |
| ATOM | 162 | C4   | G A | 6 | -31.697 | -39.106 | 117.080 | 1.00 | 0.00 | C |
| ATOM | 163 | C5   | G A | 6 | -31.481 | -37.952 | 117.813 | 1.00 | 0.00 | C |
| ATOM | 164 | C6   | G A | 6 | -32.183 | -36.771 | 117.482 | 1.00 | 0.00 | C |
| ATOM | 165 | O6   | G A | 6 | -32.127 | -35.661 | 118.009 | 1.00 | 0.00 | O |
| ATOM | 166 | N7   | G A | 6 | -30.538 | -38.188 | 118.817 | 1.00 | 0.00 | N |
| ATOM | 167 | C8   | G A | 6 | -30.225 | -39.449 | 118.665 | 1.00 | 0.00 | C |
| ATOM | 168 | N9   | G A | 6 | -30.886 | -40.075 | 117.629 | 1.00 | 0.00 | N |
| ATOM | 169 | C2'  | G A | 6 | -29.377 | -42.053 | 117.223 | 1.00 | 0.00 | C |
| ATOM | 170 | C3'  | G A | 6 | -29.635 | -43.502 | 117.602 | 1.00 | 0.00 | C |
| ATOM | 171 | O3'  | G A | 6 | -29.919 | -44.253 | 116.424 | 1.00 | 0.00 | O |
| ATOM | 172 | C4'  | G A | 6 | -30.847 | -43.400 | 118.528 | 1.00 | 0.00 | C |
| ATOM | 173 | O4'  | G A | 6 | -31.614 | -42.275 | 117.993 | 1.00 | 0.00 | O |
| ATOM | 174 | C5'  | G A | 6 | -30.558 | -43.138 | 119.986 | 1.00 | 0.00 | C |
| ATOM | 175 | O5'  | G A | 6 | -29.424 | -42.245 | 120.110 | 1.00 | 0.00 | O |
| ATOM | 176 | O1P  | G A | 6 | -27.665 | -43.682 | 121.194 | 1.00 | 0.00 | O |
| ATOM | 177 | O2P  | G A | 6 | -27.628 | -41.194 | 121.520 | 1.00 | 0.00 | O |
| ATOM | 178 | P    | G A | 6 | -28.431 | -42.430 | 121.345 | 1.00 | 0.00 | P |
| ATOM | 179 | H1   | G A | 6 | -33.609 | -36.172 | 116.067 | 1.00 | 0.00 | H |
| ATOM | 180 | H8   | G A | 6 | -29.502 | -39.961 | 119.300 | 1.00 | 0.00 | H |
| ATOM | 181 | H1'  | G A | 6 | -31.184 | -41.535 | 116.146 | 1.00 | 0.00 | H |
| ATOM | 182 | H21  | G A | 6 | -34.568 | -37.302 | 114.450 | 1.00 | 0.00 | H |
| ATOM | 183 | H3'  | G A | 6 | -28.784 | -43.948 | 118.118 | 1.00 | 0.00 | H |
| ATOM | 184 | H22  | G A | 6 | -34.214 | -39.023 | 114.138 | 1.00 | 0.00 | H |
| ATOM | 185 | H4'  | G A | 6 | -31.379 | -44.348 | 118.458 | 1.00 | 0.00 | H |
| ATOM | 186 | H2'1 | G A | 6 | -28.761 | -41.551 | 117.970 | 1.00 | 0.00 | H |
| ATOM | 187 | H2'2 | G A | 6 | -28.857 | -41.979 | 116.268 | 1.00 | 0.00 | H |
| ATOM | 188 | H5'1 | G A | 6 | -31.434 | -42.687 | 120.451 | 1.00 | 0.00 | H |

|      |     |      |     |   |         |         |         |      |      |   |
|------|-----|------|-----|---|---------|---------|---------|------|------|---|
| ATOM | 189 | H5'2 | G A | 6 | -30.339 | -44.083 | 120.483 | 1.00 | 0.00 | H |
| ATOM | 190 | C1'  | C A | 7 | -30.966 | -40.512 | 112.308 | 1.00 | 0.00 | C |
| ATOM | 191 | N1   | C A | 7 | -30.406 | -39.511 | 113.258 | 1.00 | 0.00 | N |
| ATOM | 192 | C2   | C A | 7 | -30.902 | -38.211 | 113.202 | 1.00 | 0.00 | C |
| ATOM | 193 | O2   | C A | 7 | -31.778 | -37.940 | 112.371 | 1.00 | 0.00 | O |
| ATOM | 194 | N3   | C A | 7 | -30.407 | -37.285 | 114.060 | 1.00 | 0.00 | N |
| ATOM | 195 | C4   | C A | 7 | -29.457 | -37.607 | 114.948 | 1.00 | 0.00 | C |
| ATOM | 196 | N4   | C A | 7 | -29.012 | -36.665 | 115.764 | 1.00 | 0.00 | N |
| ATOM | 197 | C5   | C A | 7 | -28.926 | -38.937 | 115.025 | 1.00 | 0.00 | C |
| ATOM | 198 | C6   | C A | 7 | -29.444 | -39.854 | 114.155 | 1.00 | 0.00 | C |
| ATOM | 199 | C2'  | C A | 7 | -29.932 | -41.493 | 111.771 | 1.00 | 0.00 | C |
| ATOM | 200 | C3'  | C A | 7 | -30.741 | -42.777 | 111.662 | 1.00 | 0.00 | C |
| ATOM | 201 | O3'  | C A | 7 | -31.440 | -42.785 | 110.418 | 1.00 | 0.00 | O |
| ATOM | 202 | C4'  | C A | 7 | -31.689 | -42.683 | 112.856 | 1.00 | 0.00 | C |
| ATOM | 203 | O4'  | C A | 7 | -31.956 | -41.252 | 112.995 | 1.00 | 0.00 | O |
| ATOM | 204 | C5'  | C A | 7 | -31.161 | -43.206 | 114.173 | 1.00 | 0.00 | C |
| ATOM | 205 | O5'  | C A | 7 | -29.747 | -42.904 | 114.290 | 1.00 | 0.00 | O |
| ATOM | 206 | O1P  | C A | 7 | -28.661 | -45.175 | 114.257 | 1.00 | 0.00 | O |
| ATOM | 207 | O2P  | C A | 7 | -27.539 | -43.261 | 115.429 | 1.00 | 0.00 | O |
| ATOM | 208 | P    | C A | 7 | -28.802 | -43.937 | 115.052 | 1.00 | 0.00 | P |
| ATOM | 209 | H5   | C A | 7 | -28.149 | -39.203 | 115.743 | 1.00 | 0.00 | H |
| ATOM | 210 | H6   | C A | 7 | -29.077 | -40.881 | 114.181 | 1.00 | 0.00 | H |
| ATOM | 211 | H1'  | C A | 7 | -31.453 | -39.973 | 111.495 | 1.00 | 0.00 | H |
| ATOM | 212 | H3'  | C A | 7 | -30.109 | -43.662 | 111.727 | 1.00 | 0.00 | H |
| ATOM | 213 | H4'  | C A | 7 | -32.576 | -43.261 | 112.601 | 1.00 | 0.00 | H |
| ATOM | 214 | H41  | C A | 7 | -28.283 | -36.886 | 116.459 | 1.00 | 0.00 | H |
| ATOM | 215 | H42  | C A | 7 | -29.391 | -35.708 | 115.706 | 1.00 | 0.00 | H |
| ATOM | 216 | H2'1 | C A | 7 | -29.087 | -41.614 | 112.446 | 1.00 | 0.00 | H |
| ATOM | 217 | H2'2 | C A | 7 | -29.537 | -41.188 | 110.801 | 1.00 | 0.00 | H |
| ATOM | 218 | H5'1 | C A | 7 | -31.708 | -42.734 | 114.990 | 1.00 | 0.00 | H |
| ATOM | 219 | H5'2 | C A | 7 | -31.311 | -44.285 | 114.216 | 1.00 | 0.00 | H |
| ATOM | 220 | C1'  | A A | 8 | -31.217 | -37.524 | 108.368 | 1.00 | 0.00 | C |
| ATOM | 221 | N1   | A A | 8 | -29.140 | -34.085 | 111.562 | 1.00 | 0.00 | N |
| ATOM | 222 | C2   | A A | 8 | -30.115 | -34.001 | 110.662 | 1.00 | 0.00 | C |
| ATOM | 223 | N3   | A A | 8 | -30.606 | -34.930 | 109.870 | 1.00 | 0.00 | N |
| ATOM | 224 | C4   | A A | 8 | -29.963 | -36.096 | 110.069 | 1.00 | 0.00 | C |
| ATOM | 225 | C5   | A A | 8 | -28.947 | -36.347 | 110.949 | 1.00 | 0.00 | C |
| ATOM | 226 | C6   | A A | 8 | -28.519 | -35.261 | 111.739 | 1.00 | 0.00 | C |
| ATOM | 227 | N6   | A A | 8 | -27.532 | -35.358 | 112.647 | 1.00 | 0.00 | N |
| ATOM | 228 | N7   | A A | 8 | -28.536 | -37.667 | 110.874 | 1.00 | 0.00 | N |
| ATOM | 229 | C8   | A A | 8 | -29.303 | -38.181 | 109.957 | 1.00 | 0.00 | C |
| ATOM | 230 | N9   | A A | 8 | -30.195 | -37.287 | 109.425 | 1.00 | 0.00 | N |
| ATOM | 231 | C2'  | A A | 8 | -30.753 | -38.467 | 107.266 | 1.00 | 0.00 | C |
| ATOM | 232 | C3'  | A A | 8 | -32.033 | -39.216 | 106.931 | 1.00 | 0.00 | C |
| ATOM | 233 | O3'  | A A | 8 | -32.791 | -38.449 | 106.000 | 1.00 | 0.00 | O |
| ATOM | 234 | C4'  | A A | 8 | -32.727 | -39.329 | 108.287 | 1.00 | 0.00 | C |
| ATOM | 235 | O4'  | A A | 8 | -32.351 | -38.099 | 108.988 | 1.00 | 0.00 | O |
| ATOM | 236 | C5'  | A A | 8 | -32.339 | -40.512 | 109.142 | 1.00 | 0.00 | C |
| ATOM | 237 | O5'  | A A | 8 | -30.925 | -40.791 | 108.980 | 1.00 | 0.00 | O |
| ATOM | 238 | O1P  | A A | 8 | -30.905 | -43.047 | 107.862 | 1.00 | 0.00 | O |
| ATOM | 239 | O2P  | A A | 8 | -28.968 | -42.337 | 109.290 | 1.00 | 0.00 | O |
| ATOM | 240 | P    | A A | 8 | -30.432 | -42.307 | 109.047 | 1.00 | 0.00 | P |
| ATOM | 241 | H2   | A A | 8 | -30.575 | -33.019 | 110.565 | 1.00 | 0.00 | H |
| ATOM | 242 | H8   | A A | 8 | -29.242 | -39.222 | 109.641 | 1.00 | 0.00 | H |

|      |     |      |     |    |         |         |         |      |      |   |
|------|-----|------|-----|----|---------|---------|---------|------|------|---|
| ATOM | 243 | H1'  | A A | 8  | -31.513 | -36.559 | 107.958 | 1.00 | 0.00 | H |
| ATOM | 244 | H3'  | A A | 8  | -31.832 | -40.201 | 106.509 | 1.00 | 0.00 | H |
| ATOM | 245 | H4'  | A A | 8  | -33.796 | -39.396 | 108.090 | 1.00 | 0.00 | H |
| ATOM | 246 | H61  | A A | 8  | -27.260 | -34.534 | 113.200 | 1.00 | 0.00 | H |
| ATOM | 247 | H62  | A A | 8  | -27.049 | -36.257 | 112.786 | 1.00 | 0.00 | H |
| ATOM | 248 | H2'1 | A A | 8  | -29.973 | -39.147 | 107.606 | 1.00 | 0.00 | H |
| ATOM | 249 | H2'2 | A A | 8  | -30.367 | -37.931 | 106.400 | 1.00 | 0.00 | H |
| ATOM | 250 | H5'1 | A A | 8  | -32.550 | -40.280 | 110.187 | 1.00 | 0.00 | H |
| ATOM | 251 | H5'2 | A A | 8  | -32.924 | -41.380 | 108.841 | 1.00 | 0.00 | H |
| ATOM | 252 | C1'  | C A | 9  | -30.553 | -33.193 | 106.033 | 1.00 | 0.00 | C |
| ATOM | 253 | N1   | C A | 9  | -29.428 | -33.831 | 106.768 | 1.00 | 0.00 | N |
| ATOM | 254 | C2   | C A | 9  | -28.728 | -33.058 | 107.692 | 1.00 | 0.00 | C |
| ATOM | 255 | O2   | C A | 9  | -29.069 | -31.880 | 107.862 | 1.00 | 0.00 | O |
| ATOM | 256 | N3   | C A | 9  | -27.701 | -33.621 | 108.373 | 1.00 | 0.00 | N |
| ATOM | 257 | C4   | C A | 9  | -27.356 | -34.898 | 108.166 | 1.00 | 0.00 | C |
| ATOM | 258 | N4   | C A | 9  | -26.345 | -35.400 | 108.862 | 1.00 | 0.00 | N |
| ATOM | 259 | C5   | C A | 9  | -28.054 | -35.718 | 107.218 | 1.00 | 0.00 | C |
| ATOM | 260 | C6   | C A | 9  | -29.090 | -35.131 | 106.547 | 1.00 | 0.00 | C |
| ATOM | 261 | C2'  | C A | 9  | -30.661 | -33.629 | 104.578 | 1.00 | 0.00 | C |
| ATOM | 262 | C3'  | C A | 9  | -32.168 | -33.648 | 104.364 | 1.00 | 0.00 | C |
| ATOM | 263 | O3'  | C A | 9  | -32.611 | -32.333 | 104.036 | 1.00 | 0.00 | O |
| ATOM | 264 | C4'  | C A | 9  | -32.697 | -34.113 | 105.719 | 1.00 | 0.00 | C |
| ATOM | 265 | O4'  | C A | 9  | -31.755 | -33.552 | 106.688 | 1.00 | 0.00 | O |
| ATOM | 266 | C5'  | C A | 9  | -32.775 | -35.607 | 105.932 | 1.00 | 0.00 | C |
| ATOM | 267 | O5'  | C A | 9  | -31.649 | -36.254 | 105.285 | 1.00 | 0.00 | O |
| ATOM | 268 | O1P  | C A | 9  | -32.727 | -37.607 | 103.456 | 1.00 | 0.00 | O |
| ATOM | 269 | O2P  | C A | 9  | -30.538 | -38.343 | 104.437 | 1.00 | 0.00 | O |
| ATOM | 270 | P    | C A | 9  | -31.859 | -37.700 | 104.646 | 1.00 | 0.00 | P |
| ATOM | 271 | H5   | C A | 9  | -27.773 | -36.757 | 107.043 | 1.00 | 0.00 | H |
| ATOM | 272 | H6   | C A | 9  | -29.656 | -35.715 | 105.823 | 1.00 | 0.00 | H |
| ATOM | 273 | H1'  | C A | 9  | -30.439 | -32.111 | 106.109 | 1.00 | 0.00 | H |
| ATOM | 274 | H3'  | C A | 9  | -32.457 | -34.336 | 103.571 | 1.00 | 0.00 | H |
| ATOM | 275 | H4'  | C A | 9  | -33.704 | -33.710 | 105.821 | 1.00 | 0.00 | H |
| ATOM | 276 | H41  | C A | 9  | -26.061 | -36.380 | 108.723 | 1.00 | 0.00 | H |
| ATOM | 277 | H42  | C A | 9  | -25.844 | -34.808 | 109.539 | 1.00 | 0.00 | H |
| ATOM | 278 | H2'1 | C A | 9  | -30.225 | -34.612 | 104.406 | 1.00 | 0.00 | H |
| ATOM | 279 | H2'2 | C A | 9  | -30.172 | -32.929 | 103.899 | 1.00 | 0.00 | H |
| ATOM | 280 | H5'1 | C A | 9  | -32.756 | -35.819 | 107.001 | 1.00 | 0.00 | H |
| ATOM | 281 | H5'2 | C A | 9  | -33.707 | -35.980 | 105.510 | 1.00 | 0.00 | H |
| ATOM | 282 | C1'  | C A | 10 | -28.359 | -28.812 | 105.311 | 1.00 | 0.00 | C |
| ATOM | 283 | N1   | C A | 10 | -27.547 | -30.053 | 105.427 | 1.00 | 0.00 | N |
| ATOM | 284 | C2   | C A | 10 | -26.492 | -30.060 | 106.338 | 1.00 | 0.00 | C |
| ATOM | 285 | O2   | C A | 10 | -26.274 | -29.042 | 107.008 | 1.00 | 0.00 | O |
| ATOM | 286 | N3   | C A | 10 | -25.740 | -31.181 | 106.459 | 1.00 | 0.00 | N |
| ATOM | 287 | C4   | C A | 10 | -25.998 | -32.267 | 105.720 | 1.00 | 0.00 | C |
| ATOM | 288 | N4   | C A | 10 | -25.233 | -33.338 | 105.882 | 1.00 | 0.00 | N |
| ATOM | 289 | C5   | C A | 10 | -27.074 | -32.288 | 104.772 | 1.00 | 0.00 | C |
| ATOM | 290 | C6   | C A | 10 | -27.821 | -31.149 | 104.670 | 1.00 | 0.00 | C |
| ATOM | 291 | C2'  | C A | 10 | -28.794 | -28.495 | 103.887 | 1.00 | 0.00 | C |
| ATOM | 292 | C3'  | C A | 10 | -30.176 | -27.898 | 104.103 | 1.00 | 0.00 | C |
| ATOM | 293 | O3'  | C A | 10 | -30.045 | -26.511 | 104.406 | 1.00 | 0.00 | O |
| ATOM | 294 | C4'  | C A | 10 | -30.710 | -28.699 | 105.288 | 1.00 | 0.00 | C |
| ATOM | 295 | O4'  | C A | 10 | -29.524 | -28.985 | 106.096 | 1.00 | 0.00 | O |
| ATOM | 296 | C5'  | C A | 10 | -31.398 | -30.004 | 104.961 | 1.00 | 0.00 | C |

|      |     |      |   |   |    |         |         |         |      |      |   |
|------|-----|------|---|---|----|---------|---------|---------|------|------|---|
| ATOM | 297 | O5'  | C | A | 10 | -30.731 | -30.643 | 103.842 | 1.00 | 0.00 | O |
| ATOM | 298 | O1P  | C | A | 10 | -32.467 | -30.585 | 102.021 | 1.00 | 0.00 | O |
| ATOM | 299 | O2P  | C | A | 10 | -30.716 | -32.382 | 102.029 | 1.00 | 0.00 | O |
| ATOM | 300 | P    | C | A | 10 | -31.605 | -31.486 | 102.810 | 1.00 | 0.00 | P |
| ATOM | 301 | H5   | C | A | 10 | -27.284 | -33.168 | 104.163 | 1.00 | 0.00 | H |
| ATOM | 302 | H6   | C | A | 10 | -28.655 | -31.119 | 103.969 | 1.00 | 0.00 | H |
| ATOM | 303 | H1'  | C | A | 10 | -27.787 | -27.988 | 105.737 | 1.00 | 0.00 | H |
| ATOM | 304 | H3'  | C | A | 10 | -30.814 | -28.017 | 103.226 | 1.00 | 0.00 | H |
| ATOM | 305 | H4'  | C | A | 10 | -31.432 | -28.063 | 105.801 | 1.00 | 0.00 | H |
| ATOM | 306 | H41  | C | A | 10 | -25.412 | -34.187 | 105.327 | 1.00 | 0.00 | H |
| ATOM | 307 | H42  | C | A | 10 | -24.459 | -33.319 | 106.561 | 1.00 | 0.00 | H |
| ATOM | 308 | H2'1 | C | A | 10 | -28.840 | -29.384 | 103.259 | 1.00 | 0.00 | H |
| ATOM | 309 | H2'2 | C | A | 10 | -28.126 | -27.783 | 103.399 | 1.00 | 0.00 | H |
| ATOM | 310 | H5'1 | C | A | 10 | -31.360 | -30.658 | 105.834 | 1.00 | 0.00 | H |
| ATOM | 311 | H5'2 | C | A | 10 | -32.438 | -29.806 | 104.707 | 1.00 | 0.00 | H |
| ATOM | 312 | C1'  | T | A | 11 | -24.604 | -25.602 | 105.636 | 1.00 | 0.00 | C |
| ATOM | 313 | N1   | T | A | 11 | -24.376 | -26.963 | 105.083 | 1.00 | 0.00 | N |
| ATOM | 314 | C2   | T | A | 11 | -23.338 | -27.696 | 105.621 | 1.00 | 0.00 | C |
| ATOM | 315 | O2   | T | A | 11 | -22.621 | -27.270 | 106.512 | 1.00 | 0.00 | O |
| ATOM | 316 | N3   | T | A | 11 | -23.160 | -28.956 | 105.080 | 1.00 | 0.00 | N |
| ATOM | 317 | C4   | T | A | 11 | -23.910 | -29.528 | 104.072 | 1.00 | 0.00 | C |
| ATOM | 318 | O4   | T | A | 11 | -23.655 | -30.669 | 103.664 | 1.00 | 0.00 | O |
| ATOM | 319 | C5   | T | A | 11 | -24.973 | -28.688 | 103.573 | 1.00 | 0.00 | C |
| ATOM | 320 | C6   | T | A | 11 | -25.174 | -27.455 | 104.079 | 1.00 | 0.00 | C |
| ATOM | 321 | C7   | T | A | 11 | -25.814 | -29.272 | 102.478 | 1.00 | 0.00 | C |
| ATOM | 322 | C2'  | T | A | 11 | -25.016 | -24.574 | 104.589 | 1.00 | 0.00 | C |
| ATOM | 323 | C3'  | T | A | 11 | -25.991 | -23.704 | 105.363 | 1.00 | 0.00 | C |
| ATOM | 324 | O3'  | T | A | 11 | -25.263 | -22.716 | 106.091 | 1.00 | 0.00 | O |
| ATOM | 325 | C4'  | T | A | 11 | -26.683 | -24.705 | 106.285 | 1.00 | 0.00 | C |
| ATOM | 326 | O4'  | T | A | 11 | -25.646 | -25.692 | 106.590 | 1.00 | 0.00 | O |
| ATOM | 327 | C5'  | T | A | 11 | -27.883 | -25.426 | 105.714 | 1.00 | 0.00 | C |
| ATOM | 328 | O5'  | T | A | 11 | -27.665 | -25.702 | 104.307 | 1.00 | 0.00 | O |
| ATOM | 329 | O1P  | T | A | 11 | -29.399 | -24.285 | 103.160 | 1.00 | 0.00 | O |
| ATOM | 330 | O2P  | T | A | 11 | -28.565 | -26.380 | 102.061 | 1.00 | 0.00 | O |
| ATOM | 331 | P    | T | A | 11 | -28.913 | -25.669 | 103.316 | 1.00 | 0.00 | P |
| ATOM | 332 | H3   | T | A | 11 | -22.395 | -29.524 | 105.466 | 1.00 | 0.00 | H |
| ATOM | 333 | H6   | T | A | 11 | -25.983 | -26.838 | 103.687 | 1.00 | 0.00 | H |
| ATOM | 334 | H1'  | T | A | 11 | -23.700 | -25.288 | 106.156 | 1.00 | 0.00 | H |
| ATOM | 335 | H3'  | T | A | 11 | -26.708 | -23.212 | 104.708 | 1.00 | 0.00 | H |
| ATOM | 336 | H4'  | T | A | 11 | -27.015 | -24.151 | 107.163 | 1.00 | 0.00 | H |
| ATOM | 337 | H71  | T | A | 11 | -25.666 | -28.702 | 101.562 | 1.00 | 0.00 | H |
| ATOM | 338 | H72  | T | A | 11 | -25.523 | -30.310 | 102.310 | 1.00 | 0.00 | H |
| ATOM | 339 | H73  | T | A | 11 | -26.865 | -29.233 | 102.765 | 1.00 | 0.00 | H |
| ATOM | 340 | H2'1 | T | A | 11 | -25.493 | -25.034 | 103.726 | 1.00 | 0.00 | H |
| ATOM | 341 | H2'2 | T | A | 11 | -24.167 | -23.993 | 104.224 | 1.00 | 0.00 | H |
| ATOM | 342 | H5'1 | T | A | 11 | -28.030 | -26.361 | 106.254 | 1.00 | 0.00 | H |
| ATOM | 343 | H5'2 | T | A | 11 | -28.767 | -24.800 | 105.833 | 1.00 | 0.00 | H |
| ATOM | 344 | C1'  | A | A | 12 | -19.810 | -24.393 | 106.060 | 1.00 | 0.00 | C |
| ATOM | 345 | N1   | A | A | 12 | -19.035 | -29.010 | 103.956 | 1.00 | 0.00 | N |
| ATOM | 346 | C2   | A | A | 12 | -18.441 | -28.367 | 104.956 | 1.00 | 0.00 | C |
| ATOM | 347 | N3   | A | A | 12 | -18.694 | -27.174 | 105.452 | 1.00 | 0.00 | N |
| ATOM | 348 | C4   | A | A | 12 | -19.709 | -26.598 | 104.784 | 1.00 | 0.00 | C |
| ATOM | 349 | C5   | A | A | 12 | -20.420 | -27.120 | 103.740 | 1.00 | 0.00 | C |
| ATOM | 350 | C6   | A | A | 12 | -20.046 | -28.411 | 103.309 | 1.00 | 0.00 | C |

|      |     |      |   |   |    |         |         |         |      |      |   |
|------|-----|------|---|---|----|---------|---------|---------|------|------|---|
| ATOM | 351 | N6   | A | A | 12 | -20.654 | -29.050 | 102.295 | 1.00 | 0.00 | N |
| ATOM | 352 | N7   | A | A | 12 | -21.393 | -26.238 | 103.308 | 1.00 | 0.00 | N |
| ATOM | 353 | C8   | A | A | 12 | -21.251 | -25.208 | 104.089 | 1.00 | 0.00 | C |
| ATOM | 354 | N9   | A | A | 12 | -20.248 | -25.356 | 105.012 | 1.00 | 0.00 | N |
| ATOM | 355 | C2'  | A | A | 12 | -19.850 | -22.939 | 105.609 | 1.00 | 0.00 | C |
| ATOM | 356 | C3'  | A | A | 12 | -20.269 | -22.223 | 106.884 | 1.00 | 0.00 | C |
| ATOM | 357 | O3'  | A | A | 12 | -19.114 | -21.978 | 107.683 | 1.00 | 0.00 | O |
| ATOM | 358 | C4'  | A | A | 12 | -21.221 | -23.223 | 107.537 | 1.00 | 0.00 | C |
| ATOM | 359 | O4'  | A | A | 12 | -20.681 | -24.531 | 107.165 | 1.00 | 0.00 | O |
| ATOM | 360 | C5'  | A | A | 12 | -22.666 | -23.155 | 107.105 | 1.00 | 0.00 | C |
| ATOM | 361 | O5'  | A | A | 12 | -22.740 | -22.837 | 105.691 | 1.00 | 0.00 | O |
| ATOM | 362 | O1P  | A | A | 12 | -23.810 | -20.559 | 105.661 | 1.00 | 0.00 | O |
| ATOM | 363 | O2P  | A | A | 12 | -24.080 | -22.098 | 103.698 | 1.00 | 0.00 | O |
| ATOM | 364 | P    | A | A | 12 | -23.952 | -21.943 | 105.168 | 1.00 | 0.00 | P |
| ATOM | 365 | H2   | A | A | 12 | -17.625 | -28.907 | 105.437 | 1.00 | 0.00 | H |
| ATOM | 366 | H8   | A | A | 12 | -21.869 | -24.312 | 104.018 | 1.00 | 0.00 | H |
| ATOM | 367 | H1'  | A | A | 12 | -18.808 | -24.674 | 106.383 | 1.00 | 0.00 | H |
| ATOM | 368 | H3'  | A | A | 12 | -20.772 | -21.279 | 106.677 | 1.00 | 0.00 | H |
| ATOM | 369 | H4'  | A | A | 12 | -21.186 | -23.037 | 108.611 | 1.00 | 0.00 | H |
| ATOM | 370 | H61  | A | A | 12 | -20.345 | -29.993 | 102.022 | 1.00 | 0.00 | H |
| ATOM | 371 | H62  | A | A | 12 | -21.430 | -28.595 | 101.792 | 1.00 | 0.00 | H |
| ATOM | 372 | H2'1 | A | A | 12 | -20.568 | -22.773 | 104.807 | 1.00 | 0.00 | H |
| ATOM | 373 | H2'2 | A | A | 12 | -18.879 | -22.589 | 105.258 | 1.00 | 0.00 | H |
| ATOM | 374 | H5'1 | A | A | 12 | -23.141 | -24.118 | 107.291 | 1.00 | 0.00 | H |
| ATOM | 375 | H5'2 | A | A | 12 | -23.177 | -22.386 | 107.681 | 1.00 | 0.00 | H |
| ATOM | 376 | C1'  | G | A | 13 | -14.947 | -25.248 | 105.539 | 1.00 | 0.00 | C |
| ATOM | 377 | N1   | G | A | 13 | -16.455 | -28.375 | 101.802 | 1.00 | 0.00 | N |
| ATOM | 378 | C2   | G | A | 13 | -15.491 | -28.558 | 102.776 | 1.00 | 0.00 | C |
| ATOM | 379 | N2   | G | A | 13 | -14.837 | -29.728 | 102.751 | 1.00 | 0.00 | N |
| ATOM | 380 | N3   | G | A | 13 | -15.199 | -27.645 | 103.701 | 1.00 | 0.00 | N |
| ATOM | 381 | C4   | G | A | 13 | -15.950 | -26.520 | 103.574 | 1.00 | 0.00 | C |
| ATOM | 382 | C5   | G | A | 13 | -16.931 | -26.250 | 102.633 | 1.00 | 0.00 | C |
| ATOM | 383 | C6   | G | A | 13 | -17.243 | -27.220 | 101.651 | 1.00 | 0.00 | C |
| ATOM | 384 | O6   | G | A | 13 | -18.072 | -27.164 | 100.743 | 1.00 | 0.00 | O |
| ATOM | 385 | N7   | G | A | 13 | -17.463 | -24.977 | 102.844 | 1.00 | 0.00 | N |
| ATOM | 386 | C8   | G | A | 13 | -16.809 | -24.528 | 103.883 | 1.00 | 0.00 | C |
| ATOM | 387 | N9   | G | A | 13 | -15.871 | -25.409 | 104.382 | 1.00 | 0.00 | N |
| ATOM | 388 | C2'  | G | A | 13 | -14.388 | -23.839 | 105.687 | 1.00 | 0.00 | C |
| ATOM | 389 | C3'  | G | A | 13 | -14.316 | -23.682 | 107.196 | 1.00 | 0.00 | C |
| ATOM | 390 | O3'  | G | A | 13 | -13.095 | -24.249 | 107.668 | 1.00 | 0.00 | O |
| ATOM | 391 | C4'  | G | A | 13 | -15.538 | -24.462 | 107.678 | 1.00 | 0.00 | C |
| ATOM | 392 | O4'  | G | A | 13 | -15.671 | -25.556 | 106.715 | 1.00 | 0.00 | O |
| ATOM | 393 | C5'  | G | A | 13 | -16.842 | -23.702 | 107.729 | 1.00 | 0.00 | C |
| ATOM | 394 | O5'  | G | A | 13 | -16.914 | -22.777 | 106.616 | 1.00 | 0.00 | O |
| ATOM | 395 | O1P  | G | A | 13 | -16.870 | -20.520 | 107.729 | 1.00 | 0.00 | O |
| ATOM | 396 | O2P  | G | A | 13 | -17.990 | -20.797 | 105.503 | 1.00 | 0.00 | O |
| ATOM | 397 | P    | G | A | 13 | -17.656 | -21.380 | 106.825 | 1.00 | 0.00 | P |
| ATOM | 398 | H1   | G | A | 13 | -16.609 | -29.148 | 101.135 | 1.00 | 0.00 | H |
| ATOM | 399 | H8   | G | A | 13 | -16.986 | -23.545 | 104.318 | 1.00 | 0.00 | H |
| ATOM | 400 | H1'  | G | A | 13 | -14.143 | -25.978 | 105.437 | 1.00 | 0.00 | H |
| ATOM | 401 | H21  | G | A | 13 | -15.072 | -30.430 | 102.033 | 1.00 | 0.00 | H |
| ATOM | 402 | H3'  | G | A | 13 | -14.371 | -22.637 | 107.502 | 1.00 | 0.00 | H |
| ATOM | 403 | H22  | G | A | 13 | -14.107 | -29.923 | 103.447 | 1.00 | 0.00 | H |
| ATOM | 404 | H4'  | G | A | 13 | -15.315 | -24.809 | 108.687 | 1.00 | 0.00 | H |



|      |     |      |   |   |    |         |         |         |      |      |   |
|------|-----|------|---|---|----|---------|---------|---------|------|------|---|
| ATOM | 405 | H2'1 | G | A | 13 | -15.040 | -23.087 | 105.241 | 1.00 | 0.00 | H |
| ATOM | 406 | H2'2 | G | A | 13 | -13.404 | -23.733 | 105.228 | 1.00 | 0.00 | H |
| ATOM | 407 | H5'1 | G | A | 13 | -17.670 | -24.408 | 107.675 | 1.00 | 0.00 | H |
| ATOM | 408 | H5'2 | G | A | 13 | -16.900 | -23.154 | 108.669 | 1.00 | 0.00 | H |
| ATOM | 409 | C1'  | G | A | 14 | -10.998 | -27.382 | 103.445 | 1.00 | 0.00 | C |
| ATOM | 410 | N1   | G | A | 14 | -14.079 | -27.807 | 99.402  | 1.00 | 0.00 | N |
| ATOM | 411 | C2   | G | A | 14 | -13.189 | -28.719 | 99.940  | 1.00 | 0.00 | C |
| ATOM | 412 | N2   | G | A | 14 | -13.108 | -29.901 | 99.317  | 1.00 | 0.00 | N |
| ATOM | 413 | N3   | G | A | 14 | -12.441 | -28.472 | 101.015 | 1.00 | 0.00 | N |
| ATOM | 414 | C4   | G | A | 14 | -12.647 | -27.224 | 101.510 | 1.00 | 0.00 | C |
| ATOM | 415 | C5   | G | A | 14 | -13.509 | -26.249 | 101.038 | 1.00 | 0.00 | C |
| ATOM | 416 | C6   | G | A | 14 | -14.306 | -26.510 | 99.902  | 1.00 | 0.00 | C |
| ATOM | 417 | O6   | G | A | 14 | -15.121 | -25.780 | 99.339  | 1.00 | 0.00 | O |
| ATOM | 418 | N7   | G | A | 14 | -13.420 | -25.103 | 101.834 | 1.00 | 0.00 | N |
| ATOM | 419 | C8   | G | A | 14 | -12.532 | -25.415 | 102.741 | 1.00 | 0.00 | C |
| ATOM | 420 | N9   | G | A | 14 | -12.016 | -26.687 | 102.611 | 1.00 | 0.00 | N |
| ATOM | 421 | C2'  | G | A | 14 | -9.879  | -26.471 | 103.932 | 1.00 | 0.00 | C |
| ATOM | 422 | C3'  | G | A | 14 | -9.589  | -27.033 | 105.315 | 1.00 | 0.00 | C |
| ATOM | 423 | O3'  | G | A | 14 | -8.688  | -28.130 | 105.196 | 1.00 | 0.00 | O |
| ATOM | 424 | C4'  | G | A | 14 | -10.972 | -27.471 | 105.798 | 1.00 | 0.00 | C |
| ATOM | 425 | O4'  | G | A | 14 | -11.658 | -27.906 | 104.582 | 1.00 | 0.00 | O |
| ATOM | 426 | C5'  | G | A | 14 | -11.811 | -26.414 | 106.475 | 1.00 | 0.00 | C |
| ATOM | 427 | O5'  | G | A | 14 | -11.595 | -25.131 | 105.836 | 1.00 | 0.00 | O |
| ATOM | 428 | O1P  | G | A | 14 | -10.474 | -23.768 | 107.631 | 1.00 | 0.00 | O |
| ATOM | 429 | O2P  | G | A | 14 | -11.828 | -22.629 | 105.853 | 1.00 | 0.00 | O |
| ATOM | 430 | P    | G | A | 14 | -11.641 | -23.811 | 106.730 | 1.00 | 0.00 | P |
| ATOM | 431 | H1   | G | A | 14 | -14.616 | -28.100 | 98.571  | 1.00 | 0.00 | H |
| ATOM | 432 | H8   | G | A | 14 | -12.227 | -24.729 | 103.532 | 1.00 | 0.00 | H |
| ATOM | 433 | H1'  | G | A | 14 | -10.600 | -28.218 | 102.872 | 1.00 | 0.00 | H |
| ATOM | 434 | H21  | G | A | 14 | -13.692 | -30.088 | 98.488  | 1.00 | 0.00 | H |
| ATOM | 435 | H3'  | G | A | 14 | -9.161  | -26.282 | 105.978 | 1.00 | 0.00 | H |
| ATOM | 436 | H22  | G | A | 14 | -12.462 | -30.623 | 99.667  | 1.00 | 0.00 | H |
| ATOM | 437 | H4'  | G | A | 14 | -10.815 | -28.280 | 106.511 | 1.00 | 0.00 | H |
| ATOM | 438 | H2'1 | G | A | 14 | -10.187 | -25.428 | 103.984 | 1.00 | 0.00 | H |
| ATOM | 439 | H2'2 | G | A | 14 | -8.998  | -26.521 | 103.290 | 1.00 | 0.00 | H |
| ATOM | 440 | H5'1 | G | A | 14 | -12.863 | -26.690 | 106.400 | 1.00 | 0.00 | H |
| ATOM | 441 | H5'2 | G | A | 14 | -11.531 | -26.354 | 107.528 | 1.00 | 0.00 | H |
| ATOM | 442 | C1'  | A | A | 15 | -8.568  | -29.592 | 99.744  | 1.00 | 0.00 | C |
| ATOM | 443 | N1   | A | A | 15 | -11.957 | -27.107 | 96.799  | 1.00 | 0.00 | N |
| ATOM | 444 | C2   | A | A | 15 | -11.472 | -28.347 | 96.763  | 1.00 | 0.00 | C |
| ATOM | 445 | N3   | A | A | 15 | -10.600 | -28.927 | 97.558  | 1.00 | 0.00 | N |
| ATOM | 446 | C4   | A | A | 15 | -10.191 | -28.064 | 98.508  | 1.00 | 0.00 | C |
| ATOM | 447 | C5   | A | A | 15 | -10.587 | -26.768 | 98.681  | 1.00 | 0.00 | C |
| ATOM | 448 | C6   | A | A | 15 | -11.532 | -26.272 | 97.758  | 1.00 | 0.00 | C |
| ATOM | 449 | N6   | A | A | 15 | -12.012 | -25.017 | 97.804  | 1.00 | 0.00 | N |
| ATOM | 450 | N7   | A | A | 15 | -9.952  | -26.192 | 99.767  | 1.00 | 0.00 | N |
| ATOM | 451 | C8   | A | A | 15 | -9.189  | -27.142 | 100.223 | 1.00 | 0.00 | C |
| ATOM | 452 | N9   | A | A | 15 | -9.283  | -28.310 | 99.509  | 1.00 | 0.00 | N |
| ATOM | 453 | C2'  | A | A | 15 | -7.126  | -29.416 | 100.204 | 1.00 | 0.00 | C |
| ATOM | 454 | C3'  | A | A | 15 | -6.956  | -30.578 | 101.170 | 1.00 | 0.00 | C |
| ATOM | 455 | O3'  | A | A | 15 | -6.611  | -31.748 | 100.435 | 1.00 | 0.00 | O |
| ATOM | 456 | C4'  | A | A | 15 | -8.337  | -30.687 | 101.816 | 1.00 | 0.00 | C |
| ATOM | 457 | O4'  | A | A | 15 | -9.265  | -30.297 | 100.752 | 1.00 | 0.00 | O |
| ATOM | 458 | C5'  | A | A | 15 | -8.586  | -29.810 | 103.020 | 1.00 | 0.00 | C |

|      |     |      |   |   |    |         |         |         |      |      |   |
|------|-----|------|---|---|----|---------|---------|---------|------|------|---|
| ATOM | 459 | O5'  | A | A | 15 | -7.922  | -28.533 | 102.842 | 1.00 | 0.00 | O |
| ATOM | 460 | O1P  | A | A | 15 | -6.156  | -28.540 | 104.636 | 1.00 | 0.00 | O |
| ATOM | 461 | O2P  | A | A | 15 | -7.091  | -26.364 | 103.802 | 1.00 | 0.00 | O |
| ATOM | 462 | P    | A | A | 15 | -7.323  | -27.794 | 104.122 | 1.00 | 0.00 | P |
| ATOM | 463 | H2   | A | A | 15 | -11.856 | -28.972 | 95.958  | 1.00 | 0.00 | H |
| ATOM | 464 | H8   | A | A | 15 | -8.538  | -27.023 | 101.087 | 1.00 | 0.00 | H |
| ATOM | 465 | H1'  | A | A | 15 | -8.615  | -30.182 | 98.828  | 1.00 | 0.00 | H |
| ATOM | 466 | H3'  | A | A | 15 | -6.188  | -30.380 | 101.917 | 1.00 | 0.00 | H |
| ATOM | 467 | H4'  | A | A | 15 | -8.458  | -31.724 | 102.128 | 1.00 | 0.00 | H |
| ATOM | 468 | H61  | A | A | 15 | -12.703 | -24.707 | 97.106  | 1.00 | 0.00 | H |
| ATOM | 469 | H62  | A | A | 15 | -11.689 | -24.369 | 98.536  | 1.00 | 0.00 | H |
| ATOM | 470 | H2'1 | A | A | 15 | -6.967  | -28.459 | 100.701 | 1.00 | 0.00 | H |
| ATOM | 471 | H2'2 | A | A | 15 | -6.418  | -29.480 | 99.379  | 1.00 | 0.00 | H |
| ATOM | 472 | H5'1 | A | A | 15 | -9.658  | -29.655 | 103.133 | 1.00 | 0.00 | H |
| ATOM | 473 | H5'2 | A | A | 15 | -8.199  | -30.305 | 103.909 | 1.00 | 0.00 | H |
| ATOM | 474 | C1'  | C | A | 16 | -7.746  | -30.605 | 94.952  | 1.00 | 0.00 | C |
| ATOM | 475 | N1   | C | A | 16 | -7.850  | -29.195 | 95.417  | 1.00 | 0.00 | N |
| ATOM | 476 | C2   | C | A | 16 | -8.726  | -28.348 | 94.743  | 1.00 | 0.00 | C |
| ATOM | 477 | O2   | C | A | 16 | -9.378  | -28.800 | 93.791  | 1.00 | 0.00 | O |
| ATOM | 478 | N3   | C | A | 16 | -8.836  | -27.059 | 95.149  | 1.00 | 0.00 | N |
| ATOM | 479 | C4   | C | A | 16 | -8.117  | -26.602 | 96.182  | 1.00 | 0.00 | C |
| ATOM | 480 | N4   | C | A | 16 | -8.267  | -25.335 | 96.540  | 1.00 | 0.00 | N |
| ATOM | 481 | C5   | C | A | 16 | -7.204  | -27.448 | 96.892  | 1.00 | 0.00 | C |
| ATOM | 482 | C6   | C | A | 16 | -7.112  | -28.744 | 96.468  | 1.00 | 0.00 | C |
| ATOM | 483 | C2'  | C | A | 16 | -6.333  | -31.170 | 95.014  | 1.00 | 0.00 | C |
| ATOM | 484 | C3'  | C | A | 16 | -6.587  | -32.619 | 95.399  | 1.00 | 0.00 | C |
| ATOM | 485 | O3'  | C | A | 16 | -6.869  | -33.374 | 94.223  | 1.00 | 0.00 | O |
| ATOM | 486 | C4'  | C | A | 16 | -7.798  | -32.517 | 96.325  | 1.00 | 0.00 | C |
| ATOM | 487 | O4'  | C | A | 16 | -8.570  | -31.396 | 95.789  | 1.00 | 0.00 | O |
| ATOM | 488 | C5'  | C | A | 16 | -7.506  | -32.250 | 97.784  | 1.00 | 0.00 | C |
| ATOM | 489 | O5'  | C | A | 16 | -6.374  | -31.353 | 97.900  | 1.00 | 0.00 | O |
| ATOM | 490 | O1P  | C | A | 16 | -4.607  | -32.780 | 98.986  | 1.00 | 0.00 | O |
| ATOM | 491 | O2P  | C | A | 16 | -4.579  | -30.293 | 99.304  | 1.00 | 0.00 | O |
| ATOM | 492 | P    | C | A | 16 | -5.378  | -31.530 | 99.135  | 1.00 | 0.00 | P |
| ATOM | 493 | H5   | C | A | 16 | -6.611  | -27.076 | 97.730  | 1.00 | 0.00 | H |
| ATOM | 494 | H6   | C | A | 16 | -6.438  | -29.428 | 96.982  | 1.00 | 0.00 | H |
| ATOM | 495 | H1'  | C | A | 16 | -8.146  | -30.661 | 93.940  | 1.00 | 0.00 | H |
| ATOM | 496 | H3'  | C | A | 16 | -5.733  | -33.058 | 95.915  | 1.00 | 0.00 | H |
| ATOM | 497 | H4'  | C | A | 16 | -8.325  | -33.468 | 96.261  | 1.00 | 0.00 | H |
| ATOM | 498 | H41  | C | A | 16 | -7.726  | -24.956 | 97.333  | 1.00 | 0.00 | H |
| ATOM | 499 | H42  | C | A | 16 | -8.920  | -24.726 | 96.027  | 1.00 | 0.00 | H |
| ATOM | 500 | H2'1 | C | A | 16 | -5.718  | -30.664 | 95.757  | 1.00 | 0.00 | H |
| ATOM | 501 | H2'2 | C | A | 16 | -5.817  | -31.097 | 94.056  | 1.00 | 0.00 | H |
| ATOM | 502 | H5'1 | C | A | 16 | -8.384  | -31.800 | 98.247  | 1.00 | 0.00 | H |
| ATOM | 503 | H5'2 | C | A | 16 | -7.282  | -33.193 | 98.282  | 1.00 | 0.00 | H |
| ATOM | 504 | C1'  | G | A | 17 | -7.923  | -29.632 | 90.101  | 1.00 | 0.00 | C |
| ATOM | 505 | N1   | G | A | 17 | -8.101  | -24.776 | 91.656  | 1.00 | 0.00 | N |
| ATOM | 506 | C2   | G | A | 17 | -8.817  | -25.417 | 90.661  | 1.00 | 0.00 | C |
| ATOM | 507 | N2   | G | A | 17 | -9.697  | -24.663 | 89.989  | 1.00 | 0.00 | N |
| ATOM | 508 | N3   | G | A | 17 | -8.670  | -26.706 | 90.360  | 1.00 | 0.00 | N |
| ATOM | 509 | C4   | G | A | 17 | -7.731  | -27.312 | 91.135  | 1.00 | 0.00 | C |
| ATOM | 510 | C5   | G | A | 17 | -6.967  | -26.755 | 92.146  | 1.00 | 0.00 | C |
| ATOM | 511 | C6   | G | A | 17 | -7.125  | -25.388 | 92.469  | 1.00 | 0.00 | C |
| ATOM | 512 | O6   | G | A | 17 | -6.545  | -24.718 | 93.323  | 1.00 | 0.00 | O |

|      |     |      |     |    |         |         |        |      |      |   |
|------|-----|------|-----|----|---------|---------|--------|------|------|---|
| ATOM | 513 | N7   | G A | 17 | -6.118  | -27.718 | 92.696 | 1.00 | 0.00 | N |
| ATOM | 514 | C8   | G A | 17 | -6.391  | -28.803 | 92.020 | 1.00 | 0.00 | C |
| ATOM | 515 | N9   | G A | 17 | -7.361  | -28.636 | 91.053 | 1.00 | 0.00 | N |
| ATOM | 516 | C2'  | G A | 17 | -6.895  | -30.618 | 89.563 | 1.00 | 0.00 | C |
| ATOM | 517 | C3'  | G A | 17 | -7.707  | -31.897 | 89.452 | 1.00 | 0.00 | C |
| ATOM | 518 | O3'  | G A | 17 | -8.405  | -31.901 | 88.208 | 1.00 | 0.00 | O |
| ATOM | 519 | C4'  | G A | 17 | -8.656  | -31.802 | 90.646 | 1.00 | 0.00 | C |
| ATOM | 520 | O4'  | G A | 17 | -8.918  | -30.369 | 90.785 | 1.00 | 0.00 | O |
| ATOM | 521 | C5'  | G A | 17 | -8.133  | -32.328 | 91.961 | 1.00 | 0.00 | C |
| ATOM | 522 | O5'  | G A | 17 | -6.719  | -32.032 | 92.081 | 1.00 | 0.00 | O |
| ATOM | 523 | O1P  | G A | 17 | -5.643  | -34.308 | 92.046 | 1.00 | 0.00 | O |
| ATOM | 524 | O2P  | G A | 17 | -4.512  | -32.402 | 93.223 | 1.00 | 0.00 | O |
| ATOM | 525 | P    | G A | 17 | -5.779  | -33.072 | 92.842 | 1.00 | 0.00 | P |
| ATOM | 526 | H1   | G A | 17 | -8.296  | -23.776 | 91.814 | 1.00 | 0.00 | H |
| ATOM | 527 | H8   | G A | 17 | -5.895  | -29.757 | 92.204 | 1.00 | 0.00 | H |
| ATOM | 528 | H1'  | G A | 17 | -8.407  | -29.090 | 89.287 | 1.00 | 0.00 | H |
| ATOM | 529 | H21  | G A | 17 | -9.808  | -23.667 | 90.229 | 1.00 | 0.00 | H |
| ATOM | 530 | H3'  | G A | 17 | -7.080  | -32.787 | 89.517 | 1.00 | 0.00 | H |
| ATOM | 531 | H22  | G A | 17 | -10.260 | -25.079 | 89.234 | 1.00 | 0.00 | H |
| ATOM | 532 | H4'  | G A | 17 | -9.546  | -32.374 | 90.389 | 1.00 | 0.00 | H |
| ATOM | 533 | H2'1 | G A | 17 | -6.050  | -30.742 | 90.241 | 1.00 | 0.00 | H |
| ATOM | 534 | H2'2 | G A | 17 | -6.496  | -30.313 | 88.595 | 1.00 | 0.00 | H |
| ATOM | 535 | H5'1 | G A | 17 | -8.679  | -31.856 | 92.778 | 1.00 | 0.00 | H |
| ATOM | 536 | H5'2 | G A | 17 | -8.290  | -33.407 | 92.003 | 1.00 | 0.00 | H |
| ATOM | 537 | C1'  | G A | 18 | -8.170  | -26.624 | 86.174 | 1.00 | 0.00 | C |
| ATOM | 538 | N1   | G A | 18 | -6.089  | -23.226 | 89.359 | 1.00 | 0.00 | N |
| ATOM | 539 | C2   | G A | 18 | -7.110  | -23.070 | 88.437 | 1.00 | 0.00 | C |
| ATOM | 540 | N2   | G A | 18 | -7.647  | -21.845 | 88.352 | 1.00 | 0.00 | N |
| ATOM | 541 | N3   | G A | 18 | -7.560  | -24.056 | 87.665 | 1.00 | 0.00 | N |
| ATOM | 542 | C4   | G A | 18 | -6.897  | -25.224 | 87.879 | 1.00 | 0.00 | C |
| ATOM | 543 | C5   | G A | 18 | -5.867  | -25.471 | 88.771 | 1.00 | 0.00 | C |
| ATOM | 544 | C6   | G A | 18 | -5.392  | -24.424 | 89.595 | 1.00 | 0.00 | C |
| ATOM | 545 | O6   | G A | 18 | -4.494  | -24.448 | 90.438 | 1.00 | 0.00 | O |
| ATOM | 546 | N7   | G A | 18 | -5.461  | -26.802 | 88.682 | 1.00 | 0.00 | N |
| ATOM | 547 | C8   | G A | 18 | -6.240  | -27.311 | 87.763 | 1.00 | 0.00 | C |
| ATOM | 548 | N9   | G A | 18 | -7.140  | -26.413 | 87.227 | 1.00 | 0.00 | N |
| ATOM | 549 | C2'  | G A | 18 | -7.724  | -27.558 | 85.058 | 1.00 | 0.00 | C |
| ATOM | 550 | C3'  | G A | 18 | -9.013  | -28.288 | 84.721 | 1.00 | 0.00 | C |
| ATOM | 551 | O3'  | G A | 18 | -9.770  | -27.504 | 83.802 | 1.00 | 0.00 | O |
| ATOM | 552 | C4'  | G A | 18 | -9.701  | -28.411 | 86.079 | 1.00 | 0.00 | C |
| ATOM | 553 | O4'  | G A | 18 | -9.308  | -27.194 | 86.792 | 1.00 | 0.00 | O |
| ATOM | 554 | C5'  | G A | 18 | -9.320  | -29.607 | 86.919 | 1.00 | 0.00 | C |
| ATOM | 555 | O5'  | G A | 18 | -7.912  | -29.902 | 86.743 | 1.00 | 0.00 | O |
| ATOM | 556 | O1P  | G A | 18 | -7.923  | -32.142 | 85.597 | 1.00 | 0.00 | O |
| ATOM | 557 | O2P  | G A | 18 | -5.970  | -31.472 | 87.023 | 1.00 | 0.00 | O |
| ATOM | 558 | P    | G A | 18 | -7.434  | -31.423 | 86.789 | 1.00 | 0.00 | P |
| ATOM | 559 | H1   | G A | 18 | -5.820  | -22.399 | 89.914 | 1.00 | 0.00 | H |
| ATOM | 560 | H8   | G A | 18 | -6.186  | -28.353 | 87.447 | 1.00 | 0.00 | H |
| ATOM | 561 | H1'  | G A | 18 | -8.457  | -25.650 | 85.777 | 1.00 | 0.00 | H |
| ATOM | 562 | H21  | G A | 18 | -7.295  | -21.087 | 88.956 | 1.00 | 0.00 | H |
| ATOM | 563 | H3'  | G A | 18 | -8.824  | -29.271 | 84.286 | 1.00 | 0.00 | H |
| ATOM | 564 | H22  | G A | 18 | -8.407  | -21.664 | 87.685 | 1.00 | 0.00 | H |
| ATOM | 565 | H4'  | G A | 18 | -10.772 | -28.465 | 85.887 | 1.00 | 0.00 | H |
| ATOM | 566 | H2'1 | G A | 18 | -6.948  | -28.251 | 85.384 | 1.00 | 0.00 | H |

|      |     |      |       |    |         |         |        |      |      |   |
|------|-----|------|-------|----|---------|---------|--------|------|------|---|
| ATOM | 567 | H2'2 | G A   | 18 | -7.336  | -27.016 | 84.194 | 1.00 | 0.00 | H |
| ATOM | 568 | H5'1 | G A   | 18 | -9.524  | -29.388 | 87.967 | 1.00 | 0.00 | H |
| ATOM | 569 | H5'2 | G A   | 18 | -9.917  | -30.464 | 86.611 | 1.00 | 0.00 | H |
| ATOM | 570 | C1'  | T A   | 19 | -7.524  | -22.324 | 83.809 | 1.00 | 0.00 | C |
| ATOM | 571 | N1   | T A   | 19 | -6.396  | -22.942 | 84.554 | 1.00 | 0.00 | N |
| ATOM | 572 | C2   | T A   | 19 | -5.726  | -22.145 | 85.459 | 1.00 | 0.00 | C |
| ATOM | 573 | O2   | T A   | 19 | -6.024  | -20.980 | 85.659 | 1.00 | 0.00 | O |
| ATOM | 574 | N3   | T A   | 19 | -4.684  | -22.760 | 86.129 | 1.00 | 0.00 | N |
| ATOM | 575 | C4   | T A   | 19 | -4.265  | -24.064 | 85.976 | 1.00 | 0.00 | C |
| ATOM | 576 | O4   | T A   | 19 | -3.315  | -24.505 | 86.633 | 1.00 | 0.00 | O |
| ATOM | 577 | C5   | T A   | 19 | -5.025  | -24.820 | 85.008 | 1.00 | 0.00 | C |
| ATOM | 578 | C6   | T A   | 19 | -6.048  | -24.253 | 84.337 | 1.00 | 0.00 | C |
| ATOM | 579 | C7   | T A   | 19 | -4.606  | -26.245 | 84.811 | 1.00 | 0.00 | C |
| ATOM | 580 | C2'  | T A   | 19 | -7.625  | -22.778 | 82.358 | 1.00 | 0.00 | C |
| ATOM | 581 | C3'  | T A   | 19 | -9.129  | -22.814 | 82.139 | 1.00 | 0.00 | C |
| ATOM | 582 | O3'  | T A   | 19 | -9.585  | -21.508 | 81.795 | 1.00 | 0.00 | O |
| ATOM | 583 | C4'  | T A   | 19 | -9.657  | -23.272 | 83.497 | 1.00 | 0.00 | C |
| ATOM | 584 | O4'  | T A   | 19 | -8.725  | -22.689 | 84.462 | 1.00 | 0.00 | O |
| ATOM | 585 | C5'  | T A   | 19 | -9.721  | -24.763 | 83.727 | 1.00 | 0.00 | C |
| ATOM | 586 | O5'  | T A   | 19 | -8.587  | -25.405 | 83.091 | 1.00 | 0.00 | O |
| ATOM | 587 | O1P  | T A   | 19 | -9.645  | -26.789 | 81.274 | 1.00 | 0.00 | O |
| ATOM | 588 | O2P  | T A   | 19 | -7.452  | -27.490 | 82.270 | 1.00 | 0.00 | O |
| ATOM | 589 | P    | T A   | 19 | -8.779  | -26.860 | 82.467 | 1.00 | 0.00 | P |
| ATOM | 590 | H3   | T A   | 19 | -4.172  | -22.186 | 86.814 | 1.00 | 0.00 | H |
| ATOM | 591 | H6   | T A   | 19 | -6.607  | -24.844 | 83.611 | 1.00 | 0.00 | H |
| ATOM | 592 | H1'  | T A   | 19 | -7.423  | -21.240 | 83.872 | 1.00 | 0.00 | H |
| ATOM | 593 | H3'  | T A   | 19 | -9.409  | -23.514 | 81.353 | 1.00 | 0.00 | H |
| ATOM | 594 | H4'  | T A   | 19 | -10.671 | -22.877 | 83.592 | 1.00 | 0.00 | H |
| ATOM | 595 | H71  | T A   | 19 | -4.218  | -26.374 | 83.801 | 1.00 | 0.00 | H |
| ATOM | 596 | H72  | T A   | 19 | -3.828  | -26.499 | 85.532 | 1.00 | 0.00 | H |
| ATOM | 597 | H73  | T A   | 19 | -5.463  | -26.903 | 84.956 | 1.00 | 0.00 | H |
| ATOM | 598 | H2'1 | T A   | 19 | -7.177  | -23.758 | 82.201 | 1.00 | 0.00 | H |
| ATOM | 599 | H2'2 | T A   | 19 | -7.141  | -22.081 | 81.672 | 1.00 | 0.00 | H |
| ATOM | 600 | H5'1 | T A   | 19 | -9.704  | -24.962 | 84.798 | 1.00 | 0.00 | H |
| ATOM | 601 | H5'2 | T A   | 19 | -10.647 | -25.151 | 83.305 | 1.00 | 0.00 | H |
| ATOM | 602 | C01  | LNK A | 20 | -9.605  | -19.726 | 78.527 | 0.00 | 0.00 | C |
| ATOM | 603 | O1   | LNK A | 20 | -9.279  | -20.855 | 79.342 | 1.00 | 0.00 | O |
| ATOM | 604 | S    | LNK A | 20 | -9.073  | -18.464 | 74.789 | 0.00 | 0.00 | S |
| ATOM | 605 | C02  | LNK A | 20 | -9.055  | -19.946 | 77.104 | 0.00 | 0.00 | C |
| ATOM | 606 | C03  | LNK A | 20 | -8.563  | -18.602 | 76.531 | 0.00 | 0.00 | C |
| ATOM | 607 | O1P  | LNK A | 20 | -7.201  | -21.327 | 80.683 | 1.00 | 0.00 | O |
| ATOM | 608 | O2P  | LNK A | 20 | -8.429  | -19.158 | 80.988 | 1.00 | 0.00 | O |
| ATOM | 609 | P    | LNK A | 20 | -8.494  | -20.614 | 80.709 | 1.00 | 0.00 | P |
| ATOM | 610 | H01  | LNK A | 20 | -9.161  | -18.828 | 78.954 | 0.00 | 0.00 | H |
| ATOM | 611 | H02  | LNK A | 20 | -10.688 | -19.610 | 78.483 | 0.00 | 0.00 | H |
| ATOM | 612 | H03  | LNK A | 20 | -7.476  | -18.556 | 76.597 | 0.00 | 0.00 | H |
| ATOM | 613 | H04  | LNK A | 20 | -9.844  | -20.346 | 76.467 | 0.00 | 0.00 | H |
| ATOM | 614 | H05  | LNK A | 20 | -8.225  | -20.650 | 77.141 | 0.00 | 0.00 | H |
| ATOM | 615 | H06  | LNK A | 20 | -8.998  | -17.783 | 77.103 | 0.00 | 0.00 | H |
| ATOM | 616 | AU   | LNK A | 20 | -8.771  | -17.918 | 74.505 |      |      |   |
| TER  |     |      |       |    |         |         |        |      |      |   |
| ATOM | 618 | C1'  | A B   | 2  | -1.069  | -17.752 | 91.313 | 1.00 | 0.00 | C |
| ATOM | 619 | N1   | A B   | 2  | -3.198  | -21.130 | 88.089 | 1.00 | 0.00 | N |
| ATOM | 620 | C2   | A B   | 2  | -3.470  | -19.860 | 88.365 | 1.00 | 0.00 | C |

|      |     |      |     |   |        |         |        |      |      |   |
|------|-----|------|-----|---|--------|---------|--------|------|------|---|
| ATOM | 621 | N3   | A B | 2 | -2.877 | -19.041 | 89.209 | 1.00 | 0.00 | N |
| ATOM | 622 | C4   | A B | 2 | -1.868 | -19.673 | 89.839 | 1.00 | 0.00 | C |
| ATOM | 623 | C5   | A B | 2 | -1.463 | -20.966 | 89.670 | 1.00 | 0.00 | C |
| ATOM | 624 | C6   | A B | 2 | -2.186 | -21.733 | 88.730 | 1.00 | 0.00 | C |
| ATOM | 625 | N6   | A B | 2 | -1.902 | -23.019 | 88.459 | 1.00 | 0.00 | N |
| ATOM | 626 | N7   | A B | 2 | -0.389 | -21.265 | 90.489 | 1.00 | 0.00 | N |
| ATOM | 627 | C8   | A B | 2 | -0.171 | -20.156 | 91.132 | 1.00 | 0.00 | C |
| ATOM | 628 | N9   | A B | 2 | -1.028 | -19.144 | 90.787 | 1.00 | 0.00 | N |
| ATOM | 629 | C2'  | A B | 2 | -0.763 | -17.648 | 92.801 | 1.00 | 0.00 | C |
| ATOM | 630 | C3'  | A B | 2 | -0.003 | -16.334 | 92.878 | 1.00 | 0.00 | C |
| ATOM | 631 | O3'  | A B | 2 | -0.936 | -15.259 | 92.962 | 1.00 | 0.00 | O |
| ATOM | 632 | C4'  | A B | 2 | 0.781  | -16.318 | 91.567 | 1.00 | 0.00 | C |
| ATOM | 633 | O4'  | A B | 2 | -0.096 | -17.000 | 90.614 | 1.00 | 0.00 | O |
| ATOM | 634 | C5'  | A B | 2 | 2.121  | -17.015 | 91.577 | 1.00 | 0.00 | C |
| ATOM | 635 | O5'  | A B | 2 | 2.051  | -18.198 | 92.413 | 1.00 | 0.00 | O |
| ATOM | 636 | H2   | A B | 2 | -4.305 | -19.430 | 87.814 | 1.00 | 0.00 | H |
| ATOM | 637 | H8   | A B | 2 | 0.619  | -20.043 | 91.876 | 1.00 | 0.00 | H |
| ATOM | 638 | H1'  | A B | 2 | -2.048 | -17.330 | 91.085 | 1.00 | 0.00 | H |
| ATOM | 639 | H3'  | A B | 2 | 0.666  | -16.298 | 93.737 | 1.00 | 0.00 | H |
| ATOM | 640 | H4'  | A B | 2 | 0.952  | -15.272 | 91.314 | 1.00 | 0.00 | H |
| ATOM | 641 | H61  | A B | 2 | -2.458 | -23.532 | 87.763 | 1.00 | 0.00 | H |
| ATOM | 642 | H62  | A B | 2 | -1.126 | -23.489 | 88.950 | 1.00 | 0.00 | H |
| ATOM | 643 | H2'1 | A B | 2 | -0.155 | -18.479 | 93.157 | 1.00 | 0.00 | H |
| ATOM | 644 | H2'2 | A B | 2 | -1.669 | -17.619 | 93.409 | 1.00 | 0.00 | H |
| ATOM | 645 | H5'1 | A B | 2 | 2.383  | -17.300 | 90.558 | 1.00 | 0.00 | H |
| ATOM | 646 | H5'2 | A B | 2 | 2.875  | -16.333 | 91.966 | 1.00 | 0.00 | H |
| ATOM | 647 | C1'  | C B | 3 | -6.020 | -17.409 | 91.493 | 1.00 | 0.00 | C |
| ATOM | 648 | N1   | C B | 3 | -5.347 | -18.726 | 91.658 | 1.00 | 0.00 | N |
| ATOM | 649 | C2   | C B | 3 | -5.786 | -19.787 | 90.867 | 1.00 | 0.00 | C |
| ATOM | 650 | O2   | C B | 3 | -6.708 | -19.591 | 90.064 | 1.00 | 0.00 | O |
| ATOM | 651 | N3   | C B | 3 | -5.187 | -20.994 | 91.003 | 1.00 | 0.00 | N |
| ATOM | 652 | C4   | C B | 3 | -4.192 | -21.175 | 91.881 | 1.00 | 0.00 | C |
| ATOM | 653 | N4   | C B | 3 | -3.640 | -22.378 | 91.969 | 1.00 | 0.00 | N |
| ATOM | 654 | C5   | C B | 3 | -3.723 | -20.105 | 92.712 | 1.00 | 0.00 | C |
| ATOM | 655 | C6   | C B | 3 | -4.338 | -18.894 | 92.555 | 1.00 | 0.00 | C |
| ATOM | 656 | C2'  | C B | 3 | -6.208 | -16.647 | 92.797 | 1.00 | 0.00 | C |
| ATOM | 657 | C3'  | C B | 3 | -6.007 | -15.206 | 92.355 | 1.00 | 0.00 | C |
| ATOM | 658 | O3'  | C B | 3 | -7.238 | -14.698 | 91.845 | 1.00 | 0.00 | O |
| ATOM | 659 | C4'  | C B | 3 | -4.940 | -15.328 | 91.271 | 1.00 | 0.00 | C |
| ATOM | 660 | O4'  | C B | 3 | -5.213 | -16.620 | 90.638 | 1.00 | 0.00 | O |
| ATOM | 661 | C5'  | C B | 3 | -3.503 | -15.313 | 91.738 | 1.00 | 0.00 | C |
| ATOM | 662 | O5'  | C B | 3 | -3.393 | -16.012 | 93.005 | 1.00 | 0.00 | O |
| ATOM | 663 | O1P  | C B | 3 | -2.743 | -14.192 | 94.618 | 1.00 | 0.00 | O |
| ATOM | 664 | O2P  | C B | 3 | -2.075 | -16.567 | 95.071 | 1.00 | 0.00 | O |
| ATOM | 665 | P    | C B | 3 | -2.326 | -15.499 | 94.072 | 1.00 | 0.00 | P |
| ATOM | 666 | H5   | C B | 3 | -2.919 | -20.249 | 93.434 | 1.00 | 0.00 | H |
| ATOM | 667 | H6   | C B | 3 | -4.011 | -18.048 | 93.159 | 1.00 | 0.00 | H |
| ATOM | 668 | H1'  | C B | 3 | -6.975 | -17.573 | 90.994 | 1.00 | 0.00 | H |
| ATOM | 669 | H3'  | C B | 3 | -5.667 | -14.572 | 93.173 | 1.00 | 0.00 | H |
| ATOM | 670 | H4'  | C B | 3 | -5.076 | -14.485 | 90.594 | 1.00 | 0.00 | H |
| ATOM | 671 | H41  | C B | 3 | -2.871 | -22.544 | 92.635 | 1.00 | 0.00 | H |
| ATOM | 672 | H42  | C B | 3 | -3.980 | -23.147 | 91.373 | 1.00 | 0.00 | H |
| ATOM | 673 | H2'1 | C B | 3 | -5.478 | -16.935 | 93.554 | 1.00 | 0.00 | H |
| ATOM | 674 | H2'2 | C B | 3 | -7.200 | -16.797 | 93.224 | 1.00 | 0.00 | H |

|      |     |       |     |   |         |         |        |      |      |   |
|------|-----|-------|-----|---|---------|---------|--------|------|------|---|
| ATOM | 675 | H5 '1 | C B | 3 | -2.878  | -15.805 | 90.992 | 1.00 | 0.00 | H |
| ATOM | 676 | H5 '2 | C B | 3 | -3.176  | -14.283 | 91.857 | 1.00 | 0.00 | H |
| ATOM | 677 | C1 '  | C B | 4 | -10.627 | -19.157 | 91.000 | 1.00 | 0.00 | C |
| ATOM | 678 | N1    | C B | 4 | -9.616  | -19.901 | 91.798 | 1.00 | 0.00 | N |
| ATOM | 679 | C2    | C B | 4 | -9.426  | -21.253 | 91.515 | 1.00 | 0.00 | C |
| ATOM | 680 | O2    | C B | 4 | -10.100 | -21.775 | 90.618 | 1.00 | 0.00 | O |
| ATOM | 681 | N3    | C B | 4 | -8.511  | -21.950 | 92.230 | 1.00 | 0.00 | N |
| ATOM | 682 | C4    | C B | 4 | -7.796  | -21.357 | 93.197 | 1.00 | 0.00 | C |
| ATOM | 683 | N4    | C B | 4 | -6.911  | -22.084 | 93.864 | 1.00 | 0.00 | N |
| ATOM | 684 | C5    | C B | 4 | -7.973  | -19.970 | 93.514 | 1.00 | 0.00 | C |
| ATOM | 685 | C6    | C B | 4 | -8.898  | -19.286 | 92.776 | 1.00 | 0.00 | C |
| ATOM | 686 | C2 '  | C B | 4 | -11.417 | -18.137 | 91.808 | 1.00 | 0.00 | C |
| ATOM | 687 | C3 '  | C B | 4 | -11.612 | -17.016 | 90.799 | 1.00 | 0.00 | C |
| ATOM | 688 | O3 '  | C B | 4 | -12.751 | -17.305 | 89.992 | 1.00 | 0.00 | O |
| ATOM | 689 | C4 '  | C B | 4 | -10.313 | -17.050 | 89.997 | 1.00 | 0.00 | C |
| ATOM | 690 | O4 '  | C B | 4 | -9.939  | -18.466 | 89.973 | 1.00 | 0.00 | O |
| ATOM | 691 | C5 '  | C B | 4 | -9.155  | -16.256 | 90.557 | 1.00 | 0.00 | C |
| ATOM | 692 | O5 '  | C B | 4 | -9.165  | -16.330 | 92.005 | 1.00 | 0.00 | O |
| ATOM | 693 | O1P   | C B | 4 | -9.651  | -13.962 | 92.706 | 1.00 | 0.00 | O |
| ATOM | 694 | O2P   | C B | 4 | -8.358  | -15.482 | 94.228 | 1.00 | 0.00 | O |
| ATOM | 695 | P     | C B | 4 | -8.677  | -15.064 | 92.841 | 1.00 | 0.00 | P |
| ATOM | 696 | H5    | C B | 4 | -7.399  | -19.486 | 94.304 | 1.00 | 0.00 | H |
| ATOM | 697 | H6    | C B | 4 | -9.062  | -18.228 | 92.976 | 1.00 | 0.00 | H |
| ATOM | 698 | H1 '  | C B | 4 | -11.291 | -19.882 | 90.529 | 1.00 | 0.00 | H |
| ATOM | 699 | H3 '  | C B | 4 | -11.749 | -16.049 | 91.284 | 1.00 | 0.00 | H |
| ATOM | 700 | H4 '  | C B | 4 | -10.540 | -16.654 | 89.007 | 1.00 | 0.00 | H |
| ATOM | 701 | H41   | C B | 4 | -6.346  | -21.653 | 94.610 | 1.00 | 0.00 | H |
| ATOM | 702 | H42   | C B | 4 | -6.787  | -23.083 | 93.636 | 1.00 | 0.00 | H |
| ATOM | 703 | H2 '1 | C B | 4 | -10.870 | -17.790 | 92.685 | 1.00 | 0.00 | H |
| ATOM | 704 | H2 '2 | C B | 4 | -12.373 | -18.532 | 92.151 | 1.00 | 0.00 | H |
| ATOM | 705 | H5 '1 | C B | 4 | -8.221  | -16.664 | 90.173 | 1.00 | 0.00 | H |
| ATOM | 706 | H5 '2 | C B | 4 | -9.251  | -15.218 | 90.241 | 1.00 | 0.00 | H |
| ATOM | 707 | C1 '  | G B | 5 | -14.025 | -22.756 | 90.855 | 1.00 | 0.00 | C |
| ATOM | 708 | N1    | G B | 5 | -10.659 | -25.272 | 93.749 | 1.00 | 0.00 | N |
| ATOM | 709 | C2    | G B | 5 | -11.421 | -25.716 | 92.682 | 1.00 | 0.00 | C |
| ATOM | 710 | N2    | G B | 5 | -11.268 | -27.002 | 92.343 | 1.00 | 0.00 | N |
| ATOM | 711 | N3    | G B | 5 | -12.268 | -24.940 | 92.009 | 1.00 | 0.00 | N |
| ATOM | 712 | C4    | G B | 5 | -12.302 | -23.670 | 92.493 | 1.00 | 0.00 | C |
| ATOM | 713 | C5    | G B | 5 | -11.582 | -23.141 | 93.551 | 1.00 | 0.00 | C |
| ATOM | 714 | C6    | G B | 5 | -10.681 | -23.963 | 94.264 | 1.00 | 0.00 | C |
| ATOM | 715 | O6    | G B | 5 | -9.963  | -23.678 | 95.222 | 1.00 | 0.00 | O |
| ATOM | 716 | N7    | G B | 5 | -11.908 | -21.793 | 93.729 | 1.00 | 0.00 | N |
| ATOM | 717 | C8    | G B | 5 | -12.791 | -21.554 | 92.793 | 1.00 | 0.00 | C |
| ATOM | 718 | N9    | G B | 5 | -13.083 | -22.647 | 92.002 | 1.00 | 0.00 | N |
| ATOM | 719 | C2 '  | G B | 5 | -15.308 | -21.956 | 91.037 | 1.00 | 0.00 | C |
| ATOM | 720 | C3 '  | G B | 5 | -15.590 | -21.482 | 89.621 | 1.00 | 0.00 | C |
| ATOM | 721 | O3 '  | G B | 5 | -16.291 | -22.502 | 88.916 | 1.00 | 0.00 | O |
| ATOM | 722 | C4 '  | G B | 5 | -14.190 | -21.245 | 89.057 | 1.00 | 0.00 | C |
| ATOM | 723 | O4 '  | G B | 5 | -13.364 | -22.264 | 89.705 | 1.00 | 0.00 | O |
| ATOM | 724 | C5 '  | G B | 5 | -13.580 | -19.889 | 89.319 | 1.00 | 0.00 | C |
| ATOM | 725 | O5 '  | G B | 5 | -13.962 | -19.427 | 90.638 | 1.00 | 0.00 | O |
| ATOM | 726 | O1P   | G B | 5 | -15.404 | -17.421 | 90.159 | 1.00 | 0.00 | O |
| ATOM | 727 | O2P   | G B | 5 | -14.141 | -17.569 | 92.321 | 1.00 | 0.00 | O |
| ATOM | 728 | P     | G B | 5 | -14.190 | -17.865 | 90.869 | 1.00 | 0.00 | P |

|      |     |      |     |   |         |         |        |      |      |   |
|------|-----|------|-----|---|---------|---------|--------|------|------|---|
| ATOM | 729 | H1   | G B | 5 | -10.029 | -25.953 | 94.199 | 1.00 | 0.00 | H |
| ATOM | 730 | H8   | G B | 5 | -13.256 | -20.579 | 92.651 | 1.00 | 0.00 | H |
| ATOM | 731 | H1'  | G B | 5 | -14.243 | -23.811 | 90.691 | 1.00 | 0.00 | H |
| ATOM | 732 | H21  | G B | 5 | -10.609 | -27.597 | 92.867 | 1.00 | 0.00 | H |
| ATOM | 733 | H3'  | G B | 5 | -16.179 | -20.563 | 89.607 | 1.00 | 0.00 | H |
| ATOM | 734 | H22  | G B | 5 | -11.809 | -27.397 | 91.561 | 1.00 | 0.00 | H |
| ATOM | 735 | H4'  | G B | 5 | -14.258 | -21.377 | 87.978 | 1.00 | 0.00 | H |
| ATOM | 736 | H2'1 | G B | 5 | -15.178 | -21.116 | 91.719 | 1.00 | 0.00 | H |
| ATOM | 737 | H2'2 | G B | 5 | -16.125 | -22.567 | 91.421 | 1.00 | 0.00 | H |
| ATOM | 738 | H5'1 | G B | 5 | -12.495 | -19.967 | 89.255 | 1.00 | 0.00 | H |
| ATOM | 739 | H5'2 | G B | 5 | -13.934 | -19.185 | 88.566 | 1.00 | 0.00 | H |
| ATOM | 740 | C1'  | T B | 6 | -15.814 | -27.241 | 91.943 | 1.00 | 0.00 | C |
| ATOM | 741 | N1   | T B | 6 | -15.304 | -26.357 | 93.025 | 1.00 | 0.00 | N |
| ATOM | 742 | C2   | T B | 6 | -14.382 | -26.897 | 93.898 | 1.00 | 0.00 | C |
| ATOM | 743 | O2   | T B | 6 | -13.985 | -28.046 | 93.812 | 1.00 | 0.00 | O |
| ATOM | 744 | N3   | T B | 6 | -13.934 | -26.039 | 94.886 | 1.00 | 0.00 | N |
| ATOM | 745 | C4   | T B | 6 | -14.319 | -24.728 | 95.074 | 1.00 | 0.00 | C |
| ATOM | 746 | O4   | T B | 6 | -13.849 | -24.058 | 96.000 | 1.00 | 0.00 | O |
| ATOM | 747 | C5   | T B | 6 | -15.284 | -24.254 | 94.112 | 1.00 | 0.00 | C |
| ATOM | 748 | C6   | T B | 6 | -15.743 | -25.060 | 93.135 | 1.00 | 0.00 | C |
| ATOM | 749 | C7   | T B | 6 | -15.729 | -22.830 | 94.276 | 1.00 | 0.00 | C |
| ATOM | 750 | C2'  | T B | 6 | -17.292 | -27.040 | 91.633 | 1.00 | 0.00 | C |
| ATOM | 751 | C3'  | T B | 6 | -17.331 | -27.257 | 90.128 | 1.00 | 0.00 | C |
| ATOM | 752 | O3'  | T B | 6 | -17.433 | -28.653 | 89.857 | 1.00 | 0.00 | O |
| ATOM | 753 | C4'  | T B | 6 | -15.998 | -26.673 | 89.665 | 1.00 | 0.00 | C |
| ATOM | 754 | O4'  | T B | 6 | -15.080 | -26.955 | 90.768 | 1.00 | 0.00 | O |
| ATOM | 755 | C5'  | T B | 6 | -15.974 | -25.188 | 89.385 | 1.00 | 0.00 | C |
| ATOM | 756 | O5'  | T B | 6 | -16.825 | -24.498 | 90.335 | 1.00 | 0.00 | O |
| ATOM | 757 | O1P  | T B | 6 | -18.679 | -23.586 | 88.898 | 1.00 | 0.00 | O |
| ATOM | 758 | O2P  | T B | 6 | -18.061 | -22.426 | 91.035 | 1.00 | 0.00 | O |
| ATOM | 759 | P    | T B | 6 | -17.620 | -23.202 | 89.852 | 1.00 | 0.00 | P |
| ATOM | 760 | H3   | T B | 6 | -13.242 | -26.418 | 95.549 | 1.00 | 0.00 | H |
| ATOM | 761 | H6   | T B | 6 | -16.471 | -24.678 | 92.420 | 1.00 | 0.00 | H |
| ATOM | 762 | H1'  | T B | 6 | -15.611 | -28.275 | 92.222 | 1.00 | 0.00 | H |
| ATOM | 763 | H3'  | T B | 6 | -18.170 | -26.738 | 89.663 | 1.00 | 0.00 | H |
| ATOM | 764 | H4'  | T B | 6 | -15.729 | -27.190 | 88.743 | 1.00 | 0.00 | H |
| ATOM | 765 | H71  | T B | 6 | -16.787 | -22.808 | 94.539 | 1.00 | 0.00 | H |
| ATOM | 766 | H72  | T B | 6 | -15.148 | -22.357 | 95.069 | 1.00 | 0.00 | H |
| ATOM | 767 | H73  | T B | 6 | -15.576 | -22.290 | 93.342 | 1.00 | 0.00 | H |
| ATOM | 768 | H2'1 | T B | 6 | -17.638 | -26.044 | 91.899 | 1.00 | 0.00 | H |
| ATOM | 769 | H2'2 | T B | 6 | -17.925 | -27.760 | 92.153 | 1.00 | 0.00 | H |
| ATOM | 770 | H5'1 | T B | 6 | -14.951 | -24.823 | 89.474 | 1.00 | 0.00 | H |
| ATOM | 771 | H5'2 | T B | 6 | -16.333 | -25.010 | 88.372 | 1.00 | 0.00 | H |
| ATOM | 772 | C1'  | C B | 7 | -16.147 | -31.330 | 94.742 | 1.00 | 0.00 | C |
| ATOM | 773 | N1   | C B | 7 | -16.305 | -29.980 | 95.353 | 1.00 | 0.00 | N |
| ATOM | 774 | C2   | C B | 7 | -15.540 | -29.679 | 96.477 | 1.00 | 0.00 | C |
| ATOM | 775 | O2   | C B | 7 | -14.764 | -30.537 | 96.919 | 1.00 | 0.00 | O |
| ATOM | 776 | N3   | C B | 7 | -15.669 | -28.456 | 97.048 | 1.00 | 0.00 | N |
| ATOM | 777 | C4   | C B | 7 | -16.518 | -27.549 | 96.548 | 1.00 | 0.00 | C |
| ATOM | 778 | N4   | C B | 7 | -16.602 | -26.370 | 97.143 | 1.00 | 0.00 | N |
| ATOM | 779 | C5   | C B | 7 | -17.322 | -27.833 | 95.395 | 1.00 | 0.00 | C |
| ATOM | 780 | C6   | C B | 7 | -17.171 | -29.069 | 94.833 | 1.00 | 0.00 | C |
| ATOM | 781 | C2'  | C B | 7 | -17.448 | -31.926 | 94.227 | 1.00 | 0.00 | C |
| ATOM | 782 | C3'  | C B | 7 | -16.984 | -32.673 | 92.986 | 1.00 | 0.00 | C |

|      |     |      |     |   |         |         |         |      |      |   |
|------|-----|------|-----|---|---------|---------|---------|------|------|---|
| ATOM | 783 | O3'  | C B | 7 | -16.508 | -33.962 | 93.367  | 1.00 | 0.00 | O |
| ATOM | 784 | C4'  | C B | 7 | -15.869 | -31.781 | 92.450  | 1.00 | 0.00 | C |
| ATOM | 785 | O4'  | C B | 7 | -15.259 | -31.204 | 93.647  | 1.00 | 0.00 | O |
| ATOM | 786 | C5'  | C B | 7 | -16.290 | -30.655 | 91.532  | 1.00 | 0.00 | C |
| ATOM | 787 | O5'  | C B | 7 | -17.560 | -30.114 | 91.975  | 1.00 | 0.00 | O |
| ATOM | 788 | O1P  | C B | 7 | -19.132 | -30.705 | 90.101  | 1.00 | 0.00 | O |
| ATOM | 789 | O2P  | C B | 7 | -19.589 | -28.699 | 91.533  | 1.00 | 0.00 | O |
| ATOM | 790 | P    | C B | 7 | -18.588 | -29.577 | 90.880  | 1.00 | 0.00 | P |
| ATOM | 791 | H5   | C B | 7 | -18.018 | -27.099 | 94.988  | 1.00 | 0.00 | H |
| ATOM | 792 | H6   | C B | 7 | -17.755 | -29.328 | 93.950  | 1.00 | 0.00 | H |
| ATOM | 793 | H1'  | C B | 7 | -15.680 | -31.984 | 95.479  | 1.00 | 0.00 | H |
| ATOM | 794 | H3'  | C B | 7 | -17.786 | -32.787 | 92.253  | 1.00 | 0.00 | H |
| ATOM | 795 | H4'  | C B | 7 | -15.188 | -32.425 | 91.892  | 1.00 | 0.00 | H |
| ATOM | 796 | H41  | C B | 7 | -17.244 | -25.652 | 96.776  | 1.00 | 0.00 | H |
| ATOM | 797 | H42  | C B | 7 | -16.024 | -26.168 | 97.974  | 1.00 | 0.00 | H |
| ATOM | 798 | H2'1 | C B | 7 | -18.185 | -31.162 | 93.978  | 1.00 | 0.00 | H |
| ATOM | 799 | H2'2 | C B | 7 | -17.909 | -32.601 | 94.949  | 1.00 | 0.00 | H |
| ATOM | 800 | H5'1 | C B | 7 | -15.529 | -29.875 | 91.550  | 1.00 | 0.00 | H |
| ATOM | 801 | H5'2 | C B | 7 | -16.388 | -31.039 | 90.518  | 1.00 | 0.00 | H |
| ATOM | 802 | C1'  | C B | 8 | -15.819 | -33.859 | 98.988  | 1.00 | 0.00 | C |
| ATOM | 803 | N1   | C B | 8 | -16.593 | -32.590 | 98.921  | 1.00 | 0.00 | N |
| ATOM | 804 | C2   | C B | 8 | -16.319 | -31.606 | 99.870  | 1.00 | 0.00 | C |
| ATOM | 805 | O2   | C B | 8 | -15.449 | -31.827 | 100.722 | 1.00 | 0.00 | O |
| ATOM | 806 | N3   | C B | 8 | -17.013 | -30.444 | 99.826  | 1.00 | 0.00 | N |
| ATOM | 807 | C4   | C B | 8 | -17.949 | -30.235 | 98.891  | 1.00 | 0.00 | C |
| ATOM | 808 | N4   | C B | 8 | -18.595 | -29.077 | 98.894  | 1.00 | 0.00 | N |
| ATOM | 809 | C5   | C B | 8 | -18.258 | -31.229 | 97.904  | 1.00 | 0.00 | C |
| ATOM | 810 | C6   | C B | 8 | -17.541 | -32.392 | 97.965  | 1.00 | 0.00 | C |
| ATOM | 811 | C2'  | C B | 8 | -16.640 | -35.098 | 98.656  | 1.00 | 0.00 | C |
| ATOM | 812 | C3'  | C B | 8 | -15.626 | -35.966 | 97.928  | 1.00 | 0.00 | C |
| ATOM | 813 | O3'  | C B | 8 | -14.859 | -36.692 | 98.885  | 1.00 | 0.00 | O |
| ATOM | 814 | C4'  | C B | 8 | -14.784 | -34.941 | 97.171  | 1.00 | 0.00 | C |
| ATOM | 815 | O4'  | C B | 8 | -14.765 | -33.769 | 98.048  | 1.00 | 0.00 | O |
| ATOM | 816 | C5'  | C B | 8 | -15.298 | -34.520 | 95.815  | 1.00 | 0.00 | C |
| ATOM | 817 | O5'  | C B | 8 | -16.747 | -34.454 | 95.837  | 1.00 | 0.00 | O |
| ATOM | 818 | O1P  | C B | 8 | -17.438 | -36.293 | 94.264  | 1.00 | 0.00 | O |
| ATOM | 819 | O2P  | C B | 8 | -18.933 | -34.308 | 94.609  | 1.00 | 0.00 | O |
| ATOM | 820 | P    | C B | 8 | -17.553 | -34.843 | 94.520  | 1.00 | 0.00 | P |
| ATOM | 821 | H5   | C B | 8 | -19.023 | -31.067 | 97.147  | 1.00 | 0.00 | H |
| ATOM | 822 | H6   | C B | 8 | -17.734 | -33.175 | 97.232  | 1.00 | 0.00 | H |
| ATOM | 823 | H1'  | C B | 8 | -15.377 | -33.937 | 99.982  | 1.00 | 0.00 | H |
| ATOM | 824 | H3'  | C B | 8 | -16.105 | -36.665 | 97.243  | 1.00 | 0.00 | H |
| ATOM | 825 | H4'  | C B | 8 | -13.799 | -35.384 | 97.028  | 1.00 | 0.00 | H |
| ATOM | 826 | H41  | C B | 8 | -19.317 | -28.890 | 98.183  | 1.00 | 0.00 | H |
| ATOM | 827 | H42  | C B | 8 | -18.373 | -28.365 | 99.604  | 1.00 | 0.00 | H |
| ATOM | 828 | H2'1 | C B | 8 | -17.496 | -34.870 | 98.022  | 1.00 | 0.00 | H |
| ATOM | 829 | H2'2 | C B | 8 | -17.019 | -35.594 | 99.551  | 1.00 | 0.00 | H |
| ATOM | 830 | H5'1 | C B | 8 | -14.889 | -33.541 | 95.564  | 1.00 | 0.00 | H |
| ATOM | 831 | H5'2 | C B | 8 | -14.974 | -35.244 | 95.069  | 1.00 | 0.00 | H |
| ATOM | 832 | C1'  | T B | 9 | -15.812 | -34.308 | 103.916 | 1.00 | 0.00 | C |
| ATOM | 833 | N1   | T B | 9 | -16.923 | -33.594 | 103.232 | 1.00 | 0.00 | N |
| ATOM | 834 | C2   | T B | 9 | -17.244 | -32.335 | 103.696 | 1.00 | 0.00 | C |
| ATOM | 835 | O2   | T B | 9 | -16.661 | -31.807 | 104.626 | 1.00 | 0.00 | O |
| ATOM | 836 | N3   | T B | 9 | -18.281 | -31.708 | 103.031 | 1.00 | 0.00 | N |



|      |     |      |     |    |         |         |         |      |      |   |
|------|-----|------|-----|----|---------|---------|---------|------|------|---|
| ATOM | 837 | C4   | T B | 9  | -19.006 | -32.217 | 101.975 | 1.00 | 0.00 | C |
| ATOM | 838 | O4   | T B | 9  | -19.920 | -31.560 | 101.460 | 1.00 | 0.00 | O |
| ATOM | 839 | C5   | T B | 9  | -18.598 | -33.538 | 101.559 | 1.00 | 0.00 | C |
| ATOM | 840 | C6   | T B | 9  | -17.590 | -34.178 | 102.184 | 1.00 | 0.00 | C |
| ATOM | 841 | C7   | T B | 9  | -19.358 | -34.128 | 100.410 | 1.00 | 0.00 | C |
| ATOM | 842 | C2'  | T B | 9  | -16.044 | -35.808 | 104.066 | 1.00 | 0.00 | C |
| ATOM | 843 | C3'  | T B | 9  | -14.639 | -36.364 | 103.891 | 1.00 | 0.00 | C |
| ATOM | 844 | O3'  | T B | 9  | -13.958 | -36.315 | 105.142 | 1.00 | 0.00 | O |
| ATOM | 845 | C4'  | T B | 9  | -14.026 | -35.421 | 102.859 | 1.00 | 0.00 | C |
| ATOM | 846 | O4'  | T B | 9  | -14.640 | -34.124 | 103.147 | 1.00 | 0.00 | O |
| ATOM | 847 | C5'  | T B | 9  | -14.270 | -35.761 | 101.407 | 1.00 | 0.00 | C |
| ATOM | 848 | O5'  | T B | 9  | -15.605 | -36.305 | 101.250 | 1.00 | 0.00 | O |
| ATOM | 849 | O1P  | T B | 9  | -15.186 | -38.688 | 100.558 | 1.00 | 0.00 | O |
| ATOM | 850 | O2P  | T B | 9  | -17.300 | -37.531 | 99.859  | 1.00 | 0.00 | O |
| ATOM | 851 | P    | T B | 9  | -15.850 | -37.433 | 100.150 | 1.00 | 0.00 | P |
| ATOM | 852 | H3   | T B | 9  | -18.538 | -30.766 | 103.357 | 1.00 | 0.00 | H |
| ATOM | 853 | H6   | T B | 9  | -17.300 | -35.175 | 101.852 | 1.00 | 0.00 | H |
| ATOM | 854 | H1'  | T B | 9  | -15.652 | -33.840 | 104.888 | 1.00 | 0.00 | H |
| ATOM | 855 | H3'  | T B | 9  | -14.653 | -37.391 | 103.526 | 1.00 | 0.00 | H |
| ATOM | 856 | H4'  | T B | 9  | -12.947 | -35.428 | 103.026 | 1.00 | 0.00 | H |
| ATOM | 857 | H71  | T B | 9  | -19.916 | -35.000 | 100.753 | 1.00 | 0.00 | H |
| ATOM | 858 | H72  | T B | 9  | -20.052 | -33.387 | 100.012 | 1.00 | 0.00 | H |
| ATOM | 859 | H73  | T B | 9  | -18.660 | -34.430 | 99.628  | 1.00 | 0.00 | H |
| ATOM | 860 | H2'1 | T B | 9  | -16.724 | -36.197 | 103.309 | 1.00 | 0.00 | H |
| ATOM | 861 | H2'2 | T B | 9  | -16.457 | -36.066 | 105.041 | 1.00 | 0.00 | H |
| ATOM | 862 | H5'1 | T B | 9  | -14.167 | -34.859 | 100.805 | 1.00 | 0.00 | H |
| ATOM | 863 | H5'2 | T B | 9  | -13.534 | -36.495 | 101.084 | 1.00 | 0.00 | H |
| ATOM | 864 | C1'  | A B | 10 | -17.013 | -32.879 | 108.515 | 1.00 | 0.00 | C |
| ATOM | 865 | N1   | A B | 10 | -20.966 | -30.595 | 106.171 | 1.00 | 0.00 | N |
| ATOM | 866 | C2   | A B | 10 | -20.150 | -30.203 | 107.146 | 1.00 | 0.00 | C |
| ATOM | 867 | N3   | A B | 10 | -19.145 | -30.843 | 107.703 | 1.00 | 0.00 | N |
| ATOM | 868 | C4   | A B | 10 | -19.002 | -32.060 | 107.147 | 1.00 | 0.00 | C |
| ATOM | 869 | C5   | A B | 10 | -19.751 | -32.611 | 106.145 | 1.00 | 0.00 | C |
| ATOM | 870 | C6   | A B | 10 | -20.798 | -31.815 | 105.635 | 1.00 | 0.00 | C |
| ATOM | 871 | N6   | A B | 10 | -21.617 | -32.223 | 104.650 | 1.00 | 0.00 | N |
| ATOM | 872 | N7   | A B | 10 | -19.308 | -33.883 | 105.831 | 1.00 | 0.00 | N |
| ATOM | 873 | C8   | A B | 10 | -18.312 | -34.076 | 106.645 | 1.00 | 0.00 | C |
| ATOM | 874 | N9   | A B | 10 | -18.065 | -33.011 | 107.472 | 1.00 | 0.00 | N |
| ATOM | 875 | C2'  | A B | 10 | -16.745 | -34.167 | 109.282 | 1.00 | 0.00 | C |
| ATOM | 876 | C3'  | A B | 10 | -15.245 | -34.087 | 109.522 | 1.00 | 0.00 | C |
| ATOM | 877 | O3'  | A B | 10 | -14.998 | -33.304 | 110.686 | 1.00 | 0.00 | O |
| ATOM | 878 | C4'  | A B | 10 | -14.734 | -33.410 | 108.251 | 1.00 | 0.00 | C |
| ATOM | 879 | O4'  | A B | 10 | -15.813 | -32.497 | 107.870 | 1.00 | 0.00 | O |
| ATOM | 880 | C5'  | A B | 10 | -14.432 | -34.317 | 107.082 | 1.00 | 0.00 | C |
| ATOM | 881 | O5'  | A B | 10 | -15.397 | -35.399 | 107.038 | 1.00 | 0.00 | O |
| ATOM | 882 | O1P  | A B | 10 | -14.005 | -37.441 | 107.515 | 1.00 | 0.00 | O |
| ATOM | 883 | O2P  | A B | 10 | -16.106 | -37.643 | 106.159 | 1.00 | 0.00 | O |
| ATOM | 884 | P    | A B | 10 | -14.920 | -36.833 | 106.530 | 1.00 | 0.00 | P |
| ATOM | 885 | H2   | A B | 10 | -20.343 | -29.206 | 107.539 | 1.00 | 0.00 | H |
| ATOM | 886 | H8   | A B | 10 | -17.729 | -34.997 | 106.668 | 1.00 | 0.00 | H |
| ATOM | 887 | H1'  | A B | 10 | -17.301 | -32.075 | 109.191 | 1.00 | 0.00 | H |
| ATOM | 888 | H3'  | A B | 10 | -14.800 | -35.074 | 109.648 | 1.00 | 0.00 | H |
| ATOM | 889 | H4'  | A B | 10 | -13.812 | -32.893 | 108.518 | 1.00 | 0.00 | H |
| ATOM | 890 | H61  | A B | 10 | -22.363 | -31.601 | 104.312 | 1.00 | 0.00 | H |

|      |     |      |     |    |         |         |         |      |      |   |
|------|-----|------|-----|----|---------|---------|---------|------|------|---|
| ATOM | 891 | H62  | A B | 10 | -21.496 | -33.157 | 104.234 | 1.00 | 0.00 | H |
| ATOM | 892 | H2'1 | A B | 10 | -17.008 | -35.054 | 108.707 | 1.00 | 0.00 | H |
| ATOM | 893 | H2'2 | A B | 10 | -17.295 | -34.210 | 110.223 | 1.00 | 0.00 | H |
| ATOM | 894 | H5'1 | A B | 10 | -14.484 | -33.741 | 106.159 | 1.00 | 0.00 | H |
| ATOM | 895 | H5'2 | A B | 10 | -13.429 | -34.724 | 107.195 | 1.00 | 0.00 | H |
| ATOM | 896 | C1'  | G B | 11 | -19.865 | -30.549 | 111.843 | 1.00 | 0.00 | C |
| ATOM | 897 | N1   | G B | 11 | -23.526 | -31.215 | 108.354 | 1.00 | 0.00 | N |
| ATOM | 898 | C2   | G B | 11 | -23.236 | -30.112 | 109.137 | 1.00 | 0.00 | C |
| ATOM | 899 | N2   | G B | 11 | -24.028 | -29.046 | 108.970 | 1.00 | 0.00 | N |
| ATOM | 900 | N3   | G B | 11 | -22.236 | -30.076 | 110.017 | 1.00 | 0.00 | N |
| ATOM | 901 | C4   | G B | 11 | -21.543 | -31.245 | 110.059 | 1.00 | 0.00 | C |
| ATOM | 902 | C5   | G B | 11 | -21.763 | -32.395 | 109.321 | 1.00 | 0.00 | C |
| ATOM | 903 | C6   | G B | 11 | -22.822 | -32.434 | 108.385 | 1.00 | 0.00 | C |
| ATOM | 904 | O6   | G B | 11 | -23.171 | -33.354 | 107.644 | 1.00 | 0.00 | O |
| ATOM | 905 | N7   | G B | 11 | -20.829 | -33.375 | 109.665 | 1.00 | 0.00 | N |
| ATOM | 906 | C8   | G B | 11 | -20.089 | -32.799 | 110.578 | 1.00 | 0.00 | C |
| ATOM | 907 | N9   | G B | 11 | -20.462 | -31.504 | 110.873 | 1.00 | 0.00 | N |
| ATOM | 908 | C2'  | G B | 11 | -19.393 | -31.202 | 113.135 | 1.00 | 0.00 | C |
| ATOM | 909 | C3'  | G B | 11 | -18.150 | -30.392 | 113.465 | 1.00 | 0.00 | C |
| ATOM | 910 | O3'  | G B | 11 | -18.534 | -29.212 | 114.168 | 1.00 | 0.00 | O |
| ATOM | 911 | C4'  | G B | 11 | -17.571 | -30.081 | 112.088 | 1.00 | 0.00 | C |
| ATOM | 912 | O4'  | G B | 11 | -18.746 | -29.947 | 111.225 | 1.00 | 0.00 | O |
| ATOM | 913 | C5'  | G B | 11 | -16.652 | -31.124 | 111.495 | 1.00 | 0.00 | C |
| ATOM | 914 | O5'  | G B | 11 | -17.121 | -32.449 | 111.847 | 1.00 | 0.00 | O |
| ATOM | 915 | O1P  | G B | 11 | -15.299 | -33.335 | 113.339 | 1.00 | 0.00 | O |
| ATOM | 916 | O2P  | G B | 11 | -16.718 | -34.922 | 112.012 | 1.00 | 0.00 | O |
| ATOM | 917 | P    | G B | 11 | -16.049 | -33.602 | 112.097 | 1.00 | 0.00 | P |
| ATOM | 918 | H1   | G B | 11 | -24.318 | -31.138 | 107.699 | 1.00 | 0.00 | H |
| ATOM | 919 | H8   | G B | 11 | -19.253 | -33.300 | 111.063 | 1.00 | 0.00 | H |
| ATOM | 920 | H1'  | G B | 11 | -20.597 | -29.766 | 112.047 | 1.00 | 0.00 | H |
| ATOM | 921 | H21  | G B | 11 | -24.798 | -29.079 | 108.286 | 1.00 | 0.00 | H |
| ATOM | 922 | H3'  | G B | 11 | -17.442 | -30.958 | 114.071 | 1.00 | 0.00 | H |
| ATOM | 923 | H22  | G B | 11 | -23.867 | -28.193 | 109.525 | 1.00 | 0.00 | H |
| ATOM | 924 | H4'  | G B | 11 | -17.005 | -29.154 | 112.183 | 1.00 | 0.00 | H |
| ATOM | 925 | H2'1 | G B | 11 | -19.155 | -32.258 | 113.001 | 1.00 | 0.00 | H |
| ATOM | 926 | H2'2 | G B | 11 | -20.136 | -31.133 | 113.930 | 1.00 | 0.00 | H |
| ATOM | 927 | H5'1 | G B | 11 | -16.639 | -31.014 | 110.411 | 1.00 | 0.00 | H |
| ATOM | 928 | H5'2 | G B | 11 | -15.645 | -30.974 | 111.883 | 1.00 | 0.00 | H |
| ATOM | 929 | C1'  | G B | 12 | -24.124 | -28.643 | 113.504 | 1.00 | 0.00 | C |
| ATOM | 930 | N1   | G B | 12 | -26.223 | -32.020 | 110.306 | 1.00 | 0.00 | N |
| ATOM | 931 | C2   | G B | 12 | -26.557 | -30.698 | 110.548 | 1.00 | 0.00 | C |
| ATOM | 932 | N2   | G B | 12 | -27.590 | -30.213 | 109.847 | 1.00 | 0.00 | N |
| ATOM | 933 | N3   | G B | 12 | -25.914 | -29.925 | 111.420 | 1.00 | 0.00 | N |
| ATOM | 934 | C4   | G B | 12 | -24.902 | -30.581 | 112.045 | 1.00 | 0.00 | C |
| ATOM | 935 | C5   | G B | 12 | -24.499 | -31.894 | 111.872 | 1.00 | 0.00 | C |
| ATOM | 936 | C6   | G B | 12 | -25.180 | -32.716 | 110.945 | 1.00 | 0.00 | C |
| ATOM | 937 | O6   | G B | 12 | -24.973 | -33.895 | 110.654 | 1.00 | 0.00 | O |
| ATOM | 938 | N7   | G B | 12 | -23.418 | -32.182 | 112.707 | 1.00 | 0.00 | N |
| ATOM | 939 | C8   | G B | 12 | -23.202 | -31.061 | 113.344 | 1.00 | 0.00 | C |
| ATOM | 940 | N9   | G B | 12 | -24.064 | -30.041 | 112.996 | 1.00 | 0.00 | N |
| ATOM | 941 | C2'  | G B | 12 | -23.830 | -28.518 | 114.992 | 1.00 | 0.00 | C |
| ATOM | 942 | C3'  | G B | 12 | -23.084 | -27.194 | 115.058 | 1.00 | 0.00 | C |
| ATOM | 943 | O3'  | G B | 12 | -24.028 | -26.127 | 115.123 | 1.00 | 0.00 | O |
| ATOM | 944 | C4'  | G B | 12 | -22.292 | -27.185 | 113.752 | 1.00 | 0.00 | C |

|      |     |      |     |    |         |         |         |      |      |   |
|------|-----|------|-----|----|---------|---------|---------|------|------|---|
| ATOM | 945 | O4'  | G B | 12 | -23.156 | -27.887 | 112.802 | 1.00 | 0.00 | O |
| ATOM | 946 | C5'  | G B | 12 | -20.946 | -27.869 | 113.778 | 1.00 | 0.00 | C |
| ATOM | 947 | O5'  | G B | 12 | -21.008 | -29.041 | 114.628 | 1.00 | 0.00 | O |
| ATOM | 948 | O1P  | G B | 12 | -19.477 | -28.458 | 116.538 | 1.00 | 0.00 | O |
| ATOM | 949 | O2P  | G B | 12 | -19.839 | -30.860 | 115.909 | 1.00 | 0.00 | O |
| ATOM | 950 | P    | G B | 12 | -19.716 | -29.448 | 115.470 | 1.00 | 0.00 | P |
| ATOM | 951 | H1   | G B | 12 | -26.782 | -32.531 | 109.606 | 1.00 | 0.00 | H |
| ATOM | 952 | H8   | G B | 12 | -22.412 | -30.940 | 114.085 | 1.00 | 0.00 | H |
| ATOM | 953 | H1'  | G B | 12 | -25.106 | -28.235 | 113.263 | 1.00 | 0.00 | H |
| ATOM | 954 | H21  | G B | 12 | -28.081 | -30.818 | 109.171 | 1.00 | 0.00 | H |
| ATOM | 955 | H3'  | G B | 12 | -22.420 | -27.141 | 115.921 | 1.00 | 0.00 | H |
| ATOM | 956 | H22  | G B | 12 | -27.890 | -29.239 | 109.982 | 1.00 | 0.00 | H |
| ATOM | 957 | H4'  | G B | 12 | -22.129 | -26.141 | 113.487 | 1.00 | 0.00 | H |
| ATOM | 958 | H2'1 | G B | 12 | -23.216 | -29.338 | 115.362 | 1.00 | 0.00 | H |
| ATOM | 959 | H2'2 | G B | 12 | -24.738 | -28.491 | 115.593 | 1.00 | 0.00 | H |
| ATOM | 960 | H5'1 | G B | 12 | -20.674 | -28.163 | 112.764 | 1.00 | 0.00 | H |
| ATOM | 961 | H5'2 | G B | 12 | -20.199 | -27.175 | 114.163 | 1.00 | 0.00 | H |
| ATOM | 962 | C1'  | T B | 13 | -29.055 | -28.268 | 113.712 | 1.00 | 0.00 | C |
| ATOM | 963 | N1   | T B | 13 | -28.399 | -29.593 | 113.862 | 1.00 | 0.00 | N |
| ATOM | 964 | C2   | T B | 13 | -28.860 | -30.621 | 113.062 | 1.00 | 0.00 | C |
| ATOM | 965 | O2   | T B | 13 | -29.766 | -30.474 | 112.259 | 1.00 | 0.00 | O |
| ATOM | 966 | N3   | T B | 13 | -28.221 | -31.834 | 113.234 | 1.00 | 0.00 | N |
| ATOM | 967 | C4   | T B | 13 | -27.194 | -32.106 | 114.112 | 1.00 | 0.00 | C |
| ATOM | 968 | O4   | T B | 13 | -26.701 | -33.237 | 114.180 | 1.00 | 0.00 | O |
| ATOM | 969 | C5   | T B | 13 | -26.779 | -30.972 | 114.905 | 1.00 | 0.00 | C |
| ATOM | 970 | C6   | T B | 13 | -27.379 | -29.772 | 114.763 | 1.00 | 0.00 | C |
| ATOM | 971 | C7   | T B | 13 | -25.661 | -31.220 | 115.873 | 1.00 | 0.00 | C |
| ATOM | 972 | C2'  | T B | 13 | -29.228 | -27.515 | 115.027 | 1.00 | 0.00 | C |
| ATOM | 973 | C3'  | T B | 13 | -29.015 | -26.073 | 114.596 | 1.00 | 0.00 | C |
| ATOM | 974 | O3'  | T B | 13 | -30.243 | -25.546 | 114.098 | 1.00 | 0.00 | O |
| ATOM | 975 | C4'  | T B | 13 | -27.955 | -26.197 | 113.504 | 1.00 | 0.00 | C |
| ATOM | 976 | O4'  | T B | 13 | -28.247 | -27.479 | 112.862 | 1.00 | 0.00 | O |
| ATOM | 977 | C5'  | T B | 13 | -26.515 | -26.203 | 113.963 | 1.00 | 0.00 | C |
| ATOM | 978 | O5'  | T B | 13 | -26.405 | -26.913 | 115.223 | 1.00 | 0.00 | O |
| ATOM | 979 | O1P  | T B | 13 | -25.727 | -25.116 | 116.847 | 1.00 | 0.00 | O |
| ATOM | 980 | O2P  | T B | 13 | -25.082 | -27.503 | 117.275 | 1.00 | 0.00 | O |
| ATOM | 981 | P    | T B | 13 | -25.327 | -26.423 | 116.288 | 1.00 | 0.00 | P |
| ATOM | 982 | H3   | T B | 13 | -28.546 | -32.615 | 112.645 | 1.00 | 0.00 | H |
| ATOM | 983 | H6   | T B | 13 | -27.049 | -28.932 | 115.374 | 1.00 | 0.00 | H |
| ATOM | 984 | H1'  | T B | 13 | -30.016 | -28.415 | 113.218 | 1.00 | 0.00 | H |
| ATOM | 985 | H3'  | T B | 13 | -28.662 | -25.450 | 115.418 | 1.00 | 0.00 | H |
| ATOM | 986 | H4'  | T B | 13 | -28.086 | -25.345 | 112.836 | 1.00 | 0.00 | H |
| ATOM | 987 | H71  | T B | 13 | -26.031 | -31.110 | 116.892 | 1.00 | 0.00 | H |
| ATOM | 988 | H72  | T B | 13 | -25.277 | -32.231 | 115.733 | 1.00 | 0.00 | H |
| ATOM | 989 | H73  | T B | 13 | -24.860 | -30.500 | 115.698 | 1.00 | 0.00 | H |
| ATOM | 990 | H2'1 | T B | 13 | -28.498 | -27.819 | 115.774 | 1.00 | 0.00 | H |
| ATOM | 991 | H2'2 | T B | 13 | -30.219 | -27.658 | 115.458 | 1.00 | 0.00 | H |
| ATOM | 992 | H5'1 | T B | 13 | -25.900 | -26.693 | 113.208 | 1.00 | 0.00 | H |
| ATOM | 993 | H5'2 | T B | 13 | -26.176 | -25.176 | 114.090 | 1.00 | 0.00 | H |
| ATOM | 994 | C1'  | G B | 14 | -33.667 | -30.036 | 113.208 | 1.00 | 0.00 | C |
| ATOM | 995 | N1   | G B | 14 | -31.424 | -34.557 | 113.956 | 1.00 | 0.00 | N |
| ATOM | 996 | C2   | G B | 14 | -32.408 | -34.193 | 113.055 | 1.00 | 0.00 | C |
| ATOM | 997 | N2   | G B | 14 | -32.856 | -35.161 | 112.247 | 1.00 | 0.00 | N |
| ATOM | 998 | N3   | G B | 14 | -32.905 | -32.960 | 112.967 | 1.00 | 0.00 | N |

|      |      |      |     |    |         |         |         |      |      |   |
|------|------|------|-----|----|---------|---------|---------|------|------|---|
| ATOM | 999  | C4   | G B | 14 | -32.341 | -32.110 | 113.865 | 1.00 | 0.00 | C |
| ATOM | 1000 | C5   | G B | 14 | -31.361 | -32.384 | 114.802 | 1.00 | 0.00 | C |
| ATOM | 1001 | C6   | G B | 14 | -30.829 | -33.692 | 114.894 | 1.00 | 0.00 | C |
| ATOM | 1002 | O6   | G B | 14 | -29.962 | -34.126 | 115.654 | 1.00 | 0.00 | O |
| ATOM | 1003 | N7   | G B | 14 | -31.057 | -31.235 | 115.535 | 1.00 | 0.00 | N |
| ATOM | 1004 | C8   | G B | 14 | -31.844 | -30.321 | 115.029 | 1.00 | 0.00 | C |
| ATOM | 1005 | N9   | G B | 14 | -32.657 | -30.777 | 114.010 | 1.00 | 0.00 | N |
| ATOM | 1006 | C2'  | G B | 14 | -34.458 | -29.012 | 114.011 | 1.00 | 0.00 | C |
| ATOM | 1007 | C3'  | G B | 14 | -34.655 | -27.897 | 112.998 | 1.00 | 0.00 | C |
| ATOM | 1008 | O3'  | G B | 14 | -35.794 | -28.191 | 112.193 | 1.00 | 0.00 | O |
| ATOM | 1009 | C4'  | G B | 14 | -33.356 | -27.935 | 112.195 | 1.00 | 0.00 | C |
| ATOM | 1010 | O4'  | G B | 14 | -32.983 | -29.349 | 112.179 | 1.00 | 0.00 | O |
| ATOM | 1011 | C5'  | G B | 14 | -32.201 | -27.136 | 112.749 | 1.00 | 0.00 | C |
| ATOM | 1012 | O5'  | G B | 14 | -32.207 | -27.204 | 114.197 | 1.00 | 0.00 | O |
| ATOM | 1013 | O1P  | G B | 14 | -32.694 | -24.833 | 114.890 | 1.00 | 0.00 | O |
| ATOM | 1014 | O2P  | G B | 14 | -31.398 | -26.345 | 116.416 | 1.00 | 0.00 | O |
| ATOM | 1015 | P    | G B | 14 | -31.720 | -25.932 | 115.028 | 1.00 | 0.00 | P |
| ATOM | 1016 | H1   | G B | 14 | -31.102 | -35.537 | 113.939 | 1.00 | 0.00 | H |
| ATOM | 1017 | H8   | G B | 14 | -31.858 | -29.289 | 115.382 | 1.00 | 0.00 | H |
| ATOM | 1018 | H1'  | G B | 14 | -34.332 | -30.764 | 112.740 | 1.00 | 0.00 | H |
| ATOM | 1019 | H21  | G B | 14 | -32.464 | -36.112 | 112.319 | 1.00 | 0.00 | H |
| ATOM | 1020 | H3'  | G B | 14 | -34.792 | -26.927 | 113.478 | 1.00 | 0.00 | H |
| ATOM | 1021 | H22  | G B | 14 | -33.591 | -34.956 | 111.556 | 1.00 | 0.00 | H |
| ATOM | 1022 | H4'  | G B | 14 | -33.585 | -27.544 | 111.203 | 1.00 | 0.00 | H |
| ATOM | 1023 | H2'1 | G B | 14 | -33.911 | -28.661 | 114.886 | 1.00 | 0.00 | H |
| ATOM | 1024 | H2'2 | G B | 14 | -35.413 | -29.406 | 114.359 | 1.00 | 0.00 | H |
| ATOM | 1025 | H5'1 | G B | 14 | -31.266 | -27.545 | 112.366 | 1.00 | 0.00 | H |
| ATOM | 1026 | H5'2 | G B | 14 | -32.295 | -26.099 | 112.428 | 1.00 | 0.00 | H |
| ATOM | 1027 | C1'  | C B | 15 | -37.067 | -33.636 | 113.062 | 1.00 | 0.00 | C |
| ATOM | 1028 | N1   | C B | 15 | -36.122 | -33.533 | 114.207 | 1.00 | 0.00 | N |
| ATOM | 1029 | C2   | C B | 15 | -35.409 | -34.673 | 114.571 | 1.00 | 0.00 | C |
| ATOM | 1030 | O2   | C B | 15 | -35.589 | -35.717 | 113.930 | 1.00 | 0.00 | O |
| ATOM | 1031 | N3   | C B | 15 | -34.543 | -34.600 | 115.611 | 1.00 | 0.00 | N |
| ATOM | 1032 | C4   | C B | 15 | -34.372 | -33.456 | 116.284 | 1.00 | 0.00 | C |
| ATOM | 1033 | N4   | C B | 15 | -33.511 | -33.440 | 117.290 | 1.00 | 0.00 | N |
| ATOM | 1034 | C5   | C B | 15 | -35.096 | -32.267 | 115.936 | 1.00 | 0.00 | C |
| ATOM | 1035 | C6   | C B | 15 | -35.957 | -32.363 | 114.883 | 1.00 | 0.00 | C |
| ATOM | 1036 | C2'  | C B | 15 | -38.349 | -32.837 | 113.250 | 1.00 | 0.00 | C |
| ATOM | 1037 | C3'  | C B | 15 | -38.634 | -32.355 | 111.836 | 1.00 | 0.00 | C |
| ATOM | 1038 | O3'  | C B | 15 | -39.336 | -33.372 | 111.125 | 1.00 | 0.00 | O |
| ATOM | 1039 | C4'  | C B | 15 | -37.235 | -32.117 | 111.270 | 1.00 | 0.00 | C |
| ATOM | 1040 | O4'  | C B | 15 | -36.406 | -33.138 | 111.913 | 1.00 | 0.00 | O |
| ATOM | 1041 | C5'  | C B | 15 | -36.623 | -30.761 | 111.539 | 1.00 | 0.00 | C |
| ATOM | 1042 | O5'  | C B | 15 | -37.005 | -30.305 | 112.862 | 1.00 | 0.00 | O |
| ATOM | 1043 | O1P  | C B | 15 | -38.449 | -28.297 | 112.393 | 1.00 | 0.00 | O |
| ATOM | 1044 | O2P  | C B | 15 | -37.182 | -28.455 | 114.554 | 1.00 | 0.00 | O |
| ATOM | 1045 | P    | C B | 15 | -37.232 | -28.745 | 113.100 | 1.00 | 0.00 | P |
| ATOM | 1046 | H5   | C B | 15 | -34.963 | -31.335 | 116.486 | 1.00 | 0.00 | H |
| ATOM | 1047 | H6   | C B | 15 | -36.525 | -31.484 | 114.576 | 1.00 | 0.00 | H |
| ATOM | 1048 | H1'  | C B | 15 | -37.284 | -34.691 | 112.893 | 1.00 | 0.00 | H |
| ATOM | 1049 | H3'  | C B | 15 | -39.221 | -31.437 | 111.829 | 1.00 | 0.00 | H |
| ATOM | 1050 | H4'  | C B | 15 | -37.304 | -32.242 | 110.190 | 1.00 | 0.00 | H |
| ATOM | 1051 | H41  | C B | 15 | -33.356 | -32.571 | 117.824 | 1.00 | 0.00 | H |
| ATOM | 1052 | H42  | C B | 15 | -32.994 | -34.296 | 117.541 | 1.00 | 0.00 | H |

|      |      |      |   |   |    |         |         |         |      |      |   |
|------|------|------|---|---|----|---------|---------|---------|------|------|---|
| ATOM | 1053 | H2'1 | C | B | 15 | -38.219 | -32.001 | 113.936 | 1.00 | 0.00 | H |
| ATOM | 1054 | H2'2 | C | B | 15 | -39.166 | -33.450 | 113.633 | 1.00 | 0.00 | H |
| ATOM | 1055 | H5'1 | C | B | 15 | -35.538 | -30.838 | 111.474 | 1.00 | 0.00 | H |
| ATOM | 1056 | H5'2 | C | B | 15 | -36.980 | -30.054 | 110.790 | 1.00 | 0.00 | H |
| ATOM | 1057 | C1'  | G | B | 16 | -38.839 | -38.125 | 114.168 | 1.00 | 0.00 | C |
| ATOM | 1058 | N1   | G | B | 16 | -35.747 | -37.728 | 118.206 | 1.00 | 0.00 | N |
| ATOM | 1059 | C2   | G | B | 16 | -35.985 | -38.807 | 117.372 | 1.00 | 0.00 | C |
| ATOM | 1060 | N2   | G | B | 16 | -35.311 | -39.928 | 117.653 | 1.00 | 0.00 | N |
| ATOM | 1061 | N3   | G | B | 16 | -36.827 | -38.768 | 116.341 | 1.00 | 0.00 | N |
| ATOM | 1062 | C4   | G | B | 16 | -37.427 | -37.555 | 116.209 | 1.00 | 0.00 | C |
| ATOM | 1063 | C5   | G | B | 16 | -37.256 | -36.427 | 116.994 | 1.00 | 0.00 | C |
| ATOM | 1064 | C6   | G | B | 16 | -36.358 | -36.466 | 118.087 | 1.00 | 0.00 | C |
| ATOM | 1065 | O6   | G | B | 16 | -36.074 | -35.576 | 118.889 | 1.00 | 0.00 | O |
| ATOM | 1066 | N7   | G | B | 16 | -38.060 | -35.386 | 116.524 | 1.00 | 0.00 | N |
| ATOM | 1067 | C8   | G | B | 16 | -38.678 | -35.903 | 115.493 | 1.00 | 0.00 | C |
| ATOM | 1068 | N9   | G | B | 16 | -38.346 | -37.219 | 115.240 | 1.00 | 0.00 | N |
| ATOM | 1069 | C2'  | G | B | 16 | -40.317 | -37.946 | 113.845 | 1.00 | 0.00 | C |
| ATOM | 1070 | C3'  | G | B | 16 | -40.344 | -38.183 | 112.344 | 1.00 | 0.00 | C |
| ATOM | 1071 | O3'  | G | B | 16 | -40.428 | -39.584 | 112.093 | 1.00 | 0.00 | O |
| ATOM | 1072 | C4'  | G | B | 16 | -39.013 | -37.592 | 111.881 | 1.00 | 0.00 | C |
| ATOM | 1073 | O4'  | G | B | 16 | -38.099 | -37.849 | 112.995 | 1.00 | 0.00 | O |
| ATOM | 1074 | C5'  | G | B | 16 | -39.005 | -36.112 | 111.581 | 1.00 | 0.00 | C |
| ATOM | 1075 | O5'  | G | B | 16 | -39.869 | -35.416 | 112.513 | 1.00 | 0.00 | O |
| ATOM | 1076 | O1P  | G | B | 16 | -41.723 | -34.544 | 111.052 | 1.00 | 0.00 | O |
| ATOM | 1077 | O2P  | G | B | 16 | -41.131 | -33.348 | 113.176 | 1.00 | 0.00 | O |
| ATOM | 1078 | P    | G | B | 16 | -40.675 | -34.137 | 112.005 | 1.00 | 0.00 | P |
| ATOM | 1079 | H1   | G | B | 16 | -35.070 | -37.860 | 118.973 | 1.00 | 0.00 | H |
| ATOM | 1080 | H8   | G | B | 16 | -39.390 | -35.345 | 114.889 | 1.00 | 0.00 | H |
| ATOM | 1081 | H1'  | G | B | 16 | -38.626 | -39.152 | 114.464 | 1.00 | 0.00 | H |
| ATOM | 1082 | H21  | G | B | 16 | -34.658 | -39.949 | 118.451 | 1.00 | 0.00 | H |
| ATOM | 1083 | H3'  | G | B | 16 | -41.185 | -37.679 | 111.866 | 1.00 | 0.00 | H |
| ATOM | 1084 | H22  | G | B | 16 | -35.445 | -40.767 | 117.072 | 1.00 | 0.00 | H |
| ATOM | 1085 | H4'  | G | B | 16 | -38.733 | -38.119 | 110.970 | 1.00 | 0.00 | H |
| ATOM | 1086 | H2'1 | G | B | 16 | -40.676 | -36.948 | 114.096 | 1.00 | 0.00 | H |
| ATOM | 1087 | H2'2 | G | B | 16 | -40.945 | -38.664 | 114.372 | 1.00 | 0.00 | H |
| ATOM | 1088 | H5'1 | G | B | 16 | -37.986 | -35.735 | 111.670 | 1.00 | 0.00 | H |
| ATOM | 1089 | H5'2 | G | B | 16 | -39.358 | -35.953 | 110.562 | 1.00 | 0.00 | H |
| ATOM | 1090 | C1'  | G | B | 17 | -39.189 | -42.207 | 116.950 | 1.00 | 0.00 | C |
| ATOM | 1091 | N1   | G | B | 17 | -37.658 | -39.099 | 120.695 | 1.00 | 0.00 | N |
| ATOM | 1092 | C2   | G | B | 17 | -37.273 | -40.395 | 120.403 | 1.00 | 0.00 | C |
| ATOM | 1093 | N2   | G | B | 17 | -36.358 | -40.935 | 121.218 | 1.00 | 0.00 | N |
| ATOM | 1094 | N3   | G | B | 17 | -37.758 | -41.095 | 119.380 | 1.00 | 0.00 | N |
| ATOM | 1095 | C4   | G | B | 17 | -38.679 | -40.395 | 118.666 | 1.00 | 0.00 | C |
| ATOM | 1096 | C5   | G | B | 17 | -39.127 | -39.104 | 118.884 | 1.00 | 0.00 | C |
| ATOM | 1097 | C6   | G | B | 17 | -38.610 | -38.359 | 119.967 | 1.00 | 0.00 | C |
| ATOM | 1098 | O6   | G | B | 17 | -38.880 | -37.210 | 120.321 | 1.00 | 0.00 | O |
| ATOM | 1099 | N7   | G | B | 17 | -40.079 | -38.754 | 117.923 | 1.00 | 0.00 | N |
| ATOM | 1100 | C8   | G | B | 17 | -40.172 | -39.818 | 117.169 | 1.00 | 0.00 | C |
| ATOM | 1101 | N9   | G | B | 17 | -39.352 | -40.858 | 117.557 | 1.00 | 0.00 | N |
| ATOM | 1102 | C2'  | G | B | 17 | -40.488 | -42.807 | 116.430 | 1.00 | 0.00 | C |
| ATOM | 1103 | C3'  | G | B | 17 | -40.019 | -43.557 | 115.193 | 1.00 | 0.00 | C |
| ATOM | 1104 | O3'  | G | B | 17 | -39.543 | -44.845 | 115.578 | 1.00 | 0.00 | O |
| ATOM | 1105 | C4'  | G | B | 17 | -38.901 | -42.664 | 114.658 | 1.00 | 0.00 | C |
| ATOM | 1106 | O4'  | G | B | 17 | -38.298 | -42.084 | 115.859 | 1.00 | 0.00 | O |

|      |      |      |     |    |         |         |         |      |      |   |
|------|------|------|-----|----|---------|---------|---------|------|------|---|
| ATOM | 1107 | C5'  | G B | 17 | -39.320 | -41.542 | 113.738 | 1.00 | 0.00 | C |
| ATOM | 1108 | O5'  | G B | 17 | -40.591 | -40.999 | 114.174 | 1.00 | 0.00 | O |
| ATOM | 1109 | O1P  | G B | 17 | -42.154 | -41.598 | 112.294 | 1.00 | 0.00 | O |
| ATOM | 1110 | O2P  | G B | 17 | -42.620 | -39.586 | 113.720 | 1.00 | 0.00 | O |
| ATOM | 1111 | P    | G B | 17 | -41.616 | -40.466 | 113.074 | 1.00 | 0.00 | P |
| ATOM | 1112 | H1   | G B | 17 | -37.217 | -38.642 | 121.508 | 1.00 | 0.00 | H |
| ATOM | 1113 | H8   | G B | 17 | -40.838 | -39.880 | 116.309 | 1.00 | 0.00 | H |
| ATOM | 1114 | H1'  | G B | 17 | -38.726 | -42.860 | 117.689 | 1.00 | 0.00 | H |
| ATOM | 1115 | H21  | G B | 17 | -35.983 | -40.386 | 122.006 | 1.00 | 0.00 | H |
| ATOM | 1116 | H3'  | G B | 17 | -40.815 | -43.672 | 114.458 | 1.00 | 0.00 | H |
| ATOM | 1117 | H22  | G B | 17 | -36.030 | -41.898 | 121.056 | 1.00 | 0.00 | H |
| ATOM | 1118 | H4'  | G B | 17 | -38.217 | -43.308 | 114.107 | 1.00 | 0.00 | H |
| ATOM | 1119 | H2'1 | G B | 17 | -41.223 | -42.044 | 116.176 | 1.00 | 0.00 | H |
| ATOM | 1120 | H2'2 | G B | 17 | -40.950 | -43.480 | 117.151 | 1.00 | 0.00 | H |
| ATOM | 1121 | H5'1 | G B | 17 | -38.560 | -40.762 | 113.757 | 1.00 | 0.00 | H |
| ATOM | 1122 | H5'2 | G B | 17 | -39.412 | -41.928 | 112.723 | 1.00 | 0.00 | H |
| ATOM | 1123 | C1'  | C B | 18 | -38.861 | -44.738 | 121.195 | 1.00 | 0.00 | C |
| ATOM | 1124 | N1   | C B | 18 | -39.635 | -43.468 | 121.128 | 1.00 | 0.00 | N |
| ATOM | 1125 | C2   | C B | 18 | -39.359 | -42.486 | 122.076 | 1.00 | 0.00 | C |
| ATOM | 1126 | O2   | C B | 18 | -38.489 | -42.705 | 122.929 | 1.00 | 0.00 | O |
| ATOM | 1127 | N3   | C B | 18 | -40.054 | -41.324 | 122.033 | 1.00 | 0.00 | N |
| ATOM | 1128 | C4   | C B | 18 | -40.990 | -41.115 | 121.097 | 1.00 | 0.00 | C |
| ATOM | 1129 | N4   | C B | 18 | -41.637 | -39.959 | 121.100 | 1.00 | 0.00 | N |
| ATOM | 1130 | C5   | C B | 18 | -41.295 | -42.110 | 120.113 | 1.00 | 0.00 | C |
| ATOM | 1131 | C6   | C B | 18 | -40.582 | -43.271 | 120.173 | 1.00 | 0.00 | C |
| ATOM | 1132 | C2'  | C B | 18 | -39.682 | -45.977 | 120.864 | 1.00 | 0.00 | C |
| ATOM | 1133 | C3'  | C B | 18 | -38.668 | -46.845 | 120.135 | 1.00 | 0.00 | C |
| ATOM | 1134 | O3'  | C B | 18 | -37.900 | -47.571 | 121.093 | 1.00 | 0.00 | O |
| ATOM | 1135 | C4'  | C B | 18 | -37.826 | -45.820 | 119.379 | 1.00 | 0.00 | C |
| ATOM | 1136 | O4'  | C B | 18 | -37.806 | -44.648 | 120.255 | 1.00 | 0.00 | O |
| ATOM | 1137 | C5'  | C B | 18 | -38.339 | -45.399 | 118.022 | 1.00 | 0.00 | C |
| ATOM | 1138 | O5'  | C B | 18 | -39.787 | -45.333 | 118.046 | 1.00 | 0.00 | O |
| ATOM | 1139 | O1P  | C B | 18 | -40.480 | -47.172 | 116.471 | 1.00 | 0.00 | O |
| ATOM | 1140 | O2P  | C B | 18 | -41.975 | -45.186 | 116.817 | 1.00 | 0.00 | O |
| ATOM | 1141 | P    | C B | 18 | -40.595 | -45.722 | 116.726 | 1.00 | 0.00 | P |
| ATOM | 1142 | H5   | C B | 18 | -42.059 | -41.946 | 119.351 | 1.00 | 0.00 | H |
| ATOM | 1143 | H6   | C B | 18 | -40.778 | -44.054 | 119.443 | 1.00 | 0.00 | H |
| ATOM | 1144 | H1'  | C B | 18 | -38.419 | -44.816 | 122.188 | 1.00 | 0.00 | H |
| ATOM | 1145 | H3'  | C B | 18 | -39.146 | -47.544 | 119.450 | 1.00 | 0.00 | H |
| ATOM | 1146 | H4'  | C B | 18 | -36.840 | -46.263 | 119.237 | 1.00 | 0.00 | H |
| ATOM | 1147 | H41  | C B | 18 | -42.361 | -39.772 | 120.390 | 1.00 | 0.00 | H |
| ATOM | 1148 | H42  | C B | 18 | -41.416 | -39.247 | 121.810 | 1.00 | 0.00 | H |
| ATOM | 1149 | H2'1 | C B | 18 | -40.537 | -45.748 | 120.229 | 1.00 | 0.00 | H |
| ATOM | 1150 | H2'2 | C B | 18 | -40.061 | -46.472 | 121.758 | 1.00 | 0.00 | H |
| ATOM | 1151 | H5'1 | C B | 18 | -37.931 | -44.420 | 117.772 | 1.00 | 0.00 | H |
| ATOM | 1152 | H5'2 | C B | 18 | -38.016 | -46.123 | 117.276 | 1.00 | 0.00 | H |
| ATOM | 1153 | C1'  | C B | 19 | -38.862 | -45.166 | 126.129 | 1.00 | 0.00 | C |
| ATOM | 1154 | N1   | C B | 19 | -39.975 | -44.469 | 125.430 | 1.00 | 0.00 | N |
| ATOM | 1155 | C2   | C B | 19 | -40.327 | -43.194 | 125.870 | 1.00 | 0.00 | C |
| ATOM | 1156 | O2   | C B | 19 | -39.704 | -42.696 | 126.816 | 1.00 | 0.00 | O |
| ATOM | 1157 | N3   | C B | 19 | -41.338 | -42.544 | 125.246 | 1.00 | 0.00 | N |
| ATOM | 1158 | C4   | C B | 19 | -41.993 | -43.110 | 124.223 | 1.00 | 0.00 | C |
| ATOM | 1159 | N4   | C B | 19 | -42.972 | -42.430 | 123.650 | 1.00 | 0.00 | N |
| ATOM | 1160 | C5   | C B | 19 | -41.653 | -44.418 | 123.753 | 1.00 | 0.00 | C |

|      |      |      |     |    |         |         |         |      |      |   |
|------|------|------|-----|----|---------|---------|---------|------|------|---|
| ATOM | 1161 | C6   | C B | 19 | -40.632 | -45.053 | 124.394 | 1.00 | 0.00 | C |
| ATOM | 1162 | C2'  | C B | 19 | -39.083 | -46.662 | 126.295 | 1.00 | 0.00 | C |
| ATOM | 1163 | C3'  | C B | 19 | -37.672 | -47.210 | 126.133 | 1.00 | 0.00 | C |
| ATOM | 1164 | O3'  | C B | 19 | -36.996 | -47.140 | 127.386 | 1.00 | 0.00 | O |
| ATOM | 1165 | C4'  | C B | 19 | -37.061 | -46.274 | 125.094 | 1.00 | 0.00 | C |
| ATOM | 1166 | O4'  | C B | 19 | -37.688 | -44.979 | 125.361 | 1.00 | 0.00 | O |
| ATOM | 1167 | C5'  | C B | 19 | -37.296 | -46.633 | 123.645 | 1.00 | 0.00 | C |
| ATOM | 1168 | O5'  | C B | 19 | -38.624 | -47.191 | 123.487 | 1.00 | 0.00 | O |
| ATOM | 1169 | O1P  | C B | 19 | -38.179 | -49.577 | 122.825 | 1.00 | 0.00 | O |
| ATOM | 1170 | O2P  | C B | 19 | -40.301 | -48.448 | 122.101 | 1.00 | 0.00 | O |
| ATOM | 1171 | P    | C B | 19 | -38.852 | -48.334 | 122.400 | 1.00 | 0.00 | P |
| ATOM | 1172 | H5   | C B | 19 | -42.184 | -44.884 | 122.923 | 1.00 | 0.00 | H |
| ATOM | 1173 | H6   | C B | 19 | -40.336 | -46.051 | 124.069 | 1.00 | 0.00 | H |
| ATOM | 1174 | H1'  | C B | 19 | -38.711 | -44.683 | 127.095 | 1.00 | 0.00 | H |
| ATOM | 1175 | H3'  | C B | 19 | -37.674 | -48.241 | 125.780 | 1.00 | 0.00 | H |
| ATOM | 1176 | H4'  | C B | 19 | -35.984 | -46.269 | 125.265 | 1.00 | 0.00 | H |
| ATOM | 1177 | H41  | C B | 19 | -43.493 | -42.839 | 122.860 | 1.00 | 0.00 | H |
| ATOM | 1178 | H42  | C B | 19 | -43.215 | -41.487 | 123.991 | 1.00 | 0.00 | H |
| ATOM | 1179 | H2'1 | C B | 19 | -39.754 | -47.069 | 125.539 | 1.00 | 0.00 | H |
| ATOM | 1180 | H2'2 | C B | 19 | -39.497 | -46.914 | 127.271 | 1.00 | 0.00 | H |
| ATOM | 1181 | H5'1 | C B | 19 | -37.195 | -45.737 | 123.033 | 1.00 | 0.00 | H |
| ATOM | 1182 | H5'2 | C B | 19 | -36.550 | -47.364 | 123.334 | 1.00 | 0.00 | H |
| ATOM | 1183 | C1'  | T B | 20 | -40.055 | -43.758 | 130.722 | 1.00 | 0.00 | C |
| ATOM | 1184 | N1   | T B | 20 | -41.110 | -43.890 | 129.682 | 1.00 | 0.00 | N |
| ATOM | 1185 | C2   | T B | 20 | -41.959 | -42.816 | 129.507 | 1.00 | 0.00 | C |
| ATOM | 1186 | O2   | T B | 20 | -41.872 | -41.792 | 130.163 | 1.00 | 0.00 | O |
| ATOM | 1187 | N3   | T B | 20 | -42.923 | -42.981 | 128.531 | 1.00 | 0.00 | N |
| ATOM | 1188 | C4   | T B | 20 | -43.107 | -44.092 | 127.738 | 1.00 | 0.00 | C |
| ATOM | 1189 | O4   | T B | 20 | -44.012 | -44.124 | 126.893 | 1.00 | 0.00 | O |
| ATOM | 1190 | C5   | T B | 20 | -42.173 | -45.162 | 127.992 | 1.00 | 0.00 | C |
| ATOM | 1191 | C6   | T B | 20 | -41.220 | -45.037 | 128.936 | 1.00 | 0.00 | C |
| ATOM | 1192 | C7   | T B | 20 | -42.336 | -46.392 | 127.150 | 1.00 | 0.00 | C |
| ATOM | 1193 | C2'  | T B | 20 | -39.789 | -45.047 | 131.491 | 1.00 | 0.00 | C |
| ATOM | 1194 | C3'  | T B | 20 | -38.287 | -44.971 | 131.728 | 1.00 | 0.00 | C |
| ATOM | 1195 | O3'  | T B | 20 | -38.035 | -44.187 | 132.892 | 1.00 | 0.00 | O |
| ATOM | 1196 | C4'  | T B | 20 | -37.778 | -44.297 | 130.456 | 1.00 | 0.00 | C |
| ATOM | 1197 | O4'  | T B | 20 | -38.855 | -43.382 | 130.075 | 1.00 | 0.00 | O |
| ATOM | 1198 | C5'  | T B | 20 | -37.481 | -45.206 | 129.286 | 1.00 | 0.00 | C |
| ATOM | 1199 | O5'  | T B | 20 | -38.450 | -46.286 | 129.246 | 1.00 | 0.00 | O |
| ATOM | 1200 | O1P  | T B | 20 | -37.063 | -48.330 | 129.724 | 1.00 | 0.00 | O |
| ATOM | 1201 | O2P  | T B | 20 | -39.167 | -48.529 | 128.372 | 1.00 | 0.00 | O |
| ATOM | 1202 | P    | T B | 20 | -37.978 | -47.721 | 128.739 | 1.00 | 0.00 | P |
| ATOM | 1203 | H3   | T B | 20 | -43.569 | -42.194 | 128.381 | 1.00 | 0.00 | H |
| ATOM | 1204 | H6   | T B | 20 | -40.525 | -45.859 | 129.110 | 1.00 | 0.00 | H |
| ATOM | 1205 | H1'  | T B | 20 | -40.339 | -42.952 | 131.397 | 1.00 | 0.00 | H |
| ATOM | 1206 | H3'  | T B | 20 | -37.845 | -45.958 | 131.855 | 1.00 | 0.00 | H |
| ATOM | 1207 | H4'  | T B | 20 | -36.853 | -43.782 | 130.719 | 1.00 | 0.00 | H |
| ATOM | 1208 | H3T  | T B | 20 | -38.509 | -44.463 | 133.679 | 1.00 | 0.00 | H |
| ATOM | 1209 | H71  | T B | 20 | -42.631 | -47.229 | 127.782 | 1.00 | 0.00 | H |
| ATOM | 1210 | H72  | T B | 20 | -43.105 | -46.217 | 126.395 | 1.00 | 0.00 | H |
| ATOM | 1211 | H73  | T B | 20 | -41.392 | -46.624 | 126.657 | 1.00 | 0.00 | H |
| ATOM | 1212 | H2'1 | T B | 20 | -40.056 | -45.933 | 130.919 | 1.00 | 0.00 | H |
| ATOM | 1213 | H2'2 | T B | 20 | -40.337 | -45.086 | 132.433 | 1.00 | 0.00 | H |
| ATOM | 1214 | H5'1 | T B | 20 | -37.533 | -44.631 | 128.362 | 1.00 | 0.00 | H |

|      |      |      |     |    |         |         |         |      |      |   |
|------|------|------|-----|----|---------|---------|---------|------|------|---|
| ATOM | 1215 | H5'2 | T B | 20 | -36.479 | -45.616 | 129.398 | 1.00 | 0.00 | H |
| TER  |      |      |     |    |         |         |         |      |      |   |
| ATOM | 1    | C1'  | A A | 1  | -9.917  | -55.065 | 132.121 | 1.00 | 0.00 | C |
| ATOM | 2    | N1   | A A | 1  | -10.333 | -59.200 | 129.110 | 1.00 | 0.00 | N |
| ATOM | 3    | C2   | A A | 1  | -9.296  | -58.634 | 129.720 | 1.00 | 0.00 | C |
| ATOM | 4    | N3   | A A | 1  | -9.260  | -57.566 | 130.488 | 1.00 | 0.00 | N |
| ATOM | 5    | C4   | A A | 1  | -10.490 | -57.036 | 130.610 | 1.00 | 0.00 | C |
| ATOM | 6    | C5   | A A | 1  | -11.650 | -57.492 | 130.050 | 1.00 | 0.00 | C |
| ATOM | 7    | C6   | A A | 1  | -11.549 | -58.650 | 129.250 | 1.00 | 0.00 | C |
| ATOM | 8    | N6   | A A | 1  | -12.604 | -59.213 | 128.636 | 1.00 | 0.00 | N |
| ATOM | 9    | N7   | A A | 1  | -12.722 | -56.690 | 130.399 | 1.00 | 0.00 | N |
| ATOM | 10   | C8   | A A | 1  | -12.191 | -55.772 | 131.152 | 1.00 | 0.00 | C |
| ATOM | 11   | N9   | A A | 1  | -10.840 | -55.919 | 131.327 | 1.00 | 0.00 | N |
| ATOM | 12   | C2'  | A A | 1  | -10.242 | -53.580 | 132.051 | 1.00 | 0.00 | C |
| ATOM | 13   | C3'  | A A | 1  | -9.890  | -53.113 | 133.454 | 1.00 | 0.00 | C |
| ATOM | 14   | O3'  | A A | 1  | -8.493  | -52.835 | 133.519 | 1.00 | 0.00 | O |
| ATOM | 15   | C4'  | A A | 1  | -10.282 | -54.309 | 134.321 | 1.00 | 0.00 | C |
| ATOM | 16   | O4'  | A A | 1  | -10.010 | -55.471 | 133.473 | 1.00 | 0.00 | O |
| ATOM | 17   | C5'  | A A | 1  | -11.721 | -54.366 | 134.772 | 1.00 | 0.00 | C |
| ATOM | 18   | O5'  | A A | 1  | -12.587 | -53.864 | 133.723 | 1.00 | 0.00 | O |
| ATOM | 19   | H2   | A A | 1  | -8.338  | -59.127 | 129.563 | 1.00 | 0.00 | H |
| ATOM | 20   | H8   | A A | 1  | -12.767 | -54.964 | 131.604 | 1.00 | 0.00 | H |
| ATOM | 21   | H1'  | A A | 1  | -8.899  | -55.259 | 131.783 | 1.00 | 0.00 | H |
| ATOM | 22   | H3'  | A A | 1  | -10.449 | -52.220 | 133.741 | 1.00 | 0.00 | H |
| ATOM | 23   | H4'  | A A | 1  | -9.654  | -54.274 | 135.210 | 1.00 | 0.00 | H |
| ATOM | 24   | H61  | A A | 1  | -12.476 | -60.058 | 128.066 | 1.00 | 0.00 | H |
| ATOM | 25   | H62  | A A | 1  | -13.540 | -58.796 | 128.741 | 1.00 | 0.00 | H |
| ATOM | 26   | H5T  | A A | 1  | -13.381 | -53.386 | 133.968 | 1.00 | 0.00 | H |
| ATOM | 27   | H2'1 | A A | 1  | -11.291 | -53.396 | 131.824 | 1.00 | 0.00 | H |
| ATOM | 28   | H2'2 | A A | 1  | -9.646  | -53.061 | 131.300 | 1.00 | 0.00 | H |
| ATOM | 29   | H5'1 | A A | 1  | -11.983 | -55.399 | 135.002 | 1.00 | 0.00 | H |
| ATOM | 30   | H5'2 | A A | 1  | -11.840 | -53.759 | 135.668 | 1.00 | 0.00 | H |
| ATOM | 31   | C1'  | G A | 2  | -6.168  | -55.206 | 128.868 | 1.00 | 0.00 | C |
| ATOM | 32   | N1   | G A | 2  | -9.431  | -57.941 | 126.059 | 1.00 | 0.00 | N |
| ATOM | 33   | C2   | G A | 2  | -8.082  | -58.134 | 126.290 | 1.00 | 0.00 | C |
| ATOM | 34   | N2   | G A | 2  | -7.527  | -59.195 | 125.692 | 1.00 | 0.00 | N |
| ATOM | 35   | N3   | G A | 2  | -7.344  | -57.333 | 127.057 | 1.00 | 0.00 | N |
| ATOM | 36   | C4   | G A | 2  | -8.068  | -56.306 | 127.577 | 1.00 | 0.00 | C |
| ATOM | 37   | C5   | G A | 2  | -9.414  | -56.033 | 127.400 | 1.00 | 0.00 | C |
| ATOM | 38   | C6   | G A | 2  | -10.198 | -56.887 | 126.588 | 1.00 | 0.00 | C |
| ATOM | 39   | O6   | G A | 2  | -11.396 | -56.813 | 126.315 | 1.00 | 0.00 | O |
| ATOM | 40   | N7   | G A | 2  | -9.770  | -54.882 | 128.106 | 1.00 | 0.00 | N |
| ATOM | 41   | C8   | G A | 2  | -8.656  | -54.505 | 128.677 | 1.00 | 0.00 | C |
| ATOM | 42   | N9   | G A | 2  | -7.576  | -55.319 | 128.403 | 1.00 | 0.00 | N |
| ATOM | 43   | C2'  | G A | 2  | -5.661  | -53.772 | 128.950 | 1.00 | 0.00 | C |
| ATOM | 44   | C3'  | G A | 2  | -4.756  | -53.823 | 130.169 | 1.00 | 0.00 | C |
| ATOM | 45   | O3'  | G A | 2  | -3.467  | -54.289 | 129.777 | 1.00 | 0.00 | O |
| ATOM | 46   | C4'  | G A | 2  | -5.474  | -54.814 | 131.084 | 1.00 | 0.00 | C |
| ATOM | 47   | O4'  | G A | 2  | -6.095  | -55.767 | 130.165 | 1.00 | 0.00 | O |
| ATOM | 48   | C5'  | G A | 2  | -6.544  | -54.242 | 131.984 | 1.00 | 0.00 | C |
| ATOM | 49   | O5'  | G A | 2  | -7.254  | -53.186 | 131.291 | 1.00 | 0.00 | O |
| ATOM | 50   | O1P  | G A | 2  | -6.652  | -51.123 | 132.603 | 1.00 | 0.00 | O |
| ATOM | 51   | O2P  | G A | 2  | -8.823  | -51.224 | 131.349 | 1.00 | 0.00 | O |
| ATOM | 52   | P    | G A | 2  | -7.787  | -51.940 | 132.134 | 1.00 | 0.00 | P |



|      |     |      |     |   |        |         |         |      |      |   |
|------|-----|------|-----|---|--------|---------|---------|------|------|---|
| ATOM | 53  | H1   | G A | 2 | -9.910 | -58.621 | 125.453 | 1.00 | 0.00 | H |
| ATOM | 54  | H8   | G A | 2 | -8.586 | -53.624 | 129.315 | 1.00 | 0.00 | H |
| ATOM | 55  | H1'  | G A | 2 | -5.540 | -55.804 | 128.208 | 1.00 | 0.00 | H |
| ATOM | 56  | H21  | G A | 2 | -8.104 | -59.811 | 125.102 | 1.00 | 0.00 | H |
| ATOM | 57  | H3'  | G A | 2 | -4.659 | -52.847 | 130.645 | 1.00 | 0.00 | H |
| ATOM | 58  | H22  | G A | 2 | -6.525 | -59.392 | 125.823 | 1.00 | 0.00 | H |
| ATOM | 59  | H4'  | G A | 2 | -4.713 | -55.267 | 131.718 | 1.00 | 0.00 | H |
| ATOM | 60  | H2'1 | G A | 2 | -6.471 | -53.055 | 129.086 | 1.00 | 0.00 | H |
| ATOM | 61  | H2'2 | G A | 2 | -5.109 | -53.477 | 128.056 | 1.00 | 0.00 | H |
| ATOM | 62  | H5'1 | G A | 2 | -7.239 | -55.034 | 132.261 | 1.00 | 0.00 | H |
| ATOM | 63  | H5'2 | G A | 2 | -6.077 | -53.845 | 132.885 | 1.00 | 0.00 | H |
| ATOM | 64  | C1'  | G A | 3 | -4.024 | -56.497 | 124.595 | 1.00 | 0.00 | C |
| ATOM | 65  | N1   | G A | 3 | -8.832 | -56.737 | 122.909 | 1.00 | 0.00 | N |
| ATOM | 66  | C2   | G A | 3 | -7.771 | -57.595 | 122.688 | 1.00 | 0.00 | C |
| ATOM | 67  | N2   | G A | 3 | -8.023 | -58.657 | 121.913 | 1.00 | 0.00 | N |
| ATOM | 68  | N3   | G A | 3 | -6.556 | -57.408 | 123.199 | 1.00 | 0.00 | N |
| ATOM | 69  | C4   | G A | 3 | -6.480 | -56.280 | 123.953 | 1.00 | 0.00 | C |
| ATOM | 70  | C5   | G A | 3 | -7.483 | -55.366 | 124.226 | 1.00 | 0.00 | C |
| ATOM | 71  | C6   | G A | 3 | -8.775 | -55.566 | 123.686 | 1.00 | 0.00 | C |
| ATOM | 72  | O6   | G A | 3 | -9.786 | -54.874 | 123.814 | 1.00 | 0.00 | O |
| ATOM | 73  | N7   | G A | 3 | -6.995 | -54.343 | 125.040 | 1.00 | 0.00 | N |
| ATOM | 74  | C8   | G A | 3 | -5.743 | -54.663 | 125.234 | 1.00 | 0.00 | C |
| ATOM | 75  | N9   | G A | 3 | -5.354 | -55.828 | 124.604 | 1.00 | 0.00 | N |
| ATOM | 76  | C2'  | G A | 3 | -2.850 | -55.528 | 124.548 | 1.00 | 0.00 | C |
| ATOM | 77  | C3'  | G A | 3 | -1.819 | -56.237 | 125.410 | 1.00 | 0.00 | C |
| ATOM | 78  | O3'  | G A | 3 | -1.111 | -57.182 | 124.611 | 1.00 | 0.00 | O |
| ATOM | 79  | C4'  | G A | 3 | -2.675 | -56.914 | 126.479 | 1.00 | 0.00 | C |
| ATOM | 80  | O4'  | G A | 3 | -3.915 | -57.257 | 125.782 | 1.00 | 0.00 | O |
| ATOM | 81  | C5'  | G A | 3 | -3.018 | -56.080 | 127.691 | 1.00 | 0.00 | C |
| ATOM | 82  | O5'  | G A | 3 | -3.233 | -54.703 | 127.295 | 1.00 | 0.00 | O |
| ATOM | 83  | O1P  | G A | 3 | -1.335 | -53.474 | 128.400 | 1.00 | 0.00 | O |
| ATOM | 84  | O2P  | G A | 3 | -3.485 | -52.279 | 127.910 | 1.00 | 0.00 | O |
| ATOM | 85  | P    | G A | 3 | -2.804 | -53.539 | 128.298 | 1.00 | 0.00 | P |
| ATOM | 86  | H1   | G A | 3 | -9.735 | -56.975 | 122.470 | 1.00 | 0.00 | H |
| ATOM | 87  | H8   | G A | 3 | -5.064 | -54.063 | 125.840 | 1.00 | 0.00 | H |
| ATOM | 88  | H1'  | G A | 3 | -3.995 | -57.186 | 123.750 | 1.00 | 0.00 | H |
| ATOM | 89  | H21  | G A | 3 | -8.967 | -58.796 | 121.522 | 1.00 | 0.00 | H |
| ATOM | 90  | H3'  | G A | 3 | -1.110 | -55.540 | 125.858 | 1.00 | 0.00 | H |
| ATOM | 91  | H22  | G A | 3 | -7.274 | -59.333 | 121.707 | 1.00 | 0.00 | H |
| ATOM | 92  | H4'  | G A | 3 | -2.123 | -57.788 | 126.821 | 1.00 | 0.00 | H |
| ATOM | 93  | H2'1 | G A | 3 | -3.105 | -54.551 | 124.958 | 1.00 | 0.00 | H |
| ATOM | 94  | H2'2 | G A | 3 | -2.482 | -55.372 | 123.534 | 1.00 | 0.00 | H |
| ATOM | 95  | H5'1 | G A | 3 | -3.920 | -56.476 | 128.154 | 1.00 | 0.00 | H |
| ATOM | 96  | H5'2 | G A | 3 | -2.196 | -56.135 | 128.405 | 1.00 | 0.00 | H |
| ATOM | 97  | C1'  | C A | 4 | -4.062 | -57.825 | 119.824 | 1.00 | 0.00 | C |
| ATOM | 98  | N1   | C A | 4 | -4.803 | -56.616 | 120.278 | 1.00 | 0.00 | N |
| ATOM | 99  | C2   | C A | 4 | -6.144 | -56.500 | 119.914 | 1.00 | 0.00 | C |
| ATOM | 100 | O2   | C A | 4 | -6.659 | -57.397 | 119.234 | 1.00 | 0.00 | O |
| ATOM | 101 | N3   | C A | 4 | -6.837 | -55.408 | 120.318 | 1.00 | 0.00 | N |
| ATOM | 102 | C4   | C A | 4 | -6.251 | -54.453 | 121.052 | 1.00 | 0.00 | C |
| ATOM | 103 | N4   | C A | 4 | -6.977 | -53.408 | 121.421 | 1.00 | 0.00 | N |
| ATOM | 104 | C5   | C A | 4 | -4.874 | -54.547 | 121.437 | 1.00 | 0.00 | C |
| ATOM | 105 | C6   | C A | 4 | -4.196 | -55.656 | 121.023 | 1.00 | 0.00 | C |
| ATOM | 106 | C2'  | C A | 4 | -2.618 | -57.546 | 119.428 | 1.00 | 0.00 | C |

|      |     |      |     |   |         |         |         |      |      |   |
|------|-----|------|-----|---|---------|---------|---------|------|------|---|
| ATOM | 107 | C3'  | C A | 4 | -1.911  | -58.810 | 119.895 | 1.00 | 0.00 | C |
| ATOM | 108 | O3'  | C A | 4 | -2.027  | -59.811 | 118.884 | 1.00 | 0.00 | O |
| ATOM | 109 | C4'  | C A | 4 | -2.677  | -59.178 | 121.163 | 1.00 | 0.00 | C |
| ATOM | 110 | O4'  | C A | 4 | -4.050  | -58.750 | 120.894 | 1.00 | 0.00 | O |
| ATOM | 111 | C5'  | C A | 4 | -2.209  | -58.524 | 122.442 | 1.00 | 0.00 | C |
| ATOM | 112 | O5'  | C A | 4 | -1.784  | -57.165 | 122.171 | 1.00 | 0.00 | O |
| ATOM | 113 | O1P  | C A | 4 | 0.688   | -57.223 | 122.639 | 1.00 | 0.00 | O |
| ATOM | 114 | O2P  | C A | 4 | -0.586  | -55.078 | 122.896 | 1.00 | 0.00 | O |
| ATOM | 115 | P    | C A | 4 | -0.574  | -56.557 | 123.013 | 1.00 | 0.00 | P |
| ATOM | 116 | H5   | C A | 4 | -4.392  | -53.770 | 122.030 | 1.00 | 0.00 | H |
| ATOM | 117 | H6   | C A | 4 | -3.148  | -55.774 | 121.296 | 1.00 | 0.00 | H |
| ATOM | 118 | H1'  | C A | 4 | -4.614  | -58.273 | 118.999 | 1.00 | 0.00 | H |
| ATOM | 119 | H3'  | C A | 4 | -0.857  | -58.632 | 120.107 | 1.00 | 0.00 | H |
| ATOM | 120 | H4'  | C A | 4 | -2.583  | -60.257 | 121.287 | 1.00 | 0.00 | H |
| ATOM | 121 | H41  | C A | 4 | -6.551  | -52.660 | 121.988 | 1.00 | 0.00 | H |
| ATOM | 122 | H42  | C A | 4 | -7.966  | -53.342 | 121.142 | 1.00 | 0.00 | H |
| ATOM | 123 | H2'1 | C A | 4 | -2.216  | -56.663 | 119.922 | 1.00 | 0.00 | H |
| ATOM | 124 | H2'2 | C A | 4 | -2.505  | -57.400 | 118.352 | 1.00 | 0.00 | H |
| ATOM | 125 | H5'1 | C A | 4 | -3.028  | -58.517 | 123.162 | 1.00 | 0.00 | H |
| ATOM | 126 | H5'2 | C A | 4 | -1.378  | -59.096 | 122.853 | 1.00 | 0.00 | H |
| ATOM | 127 | C1'  | C A | 5 | -6.027  | -58.042 | 115.283 | 1.00 | 0.00 | C |
| ATOM | 128 | N1   | C A | 5 | -5.889  | -56.735 | 115.985 | 1.00 | 0.00 | N |
| ATOM | 129 | C2   | C A | 5 | -7.016  | -55.923 | 116.076 | 1.00 | 0.00 | C |
| ATOM | 130 | O2   | C A | 5 | -8.079  | -56.314 | 115.573 | 1.00 | 0.00 | O |
| ATOM | 131 | N3   | C A | 5 | -6.913  | -54.731 | 116.712 | 1.00 | 0.00 | N |
| ATOM | 132 | C4   | C A | 5 | -5.751  | -54.333 | 117.245 | 1.00 | 0.00 | C |
| ATOM | 133 | N4   | C A | 5 | -5.707  | -53.161 | 117.858 | 1.00 | 0.00 | N |
| ATOM | 134 | C5   | C A | 5 | -4.575  | -55.149 | 117.164 | 1.00 | 0.00 | C |
| ATOM | 135 | C6   | C A | 5 | -4.704  | -56.345 | 116.523 | 1.00 | 0.00 | C |
| ATOM | 136 | C2'  | C A | 5 | -4.810  | -58.422 | 114.452 | 1.00 | 0.00 | C |
| ATOM | 137 | C3'  | C A | 5 | -4.764  | -59.931 | 114.631 | 1.00 | 0.00 | C |
| ATOM | 138 | O3'  | C A | 5 | -5.638  | -60.541 | 113.684 | 1.00 | 0.00 | O |
| ATOM | 139 | C4'  | C A | 5 | -5.245  | -60.118 | 116.067 | 1.00 | 0.00 | C |
| ATOM | 140 | O4'  | C A | 5 | -6.215  | -59.042 | 116.266 | 1.00 | 0.00 | O |
| ATOM | 141 | C5'  | C A | 5 | -4.191  | -60.026 | 117.146 | 1.00 | 0.00 | C |
| ATOM | 142 | O5'  | C A | 5 | -3.213  | -59.015 | 116.791 | 1.00 | 0.00 | O |
| ATOM | 143 | O1P  | C A | 5 | -1.106  | -60.343 | 116.436 | 1.00 | 0.00 | O |
| ATOM | 144 | O2P  | C A | 5 | -0.970  | -57.942 | 117.151 | 1.00 | 0.00 | O |
| ATOM | 145 | P    | C A | 5 | -1.693  | -59.236 | 117.215 | 1.00 | 0.00 | P |
| ATOM | 146 | H5   | C A | 5 | -3.625  | -54.828 | 117.592 | 1.00 | 0.00 | H |
| ATOM | 147 | H6   | C A | 5 | -3.838  | -57.003 | 116.440 | 1.00 | 0.00 | H |
| ATOM | 148 | H1'  | C A | 5 | -6.925  | -58.004 | 114.667 | 1.00 | 0.00 | H |
| ATOM | 149 | H3'  | C A | 5 | -3.756  | -60.328 | 114.497 | 1.00 | 0.00 | H |
| ATOM | 150 | H4'  | C A | 5 | -5.692  | -61.111 | 116.124 | 1.00 | 0.00 | H |
| ATOM | 151 | H41  | C A | 5 | -4.825  | -52.832 | 118.278 | 1.00 | 0.00 | H |
| ATOM | 152 | H42  | C A | 5 | -6.554  | -52.576 | 117.913 | 1.00 | 0.00 | H |
| ATOM | 153 | H2'1 | C A | 5 | -3.897  | -57.952 | 114.815 | 1.00 | 0.00 | H |
| ATOM | 154 | H2'2 | C A | 5 | -4.924  | -58.149 | 113.401 | 1.00 | 0.00 | H |
| ATOM | 155 | H5'1 | C A | 5 | -4.668  | -59.761 | 118.090 | 1.00 | 0.00 | H |
| ATOM | 156 | H5'2 | C A | 5 | -3.700  | -60.993 | 117.250 | 1.00 | 0.00 | H |
| ATOM | 157 | C1'  | G A | 6 | -8.930  | -56.422 | 111.612 | 1.00 | 0.00 | C |
| ATOM | 158 | N1   | G A | 6 | -8.333  | -51.899 | 113.896 | 1.00 | 0.00 | N |
| ATOM | 159 | C2   | G A | 6 | -9.469  | -52.478 | 113.357 | 1.00 | 0.00 | C |
| ATOM | 160 | N2   | G A | 6 | -10.592 | -51.757 | 113.434 | 1.00 | 0.00 | N |

|      |     |      |     |   |         |         |         |      |      |   |
|------|-----|------|-----|---|---------|---------|---------|------|------|---|
| ATOM | 161 | N3   | G A | 6 | -9.479  | -53.683 | 112.787 | 1.00 | 0.00 | N |
| ATOM | 162 | C4   | G A | 6 | -8.253  | -54.266 | 112.788 | 1.00 | 0.00 | C |
| ATOM | 163 | C5   | G A | 6 | -7.067  | -53.763 | 113.298 | 1.00 | 0.00 | C |
| ATOM | 164 | C6   | G A | 6 | -7.055  | -52.489 | 113.907 | 1.00 | 0.00 | C |
| ATOM | 165 | O6   | G A | 6 | -6.112  | -51.878 | 114.411 | 1.00 | 0.00 | O |
| ATOM | 166 | N7   | G A | 6 | -6.030  | -54.676 | 113.099 | 1.00 | 0.00 | N |
| ATOM | 167 | C8   | G A | 6 | -6.606  | -55.682 | 112.493 | 1.00 | 0.00 | C |
| ATOM | 168 | N9   | G A | 6 | -7.956  | -55.507 | 112.268 | 1.00 | 0.00 | N |
| ATOM | 169 | C2'  | G A | 6 | -8.356  | -57.180 | 110.425 | 1.00 | 0.00 | C |
| ATOM | 170 | C3'  | G A | 6 | -9.056  | -58.524 | 110.537 | 1.00 | 0.00 | C |
| ATOM | 171 | O3'  | G A | 6 | -10.332 | -58.443 | 109.906 | 1.00 | 0.00 | O |
| ATOM | 172 | C4'  | G A | 6 | -9.170  | -58.723 | 112.047 | 1.00 | 0.00 | C |
| ATOM | 173 | O4'  | G A | 6 | -9.348  | -57.370 | 112.575 | 1.00 | 0.00 | O |
| ATOM | 174 | C5'  | G A | 6 | -7.984  | -59.358 | 112.733 | 1.00 | 0.00 | C |
| ATOM | 175 | O5'  | G A | 6 | -6.756  | -58.904 | 112.111 | 1.00 | 0.00 | O |
| ATOM | 176 | O1P  | G A | 6 | -5.825  | -60.993 | 111.062 | 1.00 | 0.00 | O |
| ATOM | 177 | O2P  | G A | 6 | -4.279  | -59.145 | 111.760 | 1.00 | 0.00 | O |
| ATOM | 178 | P    | G A | 6 | -5.523  | -59.911 | 112.018 | 1.00 | 0.00 | P |
| ATOM | 179 | H1   | G A | 6 | -8.433  | -50.964 | 114.322 | 1.00 | 0.00 | H |
| ATOM | 180 | H8   | G A | 6 | -6.069  | -56.581 | 112.190 | 1.00 | 0.00 | H |
| ATOM | 181 | H1'  | G A | 6 | -9.803  | -55.837 | 111.318 | 1.00 | 0.00 | H |
| ATOM | 182 | H21  | G A | 6 | -10.578 | -50.828 | 113.880 | 1.00 | 0.00 | H |
| ATOM | 183 | H3'  | G A | 6 | -8.477  | -59.327 | 110.077 | 1.00 | 0.00 | H |
| ATOM | 184 | H22  | G A | 6 | -11.472 | -52.131 | 113.050 | 1.00 | 0.00 | H |
| ATOM | 185 | H4'  | G A | 6 | -10.035 | -59.363 | 112.218 | 1.00 | 0.00 | H |
| ATOM | 186 | H2'1 | G A | 6 | -7.272  | -57.291 | 110.489 | 1.00 | 0.00 | H |
| ATOM | 187 | H2'2 | G A | 6 | -8.579  | -56.694 | 109.475 | 1.00 | 0.00 | H |
| ATOM | 188 | H5'1 | G A | 6 | -7.988  | -59.082 | 113.785 | 1.00 | 0.00 | H |
| ATOM | 189 | H5'2 | G A | 6 | -8.060  | -60.443 | 112.648 | 1.00 | 0.00 | H |
| ATOM | 190 | C1'  | C A | 7 | -11.425 | -52.945 | 109.119 | 1.00 | 0.00 | C |
| ATOM | 191 | N1   | C A | 7 | -9.988  | -52.750 | 109.454 | 1.00 | 0.00 | N |
| ATOM | 192 | C2   | C A | 7 | -9.624  | -51.565 | 110.089 | 1.00 | 0.00 | C |
| ATOM | 193 | O2   | C A | 7 | -10.499 | -50.728 | 110.345 | 1.00 | 0.00 | O |
| ATOM | 194 | N3   | C A | 7 | -8.320  | -51.367 | 110.404 | 1.00 | 0.00 | N |
| ATOM | 195 | C4   | C A | 7 | -7.394  | -52.289 | 110.113 | 1.00 | 0.00 | C |
| ATOM | 196 | N4   | C A | 7 | -6.134  | -52.045 | 110.446 | 1.00 | 0.00 | N |
| ATOM | 197 | C5   | C A | 7 | -7.740  | -53.516 | 109.457 | 1.00 | 0.00 | C |
| ATOM | 198 | C6   | C A | 7 | -9.060  | -53.696 | 109.154 | 1.00 | 0.00 | C |
| ATOM | 199 | C2'  | C A | 7 | -11.655 | -53.645 | 107.785 | 1.00 | 0.00 | C |
| ATOM | 200 | C3'  | C A | 7 | -12.888 | -54.486 | 108.077 | 1.00 | 0.00 | C |
| ATOM | 201 | O3'  | C A | 7 | -14.054 | -53.686 | 107.892 | 1.00 | 0.00 | O |
| ATOM | 202 | C4'  | C A | 7 | -12.688 | -54.888 | 109.536 | 1.00 | 0.00 | C |
| ATOM | 203 | O4'  | C A | 7 | -12.000 | -53.744 | 110.137 | 1.00 | 0.00 | O |
| ATOM | 204 | C5'  | C A | 7 | -11.863 | -56.130 | 109.783 | 1.00 | 0.00 | C |
| ATOM | 205 | O5'  | C A | 7 | -10.789 | -56.207 | 108.812 | 1.00 | 0.00 | O |
| ATOM | 206 | O1P  | C A | 7 | -11.372 | -58.245 | 107.455 | 1.00 | 0.00 | O |
| ATOM | 207 | O2P  | C A | 7 | -8.979  | -57.527 | 107.677 | 1.00 | 0.00 | O |
| ATOM | 208 | P    | C A | 7 | -10.319 | -57.641 | 108.298 | 1.00 | 0.00 | P |
| ATOM | 209 | H5   | C A | 7 | -6.989  | -54.268 | 109.212 | 1.00 | 0.00 | H |
| ATOM | 210 | H6   | C A | 7 | -9.373  | -54.617 | 108.662 | 1.00 | 0.00 | H |
| ATOM | 211 | H1'  | C A | 7 | -11.916 | -51.972 | 109.139 | 1.00 | 0.00 | H |
| ATOM | 212 | H3'  | C A | 7 | -12.945 | -55.363 | 107.430 | 1.00 | 0.00 | H |
| ATOM | 213 | H4'  | C A | 7 | -13.679 | -55.058 | 109.956 | 1.00 | 0.00 | H |
| ATOM | 214 | H41  | C A | 7 | -5.402  | -52.739 | 110.236 | 1.00 | 0.00 | H |

|      |     |      |     |   |         |         |         |      |      |   |
|------|-----|------|-----|---|---------|---------|---------|------|------|---|
| ATOM | 215 | H42  | C A | 7 | -5.886  | -51.163 | 110.915 | 1.00 | 0.00 | H |
| ATOM | 216 | H2'1 | C A | 7 | -10.810 | -54.267 | 107.494 | 1.00 | 0.00 | H |
| ATOM | 217 | H2'2 | C A | 7 | -11.837 | -52.939 | 106.974 | 1.00 | 0.00 | H |
| ATOM | 218 | H5'1 | C A | 7 | -11.447 | -56.091 | 110.791 | 1.00 | 0.00 | H |
| ATOM | 219 | H5'2 | C A | 7 | -12.503 | -57.009 | 109.693 | 1.00 | 0.00 | H |
| ATOM | 220 | C1'  | A A | 8 | -12.341 | -48.308 | 107.651 | 1.00 | 0.00 | C |
| ATOM | 221 | N1   | A A | 8 | -7.351  | -47.620 | 108.641 | 1.00 | 0.00 | N |
| ATOM | 222 | C2   | A A | 8 | -8.428  | -46.880 | 108.893 | 1.00 | 0.00 | C |
| ATOM | 223 | N3   | A A | 8 | -9.691  | -47.119 | 108.613 | 1.00 | 0.00 | N |
| ATOM | 224 | C4   | A A | 8 | -9.811  | -48.299 | 107.975 | 1.00 | 0.00 | C |
| ATOM | 225 | C5   | A A | 8 | -8.812  | -49.170 | 107.643 | 1.00 | 0.00 | C |
| ATOM | 226 | C6   | A A | 8 | -7.503  | -48.792 | 108.007 | 1.00 | 0.00 | C |
| ATOM | 227 | N6   | A A | 8 | -6.422  | -49.547 | 107.746 | 1.00 | 0.00 | N |
| ATOM | 228 | N7   | A A | 8 | -9.316  | -50.285 | 106.995 | 1.00 | 0.00 | N |
| ATOM | 229 | C8   | A A | 8 | -10.597 | -50.063 | 106.945 | 1.00 | 0.00 | C |
| ATOM | 230 | N9   | A A | 8 | -10.972 | -48.877 | 107.523 | 1.00 | 0.00 | N |
| ATOM | 231 | C2'  | A A | 8 | -13.228 | -48.561 | 106.441 | 1.00 | 0.00 | C |
| ATOM | 232 | C3'  | A A | 8 | -14.592 | -48.756 | 107.082 | 1.00 | 0.00 | C |
| ATOM | 233 | O3'  | A A | 8 | -15.194 | -47.482 | 107.294 | 1.00 | 0.00 | O |
| ATOM | 234 | C4'  | A A | 8 | -14.253 | -49.461 | 108.394 | 1.00 | 0.00 | C |
| ATOM | 235 | O4'  | A A | 8 | -12.953 | -48.907 | 108.777 | 1.00 | 0.00 | O |
| ATOM | 236 | C5'  | A A | 8 | -14.141 | -50.966 | 108.337 | 1.00 | 0.00 | C |
| ATOM | 237 | O5'  | A A | 8 | -13.545 | -51.366 | 107.077 | 1.00 | 0.00 | O |
| ATOM | 238 | O1P  | A A | 8 | -15.408 | -52.603 | 105.921 | 1.00 | 0.00 | O |
| ATOM | 239 | O2P  | A A | 8 | -13.017 | -53.158 | 105.397 | 1.00 | 0.00 | O |
| ATOM | 240 | P    | A A | 8 | -14.019 | -52.733 | 106.404 | 1.00 | 0.00 | P |
| ATOM | 241 | H2   | A A | 8 | -8.236  | -45.941 | 109.408 | 1.00 | 0.00 | H |
| ATOM | 242 | H8   | A A | 8 | -11.306 | -50.754 | 106.488 | 1.00 | 0.00 | H |
| ATOM | 243 | H1'  | A A | 8 | -12.248 | -47.240 | 107.850 | 1.00 | 0.00 | H |
| ATOM | 244 | H3'  | A A | 8 | -15.250 | -49.368 | 106.465 | 1.00 | 0.00 | H |
| ATOM | 245 | H4'  | A A | 8 | -15.045 | -49.213 | 109.100 | 1.00 | 0.00 | H |
| ATOM | 246 | H61  | A A | 8 | -5.488  | -49.226 | 108.034 | 1.00 | 0.00 | H |
| ATOM | 247 | H62  | A A | 8 | -6.531  | -50.448 | 107.256 | 1.00 | 0.00 | H |
| ATOM | 248 | H2'1 | A A | 8 | -12.922 | -49.446 | 105.883 | 1.00 | 0.00 | H |
| ATOM | 249 | H2'2 | A A | 8 | -13.231 | -47.721 | 105.747 | 1.00 | 0.00 | H |
| ATOM | 250 | H5'1 | A A | 8 | -13.518 | -51.308 | 109.164 | 1.00 | 0.00 | H |
| ATOM | 251 | H5'2 | A A | 8 | -15.133 | -51.404 | 108.430 | 1.00 | 0.00 | H |
| ATOM | 252 | C1'  | C A | 9 | -11.031 | -43.612 | 106.698 | 1.00 | 0.00 | C |
| ATOM | 253 | N1   | C A | 9 | -10.260 | -44.743 | 106.112 | 1.00 | 0.00 | N |
| ATOM | 254 | C2   | C A | 9 | -8.876  | -44.744 | 106.275 | 1.00 | 0.00 | C |
| ATOM | 255 | O2   | C A | 9 | -8.348  | -43.811 | 106.893 | 1.00 | 0.00 | O |
| ATOM | 256 | N3   | C A | 9 | -8.157  | -45.764 | 105.749 | 1.00 | 0.00 | N |
| ATOM | 257 | C4   | C A | 9 | -8.757  | -46.759 | 105.082 | 1.00 | 0.00 | C |
| ATOM | 258 | N4   | C A | 9 | -8.005  | -47.734 | 104.593 | 1.00 | 0.00 | N |
| ATOM | 259 | C5   | C A | 9 | -10.179 | -46.784 | 104.896 | 1.00 | 0.00 | C |
| ATOM | 260 | C6   | C A | 9 | -10.884 | -45.747 | 105.438 | 1.00 | 0.00 | C |
| ATOM | 261 | C2'  | C A | 9 | -12.201 | -43.156 | 105.837 | 1.00 | 0.00 | C |
| ATOM | 262 | C3'  | C A | 9 | -13.238 | -42.779 | 106.884 | 1.00 | 0.00 | C |
| ATOM | 263 | O3'  | C A | 9 | -12.997 | -41.443 | 107.320 | 1.00 | 0.00 | O |
| ATOM | 264 | C4'  | C A | 9 | -12.990 | -43.801 | 107.991 | 1.00 | 0.00 | C |
| ATOM | 265 | O4'  | C A | 9 | -11.548 | -44.044 | 107.944 | 1.00 | 0.00 | O |
| ATOM | 266 | C5'  | C A | 9 | -13.706 | -45.124 | 107.855 | 1.00 | 0.00 | C |
| ATOM | 267 | O5'  | C A | 9 | -13.769 | -45.506 | 106.457 | 1.00 | 0.00 | O |
| ATOM | 268 | O1P  | C A | 9 | -16.229 | -45.417 | 105.937 | 1.00 | 0.00 | O |

|      |     |      |   |   |    |         |         |         |      |      |   |
|------|-----|------|---|---|----|---------|---------|---------|------|------|---|
| ATOM | 269 | O2P  | C | A | 9  | -14.729 | -46.956 | 104.642 | 1.00 | 0.00 | O |
| ATOM | 270 | P    | C | A | 9  | -15.048 | -46.302 | 105.935 | 1.00 | 0.00 | P |
| ATOM | 271 | H5   | C | A | 9  | -10.671 | -47.589 | 104.349 | 1.00 | 0.00 | H |
| ATOM | 272 | H6   | C | A | 9  | -11.969 | -45.726 | 105.331 | 1.00 | 0.00 | H |
| ATOM | 273 | H1'  | C | A | 9  | -10.341 | -42.792 | 106.887 | 1.00 | 0.00 | H |
| ATOM | 274 | H3'  | C | A | 9  | -14.253 | -42.854 | 106.497 | 1.00 | 0.00 | H |
| ATOM | 275 | H4'  | C | A | 9  | -13.314 | -43.342 | 108.925 | 1.00 | 0.00 | H |
| ATOM | 276 | H41  | C | A | 9  | -8.441  | -48.513 | 104.078 | 1.00 | 0.00 | H |
| ATOM | 277 | H42  | C | A | 9  | -6.983  | -47.713 | 104.725 | 1.00 | 0.00 | H |
| ATOM | 278 | H2'1 | C | A | 9  | -12.568 | -43.946 | 105.184 | 1.00 | 0.00 | H |
| ATOM | 279 | H2'2 | C | A | 9  | -11.942 | -42.303 | 105.208 | 1.00 | 0.00 | H |
| ATOM | 280 | H5'1 | C | A | 9  | -13.168 | -45.884 | 108.420 | 1.00 | 0.00 | H |
| ATOM | 281 | H5'2 | C | A | 9  | -14.715 | -45.028 | 108.255 | 1.00 | 0.00 | H |
| ATOM | 282 | C1'  | C | A | 10 | -7.816  | -40.039 | 105.506 | 1.00 | 0.00 | C |
| ATOM | 283 | N1   | C | A | 10 | -7.925  | -41.268 | 104.671 | 1.00 | 0.00 | N |
| ATOM | 284 | C2   | C | A | 10 | -6.754  | -41.964 | 104.380 | 1.00 | 0.00 | C |
| ATOM | 285 | O2   | C | A | 10 | -5.678  | -41.537 | 104.821 | 1.00 | 0.00 | O |
| ATOM | 286 | N3   | C | A | 10 | -6.830  | -43.085 | 103.622 | 1.00 | 0.00 | N |
| ATOM | 287 | C4   | C | A | 10 | -8.007  | -43.522 | 103.156 | 1.00 | 0.00 | C |
| ATOM | 288 | N4   | C | A | 10 | -8.025  | -44.626 | 102.422 | 1.00 | 0.00 | N |
| ATOM | 289 | C5   | C | A | 10 | -9.228  | -42.824 | 103.437 | 1.00 | 0.00 | C |
| ATOM | 290 | C6   | C | A | 10 | -9.127  | -41.700 | 104.206 | 1.00 | 0.00 | C |
| ATOM | 291 | C2'  | C | A | 10 | -8.760  | -38.923 | 105.079 | 1.00 | 0.00 | C |
| ATOM | 292 | C3'  | C | A | 10 | -9.136  | -38.301 | 106.415 | 1.00 | 0.00 | C |
| ATOM | 293 | O3'  | C | A | 10 | -8.135  | -37.355 | 106.789 | 1.00 | 0.00 | O |
| ATOM | 294 | C4'  | C | A | 10 | -9.171  | -39.503 | 107.353 | 1.00 | 0.00 | C |
| ATOM | 295 | O4'  | C | A | 10 | -8.133  | -40.396 | 106.838 | 1.00 | 0.00 | O |
| ATOM | 296 | C5'  | C | A | 10 | -10.475 | -40.266 | 107.418 | 1.00 | 0.00 | C |
| ATOM | 297 | O5'  | C | A | 10 | -11.089 | -40.300 | 106.104 | 1.00 | 0.00 | O |
| ATOM | 298 | O1P  | C | A | 10 | -13.185 | -38.941 | 106.407 | 1.00 | 0.00 | O |
| ATOM | 299 | O2P  | C | A | 10 | -13.094 | -40.735 | 104.655 | 1.00 | 0.00 | O |
| ATOM | 300 | P    | C | A | 10 | -12.680 | -40.266 | 105.999 | 1.00 | 0.00 | P |
| ATOM | 301 | H5   | C | A | 10 | -10.188 | -43.173 | 103.054 | 1.00 | 0.00 | H |
| ATOM | 302 | H6   | C | A | 10 | -10.029 | -41.140 | 104.454 | 1.00 | 0.00 | H |
| ATOM | 303 | H1'  | C | A | 10 | -6.779  | -39.705 | 105.486 | 1.00 | 0.00 | H |
| ATOM | 304 | H3'  | C | A | 10 | -10.105 | -37.802 | 106.374 | 1.00 | 0.00 | H |
| ATOM | 305 | H4'  | C | A | 10 | -8.956  | -39.131 | 108.355 | 1.00 | 0.00 | H |
| ATOM | 306 | H41  | C | A | 10 | -8.918  | -44.985 | 102.054 | 1.00 | 0.00 | H |
| ATOM | 307 | H42  | C | A | 10 | -7.147  | -45.123 | 102.220 | 1.00 | 0.00 | H |
| ATOM | 308 | H2'1 | C | A | 10 | -9.638  | -39.300 | 104.557 | 1.00 | 0.00 | H |
| ATOM | 309 | H2'2 | C | A | 10 | -8.273  | -38.198 | 104.425 | 1.00 | 0.00 | H |
| ATOM | 310 | H5'1 | C | A | 10 | -10.279 | -41.284 | 107.759 | 1.00 | 0.00 | H |
| ATOM | 311 | H5'2 | C | A | 10 | -11.142 | -39.775 | 108.124 | 1.00 | 0.00 | H |
| ATOM | 312 | C1'  | T | A | 11 | -3.668  | -38.283 | 103.455 | 1.00 | 0.00 | C |
| ATOM | 313 | N1   | T | A | 11 | -4.589  | -39.136 | 102.659 | 1.00 | 0.00 | N |
| ATOM | 314 | C2   | T | A | 11 | -4.038  | -40.219 | 102.005 | 1.00 | 0.00 | C |
| ATOM | 315 | O2   | T | A | 11 | -2.850  | -40.489 | 102.059 | 1.00 | 0.00 | O |
| ATOM | 316 | N3   | T | A | 11 | -4.930  | -40.986 | 101.278 | 1.00 | 0.00 | N |
| ATOM | 317 | C4   | T | A | 11 | -6.287  | -40.767 | 101.150 | 1.00 | 0.00 | C |
| ATOM | 318 | O4   | T | A | 11 | -6.987  | -41.524 | 100.465 | 1.00 | 0.00 | O |
| ATOM | 319 | C5   | T | A | 11 | -6.770  | -39.612 | 101.869 | 1.00 | 0.00 | C |
| ATOM | 320 | C6   | T | A | 11 | -5.929  | -38.844 | 102.587 | 1.00 | 0.00 | C |
| ATOM | 321 | C7   | T | A | 11 | -8.241  | -39.338 | 101.759 | 1.00 | 0.00 | C |
| ATOM | 322 | C2'  | T | A | 11 | -3.992  | -36.795 | 103.384 | 1.00 | 0.00 | C |

|      |     |      |     |    |        |         |         |      |      |   |
|------|-----|------|-----|----|--------|---------|---------|------|------|---|
| ATOM | 323 | C3'  | T A | 11 | -3.644 | -36.327 | 104.789 | 1.00 | 0.00 | C |
| ATOM | 324 | O3'  | T A | 11 | -2.247 | -36.050 | 104.859 | 1.00 | 0.00 | O |
| ATOM | 325 | C4'  | T A | 11 | -4.041 | -37.522 | 105.652 | 1.00 | 0.00 | C |
| ATOM | 326 | O4'  | T A | 11 | -3.766 | -38.685 | 104.808 | 1.00 | 0.00 | O |
| ATOM | 327 | C5'  | T A | 11 | -5.483 | -37.580 | 106.100 | 1.00 | 0.00 | C |
| ATOM | 328 | O5'  | T A | 11 | -6.343 | -37.077 | 105.046 | 1.00 | 0.00 | O |
| ATOM | 329 | O1P  | T A | 11 | -7.308 | -34.974 | 106.035 | 1.00 | 0.00 | O |
| ATOM | 330 | O2P  | T A | 11 | -8.588 | -36.241 | 104.288 | 1.00 | 0.00 | O |
| ATOM | 331 | P    | T A | 11 | -7.663 | -36.280 | 105.448 | 1.00 | 0.00 | P |
| ATOM | 332 | H3   | T A | 11 | -4.545 | -41.802 | 100.784 | 1.00 | 0.00 | H |
| ATOM | 333 | H6   | T A | 11 | -6.318 | -37.977 | 103.123 | 1.00 | 0.00 | H |
| ATOM | 334 | H1'  | T A | 11 | -2.648 | -38.476 | 103.121 | 1.00 | 0.00 | H |
| ATOM | 335 | H3'  | T A | 11 | -4.202 | -35.435 | 105.069 | 1.00 | 0.00 | H |
| ATOM | 336 | H4'  | T A | 11 | -3.416 | -37.488 | 106.547 | 1.00 | 0.00 | H |
| ATOM | 337 | H71  | T A | 11 | -8.397 | -38.398 | 101.230 | 1.00 | 0.00 | H |
| ATOM | 338 | H72  | T A | 11 | -8.722 | -40.148 | 101.209 | 1.00 | 0.00 | H |
| ATOM | 339 | H73  | T A | 11 | -8.675 | -39.269 | 102.756 | 1.00 | 0.00 | H |
| ATOM | 340 | H2'1 | T A | 11 | -5.039 | -36.612 | 103.153 | 1.00 | 0.00 | H |
| ATOM | 341 | H2'2 | T A | 11 | -3.394 | -36.277 | 102.633 | 1.00 | 0.00 | H |
| ATOM | 342 | H5'1 | T A | 11 | -5.746 | -38.611 | 106.330 | 1.00 | 0.00 | H |
| ATOM | 343 | H5'2 | T A | 11 | -5.604 | -36.970 | 106.995 | 1.00 | 0.00 | H |
| ATOM | 344 | C1'  | A A | 12 | 0.092  | -38.405 | 100.218 | 1.00 | 0.00 | C |
| ATOM | 345 | N1   | A A | 12 | -3.171 | -41.175 | 97.385  | 1.00 | 0.00 | N |
| ATOM | 346 | C2   | A A | 12 | -1.874 | -41.304 | 97.645  | 1.00 | 0.00 | C |
| ATOM | 347 | N3   | A A | 12 | -1.090 | -40.552 | 98.391  | 1.00 | 0.00 | N |
| ATOM | 348 | C4   | A A | 12 | -1.790 | -39.531 | 98.917  | 1.00 | 0.00 | C |
| ATOM | 349 | C5   | A A | 12 | -3.117 | -39.256 | 98.747  | 1.00 | 0.00 | C |
| ATOM | 350 | C6   | A A | 12 | -3.841 | -40.145 | 97.925  | 1.00 | 0.00 | C |
| ATOM | 351 | N6   | A A | 12 | -5.153 | -40.003 | 97.668  | 1.00 | 0.00 | N |
| ATOM | 352 | N7   | A A | 12 | -3.486 | -38.121 | 99.445  | 1.00 | 0.00 | N |
| ATOM | 353 | C8   | A A | 12 | -2.383 | -37.731 | 100.014 | 1.00 | 0.00 | C |
| ATOM | 354 | N9   | A A | 12 | -1.310 | -38.541 | 99.739  | 1.00 | 0.00 | N |
| ATOM | 355 | C2'  | A A | 12 | 0.575  | -36.963 | 100.298 | 1.00 | 0.00 | C |
| ATOM | 356 | C3'  | A A | 12 | 1.470  | -36.997 | 101.527 | 1.00 | 0.00 | C |
| ATOM | 357 | O3'  | A A | 12 | 2.770  | -37.445 | 101.146 | 1.00 | 0.00 | O |
| ATOM | 358 | C4'  | A A | 12 | 0.760  | -37.997 | 102.439 | 1.00 | 0.00 | C |
| ATOM | 359 | O4'  | A A | 12 | 0.160  | -38.962 | 101.516 | 1.00 | 0.00 | O |
| ATOM | 360 | C5'  | A A | 12 | -0.324 | -37.438 | 103.329 | 1.00 | 0.00 | C |
| ATOM | 361 | O5'  | A A | 12 | -1.047 | -36.395 | 102.627 | 1.00 | 0.00 | O |
| ATOM | 362 | O1P  | A A | 12 | -0.486 | -34.319 | 103.937 | 1.00 | 0.00 | O |
| ATOM | 363 | O2P  | A A | 12 | -2.645 | -34.456 | 102.665 | 1.00 | 0.00 | O |
| ATOM | 364 | P    | A A | 12 | -1.605 | -35.156 | 103.460 | 1.00 | 0.00 | P |
| ATOM | 365 | H2   | A A | 12 | -1.387 | -42.157 | 97.174  | 1.00 | 0.00 | H |
| ATOM | 366 | H8   | A A | 12 | -2.316 | -36.846 | 100.648 | 1.00 | 0.00 | H |
| ATOM | 367 | H1'  | A A | 12 | 0.733  | -38.996 | 99.565  | 1.00 | 0.00 | H |
| ATOM | 368 | H3'  | A A | 12 | 1.551  | -36.020 | 102.002 | 1.00 | 0.00 | H |
| ATOM | 369 | H4'  | A A | 12 | 1.524  | -38.437 | 103.080 | 1.00 | 0.00 | H |
| ATOM | 370 | H61  | A A | 12 | -5.636 | -40.682 | 97.064  | 1.00 | 0.00 | H |
| ATOM | 371 | H62  | A A | 12 | -5.675 | -39.214 | 98.078  | 1.00 | 0.00 | H |
| ATOM | 372 | H2'1 | A A | 12 | -0.245 | -36.258 | 100.426 | 1.00 | 0.00 | H |
| ATOM | 373 | H2'2 | A A | 12 | 1.130  | -36.664 | 99.411  | 1.00 | 0.00 | H |
| ATOM | 374 | H5'1 | A A | 12 | -1.010 | -38.241 | 103.601 | 1.00 | 0.00 | H |
| ATOM | 375 | H5'2 | A A | 12 | 0.127  | -37.031 | 104.232 | 1.00 | 0.00 | H |
| ATOM | 376 | C1'  | G A | 13 | 2.225  | -39.713 | 95.930  | 1.00 | 0.00 | C |

|      |     |      |     |    |        |         |        |      |      |   |
|------|-----|------|-----|----|--------|---------|--------|------|------|---|
| ATOM | 377 | N1   | G A | 13 | -2.584 | -39.954 | 94.244 | 1.00 | 0.00 | N |
| ATOM | 378 | C2   | G A | 13 | -1.522 | -40.812 | 94.023 | 1.00 | 0.00 | C |
| ATOM | 379 | N2   | G A | 13 | -1.772 | -41.875 | 93.245 | 1.00 | 0.00 | N |
| ATOM | 380 | N3   | G A | 13 | -0.306 | -40.625 | 94.533 | 1.00 | 0.00 | N |
| ATOM | 381 | C4   | G A | 13 | -0.230 | -39.497 | 95.287 | 1.00 | 0.00 | C |
| ATOM | 382 | C5   | G A | 13 | -1.234 | -38.582 | 95.560 | 1.00 | 0.00 | C |
| ATOM | 383 | C6   | G A | 13 | -2.526 | -38.782 | 95.021 | 1.00 | 0.00 | C |
| ATOM | 384 | O6   | G A | 13 | -3.536 | -38.089 | 95.148 | 1.00 | 0.00 | O |
| ATOM | 385 | N7   | G A | 13 | -0.746 | -37.560 | 96.376 | 1.00 | 0.00 | N |
| ATOM | 386 | C8   | G A | 13 | 0.506  | -37.880 | 96.570 | 1.00 | 0.00 | C |
| ATOM | 387 | N9   | G A | 13 | 0.895  | -39.044 | 95.940 | 1.00 | 0.00 | N |
| ATOM | 388 | C2'  | G A | 13 | 3.399  | -38.744 | 95.884 | 1.00 | 0.00 | C |
| ATOM | 389 | C3'  | G A | 13 | 4.430  | -39.453 | 96.745 | 1.00 | 0.00 | C |
| ATOM | 390 | O3'  | G A | 13 | 5.139  | -40.398 | 95.945 | 1.00 | 0.00 | O |
| ATOM | 391 | C4'  | G A | 13 | 3.574  | -40.130 | 97.814 | 1.00 | 0.00 | C |
| ATOM | 392 | O4'  | G A | 13 | 2.334  | -40.473 | 97.117 | 1.00 | 0.00 | O |
| ATOM | 393 | C5'  | G A | 13 | 3.231  | -39.296 | 99.026 | 1.00 | 0.00 | C |
| ATOM | 394 | O5'  | G A | 13 | 3.016  | -37.919 | 98.629 | 1.00 | 0.00 | O |
| ATOM | 395 | O1P  | G A | 13 | 4.915  | -36.690 | 99.734 | 1.00 | 0.00 | O |
| ATOM | 396 | O2P  | G A | 13 | 2.764  | -35.496 | 99.245 | 1.00 | 0.00 | O |
| ATOM | 397 | P    | G A | 13 | 3.445  | -36.756 | 99.633 | 1.00 | 0.00 | P |
| ATOM | 398 | H1   | G A | 13 | -3.487 | -40.193 | 93.808 | 1.00 | 0.00 | H |
| ATOM | 399 | H8   | G A | 13 | 1.186  | -37.280 | 97.175 | 1.00 | 0.00 | H |
| ATOM | 400 | H1'  | G A | 13 | 2.254  | -40.402 | 95.086 | 1.00 | 0.00 | H |
| ATOM | 401 | H21  | G A | 13 | -2.717 | -42.014 | 92.856 | 1.00 | 0.00 | H |
| ATOM | 402 | H3'  | G A | 13 | 5.139  | -38.756 | 97.192 | 1.00 | 0.00 | H |
| ATOM | 403 | H22  | G A | 13 | -1.023 | -42.548 | 93.040 | 1.00 | 0.00 | H |
| ATOM | 404 | H4'  | G A | 13 | 4.126  | -41.004 | 98.155 | 1.00 | 0.00 | H |
| ATOM | 405 | H2'1 | G A | 13 | 3.144  | -37.767 | 96.294 | 1.00 | 0.00 | H |
| ATOM | 406 | H2'2 | G A | 13 | 3.767  | -38.588 | 94.869 | 1.00 | 0.00 | H |
| ATOM | 407 | H5'1 | G A | 13 | 2.329  | -39.693 | 99.490 | 1.00 | 0.00 | H |
| ATOM | 408 | H5'2 | G A | 13 | 4.054  | -39.351 | 99.741 | 1.00 | 0.00 | H |
| ATOM | 409 | C1'  | G A | 14 | 2.187  | -41.041 | 91.159 | 1.00 | 0.00 | C |
| ATOM | 410 | N1   | G A | 14 | -2.301 | -38.616 | 91.104 | 1.00 | 0.00 | N |
| ATOM | 411 | C2   | G A | 14 | -1.935 | -39.819 | 90.529 | 1.00 | 0.00 | C |
| ATOM | 412 | N2   | G A | 14 | -2.890 | -40.460 | 89.845 | 1.00 | 0.00 | N |
| ATOM | 413 | N3   | G A | 14 | -0.712 | -40.341 | 90.626 | 1.00 | 0.00 | N |
| ATOM | 414 | C4   | G A | 14 | 0.128  | -39.553 | 91.347 | 1.00 | 0.00 | C |
| ATOM | 415 | C5   | G A | 14 | -0.147 | -38.339 | 91.954 | 1.00 | 0.00 | C |
| ATOM | 416 | C6   | G A | 14 | -1.444 | -37.787 | 91.854 | 1.00 | 0.00 | C |
| ATOM | 417 | O6   | G A | 14 | -1.878 | -36.732 | 92.319 | 1.00 | 0.00 | O |
| ATOM | 418 | N7   | G A | 14 | 0.993  | -37.852 | 92.597 | 1.00 | 0.00 | N |
| ATOM | 419 | C8   | G A | 14 | 1.901  | -38.767 | 92.369 | 1.00 | 0.00 | C |
| ATOM | 420 | N9   | G A | 14 | 1.451  | -39.830 | 91.615 | 1.00 | 0.00 | N |
| ATOM | 421 | C2'  | G A | 14 | 3.633  | -40.766 | 90.765 | 1.00 | 0.00 | C |
| ATOM | 422 | C3'  | G A | 14 | 4.334  | -42.033 | 91.228 | 1.00 | 0.00 | C |
| ATOM | 423 | O3'  | G A | 14 | 4.215  | -43.032 | 90.217 | 1.00 | 0.00 | O |
| ATOM | 424 | C4'  | G A | 14 | 3.565  | -42.403 | 92.496 | 1.00 | 0.00 | C |
| ATOM | 425 | O4'  | G A | 14 | 2.194  | -41.968 | 92.227 | 1.00 | 0.00 | O |
| ATOM | 426 | C5'  | G A | 14 | 4.034  | -41.753 | 93.777 | 1.00 | 0.00 | C |
| ATOM | 427 | O5'  | G A | 14 | 4.466  | -40.396 | 93.509 | 1.00 | 0.00 | O |
| ATOM | 428 | O1P  | G A | 14 | 6.937  | -40.466 | 93.979 | 1.00 | 0.00 | O |
| ATOM | 429 | O2P  | G A | 14 | 5.671  | -38.316 | 94.242 | 1.00 | 0.00 | O |
| ATOM | 430 | P    | G A | 14 | 5.678  | -39.796 | 94.354 | 1.00 | 0.00 | P |

|      |     |      |     |    |        |         |        |      |      |   |
|------|-----|------|-----|----|--------|---------|--------|------|------|---|
| ATOM | 431 | H1   | G A | 14 | -3.275 | -38.303 | 90.975 | 1.00 | 0.00 | H |
| ATOM | 432 | H8   | G A | 14 | 2.923  | -38.693 | 92.740 | 1.00 | 0.00 | H |
| ATOM | 433 | H1'  | G A | 14 | 1.634  | -41.485 | 90.331 | 1.00 | 0.00 | H |
| ATOM | 434 | H21  | G A | 14 | -3.834 | -40.053 | 89.776 | 1.00 | 0.00 | H |
| ATOM | 435 | H3'  | G A | 14 | 5.389  | -41.862 | 91.443 | 1.00 | 0.00 | H |
| ATOM | 436 | H22  | G A | 14 | -2.682 | -41.360 | 89.389 | 1.00 | 0.00 | H |
| ATOM | 437 | H4'  | G A | 14 | 3.653  | -43.481 | 92.617 | 1.00 | 0.00 | H |
| ATOM | 438 | H2'1 | G A | 14 | 4.037  | -39.885 | 91.262 | 1.00 | 0.00 | H |
| ATOM | 439 | H2'2 | G A | 14 | 3.747  | -40.619 | 89.690 | 1.00 | 0.00 | H |
| ATOM | 440 | H5'1 | G A | 14 | 3.214  | -41.746 | 94.496 | 1.00 | 0.00 | H |
| ATOM | 441 | H5'2 | G A | 14 | 4.864  | -42.330 | 94.187 | 1.00 | 0.00 | H |
| ATOM | 442 | C1'  | A A | 15 | 0.240  | -41.274 | 86.614 | 1.00 | 0.00 | C |
| ATOM | 443 | N1   | A A | 15 | -2.221 | -37.012 | 88.073 | 1.00 | 0.00 | N |
| ATOM | 444 | C2   | A A | 15 | -2.615 | -38.095 | 87.406 | 1.00 | 0.00 | C |
| ATOM | 445 | N3   | A A | 15 | -1.926 | -39.164 | 87.065 | 1.00 | 0.00 | N |
| ATOM | 446 | C4   | A A | 15 | -0.654 | -39.052 | 87.488 | 1.00 | 0.00 | C |
| ATOM | 447 | C5   | A A | 15 | -0.094 | -38.013 | 88.177 | 1.00 | 0.00 | C |
| ATOM | 448 | C6   | A A | 15 | -0.946 | -36.931 | 88.482 | 1.00 | 0.00 | C |
| ATOM | 449 | N6   | A A | 15 | -0.535 | -35.842 | 89.155 | 1.00 | 0.00 | N |
| ATOM | 450 | N7   | A A | 15 | 1.243  | -38.252 | 88.443 | 1.00 | 0.00 | N |
| ATOM | 451 | C8   | A A | 15 | 1.463  | -39.418 | 87.909 | 1.00 | 0.00 | C |
| ATOM | 452 | N9   | A A | 15 | 0.356  | -39.967 | 87.312 | 1.00 | 0.00 | N |
| ATOM | 453 | C2'  | A A | 15 | 1.469  | -41.645 | 85.796 | 1.00 | 0.00 | C |
| ATOM | 454 | C3'  | A A | 15 | 1.529  | -43.154 | 85.979 | 1.00 | 0.00 | C |
| ATOM | 455 | O3'  | A A | 15 | 0.670  | -43.773 | 85.026 | 1.00 | 0.00 | O |
| ATOM | 456 | C4'  | A A | 15 | 1.035  | -43.342 | 87.412 | 1.00 | 0.00 | C |
| ATOM | 457 | O4'  | A A | 15 | 0.052  | -42.273 | 87.598 | 1.00 | 0.00 | O |
| ATOM | 458 | C5'  | A A | 15 | 2.075  | -43.237 | 88.501 | 1.00 | 0.00 | C |
| ATOM | 459 | O5'  | A A | 15 | 3.046  | -42.216 | 88.153 | 1.00 | 0.00 | O |
| ATOM | 460 | O1P  | A A | 15 | 5.171  | -43.526 | 87.824 | 1.00 | 0.00 | O |
| ATOM | 461 | O2P  | A A | 15 | 5.276  | -41.121 | 88.534 | 1.00 | 0.00 | O |
| ATOM | 462 | P    | A A | 15 | 4.566  | -42.422 | 88.595 | 1.00 | 0.00 | P |
| ATOM | 463 | H2   | A A | 15 | -3.661 | -38.096 | 87.099 | 1.00 | 0.00 | H |
| ATOM | 464 | H8   | A A | 15 | 2.434  | -39.912 | 87.932 | 1.00 | 0.00 | H |
| ATOM | 465 | H1'  | A A | 15 | -0.652 | -41.247 | 85.988 | 1.00 | 0.00 | H |
| ATOM | 466 | H3'  | A A | 15 | 2.541  | -43.541 | 85.858 | 1.00 | 0.00 | H |
| ATOM | 467 | H4'  | A A | 15 | 0.595  | -44.338 | 87.466 | 1.00 | 0.00 | H |
| ATOM | 468 | H61  | A A | 15 | -1.200 | -35.080 | 89.353 | 1.00 | 0.00 | H |
| ATOM | 469 | H62  | A A | 15 | 0.442  | -35.771 | 89.471 | 1.00 | 0.00 | H |
| ATOM | 470 | H2'1 | A A | 15 | 2.373  | -41.164 | 86.168 | 1.00 | 0.00 | H |
| ATOM | 471 | H2'2 | A A | 15 | 1.364  | -41.377 | 84.744 | 1.00 | 0.00 | H |
| ATOM | 472 | H5'1 | A A | 15 | 1.586  | -42.974 | 89.439 | 1.00 | 0.00 | H |
| ATOM | 473 | H5'2 | A A | 15 | 2.574  | -44.197 | 88.612 | 1.00 | 0.00 | H |
| ATOM | 474 | C1'  | C A | 16 | -2.682 | -39.638 | 82.948 | 1.00 | 0.00 | C |
| ATOM | 475 | N1   | C A | 16 | -1.713 | -38.719 | 83.605 | 1.00 | 0.00 | N |
| ATOM | 476 | C2   | C A | 16 | -2.188 | -37.498 | 84.077 | 1.00 | 0.00 | C |
| ATOM | 477 | O2   | C A | 16 | -3.388 | -37.228 | 83.931 | 1.00 | 0.00 | O |
| ATOM | 478 | N3   | C A | 16 | -1.321 | -36.647 | 84.678 | 1.00 | 0.00 | N |
| ATOM | 479 | C4   | C A | 16 | -0.030 | -36.968 | 84.820 | 1.00 | 0.00 | C |
| ATOM | 480 | N4   | C A | 16 | 0.773  | -36.100 | 85.420 | 1.00 | 0.00 | N |
| ATOM | 481 | C5   | C A | 16 | 0.490  | -38.215 | 84.341 | 1.00 | 0.00 | C |
| ATOM | 482 | C6   | C A | 16 | -0.402 | -39.060 | 83.741 | 1.00 | 0.00 | C |
| ATOM | 483 | C2'  | C A | 16 | -2.104 | -40.392 | 81.758 | 1.00 | 0.00 | C |
| ATOM | 484 | C3'  | C A | 16 | -2.799 | -41.741 | 81.870 | 1.00 | 0.00 | C |



|      |     |      |   |   |    |        |         |        |      |      |   |
|------|-----|------|---|---|----|--------|---------|--------|------|------|---|
| ATOM | 485 | O3'  | C | A | 16 | -4.074 | -41.664 | 81.238 | 1.00 | 0.00 | O |
| ATOM | 486 | C4'  | C | A | 16 | -2.911 | -41.941 | 83.379 | 1.00 | 0.00 | C |
| ATOM | 487 | O4'  | C | A | 16 | -3.094 | -40.590 | 83.910 | 1.00 | 0.00 | O |
| ATOM | 488 | C5'  | C | A | 16 | -1.720 | -42.572 | 84.064 | 1.00 | 0.00 | C |
| ATOM | 489 | O5'  | C | A | 16 | -0.495 | -42.111 | 83.440 | 1.00 | 0.00 | O |
| ATOM | 490 | O1P  | C | A | 16 | 0.446  | -44.194 | 82.390 | 1.00 | 0.00 | O |
| ATOM | 491 | O2P  | C | A | 16 | 1.982  | -42.338 | 83.090 | 1.00 | 0.00 | O |
| ATOM | 492 | P    | C | A | 16 | 0.742  | -43.111 | 83.347 | 1.00 | 0.00 | P |
| ATOM | 493 | H5   | C | A | 16 | 1.543  | -38.477 | 84.448 | 1.00 | 0.00 | H |
| ATOM | 494 | H6   | C | A | 16 | -0.057 | -40.024 | 83.368 | 1.00 | 0.00 | H |
| ATOM | 495 | H1'  | C | A | 16 | -3.558 | -39.058 | 82.654 | 1.00 | 0.00 | H |
| ATOM | 496 | H3'  | C | A | 16 | -2.214 | -42.539 | 81.409 | 1.00 | 0.00 | H |
| ATOM | 497 | H4'  | C | A | 16 | -3.772 | -42.587 | 83.549 | 1.00 | 0.00 | H |
| ATOM | 498 | H41  | C | A | 16 | 1.772  | -36.322 | 85.544 | 1.00 | 0.00 | H |
| ATOM | 499 | H42  | C | A | 16 | 0.399  | -35.202 | 85.761 | 1.00 | 0.00 | H |
| ATOM | 500 | H2'1 | C | A | 16 | -1.021 | -40.498 | 81.821 | 1.00 | 0.00 | H |
| ATOM | 501 | H2'2 | C | A | 16 | -2.331 | -39.905 | 80.809 | 1.00 | 0.00 | H |
| ATOM | 502 | H5'1 | C | A | 16 | -1.727 | -42.296 | 85.118 | 1.00 | 0.00 | H |
| ATOM | 503 | H5'2 | C | A | 16 | -1.792 | -43.656 | 83.977 | 1.00 | 0.00 | H |
| ATOM | 504 | C1'  | G | A | 17 | -5.176 | -36.161 | 80.453 | 1.00 | 0.00 | C |
| ATOM | 505 | N1   | G | A | 17 | -1.757 | -33.008 | 82.550 | 1.00 | 0.00 | N |
| ATOM | 506 | C2   | G | A | 17 | -3.123 | -32.857 | 82.389 | 1.00 | 0.00 | C |
| ATOM | 507 | N2   | G | A | 17 | -3.647 | -31.713 | 82.845 | 1.00 | 0.00 | N |
| ATOM | 508 | N3   | G | A | 17 | -3.903 | -33.774 | 81.819 | 1.00 | 0.00 | N |
| ATOM | 509 | C4   | G | A | 17 | -3.203 | -34.865 | 81.409 | 1.00 | 0.00 | C |
| ATOM | 510 | C5   | G | A | 17 | -1.843 | -35.101 | 81.524 | 1.00 | 0.00 | C |
| ATOM | 511 | C6   | G | A | 17 | -1.015 | -34.131 | 82.133 | 1.00 | 0.00 | C |
| ATOM | 512 | O6   | G | A | 17 | 0.202  | -34.156 | 82.324 | 1.00 | 0.00 | O |
| ATOM | 513 | N7   | G | A | 17 | -1.520 | -36.344 | 80.976 | 1.00 | 0.00 | N |
| ATOM | 514 | C8   | G | A | 17 | -2.669 | -36.813 | 80.560 | 1.00 | 0.00 | C |
| ATOM | 515 | N9   | G | A | 17 | -3.738 | -35.971 | 80.787 | 1.00 | 0.00 | N |
| ATOM | 516 | C2'  | G | A | 17 | -5.410 | -36.864 | 79.123 | 1.00 | 0.00 | C |
| ATOM | 517 | C3'  | G | A | 17 | -6.645 | -37.699 | 79.416 | 1.00 | 0.00 | C |
| ATOM | 518 | O3'  | G | A | 17 | -7.808 | -36.896 | 79.232 | 1.00 | 0.00 | O |
| ATOM | 519 | C4'  | G | A | 17 | -6.444 | -38.099 | 80.877 | 1.00 | 0.00 | C |
| ATOM | 520 | O4'  | G | A | 17 | -5.753 | -36.956 | 81.472 | 1.00 | 0.00 | O |
| ATOM | 521 | C5'  | G | A | 17 | -5.626 | -39.344 | 81.125 | 1.00 | 0.00 | C |
| ATOM | 522 | O5'  | G | A | 17 | -4.552 | -39.426 | 80.155 | 1.00 | 0.00 | O |
| ATOM | 523 | O1P  | G | A | 17 | -5.147 | -41.465 | 78.804 | 1.00 | 0.00 | O |
| ATOM | 524 | O2P  | G | A | 17 | -2.749 | -40.757 | 79.020 | 1.00 | 0.00 | O |
| ATOM | 525 | P    | G | A | 17 | -4.090 | -40.864 | 79.643 | 1.00 | 0.00 | P |
| ATOM | 526 | H1   | G | A | 17 | -1.245 | -32.241 | 83.011 | 1.00 | 0.00 | H |
| ATOM | 527 | H8   | G | A | 17 | -2.772 | -37.785 | 80.075 | 1.00 | 0.00 | H |
| ATOM | 528 | H1'  | G | A | 17 | -5.662 | -35.187 | 80.471 | 1.00 | 0.00 | H |
| ATOM | 529 | H21  | G | A | 17 | -3.039 | -31.009 | 83.287 | 1.00 | 0.00 | H |
| ATOM | 530 | H3'  | G | A | 17 | -6.706 | -38.577 | 78.773 | 1.00 | 0.00 | H |
| ATOM | 531 | H22  | G | A | 17 | -4.658 | -31.537 | 82.753 | 1.00 | 0.00 | H |
| ATOM | 532 | H4'  | G | A | 17 | -7.435 | -38.263 | 81.299 | 1.00 | 0.00 | H |
| ATOM | 533 | H2'1 | G | A | 17 | -4.566 | -37.490 | 78.832 | 1.00 | 0.00 | H |
| ATOM | 534 | H2'2 | G | A | 17 | -5.590 | -36.159 | 78.309 | 1.00 | 0.00 | H |
| ATOM | 535 | H5'1 | G | A | 17 | -5.210 | -39.303 | 82.132 | 1.00 | 0.00 | H |
| ATOM | 536 | H5'2 | G | A | 17 | -6.270 | -40.219 | 81.040 | 1.00 | 0.00 | H |
| ATOM | 537 | C1'  | G | A | 18 | -6.069 | -31.515 | 78.994 | 1.00 | 0.00 | C |
| ATOM | 538 | N1   | G | A | 18 | -1.105 | -30.856 | 79.967 | 1.00 | 0.00 | N |

|      |     |      |     |    |        |         |        |      |      |   |
|------|-----|------|-----|----|--------|---------|--------|------|------|---|
| ATOM | 539 | C2   | G A | 18 | -2.183 | -30.039 | 80.259 | 1.00 | 0.00 | C |
| ATOM | 540 | N2   | G A | 18 | -1.901 | -28.892 | 80.892 | 1.00 | 0.00 | N |
| ATOM | 541 | N3   | G A | 18 | -3.440 | -30.341 | 79.945 | 1.00 | 0.00 | N |
| ATOM | 542 | C4   | G A | 18 | -3.541 | -31.533 | 79.301 | 1.00 | 0.00 | C |
| ATOM | 543 | C5   | G A | 18 | -2.524 | -32.412 | 78.965 | 1.00 | 0.00 | C |
| ATOM | 544 | C6   | G A | 18 | -1.187 | -32.093 | 79.302 | 1.00 | 0.00 | C |
| ATOM | 545 | O6   | G A | 18 | -0.159 | -32.737 | 79.090 | 1.00 | 0.00 | O |
| ATOM | 546 | N7   | G A | 18 | -3.045 | -33.526 | 78.307 | 1.00 | 0.00 | N |
| ATOM | 547 | C8   | G A | 18 | -4.333 | -33.298 | 78.270 | 1.00 | 0.00 | C |
| ATOM | 548 | N9   | G A | 18 | -4.711 | -32.106 | 78.852 | 1.00 | 0.00 | N |
| ATOM | 549 | C2'  | G A | 18 | -6.970 | -31.750 | 77.790 | 1.00 | 0.00 | C |
| ATOM | 550 | C3'  | G A | 18 | -8.331 | -31.927 | 78.442 | 1.00 | 0.00 | C |
| ATOM | 551 | O3'  | G A | 18 | -8.914 | -30.646 | 78.665 | 1.00 | 0.00 | O |
| ATOM | 552 | C4'  | G A | 18 | -7.993 | -32.642 | 79.750 | 1.00 | 0.00 | C |
| ATOM | 553 | O4'  | G A | 18 | -6.683 | -32.109 | 80.121 | 1.00 | 0.00 | O |
| ATOM | 554 | C5'  | G A | 18 | -7.902 | -34.148 | 79.686 | 1.00 | 0.00 | C |
| ATOM | 555 | O5'  | G A | 18 | -7.324 | -34.553 | 78.419 | 1.00 | 0.00 | O |
| ATOM | 556 | O1P  | G A | 18 | -9.214 | -35.757 | 77.274 | 1.00 | 0.00 | O |
| ATOM | 557 | O2P  | G A | 18 | -6.837 | -36.345 | 76.727 | 1.00 | 0.00 | O |
| ATOM | 558 | P    | G A | 18 | -7.824 | -35.909 | 77.745 | 1.00 | 0.00 | P |
| ATOM | 559 | H1   | G A | 18 | -0.170 | -30.532 | 80.260 | 1.00 | 0.00 | H |
| ATOM | 560 | H8   | G A | 18 | -5.045 | -33.986 | 77.817 | 1.00 | 0.00 | H |
| ATOM | 561 | H1'  | G A | 18 | -5.958 | -30.448 | 79.196 | 1.00 | 0.00 | H |
| ATOM | 562 | H21  | G A | 18 | -0.924 | -28.667 | 81.135 | 1.00 | 0.00 | H |
| ATOM | 563 | H3'  | G A | 18 | -9.005 | -32.528 | 77.828 | 1.00 | 0.00 | H |
| ATOM | 564 | H22  | G A | 18 | -2.658 | -28.240 | 81.134 | 1.00 | 0.00 | H |
| ATOM | 565 | H4'  | G A | 18 | -8.775 | -32.385 | 80.463 | 1.00 | 0.00 | H |
| ATOM | 566 | H2'1 | G A | 18 | -6.683 | -32.639 | 77.226 | 1.00 | 0.00 | H |
| ATOM | 567 | H2'2 | G A | 18 | -6.967 | -30.907 | 77.099 | 1.00 | 0.00 | H |
| ATOM | 568 | H5'1 | G A | 18 | -7.278 | -34.504 | 80.505 | 1.00 | 0.00 | H |
| ATOM | 569 | H5'2 | G A | 18 | -8.900 | -34.571 | 79.787 | 1.00 | 0.00 | H |
| ATOM | 570 | C1'  | T A | 19 | -4.805 | -26.826 | 78.032 | 1.00 | 0.00 | C |
| ATOM | 571 | N1   | T A | 19 | -4.016 | -27.946 | 77.453 | 1.00 | 0.00 | N |
| ATOM | 572 | C2   | T A | 19 | -2.648 | -27.911 | 77.631 | 1.00 | 0.00 | C |
| ATOM | 573 | O2   | T A | 19 | -2.084 | -27.012 | 78.233 | 1.00 | 0.00 | O |
| ATOM | 574 | N3   | T A | 19 | -1.954 | -28.970 | 77.079 | 1.00 | 0.00 | N |
| ATOM | 575 | C4   | T A | 19 | -2.492 | -30.030 | 76.380 | 1.00 | 0.00 | C |
| ATOM | 576 | O4   | T A | 19 | -1.766 | -30.924 | 75.926 | 1.00 | 0.00 | O |
| ATOM | 577 | C5   | T A | 19 | -3.929 | -29.981 | 76.244 | 1.00 | 0.00 | C |
| ATOM | 578 | C6   | T A | 19 | -4.638 | -28.963 | 76.771 | 1.00 | 0.00 | C |
| ATOM | 579 | C7   | T A | 19 | -4.557 | -31.116 | 75.493 | 1.00 | 0.00 | C |
| ATOM | 580 | C2'  | T A | 19 | -5.977 | -26.387 | 77.162 | 1.00 | 0.00 | C |
| ATOM | 581 | C3'  | T A | 19 | -7.025 | -26.022 | 78.201 | 1.00 | 0.00 | C |
| ATOM | 582 | O3'  | T A | 19 | -6.806 | -24.683 | 78.637 | 1.00 | 0.00 | O |
| ATOM | 583 | C4'  | T A | 19 | -6.771 | -27.039 | 79.311 | 1.00 | 0.00 | C |
| ATOM | 584 | O4'  | T A | 19 | -5.325 | -27.261 | 79.274 | 1.00 | 0.00 | O |
| ATOM | 585 | C5'  | T A | 19 | -7.467 | -28.373 | 79.174 | 1.00 | 0.00 | C |
| ATOM | 586 | O5'  | T A | 19 | -7.515 | -28.759 | 77.778 | 1.00 | 0.00 | O |
| ATOM | 587 | O1P  | T A | 19 | -9.974 | -28.703 | 77.241 | 1.00 | 0.00 | O |
| ATOM | 588 | O2P  | T A | 19 | -8.443 | -30.224 | 75.960 | 1.00 | 0.00 | O |
| ATOM | 589 | P    | T A | 19 | -8.780 | -29.573 | 77.248 | 1.00 | 0.00 | P |
| ATOM | 590 | H3   | T A | 19 | -0.931 | -28.969 | 77.202 | 1.00 | 0.00 | H |
| ATOM | 591 | H6   | T A | 19 | -5.721 | -28.947 | 76.655 | 1.00 | 0.00 | H |
| ATOM | 592 | H1'  | T A | 19 | -4.128 | -25.994 | 78.223 | 1.00 | 0.00 | H |

|      |     |      |       |    |        |         |        |      |      |   |
|------|-----|------|-------|----|--------|---------|--------|------|------|---|
| ATOM | 593 | H3'  | T A   | 19 | -8.037 | -26.114 | 77.808 | 1.00 | 0.00 | H |
| ATOM | 594 | H4'  | T A   | 19 | -7.107 | -26.582 | 80.243 | 1.00 | 0.00 | H |
| ATOM | 595 | H71  | T A   | 19 | -5.000 | -30.741 | 74.571 | 1.00 | 0.00 | H |
| ATOM | 596 | H72  | T A   | 19 | -3.796 | -31.859 | 75.253 | 1.00 | 0.00 | H |
| ATOM | 597 | H73  | T A   | 19 | -5.333 | -31.575 | 76.106 | 1.00 | 0.00 | H |
| ATOM | 598 | H2'1 | T A   | 19 | -6.327 | -27.185 | 76.508 | 1.00 | 0.00 | H |
| ATOM | 599 | H2'2 | T A   | 19 | -5.727 | -25.533 | 76.532 | 1.00 | 0.00 | H |
| ATOM | 600 | H5'1 | T A   | 19 | -6.922 | -29.123 | 79.745 | 1.00 | 0.00 | H |
| ATOM | 601 | H5'2 | T A   | 19 | -8.479 | -28.289 | 79.567 | 1.00 | 0.00 | H |
| ATOM | 602 | C01  | LNK A | 20 | -7.825 | -21.438 | 77.123 | 0.00 | 0.00 | C |
| ATOM | 603 | O1   | LNK A | 20 | -7.745 | -22.865 | 77.101 | 1.00 | 0.00 | O |
| ATOM | 604 | S    | LNK A | 20 | -9.073 | -18.464 | 74.789 | 0.00 | 0.00 | S |
| ATOM | 605 | C02  | LNK A | 20 | -8.466 | -20.941 | 75.813 | 0.00 | 0.00 | C |
| ATOM | 606 | C03  | LNK A | 20 | -7.799 | -19.622 | 75.382 | 0.00 | 0.00 | C |
| ATOM | 607 | O1P  | LNK A | 20 | -5.954 | -24.364 | 76.163 | 1.00 | 0.00 | O |
| ATOM | 608 | O2P  | LNK A | 20 | -5.344 | -22.533 | 77.768 | 1.00 | 0.00 | O |
| ATOM | 609 | P    | LNK A | 20 | -6.329 | -23.559 | 77.342 | 1.00 | 0.00 | P |
| ATOM | 610 | H01  | LNK A | 20 | -6.824 | -21.018 | 77.220 | 0.00 | 0.00 | H |
| ATOM | 611 | H02  | LNK A | 20 | -8.436 | -21.120 | 77.968 | 0.00 | 0.00 | H |
| ATOM | 612 | H03  | LNK A | 20 | -7.086 | -19.819 | 74.582 | 0.00 | 0.00 | H |
| ATOM | 613 | H04  | LNK A | 20 | -9.533 | -20.777 | 75.969 | 0.00 | 0.00 | H |
| ATOM | 614 | H05  | LNK A | 20 | -8.325 | -21.691 | 75.033 | 0.00 | 0.00 | H |
| ATOM | 615 | H06  | LNK A | 20 | -7.278 | -19.184 | 76.234 | 0.00 | 0.00 | H |
| ATOM | 616 | AU   | LNK A | 20 | -8.771 | -17.918 | 74.505 |      |      |   |
| TER  |     |      |       |    |        |         |        |      |      |   |
| ATOM | 618 | C1'  | A B   | 2  | 5.983  | -28.368 | 78.370 | 1.00 | 0.00 | C |
| ATOM | 619 | N1   | A B   | 2  | 0.978  | -28.981 | 77.415 | 1.00 | 0.00 | N |
| ATOM | 620 | C2   | A B   | 2  | 1.659  | -28.042 | 78.064 | 1.00 | 0.00 | C |
| ATOM | 621 | N3   | A B   | 2  | 2.956  | -27.943 | 78.271 | 1.00 | 0.00 | N |
| ATOM | 622 | C4   | A B   | 2  | 3.598  | -28.988 | 77.716 | 1.00 | 0.00 | C |
| ATOM | 623 | C5   | A B   | 2  | 3.047  | -30.028 | 77.022 | 1.00 | 0.00 | C |
| ATOM | 624 | C6   | A B   | 2  | 1.644  | -30.010 | 76.871 | 1.00 | 0.00 | C |
| ATOM | 625 | N6   | A B   | 2  | 0.964  | -30.964 | 76.213 | 1.00 | 0.00 | N |
| ATOM | 626 | N7   | A B   | 2  | 4.020  | -30.916 | 76.598 | 1.00 | 0.00 | N |
| ATOM | 627 | C8   | A B   | 2  | 5.127  | -30.402 | 77.044 | 1.00 | 0.00 | C |
| ATOM | 628 | N9   | A B   | 2  | 4.949  | -29.228 | 77.730 | 1.00 | 0.00 | N |
| ATOM | 629 | C2'  | A B   | 2  | 7.113  | -29.153 | 79.024 | 1.00 | 0.00 | C |
| ATOM | 630 | C3'  | A B   | 2  | 8.314  | -28.260 | 78.759 | 1.00 | 0.00 | C |
| ATOM | 631 | O3'  | A B   | 2  | 8.381  | -27.255 | 79.768 | 1.00 | 0.00 | O |
| ATOM | 632 | C4'  | A B   | 2  | 8.005  | -27.674 | 77.382 | 1.00 | 0.00 | C |
| ATOM | 633 | O4'  | A B   | 2  | 6.546  | -27.551 | 77.362 | 1.00 | 0.00 | O |
| ATOM | 634 | C5'  | A B   | 2  | 8.438  | -28.497 | 76.192 | 1.00 | 0.00 | C |
| ATOM | 635 | O5'  | A B   | 2  | 8.265  | -29.907 | 76.480 | 1.00 | 0.00 | O |
| ATOM | 636 | H2   | A B   | 2  | 1.060  | -27.238 | 78.486 | 1.00 | 0.00 | H |
| ATOM | 637 | H8   | A B   | 2  | 6.104  | -30.859 | 76.888 | 1.00 | 0.00 | H |
| ATOM | 638 | H1'  | A B   | 2  | 5.488  | -27.720 | 79.092 | 1.00 | 0.00 | H |
| ATOM | 639 | H3'  | A B   | 2  | 9.247  | -28.823 | 78.747 | 1.00 | 0.00 | H |
| ATOM | 640 | H4'  | A B   | 2  | 8.514  | -26.713 | 77.326 | 1.00 | 0.00 | H |
| ATOM | 641 | H61  | A B   | 2  | -0.059 | -30.902 | 76.130 | 1.00 | 0.00 | H |
| ATOM | 642 | H62  | A B   | 2  | 1.470  | -31.759 | 75.794 | 1.00 | 0.00 | H |
| ATOM | 643 | H2'1 | A B   | 2  | 7.245  | -30.139 | 78.579 | 1.00 | 0.00 | H |
| ATOM | 644 | H2'2 | A B   | 2  | 6.951  | -29.294 | 80.094 | 1.00 | 0.00 | H |
| ATOM | 645 | H5'1 | A B   | 2  | 7.832  | -28.220 | 75.328 | 1.00 | 0.00 | H |
| ATOM | 646 | H5'2 | A B   | 2  | 9.485  | -28.289 | 75.976 | 1.00 | 0.00 | H |

|      |     |      |     |   |        |         |        |      |      |   |
|------|-----|------|-----|---|--------|---------|--------|------|------|---|
| ATOM | 647 | C1'  | C B | 3 | 3.320  | -27.277 | 82.416 | 1.00 | 0.00 | C |
| ATOM | 648 | N1   | C B | 3 | 3.117  | -28.568 | 81.704 | 1.00 | 0.00 | N |
| ATOM | 649 | C2   | C B | 3 | 1.816  | -28.923 | 81.354 | 1.00 | 0.00 | C |
| ATOM | 650 | O2   | C B | 3 | 0.890  | -28.155 | 81.647 | 1.00 | 0.00 | O |
| ATOM | 651 | N3   | C B | 3 | 1.609  | -30.094 | 80.707 | 1.00 | 0.00 | N |
| ATOM | 652 | C4   | C B | 3 | 2.632  | -30.904 | 80.404 | 1.00 | 0.00 | C |
| ATOM | 653 | N4   | C B | 3 | 2.372  | -32.037 | 79.766 | 1.00 | 0.00 | N |
| ATOM | 654 | C5   | C B | 3 | 3.981  | -30.569 | 80.755 | 1.00 | 0.00 | C |
| ATOM | 655 | C6   | C B | 3 | 4.167  | -29.381 | 81.404 | 1.00 | 0.00 | C |
| ATOM | 656 | C2'  | C B | 3 | 4.397  | -27.332 | 83.492 | 1.00 | 0.00 | C |
| ATOM | 657 | C3'  | C B | 3 | 5.021  | -25.949 | 83.388 | 1.00 | 0.00 | C |
| ATOM | 658 | O3'  | C B | 3 | 4.252  | -25.029 | 84.159 | 1.00 | 0.00 | O |
| ATOM | 659 | C4'  | C B | 3 | 4.942  | -25.654 | 81.892 | 1.00 | 0.00 | C |
| ATOM | 660 | O4'  | C B | 3 | 3.711  | -26.314 | 81.456 | 1.00 | 0.00 | O |
| ATOM | 661 | C5'  | C B | 3 | 6.088  | -26.161 | 81.046 | 1.00 | 0.00 | C |
| ATOM | 662 | O5'  | C B | 3 | 6.540  | -27.442 | 81.552 | 1.00 | 0.00 | O |
| ATOM | 663 | O1P  | C B | 3 | 8.866  | -26.954 | 82.381 | 1.00 | 0.00 | O |
| ATOM | 664 | O2P  | C B | 3 | 8.267  | -29.266 | 81.612 | 1.00 | 0.00 | O |
| ATOM | 665 | P    | C B | 3 | 8.089  | -27.802 | 81.454 | 1.00 | 0.00 | P |
| ATOM | 666 | H5   | C B | 3 | 4.817  | -31.228 | 80.519 | 1.00 | 0.00 | H |
| ATOM | 667 | H6   | C B | 3 | 5.175  | -29.079 | 81.686 | 1.00 | 0.00 | H |
| ATOM | 668 | H1'  | C B | 3 | 2.364  | -26.964 | 82.835 | 1.00 | 0.00 | H |
| ATOM | 669 | H3'  | C B | 3 | 6.052  | -25.940 | 83.737 | 1.00 | 0.00 | H |
| ATOM | 670 | H4'  | C B | 3 | 4.906  | -24.570 | 81.783 | 1.00 | 0.00 | H |
| ATOM | 671 | H41  | C B | 3 | 3.142  | -32.677 | 79.518 | 1.00 | 0.00 | H |
| ATOM | 672 | H42  | C B | 3 | 1.403  | -32.278 | 79.516 | 1.00 | 0.00 | H |
| ATOM | 673 | H2'1 | C B | 3 | 5.131  | -28.114 | 83.303 | 1.00 | 0.00 | H |
| ATOM | 674 | H2'2 | C B | 3 | 3.979  | -27.506 | 84.485 | 1.00 | 0.00 | H |
| ATOM | 675 | H5'1 | C B | 3 | 5.751  | -26.270 | 80.015 | 1.00 | 0.00 | H |
| ATOM | 676 | H5'2 | C B | 3 | 6.904  | -25.442 | 81.083 | 1.00 | 0.00 | H |
| ATOM | 677 | C1'  | C B | 4 | -0.656 | -27.592 | 85.350 | 1.00 | 0.00 | C |
| ATOM | 678 | N1   | C B | 4 | 0.027  | -28.822 | 84.868 | 1.00 | 0.00 | N |
| ATOM | 679 | C2   | C B | 4 | -0.750 | -29.807 | 84.262 | 1.00 | 0.00 | C |
| ATOM | 680 | O2   | C B | 4 | -1.970 | -29.620 | 84.150 | 1.00 | 0.00 | O |
| ATOM | 681 | N3   | C B | 4 | -0.149 | -30.936 | 83.816 | 1.00 | 0.00 | N |
| ATOM | 682 | C4   | C B | 4 | 1.174  | -31.110 | 83.951 | 1.00 | 0.00 | C |
| ATOM | 683 | N4   | C B | 4 | 1.712  | -32.231 | 83.494 | 1.00 | 0.00 | N |
| ATOM | 684 | C5   | C B | 4 | 1.999  | -30.116 | 84.574 | 1.00 | 0.00 | C |
| ATOM | 685 | C6   | C B | 4 | 1.370  | -28.986 | 85.012 | 1.00 | 0.00 | C |
| ATOM | 686 | C2'  | C B | 4 | -0.099 | -27.054 | 86.661 | 1.00 | 0.00 | C |
| ATOM | 687 | C3'  | C B | 4 | -0.222 | -25.551 | 86.464 | 1.00 | 0.00 | C |
| ATOM | 688 | O3'  | C B | 4 | -1.539 | -25.138 | 86.819 | 1.00 | 0.00 | O |
| ATOM | 689 | C4'  | C B | 4 | 0.054  | -25.380 | 84.971 | 1.00 | 0.00 | C |
| ATOM | 690 | O4'  | C B | 4 | -0.492 | -26.593 | 84.361 | 1.00 | 0.00 | O |
| ATOM | 691 | C5'  | C B | 4 | 1.505  | -25.248 | 84.567 | 1.00 | 0.00 | C |
| ATOM | 692 | O5'  | C B | 4 | 2.327  | -26.097 | 85.407 | 1.00 | 0.00 | O |
| ATOM | 693 | O1P  | C B | 4 | 3.722  | -24.455 | 86.707 | 1.00 | 0.00 | O |
| ATOM | 694 | O2P  | C B | 4 | 4.593  | -26.766 | 86.260 | 1.00 | 0.00 | O |
| ATOM | 695 | P    | C B | 4 | 3.795  | -25.608 | 85.788 | 1.00 | 0.00 | P |
| ATOM | 696 | H5   | C B | 4 | 3.073  | -30.256 | 84.693 | 1.00 | 0.00 | H |
| ATOM | 697 | H6   | C B | 4 | 1.957  | -28.198 | 85.485 | 1.00 | 0.00 | H |
| ATOM | 698 | H1'  | C B | 4 | -1.722 | -27.806 | 85.437 | 1.00 | 0.00 | H |
| ATOM | 699 | H3'  | C B | 4 | 0.504  | -25.000 | 87.063 | 1.00 | 0.00 | H |
| ATOM | 700 | H4'  | C B | 4 | -0.463 | -24.474 | 84.654 | 1.00 | 0.00 | H |

|      |     |      |     |   |         |         |        |      |      |   |
|------|-----|------|-----|---|---------|---------|--------|------|------|---|
| ATOM | 701 | H41  | C B | 4 | 2.727   | -32.389 | 83.583 | 1.00 | 0.00 | H |
| ATOM | 702 | H42  | C B | 4 | 1.117   | -32.945 | 83.049 | 1.00 | 0.00 | H |
| ATOM | 703 | H2'1 | C B | 4 | 0.937   | -27.349 | 86.822 | 1.00 | 0.00 | H |
| ATOM | 704 | H2'2 | C B | 4 | -0.674  | -27.390 | 87.524 | 1.00 | 0.00 | H |
| ATOM | 705 | H5'1 | C B | 4 | 1.614   | -25.544 | 83.524 | 1.00 | 0.00 | H |
| ATOM | 706 | H5'2 | C B | 4 | 1.813   | -24.210 | 84.680 | 1.00 | 0.00 | H |
| ATOM | 707 | C1'  | G B | 5 | -4.692  | -29.832 | 87.144 | 1.00 | 0.00 | C |
| ATOM | 708 | N1   | G B | 5 | -2.294  | -34.087 | 85.668 | 1.00 | 0.00 | N |
| ATOM | 709 | C2   | G B | 5 | -3.625  | -33.728 | 85.543 | 1.00 | 0.00 | C |
| ATOM | 710 | N2   | G B | 5 | -4.423  | -34.622 | 84.947 | 1.00 | 0.00 | N |
| ATOM | 711 | N3   | G B | 5 | -4.119  | -32.569 | 85.977 | 1.00 | 0.00 | N |
| ATOM | 712 | C4   | G B | 5 | -3.171  | -31.789 | 86.560 | 1.00 | 0.00 | C |
| ATOM | 713 | C5   | G B | 5 | -1.825  | -32.066 | 86.733 | 1.00 | 0.00 | C |
| ATOM | 714 | C6   | G B | 5 | -1.299  | -33.293 | 86.269 | 1.00 | 0.00 | C |
| ATOM | 715 | O6   | G B | 5 | -0.144  | -33.715 | 86.331 | 1.00 | 0.00 | O |
| ATOM | 716 | N7   | G B | 5 | -1.194  | -31.002 | 87.382 | 1.00 | 0.00 | N |
| ATOM | 717 | C8   | G B | 5 | -2.153  | -30.133 | 87.574 | 1.00 | 0.00 | C |
| ATOM | 718 | N9   | G B | 5 | -3.385  | -30.542 | 87.103 | 1.00 | 0.00 | N |
| ATOM | 719 | C2'  | G B | 5 | -4.921  | -29.042 | 88.426 | 1.00 | 0.00 | C |
| ATOM | 720 | C3'  | G B | 5 | -5.685  | -27.829 | 87.919 | 1.00 | 0.00 | C |
| ATOM | 721 | O3'  | G B | 5 | -7.071  | -28.150 | 87.833 | 1.00 | 0.00 | O |
| ATOM | 722 | C4'  | G B | 5 | -5.062  | -27.585 | 86.546 | 1.00 | 0.00 | C |
| ATOM | 723 | O4'  | G B | 5 | -4.725  | -28.923 | 86.061 | 1.00 | 0.00 | O |
| ATOM | 724 | C5'  | G B | 5 | -3.817  | -26.731 | 86.515 | 1.00 | 0.00 | C |
| ATOM | 725 | O5'  | G B | 5 | -3.007  | -27.003 | 87.686 | 1.00 | 0.00 | O |
| ATOM | 726 | O1P  | G B | 5 | -3.084  | -24.837 | 88.965 | 1.00 | 0.00 | O |
| ATOM | 727 | O2P  | G B | 5 | -1.114  | -26.370 | 89.213 | 1.00 | 0.00 | O |
| ATOM | 728 | P    | G B | 5 | -2.171  | -25.810 | 88.336 | 1.00 | 0.00 | P |
| ATOM | 729 | H1   | G B | 5 | -2.012  | -35.004 | 85.292 | 1.00 | 0.00 | H |
| ATOM | 730 | H8   | G B | 5 | -1.996  | -29.173 | 88.064 | 1.00 | 0.00 | H |
| ATOM | 731 | H1'  | G B | 5 | -5.484  | -30.564 | 86.991 | 1.00 | 0.00 | H |
| ATOM | 732 | H21  | G B | 5 | -4.034  | -35.514 | 84.611 | 1.00 | 0.00 | H |
| ATOM | 733 | H3'  | G B | 5 | -5.554  | -26.962 | 88.570 | 1.00 | 0.00 | H |
| ATOM | 734 | H22  | G B | 5 | -5.425  | -34.417 | 84.826 | 1.00 | 0.00 | H |
| ATOM | 735 | H4'  | G B | 5 | -5.820  | -27.091 | 85.938 | 1.00 | 0.00 | H |
| ATOM | 736 | H2'1 | G B | 5 | -3.987  | -28.751 | 88.905 | 1.00 | 0.00 | H |
| ATOM | 737 | H2'2 | G B | 5 | -5.504  | -29.601 | 89.158 | 1.00 | 0.00 | H |
| ATOM | 738 | H5'1 | G B | 5 | -3.249  | -26.959 | 85.613 | 1.00 | 0.00 | H |
| ATOM | 739 | H5'2 | G B | 5 | -4.104  | -25.679 | 86.502 | 1.00 | 0.00 | H |
| ATOM | 740 | C1'  | T B | 6 | -7.503  | -33.765 | 88.213 | 1.00 | 0.00 | C |
| ATOM | 741 | N1   | T B | 6 | -6.078  | -33.724 | 88.639 | 1.00 | 0.00 | N |
| ATOM | 742 | C2   | T B | 6 | -5.293  | -34.812 | 88.312 | 1.00 | 0.00 | C |
| ATOM | 743 | O2   | T B | 6 | -5.722  | -35.777 | 87.705 | 1.00 | 0.00 | O |
| ATOM | 744 | N3   | T B | 6 | -3.976  | -34.732 | 88.727 | 1.00 | 0.00 | N |
| ATOM | 745 | C4   | T B | 6 | -3.393  | -33.693 | 89.421 | 1.00 | 0.00 | C |
| ATOM | 746 | O4   | T B | 6 | -2.200  | -33.736 | 89.741 | 1.00 | 0.00 | O |
| ATOM | 747 | C5   | T B | 6 | -4.292  | -32.602 | 89.714 | 1.00 | 0.00 | C |
| ATOM | 748 | C6   | T B | 6 | -5.582  | -32.645 | 89.324 | 1.00 | 0.00 | C |
| ATOM | 749 | C7   | T B | 6 | -3.698  | -31.447 | 90.465 | 1.00 | 0.00 | C |
| ATOM | 750 | C2'  | T B | 6 | -8.463  | -33.159 | 89.229 | 1.00 | 0.00 | C |
| ATOM | 751 | C3'  | T B | 6 | -9.504  | -32.507 | 88.330 | 1.00 | 0.00 | C |
| ATOM | 752 | O3'  | T B | 6 | -10.473 | -33.482 | 87.951 | 1.00 | 0.00 | O |
| ATOM | 753 | C4'  | T B | 6 | -8.674  | -32.023 | 87.144 | 1.00 | 0.00 | C |
| ATOM | 754 | O4'  | T B | 6 | -7.616  | -33.024 | 87.013 | 1.00 | 0.00 | O |

|      |     |      |     |   |         |         |        |      |      |   |
|------|-----|------|-----|---|---------|---------|--------|------|------|---|
| ATOM | 755 | C5'  | T B | 6 | -8.035  | -30.660 | 87.282 | 1.00 | 0.00 | C |
| ATOM | 756 | O5'  | T B | 6 | -7.605  | -30.458 | 88.653 | 1.00 | 0.00 | O |
| ATOM | 757 | O1P  | T B | 6 | -9.085  | -28.588 | 89.455 | 1.00 | 0.00 | O |
| ATOM | 758 | O2P  | T B | 6 | -6.816  | -28.919 | 90.475 | 1.00 | 0.00 | O |
| ATOM | 759 | P    | T B | 6 | -7.676  | -28.988 | 89.269 | 1.00 | 0.00 | P |
| ATOM | 760 | H3   | T B | 6 | -3.367  | -35.531 | 88.493 | 1.00 | 0.00 | H |
| ATOM | 761 | H6   | T B | 6 | -6.240  | -31.808 | 89.558 | 1.00 | 0.00 | H |
| ATOM | 762 | H1'  | T B | 6 | -7.766  | -34.799 | 87.995 | 1.00 | 0.00 | H |
| ATOM | 763 | H3'  | T B | 6 | -10.005 | -31.675 | 88.826 | 1.00 | 0.00 | H |
| ATOM | 764 | H4'  | T B | 6 | -9.341  | -31.991 | 86.283 | 1.00 | 0.00 | H |
| ATOM | 765 | H71  | T B | 6 | -4.162  | -31.378 | 91.449 | 1.00 | 0.00 | H |
| ATOM | 766 | H72  | T B | 6 | -2.625  | -31.599 | 90.577 | 1.00 | 0.00 | H |
| ATOM | 767 | H73  | T B | 6 | -3.879  | -30.523 | 89.913 | 1.00 | 0.00 | H |
| ATOM | 768 | H2'1 | T B | 6 | -7.978  | -32.427 | 89.871 | 1.00 | 0.00 | H |
| ATOM | 769 | H2'2 | T B | 6 | -8.914  | -33.915 | 89.873 | 1.00 | 0.00 | H |
| ATOM | 770 | H5'1 | T B | 6 | -7.177  | -30.598 | 86.613 | 1.00 | 0.00 | H |
| ATOM | 771 | H5'2 | T B | 6 | -8.760  | -29.897 | 87.007 | 1.00 | 0.00 | H |
| ATOM | 772 | C1'  | C B | 7 | -8.207  | -38.573 | 89.231 | 1.00 | 0.00 | C |
| ATOM | 773 | N1   | C B | 7 | -7.215  | -37.774 | 90.004 | 1.00 | 0.00 | N |
| ATOM | 774 | C2   | C B | 7 | -5.924  | -38.282 | 90.129 | 1.00 | 0.00 | C |
| ATOM | 775 | O2   | C B | 7 | -5.654  | -39.367 | 89.597 | 1.00 | 0.00 | O |
| ATOM | 776 | N3   | C B | 7 | -5.006  | -37.571 | 90.828 | 1.00 | 0.00 | N |
| ATOM | 777 | C4   | C B | 7 | -5.328  | -36.400 | 91.393 | 1.00 | 0.00 | C |
| ATOM | 778 | N4   | C B | 7 | -4.391  | -35.745 | 92.062 | 1.00 | 0.00 | N |
| ATOM | 779 | C5   | C B | 7 | -6.650  | -35.854 | 91.285 | 1.00 | 0.00 | C |
| ATOM | 780 | C6   | C B | 7 | -7.556  | -36.587 | 90.571 | 1.00 | 0.00 | C |
| ATOM | 781 | C2'  | C B | 7 | -9.611  | -38.541 | 89.818 | 1.00 | 0.00 | C |
| ATOM | 782 | C3'  | C B | 7 | -10.476 | -38.560 | 88.567 | 1.00 | 0.00 | C |
| ATOM | 783 | O3'  | C B | 7 | -10.652 | -39.909 | 88.140 | 1.00 | 0.00 | O |
| ATOM | 784 | C4'  | C B | 7 | -9.656  | -37.742 | 87.573 | 1.00 | 0.00 | C |
| ATOM | 785 | O4'  | C B | 7 | -8.266  | -38.036 | 87.923 | 1.00 | 0.00 | O |
| ATOM | 786 | C5'  | C B | 7 | -9.856  | -36.244 | 87.609 | 1.00 | 0.00 | C |
| ATOM | 787 | O5'  | C B | 7 | -10.059 | -35.811 | 88.976 | 1.00 | 0.00 | O |
| ATOM | 788 | O1P  | C B | 7 | -12.436 | -34.982 | 88.978 | 1.00 | 0.00 | O |
| ATOM | 789 | O2P  | C B | 7 | -10.778 | -34.039 | 90.607 | 1.00 | 0.00 | O |
| ATOM | 790 | P    | C B | 7 | -11.042 | -34.584 | 89.254 | 1.00 | 0.00 | P |
| ATOM | 791 | H5   | C B | 7 | -6.918  | -34.906 | 91.749 | 1.00 | 0.00 | H |
| ATOM | 792 | H6   | C B | 7 | -8.572  | -36.210 | 90.455 | 1.00 | 0.00 | H |
| ATOM | 793 | H1'  | C B | 7 | -7.837  | -39.596 | 89.157 | 1.00 | 0.00 | H |
| ATOM | 794 | H3'  | C B | 7 | -11.453 | -38.105 | 88.740 | 1.00 | 0.00 | H |
| ATOM | 795 | H4'  | C B | 7 | -9.927  | -38.089 | 86.576 | 1.00 | 0.00 | H |
| ATOM | 796 | H41  | C B | 7 | -4.612  | -34.840 | 92.503 | 1.00 | 0.00 | H |
| ATOM | 797 | H42  | C B | 7 | -3.441  | -36.139 | 92.141 | 1.00 | 0.00 | H |
| ATOM | 798 | H2'1 | C B | 7 | -9.791  | -37.646 | 90.411 | 1.00 | 0.00 | H |
| ATOM | 799 | H2'2 | C B | 7 | -9.813  | -39.402 | 90.454 | 1.00 | 0.00 | H |
| ATOM | 800 | H5'1 | C B | 7 | -8.975  | -35.755 | 87.193 | 1.00 | 0.00 | H |
| ATOM | 801 | H5'2 | C B | 7 | -10.726 | -35.985 | 87.007 | 1.00 | 0.00 | H |
| ATOM | 802 | C1'  | C B | 8 | -6.818  | -43.018 | 90.917 | 1.00 | 0.00 | C |
| ATOM | 803 | N1   | C B | 8 | -6.642  | -41.802 | 91.756 | 1.00 | 0.00 | N |
| ATOM | 804 | C2   | C B | 8 | -5.385  | -41.566 | 92.310 | 1.00 | 0.00 | C |
| ATOM | 805 | O2   | C B | 8 | -4.473  | -42.371 | 92.081 | 1.00 | 0.00 | O |
| ATOM | 806 | N3   | C B | 8 | -5.204  | -40.464 | 93.076 | 1.00 | 0.00 | N |
| ATOM | 807 | C4   | C B | 8 | -6.212  | -39.611 | 93.305 | 1.00 | 0.00 | C |
| ATOM | 808 | N4   | C B | 8 | -5.977  | -38.548 | 94.060 | 1.00 | 0.00 | N |

|      |     |      |     |   |         |         |        |      |      |   |
|------|-----|------|-----|---|---------|---------|--------|------|------|---|
| ATOM | 809 | C5   | C B | 8 | -7.518  | -39.829 | 92.754 | 1.00 | 0.00 | C |
| ATOM | 810 | C6   | C B | 8 | -7.675  | -40.945 | 91.979 | 1.00 | 0.00 | C |
| ATOM | 811 | C2'  | C B | 8 | -8.168  | -43.699 | 91.097 | 1.00 | 0.00 | C |
| ATOM | 812 | C3'  | C B | 8 | -8.463  | -44.197 | 89.691 | 1.00 | 0.00 | C |
| ATOM | 813 | O3'  | C B | 8 | -7.820  | -45.455 | 89.496 | 1.00 | 0.00 | O |
| ATOM | 814 | C4'  | C B | 8 | -7.866  | -43.101 | 88.810 | 1.00 | 0.00 | C |
| ATOM | 815 | O4'  | C B | 8 | -6.704  | -42.626 | 89.562 | 1.00 | 0.00 | O |
| ATOM | 816 | C5'  | C B | 8 | -8.761  | -41.923 | 88.507 | 1.00 | 0.00 | C |
| ATOM | 817 | O5'  | C B | 8 | -9.577  | -41.615 | 89.668 | 1.00 | 0.00 | O |
| ATOM | 818 | O1P  | C B | 8 | -11.913 | -42.133 | 88.889 | 1.00 | 0.00 | O |
| ATOM | 819 | O2P  | C B | 8 | -11.539 | -40.425 | 90.688 | 1.00 | 0.00 | O |
| ATOM | 820 | P    | C B | 8 | -11.055 | -41.067 | 89.441 | 1.00 | 0.00 | P |
| ATOM | 821 | H5   | C B | 8 | -8.342  | -39.143 | 92.943 | 1.00 | 0.00 | H |
| ATOM | 822 | H6   | C B | 8 | -8.648  | -41.149 | 91.532 | 1.00 | 0.00 | H |
| ATOM | 823 | H1'  | C B | 8 | -6.001  | -43.706 | 91.137 | 1.00 | 0.00 | H |
| ATOM | 824 | H3'  | C B | 8 | -9.531  | -44.307 | 89.513 | 1.00 | 0.00 | H |
| ATOM | 825 | H4'  | C B | 8 | -7.600  | -43.567 | 87.861 | 1.00 | 0.00 | H |
| ATOM | 826 | H41  | C B | 8 | -6.734  | -37.875 | 94.249 | 1.00 | 0.00 | H |
| ATOM | 827 | H42  | C B | 8 | -5.039  | -38.394 | 94.457 | 1.00 | 0.00 | H |
| ATOM | 828 | H2'1 | C B | 8 | -8.936  | -43.009 | 91.442 | 1.00 | 0.00 | H |
| ATOM | 829 | H2'2 | C B | 8 | -8.122  | -44.524 | 91.810 | 1.00 | 0.00 | H |
| ATOM | 830 | H5'1 | C B | 8 | -8.145  | -41.060 | 88.253 | 1.00 | 0.00 | H |
| ATOM | 831 | H5'2 | C B | 8 | -9.402  | -42.167 | 87.662 | 1.00 | 0.00 | H |
| ATOM | 832 | C1'  | T B | 9 | -4.100  | -46.076 | 93.702 | 1.00 | 0.00 | C |
| ATOM | 833 | N1   | T B | 9 | -4.792  | -44.916 | 94.323 | 1.00 | 0.00 | N |
| ATOM | 834 | C2   | T B | 9 | -4.033  | -44.080 | 95.118 | 1.00 | 0.00 | C |
| ATOM | 835 | O2   | T B | 9 | -2.846  | -44.264 | 95.319 | 1.00 | 0.00 | O |
| ATOM | 836 | N3   | T B | 9 | -4.716  | -43.014 | 95.673 | 1.00 | 0.00 | N |
| ATOM | 837 | C4   | T B | 9 | -6.052  | -42.721 | 95.511 | 1.00 | 0.00 | C |
| ATOM | 838 | O4   | T B | 9 | -6.556  | -41.735 | 96.064 | 1.00 | 0.00 | O |
| ATOM | 839 | C5   | T B | 9 | -6.764  | -43.649 | 94.663 | 1.00 | 0.00 | C |
| ATOM | 840 | C6   | T B | 9 | -6.130  | -44.698 | 94.104 | 1.00 | 0.00 | C |
| ATOM | 841 | C7   | T B | 9 | -8.222  | -43.365 | 94.457 | 1.00 | 0.00 | C |
| ATOM | 842 | C2'  | T B | 9 | -4.950  | -47.341 | 93.647 | 1.00 | 0.00 | C |
| ATOM | 843 | C3'  | T B | 9 | -4.514  | -47.959 | 92.328 | 1.00 | 0.00 | C |
| ATOM | 844 | O3'  | T B | 9 | -3.332  | -48.726 | 92.538 | 1.00 | 0.00 | O |
| ATOM | 845 | C4'  | T B | 9 | -4.262  | -46.737 | 91.447 | 1.00 | 0.00 | C |
| ATOM | 846 | O4'  | T B | 9 | -3.764  | -45.721 | 92.375 | 1.00 | 0.00 | O |
| ATOM | 847 | C5'  | T B | 9 | -5.460  | -46.178 | 90.714 | 1.00 | 0.00 | C |
| ATOM | 848 | O5'  | T B | 9 | -6.641  | -46.292 | 91.548 | 1.00 | 0.00 | O |
| ATOM | 849 | O1P  | T B | 9 | -8.077  | -47.939 | 90.301 | 1.00 | 0.00 | O |
| ATOM | 850 | O2P  | T B | 9 | -9.140  | -46.224 | 91.792 | 1.00 | 0.00 | O |
| ATOM | 851 | P    | T B | 9 | -8.048  | -46.568 | 90.851 | 1.00 | 0.00 | P |
| ATOM | 852 | H3   | T B | 9 | -4.170  | -42.375 | 96.267 | 1.00 | 0.00 | H |
| ATOM | 853 | H6   | T B | 9 | -6.688  | -45.385 | 93.468 | 1.00 | 0.00 | H |
| ATOM | 854 | H1'  | T B | 9 | -3.173  | -46.253 | 94.246 | 1.00 | 0.00 | H |
| ATOM | 855 | H3'  | T B | 9 | -5.289  | -48.597 | 91.903 | 1.00 | 0.00 | H |
| ATOM | 856 | H4'  | T B | 9 | -3.523  | -47.032 | 90.701 | 1.00 | 0.00 | H |
| ATOM | 857 | H71  | T B | 9 | -8.815  | -44.162 | 94.906 | 1.00 | 0.00 | H |
| ATOM | 858 | H72  | T B | 9 | -8.478  | -42.414 | 94.925 | 1.00 | 0.00 | H |
| ATOM | 859 | H73  | T B | 9 | -8.434  | -43.312 | 93.388 | 1.00 | 0.00 | H |
| ATOM | 860 | H2'1 | T B | 9 | -6.017  | -47.122 | 93.651 | 1.00 | 0.00 | H |
| ATOM | 861 | H2'2 | T B | 9 | -4.750  | -48.009 | 94.485 | 1.00 | 0.00 | H |
| ATOM | 862 | H5'1 | T B | 9 | -5.276  | -45.131 | 90.474 | 1.00 | 0.00 | H |

|      |     |      |     |    |        |         |         |      |      |   |
|------|-----|------|-----|----|--------|---------|---------|------|------|---|
| ATOM | 863 | H5'2 | T B | 9  | -5.605 | -46.737 | 89.791  | 1.00 | 0.00 | H |
| ATOM | 864 | C1'  | A B | 10 | -1.298 | -47.197 | 97.642  | 1.00 | 0.00 | C |
| ATOM | 865 | N1   | A B | 10 | -3.842 | -43.326 | 99.850  | 1.00 | 0.00 | N |
| ATOM | 866 | C2   | A B | 10 | -2.562 | -43.686 | 99.867  | 1.00 | 0.00 | C |
| ATOM | 867 | N3   | A B | 10 | -1.971 | -44.699 | 99.271  | 1.00 | 0.00 | N |
| ATOM | 868 | C4   | A B | 10 | -2.867 | -45.417 | 98.571  | 1.00 | 0.00 | C |
| ATOM | 869 | C5   | A B | 10 | -4.210 | -45.182 | 98.451  | 1.00 | 0.00 | C |
| ATOM | 870 | C6   | A B | 10 | -4.713 | -44.061 | 99.142  | 1.00 | 0.00 | C |
| ATOM | 871 | N6   | A B | 10 | -6.011 | -43.707 | 99.115  | 1.00 | 0.00 | N |
| ATOM | 872 | N7   | A B | 10 | -4.812 | -46.133 | 97.646  | 1.00 | 0.00 | N |
| ATOM | 873 | C8   | A B | 10 | -3.834 | -46.917 | 97.304  | 1.00 | 0.00 | C |
| ATOM | 874 | N9   | A B | 10 | -2.622 | -46.542 | 97.825  | 1.00 | 0.00 | N |
| ATOM | 875 | C2'  | A B | 10 | -1.366 | -48.718 | 97.605  | 1.00 | 0.00 | C |
| ATOM | 876 | C3'  | A B | 10 | -0.286 | -49.060 | 96.590  | 1.00 | 0.00 | C |
| ATOM | 877 | O3'  | A B | 10 | 0.978  | -49.100 | 97.248  | 1.00 | 0.00 | O |
| ATOM | 878 | C4'  | A B | 10 | -0.381 | -47.906 | 95.592  | 1.00 | 0.00 | C |
| ATOM | 879 | O4'  | A B | 10 | -0.766 | -46.754 | 96.409  | 1.00 | 0.00 | O |
| ATOM | 880 | C5'  | A B | 10 | -1.385 | -48.065 | 94.476  | 1.00 | 0.00 | C |
| ATOM | 881 | O5'  | A B | 10 | -2.565 | -48.748 | 94.971  | 1.00 | 0.00 | O |
| ATOM | 882 | O1P  | A B | 10 | -2.538 | -50.934 | 93.723  | 1.00 | 0.00 | O |
| ATOM | 883 | O2P  | A B | 10 | -4.713 | -49.973 | 94.525  | 1.00 | 0.00 | O |
| ATOM | 884 | P    | A B | 10 | -3.350 | -49.732 | 93.991  | 1.00 | 0.00 | P |
| ATOM | 885 | H2   | A B | 10 | -1.909 | -43.050 | 100.464 | 1.00 | 0.00 | H |
| ATOM | 886 | H8   | A B | 10 | -3.964 | -47.789 | 96.663  | 1.00 | 0.00 | H |
| ATOM | 887 | H1'  | A B | 10 | -0.636 | -46.855 | 98.437  | 1.00 | 0.00 | H |
| ATOM | 888 | H3'  | A B | 10 | -0.472 | -50.016 | 96.103  | 1.00 | 0.00 | H |
| ATOM | 889 | H4'  | A B | 10 | 0.605  | -47.797 | 95.140  | 1.00 | 0.00 | H |
| ATOM | 890 | H61  | A B | 10 | -6.327 | -42.877 | 99.636  | 1.00 | 0.00 | H |
| ATOM | 891 | H62  | A B | 10 | -6.686 | -44.266 | 98.576  | 1.00 | 0.00 | H |
| ATOM | 892 | H2'1 | A B | 10 | -2.342 | -49.081 | 97.281  | 1.00 | 0.00 | H |
| ATOM | 893 | H2'2 | A B | 10 | -1.153 | -49.166 | 98.576  | 1.00 | 0.00 | H |
| ATOM | 894 | H5'1 | A B | 10 | -1.661 | -47.080 | 94.100  | 1.00 | 0.00 | H |
| ATOM | 895 | H5'2 | A B | 10 | -0.937 | -48.644 | 93.670  | 1.00 | 0.00 | H |
| ATOM | 896 | C1'  | G B | 11 | 0.238  | -46.586 | 102.323 | 1.00 | 0.00 | C |
| ATOM | 897 | N1   | G B | 11 | -4.393 | -44.553 | 102.995 | 1.00 | 0.00 | N |
| ATOM | 898 | C2   | G B | 11 | -3.161 | -44.132 | 103.466 | 1.00 | 0.00 | C |
| ATOM | 899 | N2   | G B | 11 | -3.165 | -43.023 | 104.215 | 1.00 | 0.00 | N |
| ATOM | 900 | N3   | G B | 11 | -2.019 | -44.766 | 103.206 | 1.00 | 0.00 | N |
| ATOM | 901 | C4   | G B | 11 | -2.204 | -45.872 | 102.439 | 1.00 | 0.00 | C |
| ATOM | 902 | C5   | G B | 11 | -3.392 | -46.369 | 101.929 | 1.00 | 0.00 | C |
| ATOM | 903 | C6   | G B | 11 | -4.605 | -45.696 | 102.200 | 1.00 | 0.00 | C |
| ATOM | 904 | O6   | G B | 11 | -5.748 | -45.980 | 101.841 | 1.00 | 0.00 | O |
| ATOM | 905 | N7   | G B | 11 | -3.151 | -47.530 | 101.190 | 1.00 | 0.00 | N |
| ATOM | 906 | C8   | G B | 11 | -1.856 | -47.693 | 101.271 | 1.00 | 0.00 | C |
| ATOM | 907 | N9   | G B | 11 | -1.210 | -46.727 | 102.014 | 1.00 | 0.00 | N |
| ATOM | 908 | C2'  | G B | 11 | 0.945  | -47.911 | 102.570 | 1.00 | 0.00 | C |
| ATOM | 909 | C3'  | G B | 11 | 2.317  | -47.657 | 101.967 | 1.00 | 0.00 | C |
| ATOM | 910 | O3'  | G B | 11 | 3.138  | -47.005 | 102.932 | 1.00 | 0.00 | O |
| ATOM | 911 | C4'  | G B | 11 | 2.003  | -46.756 | 100.773 | 1.00 | 0.00 | C |
| ATOM | 912 | O4'  | G B | 11 | 0.857  | -45.961 | 101.215 | 1.00 | 0.00 | O |
| ATOM | 913 | C5'  | G B | 11 | 1.639  | -47.454 | 99.484  | 1.00 | 0.00 | C |
| ATOM | 914 | O5'  | G B | 11 | 0.863  | -48.644 | 99.772  | 1.00 | 0.00 | O |
| ATOM | 915 | O1P  | G B | 11 | 2.370  | -50.517 | 99.031  | 1.00 | 0.00 | O |
| ATOM | 916 | O2P  | G B | 11 | -0.118 | -50.831 | 99.020  | 1.00 | 0.00 | O |



|      |     |      |     |    |        |         |         |      |      |   |
|------|-----|------|-----|----|--------|---------|---------|------|------|---|
| ATOM | 917 | P    | G B | 11 | 1.036  | -49.920 | 98.831  | 1.00 | 0.00 | P |
| ATOM | 918 | H1   | G B | 11 | -5.216 | -43.987 | 103.247 | 1.00 | 0.00 | H |
| ATOM | 919 | H8   | G B | 11 | -1.333 | -48.521 | 100.794 | 1.00 | 0.00 | H |
| ATOM | 920 | H1'  | G B | 11 | 0.342  | -45.921 | 103.182 | 1.00 | 0.00 | H |
| ATOM | 921 | H21  | G B | 11 | -4.052 | -42.536 | 104.408 | 1.00 | 0.00 | H |
| ATOM | 922 | H3'  | G B | 11 | 2.800  | -48.580 | 101.647 | 1.00 | 0.00 | H |
| ATOM | 923 | H22  | G B | 11 | -2.281 | -42.659 | 104.599 | 1.00 | 0.00 | H |
| ATOM | 924 | H4'  | G B | 11 | 2.892  | -46.155 | 100.587 | 1.00 | 0.00 | H |
| ATOM | 925 | H2'1 | G B | 11 | 0.443  | -48.745 | 102.077 | 1.00 | 0.00 | H |
| ATOM | 926 | H2'2 | G B | 11 | 1.015  | -48.151 | 103.630 | 1.00 | 0.00 | H |
| ATOM | 927 | H5'1 | G B | 11 | 1.056  | -46.775 | 98.863  | 1.00 | 0.00 | H |
| ATOM | 928 | H5'2 | G B | 11 | 2.552  | -47.729 | 98.957  | 1.00 | 0.00 | H |
| ATOM | 929 | C1'  | G B | 12 | -0.291 | -45.150 | 107.034 | 1.00 | 0.00 | C |
| ATOM | 930 | N1   | G B | 12 | -5.261 | -45.781 | 106.072 | 1.00 | 0.00 | N |
| ATOM | 931 | C2   | G B | 12 | -4.610 | -44.772 | 106.760 | 1.00 | 0.00 | C |
| ATOM | 932 | N2   | G B | 12 | -5.388 | -43.803 | 107.260 | 1.00 | 0.00 | N |
| ATOM | 933 | N3   | G B | 12 | -3.292 | -44.733 | 106.934 | 1.00 | 0.00 | N |
| ATOM | 934 | C4   | G B | 12 | -2.664 | -45.797 | 106.369 | 1.00 | 0.00 | C |
| ATOM | 935 | C5   | G B | 12 | -3.228 | -46.849 | 105.669 | 1.00 | 0.00 | C |
| ATOM | 936 | C6   | G B | 12 | -4.627 | -46.891 | 105.480 | 1.00 | 0.00 | C |
| ATOM | 937 | O6   | G B | 12 | -5.308 | -47.733 | 104.895 | 1.00 | 0.00 | O |
| ATOM | 938 | N7   | G B | 12 | -2.236 | -47.740 | 105.252 | 1.00 | 0.00 | N |
| ATOM | 939 | C8   | G B | 12 | -1.128 | -47.209 | 105.698 | 1.00 | 0.00 | C |
| ATOM | 940 | N9   | G B | 12 | -1.305 | -46.028 | 106.388 | 1.00 | 0.00 | N |
| ATOM | 941 | C2'  | G B | 12 | 0.844  | -45.915 | 107.703 | 1.00 | 0.00 | C |
| ATOM | 942 | C3'  | G B | 12 | 2.035  | -45.005 | 107.444 | 1.00 | 0.00 | C |
| ATOM | 943 | O3'  | G B | 12 | 2.080  | -43.995 | 108.450 | 1.00 | 0.00 | O |
| ATOM | 944 | C4'  | G B | 12 | 1.729  | -44.430 | 106.062 | 1.00 | 0.00 | C |
| ATOM | 945 | O4'  | G B | 12 | 0.270  | -44.328 | 106.029 | 1.00 | 0.00 | O |
| ATOM | 946 | C5'  | G B | 12 | 2.183  | -45.251 | 104.878 | 1.00 | 0.00 | C |
| ATOM | 947 | O5'  | G B | 12 | 2.029  | -46.662 | 105.172 | 1.00 | 0.00 | O |
| ATOM | 948 | O1P  | G B | 12 | 4.399  | -47.509 | 105.220 | 1.00 | 0.00 | O |
| ATOM | 949 | O2P  | G B | 12 | 2.524  | -49.063 | 104.617 | 1.00 | 0.00 | O |
| ATOM | 950 | P    | G B | 12 | 3.087  | -47.692 | 104.568 | 1.00 | 0.00 | P |
| ATOM | 951 | H1   | G B | 12 | -6.287 | -45.715 | 105.987 | 1.00 | 0.00 | H |
| ATOM | 952 | H8   | G B | 12 | -0.147 | -47.660 | 105.541 | 1.00 | 0.00 | H |
| ATOM | 953 | H1'  | G B | 12 | -0.803 | -44.506 | 107.748 | 1.00 | 0.00 | H |
| ATOM | 954 | H21  | G B | 12 | -6.408 | -43.838 | 107.118 | 1.00 | 0.00 | H |
| ATOM | 955 | H3'  | G B | 12 | 2.976  | -45.555 | 107.442 | 1.00 | 0.00 | H |
| ATOM | 956 | H22  | G B | 12 | -4.966 | -43.025 | 107.784 | 1.00 | 0.00 | H |
| ATOM | 957 | H4'  | G B | 12 | 2.225  | -43.462 | 106.004 | 1.00 | 0.00 | H |
| ATOM | 958 | H2'1 | G B | 12 | 0.994  | -46.900 | 107.263 | 1.00 | 0.00 | H |
| ATOM | 959 | H2'2 | G B | 12 | 0.675  | -46.054 | 108.770 | 1.00 | 0.00 | H |
| ATOM | 960 | H5'1 | G B | 12 | 1.581  | -44.989 | 104.008 | 1.00 | 0.00 | H |
| ATOM | 961 | H5'2 | G B | 12 | 3.230  | -45.031 | 104.670 | 1.00 | 0.00 | H |
| ATOM | 962 | C1'  | T B | 13 | -2.907 | -44.052 | 111.089 | 1.00 | 0.00 | C |
| ATOM | 963 | N1   | T B | 13 | -3.134 | -45.338 | 110.378 | 1.00 | 0.00 | N |
| ATOM | 964 | C2   | T B | 13 | -4.437 | -45.657 | 110.048 | 1.00 | 0.00 | C |
| ATOM | 965 | O2   | T B | 13 | -5.379 | -44.933 | 110.317 | 1.00 | 0.00 | O |
| ATOM | 966 | N3   | T B | 13 | -4.601 | -46.860 | 109.388 | 1.00 | 0.00 | N |
| ATOM | 967 | C4   | T B | 13 | -3.606 | -47.750 | 109.042 | 1.00 | 0.00 | C |
| ATOM | 968 | O4   | T B | 13 | -3.876 | -48.804 | 108.452 | 1.00 | 0.00 | O |
| ATOM | 969 | C5   | T B | 13 | -2.278 | -47.332 | 109.426 | 1.00 | 0.00 | C |
| ATOM | 970 | C6   | T B | 13 | -2.080 | -46.165 | 110.070 | 1.00 | 0.00 | C |

|      |      |      |     |    |         |         |         |      |      |   |
|------|------|------|-----|----|---------|---------|---------|------|------|---|
| ATOM | 971  | C7   | T B | 13 | -1.163  | -48.268 | 109.066 | 1.00 | 0.00 | C |
| ATOM | 972  | C2'  | T B | 13 | -1.822  | -44.123 | 112.155 | 1.00 | 0.00 | C |
| ATOM | 973  | C3'  | T B | 13 | -1.182  | -42.747 | 112.048 | 1.00 | 0.00 | C |
| ATOM | 974  | O3'  | T B | 13 | -1.932  | -41.820 | 112.829 | 1.00 | 0.00 | O |
| ATOM | 975  | C4'  | T B | 13 | -1.270  | -42.448 | 110.553 | 1.00 | 0.00 | C |
| ATOM | 976  | O4'  | T B | 13 | -2.513  | -43.092 | 110.128 | 1.00 | 0.00 | O |
| ATOM | 977  | C5'  | T B | 13 | -0.139  | -42.967 | 109.695 | 1.00 | 0.00 | C |
| ATOM | 978  | O5'  | T B | 13 | 0.302   | -44.256 | 110.195 | 1.00 | 0.00 | O |
| ATOM | 979  | O1P  | T B | 13 | 2.640   | -43.798 | 111.003 | 1.00 | 0.00 | O |
| ATOM | 980  | O2P  | T B | 13 | 2.007   | -46.102 | 110.236 | 1.00 | 0.00 | O |
| ATOM | 981  | P    | T B | 13 | 1.846   | -44.636 | 110.082 | 1.00 | 0.00 | P |
| ATOM | 982  | H3   | T B | 13 | -5.564  | -47.118 | 109.128 | 1.00 | 0.00 | H |
| ATOM | 983  | H6   | T B | 13 | -1.069  | -45.870 | 110.351 | 1.00 | 0.00 | H |
| ATOM | 984  | H1'  | T B | 13 | -3.855  | -43.727 | 111.518 | 1.00 | 0.00 | H |
| ATOM | 985  | H3'  | T B | 13 | -0.146  | -42.752 | 112.389 | 1.00 | 0.00 | H |
| ATOM | 986  | H4'  | T B | 13 | -1.293  | -41.363 | 110.449 | 1.00 | 0.00 | H |
| ATOM | 987  | H71  | T B | 13 | -0.715  | -48.667 | 109.976 | 1.00 | 0.00 | H |
| ATOM | 988  | H72  | T B | 13 | -1.558  | -49.090 | 108.466 | 1.00 | 0.00 | H |
| ATOM | 989  | H73  | T B | 13 | -0.406  | -47.731 | 108.493 | 1.00 | 0.00 | H |
| ATOM | 990  | H2'1 | T B | 13 | -1.099  | -44.913 | 111.958 | 1.00 | 0.00 | H |
| ATOM | 991  | H2'2 | T B | 13 | -2.230  | -44.293 | 113.152 | 1.00 | 0.00 | H |
| ATOM | 992  | H5'1 | T B | 13 | -0.486  | -43.069 | 108.668 | 1.00 | 0.00 | H |
| ATOM | 993  | H5'2 | T B | 13 | 0.688   | -42.260 | 109.727 | 1.00 | 0.00 | H |
| ATOM | 994  | C1'  | G B | 14 | -6.906  | -44.376 | 114.015 | 1.00 | 0.00 | C |
| ATOM | 995  | N1   | G B | 14 | -7.532  | -48.893 | 111.726 | 1.00 | 0.00 | N |
| ATOM | 996  | C2   | G B | 14 | -8.465  | -47.923 | 112.046 | 1.00 | 0.00 | C |
| ATOM | 997  | N2   | G B | 14 | -9.733  | -48.191 | 111.713 | 1.00 | 0.00 | N |
| ATOM | 998  | N3   | G B | 14 | -8.156  | -46.775 | 112.648 | 1.00 | 0.00 | N |
| ATOM | 999  | C4   | G B | 14 | -6.827  | -46.673 | 112.917 | 1.00 | 0.00 | C |
| ATOM | 1000 | C5   | G B | 14 | -5.828  | -47.589 | 112.640 | 1.00 | 0.00 | C |
| ATOM | 1001 | C6   | G B | 14 | -6.153  | -48.806 | 111.997 | 1.00 | 0.00 | C |
| ATOM | 1002 | O6   | G B | 14 | -5.412  | -49.735 | 111.672 | 1.00 | 0.00 | O |
| ATOM | 1003 | N7   | G B | 14 | -4.593  | -47.106 | 113.080 | 1.00 | 0.00 | N |
| ATOM | 1004 | C8   | G B | 14 | -4.878  | -45.937 | 113.596 | 1.00 | 0.00 | C |
| ATOM | 1005 | N9   | G B | 14 | -6.216  | -45.605 | 113.535 | 1.00 | 0.00 | N |
| ATOM | 1006 | C2'  | G B | 14 | -6.349  | -43.832 | 115.324 | 1.00 | 0.00 | C |
| ATOM | 1007 | C3'  | G B | 14 | -6.478  | -42.331 | 115.125 | 1.00 | 0.00 | C |
| ATOM | 1008 | O3'  | G B | 14 | -7.797  | -41.923 | 115.480 | 1.00 | 0.00 | O |
| ATOM | 1009 | C4'  | G B | 14 | -6.204  | -42.163 | 113.631 | 1.00 | 0.00 | C |
| ATOM | 1010 | O4'  | G B | 14 | -6.747  | -43.379 | 113.026 | 1.00 | 0.00 | O |
| ATOM | 1011 | C5'  | G B | 14 | -4.756  | -42.025 | 113.225 | 1.00 | 0.00 | C |
| ATOM | 1012 | O5'  | G B | 14 | -3.929  | -42.869 | 114.065 | 1.00 | 0.00 | O |
| ATOM | 1013 | O1P  | G B | 14 | -2.539  | -41.219 | 115.361 | 1.00 | 0.00 | O |
| ATOM | 1014 | O2P  | G B | 14 | -1.658  | -43.525 | 114.918 | 1.00 | 0.00 | O |
| ATOM | 1015 | P    | G B | 14 | -2.461  | -42.372 | 114.444 | 1.00 | 0.00 | P |
| ATOM | 1016 | H1   | G B | 14 | -7.874  | -49.743 | 111.253 | 1.00 | 0.00 | H |
| ATOM | 1017 | H8   | G B | 14 | -4.124  | -45.284 | 114.036 | 1.00 | 0.00 | H |
| ATOM | 1018 | H1'  | G B | 14 | -7.971  | -44.594 | 114.104 | 1.00 | 0.00 | H |
| ATOM | 1019 | H21  | G B | 14 | -9.964  | -49.080 | 111.244 | 1.00 | 0.00 | H |
| ATOM | 1020 | H3'  | G B | 14 | -5.755  | -41.776 | 115.721 | 1.00 | 0.00 | H |
| ATOM | 1021 | H22  | G B | 14 | -10.476 | -47.511 | 111.927 | 1.00 | 0.00 | H |
| ATOM | 1022 | H4'  | G B | 14 | -6.726  | -41.259 | 113.313 | 1.00 | 0.00 | H |
| ATOM | 1023 | H2'1 | G B | 14 | -5.312  | -44.124 | 115.485 | 1.00 | 0.00 | H |
| ATOM | 1024 | H2'2 | G B | 14 | -6.921  | -44.169 | 116.188 | 1.00 | 0.00 | H |

|      |      |       |     |    |         |         |         |      |      |   |
|------|------|-------|-----|----|---------|---------|---------|------|------|---|
| ATOM | 1025 | H5 '1 | G B | 14 | -4.646  | -42.322 | 112.183 | 1.00 | 0.00 | H |
| ATOM | 1026 | H5 '2 | G B | 14 | -4.451  | -40.984 | 113.335 | 1.00 | 0.00 | H |
| ATOM | 1027 | C1 '  | C B | 15 | -10.942 | -46.615 | 115.809 | 1.00 | 0.00 | C |
| ATOM | 1028 | N1    | C B | 15 | -9.638  | -47.329 | 115.764 | 1.00 | 0.00 | N |
| ATOM | 1029 | C2    | C B | 15 | -9.604  | -48.591 | 115.174 | 1.00 | 0.00 | C |
| ATOM | 1030 | O2    | C B | 15 | -10.652 | -49.063 | 114.715 | 1.00 | 0.00 | O |
| ATOM | 1031 | N3    | C B | 15 | -8.425  | -49.258 | 115.123 | 1.00 | 0.00 | N |
| ATOM | 1032 | C4    | C B | 15 | -7.308  | -48.722 | 115.630 | 1.00 | 0.00 | C |
| ATOM | 1033 | N4    | C B | 15 | -6.182  | -49.416 | 115.550 | 1.00 | 0.00 | N |
| ATOM | 1034 | C5    | C B | 15 | -7.314  | -47.426 | 116.248 | 1.00 | 0.00 | C |
| ATOM | 1035 | C6    | C B | 15 | -8.510  | -46.773 | 116.284 | 1.00 | 0.00 | C |
| ATOM | 1036 | C2 '  | C B | 15 | -11.169 | -45.830 | 117.093 | 1.00 | 0.00 | C |
| ATOM | 1037 | C3 '  | C B | 15 | -11.928 | -44.612 | 116.591 | 1.00 | 0.00 | C |
| ATOM | 1038 | O3 '  | C B | 15 | -13.317 | -44.927 | 116.504 | 1.00 | 0.00 | O |
| ATOM | 1039 | C4 '  | C B | 15 | -11.306 | -44.365 | 115.219 | 1.00 | 0.00 | C |
| ATOM | 1040 | O4 '  | C B | 15 | -10.971 | -45.702 | 114.728 | 1.00 | 0.00 | O |
| ATOM | 1041 | C5 '  | C B | 15 | -10.056 | -43.515 | 115.191 | 1.00 | 0.00 | C |
| ATOM | 1042 | O5 '  | C B | 15 | -9.248  | -43.795 | 116.361 | 1.00 | 0.00 | O |
| ATOM | 1043 | O1P   | C B | 15 | -9.317  | -41.632 | 117.648 | 1.00 | 0.00 | O |
| ATOM | 1044 | O2P   | C B | 15 | -7.351  | -43.172 | 117.891 | 1.00 | 0.00 | O |
| ATOM | 1045 | P     | C B | 15 | -8.406  | -42.608 | 117.015 | 1.00 | 0.00 | P |
| ATOM | 1046 | H5    | C B | 15 | -6.407  | -46.990 | 116.668 | 1.00 | 0.00 | H |
| ATOM | 1047 | H6    | C B | 15 | -8.564  | -45.782 | 116.738 | 1.00 | 0.00 | H |
| ATOM | 1048 | H1 '  | C B | 15 | -11.736 | -47.346 | 115.653 | 1.00 | 0.00 | H |
| ATOM | 1049 | H3 '  | C B | 15 | -11.793 | -43.749 | 117.244 | 1.00 | 0.00 | H |
| ATOM | 1050 | H4 '  | C B | 15 | -12.061 | -43.865 | 114.613 | 1.00 | 0.00 | H |
| ATOM | 1051 | H41   | C B | 15 | -5.308  | -49.025 | 115.930 | 1.00 | 0.00 | H |
| ATOM | 1052 | H42   | C B | 15 | -6.181  | -50.348 | 115.109 | 1.00 | 0.00 | H |
| ATOM | 1053 | H2 '1 | C B | 15 | -10.233 | -45.544 | 117.574 | 1.00 | 0.00 | H |
| ATOM | 1054 | H2 '2 | C B | 15 | -11.754 | -46.389 | 117.824 | 1.00 | 0.00 | H |
| ATOM | 1055 | H5 '1 | C B | 15 | -9.488  | -43.742 | 114.289 | 1.00 | 0.00 | H |
| ATOM | 1056 | H5 '2 | C B | 15 | -10.340 | -42.463 | 115.183 | 1.00 | 0.00 | H |
| ATOM | 1057 | C1 '  | G B | 16 | -13.734 | -50.564 | 116.874 | 1.00 | 0.00 | C |
| ATOM | 1058 | N1    | G B | 16 | -9.258  | -53.010 | 116.910 | 1.00 | 0.00 | N |
| ATOM | 1059 | C2    | G B | 16 | -10.475 | -53.394 | 116.375 | 1.00 | 0.00 | C |
| ATOM | 1060 | N2    | G B | 16 | -10.503 | -54.589 | 115.771 | 1.00 | 0.00 | N |
| ATOM | 1061 | N3    | G B | 16 | -11.575 | -52.645 | 116.437 | 1.00 | 0.00 | N |
| ATOM | 1062 | C4    | G B | 16 | -11.364 | -51.472 | 117.089 | 1.00 | 0.00 | C |
| ATOM | 1063 | C5    | G B | 16 | -10.190 | -51.009 | 117.658 | 1.00 | 0.00 | C |
| ATOM | 1064 | C6    | G B | 16 | -9.020  | -51.801 | 117.590 | 1.00 | 0.00 | C |
| ATOM | 1065 | O6    | G B | 16 | -7.895  | -51.564 | 118.029 | 1.00 | 0.00 | O |
| ATOM | 1066 | N7    | G B | 16 | -10.394 | -49.754 | 118.236 | 1.00 | 0.00 | N |
| ATOM | 1067 | C8    | G B | 16 | -11.657 | -49.501 | 118.003 | 1.00 | 0.00 | C |
| ATOM | 1068 | N9    | G B | 16 | -12.314 | -50.499 | 117.312 | 1.00 | 0.00 | N |
| ATOM | 1069 | C2 '  | G B | 16 | -14.713 | -49.971 | 117.877 | 1.00 | 0.00 | C |
| ATOM | 1070 | C3 '  | G B | 16 | -15.756 | -49.340 | 116.969 | 1.00 | 0.00 | C |
| ATOM | 1071 | O3 '  | G B | 16 | -16.704 | -50.332 | 116.585 | 1.00 | 0.00 | O |
| ATOM | 1072 | C4 '  | G B | 16 | -14.924 | -48.848 | 115.786 | 1.00 | 0.00 | C |
| ATOM | 1073 | O4 '  | G B | 16 | -13.848 | -49.834 | 115.669 | 1.00 | 0.00 | O |
| ATOM | 1074 | C5 '  | G B | 16 | -14.309 | -47.476 | 115.922 | 1.00 | 0.00 | C |
| ATOM | 1075 | O5 '  | G B | 16 | -13.894 | -47.258 | 117.293 | 1.00 | 0.00 | O |
| ATOM | 1076 | O1P   | G B | 16 | -15.410 | -45.407 | 118.074 | 1.00 | 0.00 | O |
| ATOM | 1077 | O2P   | G B | 16 | -13.146 | -45.696 | 119.114 | 1.00 | 0.00 | O |
| ATOM | 1078 | P     | G B | 16 | -13.996 | -45.786 | 117.902 | 1.00 | 0.00 | P |

|      |      |      |     |    |         |         |         |      |      |   |
|------|------|------|-----|----|---------|---------|---------|------|------|---|
| ATOM | 1079 | H1   | G B | 16 | -8.465  | -53.661 | 116.801 | 1.00 | 0.00 | H |
| ATOM | 1080 | H8   | G B | 16 | -12.147 | -48.583 | 118.326 | 1.00 | 0.00 | H |
| ATOM | 1081 | H1'  | G B | 16 | -13.978 | -51.605 | 116.659 | 1.00 | 0.00 | H |
| ATOM | 1082 | H21  | G B | 16 | -9.649  | -55.161 | 115.723 | 1.00 | 0.00 | H |
| ATOM | 1083 | H3'  | G B | 16 | -16.275 | -48.513 | 117.454 | 1.00 | 0.00 | H |
| ATOM | 1084 | H22  | G B | 16 | -11.380 | -54.932 | 115.354 | 1.00 | 0.00 | H |
| ATOM | 1085 | H4'  | G B | 16 | -15.584 | -48.833 | 114.919 | 1.00 | 0.00 | H |
| ATOM | 1086 | H2'1 | G B | 16 | -14.245 | -49.225 | 118.521 | 1.00 | 0.00 | H |
| ATOM | 1087 | H2'2 | G B | 16 | -15.155 | -50.729 | 118.523 | 1.00 | 0.00 | H |
| ATOM | 1088 | H5'1 | G B | 16 | -13.445 | -47.403 | 115.260 | 1.00 | 0.00 | H |
| ATOM | 1089 | H5'2 | G B | 16 | -15.044 | -46.725 | 115.636 | 1.00 | 0.00 | H |
| ATOM | 1090 | C1'  | G B | 17 | -14.455 | -55.356 | 117.897 | 1.00 | 0.00 | C |
| ATOM | 1091 | N1   | G B | 17 | -9.639  | -55.139 | 119.566 | 1.00 | 0.00 | N |
| ATOM | 1092 | C2   | G B | 17 | -10.275 | -56.111 | 118.813 | 1.00 | 0.00 | C |
| ATOM | 1093 | N2   | G B | 17 | -9.530  | -57.164 | 118.460 | 1.00 | 0.00 | N |
| ATOM | 1094 | N3   | G B | 17 | -11.552 | -56.035 | 118.442 | 1.00 | 0.00 | N |
| ATOM | 1095 | C4   | G B | 17 | -12.155 | -54.904 | 118.894 | 1.00 | 0.00 | C |
| ATOM | 1096 | C5   | G B | 17 | -11.603 | -53.885 | 119.651 | 1.00 | 0.00 | C |
| ATOM | 1097 | C6   | G B | 17 | -10.247 | -53.962 | 120.042 | 1.00 | 0.00 | C |
| ATOM | 1098 | O6   | G B | 17 | -9.584  | -53.166 | 120.708 | 1.00 | 0.00 | O |
| ATOM | 1099 | N7   | G B | 17 | -12.560 | -52.901 | 119.907 | 1.00 | 0.00 | N |
| ATOM | 1100 | C8   | G B | 17 | -13.635 | -53.342 | 119.308 | 1.00 | 0.00 | C |
| ATOM | 1101 | N9   | G B | 17 | -13.469 | -54.554 | 118.671 | 1.00 | 0.00 | N |
| ATOM | 1102 | C2'  | G B | 17 | -15.862 | -55.324 | 118.478 | 1.00 | 0.00 | C |
| ATOM | 1103 | C3'  | G B | 17 | -16.724 | -55.348 | 117.226 | 1.00 | 0.00 | C |
| ATOM | 1104 | O3'  | G B | 17 | -16.896 | -56.699 | 116.802 | 1.00 | 0.00 | O |
| ATOM | 1105 | C4'  | G B | 17 | -15.900 | -54.531 | 116.231 | 1.00 | 0.00 | C |
| ATOM | 1106 | O4'  | G B | 17 | -14.512 | -54.824 | 116.588 | 1.00 | 0.00 | O |
| ATOM | 1107 | C5'  | G B | 17 | -16.103 | -53.035 | 116.261 | 1.00 | 0.00 | C |
| ATOM | 1108 | O5'  | G B | 17 | -16.310 | -52.596 | 117.626 | 1.00 | 0.00 | O |
| ATOM | 1109 | O1P  | G B | 17 | -18.689 | -51.772 | 117.618 | 1.00 | 0.00 | O |
| ATOM | 1110 | O2P  | G B | 17 | -17.038 | -50.821 | 119.251 | 1.00 | 0.00 | O |
| ATOM | 1111 | P    | G B | 17 | -17.296 | -51.371 | 117.897 | 1.00 | 0.00 | P |
| ATOM | 1112 | H1   | G B | 17 | -8.645  | -55.291 | 119.796 | 1.00 | 0.00 | H |
| ATOM | 1113 | H8   | G B | 17 | -14.581 | -52.800 | 119.312 | 1.00 | 0.00 | H |
| ATOM | 1114 | H1'  | G B | 17 | -14.084 | -56.378 | 117.828 | 1.00 | 0.00 | H |
| ATOM | 1115 | H21  | G B | 17 | -8.541  | -57.215 | 118.747 | 1.00 | 0.00 | H |
| ATOM | 1116 | H3'  | G B | 17 | -17.701 | -54.894 | 117.392 | 1.00 | 0.00 | H |
| ATOM | 1117 | H22  | G B | 17 | -9.945  | -57.924 | 117.901 | 1.00 | 0.00 | H |
| ATOM | 1118 | H4'  | G B | 17 | -16.167 | -54.883 | 115.235 | 1.00 | 0.00 | H |
| ATOM | 1119 | H2'1 | G B | 17 | -16.045 | -54.427 | 119.069 | 1.00 | 0.00 | H |
| ATOM | 1120 | H2'2 | G B | 17 | -16.066 | -56.183 | 119.117 | 1.00 | 0.00 | H |
| ATOM | 1121 | H5'1 | G B | 17 | -15.221 | -52.546 | 115.847 | 1.00 | 0.00 | H |
| ATOM | 1122 | H5'2 | G B | 17 | -16.972 | -52.780 | 115.655 | 1.00 | 0.00 | H |
| ATOM | 1123 | C1'  | C B | 18 | -13.067 | -59.802 | 119.582 | 1.00 | 0.00 | C |
| ATOM | 1124 | N1   | C B | 18 | -12.892 | -58.585 | 120.422 | 1.00 | 0.00 | N |
| ATOM | 1125 | C2   | C B | 18 | -11.634 | -58.350 | 120.973 | 1.00 | 0.00 | C |
| ATOM | 1126 | O2   | C B | 18 | -10.721 | -59.155 | 120.746 | 1.00 | 0.00 | O |
| ATOM | 1127 | N3   | C B | 18 | -11.454 | -57.248 | 121.741 | 1.00 | 0.00 | N |
| ATOM | 1128 | C4   | C B | 18 | -12.462 | -56.396 | 121.969 | 1.00 | 0.00 | C |
| ATOM | 1129 | N4   | C B | 18 | -12.228 | -55.333 | 122.726 | 1.00 | 0.00 | N |
| ATOM | 1130 | C5   | C B | 18 | -13.765 | -56.615 | 121.416 | 1.00 | 0.00 | C |
| ATOM | 1131 | C6   | C B | 18 | -13.922 | -57.728 | 120.645 | 1.00 | 0.00 | C |
| ATOM | 1132 | C2'  | C B | 18 | -14.417 | -60.483 | 119.763 | 1.00 | 0.00 | C |

|      |      |      |     |    |         |         |         |      |      |   |
|------|------|------|-----|----|---------|---------|---------|------|------|---|
| ATOM | 1133 | C3'  | C B | 18 | -14.712 | -60.981 | 118.356 | 1.00 | 0.00 | C |
| ATOM | 1134 | O3'  | C B | 18 | -14.069 | -62.239 | 118.161 | 1.00 | 0.00 | O |
| ATOM | 1135 | C4'  | C B | 18 | -14.115 | -59.885 | 117.476 | 1.00 | 0.00 | C |
| ATOM | 1136 | O4'  | C B | 18 | -12.953 | -59.409 | 118.227 | 1.00 | 0.00 | O |
| ATOM | 1137 | C5'  | C B | 18 | -15.010 | -58.707 | 117.173 | 1.00 | 0.00 | C |
| ATOM | 1138 | O5'  | C B | 18 | -15.826 | -58.399 | 118.332 | 1.00 | 0.00 | O |
| ATOM | 1139 | O1P  | C B | 18 | -18.164 | -58.916 | 117.555 | 1.00 | 0.00 | O |
| ATOM | 1140 | O2P  | C B | 18 | -17.788 | -57.207 | 119.354 | 1.00 | 0.00 | O |
| ATOM | 1141 | P    | C B | 18 | -17.304 | -57.849 | 118.107 | 1.00 | 0.00 | P |
| ATOM | 1142 | H5   | C B | 18 | -14.589 | -55.926 | 121.602 | 1.00 | 0.00 | H |
| ATOM | 1143 | H6   | C B | 18 | -14.895 | -57.934 | 120.200 | 1.00 | 0.00 | H |
| ATOM | 1144 | H1'  | C B | 18 | -12.250 | -60.489 | 119.802 | 1.00 | 0.00 | H |
| ATOM | 1145 | H3'  | C B | 18 | -15.781 | -61.091 | 118.178 | 1.00 | 0.00 | H |
| ATOM | 1146 | H4'  | C B | 18 | -13.848 | -60.350 | 116.527 | 1.00 | 0.00 | H |
| ATOM | 1147 | H41  | C B | 18 | -12.987 | -54.661 | 122.915 | 1.00 | 0.00 | H |
| ATOM | 1148 | H42  | C B | 18 | -11.291 | -55.179 | 123.122 | 1.00 | 0.00 | H |
| ATOM | 1149 | H2'1 | C B | 18 | -15.185 | -59.793 | 120.108 | 1.00 | 0.00 | H |
| ATOM | 1150 | H2'2 | C B | 18 | -14.372 | -61.307 | 120.476 | 1.00 | 0.00 | H |
| ATOM | 1151 | H5'1 | C B | 18 | -14.394 | -57.843 | 116.918 | 1.00 | 0.00 | H |
| ATOM | 1152 | H5'2 | C B | 18 | -15.651 | -58.951 | 116.328 | 1.00 | 0.00 | H |
| ATOM | 1153 | C1'  | C B | 19 | -10.341 | -62.845 | 122.381 | 1.00 | 0.00 | C |
| ATOM | 1154 | N1   | C B | 19 | -11.051 | -61.688 | 122.991 | 1.00 | 0.00 | N |
| ATOM | 1155 | C2   | C B | 19 | -10.317 | -60.821 | 123.799 | 1.00 | 0.00 | C |
| ATOM | 1156 | O2   | C B | 19 | -9.112  | -61.045 | 123.974 | 1.00 | 0.00 | O |
| ATOM | 1157 | N3   | C B | 19 | -10.947 | -59.764 | 124.363 | 1.00 | 0.00 | N |
| ATOM | 1158 | C4   | C B | 19 | -12.253 | -59.548 | 124.154 | 1.00 | 0.00 | C |
| ATOM | 1159 | N4   | C B | 19 | -12.817 | -58.499 | 124.730 | 1.00 | 0.00 | N |
| ATOM | 1160 | C5   | C B | 19 | -13.030 | -60.423 | 123.330 | 1.00 | 0.00 | C |
| ATOM | 1161 | C6   | C B | 19 | -12.376 | -61.480 | 122.772 | 1.00 | 0.00 | C |
| ATOM | 1162 | C2'  | C B | 19 | -11.171 | -64.117 | 122.328 | 1.00 | 0.00 | C |
| ATOM | 1163 | C3'  | C B | 19 | -10.719 | -64.736 | 121.013 | 1.00 | 0.00 | C |
| ATOM | 1164 | O3'  | C B | 19 | -9.527  | -65.487 | 121.234 | 1.00 | 0.00 | O |
| ATOM | 1165 | C4'  | C B | 19 | -10.477 | -63.516 | 120.128 | 1.00 | 0.00 | C |
| ATOM | 1166 | O4'  | C B | 19 | -10.000 | -62.488 | 121.054 | 1.00 | 0.00 | O |
| ATOM | 1167 | C5'  | C B | 19 | -11.677 | -62.975 | 119.386 | 1.00 | 0.00 | C |
| ATOM | 1168 | O5'  | C B | 19 | -12.862 | -63.101 | 120.211 | 1.00 | 0.00 | O |
| ATOM | 1169 | O1P  | C B | 19 | -14.268 | -64.773 | 118.962 | 1.00 | 0.00 | O |
| ATOM | 1170 | O2P  | C B | 19 | -15.364 | -63.065 | 120.438 | 1.00 | 0.00 | O |
| ATOM | 1171 | P    | C B | 19 | -14.260 | -63.400 | 119.506 | 1.00 | 0.00 | P |
| ATOM | 1172 | H5   | C B | 19 | -14.093 | -60.253 | 123.159 | 1.00 | 0.00 | H |
| ATOM | 1173 | H6   | C B | 19 | -12.927 | -62.173 | 122.136 | 1.00 | 0.00 | H |
| ATOM | 1174 | H1'  | C B | 19 | -9.414  | -63.004 | 122.934 | 1.00 | 0.00 | H |
| ATOM | 1175 | H3'  | C B | 19 | -11.483 | -65.387 | 120.586 | 1.00 | 0.00 | H |
| ATOM | 1176 | H4'  | C B | 19 | -9.730  | -63.803 | 119.389 | 1.00 | 0.00 | H |
| ATOM | 1177 | H41  | C B | 19 | -13.820 | -58.307 | 124.585 | 1.00 | 0.00 | H |
| ATOM | 1178 | H42  | C B | 19 | -12.254 | -57.870 | 125.323 | 1.00 | 0.00 | H |
| ATOM | 1179 | H2'1 | C B | 19 | -12.241 | -63.914 | 122.322 | 1.00 | 0.00 | H |
| ATOM | 1180 | H2'2 | C B | 19 | -10.967 | -64.780 | 123.170 | 1.00 | 0.00 | H |
| ATOM | 1181 | H5'1 | C B | 19 | -11.506 | -61.928 | 119.143 | 1.00 | 0.00 | H |
| ATOM | 1182 | H5'2 | C B | 19 | -11.809 | -63.540 | 118.464 | 1.00 | 0.00 | H |
| ATOM | 1183 | C1'  | T B | 20 | -7.548  | -63.981 | 126.307 | 1.00 | 0.00 | C |
| ATOM | 1184 | N1   | T B | 20 | -8.871  | -63.327 | 126.493 | 1.00 | 0.00 | N |
| ATOM | 1185 | C2   | T B | 20 | -8.909  | -62.198 | 127.286 | 1.00 | 0.00 | C |
| ATOM | 1186 | O2   | T B | 20 | -7.918  | -61.734 | 127.824 | 1.00 | 0.00 | O |

|      |      |      |     |    |         |         |         |      |      |   |
|------|------|------|-----|----|---------|---------|---------|------|------|---|
| ATOM | 1187 | N3   | T B | 20 | -10.157 | -61.623 | 127.432 | 1.00 | 0.00 | N |
| ATOM | 1188 | C4   | T B | 20 | -11.336 | -62.065 | 126.872 | 1.00 | 0.00 | C |
| ATOM | 1189 | O4   | T B | 20 | -12.398 | -61.464 | 127.077 | 1.00 | 0.00 | O |
| ATOM | 1190 | C5   | T B | 20 | -11.196 | -63.250 | 126.060 | 1.00 | 0.00 | C |
| ATOM | 1191 | C6   | T B | 20 | -9.996  | -63.837 | 125.895 | 1.00 | 0.00 | C |
| ATOM | 1192 | C7   | T B | 20 | -12.456 | -63.765 | 125.430 | 1.00 | 0.00 | C |
| ATOM | 1193 | C2'  | T B | 20 | -7.616  | -65.503 | 126.273 | 1.00 | 0.00 | C |
| ATOM | 1194 | C3'  | T B | 20 | -6.539  | -65.845 | 125.254 | 1.00 | 0.00 | C |
| ATOM | 1195 | O3'  | T B | 20 | -5.272  | -65.886 | 125.908 | 1.00 | 0.00 | O |
| ATOM | 1196 | C4'  | T B | 20 | -6.637  | -64.694 | 124.255 | 1.00 | 0.00 | C |
| ATOM | 1197 | O4'  | T B | 20 | -7.019  | -63.540 | 125.072 | 1.00 | 0.00 | O |
| ATOM | 1198 | C5'  | T B | 20 | -7.646  | -64.854 | 123.143 | 1.00 | 0.00 | C |
| ATOM | 1199 | O5'  | T B | 20 | -8.825  | -65.537 | 123.644 | 1.00 | 0.00 | O |
| ATOM | 1200 | O1P  | T B | 20 | -8.802  | -67.724 | 122.399 | 1.00 | 0.00 | O |
| ATOM | 1201 | O2P  | T B | 20 | -10.974 | -66.762 | 123.208 | 1.00 | 0.00 | O |
| ATOM | 1202 | P    | T B | 20 | -9.614  | -66.520 | 122.668 | 1.00 | 0.00 | P |
| ATOM | 1203 | H3   | T B | 20 | -10.212 | -60.778 | 128.018 | 1.00 | 0.00 | H |
| ATOM | 1204 | H6   | T B | 20 | -9.915  | -64.731 | 125.277 | 1.00 | 0.00 | H |
| ATOM | 1205 | H1'  | T B | 20 | -6.882  | -63.638 | 127.098 | 1.00 | 0.00 | H |
| ATOM | 1206 | H3'  | T B | 20 | -6.726  | -66.803 | 124.770 | 1.00 | 0.00 | H |
| ATOM | 1207 | H4'  | T B | 20 | -5.652  | -64.587 | 123.798 | 1.00 | 0.00 | H |
| ATOM | 1208 | H3T  | T B | 20 | -5.230  | -66.455 | 126.680 | 1.00 | 0.00 | H |
| ATOM | 1209 | H71  | T B | 20 | -12.700 | -64.741 | 125.850 | 1.00 | 0.00 | H |
| ATOM | 1210 | H72  | T B | 20 | -13.273 | -63.070 | 125.625 | 1.00 | 0.00 | H |
| ATOM | 1211 | H73  | T B | 20 | -12.311 | -63.860 | 124.352 | 1.00 | 0.00 | H |
| ATOM | 1212 | H2'1 | T B | 20 | -8.592  | -65.866 | 125.954 | 1.00 | 0.00 | H |
| ATOM | 1213 | H2'2 | T B | 20 | -7.400  | -65.949 | 127.243 | 1.00 | 0.00 | H |
| ATOM | 1214 | H5'1 | T B | 20 | -7.923  | -63.869 | 122.766 | 1.00 | 0.00 | H |
| ATOM | 1215 | H5'2 | T B | 20 | -7.200  | -65.434 | 122.337 | 1.00 | 0.00 | H |
| TER  |      |      |     |    |         |         |         |      |      |   |
| ATOM | 1    | C1'  | A A | 1  | 5.233   | -79.522 | 101.143 | 1.00 | 0.00 | C |
| ATOM | 2    | N1   | A A | 1  | 0.973   | -81.183 | 98.814  | 1.00 | 0.00 | N |
| ATOM | 3    | C2   | A A | 1  | 2.260   | -81.244 | 98.483  | 1.00 | 0.00 | C |
| ATOM | 4    | N3   | A A | 1  | 3.313   | -80.796 | 99.134  | 1.00 | 0.00 | N |
| ATOM | 5    | C4   | A A | 1  | 2.934   | -80.204 | 100.281 | 1.00 | 0.00 | C |
| ATOM | 6    | C5   | A A | 1  | 1.663   | -80.058 | 100.761 | 1.00 | 0.00 | C |
| ATOM | 7    | C6   | A A | 1  | 0.626   | -80.587 | 99.964  | 1.00 | 0.00 | C |
| ATOM | 8    | N6   | A A | 1  | -0.672  | -80.519 | 100.308 | 1.00 | 0.00 | N |
| ATOM | 9    | N7   | A A | 1  | 1.661   | -79.395 | 101.976 | 1.00 | 0.00 | N |
| ATOM | 10   | C8   | A A | 1  | 2.918   | -79.154 | 102.201 | 1.00 | 0.00 | C |
| ATOM | 11   | N9   | A A | 1  | 3.751   | -79.617 | 101.216 | 1.00 | 0.00 | N |
| ATOM | 12   | C2'  | A A | 1  | 5.791   | -78.210 | 101.677 | 1.00 | 0.00 | C |
| ATOM | 13   | C3'  | A A | 1  | 7.091   | -78.659 | 102.324 | 1.00 | 0.00 | C |
| ATOM | 14   | O3'  | A A | 1  | 8.111   | -78.723 | 101.331 | 1.00 | 0.00 | O |
| ATOM | 15   | C4'  | A A | 1  | 6.738   | -80.037 | 102.880 | 1.00 | 0.00 | C |
| ATOM | 16   | O4'  | A A | 1  | 5.771   | -80.574 | 101.921 | 1.00 | 0.00 | O |
| ATOM | 17   | C5'  | A A | 1  | 6.118   | -80.066 | 104.258 | 1.00 | 0.00 | C |
| ATOM | 18   | O5'  | A A | 1  | 5.242   | -78.924 | 104.427 | 1.00 | 0.00 | O |
| ATOM | 19   | H2   | A A | 1  | 2.474   | -81.737 | 97.535  | 1.00 | 0.00 | H |
| ATOM | 20   | H8   | A A | 1  | 3.277   | -78.634 | 103.090 | 1.00 | 0.00 | H |
| ATOM | 21   | H1'  | A A | 1  | 5.535   | -79.683 | 100.108 | 1.00 | 0.00 | H |
| ATOM | 22   | H3'  | A A | 1  | 7.406   | -77.982 | 103.121 | 1.00 | 0.00 | H |
| ATOM | 23   | H4'  | A A | 1  | 7.664   | -80.609 | 102.919 | 1.00 | 0.00 | H |
| ATOM | 24   | H61  | A A | 1  | -1.389  | -80.921 | 99.691  | 1.00 | 0.00 | H |

|      |    |      |     |   |        |         |         |      |      |   |
|------|----|------|-----|---|--------|---------|---------|------|------|---|
| ATOM | 25 | H62  | A A | 1 | -0.946 | -80.062 | 101.190 | 1.00 | 0.00 | H |
| ATOM | 26 | H5T  | A A | 1 | 5.171  | -78.521 | 105.294 | 1.00 | 0.00 | H |
| ATOM | 27 | H2'1 | A A | 1 | 5.127  | -77.743 | 102.403 | 1.00 | 0.00 | H |
| ATOM | 28 | H2'2 | A A | 1 | 5.973  | -77.485 | 100.884 | 1.00 | 0.00 | H |
| ATOM | 29 | H5'1 | A A | 1 | 5.549  | -80.988 | 104.374 | 1.00 | 0.00 | H |
| ATOM | 30 | H5'2 | A A | 1 | 6.909  | -80.037 | 105.006 | 1.00 | 0.00 | H |
| ATOM | 31 | C1'  | G A | 2 | 5.446  | -78.550 | 96.279  | 1.00 | 0.00 | C |
| ATOM | 32 | N1   | G A | 2 | 0.357  | -78.654 | 96.593  | 1.00 | 0.00 | N |
| ATOM | 33 | C2   | G A | 2 | 1.195  | -79.185 | 95.633  | 1.00 | 0.00 | C |
| ATOM | 34 | N2   | G A | 2 | 0.602  | -79.828 | 94.620  | 1.00 | 0.00 | N |
| ATOM | 35 | N3   | G A | 2 | 2.523  | -79.085 | 95.678  | 1.00 | 0.00 | N |
| ATOM | 36 | C4   | G A | 2 | 2.951  | -78.397 | 96.769  | 1.00 | 0.00 | C |
| ATOM | 37 | C5   | G A | 2 | 2.187  | -77.829 | 97.776  | 1.00 | 0.00 | C |
| ATOM | 38 | C6   | G A | 2 | 0.778  | -77.941 | 97.729  | 1.00 | 0.00 | C |
| ATOM | 39 | O6   | G A | 2 | -0.061 | -77.511 | 98.521  | 1.00 | 0.00 | O |
| ATOM | 40 | N7   | G A | 2 | 3.013  | -77.208 | 98.716  | 1.00 | 0.00 | N |
| ATOM | 41 | C8   | G A | 2 | 4.222  | -77.416 | 98.262  | 1.00 | 0.00 | C |
| ATOM | 42 | N9   | G A | 2 | 4.266  | -78.130 | 97.082  | 1.00 | 0.00 | N |
| ATOM | 43 | C2'  | G A | 2 | 6.562  | -77.516 | 96.240  | 1.00 | 0.00 | C |
| ATOM | 44 | C3'  | G A | 2 | 7.806  | -78.389 | 96.237  | 1.00 | 0.00 | C |
| ATOM | 45 | O3'  | G A | 2 | 8.091  | -78.792 | 94.898  | 1.00 | 0.00 | O |
| ATOM | 46 | C4'  | G A | 2 | 7.396  | -79.567 | 97.119  | 1.00 | 0.00 | C |
| ATOM | 47 | O4'  | G A | 2 | 5.967  | -79.730 | 96.861  | 1.00 | 0.00 | O |
| ATOM | 48 | C5'  | G A | 2 | 7.604  | -79.394 | 98.605  | 1.00 | 0.00 | C |
| ATOM | 49 | O5'  | G A | 2 | 7.328  | -78.022 | 98.983  | 1.00 | 0.00 | O |
| ATOM | 50 | O1P  | G A | 2 | 9.574  | -77.161 | 99.725  | 1.00 | 0.00 | O |
| ATOM | 51 | O2P  | G A | 2 | 7.475  | -76.161 | 100.665 | 1.00 | 0.00 | O |
| ATOM | 52 | P    | G A | 2 | 8.180  | -77.365 | 100.161 | 1.00 | 0.00 | P |
| ATOM | 53 | H1   | G A | 2 | -0.657 | -78.791 | 96.466  | 1.00 | 0.00 | H |
| ATOM | 54 | H8   | G A | 2 | 5.116  | -77.057 | 98.771  | 1.00 | 0.00 | H |
| ATOM | 55 | H1'  | G A | 2 | 5.105  | -78.795 | 95.273  | 1.00 | 0.00 | H |
| ATOM | 56 | H21  | G A | 2 | -0.425 | -79.905 | 94.592  | 1.00 | 0.00 | H |
| ATOM | 57 | H3'  | G A | 2 | 8.671  | -77.869 | 96.650  | 1.00 | 0.00 | H |
| ATOM | 58 | H22  | G A | 2 | 1.173  | -80.245 | 93.872  | 1.00 | 0.00 | H |
| ATOM | 59 | H4'  | G A | 2 | 7.989  | -80.423 | 96.798  | 1.00 | 0.00 | H |
| ATOM | 60 | H2'1 | G A | 2 | 6.544  | -76.854 | 97.107  | 1.00 | 0.00 | H |
| ATOM | 61 | H2'2 | G A | 2 | 6.514  | -76.889 | 95.348  | 1.00 | 0.00 | H |
| ATOM | 62 | H5'1 | G A | 2 | 6.932  | -80.065 | 99.140  | 1.00 | 0.00 | H |
| ATOM | 63 | H5'2 | G A | 2 | 8.634  | -79.647 | 98.855  | 1.00 | 0.00 | H |
| ATOM | 64 | C1'  | G A | 3 | 3.475  | -77.667 | 91.822  | 1.00 | 0.00 | C |
| ATOM | 65 | N1   | G A | 3 | -0.532 | -76.061 | 94.539  | 1.00 | 0.00 | N |
| ATOM | 66 | C2   | G A | 3 | -0.489 | -76.836 | 93.396  | 1.00 | 0.00 | C |
| ATOM | 67 | N2   | G A | 3 | -1.671 | -77.235 | 92.909  | 1.00 | 0.00 | N |
| ATOM | 68 | N3   | G A | 3 | 0.641  | -77.186 | 92.786  | 1.00 | 0.00 | N |
| ATOM | 69 | C4   | G A | 3 | 1.741  | -76.689 | 93.411  | 1.00 | 0.00 | C |
| ATOM | 70 | C5   | G A | 3 | 1.793  | -75.906 | 94.552  | 1.00 | 0.00 | C |
| ATOM | 71 | C6   | G A | 3 | 0.593  | -75.538 | 95.203  | 1.00 | 0.00 | C |
| ATOM | 72 | O6   | G A | 3 | 0.436  | -74.856 | 96.216  | 1.00 | 0.00 | O |
| ATOM | 73 | N7   | G A | 3 | 3.119  | -75.604 | 94.869  | 1.00 | 0.00 | N |
| ATOM | 74 | C8   | G A | 3 | 3.812  | -76.201 | 93.935  | 1.00 | 0.00 | C |
| ATOM | 75 | N9   | G A | 3 | 3.045  | -76.882 | 93.011  | 1.00 | 0.00 | N |
| ATOM | 76 | C2'  | G A | 3 | 4.665  | -77.066 | 91.087  | 1.00 | 0.00 | C |
| ATOM | 77 | C3'  | G A | 3 | 5.418  | -78.305 | 90.633  | 1.00 | 0.00 | C |
| ATOM | 78 | O3'  | G A | 3 | 4.857  | -78.770 | 89.408  | 1.00 | 0.00 | O |

|      |     |      |     |   |        |         |        |      |      |   |
|------|-----|------|-----|---|--------|---------|--------|------|------|---|
| ATOM | 79  | C4'  | G A | 3 | 5.186  | -79.284 | 91.783 | 1.00 | 0.00 | C |
| ATOM | 80  | O4'  | G A | 3 | 3.845  | -78.958 | 92.269 | 1.00 | 0.00 | O |
| ATOM | 81  | C5'  | G A | 3 | 6.154  | -79.201 | 92.939 | 1.00 | 0.00 | C |
| ATOM | 82  | O5'  | G A | 3 | 6.523  | -77.819 | 93.172 | 1.00 | 0.00 | O |
| ATOM | 83  | O1P  | G A | 3 | 8.974  | -77.767 | 92.602 | 1.00 | 0.00 | O |
| ATOM | 84  | O2P  | G A | 3 | 8.035  | -76.127 | 94.252 | 1.00 | 0.00 | O |
| ATOM | 85  | P    | G A | 3 | 8.001  | -77.494 | 93.677 | 1.00 | 0.00 | P |
| ATOM | 86  | H1   | G A | 3 | -1.461 | -75.850 | 94.936 | 1.00 | 0.00 | H |
| ATOM | 87  | H8   | G A | 3 | 4.900  | -76.166 | 93.888 | 1.00 | 0.00 | H |
| ATOM | 88  | H1'  | G A | 3 | 2.619  | -77.775 | 91.156 | 1.00 | 0.00 | H |
| ATOM | 89  | H21  | G A | 3 | -2.543 | -76.963 | 93.388 | 1.00 | 0.00 | H |
| ATOM | 90  | H3'  | G A | 3 | 6.481  | -78.109 | 90.492 | 1.00 | 0.00 | H |
| ATOM | 91  | H22  | G A | 3 | -1.707 | -77.813 | 92.058 | 1.00 | 0.00 | H |
| ATOM | 92  | H4'  | G A | 3 | 5.254  | -80.287 | 91.363 | 1.00 | 0.00 | H |
| ATOM | 93  | H2'1 | G A | 3 | 5.280  | -76.443 | 91.736 | 1.00 | 0.00 | H |
| ATOM | 94  | H2'2 | G A | 3 | 4.360  | -76.452 | 90.239 | 1.00 | 0.00 | H |
| ATOM | 95  | H5'1 | G A | 3 | 5.681  | -79.612 | 93.831 | 1.00 | 0.00 | H |
| ATOM | 96  | H5'2 | G A | 3 | 7.042  | -79.786 | 92.705 | 1.00 | 0.00 | H |
| ATOM | 97  | C1'  | C A | 4 | -0.116 | -76.143 | 88.770 | 1.00 | 0.00 | C |
| ATOM | 98  | N1   | C A | 4 | 0.359  | -75.265 | 89.877 | 1.00 | 0.00 | N |
| ATOM | 99  | C2   | C A | 4 | -0.596 | -74.727 | 90.735 | 1.00 | 0.00 | C |
| ATOM | 100 | O2   | C A | 4 | -1.789 | -74.994 | 90.547 | 1.00 | 0.00 | O |
| ATOM | 101 | N3   | C A | 4 | -0.184 | -73.926 | 91.748 | 1.00 | 0.00 | N |
| ATOM | 102 | C4   | C A | 4 | 1.115  | -73.654 | 91.927 | 1.00 | 0.00 | C |
| ATOM | 103 | N4   | C A | 4 | 1.461  | -72.868 | 92.936 | 1.00 | 0.00 | N |
| ATOM | 104 | C5   | C A | 4 | 2.117  | -74.194 | 91.057 | 1.00 | 0.00 | C |
| ATOM | 105 | C6   | C A | 4 | 1.681  | -74.998 | 90.046 | 1.00 | 0.00 | C |
| ATOM | 106 | C2'  | C A | 4 | 0.657  | -75.963 | 87.471 | 1.00 | 0.00 | C |
| ATOM | 107 | C3'  | C A | 4 | 0.685  | -77.381 | 86.920 | 1.00 | 0.00 | C |
| ATOM | 108 | O3'  | C A | 4 | -0.524 | -77.627 | 86.203 | 1.00 | 0.00 | O |
| ATOM | 109 | C4'  | C A | 4 | 0.791  | -78.234 | 88.181 | 1.00 | 0.00 | C |
| ATOM | 110 | O4'  | C A | 4 | 0.039  | -77.486 | 89.189 | 1.00 | 0.00 | O |
| ATOM | 111 | C5'  | C A | 4 | 2.185  | -78.483 | 88.707 | 1.00 | 0.00 | C |
| ATOM | 112 | O5'  | C A | 4 | 3.002  | -77.302 | 88.508 | 1.00 | 0.00 | O |
| ATOM | 113 | O1P  | C A | 4 | 4.727  | -78.059 | 86.838 | 1.00 | 0.00 | O |
| ATOM | 114 | O2P  | C A | 4 | 5.267  | -76.211 | 88.447 | 1.00 | 0.00 | O |
| ATOM | 115 | P    | C A | 4 | 4.554  | -77.487 | 88.188 | 1.00 | 0.00 | P |
| ATOM | 116 | H5   | C A | 4 | 3.175  | -73.970 | 91.195 | 1.00 | 0.00 | H |
| ATOM | 117 | H6   | C A | 4 | 2.407  | -75.437 | 89.361 | 1.00 | 0.00 | H |
| ATOM | 118 | H1'  | C A | 4 | -1.178 | -75.957 | 88.622 | 1.00 | 0.00 | H |
| ATOM | 119 | H3'  | C A | 4 | 1.535  | -77.545 | 86.259 | 1.00 | 0.00 | H |
| ATOM | 120 | H4'  | C A | 4 | 0.346  | -79.201 | 87.948 | 1.00 | 0.00 | H |
| ATOM | 121 | H41  | C A | 4 | 2.455  | -72.643 | 93.096 | 1.00 | 0.00 | H |
| ATOM | 122 | H42  | C A | 4 | 0.739  | -72.480 | 93.559 | 1.00 | 0.00 | H |
| ATOM | 123 | H2'1 | C A | 4 | 1.665  | -75.584 | 87.637 | 1.00 | 0.00 | H |
| ATOM | 124 | H2'2 | C A | 4 | 0.159  | -75.278 | 86.784 | 1.00 | 0.00 | H |
| ATOM | 125 | H5'1 | C A | 4 | 2.131  | -78.720 | 89.770 | 1.00 | 0.00 | H |
| ATOM | 126 | H5'2 | C A | 4 | 2.622  | -79.327 | 88.174 | 1.00 | 0.00 | H |
| ATOM | 127 | C1'  | C A | 5 | -4.124 | -73.481 | 87.599 | 1.00 | 0.00 | C |
| ATOM | 128 | N1   | C A | 5 | -2.924 | -72.821 | 88.185 | 1.00 | 0.00 | N |
| ATOM | 129 | C2   | C A | 5 | -3.108 | -72.000 | 89.294 | 1.00 | 0.00 | C |
| ATOM | 130 | O2   | C A | 5 | -4.252 | -71.849 | 89.745 | 1.00 | 0.00 | O |
| ATOM | 131 | N3   | C A | 5 | -2.028 | -71.390 | 89.842 | 1.00 | 0.00 | N |
| ATOM | 132 | C4   | C A | 5 | -0.803 | -71.570 | 89.332 | 1.00 | 0.00 | C |



|      |     |      |     |   |         |         |        |      |      |   |
|------|-----|------|-----|---|---------|---------|--------|------|------|---|
| ATOM | 133 | N4   | C A | 5 | 0.216   | -70.954 | 89.910 | 1.00 | 0.00 | N |
| ATOM | 134 | C5   | C A | 5 | -0.585  | -72.409 | 88.190 | 1.00 | 0.00 | C |
| ATOM | 135 | C6   | C A | 5 | -1.687  | -73.013 | 87.658 | 1.00 | 0.00 | C |
| ATOM | 136 | C2'  | C A | 5 | -4.098  | -73.561 | 86.079 | 1.00 | 0.00 | C |
| ATOM | 137 | C3'  | C A | 5 | -4.770  | -74.902 | 85.822 | 1.00 | 0.00 | C |
| ATOM | 138 | O3'  | C A | 5 | -6.185  | -74.724 | 85.820 | 1.00 | 0.00 | O |
| ATOM | 139 | C4'  | C A | 5 | -4.296  | -75.751 | 87.000 | 1.00 | 0.00 | C |
| ATOM | 140 | O4'  | C A | 5 | -4.181  | -74.801 | 88.106 | 1.00 | 0.00 | O |
| ATOM | 141 | C5'  | C A | 5 | -2.972  | -76.456 | 86.828 | 1.00 | 0.00 | C |
| ATOM | 142 | O5'  | C A | 5 | -2.061  | -75.615 | 86.075 | 1.00 | 0.00 | O |
| ATOM | 143 | O1P  | C A | 5 | -1.726  | -76.896 | 83.933 | 1.00 | 0.00 | O |
| ATOM | 144 | O2P  | C A | 5 | 0.065   | -75.347 | 84.765 | 1.00 | 0.00 | O |
| ATOM | 145 | P    | C A | 5 | -1.018  | -76.308 | 85.087 | 1.00 | 0.00 | P |
| ATOM | 146 | H5   | C A | 5 | 0.409   | -72.554 | 87.768 | 1.00 | 0.00 | H |
| ATOM | 147 | H6   | C A | 5 | -1.570  | -73.664 | 86.791 | 1.00 | 0.00 | H |
| ATOM | 148 | H1'  | C A | 5 | -5.008  | -72.948 | 87.948 | 1.00 | 0.00 | H |
| ATOM | 149 | H3'  | C A | 5 | -4.460  | -75.338 | 84.872 | 1.00 | 0.00 | H |
| ATOM | 150 | H4'  | C A | 5 | -5.059  | -76.511 | 87.168 | 1.00 | 0.00 | H |
| ATOM | 151 | H41  | C A | 5 | 1.170   | -71.076 | 89.538 | 1.00 | 0.00 | H |
| ATOM | 152 | H42  | C A | 5 | 0.057   | -70.351 | 90.730 | 1.00 | 0.00 | H |
| ATOM | 153 | H2'1 | C A | 5 | -3.085  | -73.543 | 85.680 | 1.00 | 0.00 | H |
| ATOM | 154 | H2'2 | C A | 5 | -4.650  | -72.744 | 85.612 | 1.00 | 0.00 | H |
| ATOM | 155 | H5'1 | C A | 5 | -2.549  | -76.668 | 87.811 | 1.00 | 0.00 | H |
| ATOM | 156 | H5'2 | C A | 5 | -3.133  | -77.395 | 86.297 | 1.00 | 0.00 | H |
| ATOM | 157 | C1'  | G A | 6 | -7.190  | -69.621 | 88.067 | 1.00 | 0.00 | C |
| ATOM | 158 | N1   | G A | 6 | -3.051  | -67.277 | 89.912 | 1.00 | 0.00 | N |
| ATOM | 159 | C2   | G A | 6 | -4.361  | -67.249 | 90.359 | 1.00 | 0.00 | C |
| ATOM | 160 | N2   | G A | 6 | -4.600  | -66.496 | 91.438 | 1.00 | 0.00 | N |
| ATOM | 161 | N3   | G A | 6 | -5.351  | -67.920 | 89.774 | 1.00 | 0.00 | N |
| ATOM | 162 | C4   | G A | 6 | -4.931  | -68.624 | 88.691 | 1.00 | 0.00 | C |
| ATOM | 163 | C5   | G A | 6 | -3.650  | -68.709 | 88.171 | 1.00 | 0.00 | C |
| ATOM | 164 | C6   | G A | 6 | -2.596  | -68.000 | 88.793 | 1.00 | 0.00 | C |
| ATOM | 165 | O6   | G A | 6 | -1.406  | -67.950 | 88.484 | 1.00 | 0.00 | O |
| ATOM | 166 | N7   | G A | 6 | -3.638  | -69.537 | 87.048 | 1.00 | 0.00 | N |
| ATOM | 167 | C8   | G A | 6 | -4.881  | -69.923 | 86.926 | 1.00 | 0.00 | C |
| ATOM | 168 | N9   | G A | 6 | -5.728  | -69.409 | 87.887 | 1.00 | 0.00 | N |
| ATOM | 169 | C2'  | G A | 6 | -7.964  | -69.698 | 86.758 | 1.00 | 0.00 | C |
| ATOM | 170 | C3'  | G A | 6 | -9.033  | -70.729 | 87.081 | 1.00 | 0.00 | C |
| ATOM | 171 | O3'  | G A | 6 | -10.128 | -70.084 | 87.725 | 1.00 | 0.00 | O |
| ATOM | 172 | C4'  | G A | 6 | -8.302  | -71.696 | 88.012 | 1.00 | 0.00 | C |
| ATOM | 173 | O4'  | G A | 6 | -7.369  | -70.845 | 88.751 | 1.00 | 0.00 | O |
| ATOM | 174 | C5'  | G A | 6 | -7.523  | -72.806 | 87.350 | 1.00 | 0.00 | C |
| ATOM | 175 | O5'  | G A | 6 | -6.920  | -72.321 | 86.124 | 1.00 | 0.00 | O |
| ATOM | 176 | O1P  | G A | 6 | -8.108  | -73.627 | 84.332 | 1.00 | 0.00 | O |
| ATOM | 177 | O2P  | G A | 6 | -5.781  | -72.781 | 83.933 | 1.00 | 0.00 | O |
| ATOM | 178 | P    | G A | 6 | -6.778  | -73.320 | 84.890 | 1.00 | 0.00 | P |
| ATOM | 179 | H1   | G A | 6 | -2.357  | -66.727 | 90.441 | 1.00 | 0.00 | H |
| ATOM | 180 | H8   | G A | 6 | -5.222  | -70.591 | 86.135 | 1.00 | 0.00 | H |
| ATOM | 181 | H1'  | G A | 6 | -7.575  | -68.821 | 88.701 | 1.00 | 0.00 | H |
| ATOM | 182 | H21  | G A | 6 | -3.828  | -65.982 | 91.888 | 1.00 | 0.00 | H |
| ATOM | 183 | H3'  | G A | 6 | -9.391  | -71.241 | 86.187 | 1.00 | 0.00 | H |
| ATOM | 184 | H22  | G A | 6 | -5.555  | -66.430 | 91.819 | 1.00 | 0.00 | H |
| ATOM | 185 | H4'  | G A | 6 | -9.057  | -72.152 | 88.650 | 1.00 | 0.00 | H |
| ATOM | 186 | H2'1 | G A | 6 | -7.339  | -70.022 | 85.926 | 1.00 | 0.00 | H |

|      |     |      |     |   |         |         |        |      |      |   |
|------|-----|------|-----|---|---------|---------|--------|------|------|---|
| ATOM | 187 | H2'2 | G A | 6 | -8.407  | -68.740 | 86.481 | 1.00 | 0.00 | H |
| ATOM | 188 | H5'1 | G A | 6 | -6.747  | -73.155 | 88.030 | 1.00 | 0.00 | H |
| ATOM | 189 | H5'2 | G A | 6 | -8.198  | -73.632 | 87.126 | 1.00 | 0.00 | H |
| ATOM | 190 | C1'  | C A | 7 | -8.318  | -64.959 | 89.304 | 1.00 | 0.00 | C |
| ATOM | 191 | N1   | C A | 7 | -7.154  | -65.246 | 88.421 | 1.00 | 0.00 | N |
| ATOM | 192 | C2   | C A | 7 | -5.924  | -64.690 | 88.762 | 1.00 | 0.00 | C |
| ATOM | 193 | O2   | C A | 7 | -5.846  | -63.985 | 89.777 | 1.00 | 0.00 | O |
| ATOM | 194 | N3   | C A | 7 | -4.851  | -64.940 | 87.971 | 1.00 | 0.00 | N |
| ATOM | 195 | C4   | C A | 7 | -4.965  | -65.705 | 86.878 | 1.00 | 0.00 | C |
| ATOM | 196 | N4   | C A | 7 | -3.885  | -65.919 | 86.143 | 1.00 | 0.00 | N |
| ATOM | 197 | C5   | C A | 7 | -6.220  | -66.286 | 86.500 | 1.00 | 0.00 | C |
| ATOM | 198 | C6   | C A | 7 | -7.285  | -66.026 | 87.315 | 1.00 | 0.00 | C |
| ATOM | 199 | C2'  | C A | 7 | -9.626  | -64.761 | 88.551 | 1.00 | 0.00 | C |
| ATOM | 200 | C3'  | C A | 7 | -10.636 | -65.381 | 89.504 | 1.00 | 0.00 | C |
| ATOM | 201 | O3'  | C A | 7 | -11.016 | -64.413 | 90.480 | 1.00 | 0.00 | O |
| ATOM | 202 | C4'  | C A | 7 | -9.858  | -66.543 | 90.117 | 1.00 | 0.00 | C |
| ATOM | 203 | O4'  | C A | 7 | -8.477  | -66.062 | 90.178 | 1.00 | 0.00 | O |
| ATOM | 204 | C5'  | C A | 7 | -9.880  | -67.845 | 89.349 | 1.00 | 0.00 | C |
| ATOM | 205 | O5'  | C A | 7 | -9.862  | -67.575 | 87.924 | 1.00 | 0.00 | O |
| ATOM | 206 | O1P  | C A | 7 | -12.112 | -68.394 | 87.146 | 1.00 | 0.00 | O |
| ATOM | 207 | O2P  | C A | 7 | -10.167 | -68.368 | 85.561 | 1.00 | 0.00 | O |
| ATOM | 208 | P    | C A | 7 | -10.657 | -68.553 | 86.947 | 1.00 | 0.00 | P |
| ATOM | 209 | H5   | C A | 7 | -6.320  | -66.906 | 85.608 | 1.00 | 0.00 | H |
| ATOM | 210 | H6   | C A | 7 | -8.259  | -66.452 | 87.073 | 1.00 | 0.00 | H |
| ATOM | 211 | H1'  | C A | 7 | -8.078  | -64.084 | 89.909 | 1.00 | 0.00 | H |
| ATOM | 212 | H3'  | C A | 7 | -11.525 | -65.734 | 88.981 | 1.00 | 0.00 | H |
| ATOM | 213 | H4'  | C A | 7 | -10.289 | -66.729 | 91.100 | 1.00 | 0.00 | H |
| ATOM | 214 | H41  | C A | 7 | -3.943  | -66.506 | 85.298 | 1.00 | 0.00 | H |
| ATOM | 215 | H42  | C A | 7 | -2.984  | -65.498 | 86.413 | 1.00 | 0.00 | H |
| ATOM | 216 | H2'1 | C A | 7 | -9.629  | -65.266 | 87.587 | 1.00 | 0.00 | H |
| ATOM | 217 | H2'2 | C A | 7 | -9.844  | -63.707 | 88.371 | 1.00 | 0.00 | H |
| ATOM | 218 | H5'1 | C A | 7 | -9.008  | -68.439 | 89.623 | 1.00 | 0.00 | H |
| ATOM | 219 | H5'2 | C A | 7 | -10.784 | -68.397 | 89.607 | 1.00 | 0.00 | H |
| ATOM | 220 | C1'  | A A | 8 | -7.266  | -60.198 | 90.160 | 1.00 | 0.00 | C |
| ATOM | 221 | N1   | A A | 8 | -3.329  | -61.092 | 86.990 | 1.00 | 0.00 | N |
| ATOM | 222 | C2   | A A | 8 | -3.426  | -60.428 | 88.138 | 1.00 | 0.00 | C |
| ATOM | 223 | N3   | A A | 8 | -4.474  | -60.237 | 88.909 | 1.00 | 0.00 | N |
| ATOM | 224 | C4   | A A | 8 | -5.558  | -60.832 | 88.375 | 1.00 | 0.00 | C |
| ATOM | 225 | C5   | A A | 8 | -5.626  | -61.547 | 87.212 | 1.00 | 0.00 | C |
| ATOM | 226 | C6   | A A | 8 | -4.426  | -61.675 | 86.484 | 1.00 | 0.00 | C |
| ATOM | 227 | N6   | A A | 8 | -4.340  | -62.349 | 85.324 | 1.00 | 0.00 | N |
| ATOM | 228 | N7   | A A | 8 | -6.910  | -62.011 | 86.986 | 1.00 | 0.00 | N |
| ATOM | 229 | C8   | A A | 8 | -7.587  | -61.568 | 88.006 | 1.00 | 0.00 | C |
| ATOM | 230 | N9   | A A | 8 | -6.830  | -60.845 | 88.892 | 1.00 | 0.00 | N |
| ATOM | 231 | C2'  | A A | 8 | -8.657  | -59.582 | 90.088 | 1.00 | 0.00 | C |
| ATOM | 232 | C3'  | A A | 8 | -9.190  | -59.841 | 91.488 | 1.00 | 0.00 | C |
| ATOM | 233 | O3'  | A A | 8 | -8.741  | -58.805 | 92.358 | 1.00 | 0.00 | O |
| ATOM | 234 | C4'  | A A | 8 | -8.578  | -61.196 | 91.841 | 1.00 | 0.00 | C |
| ATOM | 235 | O4'  | A A | 8 | -7.277  | -61.190 | 91.168 | 1.00 | 0.00 | O |
| ATOM | 236 | C5'  | A A | 8 | -9.348  | -62.416 | 91.395 | 1.00 | 0.00 | C |
| ATOM | 237 | O5'  | A A | 8 | -9.961  | -62.165 | 90.105 | 1.00 | 0.00 | O |
| ATOM | 238 | O1P  | A A | 8 | -12.426 | -62.202 | 90.616 | 1.00 | 0.00 | O |
| ATOM | 239 | O2P  | A A | 8 | -11.610 | -62.809 | 88.321 | 1.00 | 0.00 | O |
| ATOM | 240 | P    | A A | 8 | -11.377 | -62.827 | 89.787 | 1.00 | 0.00 | P |

|      |     |      |     |    |         |         |        |      |      |   |
|------|-----|------|-----|----|---------|---------|--------|------|------|---|
| ATOM | 241 | H2   | A A | 8  | -2.501  | -59.975 | 88.491 | 1.00 | 0.00 | H |
| ATOM | 242 | H8   | A A | 8  | -8.652  | -61.752 | 88.143 | 1.00 | 0.00 | H |
| ATOM | 243 | H1'  | A A | 8  | -6.521  | -59.451 | 90.434 | 1.00 | 0.00 | H |
| ATOM | 244 | H3'  | A A | 8  | -10.279 | -59.883 | 91.509 | 1.00 | 0.00 | H |
| ATOM | 245 | H4'  | A A | 8  | -8.495  | -61.232 | 92.926 | 1.00 | 0.00 | H |
| ATOM | 246 | H61  | A A | 8  | -3.438  | -62.416 | 84.833 | 1.00 | 0.00 | H |
| ATOM | 247 | H62  | A A | 8  | -5.179  | -62.799 | 84.927 | 1.00 | 0.00 | H |
| ATOM | 248 | H2'1 | A A | 8  | -9.280  | -60.057 | 89.332 | 1.00 | 0.00 | H |
| ATOM | 249 | H2'2 | A A | 8  | -8.625  | -58.515 | 89.866 | 1.00 | 0.00 | H |
| ATOM | 250 | H5'1 | A A | 8  | -8.664  | -63.261 | 91.319 | 1.00 | 0.00 | H |
| ATOM | 251 | H5'2 | A A | 8  | -10.119 | -62.643 | 92.130 | 1.00 | 0.00 | H |
| ATOM | 252 | C1'  | C A | 9  | -4.549  | -56.079 | 89.590 | 1.00 | 0.00 | C |
| ATOM | 253 | N1   | C A | 9  | -5.044  | -56.826 | 88.401 | 1.00 | 0.00 | N |
| ATOM | 254 | C2   | C A | 9  | -4.121  | -57.169 | 87.415 | 1.00 | 0.00 | C |
| ATOM | 255 | O2   | C A | 9  | -2.938  | -56.841 | 87.565 | 1.00 | 0.00 | O |
| ATOM | 256 | N3   | C A | 9  | -4.552  | -57.848 | 86.325 | 1.00 | 0.00 | N |
| ATOM | 257 | C4   | C A | 9  | -5.840  | -58.188 | 86.188 | 1.00 | 0.00 | C |
| ATOM | 258 | N4   | C A | 9  | -6.206  | -58.856 | 85.103 | 1.00 | 0.00 | N |
| ATOM | 259 | C5   | C A | 9  | -6.813  | -57.846 | 87.185 | 1.00 | 0.00 | C |
| ATOM | 260 | C6   | C A | 9  | -6.357  | -57.165 | 88.278 | 1.00 | 0.00 | C |
| ATOM | 261 | C2'  | C A | 9  | -5.519  | -55.022 | 90.098 | 1.00 | 0.00 | C |
| ATOM | 262 | C3'  | C A | 9  | -5.309  | -55.095 | 91.603 | 1.00 | 0.00 | C |
| ATOM | 263 | O3'  | C A | 9  | -4.191  | -54.285 | 91.958 | 1.00 | 0.00 | O |
| ATOM | 264 | C4'  | C A | 9  | -5.043  | -56.579 | 91.838 | 1.00 | 0.00 | C |
| ATOM | 265 | O4'  | C A | 9  | -4.342  | -57.017 | 90.630 | 1.00 | 0.00 | O |
| ATOM | 266 | C5'  | C A | 9  | -6.259  | -57.455 | 92.032 | 1.00 | 0.00 | C |
| ATOM | 267 | O5'  | C A | 9  | -7.338  | -56.994 | 91.179 | 1.00 | 0.00 | O |
| ATOM | 268 | O1P  | C A | 9  | -9.070  | -56.185 | 92.815 | 1.00 | 0.00 | O |
| ATOM | 269 | O2P  | C A | 9  | -9.773  | -57.013 | 90.553 | 1.00 | 0.00 | O |
| ATOM | 270 | P    | C A | 9  | -8.839  | -57.125 | 91.701 | 1.00 | 0.00 | P |
| ATOM | 271 | H5   | C A | 9  | -7.864  | -58.115 | 87.076 | 1.00 | 0.00 | H |
| ATOM | 272 | H6   | C A | 9  | -7.056  | -56.889 | 89.067 | 1.00 | 0.00 | H |
| ATOM | 273 | H1'  | C A | 9  | -3.585  | -55.639 | 89.339 | 1.00 | 0.00 | H |
| ATOM | 274 | H3'  | C A | 9  | -6.187  | -54.759 | 92.153 | 1.00 | 0.00 | H |
| ATOM | 275 | H4'  | C A | 9  | -4.433  | -56.654 | 92.737 | 1.00 | 0.00 | H |
| ATOM | 276 | H41  | C A | 9  | -7.190  | -59.131 | 84.976 | 1.00 | 0.00 | H |
| ATOM | 277 | H42  | C A | 9  | -5.505  | -59.099 | 84.387 | 1.00 | 0.00 | H |
| ATOM | 278 | H2'1 | C A | 9  | -6.551  | -55.244 | 89.831 | 1.00 | 0.00 | H |
| ATOM | 279 | H2'2 | C A | 9  | -5.287  | -54.028 | 89.711 | 1.00 | 0.00 | H |
| ATOM | 280 | H5'1 | C A | 9  | -6.004  | -58.485 | 91.779 | 1.00 | 0.00 | H |
| ATOM | 281 | H5'2 | C A | 9  | -6.570  | -57.409 | 93.075 | 1.00 | 0.00 | H |
| ATOM | 282 | C1'  | C A | 10 | -1.438  | -53.098 | 87.150 | 1.00 | 0.00 | C |
| ATOM | 283 | N1   | C A | 10 | -2.658  | -53.626 | 86.481 | 1.00 | 0.00 | N |
| ATOM | 284 | C2   | C A | 10 | -2.506  | -54.252 | 85.246 | 1.00 | 0.00 | C |
| ATOM | 285 | O2   | C A | 10 | -1.372  | -54.342 | 84.756 | 1.00 | 0.00 | O |
| ATOM | 286 | N3   | C A | 10 | -3.604  | -54.741 | 84.620 | 1.00 | 0.00 | N |
| ATOM | 287 | C4   | C A | 10 | -4.820  | -54.628 | 85.172 | 1.00 | 0.00 | C |
| ATOM | 288 | N4   | C A | 10 | -5.859  | -55.126 | 84.519 | 1.00 | 0.00 | N |
| ATOM | 289 | C5   | C A | 10 | -5.007  | -53.986 | 86.441 | 1.00 | 0.00 | C |
| ATOM | 290 | C6   | C A | 10 | -3.885  | -53.505 | 87.055 | 1.00 | 0.00 | C |
| ATOM | 291 | C2'  | C A | 10 | -1.661  | -51.780 | 87.878 | 1.00 | 0.00 | C |
| ATOM | 292 | C3'  | C A | 10 | -0.752  | -51.930 | 89.089 | 1.00 | 0.00 | C |
| ATOM | 293 | O3'  | C A | 10 | 0.573   | -51.545 | 88.730 | 1.00 | 0.00 | O |
| ATOM | 294 | C4'  | C A | 10 | -0.854  | -53.419 | 89.407 | 1.00 | 0.00 | C |

|      |     |      |   |   |    |        |         |        |      |      |   |
|------|-----|------|---|---|----|--------|---------|--------|------|------|---|
| ATOM | 295 | O4'  | C | A | 10 | -1.019 | -54.058 | 88.102 | 1.00 | 0.00 | O |
| ATOM | 296 | C5'  | C | A | 10 | -2.000 | -53.839 | 90.298 | 1.00 | 0.00 | C |
| ATOM | 297 | O5'  | C | A | 10 | -3.171 | -53.037 | 90.002 | 1.00 | 0.00 | O |
| ATOM | 298 | O1P  | C | A | 10 | -3.515 | -51.705 | 92.109 | 1.00 | 0.00 | O |
| ATOM | 299 | O2P  | C | A | 10 | -5.468 | -52.233 | 90.626 | 1.00 | 0.00 | O |
| ATOM | 300 | P    | C | A | 10 | -4.165 | -52.660 | 91.190 | 1.00 | 0.00 | P |
| ATOM | 301 | H5   | C | A | 10 | -5.995 | -53.887 | 86.893 | 1.00 | 0.00 | H |
| ATOM | 302 | H6   | C | A | 10 | -3.976 | -53.017 | 88.025 | 1.00 | 0.00 | H |
| ATOM | 303 | H1'  | C | A | 10 | -0.653 | -53.003 | 86.401 | 1.00 | 0.00 | H |
| ATOM | 304 | H3'  | C | A | 10 | -1.089 | -51.323 | 89.930 | 1.00 | 0.00 | H |
| ATOM | 305 | H4'  | C | A | 10 | 0.075  | -53.700 | 89.906 | 1.00 | 0.00 | H |
| ATOM | 306 | H41  | C | A | 10 | -6.804 | -55.055 | 84.923 | 1.00 | 0.00 | H |
| ATOM | 307 | H42  | C | A | 10 | -5.721 | -55.584 | 83.606 | 1.00 | 0.00 | H |
| ATOM | 308 | H2'1 | C | A | 10 | -2.698 | -51.641 | 88.178 | 1.00 | 0.00 | H |
| ATOM | 309 | H2'2 | C | A | 10 | -1.375 | -50.919 | 87.271 | 1.00 | 0.00 | H |
| ATOM | 310 | H5'1 | C | A | 10 | -2.222 | -54.893 | 90.126 | 1.00 | 0.00 | H |
| ATOM | 311 | H5'2 | C | A | 10 | -1.712 | -53.699 | 91.339 | 1.00 | 0.00 | H |
| ATOM | 312 | C1'  | T | A | 11 | 0.746  | -51.305 | 83.087 | 1.00 | 0.00 | C |
| ATOM | 313 | N1   | T | A | 11 | -0.736 | -51.398 | 83.157 | 1.00 | 0.00 | N |
| ATOM | 314 | C2   | T | A | 11 | -1.377 | -52.028 | 82.110 | 1.00 | 0.00 | C |
| ATOM | 315 | O2   | T | A | 11 | -0.781 | -52.496 | 81.155 | 1.00 | 0.00 | O |
| ATOM | 316 | N3   | T | A | 11 | -2.755 | -52.095 | 82.215 | 1.00 | 0.00 | N |
| ATOM | 317 | C4   | T | A | 11 | -3.524 | -51.596 | 83.247 | 1.00 | 0.00 | C |
| ATOM | 318 | O4   | T | A | 11 | -4.756 | -51.712 | 83.230 | 1.00 | 0.00 | O |
| ATOM | 319 | C5   | T | A | 11 | -2.765 | -50.955 | 84.295 | 1.00 | 0.00 | C |
| ATOM | 320 | C6   | T | A | 11 | -1.422 | -50.874 | 84.225 | 1.00 | 0.00 | C |
| ATOM | 321 | C7   | T | A | 11 | -3.562 | -50.402 | 85.438 | 1.00 | 0.00 | C |
| ATOM | 322 | C2'  | T | A | 11 | 1.305  | -49.990 | 83.619 | 1.00 | 0.00 | C |
| ATOM | 323 | C3'  | T | A | 11 | 2.603  | -50.437 | 84.271 | 1.00 | 0.00 | C |
| ATOM | 324 | O3'  | T | A | 11 | 3.627  | -50.506 | 83.280 | 1.00 | 0.00 | O |
| ATOM | 325 | C4'  | T | A | 11 | 2.247  | -51.812 | 84.829 | 1.00 | 0.00 | C |
| ATOM | 326 | O4'  | T | A | 11 | 1.284  | -52.353 | 83.869 | 1.00 | 0.00 | O |
| ATOM | 327 | C5'  | T | A | 11 | 1.623  | -51.839 | 86.205 | 1.00 | 0.00 | C |
| ATOM | 328 | O5'  | T | A | 11 | 0.748  | -50.696 | 86.369 | 1.00 | 0.00 | O |
| ATOM | 329 | O1P  | T | A | 11 | 1.886  | -49.338 | 88.155 | 1.00 | 0.00 | O |
| ATOM | 330 | O2P  | T | A | 11 | -0.600 | -49.186 | 87.858 | 1.00 | 0.00 | O |
| ATOM | 331 | P    | T | A | 11 | 0.626  | -50.021 | 87.807 | 1.00 | 0.00 | P |
| ATOM | 332 | H3   | T | A | 11 | -3.256 | -52.562 | 81.449 | 1.00 | 0.00 | H |
| ATOM | 333 | H6   | T | A | 11 | -0.870 | -50.386 | 85.029 | 1.00 | 0.00 | H |
| ATOM | 334 | H1'  | T | A | 11 | 1.051  | -51.467 | 82.053 | 1.00 | 0.00 | H |
| ATOM | 335 | H3'  | T | A | 11 | 2.915  | -49.759 | 85.065 | 1.00 | 0.00 | H |
| ATOM | 336 | H4'  | T | A | 11 | 3.173  | -52.388 | 84.872 | 1.00 | 0.00 | H |
| ATOM | 337 | H71  | T | A | 11 | -3.471 | -49.315 | 85.452 | 1.00 | 0.00 | H |
| ATOM | 338 | H72  | T | A | 11 | -4.610 | -50.676 | 85.317 | 1.00 | 0.00 | H |
| ATOM | 339 | H73  | T | A | 11 | -3.186 | -50.811 | 86.377 | 1.00 | 0.00 | H |
| ATOM | 340 | H2'1 | T | A | 11 | 0.639  | -49.521 | 84.341 | 1.00 | 0.00 | H |
| ATOM | 341 | H2'2 | T | A | 11 | 1.488  | -49.267 | 82.824 | 1.00 | 0.00 | H |
| ATOM | 342 | H5'1 | T | A | 11 | 1.053  | -52.760 | 86.324 | 1.00 | 0.00 | H |
| ATOM | 343 | H5'2 | T | A | 11 | 2.413  | -51.808 | 86.956 | 1.00 | 0.00 | H |
| ATOM | 344 | C1'  | A | A | 12 | 0.984  | -50.328 | 78.226 | 1.00 | 0.00 | C |
| ATOM | 345 | N1   | A | A | 12 | -4.138 | -50.447 | 78.520 | 1.00 | 0.00 | N |
| ATOM | 346 | C2   | A | A | 12 | -3.277 | -50.933 | 77.631 | 1.00 | 0.00 | C |
| ATOM | 347 | N3   | A | A | 12 | -1.962 | -50.869 | 77.618 | 1.00 | 0.00 | N |
| ATOM | 348 | C4   | A | A | 12 | -1.519 | -50.192 | 78.691 | 1.00 | 0.00 | C |

|      |     |      |   |   |    |        |         |        |      |      |   |
|------|-----|------|---|---|----|--------|---------|--------|------|------|---|
| ATOM | 349 | C5   | A | A | 12 | -2.265 | -49.633 | 79.689 | 1.00 | 0.00 | C |
| ATOM | 350 | C6   | A | A | 12 | -3.666 | -49.778 | 79.582 | 1.00 | 0.00 | C |
| ATOM | 351 | N6   | A | A | 12 | -4.526 | -49.281 | 80.486 | 1.00 | 0.00 | N |
| ATOM | 352 | N7   | A | A | 12 | -1.461 | -49.016 | 80.631 | 1.00 | 0.00 | N |
| ATOM | 353 | C8   | A | A | 12 | -0.255 | -49.211 | 80.187 | 1.00 | 0.00 | C |
| ATOM | 354 | N9   | A | A | 12 | -0.211 | -49.920 | 79.012 | 1.00 | 0.00 | N |
| ATOM | 355 | C2'  | A | A | 12 | 2.090  | -49.282 | 78.207 | 1.00 | 0.00 | C |
| ATOM | 356 | C3'  | A | A | 12 | 3.342  | -50.144 | 78.220 | 1.00 | 0.00 | C |
| ATOM | 357 | O3'  | A | A | 12 | 3.650  | -50.541 | 76.885 | 1.00 | 0.00 | O |
| ATOM | 358 | C4'  | A | A | 12 | 2.932  | -51.329 | 79.094 | 1.00 | 0.00 | C |
| ATOM | 359 | O4'  | A | A | 12 | 1.506  | -51.504 | 78.814 | 1.00 | 0.00 | O |
| ATOM | 360 | C5'  | A | A | 12 | 3.115  | -51.159 | 80.583 | 1.00 | 0.00 | C |
| ATOM | 361 | O5'  | A | A | 12 | 2.822  | -49.790 | 80.961 | 1.00 | 0.00 | O |
| ATOM | 362 | O1P  | A | A | 12 | 5.049  | -48.910 | 81.738 | 1.00 | 0.00 | O |
| ATOM | 363 | O2P  | A | A | 12 | 2.926  | -47.933 | 82.650 | 1.00 | 0.00 | O |
| ATOM | 364 | P    | A | A | 12 | 3.650  | -49.129 | 82.152 | 1.00 | 0.00 | P |
| ATOM | 365 | H2   | A | A | 12 | -3.726 | -51.462 | 76.790 | 1.00 | 0.00 | H |
| ATOM | 366 | H8   | A | A | 12 | 0.638  | -48.847 | 80.696 | 1.00 | 0.00 | H |
| ATOM | 367 | H1'  | A | A | 12 | 0.661  | -50.572 | 77.215 | 1.00 | 0.00 | H |
| ATOM | 368 | H3'  | A | A | 12 | 4.197  | -49.619 | 78.646 | 1.00 | 0.00 | H |
| ATOM | 369 | H4'  | A | A | 12 | 3.536  | -52.179 | 78.778 | 1.00 | 0.00 | H |
| ATOM | 370 | H61  | A | A | 12 | -5.539 | -49.416 | 80.362 | 1.00 | 0.00 | H |
| ATOM | 371 | H62  | A | A | 12 | -4.170 | -48.762 | 81.304 | 1.00 | 0.00 | H |
| ATOM | 372 | H2'1 | A | A | 12 | 2.054  | -48.625 | 79.075 | 1.00 | 0.00 | H |
| ATOM | 373 | H2'2 | A | A | 12 | 2.050  | -48.653 | 77.318 | 1.00 | 0.00 | H |
| ATOM | 374 | H5'1 | A | A | 12 | 2.441  | -51.837 | 81.105 | 1.00 | 0.00 | H |
| ATOM | 375 | H5'2 | A | A | 12 | 4.143  | -51.401 | 80.846 | 1.00 | 0.00 | H |
| ATOM | 376 | C1'  | G | A | 13 | -1.010 | -49.448 | 73.766 | 1.00 | 0.00 | C |
| ATOM | 377 | N1   | G | A | 13 | -5.018 | -47.844 | 76.484 | 1.00 | 0.00 | N |
| ATOM | 378 | C2   | G | A | 13 | -4.975 | -48.618 | 75.340 | 1.00 | 0.00 | C |
| ATOM | 379 | N2   | G | A | 13 | -6.157 | -49.017 | 74.851 | 1.00 | 0.00 | N |
| ATOM | 380 | N3   | G | A | 13 | -3.844 | -48.967 | 74.729 | 1.00 | 0.00 | N |
| ATOM | 381 | C4   | G | A | 13 | -2.745 | -48.470 | 75.355 | 1.00 | 0.00 | C |
| ATOM | 382 | C5   | G | A | 13 | -2.692 | -47.687 | 76.496 | 1.00 | 0.00 | C |
| ATOM | 383 | C6   | G | A | 13 | -3.892 | -47.320 | 77.146 | 1.00 | 0.00 | C |
| ATOM | 384 | O6   | G | A | 13 | -4.048 | -46.636 | 78.159 | 1.00 | 0.00 | O |
| ATOM | 385 | N7   | G | A | 13 | -1.367 | -47.385 | 76.813 | 1.00 | 0.00 | N |
| ATOM | 386 | C8   | G | A | 13 | -0.673 | -47.983 | 75.879 | 1.00 | 0.00 | C |
| ATOM | 387 | N9   | G | A | 13 | -1.441 | -48.663 | 74.955 | 1.00 | 0.00 | N |
| ATOM | 388 | C2'  | G | A | 13 | 0.179  | -48.847 | 73.030 | 1.00 | 0.00 | C |
| ATOM | 389 | C3'  | G | A | 13 | 0.932  | -50.086 | 72.577 | 1.00 | 0.00 | C |
| ATOM | 390 | O3'  | G | A | 13 | 0.371  | -50.551 | 71.352 | 1.00 | 0.00 | O |
| ATOM | 391 | C4'  | G | A | 13 | 0.700  | -51.065 | 73.727 | 1.00 | 0.00 | C |
| ATOM | 392 | O4'  | G | A | 13 | -0.640 | -50.739 | 74.213 | 1.00 | 0.00 | O |
| ATOM | 393 | C5'  | G | A | 13 | 1.667  | -50.982 | 74.883 | 1.00 | 0.00 | C |
| ATOM | 394 | O5'  | G | A | 13 | 2.037  | -49.600 | 75.116 | 1.00 | 0.00 | O |
| ATOM | 395 | O1P  | G | A | 13 | 4.488  | -49.548 | 74.546 | 1.00 | 0.00 | O |
| ATOM | 396 | O2P  | G | A | 13 | 3.549  | -47.908 | 76.196 | 1.00 | 0.00 | O |
| ATOM | 397 | P    | G | A | 13 | 3.515  | -49.276 | 75.621 | 1.00 | 0.00 | P |
| ATOM | 398 | H1   | G | A | 13 | -5.947 | -47.634 | 76.882 | 1.00 | 0.00 | H |
| ATOM | 399 | H8   | G | A | 13 | 0.415  | -47.948 | 75.831 | 1.00 | 0.00 | H |
| ATOM | 400 | H1'  | G | A | 13 | -1.867 | -49.557 | 73.100 | 1.00 | 0.00 | H |
| ATOM | 401 | H21  | G | A | 13 | -7.029 | -48.745 | 75.331 | 1.00 | 0.00 | H |
| ATOM | 402 | H3'  | G | A | 13 | 1.995  | -49.890 | 72.436 | 1.00 | 0.00 | H |

|      |     |      |     |    |         |         |        |      |      |   |
|------|-----|------|-----|----|---------|---------|--------|------|------|---|
| ATOM | 403 | H22  | G A | 13 | -6.194  | -49.593 | 74.000 | 1.00 | 0.00 | H |
| ATOM | 404 | H4'  | G A | 13 | 0.768   | -52.068 | 73.307 | 1.00 | 0.00 | H |
| ATOM | 405 | H2'1 | G A | 13 | 0.795   | -48.225 | 73.680 | 1.00 | 0.00 | H |
| ATOM | 406 | H2'2 | G A | 13 | -0.126  | -48.234 | 72.183 | 1.00 | 0.00 | H |
| ATOM | 407 | H5'1 | G A | 13 | 1.195   | -51.394 | 75.775 | 1.00 | 0.00 | H |
| ATOM | 408 | H5'2 | G A | 13 | 2.556   | -51.567 | 74.649 | 1.00 | 0.00 | H |
| ATOM | 409 | C1'  | G A | 14 | -4.601  | -47.923 | 70.715 | 1.00 | 0.00 | C |
| ATOM | 410 | N1   | G A | 14 | -6.016  | -45.087 | 74.712 | 1.00 | 0.00 | N |
| ATOM | 411 | C2   | G A | 14 | -6.785  | -45.823 | 73.829 | 1.00 | 0.00 | C |
| ATOM | 412 | N2   | G A | 14 | -8.108  | -45.800 | 74.036 | 1.00 | 0.00 | N |
| ATOM | 413 | N3   | G A | 14 | -6.276  | -46.527 | 72.819 | 1.00 | 0.00 | N |
| ATOM | 414 | C4   | G A | 14 | -4.923  | -46.432 | 72.755 | 1.00 | 0.00 | C |
| ATOM | 415 | C5   | G A | 14 | -4.076  | -45.720 | 73.587 | 1.00 | 0.00 | C |
| ATOM | 416 | C6   | G A | 14 | -4.613  | -44.977 | 74.660 | 1.00 | 0.00 | C |
| ATOM | 417 | O6   | G A | 14 | -4.031  | -44.287 | 75.499 | 1.00 | 0.00 | O |
| ATOM | 418 | N7   | G A | 14 | -2.748  | -45.883 | 73.177 | 1.00 | 0.00 | N |
| ATOM | 419 | C8   | G A | 14 | -2.833  | -46.672 | 72.138 | 1.00 | 0.00 | C |
| ATOM | 420 | N9   | G A | 14 | -4.121  | -47.047 | 71.819 | 1.00 | 0.00 | N |
| ATOM | 421 | C2'  | G A | 14 | -3.828  | -47.750 | 69.414 | 1.00 | 0.00 | C |
| ATOM | 422 | C3'  | G A | 14 | -3.809  | -49.167 | 68.864 | 1.00 | 0.00 | C |
| ATOM | 423 | O3'  | G A | 14 | -5.018  | -49.409 | 68.150 | 1.00 | 0.00 | O |
| ATOM | 424 | C4'  | G A | 14 | -3.704  | -50.020 | 70.128 | 1.00 | 0.00 | C |
| ATOM | 425 | O4'  | G A | 14 | -4.452  | -49.266 | 71.134 | 1.00 | 0.00 | O |
| ATOM | 426 | C5'  | G A | 14 | -2.310  | -50.274 | 70.652 | 1.00 | 0.00 | C |
| ATOM | 427 | O5'  | G A | 14 | -1.489  | -49.098 | 70.451 | 1.00 | 0.00 | O |
| ATOM | 428 | O1P  | G A | 14 | 0.230   | -49.865 | 68.780 | 1.00 | 0.00 | O |
| ATOM | 429 | O2P  | G A | 14 | 0.780   | -48.018 | 70.386 | 1.00 | 0.00 | O |
| ATOM | 430 | P    | G A | 14 | 0.061   | -49.290 | 70.129 | 1.00 | 0.00 | P |
| ATOM | 431 | H1   | G A | 14 | -6.509  | -44.582 | 75.465 | 1.00 | 0.00 | H |
| ATOM | 432 | H8   | G A | 14 | -1.961  | -47.002 | 71.573 | 1.00 | 0.00 | H |
| ATOM | 433 | H1'  | G A | 14 | -5.664  | -47.734 | 70.566 | 1.00 | 0.00 | H |
| ATOM | 434 | H21  | G A | 14 | -8.494  | -45.256 | 74.822 | 1.00 | 0.00 | H |
| ATOM | 435 | H3'  | G A | 14 | -2.958  | -49.337 | 68.203 | 1.00 | 0.00 | H |
| ATOM | 436 | H22  | G A | 14 | -8.736  | -46.324 | 73.413 | 1.00 | 0.00 | H |
| ATOM | 437 | H4'  | G A | 14 | -4.154  | -50.984 | 69.897 | 1.00 | 0.00 | H |
| ATOM | 438 | H2'1 | G A | 14 | -2.818  | -47.374 | 69.579 | 1.00 | 0.00 | H |
| ATOM | 439 | H2'2 | G A | 14 | -4.325  | -47.064 | 68.726 | 1.00 | 0.00 | H |
| ATOM | 440 | H5'1 | G A | 14 | -2.365  | -50.510 | 71.714 | 1.00 | 0.00 | H |
| ATOM | 441 | H5'2 | G A | 14 | -1.877  | -51.122 | 70.120 | 1.00 | 0.00 | H |
| ATOM | 442 | C1'  | A A | 15 | -8.610  | -45.276 | 69.524 | 1.00 | 0.00 | C |
| ATOM | 443 | N1   | A A | 15 | -6.929  | -42.137 | 73.219 | 1.00 | 0.00 | N |
| ATOM | 444 | C2   | A A | 15 | -8.142  | -42.585 | 72.904 | 1.00 | 0.00 | C |
| ATOM | 445 | N3   | A A | 15 | -8.506  | -43.399 | 71.936 | 1.00 | 0.00 | N |
| ATOM | 446 | C4   | A A | 15 | -7.433  | -43.772 | 71.213 | 1.00 | 0.00 | C |
| ATOM | 447 | C5   | A A | 15 | -6.132  | -43.403 | 71.403 | 1.00 | 0.00 | C |
| ATOM | 448 | C6   | A A | 15 | -5.879  | -42.528 | 72.481 | 1.00 | 0.00 | C |
| ATOM | 449 | N6   | A A | 15 | -4.650  | -42.079 | 72.789 | 1.00 | 0.00 | N |
| ATOM | 450 | N7   | A A | 15 | -5.303  | -43.988 | 70.463 | 1.00 | 0.00 | N |
| ATOM | 451 | C8   | A A | 15 | -6.113  | -44.690 | 69.727 | 1.00 | 0.00 | C |
| ATOM | 452 | N9   | A A | 15 | -7.424  | -44.609 | 70.124 | 1.00 | 0.00 | N |
| ATOM | 453 | C2'  | A A | 15 | -8.566  | -45.359 | 68.004 | 1.00 | 0.00 | C |
| ATOM | 454 | C3'  | A A | 15 | -9.226  | -46.703 | 67.739 | 1.00 | 0.00 | C |
| ATOM | 455 | O3'  | A A | 15 | -10.640 | -46.532 | 67.719 | 1.00 | 0.00 | O |
| ATOM | 456 | C4'  | A A | 15 | -8.763  | -47.549 | 68.925 | 1.00 | 0.00 | C |

|      |     |      |   |   |    |         |         |        |      |      |   |
|------|-----|------|---|---|----|---------|---------|--------|------|------|---|
| ATOM | 457 | O4'  | A | A | 15 | -8.667  | -46.595 | 70.031 | 1.00 | 0.00 | O |
| ATOM | 458 | C5'  | A | A | 15 | -7.432  | -48.248 | 68.772 | 1.00 | 0.00 | C |
| ATOM | 459 | O5'  | A | A | 15 | -6.517  | -47.403 | 68.029 | 1.00 | 0.00 | O |
| ATOM | 460 | O1P  | A | A | 15 | -6.145  | -48.682 | 65.894 | 1.00 | 0.00 | O |
| ATOM | 461 | O2P  | A | A | 15 | -4.374  | -47.123 | 66.747 | 1.00 | 0.00 | O |
| ATOM | 462 | P    | A | A | 15 | -5.456  | -48.090 | 67.057 | 1.00 | 0.00 | P |
| ATOM | 463 | H2   | A | A | 15 | -8.950  | -42.228 | 73.540 | 1.00 | 0.00 | H |
| ATOM | 464 | H8   | A | A | 15 | -5.784  | -45.285 | 68.875 | 1.00 | 0.00 | H |
| ATOM | 465 | H1'  | A | A | 15 | -9.503  | -44.749 | 69.860 | 1.00 | 0.00 | H |
| ATOM | 466 | H3'  | A | A | 15 | -8.900  | -47.140 | 66.794 | 1.00 | 0.00 | H |
| ATOM | 467 | H4'  | A | A | 15 | -9.524  | -48.311 | 69.085 | 1.00 | 0.00 | H |
| ATOM | 468 | H61  | A | A | 15 | -4.521  | -41.443 | 73.588 | 1.00 | 0.00 | H |
| ATOM | 469 | H62  | A | A | 15 | -3.839  | -42.374 | 72.225 | 1.00 | 0.00 | H |
| ATOM | 470 | H2'1 | A | A | 15 | -7.546  | -45.335 | 67.619 | 1.00 | 0.00 | H |
| ATOM | 471 | H2'2 | A | A | 15 | -9.115  | -44.546 | 67.529 | 1.00 | 0.00 | H |
| ATOM | 472 | H5'1 | A | A | 15 | -7.022  | -48.455 | 69.760 | 1.00 | 0.00 | H |
| ATOM | 473 | H5'2 | A | A | 15 | -7.580  | -49.186 | 68.240 | 1.00 | 0.00 | H |
| ATOM | 474 | C1'  | C | A | 16 | -11.678 | -41.401 | 70.011 | 1.00 | 0.00 | C |
| ATOM | 475 | N1   | C | A | 16 | -10.215 | -41.187 | 69.837 | 1.00 | 0.00 | N |
| ATOM | 476 | C2   | C | A | 16 | -9.563  | -40.359 | 70.748 | 1.00 | 0.00 | C |
| ATOM | 477 | O2   | C | A | 16 | -10.222 | -39.838 | 71.657 | 1.00 | 0.00 | O |
| ATOM | 478 | N3   | C | A | 16 | -8.231  | -40.150 | 70.606 | 1.00 | 0.00 | N |
| ATOM | 479 | C4   | C | A | 16 | -7.546  | -40.728 | 69.611 | 1.00 | 0.00 | C |
| ATOM | 480 | N4   | C | A | 16 | -6.245  | -40.491 | 69.523 | 1.00 | 0.00 | N |
| ATOM | 481 | C5   | C | A | 16 | -8.190  | -41.581 | 68.656 | 1.00 | 0.00 | C |
| ATOM | 482 | C6   | C | A | 16 | -9.532  | -41.780 | 68.820 | 1.00 | 0.00 | C |
| ATOM | 483 | C2'  | C | A | 16 | -12.448 | -41.474 | 68.700 | 1.00 | 0.00 | C |
| ATOM | 484 | C3'  | C | A | 16 | -13.515 | -42.511 | 69.017 | 1.00 | 0.00 | C |
| ATOM | 485 | O3'  | C | A | 16 | -14.613 | -41.869 | 69.660 | 1.00 | 0.00 | O |
| ATOM | 486 | C4'  | C | A | 16 | -12.785 | -43.477 | 69.947 | 1.00 | 0.00 | C |
| ATOM | 487 | O4'  | C | A | 16 | -11.853 | -42.630 | 70.692 | 1.00 | 0.00 | O |
| ATOM | 488 | C5'  | C | A | 16 | -12.001 | -44.586 | 69.281 | 1.00 | 0.00 | C |
| ATOM | 489 | O5'  | C | A | 16 | -11.397 | -44.093 | 68.059 | 1.00 | 0.00 | O |
| ATOM | 490 | O1P  | C | A | 16 | -12.578 | -45.396 | 66.258 | 1.00 | 0.00 | O |
| ATOM | 491 | O2P  | C | A | 16 | -10.251 | -44.544 | 65.869 | 1.00 | 0.00 | O |
| ATOM | 492 | P    | C | A | 16 | -11.249 | -45.088 | 66.821 | 1.00 | 0.00 | P |
| ATOM | 493 | H5   | C | A | 16 | -7.638  | -42.047 | 67.839 | 1.00 | 0.00 | H |
| ATOM | 494 | H6   | C | A | 16 | -10.065 | -42.428 | 68.123 | 1.00 | 0.00 | H |
| ATOM | 495 | H1'  | C | A | 16 | -12.065 | -40.606 | 70.648 | 1.00 | 0.00 | H |
| ATOM | 496 | H3'  | C | A | 16 | -13.868 | -43.019 | 68.119 | 1.00 | 0.00 | H |
| ATOM | 497 | H4'  | C | A | 16 | -13.541 | -43.940 | 70.579 | 1.00 | 0.00 | H |
| ATOM | 498 | H41  | C | A | 16 | -5.694  | -40.925 | 68.768 | 1.00 | 0.00 | H |
| ATOM | 499 | H42  | C | A | 16 | -5.784  | -39.876 | 70.208 | 1.00 | 0.00 | H |
| ATOM | 500 | H2'1 | C | A | 16 | -11.819 | -41.794 | 67.868 | 1.00 | 0.00 | H |
| ATOM | 501 | H2'2 | C | A | 16 | -12.892 | -40.517 | 68.426 | 1.00 | 0.00 | H |
| ATOM | 502 | H5'1 | C | A | 16 | -11.225 | -44.934 | 69.963 | 1.00 | 0.00 | H |
| ATOM | 503 | H5'2 | C | A | 16 | -12.674 | -45.412 | 69.052 | 1.00 | 0.00 | H |
| ATOM | 504 | C1'  | G | A | 17 | -12.803 | -36.740 | 71.248 | 1.00 | 0.00 | C |
| ATOM | 505 | N1   | G | A | 17 | -7.823  | -35.934 | 70.484 | 1.00 | 0.00 | N |
| ATOM | 506 | C2   | G | A | 17 | -8.654  | -35.472 | 71.490 | 1.00 | 0.00 | C |
| ATOM | 507 | N2   | G | A | 17 | -8.083  | -34.688 | 72.413 | 1.00 | 0.00 | N |
| ATOM | 508 | N3   | G | A | 17 | -9.950  | -35.767 | 71.568 | 1.00 | 0.00 | N |
| ATOM | 509 | C4   | G | A | 17 | -10.361 | -36.564 | 70.546 | 1.00 | 0.00 | C |
| ATOM | 510 | C5   | G | A | 17 | -9.607  | -37.069 | 69.500 | 1.00 | 0.00 | C |

|      |     |      |     |    |         |         |        |      |      |   |
|------|-----|------|-----|----|---------|---------|--------|------|------|---|
| ATOM | 511 | C6   | G A | 17 | -8.229  | -36.760 | 69.418 | 1.00 | 0.00 | C |
| ATOM | 512 | O6   | G A | 17 | -7.403  | -37.108 | 68.575 | 1.00 | 0.00 | O |
| ATOM | 513 | N7   | G A | 17 | -10.407 | -37.846 | 68.658 | 1.00 | 0.00 | N |
| ATOM | 514 | C8   | G A | 17 | -11.591 | -37.791 | 69.211 | 1.00 | 0.00 | C |
| ATOM | 515 | N9   | G A | 17 | -11.644 | -37.031 | 70.361 | 1.00 | 0.00 | N |
| ATOM | 516 | C2'  | G A | 17 | -14.115 | -36.545 | 70.500 | 1.00 | 0.00 | C |
| ATOM | 517 | C3'  | G A | 17 | -15.121 | -37.161 | 71.456 | 1.00 | 0.00 | C |
| ATOM | 518 | O3'  | G A | 17 | -15.497 | -36.191 | 72.430 | 1.00 | 0.00 | O |
| ATOM | 519 | C4'  | G A | 17 | -14.340 | -38.322 | 72.069 | 1.00 | 0.00 | C |
| ATOM | 520 | O4'  | G A | 17 | -12.960 | -37.840 | 72.124 | 1.00 | 0.00 | O |
| ATOM | 521 | C5'  | G A | 17 | -14.367 | -39.626 | 71.307 | 1.00 | 0.00 | C |
| ATOM | 522 | O5'  | G A | 17 | -14.352 | -39.361 | 69.882 | 1.00 | 0.00 | O |
| ATOM | 523 | O1P  | G A | 17 | -16.605 | -40.181 | 69.115 | 1.00 | 0.00 | O |
| ATOM | 524 | O2P  | G A | 17 | -14.667 | -40.161 | 67.522 | 1.00 | 0.00 | O |
| ATOM | 525 | P    | G A | 17 | -15.152 | -40.342 | 68.912 | 1.00 | 0.00 | P |
| ATOM | 526 | H1   | G A | 17 | -6.832  | -35.652 | 70.520 | 1.00 | 0.00 | H |
| ATOM | 527 | H8   | G A | 17 | -12.462 | -38.301 | 68.798 | 1.00 | 0.00 | H |
| ATOM | 528 | H1'  | G A | 17 | -12.562 | -35.864 | 71.849 | 1.00 | 0.00 | H |
| ATOM | 529 | H21  | G A | 17 | -7.079  | -34.467 | 72.349 | 1.00 | 0.00 | H |
| ATOM | 530 | H3'  | G A | 17 | -16.012 | -37.517 | 70.939 | 1.00 | 0.00 | H |
| ATOM | 531 | H22  | G A | 17 | -8.647  | -34.309 | 73.187 | 1.00 | 0.00 | H |
| ATOM | 532 | H4'  | G A | 17 | -14.767 | -38.505 | 73.056 | 1.00 | 0.00 | H |
| ATOM | 533 | H2'1 | G A | 17 | -14.120 | -37.054 | 69.535 | 1.00 | 0.00 | H |
| ATOM | 534 | H2'2 | G A | 17 | -14.333 | -35.492 | 70.316 | 1.00 | 0.00 | H |
| ATOM | 535 | H5'1 | G A | 17 | -13.495 | -40.219 | 71.581 | 1.00 | 0.00 | H |
| ATOM | 536 | H5'2 | G A | 17 | -15.270 | -40.176 | 71.571 | 1.00 | 0.00 | H |
| ATOM | 537 | C1'  | G A | 18 | -11.729 | -31.980 | 72.093 | 1.00 | 0.00 | C |
| ATOM | 538 | N1   | G A | 18 | -7.833  | -32.884 | 68.927 | 1.00 | 0.00 | N |
| ATOM | 539 | C2   | G A | 18 | -7.865  | -32.177 | 70.116 | 1.00 | 0.00 | C |
| ATOM | 540 | N2   | G A | 18 | -6.705  | -31.637 | 70.513 | 1.00 | 0.00 | N |
| ATOM | 541 | N3   | G A | 18 | -8.965  | -32.022 | 70.849 | 1.00 | 0.00 | N |
| ATOM | 542 | C4   | G A | 18 | -10.047 | -32.627 | 70.293 | 1.00 | 0.00 | C |
| ATOM | 543 | C5   | G A | 18 | -10.110 | -33.349 | 69.111 | 1.00 | 0.00 | C |
| ATOM | 544 | C6   | G A | 18 | -8.940  | -33.518 | 68.334 | 1.00 | 0.00 | C |
| ATOM | 545 | O6   | G A | 18 | -8.799  | -34.118 | 67.268 | 1.00 | 0.00 | O |
| ATOM | 546 | N7   | G A | 18 | -11.411 | -33.806 | 68.894 | 1.00 | 0.00 | N |
| ATOM | 547 | C8   | G A | 18 | -12.079 | -33.362 | 69.927 | 1.00 | 0.00 | C |
| ATOM | 548 | N9   | G A | 18 | -11.319 | -32.636 | 70.820 | 1.00 | 0.00 | N |
| ATOM | 549 | C2'  | G A | 18 | -13.114 | -31.351 | 72.041 | 1.00 | 0.00 | C |
| ATOM | 550 | C3'  | G A | 18 | -13.630 | -31.602 | 73.447 | 1.00 | 0.00 | C |
| ATOM | 551 | O3'  | G A | 18 | -13.160 | -30.568 | 74.310 | 1.00 | 0.00 | O |
| ATOM | 552 | C4'  | G A | 18 | -13.027 | -32.962 | 73.796 | 1.00 | 0.00 | C |
| ATOM | 553 | O4'  | G A | 18 | -11.737 | -32.969 | 73.105 | 1.00 | 0.00 | O |
| ATOM | 554 | C5'  | G A | 18 | -13.814 | -34.174 | 73.362 | 1.00 | 0.00 | C |
| ATOM | 555 | O5'  | G A | 18 | -14.444 | -33.920 | 72.081 | 1.00 | 0.00 | O |
| ATOM | 556 | O1P  | G A | 18 | -16.901 | -33.933 | 72.627 | 1.00 | 0.00 | O |
| ATOM | 557 | O2P  | G A | 18 | -16.124 | -34.552 | 70.324 | 1.00 | 0.00 | O |
| ATOM | 558 | P    | G A | 18 | -15.871 | -34.570 | 71.785 | 1.00 | 0.00 | P |
| ATOM | 559 | H1   | G A | 18 | -6.927  | -32.951 | 68.437 | 1.00 | 0.00 | H |
| ATOM | 560 | H8   | G A | 18 | -13.144 | -33.547 | 70.070 | 1.00 | 0.00 | H |
| ATOM | 561 | H1'  | G A | 18 | -10.973 | -31.240 | 72.353 | 1.00 | 0.00 | H |
| ATOM | 562 | H21  | G A | 18 | -5.857  | -31.765 | 69.940 | 1.00 | 0.00 | H |
| ATOM | 563 | H3'  | G A | 18 | -14.720 | -31.634 | 73.485 | 1.00 | 0.00 | H |
| ATOM | 564 | H22  | G A | 18 | -6.663  | -31.097 | 71.387 | 1.00 | 0.00 | H |



|      |     |      |       |    |         |         |        |      |      |   |
|------|-----|------|-------|----|---------|---------|--------|------|------|---|
| ATOM | 565 | H4'  | G A   | 18 | -12.929 | -32.996 | 74.879 | 1.00 | 0.00 | H |
| ATOM | 566 | H2'1 | G A   | 18 | -13.754 | -31.821 | 71.295 | 1.00 | 0.00 | H |
| ATOM | 567 | H2'2 | G A   | 18 | -13.077 | -30.285 | 71.814 | 1.00 | 0.00 | H |
| ATOM | 568 | H5'1 | G A   | 18 | -13.141 | -35.027 | 73.279 | 1.00 | 0.00 | H |
| ATOM | 569 | H5'2 | G A   | 18 | -14.576 | -34.392 | 74.110 | 1.00 | 0.00 | H |
| ATOM | 570 | C1'  | T A   | 19 | -9.049  | -27.854 | 71.552 | 1.00 | 0.00 | C |
| ATOM | 571 | N1   | T A   | 19 | -9.522  | -28.599 | 70.355 | 1.00 | 0.00 | N |
| ATOM | 572 | C2   | T A   | 19 | -8.580  | -28.918 | 69.398 | 1.00 | 0.00 | C |
| ATOM | 573 | O2   | T A   | 19 | -7.404  | -28.616 | 69.504 | 1.00 | 0.00 | O |
| ATOM | 574 | N3   | T A   | 19 | -9.063  | -29.610 | 68.304 | 1.00 | 0.00 | N |
| ATOM | 575 | C4   | T A   | 19 | -10.369 | -29.997 | 68.086 | 1.00 | 0.00 | C |
| ATOM | 576 | O4   | T A   | 19 | -10.684 | -30.613 | 67.061 | 1.00 | 0.00 | O |
| ATOM | 577 | C5   | T A   | 19 | -11.281 | -29.619 | 69.140 | 1.00 | 0.00 | C |
| ATOM | 578 | C6   | T A   | 19 | -10.845 | -28.943 | 70.222 | 1.00 | 0.00 | C |
| ATOM | 579 | C7   | T A   | 19 | -12.713 | -30.021 | 68.947 | 1.00 | 0.00 | C |
| ATOM | 580 | C2'  | T A   | 19 | -10.034 | -26.805 | 72.053 | 1.00 | 0.00 | C |
| ATOM | 581 | C3'  | T A   | 19 | -9.841  | -26.881 | 73.559 | 1.00 | 0.00 | C |
| ATOM | 582 | O3'  | T A   | 19 | -8.734  | -26.065 | 73.932 | 1.00 | 0.00 | O |
| ATOM | 583 | C4'  | T A   | 19 | -9.568  | -28.366 | 73.790 | 1.00 | 0.00 | C |
| ATOM | 584 | O4'  | T A   | 19 | -8.846  | -28.791 | 72.592 | 1.00 | 0.00 | O |
| ATOM | 585 | C5'  | T A   | 19 | -10.778 | -29.253 | 73.968 | 1.00 | 0.00 | C |
| ATOM | 586 | O5'  | T A   | 19 | -11.849 | -28.798 | 73.104 | 1.00 | 0.00 | O |
| ATOM | 587 | O1P  | T A   | 19 | -13.608 | -28.008 | 74.721 | 1.00 | 0.00 | O |
| ATOM | 588 | O2P  | T A   | 19 | -14.275 | -28.833 | 72.447 | 1.00 | 0.00 | O |
| ATOM | 589 | P    | T A   | 19 | -13.356 | -28.943 | 73.606 | 1.00 | 0.00 | P |
| ATOM | 590 | H3   | T A   | 19 | -8.378  | -29.864 | 67.578 | 1.00 | 0.00 | H |
| ATOM | 591 | H6   | T A   | 19 | -11.552 | -28.669 | 71.005 | 1.00 | 0.00 | H |
| ATOM | 592 | H1'  | T A   | 19 | -8.085  | -27.402 | 71.314 | 1.00 | 0.00 | H |
| ATOM | 593 | H3'  | T A   | 19 | -10.730 | -26.556 | 74.100 | 1.00 | 0.00 | H |
| ATOM | 594 | H4'  | T A   | 19 | -8.967  | -28.439 | 74.698 | 1.00 | 0.00 | H |
| ATOM | 595 | H71  | T A   | 19 | -13.328 | -29.129 | 68.833 | 1.00 | 0.00 | H |
| ATOM | 596 | H72  | T A   | 19 | -12.798 | -30.638 | 68.051 | 1.00 | 0.00 | H |
| ATOM | 597 | H73  | T A   | 19 | -13.053 | -30.589 | 69.812 | 1.00 | 0.00 | H |
| ATOM | 598 | H2'1 | T A   | 19 | -11.060 | -27.036 | 71.771 | 1.00 | 0.00 | H |
| ATOM | 599 | H2'2 | T A   | 19 | -9.807  | -25.809 | 71.673 | 1.00 | 0.00 | H |
| ATOM | 600 | H5'1 | T A   | 19 | -10.511 | -30.279 | 73.715 | 1.00 | 0.00 | H |
| ATOM | 601 | H5'2 | T A   | 19 | -11.102 | -29.214 | 75.006 | 1.00 | 0.00 | H |
| ATOM | 602 | C01  | LNK A | 20 | -8.518  | -22.398 | 74.540 | 0.00 | 0.00 | C |
| ATOM | 603 | O1   | LNK A | 20 | -9.245  | -23.569 | 74.157 | 1.00 | 0.00 | O |
| ATOM | 604 | S    | LNK A | 20 | -9.073  | -18.464 | 74.789 | 0.00 | 0.00 | S |
| ATOM | 605 | C02  | LNK A | 20 | -9.420  | -21.160 | 74.381 | 0.00 | 0.00 | C |
| ATOM | 606 | C03  | LNK A | 20 | -8.575  | -19.968 | 73.892 | 0.00 | 0.00 | C |
| ATOM | 607 | O1P  | LNK A | 20 | -9.539  | -24.611 | 71.885 | 1.00 | 0.00 | O |
| ATOM | 608 | O2P  | LNK A | 20 | -7.237  | -24.101 | 72.745 | 1.00 | 0.00 | O |
| ATOM | 609 | P    | LNK A | 20 | -8.627  | -24.526 | 73.042 | 1.00 | 0.00 | P |
| ATOM | 610 | H01  | LNK A | 20 | -7.638  | -22.291 | 73.905 | 0.00 | 0.00 | H |
| ATOM | 611 | H02  | LNK A | 20 | -8.206  | -22.488 | 75.581 | 0.00 | 0.00 | H |
| ATOM | 612 | H03  | LNK A | 20 | -8.735  | -19.823 | 72.824 | 0.00 | 0.00 | H |
| ATOM | 613 | H04  | LNK A | 20 | -9.875  | -20.915 | 75.341 | 0.00 | 0.00 | H |
| ATOM | 614 | H05  | LNK A | 20 | -10.203 | -21.372 | 73.653 | 0.00 | 0.00 | H |
| ATOM | 615 | H06  | LNK A | 20 | -7.521  | -20.170 | 74.078 | 0.00 | 0.00 | H |
| ATOM | 616 | AU   | LNK A | 20 | -8.771  | -17.918 | 74.505 |      |      |   |
| TER  |     |      |       |    |         |         |        |      |      |   |
| ATOM | 618 | C1'  | A B   | 2  | -3.233  | -31.281 | 62.989 | 1.00 | 0.00 | C |

|      |     |      |     |   |        |         |        |      |      |   |
|------|-----|------|-----|---|--------|---------|--------|------|------|---|
| ATOM | 619 | N1   | A B | 2 | -7.118 | -30.341 | 66.209 | 1.00 | 0.00 | N |
| ATOM | 620 | C2   | A B | 2 | -5.822 | -30.053 | 66.258 | 1.00 | 0.00 | C |
| ATOM | 621 | N3   | A B | 2 | -4.871 | -30.323 | 65.389 | 1.00 | 0.00 | N |
| ATOM | 622 | C4   | A B | 2 | -5.379 | -30.992 | 64.337 | 1.00 | 0.00 | C |
| ATOM | 623 | C5   | A B | 2 | -6.678 | -31.362 | 64.136 | 1.00 | 0.00 | C |
| ATOM | 624 | C6   | A B | 2 | -7.596 | -31.007 | 65.147 | 1.00 | 0.00 | C |
| ATOM | 625 | N6   | A B | 2 | -8.905 | -31.304 | 65.087 | 1.00 | 0.00 | N |
| ATOM | 626 | N7   | A B | 2 | -6.826 | -32.035 | 62.935 | 1.00 | 0.00 | N |
| ATOM | 627 | C8   | A B | 2 | -5.623 | -32.062 | 62.443 | 1.00 | 0.00 | C |
| ATOM | 628 | N9   | A B | 2 | -4.692 | -31.444 | 63.237 | 1.00 | 0.00 | N |
| ATOM | 629 | C2'  | A B | 2 | -2.585 | -32.486 | 62.322 | 1.00 | 0.00 | C |
| ATOM | 630 | C3'  | A B | 2 | -1.551 | -31.833 | 61.420 | 1.00 | 0.00 | C |
| ATOM | 631 | O3'  | A B | 2 | -0.369 | -31.574 | 62.175 | 1.00 | 0.00 | O |
| ATOM | 632 | C4'  | A B | 2 | -2.249 | -30.545 | 60.981 | 1.00 | 0.00 | C |
| ATOM | 633 | O4'  | A B | 2 | -3.065 | -30.165 | 62.135 | 1.00 | 0.00 | O |
| ATOM | 634 | C5'  | A B | 2 | -3.142 | -30.646 | 59.768 | 1.00 | 0.00 | C |
| ATOM | 635 | O5'  | A B | 2 | -3.825 | -31.925 | 59.767 | 1.00 | 0.00 | O |
| ATOM | 636 | H2   | A B | 2 | -5.497 | -29.515 | 67.147 | 1.00 | 0.00 | H |
| ATOM | 637 | H8   | A B | 2 | -5.379 | -32.530 | 61.489 | 1.00 | 0.00 | H |
| ATOM | 638 | H1'  | A B | 2 | -2.750 | -31.053 | 63.940 | 1.00 | 0.00 | H |
| ATOM | 639 | H3'  | A B | 2 | -1.302 | -32.456 | 60.563 | 1.00 | 0.00 | H |
| ATOM | 640 | H4'  | A B | 2 | -1.464 | -29.822 | 60.758 | 1.00 | 0.00 | H |
| ATOM | 641 | H61  | A B | 2 | -9.533 | -31.020 | 65.851 | 1.00 | 0.00 | H |
| ATOM | 642 | H62  | A B | 2 | -9.279 | -31.818 | 64.275 | 1.00 | 0.00 | H |
| ATOM | 643 | H2'1 | A B | 2 | -3.299 | -33.074 | 61.745 | 1.00 | 0.00 | H |
| ATOM | 644 | H2'2 | A B | 2 | -2.116 | -33.156 | 63.043 | 1.00 | 0.00 | H |
| ATOM | 645 | H5'1 | A B | 2 | -3.874 | -29.839 | 59.795 | 1.00 | 0.00 | H |
| ATOM | 646 | H5'2 | A B | 2 | -2.536 | -30.551 | 58.869 | 1.00 | 0.00 | H |
| ATOM | 647 | C1'  | C B | 3 | -1.814 | -32.108 | 67.675 | 1.00 | 0.00 | C |
| ATOM | 648 | N1   | C B | 3 | -3.052 | -32.737 | 67.139 | 1.00 | 0.00 | N |
| ATOM | 649 | C2   | C B | 3 | -4.227 | -32.597 | 67.874 | 1.00 | 0.00 | C |
| ATOM | 650 | O2   | C B | 3 | -4.194 | -31.959 | 68.935 | 1.00 | 0.00 | O |
| ATOM | 651 | N3   | C B | 3 | -5.365 | -33.163 | 67.403 | 1.00 | 0.00 | N |
| ATOM | 652 | C4   | C B | 3 | -5.368 | -33.849 | 66.252 | 1.00 | 0.00 | C |
| ATOM | 653 | N4   | C B | 3 | -6.510 | -34.379 | 65.837 | 1.00 | 0.00 | N |
| ATOM | 654 | C5   | C B | 3 | -4.173 | -34.014 | 65.476 | 1.00 | 0.00 | C |
| ATOM | 655 | C6   | C B | 3 | -3.039 | -33.431 | 65.968 | 1.00 | 0.00 | C |
| ATOM | 656 | C2'  | C B | 3 | -0.557 | -32.937 | 67.453 | 1.00 | 0.00 | C |
| ATOM | 657 | C3'  | C B | 3 | 0.491  | -31.864 | 67.202 | 1.00 | 0.00 | C |
| ATOM | 658 | O3'  | C B | 3 | 0.986  | -31.392 | 68.454 | 1.00 | 0.00 | O |
| ATOM | 659 | C4'  | C B | 3 | -0.294 | -30.791 | 66.450 | 1.00 | 0.00 | C |
| ATOM | 660 | O4'  | C B | 3 | -1.642 | -30.868 | 67.014 | 1.00 | 0.00 | O |
| ATOM | 661 | C5'  | C B | 3 | -0.388 | -30.955 | 64.952 | 1.00 | 0.00 | C |
| ATOM | 662 | O5'  | C B | 3 | -0.499 | -32.362 | 64.618 | 1.00 | 0.00 | O |
| ATOM | 663 | O1P  | C B | 3 | 1.646  | -32.842 | 63.391 | 1.00 | 0.00 | O |
| ATOM | 664 | O2P  | C B | 3 | -0.408 | -34.203 | 62.910 | 1.00 | 0.00 | O |
| ATOM | 665 | P    | C B | 3 | 0.174  | -32.887 | 63.273 | 1.00 | 0.00 | P |
| ATOM | 666 | H5   | C B | 3 | -4.168 | -34.577 | 64.542 | 1.00 | 0.00 | H |
| ATOM | 667 | H6   | C B | 3 | -2.107 | -33.522 | 65.409 | 1.00 | 0.00 | H |
| ATOM | 668 | H1'  | C B | 3 | -1.966 | -31.904 | 68.736 | 1.00 | 0.00 | H |
| ATOM | 669 | H3'  | C B | 3 | 1.321  | -32.236 | 66.603 | 1.00 | 0.00 | H |
| ATOM | 670 | H4'  | C B | 3 | 0.198  | -29.840 | 66.649 | 1.00 | 0.00 | H |
| ATOM | 671 | H41  | C B | 3 | -6.540 | -34.908 | 64.953 | 1.00 | 0.00 | H |
| ATOM | 672 | H42  | C B | 3 | -7.367 | -34.261 | 66.397 | 1.00 | 0.00 | H |

|      |     |      |     |   |        |         |        |      |      |   |
|------|-----|------|-----|---|--------|---------|--------|------|------|---|
| ATOM | 673 | H2'1 | C B | 3 | -0.650 | -33.608 | 66.600 | 1.00 | 0.00 | H |
| ATOM | 674 | H2'2 | C B | 3 | -0.304 | -33.544 | 68.323 | 1.00 | 0.00 | H |
| ATOM | 675 | H5'1 | C B | 3 | -1.266 | -30.420 | 64.587 | 1.00 | 0.00 | H |
| ATOM | 676 | H5'2 | C B | 3 | 0.504  | -30.537 | 64.490 | 1.00 | 0.00 | H |
| ATOM | 677 | C1'  | C B | 4 | -2.597 | -33.236 | 72.433 | 1.00 | 0.00 | C |
| ATOM | 678 | N1   | C B | 4 | -3.135 | -34.104 | 71.350 | 1.00 | 0.00 | N |
| ATOM | 679 | C2   | C B | 4 | -4.488 | -34.436 | 71.392 | 1.00 | 0.00 | C |
| ATOM | 680 | O2   | C B | 4 | -5.183 | -33.999 | 72.319 | 1.00 | 0.00 | O |
| ATOM | 681 | N3   | C B | 4 | -4.999 | -35.225 | 70.417 | 1.00 | 0.00 | N |
| ATOM | 682 | C4   | C B | 4 | -4.221 | -35.685 | 69.426 | 1.00 | 0.00 | C |
| ATOM | 683 | N4   | C B | 4 | -4.772 | -36.450 | 68.495 | 1.00 | 0.00 | N |
| ATOM | 684 | C5   | C B | 4 | -2.826 | -35.363 | 69.360 | 1.00 | 0.00 | C |
| ATOM | 685 | C6   | C B | 4 | -2.334 | -34.562 | 70.351 | 1.00 | 0.00 | C |
| ATOM | 686 | C2'  | C B | 4 | -1.192 | -33.613 | 72.881 | 1.00 | 0.00 | C |
| ATOM | 687 | C3'  | C B | 4 | -0.581 | -32.254 | 73.186 | 1.00 | 0.00 | C |
| ATOM | 688 | O3'  | C B | 4 | -0.933 | -31.869 | 74.512 | 1.00 | 0.00 | O |
| ATOM | 689 | C4'  | C B | 4 | -1.219 | -31.351 | 72.133 | 1.00 | 0.00 | C |
| ATOM | 690 | O4'  | C B | 4 | -2.559 | -31.910 | 71.941 | 1.00 | 0.00 | O |
| ATOM | 691 | C5'  | C B | 4 | -0.526 | -31.289 | 70.791 | 1.00 | 0.00 | C |
| ATOM | 692 | O5'  | C B | 4 | 0.014  | -32.592 | 70.457 | 1.00 | 0.00 | O |
| ATOM | 693 | O1P  | C B | 4 | 2.502  | -32.216 | 70.483 | 1.00 | 0.00 | O |
| ATOM | 694 | O2P  | C B | 4 | 1.521  | -34.021 | 69.043 | 1.00 | 0.00 | O |
| ATOM | 695 | P    | C B | 4 | 1.380  | -32.670 | 69.640 | 1.00 | 0.00 | P |
| ATOM | 696 | H5   | C B | 4 | -2.188 | -35.740 | 68.560 | 1.00 | 0.00 | H |
| ATOM | 697 | H6   | C B | 4 | -1.281 | -34.285 | 70.340 | 1.00 | 0.00 | H |
| ATOM | 698 | H1'  | C B | 4 | -3.295 | -33.263 | 73.270 | 1.00 | 0.00 | H |
| ATOM | 699 | H3'  | C B | 4 | 0.505  | -32.264 | 73.089 | 1.00 | 0.00 | H |
| ATOM | 700 | H4'  | C B | 4 | -1.234 | -30.342 | 72.546 | 1.00 | 0.00 | H |
| ATOM | 701 | H41  | C B | 4 | -4.198 | -36.815 | 67.719 | 1.00 | 0.00 | H |
| ATOM | 702 | H42  | C B | 4 | -5.777 | -36.682 | 68.545 | 1.00 | 0.00 | H |
| ATOM | 703 | H2'1 | C B | 4 | -0.635 | -34.133 | 72.102 | 1.00 | 0.00 | H |
| ATOM | 704 | H2'2 | C B | 4 | -1.197 | -34.253 | 73.764 | 1.00 | 0.00 | H |
| ATOM | 705 | H5'1 | C B | 4 | -1.244 | -30.981 | 70.031 | 1.00 | 0.00 | H |
| ATOM | 706 | H5'2 | C B | 4 | 0.280  | -30.558 | 70.840 | 1.00 | 0.00 | H |
| ATOM | 707 | C1'  | G B | 5 | -5.126 | -35.305 | 76.155 | 1.00 | 0.00 | C |
| ATOM | 708 | N1   | G B | 5 | -6.851 | -38.418 | 72.499 | 1.00 | 0.00 | N |
| ATOM | 709 | C2   | G B | 5 | -7.529 | -37.812 | 73.543 | 1.00 | 0.00 | C |
| ATOM | 710 | N2   | G B | 5 | -8.839 | -38.072 | 73.624 | 1.00 | 0.00 | N |
| ATOM | 711 | N3   | G B | 5 | -6.944 | -37.011 | 74.432 | 1.00 | 0.00 | N |
| ATOM | 712 | C4   | G B | 5 | -5.614 | -36.866 | 74.202 | 1.00 | 0.00 | C |
| ATOM | 713 | C5   | G B | 5 | -4.855 | -37.434 | 73.191 | 1.00 | 0.00 | C |
| ATOM | 714 | C6   | G B | 5 | -5.473 | -38.280 | 72.244 | 1.00 | 0.00 | C |
| ATOM | 715 | O6   | G B | 5 | -4.973 | -38.870 | 71.288 | 1.00 | 0.00 | O |
| ATOM | 716 | N7   | G B | 5 | -3.521 | -37.034 | 73.308 | 1.00 | 0.00 | N |
| ATOM | 717 | C8   | G B | 5 | -3.515 | -36.252 | 74.357 | 1.00 | 0.00 | C |
| ATOM | 718 | N9   | G B | 5 | -4.749 | -36.103 | 74.956 | 1.00 | 0.00 | N |
| ATOM | 719 | C2'  | G B | 5 | -4.073 | -35.317 | 77.254 | 1.00 | 0.00 | C |
| ATOM | 720 | C3'  | G B | 5 | -4.185 | -33.908 | 77.815 | 1.00 | 0.00 | C |
| ATOM | 721 | O3'  | G B | 5 | -5.234 | -33.869 | 78.779 | 1.00 | 0.00 | O |
| ATOM | 722 | C4'  | G B | 5 | -4.505 | -33.073 | 76.577 | 1.00 | 0.00 | C |
| ATOM | 723 | O4'  | G B | 5 | -5.310 | -33.965 | 75.741 | 1.00 | 0.00 | O |
| ATOM | 724 | C5'  | G B | 5 | -3.325 | -32.587 | 75.770 | 1.00 | 0.00 | C |
| ATOM | 725 | O5'  | G B | 5 | -2.285 | -33.597 | 75.764 | 1.00 | 0.00 | O |
| ATOM | 726 | O1P  | G B | 5 | -0.408 | -32.511 | 77.041 | 1.00 | 0.00 | O |

|      |     |      |     |   |         |         |        |      |      |   |
|------|-----|------|-----|---|---------|---------|--------|------|------|---|
| ATOM | 727 | O2P  | G B | 5 | 0.096   | -34.260 | 75.316 | 1.00 | 0.00 | O |
| ATOM | 728 | P    | G B | 5 | -0.761  | -33.130 | 75.749 | 1.00 | 0.00 | P |
| ATOM | 729 | H1   | G B | 5 | -7.398  | -39.015 | 71.860 | 1.00 | 0.00 | H |
| ATOM | 730 | H8   | G B | 5 | -2.614  | -35.764 | 74.729 | 1.00 | 0.00 | H |
| ATOM | 731 | H1'  | G B | 5 | -6.081  | -35.676 | 76.524 | 1.00 | 0.00 | H |
| ATOM | 732 | H21  | G B | 5 | -9.286  | -38.689 | 72.931 | 1.00 | 0.00 | H |
| ATOM | 733 | H3'  | G B | 5 | -3.254  | -33.579 | 78.281 | 1.00 | 0.00 | H |
| ATOM | 734 | H22  | G B | 5 | -9.400  | -37.654 | 74.380 | 1.00 | 0.00 | H |
| ATOM | 735 | H4'  | G B | 5 | -5.058  | -32.198 | 76.918 | 1.00 | 0.00 | H |
| ATOM | 736 | H2'1 | G B | 5 | -3.072  | -35.512 | 76.868 | 1.00 | 0.00 | H |
| ATOM | 737 | H2'2 | G B | 5 | -4.281  | -36.066 | 78.018 | 1.00 | 0.00 | H |
| ATOM | 738 | H5'1 | G B | 5 | -3.649  | -32.386 | 74.750 | 1.00 | 0.00 | H |
| ATOM | 739 | H5'2 | G B | 5 | -2.942  | -31.669 | 76.213 | 1.00 | 0.00 | H |
| ATOM | 740 | C1'  | T B | 6 | -8.262  | -38.588 | 78.128 | 1.00 | 0.00 | C |
| ATOM | 741 | N1   | T B | 6 | -7.136  | -39.049 | 77.272 | 1.00 | 0.00 | N |
| ATOM | 742 | C2   | T B | 6 | -7.443  | -39.904 | 76.235 | 1.00 | 0.00 | C |
| ATOM | 743 | O2   | T B | 6 | -8.578  | -40.284 | 76.004 | 1.00 | 0.00 | O |
| ATOM | 744 | N3   | T B | 6 | -6.366  | -40.307 | 75.465 | 1.00 | 0.00 | N |
| ATOM | 745 | C4   | T B | 6 | -5.048  | -39.943 | 75.640 | 1.00 | 0.00 | C |
| ATOM | 746 | O4   | T B | 6 | -4.167  | -40.372 | 74.886 | 1.00 | 0.00 | O |
| ATOM | 747 | C5   | T B | 6 | -4.827  | -39.045 | 76.749 | 1.00 | 0.00 | C |
| ATOM | 748 | C6   | T B | 6 | -5.851  | -38.632 | 77.520 | 1.00 | 0.00 | C |
| ATOM | 749 | C7   | T B | 6 | -3.406  | -38.620 | 76.975 | 1.00 | 0.00 | C |
| ATOM | 750 | C2'  | T B | 6 | -7.903  | -38.471 | 79.604 | 1.00 | 0.00 | C |
| ATOM | 751 | C3'  | T B | 6 | -8.713  | -37.256 | 80.032 | 1.00 | 0.00 | C |
| ATOM | 752 | O3'  | T B | 6 | -10.040 | -37.668 | 80.355 | 1.00 | 0.00 | O |
| ATOM | 753 | C4'  | T B | 6 | -8.671  | -36.365 | 78.793 | 1.00 | 0.00 | C |
| ATOM | 754 | O4'  | T B | 6 | -8.653  | -37.307 | 77.673 | 1.00 | 0.00 | O |
| ATOM | 755 | C5'  | T B | 6 | -7.480  | -35.444 | 78.668 | 1.00 | 0.00 | C |
| ATOM | 756 | O5'  | T B | 6 | -6.294  | -36.105 | 79.178 | 1.00 | 0.00 | O |
| ATOM | 757 | O1P  | T B | 6 | -5.697  | -34.742 | 81.209 | 1.00 | 0.00 | O |
| ATOM | 758 | O2P  | T B | 6 | -3.910  | -35.986 | 79.962 | 1.00 | 0.00 | O |
| ATOM | 759 | P    | T B | 6 | -5.183  | -35.228 | 79.913 | 1.00 | 0.00 | P |
| ATOM | 760 | H3   | T B | 6 | -6.571  | -40.945 | 74.681 | 1.00 | 0.00 | H |
| ATOM | 761 | H6   | T B | 6 | -5.658  | -37.954 | 78.352 | 1.00 | 0.00 | H |
| ATOM | 762 | H1'  | T B | 6 | -9.102  | -39.266 | 77.983 | 1.00 | 0.00 | H |
| ATOM | 763 | H3'  | T B | 6 | -8.272  | -36.755 | 80.892 | 1.00 | 0.00 | H |
| ATOM | 764 | H4'  | T B | 6 | -9.568  | -35.747 | 78.816 | 1.00 | 0.00 | H |
| ATOM | 765 | H71  | T B | 6 | -3.055  | -39.015 | 77.928 | 1.00 | 0.00 | H |
| ATOM | 766 | H72  | T B | 6 | -2.779  | -39.003 | 76.169 | 1.00 | 0.00 | H |
| ATOM | 767 | H73  | T B | 6 | -3.350  | -37.531 | 76.992 | 1.00 | 0.00 | H |
| ATOM | 768 | H2'1 | T B | 6 | -6.838  | -38.312 | 79.759 | 1.00 | 0.00 | H |
| ATOM | 769 | H2'2 | T B | 6 | -8.189  | -39.358 | 80.171 | 1.00 | 0.00 | H |
| ATOM | 770 | H5'1 | T B | 6 | -7.335  | -35.186 | 77.619 | 1.00 | 0.00 | H |
| ATOM | 771 | H5'2 | T B | 6 | -7.669  | -34.536 | 79.239 | 1.00 | 0.00 | H |
| ATOM | 772 | C1'  | C B | 7 | -10.639 | -42.946 | 78.238 | 1.00 | 0.00 | C |
| ATOM | 773 | N1   | C B | 7 | -9.158  | -42.896 | 78.088 | 1.00 | 0.00 | N |
| ATOM | 774 | C2   | C B | 7 | -8.584  | -43.617 | 77.043 | 1.00 | 0.00 | C |
| ATOM | 775 | O2   | C B | 7 | -9.322  | -44.264 | 76.287 | 1.00 | 0.00 | O |
| ATOM | 776 | N3   | C B | 7 | -7.237  | -43.585 | 76.889 | 1.00 | 0.00 | N |
| ATOM | 777 | C4   | C B | 7 | -6.466  | -42.877 | 77.724 | 1.00 | 0.00 | C |
| ATOM | 778 | N4   | C B | 7 | -5.157  | -42.879 | 77.525 | 1.00 | 0.00 | N |
| ATOM | 779 | C5   | C B | 7 | -7.028  | -42.129 | 78.811 | 1.00 | 0.00 | C |
| ATOM | 780 | C6   | C B | 7 | -8.388  | -42.172 | 78.943 | 1.00 | 0.00 | C |

|      |     |      |     |   |         |         |        |      |      |   |
|------|-----|------|-----|---|---------|---------|--------|------|------|---|
| ATOM | 781 | C2'  | C B | 7 | -11.109 | -42.981 | 79.685 | 1.00 | 0.00 | C |
| ATOM | 782 | C3'  | C B | 7 | -12.385 | -42.156 | 79.624 | 1.00 | 0.00 | C |
| ATOM | 783 | O3'  | C B | 7 | -13.465 | -42.994 | 79.221 | 1.00 | 0.00 | O |
| ATOM | 784 | C4'  | C B | 7 | -12.054 | -41.095 | 78.578 | 1.00 | 0.00 | C |
| ATOM | 785 | O4'  | C B | 7 | -11.172 | -41.782 | 77.634 | 1.00 | 0.00 | O |
| ATOM | 786 | C5'  | C B | 7 | -11.352 | -39.852 | 79.078 | 1.00 | 0.00 | C |
| ATOM | 787 | O5'  | C B | 7 | -10.421 | -40.207 | 80.131 | 1.00 | 0.00 | O |
| ATOM | 788 | O1P  | C B | 7 | -11.396 | -39.095 | 82.168 | 1.00 | 0.00 | O |
| ATOM | 789 | O2P  | C B | 7 | -8.928  | -39.518 | 82.030 | 1.00 | 0.00 | O |
| ATOM | 790 | P    | C B | 7 | -10.186 | -39.177 | 81.326 | 1.00 | 0.00 | P |
| ATOM | 791 | H5   | C B | 7 | -6.403  | -41.558 | 79.496 | 1.00 | 0.00 | H |
| ATOM | 792 | H6   | C B | 7 | -8.863  | -41.614 | 79.749 | 1.00 | 0.00 | H |
| ATOM | 793 | H1'  | C B | 7 | -11.008 | -43.810 | 77.685 | 1.00 | 0.00 | H |
| ATOM | 794 | H3'  | C B | 7 | -12.621 | -41.699 | 80.587 | 1.00 | 0.00 | H |
| ATOM | 795 | H4'  | C B | 7 | -12.997 | -40.785 | 78.131 | 1.00 | 0.00 | H |
| ATOM | 796 | H41  | C B | 7 | -4.541  | -42.340 | 78.151 | 1.00 | 0.00 | H |
| ATOM | 797 | H42  | C B | 7 | -4.754  | -43.419 | 76.744 | 1.00 | 0.00 | H |
| ATOM | 798 | H2'1 | C B | 7 | -10.382 | -42.541 | 80.367 | 1.00 | 0.00 | H |
| ATOM | 799 | H2'2 | C B | 7 | -11.307 | -43.997 | 80.031 | 1.00 | 0.00 | H |
| ATOM | 800 | H5'1 | C B | 7 | -10.814 | -39.389 | 78.251 | 1.00 | 0.00 | H |
| ATOM | 801 | H5'2 | C B | 7 | -12.094 | -39.154 | 79.462 | 1.00 | 0.00 | H |
| ATOM | 802 | C1'  | C B | 8 | -11.174 | -47.755 | 77.182 | 1.00 | 0.00 | C |
| ATOM | 803 | N1   | C B | 8 | -9.917  | -47.251 | 77.799 | 1.00 | 0.00 | N |
| ATOM | 804 | C2   | C B | 8 | -8.709  | -47.591 | 77.192 | 1.00 | 0.00 | C |
| ATOM | 805 | O2   | C B | 8 | -8.732  | -48.292 | 76.171 | 1.00 | 0.00 | O |
| ATOM | 806 | N3   | C B | 8 | -7.554  | -47.142 | 77.737 | 1.00 | 0.00 | N |
| ATOM | 807 | C4   | C B | 8 | -7.562  | -46.384 | 78.842 | 1.00 | 0.00 | C |
| ATOM | 808 | N4   | C B | 8 | -6.402  | -45.970 | 79.331 | 1.00 | 0.00 | N |
| ATOM | 809 | C5   | C B | 8 | -8.788  | -46.022 | 79.493 | 1.00 | 0.00 | C |
| ATOM | 810 | C6   | C B | 8 | -9.941  | -46.482 | 78.921 | 1.00 | 0.00 | C |
| ATOM | 811 | C2'  | C B | 8 | -12.235 | -48.162 | 78.196 | 1.00 | 0.00 | C |
| ATOM | 812 | C3'  | C B | 8 | -13.520 | -47.748 | 77.494 | 1.00 | 0.00 | C |
| ATOM | 813 | O3'  | C B | 8 | -13.924 | -48.787 | 76.607 | 1.00 | 0.00 | O |
| ATOM | 814 | C4'  | C B | 8 | -13.106 | -46.481 | 76.750 | 1.00 | 0.00 | C |
| ATOM | 815 | O4'  | C B | 8 | -11.708 | -46.715 | 76.384 | 1.00 | 0.00 | O |
| ATOM | 816 | C5'  | C B | 8 | -13.191 | -45.187 | 77.525 | 1.00 | 0.00 | C |
| ATOM | 817 | O5'  | C B | 8 | -12.819 | -45.419 | 78.907 | 1.00 | 0.00 | O |
| ATOM | 818 | O1P  | C B | 8 | -14.956 | -44.990 | 80.167 | 1.00 | 0.00 | O |
| ATOM | 819 | O2P  | C B | 8 | -12.743 | -44.643 | 81.295 | 1.00 | 0.00 | O |
| ATOM | 820 | P    | C B | 8 | -13.544 | -44.576 | 80.049 | 1.00 | 0.00 | P |
| ATOM | 821 | H5   | C B | 8 | -8.801  | -45.413 | 80.395 | 1.00 | 0.00 | H |
| ATOM | 822 | H6   | C B | 8 | -10.899 | -46.227 | 79.375 | 1.00 | 0.00 | H |
| ATOM | 823 | H1'  | C B | 8 | -10.922 | -48.587 | 76.525 | 1.00 | 0.00 | H |
| ATOM | 824 | H3'  | C B | 8 | -14.323 | -47.544 | 78.202 | 1.00 | 0.00 | H |
| ATOM | 825 | H4'  | C B | 8 | -13.765 | -46.392 | 75.885 | 1.00 | 0.00 | H |
| ATOM | 826 | H41  | C B | 8 | -6.381  | -45.383 | 80.178 | 1.00 | 0.00 | H |
| ATOM | 827 | H42  | C B | 8 | -5.522  | -46.233 | 78.863 | 1.00 | 0.00 | H |
| ATOM | 828 | H2'1 | C B | 8 | -12.118 | -47.645 | 79.148 | 1.00 | 0.00 | H |
| ATOM | 829 | H2'2 | C B | 8 | -12.221 | -49.233 | 78.400 | 1.00 | 0.00 | H |
| ATOM | 830 | H5'1 | C B | 8 | -12.516 | -44.457 | 77.081 | 1.00 | 0.00 | H |
| ATOM | 831 | H5'2 | C B | 8 | -14.211 | -44.809 | 77.478 | 1.00 | 0.00 | H |
| ATOM | 832 | C1'  | T B | 9 | -9.516  | -52.273 | 76.031 | 1.00 | 0.00 | C |
| ATOM | 833 | N1   | T B | 9 | -8.938  | -51.536 | 77.186 | 1.00 | 0.00 | N |
| ATOM | 834 | C2   | T B | 9 | -7.563  | -51.427 | 77.238 | 1.00 | 0.00 | C |

|      |     |      |     |    |         |         |        |      |      |   |
|------|-----|------|-----|----|---------|---------|--------|------|------|---|
| ATOM | 835 | O2   | T B | 9  | -6.831  | -51.905 | 76.390 | 1.00 | 0.00 | O |
| ATOM | 836 | N3   | T B | 9  | -7.068  | -50.733 | 78.327 | 1.00 | 0.00 | N |
| ATOM | 837 | C4   | T B | 9  | -7.806  | -50.159 | 79.340 | 1.00 | 0.00 | C |
| ATOM | 838 | O4   | T B | 9  | -7.249  | -49.563 | 80.270 | 1.00 | 0.00 | O |
| ATOM | 839 | C5   | T B | 9  | -9.234  | -50.325 | 79.198 | 1.00 | 0.00 | C |
| ATOM | 840 | C6   | T B | 9  | -9.751  | -50.994 | 78.149 | 1.00 | 0.00 | C |
| ATOM | 841 | C7   | T B | 9  | -10.075 | -49.712 | 80.278 | 1.00 | 0.00 | C |
| ATOM | 842 | C2'  | T B | 9  | -10.732 | -53.123 | 76.390 | 1.00 | 0.00 | C |
| ATOM | 843 | C3'  | T B | 9  | -11.592 | -52.987 | 75.144 | 1.00 | 0.00 | C |
| ATOM | 844 | O3'  | T B | 9  | -11.170 | -53.947 | 74.177 | 1.00 | 0.00 | O |
| ATOM | 845 | C4'  | T B | 9  | -11.318 | -51.554 | 74.695 | 1.00 | 0.00 | C |
| ATOM | 846 | O4'  | T B | 9  | -9.922  | -51.321 | 75.068 | 1.00 | 0.00 | O |
| ATOM | 847 | C5'  | T B | 9  | -12.173 | -50.477 | 75.321 | 1.00 | 0.00 | C |
| ATOM | 848 | O5'  | T B | 9  | -12.438 | -50.809 | 76.707 | 1.00 | 0.00 | O |
| ATOM | 849 | O1P  | T B | 9  | -14.921 | -51.211 | 76.744 | 1.00 | 0.00 | O |
| ATOM | 850 | O2P  | T B | 9  | -13.746 | -50.427 | 78.818 | 1.00 | 0.00 | O |
| ATOM | 851 | P    | T B | 9  | -13.843 | -50.396 | 77.339 | 1.00 | 0.00 | P |
| ATOM | 852 | H3   | T B | 9  | -6.044  | -50.634 | 78.387 | 1.00 | 0.00 | H |
| ATOM | 853 | H6   | T B | 9  | -10.832 | -51.106 | 78.065 | 1.00 | 0.00 | H |
| ATOM | 854 | H1'  | T B | 9  | -8.731  | -52.886 | 75.587 | 1.00 | 0.00 | H |
| ATOM | 855 | H3'  | T B | 9  | -12.650 | -53.136 | 75.362 | 1.00 | 0.00 | H |
| ATOM | 856 | H4'  | T B | 9  | -11.481 | -51.524 | 73.616 | 1.00 | 0.00 | H |
| ATOM | 857 | H71  | T B | 9  | -10.586 | -50.501 | 80.832 | 1.00 | 0.00 | H |
| ATOM | 858 | H72  | T B | 9  | -9.440  | -49.143 | 80.957 | 1.00 | 0.00 | H |
| ATOM | 859 | H73  | T B | 9  | -10.814 | -49.047 | 79.829 | 1.00 | 0.00 | H |
| ATOM | 860 | H2'1 | T B | 9  | -11.248 | -52.749 | 77.272 | 1.00 | 0.00 | H |
| ATOM | 861 | H2'2 | T B | 9  | -10.467 | -54.162 | 76.580 | 1.00 | 0.00 | H |
| ATOM | 862 | H5'1 | T B | 9  | -11.647 | -49.524 | 75.263 | 1.00 | 0.00 | H |
| ATOM | 863 | H5'2 | T B | 9  | -13.110 | -50.403 | 74.774 | 1.00 | 0.00 | H |
| ATOM | 864 | C1'  | A B | 10 | -6.082  | -55.855 | 75.909 | 1.00 | 0.00 | C |
| ATOM | 865 | N1   | A B | 10 | -4.211  | -53.427 | 80.024 | 1.00 | 0.00 | N |
| ATOM | 866 | C2   | A B | 10 | -3.629  | -53.967 | 78.956 | 1.00 | 0.00 | C |
| ATOM | 867 | N3   | A B | 10 | -4.174  | -54.578 | 77.927 | 1.00 | 0.00 | N |
| ATOM | 868 | C4   | A B | 10 | -5.511  | -54.618 | 78.062 | 1.00 | 0.00 | C |
| ATOM | 869 | C5   | A B | 10 | -6.259  | -54.115 | 79.091 | 1.00 | 0.00 | C |
| ATOM | 870 | C6   | A B | 10 | -5.547  | -53.482 | 80.131 | 1.00 | 0.00 | C |
| ATOM | 871 | N6   | A B | 10 | -6.148  | -52.941 | 81.206 | 1.00 | 0.00 | N |
| ATOM | 872 | N7   | A B | 10 | -7.608  | -54.342 | 78.886 | 1.00 | 0.00 | N |
| ATOM | 873 | C8   | A B | 10 | -7.648  | -54.976 | 77.751 | 1.00 | 0.00 | C |
| ATOM | 874 | N9   | A B | 10 | -6.413  | -55.177 | 77.191 | 1.00 | 0.00 | N |
| ATOM | 875 | C2'  | A B | 10 | -6.958  | -57.065 | 75.612 | 1.00 | 0.00 | C |
| ATOM | 876 | C3'  | A B | 10 | -7.104  | -56.990 | 74.100 | 1.00 | 0.00 | C |
| ATOM | 877 | O3'  | A B | 10 | -5.976  | -57.613 | 73.489 | 1.00 | 0.00 | O |
| ATOM | 878 | C4'  | A B | 10 | -7.141  | -55.484 | 73.838 | 1.00 | 0.00 | C |
| ATOM | 879 | O4'  | A B | 10 | -6.267  | -54.917 | 74.866 | 1.00 | 0.00 | O |
| ATOM | 880 | C5'  | A B | 10 | -8.495  | -54.821 | 73.935 | 1.00 | 0.00 | C |
| ATOM | 881 | O5'  | A B | 10 | -9.267  | -55.433 | 74.999 | 1.00 | 0.00 | O |
| ATOM | 882 | O1P  | A B | 10 | -11.166 | -56.543 | 73.776 | 1.00 | 0.00 | O |
| ATOM | 883 | O2P  | A B | 10 | -11.469 | -55.797 | 76.152 | 1.00 | 0.00 | O |
| ATOM | 884 | P    | A B | 10 | -10.848 | -55.558 | 74.827 | 1.00 | 0.00 | P |
| ATOM | 885 | H2   | A B | 10 | -2.542  | -53.892 | 78.933 | 1.00 | 0.00 | H |
| ATOM | 886 | H8   | A B | 10 | -8.575  | -55.316 | 77.290 | 1.00 | 0.00 | H |
| ATOM | 887 | H1'  | A B | 10 | -5.029  | -56.131 | 75.931 | 1.00 | 0.00 | H |
| ATOM | 888 | H3'  | A B | 10 | -8.017  | -57.472 | 73.753 | 1.00 | 0.00 | H |

|      |     |      |     |    |        |         |        |      |      |   |
|------|-----|------|-----|----|--------|---------|--------|------|------|---|
| ATOM | 889 | H4'  | A B | 10 | -6.766 | -55.331 | 72.827 | 1.00 | 0.00 | H |
| ATOM | 890 | H61  | A B | 10 | -5.581 | -52.487 | 81.936 | 1.00 | 0.00 | H |
| ATOM | 891 | H62  | A B | 10 | -7.172 | -52.979 | 81.297 | 1.00 | 0.00 | H |
| ATOM | 892 | H2'1 | A B | 10 | -7.927 | -57.007 | 76.106 | 1.00 | 0.00 | H |
| ATOM | 893 | H2'2 | A B | 10 | -6.488 | -58.001 | 75.918 | 1.00 | 0.00 | H |
| ATOM | 894 | H5'1 | A B | 10 | -8.360 | -53.760 | 74.142 | 1.00 | 0.00 | H |
| ATOM | 895 | H5'2 | A B | 10 | -9.019 | -54.937 | 72.988 | 1.00 | 0.00 | H |
| ATOM | 896 | C1'  | G B | 11 | -2.035 | -58.192 | 77.582 | 1.00 | 0.00 | C |
| ATOM | 897 | N1   | G B | 11 | -3.310 | -56.046 | 82.031 | 1.00 | 0.00 | N |
| ATOM | 898 | C2   | G B | 11 | -2.068 | -56.185 | 81.436 | 1.00 | 0.00 | C |
| ATOM | 899 | N2   | G B | 11 | -1.029 | -55.687 | 82.117 | 1.00 | 0.00 | N |
| ATOM | 900 | N3   | G B | 11 | -1.880 | -56.772 | 80.255 | 1.00 | 0.00 | N |
| ATOM | 901 | C4   | G B | 11 | -3.042 | -57.222 | 79.712 | 1.00 | 0.00 | C |
| ATOM | 902 | C5   | G B | 11 | -4.320 | -57.133 | 80.233 | 1.00 | 0.00 | C |
| ATOM | 903 | C6   | G B | 11 | -4.523 | -56.507 | 81.486 | 1.00 | 0.00 | C |
| ATOM | 904 | O6   | G B | 11 | -5.572 | -56.334 | 82.107 | 1.00 | 0.00 | O |
| ATOM | 905 | N7   | G B | 11 | -5.240 | -57.723 | 79.363 | 1.00 | 0.00 | N |
| ATOM | 906 | C8   | G B | 11 | -4.506 | -58.139 | 78.362 | 1.00 | 0.00 | C |
| ATOM | 907 | N9   | G B | 11 | -3.159 | -57.872 | 78.503 | 1.00 | 0.00 | N |
| ATOM | 908 | C2'  | G B | 11 | -2.174 | -59.540 | 76.889 | 1.00 | 0.00 | C |
| ATOM | 909 | C3'  | G B | 11 | -1.580 | -59.255 | 75.518 | 1.00 | 0.00 | C |
| ATOM | 910 | O3'  | G B | 11 | -0.164 | -59.399 | 75.582 | 1.00 | 0.00 | O |
| ATOM | 911 | C4'  | G B | 11 | -2.002 | -57.810 | 75.259 | 1.00 | 0.00 | C |
| ATOM | 912 | O4'  | G B | 11 | -1.996 | -57.190 | 76.585 | 1.00 | 0.00 | O |
| ATOM | 913 | C5'  | G B | 11 | -3.364 | -57.609 | 74.638 | 1.00 | 0.00 | C |
| ATOM | 914 | O5'  | G B | 11 | -4.289 | -58.597 | 75.155 | 1.00 | 0.00 | O |
| ATOM | 915 | O1P  | G B | 11 | -4.835 | -60.000 | 73.140 | 1.00 | 0.00 | O |
| ATOM | 916 | O2P  | G B | 11 | -6.494 | -59.794 | 75.010 | 1.00 | 0.00 | O |
| ATOM | 917 | P    | G B | 11 | -5.431 | -59.160 | 74.194 | 1.00 | 0.00 | P |
| ATOM | 918 | H1   | G B | 11 | -3.347 | -55.570 | 82.945 | 1.00 | 0.00 | H |
| ATOM | 919 | H8   | G B | 11 | -4.921 | -58.652 | 77.495 | 1.00 | 0.00 | H |
| ATOM | 920 | H1'  | G B | 11 | -1.104 | -58.136 | 78.148 | 1.00 | 0.00 | H |
| ATOM | 921 | H21  | G B | 11 | -1.182 | -55.232 | 83.028 | 1.00 | 0.00 | H |
| ATOM | 922 | H3'  | G B | 11 | -1.977 | -59.924 | 74.754 | 1.00 | 0.00 | H |
| ATOM | 923 | H22  | G B | 11 | -0.077 | -55.761 | 81.730 | 1.00 | 0.00 | H |
| ATOM | 924 | H4'  | G B | 11 | -1.262 | -57.380 | 74.585 | 1.00 | 0.00 | H |
| ATOM | 925 | H2'1 | G B | 11 | -3.213 | -59.860 | 76.812 | 1.00 | 0.00 | H |
| ATOM | 926 | H2'2 | G B | 11 | -1.624 | -60.328 | 77.404 | 1.00 | 0.00 | H |
| ATOM | 927 | H5'1 | G B | 11 | -3.722 | -56.608 | 74.875 | 1.00 | 0.00 | H |
| ATOM | 928 | H5'2 | G B | 11 | -3.281 | -57.714 | 73.556 | 1.00 | 0.00 | H |
| ATOM | 929 | C1'  | G B | 12 | 1.238  | -59.492 | 81.064 | 1.00 | 0.00 | C |
| ATOM | 930 | N1   | G B | 12 | -2.640 | -58.570 | 84.248 | 1.00 | 0.00 | N |
| ATOM | 931 | C2   | G B | 12 | -1.300 | -58.241 | 84.360 | 1.00 | 0.00 | C |
| ATOM | 932 | N2   | G B | 12 | -0.947 | -57.578 | 85.469 | 1.00 | 0.00 | N |
| ATOM | 933 | N3   | G B | 12 | -0.388 | -58.545 | 83.440 | 1.00 | 0.00 | N |
| ATOM | 934 | C4   | G B | 12 | -0.921 | -59.221 | 82.390 | 1.00 | 0.00 | C |
| ATOM | 935 | C5   | G B | 12 | -2.239 | -59.597 | 82.194 | 1.00 | 0.00 | C |
| ATOM | 936 | C6   | G B | 12 | -3.209 | -59.270 | 83.168 | 1.00 | 0.00 | C |
| ATOM | 937 | O6   | G B | 12 | -4.415 | -59.515 | 83.174 | 1.00 | 0.00 | O |
| ATOM | 938 | N7   | G B | 12 | -2.373 | -60.280 | 80.983 | 1.00 | 0.00 | N |
| ATOM | 939 | C8   | G B | 12 | -1.161 | -60.293 | 80.491 | 1.00 | 0.00 | C |
| ATOM | 940 | N9   | G B | 12 | -0.222 | -59.671 | 81.289 | 1.00 | 0.00 | N |
| ATOM | 941 | C2'  | G B | 12 | 1.908  | -60.689 | 80.405 | 1.00 | 0.00 | C |
| ATOM | 942 | C3'  | G B | 12 | 2.949  | -60.024 | 79.518 | 1.00 | 0.00 | C |

|      |     |      |     |    |        |         |        |      |      |   |
|------|-----|------|-----|----|--------|---------|--------|------|------|---|
| ATOM | 943 | O3'  | G B | 12 | 4.118  | -59.756 | 80.289 | 1.00 | 0.00 | O |
| ATOM | 944 | C4'  | G B | 12 | 2.245  | -58.744 | 79.072 | 1.00 | 0.00 | C |
| ATOM | 945 | O4'  | G B | 12 | 1.410  | -58.374 | 80.214 | 1.00 | 0.00 | O |
| ATOM | 946 | C5'  | G B | 12 | 1.369  | -58.852 | 77.847 | 1.00 | 0.00 | C |
| ATOM | 947 | O5'  | G B | 12 | 0.699  | -60.137 | 77.835 | 1.00 | 0.00 | O |
| ATOM | 948 | O1P  | G B | 12 | 1.690  | -61.291 | 75.830 | 1.00 | 0.00 | O |
| ATOM | 949 | O2P  | G B | 12 | -0.620 | -61.889 | 76.606 | 1.00 | 0.00 | O |
| ATOM | 950 | P    | G B | 12 | 0.420  | -60.845 | 76.433 | 1.00 | 0.00 | P |
| ATOM | 951 | H1   | G B | 12 | -3.268 | -58.281 | 85.015 | 1.00 | 0.00 | H |
| ATOM | 952 | H8   | G B | 12 | -0.911 | -60.756 | 79.537 | 1.00 | 0.00 | H |
| ATOM | 953 | H1'  | G B | 12 | 1.705  | -59.260 | 82.021 | 1.00 | 0.00 | H |
| ATOM | 954 | H21  | G B | 12 | -1.661 | -57.341 | 86.175 | 1.00 | 0.00 | H |
| ATOM | 955 | H3'  | G B | 12 | 3.215  | -60.645 | 78.664 | 1.00 | 0.00 | H |
| ATOM | 956 | H22  | G B | 12 | 0.034  | -57.306 | 85.614 | 1.00 | 0.00 | H |
| ATOM | 957 | H4'  | G B | 12 | 3.024  | -58.011 | 78.860 | 1.00 | 0.00 | H |
| ATOM | 958 | H2'1 | G B | 12 | 1.208  | -61.284 | 79.817 | 1.00 | 0.00 | H |
| ATOM | 959 | H2'2 | G B | 12 | 2.373  | -61.356 | 81.131 | 1.00 | 0.00 | H |
| ATOM | 960 | H5'1 | G B | 12 | 0.629  | -58.052 | 77.864 | 1.00 | 0.00 | H |
| ATOM | 961 | H5'2 | G B | 12 | 1.987  | -58.750 | 76.955 | 1.00 | 0.00 | H |
| ATOM | 962 | C1'  | T B | 13 | 2.693  | -60.327 | 85.721 | 1.00 | 0.00 | C |
| ATOM | 963 | N1   | T B | 13 | 1.446  | -60.950 | 85.204 | 1.00 | 0.00 | N |
| ATOM | 964 | C2   | T B | 13 | 0.301  | -60.790 | 85.960 | 1.00 | 0.00 | C |
| ATOM | 965 | O2   | T B | 13 | 0.286  | -60.172 | 87.010 | 1.00 | 0.00 | O |
| ATOM | 966 | N3   | T B | 13 | -0.835 | -61.383 | 85.442 | 1.00 | 0.00 | N |
| ATOM | 967 | C4   | T B | 13 | -0.925 | -62.105 | 84.270 | 1.00 | 0.00 | C |
| ATOM | 968 | O4   | T B | 13 | -2.001 | -62.595 | 83.909 | 1.00 | 0.00 | O |
| ATOM | 969 | C5   | T B | 13 | 0.322  | -62.216 | 83.548 | 1.00 | 0.00 | C |
| ATOM | 970 | C6   | T B | 13 | 1.449  | -61.649 | 84.023 | 1.00 | 0.00 | C |
| ATOM | 971 | C7   | T B | 13 | 0.271  | -62.990 | 82.265 | 1.00 | 0.00 | C |
| ATOM | 972 | C2'  | T B | 13 | 3.943  | -61.166 | 85.483 | 1.00 | 0.00 | C |
| ATOM | 973 | C3'  | T B | 13 | 4.994  | -60.100 | 85.215 | 1.00 | 0.00 | C |
| ATOM | 974 | O3'  | T B | 13 | 5.510  | -59.631 | 86.459 | 1.00 | 0.00 | O |
| ATOM | 975 | C4'  | T B | 13 | 4.206  | -59.023 | 84.473 | 1.00 | 0.00 | C |
| ATOM | 976 | O4'  | T B | 13 | 2.865  | -59.090 | 85.057 | 1.00 | 0.00 | O |
| ATOM | 977 | C5'  | T B | 13 | 4.089  | -59.188 | 82.975 | 1.00 | 0.00 | C |
| ATOM | 978 | O5'  | T B | 13 | 3.965  | -60.595 | 82.646 | 1.00 | 0.00 | O |
| ATOM | 979 | O1P  | T B | 13 | 6.087  | -61.091 | 81.392 | 1.00 | 0.00 | O |
| ATOM | 980 | O2P  | T B | 13 | 4.020  | -62.439 | 80.941 | 1.00 | 0.00 | O |
| ATOM | 981 | P    | T B | 13 | 4.615  | -61.127 | 81.292 | 1.00 | 0.00 | P |
| ATOM | 982 | H3   | T B | 13 | -1.703 | -61.276 | 85.987 | 1.00 | 0.00 | H |
| ATOM | 983 | H6   | T B | 13 | 2.377  | -61.748 | 83.461 | 1.00 | 0.00 | H |
| ATOM | 984 | H1'  | T B | 13 | 2.559  | -60.121 | 86.783 | 1.00 | 0.00 | H |
| ATOM | 985 | H3'  | T B | 13 | 5.813  | -60.480 | 84.605 | 1.00 | 0.00 | H |
| ATOM | 986 | H4'  | T B | 13 | 4.709  | -58.075 | 84.665 | 1.00 | 0.00 | H |
| ATOM | 987 | H71  | T B | 13 | 0.871  | -63.895 | 82.361 | 1.00 | 0.00 | H |
| ATOM | 988 | H72  | T B | 13 | -0.762 | -63.262 | 82.045 | 1.00 | 0.00 | H |
| ATOM | 989 | H73  | T B | 13 | 0.665  | -62.377 | 81.453 | 1.00 | 0.00 | H |
| ATOM | 990 | H2'1 | T B | 13 | 3.834  | -61.837 | 84.632 | 1.00 | 0.00 | H |
| ATOM | 991 | H2'2 | T B | 13 | 4.205  | -61.774 | 86.349 | 1.00 | 0.00 | H |
| ATOM | 992 | H5'1 | T B | 13 | 3.213  | -58.646 | 82.623 | 1.00 | 0.00 | H |
| ATOM | 993 | H5'2 | T B | 13 | 4.980  | -58.778 | 82.501 | 1.00 | 0.00 | H |
| ATOM | 994 | C1'  | G B | 14 | 1.888  | -61.455 | 90.489 | 1.00 | 0.00 | C |
| ATOM | 995 | N1   | G B | 14 | -2.268 | -63.783 | 88.664 | 1.00 | 0.00 | N |
| ATOM | 996 | C2   | G B | 14 | -2.116 | -62.993 | 89.789 | 1.00 | 0.00 | C |



|      |      |      |     |    |        |         |        |      |      |   |
|------|------|------|-----|----|--------|---------|--------|------|------|---|
| ATOM | 997  | N2   | G B | 14 | -3.214 | -62.798 | 90.528 | 1.00 | 0.00 | N |
| ATOM | 998  | N3   | G B | 14 | -0.957 | -62.441 | 90.148 | 1.00 | 0.00 | N |
| ATOM | 999  | C4   | G B | 14 | 0.050  | -62.748 | 89.289 | 1.00 | 0.00 | C |
| ATOM | 1000 | C5   | G B | 14 | -0.008 | -63.530 | 88.148 | 1.00 | 0.00 | C |
| ATOM | 1001 | C6   | G B | 14 | -1.237 | -64.114 | 87.764 | 1.00 | 0.00 | C |
| ATOM | 1002 | O6   | G B | 14 | -1.486 | -64.831 | 86.794 | 1.00 | 0.00 | O |
| ATOM | 1003 | N7   | G B | 14 | 1.250  | -63.601 | 87.546 | 1.00 | 0.00 | N |
| ATOM | 1004 | C8   | G B | 14 | 2.013  | -62.875 | 88.323 | 1.00 | 0.00 | C |
| ATOM | 1005 | N9   | G B | 14 | 1.356  | -62.325 | 89.405 | 1.00 | 0.00 | N |
| ATOM | 1006 | C2'  | G B | 14 | 3.295  | -61.826 | 90.938 | 1.00 | 0.00 | C |
| ATOM | 1007 | C3'  | G B | 14 | 3.900  | -60.466 | 91.246 | 1.00 | 0.00 | C |
| ATOM | 1008 | O3'  | G B | 14 | 3.544  | -60.085 | 92.572 | 1.00 | 0.00 | O |
| ATOM | 1009 | C4'  | G B | 14 | 3.259  | -59.564 | 90.193 | 1.00 | 0.00 | C |
| ATOM | 1010 | O4'  | G B | 14 | 1.923  | -60.128 | 90.000 | 1.00 | 0.00 | O |
| ATOM | 1011 | C5'  | G B | 14 | 3.954  | -59.495 | 88.854 | 1.00 | 0.00 | C |
| ATOM | 1012 | O5'  | G B | 14 | 4.499  | -60.795 | 88.517 | 1.00 | 0.00 | O |
| ATOM | 1013 | O1P  | G B | 14 | 6.986  | -60.410 | 88.547 | 1.00 | 0.00 | O |
| ATOM | 1014 | O2P  | G B | 14 | 6.014  | -62.215 | 87.102 | 1.00 | 0.00 | O |
| ATOM | 1015 | P    | G B | 14 | 5.867  | -60.866 | 87.700 | 1.00 | 0.00 | P |
| ATOM | 1016 | H1   | G B | 14 | -3.209 | -64.159 | 88.470 | 1.00 | 0.00 | H |
| ATOM | 1017 | H8   | G B | 14 | 3.076  | -62.718 | 88.133 | 1.00 | 0.00 | H |
| ATOM | 1018 | H1'  | G B | 14 | 1.189  | -61.485 | 91.326 | 1.00 | 0.00 | H |
| ATOM | 1019 | H21  | G B | 14 | -4.108 | -63.227 | 90.241 | 1.00 | 0.00 | H |
| ATOM | 1020 | H3'  | G B | 14 | 4.986  | -60.472 | 91.149 | 1.00 | 0.00 | H |
| ATOM | 1021 | H22  | G B | 14 | -3.167 | -62.222 | 91.380 | 1.00 | 0.00 | H |
| ATOM | 1022 | H4'  | G B | 14 | 3.239  | -58.556 | 90.610 | 1.00 | 0.00 | H |
| ATOM | 1023 | H2'1 | G B | 14 | 3.855  | -62.343 | 90.158 | 1.00 | 0.00 | H |
| ATOM | 1024 | H2'2 | G B | 14 | 3.292  | -62.468 | 91.819 | 1.00 | 0.00 | H |
| ATOM | 1025 | H5'1 | G B | 14 | 3.236  | -59.190 | 88.093 | 1.00 | 0.00 | H |
| ATOM | 1026 | H5'2 | G B | 14 | 4.756  | -58.761 | 88.905 | 1.00 | 0.00 | H |
| ATOM | 1027 | C1'  | C B | 15 | -0.640 | -63.524 | 94.211 | 1.00 | 0.00 | C |
| ATOM | 1028 | N1   | C B | 15 | -0.270 | -64.323 | 93.011 | 1.00 | 0.00 | N |
| ATOM | 1029 | C2   | C B | 15 | -1.277 | -65.039 | 92.367 | 1.00 | 0.00 | C |
| ATOM | 1030 | O2   | C B | 15 | -2.430 | -64.981 | 92.815 | 1.00 | 0.00 | O |
| ATOM | 1031 | N3   | C B | 15 | -0.961 | -65.773 | 91.273 | 1.00 | 0.00 | N |
| ATOM | 1032 | C4   | C B | 15 | 0.295  | -65.815 | 90.813 | 1.00 | 0.00 | C |
| ATOM | 1033 | N4   | C B | 15 | 0.549  | -66.546 | 89.737 | 1.00 | 0.00 | N |
| ATOM | 1034 | C5   | C B | 15 | 1.354  | -65.093 | 91.458 | 1.00 | 0.00 | C |
| ATOM | 1035 | C6   | C B | 15 | 1.010  | -64.356 | 92.554 | 1.00 | 0.00 | C |
| ATOM | 1036 | C2'  | C B | 15 | 0.413  | -63.541 | 95.309 | 1.00 | 0.00 | C |
| ATOM | 1037 | C3'  | C B | 15 | 0.310  | -62.130 | 95.871 | 1.00 | 0.00 | C |
| ATOM | 1038 | O3'  | C B | 15 | -0.739 | -62.086 | 96.837 | 1.00 | 0.00 | O |
| ATOM | 1039 | C4'  | C B | 15 | -0.010 | -61.296 | 94.633 | 1.00 | 0.00 | C |
| ATOM | 1040 | O4'  | C B | 15 | -0.818 | -62.182 | 93.796 | 1.00 | 0.00 | O |
| ATOM | 1041 | C5'  | C B | 15 | 1.174  | -60.815 | 93.824 | 1.00 | 0.00 | C |
| ATOM | 1042 | O5'  | C B | 15 | 2.207  | -61.829 | 93.819 | 1.00 | 0.00 | O |
| ATOM | 1043 | O1P  | C B | 15 | 4.092  | -60.751 | 95.092 | 1.00 | 0.00 | O |
| ATOM | 1044 | O2P  | C B | 15 | 4.587  | -62.503 | 93.367 | 1.00 | 0.00 | O |
| ATOM | 1045 | P    | C B | 15 | 3.734  | -61.370 | 93.800 | 1.00 | 0.00 | P |
| ATOM | 1046 | H5   | C B | 15 | 2.380  | -65.130 | 91.090 | 1.00 | 0.00 | H |
| ATOM | 1047 | H6   | C B | 15 | 1.780  | -63.785 | 93.076 | 1.00 | 0.00 | H |
| ATOM | 1048 | H1'  | C B | 15 | -1.598 | -63.890 | 94.582 | 1.00 | 0.00 | H |
| ATOM | 1049 | H3'  | C B | 15 | 1.241  | -61.807 | 96.335 | 1.00 | 0.00 | H |
| ATOM | 1050 | H4'  | C B | 15 | -0.556 | -60.417 | 94.976 | 1.00 | 0.00 | H |

|      |      |      |     |    |        |         |        |      |      |   |
|------|------|------|-----|----|--------|---------|--------|------|------|---|
| ATOM | 1051 | H41  | C B | 15 | 1.507  | -66.594 | 89.359 | 1.00 | 0.00 | H |
| ATOM | 1052 | H42  | C B | 15 | -0.213 | -67.067 | 89.276 | 1.00 | 0.00 | H |
| ATOM | 1053 | H2'1 | C B | 15 | 1.412  | -63.741 | 94.922 | 1.00 | 0.00 | H |
| ATOM | 1054 | H2'2 | C B | 15 | 0.203  | -64.289 | 96.074 | 1.00 | 0.00 | H |
| ATOM | 1055 | H5'1 | C B | 15 | 0.849  | -60.611 | 92.804 | 1.00 | 0.00 | H |
| ATOM | 1056 | H5'2 | C B | 15 | 1.561  | -59.897 | 94.268 | 1.00 | 0.00 | H |
| ATOM | 1057 | C1'  | G B | 16 | -3.776 | -66.821 | 96.164 | 1.00 | 0.00 | C |
| ATOM | 1058 | N1   | G B | 16 | -2.391 | -69.662 | 92.160 | 1.00 | 0.00 | N |
| ATOM | 1059 | C2   | G B | 16 | -3.641 | -69.460 | 92.716 | 1.00 | 0.00 | C |
| ATOM | 1060 | N2   | G B | 16 | -4.659 | -70.102 | 92.126 | 1.00 | 0.00 | N |
| ATOM | 1061 | N3   | G B | 16 | -3.861 | -68.680 | 93.773 | 1.00 | 0.00 | N |
| ATOM | 1062 | C4   | G B | 16 | -2.718 | -68.115 | 94.243 | 1.00 | 0.00 | C |
| ATOM | 1063 | C5   | G B | 16 | -1.429 | -68.263 | 93.758 | 1.00 | 0.00 | C |
| ATOM | 1064 | C6   | G B | 16 | -1.196 | -69.088 | 92.634 | 1.00 | 0.00 | C |
| ATOM | 1065 | O6   | G B | 16 | -0.134 | -69.340 | 92.063 | 1.00 | 0.00 | O |
| ATOM | 1066 | N7   | G B | 16 | -0.536 | -67.515 | 94.528 | 1.00 | 0.00 | N |
| ATOM | 1067 | C8   | G B | 16 | -1.293 | -66.948 | 95.433 | 1.00 | 0.00 | C |
| ATOM | 1068 | N9   | G B | 16 | -2.631 | -67.266 | 95.325 | 1.00 | 0.00 | N |
| ATOM | 1069 | C2'  | G B | 16 | -3.442 | -66.703 | 97.645 | 1.00 | 0.00 | C |
| ATOM | 1070 | C3'  | G B | 16 | -4.272 | -65.499 | 98.064 | 1.00 | 0.00 | C |
| ATOM | 1071 | O3'  | G B | 16 | -5.597 | -65.928 | 98.365 | 1.00 | 0.00 | O |
| ATOM | 1072 | C4'  | G B | 16 | -4.222 | -64.606 | 96.826 | 1.00 | 0.00 | C |
| ATOM | 1073 | O4'  | G B | 16 | -4.177 | -65.545 | 95.705 | 1.00 | 0.00 | O |
| ATOM | 1074 | C5'  | G B | 16 | -3.040 | -63.670 | 96.721 | 1.00 | 0.00 | C |
| ATOM | 1075 | O5'  | G B | 16 | -1.855 | -64.317 | 97.248 | 1.00 | 0.00 | O |
| ATOM | 1076 | O1P  | G B | 16 | -1.304 | -62.951 | 99.288 | 1.00 | 0.00 | O |
| ATOM | 1077 | O2P  | G B | 16 | 0.516  | -64.171 | 98.067 | 1.00 | 0.00 | O |
| ATOM | 1078 | P    | G B | 16 | -0.766 | -63.427 | 98.000 | 1.00 | 0.00 | P |
| ATOM | 1079 | H1   | G B | 16 | -2.330 | -70.281 | 91.337 | 1.00 | 0.00 | H |
| ATOM | 1080 | H8   | G B | 16 | -0.902 | -66.285 | 96.202 | 1.00 | 0.00 | H |
| ATOM | 1081 | H1'  | G B | 16 | -4.606 | -67.510 | 96.005 | 1.00 | 0.00 | H |
| ATOM | 1082 | H21  | G B | 16 | -4.482 | -70.701 | 91.308 | 1.00 | 0.00 | H |
| ATOM | 1083 | H3'  | G B | 16 | -3.849 | -64.994 | 98.932 | 1.00 | 0.00 | H |
| ATOM | 1084 | H22  | G B | 16 | -5.615 | -69.995 | 92.494 | 1.00 | 0.00 | H |
| ATOM | 1085 | H4'  | G B | 16 | -5.127 | -63.998 | 96.837 | 1.00 | 0.00 | H |
| ATOM | 1086 | H2'1 | G B | 16 | -2.379 | -66.531 | 97.816 | 1.00 | 0.00 | H |
| ATOM | 1087 | H2'2 | G B | 16 | -3.724 | -67.594 | 98.206 | 1.00 | 0.00 | H |
| ATOM | 1088 | H5'1 | G B | 16 | -2.884 | -63.408 | 95.675 | 1.00 | 0.00 | H |
| ATOM | 1089 | H5'2 | G B | 16 | -3.251 | -62.764 | 97.290 | 1.00 | 0.00 | H |
| ATOM | 1090 | C1'  | G B | 17 | -6.152 | -71.164 | 96.294 | 1.00 | 0.00 | C |
| ATOM | 1091 | N1   | G B | 17 | -2.163 | -72.781 | 93.556 | 1.00 | 0.00 | N |
| ATOM | 1092 | C2   | G B | 17 | -3.513 | -73.048 | 93.403 | 1.00 | 0.00 | C |
| ATOM | 1093 | N2   | G B | 17 | -3.842 | -73.854 | 92.387 | 1.00 | 0.00 | N |
| ATOM | 1094 | N3   | G B | 17 | -4.455 | -72.550 | 94.199 | 1.00 | 0.00 | N |
| ATOM | 1095 | C4   | G B | 17 | -3.941 | -71.762 | 95.178 | 1.00 | 0.00 | C |
| ATOM | 1096 | C5   | G B | 17 | -2.614 | -71.443 | 95.410 | 1.00 | 0.00 | C |
| ATOM | 1097 | C6   | G B | 17 | -1.613 | -71.968 | 94.564 | 1.00 | 0.00 | C |
| ATOM | 1098 | O6   | G B | 17 | -0.393 | -71.802 | 94.607 | 1.00 | 0.00 | O |
| ATOM | 1099 | N7   | G B | 17 | -2.505 | -70.601 | 96.520 | 1.00 | 0.00 | N |
| ATOM | 1100 | C8   | G B | 17 | -3.742 | -70.438 | 96.914 | 1.00 | 0.00 | C |
| ATOM | 1101 | N9   | G B | 17 | -4.671 | -71.112 | 96.150 | 1.00 | 0.00 | N |
| ATOM | 1102 | C2'  | G B | 17 | -6.627 | -71.197 | 97.740 | 1.00 | 0.00 | C |
| ATOM | 1103 | C3'  | G B | 17 | -7.904 | -70.374 | 97.674 | 1.00 | 0.00 | C |
| ATOM | 1104 | O3'  | G B | 17 | -8.981 | -71.215 | 97.270 | 1.00 | 0.00 | O |

|      |      |      |     |    |         |         |         |      |      |   |
|------|------|------|-----|----|---------|---------|---------|------|------|---|
| ATOM | 1105 | C4'  | G B | 17 | -7.573  | -69.316 | 96.625  | 1.00 | 0.00 | C |
| ATOM | 1106 | O4'  | G B | 17 | -6.686  | -70.004 | 95.686  | 1.00 | 0.00 | O |
| ATOM | 1107 | C5'  | G B | 17 | -6.876  | -68.072 | 97.123  | 1.00 | 0.00 | C |
| ATOM | 1108 | O5'  | G B | 17 | -5.947  | -68.420 | 98.179  | 1.00 | 0.00 | O |
| ATOM | 1109 | O1P  | G B | 17 | -6.932  | -67.304 | 100.210 | 1.00 | 0.00 | O |
| ATOM | 1110 | O2P  | G B | 17 | -4.460  | -67.720 | 100.082 | 1.00 | 0.00 | O |
| ATOM | 1111 | P    | G B | 17 | -5.720  | -67.385 | 99.374  | 1.00 | 0.00 | P |
| ATOM | 1112 | H1   | G B | 17 | -1.513  | -73.213 | 92.880  | 1.00 | 0.00 | H |
| ATOM | 1113 | H8   | G B | 17 | -4.014  | -69.823 | 97.772  | 1.00 | 0.00 | H |
| ATOM | 1114 | H1'  | G B | 17 | -6.518  | -72.030 | 95.743  | 1.00 | 0.00 | H |
| ATOM | 1115 | H21  | G B | 17 | -3.108  | -74.234 | 91.771  | 1.00 | 0.00 | H |
| ATOM | 1116 | H3'  | G B | 17 | -8.145  | -69.915 | 98.633  | 1.00 | 0.00 | H |
| ATOM | 1117 | H22  | G B | 17 | -4.830  | -74.093 | 92.220  | 1.00 | 0.00 | H |
| ATOM | 1118 | H4'  | G B | 17 | -8.516  | -69.011 | 96.174  | 1.00 | 0.00 | H |
| ATOM | 1119 | H2'1 | G B | 17 | -5.903  | -70.751 | 98.423  | 1.00 | 0.00 | H |
| ATOM | 1120 | H2'2 | G B | 17 | -6.824  | -72.210 | 98.089  | 1.00 | 0.00 | H |
| ATOM | 1121 | H5'1 | G B | 17 | -6.337  | -67.607 | 96.297  | 1.00 | 0.00 | H |
| ATOM | 1122 | H5'2 | G B | 17 | -7.621  | -67.372 | 97.503  | 1.00 | 0.00 | H |
| ATOM | 1123 | C1'  | C B | 18 | -6.688  | -75.974 | 95.238  | 1.00 | 0.00 | C |
| ATOM | 1124 | N1   | C B | 18 | -5.431  | -75.468 | 95.855  | 1.00 | 0.00 | N |
| ATOM | 1125 | C2   | C B | 18 | -4.224  | -75.809 | 95.247  | 1.00 | 0.00 | C |
| ATOM | 1126 | O2   | C B | 18 | -4.246  | -76.510 | 94.227  | 1.00 | 0.00 | O |
| ATOM | 1127 | N3   | C B | 18 | -3.069  | -75.360 | 95.794  | 1.00 | 0.00 | N |
| ATOM | 1128 | C4   | C B | 18 | -3.079  | -74.603 | 96.898  | 1.00 | 0.00 | C |
| ATOM | 1129 | N4   | C B | 18 | -1.918  | -74.190 | 97.388  | 1.00 | 0.00 | N |
| ATOM | 1130 | C5   | C B | 18 | -4.304  | -74.240 | 97.545  | 1.00 | 0.00 | C |
| ATOM | 1131 | C6   | C B | 18 | -5.454  | -74.701 | 96.976  | 1.00 | 0.00 | C |
| ATOM | 1132 | C2'  | C B | 18 | -7.749  | -76.381 | 96.252  | 1.00 | 0.00 | C |
| ATOM | 1133 | C3'  | C B | 18 | -9.033  | -75.966 | 95.550  | 1.00 | 0.00 | C |
| ATOM | 1134 | O3'  | C B | 18 | -9.438  | -77.006 | 94.663  | 1.00 | 0.00 | O |
| ATOM | 1135 | C4'  | C B | 18 | -8.620  | -74.700 | 94.806  | 1.00 | 0.00 | C |
| ATOM | 1136 | O4'  | C B | 18 | -7.223  | -74.933 | 94.440  | 1.00 | 0.00 | O |
| ATOM | 1137 | C5'  | C B | 18 | -8.706  | -73.406 | 95.581  | 1.00 | 0.00 | C |
| ATOM | 1138 | O5'  | C B | 18 | -8.333  | -73.639 | 96.964  | 1.00 | 0.00 | O |
| ATOM | 1139 | O1P  | C B | 18 | -10.470 | -73.208 | 98.223  | 1.00 | 0.00 | O |
| ATOM | 1140 | O2P  | C B | 18 | -8.256  | -72.861 | 99.352  | 1.00 | 0.00 | O |
| ATOM | 1141 | P    | C B | 18 | -9.058  | -72.794 | 98.106  | 1.00 | 0.00 | P |
| ATOM | 1142 | H5   | C B | 18 | -4.316  | -73.627 | 98.446  | 1.00 | 0.00 | H |
| ATOM | 1143 | H6   | C B | 18 | -6.411  | -74.448 | 97.431  | 1.00 | 0.00 | H |
| ATOM | 1144 | H1'  | C B | 18 | -6.435  | -76.805 | 94.581  | 1.00 | 0.00 | H |
| ATOM | 1145 | H3'  | C B | 18 | -9.836  | -75.763 | 96.258  | 1.00 | 0.00 | H |
| ATOM | 1146 | H4'  | C B | 18 | -9.277  | -74.611 | 93.940  | 1.00 | 0.00 | H |
| ATOM | 1147 | H41  | C B | 18 | -1.898  | -73.604 | 98.236  | 1.00 | 0.00 | H |
| ATOM | 1148 | H42  | C B | 18 | -1.039  | -74.452 | 96.920  | 1.00 | 0.00 | H |
| ATOM | 1149 | H2'1 | C B | 18 | -7.632  | -75.864 | 97.204  | 1.00 | 0.00 | H |
| ATOM | 1150 | H2'2 | C B | 18 | -7.735  | -77.451 | 96.456  | 1.00 | 0.00 | H |
| ATOM | 1151 | H5'1 | C B | 18 | -8.030  | -72.675 | 95.137  | 1.00 | 0.00 | H |
| ATOM | 1152 | H5'2 | C B | 18 | -9.725  | -73.027 | 95.534  | 1.00 | 0.00 | H |
| ATOM | 1153 | C1'  | C B | 19 | -5.009  | -80.489 | 94.091  | 1.00 | 0.00 | C |
| ATOM | 1154 | N1   | C B | 19 | -4.450  | -79.746 | 95.254  | 1.00 | 0.00 | N |
| ATOM | 1155 | C2   | C B | 19 | -3.065  | -79.614 | 95.339  | 1.00 | 0.00 | C |
| ATOM | 1156 | O2   | C B | 19 | -2.361  | -80.113 | 94.453  | 1.00 | 0.00 | O |
| ATOM | 1157 | N3   | C B | 19 | -2.537  | -78.940 | 96.391  | 1.00 | 0.00 | N |
| ATOM | 1158 | C4   | C B | 19 | -3.327  | -78.411 | 97.335  | 1.00 | 0.00 | C |

|      |      |      |     |    |         |         |        |      |      |   |
|------|------|------|-----|----|---------|---------|--------|------|------|---|
| ATOM | 1159 | N4   | C B | 19 | -2.758  | -77.763 | 98.339 | 1.00 | 0.00 | N |
| ATOM | 1160 | C5   | C B | 19 | -4.752  | -78.534 | 97.272 | 1.00 | 0.00 | C |
| ATOM | 1161 | C6   | C B | 19 | -5.261  | -79.214 | 96.205 | 1.00 | 0.00 | C |
| ATOM | 1162 | C2'  | C B | 19 | -6.216  | -81.348 | 94.435 | 1.00 | 0.00 | C |
| ATOM | 1163 | C3'  | C B | 19 | -7.065  | -81.220 | 93.179 | 1.00 | 0.00 | C |
| ATOM | 1164 | O3'  | C B | 19 | -6.622  | -82.173 | 92.216 | 1.00 | 0.00 | O |
| ATOM | 1165 | C4'  | C B | 19 | -6.798  | -79.784 | 92.734 | 1.00 | 0.00 | C |
| ATOM | 1166 | O4'  | C B | 19 | -5.410  | -79.535 | 93.126 | 1.00 | 0.00 | O |
| ATOM | 1167 | C5'  | C B | 19 | -7.671  | -78.716 | 93.353 | 1.00 | 0.00 | C |
| ATOM | 1168 | O5'  | C B | 19 | -7.950  | -79.051 | 94.736 | 1.00 | 0.00 | O |
| ATOM | 1169 | O1P  | C B | 19 | -10.430 | -79.478 | 94.742 | 1.00 | 0.00 | O |
| ATOM | 1170 | O2P  | C B | 19 | -9.288  | -78.687 | 96.830 | 1.00 | 0.00 | O |
| ATOM | 1171 | P    | C B | 19 | -9.366  | -78.655 | 95.350 | 1.00 | 0.00 | P |
| ATOM | 1172 | H5   | C B | 19 | -5.398  | -78.107 | 98.037 | 1.00 | 0.00 | H |
| ATOM | 1173 | H6   | C B | 19 | -6.340  | -79.331 | 96.113 | 1.00 | 0.00 | H |
| ATOM | 1174 | H1'  | C B | 19 | -4.210  | -81.092 | 93.657 | 1.00 | 0.00 | H |
| ATOM | 1175 | H3'  | C B | 19 | -8.123  | -81.378 | 93.384 | 1.00 | 0.00 | H |
| ATOM | 1176 | H4'  | C B | 19 | -6.948  | -79.752 | 91.655 | 1.00 | 0.00 | H |
| ATOM | 1177 | H41  | C B | 19 | -3.341  | -77.344 | 99.079 | 1.00 | 0.00 | H |
| ATOM | 1178 | H42  | C B | 19 | -1.731  | -77.677 | 98.382 | 1.00 | 0.00 | H |
| ATOM | 1179 | H2'1 | C B | 19 | -6.749  | -80.982 | 95.312 | 1.00 | 0.00 | H |
| ATOM | 1180 | H2'2 | C B | 19 | -5.944  | -82.387 | 94.626 | 1.00 | 0.00 | H |
| ATOM | 1181 | H5'1 | C B | 19 | -7.155  | -77.758 | 93.302 | 1.00 | 0.00 | H |
| ATOM | 1182 | H5'2 | C B | 19 | -8.603  | -78.650 | 92.794 | 1.00 | 0.00 | H |
| ATOM | 1183 | C1'  | T B | 20 | -1.597  | -84.074 | 93.966 | 1.00 | 0.00 | C |
| ATOM | 1184 | N1   | T B | 20 | -1.926  | -83.398 | 95.249 | 1.00 | 0.00 | N |
| ATOM | 1185 | C2   | T B | 20 | -0.871  | -82.901 | 95.987 | 1.00 | 0.00 | C |
| ATOM | 1186 | O2   | T B | 20 | 0.290   | -82.996 | 95.626 | 1.00 | 0.00 | O |
| ATOM | 1187 | N3   | T B | 20 | -1.221  | -82.281 | 97.171 | 1.00 | 0.00 | N |
| ATOM | 1188 | C4   | T B | 20 | -2.496  | -82.120 | 97.668 | 1.00 | 0.00 | C |
| ATOM | 1189 | O4   | T B | 20 | -2.686  | -81.545 | 98.748 | 1.00 | 0.00 | O |
| ATOM | 1190 | C5   | T B | 20 | -3.531  | -82.671 | 96.829 | 1.00 | 0.00 | C |
| ATOM | 1191 | C6   | T B | 20 | -3.228  | -83.282 | 95.667 | 1.00 | 0.00 | C |
| ATOM | 1192 | C7   | T B | 20 | -4.936  | -82.518 | 97.331 | 1.00 | 0.00 | C |
| ATOM | 1193 | C2'  | T B | 20 | -2.471  | -85.287 | 93.670 | 1.00 | 0.00 | C |
| ATOM | 1194 | C3'  | T B | 20 | -2.621  | -85.208 | 92.158 | 1.00 | 0.00 | C |
| ATOM | 1195 | O3'  | T B | 20 | -1.496  | -85.831 | 91.543 | 1.00 | 0.00 | O |
| ATOM | 1196 | C4'  | T B | 20 | -2.664  | -83.704 | 91.898 | 1.00 | 0.00 | C |
| ATOM | 1197 | O4'  | T B | 20 | -1.786  | -83.136 | 92.923 | 1.00 | 0.00 | O |
| ATOM | 1198 | C5'  | T B | 20 | -4.018  | -83.042 | 92.000 | 1.00 | 0.00 | C |
| ATOM | 1199 | O5'  | T B | 20 | -4.785  | -83.658 | 93.066 | 1.00 | 0.00 | O |
| ATOM | 1200 | O1P  | T B | 20 | -6.685  | -84.770 | 91.848 | 1.00 | 0.00 | O |
| ATOM | 1201 | O2P  | T B | 20 | -6.982  | -84.027 | 94.226 | 1.00 | 0.00 | O |
| ATOM | 1202 | P    | T B | 20 | -6.365  | -83.785 | 92.899 | 1.00 | 0.00 | P |
| ATOM | 1203 | H3   | T B | 20 | -0.452  | -81.900 | 97.740 | 1.00 | 0.00 | H |
| ATOM | 1204 | H6   | T B | 20 | -4.027  | -83.690 | 95.049 | 1.00 | 0.00 | H |
| ATOM | 1205 | H1'  | T B | 20 | -0.542  | -84.348 | 93.983 | 1.00 | 0.00 | H |
| ATOM | 1206 | H3'  | T B | 20 | -3.534  | -85.693 | 91.814 | 1.00 | 0.00 | H |
| ATOM | 1207 | H4'  | T B | 20 | -2.293  | -83.548 | 90.884 | 1.00 | 0.00 | H |
| ATOM | 1208 | H3T  | T B | 20 | -1.312  | -86.725 | 91.839 | 1.00 | 0.00 | H |
| ATOM | 1209 | H71  | T B | 20 | -5.351  | -83.499 | 97.558 | 1.00 | 0.00 | H |
| ATOM | 1210 | H72  | T B | 20 | -4.934  | -81.905 | 98.234 | 1.00 | 0.00 | H |
| ATOM | 1211 | H73  | T B | 20 | -5.546  | -82.033 | 96.568 | 1.00 | 0.00 | H |
| ATOM | 1212 | H2'1 | T B | 20 | -3.437  | -85.230 | 94.167 | 1.00 | 0.00 | H |

|      |      |      |     |    |        |         |        |      |      |   |
|------|------|------|-----|----|--------|---------|--------|------|------|---|
| ATOM | 1213 | H2'2 | T B | 20 | -1.998 | -86.220 | 93.974 | 1.00 | 0.00 | H |
| ATOM | 1214 | H5'1 | T B | 20 | -3.883 | -81.981 | 92.208 | 1.00 | 0.00 | H |
| ATOM | 1215 | H5'2 | T B | 20 | -4.544 | -83.159 | 91.054 | 1.00 | 0.00 | H |
| TER  |      |      |     |    |        |         |        |      |      |   |
| ATOM | 1    | C1'  | A A | 1  | 65.948 | -22.334 | 82.224 | 1.00 | 0.00 | C |
| ATOM | 2    | N1   | A A | 1  | 65.413 | -20.561 | 87.010 | 1.00 | 0.00 | N |
| ATOM | 3    | C2   | A A | 1  | 65.453 | -21.791 | 86.507 | 1.00 | 0.00 | C |
| ATOM | 4    | N3   | A A | 1  | 65.597 | -22.179 | 85.257 | 1.00 | 0.00 | N |
| ATOM | 5    | C4   | A A | 1  | 65.706 | -21.112 | 84.447 | 1.00 | 0.00 | C |
| ATOM | 6    | C5   | A A | 1  | 65.683 | -19.792 | 84.803 | 1.00 | 0.00 | C |
| ATOM | 7    | C6   | A A | 1  | 65.526 | -19.515 | 86.177 | 1.00 | 0.00 | C |
| ATOM | 8    | N6   | A A | 1  | 65.485 | -18.267 | 86.674 | 1.00 | 0.00 | N |
| ATOM | 9    | N7   | A A | 1  | 65.824 | -18.974 | 83.696 | 1.00 | 0.00 | N |
| ATOM | 10   | C8   | A A | 1  | 65.926 | -19.808 | 82.703 | 1.00 | 0.00 | C |
| ATOM | 11   | N9   | A A | 1  | 65.864 | -21.123 | 83.083 | 1.00 | 0.00 | N |
| ATOM | 12   | C2'  | A A | 1  | 65.253 | -22.181 | 80.878 | 1.00 | 0.00 | C |
| ATOM | 13   | C3'  | A A | 1  | 66.160 | -22.985 | 79.960 | 1.00 | 0.00 | C |
| ATOM | 14   | O3'  | A A | 1  | 65.794 | -24.361 | 80.027 | 1.00 | 0.00 | O |
| ATOM | 15   | C4'  | A A | 1  | 67.549 | -22.727 | 80.542 | 1.00 | 0.00 | C |
| ATOM | 16   | O4'  | A A | 1  | 67.317 | -22.597 | 81.982 | 1.00 | 0.00 | O |
| ATOM | 17   | C5'  | A A | 1  | 68.262 | -21.489 | 80.054 | 1.00 | 0.00 | C |
| ATOM | 18   | O5'  | A A | 1  | 67.305 | -20.418 | 79.852 | 1.00 | 0.00 | O |
| ATOM | 19   | H2   | A A | 1  | 65.352 | -22.596 | 87.235 | 1.00 | 0.00 | H |
| ATOM | 20   | H8   | A A | 1  | 66.049 | -19.491 | 81.667 | 1.00 | 0.00 | H |
| ATOM | 21   | H1'  | A A | 1  | 65.539 | -23.177 | 82.782 | 1.00 | 0.00 | H |
| ATOM | 22   | H3'  | A A | 1  | 66.099 | -22.645 | 78.925 | 1.00 | 0.00 | H |
| ATOM | 23   | H4'  | A A | 1  | 68.164 | -23.589 | 80.286 | 1.00 | 0.00 | H |
| ATOM | 24   | H61  | A A | 1  | 65.370 | -18.120 | 87.685 | 1.00 | 0.00 | H |
| ATOM | 25   | H62  | A A | 1  | 65.571 | -17.460 | 86.040 | 1.00 | 0.00 | H |
| ATOM | 26   | H5T  | A A | 1  | 67.454 | -19.794 | 79.139 | 1.00 | 0.00 | H |
| ATOM | 27   | H2'1 | A A | 1  | 65.189 | -21.141 | 80.561 | 1.00 | 0.00 | H |
| ATOM | 28   | H2'2 | A A | 1  | 64.240 | -22.585 | 80.887 | 1.00 | 0.00 | H |
| ATOM | 29   | H5'1 | A A | 1  | 69.002 | -21.186 | 80.795 | 1.00 | 0.00 | H |
| ATOM | 30   | H5'2 | A A | 1  | 68.766 | -21.713 | 79.115 | 1.00 | 0.00 | H |
| ATOM | 31   | C1'  | G A | 2  | 62.452 | -24.911 | 84.629 | 1.00 | 0.00 | C |
| ATOM | 32   | N1   | G A | 2  | 62.018 | -20.666 | 87.421 | 1.00 | 0.00 | N |
| ATOM | 33   | C2   | G A | 2  | 62.027 | -21.989 | 87.817 | 1.00 | 0.00 | C |
| ATOM | 34   | N2   | G A | 2  | 61.902 | -22.213 | 89.130 | 1.00 | 0.00 | N |
| ATOM | 35   | N3   | G A | 2  | 62.151 | -23.010 | 86.971 | 1.00 | 0.00 | N |
| ATOM | 36   | C4   | G A | 2  | 62.261 | -22.599 | 85.680 | 1.00 | 0.00 | C |
| ATOM | 37   | C5   | G A | 2  | 62.259 | -21.302 | 85.192 | 1.00 | 0.00 | C |
| ATOM | 38   | C6   | G A | 2  | 62.132 | -20.219 | 86.093 | 1.00 | 0.00 | C |
| ATOM | 39   | O6   | G A | 2  | 62.111 | -19.011 | 85.855 | 1.00 | 0.00 | O |
| ATOM | 40   | N7   | G A | 2  | 62.393 | -21.309 | 83.802 | 1.00 | 0.00 | N |
| ATOM | 41   | C8   | G A | 2  | 62.473 | -22.579 | 83.498 | 1.00 | 0.00 | C |
| ATOM | 42   | N9   | G A | 2  | 62.399 | -23.426 | 84.586 | 1.00 | 0.00 | N |
| ATOM | 43   | C2'  | G A | 2  | 61.737 | -25.586 | 83.466 | 1.00 | 0.00 | C |
| ATOM | 44   | C3'  | G A | 2  | 62.618 | -26.798 | 83.210 | 1.00 | 0.00 | C |
| ATOM | 45   | O3'  | G A | 2  | 62.234 | -27.849 | 84.094 | 1.00 | 0.00 | O |
| ATOM | 46   | C4'  | G A | 2  | 64.019 | -26.270 | 83.515 | 1.00 | 0.00 | C |
| ATOM | 47   | O4'  | G A | 2  | 63.813 | -25.297 | 84.587 | 1.00 | 0.00 | O |
| ATOM | 48   | C5'  | G A | 2  | 64.741 | -25.589 | 82.376 | 1.00 | 0.00 | C |
| ATOM | 49   | O5'  | G A | 2  | 63.796 | -24.836 | 81.576 | 1.00 | 0.00 | O |
| ATOM | 50   | O1P  | G A | 2  | 63.817 | -26.038 | 79.365 | 1.00 | 0.00 | O |

|      |     |      |     |   |        |         |        |      |      |   |
|------|-----|------|-----|---|--------|---------|--------|------|------|---|
| ATOM | 51  | O2P  | G A | 2 | 63.243 | -23.598 | 79.461 | 1.00 | 0.00 | O |
| ATOM | 52  | P    | G A | 2 | 64.038 | -24.726 | 80.003 | 1.00 | 0.00 | P |
| ATOM | 53  | H1   | G A | 2 | 61.920 | -19.951 | 88.157 | 1.00 | 0.00 | H |
| ATOM | 54  | H8   | G A | 2 | 62.587 | -22.938 | 82.476 | 1.00 | 0.00 | H |
| ATOM | 55  | H1'  | G A | 2 | 62.039 | -25.240 | 85.583 | 1.00 | 0.00 | H |
| ATOM | 56  | H21  | G A | 2 | 61.808 | -21.419 | 89.780 | 1.00 | 0.00 | H |
| ATOM | 57  | H3'  | G A | 2 | 62.544 | -27.147 | 82.180 | 1.00 | 0.00 | H |
| ATOM | 58  | H22  | G A | 2 | 61.900 | -23.178 | 89.489 | 1.00 | 0.00 | H |
| ATOM | 59  | H4'  | G A | 2 | 64.618 | -27.125 | 83.825 | 1.00 | 0.00 | H |
| ATOM | 60  | H2'1 | G A | 2 | 61.683 | -24.943 | 82.586 | 1.00 | 0.00 | H |
| ATOM | 61  | H2'2 | G A | 2 | 60.719 | -25.880 | 83.720 | 1.00 | 0.00 | H |
| ATOM | 62  | H5'1 | G A | 2 | 65.497 | -24.918 | 82.782 | 1.00 | 0.00 | H |
| ATOM | 63  | H5'2 | G A | 2 | 65.228 | -26.345 | 81.759 | 1.00 | 0.00 | H |
| ATOM | 64  | C1'  | G A | 3 | 58.959 | -25.530 | 88.085 | 1.00 | 0.00 | C |
| ATOM | 65  | N1   | G A | 3 | 58.627 | -20.445 | 87.851 | 1.00 | 0.00 | N |
| ATOM | 66  | C2   | G A | 3 | 58.624 | -21.284 | 88.949 | 1.00 | 0.00 | C |
| ATOM | 67  | N2   | G A | 3 | 58.514 | -20.691 | 90.145 | 1.00 | 0.00 | N |
| ATOM | 68  | N3   | G A | 3 | 58.721 | -22.609 | 88.863 | 1.00 | 0.00 | N |
| ATOM | 69  | C4   | G A | 3 | 58.816 | -23.038 | 87.577 | 1.00 | 0.00 | C |
| ATOM | 70  | C5   | G A | 3 | 58.826 | -22.275 | 86.421 | 1.00 | 0.00 | C |
| ATOM | 71  | C6   | G A | 3 | 58.727 | -20.867 | 86.513 | 1.00 | 0.00 | C |
| ATOM | 72  | O6   | G A | 3 | 58.719 | -20.028 | 85.611 | 1.00 | 0.00 | O |
| ATOM | 73  | N7   | G A | 3 | 58.938 | -23.099 | 85.300 | 1.00 | 0.00 | N |
| ATOM | 74  | C8   | G A | 3 | 58.996 | -24.306 | 85.799 | 1.00 | 0.00 | C |
| ATOM | 75  | N9   | G A | 3 | 58.926 | -24.351 | 87.176 | 1.00 | 0.00 | N |
| ATOM | 76  | C2'  | G A | 3 | 58.217 | -26.743 | 87.542 | 1.00 | 0.00 | C |
| ATOM | 77  | C3'  | G A | 3 | 59.076 | -27.891 | 88.044 | 1.00 | 0.00 | C |
| ATOM | 78  | O3'  | G A | 3 | 58.692 | -28.215 | 89.378 | 1.00 | 0.00 | O |
| ATOM | 79  | C4'  | G A | 3 | 60.489 | -27.315 | 87.975 | 1.00 | 0.00 | C |
| ATOM | 80  | O4'  | G A | 3 | 60.313 | -25.893 | 88.272 | 1.00 | 0.00 | O |
| ATOM | 81  | C5'  | G A | 3 | 61.203 | -27.447 | 86.651 | 1.00 | 0.00 | C |
| ATOM | 82  | O5'  | G A | 3 | 60.257 | -27.289 | 85.565 | 1.00 | 0.00 | O |
| ATOM | 83  | O1P  | G A | 3 | 60.228 | -29.561 | 84.481 | 1.00 | 0.00 | O |
| ATOM | 84  | O2P  | G A | 3 | 59.690 | -27.518 | 83.128 | 1.00 | 0.00 | O |
| ATOM | 85  | P    | G A | 3 | 60.477 | -28.129 | 84.226 | 1.00 | 0.00 | P |
| ATOM | 86  | H1   | G A | 3 | 58.552 | -19.431 | 88.028 | 1.00 | 0.00 | H |
| ATOM | 87  | H8   | G A | 3 | 59.089 | -25.199 | 85.183 | 1.00 | 0.00 | H |
| ATOM | 88  | H1'  | G A | 3 | 58.556 | -25.226 | 89.052 | 1.00 | 0.00 | H |
| ATOM | 89  | H21  | G A | 3 | 58.442 | -19.665 | 90.205 | 1.00 | 0.00 | H |
| ATOM | 90  | H3'  | G A | 3 | 58.982 | -28.778 | 87.416 | 1.00 | 0.00 | H |
| ATOM | 91  | H22  | G A | 3 | 58.503 | -21.261 | 91.002 | 1.00 | 0.00 | H |
| ATOM | 92  | H4'  | G A | 3 | 61.081 | -27.836 | 88.727 | 1.00 | 0.00 | H |
| ATOM | 93  | H2'1 | G A | 3 | 58.158 | -26.739 | 86.453 | 1.00 | 0.00 | H |
| ATOM | 94  | H2'2 | G A | 3 | 57.198 | -26.811 | 87.925 | 1.00 | 0.00 | H |
| ATOM | 95  | H5'1 | G A | 3 | 61.975 | -26.681 | 86.583 | 1.00 | 0.00 | H |
| ATOM | 96  | H5'2 | G A | 3 | 61.670 | -28.431 | 86.593 | 1.00 | 0.00 | H |
| ATOM | 97  | C1'  | C A | 4 | 55.510 | -23.928 | 91.259 | 1.00 | 0.00 | C |
| ATOM | 98  | N1   | C A | 4 | 55.481 | -23.501 | 89.832 | 1.00 | 0.00 | N |
| ATOM | 99  | C2   | C A | 4 | 55.393 | -22.137 | 89.562 | 1.00 | 0.00 | C |
| ATOM | 100 | O2   | C A | 4 | 55.342 | -21.343 | 90.509 | 1.00 | 0.00 | O |
| ATOM | 101 | N3   | C A | 4 | 55.365 | -21.730 | 88.270 | 1.00 | 0.00 | N |
| ATOM | 102 | C4   | C A | 4 | 55.420 | -22.614 | 87.267 | 1.00 | 0.00 | C |
| ATOM | 103 | N4   | C A | 4 | 55.393 | -22.159 | 86.023 | 1.00 | 0.00 | N |
| ATOM | 104 | C5   | C A | 4 | 55.509 | -24.022 | 87.517 | 1.00 | 0.00 | C |

|      |     |      |     |   |        |         |        |      |      |   |
|------|-----|------|-----|---|--------|---------|--------|------|------|---|
| ATOM | 105 | C6   | C A | 4 | 55.538 | -24.411 | 88.824 | 1.00 | 0.00 | C |
| ATOM | 106 | C2'  | C A | 4 | 54.740 | -25.212 | 91.531 | 1.00 | 0.00 | C |
| ATOM | 107 | C3'  | C A | 4 | 55.591 | -25.871 | 92.607 | 1.00 | 0.00 | C |
| ATOM | 108 | O3'  | C A | 4 | 55.224 | -25.345 | 93.881 | 1.00 | 0.00 | O |
| ATOM | 109 | C4'  | C A | 4 | 57.010 | -25.476 | 92.206 | 1.00 | 0.00 | C |
| ATOM | 110 | O4'  | C A | 4 | 56.863 | -24.146 | 91.615 | 1.00 | 0.00 | O |
| ATOM | 111 | C5'  | C A | 4 | 57.699 | -26.374 | 91.205 | 1.00 | 0.00 | C |
| ATOM | 112 | O5'  | C A | 4 | 56.735 | -26.859 | 90.236 | 1.00 | 0.00 | O |
| ATOM | 113 | O1P  | C A | 4 | 56.650 | -29.333 | 90.685 | 1.00 | 0.00 | O |
| ATOM | 114 | O2P  | C A | 4 | 56.120 | -28.455 | 88.395 | 1.00 | 0.00 | O |
| ATOM | 115 | P    | C A | 4 | 56.917 | -28.327 | 89.639 | 1.00 | 0.00 | P |
| ATOM | 116 | H5   | C A | 4 | 55.549 | -24.746 | 86.703 | 1.00 | 0.00 | H |
| ATOM | 117 | H6   | C A | 4 | 55.610 | -25.472 | 89.064 | 1.00 | 0.00 | H |
| ATOM | 118 | H1'  | C A | 4 | 55.130 | -23.108 | 91.867 | 1.00 | 0.00 | H |
| ATOM | 119 | H3'  | C A | 4 | 55.470 | -26.954 | 92.615 | 1.00 | 0.00 | H |
| ATOM | 120 | H4'  | C A | 4 | 57.607 | -25.475 | 93.117 | 1.00 | 0.00 | H |
| ATOM | 121 | H41  | C A | 4 | 55.436 | -22.818 | 85.232 | 1.00 | 0.00 | H |
| ATOM | 122 | H42  | C A | 4 | 55.328 | -21.146 | 85.845 | 1.00 | 0.00 | H |
| ATOM | 123 | H2'1 | C A | 4 | 54.661 | -25.844 | 90.647 | 1.00 | 0.00 | H |
| ATOM | 124 | H2'2 | C A | 4 | 53.727 | -25.019 | 91.888 | 1.00 | 0.00 | H |
| ATOM | 125 | H5'1 | C A | 4 | 58.481 | -25.811 | 90.696 | 1.00 | 0.00 | H |
| ATOM | 126 | H5'2 | C A | 4 | 58.148 | -27.217 | 91.731 | 1.00 | 0.00 | H |
| ATOM | 127 | C1'  | C A | 5 | 52.133 | -20.699 | 92.900 | 1.00 | 0.00 | C |
| ATOM | 128 | N1   | C A | 5 | 52.088 | -21.191 | 91.496 | 1.00 | 0.00 | N |
| ATOM | 129 | C2   | C A | 5 | 52.015 | -20.245 | 90.475 | 1.00 | 0.00 | C |
| ATOM | 130 | O2   | C A | 5 | 51.990 | -19.043 | 90.774 | 1.00 | 0.00 | O |
| ATOM | 131 | N3   | C A | 5 | 51.974 | -20.672 | 89.189 | 1.00 | 0.00 | N |
| ATOM | 132 | C4   | C A | 5 | 52.001 | -21.978 | 88.897 | 1.00 | 0.00 | C |
| ATOM | 133 | N4   | C A | 5 | 51.961 | -22.340 | 87.624 | 1.00 | 0.00 | N |
| ATOM | 134 | C5   | C A | 5 | 52.074 | -22.973 | 89.926 | 1.00 | 0.00 | C |
| ATOM | 135 | C6   | C A | 5 | 52.117 | -22.519 | 91.212 | 1.00 | 0.00 | C |
| ATOM | 136 | C2'  | C A | 5 | 51.349 | -21.563 | 93.878 | 1.00 | 0.00 | C |
| ATOM | 137 | C3'  | C A | 5 | 52.207 | -21.480 | 95.131 | 1.00 | 0.00 | C |
| ATOM | 138 | O3'  | C A | 5 | 51.867 | -20.299 | 95.854 | 1.00 | 0.00 | O |
| ATOM | 139 | C4'  | C A | 5 | 53.625 | -21.426 | 94.569 | 1.00 | 0.00 | C |
| ATOM | 140 | O4'  | C A | 5 | 53.488 | -20.693 | 93.311 | 1.00 | 0.00 | O |
| ATOM | 141 | C5'  | C A | 5 | 54.286 | -22.754 | 94.285 | 1.00 | 0.00 | C |
| ATOM | 142 | O5'  | C A | 5 | 53.301 | -23.696 | 93.788 | 1.00 | 0.00 | O |
| ATOM | 143 | O1P  | C A | 5 | 53.188 | -25.433 | 95.606 | 1.00 | 0.00 | O |
| ATOM | 144 | O2P  | C A | 5 | 52.636 | -26.056 | 93.239 | 1.00 | 0.00 | O |
| ATOM | 145 | P    | C A | 5 | 53.453 | -25.237 | 94.168 | 1.00 | 0.00 | P |
| ATOM | 146 | H5   | C A | 5 | 52.091 | -24.038 | 89.694 | 1.00 | 0.00 | H |
| ATOM | 147 | H6   | C A | 5 | 52.178 | -23.238 | 92.030 | 1.00 | 0.00 | H |
| ATOM | 148 | H1'  | C A | 5 | 51.774 | -19.670 | 92.911 | 1.00 | 0.00 | H |
| ATOM | 149 | H3'  | C A | 5 | 52.071 | -22.349 | 95.776 | 1.00 | 0.00 | H |
| ATOM | 150 | H4'  | C A | 5 | 54.236 | -20.902 | 95.304 | 1.00 | 0.00 | H |
| ATOM | 151 | H41  | C A | 5 | 51.982 | -23.338 | 87.371 | 1.00 | 0.00 | H |
| ATOM | 152 | H42  | C A | 5 | 51.908 | -21.623 | 86.886 | 1.00 | 0.00 | H |
| ATOM | 153 | H2'1 | C A | 5 | 51.248 | -22.591 | 93.533 | 1.00 | 0.00 | H |
| ATOM | 154 | H2'2 | C A | 5 | 50.344 | -21.176 | 94.057 | 1.00 | 0.00 | H |
| ATOM | 155 | H5'1 | C A | 5 | 55.069 | -22.612 | 93.538 | 1.00 | 0.00 | H |
| ATOM | 156 | H5'2 | C A | 5 | 54.731 | -23.136 | 95.203 | 1.00 | 0.00 | H |
| ATOM | 157 | C1'  | G A | 6 | 48.827 | -17.054 | 92.343 | 1.00 | 0.00 | C |
| ATOM | 158 | N1   | G A | 6 | 48.517 | -18.829 | 87.570 | 1.00 | 0.00 | N |

|      |     |      |     |   |        |         |        |      |      |   |
|------|-----|------|-----|---|--------|---------|--------|------|------|---|
| ATOM | 159 | C2   | G A | 6 | 48.566 | -17.525 | 88.031 | 1.00 | 0.00 | C |
| ATOM | 160 | N2   | G A | 6 | 48.524 | -16.568 | 87.097 | 1.00 | 0.00 | N |
| ATOM | 161 | N3   | G A | 6 | 48.650 | -17.204 | 89.321 | 1.00 | 0.00 | N |
| ATOM | 162 | C4   | G A | 6 | 48.673 | -18.299 | 90.125 | 1.00 | 0.00 | C |
| ATOM | 163 | C5   | G A | 6 | 48.625 | -19.632 | 89.756 | 1.00 | 0.00 | C |
| ATOM | 164 | C6   | G A | 6 | 48.541 | -19.975 | 88.388 | 1.00 | 0.00 | C |
| ATOM | 165 | O6   | G A | 6 | 48.488 | -21.090 | 87.868 | 1.00 | 0.00 | O |
| ATOM | 166 | N7   | G A | 6 | 48.672 | -20.449 | 90.887 | 1.00 | 0.00 | N |
| ATOM | 167 | C8   | G A | 6 | 48.749 | -19.605 | 91.883 | 1.00 | 0.00 | C |
| ATOM | 168 | N9   | G A | 6 | 48.754 | -18.279 | 91.501 | 1.00 | 0.00 | N |
| ATOM | 169 | C2'  | G A | 6 | 48.050 | -17.158 | 93.647 | 1.00 | 0.00 | C |
| ATOM | 170 | C3'  | G A | 6 | 48.927 | -16.368 | 94.605 | 1.00 | 0.00 | C |
| ATOM | 171 | O3'  | G A | 6 | 48.613 | -14.982 | 94.493 | 1.00 | 0.00 | O |
| ATOM | 172 | C4'  | G A | 6 | 50.338 | -16.683 | 94.110 | 1.00 | 0.00 | C |
| ATOM | 173 | O4'  | G A | 6 | 50.187 | -16.831 | 92.662 | 1.00 | 0.00 | O |
| ATOM | 174 | C5'  | G A | 6 | 50.979 | -17.934 | 94.660 | 1.00 | 0.00 | C |
| ATOM | 175 | O5'  | G A | 6 | 49.977 | -18.969 | 94.822 | 1.00 | 0.00 | O |
| ATOM | 176 | O1P  | G A | 6 | 49.874 | -19.295 | 97.315 | 1.00 | 0.00 | O |
| ATOM | 177 | O2P  | G A | 6 | 49.277 | -21.185 | 95.778 | 1.00 | 0.00 | O |
| ATOM | 178 | P    | G A | 6 | 50.118 | -19.991 | 96.038 | 1.00 | 0.00 | P |
| ATOM | 179 | H1   | G A | 6 | 48.460 | -18.971 | 86.549 | 1.00 | 0.00 | H |
| ATOM | 180 | H8   | G A | 6 | 48.803 | -19.919 | 92.926 | 1.00 | 0.00 | H |
| ATOM | 181 | H1'  | G A | 6 | 48.479 | -16.209 | 91.747 | 1.00 | 0.00 | H |
| ATOM | 182 | H21  | G A | 6 | 48.463 | -16.823 | 86.101 | 1.00 | 0.00 | H |
| ATOM | 183 | H3'  | G A | 6 | 48.793 | -16.686 | 95.639 | 1.00 | 0.00 | H |
| ATOM | 184 | H22  | G A | 6 | 48.554 | -15.576 | 87.375 | 1.00 | 0.00 | H |
| ATOM | 185 | H4'  | G A | 6 | 50.966 | -15.837 | 94.387 | 1.00 | 0.00 | H |
| ATOM | 186 | H2'1 | G A | 6 | 47.932 | -18.191 | 93.977 | 1.00 | 0.00 | H |
| ATOM | 187 | H2'2 | G A | 6 | 47.052 | -16.724 | 93.571 | 1.00 | 0.00 | H |
| ATOM | 188 | H5'1 | G A | 6 | 51.751 | -18.274 | 93.971 | 1.00 | 0.00 | H |
| ATOM | 189 | H5'2 | G A | 6 | 51.436 | -17.709 | 95.624 | 1.00 | 0.00 | H |
| ATOM | 190 | C1'  | C A | 7 | 45.565 | -14.363 | 89.764 | 1.00 | 0.00 | C |
| ATOM | 191 | N1   | C A | 7 | 45.461 | -15.848 | 89.797 | 1.00 | 0.00 | N |
| ATOM | 192 | C2   | C A | 7 | 45.368 | -16.522 | 88.581 | 1.00 | 0.00 | C |
| ATOM | 193 | O2   | C A | 7 | 45.373 | -15.866 | 87.532 | 1.00 | 0.00 | O |
| ATOM | 194 | N3   | C A | 7 | 45.273 | -17.874 | 88.589 | 1.00 | 0.00 | N |
| ATOM | 195 | C4   | C A | 7 | 45.269 | -18.557 | 89.741 | 1.00 | 0.00 | C |
| ATOM | 196 | N4   | C A | 7 | 45.177 | -19.878 | 89.690 | 1.00 | 0.00 | N |
| ATOM | 197 | C5   | C A | 7 | 45.359 | -17.890 | 91.007 | 1.00 | 0.00 | C |
| ATOM | 198 | C6   | C A | 7 | 45.459 | -16.528 | 90.975 | 1.00 | 0.00 | C |
| ATOM | 199 | C2'  | C A | 7 | 44.802 | -13.670 | 90.885 | 1.00 | 0.00 | C |
| ATOM | 200 | C3'  | C A | 7 | 45.705 | -12.487 | 91.198 | 1.00 | 0.00 | C |
| ATOM | 201 | O3'  | C A | 7 | 45.411 | -11.421 | 90.298 | 1.00 | 0.00 | O |
| ATOM | 202 | C4'  | C A | 7 | 47.103 | -13.060 | 90.979 | 1.00 | 0.00 | C |
| ATOM | 203 | O4'  | C A | 7 | 46.933 | -14.024 | 89.892 | 1.00 | 0.00 | O |
| ATOM | 204 | C5'  | C A | 7 | 47.732 | -13.768 | 92.158 | 1.00 | 0.00 | C |
| ATOM | 205 | O5'  | C A | 7 | 46.714 | -14.490 | 92.895 | 1.00 | 0.00 | O |
| ATOM | 206 | O1P  | C A | 7 | 46.637 | -13.296 | 95.109 | 1.00 | 0.00 | O |
| ATOM | 207 | O2P  | C A | 7 | 45.991 | -15.716 | 94.965 | 1.00 | 0.00 | O |
| ATOM | 208 | P    | C A | 7 | 46.854 | -14.613 | 94.478 | 1.00 | 0.00 | P |
| ATOM | 209 | H5   | C A | 7 | 45.350 | -18.441 | 91.948 | 1.00 | 0.00 | H |
| ATOM | 210 | H6   | C A | 7 | 45.538 | -15.976 | 91.912 | 1.00 | 0.00 | H |
| ATOM | 211 | H1'  | C A | 7 | 45.224 | -14.019 | 88.788 | 1.00 | 0.00 | H |
| ATOM | 212 | H3'  | C A | 7 | 45.578 | -12.138 | 92.224 | 1.00 | 0.00 | H |



|      |     |      |     |   |        |         |        |      |      |   |
|------|-----|------|-----|---|--------|---------|--------|------|------|---|
| ATOM | 213 | H4'  | C A | 7 | 47.749 | -12.223 | 90.710 | 1.00 | 0.00 | H |
| ATOM | 214 | H41  | C A | 7 | 45.174 | -20.428 | 90.561 | 1.00 | 0.00 | H |
| ATOM | 215 | H42  | C A | 7 | 45.109 | -20.356 | 88.781 | 1.00 | 0.00 | H |
| ATOM | 216 | H2'1 | C A | 7 | 44.672 | -14.311 | 91.756 | 1.00 | 0.00 | H |
| ATOM | 217 | H2'2 | C A | 7 | 43.811 | -13.341 | 90.569 | 1.00 | 0.00 | H |
| ATOM | 218 | H5'1 | C A | 7 | 48.489 | -14.464 | 91.795 | 1.00 | 0.00 | H |
| ATOM | 219 | H5'2 | C A | 7 | 48.203 | -13.031 | 92.808 | 1.00 | 0.00 | H |
| ATOM | 220 | C1'  | A A | 8 | 42.304 | -13.611 | 86.117 | 1.00 | 0.00 | C |
| ATOM | 221 | N1   | A A | 8 | 41.790 | -18.715 | 86.299 | 1.00 | 0.00 | N |
| ATOM | 222 | C2   | A A | 8 | 41.879 | -17.857 | 85.288 | 1.00 | 0.00 | C |
| ATOM | 223 | N3   | A A | 8 | 42.014 | -16.547 | 85.310 | 1.00 | 0.00 | N |
| ATOM | 224 | C4   | A A | 8 | 42.052 | -16.106 | 86.581 | 1.00 | 0.00 | C |
| ATOM | 225 | C5   | A A | 8 | 41.973 | -16.852 | 87.724 | 1.00 | 0.00 | C |
| ATOM | 226 | C6   | A A | 8 | 41.833 | -18.245 | 87.555 | 1.00 | 0.00 | C |
| ATOM | 227 | N6   | A A | 8 | 41.742 | -19.103 | 88.585 | 1.00 | 0.00 | N |
| ATOM | 228 | N7   | A A | 8 | 42.049 | -16.051 | 88.850 | 1.00 | 0.00 | N |
| ATOM | 229 | C8   | A A | 8 | 42.168 | -14.848 | 88.369 | 1.00 | 0.00 | C |
| ATOM | 230 | N9   | A A | 8 | 42.179 | -14.804 | 86.999 | 1.00 | 0.00 | N |
| ATOM | 231 | C2'  | A A | 8 | 41.571 | -12.382 | 86.639 | 1.00 | 0.00 | C |
| ATOM | 232 | C3'  | A A | 8 | 42.496 | -11.256 | 86.208 | 1.00 | 0.00 | C |
| ATOM | 233 | O3'  | A A | 8 | 42.200 | -10.898 | 84.860 | 1.00 | 0.00 | O |
| ATOM | 234 | C4'  | A A | 8 | 43.883 | -11.880 | 86.348 | 1.00 | 0.00 | C |
| ATOM | 235 | O4'  | A A | 8 | 43.678 | -13.292 | 86.016 | 1.00 | 0.00 | O |
| ATOM | 236 | C5'  | A A | 8 | 44.523 | -11.792 | 87.713 | 1.00 | 0.00 | C |
| ATOM | 237 | O5'  | A A | 8 | 43.510 | -11.939 | 88.740 | 1.00 | 0.00 | O |
| ATOM | 238 | O1P  | A A | 8 | 43.491 | -9.684  | 89.862 | 1.00 | 0.00 | O |
| ATOM | 239 | O2P  | A A | 8 | 42.809 | -11.731 | 91.144 | 1.00 | 0.00 | O |
| ATOM | 240 | P    | A A | 8 | 43.679 | -11.128 | 90.104 | 1.00 | 0.00 | P |
| ATOM | 241 | H2   | A A | 8 | 41.835 | -18.301 | 84.295 | 1.00 | 0.00 | H |
| ATOM | 242 | H8   | A A | 8 | 42.250 | -13.959 | 88.995 | 1.00 | 0.00 | H |
| ATOM | 243 | H1'  | A A | 8 | 41.949 | -13.885 | 85.123 | 1.00 | 0.00 | H |
| ATOM | 244 | H3'  | A A | 8 | 42.395 | -10.377 | 86.844 | 1.00 | 0.00 | H |
| ATOM | 245 | H4'  | A A | 8 | 44.534 | -11.367 | 85.641 | 1.00 | 0.00 | H |
| ATOM | 246 | H61  | A A | 8 | 41.644 | -20.112 | 88.408 | 1.00 | 0.00 | H |
| ATOM | 247 | H62  | A A | 8 | 41.772 | -18.749 | 89.553 | 1.00 | 0.00 | H |
| ATOM | 248 | H2'1 | A A | 8 | 41.449 | -12.403 | 87.721 | 1.00 | 0.00 | H |
| ATOM | 249 | H2'2 | A A | 8 | 40.580 | -12.274 | 86.198 | 1.00 | 0.00 | H |
| ATOM | 250 | H5'1 | A A | 8 | 45.264 | -12.587 | 87.811 | 1.00 | 0.00 | H |
| ATOM | 251 | H5'2 | A A | 8 | 45.016 | -10.827 | 87.817 | 1.00 | 0.00 | H |
| ATOM | 252 | C1'  | C A | 9 | 38.994 | -15.127 | 82.739 | 1.00 | 0.00 | C |
| ATOM | 253 | N1   | C A | 9 | 38.867 | -15.551 | 84.160 | 1.00 | 0.00 | N |
| ATOM | 254 | C2   | C A | 9 | 38.719 | -16.910 | 84.425 | 1.00 | 0.00 | C |
| ATOM | 255 | O2   | C A | 9 | 38.698 | -17.704 | 83.475 | 1.00 | 0.00 | O |
| ATOM | 256 | N3   | C A | 9 | 38.603 | -17.317 | 85.712 | 1.00 | 0.00 | N |
| ATOM | 257 | C4   | C A | 9 | 38.628 | -16.434 | 86.719 | 1.00 | 0.00 | C |
| ATOM | 258 | N4   | C A | 9 | 38.513 | -16.887 | 87.958 | 1.00 | 0.00 | N |
| ATOM | 259 | C5   | C A | 9 | 38.775 | -15.028 | 86.476 | 1.00 | 0.00 | C |
| ATOM | 260 | C6   | C A | 9 | 38.896 | -14.641 | 85.172 | 1.00 | 0.00 | C |
| ATOM | 261 | C2'  | C A | 9 | 38.283 | -13.818 | 82.423 | 1.00 | 0.00 | C |
| ATOM | 262 | C3'  | C A | 9 | 39.217 | -13.188 | 81.400 | 1.00 | 0.00 | C |
| ATOM | 263 | O3'  | C A | 9 | 38.908 | -13.704 | 80.106 | 1.00 | 0.00 | O |
| ATOM | 264 | C4'  | C A | 9 | 40.597 | -13.629 | 81.883 | 1.00 | 0.00 | C |
| ATOM | 265 | O4'  | C A | 9 | 40.372 | -14.954 | 82.462 | 1.00 | 0.00 | O |
| ATOM | 266 | C5'  | C A | 9 | 41.255 | -12.753 | 82.923 | 1.00 | 0.00 | C |

|      |     |      |   |   |    |        |         |        |      |      |   |
|------|-----|------|---|---|----|--------|---------|--------|------|------|---|
| ATOM | 267 | O5'  | C | A | 9  | 40.252 | -12.236 | 83.834 | 1.00 | 0.00 | O |
| ATOM | 268 | O1P  | C | A | 9  | 40.275 | -9.761  | 83.384 | 1.00 | 0.00 | O |
| ATOM | 269 | O2P  | C | A | 9  | 39.583 | -10.619 | 85.638 | 1.00 | 0.00 | O |
| ATOM | 270 | P    | C | A | 9  | 40.447 | -10.775 | 84.442 | 1.00 | 0.00 | P |
| ATOM | 271 | H5   | C | A | 9  | 38.790 | -14.304 | 87.292 | 1.00 | 0.00 | H |
| ATOM | 272 | H6   | C | A | 9  | 39.018 | -13.584 | 84.937 | 1.00 | 0.00 | H |
| ATOM | 273 | H1'  | C | A | 9  | 38.624 | -15.934 | 82.108 | 1.00 | 0.00 | H |
| ATOM | 274 | H3'  | C | A | 9  | 39.132 | -12.102 | 81.385 | 1.00 | 0.00 | H |
| ATOM | 275 | H4'  | C | A | 9  | 41.246 | -13.651 | 81.008 | 1.00 | 0.00 | H |
| ATOM | 276 | H41  | C | A | 9  | 38.532 | -16.228 | 88.751 | 1.00 | 0.00 | H |
| ATOM | 277 | H42  | C | A | 9  | 38.405 | -17.897 | 88.130 | 1.00 | 0.00 | H |
| ATOM | 278 | H2'1 | C | A | 9  | 38.174 | -13.183 | 83.302 | 1.00 | 0.00 | H |
| ATOM | 279 | H2'2 | C | A | 9  | 37.287 | -13.978 | 82.008 | 1.00 | 0.00 | H |
| ATOM | 280 | H5'1 | C | A | 9  | 41.987 | -13.341 | 83.476 | 1.00 | 0.00 | H |
| ATOM | 281 | H5'2 | C | A | 9  | 41.761 | -11.926 | 82.426 | 1.00 | 0.00 | H |
| ATOM | 282 | C1'  | C | A | 10 | 35.615 | -18.245 | 80.900 | 1.00 | 0.00 | C |
| ATOM | 283 | N1   | C | A | 10 | 35.504 | -17.750 | 82.300 | 1.00 | 0.00 | N |
| ATOM | 284 | C2   | C | A | 10 | 35.341 | -18.693 | 83.313 | 1.00 | 0.00 | C |
| ATOM | 285 | O2   | C | A | 10 | 35.294 | -19.893 | 83.013 | 1.00 | 0.00 | O |
| ATOM | 286 | N3   | C | A | 10 | 35.238 | -18.264 | 84.595 | 1.00 | 0.00 | N |
| ATOM | 287 | C4   | C | A | 10 | 35.291 | -16.958 | 84.890 | 1.00 | 0.00 | C |
| ATOM | 288 | N4   | C | A | 10 | 35.189 | -16.594 | 86.160 | 1.00 | 0.00 | N |
| ATOM | 289 | C5   | C | A | 10 | 35.454 | -15.966 | 83.868 | 1.00 | 0.00 | C |
| ATOM | 290 | C6   | C | A | 10 | 35.560 | -16.422 | 82.584 | 1.00 | 0.00 | C |
| ATOM | 291 | C2'  | C | A | 10 | 34.918 | -17.357 | 79.879 | 1.00 | 0.00 | C |
| ATOM | 292 | C3'  | C | A | 10 | 35.845 | -17.468 | 78.678 | 1.00 | 0.00 | C |
| ATOM | 293 | O3'  | C | A | 10 | 35.509 | -18.638 | 77.935 | 1.00 | 0.00 | O |
| ATOM | 294 | C4'  | C | A | 10 | 37.225 | -17.569 | 79.322 | 1.00 | 0.00 | C |
| ATOM | 295 | O4'  | C | A | 10 | 36.991 | -18.296 | 80.569 | 1.00 | 0.00 | O |
| ATOM | 296 | C5'  | C | A | 10 | 37.911 | -16.263 | 79.646 | 1.00 | 0.00 | C |
| ATOM | 297 | O5'  | C | A | 10 | 36.930 | -15.289 | 80.084 | 1.00 | 0.00 | O |
| ATOM | 298 | O1P  | C | A | 10 | 36.981 | -13.551 | 78.264 | 1.00 | 0.00 | O |
| ATOM | 299 | O2P  | C | A | 10 | 36.312 | -12.908 | 80.596 | 1.00 | 0.00 | O |
| ATOM | 300 | P    | C | A | 10 | 37.155 | -13.754 | 79.716 | 1.00 | 0.00 | P |
| ATOM | 301 | H5   | C | A | 10 | 35.492 | -14.902 | 84.102 | 1.00 | 0.00 | H |
| ATOM | 302 | H6   | C | A | 10 | 35.694 | -15.707 | 81.773 | 1.00 | 0.00 | H |
| ATOM | 303 | H1'  | C | A | 10 | 35.224 | -19.262 | 80.866 | 1.00 | 0.00 | H |
| ATOM | 304 | H3'  | C | A | 10 | 35.775 | -16.596 | 78.027 | 1.00 | 0.00 | H |
| ATOM | 305 | H4'  | C | A | 10 | 37.861 | -18.113 | 78.623 | 1.00 | 0.00 | H |
| ATOM | 306 | H41  | C | A | 10 | 35.229 | -15.597 | 86.415 | 1.00 | 0.00 | H |
| ATOM | 307 | H42  | C | A | 10 | 35.069 | -17.309 | 86.893 | 1.00 | 0.00 | H |
| ATOM | 308 | H2'1 | C | A | 10 | 34.831 | -16.325 | 80.218 | 1.00 | 0.00 | H |
| ATOM | 309 | H2'2 | C | A | 10 | 33.914 | -17.711 | 79.641 | 1.00 | 0.00 | H |
| ATOM | 310 | H5'1 | C | A | 10 | 38.644 | -16.429 | 80.437 | 1.00 | 0.00 | H |
| ATOM | 311 | H5'2 | C | A | 10 | 38.422 | -15.896 | 78.756 | 1.00 | 0.00 | H |
| ATOM | 312 | C1'  | T | A | 11 | 32.167 | -21.781 | 81.236 | 1.00 | 0.00 | C |
| ATOM | 313 | N1   | T | A | 11 | 32.081 | -20.571 | 82.096 | 1.00 | 0.00 | N |
| ATOM | 314 | C2   | T | A | 11 | 31.919 | -20.772 | 83.451 | 1.00 | 0.00 | C |
| ATOM | 315 | O2   | T | A | 11 | 31.846 | -21.882 | 83.950 | 1.00 | 0.00 | O |
| ATOM | 316 | N3   | T | A | 11 | 31.844 | -19.621 | 84.214 | 1.00 | 0.00 | N |
| ATOM | 317 | C4   | T | A | 11 | 31.912 | -18.323 | 83.751 | 1.00 | 0.00 | C |
| ATOM | 318 | O4   | T | A | 11 | 31.830 | -17.367 | 84.533 | 1.00 | 0.00 | O |
| ATOM | 319 | C5   | T | A | 11 | 32.082 | -18.213 | 82.321 | 1.00 | 0.00 | C |
| ATOM | 320 | C6   | T | A | 11 | 32.160 | -19.314 | 81.548 | 1.00 | 0.00 | C |

|      |     |      |     |    |        |         |        |      |      |   |
|------|-----|------|-----|----|--------|---------|--------|------|------|---|
| ATOM | 321 | C7   | T A | 11 | 32.164 | -16.819 | 81.774 | 1.00 | 0.00 | C |
| ATOM | 322 | C2'  | T A | 11 | 31.470 | -21.629 | 79.890 | 1.00 | 0.00 | C |
| ATOM | 323 | C3'  | T A | 11 | 32.378 | -22.428 | 78.969 | 1.00 | 0.00 | C |
| ATOM | 324 | O3'  | T A | 11 | 32.018 | -23.806 | 79.034 | 1.00 | 0.00 | O |
| ATOM | 325 | C4'  | T A | 11 | 33.765 | -22.166 | 79.550 | 1.00 | 0.00 | C |
| ATOM | 326 | O4'  | T A | 11 | 33.536 | -22.040 | 80.989 | 1.00 | 0.00 | O |
| ATOM | 327 | C5'  | T A | 11 | 34.475 | -20.924 | 79.063 | 1.00 | 0.00 | C |
| ATOM | 328 | O5'  | T A | 11 | 33.514 | -19.857 | 78.864 | 1.00 | 0.00 | O |
| ATOM | 329 | O1P  | T A | 11 | 33.565 | -19.483 | 76.376 | 1.00 | 0.00 | O |
| ATOM | 330 | O2P  | T A | 11 | 32.935 | -17.604 | 77.914 | 1.00 | 0.00 | O |
| ATOM | 331 | P    | T A | 11 | 33.755 | -18.818 | 77.679 | 1.00 | 0.00 | P |
| ATOM | 332 | H3   | T A | 11 | 31.728 | -19.744 | 85.229 | 1.00 | 0.00 | H |
| ATOM | 333 | H6   | T A | 11 | 32.288 | -19.206 | 80.470 | 1.00 | 0.00 | H |
| ATOM | 334 | H1'  | T A | 11 | 31.761 | -22.626 | 81.792 | 1.00 | 0.00 | H |
| ATOM | 335 | H3'  | T A | 11 | 32.313 | -22.087 | 77.936 | 1.00 | 0.00 | H |
| ATOM | 336 | H4'  | T A | 11 | 34.385 | -23.026 | 79.291 | 1.00 | 0.00 | H |
| ATOM | 337 | H71  | T A | 11 | 31.298 | -16.626 | 81.140 | 1.00 | 0.00 | H |
| ATOM | 338 | H72  | T A | 11 | 32.176 | -16.106 | 82.598 | 1.00 | 0.00 | H |
| ATOM | 339 | H73  | T A | 11 | 33.075 | -16.711 | 81.186 | 1.00 | 0.00 | H |
| ATOM | 340 | H2'1 | T A | 11 | 31.402 | -20.589 | 79.575 | 1.00 | 0.00 | H |
| ATOM | 341 | H2'2 | T A | 11 | 30.457 | -22.035 | 79.900 | 1.00 | 0.00 | H |
| ATOM | 342 | H5'1 | T A | 11 | 35.215 | -20.620 | 79.803 | 1.00 | 0.00 | H |
| ATOM | 343 | H5'2 | T A | 11 | 34.978 | -21.145 | 78.122 | 1.00 | 0.00 | H |
| ATOM | 344 | C1'  | A A | 12 | 28.673 | -24.375 | 83.622 | 1.00 | 0.00 | C |
| ATOM | 345 | N1   | A A | 12 | 28.236 | -20.117 | 86.454 | 1.00 | 0.00 | N |
| ATOM | 346 | C2   | A A | 12 | 28.250 | -21.409 | 86.769 | 1.00 | 0.00 | C |
| ATOM | 347 | N3   | A A | 12 | 28.370 | -22.460 | 85.986 | 1.00 | 0.00 | N |
| ATOM | 348 | C4   | A A | 12 | 28.482 | -22.074 | 84.703 | 1.00 | 0.00 | C |
| ATOM | 349 | C5   | A A | 12 | 28.483 | -20.798 | 84.215 | 1.00 | 0.00 | C |
| ATOM | 350 | C6   | A A | 12 | 28.350 | -19.763 | 85.165 | 1.00 | 0.00 | C |
| ATOM | 351 | N6   | A A | 12 | 28.335 | -18.460 | 84.834 | 1.00 | 0.00 | N |
| ATOM | 352 | N7   | A A | 12 | 28.620 | -20.788 | 82.838 | 1.00 | 0.00 | N |
| ATOM | 353 | C8   | A A | 12 | 28.693 | -22.048 | 82.523 | 1.00 | 0.00 | C |
| ATOM | 354 | N9   | A A | 12 | 28.619 | -22.888 | 83.605 | 1.00 | 0.00 | N |
| ATOM | 355 | C2'  | A A | 12 | 27.959 | -25.027 | 82.445 | 1.00 | 0.00 | C |
| ATOM | 356 | C3'  | A A | 12 | 28.841 | -26.235 | 82.170 | 1.00 | 0.00 | C |
| ATOM | 357 | O3'  | A A | 12 | 28.457 | -27.301 | 83.035 | 1.00 | 0.00 | O |
| ATOM | 358 | C4'  | A A | 12 | 30.242 | -25.712 | 82.484 | 1.00 | 0.00 | C |
| ATOM | 359 | O4'  | A A | 12 | 30.034 | -24.757 | 83.573 | 1.00 | 0.00 | O |
| ATOM | 360 | C5'  | A A | 12 | 30.965 | -25.013 | 81.358 | 1.00 | 0.00 | C |
| ATOM | 361 | O5'  | A A | 12 | 30.020 | -24.245 | 80.570 | 1.00 | 0.00 | O |
| ATOM | 362 | O1P  | A A | 12 | 30.044 | -25.408 | 78.338 | 1.00 | 0.00 | O |
| ATOM | 363 | O2P  | A A | 12 | 29.468 | -22.970 | 78.476 | 1.00 | 0.00 | O |
| ATOM | 364 | P    | A A | 12 | 30.264 | -24.108 | 79.000 | 1.00 | 0.00 | P |
| ATOM | 365 | H2   | A A | 12 | 28.150 | -21.630 | 87.831 | 1.00 | 0.00 | H |
| ATOM | 366 | H8   | A A | 12 | 28.804 | -22.404 | 81.498 | 1.00 | 0.00 | H |
| ATOM | 367 | H1'  | A A | 12 | 28.261 | -24.720 | 84.568 | 1.00 | 0.00 | H |
| ATOM | 368 | H3'  | A A | 12 | 28.769 | -26.567 | 81.135 | 1.00 | 0.00 | H |
| ATOM | 369 | H4'  | A A | 12 | 30.841 | -26.573 | 82.780 | 1.00 | 0.00 | H |
| ATOM | 370 | H61  | A A | 12 | 28.238 | -17.744 | 85.567 | 1.00 | 0.00 | H |
| ATOM | 371 | H62  | A A | 12 | 28.421 | -18.180 | 83.846 | 1.00 | 0.00 | H |
| ATOM | 372 | H2'1 | A A | 12 | 27.906 | -24.371 | 81.577 | 1.00 | 0.00 | H |
| ATOM | 373 | H2'2 | A A | 12 | 26.942 | -25.327 | 82.694 | 1.00 | 0.00 | H |
| ATOM | 374 | H5'1 | A A | 12 | 31.720 | -24.348 | 81.777 | 1.00 | 0.00 | H |

|      |     |      |   |   |    |        |         |        |      |      |   |
|------|-----|------|---|---|----|--------|---------|--------|------|------|---|
| ATOM | 375 | H5'2 | A | A | 12 | 31.452 | -25.756 | 80.728 | 1.00 | 0.00 | H |
| ATOM | 376 | C1'  | G | A | 13 | 25.178 | -24.976 | 87.096 | 1.00 | 0.00 | C |
| ATOM | 377 | N1   | G | A | 13 | 24.847 | -19.891 | 86.862 | 1.00 | 0.00 | N |
| ATOM | 378 | C2   | G | A | 13 | 24.843 | -20.731 | 87.961 | 1.00 | 0.00 | C |
| ATOM | 379 | N2   | G | A | 13 | 24.732 | -20.139 | 89.158 | 1.00 | 0.00 | N |
| ATOM | 380 | N3   | G | A | 13 | 24.939 | -22.056 | 87.874 | 1.00 | 0.00 | N |
| ATOM | 381 | C4   | G | A | 13 | 25.035 | -22.484 | 86.588 | 1.00 | 0.00 | C |
| ATOM | 382 | C5   | G | A | 13 | 25.045 | -21.721 | 85.431 | 1.00 | 0.00 | C |
| ATOM | 383 | C6   | G | A | 13 | 24.946 | -20.314 | 85.523 | 1.00 | 0.00 | C |
| ATOM | 384 | O6   | G | A | 13 | 24.936 | -19.476 | 84.621 | 1.00 | 0.00 | O |
| ATOM | 385 | N7   | G | A | 13 | 25.157 | -22.546 | 84.311 | 1.00 | 0.00 | N |
| ATOM | 386 | C8   | G | A | 13 | 25.215 | -23.753 | 84.810 | 1.00 | 0.00 | C |
| ATOM | 387 | N9   | G | A | 13 | 25.145 | -23.798 | 86.187 | 1.00 | 0.00 | N |
| ATOM | 388 | C2'  | G | A | 13 | 24.436 | -26.190 | 86.553 | 1.00 | 0.00 | C |
| ATOM | 389 | C3'  | G | A | 13 | 25.295 | -27.338 | 87.055 | 1.00 | 0.00 | C |
| ATOM | 390 | O3'  | G | A | 13 | 24.911 | -27.662 | 88.389 | 1.00 | 0.00 | O |
| ATOM | 391 | C4'  | G | A | 13 | 26.708 | -26.762 | 86.986 | 1.00 | 0.00 | C |
| ATOM | 392 | O4'  | G | A | 13 | 26.532 | -25.340 | 87.282 | 1.00 | 0.00 | O |
| ATOM | 393 | C5'  | G | A | 13 | 27.422 | -26.894 | 85.661 | 1.00 | 0.00 | C |
| ATOM | 394 | O5'  | G | A | 13 | 26.476 | -26.736 | 84.575 | 1.00 | 0.00 | O |
| ATOM | 395 | O1P  | G | A | 13 | 26.447 | -29.007 | 83.492 | 1.00 | 0.00 | O |
| ATOM | 396 | O2P  | G | A | 13 | 25.909 | -26.965 | 82.138 | 1.00 | 0.00 | O |
| ATOM | 397 | P    | G | A | 13 | 26.696 | -27.576 | 83.237 | 1.00 | 0.00 | P |
| ATOM | 398 | H1   | G | A | 13 | 24.774 | -18.877 | 87.038 | 1.00 | 0.00 | H |
| ATOM | 399 | H8   | G | A | 13 | 25.308 | -24.647 | 84.193 | 1.00 | 0.00 | H |
| ATOM | 400 | H1'  | G | A | 13 | 24.775 | -24.673 | 88.062 | 1.00 | 0.00 | H |
| ATOM | 401 | H21  | G | A | 13 | 24.661 | -19.111 | 89.216 | 1.00 | 0.00 | H |
| ATOM | 402 | H3'  | G | A | 13 | 25.201 | -28.225 | 86.427 | 1.00 | 0.00 | H |
| ATOM | 403 | H22  | G | A | 13 | 24.720 | -20.708 | 90.013 | 1.00 | 0.00 | H |
| ATOM | 404 | H4'  | G | A | 13 | 27.300 | -27.283 | 87.737 | 1.00 | 0.00 | H |
| ATOM | 405 | H2'1 | G | A | 13 | 24.377 | -26.186 | 85.464 | 1.00 | 0.00 | H |
| ATOM | 406 | H2'2 | G | A | 13 | 23.417 | -26.258 | 86.935 | 1.00 | 0.00 | H |
| ATOM | 407 | H5'1 | G | A | 13 | 28.194 | -26.128 | 85.593 | 1.00 | 0.00 | H |
| ATOM | 408 | H5'2 | G | A | 13 | 27.889 | -27.877 | 85.604 | 1.00 | 0.00 | H |
| ATOM | 409 | C1'  | G | A | 14 | 21.729 | -23.375 | 90.269 | 1.00 | 0.00 | C |
| ATOM | 410 | N1   | G | A | 14 | 21.467 | -19.391 | 87.093 | 1.00 | 0.00 | N |
| ATOM | 411 | C2   | G | A | 14 | 21.467 | -19.426 | 88.476 | 1.00 | 0.00 | C |
| ATOM | 412 | N2   | G | A | 14 | 21.383 | -18.242 | 89.096 | 1.00 | 0.00 | N |
| ATOM | 413 | N3   | G | A | 14 | 21.544 | -20.551 | 89.184 | 1.00 | 0.00 | N |
| ATOM | 414 | C4   | G | A | 14 | 21.614 | -21.654 | 88.394 | 1.00 | 0.00 | C |
| ATOM | 415 | C5   | G | A | 14 | 21.616 | -21.715 | 87.011 | 1.00 | 0.00 | C |
| ATOM | 416 | C6   | G | A | 14 | 21.539 | -20.522 | 86.258 | 1.00 | 0.00 | C |
| ATOM | 417 | O6   | G | A | 14 | 21.527 | -20.373 | 85.036 | 1.00 | 0.00 | O |
| ATOM | 418 | N7   | G | A | 14 | 21.700 | -23.045 | 86.588 | 1.00 | 0.00 | N |
| ATOM | 419 | C8   | G | A | 14 | 21.748 | -23.729 | 87.701 | 1.00 | 0.00 | C |
| ATOM | 420 | N9   | G | A | 14 | 21.700 | -22.954 | 88.841 | 1.00 | 0.00 | N |
| ATOM | 421 | C2'  | G | A | 14 | 20.962 | -24.661 | 90.545 | 1.00 | 0.00 | C |
| ATOM | 422 | C3'  | G | A | 14 | 21.813 | -25.313 | 91.623 | 1.00 | 0.00 | C |
| ATOM | 423 | O3'  | G | A | 14 | 21.444 | -24.783 | 92.895 | 1.00 | 0.00 | O |
| ATOM | 424 | C4'  | G | A | 14 | 23.233 | -24.915 | 91.223 | 1.00 | 0.00 | C |
| ATOM | 425 | O4'  | G | A | 14 | 23.081 | -23.587 | 90.628 | 1.00 | 0.00 | O |
| ATOM | 426 | C5'  | G | A | 14 | 23.925 | -25.815 | 90.226 | 1.00 | 0.00 | C |
| ATOM | 427 | O5'  | G | A | 14 | 22.964 | -26.305 | 89.258 | 1.00 | 0.00 | O |
| ATOM | 428 | O1P  | G | A | 14 | 22.886 | -28.779 | 89.716 | 1.00 | 0.00 | O |

|      |     |      |     |    |        |         |        |      |      |   |
|------|-----|------|-----|----|--------|---------|--------|------|------|---|
| ATOM | 429 | O2P  | G A | 14 | 22.356 | -27.911 | 87.423 | 1.00 | 0.00 | O |
| ATOM | 430 | P    | G A | 14 | 23.152 | -27.775 | 88.668 | 1.00 | 0.00 | P |
| ATOM | 431 | H1   | G A | 14 | 21.410 | -18.466 | 86.641 | 1.00 | 0.00 | H |
| ATOM | 432 | H8   | G A | 14 | 21.820 | -24.816 | 87.726 | 1.00 | 0.00 | H |
| ATOM | 433 | H1'  | G A | 14 | 21.346 | -22.554 | 90.874 | 1.00 | 0.00 | H |
| ATOM | 434 | H21  | G A | 14 | 21.328 | -17.375 | 88.542 | 1.00 | 0.00 | H |
| ATOM | 435 | H3'  | G A | 14 | 21.697 | -26.396 | 91.636 | 1.00 | 0.00 | H |
| ATOM | 436 | H22  | G A | 14 | 21.376 | -18.199 | 90.124 | 1.00 | 0.00 | H |
| ATOM | 437 | H4'  | G A | 14 | 23.829 | -24.907 | 92.134 | 1.00 | 0.00 | H |
| ATOM | 438 | H2'1 | G A | 14 | 20.887 | -25.296 | 89.662 | 1.00 | 0.00 | H |
| ATOM | 439 | H2'2 | G A | 14 | 19.949 | -24.470 | 90.900 | 1.00 | 0.00 | H |
| ATOM | 440 | H5'1 | G A | 14 | 24.706 | -25.251 | 89.717 | 1.00 | 0.00 | H |
| ATOM | 441 | H5'2 | G A | 14 | 24.377 | -26.654 | 90.755 | 1.00 | 0.00 | H |
| ATOM | 442 | C1'  | A A | 15 | 18.353 | -20.159 | 91.930 | 1.00 | 0.00 | C |
| ATOM | 443 | N1   | A A | 15 | 18.096 | -18.761 | 86.999 | 1.00 | 0.00 | N |
| ATOM | 444 | C2   | A A | 15 | 18.119 | -18.063 | 88.131 | 1.00 | 0.00 | C |
| ATOM | 445 | N3   | A A | 15 | 18.190 | -18.488 | 89.375 | 1.00 | 0.00 | N |
| ATOM | 446 | C4   | A A | 15 | 18.235 | -19.833 | 89.405 | 1.00 | 0.00 | C |
| ATOM | 447 | C5   | A A | 15 | 18.218 | -20.690 | 88.341 | 1.00 | 0.00 | C |
| ATOM | 448 | C6   | A A | 15 | 18.143 | -20.100 | 87.061 | 1.00 | 0.00 | C |
| ATOM | 449 | N6   | A A | 15 | 18.119 | -20.817 | 85.924 | 1.00 | 0.00 | N |
| ATOM | 450 | N7   | A A | 15 | 18.281 | -22.007 | 88.759 | 1.00 | 0.00 | N |
| ATOM | 451 | C8   | A A | 15 | 18.329 | -21.921 | 90.055 | 1.00 | 0.00 | C |
| ATOM | 452 | N9   | A A | 15 | 18.308 | -20.630 | 90.521 | 1.00 | 0.00 | N |
| ATOM | 453 | C2'  | A A | 15 | 17.573 | -21.039 | 92.898 | 1.00 | 0.00 | C |
| ATOM | 454 | C3'  | A A | 15 | 18.431 | -20.971 | 94.152 | 1.00 | 0.00 | C |
| ATOM | 455 | O3'  | A A | 15 | 18.087 | -19.802 | 94.889 | 1.00 | 0.00 | O |
| ATOM | 456 | C4'  | A A | 15 | 19.850 | -20.903 | 93.589 | 1.00 | 0.00 | C |
| ATOM | 457 | O4'  | A A | 15 | 19.707 | -20.153 | 92.340 | 1.00 | 0.00 | O |
| ATOM | 458 | C5'  | A A | 15 | 20.516 | -22.224 | 93.286 | 1.00 | 0.00 | C |
| ATOM | 459 | O5'  | A A | 15 | 19.535 | -23.163 | 92.777 | 1.00 | 0.00 | O |
| ATOM | 460 | O1P  | A A | 15 | 19.430 | -24.925 | 94.572 | 1.00 | 0.00 | O |
| ATOM | 461 | O2P  | A A | 15 | 18.879 | -25.518 | 92.196 | 1.00 | 0.00 | O |
| ATOM | 462 | P    | A A | 15 | 19.694 | -24.709 | 93.135 | 1.00 | 0.00 | P |
| ATOM | 463 | H2   | A A | 15 | 18.075 | -16.980 | 88.011 | 1.00 | 0.00 | H |
| ATOM | 464 | H8   | A A | 15 | 18.382 | -22.789 | 90.712 | 1.00 | 0.00 | H |
| ATOM | 465 | H1'  | A A | 15 | 17.990 | -19.132 | 91.958 | 1.00 | 0.00 | H |
| ATOM | 466 | H3'  | A A | 15 | 18.301 | -21.849 | 94.784 | 1.00 | 0.00 | H |
| ATOM | 467 | H4'  | A A | 15 | 20.458 | -20.385 | 94.329 | 1.00 | 0.00 | H |
| ATOM | 468 | H61  | A A | 15 | 18.066 | -20.335 | 85.015 | 1.00 | 0.00 | H |
| ATOM | 469 | H62  | A A | 15 | 18.153 | -21.846 | 85.964 | 1.00 | 0.00 | H |
| ATOM | 470 | H2'1 | A A | 15 | 17.477 | -22.063 | 92.538 | 1.00 | 0.00 | H |
| ATOM | 471 | H2'2 | A A | 15 | 16.568 | -20.660 | 93.084 | 1.00 | 0.00 | H |
| ATOM | 472 | H5'1 | A A | 15 | 21.297 | -22.068 | 92.542 | 1.00 | 0.00 | H |
| ATOM | 473 | H5'2 | A A | 15 | 20.963 | -22.617 | 94.197 | 1.00 | 0.00 | H |
| ATOM | 474 | C1'  | C A | 16 | 15.046 | -16.500 | 91.353 | 1.00 | 0.00 | C |
| ATOM | 475 | N1   | C A | 16 | 14.973 | -17.721 | 90.506 | 1.00 | 0.00 | N |
| ATOM | 476 | C2   | C A | 16 | 14.898 | -17.555 | 89.125 | 1.00 | 0.00 | C |
| ATOM | 477 | O2   | C A | 16 | 14.894 | -16.407 | 88.663 | 1.00 | 0.00 | O |
| ATOM | 478 | N3   | C A | 16 | 14.830 | -18.655 | 88.336 | 1.00 | 0.00 | N |
| ATOM | 479 | C4   | C A | 16 | 14.835 | -19.884 | 88.867 | 1.00 | 0.00 | C |
| ATOM | 480 | N4   | C A | 16 | 14.771 | -20.924 | 88.048 | 1.00 | 0.00 | N |
| ATOM | 481 | C5   | C A | 16 | 14.908 | -20.086 | 90.284 | 1.00 | 0.00 | C |
| ATOM | 482 | C6   | C A | 16 | 14.979 | -18.964 | 91.061 | 1.00 | 0.00 | C |

|      |     |      |     |    |        |         |        |      |      |   |
|------|-----|------|-----|----|--------|---------|--------|------|------|---|
| ATOM | 483 | C2'  | C A | 16 | 14.265 | -16.607 | 92.655 | 1.00 | 0.00 | C |
| ATOM | 484 | C3'  | C A | 16 | 15.143 | -15.822 | 93.618 | 1.00 | 0.00 | C |
| ATOM | 485 | O3'  | C A | 16 | 14.831 | -14.436 | 93.511 | 1.00 | 0.00 | O |
| ATOM | 486 | C4'  | C A | 16 | 16.553 | -16.137 | 93.125 | 1.00 | 0.00 | C |
| ATOM | 487 | O4'  | C A | 16 | 16.407 | -16.281 | 91.676 | 1.00 | 0.00 | O |
| ATOM | 488 | C5'  | C A | 16 | 17.191 | -17.394 | 93.673 | 1.00 | 0.00 | C |
| ATOM | 489 | O5'  | C A | 16 | 16.185 | -18.426 | 93.829 | 1.00 | 0.00 | O |
| ATOM | 490 | O1P  | C A | 16 | 16.075 | -18.762 | 96.321 | 1.00 | 0.00 | O |
| ATOM | 491 | O2P  | C A | 16 | 15.478 | -20.644 | 94.774 | 1.00 | 0.00 | O |
| ATOM | 492 | P    | C A | 16 | 16.321 | -19.453 | 95.041 | 1.00 | 0.00 | P |
| ATOM | 493 | H5   | C A | 16 | 14.904 | -21.086 | 90.722 | 1.00 | 0.00 | H |
| ATOM | 494 | H6   | C A | 16 | 15.044 | -19.067 | 92.144 | 1.00 | 0.00 | H |
| ATOM | 495 | H1'  | C A | 16 | 14.702 | -15.652 | 90.760 | 1.00 | 0.00 | H |
| ATOM | 496 | H3'  | C A | 16 | 15.004 | -16.146 | 94.650 | 1.00 | 0.00 | H |
| ATOM | 497 | H4'  | C A | 16 | 17.183 | -15.295 | 93.410 | 1.00 | 0.00 | H |
| ATOM | 498 | H41  | C A | 16 | 14.775 | -21.881 | 88.431 | 1.00 | 0.00 | H |
| ATOM | 499 | H42  | C A | 16 | 14.716 | -20.777 | 87.030 | 1.00 | 0.00 | H |
| ATOM | 500 | H2'1 | C A | 16 | 14.144 | -17.640 | 92.982 | 1.00 | 0.00 | H |
| ATOM | 501 | H2'2 | C A | 16 | 13.269 | -16.170 | 92.578 | 1.00 | 0.00 | H |
| ATOM | 502 | H5'1 | C A | 16 | 17.964 | -17.732 | 92.983 | 1.00 | 0.00 | H |
| ATOM | 503 | H5'2 | C A | 16 | 17.644 | -17.173 | 94.639 | 1.00 | 0.00 | H |
| ATOM | 504 | C1'  | G A | 17 | 11.784 | -13.811 | 88.775 | 1.00 | 0.00 | C |
| ATOM | 505 | N1   | G A | 17 | 11.377 | -18.044 | 85.957 | 1.00 | 0.00 | N |
| ATOM | 506 | C2   | G A | 17 | 11.451 | -16.719 | 85.564 | 1.00 | 0.00 | C |
| ATOM | 507 | N2   | G A | 17 | 11.408 | -16.493 | 84.246 | 1.00 | 0.00 | N |
| ATOM | 508 | N3   | G A | 17 | 11.559 | -15.703 | 86.418 | 1.00 | 0.00 | N |
| ATOM | 509 | C4   | G A | 17 | 11.579 | -16.117 | 87.713 | 1.00 | 0.00 | C |
| ATOM | 510 | C5   | G A | 17 | 11.506 | -17.412 | 88.199 | 1.00 | 0.00 | C |
| ATOM | 511 | C6   | G A | 17 | 11.396 | -18.492 | 87.293 | 1.00 | 0.00 | C |
| ATOM | 512 | O6   | G A | 17 | 11.320 | -19.698 | 87.527 | 1.00 | 0.00 | O |
| ATOM | 513 | N7   | G A | 17 | 11.559 | -17.409 | 89.594 | 1.00 | 0.00 | N |
| ATOM | 514 | C8   | G A | 17 | 11.662 | -16.142 | 89.903 | 1.00 | 0.00 | C |
| ATOM | 515 | N9   | G A | 17 | 11.680 | -15.294 | 88.814 | 1.00 | 0.00 | N |
| ATOM | 516 | C2'  | G A | 17 | 11.025 | -13.113 | 89.895 | 1.00 | 0.00 | C |
| ATOM | 517 | C3'  | G A | 17 | 11.928 | -11.930 | 90.203 | 1.00 | 0.00 | C |
| ATOM | 518 | O3'  | G A | 17 | 11.631 | -10.868 | 89.299 | 1.00 | 0.00 | O |
| ATOM | 519 | C4'  | G A | 17 | 13.327 | -12.504 | 89.980 | 1.00 | 0.00 | C |
| ATOM | 520 | O4'  | G A | 17 | 13.151 | -13.470 | 88.897 | 1.00 | 0.00 | O |
| ATOM | 521 | C5'  | G A | 17 | 13.958 | -13.206 | 91.159 | 1.00 | 0.00 | C |
| ATOM | 522 | O5'  | G A | 17 | 12.944 | -13.928 | 91.901 | 1.00 | 0.00 | O |
| ATOM | 523 | O1P  | G A | 17 | 12.875 | -12.724 | 94.111 | 1.00 | 0.00 | O |
| ATOM | 524 | O2P  | G A | 17 | 12.228 | -15.145 | 93.979 | 1.00 | 0.00 | O |
| ATOM | 525 | P    | G A | 17 | 13.090 | -14.044 | 93.485 | 1.00 | 0.00 | P |
| ATOM | 526 | H1   | G A | 17 | 11.302 | -18.756 | 85.215 | 1.00 | 0.00 | H |
| ATOM | 527 | H8   | G A | 17 | 11.728 | -15.785 | 90.932 | 1.00 | 0.00 | H |
| ATOM | 528 | H1'  | G A | 17 | 11.439 | -13.470 | 87.799 | 1.00 | 0.00 | H |
| ATOM | 529 | H21  | G A | 17 | 11.328 | -17.284 | 83.591 | 1.00 | 0.00 | H |
| ATOM | 530 | H3'  | G A | 17 | 11.805 | -11.578 | 91.228 | 1.00 | 0.00 | H |
| ATOM | 531 | H22  | G A | 17 | 11.456 | -15.528 | 83.888 | 1.00 | 0.00 | H |
| ATOM | 532 | H4'  | G A | 17 | 13.971 | -11.669 | 89.706 | 1.00 | 0.00 | H |
| ATOM | 533 | H2'1 | G A | 17 | 10.898 | -13.753 | 90.769 | 1.00 | 0.00 | H |
| ATOM | 534 | H2'2 | G A | 17 | 10.033 | -12.785 | 89.582 | 1.00 | 0.00 | H |
| ATOM | 535 | H5'1 | G A | 17 | 14.715 | -13.902 | 90.797 | 1.00 | 0.00 | H |
| ATOM | 536 | H5'2 | G A | 17 | 14.432 | -12.467 | 91.804 | 1.00 | 0.00 | H |

|      |     |      |     |    |        |         |        |      |      |   |
|------|-----|------|-----|----|--------|---------|--------|------|------|---|
| ATOM | 537 | C1'  | G A | 18 | 8.521  | -13.082 | 85.122 | 1.00 | 0.00 | C |
| ATOM | 538 | N1   | G A | 18 | 8.011  | -18.154 | 85.331 | 1.00 | 0.00 | N |
| ATOM | 539 | C2   | G A | 18 | 8.098  | -17.314 | 84.234 | 1.00 | 0.00 | C |
| ATOM | 540 | N2   | G A | 18 | 8.039  | -17.905 | 83.032 | 1.00 | 0.00 | N |
| ATOM | 541 | N3   | G A | 18 | 8.233  | -15.994 | 84.328 | 1.00 | 0.00 | N |
| ATOM | 542 | C4   | G A | 18 | 8.267  | -15.568 | 85.618 | 1.00 | 0.00 | C |
| ATOM | 543 | C5   | G A | 18 | 8.184  | -16.330 | 86.772 | 1.00 | 0.00 | C |
| ATOM | 544 | C6   | G A | 18 | 8.045  | -17.734 | 86.673 | 1.00 | 0.00 | C |
| ATOM | 545 | O6   | G A | 18 | 7.955  | -18.569 | 87.573 | 1.00 | 0.00 | O |
| ATOM | 546 | N7   | G A | 18 | 8.258  | -15.509 | 87.898 | 1.00 | 0.00 | N |
| ATOM | 547 | C8   | G A | 18 | 8.384  | -14.304 | 87.404 | 1.00 | 0.00 | C |
| ATOM | 548 | N9   | G A | 18 | 8.397  | -14.259 | 86.026 | 1.00 | 0.00 | N |
| ATOM | 549 | C2'  | G A | 18 | 7.789  | -11.845 | 85.621 | 1.00 | 0.00 | C |
| ATOM | 550 | C3'  | G A | 18 | 8.713  | -10.726 | 85.171 | 1.00 | 0.00 | C |
| ATOM | 551 | O3'  | G A | 18 | 8.418  | -10.391 | 83.817 | 1.00 | 0.00 | O |
| ATOM | 552 | C4'  | G A | 18 | 10.100 | -11.348 | 85.322 | 1.00 | 0.00 | C |
| ATOM | 553 | O4'  | G A | 18 | 9.895  | -12.763 | 85.014 | 1.00 | 0.00 | O |
| ATOM | 554 | C5'  | G A | 18 | 10.739 | -11.238 | 86.686 | 1.00 | 0.00 | C |
| ATOM | 555 | O5'  | G A | 18 | 9.727  | -11.364 | 87.715 | 1.00 | 0.00 | O |
| ATOM | 556 | O1P  | G A | 18 | 9.708  | -9.092  | 88.797 | 1.00 | 0.00 | O |
| ATOM | 557 | O2P  | G A | 18 | 9.025  | -11.114 | 90.115 | 1.00 | 0.00 | O |
| ATOM | 558 | P    | G A | 18 | 9.895  | -10.530 | 89.065 | 1.00 | 0.00 | P |
| ATOM | 559 | H1   | G A | 18 | 7.915  | -19.165 | 85.149 | 1.00 | 0.00 | H |
| ATOM | 560 | H8   | G A | 18 | 8.470  | -13.413 | 88.026 | 1.00 | 0.00 | H |
| ATOM | 561 | H1'  | G A | 18 | 8.166  | -13.373 | 84.133 | 1.00 | 0.00 | H |
| ATOM | 562 | H21  | G A | 18 | 7.938  | -18.929 | 82.968 | 1.00 | 0.00 | H |
| ATOM | 563 | H3'  | G A | 18 | 8.611  | -9.836  | 85.794 | 1.00 | 0.00 | H |
| ATOM | 564 | H22  | G A | 18 | 8.095  | -17.336 | 82.178 | 1.00 | 0.00 | H |
| ATOM | 565 | H4'  | G A | 18 | 10.752 | -10.847 | 84.607 | 1.00 | 0.00 | H |
| ATOM | 566 | H2'1 | G A | 18 | 7.666  | -11.846 | 86.704 | 1.00 | 0.00 | H |
| ATOM | 567 | H2'2 | G A | 18 | 6.797  | -11.744 | 85.180 | 1.00 | 0.00 | H |
| ATOM | 568 | H5'1 | G A | 18 | 11.480 | -12.029 | 86.799 | 1.00 | 0.00 | H |
| ATOM | 569 | H5'2 | G A | 18 | 11.234 | -10.270 | 86.772 | 1.00 | 0.00 | H |
| ATOM | 570 | C1'  | T A | 19 | 5.216  | -14.551 | 81.742 | 1.00 | 0.00 | C |
| ATOM | 571 | N1   | T A | 19 | 5.086  | -14.996 | 83.155 | 1.00 | 0.00 | N |
| ATOM | 572 | C2   | T A | 19 | 4.938  | -16.350 | 83.378 | 1.00 | 0.00 | C |
| ATOM | 573 | O2   | T A | 19 | 4.911  | -17.169 | 82.475 | 1.00 | 0.00 | O |
| ATOM | 574 | N3   | T A | 19 | 4.822  | -16.720 | 84.705 | 1.00 | 0.00 | N |
| ATOM | 575 | C4   | T A | 19 | 4.837  | -15.878 | 85.797 | 1.00 | 0.00 | C |
| ATOM | 576 | O4   | T A | 19 | 4.721  | -16.326 | 86.943 | 1.00 | 0.00 | O |
| ATOM | 577 | C5   | T A | 19 | 4.996  | -14.482 | 85.465 | 1.00 | 0.00 | C |
| ATOM | 578 | C6   | T A | 19 | 5.113  | -14.085 | 84.182 | 1.00 | 0.00 | C |
| ATOM | 579 | C7   | T A | 19 | 5.020  | -13.529 | 86.623 | 1.00 | 0.00 | C |
| ATOM | 580 | C2'  | T A | 19 | 4.507  | -13.235 | 81.445 | 1.00 | 0.00 | C |
| ATOM | 581 | C3'  | T A | 19 | 5.441  | -12.592 | 80.433 | 1.00 | 0.00 | C |
| ATOM | 582 | O3'  | T A | 19 | 5.135  | -13.087 | 79.131 | 1.00 | 0.00 | O |
| ATOM | 583 | C4'  | T A | 19 | 6.820  | -13.041 | 80.912 | 1.00 | 0.00 | C |
| ATOM | 584 | O4'  | T A | 19 | 6.592  | -14.374 | 81.469 | 1.00 | 0.00 | O |
| ATOM | 585 | C5'  | T A | 19 | 7.478  | -12.182 | 81.966 | 1.00 | 0.00 | C |
| ATOM | 586 | O5'  | T A | 19 | 6.475  | -11.678 | 82.884 | 1.00 | 0.00 | O |
| ATOM | 587 | O1P  | T A | 19 | 6.500  | -9.196  | 82.470 | 1.00 | 0.00 | O |
| ATOM | 588 | O2P  | T A | 19 | 5.804  | -10.089 | 84.710 | 1.00 | 0.00 | O |
| ATOM | 589 | P    | T A | 19 | 6.669  | -10.227 | 83.514 | 1.00 | 0.00 | P |
| ATOM | 590 | H3   | T A | 19 | 4.715  | -17.726 | 84.898 | 1.00 | 0.00 | H |

|      |     |      |       |    |        |         |        |      |      |   |
|------|-----|------|-------|----|--------|---------|--------|------|------|---|
| ATOM | 591 | H6   | T A   | 19 | 5.232  | -13.025 | 83.956 | 1.00 | 0.00 | H |
| ATOM | 592 | H1'  | T A   | 19 | 4.845  | -15.348 | 81.097 | 1.00 | 0.00 | H |
| ATOM | 593 | H3'  | T A   | 19 | 5.358  | -11.505 | 80.435 | 1.00 | 0.00 | H |
| ATOM | 594 | H4'  | T A   | 19 | 7.471  | -13.050 | 80.036 | 1.00 | 0.00 | H |
| ATOM | 595 | H71  | T A   | 19 | 4.145  | -12.882 | 86.580 | 1.00 | 0.00 | H |
| ATOM | 596 | H72  | T A   | 19 | 5.009  | -14.092 | 87.557 | 1.00 | 0.00 | H |
| ATOM | 597 | H73  | T A   | 19 | 5.924  | -12.921 | 86.577 | 1.00 | 0.00 | H |
| ATOM | 598 | H2'1 | T A   | 19 | 4.397  | -12.616 | 82.334 | 1.00 | 0.00 | H |
| ATOM | 599 | H2'2 | T A   | 19 | 3.511  | -13.387 | 81.026 | 1.00 | 0.00 | H |
| ATOM | 600 | H5'1 | T A   | 19 | 8.209  | -12.779 | 82.510 | 1.00 | 0.00 | H |
| ATOM | 601 | H5'2 | T A   | 19 | 7.985  | -11.348 | 81.482 | 1.00 | 0.00 | H |
| ATOM | 602 | C01  | LNK A | 20 | 2.515  | -12.057 | 76.696 | 0.00 | 0.00 | C |
| ATOM | 603 | O1   | LNK A | 20 | 3.155  | -11.958 | 77.970 | 1.00 | 0.00 | O |
| ATOM | 604 | S    | LNK A | 20 | -0.631 | -10.538 | 74.789 | 0.00 | 0.00 | S |
| ATOM | 605 | C02  | LNK A | 20 | 1.291  | -11.122 | 76.664 | 0.00 | 0.00 | C |
| ATOM | 606 | C03  | LNK A | 20 | 0.159  | -11.784 | 75.854 | 0.00 | 0.00 | C |
| ATOM | 607 | O1P  | LNK A | 20 | 2.689  | -13.202 | 80.109 | 1.00 | 0.00 | O |
| ATOM | 608 | O2P  | LNK A | 20 | 3.070  | -14.470 | 77.976 | 1.00 | 0.00 | O |
| ATOM | 609 | P    | LNK A | 20 | 3.395  | -13.290 | 78.815 | 1.00 | 0.00 | P |
| ATOM | 610 | H01  | LNK A | 20 | 2.191  | -13.085 | 76.529 | 0.00 | 0.00 | H |
| ATOM | 611 | H02  | LNK A | 20 | 3.215  | -11.766 | 75.913 | 0.00 | 0.00 | H |
| ATOM | 612 | H03  | LNK A | 20 | -0.581 | -12.199 | 76.538 | 0.00 | 0.00 | H |
| ATOM | 613 | H04  | LNK A | 20 | 1.569  | -10.177 | 76.197 | 0.00 | 0.00 | H |
| ATOM | 614 | H05  | LNK A | 20 | 0.949  | -10.937 | 77.682 | 0.00 | 0.00 | H |
| ATOM | 615 | H06  | LNK A | 20 | 0.573  | -12.581 | 75.237 | 0.00 | 0.00 | H |
| ATOM | 616 | AU   | LNK A | 20 | -1.196 | -10.804 | 74.505 |      |      |   |
| TER  |     |      |       |    |        |         |        |      |      |   |
| ATOM | 618 | C1'  | A B   | 2  | 3.996  | -24.697 | 85.545 | 1.00 | 0.00 | C |
| ATOM | 619 | N1   | A B   | 2  | 4.507  | -19.597 | 85.278 | 1.00 | 0.00 | N |
| ATOM | 620 | C2   | A B   | 2  | 4.477  | -20.546 | 84.348 | 1.00 | 0.00 | C |
| ATOM | 621 | N3   | A B   | 2  | 4.338  | -21.848 | 84.485 | 1.00 | 0.00 | N |
| ATOM | 622 | C4   | A B   | 2  | 4.224  | -22.169 | 85.788 | 1.00 | 0.00 | C |
| ATOM | 623 | C5   | A B   | 2  | 4.237  | -21.319 | 86.857 | 1.00 | 0.00 | C |
| ATOM | 624 | C6   | A B   | 2  | 4.390  | -19.947 | 86.568 | 1.00 | 0.00 | C |
| ATOM | 625 | N6   | A B   | 2  | 4.420  | -18.995 | 87.516 | 1.00 | 0.00 | N |
| ATOM | 626 | N7   | A B   | 2  | 4.091  | -22.011 | 88.047 | 1.00 | 0.00 | N |
| ATOM | 627 | C8   | A B   | 2  | 4.000  | -23.253 | 87.675 | 1.00 | 0.00 | C |
| ATOM | 628 | N9   | A B   | 2  | 4.069  | -23.426 | 86.318 | 1.00 | 0.00 | N |
| ATOM | 629 | C2'  | A B   | 2  | 4.693  | -25.868 | 86.224 | 1.00 | 0.00 | C |
| ATOM | 630 | C3'  | A B   | 2  | 3.794  | -27.034 | 85.847 | 1.00 | 0.00 | C |
| ATOM | 631 | O3'  | A B   | 2  | 4.169  | -27.515 | 84.558 | 1.00 | 0.00 | O |
| ATOM | 632 | C4'  | A B   | 2  | 2.402  | -26.404 | 85.845 | 1.00 | 0.00 | C |
| ATOM | 633 | O4'  | A B   | 2  | 2.629  | -25.029 | 85.394 | 1.00 | 0.00 | O |
| ATOM | 634 | C5'  | A B   | 2  | 1.681  | -26.365 | 87.172 | 1.00 | 0.00 | C |
| ATOM | 635 | O5'  | A B   | 2  | 2.632  | -26.120 | 88.239 | 1.00 | 0.00 | O |
| ATOM | 636 | H2   | A B   | 2  | 4.582  | -20.197 | 83.322 | 1.00 | 0.00 | H |
| ATOM | 637 | H8   | A B   | 2  | 3.880  | -24.080 | 88.377 | 1.00 | 0.00 | H |
| ATOM | 638 | H1'  | A B   | 2  | 4.410  | -24.517 | 84.553 | 1.00 | 0.00 | H |
| ATOM | 639 | H3'  | A B   | 2  | 3.856  | -27.849 | 86.568 | 1.00 | 0.00 | H |
| ATOM | 640 | H4'  | A B   | 2  | 1.794  | -26.984 | 85.152 | 1.00 | 0.00 | H |
| ATOM | 641 | H61  | A B   | 2  | 4.531  | -18.007 | 87.250 | 1.00 | 0.00 | H |
| ATOM | 642 | H62  | A B   | 2  | 4.331  | -19.256 | 88.509 | 1.00 | 0.00 | H |
| ATOM | 643 | H2'1 | A B   | 2  | 4.750  | -25.746 | 87.305 | 1.00 | 0.00 | H |
| ATOM | 644 | H2'2 | A B   | 2  | 5.709  | -26.015 | 85.855 | 1.00 | 0.00 | H |



|      |     |      |     |   |        |         |        |      |      |   |
|------|-----|------|-----|---|--------|---------|--------|------|------|---|
| ATOM | 645 | H5'1 | A B | 2 | 0.938  | -25.569 | 87.151 | 1.00 | 0.00 | H |
| ATOM | 646 | H5'2 | A B | 2 | 1.182  | -27.319 | 87.335 | 1.00 | 0.00 | H |
| ATOM | 647 | C1'  | C B | 3 | 7.496  | -23.496 | 82.234 | 1.00 | 0.00 | C |
| ATOM | 648 | N1   | C B | 3 | 7.540  | -22.940 | 83.614 | 1.00 | 0.00 | N |
| ATOM | 649 | C2   | C B | 3 | 7.678  | -21.561 | 83.759 | 1.00 | 0.00 | C |
| ATOM | 650 | O2   | C B | 3 | 7.758  | -20.860 | 82.742 | 1.00 | 0.00 | O |
| ATOM | 651 | N3   | C B | 3 | 7.720  | -21.035 | 85.006 | 1.00 | 0.00 | N |
| ATOM | 652 | C4   | C B | 3 | 7.633  | -21.821 | 86.088 | 1.00 | 0.00 | C |
| ATOM | 653 | N4   | C B | 3 | 7.676  | -21.252 | 87.286 | 1.00 | 0.00 | N |
| ATOM | 654 | C5   | C B | 3 | 7.495  | -23.243 | 85.972 | 1.00 | 0.00 | C |
| ATOM | 655 | C6   | C B | 3 | 7.450  | -23.751 | 84.704 | 1.00 | 0.00 | C |
| ATOM | 656 | C2'  | C B | 3 | 8.220  | -24.828 | 82.085 | 1.00 | 0.00 | C |
| ATOM | 657 | C3'  | C B | 3 | 7.346  | -25.552 | 81.073 | 1.00 | 0.00 | C |
| ATOM | 658 | O3'  | C B | 3 | 7.732  | -25.160 | 79.757 | 1.00 | 0.00 | O |
| ATOM | 659 | C4'  | C B | 3 | 5.942  | -25.071 | 81.431 | 1.00 | 0.00 | C |
| ATOM | 660 | O4'  | C B | 3 | 6.137  | -23.697 | 81.895 | 1.00 | 0.00 | O |
| ATOM | 661 | C5'  | C B | 3 | 5.220  | -25.847 | 82.507 | 1.00 | 0.00 | C |
| ATOM | 662 | O5'  | C B | 3 | 6.166  | -26.273 | 83.521 | 1.00 | 0.00 | O |
| ATOM | 663 | O1P  | C B | 3 | 6.162  | -28.782 | 83.304 | 1.00 | 0.00 | O |
| ATOM | 664 | O2P  | C B | 3 | 6.722  | -27.713 | 85.504 | 1.00 | 0.00 | O |
| ATOM | 665 | P    | C B | 3 | 5.931  | -27.671 | 84.250 | 1.00 | 0.00 | P |
| ATOM | 666 | H5   | C B | 3 | 7.431  | -23.887 | 86.849 | 1.00 | 0.00 | H |
| ATOM | 667 | H6   | C B | 3 | 7.338  | -24.826 | 84.564 | 1.00 | 0.00 | H |
| ATOM | 668 | H1'  | C B | 3 | 7.906  | -22.750 | 81.553 | 1.00 | 0.00 | H |
| ATOM | 669 | H3'  | C B | 3 | 7.427  | -26.635 | 81.165 | 1.00 | 0.00 | H |
| ATOM | 670 | H4'  | C B | 3 | 5.344  | -25.133 | 80.521 | 1.00 | 0.00 | H |
| ATOM | 671 | H41  | C B | 3 | 7.608  | -21.833 | 88.134 | 1.00 | 0.00 | H |
| ATOM | 672 | H42  | C B | 3 | 7.778  | -20.230 | 87.368 | 1.00 | 0.00 | H |
| ATOM | 673 | H2'1 | C B | 3 | 8.276  | -25.376 | 83.025 | 1.00 | 0.00 | H |
| ATOM | 674 | H2'2 | C B | 3 | 9.239  | -24.705 | 81.716 | 1.00 | 0.00 | H |
| ATOM | 675 | H5'1 | C B | 3 | 4.459  | -25.211 | 82.959 | 1.00 | 0.00 | H |
| ATOM | 676 | H5'2 | C B | 3 | 4.742  | -26.718 | 82.062 | 1.00 | 0.00 | H |
| ATOM | 677 | C1'  | C B | 4 | 10.983 | -20.555 | 80.306 | 1.00 | 0.00 | C |
| ATOM | 678 | N1   | C B | 4 | 11.010 | -20.915 | 81.750 | 1.00 | 0.00 | N |
| ATOM | 679 | C2   | C B | 4 | 11.119 | -19.882 | 82.679 | 1.00 | 0.00 | C |
| ATOM | 680 | O2   | C B | 4 | 11.188 | -18.715 | 82.270 | 1.00 | 0.00 | O |
| ATOM | 681 | N3   | C B | 4 | 11.146 | -20.188 | 83.998 | 1.00 | 0.00 | N |
| ATOM | 682 | C4   | C B | 4 | 11.070 | -21.461 | 84.412 | 1.00 | 0.00 | C |
| ATOM | 683 | N4   | C B | 4 | 11.097 | -21.704 | 85.714 | 1.00 | 0.00 | N |
| ATOM | 684 | C5   | C B | 4 | 10.961 | -22.545 | 83.479 | 1.00 | 0.00 | C |
| ATOM | 685 | C6   | C B | 4 | 10.931 | -22.211 | 82.155 | 1.00 | 0.00 | C |
| ATOM | 686 | C2'  | C B | 4 | 11.734 | -21.534 | 79.415 | 1.00 | 0.00 | C |
| ATOM | 687 | C3'  | C B | 4 | 10.879 | -21.537 | 78.157 | 1.00 | 0.00 | C |
| ATOM | 688 | O3'  | C B | 4 | 11.262 | -20.442 | 77.329 | 1.00 | 0.00 | O |
| ATOM | 689 | C4'  | C B | 4 | 9.464  | -21.379 | 78.707 | 1.00 | 0.00 | C |
| ATOM | 690 | O4'  | C B | 4 | 9.629  | -20.536 | 79.893 | 1.00 | 0.00 | O |
| ATOM | 691 | C5'  | C B | 4 | 8.754  | -22.650 | 79.114 | 1.00 | 0.00 | C |
| ATOM | 692 | O5'  | C B | 4 | 9.704  | -23.577 | 79.697 | 1.00 | 0.00 | O |
| ATOM | 693 | O1P  | C B | 4 | 9.752  | -25.477 | 78.048 | 1.00 | 0.00 | O |
| ATOM | 694 | O2P  | C B | 4 | 10.281 | -25.898 | 80.465 | 1.00 | 0.00 | O |
| ATOM | 695 | P    | C B | 4 | 9.495  | -25.139 | 79.462 | 1.00 | 0.00 | P |
| ATOM | 696 | H5   | C B | 4 | 10.907 | -23.582 | 83.810 | 1.00 | 0.00 | H |
| ATOM | 697 | H6   | C B | 4 | 10.842 | -23.000 | 81.408 | 1.00 | 0.00 | H |
| ATOM | 698 | H1'  | C B | 4 | 11.380 | -19.545 | 80.199 | 1.00 | 0.00 | H |

|      |     |      |     |   |        |         |        |      |      |   |
|------|-----|------|-----|---|--------|---------|--------|------|------|---|
| ATOM | 699 | H3'  | C B | 4 | 10.982 | -22.467 | 77.597 | 1.00 | 0.00 | H |
| ATOM | 700 | H4'  | C B | 4 | 8.872  | -20.902 | 77.926 | 1.00 | 0.00 | H |
| ATOM | 701 | H41  | C B | 4 | 11.037 | -22.673 | 86.059 | 1.00 | 0.00 | H |
| ATOM | 702 | H42  | C B | 4 | 11.177 | -20.924 | 86.383 | 1.00 | 0.00 | H |
| ATOM | 703 | H2'1 | C B | 4 | 11.797 | -22.529 | 79.855 | 1.00 | 0.00 | H |
| ATOM | 704 | H2'2 | C B | 4 | 12.751 | -21.204 | 79.204 | 1.00 | 0.00 | H |
| ATOM | 705 | H5'1 | C B | 4 | 7.978  | -22.410 | 79.840 | 1.00 | 0.00 | H |
| ATOM | 706 | H5'2 | C B | 4 | 8.295  | -23.098 | 78.233 | 1.00 | 0.00 | H |
| ATOM | 707 | C1'  | G B | 5 | 14.416 | -16.993 | 80.528 | 1.00 | 0.00 | C |
| ATOM | 708 | N1   | G B | 5 | 14.668 | -18.328 | 85.446 | 1.00 | 0.00 | N |
| ATOM | 709 | C2   | G B | 5 | 14.667 | -17.071 | 84.866 | 1.00 | 0.00 | C |
| ATOM | 710 | N2   | G B | 5 | 14.746 | -16.033 | 85.706 | 1.00 | 0.00 | N |
| ATOM | 711 | N3   | G B | 5 | 14.593 | -16.869 | 83.551 | 1.00 | 0.00 | N |
| ATOM | 712 | C4   | G B | 5 | 14.526 | -18.031 | 82.852 | 1.00 | 0.00 | C |
| ATOM | 713 | C5   | G B | 5 | 14.526 | -19.326 | 83.344 | 1.00 | 0.00 | C |
| ATOM | 714 | C6   | G B | 5 | 14.601 | -19.543 | 84.739 | 1.00 | 0.00 | C |
| ATOM | 715 | O6   | G B | 5 | 14.613 | -20.606 | 85.359 | 1.00 | 0.00 | O |
| ATOM | 716 | N7   | G B | 5 | 14.447 | -20.242 | 82.292 | 1.00 | 0.00 | N |
| ATOM | 717 | C8   | G B | 5 | 14.400 | -19.492 | 81.221 | 1.00 | 0.00 | C |
| ATOM | 718 | N9   | G B | 5 | 14.446 | -18.137 | 81.480 | 1.00 | 0.00 | N |
| ATOM | 719 | C2'  | G B | 5 | 15.187 | -17.248 | 79.240 | 1.00 | 0.00 | C |
| ATOM | 720 | C3'  | G B | 5 | 14.338 | -16.518 | 78.212 | 1.00 | 0.00 | C |
| ATOM | 721 | O3'  | G B | 5 | 14.704 | -15.141 | 78.195 | 1.00 | 0.00 | O |
| ATOM | 722 | C4'  | G B | 5 | 12.917 | -16.732 | 78.731 | 1.00 | 0.00 | C |
| ATOM | 723 | O4'  | G B | 5 | 13.066 | -16.750 | 80.187 | 1.00 | 0.00 | O |
| ATOM | 724 | C5'  | G B | 5 | 12.229 | -18.004 | 78.299 | 1.00 | 0.00 | C |
| ATOM | 725 | O5'  | G B | 5 | 13.192 | -19.086 | 78.235 | 1.00 | 0.00 | O |
| ATOM | 726 | O1P  | G B | 5 | 13.277 | -19.647 | 75.783 | 1.00 | 0.00 | O |
| ATOM | 727 | O2P  | G B | 5 | 13.806 | -21.406 | 77.492 | 1.00 | 0.00 | O |
| ATOM | 728 | P    | G B | 5 | 13.010 | -20.212 | 77.120 | 1.00 | 0.00 | P |
| ATOM | 729 | H1   | G B | 5 | 14.722 | -18.376 | 86.475 | 1.00 | 0.00 | H |
| ATOM | 730 | H8   | G B | 5 | 14.333 | -19.899 | 80.213 | 1.00 | 0.00 | H |
| ATOM | 731 | H1'  | G B | 5 | 14.796 | -16.111 | 81.042 | 1.00 | 0.00 | H |
| ATOM | 732 | H21  | G B | 5 | 14.799 | -16.197 | 86.722 | 1.00 | 0.00 | H |
| ATOM | 733 | H3'  | G B | 5 | 14.457 | -16.936 | 77.212 | 1.00 | 0.00 | H |
| ATOM | 734 | H22  | G B | 5 | 14.753 | -15.071 | 85.338 | 1.00 | 0.00 | H |
| ATOM | 735 | H4'  | G B | 5 | 12.320 | -15.893 | 78.376 | 1.00 | 0.00 | H |
| ATOM | 736 | H2'1 | G B | 5 | 15.266 | -18.311 | 79.008 | 1.00 | 0.00 | H |
| ATOM | 737 | H2'2 | G B | 5 | 16.199 | -16.845 | 79.277 | 1.00 | 0.00 | H |
| ATOM | 738 | H5'1 | G B | 5 | 11.446 | -18.249 | 79.017 | 1.00 | 0.00 | H |
| ATOM | 739 | H5'2 | G B | 5 | 11.780 | -17.853 | 77.318 | 1.00 | 0.00 | H |
| ATOM | 740 | C1'  | T B | 6 | 17.775 | -14.179 | 82.831 | 1.00 | 0.00 | C |
| ATOM | 741 | N1   | T B | 6 | 17.825 | -15.660 | 82.959 | 1.00 | 0.00 | N |
| ATOM | 742 | C2   | T B | 6 | 17.898 | -16.180 | 84.236 | 1.00 | 0.00 | C |
| ATOM | 743 | O2   | T B | 6 | 17.923 | -15.480 | 85.233 | 1.00 | 0.00 | O |
| ATOM | 744 | N3   | T B | 6 | 17.941 | -17.561 | 84.308 | 1.00 | 0.00 | N |
| ATOM | 745 | C4   | T B | 6 | 17.922 | -18.441 | 83.247 | 1.00 | 0.00 | C |
| ATOM | 746 | O4   | T B | 6 | 17.970 | -19.661 | 83.436 | 1.00 | 0.00 | O |
| ATOM | 747 | C5   | T B | 6 | 17.843 | -17.804 | 81.954 | 1.00 | 0.00 | C |
| ATOM | 748 | C6   | T B | 6 | 17.798 | -16.461 | 81.844 | 1.00 | 0.00 | C |
| ATOM | 749 | C7   | T B | 6 | 17.817 | -18.724 | 80.770 | 1.00 | 0.00 | C |
| ATOM | 750 | C2'  | T B | 6 | 18.558 | -13.640 | 81.640 | 1.00 | 0.00 | C |
| ATOM | 751 | C3'  | T B | 6 | 17.697 | -12.465 | 81.201 | 1.00 | 0.00 | C |
| ATOM | 752 | O3'  | T B | 6 | 18.034 | -11.320 | 81.980 | 1.00 | 0.00 | O |

|      |     |      |     |   |        |         |        |      |      |   |
|------|-----|------|-----|---|--------|---------|--------|------|------|---|
| ATOM | 753 | C4'  | T B | 6 | 16.280 | -12.959 | 81.481 | 1.00 | 0.00 | C |
| ATOM | 754 | O4'  | T B | 6 | 16.421 | -13.805 | 82.667 | 1.00 | 0.00 | O |
| ATOM | 755 | C5'  | T B | 6 | 15.620 | -13.767 | 80.388 | 1.00 | 0.00 | C |
| ATOM | 756 | O5'  | T B | 6 | 16.608 | -14.603 | 79.733 | 1.00 | 0.00 | O |
| ATOM | 757 | O1P  | T B | 6 | 16.718 | -13.658 | 77.403 | 1.00 | 0.00 | O |
| ATOM | 758 | O2P  | T B | 6 | 17.277 | -16.071 | 77.807 | 1.00 | 0.00 | O |
| ATOM | 759 | P    | T B | 6 | 16.456 | -14.891 | 78.172 | 1.00 | 0.00 | P |
| ATOM | 760 | H3   | T B | 6 | 17.993 | -17.973 | 85.251 | 1.00 | 0.00 | H |
| ATOM | 761 | H6   | T B | 6 | 17.740 | -16.005 | 80.857 | 1.00 | 0.00 | H |
| ATOM | 762 | H1'  | T B | 6 | 18.133 | -13.743 | 83.763 | 1.00 | 0.00 | H |
| ATOM | 763 | H3'  | T B | 6 | 17.831 | -12.235 | 80.144 | 1.00 | 0.00 | H |
| ATOM | 764 | H4'  | T B | 6 | 15.666 | -12.076 | 81.658 | 1.00 | 0.00 | H |
| ATOM | 765 | H71  | T B | 6 | 18.723 | -18.585 | 80.180 | 1.00 | 0.00 | H |
| ATOM | 766 | H72  | T B | 6 | 17.762 | -19.758 | 81.113 | 1.00 | 0.00 | H |
| ATOM | 767 | H73  | T B | 6 | 16.945 | -18.500 | 80.153 | 1.00 | 0.00 | H |
| ATOM | 768 | H2'1 | T B | 6 | 18.660 | -14.376 | 80.846 | 1.00 | 0.00 | H |
| ATOM | 769 | H2'2 | T B | 6 | 19.561 | -13.314 | 81.918 | 1.00 | 0.00 | H |
| ATOM | 770 | H5'1 | T B | 6 | 14.840 | -14.391 | 80.823 | 1.00 | 0.00 | H |
| ATOM | 771 | H5'2 | T B | 6 | 15.174 | -13.088 | 79.662 | 1.00 | 0.00 | H |
| ATOM | 772 | C1'  | C B | 7 | 21.069 | -13.243 | 86.427 | 1.00 | 0.00 | C |
| ATOM | 773 | N1   | C B | 7 | 21.146 | -14.507 | 85.641 | 1.00 | 0.00 | N |
| ATOM | 774 | C2   | C B | 7 | 21.226 | -15.707 | 86.342 | 1.00 | 0.00 | C |
| ATOM | 775 | O2   | C B | 7 | 21.228 | -15.677 | 87.581 | 1.00 | 0.00 | O |
| ATOM | 776 | N3   | C B | 7 | 21.298 | -16.868 | 85.646 | 1.00 | 0.00 | N |
| ATOM | 777 | C4   | C B | 7 | 21.294 | -16.868 | 84.307 | 1.00 | 0.00 | C |
| ATOM | 778 | N4   | C B | 7 | 21.362 | -18.031 | 83.677 | 1.00 | 0.00 | N |
| ATOM | 779 | C5   | C B | 7 | 21.218 | -15.647 | 83.558 | 1.00 | 0.00 | C |
| ATOM | 780 | C6   | C B | 7 | 21.141 | -14.491 | 84.282 | 1.00 | 0.00 | C |
| ATOM | 781 | C2'  | C B | 7 | 21.847 | -12.089 | 85.812 | 1.00 | 0.00 | C |
| ATOM | 782 | C3'  | C B | 7 | 20.965 | -10.897 | 86.151 | 1.00 | 0.00 | C |
| ATOM | 783 | O3'  | C B | 7 | 21.274 | -10.445 | 87.466 | 1.00 | 0.00 | O |
| ATOM | 784 | C4'  | C B | 7 | 19.557 | -11.479 | 86.056 | 1.00 | 0.00 | C |
| ATOM | 785 | O4'  | C B | 7 | 19.707 | -12.864 | 86.499 | 1.00 | 0.00 | O |
| ATOM | 786 | C5'  | C B | 7 | 18.920 | -11.476 | 84.684 | 1.00 | 0.00 | C |
| ATOM | 787 | O5'  | C B | 7 | 19.927 | -11.739 | 83.677 | 1.00 | 0.00 | O |
| ATOM | 788 | O1P  | C B | 7 | 20.031 | -9.584  | 82.380 | 1.00 | 0.00 | O |
| ATOM | 789 | O2P  | C B | 7 | 20.635 | -11.749 | 81.266 | 1.00 | 0.00 | O |
| ATOM | 790 | P    | C B | 7 | 19.789 | -11.035 | 82.252 | 1.00 | 0.00 | P |
| ATOM | 791 | H5   | C B | 7 | 21.222 | -15.643 | 82.468 | 1.00 | 0.00 | H |
| ATOM | 792 | H6   | C B | 7 | 21.074 | -13.538 | 83.757 | 1.00 | 0.00 | H |
| ATOM | 793 | H1'  | C B | 7 | 21.413 | -13.451 | 87.440 | 1.00 | 0.00 | H |
| ATOM | 794 | H3'  | C B | 7 | 21.100 | -10.076 | 85.445 | 1.00 | 0.00 | H |
| ATOM | 795 | H4'  | C B | 7 | 18.924 | -10.886 | 86.716 | 1.00 | 0.00 | H |
| ATOM | 796 | H41  | C B | 7 | 21.358 | -18.060 | 82.647 | 1.00 | 0.00 | H |
| ATOM | 797 | H42  | C B | 7 | 21.419 | -18.908 | 84.217 | 1.00 | 0.00 | H |
| ATOM | 798 | H2'1 | C B | 7 | 21.969 | -12.200 | 84.735 | 1.00 | 0.00 | H |
| ATOM | 799 | H2'2 | C B | 7 | 22.842 | -11.984 | 86.245 | 1.00 | 0.00 | H |
| ATOM | 800 | H5'1 | C B | 7 | 18.150 | -12.247 | 84.647 | 1.00 | 0.00 | H |
| ATOM | 801 | H5'2 | C B | 7 | 18.463 | -10.504 | 84.505 | 1.00 | 0.00 | H |
| ATOM | 802 | C1'  | C B | 8 | 24.327 | -14.532 | 89.928 | 1.00 | 0.00 | C |
| ATOM | 803 | N1   | C B | 8 | 24.433 | -15.090 | 88.552 | 1.00 | 0.00 | N |
| ATOM | 804 | C2   | C B | 8 | 24.535 | -16.473 | 88.415 | 1.00 | 0.00 | C |
| ATOM | 805 | O2   | C B | 8 | 24.531 | -17.176 | 89.434 | 1.00 | 0.00 | O |
| ATOM | 806 | N3   | C B | 8 | 24.633 | -17.001 | 87.171 | 1.00 | 0.00 | N |

|      |     |      |     |   |        |         |        |      |      |   |
|------|-----|------|-----|---|--------|---------|--------|------|------|---|
| ATOM | 807 | C4   | C B | 8 | 24.634 | -16.215 | 86.087 | 1.00 | 0.00 | C |
| ATOM | 808 | N4   | C B | 8 | 24.729 | -16.786 | 84.895 | 1.00 | 0.00 | N |
| ATOM | 809 | C5   | C B | 8 | 24.536 | -14.788 | 86.196 | 1.00 | 0.00 | C |
| ATOM | 810 | C6   | C B | 8 | 24.434 | -14.278 | 87.460 | 1.00 | 0.00 | C |
| ATOM | 811 | C2'  | C B | 8 | 25.084 | -13.225 | 90.120 | 1.00 | 0.00 | C |
| ATOM | 812 | C3'  | C B | 8 | 24.177 | -12.471 | 91.081 | 1.00 | 0.00 | C |
| ATOM | 813 | O3'  | C B | 8 | 24.472 | -12.875 | 92.416 | 1.00 | 0.00 | O |
| ATOM | 814 | C4'  | C B | 8 | 22.781 | -12.906 | 90.641 | 1.00 | 0.00 | C |
| ATOM | 815 | O4'  | C B | 8 | 22.958 | -14.286 | 90.187 | 1.00 | 0.00 | O |
| ATOM | 816 | C5'  | C B | 8 | 22.149 | -12.108 | 89.524 | 1.00 | 0.00 | C |
| ATOM | 817 | O5'  | C B | 8 | 23.166 | -11.714 | 88.567 | 1.00 | 0.00 | O |
| ATOM | 818 | O1P  | C B | 8 | 23.231 | -9.207  | 88.787 | 1.00 | 0.00 | O |
| ATOM | 819 | O2P  | C B | 8 | 23.884 | -10.295 | 86.622 | 1.00 | 0.00 | O |
| ATOM | 820 | P    | C B | 8 | 23.020 | -10.310 | 87.828 | 1.00 | 0.00 | P |
| ATOM | 821 | H5   | C B | 8 | 24.545 | -14.143 | 85.318 | 1.00 | 0.00 | H |
| ATOM | 822 | H6   | C B | 8 | 24.349 | -13.200 | 87.594 | 1.00 | 0.00 | H |
| ATOM | 823 | H1'  | C B | 8 | 24.671 | -15.290 | 90.631 | 1.00 | 0.00 | H |
| ATOM | 824 | H3'  | C B | 8 | 24.298 | -11.392 | 90.994 | 1.00 | 0.00 | H |
| ATOM | 825 | H4'  | C B | 8 | 22.133 | -12.823 | 91.514 | 1.00 | 0.00 | H |
| ATOM | 826 | H41  | C B | 8 | 24.729 | -16.204 | 84.044 | 1.00 | 0.00 | H |
| ATOM | 827 | H42  | C B | 8 | 24.801 | -17.811 | 84.818 | 1.00 | 0.00 | H |
| ATOM | 828 | H2'1 | C B | 8 | 25.213 | -12.680 | 89.186 | 1.00 | 0.00 | H |
| ATOM | 829 | H2'2 | C B | 8 | 26.075 | -13.380 | 90.548 | 1.00 | 0.00 | H |
| ATOM | 830 | H5'1 | C B | 8 | 21.396 | -12.719 | 89.028 | 1.00 | 0.00 | H |
| ATOM | 831 | H5'2 | C B | 8 | 21.674 | -11.222 | 89.942 | 1.00 | 0.00 | H |
| ATOM | 832 | C1'  | T B | 9 | 27.595 | -17.569 | 92.071 | 1.00 | 0.00 | C |
| ATOM | 833 | N1   | T B | 9 | 27.720 | -17.234 | 90.627 | 1.00 | 0.00 | N |
| ATOM | 834 | C2   | T B | 9 | 27.848 | -18.286 | 89.744 | 1.00 | 0.00 | C |
| ATOM | 835 | O2   | T B | 9 | 27.861 | -19.450 | 90.105 | 1.00 | 0.00 | O |
| ATOM | 836 | N3   | T B | 9 | 27.961 | -17.930 | 88.414 | 1.00 | 0.00 | N |
| ATOM | 837 | C4   | T B | 9 | 27.961 | -16.649 | 87.904 | 1.00 | 0.00 | C |
| ATOM | 838 | O4   | T B | 9 | 28.073 | -16.452 | 86.688 | 1.00 | 0.00 | O |
| ATOM | 839 | C5   | T B | 9 | 27.821 | -15.615 | 88.903 | 1.00 | 0.00 | C |
| ATOM | 840 | C6   | T B | 9 | 27.708 | -15.926 | 90.208 | 1.00 | 0.00 | C |
| ATOM | 841 | C7   | T B | 9 | 27.813 | -14.206 | 88.391 | 1.00 | 0.00 | C |
| ATOM | 842 | C2'  | T B | 9 | 28.323 | -16.598 | 92.993 | 1.00 | 0.00 | C |
| ATOM | 843 | C3'  | T B | 9 | 27.395 | -16.548 | 94.197 | 1.00 | 0.00 | C |
| ATOM | 844 | O3'  | T B | 9 | 27.693 | -17.640 | 95.064 | 1.00 | 0.00 | O |
| ATOM | 845 | C4'  | T B | 9 | 26.011 | -16.671 | 93.565 | 1.00 | 0.00 | C |
| ATOM | 846 | O4'  | T B | 9 | 26.221 | -17.538 | 92.405 | 1.00 | 0.00 | O |
| ATOM | 847 | C5'  | T B | 9 | 25.367 | -15.386 | 93.099 | 1.00 | 0.00 | C |
| ATOM | 848 | O5'  | T B | 9 | 26.380 | -14.499 | 92.561 | 1.00 | 0.00 | O |
| ATOM | 849 | O1P  | T B | 9 | 26.390 | -12.574 | 94.181 | 1.00 | 0.00 | O |
| ATOM | 850 | O2P  | T B | 9 | 27.076 | -12.210 | 91.795 | 1.00 | 0.00 | O |
| ATOM | 851 | P    | T B | 9 | 26.207 | -12.926 | 92.758 | 1.00 | 0.00 | P |
| ATOM | 852 | H3   | T B | 9 | 28.054 | -18.698 | 87.734 | 1.00 | 0.00 | H |
| ATOM | 853 | H6   | T B | 9 | 27.605 | -15.128 | 90.944 | 1.00 | 0.00 | H |
| ATOM | 854 | H1'  | T B | 9 | 27.952 | -18.589 | 92.218 | 1.00 | 0.00 | H |
| ATOM | 855 | H3'  | T B | 9 | 27.494 | -15.613 | 94.748 | 1.00 | 0.00 | H |
| ATOM | 856 | H4'  | T B | 9 | 25.358 | -17.117 | 94.317 | 1.00 | 0.00 | H |
| ATOM | 857 | H71  | T B | 9 | 28.698 | -13.682 | 88.754 | 1.00 | 0.00 | H |
| ATOM | 858 | H72  | T B | 9 | 27.817 | -14.213 | 87.300 | 1.00 | 0.00 | H |
| ATOM | 859 | H73  | T B | 9 | 26.918 | -13.695 | 88.747 | 1.00 | 0.00 | H |
| ATOM | 860 | H2'1 | T B | 9 | 28.443 | -15.613 | 92.544 | 1.00 | 0.00 | H |

|      |     |      |     |    |        |         |        |      |      |   |
|------|-----|------|-----|----|--------|---------|--------|------|------|---|
| ATOM | 861 | H2'2 | T B | 9  | 29.314 | -16.956 | 93.270 | 1.00 | 0.00 | H |
| ATOM | 862 | H5'1 | T B | 9  | 24.628 | -15.613 | 92.331 | 1.00 | 0.00 | H |
| ATOM | 863 | H5'2 | T B | 9  | 24.872 | -14.909 | 93.943 | 1.00 | 0.00 | H |
| ATOM | 864 | C1'  | A B | 10 | 30.917 | -21.256 | 92.054 | 1.00 | 0.00 | C |
| ATOM | 865 | N1   | A B | 10 | 31.503 | -19.954 | 87.125 | 1.00 | 0.00 | N |
| ATOM | 866 | C2   | A B | 10 | 31.423 | -21.130 | 87.741 | 1.00 | 0.00 | C |
| ATOM | 867 | N3   | A B | 10 | 31.268 | -21.395 | 89.020 | 1.00 | 0.00 | N |
| ATOM | 868 | C4   | A B | 10 | 31.195 | -20.254 | 89.727 | 1.00 | 0.00 | C |
| ATOM | 869 | C5   | A B | 10 | 31.260 | -18.974 | 89.250 | 1.00 | 0.00 | C |
| ATOM | 870 | C6   | A B | 10 | 31.425 | -18.832 | 87.857 | 1.00 | 0.00 | C |
| ATOM | 871 | N6   | A B | 10 | 31.505 | -17.636 | 87.246 | 1.00 | 0.00 | N |
| ATOM | 872 | N7   | A B | 10 | 31.146 | -18.052 | 90.276 | 1.00 | 0.00 | N |
| ATOM | 873 | C8   | A B | 10 | 31.021 | -18.786 | 91.341 | 1.00 | 0.00 | C |
| ATOM | 874 | N9   | A B | 10 | 31.038 | -20.133 | 91.086 | 1.00 | 0.00 | N |
| ATOM | 875 | C2'  | A B | 10 | 31.618 | -21.000 | 93.381 | 1.00 | 0.00 | C |
| ATOM | 876 | C3'  | A B | 10 | 30.688 | -21.685 | 94.370 | 1.00 | 0.00 | C |
| ATOM | 877 | O3'  | A B | 10 | 31.007 | -23.072 | 94.430 | 1.00 | 0.00 | O |
| ATOM | 878 | C4'  | A B | 10 | 29.307 | -21.437 | 93.763 | 1.00 | 0.00 | C |
| ATOM | 879 | O4'  | A B | 10 | 29.540 | -21.450 | 92.318 | 1.00 | 0.00 | O |
| ATOM | 880 | C5'  | A B | 10 | 28.635 | -20.137 | 94.133 | 1.00 | 0.00 | C |
| ATOM | 881 | O5'  | A B | 10 | 29.627 | -19.083 | 94.235 | 1.00 | 0.00 | O |
| ATOM | 882 | O1P  | A B | 10 | 29.587 | -18.481 | 96.679 | 1.00 | 0.00 | O |
| ATOM | 883 | O2P  | A B | 10 | 30.271 | -16.770 | 94.976 | 1.00 | 0.00 | O |
| ATOM | 884 | P    | A B | 10 | 29.417 | -17.932 | 95.320 | 1.00 | 0.00 | P |
| ATOM | 885 | H2   | A B | 10 | 31.497 | -22.001 | 87.090 | 1.00 | 0.00 | H |
| ATOM | 886 | H8   | A B | 10 | 30.912 | -18.370 | 92.343 | 1.00 | 0.00 | H |
| ATOM | 887 | H1'  | A B | 10 | 31.298 | -22.159 | 91.578 | 1.00 | 0.00 | H |
| ATOM | 888 | H3'  | A B | 10 | 30.762 | -21.252 | 95.367 | 1.00 | 0.00 | H |
| ATOM | 889 | H4'  | A B | 10 | 28.664 | -22.251 | 94.097 | 1.00 | 0.00 | H |
| ATOM | 890 | H61  | A B | 10 | 31.623 | -17.589 | 86.225 | 1.00 | 0.00 | H |
| ATOM | 891 | H62  | A B | 10 | 31.448 | -16.771 | 87.801 | 1.00 | 0.00 | H |
| ATOM | 892 | H2'1 | A B | 10 | 31.716 | -19.938 | 93.600 | 1.00 | 0.00 | H |
| ATOM | 893 | H2'2 | A B | 10 | 32.618 | -21.436 | 93.412 | 1.00 | 0.00 | H |
| ATOM | 894 | H5'1 | A B | 10 | 27.904 | -19.880 | 93.366 | 1.00 | 0.00 | H |
| ATOM | 895 | H5'2 | A B | 10 | 28.126 | -20.255 | 95.088 | 1.00 | 0.00 | H |
| ATOM | 896 | C1'  | G B | 11 | 34.316 | -24.167 | 89.905 | 1.00 | 0.00 | C |
| ATOM | 897 | N1   | G B | 11 | 34.891 | -20.216 | 86.730 | 1.00 | 0.00 | N |
| ATOM | 898 | C2   | G B | 11 | 34.838 | -21.572 | 86.460 | 1.00 | 0.00 | C |
| ATOM | 899 | N2   | G B | 11 | 34.956 | -21.921 | 85.173 | 1.00 | 0.00 | N |
| ATOM | 900 | N3   | G B | 11 | 34.680 | -22.504 | 87.398 | 1.00 | 0.00 | N |
| ATOM | 901 | C4   | G B | 11 | 34.584 | -21.970 | 88.644 | 1.00 | 0.00 | C |
| ATOM | 902 | C5   | G B | 11 | 34.630 | -20.636 | 89.009 | 1.00 | 0.00 | C |
| ATOM | 903 | C6   | G B | 11 | 34.794 | -19.645 | 88.013 | 1.00 | 0.00 | C |
| ATOM | 904 | O6   | G B | 11 | 34.859 | -18.421 | 88.138 | 1.00 | 0.00 | O |
| ATOM | 905 | N7   | G B | 11 | 34.496 | -20.508 | 90.393 | 1.00 | 0.00 | N |
| ATOM | 906 | C8   | G B | 11 | 34.374 | -21.740 | 90.814 | 1.00 | 0.00 | C |
| ATOM | 907 | N9   | G B | 11 | 34.419 | -22.686 | 89.810 | 1.00 | 0.00 | N |
| ATOM | 908 | C2'  | G B | 11 | 35.008 | -24.753 | 91.128 | 1.00 | 0.00 | C |
| ATOM | 909 | C3'  | G B | 11 | 34.087 | -25.906 | 91.493 | 1.00 | 0.00 | C |
| ATOM | 910 | O3'  | G B | 11 | 34.434 | -27.047 | 90.712 | 1.00 | 0.00 | O |
| ATOM | 911 | C4'  | G B | 11 | 32.704 | -25.362 | 91.137 | 1.00 | 0.00 | C |
| ATOM | 912 | O4'  | G B | 11 | 32.943 | -24.500 | 89.979 | 1.00 | 0.00 | O |
| ATOM | 913 | C5'  | G B | 11 | 32.006 | -24.554 | 92.205 | 1.00 | 0.00 | C |
| ATOM | 914 | O5'  | G B | 11 | 32.976 | -23.763 | 92.934 | 1.00 | 0.00 | O |

|      |     |      |     |    |        |         |        |      |      |   |
|------|-----|------|-----|----|--------|---------|--------|------|------|---|
| ATOM | 915 | O1P  | G B | 11 | 32.915 | -24.751 | 95.248 | 1.00 | 0.00 | O |
| ATOM | 916 | O2P  | G B | 11 | 33.571 | -22.352 | 94.926 | 1.00 | 0.00 | O |
| ATOM | 917 | P    | G B | 11 | 32.739 | -23.499 | 94.490 | 1.00 | 0.00 | P |
| ATOM | 918 | H1   | G B | 11 | 35.010 | -19.576 | 85.930 | 1.00 | 0.00 | H |
| ATOM | 919 | H8   | G B | 11 | 34.249 | -21.998 | 91.865 | 1.00 | 0.00 | H |
| ATOM | 920 | H1'  | G B | 11 | 34.716 | -24.597 | 88.986 | 1.00 | 0.00 | H |
| ATOM | 921 | H21  | G B | 11 | 35.075 | -21.195 | 84.452 | 1.00 | 0.00 | H |
| ATOM | 922 | H3'  | G B | 11 | 34.149 | -26.160 | 92.551 | 1.00 | 0.00 | H |
| ATOM | 923 | H22  | G B | 11 | 34.929 | -22.915 | 84.905 | 1.00 | 0.00 | H |
| ATOM | 924 | H4'  | G B | 11 | 32.076 | -26.222 | 90.905 | 1.00 | 0.00 | H |
| ATOM | 925 | H2'1 | G B | 11 | 35.085 | -24.033 | 91.944 | 1.00 | 0.00 | H |
| ATOM | 926 | H2'2 | G B | 11 | 36.015 | -25.104 | 90.905 | 1.00 | 0.00 | H |
| ATOM | 927 | H5'1 | G B | 11 | 31.273 | -23.898 | 91.735 | 1.00 | 0.00 | H |
| ATOM | 928 | H5'2 | G B | 11 | 31.494 | -25.232 | 92.888 | 1.00 | 0.00 | H |
| ATOM | 929 | C1'  | G B | 12 | 37.779 | -25.226 | 86.527 | 1.00 | 0.00 | C |
| ATOM | 930 | N1   | G B | 12 | 38.287 | -20.155 | 86.288 | 1.00 | 0.00 | N |
| ATOM | 931 | C2   | G B | 12 | 38.263 | -21.095 | 85.272 | 1.00 | 0.00 | C |
| ATOM | 932 | N2   | G B | 12 | 38.393 | -20.620 | 84.026 | 1.00 | 0.00 | N |
| ATOM | 933 | N3   | G B | 12 | 38.119 | -22.402 | 85.482 | 1.00 | 0.00 | N |
| ATOM | 934 | C4   | G B | 12 | 38.009 | -22.704 | 86.802 | 1.00 | 0.00 | C |
| ATOM | 935 | C5   | G B | 12 | 38.025 | -21.838 | 87.881 | 1.00 | 0.00 | C |
| ATOM | 936 | C6   | G B | 12 | 38.173 | -20.450 | 87.660 | 1.00 | 0.00 | C |
| ATOM | 937 | O6   | G B | 12 | 38.213 | -19.532 | 88.480 | 1.00 | 0.00 | O |
| ATOM | 938 | N7   | G B | 12 | 37.884 | -22.550 | 89.074 | 1.00 | 0.00 | N |
| ATOM | 939 | C8   | G B | 12 | 37.784 | -23.795 | 88.689 | 1.00 | 0.00 | C |
| ATOM | 940 | N9   | G B | 12 | 37.853 | -23.970 | 87.322 | 1.00 | 0.00 | N |
| ATOM | 941 | C2'  | G B | 12 | 38.478 | -26.409 | 87.184 | 1.00 | 0.00 | C |
| ATOM | 942 | C3'  | G B | 12 | 37.579 | -27.570 | 86.787 | 1.00 | 0.00 | C |
| ATOM | 943 | O3'  | G B | 12 | 37.953 | -28.029 | 85.490 | 1.00 | 0.00 | O |
| ATOM | 944 | C4'  | G B | 12 | 36.187 | -26.940 | 86.798 | 1.00 | 0.00 | C |
| ATOM | 945 | O4'  | G B | 12 | 36.414 | -25.559 | 86.371 | 1.00 | 0.00 | O |
| ATOM | 946 | C5'  | G B | 12 | 35.468 | -26.923 | 88.126 | 1.00 | 0.00 | C |
| ATOM | 947 | O5'  | G B | 12 | 36.419 | -26.697 | 89.196 | 1.00 | 0.00 | O |
| ATOM | 948 | O1P  | G B | 12 | 36.369 | -28.858 | 90.486 | 1.00 | 0.00 | O |
| ATOM | 949 | O2P  | G B | 12 | 36.978 | -26.718 | 91.646 | 1.00 | 0.00 | O |
| ATOM | 950 | P    | G B | 12 | 36.170 | -27.401 | 90.606 | 1.00 | 0.00 | P |
| ATOM | 951 | H1   | G B | 12 | 38.396 | -19.165 | 86.018 | 1.00 | 0.00 | H |
| ATOM | 952 | H8   | G B | 12 | 37.659 | -24.625 | 89.386 | 1.00 | 0.00 | H |
| ATOM | 953 | H1'  | G B | 12 | 38.192 | -25.028 | 85.538 | 1.00 | 0.00 | H |
| ATOM | 954 | H21  | G B | 12 | 38.500 | -19.607 | 83.872 | 1.00 | 0.00 | H |
| ATOM | 955 | H3'  | G B | 12 | 37.642 | -28.396 | 87.495 | 1.00 | 0.00 | H |
| ATOM | 956 | H22  | G B | 12 | 38.387 | -21.268 | 83.227 | 1.00 | 0.00 | H |
| ATOM | 957 | H4'  | G B | 12 | 35.577 | -27.507 | 86.096 | 1.00 | 0.00 | H |
| ATOM | 958 | H2'1 | G B | 12 | 38.537 | -26.305 | 88.267 | 1.00 | 0.00 | H |
| ATOM | 959 | H2'2 | G B | 12 | 39.493 | -26.548 | 86.813 | 1.00 | 0.00 | H |
| ATOM | 960 | H5'1 | G B | 12 | 34.724 | -26.127 | 88.120 | 1.00 | 0.00 | H |
| ATOM | 961 | H5'2 | G B | 12 | 34.968 | -27.881 | 88.274 | 1.00 | 0.00 | H |
| ATOM | 962 | C1'  | T B | 13 | 41.275 | -24.073 | 83.219 | 1.00 | 0.00 | C |
| ATOM | 963 | N1   | T B | 13 | 41.322 | -23.496 | 84.588 | 1.00 | 0.00 | N |
| ATOM | 964 | C2   | T B | 13 | 41.461 | -22.126 | 84.692 | 1.00 | 0.00 | C |
| ATOM | 965 | O2   | T B | 13 | 41.544 | -21.397 | 83.718 | 1.00 | 0.00 | O |
| ATOM | 966 | N3   | T B | 13 | 41.499 | -21.633 | 85.982 | 1.00 | 0.00 | N |
| ATOM | 967 | C4   | T B | 13 | 41.417 | -22.369 | 87.146 | 1.00 | 0.00 | C |
| ATOM | 968 | O4   | T B | 13 | 41.467 | -21.814 | 88.250 | 1.00 | 0.00 | O |

|      |      |      |     |    |        |         |        |      |      |   |
|------|------|------|-----|----|--------|---------|--------|------|------|---|
| ATOM | 969  | C5   | T B | 13 | 41.273 | -23.790 | 86.938 | 1.00 | 0.00 | C |
| ATOM | 970  | C6   | T B | 13 | 41.231 | -24.306 | 85.693 | 1.00 | 0.00 | C |
| ATOM | 971  | C7   | T B | 13 | 41.177 | -24.630 | 88.176 | 1.00 | 0.00 | C |
| ATOM | 972  | C2'  | T B | 13 | 41.996 | -25.409 | 83.089 | 1.00 | 0.00 | C |
| ATOM | 973  | C3'  | T B | 13 | 41.120 | -26.146 | 82.088 | 1.00 | 0.00 | C |
| ATOM | 974  | O3'  | T B | 13 | 41.506 | -25.776 | 80.766 | 1.00 | 0.00 | O |
| ATOM | 975  | C4'  | T B | 13 | 39.717 | -25.657 | 82.439 | 1.00 | 0.00 | C |
| ATOM | 976  | O4'  | T B | 13 | 39.917 | -24.277 | 82.882 | 1.00 | 0.00 | O |
| ATOM | 977  | C5'  | T B | 13 | 38.994 | -26.415 | 83.529 | 1.00 | 0.00 | C |
| ATOM | 978  | O5'  | T B | 13 | 39.940 | -26.828 | 84.548 | 1.00 | 0.00 | O |
| ATOM | 979  | O1P  | T B | 13 | 39.930 | -29.337 | 84.369 | 1.00 | 0.00 | O |
| ATOM | 980  | O2P  | T B | 13 | 40.495 | -28.237 | 86.553 | 1.00 | 0.00 | O |
| ATOM | 981  | P    | T B | 13 | 39.702 | -28.213 | 85.299 | 1.00 | 0.00 | P |
| ATOM | 982  | H3   | T B | 13 | 41.599 | -20.613 | 86.086 | 1.00 | 0.00 | H |
| ATOM | 983  | H6   | T B | 13 | 41.122 | -25.383 | 85.561 | 1.00 | 0.00 | H |
| ATOM | 984  | H1'  | T B | 13 | 41.686 | -23.339 | 82.524 | 1.00 | 0.00 | H |
| ATOM | 985  | H3'  | T B | 13 | 41.199 | -27.228 | 82.197 | 1.00 | 0.00 | H |
| ATOM | 986  | H4'  | T B | 13 | 39.119 | -25.732 | 81.531 | 1.00 | 0.00 | H |
| ATOM | 987  | H71  | T B | 13 | 42.050 | -25.277 | 88.247 | 1.00 | 0.00 | H |
| ATOM | 988  | H72  | T B | 13 | 41.134 | -23.982 | 89.053 | 1.00 | 0.00 | H |
| ATOM | 989  | H73  | T B | 13 | 40.274 | -25.242 | 88.133 | 1.00 | 0.00 | H |
| ATOM | 990  | H2'1 | T B | 13 | 42.051 | -25.942 | 84.037 | 1.00 | 0.00 | H |
| ATOM | 991  | H2'2 | T B | 13 | 43.015 | -25.295 | 82.717 | 1.00 | 0.00 | H |
| ATOM | 992  | H5'1 | T B | 13 | 38.234 | -25.770 | 83.970 | 1.00 | 0.00 | H |
| ATOM | 993  | H5'2 | T B | 13 | 38.514 | -27.291 | 83.097 | 1.00 | 0.00 | H |
| ATOM | 994  | C1'  | G B | 14 | 44.764 | -21.108 | 81.297 | 1.00 | 0.00 | C |
| ATOM | 995  | N1   | G B | 14 | 45.071 | -19.304 | 86.059 | 1.00 | 0.00 | N |
| ATOM | 996  | C2   | G B | 14 | 45.079 | -18.628 | 84.852 | 1.00 | 0.00 | C |
| ATOM | 997  | N2   | G B | 14 | 45.185 | -17.296 | 84.921 | 1.00 | 0.00 | N |
| ATOM | 998  | N3   | G B | 14 | 44.988 | -19.235 | 83.669 | 1.00 | 0.00 | N |
| ATOM | 999  | C4   | G B | 14 | 44.894 | -20.586 | 83.787 | 1.00 | 0.00 | C |
| ATOM | 1000 | C5   | G B | 14 | 44.883 | -21.344 | 84.945 | 1.00 | 0.00 | C |
| ATOM | 1001 | C6   | G B | 14 | 44.976 | -20.701 | 86.201 | 1.00 | 0.00 | C |
| ATOM | 1002 | O6   | G B | 14 | 44.983 | -21.198 | 87.328 | 1.00 | 0.00 | O |
| ATOM | 1003 | N7   | G B | 14 | 44.775 | -22.701 | 84.633 | 1.00 | 0.00 | N |
| ATOM | 1004 | C8   | G B | 14 | 44.723 | -22.721 | 83.325 | 1.00 | 0.00 | C |
| ATOM | 1005 | N9   | G B | 14 | 44.791 | -21.474 | 82.739 | 1.00 | 0.00 | N |
| ATOM | 1006 | C2'  | G B | 14 | 45.511 | -22.086 | 80.401 | 1.00 | 0.00 | C |
| ATOM | 1007 | C3'  | G B | 14 | 44.657 | -22.083 | 79.143 | 1.00 | 0.00 | C |
| ATOM | 1008 | O3'  | G B | 14 | 45.042 | -20.985 | 78.319 | 1.00 | 0.00 | O |
| ATOM | 1009 | C4'  | G B | 14 | 43.241 | -21.922 | 79.696 | 1.00 | 0.00 | C |
| ATOM | 1010 | O4'  | G B | 14 | 43.411 | -21.084 | 80.883 | 1.00 | 0.00 | O |
| ATOM | 1011 | C5'  | G B | 14 | 42.528 | -23.191 | 80.096 | 1.00 | 0.00 | C |
| ATOM | 1012 | O5'  | G B | 14 | 43.475 | -24.123 | 80.677 | 1.00 | 0.00 | O |
| ATOM | 1013 | O1P  | G B | 14 | 43.515 | -26.019 | 79.021 | 1.00 | 0.00 | O |
| ATOM | 1014 | O2P  | G B | 14 | 44.045 | -26.450 | 81.435 | 1.00 | 0.00 | O |
| ATOM | 1015 | P    | G B | 14 | 43.260 | -25.685 | 80.436 | 1.00 | 0.00 | P |
| ATOM | 1016 | H1   | G B | 14 | 45.140 | -18.740 | 86.920 | 1.00 | 0.00 | H |
| ATOM | 1017 | H8   | G B | 14 | 44.634 | -23.643 | 82.750 | 1.00 | 0.00 | H |
| ATOM | 1018 | H1'  | G B | 14 | 45.163 | -20.099 | 81.192 | 1.00 | 0.00 | H |
| ATOM | 1019 | H21  | G B | 14 | 45.252 | -16.834 | 85.841 | 1.00 | 0.00 | H |
| ATOM | 1020 | H3'  | G B | 14 | 44.755 | -23.011 | 78.580 | 1.00 | 0.00 | H |
| ATOM | 1021 | H22  | G B | 14 | 45.201 | -16.735 | 84.058 | 1.00 | 0.00 | H |
| ATOM | 1022 | H4'  | G B | 14 | 42.651 | -21.440 | 78.917 | 1.00 | 0.00 | H |

|      |      |      |     |    |        |         |        |      |      |   |
|------|------|------|-----|----|--------|---------|--------|------|------|---|
| ATOM | 1023 | H2'1 | G B | 14 | 45.571 | -23.083 | 80.837 | 1.00 | 0.00 | H |
| ATOM | 1024 | H2'2 | G B | 14 | 46.529 | -21.760 | 80.190 | 1.00 | 0.00 | H |
| ATOM | 1025 | H5'1 | G B | 14 | 41.754 | -22.952 | 80.824 | 1.00 | 0.00 | H |
| ATOM | 1026 | H5'2 | G B | 14 | 42.067 | -23.635 | 79.214 | 1.00 | 0.00 | H |
| ATOM | 1027 | C1'  | C B | 15 | 48.197 | -17.545 | 81.517 | 1.00 | 0.00 | C |
| ATOM | 1028 | N1   | C B | 15 | 48.226 | -18.685 | 82.474 | 1.00 | 0.00 | N |
| ATOM | 1029 | C2   | C B | 15 | 48.311 | -18.394 | 83.834 | 1.00 | 0.00 | C |
| ATOM | 1030 | O2   | C B | 15 | 48.358 | -17.209 | 84.188 | 1.00 | 0.00 | O |
| ATOM | 1031 | N3   | C B | 15 | 48.338 | -19.417 | 84.722 | 1.00 | 0.00 | N |
| ATOM | 1032 | C4   | C B | 15 | 48.286 | -20.689 | 84.308 | 1.00 | 0.00 | C |
| ATOM | 1033 | N4   | C B | 15 | 48.313 | -21.650 | 85.219 | 1.00 | 0.00 | N |
| ATOM | 1034 | C5   | C B | 15 | 48.204 | -21.020 | 82.914 | 1.00 | 0.00 | C |
| ATOM | 1035 | C6   | C B | 15 | 48.172 | -19.973 | 82.040 | 1.00 | 0.00 | C |
| ATOM | 1036 | C2'  | C B | 15 | 48.972 | -17.803 | 80.233 | 1.00 | 0.00 | C |
| ATOM | 1037 | C3'  | C B | 15 | 48.123 | -17.079 | 79.199 | 1.00 | 0.00 | C |
| ATOM | 1038 | O3'  | C B | 15 | 48.486 | -15.700 | 79.176 | 1.00 | 0.00 | O |
| ATOM | 1039 | C4'  | C B | 15 | 46.702 | -17.293 | 79.716 | 1.00 | 0.00 | C |
| ATOM | 1040 | O4'  | C B | 15 | 46.846 | -17.307 | 81.172 | 1.00 | 0.00 | O |
| ATOM | 1041 | C5'  | C B | 15 | 46.017 | -18.571 | 79.287 | 1.00 | 0.00 | C |
| ATOM | 1042 | O5'  | C B | 15 | 46.983 | -19.649 | 79.229 | 1.00 | 0.00 | O |
| ATOM | 1043 | O1P  | C B | 15 | 47.076 | -20.219 | 76.779 | 1.00 | 0.00 | O |
| ATOM | 1044 | O2P  | C B | 15 | 47.604 | -21.972 | 78.495 | 1.00 | 0.00 | O |
| ATOM | 1045 | P    | C B | 15 | 46.806 | -20.780 | 78.119 | 1.00 | 0.00 | P |
| ATOM | 1046 | H5   | C B | 15 | 48.168 | -22.054 | 82.573 | 1.00 | 0.00 | H |
| ATOM | 1047 | H6   | C B | 15 | 48.103 | -20.173 | 80.969 | 1.00 | 0.00 | H |
| ATOM | 1048 | H1'  | C B | 15 | 48.574 | -16.660 | 82.030 | 1.00 | 0.00 | H |
| ATOM | 1049 | H3'  | C B | 15 | 48.246 | -17.501 | 78.202 | 1.00 | 0.00 | H |
| ATOM | 1050 | H4'  | C B | 15 | 46.103 | -16.457 | 79.354 | 1.00 | 0.00 | H |
| ATOM | 1051 | H41  | C B | 15 | 48.271 | -22.638 | 84.928 | 1.00 | 0.00 | H |
| ATOM | 1052 | H42  | C B | 15 | 48.375 | -21.411 | 86.220 | 1.00 | 0.00 | H |
| ATOM | 1053 | H2'1 | C B | 15 | 49.054 | -18.865 | 80.005 | 1.00 | 0.00 | H |
| ATOM | 1054 | H2'2 | C B | 15 | 49.983 | -17.398 | 80.270 | 1.00 | 0.00 | H |
| ATOM | 1055 | H5'1 | C B | 15 | 45.233 | -18.815 | 80.004 | 1.00 | 0.00 | H |
| ATOM | 1056 | H5'2 | C B | 15 | 45.571 | -18.423 | 78.304 | 1.00 | 0.00 | H |
| ATOM | 1057 | C1'  | G B | 16 | 51.557 | -14.746 | 83.840 | 1.00 | 0.00 | C |
| ATOM | 1058 | N1   | G B | 16 | 51.816 | -18.711 | 87.040 | 1.00 | 0.00 | N |
| ATOM | 1059 | C2   | G B | 16 | 51.792 | -17.354 | 87.307 | 1.00 | 0.00 | C |
| ATOM | 1060 | N2   | G B | 16 | 51.846 | -17.007 | 88.600 | 1.00 | 0.00 | N |
| ATOM | 1061 | N3   | G B | 16 | 51.719 | -16.418 | 86.362 | 1.00 | 0.00 | N |
| ATOM | 1062 | C4   | G B | 16 | 51.679 | -16.949 | 85.112 | 1.00 | 0.00 | C |
| ATOM | 1063 | C5   | G B | 16 | 51.703 | -18.285 | 84.750 | 1.00 | 0.00 | C |
| ATOM | 1064 | C6   | G B | 16 | 51.776 | -19.280 | 85.753 | 1.00 | 0.00 | C |
| ATOM | 1065 | O6   | G B | 16 | 51.807 | -20.505 | 85.630 | 1.00 | 0.00 | O |
| ATOM | 1066 | N7   | G B | 16 | 51.646 | -18.410 | 83.360 | 1.00 | 0.00 | N |
| ATOM | 1067 | C8   | G B | 16 | 51.589 | -17.174 | 82.934 | 1.00 | 0.00 | C |
| ATOM | 1068 | N9   | G B | 16 | 51.606 | -16.229 | 83.939 | 1.00 | 0.00 | N |
| ATOM | 1069 | C2'  | G B | 16 | 52.338 | -14.184 | 82.660 | 1.00 | 0.00 | C |
| ATOM | 1070 | C3'  | G B | 16 | 51.478 | -13.002 | 82.243 | 1.00 | 0.00 | C |
| ATOM | 1071 | O3'  | G B | 16 | 51.817 | -11.872 | 83.044 | 1.00 | 0.00 | O |
| ATOM | 1072 | C4'  | G B | 16 | 50.060 | -13.500 | 82.517 | 1.00 | 0.00 | C |
| ATOM | 1073 | O4'  | G B | 16 | 50.203 | -14.368 | 83.686 | 1.00 | 0.00 | O |
| ATOM | 1074 | C5'  | G B | 16 | 49.400 | -14.286 | 81.409 | 1.00 | 0.00 | C |
| ATOM | 1075 | O5'  | G B | 16 | 50.384 | -15.109 | 80.737 | 1.00 | 0.00 | O |
| ATOM | 1076 | O1P  | G B | 16 | 50.491 | -14.121 | 78.425 | 1.00 | 0.00 | O |



|      |      |      |     |    |        |         |        |      |      |   |
|------|------|------|-----|----|--------|---------|--------|------|------|---|
| ATOM | 1077 | O2P  | G B | 16 | 51.049 | -16.541 | 78.782 | 1.00 | 0.00 | O |
| ATOM | 1078 | P    | G B | 16 | 50.230 | -15.367 | 79.170 | 1.00 | 0.00 | P |
| ATOM | 1079 | H1   | G B | 16 | 51.867 | -19.353 | 87.844 | 1.00 | 0.00 | H |
| ATOM | 1080 | H8   | G B | 16 | 51.533 | -16.914 | 81.877 | 1.00 | 0.00 | H |
| ATOM | 1081 | H1'  | G B | 16 | 51.917 | -14.329 | 84.781 | 1.00 | 0.00 | H |
| ATOM | 1082 | H21  | G B | 16 | 51.899 | -17.736 | 89.326 | 1.00 | 0.00 | H |
| ATOM | 1083 | H3'  | G B | 16 | 51.610 | -12.751 | 81.191 | 1.00 | 0.00 | H |
| ATOM | 1084 | H22  | G B | 16 | 51.835 | -16.012 | 88.865 | 1.00 | 0.00 | H |
| ATOM | 1085 | H4'  | G B | 16 | 49.448 | -12.620 | 82.712 | 1.00 | 0.00 | H |
| ATOM | 1086 | H2'1 | G B | 16 | 52.439 | -14.907 | 81.850 | 1.00 | 0.00 | H |
| ATOM | 1087 | H2'2 | G B | 16 | 53.342 | -13.866 | 82.942 | 1.00 | 0.00 | H |
| ATOM | 1088 | H5'1 | G B | 16 | 48.619 | -14.917 | 81.834 | 1.00 | 0.00 | H |
| ATOM | 1089 | H5'2 | G B | 16 | 48.952 | -13.592 | 80.698 | 1.00 | 0.00 | H |
| ATOM | 1090 | C1'  | G B | 17 | 54.850 | -13.797 | 87.416 | 1.00 | 0.00 | C |
| ATOM | 1091 | N1   | G B | 17 | 55.176 | -18.882 | 87.679 | 1.00 | 0.00 | N |
| ATOM | 1092 | C2   | G B | 17 | 55.124 | -17.941 | 88.693 | 1.00 | 0.00 | C |
| ATOM | 1093 | N2   | G B | 17 | 55.165 | -18.419 | 89.943 | 1.00 | 0.00 | N |
| ATOM | 1094 | N3   | G B | 17 | 55.036 | -16.631 | 88.477 | 1.00 | 0.00 | N |
| ATOM | 1095 | C4   | G B | 17 | 55.012 | -16.327 | 87.153 | 1.00 | 0.00 | C |
| ATOM | 1096 | C5   | G B | 17 | 55.064 | -17.194 | 86.075 | 1.00 | 0.00 | C |
| ATOM | 1097 | C6   | G B | 17 | 55.153 | -18.585 | 86.304 | 1.00 | 0.00 | C |
| ATOM | 1098 | O6   | G B | 17 | 55.209 | -19.504 | 85.486 | 1.00 | 0.00 | O |
| ATOM | 1099 | N7   | G B | 17 | 55.015 | -16.479 | 84.876 | 1.00 | 0.00 | N |
| ATOM | 1100 | C8   | G B | 17 | 54.935 | -15.230 | 85.256 | 1.00 | 0.00 | C |
| ATOM | 1101 | N9   | G B | 17 | 54.928 | -15.056 | 86.625 | 1.00 | 0.00 | N |
| ATOM | 1102 | C2'  | G B | 17 | 55.624 | -12.639 | 86.802 | 1.00 | 0.00 | C |
| ATOM | 1103 | C3'  | G B | 17 | 54.742 | -11.449 | 87.147 | 1.00 | 0.00 | C |
| ATOM | 1104 | O3'  | G B | 17 | 55.054 | -11.001 | 88.464 | 1.00 | 0.00 | O |
| ATOM | 1105 | C4'  | G B | 17 | 53.333 | -12.033 | 87.054 | 1.00 | 0.00 | C |
| ATOM | 1106 | O4'  | G B | 17 | 53.489 | -13.420 | 87.492 | 1.00 | 0.00 | O |
| ATOM | 1107 | C5'  | G B | 17 | 52.693 | -12.027 | 85.686 | 1.00 | 0.00 | C |
| ATOM | 1108 | O5'  | G B | 17 | 53.697 | -12.286 | 84.674 | 1.00 | 0.00 | O |
| ATOM | 1109 | O1P  | G B | 17 | 53.793 | -10.125 | 83.385 | 1.00 | 0.00 | O |
| ATOM | 1110 | O2P  | G B | 17 | 54.398 | -12.285 | 82.260 | 1.00 | 0.00 | O |
| ATOM | 1111 | P    | G B | 17 | 53.554 | -11.575 | 83.252 | 1.00 | 0.00 | P |
| ATOM | 1112 | H1   | G B | 17 | 55.238 | -19.875 | 87.954 | 1.00 | 0.00 | H |
| ATOM | 1113 | H8   | G B | 17 | 54.878 | -14.399 | 84.554 | 1.00 | 0.00 | H |
| ATOM | 1114 | H1'  | G B | 17 | 55.197 | -14.008 | 88.427 | 1.00 | 0.00 | H |
| ATOM | 1115 | H21  | G B | 17 | 55.230 | -19.435 | 90.103 | 1.00 | 0.00 | H |
| ATOM | 1116 | H3'  | G B | 17 | 54.873 | -10.626 | 86.445 | 1.00 | 0.00 | H |
| ATOM | 1117 | H22  | G B | 17 | 55.133 | -17.771 | 90.742 | 1.00 | 0.00 | H |
| ATOM | 1118 | H4'  | G B | 17 | 52.702 | -11.445 | 87.719 | 1.00 | 0.00 | H |
| ATOM | 1119 | H2'1 | G B | 17 | 55.743 | -12.745 | 85.724 | 1.00 | 0.00 | H |
| ATOM | 1120 | H2'2 | G B | 17 | 56.620 | -12.533 | 87.232 | 1.00 | 0.00 | H |
| ATOM | 1121 | H5'1 | G B | 17 | 51.924 | -12.798 | 85.648 | 1.00 | 0.00 | H |
| ATOM | 1122 | H5'2 | G B | 17 | 52.234 | -11.054 | 85.510 | 1.00 | 0.00 | H |
| ATOM | 1123 | C1'  | C B | 18 | 58.108 | -15.085 | 90.917 | 1.00 | 0.00 | C |
| ATOM | 1124 | N1   | C B | 18 | 58.214 | -15.643 | 89.540 | 1.00 | 0.00 | N |
| ATOM | 1125 | C2   | C B | 18 | 58.315 | -17.026 | 89.405 | 1.00 | 0.00 | C |
| ATOM | 1126 | O2   | C B | 18 | 58.311 | -17.729 | 90.423 | 1.00 | 0.00 | O |
| ATOM | 1127 | N3   | C B | 18 | 58.414 | -17.553 | 88.161 | 1.00 | 0.00 | N |
| ATOM | 1128 | C4   | C B | 18 | 58.414 | -16.766 | 87.077 | 1.00 | 0.00 | C |
| ATOM | 1129 | N4   | C B | 18 | 58.511 | -17.337 | 85.885 | 1.00 | 0.00 | N |
| ATOM | 1130 | C5   | C B | 18 | 58.315 | -15.342 | 87.189 | 1.00 | 0.00 | C |

|      |      |      |     |    |        |         |        |      |      |   |
|------|------|------|-----|----|--------|---------|--------|------|------|---|
| ATOM | 1131 | C6   | C B | 18 | 58.215 | -14.833 | 88.450 | 1.00 | 0.00 | C |
| ATOM | 1132 | C2'  | C B | 18 | 58.865 | -13.778 | 91.110 | 1.00 | 0.00 | C |
| ATOM | 1133 | C3'  | C B | 18 | 57.958 | -13.024 | 92.070 | 1.00 | 0.00 | C |
| ATOM | 1134 | O3'  | C B | 18 | 58.253 | -13.428 | 93.405 | 1.00 | 0.00 | O |
| ATOM | 1135 | C4'  | C B | 18 | 56.562 | -13.459 | 91.630 | 1.00 | 0.00 | C |
| ATOM | 1136 | O4'  | C B | 18 | 56.739 | -14.839 | 91.176 | 1.00 | 0.00 | O |
| ATOM | 1137 | C5'  | C B | 18 | 55.930 | -12.661 | 90.514 | 1.00 | 0.00 | C |
| ATOM | 1138 | O5'  | C B | 18 | 56.947 | -12.267 | 89.558 | 1.00 | 0.00 | O |
| ATOM | 1139 | O1P  | C B | 18 | 57.012 | -9.760  | 89.775 | 1.00 | 0.00 | O |
| ATOM | 1140 | O2P  | C B | 18 | 57.665 | -10.848 | 87.611 | 1.00 | 0.00 | O |
| ATOM | 1141 | P    | C B | 18 | 56.801 | -10.863 | 88.816 | 1.00 | 0.00 | P |
| ATOM | 1142 | H5   | C B | 18 | 58.319 | -14.697 | 86.310 | 1.00 | 0.00 | H |
| ATOM | 1143 | H6   | C B | 18 | 58.133 | -13.755 | 88.584 | 1.00 | 0.00 | H |
| ATOM | 1144 | H1'  | C B | 18 | 58.452 | -15.843 | 91.620 | 1.00 | 0.00 | H |
| ATOM | 1145 | H3'  | C B | 18 | 58.079 | -11.945 | 91.983 | 1.00 | 0.00 | H |
| ATOM | 1146 | H4'  | C B | 18 | 55.914 | -13.377 | 92.503 | 1.00 | 0.00 | H |
| ATOM | 1147 | H41  | C B | 18 | 58.512 | -16.754 | 85.034 | 1.00 | 0.00 | H |
| ATOM | 1148 | H42  | C B | 18 | 58.582 | -18.361 | 85.808 | 1.00 | 0.00 | H |
| ATOM | 1149 | H2'1 | C B | 18 | 58.994 | -13.233 | 90.175 | 1.00 | 0.00 | H |
| ATOM | 1150 | H2'2 | C B | 18 | 59.856 | -13.934 | 91.537 | 1.00 | 0.00 | H |
| ATOM | 1151 | H5'1 | C B | 18 | 55.176 | -13.273 | 90.017 | 1.00 | 0.00 | H |
| ATOM | 1152 | H5'2 | C B | 18 | 55.455 | -11.775 | 90.931 | 1.00 | 0.00 | H |
| ATOM | 1153 | C1'  | C B | 19 | 61.378 | -18.137 | 93.043 | 1.00 | 0.00 | C |
| ATOM | 1154 | N1   | C B | 19 | 61.501 | -17.779 | 91.603 | 1.00 | 0.00 | N |
| ATOM | 1155 | C2   | C B | 19 | 61.630 | -18.817 | 90.681 | 1.00 | 0.00 | C |
| ATOM | 1156 | O2   | C B | 19 | 61.636 | -19.984 | 91.093 | 1.00 | 0.00 | O |
| ATOM | 1157 | N3   | C B | 19 | 61.744 | -18.512 | 89.366 | 1.00 | 0.00 | N |
| ATOM | 1158 | C4   | C B | 19 | 61.733 | -17.237 | 88.953 | 1.00 | 0.00 | C |
| ATOM | 1159 | N4   | C B | 19 | 61.846 | -16.996 | 87.656 | 1.00 | 0.00 | N |
| ATOM | 1160 | C5   | C B | 19 | 61.604 | -16.153 | 89.878 | 1.00 | 0.00 | C |
| ATOM | 1161 | C6   | C B | 19 | 61.490 | -16.484 | 91.196 | 1.00 | 0.00 | C |
| ATOM | 1162 | C2'  | C B | 19 | 62.108 | -17.182 | 93.976 | 1.00 | 0.00 | C |
| ATOM | 1163 | C3'  | C B | 19 | 61.181 | -17.150 | 95.183 | 1.00 | 0.00 | C |
| ATOM | 1164 | O3'  | C B | 19 | 61.478 | -18.256 | 96.032 | 1.00 | 0.00 | O |
| ATOM | 1165 | C4'  | C B | 19 | 59.796 | -17.263 | 94.551 | 1.00 | 0.00 | C |
| ATOM | 1166 | O4'  | C B | 19 | 60.003 | -18.110 | 93.376 | 1.00 | 0.00 | O |
| ATOM | 1167 | C5'  | C B | 19 | 59.153 | -15.969 | 94.105 | 1.00 | 0.00 | C |
| ATOM | 1168 | O5'  | C B | 19 | 60.166 | -15.075 | 93.579 | 1.00 | 0.00 | O |
| ATOM | 1169 | O1P  | C B | 19 | 60.178 | -13.175 | 95.230 | 1.00 | 0.00 | O |
| ATOM | 1170 | O2P  | C B | 19 | 60.862 | -12.774 | 92.849 | 1.00 | 0.00 | O |
| ATOM | 1171 | P    | C B | 19 | 59.994 | -13.506 | 93.803 | 1.00 | 0.00 | P |
| ATOM | 1172 | H5   | C B | 19 | 61.598 | -15.115 | 89.547 | 1.00 | 0.00 | H |
| ATOM | 1173 | H6   | C B | 19 | 61.387 | -15.691 | 91.938 | 1.00 | 0.00 | H |
| ATOM | 1174 | H1'  | C B | 19 | 61.735 | -19.159 | 93.171 | 1.00 | 0.00 | H |
| ATOM | 1175 | H3'  | C B | 19 | 61.281 | -16.223 | 95.748 | 1.00 | 0.00 | H |
| ATOM | 1176 | H4'  | C B | 19 | 59.143 | -17.719 | 95.296 | 1.00 | 0.00 | H |
| ATOM | 1177 | H41  | C B | 19 | 61.840 | -16.026 | 87.309 | 1.00 | 0.00 | H |
| ATOM | 1178 | H42  | C B | 19 | 61.940 | -17.780 | 86.992 | 1.00 | 0.00 | H |
| ATOM | 1179 | H2'1 | C B | 19 | 62.229 | -16.190 | 93.543 | 1.00 | 0.00 | H |
| ATOM | 1180 | H2'2 | C B | 19 | 63.099 | -17.546 | 94.247 | 1.00 | 0.00 | H |
| ATOM | 1181 | H5'1 | C B | 19 | 58.414 | -16.184 | 93.335 | 1.00 | 0.00 | H |
| ATOM | 1182 | H5'2 | C B | 19 | 58.658 | -15.505 | 94.958 | 1.00 | 0.00 | H |
| ATOM | 1183 | C1'  | T B | 20 | 64.698 | -21.808 | 93.043 | 1.00 | 0.00 | C |
| ATOM | 1184 | N1   | T B | 20 | 64.822 | -20.687 | 92.074 | 1.00 | 0.00 | N |

|      |      |      |     |    |        |         |         |      |      |   |
|------|------|------|-----|----|--------|---------|---------|------|------|---|
| ATOM | 1185 | C2   | T B | 20 | 64.975 | -21.018 | 90.743  | 1.00 | 0.00 | C |
| ATOM | 1186 | O2   | T B | 20 | 65.010 | -22.171 | 90.350  | 1.00 | 0.00 | O |
| ATOM | 1187 | N3   | T B | 20 | 65.087 | -19.946 | 89.879  | 1.00 | 0.00 | N |
| ATOM | 1188 | C4   | T B | 20 | 65.061 | -18.611 | 90.218  | 1.00 | 0.00 | C |
| ATOM | 1189 | O4   | T B | 20 | 65.173 | -17.735 | 89.350  | 1.00 | 0.00 | O |
| ATOM | 1190 | C5   | T B | 20 | 64.897 | -18.363 | 91.630  | 1.00 | 0.00 | C |
| ATOM | 1191 | C6   | T B | 20 | 64.785 | -19.383 | 92.503  | 1.00 | 0.00 | C |
| ATOM | 1192 | C7   | T B | 20 | 64.863 | -16.922 | 92.045  | 1.00 | 0.00 | C |
| ATOM | 1193 | C2'  | T B | 20 | 65.402 | -21.554 | 94.370  | 1.00 | 0.00 | C |
| ATOM | 1194 | C3'  | T B | 20 | 64.469 | -22.234 | 95.360  | 1.00 | 0.00 | C |
| ATOM | 1195 | O3'  | T B | 20 | 64.785 | -23.623 | 95.424  | 1.00 | 0.00 | O |
| ATOM | 1196 | C4'  | T B | 20 | 63.090 | -21.982 | 94.755  | 1.00 | 0.00 | C |
| ATOM | 1197 | O4'  | T B | 20 | 63.322 | -21.998 | 93.310  | 1.00 | 0.00 | O |
| ATOM | 1198 | C5'  | T B | 20 | 62.422 | -20.678 | 95.123  | 1.00 | 0.00 | C |
| ATOM | 1199 | O5'  | T B | 20 | 63.419 | -19.628 | 95.223  | 1.00 | 0.00 | O |
| ATOM | 1200 | O1P  | T B | 20 | 63.383 | -19.023 | 97.666  | 1.00 | 0.00 | O |
| ATOM | 1201 | O2P  | T B | 20 | 64.071 | -17.317 | 95.959  | 1.00 | 0.00 | O |
| ATOM | 1202 | P    | T B | 20 | 63.213 | -18.476 | 96.305  | 1.00 | 0.00 | P |
| ATOM | 1203 | H3   | T B | 20 | 65.201 | -20.166 | 88.880  | 1.00 | 0.00 | H |
| ATOM | 1204 | H6   | T B | 20 | 64.662 | -19.171 | 93.565  | 1.00 | 0.00 | H |
| ATOM | 1205 | H1'  | T B | 20 | 65.075 | -22.714 | 92.568  | 1.00 | 0.00 | H |
| ATOM | 1206 | H3'  | T B | 20 | 64.547 | -21.800 | 96.356  | 1.00 | 0.00 | H |
| ATOM | 1207 | H4'  | T B | 20 | 62.443 | -22.793 | 95.092  | 1.00 | 0.00 | H |
| ATOM | 1208 | H3T  | T B | 20 | 65.706 | -23.823 | 95.603  | 1.00 | 0.00 | H |
| ATOM | 1209 | H71  | T B | 20 | 65.735 | -16.699 | 92.659  | 1.00 | 0.00 | H |
| ATOM | 1210 | H72  | T B | 20 | 64.871 | -16.288 | 91.157  | 1.00 | 0.00 | H |
| ATOM | 1211 | H73  | T B | 20 | 63.956 | -16.729 | 92.618  | 1.00 | 0.00 | H |
| ATOM | 1212 | H2'1 | T B | 20 | 65.504 | -20.492 | 94.586  | 1.00 | 0.00 | H |
| ATOM | 1213 | H2'2 | T B | 20 | 66.400 | -21.992 | 94.399  | 1.00 | 0.00 | H |
| ATOM | 1214 | H5'1 | T B | 20 | 61.691 | -20.420 | 94.357  | 1.00 | 0.00 | H |
| ATOM | 1215 | H5'2 | T B | 20 | 61.914 | -20.794 | 96.079  | 1.00 | 0.00 | H |
| TER  |      |      |     |    |        |         |         |      |      |   |
| ATOM | 1    | C1'  | A A | 1  | 47.856 | -24.658 | 120.362 | 1.00 | 0.00 | C |
| ATOM | 2    | N1   | A A | 1  | 47.531 | -19.735 | 121.773 | 1.00 | 0.00 | N |
| ATOM | 3    | C2   | A A | 1  | 47.010 | -20.850 | 122.276 | 1.00 | 0.00 | C |
| ATOM | 4    | N3   | A A | 1  | 47.137 | -22.093 | 121.863 | 1.00 | 0.00 | N |
| ATOM | 5    | C4   | A A | 1  | 47.917 | -22.142 | 120.769 | 1.00 | 0.00 | C |
| ATOM | 6    | C5   | A A | 1  | 48.523 | -21.096 | 120.131 | 1.00 | 0.00 | C |
| ATOM | 7    | C6   | A A | 1  | 48.306 | -19.815 | 120.681 | 1.00 | 0.00 | C |
| ATOM | 8    | N6   | A A | 1  | 48.837 | -18.694 | 120.163 | 1.00 | 0.00 | N |
| ATOM | 9    | N7   | A A | 1  | 49.250 | -21.532 | 119.036 | 1.00 | 0.00 | N |
| ATOM | 10   | C8   | A A | 1  | 49.067 | -22.819 | 119.035 | 1.00 | 0.00 | C |
| ATOM | 11   | N9   | A A | 1  | 48.270 | -23.263 | 120.056 | 1.00 | 0.00 | N |
| ATOM | 12   | C2'  | A A | 1  | 47.575 | -25.499 | 119.124 | 1.00 | 0.00 | C |
| ATOM | 13   | C3'  | A A | 1  | 48.072 | -26.870 | 119.554 | 1.00 | 0.00 | C |
| ATOM | 14   | O3'  | A A | 1  | 47.041 | -27.536 | 120.279 | 1.00 | 0.00 | O |
| ATOM | 15   | C4'  | A A | 1  | 49.274 | -26.536 | 120.437 | 1.00 | 0.00 | C |
| ATOM | 16   | O4'  | A A | 1  | 48.907 | -25.273 | 121.080 | 1.00 | 0.00 | O |
| ATOM | 17   | C5'  | A A | 1  | 50.595 | -26.352 | 119.729 | 1.00 | 0.00 | C |
| ATOM | 18   | O5'  | A A | 1  | 50.381 | -25.706 | 118.449 | 1.00 | 0.00 | O |
| ATOM | 19   | H2   | A A | 1  | 46.387 | -20.715 | 123.161 | 1.00 | 0.00 | H |
| ATOM | 20   | H8   | A A | 1  | 49.507 | -23.483 | 118.289 | 1.00 | 0.00 | H |
| ATOM | 21   | H1'  | A A | 1  | 46.983 | -24.619 | 121.014 | 1.00 | 0.00 | H |
| ATOM | 22   | H3'  | A A | 1  | 48.369 | -27.484 | 118.702 | 1.00 | 0.00 | H |

|      |    |      |     |   |        |         |         |      |      |   |
|------|----|------|-----|---|--------|---------|---------|------|------|---|
| ATOM | 23 | H4'  | A A | 1 | 49.385 | -27.357 | 121.144 | 1.00 | 0.00 | H |
| ATOM | 24 | H61  | A A | 1 | 48.649 | -17.786 | 120.603 | 1.00 | 0.00 | H |
| ATOM | 25 | H62  | A A | 1 | 49.433 | -18.750 | 119.324 | 1.00 | 0.00 | H |
| ATOM | 26 | H5T  | A A | 1 | 50.948 | -25.943 | 117.712 | 1.00 | 0.00 | H |
| ATOM | 27 | H2'1 | A A | 1 | 48.114 | -25.140 | 118.248 | 1.00 | 0.00 | H |
| ATOM | 28 | H2'2 | A A | 1 | 46.516 | -25.524 | 118.872 | 1.00 | 0.00 | H |
| ATOM | 29 | H5'1 | A A | 1 | 51.250 | -25.737 | 120.347 | 1.00 | 0.00 | H |
| ATOM | 30 | H5'2 | A A | 1 | 51.058 | -27.326 | 119.577 | 1.00 | 0.00 | H |
| ATOM | 31 | C1'  | G A | 2 | 43.187 | -23.538 | 121.628 | 1.00 | 0.00 | C |
| ATOM | 32 | N1   | G A | 2 | 44.561 | -18.794 | 120.359 | 1.00 | 0.00 | N |
| ATOM | 33 | C2   | G A | 2 | 43.816 | -19.243 | 121.432 | 1.00 | 0.00 | C |
| ATOM | 34 | N2   | G A | 2 | 43.377 | -18.306 | 122.279 | 1.00 | 0.00 | N |
| ATOM | 35 | N3   | G A | 2 | 43.532 | -20.527 | 121.644 | 1.00 | 0.00 | N |
| ATOM | 36 | C4   | G A | 2 | 44.051 | -21.337 | 120.685 | 1.00 | 0.00 | C |
| ATOM | 37 | C5   | G A | 2 | 44.803 | -20.977 | 119.577 | 1.00 | 0.00 | C |
| ATOM | 38 | C6   | G A | 2 | 45.108 | -19.613 | 119.356 | 1.00 | 0.00 | C |
| ATOM | 39 | O6   | G A | 2 | 45.758 | -19.102 | 118.442 | 1.00 | 0.00 | O |
| ATOM | 40 | N7   | G A | 2 | 45.143 | -22.110 | 118.835 | 1.00 | 0.00 | N |
| ATOM | 41 | C8   | G A | 2 | 44.602 | -23.098 | 119.501 | 1.00 | 0.00 | C |
| ATOM | 42 | N9   | G A | 2 | 43.921 | -22.707 | 120.636 | 1.00 | 0.00 | N |
| ATOM | 43 | C2'  | G A | 2 | 42.431 | -24.707 | 121.010 | 1.00 | 0.00 | C |
| ATOM | 44 | C3'  | G A | 2 | 42.583 | -25.783 | 122.073 | 1.00 | 0.00 | C |
| ATOM | 45 | O3'  | G A | 2 | 41.570 | -25.611 | 123.061 | 1.00 | 0.00 | O |
| ATOM | 46 | C4'  | G A | 2 | 43.982 | -25.515 | 122.628 | 1.00 | 0.00 | C |
| ATOM | 47 | O4'  | G A | 2 | 44.135 | -24.064 | 122.537 | 1.00 | 0.00 | O |
| ATOM | 48 | C5'  | G A | 2 | 45.130 | -26.171 | 121.897 | 1.00 | 0.00 | C |
| ATOM | 49 | O5'  | G A | 2 | 44.861 | -26.184 | 120.473 | 1.00 | 0.00 | O |
| ATOM | 50 | O1P  | G A | 2 | 44.623 | -28.634 | 119.949 | 1.00 | 0.00 | O |
| ATOM | 51 | O2P  | G A | 2 | 45.391 | -27.039 | 118.171 | 1.00 | 0.00 | O |
| ATOM | 52 | P    | G A | 2 | 45.382 | -27.416 | 119.605 | 1.00 | 0.00 | P |
| ATOM | 53 | H1   | G A | 2 | 44.727 | -17.779 | 120.288 | 1.00 | 0.00 | H |
| ATOM | 54 | H8   | G A | 2 | 44.681 | -24.138 | 119.188 | 1.00 | 0.00 | H |
| ATOM | 55 | H1'  | G A | 2 | 42.512 | -22.889 | 122.185 | 1.00 | 0.00 | H |
| ATOM | 56 | H21  | G A | 2 | 43.602 | -17.315 | 122.110 | 1.00 | 0.00 | H |
| ATOM | 57 | H3'  | G A | 2 | 42.512 | -26.786 | 121.653 | 1.00 | 0.00 | H |
| ATOM | 58 | H22  | G A | 2 | 42.815 | -18.576 | 123.098 | 1.00 | 0.00 | H |
| ATOM | 59 | H4'  | G A | 2 | 43.989 | -25.880 | 123.655 | 1.00 | 0.00 | H |
| ATOM | 60 | H2'1 | G A | 2 | 42.865 | -25.024 | 120.061 | 1.00 | 0.00 | H |
| ATOM | 61 | H2'2 | G A | 2 | 41.382 | -24.473 | 120.829 | 1.00 | 0.00 | H |
| ATOM | 62 | H5'1 | G A | 2 | 46.045 | -25.613 | 122.094 | 1.00 | 0.00 | H |
| ATOM | 63 | H5'2 | G A | 2 | 45.248 | -27.192 | 122.260 | 1.00 | 0.00 | H |
| ATOM | 64 | C1'  | G A | 3 | 39.362 | -20.459 | 122.271 | 1.00 | 0.00 | C |
| ATOM | 65 | N1   | G A | 3 | 41.760 | -17.652 | 118.752 | 1.00 | 0.00 | N |
| ATOM | 66 | C2   | G A | 3 | 41.139 | -17.263 | 119.923 | 1.00 | 0.00 | C |
| ATOM | 67 | N2   | G A | 3 | 41.157 | -15.952 | 120.193 | 1.00 | 0.00 | N |
| ATOM | 68 | N3   | G A | 3 | 40.548 | -18.113 | 120.760 | 1.00 | 0.00 | N |
| ATOM | 69 | C4   | G A | 3 | 40.619 | -19.399 | 120.326 | 1.00 | 0.00 | C |
| ATOM | 70 | C5   | G A | 3 | 41.215 | -19.879 | 119.171 | 1.00 | 0.00 | C |
| ATOM | 71 | C6   | G A | 3 | 41.847 | -18.976 | 118.285 | 1.00 | 0.00 | C |
| ATOM | 72 | O6   | G A | 3 | 42.425 | -19.207 | 117.222 | 1.00 | 0.00 | O |
| ATOM | 73 | N7   | G A | 3 | 41.068 | -21.265 | 119.093 | 1.00 | 0.00 | N |
| ATOM | 74 | C8   | G A | 3 | 40.408 | -21.575 | 120.177 | 1.00 | 0.00 | C |
| ATOM | 75 | N9   | G A | 3 | 40.098 | -20.495 | 120.978 | 1.00 | 0.00 | N |
| ATOM | 76 | C2'  | G A | 3 | 38.201 | -21.441 | 122.344 | 1.00 | 0.00 | C |

|      |     |      |     |   |        |         |         |      |      |   |
|------|-----|------|-----|---|--------|---------|---------|------|------|---|
| ATOM | 77  | C3'  | G A | 3 | 38.242 | -21.874 | 123.800 | 1.00 | 0.00 | C |
| ATOM | 78  | O3'  | G A | 3 | 37.530 | -20.925 | 124.592 | 1.00 | 0.00 | O |
| ATOM | 79  | C4'  | G A | 3 | 39.738 | -21.878 | 124.112 | 1.00 | 0.00 | C |
| ATOM | 80  | O4'  | G A | 3 | 40.278 | -20.789 | 123.297 | 1.00 | 0.00 | O |
| ATOM | 81  | C5'  | G A | 3 | 40.488 | -23.146 | 123.782 | 1.00 | 0.00 | C |
| ATOM | 82  | O5'  | G A | 3 | 39.958 | -23.729 | 122.566 | 1.00 | 0.00 | O |
| ATOM | 83  | O1P  | G A | 3 | 38.935 | -25.890 | 123.353 | 1.00 | 0.00 | O |
| ATOM | 84  | O2P  | G A | 3 | 39.767 | -25.681 | 120.996 | 1.00 | 0.00 | O |
| ATOM | 85  | P    | G A | 3 | 39.928 | -25.318 | 122.425 | 1.00 | 0.00 | P |
| ATOM | 86  | H1   | G A | 3 | 42.192 | -16.914 | 118.176 | 1.00 | 0.00 | H |
| ATOM | 87  | H8   | G A | 3 | 40.125 | -22.597 | 120.429 | 1.00 | 0.00 | H |
| ATOM | 88  | H1'  | G A | 3 | 39.022 | -19.438 | 122.442 | 1.00 | 0.00 | H |
| ATOM | 89  | H21  | G A | 3 | 41.619 | -15.299 | 119.543 | 1.00 | 0.00 | H |
| ATOM | 90  | H3'  | G A | 3 | 37.808 | -22.863 | 123.946 | 1.00 | 0.00 | H |
| ATOM | 91  | H22  | G A | 3 | 40.709 | -15.597 | 121.049 | 1.00 | 0.00 | H |
| ATOM | 92  | H4'  | G A | 3 | 39.840 | -21.699 | 125.183 | 1.00 | 0.00 | H |
| ATOM | 93  | H2'1 | G A | 3 | 38.335 | -22.290 | 121.674 | 1.00 | 0.00 | H |
| ATOM | 94  | H2'2 | G A | 3 | 37.247 | -20.974 | 122.096 | 1.00 | 0.00 | H |
| ATOM | 95  | H5'1 | G A | 3 | 41.545 | -22.912 | 123.650 | 1.00 | 0.00 | H |
| ATOM | 96  | H5'2 | G A | 3 | 40.380 | -23.850 | 124.607 | 1.00 | 0.00 | H |
| ATOM | 97  | C1'  | C A | 4 | 36.772 | -16.334 | 121.369 | 1.00 | 0.00 | C |
| ATOM | 98  | N1   | C A | 4 | 37.207 | -17.215 | 120.249 | 1.00 | 0.00 | N |
| ATOM | 99  | C2   | C A | 4 | 37.885 | -16.626 | 119.184 | 1.00 | 0.00 | C |
| ATOM | 100 | O2   | C A | 4 | 38.098 | -15.407 | 119.210 | 1.00 | 0.00 | O |
| ATOM | 101 | N3   | C A | 4 | 38.289 | -17.410 | 118.155 | 1.00 | 0.00 | N |
| ATOM | 102 | C4   | C A | 4 | 38.042 | -18.727 | 118.155 | 1.00 | 0.00 | C |
| ATOM | 103 | N4   | C A | 4 | 38.463 | -19.446 | 117.124 | 1.00 | 0.00 | N |
| ATOM | 104 | C5   | C A | 4 | 37.345 | -19.356 | 119.236 | 1.00 | 0.00 | C |
| ATOM | 105 | C6   | C A | 4 | 36.951 | -18.549 | 120.263 | 1.00 | 0.00 | C |
| ATOM | 106 | C2'  | C A | 4 | 35.416 | -16.704 | 121.950 | 1.00 | 0.00 | C |
| ATOM | 107 | C3'  | C A | 4 | 35.608 | -16.399 | 123.428 | 1.00 | 0.00 | C |
| ATOM | 108 | O3'  | C A | 4 | 35.362 | -15.013 | 123.656 | 1.00 | 0.00 | O |
| ATOM | 109 | C4'  | C A | 4 | 37.070 | -16.772 | 123.664 | 1.00 | 0.00 | C |
| ATOM | 110 | O4'  | C A | 4 | 37.735 | -16.445 | 122.402 | 1.00 | 0.00 | O |
| ATOM | 111 | C5'  | C A | 4 | 37.349 | -18.219 | 123.994 | 1.00 | 0.00 | C |
| ATOM | 112 | O5'  | C A | 4 | 36.449 | -19.075 | 123.245 | 1.00 | 0.00 | O |
| ATOM | 113 | O1P  | C A | 4 | 35.021 | -20.127 | 125.029 | 1.00 | 0.00 | O |
| ATOM | 114 | O2P  | C A | 4 | 35.412 | -21.332 | 122.864 | 1.00 | 0.00 | O |
| ATOM | 115 | P    | C A | 4 | 35.941 | -20.430 | 123.916 | 1.00 | 0.00 | P |
| ATOM | 116 | H5   | C A | 4 | 37.138 | -20.427 | 119.238 | 1.00 | 0.00 | H |
| ATOM | 117 | H6   | C A | 4 | 36.420 | -18.983 | 121.110 | 1.00 | 0.00 | H |
| ATOM | 118 | H1'  | C A | 4 | 36.779 | -15.304 | 121.015 | 1.00 | 0.00 | H |
| ATOM | 119 | H3'  | C A | 4 | 34.944 | -16.991 | 124.056 | 1.00 | 0.00 | H |
| ATOM | 120 | H4'  | C A | 4 | 37.421 | -16.167 | 124.500 | 1.00 | 0.00 | H |
| ATOM | 121 | H41  | C A | 4 | 38.288 | -20.461 | 117.100 | 1.00 | 0.00 | H |
| ATOM | 122 | H42  | C A | 4 | 38.962 | -18.991 | 116.347 | 1.00 | 0.00 | H |
| ATOM | 123 | H2'1 | C A | 4 | 35.169 | -17.753 | 121.792 | 1.00 | 0.00 | H |
| ATOM | 124 | H2'2 | C A | 4 | 34.606 | -16.109 | 121.523 | 1.00 | 0.00 | H |
| ATOM | 125 | H5'1 | C A | 4 | 38.381 | -18.455 | 123.737 | 1.00 | 0.00 | H |
| ATOM | 126 | H5'2 | C A | 4 | 37.201 | -18.377 | 125.063 | 1.00 | 0.00 | H |
| ATOM | 127 | C1'  | C A | 5 | 35.342 | -12.503 | 118.576 | 1.00 | 0.00 | C |
| ATOM | 128 | N1   | C A | 5 | 35.283 | -13.891 | 118.042 | 1.00 | 0.00 | N |
| ATOM | 129 | C2   | C A | 5 | 35.882 | -14.141 | 116.810 | 1.00 | 0.00 | C |
| ATOM | 130 | O2   | C A | 5 | 36.434 | -13.208 | 116.212 | 1.00 | 0.00 | O |

|      |     |      |     |   |        |         |         |      |      |   |
|------|-----|------|-----|---|--------|---------|---------|------|------|---|
| ATOM | 131 | N3   | C A | 5 | 35.839 | -15.399 | 116.306 | 1.00 | 0.00 | N |
| ATOM | 132 | C4   | C A | 5 | 35.233 | -16.388 | 116.973 | 1.00 | 0.00 | C |
| ATOM | 133 | N4   | C A | 5 | 35.224 | -17.598 | 116.437 | 1.00 | 0.00 | N |
| ATOM | 134 | C5   | C A | 5 | 34.608 | -16.159 | 118.243 | 1.00 | 0.00 | C |
| ATOM | 135 | C6   | C A | 5 | 34.666 | -14.886 | 118.731 | 1.00 | 0.00 | C |
| ATOM | 136 | C2'  | C A | 5 | 34.074 | -12.068 | 119.298 | 1.00 | 0.00 | C |
| ATOM | 137 | C3'  | C A | 5 | 34.628 | -11.198 | 120.415 | 1.00 | 0.00 | C |
| ATOM | 138 | O3'  | C A | 5 | 34.835 | -9.877  | 119.920 | 1.00 | 0.00 | O |
| ATOM | 139 | C4'  | C A | 5 | 35.939 | -11.893 | 120.770 | 1.00 | 0.00 | C |
| ATOM | 140 | O4'  | C A | 5 | 36.414 | -12.442 | 119.501 | 1.00 | 0.00 | O |
| ATOM | 141 | C5'  | C A | 5 | 35.852 | -13.015 | 121.779 | 1.00 | 0.00 | C |
| ATOM | 142 | O5'  | C A | 5 | 34.619 | -13.755 | 121.584 | 1.00 | 0.00 | O |
| ATOM | 143 | O1P  | C A | 5 | 33.322 | -13.290 | 123.690 | 1.00 | 0.00 | O |
| ATOM | 144 | O2P  | C A | 5 | 32.930 | -15.417 | 122.417 | 1.00 | 0.00 | O |
| ATOM | 145 | P    | C A | 5 | 33.885 | -14.371 | 122.858 | 1.00 | 0.00 | P |
| ATOM | 146 | H5   | C A | 5 | 34.108 | -16.959 | 118.789 | 1.00 | 0.00 | H |
| ATOM | 147 | H6   | C A | 5 | 34.207 | -14.663 | 119.695 | 1.00 | 0.00 | H |
| ATOM | 148 | H1'  | C A | 5 | 35.573 | -11.830 | 117.750 | 1.00 | 0.00 | H |
| ATOM | 149 | H3'  | C A | 5 | 33.956 | -11.159 | 121.273 | 1.00 | 0.00 | H |
| ATOM | 150 | H4'  | C A | 5 | 36.602 | -11.130 | 121.180 | 1.00 | 0.00 | H |
| ATOM | 151 | H41  | C A | 5 | 34.766 | -18.378 | 116.931 | 1.00 | 0.00 | H |
| ATOM | 152 | H42  | C A | 5 | 35.674 | -17.761 | 115.523 | 1.00 | 0.00 | H |
| ATOM | 153 | H2'1 | C A | 5 | 33.514 | -12.914 | 119.695 | 1.00 | 0.00 | H |
| ATOM | 154 | H2'2 | C A | 5 | 33.402 | -11.504 | 118.649 | 1.00 | 0.00 | H |
| ATOM | 155 | H5'1 | C A | 5 | 36.706 | -13.681 | 121.649 | 1.00 | 0.00 | H |
| ATOM | 156 | H5'2 | C A | 5 | 35.875 | -12.594 | 122.783 | 1.00 | 0.00 | H |
| ATOM | 157 | C1'  | G A | 6 | 34.553 | -10.190 | 114.269 | 1.00 | 0.00 | C |
| ATOM | 158 | N1   | G A | 6 | 34.165 | -14.936 | 112.439 | 1.00 | 0.00 | N |
| ATOM | 159 | C2   | G A | 6 | 34.806 | -13.830 | 111.909 | 1.00 | 0.00 | C |
| ATOM | 160 | N2   | G A | 6 | 35.423 | -14.011 | 110.736 | 1.00 | 0.00 | N |
| ATOM | 161 | N3   | G A | 6 | 34.828 | -12.638 | 112.504 | 1.00 | 0.00 | N |
| ATOM | 162 | C4   | G A | 6 | 34.147 | -12.635 | 113.679 | 1.00 | 0.00 | C |
| ATOM | 163 | C5   | G A | 6 | 33.476 | -13.686 | 114.282 | 1.00 | 0.00 | C |
| ATOM | 164 | C6   | G A | 6 | 33.455 | -14.952 | 113.654 | 1.00 | 0.00 | C |
| ATOM | 165 | O6   | G A | 6 | 32.919 | -15.995 | 114.028 | 1.00 | 0.00 | O |
| ATOM | 166 | N7   | G A | 6 | 32.904 | -13.267 | 115.484 | 1.00 | 0.00 | N |
| ATOM | 167 | C8   | G A | 6 | 33.240 | -12.007 | 115.574 | 1.00 | 0.00 | C |
| ATOM | 168 | N9   | G A | 6 | 33.996 | -11.548 | 114.513 | 1.00 | 0.00 | N |
| ATOM | 169 | C2'  | G A | 6 | 33.630 | -9.061  | 114.705 | 1.00 | 0.00 | C |
| ATOM | 170 | C3'  | G A | 6 | 34.616 | -8.022  | 115.211 | 1.00 | 0.00 | C |
| ATOM | 171 | O3'  | G A | 6 | 35.090 | -7.249  | 114.111 | 1.00 | 0.00 | O |
| ATOM | 172 | C4'  | G A | 6 | 35.719 | -8.875  | 115.836 | 1.00 | 0.00 | C |
| ATOM | 173 | O4'  | G A | 6 | 35.756 | -10.078 | 115.005 | 1.00 | 0.00 | O |
| ATOM | 174 | C5'  | G A | 6 | 35.516 | -9.286  | 117.274 | 1.00 | 0.00 | C |
| ATOM | 175 | O5'  | G A | 6 | 34.112 | -9.554  | 117.515 | 1.00 | 0.00 | O |
| ATOM | 176 | O1P  | G A | 6 | 33.443 | -7.743  | 119.130 | 1.00 | 0.00 | O |
| ATOM | 177 | O2P  | G A | 6 | 32.216 | -9.933  | 119.122 | 1.00 | 0.00 | O |
| ATOM | 178 | P    | G A | 6 | 33.498 | -9.206  | 118.946 | 1.00 | 0.00 | P |
| ATOM | 179 | H1   | G A | 6 | 34.214 | -15.816 | 111.902 | 1.00 | 0.00 | H |
| ATOM | 180 | H8   | G A | 6 | 32.950 | -11.371 | 116.410 | 1.00 | 0.00 | H |
| ATOM | 181 | H1'  | G A | 6 | 34.798 | -10.107 | 113.209 | 1.00 | 0.00 | H |
| ATOM | 182 | H21  | G A | 6 | 35.405 | -14.936 | 110.283 | 1.00 | 0.00 | H |
| ATOM | 183 | H3'  | G A | 6 | 34.167 | -7.356  | 115.951 | 1.00 | 0.00 | H |
| ATOM | 184 | H22  | G A | 6 | 35.916 | -13.226 | 110.286 | 1.00 | 0.00 | H |

|      |     |      |     |   |        |         |         |      |      |   |
|------|-----|------|-----|---|--------|---------|---------|------|------|---|
| ATOM | 185 | H4'  | G A | 6 | 36.638 | -8.293  | 115.782 | 1.00 | 0.00 | H |
| ATOM | 186 | H2'1 | G A | 6 | 32.940 | -9.370  | 115.492 | 1.00 | 0.00 | H |
| ATOM | 187 | H2'2 | G A | 6 | 33.031 | -8.673  | 113.881 | 1.00 | 0.00 | H |
| ATOM | 188 | H5'1 | G A | 6 | 36.102 | -10.182 | 117.477 | 1.00 | 0.00 | H |
| ATOM | 189 | H5'2 | G A | 6 | 35.855 | -8.483  | 117.928 | 1.00 | 0.00 | H |
| ATOM | 190 | C1'  | C A | 7 | 33.640 | -10.039 | 109.403 | 1.00 | 0.00 | C |
| ATOM | 191 | N1   | C A | 7 | 32.779 | -10.846 | 110.309 | 1.00 | 0.00 | N |
| ATOM | 192 | C2   | C A | 7 | 32.553 | -12.180 | 109.976 | 1.00 | 0.00 | C |
| ATOM | 193 | O2   | C A | 7 | 33.071 | -12.636 | 108.949 | 1.00 | 0.00 | O |
| ATOM | 194 | N3   | C A | 7 | 31.771 | -12.934 | 110.787 | 1.00 | 0.00 | N |
| ATOM | 195 | C4   | C A | 7 | 31.221 | -12.412 | 111.892 | 1.00 | 0.00 | C |
| ATOM | 196 | N4   | C A | 7 | 30.467 | -13.195 | 112.650 | 1.00 | 0.00 | N |
| ATOM | 197 | C5   | C A | 7 | 31.433 | -11.042 | 112.258 | 1.00 | 0.00 | C |
| ATOM | 198 | C6   | C A | 7 | 32.228 | -10.303 | 111.428 | 1.00 | 0.00 | C |
| ATOM | 199 | C2'  | C A | 7 | 33.174 | -8.600  | 109.234 | 1.00 | 0.00 | C |
| ATOM | 200 | C3'  | C A | 7 | 34.493 | -7.849  | 109.128 | 1.00 | 0.00 | C |
| ATOM | 201 | O3'  | C A | 7 | 34.948 | -7.892  | 107.777 | 1.00 | 0.00 | O |
| ATOM | 202 | C4'  | C A | 7 | 35.405 | -8.630  | 110.070 | 1.00 | 0.00 | C |
| ATOM | 203 | O4'  | C A | 7 | 34.943 | -10.014 | 109.958 | 1.00 | 0.00 | O |
| ATOM | 204 | C5'  | C A | 7 | 35.368 | -8.227  | 111.528 | 1.00 | 0.00 | C |
| ATOM | 205 | O5'  | C A | 7 | 34.018 | -7.857  | 111.900 | 1.00 | 0.00 | O |
| ATOM | 206 | O1P  | C A | 7 | 34.205 | -5.398  | 112.403 | 1.00 | 0.00 | O |
| ATOM | 207 | O2P  | C A | 7 | 32.432 | -6.776  | 113.521 | 1.00 | 0.00 | O |
| ATOM | 208 | P    | C A | 7 | 33.809 | -6.700  | 112.977 | 1.00 | 0.00 | P |
| ATOM | 209 | H5   | C A | 7 | 30.982 | -10.610 | 113.152 | 1.00 | 0.00 | H |
| ATOM | 210 | H6   | C A | 7 | 32.425 | -9.258  | 111.667 | 1.00 | 0.00 | H |
| ATOM | 211 | H1'  | C A | 7 | 33.695 | -10.547 | 108.441 | 1.00 | 0.00 | H |
| ATOM | 212 | H3'  | C A | 7 | 34.397 | -6.809  | 109.444 | 1.00 | 0.00 | H |
| ATOM | 213 | H4'  | C A | 7 | 36.425 | -8.491  | 109.712 | 1.00 | 0.00 | H |
| ATOM | 214 | H41  | C A | 7 | 30.035 | -12.820 | 113.507 | 1.00 | 0.00 | H |
| ATOM | 215 | H42  | C A | 7 | 30.314 | -14.178 | 112.386 | 1.00 | 0.00 | H |
| ATOM | 216 | H2'1 | C A | 7 | 32.588 | -8.251  | 110.084 | 1.00 | 0.00 | H |
| ATOM | 217 | H2'2 | C A | 7 | 32.566 | -8.463  | 108.339 | 1.00 | 0.00 | H |
| ATOM | 218 | H5'1 | C A | 7 | 35.704 | -9.066  | 112.140 | 1.00 | 0.00 | H |
| ATOM | 219 | H5'2 | C A | 7 | 36.038 | -7.382  | 111.681 | 1.00 | 0.00 | H |
| ATOM | 220 | C1'  | A A | 8 | 31.902 | -11.852 | 105.138 | 1.00 | 0.00 | C |
| ATOM | 221 | N1   | A A | 8 | 28.793 | -14.542 | 108.211 | 1.00 | 0.00 | N |
| ATOM | 222 | C2   | A A | 8 | 29.482 | -14.868 | 107.121 | 1.00 | 0.00 | C |
| ATOM | 223 | N3   | A A | 8 | 30.270 | -14.124 | 106.375 | 1.00 | 0.00 | N |
| ATOM | 224 | C4   | A A | 8 | 30.319 | -12.869 | 106.860 | 1.00 | 0.00 | C |
| ATOM | 225 | C5   | A A | 8 | 29.677 | -12.376 | 107.960 | 1.00 | 0.00 | C |
| ATOM | 226 | C6   | A A | 8 | 28.865 | -13.283 | 108.672 | 1.00 | 0.00 | C |
| ATOM | 227 | N6   | A A | 8 | 28.173 | -12.942 | 109.772 | 1.00 | 0.00 | N |
| ATOM | 228 | N7   | A A | 8 | 29.968 | -11.036 | 108.152 | 1.00 | 0.00 | N |
| ATOM | 229 | C8   | A A | 8 | 30.772 | -10.749 | 107.170 | 1.00 | 0.00 | C |
| ATOM | 230 | N9   | A A | 8 | 31.033 | -11.813 | 106.345 | 1.00 | 0.00 | N |
| ATOM | 231 | C2'  | A A | 8 | 31.837 | -10.584 | 104.296 | 1.00 | 0.00 | C |
| ATOM | 232 | C3'  | A A | 8 | 33.270 | -10.461 | 103.799 | 1.00 | 0.00 | C |
| ATOM | 233 | O3'  | A A | 8 | 33.430 | -11.266 | 102.634 | 1.00 | 0.00 | O |
| ATOM | 234 | C4'  | A A | 8 | 34.086 | -10.985 | 104.980 | 1.00 | 0.00 | C |
| ATOM | 235 | O4'  | A A | 8 | 33.236 | -12.021 | 105.573 | 1.00 | 0.00 | O |
| ATOM | 236 | C5'  | A A | 8 | 34.442 | -9.979  | 106.048 | 1.00 | 0.00 | C |
| ATOM | 237 | O5'  | A A | 8 | 33.345 | -9.047  | 106.229 | 1.00 | 0.00 | O |
| ATOM | 238 | O1P  | A A | 8 | 34.312 | -6.856  | 105.451 | 1.00 | 0.00 | O |

|      |     |      |     |    |        |         |         |      |      |   |
|------|-----|------|-----|----|--------|---------|---------|------|------|---|
| ATOM | 239 | O2P  | A A | 8  | 32.465 | -6.882  | 107.150 | 1.00 | 0.00 | O |
| ATOM | 240 | P    | A A | 8  | 33.680 | -7.533  | 106.601 | 1.00 | 0.00 | P |
| ATOM | 241 | H2   | A A | 8  | 29.379 | -15.903 | 106.799 | 1.00 | 0.00 | H |
| ATOM | 242 | H8   | A A | 8  | 31.198 | -9.758  | 107.016 | 1.00 | 0.00 | H |
| ATOM | 243 | H1'  | A A | 8  | 31.628 | -12.726 | 104.549 | 1.00 | 0.00 | H |
| ATOM | 244 | H3'  | A A | 8  | 33.534 | -9.431  | 103.565 | 1.00 | 0.00 | H |
| ATOM | 245 | H4'  | A A | 8  | 35.015 | -11.380 | 104.571 | 1.00 | 0.00 | H |
| ATOM | 246 | H61  | A A | 8  | 27.597 | -13.645 | 110.256 | 1.00 | 0.00 | H |
| ATOM | 247 | H62  | A A | 8  | 28.220 | -11.977 | 110.130 | 1.00 | 0.00 | H |
| ATOM | 248 | H2'1 | A A | 8  | 31.544 | -9.714  | 104.881 | 1.00 | 0.00 | H |
| ATOM | 249 | H2'2 | A A | 8  | 31.136 | -10.675 | 103.466 | 1.00 | 0.00 | H |
| ATOM | 250 | H5'1 | A A | 8  | 34.634 | -10.505 | 106.984 | 1.00 | 0.00 | H |
| ATOM | 251 | H5'2 | A A | 8  | 35.338 | -9.439  | 105.748 | 1.00 | 0.00 | H |
| ATOM | 252 | C1'  | C A | 9  | 28.901 | -14.745 | 102.439 | 1.00 | 0.00 | C |
| ATOM | 253 | N1   | C A | 9  | 28.339 | -13.837 | 103.476 | 1.00 | 0.00 | N |
| ATOM | 254 | C2   | C A | 9  | 27.465 | -14.380 | 104.416 | 1.00 | 0.00 | C |
| ATOM | 255 | O2   | C A | 9  | 27.194 | -15.586 | 104.351 | 1.00 | 0.00 | O |
| ATOM | 256 | N3   | C A | 9  | 26.943 | -13.570 | 105.368 | 1.00 | 0.00 | N |
| ATOM | 257 | C4   | C A | 9  | 27.255 | -12.268 | 105.411 | 1.00 | 0.00 | C |
| ATOM | 258 | N4   | C A | 9  | 26.718 | -11.522 | 106.365 | 1.00 | 0.00 | N |
| ATOM | 259 | C5   | C A | 9  | 28.148 | -11.681 | 104.455 | 1.00 | 0.00 | C |
| ATOM | 260 | C6   | C A | 9  | 28.666 | -12.517 | 103.507 | 1.00 | 0.00 | C |
| ATOM | 261 | C2'  | C A | 9  | 29.036 | -14.102 | 101.067 | 1.00 | 0.00 | C |
| ATOM | 262 | C3'  | C A | 9  | 30.317 | -14.737 | 100.542 | 1.00 | 0.00 | C |
| ATOM | 263 | O3'  | C A | 9  | 30.005 | -15.998 | 99.955  | 1.00 | 0.00 | O |
| ATOM | 264 | C4'  | C A | 9  | 31.165 | -14.881 | 101.803 | 1.00 | 0.00 | C |
| ATOM | 265 | O4'  | C A | 9  | 30.193 | -15.139 | 102.867 | 1.00 | 0.00 | O |
| ATOM | 266 | C5'  | C A | 9  | 31.997 | -13.682 | 102.193 | 1.00 | 0.00 | C |
| ATOM | 267 | O5'  | C A | 9  | 31.273 | -12.463 | 101.892 | 1.00 | 0.00 | O |
| ATOM | 268 | O1P  | C A | 9  | 32.651 | -11.400 | 100.074 | 1.00 | 0.00 | O |
| ATOM | 269 | O2P  | C A | 9  | 31.252 | -9.968  | 101.586 | 1.00 | 0.00 | O |
| ATOM | 270 | P    | C A | 9  | 32.094 | -11.179 | 101.422 | 1.00 | 0.00 | P |
| ATOM | 271 | H5   | C A | 9  | 28.400 | -10.619 | 104.483 | 1.00 | 0.00 | H |
| ATOM | 272 | H6   | C A | 9  | 29.356 | -12.118 | 102.764 | 1.00 | 0.00 | H |
| ATOM | 273 | H1'  | C A | 9  | 28.277 | -15.638 | 102.393 | 1.00 | 0.00 | H |
| ATOM | 274 | H3'  | C A | 9  | 30.811 | -14.106 | 99.804  | 1.00 | 0.00 | H |
| ATOM | 275 | H4'  | C A | 9  | 31.843 | -15.717 | 101.634 | 1.00 | 0.00 | H |
| ATOM | 276 | H41  | C A | 9  | 26.943 | -10.518 | 106.424 | 1.00 | 0.00 | H |
| ATOM | 277 | H42  | C A | 9  | 26.074 | -11.947 | 107.050 | 1.00 | 0.00 | H |
| ATOM | 278 | H2'1 | C A | 9  | 29.128 | -13.017 | 101.124 | 1.00 | 0.00 | H |
| ATOM | 279 | H2'2 | C A | 9  | 28.187 | -14.325 | 100.420 | 1.00 | 0.00 | H |
| ATOM | 280 | H5'1 | C A | 9  | 32.216 | -13.728 | 103.260 | 1.00 | 0.00 | H |
| ATOM | 281 | H5'2 | C A | 9  | 32.934 | -13.702 | 101.636 | 1.00 | 0.00 | H |
| ATOM | 282 | C1'  | C A | 10 | 24.755 | -17.327 | 101.621 | 1.00 | 0.00 | C |
| ATOM | 283 | N1   | C A | 10 | 24.686 | -15.910 | 102.071 | 1.00 | 0.00 | N |
| ATOM | 284 | C2   | C A | 10 | 23.892 | -15.616 | 103.177 | 1.00 | 0.00 | C |
| ATOM | 285 | O2   | C A | 10 | 23.281 | -16.537 | 103.737 | 1.00 | 0.00 | O |
| ATOM | 286 | N3   | C A | 10 | 23.816 | -14.333 | 103.606 | 1.00 | 0.00 | N |
| ATOM | 287 | C4   | C A | 10 | 24.488 | -13.357 | 102.980 | 1.00 | 0.00 | C |
| ATOM | 288 | N4   | C A | 10 | 24.380 | -12.119 | 103.441 | 1.00 | 0.00 | N |
| ATOM | 289 | C5   | C A | 10 | 25.309 | -13.629 | 101.836 | 1.00 | 0.00 | C |
| ATOM | 290 | C6   | C A | 10 | 25.376 | -14.931 | 101.427 | 1.00 | 0.00 | C |
| ATOM | 291 | C2'  | C A | 10 | 24.801 | -17.488 | 100.108 | 1.00 | 0.00 | C |
| ATOM | 292 | C3'  | C A | 10 | 25.721 | -18.689 | 99.944  | 1.00 | 0.00 | C |



|      |     |      |   |   |    |        |         |         |      |      |   |
|------|-----|------|---|---|----|--------|---------|---------|------|------|---|
| ATOM | 293 | O3'  | C | A | 10 | 24.956 | -19.885 | 100.079 | 1.00 | 0.00 | O |
| ATOM | 294 | C4'  | C | A | 10 | 26.719 | -18.510 | 101.085 | 1.00 | 0.00 | C |
| ATOM | 295 | O4'  | C | A | 10 | 25.938 | -17.893 | 102.156 | 1.00 | 0.00 | O |
| ATOM | 296 | C5'  | C | A | 10 | 27.918 | -17.637 | 100.797 | 1.00 | 0.00 | C |
| ATOM | 297 | O5'  | C | A | 10 | 27.527 | -16.534 | 99.940  | 1.00 | 0.00 | O |
| ATOM | 298 | O1P  | C | A | 10 | 28.773 | -16.988 | 97.802  | 1.00 | 0.00 | O |
| ATOM | 299 | O2P  | C | A | 10 | 28.158 | -14.636 | 98.421  | 1.00 | 0.00 | O |
| ATOM | 300 | P    | C | A | 10 | 28.573 | -15.988 | 98.869  | 1.00 | 0.00 | P |
| ATOM | 301 | H5   | C | A | 10 | 25.854 | -12.839 | 101.320 | 1.00 | 0.00 | H |
| ATOM | 302 | H6   | C | A | 10 | 25.993 | -15.189 | 100.567 | 1.00 | 0.00 | H |
| ATOM | 303 | H1'  | C | A | 10 | 23.906 | -17.862 | 102.046 | 1.00 | 0.00 | H |
| ATOM | 304 | H3'  | C | A | 10 | 26.222 | -18.690 | 98.977  | 1.00 | 0.00 | H |
| ATOM | 305 | H4'  | C | A | 10 | 27.086 | -19.504 | 101.342 | 1.00 | 0.00 | H |
| ATOM | 306 | H41  | C | A | 10 | 24.888 | -11.352 | 102.980 | 1.00 | 0.00 | H |
| ATOM | 307 | H42  | C | A | 10 | 23.787 | -11.927 | 104.262 | 1.00 | 0.00 | H |
| ATOM | 308 | H2'1 | C | A | 10 | 25.207 | -16.609 | 99.609  | 1.00 | 0.00 | H |
| ATOM | 309 | H2'2 | C | A | 10 | 23.815 | -17.681 | 99.682  | 1.00 | 0.00 | H |
| ATOM | 310 | H5'1 | C | A | 10 | 28.314 | -17.251 | 101.737 | 1.00 | 0.00 | H |
| ATOM | 311 | H5'2 | C | A | 10 | 28.684 | -18.234 | 100.304 | 1.00 | 0.00 | H |
| ATOM | 312 | C1'  | T | A | 11 | 19.975 | -18.411 | 102.305 | 1.00 | 0.00 | C |
| ATOM | 313 | N1   | T | A | 11 | 20.387 | -17.016 | 102.000 | 1.00 | 0.00 | N |
| ATOM | 314 | C2   | T | A | 11 | 19.921 | -16.023 | 102.839 | 1.00 | 0.00 | C |
| ATOM | 315 | O2   | T | A | 11 | 19.201 | -16.252 | 103.796 | 1.00 | 0.00 | O |
| ATOM | 316 | N3   | T | A | 11 | 20.329 | -14.741 | 102.520 | 1.00 | 0.00 | N |
| ATOM | 317 | C4   | T | A | 11 | 21.136 | -14.376 | 101.462 | 1.00 | 0.00 | C |
| ATOM | 318 | O4   | T | A | 11 | 21.432 | -13.188 | 101.273 | 1.00 | 0.00 | O |
| ATOM | 319 | C5   | T | A | 11 | 21.573 | -15.480 | 100.641 | 1.00 | 0.00 | C |
| ATOM | 320 | C6   | T | A | 11 | 21.195 | -16.742 | 100.924 | 1.00 | 0.00 | C |
| ATOM | 321 | C7   | T | A | 11 | 22.455 | -15.128 | 99.481  | 1.00 | 0.00 | C |
| ATOM | 322 | C2'  | T | A | 11 | 19.692 | -19.253 | 101.067 | 1.00 | 0.00 | C |
| ATOM | 323 | C3'  | T | A | 11 | 20.193 | -20.623 | 101.493 | 1.00 | 0.00 | C |
| ATOM | 324 | O3'  | T | A | 11 | 19.165 | -21.293 | 102.220 | 1.00 | 0.00 | O |
| ATOM | 325 | C4'  | T | A | 11 | 21.395 | -20.288 | 102.371 | 1.00 | 0.00 | C |
| ATOM | 326 | O4'  | T | A | 11 | 21.030 | -19.027 | 103.018 | 1.00 | 0.00 | O |
| ATOM | 327 | C5'  | T | A | 11 | 22.716 | -20.100 | 101.660 | 1.00 | 0.00 | C |
| ATOM | 328 | O5'  | T | A | 11 | 22.496 | -19.453 | 100.382 | 1.00 | 0.00 | O |
| ATOM | 329 | O1P  | T | A | 11 | 23.146 | -21.222 | 98.714  | 1.00 | 0.00 | O |
| ATOM | 330 | O2P  | T | A | 11 | 23.337 | -18.794 | 98.107  | 1.00 | 0.00 | O |
| ATOM | 331 | P    | T | A | 11 | 23.434 | -19.843 | 99.153  | 1.00 | 0.00 | P |
| ATOM | 332 | H3   | T | A | 11 | 19.998 | -13.984 | 103.133 | 1.00 | 0.00 | H |
| ATOM | 333 | H6   | T | A | 11 | 21.538 | -17.561 | 100.289 | 1.00 | 0.00 | H |
| ATOM | 334 | H1'  | T | A | 11 | 19.103 | -18.376 | 102.958 | 1.00 | 0.00 | H |
| ATOM | 335 | H3'  | T | A | 11 | 20.486 | -21.234 | 100.640 | 1.00 | 0.00 | H |
| ATOM | 336 | H4'  | T | A | 11 | 21.512 | -21.111 | 103.078 | 1.00 | 0.00 | H |
| ATOM | 337 | H71  | T | A | 11 | 21.934 | -15.348 | 98.549  | 1.00 | 0.00 | H |
| ATOM | 338 | H72  | T | A | 11 | 22.699 | -14.065 | 99.519  | 1.00 | 0.00 | H |
| ATOM | 339 | H73  | T | A | 11 | 23.373 | -15.713 | 99.531  | 1.00 | 0.00 | H |
| ATOM | 340 | H2'1 | T | A | 11 | 20.227 | -18.890 | 100.190 | 1.00 | 0.00 | H |
| ATOM | 341 | H2'2 | T | A | 11 | 18.631 | -19.278 | 100.816 | 1.00 | 0.00 | H |
| ATOM | 342 | H5'1 | T | A | 11 | 23.371 | -19.486 | 102.277 | 1.00 | 0.00 | H |
| ATOM | 343 | H5'2 | T | A | 11 | 23.180 | -21.074 | 101.505 | 1.00 | 0.00 | H |
| ATOM | 344 | C1'  | A | A | 12 | 15.302 | -17.317 | 103.570 | 1.00 | 0.00 | C |
| ATOM | 345 | N1   | A | A | 12 | 16.672 | -12.533 | 102.317 | 1.00 | 0.00 | N |
| ATOM | 346 | C2   | A | A | 12 | 15.963 | -13.030 | 103.324 | 1.00 | 0.00 | C |

|      |     |      |   |   |    |        |         |         |      |      |   |
|------|-----|------|---|---|----|--------|---------|---------|------|------|---|
| ATOM | 347 | N3   | A | A | 12 | 15.647 | -14.280 | 103.592 | 1.00 | 0.00 | N |
| ATOM | 348 | C4   | A | A | 12 | 16.156 | -15.097 | 102.652 | 1.00 | 0.00 | C |
| ATOM | 349 | C5   | A | A | 12 | 16.899 | -14.750 | 101.560 | 1.00 | 0.00 | C |
| ATOM | 350 | C6   | A | A | 12 | 17.166 | -13.374 | 101.395 | 1.00 | 0.00 | C |
| ATOM | 351 | N6   | A | A | 12 | 17.885 | -12.884 | 100.370 | 1.00 | 0.00 | N |
| ATOM | 352 | N7   | A | A | 12 | 17.248 | -15.864 | 100.817 | 1.00 | 0.00 | N |
| ATOM | 353 | C8   | A | A | 12 | 16.708 | -16.853 | 101.466 | 1.00 | 0.00 | C |
| ATOM | 354 | N9   | A | A | 12 | 16.030 | -16.464 | 102.594 | 1.00 | 0.00 | N |
| ATOM | 355 | C2'  | A | A | 12 | 14.561 | -18.484 | 102.932 | 1.00 | 0.00 | C |
| ATOM | 356 | C3'  | A | A | 12 | 14.720 | -19.573 | 103.981 | 1.00 | 0.00 | C |
| ATOM | 357 | O3'  | A | A | 12 | 13.701 | -19.424 | 104.968 | 1.00 | 0.00 | O |
| ATOM | 358 | C4'  | A | A | 12 | 16.114 | -19.302 | 104.546 | 1.00 | 0.00 | C |
| ATOM | 359 | O4'  | A | A | 12 | 16.254 | -17.846 | 104.474 | 1.00 | 0.00 | O |
| ATOM | 360 | C5'  | A | A | 12 | 17.269 | -19.935 | 103.811 | 1.00 | 0.00 | C |
| ATOM | 361 | O5'  | A | A | 12 | 17.007 | -19.931 | 102.384 | 1.00 | 0.00 | O |
| ATOM | 362 | O1P  | A | A | 12 | 16.793 | -22.376 | 101.824 | 1.00 | 0.00 | O |
| ATOM | 363 | O2P  | A | A | 12 | 17.553 | -20.748 | 100.071 | 1.00 | 0.00 | O |
| ATOM | 364 | P    | A | A | 12 | 17.542 | -21.146 | 101.501 | 1.00 | 0.00 | P |
| ATOM | 365 | H2   | A | A | 12 | 15.587 | -12.294 | 104.035 | 1.00 | 0.00 | H |
| ATOM | 366 | H8   | A | A | 12 | 16.787 | -17.893 | 101.147 | 1.00 | 0.00 | H |
| ATOM | 367 | H1'  | A | A | 12 | 14.620 | -16.683 | 104.135 | 1.00 | 0.00 | H |
| ATOM | 368 | H3'  | A | A | 12 | 14.659 | -20.571 | 103.549 | 1.00 | 0.00 | H |
| ATOM | 369 | H4'  | A | A | 12 | 16.120 | -19.681 | 105.568 | 1.00 | 0.00 | H |
| ATOM | 370 | H61  | A | A | 12 | 18.054 | -11.871 | 100.297 | 1.00 | 0.00 | H |
| ATOM | 371 | H62  | A | A | 12 | 18.266 | -13.524 | 99.657  | 1.00 | 0.00 | H |
| ATOM | 372 | H2'1 | A | A | 12 | 15.001 | -18.783 | 101.981 | 1.00 | 0.00 | H |
| ATOM | 373 | H2'2 | A | A | 12 | 13.511 | -18.258 | 102.751 | 1.00 | 0.00 | H |
| ATOM | 374 | H5'1 | A | A | 12 | 18.178 | -19.370 | 104.018 | 1.00 | 0.00 | H |
| ATOM | 375 | H5'2 | A | A | 12 | 17.398 | -20.959 | 104.158 | 1.00 | 0.00 | H |
| ATOM | 376 | C1'  | G | A | 13 | 11.481 | -14.214 | 104.214 | 1.00 | 0.00 | C |
| ATOM | 377 | N1   | G | A | 13 | 13.880 | -11.406 | 100.694 | 1.00 | 0.00 | N |
| ATOM | 378 | C2   | G | A | 13 | 13.258 | -11.017 | 101.867 | 1.00 | 0.00 | C |
| ATOM | 379 | N2   | G | A | 13 | 13.274 | -9.704  | 102.137 | 1.00 | 0.00 | N |
| ATOM | 380 | N3   | G | A | 13 | 12.666 | -11.868 | 102.702 | 1.00 | 0.00 | N |
| ATOM | 381 | C4   | G | A | 13 | 12.738 | -13.154 | 102.268 | 1.00 | 0.00 | C |
| ATOM | 382 | C5   | G | A | 13 | 13.334 | -13.634 | 101.114 | 1.00 | 0.00 | C |
| ATOM | 383 | C6   | G | A | 13 | 13.966 | -12.730 | 100.227 | 1.00 | 0.00 | C |
| ATOM | 384 | O6   | G | A | 13 | 14.542 | -12.963 | 99.164  | 1.00 | 0.00 | O |
| ATOM | 385 | N7   | G | A | 13 | 13.187 | -15.020 | 101.034 | 1.00 | 0.00 | N |
| ATOM | 386 | C8   | G | A | 13 | 12.527 | -15.330 | 102.120 | 1.00 | 0.00 | C |
| ATOM | 387 | N9   | G | A | 13 | 12.217 | -14.249 | 102.919 | 1.00 | 0.00 | N |
| ATOM | 388 | C2'  | G | A | 13 | 10.320 | -15.195 | 104.287 | 1.00 | 0.00 | C |
| ATOM | 389 | C3'  | G | A | 13 | 10.361 | -15.629 | 105.743 | 1.00 | 0.00 | C |
| ATOM | 390 | O3'  | G | A | 13 | 9.649  | -14.680 | 106.534 | 1.00 | 0.00 | O |
| ATOM | 391 | C4'  | G | A | 13 | 11.857 | -15.633 | 106.055 | 1.00 | 0.00 | C |
| ATOM | 392 | O4'  | G | A | 13 | 12.397 | -14.544 | 105.240 | 1.00 | 0.00 | O |
| ATOM | 393 | C5'  | G | A | 13 | 12.607 | -16.901 | 105.724 | 1.00 | 0.00 | C |
| ATOM | 394 | O5'  | G | A | 13 | 12.077 | -17.483 | 104.509 | 1.00 | 0.00 | O |
| ATOM | 395 | O1P  | G | A | 13 | 11.054 | -19.645 | 105.295 | 1.00 | 0.00 | O |
| ATOM | 396 | O2P  | G | A | 13 | 11.886 | -19.436 | 102.938 | 1.00 | 0.00 | O |
| ATOM | 397 | P    | G | A | 13 | 12.047 | -19.072 | 104.367 | 1.00 | 0.00 | P |
| ATOM | 398 | H1   | G | A | 13 | 14.315 | -10.668 | 100.119 | 1.00 | 0.00 | H |
| ATOM | 399 | H8   | G | A | 13 | 12.243 | -16.351 | 102.371 | 1.00 | 0.00 | H |
| ATOM | 400 | H1'  | G | A | 13 | 11.141 | -13.191 | 104.384 | 1.00 | 0.00 | H |

|      |     |      |     |    |        |         |         |      |      |   |
|------|-----|------|-----|----|--------|---------|---------|------|------|---|
| ATOM | 401 | H21  | G A | 13 | 13.738 | -9.053  | 101.485 | 1.00 | 0.00 | H |
| ATOM | 402 | H3'  | G A | 13 | 9.927  | -16.618 | 105.888 | 1.00 | 0.00 | H |
| ATOM | 403 | H22  | G A | 13 | 12.826 | -9.351  | 102.992 | 1.00 | 0.00 | H |
| ATOM | 404 | H4'  | G A | 13 | 11.959 | -15.453 | 107.124 | 1.00 | 0.00 | H |
| ATOM | 405 | H2'1 | G A | 13 | 10.454 | -16.045 | 103.617 | 1.00 | 0.00 | H |
| ATOM | 406 | H2'2 | G A | 13 | 9.367  | -14.728 | 104.037 | 1.00 | 0.00 | H |
| ATOM | 407 | H5'1 | G A | 13 | 13.664 | -16.667 | 105.591 | 1.00 | 0.00 | H |
| ATOM | 408 | H5'2 | G A | 13 | 12.499 | -17.605 | 106.549 | 1.00 | 0.00 | H |
| ATOM | 409 | C1'  | G A | 14 | 8.891  | -10.089 | 103.311 | 1.00 | 0.00 | C |
| ATOM | 410 | N1   | G A | 14 | 11.266 | -10.263 | 98.799  | 1.00 | 0.00 | N |
| ATOM | 411 | C2   | G A | 14 | 11.018 | -9.186  | 99.631  | 1.00 | 0.00 | C |
| ATOM | 412 | N2   | G A | 14 | 11.458 | -7.997  | 99.203  | 1.00 | 0.00 | N |
| ATOM | 413 | N3   | G A | 14 | 10.381 | -9.288  | 100.797 | 1.00 | 0.00 | N |
| ATOM | 414 | C4   | G A | 14 | 10.000 | -10.563 | 101.066 | 1.00 | 0.00 | C |
| ATOM | 415 | C5   | G A | 14 | 10.200 | -11.696 | 100.296 | 1.00 | 0.00 | C |
| ATOM | 416 | C6   | G A | 14 | 10.878 | -11.591 | 99.062  | 1.00 | 0.00 | C |
| ATOM | 417 | O6   | G A | 14 | 11.149 | -12.472 | 98.245  | 1.00 | 0.00 | O |
| ATOM | 418 | N7   | G A | 14 | 9.651  | -12.813 | 100.932 | 1.00 | 0.00 | N |
| ATOM | 419 | C8   | G A | 14 | 9.151  | -12.333 | 102.041 | 1.00 | 0.00 | C |
| ATOM | 420 | N9   | G A | 14 | 9.323  | -10.973 | 102.194 | 1.00 | 0.00 | N |
| ATOM | 421 | C2'  | G A | 14 | 7.537  | -10.458 | 103.898 | 1.00 | 0.00 | C |
| ATOM | 422 | C3'  | G A | 14 | 7.732  | -10.146 | 105.373 | 1.00 | 0.00 | C |
| ATOM | 423 | O3'  | G A | 14 | 7.486  | -8.760  | 105.596 | 1.00 | 0.00 | O |
| ATOM | 424 | C4'  | G A | 14 | 9.195  | -10.518 | 105.606 | 1.00 | 0.00 | C |
| ATOM | 425 | O4'  | G A | 14 | 9.856  | -10.195 | 104.341 | 1.00 | 0.00 | O |
| ATOM | 426 | C5'  | G A | 14 | 9.475  | -11.964 | 105.942 | 1.00 | 0.00 | C |
| ATOM | 427 | O5'  | G A | 14 | 8.576  | -12.823 | 105.198 | 1.00 | 0.00 | O |
| ATOM | 428 | O1P  | G A | 14 | 7.152  | -13.867 | 106.990 | 1.00 | 0.00 | O |
| ATOM | 429 | O2P  | G A | 14 | 7.539  | -15.082 | 104.830 | 1.00 | 0.00 | O |
| ATOM | 430 | P    | G A | 14 | 8.069  | -14.174 | 105.876 | 1.00 | 0.00 | P |
| ATOM | 431 | H1   | G A | 14 | 11.774 | -10.078 | 97.920  | 1.00 | 0.00 | H |
| ATOM | 432 | H8   | G A | 14 | 8.643  | -12.954 | 102.780 | 1.00 | 0.00 | H |
| ATOM | 433 | H1'  | G A | 14 | 8.896  | -9.060  | 102.952 | 1.00 | 0.00 | H |
| ATOM | 434 | H21  | G A | 14 | 11.954 | -7.926  | 98.302  | 1.00 | 0.00 | H |
| ATOM | 435 | H3'  | G A | 14 | 7.071  | -10.737 | 106.006 | 1.00 | 0.00 | H |
| ATOM | 436 | H22  | G A | 14 | 11.304 | -7.154  | 99.774  | 1.00 | 0.00 | H |
| ATOM | 437 | H4'  | G A | 14 | 9.548  | -9.908  | 106.438 | 1.00 | 0.00 | H |
| ATOM | 438 | H2'1 | G A | 14 | 7.291  | -11.508 | 103.744 | 1.00 | 0.00 | H |
| ATOM | 439 | H2'2 | G A | 14 | 6.726  | -9.866  | 103.471 | 1.00 | 0.00 | H |
| ATOM | 440 | H5'1 | G A | 14 | 10.507 | -12.198 | 105.684 | 1.00 | 0.00 | H |
| ATOM | 441 | H5'2 | G A | 14 | 9.331  | -12.117 | 107.012 | 1.00 | 0.00 | H |
| ATOM | 442 | C1'  | A A | 15 | 7.453  | -6.249  | 100.539 | 1.00 | 0.00 | C |
| ATOM | 443 | N1   | A A | 15 | 8.782  | -9.306  | 96.636  | 1.00 | 0.00 | N |
| ATOM | 444 | C2   | A A | 15 | 8.975  | -8.010  | 96.870  | 1.00 | 0.00 | C |
| ATOM | 445 | N3   | A A | 15 | 8.607  | -7.282  | 97.903  | 1.00 | 0.00 | N |
| ATOM | 446 | C4   | A A | 15 | 7.943  | -8.041  | 98.794  | 1.00 | 0.00 | C |
| ATOM | 447 | C5   | A A | 15 | 7.660  | -9.375  | 98.704  | 1.00 | 0.00 | C |
| ATOM | 448 | C6   | A A | 15 | 8.116  | -10.037 | 97.544  | 1.00 | 0.00 | C |
| ATOM | 449 | N6   | A A | 15 | 7.913  | -11.346 | 97.318  | 1.00 | 0.00 | N |
| ATOM | 450 | N7   | A A | 15 | 6.960  | -9.815  | 99.814  | 1.00 | 0.00 | N |
| ATOM | 451 | C8   | A A | 15 | 6.830  | -8.746  | 100.543 | 1.00 | 0.00 | C |
| ATOM | 452 | N9   | A A | 15 | 7.404  | -7.630  | 99.988  | 1.00 | 0.00 | N |
| ATOM | 453 | C2'  | A A | 15 | 6.180  | -5.833  | 101.267 | 1.00 | 0.00 | C |
| ATOM | 454 | C3'  | A A | 15 | 6.727  | -4.970  | 102.393 | 1.00 | 0.00 | C |

|      |     |      |   |   |    |       |         |         |      |      |   |
|------|-----|------|---|---|----|-------|---------|---------|------|------|---|
| ATOM | 455 | O3'  | A | A | 15 | 6.923 | -3.644  | 101.912 | 1.00 | 0.00 | O |
| ATOM | 456 | C4'  | A | A | 15 | 8.046 | -5.659  | 102.741 | 1.00 | 0.00 | C |
| ATOM | 457 | O4'  | A | A | 15 | 8.523 | -6.189  | 101.461 | 1.00 | 0.00 | O |
| ATOM | 458 | C5'  | A | A | 15 | 7.970 | -6.793  | 103.735 | 1.00 | 0.00 | C |
| ATOM | 459 | O5'  | A | A | 15 | 6.744 | -7.541  | 103.534 | 1.00 | 0.00 | O |
| ATOM | 460 | O1P  | A | A | 15 | 5.445 | -7.111  | 105.646 | 1.00 | 0.00 | O |
| ATOM | 461 | O2P  | A | A | 15 | 5.070 | -9.228  | 104.350 | 1.00 | 0.00 | O |
| ATOM | 462 | P    | A | A | 15 | 6.016 | -8.179  | 104.802 | 1.00 | 0.00 | P |
| ATOM | 463 | H2   | A | A | 15 | 9.519 | -7.473  | 96.092  | 1.00 | 0.00 | H |
| ATOM | 464 | H8   | A | A | 15 | 6.315 | -8.735  | 101.503 | 1.00 | 0.00 | H |
| ATOM | 465 | H1'  | A | A | 15 | 7.676 | -5.564  | 99.721  | 1.00 | 0.00 | H |
| ATOM | 466 | H3'  | A | A | 15 | 6.058 | -4.948  | 103.254 | 1.00 | 0.00 | H |
| ATOM | 467 | H4'  | A | A | 15 | 8.702 | -4.894  | 103.155 | 1.00 | 0.00 | H |
| ATOM | 468 | H61  | A | A | 15 | 8.270 | -11.780 | 96.454  | 1.00 | 0.00 | H |
| ATOM | 469 | H62  | A | A | 15 | 7.401 | -11.914 | 98.009  | 1.00 | 0.00 | H |
| ATOM | 470 | H2'1 | A | A | 15 | 5.629 | -6.690  | 101.655 | 1.00 | 0.00 | H |
| ATOM | 471 | H2'2 | A | A | 15 | 5.504 | -5.268  | 100.627 | 1.00 | 0.00 | H |
| ATOM | 472 | H5'1 | A | A | 15 | 8.829 | -7.448  | 103.596 | 1.00 | 0.00 | H |
| ATOM | 473 | H5'2 | A | A | 15 | 7.990 | -6.384  | 104.744 | 1.00 | 0.00 | H |
| ATOM | 474 | C1'  | C | A | 16 | 6.673 | -3.944  | 96.210  | 1.00 | 0.00 | C |
| ATOM | 475 | N1   | C | A | 16 | 6.118 | -5.305  | 96.450  | 1.00 | 0.00 | N |
| ATOM | 476 | C2   | C | A | 16 | 6.371 | -6.290  | 95.498  | 1.00 | 0.00 | C |
| ATOM | 477 | O2   | C | A | 16 | 7.040 | -5.995  | 94.499  | 1.00 | 0.00 | O |
| ATOM | 478 | N3   | C | A | 16 | 5.874 | -7.535  | 95.697  | 1.00 | 0.00 | N |
| ATOM | 479 | C4   | C | A | 16 | 5.153 | -7.822  | 96.787  | 1.00 | 0.00 | C |
| ATOM | 480 | N4   | C | A | 16 | 4.697 | -9.058  | 96.932  | 1.00 | 0.00 | N |
| ATOM | 481 | C5   | C | A | 16 | 4.873 | -6.829  | 97.782  | 1.00 | 0.00 | C |
| ATOM | 482 | C6   | C | A | 16 | 5.386 | -5.581  | 97.564  | 1.00 | 0.00 | C |
| ATOM | 483 | C2'  | C | A | 16 | 5.745 | -2.818  | 96.645  | 1.00 | 0.00 | C |
| ATOM | 484 | C3'  | C | A | 16 | 6.728 | -1.777  | 97.158  | 1.00 | 0.00 | C |
| ATOM | 485 | O3'  | C | A | 16 | 7.203 | -1.002  | 96.061  | 1.00 | 0.00 | O |
| ATOM | 486 | C4'  | C | A | 16 | 7.830 | -2.630  | 97.783  | 1.00 | 0.00 | C |
| ATOM | 487 | O4'  | C | A | 16 | 7.873 | -3.833  | 96.951  | 1.00 | 0.00 | O |
| ATOM | 488 | C5'  | C | A | 16 | 7.622 | -3.045  | 99.222  | 1.00 | 0.00 | C |
| ATOM | 489 | O5'  | C | A | 16 | 6.217 | -3.315  | 99.456  | 1.00 | 0.00 | O |
| ATOM | 490 | O1P  | C | A | 16 | 5.536 | -1.510  | 101.073 | 1.00 | 0.00 | O |
| ATOM | 491 | O2P  | C | A | 16 | 4.316 | -3.702  | 101.054 | 1.00 | 0.00 | O |
| ATOM | 492 | P    | C | A | 16 | 5.597 | -2.972  | 100.885 | 1.00 | 0.00 | P |
| ATOM | 493 | H5   | C | A | 16 | 4.279 | -7.056  | 98.669  | 1.00 | 0.00 | H |
| ATOM | 494 | H6   | C | A | 16 | 5.208 | -4.794  | 98.296  | 1.00 | 0.00 | H |
| ATOM | 495 | H1'  | C | A | 16 | 6.922 | -3.858  | 95.153  | 1.00 | 0.00 | H |
| ATOM | 496 | H3'  | C | A | 16 | 6.272 | -1.117  | 97.898  | 1.00 | 0.00 | H |
| ATOM | 497 | H4'  | C | A | 16 | 8.747 | -2.044  | 97.737  | 1.00 | 0.00 | H |
| ATOM | 498 | H41  | C | A | 16 | 4.140 | -9.305  | 97.764  | 1.00 | 0.00 | H |
| ATOM | 499 | H42  | C | A | 16 | 4.896 | -9.769  | 96.215  | 1.00 | 0.00 | H |
| ATOM | 500 | H2'1 | C | A | 16 | 5.053 | -3.130  | 97.429  | 1.00 | 0.00 | H |
| ATOM | 501 | H2'2 | C | A | 16 | 5.149 | -2.429  | 95.818  | 1.00 | 0.00 | H |
| ATOM | 502 | H5'1 | C | A | 16 | 8.209 | -3.941  | 99.424  | 1.00 | 0.00 | H |
| ATOM | 503 | H5'2 | C | A | 16 | 7.957 | -2.241  | 99.878  | 1.00 | 0.00 | H |
| ATOM | 504 | C1'  | G | A | 17 | 5.759 | -3.794  | 91.347  | 1.00 | 0.00 | C |
| ATOM | 505 | N1   | G | A | 17 | 3.691 | -8.385  | 92.166  | 1.00 | 0.00 | N |
| ATOM | 506 | C2   | G | A | 17 | 4.505 | -7.948  | 91.136  | 1.00 | 0.00 | C |
| ATOM | 507 | N2   | G | A | 17 | 4.806 | -8.855  | 90.198  | 1.00 | 0.00 | N |
| ATOM | 508 | N3   | G | A | 17 | 4.981 | -6.707  | 91.048  | 1.00 | 0.00 | N |

|      |     |      |     |    |       |         |        |      |      |   |
|------|-----|------|-----|----|-------|---------|--------|------|------|---|
| ATOM | 509 | C4   | G A | 17 | 4.568 | -5.922  | 92.078 | 1.00 | 0.00 | C |
| ATOM | 510 | C5   | G A | 17 | 3.755 | -6.268  | 93.145 | 1.00 | 0.00 | C |
| ATOM | 511 | C6   | G A | 17 | 3.253 | -7.587  | 93.242 | 1.00 | 0.00 | C |
| ATOM | 512 | O6   | G A | 17 | 2.524 | -8.081  | 94.102 | 1.00 | 0.00 | O |
| ATOM | 513 | N7   | G A | 17 | 3.568 | -5.170  | 93.986 | 1.00 | 0.00 | N |
| ATOM | 514 | C8   | G A | 17 | 4.261 | -4.216  | 93.419 | 1.00 | 0.00 | C |
| ATOM | 515 | N9   | G A | 17 | 4.897 | -4.596  | 92.254 | 1.00 | 0.00 | N |
| ATOM | 516 | C2'  | G A | 17 | 5.298 | -2.353  | 91.176 | 1.00 | 0.00 | C |
| ATOM | 517 | C3'  | G A | 17 | 6.618 | -1.607  | 91.066 | 1.00 | 0.00 | C |
| ATOM | 518 | O3'  | G A | 17 | 7.070 | -1.653  | 89.715 | 1.00 | 0.00 | O |
| ATOM | 519 | C4'  | G A | 17 | 7.530 | -2.391  | 92.008 | 1.00 | 0.00 | C |
| ATOM | 520 | O4'  | G A | 17 | 7.063 | -3.772  | 91.896 | 1.00 | 0.00 | O |
| ATOM | 521 | C5'  | G A | 17 | 7.500 | -1.986  | 93.463 | 1.00 | 0.00 | C |
| ATOM | 522 | O5'  | G A | 17 | 6.152 | -1.611  | 93.839 | 1.00 | 0.00 | O |
| ATOM | 523 | O1P  | G A | 17 | 6.351 | 0.848   | 94.338 | 1.00 | 0.00 | O |
| ATOM | 524 | O2P  | G A | 17 | 4.574 | -0.521  | 95.464 | 1.00 | 0.00 | O |
| ATOM | 525 | P    | G A | 17 | 5.951 | -0.450  | 94.915 | 1.00 | 0.00 | P |
| ATOM | 526 | H1   | G A | 17 | 3.382 | -9.367  | 92.143 | 1.00 | 0.00 | H |
| ATOM | 527 | H8   | G A | 17 | 4.330 | -3.208  | 93.829 | 1.00 | 0.00 | H |
| ATOM | 528 | H1'  | G A | 17 | 5.809 | -4.303  | 90.384 | 1.00 | 0.00 | H |
| ATOM | 529 | H21  | G A | 17 | 4.438 | -9.815  | 90.275 | 1.00 | 0.00 | H |
| ATOM | 530 | H3'  | G A | 17 | 6.528 | -0.567  | 91.382 | 1.00 | 0.00 | H |
| ATOM | 531 | H22  | G A | 17 | 5.406 | -8.594  | 89.403 | 1.00 | 0.00 | H |
| ATOM | 532 | H4'  | G A | 17 | 8.549 | -2.256  | 91.647 | 1.00 | 0.00 | H |
| ATOM | 533 | H2'1 | G A | 17 | 4.715 | -2.002  | 92.028 | 1.00 | 0.00 | H |
| ATOM | 534 | H2'2 | G A | 17 | 4.688 | -2.215  | 90.283 | 1.00 | 0.00 | H |
| ATOM | 535 | H5'1 | G A | 17 | 7.834 | -2.824  | 94.075 | 1.00 | 0.00 | H |
| ATOM | 536 | H5'2 | G A | 17 | 8.174 | -1.144  | 93.614 | 1.00 | 0.00 | H |
| ATOM | 537 | C1'  | G A | 18 | 4.008 | -5.624  | 87.091 | 1.00 | 0.00 | C |
| ATOM | 538 | N1   | G A | 18 | 0.916 | -8.275  | 90.162 | 1.00 | 0.00 | N |
| ATOM | 539 | C2   | G A | 18 | 1.605 | -8.680  | 89.033 | 1.00 | 0.00 | C |
| ATOM | 540 | N2   | G A | 18 | 1.449 | -9.961  | 88.672 | 1.00 | 0.00 | N |
| ATOM | 541 | N3   | G A | 18 | 2.388 | -7.873  | 88.321 | 1.00 | 0.00 | N |
| ATOM | 542 | C4   | G A | 18 | 2.424 | -6.610  | 88.824 | 1.00 | 0.00 | C |
| ATOM | 543 | C5   | G A | 18 | 1.767 | -6.117  | 89.940 | 1.00 | 0.00 | C |
| ATOM | 544 | C6   | G A | 18 | 0.938 | -6.976  | 90.699 | 1.00 | 0.00 | C |
| ATOM | 545 | O6   | G A | 18 | 0.280 | -6.725  | 91.709 | 1.00 | 0.00 | O |
| ATOM | 546 | N7   | G A | 18 | 2.067 | -4.766  | 90.118 | 1.00 | 0.00 | N |
| ATOM | 547 | C8   | G A | 18 | 2.880 | -4.489  | 89.131 | 1.00 | 0.00 | C |
| ATOM | 548 | N9   | G A | 18 | 3.144 | -5.559  | 88.302 | 1.00 | 0.00 | N |
| ATOM | 549 | C2'  | G A | 18 | 3.952 | -4.370  | 86.230 | 1.00 | 0.00 | C |
| ATOM | 550 | C3'  | G A | 18 | 5.382 | -4.267  | 85.727 | 1.00 | 0.00 | C |
| ATOM | 551 | O3'  | G A | 18 | 5.534 | -5.089  | 84.573 | 1.00 | 0.00 | O |
| ATOM | 552 | C4'  | G A | 18 | 6.198 | -4.781  | 86.913 | 1.00 | 0.00 | C |
| ATOM | 553 | O4'  | G A | 18 | 5.343 | -5.798  | 87.523 | 1.00 | 0.00 | O |
| ATOM | 554 | C5'  | G A | 18 | 6.565 | -3.762  | 87.966 | 1.00 | 0.00 | C |
| ATOM | 555 | O5'  | G A | 18 | 5.479 | -2.818  | 88.135 | 1.00 | 0.00 | O |
| ATOM | 556 | O1P  | G A | 18 | 6.462 | -0.647  | 87.323 | 1.00 | 0.00 | O |
| ATOM | 557 | O2P  | G A | 18 | 4.621 | -0.630  | 89.026 | 1.00 | 0.00 | O |
| ATOM | 558 | P    | G A | 18 | 5.828 | -1.300  | 88.483 | 1.00 | 0.00 | P |
| ATOM | 559 | H1   | G A | 18 | 0.340 | -8.983  | 90.646 | 1.00 | 0.00 | H |
| ATOM | 560 | H8   | G A | 18 | 3.311 | -3.500  | 88.976 | 1.00 | 0.00 | H |
| ATOM | 561 | H1'  | G A | 18 | 3.723 | -6.505  | 86.516 | 1.00 | 0.00 | H |
| ATOM | 562 | H21  | G A | 18 | 0.844 | -10.581 | 89.231 | 1.00 | 0.00 | H |

|      |     |      |     |   |    |        |         |        |      |      |   |
|------|-----|------|-----|---|----|--------|---------|--------|------|------|---|
| ATOM | 563 | H3'  | G   | A | 18 | 5.656  | -3.240  | 85.478 | 1.00 | 0.00 | H |
| ATOM | 564 | H22  | G   | A | 18 | 1.934  | -10.323 | 87.840 | 1.00 | 0.00 | H |
| ATOM | 565 | H4'  | G   | A | 18 | 7.123  | -5.189  | 86.507 | 1.00 | 0.00 | H |
| ATOM | 566 | H2'1 | G   | A | 18 | 3.669  | -3.487  | 86.803 | 1.00 | 0.00 | H |
| ATOM | 567 | H2'2 | G   | A | 18 | 3.246  | -4.465  | 85.404 | 1.00 | 0.00 | H |
| ATOM | 568 | H5'1 | G   | A | 18 | 6.758  | -4.275  | 88.908 | 1.00 | 0.00 | H |
| ATOM | 569 | H5'2 | G   | A | 18 | 7.467  | -3.235  | 87.656 | 1.00 | 0.00 | H |
| ATOM | 570 | C1'  | T   | A | 19 | 1.036  | -8.493  | 84.365 | 1.00 | 0.00 | C |
| ATOM | 571 | N1   | T   | A | 19 | 0.461  | -7.604  | 85.407 | 1.00 | 0.00 | N |
| ATOM | 572 | C2   | T   | A | 19 | -0.402 | -8.176  | 86.320 | 1.00 | 0.00 | C |
| ATOM | 573 | O2   | T   | A | 19 | -0.699 | -9.358  | 86.294 | 1.00 | 0.00 | O |
| ATOM | 574 | N3   | T   | A | 19 | -0.912 | -7.312  | 87.272 | 1.00 | 0.00 | N |
| ATOM | 575 | C4   | T   | A | 19 | -0.644 | -5.965  | 87.387 | 1.00 | 0.00 | C |
| ATOM | 576 | O4   | T   | A | 19 | -1.165 | -5.291  | 88.282 | 1.00 | 0.00 | O |
| ATOM | 577 | C5   | T   | A | 19 | 0.268  | -5.456  | 86.390 | 1.00 | 0.00 | C |
| ATOM | 578 | C6   | T   | A | 19 | 0.785  | -6.269  | 85.447 | 1.00 | 0.00 | C |
| ATOM | 579 | C7   | T   | A | 19 | 0.590  | -3.995  | 86.478 | 1.00 | 0.00 | C |
| ATOM | 580 | C2'  | T   | A | 19 | 1.173  | -7.831  | 82.998 | 1.00 | 0.00 | C |
| ATOM | 581 | C3'  | T   | A | 19 | 2.458  | -8.449  | 82.473 | 1.00 | 0.00 | C |
| ATOM | 582 | O3'  | T   | A | 19 | 2.161  | -9.706  | 81.868 | 1.00 | 0.00 | O |
| ATOM | 583 | C4'  | T   | A | 19 | 3.302  | -8.602  | 83.736 | 1.00 | 0.00 | C |
| ATOM | 584 | O4'  | T   | A | 19 | 2.328  | -8.882  | 84.790 | 1.00 | 0.00 | O |
| ATOM | 585 | C5'  | T   | A | 19 | 4.125  | -7.402  | 84.144 | 1.00 | 0.00 | C |
| ATOM | 586 | O5'  | T   | A | 19 | 3.392  | -6.185  | 83.856 | 1.00 | 0.00 | O |
| ATOM | 587 | O1P  | T   | A | 19 | 4.768  | -5.089  | 82.055 | 1.00 | 0.00 | O |
| ATOM | 588 | O2P  | T   | A | 19 | 3.350  | -3.688  | 83.580 | 1.00 | 0.00 | O |
| ATOM | 589 | P    | T   | A | 19 | 4.203  | -4.888  | 83.405 | 1.00 | 0.00 | P |
| ATOM | 590 | H3   | T   | A | 19 | -1.556 | -7.718  | 87.967 | 1.00 | 0.00 | H |
| ATOM | 591 | H6   | T   | A | 19 | 1.472  | -5.862  | 84.705 | 1.00 | 0.00 | H |
| ATOM | 592 | H1'  | T   | A | 19 | 0.418  | -9.390  | 84.303 | 1.00 | 0.00 | H |
| ATOM | 593 | H3'  | T   | A | 19 | 2.952  | -7.805  | 81.745 | 1.00 | 0.00 | H |
| ATOM | 594 | H4'  | T   | A | 19 | 3.990  | -9.431  | 83.560 | 1.00 | 0.00 | H |
| ATOM | 595 | H71  | T   | A | 19 | 0.199  | -3.483  | 85.599 | 1.00 | 0.00 | H |
| ATOM | 596 | H72  | T   | A | 19 | 0.134  | -3.575  | 87.375 | 1.00 | 0.00 | H |
| ATOM | 597 | H73  | T   | A | 19 | 1.672  | -3.860  | 86.524 | 1.00 | 0.00 | H |
| ATOM | 598 | H2'1 | T   | A | 19 | 1.253  | -6.748  | 83.072 | 1.00 | 0.00 | H |
| ATOM | 599 | H2'2 | T   | A | 19 | 0.328  | -8.053  | 82.345 | 1.00 | 0.00 | H |
| ATOM | 600 | H5'1 | T   | A | 19 | 4.338  | -7.459  | 85.211 | 1.00 | 0.00 | H |
| ATOM | 601 | H5'2 | T   | A | 19 | 5.062  | -7.406  | 83.591 | 1.00 | 0.00 | H |
| ATOM | 602 | C01  | LNK | A | 20 | 0.902  | -10.525 | 78.462 | 0.00 | 0.00 | C |
| ATOM | 603 | O1   | LNK | A | 20 | 1.279  | -9.585  | 79.470 | 1.00 | 0.00 | O |
| ATOM | 604 | S    | LNK | A | 20 | -0.631 | -10.538 | 74.789 | 0.00 | 0.00 | S |
| ATOM | 605 | C02  | LNK | A | 20 | 0.366  | -9.769  | 77.232 | 0.00 | 0.00 | C |
| ATOM | 606 | C03  | LNK | A | 20 | -0.791 | -10.566 | 76.602 | 0.00 | 0.00 | C |
| ATOM | 607 | O1P  | LNK | A | 20 | -0.113 | -8.511  | 81.273 | 1.00 | 0.00 | O |
| ATOM | 608 | O2P  | LNK | A | 20 | -0.096 | -11.008 | 81.019 | 1.00 | 0.00 | O |
| ATOM | 609 | P    | LNK | A | 20 | 0.649  | -9.728  | 80.929 | 1.00 | 0.00 | P |
| ATOM | 610 | H01  | LNK | A | 20 | 0.125  | -11.184 | 78.850 | 0.00 | 0.00 | H |
| ATOM | 611 | H02  | LNK | A | 20 | 1.770  | -11.117 | 78.175 | 0.00 | 0.00 | H |
| ATOM | 612 | H03  | LNK | A | 20 | -1.742 | -10.117 | 76.890 | 0.00 | 0.00 | H |
| ATOM | 613 | H04  | LNK | A | 20 | 1.167  | -9.650  | 76.501 | 0.00 | 0.00 | H |
| ATOM | 614 | H05  | LNK | A | 20 | 0.006  | -8.786  | 77.537 | 0.00 | 0.00 | H |
| ATOM | 615 | H06  | LNK | A | 20 | -0.755 | -11.597 | 76.953 | 0.00 | 0.00 | H |
| ATOM | 616 | AU   | LNK | A | 20 | -1.196 | -10.804 | 74.505 |      |      |   |

TER

|      |     |      |     |   |        |         |        |      |      |   |
|------|-----|------|-----|---|--------|---------|--------|------|------|---|
| ATOM | 618 | C1'  | A B | 2 | -5.881 | -11.074 | 92.388 | 1.00 | 0.00 | C |
| ATOM | 619 | N1   | A B | 2 | -2.763 | -8.452  | 89.267 | 1.00 | 0.00 | N |
| ATOM | 620 | C2   | A B | 2 | -3.127 | -9.730  | 89.307 | 1.00 | 0.00 | C |
| ATOM | 621 | N3   | A B | 2 | -3.940 | -10.343 | 90.140 | 1.00 | 0.00 | N |
| ATOM | 622 | C4   | A B | 2 | -4.419 | -9.471  | 91.047 | 1.00 | 0.00 | C |
| ATOM | 623 | C5   | A B | 2 | -4.146 | -8.137  | 91.144 | 1.00 | 0.00 | C |
| ATOM | 624 | C6   | A B | 2 | -3.258 | -7.607  | 90.184 | 1.00 | 0.00 | C |
| ATOM | 625 | N6   | A B | 2 | -2.896 | -6.313  | 90.152 | 1.00 | 0.00 | N |
| ATOM | 626 | N7   | A B | 2 | -4.824 | -7.562  | 92.204 | 1.00 | 0.00 | N |
| ATOM | 627 | C8   | A B | 2 | -5.484 | -8.553  | 92.725 | 1.00 | 0.00 | C |
| ATOM | 628 | N9   | A B | 2 | -5.289 | -9.743  | 92.074 | 1.00 | 0.00 | N |
| ATOM | 629 | C2'  | A B | 2 | -6.016 | -11.348 | 93.880 | 1.00 | 0.00 | C |
| ATOM | 630 | C3'  | A B | 2 | -7.313 | -12.140 | 93.941 | 1.00 | 0.00 | C |
| ATOM | 631 | O3'  | A B | 2 | -7.035 | -13.514 | 93.680 | 1.00 | 0.00 | O |
| ATOM | 632 | C4'  | A B | 2 | -8.154 | -11.502 | 92.835 | 1.00 | 0.00 | C |
| ATOM | 633 | O4'  | A B | 2 | -7.175 | -11.113 | 91.817 | 1.00 | 0.00 | O |
| ATOM | 634 | C5'  | A B | 2 | -8.958 | -10.284 | 93.223 | 1.00 | 0.00 | C |
| ATOM | 635 | O5'  | A B | 2 | -8.212 | -9.485  | 94.175 | 1.00 | 0.00 | O |
| ATOM | 636 | H2   | A B | 2 | -2.687 | -10.364 | 88.538 | 1.00 | 0.00 | H |
| ATOM | 637 | H8   | A B | 2 | -6.129 | -8.449  | 93.598 | 1.00 | 0.00 | H |
| ATOM | 638 | H1'  | A B | 2 | -5.276 | -11.839 | 91.904 | 1.00 | 0.00 | H |
| ATOM | 639 | H3'  | A B | 2 | -7.803 | -12.049 | 94.910 | 1.00 | 0.00 | H |
| ATOM | 640 | H4'  | A B | 2 | -8.849 | -12.264 | 92.488 | 1.00 | 0.00 | H |
| ATOM | 641 | H61  | A B | 2 | -2.247 | -5.977  | 89.429 | 1.00 | 0.00 | H |
| ATOM | 642 | H62  | A B | 2 | -3.271 | -5.658  | 90.855 | 1.00 | 0.00 | H |
| ATOM | 643 | H2'1 | A B | 2 | -6.085 | -10.431 | 94.465 | 1.00 | 0.00 | H |
| ATOM | 644 | H2'2 | A B | 2 | -5.180 | -11.927 | 94.272 | 1.00 | 0.00 | H |
| ATOM | 645 | H5'1 | A B | 2 | -9.166 | -9.694  | 92.331 | 1.00 | 0.00 | H |
| ATOM | 646 | H5'2 | A B | 2 | -9.899 | -10.604 | 93.668 | 1.00 | 0.00 | H |
| ATOM | 647 | C1'  | C B | 3 | -1.773 | -13.705 | 91.465 | 1.00 | 0.00 | C |
| ATOM | 648 | N1   | C B | 3 | -1.677 | -12.299 | 91.944 | 1.00 | 0.00 | N |
| ATOM | 649 | C2   | C B | 3 | -0.870 | -11.417 | 91.227 | 1.00 | 0.00 | C |
| ATOM | 650 | O2   | C B | 3 | -0.270 | -11.837 | 90.227 | 1.00 | 0.00 | O |
| ATOM | 651 | N3   | C B | 3 | -0.769 | -10.134 | 91.646 | 1.00 | 0.00 | N |
| ATOM | 652 | C4   | C B | 3 | -1.430 | -9.710  | 92.732 | 1.00 | 0.00 | C |
| ATOM | 653 | N4   | C B | 3 | -1.297 | -8.442  | 93.096 | 1.00 | 0.00 | N |
| ATOM | 654 | C5   | C B | 3 | -2.264 | -10.594 | 93.493 | 1.00 | 0.00 | C |
| ATOM | 655 | C6   | C B | 3 | -2.354 | -11.883 | 93.049 | 1.00 | 0.00 | C |
| ATOM | 656 | C2'  | C B | 3 | -1.832 | -14.733 | 92.587 | 1.00 | 0.00 | C |
| ATOM | 657 | C3'  | C B | 3 | -2.771 | -15.780 | 92.008 | 1.00 | 0.00 | C |
| ATOM | 658 | O3'  | C B | 3 | -2.026 | -16.673 | 91.185 | 1.00 | 0.00 | O |
| ATOM | 659 | C4'  | C B | 3 | -3.760 | -14.940 | 91.202 | 1.00 | 0.00 | C |
| ATOM | 660 | O4'  | C B | 3 | -2.960 | -13.818 | 90.705 | 1.00 | 0.00 | O |
| ATOM | 661 | C5'  | C B | 3 | -4.946 | -14.389 | 91.958 | 1.00 | 0.00 | C |
| ATOM | 662 | O5'  | C B | 3 | -4.542 | -14.018 | 93.300 | 1.00 | 0.00 | O |
| ATOM | 663 | O1P  | C B | 3 | -5.811 | -15.633 | 94.757 | 1.00 | 0.00 | O |
| ATOM | 664 | O2P  | C B | 3 | -5.152 | -13.384 | 95.654 | 1.00 | 0.00 | O |
| ATOM | 665 | P    | C B | 3 | -5.586 | -14.197 | 94.491 | 1.00 | 0.00 | P |
| ATOM | 666 | H5   | C B | 3 | -2.797 | -10.256 | 94.381 | 1.00 | 0.00 | H |
| ATOM | 667 | H6   | C B | 3 | -2.982 | -12.590 | 93.590 | 1.00 | 0.00 | H |
| ATOM | 668 | H1'  | C B | 3 | -0.929 | -13.897 | 90.801 | 1.00 | 0.00 | H |
| ATOM | 669 | H3'  | C B | 3 | -3.281 | -16.345 | 92.788 | 1.00 | 0.00 | H |
| ATOM | 670 | H4'  | C B | 3 | -4.142 | -15.578 | 90.405 | 1.00 | 0.00 | H |

|      |     |      |     |   |        |         |        |      |      |   |
|------|-----|------|-----|---|--------|---------|--------|------|------|---|
| ATOM | 671 | H41  | C B | 3 | -1.797 | -8.089  | 93.925 | 1.00 | 0.00 | H |
| ATOM | 672 | H42  | C B | 3 | -0.696 | -7.808  | 92.549 | 1.00 | 0.00 | H |
| ATOM | 673 | H2'1 | C B | 3 | -2.225 | -14.314 | 93.512 | 1.00 | 0.00 | H |
| ATOM | 674 | H2'2 | C B | 3 | -0.852 | -15.158 | 92.809 | 1.00 | 0.00 | H |
| ATOM | 675 | H5'1 | C B | 3 | -5.330 | -13.513 | 91.434 | 1.00 | 0.00 | H |
| ATOM | 676 | H5'2 | C B | 3 | -5.725 | -15.148 | 92.004 | 1.00 | 0.00 | H |
| ATOM | 677 | C1'  | C B | 4 | 2.997  | -14.234 | 90.244 | 1.00 | 0.00 | C |
| ATOM | 678 | N1   | C B | 4 | 2.593  | -13.301 | 91.330 | 1.00 | 0.00 | N |
| ATOM | 679 | C2   | C B | 4 | 3.066  | -11.991 | 91.277 | 1.00 | 0.00 | C |
| ATOM | 680 | O2   | C B | 4 | 3.798  | -11.659 | 90.335 | 1.00 | 0.00 | O |
| ATOM | 681 | N3   | C B | 4 | 2.711  | -11.126 | 92.257 | 1.00 | 0.00 | N |
| ATOM | 682 | C4   | C B | 4 | 1.918  | -11.516 | 93.265 | 1.00 | 0.00 | C |
| ATOM | 683 | N4   | C B | 4 | 1.598  | -10.628 | 94.196 | 1.00 | 0.00 | N |
| ATOM | 684 | C5   | C B | 4 | 1.420  | -12.858 | 93.349 | 1.00 | 0.00 | C |
| ATOM | 685 | C6   | C B | 4 | 1.788  | -13.711 | 92.347 | 1.00 | 0.00 | C |
| ATOM | 686 | C2'  | C B | 4 | 3.268  | -15.653 | 90.722 | 1.00 | 0.00 | C |
| ATOM | 687 | C3'  | C B | 4 | 2.758  | -16.484 | 89.554 | 1.00 | 0.00 | C |
| ATOM | 688 | O3'  | C B | 4 | 3.785  | -16.587 | 88.570 | 1.00 | 0.00 | O |
| ATOM | 689 | C4'  | C B | 4 | 1.562  | -15.674 | 89.058 | 1.00 | 0.00 | C |
| ATOM | 690 | O4'  | C B | 4 | 1.940  | -14.282 | 89.304 | 1.00 | 0.00 | O |
| ATOM | 691 | C5'  | C B | 4 | 0.240  | -15.943 | 89.739 | 1.00 | 0.00 | C |
| ATOM | 692 | O5'  | C B | 4 | 0.460  | -16.202 | 91.149 | 1.00 | 0.00 | O |
| ATOM | 693 | O1P  | C B | 4 | -0.213 | -18.613 | 91.409 | 1.00 | 0.00 | O |
| ATOM | 694 | O2P  | C B | 4 | -0.388 | -17.044 | 93.359 | 1.00 | 0.00 | O |
| ATOM | 695 | P    | C B | 4 | -0.488 | -17.246 | 91.893 | 1.00 | 0.00 | P |
| ATOM | 696 | H5   | C B | 4 | 0.782  | -13.182 | 94.171 | 1.00 | 0.00 | H |
| ATOM | 697 | H6   | C B | 4 | 1.429  | -14.739 | 92.364 | 1.00 | 0.00 | H |
| ATOM | 698 | H1'  | C B | 4 | 3.872  | -13.816 | 89.744 | 1.00 | 0.00 | H |
| ATOM | 699 | H3'  | C B | 4 | 2.454  | -17.483 | 89.866 | 1.00 | 0.00 | H |
| ATOM | 700 | H4'  | C B | 4 | 1.442  | -15.902 | 87.998 | 1.00 | 0.00 | H |
| ATOM | 701 | H41  | C B | 4 | 0.988  | -10.900 | 94.980 | 1.00 | 0.00 | H |
| ATOM | 702 | H42  | C B | 4 | 1.959  | -9.664  | 94.135 | 1.00 | 0.00 | H |
| ATOM | 703 | H2'1 | C B | 4 | 2.732  | -15.890 | 91.640 | 1.00 | 0.00 | H |
| ATOM | 704 | H2'2 | C B | 4 | 4.327  | -15.834 | 90.904 | 1.00 | 0.00 | H |
| ATOM | 705 | H5'1 | C B | 4 | -0.408 | -15.074 | 89.620 | 1.00 | 0.00 | H |
| ATOM | 706 | H5'2 | C B | 4 | -0.231 | -16.808 | 89.275 | 1.00 | 0.00 | H |
| ATOM | 707 | C1'  | G B | 5 | 7.687  | -12.690 | 89.862 | 1.00 | 0.00 | C |
| ATOM | 708 | N1   | G B | 5 | 6.389  | -9.607  | 93.714 | 1.00 | 0.00 | N |
| ATOM | 709 | C2   | G B | 5 | 7.137  | -9.345  | 92.580 | 1.00 | 0.00 | C |
| ATOM | 710 | N2   | G B | 5 | 7.601  | -8.095  | 92.455 | 1.00 | 0.00 | N |
| ATOM | 711 | N3   | G B | 5 | 7.397  | -10.256 | 91.644 | 1.00 | 0.00 | N |
| ATOM | 712 | C4   | G B | 5 | 6.855  | -11.466 | 91.935 | 1.00 | 0.00 | C |
| ATOM | 713 | C5   | G B | 5 | 6.101  | -11.821 | 93.042 | 1.00 | 0.00 | C |
| ATOM | 714 | C6   | G B | 5 | 5.820  | -10.854 | 94.034 | 1.00 | 0.00 | C |
| ATOM | 715 | O6   | G B | 5 | 5.176  | -10.976 | 95.076 | 1.00 | 0.00 | O |
| ATOM | 716 | N7   | G B | 5 | 5.735  | -13.167 | 92.965 | 1.00 | 0.00 | N |
| ATOM | 717 | C8   | G B | 5 | 6.263  | -13.576 | 91.841 | 1.00 | 0.00 | C |
| ATOM | 718 | N9   | G B | 5 | 6.961  | -12.599 | 91.158 | 1.00 | 0.00 | N |
| ATOM | 719 | C2'  | G B | 5 | 8.416  | -14.012 | 89.660 | 1.00 | 0.00 | C |
| ATOM | 720 | C3'  | G B | 5 | 8.252  | -14.239 | 88.166 | 1.00 | 0.00 | C |
| ATOM | 721 | O3'  | G B | 5 | 9.277  | -13.532 | 87.471 | 1.00 | 0.00 | O |
| ATOM | 722 | C4'  | G B | 5 | 6.864  | -13.667 | 87.885 | 1.00 | 0.00 | C |
| ATOM | 723 | O4'  | G B | 5 | 6.737  | -12.552 | 88.823 | 1.00 | 0.00 | O |
| ATOM | 724 | C5'  | G B | 5 | 5.698  | -14.605 | 88.087 | 1.00 | 0.00 | C |



|      |     |      |     |   |        |         |        |      |      |   |
|------|-----|------|-----|---|--------|---------|--------|------|------|---|
| ATOM | 725 | O5'  | G B | 5 | 5.956  | -15.470 | 89.222 | 1.00 | 0.00 | O |
| ATOM | 726 | O1P  | G B | 5 | 6.144  | -17.755 | 88.183 | 1.00 | 0.00 | O |
| ATOM | 727 | O2P  | G B | 5 | 5.391  | -17.517 | 90.564 | 1.00 | 0.00 | O |
| ATOM | 728 | P    | G B | 5 | 5.404  | -16.966 | 89.188 | 1.00 | 0.00 | P |
| ATOM | 729 | H1   | G B | 5 | 6.238  | -8.830  | 94.375 | 1.00 | 0.00 | H |
| ATOM | 730 | H8   | G B | 5 | 6.163  | -14.596 | 91.473 | 1.00 | 0.00 | H |
| ATOM | 731 | H1'  | G B | 5 | 8.378  | -11.850 | 89.799 | 1.00 | 0.00 | H |
| ATOM | 732 | H21  | G B | 5 | 7.392  | -7.395  | 93.181 | 1.00 | 0.00 | H |
| ATOM | 733 | H3'  | G B | 5 | 8.303  | -15.296 | 87.905 | 1.00 | 0.00 | H |
| ATOM | 734 | H22  | G B | 5 | 8.168  | -7.836  | 91.636 | 1.00 | 0.00 | H |
| ATOM | 735 | H4'  | G B | 5 | 6.858  | -13.348 | 86.843 | 1.00 | 0.00 | H |
| ATOM | 736 | H2'1 | G B | 5 | 7.969  | -14.823 | 90.235 | 1.00 | 0.00 | H |
| ATOM | 737 | H2'2 | G B | 5 | 9.468  | -13.951 | 89.940 | 1.00 | 0.00 | H |
| ATOM | 738 | H5'1 | G B | 5 | 4.796  | -14.021 | 88.266 | 1.00 | 0.00 | H |
| ATOM | 739 | H5'2 | G B | 5 | 5.564  | -15.208 | 87.188 | 1.00 | 0.00 | H |
| ATOM | 740 | C1'  | T B | 6 | 11.581 | -9.911  | 91.135 | 1.00 | 0.00 | C |
| ATOM | 741 | N1   | T B | 6 | 10.833 | -10.672 | 92.172 | 1.00 | 0.00 | N |
| ATOM | 742 | C2   | T B | 6 | 10.414 | -9.973  | 93.286 | 1.00 | 0.00 | C |
| ATOM | 743 | O2   | T B | 6 | 10.632 | -8.784  | 93.440 | 1.00 | 0.00 | O |
| ATOM | 744 | N3   | T B | 6 | 9.722  | -10.719 | 94.222 | 1.00 | 0.00 | N |
| ATOM | 745 | C4   | T B | 6 | 9.425  | -12.063 | 94.148 | 1.00 | 0.00 | C |
| ATOM | 746 | O4   | T B | 6 | 8.801  | -12.625 | 95.055 | 1.00 | 0.00 | O |
| ATOM | 747 | C5   | T B | 6 | 9.905  | -12.707 | 92.948 | 1.00 | 0.00 | C |
| ATOM | 748 | C6   | T B | 6 | 10.581 | -12.012 | 92.012 | 1.00 | 0.00 | C |
| ATOM | 749 | C7   | T B | 6 | 9.601  | -14.171 | 92.823 | 1.00 | 0.00 | C |
| ATOM | 750 | C2'  | T B | 6 | 12.716 | -10.701 | 90.493 | 1.00 | 0.00 | C |
| ATOM | 751 | C3'  | T B | 6 | 12.675 | -10.202 | 89.057 | 1.00 | 0.00 | C |
| ATOM | 752 | O3'  | T B | 6 | 13.422 | -8.992  | 88.960 | 1.00 | 0.00 | O |
| ATOM | 753 | C4'  | T B | 6 | 11.184 | -9.982  | 88.814 | 1.00 | 0.00 | C |
| ATOM | 754 | O4'  | T B | 6 | 10.666 | -9.557  | 90.117 | 1.00 | 0.00 | O |
| ATOM | 755 | C5'  | T B | 6 | 10.393 | -11.184 | 88.351 | 1.00 | 0.00 | C |
| ATOM | 756 | O5'  | T B | 6 | 10.897 | -12.380 | 88.997 | 1.00 | 0.00 | O |
| ATOM | 757 | O1P  | T B | 6 | 11.867 | -13.707 | 87.090 | 1.00 | 0.00 | O |
| ATOM | 758 | O2P  | T B | 6 | 11.017 | -14.886 | 89.136 | 1.00 | 0.00 | O |
| ATOM | 759 | P    | T B | 6 | 10.879 | -13.754 | 88.188 | 1.00 | 0.00 | P |
| ATOM | 760 | H3   | T B | 6 | 9.394  | -10.218 | 95.063 | 1.00 | 0.00 | H |
| ATOM | 761 | H6   | T B | 6 | 10.933 | -12.521 | 91.115 | 1.00 | 0.00 | H |
| ATOM | 762 | H1'  | T B | 6 | 11.952 | -8.992  | 91.587 | 1.00 | 0.00 | H |
| ATOM | 763 | H3'  | T B | 6 | 13.084 | -10.934 | 88.360 | 1.00 | 0.00 | H |
| ATOM | 764 | H4'  | T B | 6 | 11.098 | -9.211  | 88.048 | 1.00 | 0.00 | H |
| ATOM | 765 | H71  | T B | 6 | 10.532 | -14.738 | 92.848 | 1.00 | 0.00 | H |
| ATOM | 766 | H72  | T B | 6 | 8.962  | -14.482 | 93.650 | 1.00 | 0.00 | H |
| ATOM | 767 | H73  | T B | 6 | 9.089  | -14.357 | 91.878 | 1.00 | 0.00 | H |
| ATOM | 768 | H2'1 | T B | 6 | 12.552 | -11.775 | 90.546 | 1.00 | 0.00 | H |
| ATOM | 769 | H2'2 | T B | 6 | 13.679 | -10.492 | 90.958 | 1.00 | 0.00 | H |
| ATOM | 770 | H5'1 | T B | 6 | 9.343  | -11.043 | 88.604 | 1.00 | 0.00 | H |
| ATOM | 771 | H5'2 | T B | 6 | 10.492 | -11.280 | 87.270 | 1.00 | 0.00 | H |
| ATOM | 772 | C1'  | C B | 7 | 14.231 | -7.174  | 94.320 | 1.00 | 0.00 | C |
| ATOM | 773 | N1   | C B | 7 | 13.772 | -8.541  | 94.697 | 1.00 | 0.00 | N |
| ATOM | 774 | C2   | C B | 7 | 13.099 | -8.691  | 95.908 | 1.00 | 0.00 | C |
| ATOM | 775 | O2   | C B | 7 | 12.911 | -7.691  | 96.616 | 1.00 | 0.00 | O |
| ATOM | 776 | N3   | C B | 7 | 12.673 | -9.926  | 96.270 | 1.00 | 0.00 | N |
| ATOM | 777 | C4   | C B | 7 | 12.892 | -10.988 | 95.484 | 1.00 | 0.00 | C |
| ATOM | 778 | N4   | C B | 7 | 12.451 | -12.169 | 95.886 | 1.00 | 0.00 | N |

|      |     |      |     |   |        |         |         |      |      |   |
|------|-----|------|-----|---|--------|---------|---------|------|------|---|
| ATOM | 779 | C5   | C B | 7 | 13.586 | -10.863 | 94.235  | 1.00 | 0.00 | C |
| ATOM | 780 | C6   | C B | 7 | 14.001 | -9.609  | 93.889  | 1.00 | 0.00 | C |
| ATOM | 781 | C2'  | C B | 7 | 15.585 | -7.152  | 93.625  | 1.00 | 0.00 | C |
| ATOM | 782 | C3'  | C B | 7 | 15.407 | -6.023  | 92.622  | 1.00 | 0.00 | C |
| ATOM | 783 | O3'  | C B | 7 | 15.682 | -4.780  | 93.264  | 1.00 | 0.00 | O |
| ATOM | 784 | C4'  | C B | 7 | 13.940 | -6.153  | 92.220  | 1.00 | 0.00 | C |
| ATOM | 785 | O4'  | C B | 7 | 13.274 | -6.628  | 93.432  | 1.00 | 0.00 | O |
| ATOM | 786 | C5'  | C B | 7 | 13.634 | -7.112  | 91.092  | 1.00 | 0.00 | C |
| ATOM | 787 | O5'  | C B | 7 | 14.511 | -8.263  | 91.179  | 1.00 | 0.00 | O |
| ATOM | 788 | O1P  | C B | 7 | 15.930 | -8.073  | 89.109  | 1.00 | 0.00 | O |
| ATOM | 789 | O2P  | C B | 7 | 15.500 | -10.322 | 90.132  | 1.00 | 0.00 | O |
| ATOM | 790 | P    | C B | 7 | 14.997 | -8.961  | 89.829  | 1.00 | 0.00 | P |
| ATOM | 791 | H5   | C B | 7 | 13.773 | -11.726 | 93.596  | 1.00 | 0.00 | H |
| ATOM | 792 | H6   | C B | 7 | 14.526 | -9.463  | 92.945  | 1.00 | 0.00 | H |
| ATOM | 793 | H1'  | C B | 7 | 14.243 | -6.558  | 95.219  | 1.00 | 0.00 | H |
| ATOM | 794 | H3'  | C B | 7 | 16.063 | -6.136  | 91.758  | 1.00 | 0.00 | H |
| ATOM | 795 | H4'  | C B | 7 | 13.606 | -5.162  | 91.910  | 1.00 | 0.00 | H |
| ATOM | 796 | H41  | C B | 7 | 12.603 | -13.003 | 95.298  | 1.00 | 0.00 | H |
| ATOM | 797 | H42  | C B | 7 | 11.955 | -12.257 | 96.785  | 1.00 | 0.00 | H |
| ATOM | 798 | H2'1 | C B | 7 | 15.808 | -8.094  | 93.126  | 1.00 | 0.00 | H |
| ATOM | 799 | H2'2 | C B | 7 | 16.401 | -6.946  | 94.315  | 1.00 | 0.00 | H |
| ATOM | 800 | H5'1 | C B | 7 | 12.595 | -7.434  | 91.167  | 1.00 | 0.00 | H |
| ATOM | 801 | H5'2 | C B | 7 | 13.786 | -6.605  | 90.141  | 1.00 | 0.00 | H |
| ATOM | 802 | C1'  | C B | 8 | 15.714 | -5.786  | 98.837  | 1.00 | 0.00 | C |
| ATOM | 803 | N1   | C B | 8 | 15.742 | -7.220  | 98.439  | 1.00 | 0.00 | N |
| ATOM | 804 | C2   | C B | 8 | 15.133 | -8.145  | 99.284  | 1.00 | 0.00 | C |
| ATOM | 805 | O2   | C B | 8 | 14.597 | -7.740  | 100.323 | 1.00 | 0.00 | O |
| ATOM | 806 | N3   | C B | 8 | 15.147 | -9.455  | 98.940  | 1.00 | 0.00 | N |
| ATOM | 807 | C4   | C B | 8 | 15.737 | -9.862  | 97.808  | 1.00 | 0.00 | C |
| ATOM | 808 | N4   | C B | 8 | 15.718 | -11.156 | 97.518  | 1.00 | 0.00 | N |
| ATOM | 809 | C5   | C B | 8 | 16.377 | -8.936  | 96.920  | 1.00 | 0.00 | C |
| ATOM | 810 | C6   | C B | 8 | 16.344 | -7.619  | 97.286  | 1.00 | 0.00 | C |
| ATOM | 811 | C2'  | C B | 8 | 16.994 | -5.031  | 98.508  | 1.00 | 0.00 | C |
| ATOM | 812 | C3'  | C B | 8 | 16.466 | -3.656  | 98.133  | 1.00 | 0.00 | C |
| ATOM | 813 | O3'  | C B | 8 | 16.281 | -2.887  | 99.320  | 1.00 | 0.00 | O |
| ATOM | 814 | C4'  | C B | 8 | 15.142 | -3.978  | 97.443  | 1.00 | 0.00 | C |
| ATOM | 815 | O4'  | C B | 8 | 14.650 | -5.167  | 98.140  | 1.00 | 0.00 | O |
| ATOM | 816 | C5'  | C B | 8 | 15.211 | -4.278  | 95.964  | 1.00 | 0.00 | C |
| ATOM | 817 | O5'  | C B | 8 | 16.427 | -5.013  | 95.670  | 1.00 | 0.00 | O |
| ATOM | 818 | O1P  | C B | 8 | 17.746 | -3.409  | 94.246  | 1.00 | 0.00 | O |
| ATOM | 819 | O2P  | C B | 8 | 18.088 | -5.882  | 93.998  | 1.00 | 0.00 | O |
| ATOM | 820 | P    | C B | 8 | 17.156 | -4.763  | 94.275  | 1.00 | 0.00 | P |
| ATOM | 821 | H5   | C B | 8 | 16.863 | -9.263  | 96.002  | 1.00 | 0.00 | H |
| ATOM | 822 | H6   | C B | 8 | 16.811 | -6.875  | 96.639  | 1.00 | 0.00 | H |
| ATOM | 823 | H1'  | C B | 8 | 15.492 | -5.733  | 99.903  | 1.00 | 0.00 | H |
| ATOM | 824 | H3'  | C B | 8 | 17.141 | -3.127  | 97.462  | 1.00 | 0.00 | H |
| ATOM | 825 | H4'  | C B | 8 | 14.497 | -3.109  | 97.574  | 1.00 | 0.00 | H |
| ATOM | 826 | H41  | C B | 8 | 16.162 | -11.496 | 96.652  | 1.00 | 0.00 | H |
| ATOM | 827 | H42  | C B | 8 | 15.261 | -11.821 | 98.158  | 1.00 | 0.00 | H |
| ATOM | 828 | H2'1 | C B | 8 | 17.540 | -5.485  | 97.680  | 1.00 | 0.00 | H |
| ATOM | 829 | H2'2 | C B | 8 | 17.674 | -4.979  | 99.359  | 1.00 | 0.00 | H |
| ATOM | 830 | H5'1 | C B | 8 | 14.344 | -4.875  | 95.678  | 1.00 | 0.00 | H |
| ATOM | 831 | H5'2 | C B | 8 | 15.203 | -3.343  | 95.408  | 1.00 | 0.00 | H |
| ATOM | 832 | C1'  | T B | 9 | 16.523 | -6.484  | 103.669 | 1.00 | 0.00 | C |

|      |     |      |     |    |        |         |         |      |      |   |
|------|-----|------|-----|----|--------|---------|---------|------|------|---|
| ATOM | 833 | N1   | T B | 9  | 17.043 | -7.460  | 102.677 | 1.00 | 0.00 | N |
| ATOM | 834 | C2   | T B | 9  | 16.750 | -8.792  | 102.889 | 1.00 | 0.00 | C |
| ATOM | 835 | O2   | T B | 9  | 16.098 | -9.178  | 103.843 | 1.00 | 0.00 | O |
| ATOM | 836 | N3   | T B | 9  | 17.251 | -9.665  | 101.942 | 1.00 | 0.00 | N |
| ATOM | 837 | C4   | T B | 9  | 18.000 | -9.332  | 100.833 | 1.00 | 0.00 | C |
| ATOM | 838 | O4   | T B | 9  | 18.397 | -10.206 | 100.053 | 1.00 | 0.00 | O |
| ATOM | 839 | C5   | T B | 9  | 18.253 | -7.916  | 100.693 | 1.00 | 0.00 | C |
| ATOM | 840 | C6   | T B | 9  | 17.780 | -7.038  | 101.598 | 1.00 | 0.00 | C |
| ATOM | 841 | C7   | T B | 9  | 19.062 | -7.511  | 99.499  | 1.00 | 0.00 | C |
| ATOM | 842 | C2'  | T B | 9  | 17.484 | -5.338  | 103.965 | 1.00 | 0.00 | C |
| ATOM | 843 | C3'  | T B | 9  | 16.532 | -4.169  | 104.169 | 1.00 | 0.00 | C |
| ATOM | 844 | O3'  | T B | 9  | 16.071 | -4.170  | 105.518 | 1.00 | 0.00 | O |
| ATOM | 845 | C4'  | T B | 9  | 15.412 | -4.467  | 103.174 | 1.00 | 0.00 | C |
| ATOM | 846 | O4'  | T B | 9  | 15.331 | -5.928  | 103.149 | 1.00 | 0.00 | O |
| ATOM | 847 | C5'  | T B | 9  | 15.616 | -3.968  | 101.762 | 1.00 | 0.00 | C |
| ATOM | 848 | O5'  | T B | 9  | 17.015 | -4.086  | 101.399 | 1.00 | 0.00 | O |
| ATOM | 849 | O1P  | T B | 9  | 17.752 | -1.695  | 101.137 | 1.00 | 0.00 | O |
| ATOM | 850 | O2P  | T B | 9  | 18.913 | -3.515  | 99.856  | 1.00 | 0.00 | O |
| ATOM | 851 | P    | T B | 9  | 17.652 | -2.991  | 100.433 | 1.00 | 0.00 | P |
| ATOM | 852 | H3   | T B | 9  | 17.044 | -10.664 | 102.076 | 1.00 | 0.00 | H |
| ATOM | 853 | H6   | T B | 9  | 17.985 | -5.975  | 101.472 | 1.00 | 0.00 | H |
| ATOM | 854 | H1'  | T B | 9  | 16.270 | -7.024  | 104.582 | 1.00 | 0.00 | H |
| ATOM | 855 | H3'  | T B | 9  | 17.008 | -3.214  | 103.950 | 1.00 | 0.00 | H |
| ATOM | 856 | H4'  | T B | 9  | 14.508 | -3.997  | 103.566 | 1.00 | 0.00 | H |
| ATOM | 857 | H71  | T B | 9  | 20.016 | -7.097  | 99.828  | 1.00 | 0.00 | H |
| ATOM | 858 | H72  | T B | 9  | 19.242 | -8.381  | 98.867  | 1.00 | 0.00 | H |
| ATOM | 859 | H73  | T B | 9  | 18.518 | -6.756  | 98.930  | 1.00 | 0.00 | H |
| ATOM | 860 | H2'1 | T B | 9  | 18.170 | -5.151  | 103.141 | 1.00 | 0.00 | H |
| ATOM | 861 | H2'2 | T B | 9  | 18.084 | -5.521  | 104.856 | 1.00 | 0.00 | H |
| ATOM | 862 | H5'1 | T B | 9  | 15.007 | -4.562  | 101.081 | 1.00 | 0.00 | H |
| ATOM | 863 | H5'2 | T B | 9  | 15.307 | -2.926  | 101.705 | 1.00 | 0.00 | H |
| ATOM | 864 | C1'  | A B | 10 | 17.400 | -9.279  | 107.676 | 1.00 | 0.00 | C |
| ATOM | 865 | N1   | A B | 10 | 19.386 | -12.556 | 104.262 | 1.00 | 0.00 | N |
| ATOM | 866 | C2   | A B | 10 | 18.607 | -12.729 | 105.327 | 1.00 | 0.00 | C |
| ATOM | 867 | N3   | A B | 10 | 18.127 | -11.836 | 106.164 | 1.00 | 0.00 | N |
| ATOM | 868 | C4   | A B | 10 | 18.540 | -10.604 | 105.821 | 1.00 | 0.00 | C |
| ATOM | 869 | C5   | A B | 10 | 19.338 | -10.258 | 104.764 | 1.00 | 0.00 | C |
| ATOM | 870 | C6   | A B | 10 | 19.781 | -11.315 | 103.942 | 1.00 | 0.00 | C |
| ATOM | 871 | N6   | A B | 10 | 20.569 | -11.126 | 102.869 | 1.00 | 0.00 | N |
| ATOM | 872 | N7   | A B | 10 | 19.550 | -8.891  | 104.724 | 1.00 | 0.00 | N |
| ATOM | 873 | C8   | A B | 10 | 18.887 | -8.443  | 105.749 | 1.00 | 0.00 | C |
| ATOM | 874 | N9   | A B | 10 | 18.245 | -9.424  | 106.460 | 1.00 | 0.00 | N |
| ATOM | 875 | C2'  | A B | 10 | 17.900 | -8.219  | 108.647 | 1.00 | 0.00 | C |
| ATOM | 876 | C3'  | A B | 10 | 16.601 | -7.643  | 109.187 | 1.00 | 0.00 | C |
| ATOM | 877 | O3'  | A B | 10 | 16.139 | -8.458  | 110.262 | 1.00 | 0.00 | O |
| ATOM | 878 | C4'  | A B | 10 | 15.672 | -7.708  | 107.975 | 1.00 | 0.00 | C |
| ATOM | 879 | O4'  | A B | 10 | 16.100 | -8.908  | 107.255 | 1.00 | 0.00 | O |
| ATOM | 880 | C5'  | A B | 10 | 15.721 | -6.531  | 107.029 | 1.00 | 0.00 | C |
| ATOM | 881 | O5'  | A B | 10 | 17.083 | -6.042  | 106.925 | 1.00 | 0.00 | O |
| ATOM | 882 | O1P  | A B | 10 | 16.955 | -3.749  | 107.956 | 1.00 | 0.00 | O |
| ATOM | 883 | O2P  | A B | 10 | 18.699 | -4.251  | 106.223 | 1.00 | 0.00 | O |
| ATOM | 884 | P    | A B | 10 | 17.322 | -4.477  | 106.726 | 1.00 | 0.00 | P |
| ATOM | 885 | H2   | A B | 10 | 18.326 | -13.761 | 105.533 | 1.00 | 0.00 | H |
| ATOM | 886 | H8   | A B | 10 | 18.845 | -7.388  | 106.018 | 1.00 | 0.00 | H |

|      |     |      |     |    |        |         |         |      |      |   |
|------|-----|------|-----|----|--------|---------|---------|------|------|---|
| ATOM | 887 | H1'  | A B | 10 | 17.331 | -10.252 | 108.161 | 1.00 | 0.00 | H |
| ATOM | 888 | H3'  | A B | 10 | 16.722 | -6.618  | 109.535 | 1.00 | 0.00 | H |
| ATOM | 889 | H4'  | A B | 10 | 14.655 | -7.783  | 108.359 | 1.00 | 0.00 | H |
| ATOM | 890 | H61  | A B | 10 | 20.863 | -11.933 | 102.301 | 1.00 | 0.00 | H |
| ATOM | 891 | H62  | A B | 10 | 20.878 | -10.177 | 102.617 | 1.00 | 0.00 | H |
| ATOM | 892 | H2'1 | A B | 10 | 18.497 | -7.452  | 108.153 | 1.00 | 0.00 | H |
| ATOM | 893 | H2'2 | A B | 10 | 18.508 | -8.644  | 109.447 | 1.00 | 0.00 | H |
| ATOM | 894 | H5'1 | A B | 10 | 15.369 | -6.847  | 106.046 | 1.00 | 0.00 | H |
| ATOM | 895 | H5'2 | A B | 10 | 15.073 | -5.741  | 107.405 | 1.00 | 0.00 | H |
| ATOM | 896 | C1'  | G B | 11 | 19.098 | -13.334 | 109.981 | 1.00 | 0.00 | C |
| ATOM | 897 | N1   | G B | 11 | 22.158 | -13.693 | 105.914 | 1.00 | 0.00 | N |
| ATOM | 898 | C2   | G B | 11 | 21.455 | -14.678 | 106.587 | 1.00 | 0.00 | C |
| ATOM | 899 | N2   | G B | 11 | 21.587 | -15.923 | 106.114 | 1.00 | 0.00 | N |
| ATOM | 900 | N3   | G B | 11 | 20.682 | -14.437 | 107.645 | 1.00 | 0.00 | N |
| ATOM | 901 | C4   | G B | 11 | 20.671 | -13.124 | 107.990 | 1.00 | 0.00 | C |
| ATOM | 902 | C5   | G B | 11 | 21.342 | -12.075 | 107.382 | 1.00 | 0.00 | C |
| ATOM | 903 | C6   | G B | 11 | 22.159 | -12.328 | 106.256 | 1.00 | 0.00 | C |
| ATOM | 904 | O6   | G B | 11 | 22.827 | -11.537 | 105.588 | 1.00 | 0.00 | O |
| ATOM | 905 | N7   | G B | 11 | 21.067 | -10.877 | 108.045 | 1.00 | 0.00 | N |
| ATOM | 906 | C8   | G B | 11 | 20.254 | -11.228 | 109.009 | 1.00 | 0.00 | C |
| ATOM | 907 | N9   | G B | 11 | 19.968 | -12.578 | 109.041 | 1.00 | 0.00 | N |
| ATOM | 908 | C2'  | G B | 11 | 19.172 | -12.839 | 111.419 | 1.00 | 0.00 | C |
| ATOM | 909 | C3'  | G B | 11 | 17.740 | -13.030 | 111.894 | 1.00 | 0.00 | C |
| ATOM | 910 | O3'  | G B | 11 | 17.570 | -14.375 | 112.334 | 1.00 | 0.00 | O |
| ATOM | 911 | C4'  | G B | 11 | 16.922 | -12.724 | 110.641 | 1.00 | 0.00 | C |
| ATOM | 912 | O4'  | G B | 11 | 17.762 | -13.195 | 109.539 | 1.00 | 0.00 | O |
| ATOM | 913 | C5'  | G B | 11 | 16.578 | -11.274 | 110.402 | 1.00 | 0.00 | C |
| ATOM | 914 | O5'  | G B | 11 | 17.681 | -10.433 | 110.821 | 1.00 | 0.00 | O |
| ATOM | 915 | O1P  | G B | 11 | 16.732 | -9.155  | 112.770 | 1.00 | 0.00 | O |
| ATOM | 916 | O2P  | G B | 11 | 18.581 | -8.159  | 111.396 | 1.00 | 0.00 | O |
| ATOM | 917 | P    | G B | 11 | 17.360 | -9.000  | 111.444 | 1.00 | 0.00 | P |
| ATOM | 918 | H1   | G B | 11 | 22.722 | -13.983 | 105.101 | 1.00 | 0.00 | H |
| ATOM | 919 | H8   | G B | 11 | 19.841 | -10.518 | 109.723 | 1.00 | 0.00 | H |
| ATOM | 920 | H1'  | G B | 11 | 19.364 | -14.390 | 109.917 | 1.00 | 0.00 | H |
| ATOM | 921 | H21  | G B | 11 | 22.183 | -16.100 | 105.293 | 1.00 | 0.00 | H |
| ATOM | 922 | H3'  | G B | 11 | 17.484 | -12.350 | 112.706 | 1.00 | 0.00 | H |
| ATOM | 923 | H22  | G B | 11 | 21.093 | -16.702 | 106.572 | 1.00 | 0.00 | H |
| ATOM | 924 | H4'  | G B | 11 | 15.987 | -13.278 | 110.730 | 1.00 | 0.00 | H |
| ATOM | 925 | H2'1 | G B | 11 | 19.473 | -11.793 | 111.481 | 1.00 | 0.00 | H |
| ATOM | 926 | H2'2 | G B | 11 | 19.871 | -13.418 | 112.021 | 1.00 | 0.00 | H |
| ATOM | 927 | H5'1 | G B | 11 | 16.381 | -11.123 | 109.341 | 1.00 | 0.00 | H |
| ATOM | 928 | H5'2 | G B | 11 | 15.684 | -11.021 | 110.972 | 1.00 | 0.00 | H |
| ATOM | 929 | C1'  | G B | 12 | 22.015 | -17.312 | 110.429 | 1.00 | 0.00 | C |
| ATOM | 930 | N1   | G B | 12 | 25.111 | -14.683 | 107.339 | 1.00 | 0.00 | N |
| ATOM | 931 | C2   | G B | 12 | 24.772 | -16.026 | 107.326 | 1.00 | 0.00 | C |
| ATOM | 932 | N2   | G B | 12 | 25.334 | -16.766 | 106.362 | 1.00 | 0.00 | N |
| ATOM | 933 | N3   | G B | 12 | 23.939 | -16.583 | 108.202 | 1.00 | 0.00 | N |
| ATOM | 934 | C4   | G B | 12 | 23.470 | -15.687 | 109.111 | 1.00 | 0.00 | C |
| ATOM | 935 | C5   | G B | 12 | 23.754 | -14.336 | 109.203 | 1.00 | 0.00 | C |
| ATOM | 936 | C6   | G B | 12 | 24.634 | -13.742 | 108.271 | 1.00 | 0.00 | C |
| ATOM | 937 | O6   | G B | 12 | 25.007 | -12.571 | 108.192 | 1.00 | 0.00 | O |
| ATOM | 938 | N7   | G B | 12 | 23.067 | -13.771 | 110.281 | 1.00 | 0.00 | N |
| ATOM | 939 | C8   | G B | 12 | 22.402 | -14.774 | 110.793 | 1.00 | 0.00 | C |
| ATOM | 940 | N9   | G B | 12 | 22.596 | -15.972 | 110.137 | 1.00 | 0.00 | N |

|      |     |      |     |    |        |         |         |      |      |   |
|------|-----|------|-----|----|--------|---------|---------|------|------|---|
| ATOM | 941 | C2'  | G B | 12 | 21.879 | -17.610 | 111.915 | 1.00 | 0.00 | C |
| ATOM | 942 | C3'  | G B | 12 | 20.589 | -18.415 | 111.961 | 1.00 | 0.00 | C |
| ATOM | 943 | O3'  | G B | 12 | 20.880 | -19.782 | 111.681 | 1.00 | 0.00 | O |
| ATOM | 944 | C4'  | G B | 12 | 19.746 | -17.767 | 110.863 | 1.00 | 0.00 | C |
| ATOM | 945 | O4'  | G B | 12 | 20.723 | -17.356 | 109.854 | 1.00 | 0.00 | O |
| ATOM | 946 | C5'  | G B | 12 | 18.931 | -16.562 | 111.266 | 1.00 | 0.00 | C |
| ATOM | 947 | O5'  | G B | 12 | 19.668 | -15.771 | 112.232 | 1.00 | 0.00 | O |
| ATOM | 948 | O1P  | G B | 12 | 18.291 | -15.981 | 114.328 | 1.00 | 0.00 | O |
| ATOM | 949 | O2P  | G B | 12 | 19.719 | -13.950 | 113.964 | 1.00 | 0.00 | O |
| ATOM | 950 | P    | G B | 12 | 18.860 | -15.008 | 113.377 | 1.00 | 0.00 | P |
| ATOM | 951 | H1   | G B | 12 | 25.760 | -14.349 | 106.610 | 1.00 | 0.00 | H |
| ATOM | 952 | H8   | G B | 12 | 21.751 | -14.674 | 111.662 | 1.00 | 0.00 | H |
| ATOM | 953 | H1'  | G B | 12 | 22.628 | -18.064 | 109.933 | 1.00 | 0.00 | H |
| ATOM | 954 | H21  | G B | 12 | 25.976 | -16.328 | 105.685 | 1.00 | 0.00 | H |
| ATOM | 955 | H3'  | G B | 12 | 20.095 | -18.341 | 112.929 | 1.00 | 0.00 | H |
| ATOM | 956 | H22  | G B | 12 | 25.126 | -17.773 | 106.301 | 1.00 | 0.00 | H |
| ATOM | 957 | H4'  | G B | 12 | 19.057 | -18.529 | 110.502 | 1.00 | 0.00 | H |
| ATOM | 958 | H2'1 | G B | 12 | 21.802 | -16.703 | 112.514 | 1.00 | 0.00 | H |
| ATOM | 959 | H2'2 | G B | 12 | 22.720 | -18.187 | 112.301 | 1.00 | 0.00 | H |
| ATOM | 960 | H5'1 | G B | 12 | 18.721 | -15.960 | 110.382 | 1.00 | 0.00 | H |
| ATOM | 961 | H5'2 | G B | 12 | 17.991 | -16.896 | 111.704 | 1.00 | 0.00 | H |
| ATOM | 962 | C1'  | T B | 13 | 26.095 | -19.967 | 109.533 | 1.00 | 0.00 | C |
| ATOM | 963 | N1   | T B | 13 | 26.206 | -18.558 | 109.995 | 1.00 | 0.00 | N |
| ATOM | 964 | C2   | T B | 13 | 27.016 | -17.715 | 109.259 | 1.00 | 0.00 | C |
| ATOM | 965 | O2   | T B | 13 | 27.625 | -18.084 | 108.270 | 1.00 | 0.00 | O |
| ATOM | 966 | N3   | T B | 13 | 27.089 | -16.415 | 109.724 | 1.00 | 0.00 | N |
| ATOM | 967 | C4   | T B | 13 | 26.445 | -15.898 | 110.829 | 1.00 | 0.00 | C |
| ATOM | 968 | O4   | T B | 13 | 26.590 | -14.713 | 111.150 | 1.00 | 0.00 | O |
| ATOM | 969 | C5   | T B | 13 | 25.622 | -16.854 | 111.532 | 1.00 | 0.00 | C |
| ATOM | 970 | C6   | T B | 13 | 25.525 | -18.130 | 111.108 | 1.00 | 0.00 | C |
| ATOM | 971 | C7   | T B | 13 | 24.899 | -16.336 | 112.740 | 1.00 | 0.00 | C |
| ATOM | 972 | C2'  | T B | 13 | 26.029 | -20.983 | 110.668 | 1.00 | 0.00 | C |
| ATOM | 973 | C3'  | T B | 13 | 25.077 | -22.026 | 110.104 | 1.00 | 0.00 | C |
| ATOM | 974 | O3'  | T B | 13 | 25.813 | -22.938 | 109.291 | 1.00 | 0.00 | O |
| ATOM | 975 | C4'  | T B | 13 | 24.096 | -21.188 | 109.289 | 1.00 | 0.00 | C |
| ATOM | 976 | O4'  | T B | 13 | 24.906 | -20.082 | 108.777 | 1.00 | 0.00 | O |
| ATOM | 977 | C5'  | T B | 13 | 22.916 | -20.615 | 110.040 | 1.00 | 0.00 | C |
| ATOM | 978 | O5'  | T B | 13 | 23.326 | -20.233 | 111.378 | 1.00 | 0.00 | O |
| ATOM | 979 | O1P  | T B | 13 | 22.046 | -21.817 | 112.854 | 1.00 | 0.00 | O |
| ATOM | 980 | O2P  | T B | 13 | 22.726 | -19.563 | 113.724 | 1.00 | 0.00 | O |
| ATOM | 981 | P    | T B | 13 | 22.283 | -20.387 | 112.573 | 1.00 | 0.00 | P |
| ATOM | 982 | H3   | T B | 13 | 27.684 | -15.765 | 109.190 | 1.00 | 0.00 | H |
| ATOM | 983 | H6   | T B | 13 | 24.898 | -18.832 | 111.656 | 1.00 | 0.00 | H |
| ATOM | 984 | H1'  | T B | 13 | 26.935 | -20.177 | 108.871 | 1.00 | 0.00 | H |
| ATOM | 985 | H3'  | T B | 13 | 24.565 | -22.578 | 110.891 | 1.00 | 0.00 | H |
| ATOM | 986 | H4'  | T B | 13 | 23.707 | -21.832 | 108.500 | 1.00 | 0.00 | H |
| ATOM | 987 | H71  | T B | 13 | 25.285 | -16.826 | 113.634 | 1.00 | 0.00 | H |
| ATOM | 988 | H72  | T B | 13 | 25.054 | -15.258 | 112.822 | 1.00 | 0.00 | H |
| ATOM | 989 | H73  | T B | 13 | 23.833 | -16.542 | 112.645 | 1.00 | 0.00 | H |
| ATOM | 990 | H2'1 | T B | 13 | 25.641 | -20.548 | 111.588 | 1.00 | 0.00 | H |
| ATOM | 991 | H2'2 | T B | 13 | 27.003 | -21.414 | 110.895 | 1.00 | 0.00 | H |
| ATOM | 992 | H5'1 | T B | 13 | 22.540 | -19.743 | 109.505 | 1.00 | 0.00 | H |
| ATOM | 993 | H5'2 | T B | 13 | 22.131 | -21.368 | 110.098 | 1.00 | 0.00 | H |
| ATOM | 994 | C1'  | G B | 14 | 30.878 | -20.479 | 108.303 | 1.00 | 0.00 | C |

|      |      |      |     |    |        |         |         |      |      |   |
|------|------|------|-----|----|--------|---------|---------|------|------|---|
| ATOM | 995  | N1   | G B | 14 | 31.280 | -15.723 | 110.106 | 1.00 | 0.00 | N |
| ATOM | 996  | C2   | G B | 14 | 31.838 | -16.294 | 108.976 | 1.00 | 0.00 | C |
| ATOM | 997  | N2   | G B | 14 | 32.605 | -15.494 | 108.228 | 1.00 | 0.00 | N |
| ATOM | 998  | N3   | G B | 14 | 31.644 | -17.563 | 108.621 | 1.00 | 0.00 | N |
| ATOM | 999  | C4   | G B | 14 | 30.845 | -18.229 | 109.497 | 1.00 | 0.00 | C |
| ATOM | 1000 | C5   | G B | 14 | 30.249 | -17.744 | 110.649 | 1.00 | 0.00 | C |
| ATOM | 1001 | C6   | G B | 14 | 30.452 | -16.396 | 111.026 | 1.00 | 0.00 | C |
| ATOM | 1002 | O6   | G B | 14 | 30.013 | -15.789 | 112.003 | 1.00 | 0.00 | O |
| ATOM | 1003 | N7   | G B | 14 | 29.506 | -18.752 | 111.270 | 1.00 | 0.00 | N |
| ATOM | 1004 | C8   | G B | 14 | 29.670 | -19.789 | 110.490 | 1.00 | 0.00 | C |
| ATOM | 1005 | N9   | G B | 14 | 30.472 | -19.551 | 109.392 | 1.00 | 0.00 | N |
| ATOM | 1006 | C2'  | G B | 14 | 31.147 | -21.901 | 108.775 | 1.00 | 0.00 | C |
| ATOM | 1007 | C3'  | G B | 14 | 30.640 | -22.726 | 107.602 | 1.00 | 0.00 | C |
| ATOM | 1008 | O3'  | G B | 14 | 31.670 | -22.825 | 106.622 | 1.00 | 0.00 | O |
| ATOM | 1009 | C4'  | G B | 14 | 29.445 | -21.914 | 107.107 | 1.00 | 0.00 | C |
| ATOM | 1010 | O4'  | G B | 14 | 29.825 | -20.524 | 107.359 | 1.00 | 0.00 | O |
| ATOM | 1011 | C5'  | G B | 14 | 28.122 | -22.185 | 107.782 | 1.00 | 0.00 | C |
| ATOM | 1012 | O5'  | G B | 14 | 28.336 | -22.449 | 109.192 | 1.00 | 0.00 | O |
| ATOM | 1013 | O1P  | G B | 14 | 27.662 | -24.861 | 109.442 | 1.00 | 0.00 | O |
| ATOM | 1014 | O2P  | G B | 14 | 27.482 | -23.299 | 111.396 | 1.00 | 0.00 | O |
| ATOM | 1015 | P    | G B | 14 | 27.386 | -23.497 | 109.929 | 1.00 | 0.00 | P |
| ATOM | 1016 | H1   | G B | 14 | 31.487 | -14.729 | 110.289 | 1.00 | 0.00 | H |
| ATOM | 1017 | H8   | G B | 14 | 29.212 | -20.759 | 110.691 | 1.00 | 0.00 | H |
| ATOM | 1018 | H1'  | G B | 14 | 31.754 | -20.060 | 107.806 | 1.00 | 0.00 | H |
| ATOM | 1019 | H21  | G B | 14 | 32.748 | -14.511 | 108.509 | 1.00 | 0.00 | H |
| ATOM | 1020 | H3'  | G B | 14 | 30.336 | -23.727 | 107.909 | 1.00 | 0.00 | H |
| ATOM | 1021 | H22  | G B | 14 | 33.054 | -15.858 | 107.376 | 1.00 | 0.00 | H |
| ATOM | 1022 | H4'  | G B | 14 | 29.330 | -22.137 | 106.046 | 1.00 | 0.00 | H |
| ATOM | 1023 | H2'1 | G B | 14 | 30.608 | -22.141 | 109.691 | 1.00 | 0.00 | H |
| ATOM | 1024 | H2'2 | G B | 14 | 32.205 | -22.083 | 108.961 | 1.00 | 0.00 | H |
| ATOM | 1025 | H5'1 | G B | 14 | 27.476 | -21.316 | 107.665 | 1.00 | 0.00 | H |
| ATOM | 1026 | H5'2 | G B | 14 | 27.652 | -23.049 | 107.313 | 1.00 | 0.00 | H |
| ATOM | 1027 | C1'  | C B | 15 | 35.569 | -18.935 | 107.920 | 1.00 | 0.00 | C |
| ATOM | 1028 | N1   | C B | 15 | 34.843 | -18.838 | 109.215 | 1.00 | 0.00 | N |
| ATOM | 1029 | C2   | C B | 15 | 34.839 | -17.609 | 109.871 | 1.00 | 0.00 | C |
| ATOM | 1030 | O2   | C B | 15 | 35.434 | -16.654 | 109.352 | 1.00 | 0.00 | O |
| ATOM | 1031 | N3   | C B | 15 | 34.183 | -17.498 | 111.052 | 1.00 | 0.00 | N |
| ATOM | 1032 | C4   | C B | 15 | 33.550 | -18.548 | 111.587 | 1.00 | 0.00 | C |
| ATOM | 1033 | N4   | C B | 15 | 32.921 | -18.384 | 112.742 | 1.00 | 0.00 | N |
| ATOM | 1034 | C5   | C B | 15 | 33.540 | -19.829 | 110.938 | 1.00 | 0.00 | C |
| ATOM | 1035 | C6   | C B | 15 | 34.203 | -19.913 | 109.748 | 1.00 | 0.00 | C |
| ATOM | 1036 | C2'  | C B | 15 | 36.298 | -20.257 | 107.724 | 1.00 | 0.00 | C |
| ATOM | 1037 | C3'  | C B | 15 | 36.133 | -20.491 | 106.230 | 1.00 | 0.00 | C |
| ATOM | 1038 | O3'  | C B | 15 | 37.157 | -19.787 | 105.529 | 1.00 | 0.00 | O |
| ATOM | 1039 | C4'  | C B | 15 | 34.745 | -19.922 | 105.947 | 1.00 | 0.00 | C |
| ATOM | 1040 | O4'  | C B | 15 | 34.616 | -18.803 | 106.881 | 1.00 | 0.00 | O |
| ATOM | 1041 | C5'  | C B | 15 | 33.579 | -20.861 | 106.156 | 1.00 | 0.00 | C |
| ATOM | 1042 | O5'  | C B | 15 | 33.840 | -21.720 | 107.294 | 1.00 | 0.00 | O |
| ATOM | 1043 | O1P  | C B | 15 | 34.029 | -24.010 | 106.266 | 1.00 | 0.00 | O |
| ATOM | 1044 | O2P  | C B | 15 | 33.278 | -23.762 | 108.648 | 1.00 | 0.00 | O |
| ATOM | 1045 | P    | C B | 15 | 33.290 | -23.216 | 107.268 | 1.00 | 0.00 | P |
| ATOM | 1046 | H5   | C B | 15 | 33.030 | -20.687 | 111.374 | 1.00 | 0.00 | H |
| ATOM | 1047 | H6   | C B | 15 | 34.218 | -20.863 | 109.213 | 1.00 | 0.00 | H |
| ATOM | 1048 | H1'  | C B | 15 | 36.259 | -18.093 | 107.851 | 1.00 | 0.00 | H |

|      |      |      |   |   |    |        |         |         |      |      |   |
|------|------|------|---|---|----|--------|---------|---------|------|------|---|
| ATOM | 1049 | H3'  | C | B | 15 | 36.183 | -21.549 | 105.974 | 1.00 | 0.00 | H |
| ATOM | 1050 | H4'  | C | B | 15 | 34.737 | -19.609 | 104.903 | 1.00 | 0.00 | H |
| ATOM | 1051 | H41  | C | B | 15 | 32.422 | -19.175 | 113.176 | 1.00 | 0.00 | H |
| ATOM | 1052 | H42  | C | B | 15 | 32.932 | -17.465 | 113.208 | 1.00 | 0.00 | H |
| ATOM | 1053 | H2'1 | C | B | 15 | 35.854 | -21.065 | 108.303 | 1.00 | 0.00 | H |
| ATOM | 1054 | H2'2 | C | B | 15 | 37.351 | -20.194 | 108.002 | 1.00 | 0.00 | H |
| ATOM | 1055 | H5'1 | C | B | 15 | 32.676 | -20.277 | 106.333 | 1.00 | 0.00 | H |
| ATOM | 1056 | H5'2 | C | B | 15 | 33.444 | -21.468 | 105.260 | 1.00 | 0.00 | H |
| ATOM | 1057 | C1'  | G | B | 16 | 39.452 | -16.149 | 109.214 | 1.00 | 0.00 | C |
| ATOM | 1058 | N1   | G | B | 16 | 37.081 | -15.944 | 113.726 | 1.00 | 0.00 | N |
| ATOM | 1059 | C2   | G | B | 16 | 37.721 | -14.946 | 113.013 | 1.00 | 0.00 | C |
| ATOM | 1060 | N2   | G | B | 16 | 37.731 | -13.732 | 113.578 | 1.00 | 0.00 | N |
| ATOM | 1061 | N3   | G | B | 16 | 38.302 | -15.143 | 111.831 | 1.00 | 0.00 | N |
| ATOM | 1062 | C4   | G | B | 16 | 38.201 | -16.432 | 111.414 | 1.00 | 0.00 | C |
| ATOM | 1063 | C5   | G | B | 16 | 37.587 | -17.494 | 112.058 | 1.00 | 0.00 | C |
| ATOM | 1064 | C6   | G | B | 16 | 36.967 | -17.284 | 113.312 | 1.00 | 0.00 | C |
| ATOM | 1065 | O6   | G | B | 16 | 36.377 | -18.093 | 114.031 | 1.00 | 0.00 | O |
| ATOM | 1066 | N7   | G | B | 16 | 37.707 | -18.657 | 111.295 | 1.00 | 0.00 | N |
| ATOM | 1067 | C8   | G | B | 16 | 38.371 | -18.272 | 110.234 | 1.00 | 0.00 | C |
| ATOM | 1068 | N9   | G | B | 16 | 38.708 | -16.933 | 110.235 | 1.00 | 0.00 | N |
| ATOM | 1069 | C2'  | G | B | 16 | 40.595 | -16.918 | 108.563 | 1.00 | 0.00 | C |
| ATOM | 1070 | C3'  | G | B | 16 | 40.556 | -16.397 | 107.136 | 1.00 | 0.00 | C |
| ATOM | 1071 | O3'  | G | B | 16 | 41.293 | -15.179 | 107.062 | 1.00 | 0.00 | O |
| ATOM | 1072 | C4'  | G | B | 16 | 39.063 | -16.184 | 106.892 | 1.00 | 0.00 | C |
| ATOM | 1073 | O4'  | G | B | 16 | 38.538 | -15.785 | 108.198 | 1.00 | 0.00 | O |
| ATOM | 1074 | C5'  | G | B | 16 | 38.285 | -17.384 | 106.405 | 1.00 | 0.00 | C |
| ATOM | 1075 | O5'  | G | B | 16 | 38.796 | -18.587 | 107.031 | 1.00 | 0.00 | O |
| ATOM | 1076 | O1P  | G | B | 16 | 39.782 | -19.873 | 105.107 | 1.00 | 0.00 | O |
| ATOM | 1077 | O2P  | G | B | 16 | 38.936 | -21.093 | 107.128 | 1.00 | 0.00 | O |
| ATOM | 1078 | P    | G | B | 16 | 38.793 | -19.947 | 106.198 | 1.00 | 0.00 | P |
| ATOM | 1079 | H1   | G | B | 16 | 36.657 | -15.686 | 114.629 | 1.00 | 0.00 | H |
| ATOM | 1080 | H8   | G | B | 16 | 38.634 | -18.949 | 109.422 | 1.00 | 0.00 | H |
| ATOM | 1081 | H1'  | G | B | 16 | 39.814 | -15.234 | 109.684 | 1.00 | 0.00 | H |
| ATOM | 1082 | H21  | G | B | 16 | 37.277 | -13.586 | 114.491 | 1.00 | 0.00 | H |
| ATOM | 1083 | H3'  | G | B | 16 | 40.972 | -17.113 | 106.428 | 1.00 | 0.00 | H |
| ATOM | 1084 | H22  | G | B | 16 | 38.193 | -12.947 | 113.098 | 1.00 | 0.00 | H |
| ATOM | 1085 | H4'  | G | B | 16 | 38.974 | -15.401 | 106.139 | 1.00 | 0.00 | H |
| ATOM | 1086 | H2'1 | G | B | 16 | 40.439 | -17.996 | 108.597 | 1.00 | 0.00 | H |
| ATOM | 1087 | H2'2 | G | B | 16 | 41.555 | -16.709 | 109.037 | 1.00 | 0.00 | H |
| ATOM | 1088 | H5'1 | G | B | 16 | 37.233 | -17.255 | 106.658 | 1.00 | 0.00 | H |
| ATOM | 1089 | H5'2 | G | B | 16 | 38.388 | -17.460 | 105.322 | 1.00 | 0.00 | H |
| ATOM | 1090 | C1'  | G | B | 17 | 42.111 | -13.421 | 112.378 | 1.00 | 0.00 | C |
| ATOM | 1091 | N1   | G | B | 17 | 39.705 | -16.203 | 115.912 | 1.00 | 0.00 | N |
| ATOM | 1092 | C2   | G | B | 17 | 39.980 | -14.847 | 115.886 | 1.00 | 0.00 | C |
| ATOM | 1093 | N2   | G | B | 17 | 39.560 | -14.139 | 116.941 | 1.00 | 0.00 | N |
| ATOM | 1094 | N3   | G | B | 17 | 40.622 | -14.247 | 114.885 | 1.00 | 0.00 | N |
| ATOM | 1095 | C4   | G | B | 17 | 40.980 | -15.118 | 113.906 | 1.00 | 0.00 | C |
| ATOM | 1096 | C5   | G | B | 17 | 40.752 | -16.481 | 113.848 | 1.00 | 0.00 | C |
| ATOM | 1097 | C6   | G | B | 17 | 40.068 | -17.120 | 114.907 | 1.00 | 0.00 | C |
| ATOM | 1098 | O6   | G | B | 17 | 39.774 | -18.308 | 115.038 | 1.00 | 0.00 | O |
| ATOM | 1099 | N7   | G | B | 17 | 41.281 | -17.011 | 112.670 | 1.00 | 0.00 | N |
| ATOM | 1100 | C8   | G | B | 17 | 41.799 | -15.975 | 112.062 | 1.00 | 0.00 | C |
| ATOM | 1101 | N9   | G | B | 17 | 41.657 | -14.788 | 112.751 | 1.00 | 0.00 | N |
| ATOM | 1102 | C2'  | G | B | 17 | 43.464 | -13.395 | 111.679 | 1.00 | 0.00 | C |

|      |      |      |     |    |        |         |         |      |      |   |
|------|------|------|-----|----|--------|---------|---------|------|------|---|
| ATOM | 1103 | C3'  | G B | 17 | 43.284 | -12.261 | 110.681 | 1.00 | 0.00 | C |
| ATOM | 1104 | O3'  | G B | 17 | 43.559 | -11.020 | 111.327 | 1.00 | 0.00 | O |
| ATOM | 1105 | C4'  | G B | 17 | 41.815 | -12.391 | 110.282 | 1.00 | 0.00 | C |
| ATOM | 1106 | O4'  | G B | 17 | 41.154 | -12.873 | 111.495 | 1.00 | 0.00 | O |
| ATOM | 1107 | C5'  | G B | 17 | 41.509 | -13.345 | 109.152 | 1.00 | 0.00 | C |
| ATOM | 1108 | O5'  | G B | 17 | 42.385 | -14.497 | 109.232 | 1.00 | 0.00 | O |
| ATOM | 1109 | O1P  | G B | 17 | 43.800 | -14.295 | 107.159 | 1.00 | 0.00 | O |
| ATOM | 1110 | O2P  | G B | 17 | 43.374 | -16.550 | 108.173 | 1.00 | 0.00 | O |
| ATOM | 1111 | P    | G B | 17 | 42.869 | -15.188 | 107.878 | 1.00 | 0.00 | P |
| ATOM | 1112 | H1   | G B | 17 | 39.196 | -16.569 | 116.732 | 1.00 | 0.00 | H |
| ATOM | 1113 | H8   | G B | 17 | 42.299 | -16.042 | 111.096 | 1.00 | 0.00 | H |
| ATOM | 1114 | H1'  | G B | 17 | 42.126 | -12.808 | 113.279 | 1.00 | 0.00 | H |
| ATOM | 1115 | H21  | G B | 17 | 39.060 | -14.609 | 117.710 | 1.00 | 0.00 | H |
| ATOM | 1116 | H3'  | G B | 17 | 43.937 | -12.371 | 109.816 | 1.00 | 0.00 | H |
| ATOM | 1117 | H22  | G B | 17 | 39.735 | -13.125 | 116.982 | 1.00 | 0.00 | H |
| ATOM | 1118 | H4'  | G B | 17 | 41.480 | -11.400 | 109.979 | 1.00 | 0.00 | H |
| ATOM | 1119 | H2'1 | G B | 17 | 43.687 | -14.335 | 111.175 | 1.00 | 0.00 | H |
| ATOM | 1120 | H2'2 | G B | 17 | 44.283 | -13.190 | 112.369 | 1.00 | 0.00 | H |
| ATOM | 1121 | H5'1 | G B | 17 | 40.470 | -13.667 | 109.227 | 1.00 | 0.00 | H |
| ATOM | 1122 | H5'2 | G B | 17 | 41.657 | -12.834 | 108.201 | 1.00 | 0.00 | H |
| ATOM | 1123 | C1'  | C B | 18 | 43.595 | -12.031 | 116.895 | 1.00 | 0.00 | C |
| ATOM | 1124 | N1   | C B | 18 | 43.623 | -13.466 | 116.495 | 1.00 | 0.00 | N |
| ATOM | 1125 | C2   | C B | 18 | 43.013 | -14.390 | 117.342 | 1.00 | 0.00 | C |
| ATOM | 1126 | O2   | C B | 18 | 42.477 | -13.986 | 118.381 | 1.00 | 0.00 | O |
| ATOM | 1127 | N3   | C B | 18 | 43.028 | -15.700 | 116.996 | 1.00 | 0.00 | N |
| ATOM | 1128 | C4   | C B | 18 | 43.618 | -16.107 | 115.864 | 1.00 | 0.00 | C |
| ATOM | 1129 | N4   | C B | 18 | 43.601 | -17.399 | 115.575 | 1.00 | 0.00 | N |
| ATOM | 1130 | C5   | C B | 18 | 44.255 | -15.179 | 114.978 | 1.00 | 0.00 | C |
| ATOM | 1131 | C6   | C B | 18 | 44.224 | -13.866 | 115.344 | 1.00 | 0.00 | C |
| ATOM | 1132 | C2'  | C B | 18 | 44.875 | -11.277 | 116.565 | 1.00 | 0.00 | C |
| ATOM | 1133 | C3'  | C B | 18 | 44.346 | -9.902  | 116.191 | 1.00 | 0.00 | C |
| ATOM | 1134 | O3'  | C B | 18 | 44.162 | -9.133  | 117.378 | 1.00 | 0.00 | O |
| ATOM | 1135 | C4'  | C B | 18 | 43.023 | -10.224 | 115.501 | 1.00 | 0.00 | C |
| ATOM | 1136 | O4'  | C B | 18 | 42.531 | -11.413 | 116.197 | 1.00 | 0.00 | O |
| ATOM | 1137 | C5'  | C B | 18 | 43.092 | -10.524 | 114.022 | 1.00 | 0.00 | C |
| ATOM | 1138 | O5'  | C B | 18 | 44.308 | -11.258 | 113.729 | 1.00 | 0.00 | O |
| ATOM | 1139 | O1P  | C B | 18 | 45.627 | -9.655  | 112.304 | 1.00 | 0.00 | O |
| ATOM | 1140 | O2P  | C B | 18 | 45.970 | -12.129 | 112.055 | 1.00 | 0.00 | O |
| ATOM | 1141 | P    | C B | 18 | 45.037 | -11.009 | 112.333 | 1.00 | 0.00 | P |
| ATOM | 1142 | H5   | C B | 18 | 44.738 | -15.506 | 114.058 | 1.00 | 0.00 | H |
| ATOM | 1143 | H6   | C B | 18 | 44.694 | -13.122 | 114.701 | 1.00 | 0.00 | H |
| ATOM | 1144 | H1'  | C B | 18 | 43.373 | -11.980 | 117.961 | 1.00 | 0.00 | H |
| ATOM | 1145 | H3'  | C B | 18 | 45.022 | -9.373  | 115.519 | 1.00 | 0.00 | H |
| ATOM | 1146 | H4'  | C B | 18 | 42.377 | -9.355  | 115.632 | 1.00 | 0.00 | H |
| ATOM | 1147 | H41  | C B | 18 | 44.046 | -17.739 | 114.709 | 1.00 | 0.00 | H |
| ATOM | 1148 | H42  | C B | 18 | 43.143 | -18.064 | 116.214 | 1.00 | 0.00 | H |
| ATOM | 1149 | H2'1 | C B | 18 | 45.421 | -11.730 | 115.739 | 1.00 | 0.00 | H |
| ATOM | 1150 | H2'2 | C B | 18 | 45.555 | -11.225 | 117.416 | 1.00 | 0.00 | H |
| ATOM | 1151 | H5'1 | C B | 18 | 42.225 | -11.120 | 113.736 | 1.00 | 0.00 | H |
| ATOM | 1152 | H5'2 | C B | 18 | 43.084 | -9.589  | 113.465 | 1.00 | 0.00 | H |
| ATOM | 1153 | C1'  | C B | 19 | 44.401 | -12.752 | 121.728 | 1.00 | 0.00 | C |
| ATOM | 1154 | N1   | C B | 19 | 44.929 | -13.712 | 120.721 | 1.00 | 0.00 | N |
| ATOM | 1155 | C2   | C B | 19 | 44.652 | -15.066 | 120.902 | 1.00 | 0.00 | C |
| ATOM | 1156 | O2   | C B | 19 | 43.983 | -15.413 | 121.885 | 1.00 | 0.00 | O |



|      |      |      |     |    |        |         |         |      |      |   |
|------|------|------|-----|----|--------|---------|---------|------|------|---|
| ATOM | 1157 | N3   | C B | 19 | 45.124 | -15.956 | 119.996 | 1.00 | 0.00 | N |
| ATOM | 1158 | C4   | C B | 19 | 45.845 | -15.549 | 118.943 | 1.00 | 0.00 | C |
| ATOM | 1159 | N4   | C B | 19 | 46.281 | -16.461 | 118.089 | 1.00 | 0.00 | N |
| ATOM | 1160 | C5   | C B | 19 | 46.145 | -14.166 | 118.735 | 1.00 | 0.00 | C |
| ATOM | 1161 | C6   | C B | 19 | 45.659 | -13.288 | 119.658 | 1.00 | 0.00 | C |
| ATOM | 1162 | C2'  | C B | 19 | 45.353 | -11.607 | 122.041 | 1.00 | 0.00 | C |
| ATOM | 1163 | C3'  | C B | 19 | 44.392 | -10.446 | 122.258 | 1.00 | 0.00 | C |
| ATOM | 1164 | O3'  | C B | 19 | 43.927 | -10.469 | 123.605 | 1.00 | 0.00 | O |
| ATOM | 1165 | C4'  | C B | 19 | 43.277 | -10.738 | 121.257 | 1.00 | 0.00 | C |
| ATOM | 1166 | O4'  | C B | 19 | 43.206 | -12.199 | 121.209 | 1.00 | 0.00 | O |
| ATOM | 1167 | C5'  | C B | 19 | 43.483 | -10.220 | 119.852 | 1.00 | 0.00 | C |
| ATOM | 1168 | O5'  | C B | 19 | 44.883 | -10.322 | 119.491 | 1.00 | 0.00 | O |
| ATOM | 1169 | O1P  | C B | 19 | 45.605 | -7.923  | 119.263 | 1.00 | 0.00 | O |
| ATOM | 1170 | O2P  | C B | 19 | 46.782 | -9.716  | 117.962 | 1.00 | 0.00 | O |
| ATOM | 1171 | P    | C B | 19 | 45.516 | -9.208  | 118.543 | 1.00 | 0.00 | P |
| ATOM | 1172 | H5   | C B | 19 | 46.733 | -13.829 | 117.881 | 1.00 | 0.00 | H |
| ATOM | 1173 | H6   | C B | 19 | 45.860 | -12.223 | 119.539 | 1.00 | 0.00 | H |
| ATOM | 1174 | H1'  | C B | 19 | 44.148 | -13.309 | 122.630 | 1.00 | 0.00 | H |
| ATOM | 1175 | H3'  | C B | 19 | 44.863 | -9.485  | 122.053 | 1.00 | 0.00 | H |
| ATOM | 1176 | H4'  | C B | 19 | 42.369 | -10.279 | 121.651 | 1.00 | 0.00 | H |
| ATOM | 1177 | H41  | C B | 19 | 46.837 | -16.177 | 117.269 | 1.00 | 0.00 | H |
| ATOM | 1178 | H42  | C B | 19 | 46.064 | -17.458 | 118.243 | 1.00 | 0.00 | H |
| ATOM | 1179 | H2'1 | C B | 19 | 46.041 | -11.404 | 121.221 | 1.00 | 0.00 | H |
| ATOM | 1180 | H2'2 | C B | 19 | 45.951 | -11.798 | 122.932 | 1.00 | 0.00 | H |
| ATOM | 1181 | H5'1 | C B | 19 | 42.879 | -10.807 | 119.161 | 1.00 | 0.00 | H |
| ATOM | 1182 | H5'2 | C B | 19 | 43.167 | -9.178  | 119.807 | 1.00 | 0.00 | H |
| ATOM | 1183 | C1'  | T B | 20 | 45.282 | -15.525 | 125.732 | 1.00 | 0.00 | C |
| ATOM | 1184 | N1   | T B | 20 | 46.128 | -15.672 | 124.519 | 1.00 | 0.00 | N |
| ATOM | 1185 | C2   | T B | 20 | 46.306 | -16.949 | 124.027 | 1.00 | 0.00 | C |
| ATOM | 1186 | O2   | T B | 20 | 45.802 | -17.931 | 124.543 | 1.00 | 0.00 | O |
| ATOM | 1187 | N3   | T B | 20 | 47.100 | -17.039 | 122.899 | 1.00 | 0.00 | N |
| ATOM | 1188 | C4   | T B | 20 | 47.714 | -15.998 | 122.240 | 1.00 | 0.00 | C |
| ATOM | 1189 | O4   | T B | 20 | 48.406 | -16.204 | 121.235 | 1.00 | 0.00 | O |
| ATOM | 1190 | C5   | T B | 20 | 47.470 | -14.702 | 122.828 | 1.00 | 0.00 | C |
| ATOM | 1191 | C6   | T B | 20 | 46.702 | -14.575 | 123.927 | 1.00 | 0.00 | C |
| ATOM | 1192 | C7   | T B | 20 | 48.120 | -13.537 | 122.142 | 1.00 | 0.00 | C |
| ATOM | 1193 | C2'  | T B | 20 | 45.784 | -14.465 | 126.706 | 1.00 | 0.00 | C |
| ATOM | 1194 | C3'  | T B | 20 | 44.484 | -13.886 | 127.243 | 1.00 | 0.00 | C |
| ATOM | 1195 | O3'  | T B | 20 | 44.018 | -14.697 | 128.319 | 1.00 | 0.00 | O |
| ATOM | 1196 | C4'  | T B | 20 | 43.558 | -13.947 | 126.030 | 1.00 | 0.00 | C |
| ATOM | 1197 | O4'  | T B | 20 | 43.985 | -15.148 | 125.311 | 1.00 | 0.00 | O |
| ATOM | 1198 | C5'  | T B | 20 | 43.613 | -12.771 | 125.082 | 1.00 | 0.00 | C |
| ATOM | 1199 | O5'  | T B | 20 | 44.977 | -12.286 | 124.983 | 1.00 | 0.00 | O |
| ATOM | 1200 | O1P  | T B | 20 | 44.855 | -9.993  | 126.014 | 1.00 | 0.00 | O |
| ATOM | 1201 | O2P  | T B | 20 | 46.600 | -10.501 | 124.284 | 1.00 | 0.00 | O |
| ATOM | 1202 | P    | T B | 20 | 45.222 | -10.724 | 124.784 | 1.00 | 0.00 | P |
| ATOM | 1203 | H3   | T B | 20 | 47.246 | -17.982 | 122.511 | 1.00 | 0.00 | H |
| ATOM | 1204 | H6   | T B | 20 | 46.533 | -13.586 | 124.353 | 1.00 | 0.00 | H |
| ATOM | 1205 | H1'  | T B | 20 | 45.207 | -16.497 | 126.218 | 1.00 | 0.00 | H |
| ATOM | 1206 | H3'  | T B | 20 | 44.609 | -12.861 | 127.592 | 1.00 | 0.00 | H |
| ATOM | 1207 | H4'  | T B | 20 | 42.539 | -14.018 | 126.412 | 1.00 | 0.00 | H |
| ATOM | 1208 | H3T  | T B | 20 | 44.656 | -14.854 | 129.018 | 1.00 | 0.00 | H |
| ATOM | 1209 | H71  | T B | 20 | 48.865 | -13.094 | 122.804 | 1.00 | 0.00 | H |
| ATOM | 1210 | H72  | T B | 20 | 48.603 | -13.878 | 121.226 | 1.00 | 0.00 | H |

|      |      |      |     |    |        |         |         |      |      |   |
|------|------|------|-----|----|--------|---------|---------|------|------|---|
| ATOM | 1211 | H73  | T B | 20 | 47.364 | -12.790 | 121.896 | 1.00 | 0.00 | H |
| ATOM | 1212 | H2'1 | T B | 20 | 46.384 | -13.703 | 126.214 | 1.00 | 0.00 | H |
| ATOM | 1213 | H2'2 | T B | 20 | 46.388 | -14.893 | 127.507 | 1.00 | 0.00 | H |
| ATOM | 1214 | H5'1 | T B | 20 | 43.261 | -13.086 | 124.101 | 1.00 | 0.00 | H |
| ATOM | 1215 | H5'2 | T B | 20 | 42.967 | -11.980 | 125.458 | 1.00 | 0.00 | H |
| TER  |      |      |     |    |        |         |         |      |      |   |
| ATOM | 1    | C1'  | A A | 1  | 25.138 | 7.853   | 134.997 | 1.00 | 0.00 | C |
| ATOM | 2    | N1   | A A | 1  | 27.184 | 11.871  | 132.546 | 1.00 | 0.00 | N |
| ATOM | 3    | C2   | A A | 1  | 26.085 | 11.732  | 133.281 | 1.00 | 0.00 | C |
| ATOM | 4    | N3   | A A | 1  | 25.615 | 10.663  | 133.890 | 1.00 | 0.00 | N |
| ATOM | 5    | C4   | A A | 1  | 26.426 | 9.611   | 133.676 | 1.00 | 0.00 | C |
| ATOM | 6    | C5   | A A | 1  | 27.583 | 9.587   | 132.948 | 1.00 | 0.00 | C |
| ATOM | 7    | C6   | A A | 1  | 27.973 | 10.804  | 132.350 | 1.00 | 0.00 | C |
| ATOM | 8    | N6   | A A | 1  | 29.087 | 10.932  | 131.607 | 1.00 | 0.00 | N |
| ATOM | 9    | N7   | A A | 1  | 28.148 | 8.324   | 132.951 | 1.00 | 0.00 | N |
| ATOM | 10   | C8   | A A | 1  | 27.328 | 7.617   | 133.671 | 1.00 | 0.00 | C |
| ATOM | 11   | N9   | A A | 1  | 26.259 | 8.332   | 134.146 | 1.00 | 0.00 | N |
| ATOM | 12   | C2'  | A A | 1  | 24.672 | 6.443   | 134.662 | 1.00 | 0.00 | C |
| ATOM | 13   | C3'  | A A | 1  | 24.306 | 5.896   | 136.033 | 1.00 | 0.00 | C |
| ATOM | 14   | O3'  | A A | 1  | 22.975 | 6.292   | 136.355 | 1.00 | 0.00 | O |
| ATOM | 15   | C4'  | A A | 1  | 25.341 | 6.550   | 136.947 | 1.00 | 0.00 | C |
| ATOM | 16   | O4'  | A A | 1  | 25.582 | 7.860   | 136.340 | 1.00 | 0.00 | O |
| ATOM | 17   | C5'  | A A | 1  | 26.661 | 5.831   | 137.087 | 1.00 | 0.00 | C |
| ATOM | 18   | O5'  | A A | 1  | 27.030 | 5.230   | 135.820 | 1.00 | 0.00 | O |
| ATOM | 19   | H2   | A A | 1  | 25.486 | 12.634  | 133.398 | 1.00 | 0.00 | H |
| ATOM | 20   | H8   | A A | 1  | 27.477 | 6.558   | 133.878 | 1.00 | 0.00 | H |
| ATOM | 21   | H1'  | A A | 1  | 24.318 | 8.566   | 134.911 | 1.00 | 0.00 | H |
| ATOM | 22   | H3'  | A A | 1  | 24.378 | 4.809   | 136.072 | 1.00 | 0.00 | H |
| ATOM | 23   | H4'  | A A | 1  | 24.890 | 6.615   | 137.937 | 1.00 | 0.00 | H |
| ATOM | 24   | H61  | A A | 1  | 29.327 | 11.842  | 131.194 | 1.00 | 0.00 | H |
| ATOM | 25   | H62  | A A | 1  | 29.697 | 10.116  | 131.453 | 1.00 | 0.00 | H |
| ATOM | 26   | H5T  | A A | 1  | 27.506 | 4.397   | 135.825 | 1.00 | 0.00 | H |
| ATOM | 27   | H2'1 | A A | 1  | 25.456 | 5.848   | 134.194 | 1.00 | 0.00 | H |
| ATOM | 28   | H2'2 | A A | 1  | 23.812 | 6.439   | 133.992 | 1.00 | 0.00 | H |
| ATOM | 29   | H5'1 | A A | 1  | 27.427 | 6.546   | 137.392 | 1.00 | 0.00 | H |
| ATOM | 30   | H5'2 | A A | 1  | 26.570 | 5.059   | 137.848 | 1.00 | 0.00 | H |
| ATOM | 31   | C1'  | G A | 2  | 21.592 | 10.429  | 132.663 | 1.00 | 0.00 | C |
| ATOM | 32   | N1   | G A | 2  | 25.416 | 11.881  | 129.617 | 1.00 | 0.00 | N |
| ATOM | 33   | C2   | G A | 2  | 24.380 | 12.621  | 130.151 | 1.00 | 0.00 | C |
| ATOM | 34   | N2   | G A | 2  | 24.357 | 13.920  | 129.832 | 1.00 | 0.00 | N |
| ATOM | 35   | N3   | G A | 2  | 23.440 | 12.108  | 130.944 | 1.00 | 0.00 | N |
| ATOM | 36   | C4   | G A | 2  | 23.615 | 10.776  | 131.157 | 1.00 | 0.00 | C |
| ATOM | 37   | C5   | G A | 2  | 24.617 | 9.956   | 130.662 | 1.00 | 0.00 | C |
| ATOM | 38   | C6   | G A | 2  | 25.617 | 10.504  | 129.825 | 1.00 | 0.00 | C |
| ATOM | 39   | O6   | G A | 2  | 26.578 | 9.945   | 129.296 | 1.00 | 0.00 | O |
| ATOM | 40   | N7   | G A | 2  | 24.438 | 8.648   | 131.116 | 1.00 | 0.00 | N |
| ATOM | 41   | C8   | G A | 2  | 23.361 | 8.715   | 131.856 | 1.00 | 0.00 | C |
| ATOM | 42   | N9   | G A | 2  | 22.803 | 9.975   | 131.929 | 1.00 | 0.00 | N |
| ATOM | 43   | C2'  | G A | 2  | 20.454 | 9.417   | 132.658 | 1.00 | 0.00 | C |
| ATOM | 44   | C3'  | G A | 2  | 19.848 | 9.611   | 134.037 | 1.00 | 0.00 | C |
| ATOM | 45   | O3'  | G A | 2  | 18.923 | 10.696  | 133.993 | 1.00 | 0.00 | O |
| ATOM | 46   | C4'  | G A | 2  | 21.067 | 9.927   | 134.903 | 1.00 | 0.00 | C |
| ATOM | 47   | O4'  | G A | 2  | 21.964 | 10.660  | 134.009 | 1.00 | 0.00 | O |
| ATOM | 48   | C5'  | G A | 2  | 21.812 | 8.742   | 135.471 | 1.00 | 0.00 | C |

|      |     |      |     |   |        |        |         |      |      |   |
|------|-----|------|-----|---|--------|--------|---------|------|------|---|
| ATOM | 49  | O5'  | G A | 2 | 21.816 | 7.659  | 134.508 | 1.00 | 0.00 | O |
| ATOM | 50  | O1P  | G A | 2 | 20.432 | 5.879  | 135.630 | 1.00 | 0.00 | O |
| ATOM | 51  | O2P  | G A | 2 | 22.199 | 5.235  | 133.969 | 1.00 | 0.00 | O |
| ATOM | 52  | P    | G A | 2 | 21.758 | 6.157  | 135.044 | 1.00 | 0.00 | P |
| ATOM | 53  | H1   | G A | 2 | 26.093 | 12.376 | 129.018 | 1.00 | 0.00 | H |
| ATOM | 54  | H8   | G A | 2 | 22.940 | 7.852  | 132.371 | 1.00 | 0.00 | H |
| ATOM | 55  | H1'  | G A | 2 | 21.270 | 11.379 | 132.236 | 1.00 | 0.00 | H |
| ATOM | 56  | H21  | G A | 2 | 25.088 | 14.312 | 129.221 | 1.00 | 0.00 | H |
| ATOM | 57  | H3'  | G A | 2 | 19.337 | 8.714  | 134.390 | 1.00 | 0.00 | H |
| ATOM | 58  | H22  | G A | 2 | 23.609 | 14.526 | 130.198 | 1.00 | 0.00 | H |
| ATOM | 59  | H4'  | G A | 2 | 20.713 | 10.530 | 135.739 | 1.00 | 0.00 | H |
| ATOM | 60  | H2'1 | G A | 2 | 20.812 | 8.395  | 132.522 | 1.00 | 0.00 | H |
| ATOM | 61  | H2'2 | G A | 2 | 19.726 | 9.617  | 131.871 | 1.00 | 0.00 | H |
| ATOM | 62  | H5'1 | G A | 2 | 22.835 | 9.038  | 135.697 | 1.00 | 0.00 | H |
| ATOM | 63  | H5'2 | G A | 2 | 21.321 | 8.419  | 136.389 | 1.00 | 0.00 | H |
| ATOM | 64  | C1'  | G A | 3 | 19.874 | 13.472 | 129.154 | 1.00 | 0.00 | C |
| ATOM | 65  | N1   | G A | 3 | 23.926 | 11.820 | 126.534 | 1.00 | 0.00 | N |
| ATOM | 66  | C2   | G A | 3 | 23.413 | 13.096 | 126.659 | 1.00 | 0.00 | C |
| ATOM | 67  | N2   | G A | 3 | 24.062 | 14.061 | 125.996 | 1.00 | 0.00 | N |
| ATOM | 68  | N3   | G A | 3 | 22.337 | 13.387 | 127.386 | 1.00 | 0.00 | N |
| ATOM | 69  | C4   | G A | 3 | 21.802 | 12.289 | 127.981 | 1.00 | 0.00 | C |
| ATOM | 70  | C5   | G A | 3 | 22.245 | 10.978 | 127.910 | 1.00 | 0.00 | C |
| ATOM | 71  | C6   | G A | 3 | 23.390 | 10.669 | 127.141 | 1.00 | 0.00 | C |
| ATOM | 72  | O6   | G A | 3 | 23.932 | 9.579  | 126.959 | 1.00 | 0.00 | O |
| ATOM | 73  | N7   | G A | 3 | 21.416 | 10.147 | 128.667 | 1.00 | 0.00 | N |
| ATOM | 74  | C8   | G A | 3 | 20.520 | 10.961 | 129.163 | 1.00 | 0.00 | C |
| ATOM | 75  | N9   | G A | 3 | 20.687 | 12.279 | 128.791 | 1.00 | 0.00 | N |
| ATOM | 76  | C2'  | G A | 3 | 18.379 | 13.196 | 129.229 | 1.00 | 0.00 | C |
| ATOM | 77  | C3'  | G A | 3 | 17.947 | 14.093 | 130.376 | 1.00 | 0.00 | C |
| ATOM | 78  | O3'  | G A | 3 | 17.711 | 15.409 | 129.879 | 1.00 | 0.00 | O |
| ATOM | 79  | C4'  | G A | 3 | 19.148 | 14.042 | 131.320 | 1.00 | 0.00 | C |
| ATOM | 80  | O4'  | G A | 3 | 20.301 | 13.915 | 130.428 | 1.00 | 0.00 | O |
| ATOM | 81  | C5'  | G A | 3 | 19.175 | 12.900 | 132.309 | 1.00 | 0.00 | C |
| ATOM | 82  | O5'  | G A | 3 | 18.629 | 11.705 | 131.696 | 1.00 | 0.00 | O |
| ATOM | 83  | O1P  | G A | 3 | 16.519 | 11.289 | 133.005 | 1.00 | 0.00 | O |
| ATOM | 84  | O2P  | G A | 3 | 17.718 | 9.374  | 131.914 | 1.00 | 0.00 | O |
| ATOM | 85  | P    | G A | 3 | 17.804 | 10.685 | 132.603 | 1.00 | 0.00 | P |
| ATOM | 86  | H1   | G A | 3 | 24.767 | 11.701 | 125.948 | 1.00 | 0.00 | H |
| ATOM | 87  | H8   | G A | 3 | 19.712 | 10.628 | 129.814 | 1.00 | 0.00 | H |
| ATOM | 88  | H1'  | G A | 3 | 20.090 | 14.263 | 128.435 | 1.00 | 0.00 | H |
| ATOM | 89  | H21  | G A | 3 | 24.896 | 13.829 | 125.437 | 1.00 | 0.00 | H |
| ATOM | 90  | H3'  | G A | 3 | 17.045 | 13.725 | 130.867 | 1.00 | 0.00 | H |
| ATOM | 91  | H22  | G A | 3 | 23.728 | 15.034 | 126.047 | 1.00 | 0.00 | H |
| ATOM | 92  | H4'  | G A | 3 | 19.148 | 14.973 | 131.885 | 1.00 | 0.00 | H |
| ATOM | 93  | H2'1 | G A | 3 | 18.162 | 12.149 | 129.440 | 1.00 | 0.00 | H |
| ATOM | 94  | H2'2 | G A | 3 | 17.863 | 13.456 | 128.304 | 1.00 | 0.00 | H |
| ATOM | 95  | H5'1 | G A | 3 | 20.203 | 12.720 | 132.620 | 1.00 | 0.00 | H |
| ATOM | 96  | H5'2 | G A | 3 | 18.580 | 13.170 | 133.182 | 1.00 | 0.00 | H |
| ATOM | 97  | C1'  | C A | 4 | 19.992 | 15.645 | 124.704 | 1.00 | 0.00 | C |
| ATOM | 98  | N1   | C A | 4 | 20.085 | 14.163 | 124.825 | 1.00 | 0.00 | N |
| ATOM | 99  | C2   | C A | 4 | 21.136 | 13.523 | 124.173 | 1.00 | 0.00 | C |
| ATOM | 100 | O2   | C A | 4 | 21.942 | 14.202 | 123.526 | 1.00 | 0.00 | O |
| ATOM | 101 | N3   | C A | 4 | 21.238 | 12.175 | 124.271 | 1.00 | 0.00 | N |
| ATOM | 102 | C4   | C A | 4 | 20.349 | 11.466 | 124.978 | 1.00 | 0.00 | C |

|      |     |      |     |   |        |        |         |      |      |   |
|------|-----|------|-----|---|--------|--------|---------|------|------|---|
| ATOM | 103 | N4   | C A | 4 | 20.500 | 10.151 | 125.042 | 1.00 | 0.00 | N |
| ATOM | 104 | C5   | C A | 4 | 19.258 | 12.100 | 125.656 | 1.00 | 0.00 | C |
| ATOM | 105 | C6   | C A | 4 | 19.176 | 13.457 | 125.547 | 1.00 | 0.00 | C |
| ATOM | 106 | C2'  | C A | 4 | 18.565 | 16.163 | 124.590 | 1.00 | 0.00 | C |
| ATOM | 107 | C3'  | C A | 4 | 18.640 | 17.473 | 125.362 | 1.00 | 0.00 | C |
| ATOM | 108 | O3'  | C A | 4 | 19.114 | 18.499 | 124.493 | 1.00 | 0.00 | O |
| ATOM | 109 | C4'  | C A | 4 | 19.633 | 17.154 | 126.476 | 1.00 | 0.00 | C |
| ATOM | 110 | O4'  | C A | 4 | 20.570 | 16.209 | 125.868 | 1.00 | 0.00 | O |
| ATOM | 111 | C5'  | C A | 4 | 19.061 | 16.528 | 127.726 | 1.00 | 0.00 | C |
| ATOM | 112 | O5'  | C A | 4 | 17.988 | 15.619 | 127.372 | 1.00 | 0.00 | O |
| ATOM | 113 | O1P  | C A | 4 | 15.947 | 16.713 | 128.358 | 1.00 | 0.00 | O |
| ATOM | 114 | O2P  | C A | 4 | 16.010 | 14.224 | 128.051 | 1.00 | 0.00 | O |
| ATOM | 115 | P    | C A | 4 | 16.747 | 15.473 | 128.363 | 1.00 | 0.00 | P |
| ATOM | 116 | H5   | C A | 4 | 18.530 | 11.526 | 126.229 | 1.00 | 0.00 | H |
| ATOM | 117 | H6   | C A | 4 | 18.365 | 13.985 | 126.050 | 1.00 | 0.00 | H |
| ATOM | 118 | H1'  | C A | 4 | 20.590 | 15.955 | 123.848 | 1.00 | 0.00 | H |
| ATOM | 119 | H3'  | C A | 4 | 17.671 | 17.762 | 125.767 | 1.00 | 0.00 | H |
| ATOM | 120 | H4'  | C A | 4 | 20.102 | 18.096 | 126.760 | 1.00 | 0.00 | H |
| ATOM | 121 | H41  | C A | 4 | 19.831 | 9.581  | 125.581 | 1.00 | 0.00 | H |
| ATOM | 122 | H42  | C A | 4 | 21.285 | 9.697  | 124.553 | 1.00 | 0.00 | H |
| ATOM | 123 | H2'1 | C A | 4 | 17.840 | 15.482 | 125.036 | 1.00 | 0.00 | H |
| ATOM | 124 | H2'2 | C A | 4 | 18.266 | 16.327 | 123.554 | 1.00 | 0.00 | H |
| ATOM | 125 | H5'1 | C A | 4 | 19.848 | 15.984 | 128.248 | 1.00 | 0.00 | H |
| ATOM | 126 | H5'2 | C A | 4 | 18.678 | 17.314 | 128.377 | 1.00 | 0.00 | H |
| ATOM | 127 | C1'  | C A | 5 | 21.243 | 15.919 | 119.921 | 1.00 | 0.00 | C |
| ATOM | 128 | N1   | C A | 5 | 20.562 | 14.708 | 120.455 | 1.00 | 0.00 | N |
| ATOM | 129 | C2   | C A | 5 | 21.140 | 13.467 | 120.195 | 1.00 | 0.00 | C |
| ATOM | 130 | O2   | C A | 5 | 22.187 | 13.420 | 119.535 | 1.00 | 0.00 | O |
| ATOM | 131 | N3   | C A | 5 | 20.535 | 12.352 | 120.674 | 1.00 | 0.00 | N |
| ATOM | 132 | C4   | C A | 5 | 19.403 | 12.433 | 121.383 | 1.00 | 0.00 | C |
| ATOM | 133 | N4   | C A | 5 | 18.857 | 11.312 | 121.829 | 1.00 | 0.00 | N |
| ATOM | 134 | C5   | C A | 5 | 18.786 | 13.696 | 121.664 | 1.00 | 0.00 | C |
| ATOM | 135 | C6   | C A | 5 | 19.414 | 14.804 | 121.175 | 1.00 | 0.00 | C |
| ATOM | 136 | C2'  | C A | 5 | 20.285 | 16.993 | 119.425 | 1.00 | 0.00 | C |
| ATOM | 137 | C3'  | C A | 5 | 21.015 | 18.271 | 119.811 | 1.00 | 0.00 | C |
| ATOM | 138 | O3'  | C A | 5 | 21.957 | 18.596 | 118.790 | 1.00 | 0.00 | O |
| ATOM | 139 | C4'  | C A | 5 | 21.695 | 17.891 | 121.123 | 1.00 | 0.00 | C |
| ATOM | 140 | O4'  | C A | 5 | 22.020 | 16.473 | 120.966 | 1.00 | 0.00 | O |
| ATOM | 141 | C5'  | C A | 5 | 20.873 | 18.063 | 122.379 | 1.00 | 0.00 | C |
| ATOM | 142 | O5'  | C A | 5 | 19.487 | 17.728 | 122.108 | 1.00 | 0.00 | O |
| ATOM | 143 | O1P  | C A | 5 | 18.290 | 19.924 | 122.389 | 1.00 | 0.00 | O |
| ATOM | 144 | O2P  | C A | 5 | 17.070 | 17.768 | 122.789 | 1.00 | 0.00 | O |
| ATOM | 145 | P    | C A | 5 | 18.341 | 18.530 | 122.871 | 1.00 | 0.00 | P |
| ATOM | 146 | H5   | C A | 5 | 17.861 | 13.767 | 122.237 | 1.00 | 0.00 | H |
| ATOM | 147 | H6   | C A | 5 | 18.985 | 15.789 | 121.367 | 1.00 | 0.00 | H |
| ATOM | 148 | H1'  | C A | 5 | 21.923 | 15.605 | 119.129 | 1.00 | 0.00 | H |
| ATOM | 149 | H3'  | C A | 5 | 20.330 | 19.107 | 119.948 | 1.00 | 0.00 | H |
| ATOM | 150 | H4'  | C A | 5 | 22.578 | 18.524 | 121.216 | 1.00 | 0.00 | H |
| ATOM | 151 | H41  | C A | 5 | 17.986 | 11.346 | 122.380 | 1.00 | 0.00 | H |
| ATOM | 152 | H42  | C A | 5 | 19.302 | 10.406 | 121.625 | 1.00 | 0.00 | H |
| ATOM | 153 | H2'1 | C A | 5 | 19.311 | 16.934 | 119.908 | 1.00 | 0.00 | H |
| ATOM | 154 | H2'2 | C A | 5 | 20.122 | 16.937 | 118.348 | 1.00 | 0.00 | H |
| ATOM | 155 | H5'1 | C A | 5 | 21.266 | 17.407 | 123.156 | 1.00 | 0.00 | H |
| ATOM | 156 | H5'2 | C A | 5 | 20.943 | 19.098 | 122.713 | 1.00 | 0.00 | H |

|      |     |      |     |   |        |        |         |      |      |   |
|------|-----|------|-----|---|--------|--------|---------|------|------|---|
| ATOM | 157 | C1'  | G A | 6 | 22.496 | 13.990 | 115.534 | 1.00 | 0.00 | C |
| ATOM | 158 | N1   | G A | 6 | 20.014 | 9.884  | 117.267 | 1.00 | 0.00 | N |
| ATOM | 159 | C2   | G A | 6 | 21.213 | 9.973  | 116.582 | 1.00 | 0.00 | C |
| ATOM | 160 | N2   | G A | 6 | 21.831 | 8.815  | 116.323 | 1.00 | 0.00 | N |
| ATOM | 161 | N3   | G A | 6 | 21.751 | 11.126 | 116.189 | 1.00 | 0.00 | N |
| ATOM | 162 | C4   | G A | 6 | 20.986 | 12.196 | 116.529 | 1.00 | 0.00 | C |
| ATOM | 163 | C5   | G A | 6 | 19.778 | 12.202 | 117.208 | 1.00 | 0.00 | C |
| ATOM | 164 | C6   | G A | 6 | 19.208 | 10.980 | 117.629 | 1.00 | 0.00 | C |
| ATOM | 165 | O6   | G A | 6 | 18.155 | 10.782 | 118.236 | 1.00 | 0.00 | O |
| ATOM | 166 | N7   | G A | 6 | 19.315 | 13.511 | 117.357 | 1.00 | 0.00 | N |
| ATOM | 167 | C8   | G A | 6 | 20.237 | 14.240 | 116.782 | 1.00 | 0.00 | C |
| ATOM | 168 | N9   | G A | 6 | 21.284 | 13.513 | 116.254 | 1.00 | 0.00 | N |
| ATOM | 169 | C2'  | G A | 6 | 22.235 | 15.169 | 114.608 | 1.00 | 0.00 | C |
| ATOM | 170 | C3'  | G A | 6 | 23.517 | 15.973 | 114.748 | 1.00 | 0.00 | C |
| ATOM | 171 | O3'  | G A | 6 | 24.499 | 15.451 | 113.855 | 1.00 | 0.00 | O |
| ATOM | 172 | C4'  | G A | 6 | 23.896 | 15.758 | 116.212 | 1.00 | 0.00 | C |
| ATOM | 173 | O4'  | G A | 6 | 23.441 | 14.399 | 116.506 | 1.00 | 0.00 | O |
| ATOM | 174 | C5'  | G A | 6 | 23.273 | 16.703 | 117.212 | 1.00 | 0.00 | C |
| ATOM | 175 | O5'  | G A | 6 | 21.916 | 17.019 | 116.811 | 1.00 | 0.00 | O |
| ATOM | 176 | O1P  | G A | 6 | 22.026 | 19.475 | 116.272 | 1.00 | 0.00 | O |
| ATOM | 177 | O2P  | G A | 6 | 19.864 | 18.452 | 117.030 | 1.00 | 0.00 | O |
| ATOM | 178 | P    | G A | 6 | 21.345 | 18.476 | 117.117 | 1.00 | 0.00 | P |
| ATOM | 179 | H1   | G A | 6 | 19.688 | 8.942  | 117.534 | 1.00 | 0.00 | H |
| ATOM | 180 | H8   | G A | 6 | 20.183 | 15.327 | 116.724 | 1.00 | 0.00 | H |
| ATOM | 181 | H1'  | G A | 6 | 22.921 | 13.148 | 114.986 | 1.00 | 0.00 | H |
| ATOM | 182 | H21  | G A | 6 | 21.411 | 7.927  | 116.633 | 1.00 | 0.00 | H |
| ATOM | 183 | H3'  | G A | 6 | 23.363 | 17.031 | 114.533 | 1.00 | 0.00 | H |
| ATOM | 184 | H22  | G A | 6 | 22.727 | 8.813  | 115.813 | 1.00 | 0.00 | H |
| ATOM | 185 | H4'  | G A | 6 | 24.978 | 15.868 | 116.279 | 1.00 | 0.00 | H |
| ATOM | 186 | H2'1 | G A | 6 | 21.366 | 15.752 | 114.916 | 1.00 | 0.00 | H |
| ATOM | 187 | H2'2 | G A | 6 | 22.072 | 14.857 | 113.577 | 1.00 | 0.00 | H |
| ATOM | 188 | H5'1 | G A | 6 | 23.266 | 16.231 | 118.194 | 1.00 | 0.00 | H |
| ATOM | 189 | H5'2 | G A | 6 | 23.866 | 17.616 | 117.260 | 1.00 | 0.00 | H |
| ATOM | 190 | C1'  | C A | 7 | 22.618 | 10.398 | 112.126 | 1.00 | 0.00 | C |
| ATOM | 191 | N1   | C A | 7 | 21.326 | 10.824 | 112.731 | 1.00 | 0.00 | N |
| ATOM | 192 | C2   | C A | 7 | 20.500 | 9.836  | 113.264 | 1.00 | 0.00 | C |
| ATOM | 193 | O2   | C A | 7 | 20.870 | 8.656  | 113.214 | 1.00 | 0.00 | O |
| ATOM | 194 | N3   | C A | 7 | 19.319 | 10.202 | 113.819 | 1.00 | 0.00 | N |
| ATOM | 195 | C4   | C A | 7 | 18.944 | 11.487 | 113.858 | 1.00 | 0.00 | C |
| ATOM | 196 | N4   | C A | 7 | 17.781 | 11.789 | 114.415 | 1.00 | 0.00 | N |
| ATOM | 197 | C5   | C A | 7 | 19.772 | 12.524 | 113.313 | 1.00 | 0.00 | C |
| ATOM | 198 | C6   | C A | 7 | 20.960 | 12.132 | 112.763 | 1.00 | 0.00 | C |
| ATOM | 199 | C2'  | C A | 7 | 23.002 | 11.186 | 110.881 | 1.00 | 0.00 | C |
| ATOM | 200 | C3'  | C A | 7 | 24.514 | 11.271 | 111.014 | 1.00 | 0.00 | C |
| ATOM | 201 | O3'  | C A | 7 | 25.099 | 10.085 | 110.480 | 1.00 | 0.00 | O |
| ATOM | 202 | C4'  | C A | 7 | 24.717 | 11.388 | 112.522 | 1.00 | 0.00 | C |
| ATOM | 203 | O4'  | C A | 7 | 23.631 | 10.594 | 113.097 | 1.00 | 0.00 | O |
| ATOM | 204 | C5'  | C A | 7 | 24.654 | 12.783 | 113.102 | 1.00 | 0.00 | C |
| ATOM | 205 | O5'  | C A | 7 | 23.652 | 13.560 | 112.401 | 1.00 | 0.00 | O |
| ATOM | 206 | O1P  | C A | 7 | 25.001 | 15.337 | 111.236 | 1.00 | 0.00 | O |
| ATOM | 207 | O2P  | C A | 7 | 22.612 | 15.783 | 111.863 | 1.00 | 0.00 | O |
| ATOM | 208 | P    | C A | 7 | 23.897 | 15.122 | 112.194 | 1.00 | 0.00 | P |
| ATOM | 209 | H5   | C A | 7 | 19.469 | 13.571 | 113.337 | 1.00 | 0.00 | H |
| ATOM | 210 | H6   | C A | 7 | 21.627 | 12.885 | 112.343 | 1.00 | 0.00 | H |

|      |     |      |     |   |        |        |         |      |      |   |
|------|-----|------|-----|---|--------|--------|---------|------|------|---|
| ATOM | 211 | H1'  | C A | 7 | 22.560 | 9.332  | 111.913 | 1.00 | 0.00 | H |
| ATOM | 212 | H3'  | C A | 7 | 24.920 | 12.140 | 110.493 | 1.00 | 0.00 | H |
| ATOM | 213 | H4'  | C A | 7 | 25.705 | 10.982 | 112.741 | 1.00 | 0.00 | H |
| ATOM | 214 | H41  | C A | 7 | 17.470 | 12.770 | 114.460 | 1.00 | 0.00 | H |
| ATOM | 215 | H42  | C A | 7 | 17.186 | 11.043 | 114.804 | 1.00 | 0.00 | H |
| ATOM | 216 | H2'1 | C A | 7 | 22.549 | 12.176 | 110.861 | 1.00 | 0.00 | H |
| ATOM | 217 | H2'2 | C A | 7 | 22.711 | 10.674 | 109.962 | 1.00 | 0.00 | H |
| ATOM | 218 | H5'1 | C A | 7 | 24.398 | 12.719 | 114.160 | 1.00 | 0.00 | H |
| ATOM | 219 | H5'2 | C A | 7 | 25.628 | 13.258 | 112.997 | 1.00 | 0.00 | H |
| ATOM | 220 | C1'  | A A | 8 | 20.929 | 6.317  | 109.893 | 1.00 | 0.00 | C |
| ATOM | 221 | N1   | A A | 8 | 16.416 | 7.824  | 111.818 | 1.00 | 0.00 | N |
| ATOM | 222 | C2   | A A | 8 | 17.005 | 6.635  | 111.735 | 1.00 | 0.00 | C |
| ATOM | 223 | N3   | A A | 8 | 18.176 | 6.315  | 111.227 | 1.00 | 0.00 | N |
| ATOM | 224 | C4   | A A | 8 | 18.788 | 7.412  | 110.743 | 1.00 | 0.00 | C |
| ATOM | 225 | C5   | A A | 8 | 18.321 | 8.696  | 110.749 | 1.00 | 0.00 | C |
| ATOM | 226 | C6   | A A | 8 | 17.051 | 8.899  | 111.328 | 1.00 | 0.00 | C |
| ATOM | 227 | N6   | A A | 8 | 16.465 | 10.107 | 111.406 | 1.00 | 0.00 | N |
| ATOM | 228 | N7   | A A | 8 | 19.229 | 9.561  | 110.162 | 1.00 | 0.00 | N |
| ATOM | 229 | C8   | A A | 8 | 20.215 | 8.788  | 109.813 | 1.00 | 0.00 | C |
| ATOM | 230 | N9   | A A | 8 | 20.019 | 7.469  | 110.135 | 1.00 | 0.00 | N |
| ATOM | 231 | C2'  | A A | 8 | 21.673 | 6.391  | 108.565 | 1.00 | 0.00 | C |
| ATOM | 232 | C3'  | A A | 8 | 23.019 | 5.784  | 108.923 | 1.00 | 0.00 | C |
| ATOM | 233 | O3'  | A A | 8 | 22.930 | 4.364  | 108.831 | 1.00 | 0.00 | O |
| ATOM | 234 | C4'  | A A | 8 | 23.236 | 6.256  | 110.360 | 1.00 | 0.00 | C |
| ATOM | 235 | O4'  | A A | 8 | 21.888 | 6.300  | 110.931 | 1.00 | 0.00 | O |
| ATOM | 236 | C5'  | A A | 8 | 23.878 | 7.612  | 110.530 | 1.00 | 0.00 | C |
| ATOM | 237 | O5'  | A A | 8 | 23.412 | 8.509  | 109.490 | 1.00 | 0.00 | O |
| ATOM | 238 | O1P  | A A | 8 | 25.488 | 8.961  | 108.140 | 1.00 | 0.00 | O |
| ATOM | 239 | O2P  | A A | 8 | 23.644 | 10.662 | 108.214 | 1.00 | 0.00 | O |
| ATOM | 240 | P    | A A | 8 | 24.416 | 9.610  | 108.920 | 1.00 | 0.00 | P |
| ATOM | 241 | H2   | A A | 8 | 16.436 | 5.804  | 112.148 | 1.00 | 0.00 | H |
| ATOM | 242 | H8   | A A | 8 | 21.113 | 9.152  | 109.312 | 1.00 | 0.00 | H |
| ATOM | 243 | H1'  | A A | 8 | 20.343 | 5.401  | 109.962 | 1.00 | 0.00 | H |
| ATOM | 244 | H3'  | A A | 8 | 23.814 | 6.139  | 108.269 | 1.00 | 0.00 | H |
| ATOM | 245 | H4'  | A A | 8 | 23.878 | 5.520  | 110.842 | 1.00 | 0.00 | H |
| ATOM | 246 | H61  | A A | 8 | 15.538 | 10.200 | 111.841 | 1.00 | 0.00 | H |
| ATOM | 247 | H62  | A A | 8 | 16.946 | 10.936 | 111.029 | 1.00 | 0.00 | H |
| ATOM | 248 | H2'1 | A A | 8 | 21.781 | 7.414  | 108.209 | 1.00 | 0.00 | H |
| ATOM | 249 | H2'2 | A A | 8 | 21.175 | 5.820  | 107.782 | 1.00 | 0.00 | H |
| ATOM | 250 | H5'1 | A A | 8 | 23.611 | 8.013  | 111.508 | 1.00 | 0.00 | H |
| ATOM | 251 | H5'2 | A A | 8 | 24.960 | 7.507  | 110.467 | 1.00 | 0.00 | H |
| ATOM | 252 | C1'  | C A | 9 | 17.360 | 3.106  | 108.620 | 1.00 | 0.00 | C |
| ATOM | 253 | N1   | C A | 9 | 17.187 | 4.564  | 108.368 | 1.00 | 0.00 | N |
| ATOM | 254 | C2   | C A | 9 | 16.017 | 5.170  | 108.819 | 1.00 | 0.00 | C |
| ATOM | 255 | O2   | C A | 9 | 15.174 | 4.478  | 109.406 | 1.00 | 0.00 | O |
| ATOM | 256 | N3   | C A | 9 | 15.841 | 6.496  | 108.600 | 1.00 | 0.00 | N |
| ATOM | 257 | C4   | C A | 9 | 16.770 | 7.217  | 107.960 | 1.00 | 0.00 | C |
| ATOM | 258 | N4   | C A | 9 | 16.547 | 8.510  | 107.775 | 1.00 | 0.00 | N |
| ATOM | 259 | C5   | C A | 9 | 17.983 | 6.620  | 107.481 | 1.00 | 0.00 | C |
| ATOM | 260 | C6   | C A | 9 | 18.141 | 5.283  | 107.718 | 1.00 | 0.00 | C |
| ATOM | 261 | C2'  | C A | 9 | 18.035 | 2.362  | 107.478 | 1.00 | 0.00 | C |
| ATOM | 262 | C3'  | C A | 9 | 18.866 | 1.326  | 108.221 | 1.00 | 0.00 | C |
| ATOM | 263 | O3'  | C A | 9 | 18.050 | 0.196  | 108.516 | 1.00 | 0.00 | O |
| ATOM | 264 | C4'  | C A | 9 | 19.294 | 2.075  | 109.481 | 1.00 | 0.00 | C |

|      |     |      |   |   |    |        |        |         |      |      |   |
|------|-----|------|---|---|----|--------|--------|---------|------|------|---|
| ATOM | 265 | O4'  | C | A | 9  | 18.168 | 2.963  | 109.775 | 1.00 | 0.00 | O |
| ATOM | 266 | C5'  | C | A | 9  | 20.549 | 2.908  | 109.374 | 1.00 | 0.00 | C |
| ATOM | 267 | O5'  | C | A | 9  | 20.624 | 3.515  | 108.059 | 1.00 | 0.00 | O |
| ATOM | 268 | O1P  | C | A | 9  | 22.633 | 2.411  | 107.020 | 1.00 | 0.00 | O |
| ATOM | 269 | O2P  | C | A | 9  | 21.951 | 4.713  | 106.292 | 1.00 | 0.00 | O |
| ATOM | 270 | P    | C | A | 9  | 22.056 | 3.719  | 107.388 | 1.00 | 0.00 | P |
| ATOM | 271 | H5   | C | A | 9  | 18.739 | 7.203  | 106.954 | 1.00 | 0.00 | H |
| ATOM | 272 | H6   | C | A | 9  | 19.049 | 4.786  | 107.380 | 1.00 | 0.00 | H |
| ATOM | 273 | H1'  | C | A | 9  | 16.382 | 2.681  | 108.841 | 1.00 | 0.00 | H |
| ATOM | 274 | H3'  | C | A | 9  | 19.731 | 1.005  | 107.641 | 1.00 | 0.00 | H |
| ATOM | 275 | H4'  | C | A | 9  | 19.457 | 1.325  | 110.255 | 1.00 | 0.00 | H |
| ATOM | 276 | H41  | C | A | 9  | 17.248 | 9.089  | 107.288 | 1.00 | 0.00 | H |
| ATOM | 277 | H42  | C | A | 9  | 15.674 | 8.937  | 108.117 | 1.00 | 0.00 | H |
| ATOM | 278 | H2'1 | C | A | 9  | 18.664 | 3.013  | 106.873 | 1.00 | 0.00 | H |
| ATOM | 279 | H2'2 | C | A | 9  | 17.315 | 1.889  | 106.809 | 1.00 | 0.00 | H |
| ATOM | 280 | H5'1 | C | A | 9  | 20.531 | 3.686  | 110.138 | 1.00 | 0.00 | H |
| ATOM | 281 | H5'2 | C | A | 9  | 21.417 | 2.268  | 109.534 | 1.00 | 0.00 | H |
| ATOM | 282 | C1'  | C | A | 10 | 12.679 | 1.796  | 107.671 | 1.00 | 0.00 | C |
| ATOM | 283 | N1   | C | A | 10 | 13.282 | 2.982  | 107.004 | 1.00 | 0.00 | N |
| ATOM | 284 | C2   | C | A | 10 | 12.584 | 4.187  | 107.064 | 1.00 | 0.00 | C |
| ATOM | 285 | O2   | C | A | 10 | 11.501 | 4.222  | 107.663 | 1.00 | 0.00 | O |
| ATOM | 286 | N3   | C | A | 10 | 13.115 | 5.280  | 106.464 | 1.00 | 0.00 | N |
| ATOM | 287 | C4   | C | A | 10 | 14.288 | 5.211  | 105.822 | 1.00 | 0.00 | C |
| ATOM | 288 | N4   | C | A | 10 | 14.763 | 6.312  | 105.254 | 1.00 | 0.00 | N |
| ATOM | 289 | C5   | C | A | 10 | 15.026 | 3.985  | 105.741 | 1.00 | 0.00 | C |
| ATOM | 290 | C6   | C | A | 10 | 14.474 | 2.897  | 106.357 | 1.00 | 0.00 | C |
| ATOM | 291 | C2'  | C | A | 10 | 12.887 | 0.494  | 106.910 | 1.00 | 0.00 | C |
| ATOM | 292 | C3'  | C | A | 10 | 13.061 | -0.510 | 108.040 | 1.00 | 0.00 | C |
| ATOM | 293 | O3'  | C | A | 10 | 11.777 | -0.940 | 108.487 | 1.00 | 0.00 | O |
| ATOM | 294 | C4'  | C | A | 10 | 13.802 | 0.299  | 109.101 | 1.00 | 0.00 | C |
| ATOM | 295 | O4'  | C | A | 10 | 13.289 | 1.660  | 108.942 | 1.00 | 0.00 | O |
| ATOM | 296 | C5'  | C | A | 10 | 15.308 | 0.336  | 108.988 | 1.00 | 0.00 | C |
| ATOM | 297 | O5'  | C | A | 10 | 15.695 | 0.368  | 107.591 | 1.00 | 0.00 | O |
| ATOM | 298 | O1P  | C | A | 10 | 16.860 | -1.837 | 107.257 | 1.00 | 0.00 | O |
| ATOM | 299 | O2P  | C | A | 10 | 17.462 | 0.130  | 105.821 | 1.00 | 0.00 | O |
| ATOM | 300 | P    | C | A | 10 | 17.034 | -0.375 | 107.148 | 1.00 | 0.00 | P |
| ATOM | 301 | H5   | C | A | 10 | 15.979 | 3.922  | 105.214 | 1.00 | 0.00 | H |
| ATOM | 302 | H6   | C | A | 10 | 15.001 | 1.944  | 106.330 | 1.00 | 0.00 | H |
| ATOM | 303 | H1'  | C | A | 10 | 11.620 | 1.993  | 107.828 | 1.00 | 0.00 | H |
| ATOM | 304 | H3'  | C | A | 10 | 13.643 | -1.378 | 107.728 | 1.00 | 0.00 | H |
| ATOM | 305 | H4'  | C | A | 10 | 13.552 | -0.141 | 110.066 | 1.00 | 0.00 | H |
| ATOM | 306 | H41  | C | A | 10 | 15.665 | 6.287  | 104.757 | 1.00 | 0.00 | H |
| ATOM | 307 | H42  | C | A | 10 | 14.230 | 7.191  | 105.312 | 1.00 | 0.00 | H |
| ATOM | 308 | H2'1 | C | A | 10 | 13.765 | 0.524  | 106.268 | 1.00 | 0.00 | H |
| ATOM | 309 | H2'2 | C | A | 10 | 12.030 | 0.241  | 106.282 | 1.00 | 0.00 | H |
| ATOM | 310 | H5'1 | C | A | 10 | 15.685 | 1.225  | 109.496 | 1.00 | 0.00 | H |
| ATOM | 311 | H5'2 | C | A | 10 | 15.723 | -0.552 | 109.465 | 1.00 | 0.00 | H |
| ATOM | 312 | C1'  | T | A | 11 | 7.994  | 2.663  | 106.333 | 1.00 | 0.00 | C |
| ATOM | 313 | N1   | T | A | 11 | 9.115  | 3.144  | 105.481 | 1.00 | 0.00 | N |
| ATOM | 314 | C2   | T | A | 11 | 9.099  | 4.472  | 105.109 | 1.00 | 0.00 | C |
| ATOM | 315 | O2   | T | A | 11 | 8.217  | 5.243  | 105.450 | 1.00 | 0.00 | O |
| ATOM | 316 | N3   | T | A | 11 | 10.159 | 4.877  | 104.318 | 1.00 | 0.00 | N |
| ATOM | 317 | C4   | T | A | 11 | 11.201 | 4.087  | 103.876 | 1.00 | 0.00 | C |
| ATOM | 318 | O4   | T | A | 11 | 12.097 | 4.563  | 103.167 | 1.00 | 0.00 | O |

|      |     |      |     |    |        |        |         |      |      |   |
|------|-----|------|-----|----|--------|--------|---------|------|------|---|
| ATOM | 319 | C5   | T A | 11 | 11.131 | 2.714  | 104.316 | 1.00 | 0.00 | C |
| ATOM | 320 | C6   | T A | 11 | 10.114 | 2.287  | 105.088 | 1.00 | 0.00 | C |
| ATOM | 321 | C7   | T A | 11 | 12.247 | 1.821  | 103.861 | 1.00 | 0.00 | C |
| ATOM | 322 | C2'  | T A | 11 | 7.527  | 1.253  | 105.997 | 1.00 | 0.00 | C |
| ATOM | 323 | C3'  | T A | 11 | 7.164  | 0.703  | 107.367 | 1.00 | 0.00 | C |
| ATOM | 324 | O3'  | T A | 11 | 5.835  | 1.098  | 107.695 | 1.00 | 0.00 | O |
| ATOM | 325 | C4'  | T A | 11 | 8.202  | 1.354  | 108.279 | 1.00 | 0.00 | C |
| ATOM | 326 | O4'  | T A | 11 | 8.440  | 2.666  | 107.675 | 1.00 | 0.00 | O |
| ATOM | 327 | C5'  | T A | 11 | 9.525  | 0.636  | 108.414 | 1.00 | 0.00 | C |
| ATOM | 328 | O5'  | T A | 11 | 9.888  | 0.038  | 107.144 | 1.00 | 0.00 | O |
| ATOM | 329 | O1P  | T A | 11 | 9.794  | -2.432 | 107.614 | 1.00 | 0.00 | O |
| ATOM | 330 | O2P  | T A | 11 | 11.313 | -1.554 | 105.822 | 1.00 | 0.00 | O |
| ATOM | 331 | P    | T A | 11 | 10.677 | -1.347 | 107.146 | 1.00 | 0.00 | P |
| ATOM | 332 | H3   | T A | 11 | 10.173 | 5.865  | 104.031 | 1.00 | 0.00 | H |
| ATOM | 333 | H6   | T A | 11 | 10.081 | 1.244  | 105.407 | 1.00 | 0.00 | H |
| ATOM | 334 | H1'  | T A | 11 | 7.173  | 3.376  | 106.252 | 1.00 | 0.00 | H |
| ATOM | 335 | H3'  | T A | 11 | 7.237  | -0.383 | 107.402 | 1.00 | 0.00 | H |
| ATOM | 336 | H4'  | T A | 11 | 7.756  | 1.418  | 109.273 | 1.00 | 0.00 | H |
| ATOM | 337 | H71  | T A | 11 | 11.851 | 1.059  | 103.190 | 1.00 | 0.00 | H |
| ATOM | 338 | H72  | T A | 11 | 12.996 | 2.414  | 103.335 | 1.00 | 0.00 | H |
| ATOM | 339 | H73  | T A | 11 | 12.705 | 1.341  | 104.726 | 1.00 | 0.00 | H |
| ATOM | 340 | H2'1 | T A | 11 | 8.309  | 0.661  | 105.526 | 1.00 | 0.00 | H |
| ATOM | 341 | H2'2 | T A | 11 | 6.666  | 1.252  | 105.327 | 1.00 | 0.00 | H |
| ATOM | 342 | H5'1 | T A | 11 | 10.290 | 1.349  | 108.717 | 1.00 | 0.00 | H |
| ATOM | 343 | H5'2 | T A | 11 | 9.434  | -0.140 | 109.173 | 1.00 | 0.00 | H |
| ATOM | 344 | C1'  | A A | 12 | 4.432  | 5.226  | 104.014 | 1.00 | 0.00 | C |
| ATOM | 345 | N1   | A A | 12 | 8.271  | 6.712  | 100.948 | 1.00 | 0.00 | N |
| ATOM | 346 | C2   | A A | 12 | 7.251  | 7.367  | 101.493 | 1.00 | 0.00 | C |
| ATOM | 347 | N3   | A A | 12 | 6.294  | 6.922  | 102.281 | 1.00 | 0.00 | N |
| ATOM | 348 | C4   | A A | 12 | 6.453  | 5.605  | 102.505 | 1.00 | 0.00 | C |
| ATOM | 349 | C5   | A A | 12 | 7.438  | 4.792  | 102.022 | 1.00 | 0.00 | C |
| ATOM | 350 | C6   | A A | 12 | 8.403  | 5.400  | 101.192 | 1.00 | 0.00 | C |
| ATOM | 351 | N6   | A A | 12 | 9.429  | 4.725  | 100.645 | 1.00 | 0.00 | N |
| ATOM | 352 | N7   | A A | 12 | 7.275  | 3.492  | 102.469 | 1.00 | 0.00 | N |
| ATOM | 353 | C8   | A A | 12 | 6.202  | 3.545  | 103.201 | 1.00 | 0.00 | C |
| ATOM | 354 | N9   | A A | 12 | 5.648  | 4.797  | 103.271 | 1.00 | 0.00 | N |
| ATOM | 355 | C2'  | A A | 12 | 3.312  | 4.195  | 104.002 | 1.00 | 0.00 | C |
| ATOM | 356 | C3'  | A A | 12 | 2.706  | 4.369  | 105.386 | 1.00 | 0.00 | C |
| ATOM | 357 | O3'  | A A | 12 | 1.765  | 5.441  | 105.352 | 1.00 | 0.00 | O |
| ATOM | 358 | C4'  | A A | 12 | 3.923  | 4.697  | 106.251 | 1.00 | 0.00 | C |
| ATOM | 359 | O4'  | A A | 12 | 4.806  | 5.449  | 105.360 | 1.00 | 0.00 | O |
| ATOM | 360 | C5'  | A A | 12 | 4.685  | 3.519  | 106.807 | 1.00 | 0.00 | C |
| ATOM | 361 | O5'  | A A | 12 | 4.704  | 2.442  | 105.836 | 1.00 | 0.00 | O |
| ATOM | 362 | O1P  | A A | 12 | 3.350  | 0.634  | 106.946 | 1.00 | 0.00 | O |
| ATOM | 363 | O2P  | A A | 12 | 5.122  | 0.029  | 105.274 | 1.00 | 0.00 | O |
| ATOM | 364 | P    | A A | 12 | 4.670  | 0.936  | 106.358 | 1.00 | 0.00 | P |
| ATOM | 365 | H2   | A A | 12 | 7.200  | 8.430  | 101.255 | 1.00 | 0.00 | H |
| ATOM | 366 | H8   | A A | 12 | 5.782  | 2.677  | 103.711 | 1.00 | 0.00 | H |
| ATOM | 367 | H1'  | A A | 12 | 4.096  | 6.174  | 103.597 | 1.00 | 0.00 | H |
| ATOM | 368 | H3'  | A A | 12 | 2.210  | 3.464  | 105.733 | 1.00 | 0.00 | H |
| ATOM | 369 | H4'  | A A | 12 | 3.560  | 5.288  | 107.092 | 1.00 | 0.00 | H |
| ATOM | 370 | H61  | A A | 12 | 10.108 | 5.217  | 100.047 | 1.00 | 0.00 | H |
| ATOM | 371 | H62  | A A | 12 | 9.536  | 3.715  | 100.826 | 1.00 | 0.00 | H |
| ATOM | 372 | H2'1 | A A | 12 | 3.683  | 3.181  | 103.857 | 1.00 | 0.00 | H |



|      |     |      |   |   |    |        |        |         |      |      |   |
|------|-----|------|---|---|----|--------|--------|---------|------|------|---|
| ATOM | 373 | H2'2 | A | A | 12 | 2.579  | 4.391  | 103.220 | 1.00 | 0.00 | H |
| ATOM | 374 | H5'1 | A | A | 12 | 5.705  | 3.828  | 107.033 | 1.00 | 0.00 | H |
| ATOM | 375 | H5'2 | A | A | 12 | 4.204  | 3.180  | 107.723 | 1.00 | 0.00 | H |
| ATOM | 376 | C1'  | G | A | 13 | 2.731  | 8.282  | 100.490 | 1.00 | 0.00 | C |
| ATOM | 377 | N1   | G | A | 13 | 6.784  | 6.628  | 97.870  | 1.00 | 0.00 | N |
| ATOM | 378 | C2   | G | A | 13 | 6.269  | 7.907  | 97.995  | 1.00 | 0.00 | C |
| ATOM | 379 | N2   | G | A | 13 | 6.918  | 8.873  | 97.332  | 1.00 | 0.00 | N |
| ATOM | 380 | N3   | G | A | 13 | 5.192  | 8.197  | 98.724  | 1.00 | 0.00 | N |
| ATOM | 381 | C4   | G | A | 13 | 4.658  | 7.099  | 99.318  | 1.00 | 0.00 | C |
| ATOM | 382 | C5   | G | A | 13 | 5.101  | 5.788  | 99.247  | 1.00 | 0.00 | C |
| ATOM | 383 | C6   | G | A | 13 | 6.246  | 5.479  | 98.478  | 1.00 | 0.00 | C |
| ATOM | 384 | O6   | G | A | 13 | 6.786  | 4.387  | 98.294  | 1.00 | 0.00 | O |
| ATOM | 385 | N7   | G | A | 13 | 4.272  | 4.957  | 100.003 | 1.00 | 0.00 | N |
| ATOM | 386 | C8   | G | A | 13 | 3.376  | 5.771  | 100.499 | 1.00 | 0.00 | C |
| ATOM | 387 | N9   | G | A | 13 | 3.544  | 7.088  | 100.128 | 1.00 | 0.00 | N |
| ATOM | 388 | C2'  | G | A | 13 | 1.236  | 8.006  | 100.566 | 1.00 | 0.00 | C |
| ATOM | 389 | C3'  | G | A | 13 | 0.803  | 8.903  | 101.713 | 1.00 | 0.00 | C |
| ATOM | 390 | O3'  | G | A | 13 | 0.567  | 10.219 | 101.216 | 1.00 | 0.00 | O |
| ATOM | 391 | C4'  | G | A | 13 | 2.005  | 8.851  | 102.656 | 1.00 | 0.00 | C |
| ATOM | 392 | O4'  | G | A | 13 | 3.157  | 8.724  | 101.764 | 1.00 | 0.00 | O |
| ATOM | 393 | C5'  | G | A | 13 | 2.031  | 7.709  | 103.646 | 1.00 | 0.00 | C |
| ATOM | 394 | O5'  | G | A | 13 | 1.485  | 6.515  | 103.033 | 1.00 | 0.00 | O |
| ATOM | 395 | O1P  | G | A | 13 | -0.624 | 6.099  | 104.341 | 1.00 | 0.00 | O |
| ATOM | 396 | O2P  | G | A | 13 | 0.574  | 4.184  | 103.250 | 1.00 | 0.00 | O |
| ATOM | 397 | P    | G | A | 13 | 0.660  | 5.495  | 103.939 | 1.00 | 0.00 | P |
| ATOM | 398 | H1   | G | A | 13 | 7.627  | 6.511  | 97.287  | 1.00 | 0.00 | H |
| ATOM | 399 | H8   | G | A | 13 | 2.567  | 5.438  | 101.150 | 1.00 | 0.00 | H |
| ATOM | 400 | H1'  | G | A | 13 | 2.946  | 9.073  | 99.771  | 1.00 | 0.00 | H |
| ATOM | 401 | H21  | G | A | 13 | 7.753  | 8.640  | 96.774  | 1.00 | 0.00 | H |
| ATOM | 402 | H3'  | G | A | 13 | -0.098 | 8.535  | 102.203 | 1.00 | 0.00 | H |
| ATOM | 403 | H22  | G | A | 13 | 6.583  | 9.844  | 97.383  | 1.00 | 0.00 | H |
| ATOM | 404 | H4'  | G | A | 13 | 2.004  | 9.782  | 103.221 | 1.00 | 0.00 | H |
| ATOM | 405 | H2'1 | G | A | 13 | 1.019  | 6.959  | 100.777 | 1.00 | 0.00 | H |
| ATOM | 406 | H2'2 | G | A | 13 | 0.720  | 8.266  | 99.640  | 1.00 | 0.00 | H |
| ATOM | 407 | H5'1 | G | A | 13 | 3.060  | 7.529  | 103.956 | 1.00 | 0.00 | H |
| ATOM | 408 | H5'2 | G | A | 13 | 1.438  | 7.980  | 104.519 | 1.00 | 0.00 | H |
| ATOM | 409 | C1'  | G | A | 14 | 2.848  | 10.454 | 96.041  | 1.00 | 0.00 | C |
| ATOM | 410 | N1   | G | A | 14 | 5.498  | 6.303  | 94.712  | 1.00 | 0.00 | N |
| ATOM | 411 | C2   | G | A | 14 | 5.712  | 7.632  | 94.392  | 1.00 | 0.00 | C |
| ATOM | 412 | N2   | G | A | 14 | 6.769  | 7.890  | 93.613  | 1.00 | 0.00 | N |
| ATOM | 413 | N3   | G | A | 14 | 4.930  | 8.625  | 94.817  | 1.00 | 0.00 | N |
| ATOM | 414 | C4   | G | A | 14 | 3.905  | 8.180  | 95.588  | 1.00 | 0.00 | C |
| ATOM | 415 | C5   | G | A | 14 | 3.612  | 6.878  | 95.954  | 1.00 | 0.00 | C |
| ATOM | 416 | C6   | G | A | 14 | 4.442  | 5.824  | 95.509  | 1.00 | 0.00 | C |
| ATOM | 417 | O6   | G | A | 14 | 4.348  | 4.615  | 95.725  | 1.00 | 0.00 | O |
| ATOM | 418 | N7   | G | A | 14 | 2.467  | 6.848  | 96.754  | 1.00 | 0.00 | N |
| ATOM | 419 | C8   | G | A | 14 | 2.113  | 8.103  | 96.847  | 1.00 | 0.00 | C |
| ATOM | 420 | N9   | G | A | 14 | 2.936  | 8.973  | 96.165  | 1.00 | 0.00 | N |
| ATOM | 421 | C2'  | G | A | 14 | 1.422  | 10.977 | 95.930  | 1.00 | 0.00 | C |
| ATOM | 422 | C3'  | G | A | 14 | 1.503  | 12.286 | 96.696  | 1.00 | 0.00 | C |
| ATOM | 423 | O3'  | G | A | 14 | 1.979  | 13.311 | 95.825  | 1.00 | 0.00 | O |
| ATOM | 424 | C4'  | G | A | 14 | 2.499  | 11.967 | 97.810  | 1.00 | 0.00 | C |
| ATOM | 425 | O4'  | G | A | 14 | 3.431  | 11.019 | 97.200  | 1.00 | 0.00 | O |
| ATOM | 426 | C5'  | G | A | 14 | 1.928  | 11.347 | 99.063  | 1.00 | 0.00 | C |

|      |     |      |     |    |        |        |        |      |      |   |
|------|-----|------|-----|----|--------|--------|--------|------|------|---|
| ATOM | 427 | O5'  | G A | 14 | 0.851  | 10.440 | 98.715 | 1.00 | 0.00 | O |
| ATOM | 428 | O1P  | G A | 14 | -1.183 | 11.544 | 99.703 | 1.00 | 0.00 | O |
| ATOM | 429 | O2P  | G A | 14 | -1.129 | 9.054  | 99.402 | 1.00 | 0.00 | O |
| ATOM | 430 | P    | G A | 14 | -0.387 | 10.302 | 99.710 | 1.00 | 0.00 | P |
| ATOM | 431 | H1   | G A | 14 | 6.166  | 5.612  | 94.338 | 1.00 | 0.00 | H |
| ATOM | 432 | H8   | G A | 14 | 1.242  | 8.433  | 97.415 | 1.00 | 0.00 | H |
| ATOM | 433 | H1'  | G A | 14 | 3.445  | 10.761 | 95.182 | 1.00 | 0.00 | H |
| ATOM | 434 | H21  | G A | 14 | 7.370  | 7.118  | 93.292 | 1.00 | 0.00 | H |
| ATOM | 435 | H3'  | G A | 14 | 0.536  | 12.581 | 97.106 | 1.00 | 0.00 | H |
| ATOM | 436 | H22  | G A | 14 | 6.980  | 8.859  | 93.337 | 1.00 | 0.00 | H |
| ATOM | 437 | H4'  | G A | 14 | 2.972  | 12.908 | 98.091 | 1.00 | 0.00 | H |
| ATOM | 438 | H2'1 | G A | 14 | 0.697  | 10.298 | 96.379 | 1.00 | 0.00 | H |
| ATOM | 439 | H2'2 | G A | 14 | 1.121  | 11.140 | 94.895 | 1.00 | 0.00 | H |
| ATOM | 440 | H5'1 | G A | 14 | 2.715  | 10.801 | 99.583 | 1.00 | 0.00 | H |
| ATOM | 441 | H5'2 | G A | 14 | 1.549  | 12.136 | 99.713 | 1.00 | 0.00 | H |
| ATOM | 442 | C1'  | A A | 15 | 4.092  | 10.751 | 91.260 | 1.00 | 0.00 | C |
| ATOM | 443 | N1   | A A | 15 | 4.271  | 5.632  | 91.580 | 1.00 | 0.00 | N |
| ATOM | 444 | C2   | A A | 15 | 5.067  | 6.525  | 90.996 | 1.00 | 0.00 | C |
| ATOM | 445 | N3   | A A | 15 | 4.963  | 7.837  | 90.954 | 1.00 | 0.00 | N |
| ATOM | 446 | C4   | A A | 15 | 3.864  | 8.238  | 91.619 | 1.00 | 0.00 | C |
| ATOM | 447 | C5   | A A | 15 | 2.950  | 7.455  | 92.267 | 1.00 | 0.00 | C |
| ATOM | 448 | C6   | A A | 15 | 3.183  | 6.064  | 92.236 | 1.00 | 0.00 | C |
| ATOM | 449 | N6   | A A | 15 | 2.371  | 5.171  | 92.829 | 1.00 | 0.00 | N |
| ATOM | 450 | N7   | A A | 15 | 1.952  | 8.222  | 92.839 | 1.00 | 0.00 | N |
| ATOM | 451 | C8   | A A | 15 | 2.275  | 9.441  | 92.525 | 1.00 | 0.00 | C |
| ATOM | 452 | N9   | A A | 15 | 3.428  | 9.530  | 91.785 | 1.00 | 0.00 | N |
| ATOM | 453 | C2'  | A A | 15 | 3.121  | 11.820 | 90.778 | 1.00 | 0.00 | C |
| ATOM | 454 | C3'  | A A | 15 | 3.840  | 13.103 | 91.169 | 1.00 | 0.00 | C |
| ATOM | 455 | O3'  | A A | 15 | 4.772  | 13.446 | 90.148 | 1.00 | 0.00 | O |
| ATOM | 456 | C4'  | A A | 15 | 4.531  | 12.719 | 92.477 | 1.00 | 0.00 | C |
| ATOM | 457 | O4'  | A A | 15 | 4.868  | 11.304 | 92.306 | 1.00 | 0.00 | O |
| ATOM | 458 | C5'  | A A | 15 | 3.714  | 12.871 | 93.737 | 1.00 | 0.00 | C |
| ATOM | 459 | O5'  | A A | 15 | 2.332  | 12.524 | 93.472 | 1.00 | 0.00 | O |
| ATOM | 460 | O1P  | A A | 15 | 1.114  | 14.706 | 93.778 | 1.00 | 0.00 | O |
| ATOM | 461 | O2P  | A A | 15 | -0.084 | 12.534 | 94.167 | 1.00 | 0.00 | O |
| ATOM | 462 | P    | A A | 15 | 1.179  | 13.308 | 94.248 | 1.00 | 0.00 | P |
| ATOM | 463 | H2   | A A | 15 | 5.929  | 6.108  | 90.476 | 1.00 | 0.00 | H |
| ATOM | 464 | H8   | A A | 15 | 1.689  | 10.311 | 92.820 | 1.00 | 0.00 | H |
| ATOM | 465 | H1'  | A A | 15 | 4.771  | 10.452 | 90.461 | 1.00 | 0.00 | H |
| ATOM | 466 | H3'  | A A | 15 | 3.146  | 13.930 | 91.319 | 1.00 | 0.00 | H |
| ATOM | 467 | H4'  | A A | 15 | 5.409  | 13.358 | 92.569 | 1.00 | 0.00 | H |
| ATOM | 468 | H61  | A A | 15 | 2.588  | 4.166  | 92.779 | 1.00 | 0.00 | H |
| ATOM | 469 | H62  | A A | 15 | 1.532  | 5.494  | 93.333 | 1.00 | 0.00 | H |
| ATOM | 470 | H2'1 | A A | 15 | 2.149  | 11.745 | 91.267 | 1.00 | 0.00 | H |
| ATOM | 471 | H2'2 | A A | 15 | 2.952  | 11.773 | 89.702 | 1.00 | 0.00 | H |
| ATOM | 472 | H5'1 | A A | 15 | 4.117  | 12.213 | 94.507 | 1.00 | 0.00 | H |
| ATOM | 473 | H5'2 | A A | 15 | 3.774  | 13.903 | 94.081 | 1.00 | 0.00 | H |
| ATOM | 474 | C1'  | C A | 16 | 5.354  | 8.799  | 86.871 | 1.00 | 0.00 | C |
| ATOM | 475 | N1   | C A | 16 | 4.143  | 8.316  | 87.590 | 1.00 | 0.00 | N |
| ATOM | 476 | C2   | C A | 16 | 4.003  | 6.944  | 87.783 | 1.00 | 0.00 | C |
| ATOM | 477 | O2   | C A | 16 | 4.883  | 6.188  | 87.352 | 1.00 | 0.00 | O |
| ATOM | 478 | N3   | C A | 16 | 2.908  | 6.483  | 88.435 | 1.00 | 0.00 | N |
| ATOM | 479 | C4   | C A | 16 | 1.973  | 7.327  | 88.891 | 1.00 | 0.00 | C |
| ATOM | 480 | N4   | C A | 16 | 0.924  | 6.822  | 89.526 | 1.00 | 0.00 | N |

|      |     |      |     |    |       |        |        |      |      |   |
|------|-----|------|-----|----|-------|--------|--------|------|------|---|
| ATOM | 481 | C5   | C A | 16 | 2.087 | 8.743  | 88.703 | 1.00 | 0.00 | C |
| ATOM | 482 | C6   | C A | 16 | 3.201 | 9.185  | 88.047 | 1.00 | 0.00 | C |
| ATOM | 483 | C2'  | C A | 16 | 5.087 | 9.976  | 85.944 | 1.00 | 0.00 | C |
| ATOM | 484 | C3'  | C A | 16 | 6.367 | 10.787 | 86.084 | 1.00 | 0.00 | C |
| ATOM | 485 | O3'  | C A | 16 | 7.350 | 10.268 | 85.191 | 1.00 | 0.00 | O |
| ATOM | 486 | C4'  | C A | 16 | 6.745 | 10.573 | 87.548 | 1.00 | 0.00 | C |
| ATOM | 487 | O4'  | C A | 16 | 6.296 | 9.213  | 87.844 | 1.00 | 0.00 | O |
| ATOM | 488 | C5'  | C A | 16 | 6.116 | 11.517 | 88.547 | 1.00 | 0.00 | C |
| ATOM | 489 | O5'  | C A | 16 | 4.758 | 11.827 | 88.144 | 1.00 | 0.00 | O |
| ATOM | 490 | O1P  | C A | 16 | 4.856 | 14.283 | 87.603 | 1.00 | 0.00 | O |
| ATOM | 491 | O2P  | C A | 16 | 2.698 | 13.250 | 88.360 | 1.00 | 0.00 | O |
| ATOM | 492 | P    | C A | 16 | 4.179 | 13.280 | 88.449 | 1.00 | 0.00 | P |
| ATOM | 493 | H5   | C A | 16 | 1.325 | 9.433  | 89.066 | 1.00 | 0.00 | H |
| ATOM | 494 | H6   | C A | 16 | 3.338 | 10.256 | 87.887 | 1.00 | 0.00 | H |
| ATOM | 495 | H1'  | C A | 16 | 5.783 | 7.960  | 86.324 | 1.00 | 0.00 | H |
| ATOM | 496 | H3'  | C A | 16 | 6.204 | 11.844 | 85.869 | 1.00 | 0.00 | H |
| ATOM | 497 | H4'  | C A | 16 | 7.825 | 10.691 | 87.616 | 1.00 | 0.00 | H |
| ATOM | 498 | H41  | C A | 16 | 0.190 | 7.449  | 89.887 | 1.00 | 0.00 | H |
| ATOM | 499 | H42  | C A | 16 | 0.842 | 5.804  | 89.656 | 1.00 | 0.00 | H |
| ATOM | 500 | H2'1 | C A | 16 | 4.216 | 10.555 | 86.248 | 1.00 | 0.00 | H |
| ATOM | 501 | H2'2 | C A | 16 | 4.927 | 9.663  | 84.911 | 1.00 | 0.00 | H |
| ATOM | 502 | H5'1 | C A | 16 | 6.110 | 11.045 | 89.530 | 1.00 | 0.00 | H |
| ATOM | 503 | H5'2 | C A | 16 | 6.704 | 12.434 | 88.593 | 1.00 | 0.00 | H |
| ATOM | 504 | C1'  | G A | 17 | 5.474 | 5.209  | 83.464 | 1.00 | 0.00 | C |
| ATOM | 505 | N1   | G A | 17 | 1.222 | 3.628  | 85.798 | 1.00 | 0.00 | N |
| ATOM | 506 | C2   | G A | 17 | 2.303 | 2.899  | 85.331 | 1.00 | 0.00 | C |
| ATOM | 507 | N2   | G A | 17 | 2.241 | 1.574  | 85.509 | 1.00 | 0.00 | N |
| ATOM | 508 | N3   | G A | 17 | 3.360 | 3.450  | 84.736 | 1.00 | 0.00 | N |
| ATOM | 509 | C4   | G A | 17 | 3.250 | 4.800  | 84.635 | 1.00 | 0.00 | C |
| ATOM | 510 | C5   | G A | 17 | 2.211 | 5.609  | 85.066 | 1.00 | 0.00 | C |
| ATOM | 511 | C6   | G A | 17 | 1.090 | 5.027  | 85.701 | 1.00 | 0.00 | C |
| ATOM | 512 | O6   | G A | 17 | 0.080 | 5.571  | 86.147 | 1.00 | 0.00 | O |
| ATOM | 513 | N7   | G A | 17 | 2.484 | 6.946  | 84.769 | 1.00 | 0.00 | N |
| ATOM | 514 | C8   | G A | 17 | 3.654 | 6.907  | 84.185 | 1.00 | 0.00 | C |
| ATOM | 515 | N9   | G A | 17 | 4.183 | 5.638  | 84.066 | 1.00 | 0.00 | N |
| ATOM | 516 | C2'  | G A | 17 | 5.863 | 5.995  | 82.219 | 1.00 | 0.00 | C |
| ATOM | 517 | C3'  | G A | 17 | 7.375 | 6.075  | 82.353 | 1.00 | 0.00 | C |
| ATOM | 518 | O3'  | G A | 17 | 7.955 | 4.885  | 81.819 | 1.00 | 0.00 | O |
| ATOM | 519 | C4'  | G A | 17 | 7.576 | 6.189  | 83.863 | 1.00 | 0.00 | C |
| ATOM | 520 | O4'  | G A | 17 | 6.487 | 5.398  | 84.433 | 1.00 | 0.00 | O |
| ATOM | 521 | C5'  | G A | 17 | 7.520 | 7.582  | 84.443 | 1.00 | 0.00 | C |
| ATOM | 522 | O5'  | G A | 17 | 6.521 | 8.364  | 83.743 | 1.00 | 0.00 | O |
| ATOM | 523 | O1P  | G A | 17 | 7.881 | 10.136 | 82.581 | 1.00 | 0.00 | O |
| ATOM | 524 | O2P  | G A | 17 | 5.493 | 10.593 | 83.205 | 1.00 | 0.00 | O |
| ATOM | 525 | P    | G A | 17 | 6.776 | 9.925  | 83.537 | 1.00 | 0.00 | P |
| ATOM | 526 | H1   | G A | 17 | 0.457 | 3.105  | 86.249 | 1.00 | 0.00 | H |
| ATOM | 527 | H8   | G A | 17 | 4.166 | 7.799  | 83.823 | 1.00 | 0.00 | H |
| ATOM | 528 | H1'  | G A | 17 | 5.412 | 4.142  | 83.247 | 1.00 | 0.00 | H |
| ATOM | 529 | H21  | G A | 17 | 1.422 | 1.156  | 85.973 | 1.00 | 0.00 | H |
| ATOM | 530 | H3'  | G A | 17 | 7.786 | 6.942  | 81.834 | 1.00 | 0.00 | H |
| ATOM | 531 | H22  | G A | 17 | 3.012 | 0.975  | 85.181 | 1.00 | 0.00 | H |
| ATOM | 532 | H4'  | G A | 17 | 8.562 | 5.777  | 84.082 | 1.00 | 0.00 | H |
| ATOM | 533 | H2'1 | G A | 17 | 5.414 | 6.989  | 82.201 | 1.00 | 0.00 | H |
| ATOM | 534 | H2'2 | G A | 17 | 5.572 | 5.486  | 81.299 | 1.00 | 0.00 | H |

|      |     |      |     |    |        |        |        |      |      |   |
|------|-----|------|-----|----|--------|--------|--------|------|------|---|
| ATOM | 535 | H5'1 | G A | 17 | 7.263  | 7.518  | 85.500 | 1.00 | 0.00 | H |
| ATOM | 536 | H5'2 | G A | 17 | 8.497  | 8.053  | 84.341 | 1.00 | 0.00 | H |
| ATOM | 537 | C1'  | G A | 18 | 3.763  | 1.128  | 81.241 | 1.00 | 0.00 | C |
| ATOM | 538 | N1   | G A | 18 | -0.716 | 2.652  | 83.147 | 1.00 | 0.00 | N |
| ATOM | 539 | C2   | G A | 18 | -0.159 | 1.386  | 83.092 | 1.00 | 0.00 | C |
| ATOM | 540 | N2   | G A | 18 | -0.895 | 0.394  | 83.612 | 1.00 | 0.00 | N |
| ATOM | 541 | N3   | G A | 18 | 1.034  | 1.132  | 82.561 | 1.00 | 0.00 | N |
| ATOM | 542 | C4   | G A | 18 | 1.635  | 2.250  | 82.077 | 1.00 | 0.00 | C |
| ATOM | 543 | C5   | G A | 18 | 1.155  | 3.549  | 82.085 | 1.00 | 0.00 | C |
| ATOM | 544 | C6   | G A | 18 | -0.112 | 3.822  | 82.653 | 1.00 | 0.00 | C |
| ATOM | 545 | O6   | G A | 18 | -0.702 | 4.898  | 82.752 | 1.00 | 0.00 | O |
| ATOM | 546 | N7   | G A | 18 | 2.078  | 4.408  | 81.487 | 1.00 | 0.00 | N |
| ATOM | 547 | C8   | G A | 18 | 3.066  | 3.623  | 81.146 | 1.00 | 0.00 | C |
| ATOM | 548 | N9   | G A | 18 | 2.870  | 2.297  | 81.471 | 1.00 | 0.00 | N |
| ATOM | 549 | C2'  | G A | 18 | 4.510  | 1.177  | 79.915 | 1.00 | 0.00 | C |
| ATOM | 550 | C3'  | G A | 18 | 5.847  | 0.554  | 80.280 | 1.00 | 0.00 | C |
| ATOM | 551 | O3'  | G A | 18 | 5.739  | -0.866 | 80.201 | 1.00 | 0.00 | O |
| ATOM | 552 | C4'  | G A | 18 | 6.067  | 1.036  | 81.713 | 1.00 | 0.00 | C |
| ATOM | 553 | O4'  | G A | 18 | 4.721  | 1.104  | 82.281 | 1.00 | 0.00 | O |
| ATOM | 554 | C5'  | G A | 18 | 6.728  | 2.385  | 81.872 | 1.00 | 0.00 | C |
| ATOM | 555 | O5'  | G A | 18 | 6.279  | 3.279  | 80.824 | 1.00 | 0.00 | O |
| ATOM | 556 | O1P  | G A | 18 | 8.364  | 3.689  | 79.474 | 1.00 | 0.00 | O |
| ATOM | 557 | O2P  | G A | 18 | 6.546  | 5.415  | 79.528 | 1.00 | 0.00 | O |
| ATOM | 558 | P    | G A | 18 | 7.301  | 4.359  | 80.245 | 1.00 | 0.00 | P |
| ATOM | 559 | H1   | G A | 18 | -1.645 | 2.743  | 83.586 | 1.00 | 0.00 | H |
| ATOM | 560 | H8   | G A | 18 | 3.967  | 3.983  | 80.648 | 1.00 | 0.00 | H |
| ATOM | 561 | H1'  | G A | 18 | 3.163  | 0.220  | 81.316 | 1.00 | 0.00 | H |
| ATOM | 562 | H21  | G A | 18 | -1.817 | 0.601  | 84.025 | 1.00 | 0.00 | H |
| ATOM | 563 | H3'  | G A | 18 | 6.649  | 0.892  | 79.623 | 1.00 | 0.00 | H |
| ATOM | 564 | H22  | G A | 18 | -0.538 | -0.570 | 83.598 | 1.00 | 0.00 | H |
| ATOM | 565 | H4'  | G A | 18 | 6.699  | 0.296  | 82.203 | 1.00 | 0.00 | H |
| ATOM | 566 | H2'1 | G A | 18 | 4.635  | 2.196  | 79.549 | 1.00 | 0.00 | H |
| ATOM | 567 | H2'2 | G A | 18 | 4.005  | 0.608  | 79.134 | 1.00 | 0.00 | H |
| ATOM | 568 | H5'1 | G A | 18 | 6.467  | 2.799  | 82.845 | 1.00 | 0.00 | H |
| ATOM | 569 | H5'2 | G A | 18 | 7.809  | 2.262  | 81.814 | 1.00 | 0.00 | H |
| ATOM | 570 | C1'  | T A | 19 | 0.235  | -2.096 | 79.951 | 1.00 | 0.00 | C |
| ATOM | 571 | N1   | T A | 19 | 0.042  | -0.643 | 79.707 | 1.00 | 0.00 | N |
| ATOM | 572 | C2   | T A | 19 | -1.131 | -0.077 | 80.166 | 1.00 | 0.00 | C |
| ATOM | 573 | O2   | T A | 19 | -1.989 | -0.718 | 80.748 | 1.00 | 0.00 | O |
| ATOM | 574 | N3   | T A | 19 | -1.269 | 1.277  | 79.919 | 1.00 | 0.00 | N |
| ATOM | 575 | C4   | T A | 19 | -0.365 | 2.090  | 79.271 | 1.00 | 0.00 | C |
| ATOM | 576 | O4   | T A | 19 | -0.600 | 3.293  | 79.105 | 1.00 | 0.00 | O |
| ATOM | 577 | C5   | T A | 19 | 0.830  | 1.411  | 78.827 | 1.00 | 0.00 | C |
| ATOM | 578 | C6   | T A | 19 | 0.999  | 0.092  | 79.051 | 1.00 | 0.00 | C |
| ATOM | 579 | C7   | T A | 19 | 1.844  | 2.258  | 78.118 | 1.00 | 0.00 | C |
| ATOM | 580 | C2'  | T A | 19 | 0.920  | -2.826 | 78.801 | 1.00 | 0.00 | C |
| ATOM | 581 | C3'  | T A | 19 | 1.765  | -3.854 | 79.536 | 1.00 | 0.00 | C |
| ATOM | 582 | O3'  | T A | 19 | 0.966  | -4.998 | 79.826 | 1.00 | 0.00 | O |
| ATOM | 583 | C4'  | T A | 19 | 2.184  | -3.107 | 80.800 | 1.00 | 0.00 | C |
| ATOM | 584 | O4'  | T A | 19 | 1.047  | -2.239 | 81.100 | 1.00 | 0.00 | O |
| ATOM | 585 | C5'  | T A | 19 | 3.428  | -2.257 | 80.697 | 1.00 | 0.00 | C |
| ATOM | 586 | O5'  | T A | 19 | 3.493  | -1.640 | 79.387 | 1.00 | 0.00 | O |
| ATOM | 587 | O1P  | T A | 19 | 5.515  | -2.710 | 78.338 | 1.00 | 0.00 | O |
| ATOM | 588 | O2P  | T A | 19 | 4.799  | -0.413 | 77.626 | 1.00 | 0.00 | O |

|      |     |      |       |    |         |         |        |      |      |   |
|------|-----|------|-------|----|---------|---------|--------|------|------|---|
| ATOM | 589 | P    | T A   | 19 | 4.921   | -1.411  | 78.715 | 1.00 | 0.00 | P |
| ATOM | 590 | H3   | T A   | 19 | -2.135  | 1.722   | 80.256 | 1.00 | 0.00 | H |
| ATOM | 591 | H6   | T A   | 19 | 1.910   | -0.399  | 78.708 | 1.00 | 0.00 | H |
| ATOM | 592 | H1'  | T A   | 19 | -0.737  | -2.539  | 80.168 | 1.00 | 0.00 | H |
| ATOM | 593 | H3'  | T A   | 19 | 2.634   | -4.159  | 78.952 | 1.00 | 0.00 | H |
| ATOM | 594 | H4'  | T A   | 19 | 2.360   | -3.861  | 81.570 | 1.00 | 0.00 | H |
| ATOM | 595 | H71  | T A   | 19 | 1.927   | 1.934   | 77.081 | 1.00 | 0.00 | H |
| ATOM | 596 | H72  | T A   | 19 | 1.529   | 3.301   | 78.147 | 1.00 | 0.00 | H |
| ATOM | 597 | H73  | T A   | 19 | 2.812   | 2.158   | 78.609 | 1.00 | 0.00 | H |
| ATOM | 598 | H2'1 | T A   | 19 | 1.538   | -2.160  | 78.200 | 1.00 | 0.00 | H |
| ATOM | 599 | H2'2 | T A   | 19 | 0.206   | -3.304  | 78.130 | 1.00 | 0.00 | H |
| ATOM | 600 | H5'1 | T A   | 19 | 3.401   | -1.485  | 81.466 | 1.00 | 0.00 | H |
| ATOM | 601 | H5'2 | T A   | 19 | 4.305   | -2.885  | 80.852 | 1.00 | 0.00 | H |
| ATOM | 602 | C01  | LNK A | 20 | 0.051   | -7.921  | 77.710 | 0.00 | 0.00 | C |
| ATOM | 603 | O1   | LNK A | 20 | 0.687   | -6.655  | 77.897 | 1.00 | 0.00 | O |
| ATOM | 604 | S    | LNK A | 20 | -0.631  | -10.538 | 74.789 | 0.00 | 0.00 | S |
| ATOM | 605 | C02  | LNK A | 20 | 0.198   | -8.355  | 76.239 | 0.00 | 0.00 | C |
| ATOM | 606 | C03  | LNK A | 20 | -1.082  | -9.084  | 75.788 | 0.00 | 0.00 | C |
| ATOM | 607 | O1P  | LNK A | 20 | -0.223  | -4.330  | 77.569 | 1.00 | 0.00 | O |
| ATOM | 608 | O2P  | LNK A | 20 | -1.462  | -5.973  | 79.007 | 1.00 | 0.00 | O |
| ATOM | 609 | P    | LNK A | 20 | -0.158  | -5.455  | 78.523 | 1.00 | 0.00 | P |
| ATOM | 610 | H01  | LNK A | 20 | -1.007  | -7.838  | 77.959 | 0.00 | 0.00 | H |
| ATOM | 611 | H02  | LNK A | 20 | 0.519   | -8.663  | 78.356 | 0.00 | 0.00 | H |
| ATOM | 612 | H03  | LNK A | 20 | -1.693  | -8.408  | 75.190 | 0.00 | 0.00 | H |
| ATOM | 613 | H04  | LNK A | 20 | 1.053   | -9.027  | 76.143 | 0.00 | 0.00 | H |
| ATOM | 614 | H05  | LNK A | 20 | 0.355   | -7.476  | 75.615 | 0.00 | 0.00 | H |
| ATOM | 615 | H06  | LNK A | 20 | -1.645  | -9.406  | 76.664 | 0.00 | 0.00 | H |
| ATOM | 616 | AU   | LNK A | 20 | -1.196  | -10.804 | 74.505 |      |      |   |
| TER  |     |      |       |    |         |         |        |      |      |   |
| ATOM | 618 | C1'  | A B   | 2  | -8.238  | 4.158   | 82.775 | 1.00 | 0.00 | C |
| ATOM | 619 | N1   | A B   | 2  | -3.745  | 2.571   | 80.869 | 1.00 | 0.00 | N |
| ATOM | 620 | C2   | A B   | 2  | -4.717  | 1.939   | 81.517 | 1.00 | 0.00 | C |
| ATOM | 621 | N3   | A B   | 2  | -5.857  | 2.409   | 81.980 | 1.00 | 0.00 | N |
| ATOM | 622 | C4   | A B   | 2  | -5.958  | 3.727   | 81.717 | 1.00 | 0.00 | C |
| ATOM | 623 | C5   | A B   | 2  | -5.051  | 4.516   | 81.068 | 1.00 | 0.00 | C |
| ATOM | 624 | C6   | A B   | 2  | -3.873  | 3.883   | 80.622 | 1.00 | 0.00 | C |
| ATOM | 625 | N6   | A B   | 2  | -2.894  | 4.532   | 79.968 | 1.00 | 0.00 | N |
| ATOM | 626 | N7   | A B   | 2  | -5.499  | 5.823   | 80.983 | 1.00 | 0.00 | N |
| ATOM | 627 | C8   | A B   | 2  | -6.653  | 5.797   | 81.581 | 1.00 | 0.00 | C |
| ATOM | 628 | N9   | A B   | 2  | -7.000  | 4.557   | 82.050 | 1.00 | 0.00 | N |
| ATOM | 629 | C2'  | A B   | 2  | -8.742  | 5.210   | 83.754 | 1.00 | 0.00 | C |
| ATOM | 630 | C3'  | A B   | 2  | -10.249 | 5.060   | 83.632 | 1.00 | 0.00 | C |
| ATOM | 631 | O3'  | A B   | 2  | -10.684 | 4.007   | 84.489 | 1.00 | 0.00 | O |
| ATOM | 632 | C4'  | A B   | 2  | -10.439 | 4.719   | 82.155 | 1.00 | 0.00 | C |
| ATOM | 633 | O4'  | A B   | 2  | -9.248  | 3.939   | 81.809 | 1.00 | 0.00 | O |
| ATOM | 634 | C5'  | A B   | 2  | -10.547 | 5.887   | 81.204 | 1.00 | 0.00 | C |
| ATOM | 635 | O5'  | A B   | 2  | -9.665  | 6.952   | 81.635 | 1.00 | 0.00 | O |
| ATOM | 636 | H2   | A B   | 2  | -4.551  | 0.878   | 81.690 | 1.00 | 0.00 | H |
| ATOM | 637 | H8   | A B   | 2  | -7.286  | 6.678   | 81.698 | 1.00 | 0.00 | H |
| ATOM | 638 | H1'  | A B   | 2  | -8.046  | 3.213   | 83.282 | 1.00 | 0.00 | H |
| ATOM | 639 | H3'  | A B   | 2  | -10.774 | 5.979   | 83.894 | 1.00 | 0.00 | H |
| ATOM | 640 | H4'  | A B   | 2  | -11.361 | 4.142   | 82.081 | 1.00 | 0.00 | H |
| ATOM | 641 | H61  | A B   | 2  | -2.055  | 4.021   | 79.661 | 1.00 | 0.00 | H |
| ATOM | 642 | H62  | A B   | 2  | -2.985  | 5.540   | 79.775 | 1.00 | 0.00 | H |

|      |     |      |     |   |         |        |        |      |      |   |
|------|-----|------|-----|---|---------|--------|--------|------|------|---|
| ATOM | 643 | H2'1 | A B | 2 | -8.420  | 6.216  | 83.482 | 1.00 | 0.00 | H |
| ATOM | 644 | H2'2 | A B | 2 | -8.404  | 5.022  | 84.774 | 1.00 | 0.00 | H |
| ATOM | 645 | H5'1 | A B | 2 | -10.267 | 5.559  | 80.203 | 1.00 | 0.00 | H |
| ATOM | 646 | H5'2 | A B | 2 | -11.576 | 6.242  | 81.190 | 1.00 | 0.00 | H |
| ATOM | 647 | C1'  | C B | 3 | -6.003  | 1.095  | 85.980 | 1.00 | 0.00 | C |
| ATOM | 648 | N1   | C B | 3 | -5.273  | 2.266  | 85.420 | 1.00 | 0.00 | N |
| ATOM | 649 | C2   | C B | 3 | -4.020  | 2.043  | 84.853 | 1.00 | 0.00 | C |
| ATOM | 650 | O2   | C B | 3 | -3.569  | 0.890  | 84.836 | 1.00 | 0.00 | O |
| ATOM | 651 | N3   | C B | 3 | -3.339  | 3.094  | 84.338 | 1.00 | 0.00 | N |
| ATOM | 652 | C4   | C B | 3 | -3.853  | 4.331  | 84.371 | 1.00 | 0.00 | C |
| ATOM | 653 | N4   | C B | 3 | -3.145  | 5.324  | 83.850 | 1.00 | 0.00 | N |
| ATOM | 654 | C5   | C B | 3 | -5.138  | 4.593  | 84.953 | 1.00 | 0.00 | C |
| ATOM | 655 | C6   | C B | 3 | -5.809  | 3.516  | 85.462 | 1.00 | 0.00 | C |
| ATOM | 656 | C2'  | C B | 3 | -6.771  | 1.405  | 87.258 | 1.00 | 0.00 | C |
| ATOM | 657 | C3'  | C B | 3 | -8.007  | 0.530  | 87.104 | 1.00 | 0.00 | C |
| ATOM | 658 | O3'  | C B | 3 | -7.709  | -0.785 | 87.565 | 1.00 | 0.00 | O |
| ATOM | 659 | C4'  | C B | 3 | -8.265  | 0.570  | 85.600 | 1.00 | 0.00 | C |
| ATOM | 660 | O4'  | C B | 3 | -6.932  | 0.662  | 85.005 | 1.00 | 0.00 | O |
| ATOM | 661 | C5'  | C B | 3 | -9.101  | 1.723  | 85.093 | 1.00 | 0.00 | C |
| ATOM | 662 | O5'  | C B | 3 | -8.794  | 2.921  | 85.850 | 1.00 | 0.00 | O |
| ATOM | 663 | O1P  | C B | 3 | -10.936 | 3.399  | 87.080 | 1.00 | 0.00 | O |
| ATOM | 664 | O2P  | C B | 3 | -9.367  | 5.274  | 86.518 | 1.00 | 0.00 | O |
| ATOM | 665 | P    | C B | 3 | -9.959  | 3.970  | 86.132 | 1.00 | 0.00 | P |
| ATOM | 666 | H5   | C B | 3 | -5.559  | 5.597  | 84.989 | 1.00 | 0.00 | H |
| ATOM | 667 | H6   | C B | 3 | -6.792  | 3.662  | 85.908 | 1.00 | 0.00 | H |
| ATOM | 668 | H1'  | C B | 3 | -5.285  | 0.290  | 86.142 | 1.00 | 0.00 | H |
| ATOM | 669 | H3'  | C B | 3 | -8.857  | 0.925  | 87.660 | 1.00 | 0.00 | H |
| ATOM | 670 | H4'  | C B | 3 | -8.785  | -0.353 | 85.343 | 1.00 | 0.00 | H |
| ATOM | 671 | H41  | C B | 3 | -3.520  | 6.284  | 83.859 | 1.00 | 0.00 | H |
| ATOM | 672 | H42  | C B | 3 | -2.222  | 5.135  | 83.433 | 1.00 | 0.00 | H |
| ATOM | 673 | H2'1 | C B | 3 | -7.039  | 2.457  | 87.336 | 1.00 | 0.00 | H |
| ATOM | 674 | H2'2 | C B | 3 | -6.208  | 1.142  | 88.153 | 1.00 | 0.00 | H |
| ATOM | 675 | H5'1 | C B | 3 | -8.881  | 1.888  | 84.038 | 1.00 | 0.00 | H |
| ATOM | 676 | H5'2 | C B | 3 | -10.155 | 1.477  | 85.205 | 1.00 | 0.00 | H |
| ATOM | 677 | C1'  | C B | 4 | -2.073  | -1.126 | 88.019 | 1.00 | 0.00 | C |
| ATOM | 678 | N1   | C B | 4 | -2.110  | 0.354  | 87.861 | 1.00 | 0.00 | N |
| ATOM | 679 | C2   | C B | 4 | -1.025  | 0.971  | 87.242 | 1.00 | 0.00 | C |
| ATOM | 680 | O2   | C B | 4 | -0.082  | 0.270  | 86.849 | 1.00 | 0.00 | O |
| ATOM | 681 | N3   | C B | 4 | -1.037  | 2.316  | 87.088 | 1.00 | 0.00 | N |
| ATOM | 682 | C4   | C B | 4 | -2.072  | 3.050  | 87.523 | 1.00 | 0.00 | C |
| ATOM | 683 | N4   | C B | 4 | -2.034  | 4.361  | 87.344 | 1.00 | 0.00 | N |
| ATOM | 684 | C5   | C B | 4 | -3.199  | 2.443  | 88.168 | 1.00 | 0.00 | C |
| ATOM | 685 | C6   | C B | 4 | -3.166  | 1.084  | 88.307 | 1.00 | 0.00 | C |
| ATOM | 686 | C2'  | C B | 4 | -2.662  | -1.617 | 89.334 | 1.00 | 0.00 | C |
| ATOM | 687 | C3'  | C B | 4 | -3.326  | -2.921 | 88.916 | 1.00 | 0.00 | C |
| ATOM | 688 | O3'  | C B | 4 | -2.356  | -3.965 | 88.925 | 1.00 | 0.00 | O |
| ATOM | 689 | C4'  | C B | 4 | -3.827  | -2.611 | 87.508 | 1.00 | 0.00 | C |
| ATOM | 690 | O4'  | C B | 4 | -2.828  | -1.690 | 86.963 | 1.00 | 0.00 | O |
| ATOM | 691 | C5'  | C B | 4 | -5.189  | -1.962 | 87.405 | 1.00 | 0.00 | C |
| ATOM | 692 | O5'  | C B | 4 | -5.373  | -1.036 | 88.507 | 1.00 | 0.00 | O |
| ATOM | 693 | O1P  | C B | 4 | -7.231  | -2.084 | 89.842 | 1.00 | 0.00 | O |
| ATOM | 694 | O2P  | C B | 4 | -6.888  | 0.401  | 89.904 | 1.00 | 0.00 | O |
| ATOM | 695 | P    | C B | 4 | -6.833  | -0.859 | 89.122 | 1.00 | 0.00 | P |
| ATOM | 696 | H5   | C B | 4 | -4.039  | 3.035  | 88.530 | 1.00 | 0.00 | H |

|      |     |      |     |   |        |        |        |      |      |   |
|------|-----|------|-----|---|--------|--------|--------|------|------|---|
| ATOM | 697 | H6   | C B | 4 | -4.004 | 0.577  | 88.785 | 1.00 | 0.00 | H |
| ATOM | 698 | H1'  | C B | 4 | -1.041 | -1.456 | 87.905 | 1.00 | 0.00 | H |
| ATOM | 699 | H3'  | C B | 4 | -4.151 | -3.189 | 89.577 | 1.00 | 0.00 | H |
| ATOM | 700 | H4'  | C B | 4 | -3.870 | -3.558 | 86.970 | 1.00 | 0.00 | H |
| ATOM | 701 | H41  | C B | 4 | -2.817 | 4.949  | 87.666 | 1.00 | 0.00 | H |
| ATOM | 702 | H42  | C B | 4 | -1.221 | 4.797  | 86.882 | 1.00 | 0.00 | H |
| ATOM | 703 | H2'1 | C B | 4 | -3.387 | -0.918 | 89.749 | 1.00 | 0.00 | H |
| ATOM | 704 | H2'2 | C B | 4 | -1.897 | -1.787 | 90.092 | 1.00 | 0.00 | H |
| ATOM | 705 | H5'1 | C B | 4 | -5.261 | -1.428 | 86.459 | 1.00 | 0.00 | H |
| ATOM | 706 | H5'2 | C B | 4 | -5.955 | -2.735 | 87.442 | 1.00 | 0.00 | H |
| ATOM | 707 | C1'  | G B | 5 | 2.724  | -1.472 | 89.197 | 1.00 | 0.00 | C |
| ATOM | 708 | N1   | G B | 5 | 2.594  | 3.616  | 88.846 | 1.00 | 0.00 | N |
| ATOM | 709 | C2   | G B | 5 | 3.546  | 2.718  | 88.394 | 1.00 | 0.00 | C |
| ATOM | 710 | N2   | G B | 5 | 4.603  | 3.247  | 87.767 | 1.00 | 0.00 | N |
| ATOM | 711 | N3   | G B | 5 | 3.447  | 1.400  | 88.555 | 1.00 | 0.00 | N |
| ATOM | 712 | C4   | G B | 5 | 2.315  | 1.042  | 89.216 | 1.00 | 0.00 | C |
| ATOM | 713 | C5   | G B | 5 | 1.316  | 1.867  | 89.706 | 1.00 | 0.00 | C |
| ATOM | 714 | C6   | G B | 5 | 1.416  | 3.266  | 89.533 | 1.00 | 0.00 | C |
| ATOM | 715 | O6   | G B | 5 | 0.640  | 4.149  | 89.894 | 1.00 | 0.00 | O |
| ATOM | 716 | N7   | G B | 5 | 0.324  | 1.103  | 90.326 | 1.00 | 0.00 | N |
| ATOM | 717 | C8   | G B | 5 | 0.742  | -0.130 | 90.193 | 1.00 | 0.00 | C |
| ATOM | 718 | N9   | G B | 5 | 1.946  | -0.247 | 89.530 | 1.00 | 0.00 | N |
| ATOM | 719 | C2'  | G B | 5 | 2.683  | -2.538 | 90.284 | 1.00 | 0.00 | C |
| ATOM | 720 | C3'  | G B | 5 | 2.678  | -3.821 | 89.469 | 1.00 | 0.00 | C |
| ATOM | 721 | O3'  | G B | 5 | 4.019  | -4.170 | 89.135 | 1.00 | 0.00 | O |
| ATOM | 722 | C4'  | G B | 5 | 1.855  | -3.439 | 88.239 | 1.00 | 0.00 | C |
| ATOM | 723 | O4'  | G B | 5 | 2.171  | -2.028 | 88.020 | 1.00 | 0.00 | O |
| ATOM | 724 | C5'  | G B | 5 | 0.358  | -3.588 | 88.360 | 1.00 | 0.00 | C |
| ATOM | 725 | O5'  | G B | 5 | -0.063 | -3.236 | 89.701 | 1.00 | 0.00 | O |
| ATOM | 726 | O1P  | G B | 5 | -0.917 | -5.412 | 90.634 | 1.00 | 0.00 | O |
| ATOM | 727 | O2P  | G B | 5 | -1.822 | -3.238 | 91.496 | 1.00 | 0.00 | O |
| ATOM | 728 | P    | G B | 5 | -1.296 | -4.014 | 90.349 | 1.00 | 0.00 | P |
| ATOM | 729 | H1   | G B | 5 | 2.760  | 4.618  | 88.664 | 1.00 | 0.00 | H |
| ATOM | 730 | H8   | G B | 5 | 0.189  | -0.988 | 90.572 | 1.00 | 0.00 | H |
| ATOM | 731 | H1'  | G B | 5 | 3.750  | -1.176 | 88.979 | 1.00 | 0.00 | H |
| ATOM | 732 | H21  | G B | 5 | 4.671  | 4.267  | 87.644 | 1.00 | 0.00 | H |
| ATOM | 733 | H3'  | G B | 5 | 2.214  | -4.647 | 90.010 | 1.00 | 0.00 | H |
| ATOM | 734 | H22  | G B | 5 | 5.349  | 2.634  | 87.409 | 1.00 | 0.00 | H |
| ATOM | 735 | H4'  | G B | 5 | 2.189  | -4.081 | 87.424 | 1.00 | 0.00 | H |
| ATOM | 736 | H2'1 | G B | 5 | 1.792  | -2.459 | 90.908 | 1.00 | 0.00 | H |
| ATOM | 737 | H2'2 | G B | 5 | 3.550  | -2.490 | 90.943 | 1.00 | 0.00 | H |
| ATOM | 738 | H5'1 | G B | 5 | -0.126 | -2.930 | 87.638 | 1.00 | 0.00 | H |
| ATOM | 739 | H5'2 | G B | 5 | 0.082  | -4.620 | 88.146 | 1.00 | 0.00 | H |
| ATOM | 740 | C1'  | T B | 6 | 7.219  | 0.363  | 90.159 | 1.00 | 0.00 | C |
| ATOM | 741 | N1   | T B | 6 | 6.026  | 0.897  | 90.869 | 1.00 | 0.00 | N |
| ATOM | 742 | C2   | T B | 6 | 5.851  | 2.266  | 90.866 | 1.00 | 0.00 | C |
| ATOM | 743 | O2   | T B | 6 | 6.625  | 3.030  | 90.315 | 1.00 | 0.00 | O |
| ATOM | 744 | N3   | T B | 6 | 4.727  | 2.718  | 91.536 | 1.00 | 0.00 | N |
| ATOM | 745 | C4   | T B | 6 | 3.794  | 1.944  | 92.192 | 1.00 | 0.00 | C |
| ATOM | 746 | O4   | T B | 6 | 2.828  | 2.463  | 92.762 | 1.00 | 0.00 | O |
| ATOM | 747 | C5   | T B | 6 | 4.062  | 0.526  | 92.139 | 1.00 | 0.00 | C |
| ATOM | 748 | C6   | T B | 6 | 5.145  | 0.049  | 91.495 | 1.00 | 0.00 | C |
| ATOM | 749 | C7   | T B | 6 | 3.070  | -0.355 | 92.838 | 1.00 | 0.00 | C |
| ATOM | 750 | C2'  | T B | 6 | 7.868  | -0.825 | 90.859 | 1.00 | 0.00 | C |

|      |     |      |     |   |        |        |        |      |      |   |
|------|-----|------|-----|---|--------|--------|--------|------|------|---|
| ATOM | 751 | C3'  | T B | 6 | 8.331  | -1.670 | 89.682 | 1.00 | 0.00 | C |
| ATOM | 752 | O3'  | T B | 6 | 9.602  | -1.198 | 89.238 | 1.00 | 0.00 | O |
| ATOM | 753 | C4'  | T B | 6 | 7.234  | -1.439 | 88.644 | 1.00 | 0.00 | C |
| ATOM | 754 | O4'  | T B | 6 | 6.805  | -0.059 | 88.875 | 1.00 | 0.00 | O |
| ATOM | 755 | C5'  | T B | 6 | 6.025  | -2.342 | 88.731 | 1.00 | 0.00 | C |
| ATOM | 756 | O5'  | T B | 6 | 5.720  | -2.618 | 90.122 | 1.00 | 0.00 | O |
| ATOM | 757 | O1P  | T B | 6 | 6.163  | -5.086 | 90.336 | 1.00 | 0.00 | O |
| ATOM | 758 | O2P  | T B | 6 | 4.498  | -3.973 | 91.848 | 1.00 | 0.00 | O |
| ATOM | 759 | P    | T B | 6 | 5.128  | -4.048 | 90.508 | 1.00 | 0.00 | P |
| ATOM | 760 | H3   | T B | 6 | 4.573  | 3.737  | 91.546 | 1.00 | 0.00 | H |
| ATOM | 761 | H6   | T B | 6 | 5.325  | -1.026 | 91.470 | 1.00 | 0.00 | H |
| ATOM | 762 | H1'  | T B | 6 | 7.933  | 1.177  | 90.031 | 1.00 | 0.00 | H |
| ATOM | 763 | H3'  | T B | 6 | 8.410  | -2.724 | 89.943 | 1.00 | 0.00 | H |
| ATOM | 764 | H4'  | T B | 6 | 7.690  | -1.586 | 87.665 | 1.00 | 0.00 | H |
| ATOM | 765 | H71  | T B | 6 | 3.551  | -0.847 | 93.683 | 1.00 | 0.00 | H |
| ATOM | 766 | H72  | T B | 6 | 2.235  | 0.248  | 93.195 | 1.00 | 0.00 | H |
| ATOM | 767 | H73  | T B | 6 | 2.700  | -1.111 | 92.143 | 1.00 | 0.00 | H |
| ATOM | 768 | H2'1 | T B | 6 | 7.164  | -1.370 | 91.485 | 1.00 | 0.00 | H |
| ATOM | 769 | H2'2 | T B | 6 | 8.707  | -0.528 | 91.488 | 1.00 | 0.00 | H |
| ATOM | 770 | H5'1 | T B | 6 | 5.176  | -1.850 | 88.258 | 1.00 | 0.00 | H |
| ATOM | 771 | H5'2 | T B | 6 | 6.238  | -3.274 | 88.209 | 1.00 | 0.00 | H |
| ATOM | 772 | C1'  | C B | 7 | 10.332 | 3.939  | 91.638 | 1.00 | 0.00 | C |
| ATOM | 773 | N1   | C B | 7 | 9.175  | 3.543  | 92.491 | 1.00 | 0.00 | N |
| ATOM | 774 | C2   | C B | 7 | 8.333  | 4.550  | 92.954 | 1.00 | 0.00 | C |
| ATOM | 775 | O2   | C B | 7 | 8.574  | 5.724  | 92.641 | 1.00 | 0.00 | O |
| ATOM | 776 | N3   | C B | 7 | 7.274  | 4.211  | 93.731 | 1.00 | 0.00 | N |
| ATOM | 777 | C4   | C B | 7 | 7.039  | 2.934  | 94.052 | 1.00 | 0.00 | C |
| ATOM | 778 | N4   | C B | 7 | 5.988  | 2.659  | 94.811 | 1.00 | 0.00 | N |
| ATOM | 779 | C5   | C B | 7 | 7.892  | 1.876  | 93.595 | 1.00 | 0.00 | C |
| ATOM | 780 | C6   | C B | 7 | 8.949  | 2.241  | 92.808 | 1.00 | 0.00 | C |
| ATOM | 781 | C2'  | C B | 7 | 11.594 | 3.130  | 91.904 | 1.00 | 0.00 | C |
| ATOM | 782 | C3'  | C B | 7 | 12.197 | 3.021  | 90.513 | 1.00 | 0.00 | C |
| ATOM | 783 | O3'  | C B | 7 | 12.966 | 4.190  | 90.242 | 1.00 | 0.00 | O |
| ATOM | 784 | C4'  | C B | 7 | 10.966 | 2.919  | 89.615 | 1.00 | 0.00 | C |
| ATOM | 785 | O4'  | C B | 7 | 9.959  | 3.738  | 90.288 | 1.00 | 0.00 | O |
| ATOM | 786 | C5'  | C B | 7 | 10.400 | 1.532  | 89.406 | 1.00 | 0.00 | C |
| ATOM | 787 | O5'  | C B | 7 | 10.524 | 0.764  | 90.629 | 1.00 | 0.00 | O |
| ATOM | 788 | O1P  | C B | 7 | 12.157 | -1.049 | 90.016 | 1.00 | 0.00 | O |
| ATOM | 789 | O2P  | C B | 7 | 10.460 | -1.448 | 91.819 | 1.00 | 0.00 | O |
| ATOM | 790 | P    | C B | 7 | 10.795 | -0.804 | 90.527 | 1.00 | 0.00 | P |
| ATOM | 791 | H5   | C B | 7 | 7.707  | 0.835  | 93.860 | 1.00 | 0.00 | H |
| ATOM | 792 | H6   | C B | 7 | 9.622  | 1.472  | 92.430 | 1.00 | 0.00 | H |
| ATOM | 793 | H1'  | C B | 7 | 10.512 | 5.004  | 91.783 | 1.00 | 0.00 | H |
| ATOM | 794 | H3'  | C B | 7 | 12.833 | 2.139  | 90.411 | 1.00 | 0.00 | H |
| ATOM | 795 | H4'  | C B | 7 | 11.252 | 3.310  | 88.638 | 1.00 | 0.00 | H |
| ATOM | 796 | H41  | C B | 7 | 5.781  | 1.683  | 95.072 | 1.00 | 0.00 | H |
| ATOM | 797 | H42  | C B | 7 | 5.377  | 3.421  | 95.142 | 1.00 | 0.00 | H |
| ATOM | 798 | H2'1 | C B | 7 | 11.377 | 2.147  | 92.320 | 1.00 | 0.00 | H |
| ATOM | 799 | H2'2 | C B | 7 | 12.272 | 3.636  | 92.592 | 1.00 | 0.00 | H |
| ATOM | 800 | H5'1 | C B | 7 | 9.349  | 1.613  | 89.126 | 1.00 | 0.00 | H |
| ATOM | 801 | H5'2 | C B | 7 | 10.948 | 1.039  | 88.605 | 1.00 | 0.00 | H |
| ATOM | 802 | C1'  | C B | 8 | 11.544 | 8.026  | 94.159 | 1.00 | 0.00 | C |
| ATOM | 803 | N1   | C B | 8 | 10.891 | 6.879  | 94.846 | 1.00 | 0.00 | N |
| ATOM | 804 | C2   | C B | 8 | 9.760  | 7.139  | 95.618 | 1.00 | 0.00 | C |



|      |     |      |     |   |        |        |        |      |      |   |
|------|-----|------|-----|---|--------|--------|--------|------|------|---|
| ATOM | 805 | O2   | C B | 8 | 9.346  | 8.303  | 95.698 | 1.00 | 0.00 | O |
| ATOM | 806 | N3   | C B | 8 | 9.150  | 6.109  | 96.251 | 1.00 | 0.00 | N |
| ATOM | 807 | C4   | C B | 8 | 9.621  | 4.859  | 96.145 | 1.00 | 0.00 | C |
| ATOM | 808 | N4   | C B | 8 | 8.983  | 3.889  | 96.784 | 1.00 | 0.00 | N |
| ATOM | 809 | C5   | C B | 8 | 10.786 | 4.561  | 95.363 | 1.00 | 0.00 | C |
| ATOM | 810 | C6   | C B | 8 | 11.381 | 5.616  | 94.729 | 1.00 | 0.00 | C |
| ATOM | 811 | C2'  | C B | 8 | 13.065 | 7.944  | 94.139 | 1.00 | 0.00 | C |
| ATOM | 812 | C3'  | C B | 8 | 13.396 | 8.545  | 92.781 | 1.00 | 0.00 | C |
| ATOM | 813 | O3'  | C B | 8 | 13.443 | 9.965  | 92.897 | 1.00 | 0.00 | O |
| ATOM | 814 | C4'  | C B | 8 | 12.234 | 8.075  | 91.908 | 1.00 | 0.00 | C |
| ATOM | 815 | O4'  | C B | 8 | 11.089 | 8.040  | 92.819 | 1.00 | 0.00 | O |
| ATOM | 816 | C5'  | C B | 8 | 12.383 | 6.714  | 91.268 | 1.00 | 0.00 | C |
| ATOM | 817 | O5'  | C B | 8 | 13.071 | 5.817  | 92.177 | 1.00 | 0.00 | O |
| ATOM | 818 | O1P  | C B | 8 | 15.245 | 5.349  | 90.997 | 1.00 | 0.00 | O |
| ATOM | 819 | O2P  | C B | 8 | 14.291 | 3.660  | 92.588 | 1.00 | 0.00 | O |
| ATOM | 820 | P    | C B | 8 | 14.043 | 4.711  | 91.571 | 1.00 | 0.00 | P |
| ATOM | 821 | H5   | C B | 8 | 11.177 | 3.547  | 95.279 | 1.00 | 0.00 | H |
| ATOM | 822 | H6   | C B | 8 | 12.266 | 5.438  | 94.117 | 1.00 | 0.00 | H |
| ATOM | 823 | H1'  | C B | 8 | 11.209 | 8.947  | 94.637 | 1.00 | 0.00 | H |
| ATOM | 824 | H3'  | C B | 8 | 14.349 | 8.182  | 92.395 | 1.00 | 0.00 | H |
| ATOM | 825 | H4'  | C B | 8 | 12.123 | 8.806  | 91.109 | 1.00 | 0.00 | H |
| ATOM | 826 | H41  | C B | 8 | 9.323  | 2.917  | 96.716 | 1.00 | 0.00 | H |
| ATOM | 827 | H42  | C B | 8 | 8.147  | 4.104  | 97.347 | 1.00 | 0.00 | H |
| ATOM | 828 | H2'1 | C B | 8 | 13.425 | 6.919  | 94.217 | 1.00 | 0.00 | H |
| ATOM | 829 | H2'2 | C B | 8 | 13.520 | 8.516  | 94.948 | 1.00 | 0.00 | H |
| ATOM | 830 | H5'1 | C B | 8 | 11.395 | 6.317  | 91.038 | 1.00 | 0.00 | H |
| ATOM | 831 | H5'2 | C B | 8 | 12.954 | 6.814  | 90.346 | 1.00 | 0.00 | H |
| ATOM | 832 | C1'  | T B | 9 | 11.059 | 11.297 | 97.841 | 1.00 | 0.00 | C |
| ATOM | 833 | N1   | T B | 9 | 11.152 | 9.844  | 98.140 | 1.00 | 0.00 | N |
| ATOM | 834 | C2   | T B | 9 | 10.181 | 9.304  | 98.959 | 1.00 | 0.00 | C |
| ATOM | 835 | O2   | T B | 9 | 9.275  | 9.968  | 99.431 | 1.00 | 0.00 | O |
| ATOM | 836 | N3   | T B | 9 | 10.307 | 7.951  | 99.209 | 1.00 | 0.00 | N |
| ATOM | 837 | C4   | T B | 9 | 11.291 | 7.114  | 98.729 | 1.00 | 0.00 | C |
| ATOM | 838 | O4   | T B | 9 | 11.301 | 5.913  | 99.026 | 1.00 | 0.00 | O |
| ATOM | 839 | C5   | T B | 9 | 12.260 | 7.767  | 97.881 | 1.00 | 0.00 | C |
| ATOM | 840 | C6   | T B | 9 | 12.169 | 9.085  | 97.615 | 1.00 | 0.00 | C |
| ATOM | 841 | C7   | T B | 9 | 13.349 | 6.893  | 97.334 | 1.00 | 0.00 | C |
| ATOM | 842 | C2'  | T B | 9 | 12.410 | 12.001 | 97.777 | 1.00 | 0.00 | C |
| ATOM | 843 | C3'  | T B | 9 | 12.183 | 13.024 | 96.674 | 1.00 | 0.00 | C |
| ATOM | 844 | O3'  | T B | 9 | 11.572 | 14.185 | 97.232 | 1.00 | 0.00 | O |
| ATOM | 845 | C4'  | T B | 9 | 11.254 | 12.286 | 95.711 | 1.00 | 0.00 | C |
| ATOM | 846 | O4'  | T B | 9 | 10.434 | 11.441 | 96.580 | 1.00 | 0.00 | O |
| ATOM | 847 | C5'  | T B | 9 | 11.919 | 11.413 | 94.673 | 1.00 | 0.00 | C |
| ATOM | 848 | O5'  | T B | 9 | 13.091 | 10.779 | 95.245 | 1.00 | 0.00 | O |
| ATOM | 849 | O1P  | T B | 9 | 14.994 | 11.800 | 93.953 | 1.00 | 0.00 | O |
| ATOM | 850 | O2P  | T B | 9 | 15.237 | 9.506  | 94.942 | 1.00 | 0.00 | O |
| ATOM | 851 | P    | T B | 9 | 14.355 | 10.517 | 94.309 | 1.00 | 0.00 | P |
| ATOM | 852 | H3   | T B | 9 | 9.591  | 7.524  | 99.815 | 1.00 | 0.00 | H |
| ATOM | 853 | H6   | T B | 9 | 12.914 | 9.556  | 96.973 | 1.00 | 0.00 | H |
| ATOM | 854 | H1'  | T B | 9 | 10.414 | 11.760 | 98.589 | 1.00 | 0.00 | H |
| ATOM | 855 | H3'  | T B | 9 | 13.114 | 13.305 | 96.184 | 1.00 | 0.00 | H |
| ATOM | 856 | H4'  | T B | 9 | 10.675 | 13.047 | 95.186 | 1.00 | 0.00 | H |
| ATOM | 857 | H71  | T B | 9 | 14.308 | 7.203  | 97.749 | 1.00 | 0.00 | H |
| ATOM | 858 | H72  | T B | 9 | 13.154 | 5.855  | 97.606 | 1.00 | 0.00 | H |

|      |     |      |     |    |        |        |         |      |      |   |
|------|-----|------|-----|----|--------|--------|---------|------|------|---|
| ATOM | 859 | H73  | T B | 9  | 13.377 | 6.985  | 96.248  | 1.00 | 0.00 | H |
| ATOM | 860 | H2'1 | T B | 9  | 13.219 | 11.317 | 97.524  | 1.00 | 0.00 | H |
| ATOM | 861 | H2'2 | T B | 9  | 12.669 | 12.483 | 98.719  | 1.00 | 0.00 | H |
| ATOM | 862 | H5'1 | T B | 9  | 11.214 | 10.652 | 94.340  | 1.00 | 0.00 | H |
| ATOM | 863 | H5'2 | T B | 9  | 12.211 | 12.027 | 93.824  | 1.00 | 0.00 | H |
| ATOM | 864 | C1'  | A B | 10 | 9.678  | 12.692 | 102.400 | 1.00 | 0.00 | C |
| ATOM | 865 | N1   | A B | 10 | 10.211 | 7.704  | 103.479 | 1.00 | 0.00 | N |
| ATOM | 866 | C2   | A B | 10 | 9.292  | 8.603  | 103.817 | 1.00 | 0.00 | C |
| ATOM | 867 | N3   | A B | 10 | 9.213  | 9.877  | 103.500 | 1.00 | 0.00 | N |
| ATOM | 868 | C4   | A B | 10 | 10.256 | 10.231 | 102.728 | 1.00 | 0.00 | C |
| ATOM | 869 | C5   | A B | 10 | 11.280 | 9.434  | 102.295 | 1.00 | 0.00 | C |
| ATOM | 870 | C6   | A B | 10 | 11.241 | 8.086  | 102.707 | 1.00 | 0.00 | C |
| ATOM | 871 | N6   | A B | 10 | 12.177 | 7.186  | 102.359 | 1.00 | 0.00 | N |
| ATOM | 872 | N7   | A B | 10 | 12.173 | 10.148 | 101.515 | 1.00 | 0.00 | N |
| ATOM | 873 | C8   | A B | 10 | 11.679 | 11.350 | 101.496 | 1.00 | 0.00 | C |
| ATOM | 874 | N9   | A B | 10 | 10.514 | 11.476 | 102.208 | 1.00 | 0.00 | N |
| ATOM | 875 | C2'  | A B | 10 | 10.486 | 13.974 | 102.552 | 1.00 | 0.00 | C |
| ATOM | 876 | C3'  | A B | 10 | 9.605  | 14.992 | 101.845 | 1.00 | 0.00 | C |
| ATOM | 877 | O3'  | A B | 10 | 8.617  | 15.467 | 102.756 | 1.00 | 0.00 | O |
| ATOM | 878 | C4'  | A B | 10 | 8.994  | 14.177 | 100.705 | 1.00 | 0.00 | C |
| ATOM | 879 | O4'  | A B | 10 | 8.852  | 12.830 | 101.259 | 1.00 | 0.00 | O |
| ATOM | 880 | C5'  | A B | 10 | 9.802  | 14.094 | 99.432  | 1.00 | 0.00 | C |
| ATOM | 881 | O5'  | A B | 10 | 11.216 | 14.024 | 99.752  | 1.00 | 0.00 | O |
| ATOM | 882 | O1P  | A B | 10 | 12.127 | 16.186 | 98.841  | 1.00 | 0.00 | O |
| ATOM | 883 | O2P  | A B | 10 | 13.618 | 14.176 | 99.029  | 1.00 | 0.00 | O |
| ATOM | 884 | P    | A B | 10 | 12.261 | 14.718 | 98.768  | 1.00 | 0.00 | P |
| ATOM | 885 | H2   | A B | 10 | 8.486  | 8.229  | 104.447 | 1.00 | 0.00 | H |
| ATOM | 886 | H8   | A B | 10 | 12.146 | 12.179 | 100.965 | 1.00 | 0.00 | H |
| ATOM | 887 | H1'  | A B | 10 | 9.035  | 12.532 | 103.264 | 1.00 | 0.00 | H |
| ATOM | 888 | H3'  | A B | 10 | 10.180 | 15.834 | 101.462 | 1.00 | 0.00 | H |
| ATOM | 889 | H4'  | A B | 10 | 8.038  | 14.641 | 100.462 | 1.00 | 0.00 | H |
| ATOM | 890 | H61  | A B | 10 | 12.099 | 6.213  | 102.684 | 1.00 | 0.00 | H |
| ATOM | 891 | H62  | A B | 10 | 12.971 | 7.472  | 101.768 | 1.00 | 0.00 | H |
| ATOM | 892 | H2'1 | A B | 10 | 11.467 | 13.904 | 102.081 | 1.00 | 0.00 | H |
| ATOM | 893 | H2'2 | A B | 10 | 10.642 | 14.243 | 103.597 | 1.00 | 0.00 | H |
| ATOM | 894 | H5'1 | A B | 10 | 9.507  | 13.203 | 98.877  | 1.00 | 0.00 | H |
| ATOM | 895 | H5'2 | A B | 10 | 9.607  | 14.975 | 98.825  | 1.00 | 0.00 | H |
| ATOM | 896 | C1'  | G B | 11 | 8.616  | 11.849 | 107.175 | 1.00 | 0.00 | C |
| ATOM | 897 | N1   | G B | 11 | 11.671 | 7.809  | 106.571 | 1.00 | 0.00 | N |
| ATOM | 898 | C2   | G B | 11 | 10.460 | 7.916  | 107.232 | 1.00 | 0.00 | C |
| ATOM | 899 | N2   | G B | 11 | 10.004 | 6.798  | 107.809 | 1.00 | 0.00 | N |
| ATOM | 900 | N3   | G B | 11 | 9.761  | 9.046  | 107.308 | 1.00 | 0.00 | N |
| ATOM | 901 | C4   | G B | 11 | 10.377 | 10.078 | 106.673 | 1.00 | 0.00 | C |
| ATOM | 902 | C5   | G B | 11 | 11.583 | 10.066 | 105.995 | 1.00 | 0.00 | C |
| ATOM | 903 | C6   | G B | 11 | 12.326 | 8.866  | 105.909 | 1.00 | 0.00 | C |
| ATOM | 904 | O6   | G B | 11 | 13.406 | 8.659  | 105.357 | 1.00 | 0.00 | O |
| ATOM | 905 | N7   | G B | 11 | 11.863 | 11.336 | 105.485 | 1.00 | 0.00 | N |
| ATOM | 906 | C8   | G B | 11 | 10.839 | 12.061 | 105.860 | 1.00 | 0.00 | C |
| ATOM | 907 | N9   | G B | 11 | 9.895  | 11.366 | 106.587 | 1.00 | 0.00 | N |
| ATOM | 908 | C2'  | G B | 11 | 8.696  | 13.261 | 107.741 | 1.00 | 0.00 | C |
| ATOM | 909 | C3'  | G B | 11 | 7.318  | 13.812 | 107.415 | 1.00 | 0.00 | C |
| ATOM | 910 | O3'  | G B | 11 | 6.404  | 13.421 | 108.437 | 1.00 | 0.00 | O |
| ATOM | 911 | C4'  | G B | 11 | 6.998  | 13.156 | 106.073 | 1.00 | 0.00 | C |
| ATOM | 912 | O4'  | G B | 11 | 7.642  | 11.845 | 106.151 | 1.00 | 0.00 | O |

|      |     |      |     |    |        |        |         |      |      |   |
|------|-----|------|-----|----|--------|--------|---------|------|------|---|
| ATOM | 913 | C5'  | G B | 11 | 7.501  | 13.870 | 104.841 | 1.00 | 0.00 | C |
| ATOM | 914 | O5'  | G B | 11 | 8.793  | 14.467 | 105.113 | 1.00 | 0.00 | O |
| ATOM | 915 | O1P  | G B | 11 | 8.337  | 16.938 | 104.966 | 1.00 | 0.00 | O |
| ATOM | 916 | O2P  | G B | 11 | 10.631 | 16.054 | 104.469 | 1.00 | 0.00 | O |
| ATOM | 917 | P    | G B | 11 | 9.164  | 15.851 | 104.410 | 1.00 | 0.00 | P |
| ATOM | 918 | H1   | G B | 11 | 12.130 | 6.885  | 106.565 | 1.00 | 0.00 | H |
| ATOM | 919 | H8   | G B | 11 | 10.744 | 13.119 | 105.620 | 1.00 | 0.00 | H |
| ATOM | 920 | H1'  | G B | 11 | 8.302  | 11.138 | 107.940 | 1.00 | 0.00 | H |
| ATOM | 921 | H21  | G B | 11 | 10.548 | 5.925  | 107.742 | 1.00 | 0.00 | H |
| ATOM | 922 | H3'  | G B | 11 | 7.321  | 14.899 | 107.330 | 1.00 | 0.00 | H |
| ATOM | 923 | H22  | G B | 11 | 9.109  | 6.810  | 108.319 | 1.00 | 0.00 | H |
| ATOM | 924 | H4'  | G B | 11 | 5.911  | 13.094 | 106.002 | 1.00 | 0.00 | H |
| ATOM | 925 | H2'1 | G B | 11 | 9.482  | 13.852 | 107.269 | 1.00 | 0.00 | H |
| ATOM | 926 | H2'2 | G B | 11 | 8.882  | 13.265 | 108.815 | 1.00 | 0.00 | H |
| ATOM | 927 | H5'1 | G B | 11 | 7.591  | 13.153 | 104.024 | 1.00 | 0.00 | H |
| ATOM | 928 | H5'2 | G B | 11 | 6.788  | 14.645 | 104.561 | 1.00 | 0.00 | H |
| ATOM | 929 | C1'  | G B | 12 | 8.926  | 9.335  | 111.431 | 1.00 | 0.00 | C |
| ATOM | 930 | N1   | G B | 12 | 13.398 | 7.783  | 109.529 | 1.00 | 0.00 | N |
| ATOM | 931 | C2   | G B | 12 | 12.421 | 7.067  | 110.199 | 1.00 | 0.00 | C |
| ATOM | 932 | N2   | G B | 12 | 12.669 | 5.764  | 110.387 | 1.00 | 0.00 | N |
| ATOM | 933 | N3   | G B | 12 | 11.287 | 7.607  | 110.642 | 1.00 | 0.00 | N |
| ATOM | 934 | C4   | G B | 12 | 11.207 | 8.936  | 110.370 | 1.00 | 0.00 | C |
| ATOM | 935 | C5   | G B | 12 | 12.130 | 9.731  | 109.714 | 1.00 | 0.00 | C |
| ATOM | 936 | C6   | G B | 12 | 13.332 | 9.158  | 109.239 | 1.00 | 0.00 | C |
| ATOM | 937 | O6   | G B | 12 | 14.265 | 9.695  | 108.640 | 1.00 | 0.00 | O |
| ATOM | 938 | N7   | G B | 12 | 11.669 | 11.047 | 109.640 | 1.00 | 0.00 | N |
| ATOM | 939 | C8   | G B | 12 | 10.506 | 11.008 | 110.236 | 1.00 | 0.00 | C |
| ATOM | 940 | N9   | G B | 12 | 10.155 | 9.760  | 110.708 | 1.00 | 0.00 | N |
| ATOM | 941 | C2'  | G B | 12 | 8.409  | 10.370 | 112.422 | 1.00 | 0.00 | C |
| ATOM | 942 | C3'  | G B | 12 | 6.903  | 10.200 | 112.303 | 1.00 | 0.00 | C |
| ATOM | 943 | O3'  | G B | 12 | 6.484  | 9.133  | 113.151 | 1.00 | 0.00 | O |
| ATOM | 944 | C4'  | G B | 12 | 6.715  | 9.869  | 110.824 | 1.00 | 0.00 | C |
| ATOM | 945 | O4'  | G B | 12 | 7.915  | 9.112  | 110.468 | 1.00 | 0.00 | O |
| ATOM | 946 | C5'  | G B | 12 | 6.590  | 11.045 | 109.883 | 1.00 | 0.00 | C |
| ATOM | 947 | O5'  | G B | 12 | 7.457  | 12.119 | 110.323 | 1.00 | 0.00 | O |
| ATOM | 948 | O1P  | G B | 12 | 5.844  | 13.935 | 110.986 | 1.00 | 0.00 | O |
| ATOM | 949 | O2P  | G B | 12 | 8.155  | 14.531 | 110.212 | 1.00 | 0.00 | O |
| ATOM | 950 | P    | G B | 12 | 6.984  | 13.627 | 110.102 | 1.00 | 0.00 | P |
| ATOM | 951 | H1   | G B | 12 | 14.238 | 7.268  | 109.221 | 1.00 | 0.00 | H |
| ATOM | 952 | H8   | G B | 12 | 9.868  | 11.885 | 110.352 | 1.00 | 0.00 | H |
| ATOM | 953 | H1'  | G B | 12 | 9.132  | 8.388  | 111.928 | 1.00 | 0.00 | H |
| ATOM | 954 | H21  | G B | 12 | 13.546 | 5.353  | 110.038 | 1.00 | 0.00 | H |
| ATOM | 955 | H3'  | G B | 12 | 6.366  | 11.109 | 112.574 | 1.00 | 0.00 | H |
| ATOM | 956 | H22  | G B | 12 | 11.982 | 5.177  | 110.882 | 1.00 | 0.00 | H |
| ATOM | 957 | H4'  | G B | 12 | 5.801  | 9.281  | 110.744 | 1.00 | 0.00 | H |
| ATOM | 958 | H2'1 | G B | 12 | 8.716  | 11.382 | 112.159 | 1.00 | 0.00 | H |
| ATOM | 959 | H2'2 | G B | 12 | 8.752  | 10.177 | 113.438 | 1.00 | 0.00 | H |
| ATOM | 960 | H5'1 | G B | 12 | 6.872  | 10.732 | 108.879 | 1.00 | 0.00 | H |
| ATOM | 961 | H5'2 | G B | 12 | 5.554  | 11.387 | 109.875 | 1.00 | 0.00 | H |
| ATOM | 962 | C1'  | T B | 13 | 11.120 | 6.286  | 114.654 | 1.00 | 0.00 | C |
| ATOM | 963 | N1   | T B | 13 | 11.867 | 7.441  | 114.090 | 1.00 | 0.00 | N |
| ATOM | 964 | C2   | T B | 13 | 13.105 | 7.182  | 113.537 | 1.00 | 0.00 | C |
| ATOM | 965 | O2   | T B | 13 | 13.589 | 6.065  | 113.500 | 1.00 | 0.00 | O |
| ATOM | 966 | N3   | T B | 13 | 13.764 | 8.284  | 113.024 | 1.00 | 0.00 | N |

|      |      |      |     |    |        |        |         |      |      |   |
|------|------|------|-----|----|--------|--------|---------|------|------|---|
| ATOM | 967  | C4   | T B | 13 | 13.308 | 9.587  | 113.018 | 1.00 | 0.00 | C |
| ATOM | 968  | O4   | T B | 13 | 13.991 | 10.494 | 112.531 | 1.00 | 0.00 | O |
| ATOM | 969  | C5   | T B | 13 | 12.004 | 9.759  | 113.617 | 1.00 | 0.00 | C |
| ATOM | 970  | C6   | T B | 13 | 11.333 | 8.706  | 114.127 | 1.00 | 0.00 | C |
| ATOM | 971  | C7   | T B | 13 | 11.467 | 11.158 | 113.631 | 1.00 | 0.00 | C |
| ATOM | 972  | C2'  | T B | 13 | 10.348 | 6.616  | 115.928 | 1.00 | 0.00 | C |
| ATOM | 973  | C3'  | T B | 13 | 9.103  | 5.756  | 115.774 | 1.00 | 0.00 | C |
| ATOM | 974  | O3'  | T B | 13 | 9.382  | 4.440  | 116.248 | 1.00 | 0.00 | O |
| ATOM | 975  | C4'  | T B | 13 | 8.851  | 5.787  | 114.269 | 1.00 | 0.00 | C |
| ATOM | 976  | O4'  | T B | 13 | 10.189 | 5.856  | 113.680 | 1.00 | 0.00 | O |
| ATOM | 977  | C5'  | T B | 13 | 8.032  | 6.947  | 113.749 | 1.00 | 0.00 | C |
| ATOM | 978  | O5'  | T B | 13 | 8.352  | 8.147  | 114.499 | 1.00 | 0.00 | O |
| ATOM | 979  | O1P  | T B | 13 | 6.212  | 8.661  | 115.716 | 1.00 | 0.00 | O |
| ATOM | 980  | O2P  | T B | 13 | 7.808  | 10.512 | 115.146 | 1.00 | 0.00 | O |
| ATOM | 981  | P    | T B | 13 | 7.199  | 9.214  | 114.767 | 1.00 | 0.00 | P |
| ATOM | 982  | H3   | T B | 13 | 14.689 | 8.116  | 112.603 | 1.00 | 0.00 | H |
| ATOM | 983  | H6   | T B | 13 | 10.351 | 8.862  | 114.573 | 1.00 | 0.00 | H |
| ATOM | 984  | H1'  | T B | 13 | 11.825 | 5.473  | 114.826 | 1.00 | 0.00 | H |
| ATOM | 985  | H3'  | T B | 13 | 8.256  | 6.166  | 116.325 | 1.00 | 0.00 | H |
| ATOM | 986  | H4'  | T B | 13 | 8.321  | 4.869  | 114.018 | 1.00 | 0.00 | H |
| ATOM | 987  | H71  | T B | 13 | 11.388 | 11.508 | 114.659 | 1.00 | 0.00 | H |
| ATOM | 988  | H72  | T B | 13 | 12.142 | 11.812 | 113.075 | 1.00 | 0.00 | H |
| ATOM | 989  | H73  | T B | 13 | 10.481 | 11.175 | 113.164 | 1.00 | 0.00 | H |
| ATOM | 990  | H2'1 | T B | 13 | 10.096 | 7.673  | 115.995 | 1.00 | 0.00 | H |
| ATOM | 991  | H2'2 | T B | 13 | 10.904 | 6.353  | 116.827 | 1.00 | 0.00 | H |
| ATOM | 992  | H5'1 | T B | 13 | 8.258  | 7.099  | 112.693 | 1.00 | 0.00 | H |
| ATOM | 993  | H5'2 | T B | 13 | 6.975  | 6.715  | 113.860 | 1.00 | 0.00 | H |
| ATOM | 994  | C1'  | G B | 14 | 15.070 | 4.065  | 116.682 | 1.00 | 0.00 | C |
| ATOM | 995  | N1   | G B | 14 | 17.574 | 8.154  | 114.936 | 1.00 | 0.00 | N |
| ATOM | 996  | C2   | G B | 14 | 17.934 | 6.818  | 114.918 | 1.00 | 0.00 | C |
| ATOM | 997  | N2   | G B | 14 | 19.117 | 6.533  | 114.363 | 1.00 | 0.00 | N |
| ATOM | 998  | N3   | G B | 14 | 17.172 | 5.844  | 115.413 | 1.00 | 0.00 | N |
| ATOM | 999  | C4   | G B | 14 | 16.010 | 6.315  | 115.942 | 1.00 | 0.00 | C |
| ATOM | 1000 | C5   | G B | 14 | 15.571 | 7.625  | 116.009 | 1.00 | 0.00 | C |
| ATOM | 1001 | C6   | G B | 14 | 16.377 | 8.660  | 115.480 | 1.00 | 0.00 | C |
| ATOM | 1002 | O6   | G B | 14 | 16.161 | 9.872  | 115.445 | 1.00 | 0.00 | O |
| ATOM | 1003 | N7   | G B | 14 | 14.322 | 7.685  | 116.633 | 1.00 | 0.00 | N |
| ATOM | 1004 | C8   | G B | 14 | 14.051 | 6.437  | 116.915 | 1.00 | 0.00 | C |
| ATOM | 1005 | N9   | G B | 14 | 15.030 | 5.545  | 116.528 | 1.00 | 0.00 | N |
| ATOM | 1006 | C2'  | G B | 14 | 14.479 | 3.568  | 117.995 | 1.00 | 0.00 | C |
| ATOM | 1007 | C3'  | G B | 14 | 13.822 | 2.263  | 117.573 | 1.00 | 0.00 | C |
| ATOM | 1008 | O3'  | G B | 14 | 14.796 | 1.224  | 117.583 | 1.00 | 0.00 | O |
| ATOM | 1009 | C4'  | G B | 14 | 13.323 | 2.576  | 116.162 | 1.00 | 0.00 | C |
| ATOM | 1010 | O4'  | G B | 14 | 14.319 | 3.500  | 115.625 | 1.00 | 0.00 | O |
| ATOM | 1011 | C5'  | G B | 14 | 11.960 | 3.218  | 116.059 | 1.00 | 0.00 | C |
| ATOM | 1012 | O5'  | G B | 14 | 11.769 | 4.142  | 117.160 | 1.00 | 0.00 | O |
| ATOM | 1013 | O1P  | G B | 14 | 9.910  | 3.085  | 118.490 | 1.00 | 0.00 | O |
| ATOM | 1014 | O2P  | G B | 14 | 10.244 | 5.570  | 118.556 | 1.00 | 0.00 | O |
| ATOM | 1015 | P    | G B | 14 | 10.306 | 4.312  | 117.773 | 1.00 | 0.00 | P |
| ATOM | 1016 | H1   | G B | 14 | 18.232 | 8.829  | 114.520 | 1.00 | 0.00 | H |
| ATOM | 1017 | H8   | G B | 14 | 13.130 | 6.130  | 117.414 | 1.00 | 0.00 | H |
| ATOM | 1018 | H1'  | G B | 14 | 16.105 | 3.738  | 116.571 | 1.00 | 0.00 | H |
| ATOM | 1019 | H21  | G B | 14 | 19.700 | 7.292  | 113.978 | 1.00 | 0.00 | H |
| ATOM | 1020 | H3'  | G B | 14 | 12.996 | 1.992  | 118.231 | 1.00 | 0.00 | H |

|      |      |      |     |    |        |        |         |      |      |   |
|------|------|------|-----|----|--------|--------|---------|------|------|---|
| ATOM | 1021 | H22  | G B | 14 | 19.445 | 5.558  | 114.321 | 1.00 | 0.00 | H |
| ATOM | 1022 | H4'  | G B | 14 | 13.285 | 1.628  | 115.624 | 1.00 | 0.00 | H |
| ATOM | 1023 | H2'1 | G B | 14 | 13.750 | 4.264  | 118.409 | 1.00 | 0.00 | H |
| ATOM | 1024 | H2'2 | G B | 14 | 15.242 | 3.401  | 118.754 | 1.00 | 0.00 | H |
| ATOM | 1025 | H5'1 | G B | 14 | 11.888 | 3.753  | 115.114 | 1.00 | 0.00 | H |
| ATOM | 1026 | H5'2 | G B | 14 | 11.196 | 2.442  | 116.092 | 1.00 | 0.00 | H |
| ATOM | 1027 | C1'  | C B | 15 | 19.869 | 3.718  | 117.861 | 1.00 | 0.00 | C |
| ATOM | 1028 | N1   | C B | 15 | 19.095 | 4.946  | 118.189 | 1.00 | 0.00 | N |
| ATOM | 1029 | C2   | C B | 15 | 19.620 | 6.175  | 117.794 | 1.00 | 0.00 | C |
| ATOM | 1030 | O2   | C B | 15 | 20.700 | 6.194  | 117.189 | 1.00 | 0.00 | O |
| ATOM | 1031 | N3   | C B | 15 | 18.931 | 7.305  | 118.084 | 1.00 | 0.00 | N |
| ATOM | 1032 | C4   | C B | 15 | 17.766 | 7.251  | 118.740 | 1.00 | 0.00 | C |
| ATOM | 1033 | N4   | C B | 15 | 17.132 | 8.386  | 118.994 | 1.00 | 0.00 | N |
| ATOM | 1034 | C5   | C B | 15 | 17.202 | 6.001  | 119.165 | 1.00 | 0.00 | C |
| ATOM | 1035 | C6   | C B | 15 | 17.911 | 4.877  | 118.857 | 1.00 | 0.00 | C |
| ATOM | 1036 | C2'  | C B | 15 | 19.827 | 2.656  | 118.951 | 1.00 | 0.00 | C |
| ATOM | 1037 | C3'  | C B | 15 | 19.816 | 1.369  | 118.140 | 1.00 | 0.00 | C |
| ATOM | 1038 | O3'  | C B | 15 | 21.156 | 1.015  | 117.804 | 1.00 | 0.00 | O |
| ATOM | 1039 | C4'  | C B | 15 | 18.994 | 1.749  | 116.911 | 1.00 | 0.00 | C |
| ATOM | 1040 | O4'  | C B | 15 | 19.310 | 3.160  | 116.686 | 1.00 | 0.00 | O |
| ATOM | 1041 | C5'  | C B | 15 | 17.494 | 1.606  | 117.036 | 1.00 | 0.00 | C |
| ATOM | 1042 | O5'  | C B | 15 | 17.078 | 1.963  | 118.378 | 1.00 | 0.00 | O |
| ATOM | 1043 | O1P  | C B | 15 | 16.220 | -0.208 | 119.319 | 1.00 | 0.00 | O |
| ATOM | 1044 | O2P  | C B | 15 | 15.323 | 1.972  | 120.178 | 1.00 | 0.00 | O |
| ATOM | 1045 | P    | C B | 15 | 15.845 | 1.191  | 119.031 | 1.00 | 0.00 | P |
| ATOM | 1046 | H5   | C B | 15 | 16.256 | 5.955  | 119.705 | 1.00 | 0.00 | H |
| ATOM | 1047 | H6   | C B | 15 | 17.521 | 3.902  | 119.152 | 1.00 | 0.00 | H |
| ATOM | 1048 | H1'  | C B | 15 | 20.895 | 4.011  | 117.638 | 1.00 | 0.00 | H |
| ATOM | 1049 | H3'  | C B | 15 | 19.351 | 0.548  | 118.686 | 1.00 | 0.00 | H |
| ATOM | 1050 | H4'  | C B | 15 | 19.322 | 1.103  | 116.097 | 1.00 | 0.00 | H |
| ATOM | 1051 | H41  | C B | 15 | 16.231 | 8.374  | 119.496 | 1.00 | 0.00 | H |
| ATOM | 1052 | H42  | C B | 15 | 17.540 | 9.284  | 118.691 | 1.00 | 0.00 | H |
| ATOM | 1053 | H2'1 | C B | 15 | 18.939 | 2.739  | 119.576 | 1.00 | 0.00 | H |
| ATOM | 1054 | H2'2 | C B | 15 | 20.696 | 2.705  | 119.608 | 1.00 | 0.00 | H |
| ATOM | 1055 | H5'1 | C B | 15 | 17.010 | 2.262  | 116.312 | 1.00 | 0.00 | H |
| ATOM | 1056 | H5'2 | C B | 15 | 17.215 | 0.573  | 116.827 | 1.00 | 0.00 | H |
| ATOM | 1057 | C1'  | G B | 16 | 24.355 | 5.577  | 118.827 | 1.00 | 0.00 | C |
| ATOM | 1058 | N1   | G B | 16 | 21.723 | 9.745  | 120.138 | 1.00 | 0.00 | N |
| ATOM | 1059 | C2   | G B | 16 | 22.896 | 9.627  | 119.413 | 1.00 | 0.00 | C |
| ATOM | 1060 | N2   | G B | 16 | 23.439 | 10.772 | 118.982 | 1.00 | 0.00 | N |
| ATOM | 1061 | N3   | G B | 16 | 23.477 | 8.460  | 119.140 | 1.00 | 0.00 | N |
| ATOM | 1062 | C4   | G B | 16 | 22.793 | 7.408  | 119.659 | 1.00 | 0.00 | C |
| ATOM | 1063 | C5   | G B | 16 | 21.621 | 7.430  | 120.397 | 1.00 | 0.00 | C |
| ATOM | 1064 | C6   | G B | 16 | 21.001 | 8.669  | 120.685 | 1.00 | 0.00 | C |
| ATOM | 1065 | O6   | G B | 16 | 19.968 | 8.890  | 121.317 | 1.00 | 0.00 | O |
| ATOM | 1066 | N7   | G B | 16 | 21.246 | 6.131  | 120.745 | 1.00 | 0.00 | N |
| ATOM | 1067 | C8   | G B | 16 | 22.177 | 5.379  | 120.217 | 1.00 | 0.00 | C |
| ATOM | 1068 | N9   | G B | 16 | 23.154 | 6.083  | 119.543 | 1.00 | 0.00 | N |
| ATOM | 1069 | C2'  | G B | 16 | 25.023 | 4.392  | 119.510 | 1.00 | 0.00 | C |
| ATOM | 1070 | C3'  | G B | 16 | 25.498 | 3.567  | 118.325 | 1.00 | 0.00 | C |
| ATOM | 1071 | O3'  | G B | 16 | 26.760 | 4.063  | 117.885 | 1.00 | 0.00 | O |
| ATOM | 1072 | C4'  | G B | 16 | 24.396 | 3.792  | 117.291 | 1.00 | 0.00 | C |
| ATOM | 1073 | O4'  | G B | 16 | 23.946 | 5.163  | 117.537 | 1.00 | 0.00 | O |
| ATOM | 1074 | C5'  | G B | 16 | 23.203 | 2.869  | 117.370 | 1.00 | 0.00 | C |

|      |      |      |     |    |        |        |         |      |      |   |
|------|------|------|-----|----|--------|--------|---------|------|------|---|
| ATOM | 1075 | O5'  | G B | 16 | 22.903 | 2.573  | 118.756 | 1.00 | 0.00 | O |
| ATOM | 1076 | O1P  | G B | 16 | 23.383 | 0.110  | 118.942 | 1.00 | 0.00 | O |
| ATOM | 1077 | O2P  | G B | 16 | 21.705 | 1.179  | 120.468 | 1.00 | 0.00 | O |
| ATOM | 1078 | P    | G B | 16 | 22.334 | 1.129  | 119.126 | 1.00 | 0.00 | P |
| ATOM | 1079 | H1   | G B | 16 | 21.351 | 10.695 | 120.288 | 1.00 | 0.00 | H |
| ATOM | 1080 | H8   | G B | 16 | 22.182 | 4.294  | 120.304 | 1.00 | 0.00 | H |
| ATOM | 1081 | H1'  | G B | 16 | 25.055 | 6.404  | 118.705 | 1.00 | 0.00 | H |
| ATOM | 1082 | H21  | G B | 16 | 22.983 | 11.670 | 119.194 | 1.00 | 0.00 | H |
| ATOM | 1083 | H3'  | G B | 16 | 25.593 | 2.510  | 118.574 | 1.00 | 0.00 | H |
| ATOM | 1084 | H22  | G B | 16 | 24.314 | 10.751 | 118.439 | 1.00 | 0.00 | H |
| ATOM | 1085 | H4'  | G B | 16 | 24.852 | 3.664  | 116.309 | 1.00 | 0.00 | H |
| ATOM | 1086 | H2'1 | G B | 16 | 24.329 | 3.828  | 120.133 | 1.00 | 0.00 | H |
| ATOM | 1087 | H2'2 | G B | 16 | 25.857 | 4.696  | 120.143 | 1.00 | 0.00 | H |
| ATOM | 1088 | H5'1 | G B | 16 | 22.345 | 3.354  | 116.903 | 1.00 | 0.00 | H |
| ATOM | 1089 | H5'2 | G B | 16 | 23.430 | 1.946  | 116.836 | 1.00 | 0.00 | H |
| ATOM | 1090 | C1'  | G B | 17 | 27.475 | 9.129  | 120.303 | 1.00 | 0.00 | C |
| ATOM | 1091 | N1   | G B | 17 | 23.425 | 10.810 | 122.912 | 1.00 | 0.00 | N |
| ATOM | 1092 | C2   | G B | 17 | 24.364 | 11.513 | 122.178 | 1.00 | 0.00 | C |
| ATOM | 1093 | N2   | G B | 17 | 24.203 | 12.842 | 122.135 | 1.00 | 0.00 | N |
| ATOM | 1094 | N3   | G B | 17 | 25.380 | 10.938 | 121.538 | 1.00 | 0.00 | N |
| ATOM | 1095 | C4   | G B | 17 | 25.392 | 9.588  | 121.697 | 1.00 | 0.00 | C |
| ATOM | 1096 | C5   | G B | 17 | 24.503 | 8.804  | 122.411 | 1.00 | 0.00 | C |
| ATOM | 1097 | C6   | G B | 17 | 23.422 | 9.412  | 123.086 | 1.00 | 0.00 | C |
| ATOM | 1098 | O6   | G B | 17 | 22.537 | 8.891  | 123.766 | 1.00 | 0.00 | O |
| ATOM | 1099 | N7   | G B | 17 | 24.868 | 7.459  | 122.323 | 1.00 | 0.00 | N |
| ATOM | 1100 | C8   | G B | 17 | 25.940 | 7.470  | 121.574 | 1.00 | 0.00 | C |
| ATOM | 1101 | N9   | G B | 17 | 26.322 | 8.727  | 121.155 | 1.00 | 0.00 | N |
| ATOM | 1102 | C2'  | G B | 17 | 28.738 | 8.321  | 120.562 | 1.00 | 0.00 | C |
| ATOM | 1103 | C3'  | G B | 17 | 29.341 | 8.217  | 119.170 | 1.00 | 0.00 | C |
| ATOM | 1104 | O3'  | G B | 17 | 30.108 | 9.389  | 118.903 | 1.00 | 0.00 | O |
| ATOM | 1105 | C4'  | G B | 17 | 28.108 | 8.117  | 118.273 | 1.00 | 0.00 | C |
| ATOM | 1106 | O4'  | G B | 17 | 27.102 | 8.933  | 118.952 | 1.00 | 0.00 | O |
| ATOM | 1107 | C5'  | G B | 17 | 27.544 | 6.733  | 118.060 | 1.00 | 0.00 | C |
| ATOM | 1108 | O5'  | G B | 17 | 27.668 | 5.959  | 119.279 | 1.00 | 0.00 | O |
| ATOM | 1109 | O1P  | G B | 17 | 29.305 | 4.151  | 118.655 | 1.00 | 0.00 | O |
| ATOM | 1110 | O2P  | G B | 17 | 27.609 | 3.740  | 120.459 | 1.00 | 0.00 | O |
| ATOM | 1111 | P    | G B | 17 | 27.942 | 4.391  | 119.168 | 1.00 | 0.00 | P |
| ATOM | 1112 | H1   | G B | 17 | 22.673 | 11.351 | 123.365 | 1.00 | 0.00 | H |
| ATOM | 1113 | H8   | G B | 17 | 26.485 | 6.566  | 121.305 | 1.00 | 0.00 | H |
| ATOM | 1114 | H1'  | G B | 17 | 27.654 | 10.193 | 120.451 | 1.00 | 0.00 | H |
| ATOM | 1115 | H21  | G B | 17 | 23.413 | 13.280 | 122.631 | 1.00 | 0.00 | H |
| ATOM | 1116 | H3'  | G B | 17 | 29.976 | 7.338  | 119.063 | 1.00 | 0.00 | H |
| ATOM | 1117 | H22  | G B | 17 | 24.870 | 13.423 | 121.608 | 1.00 | 0.00 | H |
| ATOM | 1118 | H4'  | G B | 17 | 28.391 | 8.515  | 117.299 | 1.00 | 0.00 | H |
| ATOM | 1119 | H2'1 | G B | 17 | 28.523 | 7.335  | 120.975 | 1.00 | 0.00 | H |
| ATOM | 1120 | H2'2 | G B | 17 | 29.416 | 8.822  | 121.252 | 1.00 | 0.00 | H |
| ATOM | 1121 | H5'1 | G B | 17 | 26.493 | 6.814  | 117.781 | 1.00 | 0.00 | H |
| ATOM | 1122 | H5'2 | G B | 17 | 28.092 | 6.244  | 117.254 | 1.00 | 0.00 | H |
| ATOM | 1123 | C1'  | C B | 18 | 28.688 | 13.217 | 122.822 | 1.00 | 0.00 | C |
| ATOM | 1124 | N1   | C B | 18 | 28.035 | 12.069 | 123.510 | 1.00 | 0.00 | N |
| ATOM | 1125 | C2   | C B | 18 | 26.903 | 12.330 | 124.280 | 1.00 | 0.00 | C |
| ATOM | 1126 | O2   | C B | 18 | 26.490 | 13.493 | 124.361 | 1.00 | 0.00 | O |
| ATOM | 1127 | N3   | C B | 18 | 26.294 | 11.298 | 124.914 | 1.00 | 0.00 | N |
| ATOM | 1128 | C4   | C B | 18 | 26.766 | 10.049 | 124.806 | 1.00 | 0.00 | C |

|      |      |      |     |    |        |        |         |      |      |   |
|------|------|------|-----|----|--------|--------|---------|------|------|---|
| ATOM | 1129 | N4   | C B | 18 | 26.129 | 9.079  | 125.447 | 1.00 | 0.00 | N |
| ATOM | 1130 | C5   | C B | 18 | 27.928 | 9.755  | 124.024 | 1.00 | 0.00 | C |
| ATOM | 1131 | C6   | C B | 18 | 28.524 | 10.806 | 123.393 | 1.00 | 0.00 | C |
| ATOM | 1132 | C2'  | C B | 18 | 30.209 | 13.135 | 122.802 | 1.00 | 0.00 | C |
| ATOM | 1133 | C3'  | C B | 18 | 30.540 | 13.735 | 121.444 | 1.00 | 0.00 | C |
| ATOM | 1134 | O3'  | C B | 18 | 30.587 | 15.156 | 121.560 | 1.00 | 0.00 | O |
| ATOM | 1135 | C4'  | C B | 18 | 29.378 | 13.265 | 120.572 | 1.00 | 0.00 | C |
| ATOM | 1136 | O4'  | C B | 18 | 28.233 | 13.230 | 121.482 | 1.00 | 0.00 | O |
| ATOM | 1137 | C5'  | C B | 18 | 29.527 | 11.905 | 119.931 | 1.00 | 0.00 | C |
| ATOM | 1138 | O5'  | C B | 18 | 30.215 | 11.009 | 120.840 | 1.00 | 0.00 | O |
| ATOM | 1139 | O1P  | C B | 18 | 32.388 | 10.539 | 119.660 | 1.00 | 0.00 | O |
| ATOM | 1140 | O2P  | C B | 18 | 31.434 | 8.850  | 121.253 | 1.00 | 0.00 | O |
| ATOM | 1141 | P    | C B | 18 | 31.187 | 9.900  | 120.234 | 1.00 | 0.00 | P |
| ATOM | 1142 | H5   | C B | 18 | 28.318 | 8.740  | 123.937 | 1.00 | 0.00 | H |
| ATOM | 1143 | H6   | C B | 18 | 29.409 | 10.630 | 122.783 | 1.00 | 0.00 | H |
| ATOM | 1144 | H1'  | C B | 18 | 28.353 | 14.136 | 123.301 | 1.00 | 0.00 | H |
| ATOM | 1145 | H3'  | C B | 18 | 31.493 | 13.372 | 121.059 | 1.00 | 0.00 | H |
| ATOM | 1146 | H4'  | C B | 18 | 29.265 | 13.998 | 119.772 | 1.00 | 0.00 | H |
| ATOM | 1147 | H41  | C B | 18 | 26.470 | 8.108  | 125.380 | 1.00 | 0.00 | H |
| ATOM | 1148 | H42  | C B | 18 | 25.294 | 9.294  | 126.009 | 1.00 | 0.00 | H |
| ATOM | 1149 | H2'1 | C B | 18 | 30.569 | 12.110 | 122.881 | 1.00 | 0.00 | H |
| ATOM | 1150 | H2'2 | C B | 18 | 30.664 | 13.705 | 123.612 | 1.00 | 0.00 | H |
| ATOM | 1151 | H5'1 | C B | 18 | 28.537 | 11.507 | 119.701 | 1.00 | 0.00 | H |
| ATOM | 1152 | H5'2 | C B | 18 | 30.096 | 12.004 | 119.009 | 1.00 | 0.00 | H |
| ATOM | 1153 | C1'  | C B | 19 | 28.188 | 16.476 | 126.517 | 1.00 | 0.00 | C |
| ATOM | 1154 | N1   | C B | 19 | 28.300 | 15.020 | 126.802 | 1.00 | 0.00 | N |
| ATOM | 1155 | C2   | C B | 19 | 27.336 | 14.439 | 127.624 | 1.00 | 0.00 | C |
| ATOM | 1156 | O2   | C B | 19 | 26.431 | 15.151 | 128.080 | 1.00 | 0.00 | O |
| ATOM | 1157 | N3   | C B | 19 | 27.420 | 13.115 | 127.896 | 1.00 | 0.00 | N |
| ATOM | 1158 | C4   | C B | 19 | 28.411 | 12.370 | 127.388 | 1.00 | 0.00 | C |
| ATOM | 1159 | N4   | C B | 19 | 28.446 | 11.081 | 127.685 | 1.00 | 0.00 | N |
| ATOM | 1160 | C5   | C B | 19 | 29.415 | 12.941 | 126.542 | 1.00 | 0.00 | C |
| ATOM | 1161 | C6   | C B | 19 | 29.309 | 14.275 | 126.281 | 1.00 | 0.00 | C |
| ATOM | 1162 | C2'  | C B | 19 | 29.528 | 17.194 | 126.460 | 1.00 | 0.00 | C |
| ATOM | 1163 | C3'  | C B | 19 | 29.288 | 18.224 | 125.366 | 1.00 | 0.00 | C |
| ATOM | 1164 | O3'  | C B | 19 | 28.662 | 19.372 | 125.933 | 1.00 | 0.00 | O |
| ATOM | 1165 | C4'  | C B | 19 | 28.368 | 17.484 | 124.398 | 1.00 | 0.00 | C |
| ATOM | 1166 | O4'  | C B | 19 | 27.559 | 16.620 | 125.258 | 1.00 | 0.00 | O |
| ATOM | 1167 | C5'  | C B | 19 | 29.042 | 16.627 | 123.352 | 1.00 | 0.00 | C |
| ATOM | 1168 | O5'  | C B | 19 | 30.223 | 16.004 | 123.915 | 1.00 | 0.00 | O |
| ATOM | 1169 | O1P  | C B | 19 | 32.111 | 17.061 | 122.631 | 1.00 | 0.00 | O |
| ATOM | 1170 | O2P  | C B | 19 | 32.385 | 14.762 | 123.600 | 1.00 | 0.00 | O |
| ATOM | 1171 | P    | C B | 19 | 31.489 | 15.767 | 122.976 | 1.00 | 0.00 | P |
| ATOM | 1172 | H5   | C B | 19 | 30.225 | 12.341 | 126.128 | 1.00 | 0.00 | H |
| ATOM | 1173 | H6   | C B | 19 | 30.050 | 14.753 | 125.641 | 1.00 | 0.00 | H |
| ATOM | 1174 | H1'  | C B | 19 | 27.537 | 16.921 | 127.271 | 1.00 | 0.00 | H |
| ATOM | 1175 | H3'  | C B | 19 | 30.215 | 18.523 | 124.876 | 1.00 | 0.00 | H |
| ATOM | 1176 | H4'  | C B | 19 | 27.779 | 18.241 | 123.879 | 1.00 | 0.00 | H |
| ATOM | 1177 | H41  | C B | 19 | 29.195 | 10.484 | 127.307 | 1.00 | 0.00 | H |
| ATOM | 1178 | H42  | C B | 19 | 27.721 | 10.672 | 128.294 | 1.00 | 0.00 | H |
| ATOM | 1179 | H2'1 | C B | 19 | 30.346 | 16.524 | 126.200 | 1.00 | 0.00 | H |
| ATOM | 1180 | H2'2 | C B | 19 | 29.782 | 17.672 | 127.406 | 1.00 | 0.00 | H |
| ATOM | 1181 | H5'1 | C B | 19 | 28.346 | 15.862 | 123.012 | 1.00 | 0.00 | H |
| ATOM | 1182 | H5'2 | C B | 19 | 29.326 | 17.254 | 122.506 | 1.00 | 0.00 | H |

|      |      |      |     |    |        |        |         |      |      |   |
|------|------|------|-----|----|--------|--------|---------|------|------|---|
| ATOM | 1183 | C1'  | T B | 20 | 26.823 | 17.881 | 131.062 | 1.00 | 0.00 | C |
| ATOM | 1184 | N1   | T B | 20 | 27.658 | 16.666 | 130.875 | 1.00 | 0.00 | N |
| ATOM | 1185 | C2   | T B | 20 | 27.227 | 15.505 | 131.483 | 1.00 | 0.00 | C |
| ATOM | 1186 | O2   | T B | 20 | 26.209 | 15.449 | 132.152 | 1.00 | 0.00 | O |
| ATOM | 1187 | N3   | T B | 20 | 28.032 | 14.401 | 131.283 | 1.00 | 0.00 | N |
| ATOM | 1188 | C4   | T B | 20 | 29.198 | 14.356 | 130.550 | 1.00 | 0.00 | C |
| ATOM | 1189 | O4   | T B | 20 | 29.838 | 13.303 | 130.442 | 1.00 | 0.00 | O |
| ATOM | 1190 | C5   | T B | 20 | 29.568 | 15.615 | 129.951 | 1.00 | 0.00 | C |
| ATOM | 1191 | C6   | T B | 20 | 28.807 | 16.714 | 130.125 | 1.00 | 0.00 | C |
| ATOM | 1192 | C7   | T B | 20 | 30.830 | 15.613 | 129.142 | 1.00 | 0.00 | C |
| ATOM | 1193 | C2'  | T B | 20 | 27.632 | 19.164 | 131.218 | 1.00 | 0.00 | C |
| ATOM | 1194 | C3'  | T B | 20 | 26.752 | 20.182 | 130.506 | 1.00 | 0.00 | C |
| ATOM | 1195 | O3'  | T B | 20 | 25.762 | 20.661 | 131.414 | 1.00 | 0.00 | O |
| ATOM | 1196 | C4'  | T B | 20 | 26.146 | 19.368 | 129.366 | 1.00 | 0.00 | C |
| ATOM | 1197 | O4'  | T B | 20 | 26.000 | 18.022 | 129.920 | 1.00 | 0.00 | O |
| ATOM | 1198 | C5'  | T B | 20 | 26.960 | 19.282 | 128.095 | 1.00 | 0.00 | C |
| ATOM | 1199 | O5'  | T B | 20 | 28.371 | 19.212 | 128.422 | 1.00 | 0.00 | O |
| ATOM | 1200 | O1P  | T B | 20 | 29.286 | 21.372 | 127.513 | 1.00 | 0.00 | O |
| ATOM | 1201 | O2P  | T B | 20 | 30.775 | 19.361 | 127.707 | 1.00 | 0.00 | O |
| ATOM | 1202 | P    | T B | 20 | 29.421 | 19.904 | 127.442 | 1.00 | 0.00 | P |
| ATOM | 1203 | H3   | T B | 20 | 27.732 | 13.522 | 131.726 | 1.00 | 0.00 | H |
| ATOM | 1204 | H6   | T B | 20 | 29.107 | 17.655 | 129.663 | 1.00 | 0.00 | H |
| ATOM | 1205 | H1'  | T B | 20 | 26.175 | 17.723 | 131.925 | 1.00 | 0.00 | H |
| ATOM | 1206 | H3'  | T B | 20 | 27.330 | 21.023 | 130.127 | 1.00 | 0.00 | H |
| ATOM | 1207 | H4'  | T B | 20 | 25.191 | 19.833 | 129.118 | 1.00 | 0.00 | H |
| ATOM | 1208 | H3T  | T B | 20 | 26.101 | 20.998 | 132.246 | 1.00 | 0.00 | H |
| ATOM | 1209 | H71  | T B | 20 | 31.575 | 16.245 | 129.627 | 1.00 | 0.00 | H |
| ATOM | 1210 | H72  | T B | 20 | 31.211 | 14.594 | 129.066 | 1.00 | 0.00 | H |
| ATOM | 1211 | H73  | T B | 20 | 30.625 | 15.999 | 128.143 | 1.00 | 0.00 | H |
| ATOM | 1212 | H2'1 | T B | 20 | 28.612 | 19.093 | 130.752 | 1.00 | 0.00 | H |
| ATOM | 1213 | H2'2 | T B | 20 | 27.784 | 19.433 | 132.263 | 1.00 | 0.00 | H |
| ATOM | 1214 | H5'1 | T B | 20 | 26.664 | 18.392 | 127.540 | 1.00 | 0.00 | H |
| ATOM | 1215 | H5'2 | T B | 20 | 26.766 | 20.164 | 127.487 | 1.00 | 0.00 | H |
| TER  |      |      |     |    |        |        |         |      |      |   |
| ATOM | 1    | C1'  | A A | 1  | 20.512 | 42.688 | 111.494 | 1.00 | 0.00 | C |
| ATOM | 2    | N1   | A A | 1  | 24.720 | 42.649 | 108.556 | 1.00 | 0.00 | N |
| ATOM | 3    | C2   | A A | 1  | 23.603 | 43.371 | 108.517 | 1.00 | 0.00 | C |
| ATOM | 4    | N3   | A A | 1  | 22.555 | 43.332 | 109.311 | 1.00 | 0.00 | N |
| ATOM | 5    | C4   | A A | 1  | 22.724 | 42.396 | 110.261 | 1.00 | 0.00 | C |
| ATOM | 6    | C5   | A A | 1  | 23.803 | 41.575 | 110.437 | 1.00 | 0.00 | C |
| ATOM | 7    | C6   | A A | 1  | 24.861 | 41.723 | 109.516 | 1.00 | 0.00 | C |
| ATOM | 8    | N6   | A A | 1  | 25.984 | 40.986 | 109.563 | 1.00 | 0.00 | N |
| ATOM | 9    | N7   | A A | 1  | 23.621 | 40.738 | 111.524 | 1.00 | 0.00 | N |
| ATOM | 10   | C8   | A A | 1  | 22.448 | 41.065 | 111.977 | 1.00 | 0.00 | C |
| ATOM | 11   | N9   | A A | 1  | 21.842 | 42.066 | 111.262 | 1.00 | 0.00 | N |
| ATOM | 12   | C2'  | A A | 1  | 19.446 | 41.703 | 111.953 | 1.00 | 0.00 | C |
| ATOM | 13   | C3'  | A A | 1  | 18.628 | 42.549 | 112.916 | 1.00 | 0.00 | C |
| ATOM | 14   | O3'  | A A | 1  | 17.663 | 43.297 | 112.180 | 1.00 | 0.00 | O |
| ATOM | 15   | C4'  | A A | 1  | 19.682 | 43.445 | 113.563 | 1.00 | 0.00 | C |
| ATOM | 16   | O4'  | A A | 1  | 20.665 | 43.670 | 112.501 | 1.00 | 0.00 | O |
| ATOM | 17   | C5'  | A A | 1  | 20.394 | 42.880 | 114.769 | 1.00 | 0.00 | C |
| ATOM | 18   | O5'  | A A | 1  | 20.602 | 41.455 | 114.594 | 1.00 | 0.00 | O |
| ATOM | 19   | H2   | A A | 1  | 23.550 | 44.102 | 107.711 | 1.00 | 0.00 | H |
| ATOM | 20   | H8   | A A | 1  | 21.988 | 40.589 | 112.843 | 1.00 | 0.00 | H |



|      |    |      |     |   |        |        |         |      |      |   |
|------|----|------|-----|---|--------|--------|---------|------|------|---|
| ATOM | 21 | H1'  | A A | 1 | 20.208 | 43.194 | 110.577 | 1.00 | 0.00 | H |
| ATOM | 22 | H3'  | A A | 1 | 18.118 | 41.940 | 113.664 | 1.00 | 0.00 | H |
| ATOM | 23 | H4'  | A A | 1 | 19.174 | 44.358 | 113.874 | 1.00 | 0.00 | H |
| ATOM | 24 | H61  | A A | 1 | 26.726 | 41.135 | 108.868 | 1.00 | 0.00 | H |
| ATOM | 25 | H62  | A A | 1 | 26.099 | 40.274 | 110.299 | 1.00 | 0.00 | H |
| ATOM | 26 | H5T  | A A | 1 | 20.568 | 40.886 | 115.365 | 1.00 | 0.00 | H |
| ATOM | 27 | H2'1 | A A | 1 | 19.872 | 40.835 | 112.453 | 1.00 | 0.00 | H |
| ATOM | 28 | H2'2 | A A | 1 | 18.834 | 41.340 | 111.127 | 1.00 | 0.00 | H |
| ATOM | 29 | H5'1 | A A | 1 | 21.356 | 43.381 | 114.884 | 1.00 | 0.00 | H |
| ATOM | 30 | H5'2 | A A | 1 | 19.791 | 43.057 | 115.657 | 1.00 | 0.00 | H |
| ATOM | 31 | C1'  | G A | 2 | 19.262 | 43.024 | 106.700 | 1.00 | 0.00 | C |
| ATOM | 32 | N1   | G A | 2 | 23.729 | 40.682 | 105.937 | 1.00 | 0.00 | N |
| ATOM | 33 | C2   | G A | 2 | 23.155 | 41.739 | 105.257 | 1.00 | 0.00 | C |
| ATOM | 34 | N2   | G A | 2 | 23.862 | 42.238 | 104.237 | 1.00 | 0.00 | N |
| ATOM | 35 | N3   | G A | 2 | 21.968 | 42.258 | 105.569 | 1.00 | 0.00 | N |
| ATOM | 36 | C4   | G A | 2 | 21.390 | 41.626 | 106.624 | 1.00 | 0.00 | C |
| ATOM | 37 | C5   | G A | 2 | 21.887 | 40.563 | 107.361 | 1.00 | 0.00 | C |
| ATOM | 38 | C6   | G A | 2 | 23.148 | 40.016 | 107.031 | 1.00 | 0.00 | C |
| ATOM | 39 | O6   | G A | 2 | 23.752 | 39.084 | 107.562 | 1.00 | 0.00 | O |
| ATOM | 40 | N7   | G A | 2 | 20.982 | 40.206 | 108.364 | 1.00 | 0.00 | N |
| ATOM | 41 | C8   | G A | 2 | 19.991 | 41.047 | 108.209 | 1.00 | 0.00 | C |
| ATOM | 42 | N9   | G A | 2 | 20.165 | 41.940 | 107.171 | 1.00 | 0.00 | N |
| ATOM | 43 | C2'  | G A | 2 | 17.785 | 42.663 | 106.761 | 1.00 | 0.00 | C |
| ATOM | 44 | C3'  | G A | 2 | 17.147 | 43.989 | 107.138 | 1.00 | 0.00 | C |
| ATOM | 45 | O3'  | G A | 2 | 16.941 | 44.763 | 105.958 | 1.00 | 0.00 | O |
| ATOM | 46 | C4'  | G A | 2 | 18.190 | 44.615 | 108.064 | 1.00 | 0.00 | C |
| ATOM | 47 | O4'  | G A | 2 | 19.469 | 44.150 | 107.531 | 1.00 | 0.00 | O |
| ATOM | 48 | C5'  | G A | 2 | 18.105 | 44.236 | 109.523 | 1.00 | 0.00 | C |
| ATOM | 49 | O5'  | G A | 2 | 17.706 | 42.848 | 109.646 | 1.00 | 0.00 | O |
| ATOM | 50 | O1P  | G A | 2 | 15.438 | 42.989 | 110.727 | 1.00 | 0.00 | O |
| ATOM | 51 | O2P  | G A | 2 | 16.860 | 40.950 | 111.058 | 1.00 | 0.00 | O |
| ATOM | 52 | P    | G A | 2 | 16.791 | 42.420 | 110.880 | 1.00 | 0.00 | P |
| ATOM | 53 | H1   | G A | 2 | 24.652 | 40.358 | 105.617 | 1.00 | 0.00 | H |
| ATOM | 54 | H8   | G A | 2 | 19.105 | 41.041 | 108.842 | 1.00 | 0.00 | H |
| ATOM | 55 | H1'  | G A | 2 | 19.556 | 43.297 | 105.686 | 1.00 | 0.00 | H |
| ATOM | 56 | H21  | G A | 2 | 24.780 | 41.833 | 104.001 | 1.00 | 0.00 | H |
| ATOM | 57 | H3'  | G A | 2 | 16.195 | 43.855 | 107.652 | 1.00 | 0.00 | H |
| ATOM | 58 | H22  | G A | 2 | 23.489 | 43.026 | 103.689 | 1.00 | 0.00 | H |
| ATOM | 59 | H4'  | G A | 2 | 18.066 | 45.697 | 107.992 | 1.00 | 0.00 | H |
| ATOM | 60 | H2'1 | G A | 2 | 17.577 | 41.896 | 107.508 | 1.00 | 0.00 | H |
| ATOM | 61 | H2'2 | G A | 2 | 17.408 | 42.298 | 105.804 | 1.00 | 0.00 | H |
| ATOM | 62 | H5'1 | G A | 2 | 19.079 | 44.383 | 109.988 | 1.00 | 0.00 | H |
| ATOM | 63 | H5'2 | G A | 2 | 17.373 | 44.877 | 110.017 | 1.00 | 0.00 | H |
| ATOM | 64 | C1'  | G A | 3 | 19.983 | 42.333 | 101.850 | 1.00 | 0.00 | C |
| ATOM | 65 | N1   | G A | 3 | 22.959 | 38.498 | 103.414 | 1.00 | 0.00 | N |
| ATOM | 66 | C2   | G A | 3 | 23.170 | 39.434 | 102.420 | 1.00 | 0.00 | C |
| ATOM | 67 | N2   | G A | 3 | 24.326 | 39.336 | 101.751 | 1.00 | 0.00 | N |
| ATOM | 68 | N3   | G A | 3 | 22.298 | 40.393 | 102.116 | 1.00 | 0.00 | N |
| ATOM | 69 | C4   | G A | 3 | 21.181 | 40.339 | 102.888 | 1.00 | 0.00 | C |
| ATOM | 70 | C5   | G A | 3 | 20.884 | 39.441 | 103.900 | 1.00 | 0.00 | C |
| ATOM | 71 | C6   | G A | 3 | 21.813 | 38.425 | 104.226 | 1.00 | 0.00 | C |
| ATOM | 72 | O6   | G A | 3 | 21.731 | 37.544 | 105.082 | 1.00 | 0.00 | O |
| ATOM | 73 | N7   | G A | 3 | 19.632 | 39.727 | 104.448 | 1.00 | 0.00 | N |
| ATOM | 74 | C8   | G A | 3 | 19.221 | 40.767 | 103.770 | 1.00 | 0.00 | C |

|      |     |      |     |   |        |        |         |      |      |   |
|------|-----|------|-----|---|--------|--------|---------|------|------|---|
| ATOM | 75  | N9   | G A | 3 | 20.107 | 41.198 | 102.804 | 1.00 | 0.00 | N |
| ATOM | 76  | C2'  | G A | 3 | 18.574 | 42.531 | 101.310 | 1.00 | 0.00 | C |
| ATOM | 77  | C3'  | G A | 3 | 18.486 | 44.043 | 101.196 | 1.00 | 0.00 | C |
| ATOM | 78  | O3'  | G A | 3 | 19.052 | 44.453 | 99.954  | 1.00 | 0.00 | O |
| ATOM | 79  | C4'  | G A | 3 | 19.309 | 44.523 | 102.390 | 1.00 | 0.00 | C |
| ATOM | 80  | O4'  | G A | 3 | 20.358 | 43.513 | 102.533 | 1.00 | 0.00 | O |
| ATOM | 81  | C5'  | G A | 3 | 18.575 | 44.646 | 103.705 | 1.00 | 0.00 | C |
| ATOM | 82  | O5'  | G A | 3 | 17.601 | 43.580 | 103.824 | 1.00 | 0.00 | O |
| ATOM | 83  | O1P  | G A | 3 | 15.397 | 44.798 | 103.785 | 1.00 | 0.00 | O |
| ATOM | 84  | O2P  | G A | 3 | 15.591 | 42.593 | 104.964 | 1.00 | 0.00 | O |
| ATOM | 85  | P    | G A | 3 | 16.228 | 43.876 | 104.582 | 1.00 | 0.00 | P |
| ATOM | 86  | H1   | G A | 3 | 23.702 | 37.798 | 103.573 | 1.00 | 0.00 | H |
| ATOM | 87  | H8   | G A | 3 | 18.262 | 41.252 | 103.952 | 1.00 | 0.00 | H |
| ATOM | 88  | H1'  | G A | 3 | 20.694 | 42.174 | 101.038 | 1.00 | 0.00 | H |
| ATOM | 89  | H21  | G A | 3 | 24.998 | 38.592 | 101.993 | 1.00 | 0.00 | H |
| ATOM | 90  | H3'  | G A | 3 | 17.457 | 44.400 | 101.259 | 1.00 | 0.00 | H |
| ATOM | 91  | H22  | G A | 3 | 24.542 | 40.002 | 100.997 | 1.00 | 0.00 | H |
| ATOM | 92  | H4'  | G A | 3 | 19.698 | 45.507 | 102.133 | 1.00 | 0.00 | H |
| ATOM | 93  | H2'1 | G A | 3 | 17.813 | 42.139 | 101.986 | 1.00 | 0.00 | H |
| ATOM | 94  | H2'2 | G A | 3 | 18.429 | 42.050 | 100.342 | 1.00 | 0.00 | H |
| ATOM | 95  | H5'1 | G A | 3 | 19.292 | 44.583 | 104.522 | 1.00 | 0.00 | H |
| ATOM | 96  | H5'2 | G A | 3 | 18.072 | 45.612 | 103.744 | 1.00 | 0.00 | H |
| ATOM | 97  | C1'  | C A | 4 | 21.948 | 40.031 | 97.929  | 1.00 | 0.00 | C |
| ATOM | 98  | N1   | C A | 4 | 21.238 | 39.255 | 98.984  | 1.00 | 0.00 | N |
| ATOM | 99  | C2   | C A | 4 | 21.896 | 38.159 | 99.541  | 1.00 | 0.00 | C |
| ATOM | 100 | O2   | C A | 4 | 23.031 | 37.877 | 99.140  | 1.00 | 0.00 | O |
| ATOM | 101 | N3   | C A | 4 | 21.266 | 37.441 | 100.502 | 1.00 | 0.00 | N |
| ATOM | 102 | C4   | C A | 4 | 20.035 | 37.771 | 100.913 | 1.00 | 0.00 | C |
| ATOM | 103 | N4   | C A | 4 | 19.469 | 37.036 | 101.859 | 1.00 | 0.00 | N |
| ATOM | 104 | C5   | C A | 4 | 19.336 | 38.891 | 100.357 | 1.00 | 0.00 | C |
| ATOM | 105 | C6   | C A | 4 | 19.989 | 39.602 | 99.392  | 1.00 | 0.00 | C |
| ATOM | 106 | C2'  | C A | 4 | 21.039 | 40.522 | 96.811  | 1.00 | 0.00 | C |
| ATOM | 107 | C3'  | C A | 4 | 21.652 | 41.872 | 96.473  | 1.00 | 0.00 | C |
| ATOM | 108 | O3'  | C A | 4 | 22.727 | 41.680 | 95.555  | 1.00 | 0.00 | O |
| ATOM | 109 | C4'  | C A | 4 | 22.135 | 42.376 | 97.831  | 1.00 | 0.00 | C |
| ATOM | 110 | O4'  | C A | 4 | 22.532 | 41.163 | 98.547  | 1.00 | 0.00 | O |
| ATOM | 111 | C5'  | C A | 4 | 21.123 | 43.121 | 98.668  | 1.00 | 0.00 | C |
| ATOM | 112 | O5'  | C A | 4 | 19.810 | 42.530 | 98.492  | 1.00 | 0.00 | O |
| ATOM | 113 | O1P  | C A | 4 | 18.502 | 44.347 | 97.343  | 1.00 | 0.00 | O |
| ATOM | 114 | O2P  | C A | 4 | 17.315 | 42.658 | 98.769  | 1.00 | 0.00 | O |
| ATOM | 115 | P    | C A | 4 | 18.529 | 43.479 | 98.536  | 1.00 | 0.00 | P |
| ATOM | 116 | H5   | C A | 4 | 18.333 | 39.160 | 100.685 | 1.00 | 0.00 | H |
| ATOM | 117 | H6   | C A | 4 | 19.500 | 40.465 | 98.942  | 1.00 | 0.00 | H |
| ATOM | 118 | H1'  | C A | 4 | 22.752 | 39.412 | 97.535  | 1.00 | 0.00 | H |
| ATOM | 119 | H3'  | C A | 4 | 20.923 | 42.553 | 96.036  | 1.00 | 0.00 | H |
| ATOM | 120 | H4'  | C A | 4 | 22.970 | 43.050 | 97.640  | 1.00 | 0.00 | H |
| ATOM | 121 | H41  | C A | 4 | 18.522 | 37.269 | 102.195 | 1.00 | 0.00 | H |
| ATOM | 122 | H42  | C A | 4 | 19.972 | 36.229 | 102.258 | 1.00 | 0.00 | H |
| ATOM | 123 | H2'1 | C A | 4 | 20.004 | 40.627 | 97.135  | 1.00 | 0.00 | H |
| ATOM | 124 | H2'2 | C A | 4 | 21.046 | 39.854 | 95.948  | 1.00 | 0.00 | H |
| ATOM | 125 | H5'1 | C A | 4 | 21.413 | 43.064 | 99.718  | 1.00 | 0.00 | H |
| ATOM | 126 | H5'2 | C A | 4 | 21.101 | 44.165 | 98.358  | 1.00 | 0.00 | H |
| ATOM | 127 | C1'  | C A | 5 | 23.935 | 36.145 | 95.588  | 1.00 | 0.00 | C |
| ATOM | 128 | N1   | C A | 5 | 22.646 | 36.007 | 96.322  | 1.00 | 0.00 | N |

|      |     |      |     |   |        |        |        |      |      |   |
|------|-----|------|-----|---|--------|--------|--------|------|------|---|
| ATOM | 129 | C2   | C A | 5 | 22.531 | 34.972 | 97.247 | 1.00 | 0.00 | C |
| ATOM | 130 | O2   | C A | 5 | 23.494 | 34.214 | 97.421 | 1.00 | 0.00 | O |
| ATOM | 131 | N3   | C A | 5 | 21.365 | 34.830 | 97.926 | 1.00 | 0.00 | N |
| ATOM | 132 | C4   | C A | 5 | 20.340 | 35.664 | 97.716 | 1.00 | 0.00 | C |
| ATOM | 133 | N4   | C A | 5 | 19.227 | 35.482 | 98.409 | 1.00 | 0.00 | N |
| ATOM | 134 | C5   | C A | 5 | 20.432 | 36.737 | 96.770 | 1.00 | 0.00 | C |
| ATOM | 135 | C6   | C A | 5 | 21.614 | 36.862 | 96.100 | 1.00 | 0.00 | C |
| ATOM | 136 | C2'  | C A | 5 | 23.770 | 36.561 | 94.133 | 1.00 | 0.00 | C |
| ATOM | 137 | C3'  | C A | 5 | 24.981 | 37.456 | 93.921 | 1.00 | 0.00 | C |
| ATOM | 138 | O3'  | C A | 5 | 26.109 | 36.647 | 93.595 | 1.00 | 0.00 | O |
| ATOM | 139 | C4'  | C A | 5 | 25.137 | 38.144 | 95.275 | 1.00 | 0.00 | C |
| ATOM | 140 | O4'  | C A | 5 | 24.699 | 37.139 | 96.244 | 1.00 | 0.00 | O |
| ATOM | 141 | C5'  | C A | 5 | 24.327 | 39.402 | 95.484 | 1.00 | 0.00 | C |
| ATOM | 142 | O5'  | C A | 5 | 23.037 | 39.269 | 94.836 | 1.00 | 0.00 | O |
| ATOM | 143 | O1P  | C A | 5 | 23.125 | 40.994 | 93.006 | 1.00 | 0.00 | O |
| ATOM | 144 | O2P  | C A | 5 | 20.917 | 40.314 | 93.983 | 1.00 | 0.00 | O |
| ATOM | 145 | P    | C A | 5 | 22.364 | 40.565 | 94.195 | 1.00 | 0.00 | P |
| ATOM | 146 | H5   | C A | 5 | 19.598 | 37.416 | 96.591 | 1.00 | 0.00 | H |
| ATOM | 147 | H6   | C A | 5 | 21.732 | 37.665 | 95.373 | 1.00 | 0.00 | H |
| ATOM | 148 | H1'  | C A | 5 | 24.474 | 35.201 | 95.667 | 1.00 | 0.00 | H |
| ATOM | 149 | H3'  | C A | 5 | 24.817 | 38.182 | 93.125 | 1.00 | 0.00 | H |
| ATOM | 150 | H4'  | C A | 5 | 26.190 | 38.406 | 95.378 | 1.00 | 0.00 | H |
| ATOM | 151 | H41  | C A | 5 | 18.423 | 36.110 | 98.268 | 1.00 | 0.00 | H |
| ATOM | 152 | H42  | C A | 5 | 19.164 | 34.709 | 99.088 | 1.00 | 0.00 | H |
| ATOM | 153 | H2'1 | C A | 5 | 22.842 | 37.103 | 93.960 | 1.00 | 0.00 | H |
| ATOM | 154 | H2'2 | C A | 5 | 23.784 | 35.706 | 93.455 | 1.00 | 0.00 | H |
| ATOM | 155 | H5'1 | C A | 5 | 24.187 | 39.564 | 96.554 | 1.00 | 0.00 | H |
| ATOM | 156 | H5'2 | C A | 5 | 24.867 | 40.249 | 95.062 | 1.00 | 0.00 | H |
| ATOM | 157 | C1'  | G A | 6 | 24.714 | 31.306 | 94.875 | 1.00 | 0.00 | C |
| ATOM | 158 | N1   | G A | 6 | 20.214 | 30.811 | 97.228 | 1.00 | 0.00 | N |
| ATOM | 159 | C2   | G A | 6 | 21.380 | 30.080 | 97.377 | 1.00 | 0.00 | C |
| ATOM | 160 | N2   | G A | 6 | 21.342 | 29.085 | 98.270 | 1.00 | 0.00 | N |
| ATOM | 161 | N3   | G A | 6 | 22.495 | 30.326 | 96.690 | 1.00 | 0.00 | N |
| ATOM | 162 | C4   | G A | 6 | 22.351 | 31.363 | 95.825 | 1.00 | 0.00 | C |
| ATOM | 163 | C5   | G A | 6 | 21.229 | 32.144 | 95.606 | 1.00 | 0.00 | C |
| ATOM | 164 | C6   | G A | 6 | 20.047 | 31.888 | 96.337 | 1.00 | 0.00 | C |
| ATOM | 165 | O6   | G A | 6 | 18.961 | 32.465 | 96.284 | 1.00 | 0.00 | O |
| ATOM | 166 | N7   | G A | 6 | 21.494 | 33.108 | 94.631 | 1.00 | 0.00 | N |
| ATOM | 167 | C8   | G A | 6 | 22.741 | 32.888 | 94.301 | 1.00 | 0.00 | C |
| ATOM | 168 | N9   | G A | 6 | 23.331 | 31.843 | 94.982 | 1.00 | 0.00 | N |
| ATOM | 169 | C2'  | G A | 6 | 25.260 | 31.302 | 93.453 | 1.00 | 0.00 | C |
| ATOM | 170 | C3'  | G A | 6 | 26.730 | 31.620 | 93.677 | 1.00 | 0.00 | C |
| ATOM | 171 | O3'  | G A | 6 | 27.430 | 30.416 | 93.983 | 1.00 | 0.00 | O |
| ATOM | 172 | C4'  | G A | 6 | 26.692 | 32.583 | 94.863 | 1.00 | 0.00 | C |
| ATOM | 173 | O4'  | G A | 6 | 25.557 | 32.124 | 95.664 | 1.00 | 0.00 | O |
| ATOM | 174 | C5'  | G A | 6 | 26.493 | 34.043 | 94.535 | 1.00 | 0.00 | C |
| ATOM | 175 | O5'  | G A | 6 | 25.587 | 34.177 | 93.413 | 1.00 | 0.00 | O |
| ATOM | 176 | O1P  | G A | 6 | 27.042 | 35.141 | 91.600 | 1.00 | 0.00 | O |
| ATOM | 177 | O2P  | G A | 6 | 24.572 | 35.583 | 91.594 | 1.00 | 0.00 | O |
| ATOM | 178 | P    | G A | 6 | 25.812 | 35.373 | 92.381 | 1.00 | 0.00 | P |
| ATOM | 179 | H1   | G A | 6 | 19.408 | 30.545 | 97.813 | 1.00 | 0.00 | H |
| ATOM | 180 | H8   | G A | 6 | 23.270 | 33.478 | 93.552 | 1.00 | 0.00 | H |
| ATOM | 181 | H1'  | G A | 6 | 24.725 | 30.302 | 95.300 | 1.00 | 0.00 | H |
| ATOM | 182 | H21  | G A | 6 | 20.478 | 28.904 | 98.801 | 1.00 | 0.00 | H |

|      |     |      |     |   |        |        |        |      |      |   |
|------|-----|------|-----|---|--------|--------|--------|------|------|---|
| ATOM | 183 | H3'  | G A | 6 | 27.184 | 32.090 | 92.804 | 1.00 | 0.00 | H |
| ATOM | 184 | H22  | G A | 6 | 22.176 | 28.502 | 98.428 | 1.00 | 0.00 | H |
| ATOM | 185 | H4'  | G A | 6 | 27.646 | 32.484 | 95.381 | 1.00 | 0.00 | H |
| ATOM | 186 | H2'1 | G A | 6 | 24.783 | 32.054 | 92.825 | 1.00 | 0.00 | H |
| ATOM | 187 | H2'2 | G A | 6 | 25.133 | 30.337 | 92.963 | 1.00 | 0.00 | H |
| ATOM | 188 | H5'1 | G A | 6 | 26.080 | 34.554 | 95.405 | 1.00 | 0.00 | H |
| ATOM | 189 | H5'2 | G A | 6 | 27.456 | 34.489 | 94.286 | 1.00 | 0.00 | H |
| ATOM | 190 | C1'  | C A | 7 | 23.521 | 26.512 | 95.211 | 1.00 | 0.00 | C |
| ATOM | 191 | N1   | C A | 7 | 22.556 | 27.492 | 94.640 | 1.00 | 0.00 | N |
| ATOM | 192 | C2   | C A | 7 | 21.263 | 27.511 | 95.158 | 1.00 | 0.00 | C |
| ATOM | 193 | O2   | C A | 7 | 20.970 | 26.719 | 96.063 | 1.00 | 0.00 | O |
| ATOM | 194 | N3   | C A | 7 | 20.369 | 28.397 | 94.653 | 1.00 | 0.00 | N |
| ATOM | 195 | C4   | C A | 7 | 20.716 | 29.242 | 93.673 | 1.00 | 0.00 | C |
| ATOM | 196 | N4   | C A | 7 | 19.804 | 30.088 | 93.220 | 1.00 | 0.00 | N |
| ATOM | 197 | C5   | C A | 7 | 22.038 | 29.241 | 93.118 | 1.00 | 0.00 | C |
| ATOM | 198 | C6   | C A | 7 | 22.923 | 28.344 | 93.646 | 1.00 | 0.00 | C |
| ATOM | 199 | C2'  | C A | 7 | 24.457 | 25.901 | 94.177 | 1.00 | 0.00 | C |
| ATOM | 200 | C3'  | C A | 7 | 25.749 | 25.754 | 94.968 | 1.00 | 0.00 | C |
| ATOM | 201 | O3'  | C A | 7 | 25.712 | 24.532 | 95.703 | 1.00 | 0.00 | O |
| ATOM | 202 | C4'  | C A | 7 | 25.728 | 26.978 | 95.882 | 1.00 | 0.00 | C |
| ATOM | 203 | O4'  | C A | 7 | 24.309 | 27.191 | 96.169 | 1.00 | 0.00 | O |
| ATOM | 204 | C5'  | C A | 7 | 26.302 | 28.253 | 95.307 | 1.00 | 0.00 | C |
| ATOM | 205 | O5'  | C A | 7 | 25.981 | 28.343 | 93.896 | 1.00 | 0.00 | O |
| ATOM | 206 | O1P  | C A | 7 | 28.228 | 28.173 | 92.774 | 1.00 | 0.00 | O |
| ATOM | 207 | O2P  | C A | 7 | 26.351 | 29.402 | 91.649 | 1.00 | 0.00 | O |
| ATOM | 208 | P    | C A | 7 | 27.031 | 29.029 | 92.912 | 1.00 | 0.00 | P |
| ATOM | 209 | H5   | C A | 7 | 22.324 | 29.923 | 92.316 | 1.00 | 0.00 | H |
| ATOM | 210 | H6   | C A | 7 | 23.943 | 28.311 | 93.262 | 1.00 | 0.00 | H |
| ATOM | 211 | H1'  | C A | 7 | 22.954 | 25.739 | 95.731 | 1.00 | 0.00 | H |
| ATOM | 212 | H3'  | C A | 7 | 26.625 | 25.760 | 94.320 | 1.00 | 0.00 | H |
| ATOM | 213 | H4'  | C A | 7 | 26.309 | 26.721 | 96.767 | 1.00 | 0.00 | H |
| ATOM | 214 | H41  | C A | 7 | 20.044 | 30.750 | 92.467 | 1.00 | 0.00 | H |
| ATOM | 215 | H42  | C A | 7 | 18.853 | 30.086 | 93.616 | 1.00 | 0.00 | H |
| ATOM | 216 | H2'1 | C A | 7 | 24.594 | 26.545 | 93.311 | 1.00 | 0.00 | H |
| ATOM | 217 | H2'2 | C A | 7 | 24.101 | 24.935 | 93.816 | 1.00 | 0.00 | H |
| ATOM | 218 | H5'1 | C A | 7 | 25.878 | 29.107 | 95.838 | 1.00 | 0.00 | H |
| ATOM | 219 | H5'2 | C A | 7 | 27.384 | 28.249 | 95.438 | 1.00 | 0.00 | H |
| ATOM | 220 | C1'  | A A | 8 | 20.358 | 22.726 | 95.626 | 1.00 | 0.00 | C |
| ATOM | 221 | N1   | A A | 8 | 17.035 | 26.017 | 93.513 | 1.00 | 0.00 | N |
| ATOM | 222 | C2   | A A | 8 | 16.926 | 25.150 | 94.515 | 1.00 | 0.00 | C |
| ATOM | 223 | N3   | A A | 8 | 17.827 | 24.330 | 95.014 | 1.00 | 0.00 | N |
| ATOM | 224 | C4   | A A | 8 | 18.989 | 24.455 | 94.346 | 1.00 | 0.00 | C |
| ATOM | 225 | C5   | A A | 8 | 19.262 | 25.293 | 93.301 | 1.00 | 0.00 | C |
| ATOM | 226 | C6   | A A | 8 | 18.207 | 26.121 | 92.868 | 1.00 | 0.00 | C |
| ATOM | 227 | N6   | A A | 8 | 18.328 | 26.994 | 91.853 | 1.00 | 0.00 | N |
| ATOM | 228 | N7   | A A | 8 | 20.570 | 25.145 | 92.871 | 1.00 | 0.00 | N |
| ATOM | 229 | C8   | A A | 8 | 21.054 | 24.226 | 93.655 | 1.00 | 0.00 | C |
| ATOM | 230 | N9   | A A | 8 | 20.152 | 23.763 | 94.578 | 1.00 | 0.00 | N |
| ATOM | 231 | C2'  | A A | 8 | 21.240 | 21.568 | 95.179 | 1.00 | 0.00 | C |
| ATOM | 232 | C3'  | A A | 8 | 21.995 | 21.234 | 96.456 | 1.00 | 0.00 | C |
| ATOM | 233 | O3'  | A A | 8 | 21.200 | 20.362 | 97.254 | 1.00 | 0.00 | O |
| ATOM | 234 | C4'  | A A | 8 | 22.183 | 22.603 | 97.108 | 1.00 | 0.00 | C |
| ATOM | 235 | O4'  | A A | 8 | 20.981 | 23.350 | 96.732 | 1.00 | 0.00 | O |
| ATOM | 236 | C5'  | A A | 8 | 23.398 | 23.390 | 96.676 | 1.00 | 0.00 | C |

|      |     |      |   |   |    |        |        |        |      |      |   |
|------|-----|------|---|---|----|--------|--------|--------|------|------|---|
| ATOM | 237 | O5'  | A | A | 8  | 23.645 | 23.175 | 95.263 | 1.00 | 0.00 | O |
| ATOM | 238 | O1P  | A | A | 8  | 25.845 | 21.951 | 95.239 | 1.00 | 0.00 | O |
| ATOM | 239 | O2P  | A | A | 8  | 25.168 | 23.356 | 93.273 | 1.00 | 0.00 | O |
| ATOM | 240 | P    | A | A | 8  | 25.152 | 23.156 | 94.743 | 1.00 | 0.00 | P |
| ATOM | 241 | H2   | A | A | 8  | 15.949 | 25.112 | 94.993 | 1.00 | 0.00 | H |
| ATOM | 242 | H8   | A | A | 8  | 22.078 | 23.861 | 93.587 | 1.00 | 0.00 | H |
| ATOM | 243 | H1'  | A | A | 8  | 19.380 | 22.369 | 95.949 | 1.00 | 0.00 | H |
| ATOM | 244 | H3'  | A | A | 8  | 22.956 | 20.761 | 96.251 | 1.00 | 0.00 | H |
| ATOM | 245 | H4'  | A | A | 8  | 22.260 | 22.433 | 98.181 | 1.00 | 0.00 | H |
| ATOM | 246 | H61  | A | A | 8  | 17.526 | 27.578 | 91.578 | 1.00 | 0.00 | H |
| ATOM | 247 | H62  | A | A | 8  | 19.224 | 27.077 | 91.352 | 1.00 | 0.00 | H |
| ATOM | 248 | H2'1 | A | A | 8  | 21.922 | 21.853 | 94.379 | 1.00 | 0.00 | H |
| ATOM | 249 | H2'2 | A | A | 8  | 20.657 | 20.717 | 94.828 | 1.00 | 0.00 | H |
| ATOM | 250 | H5'1 | A | A | 8  | 23.219 | 24.450 | 96.860 | 1.00 | 0.00 | H |
| ATOM | 251 | H5'2 | A | A | 8  | 24.261 | 23.066 | 97.255 | 1.00 | 0.00 | H |
| ATOM | 252 | C1'  | C | A | 9  | 15.912 | 20.578 | 95.102 | 1.00 | 0.00 | C |
| ATOM | 253 | N1   | C | A | 9  | 16.564 | 21.251 | 93.945 | 1.00 | 0.00 | N |
| ATOM | 254 | C2   | C | A | 9  | 15.822 | 22.190 | 93.231 | 1.00 | 0.00 | C |
| ATOM | 255 | O2   | C | A | 9  | 14.659 | 22.424 | 93.586 | 1.00 | 0.00 | O |
| ATOM | 256 | N3   | C | A | 9  | 16.398 | 22.813 | 92.176 | 1.00 | 0.00 | N |
| ATOM | 257 | C4   | C | A | 9  | 17.658 | 22.537 | 91.816 | 1.00 | 0.00 | C |
| ATOM | 258 | N4   | C | A | 9  | 18.173 | 23.179 | 90.777 | 1.00 | 0.00 | N |
| ATOM | 259 | C5   | C | A | 9  | 18.445 | 21.572 | 92.528 | 1.00 | 0.00 | C |
| ATOM | 260 | C6   | C | A | 9  | 17.846 | 20.959 | 93.592 | 1.00 | 0.00 | C |
| ATOM | 261 | C2'  | C | A | 9  | 16.281 | 19.109 | 95.245 | 1.00 | 0.00 | C |
| ATOM | 262 | C3'  | C | A | 9  | 16.317 | 18.937 | 96.757 | 1.00 | 0.00 | C |
| ATOM | 263 | O3'  | C | A | 9  | 14.997 | 18.683 | 97.231 | 1.00 | 0.00 | O |
| ATOM | 264 | C4'  | C | A | 9  | 16.855 | 20.283 | 97.239 | 1.00 | 0.00 | C |
| ATOM | 265 | O4'  | C | A | 9  | 16.322 | 21.250 | 96.277 | 1.00 | 0.00 | O |
| ATOM | 266 | C5'  | C | A | 9  | 18.357 | 20.427 | 97.286 | 1.00 | 0.00 | C |
| ATOM | 267 | O5'  | C | A | 9  | 18.954 | 19.719 | 96.169 | 1.00 | 0.00 | O |
| ATOM | 268 | O1P  | C | A | 9  | 20.239 | 17.860 | 97.278 | 1.00 | 0.00 | O |
| ATOM | 269 | O2P  | C | A | 9  | 20.981 | 18.743 | 95.049 | 1.00 | 0.00 | O |
| ATOM | 270 | P    | C | A | 9  | 20.372 | 19.019 | 96.374 | 1.00 | 0.00 | P |
| ATOM | 271 | H5   | C | A | 9  | 19.469 | 21.340 | 92.236 | 1.00 | 0.00 | H |
| ATOM | 272 | H6   | C | A | 9  | 18.405 | 20.224 | 94.170 | 1.00 | 0.00 | H |
| ATOM | 273 | H1'  | C | A | 9  | 14.833 | 20.702 | 95.003 | 1.00 | 0.00 | H |
| ATOM | 274 | H3'  | C | A | 9  | 16.973 | 18.120 | 97.058 | 1.00 | 0.00 | H |
| ATOM | 275 | H4'  | C | A | 9  | 16.474 | 20.432 | 98.248 | 1.00 | 0.00 | H |
| ATOM | 276 | H41  | C | A | 9  | 19.141 | 22.987 | 90.481 | 1.00 | 0.00 | H |
| ATOM | 277 | H42  | C | A | 9  | 17.605 | 23.870 | 90.266 | 1.00 | 0.00 | H |
| ATOM | 278 | H2'1 | C | A | 9  | 17.247 | 18.878 | 94.798 | 1.00 | 0.00 | H |
| ATOM | 279 | H2'2 | C | A | 9  | 15.543 | 18.450 | 94.788 | 1.00 | 0.00 | H |
| ATOM | 280 | H5'1 | C | A | 9  | 18.619 | 21.485 | 97.232 | 1.00 | 0.00 | H |
| ATOM | 281 | H5'2 | C | A | 9  | 18.727 | 20.015 | 98.224 | 1.00 | 0.00 | H |
| ATOM | 282 | C1'  | C | A | 10 | 11.464 | 20.001 | 93.002 | 1.00 | 0.00 | C |
| ATOM | 283 | N1   | C | A | 10 | 12.695 | 20.035 | 92.166 | 1.00 | 0.00 | N |
| ATOM | 284 | C2   | C | A | 10 | 12.725 | 20.914 | 91.085 | 1.00 | 0.00 | C |
| ATOM | 285 | O2   | C | A | 10 | 11.735 | 21.626 | 90.864 | 1.00 | 0.00 | O |
| ATOM | 286 | N3   | C | A | 10 | 13.837 | 20.962 | 90.311 | 1.00 | 0.00 | N |
| ATOM | 287 | C4   | C | A | 10 | 14.892 | 20.179 | 90.573 | 1.00 | 0.00 | C |
| ATOM | 288 | N4   | C | A | 10 | 15.955 | 20.269 | 89.786 | 1.00 | 0.00 | N |
| ATOM | 289 | C5   | C | A | 10 | 14.888 | 19.263 | 91.676 | 1.00 | 0.00 | C |
| ATOM | 290 | C6   | C | A | 10 | 13.759 | 19.236 | 92.444 | 1.00 | 0.00 | C |

|      |     |      |     |    |        |        |        |      |      |   |
|------|-----|------|-----|----|--------|--------|--------|------|------|---|
| ATOM | 291 | C2'  | C A | 10 | 11.089 | 18.606 | 93.483 | 1.00 | 0.00 | C |
| ATOM | 292 | C3'  | C A | 10 | 10.527 | 18.890 | 94.868 | 1.00 | 0.00 | C |
| ATOM | 293 | O3'  | C A | 10 | 9.153  | 19.253 | 94.751 | 1.00 | 0.00 | O |
| ATOM | 294 | C4'  | C A | 10 | 11.392 | 20.050 | 95.354 | 1.00 | 0.00 | C |
| ATOM | 295 | O4'  | C A | 10 | 11.694 | 20.810 | 94.140 | 1.00 | 0.00 | O |
| ATOM | 296 | C5'  | C A | 10 | 12.692 | 19.682 | 96.029 | 1.00 | 0.00 | C |
| ATOM | 297 | O5'  | C A | 10 | 13.266 | 18.516 | 95.386 | 1.00 | 0.00 | O |
| ATOM | 298 | O1P  | C A | 10 | 13.155 | 16.750 | 97.175 | 1.00 | 0.00 | O |
| ATOM | 299 | O2P  | C A | 10 | 14.919 | 16.624 | 95.395 | 1.00 | 0.00 | O |
| ATOM | 300 | P    | C A | 10 | 14.076 | 17.471 | 96.275 | 1.00 | 0.00 | P |
| ATOM | 301 | H5   | C A | 10 | 15.742 | 18.620 | 91.890 | 1.00 | 0.00 | H |
| ATOM | 302 | H6   | C A | 10 | 13.711 | 18.561 | 93.299 | 1.00 | 0.00 | H |
| ATOM | 303 | H1'  | C A | 10 | 10.651 | 20.449 | 92.431 | 1.00 | 0.00 | H |
| ATOM | 304 | H3'  | C A | 10 | 10.616 | 18.027 | 95.529 | 1.00 | 0.00 | H |
| ATOM | 305 | H4'  | C A | 10 | 10.793 | 20.613 | 96.071 | 1.00 | 0.00 | H |
| ATOM | 306 | H41  | C A | 10 | 16.781 | 19.680 | 89.968 | 1.00 | 0.00 | H |
| ATOM | 307 | H42  | C A | 10 | 15.954 | 20.926 | 88.993 | 1.00 | 0.00 | H |
| ATOM | 308 | H2'1 | C A | 10 | 11.948 | 17.939 | 93.533 | 1.00 | 0.00 | H |
| ATOM | 309 | H2'2 | C A | 10 | 10.344 | 18.134 | 92.841 | 1.00 | 0.00 | H |
| ATOM | 310 | H5'1 | C A | 10 | 13.385 | 20.522 | 95.956 | 1.00 | 0.00 | H |
| ATOM | 311 | H5'2 | C A | 10 | 12.501 | 19.467 | 97.080 | 1.00 | 0.00 | H |
| ATOM | 312 | C1'  | T A | 11 | 8.207  | 20.369 | 89.292 | 1.00 | 0.00 | C |
| ATOM | 313 | N1   | T A | 11 | 9.536  | 19.747 | 89.058 | 1.00 | 0.00 | N |
| ATOM | 314 | C2   | T A | 11 | 10.275 | 20.220 | 87.992 | 1.00 | 0.00 | C |
| ATOM | 315 | O2   | T A | 11 | 9.878  | 21.109 | 87.257 | 1.00 | 0.00 | O |
| ATOM | 316 | N3   | T A | 11 | 11.505 | 19.615 | 87.810 | 1.00 | 0.00 | N |
| ATOM | 317 | C4   | T A | 11 | 12.043 | 18.603 | 88.579 | 1.00 | 0.00 | C |
| ATOM | 318 | O4   | T A | 11 | 13.159 | 18.136 | 88.318 | 1.00 | 0.00 | O |
| ATOM | 319 | C5   | T A | 11 | 11.200 | 18.175 | 89.670 | 1.00 | 0.00 | C |
| ATOM | 320 | C6   | T A | 11 | 9.995  | 18.744 | 89.876 | 1.00 | 0.00 | C |
| ATOM | 321 | C7   | T A | 11 | 11.747 | 17.078 | 90.534 | 1.00 | 0.00 | C |
| ATOM | 322 | C2'  | T A | 11 | 7.139  | 19.384 | 89.751 | 1.00 | 0.00 | C |
| ATOM | 323 | C3'  | T A | 11 | 6.323  | 20.226 | 90.717 | 1.00 | 0.00 | C |
| ATOM | 324 | O3'  | T A | 11 | 5.357  | 20.978 | 89.985 | 1.00 | 0.00 | O |
| ATOM | 325 | C4'  | T A | 11 | 7.378  | 21.118 | 91.366 | 1.00 | 0.00 | C |
| ATOM | 326 | O4'  | T A | 11 | 8.359  | 21.347 | 90.304 | 1.00 | 0.00 | O |
| ATOM | 327 | C5'  | T A | 11 | 8.093  | 20.549 | 92.569 | 1.00 | 0.00 | C |
| ATOM | 328 | O5'  | T A | 11 | 8.299  | 19.125 | 92.388 | 1.00 | 0.00 | O |
| ATOM | 329 | O1P  | T A | 11 | 6.861  | 18.096 | 94.178 | 1.00 | 0.00 | O |
| ATOM | 330 | O2P  | T A | 11 | 8.887  | 16.876 | 93.343 | 1.00 | 0.00 | O |
| ATOM | 331 | P    | T A | 11 | 8.242  | 18.172 | 93.665 | 1.00 | 0.00 | P |
| ATOM | 332 | H3   | T A | 11 | 12.077 | 19.953 | 87.025 | 1.00 | 0.00 | H |
| ATOM | 333 | H6   | T A | 11 | 9.375  | 18.404 | 90.707 | 1.00 | 0.00 | H |
| ATOM | 334 | H1'  | T A | 11 | 7.901  | 20.878 | 88.378 | 1.00 | 0.00 | H |
| ATOM | 335 | H3'  | T A | 11 | 5.814  | 19.615 | 91.461 | 1.00 | 0.00 | H |
| ATOM | 336 | H4'  | T A | 11 | 6.871  | 22.031 | 91.681 | 1.00 | 0.00 | H |
| ATOM | 337 | H71  | T A | 11 | 11.132 | 16.186 | 90.422 | 1.00 | 0.00 | H |
| ATOM | 338 | H72  | T A | 11 | 12.770 | 16.854 | 90.231 | 1.00 | 0.00 | H |
| ATOM | 339 | H73  | T A | 11 | 11.739 | 17.396 | 91.576 | 1.00 | 0.00 | H |
| ATOM | 340 | H2'1 | T A | 11 | 7.566  | 18.514 | 90.246 | 1.00 | 0.00 | H |
| ATOM | 341 | H2'2 | T A | 11 | 6.527  | 19.022 | 88.923 | 1.00 | 0.00 | H |
| ATOM | 342 | H5'1 | T A | 11 | 9.054  | 21.048 | 92.686 | 1.00 | 0.00 | H |
| ATOM | 343 | H5'2 | T A | 11 | 7.488  | 20.722 | 93.459 | 1.00 | 0.00 | H |
| ATOM | 344 | C1'  | A A | 12 | 6.934  | 20.713 | 84.508 | 1.00 | 0.00 | C |

|      |     |      |   |   |    |        |        |        |      |      |   |
|------|-----|------|---|---|----|--------|--------|--------|------|------|---|
| ATOM | 345 | N1   | A | A | 12 | 11.434 | 18.374 | 83.719 | 1.00 | 0.00 | N |
| ATOM | 346 | C2   | A | A | 12 | 10.827 | 19.385 | 83.107 | 1.00 | 0.00 | C |
| ATOM | 347 | N3   | A | A | 12 | 9.663  | 19.944 | 83.365 | 1.00 | 0.00 | N |
| ATOM | 348 | C4   | A | A | 12 | 9.075  | 19.333 | 84.408 | 1.00 | 0.00 | C |
| ATOM | 349 | C5   | A | A | 12 | 9.560  | 18.286 | 85.140 | 1.00 | 0.00 | C |
| ATOM | 350 | C6   | A | A | 12 | 10.823 | 17.784 | 84.758 | 1.00 | 0.00 | C |
| ATOM | 351 | N6   | A | A | 12 | 11.425 | 16.759 | 85.386 | 1.00 | 0.00 | N |
| ATOM | 352 | N7   | A | A | 12 | 8.676  | 17.924 | 86.141 | 1.00 | 0.00 | N |
| ATOM | 353 | C8   | A | A | 12 | 7.682  | 18.747 | 85.993 | 1.00 | 0.00 | C |
| ATOM | 354 | N9   | A | A | 12 | 7.854  | 19.634 | 84.960 | 1.00 | 0.00 | N |
| ATOM | 355 | C2'  | A | A | 12 | 5.461  | 20.332 | 84.585 | 1.00 | 0.00 | C |
| ATOM | 356 | C3'  | A | A | 12 | 4.813  | 21.651 | 84.978 | 1.00 | 0.00 | C |
| ATOM | 357 | O3'  | A | A | 12 | 4.585  | 22.427 | 83.804 | 1.00 | 0.00 | O |
| ATOM | 358 | C4'  | A | A | 12 | 5.859  | 22.283 | 85.894 | 1.00 | 0.00 | C |
| ATOM | 359 | O4'  | A | A | 12 | 7.139  | 21.835 | 85.344 | 1.00 | 0.00 | O |
| ATOM | 360 | C5'  | A | A | 12 | 5.796  | 21.896 | 87.352 | 1.00 | 0.00 | C |
| ATOM | 361 | O5'  | A | A | 12 | 5.415  | 20.501 | 87.473 | 1.00 | 0.00 | O |
| ATOM | 362 | O1P  | A | A | 12 | 3.157  | 20.609 | 88.580 | 1.00 | 0.00 | O |
| ATOM | 363 | O2P  | A | A | 12 | 4.608  | 18.584 | 88.882 | 1.00 | 0.00 | O |
| ATOM | 364 | P    | A | A | 12 | 4.519  | 20.056 | 88.714 | 1.00 | 0.00 | P |
| ATOM | 365 | H2   | A | A | 12 | 11.374 | 19.817 | 82.269 | 1.00 | 0.00 | H |
| ATOM | 366 | H8   | A | A | 12 | 6.794  | 18.737 | 86.627 | 1.00 | 0.00 | H |
| ATOM | 367 | H1'  | A | A | 12 | 7.212  | 20.994 | 83.493 | 1.00 | 0.00 | H |
| ATOM | 368 | H3'  | A | A | 12 | 3.870  | 21.502 | 85.502 | 1.00 | 0.00 | H |
| ATOM | 369 | H4'  | A | A | 12 | 5.723  | 23.363 | 85.831 | 1.00 | 0.00 | H |
| ATOM | 370 | H61  | A | A | 12 | 12.348 | 16.433 | 85.069 | 1.00 | 0.00 | H |
| ATOM | 371 | H62  | A | A | 12 | 10.961 | 16.300 | 86.183 | 1.00 | 0.00 | H |
| ATOM | 372 | H2'1 | A | A | 12 | 5.271  | 19.560 | 85.329 | 1.00 | 0.00 | H |
| ATOM | 373 | H2'2 | A | A | 12 | 5.078  | 19.970 | 83.630 | 1.00 | 0.00 | H |
| ATOM | 374 | H5'1 | A | A | 12 | 6.775  | 22.050 | 87.805 | 1.00 | 0.00 | H |
| ATOM | 375 | H5'2 | A | A | 12 | 5.064  | 22.522 | 87.858 | 1.00 | 0.00 | H |
| ATOM | 376 | C1'  | G | A | 13 | 7.677  | 20.014 | 79.649 | 1.00 | 0.00 | C |
| ATOM | 377 | N1   | G | A | 13 | 10.654 | 16.179 | 81.215 | 1.00 | 0.00 | N |
| ATOM | 378 | C2   | G | A | 13 | 10.865 | 17.116 | 80.219 | 1.00 | 0.00 | C |
| ATOM | 379 | N2   | G | A | 13 | 12.020 | 17.017 | 79.548 | 1.00 | 0.00 | N |
| ATOM | 380 | N3   | G | A | 13 | 9.991  | 18.074 | 79.916 | 1.00 | 0.00 | N |
| ATOM | 381 | C4   | G | A | 13 | 8.875  | 18.021 | 80.688 | 1.00 | 0.00 | C |
| ATOM | 382 | C5   | G | A | 13 | 8.578  | 17.122 | 81.700 | 1.00 | 0.00 | C |
| ATOM | 383 | C6   | G | A | 13 | 9.506  | 16.105 | 82.025 | 1.00 | 0.00 | C |
| ATOM | 384 | O6   | G | A | 13 | 9.423  | 15.224 | 82.881 | 1.00 | 0.00 | O |
| ATOM | 385 | N7   | G | A | 13 | 7.326  | 17.408 | 82.247 | 1.00 | 0.00 | N |
| ATOM | 386 | C8   | G | A | 13 | 6.915  | 18.448 | 81.570 | 1.00 | 0.00 | C |
| ATOM | 387 | N9   | G | A | 13 | 7.800  | 18.878 | 80.604 | 1.00 | 0.00 | N |
| ATOM | 388 | C2'  | G | A | 13 | 6.267  | 20.212 | 79.109 | 1.00 | 0.00 | C |
| ATOM | 389 | C3'  | G | A | 13 | 6.179  | 21.724 | 78.995 | 1.00 | 0.00 | C |
| ATOM | 390 | O3'  | G | A | 13 | 6.746  | 22.134 | 77.752 | 1.00 | 0.00 | O |
| ATOM | 391 | C4'  | G | A | 13 | 7.003  | 22.204 | 80.190 | 1.00 | 0.00 | C |
| ATOM | 392 | O4'  | G | A | 13 | 8.052  | 21.195 | 80.333 | 1.00 | 0.00 | O |
| ATOM | 393 | C5'  | G | A | 13 | 6.269  | 22.327 | 81.504 | 1.00 | 0.00 | C |
| ATOM | 394 | O5'  | G | A | 13 | 5.294  | 21.262 | 81.624 | 1.00 | 0.00 | O |
| ATOM | 395 | O1P  | G | A | 13 | 3.091  | 22.478 | 81.584 | 1.00 | 0.00 | O |
| ATOM | 396 | O2P  | G | A | 13 | 3.285  | 20.274 | 82.764 | 1.00 | 0.00 | O |
| ATOM | 397 | P    | G | A | 13 | 3.922  | 21.558 | 82.382 | 1.00 | 0.00 | P |
| ATOM | 398 | H1   | G | A | 13 | 11.397 | 15.481 | 81.375 | 1.00 | 0.00 | H |

|      |     |      |     |    |        |        |        |      |      |   |
|------|-----|------|-----|----|--------|--------|--------|------|------|---|
| ATOM | 399 | H8   | G A | 13 | 5.956  | 18.933 | 81.750 | 1.00 | 0.00 | H |
| ATOM | 400 | H1'  | G A | 13 | 8.388  | 19.856 | 78.837 | 1.00 | 0.00 | H |
| ATOM | 401 | H21  | G A | 13 | 12.692 | 16.273 | 79.792 | 1.00 | 0.00 | H |
| ATOM | 402 | H3'  | G A | 13 | 5.151  | 22.081 | 79.058 | 1.00 | 0.00 | H |
| ATOM | 403 | H22  | G A | 13 | 12.234 | 17.682 | 78.794 | 1.00 | 0.00 | H |
| ATOM | 404 | H4'  | G A | 13 | 7.391  | 23.188 | 79.931 | 1.00 | 0.00 | H |
| ATOM | 405 | H2'1 | G A | 13 | 5.507  | 19.821 | 79.786 | 1.00 | 0.00 | H |
| ATOM | 406 | H2'2 | G A | 13 | 6.123  | 19.731 | 78.141 | 1.00 | 0.00 | H |
| ATOM | 407 | H5'1 | G A | 13 | 6.986  | 22.264 | 82.322 | 1.00 | 0.00 | H |
| ATOM | 408 | H5'2 | G A | 13 | 5.766  | 23.293 | 81.544 | 1.00 | 0.00 | H |
| ATOM | 409 | C1'  | G A | 14 | 9.641  | 17.711 | 75.728 | 1.00 | 0.00 | C |
| ATOM | 410 | N1   | G A | 14 | 9.933  | 13.741 | 78.919 | 1.00 | 0.00 | N |
| ATOM | 411 | C2   | G A | 14 | 10.853 | 14.211 | 77.999 | 1.00 | 0.00 | C |
| ATOM | 412 | N2   | G A | 14 | 12.003 | 13.531 | 77.916 | 1.00 | 0.00 | N |
| ATOM | 413 | N3   | G A | 14 | 10.643 | 15.274 | 77.224 | 1.00 | 0.00 | N |
| ATOM | 414 | C4   | G A | 14 | 9.423  | 15.833 | 77.436 | 1.00 | 0.00 | C |
| ATOM | 415 | C5   | G A | 14 | 8.442  | 15.432 | 78.327 | 1.00 | 0.00 | C |
| ATOM | 416 | C6   | G A | 14 | 8.665  | 14.308 | 79.153 | 1.00 | 0.00 | C |
| ATOM | 417 | O6   | G A | 14 | 7.923  | 13.803 | 79.996 | 1.00 | 0.00 | O |
| ATOM | 418 | N7   | G A | 14 | 7.333  | 16.278 | 78.234 | 1.00 | 0.00 | N |
| ATOM | 419 | C8   | G A | 14 | 7.671  | 17.144 | 77.314 | 1.00 | 0.00 | C |
| ATOM | 420 | N9   | G A | 14 | 8.926  | 16.940 | 76.782 | 1.00 | 0.00 | N |
| ATOM | 421 | C2'  | G A | 14 | 8.734  | 18.208 | 74.611 | 1.00 | 0.00 | C |
| ATOM | 422 | C3'  | G A | 14 | 9.355  | 19.554 | 74.272 | 1.00 | 0.00 | C |
| ATOM | 423 | O3'  | G A | 14 | 10.429 | 19.358 | 73.356 | 1.00 | 0.00 | O |
| ATOM | 424 | C4'  | G A | 14 | 9.839  | 20.055 | 75.632 | 1.00 | 0.00 | C |
| ATOM | 425 | O4'  | G A | 14 | 10.230 | 18.840 | 76.346 | 1.00 | 0.00 | O |
| ATOM | 426 | C5'  | G A | 14 | 8.830  | 20.805 | 76.468 | 1.00 | 0.00 | C |
| ATOM | 427 | O5'  | G A | 14 | 7.515  | 20.221 | 76.292 | 1.00 | 0.00 | O |
| ATOM | 428 | O1P  | G A | 14 | 6.217  | 22.045 | 75.142 | 1.00 | 0.00 | O |
| ATOM | 429 | O2P  | G A | 14 | 5.021  | 20.362 | 76.566 | 1.00 | 0.00 | O |
| ATOM | 430 | P    | G A | 14 | 6.239  | 21.177 | 76.334 | 1.00 | 0.00 | P |
| ATOM | 431 | H1   | G A | 14 | 10.196 | 12.914 | 79.475 | 1.00 | 0.00 | H |
| ATOM | 432 | H8   | G A | 14 | 7.018  | 17.957 | 76.997 | 1.00 | 0.00 | H |
| ATOM | 433 | H1'  | G A | 14 | 10.443 | 17.088 | 75.334 | 1.00 | 0.00 | H |
| ATOM | 434 | H21  | G A | 14 | 12.161 | 12.711 | 78.521 | 1.00 | 0.00 | H |
| ATOM | 435 | H3'  | G A | 14 | 8.628  | 20.239 | 73.836 | 1.00 | 0.00 | H |
| ATOM | 436 | H22  | G A | 14 | 12.729 | 13.827 | 77.249 | 1.00 | 0.00 | H |
| ATOM | 437 | H4'  | G A | 14 | 10.677 | 20.725 | 75.441 | 1.00 | 0.00 | H |
| ATOM | 438 | H2'1 | G A | 14 | 7.700  | 18.317 | 74.935 | 1.00 | 0.00 | H |
| ATOM | 439 | H2'2 | G A | 14 | 8.739  | 17.540 | 73.748 | 1.00 | 0.00 | H |
| ATOM | 440 | H5'1 | G A | 14 | 9.121  | 20.747 | 77.517 | 1.00 | 0.00 | H |
| ATOM | 441 | H5'2 | G A | 14 | 8.814  | 21.851 | 76.158 | 1.00 | 0.00 | H |
| ATOM | 442 | C1'  | A A | 15 | 11.634 | 13.843 | 73.371 | 1.00 | 0.00 | C |
| ATOM | 443 | N1   | A A | 15 | 9.075  | 11.115 | 76.886 | 1.00 | 0.00 | N |
| ATOM | 444 | C2   | A A | 15 | 10.303 | 11.007 | 76.382 | 1.00 | 0.00 | C |
| ATOM | 445 | N3   | A A | 15 | 10.904 | 11.749 | 75.477 | 1.00 | 0.00 | N |
| ATOM | 446 | C4   | A A | 15 | 10.078 | 12.726 | 75.055 | 1.00 | 0.00 | C |
| ATOM | 447 | C5   | A A | 15 | 8.800  | 12.971 | 75.467 | 1.00 | 0.00 | C |
| ATOM | 448 | C6   | A A | 15 | 8.277  | 12.100 | 76.446 | 1.00 | 0.00 | C |
| ATOM | 449 | N6   | A A | 15 | 7.035  | 12.218 | 76.945 | 1.00 | 0.00 | N |
| ATOM | 450 | N7   | A A | 15 | 8.264  | 14.064 | 74.810 | 1.00 | 0.00 | N |
| ATOM | 451 | C8   | A A | 15 | 9.220  | 14.453 | 74.019 | 1.00 | 0.00 | C |
| ATOM | 452 | N9   | A A | 15 | 10.355 | 13.689 | 74.114 | 1.00 | 0.00 | N |



|      |     |      |   |   |    |        |        |        |      |      |   |
|------|-----|------|---|---|----|--------|--------|--------|------|------|---|
| ATOM | 453 | C2'  | A | A | 15 | 11.453 | 14.269 | 71.920 | 1.00 | 0.00 | C |
| ATOM | 454 | C3'  | A | A | 15 | 12.656 | 15.173 | 71.703 | 1.00 | 0.00 | C |
| ATOM | 455 | O3'  | A | A | 15 | 13.785 | 14.376 | 71.361 | 1.00 | 0.00 | O |
| ATOM | 456 | C4'  | A | A | 15 | 12.820 | 15.854 | 73.062 | 1.00 | 0.00 | C |
| ATOM | 457 | O4'  | A | A | 15 | 12.397 | 14.836 | 74.027 | 1.00 | 0.00 | O |
| ATOM | 458 | C5'  | A | A | 15 | 12.004 | 17.103 | 73.291 | 1.00 | 0.00 | C |
| ATOM | 459 | O5'  | A | A | 15 | 10.709 | 16.967 | 72.653 | 1.00 | 0.00 | O |
| ATOM | 460 | O1P  | A | A | 15 | 10.767 | 18.708 | 70.835 | 1.00 | 0.00 | O |
| ATOM | 461 | O2P  | A | A | 15 | 8.572  | 18.004 | 71.829 | 1.00 | 0.00 | O |
| ATOM | 462 | P    | A | A | 15 | 10.020 | 18.263 | 72.029 | 1.00 | 0.00 | P |
| ATOM | 463 | H2   | A | A | 15 | 10.897 | 10.184 | 76.779 | 1.00 | 0.00 | H |
| ATOM | 464 | H8   | A | A | 15 | 9.130  | 15.303 | 73.344 | 1.00 | 0.00 | H |
| ATOM | 465 | H1'  | A | A | 15 | 12.181 | 12.902 | 73.436 | 1.00 | 0.00 | H |
| ATOM | 466 | H3'  | A | A | 15 | 12.479 | 15.907 | 70.917 | 1.00 | 0.00 | H |
| ATOM | 467 | H4'  | A | A | 15 | 13.872 | 16.120 | 73.158 | 1.00 | 0.00 | H |
| ATOM | 468 | H61  | A | A | 15 | 6.705  | 11.555 | 77.662 | 1.00 | 0.00 | H |
| ATOM | 469 | H62  | A | A | 15 | 6.416  | 12.970 | 76.612 | 1.00 | 0.00 | H |
| ATOM | 470 | H2'1 | A | A | 15 | 10.518 | 14.806 | 71.762 | 1.00 | 0.00 | H |
| ATOM | 471 | H2'2 | A | A | 15 | 11.466 | 13.422 | 71.235 | 1.00 | 0.00 | H |
| ATOM | 472 | H5'1 | A | A | 15 | 11.874 | 17.255 | 74.361 | 1.00 | 0.00 | H |
| ATOM | 473 | H5'2 | A | A | 15 | 12.532 | 17.957 | 72.870 | 1.00 | 0.00 | H |
| ATOM | 474 | C1'  | C | A | 16 | 12.408 | 8.986  | 72.675 | 1.00 | 0.00 | C |
| ATOM | 475 | N1   | C | A | 16 | 11.023 | 9.520  | 72.787 | 1.00 | 0.00 | N |
| ATOM | 476 | C2   | C | A | 16 | 10.162 | 8.912  | 73.697 | 1.00 | 0.00 | C |
| ATOM | 477 | O2   | C | A | 16 | 10.580 | 7.958  | 74.368 | 1.00 | 0.00 | O |
| ATOM | 478 | N3   | C | A | 16 | 8.895  | 9.381  | 73.816 | 1.00 | 0.00 | N |
| ATOM | 479 | C4   | C | A | 16 | 8.474  | 10.413 | 73.074 | 1.00 | 0.00 | C |
| ATOM | 480 | N4   | C | A | 16 | 7.227  | 10.834 | 73.234 | 1.00 | 0.00 | N |
| ATOM | 481 | C5   | C | A | 16 | 9.335  | 11.057 | 72.127 | 1.00 | 0.00 | C |
| ATOM | 482 | C6   | C | A | 16 | 10.608 | 10.570 | 72.027 | 1.00 | 0.00 | C |
| ATOM | 483 | C2'  | C | A | 16 | 12.950 | 8.982  | 71.251 | 1.00 | 0.00 | C |
| ATOM | 484 | C3'  | C | A | 16 | 14.420 | 9.305  | 71.470 | 1.00 | 0.00 | C |
| ATOM | 485 | O3'  | C | A | 16 | 15.124 | 8.103  | 71.774 | 1.00 | 0.00 | O |
| ATOM | 486 | C4'  | C | A | 16 | 14.382 | 10.269 | 72.654 | 1.00 | 0.00 | C |
| ATOM | 487 | O4'  | C | A | 16 | 13.251 | 9.809  | 73.460 | 1.00 | 0.00 | O |
| ATOM | 488 | C5'  | C | A | 16 | 14.178 | 11.730 | 72.325 | 1.00 | 0.00 | C |
| ATOM | 489 | O5'  | C | A | 16 | 13.268 | 11.856 | 71.204 | 1.00 | 0.00 | O |
| ATOM | 490 | O1P  | C | A | 16 | 14.713 | 12.823 | 69.383 | 1.00 | 0.00 | O |
| ATOM | 491 | O2P  | C | A | 16 | 12.242 | 13.257 | 69.386 | 1.00 | 0.00 | O |
| ATOM | 492 | P    | C | A | 16 | 13.485 | 13.052 | 70.169 | 1.00 | 0.00 | P |
| ATOM | 493 | H5   | C | A | 16 | 8.993  | 11.894 | 71.516 | 1.00 | 0.00 | H |
| ATOM | 494 | H6   | C | A | 16 | 11.304 | 11.032 | 71.327 | 1.00 | 0.00 | H |
| ATOM | 495 | H1'  | C | A | 16 | 12.424 | 7.985  | 73.103 | 1.00 | 0.00 | H |
| ATOM | 496 | H3'  | C | A | 16 | 14.867 | 9.775  | 70.593 | 1.00 | 0.00 | H |
| ATOM | 497 | H4'  | C | A | 16 | 15.339 | 10.176 | 73.168 | 1.00 | 0.00 | H |
| ATOM | 498 | H41  | C | A | 16 | 6.876  | 11.629 | 72.677 | 1.00 | 0.00 | H |
| ATOM | 499 | H42  | C | A | 16 | 6.607  | 10.369 | 73.912 | 1.00 | 0.00 | H |
| ATOM | 500 | H2'1 | C | A | 16 | 12.469 | 9.730  | 70.622 | 1.00 | 0.00 | H |
| ATOM | 501 | H2'2 | C | A | 16 | 12.823 | 8.014  | 70.764 | 1.00 | 0.00 | H |
| ATOM | 502 | H5'1 | C | A | 16 | 13.766 | 12.239 | 73.196 | 1.00 | 0.00 | H |
| ATOM | 503 | H5'2 | C | A | 16 | 15.140 | 12.177 | 72.071 | 1.00 | 0.00 | H |
| ATOM | 504 | C1'  | G | A | 17 | 11.213 | 4.193  | 73.009 | 1.00 | 0.00 | C |
| ATOM | 505 | N1   | G | A | 17 | 6.440  | 5.980  | 73.221 | 1.00 | 0.00 | N |
| ATOM | 506 | C2   | G | A | 17 | 7.046  | 4.976  | 73.955 | 1.00 | 0.00 | C |

|      |     |      |     |    |        |        |        |      |      |   |
|------|-----|------|-----|----|--------|--------|--------|------|------|---|
| ATOM | 507 | N2   | G A | 17 | 6.277  | 4.366  | 74.866 | 1.00 | 0.00 | N |
| ATOM | 508 | N3   | G A | 17 | 8.317  | 4.611  | 73.795 | 1.00 | 0.00 | N |
| ATOM | 509 | C4   | G A | 17 | 8.941  | 5.329  | 72.825 | 1.00 | 0.00 | C |
| ATOM | 510 | C5   | G A | 17 | 8.418  | 6.343  | 72.040 | 1.00 | 0.00 | C |
| ATOM | 511 | C6   | G A | 17 | 7.071  | 6.735  | 72.212 | 1.00 | 0.00 | C |
| ATOM | 512 | O6   | G A | 17 | 6.431  | 7.602  | 71.618 | 1.00 | 0.00 | O |
| ATOM | 513 | N7   | G A | 17 | 9.391  | 6.824  | 71.160 | 1.00 | 0.00 | N |
| ATOM | 514 | C8   | G A | 17 | 10.448 | 6.105  | 71.435 | 1.00 | 0.00 | C |
| ATOM | 515 | N9   | G A | 17 | 10.254 | 5.175  | 72.436 | 1.00 | 0.00 | N |
| ATOM | 516 | C2'  | G A | 17 | 12.155 | 3.581  | 71.981 | 1.00 | 0.00 | C |
| ATOM | 517 | C3'  | G A | 17 | 13.442 | 3.433  | 72.775 | 1.00 | 0.00 | C |
| ATOM | 518 | O3'  | G A | 17 | 13.401 | 2.210  | 73.508 | 1.00 | 0.00 | O |
| ATOM | 519 | C4'  | G A | 17 | 13.419 | 4.656  | 73.690 | 1.00 | 0.00 | C |
| ATOM | 520 | O4'  | G A | 17 | 12.000 | 4.870  | 73.971 | 1.00 | 0.00 | O |
| ATOM | 521 | C5'  | G A | 17 | 13.997 | 5.930  | 73.120 | 1.00 | 0.00 | C |
| ATOM | 522 | O5'  | G A | 17 | 13.682 | 6.023  | 71.709 | 1.00 | 0.00 | O |
| ATOM | 523 | O1P  | G A | 17 | 15.934 | 5.851  | 70.597 | 1.00 | 0.00 | O |
| ATOM | 524 | O2P  | G A | 17 | 14.065 | 7.083  | 69.463 | 1.00 | 0.00 | O |
| ATOM | 525 | P    | G A | 17 | 14.739 | 6.708  | 70.730 | 1.00 | 0.00 | P |
| ATOM | 526 | H1   | G A | 17 | 5.452  | 6.190  | 73.427 | 1.00 | 0.00 | H |
| ATOM | 527 | H8   | G A | 17 | 11.401 | 6.230  | 70.919 | 1.00 | 0.00 | H |
| ATOM | 528 | H1'  | G A | 17 | 10.643 | 3.420  | 73.525 | 1.00 | 0.00 | H |
| ATOM | 529 | H21  | G A | 17 | 5.296  | 4.656  | 74.987 | 1.00 | 0.00 | H |
| ATOM | 530 | H3'  | G A | 17 | 14.322 | 3.438  | 72.132 | 1.00 | 0.00 | H |
| ATOM | 531 | H22  | G A | 17 | 6.668  | 3.608  | 75.444 | 1.00 | 0.00 | H |
| ATOM | 532 | H4'  | G A | 17 | 13.994 | 4.398  | 74.578 | 1.00 | 0.00 | H |
| ATOM | 533 | H2'1 | G A | 17 | 12.296 | 4.228  | 71.115 | 1.00 | 0.00 | H |
| ATOM | 534 | H2'2 | G A | 17 | 11.799 | 2.617  | 71.616 | 1.00 | 0.00 | H |
| ATOM | 535 | H5'1 | G A | 17 | 13.573 | 6.783  | 73.650 | 1.00 | 0.00 | H |
| ATOM | 536 | H5'2 | G A | 17 | 15.079 | 5.925  | 73.258 | 1.00 | 0.00 | H |
| ATOM | 537 | C1'  | G A | 18 | 8.032  | 0.421  | 73.420 | 1.00 | 0.00 | C |
| ATOM | 538 | N1   | G A | 18 | 4.749  | 3.702  | 71.303 | 1.00 | 0.00 | N |
| ATOM | 539 | C2   | G A | 18 | 4.568  | 2.818  | 72.353 | 1.00 | 0.00 | C |
| ATOM | 540 | N2   | G A | 18 | 3.350  | 2.805  | 72.911 | 1.00 | 0.00 | N |
| ATOM | 541 | N3   | G A | 18 | 5.525  | 2.013  | 72.808 | 1.00 | 0.00 | N |
| ATOM | 542 | C4   | G A | 18 | 6.689  | 2.152  | 72.121 | 1.00 | 0.00 | C |
| ATOM | 543 | C5   | G A | 18 | 6.960  | 3.002  | 71.061 | 1.00 | 0.00 | C |
| ATOM | 544 | C6   | G A | 18 | 5.944  | 3.861  | 70.579 | 1.00 | 0.00 | C |
| ATOM | 545 | O6   | G A | 18 | 5.991  | 4.676  | 69.657 | 1.00 | 0.00 | O |
| ATOM | 546 | N7   | G A | 18 | 8.278  | 2.839  | 70.636 | 1.00 | 0.00 | N |
| ATOM | 547 | C8   | G A | 18 | 8.757  | 1.921  | 71.434 | 1.00 | 0.00 | C |
| ATOM | 548 | N9   | G A | 18 | 7.852  | 1.453  | 72.363 | 1.00 | 0.00 | N |
| ATOM | 549 | C2'  | G A | 18 | 8.905  | -0.750 | 72.992 | 1.00 | 0.00 | C |
| ATOM | 550 | C3'  | G A | 18 | 9.641  | -1.085 | 74.277 | 1.00 | 0.00 | C |
| ATOM | 551 | O3'  | G A | 18 | 8.828  | -1.943 | 75.074 | 1.00 | 0.00 | O |
| ATOM | 552 | C4'  | G A | 18 | 9.839  | 0.286  | 74.924 | 1.00 | 0.00 | C |
| ATOM | 553 | O4'  | G A | 18 | 8.650  | 1.043  | 74.530 | 1.00 | 0.00 | O |
| ATOM | 554 | C5'  | G A | 18 | 11.065 | 1.057  | 74.499 | 1.00 | 0.00 | C |
| ATOM | 555 | O5'  | G A | 18 | 11.327 | 0.828  | 73.092 | 1.00 | 0.00 | O |
| ATOM | 556 | O1P  | G A | 18 | 13.512 | -0.421 | 73.100 | 1.00 | 0.00 | O |
| ATOM | 557 | O2P  | G A | 18 | 12.874 | 0.978  | 71.117 | 1.00 | 0.00 | O |
| ATOM | 558 | P    | G A | 18 | 12.840 | 0.789  | 72.588 | 1.00 | 0.00 | P |
| ATOM | 559 | H1   | G A | 18 | 3.944  | 4.287  | 71.031 | 1.00 | 0.00 | H |
| ATOM | 560 | H8   | G A | 18 | 9.782  | 1.554  | 71.371 | 1.00 | 0.00 | H |

|      |     |      |     |   |    |        |         |        |      |      |   |
|------|-----|------|-----|---|----|--------|---------|--------|------|------|---|
| ATOM | 561 | H1'  | G   | A | 18 | 7.045  | 0.079   | 73.734 | 1.00 | 0.00 | H |
| ATOM | 562 | H21  | G   | A | 18 | 2.615  | 3.434   | 72.554 | 1.00 | 0.00 | H |
| ATOM | 563 | H3'  | G   | A | 18 | 10.599 | -1.570  | 74.085 | 1.00 | 0.00 | H |
| ATOM | 564 | H22  | G   | A | 18 | 3.152  | 2.169   | 73.694 | 1.00 | 0.00 | H |
| ATOM | 565 | H4'  | G   | A | 18 | 9.903  | 0.122   | 75.999 | 1.00 | 0.00 | H |
| ATOM | 566 | H2'1 | G   | A | 18 | 9.598  | -0.479  | 72.196 | 1.00 | 0.00 | H |
| ATOM | 567 | H2'2 | G   | A | 18 | 8.316  | -1.598  | 72.638 | 1.00 | 0.00 | H |
| ATOM | 568 | H5'1 | G   | A | 18 | 10.899 | 2.120   | 74.675 | 1.00 | 0.00 | H |
| ATOM | 569 | H5'2 | G   | A | 18 | 11.918 | 0.726   | 75.090 | 1.00 | 0.00 | H |
| ATOM | 570 | C1'  | T   | A | 19 | 3.616  | -1.757  | 72.914 | 1.00 | 0.00 | C |
| ATOM | 571 | N1   | T   | A | 19 | 4.247  | -1.074  | 71.754 | 1.00 | 0.00 | N |
| ATOM | 572 | C2   | T   | A | 19 | 3.482  | -0.152  | 71.071 | 1.00 | 0.00 | C |
| ATOM | 573 | O2   | T   | A | 19 | 2.332  | 0.111   | 71.383 | 1.00 | 0.00 | O |
| ATOM | 574 | N3   | T   | A | 19 | 4.108  | 0.459   | 70.001 | 1.00 | 0.00 | N |
| ATOM | 575 | C4   | T   | A | 19 | 5.396  | 0.232   | 69.565 | 1.00 | 0.00 | C |
| ATOM | 576 | O4   | T   | A | 19 | 5.850  | 0.840   | 68.588 | 1.00 | 0.00 | O |
| ATOM | 577 | C5   | T   | A | 19 | 6.120  | -0.748  | 70.340 | 1.00 | 0.00 | C |
| ATOM | 578 | C6   | T   | A | 19 | 5.541  | -1.362  | 71.391 | 1.00 | 0.00 | C |
| ATOM | 579 | C7   | T   | A | 19 | 7.527  | -1.023  | 69.904 | 1.00 | 0.00 | C |
| ATOM | 580 | C2'  | T   | A | 19 | 4.003  | -3.224  | 73.049 | 1.00 | 0.00 | C |
| ATOM | 581 | C3'  | T   | A | 19 | 4.056  | -3.401  | 74.559 | 1.00 | 0.00 | C |
| ATOM | 582 | O3'  | T   | A | 19 | 2.743  | -3.671  | 75.046 | 1.00 | 0.00 | O |
| ATOM | 583 | C4'  | T   | A | 19 | 4.585  | -2.052  | 75.039 | 1.00 | 0.00 | C |
| ATOM | 584 | O4'  | T   | A | 19 | 4.031  | -1.088  | 74.090 | 1.00 | 0.00 | O |
| ATOM | 585 | C5'  | T   | A | 19 | 6.087  | -1.891  | 75.072 | 1.00 | 0.00 | C |
| ATOM | 586 | O5'  | T   | A | 19 | 6.678  | -2.588  | 73.947 | 1.00 | 0.00 | O |
| ATOM | 587 | O1P  | T   | A | 19 | 7.994  | -4.437  | 75.035 | 1.00 | 0.00 | O |
| ATOM | 588 | O2P  | T   | A | 19 | 8.702  | -3.539  | 72.803 | 1.00 | 0.00 | O |
| ATOM | 589 | P    | T   | A | 19 | 8.106  | -3.274  | 74.133 | 1.00 | 0.00 | P |
| ATOM | 590 | H3   | T   | A | 19 | 3.558  | 1.155   | 69.478 | 1.00 | 0.00 | H |
| ATOM | 591 | H6   | T   | A | 19 | 6.107  | -2.099  | 71.962 | 1.00 | 0.00 | H |
| ATOM | 592 | H1'  | T   | A | 19 | 2.534  | -1.646  | 72.829 | 1.00 | 0.00 | H |
| ATOM | 593 | H3'  | T   | A | 19 | 4.723  | -4.212  | 74.850 | 1.00 | 0.00 | H |
| ATOM | 594 | H4'  | T   | A | 19 | 4.213  | -1.910  | 76.056 | 1.00 | 0.00 | H |
| ATOM | 595 | H71  | T   | A | 19 | 7.602  | -2.050  | 69.543 | 1.00 | 0.00 | H |
| ATOM | 596 | H72  | T   | A | 19 | 7.800  | -0.338  | 69.101 | 1.00 | 0.00 | H |
| ATOM | 597 | H73  | T   | A | 19 | 8.206  | -0.885  | 70.746 | 1.00 | 0.00 | H |
| ATOM | 598 | H2'1 | T   | A | 19 | 4.966  | -3.440  | 72.590 | 1.00 | 0.00 | H |
| ATOM | 599 | H2'2 | T   | A | 19 | 3.267  | -3.890  | 72.597 | 1.00 | 0.00 | H |
| ATOM | 600 | H5'1 | T   | A | 19 | 6.335  | -0.831  | 75.020 | 1.00 | 0.00 | H |
| ATOM | 601 | H5'2 | T   | A | 19 | 6.471  | -2.304  | 76.004 | 1.00 | 0.00 | H |
| ATOM | 602 | C01  | LNK | A | 20 | 0.812  | -6.850  | 75.191 | 0.00 | 0.00 | C |
| ATOM | 603 | O1   | LNK | A | 20 | 1.972  | -6.099  | 74.822 | 1.00 | 0.00 | O |
| ATOM | 604 | S    | LNK | A | 20 | -0.631 | -10.538 | 74.789 | 0.00 | 0.00 | S |
| ATOM | 605 | C02  | LNK | A | 20 | 0.955  | -8.296  | 74.679 | 0.00 | 0.00 | C |
| ATOM | 606 | C03  | LNK | A | 20 | -0.422 | -8.819  | 74.226 | 0.00 | 0.00 | C |
| ATOM | 607 | O1P  | LNK | A | 20 | 2.469  | -4.841  | 72.699 | 1.00 | 0.00 | O |
| ATOM | 608 | O2P  | LNK | A | 20 | 0.338  | -4.399  | 73.953 | 1.00 | 0.00 | O |
| ATOM | 609 | P    | LNK | A | 20 | 1.781  | -4.745  | 74.002 | 1.00 | 0.00 | P |
| ATOM | 610 | H01  | LNK | A | 20 | -0.073 | -6.394  | 74.749 | 0.00 | 0.00 | H |
| ATOM | 611 | H02  | LNK | A | 20 | 0.713  | -6.858  | 76.276 | 0.00 | 0.00 | H |
| ATOM | 612 | H03  | LNK | A | 20 | -0.484 | -8.783  | 73.139 | 0.00 | 0.00 | H |
| ATOM | 613 | H04  | LNK | A | 20 | 1.340  | -8.928  | 75.479 | 0.00 | 0.00 | H |
| ATOM | 614 | H05  | LNK | A | 20 | 1.646  | -8.316  | 73.837 | 0.00 | 0.00 | H |

|      |     |      |     |   |    |        |         |        |      |      |   |
|------|-----|------|-----|---|----|--------|---------|--------|------|------|---|
| ATOM | 615 | H06  | LNK | A | 20 | -1.206 | -8.198  | 74.657 | 0.00 | 0.00 | H |
| ATOM | 616 | AU   | LNK | A | 20 | -1.196 | -10.804 | 74.505 |      |      |   |
| TER  |     |      |     |   |    |        |         |        |      |      |   |
| ATOM | 618 | C1'  | A   | B | 2  | -0.717 | 5.766   | 66.318 | 1.00 | 0.00 | C |
| ATOM | 619 | N1   | A   | B | 2  | 2.545  | 2.449   | 68.485 | 1.00 | 0.00 | N |
| ATOM | 620 | C2   | A   | B | 2  | 1.294  | 2.793   | 68.769 | 1.00 | 0.00 | C |
| ATOM | 621 | N3   | A   | B | 2  | 0.505  | 3.657   | 68.165 | 1.00 | 0.00 | N |
| ATOM | 622 | C4   | A   | B | 2  | 1.147  | 4.227   | 67.128 | 1.00 | 0.00 | C |
| ATOM | 623 | C5   | A   | B | 2  | 2.424  | 3.987   | 66.707 | 1.00 | 0.00 | C |
| ATOM | 624 | C6   | A   | B | 2  | 3.160  | 3.033   | 67.444 | 1.00 | 0.00 | C |
| ATOM | 625 | N6   | A   | B | 2  | 4.426  | 2.693   | 67.148 | 1.00 | 0.00 | N |
| ATOM | 626 | N7   | A   | B | 2  | 2.742  | 4.760   | 65.604 | 1.00 | 0.00 | N |
| ATOM | 627 | C8   | A   | B | 2  | 1.661  | 5.448   | 65.386 | 1.00 | 0.00 | C |
| ATOM | 628 | N9   | A   | B | 2  | 0.649  | 5.175   | 66.269 | 1.00 | 0.00 | N |
| ATOM | 629 | C2'  | A   | B | 2  | -0.756 | 7.249   | 65.970 | 1.00 | 0.00 | C |
| ATOM | 630 | C3'  | A   | B | 2  | -2.079 | 7.366   | 65.230 | 1.00 | 0.00 | C |
| ATOM | 631 | O3'  | A   | B | 2  | -3.132 | 7.527   | 66.177 | 1.00 | 0.00 | O |
| ATOM | 632 | C4'  | A   | B | 2  | -2.170 | 6.035   | 64.485 | 1.00 | 0.00 | C |
| ATOM | 633 | O4'  | A   | B | 2  | -1.517 | 5.076   | 65.378 | 1.00 | 0.00 | O |
| ATOM | 634 | C5'  | A   | B | 2  | -1.497 | 5.974   | 63.134 | 1.00 | 0.00 | C |
| ATOM | 635 | O5'  | A   | B | 2  | -0.275 | 6.755   | 63.160 | 1.00 | 0.00 | O |
| ATOM | 636 | H2   | A   | B | 2  | 0.854  | 2.286   | 69.627 | 1.00 | 0.00 | H |
| ATOM | 637 | H8   | A   | B | 2  | 1.568  | 6.173   | 64.577 | 1.00 | 0.00 | H |
| ATOM | 638 | H1'  | A   | B | 2  | -1.131 | 5.587   | 67.310 | 1.00 | 0.00 | H |
| ATOM | 639 | H3'  | A   | B | 2  | -2.086 | 8.206   | 64.536 | 1.00 | 0.00 | H |
| ATOM | 640 | H4'  | A   | B | 2  | -3.229 | 5.827   | 64.338 | 1.00 | 0.00 | H |
| ATOM | 641 | H61  | A   | B | 2  | 4.916  | 1.990   | 67.715 | 1.00 | 0.00 | H |
| ATOM | 642 | H62  | A   | B | 2  | 4.904  | 3.139   | 66.350 | 1.00 | 0.00 | H |
| ATOM | 643 | H2'1 | A   | B | 2  | 0.080  | 7.548   | 65.338 | 1.00 | 0.00 | H |
| ATOM | 644 | H2'2 | A   | B | 2  | -0.741 | 7.883   | 66.858 | 1.00 | 0.00 | H |
| ATOM | 645 | H5'1 | A   | B | 2  | -1.265 | 4.936   | 62.897 | 1.00 | 0.00 | H |
| ATOM | 646 | H5'2 | A   | B | 2  | -2.173 | 6.373   | 62.380 | 1.00 | 0.00 | H |
| ATOM | 647 | C1'  | C   | B | 3  | -0.963 | 6.103   | 71.266 | 1.00 | 0.00 | C |
| ATOM | 648 | N1   | C   | B | 3  | 0.348  | 6.188   | 70.568 | 1.00 | 0.00 | N |
| ATOM | 649 | C2   | C   | B | 3  | 1.378  | 5.360   | 71.011 | 1.00 | 0.00 | C |
| ATOM | 650 | O2   | C   | B | 3  | 1.162  | 4.594   | 71.960 | 1.00 | 0.00 | O |
| ATOM | 651 | N3   | C   | B | 3  | 2.580  | 5.422   | 70.390 | 1.00 | 0.00 | N |
| ATOM | 652 | C4   | C   | B | 3  | 2.784  | 6.262   | 69.367 | 1.00 | 0.00 | C |
| ATOM | 653 | N4   | C   | B | 3  | 3.980  | 6.278   | 68.792 | 1.00 | 0.00 | N |
| ATOM | 654 | C5   | C   | B | 3  | 1.746  | 7.129   | 68.891 | 1.00 | 0.00 | C |
| ATOM | 655 | C6   | C   | B | 3  | 0.540  | 7.046   | 69.530 | 1.00 | 0.00 | C |
| ATOM | 656 | C2'  | C   | B | 3  | -1.660 | 7.447   | 71.428 | 1.00 | 0.00 | C |
| ATOM | 657 | C3'  | C   | B | 3  | -3.124 | 7.068   | 71.264 | 1.00 | 0.00 | C |
| ATOM | 658 | O3'  | C   | B | 3  | -3.633 | 6.617   | 72.518 | 1.00 | 0.00 | O |
| ATOM | 659 | C4'  | C   | B | 3  | -3.071 | 5.949   | 70.227 | 1.00 | 0.00 | C |
| ATOM | 660 | O4'  | C   | B | 3  | -1.805 | 5.264   | 70.497 | 1.00 | 0.00 | O |
| ATOM | 661 | C5'  | C   | B | 3  | -3.089 | 6.376   | 68.778 | 1.00 | 0.00 | C |
| ATOM | 662 | O5'  | C   | B | 3  | -2.335 | 7.604   | 68.620 | 1.00 | 0.00 | O |
| ATOM | 663 | O1P  | C   | B | 3  | -4.089 | 9.281   | 67.952 | 1.00 | 0.00 | O |
| ATOM | 664 | O2P  | C   | B | 3  | -1.707 | 9.603   | 67.232 | 1.00 | 0.00 | O |
| ATOM | 665 | P    | C   | B | 3  | -2.816 | 8.664   | 67.531 | 1.00 | 0.00 | P |
| ATOM | 666 | H5   | C   | B | 3  | 1.909  | 7.820   | 68.063 | 1.00 | 0.00 | H |
| ATOM | 667 | H6   | C   | B | 3  | -0.283 | 7.680   | 69.199 | 1.00 | 0.00 | H |
| ATOM | 668 | H1'  | C   | B | 3  | -0.805 | 5.625   | 72.233 | 1.00 | 0.00 | H |

|      |     |      |     |   |        |       |        |      |      |   |
|------|-----|------|-----|---|--------|-------|--------|------|------|---|
| ATOM | 669 | H3'  | C B | 3 | -3.725 | 7.905 | 70.910 | 1.00 | 0.00 | H |
| ATOM | 670 | H4'  | C B | 3 | -3.942 | 5.317 | 70.397 | 1.00 | 0.00 | H |
| ATOM | 671 | H41  | C B | 3 | 4.162  | 6.913 | 68.001 | 1.00 | 0.00 | H |
| ATOM | 672 | H42  | C B | 3 | 4.726  | 5.656 | 69.137 | 1.00 | 0.00 | H |
| ATOM | 673 | H2'1 | C B | 3 | -1.350 | 8.168 | 70.672 | 1.00 | 0.00 | H |
| ATOM | 674 | H2'2 | C B | 3 | -1.473 | 7.894 | 72.405 | 1.00 | 0.00 | H |
| ATOM | 675 | H5'1 | C B | 3 | -2.644 | 5.589 | 68.167 | 1.00 | 0.00 | H |
| ATOM | 676 | H5'2 | C B | 3 | -4.119 | 6.533 | 68.464 | 1.00 | 0.00 | H |
| ATOM | 677 | C1'  | C B | 4 | 0.841  | 5.660 | 75.856 | 1.00 | 0.00 | C |
| ATOM | 678 | N1   | C B | 4 | 1.604  | 6.394 | 74.810 | 1.00 | 0.00 | N |
| ATOM | 679 | C2   | C B | 4 | 2.937  | 6.042 | 74.607 | 1.00 | 0.00 | C |
| ATOM | 680 | O2   | C B | 4 | 3.429  | 5.141 | 75.299 | 1.00 | 0.00 | O |
| ATOM | 681 | N3   | C B | 4 | 3.651  | 6.697 | 73.660 | 1.00 | 0.00 | N |
| ATOM | 682 | C4   | C B | 4 | 3.091  | 7.670 | 72.926 | 1.00 | 0.00 | C |
| ATOM | 683 | N4   | C B | 4 | 3.832  | 8.277 | 72.011 | 1.00 | 0.00 | N |
| ATOM | 684 | C5   | C B | 4 | 1.723  | 8.057 | 73.117 | 1.00 | 0.00 | C |
| ATOM | 685 | C6   | C B | 4 | 1.023  | 7.378 | 74.074 | 1.00 | 0.00 | C |
| ATOM | 686 | C2'  | C B | 4 | -0.126 | 6.538 | 76.639 | 1.00 | 0.00 | C |
| ATOM | 687 | C3'  | C B | 4 | -1.289 | 5.588 | 76.882 | 1.00 | 0.00 | C |
| ATOM | 688 | O3'  | C B | 4 | -1.018 | 4.801 | 78.039 | 1.00 | 0.00 | O |
| ATOM | 689 | C4'  | C B | 4 | -1.315 | 4.749 | 75.606 | 1.00 | 0.00 | C |
| ATOM | 690 | O4'  | C B | 4 | 0.091  | 4.648 | 75.211 | 1.00 | 0.00 | O |
| ATOM | 691 | C5'  | C B | 4 | -2.103 | 5.312 | 74.446 | 1.00 | 0.00 | C |
| ATOM | 692 | O5'  | C B | 4 | -1.961 | 6.755 | 74.412 | 1.00 | 0.00 | O |
| ATOM | 693 | O1P  | C B | 4 | -4.285 | 7.581 | 74.916 | 1.00 | 0.00 | O |
| ATOM | 694 | O2P  | C B | 4 | -2.719 | 8.991 | 73.554 | 1.00 | 0.00 | O |
| ATOM | 695 | P    | C B | 4 | -3.195 | 7.635 | 73.921 | 1.00 | 0.00 | P |
| ATOM | 696 | H5   | C B | 4 | 1.266  | 8.852 | 72.528 | 1.00 | 0.00 | H |
| ATOM | 697 | H6   | C B | 4 | -0.022 | 7.632 | 74.250 | 1.00 | 0.00 | H |
| ATOM | 698 | H1'  | C B | 4 | 1.555  | 5.175 | 76.522 | 1.00 | 0.00 | H |
| ATOM | 699 | H3'  | C B | 4 | -2.230 | 6.122 | 77.020 | 1.00 | 0.00 | H |
| ATOM | 700 | H4'  | C B | 4 | -1.752 | 3.785 | 75.869 | 1.00 | 0.00 | H |
| ATOM | 701 | H41  | C B | 4 | 3.426  | 9.026 | 71.431 | 1.00 | 0.00 | H |
| ATOM | 702 | H42  | C B | 4 | 4.817  | 7.999 | 71.878 | 1.00 | 0.00 | H |
| ATOM | 703 | H2'1 | C B | 4 | -0.441 | 7.414 | 76.073 | 1.00 | 0.00 | H |
| ATOM | 704 | H2'2 | C B | 4 | 0.302  | 6.889 | 77.578 | 1.00 | 0.00 | H |
| ATOM | 705 | H5'1 | C B | 4 | -1.729 | 4.883 | 73.517 | 1.00 | 0.00 | H |
| ATOM | 706 | H5'2 | C B | 4 | -3.152 | 5.048 | 74.567 | 1.00 | 0.00 | H |
| ATOM | 707 | C1'  | G B | 5 | 4.490  | 5.443 | 79.197 | 1.00 | 0.00 | C |
| ATOM | 708 | N1   | G B | 5 | 7.077  | 8.119 | 75.708 | 1.00 | 0.00 | N |
| ATOM | 709 | C2   | G B | 5 | 7.485  | 7.055 | 76.494 | 1.00 | 0.00 | C |
| ATOM | 710 | N2   | G B | 5 | 8.751  | 6.651 | 76.330 | 1.00 | 0.00 | N |
| ATOM | 711 | N3   | G B | 5 | 6.693  | 6.443 | 77.372 | 1.00 | 0.00 | N |
| ATOM | 712 | C4   | G B | 5 | 5.448  | 6.986 | 77.413 | 1.00 | 0.00 | C |
| ATOM | 713 | C5   | G B | 5 | 4.956  | 8.048 | 76.671 | 1.00 | 0.00 | C |
| ATOM | 714 | C6   | G B | 5 | 5.794  | 8.696 | 75.737 | 1.00 | 0.00 | C |
| ATOM | 715 | O6   | G B | 5 | 5.541  | 9.645 | 74.996 | 1.00 | 0.00 | O |
| ATOM | 716 | N7   | G B | 5 | 3.624  | 8.298 | 77.013 | 1.00 | 0.00 | N |
| ATOM | 717 | C8   | G B | 5 | 3.357  | 7.400 | 77.927 | 1.00 | 0.00 | C |
| ATOM | 718 | N9   | G B | 5 | 4.418  | 6.567 | 78.224 | 1.00 | 0.00 | N |
| ATOM | 719 | C2'  | G B | 5 | 3.722  | 5.699 | 80.487 | 1.00 | 0.00 | C |
| ATOM | 720 | C3'  | G B | 5 | 3.187  | 4.316 | 80.819 | 1.00 | 0.00 | C |
| ATOM | 721 | O3'  | G B | 5 | 4.186  | 3.584 | 81.524 | 1.00 | 0.00 | O |
| ATOM | 722 | C4'  | G B | 5 | 2.900  | 3.724 | 79.440 | 1.00 | 0.00 | C |

|      |     |      |     |   |        |        |        |      |      |   |
|------|-----|------|-----|---|--------|--------|--------|------|------|---|
| ATOM | 723 | O4'  | G B | 5 | 3.933  | 4.299  | 78.579 | 1.00 | 0.00 | O |
| ATOM | 724 | C5'  | G B | 5 | 1.546  | 4.032  | 78.845 | 1.00 | 0.00 | C |
| ATOM | 725 | O5'  | G B | 5 | 1.153  | 5.381  | 79.195 | 1.00 | 0.00 | O |
| ATOM | 726 | O1P  | G B | 5 | -0.847 | 5.039  | 80.684 | 1.00 | 0.00 | O |
| ATOM | 727 | O2P  | G B | 5 | -0.621 | 7.155  | 79.356 | 1.00 | 0.00 | O |
| ATOM | 728 | P    | G B | 5 | -0.392 | 5.692  | 79.442 | 1.00 | 0.00 | P |
| ATOM | 729 | H1   | G B | 5 | 7.767  | 8.519  | 75.054 | 1.00 | 0.00 | H |
| ATOM | 730 | H8   | G B | 5 | 2.385  | 7.317  | 78.412 | 1.00 | 0.00 | H |
| ATOM | 731 | H1'  | G B | 5 | 5.539  | 5.236  | 79.403 | 1.00 | 0.00 | H |
| ATOM | 732 | H21  | G B | 5 | 9.357  | 7.127  | 75.646 | 1.00 | 0.00 | H |
| ATOM | 733 | H3'  | G B | 5 | 2.280  | 4.362  | 81.423 | 1.00 | 0.00 | H |
| ATOM | 734 | H22  | G B | 5 | 9.118  | 5.867  | 76.887 | 1.00 | 0.00 | H |
| ATOM | 735 | H4'  | G B | 5 | 2.982  | 2.642  | 79.538 | 1.00 | 0.00 | H |
| ATOM | 736 | H2'1 | G B | 5 | 2.912  | 6.416  | 80.352 | 1.00 | 0.00 | H |
| ATOM | 737 | H2'2 | G B | 5 | 4.364  | 6.077  | 81.283 | 1.00 | 0.00 | H |
| ATOM | 738 | H5'1 | G B | 5 | 1.603  | 3.933  | 77.761 | 1.00 | 0.00 | H |
| ATOM | 739 | H5'2 | G B | 5 | 0.815  | 3.323  | 79.232 | 1.00 | 0.00 | H |
| ATOM | 740 | C1'  | T B | 6 | 9.051  | 6.370  | 80.880 | 1.00 | 0.00 | C |
| ATOM | 741 | N1   | T B | 6 | 8.209  | 7.477  | 80.354 | 1.00 | 0.00 | N |
| ATOM | 742 | C2   | T B | 6 | 8.773  | 8.297  | 79.398 | 1.00 | 0.00 | C |
| ATOM | 743 | O2   | T B | 6 | 9.909  | 8.146  | 78.984 | 1.00 | 0.00 | O |
| ATOM | 744 | N3   | T B | 6 | 7.954  | 9.312  | 78.935 | 1.00 | 0.00 | N |
| ATOM | 745 | C4   | T B | 6 | 6.661  | 9.572  | 79.335 | 1.00 | 0.00 | C |
| ATOM | 746 | O4   | T B | 6 | 6.026  | 10.514 | 78.850 | 1.00 | 0.00 | O |
| ATOM | 747 | C5   | T B | 6 | 6.159  | 8.661  | 80.337 | 1.00 | 0.00 | C |
| ATOM | 748 | C6   | T B | 6 | 6.927  | 7.660  | 80.810 | 1.00 | 0.00 | C |
| ATOM | 749 | C7   | T B | 6 | 4.753  | 8.905  | 80.800 | 1.00 | 0.00 | C |
| ATOM | 750 | C2'  | T B | 6 | 8.862  | 6.111  | 82.370 | 1.00 | 0.00 | C |
| ATOM | 751 | C3'  | T B | 6 | 9.009  | 4.600  | 82.450 | 1.00 | 0.00 | C |
| ATOM | 752 | O3'  | T B | 6 | 10.393 | 4.267  | 82.537 | 1.00 | 0.00 | O |
| ATOM | 753 | C4'  | T B | 6 | 8.382  | 4.127  | 81.141 | 1.00 | 0.00 | C |
| ATOM | 754 | O4'  | T B | 6 | 8.698  | 5.190  | 80.186 | 1.00 | 0.00 | O |
| ATOM | 755 | C5'  | T B | 6 | 6.885  | 3.917  | 81.149 | 1.00 | 0.00 | C |
| ATOM | 756 | O5'  | T B | 6 | 6.255  | 4.922  | 81.983 | 1.00 | 0.00 | O |
| ATOM | 757 | O1P  | T B | 6 | 5.310  | 3.583  | 83.893 | 1.00 | 0.00 | O |
| ATOM | 758 | O2P  | T B | 6 | 4.240  | 5.754  | 83.232 | 1.00 | 0.00 | O |
| ATOM | 759 | P    | T B | 6 | 4.952  | 4.523  | 82.813 | 1.00 | 0.00 | P |
| ATOM | 760 | H3   | T B | 6 | 8.351  | 9.936  | 78.218 | 1.00 | 0.00 | H |
| ATOM | 761 | H6   | T B | 6 | 6.525  | 6.985  | 81.565 | 1.00 | 0.00 | H |
| ATOM | 762 | H1'  | T B | 6 | 10.093 | 6.594  | 80.653 | 1.00 | 0.00 | H |
| ATOM | 763 | H3'  | T B | 6 | 8.484  | 4.184  | 83.311 | 1.00 | 0.00 | H |
| ATOM | 764 | H4'  | T B | 6 | 8.850  | 3.175  | 80.890 | 1.00 | 0.00 | H |
| ATOM | 765 | H71  | T B | 6 | 4.762  | 9.198  | 81.850 | 1.00 | 0.00 | H |
| ATOM | 766 | H72  | T B | 6 | 4.307  | 9.702  | 80.204 | 1.00 | 0.00 | H |
| ATOM | 767 | H73  | T B | 6 | 4.167  | 7.992  | 80.683 | 1.00 | 0.00 | H |
| ATOM | 768 | H2'1 | T B | 6 | 7.886  | 6.435  | 82.725 | 1.00 | 0.00 | H |
| ATOM | 769 | H2'2 | T B | 6 | 9.616  | 6.615  | 82.976 | 1.00 | 0.00 | H |
| ATOM | 770 | H5'1 | T B | 6 | 6.506  | 3.993  | 80.130 | 1.00 | 0.00 | H |
| ATOM | 771 | H5'2 | T B | 6 | 6.666  | 2.924  | 81.540 | 1.00 | 0.00 | H |
| ATOM | 772 | C1'  | C B | 7 | 13.271 | 8.982  | 81.065 | 1.00 | 0.00 | C |
| ATOM | 773 | N1   | C B | 7 | 11.954 | 9.660  | 81.227 | 1.00 | 0.00 | N |
| ATOM | 774 | C2   | C B | 7 | 11.692 | 10.775 | 80.434 | 1.00 | 0.00 | C |
| ATOM | 775 | O2   | C B | 7 | 12.556 | 11.154 | 79.631 | 1.00 | 0.00 | O |
| ATOM | 776 | N3   | C B | 7 | 10.500 | 11.406 | 80.566 | 1.00 | 0.00 | N |

|      |     |      |     |   |        |        |        |      |      |   |
|------|-----|------|-----|---|--------|--------|--------|------|------|---|
| ATOM | 777 | C4   | C B | 7 | 9.586  | 10.974 | 81.444 | 1.00 | 0.00 | C |
| ATOM | 778 | N4   | C B | 7 | 8.437  | 11.626 | 81.530 | 1.00 | 0.00 | N |
| ATOM | 779 | C5   | C B | 7 | 9.830  | 9.832  | 82.277 | 1.00 | 0.00 | C |
| ATOM | 780 | C6   | C B | 7 | 11.036 | 9.208  | 82.122 | 1.00 | 0.00 | C |
| ATOM | 781 | C2'  | C B | 7 | 13.866 | 8.477  | 82.371 | 1.00 | 0.00 | C |
| ATOM | 782 | C3'  | C B | 7 | 14.546 | 7.190  | 81.931 | 1.00 | 0.00 | C |
| ATOM | 783 | O3'  | C B | 7 | 15.843 | 7.495  | 81.423 | 1.00 | 0.00 | O |
| ATOM | 784 | C4'  | C B | 7 | 13.610 | 6.664  | 80.846 | 1.00 | 0.00 | C |
| ATOM | 785 | O4'  | C B | 7 | 13.079 | 7.870  | 80.212 | 1.00 | 0.00 | O |
| ATOM | 786 | C5'  | C B | 7 | 12.451 | 5.812  | 81.313 | 1.00 | 0.00 | C |
| ATOM | 787 | O5'  | C B | 7 | 11.953 | 6.317  | 82.578 | 1.00 | 0.00 | O |
| ATOM | 788 | O1P  | C B | 7 | 12.484 | 4.462  | 84.194 | 1.00 | 0.00 | O |
| ATOM | 789 | O2P  | C B | 7 | 10.555 | 6.000  | 84.641 | 1.00 | 0.00 | O |
| ATOM | 790 | P    | C B | 7 | 11.384 | 5.278  | 83.646 | 1.00 | 0.00 | P |
| ATOM | 791 | H5   | C B | 7 | 9.090  | 9.480  | 82.997 | 1.00 | 0.00 | H |
| ATOM | 792 | H6   | C B | 7 | 11.264 | 8.331  | 82.728 | 1.00 | 0.00 | H |
| ATOM | 793 | H1'  | C B | 7 | 13.950 | 9.674  | 80.566 | 1.00 | 0.00 | H |
| ATOM | 794 | H3'  | C B | 7 | 14.639 | 6.475  | 82.751 | 1.00 | 0.00 | H |
| ATOM | 795 | H4'  | C B | 7 | 14.215 | 6.057  | 80.172 | 1.00 | 0.00 | H |
| ATOM | 796 | H41  | C B | 7 | 7.714  | 11.311 | 82.194 | 1.00 | 0.00 | H |
| ATOM | 797 | H42  | C B | 7 | 8.264  | 12.448 | 80.931 | 1.00 | 0.00 | H |
| ATOM | 798 | H2'1 | C B | 7 | 13.104 | 8.285  | 83.126 | 1.00 | 0.00 | H |
| ATOM | 799 | H2'2 | C B | 7 | 14.581 | 9.179  | 82.799 | 1.00 | 0.00 | H |
| ATOM | 800 | H5'1 | C B | 7 | 11.659 | 5.846  | 80.565 | 1.00 | 0.00 | H |
| ATOM | 801 | H5'2 | C B | 7 | 12.788 | 4.785  | 81.434 | 1.00 | 0.00 | H |
| ATOM | 802 | C1'  | C B | 8 | 15.988 | 13.093 | 80.571 | 1.00 | 0.00 | C |
| ATOM | 803 | N1   | C B | 8 | 14.732 | 13.108 | 81.367 | 1.00 | 0.00 | N |
| ATOM | 804 | C2   | C B | 8 | 13.789 | 14.094 | 81.082 | 1.00 | 0.00 | C |
| ATOM | 805 | O2   | C B | 8 | 14.033 | 14.910 | 80.184 | 1.00 | 0.00 | O |
| ATOM | 806 | N3   | C B | 8 | 12.638 | 14.125 | 81.795 | 1.00 | 0.00 | N |
| ATOM | 807 | C4   | C B | 8 | 12.402 | 13.228 | 82.762 | 1.00 | 0.00 | C |
| ATOM | 808 | N4   | C B | 8 | 11.258 | 13.303 | 83.426 | 1.00 | 0.00 | N |
| ATOM | 809 | C5   | C B | 8 | 13.355 | 12.204 | 83.083 | 1.00 | 0.00 | C |
| ATOM | 810 | C6   | C B | 8 | 14.507 | 12.190 | 82.346 | 1.00 | 0.00 | C |
| ATOM | 811 | C2'  | C B | 8 | 17.225 | 12.727 | 81.381 | 1.00 | 0.00 | C |
| ATOM | 812 | C3'  | C B | 8 | 18.040 | 11.930 | 80.375 | 1.00 | 0.00 | C |
| ATOM | 813 | O3'  | C B | 8 | 18.796 | 12.830 | 79.568 | 1.00 | 0.00 | O |
| ATOM | 814 | C4'  | C B | 8 | 16.966 | 11.199 | 79.572 | 1.00 | 0.00 | C |
| ATOM | 815 | O4'  | C B | 8 | 15.836 | 12.129 | 79.547 | 1.00 | 0.00 | O |
| ATOM | 816 | C5'  | C B | 8 | 16.492 | 9.879  | 80.132 | 1.00 | 0.00 | C |
| ATOM | 817 | O5'  | C B | 8 | 16.453 | 9.946  | 81.581 | 1.00 | 0.00 | O |
| ATOM | 818 | O1P  | C B | 8 | 18.229 | 8.308  | 82.288 | 1.00 | 0.00 | O |
| ATOM | 819 | O2P  | C B | 8 | 16.288 | 8.789  | 83.804 | 1.00 | 0.00 | O |
| ATOM | 820 | P    | C B | 8 | 16.795 | 8.635  | 82.419 | 1.00 | 0.00 | P |
| ATOM | 821 | H5   | C B | 8 | 13.172 | 11.478 | 83.873 | 1.00 | 0.00 | H |
| ATOM | 822 | H6   | C B | 8 | 15.258 | 11.427 | 82.548 | 1.00 | 0.00 | H |
| ATOM | 823 | H1'  | C B | 8 | 16.105 | 14.069 | 80.099 | 1.00 | 0.00 | H |
| ATOM | 824 | H3'  | C B | 8 | 18.715 | 11.227 | 80.862 | 1.00 | 0.00 | H |
| ATOM | 825 | H4'  | C B | 8 | 17.385 | 11.007 | 78.584 | 1.00 | 0.00 | H |
| ATOM | 826 | H41  | C B | 8 | 11.050 | 12.622 | 84.172 | 1.00 | 0.00 | H |
| ATOM | 827 | H42  | C B | 8 | 10.575 | 14.039 | 83.196 | 1.00 | 0.00 | H |
| ATOM | 828 | H2'1 | C B | 8 | 16.983 | 12.129 | 82.259 | 1.00 | 0.00 | H |
| ATOM | 829 | H2'2 | C B | 8 | 17.769 | 13.608 | 81.726 | 1.00 | 0.00 | H |
| ATOM | 830 | H5'1 | C B | 8 | 15.495 | 9.663  | 79.747 | 1.00 | 0.00 | H |

|      |     |      |     |    |        |        |        |      |      |   |
|------|-----|------|-----|----|--------|--------|--------|------|------|---|
| ATOM | 831 | H5'2 | C B | 8  | 17.175 | 9.091  | 79.819 | 1.00 | 0.00 | H |
| ATOM | 832 | C1'  | T B | 9  | 16.666 | 17.993 | 80.412 | 1.00 | 0.00 | C |
| ATOM | 833 | N1   | T B | 9  | 15.941 | 17.375 | 81.554 | 1.00 | 0.00 | N |
| ATOM | 834 | C2   | T B | 9  | 14.711 | 17.907 | 81.883 | 1.00 | 0.00 | C |
| ATOM | 835 | O2   | T B | 9  | 14.217 | 18.844 | 81.281 | 1.00 | 0.00 | O |
| ATOM | 836 | N3   | T B | 9  | 14.072 | 17.302 | 82.949 | 1.00 | 0.00 | N |
| ATOM | 837 | C4   | T B | 9  | 14.544 | 16.244 | 83.696 | 1.00 | 0.00 | C |
| ATOM | 838 | O4   | T B | 9  | 13.880 | 15.787 | 84.635 | 1.00 | 0.00 | O |
| ATOM | 839 | C5   | T B | 9  | 15.837 | 15.755 | 83.278 | 1.00 | 0.00 | C |
| ATOM | 840 | C6   | T B | 9  | 16.488 | 16.320 | 82.243 | 1.00 | 0.00 | C |
| ATOM | 841 | C7   | T B | 9  | 16.386 | 14.601 | 84.062 | 1.00 | 0.00 | C |
| ATOM | 842 | C2'  | T B | 9  | 18.175 | 18.079 | 80.616 | 1.00 | 0.00 | C |
| ATOM | 843 | C3'  | T B | 9  | 18.697 | 17.838 | 79.208 | 1.00 | 0.00 | C |
| ATOM | 844 | O3'  | T B | 9  | 18.695 | 19.070 | 78.491 | 1.00 | 0.00 | O |
| ATOM | 845 | C4'  | T B | 9  | 17.697 | 16.834 | 78.640 | 1.00 | 0.00 | C |
| ATOM | 846 | O4'  | T B | 9  | 16.426 | 17.200 | 79.267 | 1.00 | 0.00 | O |
| ATOM | 847 | C5'  | T B | 9  | 17.973 | 15.375 | 78.921 | 1.00 | 0.00 | C |
| ATOM | 848 | O5'  | T B | 9  | 18.533 | 15.231 | 80.251 | 1.00 | 0.00 | O |
| ATOM | 849 | O1P  | T B | 9  | 20.873 | 14.416 | 79.813 | 1.00 | 0.00 | O |
| ATOM | 850 | O2P  | T B | 9  | 19.723 | 13.833 | 81.966 | 1.00 | 0.00 | O |
| ATOM | 851 | P    | T B | 9  | 19.612 | 14.086 | 80.510 | 1.00 | 0.00 | P |
| ATOM | 852 | H3   | T B | 9  | 13.151 | 17.679 | 83.211 | 1.00 | 0.00 | H |
| ATOM | 853 | H6   | T B | 9  | 17.462 | 15.933 | 81.946 | 1.00 | 0.00 | H |
| ATOM | 854 | H1'  | T B | 9  | 16.241 | 18.980 | 80.232 | 1.00 | 0.00 | H |
| ATOM | 855 | H3'  | T B | 9  | 19.707 | 17.426 | 79.215 | 1.00 | 0.00 | H |
| ATOM | 856 | H4'  | T B | 9  | 17.693 | 16.970 | 77.557 | 1.00 | 0.00 | H |
| ATOM | 857 | H71  | T B | 9  | 17.283 | 14.919 | 84.596 | 1.00 | 0.00 | H |
| ATOM | 858 | H72  | T B | 9  | 15.640 | 14.258 | 84.779 | 1.00 | 0.00 | H |
| ATOM | 859 | H73  | T B | 9  | 16.639 | 13.786 | 83.383 | 1.00 | 0.00 | H |
| ATOM | 860 | H2'1 | T B | 9  | 18.540 | 17.324 | 81.310 | 1.00 | 0.00 | H |
| ATOM | 861 | H2'2 | T B | 9  | 18.486 | 19.052 | 80.995 | 1.00 | 0.00 | H |
| ATOM | 862 | H5'1 | T B | 9  | 17.042 | 14.814 | 78.850 | 1.00 | 0.00 | H |
| ATOM | 863 | H5'2 | T B | 9  | 18.678 | 14.998 | 78.183 | 1.00 | 0.00 | H |
| ATOM | 864 | C1'  | A B | 10 | 15.474 | 22.686 | 81.502 | 1.00 | 0.00 | C |
| ATOM | 865 | N1   | A B | 10 | 13.154 | 20.565 | 85.558 | 1.00 | 0.00 | N |
| ATOM | 866 | C2   | A B | 10 | 12.793 | 21.534 | 84.721 | 1.00 | 0.00 | C |
| ATOM | 867 | N3   | A B | 10 | 13.441 | 22.031 | 83.690 | 1.00 | 0.00 | N |
| ATOM | 868 | C4   | A B | 10 | 14.628 | 21.416 | 83.543 | 1.00 | 0.00 | C |
| ATOM | 869 | C5   | A B | 10 | 15.144 | 20.410 | 84.312 | 1.00 | 0.00 | C |
| ATOM | 870 | C6   | A B | 10 | 14.344 | 19.969 | 85.386 | 1.00 | 0.00 | C |
| ATOM | 871 | N6   | A B | 10 | 14.721 | 18.989 | 86.227 | 1.00 | 0.00 | N |
| ATOM | 872 | N7   | A B | 10 | 16.393 | 20.024 | 83.857 | 1.00 | 0.00 | N |
| ATOM | 873 | C8   | A B | 10 | 16.606 | 20.800 | 82.835 | 1.00 | 0.00 | C |
| ATOM | 874 | N9   | A B | 10 | 15.576 | 21.669 | 82.582 | 1.00 | 0.00 | N |
| ATOM | 875 | C2'  | A B | 10 | 16.791 | 23.383 | 81.191 | 1.00 | 0.00 | C |
| ATOM | 876 | C3'  | A B | 10 | 16.696 | 23.584 | 79.685 | 1.00 | 0.00 | C |
| ATOM | 877 | O3'  | A B | 10 | 15.963 | 24.776 | 79.417 | 1.00 | 0.00 | O |
| ATOM | 878 | C4'  | A B | 10 | 15.952 | 22.333 | 79.223 | 1.00 | 0.00 | C |
| ATOM | 879 | O4'  | A B | 10 | 15.041 | 22.026 | 80.327 | 1.00 | 0.00 | O |
| ATOM | 880 | C5'  | A B | 10 | 16.798 | 21.114 | 78.940 | 1.00 | 0.00 | C |
| ATOM | 881 | O5'  | A B | 10 | 17.894 | 21.047 | 79.889 | 1.00 | 0.00 | O |
| ATOM | 882 | O1P  | A B | 10 | 19.930 | 21.388 | 78.450 | 1.00 | 0.00 | O |
| ATOM | 883 | O2P  | A B | 10 | 20.107 | 20.084 | 80.586 | 1.00 | 0.00 | O |
| ATOM | 884 | P    | A B | 10 | 19.294 | 20.458 | 79.403 | 1.00 | 0.00 | P |



|      |     |      |     |    |        |        |        |      |      |   |
|------|-----|------|-----|----|--------|--------|--------|------|------|---|
| ATOM | 885 | H2   | A B | 10 | 11.819 | 21.979 | 84.919 | 1.00 | 0.00 | H |
| ATOM | 886 | H8   | A B | 10 | 17.516 | 20.763 | 82.237 | 1.00 | 0.00 | H |
| ATOM | 887 | H1'  | A B | 10 | 14.707 | 23.407 | 81.783 | 1.00 | 0.00 | H |
| ATOM | 888 | H3'  | A B | 10 | 17.680 | 23.651 | 79.221 | 1.00 | 0.00 | H |
| ATOM | 889 | H4'  | A B | 10 | 15.431 | 22.597 | 78.303 | 1.00 | 0.00 | H |
| ATOM | 890 | H61  | A B | 10 | 14.097 | 18.702 | 86.993 | 1.00 | 0.00 | H |
| ATOM | 891 | H62  | A B | 10 | 15.632 | 18.526 | 86.102 | 1.00 | 0.00 | H |
| ATOM | 892 | H2'1 | A B | 10 | 17.655 | 22.776 | 81.455 | 1.00 | 0.00 | H |
| ATOM | 893 | H2'2 | A B | 10 | 16.887 | 24.337 | 81.712 | 1.00 | 0.00 | H |
| ATOM | 894 | H5'1 | A B | 10 | 16.180 | 20.221 | 79.029 | 1.00 | 0.00 | H |
| ATOM | 895 | H5'2 | A B | 10 | 17.192 | 21.179 | 77.928 | 1.00 | 0.00 | H |
| ATOM | 896 | C1'  | G B | 11 | 13.352 | 26.200 | 84.293 | 1.00 | 0.00 | C |
| ATOM | 897 | N1   | G B | 11 | 13.920 | 22.789 | 88.043 | 1.00 | 0.00 | N |
| ATOM | 898 | C2   | G B | 11 | 12.850 | 23.614 | 87.749 | 1.00 | 0.00 | C |
| ATOM | 899 | N2   | G B | 11 | 11.791 | 23.520 | 88.562 | 1.00 | 0.00 | N |
| ATOM | 900 | N3   | G B | 11 | 12.837 | 24.466 | 86.724 | 1.00 | 0.00 | N |
| ATOM | 901 | C4   | G B | 11 | 13.994 | 24.433 | 86.011 | 1.00 | 0.00 | C |
| ATOM | 902 | C5   | G B | 11 | 15.112 | 23.649 | 86.233 | 1.00 | 0.00 | C |
| ATOM | 903 | C6   | G B | 11 | 15.126 | 22.742 | 87.319 | 1.00 | 0.00 | C |
| ATOM | 904 | O6   | G B | 11 | 16.017 | 21.970 | 87.674 | 1.00 | 0.00 | O |
| ATOM | 905 | N7   | G B | 11 | 16.090 | 23.919 | 85.274 | 1.00 | 0.00 | N |
| ATOM | 906 | C8   | G B | 11 | 15.545 | 24.837 | 84.517 | 1.00 | 0.00 | C |
| ATOM | 907 | N9   | G B | 11 | 14.272 | 25.203 | 84.902 | 1.00 | 0.00 | N |
| ATOM | 908 | C2'  | G B | 11 | 14.056 | 27.446 | 83.773 | 1.00 | 0.00 | C |
| ATOM | 909 | C3'  | G B | 11 | 13.241 | 27.778 | 82.534 | 1.00 | 0.00 | C |
| ATOM | 910 | O3'  | G B | 11 | 12.101 | 28.546 | 82.916 | 1.00 | 0.00 | O |
| ATOM | 911 | C4'  | G B | 11 | 12.856 | 26.401 | 82.000 | 1.00 | 0.00 | C |
| ATOM | 912 | O4'  | G B | 11 | 12.702 | 25.579 | 83.202 | 1.00 | 0.00 | O |
| ATOM | 913 | C5'  | G B | 11 | 13.853 | 25.733 | 81.083 | 1.00 | 0.00 | C |
| ATOM | 914 | O5'  | G B | 11 | 15.201 | 26.036 | 81.519 | 1.00 | 0.00 | O |
| ATOM | 915 | O1P  | G B | 11 | 16.123 | 27.432 | 79.640 | 1.00 | 0.00 | O |
| ATOM | 916 | O2P  | G B | 11 | 17.672 | 26.074 | 81.071 | 1.00 | 0.00 | O |
| ATOM | 917 | P    | G B | 11 | 16.345 | 26.201 | 80.422 | 1.00 | 0.00 | P |
| ATOM | 918 | H1   | G B | 11 | 13.826 | 22.161 | 88.855 | 1.00 | 0.00 | H |
| ATOM | 919 | H8   | G B | 11 | 16.052 | 25.275 | 83.659 | 1.00 | 0.00 | H |
| ATOM | 920 | H1'  | G B | 11 | 12.593 | 26.461 | 85.031 | 1.00 | 0.00 | H |
| ATOM | 921 | H21  | G B | 11 | 11.806 | 22.857 | 89.351 | 1.00 | 0.00 | H |
| ATOM | 922 | H3'  | G B | 11 | 13.822 | 28.337 | 81.799 | 1.00 | 0.00 | H |
| ATOM | 923 | H22  | G B | 11 | 10.962 | 24.110 | 88.399 | 1.00 | 0.00 | H |
| ATOM | 924 | H4'  | G B | 11 | 11.924 | 26.523 | 81.447 | 1.00 | 0.00 | H |
| ATOM | 925 | H2'1 | G B | 11 | 15.100 | 27.256 | 83.521 | 1.00 | 0.00 | H |
| ATOM | 926 | H2'2 | G B | 11 | 14.037 | 28.264 | 84.493 | 1.00 | 0.00 | H |
| ATOM | 927 | H5'1 | G B | 11 | 13.693 | 24.656 | 81.103 | 1.00 | 0.00 | H |
| ATOM | 928 | H5'2 | G B | 11 | 13.704 | 26.099 | 80.067 | 1.00 | 0.00 | H |
| ATOM | 929 | C1'  | G B | 12 | 11.601 | 28.069 | 88.532 | 1.00 | 0.00 | C |
| ATOM | 930 | N1   | G B | 12 | 14.862 | 24.777 | 90.668 | 1.00 | 0.00 | N |
| ATOM | 931 | C2   | G B | 12 | 13.560 | 25.091 | 91.016 | 1.00 | 0.00 | C |
| ATOM | 932 | N2   | G B | 12 | 13.061 | 24.442 | 92.077 | 1.00 | 0.00 | N |
| ATOM | 933 | N3   | G B | 12 | 12.816 | 25.978 | 90.361 | 1.00 | 0.00 | N |
| ATOM | 934 | C4   | G B | 12 | 13.483 | 26.543 | 89.320 | 1.00 | 0.00 | C |
| ATOM | 935 | C5   | G B | 12 | 14.779 | 26.297 | 88.901 | 1.00 | 0.00 | C |
| ATOM | 936 | C6   | G B | 12 | 15.569 | 25.352 | 89.595 | 1.00 | 0.00 | C |
| ATOM | 937 | O6   | G B | 12 | 16.729 | 25.001 | 89.378 | 1.00 | 0.00 | O |
| ATOM | 938 | N7   | G B | 12 | 15.086 | 27.087 | 87.792 | 1.00 | 0.00 | N |

|      |     |      |     |    |        |        |        |      |      |   |
|------|-----|------|-----|----|--------|--------|--------|------|------|---|
| ATOM | 939 | C8   | G B | 12 | 13.992 | 27.769 | 87.576 | 1.00 | 0.00 | C |
| ATOM | 940 | N9   | G B | 12 | 12.972 | 27.494 | 88.464 | 1.00 | 0.00 | N |
| ATOM | 941 | C2'  | G B | 12 | 11.540 | 29.552 | 88.197 | 1.00 | 0.00 | C |
| ATOM | 942 | C3'  | G B | 12 | 10.207 | 29.659 | 87.471 | 1.00 | 0.00 | C |
| ATOM | 943 | O3'  | G B | 12 | 9.162  | 29.801 | 88.430 | 1.00 | 0.00 | O |
| ATOM | 944 | C4'  | G B | 12 | 10.124 | 28.333 | 86.718 | 1.00 | 0.00 | C |
| ATOM | 945 | O4'  | G B | 12 | 10.797 | 27.376 | 87.597 | 1.00 | 0.00 | O |
| ATOM | 946 | C5'  | G B | 12 | 10.785 | 28.289 | 85.361 | 1.00 | 0.00 | C |
| ATOM | 947 | O5'  | G B | 12 | 11.996 | 29.084 | 85.379 | 1.00 | 0.00 | O |
| ATOM | 948 | O1P  | G B | 12 | 11.475 | 30.974 | 83.802 | 1.00 | 0.00 | O |
| ATOM | 949 | O2P  | G B | 12 | 13.851 | 30.244 | 84.142 | 1.00 | 0.00 | O |
| ATOM | 950 | P    | G B | 12 | 12.419 | 29.869 | 84.056 | 1.00 | 0.00 | P |
| ATOM | 951 | H1   | G B | 12 | 15.350 | 24.070 | 91.239 | 1.00 | 0.00 | H |
| ATOM | 952 | H8   | G B | 12 | 13.892 | 28.492 | 86.767 | 1.00 | 0.00 | H |
| ATOM | 953 | H1'  | G B | 12 | 11.199 | 27.876 | 89.527 | 1.00 | 0.00 | H |
| ATOM | 954 | H21  | G B | 12 | 13.642 | 23.753 | 92.578 | 1.00 | 0.00 | H |
| ATOM | 955 | H3'  | G B | 12 | 10.183 | 30.504 | 86.783 | 1.00 | 0.00 | H |
| ATOM | 956 | H22  | G B | 12 | 12.099 | 24.632 | 92.389 | 1.00 | 0.00 | H |
| ATOM | 957 | H4'  | G B | 12 | 9.066  | 28.113 | 86.580 | 1.00 | 0.00 | H |
| ATOM | 958 | H2'1 | G B | 12 | 12.365 | 29.866 | 87.559 | 1.00 | 0.00 | H |
| ATOM | 959 | H2'2 | G B | 12 | 11.557 | 30.180 | 89.087 | 1.00 | 0.00 | H |
| ATOM | 960 | H5'1 | G B | 12 | 11.026 | 27.255 | 85.114 | 1.00 | 0.00 | H |
| ATOM | 961 | H5'2 | G B | 12 | 10.096 | 28.684 | 84.614 | 1.00 | 0.00 | H |
| ATOM | 962 | C1'  | T B | 13 | 11.324 | 28.435 | 93.460 | 1.00 | 0.00 | C |
| ATOM | 963 | N1   | T B | 13 | 12.642 | 28.504 | 92.779 | 1.00 | 0.00 | N |
| ATOM | 964 | C2   | T B | 13 | 13.640 | 27.670 | 93.246 | 1.00 | 0.00 | C |
| ATOM | 965 | O2   | T B | 13 | 13.472 | 26.900 | 94.178 | 1.00 | 0.00 | O |
| ATOM | 966 | N3   | T B | 13 | 14.848 | 27.766 | 92.583 | 1.00 | 0.00 | N |
| ATOM | 967 | C4   | T B | 13 | 15.142 | 28.601 | 91.525 | 1.00 | 0.00 | C |
| ATOM | 968 | O4   | T B | 13 | 16.267 | 28.602 | 91.013 | 1.00 | 0.00 | O |
| ATOM | 969 | C5   | T B | 13 | 14.039 | 29.434 | 91.106 | 1.00 | 0.00 | C |
| ATOM | 970 | C6   | T B | 13 | 12.845 | 29.366 | 91.729 | 1.00 | 0.00 | C |
| ATOM | 971 | C7   | T B | 13 | 14.312 | 30.358 | 89.957 | 1.00 | 0.00 | C |
| ATOM | 972 | C2'  | T B | 13 | 10.636 | 29.788 | 93.607 | 1.00 | 0.00 | C |
| ATOM | 973 | C3'  | T B | 13 | 9.171  | 29.419 | 93.431 | 1.00 | 0.00 | C |
| ATOM | 974 | O3'  | T B | 13 | 8.644  | 28.982 | 94.681 | 1.00 | 0.00 | O |
| ATOM | 975 | C4'  | T B | 13 | 9.226  | 28.293 | 92.401 | 1.00 | 0.00 | C |
| ATOM | 976 | O4'  | T B | 13 | 10.482 | 27.600 | 92.690 | 1.00 | 0.00 | O |
| ATOM | 977 | C5'  | T B | 13 | 9.227  | 28.710 | 90.948 | 1.00 | 0.00 | C |
| ATOM | 978 | O5'  | T B | 13 | 9.993  | 29.931 | 90.790 | 1.00 | 0.00 | O |
| ATOM | 979 | O1P  | T B | 13 | 8.262  | 31.619 | 90.094 | 1.00 | 0.00 | O |
| ATOM | 980 | O2P  | T B | 13 | 10.655 | 31.915 | 89.398 | 1.00 | 0.00 | O |
| ATOM | 981 | P    | T B | 13 | 9.535  | 30.988 | 89.689 | 1.00 | 0.00 | P |
| ATOM | 982 | H3   | T B | 13 | 15.607 | 27.151 | 92.912 | 1.00 | 0.00 | H |
| ATOM | 983 | H6   | T B | 13 | 12.028 | 30.005 | 91.395 | 1.00 | 0.00 | H |
| ATOM | 984 | H1'  | T B | 13 | 11.464 | 27.962 | 94.433 | 1.00 | 0.00 | H |
| ATOM | 985 | H3'  | T B | 13 | 8.581  | 30.259 | 93.064 | 1.00 | 0.00 | H |
| ATOM | 986 | H4'  | T B | 13 | 8.347  | 27.670 | 92.565 | 1.00 | 0.00 | H |
| ATOM | 987 | H71  | T B | 13 | 14.256 | 31.391 | 90.298 | 1.00 | 0.00 | H |
| ATOM | 988 | H72  | T B | 13 | 15.309 | 30.159 | 89.560 | 1.00 | 0.00 | H |
| ATOM | 989 | H73  | T B | 13 | 13.571 | 30.193 | 89.173 | 1.00 | 0.00 | H |
| ATOM | 990 | H2'1 | T B | 13 | 10.961 | 30.499 | 92.850 | 1.00 | 0.00 | H |
| ATOM | 991 | H2'2 | T B | 13 | 10.816 | 30.239 | 94.583 | 1.00 | 0.00 | H |
| ATOM | 992 | H5'1 | T B | 13 | 9.671  | 27.916 | 90.348 | 1.00 | 0.00 | H |

|      |      |      |   |   |    |        |        |         |      |      |   |
|------|------|------|---|---|----|--------|--------|---------|------|------|---|
| ATOM | 993  | H5'2 | T | B | 13 | 8.202  | 28.876 | 90.622  | 1.00 | 0.00 | H |
| ATOM | 994  | C1'  | G | B | 14 | 13.148 | 27.980 | 98.056  | 1.00 | 0.00 | C |
| ATOM | 995  | N1   | G | B | 14 | 17.658 | 28.451 | 95.717  | 1.00 | 0.00 | N |
| ATOM | 996  | C2   | G | B | 14 | 17.270 | 27.596 | 96.734  | 1.00 | 0.00 | C |
| ATOM | 997  | N2   | G | B | 14 | 18.207 | 26.756 | 97.189  | 1.00 | 0.00 | N |
| ATOM | 998  | N3   | G | B | 14 | 16.043 | 27.580 | 97.254  | 1.00 | 0.00 | N |
| ATOM | 999  | C4   | G | B | 14 | 15.226 | 28.501 | 96.677  | 1.00 | 0.00 | C |
| ATOM | 1000 | C5   | G | B | 14 | 15.526 | 29.395 | 95.665  | 1.00 | 0.00 | C |
| ATOM | 1001 | C6   | G | B | 14 | 16.827 | 29.410 | 95.110  | 1.00 | 0.00 | C |
| ATOM | 1002 | O6   | G | B | 14 | 17.280 | 30.125 | 94.214  | 1.00 | 0.00 | O |
| ATOM | 1003 | N7   | G | B | 14 | 14.407 | 30.173 | 95.359  | 1.00 | 0.00 | N |
| ATOM | 1004 | C8   | G | B | 14 | 13.484 | 29.733 | 96.176  | 1.00 | 0.00 | C |
| ATOM | 1005 | N9   | G | B | 14 | 13.907 | 28.717 | 97.010  | 1.00 | 0.00 | N |
| ATOM | 1006 | C2'  | G | B | 14 | 12.176 | 28.852 | 98.839  | 1.00 | 0.00 | C |
| ATOM | 1007 | C3'  | G | B | 14 | 11.019 | 27.898 | 99.084  | 1.00 | 0.00 | C |
| ATOM | 1008 | O3'  | G | B | 14 | 11.295 | 27.113 | 100.241 | 1.00 | 0.00 | O |
| ATOM | 1009 | C4'  | G | B | 14 | 10.997 | 27.058 | 97.808  | 1.00 | 0.00 | C |
| ATOM | 1010 | O4'  | G | B | 14 | 12.401 | 26.965 | 97.413  | 1.00 | 0.00 | O |
| ATOM | 1011 | C5'  | G | B | 14 | 10.204 | 27.616 | 96.651  | 1.00 | 0.00 | C |
| ATOM | 1012 | O5'  | G | B | 14 | 10.339 | 29.059 | 96.614  | 1.00 | 0.00 | O |
| ATOM | 1013 | O1P  | G | B | 14 | 8.012  | 29.876 | 97.119  | 1.00 | 0.00 | O |
| ATOM | 1014 | O2P  | G | B | 14 | 9.570  | 31.291 | 95.755  | 1.00 | 0.00 | O |
| ATOM | 1015 | P    | G | B | 14 | 9.099  | 29.934 | 96.124  | 1.00 | 0.00 | P |
| ATOM | 1016 | H1   | G | B | 14 | 18.630 | 28.378 | 95.381  | 1.00 | 0.00 | H |
| ATOM | 1017 | H8   | G | B | 14 | 12.471 | 30.134 | 96.196  | 1.00 | 0.00 | H |
| ATOM | 1018 | H1'  | G | B | 14 | 13.865 | 27.497 | 98.722  | 1.00 | 0.00 | H |
| ATOM | 1019 | H21  | G | B | 14 | 19.154 | 26.773 | 96.779  | 1.00 | 0.00 | H |
| ATOM | 1020 | H3'  | G | B | 14 | 10.075 | 28.427 | 99.223  | 1.00 | 0.00 | H |
| ATOM | 1021 | H22  | G | B | 14 | 17.984 | 26.097 | 97.948  | 1.00 | 0.00 | H |
| ATOM | 1022 | H4'  | G | B | 14 | 10.564 | 26.093 | 98.073  | 1.00 | 0.00 | H |
| ATOM | 1023 | H2'1 | G | B | 14 | 11.857 | 29.727 | 98.273  | 1.00 | 0.00 | H |
| ATOM | 1024 | H2'2 | G | B | 14 | 12.603 | 29.208 | 99.777  | 1.00 | 0.00 | H |
| ATOM | 1025 | H5'1 | G | B | 14 | 10.578 | 27.188 | 95.721  | 1.00 | 0.00 | H |
| ATOM | 1026 | H5'2 | G | B | 14 | 9.155  | 27.347 | 96.772  | 1.00 | 0.00 | H |
| ATOM | 1027 | C1'  | C | B | 15 | 16.796 | 27.761 | 101.399 | 1.00 | 0.00 | C |
| ATOM | 1028 | N1   | C | B | 15 | 16.730 | 28.882 | 100.423 | 1.00 | 0.00 | N |
| ATOM | 1029 | C2   | C | B | 15 | 17.873 | 29.172 | 99.681  | 1.00 | 0.00 | C |
| ATOM | 1030 | O2   | C | B | 15 | 18.889 | 28.489 | 99.862  | 1.00 | 0.00 | O |
| ATOM | 1031 | N3   | C | B | 15 | 17.833 | 30.189 | 98.786  | 1.00 | 0.00 | N |
| ATOM | 1032 | C4   | C | B | 15 | 16.719 | 30.910 | 98.614  | 1.00 | 0.00 | C |
| ATOM | 1033 | N4   | C | B | 15 | 16.734 | 31.892 | 97.724  | 1.00 | 0.00 | N |
| ATOM | 1034 | C5   | C | B | 15 | 15.528 | 30.640 | 99.367  | 1.00 | 0.00 | C |
| ATOM | 1035 | C6   | C | B | 15 | 15.590 | 29.608 | 100.257 | 1.00 | 0.00 | C |
| ATOM | 1036 | C2'  | C | B | 15 | 16.030 | 28.023 | 102.688 | 1.00 | 0.00 | C |
| ATOM | 1037 | C3'  | C | B | 15 | 15.488 | 26.643 | 103.022 | 1.00 | 0.00 | C |
| ATOM | 1038 | O3'  | C | B | 15 | 16.484 | 25.905 | 103.728 | 1.00 | 0.00 | O |
| ATOM | 1039 | C4'  | C | B | 15 | 15.199 | 26.049 | 101.644 | 1.00 | 0.00 | C |
| ATOM | 1040 | O4'  | C | B | 15 | 16.234 | 26.619 | 100.781 | 1.00 | 0.00 | O |
| ATOM | 1041 | C5'  | C | B | 15 | 13.846 | 26.363 | 101.047 | 1.00 | 0.00 | C |
| ATOM | 1042 | O5'  | C | B | 15 | 13.460 | 27.716 | 101.397 | 1.00 | 0.00 | O |
| ATOM | 1043 | O1P  | C | B | 15 | 11.458 | 27.384 | 102.887 | 1.00 | 0.00 | O |
| ATOM | 1044 | O2P  | C | B | 15 | 11.693 | 29.498 | 101.555 | 1.00 | 0.00 | O |
| ATOM | 1045 | P    | C | B | 15 | 11.917 | 28.034 | 101.642 | 1.00 | 0.00 | P |
| ATOM | 1046 | H5   | C | B | 15 | 14.620 | 31.228 | 99.234  | 1.00 | 0.00 | H |

|      |      |      |     |    |        |        |         |      |      |   |
|------|------|------|-----|----|--------|--------|---------|------|------|---|
| ATOM | 1047 | H6   | C B | 15 | 14.708 | 29.359 | 100.848 | 1.00 | 0.00 | H |
| ATOM | 1048 | H1'  | C B | 15 | 17.846 | 27.550 | 101.604 | 1.00 | 0.00 | H |
| ATOM | 1049 | H3'  | C B | 15 | 14.581 | 26.695 | 103.624 | 1.00 | 0.00 | H |
| ATOM | 1050 | H4'  | C B | 15 | 15.275 | 24.966 | 101.742 | 1.00 | 0.00 | H |
| ATOM | 1051 | H41  | C B | 15 | 15.889 | 32.461 | 97.568  | 1.00 | 0.00 | H |
| ATOM | 1052 | H42  | C B | 15 | 17.592 | 32.087 | 97.186  | 1.00 | 0.00 | H |
| ATOM | 1053 | H2'1 | C B | 15 | 15.225 | 28.744 | 102.552 | 1.00 | 0.00 | H |
| ATOM | 1054 | H2'2 | C B | 15 | 16.675 | 28.400 | 103.483 | 1.00 | 0.00 | H |
| ATOM | 1055 | H5'1 | C B | 15 | 13.901 | 26.264 | 99.964  | 1.00 | 0.00 | H |
| ATOM | 1056 | H5'2 | C B | 15 | 13.112 | 25.659 | 101.437 | 1.00 | 0.00 | H |
| ATOM | 1057 | C1'  | G B | 16 | 21.363 | 28.706 | 103.064 | 1.00 | 0.00 | C |
| ATOM | 1058 | N1   | G B | 16 | 21.099 | 32.668 | 99.862  | 1.00 | 0.00 | N |
| ATOM | 1059 | C2   | G B | 16 | 22.142 | 31.792 | 100.107 | 1.00 | 0.00 | C |
| ATOM | 1060 | N2   | G B | 16 | 23.264 | 32.000 | 99.407  | 1.00 | 0.00 | N |
| ATOM | 1061 | N3   | G B | 16 | 22.070 | 30.788 | 100.979 | 1.00 | 0.00 | N |
| ATOM | 1062 | C4   | G B | 16 | 20.863 | 30.730 | 101.602 | 1.00 | 0.00 | C |
| ATOM | 1063 | C5   | G B | 16 | 19.770 | 31.562 | 101.427 | 1.00 | 0.00 | C |
| ATOM | 1064 | C6   | G B | 16 | 19.844 | 32.625 | 100.497 | 1.00 | 0.00 | C |
| ATOM | 1065 | O6   | G B | 16 | 18.988 | 33.460 | 100.205 | 1.00 | 0.00 | O |
| ATOM | 1066 | N7   | G B | 16 | 18.723 | 31.164 | 102.261 | 1.00 | 0.00 | N |
| ATOM | 1067 | C8   | G B | 16 | 19.202 | 30.128 | 102.900 | 1.00 | 0.00 | C |
| ATOM | 1068 | N9   | G B | 16 | 20.499 | 29.804 | 102.555 | 1.00 | 0.00 | N |
| ATOM | 1069 | C2'  | G B | 16 | 21.195 | 28.434 | 104.553 | 1.00 | 0.00 | C |
| ATOM | 1070 | C3'  | G B | 16 | 21.363 | 26.924 | 104.621 | 1.00 | 0.00 | C |
| ATOM | 1071 | O3'  | G B | 16 | 22.751 | 26.610 | 104.689 | 1.00 | 0.00 | O |
| ATOM | 1072 | C4'  | G B | 16 | 20.727 | 26.452 | 103.314 | 1.00 | 0.00 | C |
| ATOM | 1073 | O4'  | G B | 16 | 21.020 | 27.526 | 102.364 | 1.00 | 0.00 | O |
| ATOM | 1074 | C5'  | G B | 16 | 19.235 | 26.221 | 103.338 | 1.00 | 0.00 | C |
| ATOM | 1075 | O5'  | G B | 16 | 18.599 | 27.209 | 104.186 | 1.00 | 0.00 | O |
| ATOM | 1076 | O1P  | G B | 16 | 17.693 | 25.844 | 106.096 | 1.00 | 0.00 | O |
| ATOM | 1077 | O2P  | G B | 16 | 16.586 | 28.004 | 105.463 | 1.00 | 0.00 | O |
| ATOM | 1078 | P    | G B | 16 | 17.311 | 26.786 | 105.028 | 1.00 | 0.00 | P |
| ATOM | 1079 | H1   | G B | 16 | 21.255 | 33.408 | 99.161  | 1.00 | 0.00 | H |
| ATOM | 1080 | H8   | G B | 16 | 18.629 | 29.571 | 103.639 | 1.00 | 0.00 | H |
| ATOM | 1081 | H1'  | G B | 16 | 22.399 | 28.947 | 102.826 | 1.00 | 0.00 | H |
| ATOM | 1082 | H21  | G B | 16 | 23.310 | 32.777 | 98.731  | 1.00 | 0.00 | H |
| ATOM | 1083 | H3'  | G B | 16 | 20.852 | 26.495 | 105.484 | 1.00 | 0.00 | H |
| ATOM | 1084 | H22  | G B | 16 | 24.077 | 31.385 | 99.544  | 1.00 | 0.00 | H |
| ATOM | 1085 | H4'  | G B | 16 | 21.206 | 25.509 | 103.052 | 1.00 | 0.00 | H |
| ATOM | 1086 | H2'1 | G B | 16 | 20.216 | 28.742 | 104.921 | 1.00 | 0.00 | H |
| ATOM | 1087 | H2'2 | G B | 16 | 21.948 | 28.944 | 105.155 | 1.00 | 0.00 | H |
| ATOM | 1088 | H5'1 | G B | 16 | 18.844 | 26.299 | 102.324 | 1.00 | 0.00 | H |
| ATOM | 1089 | H5'2 | G B | 16 | 19.035 | 25.222 | 103.724 | 1.00 | 0.00 | H |
| ATOM | 1090 | C1'  | G B | 17 | 25.575 | 31.302 | 103.265 | 1.00 | 0.00 | C |
| ATOM | 1091 | N1   | G B | 17 | 22.618 | 35.143 | 101.677 | 1.00 | 0.00 | N |
| ATOM | 1092 | C2   | G B | 17 | 23.893 | 34.780 | 101.279 | 1.00 | 0.00 | C |
| ATOM | 1093 | N2   | G B | 17 | 24.453 | 35.542 | 100.333 | 1.00 | 0.00 | N |
| ATOM | 1094 | N3   | G B | 17 | 24.552 | 33.739 | 101.782 | 1.00 | 0.00 | N |
| ATOM | 1095 | C4   | G B | 17 | 23.836 | 33.085 | 102.735 | 1.00 | 0.00 | C |
| ATOM | 1096 | C5   | G B | 17 | 22.565 | 33.377 | 103.198 | 1.00 | 0.00 | C |
| ATOM | 1097 | C6   | G B | 17 | 21.862 | 34.479 | 102.661 | 1.00 | 0.00 | C |
| ATOM | 1098 | O6   | G B | 17 | 20.736 | 34.893 | 102.940 | 1.00 | 0.00 | O |
| ATOM | 1099 | N7   | G B | 17 | 22.188 | 32.461 | 104.184 | 1.00 | 0.00 | N |
| ATOM | 1100 | C8   | G B | 17 | 23.217 | 31.660 | 104.281 | 1.00 | 0.00 | C |

|      |      |      |     |    |        |        |         |      |      |   |
|------|------|------|-----|----|--------|--------|---------|------|------|---|
| ATOM | 1101 | N9   | G B | 17 | 24.259 | 31.976 | 103.433 | 1.00 | 0.00 | N |
| ATOM | 1102 | C2'  | G B | 17 | 26.173 | 30.791 | 104.569 | 1.00 | 0.00 | C |
| ATOM | 1103 | C3'  | G B | 17 | 26.857 | 29.507 | 104.124 | 1.00 | 0.00 | C |
| ATOM | 1104 | O3'  | G B | 17 | 28.152 | 29.818 | 103.617 | 1.00 | 0.00 | O |
| ATOM | 1105 | C4'  | G B | 17 | 25.920 | 28.983 | 103.038 | 1.00 | 0.00 | C |
| ATOM | 1106 | O4'  | G B | 17 | 25.386 | 30.192 | 102.409 | 1.00 | 0.00 | O |
| ATOM | 1107 | C5'  | G B | 17 | 24.764 | 28.129 | 103.502 | 1.00 | 0.00 | C |
| ATOM | 1108 | O5'  | G B | 17 | 24.265 | 28.627 | 104.768 | 1.00 | 0.00 | O |
| ATOM | 1109 | O1P  | G B | 17 | 24.803 | 26.766 | 106.375 | 1.00 | 0.00 | O |
| ATOM | 1110 | O2P  | G B | 17 | 22.868 | 28.297 | 106.832 | 1.00 | 0.00 | O |
| ATOM | 1111 | P    | G B | 17 | 23.699 | 27.582 | 105.833 | 1.00 | 0.00 | P |
| ATOM | 1112 | H1   | G B | 17 | 22.192 | 35.964 | 101.220 | 1.00 | 0.00 | H |
| ATOM | 1113 | H8   | G B | 17 | 23.250 | 30.818 | 104.970 | 1.00 | 0.00 | H |
| ATOM | 1114 | H1'  | G B | 17 | 26.254 | 31.996 | 102.770 | 1.00 | 0.00 | H |
| ATOM | 1115 | H21  | G B | 17 | 23.935 | 36.344 | 99.944  | 1.00 | 0.00 | H |
| ATOM | 1116 | H3'  | G B | 17 | 26.951 | 28.790 | 104.940 | 1.00 | 0.00 | H |
| ATOM | 1117 | H22  | G B | 17 | 25.402 | 35.326 | 99.993  | 1.00 | 0.00 | H |
| ATOM | 1118 | H4'  | G B | 17 | 26.526 | 28.383 | 102.359 | 1.00 | 0.00 | H |
| ATOM | 1119 | H2'1 | G B | 17 | 25.413 | 30.595 | 105.324 | 1.00 | 0.00 | H |
| ATOM | 1120 | H2'2 | G B | 17 | 26.888 | 31.493 | 104.999 | 1.00 | 0.00 | H |
| ATOM | 1121 | H5'1 | G B | 17 | 23.972 | 28.164 | 102.754 | 1.00 | 0.00 | H |
| ATOM | 1122 | H5'2 | G B | 17 | 25.104 | 27.100 | 103.617 | 1.00 | 0.00 | H |
| ATOM | 1123 | C1'  | C B | 18 | 28.295 | 35.412 | 102.772 | 1.00 | 0.00 | C |
| ATOM | 1124 | N1   | C B | 18 | 27.037 | 35.426 | 103.569 | 1.00 | 0.00 | N |
| ATOM | 1125 | C2   | C B | 18 | 26.095 | 36.412 | 103.281 | 1.00 | 0.00 | C |
| ATOM | 1126 | O2   | C B | 18 | 26.339 | 37.228 | 102.383 | 1.00 | 0.00 | O |
| ATOM | 1127 | N3   | C B | 18 | 24.945 | 36.442 | 103.996 | 1.00 | 0.00 | N |
| ATOM | 1128 | C4   | C B | 18 | 24.710 | 35.544 | 104.962 | 1.00 | 0.00 | C |
| ATOM | 1129 | N4   | C B | 18 | 23.567 | 35.621 | 105.628 | 1.00 | 0.00 | N |
| ATOM | 1130 | C5   | C B | 18 | 25.662 | 34.524 | 105.279 | 1.00 | 0.00 | C |
| ATOM | 1131 | C6   | C B | 18 | 26.812 | 34.510 | 104.547 | 1.00 | 0.00 | C |
| ATOM | 1132 | C2'  | C B | 18 | 29.532 | 35.046 | 103.582 | 1.00 | 0.00 | C |
| ATOM | 1133 | C3'  | C B | 18 | 30.347 | 34.249 | 102.576 | 1.00 | 0.00 | C |
| ATOM | 1134 | O3'  | C B | 18 | 31.102 | 35.149 | 101.769 | 1.00 | 0.00 | O |
| ATOM | 1135 | C4'  | C B | 18 | 29.272 | 33.518 | 101.773 | 1.00 | 0.00 | C |
| ATOM | 1136 | O4'  | C B | 18 | 28.143 | 34.448 | 101.747 | 1.00 | 0.00 | O |
| ATOM | 1137 | C5'  | C B | 18 | 28.798 | 32.198 | 102.332 | 1.00 | 0.00 | C |
| ATOM | 1138 | O5'  | C B | 18 | 28.759 | 32.266 | 103.780 | 1.00 | 0.00 | O |
| ATOM | 1139 | O1P  | C B | 18 | 30.534 | 30.627 | 104.489 | 1.00 | 0.00 | O |
| ATOM | 1140 | O2P  | C B | 18 | 28.594 | 31.108 | 106.005 | 1.00 | 0.00 | O |
| ATOM | 1141 | P    | C B | 18 | 29.100 | 30.953 | 104.620 | 1.00 | 0.00 | P |
| ATOM | 1142 | H5   | C B | 18 | 25.477 | 33.793 | 106.068 | 1.00 | 0.00 | H |
| ATOM | 1143 | H6   | C B | 18 | 27.564 | 33.749 | 104.750 | 1.00 | 0.00 | H |
| ATOM | 1144 | H1'  | C B | 18 | 28.411 | 36.387 | 102.301 | 1.00 | 0.00 | H |
| ATOM | 1145 | H3'  | C B | 18 | 31.021 | 33.546 | 103.063 | 1.00 | 0.00 | H |
| ATOM | 1146 | H4'  | C B | 18 | 29.691 | 33.327 | 100.784 | 1.00 | 0.00 | H |
| ATOM | 1147 | H41  | C B | 18 | 23.360 | 34.941 | 106.375 | 1.00 | 0.00 | H |
| ATOM | 1148 | H42  | C B | 18 | 22.884 | 36.357 | 105.397 | 1.00 | 0.00 | H |
| ATOM | 1149 | H2'1 | C B | 18 | 29.288 | 34.448 | 104.459 | 1.00 | 0.00 | H |
| ATOM | 1150 | H2'2 | C B | 18 | 30.074 | 35.927 | 103.927 | 1.00 | 0.00 | H |
| ATOM | 1151 | H5'1 | C B | 18 | 27.801 | 31.982 | 101.948 | 1.00 | 0.00 | H |
| ATOM | 1152 | H5'2 | C B | 18 | 29.481 | 31.410 | 102.019 | 1.00 | 0.00 | H |
| ATOM | 1153 | C1'  | C B | 19 | 28.952 | 40.318 | 102.622 | 1.00 | 0.00 | C |
| ATOM | 1154 | N1   | C B | 19 | 28.242 | 39.684 | 103.766 | 1.00 | 0.00 | N |

|      |      |      |     |    |        |        |         |      |      |   |
|------|------|------|-----|----|--------|--------|---------|------|------|---|
| ATOM | 1155 | C2   | C B | 19 | 26.996 | 40.194 | 104.126 | 1.00 | 0.00 | C |
| ATOM | 1156 | O2   | C B | 19 | 26.532 | 41.144 | 103.483 | 1.00 | 0.00 | O |
| ATOM | 1157 | N3   | C B | 19 | 26.336 | 39.630 | 105.165 | 1.00 | 0.00 | N |
| ATOM | 1158 | C4   | C B | 19 | 26.865 | 38.601 | 105.841 | 1.00 | 0.00 | C |
| ATOM | 1159 | N4   | C B | 19 | 26.176 | 38.088 | 106.847 | 1.00 | 0.00 | N |
| ATOM | 1160 | C5   | C B | 19 | 28.143 | 38.060 | 105.493 | 1.00 | 0.00 | C |
| ATOM | 1161 | C6   | C B | 19 | 28.790 | 38.642 | 104.444 | 1.00 | 0.00 | C |
| ATOM | 1162 | C2'  | C B | 19 | 30.458 | 40.420 | 102.813 | 1.00 | 0.00 | C |
| ATOM | 1163 | C3'  | C B | 19 | 30.973 | 40.193 | 101.399 | 1.00 | 0.00 | C |
| ATOM | 1164 | O3'  | C B | 19 | 30.949 | 41.427 | 100.688 | 1.00 | 0.00 | O |
| ATOM | 1165 | C4'  | C B | 19 | 29.978 | 39.182 | 100.834 | 1.00 | 0.00 | C |
| ATOM | 1166 | O4'  | C B | 19 | 28.708 | 39.526 | 101.474 | 1.00 | 0.00 | O |
| ATOM | 1167 | C5'  | C B | 19 | 30.273 | 37.724 | 101.105 | 1.00 | 0.00 | C |
| ATOM | 1168 | O5'  | C B | 19 | 30.847 | 37.578 | 102.428 | 1.00 | 0.00 | O |
| ATOM | 1169 | O1P  | C B | 19 | 33.192 | 36.792 | 101.964 | 1.00 | 0.00 | O |
| ATOM | 1170 | O2P  | C B | 19 | 32.068 | 36.183 | 104.124 | 1.00 | 0.00 | O |
| ATOM | 1171 | P    | C B | 19 | 31.942 | 36.446 | 102.669 | 1.00 | 0.00 | P |
| ATOM | 1172 | H5   | C B | 19 | 28.580 | 37.225 | 106.041 | 1.00 | 0.00 | H |
| ATOM | 1173 | H6   | C B | 19 | 29.766 | 38.262 | 104.141 | 1.00 | 0.00 | H |
| ATOM | 1174 | H1'  | C B | 19 | 28.512 | 41.301 | 102.451 | 1.00 | 0.00 | H |
| ATOM | 1175 | H3'  | C B | 19 | 31.986 | 39.792 | 101.394 | 1.00 | 0.00 | H |
| ATOM | 1176 | H4'  | C B | 19 | 29.962 | 39.322 | 99.753  | 1.00 | 0.00 | H |
| ATOM | 1177 | H41  | C B | 19 | 26.558 | 37.295 | 107.384 | 1.00 | 0.00 | H |
| ATOM | 1178 | H42  | C B | 19 | 25.255 | 38.481 | 107.096 | 1.00 | 0.00 | H |
| ATOM | 1179 | H2'1 | C B | 19 | 30.840 | 39.665 | 103.500 | 1.00 | 0.00 | H |
| ATOM | 1180 | H2'2 | C B | 19 | 30.762 | 41.394 | 103.195 | 1.00 | 0.00 | H |
| ATOM | 1181 | H5'1 | C B | 19 | 29.349 | 37.153 | 101.037 | 1.00 | 0.00 | H |
| ATOM | 1182 | H5'2 | C B | 19 | 30.976 | 37.359 | 100.357 | 1.00 | 0.00 | H |
| ATOM | 1183 | C1'  | T B | 20 | 27.780 | 45.004 | 103.703 | 1.00 | 0.00 | C |
| ATOM | 1184 | N1   | T B | 20 | 27.882 | 43.989 | 104.785 | 1.00 | 0.00 | N |
| ATOM | 1185 | C2   | T B | 20 | 26.816 | 43.890 | 105.657 | 1.00 | 0.00 | C |
| ATOM | 1186 | O2   | T B | 20 | 25.823 | 44.590 | 105.567 | 1.00 | 0.00 | O |
| ATOM | 1187 | N3   | T B | 20 | 26.953 | 42.935 | 106.646 | 1.00 | 0.00 | N |
| ATOM | 1188 | C4   | T B | 20 | 28.029 | 42.096 | 106.835 | 1.00 | 0.00 | C |
| ATOM | 1189 | O4   | T B | 20 | 28.037 | 41.277 | 107.763 | 1.00 | 0.00 | O |
| ATOM | 1190 | C5   | T B | 20 | 29.093 | 42.273 | 105.877 | 1.00 | 0.00 | C |
| ATOM | 1191 | C6   | T B | 20 | 28.995 | 43.194 | 104.898 | 1.00 | 0.00 | C |
| ATOM | 1192 | C7   | T B | 20 | 30.285 | 41.379 | 106.044 | 1.00 | 0.00 | C |
| ATOM | 1193 | C2'  | T B | 20 | 29.098 | 45.704 | 103.393 | 1.00 | 0.00 | C |
| ATOM | 1194 | C3'  | T B | 20 | 29.007 | 45.901 | 101.887 | 1.00 | 0.00 | C |
| ATOM | 1195 | O3'  | T B | 20 | 28.274 | 47.094 | 101.614 | 1.00 | 0.00 | O |
| ATOM | 1196 | C4'  | T B | 20 | 28.265 | 44.648 | 101.426 | 1.00 | 0.00 | C |
| ATOM | 1197 | O4'  | T B | 20 | 27.353 | 44.342 | 102.528 | 1.00 | 0.00 | O |
| ATOM | 1198 | C5'  | T B | 20 | 29.114 | 43.429 | 101.149 | 1.00 | 0.00 | C |
| ATOM | 1199 | O5'  | T B | 20 | 30.208 | 43.367 | 102.101 | 1.00 | 0.00 | O |
| ATOM | 1200 | O1P  | T B | 20 | 32.247 | 43.708 | 100.666 | 1.00 | 0.00 | O |
| ATOM | 1201 | O2P  | T B | 20 | 32.421 | 42.408 | 102.806 | 1.00 | 0.00 | O |
| ATOM | 1202 | P    | T B | 20 | 31.609 | 42.779 | 101.620 | 1.00 | 0.00 | P |
| ATOM | 1203 | H3   | T B | 20 | 26.171 | 42.841 | 107.309 | 1.00 | 0.00 | H |
| ATOM | 1204 | H6   | T B | 20 | 29.811 | 43.310 | 104.185 | 1.00 | 0.00 | H |
| ATOM | 1205 | H1'  | T B | 20 | 27.011 | 45.725 | 103.980 | 1.00 | 0.00 | H |
| ATOM | 1206 | H3'  | T B | 20 | 29.991 | 45.969 | 101.425 | 1.00 | 0.00 | H |
| ATOM | 1207 | H4'  | T B | 20 | 27.747 | 44.909 | 100.503 | 1.00 | 0.00 | H |
| ATOM | 1208 | H3T  | T B | 20 | 28.594 | 47.880 | 102.059 | 1.00 | 0.00 | H |

|      |      |      |     |    |        |        |         |      |      |   |
|------|------|------|-----|----|--------|--------|---------|------|------|---|
| ATOM | 1209 | H71  | T B | 20 | 31.155 | 41.979 | 106.307 | 1.00 | 0.00 | H |
| ATOM | 1210 | H72  | T B | 20 | 30.089 | 40.656 | 106.838 | 1.00 | 0.00 | H |
| ATOM | 1211 | H73  | T B | 20 | 30.477 | 40.849 | 105.111 | 1.00 | 0.00 | H |
| ATOM | 1212 | H2'1 | T B | 20 | 29.961 | 45.099 | 103.662 | 1.00 | 0.00 | H |
| ATOM | 1213 | H2'2 | T B | 20 | 29.191 | 46.659 | 103.913 | 1.00 | 0.00 | H |
| ATOM | 1214 | H5'1 | T B | 20 | 28.497 | 42.535 | 101.237 | 1.00 | 0.00 | H |
| ATOM | 1215 | H5'2 | T B | 20 | 29.511 | 43.493 | 100.137 | 1.00 | 0.00 | H |
| TER  |      |      |     |    |        |        |         |      |      |   |
| ATOM | 1    | C1'  | A A | 1  | 38.605 | 45.012 | 73.356  | 1.00 | 0.00 | C |
| ATOM | 2    | N1   | A A | 1  | 42.602 | 41.823 | 73.792  | 1.00 | 0.00 | N |
| ATOM | 3    | C2   | A A | 1  | 42.046 | 42.429 | 72.747  | 1.00 | 0.00 | C |
| ATOM | 4    | N3   | A A | 1  | 41.014 | 43.246 | 72.705  | 1.00 | 0.00 | N |
| ATOM | 5    | C4   | A A | 1  | 40.513 | 43.427 | 73.941  | 1.00 | 0.00 | C |
| ATOM | 6    | C5   | A A | 1  | 40.963 | 42.880 | 75.109  | 1.00 | 0.00 | C |
| ATOM | 7    | C6   | A A | 1  | 42.080 | 42.023 | 75.012  | 1.00 | 0.00 | C |
| ATOM | 8    | N6   | A A | 1  | 42.632 | 41.414 | 76.076  | 1.00 | 0.00 | N |
| ATOM | 9    | N7   | A A | 1  | 40.197 | 43.296 | 76.183  | 1.00 | 0.00 | N |
| ATOM | 10   | C8   | A A | 1  | 39.306 | 44.076 | 75.645  | 1.00 | 0.00 | C |
| ATOM | 11   | N9   | A A | 1  | 39.437 | 44.205 | 74.288  | 1.00 | 0.00 | N |
| ATOM | 12   | C2'  | A A | 1  | 37.124 | 45.021 | 73.707  | 1.00 | 0.00 | C |
| ATOM | 13   | C3'  | A A | 1  | 36.716 | 46.434 | 73.321  | 1.00 | 0.00 | C |
| ATOM | 14   | O3'  | A A | 1  | 36.417 | 46.472 | 71.928  | 1.00 | 0.00 | O |
| ATOM | 15   | C4'  | A A | 1  | 37.958 | 47.254 | 73.669  | 1.00 | 0.00 | C |
| ATOM | 16   | O4'  | A A | 1  | 39.074 | 46.345 | 73.403  | 1.00 | 0.00 | O |
| ATOM | 17   | C5'  | A A | 1  | 38.061 | 47.743 | 75.093  | 1.00 | 0.00 | C |
| ATOM | 18   | O5'  | A A | 1  | 37.526 | 46.744 | 75.997  | 1.00 | 0.00 | O |
| ATOM | 19   | H2   | A A | 1  | 42.514 | 42.222 | 71.786  | 1.00 | 0.00 | H |
| ATOM | 20   | H8   | A A | 1  | 38.530 | 44.582 | 76.221  | 1.00 | 0.00 | H |
| ATOM | 21   | H1'  | A A | 1  | 38.764 | 44.636 | 72.345  | 1.00 | 0.00 | H |
| ATOM | 22   | H3'  | A A | 1  | 35.847 | 46.778 | 73.886  | 1.00 | 0.00 | H |
| ATOM | 23   | H4'  | A A | 1  | 37.953 | 48.126 | 73.016  | 1.00 | 0.00 | H |
| ATOM | 24   | H61  | A A | 1  | 43.447 | 40.801 | 75.951  | 1.00 | 0.00 | H |
| ATOM | 25   | H62  | A A | 1  | 42.237 | 41.565 | 77.015  | 1.00 | 0.00 | H |
| ATOM | 26   | H5T  | A A | 1  | 37.074 | 47.034 | 76.791  | 1.00 | 0.00 | H |
| ATOM | 27   | H2'1 | A A | 1  | 36.947 | 44.833 | 74.765  | 1.00 | 0.00 | H |
| ATOM | 28   | H2'2 | A A | 1  | 36.560 | 44.279 | 73.142  | 1.00 | 0.00 | H |
| ATOM | 29   | H5'1 | A A | 1  | 39.108 | 47.932 | 75.331  | 1.00 | 0.00 | H |
| ATOM | 30   | H5'2 | A A | 1  | 37.499 | 48.670 | 75.195  | 1.00 | 0.00 | H |
| ATOM | 31   | C1'  | G A | 2  | 38.527 | 41.651 | 69.702  | 1.00 | 0.00 | C |
| ATOM | 32   | N1   | G A | 2  | 41.186 | 38.811 | 73.000  | 1.00 | 0.00 | N |
| ATOM | 33   | C2   | G A | 2  | 41.366 | 38.994 | 71.643  | 1.00 | 0.00 | C |
| ATOM | 34   | N2   | G A | 2  | 42.388 | 38.331 | 71.088  | 1.00 | 0.00 | N |
| ATOM | 35   | N3   | G A | 2  | 40.588 | 39.776 | 70.896  | 1.00 | 0.00 | N |
| ATOM | 36   | C4   | G A | 2  | 39.600 | 40.364 | 71.620  | 1.00 | 0.00 | C |
| ATOM | 37   | C5   | G A | 2  | 39.343 | 40.238 | 72.976  | 1.00 | 0.00 | C |
| ATOM | 38   | C6   | G A | 2  | 40.172 | 39.410 | 73.768  | 1.00 | 0.00 | C |
| ATOM | 39   | O6   | G A | 2  | 40.106 | 39.175 | 74.975  | 1.00 | 0.00 | O |
| ATOM | 40   | N7   | G A | 2  | 38.233 | 41.007 | 73.329  | 1.00 | 0.00 | N |
| ATOM | 41   | C8   | G A | 2  | 37.862 | 41.564 | 72.205  | 1.00 | 0.00 | C |
| ATOM | 42   | N9   | G A | 2  | 38.644 | 41.221 | 71.121  | 1.00 | 0.00 | N |
| ATOM | 43   | C2'  | G A | 2  | 37.090 | 41.785 | 69.216  | 1.00 | 0.00 | C |
| ATOM | 44   | C3'  | G A | 2  | 37.181 | 42.974 | 68.275  | 1.00 | 0.00 | C |
| ATOM | 45   | O3'  | G A | 2  | 37.606 | 42.524 | 66.991  | 1.00 | 0.00 | O |
| ATOM | 46   | C4'  | G A | 2  | 38.226 | 43.862 | 68.949  | 1.00 | 0.00 | C |

|      |     |      |     |   |        |        |        |      |      |   |
|------|-----|------|-----|---|--------|--------|--------|------|------|---|
| ATOM | 47  | O4'  | G A | 2 | 39.147 | 42.917 | 69.582 | 1.00 | 0.00 | O |
| ATOM | 48  | C5'  | G A | 2 | 37.716 | 44.818 | 70.002 | 1.00 | 0.00 | C |
| ATOM | 49  | O5'  | G A | 2 | 36.641 | 44.196 | 70.749 | 1.00 | 0.00 | O |
| ATOM | 50  | O1P  | G A | 2 | 34.632 | 45.585 | 70.143 | 1.00 | 0.00 | O |
| ATOM | 51  | O2P  | G A | 2 | 34.713 | 44.391 | 72.348 | 1.00 | 0.00 | O |
| ATOM | 52  | P    | G A | 2 | 35.446 | 45.111 | 71.278 | 1.00 | 0.00 | P |
| ATOM | 53  | H1   | G A | 2 | 41.846 | 38.187 | 73.486 | 1.00 | 0.00 | H |
| ATOM | 54  | H8   | G A | 2 | 37.011 | 42.240 | 72.131 | 1.00 | 0.00 | H |
| ATOM | 55  | H1'  | G A | 2 | 39.083 | 40.946 | 69.084 | 1.00 | 0.00 | H |
| ATOM | 56  | H21  | G A | 2 | 42.986 | 37.729 | 71.671 | 1.00 | 0.00 | H |
| ATOM | 57  | H3'  | G A | 2 | 36.227 | 43.493 | 68.180 | 1.00 | 0.00 | H |
| ATOM | 58  | H22  | G A | 2 | 42.573 | 38.424 | 70.079 | 1.00 | 0.00 | H |
| ATOM | 59  | H4'  | G A | 2 | 38.695 | 44.452 | 68.163 | 1.00 | 0.00 | H |
| ATOM | 60  | H2'1 | G A | 2 | 36.395 | 41.978 | 70.034 | 1.00 | 0.00 | H |
| ATOM | 61  | H2'2 | G A | 2 | 36.744 | 40.891 | 68.696 | 1.00 | 0.00 | H |
| ATOM | 62  | H5'1 | G A | 2 | 38.532 | 45.077 | 70.676 | 1.00 | 0.00 | H |
| ATOM | 63  | H5'2 | G A | 2 | 37.353 | 45.723 | 69.515 | 1.00 | 0.00 | H |
| ATOM | 64  | C1'  | G A | 3 | 39.580 | 37.262 | 67.663 | 1.00 | 0.00 | C |
| ATOM | 65  | N1   | G A | 3 | 39.827 | 35.704 | 72.514 | 1.00 | 0.00 | N |
| ATOM | 66  | C2   | G A | 3 | 40.655 | 35.414 | 71.445 | 1.00 | 0.00 | C |
| ATOM | 67  | N2   | G A | 3 | 41.683 | 34.596 | 71.702 | 1.00 | 0.00 | N |
| ATOM | 68  | N3   | G A | 3 | 40.470 | 35.897 | 70.219 | 1.00 | 0.00 | N |
| ATOM | 69  | C4   | G A | 3 | 39.377 | 36.701 | 70.139 | 1.00 | 0.00 | C |
| ATOM | 70  | C5   | G A | 3 | 38.495 | 37.045 | 71.150 | 1.00 | 0.00 | C |
| ATOM | 71  | C6   | G A | 3 | 38.692 | 36.534 | 72.453 | 1.00 | 0.00 | C |
| ATOM | 72  | O6   | G A | 3 | 38.025 | 36.723 | 73.471 | 1.00 | 0.00 | O |
| ATOM | 73  | N7   | G A | 3 | 37.502 | 37.893 | 70.655 | 1.00 | 0.00 | N |
| ATOM | 74  | C8   | G A | 3 | 37.809 | 38.036 | 69.392 | 1.00 | 0.00 | C |
| ATOM | 75  | N9   | G A | 3 | 38.936 | 37.341 | 69.003 | 1.00 | 0.00 | N |
| ATOM | 76  | C2'  | G A | 3 | 38.590 | 37.228 | 66.507 | 1.00 | 0.00 | C |
| ATOM | 77  | C3'  | G A | 3 | 39.319 | 38.025 | 65.440 | 1.00 | 0.00 | C |
| ATOM | 78  | O3'  | G A | 3 | 40.213 | 37.163 | 64.739 | 1.00 | 0.00 | O |
| ATOM | 79  | C4'  | G A | 3 | 40.060 | 39.085 | 66.253 | 1.00 | 0.00 | C |
| ATOM | 80  | O4'  | G A | 3 | 40.393 | 38.409 | 67.507 | 1.00 | 0.00 | O |
| ATOM | 81  | C5'  | G A | 3 | 39.290 | 40.344 | 66.573 | 1.00 | 0.00 | C |
| ATOM | 82  | O5'  | G A | 3 | 37.900 | 40.020 | 66.822 | 1.00 | 0.00 | O |
| ATOM | 83  | O1P  | G A | 3 | 36.690 | 41.127 | 64.913 | 1.00 | 0.00 | O |
| ATOM | 84  | O2P  | G A | 3 | 35.512 | 40.755 | 67.096 | 1.00 | 0.00 | O |
| ATOM | 85  | P    | G A | 3 | 36.776 | 41.064 | 66.384 | 1.00 | 0.00 | P |
| ATOM | 86  | H1   | G A | 3 | 40.060 | 35.281 | 73.425 | 1.00 | 0.00 | H |
| ATOM | 87  | H8   | G A | 3 | 37.226 | 38.649 | 68.706 | 1.00 | 0.00 | H |
| ATOM | 88  | H1'  | G A | 3 | 40.228 | 36.386 | 67.648 | 1.00 | 0.00 | H |
| ATOM | 89  | H21  | G A | 3 | 41.821 | 34.227 | 72.655 | 1.00 | 0.00 | H |
| ATOM | 90  | H3'  | G A | 3 | 38.631 | 38.485 | 64.729 | 1.00 | 0.00 | H |
| ATOM | 91  | H22  | G A | 3 | 42.335 | 34.338 | 70.949 | 1.00 | 0.00 | H |
| ATOM | 92  | H4'  | G A | 3 | 40.939 | 39.370 | 65.677 | 1.00 | 0.00 | H |
| ATOM | 93  | H2'1 | G A | 3 | 37.637 | 37.690 | 66.765 | 1.00 | 0.00 | H |
| ATOM | 94  | H2'2 | G A | 3 | 38.380 | 36.212 | 66.171 | 1.00 | 0.00 | H |
| ATOM | 95  | H5'1 | G A | 3 | 39.723 | 40.814 | 67.455 | 1.00 | 0.00 | H |
| ATOM | 96  | H5'2 | G A | 3 | 39.363 | 41.032 | 65.730 | 1.00 | 0.00 | H |
| ATOM | 97  | C1'  | C A | 4 | 40.685 | 32.437 | 67.819 | 1.00 | 0.00 | C |
| ATOM | 98  | N1   | C A | 4 | 39.512 | 32.968 | 68.566 | 1.00 | 0.00 | N |
| ATOM | 99  | C2   | C A | 4 | 39.403 | 32.648 | 69.918 | 1.00 | 0.00 | C |
| ATOM | 100 | O2   | C A | 4 | 40.276 | 31.942 | 70.438 | 1.00 | 0.00 | O |



|      |     |      |     |   |        |        |        |      |      |   |
|------|-----|------|-----|---|--------|--------|--------|------|------|---|
| ATOM | 101 | N3   | C A | 4 | 38.343 | 33.123 | 70.617 | 1.00 | 0.00 | N |
| ATOM | 102 | C4   | C A | 4 | 37.413 | 33.884 | 70.026 | 1.00 | 0.00 | C |
| ATOM | 103 | N4   | C A | 4 | 36.399 | 34.323 | 70.757 | 1.00 | 0.00 | N |
| ATOM | 104 | C5   | C A | 4 | 37.501 | 34.225 | 68.637 | 1.00 | 0.00 | C |
| ATOM | 105 | C6   | C A | 4 | 38.577 | 33.740 | 67.954 | 1.00 | 0.00 | C |
| ATOM | 106 | C2'  | C A | 4 | 40.363 | 32.014 | 66.392 | 1.00 | 0.00 | C |
| ATOM | 107 | C3'  | C A | 4 | 41.634 | 32.400 | 65.651 | 1.00 | 0.00 | C |
| ATOM | 108 | O3'  | C A | 4 | 42.589 | 31.348 | 65.780 | 1.00 | 0.00 | O |
| ATOM | 109 | C4'  | C A | 4 | 42.074 | 33.671 | 66.373 | 1.00 | 0.00 | C |
| ATOM | 110 | O4'  | C A | 4 | 41.659 | 33.462 | 67.760 | 1.00 | 0.00 | O |
| ATOM | 111 | C5'  | C A | 4 | 41.473 | 34.966 | 65.879 | 1.00 | 0.00 | C |
| ATOM | 112 | O5'  | C A | 4 | 40.095 | 34.747 | 65.484 | 1.00 | 0.00 | O |
| ATOM | 113 | O1P  | C A | 4 | 40.131 | 35.141 | 62.998 | 1.00 | 0.00 | O |
| ATOM | 114 | O2P  | C A | 4 | 38.023 | 35.535 | 64.300 | 1.00 | 0.00 | O |
| ATOM | 115 | P    | C A | 4 | 39.505 | 35.582 | 64.260 | 1.00 | 0.00 | P |
| ATOM | 116 | H5   | C A | 4 | 36.743 | 34.840 | 68.150 | 1.00 | 0.00 | H |
| ATOM | 117 | H6   | C A | 4 | 38.689 | 33.977 | 66.896 | 1.00 | 0.00 | H |
| ATOM | 118 | H1'  | C A | 4 | 41.104 | 31.608 | 68.387 | 1.00 | 0.00 | H |
| ATOM | 119 | H3'  | C A | 4 | 41.447 | 32.591 | 64.594 | 1.00 | 0.00 | H |
| ATOM | 120 | H4'  | C A | 4 | 43.156 | 33.742 | 66.258 | 1.00 | 0.00 | H |
| ATOM | 121 | H41  | C A | 4 | 35.671 | 34.911 | 70.327 | 1.00 | 0.00 | H |
| ATOM | 122 | H42  | C A | 4 | 36.338 | 34.075 | 71.756 | 1.00 | 0.00 | H |
| ATOM | 123 | H2'1 | C A | 4 | 39.496 | 32.537 | 65.990 | 1.00 | 0.00 | H |
| ATOM | 124 | H2'2 | C A | 4 | 40.165 | 30.943 | 66.313 | 1.00 | 0.00 | H |
| ATOM | 125 | H5'1 | C A | 4 | 41.513 | 35.708 | 66.677 | 1.00 | 0.00 | H |
| ATOM | 126 | H5'2 | C A | 4 | 42.048 | 35.325 | 65.026 | 1.00 | 0.00 | H |
| ATOM | 127 | C1'  | C A | 5 | 40.725 | 27.949 | 69.912 | 1.00 | 0.00 | C |
| ATOM | 128 | N1   | C A | 5 | 39.451 | 28.707 | 69.775 | 1.00 | 0.00 | N |
| ATOM | 129 | C2   | C A | 5 | 38.664 | 28.868 | 70.912 | 1.00 | 0.00 | C |
| ATOM | 130 | O2   | C A | 5 | 39.050 | 28.378 | 71.983 | 1.00 | 0.00 | O |
| ATOM | 131 | N3   | C A | 5 | 37.501 | 29.557 | 70.810 | 1.00 | 0.00 | N |
| ATOM | 132 | C4   | C A | 5 | 37.108 | 30.074 | 69.639 | 1.00 | 0.00 | C |
| ATOM | 133 | N4   | C A | 5 | 35.965 | 30.740 | 69.597 | 1.00 | 0.00 | N |
| ATOM | 134 | C5   | C A | 5 | 37.898 | 29.922 | 68.453 | 1.00 | 0.00 | C |
| ATOM | 135 | C6   | C A | 5 | 39.065 | 29.229 | 68.581 | 1.00 | 0.00 | C |
| ATOM | 136 | C2'  | C A | 5 | 41.045 | 27.066 | 68.713 | 1.00 | 0.00 | C |
| ATOM | 137 | C3'  | C A | 5 | 42.560 | 27.173 | 68.637 | 1.00 | 0.00 | C |
| ATOM | 138 | O3'  | C A | 5 | 43.141 | 26.224 | 69.529 | 1.00 | 0.00 | O |
| ATOM | 139 | C4'  | C A | 5 | 42.822 | 28.612 | 69.074 | 1.00 | 0.00 | C |
| ATOM | 140 | O4'  | C A | 5 | 41.773 | 28.889 | 70.055 | 1.00 | 0.00 | O |
| ATOM | 141 | C5'  | C A | 5 | 42.762 | 29.664 | 67.990 | 1.00 | 0.00 | C |
| ATOM | 142 | O5'  | C A | 5 | 41.718 | 29.328 | 67.040 | 1.00 | 0.00 | O |
| ATOM | 143 | O1P  | C A | 5 | 42.990 | 28.852 | 64.922 | 1.00 | 0.00 | O |
| ATOM | 144 | O2P  | C A | 5 | 40.623 | 29.674 | 64.805 | 1.00 | 0.00 | O |
| ATOM | 145 | P    | C A | 5 | 41.932 | 29.699 | 65.504 | 1.00 | 0.00 | P |
| ATOM | 146 | H5   | C A | 5 | 37.580 | 30.337 | 67.496 | 1.00 | 0.00 | H |
| ATOM | 147 | H6   | C A | 5 | 39.703 | 29.091 | 67.708 | 1.00 | 0.00 | H |
| ATOM | 148 | H1'  | C A | 5 | 40.675 | 27.362 | 70.828 | 1.00 | 0.00 | H |
| ATOM | 149 | H3'  | C A | 5 | 42.932 | 26.992 | 67.628 | 1.00 | 0.00 | H |
| ATOM | 150 | H4'  | C A | 5 | 43.824 | 28.635 | 69.502 | 1.00 | 0.00 | H |
| ATOM | 151 | H41  | C A | 5 | 35.640 | 31.150 | 68.709 | 1.00 | 0.00 | H |
| ATOM | 152 | H42  | C A | 5 | 35.398 | 30.847 | 70.451 | 1.00 | 0.00 | H |
| ATOM | 153 | H2'1 | C A | 5 | 40.577 | 27.426 | 67.798 | 1.00 | 0.00 | H |
| ATOM | 154 | H2'2 | C A | 5 | 40.726 | 26.034 | 68.863 | 1.00 | 0.00 | H |

|      |     |      |   |   |   |        |        |        |      |      |   |
|------|-----|------|---|---|---|--------|--------|--------|------|------|---|
| ATOM | 155 | H5'1 | C | A | 5 | 42.549 | 30.633 | 68.443 | 1.00 | 0.00 | H |
| ATOM | 156 | H5'2 | C | A | 5 | 43.723 | 29.708 | 67.481 | 1.00 | 0.00 | H |
| ATOM | 157 | C1'  | G | A | 6 | 38.988 | 24.442 | 72.948 | 1.00 | 0.00 | C |
| ATOM | 158 | N1   | G | A | 6 | 34.566 | 26.918 | 72.357 | 1.00 | 0.00 | N |
| ATOM | 159 | C2   | G | A | 6 | 35.141 | 26.386 | 73.500 | 1.00 | 0.00 | C |
| ATOM | 160 | N2   | G | A | 6 | 34.443 | 26.528 | 74.632 | 1.00 | 0.00 | N |
| ATOM | 161 | N3   | G | A | 6 | 36.317 | 25.759 | 73.506 | 1.00 | 0.00 | N |
| ATOM | 162 | C4   | G | A | 6 | 36.878 | 25.699 | 72.271 | 1.00 | 0.00 | C |
| ATOM | 163 | C5   | G | A | 6 | 36.378 | 26.198 | 71.080 | 1.00 | 0.00 | C |
| ATOM | 164 | C6   | G | A | 6 | 35.134 | 26.865 | 71.070 | 1.00 | 0.00 | C |
| ATOM | 165 | O6   | G | A | 6 | 34.530 | 27.371 | 70.124 | 1.00 | 0.00 | O |
| ATOM | 166 | N7   | G | A | 6 | 37.263 | 25.926 | 70.034 | 1.00 | 0.00 | N |
| ATOM | 167 | C8   | G | A | 6 | 38.249 | 25.291 | 70.611 | 1.00 | 0.00 | C |
| ATOM | 168 | N9   | G | A | 6 | 38.088 | 25.113 | 71.970 | 1.00 | 0.00 | N |
| ATOM | 169 | C2'  | G | A | 6 | 39.680 | 23.205 | 72.396 | 1.00 | 0.00 | C |
| ATOM | 170 | C3'  | G | A | 6 | 41.041 | 23.273 | 73.070 | 1.00 | 0.00 | C |
| ATOM | 171 | O3'  | G | A | 6 | 40.953 | 22.683 | 74.365 | 1.00 | 0.00 | O |
| ATOM | 172 | C4'  | G | A | 6 | 41.311 | 24.775 | 73.136 | 1.00 | 0.00 | C |
| ATOM | 173 | O4'  | G | A | 6 | 39.988 | 25.371 | 73.321 | 1.00 | 0.00 | O |
| ATOM | 174 | C5'  | G | A | 6 | 41.956 | 25.396 | 71.921 | 1.00 | 0.00 | C |
| ATOM | 175 | O5'  | G | A | 6 | 41.452 | 24.762 | 70.719 | 1.00 | 0.00 | O |
| ATOM | 176 | O1P  | G | A | 6 | 43.473 | 23.590 | 69.786 | 1.00 | 0.00 | O |
| ATOM | 177 | O2P  | G | A | 6 | 41.632 | 24.330 | 68.250 | 1.00 | 0.00 | O |
| ATOM | 178 | P    | G | A | 6 | 42.432 | 24.587 | 69.474 | 1.00 | 0.00 | P |
| ATOM | 179 | H1   | G | A | 6 | 33.655 | 27.390 | 72.461 | 1.00 | 0.00 | H |
| ATOM | 180 | H8   | G | A | 6 | 39.123 | 24.931 | 70.068 | 1.00 | 0.00 | H |
| ATOM | 181 | H1'  | G | A | 6 | 38.406 | 24.201 | 73.838 | 1.00 | 0.00 | H |
| ATOM | 182 | H21  | G | A | 6 | 33.536 | 27.017 | 74.620 | 1.00 | 0.00 | H |
| ATOM | 183 | H3'  | G | A | 6 | 41.811 | 22.760 | 72.492 | 1.00 | 0.00 | H |
| ATOM | 184 | H22  | G | A | 6 | 34.815 | 26.152 | 75.516 | 1.00 | 0.00 | H |
| ATOM | 185 | H4'  | G | A | 6 | 41.974 | 24.940 | 73.986 | 1.00 | 0.00 | H |
| ATOM | 186 | H2'1 | G | A | 6 | 39.775 | 23.233 | 71.309 | 1.00 | 0.00 | H |
| ATOM | 187 | H2'2 | G | A | 6 | 39.155 | 22.285 | 72.654 | 1.00 | 0.00 | H |
| ATOM | 188 | H5'1 | G | A | 6 | 41.729 | 26.461 | 71.898 | 1.00 | 0.00 | H |
| ATOM | 189 | H5'2 | G | A | 6 | 43.037 | 25.263 | 71.982 | 1.00 | 0.00 | H |
| ATOM | 190 | C1'  | C | A | 7 | 35.444 | 22.187 | 75.571 | 1.00 | 0.00 | C |
| ATOM | 191 | N1   | C | A | 7 | 35.240 | 22.490 | 74.128 | 1.00 | 0.00 | N |
| ATOM | 192 | C2   | C | A | 7 | 34.079 | 23.170 | 73.765 | 1.00 | 0.00 | C |
| ATOM | 193 | O2   | C | A | 7 | 33.271 | 23.489 | 74.646 | 1.00 | 0.00 | O |
| ATOM | 194 | N3   | C | A | 7 | 33.873 | 23.456 | 72.456 | 1.00 | 0.00 | N |
| ATOM | 195 | C4   | C | A | 7 | 34.763 | 23.096 | 71.523 | 1.00 | 0.00 | C |
| ATOM | 196 | N4   | C | A | 7 | 34.513 | 23.404 | 70.259 | 1.00 | 0.00 | N |
| ATOM | 197 | C5   | C | A | 7 | 35.964 | 22.393 | 71.868 | 1.00 | 0.00 | C |
| ATOM | 198 | C6   | C | A | 7 | 36.154 | 22.119 | 73.193 | 1.00 | 0.00 | C |
| ATOM | 199 | C2'  | C | A | 7 | 36.085 | 20.829 | 75.828 | 1.00 | 0.00 | C |
| ATOM | 200 | C3'  | C | A | 7 | 36.961 | 21.116 | 77.038 | 1.00 | 0.00 | C |
| ATOM | 201 | O3'  | C | A | 7 | 36.174 | 21.002 | 78.222 | 1.00 | 0.00 | O |
| ATOM | 202 | C4'  | C | A | 7 | 37.427 | 22.548 | 76.789 | 1.00 | 0.00 | C |
| ATOM | 203 | O4'  | C | A | 7 | 36.300 | 23.182 | 76.103 | 1.00 | 0.00 | O |
| ATOM | 204 | C5'  | C | A | 7 | 38.664 | 22.713 | 75.937 | 1.00 | 0.00 | C |
| ATOM | 205 | O5'  | C | A | 7 | 38.676 | 21.710 | 74.891 | 1.00 | 0.00 | O |
| ATOM | 206 | O1P  | C | A | 7 | 40.660 | 20.275 | 75.480 | 1.00 | 0.00 | O |
| ATOM | 207 | O2P  | C | A | 7 | 39.910 | 20.463 | 73.093 | 1.00 | 0.00 | O |
| ATOM | 208 | P    | C | A | 7 | 40.076 | 21.115 | 74.413 | 1.00 | 0.00 | P |

|      |     |      |     |   |        |        |        |      |      |   |
|------|-----|------|-----|---|--------|--------|--------|------|------|---|
| ATOM | 209 | H5   | C A | 7 | 36.691 | 22.092 | 71.113 | 1.00 | 0.00 | H |
| ATOM | 210 | H6   | C A | 7 | 37.056 | 21.594 | 73.506 | 1.00 | 0.00 | H |
| ATOM | 211 | H1'  | C A | 7 | 34.482 | 22.267 | 76.077 | 1.00 | 0.00 | H |
| ATOM | 212 | H3'  | C A | 7 | 37.807 | 20.430 | 77.100 | 1.00 | 0.00 | H |
| ATOM | 213 | H4'  | C A | 7 | 37.634 | 22.988 | 77.765 | 1.00 | 0.00 | H |
| ATOM | 214 | H41  | C A | 7 | 35.184 | 23.141 | 69.522 | 1.00 | 0.00 | H |
| ATOM | 215 | H42  | C A | 7 | 33.649 | 23.907 | 70.011 | 1.00 | 0.00 | H |
| ATOM | 216 | H2'1 | C A | 7 | 36.679 | 20.485 | 74.982 | 1.00 | 0.00 | H |
| ATOM | 217 | H2'2 | C A | 7 | 35.346 | 20.057 | 76.046 | 1.00 | 0.00 | H |
| ATOM | 218 | H5'1 | C A | 7 | 38.664 | 23.710 | 75.493 | 1.00 | 0.00 | H |
| ATOM | 219 | H5'2 | C A | 7 | 39.548 | 22.600 | 76.565 | 1.00 | 0.00 | H |
| ATOM | 220 | C1'  | A A | 8 | 30.761 | 20.966 | 76.605 | 1.00 | 0.00 | C |
| ATOM | 221 | N1   | A A | 8 | 30.031 | 21.844 | 71.601 | 1.00 | 0.00 | N |
| ATOM | 222 | C2   | A A | 8 | 29.323 | 22.161 | 72.681 | 1.00 | 0.00 | C |
| ATOM | 223 | N3   | A A | 8 | 29.571 | 21.907 | 73.948 | 1.00 | 0.00 | N |
| ATOM | 224 | C4   | A A | 8 | 30.722 | 21.218 | 74.067 | 1.00 | 0.00 | C |
| ATOM | 225 | C5   | A A | 8 | 31.559 | 20.817 | 73.065 | 1.00 | 0.00 | C |
| ATOM | 226 | C6   | A A | 8 | 31.175 | 21.160 | 71.752 | 1.00 | 0.00 | C |
| ATOM | 227 | N6   | A A | 8 | 31.898 | 20.833 | 70.667 | 1.00 | 0.00 | N |
| ATOM | 228 | N7   | A A | 8 | 32.651 | 20.131 | 73.569 | 1.00 | 0.00 | N |
| ATOM | 229 | C8   | A A | 8 | 32.450 | 20.128 | 74.854 | 1.00 | 0.00 | C |
| ATOM | 230 | N9   | A A | 8 | 31.299 | 20.772 | 75.232 | 1.00 | 0.00 | N |
| ATOM | 231 | C2'  | A A | 8 | 30.973 | 19.770 | 77.523 | 1.00 | 0.00 | C |
| ATOM | 232 | C3'  | A A | 8 | 31.222 | 20.440 | 78.864 | 1.00 | 0.00 | C |
| ATOM | 233 | O3'  | A A | 8 | 29.970 | 20.729 | 79.480 | 1.00 | 0.00 | O |
| ATOM | 234 | C4'  | A A | 8 | 31.981 | 21.708 | 78.476 | 1.00 | 0.00 | C |
| ATOM | 235 | O4'  | A A | 8 | 31.423 | 22.079 | 77.174 | 1.00 | 0.00 | O |
| ATOM | 236 | C5'  | A A | 8 | 33.479 | 21.577 | 78.340 | 1.00 | 0.00 | C |
| ATOM | 237 | O5'  | A A | 8 | 33.810 | 20.283 | 77.775 | 1.00 | 0.00 | O |
| ATOM | 238 | O1P  | A A | 8 | 35.025 | 19.124 | 79.651 | 1.00 | 0.00 | O |
| ATOM | 239 | O2P  | A A | 8 | 35.512 | 18.506 | 77.267 | 1.00 | 0.00 | O |
| ATOM | 240 | P    | A A | 8 | 35.152 | 19.561 | 78.247 | 1.00 | 0.00 | P |
| ATOM | 241 | H2   | A A | 8 | 28.405 | 22.714 | 72.490 | 1.00 | 0.00 | H |
| ATOM | 242 | H8   | A A | 8 | 33.131 | 19.660 | 75.564 | 1.00 | 0.00 | H |
| ATOM | 243 | H1'  | A A | 8 | 29.701 | 21.212 | 76.523 | 1.00 | 0.00 | H |
| ATOM | 244 | H3'  | A A | 8 | 31.816 | 19.815 | 79.530 | 1.00 | 0.00 | H |
| ATOM | 245 | H4'  | A A | 8 | 31.780 | 22.447 | 79.251 | 1.00 | 0.00 | H |
| ATOM | 246 | H61  | A A | 8 | 31.575 | 21.110 | 69.730 | 1.00 | 0.00 | H |
| ATOM | 247 | H62  | A A | 8 | 32.777 | 20.305 | 70.775 | 1.00 | 0.00 | H |
| ATOM | 248 | H2'1 | A A | 8 | 31.826 | 19.163 | 77.219 | 1.00 | 0.00 | H |
| ATOM | 249 | H2'2 | A A | 8 | 30.102 | 19.118 | 77.560 | 1.00 | 0.00 | H |
| ATOM | 250 | H5'1 | A A | 8 | 33.849 | 22.369 | 77.688 | 1.00 | 0.00 | H |
| ATOM | 251 | H5'2 | A A | 8 | 33.938 | 21.678 | 79.322 | 1.00 | 0.00 | H |
| ATOM | 252 | C1'  | C A | 9 | 26.004 | 20.197 | 75.401 | 1.00 | 0.00 | C |
| ATOM | 253 | N1   | C A | 9 | 27.092 | 19.537 | 74.629 | 1.00 | 0.00 | N |
| ATOM | 254 | C2   | C A | 9 | 27.076 | 19.660 | 73.241 | 1.00 | 0.00 | C |
| ATOM | 255 | O2   | C A | 9 | 26.163 | 20.306 | 72.710 | 1.00 | 0.00 | O |
| ATOM | 256 | N3   | C A | 9 | 28.058 | 19.066 | 72.520 | 1.00 | 0.00 | N |
| ATOM | 257 | C4   | C A | 9 | 29.031 | 18.371 | 73.124 | 1.00 | 0.00 | C |
| ATOM | 258 | N4   | C A | 9 | 29.969 | 17.815 | 72.370 | 1.00 | 0.00 | N |
| ATOM | 259 | C5   | C A | 9 | 29.072 | 18.225 | 74.550 | 1.00 | 0.00 | C |
| ATOM | 260 | C6   | C A | 9 | 28.075 | 18.835 | 75.256 | 1.00 | 0.00 | C |
| ATOM | 261 | C2'  | C A | 9 | 25.528 | 19.392 | 76.602 | 1.00 | 0.00 | C |
| ATOM | 262 | C3'  | C A | 9 | 25.219 | 20.485 | 77.615 | 1.00 | 0.00 | C |

|      |     |      |     |    |        |        |        |      |      |   |
|------|-----|------|-----|----|--------|--------|--------|------|------|---|
| ATOM | 263 | O3'  | C A | 9  | 23.900 | 20.977 | 77.383 | 1.00 | 0.00 | O |
| ATOM | 264 | C4'  | C A | 9  | 26.287 | 21.535 | 77.317 | 1.00 | 0.00 | C |
| ATOM | 265 | O4'  | C A | 9  | 26.501 | 21.436 | 75.874 | 1.00 | 0.00 | O |
| ATOM | 266 | C5'  | C A | 9  | 27.615 | 21.358 | 78.015 | 1.00 | 0.00 | C |
| ATOM | 267 | O5'  | C A | 9  | 27.932 | 19.946 | 78.113 | 1.00 | 0.00 | O |
| ATOM | 268 | O1P  | C A | 9  | 27.862 | 19.501 | 80.589 | 1.00 | 0.00 | O |
| ATOM | 269 | O2P  | C A | 9  | 29.313 | 18.093 | 79.102 | 1.00 | 0.00 | O |
| ATOM | 270 | P    | C A | 9  | 28.726 | 19.424 | 79.394 | 1.00 | 0.00 | P |
| ATOM | 271 | H5   | C A | 9  | 29.860 | 17.655 | 75.045 | 1.00 | 0.00 | H |
| ATOM | 272 | H6   | C A | 9  | 28.068 | 18.760 | 76.344 | 1.00 | 0.00 | H |
| ATOM | 273 | H1'  | C A | 9  | 25.180 | 20.405 | 74.719 | 1.00 | 0.00 | H |
| ATOM | 274 | H3'  | C A | 9  | 25.294 | 20.124 | 78.639 | 1.00 | 0.00 | H |
| ATOM | 275 | H4'  | C A | 9  | 25.877 | 22.499 | 77.622 | 1.00 | 0.00 | H |
| ATOM | 276 | H41  | C A | 9  | 30.730 | 17.277 | 72.809 | 1.00 | 0.00 | H |
| ATOM | 277 | H42  | C A | 9  | 29.935 | 17.919 | 71.346 | 1.00 | 0.00 | H |
| ATOM | 278 | H2'1 | C A | 9  | 26.293 | 18.713 | 76.975 | 1.00 | 0.00 | H |
| ATOM | 279 | H2'2 | C A | 9  | 24.642 | 18.797 | 76.377 | 1.00 | 0.00 | H |
| ATOM | 280 | H5'1 | C A | 9  | 28.390 | 21.871 | 77.448 | 1.00 | 0.00 | H |
| ATOM | 281 | H5'2 | C A | 9  | 27.555 | 21.791 | 79.014 | 1.00 | 0.00 | H |
| ATOM | 282 | C1'  | C A | 10 | 22.323 | 19.083 | 72.281 | 1.00 | 0.00 | C |
| ATOM | 283 | N1   | C A | 10 | 23.512 | 18.195 | 72.394 | 1.00 | 0.00 | N |
| ATOM | 284 | C2   | C A | 10 | 24.173 | 17.838 | 71.220 | 1.00 | 0.00 | C |
| ATOM | 285 | O2   | C A | 10 | 23.749 | 18.268 | 70.140 | 1.00 | 0.00 | O |
| ATOM | 286 | N3   | C A | 10 | 25.259 | 17.031 | 71.300 | 1.00 | 0.00 | N |
| ATOM | 287 | C4   | C A | 10 | 25.696 | 16.579 | 72.484 | 1.00 | 0.00 | C |
| ATOM | 288 | N4   | C A | 10 | 26.764 | 15.795 | 72.505 | 1.00 | 0.00 | N |
| ATOM | 289 | C5   | C A | 10 | 25.033 | 16.927 | 73.707 | 1.00 | 0.00 | C |
| ATOM | 290 | C6   | C A | 10 | 23.944 | 17.745 | 73.602 | 1.00 | 0.00 | C |
| ATOM | 291 | C2'  | C A | 10 | 21.205 | 18.737 | 73.255 | 1.00 | 0.00 | C |
| ATOM | 292 | C3'  | C A | 10 | 20.652 | 20.110 | 73.602 | 1.00 | 0.00 | C |
| ATOM | 293 | O3'  | C A | 10 | 19.707 | 20.499 | 72.606 | 1.00 | 0.00 | O |
| ATOM | 294 | C4'  | C A | 10 | 21.897 | 20.992 | 73.590 | 1.00 | 0.00 | C |
| ATOM | 295 | O4'  | C A | 10 | 22.746 | 20.406 | 72.553 | 1.00 | 0.00 | O |
| ATOM | 296 | C5'  | C A | 10 | 22.685 | 21.058 | 74.878 | 1.00 | 0.00 | C |
| ATOM | 297 | O5'  | C A | 10 | 22.669 | 19.762 | 75.530 | 1.00 | 0.00 | O |
| ATOM | 298 | O1P  | C A | 10 | 21.362 | 20.187 | 77.639 | 1.00 | 0.00 | O |
| ATOM | 299 | O2P  | C A | 10 | 23.071 | 18.352 | 77.570 | 1.00 | 0.00 | O |
| ATOM | 300 | P    | C A | 10 | 22.658 | 19.704 | 77.124 | 1.00 | 0.00 | P |
| ATOM | 301 | H5   | C A | 10 | 25.380 | 16.556 | 74.672 | 1.00 | 0.00 | H |
| ATOM | 302 | H6   | C A | 10 | 23.412 | 18.044 | 74.505 | 1.00 | 0.00 | H |
| ATOM | 303 | H1'  | C A | 10 | 21.969 | 19.049 | 71.251 | 1.00 | 0.00 | H |
| ATOM | 304 | H3'  | C A | 10 | 20.169 | 20.120 | 74.579 | 1.00 | 0.00 | H |
| ATOM | 305 | H4'  | C A | 10 | 21.568 | 22.003 | 73.352 | 1.00 | 0.00 | H |
| ATOM | 306 | H41  | C A | 10 | 27.121 | 15.436 | 73.403 | 1.00 | 0.00 | H |
| ATOM | 307 | H42  | C A | 10 | 27.236 | 15.544 | 71.625 | 1.00 | 0.00 | H |
| ATOM | 308 | H2'1 | C A | 10 | 21.573 | 18.223 | 74.142 | 1.00 | 0.00 | H |
| ATOM | 309 | H2'2 | C A | 10 | 20.441 | 18.103 | 72.799 | 1.00 | 0.00 | H |
| ATOM | 310 | H5'1 | C A | 10 | 23.714 | 21.345 | 74.656 | 1.00 | 0.00 | H |
| ATOM | 311 | H5'2 | C A | 10 | 22.239 | 21.805 | 75.533 | 1.00 | 0.00 | H |
| ATOM | 312 | C1'  | T A | 11 | 20.399 | 17.000 | 68.224 | 1.00 | 0.00 | C |
| ATOM | 313 | N1   | T A | 11 | 21.231 | 16.191 | 69.154 | 1.00 | 0.00 | N |
| ATOM | 314 | C2   | T A | 11 | 22.272 | 15.471 | 68.605 | 1.00 | 0.00 | C |
| ATOM | 315 | O2   | T A | 11 | 22.523 | 15.479 | 67.412 | 1.00 | 0.00 | O |
| ATOM | 316 | N3   | T A | 11 | 23.020 | 14.735 | 69.505 | 1.00 | 0.00 | N |

|      |     |      |     |    |        |        |        |      |      |   |
|------|-----|------|-----|----|--------|--------|--------|------|------|---|
| ATOM | 317 | C4   | T A | 11 | 22.820 | 14.656 | 70.868 | 1.00 | 0.00 | C |
| ATOM | 318 | O4   | T A | 11 | 23.556 | 13.957 | 71.576 | 1.00 | 0.00 | O |
| ATOM | 319 | C5   | T A | 11 | 21.708 | 15.442 | 71.349 | 1.00 | 0.00 | C |
| ATOM | 320 | C6   | T A | 11 | 20.959 | 16.172 | 70.500 | 1.00 | 0.00 | C |
| ATOM | 321 | C7   | T A | 11 | 21.456 | 15.387 | 72.827 | 1.00 | 0.00 | C |
| ATOM | 322 | C2'  | T A | 11 | 18.916 | 17.008 | 68.574 | 1.00 | 0.00 | C |
| ATOM | 323 | C3'  | T A | 11 | 18.507 | 18.423 | 68.193 | 1.00 | 0.00 | C |
| ATOM | 324 | O3'  | T A | 11 | 18.210 | 18.466 | 66.799 | 1.00 | 0.00 | O |
| ATOM | 325 | C4'  | T A | 11 | 19.748 | 19.240 | 68.545 | 1.00 | 0.00 | C |
| ATOM | 326 | O4'  | T A | 11 | 20.866 | 18.335 | 68.276 | 1.00 | 0.00 | O |
| ATOM | 327 | C5'  | T A | 11 | 19.852 | 19.725 | 69.972 | 1.00 | 0.00 | C |
| ATOM | 328 | O5'  | T A | 11 | 19.316 | 18.721 | 70.870 | 1.00 | 0.00 | O |
| ATOM | 329 | O1P  | T A | 11 | 17.279 | 19.835 | 71.840 | 1.00 | 0.00 | O |
| ATOM | 330 | O2P  | T A | 11 | 18.486 | 18.068 | 73.150 | 1.00 | 0.00 | O |
| ATOM | 331 | P    | T A | 11 | 18.563 | 19.198 | 72.191 | 1.00 | 0.00 | P |
| ATOM | 332 | H3   | T A | 11 | 23.806 | 14.193 | 69.121 | 1.00 | 0.00 | H |
| ATOM | 333 | H6   | T A | 11 | 20.125 | 16.758 | 70.887 | 1.00 | 0.00 | H |
| ATOM | 334 | H1'  | T A | 11 | 20.559 | 16.628 | 67.211 | 1.00 | 0.00 | H |
| ATOM | 335 | H3'  | T A | 11 | 17.640 | 18.761 | 68.757 | 1.00 | 0.00 | H |
| ATOM | 336 | H4'  | T A | 11 | 19.744 | 20.117 | 67.894 | 1.00 | 0.00 | H |
| ATOM | 337 | H71  | T A | 11 | 20.495 | 14.907 | 73.013 | 1.00 | 0.00 | H |
| ATOM | 338 | H72  | T A | 11 | 22.248 | 14.814 | 73.310 | 1.00 | 0.00 | H |
| ATOM | 339 | H73  | T A | 11 | 21.440 | 16.398 | 73.232 | 1.00 | 0.00 | H |
| ATOM | 340 | H2'1 | T A | 11 | 18.741 | 16.815 | 69.630 | 1.00 | 0.00 | H |
| ATOM | 341 | H2'2 | T A | 11 | 18.353 | 16.265 | 68.007 | 1.00 | 0.00 | H |
| ATOM | 342 | H5'1 | T A | 11 | 20.898 | 19.914 | 70.211 | 1.00 | 0.00 | H |
| ATOM | 343 | H5'2 | T A | 11 | 19.287 | 20.651 | 70.076 | 1.00 | 0.00 | H |
| ATOM | 344 | C1'  | A A | 12 | 20.305 | 13.655 | 64.559 | 1.00 | 0.00 | C |
| ATOM | 345 | N1   | A A | 12 | 22.997 | 10.789 | 67.857 | 1.00 | 0.00 | N |
| ATOM | 346 | C2   | A A | 12 | 23.115 | 11.006 | 66.551 | 1.00 | 0.00 | C |
| ATOM | 347 | N3   | A A | 12 | 22.385 | 11.764 | 65.759 | 1.00 | 0.00 | N |
| ATOM | 348 | C4   | A A | 12 | 21.401 | 12.356 | 66.459 | 1.00 | 0.00 | C |
| ATOM | 349 | C5   | A A | 12 | 21.143 | 12.238 | 67.795 | 1.00 | 0.00 | C |
| ATOM | 350 | C6   | A A | 12 | 22.005 | 11.396 | 68.528 | 1.00 | 0.00 | C |
| ATOM | 351 | N6   | A A | 12 | 21.875 | 11.183 | 69.850 | 1.00 | 0.00 | N |
| ATOM | 352 | N7   | A A | 12 | 20.048 | 12.998 | 68.162 | 1.00 | 0.00 | N |
| ATOM | 353 | C8   | A A | 12 | 19.666 | 13.553 | 67.049 | 1.00 | 0.00 | C |
| ATOM | 354 | N9   | A A | 12 | 20.443 | 13.211 | 65.972 | 1.00 | 0.00 | N |
| ATOM | 355 | C2'  | A A | 12 | 18.860 | 13.789 | 64.098 | 1.00 | 0.00 | C |
| ATOM | 356 | C3'  | A A | 12 | 18.934 | 14.989 | 63.166 | 1.00 | 0.00 | C |
| ATOM | 357 | O3'  | A A | 12 | 19.341 | 14.550 | 61.871 | 1.00 | 0.00 | O |
| ATOM | 358 | C4'  | A A | 12 | 19.988 | 15.873 | 63.832 | 1.00 | 0.00 | C |
| ATOM | 359 | O4'  | A A | 12 | 20.920 | 14.923 | 64.444 | 1.00 | 0.00 | O |
| ATOM | 360 | C5'  | A A | 12 | 19.491 | 16.818 | 64.900 | 1.00 | 0.00 | C |
| ATOM | 361 | O5'  | A A | 12 | 18.429 | 16.187 | 65.659 | 1.00 | 0.00 | O |
| ATOM | 362 | O1P  | A A | 12 | 16.407 | 17.577 | 65.094 | 1.00 | 0.00 | O |
| ATOM | 363 | O2P  | A A | 12 | 16.523 | 16.362 | 67.287 | 1.00 | 0.00 | O |
| ATOM | 364 | P    | A A | 12 | 17.240 | 17.093 | 66.213 | 1.00 | 0.00 | P |
| ATOM | 365 | H2   | A A | 12 | 23.937 | 10.482 | 66.065 | 1.00 | 0.00 | H |
| ATOM | 366 | H8   | A A | 12 | 18.810 | 14.226 | 66.978 | 1.00 | 0.00 | H |
| ATOM | 367 | H1'  | A A | 12 | 20.853 | 12.957 | 63.927 | 1.00 | 0.00 | H |
| ATOM | 368 | H3'  | A A | 12 | 17.980 | 15.507 | 63.087 | 1.00 | 0.00 | H |
| ATOM | 369 | H4'  | A A | 12 | 20.444 | 16.471 | 63.043 | 1.00 | 0.00 | H |
| ATOM | 370 | H61  | A A | 12 | 22.533 | 10.561 | 70.338 | 1.00 | 0.00 | H |

|      |     |      |   |   |    |        |        |        |      |      |   |
|------|-----|------|---|---|----|--------|--------|--------|------|------|---|
| ATOM | 371 | H62  | A | A | 12 | 21.115 | 11.644 | 70.372 | 1.00 | 0.00 | H |
| ATOM | 372 | H2'1 | A | A | 12 | 18.176 | 13.973 | 64.925 | 1.00 | 0.00 | H |
| ATOM | 373 | H2'2 | A | A | 12 | 18.509 | 12.901 | 63.574 | 1.00 | 0.00 | H |
| ATOM | 374 | H5'1 | A | A | 12 | 20.317 | 17.072 | 65.564 | 1.00 | 0.00 | H |
| ATOM | 375 | H5'2 | A | A | 12 | 19.118 | 17.726 | 64.429 | 1.00 | 0.00 | H |
| ATOM | 376 | C1'  | G | A | 13 | 21.374 | 9.251  | 62.531 | 1.00 | 0.00 | C |
| ATOM | 377 | N1   | G | A | 13 | 21.621 | 7.694  | 67.383 | 1.00 | 0.00 | N |
| ATOM | 378 | C2   | G | A | 13 | 22.449 | 7.402  | 66.313 | 1.00 | 0.00 | C |
| ATOM | 379 | N2   | G | A | 13 | 23.479 | 6.582  | 66.568 | 1.00 | 0.00 | N |
| ATOM | 380 | N3   | G | A | 13 | 22.264 | 7.886  | 65.086 | 1.00 | 0.00 | N |
| ATOM | 381 | C4   | G | A | 13 | 21.172 | 8.689  | 65.007 | 1.00 | 0.00 | C |
| ATOM | 382 | C5   | G | A | 13 | 20.288 | 9.033  | 66.018 | 1.00 | 0.00 | C |
| ATOM | 383 | C6   | G | A | 13 | 20.486 | 8.523  | 67.321 | 1.00 | 0.00 | C |
| ATOM | 384 | O6   | G | A | 13 | 19.817 | 8.711  | 68.338 | 1.00 | 0.00 | O |
| ATOM | 385 | N7   | G | A | 13 | 19.296 | 9.882  | 65.523 | 1.00 | 0.00 | N |
| ATOM | 386 | C8   | G | A | 13 | 19.603 | 10.025 | 64.260 | 1.00 | 0.00 | C |
| ATOM | 387 | N9   | G | A | 13 | 20.729 | 9.330  | 63.871 | 1.00 | 0.00 | N |
| ATOM | 388 | C2'  | G | A | 13 | 20.383 | 9.217  | 61.375 | 1.00 | 0.00 | C |
| ATOM | 389 | C3'  | G | A | 13 | 21.113 | 10.015 | 60.307 | 1.00 | 0.00 | C |
| ATOM | 390 | O3'  | G | A | 13 | 22.007 | 9.151  | 59.607 | 1.00 | 0.00 | O |
| ATOM | 391 | C4'  | G | A | 13 | 21.854 | 11.075 | 61.121 | 1.00 | 0.00 | C |
| ATOM | 392 | O4'  | G | A | 13 | 22.186 | 10.398 | 62.375 | 1.00 | 0.00 | O |
| ATOM | 393 | C5'  | G | A | 13 | 21.084 | 12.334 | 61.441 | 1.00 | 0.00 | C |
| ATOM | 394 | O5'  | G | A | 13 | 19.693 | 12.008 | 61.690 | 1.00 | 0.00 | O |
| ATOM | 395 | O1P  | G | A | 13 | 18.484 | 13.115 | 59.781 | 1.00 | 0.00 | O |
| ATOM | 396 | O2P  | G | A | 13 | 17.306 | 12.744 | 61.964 | 1.00 | 0.00 | O |
| ATOM | 397 | P    | G | A | 13 | 18.571 | 13.053 | 61.252 | 1.00 | 0.00 | P |
| ATOM | 398 | H1   | G | A | 13 | 21.856 | 7.272  | 68.294 | 1.00 | 0.00 | H |
| ATOM | 399 | H8   | G | A | 13 | 19.019 | 10.638 | 63.572 | 1.00 | 0.00 | H |
| ATOM | 400 | H1'  | G | A | 13 | 22.022 | 8.375  | 62.516 | 1.00 | 0.00 | H |
| ATOM | 401 | H21  | G | A | 13 | 23.616 | 6.215  | 67.522 | 1.00 | 0.00 | H |
| ATOM | 402 | H3'  | G | A | 13 | 20.425 | 10.473 | 59.597 | 1.00 | 0.00 | H |
| ATOM | 403 | H22  | G | A | 13 | 24.128 | 6.325  | 65.815 | 1.00 | 0.00 | H |
| ATOM | 404 | H4'  | G | A | 13 | 22.733 | 11.359 | 60.545 | 1.00 | 0.00 | H |
| ATOM | 405 | H2'1 | G | A | 13 | 19.431 | 9.680  | 61.633 | 1.00 | 0.00 | H |
| ATOM | 406 | H2'2 | G | A | 13 | 20.173 | 8.201  | 61.039 | 1.00 | 0.00 | H |
| ATOM | 407 | H5'1 | G | A | 13 | 21.517 | 12.804 | 62.323 | 1.00 | 0.00 | H |
| ATOM | 408 | H5'2 | G | A | 13 | 21.157 | 13.021 | 60.598 | 1.00 | 0.00 | H |
| ATOM | 409 | C1'  | G | A | 14 | 22.479 | 4.426  | 62.686 | 1.00 | 0.00 | C |
| ATOM | 410 | N1   | G | A | 14 | 20.134 | 4.613  | 67.214 | 1.00 | 0.00 | N |
| ATOM | 411 | C2   | G | A | 14 | 21.302 | 3.972  | 66.845 | 1.00 | 0.00 | C |
| ATOM | 412 | N2   | G | A | 14 | 21.928 | 3.285  | 67.809 | 1.00 | 0.00 | N |
| ATOM | 413 | N3   | G | A | 14 | 21.806 | 4.009  | 65.611 | 1.00 | 0.00 | N |
| ATOM | 414 | C4   | G | A | 14 | 21.038 | 4.742  | 64.764 | 1.00 | 0.00 | C |
| ATOM | 415 | C5   | G | A | 14 | 19.858 | 5.413  | 65.041 | 1.00 | 0.00 | C |
| ATOM | 416 | C6   | G | A | 14 | 19.325 | 5.376  | 66.349 | 1.00 | 0.00 | C |
| ATOM | 417 | O6   | G | A | 14 | 18.301 | 5.902  | 66.786 | 1.00 | 0.00 | O |
| ATOM | 418 | N7   | G | A | 14 | 19.382 | 6.046  | 63.890 | 1.00 | 0.00 | N |
| ATOM | 419 | C8   | G | A | 14 | 20.269 | 5.749  | 62.975 | 1.00 | 0.00 | C |
| ATOM | 420 | N9   | G | A | 14 | 21.304 | 4.959  | 63.429 | 1.00 | 0.00 | N |
| ATOM | 421 | C2'  | G | A | 14 | 22.160 | 4.005  | 61.258 | 1.00 | 0.00 | C |
| ATOM | 422 | C3'  | G | A | 14 | 23.435 | 4.387  | 60.523 | 1.00 | 0.00 | C |
| ATOM | 423 | O3'  | G | A | 14 | 24.387 | 3.334  | 60.655 | 1.00 | 0.00 | O |
| ATOM | 424 | C4'  | G | A | 14 | 23.877 | 5.658  | 61.248 | 1.00 | 0.00 | C |

|      |     |      |     |    |        |        |        |      |      |   |
|------|-----|------|-----|----|--------|--------|--------|------|------|---|
| ATOM | 425 | O4'  | G A | 14 | 23.454 | 5.449  | 62.633 | 1.00 | 0.00 | O |
| ATOM | 426 | C5'  | G A | 14 | 23.279 | 6.954  | 60.753 | 1.00 | 0.00 | C |
| ATOM | 427 | O5'  | G A | 14 | 21.904 | 6.738  | 60.351 | 1.00 | 0.00 | O |
| ATOM | 428 | O1P  | G A | 14 | 21.952 | 7.134  | 57.866 | 1.00 | 0.00 | O |
| ATOM | 429 | O2P  | G A | 14 | 19.839 | 7.534  | 59.159 | 1.00 | 0.00 | O |
| ATOM | 430 | P    | G A | 14 | 21.322 | 7.576  | 59.125 | 1.00 | 0.00 | P |
| ATOM | 431 | H1   | G A | 14 | 19.833 | 4.526  | 68.196 | 1.00 | 0.00 | H |
| ATOM | 432 | H8   | G A | 14 | 20.194 | 6.094  | 61.944 | 1.00 | 0.00 | H |
| ATOM | 433 | H1'  | G A | 14 | 22.894 | 3.594  | 63.256 | 1.00 | 0.00 | H |
| ATOM | 434 | H21  | G A | 14 | 21.534 | 3.263  | 68.761 | 1.00 | 0.00 | H |
| ATOM | 435 | H3'  | G A | 14 | 23.255 | 4.580  | 59.465 | 1.00 | 0.00 | H |
| ATOM | 436 | H22  | G A | 14 | 22.801 | 2.783  | 67.599 | 1.00 | 0.00 | H |
| ATOM | 437 | H4'  | G A | 14 | 24.958 | 5.726  | 61.139 | 1.00 | 0.00 | H |
| ATOM | 438 | H2'1 | G A | 14 | 21.296 | 4.531  | 60.854 | 1.00 | 0.00 | H |
| ATOM | 439 | H2'2 | G A | 14 | 21.961 | 2.935  | 61.177 | 1.00 | 0.00 | H |
| ATOM | 440 | H5'1 | G A | 14 | 23.320 | 7.695  | 61.551 | 1.00 | 0.00 | H |
| ATOM | 441 | H5'2 | G A | 14 | 23.859 | 7.313  | 59.902 | 1.00 | 0.00 | H |
| ATOM | 442 | C1'  | A A | 15 | 22.534 | -0.067 | 64.762 | 1.00 | 0.00 | C |
| ATOM | 443 | N1   | A A | 15 | 18.390 | 1.659  | 67.249 | 1.00 | 0.00 | N |
| ATOM | 444 | C2   | A A | 15 | 19.447 | 0.954  | 67.644 | 1.00 | 0.00 | C |
| ATOM | 445 | N3   | A A | 15 | 20.486 | 0.544  | 66.949 | 1.00 | 0.00 | N |
| ATOM | 446 | C4   | A A | 15 | 20.372 | 0.936  | 65.666 | 1.00 | 0.00 | C |
| ATOM | 447 | C5   | A A | 15 | 19.357 | 1.656  | 65.103 | 1.00 | 0.00 | C |
| ATOM | 448 | C6   | A A | 15 | 18.305 | 2.035  | 65.964 | 1.00 | 0.00 | C |
| ATOM | 449 | N6   | A A | 15 | 17.241 | 2.747  | 65.552 | 1.00 | 0.00 | N |
| ATOM | 450 | N7   | A A | 15 | 19.584 | 1.872  | 63.756 | 1.00 | 0.00 | N |
| ATOM | 451 | C8   | A A | 15 | 20.719 | 1.278  | 63.533 | 1.00 | 0.00 | C |
| ATOM | 452 | N9   | A A | 15 | 21.259 | 0.687  | 64.647 | 1.00 | 0.00 | N |
| ATOM | 453 | C2'  | A A | 15 | 22.846 | -0.937 | 63.551 | 1.00 | 0.00 | C |
| ATOM | 454 | C3'  | A A | 15 | 24.360 | -0.827 | 63.462 | 1.00 | 0.00 | C |
| ATOM | 455 | O3'  | A A | 15 | 24.949 | -1.783 | 64.338 | 1.00 | 0.00 | O |
| ATOM | 456 | C4'  | A A | 15 | 24.624 | 0.609  | 63.911 | 1.00 | 0.00 | C |
| ATOM | 457 | O4'  | A A | 15 | 23.581 | 0.873  | 64.905 | 1.00 | 0.00 | O |
| ATOM | 458 | C5'  | A A | 15 | 24.550 | 1.672  | 62.841 | 1.00 | 0.00 | C |
| ATOM | 459 | O5'  | A A | 15 | 23.498 | 1.345  | 61.897 | 1.00 | 0.00 | O |
| ATOM | 460 | O1P  | A A | 15 | 24.753 | 0.894  | 59.762 | 1.00 | 0.00 | O |
| ATOM | 461 | O2P  | A A | 15 | 22.382 | 1.713  | 59.676 | 1.00 | 0.00 | O |
| ATOM | 462 | P    | A A | 15 | 23.696 | 1.733  | 60.362 | 1.00 | 0.00 | P |
| ATOM | 463 | H2   | A A | 15 | 19.453 | 0.677  | 68.698 | 1.00 | 0.00 | H |
| ATOM | 464 | H8   | A A | 15 | 21.197 | 1.250  | 62.553 | 1.00 | 0.00 | H |
| ATOM | 465 | H1'  | A A | 15 | 22.495 | -0.666 | 65.673 | 1.00 | 0.00 | H |
| ATOM | 466 | H3'  | A A | 15 | 24.723 | -0.995 | 62.448 | 1.00 | 0.00 | H |
| ATOM | 467 | H4'  | A A | 15 | 25.628 | 0.629  | 64.332 | 1.00 | 0.00 | H |
| ATOM | 468 | H61  | A A | 15 | 16.501 | 3.000  | 66.223 | 1.00 | 0.00 | H |
| ATOM | 469 | H62  | A A | 15 | 17.168 | 3.038  | 64.566 | 1.00 | 0.00 | H |
| ATOM | 470 | H2'1 | A A | 15 | 22.366 | -0.568 | 62.645 | 1.00 | 0.00 | H |
| ATOM | 471 | H2'2 | A A | 15 | 22.531 | -1.971 | 63.692 | 1.00 | 0.00 | H |
| ATOM | 472 | H5'1 | A A | 15 | 24.340 | 2.635  | 63.307 | 1.00 | 0.00 | H |
| ATOM | 473 | H5'2 | A A | 15 | 25.506 | 1.724  | 62.323 | 1.00 | 0.00 | H |
| ATOM | 474 | C1'  | C A | 16 | 20.782 | -3.568 | 67.816 | 1.00 | 0.00 | C |
| ATOM | 475 | N1   | C A | 16 | 19.878 | -2.897 | 66.844 | 1.00 | 0.00 | N |
| ATOM | 476 | C2   | C A | 16 | 18.689 | -2.355 | 67.325 | 1.00 | 0.00 | C |
| ATOM | 477 | O2   | C A | 16 | 18.434 | -2.453 | 68.532 | 1.00 | 0.00 | O |
| ATOM | 478 | N3   | C A | 16 | 17.851 | -1.738 | 66.455 | 1.00 | 0.00 | N |

|      |     |      |     |    |        |        |        |      |      |   |
|------|-----|------|-----|----|--------|--------|--------|------|------|---|
| ATOM | 479 | C4   | C A | 16 | 18.156 | -1.649 | 65.155 | 1.00 | 0.00 | C |
| ATOM | 480 | N4   | C A | 16 | 17.302 | -1.032 | 64.349 | 1.00 | 0.00 | N |
| ATOM | 481 | C5   | C A | 16 | 19.370 | -2.201 | 64.629 | 1.00 | 0.00 | C |
| ATOM | 482 | C6   | C A | 16 | 20.201 | -2.814 | 65.524 | 1.00 | 0.00 | C |
| ATOM | 483 | C2'  | C A | 16 | 21.470 | -4.808 | 67.261 | 1.00 | 0.00 | C |
| ATOM | 484 | C3'  | C A | 16 | 22.834 | -4.740 | 67.930 | 1.00 | 0.00 | C |
| ATOM | 485 | O3'  | C A | 16 | 22.751 | -5.331 | 69.224 | 1.00 | 0.00 | O |
| ATOM | 486 | C4'  | C A | 16 | 23.106 | -3.239 | 67.995 | 1.00 | 0.00 | C |
| ATOM | 487 | O4'  | C A | 16 | 21.785 | -2.640 | 68.184 | 1.00 | 0.00 | O |
| ATOM | 488 | C5'  | C A | 16 | 23.747 | -2.619 | 66.775 | 1.00 | 0.00 | C |
| ATOM | 489 | O5'  | C A | 16 | 23.236 | -3.255 | 65.576 | 1.00 | 0.00 | O |
| ATOM | 490 | O1P  | C A | 16 | 25.251 | -4.429 | 64.632 | 1.00 | 0.00 | O |
| ATOM | 491 | O2P  | C A | 16 | 23.403 | -3.686 | 63.107 | 1.00 | 0.00 | O |
| ATOM | 492 | P    | C A | 16 | 24.209 | -3.430 | 64.326 | 1.00 | 0.00 | P |
| ATOM | 493 | H5   | C A | 16 | 19.618 | -2.136 | 63.569 | 1.00 | 0.00 | H |
| ATOM | 494 | H6   | C A | 16 | 21.141 | -3.241 | 65.174 | 1.00 | 0.00 | H |
| ATOM | 495 | H1'  | C A | 16 | 20.204 | -3.809 | 68.710 | 1.00 | 0.00 | H |
| ATOM | 496 | H3'  | C A | 16 | 23.599 | -5.254 | 67.346 | 1.00 | 0.00 | H |
| ATOM | 497 | H4'  | C A | 16 | 23.775 | -3.075 | 68.840 | 1.00 | 0.00 | H |
| ATOM | 498 | H41  | C A | 16 | 17.512 | -0.947 | 63.343 | 1.00 | 0.00 | H |
| ATOM | 499 | H42  | C A | 16 | 16.428 | -0.638 | 64.727 | 1.00 | 0.00 | H |
| ATOM | 500 | H2'1 | C A | 16 | 21.559 | -4.781 | 66.175 | 1.00 | 0.00 | H |
| ATOM | 501 | H2'2 | C A | 16 | 20.943 | -5.726 | 67.524 | 1.00 | 0.00 | H |
| ATOM | 502 | H5'1 | C A | 16 | 23.520 | -1.554 | 66.755 | 1.00 | 0.00 | H |
| ATOM | 503 | H5'2 | C A | 16 | 24.827 | -2.755 | 66.831 | 1.00 | 0.00 | H |
| ATOM | 504 | C1'  | G A | 17 | 17.238 | -5.824 | 70.439 | 1.00 | 0.00 | C |
| ATOM | 505 | N1   | G A | 17 | 14.126 | -3.680 | 67.012 | 1.00 | 0.00 | N |
| ATOM | 506 | C2   | G A | 17 | 13.992 | -3.795 | 68.385 | 1.00 | 0.00 | C |
| ATOM | 507 | N2   | G A | 17 | 12.879 | -3.271 | 68.913 | 1.00 | 0.00 | N |
| ATOM | 508 | N3   | G A | 17 | 14.895 | -4.385 | 69.165 | 1.00 | 0.00 | N |
| ATOM | 509 | C4   | G A | 17 | 15.953 | -4.866 | 68.460 | 1.00 | 0.00 | C |
| ATOM | 510 | C5   | G A | 17 | 16.170 | -4.801 | 67.094 | 1.00 | 0.00 | C |
| ATOM | 511 | C6   | G A | 17 | 15.214 | -4.171 | 66.264 | 1.00 | 0.00 | C |
| ATOM | 512 | O6   | G A | 17 | 15.226 | -4.015 | 65.042 | 1.00 | 0.00 | O |
| ATOM | 513 | N7   | G A | 17 | 17.380 | -5.415 | 66.767 | 1.00 | 0.00 | N |
| ATOM | 514 | C8   | G A | 17 | 17.849 | -5.820 | 67.920 | 1.00 | 0.00 | C |
| ATOM | 515 | N9   | G A | 17 | 17.038 | -5.524 | 68.996 | 1.00 | 0.00 | N |
| ATOM | 516 | C2'  | G A | 17 | 17.882 | -7.179 | 70.700 | 1.00 | 0.00 | C |
| ATOM | 517 | C3'  | G A | 17 | 18.751 | -6.891 | 71.912 | 1.00 | 0.00 | C |
| ATOM | 518 | O3'  | G A | 17 | 17.961 | -7.003 | 73.094 | 1.00 | 0.00 | O |
| ATOM | 519 | C4'  | G A | 17 | 19.215 | -5.456 | 71.662 | 1.00 | 0.00 | C |
| ATOM | 520 | O4'  | G A | 17 | 18.089 | -4.828 | 70.973 | 1.00 | 0.00 | O |
| ATOM | 521 | C5'  | G A | 17 | 20.456 | -5.290 | 70.817 | 1.00 | 0.00 | C |
| ATOM | 522 | O5'  | G A | 17 | 20.474 | -6.293 | 69.771 | 1.00 | 0.00 | O |
| ATOM | 523 | O1P  | G A | 17 | 22.458 | -7.721 | 70.371 | 1.00 | 0.00 | O |
| ATOM | 524 | O2P  | G A | 17 | 21.718 | -7.540 | 67.980 | 1.00 | 0.00 | O |
| ATOM | 525 | P    | G A | 17 | 21.878 | -6.886 | 69.301 | 1.00 | 0.00 | P |
| ATOM | 526 | H1   | G A | 17 | 13.372 | -3.199 | 66.499 | 1.00 | 0.00 | H |
| ATOM | 527 | H8   | G A | 17 | 18.799 | -6.347 | 68.021 | 1.00 | 0.00 | H |
| ATOM | 528 | H1'  | G A | 17 | 16.274 | -5.747 | 70.940 | 1.00 | 0.00 | H |
| ATOM | 529 | H21  | G A | 17 | 12.186 | -2.813 | 68.304 | 1.00 | 0.00 | H |
| ATOM | 530 | H3'  | G A | 17 | 19.600 | -7.572 | 71.978 | 1.00 | 0.00 | H |
| ATOM | 531 | H22  | G A | 17 | 12.717 | -3.326 | 69.930 | 1.00 | 0.00 | H |
| ATOM | 532 | H4'  | G A | 17 | 19.416 | -5.015 | 72.638 | 1.00 | 0.00 | H |



|      |     |      |     |    |        |         |        |      |      |   |
|------|-----|------|-----|----|--------|---------|--------|------|------|---|
| ATOM | 533 | H2'1 | G A | 17 | 18.479 | -7.523  | 69.855 | 1.00 | 0.00 | H |
| ATOM | 534 | H2'2 | G A | 17 | 17.143 | -7.953  | 70.916 | 1.00 | 0.00 | H |
| ATOM | 535 | H5'1 | G A | 17 | 20.454 | -4.295  | 70.372 | 1.00 | 0.00 | H |
| ATOM | 536 | H5'2 | G A | 17 | 21.337 | -5.399  | 71.449 | 1.00 | 0.00 | H |
| ATOM | 537 | C1'  | G A | 18 | 12.545 | -7.038  | 71.450 | 1.00 | 0.00 | C |
| ATOM | 538 | N1   | G A | 18 | 11.844 | -6.177  | 66.472 | 1.00 | 0.00 | N |
| ATOM | 539 | C2   | G A | 18 | 11.061 | -5.816  | 67.554 | 1.00 | 0.00 | C |
| ATOM | 540 | N2   | G A | 18 | 9.940  | -5.139  | 67.272 | 1.00 | 0.00 | N |
| ATOM | 541 | N3   | G A | 18 | 11.371 | -6.108  | 68.814 | 1.00 | 0.00 | N |
| ATOM | 542 | C4   | G A | 18 | 12.533 | -6.804  | 68.914 | 1.00 | 0.00 | C |
| ATOM | 543 | C5   | G A | 18 | 13.377 | -7.210  | 67.893 | 1.00 | 0.00 | C |
| ATOM | 544 | C6   | G A | 18 | 13.051 | -6.896  | 66.553 | 1.00 | 0.00 | C |
| ATOM | 545 | O6   | G A | 18 | 13.666 | -7.167  | 65.521 | 1.00 | 0.00 | O |
| ATOM | 546 | N7   | G A | 18 | 14.469 | -7.904  | 68.415 | 1.00 | 0.00 | N |
| ATOM | 547 | C8   | G A | 18 | 14.262 | -7.894  | 69.707 | 1.00 | 0.00 | C |
| ATOM | 548 | N9   | G A | 18 | 13.105 | -7.246  | 70.087 | 1.00 | 0.00 | N |
| ATOM | 549 | C2'  | G A | 18 | 12.740 | -8.225  | 72.382 | 1.00 | 0.00 | C |
| ATOM | 550 | C3'  | G A | 18 | 12.971 | -7.544  | 73.721 | 1.00 | 0.00 | C |
| ATOM | 551 | O3'  | G A | 18 | 11.712 | -7.245  | 74.318 | 1.00 | 0.00 | O |
| ATOM | 552 | C4'  | G A | 18 | 13.740 | -6.282  | 73.333 | 1.00 | 0.00 | C |
| ATOM | 553 | O4'  | G A | 18 | 13.202 | -5.923  | 72.021 | 1.00 | 0.00 | O |
| ATOM | 554 | C5'  | G A | 18 | 15.240 | -6.419  | 73.219 | 1.00 | 0.00 | C |
| ATOM | 555 | O5'  | G A | 18 | 15.575 | -7.719  | 72.672 | 1.00 | 0.00 | O |
| ATOM | 556 | O1P  | G A | 18 | 16.758 | -8.865  | 74.574 | 1.00 | 0.00 | O |
| ATOM | 557 | O2P  | G A | 18 | 17.277 | -9.507  | 72.205 | 1.00 | 0.00 | O |
| ATOM | 558 | P    | G A | 18 | 16.907 | -8.442  | 73.169 | 1.00 | 0.00 | P |
| ATOM | 559 | H1   | G A | 18 | 11.518 | -5.895  | 65.534 | 1.00 | 0.00 | H |
| ATOM | 560 | H8   | G A | 18 | 14.941 | -8.359  | 70.421 | 1.00 | 0.00 | H |
| ATOM | 561 | H1'  | G A | 18 | 11.487 | -6.789  | 71.351 | 1.00 | 0.00 | H |
| ATOM | 562 | H21  | G A | 18 | 9.709  | -4.913  | 66.292 | 1.00 | 0.00 | H |
| ATOM | 563 | H3'  | G A | 18 | 13.555 | -8.166  | 74.402 | 1.00 | 0.00 | H |
| ATOM | 564 | H22  | G A | 18 | 9.313  | -4.845  | 68.032 | 1.00 | 0.00 | H |
| ATOM | 565 | H4'  | G A | 18 | 13.531 | -5.535  | 74.098 | 1.00 | 0.00 | H |
| ATOM | 566 | H2'1 | G A | 18 | 13.596 | -8.839  | 72.097 | 1.00 | 0.00 | H |
| ATOM | 567 | H2'2 | G A | 18 | 11.866 | -8.876  | 72.413 | 1.00 | 0.00 | H |
| ATOM | 568 | H5'1 | G A | 18 | 15.622 | -5.635  | 72.566 | 1.00 | 0.00 | H |
| ATOM | 569 | H5'2 | G A | 18 | 15.685 | -6.309  | 74.207 | 1.00 | 0.00 | H |
| ATOM | 570 | C1'  | T A | 19 | 7.795  | -7.814  | 70.292 | 1.00 | 0.00 | C |
| ATOM | 571 | N1   | T A | 19 | 8.873  | -8.467  | 69.502 | 1.00 | 0.00 | N |
| ATOM | 572 | C2   | T A | 19 | 8.822  | -8.327  | 68.130 | 1.00 | 0.00 | C |
| ATOM | 573 | O2   | T A | 19 | 7.942  | -7.700  | 67.564 | 1.00 | 0.00 | O |
| ATOM | 574 | N3   | T A | 19 | 9.842  | -8.948  | 67.435 | 1.00 | 0.00 | N |
| ATOM | 575 | C4   | T A | 19 | 10.877 | -9.680  | 67.976 | 1.00 | 0.00 | C |
| ATOM | 576 | O4   | T A | 19 | 11.736 | -10.196 | 67.249 | 1.00 | 0.00 | O |
| ATOM | 577 | C5   | T A | 19 | 10.848 | -9.773  | 69.417 | 1.00 | 0.00 | C |
| ATOM | 578 | C6   | T A | 19 | 9.868  | -9.179  | 70.127 | 1.00 | 0.00 | C |
| ATOM | 579 | C7   | T A | 19 | 11.957 | -10.558 | 70.048 | 1.00 | 0.00 | C |
| ATOM | 580 | C2'  | T A | 19 | 7.337  | -8.628  | 71.496 | 1.00 | 0.00 | C |
| ATOM | 581 | C3'  | T A | 19 | 7.039  | -7.544  | 72.519 | 1.00 | 0.00 | C |
| ATOM | 582 | O3'  | T A | 19 | 5.718  | -7.052  | 72.309 | 1.00 | 0.00 | O |
| ATOM | 583 | C4'  | T A | 19 | 8.102  | -6.491  | 72.215 | 1.00 | 0.00 | C |
| ATOM | 584 | O4'  | T A | 19 | 8.296  | -6.580  | 70.768 | 1.00 | 0.00 | O |
| ATOM | 585 | C5'  | T A | 19 | 9.440  | -6.670  | 72.894 | 1.00 | 0.00 | C |
| ATOM | 586 | O5'  | T A | 19 | 9.762  | -8.082  | 72.977 | 1.00 | 0.00 | O |

|      |     |      |       |    |        |         |        |      |      |   |
|------|-----|------|-------|----|--------|---------|--------|------|------|---|
| ATOM | 587 | O1P  | T A   | 19 | 9.725  | -8.545  | 75.450 | 1.00 | 0.00 | O |
| ATOM | 588 | O2P  | T A   | 19 | 11.157 | -9.939  | 73.933 | 1.00 | 0.00 | O |
| ATOM | 589 | P    | T A   | 19 | 10.572 | -8.613  | 74.243 | 1.00 | 0.00 | P |
| ATOM | 590 | H3   | T A   | 19 | 9.828  | -8.854  | 66.409 | 1.00 | 0.00 | H |
| ATOM | 591 | H6   | T A   | 19 | 9.866  | -9.262  | 71.213 | 1.00 | 0.00 | H |
| ATOM | 592 | H1'  | T A   | 19 | 6.961  | -7.604  | 69.623 | 1.00 | 0.00 | H |
| ATOM | 593 | H3'  | T A   | 19 | 7.130  | -7.912  | 73.541 | 1.00 | 0.00 | H |
| ATOM | 594 | H4'  | T A   | 19 | 7.695  | -5.530  | 72.532 | 1.00 | 0.00 | H |
| ATOM | 595 | H71  | T A   | 19 | 11.547 | -11.449 | 70.524 | 1.00 | 0.00 | H |
| ATOM | 596 | H72  | T A   | 19 | 12.675 | -10.854 | 69.282 | 1.00 | 0.00 | H |
| ATOM | 597 | H73  | T A   | 19 | 12.458 | -9.945  | 70.799 | 1.00 | 0.00 | H |
| ATOM | 598 | H2'1 | T A   | 19 | 8.110  | -9.309  | 71.851 | 1.00 | 0.00 | H |
| ATOM | 599 | H2'2 | T A   | 19 | 6.450  | -9.225  | 71.278 | 1.00 | 0.00 | H |
| ATOM | 600 | H5'1 | T A   | 19 | 10.207 | -6.151  | 72.320 | 1.00 | 0.00 | H |
| ATOM | 601 | H5'2 | T A   | 19 | 9.393  | -6.245  | 73.895 | 1.00 | 0.00 | H |
| ATOM | 602 | C01  | LNK A | 20 | 2.424  | -8.382  | 73.424 | 0.00 | 0.00 | C |
| ATOM | 603 | O1   | LNK A | 20 | 3.848  | -8.474  | 73.322 | 1.00 | 0.00 | O |
| ATOM | 604 | S    | LNK A | 20 | -0.631 | -10.538 | 74.789 | 0.00 | 0.00 | S |
| ATOM | 605 | C02  | LNK A | 20 | 1.879  | -9.649  | 74.112 | 0.00 | 0.00 | C |
| ATOM | 606 | C03  | LNK A | 20 | 0.530  | -10.036 | 73.479 | 0.00 | 0.00 | C |
| ATOM | 607 | O1P  | LNK A | 20 | 5.270  | -9.532  | 71.535 | 1.00 | 0.00 | O |
| ATOM | 608 | O2P  | LNK A | 20 | 3.504  | -7.861  | 70.909 | 1.00 | 0.00 | O |
| ATOM | 609 | P    | LNK A | 20 | 4.527  | -8.306  | 71.888 | 1.00 | 0.00 | P |
| ATOM | 610 | H01  | LNK A | 20 | 1.992  | -8.295  | 72.429 | 0.00 | 0.00 | H |
| ATOM | 611 | H02  | LNK A | 20 | 2.157  | -7.506  | 74.016 | 0.00 | 0.00 | H |
| ATOM | 612 | H03  | LNK A | 20 | 0.677  | -10.865 | 72.787 | 0.00 | 0.00 | H |
| ATOM | 613 | H04  | LNK A | 20 | 1.741  | -9.455  | 75.176 | 0.00 | 0.00 | H |
| ATOM | 614 | H05  | LNK A | 20 | 2.589  | -10.467 | 73.982 | 0.00 | 0.00 | H |
| ATOM | 615 | H06  | LNK A | 20 | 0.122  | -9.180  | 72.941 | 0.00 | 0.00 | H |
| ATOM | 616 | AU   | LNK A | 20 | -1.196 | -10.804 | 74.505 |      |      |   |
| TER  |     |      |       |    |        |         |        |      |      |   |
| ATOM | 618 | C1'  | A B   | 2  | 9.160  | -7.857  | 59.474 | 1.00 | 0.00 | C |
| ATOM | 619 | N1   | A B   | 2  | 9.816  | -8.696  | 64.495 | 1.00 | 0.00 | N |
| ATOM | 620 | C2   | A B   | 2  | 8.896  | -8.024  | 63.810 | 1.00 | 0.00 | C |
| ATOM | 621 | N3   | A B   | 2  | 8.784  | -7.849  | 62.510 | 1.00 | 0.00 | N |
| ATOM | 622 | C4   | A B   | 2  | 9.790  | -8.470  | 61.868 | 1.00 | 0.00 | C |
| ATOM | 623 | C5   | A B   | 2  | 10.807 | -9.196  | 62.422 | 1.00 | 0.00 | C |
| ATOM | 624 | C6   | A B   | 2  | 10.807 | -9.306  | 63.828 | 1.00 | 0.00 | C |
| ATOM | 625 | N6   | A B   | 2  | 11.741 | -9.989  | 64.512 | 1.00 | 0.00 | N |
| ATOM | 626 | N7   | A B   | 2  | 11.657 | -9.689  | 61.447 | 1.00 | 0.00 | N |
| ATOM | 627 | C8   | A B   | 2  | 11.144 | -9.251  | 60.336 | 1.00 | 0.00 | C |
| ATOM | 628 | N9   | A B   | 2  | 10.008 | -8.506  | 60.513 | 1.00 | 0.00 | N |
| ATOM | 629 | C2'  | A B   | 2  | 9.954  | -7.272  | 58.314 | 1.00 | 0.00 | C |
| ATOM | 630 | C3'  | A B   | 2  | 9.029  | -7.529  | 57.136 | 1.00 | 0.00 | C |
| ATOM | 631 | O3'  | A B   | 2  | 8.071  | -6.476  | 57.055 | 1.00 | 0.00 | O |
| ATOM | 632 | C4'  | A B   | 2  | 8.385  | -8.867  | 57.494 | 1.00 | 0.00 | C |
| ATOM | 633 | O4'  | A B   | 2  | 8.287  | -8.841  | 58.955 | 1.00 | 0.00 | O |
| ATOM | 634 | C5'  | A B   | 2  | 9.143  | -10.107 | 57.083 | 1.00 | 0.00 | C |
| ATOM | 635 | O5'  | A B   | 2  | 10.569 | -9.881  | 57.224 | 1.00 | 0.00 | O |
| ATOM | 636 | H2   | A B   | 2  | 8.123  | -7.547  | 64.410 | 1.00 | 0.00 | H |
| ATOM | 637 | H8   | A B   | 2  | 11.577 | -9.457  | 59.356 | 1.00 | 0.00 | H |
| ATOM | 638 | H1'  | A B   | 2  | 8.555  | -7.090  | 59.959 | 1.00 | 0.00 | H |
| ATOM | 639 | H3'  | A B   | 2  | 9.574  | -7.594  | 56.194 | 1.00 | 0.00 | H |
| ATOM | 640 | H4'  | A B   | 2  | 7.414  | -8.893  | 57.003 | 1.00 | 0.00 | H |

|      |     |      |     |   |        |         |        |      |      |   |
|------|-----|------|-----|---|--------|---------|--------|------|------|---|
| ATOM | 641 | H61  | A B | 2 | 11.693 | -10.040 | 65.537 | 1.00 | 0.00 | H |
| ATOM | 642 | H62  | A B | 2 | 12.507 | -10.460 | 64.005 | 1.00 | 0.00 | H |
| ATOM | 643 | H2'1 | A B | 2 | 10.916 | -7.767  | 58.178 | 1.00 | 0.00 | H |
| ATOM | 644 | H2'2 | A B | 2 | 10.148 | -6.206  | 58.441 | 1.00 | 0.00 | H |
| ATOM | 645 | H5'1 | A B | 2 | 8.838  | -10.939 | 57.718 | 1.00 | 0.00 | H |
| ATOM | 646 | H5'2 | A B | 2 | 8.908  | -10.343 | 56.046 | 1.00 | 0.00 | H |
| ATOM | 647 | C1'  | C B | 3 | 8.305  | -3.689  | 62.035 | 1.00 | 0.00 | C |
| ATOM | 648 | N1   | C B | 3 | 9.565  | -4.455  | 62.238 | 1.00 | 0.00 | N |
| ATOM | 649 | C2   | C B | 3 | 9.927  | -4.784  | 63.543 | 1.00 | 0.00 | C |
| ATOM | 650 | O2   | C B | 3 | 9.190  | -4.430  | 64.473 | 1.00 | 0.00 | O |
| ATOM | 651 | N3   | C B | 3 | 11.070 | -5.480  | 63.750 | 1.00 | 0.00 | N |
| ATOM | 652 | C4   | C B | 3 | 11.846 | -5.849  | 62.723 | 1.00 | 0.00 | C |
| ATOM | 653 | N4   | C B | 3 | 12.953 | -6.532  | 62.983 | 1.00 | 0.00 | N |
| ATOM | 654 | C5   | C B | 3 | 11.504 | -5.521  | 61.369 | 1.00 | 0.00 | C |
| ATOM | 655 | C6   | C B | 3 | 10.344 | -4.822  | 61.184 | 1.00 | 0.00 | C |
| ATOM | 656 | C2'  | C B | 3 | 8.391  | -2.648  | 60.927 | 1.00 | 0.00 | C |
| ATOM | 657 | C3'  | C B | 3 | 6.994  | -2.705  | 60.329 | 1.00 | 0.00 | C |
| ATOM | 658 | O3'  | C B | 3 | 6.125  | -1.869  | 61.090 | 1.00 | 0.00 | O |
| ATOM | 659 | C4'  | C B | 3 | 6.631  | -4.183  | 60.456 | 1.00 | 0.00 | C |
| ATOM | 660 | O4'  | C B | 3 | 7.292  | -4.614  | 61.688 | 1.00 | 0.00 | O |
| ATOM | 661 | C5'  | C B | 3 | 7.078  | -5.083  | 59.328 | 1.00 | 0.00 | C |
| ATOM | 662 | O5'  | C B | 3 | 8.373  | -4.651  | 58.840 | 1.00 | 0.00 | O |
| ATOM | 663 | O1P  | C B | 3 | 7.883  | -3.867  | 56.499 | 1.00 | 0.00 | O |
| ATOM | 664 | O2P  | C B | 3 | 10.167 | -4.727  | 57.082 | 1.00 | 0.00 | O |
| ATOM | 665 | P    | C B | 3 | 8.701  | -4.810  | 57.289 | 1.00 | 0.00 | P |
| ATOM | 666 | H5   | C B | 3 | 12.136 | -5.812  | 60.531 | 1.00 | 0.00 | H |
| ATOM | 667 | H6   | C B | 3 | 10.038 | -4.556  | 60.173 | 1.00 | 0.00 | H |
| ATOM | 668 | H1'  | C B | 3 | 8.030  | -3.229  | 62.984 | 1.00 | 0.00 | H |
| ATOM | 669 | H3'  | C B | 3 | 6.983  | -2.385  | 59.288 | 1.00 | 0.00 | H |
| ATOM | 670 | H4'  | C B | 3 | 5.544  | -4.239  | 60.513 | 1.00 | 0.00 | H |
| ATOM | 671 | H41  | C B | 3 | 13.567 | -6.831  | 62.210 | 1.00 | 0.00 | H |
| ATOM | 672 | H42  | C B | 3 | 13.199 | -6.766  | 63.955 | 1.00 | 0.00 | H |
| ATOM | 673 | H2'1 | C B | 3 | 9.151  | -2.894  | 60.186 | 1.00 | 0.00 | H |
| ATOM | 674 | H2'2 | C B | 3 | 8.619  | -1.653  | 61.312 | 1.00 | 0.00 | H |
| ATOM | 675 | H5'1 | C B | 3 | 7.145  | -6.109  | 59.692 | 1.00 | 0.00 | H |
| ATOM | 676 | H5'2 | C B | 3 | 6.348  | -5.037  | 58.522 | 1.00 | 0.00 | H |
| ATOM | 677 | C1'  | C B | 4 | 8.827  | -0.661  | 65.919 | 1.00 | 0.00 | C |
| ATOM | 678 | N1   | C B | 4 | 10.021 | -1.220  | 65.230 | 1.00 | 0.00 | N |
| ATOM | 679 | C2   | C B | 4 | 10.990 | -1.849  | 66.008 | 1.00 | 0.00 | C |
| ATOM | 680 | O2   | C B | 4 | 10.820 | -1.917  | 67.233 | 1.00 | 0.00 | O |
| ATOM | 681 | N3   | C B | 4 | 12.086 | -2.364  | 65.402 | 1.00 | 0.00 | N |
| ATOM | 682 | C4   | C B | 4 | 12.243 | -2.276  | 64.073 | 1.00 | 0.00 | C |
| ATOM | 683 | N4   | C B | 4 | 13.332 | -2.800  | 63.530 | 1.00 | 0.00 | N |
| ATOM | 684 | C5   | C B | 4 | 11.265 | -1.630  | 63.247 | 1.00 | 0.00 | C |
| ATOM | 685 | C6   | C B | 4 | 10.167 | -1.122  | 63.880 | 1.00 | 0.00 | C |
| ATOM | 686 | C2'  | C B | 4 | 8.341  | 0.657   | 65.332 | 1.00 | 0.00 | C |
| ATOM | 687 | C3'  | C B | 4 | 6.832  | 0.534   | 65.485 | 1.00 | 0.00 | C |
| ATOM | 688 | O3'  | C B | 4 | 6.459  | 0.946   | 66.798 | 1.00 | 0.00 | O |
| ATOM | 689 | C4'  | C B | 4 | 6.587  | -0.956  | 65.256 | 1.00 | 0.00 | C |
| ATOM | 690 | O4'  | C B | 4 | 7.781  | -1.606  | 65.800 | 1.00 | 0.00 | O |
| ATOM | 691 | C5'  | C B | 4 | 6.411  | -1.395  | 63.820 | 1.00 | 0.00 | C |
| ATOM | 692 | O5'  | C B | 4 | 7.284  | -0.619  | 62.960 | 1.00 | 0.00 | O |
| ATOM | 693 | O1P  | C B | 4 | 5.680  | 0.716   | 61.555 | 1.00 | 0.00 | O |
| ATOM | 694 | O2P  | C B | 4 | 7.952  | 0.137   | 60.659 | 1.00 | 0.00 | O |

|      |     |      |     |   |        |        |        |      |      |   |
|------|-----|------|-----|---|--------|--------|--------|------|------|---|
| ATOM | 695 | P    | C B | 4 | 6.787  | -0.257 | 61.490 | 1.00 | 0.00 | P |
| ATOM | 696 | H5   | C B | 4 | 11.391 | -1.548 | 62.167 | 1.00 | 0.00 | H |
| ATOM | 697 | H6   | C B | 4 | 9.392  | -0.629 | 63.293 | 1.00 | 0.00 | H |
| ATOM | 698 | H1'  | C B | 4 | 9.063  | -0.554 | 66.978 | 1.00 | 0.00 | H |
| ATOM | 699 | H3'  | C B | 4 | 6.297  | 1.138  | 64.751 | 1.00 | 0.00 | H |
| ATOM | 700 | H4'  | C B | 4 | 5.677  | -1.215 | 65.797 | 1.00 | 0.00 | H |
| ATOM | 701 | H41  | C B | 4 | 13.475 | -2.748 | 62.511 | 1.00 | 0.00 | H |
| ATOM | 702 | H42  | C B | 4 | 14.035 | -3.261 | 64.126 | 1.00 | 0.00 | H |
| ATOM | 703 | H2'1 | C B | 4 | 8.624  | 0.774  | 64.287 | 1.00 | 0.00 | H |
| ATOM | 704 | H2'2 | C B | 4 | 8.726  | 1.519  | 65.876 | 1.00 | 0.00 | H |
| ATOM | 705 | H5'1 | C B | 4 | 6.656  | -2.453 | 63.737 | 1.00 | 0.00 | H |
| ATOM | 706 | H5'2 | C B | 4 | 5.374  | -1.242 | 63.526 | 1.00 | 0.00 | H |
| ATOM | 707 | C1'  | G B | 5 | 11.218 | 1.140  | 69.863 | 1.00 | 0.00 | C |
| ATOM | 708 | N1   | G B | 5 | 15.357 | -0.602 | 67.440 | 1.00 | 0.00 | N |
| ATOM | 709 | C2   | G B | 5 | 15.017 | -0.672 | 68.780 | 1.00 | 0.00 | C |
| ATOM | 710 | N2   | G B | 5 | 15.896 | -1.287 | 69.580 | 1.00 | 0.00 | N |
| ATOM | 711 | N3   | G B | 5 | 13.888 | -0.170 | 69.280 | 1.00 | 0.00 | N |
| ATOM | 712 | C4   | G B | 5 | 13.120 | 0.421  | 68.328 | 1.00 | 0.00 | C |
| ATOM | 713 | C5   | G B | 5 | 13.381 | 0.543  | 66.973 | 1.00 | 0.00 | C |
| ATOM | 714 | C6   | G B | 5 | 14.575 | 0.007  | 66.441 | 1.00 | 0.00 | C |
| ATOM | 715 | O6   | G B | 5 | 14.978 | 0.016  | 65.278 | 1.00 | 0.00 | O |
| ATOM | 716 | N7   | G B | 5 | 12.337 | 1.223  | 66.341 | 1.00 | 0.00 | N |
| ATOM | 717 | C8   | G B | 5 | 11.495 | 1.483  | 67.308 | 1.00 | 0.00 | C |
| ATOM | 718 | N9   | G B | 5 | 11.903 | 1.029  | 68.546 | 1.00 | 0.00 | N |
| ATOM | 719 | C2'  | G B | 5 | 10.494 | 2.463  | 70.068 | 1.00 | 0.00 | C |
| ATOM | 720 | C3'  | G B | 5 | 9.272  | 2.036  | 70.865 | 1.00 | 0.00 | C |
| ATOM | 721 | O3'  | G B | 5 | 9.613  | 1.974  | 72.248 | 1.00 | 0.00 | O |
| ATOM | 722 | C4'  | G B | 5 | 8.953  | 0.658  | 70.287 | 1.00 | 0.00 | C |
| ATOM | 723 | O4'  | G B | 5 | 10.262 | 0.102  | 69.943 | 1.00 | 0.00 | O |
| ATOM | 724 | C5'  | G B | 5 | 8.077  | 0.633  | 69.057 | 1.00 | 0.00 | C |
| ATOM | 725 | O5'  | G B | 5 | 8.389  | 1.766  | 68.210 | 1.00 | 0.00 | O |
| ATOM | 726 | O1P  | G B | 5 | 6.286  | 3.146  | 68.284 | 1.00 | 0.00 | O |
| ATOM | 727 | O2P  | G B | 5 | 7.794  | 3.266  | 66.283 | 1.00 | 0.00 | O |
| ATOM | 728 | P    | G B | 5 | 7.212  | 2.447  | 67.374 | 1.00 | 0.00 | P |
| ATOM | 729 | H1   | G B | 5 | 16.251 | -1.029 | 67.154 | 1.00 | 0.00 | H |
| ATOM | 730 | H8   | G B | 5 | 10.556 | 2.013  | 67.152 | 1.00 | 0.00 | H |
| ATOM | 731 | H1'  | G B | 5 | 11.957 | 0.975  | 70.647 | 1.00 | 0.00 | H |
| ATOM | 732 | H21  | G B | 5 | 16.764 | -1.675 | 69.186 | 1.00 | 0.00 | H |
| ATOM | 733 | H3'  | G B | 5 | 8.434  | 2.723  | 70.730 | 1.00 | 0.00 | H |
| ATOM | 734 | H22  | G B | 5 | 15.704 | -1.370 | 70.589 | 1.00 | 0.00 | H |
| ATOM | 735 | H4'  | G B | 5 | 8.446  | 0.096  | 71.070 | 1.00 | 0.00 | H |
| ATOM | 736 | H2'1 | G B | 5 | 10.209 | 2.929  | 69.124 | 1.00 | 0.00 | H |
| ATOM | 737 | H2'2 | G B | 5 | 11.096 | 3.185  | 70.620 | 1.00 | 0.00 | H |
| ATOM | 738 | H5'1 | G B | 5 | 8.253  | -0.295 | 68.513 | 1.00 | 0.00 | H |
| ATOM | 739 | H5'2 | G B | 5 | 7.031  | 0.677  | 69.362 | 1.00 | 0.00 | H |
| ATOM | 740 | C1'  | T B | 6 | 15.246 | 2.102  | 72.577 | 1.00 | 0.00 | C |
| ATOM | 741 | N1   | T B | 6 | 15.200 | 2.489  | 71.141 | 1.00 | 0.00 | N |
| ATOM | 742 | C2   | T B | 6 | 16.258 | 2.089  | 70.348 | 1.00 | 0.00 | C |
| ATOM | 743 | O2   | T B | 6 | 17.201 | 1.450  | 70.778 | 1.00 | 0.00 | O |
| ATOM | 744 | N3   | T B | 6 | 16.174 | 2.470  | 69.020 | 1.00 | 0.00 | N |
| ATOM | 745 | C4   | T B | 6 | 15.158 | 3.194  | 68.435 | 1.00 | 0.00 | C |
| ATOM | 746 | O4   | T B | 6 | 15.195 | 3.478  | 67.232 | 1.00 | 0.00 | O |
| ATOM | 747 | C5   | T B | 6 | 14.098 | 3.564  | 69.342 | 1.00 | 0.00 | C |
| ATOM | 748 | C6   | T B | 6 | 14.145 | 3.210  | 70.642 | 1.00 | 0.00 | C |

|      |     |      |     |   |        |       |        |      |      |   |
|------|-----|------|-----|---|--------|-------|--------|------|------|---|
| ATOM | 749 | C7   | T B | 6 | 12.969 | 4.351 | 68.746 | 1.00 | 0.00 | C |
| ATOM | 750 | C2'  | T B | 6 | 14.706 | 3.173 | 73.516 | 1.00 | 0.00 | C |
| ATOM | 751 | C3'  | T B | 6 | 14.031 | 2.336 | 74.594 | 1.00 | 0.00 | C |
| ATOM | 752 | O3'  | T B | 6 | 15.004 | 1.939 | 75.557 | 1.00 | 0.00 | O |
| ATOM | 753 | C4'  | T B | 6 | 13.478 | 1.150 | 73.807 | 1.00 | 0.00 | C |
| ATOM | 754 | O4'  | T B | 6 | 14.453 | 0.942 | 72.737 | 1.00 | 0.00 | O |
| ATOM | 755 | C5'  | T B | 6 | 12.112 | 1.334 | 73.186 | 1.00 | 0.00 | C |
| ATOM | 756 | O5'  | T B | 6 | 11.966 | 2.700 | 72.720 | 1.00 | 0.00 | O |
| ATOM | 757 | O1P  | T B | 6 | 10.162 | 3.631 | 74.207 | 1.00 | 0.00 | O |
| ATOM | 758 | O2P  | T B | 6 | 10.499 | 4.569 | 71.904 | 1.00 | 0.00 | O |
| ATOM | 759 | P    | T B | 6 | 10.528 | 3.386 | 72.797 | 1.00 | 0.00 | P |
| ATOM | 760 | H3   | T B | 6 | 16.950 | 2.181 | 68.406 | 1.00 | 0.00 | H |
| ATOM | 761 | H6   | T B | 6 | 13.332 | 3.502 | 71.307 | 1.00 | 0.00 | H |
| ATOM | 762 | H1'  | T B | 6 | 16.274 | 1.843 | 72.829 | 1.00 | 0.00 | H |
| ATOM | 763 | H3'  | T B | 6 | 13.232 | 2.884 | 75.093 | 1.00 | 0.00 | H |
| ATOM | 764 | H4'  | T B | 6 | 13.417 | 0.311 | 74.500 | 1.00 | 0.00 | H |
| ATOM | 765 | H71  | T B | 6 | 12.953 | 5.351 | 69.182 | 1.00 | 0.00 | H |
| ATOM | 766 | H72  | T B | 6 | 13.107 | 4.426 | 67.668 | 1.00 | 0.00 | H |
| ATOM | 767 | H73  | T B | 6 | 12.024 | 3.849 | 68.958 | 1.00 | 0.00 | H |
| ATOM | 768 | H2'1 | T B | 6 | 13.996 | 3.834 | 73.024 | 1.00 | 0.00 | H |
| ATOM | 769 | H2'2 | T B | 6 | 15.498 | 3.793 | 73.935 | 1.00 | 0.00 | H |
| ATOM | 770 | H5'1 | T B | 6 | 12.003 | 0.644 | 72.349 | 1.00 | 0.00 | H |
| ATOM | 771 | H5'2 | T B | 6 | 11.349 | 1.116 | 73.932 | 1.00 | 0.00 | H |
| ATOM | 772 | C1'  | C B | 7 | 20.109 | 2.913 | 73.172 | 1.00 | 0.00 | C |
| ATOM | 773 | N1   | C B | 7 | 19.328 | 3.694 | 72.170 | 1.00 | 0.00 | N |
| ATOM | 774 | C2   | C B | 7 | 19.819 | 3.759 | 70.868 | 1.00 | 0.00 | C |
| ATOM | 775 | O2   | C B | 7 | 20.874 | 3.169 | 70.597 | 1.00 | 0.00 | O |
| ATOM | 776 | N3   | C B | 7 | 19.125 | 4.464 | 69.942 | 1.00 | 0.00 | N |
| ATOM | 777 | C4   | C B | 7 | 17.987 | 5.092 | 70.267 | 1.00 | 0.00 | C |
| ATOM | 778 | N4   | C B | 7 | 17.347 | 5.764 | 69.322 | 1.00 | 0.00 | N |
| ATOM | 779 | C5   | C B | 7 | 17.461 | 5.047 | 71.600 | 1.00 | 0.00 | C |
| ATOM | 780 | C6   | C B | 7 | 18.176 | 4.326 | 72.514 | 1.00 | 0.00 | C |
| ATOM | 781 | C2'  | C B | 7 | 20.128 | 3.540 | 74.558 | 1.00 | 0.00 | C |
| ATOM | 782 | C3'  | C B | 7 | 20.105 | 2.315 | 75.459 | 1.00 | 0.00 | C |
| ATOM | 783 | O3'  | C B | 7 | 21.435 | 1.831 | 75.625 | 1.00 | 0.00 | O |
| ATOM | 784 | C4'  | C B | 7 | 19.227 | 1.337 | 74.682 | 1.00 | 0.00 | C |
| ATOM | 785 | O4'  | C B | 7 | 19.512 | 1.633 | 73.278 | 1.00 | 0.00 | O |
| ATOM | 786 | C5'  | C B | 7 | 17.736 | 1.449 | 74.906 | 1.00 | 0.00 | C |
| ATOM | 787 | O5'  | C B | 7 | 17.370 | 2.840 | 75.075 | 1.00 | 0.00 | O |
| ATOM | 788 | O1P  | C B | 7 | 16.585 | 2.950 | 77.464 | 1.00 | 0.00 | O |
| ATOM | 789 | O2P  | C B | 7 | 15.689 | 4.573 | 75.775 | 1.00 | 0.00 | O |
| ATOM | 790 | P    | C B | 7 | 16.175 | 3.204 | 76.070 | 1.00 | 0.00 | P |
| ATOM | 791 | H5   | C B | 7 | 16.540 | 5.563 | 71.870 | 1.00 | 0.00 | H |
| ATOM | 792 | H6   | C B | 7 | 17.812 | 4.256 | 73.540 | 1.00 | 0.00 | H |
| ATOM | 793 | H1'  | C B | 7 | 21.120 | 2.781 | 72.787 | 1.00 | 0.00 | H |
| ATOM | 794 | H3'  | C B | 7 | 19.676 | 2.537 | 76.438 | 1.00 | 0.00 | H |
| ATOM | 795 | H4'  | C B | 7 | 19.532 | 0.333 | 74.976 | 1.00 | 0.00 | H |
| ATOM | 796 | H41  | C B | 7 | 16.468 | 6.254 | 69.544 | 1.00 | 0.00 | H |
| ATOM | 797 | H42  | C B | 7 | 17.728 | 5.797 | 68.363 | 1.00 | 0.00 | H |
| ATOM | 798 | H2'1 | C B | 7 | 19.265 | 4.180 | 74.736 | 1.00 | 0.00 | H |
| ATOM | 799 | H2'2 | C B | 7 | 21.022 | 4.141 | 74.728 | 1.00 | 0.00 | H |
| ATOM | 800 | H5'1 | C B | 7 | 17.213 | 1.032 | 74.045 | 1.00 | 0.00 | H |
| ATOM | 801 | H5'2 | C B | 7 | 17.465 | 0.886 | 75.797 | 1.00 | 0.00 | H |
| ATOM | 802 | C1'  | C B | 8 | 24.602 | 4.348 | 71.661 | 1.00 | 0.00 | C |

|      |     |      |     |   |        |       |        |      |      |   |
|------|-----|------|-----|---|--------|-------|--------|------|------|---|
| ATOM | 803 | N1   | C B | 8 | 23.423 | 5.238 | 71.481 | 1.00 | 0.00 | N |
| ATOM | 804 | C2   | C B | 8 | 23.191 | 5.766 | 70.212 | 1.00 | 0.00 | C |
| ATOM | 805 | O2   | C B | 8 | 23.968 | 5.474 | 69.295 | 1.00 | 0.00 | O |
| ATOM | 806 | N3   | C B | 8 | 22.123 | 6.578 | 70.027 | 1.00 | 0.00 | N |
| ATOM | 807 | C4   | C B | 8 | 21.300 | 6.875 | 71.041 | 1.00 | 0.00 | C |
| ATOM | 808 | N4   | C B | 8 | 20.268 | 7.672 | 70.802 | 1.00 | 0.00 | N |
| ATOM | 809 | C5   | C B | 8 | 21.515 | 6.352 | 72.359 | 1.00 | 0.00 | C |
| ATOM | 810 | C6   | C B | 8 | 22.596 | 5.530 | 72.521 | 1.00 | 0.00 | C |
| ATOM | 811 | C2'  | C B | 8 | 25.314 | 4.534 | 72.995 | 1.00 | 0.00 | C |
| ATOM | 812 | C3'  | C B | 8 | 25.752 | 3.115 | 73.322 | 1.00 | 0.00 | C |
| ATOM | 813 | O3'  | C B | 8 | 26.987 | 2.843 | 72.664 | 1.00 | 0.00 | O |
| ATOM | 814 | C4'  | C B | 8 | 24.605 | 2.270 | 72.770 | 1.00 | 0.00 | C |
| ATOM | 815 | O4'  | C B | 8 | 24.145 | 3.010 | 71.594 | 1.00 | 0.00 | O |
| ATOM | 816 | C5'  | C B | 8 | 23.430 | 2.049 | 73.692 | 1.00 | 0.00 | C |
| ATOM | 817 | O5'  | C B | 8 | 23.192 | 3.245 | 74.478 | 1.00 | 0.00 | O |
| ATOM | 818 | O1P  | C B | 8 | 23.714 | 2.510 | 76.828 | 1.00 | 0.00 | O |
| ATOM | 819 | O2P  | C B | 8 | 22.084 | 4.376 | 76.429 | 1.00 | 0.00 | O |
| ATOM | 820 | P    | C B | 8 | 22.659 | 3.087 | 75.972 | 1.00 | 0.00 | P |
| ATOM | 821 | H5   | C B | 8 | 20.853 | 6.597 | 73.189 | 1.00 | 0.00 | H |
| ATOM | 822 | H6   | C B | 8 | 22.796 | 5.102 | 73.503 | 1.00 | 0.00 | H |
| ATOM | 823 | H1'  | C B | 8 | 25.284 | 4.512 | 70.828 | 1.00 | 0.00 | H |
| ATOM | 824 | H3'  | C B | 8 | 25.872 | 2.962 | 74.394 | 1.00 | 0.00 | H |
| ATOM | 825 | H4'  | C B | 8 | 25.022 | 1.293 | 72.524 | 1.00 | 0.00 | H |
| ATOM | 826 | H41  | C B | 8 | 19.618 | 7.915 | 71.565 | 1.00 | 0.00 | H |
| ATOM | 827 | H42  | C B | 8 | 20.117 | 8.050 | 69.856 | 1.00 | 0.00 | H |
| ATOM | 828 | H2'1 | C B | 8 | 24.655 | 4.933 | 73.763 | 1.00 | 0.00 | H |
| ATOM | 829 | H2'2 | C B | 8 | 26.170 | 5.206 | 72.914 | 1.00 | 0.00 | H |
| ATOM | 830 | H5'1 | C B | 8 | 22.545 | 1.818 | 73.098 | 1.00 | 0.00 | H |
| ATOM | 831 | H5'2 | C B | 8 | 23.646 | 1.212 | 74.353 | 1.00 | 0.00 | H |
| ATOM | 832 | C1'  | T B | 9 | 27.737 | 6.908 | 68.814 | 1.00 | 0.00 | C |
| ATOM | 833 | N1   | T B | 9 | 26.619 | 7.602 | 69.506 | 1.00 | 0.00 | N |
| ATOM | 834 | C2   | T B | 9 | 25.809 | 8.413 | 68.738 | 1.00 | 0.00 | C |
| ATOM | 835 | O2   | T B | 9 | 25.980 | 8.572 | 67.543 | 1.00 | 0.00 | O |
| ATOM | 836 | N3   | T B | 9 | 24.781 | 9.037 | 69.422 | 1.00 | 0.00 | N |
| ATOM | 837 | C4   | T B | 9 | 24.505 | 8.927 | 70.767 | 1.00 | 0.00 | C |
| ATOM | 838 | O4   | T B | 9 | 23.555 | 9.540 | 71.270 | 1.00 | 0.00 | O |
| ATOM | 839 | C5   | T B | 9 | 25.405 | 8.057 | 71.487 | 1.00 | 0.00 | C |
| ATOM | 840 | C6   | T B | 9 | 26.416 | 7.432 | 70.854 | 1.00 | 0.00 | C |
| ATOM | 841 | C7   | T B | 9 | 25.138 | 7.907 | 72.955 | 1.00 | 0.00 | C |
| ATOM | 842 | C2'  | T B | 9 | 29.013 | 6.818 | 69.644 | 1.00 | 0.00 | C |
| ATOM | 843 | C3'  | T B | 9 | 29.561 | 5.459 | 69.236 | 1.00 | 0.00 | C |
| ATOM | 844 | O3'  | T B | 9 | 30.317 | 5.599 | 68.037 | 1.00 | 0.00 | O |
| ATOM | 845 | C4'  | T B | 9 | 28.296 | 4.630 | 69.031 | 1.00 | 0.00 | C |
| ATOM | 846 | O4'  | T B | 9 | 27.315 | 5.590 | 68.522 | 1.00 | 0.00 | O |
| ATOM | 847 | C5'  | T B | 9 | 27.724 | 3.959 | 70.258 | 1.00 | 0.00 | C |
| ATOM | 848 | O5'  | T B | 9 | 27.898 | 4.819 | 71.412 | 1.00 | 0.00 | O |
| ATOM | 849 | O1P  | T B | 9 | 29.510 | 3.537 | 72.858 | 1.00 | 0.00 | O |
| ATOM | 850 | O2P  | T B | 9 | 27.885 | 5.138 | 73.904 | 1.00 | 0.00 | O |
| ATOM | 851 | P    | T B | 9 | 28.166 | 4.151 | 72.835 | 1.00 | 0.00 | P |
| ATOM | 852 | H3   | T B | 9 | 24.161 | 9.645 | 68.869 | 1.00 | 0.00 | H |
| ATOM | 853 | H6   | T B | 9 | 27.082 | 6.780 | 71.418 | 1.00 | 0.00 | H |
| ATOM | 854 | H1'  | T B | 9 | 27.923 | 7.416 | 67.868 | 1.00 | 0.00 | H |
| ATOM | 855 | H3'  | T B | 9 | 30.192 | 5.027 | 70.013 | 1.00 | 0.00 | H |
| ATOM | 856 | H4'  | T B | 9 | 28.542 | 3.850 | 68.309 | 1.00 | 0.00 | H |

|      |     |      |     |    |        |        |        |      |      |   |
|------|-----|------|-----|----|--------|--------|--------|------|------|---|
| ATOM | 857 | H71  | T B | 9  | 25.965 | 8.334  | 73.521 | 1.00 | 0.00 | H |
| ATOM | 858 | H72  | T B | 9  | 24.214 | 8.426  | 73.213 | 1.00 | 0.00 | H |
| ATOM | 859 | H73  | T B | 9  | 25.039 | 6.847  | 73.199 | 1.00 | 0.00 | H |
| ATOM | 860 | H2'1 | T B | 9  | 28.813 | 6.862  | 70.713 | 1.00 | 0.00 | H |
| ATOM | 861 | H2'2 | T B | 9  | 29.716 | 7.617  | 69.409 | 1.00 | 0.00 | H |
| ATOM | 862 | H5'1 | T B | 9  | 26.664 | 3.763  | 70.099 | 1.00 | 0.00 | H |
| ATOM | 863 | H5'2 | T B | 9  | 28.242 | 3.015  | 70.422 | 1.00 | 0.00 | H |
| ATOM | 864 | C1'  | A B | 10 | 28.991 | 10.709 | 65.879 | 1.00 | 0.00 | C |
| ATOM | 865 | N1   | A B | 10 | 25.271 | 13.168 | 68.421 | 1.00 | 0.00 | N |
| ATOM | 866 | C2   | A B | 10 | 25.610 | 13.132 | 67.135 | 1.00 | 0.00 | C |
| ATOM | 867 | N3   | A B | 10 | 26.583 | 12.473 | 66.545 | 1.00 | 0.00 | N |
| ATOM | 868 | C4   | A B | 10 | 27.283 | 11.765 | 67.450 | 1.00 | 0.00 | C |
| ATOM | 869 | C5   | A B | 10 | 27.067 | 11.695 | 68.799 | 1.00 | 0.00 | C |
| ATOM | 870 | C6   | A B | 10 | 25.988 | 12.451 | 69.300 | 1.00 | 0.00 | C |
| ATOM | 871 | N6   | A B | 10 | 25.656 | 12.479 | 70.604 | 1.00 | 0.00 | N |
| ATOM | 872 | N7   | A B | 10 | 27.990 | 10.864 | 69.409 | 1.00 | 0.00 | N |
| ATOM | 873 | C8   | A B | 10 | 28.740 | 10.457 | 68.428 | 1.00 | 0.00 | C |
| ATOM | 874 | N9   | A B | 10 | 28.369 | 10.961 | 67.208 | 1.00 | 0.00 | N |
| ATOM | 875 | C2'  | A B | 10 | 30.508 | 10.603 | 65.924 | 1.00 | 0.00 | C |
| ATOM | 876 | C3'  | A B | 10 | 30.784 | 9.543  | 64.869 | 1.00 | 0.00 | C |
| ATOM | 877 | O3'  | A B | 10 | 30.832 | 10.162 | 63.585 | 1.00 | 0.00 | O |
| ATOM | 878 | C4'  | A B | 10 | 29.587 | 8.603  | 65.011 | 1.00 | 0.00 | C |
| ATOM | 879 | O4'  | A B | 10 | 28.481 | 9.484  | 65.391 | 1.00 | 0.00 | O |
| ATOM | 880 | C5'  | A B | 10 | 29.712 | 7.510  | 66.045 | 1.00 | 0.00 | C |
| ATOM | 881 | O5'  | A B | 10 | 30.438 | 8.005  | 67.199 | 1.00 | 0.00 | O |
| ATOM | 882 | O1P  | A B | 10 | 32.562 | 6.656  | 67.173 | 1.00 | 0.00 | O |
| ATOM | 883 | O2P  | A B | 10 | 31.678 | 7.564  | 69.338 | 1.00 | 0.00 | O |
| ATOM | 884 | P    | A B | 10 | 31.388 | 7.003  | 67.996 | 1.00 | 0.00 | P |
| ATOM | 885 | H2   | A B | 10 | 24.991 | 13.739 | 66.475 | 1.00 | 0.00 | H |
| ATOM | 886 | H8   | A B | 10 | 29.583 | 9.780  | 68.563 | 1.00 | 0.00 | H |
| ATOM | 887 | H1'  | A B | 10 | 28.674 | 11.500 | 65.200 | 1.00 | 0.00 | H |
| ATOM | 888 | H3'  | A B | 10 | 31.720 | 9.017  | 65.052 | 1.00 | 0.00 | H |
| ATOM | 889 | H4'  | A B | 10 | 29.440 | 8.129  | 64.041 | 1.00 | 0.00 | H |
| ATOM | 890 | H61  | A B | 10 | 24.857 | 13.046 | 70.918 | 1.00 | 0.00 | H |
| ATOM | 891 | H62  | A B | 10 | 26.202 | 11.933 | 71.285 | 1.00 | 0.00 | H |
| ATOM | 892 | H2'1 | A B | 10 | 30.874 | 10.291 | 66.902 | 1.00 | 0.00 | H |
| ATOM | 893 | H2'2 | A B | 10 | 30.997 | 11.545 | 65.675 | 1.00 | 0.00 | H |
| ATOM | 894 | H5'1 | A B | 10 | 28.715 | 7.188  | 66.348 | 1.00 | 0.00 | H |
| ATOM | 895 | H5'2 | A B | 10 | 30.244 | 6.665  | 65.611 | 1.00 | 0.00 | H |
| ATOM | 896 | C1'  | G B | 11 | 28.570 | 15.368 | 64.217 | 1.00 | 0.00 | C |
| ATOM | 897 | N1   | G B | 11 | 26.653 | 16.267 | 68.859 | 1.00 | 0.00 | N |
| ATOM | 898 | C2   | G B | 11 | 26.233 | 16.721 | 67.621 | 1.00 | 0.00 | C |
| ATOM | 899 | N2   | G B | 11 | 25.160 | 17.522 | 67.621 | 1.00 | 0.00 | N |
| ATOM | 900 | N3   | G B | 11 | 26.834 | 16.400 | 66.477 | 1.00 | 0.00 | N |
| ATOM | 901 | C4   | G B | 11 | 27.906 | 15.587 | 66.667 | 1.00 | 0.00 | C |
| ATOM | 902 | C5   | G B | 11 | 28.400 | 15.089 | 67.860 | 1.00 | 0.00 | C |
| ATOM | 903 | C6   | G B | 11 | 27.762 | 15.425 | 69.076 | 1.00 | 0.00 | C |
| ATOM | 904 | O6   | G B | 11 | 28.049 | 15.086 | 70.224 | 1.00 | 0.00 | O |
| ATOM | 905 | N7   | G B | 11 | 29.521 | 14.289 | 67.622 | 1.00 | 0.00 | N |
| ATOM | 906 | C8   | G B | 11 | 29.664 | 14.325 | 66.322 | 1.00 | 0.00 | C |
| ATOM | 907 | N9   | G B | 11 | 28.722 | 15.094 | 65.672 | 1.00 | 0.00 | N |
| ATOM | 908 | C2'  | G B | 11 | 29.893 | 15.532 | 63.482 | 1.00 | 0.00 | C |
| ATOM | 909 | C3'  | G B | 11 | 29.587 | 14.903 | 62.133 | 1.00 | 0.00 | C |
| ATOM | 910 | O3'  | G B | 11 | 28.966 | 15.875 | 61.294 | 1.00 | 0.00 | O |

|      |     |      |     |    |        |        |        |      |      |   |
|------|-----|------|-----|----|--------|--------|--------|------|------|---|
| ATOM | 911 | C4'  | G B | 11 | 28.637 | 13.763 | 62.496 | 1.00 | 0.00 | C |
| ATOM | 912 | O4'  | G B | 11 | 27.884 | 14.274 | 63.641 | 1.00 | 0.00 | O |
| ATOM | 913 | C5'  | G B | 11 | 29.281 | 12.453 | 62.886 | 1.00 | 0.00 | C |
| ATOM | 914 | O5'  | G B | 11 | 30.496 | 12.706 | 63.634 | 1.00 | 0.00 | O |
| ATOM | 915 | O1P  | G B | 11 | 32.306 | 11.836 | 62.118 | 1.00 | 0.00 | O |
| ATOM | 916 | O2P  | G B | 11 | 32.663 | 11.881 | 64.600 | 1.00 | 0.00 | O |
| ATOM | 917 | P    | G B | 11 | 31.724 | 11.703 | 63.467 | 1.00 | 0.00 | P |
| ATOM | 918 | H1   | G B | 11 | 26.115 | 16.568 | 69.684 | 1.00 | 0.00 | H |
| ATOM | 919 | H8   | G B | 11 | 30.460 | 13.795 | 65.800 | 1.00 | 0.00 | H |
| ATOM | 920 | H1'  | G B | 11 | 27.945 | 16.255 | 64.099 | 1.00 | 0.00 | H |
| ATOM | 921 | H21  | G B | 11 | 24.699 | 17.763 | 68.510 | 1.00 | 0.00 | H |
| ATOM | 922 | H3'  | G B | 11 | 30.485 | 14.526 | 61.644 | 1.00 | 0.00 | H |
| ATOM | 923 | H22  | G B | 11 | 24.799 | 17.897 | 66.733 | 1.00 | 0.00 | H |
| ATOM | 924 | H4'  | G B | 11 | 28.013 | 13.580 | 61.622 | 1.00 | 0.00 | H |
| ATOM | 925 | H2'1 | G B | 11 | 30.712 | 15.016 | 63.984 | 1.00 | 0.00 | H |
| ATOM | 926 | H2'2 | G B | 11 | 30.181 | 16.578 | 63.377 | 1.00 | 0.00 | H |
| ATOM | 927 | H5'1 | G B | 11 | 28.584 | 11.881 | 63.498 | 1.00 | 0.00 | H |
| ATOM | 928 | H5'2 | G B | 11 | 29.514 | 11.888 | 61.984 | 1.00 | 0.00 | H |
| ATOM | 929 | C1'  | G B | 12 | 27.365 | 20.154 | 64.632 | 1.00 | 0.00 | C |
| ATOM | 930 | N1   | G B | 12 | 28.038 | 19.306 | 69.617 | 1.00 | 0.00 | N |
| ATOM | 931 | C2   | G B | 12 | 27.051 | 20.022 | 68.962 | 1.00 | 0.00 | C |
| ATOM | 932 | N2   | G B | 12 | 26.120 | 20.589 | 69.741 | 1.00 | 0.00 | N |
| ATOM | 933 | N3   | G B | 12 | 26.997 | 20.160 | 67.640 | 1.00 | 0.00 | N |
| ATOM | 934 | C4   | G B | 12 | 28.022 | 19.528 | 67.012 | 1.00 | 0.00 | C |
| ATOM | 935 | C5   | G B | 12 | 29.050 | 18.796 | 67.579 | 1.00 | 0.00 | C |
| ATOM | 936 | C6   | G B | 12 | 29.108 | 18.645 | 68.983 | 1.00 | 0.00 | C |
| ATOM | 937 | O6   | G B | 12 | 29.934 | 18.040 | 69.667 | 1.00 | 0.00 | O |
| ATOM | 938 | N7   | G B | 12 | 29.903 | 18.309 | 66.585 | 1.00 | 0.00 | N |
| ATOM | 939 | C8   | G B | 12 | 29.374 | 18.748 | 65.473 | 1.00 | 0.00 | C |
| ATOM | 940 | N9   | G B | 12 | 28.230 | 19.498 | 65.650 | 1.00 | 0.00 | N |
| ATOM | 941 | C2'  | G B | 12 | 28.139 | 20.754 | 63.466 | 1.00 | 0.00 | C |
| ATOM | 942 | C3'  | G B | 12 | 27.198 | 20.504 | 62.297 | 1.00 | 0.00 | C |
| ATOM | 943 | O3'  | G B | 12 | 26.235 | 21.555 | 62.239 | 1.00 | 0.00 | O |
| ATOM | 944 | C4'  | G B | 12 | 26.565 | 19.160 | 62.652 | 1.00 | 0.00 | C |
| ATOM | 945 | O4'  | G B | 12 | 26.487 | 19.174 | 64.114 | 1.00 | 0.00 | O |
| ATOM | 946 | C5'  | G B | 12 | 27.322 | 17.926 | 62.220 | 1.00 | 0.00 | C |
| ATOM | 947 | O5'  | G B | 12 | 28.747 | 18.158 | 62.342 | 1.00 | 0.00 | O |
| ATOM | 948 | O1P  | G B | 12 | 29.553 | 18.099 | 59.958 | 1.00 | 0.00 | O |
| ATOM | 949 | O2P  | G B | 12 | 31.110 | 17.477 | 61.825 | 1.00 | 0.00 | O |
| ATOM | 950 | P    | G B | 12 | 29.729 | 17.477 | 61.286 | 1.00 | 0.00 | P |
| ATOM | 951 | H1   | G B | 12 | 27.986 | 19.254 | 70.646 | 1.00 | 0.00 | H |
| ATOM | 952 | H8   | G B | 12 | 29.800 | 18.542 | 64.490 | 1.00 | 0.00 | H |
| ATOM | 953 | H1'  | G B | 12 | 26.763 | 20.912 | 65.133 | 1.00 | 0.00 | H |
| ATOM | 954 | H21  | G B | 12 | 26.167 | 20.474 | 70.765 | 1.00 | 0.00 | H |
| ATOM | 955 | H3'  | G B | 12 | 27.730 | 20.450 | 61.348 | 1.00 | 0.00 | H |
| ATOM | 956 | H22  | G B | 12 | 25.360 | 21.137 | 69.316 | 1.00 | 0.00 | H |
| ATOM | 957 | H4'  | G B | 12 | 25.586 | 19.134 | 62.175 | 1.00 | 0.00 | H |
| ATOM | 958 | H2'1 | G B | 12 | 29.100 | 20.264 | 63.312 | 1.00 | 0.00 | H |
| ATOM | 959 | H2'2 | G B | 12 | 28.331 | 21.818 | 63.600 | 1.00 | 0.00 | H |
| ATOM | 960 | H5'1 | G B | 12 | 27.030 | 17.088 | 62.851 | 1.00 | 0.00 | H |
| ATOM | 961 | H5'2 | G B | 12 | 27.073 | 17.699 | 61.183 | 1.00 | 0.00 | H |
| ATOM | 962 | C1'  | T B | 13 | 26.503 | 24.330 | 67.146 | 1.00 | 0.00 | C |
| ATOM | 963 | N1   | T B | 13 | 27.759 | 23.566 | 67.372 | 1.00 | 0.00 | N |
| ATOM | 964 | C2   | T B | 13 | 28.085 | 23.259 | 68.678 | 1.00 | 0.00 | C |



|      |      |      |     |    |        |        |        |      |      |   |
|------|------|------|-----|----|--------|--------|--------|------|------|---|
| ATOM | 965  | O2   | T B | 13 | 27.391 | 23.588 | 69.625 | 1.00 | 0.00 | O |
| ATOM | 966  | N3   | T B | 13 | 29.259 | 22.548 | 68.842 | 1.00 | 0.00 | N |
| ATOM | 967  | C4   | T B | 13 | 30.114 | 22.131 | 67.844 | 1.00 | 0.00 | C |
| ATOM | 968  | O4   | T B | 13 | 31.143 | 21.501 | 68.113 | 1.00 | 0.00 | O |
| ATOM | 969  | C5   | T B | 13 | 29.690 | 22.497 | 66.512 | 1.00 | 0.00 | C |
| ATOM | 970  | C6   | T B | 13 | 28.551 | 23.189 | 66.314 | 1.00 | 0.00 | C |
| ATOM | 971  | C7   | T B | 13 | 30.589 | 22.062 | 65.393 | 1.00 | 0.00 | C |
| ATOM | 972  | C2'  | T B | 13 | 26.604 | 25.360 | 66.028 | 1.00 | 0.00 | C |
| ATOM | 973  | C3'  | T B | 13 | 25.214 | 25.299 | 65.415 | 1.00 | 0.00 | C |
| ATOM | 974  | O3'  | T B | 13 | 24.338 | 26.144 | 66.156 | 1.00 | 0.00 | O |
| ATOM | 975  | C4'  | T B | 13 | 24.847 | 23.823 | 65.551 | 1.00 | 0.00 | C |
| ATOM | 976  | O4'  | T B | 13 | 25.493 | 23.404 | 66.796 | 1.00 | 0.00 | O |
| ATOM | 977  | C5'  | T B | 13 | 25.305 | 22.910 | 64.437 | 1.00 | 0.00 | C |
| ATOM | 978  | O5'  | T B | 13 | 26.608 | 23.337 | 63.961 | 1.00 | 0.00 | O |
| ATOM | 979  | O1P  | T B | 13 | 26.147 | 24.098 | 61.608 | 1.00 | 0.00 | O |
| ATOM | 980  | O2P  | T B | 13 | 28.423 | 23.242 | 62.226 | 1.00 | 0.00 | O |
| ATOM | 981  | P    | T B | 13 | 26.955 | 23.161 | 62.415 | 1.00 | 0.00 | P |
| ATOM | 982  | H3   | T B | 13 | 29.521 | 22.303 | 69.808 | 1.00 | 0.00 | H |
| ATOM | 983  | H6   | T B | 13 | 28.252 | 23.455 | 65.301 | 1.00 | 0.00 | H |
| ATOM | 984  | H1'  | T B | 13 | 26.215 | 24.800 | 68.086 | 1.00 | 0.00 | H |
| ATOM | 985  | H3'  | T B | 13 | 25.216 | 25.610 | 64.370 | 1.00 | 0.00 | H |
| ATOM | 986  | H4'  | T B | 13 | 23.759 | 23.771 | 65.595 | 1.00 | 0.00 | H |
| ATOM | 987  | H71  | T B | 13 | 31.021 | 22.939 | 64.911 | 1.00 | 0.00 | H |
| ATOM | 988  | H72  | T B | 13 | 31.389 | 21.436 | 65.792 | 1.00 | 0.00 | H |
| ATOM | 989  | H73  | T B | 13 | 30.012 | 21.494 | 64.662 | 1.00 | 0.00 | H |
| ATOM | 990  | H2'1 | T B | 13 | 27.371 | 25.105 | 65.299 | 1.00 | 0.00 | H |
| ATOM | 991  | H2'2 | T B | 13 | 26.827 | 26.359 | 66.404 | 1.00 | 0.00 | H |
| ATOM | 992  | H5'1 | T B | 13 | 25.366 | 21.889 | 64.812 | 1.00 | 0.00 | H |
| ATOM | 993  | H5'2 | T B | 13 | 24.586 | 22.951 | 63.622 | 1.00 | 0.00 | H |
| ATOM | 994  | C1'  | G B | 14 | 27.033 | 27.350 | 71.051 | 1.00 | 0.00 | C |
| ATOM | 995  | N1   | G B | 14 | 31.449 | 24.870 | 71.670 | 1.00 | 0.00 | N |
| ATOM | 996  | C2   | G B | 14 | 30.512 | 25.262 | 72.609 | 1.00 | 0.00 | C |
| ATOM | 997  | N2   | G B | 14 | 30.787 | 24.953 | 73.882 | 1.00 | 0.00 | N |
| ATOM | 998  | N3   | G B | 14 | 29.388 | 25.908 | 72.301 | 1.00 | 0.00 | N |
| ATOM | 999  | C4   | G B | 14 | 29.275 | 26.143 | 70.967 | 1.00 | 0.00 | C |
| ATOM | 1000 | C5   | G B | 14 | 30.160 | 25.796 | 69.961 | 1.00 | 0.00 | C |
| ATOM | 1001 | C6   | G B | 14 | 31.351 | 25.106 | 70.285 | 1.00 | 0.00 | C |
| ATOM | 1002 | O6   | G B | 14 | 32.251 | 24.716 | 69.539 | 1.00 | 0.00 | O |
| ATOM | 1003 | N7   | G B | 14 | 29.676 | 26.222 | 68.722 | 1.00 | 0.00 | N |
| ATOM | 1004 | C8   | G B | 14 | 28.537 | 26.800 | 69.011 | 1.00 | 0.00 | C |
| ATOM | 1005 | N9   | G B | 14 | 28.226 | 26.793 | 70.356 | 1.00 | 0.00 | N |
| ATOM | 1006 | C2'  | G B | 14 | 26.541 | 28.667 | 70.465 | 1.00 | 0.00 | C |
| ATOM | 1007 | C3'  | G B | 14 | 25.034 | 28.542 | 70.624 | 1.00 | 0.00 | C |
| ATOM | 1008 | O3'  | G B | 14 | 24.667 | 28.953 | 71.939 | 1.00 | 0.00 | O |
| ATOM | 1009 | C4'  | G B | 14 | 24.792 | 27.050 | 70.397 | 1.00 | 0.00 | C |
| ATOM | 1010 | O4'  | G B | 14 | 25.989 | 26.405 | 70.937 | 1.00 | 0.00 | O |
| ATOM | 1011 | C5'  | G B | 14 | 24.610 | 26.611 | 68.964 | 1.00 | 0.00 | C |
| ATOM | 1012 | O5'  | G B | 14 | 25.478 | 27.386 | 68.099 | 1.00 | 0.00 | O |
| ATOM | 1013 | O1P  | G B | 14 | 23.865 | 28.718 | 66.699 | 1.00 | 0.00 | O |
| ATOM | 1014 | O2P  | G B | 14 | 26.133 | 28.142 | 65.794 | 1.00 | 0.00 | O |
| ATOM | 1015 | P    | G B | 14 | 24.973 | 27.746 | 66.629 | 1.00 | 0.00 | P |
| ATOM | 1016 | H1   | G B | 14 | 32.283 | 24.368 | 72.012 | 1.00 | 0.00 | H |
| ATOM | 1017 | H8   | G B | 14 | 27.892 | 27.249 | 68.256 | 1.00 | 0.00 | H |
| ATOM | 1018 | H1'  | G B | 14 | 27.274 | 27.459 | 72.109 | 1.00 | 0.00 | H |

|      |      |      |     |    |        |        |        |      |      |   |
|------|------|------|-----|----|--------|--------|--------|------|------|---|
| ATOM | 1019 | H21  | G B | 14 | 31.657 | 24.449 | 74.111 | 1.00 | 0.00 | H |
| ATOM | 1020 | H3'  | G B | 14 | 24.495 | 29.143 | 69.893 | 1.00 | 0.00 | H |
| ATOM | 1021 | H22  | G B | 14 | 30.131 | 25.219 | 74.629 | 1.00 | 0.00 | H |
| ATOM | 1022 | H4'  | G B | 14 | 23.885 | 26.791 | 70.943 | 1.00 | 0.00 | H |
| ATOM | 1023 | H2'1 | G B | 14 | 26.822 | 28.784 | 69.419 | 1.00 | 0.00 | H |
| ATOM | 1024 | H2'2 | G B | 14 | 26.927 | 29.530 | 71.006 | 1.00 | 0.00 | H |
| ATOM | 1025 | H5'1 | G B | 14 | 24.856 | 25.553 | 68.880 | 1.00 | 0.00 | H |
| ATOM | 1026 | H5'2 | G B | 14 | 23.570 | 26.761 | 68.673 | 1.00 | 0.00 | H |
| ATOM | 1027 | C1'  | C B | 15 | 29.425 | 29.151 | 74.996 | 1.00 | 0.00 | C |
| ATOM | 1028 | N1   | C B | 15 | 30.113 | 29.035 | 73.682 | 1.00 | 0.00 | N |
| ATOM | 1029 | C2   | C B | 15 | 31.345 | 28.386 | 73.645 | 1.00 | 0.00 | C |
| ATOM | 1030 | O2   | C B | 15 | 31.813 | 27.935 | 74.698 | 1.00 | 0.00 | O |
| ATOM | 1031 | N3   | C B | 15 | 31.988 | 28.270 | 72.457 | 1.00 | 0.00 | N |
| ATOM | 1032 | C4   | C B | 15 | 31.456 | 28.770 | 71.334 | 1.00 | 0.00 | C |
| ATOM | 1033 | N4   | C B | 15 | 32.126 | 28.625 | 70.201 | 1.00 | 0.00 | N |
| ATOM | 1034 | C5   | C B | 15 | 30.191 | 29.448 | 71.344 | 1.00 | 0.00 | C |
| ATOM | 1035 | C6   | C B | 15 | 29.561 | 29.548 | 72.549 | 1.00 | 0.00 | C |
| ATOM | 1036 | C2'  | C B | 15 | 28.704 | 30.477 | 75.198 | 1.00 | 0.00 | C |
| ATOM | 1037 | C3'  | C B | 15 | 27.477 | 30.054 | 75.991 | 1.00 | 0.00 | C |
| ATOM | 1038 | O3'  | C B | 15 | 27.813 | 29.992 | 77.376 | 1.00 | 0.00 | O |
| ATOM | 1039 | C4'  | C B | 15 | 27.157 | 28.678 | 75.413 | 1.00 | 0.00 | C |
| ATOM | 1040 | O4'  | C B | 15 | 28.463 | 28.115 | 75.072 | 1.00 | 0.00 | O |
| ATOM | 1041 | C5'  | C B | 15 | 26.284 | 28.654 | 74.179 | 1.00 | 0.00 | C |
| ATOM | 1042 | O5'  | C B | 15 | 26.603 | 29.786 | 73.332 | 1.00 | 0.00 | O |
| ATOM | 1043 | O1P  | C B | 15 | 24.504 | 31.175 | 73.400 | 1.00 | 0.00 | O |
| ATOM | 1044 | O2P  | C B | 15 | 26.019 | 31.289 | 71.402 | 1.00 | 0.00 | O |
| ATOM | 1045 | P    | C B | 15 | 25.433 | 30.471 | 72.492 | 1.00 | 0.00 | P |
| ATOM | 1046 | H5   | C B | 15 | 29.758 | 29.862 | 70.432 | 1.00 | 0.00 | H |
| ATOM | 1047 | H6   | C B | 15 | 28.593 | 30.050 | 72.606 | 1.00 | 0.00 | H |
| ATOM | 1048 | H1'  | C B | 15 | 30.162 | 28.983 | 75.782 | 1.00 | 0.00 | H |
| ATOM | 1049 | H3'  | C B | 15 | 26.644 | 30.743 | 75.852 | 1.00 | 0.00 | H |
| ATOM | 1050 | H4'  | C B | 15 | 26.642 | 28.118 | 76.194 | 1.00 | 0.00 | H |
| ATOM | 1051 | H41  | C B | 15 | 31.738 | 28.998 | 69.322 | 1.00 | 0.00 | H |
| ATOM | 1052 | H42  | C B | 15 | 33.036 | 28.141 | 70.197 | 1.00 | 0.00 | H |
| ATOM | 1053 | H2'1 | C B | 15 | 28.424 | 30.943 | 74.253 | 1.00 | 0.00 | H |
| ATOM | 1054 | H2'2 | C B | 15 | 29.307 | 31.197 | 75.752 | 1.00 | 0.00 | H |
| ATOM | 1055 | H5'1 | C B | 15 | 26.459 | 27.726 | 73.635 | 1.00 | 0.00 | H |
| ATOM | 1056 | H5'2 | C B | 15 | 25.238 | 28.703 | 74.480 | 1.00 | 0.00 | H |
| ATOM | 1057 | C1'  | G B | 16 | 33.468 | 30.109 | 77.690 | 1.00 | 0.00 | C |
| ATOM | 1058 | N1   | G B | 16 | 35.833 | 29.902 | 73.176 | 1.00 | 0.00 | N |
| ATOM | 1059 | C2   | G B | 16 | 36.213 | 29.384 | 74.402 | 1.00 | 0.00 | C |
| ATOM | 1060 | N2   | G B | 16 | 37.379 | 28.726 | 74.428 | 1.00 | 0.00 | N |
| ATOM | 1061 | N3   | G B | 16 | 35.487 | 29.513 | 75.512 | 1.00 | 0.00 | N |
| ATOM | 1062 | C4   | G B | 16 | 34.342 | 30.213 | 75.301 | 1.00 | 0.00 | C |
| ATOM | 1063 | C5   | G B | 16 | 33.886 | 30.769 | 74.118 | 1.00 | 0.00 | C |
| ATOM | 1064 | C6   | G B | 16 | 34.653 | 30.630 | 72.938 | 1.00 | 0.00 | C |
| ATOM | 1065 | O6   | G B | 16 | 34.416 | 31.048 | 71.804 | 1.00 | 0.00 | O |
| ATOM | 1066 | N7   | G B | 16 | 32.662 | 31.411 | 74.326 | 1.00 | 0.00 | N |
| ATOM | 1067 | C8   | G B | 16 | 32.422 | 31.226 | 75.599 | 1.00 | 0.00 | C |
| ATOM | 1068 | N9   | G B | 16 | 33.397 | 30.508 | 76.259 | 1.00 | 0.00 | N |
| ATOM | 1069 | C2'  | G B | 16 | 32.939 | 31.166 | 78.649 | 1.00 | 0.00 | C |
| ATOM | 1070 | C3'  | G B | 16 | 32.285 | 30.319 | 79.729 | 1.00 | 0.00 | C |
| ATOM | 1071 | O3'  | G B | 16 | 33.275 | 29.915 | 80.671 | 1.00 | 0.00 | O |
| ATOM | 1072 | C4'  | G B | 16 | 31.724 | 29.136 | 78.939 | 1.00 | 0.00 | C |

|      |      |      |     |    |        |        |        |      |      |   |
|------|------|------|-----|----|--------|--------|--------|------|------|---|
| ATOM | 1073 | O4'  | G B | 16 | 32.685 | 28.943 | 77.852 | 1.00 | 0.00 | O |
| ATOM | 1074 | C5'  | G B | 16 | 30.349 | 29.319 | 78.344 | 1.00 | 0.00 | C |
| ATOM | 1075 | O5'  | G B | 16 | 30.188 | 30.687 | 77.892 | 1.00 | 0.00 | O |
| ATOM | 1076 | O1P  | G B | 16 | 28.402 | 31.596 | 79.415 | 1.00 | 0.00 | O |
| ATOM | 1077 | O2P  | G B | 16 | 28.699 | 32.557 | 77.117 | 1.00 | 0.00 | O |
| ATOM | 1078 | P    | G B | 16 | 28.748 | 31.366 | 78.000 | 1.00 | 0.00 | P |
| ATOM | 1079 | H1   | G B | 16 | 36.464 | 29.740 | 72.376 | 1.00 | 0.00 | H |
| ATOM | 1080 | H8   | G B | 16 | 31.528 | 31.606 | 76.094 | 1.00 | 0.00 | H |
| ATOM | 1081 | H1'  | G B | 16 | 34.501 | 29.852 | 77.923 | 1.00 | 0.00 | H |
| ATOM | 1082 | H21  | G B | 16 | 37.933 | 28.627 | 73.566 | 1.00 | 0.00 | H |
| ATOM | 1083 | H3'  | G B | 16 | 31.491 | 30.856 | 80.247 | 1.00 | 0.00 | H |
| ATOM | 1084 | H22  | G B | 16 | 37.718 | 28.319 | 75.311 | 1.00 | 0.00 | H |
| ATOM | 1085 | H4'  | G B | 16 | 31.681 | 28.290 | 79.625 | 1.00 | 0.00 | H |
| ATOM | 1086 | H2'1 | G B | 16 | 32.216 | 31.830 | 78.175 | 1.00 | 0.00 | H |
| ATOM | 1087 | H2'2 | G B | 16 | 33.734 | 31.788 | 79.060 | 1.00 | 0.00 | H |
| ATOM | 1088 | H5'1 | G B | 16 | 30.231 | 28.637 | 77.501 | 1.00 | 0.00 | H |
| ATOM | 1089 | H5'2 | G B | 16 | 29.599 | 29.089 | 79.099 | 1.00 | 0.00 | H |
| ATOM | 1090 | C1'  | G B | 17 | 38.314 | 30.925 | 78.303 | 1.00 | 0.00 | C |
| ATOM | 1091 | N1   | G B | 17 | 38.089 | 32.464 | 73.444 | 1.00 | 0.00 | N |
| ATOM | 1092 | C2   | G B | 17 | 39.036 | 31.685 | 74.086 | 1.00 | 0.00 | C |
| ATOM | 1093 | N2   | G B | 17 | 40.059 | 31.262 | 73.334 | 1.00 | 0.00 | N |
| ATOM | 1094 | N3   | G B | 17 | 38.966 | 31.355 | 75.374 | 1.00 | 0.00 | N |
| ATOM | 1095 | C4   | G B | 17 | 37.868 | 31.876 | 75.982 | 1.00 | 0.00 | C |
| ATOM | 1096 | C5   | G B | 17 | 36.876 | 32.664 | 75.425 | 1.00 | 0.00 | C |
| ATOM | 1097 | C6   | G B | 17 | 36.947 | 33.013 | 74.057 | 1.00 | 0.00 | C |
| ATOM | 1098 | O6   | G B | 17 | 36.171 | 33.696 | 73.388 | 1.00 | 0.00 | O |
| ATOM | 1099 | N7   | G B | 17 | 35.922 | 32.993 | 76.390 | 1.00 | 0.00 | N |
| ATOM | 1100 | C8   | G B | 17 | 36.353 | 32.405 | 77.475 | 1.00 | 0.00 | C |
| ATOM | 1101 | N9   | G B | 17 | 37.532 | 31.708 | 77.307 | 1.00 | 0.00 | N |
| ATOM | 1102 | C2'  | G B | 17 | 38.334 | 31.546 | 79.692 | 1.00 | 0.00 | C |
| ATOM | 1103 | C3'  | G B | 17 | 38.315 | 30.320 | 80.590 | 1.00 | 0.00 | C |
| ATOM | 1104 | O3'  | G B | 17 | 39.647 | 29.838 | 80.753 | 1.00 | 0.00 | O |
| ATOM | 1105 | C4'  | G B | 17 | 37.439 | 29.342 | 79.810 | 1.00 | 0.00 | C |
| ATOM | 1106 | O4'  | G B | 17 | 37.723 | 29.645 | 78.406 | 1.00 | 0.00 | O |
| ATOM | 1107 | C5'  | G B | 17 | 35.949 | 29.448 | 80.036 | 1.00 | 0.00 | C |
| ATOM | 1108 | O5'  | G B | 17 | 35.577 | 30.837 | 80.210 | 1.00 | 0.00 | O |
| ATOM | 1109 | O1P  | G B | 17 | 34.796 | 30.935 | 82.601 | 1.00 | 0.00 | O |
| ATOM | 1110 | O2P  | G B | 17 | 33.893 | 32.563 | 80.919 | 1.00 | 0.00 | O |
| ATOM | 1111 | P    | G B | 17 | 34.384 | 31.193 | 81.208 | 1.00 | 0.00 | P |
| ATOM | 1112 | H1   | G B | 17 | 38.234 | 32.658 | 72.441 | 1.00 | 0.00 | H |
| ATOM | 1113 | H8   | G B | 17 | 35.829 | 32.461 | 78.429 | 1.00 | 0.00 | H |
| ATOM | 1114 | H1'  | G B | 17 | 39.325 | 30.797 | 77.917 | 1.00 | 0.00 | H |
| ATOM | 1115 | H21  | G B | 17 | 40.105 | 31.518 | 72.337 | 1.00 | 0.00 | H |
| ATOM | 1116 | H3'  | G B | 17 | 37.887 | 30.535 | 81.569 | 1.00 | 0.00 | H |
| ATOM | 1117 | H22  | G B | 17 | 40.799 | 30.680 | 73.753 | 1.00 | 0.00 | H |
| ATOM | 1118 | H4'  | G B | 17 | 37.748 | 28.338 | 80.099 | 1.00 | 0.00 | H |
| ATOM | 1119 | H2'1 | G B | 17 | 37.468 | 32.184 | 79.873 | 1.00 | 0.00 | H |
| ATOM | 1120 | H2'2 | G B | 17 | 39.225 | 32.150 | 79.864 | 1.00 | 0.00 | H |
| ATOM | 1121 | H5'1 | G B | 17 | 35.426 | 29.032 | 79.174 | 1.00 | 0.00 | H |
| ATOM | 1122 | H5'2 | G B | 17 | 35.681 | 28.879 | 80.926 | 1.00 | 0.00 | H |
| ATOM | 1123 | C1'  | C B | 18 | 42.808 | 32.359 | 76.793 | 1.00 | 0.00 | C |
| ATOM | 1124 | N1   | C B | 18 | 41.628 | 33.250 | 76.613 | 1.00 | 0.00 | N |
| ATOM | 1125 | C2   | C B | 18 | 41.397 | 33.776 | 75.344 | 1.00 | 0.00 | C |
| ATOM | 1126 | O2   | C B | 18 | 42.175 | 33.485 | 74.426 | 1.00 | 0.00 | O |

|      |      |      |     |    |        |        |        |      |      |   |
|------|------|------|-----|----|--------|--------|--------|------|------|---|
| ATOM | 1127 | N3   | C B | 18 | 40.329 | 34.589 | 75.160 | 1.00 | 0.00 | N |
| ATOM | 1128 | C4   | C B | 18 | 39.507 | 34.885 | 76.175 | 1.00 | 0.00 | C |
| ATOM | 1129 | N4   | C B | 18 | 38.476 | 35.684 | 75.936 | 1.00 | 0.00 | N |
| ATOM | 1130 | C5   | C B | 18 | 39.723 | 34.360 | 77.489 | 1.00 | 0.00 | C |
| ATOM | 1131 | C6   | C B | 18 | 40.801 | 33.542 | 77.651 | 1.00 | 0.00 | C |
| ATOM | 1132 | C2'  | C B | 18 | 43.521 | 32.546 | 78.127 | 1.00 | 0.00 | C |
| ATOM | 1133 | C3'  | C B | 18 | 43.958 | 31.127 | 78.454 | 1.00 | 0.00 | C |
| ATOM | 1134 | O3'  | C B | 18 | 45.194 | 30.854 | 77.796 | 1.00 | 0.00 | O |
| ATOM | 1135 | C4'  | C B | 18 | 42.812 | 30.282 | 77.902 | 1.00 | 0.00 | C |
| ATOM | 1136 | O4'  | C B | 18 | 42.351 | 31.022 | 76.726 | 1.00 | 0.00 | O |
| ATOM | 1137 | C5'  | C B | 18 | 41.637 | 30.061 | 78.824 | 1.00 | 0.00 | C |
| ATOM | 1138 | O5'  | C B | 18 | 41.398 | 31.256 | 79.610 | 1.00 | 0.00 | O |
| ATOM | 1139 | O1P  | C B | 18 | 41.919 | 30.522 | 81.961 | 1.00 | 0.00 | O |
| ATOM | 1140 | O2P  | C B | 18 | 40.290 | 32.388 | 81.561 | 1.00 | 0.00 | O |
| ATOM | 1141 | P    | C B | 18 | 40.864 | 31.099 | 81.104 | 1.00 | 0.00 | P |
| ATOM | 1142 | H5   | C B | 18 | 39.058 | 34.601 | 78.318 | 1.00 | 0.00 | H |
| ATOM | 1143 | H6   | C B | 18 | 41.004 | 33.116 | 78.633 | 1.00 | 0.00 | H |
| ATOM | 1144 | H1'  | C B | 18 | 43.490 | 32.524 | 75.960 | 1.00 | 0.00 | H |
| ATOM | 1145 | H3'  | C B | 18 | 44.078 | 30.974 | 79.526 | 1.00 | 0.00 | H |
| ATOM | 1146 | H4'  | C B | 18 | 43.227 | 29.305 | 77.655 | 1.00 | 0.00 | H |
| ATOM | 1147 | H41  | C B | 18 | 37.827 | 35.927 | 76.700 | 1.00 | 0.00 | H |
| ATOM | 1148 | H42  | C B | 18 | 38.324 | 36.061 | 74.991 | 1.00 | 0.00 | H |
| ATOM | 1149 | H2'1 | C B | 18 | 42.861 | 32.945 | 78.895 | 1.00 | 0.00 | H |
| ATOM | 1150 | H2'2 | C B | 18 | 44.375 | 33.218 | 78.047 | 1.00 | 0.00 | H |
| ATOM | 1151 | H5'1 | C B | 18 | 40.752 | 29.829 | 78.230 | 1.00 | 0.00 | H |
| ATOM | 1152 | H5'2 | C B | 18 | 41.853 | 29.223 | 79.485 | 1.00 | 0.00 | H |
| ATOM | 1153 | C1'  | C B | 19 | 45.929 | 34.933 | 73.937 | 1.00 | 0.00 | C |
| ATOM | 1154 | N1   | C B | 19 | 44.814 | 35.617 | 74.648 | 1.00 | 0.00 | N |
| ATOM | 1155 | C2   | C B | 19 | 43.973 | 36.443 | 73.905 | 1.00 | 0.00 | C |
| ATOM | 1156 | O2   | C B | 19 | 44.184 | 36.573 | 72.692 | 1.00 | 0.00 | O |
| ATOM | 1157 | N3   | C B | 19 | 42.955 | 37.075 | 74.535 | 1.00 | 0.00 | N |
| ATOM | 1158 | C4   | C B | 19 | 42.752 | 36.913 | 75.850 | 1.00 | 0.00 | C |
| ATOM | 1159 | N4   | C B | 19 | 41.742 | 37.553 | 76.414 | 1.00 | 0.00 | N |
| ATOM | 1160 | C5   | C B | 19 | 43.602 | 36.072 | 76.636 | 1.00 | 0.00 | C |
| ATOM | 1161 | C6   | C B | 19 | 44.621 | 35.445 | 75.982 | 1.00 | 0.00 | C |
| ATOM | 1162 | C2'  | C B | 19 | 47.212 | 34.844 | 74.748 | 1.00 | 0.00 | C |
| ATOM | 1163 | C3'  | C B | 19 | 47.761 | 33.489 | 74.324 | 1.00 | 0.00 | C |
| ATOM | 1164 | O3'  | C B | 19 | 48.500 | 33.641 | 73.114 | 1.00 | 0.00 | O |
| ATOM | 1165 | C4'  | C B | 19 | 46.497 | 32.656 | 74.128 | 1.00 | 0.00 | C |
| ATOM | 1166 | O4'  | C B | 19 | 45.505 | 33.616 | 73.641 | 1.00 | 0.00 | O |
| ATOM | 1167 | C5'  | C B | 19 | 45.944 | 31.975 | 75.358 | 1.00 | 0.00 | C |
| ATOM | 1168 | O5'  | C B | 19 | 46.129 | 32.826 | 76.516 | 1.00 | 0.00 | O |
| ATOM | 1169 | O1P  | C B | 19 | 47.765 | 31.540 | 77.931 | 1.00 | 0.00 | O |
| ATOM | 1170 | O2P  | C B | 19 | 46.148 | 33.126 | 79.011 | 1.00 | 0.00 | O |
| ATOM | 1171 | P    | C B | 19 | 46.420 | 32.148 | 77.929 | 1.00 | 0.00 | P |
| ATOM | 1172 | H5   | C B | 19 | 43.443 | 35.939 | 77.706 | 1.00 | 0.00 | H |
| ATOM | 1173 | H6   | C B | 19 | 45.293 | 34.794 | 76.540 | 1.00 | 0.00 | H |
| ATOM | 1174 | H1'  | C B | 19 | 46.097 | 35.451 | 72.992 | 1.00 | 0.00 | H |
| ATOM | 1175 | H3'  | C B | 19 | 48.405 | 33.054 | 75.089 | 1.00 | 0.00 | H |
| ATOM | 1176 | H4'  | C B | 19 | 46.736 | 31.883 | 73.398 | 1.00 | 0.00 | H |
| ATOM | 1177 | H41  | C B | 19 | 41.561 | 37.446 | 77.424 | 1.00 | 0.00 | H |
| ATOM | 1178 | H42  | C B | 19 | 41.131 | 38.159 | 75.845 | 1.00 | 0.00 | H |
| ATOM | 1179 | H2'1 | C B | 19 | 47.027 | 34.878 | 75.821 | 1.00 | 0.00 | H |
| ATOM | 1180 | H2'2 | C B | 19 | 47.910 | 35.648 | 74.509 | 1.00 | 0.00 | H |

|      |      |      |     |    |        |        |        |      |      |   |
|------|------|------|-----|----|--------|--------|--------|------|------|---|
| ATOM | 1181 | H5'1 | C B | 19 | 44.883 | 31.776 | 75.211 | 1.00 | 0.00 | H |
| ATOM | 1182 | H5'2 | C B | 19 | 46.467 | 31.031 | 75.508 | 1.00 | 0.00 | H |
| ATOM | 1183 | C1'  | T B | 20 | 47.197 | 38.721 | 71.013 | 1.00 | 0.00 | C |
| ATOM | 1184 | N1   | T B | 20 | 46.576 | 38.975 | 72.340 | 1.00 | 0.00 | N |
| ATOM | 1185 | C2   | T B | 20 | 45.485 | 39.821 | 72.373 | 1.00 | 0.00 | C |
| ATOM | 1186 | O2   | T B | 20 | 45.030 | 40.351 | 71.375 | 1.00 | 0.00 | O |
| ATOM | 1187 | N3   | T B | 20 | 44.941 | 40.029 | 73.626 | 1.00 | 0.00 | N |
| ATOM | 1188 | C4   | T B | 20 | 45.376 | 39.483 | 74.813 | 1.00 | 0.00 | C |
| ATOM | 1189 | O4   | T B | 20 | 44.805 | 39.746 | 75.879 | 1.00 | 0.00 | O |
| ATOM | 1190 | C5   | T B | 20 | 46.520 | 38.612 | 74.678 | 1.00 | 0.00 | C |
| ATOM | 1191 | C6   | T B | 20 | 47.077 | 38.386 | 73.474 | 1.00 | 0.00 | C |
| ATOM | 1192 | C7   | T B | 20 | 47.028 | 37.994 | 75.946 | 1.00 | 0.00 | C |
| ATOM | 1193 | C2'  | T B | 20 | 48.717 | 38.617 | 71.057 | 1.00 | 0.00 | C |
| ATOM | 1194 | C3'  | T B | 20 | 48.991 | 37.553 | 70.004 | 1.00 | 0.00 | C |
| ATOM | 1195 | O3'  | T B | 20 | 49.041 | 38.168 | 68.719 | 1.00 | 0.00 | O |
| ATOM | 1196 | C4'  | T B | 20 | 47.797 | 36.612 | 70.150 | 1.00 | 0.00 | C |
| ATOM | 1197 | O4'  | T B | 20 | 46.690 | 37.493 | 70.527 | 1.00 | 0.00 | O |
| ATOM | 1198 | C5'  | T B | 20 | 47.923 | 35.523 | 71.189 | 1.00 | 0.00 | C |
| ATOM | 1199 | O5'  | T B | 20 | 48.650 | 36.024 | 72.341 | 1.00 | 0.00 | O |
| ATOM | 1200 | O1P  | T B | 20 | 50.776 | 34.678 | 72.318 | 1.00 | 0.00 | O |
| ATOM | 1201 | O2P  | T B | 20 | 49.891 | 35.593 | 74.481 | 1.00 | 0.00 | O |
| ATOM | 1202 | P    | T B | 20 | 49.601 | 35.027 | 73.142 | 1.00 | 0.00 | P |
| ATOM | 1203 | H3   | T B | 20 | 44.125 | 40.655 | 73.677 | 1.00 | 0.00 | H |
| ATOM | 1204 | H6   | T B | 20 | 47.940 | 37.724 | 73.396 | 1.00 | 0.00 | H |
| ATOM | 1205 | H1'  | T B | 20 | 46.880 | 39.508 | 70.330 | 1.00 | 0.00 | H |
| ATOM | 1206 | H3'  | T B | 20 | 49.929 | 37.030 | 70.190 | 1.00 | 0.00 | H |
| ATOM | 1207 | H4'  | T B | 20 | 47.652 | 36.133 | 69.181 | 1.00 | 0.00 | H |
| ATOM | 1208 | H3T  | T B | 20 | 49.644 | 38.911 | 68.645 | 1.00 | 0.00 | H |
| ATOM | 1209 | H71  | T B | 20 | 48.026 | 38.375 | 76.162 | 1.00 | 0.00 | H |
| ATOM | 1210 | H72  | T B | 20 | 46.356 | 38.246 | 76.769 | 1.00 | 0.00 | H |
| ATOM | 1211 | H73  | T B | 20 | 47.069 | 36.910 | 75.832 | 1.00 | 0.00 | H |
| ATOM | 1212 | H2'1 | T B | 20 | 49.081 | 38.309 | 72.035 | 1.00 | 0.00 | H |
| ATOM | 1213 | H2'2 | T B | 20 | 49.203 | 39.559 | 70.805 | 1.00 | 0.00 | H |
| ATOM | 1214 | H5'1 | T B | 20 | 46.927 | 35.200 | 71.493 | 1.00 | 0.00 | H |
| ATOM | 1215 | H5'2 | T B | 20 | 48.457 | 34.678 | 70.757 | 1.00 | 0.00 | H |
| TER  |      |      |     |    |        |        |        |      |      |   |
| ATOM | 1    | C1'  | A A | 1  | 61.323 | 12.501 | 58.721 | 1.00 | 0.00 | C |
| ATOM | 2    | N1   | A A | 1  | 62.948 | 10.218 | 63.019 | 1.00 | 0.00 | N |
| ATOM | 3    | C2   | A A | 1  | 62.971 | 9.849  | 61.742 | 1.00 | 0.00 | C |
| ATOM | 4    | N3   | A A | 1  | 62.535 | 10.490 | 60.678 | 1.00 | 0.00 | N |
| ATOM | 5    | C4   | A A | 1  | 62.004 | 11.673 | 61.033 | 1.00 | 0.00 | C |
| ATOM | 6    | C5   | A A | 1  | 61.904 | 12.196 | 62.291 | 1.00 | 0.00 | C |
| ATOM | 7    | C6   | A A | 1  | 62.413 | 11.405 | 63.343 | 1.00 | 0.00 | C |
| ATOM | 8    | N6   | A A | 1  | 62.384 | 11.788 | 64.631 | 1.00 | 0.00 | N |
| ATOM | 9    | N7   | A A | 1  | 61.297 | 13.440 | 62.269 | 1.00 | 0.00 | N |
| ATOM | 10   | C8   | A A | 1  | 61.045 | 13.640 | 61.009 | 1.00 | 0.00 | C |
| ATOM | 11   | N9   | A A | 1  | 61.447 | 12.611 | 60.199 | 1.00 | 0.00 | N |
| ATOM | 12   | C2'  | A A | 1  | 60.027 | 13.080 | 58.169 | 1.00 | 0.00 | C |
| ATOM | 13   | C3'  | A A | 1  | 60.482 | 13.668 | 56.843 | 1.00 | 0.00 | C |
| ATOM | 14   | O3'  | A A | 1  | 60.483 | 12.643 | 55.852 | 1.00 | 0.00 | O |
| ATOM | 15   | C4'  | A A | 1  | 61.891 | 14.168 | 57.158 | 1.00 | 0.00 | C |
| ATOM | 16   | O4'  | A A | 1  | 62.400 | 13.213 | 58.143 | 1.00 | 0.00 | O |
| ATOM | 17   | C5'  | A A | 1  | 61.995 | 15.560 | 57.736 | 1.00 | 0.00 | C |
| ATOM | 18   | O5'  | A A | 1  | 60.877 | 15.807 | 58.626 | 1.00 | 0.00 | O |

|      |    |      |     |   |        |        |        |      |      |   |
|------|----|------|-----|---|--------|--------|--------|------|------|---|
| ATOM | 19 | H2   | A A | 1 | 63.416 | 8.872  | 61.547 | 1.00 | 0.00 | H |
| ATOM | 20 | H8   | A A | 1 | 60.561 | 14.542 | 60.633 | 1.00 | 0.00 | H |
| ATOM | 21 | H1'  | A A | 1 | 61.430 | 11.451 | 58.447 | 1.00 | 0.00 | H |
| ATOM | 22 | H3'  | A A | 1 | 59.838 | 14.486 | 56.516 | 1.00 | 0.00 | H |
| ATOM | 23 | H4'  | A A | 1 | 62.448 | 14.154 | 56.222 | 1.00 | 0.00 | H |
| ATOM | 24 | H61  | A A | 1 | 62.770 | 11.174 | 65.359 | 1.00 | 0.00 | H |
| ATOM | 25 | H62  | A A | 1 | 61.973 | 12.698 | 64.886 | 1.00 | 0.00 | H |
| ATOM | 26 | H5T  | A A | 1 | 60.517 | 16.694 | 58.678 | 1.00 | 0.00 | H |
| ATOM | 27 | H2'1 | A A | 1 | 59.606 | 13.845 | 58.819 | 1.00 | 0.00 | H |
| ATOM | 28 | H2'2 | A A | 1 | 59.263 | 12.316 | 58.022 | 1.00 | 0.00 | H |
| ATOM | 29 | H5'1 | A A | 1 | 62.931 | 15.649 | 58.286 | 1.00 | 0.00 | H |
| ATOM | 30 | H5'2 | A A | 1 | 61.987 | 16.286 | 56.924 | 1.00 | 0.00 | H |
| ATOM | 31 | C1'  | G A | 2 | 60.122 | 7.683  | 58.666 | 1.00 | 0.00 | C |
| ATOM | 32 | N1   | G A | 2 | 60.331 | 8.137  | 63.741 | 1.00 | 0.00 | N |
| ATOM | 33 | C2   | G A | 2 | 60.802 | 7.130  | 62.923 | 1.00 | 0.00 | C |
| ATOM | 34 | N2   | G A | 2 | 61.407 | 6.105  | 63.535 | 1.00 | 0.00 | N |
| ATOM | 35 | N3   | G A | 2 | 60.679 | 7.141  | 61.596 | 1.00 | 0.00 | N |
| ATOM | 36 | C4   | G A | 2 | 60.035 | 8.251  | 61.148 | 1.00 | 0.00 | C |
| ATOM | 37 | C5   | G A | 2 | 59.529 | 9.305  | 61.891 | 1.00 | 0.00 | C |
| ATOM | 38 | C6   | G A | 2 | 59.663 | 9.293  | 63.299 | 1.00 | 0.00 | C |
| ATOM | 39 | O6   | G A | 2 | 59.286 | 10.128 | 64.122 | 1.00 | 0.00 | O |
| ATOM | 40 | N7   | G A | 2 | 58.937 | 10.249 | 61.048 | 1.00 | 0.00 | N |
| ATOM | 41 | C8   | G A | 2 | 59.103 | 9.752  | 59.850 | 1.00 | 0.00 | C |
| ATOM | 42 | N9   | G A | 2 | 59.761 | 8.539  | 59.828 | 1.00 | 0.00 | N |
| ATOM | 43 | C2'  | G A | 2 | 59.067 | 7.661  | 57.568 | 1.00 | 0.00 | C |
| ATOM | 44 | C3'  | G A | 2 | 59.917 | 7.581  | 56.311 | 1.00 | 0.00 | C |
| ATOM | 45 | O3'  | G A | 2 | 60.252 | 6.218  | 56.059 | 1.00 | 0.00 | O |
| ATOM | 46 | C4'  | G A | 2 | 61.142 | 8.419  | 56.676 | 1.00 | 0.00 | C |
| ATOM | 47 | O4'  | G A | 2 | 61.318 | 8.194  | 58.109 | 1.00 | 0.00 | O |
| ATOM | 48 | C5'  | G A | 2 | 61.034 | 9.905  | 56.427 | 1.00 | 0.00 | C |
| ATOM | 49 | O5'  | G A | 2 | 59.686 | 10.355 | 56.714 | 1.00 | 0.00 | O |
| ATOM | 50 | O1P  | G A | 2 | 58.822 | 11.072 | 54.463 | 1.00 | 0.00 | O |
| ATOM | 51 | O2P  | G A | 2 | 57.904 | 12.118 | 56.549 | 1.00 | 0.00 | O |
| ATOM | 52 | P    | G A | 2 | 59.070 | 11.537 | 55.840 | 1.00 | 0.00 | P |
| ATOM | 53 | H1   | G A | 2 | 60.479 | 8.033  | 64.756 | 1.00 | 0.00 | H |
| ATOM | 54 | H8   | G A | 2 | 58.752 | 10.251 | 58.948 | 1.00 | 0.00 | H |
| ATOM | 55 | H1'  | G A | 2 | 60.326 | 6.678  | 59.033 | 1.00 | 0.00 | H |
| ATOM | 56 | H21  | G A | 2 | 61.500 | 6.102  | 64.561 | 1.00 | 0.00 | H |
| ATOM | 57 | H3'  | G A | 2 | 59.402 | 7.994  | 55.443 | 1.00 | 0.00 | H |
| ATOM | 58 | H22  | G A | 2 | 61.779 | 5.322  | 62.980 | 1.00 | 0.00 | H |
| ATOM | 59 | H4'  | G A | 2 | 61.971 | 8.041  | 56.079 | 1.00 | 0.00 | H |
| ATOM | 60 | H2'1 | G A | 2 | 58.447 | 8.558  | 57.573 | 1.00 | 0.00 | H |
| ATOM | 61 | H2'2 | G A | 2 | 58.400 | 6.802  | 57.653 | 1.00 | 0.00 | H |
| ATOM | 62 | H5'1 | G A | 2 | 61.741 | 10.427 | 57.073 | 1.00 | 0.00 | H |
| ATOM | 63 | H5'2 | G A | 2 | 61.280 | 10.113 | 55.387 | 1.00 | 0.00 | H |
| ATOM | 64 | C1'  | G A | 3 | 59.067 | 3.331  | 60.781 | 1.00 | 0.00 | C |
| ATOM | 65 | N1   | G A | 3 | 57.661 | 6.233  | 64.732 | 1.00 | 0.00 | N |
| ATOM | 66 | C2   | G A | 3 | 58.381 | 5.054  | 64.710 | 1.00 | 0.00 | C |
| ATOM | 67 | N2   | G A | 3 | 58.778 | 4.583  | 65.899 | 1.00 | 0.00 | N |
| ATOM | 68 | N3   | G A | 3 | 58.682 | 4.397  | 63.593 | 1.00 | 0.00 | N |
| ATOM | 69 | C4   | G A | 3 | 58.195 | 5.013  | 62.483 | 1.00 | 0.00 | C |
| ATOM | 70 | C5   | G A | 3 | 57.465 | 6.188  | 62.410 | 1.00 | 0.00 | C |
| ATOM | 71 | C6   | G A | 3 | 57.150 | 6.888  | 63.597 | 1.00 | 0.00 | C |
| ATOM | 72 | O6   | G A | 3 | 56.519 | 7.937  | 63.735 | 1.00 | 0.00 | O |

|      |     |      |     |   |        |        |        |      |      |   |
|------|-----|------|-----|---|--------|--------|--------|------|------|---|
| ATOM | 73  | N7   | G A | 3 | 57.155 | 6.481  | 61.081 | 1.00 | 0.00 | N |
| ATOM | 74  | C8   | G A | 3 | 57.696 | 5.499  | 60.406 | 1.00 | 0.00 | C |
| ATOM | 75  | N9   | G A | 3 | 58.346 | 4.567  | 61.189 | 1.00 | 0.00 | N |
| ATOM | 76  | C2'  | G A | 3 | 58.411 | 2.591  | 59.623 | 1.00 | 0.00 | C |
| ATOM | 77  | C3'  | G A | 3 | 59.615 | 2.059  | 58.863 | 1.00 | 0.00 | C |
| ATOM | 78  | O3'  | G A | 3 | 60.033 | 0.829  | 59.453 | 1.00 | 0.00 | O |
| ATOM | 79  | C4'  | G A | 3 | 60.650 | 3.167  | 59.046 | 1.00 | 0.00 | C |
| ATOM | 80  | O4'  | G A | 3 | 60.371 | 3.706  | 60.377 | 1.00 | 0.00 | O |
| ATOM | 81  | C5'  | G A | 3 | 60.604 | 4.298  | 58.046 | 1.00 | 0.00 | C |
| ATOM | 82  | O5'  | G A | 3 | 59.228 | 4.585  | 57.693 | 1.00 | 0.00 | O |
| ATOM | 83  | O1P  | G A | 3 | 59.106 | 3.948  | 55.261 | 1.00 | 0.00 | O |
| ATOM | 84  | O2P  | G A | 3 | 57.562 | 5.700  | 56.178 | 1.00 | 0.00 | O |
| ATOM | 85  | P    | G A | 3 | 58.901 | 5.062  | 56.206 | 1.00 | 0.00 | P |
| ATOM | 86  | H1   | G A | 3 | 57.485 | 6.666  | 65.652 | 1.00 | 0.00 | H |
| ATOM | 87  | H8   | G A | 3 | 57.639 | 5.424  | 59.321 | 1.00 | 0.00 | H |
| ATOM | 88  | H1'  | G A | 3 | 59.160 | 2.685  | 61.654 | 1.00 | 0.00 | H |
| ATOM | 89  | H21  | G A | 3 | 58.544 | 5.098  | 66.761 | 1.00 | 0.00 | H |
| ATOM | 90  | H3'  | G A | 3 | 59.394 | 1.896  | 57.808 | 1.00 | 0.00 | H |
| ATOM | 91  | H22  | G A | 3 | 59.316 | 3.707  | 65.951 | 1.00 | 0.00 | H |
| ATOM | 92  | H4'  | G A | 3 | 61.631 | 2.699  | 58.974 | 1.00 | 0.00 | H |
| ATOM | 93  | H2'1 | G A | 3 | 57.809 | 3.251  | 58.999 | 1.00 | 0.00 | H |
| ATOM | 94  | H2'2 | G A | 3 | 57.765 | 1.782  | 59.962 | 1.00 | 0.00 | H |
| ATOM | 95  | H5'1 | G A | 3 | 61.065 | 5.182  | 58.485 | 1.00 | 0.00 | H |
| ATOM | 96  | H5'2 | G A | 3 | 61.162 | 4.011  | 57.155 | 1.00 | 0.00 | H |
| ATOM | 97  | C1'  | C A | 4 | 57.467 | 0.457  | 64.484 | 1.00 | 0.00 | C |
| ATOM | 98  | N1   | C A | 4 | 56.633 | 1.590  | 63.991 | 1.00 | 0.00 | N |
| ATOM | 99  | C2   | C A | 4 | 56.152 | 2.499  | 64.929 | 1.00 | 0.00 | C |
| ATOM | 100 | O2   | C A | 4 | 56.432 | 2.333  | 66.123 | 1.00 | 0.00 | O |
| ATOM | 101 | N3   | C A | 4 | 55.392 | 3.537  | 64.501 | 1.00 | 0.00 | N |
| ATOM | 102 | C4   | C A | 4 | 55.106 | 3.691  | 63.202 | 1.00 | 0.00 | C |
| ATOM | 103 | N4   | C A | 4 | 54.362 | 4.726  | 62.839 | 1.00 | 0.00 | N |
| ATOM | 104 | C5   | C A | 4 | 55.587 | 2.769  | 62.217 | 1.00 | 0.00 | C |
| ATOM | 105 | C6   | C A | 4 | 56.351 | 1.734  | 62.669 | 1.00 | 0.00 | C |
| ATOM | 106 | C2'  | C A | 4 | 57.214 | -0.853 | 63.752 | 1.00 | 0.00 | C |
| ATOM | 107 | C3'  | C A | 4 | 58.603 | -1.471 | 63.718 | 1.00 | 0.00 | C |
| ATOM | 108 | O3'  | C A | 4 | 58.837 | -2.164 | 64.943 | 1.00 | 0.00 | O |
| ATOM | 109 | C4'  | C A | 4 | 59.512 | -0.255 | 63.561 | 1.00 | 0.00 | C |
| ATOM | 110 | O4'  | C A | 4 | 58.825 | 0.808  | 64.295 | 1.00 | 0.00 | O |
| ATOM | 111 | C5'  | C A | 4 | 59.761 | 0.218  | 62.148 | 1.00 | 0.00 | C |
| ATOM | 112 | O5'  | C A | 4 | 58.557 | 0.053  | 61.356 | 1.00 | 0.00 | O |
| ATOM | 113 | O1P  | C A | 4 | 59.205 | -1.699 | 59.669 | 1.00 | 0.00 | O |
| ATOM | 114 | O2P  | C A | 4 | 57.425 | -0.022 | 59.113 | 1.00 | 0.00 | O |
| ATOM | 115 | P    | C A | 4 | 58.699 | -0.320 | 59.811 | 1.00 | 0.00 | P |
| ATOM | 116 | H5   | C A | 4 | 55.352 | 2.887  | 61.159 | 1.00 | 0.00 | H |
| ATOM | 117 | H6   | C A | 4 | 56.744 | 1.009  | 61.956 | 1.00 | 0.00 | H |
| ATOM | 118 | H1'  | C A | 4 | 57.294 | 0.348  | 65.553 | 1.00 | 0.00 | H |
| ATOM | 119 | H3'  | C A | 4 | 58.721 | -2.163 | 62.884 | 1.00 | 0.00 | H |
| ATOM | 120 | H4'  | C A | 4 | 60.475 | -0.520 | 63.997 | 1.00 | 0.00 | H |
| ATOM | 121 | H41  | C A | 4 | 54.127 | 4.868  | 61.846 | 1.00 | 0.00 | H |
| ATOM | 122 | H42  | C A | 4 | 54.016 | 5.387  | 63.550 | 1.00 | 0.00 | H |
| ATOM | 123 | H2'1 | C A | 4 | 56.824 | -0.699 | 62.746 | 1.00 | 0.00 | H |
| ATOM | 124 | H2'2 | C A | 4 | 56.506 | -1.493 | 64.282 | 1.00 | 0.00 | H |
| ATOM | 125 | H5'1 | C A | 4 | 60.047 | 1.270  | 62.167 | 1.00 | 0.00 | H |
| ATOM | 126 | H5'2 | C A | 4 | 60.571 | -0.366 | 61.713 | 1.00 | 0.00 | H |

|      |     |      |     |   |        |        |        |      |      |   |
|------|-----|------|-----|---|--------|--------|--------|------|------|---|
| ATOM | 127 | C1'  | C A | 5 | 54.825 | -0.473 | 68.567 | 1.00 | 0.00 | C |
| ATOM | 128 | N1   | C A | 5 | 54.172 | 0.109  | 67.362 | 1.00 | 0.00 | N |
| ATOM | 129 | C2   | C A | 5 | 53.407 | 1.260  | 67.527 | 1.00 | 0.00 | C |
| ATOM | 130 | O2   | C A | 5 | 53.297 | 1.750  | 68.660 | 1.00 | 0.00 | O |
| ATOM | 131 | N3   | C A | 5 | 52.804 | 1.805  | 66.442 | 1.00 | 0.00 | N |
| ATOM | 132 | C4   | C A | 5 | 52.938 | 1.253  | 65.230 | 1.00 | 0.00 | C |
| ATOM | 133 | N4   | C A | 5 | 52.332 | 1.830  | 64.204 | 1.00 | 0.00 | N |
| ATOM | 134 | C5   | C A | 5 | 53.719 | 0.067  | 65.031 | 1.00 | 0.00 | C |
| ATOM | 135 | C6   | C A | 5 | 54.318 | -0.462 | 66.138 | 1.00 | 0.00 | C |
| ATOM | 136 | C2'  | C A | 5 | 54.834 | -1.995 | 68.585 | 1.00 | 0.00 | C |
| ATOM | 137 | C3'  | C A | 5 | 56.173 | -2.295 | 69.242 | 1.00 | 0.00 | C |
| ATOM | 138 | O3'  | C A | 5 | 56.020 | -2.249 | 70.659 | 1.00 | 0.00 | O |
| ATOM | 139 | C4'  | C A | 5 | 57.067 | -1.173 | 68.720 | 1.00 | 0.00 | C |
| ATOM | 140 | O4'  | C A | 5 | 56.168 | -0.027 | 68.588 | 1.00 | 0.00 | O |
| ATOM | 141 | C5'  | C A | 5 | 57.740 | -1.415 | 67.390 | 1.00 | 0.00 | C |
| ATOM | 142 | O5'  | C A | 5 | 56.849 | -2.154 | 66.516 | 1.00 | 0.00 | O |
| ATOM | 143 | O1P  | C A | 5 | 58.022 | -4.362 | 66.223 | 1.00 | 0.00 | O |
| ATOM | 144 | O2P  | C A | 5 | 56.483 | -3.510 | 64.433 | 1.00 | 0.00 | O |
| ATOM | 145 | P    | C A | 5 | 57.476 | -3.202 | 65.490 | 1.00 | 0.00 | P |
| ATOM | 146 | H5   | C A | 5 | 53.827 | -0.390 | 64.047 | 1.00 | 0.00 | H |
| ATOM | 147 | H6   | C A | 5 | 54.925 | -1.361 | 66.036 | 1.00 | 0.00 | H |
| ATOM | 148 | H1'  | C A | 5 | 54.325 | -0.074 | 69.450 | 1.00 | 0.00 | H |
| ATOM | 149 | H3'  | C A | 5 | 56.558 | -3.274 | 68.953 | 1.00 | 0.00 | H |
| ATOM | 150 | H4'  | C A | 5 | 57.848 | -1.019 | 69.466 | 1.00 | 0.00 | H |
| ATOM | 151 | H41  | C A | 5 | 52.420 | 1.426  | 63.260 | 1.00 | 0.00 | H |
| ATOM | 152 | H42  | C A | 5 | 51.770 | 2.681  | 64.349 | 1.00 | 0.00 | H |
| ATOM | 153 | H2'1 | C A | 5 | 54.779 | -2.422 | 67.584 | 1.00 | 0.00 | H |
| ATOM | 154 | H2'2 | C A | 5 | 54.006 | -2.407 | 69.164 | 1.00 | 0.00 | H |
| ATOM | 155 | H5'1 | C A | 5 | 57.990 | -0.456 | 66.935 | 1.00 | 0.00 | H |
| ATOM | 156 | H5'2 | C A | 5 | 58.656 | -1.985 | 67.551 | 1.00 | 0.00 | H |
| ATOM | 157 | C1'  | G A | 6 | 51.045 | 0.263  | 71.682 | 1.00 | 0.00 | C |
| ATOM | 158 | N1   | G A | 6 | 48.718 | 2.097  | 67.529 | 1.00 | 0.00 | N |
| ATOM | 159 | C2   | G A | 6 | 48.734 | 2.582  | 68.826 | 1.00 | 0.00 | C |
| ATOM | 160 | N2   | G A | 6 | 48.035 | 3.702  | 69.046 | 1.00 | 0.00 | N |
| ATOM | 161 | N3   | G A | 6 | 49.394 | 1.995  | 69.822 | 1.00 | 0.00 | N |
| ATOM | 162 | C4   | G A | 6 | 50.039 | 0.869  | 69.421 | 1.00 | 0.00 | C |
| ATOM | 163 | C5   | G A | 6 | 50.077 | 0.309  | 68.155 | 1.00 | 0.00 | C |
| ATOM | 164 | C6   | G A | 6 | 49.380 | 0.933  | 67.095 | 1.00 | 0.00 | C |
| ATOM | 165 | O6   | G A | 6 | 49.293 | 0.593  | 65.916 | 1.00 | 0.00 | O |
| ATOM | 166 | N7   | G A | 6 | 50.852 | -0.852 | 68.162 | 1.00 | 0.00 | N |
| ATOM | 167 | C8   | G A | 6 | 51.253 | -0.956 | 69.403 | 1.00 | 0.00 | C |
| ATOM | 168 | N9   | G A | 6 | 50.800 | 0.052  | 70.229 | 1.00 | 0.00 | N |
| ATOM | 169 | C2'  | G A | 6 | 51.076 | -1.025 | 72.493 | 1.00 | 0.00 | C |
| ATOM | 170 | C3'  | G A | 6 | 52.140 | -0.721 | 73.534 | 1.00 | 0.00 | C |
| ATOM | 171 | O3'  | G A | 6 | 51.544 | -0.017 | 74.621 | 1.00 | 0.00 | O |
| ATOM | 172 | C4'  | G A | 6 | 53.135 | 0.142  | 72.761 | 1.00 | 0.00 | C |
| ATOM | 173 | O4'  | G A | 6 | 52.303 | 0.894  | 71.820 | 1.00 | 0.00 | O |
| ATOM | 174 | C5'  | G A | 6 | 54.199 | -0.593 | 71.983 | 1.00 | 0.00 | C |
| ATOM | 175 | O5'  | G A | 6 | 53.647 | -1.812 | 71.424 | 1.00 | 0.00 | O |
| ATOM | 176 | O1P  | G A | 6 | 54.890 | -3.628 | 72.643 | 1.00 | 0.00 | O |
| ATOM | 177 | O2P  | G A | 6 | 53.985 | -4.054 | 70.342 | 1.00 | 0.00 | O |
| ATOM | 178 | P    | G A | 6 | 54.585 | -3.095 | 71.302 | 1.00 | 0.00 | P |
| ATOM | 179 | H1   | G A | 6 | 48.181 | 2.632  | 66.829 | 1.00 | 0.00 | H |
| ATOM | 180 | H8   | G A | 6 | 51.890 | -1.768 | 69.756 | 1.00 | 0.00 | H |



|      |     |      |     |   |        |        |        |      |      |   |
|------|-----|------|-----|---|--------|--------|--------|------|------|---|
| ATOM | 181 | H1'  | G A | 6 | 50.283 | 0.945  | 72.061 | 1.00 | 0.00 | H |
| ATOM | 182 | H21  | G A | 6 | 47.529 | 4.153  | 68.269 | 1.00 | 0.00 | H |
| ATOM | 183 | H3'  | G A | 6 | 52.615 | -1.628 | 73.910 | 1.00 | 0.00 | H |
| ATOM | 184 | H22  | G A | 6 | 48.004 | 4.113  | 69.990 | 1.00 | 0.00 | H |
| ATOM | 185 | H4'  | G A | 6 | 53.634 | 0.780  | 73.489 | 1.00 | 0.00 | H |
| ATOM | 186 | H2'1 | G A | 6 | 51.349 | -1.890 | 71.886 | 1.00 | 0.00 | H |
| ATOM | 187 | H2'2 | G A | 6 | 50.114 | -1.245 | 72.958 | 1.00 | 0.00 | H |
| ATOM | 188 | H5'1 | G A | 6 | 54.565 | 0.047  | 71.182 | 1.00 | 0.00 | H |
| ATOM | 189 | H5'2 | G A | 6 | 55.026 | -0.836 | 72.650 | 1.00 | 0.00 | H |
| ATOM | 190 | C1'  | C A | 7 | 46.467 | 1.749  | 72.849 | 1.00 | 0.00 | C |
| ATOM | 191 | N1   | C A | 7 | 46.692 | 0.821  | 71.707 | 1.00 | 0.00 | N |
| ATOM | 192 | C2   | C A | 7 | 46.130 | 1.153  | 70.476 | 1.00 | 0.00 | C |
| ATOM | 193 | O2   | C A | 7 | 45.473 | 2.197  | 70.380 | 1.00 | 0.00 | O |
| ATOM | 194 | N3   | C A | 7 | 46.325 | 0.321  | 69.423 | 1.00 | 0.00 | N |
| ATOM | 195 | C4   | C A | 7 | 47.040 | -0.803 | 69.557 | 1.00 | 0.00 | C |
| ATOM | 196 | N4   | C A | 7 | 47.200 | -1.578 | 68.495 | 1.00 | 0.00 | N |
| ATOM | 197 | C5   | C A | 7 | 47.625 | -1.173 | 70.813 | 1.00 | 0.00 | C |
| ATOM | 198 | C6   | C A | 7 | 47.422 | -0.316 | 71.857 | 1.00 | 0.00 | C |
| ATOM | 199 | C2'  | C A | 7 | 46.257 | 1.044  | 74.182 | 1.00 | 0.00 | C |
| ATOM | 200 | C3'  | C A | 7 | 46.939 | 1.995  | 75.153 | 1.00 | 0.00 | C |
| ATOM | 201 | O3'  | C A | 7 | 46.024 | 3.026  | 75.520 | 1.00 | 0.00 | O |
| ATOM | 202 | C4'  | C A | 7 | 48.114 | 2.530  | 74.338 | 1.00 | 0.00 | C |
| ATOM | 203 | O4'  | C A | 7 | 47.612 | 2.574  | 72.965 | 1.00 | 0.00 | O |
| ATOM | 204 | C5'  | C A | 7 | 49.379 | 1.703  | 74.362 | 1.00 | 0.00 | C |
| ATOM | 205 | O5'  | C A | 7 | 49.043 | 0.292  | 74.390 | 1.00 | 0.00 | O |
| ATOM | 206 | O1P  | C A | 7 | 49.864 | -0.459 | 76.648 | 1.00 | 0.00 | O |
| ATOM | 207 | O2P  | C A | 7 | 49.730 | -2.096 | 74.751 | 1.00 | 0.00 | O |
| ATOM | 208 | P    | C A | 7 | 49.988 | -0.706 | 75.197 | 1.00 | 0.00 | P |
| ATOM | 209 | H5   | C A | 7 | 48.204 | -2.090 | 70.928 | 1.00 | 0.00 | H |
| ATOM | 210 | H6   | C A | 7 | 47.854 | -0.550 | 72.831 | 1.00 | 0.00 | H |
| ATOM | 211 | H1'  | C A | 7 | 45.617 | 2.388  | 72.606 | 1.00 | 0.00 | H |
| ATOM | 212 | H3'  | C A | 7 | 47.283 | 1.481  | 76.051 | 1.00 | 0.00 | H |
| ATOM | 213 | H4'  | C A | 7 | 48.354 | 3.516  | 74.737 | 1.00 | 0.00 | H |
| ATOM | 214 | H41  | C A | 7 | 47.748 | -2.448 | 68.569 | 1.00 | 0.00 | H |
| ATOM | 215 | H42  | C A | 7 | 46.777 | -1.314 | 67.593 | 1.00 | 0.00 | H |
| ATOM | 216 | H2'1 | C A | 7 | 46.717 | 0.058  | 74.204 | 1.00 | 0.00 | H |
| ATOM | 217 | H2'2 | C A | 7 | 45.201 | 0.920  | 74.422 | 1.00 | 0.00 | H |
| ATOM | 218 | H5'1 | C A | 7 | 49.969 | 1.924  | 73.472 | 1.00 | 0.00 | H |
| ATOM | 219 | H5'2 | C A | 7 | 49.958 | 1.960  | 75.249 | 1.00 | 0.00 | H |
| ATOM | 220 | C1'  | A A | 8 | 41.733 | 2.798  | 71.850 | 1.00 | 0.00 | C |
| ATOM | 221 | N1   | A A | 8 | 42.409 | -0.521 | 67.993 | 1.00 | 0.00 | N |
| ATOM | 222 | C2   | A A | 8 | 41.800 | 0.658  | 68.068 | 1.00 | 0.00 | C |
| ATOM | 223 | N3   | A A | 8 | 41.664 | 1.467  | 69.096 | 1.00 | 0.00 | N |
| ATOM | 224 | C4   | A A | 8 | 42.253 | 0.937  | 70.185 | 1.00 | 0.00 | C |
| ATOM | 225 | C5   | A A | 8 | 42.914 | -0.256 | 70.276 | 1.00 | 0.00 | C |
| ATOM | 226 | C6   | A A | 8 | 42.987 | -1.023 | 69.095 | 1.00 | 0.00 | C |
| ATOM | 227 | N6   | A A | 8 | 43.605 | -2.215 | 69.033 | 1.00 | 0.00 | N |
| ATOM | 228 | N7   | A A | 8 | 43.390 | -0.467 | 71.558 | 1.00 | 0.00 | N |
| ATOM | 229 | C8   | A A | 8 | 43.007 | 0.591  | 72.211 | 1.00 | 0.00 | C |
| ATOM | 230 | N9   | A A | 8 | 42.312 | 1.489  | 71.441 | 1.00 | 0.00 | N |
| ATOM | 231 | C2'  | A A | 8 | 41.139 | 2.795  | 73.252 | 1.00 | 0.00 | C |
| ATOM | 232 | C3'  | A A | 8 | 41.472 | 4.195  | 73.740 | 1.00 | 0.00 | C |
| ATOM | 233 | O3'  | A A | 8 | 40.470 | 5.100  | 73.283 | 1.00 | 0.00 | O |
| ATOM | 234 | C4'  | A A | 8 | 42.831 | 4.466  | 73.096 | 1.00 | 0.00 | C |

|      |     |      |     |    |        |        |        |      |      |   |
|------|-----|------|-----|----|--------|--------|--------|------|------|---|
| ATOM | 235 | O4'  | A A | 8  | 42.771 | 3.758  | 71.815 | 1.00 | 0.00 | O |
| ATOM | 236 | C5'  | A A | 8  | 44.043 | 3.986  | 73.859 | 1.00 | 0.00 | C |
| ATOM | 237 | O5'  | A A | 8  | 43.743 | 2.727  | 74.514 | 1.00 | 0.00 | O |
| ATOM | 238 | O1P  | A A | 8  | 43.848 | 3.306  | 76.961 | 1.00 | 0.00 | O |
| ATOM | 239 | O2P  | A A | 8  | 44.333 | 0.963  | 76.203 | 1.00 | 0.00 | O |
| ATOM | 240 | P    | A A | 8  | 44.415 | 2.419  | 75.927 | 1.00 | 0.00 | P |
| ATOM | 241 | H2   | A A | 8  | 41.348 | 1.007  | 67.140 | 1.00 | 0.00 | H |
| ATOM | 242 | H8   | A A | 8  | 43.216 | 0.750  | 73.270 | 1.00 | 0.00 | H |
| ATOM | 243 | H1'  | A A | 8  | 40.987 | 3.085  | 71.110 | 1.00 | 0.00 | H |
| ATOM | 244 | H3'  | A A | 8  | 41.535 | 4.246  | 74.827 | 1.00 | 0.00 | H |
| ATOM | 245 | H4'  | A A | 8  | 42.916 | 5.546  | 72.981 | 1.00 | 0.00 | H |
| ATOM | 246 | H61  | A A | 8  | 43.633 | -2.735 | 68.144 | 1.00 | 0.00 | H |
| ATOM | 247 | H62  | A A | 8  | 44.050 | -2.609 | 69.875 | 1.00 | 0.00 | H |
| ATOM | 248 | H2'1 | A A | 8  | 41.589 | 2.035  | 73.890 | 1.00 | 0.00 | H |
| ATOM | 249 | H2'2 | A A | 8  | 40.063 | 2.622  | 73.245 | 1.00 | 0.00 | H |
| ATOM | 250 | H5'1 | A A | 8  | 44.871 | 3.851  | 73.164 | 1.00 | 0.00 | H |
| ATOM | 251 | H5'2 | A A | 8  | 44.317 | 4.732  | 74.604 | 1.00 | 0.00 | H |
| ATOM | 252 | C1'  | C A | 9  | 37.545 | 2.345  | 69.219 | 1.00 | 0.00 | C |
| ATOM | 253 | N1   | C A | 9  | 38.244 | 1.136  | 69.737 | 1.00 | 0.00 | N |
| ATOM | 254 | C2   | C A | 9  | 38.525 | 0.109  | 68.837 | 1.00 | 0.00 | C |
| ATOM | 255 | O2   | C A | 9  | 38.183 | 0.242  | 67.656 | 1.00 | 0.00 | O |
| ATOM | 256 | N3   | C A | 9  | 39.160 | -0.998 | 69.288 | 1.00 | 0.00 | N |
| ATOM | 257 | C4   | C A | 9  | 39.516 | -1.114 | 70.575 | 1.00 | 0.00 | C |
| ATOM | 258 | N4   | C A | 9  | 40.139 | -2.218 | 70.961 | 1.00 | 0.00 | N |
| ATOM | 259 | C5   | C A | 9  | 39.238 | -0.076 | 71.523 | 1.00 | 0.00 | C |
| ATOM | 260 | C6   | C A | 9  | 38.601 | 1.035  | 71.046 | 1.00 | 0.00 | C |
| ATOM | 261 | C2'  | C A | 9  | 36.529 | 2.929  | 70.191 | 1.00 | 0.00 | C |
| ATOM | 262 | C3'  | C A | 9  | 36.668 | 4.423  | 69.936 | 1.00 | 0.00 | C |
| ATOM | 263 | O3'  | C A | 9  | 35.856 | 4.784  | 68.821 | 1.00 | 0.00 | O |
| ATOM | 264 | C4'  | C A | 9  | 38.157 | 4.580  | 69.639 | 1.00 | 0.00 | C |
| ATOM | 265 | O4'  | C A | 9  | 38.526 | 3.333  | 68.966 | 1.00 | 0.00 | O |
| ATOM | 266 | C5'  | C A | 9  | 39.063 | 4.767  | 70.834 | 1.00 | 0.00 | C |
| ATOM | 267 | O5'  | C A | 9  | 38.581 | 3.968  | 71.944 | 1.00 | 0.00 | O |
| ATOM | 268 | O1P  | C A | 9  | 37.880 | 5.689  | 73.641 | 1.00 | 0.00 | O |
| ATOM | 269 | O2P  | C A | 9  | 38.614 | 3.411  | 74.396 | 1.00 | 0.00 | O |
| ATOM | 270 | P    | C A | 9  | 38.763 | 4.526  | 73.428 | 1.00 | 0.00 | P |
| ATOM | 271 | H5   | C A | 9  | 39.520 | -0.167 | 72.572 | 1.00 | 0.00 | H |
| ATOM | 272 | H6   | C A | 9  | 38.374 | 1.856  | 71.726 | 1.00 | 0.00 | H |
| ATOM | 273 | H1'  | C A | 9  | 37.076 | 2.087  | 68.270 | 1.00 | 0.00 | H |
| ATOM | 274 | H3'  | C A | 9  | 36.375 | 5.013  | 70.803 | 1.00 | 0.00 | H |
| ATOM | 275 | H4'  | C A | 9  | 38.264 | 5.456  | 69.002 | 1.00 | 0.00 | H |
| ATOM | 276 | H41  | C A | 9  | 40.425 | -2.331 | 71.944 | 1.00 | 0.00 | H |
| ATOM | 277 | H42  | C A | 9  | 40.336 | -2.965 | 70.278 | 1.00 | 0.00 | H |
| ATOM | 278 | H2'1 | C A | 9  | 36.757 | 2.682  | 71.227 | 1.00 | 0.00 | H |
| ATOM | 279 | H2'2 | C A | 9  | 35.515 | 2.583  | 69.986 | 1.00 | 0.00 | H |
| ATOM | 280 | H5'1 | C A | 9  | 40.075 | 4.459  | 70.570 | 1.00 | 0.00 | H |
| ATOM | 281 | H5'2 | C A | 9  | 39.071 | 5.820  | 71.115 | 1.00 | 0.00 | H |
| ATOM | 282 | C1'  | C A | 10 | 34.399 | -0.040 | 66.230 | 1.00 | 0.00 | C |
| ATOM | 283 | N1   | C A | 10 | 34.917 | -0.698 | 67.461 | 1.00 | 0.00 | N |
| ATOM | 284 | C2   | C A | 10 | 35.481 | -1.965 | 67.334 | 1.00 | 0.00 | C |
| ATOM | 285 | O2   | C A | 10 | 35.529 | -2.491 | 66.213 | 1.00 | 0.00 | O |
| ATOM | 286 | N3   | C A | 10 | 35.960 | -2.582 | 68.442 | 1.00 | 0.00 | N |
| ATOM | 287 | C4   | C A | 10 | 35.895 | -1.990 | 69.642 | 1.00 | 0.00 | C |
| ATOM | 288 | N4   | C A | 10 | 36.381 | -2.637 | 70.692 | 1.00 | 0.00 | N |

|      |     |      |     |    |        |        |        |      |      |   |
|------|-----|------|-----|----|--------|--------|--------|------|------|---|
| ATOM | 289 | C5   | C A | 10 | 35.316 | -0.688 | 69.803 | 1.00 | 0.00 | C |
| ATOM | 290 | C6   | C A | 10 | 34.845 | -0.084 | 68.671 | 1.00 | 0.00 | C |
| ATOM | 291 | C2'  | C A | 10 | 33.120 | 0.755  | 66.453 | 1.00 | 0.00 | C |
| ATOM | 292 | C3'  | C A | 10 | 33.310 | 1.931  | 65.506 | 1.00 | 0.00 | C |
| ATOM | 293 | O3'  | C A | 10 | 32.885 | 1.553  | 64.199 | 1.00 | 0.00 | O |
| ATOM | 294 | C4'  | C A | 10 | 34.814 | 2.182  | 65.574 | 1.00 | 0.00 | C |
| ATOM | 295 | O4'  | C A | 10 | 35.394 | 0.853  | 65.768 | 1.00 | 0.00 | O |
| ATOM | 296 | C5'  | C A | 10 | 35.295 | 3.084  | 66.687 | 1.00 | 0.00 | C |
| ATOM | 297 | O5'  | C A | 10 | 34.501 | 2.860  | 67.879 | 1.00 | 0.00 | O |
| ATOM | 298 | O1P  | C A | 10 | 33.275 | 5.036  | 68.183 | 1.00 | 0.00 | O |
| ATOM | 299 | O2P  | C A | 10 | 33.768 | 3.586  | 70.170 | 1.00 | 0.00 | O |
| ATOM | 300 | P    | C A | 10 | 34.198 | 4.092  | 68.844 | 1.00 | 0.00 | P |
| ATOM | 301 | H5   | C A | 10 | 35.255 | -0.204 | 70.779 | 1.00 | 0.00 | H |
| ATOM | 302 | H6   | C A | 10 | 34.404 | 0.910  | 68.742 | 1.00 | 0.00 | H |
| ATOM | 303 | H1'  | C A | 10 | 34.255 | -0.806 | 65.469 | 1.00 | 0.00 | H |
| ATOM | 304 | H3'  | C A | 10 | 32.749 | 2.809  | 65.829 | 1.00 | 0.00 | H |
| ATOM | 305 | H4'  | C A | 10 | 35.102 | 2.640  | 64.628 | 1.00 | 0.00 | H |
| ATOM | 306 | H41  | C A | 10 | 36.344 | -2.203 | 71.626 | 1.00 | 0.00 | H |
| ATOM | 307 | H42  | C A | 10 | 36.793 | -3.574 | 70.574 | 1.00 | 0.00 | H |
| ATOM | 308 | H2'1 | C A | 10 | 33.014 | 1.090  | 67.483 | 1.00 | 0.00 | H |
| ATOM | 309 | H2'2 | C A | 10 | 32.227 | 0.181  | 66.199 | 1.00 | 0.00 | H |
| ATOM | 310 | H5'1 | C A | 10 | 36.344 | 2.869  | 66.897 | 1.00 | 0.00 | H |
| ATOM | 311 | H5'2 | C A | 10 | 35.199 | 4.123  | 66.371 | 1.00 | 0.00 | H |
| ATOM | 312 | C1'  | T A | 11 | 32.380 | -4.075 | 64.195 | 1.00 | 0.00 | C |
| ATOM | 313 | N1   | T A | 11 | 32.503 | -3.967 | 65.673 | 1.00 | 0.00 | N |
| ATOM | 314 | C2   | T A | 11 | 33.094 | -5.024 | 66.334 | 1.00 | 0.00 | C |
| ATOM | 315 | O2   | T A | 11 | 33.507 | -6.016 | 65.759 | 1.00 | 0.00 | O |
| ATOM | 316 | N3   | T A | 11 | 33.190 | -4.883 | 67.707 | 1.00 | 0.00 | N |
| ATOM | 317 | C4   | T A | 11 | 32.754 | -3.807 | 68.454 | 1.00 | 0.00 | C |
| ATOM | 318 | O4   | T A | 11 | 32.891 | -3.794 | 69.684 | 1.00 | 0.00 | O |
| ATOM | 319 | C5   | T A | 11 | 32.150 | -2.752 | 67.675 | 1.00 | 0.00 | C |
| ATOM | 320 | C6   | T A | 11 | 32.041 | -2.857 | 66.336 | 1.00 | 0.00 | C |
| ATOM | 321 | C7   | T A | 11 | 31.664 | -1.562 | 68.447 | 1.00 | 0.00 | C |
| ATOM | 322 | C2'  | T A | 11 | 31.082 | -3.498 | 63.643 | 1.00 | 0.00 | C |
| ATOM | 323 | C3'  | T A | 11 | 31.536 | -2.905 | 62.319 | 1.00 | 0.00 | C |
| ATOM | 324 | O3'  | T A | 11 | 31.540 | -3.926 | 61.324 | 1.00 | 0.00 | O |
| ATOM | 325 | C4'  | T A | 11 | 32.941 | -2.402 | 62.636 | 1.00 | 0.00 | C |
| ATOM | 326 | O4'  | T A | 11 | 33.454 | -3.359 | 63.618 | 1.00 | 0.00 | O |
| ATOM | 327 | C5'  | T A | 11 | 33.043 | -1.011 | 63.218 | 1.00 | 0.00 | C |
| ATOM | 328 | O5'  | T A | 11 | 31.924 | -0.770 | 64.108 | 1.00 | 0.00 | O |
| ATOM | 329 | O1P  | T A | 11 | 30.631 | 1.045  | 62.940 | 1.00 | 0.00 | O |
| ATOM | 330 | O2P  | T A | 11 | 30.510 | 0.827  | 65.435 | 1.00 | 0.00 | O |
| ATOM | 331 | P    | T A | 11 | 31.319 | 0.702  | 64.198 | 1.00 | 0.00 | P |
| ATOM | 332 | H3   | T A | 11 | 33.631 | -5.656 | 68.223 | 1.00 | 0.00 | H |
| ATOM | 333 | H6   | T A | 11 | 31.582 | -2.047 | 65.768 | 1.00 | 0.00 | H |
| ATOM | 334 | H1'  | T A | 11 | 32.489 | -5.124 | 63.918 | 1.00 | 0.00 | H |
| ATOM | 335 | H3'  | T A | 11 | 30.890 | -2.089 | 61.995 | 1.00 | 0.00 | H |
| ATOM | 336 | H4'  | T A | 11 | 33.502 | -2.413 | 61.700 | 1.00 | 0.00 | H |
| ATOM | 337 | H71  | T A | 11 | 30.578 | -1.499 | 68.373 | 1.00 | 0.00 | H |
| ATOM | 338 | H72  | T A | 11 | 31.951 | -1.666 | 69.494 | 1.00 | 0.00 | H |
| ATOM | 339 | H73  | T A | 11 | 32.109 | -0.655 | 68.037 | 1.00 | 0.00 | H |
| ATOM | 340 | H2'1 | T A | 11 | 30.659 | -2.736 | 64.295 | 1.00 | 0.00 | H |
| ATOM | 341 | H2'2 | T A | 11 | 30.319 | -4.263 | 63.495 | 1.00 | 0.00 | H |
| ATOM | 342 | H5'1 | T A | 11 | 33.979 | -0.920 | 63.770 | 1.00 | 0.00 | H |

|      |     |      |   |   |    |        |         |        |      |      |   |
|------|-----|------|---|---|----|--------|---------|--------|------|------|---|
| ATOM | 343 | H5'2 | T | A | 11 | 33.033 | -0.283  | 62.408 | 1.00 | 0.00 | H |
| ATOM | 344 | C1'  | A | A | 12 | 31.175 | -8.889  | 64.116 | 1.00 | 0.00 | C |
| ATOM | 345 | N1   | A | A | 12 | 31.398 | -8.456  | 69.224 | 1.00 | 0.00 | N |
| ATOM | 346 | C2   | A | A | 12 | 31.826 | -9.391  | 68.382 | 1.00 | 0.00 | C |
| ATOM | 347 | N3   | A | A | 12 | 31.739 | -9.438  | 67.069 | 1.00 | 0.00 | N |
| ATOM | 348 | C4   | A | A | 12 | 31.105 | -8.347  | 66.606 | 1.00 | 0.00 | C |
| ATOM | 349 | C5   | A | A | 12 | 30.605 | -7.304  | 67.332 | 1.00 | 0.00 | C |
| ATOM | 350 | C6   | A | A | 12 | 30.770 | -7.377  | 68.732 | 1.00 | 0.00 | C |
| ATOM | 351 | N6   | A | A | 12 | 30.331 | -6.426  | 69.573 | 1.00 | 0.00 | N |
| ATOM | 352 | N7   | A | A | 12 | 30.020 | -6.357  | 66.511 | 1.00 | 0.00 | N |
| ATOM | 353 | C8   | A | A | 12 | 30.172 | -6.844  | 65.315 | 1.00 | 0.00 | C |
| ATOM | 354 | N9   | A | A | 12 | 30.825 | -8.051  | 65.294 | 1.00 | 0.00 | N |
| ATOM | 355 | C2'  | A | A | 12 | 30.109 | -8.891  | 63.028 | 1.00 | 0.00 | C |
| ATOM | 356 | C3'  | A | A | 12 | 30.949 | -8.954  | 61.762 | 1.00 | 0.00 | C |
| ATOM | 357 | O3'  | A | A | 12 | 31.278 | -10.314 | 61.487 | 1.00 | 0.00 | O |
| ATOM | 358 | C4'  | A | A | 12 | 32.180 | -8.125  | 62.128 | 1.00 | 0.00 | C |
| ATOM | 359 | O4'  | A | A | 12 | 32.367 | -8.373  | 63.558 | 1.00 | 0.00 | O |
| ATOM | 360 | C5'  | A | A | 12 | 32.076 | -6.636  | 61.903 | 1.00 | 0.00 | C |
| ATOM | 361 | O5'  | A | A | 12 | 30.732 | -6.186  | 62.207 | 1.00 | 0.00 | O |
| ATOM | 362 | O1P  | A | A | 12 | 29.850 | -5.432  | 59.973 | 1.00 | 0.00 | O |
| ATOM | 363 | O2P  | A | A | 12 | 28.953 | -4.415  | 62.084 | 1.00 | 0.00 | O |
| ATOM | 364 | P    | A | A | 12 | 30.112 | -4.989  | 61.356 | 1.00 | 0.00 | P |
| ATOM | 365 | H2   | A | A | 12 | 32.324 | -10.242 | 68.846 | 1.00 | 0.00 | H |
| ATOM | 366 | H8   | A | A | 12 | 29.816 | -6.344  | 64.414 | 1.00 | 0.00 | H |
| ATOM | 367 | H1'  | A | A | 12 | 31.377 | -9.901  | 64.465 | 1.00 | 0.00 | H |
| ATOM | 368 | H3'  | A | A | 12 | 30.429 | -8.528  | 60.904 | 1.00 | 0.00 | H |
| ATOM | 369 | H4'  | A | A | 12 | 33.003 | -8.498  | 61.519 | 1.00 | 0.00 | H |
| ATOM | 370 | H61  | A | A | 12 | 30.479 | -6.528  | 70.588 | 1.00 | 0.00 | H |
| ATOM | 371 | H62  | A | A | 12 | 29.845 | -5.596  | 69.203 | 1.00 | 0.00 | H |
| ATOM | 372 | H2'1 | A | A | 12 | 29.494 | -7.992  | 63.049 | 1.00 | 0.00 | H |
| ATOM | 373 | H2'2 | A | A | 12 | 29.440 | -9.747  | 63.104 | 1.00 | 0.00 | H |
| ATOM | 374 | H5'1 | A | A | 12 | 32.790 | -6.127  | 62.551 | 1.00 | 0.00 | H |
| ATOM | 375 | H5'2 | A | A | 12 | 32.312 | -6.413  | 60.864 | 1.00 | 0.00 | H |
| ATOM | 376 | C1'  | G | A | 13 | 30.123 | -13.244 | 66.254 | 1.00 | 0.00 | C |
| ATOM | 377 | N1   | G | A | 13 | 28.718 | -10.341 | 70.206 | 1.00 | 0.00 | N |
| ATOM | 378 | C2   | G | A | 13 | 29.438 | -11.521 | 70.184 | 1.00 | 0.00 | C |
| ATOM | 379 | N2   | G | A | 13 | 29.835 | -11.995 | 71.373 | 1.00 | 0.00 | N |
| ATOM | 380 | N3   | G | A | 13 | 29.738 | -12.180 | 69.066 | 1.00 | 0.00 | N |
| ATOM | 381 | C4   | G | A | 13 | 29.252 | -11.563 | 67.957 | 1.00 | 0.00 | C |
| ATOM | 382 | C5   | G | A | 13 | 28.522 | -10.388 | 67.883 | 1.00 | 0.00 | C |
| ATOM | 383 | C6   | G | A | 13 | 28.206 | -9.687  | 69.070 | 1.00 | 0.00 | C |
| ATOM | 384 | O6   | G | A | 13 | 27.573 | -8.639  | 69.207 | 1.00 | 0.00 | O |
| ATOM | 385 | N7   | G | A | 13 | 28.211 | -10.095 | 66.555 | 1.00 | 0.00 | N |
| ATOM | 386 | C8   | G | A | 13 | 28.752 | -11.076 | 65.879 | 1.00 | 0.00 | C |
| ATOM | 387 | N9   | G | A | 13 | 29.402 | -12.008 | 66.663 | 1.00 | 0.00 | N |
| ATOM | 388 | C2'  | G | A | 13 | 29.468 | -13.985 | 65.097 | 1.00 | 0.00 | C |
| ATOM | 389 | C3'  | G | A | 13 | 30.671 | -14.517 | 64.337 | 1.00 | 0.00 | C |
| ATOM | 390 | O3'  | G | A | 13 | 31.089 | -15.746 | 64.926 | 1.00 | 0.00 | O |
| ATOM | 391 | C4'  | G | A | 13 | 31.706 | -13.408 | 64.519 | 1.00 | 0.00 | C |
| ATOM | 392 | O4'  | G | A | 13 | 31.427 | -12.870 | 65.850 | 1.00 | 0.00 | O |
| ATOM | 393 | C5'  | G | A | 13 | 31.660 | -12.278 | 63.520 | 1.00 | 0.00 | C |
| ATOM | 394 | O5'  | G | A | 13 | 30.284 | -11.990 | 63.167 | 1.00 | 0.00 | O |
| ATOM | 395 | O1P  | G | A | 13 | 30.162 | -12.627 | 60.734 | 1.00 | 0.00 | O |
| ATOM | 396 | O2P  | G | A | 13 | 28.618 | -10.876 | 61.652 | 1.00 | 0.00 | O |

|      |     |      |     |    |        |         |        |      |      |   |
|------|-----|------|-----|----|--------|---------|--------|------|------|---|
| ATOM | 397 | P    | G A | 13 | 29.957 | -11.513 | 61.680 | 1.00 | 0.00 | P |
| ATOM | 398 | H1   | G A | 13 | 28.544 | -9.908  | 71.126 | 1.00 | 0.00 | H |
| ATOM | 399 | H8   | G A | 13 | 28.697 | -11.152 | 64.794 | 1.00 | 0.00 | H |
| ATOM | 400 | H1'  | G A | 13 | 30.216 | -13.890 | 67.128 | 1.00 | 0.00 | H |
| ATOM | 401 | H21  | G A | 13 | 29.601 | -11.478 | 72.235 | 1.00 | 0.00 | H |
| ATOM | 402 | H3'  | G A | 13 | 30.450 | -14.679 | 63.282 | 1.00 | 0.00 | H |
| ATOM | 403 | H22  | G A | 13 | 30.371 | -12.870 | 71.425 | 1.00 | 0.00 | H |
| ATOM | 404 | H4'  | G A | 13 | 32.687 | -13.877 | 64.448 | 1.00 | 0.00 | H |
| ATOM | 405 | H2'1 | G A | 13 | 28.866 | -13.324 | 64.472 | 1.00 | 0.00 | H |
| ATOM | 406 | H2'2 | G A | 13 | 28.821 | -14.793 | 65.436 | 1.00 | 0.00 | H |
| ATOM | 407 | H5'1 | G A | 13 | 32.121 | -11.393 | 63.959 | 1.00 | 0.00 | H |
| ATOM | 408 | H5'2 | G A | 13 | 32.218 | -12.564 | 62.629 | 1.00 | 0.00 | H |
| ATOM | 409 | C1'  | G A | 14 | 28.522 | -16.118 | 69.957 | 1.00 | 0.00 | C |
| ATOM | 410 | N1   | G A | 14 | 25.900 | -11.952 | 71.300 | 1.00 | 0.00 | N |
| ATOM | 411 | C2   | G A | 14 | 26.608 | -12.847 | 72.083 | 1.00 | 0.00 | C |
| ATOM | 412 | N2   | G A | 14 | 26.618 | -12.601 | 73.399 | 1.00 | 0.00 | N |
| ATOM | 413 | N3   | G A | 14 | 27.256 | -13.903 | 71.592 | 1.00 | 0.00 | N |
| ATOM | 414 | C4   | G A | 14 | 27.134 | -14.001 | 70.243 | 1.00 | 0.00 | C |
| ATOM | 415 | C5   | G A | 14 | 26.446 | -13.161 | 69.384 | 1.00 | 0.00 | C |
| ATOM | 416 | C6   | G A | 14 | 25.763 | -12.039 | 69.901 | 1.00 | 0.00 | C |
| ATOM | 417 | O6   | G A | 14 | 25.103 | -11.186 | 69.307 | 1.00 | 0.00 | O |
| ATOM | 418 | N7   | G A | 14 | 26.566 | -13.616 | 68.067 | 1.00 | 0.00 | N |
| ATOM | 419 | C8   | G A | 14 | 27.307 | -14.687 | 68.168 | 1.00 | 0.00 | C |
| ATOM | 420 | N9   | G A | 14 | 27.690 | -14.987 | 69.459 | 1.00 | 0.00 | N |
| ATOM | 421 | C2'  | G A | 14 | 28.275 | -17.430 | 69.225 | 1.00 | 0.00 | C |
| ATOM | 422 | C3'  | G A | 14 | 29.664 | -18.046 | 69.199 | 1.00 | 0.00 | C |
| ATOM | 423 | O3'  | G A | 14 | 29.894 | -18.736 | 70.424 | 1.00 | 0.00 | O |
| ATOM | 424 | C4'  | G A | 14 | 30.573 | -16.827 | 69.043 | 1.00 | 0.00 | C |
| ATOM | 425 | O4'  | G A | 14 | 29.880 | -15.766 | 69.774 | 1.00 | 0.00 | O |
| ATOM | 426 | C5'  | G A | 14 | 30.827 | -16.356 | 67.631 | 1.00 | 0.00 | C |
| ATOM | 427 | O5'  | G A | 14 | 29.628 | -16.525 | 66.835 | 1.00 | 0.00 | O |
| ATOM | 428 | O1P  | G A | 14 | 30.286 | -18.278 | 65.153 | 1.00 | 0.00 | O |
| ATOM | 429 | O2P  | G A | 14 | 28.506 | -16.603 | 64.587 | 1.00 | 0.00 | O |
| ATOM | 430 | P    | G A | 14 | 29.778 | -16.900 | 65.292 | 1.00 | 0.00 | P |
| ATOM | 431 | H1   | G A | 14 | 25.440 | -11.163 | 71.779 | 1.00 | 0.00 | H |
| ATOM | 432 | H8   | G A | 14 | 27.596 | -15.292 | 67.309 | 1.00 | 0.00 | H |
| ATOM | 433 | H1'  | G A | 14 | 28.345 | -16.227 | 71.026 | 1.00 | 0.00 | H |
| ATOM | 434 | H21  | G A | 14 | 26.118 | -11.780 | 73.771 | 1.00 | 0.00 | H |
| ATOM | 435 | H3'  | G A | 14 | 29.788 | -18.738 | 68.365 | 1.00 | 0.00 | H |
| ATOM | 436 | H22  | G A | 14 | 27.124 | -13.230 | 74.036 | 1.00 | 0.00 | H |
| ATOM | 437 | H4'  | G A | 14 | 31.534 | -17.090 | 69.484 | 1.00 | 0.00 | H |
| ATOM | 438 | H2'1 | G A | 14 | 27.890 | -17.277 | 68.217 | 1.00 | 0.00 | H |
| ATOM | 439 | H2'2 | G A | 14 | 27.567 | -18.070 | 69.753 | 1.00 | 0.00 | H |
| ATOM | 440 | H5'1 | G A | 14 | 31.112 | -15.305 | 67.651 | 1.00 | 0.00 | H |
| ATOM | 441 | H5'2 | G A | 14 | 31.641 | -16.939 | 67.200 | 1.00 | 0.00 | H |
| ATOM | 442 | C1'  | A A | 15 | 25.894 | -17.068 | 74.042 | 1.00 | 0.00 | C |
| ATOM | 443 | N1   | A A | 15 | 22.901 | -13.278 | 72.305 | 1.00 | 0.00 | N |
| ATOM | 444 | C2   | A A | 15 | 23.355 | -13.580 | 73.519 | 1.00 | 0.00 | C |
| ATOM | 445 | N3   | A A | 15 | 24.130 | -14.575 | 73.898 | 1.00 | 0.00 | N |
| ATOM | 446 | C4   | A A | 15 | 24.450 | -15.344 | 72.841 | 1.00 | 0.00 | C |
| ATOM | 447 | C5   | A A | 15 | 24.067 | -15.174 | 71.541 | 1.00 | 0.00 | C |
| ATOM | 448 | C6   | A A | 15 | 23.238 | -14.064 | 71.271 | 1.00 | 0.00 | C |
| ATOM | 449 | N6   | A A | 15 | 22.783 | -13.770 | 70.041 | 1.00 | 0.00 | N |
| ATOM | 450 | N7   | A A | 15 | 24.592 | -16.164 | 70.730 | 1.00 | 0.00 | N |

|      |     |      |     |    |        |         |        |      |      |   |
|------|-----|------|-----|----|--------|---------|--------|------|------|---|
| ATOM | 451 | C8   | A A | 15 | 25.274 | -16.909 | 71.550 | 1.00 | 0.00 | C |
| ATOM | 452 | N9   | A A | 15 | 25.235 | -16.471 | 72.850 | 1.00 | 0.00 | N |
| ATOM | 453 | C2'  | A A | 15 | 25.906 | -18.590 | 74.041 | 1.00 | 0.00 | C |
| ATOM | 454 | C3'  | A A | 15 | 27.247 | -18.899 | 74.686 | 1.00 | 0.00 | C |
| ATOM | 455 | O3'  | A A | 15 | 27.100 | -18.871 | 76.103 | 1.00 | 0.00 | O |
| ATOM | 456 | C4'  | A A | 15 | 28.139 | -17.769 | 74.175 | 1.00 | 0.00 | C |
| ATOM | 457 | O4'  | A A | 15 | 27.236 | -16.621 | 74.062 | 1.00 | 0.00 | O |
| ATOM | 458 | C5'  | A A | 15 | 28.806 | -17.992 | 72.838 | 1.00 | 0.00 | C |
| ATOM | 459 | O5'  | A A | 15 | 27.912 | -18.720 | 71.959 | 1.00 | 0.00 | O |
| ATOM | 460 | O1P  | A A | 15 | 29.084 | -20.923 | 71.629 | 1.00 | 0.00 | O |
| ATOM | 461 | O2P  | A A | 15 | 27.535 | -20.048 | 69.859 | 1.00 | 0.00 | O |
| ATOM | 462 | P    | A A | 15 | 28.534 | -19.753 | 70.915 | 1.00 | 0.00 | P |
| ATOM | 463 | H2   | A A | 15 | 23.042 | -12.905 | 74.314 | 1.00 | 0.00 | H |
| ATOM | 464 | H8   | A A | 15 | 25.823 | -17.796 | 71.237 | 1.00 | 0.00 | H |
| ATOM | 465 | H1'  | A A | 15 | 25.399 | -16.683 | 74.933 | 1.00 | 0.00 | H |
| ATOM | 466 | H3'  | A A | 15 | 27.634 | -19.873 | 74.381 | 1.00 | 0.00 | H |
| ATOM | 467 | H4'  | A A | 15 | 28.921 | -17.623 | 74.918 | 1.00 | 0.00 | H |
| ATOM | 468 | H61  | A A | 15 | 22.182 | -12.946 | 69.899 | 1.00 | 0.00 | H |
| ATOM | 469 | H62  | A A | 15 | 23.037 | -14.370 | 69.242 | 1.00 | 0.00 | H |
| ATOM | 470 | H2'1 | A A | 15 | 25.845 | -19.003 | 73.033 | 1.00 | 0.00 | H |
| ATOM | 471 | H2'2 | A A | 15 | 25.081 | -19.011 | 74.617 | 1.00 | 0.00 | H |
| ATOM | 472 | H5'1 | A A | 15 | 29.052 | -17.027 | 72.396 | 1.00 | 0.00 | H |
| ATOM | 473 | H5'2 | A A | 15 | 29.721 | -18.563 | 72.986 | 1.00 | 0.00 | H |
| ATOM | 474 | C1'  | C A | 16 | 22.101 | -16.312 | 77.157 | 1.00 | 0.00 | C |
| ATOM | 475 | N1   | C A | 16 | 21.853 | -16.518 | 75.703 | 1.00 | 0.00 | N |
| ATOM | 476 | C2   | C A | 16 | 21.057 | -15.587 | 75.039 | 1.00 | 0.00 | C |
| ATOM | 477 | O2   | C A | 16 | 20.590 | -14.636 | 75.679 | 1.00 | 0.00 | O |
| ATOM | 478 | N3   | C A | 16 | 20.818 | -15.757 | 73.715 | 1.00 | 0.00 | N |
| ATOM | 479 | C4   | C A | 16 | 21.336 | -16.797 | 73.051 | 1.00 | 0.00 | C |
| ATOM | 480 | N4   | C A | 16 | 21.073 | -16.911 | 71.757 | 1.00 | 0.00 | N |
| ATOM | 481 | C5   | C A | 16 | 22.156 | -17.772 | 73.708 | 1.00 | 0.00 | C |
| ATOM | 482 | C6   | C A | 16 | 22.386 | -17.580 | 75.041 | 1.00 | 0.00 | C |
| ATOM | 483 | C2'  | C A | 16 | 22.127 | -17.603 | 77.963 | 1.00 | 0.00 | C |
| ATOM | 484 | C3'  | C A | 16 | 23.196 | -17.304 | 79.004 | 1.00 | 0.00 | C |
| ATOM | 485 | O3'  | C A | 16 | 22.604 | -16.601 | 80.093 | 1.00 | 0.00 | O |
| ATOM | 486 | C4'  | C A | 16 | 24.191 | -16.443 | 78.231 | 1.00 | 0.00 | C |
| ATOM | 487 | O4'  | C A | 16 | 23.363 | -15.685 | 77.293 | 1.00 | 0.00 | O |
| ATOM | 488 | C5'  | C A | 16 | 25.254 | -17.182 | 77.449 | 1.00 | 0.00 | C |
| ATOM | 489 | O5'  | C A | 16 | 24.694 | -18.395 | 76.889 | 1.00 | 0.00 | O |
| ATOM | 490 | O1P  | C A | 16 | 25.932 | -20.221 | 78.101 | 1.00 | 0.00 | O |
| ATOM | 491 | O2P  | C A | 16 | 25.022 | -20.636 | 75.801 | 1.00 | 0.00 | O |
| ATOM | 492 | P    | C A | 16 | 25.627 | -19.682 | 76.761 | 1.00 | 0.00 | P |
| ATOM | 493 | H5   | C A | 16 | 22.574 | -18.626 | 73.172 | 1.00 | 0.00 | H |
| ATOM | 494 | H6   | C A | 16 | 23.010 | -18.291 | 75.583 | 1.00 | 0.00 | H |
| ATOM | 495 | H1'  | C A | 16 | 21.343 | -15.627 | 77.539 | 1.00 | 0.00 | H |
| ATOM | 496 | H3'  | C A | 16 | 23.667 | -18.215 | 79.375 | 1.00 | 0.00 | H |
| ATOM | 497 | H4'  | C A | 16 | 24.696 | -15.811 | 78.961 | 1.00 | 0.00 | H |
| ATOM | 498 | H41  | C A | 16 | 21.461 | -17.702 | 71.221 | 1.00 | 0.00 | H |
| ATOM | 499 | H42  | C A | 16 | 20.482 | -16.211 | 71.286 | 1.00 | 0.00 | H |
| ATOM | 500 | H2'1 | C A | 16 | 22.397 | -18.466 | 77.355 | 1.00 | 0.00 | H |
| ATOM | 501 | H2'2 | C A | 16 | 21.166 | -17.818 | 78.431 | 1.00 | 0.00 | H |
| ATOM | 502 | H5'1 | C A | 16 | 25.619 | -16.539 | 76.648 | 1.00 | 0.00 | H |
| ATOM | 503 | H5'2 | C A | 16 | 26.079 | -17.430 | 78.115 | 1.00 | 0.00 | H |
| ATOM | 504 | C1'  | G A | 17 | 17.523 | -14.826 | 78.321 | 1.00 | 0.00 | C |

|      |     |      |     |    |        |         |        |      |      |   |
|------|-----|------|-----|----|--------|---------|--------|------|------|---|
| ATOM | 505 | N1   | G A | 17 | 16.594 | -15.693 | 73.380 | 1.00 | 0.00 | N |
| ATOM | 506 | C2   | G A | 17 | 16.194 | -14.643 | 74.189 | 1.00 | 0.00 | C |
| ATOM | 507 | N2   | G A | 17 | 15.445 | -13.700 | 73.603 | 1.00 | 0.00 | N |
| ATOM | 508 | N3   | G A | 17 | 16.516 | -14.542 | 75.477 | 1.00 | 0.00 | N |
| ATOM | 509 | C4   | G A | 17 | 17.271 | -15.588 | 75.904 | 1.00 | 0.00 | C |
| ATOM | 510 | C5   | G A | 17 | 17.714 | -16.678 | 75.173 | 1.00 | 0.00 | C |
| ATOM | 511 | C6   | G A | 17 | 17.377 | -16.784 | 73.803 | 1.00 | 0.00 | C |
| ATOM | 512 | O6   | G A | 17 | 17.671 | -17.666 | 72.997 | 1.00 | 0.00 | O |
| ATOM | 513 | N7   | G A | 17 | 18.465 | -17.532 | 75.985 | 1.00 | 0.00 | N |
| ATOM | 514 | C8   | G A | 17 | 18.456 | -16.944 | 77.153 | 1.00 | 0.00 | C |
| ATOM | 515 | N9   | G A | 17 | 17.751 | -15.758 | 77.184 | 1.00 | 0.00 | N |
| ATOM | 516 | C2'  | G A | 17 | 17.317 | -15.526 | 79.658 | 1.00 | 0.00 | C |
| ATOM | 517 | C3'  | G A | 17 | 17.994 | -14.572 | 80.625 | 1.00 | 0.00 | C |
| ATOM | 518 | O3'  | G A | 17 | 17.077 | -13.543 | 80.988 | 1.00 | 0.00 | O |
| ATOM | 519 | C4'  | G A | 17 | 19.169 | -14.036 | 79.807 | 1.00 | 0.00 | C |
| ATOM | 520 | O4'  | G A | 17 | 18.665 | -13.998 | 78.435 | 1.00 | 0.00 | O |
| ATOM | 521 | C5'  | G A | 17 | 20.436 | -14.858 | 79.836 | 1.00 | 0.00 | C |
| ATOM | 522 | O5'  | G A | 17 | 20.105 | -16.269 | 79.867 | 1.00 | 0.00 | O |
| ATOM | 523 | O1P  | G A | 17 | 20.928 | -17.009 | 82.128 | 1.00 | 0.00 | O |
| ATOM | 524 | O2P  | G A | 17 | 20.799 | -18.654 | 80.237 | 1.00 | 0.00 | O |
| ATOM | 525 | P    | G A | 17 | 21.053 | -17.261 | 80.679 | 1.00 | 0.00 | P |
| ATOM | 526 | H1   | G A | 17 | 16.297 | -15.672 | 72.393 | 1.00 | 0.00 | H |
| ATOM | 527 | H8   | G A | 17 | 18.962 | -17.356 | 78.027 | 1.00 | 0.00 | H |
| ATOM | 528 | H1'  | G A | 17 | 16.671 | -14.192 | 78.077 | 1.00 | 0.00 | H |
| ATOM | 529 | H21  | G A | 17 | 15.202 | -13.783 | 72.606 | 1.00 | 0.00 | H |
| ATOM | 530 | H3'  | G A | 17 | 18.342 | -15.080 | 81.526 | 1.00 | 0.00 | H |
| ATOM | 531 | H22  | G A | 17 | 15.112 | -12.894 | 74.151 | 1.00 | 0.00 | H |
| ATOM | 532 | H4'  | G A | 17 | 19.404 | -13.048 | 80.202 | 1.00 | 0.00 | H |
| ATOM | 533 | H2'1 | G A | 17 | 17.780 | -16.514 | 79.683 | 1.00 | 0.00 | H |
| ATOM | 534 | H2'2 | G A | 17 | 16.261 | -15.655 | 79.899 | 1.00 | 0.00 | H |
| ATOM | 535 | H5'1 | G A | 17 | 21.025 | -14.637 | 78.946 | 1.00 | 0.00 | H |
| ATOM | 536 | H5'2 | G A | 17 | 21.014 | -14.594 | 80.722 | 1.00 | 0.00 | H |
| ATOM | 537 | C1'  | G A | 18 | 12.789 | -13.789 | 77.301 | 1.00 | 0.00 | C |
| ATOM | 538 | N1   | G A | 18 | 13.476 | -17.104 | 73.485 | 1.00 | 0.00 | N |
| ATOM | 539 | C2   | G A | 18 | 12.826 | -15.883 | 73.494 | 1.00 | 0.00 | C |
| ATOM | 540 | N2   | G A | 18 | 12.284 | -15.494 | 72.332 | 1.00 | 0.00 | N |
| ATOM | 541 | N3   | G A | 18 | 12.725 | -15.112 | 74.575 | 1.00 | 0.00 | N |
| ATOM | 542 | C4   | G A | 18 | 13.322 | -15.664 | 75.662 | 1.00 | 0.00 | C |
| ATOM | 543 | C5   | G A | 18 | 13.989 | -16.877 | 75.748 | 1.00 | 0.00 | C |
| ATOM | 544 | C6   | G A | 18 | 14.101 | -17.694 | 74.599 | 1.00 | 0.00 | C |
| ATOM | 545 | O6   | G A | 18 | 14.648 | -18.791 | 74.479 | 1.00 | 0.00 | O |
| ATOM | 546 | N7   | G A | 18 | 14.459 | -17.078 | 77.047 | 1.00 | 0.00 | N |
| ATOM | 547 | C8   | G A | 18 | 14.075 | -16.007 | 77.692 | 1.00 | 0.00 | C |
| ATOM | 548 | N9   | G A | 18 | 13.377 | -15.102 | 76.918 | 1.00 | 0.00 | N |
| ATOM | 549 | C2'  | G A | 18 | 12.183 | -13.772 | 78.697 | 1.00 | 0.00 | C |
| ATOM | 550 | C3'  | G A | 18 | 12.508 | -12.365 | 79.168 | 1.00 | 0.00 | C |
| ATOM | 551 | O3'  | G A | 18 | 11.507 | -11.468 | 78.690 | 1.00 | 0.00 | O |
| ATOM | 552 | C4'  | G A | 18 | 13.872 | -12.098 | 78.533 | 1.00 | 0.00 | C |
| ATOM | 553 | O4'  | G A | 18 | 13.824 | -12.825 | 77.264 | 1.00 | 0.00 | O |
| ATOM | 554 | C5'  | G A | 18 | 15.077 | -12.566 | 79.312 | 1.00 | 0.00 | C |
| ATOM | 555 | O5'  | G A | 18 | 14.775 | -13.815 | 79.983 | 1.00 | 0.00 | O |
| ATOM | 556 | O1P  | G A | 18 | 14.856 | -13.200 | 82.423 | 1.00 | 0.00 | O |
| ATOM | 557 | O2P  | G A | 18 | 15.353 | -15.551 | 81.704 | 1.00 | 0.00 | O |
| ATOM | 558 | P    | G A | 18 | 15.435 | -14.101 | 81.408 | 1.00 | 0.00 | P |

|      |     |      |       |    |        |         |        |      |      |   |
|------|-----|------|-------|----|--------|---------|--------|------|------|---|
| ATOM | 559 | H1   | G A   | 18 | 13.504 | -17.622 | 72.593 | 1.00 | 0.00 | H |
| ATOM | 560 | H8   | G A   | 18 | 14.285 | -15.842 | 78.749 | 1.00 | 0.00 | H |
| ATOM | 561 | H1'  | G A   | 18 | 12.048 | -13.516 | 76.550 | 1.00 | 0.00 | H |
| ATOM | 562 | H21  | G A   | 18 | 12.370 | -16.096 | 71.499 | 1.00 | 0.00 | H |
| ATOM | 563 | H3'  | G A   | 18 | 12.561 | -12.298 | 80.255 | 1.00 | 0.00 | H |
| ATOM | 564 | H22  | G A   | 18 | 11.785 | -14.596 | 72.273 | 1.00 | 0.00 | H |
| ATOM | 565 | H4'  | G A   | 18 | 13.955 | -11.021 | 78.402 | 1.00 | 0.00 | H |
| ATOM | 566 | H2'1 | G A   | 18 | 12.629 | -14.521 | 79.351 | 1.00 | 0.00 | H |
| ATOM | 567 | H2'2 | G A   | 18 | 11.107 | -13.950 | 78.684 | 1.00 | 0.00 | H |
| ATOM | 568 | H5'1 | G A   | 18 | 15.913 | -12.708 | 78.628 | 1.00 | 0.00 | H |
| ATOM | 569 | H5'2 | G A   | 18 | 15.343 | -11.808 | 80.048 | 1.00 | 0.00 | H |
| ATOM | 570 | C1'  | T A   | 19 | 8.596  | -14.211 | 74.706 | 1.00 | 0.00 | C |
| ATOM | 571 | N1   | T A   | 19 | 9.292  | -15.428 | 75.202 | 1.00 | 0.00 | N |
| ATOM | 572 | C2   | T A   | 19 | 9.550  | -16.426 | 74.284 | 1.00 | 0.00 | C |
| ATOM | 573 | O2   | T A   | 19 | 9.232  | -16.340 | 73.110 | 1.00 | 0.00 | O |
| ATOM | 574 | N3   | T A   | 19 | 10.199 | -17.537 | 74.787 | 1.00 | 0.00 | N |
| ATOM | 575 | C4   | T A   | 19 | 10.598 | -17.736 | 76.092 | 1.00 | 0.00 | C |
| ATOM | 576 | O4   | T A   | 19 | 11.171 | -18.779 | 76.426 | 1.00 | 0.00 | O |
| ATOM | 577 | C5   | T A   | 19 | 10.286 | -16.640 | 76.979 | 1.00 | 0.00 | C |
| ATOM | 578 | C6   | T A   | 19 | 9.654  | -15.539 | 76.522 | 1.00 | 0.00 | C |
| ATOM | 579 | C7   | T A   | 19 | 10.703 | -16.811 | 78.409 | 1.00 | 0.00 | C |
| ATOM | 580 | C2'  | T A   | 19 | 7.589  | -13.634 | 75.694 | 1.00 | 0.00 | C |
| ATOM | 581 | C3'  | T A   | 19 | 7.732  | -12.140 | 75.455 | 1.00 | 0.00 | C |
| ATOM | 582 | O3'  | T A   | 19 | 6.914  | -11.760 | 74.351 | 1.00 | 0.00 | O |
| ATOM | 583 | C4'  | T A   | 19 | 9.220  | -11.986 | 75.151 | 1.00 | 0.00 | C |
| ATOM | 584 | O4'  | T A   | 19 | 9.576  | -13.223 | 74.458 | 1.00 | 0.00 | O |
| ATOM | 585 | C5'  | T A   | 19 | 10.136 | -11.816 | 76.341 | 1.00 | 0.00 | C |
| ATOM | 586 | O5'  | T A   | 19 | 9.660  | -12.627 | 77.444 | 1.00 | 0.00 | O |
| ATOM | 587 | O1P  | T A   | 19 | 8.977  | -10.925 | 79.167 | 1.00 | 0.00 | O |
| ATOM | 588 | O2P  | T A   | 19 | 9.707  | -13.215 | 79.887 | 1.00 | 0.00 | O |
| ATOM | 589 | P    | T A   | 19 | 9.855  | -12.090 | 78.932 | 1.00 | 0.00 | P |
| ATOM | 590 | H3   | T A   | 19 | 10.406 | -18.294 | 74.119 | 1.00 | 0.00 | H |
| ATOM | 591 | H6   | T A   | 19 | 9.429  | -14.725 | 77.211 | 1.00 | 0.00 | H |
| ATOM | 592 | H1'  | T A   | 19 | 8.117  | -14.455 | 73.757 | 1.00 | 0.00 | H |
| ATOM | 593 | H3'  | T A   | 19 | 7.447  | -11.559 | 76.333 | 1.00 | 0.00 | H |
| ATOM | 594 | H4'  | T A   | 19 | 9.325  | -11.100 | 74.522 | 1.00 | 0.00 | H |
| ATOM | 595 | H71  | T A   | 19 | 9.818  | -16.865 | 79.042 | 1.00 | 0.00 | H |
| ATOM | 596 | H72  | T A   | 19 | 11.280 | -17.731 | 78.510 | 1.00 | 0.00 | H |
| ATOM | 597 | H73  | T A   | 19 | 11.318 | -15.963 | 78.714 | 1.00 | 0.00 | H |
| ATOM | 598 | H2'1 | T A   | 19 | 7.825  | -13.898 | 76.723 | 1.00 | 0.00 | H |
| ATOM | 599 | H2'2 | T A   | 19 | 6.572  | -13.974 | 75.493 | 1.00 | 0.00 | H |
| ATOM | 600 | H5'1 | T A   | 19 | 11.144 | -12.125 | 76.065 | 1.00 | 0.00 | H |
| ATOM | 601 | H5'2 | T A   | 19 | 10.151 | -10.768 | 76.634 | 1.00 | 0.00 | H |
| ATOM | 602 | C01  | LNK A | 20 | 3.276  | -10.987 | 74.177 | 0.00 | 0.00 | C |
| ATOM | 603 | O1   | LNK A | 20 | 4.440  | -11.403 | 74.896 | 1.00 | 0.00 | O |
| ATOM | 604 | S    | LNK A | 20 | -0.631 | -10.538 | 74.789 | 0.00 | 0.00 | S |
| ATOM | 605 | C02  | LNK A | 20 | 2.048  | -11.062 | 75.104 | 0.00 | 0.00 | C |
| ATOM | 606 | C03  | LNK A | 20 | 0.820  | -11.518 | 74.293 | 0.00 | 0.00 | C |
| ATOM | 607 | O1P  | LNK A | 20 | 5.381  | -13.713 | 75.239 | 1.00 | 0.00 | O |
| ATOM | 608 | O2P  | LNK A | 20 | 4.871  | -12.896 | 72.921 | 1.00 | 0.00 | O |
| ATOM | 609 | P    | LNK A | 20 | 5.334  | -12.580 | 74.295 | 1.00 | 0.00 | P |
| ATOM | 610 | H01  | LNK A | 20 | 3.124  | -11.641 | 73.318 | 0.00 | 0.00 | H |
| ATOM | 611 | H02  | LNK A | 20 | 3.408  | -9.961  | 73.833 | 0.00 | 0.00 | H |
| ATOM | 612 | H03  | LNK A | 20 | 0.628  | -12.573 | 74.487 | 0.00 | 0.00 | H |



|      |     |      |     |   |    |        |         |         |        |      |      |   |
|------|-----|------|-----|---|----|--------|---------|---------|--------|------|------|---|
| ATOM | 613 | H04  | LNK | A | 20 | 1.856  | -10.079 | 75.534  | 0.00   | 0.00 | H    |   |
| ATOM | 614 | H05  | LNK | A | 20 | 2.240  | -11.777 | 75.904  | 0.00   | 0.00 | H    |   |
| ATOM | 615 | H06  | LNK | A | 20 | 1.011  | -11.372 | 73.230  | 0.00   | 0.00 | H    |   |
| ATOM | 616 | AU   | LNK | A | 20 | -1.196 | -10.804 | 74.505  |        |      |      |   |
| TER  |     |      |     |   |    |        |         |         |        |      |      |   |
| ATOM | 618 | C1'  |     | A | B  | 2      | 11.517  | -23.088 | 69.088 | 1.00 | 0.00 | C |
| ATOM | 619 | N1   |     | A | B  | 2      | 10.797  | -19.719 | 72.892 | 1.00 | 0.00 | N |
| ATOM | 620 | C2   |     | A | B  | 2      | 10.488  | -19.693 | 71.600 | 1.00 | 0.00 | C |
| ATOM | 621 | N3   |     | A | B  | 2      | 10.701  | -20.600 | 70.671 | 1.00 | 0.00 | N |
| ATOM | 622 | C4   |     | A | B  | 2      | 11.329  | -21.668 | 71.198 | 1.00 | 0.00 | C |
| ATOM | 623 | C5   |     | A | B  | 2      | 11.713  | -21.849 | 72.496 | 1.00 | 0.00 | C |
| ATOM | 624 | C6   |     | A | B  | 2      | 11.421  | -20.797 | 73.390 | 1.00 | 0.00 | C |
| ATOM | 625 | N6   |     | A | B  | 2      | 11.739  | -20.833 | 74.696 | 1.00 | 0.00 | N |
| ATOM | 626 | N7   |     | A | B  | 2      | 12.332  | -23.075 | 72.669 | 1.00 | 0.00 | N |
| ATOM | 627 | C8   |     | A | B  | 2      | 12.314  | -23.602 | 71.480 | 1.00 | 0.00 | C |
| ATOM | 628 | N9   |     | A | B  | 2      | 11.717  | -22.807 | 70.536 | 1.00 | 0.00 | N |
| ATOM | 629 | C2'  |     | A | B  | 2      | 12.678  | -23.830 | 68.441 | 1.00 | 0.00 | C |
| ATOM | 630 | C3'  |     | A | B  | 2      | 11.965  | -24.729 | 67.444 | 1.00 | 0.00 | C |
| ATOM | 631 | O3'  |     | A | B  | 2      | 11.721  | -23.996 | 66.245 | 1.00 | 0.00 | O |
| ATOM | 632 | C4'  |     | A | B  | 2      | 10.671  | -25.087 | 68.175 | 1.00 | 0.00 | C |
| ATOM | 633 | O4'  |     | A | B  | 2      | 10.360  | -23.894 | 68.963 | 1.00 | 0.00 | O |
| ATOM | 634 | C5'  |     | A | B  | 2      | 10.732  | -26.278 | 69.102 | 1.00 | 0.00 | C |
| ATOM | 635 | O5'  |     | A | B  | 2      | 12.022  | -26.319 | 69.764 | 1.00 | 0.00 | O |
| ATOM | 636 | H2   |     | A | B  | 2      | 9.987   | -18.789 | 71.258 | 1.00 | 0.00 | H |
| ATOM | 637 | H8   |     | A | B  | 2      | 12.733  | -24.584 | 71.256 | 1.00 | 0.00 | H |
| ATOM | 638 | H1'  |     | A | B  | 2      | 11.325  | -22.142 | 68.581 | 1.00 | 0.00 | H |
| ATOM | 639 | H3'  |     | A | B  | 2      | 12.544  | -25.621 | 67.210 | 1.00 | 0.00 | H |
| ATOM | 640 | H4'  |     | A | B  | 2      | 9.925   | -25.298 | 67.410 | 1.00 | 0.00 | H |
| ATOM | 641 | H61  |     | A | B  | 2      | 11.501  | -20.039 | 75.305 | 1.00 | 0.00 | H |
| ATOM | 642 | H62  |     | A | B  | 2      | 12.220  | -21.657 | 75.085 | 1.00 | 0.00 | H |
| ATOM | 643 | H2'1 |     | A | B  | 2      | 13.251  | -24.413 | 69.161 | 1.00 | 0.00 | H |
| ATOM | 644 | H2'2 |     | A | B  | 2      | 13.372  | -23.155 | 67.940 | 1.00 | 0.00 | H |
| ATOM | 645 | H5'1 |     | A | B  | 2      | 9.940   | -26.192 | 69.846 | 1.00 | 0.00 | H |
| ATOM | 646 | H5'2 |     | A | B  | 2      | 10.585  | -27.188 | 68.524 | 1.00 | 0.00 | H |
| ATOM | 647 | C1'  |     | C | B  | 3      | 12.536  | -18.489 | 67.519 | 1.00 | 0.00 | C |
| ATOM | 648 | N1   |     | C | B  | 3      | 13.161  | -19.019 | 68.762 | 1.00 | 0.00 | N |
| ATOM | 649 | C2   |     | C | B  | 3      | 13.077  | -18.244 | 69.917 | 1.00 | 0.00 | C |
| ATOM | 650 | O2   |     | C | B  | 3      | 12.488  | -17.156 | 69.864 | 1.00 | 0.00 | O |
| ATOM | 651 | N3   |     | C | B  | 3      | 13.640  | -18.709 | 71.058 | 1.00 | 0.00 | N |
| ATOM | 652 | C4   |     | C | B  | 3      | 14.271  | -19.890 | 71.084 | 1.00 | 0.00 | C |
| ATOM | 653 | N4   |     | C | B  | 3      | 14.801  | -20.297 | 72.229 | 1.00 | 0.00 | N |
| ATOM | 654 | C5   |     | C | B  | 3      | 14.379  | -20.707 | 69.910 | 1.00 | 0.00 | C |
| ATOM | 655 | C6   |     | C | B  | 3      | 13.799  | -20.221 | 68.771 | 1.00 | 0.00 | C |
| ATOM | 656 | C2'  |     | C | B  | 3      | 13.331  | -18.785 | 66.256 | 1.00 | 0.00 | C |
| ATOM | 657 | C3'  |     | C | B  | 3      | 12.230  | -19.015 | 65.233 | 1.00 | 0.00 | C |
| ATOM | 658 | O3'  |     | C | B  | 3      | 11.807  | -17.757 | 64.710 | 1.00 | 0.00 | O |
| ATOM | 659 | C4'  |     | C | B  | 3      | 11.137  | -19.693 | 66.058 | 1.00 | 0.00 | C |
| ATOM | 660 | O4'  |     | C | B  | 3      | 11.264  | -19.095 | 67.387 | 1.00 | 0.00 | O |
| ATOM | 661 | C5'  |     | C | B  | 3      | 11.232  | -21.195 | 66.192 | 1.00 | 0.00 | C |
| ATOM | 662 | O5'  |     | C | B  | 3      | 12.624  | -21.590 | 66.291 | 1.00 | 0.00 | O |
| ATOM | 663 | O1P  |     | C | B  | 3      | 13.009  | -22.899 | 64.175 | 1.00 | 0.00 | O |
| ATOM | 664 | O2P  |     | C | B  | 3      | 14.382  | -23.385 | 66.219 | 1.00 | 0.00 | O |
| ATOM | 665 | P    |     | C | B  | 3      | 13.074  | -22.978 | 65.649 | 1.00 | 0.00 | P |
| ATOM | 666 | H5   |     | C | B  | 3      | 14.898  | -21.666 | 69.923 | 1.00 | 0.00 | H |

|      |     |      |     |   |        |         |        |      |      |   |
|------|-----|------|-----|---|--------|---------|--------|------|------|---|
| ATOM | 667 | H6   | C B | 3 | 13.849 | -20.809 | 67.855 | 1.00 | 0.00 | H |
| ATOM | 668 | H1'  | C B | 3 | 12.384 | -17.416 | 67.644 | 1.00 | 0.00 | H |
| ATOM | 669 | H3'  | C B | 3 | 12.558 | -19.655 | 64.415 | 1.00 | 0.00 | H |
| ATOM | 670 | H4'  | C B | 3 | 10.187 | -19.464 | 65.575 | 1.00 | 0.00 | H |
| ATOM | 671 | H41  | C B | 3 | 15.290 | -21.204 | 72.276 | 1.00 | 0.00 | H |
| ATOM | 672 | H42  | C B | 3 | 14.725 | -19.708 | 73.071 | 1.00 | 0.00 | H |
| ATOM | 673 | H2'1 | C B | 3 | 13.963 | -19.666 | 66.362 | 1.00 | 0.00 | H |
| ATOM | 674 | H2'2 | C B | 3 | 13.974 | -17.953 | 65.968 | 1.00 | 0.00 | H |
| ATOM | 675 | H5'1 | C B | 3 | 10.697 | -21.509 | 67.089 | 1.00 | 0.00 | H |
| ATOM | 676 | H5'2 | C B | 3 | 10.778 | -21.662 | 65.321 | 1.00 | 0.00 | H |
| ATOM | 677 | C1'  | C B | 4 | 13.897 | -13.769 | 68.144 | 1.00 | 0.00 | C |
| ATOM | 678 | N1   | C B | 4 | 14.723 | -14.875 | 68.700 | 1.00 | 0.00 | N |
| ATOM | 679 | C2   | C B | 4 | 15.081 | -14.811 | 70.045 | 1.00 | 0.00 | C |
| ATOM | 680 | O2   | C B | 4 | 14.700 | -13.844 | 70.719 | 1.00 | 0.00 | O |
| ATOM | 681 | N3   | C B | 4 | 15.833 | -15.807 | 70.571 | 1.00 | 0.00 | N |
| ATOM | 682 | C4   | C B | 4 | 16.232 | -16.840 | 69.816 | 1.00 | 0.00 | C |
| ATOM | 683 | N4   | C B | 4 | 16.963 | -17.790 | 70.381 | 1.00 | 0.00 | N |
| ATOM | 684 | C5   | C B | 4 | 15.883 | -16.931 | 68.428 | 1.00 | 0.00 | C |
| ATOM | 685 | C6   | C B | 4 | 15.120 | -15.918 | 67.921 | 1.00 | 0.00 | C |
| ATOM | 686 | C2'  | C B | 4 | 14.271 | -13.379 | 66.720 | 1.00 | 0.00 | C |
| ATOM | 687 | C3'  | C B | 4 | 12.916 | -13.028 | 66.123 | 1.00 | 0.00 | C |
| ATOM | 688 | O3'  | C B | 4 | 12.600 | -11.676 | 66.442 | 1.00 | 0.00 | O |
| ATOM | 689 | C4'  | C B | 4 | 11.976 | -14.019 | 66.806 | 1.00 | 0.00 | C |
| ATOM | 690 | O4'  | C B | 4 | 12.550 | -14.199 | 68.142 | 1.00 | 0.00 | O |
| ATOM | 691 | C5'  | C B | 4 | 11.840 | -15.376 | 66.154 | 1.00 | 0.00 | C |
| ATOM | 692 | O5'  | C B | 4 | 13.116 | -15.786 | 65.603 | 1.00 | 0.00 | O |
| ATOM | 693 | O1P  | C B | 4 | 12.698 | -15.813 | 63.121 | 1.00 | 0.00 | O |
| ATOM | 694 | O2P  | C B | 4 | 14.451 | -17.307 | 64.115 | 1.00 | 0.00 | O |
| ATOM | 695 | P    | C B | 4 | 13.133 | -16.644 | 64.261 | 1.00 | 0.00 | P |
| ATOM | 696 | H5   | C B | 4 | 16.211 | -17.765 | 67.807 | 1.00 | 0.00 | H |
| ATOM | 697 | H6   | C B | 4 | 14.824 | -15.945 | 66.873 | 1.00 | 0.00 | H |
| ATOM | 698 | H1'  | C B | 4 | 13.976 | -12.914 | 68.816 | 1.00 | 0.00 | H |
| ATOM | 699 | H3'  | C B | 4 | 12.903 | -13.157 | 65.040 | 1.00 | 0.00 | H |
| ATOM | 700 | H4'  | C B | 4 | 10.989 | -13.558 | 66.826 | 1.00 | 0.00 | H |
| ATOM | 701 | H41  | C B | 4 | 17.281 | -18.598 | 69.824 | 1.00 | 0.00 | H |
| ATOM | 702 | H42  | C B | 4 | 17.215 | -17.722 | 71.379 | 1.00 | 0.00 | H |
| ATOM | 703 | H2'1 | C B | 4 | 14.743 | -14.197 | 66.178 | 1.00 | 0.00 | H |
| ATOM | 704 | H2'2 | C B | 4 | 14.951 | -12.528 | 66.690 | 1.00 | 0.00 | H |
| ATOM | 705 | H5'1 | C B | 4 | 11.510 | -16.099 | 66.899 | 1.00 | 0.00 | H |
| ATOM | 706 | H5'2 | C B | 4 | 11.098 | -15.316 | 65.359 | 1.00 | 0.00 | H |
| ATOM | 707 | C1'  | G B | 5 | 16.182 | -10.078 | 70.528 | 1.00 | 0.00 | C |
| ATOM | 708 | N1   | G B | 5 | 19.151 | -13.825 | 72.309 | 1.00 | 0.00 | N |
| ATOM | 709 | C2   | G B | 5 | 18.607 | -12.735 | 72.966 | 1.00 | 0.00 | C |
| ATOM | 710 | N2   | G B | 5 | 18.894 | -12.629 | 74.268 | 1.00 | 0.00 | N |
| ATOM | 711 | N3   | G B | 5 | 17.838 | -11.826 | 72.368 | 1.00 | 0.00 | N |
| ATOM | 712 | C4   | G B | 5 | 17.659 | -12.087 | 71.048 | 1.00 | 0.00 | C |
| ATOM | 713 | C5   | G B | 5 | 18.166 | -13.145 | 70.310 | 1.00 | 0.00 | C |
| ATOM | 714 | C6   | G B | 5 | 18.978 | -14.112 | 70.941 | 1.00 | 0.00 | C |
| ATOM | 715 | O6   | G B | 5 | 19.514 | -15.109 | 70.460 | 1.00 | 0.00 | O |
| ATOM | 716 | N7   | G B | 5 | 17.748 | -13.047 | 68.980 | 1.00 | 0.00 | N |
| ATOM | 717 | C8   | G B | 5 | 17.016 | -11.963 | 68.955 | 1.00 | 0.00 | C |
| ATOM | 718 | N9   | G B | 5 | 16.917 | -11.323 | 70.174 | 1.00 | 0.00 | N |
| ATOM | 719 | C2'  | G B | 5 | 16.226 | -9.011  | 69.444 | 1.00 | 0.00 | C |
| ATOM | 720 | C3'  | G B | 5 | 14.848 | -8.381  | 69.562 | 1.00 | 0.00 | C |

|      |     |      |     |   |        |         |        |      |      |   |
|------|-----|------|-----|---|--------|---------|--------|------|------|---|
| ATOM | 721 | O3'  | G B | 5 | 14.872 | -7.387  | 70.584 | 1.00 | 0.00 | O |
| ATOM | 722 | C4'  | G B | 5 | 13.962 | -9.569  | 69.932 | 1.00 | 0.00 | C |
| ATOM | 723 | O4'  | G B | 5 | 14.827 | -10.423 | 70.746 | 1.00 | 0.00 | O |
| ATOM | 724 | C5'  | G B | 5 | 13.418 | -10.385 | 68.785 | 1.00 | 0.00 | C |
| ATOM | 725 | O5'  | G B | 5 | 14.408 | -10.468 | 67.729 | 1.00 | 0.00 | O |
| ATOM | 726 | O1P  | G B | 5 | 13.349 | -9.196  | 65.833 | 1.00 | 0.00 | O |
| ATOM | 727 | O2P  | G B | 5 | 15.007 | -11.015 | 65.351 | 1.00 | 0.00 | O |
| ATOM | 728 | P    | G B | 5 | 13.913 | -10.505 | 66.213 | 1.00 | 0.00 | P |
| ATOM | 729 | H1   | G B | 5 | 19.728 | -14.476 | 72.865 | 1.00 | 0.00 | H |
| ATOM | 730 | H8   | G B | 5 | 16.530 | -11.594 | 68.053 | 1.00 | 0.00 | H |
| ATOM | 731 | H1'  | G B | 5 | 16.586 | -9.699  | 71.467 | 1.00 | 0.00 | H |
| ATOM | 732 | H21  | G B | 5 | 19.486 | -13.337 | 74.725 | 1.00 | 0.00 | H |
| ATOM | 733 | H3'  | G B | 5 | 14.523 | -7.927  | 68.624 | 1.00 | 0.00 | H |
| ATOM | 734 | H22  | G B | 5 | 18.521 | -11.838 | 74.814 | 1.00 | 0.00 | H |
| ATOM | 735 | H4'  | G B | 5 | 13.113 | -9.171  | 70.489 | 1.00 | 0.00 | H |
| ATOM | 736 | H2'1 | G B | 5 | 16.386 | -9.434  | 68.452 | 1.00 | 0.00 | H |
| ATOM | 737 | H2'2 | G B | 5 | 17.014 | -8.277  | 69.617 | 1.00 | 0.00 | H |
| ATOM | 738 | H5'1 | G B | 5 | 13.175 | -11.386 | 69.141 | 1.00 | 0.00 | H |
| ATOM | 739 | H5'2 | G B | 5 | 12.514 | -9.910  | 68.404 | 1.00 | 0.00 | H |
| ATOM | 740 | C1'  | T B | 6 | 19.608 | -8.173  | 73.552 | 1.00 | 0.00 | C |
| ATOM | 741 | N1   | T B | 6 | 20.009 | -9.080  | 72.443 | 1.00 | 0.00 | N |
| ATOM | 742 | C2   | T B | 6 | 20.820 | -10.148 | 72.767 | 1.00 | 0.00 | C |
| ATOM | 743 | O2   | T B | 6 | 21.209 | -10.363 | 73.902 | 1.00 | 0.00 | O |
| ATOM | 744 | N3   | T B | 6 | 21.168 | -10.966 | 71.707 | 1.00 | 0.00 | N |
| ATOM | 745 | C4   | T B | 6 | 20.789 | -10.812 | 70.390 | 1.00 | 0.00 | C |
| ATOM | 746 | O4   | T B | 6 | 21.166 | -11.610 | 69.525 | 1.00 | 0.00 | O |
| ATOM | 747 | C5   | T B | 6 | 19.940 | -9.668  | 70.152 | 1.00 | 0.00 | C |
| ATOM | 748 | C6   | T B | 6 | 19.581 | -8.850  | 71.159 | 1.00 | 0.00 | C |
| ATOM | 749 | C7   | T B | 6 | 19.501 | -9.463  | 68.731 | 1.00 | 0.00 | C |
| ATOM | 750 | C2'  | T B | 6 | 19.554 | -6.703  | 73.152 | 1.00 | 0.00 | C |
| ATOM | 751 | C3'  | T B | 6 | 18.374 | -6.196  | 73.969 | 1.00 | 0.00 | C |
| ATOM | 752 | O3'  | T B | 6 | 18.825 | -5.855  | 75.278 | 1.00 | 0.00 | O |
| ATOM | 753 | C4'  | T B | 6 | 17.426 | -7.392  | 73.977 | 1.00 | 0.00 | C |
| ATOM | 754 | O4'  | T B | 6 | 18.314 | -8.555  | 73.977 | 1.00 | 0.00 | O |
| ATOM | 755 | C5'  | T B | 6 | 16.479 | -7.508  | 72.806 | 1.00 | 0.00 | C |
| ATOM | 756 | O5'  | T B | 6 | 17.142 | -7.064  | 71.595 | 1.00 | 0.00 | O |
| ATOM | 757 | O1P  | T B | 6 | 15.865 | -4.989  | 70.961 | 1.00 | 0.00 | O |
| ATOM | 758 | O2P  | T B | 6 | 17.018 | -6.343  | 69.191 | 1.00 | 0.00 | O |
| ATOM | 759 | P    | T B | 6 | 16.280 | -6.320  | 70.477 | 1.00 | 0.00 | P |
| ATOM | 760 | H3   | T B | 6 | 21.772 | -11.773 | 71.923 | 1.00 | 0.00 | H |
| ATOM | 761 | H6   | T B | 6 | 18.939 | -7.993  | 70.953 | 1.00 | 0.00 | H |
| ATOM | 762 | H1'  | T B | 6 | 20.293 | -8.325  | 74.384 | 1.00 | 0.00 | H |
| ATOM | 763 | H3'  | T B | 6 | 17.906 | -5.326  | 73.511 | 1.00 | 0.00 | H |
| ATOM | 764 | H4'  | T B | 6 | 16.825 | -7.314  | 74.883 | 1.00 | 0.00 | H |
| ATOM | 765 | H71  | T B | 6 | 19.933 | -8.541  | 68.347 | 1.00 | 0.00 | H |
| ATOM | 766 | H72  | T B | 6 | 19.834 | -10.304 | 68.122 | 1.00 | 0.00 | H |
| ATOM | 767 | H73  | T B | 6 | 18.412 | -9.397  | 68.693 | 1.00 | 0.00 | H |
| ATOM | 768 | H2'1 | T B | 6 | 19.383 | -6.572  | 72.085 | 1.00 | 0.00 | H |
| ATOM | 769 | H2'2 | T B | 6 | 20.470 | -6.171  | 73.406 | 1.00 | 0.00 | H |
| ATOM | 770 | H5'1 | T B | 6 | 16.170 | -8.547  | 72.695 | 1.00 | 0.00 | H |
| ATOM | 771 | H5'2 | T B | 6 | 15.602 | -6.890  | 72.993 | 1.00 | 0.00 | H |
| ATOM | 772 | C1'  | C B | 7 | 24.008 | -8.200  | 75.853 | 1.00 | 0.00 | C |
| ATOM | 773 | N1   | C B | 7 | 23.925 | -8.389  | 74.377 | 1.00 | 0.00 | N |
| ATOM | 774 | C2   | C B | 7 | 24.586 | -9.483  | 73.823 | 1.00 | 0.00 | C |

|      |     |      |     |   |        |         |        |      |      |   |
|------|-----|------|-----|---|--------|---------|--------|------|------|---|
| ATOM | 775 | O2   | C B | 7 | 25.210 | -10.247 | 74.572 | 1.00 | 0.00 | O |
| ATOM | 776 | N3   | C B | 7 | 24.523 | -9.673  | 72.482 | 1.00 | 0.00 | N |
| ATOM | 777 | C4   | C B | 7 | 23.841 | -8.829  | 71.699 | 1.00 | 0.00 | C |
| ATOM | 778 | N4   | C B | 7 | 23.811 | -9.065  | 70.396 | 1.00 | 0.00 | N |
| ATOM | 779 | C5   | C B | 7 | 23.155 | -7.692  | 72.240 | 1.00 | 0.00 | C |
| ATOM | 780 | C6   | C B | 7 | 23.228 | -7.524  | 73.595 | 1.00 | 0.00 | C |
| ATOM | 781 | C2'  | C B | 7 | 24.119 | -6.743  | 76.279 | 1.00 | 0.00 | C |
| ATOM | 782 | C3'  | C B | 7 | 23.314 | -6.729  | 77.570 | 1.00 | 0.00 | C |
| ATOM | 783 | O3'  | C B | 7 | 24.151 | -7.140  | 78.648 | 1.00 | 0.00 | O |
| ATOM | 784 | C4'  | C B | 7 | 22.200 | -7.733  | 77.287 | 1.00 | 0.00 | C |
| ATOM | 785 | O4'  | C B | 7 | 22.826 | -8.733  | 76.422 | 1.00 | 0.00 | O |
| ATOM | 786 | C5'  | C B | 7 | 20.970 | -7.195  | 76.591 | 1.00 | 0.00 | C |
| ATOM | 787 | O5'  | C B | 7 | 21.357 | -6.187  | 75.625 | 1.00 | 0.00 | O |
| ATOM | 788 | O1P  | C B | 7 | 20.357 | -4.073  | 76.557 | 1.00 | 0.00 | O |
| ATOM | 789 | O2P  | C B | 7 | 20.730 | -4.301  | 74.088 | 1.00 | 0.00 | O |
| ATOM | 790 | P    | C B | 7 | 20.379 | -4.952  | 75.371 | 1.00 | 0.00 | P |
| ATOM | 791 | H5   | C B | 7 | 22.605 | -6.999  | 71.605 | 1.00 | 0.00 | H |
| ATOM | 792 | H6   | C B | 7 | 22.716 | -6.678  | 74.055 | 1.00 | 0.00 | H |
| ATOM | 793 | H1'  | C B | 7 | 24.852 | -8.782  | 76.224 | 1.00 | 0.00 | H |
| ATOM | 794 | H3'  | C B | 7 | 22.907 | -5.739  | 77.785 | 1.00 | 0.00 | H |
| ATOM | 795 | H4'  | C B | 7 | 21.886 | -8.138  | 78.248 | 1.00 | 0.00 | H |
| ATOM | 796 | H41  | C B | 7 | 23.290 | -8.432  | 69.770 | 1.00 | 0.00 | H |
| ATOM | 797 | H42  | C B | 7 | 24.306 | -9.881  | 70.007 | 1.00 | 0.00 | H |
| ATOM | 798 | H2'1 | C B | 7 | 23.697 | -6.062  | 75.540 | 1.00 | 0.00 | H |
| ATOM | 799 | H2'2 | C B | 7 | 25.152 | -6.440  | 76.451 | 1.00 | 0.00 | H |
| ATOM | 800 | H5'1 | C B | 7 | 20.459 | -8.015  | 76.086 | 1.00 | 0.00 | H |
| ATOM | 801 | H5'2 | C B | 7 | 20.304 | -6.758  | 77.333 | 1.00 | 0.00 | H |
| ATOM | 802 | C1'  | C B | 8 | 28.771 | -9.465  | 76.340 | 1.00 | 0.00 | C |
| ATOM | 803 | N1   | C B | 8 | 28.274 | -8.861  | 75.073 | 1.00 | 0.00 | N |
| ATOM | 804 | C2   | C B | 8 | 28.564 | -9.518  | 73.879 | 1.00 | 0.00 | C |
| ATOM | 805 | O2   | C B | 8 | 29.217 | -10.569 | 73.920 | 1.00 | 0.00 | O |
| ATOM | 806 | N3   | C B | 8 | 28.121 | -8.985  | 72.715 | 1.00 | 0.00 | N |
| ATOM | 807 | C4   | C B | 8 | 27.415 | -7.846  | 72.704 | 1.00 | 0.00 | C |
| ATOM | 808 | N4   | C B | 8 | 27.004 | -7.371  | 71.537 | 1.00 | 0.00 | N |
| ATOM | 809 | C5   | C B | 8 | 27.105 | -7.144  | 73.916 | 1.00 | 0.00 | C |
| ATOM | 810 | C6   | C B | 8 | 27.559 | -7.704  | 75.078 | 1.00 | 0.00 | C |
| ATOM | 811 | C2'  | C B | 8 | 29.244 | -8.441  | 77.364 | 1.00 | 0.00 | C |
| ATOM | 812 | C3'  | C B | 8 | 28.820 | -9.086  | 78.675 | 1.00 | 0.00 | C |
| ATOM | 813 | O3'  | C B | 8 | 29.825 | -10.010 | 79.088 | 1.00 | 0.00 | O |
| ATOM | 814 | C4'  | C B | 8 | 27.513 | -9.782  | 78.304 | 1.00 | 0.00 | C |
| ATOM | 815 | O4'  | C B | 8 | 27.705 | -10.197 | 76.914 | 1.00 | 0.00 | O |
| ATOM | 816 | C5'  | C B | 8 | 26.258 | -8.945  | 78.388 | 1.00 | 0.00 | C |
| ATOM | 817 | O5'  | C B | 8 | 26.548 | -7.585  | 77.972 | 1.00 | 0.00 | O |
| ATOM | 818 | O1P  | C B | 8 | 26.215 | -6.247  | 80.078 | 1.00 | 0.00 | O |
| ATOM | 819 | O2P  | C B | 8 | 25.882 | -5.167  | 77.838 | 1.00 | 0.00 | O |
| ATOM | 820 | P    | C B | 8 | 25.772 | -6.385  | 78.676 | 1.00 | 0.00 | P |
| ATOM | 821 | H5   | C B | 8 | 26.539 | -6.214  | 73.912 | 1.00 | 0.00 | H |
| ATOM | 822 | H6   | C B | 8 | 27.343 | -7.211  | 76.026 | 1.00 | 0.00 | H |
| ATOM | 823 | H1'  | C B | 8 | 29.567 | -10.167 | 76.093 | 1.00 | 0.00 | H |
| ATOM | 824 | H3'  | C B | 8 | 28.664 | -8.347  | 79.460 | 1.00 | 0.00 | H |
| ATOM | 825 | H4'  | C B | 8 | 27.396 | -10.622 | 78.989 | 1.00 | 0.00 | H |
| ATOM | 826 | H41  | C B | 8 | 26.457 | -6.498  | 71.500 | 1.00 | 0.00 | H |
| ATOM | 827 | H42  | C B | 8 | 27.229 | -7.875  | 70.667 | 1.00 | 0.00 | H |
| ATOM | 828 | H2'1 | C B | 8 | 28.770 | -7.470  | 77.227 | 1.00 | 0.00 | H |

|      |     |      |     |    |        |         |        |      |      |   |
|------|-----|------|-----|----|--------|---------|--------|------|------|---|
| ATOM | 829 | H2'2 | C B | 8  | 30.323 | -8.288  | 77.326 | 1.00 | 0.00 | H |
| ATOM | 830 | H5'1 | C B | 8  | 25.496 | -9.373  | 77.737 | 1.00 | 0.00 | H |
| ATOM | 831 | H5'2 | C B | 8  | 25.896 | -8.944  | 79.414 | 1.00 | 0.00 | H |
| ATOM | 832 | C1'  | T B | 9  | 33.201 | -10.873 | 74.643 | 1.00 | 0.00 | C |
| ATOM | 833 | N1   | T B | 9  | 32.509 | -9.702  | 74.043 | 1.00 | 0.00 | N |
| ATOM | 834 | C2   | T B | 9  | 32.377 | -9.684  | 72.669 | 1.00 | 0.00 | C |
| ATOM | 835 | O2   | T B | 9  | 32.803 | -10.575 | 71.954 | 1.00 | 0.00 | O |
| ATOM | 836 | N3   | T B | 9  | 31.726 | -8.579  | 72.154 | 1.00 | 0.00 | N |
| ATOM | 837 | C4   | T B | 9  | 31.213 | -7.519  | 72.871 | 1.00 | 0.00 | C |
| ATOM | 838 | O4   | T B | 9  | 30.651 | -6.579  | 72.297 | 1.00 | 0.00 | O |
| ATOM | 839 | C5   | T B | 9  | 31.398 | -7.628  | 74.299 | 1.00 | 0.00 | C |
| ATOM | 840 | C6   | T B | 9  | 32.026 | -8.692  | 74.836 | 1.00 | 0.00 | C |
| ATOM | 841 | C7   | T B | 9  | 30.851 | -6.497  | 75.119 | 1.00 | 0.00 | C |
| ATOM | 842 | C2'  | T B | 9  | 34.088 | -10.520 | 75.833 | 1.00 | 0.00 | C |
| ATOM | 843 | C3'  | T B | 9  | 33.910 | -11.734 | 76.731 | 1.00 | 0.00 | C |
| ATOM | 844 | O3'  | T B | 9  | 34.816 | -12.756 | 76.323 | 1.00 | 0.00 | O |
| ATOM | 845 | C4'  | T B | 9  | 32.452 | -12.122 | 76.494 | 1.00 | 0.00 | C |
| ATOM | 846 | O4'  | T B | 9  | 32.213 | -11.779 | 75.092 | 1.00 | 0.00 | O |
| ATOM | 847 | C5'  | T B | 9  | 31.421 | -11.422 | 77.348 | 1.00 | 0.00 | C |
| ATOM | 848 | O5'  | T B | 9  | 31.822 | -10.047 | 77.567 | 1.00 | 0.00 | O |
| ATOM | 849 | O1P  | T B | 9  | 32.269 | -9.957  | 80.041 | 1.00 | 0.00 | O |
| ATOM | 850 | O2P  | T B | 9  | 31.562 | -7.883  | 78.819 | 1.00 | 0.00 | O |
| ATOM | 851 | P    | T B | 9  | 31.464 | -9.356  | 78.959 | 1.00 | 0.00 | P |
| ATOM | 852 | H3   | T B | 9  | 31.612 | -8.543  | 71.131 | 1.00 | 0.00 | H |
| ATOM | 853 | H6   | T B | 9  | 32.153 | -8.751  | 75.917 | 1.00 | 0.00 | H |
| ATOM | 854 | H1'  | T B | 9  | 33.778 | -11.368 | 73.861 | 1.00 | 0.00 | H |
| ATOM | 855 | H3'  | T B | 9  | 34.087 | -11.493 | 77.780 | 1.00 | 0.00 | H |
| ATOM | 856 | H4'  | T B | 9  | 32.375 | -13.194 | 76.689 | 1.00 | 0.00 | H |
| ATOM | 857 | H71  | T B | 9  | 31.673 | -5.966  | 75.600 | 1.00 | 0.00 | H |
| ATOM | 858 | H72  | T B | 9  | 30.303 | -5.810  | 74.473 | 1.00 | 0.00 | H |
| ATOM | 859 | H73  | T B | 9  | 30.179 | -6.893  | 75.881 | 1.00 | 0.00 | H |
| ATOM | 860 | H2'1 | T B | 9  | 33.765 | -9.607  | 76.330 | 1.00 | 0.00 | H |
| ATOM | 861 | H2'2 | T B | 9  | 35.130 | -10.387 | 75.546 | 1.00 | 0.00 | H |
| ATOM | 862 | H5'1 | T B | 9  | 30.457 | -11.450 | 76.840 | 1.00 | 0.00 | H |
| ATOM | 863 | H5'2 | T B | 9  | 31.339 | -11.938 | 78.302 | 1.00 | 0.00 | H |
| ATOM | 864 | C1'  | A B | 10 | 36.712 | -11.262 | 71.156 | 1.00 | 0.00 | C |
| ATOM | 865 | N1   | A B | 10 | 34.445 | -7.092  | 69.204 | 1.00 | 0.00 | N |
| ATOM | 866 | C2   | A B | 10 | 34.925 | -8.200  | 68.645 | 1.00 | 0.00 | C |
| ATOM | 867 | N3   | A B | 10 | 35.496 | -9.241  | 69.210 | 1.00 | 0.00 | N |
| ATOM | 868 | C4   | A B | 10 | 35.566 | -9.069  | 70.542 | 1.00 | 0.00 | C |
| ATOM | 869 | C5   | A B | 10 | 35.125 | -7.997  | 71.267 | 1.00 | 0.00 | C |
| ATOM | 870 | C6   | A B | 10 | 34.529 | -6.950  | 70.536 | 1.00 | 0.00 | C |
| ATOM | 871 | N6   | A B | 10 | 34.049 | -5.834  | 71.114 | 1.00 | 0.00 | N |
| ATOM | 872 | N7   | A B | 10 | 35.366 | -8.174  | 72.618 | 1.00 | 0.00 | N |
| ATOM | 873 | C8   | A B | 10 | 35.948 | -9.336  | 72.681 | 1.00 | 0.00 | C |
| ATOM | 874 | N9   | A B | 10 | 36.100 | -9.940  | 71.459 | 1.00 | 0.00 | N |
| ATOM | 875 | C2'  | A B | 10 | 37.922 | -11.589 | 72.020 | 1.00 | 0.00 | C |
| ATOM | 876 | C3'  | A B | 10 | 37.780 | -13.092 | 72.211 | 1.00 | 0.00 | C |
| ATOM | 877 | O3'  | A B | 10 | 38.354 | -13.763 | 71.092 | 1.00 | 0.00 | O |
| ATOM | 878 | C4'  | A B | 10 | 36.264 | -13.282 | 72.280 | 1.00 | 0.00 | C |
| ATOM | 879 | O4'  | A B | 10 | 35.730 | -12.254 | 71.386 | 1.00 | 0.00 | O |
| ATOM | 880 | C5'  | A B | 10 | 35.630 | -13.115 | 73.642 | 1.00 | 0.00 | C |
| ATOM | 881 | O5'  | A B | 10 | 36.305 | -12.059 | 74.372 | 1.00 | 0.00 | O |
| ATOM | 882 | O1P  | A B | 10 | 37.390 | -13.279 | 76.287 | 1.00 | 0.00 | O |

|      |     |      |     |    |        |         |        |      |      |   |
|------|-----|------|-----|----|--------|---------|--------|------|------|---|
| ATOM | 883 | O2P  | A B | 10 | 36.761 | -10.862 | 76.533 | 1.00 | 0.00 | O |
| ATOM | 884 | P    | A B | 10 | 36.449 | -12.192 | 75.955 | 1.00 | 0.00 | P |
| ATOM | 885 | H2   | A B | 10 | 34.829 | -8.251  | 67.561 | 1.00 | 0.00 | H |
| ATOM | 886 | H8   | A B | 10 | 36.282 | -9.786  | 73.616 | 1.00 | 0.00 | H |
| ATOM | 887 | H1'  | A B | 10 | 36.970 | -11.283 | 70.097 | 1.00 | 0.00 | H |
| ATOM | 888 | H3'  | A B | 10 | 38.261 | -13.435 | 73.126 | 1.00 | 0.00 | H |
| ATOM | 889 | H4'  | A B | 10 | 36.057 | -14.295 | 71.938 | 1.00 | 0.00 | H |
| ATOM | 890 | H61  | A B | 10 | 33.619 | -5.099  | 70.533 | 1.00 | 0.00 | H |
| ATOM | 891 | H62  | A B | 10 | 34.110 | -5.715  | 72.134 | 1.00 | 0.00 | H |
| ATOM | 892 | H2'1 | A B | 10 | 37.905 | -11.066 | 72.974 | 1.00 | 0.00 | H |
| ATOM | 893 | H2'2 | A B | 10 | 38.863 | -11.342 | 71.525 | 1.00 | 0.00 | H |
| ATOM | 894 | H5'1 | A B | 10 | 34.578 | -12.862 | 73.518 | 1.00 | 0.00 | H |
| ATOM | 895 | H5'2 | A B | 10 | 35.711 | -14.051 | 74.191 | 1.00 | 0.00 | H |
| ATOM | 896 | C1'  | G B | 11 | 39.052 | -9.816  | 67.023 | 1.00 | 0.00 | C |
| ATOM | 897 | N1   | G B | 11 | 37.138 | -5.236  | 68.202 | 1.00 | 0.00 | N |
| ATOM | 898 | C2   | G B | 11 | 37.228 | -5.873  | 66.977 | 1.00 | 0.00 | C |
| ATOM | 899 | N2   | G B | 11 | 36.743 | -5.199  | 65.926 | 1.00 | 0.00 | N |
| ATOM | 900 | N3   | G B | 11 | 37.755 | -7.085  | 66.813 | 1.00 | 0.00 | N |
| ATOM | 901 | C4   | G B | 11 | 38.200 | -7.615  | 67.983 | 1.00 | 0.00 | C |
| ATOM | 902 | C5   | G B | 11 | 38.159 | -7.054  | 69.247 | 1.00 | 0.00 | C |
| ATOM | 903 | C6   | G B | 11 | 37.595 | -5.768  | 69.423 | 1.00 | 0.00 | C |
| ATOM | 904 | O6   | G B | 11 | 37.470 | -5.110  | 70.456 | 1.00 | 0.00 | O |
| ATOM | 905 | N7   | G B | 11 | 38.723 | -7.925  | 70.182 | 1.00 | 0.00 | N |
| ATOM | 906 | C8   | G B | 11 | 39.079 | -8.964  | 69.470 | 1.00 | 0.00 | C |
| ATOM | 907 | N9   | G B | 11 | 38.795 | -8.850  | 68.125 | 1.00 | 0.00 | N |
| ATOM | 908 | C2'  | G B | 11 | 40.368 | -10.567 | 67.160 | 1.00 | 0.00 | C |
| ATOM | 909 | C3'  | G B | 11 | 40.010 | -11.939 | 66.611 | 1.00 | 0.00 | C |
| ATOM | 910 | O3'  | G B | 11 | 40.132 | -11.922 | 65.192 | 1.00 | 0.00 | O |
| ATOM | 911 | C4'  | G B | 11 | 38.562 | -12.119 | 67.064 | 1.00 | 0.00 | C |
| ATOM | 912 | O4'  | G B | 11 | 38.005 | -10.766 | 67.030 | 1.00 | 0.00 | O |
| ATOM | 913 | C5'  | G B | 11 | 38.357 | -12.691 | 68.447 | 1.00 | 0.00 | C |
| ATOM | 914 | O5'  | G B | 11 | 39.383 | -12.194 | 69.341 | 1.00 | 0.00 | O |
| ATOM | 915 | O1P  | G B | 11 | 40.701 | -14.257 | 69.922 | 1.00 | 0.00 | O |
| ATOM | 916 | O2P  | G B | 11 | 40.612 | -12.332 | 71.528 | 1.00 | 0.00 | O |
| ATOM | 917 | P    | G B | 11 | 39.921 | -13.147 | 70.500 | 1.00 | 0.00 | P |
| ATOM | 918 | H1   | G B | 11 | 36.706 | -4.301  | 68.221 | 1.00 | 0.00 | H |
| ATOM | 919 | H8   | G B | 11 | 39.559 | -9.842  | 69.903 | 1.00 | 0.00 | H |
| ATOM | 920 | H1'  | G B | 11 | 39.007 | -9.275  | 66.077 | 1.00 | 0.00 | H |
| ATOM | 921 | H21  | G B | 11 | 36.333 | -4.263  | 66.060 | 1.00 | 0.00 | H |
| ATOM | 922 | H3'  | G B | 11 | 40.649 | -12.723 | 67.020 | 1.00 | 0.00 | H |
| ATOM | 923 | H22  | G B | 11 | 36.782 | -5.616  | 64.985 | 1.00 | 0.00 | H |
| ATOM | 924 | H4'  | G B | 11 | 38.088 | -12.792 | 66.351 | 1.00 | 0.00 | H |
| ATOM | 925 | H2'1 | G B | 11 | 40.703 | -10.629 | 68.196 | 1.00 | 0.00 | H |
| ATOM | 926 | H2'2 | G B | 11 | 41.170 | -10.106 | 66.582 | 1.00 | 0.00 | H |
| ATOM | 927 | H5'1 | G B | 11 | 37.374 | -12.397 | 68.814 | 1.00 | 0.00 | H |
| ATOM | 928 | H5'2 | G B | 11 | 38.410 | -13.778 | 68.394 | 1.00 | 0.00 | H |
| ATOM | 929 | C1'  | G B | 12 | 40.454 | -6.493  | 63.629 | 1.00 | 0.00 | C |
| ATOM | 930 | N1   | G B | 12 | 39.750 | -3.161  | 67.427 | 1.00 | 0.00 | N |
| ATOM | 931 | C2   | G B | 12 | 39.403 | -3.072  | 66.090 | 1.00 | 0.00 | C |
| ATOM | 932 | N2   | G B | 12 | 38.786 | -1.943  | 65.716 | 1.00 | 0.00 | N |
| ATOM | 933 | N3   | G B | 12 | 39.648 | -4.031  | 65.200 | 1.00 | 0.00 | N |
| ATOM | 934 | C4   | G B | 12 | 40.284 | -5.096  | 65.752 | 1.00 | 0.00 | C |
| ATOM | 935 | C5   | G B | 12 | 40.674 | -5.272  | 67.069 | 1.00 | 0.00 | C |
| ATOM | 936 | C6   | G B | 12 | 40.410 | -4.256  | 68.016 | 1.00 | 0.00 | C |

|      |     |      |     |    |        |         |        |      |      |   |
|------|-----|------|-----|----|--------|---------|--------|------|------|---|
| ATOM | 937 | O6   | G B | 12 | 40.676 | -4.226  | 69.217 | 1.00 | 0.00 | O |
| ATOM | 938 | N7   | G B | 12 | 41.301 | -6.509  | 67.227 | 1.00 | 0.00 | N |
| ATOM | 939 | C8   | G B | 12 | 41.271 | -7.035  | 66.030 | 1.00 | 0.00 | C |
| ATOM | 940 | N9   | G B | 12 | 40.669 | -6.235  | 65.079 | 1.00 | 0.00 | N |
| ATOM | 941 | C2'  | G B | 12 | 41.608 | -7.227  | 62.959 | 1.00 | 0.00 | C |
| ATOM | 942 | C3'  | G B | 12 | 40.883 | -8.111  | 61.955 | 1.00 | 0.00 | C |
| ATOM | 943 | O3'  | G B | 12 | 40.631 | -7.361  | 60.769 | 1.00 | 0.00 | O |
| ATOM | 944 | C4'  | G B | 12 | 39.597 | -8.476  | 62.693 | 1.00 | 0.00 | C |
| ATOM | 945 | O4'  | G B | 12 | 39.295 | -7.295  | 63.500 | 1.00 | 0.00 | O |
| ATOM | 946 | C5'  | G B | 12 | 39.664 | -9.679  | 63.603 | 1.00 | 0.00 | C |
| ATOM | 947 | O5'  | G B | 12 | 40.959 | -9.732  | 64.251 | 1.00 | 0.00 | O |
| ATOM | 948 | O1P  | G B | 12 | 42.000 | -11.817 | 63.301 | 1.00 | 0.00 | O |
| ATOM | 949 | O2P  | G B | 12 | 42.674 | -11.004 | 65.577 | 1.00 | 0.00 | O |
| ATOM | 950 | P    | G B | 12 | 41.605 | -11.158 | 64.560 | 1.00 | 0.00 | P |
| ATOM | 951 | H1   | G B | 12 | 39.509 | -2.363  | 68.036 | 1.00 | 0.00 | H |
| ATOM | 952 | H8   | G B | 12 | 41.684 | -8.017  | 65.801 | 1.00 | 0.00 | H |
| ATOM | 953 | H1'  | G B | 12 | 40.259 | -5.540  | 63.138 | 1.00 | 0.00 | H |
| ATOM | 954 | H21  | G B | 12 | 38.596 | -1.206  | 66.412 | 1.00 | 0.00 | H |
| ATOM | 955 | H3'  | G B | 12 | 41.459 | -9.001  | 61.704 | 1.00 | 0.00 | H |
| ATOM | 956 | H22  | G B | 12 | 38.504 | -1.813  | 64.735 | 1.00 | 0.00 | H |
| ATOM | 957 | H4'  | G B | 12 | 38.842 | -8.675  | 61.933 | 1.00 | 0.00 | H |
| ATOM | 958 | H2'1 | G B | 12 | 42.187 | -7.822  | 63.666 | 1.00 | 0.00 | H |
| ATOM | 959 | H2'2 | G B | 12 | 42.299 | -6.546  | 62.462 | 1.00 | 0.00 | H |
| ATOM | 960 | H5'1 | G B | 12 | 38.878 | -9.603  | 64.355 | 1.00 | 0.00 | H |
| ATOM | 961 | H5'2 | G B | 12 | 39.509 | -10.583 | 63.013 | 1.00 | 0.00 | H |
| ATOM | 962 | C1'  | T B | 13 | 41.479 | -1.924  | 62.025 | 1.00 | 0.00 | C |
| ATOM | 963 | N1   | T B | 13 | 42.099 | -2.434  | 63.276 | 1.00 | 0.00 | N |
| ATOM | 964 | C2   | T B | 13 | 41.995 | -1.640  | 64.401 | 1.00 | 0.00 | C |
| ATOM | 965 | O2   | T B | 13 | 41.427 | -0.561  | 64.395 | 1.00 | 0.00 | O |
| ATOM | 966 | N3   | T B | 13 | 42.584 | -2.152  | 65.541 | 1.00 | 0.00 | N |
| ATOM | 967 | C4   | T B | 13 | 43.251 | -3.354  | 65.654 | 1.00 | 0.00 | C |
| ATOM | 968 | O4   | T B | 13 | 43.743 | -3.707  | 66.732 | 1.00 | 0.00 | O |
| ATOM | 969 | C5   | T B | 13 | 43.307 | -4.115  | 64.427 | 1.00 | 0.00 | C |
| ATOM | 970 | C6   | T B | 13 | 42.743 | -3.647  | 63.297 | 1.00 | 0.00 | C |
| ATOM | 971 | C7   | T B | 13 | 44.021 | -5.431  | 64.503 | 1.00 | 0.00 | C |
| ATOM | 972 | C2'  | T B | 13 | 42.284 | -2.237  | 60.768 | 1.00 | 0.00 | C |
| ATOM | 973 | C3'  | T B | 13 | 41.188 | -2.484  | 59.743 | 1.00 | 0.00 | C |
| ATOM | 974 | O3'  | T B | 13 | 40.768 | -1.235  | 59.199 | 1.00 | 0.00 | O |
| ATOM | 975 | C4'  | T B | 13 | 40.092 | -3.152  | 60.571 | 1.00 | 0.00 | C |
| ATOM | 976 | O4'  | T B | 13 | 40.210 | -2.534  | 61.892 | 1.00 | 0.00 | O |
| ATOM | 977 | C5'  | T B | 13 | 40.189 | -4.652  | 60.728 | 1.00 | 0.00 | C |
| ATOM | 978 | O5'  | T B | 13 | 41.581 | -5.043  | 60.839 | 1.00 | 0.00 | O |
| ATOM | 979 | O1P  | T B | 13 | 41.981 | -6.379  | 58.746 | 1.00 | 0.00 | O |
| ATOM | 980 | O2P  | T B | 13 | 43.343 | -6.834  | 60.804 | 1.00 | 0.00 | O |
| ATOM | 981 | P    | T B | 13 | 42.038 | -6.439  | 60.220 | 1.00 | 0.00 | P |
| ATOM | 982 | H3   | T B | 13 | 42.517 | -1.578  | 66.395 | 1.00 | 0.00 | H |
| ATOM | 983 | H6   | T B | 13 | 42.799 | -4.239  | 62.384 | 1.00 | 0.00 | H |
| ATOM | 984 | H1'  | T B | 13 | 41.325 | -0.850  | 62.131 | 1.00 | 0.00 | H |
| ATOM | 985 | H3'  | T B | 13 | 41.524 | -3.134  | 58.936 | 1.00 | 0.00 | H |
| ATOM | 986 | H4'  | T B | 13 | 39.145 | -2.931  | 60.078 | 1.00 | 0.00 | H |
| ATOM | 987 | H71  | T B | 13 | 44.918 | -5.395  | 63.886 | 1.00 | 0.00 | H |
| ATOM | 988 | H72  | T B | 13 | 44.301 | -5.634  | 65.538 | 1.00 | 0.00 | H |
| ATOM | 989 | H73  | T B | 13 | 43.364 | -6.224  | 64.143 | 1.00 | 0.00 | H |
| ATOM | 990 | H2'1 | T B | 13 | 42.916 | -3.115  | 60.892 | 1.00 | 0.00 | H |

|      |      |      |     |    |        |        |        |      |      |   |
|------|------|------|-----|----|--------|--------|--------|------|------|---|
| ATOM | 991  | H2'2 | T B | 13 | 42.926 | -1.408 | 60.471 | 1.00 | 0.00 | H |
| ATOM | 992  | H5'1 | T B | 13 | 39.647 | -4.953 | 61.623 | 1.00 | 0.00 | H |
| ATOM | 993  | H5'2 | T B | 13 | 39.742 | -5.132 | 59.859 | 1.00 | 0.00 | H |
| ATOM | 994  | C1'  | G B | 14 | 42.842 | 2.807  | 62.671 | 1.00 | 0.00 | C |
| ATOM | 995  | N1   | G B | 14 | 45.156 | 0.993  | 66.841 | 1.00 | 0.00 | N |
| ATOM | 996  | C2   | G B | 14 | 44.416 | 2.150  | 66.668 | 1.00 | 0.00 | C |
| ATOM | 997  | N2   | G B | 14 | 44.275 | 2.927  | 67.747 | 1.00 | 0.00 | N |
| ATOM | 998  | N3   | G B | 14 | 43.861 | 2.501  | 65.509 | 1.00 | 0.00 | N |
| ATOM | 999  | C4   | G B | 14 | 44.110 | 1.600  | 64.522 | 1.00 | 0.00 | C |
| ATOM | 1000 | C5   | G B | 14 | 44.839 | 0.426  | 64.601 | 1.00 | 0.00 | C |
| ATOM | 1001 | C6   | G B | 14 | 45.426 | 0.049  | 65.831 | 1.00 | 0.00 | C |
| ATOM | 1002 | O6   | G B | 14 | 46.101 | -0.946 | 66.097 | 1.00 | 0.00 | O |
| ATOM | 1003 | N7   | G B | 14 | 44.860 | -0.215 | 63.360 | 1.00 | 0.00 | N |
| ATOM | 1004 | C8   | G B | 14 | 44.157 | 0.574  | 62.586 | 1.00 | 0.00 | C |
| ATOM | 1005 | N9   | G B | 14 | 43.669 | 1.698  | 63.221 | 1.00 | 0.00 | N |
| ATOM | 1006 | C2'  | G B | 14 | 43.208 | 3.197  | 61.246 | 1.00 | 0.00 | C |
| ATOM | 1007 | C3'  | G B | 14 | 41.854 | 3.551  | 60.654 | 1.00 | 0.00 | C |
| ATOM | 1008 | O3'  | G B | 14 | 41.541 | 4.904  | 60.978 | 1.00 | 0.00 | O |
| ATOM | 1009 | C4'  | G B | 14 | 40.915 | 2.561  | 61.341 | 1.00 | 0.00 | C |
| ATOM | 1010 | O4'  | G B | 14 | 41.493 | 2.380  | 62.672 | 1.00 | 0.00 | O |
| ATOM | 1011 | C5'  | G B | 14 | 40.772 | 1.207  | 60.686 | 1.00 | 0.00 | C |
| ATOM | 1012 | O5'  | G B | 14 | 42.045 | 0.794  | 60.130 | 1.00 | 0.00 | O |
| ATOM | 1013 | O1P  | G B | 14 | 41.617 | 0.771  | 57.650 | 1.00 | 0.00 | O |
| ATOM | 1014 | O2P  | G B | 14 | 43.371 | -0.729 | 58.634 | 1.00 | 0.00 | O |
| ATOM | 1015 | P    | G B | 14 | 42.053 | -0.064 | 58.786 | 1.00 | 0.00 | P |
| ATOM | 1016 | H1   | G B | 14 | 45.538 | 0.809  | 67.781 | 1.00 | 0.00 | H |
| ATOM | 1017 | H8   | G B | 14 | 43.973 | 0.361  | 61.533 | 1.00 | 0.00 | H |
| ATOM | 1018 | H1'  | G B | 14 | 42.923 | 3.660  | 63.344 | 1.00 | 0.00 | H |
| ATOM | 1019 | H21  | G B | 14 | 44.706 | 2.646  | 68.642 | 1.00 | 0.00 | H |
| ATOM | 1020 | H3'  | G B | 14 | 41.835 | 3.424  | 59.572 | 1.00 | 0.00 | H |
| ATOM | 1021 | H22  | G B | 14 | 43.739 | 3.804  | 67.685 | 1.00 | 0.00 | H |
| ATOM | 1022 | H4'  | G B | 14 | 39.928 | 3.025  | 61.365 | 1.00 | 0.00 | H |
| ATOM | 1023 | H2'1 | G B | 14 | 43.678 | 2.379  | 60.700 | 1.00 | 0.00 | H |
| ATOM | 1024 | H2'2 | G B | 14 | 43.891 | 4.047  | 61.213 | 1.00 | 0.00 | H |
| ATOM | 1025 | H5'1 | G B | 14 | 40.444 | 0.483  | 61.431 | 1.00 | 0.00 | H |
| ATOM | 1026 | H5'2 | G B | 14 | 40.027 | 1.269  | 59.895 | 1.00 | 0.00 | H |
| ATOM | 1027 | C1'  | C B | 15 | 45.126 | 6.498  | 65.056 | 1.00 | 0.00 | C |
| ATOM | 1028 | N1   | C B | 15 | 45.861 | 5.252  | 64.707 | 1.00 | 0.00 | N |
| ATOM | 1029 | C2   | C B | 15 | 46.564 | 4.604  | 65.720 | 1.00 | 0.00 | C |
| ATOM | 1030 | O2   | C B | 15 | 46.548 | 5.087  | 66.861 | 1.00 | 0.00 | O |
| ATOM | 1031 | N3   | C B | 15 | 47.241 | 3.467  | 65.425 | 1.00 | 0.00 | N |
| ATOM | 1032 | C4   | C B | 15 | 47.240 | 2.970  | 64.182 | 1.00 | 0.00 | C |
| ATOM | 1033 | N4   | C B | 15 | 47.915 | 1.855  | 63.948 | 1.00 | 0.00 | N |
| ATOM | 1034 | C5   | C B | 15 | 46.529 | 3.618  | 63.117 | 1.00 | 0.00 | C |
| ATOM | 1035 | C6   | C B | 15 | 45.851 | 4.757  | 63.440 | 1.00 | 0.00 | C |
| ATOM | 1036 | C2'  | C B | 15 | 45.175 | 7.564  | 63.970 | 1.00 | 0.00 | C |
| ATOM | 1037 | C3'  | C B | 15 | 43.795 | 8.194  | 64.079 | 1.00 | 0.00 | C |
| ATOM | 1038 | O3'  | C B | 15 | 43.814 | 9.190  | 65.101 | 1.00 | 0.00 | O |
| ATOM | 1039 | C4'  | C B | 15 | 42.909 | 7.006  | 64.450 | 1.00 | 0.00 | C |
| ATOM | 1040 | O4'  | C B | 15 | 43.769 | 6.152  | 65.267 | 1.00 | 0.00 | O |
| ATOM | 1041 | C5'  | C B | 15 | 42.370 | 6.187  | 63.298 | 1.00 | 0.00 | C |
| ATOM | 1042 | O5'  | C B | 15 | 43.365 | 6.105  | 62.249 | 1.00 | 0.00 | O |
| ATOM | 1043 | O1P  | C B | 15 | 42.314 | 7.373  | 60.345 | 1.00 | 0.00 | O |
| ATOM | 1044 | O2P  | C B | 15 | 43.975 | 5.554  | 59.872 | 1.00 | 0.00 | O |



|      |      |      |     |    |        |        |        |      |      |   |
|------|------|------|-----|----|--------|--------|--------|------|------|---|
| ATOM | 1045 | P    | C B | 15 | 42.878 | 6.064  | 60.730 | 1.00 | 0.00 | P |
| ATOM | 1046 | H5   | C B | 15 | 46.532 | 3.220  | 62.102 | 1.00 | 0.00 | H |
| ATOM | 1047 | H6   | C B | 15 | 45.291 | 5.283  | 62.666 | 1.00 | 0.00 | H |
| ATOM | 1048 | H1'  | C B | 15 | 45.526 | 6.879  | 65.995 | 1.00 | 0.00 | H |
| ATOM | 1049 | H3'  | C B | 15 | 43.476 | 8.645  | 63.141 | 1.00 | 0.00 | H |
| ATOM | 1050 | H4'  | C B | 15 | 42.057 | 7.405  | 64.999 | 1.00 | 0.00 | H |
| ATOM | 1051 | H41  | C B | 15 | 47.929 | 1.448  | 63.001 | 1.00 | 0.00 | H |
| ATOM | 1052 | H42  | C B | 15 | 48.427 | 1.392  | 64.715 | 1.00 | 0.00 | H |
| ATOM | 1053 | H2'1 | C B | 15 | 45.339 | 7.139  | 62.980 | 1.00 | 0.00 | H |
| ATOM | 1054 | H2'2 | C B | 15 | 45.961 | 8.298  | 64.145 | 1.00 | 0.00 | H |
| ATOM | 1055 | H5'1 | C B | 15 | 42.125 | 5.187  | 63.656 | 1.00 | 0.00 | H |
| ATOM | 1056 | H5'2 | C B | 15 | 41.467 | 6.662  | 62.913 | 1.00 | 0.00 | H |
| ATOM | 1057 | C1'  | G B | 16 | 48.565 | 8.382  | 68.078 | 1.00 | 0.00 | C |
| ATOM | 1058 | N1   | G B | 16 | 51.192 | 4.212  | 66.764 | 1.00 | 0.00 | N |
| ATOM | 1059 | C2   | G B | 16 | 51.038 | 4.812  | 68.001 | 1.00 | 0.00 | C |
| ATOM | 1060 | N2   | G B | 16 | 51.670 | 4.221  | 69.025 | 1.00 | 0.00 | N |
| ATOM | 1061 | N3   | G B | 16 | 50.312 | 5.910  | 68.203 | 1.00 | 0.00 | N |
| ATOM | 1062 | C4   | G B | 16 | 49.750 | 6.373  | 67.056 | 1.00 | 0.00 | C |
| ATOM | 1063 | C5   | G B | 16 | 49.852 | 5.846  | 65.780 | 1.00 | 0.00 | C |
| ATOM | 1064 | C6   | G B | 16 | 50.619 | 4.678  | 65.566 | 1.00 | 0.00 | C |
| ATOM | 1065 | O6   | G B | 16 | 50.826 | 4.066  | 64.517 | 1.00 | 0.00 | O |
| ATOM | 1066 | N7   | G B | 16 | 49.124 | 6.624  | 64.876 | 1.00 | 0.00 | N |
| ATOM | 1067 | C8   | G B | 16 | 48.614 | 7.575  | 65.616 | 1.00 | 0.00 | C |
| ATOM | 1068 | N9   | G B | 16 | 48.951 | 7.491  | 66.952 | 1.00 | 0.00 | N |
| ATOM | 1069 | C2'  | G B | 16 | 48.510 | 9.857  | 67.703 | 1.00 | 0.00 | C |
| ATOM | 1070 | C3'  | G B | 16 | 47.342 | 10.355 | 68.540 | 1.00 | 0.00 | C |
| ATOM | 1071 | O3'  | G B | 16 | 47.807 | 10.674 | 69.849 | 1.00 | 0.00 | O |
| ATOM | 1072 | C4'  | G B | 16 | 46.391 | 9.160  | 68.541 | 1.00 | 0.00 | C |
| ATOM | 1073 | O4'  | G B | 16 | 47.276 | 7.995  | 68.514 | 1.00 | 0.00 | O |
| ATOM | 1074 | C5'  | G B | 16 | 45.431 | 9.065  | 67.378 | 1.00 | 0.00 | C |
| ATOM | 1075 | O5'  | G B | 16 | 46.080 | 9.527  | 66.168 | 1.00 | 0.00 | O |
| ATOM | 1076 | O1P  | G B | 16 | 44.801 | 11.613 | 65.580 | 1.00 | 0.00 | O |
| ATOM | 1077 | O2P  | G B | 16 | 45.931 | 10.285 | 63.777 | 1.00 | 0.00 | O |
| ATOM | 1078 | P    | G B | 16 | 45.208 | 10.290 | 65.072 | 1.00 | 0.00 | P |
| ATOM | 1079 | H1   | G B | 16 | 51.771 | 3.359  | 66.718 | 1.00 | 0.00 | H |
| ATOM | 1080 | H8   | G B | 16 | 47.980 | 8.364  | 65.213 | 1.00 | 0.00 | H |
| ATOM | 1081 | H1'  | G B | 16 | 49.261 | 8.214  | 68.901 | 1.00 | 0.00 | H |
| ATOM | 1082 | H21  | G B | 16 | 52.227 | 3.371  | 68.862 | 1.00 | 0.00 | H |
| ATOM | 1083 | H3'  | G B | 16 | 46.870 | 11.234 | 68.100 | 1.00 | 0.00 | H |
| ATOM | 1084 | H22  | G B | 16 | 51.597 | 4.621  | 69.971 | 1.00 | 0.00 | H |
| ATOM | 1085 | H4'  | G B | 16 | 45.801 | 9.225  | 69.455 | 1.00 | 0.00 | H |
| ATOM | 1086 | H2'1 | G B | 16 | 48.328 | 10.006 | 66.638 | 1.00 | 0.00 | H |
| ATOM | 1087 | H2'2 | G B | 16 | 49.431 | 10.383 | 67.954 | 1.00 | 0.00 | H |
| ATOM | 1088 | H5'1 | G B | 16 | 45.118 | 8.029  | 67.257 | 1.00 | 0.00 | H |
| ATOM | 1089 | H5'2 | G B | 16 | 44.557 | 9.682  | 67.586 | 1.00 | 0.00 | H |
| ATOM | 1090 | C1'  | G B | 17 | 52.951 | 8.376  | 70.378 | 1.00 | 0.00 | C |
| ATOM | 1091 | N1   | G B | 17 | 54.368 | 5.452  | 66.445 | 1.00 | 0.00 | N |
| ATOM | 1092 | C2   | G B | 17 | 54.652 | 5.326  | 67.794 | 1.00 | 0.00 | C |
| ATOM | 1093 | N2   | G B | 17 | 55.415 | 4.282  | 68.139 | 1.00 | 0.00 | N |
| ATOM | 1094 | N3   | G B | 17 | 54.207 | 6.171  | 68.721 | 1.00 | 0.00 | N |
| ATOM | 1095 | C4   | G B | 17 | 53.457 | 7.171  | 68.191 | 1.00 | 0.00 | C |
| ATOM | 1096 | C5   | G B | 17 | 53.126 | 7.379  | 66.864 | 1.00 | 0.00 | C |
| ATOM | 1097 | C6   | G B | 17 | 53.593 | 6.481  | 65.879 | 1.00 | 0.00 | C |
| ATOM | 1098 | O6   | G B | 17 | 53.408 | 6.497  | 64.661 | 1.00 | 0.00 | O |

|      |      |      |     |    |        |        |        |      |      |   |
|------|------|------|-----|----|--------|--------|--------|------|------|---|
| ATOM | 1099 | N7   | G B | 17 | 52.335 | 8.523  | 66.736 | 1.00 | 0.00 | N |
| ATOM | 1100 | C8   | G B | 17 | 52.212 | 8.960  | 67.963 | 1.00 | 0.00 | C |
| ATOM | 1101 | N9   | G B | 17 | 52.866 | 8.192  | 68.903 | 1.00 | 0.00 | N |
| ATOM | 1102 | C2'  | G B | 17 | 53.060 | 9.832  | 70.809 | 1.00 | 0.00 | C |
| ATOM | 1103 | C3'  | G B | 17 | 52.257 | 9.841  | 72.101 | 1.00 | 0.00 | C |
| ATOM | 1104 | O3'  | G B | 17 | 53.098 | 9.428  | 73.176 | 1.00 | 0.00 | O |
| ATOM | 1105 | C4'  | G B | 17 | 51.146 | 8.833  | 71.818 | 1.00 | 0.00 | C |
| ATOM | 1106 | O4'  | G B | 17 | 51.773 | 7.838  | 70.949 | 1.00 | 0.00 | O |
| ATOM | 1107 | C5'  | G B | 17 | 49.914 | 9.370  | 71.128 | 1.00 | 0.00 | C |
| ATOM | 1108 | O5'  | G B | 17 | 50.294 | 10.381 | 70.163 | 1.00 | 0.00 | O |
| ATOM | 1109 | O1P  | G B | 17 | 49.291 | 12.489 | 71.106 | 1.00 | 0.00 | O |
| ATOM | 1110 | O2P  | G B | 17 | 49.657 | 12.272 | 68.633 | 1.00 | 0.00 | O |
| ATOM | 1111 | P    | G B | 17 | 49.312 | 11.616 | 69.918 | 1.00 | 0.00 | P |
| ATOM | 1112 | H1   | G B | 17 | 54.757 | 4.739  | 65.808 | 1.00 | 0.00 | H |
| ATOM | 1113 | H8   | G B | 17 | 51.643 | 9.853  | 68.220 | 1.00 | 0.00 | H |
| ATOM | 1114 | H1'  | G B | 17 | 53.796 | 7.795  | 70.746 | 1.00 | 0.00 | H |
| ATOM | 1115 | H21  | G B | 17 | 55.753 | 3.629  | 67.417 | 1.00 | 0.00 | H |
| ATOM | 1116 | H3'  | G B | 17 | 51.848 | 10.827 | 72.321 | 1.00 | 0.00 | H |
| ATOM | 1117 | H22  | G B | 17 | 55.664 | 4.132  | 69.128 | 1.00 | 0.00 | H |
| ATOM | 1118 | H4'  | G B | 17 | 50.837 | 8.424  | 72.779 | 1.00 | 0.00 | H |
| ATOM | 1119 | H2'1 | G B | 17 | 52.633 | 10.514 | 70.073 | 1.00 | 0.00 | H |
| ATOM | 1120 | H2'2 | G B | 17 | 54.091 | 10.138 | 70.980 | 1.00 | 0.00 | H |
| ATOM | 1121 | H5'1 | G B | 17 | 49.402 | 8.551  | 70.621 | 1.00 | 0.00 | H |
| ATOM | 1122 | H5'2 | G B | 17 | 49.246 | 9.803  | 71.873 | 1.00 | 0.00 | H |
| ATOM | 1123 | C1'  | C B | 18 | 57.715 | 7.110  | 70.866 | 1.00 | 0.00 | C |
| ATOM | 1124 | N1   | C B | 18 | 57.217 | 7.714  | 69.599 | 1.00 | 0.00 | N |
| ATOM | 1125 | C2   | C B | 18 | 57.507 | 7.057  | 68.406 | 1.00 | 0.00 | C |
| ATOM | 1126 | O2   | C B | 18 | 58.160 | 6.007  | 68.446 | 1.00 | 0.00 | O |
| ATOM | 1127 | N3   | C B | 18 | 57.064 | 7.591  | 67.242 | 1.00 | 0.00 | N |
| ATOM | 1128 | C4   | C B | 18 | 56.359 | 8.730  | 67.233 | 1.00 | 0.00 | C |
| ATOM | 1129 | N4   | C B | 18 | 55.949 | 9.205  | 66.065 | 1.00 | 0.00 | N |
| ATOM | 1130 | C5   | C B | 18 | 56.049 | 9.427  | 68.444 | 1.00 | 0.00 | C |
| ATOM | 1131 | C6   | C B | 18 | 56.503 | 8.870  | 69.603 | 1.00 | 0.00 | C |
| ATOM | 1132 | C2'  | C B | 18 | 58.188 | 8.134  | 71.890 | 1.00 | 0.00 | C |
| ATOM | 1133 | C3'  | C B | 18 | 57.764 | 7.490  | 73.201 | 1.00 | 0.00 | C |
| ATOM | 1134 | O3'  | C B | 18 | 58.768 | 6.566  | 73.615 | 1.00 | 0.00 | O |
| ATOM | 1135 | C4'  | C B | 18 | 56.457 | 6.794  | 72.830 | 1.00 | 0.00 | C |
| ATOM | 1136 | O4'  | C B | 18 | 56.649 | 6.378  | 71.441 | 1.00 | 0.00 | O |
| ATOM | 1137 | C5'  | C B | 18 | 55.202 | 7.631  | 72.915 | 1.00 | 0.00 | C |
| ATOM | 1138 | O5'  | C B | 18 | 55.493 | 8.990  | 72.498 | 1.00 | 0.00 | O |
| ATOM | 1139 | O1P  | C B | 18 | 55.159 | 10.328 | 74.604 | 1.00 | 0.00 | O |
| ATOM | 1140 | O2P  | C B | 18 | 54.825 | 11.410 | 72.364 | 1.00 | 0.00 | O |
| ATOM | 1141 | P    | C B | 18 | 54.714 | 10.191 | 73.202 | 1.00 | 0.00 | P |
| ATOM | 1142 | H5   | C B | 18 | 55.479 | 10.356 | 68.440 | 1.00 | 0.00 | H |
| ATOM | 1143 | H6   | C B | 18 | 56.288 | 9.364  | 70.550 | 1.00 | 0.00 | H |
| ATOM | 1144 | H1'  | C B | 18 | 58.510 | 6.408  | 70.619 | 1.00 | 0.00 | H |
| ATOM | 1145 | H3'  | C B | 18 | 57.608 | 8.229  | 73.986 | 1.00 | 0.00 | H |
| ATOM | 1146 | H4'  | C B | 18 | 56.340 | 5.952  | 73.514 | 1.00 | 0.00 | H |
| ATOM | 1147 | H41  | C B | 18 | 55.403 | 10.079 | 66.029 | 1.00 | 0.00 | H |
| ATOM | 1148 | H42  | C B | 18 | 56.173 | 8.701  | 65.196 | 1.00 | 0.00 | H |
| ATOM | 1149 | H2'1 | C B | 18 | 57.714 | 9.105  | 71.753 | 1.00 | 0.00 | H |
| ATOM | 1150 | H2'2 | C B | 18 | 59.266 | 8.287  | 71.852 | 1.00 | 0.00 | H |
| ATOM | 1151 | H5'1 | C B | 18 | 54.440 | 7.203  | 72.264 | 1.00 | 0.00 | H |
| ATOM | 1152 | H5'2 | C B | 18 | 54.840 | 7.631  | 73.941 | 1.00 | 0.00 | H |

|      |      |      |     |    |        |        |        |      |      |   |
|------|------|------|-----|----|--------|--------|--------|------|------|---|
| ATOM | 1153 | C1'  | C B | 19 | 62.142 | 5.705  | 69.147 | 1.00 | 0.00 | C |
| ATOM | 1154 | N1   | C B | 19 | 61.444 | 6.885  | 68.567 | 1.00 | 0.00 | N |
| ATOM | 1155 | C2   | C B | 19 | 61.291 | 6.938  | 67.182 | 1.00 | 0.00 | C |
| ATOM | 1156 | O2   | C B | 19 | 61.736 | 6.009  | 66.497 | 1.00 | 0.00 | O |
| ATOM | 1157 | N3   | C B | 19 | 60.658 | 8.004  | 66.635 | 1.00 | 0.00 | N |
| ATOM | 1158 | C4   | C B | 19 | 60.187 | 8.994  | 67.406 | 1.00 | 0.00 | C |
| ATOM | 1159 | N4   | C B | 19 | 59.577 | 10.011 | 66.819 | 1.00 | 0.00 | N |
| ATOM | 1160 | C5   | C B | 19 | 60.332 | 8.966  | 68.829 | 1.00 | 0.00 | C |
| ATOM | 1161 | C6   | C B | 19 | 60.971 | 7.884  | 69.358 | 1.00 | 0.00 | C |
| ATOM | 1162 | C2'  | C B | 19 | 63.037 | 6.043  | 70.330 | 1.00 | 0.00 | C |
| ATOM | 1163 | C3'  | C B | 19 | 62.866 | 4.819  | 71.217 | 1.00 | 0.00 | C |
| ATOM | 1164 | O3'  | C B | 19 | 63.766 | 3.799  | 70.787 | 1.00 | 0.00 | O |
| ATOM | 1165 | C4'  | C B | 19 | 61.406 | 4.434  | 70.987 | 1.00 | 0.00 | C |
| ATOM | 1166 | O4'  | C B | 19 | 61.151 | 4.797  | 69.592 | 1.00 | 0.00 | O |
| ATOM | 1167 | C5'  | C B | 19 | 60.384 | 5.128  | 71.859 | 1.00 | 0.00 | C |
| ATOM | 1168 | O5'  | C B | 19 | 60.788 | 6.500  | 72.092 | 1.00 | 0.00 | O |
| ATOM | 1169 | O1P  | C B | 19 | 61.259 | 6.557  | 74.563 | 1.00 | 0.00 | O |
| ATOM | 1170 | O2P  | C B | 19 | 60.545 | 8.647  | 73.373 | 1.00 | 0.00 | O |
| ATOM | 1171 | P    | C B | 19 | 60.446 | 7.172  | 73.496 | 1.00 | 0.00 | P |
| ATOM | 1172 | H5   | C B | 19 | 59.953 | 9.769  | 69.460 | 1.00 | 0.00 | H |
| ATOM | 1173 | H6   | C B | 19 | 61.103 | 7.816  | 70.438 | 1.00 | 0.00 | H |
| ATOM | 1174 | H1'  | C B | 19 | 62.709 | 5.221  | 68.352 | 1.00 | 0.00 | H |
| ATOM | 1175 | H3'  | C B | 19 | 63.052 | 5.046  | 72.266 | 1.00 | 0.00 | H |
| ATOM | 1176 | H4'  | C B | 19 | 61.327 | 3.363  | 71.169 | 1.00 | 0.00 | H |
| ATOM | 1177 | H41  | C B | 19 | 59.203 | 10.786 | 67.386 | 1.00 | 0.00 | H |
| ATOM | 1178 | H42  | C B | 19 | 59.474 | 10.029 | 65.792 | 1.00 | 0.00 | H |
| ATOM | 1179 | H2'1 | C B | 19 | 62.722 | 6.950  | 70.843 | 1.00 | 0.00 | H |
| ATOM | 1180 | H2'2 | C B | 19 | 64.079 | 6.177  | 70.036 | 1.00 | 0.00 | H |
| ATOM | 1181 | H5'1 | C B | 19 | 59.416 | 5.107  | 71.360 | 1.00 | 0.00 | H |
| ATOM | 1182 | H5'2 | C B | 19 | 60.309 | 4.599  | 72.808 | 1.00 | 0.00 | H |
| ATOM | 1183 | C1'  | T B | 20 | 65.656 | 5.315  | 65.683 | 1.00 | 0.00 | C |
| ATOM | 1184 | N1   | T B | 20 | 65.046 | 6.637  | 65.985 | 1.00 | 0.00 | N |
| ATOM | 1185 | C2   | T B | 20 | 64.565 | 7.367  | 64.917 | 1.00 | 0.00 | C |
| ATOM | 1186 | O2   | T B | 20 | 64.623 | 6.970  | 63.765 | 1.00 | 0.00 | O |
| ATOM | 1187 | N3   | T B | 20 | 64.007 | 8.588  | 65.242 | 1.00 | 0.00 | N |
| ATOM | 1188 | C4   | T B | 20 | 63.892 | 9.129  | 66.504 | 1.00 | 0.00 | C |
| ATOM | 1189 | O4   | T B | 20 | 63.372 | 10.239 | 66.673 | 1.00 | 0.00 | O |
| ATOM | 1190 | C5   | T B | 20 | 64.422 | 8.294  | 67.554 | 1.00 | 0.00 | C |
| ATOM | 1191 | C6   | T B | 20 | 64.973 | 7.097  | 67.276 | 1.00 | 0.00 | C |
| ATOM | 1192 | C7   | T B | 20 | 64.317 | 8.843  | 68.947 | 1.00 | 0.00 | C |
| ATOM | 1193 | C2'  | T B | 20 | 66.869 | 4.987  | 66.545 | 1.00 | 0.00 | C |
| ATOM | 1194 | C3'  | T B | 20 | 66.722 | 3.486  | 66.740 | 1.00 | 0.00 | C |
| ATOM | 1195 | O3'  | T B | 20 | 67.296 | 2.810  | 65.624 | 1.00 | 0.00 | O |
| ATOM | 1196 | C4'  | T B | 20 | 65.209 | 3.298  | 66.815 | 1.00 | 0.00 | C |
| ATOM | 1197 | O4'  | T B | 20 | 64.674 | 4.323  | 65.918 | 1.00 | 0.00 | O |
| ATOM | 1198 | C5'  | T B | 20 | 64.577 | 3.469  | 68.176 | 1.00 | 0.00 | C |
| ATOM | 1199 | O5'  | T B | 20 | 65.255 | 4.526  | 68.902 | 1.00 | 0.00 | O |
| ATOM | 1200 | O1P  | T B | 20 | 66.343 | 3.313  | 70.818 | 1.00 | 0.00 | O |
| ATOM | 1201 | O2P  | T B | 20 | 65.716 | 5.730  | 71.058 | 1.00 | 0.00 | O |
| ATOM | 1202 | P    | T B | 20 | 65.402 | 4.399  | 70.484 | 1.00 | 0.00 | P |
| ATOM | 1203 | H3   | T B | 20 | 63.640 | 9.152  | 64.463 | 1.00 | 0.00 | H |
| ATOM | 1204 | H6   | T B | 20 | 65.366 | 6.484  | 68.086 | 1.00 | 0.00 | H |
| ATOM | 1205 | H1'  | T B | 20 | 65.911 | 5.289  | 64.623 | 1.00 | 0.00 | H |
| ATOM | 1206 | H3'  | T B | 20 | 67.207 | 3.145  | 67.655 | 1.00 | 0.00 | H |
