# Supplementary material
Source: PubMed Central journal article supplement (PMC1224651)
Supplement: pnas_0506290102_3.pdf [file pnas_0506290102_3.pdf]

Table 3. REMARK model depicted in Fig. 4b with four oligonucleotides

|      |    |     |     |   |         |         |        |
|------|----|-----|-----|---|---------|---------|--------|
| ATOM | 1  | AUC | SPH | 1 | -6.134  | -13.136 | 72.020 |
| ATOM | 2  | AU  | SPH | 1 | -8.435  | -10.686 | 67.050 |
| ATOM | 3  | AU  | SPH | 1 | -9.237  | -9.832  | 68.089 |
| ATOM | 4  | AU  | SPH | 1 | -9.828  | -9.203  | 69.396 |
| ATOM | 5  | AU  | SPH | 1 | -10.167 | -8.842  | 70.882 |
| ATOM | 6  | AU  | SPH | 1 | -10.231 | -8.774  | 72.446 |
| ATOM | 7  | AU  | SPH | 1 | -10.016 | -9.003  | 73.980 |
| ATOM | 8  | AU  | SPH | 1 | -9.536  | -9.513  | 75.381 |
| ATOM | 9  | AU  | SPH | 1 | -8.825  | -10.271 | 76.553 |
| ATOM | 10 | AU  | SPH | 1 | -7.930  | -11.224 | 77.416 |
| ATOM | 11 | AU  | SPH | 1 | -6.913  | -12.307 | 77.911 |
| ATOM | 12 | AU  | SPH | 1 | -5.842  | -13.446 | 78.005 |
| ATOM | 13 | AU  | SPH | 1 | -4.792  | -14.565 | 77.691 |
| ATOM | 14 | AU  | SPH | 1 | -3.833  | -15.586 | 76.990 |
| ATOM | 15 | AU  | SPH | 1 | -8.435  | -10.686 | 67.050 |
| ATOM | 16 | AU  | SPH | 1 | -9.500  | -10.139 | 68.060 |
| ATOM | 17 | AU  | SPH | 1 | -10.336 | -9.796  | 69.339 |
| ATOM | 18 | AU  | SPH | 1 | -10.885 | -9.681  | 70.801 |
| ATOM | 19 | AU  | SPH | 1 | -11.111 | -9.801  | 72.347 |
| ATOM | 20 | AU  | SPH | 1 | -10.997 | -10.149 | 73.870 |
| ATOM | 21 | AU  | SPH | 1 | -10.552 | -10.700 | 75.267 |
| ATOM | 22 | AU  | SPH | 1 | -9.806  | -11.417 | 76.442 |
| ATOM | 23 | AU  | SPH | 1 | -8.810  | -12.251 | 77.317 |
| ATOM | 24 | AU  | SPH | 1 | -7.631  | -13.146 | 77.830 |
| ATOM | 25 | AU  | SPH | 1 | -6.350  | -14.040 | 77.947 |
| ATOM | 26 | AU  | SPH | 1 | -5.055  | -14.872 | 77.661 |
| ATOM | 27 | AU  | SPH | 1 | -3.833  | -15.586 | 76.990 |
| ATOM | 28 | AU  | SPH | 1 | -8.435  | -10.686 | 67.050 |
| ATOM | 29 | AU  | SPH | 1 | -9.685  | -10.489 | 67.973 |
| ATOM | 30 | AU  | SPH | 1 | -10.693 | -10.472 | 69.171 |
| ATOM | 31 | AU  | SPH | 1 | -11.391 | -10.637 | 70.564 |
| ATOM | 32 | AU  | SPH | 1 | -11.730 | -10.973 | 72.056 |
| ATOM | 33 | AU  | SPH | 1 | -11.688 | -11.455 | 73.545 |
| ATOM | 34 | AU  | SPH | 1 | -11.267 | -12.052 | 74.931 |
| ATOM | 35 | AU  | SPH | 1 | -10.497 | -12.723 | 76.118 |
| ATOM | 36 | AU  | SPH | 1 | -9.429  | -13.423 | 77.026 |
| ATOM | 37 | AU  | SPH | 1 | -8.137  | -14.102 | 77.593 |
| ATOM | 38 | AU  | SPH | 1 | -6.708  | -14.716 | 77.780 |
| ATOM | 39 | AU  | SPH | 1 | -5.240  | -15.222 | 77.574 |
| ATOM | 40 | AU  | SPH | 1 | -3.833  | -15.586 | 76.990 |
| ATOM | 41 | AU  | SPH | 1 | -8.435  | -10.686 | 67.050 |
| ATOM | 42 | AU  | SPH | 1 | -9.780  | -10.858 | 67.834 |
| ATOM | 43 | AU  | SPH | 1 | -10.876 | -11.186 | 68.904 |
| ATOM | 44 | AU  | SPH | 1 | -11.649 | -11.646 | 70.186 |
| ATOM | 45 | AU  | SPH | 1 | -12.046 | -12.208 | 71.593 |
| ATOM | 46 | AU  | SPH | 1 | -12.041 | -12.833 | 73.029 |
| ATOM | 47 | AU  | SPH | 1 | -11.632 | -13.479 | 74.397 |
| ATOM | 48 | AU  | SPH | 1 | -10.849 | -14.101 | 75.602 |
| ATOM | 49 | AU  | SPH | 1 | -9.745  | -14.658 | 76.563 |
| ATOM | 50 | AU  | SPH | 1 | -8.395  | -15.111 | 77.215 |
| ATOM | 51 | AU  | SPH | 1 | -6.890  | -15.429 | 77.512 |
| ATOM | 52 | AU  | SPH | 1 | -5.334  | -15.591 | 77.436 |

|      |     |    |     |   |         |         |        |
|------|-----|----|-----|---|---------|---------|--------|
| ATOM | 53  | AU | SPH | 1 | -3.833  | -15.586 | 76.990 |
| ATOM | 54  | AU | SPH | 1 | -8.435  | -10.686 | 67.050 |
| ATOM | 55  | AU | SPH | 1 | -9.777  | -11.221 | 67.654 |
| ATOM | 56  | AU | SPH | 1 | -10.871 | -11.887 | 68.556 |
| ATOM | 57  | AU | SPH | 1 | -11.642 | -12.638 | 69.694 |
| ATOM | 58  | AU | SPH | 1 | -12.038 | -13.423 | 70.990 |
| ATOM | 59  | AU | SPH | 1 | -12.031 | -14.188 | 72.357 |
| ATOM | 60  | AU | SPH | 1 | -11.623 | -14.882 | 73.701 |
| ATOM | 61  | AU | SPH | 1 | -10.840 | -15.456 | 74.930 |
| ATOM | 62  | AU | SPH | 1 | -9.737  | -15.873 | 75.960 |
| ATOM | 63  | AU | SPH | 1 | -8.388  | -16.103 | 76.723 |
| ATOM | 64  | AU | SPH | 1 | -6.886  | -16.131 | 77.164 |
| ATOM | 65  | AU | SPH | 1 | -5.332  | -15.954 | 77.256 |
| ATOM | 66  | AU | SPH | 1 | -3.833  | -15.586 | 76.990 |
| ATOM | 67  | AU | SPH | 1 | -8.435  | -10.686 | 67.050 |
| ATOM | 68  | AU | SPH | 1 | -9.678  | -11.554 | 67.445 |
| ATOM | 69  | AU | SPH | 1 | -10.679 | -12.529 | 68.151 |
| ATOM | 70  | AU | SPH | 1 | -11.371 | -13.546 | 69.121 |
| ATOM | 71  | AU | SPH | 1 | -11.706 | -14.535 | 70.288 |
| ATOM | 72  | AU | SPH | 1 | -11.661 | -15.429 | 71.574 |
| ATOM | 73  | AU | SPH | 1 | -11.239 | -16.166 | 72.890 |
| ATOM | 74  | AU | SPH | 1 | -10.470 | -16.697 | 74.147 |
| ATOM | 75  | AU | SPH | 1 | -9.405  | -16.985 | 75.258 |
| ATOM | 76  | AU | SPH | 1 | -8.117  | -17.011 | 76.149 |
| ATOM | 77  | AU | SPH | 1 | -6.694  | -16.773 | 76.759 |
| ATOM | 78  | AU | SPH | 1 | -5.233  | -16.287 | 77.046 |
| ATOM | 79  | AU | SPH | 1 | -3.833  | -15.586 | 76.990 |
| ATOM | 80  | AU | SPH | 1 | -8.435  | -10.686 | 67.050 |
| ATOM | 81  | AU | SPH | 1 | -9.489  | -11.833 | 67.219 |
| ATOM | 82  | AU | SPH | 1 | -10.313 | -13.068 | 67.716 |
| ATOM | 83  | AU | SPH | 1 | -10.854 | -14.308 | 68.506 |
| ATOM | 84  | AU | SPH | 1 | -11.072 | -15.468 | 69.535 |
| ATOM | 85  | AU | SPH | 1 | -10.954 | -16.469 | 70.734 |
| ATOM | 86  | AU | SPH | 1 | -10.507 | -17.243 | 72.020 |
| ATOM | 87  | AU | SPH | 1 | -9.763  | -17.738 | 73.306 |
| ATOM | 88  | AU | SPH | 1 | -8.771  | -17.918 | 74.505 |
| ATOM | 89  | AU | SPH | 1 | -7.599  | -17.773 | 75.534 |
| ATOM | 90  | AU | SPH | 1 | -6.328  | -17.311 | 76.324 |
| ATOM | 91  | AU | SPH | 1 | -5.043  | -16.566 | 76.821 |
| ATOM | 92  | AU | SPH | 1 | -3.833  | -15.586 | 76.990 |
| ATOM | 93  | AU | SPH | 1 | -8.435  | -10.686 | 67.050 |
| ATOM | 94  | AU | SPH | 1 | -9.222  | -12.039 | 66.994 |
| ATOM | 95  | AU | SPH | 1 | -9.799  | -13.467 | 67.281 |
| ATOM | 96  | AU | SPH | 1 | -10.125 | -14.872 | 67.891 |
| ATOM | 97  | AU | SPH | 1 | -10.180 | -16.159 | 68.782 |
| ATOM | 98  | AU | SPH | 1 | -9.959  | -17.240 | 69.893 |
| ATOM | 99  | AU | SPH | 1 | -9.478  | -18.041 | 71.150 |
| ATOM | 100 | AU | SPH | 1 | -8.768  | -18.508 | 72.466 |
| ATOM | 101 | AU | SPH | 1 | -7.879  | -18.609 | 73.752 |
| ATOM | 102 | AU | SPH | 1 | -6.871  | -18.337 | 74.919 |
| ATOM | 103 | AU | SPH | 1 | -5.813  | -17.710 | 75.889 |
| ATOM | 104 | AU | SPH | 1 | -4.777  | -16.772 | 76.595 |
| ATOM | 105 | AU | SPH | 1 | -3.833  | -15.586 | 76.990 |
| ATOM | 106 | AU | SPH | 1 | -8.435  | -10.686 | 67.050 |

|      |     |    |     |   |        |         |        |
|------|-----|----|-----|---|--------|---------|--------|
| ATOM | 107 | AU | SPH | 1 | -8.897 | -12.159 | 66.784 |
| ATOM | 108 | AU | SPH | 1 | -9.170 | -13.699 | 66.876 |
| ATOM | 109 | AU | SPH | 1 | -9.236 | -15.200 | 67.317 |
| ATOM | 110 | AU | SPH | 1 | -9.091 | -16.560 | 68.080 |
| ATOM | 111 | AU | SPH | 1 | -8.745 | -17.687 | 69.110 |
| ATOM | 112 | AU | SPH | 1 | -8.220 | -18.505 | 70.339 |
| ATOM | 113 | AU | SPH | 1 | -7.554 | -18.956 | 71.683 |
| ATOM | 114 | AU | SPH | 1 | -6.790 | -19.010 | 73.050 |
| ATOM | 115 | AU | SPH | 1 | -5.982 | -18.665 | 74.346 |
| ATOM | 116 | AU | SPH | 1 | -5.184 | -17.942 | 75.484 |
| ATOM | 117 | AU | SPH | 1 | -4.451 | -16.892 | 76.386 |
| ATOM | 118 | AU | SPH | 1 | -3.833 | -15.586 | 76.990 |
| ATOM | 119 | AU | SPH | 1 | -8.435 | -10.686 | 67.050 |
| ATOM | 120 | AU | SPH | 1 | -8.534 | -12.184 | 66.604 |
| ATOM | 121 | AU | SPH | 1 | -8.470 | -13.747 | 66.528 |
| ATOM | 122 | AU | SPH | 1 | -8.247 | -15.269 | 66.825 |
| ATOM | 123 | AU | SPH | 1 | -7.879 | -16.645 | 67.477 |
| ATOM | 124 | AU | SPH | 1 | -7.393 | -17.782 | 68.438 |
| ATOM | 125 | AU | SPH | 1 | -6.821 | -18.602 | 69.643 |
| ATOM | 126 | AU | SPH | 1 | -6.202 | -19.050 | 71.011 |
| ATOM | 127 | AU | SPH | 1 | -5.578 | -19.095 | 72.447 |
| ATOM | 128 | AU | SPH | 1 | -4.992 | -18.734 | 73.854 |
| ATOM | 129 | AU | SPH | 1 | -4.485 | -17.991 | 75.136 |
| ATOM | 130 | AU | SPH | 1 | -4.089 | -16.917 | 76.206 |
| ATOM | 131 | AU | SPH | 1 | -3.833 | -15.586 | 76.990 |
| ATOM | 132 | AU | SPH | 1 | -8.435 | -10.686 | 67.050 |
| ATOM | 133 | AU | SPH | 1 | -8.160 | -12.113 | 66.466 |
| ATOM | 134 | AU | SPH | 1 | -7.747 | -13.610 | 66.260 |
| ATOM | 135 | AU | SPH | 1 | -7.224 | -15.074 | 66.447 |
| ATOM | 136 | AU | SPH | 1 | -6.626 | -16.407 | 67.014 |
| ATOM | 137 | AU | SPH | 1 | -5.996 | -17.516 | 67.922 |
| ATOM | 138 | AU | SPH | 1 | -5.374 | -18.327 | 69.109 |
| ATOM | 139 | AU | SPH | 1 | -4.804 | -18.784 | 70.495 |
| ATOM | 140 | AU | SPH | 1 | -4.325 | -18.857 | 71.984 |
| ATOM | 141 | AU | SPH | 1 | -3.970 | -18.539 | 73.476 |
| ATOM | 142 | AU | SPH | 1 | -3.761 | -17.853 | 74.869 |
| ATOM | 143 | AU | SPH | 1 | -3.715 | -16.846 | 76.067 |
| ATOM | 144 | AU | SPH | 1 | -3.833 | -15.586 | 76.990 |
| ATOM | 145 | AU | SPH | 1 | -8.435 | -10.686 | 67.050 |
| ATOM | 146 | AU | SPH | 1 | -7.799 | -11.950 | 66.379 |
| ATOM | 147 | AU | SPH | 1 | -7.049 | -13.295 | 66.093 |
| ATOM | 148 | AU | SPH | 1 | -6.238 | -14.630 | 66.210 |
| ATOM | 149 | AU | SPH | 1 | -5.419 | -15.862 | 66.723 |
| ATOM | 150 | AU | SPH | 1 | -4.648 | -16.909 | 67.598 |
| ATOM | 151 | AU | SPH | 1 | -3.979 | -17.698 | 68.773 |
| ATOM | 152 | AU | SPH | 1 | -3.457 | -18.177 | 70.170 |
| ATOM | 153 | AU | SPH | 1 | -3.118 | -18.312 | 71.693 |
| ATOM | 154 | AU | SPH | 1 | -2.983 | -18.095 | 73.239 |
| ATOM | 155 | AU | SPH | 1 | -3.064 | -17.539 | 74.701 |
| ATOM | 156 | AU | SPH | 1 | -3.354 | -16.683 | 75.980 |
| ATOM | 157 | AU | SPH | 1 | -3.833 | -15.586 | 76.990 |
| ATOM | 158 | AU | SPH | 1 | -8.435 | -10.686 | 67.050 |
| ATOM | 159 | AU | SPH | 1 | -7.476 | -11.707 | 66.349 |
| ATOM | 160 | AU | SPH | 1 | -6.426 | -12.826 | 66.035 |

|      |     |    |     |   |        |         |        |
|------|-----|----|-----|---|--------|---------|--------|
| ATOM | 161 | AU | SPH | 1 | -5.355 | -13.965 | 66.129 |
| ATOM | 162 | AU | SPH | 1 | -4.338 | -15.048 | 66.624 |
| ATOM | 163 | AU | SPH | 1 | -3.443 | -16.001 | 67.487 |
| ATOM | 164 | AU | SPH | 1 | -2.732 | -16.759 | 68.659 |
| ATOM | 165 | AU | SPH | 1 | -2.252 | -17.269 | 70.060 |
| ATOM | 166 | AU | SPH | 1 | -2.037 | -17.498 | 71.594 |
| ATOM | 167 | AU | SPH | 1 | -2.101 | -17.430 | 73.158 |
| ATOM | 168 | AU | SPH | 1 | -2.440 | -17.069 | 74.644 |
| ATOM | 169 | AU | SPH | 1 | -3.031 | -16.440 | 75.951 |
| ATOM | 170 | AU | SPH | 1 | -3.833 | -15.586 | 76.990 |
| ATOM | 171 | AU | SPH | 1 | -8.435 | -10.686 | 67.050 |
| ATOM | 172 | AU | SPH | 1 | -7.213 | -11.400 | 66.379 |
| ATOM | 173 | AU | SPH | 1 | -5.918 | -12.232 | 66.093 |
| ATOM | 174 | AU | SPH | 1 | -4.637 | -13.126 | 66.210 |
| ATOM | 175 | AU | SPH | 1 | -3.458 | -14.021 | 66.723 |
| ATOM | 176 | AU | SPH | 1 | -2.462 | -14.855 | 67.598 |
| ATOM | 177 | AU | SPH | 1 | -1.716 | -15.572 | 68.773 |
| ATOM | 178 | AU | SPH | 1 | -1.271 | -16.123 | 70.170 |
| ATOM | 179 | AU | SPH | 1 | -1.157 | -16.471 | 71.693 |
| ATOM | 180 | AU | SPH | 1 | -1.383 | -16.591 | 73.239 |
| ATOM | 181 | AU | SPH | 1 | -1.932 | -16.476 | 74.701 |
| ATOM | 182 | AU | SPH | 1 | -2.768 | -16.133 | 75.980 |
| ATOM | 183 | AU | SPH | 1 | -3.833 | -15.586 | 76.990 |
| ATOM | 184 | AU | SPH | 1 | -8.435 | -10.686 | 67.050 |
| ATOM | 185 | AU | SPH | 1 | -7.028 | -11.050 | 66.466 |
| ATOM | 186 | AU | SPH | 1 | -5.560 | -11.556 | 66.260 |
| ATOM | 187 | AU | SPH | 1 | -4.131 | -12.170 | 66.447 |
| ATOM | 188 | AU | SPH | 1 | -2.839 | -12.849 | 67.014 |
| ATOM | 189 | AU | SPH | 1 | -1.771 | -13.549 | 67.922 |
| ATOM | 190 | AU | SPH | 1 | -1.001 | -14.220 | 69.109 |
| ATOM | 191 | AU | SPH | 1 | -0.580 | -14.817 | 70.495 |
| ATOM | 192 | AU | SPH | 1 | -0.538 | -15.299 | 71.984 |
| ATOM | 193 | AU | SPH | 1 | -0.877 | -15.635 | 73.476 |
| ATOM | 194 | AU | SPH | 1 | -1.575 | -15.800 | 74.869 |
| ATOM | 195 | AU | SPH | 1 | -2.583 | -15.783 | 76.067 |
| ATOM | 196 | AU | SPH | 1 | -3.833 | -15.586 | 76.990 |
| ATOM | 197 | AU | SPH | 1 | -8.435 | -10.686 | 67.050 |
| ATOM | 198 | AU | SPH | 1 | -6.934 | -10.681 | 66.604 |
| ATOM | 199 | AU | SPH | 1 | -5.378 | -10.843 | 66.528 |
| ATOM | 200 | AU | SPH | 1 | -3.873 | -11.161 | 66.825 |
| ATOM | 201 | AU | SPH | 1 | -2.523 | -11.614 | 67.477 |
| ATOM | 202 | AU | SPH | 1 | -1.419 | -12.171 | 68.438 |
| ATOM | 203 | AU | SPH | 1 | -0.636 | -12.793 | 69.643 |
| ATOM | 204 | AU | SPH | 1 | -0.227 | -13.439 | 71.011 |
| ATOM | 205 | AU | SPH | 1 | -0.222 | -14.064 | 72.447 |
| ATOM | 206 | AU | SPH | 1 | -0.619 | -14.626 | 73.854 |
| ATOM | 207 | AU | SPH | 1 | -1.392 | -15.086 | 75.136 |
| ATOM | 208 | AU | SPH | 1 | -2.488 | -15.414 | 76.206 |
| ATOM | 209 | AU | SPH | 1 | -3.833 | -15.586 | 76.990 |
| ATOM | 210 | AU | SPH | 1 | -8.435 | -10.686 | 67.050 |
| ATOM | 211 | AU | SPH | 1 | -6.936 | -10.318 | 66.784 |
| ATOM | 212 | AU | SPH | 1 | -5.382 | -10.141 | 66.876 |
| ATOM | 213 | AU | SPH | 1 | -3.880 | -10.169 | 67.317 |
| ATOM | 214 | AU | SPH | 1 | -2.531 | -10.399 | 68.080 |

|      |     |    |     |   |        |         |        |
|------|-----|----|-----|---|--------|---------|--------|
| ATOM | 215 | AU | SPH | 1 | -1.428 | -10.816 | 69.110 |
| ATOM | 216 | AU | SPH | 1 | -0.645 | -11.390 | 70.339 |
| ATOM | 217 | AU | SPH | 1 | -0.237 | -12.084 | 71.683 |
| ATOM | 218 | AU | SPH | 1 | -0.230 | -12.849 | 73.050 |
| ATOM | 219 | AU | SPH | 1 | -0.626 | -13.634 | 74.346 |
| ATOM | 220 | AU | SPH | 1 | -1.397 | -14.385 | 75.484 |
| ATOM | 221 | AU | SPH | 1 | -2.491 | -15.051 | 76.386 |
| ATOM | 222 | AU | SPH | 1 | -3.833 | -15.586 | 76.990 |
| ATOM | 223 | AU | SPH | 1 | -8.435 | -10.686 | 67.050 |
| ATOM | 224 | AU | SPH | 1 | -7.035 | -9.985  | 66.994 |
| ATOM | 225 | AU | SPH | 1 | -5.574 | -9.499  | 67.281 |
| ATOM | 226 | AU | SPH | 1 | -4.151 | -9.261  | 67.891 |
| ATOM | 227 | AU | SPH | 1 | -2.863 | -9.287  | 68.782 |
| ATOM | 228 | AU | SPH | 1 | -1.798 | -9.575  | 69.893 |
| ATOM | 229 | AU | SPH | 1 | -1.029 | -10.106 | 71.150 |
| ATOM | 230 | AU | SPH | 1 | -0.607 | -10.843 | 72.466 |
| ATOM | 231 | AU | SPH | 1 | -0.562 | -11.737 | 73.752 |
| ATOM | 232 | AU | SPH | 1 | -0.897 | -12.726 | 74.919 |
| ATOM | 233 | AU | SPH | 1 | -1.589 | -13.743 | 75.889 |
| ATOM | 234 | AU | SPH | 1 | -2.590 | -14.718 | 76.595 |
| ATOM | 235 | AU | SPH | 1 | -3.833 | -15.586 | 76.990 |
| ATOM | 236 | AU | SPH | 1 | -8.435 | -10.686 | 67.050 |
| ATOM | 237 | AU | SPH | 1 | -7.225 | -9.706  | 67.219 |
| ATOM | 238 | AU | SPH | 1 | -5.940 | -8.961  | 67.716 |
| ATOM | 239 | AU | SPH | 1 | -4.669 | -8.499  | 68.506 |
| ATOM | 240 | AU | SPH | 1 | -3.497 | -8.354  | 69.535 |
| ATOM | 241 | AU | SPH | 1 | -2.505 | -8.534  | 70.734 |
| ATOM | 242 | AU | SPH | 1 | -1.761 | -9.029  | 72.020 |
| ATOM | 243 | AU | SPH | 1 | -1.314 | -9.803  | 73.306 |
| ATOM | 244 | AU | SPH | 1 | -1.196 | -10.804 | 74.505 |
| ATOM | 245 | AU | SPH | 1 | -1.414 | -11.964 | 75.534 |
| ATOM | 246 | AU | SPH | 1 | -1.955 | -13.204 | 76.324 |
| ATOM | 247 | AU | SPH | 1 | -2.779 | -14.439 | 76.821 |
| ATOM | 248 | AU | SPH | 1 | -3.833 | -15.586 | 76.990 |
| ATOM | 249 | AU | SPH | 1 | -8.435 | -10.686 | 67.050 |
| ATOM | 250 | AU | SPH | 1 | -7.491 | -9.500  | 67.445 |
| ATOM | 251 | AU | SPH | 1 | -6.455 | -8.562  | 68.151 |
| ATOM | 252 | AU | SPH | 1 | -5.397 | -7.935  | 69.121 |
| ATOM | 253 | AU | SPH | 1 | -4.389 | -7.663  | 70.288 |
| ATOM | 254 | AU | SPH | 1 | -3.500 | -7.764  | 71.574 |
| ATOM | 255 | AU | SPH | 1 | -2.790 | -8.231  | 72.890 |
| ATOM | 256 | AU | SPH | 1 | -2.309 | -9.032  | 74.147 |
| ATOM | 257 | AU | SPH | 1 | -2.088 | -10.113 | 75.258 |
| ATOM | 258 | AU | SPH | 1 | -2.143 | -11.400 | 76.149 |
| ATOM | 259 | AU | SPH | 1 | -2.469 | -12.805 | 76.759 |
| ATOM | 260 | AU | SPH | 1 | -3.046 | -14.233 | 77.046 |
| ATOM | 261 | AU | SPH | 1 | -3.833 | -15.586 | 76.990 |
| ATOM | 262 | AU | SPH | 1 | -8.435 | -10.686 | 67.050 |
| ATOM | 263 | AU | SPH | 1 | -7.817 | -9.380  | 67.654 |
| ATOM | 264 | AU | SPH | 1 | -7.084 | -8.330  | 68.556 |
| ATOM | 265 | AU | SPH | 1 | -6.286 | -7.607  | 69.694 |
| ATOM | 266 | AU | SPH | 1 | -5.478 | -7.262  | 70.990 |
| ATOM | 267 | AU | SPH | 1 | -4.714 | -7.316  | 72.357 |
| ATOM | 268 | AU | SPH | 1 | -4.048 | -7.767  | 73.701 |

|      |     |     |     |   |        |         |        |      |      |   |
|------|-----|-----|-----|---|--------|---------|--------|------|------|---|
| ATOM | 269 | AU  | SPH | 1 | -3.523 | -8.585  | 74.930 |      |      |   |
| ATOM | 270 | AU  | SPH | 1 | -3.177 | -9.712  | 75.960 |      |      |   |
| ATOM | 271 | AU  | SPH | 1 | -3.032 | -11.072 | 76.723 |      |      |   |
| ATOM | 272 | AU  | SPH | 1 | -3.098 | -12.573 | 77.164 |      |      |   |
| ATOM | 273 | AU  | SPH | 1 | -3.371 | -14.113 | 77.256 |      |      |   |
| ATOM | 274 | AU  | SPH | 1 | -3.833 | -15.586 | 76.990 |      |      |   |
| ATOM | 275 | AU  | SPH | 1 | -8.435 | -10.686 | 67.050 |      |      |   |
| ATOM | 276 | AU  | SPH | 1 | -8.179 | -9.355  | 67.834 |      |      |   |
| ATOM | 277 | AU  | SPH | 1 | -7.783 | -8.281  | 68.904 |      |      |   |
| ATOM | 278 | AU  | SPH | 1 | -7.276 | -7.538  | 70.186 |      |      |   |
| ATOM | 279 | AU  | SPH | 1 | -6.690 | -7.177  | 71.593 |      |      |   |
| ATOM | 280 | AU  | SPH | 1 | -6.066 | -7.222  | 73.029 |      |      |   |
| ATOM | 281 | AU  | SPH | 1 | -5.447 | -7.670  | 74.397 |      |      |   |
| ATOM | 282 | AU  | SPH | 1 | -4.875 | -8.490  | 75.602 |      |      |   |
| ATOM | 283 | AU  | SPH | 1 | -4.389 | -9.627  | 76.563 |      |      |   |
| ATOM | 284 | AU  | SPH | 1 | -4.021 | -11.003 | 77.215 |      |      |   |
| ATOM | 285 | AU  | SPH | 1 | -3.798 | -12.525 | 77.512 |      |      |   |
| ATOM | 286 | AU  | SPH | 1 | -3.734 | -14.088 | 77.436 |      |      |   |
| ATOM | 287 | AU  | SPH | 1 | -3.833 | -15.586 | 76.990 |      |      |   |
| ATOM | 288 | AU  | SPH | 1 | -8.435 | -10.686 | 67.050 |      |      |   |
| ATOM | 289 | AU  | SPH | 1 | -8.553 | -9.426  | 67.973 |      |      |   |
| ATOM | 290 | AU  | SPH | 1 | -8.507 | -8.419  | 69.171 |      |      |   |
| ATOM | 291 | AU  | SPH | 1 | -8.298 | -7.733  | 70.564 |      |      |   |
| ATOM | 292 | AU  | SPH | 1 | -7.943 | -7.415  | 72.056 |      |      |   |
| ATOM | 293 | AU  | SPH | 1 | -7.464 | -7.488  | 73.545 |      |      |   |
| ATOM | 294 | AU  | SPH | 1 | -6.894 | -7.945  | 74.931 |      |      |   |
| ATOM | 295 | AU  | SPH | 1 | -6.272 | -8.756  | 76.118 |      |      |   |
| ATOM | 296 | AU  | SPH | 1 | -5.642 | -9.865  | 77.026 |      |      |   |
| ATOM | 297 | AU  | SPH | 1 | -5.044 | -11.198 | 77.593 |      |      |   |
| ATOM | 298 | AU  | SPH | 1 | -4.521 | -12.662 | 77.780 |      |      |   |
| ATOM | 299 | AU  | SPH | 1 | -4.108 | -14.159 | 77.574 |      |      |   |
| ATOM | 300 | AU  | SPH | 1 | -3.833 | -15.586 | 76.990 |      |      |   |
| ATOM | 301 | AU  | SPH | 1 | -8.435 | -10.686 | 67.050 |      |      |   |
| ATOM | 302 | AU  | SPH | 1 | -8.914 | -9.589  | 68.060 |      |      |   |
| ATOM | 303 | AU  | SPH | 1 | -9.204 | -8.733  | 69.339 |      |      |   |
| ATOM | 304 | AU  | SPH | 1 | -9.285 | -8.177  | 70.801 |      |      |   |
| ATOM | 305 | AU  | SPH | 1 | -9.150 | -7.960  | 72.347 |      |      |   |
| ATOM | 306 | AU  | SPH | 1 | -8.811 | -8.095  | 73.870 |      |      |   |
| ATOM | 307 | AU  | SPH | 1 | -8.289 | -8.574  | 75.267 |      |      |   |
| ATOM | 308 | AU  | SPH | 1 | -7.620 | -9.363  | 76.442 |      |      |   |
| ATOM | 309 | AU  | SPH | 1 | -6.849 | -10.410 | 77.317 |      |      |   |
| ATOM | 310 | AU  | SPH | 1 | -6.030 | -11.642 | 77.830 |      |      |   |
| ATOM | 311 | AU  | SPH | 1 | -5.219 | -12.977 | 77.947 |      |      |   |
| ATOM | 312 | AU  | SPH | 1 | -4.469 | -14.322 | 77.661 |      |      |   |
| ATOM | 313 | AU  | SPH | 1 | -3.833 | -15.586 | 76.990 |      |      |   |
| TER  |     |     |     |   |        |         |        |      |      |   |
| ATOM | 1   | C1' | A A | 1 | 2.250  | -5.432  | -0.471 | 1.00 | 0.00 | C |
| ATOM | 2   | N1  | A A | 1 | 0.711  | -0.555  | -0.047 | 1.00 | 0.00 | N |
| ATOM | 3   | C2  | A A | 1 | 1.916  | -1.116  | -0.092 | 1.00 | 0.00 | C |
| ATOM | 4   | N3  | A A | 1 | 2.243  | -2.386  | -0.206 | 1.00 | 0.00 | N |
| ATOM | 5   | C4  | A A | 1 | 1.137  | -3.148  | -0.274 | 1.00 | 0.00 | C |
| ATOM | 6   | C5  | A A | 1 | -0.164 | -2.730  | -0.240 | 1.00 | 0.00 | C |
| ATOM | 7   | C6  | A A | 1 | -0.374 | -1.340  | -0.118 | 1.00 | 0.00 | C |
| ATOM | 8   | N6  | A A | 1 | -1.597 | -0.784  | -0.072 | 1.00 | 0.00 | N |

|      |    |      |     |   |        |        |        |      |      |   |
|------|----|------|-----|---|--------|--------|--------|------|------|---|
| ATOM | 9  | N7   | A A | 1 | -1.035 | -3.801 | -0.335 | 1.00 | 0.00 | N |
| ATOM | 10 | C8   | A A | 1 | -0.250 | -4.834 | -0.421 | 1.00 | 0.00 | C |
| ATOM | 11 | N9   | A A | 1 | 1.082  | -4.515 | -0.392 | 1.00 | 0.00 | N |
| ATOM | 12 | C2'  | A A | 1 | 2.047  | -6.749 | 0.266  | 1.00 | 0.00 | C |
| ATOM | 13 | C3'  | A A | 1 | 2.791  | -7.729 | -0.627 | 1.00 | 0.00 | C |
| ATOM | 14 | O3'  | A A | 1 | 4.175  | -7.716 | -0.286 | 1.00 | 0.00 | O |
| ATOM | 15 | C4'  | A A | 1 | 2.536  | -7.175 | -2.028 | 1.00 | 0.00 | C |
| ATOM | 16 | O4'  | A A | 1 | 2.477  | -5.725 | -1.836 | 1.00 | 0.00 | O |
| ATOM | 17 | C5'  | A A | 1 | 1.264  | -7.625 | -2.706 | 1.00 | 0.00 | C |
| ATOM | 18 | O5'  | A A | 1 | 0.202  | -7.749 | -1.726 | 1.00 | 0.00 | O |
| ATOM | 19 | H2   | A A | 1 | 2.755  | -0.424 | -0.026 | 1.00 | 0.00 | H |
| ATOM | 20 | H8   | A A | 1 | -0.617 | -5.857 | -0.509 | 1.00 | 0.00 | H |
| ATOM | 21 | H1'  | A A | 1 | 3.125  | -4.903 | -0.092 | 1.00 | 0.00 | H |
| ATOM | 22 | H3'  | A A | 1 | 2.405  | -8.745 | -0.530 | 1.00 | 0.00 | H |
| ATOM | 23 | H4'  | A A | 1 | 3.374  | -7.489 | -2.649 | 1.00 | 0.00 | H |
| ATOM | 24 | H61  | A A | 1 | -1.695 | 0.235  | 0.016  | 1.00 | 0.00 | H |
| ATOM | 25 | H62  | A A | 1 | -2.434 | -1.382 | -0.126 | 1.00 | 0.00 | H |
| ATOM | 26 | H5T  | A A | 1 | -0.457 | -8.436 | -1.844 | 1.00 | 0.00 | H |
| ATOM | 27 | H2'1 | A A | 1 | 0.995  | -7.015 | 0.356  | 1.00 | 0.00 | H |
| ATOM | 28 | H2'2 | A A | 1 | 2.469  | -6.730 | 1.271  | 1.00 | 0.00 | H |
| ATOM | 29 | H5'1 | A A | 1 | 0.983  | -6.892 | -3.462 | 1.00 | 0.00 | H |
| ATOM | 30 | H5'2 | A A | 1 | 1.435  | -8.587 | -3.186 | 1.00 | 0.00 | H |
| ATOM | 31 | C1'  | G A | 2 | 4.998  | -3.052 | 2.911  | 1.00 | 0.00 | C |
| ATOM | 32 | N1   | G A | 2 | 0.895  | -0.052 | 3.332  | 1.00 | 0.00 | N |
| ATOM | 33 | C2   | G A | 2 | 2.235  | 0.281  | 3.290  | 1.00 | 0.00 | C |
| ATOM | 34 | N2   | G A | 2 | 2.522  | 1.585  | 3.373  | 1.00 | 0.00 | N |
| ATOM | 35 | N3   | G A | 2 | 3.213  | -0.616 | 3.174  | 1.00 | 0.00 | N |
| ATOM | 36 | C4   | G A | 2 | 2.741  | -1.889 | 3.109  | 1.00 | 0.00 | C |
| ATOM | 37 | C5   | G A | 2 | 1.423  | -2.315 | 3.146  | 1.00 | 0.00 | C |
| ATOM | 38 | C6   | G A | 2 | 0.385  | -1.361 | 3.265  | 1.00 | 0.00 | C |
| ATOM | 39 | O6   | G A | 2 | -0.832 | -1.541 | 3.312  | 1.00 | 0.00 | O |
| ATOM | 40 | N7   | G A | 2 | 1.363  | -3.707 | 3.053  | 1.00 | 0.00 | N |
| ATOM | 41 | C8   | G A | 2 | 2.616  | -4.072 | 2.961  | 1.00 | 0.00 | C |
| ATOM | 42 | N9   | G A | 2 | 3.513  | -3.024 | 2.989  | 1.00 | 0.00 | N |
| ATOM | 43 | C2'  | G A | 2 | 5.630  | -4.225 | 3.648  | 1.00 | 0.00 | C |
| ATOM | 44 | C3'  | G A | 2 | 6.813  | -4.562 | 2.756  | 1.00 | 0.00 | C |
| ATOM | 45 | O3'  | G A | 2 | 7.911  | -3.718 | 3.096  | 1.00 | 0.00 | O |
| ATOM | 46 | C4'  | G A | 2 | 6.275  | -4.273 | 1.355  | 1.00 | 0.00 | C |
| ATOM | 47 | O4'  | G A | 2 | 5.357  | -3.151 | 1.546  | 1.00 | 0.00 | O |
| ATOM | 48 | C5'  | G A | 2 | 5.530  | -5.399 | 0.678  | 1.00 | 0.00 | C |
| ATOM | 49 | O5'  | G A | 2 | 4.757  | -6.135 | 1.658  | 1.00 | 0.00 | O |
| ATOM | 50 | O1P  | G A | 2 | 5.854  | -8.400 | 1.682  | 1.00 | 0.00 | O |
| ATOM | 51 | O2P  | G A | 2 | 3.432  | -8.173 | 2.293  | 1.00 | 0.00 | O |
| ATOM | 52 | P    | G A | 2 | 4.570  | -7.707 | 1.464  | 1.00 | 0.00 | P |
| ATOM | 53 | H1   | G A | 2 | 0.217  | 0.719  | 3.420  | 1.00 | 0.00 | H |
| ATOM | 54 | H8   | G A | 2 | 2.925  | -5.113 | 2.871  | 1.00 | 0.00 | H |
| ATOM | 55 | H1'  | G A | 2 | 5.378  | -2.103 | 3.290  | 1.00 | 0.00 | H |
| ATOM | 56 | H21  | G A | 2 | 1.761  | 2.274  | 3.461  | 1.00 | 0.00 | H |
| ATOM | 57 | H3'  | G A | 2 | 7.115  | -5.605 | 2.854  | 1.00 | 0.00 | H |
| ATOM | 58 | H22  | G A | 2 | 3.503  | 1.898  | 3.349  | 1.00 | 0.00 | H |
| ATOM | 59 | H4'  | G A | 2 | 7.133  | -4.020 | 0.733  | 1.00 | 0.00 | H |
| ATOM | 60 | H2'1 | G A | 2 | 4.948  | -5.071 | 3.739  | 1.00 | 0.00 | H |
| ATOM | 61 | H2'2 | G A | 2 | 5.954  | -3.956 | 4.654  | 1.00 | 0.00 | H |
| ATOM | 62 | H5'1 | G A | 2 | 4.865  | -4.983 | -0.079 | 1.00 | 0.00 | H |

|      |     |      |     |   |        |        |        |      |      |   |
|------|-----|------|-----|---|--------|--------|--------|------|------|---|
| ATOM | 63  | H5'2 | G A | 2 | 6.247  | -6.064 | 0.197  | 1.00 | 0.00 | H |
| ATOM | 64  | C1'  | G A | 3 | 5.838  | 0.469  | 6.291  | 1.00 | 0.00 | C |
| ATOM | 65  | N1   | G A | 3 | 0.755  | 0.484  | 6.712  | 1.00 | 0.00 | N |
| ATOM | 66  | C2   | G A | 3 | 1.644  | 1.541  | 6.670  | 1.00 | 0.00 | C |
| ATOM | 67  | N2   | G A | 3 | 1.109  | 2.766  | 6.754  | 1.00 | 0.00 | N |
| ATOM | 68  | N3   | G A | 3 | 2.961  | 1.390  | 6.554  | 1.00 | 0.00 | N |
| ATOM | 69  | C4   | G A | 3 | 3.328  | 0.083  | 6.489  | 1.00 | 0.00 | C |
| ATOM | 70  | C5   | G A | 3 | 2.512  | -1.036 | 6.526  | 1.00 | 0.00 | C |
| ATOM | 71  | C6   | G A | 3 | 1.112  | -0.875 | 6.645  | 1.00 | 0.00 | C |
| ATOM | 72  | O6   | G A | 3 | 0.233  | -1.736 | 6.693  | 1.00 | 0.00 | O |
| ATOM | 73  | N7   | G A | 3 | 3.281  | -2.197 | 6.433  | 1.00 | 0.00 | N |
| ATOM | 74  | C8   | G A | 3 | 4.509  | -1.757 | 6.341  | 1.00 | 0.00 | C |
| ATOM | 75  | N9   | G A | 3 | 4.619  | -0.382 | 6.369  | 1.00 | 0.00 | N |
| ATOM | 76  | C2'  | G A | 3 | 7.038  | -0.109 | 7.028  | 1.00 | 0.00 | C |
| ATOM | 77  | C3'  | G A | 3 | 8.193  | 0.314  | 6.136  | 1.00 | 0.00 | C |
| ATOM | 78  | O3'  | G A | 3 | 8.585  | 1.642  | 6.476  | 1.00 | 0.00 | O |
| ATOM | 79  | C4'  | G A | 3 | 7.589  | 0.232  | 4.735  | 1.00 | 0.00 | C |
| ATOM | 80  | O4'  | G A | 3 | 6.186  | 0.600  | 4.926  | 1.00 | 0.00 | O |
| ATOM | 81  | C5'  | G A | 3 | 7.647  | -1.117 | 4.058  | 1.00 | 0.00 | C |
| ATOM | 82  | O5'  | G A | 3 | 7.455  | -2.167 | 5.038  | 1.00 | 0.00 | O |
| ATOM | 83  | O1P  | G A | 3 | 9.674  | -3.355 | 5.062  | 1.00 | 0.00 | O |
| ATOM | 84  | O2P  | G A | 3 | 7.581  | -4.595 | 5.673  | 1.00 | 0.00 | O |
| ATOM | 85  | P    | G A | 3 | 8.228  | -3.549 | 4.844  | 1.00 | 0.00 | P |
| ATOM | 86  | H1   | G A | 3 | -0.248 | 0.710  | 6.799  | 1.00 | 0.00 | H |
| ATOM | 87  | H8   | G A | 3 | 5.371  | -2.417 | 6.251  | 1.00 | 0.00 | H |
| ATOM | 88  | H1'  | G A | 3 | 5.587  | 1.460  | 6.670  | 1.00 | 0.00 | H |
| ATOM | 89  | H21  | G A | 3 | 0.088  | 2.876  | 6.841  | 1.00 | 0.00 | H |
| ATOM | 90  | H3'  | G A | 3 | 9.051  | -0.352 | 6.234  | 1.00 | 0.00 | H |
| ATOM | 91  | H22  | G A | 3 | 1.718  | 3.595  | 6.731  | 1.00 | 0.00 | H |
| ATOM | 92  | H4'  | G A | 3 | 8.134  | 0.941  | 4.113  | 1.00 | 0.00 | H |
| ATOM | 93  | H2'1 | G A | 3 | 6.984  | -1.194 | 7.119  | 1.00 | 0.00 | H |
| ATOM | 94  | H2'2 | G A | 3 | 7.142  | 0.299  | 8.034  | 1.00 | 0.00 | H |
| ATOM | 95  | H5'1 | G A | 3 | 6.865  | -1.171 | 3.301  | 1.00 | 0.00 | H |
| ATOM | 96  | H5'2 | G A | 3 | 8.618  | -1.234 | 3.577  | 1.00 | 0.00 | H |
| ATOM | 97  | C1'  | C A | 4 | 4.447  | 3.812  | 9.671  | 1.00 | 0.00 | C |
| ATOM | 98  | N1   | C A | 4 | 3.955  | 2.408  | 9.749  | 1.00 | 0.00 | N |
| ATOM | 99  | C2   | C A | 4 | 2.582  | 2.205  | 9.867  | 1.00 | 0.00 | C |
| ATOM | 100 | O2   | C A | 4 | 1.833  | 3.189  | 9.903  | 1.00 | 0.00 | O |
| ATOM | 101 | N3   | C A | 4 | 2.115  | 0.935  | 9.939  | 1.00 | 0.00 | N |
| ATOM | 102 | C4   | C A | 4 | 2.951  | -0.110 | 9.899  | 1.00 | 0.00 | C |
| ATOM | 103 | N4   | C A | 4 | 2.439  | -1.330 | 9.970  | 1.00 | 0.00 | N |
| ATOM | 104 | C5   | C A | 4 | 4.367  | 0.071  | 9.780  | 1.00 | 0.00 | C |
| ATOM | 105 | C6   | C A | 4 | 4.816  | 1.357  | 9.706  | 1.00 | 0.00 | C |
| ATOM | 106 | C2'  | C A | 4 | 5.756  | 4.045  | 10.412 | 1.00 | 0.00 | C |
| ATOM | 107 | C3'  | C A | 4 | 6.449  | 5.064  | 9.519  | 1.00 | 0.00 | C |
| ATOM | 108 | O3'  | C A | 4 | 5.989  | 6.371  | 9.857  | 1.00 | 0.00 | O |
| ATOM | 109 | C4'  | C A | 4 | 6.011  | 4.642  | 8.119  | 1.00 | 0.00 | C |
| ATOM | 110 | O4'  | C A | 4 | 4.657  | 4.119  | 8.305  | 1.00 | 0.00 | O |
| ATOM | 111 | C5'  | C A | 4 | 6.849  | 3.581  | 7.445  | 1.00 | 0.00 | C |
| ATOM | 112 | O5'  | C A | 4 | 7.305  | 2.618  | 8.429  | 1.00 | 0.00 | O |
| ATOM | 113 | O1P  | C A | 4 | 9.799  | 2.952  | 8.460  | 1.00 | 0.00 | O |
| ATOM | 114 | O2P  | C A | 4 | 8.825  | 0.722  | 9.071  | 1.00 | 0.00 | O |
| ATOM | 115 | P    | C A | 4 | 8.740  | 1.948  | 8.240  | 1.00 | 0.00 | P |
| ATOM | 116 | H5   | C A | 4 | 5.052  | -0.777 | 9.752  | 1.00 | 0.00 | H |



|      |     |      |     |   |        |        |        |      |      |   |
|------|-----|------|-----|---|--------|--------|--------|------|------|---|
| ATOM | 117 | H6   | C A | 4 | 5.885  | 1.545  | 9.610  | 1.00 | 0.00 | H |
| ATOM | 118 | H1'  | C A | 4 | 3.663  | 4.468  | 10.046 | 1.00 | 0.00 | H |
| ATOM | 119 | H3'  | C A | 4 | 7.533  | 5.025  | 9.622  | 1.00 | 0.00 | H |
| ATOM | 120 | H4'  | C A | 4 | 6.041  | 5.535  | 7.495  | 1.00 | 0.00 | H |
| ATOM | 121 | H41  | C A | 4 | 3.060  | -2.152 | 9.940  | 1.00 | 0.00 | H |
| ATOM | 122 | H42  | C A | 4 | 1.420  | -1.458 | 10.057 | 1.00 | 0.00 | H |
| ATOM | 123 | H2'1 | C A | 4 | 6.347  | 3.135  | 10.506 | 1.00 | 0.00 | H |
| ATOM | 124 | H2'2 | C A | 4 | 5.598  | 4.439  | 11.417 | 1.00 | 0.00 | H |
| ATOM | 125 | H5'1 | C A | 4 | 6.249  | 3.077  | 6.687  | 1.00 | 0.00 | H |
| ATOM | 126 | H5'2 | C A | 4 | 7.707  | 4.053  | 6.967  | 1.00 | 0.00 | H |
| ATOM | 127 | C1'  | C A | 5 | 1.358  | 5.698  | 13.051 | 1.00 | 0.00 | C |
| ATOM | 128 | N1   | C A | 5 | 1.785  | 4.274  | 13.129 | 1.00 | 0.00 | N |
| ATOM | 129 | C2   | C A | 5 | 0.794  | 3.302  | 13.247 | 1.00 | 0.00 | C |
| ATOM | 130 | O2   | C A | 5 | -0.392 | 3.657  | 13.283 | 1.00 | 0.00 | O |
| ATOM | 131 | N3   | C A | 5 | 1.162  | 1.999  | 13.319 | 1.00 | 0.00 | N |
| ATOM | 132 | C4   | C A | 5 | 2.452  | 1.645  | 13.279 | 1.00 | 0.00 | C |
| ATOM | 133 | N4   | C A | 5 | 2.755  | 0.358  | 13.350 | 1.00 | 0.00 | N |
| ATOM | 134 | C5   | C A | 5 | 3.492  | 2.624  | 13.160 | 1.00 | 0.00 | C |
| ATOM | 135 | C6   | C A | 5 | 3.098  | 3.928  | 13.086 | 1.00 | 0.00 | C |
| ATOM | 136 | C2'  | C A | 5 | 2.280  | 6.656  | 13.792 | 1.00 | 0.00 | C |
| ATOM | 137 | C3'  | C A | 5 | 2.241  | 7.887  | 12.899 | 1.00 | 0.00 | C |
| ATOM | 138 | O3'  | C A | 5 | 1.101  | 8.674  | 13.237 | 1.00 | 0.00 | O |
| ATOM | 139 | C4'  | C A | 5 | 2.135  | 7.288  | 11.499 | 1.00 | 0.00 | C |
| ATOM | 140 | O4'  | C A | 5 | 1.347  | 6.070  | 11.685 | 1.00 | 0.00 | O |
| ATOM | 141 | C5'  | C A | 5 | 3.437  | 6.923  | 10.825 | 1.00 | 0.00 | C |
| ATOM | 142 | O5'  | C A | 5 | 4.372  | 6.411  | 11.809 | 1.00 | 0.00 | O |
| ATOM | 143 | O1P  | C A | 5 | 6.193  | 8.148  | 11.840 | 1.00 | 0.00 | O |
| ATOM | 144 | O2P  | C A | 5 | 6.715  | 5.771  | 12.451 | 1.00 | 0.00 | O |
| ATOM | 145 | P    | C A | 5 | 5.926  | 6.713  | 11.620 | 1.00 | 0.00 | P |
| ATOM | 146 | H5   | C A | 5 | 4.545  | 2.341  | 13.132 | 1.00 | 0.00 | H |
| ATOM | 147 | H6   | C A | 5 | 3.853  | 4.709  | 12.990 | 1.00 | 0.00 | H |
| ATOM | 148 | H1'  | C A | 5 | 0.337  | 5.768  | 13.426 | 1.00 | 0.00 | H |
| ATOM | 149 | H3'  | C A | 5 | 3.141  | 8.494  | 13.002 | 1.00 | 0.00 | H |
| ATOM | 150 | H4'  | C A | 5 | 1.635  | 8.029  | 10.875 | 1.00 | 0.00 | H |
| ATOM | 151 | H41  | C A | 5 | 3.740  | 0.058  | 13.320 | 1.00 | 0.00 | H |
| ATOM | 152 | H42  | C A | 5 | 2.005  | -0.344 | 13.437 | 1.00 | 0.00 | H |
| ATOM | 153 | H2'1 | C A | 5 | 3.293  | 6.267  | 13.886 | 1.00 | 0.00 | H |
| ATOM | 154 | H2'2 | C A | 5 | 1.920  | 6.882  | 14.797 | 1.00 | 0.00 | H |
| ATOM | 155 | H5'1 | C A | 5 | 3.247  | 6.162  | 10.067 | 1.00 | 0.00 | H |
| ATOM | 156 | H5'2 | C A | 5 | 3.853  | 7.809  | 10.347 | 1.00 | 0.00 | H |
| ATOM | 157 | C1'  | G A | 6 | -2.250 | 5.407  | 16.431 | 1.00 | 0.00 | C |
| ATOM | 158 | N1   | G A | 6 | -0.693 | 0.567  | 16.851 | 1.00 | 0.00 | N |
| ATOM | 159 | C2   | G A | 6 | -1.975 | 1.087  | 16.810 | 1.00 | 0.00 | C |
| ATOM | 160 | N2   | G A | 6 | -2.974 | 0.201  | 16.895 | 1.00 | 0.00 | N |
| ATOM | 161 | N3   | G A | 6 | -2.237 | 2.388  | 16.694 | 1.00 | 0.00 | N |
| ATOM | 162 | C4   | G A | 6 | -1.107 | 3.139  | 16.629 | 1.00 | 0.00 | C |
| ATOM | 163 | C5   | G A | 6 | 0.209  | 2.709  | 16.666 | 1.00 | 0.00 | C |
| ATOM | 164 | C6   | G A | 6 | 0.489  | 1.329  | 16.785 | 1.00 | 0.00 | C |
| ATOM | 165 | O6   | G A | 6 | 1.579  | 0.759  | 16.835 | 1.00 | 0.00 | O |
| ATOM | 166 | N7   | G A | 6 | 1.076  | 3.799  | 16.573 | 1.00 | 0.00 | N |
| ATOM | 167 | C8   | G A | 6 | 0.278  | 4.831  | 16.481 | 1.00 | 0.00 | C |
| ATOM | 168 | N9   | G A | 6 | -1.064 | 4.511  | 16.509 | 1.00 | 0.00 | N |
| ATOM | 169 | C2'  | G A | 6 | -2.071 | 6.727  | 17.168 | 1.00 | 0.00 | C |
| ATOM | 170 | C3'  | G A | 6 | -2.831 | 7.695  | 16.276 | 1.00 | 0.00 | C |

|      |     |      |     |   |        |        |        |      |      |   |
|------|-----|------|-----|---|--------|--------|--------|------|------|---|
| ATOM | 171 | O3'  | G A | 6 | -4.215 | 7.658  | 16.616 | 1.00 | 0.00 | O |
| ATOM | 172 | C4'  | G A | 6 | -2.565 | 7.146  | 14.875 | 1.00 | 0.00 | C |
| ATOM | 173 | O4'  | G A | 6 | -2.482 | 5.698  | 15.066 | 1.00 | 0.00 | O |
| ATOM | 174 | C5'  | G A | 6 | -1.301 | 7.618  | 14.198 | 1.00 | 0.00 | C |
| ATOM | 175 | O5'  | G A | 6 | -0.242 | 7.760  | 15.178 | 1.00 | 0.00 | O |
| ATOM | 176 | O1P  | G A | 6 | 0.201  | 10.237 | 15.202 | 1.00 | 0.00 | O |
| ATOM | 177 | O2P  | G A | 6 | 2.028  | 8.630  | 15.813 | 1.00 | 0.00 | O |
| ATOM | 178 | P    | G A | 6 | 0.833  | 8.922  | 14.984 | 1.00 | 0.00 | P |
| ATOM | 179 | H1   | G A | 6 | -0.598 | -0.457 | 16.936 | 1.00 | 0.00 | H |
| ATOM | 180 | H8   | G A | 6 | 0.639  | 5.856  | 16.391 | 1.00 | 0.00 | H |
| ATOM | 181 | H1'  | G A | 6 | -3.115 | 4.862  | 16.810 | 1.00 | 0.00 | H |
| ATOM | 182 | H21  | G A | 6 | -2.764 | -0.804 | 16.981 | 1.00 | 0.00 | H |
| ATOM | 183 | H3'  | G A | 6 | -2.463 | 8.717  | 16.374 | 1.00 | 0.00 | H |
| ATOM | 184 | H22  | G A | 6 | -3.952 | 0.524  | 16.873 | 1.00 | 0.00 | H |
| ATOM | 185 | H4'  | G A | 6 | -3.408 | 7.445  | 14.253 | 1.00 | 0.00 | H |
| ATOM | 186 | H2'1 | G A | 6 | -1.022 | 7.011  | 17.259 | 1.00 | 0.00 | H |
| ATOM | 187 | H2'2 | G A | 6 | -2.491 | 6.700  | 18.174 | 1.00 | 0.00 | H |
| ATOM | 188 | H5'1 | G A | 6 | -1.007 | 6.892  | 13.441 | 1.00 | 0.00 | H |
| ATOM | 189 | H5'2 | G A | 6 | -1.489 | 8.578  | 13.717 | 1.00 | 0.00 | H |
| ATOM | 190 | C1'  | C A | 7 | -4.999 | 3.052  | 19.811 | 1.00 | 0.00 | C |
| ATOM | 191 | N1   | C A | 7 | -3.513 | 3.018  | 19.889 | 1.00 | 0.00 | N |
| ATOM | 192 | C2   | C A | 7 | -2.895 | 1.775  | 20.007 | 1.00 | 0.00 | C |
| ATOM | 193 | O2   | C A | 7 | -3.599 | 0.758  | 20.043 | 1.00 | 0.00 | O |
| ATOM | 194 | N3   | C A | 7 | -1.542 | 1.722  | 20.079 | 1.00 | 0.00 | N |
| ATOM | 195 | C4   | C A | 7 | -0.806 | 2.840  | 20.039 | 1.00 | 0.00 | C |
| ATOM | 196 | N4   | C A | 7 | 0.512  | 2.730  | 20.110 | 1.00 | 0.00 | N |
| ATOM | 197 | C5   | C A | 7 | -1.415 | 4.133  | 19.922 | 1.00 | 0.00 | C |
| ATOM | 198 | C6   | C A | 7 | -2.779 | 4.162  | 19.846 | 1.00 | 0.00 | C |
| ATOM | 199 | C2'  | C A | 7 | -5.626 | 4.225  | 20.552 | 1.00 | 0.00 | C |
| ATOM | 200 | C3'  | C A | 7 | -6.809 | 4.568  | 19.659 | 1.00 | 0.00 | C |
| ATOM | 201 | O3'  | C A | 7 | -7.910 | 3.727  | 19.997 | 1.00 | 0.00 | O |
| ATOM | 202 | C4'  | C A | 7 | -6.272 | 4.282  | 18.259 | 1.00 | 0.00 | C |
| ATOM | 203 | O4'  | C A | 7 | -5.356 | 3.156  | 18.445 | 1.00 | 0.00 | O |
| ATOM | 204 | C5'  | C A | 7 | -5.521 | 5.408  | 17.585 | 1.00 | 0.00 | C |
| ATOM | 205 | O5'  | C A | 7 | -4.747 | 6.139  | 18.569 | 1.00 | 0.00 | O |
| ATOM | 206 | O1P  | C A | 7 | -5.836 | 8.408  | 18.600 | 1.00 | 0.00 | O |
| ATOM | 207 | O2P  | C A | 7 | -3.414 | 8.169  | 19.211 | 1.00 | 0.00 | O |
| ATOM | 208 | P    | C A | 7 | -4.553 | 7.710  | 18.380 | 1.00 | 0.00 | P |
| ATOM | 209 | H5   | C A | 7 | -0.821 | 5.047  | 19.895 | 1.00 | 0.00 | H |
| ATOM | 210 | H6   | C A | 7 | -3.288 | 5.121  | 19.748 | 1.00 | 0.00 | H |
| ATOM | 211 | H1'  | C A | 7 | -5.382 | 2.103  | 20.186 | 1.00 | 0.00 | H |
| ATOM | 212 | H3'  | C A | 7 | -7.107 | 5.612  | 19.762 | 1.00 | 0.00 | H |
| ATOM | 213 | H4'  | C A | 7 | -7.131 | 4.035  | 17.635 | 1.00 | 0.00 | H |
| ATOM | 214 | H41  | C A | 7 | 1.102  | 3.574  | 20.079 | 1.00 | 0.00 | H |
| ATOM | 215 | H42  | C A | 7 | 0.949  | 1.801  | 20.197 | 1.00 | 0.00 | H |
| ATOM | 216 | H2'1 | C A | 7 | -4.943 | 5.068  | 20.646 | 1.00 | 0.00 | H |
| ATOM | 217 | H2'2 | C A | 7 | -5.952 | 3.953  | 21.557 | 1.00 | 0.00 | H |
| ATOM | 218 | H5'1 | C A | 7 | -4.856 | 4.992  | 16.827 | 1.00 | 0.00 | H |
| ATOM | 219 | H5'2 | C A | 7 | -6.235 | 6.078  | 17.107 | 1.00 | 0.00 | H |
| ATOM | 220 | C1'  | A A | 8 | -5.862 | -0.462 | 23.189 | 1.00 | 0.00 | C |
| ATOM | 221 | N1   | A A | 8 | -0.747 | -0.505 | 23.614 | 1.00 | 0.00 | N |
| ATOM | 222 | C2   | A A | 8 | -1.653 | -1.477 | 23.568 | 1.00 | 0.00 | C |
| ATOM | 223 | N3   | A A | 8 | -2.962 | -1.397 | 23.454 | 1.00 | 0.00 | N |
| ATOM | 224 | C4   | A A | 8 | -3.344 | -0.108 | 23.386 | 1.00 | 0.00 | C |

|      |     |      |     |   |        |        |        |      |      |   |
|------|-----|------|-----|---|--------|--------|--------|------|------|---|
| ATOM | 225 | C5   | A A | 8 | -2.545 | 1.000  | 23.420 | 1.00 | 0.00 | C |
| ATOM | 226 | C6   | A A | 8 | -1.159 | 0.770  | 23.542 | 1.00 | 0.00 | C |
| ATOM | 227 | N6   | A A | 8 | -0.252 | 1.761  | 23.588 | 1.00 | 0.00 | N |
| ATOM | 228 | N7   | A A | 8 | -3.294 | 2.160  | 23.324 | 1.00 | 0.00 | N |
| ATOM | 229 | C8   | A A | 8 | -4.520 | 1.733  | 23.239 | 1.00 | 0.00 | C |
| ATOM | 230 | N9   | A A | 8 | -4.628 | 0.366  | 23.268 | 1.00 | 0.00 | N |
| ATOM | 231 | C2'  | A A | 8 | -7.052 | 0.138  | 23.926 | 1.00 | 0.00 | C |
| ATOM | 232 | C3'  | A A | 8 | -8.214 | -0.266 | 23.033 | 1.00 | 0.00 | C |
| ATOM | 233 | O3'  | A A | 8 | -8.628 | -1.586 | 23.374 | 1.00 | 0.00 | O |
| ATOM | 234 | C4'  | A A | 8 | -7.608 | -0.195 | 21.632 | 1.00 | 0.00 | C |
| ATOM | 235 | O4'  | A A | 8 | -6.210 | -0.587 | 21.824 | 1.00 | 0.00 | O |
| ATOM | 236 | C5'  | A A | 8 | -7.644 | 1.154  | 20.954 | 1.00 | 0.00 | C |
| ATOM | 237 | O5'  | A A | 8 | -7.432 | 2.202  | 21.934 | 1.00 | 0.00 | O |
| ATOM | 238 | O1P  | A A | 8 | -9.631 | 3.428  | 21.957 | 1.00 | 0.00 | O |
| ATOM | 239 | O2P  | A A | 8 | -7.515 | 4.632  | 22.568 | 1.00 | 0.00 | O |
| ATOM | 240 | P    | A A | 8 | -8.181 | 3.597  | 21.739 | 1.00 | 0.00 | P |
| ATOM | 241 | H2   | A A | 8 | -1.254 | -2.488 | 23.634 | 1.00 | 0.00 | H |
| ATOM | 242 | H8   | A A | 8 | -5.380 | 2.397  | 23.153 | 1.00 | 0.00 | H |
| ATOM | 243 | H1'  | A A | 8 | -5.629 | -1.457 | 23.568 | 1.00 | 0.00 | H |
| ATOM | 244 | H3'  | A A | 8 | -9.060 | 0.414  | 23.130 | 1.00 | 0.00 | H |
| ATOM | 245 | H4'  | A A | 8 | -8.165 | -0.895 | 21.011 | 1.00 | 0.00 | H |
| ATOM | 246 | H61  | A A | 8 | 0.749  | 1.539  | 23.675 | 1.00 | 0.00 | H |
| ATOM | 247 | H62  | A A | 8 | -0.561 | 2.743  | 23.536 | 1.00 | 0.00 | H |
| ATOM | 248 | H2'1 | A A | 8 | -6.979 | 1.221  | 24.016 | 1.00 | 0.00 | H |
| ATOM | 249 | H2'2 | A A | 8 | -7.163 | -0.269 | 24.931 | 1.00 | 0.00 | H |
| ATOM | 250 | H5'1 | A A | 8 | -6.859 | 1.194  | 20.198 | 1.00 | 0.00 | H |
| ATOM | 251 | H5'2 | A A | 8 | -8.612 | 1.289  | 20.474 | 1.00 | 0.00 | H |
| ATOM | 252 | C1'  | C A | 9 | -4.447 | -3.812 | 26.571 | 1.00 | 0.00 | C |
| ATOM | 253 | N1   | C A | 9 | -3.955 | -2.409 | 26.649 | 1.00 | 0.00 | N |
| ATOM | 254 | C2   | C A | 9 | -2.582 | -2.204 | 26.767 | 1.00 | 0.00 | C |
| ATOM | 255 | O2   | C A | 9 | -1.833 | -3.189 | 26.803 | 1.00 | 0.00 | O |
| ATOM | 256 | N3   | C A | 9 | -2.114 | -0.935 | 26.839 | 1.00 | 0.00 | N |
| ATOM | 257 | C4   | C A | 9 | -2.950 | 0.111  | 26.799 | 1.00 | 0.00 | C |
| ATOM | 258 | N4   | C A | 9 | -2.438 | 1.331  | 26.870 | 1.00 | 0.00 | N |
| ATOM | 259 | C5   | C A | 9 | -4.368 | -0.069 | 26.682 | 1.00 | 0.00 | C |
| ATOM | 260 | C6   | C A | 9 | -4.817 | -1.357 | 26.606 | 1.00 | 0.00 | C |
| ATOM | 261 | C2'  | C A | 9 | -5.756 | -4.045 | 27.312 | 1.00 | 0.00 | C |
| ATOM | 262 | C3'  | C A | 9 | -6.449 | -5.064 | 26.419 | 1.00 | 0.00 | C |
| ATOM | 263 | O3'  | C A | 9 | -5.989 | -6.371 | 26.757 | 1.00 | 0.00 | O |
| ATOM | 264 | C4'  | C A | 9 | -6.011 | -4.642 | 25.019 | 1.00 | 0.00 | C |
| ATOM | 265 | O4'  | C A | 9 | -4.657 | -4.119 | 25.205 | 1.00 | 0.00 | O |
| ATOM | 266 | C5'  | C A | 9 | -6.849 | -3.581 | 24.345 | 1.00 | 0.00 | C |
| ATOM | 267 | O5'  | C A | 9 | -7.305 | -2.618 | 25.329 | 1.00 | 0.00 | O |
| ATOM | 268 | O1P  | C A | 9 | -9.799 | -2.952 | 25.360 | 1.00 | 0.00 | O |
| ATOM | 269 | O2P  | C A | 9 | -8.825 | -0.722 | 25.971 | 1.00 | 0.00 | O |
| ATOM | 270 | P    | C A | 9 | -8.740 | -1.948 | 25.140 | 1.00 | 0.00 | P |
| ATOM | 271 | H5   | C A | 9 | -5.053 | 0.779  | 26.655 | 1.00 | 0.00 | H |
| ATOM | 272 | H6   | C A | 9 | -5.886 | -1.545 | 26.508 | 1.00 | 0.00 | H |
| ATOM | 273 | H1'  | C A | 9 | -3.663 | -4.469 | 26.946 | 1.00 | 0.00 | H |
| ATOM | 274 | H3'  | C A | 9 | -7.533 | -5.025 | 26.522 | 1.00 | 0.00 | H |
| ATOM | 275 | H4'  | C A | 9 | -6.041 | -5.535 | 24.395 | 1.00 | 0.00 | H |
| ATOM | 276 | H41  | C A | 9 | -3.059 | 2.153  | 26.839 | 1.00 | 0.00 | H |
| ATOM | 277 | H42  | C A | 9 | -1.419 | 1.458  | 26.957 | 1.00 | 0.00 | H |
| ATOM | 278 | H2'1 | C A | 9 | -6.347 | -3.135 | 27.406 | 1.00 | 0.00 | H |

|      |     |      |   |   |    |        |         |        |      |      |   |
|------|-----|------|---|---|----|--------|---------|--------|------|------|---|
| ATOM | 279 | H2'2 | C | A | 9  | -5.598 | -4.439  | 28.317 | 1.00 | 0.00 | H |
| ATOM | 280 | H5'1 | C | A | 9  | -6.249 | -3.077  | 23.587 | 1.00 | 0.00 | H |
| ATOM | 281 | H5'2 | C | A | 9  | -7.707 | -4.053  | 23.867 | 1.00 | 0.00 | H |
| ATOM | 282 | C1'  | C | A | 10 | -1.358 | -5.698  | 29.951 | 1.00 | 0.00 | C |
| ATOM | 283 | N1   | C | A | 10 | -1.785 | -4.274  | 30.029 | 1.00 | 0.00 | N |
| ATOM | 284 | C2   | C | A | 10 | -0.794 | -3.302  | 30.147 | 1.00 | 0.00 | C |
| ATOM | 285 | O2   | C | A | 10 | 0.392  | -3.657  | 30.183 | 1.00 | 0.00 | O |
| ATOM | 286 | N3   | C | A | 10 | -1.161 | -1.999  | 30.219 | 1.00 | 0.00 | N |
| ATOM | 287 | C4   | C | A | 10 | -2.452 | -1.644  | 30.179 | 1.00 | 0.00 | C |
| ATOM | 288 | N4   | C | A | 10 | -2.755 | -0.356  | 30.250 | 1.00 | 0.00 | N |
| ATOM | 289 | C5   | C | A | 10 | -3.493 | -2.623  | 30.062 | 1.00 | 0.00 | C |
| ATOM | 290 | C6   | C | A | 10 | -3.099 | -3.929  | 29.986 | 1.00 | 0.00 | C |
| ATOM | 291 | C2'  | C | A | 10 | -2.280 | -6.656  | 30.692 | 1.00 | 0.00 | C |
| ATOM | 292 | C3'  | C | A | 10 | -2.241 | -7.887  | 29.799 | 1.00 | 0.00 | C |
| ATOM | 293 | O3'  | C | A | 10 | -1.101 | -8.674  | 30.137 | 1.00 | 0.00 | O |
| ATOM | 294 | C4'  | C | A | 10 | -2.135 | -7.288  | 28.399 | 1.00 | 0.00 | C |
| ATOM | 295 | O4'  | C | A | 10 | -1.347 | -6.070  | 28.585 | 1.00 | 0.00 | O |
| ATOM | 296 | C5'  | C | A | 10 | -3.437 | -6.922  | 27.725 | 1.00 | 0.00 | C |
| ATOM | 297 | O5'  | C | A | 10 | -4.372 | -6.411  | 28.709 | 1.00 | 0.00 | O |
| ATOM | 298 | O1P  | C | A | 10 | -6.193 | -8.148  | 28.740 | 1.00 | 0.00 | O |
| ATOM | 299 | O2P  | C | A | 10 | -6.715 | -5.771  | 29.351 | 1.00 | 0.00 | O |
| ATOM | 300 | P    | C | A | 10 | -5.926 | -6.713  | 28.520 | 1.00 | 0.00 | P |
| ATOM | 301 | H5   | C | A | 10 | -4.546 | -2.340  | 30.035 | 1.00 | 0.00 | H |
| ATOM | 302 | H6   | C | A | 10 | -3.854 | -4.709  | 29.888 | 1.00 | 0.00 | H |
| ATOM | 303 | H1'  | C | A | 10 | -0.337 | -5.769  | 30.326 | 1.00 | 0.00 | H |
| ATOM | 304 | H3'  | C | A | 10 | -3.141 | -8.494  | 29.902 | 1.00 | 0.00 | H |
| ATOM | 305 | H4'  | C | A | 10 | -1.635 | -8.029  | 27.775 | 1.00 | 0.00 | H |
| ATOM | 306 | H41  | C | A | 10 | -3.740 | -0.056  | 30.219 | 1.00 | 0.00 | H |
| ATOM | 307 | H42  | C | A | 10 | -2.005 | 0.345   | 30.337 | 1.00 | 0.00 | H |
| ATOM | 308 | H2'1 | C | A | 10 | -3.293 | -6.267  | 30.786 | 1.00 | 0.00 | H |
| ATOM | 309 | H2'2 | C | A | 10 | -1.920 | -6.882  | 31.697 | 1.00 | 0.00 | H |
| ATOM | 310 | H5'1 | C | A | 10 | -3.247 | -6.161  | 26.967 | 1.00 | 0.00 | H |
| ATOM | 311 | H5'2 | C | A | 10 | -3.853 | -7.808  | 27.247 | 1.00 | 0.00 | H |
| ATOM | 312 | C1'  | T | A | 11 | 2.250  | -5.431  | 33.329 | 1.00 | 0.00 | C |
| ATOM | 313 | N1   | T | A | 11 | 1.083  | -4.513  | 33.410 | 1.00 | 0.00 | N |
| ATOM | 314 | C2   | T | A | 11 | 1.350  | -3.164  | 33.529 | 1.00 | 0.00 | C |
| ATOM | 315 | O2   | T | A | 11 | 2.483  | -2.716  | 33.569 | 1.00 | 0.00 | O |
| ATOM | 316 | N3   | T | A | 11 | 0.237  | -2.346  | 33.600 | 1.00 | 0.00 | N |
| ATOM | 317 | C4   | T | A | 11 | -1.082 | -2.750  | 33.567 | 1.00 | 0.00 | C |
| ATOM | 318 | O4   | T | A | 11 | -1.999 | -1.922  | 33.642 | 1.00 | 0.00 | O |
| ATOM | 319 | C5   | T | A | 11 | -1.261 | -4.177  | 33.441 | 1.00 | 0.00 | C |
| ATOM | 320 | C6   | T | A | 11 | -0.199 | -5.003  | 33.368 | 1.00 | 0.00 | C |
| ATOM | 321 | C7   | T | A | 11 | -2.680 | -4.660  | 33.398 | 1.00 | 0.00 | C |
| ATOM | 322 | C2'  | T | A | 11 | 2.048  | -6.748  | 34.068 | 1.00 | 0.00 | C |
| ATOM | 323 | C3'  | T | A | 11 | 2.787  | -7.731  | 33.174 | 1.00 | 0.00 | C |
| ATOM | 324 | O3'  | T | A | 11 | 4.173  | -7.720  | 33.510 | 1.00 | 0.00 | O |
| ATOM | 325 | C4'  | T | A | 11 | 2.528  | -7.178  | 31.775 | 1.00 | 0.00 | C |
| ATOM | 326 | O4'  | T | A | 11 | 2.473  | -5.728  | 31.964 | 1.00 | 0.00 | O |
| ATOM | 327 | C5'  | T | A | 11 | 1.252  | -7.626  | 31.100 | 1.00 | 0.00 | C |
| ATOM | 328 | O5'  | T | A | 11 | 0.195  | -7.747  | 32.084 | 1.00 | 0.00 | O |
| ATOM | 329 | O1P  | T | A | 11 | -0.296 | -10.215 | 32.112 | 1.00 | 0.00 | O |
| ATOM | 330 | O2P  | T | A | 11 | -2.090 | -8.573  | 32.727 | 1.00 | 0.00 | O |
| ATOM | 331 | P    | T | A | 11 | -0.903 | -8.888  | 31.895 | 1.00 | 0.00 | P |
| ATOM | 332 | H3   | T | A | 11 | 0.409  | -1.335  | 33.685 | 1.00 | 0.00 | H |

|      |     |      |     |    |        |        |        |      |      |   |
|------|-----|------|-----|----|--------|--------|--------|------|------|---|
| ATOM | 333 | H6   | T A | 11 | -0.359 | -6.078 | 33.273 | 1.00 | 0.00 | H |
| ATOM | 334 | H1'  | T A | 11 | 3.127  | -4.904 | 33.705 | 1.00 | 0.00 | H |
| ATOM | 335 | H3'  | T A | 11 | 2.400  | -8.744 | 33.275 | 1.00 | 0.00 | H |
| ATOM | 336 | H4'  | T A | 11 | 3.364  | -7.494 | 31.149 | 1.00 | 0.00 | H |
| ATOM | 337 | H71  | T A | 11 | -2.887 | -5.259 | 34.285 | 1.00 | 0.00 | H |
| ATOM | 338 | H72  | T A | 11 | -3.355 | -3.804 | 33.373 | 1.00 | 0.00 | H |
| ATOM | 339 | H73  | T A | 11 | -2.832 | -5.268 | 32.506 | 1.00 | 0.00 | H |
| ATOM | 340 | H2'1 | T A | 11 | 0.996  | -7.011 | 34.162 | 1.00 | 0.00 | H |
| ATOM | 341 | H2'2 | T A | 11 | 2.472  | -6.728 | 35.073 | 1.00 | 0.00 | H |
| ATOM | 342 | H5'1 | T A | 11 | 0.970  | -6.894 | 30.344 | 1.00 | 0.00 | H |
| ATOM | 343 | H5'2 | T A | 11 | 1.421  | -8.590 | 30.621 | 1.00 | 0.00 | H |
| ATOM | 344 | C1'  | A A | 12 | 5.014  | -3.071 | 36.709 | 1.00 | 0.00 | C |
| ATOM | 345 | N1   | A A | 12 | 0.901  | -0.030 | 37.133 | 1.00 | 0.00 | N |
| ATOM | 346 | C2   | A A | 12 | 2.205  | 0.223  | 37.088 | 1.00 | 0.00 | C |
| ATOM | 347 | N3   | A A | 12 | 3.217  | -0.612 | 36.974 | 1.00 | 0.00 | N |
| ATOM | 348 | C4   | A A | 12 | 2.769  | -1.878 | 36.906 | 1.00 | 0.00 | C |
| ATOM | 349 | C5   | A A | 12 | 1.472  | -2.305 | 36.940 | 1.00 | 0.00 | C |
| ATOM | 350 | C6   | A A | 12 | 0.485  | -1.304 | 37.062 | 1.00 | 0.00 | C |
| ATOM | 351 | N6   | A A | 12 | -0.831 | -1.573 | 37.108 | 1.00 | 0.00 | N |
| ATOM | 352 | N7   | A A | 12 | 1.396  | -3.683 | 36.844 | 1.00 | 0.00 | N |
| ATOM | 353 | C8   | A A | 12 | 2.638  | -4.059 | 36.759 | 1.00 | 0.00 | C |
| ATOM | 354 | N9   | A A | 12 | 3.529  | -3.016 | 36.788 | 1.00 | 0.00 | N |
| ATOM | 355 | C2'  | A A | 12 | 5.623  | -4.256 | 37.446 | 1.00 | 0.00 | C |
| ATOM | 356 | C3'  | A A | 12 | 6.801  | -4.613 | 36.553 | 1.00 | 0.00 | C |
| ATOM | 357 | O3'  | A A | 12 | 7.913  | -3.788 | 36.894 | 1.00 | 0.00 | O |
| ATOM | 358 | C4'  | A A | 12 | 6.269  | -4.314 | 35.152 | 1.00 | 0.00 | C |
| ATOM | 359 | O4'  | A A | 12 | 5.369  | -3.176 | 35.344 | 1.00 | 0.00 | O |
| ATOM | 360 | C5'  | A A | 12 | 5.505  | -5.426 | 34.474 | 1.00 | 0.00 | C |
| ATOM | 361 | O5'  | A A | 12 | 4.718  | -6.150 | 35.454 | 1.00 | 0.00 | O |
| ATOM | 362 | O1P  | A A | 12 | 5.776  | -8.434 | 35.477 | 1.00 | 0.00 | O |
| ATOM | 363 | O2P  | A A | 12 | 3.357  | -8.165 | 36.088 | 1.00 | 0.00 | O |
| ATOM | 364 | P    | A A | 12 | 4.504  | -7.718 | 35.259 | 1.00 | 0.00 | P |
| ATOM | 365 | H2   | A A | 12 | 2.477  | 1.276  | 37.154 | 1.00 | 0.00 | H |
| ATOM | 366 | H8   | A A | 12 | 2.944  | -5.102 | 36.673 | 1.00 | 0.00 | H |
| ATOM | 367 | H1'  | A A | 12 | 5.410  | -2.130 | 37.088 | 1.00 | 0.00 | H |
| ATOM | 368 | H3'  | A A | 12 | 7.086  | -5.660 | 36.650 | 1.00 | 0.00 | H |
| ATOM | 369 | H4'  | A A | 12 | 7.132  | -4.076 | 34.531 | 1.00 | 0.00 | H |
| ATOM | 370 | H61  | A A | 12 | -1.511 | -0.805 | 37.195 | 1.00 | 0.00 | H |
| ATOM | 371 | H62  | A A | 12 | -1.159 | -2.549 | 37.056 | 1.00 | 0.00 | H |
| ATOM | 372 | H2'1 | A A | 12 | 4.928  | -5.090 | 37.536 | 1.00 | 0.00 | H |
| ATOM | 373 | H2'2 | A A | 12 | 5.952  | -3.993 | 38.451 | 1.00 | 0.00 | H |
| ATOM | 374 | H5'1 | A A | 12 | 4.847  | -4.998 | 33.718 | 1.00 | 0.00 | H |
| ATOM | 375 | H5'2 | A A | 12 | 6.209  | -6.104 | 33.994 | 1.00 | 0.00 | H |
| ATOM | 376 | C1'  | G A | 13 | 5.838  | 0.469  | 40.091 | 1.00 | 0.00 | C |
| ATOM | 377 | N1   | G A | 13 | 0.754  | 0.484  | 40.511 | 1.00 | 0.00 | N |
| ATOM | 378 | C2   | G A | 13 | 1.644  | 1.542  | 40.470 | 1.00 | 0.00 | C |
| ATOM | 379 | N2   | G A | 13 | 1.110  | 2.768  | 40.555 | 1.00 | 0.00 | N |
| ATOM | 380 | N3   | G A | 13 | 2.962  | 1.390  | 40.354 | 1.00 | 0.00 | N |
| ATOM | 381 | C4   | G A | 13 | 3.328  | 0.083  | 40.289 | 1.00 | 0.00 | C |
| ATOM | 382 | C5   | G A | 13 | 2.512  | -1.036 | 40.326 | 1.00 | 0.00 | C |
| ATOM | 383 | C6   | G A | 13 | 1.112  | -0.875 | 40.445 | 1.00 | 0.00 | C |
| ATOM | 384 | O6   | G A | 13 | 0.234  | -1.737 | 40.495 | 1.00 | 0.00 | O |
| ATOM | 385 | N7   | G A | 13 | 3.281  | -2.197 | 40.233 | 1.00 | 0.00 | N |
| ATOM | 386 | C8   | G A | 13 | 4.509  | -1.757 | 40.141 | 1.00 | 0.00 | C |

|      |     |      |     |    |        |        |        |      |      |   |
|------|-----|------|-----|----|--------|--------|--------|------|------|---|
| ATOM | 387 | N9   | G A | 13 | 4.619  | -0.382 | 40.169 | 1.00 | 0.00 | N |
| ATOM | 388 | C2'  | G A | 13 | 7.038  | -0.109 | 40.828 | 1.00 | 0.00 | C |
| ATOM | 389 | C3'  | G A | 13 | 8.193  | 0.314  | 39.936 | 1.00 | 0.00 | C |
| ATOM | 390 | O3'  | G A | 13 | 8.585  | 1.642  | 40.276 | 1.00 | 0.00 | O |
| ATOM | 391 | C4'  | G A | 13 | 7.589  | 0.232  | 38.535 | 1.00 | 0.00 | C |
| ATOM | 392 | O4'  | G A | 13 | 6.186  | 0.600  | 38.726 | 1.00 | 0.00 | O |
| ATOM | 393 | C5'  | G A | 13 | 7.647  | -1.117 | 37.858 | 1.00 | 0.00 | C |
| ATOM | 394 | O5'  | G A | 13 | 7.455  | -2.167 | 38.838 | 1.00 | 0.00 | O |
| ATOM | 395 | O1P  | G A | 13 | 9.674  | -3.355 | 38.862 | 1.00 | 0.00 | O |
| ATOM | 396 | O2P  | G A | 13 | 7.581  | -4.595 | 39.473 | 1.00 | 0.00 | O |
| ATOM | 397 | P    | G A | 13 | 8.228  | -3.549 | 38.644 | 1.00 | 0.00 | P |
| ATOM | 398 | H1   | G A | 13 | -0.249 | 0.710  | 40.596 | 1.00 | 0.00 | H |
| ATOM | 399 | H8   | G A | 13 | 5.372  | -2.417 | 40.051 | 1.00 | 0.00 | H |
| ATOM | 400 | H1'  | G A | 13 | 5.587  | 1.460  | 40.470 | 1.00 | 0.00 | H |
| ATOM | 401 | H21  | G A | 13 | 0.088  | 2.877  | 40.641 | 1.00 | 0.00 | H |
| ATOM | 402 | H3'  | G A | 13 | 9.051  | -0.352 | 40.034 | 1.00 | 0.00 | H |
| ATOM | 403 | H22  | G A | 13 | 1.719  | 3.596  | 40.533 | 1.00 | 0.00 | H |
| ATOM | 404 | H4'  | G A | 13 | 8.134  | 0.941  | 37.913 | 1.00 | 0.00 | H |
| ATOM | 405 | H2'1 | G A | 13 | 6.984  | -1.194 | 40.919 | 1.00 | 0.00 | H |
| ATOM | 406 | H2'2 | G A | 13 | 7.142  | 0.299  | 41.834 | 1.00 | 0.00 | H |
| ATOM | 407 | H5'1 | G A | 13 | 6.865  | -1.171 | 37.101 | 1.00 | 0.00 | H |
| ATOM | 408 | H5'2 | G A | 13 | 8.618  | -1.234 | 37.377 | 1.00 | 0.00 | H |
| ATOM | 409 | C1'  | G A | 14 | 4.447  | 3.811  | 43.471 | 1.00 | 0.00 | C |
| ATOM | 410 | N1   | G A | 14 | 0.325  | 0.835  | 43.891 | 1.00 | 0.00 | N |
| ATOM | 411 | C2   | G A | 14 | 0.424  | 2.214  | 43.850 | 1.00 | 0.00 | C |
| ATOM | 412 | N2   | G A | 14 | -0.728 | 2.891  | 43.935 | 1.00 | 0.00 | N |
| ATOM | 413 | N3   | G A | 14 | 1.580  | 2.866  | 43.734 | 1.00 | 0.00 | N |
| ATOM | 414 | C4   | G A | 14 | 2.643  | 2.023  | 43.669 | 1.00 | 0.00 | C |
| ATOM | 415 | C5   | G A | 14 | 2.640  | 0.639  | 43.706 | 1.00 | 0.00 | C |
| ATOM | 416 | C6   | G A | 14 | 1.415  | -0.054 | 43.825 | 1.00 | 0.00 | C |
| ATOM | 417 | O6   | G A | 14 | 1.209  | -1.267 | 43.875 | 1.00 | 0.00 | O |
| ATOM | 418 | N7   | G A | 14 | 3.947  | 0.152  | 43.613 | 1.00 | 0.00 | N |
| ATOM | 419 | C8   | G A | 14 | 4.681  | 1.230  | 43.521 | 1.00 | 0.00 | C |
| ATOM | 420 | N9   | G A | 14 | 3.961  | 2.406  | 43.549 | 1.00 | 0.00 | N |
| ATOM | 421 | C2'  | G A | 14 | 5.758  | 4.048  | 44.208 | 1.00 | 0.00 | C |
| ATOM | 422 | C3'  | G A | 14 | 6.444  | 5.070  | 43.316 | 1.00 | 0.00 | C |
| ATOM | 423 | O3'  | G A | 14 | 5.981  | 6.375  | 43.656 | 1.00 | 0.00 | O |
| ATOM | 424 | C4'  | G A | 14 | 6.003  | 4.648  | 41.915 | 1.00 | 0.00 | C |
| ATOM | 425 | O4'  | G A | 14 | 4.652  | 4.121  | 42.106 | 1.00 | 0.00 | O |
| ATOM | 426 | C5'  | G A | 14 | 6.843  | 3.591  | 41.238 | 1.00 | 0.00 | C |
| ATOM | 427 | O5'  | G A | 14 | 7.305  | 2.629  | 42.218 | 1.00 | 0.00 | O |
| ATOM | 428 | O1P  | G A | 14 | 9.798  | 2.972  | 42.242 | 1.00 | 0.00 | O |
| ATOM | 429 | O2P  | G A | 14 | 8.834  | 0.738  | 42.853 | 1.00 | 0.00 | O |
| ATOM | 430 | P    | G A | 14 | 8.742  | 1.965  | 42.024 | 1.00 | 0.00 | P |
| ATOM | 431 | H1   | G A | 14 | -0.619 | 0.428  | 43.976 | 1.00 | 0.00 | H |
| ATOM | 432 | H8   | G A | 14 | 5.767  | 1.202  | 43.431 | 1.00 | 0.00 | H |
| ATOM | 433 | H1'  | G A | 14 | 3.662  | 4.465  | 43.850 | 1.00 | 0.00 | H |
| ATOM | 434 | H21  | G A | 14 | -1.619 | 2.380  | 44.021 | 1.00 | 0.00 | H |
| ATOM | 435 | H3'  | G A | 14 | 7.529  | 5.035  | 43.414 | 1.00 | 0.00 | H |
| ATOM | 436 | H22  | G A | 14 | -0.723 | 3.920  | 43.913 | 1.00 | 0.00 | H |
| ATOM | 437 | H4'  | G A | 14 | 6.027  | 5.542  | 41.293 | 1.00 | 0.00 | H |
| ATOM | 438 | H2'1 | G A | 14 | 6.352  | 3.139  | 44.299 | 1.00 | 0.00 | H |
| ATOM | 439 | H2'2 | G A | 14 | 5.602  | 4.440  | 45.214 | 1.00 | 0.00 | H |
| ATOM | 440 | H5'1 | G A | 14 | 6.242  | 3.087  | 40.481 | 1.00 | 0.00 | H |

|      |     |      |   |   |    |        |        |        |      |      |   |
|------|-----|------|---|---|----|--------|--------|--------|------|------|---|
| ATOM | 441 | H5'2 | G | A | 14 | 7.698  | 4.067  | 40.757 | 1.00 | 0.00 | H |
| ATOM | 442 | C1'  | A | A | 15 | 1.372  | 5.717  | 46.849 | 1.00 | 0.00 | C |
| ATOM | 443 | N1   | A | A | 15 | -0.249 | 0.866  | 47.273 | 1.00 | 0.00 | N |
| ATOM | 444 | C2   | A | A | 15 | -0.894 | 2.029  | 47.228 | 1.00 | 0.00 | C |
| ATOM | 445 | N3   | A | A | 15 | -0.413 | 3.249  | 47.114 | 1.00 | 0.00 | N |
| ATOM | 446 | C4   | A | A | 15 | 0.931  | 3.214  | 47.046 | 1.00 | 0.00 | C |
| ATOM | 447 | C5   | A | A | 15 | 1.738  | 2.112  | 47.080 | 1.00 | 0.00 | C |
| ATOM | 448 | C6   | A | A | 15 | 1.091  | 0.864  | 47.202 | 1.00 | 0.00 | C |
| ATOM | 449 | N6   | A | A | 15 | 1.754  | -0.304 | 47.248 | 1.00 | 0.00 | N |
| ATOM | 450 | N7   | A | A | 15 | 3.072  | 2.466  | 46.984 | 1.00 | 0.00 | N |
| ATOM | 451 | C8   | A | A | 15 | 3.045  | 3.763  | 46.899 | 1.00 | 0.00 | C |
| ATOM | 452 | N9   | A | A | 15 | 1.778  | 4.289  | 46.928 | 1.00 | 0.00 | N |
| ATOM | 453 | C2'  | A | A | 15 | 2.310  | 6.664  | 47.586 | 1.00 | 0.00 | C |
| ATOM | 454 | C3'  | A | A | 15 | 2.285  | 7.895  | 46.693 | 1.00 | 0.00 | C |
| ATOM | 455 | O3'  | A | A | 15 | 1.158  | 8.696  | 47.034 | 1.00 | 0.00 | O |
| ATOM | 456 | C4'  | A | A | 15 | 2.166  | 7.296  | 45.292 | 1.00 | 0.00 | C |
| ATOM | 457 | O4'  | A | A | 15 | 1.361  | 6.088  | 45.484 | 1.00 | 0.00 | O |
| ATOM | 458 | C5'  | A | A | 15 | 3.459  | 6.912  | 44.614 | 1.00 | 0.00 | C |
| ATOM | 459 | O5'  | A | A | 15 | 4.391  | 6.388  | 45.594 | 1.00 | 0.00 | O |
| ATOM | 460 | O1P  | A | A | 15 | 6.236  | 8.100  | 45.617 | 1.00 | 0.00 | O |
| ATOM | 461 | O2P  | A | A | 15 | 6.728  | 5.716  | 46.228 | 1.00 | 0.00 | O |
| ATOM | 462 | P    | A | A | 15 | 5.949  | 6.668  | 45.399 | 1.00 | 0.00 | P |
| ATOM | 463 | H2   | A | A | 15 | -1.980 | 1.961  | 47.294 | 1.00 | 0.00 | H |
| ATOM | 464 | H8   | A | A | 15 | 3.942  | 4.376  | 46.813 | 1.00 | 0.00 | H |
| ATOM | 465 | H1'  | A | A | 15 | 0.354  | 5.803  | 47.228 | 1.00 | 0.00 | H |
| ATOM | 466 | H3'  | A | A | 15 | 3.194  | 8.489  | 46.790 | 1.00 | 0.00 | H |
| ATOM | 467 | H4'  | A | A | 15 | 1.672  | 8.042  | 44.671 | 1.00 | 0.00 | H |
| ATOM | 468 | H61  | A | A | 15 | 1.232  | -1.188 | 47.335 | 1.00 | 0.00 | H |
| ATOM | 469 | H62  | A | A | 15 | 2.783  | -0.314 | 47.196 | 1.00 | 0.00 | H |
| ATOM | 470 | H2'1 | A | A | 15 | 3.318  | 6.259  | 47.676 | 1.00 | 0.00 | H |
| ATOM | 471 | H2'2 | A | A | 15 | 1.958  | 6.896  | 48.591 | 1.00 | 0.00 | H |
| ATOM | 472 | H5'1 | A | A | 15 | 3.255  | 6.154  | 43.858 | 1.00 | 0.00 | H |
| ATOM | 473 | H5'2 | A | A | 15 | 3.886  | 7.791  | 44.134 | 1.00 | 0.00 | H |
| ATOM | 474 | C1'  | C | A | 16 | -2.251 | 5.407  | 50.231 | 1.00 | 0.00 | C |
| ATOM | 475 | N1   | C | A | 16 | -1.069 | 4.506  | 50.309 | 1.00 | 0.00 | N |
| ATOM | 476 | C2   | C | A | 16 | -1.298 | 3.137  | 50.427 | 1.00 | 0.00 | C |
| ATOM | 477 | O2   | C | A | 16 | -2.466 | 2.729  | 50.463 | 1.00 | 0.00 | O |
| ATOM | 478 | N3   | C | A | 16 | -0.235 | 2.299  | 50.500 | 1.00 | 0.00 | N |
| ATOM | 479 | C4   | C | A | 16 | 1.017  | 2.772  | 50.459 | 1.00 | 0.00 | C |
| ATOM | 480 | N4   | C | A | 16 | 2.019  | 1.907  | 50.530 | 1.00 | 0.00 | N |
| ATOM | 481 | C5   | C | A | 16 | 1.284  | 4.175  | 50.342 | 1.00 | 0.00 | C |
| ATOM | 482 | C6   | C | A | 16 | 0.198  | 5.001  | 50.266 | 1.00 | 0.00 | C |
| ATOM | 483 | C2'  | C | A | 16 | -2.069 | 6.724  | 50.972 | 1.00 | 0.00 | C |
| ATOM | 484 | C3'  | C | A | 16 | -2.824 | 7.697  | 50.079 | 1.00 | 0.00 | C |
| ATOM | 485 | O3'  | C | A | 16 | -4.208 | 7.665  | 50.417 | 1.00 | 0.00 | O |
| ATOM | 486 | C4'  | C | A | 16 | -2.557 | 7.150  | 48.679 | 1.00 | 0.00 | C |
| ATOM | 487 | O4'  | C | A | 16 | -2.478 | 5.701  | 48.865 | 1.00 | 0.00 | O |
| ATOM | 488 | C5'  | C | A | 16 | -1.288 | 7.620  | 48.005 | 1.00 | 0.00 | C |
| ATOM | 489 | O5'  | C | A | 16 | -0.232 | 7.756  | 48.989 | 1.00 | 0.00 | O |
| ATOM | 490 | O1P  | C | A | 16 | 0.221  | 10.232 | 49.020 | 1.00 | 0.00 | O |
| ATOM | 491 | O2P  | C | A | 16 | 2.040  | 8.616  | 49.631 | 1.00 | 0.00 | O |
| ATOM | 492 | P    | C | A | 16 | 0.848  | 8.914  | 48.800 | 1.00 | 0.00 | P |
| ATOM | 493 | H5   | C | A | 16 | 2.303  | 4.565  | 50.316 | 1.00 | 0.00 | H |
| ATOM | 494 | H6   | C | A | 16 | 0.350  | 6.076  | 50.168 | 1.00 | 0.00 | H |

|      |     |      |   |   |    |        |        |        |      |      |   |
|------|-----|------|---|---|----|--------|--------|--------|------|------|---|
| ATOM | 495 | H1'  | C | A | 16 | -3.119 | 4.864  | 50.606 | 1.00 | 0.00 | H |
| ATOM | 496 | H3'  | C | A | 16 | -2.450 | 8.717  | 50.182 | 1.00 | 0.00 | H |
| ATOM | 497 | H4'  | C | A | 16 | -3.396 | 7.456  | 48.055 | 1.00 | 0.00 | H |
| ATOM | 498 | H41  | C | A | 16 | 2.993  | 2.244  | 50.499 | 1.00 | 0.00 | H |
| ATOM | 499 | H42  | C | A | 16 | 1.826  | 0.899  | 50.617 | 1.00 | 0.00 | H |
| ATOM | 500 | H2'1 | C | A | 16 | -1.020 | 7.005  | 51.066 | 1.00 | 0.00 | H |
| ATOM | 501 | H2'2 | C | A | 16 | -2.492 | 6.696  | 51.977 | 1.00 | 0.00 | H |
| ATOM | 502 | H5'1 | C | A | 16 | -0.996 | 6.893  | 47.247 | 1.00 | 0.00 | H |
| ATOM | 503 | H5'2 | C | A | 16 | -1.472 | 8.582  | 47.527 | 1.00 | 0.00 | H |
| ATOM | 504 | C1'  | G | A | 17 | -4.998 | 3.052  | 53.611 | 1.00 | 0.00 | C |
| ATOM | 505 | N1   | G | A | 17 | -0.894 | 0.051  | 54.031 | 1.00 | 0.00 | N |
| ATOM | 506 | C2   | G | A | 17 | -2.237 | -0.281 | 53.990 | 1.00 | 0.00 | C |
| ATOM | 507 | N2   | G | A | 17 | -2.524 | -1.586 | 54.075 | 1.00 | 0.00 | N |
| ATOM | 508 | N3   | G | A | 17 | -3.214 | 0.616  | 53.874 | 1.00 | 0.00 | N |
| ATOM | 509 | C4   | G | A | 17 | -2.741 | 1.889  | 53.809 | 1.00 | 0.00 | C |
| ATOM | 510 | C5   | G | A | 17 | -1.424 | 2.315  | 53.846 | 1.00 | 0.00 | C |
| ATOM | 511 | C6   | G | A | 17 | -0.385 | 1.363  | 53.965 | 1.00 | 0.00 | C |
| ATOM | 512 | O6   | G | A | 17 | 0.832  | 1.542  | 54.015 | 1.00 | 0.00 | O |
| ATOM | 513 | N7   | G | A | 17 | -1.363 | 3.707  | 53.753 | 1.00 | 0.00 | N |
| ATOM | 514 | C8   | G | A | 17 | -2.616 | 4.072  | 53.661 | 1.00 | 0.00 | C |
| ATOM | 515 | N9   | G | A | 17 | -3.513 | 3.024  | 53.689 | 1.00 | 0.00 | N |
| ATOM | 516 | C2'  | G | A | 17 | -5.630 | 4.225  | 54.348 | 1.00 | 0.00 | C |
| ATOM | 517 | C3'  | G | A | 17 | -6.813 | 4.562  | 53.456 | 1.00 | 0.00 | C |
| ATOM | 518 | O3'  | G | A | 17 | -7.911 | 3.718  | 53.796 | 1.00 | 0.00 | O |
| ATOM | 519 | C4'  | G | A | 17 | -6.275 | 4.273  | 52.055 | 1.00 | 0.00 | C |
| ATOM | 520 | O4'  | G | A | 17 | -5.357 | 3.151  | 52.246 | 1.00 | 0.00 | O |
| ATOM | 521 | C5'  | G | A | 17 | -5.530 | 5.399  | 51.378 | 1.00 | 0.00 | C |
| ATOM | 522 | O5'  | G | A | 17 | -4.757 | 6.135  | 52.358 | 1.00 | 0.00 | O |
| ATOM | 523 | O1P  | G | A | 17 | -5.855 | 8.400  | 52.382 | 1.00 | 0.00 | O |
| ATOM | 524 | O2P  | G | A | 17 | -3.432 | 8.173  | 52.993 | 1.00 | 0.00 | O |
| ATOM | 525 | P    | G | A | 17 | -4.570 | 7.707  | 52.164 | 1.00 | 0.00 | P |
| ATOM | 526 | H1   | G | A | 17 | -0.216 | -0.721 | 54.116 | 1.00 | 0.00 | H |
| ATOM | 527 | H8   | G | A | 17 | -2.925 | 5.114  | 53.571 | 1.00 | 0.00 | H |
| ATOM | 528 | H1'  | G | A | 17 | -5.378 | 2.103  | 53.990 | 1.00 | 0.00 | H |
| ATOM | 529 | H21  | G | A | 17 | -1.763 | -2.275 | 54.161 | 1.00 | 0.00 | H |
| ATOM | 530 | H3'  | G | A | 17 | -7.115 | 5.605  | 53.554 | 1.00 | 0.00 | H |
| ATOM | 531 | H22  | G | A | 17 | -3.505 | -1.899 | 54.053 | 1.00 | 0.00 | H |
| ATOM | 532 | H4'  | G | A | 17 | -7.133 | 4.020  | 51.433 | 1.00 | 0.00 | H |
| ATOM | 533 | H2'1 | G | A | 17 | -4.948 | 5.071  | 54.439 | 1.00 | 0.00 | H |
| ATOM | 534 | H2'2 | G | A | 17 | -5.954 | 3.956  | 55.354 | 1.00 | 0.00 | H |
| ATOM | 535 | H5'1 | G | A | 17 | -4.865 | 4.983  | 50.621 | 1.00 | 0.00 | H |
| ATOM | 536 | H5'2 | G | A | 17 | -6.247 | 6.064  | 50.897 | 1.00 | 0.00 | H |
| ATOM | 537 | C1'  | G | A | 18 | -5.838 | -0.469 | 56.991 | 1.00 | 0.00 | C |
| ATOM | 538 | N1   | G | A | 18 | -0.754 | -0.484 | 57.411 | 1.00 | 0.00 | N |
| ATOM | 539 | C2   | G | A | 18 | -1.645 | -1.542 | 57.370 | 1.00 | 0.00 | C |
| ATOM | 540 | N2   | G | A | 18 | -1.110 | -2.768 | 57.455 | 1.00 | 0.00 | N |
| ATOM | 541 | N3   | G | A | 18 | -2.962 | -1.390 | 57.254 | 1.00 | 0.00 | N |
| ATOM | 542 | C4   | G | A | 18 | -3.328 | -0.083 | 57.189 | 1.00 | 0.00 | C |
| ATOM | 543 | C5   | G | A | 18 | -2.512 | 1.036  | 57.226 | 1.00 | 0.00 | C |
| ATOM | 544 | C6   | G | A | 18 | -1.112 | 0.875  | 57.345 | 1.00 | 0.00 | C |
| ATOM | 545 | O6   | G | A | 18 | -0.234 | 1.737  | 57.395 | 1.00 | 0.00 | O |
| ATOM | 546 | N7   | G | A | 18 | -3.281 | 2.197  | 57.133 | 1.00 | 0.00 | N |
| ATOM | 547 | C8   | G | A | 18 | -4.509 | 1.757  | 57.041 | 1.00 | 0.00 | C |
| ATOM | 548 | N9   | G | A | 18 | -4.619 | 0.382  | 57.069 | 1.00 | 0.00 | N |



|      |     |      |       |    |        |        |        |      |      |   |
|------|-----|------|-------|----|--------|--------|--------|------|------|---|
| ATOM | 549 | C2'  | G A   | 18 | -7.038 | 0.109  | 57.728 | 1.00 | 0.00 | C |
| ATOM | 550 | C3'  | G A   | 18 | -8.193 | -0.314 | 56.836 | 1.00 | 0.00 | C |
| ATOM | 551 | O3'  | G A   | 18 | -8.585 | -1.642 | 57.176 | 1.00 | 0.00 | O |
| ATOM | 552 | C4'  | G A   | 18 | -7.589 | -0.232 | 55.435 | 1.00 | 0.00 | C |
| ATOM | 553 | O4'  | G A   | 18 | -6.186 | -0.600 | 55.626 | 1.00 | 0.00 | O |
| ATOM | 554 | C5'  | G A   | 18 | -7.647 | 1.117  | 54.758 | 1.00 | 0.00 | C |
| ATOM | 555 | O5'  | G A   | 18 | -7.455 | 2.167  | 55.738 | 1.00 | 0.00 | O |
| ATOM | 556 | O1P  | G A   | 18 | -9.674 | 3.355  | 55.762 | 1.00 | 0.00 | O |
| ATOM | 557 | O2P  | G A   | 18 | -7.581 | 4.595  | 56.373 | 1.00 | 0.00 | O |
| ATOM | 558 | P    | G A   | 18 | -8.228 | 3.549  | 55.544 | 1.00 | 0.00 | P |
| ATOM | 559 | H1   | G A   | 18 | 0.249  | -0.710 | 57.496 | 1.00 | 0.00 | H |
| ATOM | 560 | H8   | G A   | 18 | -5.372 | 2.417  | 56.951 | 1.00 | 0.00 | H |
| ATOM | 561 | H1'  | G A   | 18 | -5.587 | -1.460 | 57.370 | 1.00 | 0.00 | H |
| ATOM | 562 | H21  | G A   | 18 | -0.088 | -2.877 | 57.541 | 1.00 | 0.00 | H |
| ATOM | 563 | H3'  | G A   | 18 | -9.051 | 0.352  | 56.934 | 1.00 | 0.00 | H |
| ATOM | 564 | H22  | G A   | 18 | -1.719 | -3.596 | 57.433 | 1.00 | 0.00 | H |
| ATOM | 565 | H4'  | G A   | 18 | -8.134 | -0.941 | 54.813 | 1.00 | 0.00 | H |
| ATOM | 566 | H2'1 | G A   | 18 | -6.984 | 1.194  | 57.819 | 1.00 | 0.00 | H |
| ATOM | 567 | H2'2 | G A   | 18 | -7.142 | -0.299 | 58.734 | 1.00 | 0.00 | H |
| ATOM | 568 | H5'1 | G A   | 18 | -6.865 | 1.171  | 54.001 | 1.00 | 0.00 | H |
| ATOM | 569 | H5'2 | G A   | 18 | -8.618 | 1.234  | 54.277 | 1.00 | 0.00 | H |
| ATOM | 570 | C1'  | T A   | 19 | -4.470 | -3.818 | 60.369 | 1.00 | 0.00 | C |
| ATOM | 571 | N1   | T A   | 19 | -3.957 | -2.425 | 60.450 | 1.00 | 0.00 | N |
| ATOM | 572 | C2   | T A   | 19 | -2.592 | -2.261 | 60.569 | 1.00 | 0.00 | C |
| ATOM | 573 | O2   | T A   | 19 | -1.816 | -3.201 | 60.609 | 1.00 | 0.00 | O |
| ATOM | 574 | N3   | T A   | 19 | -2.159 | -0.950 | 60.640 | 1.00 | 0.00 | N |
| ATOM | 575 | C4   | T A   | 19 | -2.949 | 0.179  | 60.607 | 1.00 | 0.00 | C |
| ATOM | 576 | O4   | T A   | 19 | -2.446 | 1.306  | 60.682 | 1.00 | 0.00 | O |
| ATOM | 577 | C5   | T A   | 19 | -4.362 | -0.091 | 60.481 | 1.00 | 0.00 | C |
| ATOM | 578 | C6   | T A   | 19 | -4.820 | -1.357 | 60.408 | 1.00 | 0.00 | C |
| ATOM | 579 | C7   | T A   | 19 | -5.260 | 1.109  | 60.438 | 1.00 | 0.00 | C |
| ATOM | 580 | C2'  | T A   | 19 | -5.785 | -4.033 | 61.108 | 1.00 | 0.00 | C |
| ATOM | 581 | C3'  | T A   | 19 | -6.491 | -5.040 | 60.214 | 1.00 | 0.00 | C |
| ATOM | 582 | O3'  | T A   | 19 | -6.052 | -6.354 | 60.550 | 1.00 | 0.00 | O |
| ATOM | 583 | C4'  | T A   | 19 | -6.045 | -4.622 | 58.815 | 1.00 | 0.00 | C |
| ATOM | 584 | O4'  | T A   | 19 | -4.684 | -4.122 | 59.004 | 1.00 | 0.00 | O |
| ATOM | 585 | C5'  | T A   | 19 | -6.866 | -3.548 | 58.140 | 1.00 | 0.00 | C |
| ATOM | 586 | O5'  | T A   | 19 | -7.308 | -2.579 | 59.124 | 1.00 | 0.00 | O |
| ATOM | 587 | O1P  | T A   | 19 | -9.807 | -2.876 | 59.152 | 1.00 | 0.00 | O |
| ATOM | 588 | O2P  | T A   | 19 | -8.799 | -0.662 | 59.767 | 1.00 | 0.00 | O |
| ATOM | 589 | P    | T A   | 19 | -8.732 | -1.887 | 58.935 | 1.00 | 0.00 | P |
| ATOM | 590 | H3   | T A   | 19 | -1.143 | -0.802 | 60.725 | 1.00 | 0.00 | H |
| ATOM | 591 | H6   | T A   | 19 | -5.891 | -1.536 | 60.313 | 1.00 | 0.00 | H |
| ATOM | 592 | H1'  | T A   | 19 | -3.697 | -4.489 | 60.745 | 1.00 | 0.00 | H |
| ATOM | 593 | H3'  | T A   | 19 | -7.575 | -4.984 | 60.315 | 1.00 | 0.00 | H |
| ATOM | 594 | H4'  | T A   | 19 | -6.088 | -5.515 | 58.189 | 1.00 | 0.00 | H |
| ATOM | 595 | H71  | T A   | 19 | -5.893 | 1.121  | 61.325 | 1.00 | 0.00 | H |
| ATOM | 596 | H72  | T A   | 19 | -4.654 | 2.015  | 60.413 | 1.00 | 0.00 | H |
| ATOM | 597 | H73  | T A   | 19 | -5.886 | 1.066  | 59.546 | 1.00 | 0.00 | H |
| ATOM | 598 | H2'1 | T A   | 19 | -6.360 | -3.113 | 61.202 | 1.00 | 0.00 | H |
| ATOM | 599 | H2'2 | T A   | 19 | -5.635 | -4.430 | 62.113 | 1.00 | 0.00 | H |
| ATOM | 600 | H5'1 | T A   | 19 | -6.257 | -3.053 | 57.384 | 1.00 | 0.00 | H |
| ATOM | 601 | H5'2 | T A   | 19 | -7.730 | -4.006 | 57.661 | 1.00 | 0.00 | H |
| ATOM | 602 | C01  | LNK A | 20 | -7.147 | -8.663 | 63.257 | 0.00 | 0.00 | C |

|      |     |      |     |   |    |        |         |        |      |      |   |
|------|-----|------|-----|---|----|--------|---------|--------|------|------|---|
| ATOM | 603 | O1   | LNK | A | 20 | -7.198 | -7.404  | 62.581 | 1.00 | 0.00 | O |
| ATOM | 604 | S    | LNK | A | 20 | -8.698 | -10.406 | 66.482 | 0.00 | 0.00 | S |
| ATOM | 605 | C02  | LNK | A | 20 | -8.061 | -8.616  | 64.496 | 0.00 | 0.00 | C |
| ATOM | 606 | C03  | LNK | A | 20 | -7.418 | -9.423  | 65.640 | 0.00 | 0.00 | C |
| ATOM | 607 | O1P  | LNK | A | 20 | -5.848 | -5.314  | 62.964 | 1.00 | 0.00 | O |
| ATOM | 608 | O2P  | LNK | A | 20 | -4.688 | -7.514  | 62.625 | 1.00 | 0.00 | O |
| ATOM | 609 | P    | LNK | A | 20 | -5.833 | -6.630  | 62.295 | 1.00 | 0.00 | P |
| ATOM | 610 | H01  | LNK | A | 20 | -6.123 | -8.868  | 63.569 | 0.00 | 0.00 | H |
| ATOM | 611 | H02  | LNK | A | 20 | -7.487 | -9.451  | 62.585 | 0.00 | 0.00 | H |
| ATOM | 612 | H03  | LNK | A | 20 | -6.958 | -8.739  | 66.353 | 0.00 | 0.00 | H |
| ATOM | 613 | H04  | LNK | A | 20 | -9.032 | -9.046  | 64.248 | 0.00 | 0.00 | H |
| ATOM | 614 | H05  | LNK | A | 20 | -8.193 | -7.581  | 64.811 | 0.00 | 0.00 | H |
| ATOM | 615 | H06  | LNK | A | 20 | -6.658 | -10.089 | 65.232 | 0.00 | 0.00 | H |
| ATOM | 616 | AU   | LNK | A | 20 | -8.435 | -10.686 | 67.050 |      |      |   |
| TER  |     |      |     |   |    |        |         |        |      |      |   |
| ATOM | 618 | C1'  | A   | B | 2  | 5.862  | -0.463  | 61.311 | 1.00 | 0.00 | C |
| ATOM | 619 | N1   | A   | B | 2  | 0.747  | -0.505  | 60.891 | 1.00 | 0.00 | N |
| ATOM | 620 | C2   | A   | B | 2  | 1.652  | -1.477  | 60.933 | 1.00 | 0.00 | C |
| ATOM | 621 | N3   | A   | B | 2  | 2.961  | -1.397  | 61.046 | 1.00 | 0.00 | N |
| ATOM | 622 | C4   | A   | B | 2  | 3.344  | -0.108  | 61.117 | 1.00 | 0.00 | C |
| ATOM | 623 | C5   | A   | B | 2  | 2.545  | 0.999   | 61.087 | 1.00 | 0.00 | C |
| ATOM | 624 | C6   | A   | B | 2  | 1.158  | 0.770   | 60.965 | 1.00 | 0.00 | C |
| ATOM | 625 | N6   | A   | B | 2  | 0.251  | 1.761   | 60.923 | 1.00 | 0.00 | N |
| ATOM | 626 | N7   | A   | B | 2  | 3.294  | 2.159   | 61.186 | 1.00 | 0.00 | N |
| ATOM | 627 | C8   | A   | B | 2  | 4.519  | 1.732   | 61.268 | 1.00 | 0.00 | C |
| ATOM | 628 | N9   | A   | B | 2  | 4.627  | 0.366   | 61.236 | 1.00 | 0.00 | N |
| ATOM | 629 | C2'  | A   | B | 2  | 7.051  | 0.140   | 60.575 | 1.00 | 0.00 | C |
| ATOM | 630 | C3'  | A   | B | 2  | 8.214  | -0.266  | 61.465 | 1.00 | 0.00 | C |
| ATOM | 631 | O3'  | A   | B | 2  | 8.628  | -1.586  | 61.121 | 1.00 | 0.00 | O |
| ATOM | 632 | C4'  | A   | B | 2  | 7.609  | -0.198  | 62.867 | 1.00 | 0.00 | C |
| ATOM | 633 | O4'  | A   | B | 2  | 6.211  | -0.590  | 62.676 | 1.00 | 0.00 | O |
| ATOM | 634 | C5'  | A   | B | 2  | 7.645  | 1.149   | 63.549 | 1.00 | 0.00 | C |
| ATOM | 635 | O5'  | A   | B | 2  | 7.433  | 2.199   | 62.572 | 1.00 | 0.00 | O |
| ATOM | 636 | H2   | A   | B | 2  | 1.254  | -2.488  | 60.864 | 1.00 | 0.00 | H |
| ATOM | 637 | H8   | A   | B | 2  | 5.379  | 2.397   | 61.354 | 1.00 | 0.00 | H |
| ATOM | 638 | H1'  | A   | B | 2  | 5.629  | -1.457  | 60.929 | 1.00 | 0.00 | H |
| ATOM | 639 | H3'  | A   | B | 2  | 9.060  | 0.414   | 61.369 | 1.00 | 0.00 | H |
| ATOM | 640 | H4'  | A   | B | 2  | 8.167  | -0.900  | 63.486 | 1.00 | 0.00 | H |
| ATOM | 641 | H61  | A   | B | 2  | -0.750 | 1.539   | 60.836 | 1.00 | 0.00 | H |
| ATOM | 642 | H62  | A   | B | 2  | 0.560  | 2.743   | 60.978 | 1.00 | 0.00 | H |
| ATOM | 643 | H2'1 | A   | B | 2  | 6.978  | 1.224   | 60.488 | 1.00 | 0.00 | H |
| ATOM | 644 | H2'2 | A   | B | 2  | 7.162  | -0.264  | 59.568 | 1.00 | 0.00 | H |
| ATOM | 645 | H5'1 | A   | B | 2  | 6.862  | 1.187   | 64.306 | 1.00 | 0.00 | H |
| ATOM | 646 | H5'2 | A   | B | 2  | 8.614  | 1.281   | 64.028 | 1.00 | 0.00 | H |
| ATOM | 647 | C1'  | C   | B | 3  | 4.447  | -3.812  | 57.929 | 1.00 | 0.00 | C |
| ATOM | 648 | N1   | C   | B | 3  | 3.955  | -2.409  | 57.854 | 1.00 | 0.00 | N |
| ATOM | 649 | C2   | C   | B | 3  | 2.582  | -2.204  | 57.734 | 1.00 | 0.00 | C |
| ATOM | 650 | O2   | C   | B | 3  | 1.833  | -3.189  | 57.696 | 1.00 | 0.00 | O |
| ATOM | 651 | N3   | C   | B | 3  | 2.114  | -0.935  | 57.664 | 1.00 | 0.00 | N |
| ATOM | 652 | C4   | C   | B | 3  | 2.950  | 0.111   | 57.707 | 1.00 | 0.00 | C |
| ATOM | 653 | N4   | C   | B | 3  | 2.437  | 1.332   | 57.638 | 1.00 | 0.00 | N |
| ATOM | 654 | C5   | C   | B | 3  | 4.368  | -0.068  | 57.825 | 1.00 | 0.00 | C |
| ATOM | 655 | C6   | C   | B | 3  | 4.817  | -1.357  | 57.899 | 1.00 | 0.00 | C |
| ATOM | 656 | C2'  | C   | B | 3  | 5.757  | -4.044  | 57.188 | 1.00 | 0.00 | C |

|      |     |      |     |   |        |        |        |      |      |   |
|------|-----|------|-----|---|--------|--------|--------|------|------|---|
| ATOM | 657 | C3'  | C B | 3 | 6.449  | -5.064 | 58.079 | 1.00 | 0.00 | C |
| ATOM | 658 | O3'  | C B | 3 | 5.989  | -6.370 | 57.739 | 1.00 | 0.00 | O |
| ATOM | 659 | C4'  | C B | 3 | 6.010  | -4.644 | 59.480 | 1.00 | 0.00 | C |
| ATOM | 660 | O4'  | C B | 3 | 4.656  | -4.121 | 59.294 | 1.00 | 0.00 | O |
| ATOM | 661 | C5'  | C B | 3 | 6.848  | -3.585 | 60.157 | 1.00 | 0.00 | C |
| ATOM | 662 | O5'  | C B | 3 | 7.304  | -2.620 | 59.175 | 1.00 | 0.00 | O |
| ATOM | 663 | O1P  | C B | 3 | 9.799  | -2.954 | 59.145 | 1.00 | 0.00 | O |
| ATOM | 664 | O2P  | C B | 3 | 8.824  | -0.723 | 58.538 | 1.00 | 0.00 | O |
| ATOM | 665 | P    | C B | 3 | 8.738  | -1.951 | 59.366 | 1.00 | 0.00 | P |
| ATOM | 666 | H5   | C B | 3 | 5.053  | 0.779  | 57.853 | 1.00 | 0.00 | H |
| ATOM | 667 | H6   | C B | 3 | 5.886  | -1.544 | 57.997 | 1.00 | 0.00 | H |
| ATOM | 668 | H1'  | C B | 3 | 3.663  | -4.469 | 57.552 | 1.00 | 0.00 | H |
| ATOM | 669 | H3'  | C B | 3 | 7.533  | -5.025 | 57.978 | 1.00 | 0.00 | H |
| ATOM | 670 | H4'  | C B | 3 | 6.040  | -5.538 | 60.103 | 1.00 | 0.00 | H |
| ATOM | 671 | H41  | C B | 3 | 3.058  | 2.154  | 57.672 | 1.00 | 0.00 | H |
| ATOM | 672 | H42  | C B | 3 | 1.418  | 1.459  | 57.551 | 1.00 | 0.00 | H |
| ATOM | 673 | H2'1 | C B | 3 | 6.347  | -3.133 | 57.096 | 1.00 | 0.00 | H |
| ATOM | 674 | H2'2 | C B | 3 | 5.599  | -4.436 | 56.183 | 1.00 | 0.00 | H |
| ATOM | 675 | H5'1 | C B | 3 | 6.247  | -3.082 | 60.915 | 1.00 | 0.00 | H |
| ATOM | 676 | H5'2 | C B | 3 | 7.705  | -4.057 | 60.634 | 1.00 | 0.00 | H |
| ATOM | 677 | C1'  | C B | 4 | 1.358  | -5.698 | 54.549 | 1.00 | 0.00 | C |
| ATOM | 678 | N1   | C B | 4 | 1.784  | -4.274 | 54.474 | 1.00 | 0.00 | N |
| ATOM | 679 | C2   | C B | 4 | 0.794  | -3.301 | 54.354 | 1.00 | 0.00 | C |
| ATOM | 680 | O2   | C B | 4 | -0.392 | -3.657 | 54.316 | 1.00 | 0.00 | O |
| ATOM | 681 | N3   | C B | 4 | 1.160  | -1.999 | 54.284 | 1.00 | 0.00 | N |
| ATOM | 682 | C4   | C B | 4 | 2.452  | -1.644 | 54.327 | 1.00 | 0.00 | C |
| ATOM | 683 | N4   | C B | 4 | 2.755  | -0.356 | 54.258 | 1.00 | 0.00 | N |
| ATOM | 684 | C5   | C B | 4 | 3.493  | -2.623 | 54.445 | 1.00 | 0.00 | C |
| ATOM | 685 | C6   | C B | 4 | 3.099  | -3.929 | 54.519 | 1.00 | 0.00 | C |
| ATOM | 686 | C2'  | C B | 4 | 2.281  | -6.655 | 53.808 | 1.00 | 0.00 | C |
| ATOM | 687 | C3'  | C B | 4 | 2.241  | -7.887 | 54.699 | 1.00 | 0.00 | C |
| ATOM | 688 | O3'  | C B | 4 | 1.102  | -8.674 | 54.359 | 1.00 | 0.00 | O |
| ATOM | 689 | C4'  | C B | 4 | 2.133  | -7.290 | 56.100 | 1.00 | 0.00 | C |
| ATOM | 690 | O4'  | C B | 4 | 1.344  | -6.071 | 55.914 | 1.00 | 0.00 | O |
| ATOM | 691 | C5'  | C B | 4 | 3.434  | -6.924 | 56.777 | 1.00 | 0.00 | C |
| ATOM | 692 | O5'  | C B | 4 | 4.370  | -6.412 | 55.795 | 1.00 | 0.00 | O |
| ATOM | 693 | O1P  | C B | 4 | 6.191  | -8.149 | 55.765 | 1.00 | 0.00 | O |
| ATOM | 694 | O2P  | C B | 4 | 6.714  | -5.771 | 55.158 | 1.00 | 0.00 | O |
| ATOM | 695 | P    | C B | 4 | 5.923  | -6.714 | 55.986 | 1.00 | 0.00 | P |
| ATOM | 696 | H5   | C B | 4 | 4.545  | -2.340 | 54.473 | 1.00 | 0.00 | H |
| ATOM | 697 | H6   | C B | 4 | 3.854  | -4.709 | 54.617 | 1.00 | 0.00 | H |
| ATOM | 698 | H1'  | C B | 4 | 0.337  | -5.769 | 54.172 | 1.00 | 0.00 | H |
| ATOM | 699 | H3'  | C B | 4 | 3.142  | -8.493 | 54.598 | 1.00 | 0.00 | H |
| ATOM | 700 | H4'  | C B | 4 | 1.631  | -8.031 | 56.723 | 1.00 | 0.00 | H |
| ATOM | 701 | H41  | C B | 4 | 3.740  | -0.055 | 54.292 | 1.00 | 0.00 | H |
| ATOM | 702 | H42  | C B | 4 | 2.005  | 0.347  | 54.171 | 1.00 | 0.00 | H |
| ATOM | 703 | H2'1 | C B | 4 | 3.294  | -6.265 | 53.716 | 1.00 | 0.00 | H |
| ATOM | 704 | H2'2 | C B | 4 | 1.923  | -6.880 | 52.803 | 1.00 | 0.00 | H |
| ATOM | 705 | H5'1 | C B | 4 | 3.242  | -6.165 | 57.535 | 1.00 | 0.00 | H |
| ATOM | 706 | H5'2 | C B | 4 | 3.849  | -7.811 | 57.254 | 1.00 | 0.00 | H |
| ATOM | 707 | C1'  | G B | 5 | -2.250 | -5.407 | 51.169 | 1.00 | 0.00 | C |
| ATOM | 708 | N1   | G B | 5 | -0.693 | -0.566 | 50.752 | 1.00 | 0.00 | N |
| ATOM | 709 | C2   | G B | 5 | -1.975 | -1.087 | 50.790 | 1.00 | 0.00 | C |
| ATOM | 710 | N2   | G B | 5 | -2.974 | -0.201 | 50.704 | 1.00 | 0.00 | N |

|      |     |      |     |   |        |         |        |      |      |   |
|------|-----|------|-----|---|--------|---------|--------|------|------|---|
| ATOM | 711 | N3   | G B | 5 | -2.237 | -2.388  | 50.906 | 1.00 | 0.00 | N |
| ATOM | 712 | C4   | G B | 5 | -1.107 | -3.139  | 50.974 | 1.00 | 0.00 | C |
| ATOM | 713 | C5   | G B | 5 | 0.209  | -2.708  | 50.939 | 1.00 | 0.00 | C |
| ATOM | 714 | C6   | G B | 5 | 0.489  | -1.328  | 50.820 | 1.00 | 0.00 | C |
| ATOM | 715 | O6   | G B | 5 | 1.579  | -0.759  | 50.772 | 1.00 | 0.00 | O |
| ATOM | 716 | N7   | G B | 5 | 1.076  | -3.799  | 51.034 | 1.00 | 0.00 | N |
| ATOM | 717 | C8   | G B | 5 | 0.278  | -4.832  | 51.124 | 1.00 | 0.00 | C |
| ATOM | 718 | N9   | G B | 5 | -1.064 | -4.511  | 51.093 | 1.00 | 0.00 | N |
| ATOM | 719 | C2'  | G B | 5 | -2.069 | -6.727  | 50.432 | 1.00 | 0.00 | C |
| ATOM | 720 | C3'  | G B | 5 | -2.831 | -7.695  | 51.323 | 1.00 | 0.00 | C |
| ATOM | 721 | O3'  | G B | 5 | -4.214 | -7.658  | 50.980 | 1.00 | 0.00 | O |
| ATOM | 722 | C4'  | G B | 5 | -2.568 | -7.146  | 52.724 | 1.00 | 0.00 | C |
| ATOM | 723 | O4'  | G B | 5 | -2.485 | -5.698  | 52.533 | 1.00 | 0.00 | O |
| ATOM | 724 | C5'  | G B | 5 | -1.305 | -7.618  | 53.404 | 1.00 | 0.00 | C |
| ATOM | 725 | O5'  | G B | 5 | -0.245 | -7.760  | 52.426 | 1.00 | 0.00 | O |
| ATOM | 726 | O1P  | G B | 5 | 0.200  | -10.237 | 52.403 | 1.00 | 0.00 | O |
| ATOM | 727 | O2P  | G B | 5 | 2.027  | -8.629  | 51.796 | 1.00 | 0.00 | O |
| ATOM | 728 | P    | G B | 5 | 0.831  | -8.921  | 52.622 | 1.00 | 0.00 | P |
| ATOM | 729 | H1   | G B | 5 | -0.598 | 0.457   | 50.667 | 1.00 | 0.00 | H |
| ATOM | 730 | H8   | G B | 5 | 0.639  | -5.856  | 51.214 | 1.00 | 0.00 | H |
| ATOM | 731 | H1'  | G B | 5 | -3.114 | -4.863  | 50.789 | 1.00 | 0.00 | H |
| ATOM | 732 | H21  | G B | 5 | -2.764 | 0.804   | 50.618 | 1.00 | 0.00 | H |
| ATOM | 733 | H3'  | G B | 5 | -2.462 | -8.717  | 51.226 | 1.00 | 0.00 | H |
| ATOM | 734 | H22  | G B | 5 | -3.952 | -0.524  | 50.723 | 1.00 | 0.00 | H |
| ATOM | 735 | H4'  | G B | 5 | -3.412 | -7.445  | 53.345 | 1.00 | 0.00 | H |
| ATOM | 736 | H2'1 | G B | 5 | -1.020 | -7.011  | 50.343 | 1.00 | 0.00 | H |
| ATOM | 737 | H2'2 | G B | 5 | -2.488 | -6.700  | 49.426 | 1.00 | 0.00 | H |
| ATOM | 738 | H5'1 | G B | 5 | -1.013 | -6.890  | 54.161 | 1.00 | 0.00 | H |
| ATOM | 739 | H5'2 | G B | 5 | -1.494 | -8.578  | 53.884 | 1.00 | 0.00 | H |
| ATOM | 740 | C1'  | T B | 6 | -5.013 | -3.071  | 47.791 | 1.00 | 0.00 | C |
| ATOM | 741 | N1   | T B | 6 | -3.529 | -3.014  | 47.713 | 1.00 | 0.00 | N |
| ATOM | 742 | C2   | T B | 6 | -2.952 | -1.766  | 47.594 | 1.00 | 0.00 | C |
| ATOM | 743 | O2   | T B | 6 | -3.605 | -0.738  | 47.551 | 1.00 | 0.00 | O |
| ATOM | 744 | N3   | T B | 6 | -1.570 | -1.760  | 47.526 | 1.00 | 0.00 | N |
| ATOM | 745 | C4   | T B | 6 | -0.740 | -2.860  | 47.562 | 1.00 | 0.00 | C |
| ATOM | 746 | O4   | T B | 6 | 0.487  | -2.730  | 47.489 | 1.00 | 0.00 | O |
| ATOM | 747 | C5   | T B | 6 | -1.435 | -4.119  | 47.689 | 1.00 | 0.00 | C |
| ATOM | 748 | C6   | T B | 6 | -2.780 | -4.164  | 47.759 | 1.00 | 0.00 | C |
| ATOM | 749 | C7   | T B | 6 | -0.570 | -5.344  | 47.735 | 1.00 | 0.00 | C |
| ATOM | 750 | C2'  | T B | 6 | -5.621 | -4.257  | 47.052 | 1.00 | 0.00 | C |
| ATOM | 751 | C3'  | T B | 6 | -6.799 | -4.616  | 47.945 | 1.00 | 0.00 | C |
| ATOM | 752 | O3'  | T B | 6 | -7.913 | -3.794  | 47.604 | 1.00 | 0.00 | O |
| ATOM | 753 | C4'  | T B | 6 | -6.268 | -4.319  | 49.345 | 1.00 | 0.00 | C |
| ATOM | 754 | O4'  | T B | 6 | -5.370 | -3.179  | 49.155 | 1.00 | 0.00 | O |
| ATOM | 755 | C5'  | T B | 6 | -5.500 | -5.430  | 50.023 | 1.00 | 0.00 | C |
| ATOM | 756 | O5'  | T B | 6 | -4.713 | -6.151  | 49.041 | 1.00 | 0.00 | O |
| ATOM | 757 | O1P  | T B | 6 | -5.767 | -8.436  | 49.015 | 1.00 | 0.00 | O |
| ATOM | 758 | O2P  | T B | 6 | -3.348 | -8.162  | 48.405 | 1.00 | 0.00 | O |
| ATOM | 759 | P    | T B | 6 | -4.495 | -7.719  | 49.234 | 1.00 | 0.00 | P |
| ATOM | 760 | H3   | T B | 6 | -1.115 | -0.839  | 47.440 | 1.00 | 0.00 | H |
| ATOM | 761 | H6   | T B | 6 | -3.281 | -5.127  | 47.854 | 1.00 | 0.00 | H |
| ATOM | 762 | H1'  | T B | 6 | -5.412 | -2.130  | 47.413 | 1.00 | 0.00 | H |
| ATOM | 763 | H3'  | T B | 6 | -7.081 | -5.664  | 47.845 | 1.00 | 0.00 | H |
| ATOM | 764 | H4'  | T B | 6 | -7.131 | -4.083  | 49.968 | 1.00 | 0.00 | H |

|      |     |      |     |   |        |        |        |      |      |   |
|------|-----|------|-----|---|--------|--------|--------|------|------|---|
| ATOM | 765 | H71  | T B | 6 | -0.753 | -5.952 | 46.849 | 1.00 | 0.00 | H |
| ATOM | 766 | H72  | T B | 6 | 0.479  | -5.048 | 47.763 | 1.00 | 0.00 | H |
| ATOM | 767 | H73  | T B | 6 | -0.807 | -5.924 | 48.628 | 1.00 | 0.00 | H |
| ATOM | 768 | H2'1 | T B | 6 | -4.924 | -5.088 | 46.961 | 1.00 | 0.00 | H |
| ATOM | 769 | H2'2 | T B | 6 | -5.951 | -3.993 | 46.047 | 1.00 | 0.00 | H |
| ATOM | 770 | H5'1 | T B | 6 | -4.843 | -5.002 | 50.780 | 1.00 | 0.00 | H |
| ATOM | 771 | H5'2 | T B | 6 | -6.204 | -6.110 | 50.501 | 1.00 | 0.00 | H |
| ATOM | 772 | C1'  | C B | 7 | -5.839 | 0.470  | 44.409 | 1.00 | 0.00 | C |
| ATOM | 773 | N1   | C B | 7 | -4.615 | -0.377 | 44.334 | 1.00 | 0.00 | N |
| ATOM | 774 | C2   | C B | 7 | -3.385 | 0.265  | 44.214 | 1.00 | 0.00 | C |
| ATOM | 775 | O2   | C B | 7 | -3.357 | 1.503  | 44.176 | 1.00 | 0.00 | O |
| ATOM | 776 | N3   | C B | 7 | -2.259 | -0.487 | 44.144 | 1.00 | 0.00 | N |
| ATOM | 777 | C4   | C B | 7 | -2.321 | -1.824 | 44.187 | 1.00 | 0.00 | C |
| ATOM | 778 | N4   | C B | 7 | -1.190 | -2.509 | 44.118 | 1.00 | 0.00 | N |
| ATOM | 779 | C5   | C B | 7 | -3.574 | -2.512 | 44.305 | 1.00 | 0.00 | C |
| ATOM | 780 | C6   | C B | 7 | -4.694 | -1.733 | 44.379 | 1.00 | 0.00 | C |
| ATOM | 781 | C2'  | C B | 7 | -7.034 | -0.112 | 43.668 | 1.00 | 0.00 | C |
| ATOM | 782 | C3'  | C B | 7 | -8.193 | 0.307  | 44.559 | 1.00 | 0.00 | C |
| ATOM | 783 | O3'  | C B | 7 | -8.589 | 1.633  | 44.219 | 1.00 | 0.00 | O |
| ATOM | 784 | C4'  | C B | 7 | -7.592 | 0.225  | 45.960 | 1.00 | 0.00 | C |
| ATOM | 785 | O4'  | C B | 7 | -6.190 | 0.598  | 45.774 | 1.00 | 0.00 | O |
| ATOM | 786 | C5'  | C B | 7 | -7.647 | -1.126 | 46.637 | 1.00 | 0.00 | C |
| ATOM | 787 | O5'  | C B | 7 | -7.449 | -2.173 | 45.655 | 1.00 | 0.00 | O |
| ATOM | 788 | O1P  | C B | 7 | -9.663 | -3.370 | 45.625 | 1.00 | 0.00 | O |
| ATOM | 789 | O2P  | C B | 7 | -7.564 | -4.601 | 45.018 | 1.00 | 0.00 | O |
| ATOM | 790 | P    | C B | 7 | -8.216 | -3.559 | 45.846 | 1.00 | 0.00 | P |
| ATOM | 791 | H5   | C B | 7 | -3.629 | -3.600 | 44.333 | 1.00 | 0.00 | H |
| ATOM | 792 | H6   | C B | 7 | -5.669 | -2.210 | 44.477 | 1.00 | 0.00 | H |
| ATOM | 793 | H1'  | C B | 7 | -5.590 | 1.462  | 44.032 | 1.00 | 0.00 | H |
| ATOM | 794 | H3'  | C B | 7 | -9.049 | -0.363 | 44.458 | 1.00 | 0.00 | H |
| ATOM | 795 | H4'  | C B | 7 | -8.142 | 0.930  | 46.583 | 1.00 | 0.00 | H |
| ATOM | 796 | H41  | C B | 7 | -1.209 | -3.539 | 44.152 | 1.00 | 0.00 | H |
| ATOM | 797 | H42  | C B | 7 | -0.290 | -2.013 | 44.031 | 1.00 | 0.00 | H |
| ATOM | 798 | H2'1 | C B | 7 | -6.976 | -1.196 | 43.576 | 1.00 | 0.00 | H |
| ATOM | 799 | H2'2 | C B | 7 | -7.137 | 0.297  | 42.663 | 1.00 | 0.00 | H |
| ATOM | 800 | H5'1 | C B | 7 | -6.865 | -1.178 | 47.395 | 1.00 | 0.00 | H |
| ATOM | 801 | H5'2 | C B | 7 | -8.618 | -1.247 | 47.114 | 1.00 | 0.00 | H |
| ATOM | 802 | C1'  | C B | 8 | -4.447 | 3.812  | 41.029 | 1.00 | 0.00 | C |
| ATOM | 803 | N1   | C B | 8 | -3.955 | 2.409  | 40.954 | 1.00 | 0.00 | N |
| ATOM | 804 | C2   | C B | 8 | -2.582 | 2.204  | 40.834 | 1.00 | 0.00 | C |
| ATOM | 805 | O2   | C B | 8 | -1.833 | 3.189  | 40.796 | 1.00 | 0.00 | O |
| ATOM | 806 | N3   | C B | 8 | -2.114 | 0.935  | 40.764 | 1.00 | 0.00 | N |
| ATOM | 807 | C4   | C B | 8 | -2.950 | -0.111 | 40.807 | 1.00 | 0.00 | C |
| ATOM | 808 | N4   | C B | 8 | -2.437 | -1.331 | 40.738 | 1.00 | 0.00 | N |
| ATOM | 809 | C5   | C B | 8 | -4.368 | 0.068  | 40.925 | 1.00 | 0.00 | C |
| ATOM | 810 | C6   | C B | 8 | -4.817 | 1.357  | 40.999 | 1.00 | 0.00 | C |
| ATOM | 811 | C2'  | C B | 8 | -5.757 | 4.044  | 40.288 | 1.00 | 0.00 | C |
| ATOM | 812 | C3'  | C B | 8 | -6.449 | 5.064  | 41.179 | 1.00 | 0.00 | C |
| ATOM | 813 | O3'  | C B | 8 | -5.989 | 6.370  | 40.839 | 1.00 | 0.00 | O |
| ATOM | 814 | C4'  | C B | 8 | -6.010 | 4.644  | 42.580 | 1.00 | 0.00 | C |
| ATOM | 815 | O4'  | C B | 8 | -4.656 | 4.121  | 42.394 | 1.00 | 0.00 | O |
| ATOM | 816 | C5'  | C B | 8 | -6.848 | 3.585  | 43.257 | 1.00 | 0.00 | C |
| ATOM | 817 | O5'  | C B | 8 | -7.304 | 2.619  | 42.275 | 1.00 | 0.00 | O |
| ATOM | 818 | O1P  | C B | 8 | -9.799 | 2.954  | 42.245 | 1.00 | 0.00 | O |

|      |     |      |     |    |        |        |        |      |      |   |
|------|-----|------|-----|----|--------|--------|--------|------|------|---|
| ATOM | 819 | O2P  | C B | 8  | -8.824 | 0.723  | 41.638 | 1.00 | 0.00 | O |
| ATOM | 820 | P    | C B | 8  | -8.738 | 1.951  | 42.466 | 1.00 | 0.00 | P |
| ATOM | 821 | H5   | C B | 8  | -5.053 | -0.779 | 40.953 | 1.00 | 0.00 | H |
| ATOM | 822 | H6   | C B | 8  | -5.886 | 1.544  | 41.097 | 1.00 | 0.00 | H |
| ATOM | 823 | H1'  | C B | 8  | -3.663 | 4.469  | 40.652 | 1.00 | 0.00 | H |
| ATOM | 824 | H3'  | C B | 8  | -7.533 | 5.025  | 41.078 | 1.00 | 0.00 | H |
| ATOM | 825 | H4'  | C B | 8  | -6.041 | 5.538  | 43.203 | 1.00 | 0.00 | H |
| ATOM | 826 | H41  | C B | 8  | -3.058 | -2.153 | 40.772 | 1.00 | 0.00 | H |
| ATOM | 827 | H42  | C B | 8  | -1.418 | -1.458 | 40.651 | 1.00 | 0.00 | H |
| ATOM | 828 | H2'1 | C B | 8  | -6.347 | 3.133  | 40.196 | 1.00 | 0.00 | H |
| ATOM | 829 | H2'2 | C B | 8  | -5.599 | 4.436  | 39.283 | 1.00 | 0.00 | H |
| ATOM | 830 | H5'1 | C B | 8  | -6.247 | 3.082  | 44.015 | 1.00 | 0.00 | H |
| ATOM | 831 | H5'2 | C B | 8  | -7.705 | 4.057  | 43.734 | 1.00 | 0.00 | H |
| ATOM | 832 | C1'  | T B | 9  | -1.372 | 5.716  | 37.651 | 1.00 | 0.00 | C |
| ATOM | 833 | N1   | T B | 9  | -1.776 | 4.287  | 37.573 | 1.00 | 0.00 | N |
| ATOM | 834 | C2   | T B | 9  | -0.768 | 3.352  | 37.454 | 1.00 | 0.00 | C |
| ATOM | 835 | O2   | T B | 9  | 0.411  | 3.657  | 37.411 | 1.00 | 0.00 | O |
| ATOM | 836 | N3   | T B | 9  | -1.188 | 2.037  | 37.386 | 1.00 | 0.00 | N |
| ATOM | 837 | C4   | T B | 9  | -2.491 | 1.588  | 37.422 | 1.00 | 0.00 | C |
| ATOM | 838 | O4   | T B | 9  | -2.746 | 0.380  | 37.349 | 1.00 | 0.00 | O |
| ATOM | 839 | C5   | T B | 9  | -3.475 | 2.638  | 37.549 | 1.00 | 0.00 | C |
| ATOM | 840 | C6   | T B | 9  | -3.101 | 3.930  | 37.619 | 1.00 | 0.00 | C |
| ATOM | 841 | C7   | T B | 9  | -4.906 | 2.193  | 37.595 | 1.00 | 0.00 | C |
| ATOM | 842 | C2'  | T B | 9  | -2.312 | 6.662  | 36.912 | 1.00 | 0.00 | C |
| ATOM | 843 | C3'  | T B | 9  | -2.289 | 7.893  | 37.805 | 1.00 | 0.00 | C |
| ATOM | 844 | O3'  | T B | 9  | -1.163 | 8.698  | 37.464 | 1.00 | 0.00 | O |
| ATOM | 845 | C4'  | T B | 9  | -2.171 | 7.295  | 39.205 | 1.00 | 0.00 | C |
| ATOM | 846 | O4'  | T B | 9  | -1.363 | 6.090  | 39.015 | 1.00 | 0.00 | O |
| ATOM | 847 | C5'  | T B | 9  | -3.465 | 6.909  | 39.883 | 1.00 | 0.00 | C |
| ATOM | 848 | O5'  | T B | 9  | -4.394 | 6.384  | 38.901 | 1.00 | 0.00 | O |
| ATOM | 849 | O1P  | T B | 9  | -6.241 | 8.092  | 38.875 | 1.00 | 0.00 | O |
| ATOM | 850 | O2P  | T B | 9  | -6.728 | 5.707  | 38.265 | 1.00 | 0.00 | O |
| ATOM | 851 | P    | T B | 9  | -5.952 | 6.660  | 39.094 | 1.00 | 0.00 | P |
| ATOM | 852 | H3   | T B | 9  | -0.454 | 1.320  | 37.300 | 1.00 | 0.00 | H |
| ATOM | 853 | H6   | T B | 9  | -3.862 | 4.705  | 37.714 | 1.00 | 0.00 | H |
| ATOM | 854 | H1'  | T B | 9  | -0.353 | 5.805  | 37.273 | 1.00 | 0.00 | H |
| ATOM | 855 | H3'  | T B | 9  | -3.199 | 8.484  | 37.705 | 1.00 | 0.00 | H |
| ATOM | 856 | H4'  | T B | 9  | -1.679 | 8.044  | 39.828 | 1.00 | 0.00 | H |
| ATOM | 857 | H71  | T B | 9  | -5.428 | 2.555  | 36.709 | 1.00 | 0.00 | H |
| ATOM | 858 | H72  | T B | 9  | -4.949 | 1.104  | 37.623 | 1.00 | 0.00 | H |
| ATOM | 859 | H73  | T B | 9  | -5.384 | 2.598  | 38.488 | 1.00 | 0.00 | H |
| ATOM | 860 | H2'1 | T B | 9  | -3.318 | 6.256  | 36.821 | 1.00 | 0.00 | H |
| ATOM | 861 | H2'2 | T B | 9  | -1.959 | 6.893  | 35.907 | 1.00 | 0.00 | H |
| ATOM | 862 | H5'1 | T B | 9  | -3.261 | 6.152  | 40.640 | 1.00 | 0.00 | H |
| ATOM | 863 | H5'2 | T B | 9  | -3.893 | 7.788  | 40.361 | 1.00 | 0.00 | H |
| ATOM | 864 | C1'  | A B | 10 | 2.251  | 5.431  | 34.271 | 1.00 | 0.00 | C |
| ATOM | 865 | N1   | A B | 10 | 0.711  | 0.554  | 33.851 | 1.00 | 0.00 | N |
| ATOM | 866 | C2   | A B | 10 | 1.916  | 1.116  | 33.893 | 1.00 | 0.00 | C |
| ATOM | 867 | N3   | A B | 10 | 2.243  | 2.385  | 34.006 | 1.00 | 0.00 | N |
| ATOM | 868 | C4   | A B | 10 | 1.137  | 3.147  | 34.077 | 1.00 | 0.00 | C |
| ATOM | 869 | C5   | A B | 10 | -0.165 | 2.729  | 34.047 | 1.00 | 0.00 | C |
| ATOM | 870 | C6   | A B | 10 | -0.374 | 1.340  | 33.925 | 1.00 | 0.00 | C |
| ATOM | 871 | N6   | A B | 10 | -1.598 | 0.784  | 33.883 | 1.00 | 0.00 | N |
| ATOM | 872 | N7   | A B | 10 | -1.036 | 3.800  | 34.146 | 1.00 | 0.00 | N |

|      |     |      |     |    |        |        |        |      |      |   |
|------|-----|------|-----|----|--------|--------|--------|------|------|---|
| ATOM | 873 | C8   | A B | 10 | -0.251 | 4.833  | 34.228 | 1.00 | 0.00 | C |
| ATOM | 874 | N9   | A B | 10 | 1.082  | 4.514  | 34.196 | 1.00 | 0.00 | N |
| ATOM | 875 | C2'  | A B | 10 | 2.045  | 6.748  | 33.535 | 1.00 | 0.00 | C |
| ATOM | 876 | C3'  | A B | 10 | 2.791  | 7.730  | 34.425 | 1.00 | 0.00 | C |
| ATOM | 877 | O3'  | A B | 10 | 4.174  | 7.716  | 34.081 | 1.00 | 0.00 | O |
| ATOM | 878 | C4'  | A B | 10 | 2.540  | 7.175  | 35.827 | 1.00 | 0.00 | C |
| ATOM | 879 | O4'  | A B | 10 | 2.481  | 5.725  | 35.636 | 1.00 | 0.00 | O |
| ATOM | 880 | C5'  | A B | 10 | 1.270  | 7.625  | 36.509 | 1.00 | 0.00 | C |
| ATOM | 881 | O5'  | A B | 10 | 0.205  | 7.748  | 35.532 | 1.00 | 0.00 | O |
| ATOM | 882 | O1P  | A B | 10 | -0.282 | 10.218 | 35.510 | 1.00 | 0.00 | O |
| ATOM | 883 | O2P  | A B | 10 | -2.082 | 8.578  | 34.904 | 1.00 | 0.00 | O |
| ATOM | 884 | P    | A B | 10 | -0.890 | 8.891  | 35.729 | 1.00 | 0.00 | P |
| ATOM | 885 | H2   | A B | 10 | 2.754  | 0.423  | 33.824 | 1.00 | 0.00 | H |
| ATOM | 886 | H8   | A B | 10 | -0.618 | 5.856  | 34.314 | 1.00 | 0.00 | H |
| ATOM | 887 | H1'  | A B | 10 | 3.124  | 4.903  | 33.889 | 1.00 | 0.00 | H |
| ATOM | 888 | H3'  | A B | 10 | 2.404  | 8.744  | 34.329 | 1.00 | 0.00 | H |
| ATOM | 889 | H4'  | A B | 10 | 3.380  | 7.489  | 36.446 | 1.00 | 0.00 | H |
| ATOM | 890 | H61  | A B | 10 | -1.695 | -0.237 | 33.796 | 1.00 | 0.00 | H |
| ATOM | 891 | H62  | A B | 10 | -2.436 | 1.380  | 33.938 | 1.00 | 0.00 | H |
| ATOM | 892 | H2'1 | A B | 10 | 0.992  | 7.014  | 33.448 | 1.00 | 0.00 | H |
| ATOM | 893 | H2'2 | A B | 10 | 2.464  | 6.730  | 32.528 | 1.00 | 0.00 | H |
| ATOM | 894 | H5'1 | A B | 10 | 0.991  | 6.892  | 37.266 | 1.00 | 0.00 | H |
| ATOM | 895 | H5'2 | A B | 10 | 1.442  | 8.587  | 36.988 | 1.00 | 0.00 | H |
| ATOM | 896 | C1'  | G B | 11 | 4.998  | 3.052  | 30.889 | 1.00 | 0.00 | C |
| ATOM | 897 | N1   | G B | 11 | 0.894  | 0.051  | 30.472 | 1.00 | 0.00 | N |
| ATOM | 898 | C2   | G B | 11 | 2.237  | -0.281 | 30.510 | 1.00 | 0.00 | C |
| ATOM | 899 | N2   | G B | 11 | 2.524  | -1.586 | 30.424 | 1.00 | 0.00 | N |
| ATOM | 900 | N3   | G B | 11 | 3.214  | 0.617  | 30.626 | 1.00 | 0.00 | N |
| ATOM | 901 | C4   | G B | 11 | 2.741  | 1.889  | 30.694 | 1.00 | 0.00 | C |
| ATOM | 902 | C5   | G B | 11 | 1.424  | 2.314  | 30.659 | 1.00 | 0.00 | C |
| ATOM | 903 | C6   | G B | 11 | 0.385  | 1.362  | 30.540 | 1.00 | 0.00 | C |
| ATOM | 904 | O6   | G B | 11 | -0.832 | 1.542  | 30.492 | 1.00 | 0.00 | O |
| ATOM | 905 | N7   | G B | 11 | 1.363  | 3.706  | 30.754 | 1.00 | 0.00 | N |
| ATOM | 906 | C8   | G B | 11 | 2.616  | 4.072  | 30.844 | 1.00 | 0.00 | C |
| ATOM | 907 | N9   | G B | 11 | 3.513  | 3.024  | 30.813 | 1.00 | 0.00 | N |
| ATOM | 908 | C2'  | G B | 11 | 5.628  | 4.226  | 30.152 | 1.00 | 0.00 | C |
| ATOM | 909 | C3'  | G B | 11 | 6.813  | 4.562  | 31.043 | 1.00 | 0.00 | C |
| ATOM | 910 | O3'  | G B | 11 | 7.910  | 3.719  | 30.700 | 1.00 | 0.00 | O |
| ATOM | 911 | C4'  | G B | 11 | 6.278  | 4.272  | 32.444 | 1.00 | 0.00 | C |
| ATOM | 912 | O4'  | G B | 11 | 5.359  | 3.149  | 32.253 | 1.00 | 0.00 | O |
| ATOM | 913 | C5'  | G B | 11 | 5.533  | 5.396  | 33.124 | 1.00 | 0.00 | C |
| ATOM | 914 | O5'  | G B | 11 | 4.759  | 6.134  | 32.146 | 1.00 | 0.00 | O |
| ATOM | 915 | O1P  | G B | 11 | 5.855  | 8.399  | 32.123 | 1.00 | 0.00 | O |
| ATOM | 916 | O2P  | G B | 11 | 3.432  | 8.172  | 31.516 | 1.00 | 0.00 | O |
| ATOM | 917 | P    | G B | 11 | 4.572  | 7.706  | 32.342 | 1.00 | 0.00 | P |
| ATOM | 918 | H1   | G B | 11 | 0.216  | -0.721 | 30.387 | 1.00 | 0.00 | H |
| ATOM | 919 | H8   | G B | 11 | 2.924  | 5.113  | 30.934 | 1.00 | 0.00 | H |
| ATOM | 920 | H1'  | G B | 11 | 5.378  | 2.103  | 30.509 | 1.00 | 0.00 | H |
| ATOM | 921 | H21  | G B | 11 | 1.763  | -2.275 | 30.338 | 1.00 | 0.00 | H |
| ATOM | 922 | H3'  | G B | 11 | 7.115  | 5.605  | 30.946 | 1.00 | 0.00 | H |
| ATOM | 923 | H22  | G B | 11 | 3.505  | -1.899 | 30.443 | 1.00 | 0.00 | H |
| ATOM | 924 | H4'  | G B | 11 | 7.137  | 4.018  | 33.065 | 1.00 | 0.00 | H |
| ATOM | 925 | H2'1 | G B | 11 | 4.946  | 5.072  | 30.063 | 1.00 | 0.00 | H |
| ATOM | 926 | H2'2 | G B | 11 | 5.951  | 3.958  | 29.146 | 1.00 | 0.00 | H |

|      |     |      |     |    |        |        |        |      |      |   |
|------|-----|------|-----|----|--------|--------|--------|------|------|---|
| ATOM | 927 | H5'1 | G B | 11 | 4.869  | 4.979  | 33.881 | 1.00 | 0.00 | H |
| ATOM | 928 | H5'2 | G B | 11 | 6.251  | 6.061  | 33.604 | 1.00 | 0.00 | H |
| ATOM | 929 | C1'  | G B | 12 | 5.838  | -0.469 | 27.509 | 1.00 | 0.00 | C |
| ATOM | 930 | N1   | G B | 12 | 0.753  | -0.484 | 27.092 | 1.00 | 0.00 | N |
| ATOM | 931 | C2   | G B | 12 | 1.645  | -1.542 | 27.130 | 1.00 | 0.00 | C |
| ATOM | 932 | N2   | G B | 12 | 1.110  | -2.767 | 27.044 | 1.00 | 0.00 | N |
| ATOM | 933 | N3   | G B | 12 | 2.962  | -1.390 | 27.246 | 1.00 | 0.00 | N |
| ATOM | 934 | C4   | G B | 12 | 3.327  | -0.083 | 27.313 | 1.00 | 0.00 | C |
| ATOM | 935 | C5   | G B | 12 | 2.512  | 1.035  | 27.279 | 1.00 | 0.00 | C |
| ATOM | 936 | C6   | G B | 12 | 1.113  | 0.875  | 27.160 | 1.00 | 0.00 | C |
| ATOM | 937 | O6   | G B | 12 | 0.234  | 1.736  | 27.112 | 1.00 | 0.00 | O |
| ATOM | 938 | N7   | G B | 12 | 3.281  | 2.197  | 27.374 | 1.00 | 0.00 | N |
| ATOM | 939 | C8   | G B | 12 | 4.509  | 1.757  | 27.464 | 1.00 | 0.00 | C |
| ATOM | 940 | N9   | G B | 12 | 4.619  | 0.382  | 27.433 | 1.00 | 0.00 | N |
| ATOM | 941 | C2'  | G B | 12 | 7.037  | 0.111  | 26.772 | 1.00 | 0.00 | C |
| ATOM | 942 | C3'  | G B | 12 | 8.194  | -0.314 | 27.663 | 1.00 | 0.00 | C |
| ATOM | 943 | O3'  | G B | 12 | 8.586  | -1.641 | 27.320 | 1.00 | 0.00 | O |
| ATOM | 944 | C4'  | G B | 12 | 7.590  | -0.234 | 29.064 | 1.00 | 0.00 | C |
| ATOM | 945 | O4'  | G B | 12 | 6.187  | -0.602 | 28.873 | 1.00 | 0.00 | O |
| ATOM | 946 | C5'  | G B | 12 | 7.648  | 1.113  | 29.744 | 1.00 | 0.00 | C |
| ATOM | 947 | O5'  | G B | 12 | 7.455  | 2.165  | 28.766 | 1.00 | 0.00 | O |
| ATOM | 948 | O1P  | G B | 12 | 9.674  | 3.353  | 28.743 | 1.00 | 0.00 | O |
| ATOM | 949 | O2P  | G B | 12 | 7.580  | 4.595  | 28.136 | 1.00 | 0.00 | O |
| ATOM | 950 | P    | G B | 12 | 8.228  | 3.547  | 28.962 | 1.00 | 0.00 | P |
| ATOM | 951 | H1   | G B | 12 | -0.250 | -0.710 | 27.007 | 1.00 | 0.00 | H |
| ATOM | 952 | H8   | G B | 12 | 5.372  | 2.417  | 27.555 | 1.00 | 0.00 | H |
| ATOM | 953 | H1'  | G B | 12 | 5.587  | -1.459 | 27.129 | 1.00 | 0.00 | H |
| ATOM | 954 | H21  | G B | 12 | 0.089  | -2.877 | 26.958 | 1.00 | 0.00 | H |
| ATOM | 955 | H3'  | G B | 12 | 9.051  | 0.352  | 27.566 | 1.00 | 0.00 | H |
| ATOM | 956 | H22  | G B | 12 | 1.720  | -3.596 | 27.063 | 1.00 | 0.00 | H |
| ATOM | 957 | H4'  | G B | 12 | 8.135  | -0.944 | 29.685 | 1.00 | 0.00 | H |
| ATOM | 958 | H2'1 | G B | 12 | 6.983  | 1.196  | 26.683 | 1.00 | 0.00 | H |
| ATOM | 959 | H2'2 | G B | 12 | 7.141  | -0.295 | 25.766 | 1.00 | 0.00 | H |
| ATOM | 960 | H5'1 | G B | 12 | 6.866  | 1.166  | 30.501 | 1.00 | 0.00 | H |
| ATOM | 961 | H5'2 | G B | 12 | 8.620  | 1.230  | 30.224 | 1.00 | 0.00 | H |
| ATOM | 962 | C1'  | T B | 13 | 4.470  | -3.818 | 24.131 | 1.00 | 0.00 | C |
| ATOM | 963 | N1   | T B | 13 | 3.957  | -2.425 | 24.053 | 1.00 | 0.00 | N |
| ATOM | 964 | C2   | T B | 13 | 2.591  | -2.261 | 23.934 | 1.00 | 0.00 | C |
| ATOM | 965 | O2   | T B | 13 | 1.816  | -3.201 | 23.891 | 1.00 | 0.00 | O |
| ATOM | 966 | N3   | T B | 13 | 2.158  | -0.950 | 23.866 | 1.00 | 0.00 | N |
| ATOM | 967 | C4   | T B | 13 | 2.948  | 0.180  | 23.902 | 1.00 | 0.00 | C |
| ATOM | 968 | O4   | T B | 13 | 2.445  | 1.307  | 23.829 | 1.00 | 0.00 | O |
| ATOM | 969 | C5   | T B | 13 | 4.361  | -0.091 | 24.029 | 1.00 | 0.00 | C |
| ATOM | 970 | C6   | T B | 13 | 4.819  | -1.357 | 24.099 | 1.00 | 0.00 | C |
| ATOM | 971 | C7   | T B | 13 | 5.259  | 1.109  | 24.075 | 1.00 | 0.00 | C |
| ATOM | 972 | C2'  | T B | 13 | 5.786  | -4.031 | 23.392 | 1.00 | 0.00 | C |
| ATOM | 973 | C3'  | T B | 13 | 6.491  | -5.040 | 24.285 | 1.00 | 0.00 | C |
| ATOM | 974 | O3'  | T B | 13 | 6.053  | -6.353 | 23.944 | 1.00 | 0.00 | O |
| ATOM | 975 | C4'  | T B | 13 | 6.044  | -4.626 | 25.685 | 1.00 | 0.00 | C |
| ATOM | 976 | O4'  | T B | 13 | 4.682  | -4.125 | 25.495 | 1.00 | 0.00 | O |
| ATOM | 977 | C5'  | T B | 13 | 6.864  | -3.553 | 26.363 | 1.00 | 0.00 | C |
| ATOM | 978 | O5'  | T B | 13 | 7.307  | -2.582 | 25.381 | 1.00 | 0.00 | O |
| ATOM | 979 | O1P  | T B | 13 | 9.805  | -2.878 | 25.355 | 1.00 | 0.00 | O |
| ATOM | 980 | O2P  | T B | 13 | 8.798  | -0.662 | 24.745 | 1.00 | 0.00 | O |



|      |      |      |     |    |        |        |        |      |      |   |
|------|------|------|-----|----|--------|--------|--------|------|------|---|
| ATOM | 981  | P    | T B | 13 | 8.730  | -1.890 | 25.574 | 1.00 | 0.00 | P |
| ATOM | 982  | H3   | T B | 13 | 1.142  | -0.802 | 23.780 | 1.00 | 0.00 | H |
| ATOM | 983  | H6   | T B | 13 | 5.890  | -1.536 | 24.194 | 1.00 | 0.00 | H |
| ATOM | 984  | H1'  | T B | 13 | 3.698  | -4.489 | 23.753 | 1.00 | 0.00 | H |
| ATOM | 985  | H3'  | T B | 13 | 7.575  | -4.984 | 24.185 | 1.00 | 0.00 | H |
| ATOM | 986  | H4'  | T B | 13 | 6.087  | -5.520 | 26.308 | 1.00 | 0.00 | H |
| ATOM | 987  | H71  | T B | 13 | 5.893  | 1.124  | 23.189 | 1.00 | 0.00 | H |
| ATOM | 988  | H72  | T B | 13 | 4.653  | 2.016  | 24.103 | 1.00 | 0.00 | H |
| ATOM | 989  | H73  | T B | 13 | 5.884  | 1.063  | 24.968 | 1.00 | 0.00 | H |
| ATOM | 990  | H2'1 | T B | 13 | 6.361  | -3.111 | 23.301 | 1.00 | 0.00 | H |
| ATOM | 991  | H2'2 | T B | 13 | 5.637  | -4.426 | 22.387 | 1.00 | 0.00 | H |
| ATOM | 992  | H5'1 | T B | 13 | 6.254  | -3.061 | 27.120 | 1.00 | 0.00 | H |
| ATOM | 993  | H5'2 | T B | 13 | 7.728  | -4.012 | 26.841 | 1.00 | 0.00 | H |
| ATOM | 994  | C1'  | G B | 14 | 1.358  | -5.697 | 20.749 | 1.00 | 0.00 | C |
| ATOM | 995  | N1   | G B | 14 | -0.228 | -0.866 | 20.332 | 1.00 | 0.00 | N |
| ATOM | 996  | C2   | G B | 14 | -0.959 | -2.040 | 20.370 | 1.00 | 0.00 | C |
| ATOM | 997  | N2   | G B | 14 | -2.288 | -1.911 | 20.284 | 1.00 | 0.00 | N |
| ATOM | 998  | N3   | G B | 14 | -0.407 | -3.247 | 20.486 | 1.00 | 0.00 | N |
| ATOM | 999  | C4   | G B | 14 | 0.950  | -3.190 | 20.554 | 1.00 | 0.00 | C |
| ATOM | 1000 | C5   | G B | 14 | 1.761  | -2.069 | 20.519 | 1.00 | 0.00 | C |
| ATOM | 1001 | C6   | G B | 14 | 1.176  | -0.787 | 20.400 | 1.00 | 0.00 | C |
| ATOM | 1002 | O6   | G B | 14 | 1.724  | 0.315  | 20.352 | 1.00 | 0.00 | O |
| ATOM | 1003 | N7   | G B | 14 | 3.104  | -2.441 | 20.614 | 1.00 | 0.00 | N |
| ATOM | 1004 | C8   | G B | 14 | 3.064  | -3.746 | 20.704 | 1.00 | 0.00 | C |
| ATOM | 1005 | N9   | G B | 14 | 1.790  | -4.275 | 20.673 | 1.00 | 0.00 | N |
| ATOM | 1006 | C2'  | G B | 14 | 2.280  | -6.659 | 20.012 | 1.00 | 0.00 | C |
| ATOM | 1007 | C3'  | G B | 14 | 2.233  | -7.890 | 20.903 | 1.00 | 0.00 | C |
| ATOM | 1008 | O3'  | G B | 14 | 1.092  | -8.672 | 20.560 | 1.00 | 0.00 | O |
| ATOM | 1009 | C4'  | G B | 14 | 2.123  | -7.290 | 22.304 | 1.00 | 0.00 | C |
| ATOM | 1010 | O4'  | G B | 14 | 1.339  | -6.070 | 22.113 | 1.00 | 0.00 | O |
| ATOM | 1011 | C5'  | G B | 14 | 3.422  | -6.930 | 22.984 | 1.00 | 0.00 | C |
| ATOM | 1012 | O5'  | G B | 14 | 4.363  | -6.421 | 22.006 | 1.00 | 0.00 | O |
| ATOM | 1013 | O1P  | G B | 14 | 6.179  | -8.164 | 21.983 | 1.00 | 0.00 | O |
| ATOM | 1014 | O2P  | G B | 14 | 6.712  | -5.789 | 21.376 | 1.00 | 0.00 | O |
| ATOM | 1015 | P    | G B | 14 | 5.916  | -6.729 | 22.202 | 1.00 | 0.00 | P |
| ATOM | 1016 | H1   | G B | 14 | -0.753 | 0.018  | 20.247 | 1.00 | 0.00 | H |
| ATOM | 1017 | H8   | G B | 14 | 3.960  | -4.361 | 20.795 | 1.00 | 0.00 | H |
| ATOM | 1018 | H1'  | G B | 14 | 0.338  | -5.765 | 20.369 | 1.00 | 0.00 | H |
| ATOM | 1019 | H21  | G B | 14 | -2.708 | -0.973 | 20.198 | 1.00 | 0.00 | H |
| ATOM | 1020 | H3'  | G B | 14 | 3.132  | -8.499 | 20.806 | 1.00 | 0.00 | H |
| ATOM | 1021 | H22  | G B | 14 | -2.889 | -2.747 | 20.303 | 1.00 | 0.00 | H |
| ATOM | 1022 | H4'  | G B | 14 | 1.616  | -8.029 | 22.925 | 1.00 | 0.00 | H |
| ATOM | 1023 | H2'1 | G B | 14 | 3.295  | -6.272 | 19.923 | 1.00 | 0.00 | H |
| ATOM | 1024 | H2'2 | G B | 14 | 1.926  | -6.883 | 19.006 | 1.00 | 0.00 | H |
| ATOM | 1025 | H5'1 | G B | 14 | 3.231  | -6.170 | 23.741 | 1.00 | 0.00 | H |
| ATOM | 1026 | H5'2 | G B | 14 | 3.833  | -7.818 | 23.464 | 1.00 | 0.00 | H |
| ATOM | 1027 | C1'  | C B | 15 | -2.251 | -5.407 | 17.369 | 1.00 | 0.00 | C |
| ATOM | 1028 | N1   | C B | 15 | -1.069 | -4.506 | 17.294 | 1.00 | 0.00 | N |
| ATOM | 1029 | C2   | C B | 15 | -1.298 | -3.137 | 17.174 | 1.00 | 0.00 | C |
| ATOM | 1030 | O2   | C B | 15 | -2.466 | -2.729 | 17.136 | 1.00 | 0.00 | O |
| ATOM | 1031 | N3   | C B | 15 | -0.235 | -2.299 | 17.104 | 1.00 | 0.00 | N |
| ATOM | 1032 | C4   | C B | 15 | 1.017  | -2.771 | 17.147 | 1.00 | 0.00 | C |
| ATOM | 1033 | N4   | C B | 15 | 2.019  | -1.907 | 17.078 | 1.00 | 0.00 | N |
| ATOM | 1034 | C5   | C B | 15 | 1.284  | -4.176 | 17.265 | 1.00 | 0.00 | C |

|      |      |      |     |    |        |         |        |      |      |   |
|------|------|------|-----|----|--------|---------|--------|------|------|---|
| ATOM | 1035 | C6   | C B | 15 | 0.198  | -4.999  | 17.339 | 1.00 | 0.00 | C |
| ATOM | 1036 | C2'  | C B | 15 | -2.067 | -6.724  | 16.628 | 1.00 | 0.00 | C |
| ATOM | 1037 | C3'  | C B | 15 | -2.823 | -7.698  | 17.519 | 1.00 | 0.00 | C |
| ATOM | 1038 | O3'  | C B | 15 | -4.208 | -7.666  | 17.179 | 1.00 | 0.00 | O |
| ATOM | 1039 | C4'  | C B | 15 | -2.560 | -7.151  | 18.920 | 1.00 | 0.00 | C |
| ATOM | 1040 | O4'  | C B | 15 | -2.481 | -5.702  | 18.734 | 1.00 | 0.00 | O |
| ATOM | 1041 | C5'  | C B | 15 | -1.292 | -7.620  | 19.597 | 1.00 | 0.00 | C |
| ATOM | 1042 | O5'  | C B | 15 | -0.235 | -7.756  | 18.615 | 1.00 | 0.00 | O |
| ATOM | 1043 | O1P  | C B | 15 | 0.219  | -10.232 | 18.585 | 1.00 | 0.00 | O |
| ATOM | 1044 | O2P  | C B | 15 | 2.040  | -8.616  | 17.978 | 1.00 | 0.00 | O |
| ATOM | 1045 | P    | C B | 15 | 0.846  | -8.913  | 18.806 | 1.00 | 0.00 | P |
| ATOM | 1046 | H5   | C B | 15 | 2.302  | -4.564  | 17.294 | 1.00 | 0.00 | H |
| ATOM | 1047 | H6   | C B | 15 | 0.350  | -6.075  | 17.436 | 1.00 | 0.00 | H |
| ATOM | 1048 | H1'  | C B | 15 | -3.118 | -4.864  | 16.992 | 1.00 | 0.00 | H |
| ATOM | 1049 | H3'  | C B | 15 | -2.450 | -8.717  | 17.418 | 1.00 | 0.00 | H |
| ATOM | 1050 | H4'  | C B | 15 | -3.401 | -7.456  | 19.543 | 1.00 | 0.00 | H |
| ATOM | 1051 | H41  | C B | 15 | 2.993  | -2.243  | 17.112 | 1.00 | 0.00 | H |
| ATOM | 1052 | H42  | C B | 15 | 1.825  | -0.898  | 16.991 | 1.00 | 0.00 | H |
| ATOM | 1053 | H2'1 | C B | 15 | -1.018 | -7.004  | 16.536 | 1.00 | 0.00 | H |
| ATOM | 1054 | H2'2 | C B | 15 | -2.488 | -6.696  | 15.623 | 1.00 | 0.00 | H |
| ATOM | 1055 | H5'1 | C B | 15 | -1.001 | -6.893  | 20.355 | 1.00 | 0.00 | H |
| ATOM | 1056 | H5'2 | C B | 15 | -1.477 | -8.582  | 20.074 | 1.00 | 0.00 | H |
| ATOM | 1057 | C1'  | G B | 16 | -4.998 | -3.052  | 13.989 | 1.00 | 0.00 | C |
| ATOM | 1058 | N1   | G B | 16 | -0.894 | -0.051  | 13.572 | 1.00 | 0.00 | N |
| ATOM | 1059 | C2   | G B | 16 | -2.237 | 0.281   | 13.610 | 1.00 | 0.00 | C |
| ATOM | 1060 | N2   | G B | 16 | -2.524 | 1.586   | 13.524 | 1.00 | 0.00 | N |
| ATOM | 1061 | N3   | G B | 16 | -3.214 | -0.617  | 13.726 | 1.00 | 0.00 | N |
| ATOM | 1062 | C4   | G B | 16 | -2.741 | -1.889  | 13.794 | 1.00 | 0.00 | C |
| ATOM | 1063 | C5   | G B | 16 | -1.424 | -2.314  | 13.759 | 1.00 | 0.00 | C |
| ATOM | 1064 | C6   | G B | 16 | -0.385 | -1.361  | 13.640 | 1.00 | 0.00 | C |
| ATOM | 1065 | O6   | G B | 16 | 0.832  | -1.542  | 13.593 | 1.00 | 0.00 | O |
| ATOM | 1066 | N7   | G B | 16 | -1.363 | -3.706  | 13.854 | 1.00 | 0.00 | N |
| ATOM | 1067 | C8   | G B | 16 | -2.616 | -4.072  | 13.944 | 1.00 | 0.00 | C |
| ATOM | 1068 | N9   | G B | 16 | -3.513 | -3.024  | 13.913 | 1.00 | 0.00 | N |
| ATOM | 1069 | C2'  | G B | 16 | -5.628 | -4.226  | 13.252 | 1.00 | 0.00 | C |
| ATOM | 1070 | C3'  | G B | 16 | -6.813 | -4.562  | 14.143 | 1.00 | 0.00 | C |
| ATOM | 1071 | O3'  | G B | 16 | -7.910 | -3.719  | 13.800 | 1.00 | 0.00 | O |
| ATOM | 1072 | C4'  | G B | 16 | -6.278 | -4.272  | 15.544 | 1.00 | 0.00 | C |
| ATOM | 1073 | O4'  | G B | 16 | -5.359 | -3.149  | 15.353 | 1.00 | 0.00 | O |
| ATOM | 1074 | C5'  | G B | 16 | -5.533 | -5.396  | 16.224 | 1.00 | 0.00 | C |
| ATOM | 1075 | O5'  | G B | 16 | -4.759 | -6.134  | 15.246 | 1.00 | 0.00 | O |
| ATOM | 1076 | O1P  | G B | 16 | -5.855 | -8.399  | 15.223 | 1.00 | 0.00 | O |
| ATOM | 1077 | O2P  | G B | 16 | -3.432 | -8.172  | 14.616 | 1.00 | 0.00 | O |
| ATOM | 1078 | P    | G B | 16 | -4.572 | -7.706  | 15.442 | 1.00 | 0.00 | P |
| ATOM | 1079 | H1   | G B | 16 | -0.216 | 0.721   | 13.487 | 1.00 | 0.00 | H |
| ATOM | 1080 | H8   | G B | 16 | -2.924 | -5.113  | 14.035 | 1.00 | 0.00 | H |
| ATOM | 1081 | H1'  | G B | 16 | -5.378 | -2.103  | 13.609 | 1.00 | 0.00 | H |
| ATOM | 1082 | H21  | G B | 16 | -1.763 | 2.275   | 13.438 | 1.00 | 0.00 | H |
| ATOM | 1083 | H3'  | G B | 16 | -7.115 | -5.605  | 14.046 | 1.00 | 0.00 | H |
| ATOM | 1084 | H22  | G B | 16 | -3.505 | 1.898   | 13.544 | 1.00 | 0.00 | H |
| ATOM | 1085 | H4'  | G B | 16 | -7.137 | -4.018  | 16.165 | 1.00 | 0.00 | H |
| ATOM | 1086 | H2'1 | G B | 16 | -4.946 | -5.072  | 13.163 | 1.00 | 0.00 | H |
| ATOM | 1087 | H2'2 | G B | 16 | -5.951 | -3.958  | 12.246 | 1.00 | 0.00 | H |
| ATOM | 1088 | H5'1 | G B | 16 | -4.869 | -4.979  | 16.981 | 1.00 | 0.00 | H |

|      |      |      |     |    |        |        |        |      |      |   |
|------|------|------|-----|----|--------|--------|--------|------|------|---|
| ATOM | 1089 | H5'2 | G B | 16 | -6.251 | -6.061 | 16.704 | 1.00 | 0.00 | H |
| ATOM | 1090 | C1'  | G B | 17 | -5.838 | 0.469  | 10.609 | 1.00 | 0.00 | C |
| ATOM | 1091 | N1   | G B | 17 | -0.753 | 0.484  | 10.192 | 1.00 | 0.00 | N |
| ATOM | 1092 | C2   | G B | 17 | -1.645 | 1.542  | 10.230 | 1.00 | 0.00 | C |
| ATOM | 1093 | N2   | G B | 17 | -1.110 | 2.766  | 10.144 | 1.00 | 0.00 | N |
| ATOM | 1094 | N3   | G B | 17 | -2.962 | 1.390  | 10.346 | 1.00 | 0.00 | N |
| ATOM | 1095 | C4   | G B | 17 | -3.327 | 0.083  | 10.413 | 1.00 | 0.00 | C |
| ATOM | 1096 | C5   | G B | 17 | -2.512 | -1.035 | 10.379 | 1.00 | 0.00 | C |
| ATOM | 1097 | C6   | G B | 17 | -1.113 | -0.875 | 10.260 | 1.00 | 0.00 | C |
| ATOM | 1098 | O6   | G B | 17 | -0.234 | -1.736 | 10.213 | 1.00 | 0.00 | O |
| ATOM | 1099 | N7   | G B | 17 | -3.281 | -2.197 | 10.474 | 1.00 | 0.00 | N |
| ATOM | 1100 | C8   | G B | 17 | -4.509 | -1.757 | 10.564 | 1.00 | 0.00 | C |
| ATOM | 1101 | N9   | G B | 17 | -4.619 | -0.382 | 10.533 | 1.00 | 0.00 | N |
| ATOM | 1102 | C2'  | G B | 17 | -7.037 | -0.111 | 9.872  | 1.00 | 0.00 | C |
| ATOM | 1103 | C3'  | G B | 17 | -8.194 | 0.314  | 10.763 | 1.00 | 0.00 | C |
| ATOM | 1104 | O3'  | G B | 17 | -8.586 | 1.641  | 10.420 | 1.00 | 0.00 | O |
| ATOM | 1105 | C4'  | G B | 17 | -7.590 | 0.234  | 12.164 | 1.00 | 0.00 | C |
| ATOM | 1106 | O4'  | G B | 17 | -6.187 | 0.602  | 11.973 | 1.00 | 0.00 | O |
| ATOM | 1107 | C5'  | G B | 17 | -7.648 | -1.113 | 12.844 | 1.00 | 0.00 | C |
| ATOM | 1108 | O5'  | G B | 17 | -7.455 | -2.165 | 11.866 | 1.00 | 0.00 | O |
| ATOM | 1109 | O1P  | G B | 17 | -9.674 | -3.353 | 11.843 | 1.00 | 0.00 | O |
| ATOM | 1110 | O2P  | G B | 17 | -7.580 | -4.595 | 11.236 | 1.00 | 0.00 | O |
| ATOM | 1111 | P    | G B | 17 | -8.228 | -3.547 | 12.062 | 1.00 | 0.00 | P |
| ATOM | 1112 | H1   | G B | 17 | 0.250  | 0.710  | 10.106 | 1.00 | 0.00 | H |
| ATOM | 1113 | H8   | G B | 17 | -5.371 | -2.417 | 10.655 | 1.00 | 0.00 | H |
| ATOM | 1114 | H1'  | G B | 17 | -5.587 | 1.459  | 10.229 | 1.00 | 0.00 | H |
| ATOM | 1115 | H21  | G B | 17 | -0.089 | 2.877  | 10.058 | 1.00 | 0.00 | H |
| ATOM | 1116 | H3'  | G B | 17 | -9.051 | -0.352 | 10.666 | 1.00 | 0.00 | H |
| ATOM | 1117 | H22  | G B | 17 | -1.720 | 3.596  | 10.164 | 1.00 | 0.00 | H |
| ATOM | 1118 | H4'  | G B | 17 | -8.135 | 0.944  | 12.785 | 1.00 | 0.00 | H |
| ATOM | 1119 | H2'1 | G B | 17 | -6.983 | -1.196 | 9.783  | 1.00 | 0.00 | H |
| ATOM | 1120 | H2'2 | G B | 17 | -7.141 | 0.295  | 8.866  | 1.00 | 0.00 | H |
| ATOM | 1121 | H5'1 | G B | 17 | -6.866 | -1.166 | 13.601 | 1.00 | 0.00 | H |
| ATOM | 1122 | H5'2 | G B | 17 | -8.620 | -1.230 | 13.324 | 1.00 | 0.00 | H |
| ATOM | 1123 | C1'  | C B | 18 | -4.447 | 3.812  | 7.229  | 1.00 | 0.00 | C |
| ATOM | 1124 | N1   | C B | 18 | -3.955 | 2.408  | 7.154  | 1.00 | 0.00 | N |
| ATOM | 1125 | C2   | C B | 18 | -2.582 | 2.205  | 7.035  | 1.00 | 0.00 | C |
| ATOM | 1126 | O2   | C B | 18 | -1.833 | 3.189  | 6.997  | 1.00 | 0.00 | O |
| ATOM | 1127 | N3   | C B | 18 | -2.115 | 0.935  | 6.964  | 1.00 | 0.00 | N |
| ATOM | 1128 | C4   | C B | 18 | -2.952 | -0.110 | 7.008  | 1.00 | 0.00 | C |
| ATOM | 1129 | N4   | C B | 18 | -2.439 | -1.330 | 6.937  | 1.00 | 0.00 | N |
| ATOM | 1130 | C5   | C B | 18 | -4.367 | 0.071  | 7.127  | 1.00 | 0.00 | C |
| ATOM | 1131 | C6   | C B | 18 | -4.815 | 1.357  | 7.199  | 1.00 | 0.00 | C |
| ATOM | 1132 | C2'  | C B | 18 | -5.757 | 4.044  | 6.488  | 1.00 | 0.00 | C |
| ATOM | 1133 | C3'  | C B | 18 | -6.449 | 5.064  | 7.379  | 1.00 | 0.00 | C |
| ATOM | 1134 | O3'  | C B | 18 | -5.989 | 6.370  | 7.039  | 1.00 | 0.00 | O |
| ATOM | 1135 | C4'  | C B | 18 | -6.010 | 4.644  | 8.780  | 1.00 | 0.00 | C |
| ATOM | 1136 | O4'  | C B | 18 | -4.656 | 4.121  | 8.594  | 1.00 | 0.00 | O |
| ATOM | 1137 | C5'  | C B | 18 | -6.848 | 3.585  | 9.457  | 1.00 | 0.00 | C |
| ATOM | 1138 | O5'  | C B | 18 | -7.304 | 2.620  | 8.475  | 1.00 | 0.00 | O |
| ATOM | 1139 | O1P  | C B | 18 | -9.799 | 2.953  | 8.445  | 1.00 | 0.00 | O |
| ATOM | 1140 | O2P  | C B | 18 | -8.824 | 0.722  | 7.838  | 1.00 | 0.00 | O |
| ATOM | 1141 | P    | C B | 18 | -8.738 | 1.950  | 8.666  | 1.00 | 0.00 | P |
| ATOM | 1142 | H5   | C B | 18 | -5.052 | -0.776 | 7.159  | 1.00 | 0.00 | H |

|      |      |      |     |    |        |        |        |      |      |   |
|------|------|------|-----|----|--------|--------|--------|------|------|---|
| ATOM | 1143 | H6   | C B | 18 | -5.884 | 1.544  | 7.294  | 1.00 | 0.00 | H |
| ATOM | 1144 | H1'  | C B | 18 | -3.663 | 4.468  | 6.852  | 1.00 | 0.00 | H |
| ATOM | 1145 | H3'  | C B | 18 | -7.533 | 5.025  | 7.278  | 1.00 | 0.00 | H |
| ATOM | 1146 | H4'  | C B | 18 | -6.040 | 5.538  | 9.403  | 1.00 | 0.00 | H |
| ATOM | 1147 | H41  | C B | 18 | -3.061 | -2.152 | 6.970  | 1.00 | 0.00 | H |
| ATOM | 1148 | H42  | C B | 18 | -1.421 | -1.457 | 6.851  | 1.00 | 0.00 | H |
| ATOM | 1149 | H2'1 | C B | 18 | -6.347 | 3.133  | 6.396  | 1.00 | 0.00 | H |
| ATOM | 1150 | H2'2 | C B | 18 | -5.599 | 4.435  | 5.483  | 1.00 | 0.00 | H |
| ATOM | 1151 | H5'1 | C B | 18 | -6.247 | 3.082  | 10.215 | 1.00 | 0.00 | H |
| ATOM | 1152 | H5'2 | C B | 18 | -7.705 | 4.057  | 9.934  | 1.00 | 0.00 | H |
| ATOM | 1153 | C1'  | C B | 19 | -1.358 | 5.698  | 3.849  | 1.00 | 0.00 | C |
| ATOM | 1154 | N1   | C B | 19 | -1.784 | 4.274  | 3.774  | 1.00 | 0.00 | N |
| ATOM | 1155 | C2   | C B | 19 | -0.793 | 3.301  | 3.655  | 1.00 | 0.00 | C |
| ATOM | 1156 | O2   | C B | 19 | 0.392  | 3.657  | 3.618  | 1.00 | 0.00 | O |
| ATOM | 1157 | N3   | C B | 19 | -1.161 | 1.999  | 3.585  | 1.00 | 0.00 | N |
| ATOM | 1158 | C4   | C B | 19 | -2.453 | 1.646  | 3.628  | 1.00 | 0.00 | C |
| ATOM | 1159 | N4   | C B | 19 | -2.756 | 0.360  | 3.557  | 1.00 | 0.00 | N |
| ATOM | 1160 | C5   | C B | 19 | -3.490 | 2.625  | 3.748  | 1.00 | 0.00 | C |
| ATOM | 1161 | C6   | C B | 19 | -3.097 | 3.928  | 3.818  | 1.00 | 0.00 | C |
| ATOM | 1162 | C2'  | C B | 19 | -2.281 | 6.654  | 3.108  | 1.00 | 0.00 | C |
| ATOM | 1163 | C3'  | C B | 19 | -2.241 | 7.887  | 3.999  | 1.00 | 0.00 | C |
| ATOM | 1164 | O3'  | C B | 19 | -1.102 | 8.674  | 3.659  | 1.00 | 0.00 | O |
| ATOM | 1165 | C4'  | C B | 19 | -2.133 | 7.290  | 5.400  | 1.00 | 0.00 | C |
| ATOM | 1166 | O4'  | C B | 19 | -1.345 | 6.071  | 5.214  | 1.00 | 0.00 | O |
| ATOM | 1167 | C5'  | C B | 19 | -3.434 | 6.924  | 6.077  | 1.00 | 0.00 | C |
| ATOM | 1168 | O5'  | C B | 19 | -4.370 | 6.412  | 5.095  | 1.00 | 0.00 | O |
| ATOM | 1169 | O1P  | C B | 19 | -6.191 | 8.149  | 5.065  | 1.00 | 0.00 | O |
| ATOM | 1170 | O2P  | C B | 19 | -6.714 | 5.771  | 4.458  | 1.00 | 0.00 | O |
| ATOM | 1171 | P    | C B | 19 | -5.923 | 6.714  | 5.286  | 1.00 | 0.00 | P |
| ATOM | 1172 | H5   | C B | 19 | -4.542 | 2.343  | 3.781  | 1.00 | 0.00 | H |
| ATOM | 1173 | H6   | C B | 19 | -3.852 | 4.709  | 3.912  | 1.00 | 0.00 | H |
| ATOM | 1174 | H1'  | C B | 19 | -0.337 | 5.768  | 3.472  | 1.00 | 0.00 | H |
| ATOM | 1175 | H3'  | C B | 19 | -3.142 | 8.492  | 3.898  | 1.00 | 0.00 | H |
| ATOM | 1176 | H4'  | C B | 19 | -1.631 | 8.031  | 6.023  | 1.00 | 0.00 | H |
| ATOM | 1177 | H41  | C B | 19 | -3.741 | 0.059  | 3.589  | 1.00 | 0.00 | H |
| ATOM | 1178 | H42  | C B | 19 | -2.006 | -0.343 | 3.470  | 1.00 | 0.00 | H |
| ATOM | 1179 | H2'1 | C B | 19 | -3.294 | 6.265  | 3.016  | 1.00 | 0.00 | H |
| ATOM | 1180 | H2'2 | C B | 19 | -1.923 | 6.879  | 2.103  | 1.00 | 0.00 | H |
| ATOM | 1181 | H5'1 | C B | 19 | -3.242 | 6.166  | 6.835  | 1.00 | 0.00 | H |
| ATOM | 1182 | H5'2 | C B | 19 | -3.849 | 7.811  | 6.554  | 1.00 | 0.00 | H |
| ATOM | 1183 | C1'  | T B | 20 | 2.250  | 5.431  | 0.471  | 1.00 | 0.00 | C |
| ATOM | 1184 | N1   | T B | 20 | 1.083  | 4.513  | 0.393  | 1.00 | 0.00 | N |
| ATOM | 1185 | C2   | T B | 20 | 1.349  | 3.164  | 0.274  | 1.00 | 0.00 | C |
| ATOM | 1186 | O2   | T B | 20 | 2.482  | 2.716  | 0.232  | 1.00 | 0.00 | O |
| ATOM | 1187 | N3   | T B | 20 | 0.236  | 2.348  | 0.205  | 1.00 | 0.00 | N |
| ATOM | 1188 | C4   | T B | 20 | -1.081 | 2.750  | 0.243  | 1.00 | 0.00 | C |
| ATOM | 1189 | O4   | T B | 20 | -1.998 | 1.922  | 0.171  | 1.00 | 0.00 | O |
| ATOM | 1190 | C5   | T B | 20 | -1.260 | 4.176  | 0.369  | 1.00 | 0.00 | C |
| ATOM | 1191 | C6   | T B | 20 | -0.199 | 5.003  | 0.439  | 1.00 | 0.00 | C |
| ATOM | 1192 | C7   | T B | 20 | -2.679 | 4.659  | 0.415  | 1.00 | 0.00 | C |
| ATOM | 1193 | C2'  | T B | 20 | 2.045  | 6.748  | -0.268 | 1.00 | 0.00 | C |
| ATOM | 1194 | C3'  | T B | 20 | 2.787  | 7.731  | 0.625  | 1.00 | 0.00 | C |
| ATOM | 1195 | O3'  | T B | 20 | 4.172  | 7.721  | 0.284  | 1.00 | 0.00 | O |
| ATOM | 1196 | C4'  | T B | 20 | 2.532  | 7.178  | 2.025  | 1.00 | 0.00 | C |

|      |      |      |     |    |        |        |        |      |      |   |
|------|------|------|-----|----|--------|--------|--------|------|------|---|
| ATOM | 1197 | O4'  | T B | 20 | 2.476  | 5.728  | 1.835  | 1.00 | 0.00 | O |
| ATOM | 1198 | C5'  | T B | 20 | 1.258  | 7.626  | 2.703  | 1.00 | 0.00 | C |
| ATOM | 1199 | O5'  | T B | 20 | 0.197  | 7.747  | 1.721  | 1.00 | 0.00 | O |
| ATOM | 1200 | O1P  | T B | 20 | -0.293 | 10.215 | 1.695  | 1.00 | 0.00 | O |
| ATOM | 1201 | O2P  | T B | 20 | -2.089 | 8.572  | 1.085  | 1.00 | 0.00 | O |
| ATOM | 1202 | P    | T B | 20 | -0.900 | 8.887  | 1.914  | 1.00 | 0.00 | P |
| ATOM | 1203 | H3   | T B | 20 | 0.408  | 1.337  | 0.117  | 1.00 | 0.00 | H |
| ATOM | 1204 | H6   | T B | 20 | -0.359 | 6.077  | 0.534  | 1.00 | 0.00 | H |
| ATOM | 1205 | H1'  | T B | 20 | 3.126  | 4.904  | 0.093  | 1.00 | 0.00 | H |
| ATOM | 1206 | H3'  | T B | 20 | 2.399  | 8.744  | 0.525  | 1.00 | 0.00 | H |
| ATOM | 1207 | H4'  | T B | 20 | 3.369  | 7.495  | 2.648  | 1.00 | 0.00 | H |
| ATOM | 1208 | H3T  | T B | 20 | 4.364  | 7.864  | -0.645 | 1.00 | 0.00 | H |
| ATOM | 1209 | H71  | T B | 20 | -2.889 | 5.258  | -0.471 | 1.00 | 0.00 | H |
| ATOM | 1210 | H72  | T B | 20 | -3.354 | 3.802  | 0.443  | 1.00 | 0.00 | H |
| ATOM | 1211 | H73  | T B | 20 | -2.829 | 5.267  | 1.308  | 1.00 | 0.00 | H |
| ATOM | 1212 | H2'1 | T B | 20 | 0.993  | 7.011  | -0.359 | 1.00 | 0.00 | H |
| ATOM | 1213 | H2'2 | T B | 20 | 2.467  | 6.728  | -1.273 | 1.00 | 0.00 | H |
| ATOM | 1214 | H5'1 | T B | 20 | 0.978  | 6.894  | 3.460  | 1.00 | 0.00 | H |
| ATOM | 1215 | H5'2 | T B | 20 | 1.428  | 8.589  | 3.181  | 1.00 | 0.00 | H |
| TER  |      |      |     |    |        |        |        |      |      |   |
| ATOM | 1    | C1'  | A A | 1  | 6.665  | 33.054 | 16.457 | 1.00 | 0.00 | C |
| ATOM | 2    | N1   | A A | 1  | 1.819  | 34.704 | 16.821 | 1.00 | 0.00 | N |
| ATOM | 3    | C2   | A A | 1  | 2.965  | 35.169 | 17.309 | 1.00 | 0.00 | C |
| ATOM | 4    | N3   | A A | 1  | 4.185  | 34.694 | 17.174 | 1.00 | 0.00 | N |
| ATOM | 5    | C4   | A A | 1  | 4.170  | 33.577 | 16.425 | 1.00 | 0.00 | C |
| ATOM | 6    | C5   | A A | 1  | 3.085  | 32.972 | 15.855 | 1.00 | 0.00 | C |
| ATOM | 7    | C6   | A A | 1  | 1.835  | 33.588 | 16.077 | 1.00 | 0.00 | C |
| ATOM | 8    | N6   | A A | 1  | 0.682  | 33.108 | 15.580 | 1.00 | 0.00 | N |
| ATOM | 9    | N7   | A A | 1  | 3.456  | 31.838 | 15.154 | 1.00 | 0.00 | N |
| ATOM | 10   | C8   | A A | 1  | 4.745  | 31.781 | 15.316 | 1.00 | 0.00 | C |
| ATOM | 11   | N9   | A A | 1  | 5.250  | 32.803 | 16.075 | 1.00 | 0.00 | N |
| ATOM | 12   | C2'  | A A | 1  | 7.452  | 31.787 | 16.760 | 1.00 | 0.00 | C |
| ATOM | 13   | C3'  | A A | 1  | 8.833  | 32.138 | 16.228 | 1.00 | 0.00 | C |
| ATOM | 14   | O3'  | A A | 1  | 9.550  | 32.860 | 17.227 | 1.00 | 0.00 | O |
| ATOM | 15   | C4'  | A A | 1  | 8.519  | 33.001 | 15.007 | 1.00 | 0.00 | C |
| ATOM | 16   | O4'  | A A | 1  | 7.294  | 33.713 | 15.375 | 1.00 | 0.00 | O |
| ATOM | 17   | C5'  | A A | 1  | 8.279  | 32.265 | 13.710 | 1.00 | 0.00 | C |
| ATOM | 18   | O5'  | A A | 1  | 7.578  | 31.023 | 13.972 | 1.00 | 0.00 | O |
| ATOM | 19   | H2   | A A | 1  | 2.883  | 36.076 | 17.908 | 1.00 | 0.00 | H |
| ATOM | 20   | H8   | A A | 1  | 5.366  | 30.993 | 14.887 | 1.00 | 0.00 | H |
| ATOM | 21   | H1'  | A A | 1  | 6.672  | 33.732 | 17.311 | 1.00 | 0.00 | H |
| ATOM | 22   | H3'  | A A | 1  | 9.401  | 31.250 | 15.947 | 1.00 | 0.00 | H |
| ATOM | 23   | H4'  | A A | 1  | 9.370  | 33.665 | 14.862 | 1.00 | 0.00 | H |
| ATOM | 24   | H61  | A A | 1  | -0.202 | 33.595 | 15.770 | 1.00 | 0.00 | H |
| ATOM | 25   | H62  | A A | 1  | 0.688  | 32.251 | 15.008 | 1.00 | 0.00 | H |
| ATOM | 26   | H5T  | A A | 1  | 7.770  | 30.260 | 13.423 | 1.00 | 0.00 | H |
| ATOM | 27   | H2'1 | A A | 1  | 7.043  | 30.914 | 16.253 | 1.00 | 0.00 | H |
| ATOM | 28   | H2'2 | A A | 1  | 7.484  | 31.564 | 17.826 | 1.00 | 0.00 | H |
| ATOM | 29   | H5'1 | A A | 1  | 7.682  | 32.892 | 13.048 | 1.00 | 0.00 | H |
| ATOM | 30   | H5'2 | A A | 1  | 9.236  | 32.054 | 13.236 | 1.00 | 0.00 | H |
| ATOM | 31   | C1'  | G A | 2  | 5.688  | 34.504 | 21.105 | 1.00 | 0.00 | C |
| ATOM | 32   | N1   | G A | 2  | 0.866  | 33.421 | 19.846 | 1.00 | 0.00 | N |
| ATOM | 33   | C2   | G A | 2  | 1.378  | 34.492 | 20.552 | 1.00 | 0.00 | C |
| ATOM | 34   | N2   | G A | 2  | 0.489  | 35.395 | 20.981 | 1.00 | 0.00 | N |

|      |    |      |     |   |        |        |        |      |      |   |
|------|----|------|-----|---|--------|--------|--------|------|------|---|
| ATOM | 35 | N3   | G A | 2 | 2.675  | 34.652 | 20.809 | 1.00 | 0.00 | N |
| ATOM | 36 | C4   | G A | 2 | 3.430  | 33.641 | 20.305 | 1.00 | 0.00 | C |
| ATOM | 37 | C5   | G A | 2 | 3.006  | 32.531 | 19.591 | 1.00 | 0.00 | C |
| ATOM | 38 | C6   | G A | 2 | 1.628  | 32.365 | 19.315 | 1.00 | 0.00 | C |
| ATOM | 39 | O6   | G A | 2 | 1.064  | 31.458 | 18.701 | 1.00 | 0.00 | O |
| ATOM | 40 | N7   | G A | 2 | 4.097  | 31.727 | 19.255 | 1.00 | 0.00 | N |
| ATOM | 41 | C8   | G A | 2 | 5.124  | 32.361 | 19.760 | 1.00 | 0.00 | C |
| ATOM | 42 | N9   | G A | 2 | 4.799  | 33.532 | 20.414 | 1.00 | 0.00 | N |
| ATOM | 43 | C2'  | G A | 2 | 6.840  | 33.854 | 21.859 | 1.00 | 0.00 | C |
| ATOM | 44 | C3'  | G A | 2 | 7.961  | 34.860 | 21.658 | 1.00 | 0.00 | C |
| ATOM | 45 | O3'  | G A | 2 | 7.853  | 35.884 | 22.645 | 1.00 | 0.00 | O |
| ATOM | 46 | C4'  | G A | 2 | 7.695  | 35.387 | 20.248 | 1.00 | 0.00 | C |
| ATOM | 47 | O4'  | G A | 2 | 6.239  | 35.360 | 20.122 | 1.00 | 0.00 | O |
| ATOM | 48 | C5'  | G A | 2 | 8.296  | 34.594 | 19.112 | 1.00 | 0.00 | C |
| ATOM | 49 | O5'  | G A | 2 | 8.247  | 33.179 | 19.422 | 1.00 | 0.00 | O |
| ATOM | 50 | O1P  | G A | 2 | 10.674 | 32.547 | 19.635 | 1.00 | 0.00 | O |
| ATOM | 51 | O2P  | G A | 2 | 8.985  | 30.825 | 18.946 | 1.00 | 0.00 | O |
| ATOM | 52 | P    | G A | 2 | 9.428  | 32.240 | 18.907 | 1.00 | 0.00 | P |
| ATOM | 53 | H1   | G A | 2 | -0.154 | 33.393 | 19.699 | 1.00 | 0.00 | H |
| ATOM | 54 | H8   | G A | 2 | 6.147  | 31.997 | 19.673 | 1.00 | 0.00 | H |
| ATOM | 55 | H1'  | G A | 2 | 5.077  | 35.110 | 21.774 | 1.00 | 0.00 | H |
| ATOM | 56 | H21  | G A | 2 | -0.513 | 35.266 | 20.778 | 1.00 | 0.00 | H |
| ATOM | 57 | H3'  | G A | 2 | 8.945  | 34.396 | 21.725 | 1.00 | 0.00 | H |
| ATOM | 58 | H22  | G A | 2 | 0.807  | 36.216 | 21.515 | 1.00 | 0.00 | H |
| ATOM | 59 | H4'  | G A | 2 | 8.107  | 36.395 | 20.205 | 1.00 | 0.00 | H |
| ATOM | 60 | H2'1 | G A | 2 | 7.105  | 32.879 | 21.448 | 1.00 | 0.00 | H |
| ATOM | 61 | H2'2 | G A | 2 | 6.616  | 33.714 | 22.917 | 1.00 | 0.00 | H |
| ATOM | 62 | H5'1 | G A | 2 | 7.731  | 34.791 | 18.201 | 1.00 | 0.00 | H |
| ATOM | 63 | H5'2 | G A | 2 | 9.330  | 34.905 | 18.966 | 1.00 | 0.00 | H |
| ATOM | 64 | C1'  | G A | 3 | 2.710  | 35.400 | 24.959 | 1.00 | 0.00 | C |
| ATOM | 65 | N1   | G A | 3 | -0.299 | 31.950 | 22.711 | 1.00 | 0.00 | N |
| ATOM | 66 | C2   | G A | 3 | -0.622 | 33.155 | 23.304 | 1.00 | 0.00 | C |
| ATOM | 67 | N2   | G A | 3 | -1.920 | 33.486 | 23.300 | 1.00 | 0.00 | N |
| ATOM | 68 | N3   | G A | 3 | 0.276  | 33.967 | 23.856 | 1.00 | 0.00 | N |
| ATOM | 69 | C4   | G A | 3 | 1.539  | 33.472 | 23.777 | 1.00 | 0.00 | C |
| ATOM | 70 | C5   | G A | 3 | 1.954  | 32.279 | 23.207 | 1.00 | 0.00 | C |
| ATOM | 71 | C6   | G A | 3 | 1.000  | 31.419 | 22.616 | 1.00 | 0.00 | C |
| ATOM | 72 | O6   | G A | 3 | 1.171  | 30.330 | 22.066 | 1.00 | 0.00 | O |
| ATOM | 73 | N7   | G A | 3 | 3.337  | 32.140 | 23.334 | 1.00 | 0.00 | N |
| ATOM | 74 | C8   | G A | 3 | 3.709  | 33.227 | 23.957 | 1.00 | 0.00 | C |
| ATOM | 75 | N9   | G A | 3 | 2.673  | 34.086 | 24.261 | 1.00 | 0.00 | N |
| ATOM | 76 | C2'  | G A | 3 | 3.715  | 35.460 | 26.101 | 1.00 | 0.00 | C |
| ATOM | 77 | C3'  | G A | 3 | 4.214  | 36.892 | 26.010 | 1.00 | 0.00 | C |
| ATOM | 78 | O3'  | G A | 3 | 3.316  | 37.747 | 26.714 | 1.00 | 0.00 | O |
| ATOM | 79 | C4'  | G A | 3 | 4.206  | 37.161 | 24.506 | 1.00 | 0.00 | C |
| ATOM | 80 | O4'  | G A | 3 | 3.071  | 36.383 | 24.008 | 1.00 | 0.00 | O |
| ATOM | 81 | C5'  | G A | 3 | 5.444  | 36.750 | 23.745 | 1.00 | 0.00 | C |
| ATOM | 82 | O5'  | G A | 3 | 5.979  | 35.524 | 24.301 | 1.00 | 0.00 | O |
| ATOM | 83 | O1P  | G A | 3 | 8.192  | 36.237 | 25.265 | 1.00 | 0.00 | O |
| ATOM | 84 | O2P  | G A | 3 | 7.859  | 33.870 | 24.506 | 1.00 | 0.00 | O |
| ATOM | 85 | P    | G A | 3 | 7.560  | 35.309 | 24.309 | 1.00 | 0.00 | P |
| ATOM | 86 | H1   | G A | 3 | -1.071 | 31.397 | 22.308 | 1.00 | 0.00 | H |
| ATOM | 87 | H8   | G A | 3 | 4.746  | 33.438 | 24.215 | 1.00 | 0.00 | H |
| ATOM | 88 | H1'  | G A | 3 | 1.704  | 35.628 | 25.311 | 1.00 | 0.00 | H |

|      |     |      |     |   |        |        |        |      |      |   |
|------|-----|------|-----|---|--------|--------|--------|------|------|---|
| ATOM | 89  | H21  | G A | 3 | -2.610 | 32.854 | 22.868 | 1.00 | 0.00 | H |
| ATOM | 90  | H3'  | G A | 3 | 5.217  | 37.003 | 26.424 | 1.00 | 0.00 | H |
| ATOM | 91  | H22  | G A | 3 | -2.226 | 34.370 | 23.728 | 1.00 | 0.00 | H |
| ATOM | 92  | H4'  | G A | 3 | 4.076  | 38.235 | 24.376 | 1.00 | 0.00 | H |
| ATOM | 93  | H2'1 | G A | 3 | 4.529  | 34.747 | 25.973 | 1.00 | 0.00 | H |
| ATOM | 94  | H2'2 | G A | 3 | 3.254  | 35.261 | 27.069 | 1.00 | 0.00 | H |
| ATOM | 95  | H5'1 | G A | 3 | 5.186  | 36.599 | 22.697 | 1.00 | 0.00 | H |
| ATOM | 96  | H5'2 | G A | 3 | 6.188  | 37.544 | 23.818 | 1.00 | 0.00 | H |
| ATOM | 97  | C1'  | C A | 4 | -1.406 | 34.767 | 27.641 | 1.00 | 0.00 | C |
| ATOM | 98  | N1   | C A | 4 | -0.586 | 33.595 | 27.225 | 1.00 | 0.00 | N |
| ATOM | 99  | C2   | C A | 4 | -1.235 | 32.540 | 26.588 | 1.00 | 0.00 | C |
| ATOM | 100 | O2   | C A | 4 | -2.455 | 32.617 | 26.395 | 1.00 | 0.00 | O |
| ATOM | 101 | N3   | C A | 4 | -0.507 | 31.464 | 26.202 | 1.00 | 0.00 | N |
| ATOM | 102 | C4   | C A | 4 | 0.812  | 31.409 | 26.427 | 1.00 | 0.00 | C |
| ATOM | 103 | N4   | C A | 4 | 1.475  | 30.334 | 26.025 | 1.00 | 0.00 | N |
| ATOM | 104 | C5   | C A | 4 | 1.503  | 32.479 | 27.082 | 1.00 | 0.00 | C |
| ATOM | 105 | C6   | C A | 4 | 0.752  | 33.553 | 27.459 | 1.00 | 0.00 | C |
| ATOM | 106 | C2'  | C A | 4 | -0.985 | 35.368 | 28.974 | 1.00 | 0.00 | C |
| ATOM | 107 | C3'  | C A | 4 | -1.224 | 36.853 | 28.743 | 1.00 | 0.00 | C |
| ATOM | 108 | O3'  | C A | 4 | -2.594 | 37.152 | 29.005 | 1.00 | 0.00 | O |
| ATOM | 109 | C4'  | C A | 4 | -0.867 | 37.029 | 27.269 | 1.00 | 0.00 | C |
| ATOM | 110 | O4'  | C A | 4 | -1.264 | 35.765 | 26.647 | 1.00 | 0.00 | O |
| ATOM | 111 | C5'  | C A | 4 | 0.589  | 37.283 | 26.957 | 1.00 | 0.00 | C |
| ATOM | 112 | O5'  | C A | 4 | 1.425  | 36.520 | 27.864 | 1.00 | 0.00 | O |
| ATOM | 113 | O1P  | C A | 4 | 2.584  | 38.293 | 29.222 | 1.00 | 0.00 | O |
| ATOM | 114 | O2P  | C A | 4 | 3.680  | 36.063 | 28.875 | 1.00 | 0.00 | O |
| ATOM | 115 | P    | C A | 4 | 2.818  | 37.141 | 28.330 | 1.00 | 0.00 | P |
| ATOM | 116 | H5   | C A | 4 | 2.577  | 32.436 | 27.271 | 1.00 | 0.00 | H |
| ATOM | 117 | H6   | C A | 4 | 1.234  | 34.394 | 27.957 | 1.00 | 0.00 | H |
| ATOM | 118 | H1'  | C A | 4 | -2.451 | 34.461 | 27.662 | 1.00 | 0.00 | H |
| ATOM | 119 | H3'  | C A | 4 | -0.592 | 37.471 | 29.379 | 1.00 | 0.00 | H |
| ATOM | 120 | H4'  | C A | 4 | -1.439 | 37.882 | 26.904 | 1.00 | 0.00 | H |
| ATOM | 121 | H41  | C A | 4 | 2.491  | 30.267 | 26.184 | 1.00 | 0.00 | H |
| ATOM | 122 | H42  | C A | 4 | 0.976  | 29.565 | 25.556 | 1.00 | 0.00 | H |
| ATOM | 123 | H2'1 | C A | 4 | 0.060  | 35.168 | 29.208 | 1.00 | 0.00 | H |
| ATOM | 124 | H2'2 | C A | 4 | -1.585 | 34.993 | 29.805 | 1.00 | 0.00 | H |
| ATOM | 125 | H5'1 | C A | 4 | 0.794  | 36.986 | 25.929 | 1.00 | 0.00 | H |
| ATOM | 126 | H5'2 | C A | 4 | 0.799  | 38.347 | 27.071 | 1.00 | 0.00 | H |
| ATOM | 127 | C1'  | C A | 5 | -5.337 | 32.199 | 29.215 | 1.00 | 0.00 | C |
| ATOM | 128 | N1   | C A | 5 | -3.974 | 31.602 | 29.267 | 1.00 | 0.00 | N |
| ATOM | 129 | C2   | C A | 5 | -3.792 | 30.343 | 28.700 | 1.00 | 0.00 | C |
| ATOM | 130 | O2   | C A | 5 | -4.762 | 29.774 | 28.181 | 1.00 | 0.00 | O |
| ATOM | 131 | N3   | C A | 5 | -2.558 | 29.782 | 28.737 | 1.00 | 0.00 | N |
| ATOM | 132 | C4   | C A | 5 | -1.529 | 30.419 | 29.307 | 1.00 | 0.00 | C |
| ATOM | 133 | N4   | C A | 5 | -0.345 | 29.827 | 29.312 | 1.00 | 0.00 | N |
| ATOM | 134 | C5   | C A | 5 | -1.688 | 31.715 | 29.899 | 1.00 | 0.00 | C |
| ATOM | 135 | C6   | C A | 5 | -2.937 | 32.261 | 29.847 | 1.00 | 0.00 | C |
| ATOM | 136 | C2'  | C A | 5 | -5.715 | 32.976 | 30.468 | 1.00 | 0.00 | C |
| ATOM | 137 | C3'  | C A | 5 | -6.542 | 34.116 | 29.896 | 1.00 | 0.00 | C |
| ATOM | 138 | O3'  | C A | 5 | -7.888 | 33.678 | 29.725 | 1.00 | 0.00 | O |
| ATOM | 139 | C4'  | C A | 5 | -5.854 | 34.401 | 28.564 | 1.00 | 0.00 | C |
| ATOM | 140 | O4'  | C A | 5 | -5.373 | 33.094 | 28.118 | 1.00 | 0.00 | O |
| ATOM | 141 | C5'  | C A | 5 | -4.685 | 35.358 | 28.603 | 1.00 | 0.00 | C |
| ATOM | 142 | O5'  | C A | 5 | -3.933 | 35.164 | 29.829 | 1.00 | 0.00 | O |

|      |     |      |     |   |         |        |        |      |      |   |
|------|-----|------|-----|---|---------|--------|--------|------|------|---|
| ATOM | 143 | O1P  | C A | 5 | -4.277  | 37.325 | 31.071 | 1.00 | 0.00 | O |
| ATOM | 144 | O2P  | C A | 5 | -2.205  | 35.966 | 31.466 | 1.00 | 0.00 | O |
| ATOM | 145 | P    | C A | 5 | -3.246  | 36.428 | 30.515 | 1.00 | 0.00 | P |
| ATOM | 146 | H5   | C A | 5 | -0.854  | 32.237 | 30.369 | 1.00 | 0.00 | H |
| ATOM | 147 | H6   | C A | 5 | -3.107  | 33.247 | 30.281 | 1.00 | 0.00 | H |
| ATOM | 148 | H1'  | C A | 5 | -6.051  | 31.399 | 29.019 | 1.00 | 0.00 | H |
| ATOM | 149 | H3'  | C A | 5 | -6.529  | 34.994 | 30.543 | 1.00 | 0.00 | H |
| ATOM | 150 | H4'  | C A | 5 | -6.609  | 34.827 | 27.902 | 1.00 | 0.00 | H |
| ATOM | 151 | H41  | C A | 5 | 0.465   | 30.296 | 29.743 | 1.00 | 0.00 | H |
| ATOM | 152 | H42  | C A | 5 | -0.233  | 28.894 | 28.887 | 1.00 | 0.00 | H |
| ATOM | 153 | H2'1 | C A | 5 | -4.842  | 33.349 | 31.003 | 1.00 | 0.00 | H |
| ATOM | 154 | H2'2 | C A | 5 | -6.297  | 32.374 | 31.168 | 1.00 | 0.00 | H |
| ATOM | 155 | H5'1 | C A | 5 | -4.041  | 35.173 | 27.743 | 1.00 | 0.00 | H |
| ATOM | 156 | H5'2 | C A | 5 | -5.059  | 36.380 | 28.558 | 1.00 | 0.00 | H |
| ATOM | 157 | C1'  | G A | 6 | -7.833  | 28.029 | 30.168 | 1.00 | 0.00 | C |
| ATOM | 158 | N1   | G A | 6 | -3.171  | 25.990 | 30.531 | 1.00 | 0.00 | N |
| ATOM | 159 | C2   | G A | 6 | -4.312  | 25.495 | 29.924 | 1.00 | 0.00 | C |
| ATOM | 160 | N2   | G A | 6 | -4.196  | 24.297 | 29.339 | 1.00 | 0.00 | N |
| ATOM | 161 | N3   | G A | 6 | -5.475  | 26.144 | 29.904 | 1.00 | 0.00 | N |
| ATOM | 162 | C4   | G A | 6 | -5.411  | 27.337 | 30.551 | 1.00 | 0.00 | C |
| ATOM | 163 | C5   | G A | 6 | -4.322  | 27.909 | 31.186 | 1.00 | 0.00 | C |
| ATOM | 164 | C6   | G A | 6 | -3.086  | 27.223 | 31.205 | 1.00 | 0.00 | C |
| ATOM | 165 | O6   | G A | 6 | -2.017  | 27.562 | 31.713 | 1.00 | 0.00 | O |
| ATOM | 166 | N7   | G A | 6 | -4.674  | 29.145 | 31.730 | 1.00 | 0.00 | N |
| ATOM | 167 | C8   | G A | 6 | -5.934  | 29.284 | 31.412 | 1.00 | 0.00 | C |
| ATOM | 168 | N9   | G A | 6 | -6.455  | 28.225 | 30.695 | 1.00 | 0.00 | N |
| ATOM | 169 | C2'  | G A | 6 | -8.924  | 28.544 | 31.096 | 1.00 | 0.00 | C |
| ATOM | 170 | C3'  | G A | 6 | -9.956  | 29.070 | 30.112 | 1.00 | 0.00 | C |
| ATOM | 171 | O3'  | G A | 6 | -10.787 | 27.994 | 29.684 | 1.00 | 0.00 | O |
| ATOM | 172 | C4'  | G A | 6 | -9.094  | 29.622 | 28.978 | 1.00 | 0.00 | C |
| ATOM | 173 | O4'  | G A | 6 | -7.932  | 28.735 | 28.946 | 1.00 | 0.00 | O |
| ATOM | 174 | C5'  | G A | 6 | -8.613  | 31.045 | 29.132 | 1.00 | 0.00 | C |
| ATOM | 175 | O5'  | G A | 6 | -8.309  | 31.313 | 30.524 | 1.00 | 0.00 | O |
| ATOM | 176 | O1P  | G A | 6 | -10.031 | 33.029 | 31.175 | 1.00 | 0.00 | O |
| ATOM | 177 | O2P  | G A | 6 | -7.823  | 32.953 | 32.365 | 1.00 | 0.00 | O |
| ATOM | 178 | P    | G A | 6 | -8.580  | 32.775 | 31.101 | 1.00 | 0.00 | P |
| ATOM | 179 | H1   | G A | 6 | -2.318  | 25.411 | 30.484 | 1.00 | 0.00 | H |
| ATOM | 180 | H8   | G A | 6 | -6.525  | 30.157 | 31.688 | 1.00 | 0.00 | H |
| ATOM | 181 | H1'  | G A | 6 | -7.969  | 26.968 | 29.955 | 1.00 | 0.00 | H |
| ATOM | 182 | H21  | G A | 6 | -3.293  | 23.802 | 29.355 | 1.00 | 0.00 | H |
| ATOM | 183 | H3'  | G A | 6 | -10.578 | 29.853 | 30.550 | 1.00 | 0.00 | H |
| ATOM | 184 | H22  | G A | 6 | -5.010  | 23.871 | 28.872 | 1.00 | 0.00 | H |
| ATOM | 185 | H4'  | G A | 6 | -9.694  | 29.570 | 28.070 | 1.00 | 0.00 | H |
| ATOM | 186 | H2'1 | G A | 6 | -8.566  | 29.335 | 31.757 | 1.00 | 0.00 | H |
| ATOM | 187 | H2'2 | G A | 6 | -9.339  | 27.756 | 31.725 | 1.00 | 0.00 | H |
| ATOM | 188 | H5'1 | G A | 6 | -7.719  | 31.189 | 28.526 | 1.00 | 0.00 | H |
| ATOM | 189 | H5'2 | G A | 6 | -9.391  | 31.726 | 28.787 | 1.00 | 0.00 | H |
| ATOM | 190 | C1'  | C A | 7 | -8.194  | 23.204 | 31.225 | 1.00 | 0.00 | C |
| ATOM | 191 | N1   | C A | 7 | -7.330  | 24.095 | 32.046 | 1.00 | 0.00 | N |
| ATOM | 192 | C2   | C A | 7 | -6.010  | 23.706 | 32.260 | 1.00 | 0.00 | C |
| ATOM | 193 | O2   | C A | 7 | -5.611  | 22.644 | 31.764 | 1.00 | 0.00 | O |
| ATOM | 194 | N3   | C A | 7 | -5.205  | 24.503 | 33.005 | 1.00 | 0.00 | N |
| ATOM | 195 | C4   | C A | 7 | -5.665  | 25.646 | 33.531 | 1.00 | 0.00 | C |
| ATOM | 196 | N4   | C A | 7 | -4.835  | 26.388 | 34.249 | 1.00 | 0.00 | N |



|      |     |      |     |   |         |        |        |      |      |   |
|------|-----|------|-----|---|---------|--------|--------|------|------|---|
| ATOM | 197 | C5   | C A | 7 | -7.020  | 26.070 | 33.331 | 1.00 | 0.00 | C |
| ATOM | 198 | C6   | C A | 7 | -7.811  | 25.253 | 32.573 | 1.00 | 0.00 | C |
| ATOM | 199 | C2'  | C A | 7 | -9.631  | 23.116 | 31.719 | 1.00 | 0.00 | C |
| ATOM | 200 | C3'  | C A | 7 | -10.409 | 23.008 | 30.416 | 1.00 | 0.00 | C |
| ATOM | 201 | O3'  | C A | 7 | -10.437 | 21.644 | 30.000 | 1.00 | 0.00 | O |
| ATOM | 202 | C4'  | C A | 7 | -9.601  | 23.886 | 29.464 | 1.00 | 0.00 | C |
| ATOM | 203 | O4'  | C A | 7 | -8.216  | 23.722 | 29.907 | 1.00 | 0.00 | O |
| ATOM | 204 | C5'  | C A | 7 | -9.935  | 25.361 | 29.465 | 1.00 | 0.00 | C |
| ATOM | 205 | O5'  | C A | 7 | -10.264 | 25.789 | 30.810 | 1.00 | 0.00 | O |
| ATOM | 206 | O1P  | C A | 7 | -12.700 | 26.401 | 30.648 | 1.00 | 0.00 | O |
| ATOM | 207 | O2P  | C A | 7 | -11.240 | 27.503 | 32.365 | 1.00 | 0.00 | O |
| ATOM | 208 | P    | C A | 7 | -11.366 | 26.924 | 31.006 | 1.00 | 0.00 | P |
| ATOM | 209 | H5   | C A | 7 | -7.402  | 26.996 | 33.762 | 1.00 | 0.00 | H |
| ATOM | 210 | H6   | C A | 7 | -8.847  | 25.536 | 32.386 | 1.00 | 0.00 | H |
| ATOM | 211 | H1'  | C A | 7 | -7.732  | 22.218 | 31.190 | 1.00 | 0.00 | H |
| ATOM | 212 | H3'  | C A | 7 | -11.431 | 23.375 | 30.520 | 1.00 | 0.00 | H |
| ATOM | 213 | H4'  | C A | 7 | -9.775  | 23.506 | 28.458 | 1.00 | 0.00 | H |
| ATOM | 214 | H41  | C A | 7 | -5.162  | 27.273 | 34.662 | 1.00 | 0.00 | H |
| ATOM | 215 | H42  | C A | 7 | -3.862  | 26.082 | 34.394 | 1.00 | 0.00 | H |
| ATOM | 216 | H2'1 | C A | 7 | -9.929  | 23.998 | 32.286 | 1.00 | 0.00 | H |
| ATOM | 217 | H2'2 | C A | 7 | -9.798  | 22.246 | 32.355 | 1.00 | 0.00 | H |
| ATOM | 218 | H5'1 | C A | 7 | -9.075  | 25.923 | 29.098 | 1.00 | 0.00 | H |
| ATOM | 219 | H5'2 | C A | 7 | -10.784 | 25.535 | 28.805 | 1.00 | 0.00 | H |
| ATOM | 220 | C1'  | A A | 8 | -6.551  | 18.909 | 33.057 | 1.00 | 0.00 | C |
| ATOM | 221 | N1   | A A | 8 | -3.666  | 21.940 | 36.030 | 1.00 | 0.00 | N |
| ATOM | 222 | C2   | A A | 8 | -3.403  | 20.817 | 35.368 | 1.00 | 0.00 | C |
| ATOM | 223 | N3   | A A | 8 | -4.195  | 20.084 | 34.615 | 1.00 | 0.00 | N |
| ATOM | 224 | C4   | A A | 8 | -5.427  | 20.626 | 34.572 | 1.00 | 0.00 | C |
| ATOM | 225 | C5   | A A | 8 | -5.857  | 21.766 | 35.190 | 1.00 | 0.00 | C |
| ATOM | 226 | C6   | A A | 8 | -4.903  | 22.457 | 35.966 | 1.00 | 0.00 | C |
| ATOM | 227 | N6   | A A | 8 | -5.180  | 23.591 | 36.631 | 1.00 | 0.00 | N |
| ATOM | 228 | N7   | A A | 8 | -7.191  | 22.012 | 34.915 | 1.00 | 0.00 | N |
| ATOM | 229 | C8   | A A | 8 | -7.538  | 21.022 | 34.145 | 1.00 | 0.00 | C |
| ATOM | 230 | N9   | A A | 8 | -6.518  | 20.141 | 33.891 | 1.00 | 0.00 | N |
| ATOM | 231 | C2'  | A A | 8 | -7.855  | 18.130 | 33.167 | 1.00 | 0.00 | C |
| ATOM | 232 | C3'  | A A | 8 | -8.026  | 17.599 | 31.752 | 1.00 | 0.00 | C |
| ATOM | 233 | O3'  | A A | 8 | -7.279  | 16.393 | 31.613 | 1.00 | 0.00 | O |
| ATOM | 234 | C4'  | A A | 8 | -7.462  | 18.730 | 30.893 | 1.00 | 0.00 | C |
| ATOM | 235 | O4'  | A A | 8 | -6.385  | 19.298 | 31.708 | 1.00 | 0.00 | O |
| ATOM | 236 | C5'  | A A | 8 | -8.424  | 19.834 | 30.523 | 1.00 | 0.00 | C |
| ATOM | 237 | O5'  | A A | 8 | -9.327  | 20.089 | 31.629 | 1.00 | 0.00 | O |
| ATOM | 238 | O1P  | A A | 8 | -11.568 | 19.388 | 30.721 | 1.00 | 0.00 | O |
| ATOM | 239 | O2P  | A A | 8 | -11.431 | 21.136 | 32.517 | 1.00 | 0.00 | O |
| ATOM | 240 | P    | A A | 8 | -10.828 | 20.522 | 31.308 | 1.00 | 0.00 | P |
| ATOM | 241 | H2   | A A | 8 | -2.383  | 20.449 | 35.464 | 1.00 | 0.00 | H |
| ATOM | 242 | H8   | A A | 8 | -8.542  | 20.903 | 33.740 | 1.00 | 0.00 | H |
| ATOM | 243 | H1'  | A A | 8 | -5.700  | 18.288 | 33.334 | 1.00 | 0.00 | H |
| ATOM | 244 | H3'  | A A | 8 | -9.071  | 17.406 | 31.512 | 1.00 | 0.00 | H |
| ATOM | 245 | H4'  | A A | 8 | -7.103  | 18.277 | 29.970 | 1.00 | 0.00 | H |
| ATOM | 246 | H61  | A A | 8 | -4.446  | 24.058 | 37.181 | 1.00 | 0.00 | H |
| ATOM | 247 | H62  | A A | 8 | -6.128  | 23.993 | 36.589 | 1.00 | 0.00 | H |
| ATOM | 248 | H2'1 | A A | 8 | -8.692  | 18.763 | 33.457 | 1.00 | 0.00 | H |
| ATOM | 249 | H2'2 | A A | 8 | -7.790  | 17.317 | 33.891 | 1.00 | 0.00 | H |
| ATOM | 250 | H5'1 | A A | 8 | -7.858  | 20.738 | 30.295 | 1.00 | 0.00 | H |

|      |     |      |   |   |    |        |        |        |      |      |   |
|------|-----|------|---|---|----|--------|--------|--------|------|------|---|
| ATOM | 251 | H5'2 | A | A | 8  | -8.993 | 19.534 | 29.645 | 1.00 | 0.00 | H |
| ATOM | 252 | C1'  | C | A | 9  | -3.733 | 16.164 | 36.088 | 1.00 | 0.00 | C |
| ATOM | 253 | N1   | C | A | 9  | -4.582 | 17.258 | 36.634 | 1.00 | 0.00 | N |
| ATOM | 254 | C2   | C | A | 9  | -3.981 | 18.196 | 37.471 | 1.00 | 0.00 | C |
| ATOM | 255 | O2   | C | A | 9  | -2.774 | 18.082 | 37.724 | 1.00 | 0.00 | O |
| ATOM | 256 | N3   | C | A | 9  | -4.736 | 19.199 | 37.978 | 1.00 | 0.00 | N |
| ATOM | 257 | C4   | C | A | 9  | -6.040 | 19.295 | 37.687 | 1.00 | 0.00 | C |
| ATOM | 258 | N4   | C | A | 9  | -6.731 | 20.298 | 38.208 | 1.00 | 0.00 | N |
| ATOM | 259 | C5   | C | A | 9  | -6.687 | 18.342 | 36.832 | 1.00 | 0.00 | C |
| ATOM | 260 | C6   | C | A | 9  | -5.905 | 17.342 | 36.328 | 1.00 | 0.00 | C |
| ATOM | 261 | C2'  | C | A | 9  | -4.442 | 14.820 | 36.004 | 1.00 | 0.00 | C |
| ATOM | 262 | C3'  | C | A | 9  | -3.855 | 14.230 | 34.729 | 1.00 | 0.00 | C |
| ATOM | 263 | O3'  | C | A | 9  | -2.617 | 13.593 | 35.037 | 1.00 | 0.00 | O |
| ATOM | 264 | C4'  | C | A | 9  | -3.667 | 15.458 | 33.842 | 1.00 | 0.00 | C |
| ATOM | 265 | O4'  | C | A | 9  | -3.343 | 16.536 | 34.778 | 1.00 | 0.00 | O |
| ATOM | 266 | C5'  | C | A | 9  | -4.861 | 15.880 | 33.018 | 1.00 | 0.00 | C |
| ATOM | 267 | O5'  | C | A | 9  | -6.080 | 15.657 | 33.771 | 1.00 | 0.00 | O |
| ATOM | 268 | O1P  | C | A | 9  | -7.251 | 13.853 | 32.464 | 1.00 | 0.00 | O |
| ATOM | 269 | O2P  | C | A | 9  | -8.586 | 15.470 | 33.842 | 1.00 | 0.00 | O |
| ATOM | 270 | P    | C | A | 9  | -7.399 | 15.225 | 32.985 | 1.00 | 0.00 | P |
| ATOM | 271 | H5   | C | A | 9  | -7.750 | 18.413 | 36.596 | 1.00 | 0.00 | H |
| ATOM | 272 | H6   | C | A | 9  | -6.350 | 16.599 | 35.667 | 1.00 | 0.00 | H |
| ATOM | 273 | H1'  | C | A | 9  | -2.833 | 16.094 | 36.698 | 1.00 | 0.00 | H |
| ATOM | 274 | H3'  | C | A | 9  | -4.528 | 13.509 | 34.267 | 1.00 | 0.00 | H |
| ATOM | 275 | H4'  | C | A | 9  | -2.852 | 15.231 | 33.155 | 1.00 | 0.00 | H |
| ATOM | 276 | H41  | C | A | 9  | -7.735 | 20.397 | 37.997 | 1.00 | 0.00 | H |
| ATOM | 277 | H42  | C | A | 9  | -6.264 | 20.980 | 38.824 | 1.00 | 0.00 | H |
| ATOM | 278 | H2'1 | C | A | 9  | -5.524 | 14.926 | 35.928 | 1.00 | 0.00 | H |
| ATOM | 279 | H2'2 | C | A | 9  | -4.234 | 14.188 | 36.868 | 1.00 | 0.00 | H |
| ATOM | 280 | H5'1 | C | A | 9  | -4.770 | 16.937 | 32.768 | 1.00 | 0.00 | H |
| ATOM | 281 | H5'2 | C | A | 9  | -4.884 | 15.296 | 32.098 | 1.00 | 0.00 | H |
| ATOM | 282 | C1'  | C | A | 10 | -1.119 | 15.344 | 40.213 | 1.00 | 0.00 | C |
| ATOM | 283 | N1   | C | A | 10 | -2.512 | 15.862 | 40.292 | 1.00 | 0.00 | N |
| ATOM | 284 | C2   | C | A | 10 | -2.740 | 17.003 | 41.058 | 1.00 | 0.00 | C |
| ATOM | 285 | O2   | C | A | 10 | -1.784 | 17.536 | 41.638 | 1.00 | 0.00 | O |
| ATOM | 286 | N3   | C | A | 10 | -4.001 | 17.493 | 41.143 | 1.00 | 0.00 | N |
| ATOM | 287 | C4   | C | A | 10 | -5.016 | 16.895 | 40.505 | 1.00 | 0.00 | C |
| ATOM | 288 | N4   | C | A | 10 | -6.229 | 17.417 | 40.620 | 1.00 | 0.00 | N |
| ATOM | 289 | C5   | C | A | 10 | -4.812 | 15.717 | 39.714 | 1.00 | 0.00 | C |
| ATOM | 290 | C6   | C | A | 10 | -3.532 | 15.245 | 39.638 | 1.00 | 0.00 | C |
| ATOM | 291 | C2'  | C | A | 10 | -1.030 | 13.824 | 40.209 | 1.00 | 0.00 | C |
| ATOM | 292 | C3'  | C | A | 10 | 0.146  | 13.578 | 39.275 | 1.00 | 0.00 | C |
| ATOM | 293 | O3'  | C | A | 10 | 1.360  | 13.678 | 40.016 | 1.00 | 0.00 | O |
| ATOM | 294 | C4'  | C | A | 10 | 0.003  | 14.697 | 38.247 | 1.00 | 0.00 | C |
| ATOM | 295 | O4'  | C | A | 10 | -0.550 | 15.818 | 39.006 | 1.00 | 0.00 | O |
| ATOM | 296 | C5'  | C | A | 10 | -0.904 | 14.417 | 37.071 | 1.00 | 0.00 | C |
| ATOM | 297 | O5'  | C | A | 10 | -2.038 | 13.624 | 37.505 | 1.00 | 0.00 | O |
| ATOM | 298 | O1P  | C | A | 10 | -1.707 | 11.432 | 36.315 | 1.00 | 0.00 | O |
| ATOM | 299 | O2P  | C | A | 10 | -4.016 | 12.178 | 36.950 | 1.00 | 0.00 | O |
| ATOM | 300 | P    | C | A | 10 | -2.652 | 12.550 | 36.500 | 1.00 | 0.00 | P |
| ATOM | 301 | H5   | C | A | 10 | -5.635 | 15.223 | 39.197 | 1.00 | 0.00 | H |
| ATOM | 302 | H6   | C | A | 10 | -3.325 | 14.357 | 39.042 | 1.00 | 0.00 | H |
| ATOM | 303 | H1'  | C | A | 10 | -0.550 | 15.767 | 41.041 | 1.00 | 0.00 | H |
| ATOM | 304 | H3'  | C | A | 10 | 0.093  | 12.598 | 38.802 | 1.00 | 0.00 | H |

|      |     |      |   |   |    |        |        |        |      |      |   |
|------|-----|------|---|---|----|--------|--------|--------|------|------|---|
| ATOM | 305 | H4'  | C | A | 10 | 1.001  | 14.897 | 37.856 | 1.00 | 0.00 | H |
| ATOM | 306 | H41  | C | A | 10 | -7.026 | 16.978 | 40.138 | 1.00 | 0.00 | H |
| ATOM | 307 | H42  | C | A | 10 | -6.373 | 18.262 | 41.192 | 1.00 | 0.00 | H |
| ATOM | 308 | H2'1 | C | A | 10 | -1.938 | 13.356 | 39.832 | 1.00 | 0.00 | H |
| ATOM | 309 | H2'2 | C | A | 10 | -0.839 | 13.418 | 41.204 | 1.00 | 0.00 | H |
| ATOM | 310 | H5'1 | C | A | 10 | -1.253 | 15.362 | 36.654 | 1.00 | 0.00 | H |
| ATOM | 311 | H5'2 | C | A | 10 | -0.344 | 13.874 | 36.310 | 1.00 | 0.00 | H |
| ATOM | 312 | C1'  | T | A | 11 | 0.080  | 16.112 | 44.953 | 1.00 | 0.00 | C |
| ATOM | 313 | N1   | T | A | 11 | -1.335 | 15.861 | 44.573 | 1.00 | 0.00 | N |
| ATOM | 314 | C2   | T | A | 11 | -2.279 | 16.759 | 45.030 | 1.00 | 0.00 | C |
| ATOM | 315 | O2   | T | A | 11 | -1.993 | 17.724 | 45.718 | 1.00 | 0.00 | O |
| ATOM | 316 | N3   | T | A | 11 | -3.582 | 16.489 | 44.653 | 1.00 | 0.00 | N |
| ATOM | 317 | C4   | T | A | 11 | -4.010 | 15.427 | 43.883 | 1.00 | 0.00 | C |
| ATOM | 318 | O4   | T | A | 11 | -5.210 | 15.286 | 43.612 | 1.00 | 0.00 | O |
| ATOM | 319 | C5   | T | A | 11 | -2.953 | 14.543 | 43.453 | 1.00 | 0.00 | C |
| ATOM | 320 | C6   | T | A | 11 | -1.673 | 14.777 | 43.801 | 1.00 | 0.00 | C |
| ATOM | 321 | C7   | T | A | 11 | -3.374 | 13.376 | 42.611 | 1.00 | 0.00 | C |
| ATOM | 322 | C2'  | T | A | 11 | 0.868  | 14.844 | 45.258 | 1.00 | 0.00 | C |
| ATOM | 323 | C3'  | T | A | 11 | 2.248  | 15.191 | 44.723 | 1.00 | 0.00 | C |
| ATOM | 324 | O3'  | T | A | 11 | 2.969  | 15.915 | 45.718 | 1.00 | 0.00 | O |
| ATOM | 325 | C4'  | T | A | 11 | 1.932  | 16.049 | 43.501 | 1.00 | 0.00 | C |
| ATOM | 326 | O4'  | T | A | 11 | 0.710  | 16.765 | 43.868 | 1.00 | 0.00 | O |
| ATOM | 327 | C5'  | T | A | 11 | 1.688  | 15.311 | 42.205 | 1.00 | 0.00 | C |
| ATOM | 328 | O5'  | T | A | 11 | 0.987  | 14.071 | 42.473 | 1.00 | 0.00 | O |
| ATOM | 329 | O1P  | T | A | 11 | 2.664  | 12.304 | 41.843 | 1.00 | 0.00 | O |
| ATOM | 330 | O2P  | T | A | 11 | 0.208  | 11.807 | 41.709 | 1.00 | 0.00 | O |
| ATOM | 331 | P    | T | A | 11 | 1.302  | 12.799 | 41.565 | 1.00 | 0.00 | P |
| ATOM | 332 | H3   | T | A | 11 | -4.304 | 17.146 | 44.978 | 1.00 | 0.00 | H |
| ATOM | 333 | H6   | T | A | 11 | -0.890 | 14.095 | 43.464 | 1.00 | 0.00 | H |
| ATOM | 334 | H1'  | T | A | 11 | 0.091  | 16.791 | 45.806 | 1.00 | 0.00 | H |
| ATOM | 335 | H3'  | T | A | 11 | 2.813  | 14.302 | 44.445 | 1.00 | 0.00 | H |
| ATOM | 336 | H4'  | T | A | 11 | 2.785  | 16.713 | 43.350 | 1.00 | 0.00 | H |
| ATOM | 337 | H71  | T | A | 11 | -3.189 | 12.450 | 43.155 | 1.00 | 0.00 | H |
| ATOM | 338 | H72  | T | A | 11 | -4.438 | 13.457 | 42.383 | 1.00 | 0.00 | H |
| ATOM | 339 | H73  | T | A | 11 | -2.804 | 13.372 | 41.682 | 1.00 | 0.00 | H |
| ATOM | 340 | H2'1 | T | A | 11 | 0.456  | 13.971 | 44.755 | 1.00 | 0.00 | H |
| ATOM | 341 | H2'2 | T | A | 11 | 0.900  | 14.623 | 46.326 | 1.00 | 0.00 | H |
| ATOM | 342 | H5'1 | T | A | 11 | 1.092  | 15.937 | 41.542 | 1.00 | 0.00 | H |
| ATOM | 343 | H5'2 | T | A | 11 | 2.646  | 15.097 | 41.730 | 1.00 | 0.00 | H |
| ATOM | 344 | C1'  | A | A | 12 | -0.871 | 17.560 | 49.604 | 1.00 | 0.00 | C |
| ATOM | 345 | N1   | A | A | 12 | -5.732 | 16.494 | 48.350 | 1.00 | 0.00 | N |
| ATOM | 346 | C2   | A | A | 12 | -5.176 | 17.497 | 49.021 | 1.00 | 0.00 | C |
| ATOM | 347 | N3   | A | A | 12 | -3.909 | 17.714 | 49.308 | 1.00 | 0.00 | N |
| ATOM | 348 | C4   | A | A | 12 | -3.146 | 16.723 | 48.814 | 1.00 | 0.00 | C |
| ATOM | 349 | C5   | A | A | 12 | -3.557 | 15.628 | 48.109 | 1.00 | 0.00 | C |
| ATOM | 350 | C6   | A | A | 12 | -4.943 | 15.520 | 47.869 | 1.00 | 0.00 | C |
| ATOM | 351 | N6   | A | A | 12 | -5.493 | 14.499 | 47.189 | 1.00 | 0.00 | N |
| ATOM | 352 | N7   | A | A | 12 | -2.485 | 14.824 | 47.764 | 1.00 | 0.00 | N |
| ATOM | 353 | C8   | A | A | 12 | -1.457 | 15.441 | 48.268 | 1.00 | 0.00 | C |
| ATOM | 354 | N9   | A | A | 12 | -1.781 | 16.604 | 48.919 | 1.00 | 0.00 | N |
| ATOM | 355 | C2'  | A | A | 12 | 0.278  | 16.889 | 50.344 | 1.00 | 0.00 | C |
| ATOM | 356 | C3'  | A | A | 12 | 1.412  | 17.881 | 50.137 | 1.00 | 0.00 | C |
| ATOM | 357 | O3'  | A | A | 12 | 1.327  | 18.902 | 51.129 | 1.00 | 0.00 | O |
| ATOM | 358 | C4'  | A | A | 12 | 1.142  | 18.418 | 48.732 | 1.00 | 0.00 | C |

|      |     |      |   |   |    |         |        |        |      |      |   |
|------|-----|------|---|---|----|---------|--------|--------|------|------|---|
| ATOM | 359 | O4'  | A | A | 12 | -0.318  | 18.410 | 48.618 | 1.00 | 0.00 | O |
| ATOM | 360 | C5'  | A | A | 12 | 1.720   | 17.621 | 47.588 | 1.00 | 0.00 | C |
| ATOM | 361 | O5'  | A | A | 12 | 1.654   | 16.204 | 47.892 | 1.00 | 0.00 | O |
| ATOM | 362 | O1P  | A | A | 12 | 4.074   | 15.536 | 48.082 | 1.00 | 0.00 | O |
| ATOM | 363 | O2P  | A | A | 12 | 2.353   | 13.841 | 47.401 | 1.00 | 0.00 | O |
| ATOM | 364 | P    | A | A | 12 | 2.817   | 15.250 | 47.363 | 1.00 | 0.00 | P |
| ATOM | 365 | H2   | A | A | 12 | -5.871  | 18.252 | 49.388 | 1.00 | 0.00 | H |
| ATOM | 366 | H8   | A | A | 12 | -0.435  | 15.071 | 48.182 | 1.00 | 0.00 | H |
| ATOM | 367 | H1'  | A | A | 12 | -1.466  | 18.173 | 50.280 | 1.00 | 0.00 | H |
| ATOM | 368 | H3'  | A | A | 12 | 2.389   | 17.404 | 50.194 | 1.00 | 0.00 | H |
| ATOM | 369 | H4'  | A | A | 12 | 1.568   | 19.420 | 48.690 | 1.00 | 0.00 | H |
| ATOM | 370 | H61  | A | A | 12 | -6.511  | 14.469 | 47.039 | 1.00 | 0.00 | H |
| ATOM | 371 | H62  | A | A | 12 | -4.894  | 13.746 | 46.818 | 1.00 | 0.00 | H |
| ATOM | 372 | H2'1 | A | A | 12 | 0.525   | 15.913 | 49.928 | 1.00 | 0.00 | H |
| ATOM | 373 | H2'2 | A | A | 12 | 0.062   | 16.749 | 51.403 | 1.00 | 0.00 | H |
| ATOM | 374 | H5'1 | A | A | 12 | 1.149   | 17.829 | 46.683 | 1.00 | 0.00 | H |
| ATOM | 375 | H5'2 | A | A | 12 | 2.757   | 17.916 | 47.433 | 1.00 | 0.00 | H |
| ATOM | 376 | C1'  | G | A | 13 | -3.873  | 18.457 | 53.455 | 1.00 | 0.00 | C |
| ATOM | 377 | N1   | G | A | 13 | -6.883  | 15.006 | 51.206 | 1.00 | 0.00 | N |
| ATOM | 378 | C2   | G | A | 13 | -7.206  | 16.213 | 51.800 | 1.00 | 0.00 | C |
| ATOM | 379 | N2   | G | A | 13 | -8.505  | 16.544 | 51.798 | 1.00 | 0.00 | N |
| ATOM | 380 | N3   | G | A | 13 | -6.307  | 17.024 | 52.353 | 1.00 | 0.00 | N |
| ATOM | 381 | C4   | G | A | 13 | -5.044  | 16.528 | 52.273 | 1.00 | 0.00 | C |
| ATOM | 382 | C5   | G | A | 13 | -4.629  | 15.336 | 51.703 | 1.00 | 0.00 | C |
| ATOM | 383 | C6   | G | A | 13 | -5.584  | 14.475 | 51.112 | 1.00 | 0.00 | C |
| ATOM | 384 | O6   | G | A | 13 | -5.411  | 13.386 | 50.564 | 1.00 | 0.00 | O |
| ATOM | 385 | N7   | G | A | 13 | -3.246  | 15.196 | 51.830 | 1.00 | 0.00 | N |
| ATOM | 386 | C8   | G | A | 13 | -2.874  | 16.284 | 52.453 | 1.00 | 0.00 | C |
| ATOM | 387 | N9   | G | A | 13 | -3.911  | 17.142 | 52.757 | 1.00 | 0.00 | N |
| ATOM | 388 | C2'  | G | A | 13 | -2.869  | 18.517 | 54.597 | 1.00 | 0.00 | C |
| ATOM | 389 | C3'  | G | A | 13 | -2.369  | 19.949 | 54.506 | 1.00 | 0.00 | C |
| ATOM | 390 | O3'  | G | A | 13 | -3.267  | 20.804 | 55.210 | 1.00 | 0.00 | O |
| ATOM | 391 | C4'  | G | A | 13 | -2.377  | 20.218 | 53.002 | 1.00 | 0.00 | C |
| ATOM | 392 | O4'  | G | A | 13 | -3.512  | 19.440 | 52.504 | 1.00 | 0.00 | O |
| ATOM | 393 | C5'  | G | A | 13 | -1.139  | 19.807 | 52.241 | 1.00 | 0.00 | C |
| ATOM | 394 | O5'  | G | A | 13 | -0.605  | 18.581 | 52.797 | 1.00 | 0.00 | O |
| ATOM | 395 | O1P  | G | A | 13 | 1.609   | 19.294 | 53.761 | 1.00 | 0.00 | O |
| ATOM | 396 | O2P  | G | A | 13 | 1.276   | 16.926 | 53.002 | 1.00 | 0.00 | O |
| ATOM | 397 | P    | G | A | 13 | 0.976   | 18.366 | 52.805 | 1.00 | 0.00 | P |
| ATOM | 398 | H1   | G | A | 13 | -7.655  | 14.454 | 50.800 | 1.00 | 0.00 | H |
| ATOM | 399 | H8   | G | A | 13 | -1.837  | 16.495 | 52.712 | 1.00 | 0.00 | H |
| ATOM | 400 | H1'  | G | A | 13 | -4.880  | 18.685 | 53.807 | 1.00 | 0.00 | H |
| ATOM | 401 | H21  | G | A | 13 | -9.194  | 15.911 | 51.364 | 1.00 | 0.00 | H |
| ATOM | 402 | H3'  | G | A | 13 | -1.366  | 20.060 | 54.920 | 1.00 | 0.00 | H |
| ATOM | 403 | H22  | G | A | 13 | -8.810  | 17.427 | 52.226 | 1.00 | 0.00 | H |
| ATOM | 404 | H4'  | G | A | 13 | -2.508  | 21.291 | 52.872 | 1.00 | 0.00 | H |
| ATOM | 405 | H2'1 | G | A | 13 | -2.054  | 17.804 | 54.469 | 1.00 | 0.00 | H |
| ATOM | 406 | H2'2 | G | A | 13 | -3.330  | 18.317 | 55.565 | 1.00 | 0.00 | H |
| ATOM | 407 | H5'1 | G | A | 13 | -1.397  | 19.655 | 51.193 | 1.00 | 0.00 | H |
| ATOM | 408 | H5'2 | G | A | 13 | -0.395  | 20.600 | 52.314 | 1.00 | 0.00 | H |
| ATOM | 409 | C1'  | G | A | 14 | -7.989  | 17.823 | 56.137 | 1.00 | 0.00 | C |
| ATOM | 410 | N1   | G | A | 14 | -8.067  | 13.242 | 53.893 | 1.00 | 0.00 | N |
| ATOM | 411 | C2   | G | A | 14 | -9.099  | 14.131 | 54.134 | 1.00 | 0.00 | C |
| ATOM | 412 | N2   | G | A | 14 | -10.315 | 13.747 | 53.726 | 1.00 | 0.00 | N |

|      |     |      |     |    |         |        |        |      |      |   |
|------|-----|------|-----|----|---------|--------|--------|------|------|---|
| ATOM | 413 | N3   | G A | 14 | -8.932  | 15.308 | 54.735 | 1.00 | 0.00 | N |
| ATOM | 414 | C4   | G A | 14 | -7.639  | 15.528 | 55.087 | 1.00 | 0.00 | C |
| ATOM | 415 | C5   | G A | 14 | -6.547  | 14.700 | 54.891 | 1.00 | 0.00 | C |
| ATOM | 416 | C6   | G A | 14 | -6.721  | 13.453 | 54.251 | 1.00 | 0.00 | C |
| ATOM | 417 | O6   | G A | 14 | -5.884  | 12.589 | 53.990 | 1.00 | 0.00 | O |
| ATOM | 418 | N7   | G A | 14 | -5.392  | 15.298 | 55.403 | 1.00 | 0.00 | N |
| ATOM | 419 | C8   | G A | 14 | -5.811  | 16.442 | 55.878 | 1.00 | 0.00 | C |
| ATOM | 420 | N9   | G A | 14 | -7.165  | 16.654 | 55.724 | 1.00 | 0.00 | N |
| ATOM | 421 | C2'  | G A | 14 | -7.569  | 18.430 | 57.468 | 1.00 | 0.00 | C |
| ATOM | 422 | C3'  | G A | 14 | -7.815  | 19.912 | 57.235 | 1.00 | 0.00 | C |
| ATOM | 423 | O3'  | G A | 14 | -9.185  | 20.207 | 57.497 | 1.00 | 0.00 | O |
| ATOM | 424 | C4'  | G A | 14 | -7.459  | 20.086 | 55.759 | 1.00 | 0.00 | C |
| ATOM | 425 | O4'  | G A | 14 | -7.852  | 18.819 | 55.141 | 1.00 | 0.00 | O |
| ATOM | 426 | C5'  | G A | 14 | -6.004  | 20.345 | 55.446 | 1.00 | 0.00 | C |
| ATOM | 427 | O5'  | G A | 14 | -5.165  | 19.588 | 56.352 | 1.00 | 0.00 | O |
| ATOM | 428 | O1P  | G A | 14 | -4.013  | 21.369 | 57.706 | 1.00 | 0.00 | O |
| ATOM | 429 | O2P  | G A | 14 | -2.907  | 19.144 | 57.363 | 1.00 | 0.00 | O |
| ATOM | 430 | P    | G A | 14 | -3.775  | 20.216 | 56.817 | 1.00 | 0.00 | P |
| ATOM | 431 | H1   | G A | 14 | -8.301  | 12.359 | 53.414 | 1.00 | 0.00 | H |
| ATOM | 432 | H8   | G A | 14 | -5.148  | 17.165 | 56.354 | 1.00 | 0.00 | H |
| ATOM | 433 | H1'  | G A | 14 | -9.033  | 17.513 | 56.160 | 1.00 | 0.00 | H |
| ATOM | 434 | H21  | G A | 14 | -10.436 | 12.836 | 53.258 | 1.00 | 0.00 | H |
| ATOM | 435 | H3'  | G A | 14 | -7.184  | 20.535 | 57.867 | 1.00 | 0.00 | H |
| ATOM | 436 | H22  | G A | 14 | -11.127 | 14.361 | 53.877 | 1.00 | 0.00 | H |
| ATOM | 437 | H4'  | G A | 14 | -8.036  | 20.935 | 55.392 | 1.00 | 0.00 | H |
| ATOM | 438 | H2'1 | G A | 14 | -6.523  | 18.234 | 57.701 | 1.00 | 0.00 | H |
| ATOM | 439 | H2'2 | G A | 14 | -8.166  | 18.055 | 58.300 | 1.00 | 0.00 | H |
| ATOM | 440 | H5'1 | G A | 14 | -5.801  | 20.047 | 54.418 | 1.00 | 0.00 | H |
| ATOM | 441 | H5'2 | G A | 14 | -5.799  | 21.411 | 55.556 | 1.00 | 0.00 | H |
| ATOM | 442 | C1'  | A A | 15 | -11.927 | 15.277 | 57.719 | 1.00 | 0.00 | C |
| ATOM | 443 | N1   | A A | 15 | -9.079  | 11.198 | 56.455 | 1.00 | 0.00 | N |
| ATOM | 444 | C2   | A A | 15 | -10.366 | 11.487 | 56.276 | 1.00 | 0.00 | C |
| ATOM | 445 | N3   | A A | 15 | -11.039 | 12.563 | 56.626 | 1.00 | 0.00 | N |
| ATOM | 446 | C4   | A A | 15 | -10.227 | 13.436 | 57.251 | 1.00 | 0.00 | C |
| ATOM | 447 | C5   | A A | 15 | -8.894  | 13.292 | 57.514 | 1.00 | 0.00 | C |
| ATOM | 448 | C6   | A A | 15 | -8.295  | 12.089 | 57.082 | 1.00 | 0.00 | C |
| ATOM | 449 | N6   | A A | 15 | -6.995  | 11.808 | 57.270 | 1.00 | 0.00 | N |
| ATOM | 450 | N7   | A A | 15 | -8.391  | 14.399 | 58.174 | 1.00 | 0.00 | N |
| ATOM | 451 | C8   | A A | 15 | -9.422  | 15.181 | 58.300 | 1.00 | 0.00 | C |
| ATOM | 452 | N9   | A A | 15 | -10.573 | 14.663 | 57.761 | 1.00 | 0.00 | N |
| ATOM | 453 | C2'  | A A | 15 | -12.286 | 16.059 | 58.976 | 1.00 | 0.00 | C |
| ATOM | 454 | C3'  | A A | 15 | -13.106 | 17.209 | 58.411 | 1.00 | 0.00 | C |
| ATOM | 455 | O3'  | A A | 15 | -14.456 | 16.785 | 58.251 | 1.00 | 0.00 | O |
| ATOM | 456 | C4'  | A A | 15 | -12.425 | 17.486 | 57.071 | 1.00 | 0.00 | C |
| ATOM | 457 | O4'  | A A | 15 | -11.963 | 16.170 | 56.623 | 1.00 | 0.00 | O |
| ATOM | 458 | C5'  | A A | 15 | -11.245 | 18.428 | 57.099 | 1.00 | 0.00 | C |
| ATOM | 459 | O5'  | A A | 15 | -10.485 | 18.227 | 58.318 | 1.00 | 0.00 | O |
| ATOM | 460 | O1P  | A A | 15 | -10.793 | 20.393 | 59.562 | 1.00 | 0.00 | O |
| ATOM | 461 | O2P  | A A | 15 | -8.733  | 19.010 | 59.940 | 1.00 | 0.00 | O |
| ATOM | 462 | P    | A A | 15 | -9.776  | 19.483 | 58.998 | 1.00 | 0.00 | P |
| ATOM | 463 | H2   | A A | 15 | -10.948 | 10.720 | 55.764 | 1.00 | 0.00 | H |
| ATOM | 464 | H8   | A A | 15 | -9.379  | 16.155 | 58.787 | 1.00 | 0.00 | H |
| ATOM | 465 | H1'  | A A | 15 | -12.653 | 14.486 | 57.531 | 1.00 | 0.00 | H |
| ATOM | 466 | H3'  | A A | 15 | -13.076 | 18.088 | 59.055 | 1.00 | 0.00 | H |

|      |     |      |   |   |    |         |        |        |      |      |   |
|------|-----|------|---|---|----|---------|--------|--------|------|------|---|
| ATOM | 467 | H4'  | A | A | 15 | -13.181 | 17.917 | 56.416 | 1.00 | 0.00 | H |
| ATOM | 468 | H61  | A | A | 15 | -6.608  | 10.915 | 56.931 | 1.00 | 0.00 | H |
| ATOM | 469 | H62  | A | A | 15 | -6.386  | 12.486 | 57.752 | 1.00 | 0.00 | H |
| ATOM | 470 | H2'1 | A | A | 15 | -11.403 | 16.422 | 59.502 | 1.00 | 0.00 | H |
| ATOM | 471 | H2'2 | A | A | 15 | -12.868 | 15.466 | 59.680 | 1.00 | 0.00 | H |
| ATOM | 472 | H5'1 | A | A | 15 | -10.612 | 18.234 | 56.234 | 1.00 | 0.00 | H |
| ATOM | 473 | H5'2 | A | A | 15 | -11.606 | 19.454 | 57.057 | 1.00 | 0.00 | H |
| ATOM | 474 | C1'  | C | A | 16 | -14.417 | 11.085 | 58.663 | 1.00 | 0.00 | C |
| ATOM | 475 | N1   | C | A | 16 | -13.037 | 11.276 | 59.188 | 1.00 | 0.00 | N |
| ATOM | 476 | C2   | C | A | 16 | -12.102 | 10.272 | 58.947 | 1.00 | 0.00 | C |
| ATOM | 477 | O2   | C | A | 16 | -12.455 | 9.269  | 58.312 | 1.00 | 0.00 | O |
| ATOM | 478 | N3   | C | A | 16 | -10.840 | 10.426 | 59.417 | 1.00 | 0.00 | N |
| ATOM | 479 | C4   | C | A | 16 | -10.490 | 11.522 | 60.101 | 1.00 | 0.00 | C |
| ATOM | 480 | N4   | C | A | 16 | -9.241  | 11.622 | 60.533 | 1.00 | 0.00 | N |
| ATOM | 481 | C5   | C | A | 16 | -11.431 | 12.570 | 60.368 | 1.00 | 0.00 | C |
| ATOM | 482 | C6   | C | A | 16 | -12.696 | 12.396 | 59.882 | 1.00 | 0.00 | C |
| ATOM | 483 | C2'  | C | A | 16 | -15.505 | 11.598 | 59.596 | 1.00 | 0.00 | C |
| ATOM | 484 | C3'  | C | A | 16 | -16.538 | 12.131 | 58.615 | 1.00 | 0.00 | C |
| ATOM | 485 | O3'  | C | A | 16 | -17.372 | 11.059 | 58.185 | 1.00 | 0.00 | O |
| ATOM | 486 | C4'  | C | A | 16 | -15.677 | 12.684 | 57.482 | 1.00 | 0.00 | C |
| ATOM | 487 | O4'  | C | A | 16 | -14.515 | 11.796 | 57.443 | 1.00 | 0.00 | O |
| ATOM | 488 | C5'  | C | A | 16 | -15.192 | 14.107 | 57.641 | 1.00 | 0.00 | C |
| ATOM | 489 | O5'  | C | A | 16 | -14.886 | 14.368 | 59.034 | 1.00 | 0.00 | O |
| ATOM | 490 | O1P  | C | A | 16 | -16.602 | 16.087 | 59.696 | 1.00 | 0.00 | O |
| ATOM | 491 | O2P  | C | A | 16 | -14.392 | 16.000 | 60.880 | 1.00 | 0.00 | O |
| ATOM | 492 | P    | C | A | 16 | -15.151 | 15.829 | 59.617 | 1.00 | 0.00 | P |
| ATOM | 493 | H5   | C | A | 16 | -11.152 | 13.462 | 60.932 | 1.00 | 0.00 | H |
| ATOM | 494 | H6   | C | A | 16 | -13.445 | 13.169 | 60.052 | 1.00 | 0.00 | H |
| ATOM | 495 | H1'  | C | A | 16 | -14.556 | 10.026 | 58.446 | 1.00 | 0.00 | H |
| ATOM | 496 | H3'  | C | A | 16 | -17.155 | 12.914 | 59.060 | 1.00 | 0.00 | H |
| ATOM | 497 | H4'  | C | A | 16 | -16.280 | 12.640 | 56.576 | 1.00 | 0.00 | H |
| ATOM | 498 | H41  | C | A | 16 | -8.945  | 12.457 | 61.061 | 1.00 | 0.00 | H |
| ATOM | 499 | H42  | C | A | 16 | -8.567  | 10.867 | 60.343 | 1.00 | 0.00 | H |
| ATOM | 500 | H2'1 | C | A | 16 | -15.145 | 12.386 | 60.259 | 1.00 | 0.00 | H |
| ATOM | 501 | H2'2 | C | A | 16 | -15.921 | 10.808 | 60.222 | 1.00 | 0.00 | H |
| ATOM | 502 | H5'1 | C | A | 16 | -14.298 | 14.250 | 57.033 | 1.00 | 0.00 | H |
| ATOM | 503 | H5'2 | C | A | 16 | -15.970 | 14.791 | 57.300 | 1.00 | 0.00 | H |
| ATOM | 504 | C1'  | G | A | 17 | -14.777 | 6.262  | 59.721 | 1.00 | 0.00 | C |
| ATOM | 505 | N1   | G | A | 17 | -10.117 | 6.923  | 61.689 | 1.00 | 0.00 | N |
| ATOM | 506 | C2   | G | A | 17 | -10.615 | 5.892  | 60.912 | 1.00 | 0.00 | C |
| ATOM | 507 | N2   | G | A | 17 | -9.758  | 4.904  | 60.624 | 1.00 | 0.00 | N |
| ATOM | 508 | N3   | G | A | 17 | -11.867 | 5.849  | 60.460 | 1.00 | 0.00 | N |
| ATOM | 509 | C4   | G | A | 17 | -12.596 | 6.926  | 60.855 | 1.00 | 0.00 | C |
| ATOM | 510 | C5   | G | A | 17 | -12.187 | 7.998  | 61.631 | 1.00 | 0.00 | C |
| ATOM | 511 | C6   | G | A | 17 | -10.856 | 8.047  | 62.108 | 1.00 | 0.00 | C |
| ATOM | 512 | O6   | G | A | 17 | -10.310 | 8.904  | 62.803 | 1.00 | 0.00 | O |
| ATOM | 513 | N7   | G | A | 17 | -13.241 | 8.895  | 61.811 | 1.00 | 0.00 | N |
| ATOM | 514 | C8   | G | A | 17 | -14.232 | 8.354  | 61.150 | 1.00 | 0.00 | C |
| ATOM | 515 | N9   | G | A | 17 | -13.918 | 7.155  | 60.543 | 1.00 | 0.00 | N |
| ATOM | 516 | C2'  | G | A | 17 | -16.216 | 6.172  | 60.210 | 1.00 | 0.00 | C |
| ATOM | 517 | C3'  | G | A | 17 | -16.989 | 6.060  | 58.906 | 1.00 | 0.00 | C |
| ATOM | 518 | O3'  | G | A | 17 | -17.014 | 4.696  | 58.493 | 1.00 | 0.00 | O |
| ATOM | 519 | C4'  | G | A | 17 | -16.178 | 6.938  | 57.954 | 1.00 | 0.00 | C |
| ATOM | 520 | O4'  | G | A | 17 | -14.796 | 6.774  | 58.402 | 1.00 | 0.00 | O |

|      |     |      |     |    |         |        |        |      |      |   |
|------|-----|------|-----|----|---------|--------|--------|------|------|---|
| ATOM | 521 | C5'  | G A | 17 | -16.515 | 8.410  | 57.949 | 1.00 | 0.00 | C |
| ATOM | 522 | O5'  | G A | 17 | -16.848 | 8.842  | 59.291 | 1.00 | 0.00 | O |
| ATOM | 523 | O1P  | G A | 17 | -19.284 | 9.450  | 59.118 | 1.00 | 0.00 | O |
| ATOM | 524 | O2P  | G A | 17 | -17.833 | 10.560 | 60.838 | 1.00 | 0.00 | O |
| ATOM | 525 | P    | G A | 17 | -17.954 | 9.976  | 59.479 | 1.00 | 0.00 | P |
| ATOM | 526 | H1   | G A | 17 | -9.131  | 6.863  | 61.982 | 1.00 | 0.00 | H |
| ATOM | 527 | H8   | G A | 17 | -15.221 | 8.809  | 61.086 | 1.00 | 0.00 | H |
| ATOM | 528 | H1'  | G A | 17 | -14.314 | 5.275  | 59.691 | 1.00 | 0.00 | H |
| ATOM | 529 | H21  | G A | 17 | -8.790  | 4.946  | 60.974 | 1.00 | 0.00 | H |
| ATOM | 530 | H3'  | G A | 17 | -18.012 | 6.427  | 59.004 | 1.00 | 0.00 | H |
| ATOM | 531 | H22  | G A | 17 | -10.067 | 4.106  | 60.052 | 1.00 | 0.00 | H |
| ATOM | 532 | H4'  | G A | 17 | -16.348 | 6.554  | 56.949 | 1.00 | 0.00 | H |
| ATOM | 533 | H2'1 | G A | 17 | -16.516 | 7.056  | 60.774 | 1.00 | 0.00 | H |
| ATOM | 534 | H2'2 | G A | 17 | -16.384 | 5.304  | 60.848 | 1.00 | 0.00 | H |
| ATOM | 535 | H5'1 | G A | 17 | -15.655 | 8.972  | 57.583 | 1.00 | 0.00 | H |
| ATOM | 536 | H5'2 | G A | 17 | -17.361 | 8.581  | 57.284 | 1.00 | 0.00 | H |
| ATOM | 537 | C1'  | G A | 18 | -13.116 | 1.976  | 61.566 | 1.00 | 0.00 | C |
| ATOM | 538 | N1   | G A | 18 | -10.270 | 5.006  | 64.523 | 1.00 | 0.00 | N |
| ATOM | 539 | C2   | G A | 18 | -9.931  | 3.840  | 63.860 | 1.00 | 0.00 | C |
| ATOM | 540 | N2   | G A | 18 | -8.665  | 3.424  | 64.006 | 1.00 | 0.00 | N |
| ATOM | 541 | N3   | G A | 18 | -10.784 | 3.145  | 63.112 | 1.00 | 0.00 | N |
| ATOM | 542 | C4   | G A | 18 | -12.022 | 3.706  | 63.082 | 1.00 | 0.00 | C |
| ATOM | 543 | C5   | G A | 18 | -12.451 | 4.862  | 63.714 | 1.00 | 0.00 | C |
| ATOM | 544 | C6   | G A | 18 | -11.543 | 5.603  | 64.506 | 1.00 | 0.00 | C |
| ATOM | 545 | O6   | G A | 18 | -11.735 | 6.642  | 65.138 | 1.00 | 0.00 | O |
| ATOM | 546 | N7   | G A | 18 | -13.798 | 5.094  | 63.431 | 1.00 | 0.00 | N |
| ATOM | 547 | C8   | G A | 18 | -14.134 | 4.099  | 62.652 | 1.00 | 0.00 | C |
| ATOM | 548 | N9   | G A | 18 | -13.109 | 3.213  | 62.395 | 1.00 | 0.00 | N |
| ATOM | 549 | C2'  | G A | 18 | -14.407 | 1.177  | 61.667 | 1.00 | 0.00 | C |
| ATOM | 550 | C3'  | G A | 18 | -14.559 | 0.639  | 60.254 | 1.00 | 0.00 | C |
| ATOM | 551 | O3'  | G A | 18 | -13.794 | -0.556 | 60.123 | 1.00 | 0.00 | O |
| ATOM | 552 | C4'  | G A | 18 | -14.005 | 1.776  | 59.396 | 1.00 | 0.00 | C |
| ATOM | 553 | O4'  | G A | 18 | -12.945 | 2.362  | 60.216 | 1.00 | 0.00 | O |
| ATOM | 554 | C5'  | G A | 18 | -14.980 | 2.865  | 59.015 | 1.00 | 0.00 | C |
| ATOM | 555 | O5'  | G A | 18 | -15.896 | 3.109  | 60.111 | 1.00 | 0.00 | O |
| ATOM | 556 | O1P  | G A | 18 | -18.119 | 2.372  | 59.188 | 1.00 | 0.00 | O |
| ATOM | 557 | O2P  | G A | 18 | -18.024 | 4.126  | 60.978 | 1.00 | 0.00 | O |
| ATOM | 558 | P    | G A | 18 | -17.402 | 3.518  | 59.777 | 1.00 | 0.00 | P |
| ATOM | 559 | H1   | G A | 18 | -9.531  | 5.473  | 65.072 | 1.00 | 0.00 | H |
| ATOM | 560 | H8   | G A | 18 | -15.137 | 3.978  | 62.242 | 1.00 | 0.00 | H |
| ATOM | 561 | H1'  | G A | 18 | -12.257 | 1.369  | 61.853 | 1.00 | 0.00 | H |
| ATOM | 562 | H21  | G A | 18 | -8.009  | 3.970  | 64.584 | 1.00 | 0.00 | H |
| ATOM | 563 | H3'  | G A | 18 | -15.601 | 0.431  | 60.005 | 1.00 | 0.00 | H |
| ATOM | 564 | H22  | G A | 18 | -8.351  | 2.563  | 63.540 | 1.00 | 0.00 | H |
| ATOM | 565 | H4'  | G A | 18 | -13.633 | 1.325  | 58.476 | 1.00 | 0.00 | H |
| ATOM | 566 | H2'1 | G A | 18 | -15.257 | 1.799  | 61.948 | 1.00 | 0.00 | H |
| ATOM | 567 | H2'2 | G A | 18 | -14.338 | 0.368  | 62.395 | 1.00 | 0.00 | H |
| ATOM | 568 | H5'1 | G A | 18 | -14.427 | 3.776  | 58.786 | 1.00 | 0.00 | H |
| ATOM | 569 | H5'2 | G A | 18 | -15.537 | 2.554  | 58.131 | 1.00 | 0.00 | H |
| ATOM | 570 | C1'  | T A | 19 | -10.324 | -0.796 | 64.569 | 1.00 | 0.00 | C |
| ATOM | 571 | N1   | T A | 19 | -11.154 | 0.303  | 65.127 | 1.00 | 0.00 | N |
| ATOM | 572 | C2   | T A | 19 | -10.525 | 1.212  | 65.954 | 1.00 | 0.00 | C |
| ATOM | 573 | O2   | T A | 19 | -9.340  | 1.139  | 66.232 | 1.00 | 0.00 | O |
| ATOM | 574 | N3   | T A | 19 | -11.334 | 2.218  | 66.450 | 1.00 | 0.00 | N |

|      |     |      |       |    |         |         |        |      |      |   |
|------|-----|------|-------|----|---------|---------|--------|------|------|---|
| ATOM | 575 | C4   | T A   | 19 | -12.679 | 2.388   | 66.201 | 1.00 | 0.00 | C |
| ATOM | 576 | O4   | T A   | 19 | -13.301 | 3.329   | 66.706 | 1.00 | 0.00 | O |
| ATOM | 577 | C5   | T A   | 19 | -13.250 | 1.391   | 65.327 | 1.00 | 0.00 | C |
| ATOM | 578 | C6   | T A   | 19 | -12.491 | 0.396   | 64.824 | 1.00 | 0.00 | C |
| ATOM | 579 | C7   | T A   | 19 | -14.711 | 1.538   | 65.026 | 1.00 | 0.00 | C |
| ATOM | 580 | C2'  | T A   | 19 | -11.051 | -2.133  | 64.483 | 1.00 | 0.00 | C |
| ATOM | 581 | C3'  | T A   | 19 | -10.481 | -2.723  | 63.204 | 1.00 | 0.00 | C |
| ATOM | 582 | O3'  | T A   | 19 | -9.249  | -3.378  | 63.498 | 1.00 | 0.00 | O |
| ATOM | 583 | C4'  | T A   | 19 | -10.285 | -1.493  | 62.321 | 1.00 | 0.00 | C |
| ATOM | 584 | O4'  | T A   | 19 | -9.939  | -0.426  | 63.259 | 1.00 | 0.00 | O |
| ATOM | 585 | C5'  | T A   | 19 | -11.479 | -1.053  | 61.506 | 1.00 | 0.00 | C |
| ATOM | 586 | O5'  | T A   | 19 | -12.695 | -1.263  | 62.267 | 1.00 | 0.00 | O |
| ATOM | 587 | O1P  | T A   | 19 | -13.898 | -3.048  | 60.962 | 1.00 | 0.00 | O |
| ATOM | 588 | O2P  | T A   | 19 | -15.201 | -1.420  | 62.358 | 1.00 | 0.00 | O |
| ATOM | 589 | P    | T A   | 19 | -14.026 | -1.675  | 61.491 | 1.00 | 0.00 | P |
| ATOM | 590 | H3   | T A   | 19 | -10.885 | 2.911   | 67.066 | 1.00 | 0.00 | H |
| ATOM | 591 | H6   | T A   | 19 | -12.944 | -0.345  | 64.166 | 1.00 | 0.00 | H |
| ATOM | 592 | H1'  | T A   | 19 | -9.420  | -0.882  | 65.173 | 1.00 | 0.00 | H |
| ATOM | 593 | H3'  | T A   | 19 | -11.167 | -3.434  | 62.742 | 1.00 | 0.00 | H |
| ATOM | 594 | H4'  | T A   | 19 | -9.477  | -1.728  | 61.625 | 1.00 | 0.00 | H |
| ATOM | 595 | H71  | T A   | 19 | -15.256 | 0.696   | 65.451 | 1.00 | 0.00 | H |
| ATOM | 596 | H72  | T A   | 19 | -15.080 | 2.467   | 65.463 | 1.00 | 0.00 | H |
| ATOM | 597 | H73  | T A   | 19 | -14.862 | 1.560   | 63.946 | 1.00 | 0.00 | H |
| ATOM | 598 | H2'1 | T A   | 19 | -12.131 | -2.011  | 64.418 | 1.00 | 0.00 | H |
| ATOM | 599 | H2'2 | T A   | 19 | -10.845 | -2.772  | 65.343 | 1.00 | 0.00 | H |
| ATOM | 600 | H5'1 | T A   | 19 | -11.376 | 0.004   | 61.261 | 1.00 | 0.00 | H |
| ATOM | 601 | H5'2 | T A   | 19 | -11.517 | -1.632  | 60.585 | 1.00 | 0.00 | H |
| ATOM | 602 | C01  | LNK A | 20 | -8.567  | -6.781  | 64.842 | 0.00 | 0.00 | C |
| ATOM | 603 | O1   | LNK A | 20 | -9.466  | -5.741  | 64.451 | 1.00 | 0.00 | O |
| ATOM | 604 | S    | LNK A | 20 | -8.698  | -10.406 | 66.482 | 0.00 | 0.00 | S |
| ATOM | 605 | C02  | LNK A | 20 | -9.370  | -7.959  | 65.426 | 0.00 | 0.00 | C |
| ATOM | 606 | C03  | LNK A | 20 | -8.582  | -8.592  | 66.588 | 0.00 | 0.00 | C |
| ATOM | 607 | O1P  | LNK A | 20 | -10.430 | -3.851  | 65.807 | 1.00 | 0.00 | O |
| ATOM | 608 | O2P  | LNK A | 20 | -7.948  | -4.223  | 65.757 | 1.00 | 0.00 | O |
| ATOM | 609 | P    | LNK A | 20 | -9.244  | -4.273  | 65.036 | 1.00 | 0.00 | P |
| ATOM | 610 | H01  | LNK A | 20 | -7.877  | -6.403  | 65.597 | 0.00 | 0.00 | H |
| ATOM | 611 | H02  | LNK A | 20 | -8.004  | -7.121  | 63.973 | 0.00 | 0.00 | H |
| ATOM | 612 | H03  | LNK A | 20 | -9.001  | -8.257  | 67.537 | 0.00 | 0.00 | H |
| ATOM | 613 | H04  | LNK A | 20 | -9.537  | -8.706  | 64.649 | 0.00 | 0.00 | H |
| ATOM | 614 | H05  | LNK A | 20 | -10.331 | -7.598  | 65.793 | 0.00 | 0.00 | H |
| ATOM | 615 | H06  | LNK A | 20 | -7.537  | -8.291  | 66.525 | 0.00 | 0.00 | H |
| ATOM | 616 | AU   | LNK A | 20 | -8.435  | -10.686 | 67.050 |      |      |   |
| TER  |     |      |       |    |         |         |        |      |      |   |
| ATOM | 618 | C1'  | A B   | 2  | -7.251  | 7.291   | 71.205 | 1.00 | 0.00 | C |
| ATOM | 619 | N1   | A B   | 2  | -10.070 | 4.209   | 68.223 | 1.00 | 0.00 | N |
| ATOM | 620 | C2   | A B   | 2  | -8.785  | 4.199   | 68.564 | 1.00 | 0.00 | C |
| ATOM | 621 | N3   | A B   | 2  | -8.120  | 5.025   | 69.343 | 1.00 | 0.00 | N |
| ATOM | 622 | C4   | A B   | 2  | -8.940  | 5.986   | 69.809 | 1.00 | 0.00 | C |
| ATOM | 623 | C5   | A B   | 2  | -10.273 | 6.137   | 69.555 | 1.00 | 0.00 | C |
| ATOM | 624 | C6   | A B   | 2  | -10.863 | 5.178   | 68.704 | 1.00 | 0.00 | C |
| ATOM | 625 | N6   | A B   | 2  | -12.163 | 5.197   | 68.365 | 1.00 | 0.00 | N |
| ATOM | 626 | N7   | A B   | 2  | -10.786 | 7.242   | 70.211 | 1.00 | 0.00 | N |
| ATOM | 627 | C8   | A B   | 2  | -9.760  | 7.735   | 70.839 | 1.00 | 0.00 | C |
| ATOM | 628 | N9   | A B   | 2  | -8.605  | 7.023   | 70.644 | 1.00 | 0.00 | N |



|      |     |      |     |   |         |        |        |      |      |   |
|------|-----|------|-----|---|---------|--------|--------|------|------|---|
| ATOM | 629 | C2'  | A B | 2 | -6.906  | 8.772  | 71.292 | 1.00 | 0.00 | C |
| ATOM | 630 | C3'  | A B | 2 | -6.089  | 8.832  | 72.573 | 1.00 | 0.00 | C |
| ATOM | 631 | O3'  | A B | 2 | -4.734  | 8.499  | 72.280 | 1.00 | 0.00 | O |
| ATOM | 632 | C4'  | A B | 2 | -6.763  | 7.782  | 73.456 | 1.00 | 0.00 | C |
| ATOM | 633 | O4'  | A B | 2 | -7.216  | 6.756  | 72.514 | 1.00 | 0.00 | O |
| ATOM | 634 | C5'  | A B | 2 | -7.947  | 8.249  | 74.269 | 1.00 | 0.00 | C |
| ATOM | 635 | O5'  | A B | 2 | -8.714  | 9.216  | 73.508 | 1.00 | 0.00 | O |
| ATOM | 636 | H2   | A B | 2 | -8.196  | 3.389  | 68.137 | 1.00 | 0.00 | H |
| ATOM | 637 | H8   | A B | 2 | -9.812  | 8.629  | 71.460 | 1.00 | 0.00 | H |
| ATOM | 638 | H1'  | A B | 2 | -6.520  | 6.754  | 70.602 | 1.00 | 0.00 | H |
| ATOM | 639 | H3'  | A B | 2 | -6.126  | 9.818  | 73.036 | 1.00 | 0.00 | H |
| ATOM | 640 | H4'  | A B | 2 | -6.005  | 7.419  | 74.149 | 1.00 | 0.00 | H |
| ATOM | 641 | H61  | A B | 2 | -12.544 | 4.472  | 67.743 | 1.00 | 0.00 | H |
| ATOM | 642 | H62  | A B | 2 | -12.778 | 5.940  | 68.730 | 1.00 | 0.00 | H |
| ATOM | 643 | H2'1 | A B | 2 | -7.793  | 9.401  | 71.358 | 1.00 | 0.00 | H |
| ATOM | 644 | H2'2 | A B | 2 | -6.324  | 9.112  | 70.435 | 1.00 | 0.00 | H |
| ATOM | 645 | H5'1 | A B | 2 | -8.574  | 7.392  | 74.512 | 1.00 | 0.00 | H |
| ATOM | 646 | H5'2 | A B | 2 | -7.590  | 8.705  | 75.191 | 1.00 | 0.00 | H |
| ATOM | 647 | C1'  | C B | 3 | -4.739  | 6.129  | 67.083 | 1.00 | 0.00 | C |
| ATOM | 648 | N1   | C B | 3 | -6.123  | 6.670  | 66.996 | 1.00 | 0.00 | N |
| ATOM | 649 | C2   | C B | 3 | -7.051  | 5.973  | 66.225 | 1.00 | 0.00 | C |
| ATOM | 650 | O2   | C B | 3 | -6.689  | 4.938  | 65.648 | 1.00 | 0.00 | O |
| ATOM | 651 | N3   | C B | 3 | -8.315  | 6.449  | 66.133 | 1.00 | 0.00 | N |
| ATOM | 652 | C4   | C B | 3 | -8.676  | 7.572  | 66.768 | 1.00 | 0.00 | C |
| ATOM | 653 | N4   | C B | 3 | -9.928  | 7.991  | 66.646 | 1.00 | 0.00 | N |
| ATOM | 654 | C5   | C B | 3 | -7.743  | 8.314  | 67.565 | 1.00 | 0.00 | C |
| ATOM | 655 | C6   | C B | 3 | -6.475  | 7.812  | 67.647 | 1.00 | 0.00 | C |
| ATOM | 656 | C2'  | C B | 3 | -3.659  | 7.202  | 67.092 | 1.00 | 0.00 | C |
| ATOM | 657 | C3'  | C B | 3 | -2.624  | 6.602  | 68.031 | 1.00 | 0.00 | C |
| ATOM | 658 | O3'  | C B | 3 | -1.783  | 5.717  | 67.296 | 1.00 | 0.00 | O |
| ATOM | 659 | C4'  | C B | 3 | -3.483  | 5.865  | 69.056 | 1.00 | 0.00 | C |
| ATOM | 660 | O4'  | C B | 3 | -4.640  | 5.398  | 68.290 | 1.00 | 0.00 | O |
| ATOM | 661 | C5'  | C B | 3 | -3.977  | 6.679  | 70.229 | 1.00 | 0.00 | C |
| ATOM | 662 | O5'  | C B | 3 | -4.292  | 8.025  | 69.792 | 1.00 | 0.00 | O |
| ATOM | 663 | O1P  | C B | 3 | -2.589  | 9.440  | 70.991 | 1.00 | 0.00 | O |
| ATOM | 664 | O2P  | C B | 3 | -4.805  | 10.423 | 70.343 | 1.00 | 0.00 | O |
| ATOM | 665 | P    | C B | 3 | -4.039  | 9.236  | 70.797 | 1.00 | 0.00 | P |
| ATOM | 666 | H5   | C B | 3 | -8.030  | 9.232  | 68.078 | 1.00 | 0.00 | H |
| ATOM | 667 | H6   | C B | 3 | -5.732  | 8.337  | 68.247 | 1.00 | 0.00 | H |
| ATOM | 668 | H1'  | C B | 3 | -4.593  | 5.433  | 66.256 | 1.00 | 0.00 | H |
| ATOM | 669 | H3'  | C B | 3 | -2.014  | 7.369  | 68.508 | 1.00 | 0.00 | H |
| ATOM | 670 | H4'  | C B | 3 | -2.876  | 5.050  | 69.451 | 1.00 | 0.00 | H |
| ATOM | 671 | H41  | C B | 3 | -10.233 | 8.850  | 67.127 | 1.00 | 0.00 | H |
| ATOM | 672 | H42  | C B | 3 | -10.597 | 7.457  | 66.071 | 1.00 | 0.00 | H |
| ATOM | 673 | H2'1 | C B | 3 | -4.028  | 8.157  | 67.465 | 1.00 | 0.00 | H |
| ATOM | 674 | H2'2 | C B | 3 | -3.242  | 7.376  | 66.099 | 1.00 | 0.00 | H |
| ATOM | 675 | H5'1 | C B | 3 | -4.869  | 6.208  | 70.642 | 1.00 | 0.00 | H |
| ATOM | 676 | H5'2 | C B | 3 | -3.203  | 6.712  | 70.993 | 1.00 | 0.00 | H |
| ATOM | 677 | C1'  | C B | 4 | -4.352  | 4.749  | 62.343 | 1.00 | 0.00 | C |
| ATOM | 678 | N1   | C B | 4 | -5.226  | 5.889  | 62.730 | 1.00 | 0.00 | N |
| ATOM | 679 | C2   | C B | 4 | -6.545  | 5.884  | 62.280 | 1.00 | 0.00 | C |
| ATOM | 680 | O2   | C B | 4 | -6.934  | 4.938  | 61.582 | 1.00 | 0.00 | O |
| ATOM | 681 | N3   | C B | 4 | -7.357  | 6.913  | 62.621 | 1.00 | 0.00 | N |
| ATOM | 682 | C4   | C B | 4 | -6.907  | 7.924  | 63.377 | 1.00 | 0.00 | C |

|      |     |      |     |   |         |       |        |      |      |   |
|------|-----|------|-----|---|---------|-------|--------|------|------|---|
| ATOM | 683 | N4   | C B | 4 | -7.745  | 8.904 | 63.684 | 1.00 | 0.00 | N |
| ATOM | 684 | C5   | C B | 4 | -5.554  | 7.959 | 63.851 | 1.00 | 0.00 | C |
| ATOM | 685 | C6   | C B | 4 | -4.755  | 6.908 | 63.498 | 1.00 | 0.00 | C |
| ATOM | 686 | C2'  | C B | 4 | -2.917  | 5.152 | 62.035 | 1.00 | 0.00 | C |
| ATOM | 687 | C3'  | C B | 4 | -2.133  | 3.961 | 62.565 | 1.00 | 0.00 | C |
| ATOM | 688 | O3'  | C B | 4 | -2.094  | 2.944 | 61.566 | 1.00 | 0.00 | O |
| ATOM | 689 | C4'  | C B | 4 | -2.943  | 3.538 | 63.788 | 1.00 | 0.00 | C |
| ATOM | 690 | O4'  | C B | 4 | -4.329  | 3.838 | 63.426 | 1.00 | 0.00 | O |
| ATOM | 691 | C5'  | C B | 4 | -2.620  | 4.243 | 65.085 | 1.00 | 0.00 | C |
| ATOM | 692 | O5'  | C B | 4 | -2.299  | 5.632 | 64.820 | 1.00 | 0.00 | O |
| ATOM | 693 | O1P  | C B | 4 | 0.133   | 5.798 | 65.445 | 1.00 | 0.00 | O |
| ATOM | 694 | O2P  | C B | 4 | -1.341  | 7.824 | 65.589 | 1.00 | 0.00 | O |
| ATOM | 695 | P    | C B | 4 | -1.205  | 6.353 | 65.728 | 1.00 | 0.00 | P |
| ATOM | 696 | H5   | C B | 4 | -5.181  | 8.782 | 64.459 | 1.00 | 0.00 | H |
| ATOM | 697 | H6   | C B | 4 | -3.721  | 6.887 | 63.840 | 1.00 | 0.00 | H |
| ATOM | 698 | H1'  | C B | 4 | -4.808  | 4.244 | 61.490 | 1.00 | 0.00 | H |
| ATOM | 699 | H3'  | C B | 4 | -1.115  | 4.234 | 62.843 | 1.00 | 0.00 | H |
| ATOM | 700 | H4'  | C B | 4 | -2.763  | 2.472 | 63.935 | 1.00 | 0.00 | H |
| ATOM | 701 | H41  | C B | 4 | -7.426  | 9.692 | 64.267 | 1.00 | 0.00 | H |
| ATOM | 702 | H42  | C B | 4 | -8.717  | 8.878 | 63.341 | 1.00 | 0.00 | H |
| ATOM | 703 | H2'1 | C B | 4 | -2.628  | 6.073 | 62.540 | 1.00 | 0.00 | H |
| ATOM | 704 | H2'2 | C B | 4 | -2.747  | 5.295 | 60.968 | 1.00 | 0.00 | H |
| ATOM | 705 | H5'1 | C B | 4 | -3.482  | 4.183 | 65.750 | 1.00 | 0.00 | H |
| ATOM | 706 | H5'2 | C B | 4 | -1.769  | 3.752 | 65.555 | 1.00 | 0.00 | H |
| ATOM | 707 | C1'  | G B | 5 | -5.995  | 4.307 | 57.692 | 1.00 | 0.00 | C |
| ATOM | 708 | N1   | G B | 5 | -8.872  | 8.335 | 58.927 | 1.00 | 0.00 | N |
| ATOM | 709 | C2   | G B | 5 | -9.200  | 7.193 | 58.217 | 1.00 | 0.00 | C |
| ATOM | 710 | N2   | G B | 5 | -10.462 | 7.114 | 57.777 | 1.00 | 0.00 | N |
| ATOM | 711 | N3   | G B | 5 | -8.338  | 6.208 | 57.969 | 1.00 | 0.00 | N |
| ATOM | 712 | C4   | G B | 5 | -7.106  | 6.458 | 58.483 | 1.00 | 0.00 | C |
| ATOM | 713 | C5   | G B | 5 | -6.687  | 7.568 | 59.198 | 1.00 | 0.00 | C |
| ATOM | 714 | C6   | G B | 5 | -7.601  | 8.612 | 59.466 | 1.00 | 0.00 | C |
| ATOM | 715 | O6   | G B | 5 | -7.420  | 9.665 | 60.077 | 1.00 | 0.00 | O |
| ATOM | 716 | N7   | G B | 5 | -5.340  | 7.438 | 59.544 | 1.00 | 0.00 | N |
| ATOM | 717 | C8   | G B | 5 | -4.993  | 6.281 | 59.043 | 1.00 | 0.00 | C |
| ATOM | 718 | N9   | G B | 5 | -6.013  | 5.626 | 58.381 | 1.00 | 0.00 | N |
| ATOM | 719 | C2'  | G B | 5 | -4.697  | 4.022 | 56.948 | 1.00 | 0.00 | C |
| ATOM | 720 | C3'  | G B | 5 | -4.537  | 2.524 | 57.151 | 1.00 | 0.00 | C |
| ATOM | 721 | O3'  | G B | 5 | -5.293  | 1.834 | 56.159 | 1.00 | 0.00 | O |
| ATOM | 722 | C4'  | G B | 5 | -5.096  | 2.310 | 58.556 | 1.00 | 0.00 | C |
| ATOM | 723 | O4'  | G B | 5 | -6.164  | 3.303 | 58.674 | 1.00 | 0.00 | O |
| ATOM | 724 | C5'  | G B | 5 | -4.129  | 2.501 | 59.700 | 1.00 | 0.00 | C |
| ATOM | 725 | O5'  | G B | 5 | -3.217  | 3.586 | 59.395 | 1.00 | 0.00 | O |
| ATOM | 726 | O1P  | G B | 5 | -0.987  | 2.436 | 59.200 | 1.00 | 0.00 | O |
| ATOM | 727 | O2P  | G B | 5 | -1.100  | 4.846 | 59.887 | 1.00 | 0.00 | O |
| ATOM | 728 | P    | G B | 5 | -1.715  | 3.498 | 59.923 | 1.00 | 0.00 | P |
| ATOM | 729 | H1   | G B | 5 | -9.615  | 9.035 | 59.071 | 1.00 | 0.00 | H |
| ATOM | 730 | H8   | G B | 5 | -3.989  | 5.869 | 59.137 | 1.00 | 0.00 | H |
| ATOM | 731 | H1'  | G B | 5 | -6.849  | 4.263 | 57.017 | 1.00 | 0.00 | H |
| ATOM | 732 | H21  | G B | 5 | -11.124 | 7.878 | 57.976 | 1.00 | 0.00 | H |
| ATOM | 733 | H3'  | G B | 5 | -3.494  | 2.212 | 57.091 | 1.00 | 0.00 | H |
| ATOM | 734 | H22  | G B | 5 | -10.769 | 6.292 | 57.239 | 1.00 | 0.00 | H |
| ATOM | 735 | H4'  | G B | 5 | -5.463  | 1.285 | 58.598 | 1.00 | 0.00 | H |
| ATOM | 736 | H2'1 | G B | 5 | -3.852  | 4.571 | 57.364 | 1.00 | 0.00 | H |

|      |     |      |     |   |         |        |        |      |      |   |
|------|-----|------|-----|---|---------|--------|--------|------|------|---|
| ATOM | 737 | H2'2 | G B | 5 | -4.763  | 4.274  | 55.889 | 1.00 | 0.00 | H |
| ATOM | 738 | H5'1 | G B | 5 | -4.688  | 2.733  | 60.606 | 1.00 | 0.00 | H |
| ATOM | 739 | H5'2 | G B | 5 | -3.567  | 1.579  | 59.851 | 1.00 | 0.00 | H |
| ATOM | 740 | C1'  | T B | 6 | -8.780  | 5.597  | 53.808 | 1.00 | 0.00 | C |
| ATOM | 741 | N1   | T B | 6 | -7.959  | 6.618  | 54.513 | 1.00 | 0.00 | N |
| ATOM | 742 | C2   | T B | 6 | -8.598  | 7.775  | 54.911 | 1.00 | 0.00 | C |
| ATOM | 743 | O2   | T B | 6 | -9.782  | 7.979  | 54.708 | 1.00 | 0.00 | O |
| ATOM | 744 | N3   | T B | 6 | -7.797  | 8.695  | 55.563 | 1.00 | 0.00 | N |
| ATOM | 745 | C4   | T B | 6 | -6.453  | 8.566  | 55.840 | 1.00 | 0.00 | C |
| ATOM | 746 | O4   | T B | 6 | -5.838  | 9.463  | 56.428 | 1.00 | 0.00 | O |
| ATOM | 747 | C5   | T B | 6 | -5.874  | 7.324  | 55.385 | 1.00 | 0.00 | C |
| ATOM | 748 | C6   | T B | 6 | -6.623  | 6.403  | 54.748 | 1.00 | 0.00 | C |
| ATOM | 749 | C7   | T B | 6 | -4.412  | 7.139  | 55.668 | 1.00 | 0.00 | C |
| ATOM | 750 | C2'  | T B | 6 | -8.041  | 4.887  | 52.680 | 1.00 | 0.00 | C |
| ATOM | 751 | C3'  | T B | 6 | -8.605  | 3.478  | 52.771 | 1.00 | 0.00 | C |
| ATOM | 752 | O3'  | T B | 6 | -9.832  | 3.416  | 52.047 | 1.00 | 0.00 | O |
| ATOM | 753 | C4'  | T B | 6 | -8.810  | 3.288  | 54.272 | 1.00 | 0.00 | C |
| ATOM | 754 | O4'  | T B | 6 | -9.165  | 4.623  | 54.758 | 1.00 | 0.00 | O |
| ATOM | 755 | C5'  | T B | 6 | -7.617  | 2.791  | 55.056 | 1.00 | 0.00 | C |
| ATOM | 756 | O5'  | T B | 6 | -6.401  | 3.366  | 54.514 | 1.00 | 0.00 | O |
| ATOM | 757 | O1P  | T B | 6 | -5.182  | 1.372  | 53.579 | 1.00 | 0.00 | O |
| ATOM | 758 | O2P  | T B | 6 | -3.894  | 3.384  | 54.349 | 1.00 | 0.00 | O |
| ATOM | 759 | P    | T B | 6 | -5.066  | 2.494  | 54.533 | 1.00 | 0.00 | P |
| ATOM | 760 | H3   | T B | 6 | -8.252  | 9.567  | 55.874 | 1.00 | 0.00 | H |
| ATOM | 761 | H6   | T B | 6 | -6.163  | 5.473  | 54.414 | 1.00 | 0.00 | H |
| ATOM | 762 | H1'  | T B | 6 | -9.684  | 6.081  | 53.439 | 1.00 | 0.00 | H |
| ATOM | 763 | H3'  | T B | 6 | -7.914  | 2.736  | 52.371 | 1.00 | 0.00 | H |
| ATOM | 764 | H4'  | T B | 6 | -9.614  | 2.562  | 54.393 | 1.00 | 0.00 | H |
| ATOM | 765 | H71  | T B | 6 | -3.861  | 7.111  | 54.728 | 1.00 | 0.00 | H |
| ATOM | 766 | H72  | T B | 6 | -4.052  | 7.968  | 56.277 | 1.00 | 0.00 | H |
| ATOM | 767 | H73  | T B | 6 | -4.261  | 6.201  | 56.204 | 1.00 | 0.00 | H |
| ATOM | 768 | H2'1 | T B | 6 | -6.963  | 4.894  | 52.825 | 1.00 | 0.00 | H |
| ATOM | 769 | H2'2 | T B | 6 | -8.245  | 5.334  | 51.707 | 1.00 | 0.00 | H |
| ATOM | 770 | H5'1 | T B | 6 | -7.728  | 3.081  | 56.101 | 1.00 | 0.00 | H |
| ATOM | 771 | H5'2 | T B | 6 | -7.573  | 1.705  | 54.987 | 1.00 | 0.00 | H |
| ATOM | 772 | C1'  | C B | 7 | -11.413 | 8.831  | 51.111 | 1.00 | 0.00 | C |
| ATOM | 773 | N1   | C B | 7 | -10.022 | 9.156  | 51.537 | 1.00 | 0.00 | N |
| ATOM | 774 | C2   | C B | 7 | -9.804  | 10.377 | 52.171 | 1.00 | 0.00 | C |
| ATOM | 775 | O2   | C B | 7 | -10.766 | 11.136 | 52.355 | 1.00 | 0.00 | O |
| ATOM | 776 | N3   | C B | 7 | -8.546  | 10.693 | 52.566 | 1.00 | 0.00 | N |
| ATOM | 777 | C4   | C B | 7 | -7.526  | 9.852  | 52.353 | 1.00 | 0.00 | C |
| ATOM | 778 | N4   | C B | 7 | -6.319  | 10.210 | 52.763 | 1.00 | 0.00 | N |
| ATOM | 779 | C5   | C B | 7 | -7.721  | 8.591  | 51.698 | 1.00 | 0.00 | C |
| ATOM | 780 | C6   | C B | 7 | -8.997  | 8.292  | 51.314 | 1.00 | 0.00 | C |
| ATOM | 781 | C2'  | C B | 7 | -11.491 | 8.099  | 49.779 | 1.00 | 0.00 | C |
| ATOM | 782 | C3'  | C B | 7 | -12.662 | 7.156  | 50.005 | 1.00 | 0.00 | C |
| ATOM | 783 | O3'  | C B | 7 | -13.878 | 7.847  | 49.731 | 1.00 | 0.00 | O |
| ATOM | 784 | C4'  | C B | 7 | -12.525 | 6.790  | 51.480 | 1.00 | 0.00 | C |
| ATOM | 785 | O4'  | C B | 7 | -11.982 | 7.997  | 52.103 | 1.00 | 0.00 | O |
| ATOM | 786 | C5'  | C B | 7 | -11.614 | 5.627  | 51.803 | 1.00 | 0.00 | C |
| ATOM | 787 | O5'  | C B | 7 | -10.476 | 5.635  | 50.906 | 1.00 | 0.00 | O |
| ATOM | 788 | O1P  | C B | 7 | -10.787 | 3.537  | 49.551 | 1.00 | 0.00 | O |
| ATOM | 789 | O2P  | C B | 7 | -8.486  | 4.465  | 49.914 | 1.00 | 0.00 | O |
| ATOM | 790 | P    | C B | 7 | -9.850  | 4.241  | 50.448 | 1.00 | 0.00 | P |

|      |     |      |     |   |         |        |        |      |      |   |
|------|-----|------|-----|---|---------|--------|--------|------|------|---|
| ATOM | 791 | H5   | C B | 7 | -6.892  | 7.907  | 51.516 | 1.00 | 0.00 | H |
| ATOM | 792 | H6   | C B | 7 | -9.196  | 7.342  | 50.819 | 1.00 | 0.00 | H |
| ATOM | 793 | H1'  | C B | 7 | -11.986 | 9.757  | 51.083 | 1.00 | 0.00 | H |
| ATOM | 794 | H3'  | C B | 7 | -12.601 | 6.269  | 49.372 | 1.00 | 0.00 | H |
| ATOM | 795 | H4'  | C B | 7 | -13.523 | 6.537  | 51.839 | 1.00 | 0.00 | H |
| ATOM | 796 | H41  | C B | 7 | -5.517  | 9.580  | 52.614 | 1.00 | 0.00 | H |
| ATOM | 797 | H42  | C B | 7 | -6.181  | 11.118 | 53.231 | 1.00 | 0.00 | H |
| ATOM | 798 | H2'1 | C B | 7 | -10.577 | 7.550  | 49.555 | 1.00 | 0.00 | H |
| ATOM | 799 | H2'2 | C B | 7 | -11.679 | 8.775  | 48.946 | 1.00 | 0.00 | H |
| ATOM | 800 | H5'1 | C B | 7 | -11.271 | 5.717  | 52.834 | 1.00 | 0.00 | H |
| ATOM | 801 | H5'2 | C B | 7 | -12.167 | 4.697  | 51.688 | 1.00 | 0.00 | H |
| ATOM | 802 | C1'  | C B | 8 | -12.615 | 13.364 | 49.520 | 1.00 | 0.00 | C |
| ATOM | 803 | N1   | C B | 8 | -11.202 | 12.898 | 49.480 | 1.00 | 0.00 | N |
| ATOM | 804 | C2   | C B | 8 | -10.228 | 13.716 | 50.049 | 1.00 | 0.00 | C |
| ATOM | 805 | O2   | C B | 8 | -10.575 | 14.788 | 50.561 | 1.00 | 0.00 | O |
| ATOM | 806 | N3   | C B | 8 | -8.936  | 13.310 | 50.023 | 1.00 | 0.00 | N |
| ATOM | 807 | C4   | C B | 8 | -8.592  | 12.144 | 49.460 | 1.00 | 0.00 | C |
| ATOM | 808 | N4   | C B | 8 | -7.313  | 11.794 | 49.466 | 1.00 | 0.00 | N |
| ATOM | 809 | C5   | C B | 8 | -9.570  | 11.283 | 48.862 | 1.00 | 0.00 | C |
| ATOM | 810 | C6   | C B | 8 | -10.868 | 11.711 | 48.905 | 1.00 | 0.00 | C |
| ATOM | 811 | C2'  | C B | 8 | -13.407 | 13.034 | 48.262 | 1.00 | 0.00 | C |
| ATOM | 812 | C3'  | C B | 8 | -14.789 | 12.740 | 48.824 | 1.00 | 0.00 | C |
| ATOM | 813 | O3'  | C B | 8 | -15.498 | 13.966 | 48.986 | 1.00 | 0.00 | O |
| ATOM | 814 | C4'  | C B | 8 | -14.476 | 12.073 | 50.162 | 1.00 | 0.00 | C |
| ATOM | 815 | O4'  | C B | 8 | -13.247 | 12.727 | 50.614 | 1.00 | 0.00 | O |
| ATOM | 816 | C5'  | C B | 8 | -14.246 | 10.580 | 50.131 | 1.00 | 0.00 | C |
| ATOM | 817 | O5'  | C B | 8 | -13.547 | 10.218 | 48.912 | 1.00 | 0.00 | O |
| ATOM | 818 | O1P  | C B | 8 | -15.239 | 8.834  | 47.662 | 1.00 | 0.00 | O |
| ATOM | 819 | O2P  | C B | 8 | -12.786 | 8.460  | 47.287 | 1.00 | 0.00 | O |
| ATOM | 820 | P    | C B | 8 | -13.875 | 8.816  | 48.229 | 1.00 | 0.00 | P |
| ATOM | 821 | H5   | C B | 8 | -9.295  | 10.337 | 48.397 | 1.00 | 0.00 | H |
| ATOM | 822 | H6   | C B | 8 | -11.649 | 11.087 | 48.470 | 1.00 | 0.00 | H |
| ATOM | 823 | H1'  | C B | 8 | -12.615 | 14.437 | 49.711 | 1.00 | 0.00 | H |
| ATOM | 824 | H3'  | C B | 8 | -15.360 | 12.075 | 48.177 | 1.00 | 0.00 | H |
| ATOM | 825 | H4'  | C B | 8 | -15.326 | 12.263 | 50.817 | 1.00 | 0.00 | H |
| ATOM | 826 | H41  | C B | 8 | -7.022  | 10.901 | 49.042 | 1.00 | 0.00 | H |
| ATOM | 827 | H42  | C B | 8 | -6.611  | 12.415 | 49.894 | 1.00 | 0.00 | H |
| ATOM | 828 | H2'1 | C B | 8 | -13.002 | 12.171 | 47.733 | 1.00 | 0.00 | H |
| ATOM | 829 | H2'2 | C B | 8 | -13.432 | 13.867 | 47.559 | 1.00 | 0.00 | H |
| ATOM | 830 | H5'1 | C B | 8 | -13.648 | 10.291 | 50.996 | 1.00 | 0.00 | H |
| ATOM | 831 | H5'2 | C B | 8 | -15.206 | 10.069 | 50.171 | 1.00 | 0.00 | H |
| ATOM | 832 | C1'  | T B | 9 | -11.708 | 18.133 | 48.558 | 1.00 | 0.00 | C |
| ATOM | 833 | N1   | T B | 9 | -10.788 | 17.081 | 48.052 | 1.00 | 0.00 | N |
| ATOM | 834 | C2   | T B | 9 | -9.443  | 17.239 | 48.316 | 1.00 | 0.00 | C |
| ATOM | 835 | O2   | T B | 9 | -9.001  | 18.192 | 48.934 | 1.00 | 0.00 | O |
| ATOM | 836 | N3   | T B | 9 | -8.624  | 16.238 | 47.829 | 1.00 | 0.00 | N |
| ATOM | 837 | C4   | T B | 9 | -9.021  | 15.125 | 47.119 | 1.00 | 0.00 | C |
| ATOM | 838 | O4   | T B | 9 | -8.192  | 14.294 | 46.730 | 1.00 | 0.00 | O |
| ATOM | 839 | C5   | T B | 9 | -10.446 | 15.045 | 46.893 | 1.00 | 0.00 | C |
| ATOM | 840 | C6   | T B | 9 | -11.273 | 16.003 | 47.354 | 1.00 | 0.00 | C |
| ATOM | 841 | C7   | T B | 9 | -10.921 | 13.848 | 46.126 | 1.00 | 0.00 | C |
| ATOM | 842 | C2'  | T B | 9 | -12.856 | 18.455 | 47.608 | 1.00 | 0.00 | C |
| ATOM | 843 | C3'  | T B | 9 | -13.997 | 18.740 | 48.573 | 1.00 | 0.00 | C |
| ATOM | 844 | O3'  | T B | 9 | -13.925 | 20.100 | 48.994 | 1.00 | 0.00 | O |

|      |     |      |     |    |         |        |        |      |      |   |
|------|-----|------|-----|----|---------|--------|--------|------|------|---|
| ATOM | 845 | C4'  | T B | 9  | -13.726 | 17.765 | 49.716 | 1.00 | 0.00 | C |
| ATOM | 846 | O4'  | T B | 9  | -12.266 | 17.673 | 49.774 | 1.00 | 0.00 | O |
| ATOM | 847 | C5'  | T B | 9  | -14.293 | 16.373 | 49.562 | 1.00 | 0.00 | C |
| ATOM | 848 | O5'  | T B | 9  | -14.217 | 15.965 | 48.172 | 1.00 | 0.00 | O |
| ATOM | 849 | O1P  | T B | 9  | -16.630 | 15.794 | 47.482 | 1.00 | 0.00 | O |
| ATOM | 850 | O2P  | T B | 9  | -14.893 | 14.397 | 46.330 | 1.00 | 0.00 | O |
| ATOM | 851 | P    | T B | 9  | -15.367 | 15.034 | 47.582 | 1.00 | 0.00 | P |
| ATOM | 852 | H3   | T B | 9  | -7.616  | 16.331 | 48.016 | 1.00 | 0.00 | H |
| ATOM | 853 | H6   | T B | 9  | -12.344 | 15.921 | 47.170 | 1.00 | 0.00 | H |
| ATOM | 854 | H1'  | T B | 9  | -11.121 | 19.026 | 48.776 | 1.00 | 0.00 | H |
| ATOM | 855 | H3'  | T B | 9  | -14.969 | 18.553 | 48.119 | 1.00 | 0.00 | H |
| ATOM | 856 | H4'  | T B | 9  | -14.161 | 18.204 | 50.616 | 1.00 | 0.00 | H |
| ATOM | 857 | H71  | T B | 9  | -11.336 | 14.169 | 45.170 | 1.00 | 0.00 | H |
| ATOM | 858 | H72  | T B | 9  | -10.085 | 13.171 | 45.950 | 1.00 | 0.00 | H |
| ATOM | 859 | H73  | T B | 9  | -11.692 | 13.331 | 46.699 | 1.00 | 0.00 | H |
| ATOM | 860 | H2'1 | T B | 9  | -13.093 | 17.621 | 46.949 | 1.00 | 0.00 | H |
| ATOM | 861 | H2'2 | T B | 9  | -12.642 | 19.319 | 46.979 | 1.00 | 0.00 | H |
| ATOM | 862 | H5'1 | T B | 9  | -13.721 | 15.682 | 50.181 | 1.00 | 0.00 | H |
| ATOM | 863 | H5'2 | T B | 9  | -15.331 | 16.373 | 49.889 | 1.00 | 0.00 | H |
| ATOM | 864 | C1'  | A B | 10 | -8.745  | 21.977 | 47.519 | 1.00 | 0.00 | C |
| ATOM | 865 | N1   | A B | 10 | -5.666  | 18.358 | 45.580 | 1.00 | 0.00 | N |
| ATOM | 866 | C2   | A B | 10 | -5.430  | 19.435 | 46.325 | 1.00 | 0.00 | C |
| ATOM | 867 | N3   | A B | 10 | -6.275  | 20.327 | 46.795 | 1.00 | 0.00 | N |
| ATOM | 868 | C4   | A B | 10 | -7.529  | 20.030 | 46.412 | 1.00 | 0.00 | C |
| ATOM | 869 | C5   | A B | 10 | -7.937  | 18.969 | 45.651 | 1.00 | 0.00 | C |
| ATOM | 870 | C6   | A B | 10 | -6.928  | 18.086 | 45.215 | 1.00 | 0.00 | C |
| ATOM | 871 | N6   | A B | 10 | -7.180  | 17.001 | 44.462 | 1.00 | 0.00 | N |
| ATOM | 872 | N7   | A B | 10 | -9.308  | 18.987 | 45.463 | 1.00 | 0.00 | N |
| ATOM | 873 | C8   | A B | 10 | -9.696  | 20.050 | 46.103 | 1.00 | 0.00 | C |
| ATOM | 874 | N9   | A B | 10 | -8.672  | 20.732 | 46.707 | 1.00 | 0.00 | N |
| ATOM | 875 | C2'  | A B | 10 | -9.768  | 22.982 | 47.008 | 1.00 | 0.00 | C |
| ATOM | 876 | C3'  | A B | 10 | -10.295 | 23.586 | 48.300 | 1.00 | 0.00 | C |
| ATOM | 877 | O3'  | A B | 10 | -9.423  | 24.634 | 48.717 | 1.00 | 0.00 | O |
| ATOM | 878 | C4'  | A B | 10 | -10.270 | 22.399 | 49.263 | 1.00 | 0.00 | C |
| ATOM | 879 | O4'  | A B | 10 | -9.113  | 21.611 | 48.836 | 1.00 | 0.00 | O |
| ATOM | 880 | C5'  | A B | 10 | -11.490 | 21.508 | 49.261 | 1.00 | 0.00 | C |
| ATOM | 881 | O5'  | A B | 10 | -12.008 | 21.389 | 47.911 | 1.00 | 0.00 | O |
| ATOM | 882 | O1P  | A B | 10 | -14.248 | 22.529 | 48.046 | 1.00 | 0.00 | O |
| ATOM | 883 | O2P  | A B | 10 | -13.858 | 20.726 | 46.345 | 1.00 | 0.00 | O |
| ATOM | 884 | P    | A B | 10 | -13.584 | 21.257 | 47.703 | 1.00 | 0.00 | P |
| ATOM | 885 | H2   | A B | 10 | -4.385  | 19.601 | 46.583 | 1.00 | 0.00 | H |
| ATOM | 886 | H8   | A B | 10 | -10.737 | 20.370 | 46.154 | 1.00 | 0.00 | H |
| ATOM | 887 | H1'  | A B | 10 | -7.750  | 22.418 | 47.558 | 1.00 | 0.00 | H |
| ATOM | 888 | H3'  | A B | 10 | -11.305 | 23.978 | 48.186 | 1.00 | 0.00 | H |
| ATOM | 889 | H4'  | A B | 10 | -10.159 | 22.808 | 50.267 | 1.00 | 0.00 | H |
| ATOM | 890 | H61  | A B | 10 | -6.406  | 16.387 | 44.172 | 1.00 | 0.00 | H |
| ATOM | 891 | H62  | A B | 10 | -8.145  | 16.785 | 44.176 | 1.00 | 0.00 | H |
| ATOM | 892 | H2'1 | A B | 10 | -10.567 | 22.508 | 46.438 | 1.00 | 0.00 | H |
| ATOM | 893 | H2'2 | A B | 10 | -9.317  | 23.744 | 46.370 | 1.00 | 0.00 | H |
| ATOM | 894 | H5'1 | A B | 10 | -11.214 | 20.522 | 49.636 | 1.00 | 0.00 | H |
| ATOM | 895 | H5'2 | A B | 10 | -12.250 | 21.939 | 49.910 | 1.00 | 0.00 | H |
| ATOM | 896 | C1'  | G B | 11 | -4.618  | 24.040 | 45.688 | 1.00 | 0.00 | C |
| ATOM | 897 | N1   | G B | 11 | -4.503  | 19.875 | 42.743 | 1.00 | 0.00 | N |
| ATOM | 898 | C2   | G B | 11 | -3.476  | 20.521 | 43.410 | 1.00 | 0.00 | C |

|      |     |      |     |    |        |        |        |      |      |   |
|------|-----|------|-----|----|--------|--------|--------|------|------|---|
| ATOM | 899 | N2   | G B | 11 | -2.256 | 19.986 | 43.271 | 1.00 | 0.00 | N |
| ATOM | 900 | N3   | G B | 11 | -3.653 | 21.611 | 44.155 | 1.00 | 0.00 | N |
| ATOM | 901 | C4   | G B | 11 | -4.949 | 22.017 | 44.177 | 1.00 | 0.00 | C |
| ATOM | 902 | C5   | G B | 11 | -6.036 | 21.440 | 43.542 | 1.00 | 0.00 | C |
| ATOM | 903 | C6   | G B | 11 | -5.851 | 20.281 | 42.754 | 1.00 | 0.00 | C |
| ATOM | 904 | O6   | G B | 11 | -6.683 | 19.632 | 42.119 | 1.00 | 0.00 | O |
| ATOM | 905 | N7   | G B | 11 | -7.197 | 22.166 | 43.817 | 1.00 | 0.00 | N |
| ATOM | 906 | C8   | G B | 11 | -6.787 | 23.135 | 44.595 | 1.00 | 0.00 | C |
| ATOM | 907 | N9   | G B | 11 | -5.433 | 23.112 | 44.858 | 1.00 | 0.00 | N |
| ATOM | 908 | C2'  | G B | 11 | -5.047 | 25.497 | 45.580 | 1.00 | 0.00 | C |
| ATOM | 909 | C3'  | G B | 11 | -4.809 | 26.003 | 46.994 | 1.00 | 0.00 | C |
| ATOM | 910 | O3'  | G B | 11 | -3.442 | 26.384 | 47.129 | 1.00 | 0.00 | O |
| ATOM | 911 | C4'  | G B | 11 | -5.158 | 24.790 | 47.853 | 1.00 | 0.00 | C |
| ATOM | 912 | O4'  | G B | 11 | -4.754 | 23.643 | 47.038 | 1.00 | 0.00 | O |
| ATOM | 913 | C5'  | G B | 11 | -6.612 | 24.629 | 48.228 | 1.00 | 0.00 | C |
| ATOM | 914 | O5'  | G B | 11 | -7.452 | 25.055 | 47.127 | 1.00 | 0.00 | O |
| ATOM | 915 | O1P  | G B | 11 | -8.621 | 27.088 | 48.039 | 1.00 | 0.00 | O |
| ATOM | 916 | O2P  | G B | 11 | -9.712 | 25.711 | 46.248 | 1.00 | 0.00 | O |
| ATOM | 917 | P    | G B | 11 | -8.848 | 25.754 | 47.453 | 1.00 | 0.00 | P |
| ATOM | 918 | H1   | G B | 11 | -4.261 | 19.034 | 42.198 | 1.00 | 0.00 | H |
| ATOM | 919 | H8   | G B | 11 | -7.456 | 23.894 | 44.999 | 1.00 | 0.00 | H |
| ATOM | 920 | H1'  | G B | 11 | -3.571 | 23.919 | 45.407 | 1.00 | 0.00 | H |
| ATOM | 921 | H21  | G B | 11 | -2.128 | 19.141 | 42.697 | 1.00 | 0.00 | H |
| ATOM | 922 | H3'  | G B | 11 | -5.446 | 26.853 | 47.237 | 1.00 | 0.00 | H |
| ATOM | 923 | H22  | G B | 11 | -1.448 | 20.421 | 43.739 | 1.00 | 0.00 | H |
| ATOM | 924 | H4'  | G B | 11 | -4.584 | 24.879 | 48.776 | 1.00 | 0.00 | H |
| ATOM | 925 | H2'1 | G B | 11 | -6.094 | 25.599 | 45.294 | 1.00 | 0.00 | H |
| ATOM | 926 | H2'2 | G B | 11 | -4.453 | 26.051 | 44.854 | 1.00 | 0.00 | H |
| ATOM | 927 | H5'1 | G B | 11 | -6.808 | 23.582 | 48.458 | 1.00 | 0.00 | H |
| ATOM | 928 | H5'2 | G B | 11 | -6.822 | 25.235 | 49.109 | 1.00 | 0.00 | H |
| ATOM | 929 | C1'  | G B | 12 | -0.676 | 24.217 | 42.694 | 1.00 | 0.00 | C |
| ATOM | 930 | N1   | G B | 12 | -3.500 | 21.167 | 39.734 | 1.00 | 0.00 | N |
| ATOM | 931 | C2   | G B | 12 | -2.154 | 21.101 | 40.051 | 1.00 | 0.00 | C |
| ATOM | 932 | N2   | G B | 12 | -1.469 | 20.088 | 39.505 | 1.00 | 0.00 | N |
| ATOM | 933 | N3   | G B | 12 | -1.542 | 21.973 | 40.849 | 1.00 | 0.00 | N |
| ATOM | 934 | C4   | G B | 12 | -2.386 | 22.936 | 41.305 | 1.00 | 0.00 | C |
| ATOM | 935 | C5   | G B | 12 | -3.736 | 23.084 | 41.041 | 1.00 | 0.00 | C |
| ATOM | 936 | C6   | G B | 12 | -4.388 | 22.156 | 40.198 | 1.00 | 0.00 | C |
| ATOM | 937 | O6   | G B | 12 | -5.568 | 22.121 | 39.847 | 1.00 | 0.00 | O |
| ATOM | 938 | N7   | G B | 12 | -4.238 | 24.206 | 41.705 | 1.00 | 0.00 | N |
| ATOM | 939 | C8   | G B | 12 | -3.201 | 24.689 | 42.338 | 1.00 | 0.00 | C |
| ATOM | 940 | N9   | G B | 12 | -2.038 | 23.972 | 42.144 | 1.00 | 0.00 | N |
| ATOM | 941 | C2'  | G B | 12 | -0.307 | 25.691 | 42.782 | 1.00 | 0.00 | C |
| ATOM | 942 | C3'  | G B | 12 | 0.522  | 25.736 | 44.057 | 1.00 | 0.00 | C |
| ATOM | 943 | O3'  | G B | 12 | 1.869  | 25.384 | 43.752 | 1.00 | 0.00 | O |
| ATOM | 944 | C4'  | G B | 12 | -0.161 | 24.694 | 44.942 | 1.00 | 0.00 | C |
| ATOM | 945 | O4'  | G B | 12 | -0.636 | 23.678 | 44.002 | 1.00 | 0.00 | O |
| ATOM | 946 | C5'  | G B | 12 | -1.332 | 25.176 | 45.764 | 1.00 | 0.00 | C |
| ATOM | 947 | O5'  | G B | 12 | -2.090 | 26.157 | 45.012 | 1.00 | 0.00 | O |
| ATOM | 948 | O1P  | G B | 12 | -1.758 | 28.279 | 46.324 | 1.00 | 0.00 | O |
| ATOM | 949 | O2P  | G B | 12 | -3.829 | 27.970 | 44.941 | 1.00 | 0.00 | O |
| ATOM | 950 | P    | G B | 12 | -2.784 | 27.359 | 45.799 | 1.00 | 0.00 | P |
| ATOM | 951 | H1   | G B | 12 | -3.879 | 20.437 | 39.112 | 1.00 | 0.00 | H |
| ATOM | 952 | H8   | G B | 12 | -3.249 | 25.580 | 42.965 | 1.00 | 0.00 | H |

|      |      |      |     |    |        |        |        |      |      |   |
|------|------|------|-----|----|--------|--------|--------|------|------|---|
| ATOM | 953  | H1'  | G B | 12 | 0.041  | 23.669 | 42.084 | 1.00 | 0.00 | H |
| ATOM | 954  | H21  | G B | 12 | -1.950 | 19.414 | 38.891 | 1.00 | 0.00 | H |
| ATOM | 955  | H3'  | G B | 12 | 0.502  | 26.720 | 44.523 | 1.00 | 0.00 | H |
| ATOM | 956  | H22  | G B | 12 | -0.463 | 19.985 | 39.698 | 1.00 | 0.00 | H |
| ATOM | 957  | H4'  | G B | 12 | 0.595  | 24.317 | 45.629 | 1.00 | 0.00 | H |
| ATOM | 958  | H2'1 | G B | 12 | -1.184 | 26.334 | 42.856 | 1.00 | 0.00 | H |
| ATOM | 959  | H2'2 | G B | 12 | 0.272  | 26.025 | 41.921 | 1.00 | 0.00 | H |
| ATOM | 960  | H5'1 | G B | 12 | -1.970 | 24.328 | 46.010 | 1.00 | 0.00 | H |
| ATOM | 961  | H5'2 | G B | 12 | -0.961 | 25.625 | 46.686 | 1.00 | 0.00 | H |
| ATOM | 962  | C1'  | T B | 13 | 1.862  | 23.082 | 38.599 | 1.00 | 0.00 | C |
| ATOM | 963  | N1   | T B | 13 | 0.474  | 23.606 | 38.498 | 1.00 | 0.00 | N |
| ATOM | 964  | C2   | T B | 13 | -0.417 | 22.888 | 37.724 | 1.00 | 0.00 | C |
| ATOM | 965  | O2   | T B | 13 | -0.105 | 21.866 | 37.138 | 1.00 | 0.00 | O |
| ATOM | 966  | N3   | T B | 13 | -1.695 | 23.411 | 37.659 | 1.00 | 0.00 | N |
| ATOM | 967  | C4   | T B | 13 | -2.148 | 24.557 | 38.278 | 1.00 | 0.00 | C |
| ATOM | 968  | O4   | T B | 13 | -3.319 | 24.929 | 38.143 | 1.00 | 0.00 | O |
| ATOM | 969  | C5   | T B | 13 | -1.146 | 25.238 | 39.065 | 1.00 | 0.00 | C |
| ATOM | 970  | C6   | T B | 13 | 0.110  | 24.757 | 39.153 | 1.00 | 0.00 | C |
| ATOM | 971  | C7   | T B | 13 | -1.595 | 26.489 | 39.760 | 1.00 | 0.00 | C |
| ATOM | 972  | C2'  | T B | 13 | 2.930  | 24.169 | 38.616 | 1.00 | 0.00 | C |
| ATOM | 973  | C3'  | T B | 13 | 3.963  | 23.584 | 39.566 | 1.00 | 0.00 | C |
| ATOM | 974  | O3'  | T B | 13 | 4.823  | 22.709 | 38.840 | 1.00 | 0.00 | O |
| ATOM | 975  | C4'  | T B | 13 | 3.105  | 22.838 | 40.584 | 1.00 | 0.00 | C |
| ATOM | 976  | O4'  | T B | 13 | 1.962  | 22.355 | 39.808 | 1.00 | 0.00 | O |
| ATOM | 977  | C5'  | T B | 13 | 2.589  | 23.648 | 41.751 | 1.00 | 0.00 | C |
| ATOM | 978  | O5'  | T B | 13 | 2.262  | 24.990 | 41.309 | 1.00 | 0.00 | O |
| ATOM | 979  | O1P  | T B | 13 | 3.935  | 26.426 | 42.519 | 1.00 | 0.00 | O |
| ATOM | 980  | O2P  | T B | 13 | 1.713  | 27.381 | 41.850 | 1.00 | 0.00 | O |
| ATOM | 981  | P    | T B | 13 | 2.490  | 26.206 | 42.313 | 1.00 | 0.00 | P |
| ATOM | 982  | H3   | T B | 13 | -2.379 | 22.891 | 37.090 | 1.00 | 0.00 | H |
| ATOM | 983  | H6   | T B | 13 | 0.848  | 25.289 | 39.752 | 1.00 | 0.00 | H |
| ATOM | 984  | H1'  | T B | 13 | 2.026  | 22.387 | 37.776 | 1.00 | 0.00 | H |
| ATOM | 985  | H3'  | T B | 13 | 4.560  | 24.359 | 40.046 | 1.00 | 0.00 | H |
| ATOM | 986  | H4'  | T B | 13 | 3.719  | 22.031 | 40.986 | 1.00 | 0.00 | H |
| ATOM | 987  | H71  | T B | 13 | -1.071 | 27.347 | 39.340 | 1.00 | 0.00 | H |
| ATOM | 988  | H72  | T B | 13 | -2.670 | 26.617 | 39.621 | 1.00 | 0.00 | H |
| ATOM | 989  | H73  | T B | 13 | -1.374 | 26.414 | 40.825 | 1.00 | 0.00 | H |
| ATOM | 990  | H2'1 | T B | 13 | 2.545  | 25.119 | 38.984 | 1.00 | 0.00 | H |
| ATOM | 991  | H2'2 | T B | 13 | 3.354  | 24.348 | 37.628 | 1.00 | 0.00 | H |
| ATOM | 992  | H5'1 | T B | 13 | 1.700  | 23.166 | 42.157 | 1.00 | 0.00 | H |
| ATOM | 993  | H5'2 | T B | 13 | 3.357  | 23.693 | 42.522 | 1.00 | 0.00 | H |
| ATOM | 994  | C1'  | G B | 14 | 2.231  | 21.693 | 33.847 | 1.00 | 0.00 | C |
| ATOM | 995  | N1   | G B | 14 | -2.442 | 23.706 | 33.470 | 1.00 | 0.00 | N |
| ATOM | 996  | C2   | G B | 14 | -1.934 | 22.535 | 32.936 | 1.00 | 0.00 | C |
| ATOM | 997  | N2   | G B | 14 | -2.782 | 21.804 | 32.204 | 1.00 | 0.00 | N |
| ATOM | 998  | N3   | G B | 14 | -0.680 | 22.126 | 33.120 | 1.00 | 0.00 | N |
| ATOM | 999  | C4   | G B | 14 | 0.040  | 22.992 | 33.882 | 1.00 | 0.00 | C |
| ATOM | 1000 | C5   | G B | 14 | -0.380 | 24.182 | 34.451 | 1.00 | 0.00 | C |
| ATOM | 1001 | C6   | G B | 14 | -1.713 | 24.616 | 34.260 | 1.00 | 0.00 | C |
| ATOM | 1002 | O6   | G B | 14 | -2.266 | 25.633 | 34.680 | 1.00 | 0.00 | O |
| ATOM | 1003 | N7   | G B | 14 | 0.668  | 24.776 | 35.159 | 1.00 | 0.00 | N |
| ATOM | 1004 | C8   | G B | 14 | 1.665  | 23.944 | 35.001 | 1.00 | 0.00 | C |
| ATOM | 1005 | N9   | G B | 14 | 1.362  | 22.836 | 34.236 | 1.00 | 0.00 | N |
| ATOM | 1006 | C2'  | G B | 14 | 3.668  | 22.090 | 33.541 | 1.00 | 0.00 | C |

|      |      |      |     |    |        |        |        |      |      |   |
|------|------|------|-----|----|--------|--------|--------|------|------|---|
| ATOM | 1007 | C3'  | G B | 14 | 4.447  | 20.895 | 34.068 | 1.00 | 0.00 | C |
| ATOM | 1008 | O3'  | G B | 14 | 4.482  | 19.882 | 33.066 | 1.00 | 0.00 | O |
| ATOM | 1009 | C4'  | G B | 14 | 3.634  | 20.473 | 35.290 | 1.00 | 0.00 | C |
| ATOM | 1010 | O4'  | G B | 14 | 2.251  | 20.779 | 34.926 | 1.00 | 0.00 | O |
| ATOM | 1011 | C5'  | G B | 14 | 3.960  | 21.172 | 36.588 | 1.00 | 0.00 | C |
| ATOM | 1012 | O5'  | G B | 14 | 4.285  | 22.561 | 36.329 | 1.00 | 0.00 | O |
| ATOM | 1013 | O1P  | G B | 14 | 6.718  | 22.716 | 36.956 | 1.00 | 0.00 | O |
| ATOM | 1014 | O2P  | G B | 14 | 5.252  | 24.746 | 37.104 | 1.00 | 0.00 | O |
| ATOM | 1015 | P    | G B | 14 | 5.383  | 23.275 | 37.240 | 1.00 | 0.00 | P |
| ATOM | 1016 | H1   | G B | 14 | -3.430 | 23.929 | 33.274 | 1.00 | 0.00 | H |
| ATOM | 1017 | H8   | G B | 14 | 2.651  | 24.112 | 35.437 | 1.00 | 0.00 | H |
| ATOM | 1018 | H1'  | G B | 14 | 1.774  | 21.192 | 32.993 | 1.00 | 0.00 | H |
| ATOM | 1019 | H21  | G B | 14 | -3.753 | 22.126 | 32.069 | 1.00 | 0.00 | H |
| ATOM | 1020 | H3'  | G B | 14 | 5.466  | 21.163 | 34.347 | 1.00 | 0.00 | H |
| ATOM | 1021 | H22  | G B | 14 | -2.466 | 20.923 | 31.775 | 1.00 | 0.00 | H |
| ATOM | 1022 | H4'  | G B | 14 | 3.810  | 19.406 | 35.433 | 1.00 | 0.00 | H |
| ATOM | 1023 | H2'1 | G B | 14 | 3.960  | 23.009 | 34.049 | 1.00 | 0.00 | H |
| ATOM | 1024 | H2'2 | G B | 14 | 3.840  | 22.237 | 32.475 | 1.00 | 0.00 | H |
| ATOM | 1025 | H5'1 | G B | 14 | 3.098  | 21.114 | 37.252 | 1.00 | 0.00 | H |
| ATOM | 1026 | H5'2 | G B | 14 | 4.809  | 20.676 | 37.058 | 1.00 | 0.00 | H |
| ATOM | 1027 | C1'  | C B | 15 | 0.588  | 21.250 | 29.195 | 1.00 | 0.00 | C |
| ATOM | 1028 | N1   | C B | 15 | 0.564  | 22.568 | 29.884 | 1.00 | 0.00 | N |
| ATOM | 1029 | C2   | C B | 15 | -0.633 | 23.281 | 29.889 | 1.00 | 0.00 | C |
| ATOM | 1030 | O2   | C B | 15 | -1.621 | 22.791 | 29.325 | 1.00 | 0.00 | O |
| ATOM | 1031 | N3   | C B | 15 | -0.677 | 24.484 | 30.512 | 1.00 | 0.00 | N |
| ATOM | 1032 | C4   | C B | 15 | 0.408  | 24.987 | 31.112 | 1.00 | 0.00 | C |
| ATOM | 1033 | N4   | C B | 15 | 0.309  | 26.166 | 31.709 | 1.00 | 0.00 | N |
| ATOM | 1034 | C5   | C B | 15 | 1.657  | 24.279 | 31.120 | 1.00 | 0.00 | C |
| ATOM | 1035 | C6   | C B | 15 | 1.674  | 23.068 | 30.491 | 1.00 | 0.00 | C |
| ATOM | 1036 | C2'  | C B | 15 | 1.886  | 20.971 | 28.450 | 1.00 | 0.00 | C |
| ATOM | 1037 | C3'  | C B | 15 | 2.054  | 19.473 | 28.655 | 1.00 | 0.00 | C |
| ATOM | 1038 | O3'  | C B | 15 | 1.300  | 18.777 | 27.664 | 1.00 | 0.00 | O |
| ATOM | 1039 | C4'  | C B | 15 | 1.497  | 19.257 | 30.060 | 1.00 | 0.00 | C |
| ATOM | 1040 | O4'  | C B | 15 | 0.425  | 20.246 | 30.180 | 1.00 | 0.00 | O |
| ATOM | 1041 | C5'  | C B | 15 | 2.465  | 19.455 | 31.204 | 1.00 | 0.00 | C |
| ATOM | 1042 | O5'  | C B | 15 | 3.371  | 20.543 | 30.896 | 1.00 | 0.00 | O |
| ATOM | 1043 | O1P  | C B | 15 | 5.607  | 19.404 | 30.699 | 1.00 | 0.00 | O |
| ATOM | 1044 | O2P  | C B | 15 | 5.484  | 21.815 | 31.384 | 1.00 | 0.00 | O |
| ATOM | 1045 | P    | C B | 15 | 4.874  | 20.463 | 31.422 | 1.00 | 0.00 | P |
| ATOM | 1046 | H5   | C B | 15 | 2.543  | 24.689 | 31.603 | 1.00 | 0.00 | H |
| ATOM | 1047 | H6   | C B | 15 | 2.598  | 22.489 | 30.476 | 1.00 | 0.00 | H |
| ATOM | 1048 | H1'  | C B | 15 | -0.268 | 21.201 | 28.521 | 1.00 | 0.00 | H |
| ATOM | 1049 | H3'  | C B | 15 | 3.098  | 19.167 | 28.595 | 1.00 | 0.00 | H |
| ATOM | 1050 | H4'  | C B | 15 | 1.136  | 18.230 | 30.104 | 1.00 | 0.00 | H |
| ATOM | 1051 | H41  | C B | 15 | 1.128  | 26.576 | 32.182 | 1.00 | 0.00 | H |
| ATOM | 1052 | H42  | C B | 15 | -0.588 | 26.674 | 31.700 | 1.00 | 0.00 | H |
| ATOM | 1053 | H2'1 | C B | 15 | 2.728  | 21.524 | 28.864 | 1.00 | 0.00 | H |
| ATOM | 1054 | H2'2 | C B | 15 | 1.818  | 21.222 | 27.391 | 1.00 | 0.00 | H |
| ATOM | 1055 | H5'1 | C B | 15 | 1.906  | 19.685 | 32.111 | 1.00 | 0.00 | H |
| ATOM | 1056 | H5'2 | C B | 15 | 3.032  | 18.536 | 31.355 | 1.00 | 0.00 | H |
| ATOM | 1057 | C1'  | G B | 16 | -2.203 | 22.562 | 25.322 | 1.00 | 0.00 | C |
| ATOM | 1058 | N1   | G B | 16 | -2.156 | 27.145 | 27.563 | 1.00 | 0.00 | N |
| ATOM | 1059 | C2   | G B | 16 | -3.197 | 26.461 | 26.960 | 1.00 | 0.00 | C |
| ATOM | 1060 | N2   | G B | 16 | -4.384 | 27.082 | 26.954 | 1.00 | 0.00 | N |



|      |      |      |     |    |        |        |        |      |      |   |
|------|------|------|-----|----|--------|--------|--------|------|------|---|
| ATOM | 1061 | N3   | G B | 16 | -3.066 | 25.255 | 26.411 | 1.00 | 0.00 | N |
| ATOM | 1062 | C4   | G B | 16 | -1.796 | 24.781 | 26.503 | 1.00 | 0.00 | C |
| ATOM | 1063 | C5   | G B | 16 | -0.695 | 25.392 | 27.080 | 1.00 | 0.00 | C |
| ATOM | 1064 | C6   | G B | 16 | -0.835 | 26.672 | 27.667 | 1.00 | 0.00 | C |
| ATOM | 1065 | O6   | G B | 16 | 0.017  | 27.368 | 28.222 | 1.00 | 0.00 | O |
| ATOM | 1066 | N7   | G B | 16 | 0.429  | 24.572 | 26.964 | 1.00 | 0.00 | N |
| ATOM | 1067 | C8   | G B | 16 | -0.016 | 23.512 | 26.338 | 1.00 | 0.00 | C |
| ATOM | 1068 | N9   | G B | 16 | -1.359 | 23.566 | 26.023 | 1.00 | 0.00 | N |
| ATOM | 1069 | C2'  | G B | 16 | -1.486 | 21.844 | 24.186 | 1.00 | 0.00 | C |
| ATOM | 1070 | C3'  | G B | 16 | -2.072 | 20.444 | 24.275 | 1.00 | 0.00 | C |
| ATOM | 1071 | O3'  | G B | 16 | -3.305 | 20.407 | 23.561 | 1.00 | 0.00 | O |
| ATOM | 1072 | C4'  | G B | 16 | -2.269 | 20.253 | 25.778 | 1.00 | 0.00 | C |
| ATOM | 1073 | O4'  | G B | 16 | -2.598 | 21.591 | 26.271 | 1.00 | 0.00 | O |
| ATOM | 1074 | C5'  | G B | 16 | -1.080 | 19.733 | 26.550 | 1.00 | 0.00 | C |
| ATOM | 1075 | O5'  | G B | 16 | 0.142  | 20.287 | 26.001 | 1.00 | 0.00 | O |
| ATOM | 1076 | O1P  | G B | 16 | 1.320  | 18.277 | 25.051 | 1.00 | 0.00 | O |
| ATOM | 1077 | O2P  | G B | 16 | 2.647  | 20.262 | 25.818 | 1.00 | 0.00 | O |
| ATOM | 1078 | P    | G B | 16 | 1.462  | 19.391 | 26.006 | 1.00 | 0.00 | P |
| ATOM | 1079 | H1   | G B | 16 | -2.364 | 28.071 | 27.964 | 1.00 | 0.00 | H |
| ATOM | 1080 | H8   | G B | 16 | 0.618  | 22.662 | 26.087 | 1.00 | 0.00 | H |
| ATOM | 1081 | H1'  | G B | 16 | -3.102 | 23.064 | 24.961 | 1.00 | 0.00 | H |
| ATOM | 1082 | H21  | G B | 16 | -4.479 | 28.014 | 27.383 | 1.00 | 0.00 | H |
| ATOM | 1083 | H3'  | G B | 16 | -1.397 | 19.692 | 23.868 | 1.00 | 0.00 | H |
| ATOM | 1084 | H22  | G B | 16 | -5.198 | 26.627 | 26.519 | 1.00 | 0.00 | H |
| ATOM | 1085 | H4'  | G B | 16 | -3.085 | 19.541 | 25.902 | 1.00 | 0.00 | H |
| ATOM | 1086 | H2'1 | G B | 16 | -0.405 | 21.831 | 24.323 | 1.00 | 0.00 | H |
| ATOM | 1087 | H2'2 | G B | 16 | -1.689 | 22.299 | 23.216 | 1.00 | 0.00 | H |
| ATOM | 1088 | H5'1 | G B | 16 | -1.178 | 20.021 | 27.596 | 1.00 | 0.00 | H |
| ATOM | 1089 | H5'2 | G B | 16 | -1.056 | 18.645 | 26.478 | 1.00 | 0.00 | H |
| ATOM | 1090 | C1'  | G B | 17 | -4.828 | 25.774 | 22.616 | 1.00 | 0.00 | C |
| ATOM | 1091 | N1   | G B | 17 | -1.842 | 29.241 | 24.872 | 1.00 | 0.00 | N |
| ATOM | 1092 | C2   | G B | 17 | -3.203 | 29.270 | 24.620 | 1.00 | 0.00 | C |
| ATOM | 1093 | N2   | G B | 17 | -3.853 | 30.369 | 25.021 | 1.00 | 0.00 | N |
| ATOM | 1094 | N3   | G B | 17 | -3.860 | 28.281 | 24.018 | 1.00 | 0.00 | N |
| ATOM | 1095 | C4   | G B | 17 | -3.042 | 27.252 | 23.674 | 1.00 | 0.00 | C |
| ATOM | 1096 | C5   | G B | 17 | -1.679 | 27.137 | 23.881 | 1.00 | 0.00 | C |
| ATOM | 1097 | C6   | G B | 17 | -0.980 | 28.184 | 24.524 | 1.00 | 0.00 | C |
| ATOM | 1098 | O6   | G B | 17 | 0.218  | 28.267 | 24.794 | 1.00 | 0.00 | O |
| ATOM | 1099 | N7   | G B | 17 | -1.214 | 25.921 | 23.378 | 1.00 | 0.00 | N |
| ATOM | 1100 | C8   | G B | 17 | -2.286 | 25.347 | 22.896 | 1.00 | 0.00 | C |
| ATOM | 1101 | N9   | G B | 17 | -3.437 | 26.095 | 23.037 | 1.00 | 0.00 | N |
| ATOM | 1102 | C2'  | G B | 17 | -4.910 | 25.039 | 21.285 | 1.00 | 0.00 | C |
| ATOM | 1103 | C3'  | G B | 17 | -6.086 | 24.101 | 21.513 | 1.00 | 0.00 | C |
| ATOM | 1104 | O3'  | G B | 17 | -7.300 | 24.796 | 21.239 | 1.00 | 0.00 | O |
| ATOM | 1105 | C4'  | G B | 17 | -5.949 | 23.738 | 22.990 | 1.00 | 0.00 | C |
| ATOM | 1106 | O4'  | G B | 17 | -5.399 | 24.945 | 23.608 | 1.00 | 0.00 | O |
| ATOM | 1107 | C5'  | G B | 17 | -5.043 | 22.574 | 23.314 | 1.00 | 0.00 | C |
| ATOM | 1108 | O5'  | G B | 17 | -3.904 | 22.574 | 22.417 | 1.00 | 0.00 | O |
| ATOM | 1109 | O1P  | G B | 17 | -4.227 | 20.474 | 21.067 | 1.00 | 0.00 | O |
| ATOM | 1110 | O2P  | G B | 17 | -1.920 | 21.392 | 21.426 | 1.00 | 0.00 | O |
| ATOM | 1111 | P    | G B | 17 | -3.286 | 21.176 | 21.961 | 1.00 | 0.00 | P |
| ATOM | 1112 | H1   | G B | 17 | -1.430 | 30.057 | 25.351 | 1.00 | 0.00 | H |
| ATOM | 1113 | H8   | G B | 17 | -2.273 | 24.366 | 22.423 | 1.00 | 0.00 | H |
| ATOM | 1114 | H1'  | G B | 17 | -5.398 | 26.702 | 22.585 | 1.00 | 0.00 | H |

|      |      |      |     |    |        |        |        |      |      |   |
|------|------|------|-----|----|--------|--------|--------|------|------|---|
| ATOM | 1115 | H21  | G B | 17 | -3.339 | 31.129 | 25.490 | 1.00 | 0.00 | H |
| ATOM | 1116 | H3'  | G B | 17 | -6.028 | 23.213 | 20.883 | 1.00 | 0.00 | H |
| ATOM | 1117 | H22  | G B | 17 | -4.867 | 30.453 | 24.861 | 1.00 | 0.00 | H |
| ATOM | 1118 | H4'  | G B | 17 | -6.947 | 23.492 | 23.350 | 1.00 | 0.00 | H |
| ATOM | 1119 | H2'1 | G B | 17 | -3.999 | 24.485 | 21.061 | 1.00 | 0.00 | H |
| ATOM | 1120 | H2'2 | G B | 17 | -5.097 | 25.714 | 20.450 | 1.00 | 0.00 | H |
| ATOM | 1121 | H5'1 | G B | 17 | -4.699 | 22.663 | 24.345 | 1.00 | 0.00 | H |
| ATOM | 1122 | H5'2 | G B | 17 | -5.600 | 21.644 | 23.202 | 1.00 | 0.00 | H |
| ATOM | 1123 | C1'  | C B | 18 | -6.032 | 30.307 | 21.024 | 1.00 | 0.00 | C |
| ATOM | 1124 | N1   | C B | 18 | -4.618 | 29.840 | 20.984 | 1.00 | 0.00 | N |
| ATOM | 1125 | C2   | C B | 18 | -3.645 | 30.659 | 21.554 | 1.00 | 0.00 | C |
| ATOM | 1126 | O2   | C B | 18 | -3.991 | 31.731 | 22.066 | 1.00 | 0.00 | O |
| ATOM | 1127 | N3   | C B | 18 | -2.353 | 30.252 | 21.527 | 1.00 | 0.00 | N |
| ATOM | 1128 | C4   | C B | 18 | -2.010 | 29.086 | 20.964 | 1.00 | 0.00 | C |
| ATOM | 1129 | N4   | C B | 18 | -0.732 | 28.737 | 20.968 | 1.00 | 0.00 | N |
| ATOM | 1130 | C5   | C B | 18 | -2.989 | 28.227 | 20.369 | 1.00 | 0.00 | C |
| ATOM | 1131 | C6   | C B | 18 | -4.283 | 28.655 | 20.410 | 1.00 | 0.00 | C |
| ATOM | 1132 | C2'  | C B | 18 | -6.823 | 29.977 | 19.766 | 1.00 | 0.00 | C |
| ATOM | 1133 | C3'  | C B | 18 | -8.205 | 29.683 | 20.328 | 1.00 | 0.00 | C |
| ATOM | 1134 | O3'  | C B | 18 | -8.914 | 30.910 | 20.490 | 1.00 | 0.00 | O |
| ATOM | 1135 | C4'  | C B | 18 | -7.892 | 29.017 | 21.666 | 1.00 | 0.00 | C |
| ATOM | 1136 | O4'  | C B | 18 | -6.663 | 29.670 | 22.118 | 1.00 | 0.00 | O |
| ATOM | 1137 | C5'  | C B | 18 | -7.662 | 27.524 | 21.635 | 1.00 | 0.00 | C |
| ATOM | 1138 | O5'  | C B | 18 | -6.964 | 27.162 | 20.416 | 1.00 | 0.00 | O |
| ATOM | 1139 | O1P  | C B | 18 | -8.655 | 25.777 | 19.166 | 1.00 | 0.00 | O |
| ATOM | 1140 | O2P  | C B | 18 | -6.202 | 25.402 | 18.790 | 1.00 | 0.00 | O |
| ATOM | 1141 | P    | C B | 18 | -7.291 | 25.759 | 19.733 | 1.00 | 0.00 | P |
| ATOM | 1142 | H5   | C B | 18 | -2.714 | 27.279 | 19.907 | 1.00 | 0.00 | H |
| ATOM | 1143 | H6   | C B | 18 | -5.064 | 28.034 | 19.972 | 1.00 | 0.00 | H |
| ATOM | 1144 | H1'  | C B | 18 | -6.030 | 31.380 | 21.215 | 1.00 | 0.00 | H |
| ATOM | 1145 | H3'  | C B | 18 | -8.776 | 29.018 | 19.681 | 1.00 | 0.00 | H |
| ATOM | 1146 | H4'  | C B | 18 | -8.742 | 29.207 | 22.322 | 1.00 | 0.00 | H |
| ATOM | 1147 | H41  | C B | 18 | -0.441 | 27.844 | 20.543 | 1.00 | 0.00 | H |
| ATOM | 1148 | H42  | C B | 18 | -0.030 | 29.357 | 21.397 | 1.00 | 0.00 | H |
| ATOM | 1149 | H2'1 | C B | 18 | -6.419 | 29.115 | 19.237 | 1.00 | 0.00 | H |
| ATOM | 1150 | H2'2 | C B | 18 | -6.848 | 30.810 | 19.063 | 1.00 | 0.00 | H |
| ATOM | 1151 | H5'1 | C B | 18 | -7.065 | 27.235 | 22.500 | 1.00 | 0.00 | H |
| ATOM | 1152 | H5'2 | C B | 18 | -8.622 | 27.012 | 21.675 | 1.00 | 0.00 | H |
| ATOM | 1153 | C1'  | C B | 19 | -5.102 | 35.076 | 20.065 | 1.00 | 0.00 | C |
| ATOM | 1154 | N1   | C B | 19 | -4.199 | 34.011 | 19.551 | 1.00 | 0.00 | N |
| ATOM | 1155 | C2   | C B | 19 | -2.833 | 34.136 | 19.800 | 1.00 | 0.00 | C |
| ATOM | 1156 | O2   | C B | 19 | -2.429 | 35.120 | 20.434 | 1.00 | 0.00 | O |
| ATOM | 1157 | N3   | C B | 19 | -1.995 | 33.176 | 19.340 | 1.00 | 0.00 | N |
| ATOM | 1158 | C4   | C B | 19 | -2.463 | 32.123 | 18.657 | 1.00 | 0.00 | C |
| ATOM | 1159 | N4   | C B | 19 | -1.600 | 31.215 | 18.232 | 1.00 | 0.00 | N |
| ATOM | 1160 | C5   | C B | 19 | -3.860 | 31.972 | 18.386 | 1.00 | 0.00 | C |
| ATOM | 1161 | C6   | C B | 19 | -4.685 | 32.948 | 18.859 | 1.00 | 0.00 | C |
| ATOM | 1162 | C2'  | C B | 19 | -6.248 | 35.415 | 19.123 | 1.00 | 0.00 | C |
| ATOM | 1163 | C3'  | C B | 19 | -7.380 | 35.714 | 20.096 | 1.00 | 0.00 | C |
| ATOM | 1164 | O3'  | C B | 19 | -7.286 | 37.071 | 20.521 | 1.00 | 0.00 | O |
| ATOM | 1165 | C4'  | C B | 19 | -7.115 | 34.732 | 21.235 | 1.00 | 0.00 | C |
| ATOM | 1166 | O4'  | C B | 19 | -5.657 | 34.618 | 21.283 | 1.00 | 0.00 | O |
| ATOM | 1167 | C5'  | C B | 19 | -7.702 | 33.348 | 21.079 | 1.00 | 0.00 | C |
| ATOM | 1168 | O5'  | C B | 19 | -7.641 | 32.943 | 19.688 | 1.00 | 0.00 | O |

|      |      |      |     |    |         |        |        |      |      |   |
|------|------|------|-----|----|---------|--------|--------|------|------|---|
| ATOM | 1169 | O1P  | C B | 19 | -10.061 | 32.808 | 19.013 | 1.00 | 0.00 | O |
| ATOM | 1170 | O2P  | C B | 19 | -8.351  | 31.391 | 17.845 | 1.00 | 0.00 | O |
| ATOM | 1171 | P    | C B | 19 | -8.809  | 32.031 | 19.102 | 1.00 | 0.00 | P |
| ATOM | 1172 | H5   | C B | 19 | -4.246  | 31.118 | 17.829 | 1.00 | 0.00 | H |
| ATOM | 1173 | H6   | C B | 19 | -5.758  | 32.874 | 18.679 | 1.00 | 0.00 | H |
| ATOM | 1174 | H1'  | C B | 19 | -4.499  | 35.958 | 20.282 | 1.00 | 0.00 | H |
| ATOM | 1175 | H3'  | C B | 19 | -8.358  | 35.541 | 19.647 | 1.00 | 0.00 | H |
| ATOM | 1176 | H4'  | C B | 19 | -7.539  | 35.173 | 22.138 | 1.00 | 0.00 | H |
| ATOM | 1177 | H41  | C B | 19 | -1.931  | 30.394 | 17.705 | 1.00 | 0.00 | H |
| ATOM | 1178 | H42  | C B | 19 | -0.593  | 31.328 | 18.428 | 1.00 | 0.00 | H |
| ATOM | 1179 | H2'1 | C B | 19 | -6.501  | 34.587 | 18.463 | 1.00 | 0.00 | H |
| ATOM | 1180 | H2'2 | C B | 19 | -6.026  | 36.279 | 18.496 | 1.00 | 0.00 | H |
| ATOM | 1181 | H5'1 | C B | 19 | -7.137  | 32.648 | 21.693 | 1.00 | 0.00 | H |
| ATOM | 1182 | H5'2 | C B | 19 | -8.739  | 33.361 | 21.413 | 1.00 | 0.00 | H |
| ATOM | 1183 | C1'  | T B | 20 | -2.162  | 38.919 | 19.022 | 1.00 | 0.00 | C |
| ATOM | 1184 | N1   | T B | 20 | -2.086  | 37.677 | 18.209 | 1.00 | 0.00 | N |
| ATOM | 1185 | C2   | T B | 20 | -0.837  | 37.120 | 18.025 | 1.00 | 0.00 | C |
| ATOM | 1186 | O2   | T B | 20 | 0.177   | 37.604 | 18.497 | 1.00 | 0.00 | O |
| ATOM | 1187 | N3   | T B | 20 | -0.813  | 35.967 | 17.263 | 1.00 | 0.00 | N |
| ATOM | 1188 | C4   | T B | 20 | -1.895  | 35.341 | 16.686 | 1.00 | 0.00 | C |
| ATOM | 1189 | O4   | T B | 20 | -1.748  | 34.308 | 16.020 | 1.00 | 0.00 | O |
| ATOM | 1190 | C5   | T B | 20 | -3.157  | 35.995 | 16.933 | 1.00 | 0.00 | C |
| ATOM | 1191 | C6   | T B | 20 | -3.220  | 37.121 | 17.671 | 1.00 | 0.00 | C |
| ATOM | 1192 | C7   | T B | 20 | -4.364  | 35.347 | 16.323 | 1.00 | 0.00 | C |
| ATOM | 1193 | C2'  | T B | 20 | -3.184  | 39.927 | 18.509 | 1.00 | 0.00 | C |
| ATOM | 1194 | C3'  | T B | 20 | -3.714  | 40.527 | 19.802 | 1.00 | 0.00 | C |
| ATOM | 1195 | O3'  | T B | 20 | -2.846  | 41.577 | 20.223 | 1.00 | 0.00 | O |
| ATOM | 1196 | C4'  | T B | 20 | -3.693  | 39.340 | 20.762 | 1.00 | 0.00 | C |
| ATOM | 1197 | O4'  | T B | 20 | -2.535  | 38.553 | 20.337 | 1.00 | 0.00 | O |
| ATOM | 1198 | C5'  | T B | 20 | -4.913  | 38.447 | 20.754 | 1.00 | 0.00 | C |
| ATOM | 1199 | O5'  | T B | 20 | -5.426  | 38.332 | 19.402 | 1.00 | 0.00 | O |
| ATOM | 1200 | O1P  | T B | 20 | -7.666  | 39.472 | 19.531 | 1.00 | 0.00 | O |
| ATOM | 1201 | O2P  | T B | 20 | -7.270  | 37.671 | 17.829 | 1.00 | 0.00 | O |
| ATOM | 1202 | P    | T B | 20 | -7.000  | 38.199 | 19.188 | 1.00 | 0.00 | P |
| ATOM | 1203 | H3   | T B | 20 | 0.108   | 35.531 | 17.113 | 1.00 | 0.00 | H |
| ATOM | 1204 | H6   | T B | 20 | -4.185  | 37.597 | 17.844 | 1.00 | 0.00 | H |
| ATOM | 1205 | H1'  | T B | 20 | -1.167  | 39.361 | 19.067 | 1.00 | 0.00 | H |
| ATOM | 1206 | H3'  | T B | 20 | -4.724  | 40.920 | 19.684 | 1.00 | 0.00 | H |
| ATOM | 1207 | H4'  | T B | 20 | -3.587  | 39.747 | 21.768 | 1.00 | 0.00 | H |
| ATOM | 1208 | H3T  | T B | 20 | -2.668  | 42.249 | 19.562 | 1.00 | 0.00 | H |
| ATOM | 1209 | H71  | T B | 20 | -4.789  | 36.007 | 15.566 | 1.00 | 0.00 | H |
| ATOM | 1210 | H72  | T B | 20 | -4.075  | 34.402 | 15.861 | 1.00 | 0.00 | H |
| ATOM | 1211 | H73  | T B | 20 | -5.108  | 35.158 | 17.098 | 1.00 | 0.00 | H |
| ATOM | 1212 | H2'1 | T B | 20 | -3.979  | 39.454 | 17.936 | 1.00 | 0.00 | H |
| ATOM | 1213 | H2'2 | T B | 20 | -2.730  | 40.689 | 17.875 | 1.00 | 0.00 | H |
| ATOM | 1214 | H5'1 | T B | 20 | -4.638  | 37.462 | 21.129 | 1.00 | 0.00 | H |
| ATOM | 1215 | H5'2 | T B | 20 | -5.674  | 38.878 | 21.401 | 1.00 | 0.00 | H |
| TER  |      |      |     |    |         |        |        |      |      |   |
| ATOM | 1    | C1'  | A A | 1  | -24.723 | 49.842 | 39.266 | 1.00 | 0.00 | C |
| ATOM | 2    | N1   | A A | 1  | -28.886 | 47.525 | 37.358 | 1.00 | 0.00 | N |
| ATOM | 3    | C2   | A A | 1  | -28.694 | 48.284 | 38.433 | 1.00 | 0.00 | C |
| ATOM | 4    | N3   | A A | 1  | -27.590 | 48.855 | 38.867 | 1.00 | 0.00 | N |
| ATOM | 5    | C4   | A A | 1  | -26.563 | 48.569 | 38.046 | 1.00 | 0.00 | C |
| ATOM | 6    | C5   | A A | 1  | -26.594 | 47.808 | 36.911 | 1.00 | 0.00 | C |

|      |    |      |     |   |         |        |        |      |      |   |
|------|----|------|-----|---|---------|--------|--------|------|------|---|
| ATOM | 7  | C6   | A A | 1 | -27.844 | 47.257 | 36.558 | 1.00 | 0.00 | C |
| ATOM | 8  | N6   | A A | 1 | -28.026 | 46.489 | 35.469 | 1.00 | 0.00 | N |
| ATOM | 9  | N7   | A A | 1 | -25.342 | 47.735 | 36.325 | 1.00 | 0.00 | N |
| ATOM | 10 | C8   | A A | 1 | -24.588 | 48.444 | 37.112 | 1.00 | 0.00 | C |
| ATOM | 11 | N9   | A A | 1 | -25.261 | 48.983 | 38.178 | 1.00 | 0.00 | N |
| ATOM | 12 | C2'  | A A | 1 | -23.322 | 49.454 | 39.718 | 1.00 | 0.00 | C |
| ATOM | 13 | C3'  | A A | 1 | -22.706 | 50.808 | 40.035 | 1.00 | 0.00 | C |
| ATOM | 14 | O3'  | A A | 1 | -23.063 | 51.186 | 41.362 | 1.00 | 0.00 | O |
| ATOM | 15 | C4'  | A A | 1 | -23.335 | 51.722 | 38.985 | 1.00 | 0.00 | C |
| ATOM | 16 | O4'  | A A | 1 | -24.676 | 51.170 | 38.783 | 1.00 | 0.00 | O |
| ATOM | 17 | C5'  | A A | 1 | -22.634 | 51.790 | 37.649 | 1.00 | 0.00 | C |
| ATOM | 18 | O5'  | A A | 1 | -22.099 | 50.486 | 37.308 | 1.00 | 0.00 | O |
| ATOM | 19 | H2   | A A | 1 | -29.579 | 48.460 | 39.043 | 1.00 | 0.00 | H |
| ATOM | 20 | H8   | A A | 1 | -23.523 | 48.597 | 36.940 | 1.00 | 0.00 | H |
| ATOM | 21 | H1'  | A A | 1 | -25.425 | 49.813 | 40.100 | 1.00 | 0.00 | H |
| ATOM | 22 | H3'  | A A | 1 | -21.619 | 50.794 | 39.944 | 1.00 | 0.00 | H |
| ATOM | 23 | H4'  | A A | 1 | -23.346 | 52.726 | 39.407 | 1.00 | 0.00 | H |
| ATOM | 24 | H61  | A A | 1 | -28.958 | 46.113 | 35.256 | 1.00 | 0.00 | H |
| ATOM | 25 | H62  | A A | 1 | -27.229 | 46.280 | 34.850 | 1.00 | 0.00 | H |
| ATOM | 26 | H5T  | A A | 1 | -21.275 | 50.439 | 36.818 | 1.00 | 0.00 | H |
| ATOM | 27 | H2'1 | A A | 1 | -22.764 | 48.937 | 38.939 | 1.00 | 0.00 | H |
| ATOM | 28 | H2'2 | A A | 1 | -23.334 | 48.809 | 40.597 | 1.00 | 0.00 | H |
| ATOM | 29 | H5'1 | A A | 1 | -23.347 | 52.106 | 36.887 | 1.00 | 0.00 | H |
| ATOM | 30 | H5'2 | A A | 1 | -21.825 | 52.516 | 37.705 | 1.00 | 0.00 | H |
| ATOM | 31 | C1'  | G A | 2 | -27.342 | 47.733 | 42.920 | 1.00 | 0.00 | C |
| ATOM | 32 | N1   | G A | 2 | -29.001 | 44.651 | 39.211 | 1.00 | 0.00 | N |
| ATOM | 33 | C2   | G A | 2 | -29.697 | 45.249 | 40.243 | 1.00 | 0.00 | C |
| ATOM | 34 | N2   | G A | 2 | -31.009 | 44.992 | 40.297 | 1.00 | 0.00 | N |
| ATOM | 35 | N3   | G A | 2 | -29.131 | 46.043 | 41.151 | 1.00 | 0.00 | N |
| ATOM | 36 | C4   | G A | 2 | -27.794 | 46.188 | 40.948 | 1.00 | 0.00 | C |
| ATOM | 37 | C5   | G A | 2 | -27.016 | 45.627 | 39.948 | 1.00 | 0.00 | C |
| ATOM | 38 | C6   | G A | 2 | -27.620 | 44.788 | 38.982 | 1.00 | 0.00 | C |
| ATOM | 39 | O6   | G A | 2 | -27.103 | 44.207 | 38.028 | 1.00 | 0.00 | O |
| ATOM | 40 | N7   | G A | 2 | -25.685 | 46.024 | 40.092 | 1.00 | 0.00 | N |
| ATOM | 41 | C8   | G A | 2 | -25.699 | 46.797 | 41.148 | 1.00 | 0.00 | C |
| ATOM | 42 | N9   | G A | 2 | -26.944 | 46.944 | 41.724 | 1.00 | 0.00 | N |
| ATOM | 43 | C2'  | G A | 2 | -26.311 | 47.713 | 44.041 | 1.00 | 0.00 | C |
| ATOM | 44 | C3'  | G A | 2 | -26.430 | 49.116 | 44.610 | 1.00 | 0.00 | C |
| ATOM | 45 | O3'  | G A | 2 | -27.499 | 49.150 | 45.553 | 1.00 | 0.00 | O |
| ATOM | 46 | C4'  | G A | 2 | -26.727 | 49.961 | 43.371 | 1.00 | 0.00 | C |
| ATOM | 47 | O4'  | G A | 2 | -27.516 | 49.077 | 42.513 | 1.00 | 0.00 | O |
| ATOM | 48 | C5'  | G A | 2 | -25.530 | 50.451 | 42.591 | 1.00 | 0.00 | C |
| ATOM | 49 | O5'  | G A | 2 | -24.493 | 49.439 | 42.597 | 1.00 | 0.00 | O |
| ATOM | 50 | O1P  | G A | 2 | -22.639 | 50.515 | 43.918 | 1.00 | 0.00 | O |
| ATOM | 51 | O2P  | G A | 2 | -22.104 | 48.776 | 42.190 | 1.00 | 0.00 | O |
| ATOM | 52 | P    | G A | 2 | -22.967 | 49.905 | 42.615 | 1.00 | 0.00 | P |
| ATOM | 53 | H1   | G A | 2 | -29.535 | 44.057 | 38.560 | 1.00 | 0.00 | H |
| ATOM | 54 | H8   | G A | 2 | -24.805 | 47.282 | 41.539 | 1.00 | 0.00 | H |
| ATOM | 55 | H1'  | G A | 2 | -28.305 | 47.361 | 43.270 | 1.00 | 0.00 | H |
| ATOM | 56 | H21  | G A | 2 | -31.442 | 44.379 | 39.591 | 1.00 | 0.00 | H |
| ATOM | 57 | H3'  | G A | 2 | -25.509 | 49.441 | 45.095 | 1.00 | 0.00 | H |
| ATOM | 58 | H22  | G A | 2 | -31.584 | 45.407 | 41.044 | 1.00 | 0.00 | H |
| ATOM | 59 | H4'  | G A | 2 | -27.284 | 50.834 | 43.710 | 1.00 | 0.00 | H |
| ATOM | 60 | H2'1 | G A | 2 | -25.303 | 47.519 | 43.671 | 1.00 | 0.00 | H |

|      |     |      |     |   |         |        |        |      |      |   |
|------|-----|------|-----|---|---------|--------|--------|------|------|---|
| ATOM | 61  | H2'2 | G A | 2 | -26.534 | 46.957 | 44.795 | 1.00 | 0.00 | H |
| ATOM | 62  | H5'1 | G A | 2 | -25.833 | 50.662 | 41.566 | 1.00 | 0.00 | H |
| ATOM | 63  | H5'2 | G A | 2 | -25.156 | 51.367 | 43.049 | 1.00 | 0.00 | H |
| ATOM | 64  | C1'  | G A | 3 | -30.514 | 44.421 | 44.790 | 1.00 | 0.00 | C |
| ATOM | 65  | N1   | G A | 3 | -29.057 | 41.612 | 40.790 | 1.00 | 0.00 | N |
| ATOM | 66  | C2   | G A | 3 | -30.317 | 41.812 | 41.320 | 1.00 | 0.00 | C |
| ATOM | 67  | N2   | G A | 3 | -31.323 | 41.177 | 40.706 | 1.00 | 0.00 | N |
| ATOM | 68  | N3   | G A | 3 | -30.555 | 42.582 | 42.379 | 1.00 | 0.00 | N |
| ATOM | 69  | C4   | G A | 3 | -29.421 | 43.140 | 42.878 | 1.00 | 0.00 | C |
| ATOM | 70  | C5   | G A | 3 | -28.123 | 42.995 | 42.416 | 1.00 | 0.00 | C |
| ATOM | 71  | C6   | G A | 3 | -27.870 | 42.180 | 41.289 | 1.00 | 0.00 | C |
| ATOM | 72  | O6   | G A | 3 | -26.799 | 41.931 | 40.735 | 1.00 | 0.00 | O |
| ATOM | 73  | N7   | G A | 3 | -27.243 | 43.735 | 43.209 | 1.00 | 0.00 | N |
| ATOM | 74  | C8   | G A | 3 | -28.017 | 44.294 | 44.103 | 1.00 | 0.00 | C |
| ATOM | 75  | N9   | G A | 3 | -29.353 | 43.980 | 43.968 | 1.00 | 0.00 | N |
| ATOM | 76  | C2'  | G A | 3 | -30.208 | 44.526 | 46.277 | 1.00 | 0.00 | C |
| ATOM | 77  | C3'  | G A | 3 | -31.043 | 45.726 | 46.690 | 1.00 | 0.00 | C |
| ATOM | 78  | O3'  | G A | 3 | -32.376 | 45.298 | 46.962 | 1.00 | 0.00 | O |
| ATOM | 79  | C4'  | G A | 3 | -30.969 | 46.631 | 45.461 | 1.00 | 0.00 | C |
| ATOM | 80  | O4'  | G A | 3 | -30.904 | 45.702 | 44.333 | 1.00 | 0.00 | O |
| ATOM | 81  | C5'  | G A | 3 | -29.783 | 47.565 | 45.387 | 1.00 | 0.00 | C |
| ATOM | 82  | O5'  | G A | 3 | -28.609 | 46.912 | 45.931 | 1.00 | 0.00 | O |
| ATOM | 83  | O1P  | G A | 3 | -28.095 | 48.259 | 47.994 | 1.00 | 0.00 | O |
| ATOM | 84  | O2P  | G A | 3 | -26.254 | 47.046 | 46.797 | 1.00 | 0.00 | O |
| ATOM | 85  | P    | G A | 3 | -27.533 | 47.793 | 46.712 | 1.00 | 0.00 | P |
| ATOM | 86  | H1   | G A | 3 | -28.981 | 40.998 | 39.964 | 1.00 | 0.00 | H |
| ATOM | 87  | H8   | G A | 3 | -27.640 | 44.951 | 44.886 | 1.00 | 0.00 | H |
| ATOM | 88  | H1'  | G A | 3 | -31.341 | 43.734 | 44.608 | 1.00 | 0.00 | H |
| ATOM | 89  | H21  | G A | 3 | -31.132 | 40.584 | 39.885 | 1.00 | 0.00 | H |
| ATOM | 90  | H3'  | G A | 3 | -30.637 | 46.224 | 47.571 | 1.00 | 0.00 | H |
| ATOM | 91  | H22  | G A | 3 | -32.286 | 41.283 | 41.054 | 1.00 | 0.00 | H |
| ATOM | 92  | H4'  | G A | 3 | -31.873 | 47.239 | 45.460 | 1.00 | 0.00 | H |
| ATOM | 93  | H2'1 | G A | 3 | -29.149 | 44.694 | 46.471 | 1.00 | 0.00 | H |
| ATOM | 94  | H2'2 | G A | 3 | -30.502 | 43.629 | 46.824 | 1.00 | 0.00 | H |
| ATOM | 95  | H5'1 | G A | 3 | -29.607 | 47.837 | 44.347 | 1.00 | 0.00 | H |
| ATOM | 96  | H5'2 | G A | 3 | -30.002 | 48.466 | 45.960 | 1.00 | 0.00 | H |
| ATOM | 97  | C1'  | C A | 4 | -32.893 | 40.077 | 44.838 | 1.00 | 0.00 | C |
| ATOM | 98  | N1   | C A | 4 | -31.409 | 40.125 | 44.717 | 1.00 | 0.00 | N |
| ATOM | 99  | C2   | C A | 4 | -30.818 | 39.414 | 43.675 | 1.00 | 0.00 | C |
| ATOM | 100 | O2   | C A | 4 | -31.541 | 38.777 | 42.900 | 1.00 | 0.00 | O |
| ATOM | 101 | N3   | C A | 4 | -29.469 | 39.446 | 43.548 | 1.00 | 0.00 | N |
| ATOM | 102 | C4   | C A | 4 | -28.713 | 40.144 | 44.404 | 1.00 | 0.00 | C |
| ATOM | 103 | N4   | C A | 4 | -27.399 | 40.142 | 44.230 | 1.00 | 0.00 | N |
| ATOM | 104 | C5   | C A | 4 | -29.295 | 40.882 | 45.485 | 1.00 | 0.00 | C |
| ATOM | 105 | C6   | C A | 4 | -30.654 | 40.839 | 45.593 | 1.00 | 0.00 | C |
| ATOM | 106 | C2'  | C A | 4 | -33.390 | 40.028 | 46.276 | 1.00 | 0.00 | C |
| ATOM | 107 | C3'  | C A | 4 | -34.664 | 40.858 | 46.200 | 1.00 | 0.00 | C |
| ATOM | 108 | O3'  | C A | 4 | -35.738 | 40.025 | 45.768 | 1.00 | 0.00 | O |
| ATOM | 109 | C4'  | C A | 4 | -34.311 | 41.927 | 45.169 | 1.00 | 0.00 | C |
| ATOM | 110 | O4'  | C A | 4 | -33.412 | 41.249 | 44.235 | 1.00 | 0.00 | O |
| ATOM | 111 | C5'  | C A | 4 | -33.618 | 43.162 | 45.694 | 1.00 | 0.00 | C |
| ATOM | 112 | O5'  | C A | 4 | -32.707 | 42.797 | 46.762 | 1.00 | 0.00 | O |
| ATOM | 113 | O1P  | C A | 4 | -33.718 | 43.891 | 48.791 | 1.00 | 0.00 | O |
| ATOM | 114 | O2P  | C A | 4 | -31.248 | 43.465 | 48.696 | 1.00 | 0.00 | O |

|      |     |      |     |   |         |        |        |      |      |   |
|------|-----|------|-----|---|---------|--------|--------|------|------|---|
| ATOM | 115 | P    | C A | 4 | -32.493 | 43.815 | 47.971 | 1.00 | 0.00 | P |
| ATOM | 116 | H5   | C A | 4 | -28.682 | 41.448 | 46.187 | 1.00 | 0.00 | H |
| ATOM | 117 | H6   | C A | 4 | -31.144 | 41.389 | 46.397 | 1.00 | 0.00 | H |
| ATOM | 118 | H1'  | C A | 4 | -33.253 | 39.220 | 44.270 | 1.00 | 0.00 | H |
| ATOM | 119 | H3'  | C A | 4 | -34.917 | 41.304 | 47.161 | 1.00 | 0.00 | H |
| ATOM | 120 | H4'  | C A | 4 | -35.247 | 42.242 | 44.708 | 1.00 | 0.00 | H |
| ATOM | 121 | H41  | C A | 4 | -26.793 | 40.672 | 44.874 | 1.00 | 0.00 | H |
| ATOM | 122 | H42  | C A | 4 | -26.982 | 39.610 | 43.452 | 1.00 | 0.00 | H |
| ATOM | 123 | H2'1 | C A | 4 | -32.677 | 40.462 | 46.976 | 1.00 | 0.00 | H |
| ATOM | 124 | H2'2 | C A | 4 | -33.597 | 39.010 | 46.608 | 1.00 | 0.00 | H |
| ATOM | 125 | H5'1 | C A | 4 | -33.064 | 43.635 | 44.883 | 1.00 | 0.00 | H |
| ATOM | 126 | H5'2 | C A | 4 | -34.366 | 43.860 | 46.071 | 1.00 | 0.00 | H |
| ATOM | 127 | C1'  | C A | 5 | -33.411 | 35.278 | 43.732 | 1.00 | 0.00 | C |
| ATOM | 128 | N1   | C A | 5 | -32.165 | 35.774 | 44.377 | 1.00 | 0.00 | N |
| ATOM | 129 | C2   | C A | 5 | -30.948 | 35.440 | 43.787 | 1.00 | 0.00 | C |
| ATOM | 130 | O2   | C A | 5 | -30.950 | 34.749 | 42.759 | 1.00 | 0.00 | O |
| ATOM | 131 | N3   | C A | 5 | -29.801 | 35.883 | 44.359 | 1.00 | 0.00 | N |
| ATOM | 132 | C4   | C A | 5 | -29.829 | 36.627 | 45.471 | 1.00 | 0.00 | C |
| ATOM | 133 | N4   | C A | 5 | -28.679 | 37.035 | 45.985 | 1.00 | 0.00 | N |
| ATOM | 134 | C5   | C A | 5 | -31.066 | 36.984 | 46.100 | 1.00 | 0.00 | C |
| ATOM | 135 | C6   | C A | 5 | -32.207 | 36.530 | 45.505 | 1.00 | 0.00 | C |
| ATOM | 136 | C2'  | C A | 5 | -34.490 | 34.861 | 44.721 | 1.00 | 0.00 | C |
| ATOM | 137 | C3'  | C A | 5 | -35.761 | 35.285 | 44.001 | 1.00 | 0.00 | C |
| ATOM | 138 | O3'  | C A | 5 | -36.150 | 34.254 | 43.095 | 1.00 | 0.00 | O |
| ATOM | 139 | C4'  | C A | 5 | -35.333 | 36.558 | 43.277 | 1.00 | 0.00 | C |
| ATOM | 140 | O4'  | C A | 5 | -33.930 | 36.326 | 42.934 | 1.00 | 0.00 | O |
| ATOM | 141 | C5'  | C A | 5 | -35.432 | 37.844 | 44.065 | 1.00 | 0.00 | C |
| ATOM | 142 | O5'  | C A | 5 | -35.085 | 37.597 | 45.452 | 1.00 | 0.00 | O |
| ATOM | 143 | O1P  | C A | 5 | -37.244 | 38.015 | 46.676 | 1.00 | 0.00 | O |
| ATOM | 144 | O2P  | C A | 5 | -35.051 | 38.348 | 47.849 | 1.00 | 0.00 | O |
| ATOM | 145 | P    | C A | 5 | -35.830 | 38.429 | 46.589 | 1.00 | 0.00 | P |
| ATOM | 146 | H5   | C A | 5 | -31.094 | 37.586 | 47.009 | 1.00 | 0.00 | H |
| ATOM | 147 | H6   | C A | 5 | -33.174 | 36.780 | 45.944 | 1.00 | 0.00 | H |
| ATOM | 148 | H1'  | C A | 5 | -33.146 | 34.453 | 43.070 | 1.00 | 0.00 | H |
| ATOM | 149 | H3'  | C A | 5 | -36.578 | 35.481 | 44.696 | 1.00 | 0.00 | H |
| ATOM | 150 | H4'  | C A | 5 | -35.976 | 36.656 | 42.402 | 1.00 | 0.00 | H |
| ATOM | 151 | H41  | C A | 5 | -28.672 | 37.611 | 46.840 | 1.00 | 0.00 | H |
| ATOM | 152 | H42  | C A | 5 | -27.791 | 36.776 | 45.532 | 1.00 | 0.00 | H |
| ATOM | 153 | H2'1 | C A | 5 | -34.391 | 35.368 | 45.680 | 1.00 | 0.00 | H |
| ATOM | 154 | H2'2 | C A | 5 | -34.481 | 33.787 | 44.915 | 1.00 | 0.00 | H |
| ATOM | 155 | H5'1 | C A | 5 | -34.747 | 38.578 | 43.639 | 1.00 | 0.00 | H |
| ATOM | 156 | H5'2 | C A | 5 | -36.451 | 38.224 | 44.002 | 1.00 | 0.00 | H |
| ATOM | 157 | C1'  | G A | 6 | -31.711 | 30.772 | 42.576 | 1.00 | 0.00 | C |
| ATOM | 158 | N1   | G A | 6 | -27.485 | 32.380 | 44.939 | 1.00 | 0.00 | N |
| ATOM | 159 | C2   | G A | 6 | -27.627 | 31.666 | 43.762 | 1.00 | 0.00 | C |
| ATOM | 160 | N2   | G A | 6 | -26.494 | 31.335 | 43.133 | 1.00 | 0.00 | N |
| ATOM | 161 | N3   | G A | 6 | -28.807 | 31.312 | 43.255 | 1.00 | 0.00 | N |
| ATOM | 162 | C4   | G A | 6 | -29.846 | 31.724 | 44.027 | 1.00 | 0.00 | C |
| ATOM | 163 | C5   | G A | 6 | -29.799 | 32.436 | 45.215 | 1.00 | 0.00 | C |
| ATOM | 164 | C6   | G A | 6 | -28.549 | 32.816 | 45.752 | 1.00 | 0.00 | C |
| ATOM | 165 | O6   | G A | 6 | -28.304 | 33.442 | 46.783 | 1.00 | 0.00 | O |
| ATOM | 166 | N7   | G A | 6 | -31.091 | 32.660 | 45.694 | 1.00 | 0.00 | N |
| ATOM | 167 | C8   | G A | 6 | -31.862 | 32.094 | 44.802 | 1.00 | 0.00 | C |
| ATOM | 168 | N9   | G A | 6 | -31.179 | 31.503 | 43.759 | 1.00 | 0.00 | N |

|      |     |      |     |   |         |        |        |      |      |   |
|------|-----|------|-----|---|---------|--------|--------|------|------|---|
| ATOM | 169 | C2'  | G A | 6 | -32.927 | 29.910 | 42.884 | 1.00 | 0.00 | C |
| ATOM | 170 | C3'  | G A | 6 | -33.746 | 30.051 | 41.611 | 1.00 | 0.00 | C |
| ATOM | 171 | O3'  | G A | 6 | -33.283 | 29.107 | 40.648 | 1.00 | 0.00 | O |
| ATOM | 172 | C4'  | G A | 6 | -33.470 | 31.492 | 41.186 | 1.00 | 0.00 | C |
| ATOM | 173 | O4'  | G A | 6 | -32.091 | 31.734 | 41.610 | 1.00 | 0.00 | O |
| ATOM | 174 | C5'  | G A | 6 | -34.356 | 32.552 | 41.795 | 1.00 | 0.00 | C |
| ATOM | 175 | O5'  | G A | 6 | -34.666 | 32.205 | 43.168 | 1.00 | 0.00 | O |
| ATOM | 176 | O1P  | G A | 6 | -37.146 | 31.780 | 43.114 | 1.00 | 0.00 | O |
| ATOM | 177 | O2P  | G A | 6 | -36.051 | 32.550 | 45.236 | 1.00 | 0.00 | O |
| ATOM | 178 | P    | G A | 6 | -36.097 | 32.596 | 43.754 | 1.00 | 0.00 | P |
| ATOM | 179 | H1   | G A | 6 | -26.526 | 32.611 | 45.242 | 1.00 | 0.00 | H |
| ATOM | 180 | H8   | G A | 6 | -32.950 | 32.088 | 44.875 | 1.00 | 0.00 | H |
| ATOM | 181 | H1'  | G A | 6 | -30.903 | 30.173 | 42.154 | 1.00 | 0.00 | H |
| ATOM | 182 | H21  | G A | 6 | -25.585 | 31.615 | 43.529 | 1.00 | 0.00 | H |
| ATOM | 183 | H3'  | G A | 6 | -34.810 | 29.890 | 41.789 | 1.00 | 0.00 | H |
| ATOM | 184 | H22  | G A | 6 | -26.531 | 30.800 | 42.253 | 1.00 | 0.00 | H |
| ATOM | 185 | H4'  | G A | 6 | -33.596 | 31.533 | 40.105 | 1.00 | 0.00 | H |
| ATOM | 186 | H2'1 | G A | 6 | -33.479 | 30.269 | 43.753 | 1.00 | 0.00 | H |
| ATOM | 187 | H2'2 | G A | 6 | -32.660 | 28.870 | 43.072 | 1.00 | 0.00 | H |
| ATOM | 188 | H5'1 | G A | 6 | -33.839 | 33.511 | 41.766 | 1.00 | 0.00 | H |
| ATOM | 189 | H5'2 | G A | 6 | -35.276 | 32.626 | 41.216 | 1.00 | 0.00 | H |
| ATOM | 190 | C1'  | C A | 7 | -28.284 | 27.197 | 42.495 | 1.00 | 0.00 | C |
| ATOM | 191 | N1   | C A | 7 | -28.658 | 27.857 | 43.776 | 1.00 | 0.00 | N |
| ATOM | 192 | C2   | C A | 7 | -27.632 | 28.367 | 44.570 | 1.00 | 0.00 | C |
| ATOM | 193 | O2   | C A | 7 | -26.462 | 28.251 | 44.182 | 1.00 | 0.00 | O |
| ATOM | 194 | N3   | C A | 7 | -27.951 | 28.972 | 45.740 | 1.00 | 0.00 | N |
| ATOM | 195 | C4   | C A | 7 | -29.226 | 29.082 | 46.134 | 1.00 | 0.00 | C |
| ATOM | 196 | N4   | C A | 7 | -29.481 | 29.685 | 47.285 | 1.00 | 0.00 | N |
| ATOM | 197 | C5   | C A | 7 | -30.301 | 28.563 | 45.340 | 1.00 | 0.00 | C |
| ATOM | 198 | C6   | C A | 7 | -29.957 | 27.961 | 44.162 | 1.00 | 0.00 | C |
| ATOM | 199 | C2'  | C A | 7 | -29.135 | 25.979 | 42.161 | 1.00 | 0.00 | C |
| ATOM | 200 | C3'  | C A | 7 | -29.241 | 26.073 | 40.647 | 1.00 | 0.00 | C |
| ATOM | 201 | O3'  | C A | 7 | -28.091 | 25.468 | 40.059 | 1.00 | 0.00 | O |
| ATOM | 202 | C4'  | C A | 7 | -29.291 | 27.579 | 40.402 | 1.00 | 0.00 | C |
| ATOM | 203 | O4'  | C A | 7 | -28.452 | 28.146 | 41.458 | 1.00 | 0.00 | O |
| ATOM | 204 | C5'  | C A | 7 | -30.656 | 28.225 | 40.471 | 1.00 | 0.00 | C |
| ATOM | 205 | O5'  | C A | 7 | -31.447 | 27.590 | 41.506 | 1.00 | 0.00 | O |
| ATOM | 206 | O1P  | C A | 7 | -33.300 | 26.472 | 40.221 | 1.00 | 0.00 | O |
| ATOM | 207 | O2P  | C A | 7 | -33.674 | 27.187 | 42.597 | 1.00 | 0.00 | O |
| ATOM | 208 | P    | C A | 7 | -33.021 | 27.450 | 41.292 | 1.00 | 0.00 | P |
| ATOM | 209 | H5   | C A | 7 | -31.341 | 28.644 | 45.659 | 1.00 | 0.00 | H |
| ATOM | 210 | H6   | C A | 7 | -30.740 | 27.558 | 43.520 | 1.00 | 0.00 | H |
| ATOM | 211 | H1'  | C A | 7 | -27.228 | 26.935 | 42.542 | 1.00 | 0.00 | H |
| ATOM | 212 | H3'  | C A | 7 | -30.140 | 25.582 | 40.271 | 1.00 | 0.00 | H |
| ATOM | 213 | H4'  | C A | 7 | -28.893 | 27.750 | 39.402 | 1.00 | 0.00 | H |
| ATOM | 214 | H41  | C A | 7 | -30.453 | 29.785 | 47.611 | 1.00 | 0.00 | H |
| ATOM | 215 | H42  | C A | 7 | -28.707 | 30.055 | 47.857 | 1.00 | 0.00 | H |
| ATOM | 216 | H2'1 | C A | 7 | -30.117 | 26.019 | 42.631 | 1.00 | 0.00 | H |
| ATOM | 217 | H2'2 | C A | 7 | -28.662 | 25.046 | 42.470 | 1.00 | 0.00 | H |
| ATOM | 218 | H5'1 | C A | 7 | -30.539 | 29.286 | 40.695 | 1.00 | 0.00 | H |
| ATOM | 219 | H5'2 | C A | 7 | -31.153 | 28.115 | 39.508 | 1.00 | 0.00 | H |
| ATOM | 220 | C1'  | A A | 8 | -24.282 | 24.823 | 44.182 | 1.00 | 0.00 | C |
| ATOM | 221 | N1   | A A | 8 | -25.617 | 26.945 | 48.661 | 1.00 | 0.00 | N |
| ATOM | 222 | C2   | A A | 8 | -24.444 | 26.789 | 48.055 | 1.00 | 0.00 | C |

|      |     |      |     |   |         |        |        |      |      |   |
|------|-----|------|-----|---|---------|--------|--------|------|------|---|
| ATOM | 223 | N3   | A A | 8 | -24.169 | 26.233 | 46.894 | 1.00 | 0.00 | N |
| ATOM | 224 | C4   | A A | 8 | -25.298 | 25.784 | 46.315 | 1.00 | 0.00 | C |
| ATOM | 225 | C5   | A A | 8 | -26.572 | 25.864 | 46.802 | 1.00 | 0.00 | C |
| ATOM | 226 | C6   | A A | 8 | -26.725 | 26.488 | 48.058 | 1.00 | 0.00 | C |
| ATOM | 227 | N6   | A A | 8 | -27.917 | 26.639 | 48.661 | 1.00 | 0.00 | N |
| ATOM | 228 | N7   | A A | 8 | -27.479 | 25.293 | 45.926 | 1.00 | 0.00 | N |
| ATOM | 229 | C8   | A A | 8 | -26.741 | 24.880 | 44.938 | 1.00 | 0.00 | C |
| ATOM | 230 | N9   | A A | 8 | -25.405 | 25.145 | 45.103 | 1.00 | 0.00 | N |
| ATOM | 231 | C2'  | A A | 8 | -24.430 | 23.480 | 43.479 | 1.00 | 0.00 | C |
| ATOM | 232 | C3'  | A A | 8 | -23.831 | 23.770 | 42.113 | 1.00 | 0.00 | C |
| ATOM | 233 | O3'  | A A | 8 | -22.416 | 23.614 | 42.181 | 1.00 | 0.00 | O |
| ATOM | 234 | C4'  | A A | 8 | -24.240 | 25.221 | 41.862 | 1.00 | 0.00 | C |
| ATOM | 235 | O4'  | A A | 8 | -24.233 | 25.832 | 43.193 | 1.00 | 0.00 | O |
| ATOM | 236 | C5'  | A A | 8 | -25.598 | 25.436 | 41.237 | 1.00 | 0.00 | C |
| ATOM | 237 | O5'  | A A | 8 | -26.534 | 24.453 | 41.748 | 1.00 | 0.00 | O |
| ATOM | 238 | O1P  | A A | 8 | -27.085 | 23.067 | 39.720 | 1.00 | 0.00 | O |
| ATOM | 239 | O2P  | A A | 8 | -28.747 | 23.274 | 41.589 | 1.00 | 0.00 | O |
| ATOM | 240 | P    | A A | 8 | -27.678 | 23.907 | 40.779 | 1.00 | 0.00 | P |
| ATOM | 241 | H2   | A A | 8 | -23.585 | 27.179 | 48.598 | 1.00 | 0.00 | H |
| ATOM | 242 | H8   | A A | 8 | -27.143 | 24.371 | 44.062 | 1.00 | 0.00 | H |
| ATOM | 243 | H1'  | A A | 8 | -23.353 | 24.866 | 44.751 | 1.00 | 0.00 | H |
| ATOM | 244 | H3'  | A A | 8 | -24.230 | 23.111 | 41.343 | 1.00 | 0.00 | H |
| ATOM | 245 | H4'  | A A | 8 | -23.494 | 25.649 | 41.194 | 1.00 | 0.00 | H |
| ATOM | 246 | H61  | A A | 8 | -27.974 | 27.104 | 49.577 | 1.00 | 0.00 | H |
| ATOM | 247 | H62  | A A | 8 | -28.772 | 26.288 | 48.205 | 1.00 | 0.00 | H |
| ATOM | 248 | H2'1 | A A | 8 | -25.471 | 23.169 | 43.398 | 1.00 | 0.00 | H |
| ATOM | 249 | H2'2 | A A | 8 | -23.888 | 22.685 | 43.990 | 1.00 | 0.00 | H |
| ATOM | 250 | H5'1 | A A | 8 | -25.948 | 26.439 | 41.482 | 1.00 | 0.00 | H |
| ATOM | 251 | H5'2 | A A | 8 | -25.515 | 25.338 | 40.156 | 1.00 | 0.00 | H |
| ATOM | 252 | C1'  | C A | 9 | -21.071 | 23.503 | 47.734 | 1.00 | 0.00 | C |
| ATOM | 253 | N1   | C A | 9 | -22.535 | 23.325 | 47.938 | 1.00 | 0.00 | N |
| ATOM | 254 | C2   | C A | 9 | -23.099 | 23.837 | 49.104 | 1.00 | 0.00 | C |
| ATOM | 255 | O2   | C A | 9 | -22.366 | 24.414 | 49.918 | 1.00 | 0.00 | O |
| ATOM | 256 | N3   | C A | 9 | -24.430 | 23.685 | 49.308 | 1.00 | 0.00 | N |
| ATOM | 257 | C4   | C A | 9 | -25.197 | 23.054 | 48.410 | 1.00 | 0.00 | C |
| ATOM | 258 | N4   | C A | 9 | -26.493 | 22.936 | 48.659 | 1.00 | 0.00 | N |
| ATOM | 259 | C5   | C A | 9 | -24.644 | 22.513 | 47.202 | 1.00 | 0.00 | C |
| ATOM | 260 | C6   | C A | 9 | -23.301 | 22.682 | 47.015 | 1.00 | 0.00 | C |
| ATOM | 261 | C2'  | C A | 9 | -20.393 | 22.308 | 47.080 | 1.00 | 0.00 | C |
| ATOM | 262 | C3'  | C A | 9 | -19.338 | 22.978 | 46.211 | 1.00 | 0.00 | C |
| ATOM | 263 | O3'  | C A | 9 | -18.181 | 23.243 | 47.000 | 1.00 | 0.00 | O |
| ATOM | 264 | C4'  | C A | 9 | -20.035 | 24.259 | 45.759 | 1.00 | 0.00 | C |
| ATOM | 265 | O4'  | C A | 9 | -20.888 | 24.626 | 46.890 | 1.00 | 0.00 | O |
| ATOM | 266 | C5'  | C A | 9 | -20.894 | 24.156 | 44.521 | 1.00 | 0.00 | C |
| ATOM | 267 | O5'  | C A | 9 | -21.563 | 22.869 | 44.495 | 1.00 | 0.00 | O |
| ATOM | 268 | O1P  | C A | 9 | -20.544 | 21.723 | 42.499 | 1.00 | 0.00 | O |
| ATOM | 269 | O2P  | C A | 9 | -22.865 | 21.123 | 43.240 | 1.00 | 0.00 | O |
| ATOM | 270 | P    | C A | 9 | -21.823 | 22.168 | 43.086 | 1.00 | 0.00 | P |
| ATOM | 271 | H5   | C A | 9 | -25.264 | 21.993 | 46.471 | 1.00 | 0.00 | H |
| ATOM | 272 | H6   | C A | 9 | -22.836 | 22.296 | 46.109 | 1.00 | 0.00 | H |
| ATOM | 273 | H1'  | C A | 9 | -20.618 | 23.731 | 48.698 | 1.00 | 0.00 | H |
| ATOM | 274 | H3'  | C A | 9 | -19.060 | 22.359 | 45.358 | 1.00 | 0.00 | H |
| ATOM | 275 | H4'  | C A | 9 | -19.253 | 24.992 | 45.561 | 1.00 | 0.00 | H |
| ATOM | 276 | H41  | C A | 9 | -27.106 | 22.457 | 47.983 | 1.00 | 0.00 | H |



|      |     |      |   |   |    |         |        |        |      |      |   |
|------|-----|------|---|---|----|---------|--------|--------|------|------|---|
| ATOM | 277 | H42  | C | A | 9  | -26.888 | 23.323 | 49.529 | 1.00 | 0.00 | H |
| ATOM | 278 | H2'1 | C | A | 9  | -21.082 | 21.717 | 46.480 | 1.00 | 0.00 | H |
| ATOM | 279 | H2'2 | C | A | 9  | -19.938 | 21.639 | 47.812 | 1.00 | 0.00 | H |
| ATOM | 280 | H5'1 | C | A | 9  | -21.635 | 24.956 | 44.530 | 1.00 | 0.00 | H |
| ATOM | 281 | H5'2 | C | A | 9  | -20.263 | 24.261 | 43.639 | 1.00 | 0.00 | H |
| ATOM | 282 | C1'  | C | A | 10 | -19.723 | 22.627 | 52.418 | 1.00 | 0.00 | C |
| ATOM | 283 | N1   | C | A | 10 | -20.950 | 22.000 | 51.855 | 1.00 | 0.00 | N |
| ATOM | 284 | C2   | C | A | 10 | -22.138 | 22.136 | 52.570 | 1.00 | 0.00 | C |
| ATOM | 285 | O2   | C | A | 10 | -22.126 | 22.767 | 53.636 | 1.00 | 0.00 | O |
| ATOM | 286 | N3   | C | A | 10 | -23.267 | 21.573 | 52.075 | 1.00 | 0.00 | N |
| ATOM | 287 | C4   | C | A | 10 | -23.249 | 20.895 | 50.920 | 1.00 | 0.00 | C |
| ATOM | 288 | N4   | C | A | 10 | -24.383 | 20.367 | 50.480 | 1.00 | 0.00 | N |
| ATOM | 289 | C5   | C | A | 10 | -22.041 | 20.736 | 50.165 | 1.00 | 0.00 | C |
| ATOM | 290 | C6   | C | A | 10 | -20.916 | 21.316 | 50.681 | 1.00 | 0.00 | C |
| ATOM | 291 | C2'  | C | A | 10 | -18.462 | 21.800 | 52.212 | 1.00 | 0.00 | C |
| ATOM | 292 | C3'  | C | A | 10 | -17.410 | 22.876 | 51.988 | 1.00 | 0.00 | C |
| ATOM | 293 | O3'  | C | A | 10 | -16.937 | 23.339 | 53.251 | 1.00 | 0.00 | O |
| ATOM | 294 | C4'  | C | A | 10 | -18.182 | 23.953 | 51.230 | 1.00 | 0.00 | C |
| ATOM | 295 | O4'  | C | A | 10 | -19.539 | 23.872 | 51.769 | 1.00 | 0.00 | O |
| ATOM | 296 | C5'  | C | A | 10 | -18.250 | 23.799 | 49.728 | 1.00 | 0.00 | C |
| ATOM | 297 | O5'  | C | A | 10 | -18.354 | 22.394 | 49.383 | 1.00 | 0.00 | O |
| ATOM | 298 | O1P  | C | A | 10 | -16.188 | 21.924 | 48.192 | 1.00 | 0.00 | O |
| ATOM | 299 | O2P  | C | A | 10 | -18.230 | 20.565 | 47.665 | 1.00 | 0.00 | O |
| ATOM | 300 | P    | C | A | 10 | -17.656 | 21.879 | 48.046 | 1.00 | 0.00 | P |
| ATOM | 301 | H5   | C | A | 10 | -22.019 | 20.180 | 49.227 | 1.00 | 0.00 | H |
| ATOM | 302 | H6   | C | A | 10 | -19.975 | 21.229 | 50.139 | 1.00 | 0.00 | H |
| ATOM | 303 | H1'  | C | A | 10 | -19.894 | 22.823 | 53.476 | 1.00 | 0.00 | H |
| ATOM | 304 | H3'  | C | A | 10 | -16.568 | 22.507 | 51.401 | 1.00 | 0.00 | H |
| ATOM | 305 | H4'  | C | A | 10 | -17.693 | 24.903 | 51.444 | 1.00 | 0.00 | H |
| ATOM | 306 | H41  | C | A | 10 | -24.397 | 19.843 | 49.593 | 1.00 | 0.00 | H |
| ATOM | 307 | H42  | C | A | 10 | -25.249 | 20.481 | 51.026 | 1.00 | 0.00 | H |
| ATOM | 308 | H2'1 | C | A | 10 | -18.537 | 21.135 | 51.353 | 1.00 | 0.00 | H |
| ATOM | 309 | H2'2 | C | A | 10 | -18.223 | 21.186 | 53.082 | 1.00 | 0.00 | H |
| ATOM | 310 | H5'1 | C | A | 10 | -19.121 | 24.337 | 49.351 | 1.00 | 0.00 | H |
| ATOM | 311 | H5'2 | C | A | 10 | -17.349 | 24.221 | 49.285 | 1.00 | 0.00 | H |
| ATOM | 312 | C1'  | T | A | 11 | -20.569 | 21.465 | 57.154 | 1.00 | 0.00 | C |
| ATOM | 313 | N1   | T | A | 11 | -21.108 | 20.605 | 56.067 | 1.00 | 0.00 | N |
| ATOM | 314 | C2   | T | A | 11 | -22.452 | 20.297 | 56.115 | 1.00 | 0.00 | C |
| ATOM | 315 | O2   | T | A | 11 | -23.190 | 20.698 | 56.999 | 1.00 | 0.00 | O |
| ATOM | 316 | N3   | T | A | 11 | -22.912 | 19.496 | 55.086 | 1.00 | 0.00 | N |
| ATOM | 317 | C4   | T | A | 11 | -22.162 | 18.988 | 54.044 | 1.00 | 0.00 | C |
| ATOM | 318 | O4   | T | A | 11 | -22.686 | 18.276 | 53.177 | 1.00 | 0.00 | O |
| ATOM | 319 | C5   | T | A | 11 | -20.769 | 19.364 | 54.079 | 1.00 | 0.00 | C |
| ATOM | 320 | C6   | T | A | 11 | -20.288 | 20.144 | 55.066 | 1.00 | 0.00 | C |
| ATOM | 321 | C7   | T | A | 11 | -19.918 | 18.836 | 52.962 | 1.00 | 0.00 | C |
| ATOM | 322 | C2'  | T | A | 11 | -19.168 | 21.077 | 57.608 | 1.00 | 0.00 | C |
| ATOM | 323 | C3'  | T | A | 11 | -18.548 | 22.429 | 57.921 | 1.00 | 0.00 | C |
| ATOM | 324 | O3'  | T | A | 11 | -18.904 | 22.813 | 59.247 | 1.00 | 0.00 | O |
| ATOM | 325 | C4'  | T | A | 11 | -19.174 | 23.341 | 56.868 | 1.00 | 0.00 | C |
| ATOM | 326 | O4'  | T | A | 11 | -20.517 | 22.793 | 56.669 | 1.00 | 0.00 | O |
| ATOM | 327 | C5'  | T | A | 11 | -18.474 | 23.404 | 55.530 | 1.00 | 0.00 | C |
| ATOM | 328 | O5'  | T | A | 11 | -17.943 | 22.098 | 55.195 | 1.00 | 0.00 | O |
| ATOM | 329 | O1P  | T | A | 11 | -15.452 | 22.454 | 55.234 | 1.00 | 0.00 | O |
| ATOM | 330 | O2P  | T | A | 11 | -16.439 | 20.662 | 53.783 | 1.00 | 0.00 | O |

|      |     |      |     |    |         |        |        |      |      |   |
|------|-----|------|-----|----|---------|--------|--------|------|------|---|
| ATOM | 331 | P    | T A | 11 | -16.573 | 22.012 | 54.383 | 1.00 | 0.00 | P |
| ATOM | 332 | H3   | T A | 11 | -23.912 | 19.255 | 55.096 | 1.00 | 0.00 | H |
| ATOM | 333 | H6   | T A | 11 | -19.231 | 20.415 | 55.072 | 1.00 | 0.00 | H |
| ATOM | 334 | H1'  | T A | 11 | -21.270 | 21.441 | 57.989 | 1.00 | 0.00 | H |
| ATOM | 335 | H3'  | T A | 11 | -17.463 | 22.411 | 57.830 | 1.00 | 0.00 | H |
| ATOM | 336 | H4'  | T A | 11 | -19.184 | 24.349 | 57.286 | 1.00 | 0.00 | H |
| ATOM | 337 | H71  | T A | 11 | -19.181 | 18.142 | 53.365 | 1.00 | 0.00 | H |
| ATOM | 338 | H72  | T A | 11 | -20.548 | 18.318 | 52.239 | 1.00 | 0.00 | H |
| ATOM | 339 | H73  | T A | 11 | -19.406 | 19.664 | 52.471 | 1.00 | 0.00 | H |
| ATOM | 340 | H2'1 | T A | 11 | -18.612 | 20.556 | 56.830 | 1.00 | 0.00 | H |
| ATOM | 341 | H2'2 | T A | 11 | -19.182 | 20.432 | 58.488 | 1.00 | 0.00 | H |
| ATOM | 342 | H5'1 | T A | 11 | -19.186 | 23.719 | 54.768 | 1.00 | 0.00 | H |
| ATOM | 343 | H5'2 | T A | 11 | -17.662 | 24.128 | 55.586 | 1.00 | 0.00 | H |
| ATOM | 344 | C1'  | A A | 12 | -23.173 | 19.372 | 60.824 | 1.00 | 0.00 | C |
| ATOM | 345 | N1   | A A | 12 | -24.868 | 16.271 | 57.101 | 1.00 | 0.00 | N |
| ATOM | 346 | C2   | A A | 12 | -25.479 | 16.875 | 58.115 | 1.00 | 0.00 | C |
| ATOM | 347 | N3   | A A | 12 | -24.980 | 17.668 | 59.041 | 1.00 | 0.00 | N |
| ATOM | 348 | C4   | A A | 12 | -23.658 | 17.825 | 58.855 | 1.00 | 0.00 | C |
| ATOM | 349 | C5   | A A | 12 | -22.885 | 17.277 | 57.871 | 1.00 | 0.00 | C |
| ATOM | 350 | C6   | A A | 12 | -23.548 | 16.449 | 56.941 | 1.00 | 0.00 | C |
| ATOM | 351 | N6   | A A | 12 | -22.918 | 15.842 | 55.920 | 1.00 | 0.00 | N |
| ATOM | 352 | N7   | A A | 12 | -21.563 | 17.666 | 57.999 | 1.00 | 0.00 | N |
| ATOM | 353 | C8   | A A | 12 | -21.563 | 18.430 | 59.051 | 1.00 | 0.00 | C |
| ATOM | 354 | N9   | A A | 12 | -22.801 | 18.575 | 59.623 | 1.00 | 0.00 | N |
| ATOM | 355 | C2'  | A A | 12 | -22.124 | 19.343 | 61.927 | 1.00 | 0.00 | C |
| ATOM | 356 | C3'  | A A | 12 | -22.223 | 20.750 | 62.495 | 1.00 | 0.00 | C |
| ATOM | 357 | O3'  | A A | 12 | -23.278 | 20.794 | 63.454 | 1.00 | 0.00 | O |
| ATOM | 358 | C4'  | A A | 12 | -22.532 | 21.595 | 61.259 | 1.00 | 0.00 | C |
| ATOM | 359 | O4'  | A A | 12 | -23.340 | 20.715 | 60.414 | 1.00 | 0.00 | O |
| ATOM | 360 | C5'  | A A | 12 | -21.343 | 22.073 | 60.461 | 1.00 | 0.00 | C |
| ATOM | 361 | O5'  | A A | 12 | -20.313 | 21.052 | 60.453 | 1.00 | 0.00 | O |
| ATOM | 362 | O1P  | A A | 12 | -18.431 | 22.114 | 61.744 | 1.00 | 0.00 | O |
| ATOM | 363 | O2P  | A A | 12 | -17.936 | 20.366 | 60.012 | 1.00 | 0.00 | O |
| ATOM | 364 | P    | A A | 12 | -18.784 | 21.504 | 60.447 | 1.00 | 0.00 | P |
| ATOM | 365 | H2   | A A | 12 | -26.550 | 16.688 | 58.191 | 1.00 | 0.00 | H |
| ATOM | 366 | H8   | A A | 12 | -20.665 | 18.911 | 59.442 | 1.00 | 0.00 | H |
| ATOM | 367 | H1'  | A A | 12 | -24.133 | 19.009 | 61.188 | 1.00 | 0.00 | H |
| ATOM | 368 | H3'  | A A | 12 | -21.294 | 21.068 | 62.966 | 1.00 | 0.00 | H |
| ATOM | 369 | H4'  | A A | 12 | -23.076 | 22.473 | 61.606 | 1.00 | 0.00 | H |
| ATOM | 370 | H61  | A A | 12 | -23.449 | 15.249 | 55.267 | 1.00 | 0.00 | H |
| ATOM | 371 | H62  | A A | 12 | -21.903 | 15.972 | 55.791 | 1.00 | 0.00 | H |
| ATOM | 372 | H2'1 | A A | 12 | -21.125 | 19.140 | 61.544 | 1.00 | 0.00 | H |
| ATOM | 373 | H2'2 | A A | 12 | -22.343 | 18.592 | 62.686 | 1.00 | 0.00 | H |
| ATOM | 374 | H5'1 | A A | 12 | -21.659 | 22.284 | 59.440 | 1.00 | 0.00 | H |
| ATOM | 375 | H5'2 | A A | 12 | -20.953 | 22.985 | 60.910 | 1.00 | 0.00 | H |
| ATOM | 376 | C1'  | G A | 13 | -26.359 | 16.045 | 62.677 | 1.00 | 0.00 | C |
| ATOM | 377 | N1   | G A | 13 | -24.901 | 13.236 | 58.676 | 1.00 | 0.00 | N |
| ATOM | 378 | C2   | G A | 13 | -26.163 | 13.435 | 59.208 | 1.00 | 0.00 | C |
| ATOM | 379 | N2   | G A | 13 | -27.170 | 12.800 | 58.595 | 1.00 | 0.00 | N |
| ATOM | 380 | N3   | G A | 13 | -26.400 | 14.207 | 60.268 | 1.00 | 0.00 | N |
| ATOM | 381 | C4   | G A | 13 | -25.266 | 14.764 | 60.766 | 1.00 | 0.00 | C |
| ATOM | 382 | C5   | G A | 13 | -23.968 | 14.619 | 60.304 | 1.00 | 0.00 | C |
| ATOM | 383 | C6   | G A | 13 | -23.715 | 13.804 | 59.177 | 1.00 | 0.00 | C |
| ATOM | 384 | O6   | G A | 13 | -22.643 | 13.554 | 58.625 | 1.00 | 0.00 | O |

|      |     |      |     |    |         |        |        |      |      |   |
|------|-----|------|-----|----|---------|--------|--------|------|------|---|
| ATOM | 385 | N7   | G A | 13 | -23.088 | 15.359 | 61.097 | 1.00 | 0.00 | N |
| ATOM | 386 | C8   | G A | 13 | -23.862 | 15.918 | 61.991 | 1.00 | 0.00 | C |
| ATOM | 387 | N9   | G A | 13 | -25.198 | 15.604 | 61.856 | 1.00 | 0.00 | N |
| ATOM | 388 | C2'  | G A | 13 | -26.053 | 16.150 | 64.165 | 1.00 | 0.00 | C |
| ATOM | 389 | C3'  | G A | 13 | -26.888 | 17.350 | 64.578 | 1.00 | 0.00 | C |
| ATOM | 390 | O3'  | G A | 13 | -28.221 | 16.922 | 64.850 | 1.00 | 0.00 | O |
| ATOM | 391 | C4'  | G A | 13 | -26.814 | 18.255 | 63.349 | 1.00 | 0.00 | C |
| ATOM | 392 | O4'  | G A | 13 | -26.749 | 17.326 | 62.221 | 1.00 | 0.00 | O |
| ATOM | 393 | C5'  | G A | 13 | -25.628 | 19.189 | 63.275 | 1.00 | 0.00 | C |
| ATOM | 394 | O5'  | G A | 13 | -24.454 | 18.536 | 63.819 | 1.00 | 0.00 | O |
| ATOM | 395 | O1P  | G A | 13 | -23.940 | 19.883 | 65.882 | 1.00 | 0.00 | O |
| ATOM | 396 | O2P  | G A | 13 | -22.099 | 18.670 | 64.685 | 1.00 | 0.00 | O |
| ATOM | 397 | P    | G A | 13 | -23.378 | 19.417 | 64.600 | 1.00 | 0.00 | P |
| ATOM | 398 | H1   | G A | 13 | -24.826 | 12.624 | 57.849 | 1.00 | 0.00 | H |
| ATOM | 399 | H8   | G A | 13 | -23.485 | 16.575 | 62.775 | 1.00 | 0.00 | H |
| ATOM | 400 | H1'  | G A | 13 | -27.186 | 15.358 | 62.496 | 1.00 | 0.00 | H |
| ATOM | 401 | H21  | G A | 13 | -26.978 | 12.208 | 57.773 | 1.00 | 0.00 | H |
| ATOM | 402 | H3'  | G A | 13 | -26.482 | 17.848 | 65.459 | 1.00 | 0.00 | H |
| ATOM | 403 | H22  | G A | 13 | -28.132 | 12.906 | 58.944 | 1.00 | 0.00 | H |
| ATOM | 404 | H4'  | G A | 13 | -27.717 | 18.863 | 63.348 | 1.00 | 0.00 | H |
| ATOM | 405 | H2'1 | G A | 13 | -24.994 | 16.318 | 64.358 | 1.00 | 0.00 | H |
| ATOM | 406 | H2'2 | G A | 13 | -26.347 | 15.253 | 64.712 | 1.00 | 0.00 | H |
| ATOM | 407 | H5'1 | G A | 13 | -25.452 | 19.461 | 62.235 | 1.00 | 0.00 | H |
| ATOM | 408 | H5'2 | G A | 13 | -25.847 | 20.090 | 63.847 | 1.00 | 0.00 | H |
| ATOM | 409 | C1'  | G A | 14 | -28.737 | 11.701 | 62.726 | 1.00 | 0.00 | C |
| ATOM | 410 | N1   | G A | 14 | -24.700 | 10.104 | 60.048 | 1.00 | 0.00 | N |
| ATOM | 411 | C2   | G A | 14 | -26.046 | 9.841  | 59.866 | 1.00 | 0.00 | C |
| ATOM | 412 | N2   | G A | 14 | -26.359 | 9.045  | 58.836 | 1.00 | 0.00 | N |
| ATOM | 413 | N3   | G A | 14 | -27.004 | 10.334 | 60.651 | 1.00 | 0.00 | N |
| ATOM | 414 | C4   | G A | 14 | -26.506 | 11.112 | 61.646 | 1.00 | 0.00 | C |
| ATOM | 415 | C5   | G A | 14 | -25.183 | 11.425 | 61.906 | 1.00 | 0.00 | C |
| ATOM | 416 | C6   | G A | 14 | -24.166 | 10.907 | 61.073 | 1.00 | 0.00 | C |
| ATOM | 417 | O6   | G A | 14 | -22.947 | 11.069 | 61.141 | 1.00 | 0.00 | O |
| ATOM | 418 | N7   | G A | 14 | -25.096 | 12.255 | 63.027 | 1.00 | 0.00 | N |
| ATOM | 419 | C8   | G A | 14 | -26.339 | 12.417 | 63.399 | 1.00 | 0.00 | C |
| ATOM | 420 | N9   | G A | 14 | -27.254 | 11.753 | 62.610 | 1.00 | 0.00 | N |
| ATOM | 421 | C2'  | G A | 14 | -29.239 | 11.656 | 64.163 | 1.00 | 0.00 | C |
| ATOM | 422 | C3'  | G A | 14 | -30.513 | 12.480 | 64.081 | 1.00 | 0.00 | C |
| ATOM | 423 | O3'  | G A | 14 | -31.585 | 11.645 | 63.648 | 1.00 | 0.00 | O |
| ATOM | 424 | C4'  | G A | 14 | -30.160 | 13.549 | 63.048 | 1.00 | 0.00 | C |
| ATOM | 425 | O4'  | G A | 14 | -29.258 | 12.869 | 62.119 | 1.00 | 0.00 | O |
| ATOM | 426 | C5'  | G A | 14 | -29.472 | 14.787 | 63.572 | 1.00 | 0.00 | C |
| ATOM | 427 | O5'  | G A | 14 | -28.564 | 14.427 | 64.643 | 1.00 | 0.00 | O |
| ATOM | 428 | O1P  | G A | 14 | -29.584 | 15.524 | 66.665 | 1.00 | 0.00 | O |
| ATOM | 429 | O2P  | G A | 14 | -27.112 | 15.105 | 66.579 | 1.00 | 0.00 | O |
| ATOM | 430 | P    | G A | 14 | -28.357 | 15.450 | 65.849 | 1.00 | 0.00 | P |
| ATOM | 431 | H1   | G A | 14 | -24.039 | 9.679  | 59.380 | 1.00 | 0.00 | H |
| ATOM | 432 | H8   | G A | 14 | -26.626 | 13.024 | 64.258 | 1.00 | 0.00 | H |
| ATOM | 433 | H1'  | G A | 14 | -29.094 | 10.841 | 62.160 | 1.00 | 0.00 | H |
| ATOM | 434 | H21  | G A | 14 | -25.613 | 8.671  | 58.232 | 1.00 | 0.00 | H |
| ATOM | 435 | H3'  | G A | 14 | -30.771 | 12.930 | 65.040 | 1.00 | 0.00 | H |
| ATOM | 436 | H22  | G A | 14 | -27.343 | 8.809  | 58.649 | 1.00 | 0.00 | H |
| ATOM | 437 | H4'  | G A | 14 | -31.095 | 13.860 | 62.582 | 1.00 | 0.00 | H |
| ATOM | 438 | H2'1 | G A | 14 | -28.528 | 12.093 | 64.863 | 1.00 | 0.00 | H |

|      |     |      |   |   |    |         |        |        |      |      |   |
|------|-----|------|---|---|----|---------|--------|--------|------|------|---|
| ATOM | 439 | H2'2 | G | A | 14 | -29.445 | 10.638 | 64.497 | 1.00 | 0.00 | H |
| ATOM | 440 | H5'1 | G | A | 14 | -28.917 | 15.258 | 62.761 | 1.00 | 0.00 | H |
| ATOM | 441 | H5'2 | G | A | 14 | -30.223 | 15.484 | 63.944 | 1.00 | 0.00 | H |
| ATOM | 442 | C1'  | A | A | 15 | -29.278 | 6.906  | 61.627 | 1.00 | 0.00 | C |
| ATOM | 443 | N1   | A | A | 15 | -24.154 | 6.980  | 61.355 | 1.00 | 0.00 | N |
| ATOM | 444 | C2   | A | A | 15 | -25.087 | 6.416  | 60.592 | 1.00 | 0.00 | C |
| ATOM | 445 | N3   | A | A | 15 | -26.397 | 6.439  | 60.718 | 1.00 | 0.00 | N |
| ATOM | 446 | C4   | A | A | 15 | -26.747 | 7.153  | 61.804 | 1.00 | 0.00 | C |
| ATOM | 447 | C5   | A | A | 15 | -25.919 | 7.789  | 62.685 | 1.00 | 0.00 | C |
| ATOM | 448 | C6   | A | A | 15 | -24.535 | 7.686  | 62.431 | 1.00 | 0.00 | C |
| ATOM | 449 | N6   | A | A | 15 | -23.602 | 8.260  | 63.210 | 1.00 | 0.00 | N |
| ATOM | 450 | N7   | A | A | 15 | -26.641 | 8.425  | 63.679 | 1.00 | 0.00 | N |
| ATOM | 451 | C8   | A | A | 15 | -27.879 | 8.159  | 63.385 | 1.00 | 0.00 | C |
| ATOM | 452 | N9   | A | A | 15 | -28.022 | 7.392  | 62.256 | 1.00 | 0.00 | N |
| ATOM | 453 | C2'  | A | A | 15 | -30.351 | 6.503  | 62.630 | 1.00 | 0.00 | C |
| ATOM | 454 | C3'  | A | A | 15 | -31.627 | 6.933  | 61.921 | 1.00 | 0.00 | C |
| ATOM | 455 | O3'  | A | A | 15 | -32.033 | 5.903  | 61.025 | 1.00 | 0.00 | O |
| ATOM | 456 | C4'  | A | A | 15 | -31.195 | 8.201  | 61.185 | 1.00 | 0.00 | C |
| ATOM | 457 | O4'  | A | A | 15 | -29.796 | 7.954  | 60.830 | 1.00 | 0.00 | O |
| ATOM | 458 | C5'  | A | A | 15 | -31.274 | 9.490  | 61.967 | 1.00 | 0.00 | C |
| ATOM | 459 | O5'  | A | A | 15 | -30.915 | 9.248  | 63.351 | 1.00 | 0.00 | O |
| ATOM | 460 | O1P  | A | A | 15 | -33.058 | 9.691  | 64.595 | 1.00 | 0.00 | O |
| ATOM | 461 | O2P  | A | A | 15 | -30.850 | 10.011 | 65.745 | 1.00 | 0.00 | O |
| ATOM | 462 | P    | A | A | 15 | -31.641 | 10.093 | 64.493 | 1.00 | 0.00 | P |
| ATOM | 463 | H2   | A | A | 15 | -24.710 | 5.853  | 59.738 | 1.00 | 0.00 | H |
| ATOM | 464 | H8   | A | A | 15 | -28.724 | 8.511  | 63.976 | 1.00 | 0.00 | H |
| ATOM | 465 | H1'  | A | A | 15 | -29.029 | 6.075  | 60.967 | 1.00 | 0.00 | H |
| ATOM | 466 | H3'  | A | A | 15 | -32.434 | 7.141  | 62.623 | 1.00 | 0.00 | H |
| ATOM | 467 | H4'  | A | A | 15 | -31.844 | 8.298  | 60.316 | 1.00 | 0.00 | H |
| ATOM | 468 | H61  | A | A | 15 | -22.604 | 8.156  | 62.978 | 1.00 | 0.00 | H |
| ATOM | 469 | H62  | A | A | 15 | -23.886 | 8.802  | 64.039 | 1.00 | 0.00 | H |
| ATOM | 470 | H2'1 | A | A | 15 | -30.236 | 7.015  | 63.585 | 1.00 | 0.00 | H |
| ATOM | 471 | H2'2 | A | A | 15 | -30.351 | 5.431  | 62.829 | 1.00 | 0.00 | H |
| ATOM | 472 | H5'1 | A | A | 15 | -30.588 | 10.216 | 61.531 | 1.00 | 0.00 | H |
| ATOM | 473 | H5'2 | A | A | 15 | -32.289 | 9.880  | 61.914 | 1.00 | 0.00 | H |
| ATOM | 474 | C1'  | C | A | 16 | -27.555 | 2.396  | 60.463 | 1.00 | 0.00 | C |
| ATOM | 475 | N1   | C | A | 16 | -27.018 | 3.126  | 61.644 | 1.00 | 0.00 | N |
| ATOM | 476 | C2   | C | A | 16 | -25.636 | 3.258  | 61.756 | 1.00 | 0.00 | C |
| ATOM | 477 | O2   | C | A | 16 | -24.916 | 2.767  | 60.877 | 1.00 | 0.00 | O |
| ATOM | 478 | N3   | C | A | 16 | -25.126 | 3.919  | 62.824 | 1.00 | 0.00 | N |
| ATOM | 479 | C4   | C | A | 16 | -25.931 | 4.440  | 63.759 | 1.00 | 0.00 | C |
| ATOM | 480 | N4   | C | A | 16 | -25.378 | 5.080  | 64.780 | 1.00 | 0.00 | N |
| ATOM | 481 | C5   | C | A | 16 | -27.356 | 4.316  | 63.673 | 1.00 | 0.00 | C |
| ATOM | 482 | C6   | C | A | 16 | -27.848 | 3.650  | 62.586 | 1.00 | 0.00 | C |
| ATOM | 483 | C2'  | C | A | 16 | -28.769 | 1.533  | 60.776 | 1.00 | 0.00 | C |
| ATOM | 484 | C3'  | C | A | 16 | -29.595 | 1.675  | 59.506 | 1.00 | 0.00 | C |
| ATOM | 485 | O3'  | C | A | 16 | -29.136 | 0.731  | 58.541 | 1.00 | 0.00 | O |
| ATOM | 486 | C4'  | C | A | 16 | -29.320 | 3.116  | 59.082 | 1.00 | 0.00 | C |
| ATOM | 487 | O4'  | C | A | 16 | -27.940 | 3.360  | 59.500 | 1.00 | 0.00 | O |
| ATOM | 488 | C5'  | C | A | 16 | -30.205 | 4.176  | 59.697 | 1.00 | 0.00 | C |
| ATOM | 489 | O5'  | C | A | 16 | -30.509 | 3.826  | 61.071 | 1.00 | 0.00 | O |
| ATOM | 490 | O1P  | C | A | 16 | -32.989 | 3.399  | 61.029 | 1.00 | 0.00 | O |
| ATOM | 491 | O2P  | C | A | 16 | -31.884 | 4.168  | 63.146 | 1.00 | 0.00 | O |
| ATOM | 492 | P    | C | A | 16 | -31.936 | 4.216  | 61.664 | 1.00 | 0.00 | P |

|      |     |      |     |    |         |        |        |      |      |   |
|------|-----|------|-----|----|---------|--------|--------|------|------|---|
| ATOM | 493 | H5   | C A | 16 | -28.015 | 4.732  | 64.436 | 1.00 | 0.00 | H |
| ATOM | 494 | H6   | C A | 16 | -28.927 | 3.536  | 62.472 | 1.00 | 0.00 | H |
| ATOM | 495 | H1'  | C A | 16 | -26.750 | 1.798  | 60.036 | 1.00 | 0.00 | H |
| ATOM | 496 | H3'  | C A | 16 | -30.658 | 1.514  | 59.692 | 1.00 | 0.00 | H |
| ATOM | 497 | H4'  | C A | 16 | -29.454 | 3.158  | 58.002 | 1.00 | 0.00 | H |
| ATOM | 498 | H41  | C A | 16 | -25.975 | 5.491  | 65.513 | 1.00 | 0.00 | H |
| ATOM | 499 | H42  | C A | 16 | -24.354 | 5.165  | 64.842 | 1.00 | 0.00 | H |
| ATOM | 500 | H2'1 | C A | 16 | -29.318 | 1.889  | 61.647 | 1.00 | 0.00 | H |
| ATOM | 501 | H2'2 | C A | 16 | -28.501 | 0.492  | 60.961 | 1.00 | 0.00 | H |
| ATOM | 502 | H5'1 | C A | 16 | -29.688 | 5.135  | 59.666 | 1.00 | 0.00 | H |
| ATOM | 503 | H5'2 | C A | 16 | -31.129 | 4.248  | 59.123 | 1.00 | 0.00 | H |
| ATOM | 504 | C1'  | G A | 17 | -24.130 | -1.178 | 60.384 | 1.00 | 0.00 | C |
| ATOM | 505 | N1   | G A | 17 | -22.367 | 1.199  | 64.539 | 1.00 | 0.00 | N |
| ATOM | 506 | C2   | G A | 17 | -21.680 | 0.668  | 63.461 | 1.00 | 0.00 | C |
| ATOM | 507 | N2   | G A | 17 | -20.347 | 0.785  | 63.496 | 1.00 | 0.00 | N |
| ATOM | 508 | N3   | G A | 17 | -22.276 | 0.070  | 62.431 | 1.00 | 0.00 | N |
| ATOM | 509 | C4   | G A | 17 | -23.628 | 0.035  | 62.566 | 1.00 | 0.00 | C |
| ATOM | 510 | C5   | G A | 17 | -24.397 | 0.533  | 63.605 | 1.00 | 0.00 | C |
| ATOM | 511 | C6   | G A | 17 | -23.766 | 1.172  | 64.697 | 1.00 | 0.00 | C |
| ATOM | 512 | O6   | G A | 17 | -24.271 | 1.672  | 65.702 | 1.00 | 0.00 | O |
| ATOM | 513 | N7   | G A | 17 | -25.751 | 0.292  | 63.362 | 1.00 | 0.00 | N |
| ATOM | 514 | C8   | G A | 17 | -25.760 | -0.326 | 62.209 | 1.00 | 0.00 | C |
| ATOM | 515 | N9   | G A | 17 | -24.508 | -0.520 | 61.663 | 1.00 | 0.00 | N |
| ATOM | 516 | C2'  | G A | 17 | -24.980 | -2.395 | 60.044 | 1.00 | 0.00 | C |
| ATOM | 517 | C3'  | G A | 17 | -25.080 | -2.301 | 58.531 | 1.00 | 0.00 | C |
| ATOM | 518 | O3'  | G A | 17 | -23.927 | -2.906 | 57.947 | 1.00 | 0.00 | O |
| ATOM | 519 | C4'  | G A | 17 | -25.127 | -0.793 | 58.287 | 1.00 | 0.00 | C |
| ATOM | 520 | O4'  | G A | 17 | -24.292 | -0.230 | 59.346 | 1.00 | 0.00 | O |
| ATOM | 521 | C5'  | G A | 17 | -26.491 | -0.147 | 58.349 | 1.00 | 0.00 | C |
| ATOM | 522 | O5'  | G A | 17 | -27.287 | -0.781 | 59.381 | 1.00 | 0.00 | O |
| ATOM | 523 | O1P  | G A | 17 | -29.134 | -1.897 | 58.085 | 1.00 | 0.00 | O |
| ATOM | 524 | O2P  | G A | 17 | -29.520 | -1.184 | 60.460 | 1.00 | 0.00 | O |
| ATOM | 525 | P    | G A | 17 | -28.860 | -0.920 | 59.158 | 1.00 | 0.00 | P |
| ATOM | 526 | H1   | G A | 17 | -21.810 | 1.647  | 65.282 | 1.00 | 0.00 | H |
| ATOM | 527 | H8   | G A | 17 | -26.677 | -0.660 | 61.723 | 1.00 | 0.00 | H |
| ATOM | 528 | H1'  | G A | 17 | -23.073 | -1.443 | 60.435 | 1.00 | 0.00 | H |
| ATOM | 529 | H21  | G A | 17 | -19.893 | 1.252  | 64.294 | 1.00 | 0.00 | H |
| ATOM | 530 | H3'  | G A | 17 | -25.977 | -2.790 | 58.149 | 1.00 | 0.00 | H |
| ATOM | 531 | H22  | G A | 17 | -19.778 | 0.408  | 62.725 | 1.00 | 0.00 | H |
| ATOM | 532 | H4'  | G A | 17 | -24.723 | -0.622 | 57.289 | 1.00 | 0.00 | H |
| ATOM | 533 | H2'1 | G A | 17 | -25.965 | -2.354 | 60.510 | 1.00 | 0.00 | H |
| ATOM | 534 | H2'2 | G A | 17 | -24.509 | -3.329 | 60.354 | 1.00 | 0.00 | H |
| ATOM | 535 | H5'1 | G A | 17 | -26.373 | 0.913  | 58.574 | 1.00 | 0.00 | H |
| ATOM | 536 | H5'2 | G A | 17 | -26.983 | -0.255 | 57.383 | 1.00 | 0.00 | H |
| ATOM | 537 | C1'  | G A | 18 | -20.127 | -3.541 | 62.092 | 1.00 | 0.00 | C |
| ATOM | 538 | N1   | G A | 18 | -21.481 | -1.438 | 66.538 | 1.00 | 0.00 | N |
| ATOM | 539 | C2   | G A | 18 | -20.229 | -1.569 | 65.962 | 1.00 | 0.00 | C |
| ATOM | 540 | N2   | G A | 18 | -19.201 | -1.075 | 66.666 | 1.00 | 0.00 | N |
| ATOM | 541 | N3   | G A | 18 | -20.021 | -2.145 | 64.781 | 1.00 | 0.00 | N |
| ATOM | 542 | C4   | G A | 18 | -21.171 | -2.593 | 64.213 | 1.00 | 0.00 | C |
| ATOM | 543 | C5   | G A | 18 | -22.460 | -2.510 | 64.714 | 1.00 | 0.00 | C |
| ATOM | 544 | C6   | G A | 18 | -22.683 | -1.894 | 65.968 | 1.00 | 0.00 | C |
| ATOM | 545 | O6   | G A | 18 | -23.743 | -1.728 | 66.572 | 1.00 | 0.00 | O |
| ATOM | 546 | N7   | G A | 18 | -23.362 | -3.093 | 63.823 | 1.00 | 0.00 | N |

|      |     |      |     |    |         |        |        |      |      |   |
|------|-----|------|-----|----|---------|--------|--------|------|------|---|
| ATOM | 547 | C8   | G A | 18 | -22.611 | -3.498 | 62.832 | 1.00 | 0.00 | C |
| ATOM | 548 | N9   | G A | 18 | -21.268 | -3.231 | 62.997 | 1.00 | 0.00 | N |
| ATOM | 549 | C2'  | G A | 18 | -20.251 | -4.884 | 61.385 | 1.00 | 0.00 | C |
| ATOM | 550 | C3'  | G A | 18 | -19.635 | -4.586 | 60.028 | 1.00 | 0.00 | C |
| ATOM | 551 | O3'  | G A | 18 | -18.219 | -4.729 | 60.115 | 1.00 | 0.00 | O |
| ATOM | 552 | C4'  | G A | 18 | -20.054 | -3.139 | 59.774 | 1.00 | 0.00 | C |
| ATOM | 553 | O4'  | G A | 18 | -20.072 | -2.531 | 61.104 | 1.00 | 0.00 | O |
| ATOM | 554 | C5'  | G A | 18 | -21.406 | -2.936 | 59.131 | 1.00 | 0.00 | C |
| ATOM | 555 | O5'  | G A | 18 | -22.339 | -3.928 | 59.625 | 1.00 | 0.00 | O |
| ATOM | 556 | O1P  | G A | 18 | -22.848 | -5.316 | 57.587 | 1.00 | 0.00 | O |
| ATOM | 557 | O2P  | G A | 18 | -24.538 | -5.129 | 59.431 | 1.00 | 0.00 | O |
| ATOM | 558 | P    | G A | 18 | -23.463 | -4.484 | 58.638 | 1.00 | 0.00 | P |
| ATOM | 559 | H1   | G A | 18 | -21.535 | -0.969 | 67.455 | 1.00 | 0.00 | H |
| ATOM | 560 | H8   | G A | 18 | -23.010 | -4.004 | 61.952 | 1.00 | 0.00 | H |
| ATOM | 561 | H1'  | G A | 18 | -19.206 | -3.491 | 62.675 | 1.00 | 0.00 | H |
| ATOM | 562 | H21  | G A | 18 | -19.372 | -0.627 | 67.579 | 1.00 | 0.00 | H |
| ATOM | 563 | H3'  | G A | 18 | -20.018 | -5.249 | 59.251 | 1.00 | 0.00 | H |
| ATOM | 564 | H22  | G A | 18 | -18.245 | -1.144 | 66.294 | 1.00 | 0.00 | H |
| ATOM | 565 | H4'  | G A | 18 | -19.303 | -2.703 | 59.116 | 1.00 | 0.00 | H |
| ATOM | 566 | H2'1 | G A | 18 | -21.288 | -5.205 | 61.288 | 1.00 | 0.00 | H |
| ATOM | 567 | H2'2 | G A | 18 | -19.710 | -5.676 | 61.903 | 1.00 | 0.00 | H |
| ATOM | 568 | H5'1 | G A | 18 | -21.769 | -1.937 | 59.370 | 1.00 | 0.00 | H |
| ATOM | 569 | H5'2 | G A | 18 | -21.305 | -3.030 | 58.050 | 1.00 | 0.00 | H |
| ATOM | 570 | C1'  | T A | 19 | -16.904 | -4.880 | 65.603 | 1.00 | 0.00 | C |
| ATOM | 571 | N1   | T A | 19 | -18.364 | -5.049 | 65.827 | 1.00 | 0.00 | N |
| ATOM | 572 | C2   | T A | 19 | -18.887 | -4.531 | 66.995 | 1.00 | 0.00 | C |
| ATOM | 573 | O2   | T A | 19 | -18.204 | -3.956 | 67.825 | 1.00 | 0.00 | O |
| ATOM | 574 | N3   | T A | 19 | -20.248 | -4.710 | 67.162 | 1.00 | 0.00 | N |
| ATOM | 575 | C4   | T A | 19 | -21.106 | -5.345 | 66.291 | 1.00 | 0.00 | C |
| ATOM | 576 | O4   | T A | 19 | -22.311 | -5.447 | 66.551 | 1.00 | 0.00 | O |
| ATOM | 577 | C5   | T A | 19 | -20.470 | -5.854 | 65.099 | 1.00 | 0.00 | C |
| ATOM | 578 | C6   | T A | 19 | -19.145 | -5.697 | 64.902 | 1.00 | 0.00 | C |
| ATOM | 579 | C7   | T A | 19 | -21.367 | -6.551 | 64.120 | 1.00 | 0.00 | C |
| ATOM | 580 | C2'  | T A | 19 | -16.241 | -6.082 | 64.940 | 1.00 | 0.00 | C |
| ATOM | 581 | C3'  | T A | 19 | -15.195 | -5.420 | 64.057 | 1.00 | 0.00 | C |
| ATOM | 582 | O3'  | T A | 19 | -14.025 | -5.162 | 64.829 | 1.00 | 0.00 | O |
| ATOM | 583 | C4'  | T A | 19 | -15.890 | -4.135 | 63.614 | 1.00 | 0.00 | C |
| ATOM | 584 | O4'  | T A | 19 | -16.723 | -3.762 | 64.756 | 1.00 | 0.00 | O |
| ATOM | 585 | C5'  | T A | 19 | -16.766 | -4.233 | 62.387 | 1.00 | 0.00 | C |
| ATOM | 586 | O5'  | T A | 19 | -17.444 | -5.514 | 62.371 | 1.00 | 0.00 | O |
| ATOM | 587 | O1P  | T A | 19 | -16.460 | -6.669 | 60.363 | 1.00 | 0.00 | O |
| ATOM | 588 | O2P  | T A | 19 | -18.774 | -7.252 | 61.137 | 1.00 | 0.00 | O |
| ATOM | 589 | P    | T A | 19 | -17.729 | -6.215 | 60.967 | 1.00 | 0.00 | P |
| ATOM | 590 | H3   | T A | 19 | -20.662 | -4.328 | 68.025 | 1.00 | 0.00 | H |
| ATOM | 591 | H6   | T A | 19 | -18.687 | -6.089 | 63.993 | 1.00 | 0.00 | H |
| ATOM | 592 | H1'  | T A | 19 | -16.435 | -4.656 | 66.561 | 1.00 | 0.00 | H |
| ATOM | 593 | H3'  | T A | 19 | -14.933 | -6.042 | 63.201 | 1.00 | 0.00 | H |
| ATOM | 594 | H4'  | T A | 19 | -15.104 | -3.407 | 63.403 | 1.00 | 0.00 | H |
| ATOM | 595 | H71  | T A | 19 | -21.093 | -7.604 | 64.062 | 1.00 | 0.00 | H |
| ATOM | 596 | H72  | T A | 19 | -22.402 | -6.464 | 64.451 | 1.00 | 0.00 | H |
| ATOM | 597 | H73  | T A | 19 | -21.261 | -6.093 | 63.136 | 1.00 | 0.00 | H |
| ATOM | 598 | H2'1 | T A | 19 | -16.945 | -6.668 | 64.351 | 1.00 | 0.00 | H |
| ATOM | 599 | H2'2 | T A | 19 | -15.782 | -6.754 | 65.666 | 1.00 | 0.00 | H |
| ATOM | 600 | H5'1 | T A | 19 | -17.500 | -3.428 | 62.405 | 1.00 | 0.00 | H |

|      |     |      |     |   |    |         |         |        |      |      |   |
|------|-----|------|-----|---|----|---------|---------|--------|------|------|---|
| ATOM | 601 | H5'2 | T   | A | 19 | -16.147 | -4.133  | 61.496 | 1.00 | 0.00 | H |
| ATOM | 602 | C01  | LNK | A | 20 | -11.188 | -7.386  | 65.757 | 0.00 | 0.00 | C |
| ATOM | 603 | O1   | LNK | A | 20 | -12.455 | -7.158  | 65.137 | 1.00 | 0.00 | O |
| ATOM | 604 | S    | LNK | A | 20 | -8.698  | -10.406 | 66.482 | 0.00 | 0.00 | S |
| ATOM | 605 | C02  | LNK | A | 20 | -10.825 | -8.879  | 65.646 | 0.00 | 0.00 | C |
| ATOM | 606 | C03  | LNK | A | 20 | -10.095 | -9.327  | 66.927 | 0.00 | 0.00 | C |
| ATOM | 607 | O1P  | LNK | A | 20 | -14.776 | -7.350  | 66.094 | 1.00 | 0.00 | O |
| ATOM | 608 | O2P  | LNK | A | 20 | -13.046 | -5.956  | 67.263 | 1.00 | 0.00 | O |
| ATOM | 609 | P    | LNK | A | 20 | -13.609 | -6.452  | 65.983 | 1.00 | 0.00 | P |
| ATOM | 610 | H01  | LNK | A | 20 | -11.240 | -7.103  | 66.809 | 0.00 | 0.00 | H |
| ATOM | 611 | H02  | LNK | A | 20 | -10.425 | -6.789  | 65.258 | 0.00 | 0.00 | H |
| ATOM | 612 | H03  | LNK | A | 20 | -10.787 | -9.875  | 67.566 | 0.00 | 0.00 | H |
| ATOM | 613 | H04  | LNK | A | 20 | -10.174 | -9.031  | 64.784 | 0.00 | 0.00 | H |
| ATOM | 614 | H05  | LNK | A | 20 | -11.735 | -9.465  | 65.522 | 0.00 | 0.00 | H |
| ATOM | 615 | H06  | LNK | A | 20 | -9.723  | -8.452  | 67.459 | 0.00 | 0.00 | H |
| ATOM | 616 | AU   | LNK | A | 20 | -8.435  | -10.686 | 67.050 |      |      |   |
| TER  |     |      |     |   |    |         |         |        |      |      |   |
| ATOM | 618 | C1'  | A   | B | 2  | -22.869 | -1.525  | 74.091 | 1.00 | 0.00 | C |
| ATOM | 619 | N1   | A   | B | 2  | -21.452 | -3.630  | 69.630 | 1.00 | 0.00 | N |
| ATOM | 620 | C2   | A   | B | 2  | -20.774 | -2.985  | 70.573 | 1.00 | 0.00 | C |
| ATOM | 621 | N3   | A   | B | 2  | -21.202 | -2.469  | 71.706 | 1.00 | 0.00 | N |
| ATOM | 622 | C4   | A   | B | 2  | -22.528 | -2.666  | 71.836 | 1.00 | 0.00 | C |
| ATOM | 623 | C5   | A   | B | 2  | -23.363 | -3.303  | 70.962 | 1.00 | 0.00 | C |
| ATOM | 624 | C6   | A   | B | 2  | -22.772 | -3.812  | 69.787 | 1.00 | 0.00 | C |
| ATOM | 625 | N6   | A   | B | 2  | -23.468 | -4.462  | 68.838 | 1.00 | 0.00 | N |
| ATOM | 626 | N7   | A   | B | 2  | -24.664 | -3.314  | 71.433 | 1.00 | 0.00 | N |
| ATOM | 627 | C8   | A   | B | 2  | -24.590 | -2.685  | 72.569 | 1.00 | 0.00 | C |
| ATOM | 628 | N9   | A   | B | 2  | -23.323 | -2.265  | 72.881 | 1.00 | 0.00 | N |
| ATOM | 629 | C2'  | A   | B | 2  | -23.866 | -0.484  | 74.583 | 1.00 | 0.00 | C |
| ATOM | 630 | C3'  | A   | B | 2  | -23.695 | -0.569  | 76.091 | 1.00 | 0.00 | C |
| ATOM | 631 | O3'  | A   | B | 2  | -22.596 | 0.249   | 76.483 | 1.00 | 0.00 | O |
| ATOM | 632 | C4'  | A   | B | 2  | -23.419 | -2.055  | 76.318 | 1.00 | 0.00 | C |
| ATOM | 633 | O4'  | A   | B | 2  | -22.678 | -2.471  | 75.125 | 1.00 | 0.00 | O |
| ATOM | 634 | C5'  | A   | B | 2  | -24.628 | -2.947  | 76.473 | 1.00 | 0.00 | C |
| ATOM | 635 | O5'  | A   | B | 2  | -25.688 | -2.491  | 75.596 | 1.00 | 0.00 | O |
| ATOM | 636 | H2   | A   | B | 2  | -19.709 | -2.867  | 70.384 | 1.00 | 0.00 | H |
| ATOM | 637 | H8   | A   | B | 2  | -25.453 | -2.509  | 73.212 | 1.00 | 0.00 | H |
| ATOM | 638 | H1'  | A   | B | 2  | -21.905 | -1.068  | 73.869 | 1.00 | 0.00 | H |
| ATOM | 639 | H3'  | A   | B | 2  | -24.591 | -0.250  | 76.623 | 1.00 | 0.00 | H |
| ATOM | 640 | H4'  | A   | B | 2  | -22.830 | -2.130  | 77.232 | 1.00 | 0.00 | H |
| ATOM | 641 | H61  | A   | B | 2  | -22.987 | -4.817  | 68.000 | 1.00 | 0.00 | H |
| ATOM | 642 | H62  | A   | B | 2  | -24.482 | -4.605  | 68.951 | 1.00 | 0.00 | H |
| ATOM | 643 | H2'1 | A   | B | 2  | -24.889 | -0.717  | 74.286 | 1.00 | 0.00 | H |
| ATOM | 644 | H2'2 | A   | B | 2  | -23.636 | 0.516   | 74.213 | 1.00 | 0.00 | H |
| ATOM | 645 | H5'1 | A   | B | 2  | -24.352 | -3.969  | 76.217 | 1.00 | 0.00 | H |
| ATOM | 646 | H5'2 | A   | B | 2  | -24.965 | -2.914  | 77.508 | 1.00 | 0.00 | H |
| ATOM | 647 | C1'  | C   | B | 3  | -19.701 | 1.468   | 71.713 | 1.00 | 0.00 | C |
| ATOM | 648 | N1   | C   | B | 3  | -20.909 | 0.943   | 71.019 | 1.00 | 0.00 | N |
| ATOM | 649 | C2   | C   | B | 3  | -20.735 | 0.331   | 69.780 | 1.00 | 0.00 | C |
| ATOM | 650 | O2   | C   | B | 3  | -19.592 | 0.247   | 69.311 | 1.00 | 0.00 | O |
| ATOM | 651 | N3   | C   | B | 3  | -21.821 | -0.154  | 69.132 | 1.00 | 0.00 | N |
| ATOM | 652 | C4   | C   | B | 3  | -23.046 | -0.048  | 69.665 | 1.00 | 0.00 | C |
| ATOM | 653 | N4   | C   | B | 3  | -24.074 | -0.542  | 68.989 | 1.00 | 0.00 | N |
| ATOM | 654 | C5   | C   | B | 3  | -23.257 | 0.582   | 70.936 | 1.00 | 0.00 | C |

|      |     |      |     |   |         |        |        |      |      |   |
|------|-----|------|-----|---|---------|--------|--------|------|------|---|
| ATOM | 655 | C6   | C B | 3 | -22.146 | 1.059  | 71.574 | 1.00 | 0.00 | C |
| ATOM | 656 | C2'  | C B | 3 | -19.937 | 2.780  | 72.449 | 1.00 | 0.00 | C |
| ATOM | 657 | C3'  | C B | 3 | -19.049 | 2.621  | 73.674 | 1.00 | 0.00 | C |
| ATOM | 658 | O3'  | C B | 3 | -17.719 | 3.011  | 73.341 | 1.00 | 0.00 | O |
| ATOM | 659 | C4'  | C B | 3 | -19.154 | 1.128  | 73.977 | 1.00 | 0.00 | C |
| ATOM | 660 | O4'  | C B | 3 | -19.297 | 0.500  | 72.663 | 1.00 | 0.00 | O |
| ATOM | 661 | C5'  | C B | 3 | -20.314 | 0.700  | 74.846 | 1.00 | 0.00 | C |
| ATOM | 662 | O5'  | C B | 3 | -21.481 | 1.503  | 74.536 | 1.00 | 0.00 | O |
| ATOM | 663 | O1P  | C B | 3 | -21.863 | 2.815  | 76.649 | 1.00 | 0.00 | O |
| ATOM | 664 | O2P  | C B | 3 | -23.790 | 2.297  | 75.128 | 1.00 | 0.00 | O |
| ATOM | 665 | P    | C B | 3 | -22.495 | 1.867  | 75.710 | 1.00 | 0.00 | P |
| ATOM | 666 | H5   | C B | 3 | -24.251 | 0.677  | 71.372 | 1.00 | 0.00 | H |
| ATOM | 667 | H6   | C B | 3 | -22.254 | 1.539  | 72.546 | 1.00 | 0.00 | H |
| ATOM | 668 | H1'  | C B | 3 | -18.902 | 1.571  | 70.978 | 1.00 | 0.00 | H |
| ATOM | 669 | H3'  | C B | 3 | -19.402 | 3.219  | 74.514 | 1.00 | 0.00 | H |
| ATOM | 670 | H4'  | C B | 3 | -18.235 | 0.843  | 74.489 | 1.00 | 0.00 | H |
| ATOM | 671 | H41  | C B | 3 | -25.026 | -0.477 | 69.379 | 1.00 | 0.00 | H |
| ATOM | 672 | H42  | C B | 3 | -23.921 | -0.993 | 68.075 | 1.00 | 0.00 | H |
| ATOM | 673 | H2'1 | C B | 3 | -20.980 | 2.915  | 72.731 | 1.00 | 0.00 | H |
| ATOM | 674 | H2'2 | C B | 3 | -19.643 | 3.646  | 71.855 | 1.00 | 0.00 | H |
| ATOM | 675 | H5'1 | C B | 3 | -20.532 | -0.352 | 74.660 | 1.00 | 0.00 | H |
| ATOM | 676 | H5'2 | C B | 3 | -20.045 | 0.830  | 75.892 | 1.00 | 0.00 | H |
| ATOM | 677 | C1'  | C B | 4 | -17.457 | 3.287  | 67.690 | 1.00 | 0.00 | C |
| ATOM | 678 | N1   | C B | 4 | -18.942 | 3.200  | 67.755 | 1.00 | 0.00 | N |
| ATOM | 679 | C2   | C B | 4 | -19.606 | 2.580  | 66.699 | 1.00 | 0.00 | C |
| ATOM | 680 | O2   | C B | 4 | -18.941 | 2.128  | 65.757 | 1.00 | 0.00 | O |
| ATOM | 681 | N3   | C B | 4 | -20.957 | 2.490  | 66.738 | 1.00 | 0.00 | N |
| ATOM | 682 | C4   | C B | 4 | -21.651 | 2.988  | 67.771 | 1.00 | 0.00 | C |
| ATOM | 683 | N4   | C B | 4 | -22.970 | 2.870  | 67.760 | 1.00 | 0.00 | N |
| ATOM | 684 | C5   | C B | 4 | -20.995 | 3.636  | 68.869 | 1.00 | 0.00 | C |
| ATOM | 685 | C6   | C B | 4 | -19.632 | 3.710  | 68.810 | 1.00 | 0.00 | C |
| ATOM | 686 | C2'  | C B | 4 | -16.895 | 4.594  | 68.232 | 1.00 | 0.00 | C |
| ATOM | 687 | C3'  | C B | 4 | -15.601 | 4.134  | 68.886 | 1.00 | 0.00 | C |
| ATOM | 688 | O3'  | C B | 4 | -14.575 | 4.067  | 67.899 | 1.00 | 0.00 | O |
| ATOM | 689 | C4'  | C B | 4 | -15.967 | 2.757  | 69.433 | 1.00 | 0.00 | C |
| ATOM | 690 | O4'  | C B | 4 | -16.930 | 2.228  | 68.466 | 1.00 | 0.00 | O |
| ATOM | 691 | C5'  | C B | 4 | -16.596 | 2.724  | 70.808 | 1.00 | 0.00 | C |
| ATOM | 692 | O5'  | C B | 4 | -17.466 | 3.873  | 70.975 | 1.00 | 0.00 | O |
| ATOM | 693 | O1P  | C B | 4 | -16.324 | 5.210  | 72.776 | 1.00 | 0.00 | O |
| ATOM | 694 | O2P  | C B | 4 | -18.809 | 5.378  | 72.472 | 1.00 | 0.00 | O |
| ATOM | 695 | P    | C B | 4 | -17.588 | 4.537  | 72.419 | 1.00 | 0.00 | P |
| ATOM | 696 | H5   | C B | 4 | -21.555 | 4.049  | 69.708 | 1.00 | 0.00 | H |
| ATOM | 697 | H6   | C B | 4 | -19.088 | 4.187  | 69.625 | 1.00 | 0.00 | H |
| ATOM | 698 | H1'  | C B | 4 | -17.151 | 3.129  | 66.656 | 1.00 | 0.00 | H |
| ATOM | 699 | H3'  | C B | 4 | -15.288 | 4.805  | 69.687 | 1.00 | 0.00 | H |
| ATOM | 700 | H4'  | C B | 4 | -15.045 | 2.177  | 69.476 | 1.00 | 0.00 | H |
| ATOM | 701 | H41  | C B | 4 | -23.528 | 3.242  | 68.543 | 1.00 | 0.00 | H |
| ATOM | 702 | H42  | C B | 4 | -23.441 | 2.406  | 66.968 | 1.00 | 0.00 | H |
| ATOM | 703 | H2'1 | C B | 4 | -17.561 | 5.062  | 68.956 | 1.00 | 0.00 | H |
| ATOM | 704 | H2'2 | C B | 4 | -16.704 | 5.321  | 67.442 | 1.00 | 0.00 | H |
| ATOM | 705 | H5'1 | C B | 4 | -17.172 | 1.806  | 70.916 | 1.00 | 0.00 | H |
| ATOM | 706 | H5'2 | C B | 4 | -15.808 | 2.746  | 71.560 | 1.00 | 0.00 | H |
| ATOM | 707 | C1'  | G B | 5 | -17.142 | 4.311  | 62.855 | 1.00 | 0.00 | C |
| ATOM | 708 | N1   | G B | 5 | -22.238 | 4.203  | 63.079 | 1.00 | 0.00 | N |



|      |     |      |     |   |         |       |        |      |      |   |
|------|-----|------|-----|---|---------|-------|--------|------|------|---|
| ATOM | 709 | C2   | G B | 5 | -21.379 | 3.683 | 62.126 | 1.00 | 0.00 | C |
| ATOM | 710 | N2   | G B | 5 | -21.955 | 3.051 | 61.096 | 1.00 | 0.00 | N |
| ATOM | 711 | N3   | G B | 5 | -20.053 | 3.784 | 62.198 | 1.00 | 0.00 | N |
| ATOM | 712 | C4   | G B | 5 | -19.645 | 4.460 | 63.304 | 1.00 | 0.00 | C |
| ATOM | 713 | C5   | G B | 5 | -20.428 | 5.016 | 64.302 | 1.00 | 0.00 | C |
| ATOM | 714 | C6   | G B | 5 | -21.835 | 4.906 | 64.230 | 1.00 | 0.00 | C |
| ATOM | 715 | O6   | G B | 5 | -22.687 | 5.330 | 65.010 | 1.00 | 0.00 | O |
| ATOM | 716 | N7   | G B | 5 | -19.619 | 5.627 | 65.263 | 1.00 | 0.00 | N |
| ATOM | 717 | C8   | G B | 5 | -18.401 | 5.425 | 64.829 | 1.00 | 0.00 | C |
| ATOM | 718 | N9   | G B | 5 | -18.336 | 4.723 | 63.643 | 1.00 | 0.00 | N |
| ATOM | 719 | C2'  | G B | 5 | -16.026 | 5.347 | 62.847 | 1.00 | 0.00 | C |
| ATOM | 720 | C3'  | G B | 5 | -14.782 | 4.473 | 62.855 | 1.00 | 0.00 | C |
| ATOM | 721 | O3'  | G B | 5 | -14.473 | 4.085 | 61.519 | 1.00 | 0.00 | O |
| ATOM | 722 | C4'  | G B | 5 | -15.206 | 3.287 | 63.719 | 1.00 | 0.00 | C |
| ATOM | 723 | O4'  | G B | 5 | -16.632 | 3.125 | 63.433 | 1.00 | 0.00 | O |
| ATOM | 724 | C5'  | G B | 5 | -15.026 | 3.443 | 65.210 | 1.00 | 0.00 | C |
| ATOM | 725 | O5'  | G B | 5 | -15.307 | 4.811 | 65.597 | 1.00 | 0.00 | O |
| ATOM | 726 | O1P  | G B | 5 | -13.075 | 5.664 | 66.388 | 1.00 | 0.00 | O |
| ATOM | 727 | O2P  | G B | 5 | -15.191 | 6.653 | 67.302 | 1.00 | 0.00 | O |
| ATOM | 728 | P    | G B | 5 | -14.478 | 5.456 | 66.798 | 1.00 | 0.00 | P |
| ATOM | 729 | H1   | G B | 5 | -23.250 | 4.064 | 62.934 | 1.00 | 0.00 | H |
| ATOM | 730 | H8   | G B | 5 | -17.516 | 5.779 | 65.356 | 1.00 | 0.00 | H |
| ATOM | 731 | H1'  | G B | 5 | -17.466 | 4.078 | 61.841 | 1.00 | 0.00 | H |
| ATOM | 732 | H21  | G B | 5 | -22.981 | 2.974 | 61.049 | 1.00 | 0.00 | H |
| ATOM | 733 | H3'  | G B | 5 | -13.924 | 4.988 | 63.289 | 1.00 | 0.00 | H |
| ATOM | 734 | H22  | G B | 5 | -21.372 | 2.644 | 60.351 | 1.00 | 0.00 | H |
| ATOM | 735 | H4'  | G B | 5 | -14.609 | 2.433 | 63.399 | 1.00 | 0.00 | H |
| ATOM | 736 | H2'1 | G B | 5 | -16.060 | 5.999 | 63.720 | 1.00 | 0.00 | H |
| ATOM | 737 | H2'2 | G B | 5 | -16.059 | 5.983 | 61.962 | 1.00 | 0.00 | H |
| ATOM | 738 | H5'1 | G B | 5 | -15.708 | 2.767 | 65.725 | 1.00 | 0.00 | H |
| ATOM | 739 | H5'2 | G B | 5 | -14.000 | 3.189 | 65.475 | 1.00 | 0.00 | H |
| ATOM | 740 | C1'  | T B | 6 | -19.010 | 5.230 | 58.364 | 1.00 | 0.00 | C |
| ATOM | 741 | N1   | T B | 6 | -19.489 | 5.998 | 59.545 | 1.00 | 0.00 | N |
| ATOM | 742 | C2   | T B | 6 | -20.853 | 6.064 | 59.742 | 1.00 | 0.00 | C |
| ATOM | 743 | O2   | T B | 6 | -21.655 | 5.528 | 58.997 | 1.00 | 0.00 | O |
| ATOM | 744 | N3   | T B | 6 | -21.253 | 6.786 | 60.853 | 1.00 | 0.00 | N |
| ATOM | 745 | C4   | T B | 6 | -20.433 | 7.431 | 61.754 | 1.00 | 0.00 | C |
| ATOM | 746 | O4   | T B | 6 | -20.908 | 8.052 | 62.711 | 1.00 | 0.00 | O |
| ATOM | 747 | C5   | T B | 6 | -19.024 | 7.304 | 61.464 | 1.00 | 0.00 | C |
| ATOM | 748 | C6   | T B | 6 | -18.597 | 6.608 | 60.393 | 1.00 | 0.00 | C |
| ATOM | 749 | C7   | T B | 6 | -18.094 | 7.989 | 62.421 | 1.00 | 0.00 | C |
| ATOM | 750 | C2'  | T B | 6 | -17.802 | 5.854 | 57.676 | 1.00 | 0.00 | C |
| ATOM | 751 | C3'  | T B | 6 | -17.021 | 4.626 | 57.234 | 1.00 | 0.00 | C |
| ATOM | 752 | O3'  | T B | 6 | -17.535 | 4.169 | 55.984 | 1.00 | 0.00 | O |
| ATOM | 753 | C4'  | T B | 6 | -17.280 | 3.632 | 58.364 | 1.00 | 0.00 | C |
| ATOM | 754 | O4'  | T B | 6 | -18.640 | 3.940 | 58.809 | 1.00 | 0.00 | O |
| ATOM | 755 | C5'  | T B | 6 | -16.353 | 3.711 | 59.555 | 1.00 | 0.00 | C |
| ATOM | 756 | O5'  | T B | 6 | -16.007 | 5.095 | 59.815 | 1.00 | 0.00 | O |
| ATOM | 757 | O1P  | T B | 6 | -13.540 | 5.180 | 59.326 | 1.00 | 0.00 | O |
| ATOM | 758 | O2P  | T B | 6 | -14.552 | 6.790 | 60.964 | 1.00 | 0.00 | O |
| ATOM | 759 | P    | T B | 6 | -14.551 | 5.430 | 60.372 | 1.00 | 0.00 | P |
| ATOM | 760 | H3   | T B | 6 | -22.268 | 6.848 | 61.024 | 1.00 | 0.00 | H |
| ATOM | 761 | H6   | T B | 6 | -17.528 | 6.527 | 60.196 | 1.00 | 0.00 | H |
| ATOM | 762 | H1'  | T B | 6 | -19.841 | 5.120 | 57.668 | 1.00 | 0.00 | H |

|      |     |      |     |   |         |        |        |      |      |   |
|------|-----|------|-----|---|---------|--------|--------|------|------|---|
| ATOM | 763 | H3'  | T B | 6 | -15.957 | 4.835  | 57.130 | 1.00 | 0.00 | H |
| ATOM | 764 | H4'  | T B | 6 | -17.187 | 2.634  | 57.935 | 1.00 | 0.00 | H |
| ATOM | 765 | H71  | T B | 6 | -17.572 | 8.796  | 61.907 | 1.00 | 0.00 | H |
| ATOM | 766 | H72  | T B | 6 | -18.665 | 8.398  | 63.255 | 1.00 | 0.00 | H |
| ATOM | 767 | H73  | T B | 6 | -17.365 | 7.270  | 62.799 | 1.00 | 0.00 | H |
| ATOM | 768 | H2'1 | T B | 6 | -17.216 | 6.474  | 58.352 | 1.00 | 0.00 | H |
| ATOM | 769 | H2'2 | T B | 6 | -18.084 | 6.472  | 56.824 | 1.00 | 0.00 | H |
| ATOM | 770 | H5'1 | T B | 6 | -16.851 | 3.286  | 60.426 | 1.00 | 0.00 | H |
| ATOM | 771 | H5'2 | T B | 6 | -15.450 | 3.140  | 59.342 | 1.00 | 0.00 | H |
| ATOM | 772 | C1'  | C B | 7 | -22.567 | 6.786  | 55.268 | 1.00 | 0.00 | C |
| ATOM | 773 | N1   | C B | 7 | -22.112 | 7.652  | 56.393 | 1.00 | 0.00 | N |
| ATOM | 774 | C2   | C B | 7 | -23.081 | 8.185  | 57.238 | 1.00 | 0.00 | C |
| ATOM | 775 | O2   | C B | 7 | -24.273 | 7.921  | 57.025 | 1.00 | 0.00 | O |
| ATOM | 776 | N3   | C B | 7 | -22.688 | 8.975  | 58.268 | 1.00 | 0.00 | N |
| ATOM | 777 | C4   | C B | 7 | -21.393 | 9.243  | 58.473 | 1.00 | 0.00 | C |
| ATOM | 778 | N4   | C B | 7 | -21.065 | 10.018 | 59.496 | 1.00 | 0.00 | N |
| ATOM | 779 | C5   | C B | 7 | -20.373 | 8.712  | 57.616 | 1.00 | 0.00 | C |
| ATOM | 780 | C6   | C B | 7 | -20.793 | 7.914  | 56.589 | 1.00 | 0.00 | C |
| ATOM | 781 | C2'  | C B | 7 | -21.770 | 6.977  | 53.986 | 1.00 | 0.00 | C |
| ATOM | 782 | C3'  | C B | 7 | -21.736 | 5.566  | 53.422 | 1.00 | 0.00 | C |
| ATOM | 783 | O3'  | C B | 7 | -22.930 | 5.329  | 52.681 | 1.00 | 0.00 | O |
| ATOM | 784 | C4'  | C B | 7 | -21.654 | 4.700  | 54.677 | 1.00 | 0.00 | C |
| ATOM | 785 | O4'  | C B | 7 | -22.423 | 5.439  | 55.677 | 1.00 | 0.00 | O |
| ATOM | 786 | C5'  | C B | 7 | -20.268 | 4.442  | 55.226 | 1.00 | 0.00 | C |
| ATOM | 787 | O5'  | C B | 7 | -19.447 | 5.624  | 55.054 | 1.00 | 0.00 | O |
| ATOM | 788 | O1P  | C B | 7 | -17.693 | 4.880  | 53.410 | 1.00 | 0.00 | O |
| ATOM | 789 | O2P  | C B | 7 | -17.181 | 6.710  | 55.047 | 1.00 | 0.00 | O |
| ATOM | 790 | P    | C B | 7 | -17.890 | 5.440  | 54.761 | 1.00 | 0.00 | P |
| ATOM | 791 | H5   | C B | 7 | -19.318 | 8.933  | 57.776 | 1.00 | 0.00 | H |
| ATOM | 792 | H6   | C B | 7 | -20.054 | 7.481  | 55.915 | 1.00 | 0.00 | H |
| ATOM | 793 | H1'  | C B | 7 | -23.628 | 6.975  | 55.102 | 1.00 | 0.00 | H |
| ATOM | 794 | H3'  | C B | 7 | -20.871 | 5.405  | 52.775 | 1.00 | 0.00 | H |
| ATOM | 795 | H4'  | C B | 7 | -22.095 | 3.735  | 54.426 | 1.00 | 0.00 | H |
| ATOM | 796 | H41  | C B | 7 | -20.074 | 10.238 | 59.679 | 1.00 | 0.00 | H |
| ATOM | 797 | H42  | C B | 7 | -21.799 | 10.401 | 60.110 | 1.00 | 0.00 | H |
| ATOM | 798 | H2'1 | C B | 7 | -20.765 | 7.353  | 54.175 | 1.00 | 0.00 | H |
| ATOM | 799 | H2'2 | C B | 7 | -22.255 | 7.669  | 53.297 | 1.00 | 0.00 | H |
| ATOM | 800 | H5'1 | C B | 7 | -20.344 | 4.196  | 56.286 | 1.00 | 0.00 | H |
| ATOM | 801 | H5'2 | C B | 7 | -19.823 | 3.604  | 54.694 | 1.00 | 0.00 | H |
| ATOM | 802 | C1'  | C B | 8 | -26.554 | 9.460  | 54.050 | 1.00 | 0.00 | C |
| ATOM | 803 | N1   | C B | 8 | -25.365 | 10.111 | 54.664 | 1.00 | 0.00 | N |
| ATOM | 804 | C2   | C B | 8 | -25.568 | 10.926 | 55.776 | 1.00 | 0.00 | C |
| ATOM | 805 | O2   | C B | 8 | -26.720 | 11.073 | 56.206 | 1.00 | 0.00 | O |
| ATOM | 806 | N3   | C B | 8 | -24.499 | 11.527 | 56.350 | 1.00 | 0.00 | N |
| ATOM | 807 | C4   | C B | 8 | -23.264 | 11.349 | 55.862 | 1.00 | 0.00 | C |
| ATOM | 808 | N4   | C B | 8 | -22.254 | 11.960 | 56.465 | 1.00 | 0.00 | N |
| ATOM | 809 | C5   | C B | 8 | -23.024 | 10.521 | 54.716 | 1.00 | 0.00 | C |
| ATOM | 810 | C6   | C B | 8 | -24.117 | 9.921  | 54.157 | 1.00 | 0.00 | C |
| ATOM | 811 | C2'  | C B | 8 | -26.500 | 9.393  | 52.529 | 1.00 | 0.00 | C |
| ATOM | 812 | C3'  | C B | 8 | -27.169 | 8.056  | 52.248 | 1.00 | 0.00 | C |
| ATOM | 813 | O3'  | C B | 8 | -28.583 | 8.237  | 52.221 | 1.00 | 0.00 | O |
| ATOM | 814 | C4'  | C B | 8 | -26.719 | 7.196  | 53.427 | 1.00 | 0.00 | C |
| ATOM | 815 | O4'  | C B | 8 | -26.622 | 8.136  | 54.544 | 1.00 | 0.00 | O |
| ATOM | 816 | C5'  | C B | 8 | -25.393 | 6.488  | 53.275 | 1.00 | 0.00 | C |

|      |     |      |     |    |         |        |        |      |      |   |
|------|-----|------|-----|----|---------|--------|--------|------|------|---|
| ATOM | 817 | O5'  | C B | 8  | -24.467 | 7.334  | 52.546 | 1.00 | 0.00 | O |
| ATOM | 818 | O1P  | C B | 8  | -24.093 | 6.072  | 50.400 | 1.00 | 0.00 | O |
| ATOM | 819 | O2P  | C B | 8  | -22.315 | 7.609  | 51.279 | 1.00 | 0.00 | O |
| ATOM | 820 | P    | C B | 8  | -23.407 | 6.649  | 51.574 | 1.00 | 0.00 | P |
| ATOM | 821 | H5   | C B | 8  | -22.022 | 10.379 | 54.311 | 1.00 | 0.00 | H |
| ATOM | 822 | H6   | C B | 8  | -23.984 | 9.276  | 53.288 | 1.00 | 0.00 | H |
| ATOM | 823 | H1'  | C B | 8  | -27.445 | 9.991  | 54.386 | 1.00 | 0.00 | H |
| ATOM | 824 | H3'  | C B | 8  | -26.841 | 7.627  | 51.301 | 1.00 | 0.00 | H |
| ATOM | 825 | H4'  | C B | 8  | -27.485 | 6.435  | 53.574 | 1.00 | 0.00 | H |
| ATOM | 826 | H41  | C B | 8  | -21.293 | 11.837 | 56.112 | 1.00 | 0.00 | H |
| ATOM | 827 | H42  | C B | 8  | -22.428 | 12.556 | 57.288 | 1.00 | 0.00 | H |
| ATOM | 828 | H2'1 | C B | 8  | -25.479 | 9.413  | 52.150 | 1.00 | 0.00 | H |
| ATOM | 829 | H2'2 | C B | 8  | -27.041 | 10.215 | 52.060 | 1.00 | 0.00 | H |
| ATOM | 830 | H5'1 | C B | 8  | -24.989 | 6.268  | 54.263 | 1.00 | 0.00 | H |
| ATOM | 831 | H5'2 | C B | 8  | -25.545 | 5.556  | 52.733 | 1.00 | 0.00 | H |
| ATOM | 832 | C1'  | T B | 9  | -29.641 | 13.304 | 54.481 | 1.00 | 0.00 | C |
| ATOM | 833 | N1   | T B | 9  | -28.177 | 13.532 | 54.355 | 1.00 | 0.00 | N |
| ATOM | 834 | C2   | T B | 9  | -27.583 | 14.352 | 55.293 | 1.00 | 0.00 | C |
| ATOM | 835 | O2   | T B | 9  | -28.208 | 14.880 | 56.195 | 1.00 | 0.00 | O |
| ATOM | 836 | N3   | T B | 9  | -26.222 | 14.535 | 55.138 | 1.00 | 0.00 | N |
| ATOM | 837 | C4   | T B | 9  | -25.426 | 13.988 | 54.154 | 1.00 | 0.00 | C |
| ATOM | 838 | O4   | T B | 9  | -24.213 | 14.228 | 54.116 | 1.00 | 0.00 | O |
| ATOM | 839 | C5   | T B | 9  | -26.135 | 13.144 | 53.221 | 1.00 | 0.00 | C |
| ATOM | 840 | C6   | T B | 9  | -27.462 | 12.943 | 53.342 | 1.00 | 0.00 | C |
| ATOM | 841 | C7   | T B | 9  | -25.306 | 12.526 | 52.135 | 1.00 | 0.00 | C |
| ATOM | 842 | C2'  | T B | 9  | -30.371 | 13.235 | 53.144 | 1.00 | 0.00 | C |
| ATOM | 843 | C3'  | T B | 9  | -31.440 | 12.188 | 53.420 | 1.00 | 0.00 | C |
| ATOM | 844 | O3'  | T B | 9  | -32.563 | 12.817 | 54.033 | 1.00 | 0.00 | O |
| ATOM | 845 | C4'  | T B | 9  | -30.731 | 11.219 | 54.364 | 1.00 | 0.00 | C |
| ATOM | 846 | O4'  | T B | 9  | -29.832 | 12.070 | 55.145 | 1.00 | 0.00 | O |
| ATOM | 847 | C5'  | T B | 9  | -29.919 | 10.122 | 53.716 | 1.00 | 0.00 | C |
| ATOM | 848 | O5'  | T B | 9  | -29.280 | 10.630 | 52.517 | 1.00 | 0.00 | O |
| ATOM | 849 | O1P  | T B | 9  | -30.394 | 9.334  | 50.670 | 1.00 | 0.00 | O |
| ATOM | 850 | O2P  | T B | 9  | -28.061 | 10.207 | 50.361 | 1.00 | 0.00 | O |
| ATOM | 851 | P    | T B | 9  | -29.084 | 9.647  | 51.277 | 1.00 | 0.00 | P |
| ATOM | 852 | H3   | T B | 9  | -25.755 | 15.140 | 55.828 | 1.00 | 0.00 | H |
| ATOM | 853 | H6   | T B | 9  | -27.975 | 12.303 | 52.624 | 1.00 | 0.00 | H |
| ATOM | 854 | H1'  | T B | 9  | -30.057 | 14.091 | 55.111 | 1.00 | 0.00 | H |
| ATOM | 855 | H3'  | T B | 9  | -31.760 | 11.686 | 52.508 | 1.00 | 0.00 | H |
| ATOM | 856 | H4'  | T B | 9  | -31.505 | 10.747 | 54.971 | 1.00 | 0.00 | H |
| ATOM | 857 | H71  | T B | 9  | -25.614 | 12.928 | 51.169 | 1.00 | 0.00 | H |
| ATOM | 858 | H72  | T B | 9  | -24.254 | 12.754 | 52.305 | 1.00 | 0.00 | H |
| ATOM | 859 | H73  | T B | 9  | -25.449 | 11.445 | 52.140 | 1.00 | 0.00 | H |
| ATOM | 860 | H2'1 | T B | 9  | -29.714 | 12.927 | 52.332 | 1.00 | 0.00 | H |
| ATOM | 861 | H2'2 | T B | 9  | -30.813 | 14.191 | 52.865 | 1.00 | 0.00 | H |
| ATOM | 862 | H5'1 | T B | 9  | -29.162 | 9.774  | 54.418 | 1.00 | 0.00 | H |
| ATOM | 863 | H5'2 | T B | 9  | -30.577 | 9.295  | 53.459 | 1.00 | 0.00 | H |
| ATOM | 864 | C1'  | A B | 10 | -30.798 | 17.961 | 55.750 | 1.00 | 0.00 | C |
| ATOM | 865 | N1   | A B | 10 | -25.775 | 18.789 | 55.104 | 1.00 | 0.00 | N |
| ATOM | 866 | C2   | A B | 10 | -26.641 | 19.195 | 56.028 | 1.00 | 0.00 | C |
| ATOM | 867 | N3   | A B | 10 | -27.927 | 18.941 | 56.137 | 1.00 | 0.00 | N |
| ATOM | 868 | C4   | A B | 10 | -28.335 | 18.157 | 55.123 | 1.00 | 0.00 | C |
| ATOM | 869 | C5   | A B | 10 | -27.577 | 17.658 | 54.099 | 1.00 | 0.00 | C |
| ATOM | 870 | C6   | A B | 10 | -26.211 | 18.007 | 54.104 | 1.00 | 0.00 | C |

|      |     |      |     |    |         |        |        |      |      |   |
|------|-----|------|-----|----|---------|--------|--------|------|------|---|
| ATOM | 871 | N6   | A B | 10 | -25.345 | 17.591 | 53.164 | 1.00 | 0.00 | N |
| ATOM | 872 | N7   | A B | 10 | -28.342 | 16.887 | 53.241 | 1.00 | 0.00 | N |
| ATOM | 873 | C8   | A B | 10 | -29.535 | 16.939 | 53.755 | 1.00 | 0.00 | C |
| ATOM | 874 | N9   | A B | 10 | -29.607 | 17.689 | 54.901 | 1.00 | 0.00 | N |
| ATOM | 875 | C2'  | A B | 10 | -32.085 | 18.150 | 54.959 | 1.00 | 0.00 | C |
| ATOM | 876 | C3'  | A B | 10 | -33.119 | 17.517 | 55.877 | 1.00 | 0.00 | C |
| ATOM | 877 | O3'  | A B | 10 | -33.534 | 18.477 | 56.846 | 1.00 | 0.00 | O |
| ATOM | 878 | C4'  | A B | 10 | -32.348 | 16.358 | 56.508 | 1.00 | 0.00 | C |
| ATOM | 879 | O4'  | A B | 10 | -30.974 | 16.852 | 56.612 | 1.00 | 0.00 | O |
| ATOM | 880 | C5'  | A B | 10 | -32.338 | 15.060 | 55.736 | 1.00 | 0.00 | C |
| ATOM | 881 | O5'  | A B | 10 | -32.278 | 15.336 | 54.313 | 1.00 | 0.00 | O |
| ATOM | 882 | O1P  | A B | 10 | -34.496 | 14.502 | 53.464 | 1.00 | 0.00 | O |
| ATOM | 883 | O2P  | A B | 10 | -32.506 | 14.553 | 51.936 | 1.00 | 0.00 | O |
| ATOM | 884 | P    | A B | 10 | -33.036 | 14.357 | 53.308 | 1.00 | 0.00 | P |
| ATOM | 885 | H2   | A B | 10 | -26.224 | 19.830 | 56.809 | 1.00 | 0.00 | H |
| ATOM | 886 | H8   | A B | 10 | -30.396 | 16.434 | 53.317 | 1.00 | 0.00 | H |
| ATOM | 887 | H1'  | A B | 10 | -30.586 | 18.835 | 56.365 | 1.00 | 0.00 | H |
| ATOM | 888 | H3'  | A B | 10 | -33.988 | 17.158 | 55.327 | 1.00 | 0.00 | H |
| ATOM | 889 | H4'  | A B | 10 | -32.805 | 16.165 | 57.478 | 1.00 | 0.00 | H |
| ATOM | 890 | H61  | A B | 10 | -24.356 | 17.872 | 53.216 | 1.00 | 0.00 | H |
| ATOM | 891 | H62  | A B | 10 | -25.672 | 16.991 | 52.392 | 1.00 | 0.00 | H |
| ATOM | 892 | H2'1 | A B | 10 | -32.055 | 17.649 | 53.992 | 1.00 | 0.00 | H |
| ATOM | 893 | H2'2 | A B | 10 | -32.308 | 19.202 | 54.777 | 1.00 | 0.00 | H |
| ATOM | 894 | H5'1 | A B | 10 | -31.469 | 14.473 | 56.033 | 1.00 | 0.00 | H |
| ATOM | 895 | H5'2 | A B | 10 | -33.243 | 14.501 | 55.963 | 1.00 | 0.00 | H |
| ATOM | 896 | C1'  | G B | 11 | -29.715 | 22.720 | 56.658 | 1.00 | 0.00 | C |
| ATOM | 897 | N1   | G B | 11 | -25.762 | 21.840 | 53.556 | 1.00 | 0.00 | N |
| ATOM | 898 | C2   | G B | 11 | -25.817 | 22.539 | 54.749 | 1.00 | 0.00 | C |
| ATOM | 899 | N2   | G B | 11 | -24.665 | 23.076 | 55.170 | 1.00 | 0.00 | N |
| ATOM | 900 | N3   | G B | 11 | -26.930 | 22.688 | 55.464 | 1.00 | 0.00 | N |
| ATOM | 901 | C4   | G B | 11 | -28.001 | 22.085 | 54.884 | 1.00 | 0.00 | C |
| ATOM | 902 | C5   | G B | 11 | -28.042 | 21.373 | 53.698 | 1.00 | 0.00 | C |
| ATOM | 903 | C6   | G B | 11 | -26.860 | 21.210 | 52.939 | 1.00 | 0.00 | C |
| ATOM | 904 | O6   | G B | 11 | -26.698 | 20.618 | 51.872 | 1.00 | 0.00 | O |
| ATOM | 905 | N7   | G B | 11 | -29.339 | 20.916 | 53.454 | 1.00 | 0.00 | N |
| ATOM | 906 | C8   | G B | 11 | -30.027 | 21.353 | 54.478 | 1.00 | 0.00 | C |
| ATOM | 907 | N9   | G B | 11 | -29.283 | 22.074 | 55.389 | 1.00 | 0.00 | N |
| ATOM | 908 | C2'  | G B | 11 | -31.100 | 23.349 | 56.585 | 1.00 | 0.00 | C |
| ATOM | 909 | C3'  | G B | 11 | -31.641 | 23.089 | 57.981 | 1.00 | 0.00 | C |
| ATOM | 910 | O3'  | G B | 11 | -31.187 | 24.117 | 58.858 | 1.00 | 0.00 | O |
| ATOM | 911 | C4'  | G B | 11 | -31.043 | 21.727 | 58.329 | 1.00 | 0.00 | C |
| ATOM | 912 | O4'  | G B | 11 | -29.741 | 21.725 | 57.662 | 1.00 | 0.00 | O |
| ATOM | 913 | C5'  | G B | 11 | -31.822 | 20.516 | 57.874 | 1.00 | 0.00 | C |
| ATOM | 914 | O5'  | G B | 11 | -32.429 | 20.779 | 56.584 | 1.00 | 0.00 | O |
| ATOM | 915 | O1P  | G B | 11 | -34.895 | 20.761 | 57.085 | 1.00 | 0.00 | O |
| ATOM | 916 | O2P  | G B | 11 | -34.076 | 20.158 | 54.792 | 1.00 | 0.00 | O |
| ATOM | 917 | P    | G B | 11 | -33.850 | 20.131 | 56.257 | 1.00 | 0.00 | P |
| ATOM | 918 | H1   | G B | 11 | -24.848 | 21.777 | 53.083 | 1.00 | 0.00 | H |
| ATOM | 919 | H8   | G B | 11 | -31.093 | 21.166 | 54.598 | 1.00 | 0.00 | H |
| ATOM | 920 | H1'  | G B | 11 | -28.964 | 23.459 | 56.938 | 1.00 | 0.00 | H |
| ATOM | 921 | H21  | G B | 11 | -23.806 | 22.953 | 54.614 | 1.00 | 0.00 | H |
| ATOM | 922 | H3'  | G B | 11 | -32.731 | 23.055 | 57.998 | 1.00 | 0.00 | H |
| ATOM | 923 | H22  | G B | 11 | -24.638 | 23.611 | 56.050 | 1.00 | 0.00 | H |
| ATOM | 924 | H4'  | G B | 11 | -30.965 | 21.684 | 59.416 | 1.00 | 0.00 | H |

|      |     |      |     |    |         |        |        |      |      |   |
|------|-----|------|-----|----|---------|--------|--------|------|------|---|
| ATOM | 925 | H2'1 | G B | 11 | -31.726 | 22.883 | 55.823 | 1.00 | 0.00 | H |
| ATOM | 926 | H2'2 | G B | 11 | -31.058 | 24.416 | 56.368 | 1.00 | 0.00 | H |
| ATOM | 927 | H5'1 | G B | 11 | -31.146 | 19.664 | 57.796 | 1.00 | 0.00 | H |
| ATOM | 928 | H5'2 | G B | 11 | -32.597 | 20.293 | 58.607 | 1.00 | 0.00 | H |
| ATOM | 929 | C1'  | G B | 12 | -27.012 | 26.842 | 56.183 | 1.00 | 0.00 | C |
| ATOM | 930 | N1   | G B | 12 | -25.629 | 24.743 | 51.743 | 1.00 | 0.00 | N |
| ATOM | 931 | C2   | G B | 12 | -24.866 | 25.406 | 52.689 | 1.00 | 0.00 | C |
| ATOM | 932 | N2   | G B | 12 | -23.560 | 25.526 | 52.414 | 1.00 | 0.00 | N |
| ATOM | 933 | N3   | G B | 12 | -25.364 | 25.906 | 53.818 | 1.00 | 0.00 | N |
| ATOM | 934 | C4   | G B | 12 | -26.703 | 25.699 | 53.927 | 1.00 | 0.00 | C |
| ATOM | 935 | C5   | G B | 12 | -27.544 | 25.055 | 53.037 | 1.00 | 0.00 | C |
| ATOM | 936 | C6   | G B | 12 | -27.015 | 24.520 | 51.840 | 1.00 | 0.00 | C |
| ATOM | 937 | O6   | G B | 12 | -27.596 | 23.921 | 50.934 | 1.00 | 0.00 | O |
| ATOM | 938 | N7   | G B | 12 | -28.853 | 25.056 | 53.522 | 1.00 | 0.00 | N |
| ATOM | 939 | C8   | G B | 12 | -28.766 | 25.683 | 54.666 | 1.00 | 0.00 | C |
| ATOM | 940 | N9   | G B | 12 | -27.492 | 26.106 | 54.982 | 1.00 | 0.00 | N |
| ATOM | 941 | C2'  | G B | 12 | -27.990 | 27.895 | 56.687 | 1.00 | 0.00 | C |
| ATOM | 942 | C3'  | G B | 12 | -27.799 | 27.811 | 58.193 | 1.00 | 0.00 | C |
| ATOM | 943 | O3'  | G B | 12 | -26.687 | 28.620 | 58.570 | 1.00 | 0.00 | O |
| ATOM | 944 | C4'  | G B | 12 | -27.534 | 26.324 | 58.419 | 1.00 | 0.00 | C |
| ATOM | 945 | O4'  | G B | 12 | -26.816 | 25.899 | 57.218 | 1.00 | 0.00 | O |
| ATOM | 946 | C5'  | G B | 12 | -28.750 | 25.444 | 58.591 | 1.00 | 0.00 | C |
| ATOM | 947 | O5'  | G B | 12 | -29.818 | 25.909 | 57.729 | 1.00 | 0.00 | O |
| ATOM | 948 | O1P  | G B | 12 | -31.572 | 26.702 | 59.351 | 1.00 | 0.00 | O |
| ATOM | 949 | O2P  | G B | 12 | -32.244 | 25.891 | 57.074 | 1.00 | 0.00 | O |
| ATOM | 950 | P    | G B | 12 | -31.326 | 25.772 | 58.233 | 1.00 | 0.00 | P |
| ATOM | 951 | H1   | G B | 12 | -25.144 | 24.387 | 50.905 | 1.00 | 0.00 | H |
| ATOM | 952 | H8   | G B | 12 | -29.625 | 25.858 | 55.315 | 1.00 | 0.00 | H |
| ATOM | 953 | H1'  | G B | 12 | -26.046 | 27.288 | 55.947 | 1.00 | 0.00 | H |
| ATOM | 954 | H21  | G B | 12 | -23.181 | 25.133 | 51.541 | 1.00 | 0.00 | H |
| ATOM | 955 | H3'  | G B | 12 | -28.685 | 28.140 | 58.737 | 1.00 | 0.00 | H |
| ATOM | 956 | H22  | G B | 12 | -22.939 | 26.012 | 53.076 | 1.00 | 0.00 | H |
| ATOM | 957 | H4'  | G B | 12 | -26.934 | 26.243 | 59.325 | 1.00 | 0.00 | H |
| ATOM | 958 | H2'1 | G B | 12 | -29.019 | 27.672 | 56.405 | 1.00 | 0.00 | H |
| ATOM | 959 | H2'2 | G B | 12 | -27.756 | 28.891 | 56.312 | 1.00 | 0.00 | H |
| ATOM | 960 | H5'1 | G B | 12 | -28.489 | 24.418 | 58.333 | 1.00 | 0.00 | H |
| ATOM | 961 | H5'2 | G B | 12 | -29.074 | 25.481 | 59.632 | 1.00 | 0.00 | H |
| ATOM | 962 | C1'  | T B | 13 | -23.856 | 29.855 | 53.846 | 1.00 | 0.00 | C |
| ATOM | 963 | N1   | T B | 13 | -25.049 | 29.325 | 53.135 | 1.00 | 0.00 | N |
| ATOM | 964 | C2   | T B | 13 | -24.838 | 28.725 | 51.909 | 1.00 | 0.00 | C |
| ATOM | 965 | O2   | T B | 13 | -23.732 | 28.622 | 51.408 | 1.00 | 0.00 | O |
| ATOM | 966 | N3   | T B | 13 | -25.974 | 28.246 | 51.284 | 1.00 | 0.00 | N |
| ATOM | 967 | C4   | T B | 13 | -27.267 | 28.314 | 51.761 | 1.00 | 0.00 | C |
| ATOM | 968 | O4   | T B | 13 | -28.208 | 27.851 | 51.107 | 1.00 | 0.00 | O |
| ATOM | 969 | C5   | T B | 13 | -27.388 | 28.957 | 53.049 | 1.00 | 0.00 | C |
| ATOM | 970 | C6   | T B | 13 | -26.301 | 29.436 | 53.688 | 1.00 | 0.00 | C |
| ATOM | 971 | C7   | T B | 13 | -28.775 | 29.052 | 53.609 | 1.00 | 0.00 | C |
| ATOM | 972 | C2'  | T B | 13 | -24.112 | 31.164 | 54.585 | 1.00 | 0.00 | C |
| ATOM | 973 | C3'  | T B | 13 | -23.238 | 31.006 | 55.820 | 1.00 | 0.00 | C |
| ATOM | 974 | O3'  | T B | 13 | -21.907 | 31.409 | 55.506 | 1.00 | 0.00 | O |
| ATOM | 975 | C4'  | T B | 13 | -23.335 | 29.512 | 56.117 | 1.00 | 0.00 | C |
| ATOM | 976 | O4'  | T B | 13 | -23.455 | 28.889 | 54.798 | 1.00 | 0.00 | O |
| ATOM | 977 | C5'  | T B | 13 | -24.503 | 29.070 | 56.969 | 1.00 | 0.00 | C |
| ATOM | 978 | O5'  | T B | 13 | -25.672 | 29.866 | 56.647 | 1.00 | 0.00 | O |

|      |      |      |     |    |         |        |        |      |      |   |
|------|------|------|-----|----|---------|--------|--------|------|------|---|
| ATOM | 979  | O1P  | T B | 13 | -26.091 | 31.167 | 58.759 | 1.00 | 0.00 | O |
| ATOM | 980  | O2P  | T B | 13 | -27.995 | 30.639 | 57.211 | 1.00 | 0.00 | O |
| ATOM | 981  | P    | T B | 13 | -26.705 | 30.217 | 57.809 | 1.00 | 0.00 | P |
| ATOM | 982  | H3   | T B | 13 | -25.842 | 27.791 | 50.369 | 1.00 | 0.00 | H |
| ATOM | 983  | H6   | T B | 13 | -26.418 | 29.917 | 54.659 | 1.00 | 0.00 | H |
| ATOM | 984  | H1'  | T B | 13 | -23.048 | 29.968 | 53.123 | 1.00 | 0.00 | H |
| ATOM | 985  | H3'  | T B | 13 | -23.607 | 31.599 | 56.657 | 1.00 | 0.00 | H |
| ATOM | 986  | H4'  | T B | 13 | -22.420 | 29.233 | 56.639 | 1.00 | 0.00 | H |
| ATOM | 987  | H71  | T B | 13 | -29.076 | 30.098 | 53.663 | 1.00 | 0.00 | H |
| ATOM | 988  | H72  | T B | 13 | -29.466 | 28.509 | 52.961 | 1.00 | 0.00 | H |
| ATOM | 989  | H73  | T B | 13 | -28.796 | 28.615 | 54.608 | 1.00 | 0.00 | H |
| ATOM | 990  | H2'1 | T B | 13 | -25.160 | 31.288 | 54.853 | 1.00 | 0.00 | H |
| ATOM | 991  | H2'2 | T B | 13 | -23.818 | 32.034 | 53.999 | 1.00 | 0.00 | H |
| ATOM | 992  | H5'1 | T B | 13 | -24.708 | 28.017 | 56.777 | 1.00 | 0.00 | H |
| ATOM | 993  | H5'2 | T B | 13 | -24.248 | 29.200 | 58.019 | 1.00 | 0.00 | H |
| ATOM | 994  | C1'  | G B | 14 | -21.613 | 31.663 | 49.802 | 1.00 | 0.00 | C |
| ATOM | 995  | N1   | G B | 14 | -25.822 | 30.040 | 47.418 | 1.00 | 0.00 | N |
| ATOM | 996  | C2   | G B | 14 | -24.495 | 29.949 | 47.037 | 1.00 | 0.00 | C |
| ATOM | 997  | N2   | G B | 14 | -24.257 | 29.348 | 45.866 | 1.00 | 0.00 | N |
| ATOM | 998  | N3   | G B | 14 | -23.486 | 30.420 | 47.768 | 1.00 | 0.00 | N |
| ATOM | 999  | C4   | G B | 14 | -23.911 | 31.003 | 48.921 | 1.00 | 0.00 | C |
| ATOM | 1000 | C5   | G B | 14 | -25.209 | 31.144 | 49.379 | 1.00 | 0.00 | C |
| ATOM | 1001 | C6   | G B | 14 | -26.281 | 30.641 | 48.606 | 1.00 | 0.00 | C |
| ATOM | 1002 | O6   | G B | 14 | -27.490 | 30.670 | 48.843 | 1.00 | 0.00 | O |
| ATOM | 1003 | N7   | G B | 14 | -25.218 | 31.805 | 50.610 | 1.00 | 0.00 | N |
| ATOM | 1004 | C8   | G B | 14 | -23.953 | 32.036 | 50.853 | 1.00 | 0.00 | C |
| ATOM | 1005 | N9   | G B | 14 | -23.098 | 31.580 | 49.871 | 1.00 | 0.00 | N |
| ATOM | 1006 | C2'  | G B | 14 | -21.045 | 32.967 | 50.346 | 1.00 | 0.00 | C |
| ATOM | 1007 | C3'  | G B | 14 | -19.750 | 32.504 | 50.994 | 1.00 | 0.00 | C |
| ATOM | 1008 | O3'  | G B | 14 | -18.729 | 32.437 | 50.003 | 1.00 | 0.00 | O |
| ATOM | 1009 | C4'  | G B | 14 | -20.119 | 31.124 | 51.539 | 1.00 | 0.00 | C |
| ATOM | 1010 | O4'  | G B | 14 | -21.085 | 30.602 | 50.574 | 1.00 | 0.00 | O |
| ATOM | 1011 | C5'  | G B | 14 | -20.741 | 31.090 | 52.915 | 1.00 | 0.00 | C |
| ATOM | 1012 | O5'  | G B | 14 | -21.609 | 32.238 | 53.089 | 1.00 | 0.00 | O |
| ATOM | 1013 | O1P  | G B | 14 | -20.459 | 33.569 | 54.890 | 1.00 | 0.00 | O |
| ATOM | 1014 | O2P  | G B | 14 | -22.944 | 33.742 | 54.595 | 1.00 | 0.00 | O |
| ATOM | 1015 | P    | G B | 14 | -21.725 | 32.900 | 54.536 | 1.00 | 0.00 | P |
| ATOM | 1016 | H1   | G B | 14 | -26.528 | 29.638 | 46.783 | 1.00 | 0.00 | H |
| ATOM | 1017 | H8   | G B | 14 | -23.607 | 32.546 | 51.753 | 1.00 | 0.00 | H |
| ATOM | 1018 | H1'  | G B | 14 | -21.310 | 31.507 | 48.766 | 1.00 | 0.00 | H |
| ATOM | 1019 | H21  | G B | 14 | -25.044 | 28.983 | 45.307 | 1.00 | 0.00 | H |
| ATOM | 1020 | H3'  | G B | 14 | -19.434 | 33.171 | 51.796 | 1.00 | 0.00 | H |
| ATOM | 1021 | H22  | G B | 14 | -23.291 | 29.251 | 45.523 | 1.00 | 0.00 | H |
| ATOM | 1022 | H4'  | G B | 14 | -19.197 | 30.543 | 51.577 | 1.00 | 0.00 | H |
| ATOM | 1023 | H2'1 | G B | 14 | -21.708 | 33.434 | 51.074 | 1.00 | 0.00 | H |
| ATOM | 1024 | H2'2 | G B | 14 | -20.857 | 33.696 | 49.559 | 1.00 | 0.00 | H |
| ATOM | 1025 | H5'1 | G B | 14 | -21.318 | 30.173 | 53.023 | 1.00 | 0.00 | H |
| ATOM | 1026 | H5'2 | G B | 14 | -19.951 | 31.108 | 53.665 | 1.00 | 0.00 | H |
| ATOM | 1027 | C1'  | C B | 15 | -21.297 | 32.687 | 44.966 | 1.00 | 0.00 | C |
| ATOM | 1028 | N1   | C B | 15 | -22.494 | 33.095 | 45.750 | 1.00 | 0.00 | N |
| ATOM | 1029 | C2   | C B | 15 | -23.749 | 32.743 | 45.257 | 1.00 | 0.00 | C |
| ATOM | 1030 | O2   | C B | 15 | -23.816 | 32.109 | 44.195 | 1.00 | 0.00 | O |
| ATOM | 1031 | N3   | C B | 15 | -24.852 | 33.105 | 45.955 | 1.00 | 0.00 | N |
| ATOM | 1032 | C4   | C B | 15 | -24.747 | 33.791 | 47.100 | 1.00 | 0.00 | C |

|      |      |      |     |    |         |        |        |      |      |   |
|------|------|------|-----|----|---------|--------|--------|------|------|---|
| ATOM | 1033 | N4   | C B | 15 | -25.858 | 34.116 | 47.744 | 1.00 | 0.00 | N |
| ATOM | 1034 | C5   | C B | 15 | -23.469 | 34.172 | 47.630 | 1.00 | 0.00 | C |
| ATOM | 1035 | C6   | C B | 15 | -22.373 | 33.792 | 46.912 | 1.00 | 0.00 | C |
| ATOM | 1036 | C2'  | C B | 15 | -20.185 | 33.727 | 44.958 | 1.00 | 0.00 | C |
| ATOM | 1037 | C3'  | C B | 15 | -18.937 | 32.857 | 44.972 | 1.00 | 0.00 | C |
| ATOM | 1038 | O3'  | C B | 15 | -18.622 | 32.467 | 43.637 | 1.00 | 0.00 | O |
| ATOM | 1039 | C4'  | C B | 15 | -19.359 | 31.671 | 45.836 | 1.00 | 0.00 | C |
| ATOM | 1040 | O4'  | C B | 15 | -20.784 | 31.504 | 45.550 | 1.00 | 0.00 | O |
| ATOM | 1041 | C5'  | C B | 15 | -19.183 | 31.832 | 47.329 | 1.00 | 0.00 | C |
| ATOM | 1042 | O5'  | C B | 15 | -19.470 | 33.200 | 47.711 | 1.00 | 0.00 | O |
| ATOM | 1043 | O1P  | C B | 15 | -17.243 | 34.063 | 48.506 | 1.00 | 0.00 | O |
| ATOM | 1044 | O2P  | C B | 15 | -19.365 | 35.048 | 49.413 | 1.00 | 0.00 | O |
| ATOM | 1045 | P    | C B | 15 | -18.647 | 33.851 | 48.912 | 1.00 | 0.00 | P |
| ATOM | 1046 | H5   | C B | 15 | -23.381 | 34.736 | 48.559 | 1.00 | 0.00 | H |
| ATOM | 1047 | H6   | C B | 15 | -21.379 | 34.052 | 47.278 | 1.00 | 0.00 | H |
| ATOM | 1048 | H1'  | C B | 15 | -21.618 | 32.449 | 43.952 | 1.00 | 0.00 | H |
| ATOM | 1049 | H3'  | C B | 15 | -18.083 | 33.377 | 45.407 | 1.00 | 0.00 | H |
| ATOM | 1050 | H4'  | C B | 15 | -18.757 | 30.819 | 45.521 | 1.00 | 0.00 | H |
| ATOM | 1051 | H41  | C B | 15 | -25.806 | 34.642 | 48.630 | 1.00 | 0.00 | H |
| ATOM | 1052 | H42  | C B | 15 | -26.776 | 33.844 | 47.360 | 1.00 | 0.00 | H |
| ATOM | 1053 | H2'1 | C B | 15 | -20.223 | 34.380 | 45.829 | 1.00 | 0.00 | H |
| ATOM | 1054 | H2'2 | C B | 15 | -20.218 | 34.360 | 44.071 | 1.00 | 0.00 | H |
| ATOM | 1055 | H5'1 | C B | 15 | -19.864 | 31.154 | 47.845 | 1.00 | 0.00 | H |
| ATOM | 1056 | H5'2 | C B | 15 | -18.157 | 31.583 | 47.597 | 1.00 | 0.00 | H |
| ATOM | 1057 | C1'  | G B | 16 | -23.188 | 33.611 | 40.484 | 1.00 | 0.00 | C |
| ATOM | 1058 | N1   | G B | 16 | -27.243 | 35.191 | 43.145 | 1.00 | 0.00 | N |
| ATOM | 1059 | C2   | G B | 16 | -27.180 | 34.428 | 41.992 | 1.00 | 0.00 | C |
| ATOM | 1060 | N2   | G B | 16 | -28.353 | 34.036 | 41.480 | 1.00 | 0.00 | N |
| ATOM | 1061 | N3   | G B | 16 | -26.037 | 34.084 | 41.400 | 1.00 | 0.00 | N |
| ATOM | 1062 | C4   | G B | 16 | -24.950 | 34.573 | 42.051 | 1.00 | 0.00 | C |
| ATOM | 1063 | C5   | G B | 16 | -24.917 | 35.344 | 43.201 | 1.00 | 0.00 | C |
| ATOM | 1064 | C6   | G B | 16 | -26.130 | 35.707 | 43.833 | 1.00 | 0.00 | C |
| ATOM | 1065 | O6   | G B | 16 | -26.303 | 36.378 | 44.850 | 1.00 | 0.00 | O |
| ATOM | 1066 | N7   | G B | 16 | -23.597 | 35.641 | 43.545 | 1.00 | 0.00 | N |
| ATOM | 1067 | C8   | G B | 16 | -22.887 | 35.052 | 42.617 | 1.00 | 0.00 | C |
| ATOM | 1068 | N9   | G B | 16 | -23.639 | 34.384 | 41.672 | 1.00 | 0.00 | N |
| ATOM | 1069 | C2'  | G B | 16 | -21.984 | 34.219 | 39.777 | 1.00 | 0.00 | C |
| ATOM | 1070 | C3'  | G B | 16 | -21.224 | 32.983 | 39.324 | 1.00 | 0.00 | C |
| ATOM | 1071 | O3'  | G B | 16 | -21.762 | 32.531 | 38.084 | 1.00 | 0.00 | O |
| ATOM | 1072 | C4'  | G B | 16 | -21.477 | 31.993 | 40.459 | 1.00 | 0.00 | C |
| ATOM | 1073 | O4'  | G B | 16 | -22.827 | 32.316 | 40.924 | 1.00 | 0.00 | O |
| ATOM | 1074 | C5'  | G B | 16 | -20.531 | 32.062 | 41.634 | 1.00 | 0.00 | C |
| ATOM | 1075 | O5'  | G B | 16 | -20.165 | 33.441 | 41.888 | 1.00 | 0.00 | O |
| ATOM | 1076 | O1P  | G B | 16 | -17.705 | 33.497 | 41.363 | 1.00 | 0.00 | O |
| ATOM | 1077 | O2P  | G B | 16 | -18.672 | 35.119 | 43.013 | 1.00 | 0.00 | O |
| ATOM | 1078 | P    | G B | 16 | -18.696 | 33.759 | 42.423 | 1.00 | 0.00 | P |
| ATOM | 1079 | H1   | G B | 16 | -28.178 | 35.396 | 43.528 | 1.00 | 0.00 | H |
| ATOM | 1080 | H8   | G B | 16 | -21.799 | 35.088 | 42.592 | 1.00 | 0.00 | H |
| ATOM | 1081 | H1'  | G B | 16 | -24.032 | 33.509 | 39.802 | 1.00 | 0.00 | H |
| ATOM | 1082 | H21  | G B | 16 | -29.232 | 34.303 | 41.945 | 1.00 | 0.00 | H |
| ATOM | 1083 | H3'  | G B | 16 | -20.158 | 33.179 | 39.204 | 1.00 | 0.00 | H |
| ATOM | 1084 | H22  | G B | 16 | -28.373 | 33.468 | 40.621 | 1.00 | 0.00 | H |
| ATOM | 1085 | H4'  | G B | 16 | -21.403 | 30.993 | 40.030 | 1.00 | 0.00 | H |
| ATOM | 1086 | H2'1 | G B | 16 | -21.380 | 34.834 | 40.444 | 1.00 | 0.00 | H |

|      |      |      |     |    |         |        |        |      |      |   |
|------|------|------|-----|----|---------|--------|--------|------|------|---|
| ATOM | 1087 | H2'2 | G B | 16 | -22.273 | 34.841 | 38.930 | 1.00 | 0.00 | H |
| ATOM | 1088 | H5'1 | G B | 16 | -21.021 | 31.643 | 42.513 | 1.00 | 0.00 | H |
| ATOM | 1089 | H5'2 | G B | 16 | -19.638 | 31.479 | 41.408 | 1.00 | 0.00 | H |
| ATOM | 1090 | C1'  | G B | 17 | -26.722 | 35.163 | 37.381 | 1.00 | 0.00 | C |
| ATOM | 1091 | N1   | G B | 17 | -28.208 | 37.963 | 41.380 | 1.00 | 0.00 | N |
| ATOM | 1092 | C2   | G B | 17 | -28.961 | 37.236 | 40.474 | 1.00 | 0.00 | C |
| ATOM | 1093 | N2   | G B | 17 | -30.287 | 37.260 | 40.658 | 1.00 | 0.00 | N |
| ATOM | 1094 | N3   | G B | 17 | -28.434 | 36.541 | 39.468 | 1.00 | 0.00 | N |
| ATOM | 1095 | C4   | G B | 17 | -27.079 | 36.636 | 39.430 | 1.00 | 0.00 | C |
| ATOM | 1096 | C5   | G B | 17 | -26.247 | 37.337 | 40.284 | 1.00 | 0.00 | C |
| ATOM | 1097 | C6   | G B | 17 | -26.804 | 38.071 | 41.355 | 1.00 | 0.00 | C |
| ATOM | 1098 | O6   | G B | 17 | -26.236 | 38.750 | 42.211 | 1.00 | 0.00 | O |
| ATOM | 1099 | N7   | G B | 17 | -24.914 | 37.176 | 39.900 | 1.00 | 0.00 | N |
| ATOM | 1100 | C8   | G B | 17 | -24.979 | 36.398 | 38.851 | 1.00 | 0.00 | C |
| ATOM | 1101 | N9   | G B | 17 | -26.261 | 36.028 | 38.502 | 1.00 | 0.00 | N |
| ATOM | 1102 | C2'  | G B | 17 | -25.925 | 35.348 | 36.098 | 1.00 | 0.00 | C |
| ATOM | 1103 | C3'  | G B | 17 | -25.897 | 33.936 | 35.534 | 1.00 | 0.00 | C |
| ATOM | 1104 | O3'  | G B | 17 | -27.093 | 33.703 | 34.795 | 1.00 | 0.00 | O |
| ATOM | 1105 | C4'  | G B | 17 | -25.817 | 33.071 | 36.791 | 1.00 | 0.00 | C |
| ATOM | 1106 | O4'  | G B | 17 | -26.583 | 33.816 | 37.790 | 1.00 | 0.00 | O |
| ATOM | 1107 | C5'  | G B | 17 | -24.435 | 32.809 | 37.339 | 1.00 | 0.00 | C |
| ATOM | 1108 | O5'  | G B | 17 | -23.607 | 33.986 | 37.166 | 1.00 | 0.00 | O |
| ATOM | 1109 | O1P  | G B | 17 | -21.859 | 33.232 | 35.519 | 1.00 | 0.00 | O |
| ATOM | 1110 | O2P  | G B | 17 | -21.335 | 35.062 | 37.154 | 1.00 | 0.00 | O |
| ATOM | 1111 | P    | G B | 17 | -22.051 | 33.794 | 36.870 | 1.00 | 0.00 | P |
| ATOM | 1112 | H1   | G B | 17 | -28.714 | 38.462 | 42.127 | 1.00 | 0.00 | H |
| ATOM | 1113 | H8   | G B | 17 | -24.098 | 36.071 | 38.299 | 1.00 | 0.00 | H |
| ATOM | 1114 | H1'  | G B | 17 | -27.781 | 35.356 | 37.215 | 1.00 | 0.00 | H |
| ATOM | 1115 | H21  | G B | 17 | -30.688 | 37.798 | 41.441 | 1.00 | 0.00 | H |
| ATOM | 1116 | H3'  | G B | 17 | -25.035 | 33.770 | 34.888 | 1.00 | 0.00 | H |
| ATOM | 1117 | H22  | G B | 17 | -30.904 | 36.742 | 40.017 | 1.00 | 0.00 | H |
| ATOM | 1118 | H4'  | G B | 17 | -26.265 | 32.109 | 36.543 | 1.00 | 0.00 | H |
| ATOM | 1119 | H2'1 | G B | 17 | -24.918 | 35.720 | 36.285 | 1.00 | 0.00 | H |
| ATOM | 1120 | H2'2 | G B | 17 | -26.406 | 36.041 | 35.408 | 1.00 | 0.00 | H |
| ATOM | 1121 | H5'1 | G B | 17 | -24.510 | 32.564 | 38.398 | 1.00 | 0.00 | H |
| ATOM | 1122 | H5'2 | G B | 17 | -23.993 | 31.966 | 36.806 | 1.00 | 0.00 | H |
| ATOM | 1123 | C1'  | C B | 18 | -30.709 | 37.836 | 36.162 | 1.00 | 0.00 | C |
| ATOM | 1124 | N1   | C B | 18 | -29.519 | 38.488 | 36.776 | 1.00 | 0.00 | N |
| ATOM | 1125 | C2   | C B | 18 | -29.724 | 39.301 | 37.889 | 1.00 | 0.00 | C |
| ATOM | 1126 | O2   | C B | 18 | -30.875 | 39.448 | 38.318 | 1.00 | 0.00 | O |
| ATOM | 1127 | N3   | C B | 18 | -28.653 | 39.903 | 38.462 | 1.00 | 0.00 | N |
| ATOM | 1128 | C4   | C B | 18 | -27.419 | 39.723 | 37.973 | 1.00 | 0.00 | C |
| ATOM | 1129 | N4   | C B | 18 | -26.409 | 40.335 | 38.575 | 1.00 | 0.00 | N |
| ATOM | 1130 | C5   | C B | 18 | -27.182 | 38.895 | 36.830 | 1.00 | 0.00 | C |
| ATOM | 1131 | C6   | C B | 18 | -28.272 | 38.298 | 36.270 | 1.00 | 0.00 | C |
| ATOM | 1132 | C2'  | C B | 18 | -30.655 | 37.769 | 34.641 | 1.00 | 0.00 | C |
| ATOM | 1133 | C3'  | C B | 18 | -31.324 | 36.432 | 34.360 | 1.00 | 0.00 | C |
| ATOM | 1134 | O3'  | C B | 18 | -32.738 | 36.613 | 34.333 | 1.00 | 0.00 | O |
| ATOM | 1135 | C4'  | C B | 18 | -30.874 | 35.572 | 35.539 | 1.00 | 0.00 | C |
| ATOM | 1136 | O4'  | C B | 18 | -30.777 | 36.512 | 36.656 | 1.00 | 0.00 | O |
| ATOM | 1137 | C5'  | C B | 18 | -29.548 | 34.864 | 35.387 | 1.00 | 0.00 | C |
| ATOM | 1138 | O5'  | C B | 18 | -28.623 | 35.710 | 34.658 | 1.00 | 0.00 | O |
| ATOM | 1139 | O1P  | C B | 18 | -28.247 | 34.448 | 32.513 | 1.00 | 0.00 | O |
| ATOM | 1140 | O2P  | C B | 18 | -26.469 | 35.986 | 33.392 | 1.00 | 0.00 | O |



|      |      |      |     |    |         |        |        |      |      |   |
|------|------|------|-----|----|---------|--------|--------|------|------|---|
| ATOM | 1141 | P    | C B | 18 | -27.561 | 35.025 | 33.686 | 1.00 | 0.00 | P |
| ATOM | 1142 | H5   | C B | 18 | -26.180 | 38.750 | 36.426 | 1.00 | 0.00 | H |
| ATOM | 1143 | H6   | C B | 18 | -28.140 | 37.655 | 35.400 | 1.00 | 0.00 | H |
| ATOM | 1144 | H1'  | C B | 18 | -31.599 | 38.367 | 36.498 | 1.00 | 0.00 | H |
| ATOM | 1145 | H3'  | C B | 18 | -30.996 | 36.003 | 33.413 | 1.00 | 0.00 | H |
| ATOM | 1146 | H4'  | C B | 18 | -31.641 | 34.811 | 35.687 | 1.00 | 0.00 | H |
| ATOM | 1147 | H41  | C B | 18 | -25.449 | 40.213 | 38.220 | 1.00 | 0.00 | H |
| ATOM | 1148 | H42  | C B | 18 | -26.583 | 40.930 | 39.397 | 1.00 | 0.00 | H |
| ATOM | 1149 | H2'1 | C B | 18 | -29.634 | 37.789 | 34.262 | 1.00 | 0.00 | H |
| ATOM | 1150 | H2'2 | C B | 18 | -31.195 | 38.591 | 34.172 | 1.00 | 0.00 | H |
| ATOM | 1151 | H5'1 | C B | 18 | -29.144 | 34.644 | 36.376 | 1.00 | 0.00 | H |
| ATOM | 1152 | H5'2 | C B | 18 | -29.700 | 33.932 | 34.846 | 1.00 | 0.00 | H |
| ATOM | 1153 | C1'  | C B | 19 | -33.784 | 41.693 | 36.607 | 1.00 | 0.00 | C |
| ATOM | 1154 | N1   | C B | 19 | -32.318 | 41.906 | 36.463 | 1.00 | 0.00 | N |
| ATOM | 1155 | C2   | C B | 19 | -31.683 | 42.727 | 37.393 | 1.00 | 0.00 | C |
| ATOM | 1156 | O2   | C B | 19 | -32.357 | 43.241 | 38.295 | 1.00 | 0.00 | O |
| ATOM | 1157 | N3   | C B | 19 | -30.349 | 42.934 | 37.279 | 1.00 | 0.00 | N |
| ATOM | 1158 | C4   | C B | 19 | -29.646 | 42.363 | 36.291 | 1.00 | 0.00 | C |
| ATOM | 1159 | N4   | C B | 19 | -28.346 | 42.598 | 36.227 | 1.00 | 0.00 | N |
| ATOM | 1160 | C5   | C B | 19 | -30.274 | 41.517 | 35.322 | 1.00 | 0.00 | C |
| ATOM | 1161 | C6   | C B | 19 | -31.616 | 41.322 | 35.457 | 1.00 | 0.00 | C |
| ATOM | 1162 | C2'  | C B | 19 | -34.527 | 41.631 | 35.281 | 1.00 | 0.00 | C |
| ATOM | 1163 | C3'  | C B | 19 | -35.603 | 40.594 | 35.570 | 1.00 | 0.00 | C |
| ATOM | 1164 | O3'  | C B | 19 | -36.712 | 41.232 | 36.198 | 1.00 | 0.00 | O |
| ATOM | 1165 | C4'  | C B | 19 | -34.892 | 39.619 | 36.505 | 1.00 | 0.00 | C |
| ATOM | 1166 | O4'  | C B | 19 | -33.975 | 40.460 | 37.275 | 1.00 | 0.00 | O |
| ATOM | 1167 | C5'  | C B | 19 | -34.097 | 38.515 | 35.848 | 1.00 | 0.00 | C |
| ATOM | 1168 | O5'  | C B | 19 | -33.469 | 39.015 | 34.641 | 1.00 | 0.00 | O |
| ATOM | 1169 | O1P  | C B | 19 | -34.618 | 37.728 | 32.809 | 1.00 | 0.00 | O |
| ATOM | 1170 | O2P  | C B | 19 | -32.282 | 38.580 | 32.470 | 1.00 | 0.00 | O |
| ATOM | 1171 | P    | C B | 19 | -33.299 | 38.030 | 33.400 | 1.00 | 0.00 | P |
| ATOM | 1172 | H5   | C B | 19 | -29.708 | 41.052 | 34.515 | 1.00 | 0.00 | H |
| ATOM | 1173 | H6   | C B | 19 | -32.137 | 40.684 | 34.743 | 1.00 | 0.00 | H |
| ATOM | 1174 | H1'  | C B | 19 | -34.182 | 42.485 | 37.243 | 1.00 | 0.00 | H |
| ATOM | 1175 | H3'  | C B | 19 | -35.940 | 40.093 | 34.662 | 1.00 | 0.00 | H |
| ATOM | 1176 | H4'  | C B | 19 | -35.662 | 39.153 | 37.122 | 1.00 | 0.00 | H |
| ATOM | 1177 | H41  | C B | 19 | -27.780 | 42.171 | 35.479 | 1.00 | 0.00 | H |
| ATOM | 1178 | H42  | C B | 19 | -27.896 | 43.208 | 36.927 | 1.00 | 0.00 | H |
| ATOM | 1179 | H2'1 | C B | 19 | -33.885 | 41.317 | 34.460 | 1.00 | 0.00 | H |
| ATOM | 1180 | H2'2 | C B | 19 | -34.965 | 42.591 | 35.007 | 1.00 | 0.00 | H |
| ATOM | 1181 | H5'1 | C B | 19 | -33.336 | 38.160 | 36.541 | 1.00 | 0.00 | H |
| ATOM | 1182 | H5'2 | C B | 19 | -34.767 | 37.692 | 35.600 | 1.00 | 0.00 | H |
| ATOM | 1183 | C1'  | T B | 20 | -34.952 | 46.336 | 37.861 | 1.00 | 0.00 | C |
| ATOM | 1184 | N1   | T B | 20 | -33.762 | 46.068 | 37.012 | 1.00 | 0.00 | N |
| ATOM | 1185 | C2   | T B | 20 | -32.566 | 46.633 | 37.406 | 1.00 | 0.00 | C |
| ATOM | 1186 | O2   | T B | 20 | -32.461 | 47.327 | 38.403 | 1.00 | 0.00 | O |
| ATOM | 1187 | N3   | T B | 20 | -31.487 | 46.358 | 36.589 | 1.00 | 0.00 | N |
| ATOM | 1188 | C4   | T B | 20 | -31.497 | 45.591 | 35.445 | 1.00 | 0.00 | C |
| ATOM | 1189 | O4   | T B | 20 | -30.461 | 45.416 | 34.791 | 1.00 | 0.00 | O |
| ATOM | 1190 | C5   | T B | 20 | -32.789 | 45.042 | 35.113 | 1.00 | 0.00 | C |
| ATOM | 1191 | C6   | T B | 20 | -33.865 | 45.289 | 35.886 | 1.00 | 0.00 | C |
| ATOM | 1192 | C7   | T B | 20 | -32.847 | 44.198 | 33.875 | 1.00 | 0.00 | C |
| ATOM | 1193 | C2'  | T B | 20 | -36.240 | 46.529 | 37.069 | 1.00 | 0.00 | C |
| ATOM | 1194 | C3'  | T B | 20 | -37.274 | 45.891 | 37.986 | 1.00 | 0.00 | C |

|      |      |      |     |    |         |        |        |      |      |   |
|------|------|------|-----|----|---------|--------|--------|------|------|---|
| ATOM | 1195 | O3'  | T B | 20 | -37.693 | 46.848 | 38.957 | 1.00 | 0.00 | O |
| ATOM | 1196 | C4'  | T B | 20 | -36.504 | 44.731 | 38.612 | 1.00 | 0.00 | C |
| ATOM | 1197 | O4'  | T B | 20 | -35.131 | 45.226 | 38.719 | 1.00 | 0.00 | O |
| ATOM | 1198 | C5'  | T B | 20 | -36.491 | 43.435 | 37.834 | 1.00 | 0.00 | C |
| ATOM | 1199 | O5'  | T B | 20 | -36.431 | 43.718 | 36.413 | 1.00 | 0.00 | O |
| ATOM | 1200 | O1P  | T B | 20 | -38.647 | 42.886 | 35.560 | 1.00 | 0.00 | O |
| ATOM | 1201 | O2P  | T B | 20 | -36.656 | 42.943 | 34.034 | 1.00 | 0.00 | O |
| ATOM | 1202 | P    | T B | 20 | -37.186 | 42.742 | 35.404 | 1.00 | 0.00 | P |
| ATOM | 1203 | H3   | T B | 20 | -30.583 | 46.768 | 36.862 | 1.00 | 0.00 | H |
| ATOM | 1204 | H6   | T B | 20 | -34.831 | 44.863 | 35.616 | 1.00 | 0.00 | H |
| ATOM | 1205 | H1'  | T B | 20 | -34.742 | 47.208 | 38.481 | 1.00 | 0.00 | H |
| ATOM | 1206 | H3'  | T B | 20 | -38.142 | 45.535 | 37.433 | 1.00 | 0.00 | H |
| ATOM | 1207 | H4'  | T B | 20 | -36.963 | 44.533 | 39.581 | 1.00 | 0.00 | H |
| ATOM | 1208 | H3T  | T B | 20 | -37.997 | 47.685 | 38.599 | 1.00 | 0.00 | H |
| ATOM | 1209 | H71  | T B | 20 | -33.468 | 44.691 | 33.127 | 1.00 | 0.00 | H |
| ATOM | 1210 | H72  | T B | 20 | -31.839 | 44.063 | 33.480 | 1.00 | 0.00 | H |
| ATOM | 1211 | H73  | T B | 20 | -33.275 | 43.224 | 34.116 | 1.00 | 0.00 | H |
| ATOM | 1212 | H2'1 | T B | 20 | -36.208 | 46.032 | 36.102 | 1.00 | 0.00 | H |
| ATOM | 1213 | H2'2 | T B | 20 | -36.463 | 47.581 | 36.891 | 1.00 | 0.00 | H |
| ATOM | 1214 | H5'1 | T B | 20 | -35.623 | 42.848 | 38.131 | 1.00 | 0.00 | H |
| ATOM | 1215 | H5'2 | T B | 20 | -37.397 | 42.875 | 38.060 | 1.00 | 0.00 | H |
| TER  |      |      |     |    |         |        |        |      |      |   |
| ATOM | 1    | C1'  | A A | 1  | -60.526 | 28.142 | 45.147 | 1.00 | 0.00 | C |
| ATOM | 2    | N1   | A A | 1  | -60.698 | 25.087 | 41.027 | 1.00 | 0.00 | N |
| ATOM | 3    | C2   | A A | 1  | -61.401 | 25.114 | 42.156 | 1.00 | 0.00 | C |
| ATOM | 4    | N3   | A A | 1  | -61.307 | 25.935 | 43.180 | 1.00 | 0.00 | N |
| ATOM | 5    | C4   | A A | 1  | -60.331 | 26.835 | 42.968 | 1.00 | 0.00 | C |
| ATOM | 6    | C5   | A A | 1  | -59.522 | 26.941 | 41.871 | 1.00 | 0.00 | C |
| ATOM | 7    | C6   | A A | 1  | -59.731 | 25.998 | 40.843 | 1.00 | 0.00 | C |
| ATOM | 8    | N6   | A A | 1  | -59.013 | 25.979 | 39.707 | 1.00 | 0.00 | N |
| ATOM | 9    | N7   | A A | 1  | -58.632 | 27.992 | 42.007 | 1.00 | 0.00 | N |
| ATOM | 10   | C8   | A A | 1  | -58.917 | 28.493 | 43.172 | 1.00 | 0.00 | C |
| ATOM | 11   | N9   | A A | 1  | -59.939 | 27.844 | 43.814 | 1.00 | 0.00 | N |
| ATOM | 12   | C2'  | A A | 1  | -59.502 | 28.585 | 46.183 | 1.00 | 0.00 | C |
| ATOM | 13   | C3'  | A A | 1  | -60.287 | 29.609 | 46.986 | 1.00 | 0.00 | C |
| ATOM | 14   | O3'  | A A | 1  | -61.052 | 28.937 | 47.984 | 1.00 | 0.00 | O |
| ATOM | 15   | C4'  | A A | 1  | -61.171 | 30.268 | 45.928 | 1.00 | 0.00 | C |
| ATOM | 16   | O4'  | A A | 1  | -61.462 | 29.190 | 44.981 | 1.00 | 0.00 | O |
| ATOM | 17   | C5'  | A A | 1  | -60.563 | 31.425 | 45.172 | 1.00 | 0.00 | C |
| ATOM | 18   | O5'  | A A | 1  | -59.152 | 31.177 | 44.946 | 1.00 | 0.00 | O |
| ATOM | 19   | H2   | A A | 1  | -62.168 | 24.345 | 42.245 | 1.00 | 0.00 | H |
| ATOM | 20   | H8   | A A | 1  | -58.393 | 29.349 | 43.598 | 1.00 | 0.00 | H |
| ATOM | 21   | H1'  | A A | 1  | -61.068 | 27.259 | 45.486 | 1.00 | 0.00 | H |
| ATOM | 22   | H3'  | A A | 1  | -59.635 | 30.342 | 47.464 | 1.00 | 0.00 | H |
| ATOM | 23   | H4'  | A A | 1  | -62.059 | 30.635 | 46.442 | 1.00 | 0.00 | H |
| ATOM | 24   | H61  | A A | 1  | -59.207 | 25.271 | 38.988 | 1.00 | 0.00 | H |
| ATOM | 25   | H62  | A A | 1  | -58.269 | 26.677 | 39.559 | 1.00 | 0.00 | H |
| ATOM | 26   | H5T  | A A | 1  | -58.547 | 31.921 | 44.948 | 1.00 | 0.00 | H |
| ATOM | 27   | H2'1 | A A | 1  | -58.619 | 29.031 | 45.728 | 1.00 | 0.00 | H |
| ATOM | 28   | H2'2 | A A | 1  | -59.167 | 27.760 | 46.813 | 1.00 | 0.00 | H |
| ATOM | 29   | H5'1 | A A | 1  | -61.075 | 31.536 | 44.216 | 1.00 | 0.00 | H |
| ATOM | 30   | H5'2 | A A | 1  | -60.688 | 32.337 | 45.752 | 1.00 | 0.00 | H |
| ATOM | 31   | C1'  | G A | 2  | -61.062 | 23.407 | 46.542 | 1.00 | 0.00 | C |
| ATOM | 32   | N1   | G A | 2  | -58.838 | 22.408 | 42.062 | 1.00 | 0.00 | N |

|      |    |      |     |   |         |        |        |      |      |   |
|------|----|------|-----|---|---------|--------|--------|------|------|---|
| ATOM | 33 | C2   | G A | 2 | -59.915 | 21.795 | 42.673 | 1.00 | 0.00 | C |
| ATOM | 34 | N2   | G A | 2 | -60.473 | 20.780 | 42.004 | 1.00 | 0.00 | N |
| ATOM | 35 | N3   | G A | 2 | -60.398 | 22.165 | 43.858 | 1.00 | 0.00 | N |
| ATOM | 36 | C4   | G A | 2 | -59.707 | 23.205 | 44.395 | 1.00 | 0.00 | C |
| ATOM | 37 | C5   | G A | 2 | -58.620 | 23.877 | 43.859 | 1.00 | 0.00 | C |
| ATOM | 38 | C6   | G A | 2 | -58.111 | 23.486 | 42.599 | 1.00 | 0.00 | C |
| ATOM | 39 | O6   | G A | 2 | -57.166 | 23.955 | 41.965 | 1.00 | 0.00 | O |
| ATOM | 40 | N7   | G A | 2 | -58.201 | 24.887 | 44.728 | 1.00 | 0.00 | N |
| ATOM | 41 | C8   | G A | 2 | -59.030 | 24.800 | 45.737 | 1.00 | 0.00 | C |
| ATOM | 42 | N9   | G A | 2 | -59.973 | 23.801 | 45.608 | 1.00 | 0.00 | N |
| ATOM | 43 | C2'  | G A | 2 | -60.672 | 23.493 | 48.011 | 1.00 | 0.00 | C |
| ATOM | 44 | C3'  | G A | 2 | -61.968 | 23.950 | 48.659 | 1.00 | 0.00 | C |
| ATOM | 45 | O3'  | G A | 2 | -62.792 | 22.814 | 48.912 | 1.00 | 0.00 | O |
| ATOM | 46 | C4'  | G A | 2 | -62.569 | 24.874 | 47.600 | 1.00 | 0.00 | C |
| ATOM | 47 | O4'  | G A | 2 | -62.152 | 24.284 | 46.329 | 1.00 | 0.00 | O |
| ATOM | 48 | C5'  | G A | 2 | -62.121 | 26.316 | 47.636 | 1.00 | 0.00 | C |
| ATOM | 49 | O5'  | G A | 2 | -60.722 | 26.385 | 48.008 | 1.00 | 0.00 | O |
| ATOM | 50 | O1P  | G A | 2 | -60.772 | 27.535 | 50.246 | 1.00 | 0.00 | O |
| ATOM | 51 | O2P  | G A | 2 | -58.745 | 27.729 | 48.781 | 1.00 | 0.00 | O |
| ATOM | 52 | P    | G A | 2 | -60.221 | 27.623 | 48.880 | 1.00 | 0.00 | P |
| ATOM | 53 | H1   | G A | 2 | -58.545 | 22.047 | 41.143 | 1.00 | 0.00 | H |
| ATOM | 54 | H8   | G A | 2 | -58.979 | 25.457 | 46.604 | 1.00 | 0.00 | H |
| ATOM | 55 | H1'  | G A | 2 | -61.387 | 22.399 | 46.283 | 1.00 | 0.00 | H |
| ATOM | 56 | H21  | G A | 2 | -60.096 | 20.499 | 41.087 | 1.00 | 0.00 | H |
| ATOM | 57 | H3'  | G A | 2 | -61.793 | 24.484 | 49.593 | 1.00 | 0.00 | H |
| ATOM | 58 | H22  | G A | 2 | -61.279 | 20.280 | 42.406 | 1.00 | 0.00 | H |
| ATOM | 59 | H4'  | G A | 2 | -63.650 | 24.857 | 47.743 | 1.00 | 0.00 | H |
| ATOM | 60 | H2'1 | G A | 2 | -59.868 | 24.209 | 48.184 | 1.00 | 0.00 | H |
| ATOM | 61 | H2'2 | G A | 2 | -60.346 | 22.531 | 48.410 | 1.00 | 0.00 | H |
| ATOM | 62 | H5'1 | G A | 2 | -62.263 | 26.759 | 46.651 | 1.00 | 0.00 | H |
| ATOM | 63 | H5'2 | G A | 2 | -62.725 | 26.860 | 48.363 | 1.00 | 0.00 | H |
| ATOM | 64 | C1'  | G A | 3 | -60.610 | 18.511 | 45.952 | 1.00 | 0.00 | C |
| ATOM | 65 | N1   | G A | 3 | -56.760 | 19.808 | 42.869 | 1.00 | 0.00 | N |
| ATOM | 66 | C2   | G A | 3 | -57.745 | 18.854 | 42.703 | 1.00 | 0.00 | C |
| ATOM | 67 | N2   | G A | 3 | -57.698 | 18.148 | 41.566 | 1.00 | 0.00 | N |
| ATOM | 68 | N3   | G A | 3 | -58.701 | 18.620 | 43.599 | 1.00 | 0.00 | N |
| ATOM | 69 | C4   | G A | 3 | -58.592 | 19.420 | 44.692 | 1.00 | 0.00 | C |
| ATOM | 70 | C5   | G A | 3 | -57.642 | 20.397 | 44.944 | 1.00 | 0.00 | C |
| ATOM | 71 | C6   | G A | 3 | -56.629 | 20.648 | 43.990 | 1.00 | 0.00 | C |
| ATOM | 72 | O6   | G A | 3 | -55.708 | 21.464 | 44.032 | 1.00 | 0.00 | O |
| ATOM | 73 | N7   | G A | 3 | -57.880 | 20.993 | 46.184 | 1.00 | 0.00 | N |
| ATOM | 74 | C8   | G A | 3 | -58.943 | 20.377 | 46.632 | 1.00 | 0.00 | C |
| ATOM | 75 | N9   | G A | 3 | -59.434 | 19.407 | 45.782 | 1.00 | 0.00 | N |
| ATOM | 76 | C2'  | G A | 3 | -60.808 | 18.022 | 47.380 | 1.00 | 0.00 | C |
| ATOM | 77 | C3'  | G A | 3 | -62.322 | 17.981 | 47.496 | 1.00 | 0.00 | C |
| ATOM | 78 | O3'  | G A | 3 | -62.799 | 16.744 | 46.973 | 1.00 | 0.00 | O |
| ATOM | 79 | C4'  | G A | 3 | -62.760 | 19.173 | 46.646 | 1.00 | 0.00 | C |
| ATOM | 80 | O4'  | G A | 3 | -61.764 | 19.238 | 45.577 | 1.00 | 0.00 | O |
| ATOM | 81 | C5'  | G A | 3 | -62.809 | 20.512 | 47.343 | 1.00 | 0.00 | C |
| ATOM | 82 | O5'  | G A | 3 | -61.722 | 20.609 | 48.296 | 1.00 | 0.00 | O |
| ATOM | 83 | O1P  | G A | 3 | -62.901 | 20.690 | 50.519 | 1.00 | 0.00 | O |
| ATOM | 84 | O2P  | G A | 3 | -60.647 | 21.758 | 50.255 | 1.00 | 0.00 | O |
| ATOM | 85 | P    | G A | 3 | -61.958 | 21.419 | 49.650 | 1.00 | 0.00 | P |
| ATOM | 86 | H1   | G A | 3 | -56.067 | 19.913 | 42.111 | 1.00 | 0.00 | H |

|      |     |      |     |   |         |        |        |      |      |   |
|------|-----|------|-----|---|---------|--------|--------|------|------|---|
| ATOM | 87  | H8   | G A | 3 | -59.402 | 20.608 | 47.593 | 1.00 | 0.00 | H |
| ATOM | 88  | H1'  | G A | 3 | -60.502 | 17.673 | 45.263 | 1.00 | 0.00 | H |
| ATOM | 89  | H21  | G A | 3 | -56.956 | 18.336 | 40.875 | 1.00 | 0.00 | H |
| ATOM | 90  | H3'  | G A | 3 | -62.657 | 18.090 | 48.528 | 1.00 | 0.00 | H |
| ATOM | 91  | H22  | G A | 3 | -58.402 | 17.420 | 41.383 | 1.00 | 0.00 | H |
| ATOM | 92  | H4'  | G A | 3 | -63.762 | 18.951 | 46.281 | 1.00 | 0.00 | H |
| ATOM | 93  | H2'1 | G A | 3 | -60.372 | 18.700 | 48.114 | 1.00 | 0.00 | H |
| ATOM | 94  | H2'2 | G A | 3 | -60.370 | 17.037 | 47.545 | 1.00 | 0.00 | H |
| ATOM | 95  | H5'1 | G A | 3 | -62.721 | 21.305 | 46.601 | 1.00 | 0.00 | H |
| ATOM | 96  | H5'2 | G A | 3 | -63.763 | 20.611 | 47.860 | 1.00 | 0.00 | H |
| ATOM | 97  | C1'  | C A | 4 | -58.528 | 14.432 | 44.065 | 1.00 | 0.00 | C |
| ATOM | 98  | N1   | C A | 4 | -57.691 | 15.469 | 44.731 | 1.00 | 0.00 | N |
| ATOM | 99  | C2   | C A | 4 | -56.583 | 15.955 | 44.040 | 1.00 | 0.00 | C |
| ATOM | 100 | O2   | C A | 4 | -56.340 | 15.509 | 42.912 | 1.00 | 0.00 | O |
| ATOM | 101 | N3   | C A | 4 | -55.810 | 16.899 | 44.629 | 1.00 | 0.00 | N |
| ATOM | 102 | C4   | C A | 4 | -56.098 | 17.360 | 45.853 | 1.00 | 0.00 | C |
| ATOM | 103 | N4   | C A | 4 | -55.310 | 18.286 | 46.379 | 1.00 | 0.00 | N |
| ATOM | 104 | C5   | C A | 4 | -57.230 | 16.877 | 46.586 | 1.00 | 0.00 | C |
| ATOM | 105 | C6   | C A | 4 | -57.997 | 15.929 | 45.974 | 1.00 | 0.00 | C |
| ATOM | 106 | C2'  | C A | 4 | -59.054 | 13.365 | 45.015 | 1.00 | 0.00 | C |
| ATOM | 107 | C3'  | C A | 4 | -60.429 | 13.073 | 44.434 | 1.00 | 0.00 | C |
| ATOM | 108 | O3'  | C A | 4 | -60.299 | 12.117 | 43.383 | 1.00 | 0.00 | O |
| ATOM | 109 | C4'  | C A | 4 | -60.878 | 14.439 | 43.920 | 1.00 | 0.00 | C |
| ATOM | 110 | O4'  | C A | 4 | -59.640 | 15.086 | 43.482 | 1.00 | 0.00 | O |
| ATOM | 111 | C5'  | C A | 4 | -61.565 | 15.339 | 44.919 | 1.00 | 0.00 | C |
| ATOM | 112 | O5'  | C A | 4 | -60.960 | 15.173 | 46.227 | 1.00 | 0.00 | O |
| ATOM | 113 | O1P  | C A | 4 | -62.805 | 14.148 | 47.597 | 1.00 | 0.00 | O |
| ATOM | 114 | O2P  | C A | 4 | -61.031 | 15.526 | 48.714 | 1.00 | 0.00 | O |
| ATOM | 115 | P    | C A | 4 | -61.883 | 15.298 | 47.521 | 1.00 | 0.00 | P |
| ATOM | 116 | H5   | C A | 4 | -57.466 | 17.246 | 47.584 | 1.00 | 0.00 | H |
| ATOM | 117 | H6   | C A | 4 | -58.871 | 15.534 | 46.490 | 1.00 | 0.00 | H |
| ATOM | 118 | H1'  | C A | 4 | -57.942 | 13.987 | 43.263 | 1.00 | 0.00 | H |
| ATOM | 119 | H3'  | C A | 4 | -61.117 | 12.690 | 45.187 | 1.00 | 0.00 | H |
| ATOM | 120 | H4'  | C A | 4 | -61.575 | 14.256 | 43.102 | 1.00 | 0.00 | H |
| ATOM | 121 | H41  | C A | 4 | -55.510 | 18.660 | 47.319 | 1.00 | 0.00 | H |
| ATOM | 122 | H42  | C A | 4 | -54.495 | 18.632 | 45.851 | 1.00 | 0.00 | H |
| ATOM | 123 | H2'1 | C A | 4 | -59.126 | 13.723 | 46.041 | 1.00 | 0.00 | H |
| ATOM | 124 | H2'2 | C A | 4 | -58.427 | 12.472 | 45.022 | 1.00 | 0.00 | H |
| ATOM | 125 | H5'1 | C A | 4 | -61.465 | 16.376 | 44.597 | 1.00 | 0.00 | H |
| ATOM | 126 | H5'2 | C A | 4 | -62.622 | 15.079 | 44.967 | 1.00 | 0.00 | H |
| ATOM | 127 | C1'  | C A | 5 | -54.791 | 11.856 | 42.085 | 1.00 | 0.00 | C |
| ATOM | 128 | N1   | C A | 5 | -54.596 | 12.619 | 43.349 | 1.00 | 0.00 | N |
| ATOM | 129 | C2   | C A | 5 | -53.517 | 13.497 | 43.420 | 1.00 | 0.00 | C |
| ATOM | 130 | O2   | C A | 5 | -52.769 | 13.608 | 42.440 | 1.00 | 0.00 | O |
| ATOM | 131 | N3   | C A | 5 | -53.323 | 14.201 | 44.563 | 1.00 | 0.00 | N |
| ATOM | 132 | C4   | C A | 5 | -54.148 | 14.060 | 45.607 | 1.00 | 0.00 | C |
| ATOM | 133 | N4   | C A | 5 | -53.914 | 14.775 | 46.696 | 1.00 | 0.00 | N |
| ATOM | 134 | C5   | C A | 5 | -55.265 | 13.163 | 45.561 | 1.00 | 0.00 | C |
| ATOM | 135 | C6   | C A | 5 | -55.442 | 12.467 | 44.401 | 1.00 | 0.00 | C |
| ATOM | 136 | C2'  | C A | 5 | -55.271 | 10.427 | 42.299 | 1.00 | 0.00 | C |
| ATOM | 137 | C3'  | C A | 5 | -56.196 | 10.223 | 41.109 | 1.00 | 0.00 | C |
| ATOM | 138 | O3'  | C A | 5 | -55.423 | 9.827  | 39.978 | 1.00 | 0.00 | O |
| ATOM | 139 | C4'  | C A | 5 | -56.823 | 11.603 | 40.925 | 1.00 | 0.00 | C |
| ATOM | 140 | O4'  | C A | 5 | -55.767 | 12.536 | 41.318 | 1.00 | 0.00 | O |

|      |     |      |     |   |         |        |        |      |      |   |
|------|-----|------|-----|---|---------|--------|--------|------|------|---|
| ATOM | 141 | C5'  | C A | 5 | -58.056 | 11.894 | 41.749 | 1.00 | 0.00 | C |
| ATOM | 142 | O5'  | C A | 5 | -57.930 | 11.277 | 43.055 | 1.00 | 0.00 | O |
| ATOM | 143 | O1P  | C A | 5 | -59.740 | 9.528  | 43.049 | 1.00 | 0.00 | O |
| ATOM | 144 | O2P  | C A | 5 | -58.976 | 10.535 | 45.216 | 1.00 | 0.00 | O |
| ATOM | 145 | P    | C A | 5 | -59.242 | 10.717 | 43.768 | 1.00 | 0.00 | P |
| ATOM | 146 | H5   | C A | 5 | -55.937 | 13.040 | 46.411 | 1.00 | 0.00 | H |
| ATOM | 147 | H6   | C A | 5 | -56.280 | 11.775 | 44.317 | 1.00 | 0.00 | H |
| ATOM | 148 | H1'  | C A | 5 | -53.854 | 11.875 | 41.528 | 1.00 | 0.00 | H |
| ATOM | 149 | H3'  | C A | 5 | -56.956 | 9.467  | 41.308 | 1.00 | 0.00 | H |
| ATOM | 150 | H4'  | C A | 5 | -57.099 | 11.688 | 39.874 | 1.00 | 0.00 | H |
| ATOM | 151 | H41  | C A | 5 | -54.534 | 14.687 | 47.514 | 1.00 | 0.00 | H |
| ATOM | 152 | H42  | C A | 5 | -53.109 | 15.419 | 46.727 | 1.00 | 0.00 | H |
| ATOM | 153 | H2'1 | C A | 5 | -55.804 | 10.306 | 43.240 | 1.00 | 0.00 | H |
| ATOM | 154 | H2'2 | C A | 5 | -54.449 | 9.710  | 42.291 | 1.00 | 0.00 | H |
| ATOM | 155 | H5'1 | C A | 5 | -58.165 | 12.974 | 41.860 | 1.00 | 0.00 | H |
| ATOM | 156 | H5'2 | C A | 5 | -58.931 | 11.497 | 41.236 | 1.00 | 0.00 | H |
| ATOM | 157 | C1'  | G A | 6 | -50.005 | 10.894 | 41.248 | 1.00 | 0.00 | C |
| ATOM | 158 | N1   | G A | 6 | -49.321 | 13.348 | 45.668 | 1.00 | 0.00 | N |
| ATOM | 159 | C2   | G A | 6 | -48.605 | 13.430 | 44.486 | 1.00 | 0.00 | C |
| ATOM | 160 | N2   | G A | 6 | -47.569 | 14.276 | 44.482 | 1.00 | 0.00 | N |
| ATOM | 161 | N3   | G A | 6 | -48.902 | 12.724 | 43.396 | 1.00 | 0.00 | N |
| ATOM | 162 | C4   | G A | 6 | -49.976 | 11.913 | 43.582 | 1.00 | 0.00 | C |
| ATOM | 163 | C5   | G A | 6 | -50.746 | 11.763 | 44.723 | 1.00 | 0.00 | C |
| ATOM | 164 | C6   | G A | 6 | -50.436 | 12.514 | 45.879 | 1.00 | 0.00 | C |
| ATOM | 165 | O6   | G A | 6 | -50.995 | 12.519 | 46.975 | 1.00 | 0.00 | O |
| ATOM | 166 | N7   | G A | 6 | -51.759 | 10.827 | 44.502 | 1.00 | 0.00 | N |
| ATOM | 167 | C8   | G A | 6 | -51.577 | 10.452 | 43.262 | 1.00 | 0.00 | C |
| ATOM | 168 | N9   | G A | 6 | -50.512 | 11.066 | 42.636 | 1.00 | 0.00 | N |
| ATOM | 169 | C2'  | G A | 6 | -50.077 | 9.459  | 40.743 | 1.00 | 0.00 | C |
| ATOM | 170 | C3'  | G A | 6 | -50.410 | 9.655  | 39.273 | 1.00 | 0.00 | C |
| ATOM | 171 | O3'  | G A | 6 | -49.206 | 9.884  | 38.545 | 1.00 | 0.00 | O |
| ATOM | 172 | C4'  | G A | 6 | -51.316 | 10.886 | 39.292 | 1.00 | 0.00 | C |
| ATOM | 173 | O4'  | G A | 6 | -50.800 | 11.696 | 40.395 | 1.00 | 0.00 | O |
| ATOM | 174 | C5'  | G A | 6 | -52.786 | 10.633 | 39.524 | 1.00 | 0.00 | C |
| ATOM | 175 | O5'  | G A | 6 | -52.956 | 9.544  | 40.465 | 1.00 | 0.00 | O |
| ATOM | 176 | O1P  | G A | 6 | -54.029 | 7.738  | 39.080 | 1.00 | 0.00 | O |
| ATOM | 177 | O2P  | G A | 6 | -54.427 | 7.823  | 41.556 | 1.00 | 0.00 | O |
| ATOM | 178 | P    | G A | 6 | -54.202 | 8.564  | 40.290 | 1.00 | 0.00 | P |
| ATOM | 179 | H1   | G A | 6 | -49.014 | 13.943 | 46.452 | 1.00 | 0.00 | H |
| ATOM | 180 | H8   | G A | 6 | -52.210 | 9.716  | 42.765 | 1.00 | 0.00 | H |
| ATOM | 181 | H1'  | G A | 6 | -48.983 | 11.271 | 41.208 | 1.00 | 0.00 | H |
| ATOM | 182 | H21  | G A | 6 | -47.348 | 14.822 | 45.327 | 1.00 | 0.00 | H |
| ATOM | 183 | H3'  | G A | 6 | -50.928 | 8.793  | 38.852 | 1.00 | 0.00 | H |
| ATOM | 184 | H22  | G A | 6 | -46.994 | 14.382 | 43.634 | 1.00 | 0.00 | H |
| ATOM | 185 | H4'  | G A | 6 | -51.210 | 11.371 | 38.322 | 1.00 | 0.00 | H |
| ATOM | 186 | H2'1 | G A | 6 | -50.848 | 8.880  | 41.251 | 1.00 | 0.00 | H |
| ATOM | 187 | H2'2 | G A | 6 | -49.133 | 8.928  | 40.869 | 1.00 | 0.00 | H |
| ATOM | 188 | H5'1 | G A | 6 | -53.248 | 11.537 | 39.920 | 1.00 | 0.00 | H |
| ATOM | 189 | H5'2 | G A | 6 | -53.260 | 10.378 | 38.576 | 1.00 | 0.00 | H |
| ATOM | 190 | C1'  | C A | 7 | -45.180 | 11.038 | 42.352 | 1.00 | 0.00 | C |
| ATOM | 191 | N1   | C A | 7 | -46.168 | 10.542 | 43.349 | 1.00 | 0.00 | N |
| ATOM | 192 | C2   | C A | 7 | -46.140 | 11.097 | 44.626 | 1.00 | 0.00 | C |
| ATOM | 193 | O2   | C A | 7 | -45.302 | 11.971 | 44.880 | 1.00 | 0.00 | O |
| ATOM | 194 | N3   | C A | 7 | -47.033 | 10.660 | 45.549 | 1.00 | 0.00 | N |

|      |     |      |     |   |         |        |        |      |      |   |
|------|-----|------|-----|---|---------|--------|--------|------|------|---|
| ATOM | 195 | C4   | C A | 7 | -47.928 | 9.711  | 45.245 | 1.00 | 0.00 | C |
| ATOM | 196 | N4   | C A | 7 | -48.778 | 9.324  | 46.183 | 1.00 | 0.00 | N |
| ATOM | 197 | C5   | C A | 7 | -47.977 | 9.119  | 43.940 | 1.00 | 0.00 | C |
| ATOM | 198 | C6   | C A | 7 | -47.072 | 9.579  | 43.025 | 1.00 | 0.00 | C |
| ATOM | 199 | C2'  | C A | 7 | -44.634 | 9.951  | 41.436 | 1.00 | 0.00 | C |
| ATOM | 200 | C3'  | C A | 7 | -44.474 | 10.697 | 40.120 | 1.00 | 0.00 | C |
| ATOM | 201 | O3'  | C A | 7 | -43.218 | 11.374 | 40.115 | 1.00 | 0.00 | O |
| ATOM | 202 | C4'  | C A | 7 | -45.653 | 11.667 | 40.134 | 1.00 | 0.00 | C |
| ATOM | 203 | O4'  | C A | 7 | -45.828 | 12.004 | 41.547 | 1.00 | 0.00 | O |
| ATOM | 204 | C5'  | C A | 7 | -46.964 | 11.137 | 39.598 | 1.00 | 0.00 | C |
| ATOM | 205 | O5'  | C A | 7 | -47.114 | 9.741  | 39.962 | 1.00 | 0.00 | O |
| ATOM | 206 | O1P  | C A | 7 | -47.036 | 8.549  | 37.746 | 1.00 | 0.00 | O |
| ATOM | 207 | O2P  | C A | 7 | -48.282 | 7.537  | 39.675 | 1.00 | 0.00 | O |
| ATOM | 208 | P    | C A | 7 | -47.863 | 8.761  | 38.952 | 1.00 | 0.00 | P |
| ATOM | 209 | H5   | C A | 7 | -48.700 | 8.342  | 43.689 | 1.00 | 0.00 | H |
| ATOM | 210 | H6   | C A | 7 | -47.075 | 9.165  | 42.016 | 1.00 | 0.00 | H |
| ATOM | 211 | H1'  | C A | 7 | -44.374 | 11.537 | 42.891 | 1.00 | 0.00 | H |
| ATOM | 212 | H3'  | C A | 7 | -44.525 | 10.025 | 39.263 | 1.00 | 0.00 | H |
| ATOM | 213 | H4'  | C A | 7 | -45.366 | 12.522 | 39.523 | 1.00 | 0.00 | H |
| ATOM | 214 | H41  | C A | 7 | -49.479 | 8.597  | 45.976 | 1.00 | 0.00 | H |
| ATOM | 215 | H42  | C A | 7 | -48.741 | 9.747  | 47.122 | 1.00 | 0.00 | H |
| ATOM | 216 | H2'1 | C A | 7 | -45.320 | 9.112  | 41.335 | 1.00 | 0.00 | H |
| ATOM | 217 | H2'2 | C A | 7 | -43.680 | 9.555  | 41.787 | 1.00 | 0.00 | H |
| ATOM | 218 | H5'1 | C A | 7 | -47.784 | 11.719 | 40.020 | 1.00 | 0.00 | H |
| ATOM | 219 | H5'2 | C A | 7 | -46.973 | 11.237 | 38.513 | 1.00 | 0.00 | H |
| ATOM | 220 | C1'  | A A | 8 | -41.323 | 11.365 | 45.439 | 1.00 | 0.00 | C |
| ATOM | 221 | N1   | A A | 8 | -44.650 | 9.504  | 48.876 | 1.00 | 0.00 | N |
| ATOM | 222 | C2   | A A | 8 | -43.735 | 10.467 | 48.941 | 1.00 | 0.00 | C |
| ATOM | 223 | N3   | A A | 8 | -42.909 | 10.901 | 48.013 | 1.00 | 0.00 | N |
| ATOM | 224 | C4   | A A | 8 | -43.086 | 10.207 | 46.873 | 1.00 | 0.00 | C |
| ATOM | 225 | C5   | A A | 8 | -43.976 | 9.195  | 46.644 | 1.00 | 0.00 | C |
| ATOM | 226 | C6   | A A | 8 | -44.804 | 8.832  | 47.725 | 1.00 | 0.00 | C |
| ATOM | 227 | N6   | A A | 8 | -45.726 | 7.856  | 47.648 | 1.00 | 0.00 | N |
| ATOM | 228 | N7   | A A | 8 | -43.871 | 8.722  | 45.347 | 1.00 | 0.00 | N |
| ATOM | 229 | C8   | A A | 8 | -42.926 | 9.448  | 44.825 | 1.00 | 0.00 | C |
| ATOM | 230 | N9   | A A | 8 | -42.404 | 10.373 | 45.692 | 1.00 | 0.00 | N |
| ATOM | 231 | C2'  | A A | 8 | -40.203 | 10.839 | 44.551 | 1.00 | 0.00 | C |
| ATOM | 232 | C3'  | A A | 8 | -39.824 | 12.077 | 43.754 | 1.00 | 0.00 | C |
| ATOM | 233 | O3'  | A A | 8 | -38.902 | 12.855 | 44.511 | 1.00 | 0.00 | O |
| ATOM | 234 | C4'  | A A | 8 | -41.164 | 12.787 | 43.569 | 1.00 | 0.00 | C |
| ATOM | 235 | O4'  | A A | 8 | -41.906 | 12.481 | 44.794 | 1.00 | 0.00 | O |
| ATOM | 236 | C5'  | A A | 8 | -41.992 | 12.358 | 42.381 | 1.00 | 0.00 | C |
| ATOM | 237 | O5'  | A A | 8 | -41.847 | 10.930 | 42.172 | 1.00 | 0.00 | O |
| ATOM | 238 | O1P  | A A | 8 | -40.665 | 10.786 | 39.954 | 1.00 | 0.00 | O |
| ATOM | 239 | O2P  | A A | 8 | -42.147 | 8.908  | 40.711 | 1.00 | 0.00 | O |
| ATOM | 240 | P    | A A | 8 | -41.879 | 10.367 | 40.680 | 1.00 | 0.00 | P |
| ATOM | 241 | H2   | A A | 8 | -43.658 | 10.971 | 49.903 | 1.00 | 0.00 | H |
| ATOM | 242 | H8   | A A | 8 | -42.582 | 9.333  | 43.798 | 1.00 | 0.00 | H |
| ATOM | 243 | H1'  | A A | 8 | -40.935 | 11.699 | 46.401 | 1.00 | 0.00 | H |
| ATOM | 244 | H3'  | A A | 8 | -39.378 | 11.823 | 42.792 | 1.00 | 0.00 | H |
| ATOM | 245 | H4'  | A A | 8 | -40.946 | 13.848 | 43.458 | 1.00 | 0.00 | H |
| ATOM | 246 | H61  | A A | 8 | -46.307 | 7.632  | 48.467 | 1.00 | 0.00 | H |
| ATOM | 247 | H62  | A A | 8 | -45.848 | 7.334  | 46.768 | 1.00 | 0.00 | H |
| ATOM | 248 | H2'1 | A A | 8 | -40.537 | 10.034 | 43.898 | 1.00 | 0.00 | H |

|      |     |      |     |    |         |        |        |      |      |   |
|------|-----|------|-----|----|---------|--------|--------|------|------|---|
| ATOM | 249 | H2'2 | A A | 8  | -39.359 | 10.465 | 45.130 | 1.00 | 0.00 | H |
| ATOM | 250 | H5'1 | A A | 8  | -43.039 | 12.597 | 42.572 | 1.00 | 0.00 | H |
| ATOM | 251 | H5'2 | A A | 8  | -41.656 | 12.896 | 41.496 | 1.00 | 0.00 | H |
| ATOM | 252 | C1'  | C A | 9  | -39.124 | 10.867 | 49.863 | 1.00 | 0.00 | C |
| ATOM | 253 | N1   | C A | 9  | -39.861 | 9.725  | 49.256 | 1.00 | 0.00 | N |
| ATOM | 254 | C2   | C A | 9  | -40.819 | 9.078  | 50.034 | 1.00 | 0.00 | C |
| ATOM | 255 | O2   | C A | 9  | -41.016 | 9.476  | 51.189 | 1.00 | 0.00 | O |
| ATOM | 256 | N3   | C A | 9  | -41.501 | 8.037  | 49.499 | 1.00 | 0.00 | N |
| ATOM | 257 | C4   | C A | 9  | -41.264 | 7.629  | 48.246 | 1.00 | 0.00 | C |
| ATOM | 258 | N4   | C A | 9  | -41.963 | 6.607  | 47.772 | 1.00 | 0.00 | N |
| ATOM | 259 | C5   | C A | 9  | -40.281 | 8.272  | 47.423 | 1.00 | 0.00 | C |
| ATOM | 260 | C6   | C A | 9  | -39.609 | 9.323  | 47.980 | 1.00 | 0.00 | C |
| ATOM | 261 | C2'  | C A | 9  | -37.656 | 10.931 | 49.465 | 1.00 | 0.00 | C |
| ATOM | 262 | C3'  | C A | 9  | -37.415 | 12.431 | 49.382 | 1.00 | 0.00 | C |
| ATOM | 263 | O3'  | C A | 9  | -37.116 | 12.930 | 50.684 | 1.00 | 0.00 | O |
| ATOM | 264 | C4'  | C A | 9  | -38.746 | 12.960 | 48.853 | 1.00 | 0.00 | C |
| ATOM | 265 | O4'  | C A | 9  | -39.747 | 12.061 | 49.429 | 1.00 | 0.00 | O |
| ATOM | 266 | C5'  | C A | 9  | -38.915 | 12.971 | 47.352 | 1.00 | 0.00 | C |
| ATOM | 267 | O5'  | C A | 9  | -38.270 | 11.806 | 46.777 | 1.00 | 0.00 | O |
| ATOM | 268 | O1P  | C A | 9  | -36.385 | 12.789 | 45.430 | 1.00 | 0.00 | O |
| ATOM | 269 | O2P  | C A | 9  | -37.383 | 10.584 | 44.768 | 1.00 | 0.00 | O |
| ATOM | 270 | P    | C A | 9  | -37.587 | 11.937 | 45.342 | 1.00 | 0.00 | P |
| ATOM | 271 | H5   | C A | 9  | -40.081 | 7.940  | 46.404 | 1.00 | 0.00 | H |
| ATOM | 272 | H6   | C A | 9  | -38.858 | 9.849  | 47.392 | 1.00 | 0.00 | H |
| ATOM | 273 | H1'  | C A | 9  | -39.233 | 10.805 | 50.946 | 1.00 | 0.00 | H |
| ATOM | 274 | H3'  | C A | 9  | -36.597 | 12.675 | 48.705 | 1.00 | 0.00 | H |
| ATOM | 275 | H4'  | C A | 9  | -38.842 | 13.986 | 49.206 | 1.00 | 0.00 | H |
| ATOM | 276 | H41  | C A | 9  | -41.802 | 6.275  | 46.810 | 1.00 | 0.00 | H |
| ATOM | 277 | H42  | C A | 9  | -42.666 | 6.145  | 48.366 | 1.00 | 0.00 | H |
| ATOM | 278 | H2'1 | C A | 9  | -37.464 | 10.446 | 48.509 | 1.00 | 0.00 | H |
| ATOM | 279 | H2'2 | C A | 9  | -37.006 | 10.464 | 50.206 | 1.00 | 0.00 | H |
| ATOM | 280 | H5'1 | C A | 9  | -39.978 | 12.960 | 47.110 | 1.00 | 0.00 | H |
| ATOM | 281 | H5'2 | C A | 9  | -38.466 | 13.878 | 46.948 | 1.00 | 0.00 | H |
| ATOM | 282 | C1'  | C A | 10 | -38.566 | 8.870  | 54.360 | 1.00 | 0.00 | C |
| ATOM | 283 | N1   | C A | 10 | -38.661 | 8.002  | 53.155 | 1.00 | 0.00 | N |
| ATOM | 284 | C2   | C A | 10 | -39.590 | 6.963  | 53.171 | 1.00 | 0.00 | C |
| ATOM | 285 | O2   | C A | 10 | -40.293 | 6.804  | 54.178 | 1.00 | 0.00 | O |
| ATOM | 286 | N3   | C A | 10 | -39.693 | 6.161  | 52.083 | 1.00 | 0.00 | N |
| ATOM | 287 | C4   | C A | 10 | -38.918 | 6.356  | 51.008 | 1.00 | 0.00 | C |
| ATOM | 288 | N4   | C A | 10 | -39.063 | 5.544  | 49.970 | 1.00 | 0.00 | N |
| ATOM | 289 | C5   | C A | 10 | -37.951 | 7.414  | 50.965 | 1.00 | 0.00 | C |
| ATOM | 290 | C6   | C A | 10 | -37.869 | 8.212  | 52.070 | 1.00 | 0.00 | C |
| ATOM | 291 | C2'  | C A | 10 | -37.144 | 9.296  | 54.698 | 1.00 | 0.00 | C |
| ATOM | 292 | C3'  | C A | 10 | -37.353 | 10.708 | 55.224 | 1.00 | 0.00 | C |
| ATOM | 293 | O3'  | C A | 10 | -37.697 | 10.647 | 56.606 | 1.00 | 0.00 | O |
| ATOM | 294 | C4'  | C A | 10 | -38.505 | 11.223 | 54.364 | 1.00 | 0.00 | C |
| ATOM | 295 | O4'  | C A | 10 | -39.325 | 10.038 | 54.110 | 1.00 | 0.00 | O |
| ATOM | 296 | C5'  | C A | 10 | -38.129 | 11.843 | 53.039 | 1.00 | 0.00 | C |
| ATOM | 297 | O5'  | C A | 10 | -37.004 | 11.129 | 52.465 | 1.00 | 0.00 | O |
| ATOM | 298 | O1P  | C A | 10 | -35.155 | 12.836 | 52.495 | 1.00 | 0.00 | O |
| ATOM | 299 | O2P  | C A | 10 | -35.143 | 11.002 | 50.782 | 1.00 | 0.00 | O |
| ATOM | 300 | P    | C A | 10 | -35.933 | 11.945 | 51.612 | 1.00 | 0.00 | P |
| ATOM | 301 | H5   | C A | 10 | -37.314 | 7.573  | 50.094 | 1.00 | 0.00 | H |
| ATOM | 302 | H6   | C A | 10 | -37.154 | 9.035  | 52.082 | 1.00 | 0.00 | H |

|      |     |      |   |   |    |         |        |        |      |      |   |
|------|-----|------|---|---|----|---------|--------|--------|------|------|---|
| ATOM | 303 | H1'  | C | A | 10 | -39.026 | 8.344  | 55.197 | 1.00 | 0.00 | H |
| ATOM | 304 | H3'  | C | A | 10 | -36.462 | 11.325 | 55.101 | 1.00 | 0.00 | H |
| ATOM | 305 | H4'  | C | A | 10 | -39.023 | 11.982 | 54.951 | 1.00 | 0.00 | H |
| ATOM | 306 | H41  | C | A | 10 | -38.481 | 5.674  | 49.130 | 1.00 | 0.00 | H |
| ATOM | 307 | H42  | C | A | 10 | -39.756 | 4.783  | 50.005 | 1.00 | 0.00 | H |
| ATOM | 308 | H2'1 | C | A | 10 | -36.491 | 9.290  | 53.827 | 1.00 | 0.00 | H |
| ATOM | 309 | H2'2 | C | A | 10 | -36.689 | 8.654  | 55.454 | 1.00 | 0.00 | H |
| ATOM | 310 | H5'1 | C | A | 10 | -38.983 | 11.789 | 52.362 | 1.00 | 0.00 | H |
| ATOM | 311 | H5'2 | C | A | 10 | -37.862 | 12.887 | 53.196 | 1.00 | 0.00 | H |
| ATOM | 312 | C1'  | T | A | 11 | -39.049 | 5.276  | 57.730 | 1.00 | 0.00 | C |
| ATOM | 313 | N1   | T | A | 11 | -38.462 | 4.975  | 56.398 | 1.00 | 0.00 | N |
| ATOM | 314 | C2   | T | A | 11 | -38.997 | 3.912  | 55.699 | 1.00 | 0.00 | C |
| ATOM | 315 | O2   | T | A | 11 | -39.912 | 3.231  | 56.131 | 1.00 | 0.00 | O |
| ATOM | 316 | N3   | T | A | 11 | -38.423 | 3.667  | 54.465 | 1.00 | 0.00 | N |
| ATOM | 317 | C4   | T | A | 11 | -37.386 | 4.372  | 53.888 | 1.00 | 0.00 | C |
| ATOM | 318 | O4   | T | A | 11 | -36.951 | 4.057  | 52.773 | 1.00 | 0.00 | O |
| ATOM | 319 | C5   | T | A | 11 | -36.893 | 5.465  | 54.692 | 1.00 | 0.00 | C |
| ATOM | 320 | C6   | T | A | 11 | -37.430 | 5.732  | 55.899 | 1.00 | 0.00 | C |
| ATOM | 321 | C7   | T | A | 11 | -35.767 | 6.260  | 54.102 | 1.00 | 0.00 | C |
| ATOM | 322 | C2'  | T | A | 11 | -38.025 | 5.718  | 58.768 | 1.00 | 0.00 | C |
| ATOM | 323 | C3'  | T | A | 11 | -38.806 | 6.746  | 59.569 | 1.00 | 0.00 | C |
| ATOM | 324 | O3'  | T | A | 11 | -39.574 | 6.077  | 60.568 | 1.00 | 0.00 | O |
| ATOM | 325 | C4'  | T | A | 11 | -39.686 | 7.405  | 58.510 | 1.00 | 0.00 | C |
| ATOM | 326 | O4'  | T | A | 11 | -39.981 | 6.328  | 57.564 | 1.00 | 0.00 | O |
| ATOM | 327 | C5'  | T | A | 11 | -39.074 | 8.560  | 57.751 | 1.00 | 0.00 | C |
| ATOM | 328 | O5'  | T | A | 11 | -37.664 | 8.306  | 57.527 | 1.00 | 0.00 | O |
| ATOM | 329 | O1P  | T | A | 11 | -36.527 | 10.086 | 58.895 | 1.00 | 0.00 | O |
| ATOM | 330 | O2P  | T | A | 11 | -35.384 | 9.137  | 56.874 | 1.00 | 0.00 | O |
| ATOM | 331 | P    | T | A | 11 | -36.652 | 9.538  | 57.531 | 1.00 | 0.00 | P |
| ATOM | 332 | H3   | T | A | 11 | -38.807 | 2.882  | 53.922 | 1.00 | 0.00 | H |
| ATOM | 333 | H6   | T | A | 11 | -37.041 | 6.563  | 56.489 | 1.00 | 0.00 | H |
| ATOM | 334 | H1'  | T | A | 11 | -39.594 | 4.396  | 58.071 | 1.00 | 0.00 | H |
| ATOM | 335 | H3'  | T | A | 11 | -38.152 | 7.474  | 60.046 | 1.00 | 0.00 | H |
| ATOM | 336 | H4'  | T | A | 11 | -40.574 | 7.777  | 59.022 | 1.00 | 0.00 | H |
| ATOM | 337 | H71  | T | A | 11 | -34.870 | 6.124  | 54.705 | 1.00 | 0.00 | H |
| ATOM | 338 | H72  | T | A | 11 | -35.575 | 5.918  | 53.084 | 1.00 | 0.00 | H |
| ATOM | 339 | H73  | T | A | 11 | -36.036 | 7.316  | 54.084 | 1.00 | 0.00 | H |
| ATOM | 340 | H2'1 | T | A | 11 | -37.140 | 6.159  | 58.312 | 1.00 | 0.00 | H |
| ATOM | 341 | H2'2 | T | A | 11 | -37.691 | 4.892  | 59.398 | 1.00 | 0.00 | H |
| ATOM | 342 | H5'1 | T | A | 11 | -39.584 | 8.672  | 56.795 | 1.00 | 0.00 | H |
| ATOM | 343 | H5'2 | T | A | 11 | -39.195 | 9.474  | 58.332 | 1.00 | 0.00 | H |
| ATOM | 344 | C1'  | A | A | 12 | -39.592 | 0.551  | 59.148 | 1.00 | 0.00 | C |
| ATOM | 345 | N1   | A | A | 12 | -37.372 | -0.474 | 54.635 | 1.00 | 0.00 | N |
| ATOM | 346 | C2   | A | A | 12 | -38.400 | -1.021 | 55.276 | 1.00 | 0.00 | C |
| ATOM | 347 | N3   | A | A | 12 | -38.925 | -0.704 | 56.441 | 1.00 | 0.00 | N |
| ATOM | 348 | C4   | A | A | 12 | -38.256 | 0.326  | 56.988 | 1.00 | 0.00 | C |
| ATOM | 349 | C5   | A | A | 12 | -37.185 | 0.994  | 56.465 | 1.00 | 0.00 | C |
| ATOM | 350 | C6   | A | A | 12 | -36.724 | 0.553  | 55.206 | 1.00 | 0.00 | C |
| ATOM | 351 | N6   | A | A | 12 | -35.682 | 1.114  | 54.569 | 1.00 | 0.00 | N |
| ATOM | 352 | N7   | A | A | 12 | -36.761 | 2.001  | 57.313 | 1.00 | 0.00 | N |
| ATOM | 353 | C8   | A | A | 12 | -37.573 | 1.920  | 58.325 | 1.00 | 0.00 | C |
| ATOM | 354 | N9   | A | A | 12 | -38.510 | 0.926  | 58.197 | 1.00 | 0.00 | N |
| ATOM | 355 | C2'  | A | A | 12 | -39.182 | 0.652  | 60.611 | 1.00 | 0.00 | C |
| ATOM | 356 | C3'  | A | A | 12 | -40.469 | 1.125  | 61.269 | 1.00 | 0.00 | C |



|      |     |      |   |   |    |         |        |        |      |      |   |
|------|-----|------|---|---|----|---------|--------|--------|------|------|---|
| ATOM | 357 | O3'  | A | A | 12 | -41.295 | -0.004 | 61.544 | 1.00 | 0.00 | O |
| ATOM | 358 | C4'  | A | A | 12 | -41.077 | 2.040  | 60.207 | 1.00 | 0.00 | C |
| ATOM | 359 | O4'  | A | A | 12 | -40.677 | 1.433  | 58.937 | 1.00 | 0.00 | O |
| ATOM | 360 | C5'  | A | A | 12 | -40.621 | 3.479  | 60.221 | 1.00 | 0.00 | C |
| ATOM | 361 | O5'  | A | A | 12 | -39.216 | 3.545  | 60.576 | 1.00 | 0.00 | O |
| ATOM | 362 | O1P  | A | A | 12 | -39.232 | 4.720  | 62.802 | 1.00 | 0.00 | O |
| ATOM | 363 | O2P  | A | A | 12 | -37.221 | 4.885  | 61.310 | 1.00 | 0.00 | O |
| ATOM | 364 | P    | A | A | 12 | -38.697 | 4.789  | 61.428 | 1.00 | 0.00 | P |
| ATOM | 365 | H2   | A | A | 12 | -38.880 | -1.853 | 54.761 | 1.00 | 0.00 | H |
| ATOM | 366 | H8   | A | A | 12 | -37.517 | 2.578  | 59.193 | 1.00 | 0.00 | H |
| ATOM | 367 | H1'  | A | A | 12 | -39.925 | -0.457 | 58.904 | 1.00 | 0.00 | H |
| ATOM | 368 | H3'  | A | A | 12 | -40.280 | 1.668  | 62.194 | 1.00 | 0.00 | H |
| ATOM | 369 | H4'  | A | A | 12 | -42.156 | 2.031  | 60.363 | 1.00 | 0.00 | H |
| ATOM | 370 | H61  | A | A | 12 | -35.387 | 0.756  | 53.650 | 1.00 | 0.00 | H |
| ATOM | 371 | H62  | A | A | 12 | -35.178 | 1.902  | 55.002 | 1.00 | 0.00 | H |
| ATOM | 372 | H2'1 | A | A | 12 | -38.373 | 1.364  | 60.767 | 1.00 | 0.00 | H |
| ATOM | 373 | H2'2 | A | A | 12 | -38.858 | -0.307 | 61.016 | 1.00 | 0.00 | H |
| ATOM | 374 | H5'1 | A | A | 12 | -40.771 | 3.911  | 59.232 | 1.00 | 0.00 | H |
| ATOM | 375 | H5'2 | A | A | 12 | -41.210 | 4.035  | 60.948 | 1.00 | 0.00 | H |
| ATOM | 376 | C1'  | G | A | 13 | -39.133 | -4.354 | 58.536 | 1.00 | 0.00 | C |
| ATOM | 377 | N1   | G | A | 13 | -35.283 | -3.056 | 55.452 | 1.00 | 0.00 | N |
| ATOM | 378 | C2   | G | A | 13 | -36.268 | -4.012 | 55.286 | 1.00 | 0.00 | C |
| ATOM | 379 | N2   | G | A | 13 | -36.221 | -4.720 | 54.149 | 1.00 | 0.00 | N |
| ATOM | 380 | N3   | G | A | 13 | -37.224 | -4.245 | 56.184 | 1.00 | 0.00 | N |
| ATOM | 381 | C4   | G | A | 13 | -37.115 | -3.445 | 57.276 | 1.00 | 0.00 | C |
| ATOM | 382 | C5   | G | A | 13 | -36.165 | -2.468 | 57.528 | 1.00 | 0.00 | C |
| ATOM | 383 | C6   | G | A | 13 | -35.151 | -2.218 | 56.574 | 1.00 | 0.00 | C |
| ATOM | 384 | O6   | G | A | 13 | -34.230 | -1.402 | 56.618 | 1.00 | 0.00 | O |
| ATOM | 385 | N7   | G | A | 13 | -36.403 | -1.873 | 58.768 | 1.00 | 0.00 | N |
| ATOM | 386 | C8   | G | A | 13 | -37.466 | -2.488 | 59.216 | 1.00 | 0.00 | C |
| ATOM | 387 | N9   | G | A | 13 | -37.956 | -3.458 | 58.366 | 1.00 | 0.00 | N |
| ATOM | 388 | C2'  | G | A | 13 | -39.331 | -4.844 | 59.964 | 1.00 | 0.00 | C |
| ATOM | 389 | C3'  | G | A | 13 | -40.845 | -4.884 | 60.080 | 1.00 | 0.00 | C |
| ATOM | 390 | O3'  | G | A | 13 | -41.322 | -6.122 | 59.557 | 1.00 | 0.00 | O |
| ATOM | 391 | C4'  | G | A | 13 | -41.283 | -3.692 | 59.230 | 1.00 | 0.00 | C |
| ATOM | 392 | O4'  | G | A | 13 | -40.287 | -3.627 | 58.160 | 1.00 | 0.00 | O |
| ATOM | 393 | C5'  | G | A | 13 | -41.332 | -2.353 | 59.927 | 1.00 | 0.00 | C |
| ATOM | 394 | O5'  | G | A | 13 | -40.245 | -2.256 | 60.880 | 1.00 | 0.00 | O |
| ATOM | 395 | O1P  | G | A | 13 | -41.423 | -2.176 | 63.103 | 1.00 | 0.00 | O |
| ATOM | 396 | O2P  | G | A | 13 | -39.170 | -1.107 | 62.839 | 1.00 | 0.00 | O |
| ATOM | 397 | P    | G | A | 13 | -40.481 | -1.446 | 62.234 | 1.00 | 0.00 | P |
| ATOM | 398 | H1   | G | A | 13 | -34.591 | -2.950 | 54.693 | 1.00 | 0.00 | H |
| ATOM | 399 | H8   | G | A | 13 | -37.925 | -2.258 | 60.177 | 1.00 | 0.00 | H |
| ATOM | 400 | H1'  | G | A | 13 | -39.025 | -5.193 | 57.847 | 1.00 | 0.00 | H |
| ATOM | 401 | H21  | G | A | 13 | -35.479 | -4.530 | 53.458 | 1.00 | 0.00 | H |
| ATOM | 402 | H3'  | G | A | 13 | -41.180 | -4.775 | 61.112 | 1.00 | 0.00 | H |
| ATOM | 403 | H22  | G | A | 13 | -36.924 | -5.447 | 53.968 | 1.00 | 0.00 | H |
| ATOM | 404 | H4'  | G | A | 13 | -42.285 | -3.915 | 58.865 | 1.00 | 0.00 | H |
| ATOM | 405 | H2'1 | G | A | 13 | -38.895 | -4.165 | 60.698 | 1.00 | 0.00 | H |
| ATOM | 406 | H2'2 | G | A | 13 | -38.893 | -5.829 | 60.129 | 1.00 | 0.00 | H |
| ATOM | 407 | H5'1 | G | A | 13 | -41.244 | -1.560 | 59.185 | 1.00 | 0.00 | H |
| ATOM | 408 | H5'2 | G | A | 13 | -42.286 | -2.254 | 60.444 | 1.00 | 0.00 | H |
| ATOM | 409 | C1'  | G | A | 14 | -37.050 | -8.433 | 56.650 | 1.00 | 0.00 | C |
| ATOM | 410 | N1   | G | A | 14 | -32.942 | -5.442 | 56.200 | 1.00 | 0.00 | N |

|      |     |      |     |    |         |         |        |      |      |   |
|------|-----|------|-----|----|---------|---------|--------|------|------|---|
| ATOM | 411 | C2   | G A | 14 | -33.470 | -6.365  | 55.315 | 1.00 | 0.00 | C |
| ATOM | 412 | N2   | G A | 14 | -32.815 | -6.512  | 54.157 | 1.00 | 0.00 | N |
| ATOM | 413 | N3   | G A | 14 | -34.564 | -7.083  | 55.565 | 1.00 | 0.00 | N |
| ATOM | 414 | C4   | G A | 14 | -35.091 | -6.810  | 56.787 | 1.00 | 0.00 | C |
| ATOM | 415 | C5   | G A | 14 | -34.632 | -5.911  | 57.735 | 1.00 | 0.00 | C |
| ATOM | 416 | C6   | G A | 14 | -33.475 | -5.146  | 57.470 | 1.00 | 0.00 | C |
| ATOM | 417 | O6   | G A | 14 | -32.918 | -4.307  | 58.178 | 1.00 | 0.00 | O |
| ATOM | 418 | N7   | G A | 14 | -35.461 | -5.933  | 58.860 | 1.00 | 0.00 | N |
| ATOM | 419 | C8   | G A | 14 | -36.375 | -6.820  | 58.563 | 1.00 | 0.00 | C |
| ATOM | 420 | N9   | G A | 14 | -36.218 | -7.397  | 57.321 | 1.00 | 0.00 | N |
| ATOM | 421 | C2'  | G A | 14 | -37.582 | -9.500  | 57.597 | 1.00 | 0.00 | C |
| ATOM | 422 | C3'  | G A | 14 | -38.953 | -9.793  | 57.009 | 1.00 | 0.00 | C |
| ATOM | 423 | O3'  | G A | 14 | -38.819 | -10.747 | 55.959 | 1.00 | 0.00 | O |
| ATOM | 424 | C4'  | G A | 14 | -39.399 | -8.425  | 56.493 | 1.00 | 0.00 | C |
| ATOM | 425 | O4'  | G A | 14 | -38.159 | -7.780  | 56.062 | 1.00 | 0.00 | O |
| ATOM | 426 | C5'  | G A | 14 | -40.091 | -7.526  | 57.490 | 1.00 | 0.00 | C |
| ATOM | 427 | O5'  | G A | 14 | -39.493 | -7.692  | 58.799 | 1.00 | 0.00 | O |
| ATOM | 428 | O1P  | G A | 14 | -41.345 | -8.718  | 60.160 | 1.00 | 0.00 | O |
| ATOM | 429 | O2P  | G A | 14 | -39.577 | -7.341  | 61.286 | 1.00 | 0.00 | O |
| ATOM | 430 | P    | G A | 14 | -40.423 | -7.569  | 60.089 | 1.00 | 0.00 | P |
| ATOM | 431 | H1   | G A | 14 | -32.094 | -4.933  | 55.907 | 1.00 | 0.00 | H |
| ATOM | 432 | H8   | G A | 14 | -37.190 | -7.080  | 59.239 | 1.00 | 0.00 | H |
| ATOM | 433 | H1'  | G A | 14 | -36.460 | -8.879  | 55.850 | 1.00 | 0.00 | H |
| ATOM | 434 | H21  | G A | 14 | -31.971 | -5.951  | 53.968 | 1.00 | 0.00 | H |
| ATOM | 435 | H3'  | G A | 14 | -39.645 | -10.175 | 57.759 | 1.00 | 0.00 | H |
| ATOM | 436 | H22  | G A | 14 | -33.155 | -7.185  | 53.456 | 1.00 | 0.00 | H |
| ATOM | 437 | H4'  | G A | 14 | -40.092 | -8.608  | 55.672 | 1.00 | 0.00 | H |
| ATOM | 438 | H2'1 | G A | 14 | -37.658 | -9.142  | 58.623 | 1.00 | 0.00 | H |
| ATOM | 439 | H2'2 | G A | 14 | -36.955 | -10.393 | 57.607 | 1.00 | 0.00 | H |
| ATOM | 440 | H5'1 | G A | 14 | -39.990 | -6.490  | 57.167 | 1.00 | 0.00 | H |
| ATOM | 441 | H5'2 | G A | 14 | -41.150 | -7.786  | 57.532 | 1.00 | 0.00 | H |
| ATOM | 442 | C1'  | A A | 15 | -33.331 | -11.025 | 54.664 | 1.00 | 0.00 | C |
| ATOM | 443 | N1   | A A | 15 | -30.398 | -7.571  | 57.074 | 1.00 | 0.00 | N |
| ATOM | 444 | C2   | A A | 15 | -30.335 | -8.114  | 55.860 | 1.00 | 0.00 | C |
| ATOM | 445 | N3   | A A | 15 | -31.129 | -9.000  | 55.298 | 1.00 | 0.00 | N |
| ATOM | 446 | C4   | A A | 15 | -32.110 | -9.352  | 56.151 | 1.00 | 0.00 | C |
| ATOM | 447 | C5   | A A | 15 | -32.313 | -8.893  | 57.421 | 1.00 | 0.00 | C |
| ATOM | 448 | C6   | A A | 15 | -31.388 | -7.941  | 57.900 | 1.00 | 0.00 | C |
| ATOM | 449 | N6   | A A | 15 | -31.461 | -7.402  | 59.129 | 1.00 | 0.00 | N |
| ATOM | 450 | N7   | A A | 15 | -33.426 | -9.482  | 57.994 | 1.00 | 0.00 | N |
| ATOM | 451 | C8   | A A | 15 | -33.868 | -10.281 | 57.068 | 1.00 | 0.00 | C |
| ATOM | 452 | N9   | A A | 15 | -33.120 | -10.254 | 55.918 | 1.00 | 0.00 | N |
| ATOM | 453 | C2'  | A A | 15 | -33.821 | -12.449 | 54.894 | 1.00 | 0.00 | C |
| ATOM | 454 | C3'  | A A | 15 | -34.756 | -12.657 | 53.713 | 1.00 | 0.00 | C |
| ATOM | 455 | O3'  | A A | 15 | -33.995 | -13.069 | 52.582 | 1.00 | 0.00 | O |
| ATOM | 456 | C4'  | A A | 15 | -35.375 | -11.273 | 53.521 | 1.00 | 0.00 | C |
| ATOM | 457 | O4'  | A A | 15 | -34.306 | -10.345 | 53.898 | 1.00 | 0.00 | O |
| ATOM | 458 | C5'  | A A | 15 | -36.598 | -10.963 | 54.350 | 1.00 | 0.00 | C |
| ATOM | 459 | O5'  | A A | 15 | -36.469 | -11.569 | 55.661 | 1.00 | 0.00 | O |
| ATOM | 460 | O1P  | A A | 15 | -38.293 | -13.304 | 55.684 | 1.00 | 0.00 | O |
| ATOM | 461 | O2P  | A A | 15 | -37.505 | -12.282 | 57.837 | 1.00 | 0.00 | O |
| ATOM | 462 | P    | A A | 15 | -37.780 | -12.112 | 56.389 | 1.00 | 0.00 | P |
| ATOM | 463 | H2   | A A | 15 | -29.506 | -7.773  | 55.241 | 1.00 | 0.00 | H |
| ATOM | 464 | H8   | A A | 15 | -34.747 | -10.912 | 57.191 | 1.00 | 0.00 | H |

|      |     |      |   |   |    |         |         |        |      |      |   |
|------|-----|------|---|---|----|---------|---------|--------|------|------|---|
| ATOM | 465 | H1'  | A | A | 15 | -32.398 | -11.020 | 54.100 | 1.00 | 0.00 | H |
| ATOM | 466 | H3'  | A | A | 15 | -35.522 | -13.403 | 53.925 | 1.00 | 0.00 | H |
| ATOM | 467 | H4'  | A | A | 15 | -35.655 | -11.195 | 52.471 | 1.00 | 0.00 | H |
| ATOM | 468 | H61  | A | A | 15 | -30.760 | -6.708  | 59.427 | 1.00 | 0.00 | H |
| ATOM | 469 | H62  | A | A | 15 | -32.217 | -7.682  | 59.770 | 1.00 | 0.00 | H |
| ATOM | 470 | H2'1 | A | A | 15 | -34.348 | -12.555 | 55.842 | 1.00 | 0.00 | H |
| ATOM | 471 | H2'2 | A | A | 15 | -33.007 | -13.173 | 54.887 | 1.00 | 0.00 | H |
| ATOM | 472 | H5'1 | A | A | 15 | -36.697 | -9.883  | 54.451 | 1.00 | 0.00 | H |
| ATOM | 473 | H5'2 | A | A | 15 | -37.480 | -11.358 | 53.848 | 1.00 | 0.00 | H |
| ATOM | 474 | C1'  | C | A | 16 | -28.527 | -11.971 | 53.831 | 1.00 | 0.00 | C |
| ATOM | 475 | N1   | C | A | 16 | -29.030 | -11.794 | 55.221 | 1.00 | 0.00 | N |
| ATOM | 476 | C2   | C | A | 16 | -28.365 | -10.890 | 56.045 | 1.00 | 0.00 | C |
| ATOM | 477 | O2   | C | A | 16 | -27.389 | -10.276 | 55.592 | 1.00 | 0.00 | O |
| ATOM | 478 | N3   | C | A | 16 | -28.806 | -10.713 | 57.315 | 1.00 | 0.00 | N |
| ATOM | 479 | C4   | C | A | 16 | -29.864 | -11.393 | 57.775 | 1.00 | 0.00 | C |
| ATOM | 480 | N4   | C | A | 16 | -30.255 | -11.178 | 59.023 | 1.00 | 0.00 | N |
| ATOM | 481 | C5   | C | A | 16 | -30.566 | -12.333 | 56.952 | 1.00 | 0.00 | C |
| ATOM | 482 | C6   | C | A | 16 | -30.107 | -12.492 | 55.675 | 1.00 | 0.00 | C |
| ATOM | 483 | C2'  | C | A | 16 | -28.598 | -13.408 | 53.331 | 1.00 | 0.00 | C |
| ATOM | 484 | C3'  | C | A | 16 | -28.937 | -13.216 | 51.861 | 1.00 | 0.00 | C |
| ATOM | 485 | O3'  | C | A | 16 | -27.735 | -12.989 | 51.129 | 1.00 | 0.00 | O |
| ATOM | 486 | C4'  | C | A | 16 | -29.844 | -11.987 | 51.880 | 1.00 | 0.00 | C |
| ATOM | 487 | O4'  | C | A | 16 | -29.327 | -11.172 | 52.979 | 1.00 | 0.00 | O |
| ATOM | 488 | C5'  | C | A | 16 | -31.315 | -12.242 | 52.117 | 1.00 | 0.00 | C |
| ATOM | 489 | O5'  | C | A | 16 | -31.477 | -13.329 | 53.062 | 1.00 | 0.00 | O |
| ATOM | 490 | O1P  | C | A | 16 | -32.553 | -15.143 | 51.687 | 1.00 | 0.00 | O |
| ATOM | 491 | O2P  | C | A | 16 | -32.942 | -15.049 | 54.163 | 1.00 | 0.00 | O |
| ATOM | 492 | P    | C | A | 16 | -32.723 | -14.312 | 52.895 | 1.00 | 0.00 | P |
| ATOM | 493 | H5   | C | A | 16 | -31.424 | -12.894 | 57.326 | 1.00 | 0.00 | H |
| ATOM | 494 | H6   | C | A | 16 | -30.613 | -13.189 | 55.008 | 1.00 | 0.00 | H |
| ATOM | 495 | H1'  | C | A | 16 | -27.507 | -11.591 | 53.786 | 1.00 | 0.00 | H |
| ATOM | 496 | H3'  | C | A | 16 | -29.455 | -14.082 | 51.447 | 1.00 | 0.00 | H |
| ATOM | 497 | H4'  | C | A | 16 | -29.744 | -11.506 | 50.907 | 1.00 | 0.00 | H |
| ATOM | 498 | H41  | C | A | 16 | -31.068 | -11.687 | 59.403 | 1.00 | 0.00 | H |
| ATOM | 499 | H42  | C | A | 16 | -29.748 | -10.505 | 59.615 | 1.00 | 0.00 | H |
| ATOM | 500 | H2'1 | C | A | 16 | -29.366 | -13.987 | 53.843 | 1.00 | 0.00 | H |
| ATOM | 501 | H2'2 | C | A | 16 | -27.652 | -13.936 | 53.456 | 1.00 | 0.00 | H |
| ATOM | 502 | H5'1 | C | A | 16 | -31.775 | -11.336 | 52.512 | 1.00 | 0.00 | H |
| ATOM | 503 | H5'2 | C | A | 16 | -31.790 | -12.502 | 51.171 | 1.00 | 0.00 | H |
| ATOM | 504 | C1'  | G | A | 17 | -23.703 | -11.828 | 54.937 | 1.00 | 0.00 | C |
| ATOM | 505 | N1   | G | A | 17 | -25.393 | -11.397 | 59.731 | 1.00 | 0.00 | N |
| ATOM | 506 | C2   | G | A | 17 | -24.367 | -10.728 | 59.087 | 1.00 | 0.00 | C |
| ATOM | 507 | N2   | G | A | 17 | -23.702 | -9.825  | 59.819 | 1.00 | 0.00 | N |
| ATOM | 508 | N3   | G | A | 17 | -24.032 | -10.941 | 57.816 | 1.00 | 0.00 | N |
| ATOM | 509 | C4   | G | A | 17 | -24.806 | -11.894 | 57.232 | 1.00 | 0.00 | C |
| ATOM | 510 | C5   | G | A | 17 | -25.846 | -12.615 | 57.794 | 1.00 | 0.00 | C |
| ATOM | 511 | C6   | G | A | 17 | -26.205 | -12.387 | 59.142 | 1.00 | 0.00 | C |
| ATOM | 512 | O6   | G | A | 17 | -27.088 | -12.921 | 59.813 | 1.00 | 0.00 | O |
| ATOM | 513 | N7   | G | A | 17 | -26.384 | -13.499 | 56.856 | 1.00 | 0.00 | N |
| ATOM | 514 | C8   | G | A | 17 | -25.672 | -13.288 | 55.779 | 1.00 | 0.00 | C |
| ATOM | 515 | N9   | G | A | 17 | -24.693 | -12.327 | 55.929 | 1.00 | 0.00 | N |
| ATOM | 516 | C2'  | G | A | 17 | -23.156 | -12.910 | 54.016 | 1.00 | 0.00 | C |
| ATOM | 517 | C3'  | G | A | 17 | -22.994 | -12.161 | 52.704 | 1.00 | 0.00 | C |
| ATOM | 518 | O3'  | G | A | 17 | -21.738 | -11.485 | 52.704 | 1.00 | 0.00 | O |

|      |     |      |     |    |         |         |        |      |      |   |
|------|-----|------|-----|----|---------|---------|--------|------|------|---|
| ATOM | 519 | C4'  | G A | 17 | -24.173 | -11.189 | 52.720 | 1.00 | 0.00 | C |
| ATOM | 520 | O4'  | G A | 17 | -24.348 | -10.858 | 54.134 | 1.00 | 0.00 | O |
| ATOM | 521 | C5'  | G A | 17 | -25.482 | -11.715 | 52.180 | 1.00 | 0.00 | C |
| ATOM | 522 | O5'  | G A | 17 | -25.635 | -13.111 | 52.538 | 1.00 | 0.00 | O |
| ATOM | 523 | O1P  | G A | 17 | -25.555 | -14.293 | 50.317 | 1.00 | 0.00 | O |
| ATOM | 524 | O2P  | G A | 17 | -26.805 | -15.314 | 52.238 | 1.00 | 0.00 | O |
| ATOM | 525 | P    | G A | 17 | -26.383 | -14.086 | 51.521 | 1.00 | 0.00 | P |
| ATOM | 526 | H1   | G A | 17 | -25.576 | -11.153 | 60.716 | 1.00 | 0.00 | H |
| ATOM | 527 | H8   | G A | 17 | -25.838 | -13.825 | 54.844 | 1.00 | 0.00 | H |
| ATOM | 528 | H1'  | G A | 17 | -22.897 | -11.333 | 55.479 | 1.00 | 0.00 | H |
| ATOM | 529 | H21  | G A | 17 | -23.968 | -9.663  | 60.801 | 1.00 | 0.00 | H |
| ATOM | 530 | H3'  | G A | 17 | -23.045 | -12.828 | 51.843 | 1.00 | 0.00 | H |
| ATOM | 531 | H22  | G A | 17 | -22.925 | -9.295  | 59.399 | 1.00 | 0.00 | H |
| ATOM | 532 | H4'  | G A | 17 | -23.884 | -10.331 | 52.115 | 1.00 | 0.00 | H |
| ATOM | 533 | H2'1 | G A | 17 | -23.845 | -13.749 | 53.911 | 1.00 | 0.00 | H |
| ATOM | 534 | H2'2 | G A | 17 | -22.204 | -13.310 | 54.367 | 1.00 | 0.00 | H |
| ATOM | 535 | H5'1 | G A | 17 | -26.302 | -11.134 | 52.602 | 1.00 | 0.00 | H |
| ATOM | 536 | H5'2 | G A | 17 | -25.490 | -11.608 | 51.095 | 1.00 | 0.00 | H |
| ATOM | 537 | C1'  | G A | 18 | -19.860 | -11.505 | 58.043 | 1.00 | 0.00 | C |
| ATOM | 538 | N1   | G A | 18 | -23.177 | -13.371 | 61.440 | 1.00 | 0.00 | N |
| ATOM | 539 | C2   | G A | 18 | -22.242 | -12.359 | 61.575 | 1.00 | 0.00 | C |
| ATOM | 540 | N2   | G A | 18 | -22.182 | -11.767 | 62.776 | 1.00 | 0.00 | N |
| ATOM | 541 | N3   | G A | 18 | -21.434 | -11.969 | 60.592 | 1.00 | 0.00 | N |
| ATOM | 542 | C4   | G A | 18 | -21.626 | -12.682 | 59.451 | 1.00 | 0.00 | C |
| ATOM | 543 | C5   | G A | 18 | -22.529 | -13.708 | 59.226 | 1.00 | 0.00 | C |
| ATOM | 544 | C6   | G A | 18 | -23.391 | -14.120 | 60.269 | 1.00 | 0.00 | C |
| ATOM | 545 | O6   | G A | 18 | -24.249 | -15.004 | 60.262 | 1.00 | 0.00 | O |
| ATOM | 546 | N7   | G A | 18 | -22.409 | -14.178 | 57.918 | 1.00 | 0.00 | N |
| ATOM | 547 | C8   | G A | 18 | -21.463 | -13.438 | 57.401 | 1.00 | 0.00 | C |
| ATOM | 548 | N9   | G A | 18 | -20.937 | -12.506 | 58.271 | 1.00 | 0.00 | N |
| ATOM | 549 | C2'  | G A | 18 | -18.726 | -12.012 | 57.164 | 1.00 | 0.00 | C |
| ATOM | 550 | C3'  | G A | 18 | -18.345 | -10.765 | 56.385 | 1.00 | 0.00 | C |
| ATOM | 551 | O3'  | G A | 18 | -17.436 | -9.987  | 57.160 | 1.00 | 0.00 | O |
| ATOM | 552 | C4'  | G A | 18 | -19.687 | -10.061 | 56.191 | 1.00 | 0.00 | C |
| ATOM | 553 | O4'  | G A | 18 | -20.441 | -10.385 | 57.403 | 1.00 | 0.00 | O |
| ATOM | 554 | C5'  | G A | 18 | -20.499 | -10.484 | 54.990 | 1.00 | 0.00 | C |
| ATOM | 555 | O5'  | G A | 18 | -20.340 | -11.907 | 54.766 | 1.00 | 0.00 | O |
| ATOM | 556 | O1P  | G A | 18 | -19.131 | -12.020 | 52.562 | 1.00 | 0.00 | O |
| ATOM | 557 | O2P  | G A | 18 | -20.609 | -13.916 | 53.280 | 1.00 | 0.00 | O |
| ATOM | 558 | P    | G A | 18 | -20.351 | -12.455 | 53.268 | 1.00 | 0.00 | P |
| ATOM | 559 | H1   | G A | 18 | -23.760 | -13.592 | 62.262 | 1.00 | 0.00 | H |
| ATOM | 560 | H8   | G A | 18 | -21.118 | -13.547 | 56.372 | 1.00 | 0.00 | H |
| ATOM | 561 | H1'  | G A | 18 | -19.486 | -11.179 | 59.014 | 1.00 | 0.00 | H |
| ATOM | 562 | H21  | G A | 18 | -22.814 | -12.073 | 63.531 | 1.00 | 0.00 | H |
| ATOM | 563 | H3'  | G A | 18 | -17.886 | -11.007 | 55.425 | 1.00 | 0.00 | H |
| ATOM | 564 | H22  | G A | 18 | -21.507 | -11.010 | 62.941 | 1.00 | 0.00 | H |
| ATOM | 565 | H4'  | G A | 18 | -19.475 | -8.997  | 56.093 | 1.00 | 0.00 | H |
| ATOM | 566 | H2'1 | G A | 18 | -19.046 | -12.814 | 56.499 | 1.00 | 0.00 | H |
| ATOM | 567 | H2'2 | G A | 18 | -17.885 | -12.388 | 57.749 | 1.00 | 0.00 | H |
| ATOM | 568 | H5'1 | G A | 18 | -21.549 | -10.253 | 55.168 | 1.00 | 0.00 | H |
| ATOM | 569 | H5'2 | G A | 18 | -20.156 | -9.933  | 54.115 | 1.00 | 0.00 | H |
| ATOM | 570 | C1'  | T A | 19 | -17.630 | -11.986 | 62.436 | 1.00 | 0.00 | C |
| ATOM | 571 | N1   | T A | 19 | -18.377 | -13.130 | 61.850 | 1.00 | 0.00 | N |
| ATOM | 572 | C2   | T A | 19 | -19.316 | -13.747 | 62.650 | 1.00 | 0.00 | C |

|      |     |      |       |    |         |         |        |      |      |   |
|------|-----|------|-------|----|---------|---------|--------|------|------|---|
| ATOM | 573 | O2   | T A   | 19 | -19.544 | -13.391 | 63.794 | 1.00 | 0.00 | O |
| ATOM | 574 | N3   | T A   | 19 | -19.987 | -14.805 | 62.065 | 1.00 | 0.00 | N |
| ATOM | 575 | C4   | T A   | 19 | -19.804 | -15.288 | 60.787 | 1.00 | 0.00 | C |
| ATOM | 576 | O4   | T A   | 19 | -20.465 | -16.247 | 60.372 | 1.00 | 0.00 | O |
| ATOM | 577 | C5   | T A   | 19 | -18.802 | -14.580 | 60.025 | 1.00 | 0.00 | C |
| ATOM | 578 | C6   | T A   | 19 | -18.129 | -13.543 | 60.563 | 1.00 | 0.00 | C |
| ATOM | 579 | C7   | T A   | 19 | -18.572 | -15.069 | 58.627 | 1.00 | 0.00 | C |
| ATOM | 580 | C2'  | T A   | 19 | -16.165 | -11.931 | 62.021 | 1.00 | 0.00 | C |
| ATOM | 581 | C3'  | T A   | 19 | -15.919 | -10.434 | 61.921 | 1.00 | 0.00 | C |
| ATOM | 582 | O3'  | T A   | 19 | -15.604 | -9.923  | 63.214 | 1.00 | 0.00 | O |
| ATOM | 583 | C4'  | T A   | 19 | -17.254 | -9.906  | 61.400 | 1.00 | 0.00 | C |
| ATOM | 584 | O4'  | T A   | 19 | -18.251 | -10.793 | 61.997 | 1.00 | 0.00 | O |
| ATOM | 585 | C5'  | T A   | 19 | -17.440 | -9.908  | 59.901 | 1.00 | 0.00 | C |
| ATOM | 586 | O5'  | T A   | 19 | -16.806 | -11.081 | 59.331 | 1.00 | 0.00 | O |
| ATOM | 587 | O1P  | T A   | 19 | -14.932 | -10.119 | 57.954 | 1.00 | 0.00 | O |
| ATOM | 588 | O2P  | T A   | 19 | -15.946 | -12.326 | 57.326 | 1.00 | 0.00 | O |
| ATOM | 589 | P    | T A   | 19 | -16.138 | -10.968 | 57.888 | 1.00 | 0.00 | P |
| ATOM | 590 | H3   | T A   | 19 | -20.697 | -15.279 | 62.642 | 1.00 | 0.00 | H |
| ATOM | 591 | H6   | T A   | 19 | -17.377 | -13.024 | 59.968 | 1.00 | 0.00 | H |
| ATOM | 592 | H1'  | T A   | 19 | -17.726 | -12.035 | 63.521 | 1.00 | 0.00 | H |
| ATOM | 593 | H3'  | T A   | 19 | -15.108 | -10.200 | 61.232 | 1.00 | 0.00 | H |
| ATOM | 594 | H4'  | T A   | 19 | -17.342 | -8.873  | 61.744 | 1.00 | 0.00 | H |
| ATOM | 595 | H71  | T A   | 19 | -17.565 | -15.479 | 58.546 | 1.00 | 0.00 | H |
| ATOM | 596 | H72  | T A   | 19 | -19.299 | -15.846 | 58.389 | 1.00 | 0.00 | H |
| ATOM | 597 | H73  | T A   | 19 | -18.683 | -14.241 | 57.926 | 1.00 | 0.00 | H |
| ATOM | 598 | H2'1 | T A   | 19 | -15.988 | -12.427 | 61.068 | 1.00 | 0.00 | H |
| ATOM | 599 | H2'2 | T A   | 19 | -15.508 | -12.393 | 62.759 | 1.00 | 0.00 | H |
| ATOM | 600 | H5'1 | T A   | 19 | -18.505 | -9.917  | 59.672 | 1.00 | 0.00 | H |
| ATOM | 601 | H5'2 | T A   | 19 | -16.991 | -9.008  | 59.483 | 1.00 | 0.00 | H |
| ATOM | 602 | C01  | LNK A | 20 | -12.388 | -9.872  | 65.088 | 0.00 | 0.00 | C |
| ATOM | 603 | O1   | LNK A | 20 | -13.176 | -10.238 | 63.952 | 1.00 | 0.00 | O |
| ATOM | 604 | S    | LNK A | 20 | -8.698  | -10.406 | 66.482 | 0.00 | 0.00 | S |
| ATOM | 605 | C02  | LNK A | 20 | -10.970 | -10.455 | 64.936 | 0.00 | 0.00 | C |
| ATOM | 606 | C03  | LNK A | 20 | -10.444 | -10.893 | 66.317 | 0.00 | 0.00 | C |
| ATOM | 607 | O1P  | LNK A | 20 | -14.540 | -12.313 | 63.538 | 1.00 | 0.00 | O |
| ATOM | 608 | O2P  | LNK A | 20 | -14.885 | -10.980 | 65.638 | 1.00 | 0.00 | O |
| ATOM | 609 | P    | LNK A | 20 | -14.563 | -10.988 | 64.189 | 1.00 | 0.00 | P |
| ATOM | 610 | H01  | LNK A | 20 | -12.848 | -10.267 | 65.993 | 0.00 | 0.00 | H |
| ATOM | 611 | H02  | LNK A | 20 | -12.328 | -8.786  | 65.155 | 0.00 | 0.00 | H |
| ATOM | 612 | H03  | LNK A | 20 | -10.530 | -11.975 | 66.412 | 0.00 | 0.00 | H |
| ATOM | 613 | H04  | LNK A | 20 | -10.308 | -9.697  | 64.518 | 0.00 | 0.00 | H |
| ATOM | 614 | H05  | LNK A | 20 | -11.001 | -11.317 | 64.270 | 0.00 | 0.00 | H |
| ATOM | 615 | H06  | LNK A | 20 | -11.031 | -10.411 | 67.098 | 0.00 | 0.00 | H |
| ATOM | 616 | AU   | LNK A | 20 | -8.435  | -10.686 | 67.050 |      |      |   |
| TER  |     |      |       |    |         |         |        |      |      |   |
| ATOM | 618 | C1'  | A B   | 2  | -25.374 | -18.096 | 67.082 | 1.00 | 0.00 | C |
| ATOM | 619 | N1   | A B   | 2  | -22.018 | -16.181 | 63.704 | 1.00 | 0.00 | N |
| ATOM | 620 | C2   | A B   | 2  | -22.326 | -15.845 | 64.952 | 1.00 | 0.00 | C |
| ATOM | 621 | N3   | A B   | 2  | -23.203 | -16.385 | 65.772 | 1.00 | 0.00 | N |
| ATOM | 622 | C4   | A B   | 2  | -23.832 | -17.412 | 65.170 | 1.00 | 0.00 | C |
| ATOM | 623 | C5   | A B   | 2  | -23.634 | -17.880 | 63.902 | 1.00 | 0.00 | C |
| ATOM | 624 | C6   | A B   | 2  | -22.660 | -17.210 | 63.130 | 1.00 | 0.00 | C |
| ATOM | 625 | N6   | A B   | 2  | -22.357 | -17.558 | 61.868 | 1.00 | 0.00 | N |
| ATOM | 626 | N7   | A B   | 2  | -24.463 | -18.954 | 63.630 | 1.00 | 0.00 | N |

|      |     |      |     |   |         |         |        |      |      |   |
|------|-----|------|-----|---|---------|---------|--------|------|------|---|
| ATOM | 627 | C8   | A B | 2 | -25.141 | -19.109 | 64.728 | 1.00 | 0.00 | C |
| ATOM | 628 | N9   | A B | 2 | -24.810 | -18.211 | 65.709 | 1.00 | 0.00 | N |
| ATOM | 629 | C2'  | A B | 2 | -26.870 | -18.372 | 67.156 | 1.00 | 0.00 | C |
| ATOM | 630 | C3'  | A B | 2 | -26.998 | -19.068 | 68.501 | 1.00 | 0.00 | C |
| ATOM | 631 | O3'  | A B | 2 | -27.096 | -18.085 | 69.529 | 1.00 | 0.00 | O |
| ATOM | 632 | C4'  | A B | 2 | -25.702 | -19.872 | 68.592 | 1.00 | 0.00 | C |
| ATOM | 633 | O4'  | A B | 2 | -24.714 | -19.044 | 67.898 | 1.00 | 0.00 | O |
| ATOM | 634 | C5'  | A B | 2 | -25.716 | -21.243 | 67.958 | 1.00 | 0.00 | C |
| ATOM | 635 | O5'  | A B | 2 | -26.516 | -21.215 | 66.749 | 1.00 | 0.00 | O |
| ATOM | 636 | H2   | A B | 2 | -21.772 | -15.000 | 65.358 | 1.00 | 0.00 | H |
| ATOM | 637 | H8   | A B | 2 | -25.902 | -19.880 | 64.856 | 1.00 | 0.00 | H |
| ATOM | 638 | H1'  | A B | 2 | -25.141 | -17.102 | 67.464 | 1.00 | 0.00 | H |
| ATOM | 639 | H3'  | A B | 2 | -27.869 | -19.721 | 68.543 | 1.00 | 0.00 | H |
| ATOM | 640 | H4'  | A B | 2 | -25.482 | -19.998 | 69.652 | 1.00 | 0.00 | H |
| ATOM | 641 | H61  | A B | 2 | -21.637 | -17.038 | 61.350 | 1.00 | 0.00 | H |
| ATOM | 642 | H62  | A B | 2 | -22.848 | -18.347 | 61.420 | 1.00 | 0.00 | H |
| ATOM | 643 | H2'1 | A B | 2 | -27.213 | -19.013 | 66.344 | 1.00 | 0.00 | H |
| ATOM | 644 | H2'2 | A B | 2 | -27.462 | -17.456 | 67.125 | 1.00 | 0.00 | H |
| ATOM | 645 | H5'1 | A B | 2 | -24.694 | -21.535 | 67.716 | 1.00 | 0.00 | H |
| ATOM | 646 | H5'2 | A B | 2 | -26.137 | -21.958 | 68.663 | 1.00 | 0.00 | H |
| ATOM | 647 | C1'  | C B | 3 | -25.476 | -13.132 | 67.189 | 1.00 | 0.00 | C |
| ATOM | 648 | N1   | C B | 3 | -25.616 | -13.863 | 65.900 | 1.00 | 0.00 | N |
| ATOM | 649 | C2   | C B | 3 | -24.787 | -13.488 | 64.844 | 1.00 | 0.00 | C |
| ATOM | 650 | O2   | C B | 3 | -23.974 | -12.571 | 65.020 | 1.00 | 0.00 | O |
| ATOM | 651 | N3   | C B | 3 | -24.899 | -14.140 | 63.662 | 1.00 | 0.00 | N |
| ATOM | 652 | C4   | C B | 3 | -25.789 | -15.128 | 63.502 | 1.00 | 0.00 | C |
| ATOM | 653 | N4   | C B | 3 | -25.853 | -15.735 | 62.324 | 1.00 | 0.00 | N |
| ATOM | 654 | C5   | C B | 3 | -26.659 | -15.533 | 64.568 | 1.00 | 0.00 | C |
| ATOM | 655 | C6   | C B | 3 | -26.525 | -14.864 | 65.753 | 1.00 | 0.00 | C |
| ATOM | 656 | C2'  | C B | 3 | -26.798 | -12.887 | 67.903 | 1.00 | 0.00 | C |
| ATOM | 657 | C3'  | C B | 3 | -26.401 | -13.027 | 69.364 | 1.00 | 0.00 | C |
| ATOM | 658 | O3'  | C B | 3 | -25.884 | -11.782 | 69.829 | 1.00 | 0.00 | O |
| ATOM | 659 | C4'  | C B | 3 | -25.333 | -14.117 | 69.323 | 1.00 | 0.00 | C |
| ATOM | 660 | O4'  | C B | 3 | -24.659 | -13.915 | 68.039 | 1.00 | 0.00 | O |
| ATOM | 661 | C5'  | C B | 3 | -25.826 | -15.543 | 69.391 | 1.00 | 0.00 | C |
| ATOM | 662 | O5'  | C B | 3 | -27.074 | -15.665 | 68.662 | 1.00 | 0.00 | O |
| ATOM | 663 | O1P  | C B | 3 | -28.749 | -16.203 | 70.462 | 1.00 | 0.00 | O |
| ATOM | 664 | O2P  | C B | 3 | -29.146 | -16.974 | 68.108 | 1.00 | 0.00 | O |
| ATOM | 665 | P    | C B | 3 | -28.174 | -16.689 | 69.192 | 1.00 | 0.00 | P |
| ATOM | 666 | H5   | C B | 3 | -27.390 | -16.331 | 64.440 | 1.00 | 0.00 | H |
| ATOM | 667 | H6   | C B | 3 | -27.159 | -15.141 | 66.595 | 1.00 | 0.00 | H |
| ATOM | 668 | H1'  | C B | 3 | -24.956 | -12.194 | 66.995 | 1.00 | 0.00 | H |
| ATOM | 669 | H3'  | C B | 3 | -27.243 | -13.324 | 69.989 | 1.00 | 0.00 | H |
| ATOM | 670 | H4'  | C B | 3 | -24.678 | -13.952 | 70.179 | 1.00 | 0.00 | H |
| ATOM | 671 | H41  | C B | 3 | -26.527 | -16.500 | 62.175 | 1.00 | 0.00 | H |
| ATOM | 672 | H42  | C B | 3 | -25.229 | -15.441 | 61.558 | 1.00 | 0.00 | H |
| ATOM | 673 | H2'1 | C B | 3 | -27.559 | -13.617 | 67.627 | 1.00 | 0.00 | H |
| ATOM | 674 | H2'2 | C B | 3 | -27.203 | -11.896 | 67.694 | 1.00 | 0.00 | H |
| ATOM | 675 | H5'1 | C B | 3 | -25.077 | -16.203 | 68.951 | 1.00 | 0.00 | H |
| ATOM | 676 | H5'2 | C B | 3 | -25.980 | -15.820 | 70.432 | 1.00 | 0.00 | H |
| ATOM | 677 | C1'  | C B | 4 | -24.852 | -8.621  | 65.244 | 1.00 | 0.00 | C |
| ATOM | 678 | N1   | C B | 4 | -25.647 | -9.653  | 64.524 | 1.00 | 0.00 | N |
| ATOM | 679 | C2   | C B | 4 | -25.329 | -9.910  | 63.192 | 1.00 | 0.00 | C |
| ATOM | 680 | O2   | C B | 4 | -24.405 | -9.276  | 62.665 | 1.00 | 0.00 | O |

|      |     |      |     |   |         |         |        |      |      |   |
|------|-----|------|-----|---|---------|---------|--------|------|------|---|
| ATOM | 681 | N3   | C B | 4 | -26.040 | -10.845 | 62.517 | 1.00 | 0.00 | N |
| ATOM | 682 | C4   | C B | 4 | -27.036 | -11.516 | 63.114 | 1.00 | 0.00 | C |
| ATOM | 683 | N4   | C B | 4 | -27.697 | -12.423 | 62.410 | 1.00 | 0.00 | N |
| ATOM | 684 | C5   | C B | 4 | -27.389 | -11.269 | 64.482 | 1.00 | 0.00 | C |
| ATOM | 685 | C6   | C B | 4 | -26.654 | -10.325 | 65.143 | 1.00 | 0.00 | C |
| ATOM | 686 | C2'  | C B | 4 | -25.675 | -7.771  | 66.202 | 1.00 | 0.00 | C |
| ATOM | 687 | C3'  | C B | 4 | -24.695 | -7.540  | 67.342 | 1.00 | 0.00 | C |
| ATOM | 688 | O3'  | C B | 4 | -23.860 | -6.429  | 67.024 | 1.00 | 0.00 | O |
| ATOM | 689 | C4'  | C B | 4 | -23.915 | -8.852  | 67.391 | 1.00 | 0.00 | C |
| ATOM | 690 | O4'  | C B | 4 | -23.858 | -9.292  | 65.996 | 1.00 | 0.00 | O |
| ATOM | 691 | C5'  | C B | 4 | -24.518 | -9.962  | 68.222 | 1.00 | 0.00 | C |
| ATOM | 692 | O5'  | C B | 4 | -25.963 | -9.932  | 68.105 | 1.00 | 0.00 | O |
| ATOM | 693 | O1P  | C B | 4 | -26.723 | -9.324  | 70.426 | 1.00 | 0.00 | O |
| ATOM | 694 | O2P  | C B | 4 | -28.223 | -10.662 | 68.924 | 1.00 | 0.00 | O |
| ATOM | 695 | P    | C B | 4 | -26.843 | -10.346 | 69.367 | 1.00 | 0.00 | P |
| ATOM | 696 | H5   | C B | 4 | -28.202 | -11.806 | 64.969 | 1.00 | 0.00 | H |
| ATOM | 697 | H6   | C B | 4 | -26.881 | -10.108 | 66.186 | 1.00 | 0.00 | H |
| ATOM | 698 | H1'  | C B | 4 | -24.349 | -7.999  | 64.503 | 1.00 | 0.00 | H |
| ATOM | 699 | H3'  | C B | 4 | -25.205 | -7.350  | 68.287 | 1.00 | 0.00 | H |
| ATOM | 700 | H4'  | C B | 4 | -22.933 | -8.623  | 67.805 | 1.00 | 0.00 | H |
| ATOM | 701 | H41  | C B | 4 | -28.465 | -12.955 | 62.845 | 1.00 | 0.00 | H |
| ATOM | 702 | H42  | C B | 4 | -27.443 | -12.597 | 61.425 | 1.00 | 0.00 | H |
| ATOM | 703 | H2'1 | C B | 4 | -26.571 | -8.286  | 66.548 | 1.00 | 0.00 | H |
| ATOM | 704 | H2'2 | C B | 4 | -25.990 | -6.829  | 65.753 | 1.00 | 0.00 | H |
| ATOM | 705 | H5'1 | C B | 4 | -24.139 | -10.920 | 67.869 | 1.00 | 0.00 | H |
| ATOM | 706 | H5'2 | C B | 4 | -24.230 | -9.823  | 69.263 | 1.00 | 0.00 | H |
| ATOM | 707 | C1'  | G B | 5 | -24.545 | -5.399  | 61.496 | 1.00 | 0.00 | C |
| ATOM | 708 | N1   | G B | 5 | -27.425 | -8.831  | 59.056 | 1.00 | 0.00 | N |
| ATOM | 709 | C2   | G B | 5 | -26.333 | -8.108  | 58.608 | 1.00 | 0.00 | C |
| ATOM | 710 | N2   | G B | 5 | -25.960 | -8.327  | 57.341 | 1.00 | 0.00 | N |
| ATOM | 711 | N3   | G B | 5 | -25.667 | -7.237  | 59.364 | 1.00 | 0.00 | N |
| ATOM | 712 | C4   | G B | 5 | -26.186 | -7.136  | 60.616 | 1.00 | 0.00 | C |
| ATOM | 713 | C5   | G B | 5 | -27.272 | -7.812  | 61.147 | 1.00 | 0.00 | C |
| ATOM | 714 | C6   | G B | 5 | -27.977 | -8.739  | 60.347 | 1.00 | 0.00 | C |
| ATOM | 715 | O6   | G B | 5 | -28.955 | -9.427  | 60.637 | 1.00 | 0.00 | O |
| ATOM | 716 | N7   | G B | 5 | -27.482 | -7.421  | 62.472 | 1.00 | 0.00 | N |
| ATOM | 717 | C8   | G B | 5 | -26.538 | -6.543  | 62.697 | 1.00 | 0.00 | C |
| ATOM | 718 | N9   | G B | 5 | -25.711 | -6.316  | 61.615 | 1.00 | 0.00 | N |
| ATOM | 719 | C2'  | G B | 5 | -24.727 | -4.077  | 62.230 | 1.00 | 0.00 | C |
| ATOM | 720 | C3'  | G B | 5 | -23.320 | -3.796  | 62.732 | 1.00 | 0.00 | C |
| ATOM | 721 | O3'  | G B | 5 | -22.574 | -3.155  | 61.701 | 1.00 | 0.00 | O |
| ATOM | 722 | C4'  | G B | 5 | -22.788 | -5.192  | 63.050 | 1.00 | 0.00 | C |
| ATOM | 723 | O4'  | G B | 5 | -23.421 | -6.054  | 62.052 | 1.00 | 0.00 | O |
| ATOM | 724 | C5'  | G B | 5 | -23.099 | -5.733  | 64.425 | 1.00 | 0.00 | C |
| ATOM | 725 | O5'  | G B | 5 | -24.424 | -5.309  | 64.830 | 1.00 | 0.00 | O |
| ATOM | 726 | O1P  | G B | 5 | -23.977 | -3.782  | 66.780 | 1.00 | 0.00 | O |
| ATOM | 727 | O2P  | G B | 5 | -26.156 | -5.015  | 66.627 | 1.00 | 0.00 | O |
| ATOM | 728 | P    | G B | 5 | -24.695 | -5.004  | 66.372 | 1.00 | 0.00 | P |
| ATOM | 729 | H1   | G B | 5 | -27.867 | -9.485  | 58.392 | 1.00 | 0.00 | H |
| ATOM | 730 | H8   | G B | 5 | -26.415 | -6.035  | 63.653 | 1.00 | 0.00 | H |
| ATOM | 731 | H1'  | G B | 5 | -24.347 | -5.233  | 60.438 | 1.00 | 0.00 | H |
| ATOM | 732 | H21  | G B | 5 | -26.478 | -9.005  | 56.763 | 1.00 | 0.00 | H |
| ATOM | 733 | H3'  | G B | 5 | -23.322 | -3.165  | 63.622 | 1.00 | 0.00 | H |
| ATOM | 734 | H22  | G B | 5 | -25.157 | -7.818  | 56.945 | 1.00 | 0.00 | H |

|      |     |      |     |   |         |        |        |      |      |   |
|------|-----|------|-----|---|---------|--------|--------|------|------|---|
| ATOM | 735 | H4'  | G B | 5 | -21.704 | -5.148 | 62.947 | 1.00 | 0.00 | H |
| ATOM | 736 | H2'1 | G B | 5 | -25.435 | -4.156 | 63.055 | 1.00 | 0.00 | H |
| ATOM | 737 | H2'2 | G B | 5 | -25.079 | -3.283 | 61.571 | 1.00 | 0.00 | H |
| ATOM | 738 | H5'1 | G B | 5 | -23.052 | -6.822 | 64.399 | 1.00 | 0.00 | H |
| ATOM | 739 | H5'2 | G B | 5 | -22.360 | -5.359 | 65.133 | 1.00 | 0.00 | H |
| ATOM | 740 | C1'  | T B | 6 | -25.473 | -3.805 | 56.903 | 1.00 | 0.00 | C |
| ATOM | 741 | N1   | T B | 6 | -26.588 | -4.255 | 57.778 | 1.00 | 0.00 | N |
| ATOM | 742 | C2   | T B | 6 | -27.462 | -5.187 | 57.256 | 1.00 | 0.00 | C |
| ATOM | 743 | O2   | T B | 6 | -27.350 | -5.639 | 56.130 | 1.00 | 0.00 | O |
| ATOM | 744 | N3   | T B | 6 | -28.482 | -5.578 | 58.105 | 1.00 | 0.00 | N |
| ATOM | 745 | C4   | T B | 6 | -28.700 | -5.129 | 59.390 | 1.00 | 0.00 | C |
| ATOM | 746 | O4   | T B | 6 | -29.653 | -5.551 | 60.054 | 1.00 | 0.00 | O |
| ATOM | 747 | C5   | T B | 6 | -27.735 | -4.158 | 59.847 | 1.00 | 0.00 | C |
| ATOM | 748 | C6   | T B | 6 | -26.727 | -3.754 | 59.049 | 1.00 | 0.00 | C |
| ATOM | 749 | C7   | T B | 6 | -27.932 | -3.644 | 61.243 | 1.00 | 0.00 | C |
| ATOM | 750 | C2'  | T B | 6 | -25.142 | -2.324 | 57.044 | 1.00 | 0.00 | C |
| ATOM | 751 | C3'  | T B | 6 | -23.631 | -2.320 | 56.870 | 1.00 | 0.00 | C |
| ATOM | 752 | O3'  | T B | 6 | -23.319 | -2.288 | 55.479 | 1.00 | 0.00 | O |
| ATOM | 753 | C4'  | T B | 6 | -23.209 | -3.631 | 57.528 | 1.00 | 0.00 | C |
| ATOM | 754 | O4'  | T B | 6 | -24.320 | -4.544 | 57.257 | 1.00 | 0.00 | O |
| ATOM | 755 | C5'  | T B | 6 | -22.972 | -3.590 | 59.020 | 1.00 | 0.00 | C |
| ATOM | 756 | O5'  | T B | 6 | -23.926 | -2.692 | 59.642 | 1.00 | 0.00 | O |
| ATOM | 757 | O1P  | T B | 6 | -22.483 | -0.821 | 60.509 | 1.00 | 0.00 | O |
| ATOM | 758 | O2P  | T B | 6 | -24.663 | -1.349 | 61.633 | 1.00 | 0.00 | O |
| ATOM | 759 | P    | T B | 6 | -23.466 | -1.845 | 60.913 | 1.00 | 0.00 | P |
| ATOM | 760 | H3   | T B | 6 | -29.146 | -6.276 | 57.739 | 1.00 | 0.00 | H |
| ATOM | 761 | H6   | T B | 6 | -26.011 | -3.020 | 59.418 | 1.00 | 0.00 | H |
| ATOM | 762 | H1'  | T B | 6 | -25.726 | -4.051 | 55.872 | 1.00 | 0.00 | H |
| ATOM | 763 | H3'  | T B | 6 | -23.167 | -1.465 | 57.363 | 1.00 | 0.00 | H |
| ATOM | 764 | H4'  | T B | 6 | -22.278 | -3.940 | 57.052 | 1.00 | 0.00 | H |
| ATOM | 765 | H71  | T B | 6 | -28.176 | -2.582 | 61.208 | 1.00 | 0.00 | H |
| ATOM | 766 | H72  | T B | 6 | -28.748 | -4.189 | 61.719 | 1.00 | 0.00 | H |
| ATOM | 767 | H73  | T B | 6 | -27.016 | -3.787 | 61.817 | 1.00 | 0.00 | H |
| ATOM | 768 | H2'1 | T B | 6 | -25.431 | -1.927 | 58.015 | 1.00 | 0.00 | H |
| ATOM | 769 | H2'2 | T B | 6 | -25.630 | -1.717 | 56.281 | 1.00 | 0.00 | H |
| ATOM | 770 | H5'1 | T B | 6 | -23.089 | -4.593 | 59.430 | 1.00 | 0.00 | H |
| ATOM | 771 | H5'2 | T B | 6 | -21.958 | -3.240 | 59.211 | 1.00 | 0.00 | H |
| ATOM | 772 | C1'  | C B | 7 | -28.148 | -3.618 | 52.723 | 1.00 | 0.00 | C |
| ATOM | 773 | N1   | C B | 7 | -28.794 | -3.387 | 54.046 | 1.00 | 0.00 | N |
| ATOM | 774 | C2   | C B | 7 | -29.940 | -4.119 | 54.349 | 1.00 | 0.00 | C |
| ATOM | 775 | O2   | C B | 7 | -30.371 | -4.927 | 53.515 | 1.00 | 0.00 | O |
| ATOM | 776 | N3   | C B | 7 | -30.543 | -3.923 | 55.547 | 1.00 | 0.00 | N |
| ATOM | 777 | C4   | C B | 7 | -30.054 | -3.041 | 56.428 | 1.00 | 0.00 | C |
| ATOM | 778 | N4   | C B | 7 | -30.681 | -2.892 | 57.584 | 1.00 | 0.00 | N |
| ATOM | 779 | C5   | C B | 7 | -28.879 | -2.270 | 56.141 | 1.00 | 0.00 | C |
| ATOM | 780 | C6   | C B | 7 | -28.285 | -2.488 | 54.930 | 1.00 | 0.00 | C |
| ATOM | 781 | C2'  | C B | 7 | -27.593 | -2.355 | 52.082 | 1.00 | 0.00 | C |
| ATOM | 782 | C3'  | C B | 7 | -26.340 | -2.874 | 51.394 | 1.00 | 0.00 | C |
| ATOM | 783 | O3'  | C B | 7 | -26.692 | -3.404 | 50.118 | 1.00 | 0.00 | O |
| ATOM | 784 | C4'  | C B | 7 | -25.849 | -3.955 | 52.353 | 1.00 | 0.00 | C |
| ATOM | 785 | O4'  | C B | 7 | -27.073 | -4.517 | 52.922 | 1.00 | 0.00 | O |
| ATOM | 786 | C5'  | C B | 7 | -24.956 | -3.496 | 53.484 | 1.00 | 0.00 | C |
| ATOM | 787 | O5'  | C B | 7 | -25.392 | -2.195 | 53.952 | 1.00 | 0.00 | O |
| ATOM | 788 | O1P  | C B | 7 | -23.474 | -0.684 | 53.344 | 1.00 | 0.00 | O |



|      |     |      |     |   |         |        |        |      |      |   |
|------|-----|------|-----|---|---------|--------|--------|------|------|---|
| ATOM | 789 | O2P  | C B | 7 | -24.955 | -0.110 | 55.284 | 1.00 | 0.00 | O |
| ATOM | 790 | P    | C B | 7 | -24.295 | -1.161 | 54.473 | 1.00 | 0.00 | P |
| ATOM | 791 | H5   | C B | 7 | -28.481 | -1.547 | 56.853 | 1.00 | 0.00 | H |
| ATOM | 792 | H6   | C B | 7 | -27.385 | -1.931 | 54.670 | 1.00 | 0.00 | H |
| ATOM | 793 | H1'  | C B | 7 | -28.874 | -4.103 | 52.070 | 1.00 | 0.00 | H |
| ATOM | 794 | H3'  | C B | 7 | -25.590 | -2.091 | 51.265 | 1.00 | 0.00 | H |
| ATOM | 795 | H4'  | C B | 7 | -25.285 | -4.674 | 51.758 | 1.00 | 0.00 | H |
| ATOM | 796 | H41  | C B | 7 | -30.323 | -2.223 | 58.282 | 1.00 | 0.00 | H |
| ATOM | 797 | H42  | C B | 7 | -31.527 | -3.446 | 57.788 | 1.00 | 0.00 | H |
| ATOM | 798 | H2'1 | C B | 7 | -27.353 | -1.588 | 52.818 | 1.00 | 0.00 | H |
| ATOM | 799 | H2'2 | C B | 7 | -28.287 | -1.915 | 51.366 | 1.00 | 0.00 | H |
| ATOM | 800 | H5'1 | C B | 7 | -25.010 | -4.219 | 54.298 | 1.00 | 0.00 | H |
| ATOM | 801 | H5'2 | C B | 7 | -23.930 | -3.433 | 53.126 | 1.00 | 0.00 | H |
| ATOM | 802 | C1'  | C B | 8 | -32.325 | -3.995 | 50.089 | 1.00 | 0.00 | C |
| ATOM | 803 | N1   | C B | 8 | -32.281 | -3.164 | 51.322 | 1.00 | 0.00 | N |
| ATOM | 804 | C2   | C B | 8 | -33.262 | -3.376 | 52.289 | 1.00 | 0.00 | C |
| ATOM | 805 | O2   | C B | 8 | -34.123 | -4.241 | 52.084 | 1.00 | 0.00 | O |
| ATOM | 806 | N3   | C B | 8 | -33.239 | -2.629 | 53.419 | 1.00 | 0.00 | N |
| ATOM | 807 | C4   | C B | 8 | -32.294 | -1.699 | 53.611 | 1.00 | 0.00 | C |
| ATOM | 808 | N4   | C B | 8 | -32.318 | -1.000 | 54.737 | 1.00 | 0.00 | N |
| ATOM | 809 | C5   | C B | 8 | -31.274 | -1.454 | 52.633 | 1.00 | 0.00 | C |
| ATOM | 810 | C6   | C B | 8 | -31.314 | -2.223 | 51.503 | 1.00 | 0.00 | C |
| ATOM | 811 | C2'  | C B | 8 | -31.944 | -3.239 | 48.823 | 1.00 | 0.00 | C |
| ATOM | 812 | C3'  | C B | 8 | -31.209 | -4.304 | 48.025 | 1.00 | 0.00 | C |
| ATOM | 813 | O3'  | C B | 8 | -32.159 | -5.089 | 47.308 | 1.00 | 0.00 | O |
| ATOM | 814 | C4'  | C B | 8 | -30.497 | -5.110 | 49.110 | 1.00 | 0.00 | C |
| ATOM | 815 | O4'  | C B | 8 | -31.407 | -5.059 | 50.255 | 1.00 | 0.00 | O |
| ATOM | 816 | C5'  | C B | 8 | -29.144 | -4.599 | 49.546 | 1.00 | 0.00 | C |
| ATOM | 817 | O5'  | C B | 8 | -29.143 | -3.148 | 49.544 | 1.00 | 0.00 | O |
| ATOM | 818 | O1P  | C B | 8 | -27.506 | -2.570 | 47.721 | 1.00 | 0.00 | O |
| ATOM | 819 | O2P  | C B | 8 | -27.881 | -0.978 | 49.624 | 1.00 | 0.00 | O |
| ATOM | 820 | P    | C B | 8 | -27.801 | -2.383 | 49.156 | 1.00 | 0.00 | P |
| ATOM | 821 | H5   | C B | 8 | -30.508 | -0.694 | 52.781 | 1.00 | 0.00 | H |
| ATOM | 822 | H6   | C B | 8 | -30.556 | -2.079 | 50.734 | 1.00 | 0.00 | H |
| ATOM | 823 | H1'  | C B | 8 | -33.324 | -4.424 | 50.002 | 1.00 | 0.00 | H |
| ATOM | 824 | H3'  | C B | 8 | -30.496 | -3.870 | 47.325 | 1.00 | 0.00 | H |
| ATOM | 825 | H4'  | C B | 8 | -30.359 | -6.117 | 48.717 | 1.00 | 0.00 | H |
| ATOM | 826 | H41  | C B | 8 | -31.600 | -0.281 | 54.911 | 1.00 | 0.00 | H |
| ATOM | 827 | H42  | C B | 8 | -33.052 | -1.176 | 55.438 | 1.00 | 0.00 | H |
| ATOM | 828 | H2'1 | C B | 8 | -31.301 | -2.384 | 49.030 | 1.00 | 0.00 | H |
| ATOM | 829 | H2'2 | C B | 8 | -32.817 | -2.869 | 48.284 | 1.00 | 0.00 | H |
| ATOM | 830 | H5'1 | C B | 8 | -28.929 | -4.965 | 50.550 | 1.00 | 0.00 | H |
| ATOM | 831 | H5'2 | C B | 8 | -28.384 | -4.968 | 48.860 | 1.00 | 0.00 | H |
| ATOM | 832 | C1'  | T B | 9 | -37.238 | -3.943 | 49.497 | 1.00 | 0.00 | C |
| ATOM | 833 | N1   | T B | 9 | -36.555 | -2.811 | 50.178 | 1.00 | 0.00 | N |
| ATOM | 834 | C2   | T B | 9 | -37.049 | -2.423 | 51.406 | 1.00 | 0.00 | C |
| ATOM | 835 | O2   | T B | 9 | -38.004 | -2.966 | 51.933 | 1.00 | 0.00 | O |
| ATOM | 836 | N3   | T B | 9 | -36.384 | -1.369 | 52.004 | 1.00 | 0.00 | N |
| ATOM | 837 | C4   | T B | 9 | -35.301 | -0.686 | 51.493 | 1.00 | 0.00 | C |
| ATOM | 838 | O4   | T B | 9 | -34.789 | 0.249  | 52.121 | 1.00 | 0.00 | O |
| ATOM | 839 | C5   | T B | 9 | -34.855 | -1.163 | 50.205 | 1.00 | 0.00 | C |
| ATOM | 840 | C6   | T B | 9 | -35.479 | -2.189 | 49.594 | 1.00 | 0.00 | C |
| ATOM | 841 | C7   | T B | 9 | -33.676 | -0.450 | 49.614 | 1.00 | 0.00 | C |
| ATOM | 842 | C2'  | T B | 9 | -37.341 | -3.779 | 47.984 | 1.00 | 0.00 | C |

|      |     |      |     |    |         |        |        |      |      |   |
|------|-----|------|-----|----|---------|--------|--------|------|------|---|
| ATOM | 843 | C3'  | T B | 9  | -37.175 | -5.211 | 47.499 | 1.00 | 0.00 | C |
| ATOM | 844 | O3'  | T B | 9  | -38.439 | -5.869 | 47.543 | 1.00 | 0.00 | O |
| ATOM | 845 | C4'  | T B | 9  | -36.181 | -5.796 | 48.499 | 1.00 | 0.00 | C |
| ATOM | 846 | O4'  | T B | 9  | -36.495 | -5.117 | 49.757 | 1.00 | 0.00 | O |
| ATOM | 847 | C5'  | T B | 9  | -34.716 | -5.592 | 48.191 | 1.00 | 0.00 | C |
| ATOM | 848 | O5'  | T B | 9  | -34.520 | -4.287 | 47.590 | 1.00 | 0.00 | O |
| ATOM | 849 | O1P  | T B | 9  | -33.768 | -4.829 | 45.251 | 1.00 | 0.00 | O |
| ATOM | 850 | O2P  | T B | 9  | -33.065 | -2.674 | 46.328 | 1.00 | 0.00 | O |
| ATOM | 851 | P    | T B | 9  | -33.384 | -4.113 | 46.485 | 1.00 | 0.00 | P |
| ATOM | 852 | H3   | T B | 9  | -36.732 | -1.063 | 52.923 | 1.00 | 0.00 | H |
| ATOM | 853 | H6   | T B | 9  | -35.124 | -2.531 | 48.622 | 1.00 | 0.00 | H |
| ATOM | 854 | H1'  | T B | 9  | -38.225 | -4.065 | 49.943 | 1.00 | 0.00 | H |
| ATOM | 855 | H3'  | T B | 9  | -36.781 | -5.252 | 46.483 | 1.00 | 0.00 | H |
| ATOM | 856 | H4'  | T B | 9  | -36.367 | -6.871 | 48.537 | 1.00 | 0.00 | H |
| ATOM | 857 | H71  | T B | 9  | -33.984 | 0.072  | 48.707 | 1.00 | 0.00 | H |
| ATOM | 858 | H72  | T B | 9  | -33.287 | 0.271  | 50.333 | 1.00 | 0.00 | H |
| ATOM | 859 | H73  | T B | 9  | -32.898 | -1.174 | 49.368 | 1.00 | 0.00 | H |
| ATOM | 860 | H2'1 | T B | 9  | -36.561 | -3.131 | 47.586 | 1.00 | 0.00 | H |
| ATOM | 861 | H2'2 | T B | 9  | -38.301 | -3.363 | 47.678 | 1.00 | 0.00 | H |
| ATOM | 862 | H5'1 | T B | 9  | -34.142 | -5.663 | 49.114 | 1.00 | 0.00 | H |
| ATOM | 863 | H5'2 | T B | 9  | -34.386 | -6.367 | 47.502 | 1.00 | 0.00 | H |
| ATOM | 864 | C1'  | A B | 10 | -41.854 | -2.601 | 50.733 | 1.00 | 0.00 | C |
| ATOM | 865 | N1   | A B | 10 | -39.506 | 1.416  | 52.898 | 1.00 | 0.00 | N |
| ATOM | 866 | C2   | A B | 10 | -40.506 | 0.636  | 53.299 | 1.00 | 0.00 | C |
| ATOM | 867 | N3   | A B | 10 | -41.062 | -0.389 | 52.690 | 1.00 | 0.00 | N |
| ATOM | 868 | C4   | A B | 10 | -40.475 | -0.598 | 51.498 | 1.00 | 0.00 | C |
| ATOM | 869 | C5   | A B | 10 | -39.444 | 0.108  | 50.943 | 1.00 | 0.00 | C |
| ATOM | 870 | C6   | A B | 10 | -38.939 | 1.182  | 51.704 | 1.00 | 0.00 | C |
| ATOM | 871 | N6   | A B | 10 | -37.928 | 1.965  | 51.287 | 1.00 | 0.00 | N |
| ATOM | 872 | N7   | A B | 10 | -39.102 | -0.400 | 49.702 | 1.00 | 0.00 | N |
| ATOM | 873 | C8   | A B | 10 | -39.928 | -1.390 | 49.532 | 1.00 | 0.00 | C |
| ATOM | 874 | N9   | A B | 10 | -40.789 | -1.573 | 50.583 | 1.00 | 0.00 | N |
| ATOM | 875 | C2'  | A B | 10 | -42.588 | -2.916 | 49.437 | 1.00 | 0.00 | C |
| ATOM | 876 | C3'  | A B | 10 | -42.857 | -4.407 | 49.579 | 1.00 | 0.00 | C |
| ATOM | 877 | O3'  | A B | 10 | -44.047 | -4.598 | 50.339 | 1.00 | 0.00 | O |
| ATOM | 878 | C4'  | A B | 10 | -41.615 | -4.906 | 50.316 | 1.00 | 0.00 | C |
| ATOM | 879 | O4'  | A B | 10 | -41.241 | -3.792 | 51.189 | 1.00 | 0.00 | O |
| ATOM | 880 | C5'  | A B | 10 | -40.426 | -5.270 | 49.459 | 1.00 | 0.00 | C |
| ATOM | 881 | O5'  | A B | 10 | -40.334 | -4.357 | 48.335 | 1.00 | 0.00 | O |
| ATOM | 882 | O1P  | A B | 10 | -40.778 | -5.836 | 46.347 | 1.00 | 0.00 | O |
| ATOM | 883 | O2P  | A B | 10 | -39.379 | -3.769 | 46.087 | 1.00 | 0.00 | O |
| ATOM | 884 | P    | A B | 10 | -39.794 | -4.910 | 46.940 | 1.00 | 0.00 | P |
| ATOM | 885 | H2   | A B | 10 | -40.924 | 0.882  | 54.274 | 1.00 | 0.00 | H |
| ATOM | 886 | H8   | A B | 10 | -39.935 | -2.015 | 48.639 | 1.00 | 0.00 | H |
| ATOM | 887 | H1'  | A B | 10 | -42.547 | -2.264 | 51.503 | 1.00 | 0.00 | H |
| ATOM | 888 | H3'  | A B | 10 | -42.963 | -4.896 | 48.611 | 1.00 | 0.00 | H |
| ATOM | 889 | H4'  | A B | 10 | -41.913 | -5.798 | 50.868 | 1.00 | 0.00 | H |
| ATOM | 890 | H61  | A B | 10 | -37.595 | 2.734  | 51.883 | 1.00 | 0.00 | H |
| ATOM | 891 | H62  | A B | 10 | -37.488 | 1.793  | 50.372 | 1.00 | 0.00 | H |
| ATOM | 892 | H2'1 | A B | 10 | -41.984 | -2.705 | 48.556 | 1.00 | 0.00 | H |
| ATOM | 893 | H2'2 | A B | 10 | -43.518 | -2.354 | 49.341 | 1.00 | 0.00 | H |
| ATOM | 894 | H5'1 | A B | 10 | -39.519 | -5.206 | 50.059 | 1.00 | 0.00 | H |
| ATOM | 895 | H5'2 | A B | 10 | -40.545 | -6.289 | 49.096 | 1.00 | 0.00 | H |
| ATOM | 896 | C1'  | G B | 11 | -45.196 | 0.412  | 52.829 | 1.00 | 0.00 | C |

|      |     |      |     |    |         |        |        |      |      |   |
|------|-----|------|-----|----|---------|--------|--------|------|------|---|
| ATOM | 897 | N1   | G B | 11 | -41.625 | 3.980  | 52.096 | 1.00 | 0.00 | N |
| ATOM | 898 | C2   | G B | 11 | -42.444 | 3.755  | 53.188 | 1.00 | 0.00 | C |
| ATOM | 899 | N2   | G B | 11 | -42.293 | 4.593  | 54.221 | 1.00 | 0.00 | N |
| ATOM | 900 | N3   | G B | 11 | -43.342 | 2.772  | 53.245 | 1.00 | 0.00 | N |
| ATOM | 901 | C4   | G B | 11 | -43.363 | 2.026  | 52.109 | 1.00 | 0.00 | C |
| ATOM | 902 | C5   | G B | 11 | -42.589 | 2.179  | 50.972 | 1.00 | 0.00 | C |
| ATOM | 903 | C6   | G B | 11 | -41.633 | 3.220  | 50.911 | 1.00 | 0.00 | C |
| ATOM | 904 | O6   | G B | 11 | -40.861 | 3.513  | 49.998 | 1.00 | 0.00 | O |
| ATOM | 905 | N7   | G B | 11 | -42.921 | 1.206  | 50.027 | 1.00 | 0.00 | N |
| ATOM | 906 | C8   | G B | 11 | -43.863 | 0.509  | 50.609 | 1.00 | 0.00 | C |
| ATOM | 907 | N9   | G B | 11 | -44.188 | 0.947  | 51.876 | 1.00 | 0.00 | N |
| ATOM | 908 | C2'  | G B | 11 | -46.477 | -0.069 | 52.161 | 1.00 | 0.00 | C |
| ATOM | 909 | C3'  | G B | 11 | -46.852 | -1.267 | 53.018 | 1.00 | 0.00 | C |
| ATOM | 910 | O3'  | G B | 11 | -47.581 | -0.817 | 54.158 | 1.00 | 0.00 | O |
| ATOM | 911 | C4'  | G B | 11 | -45.494 | -1.854 | 53.396 | 1.00 | 0.00 | C |
| ATOM | 912 | O4'  | G B | 11 | -44.615 | -0.688 | 53.501 | 1.00 | 0.00 | O |
| ATOM | 913 | C5'  | G B | 11 | -44.888 | -2.830 | 52.415 | 1.00 | 0.00 | C |
| ATOM | 914 | O5'  | G B | 11 | -45.194 | -2.418 | 51.060 | 1.00 | 0.00 | O |
| ATOM | 915 | O1P  | G B | 11 | -46.692 | -4.255 | 50.216 | 1.00 | 0.00 | O |
| ATOM | 916 | O2P  | G B | 11 | -45.296 | -2.934 | 48.604 | 1.00 | 0.00 | O |
| ATOM | 917 | P    | G B | 11 | -45.430 | -3.539 | 49.951 | 1.00 | 0.00 | P |
| ATOM | 918 | H1   | G B | 11 | -40.958 | 4.764  | 52.156 | 1.00 | 0.00 | H |
| ATOM | 919 | H8   | G B | 11 | -44.349 | -0.342 | 50.134 | 1.00 | 0.00 | H |
| ATOM | 920 | H1'  | G B | 11 | -45.409 | 1.183  | 53.571 | 1.00 | 0.00 | H |
| ATOM | 921 | H21  | G B | 11 | -41.595 | 5.349  | 54.172 | 1.00 | 0.00 | H |
| ATOM | 922 | H3'  | G B | 11 | -47.454 | -1.991 | 52.468 | 1.00 | 0.00 | H |
| ATOM | 923 | H22  | G B | 11 | -42.875 | 4.481  | 55.064 | 1.00 | 0.00 | H |
| ATOM | 924 | H4'  | G B | 11 | -45.626 | -2.374 | 54.345 | 1.00 | 0.00 | H |
| ATOM | 925 | H2'1 | G B | 11 | -46.317 | -0.359 | 51.122 | 1.00 | 0.00 | H |
| ATOM | 926 | H2'2 | G B | 11 | -47.260 | 0.689  | 52.173 | 1.00 | 0.00 | H |
| ATOM | 927 | H5'1 | G B | 11 | -43.808 | -2.856 | 52.557 | 1.00 | 0.00 | H |
| ATOM | 928 | H5'2 | G B | 11 | -45.298 | -3.823 | 52.600 | 1.00 | 0.00 | H |
| ATOM | 929 | C1'  | G B | 12 | -46.834 | 4.782  | 54.486 | 1.00 | 0.00 | C |
| ATOM | 930 | N1   | G B | 12 | -43.505 | 6.667  | 51.110 | 1.00 | 0.00 | N |
| ATOM | 931 | C2   | G B | 12 | -43.779 | 7.067  | 52.407 | 1.00 | 0.00 | C |
| ATOM | 932 | N2   | G B | 12 | -43.073 | 8.110  | 52.864 | 1.00 | 0.00 | N |
| ATOM | 933 | N3   | G B | 12 | -44.683 | 6.475  | 53.184 | 1.00 | 0.00 | N |
| ATOM | 934 | C4   | G B | 12 | -45.307 | 5.444  | 52.557 | 1.00 | 0.00 | C |
| ATOM | 935 | C5   | G B | 12 | -45.104 | 4.977  | 51.270 | 1.00 | 0.00 | C |
| ATOM | 936 | C6   | G B | 12 | -44.142 | 5.603  | 50.445 | 1.00 | 0.00 | C |
| ATOM | 937 | O6   | G B | 12 | -43.822 | 5.337  | 49.286 | 1.00 | 0.00 | O |
| ATOM | 938 | N7   | G B | 12 | -45.950 | 3.898  | 51.008 | 1.00 | 0.00 | N |
| ATOM | 939 | C8   | G B | 12 | -46.622 | 3.745  | 52.119 | 1.00 | 0.00 | C |
| ATOM | 940 | N9   | G B | 12 | -46.288 | 4.648  | 53.108 | 1.00 | 0.00 | N |
| ATOM | 941 | C2'  | G B | 12 | -48.330 | 4.519  | 54.581 | 1.00 | 0.00 | C |
| ATOM | 942 | C3'  | G B | 12 | -48.447 | 3.837  | 55.936 | 1.00 | 0.00 | C |
| ATOM | 943 | O3'  | G B | 12 | -48.526 | 4.831  | 56.955 | 1.00 | 0.00 | O |
| ATOM | 944 | C4'  | G B | 12 | -47.156 | 3.025  | 56.020 | 1.00 | 0.00 | C |
| ATOM | 945 | O4'  | G B | 12 | -46.172 | 3.839  | 55.306 | 1.00 | 0.00 | O |
| ATOM | 946 | C5'  | G B | 12 | -47.187 | 1.649  | 55.398 | 1.00 | 0.00 | C |
| ATOM | 947 | O5'  | G B | 12 | -48.002 | 1.670  | 54.200 | 1.00 | 0.00 | O |
| ATOM | 948 | O1P  | G B | 12 | -49.954 | 0.199  | 54.798 | 1.00 | 0.00 | O |
| ATOM | 949 | O2P  | G B | 12 | -49.251 | 0.437  | 52.401 | 1.00 | 0.00 | O |
| ATOM | 950 | P    | G B | 12 | -48.855 | 0.374  | 53.829 | 1.00 | 0.00 | P |

|      |      |      |     |    |         |        |        |      |      |   |
|------|------|------|-----|----|---------|--------|--------|------|------|---|
| ATOM | 951  | H1   | G B | 12 | -42.781 | 7.190  | 50.594 | 1.00 | 0.00 | H |
| ATOM | 952  | H8   | G B | 12 | -47.380 | 2.974  | 52.255 | 1.00 | 0.00 | H |
| ATOM | 953  | H1'  | G B | 12 | -46.588 | 5.778  | 54.855 | 1.00 | 0.00 | H |
| ATOM | 954  | H21  | G B | 12 | -42.372 | 8.561  | 52.257 | 1.00 | 0.00 | H |
| ATOM | 955  | H3'  | G B | 12 | -49.323 | 3.190  | 55.994 | 1.00 | 0.00 | H |
| ATOM | 956  | H22  | G B | 12 | -43.231 | 8.458  | 53.819 | 1.00 | 0.00 | H |
| ATOM | 957  | H4'  | G B | 12 | -46.924 | 2.907  | 57.077 | 1.00 | 0.00 | H |
| ATOM | 958  | H2'1 | G B | 12 | -48.688 | 3.873  | 53.780 | 1.00 | 0.00 | H |
| ATOM | 959  | H2'2 | G B | 12 | -48.916 | 5.437  | 54.548 | 1.00 | 0.00 | H |
| ATOM | 960  | H5'1 | G B | 12 | -46.170 | 1.347  | 55.147 | 1.00 | 0.00 | H |
| ATOM | 961  | H5'2 | G B | 12 | -47.604 | 0.942  | 56.115 | 1.00 | 0.00 | H |
| ATOM | 962  | C1'  | T B | 13 | -46.966 | 9.728  | 54.625 | 1.00 | 0.00 | C |
| ATOM | 963  | N1   | T B | 13 | -47.090 | 9.013  | 53.328 | 1.00 | 0.00 | N |
| ATOM | 964  | C2   | T B | 13 | -46.253 | 9.412  | 52.304 | 1.00 | 0.00 | C |
| ATOM | 965  | O2   | T B | 13 | -45.438 | 10.311 | 52.432 | 1.00 | 0.00 | O |
| ATOM | 966  | N3   | T B | 13 | -46.401 | 8.720  | 51.117 | 1.00 | 0.00 | N |
| ATOM | 967  | C4   | T B | 13 | -47.289 | 7.695  | 50.868 | 1.00 | 0.00 | C |
| ATOM | 968  | O4   | T B | 13 | -47.334 | 7.151  | 49.759 | 1.00 | 0.00 | O |
| ATOM | 969  | C5   | T B | 13 | -48.121 | 7.347  | 51.996 | 1.00 | 0.00 | C |
| ATOM | 970  | C6   | T B | 13 | -48.003 | 8.000  | 53.170 | 1.00 | 0.00 | C |
| ATOM | 971  | C7   | T B | 13 | -49.102 | 6.235  | 51.772 | 1.00 | 0.00 | C |
| ATOM | 972  | C2'  | T B | 13 | -48.298 | 9.958  | 55.330 | 1.00 | 0.00 | C |
| ATOM | 973  | C3'  | T B | 13 | -47.912 | 9.806  | 56.793 | 1.00 | 0.00 | C |
| ATOM | 974  | O3'  | T B | 13 | -47.408 | 11.049 | 57.276 | 1.00 | 0.00 | O |
| ATOM | 975  | C4'  | T B | 13 | -46.836 | 8.723  | 56.750 | 1.00 | 0.00 | C |
| ATOM | 976  | O4'  | T B | 13 | -46.153 | 8.944  | 55.475 | 1.00 | 0.00 | O |
| ATOM | 977  | C5'  | T B | 13 | -47.320 | 7.292  | 56.798 | 1.00 | 0.00 | C |
| ATOM | 978  | O5'  | T B | 13 | -48.561 | 7.170  | 56.057 | 1.00 | 0.00 | O |
| ATOM | 979  | O1P  | T B | 13 | -50.248 | 6.603  | 57.835 | 1.00 | 0.00 | O |
| ATOM | 980  | O2P  | T B | 13 | -50.619 | 5.854  | 55.469 | 1.00 | 0.00 | O |
| ATOM | 981  | P    | T B | 13 | -49.659 | 6.133  | 56.565 | 1.00 | 0.00 | P |
| ATOM | 982  | H3   | T B | 13 | -45.785 | 8.998  | 50.339 | 1.00 | 0.00 | H |
| ATOM | 983  | H6   | T B | 13 | -48.643 | 7.720  | 54.007 | 1.00 | 0.00 | H |
| ATOM | 984  | H1'  | T B | 13 | -46.451 | 10.673 | 54.448 | 1.00 | 0.00 | H |
| ATOM | 985  | H3'  | T B | 13 | -48.758 | 9.496  | 57.407 | 1.00 | 0.00 | H |
| ATOM | 986  | H4'  | T B | 13 | -46.191 | 8.883  | 57.614 | 1.00 | 0.00 | H |
| ATOM | 987  | H71  | T B | 13 | -50.117 | 6.626  | 51.835 | 1.00 | 0.00 | H |
| ATOM | 988  | H72  | T B | 13 | -48.940 | 5.801  | 50.784 | 1.00 | 0.00 | H |
| ATOM | 989  | H73  | T B | 13 | -48.961 | 5.466  | 52.533 | 1.00 | 0.00 | H |
| ATOM | 990  | H2'1 | T B | 13 | -49.049 | 9.226  | 55.039 | 1.00 | 0.00 | H |
| ATOM | 991  | H2'2 | T B | 13 | -48.707 | 10.948 | 55.129 | 1.00 | 0.00 | H |
| ATOM | 992  | H5'1 | T B | 13 | -46.563 | 6.643  | 56.359 | 1.00 | 0.00 | H |
| ATOM | 993  | H5'2 | T B | 13 | -47.483 | 7.004  | 57.835 | 1.00 | 0.00 | H |
| ATOM | 994  | C1'  | G B | 14 | -46.330 | 14.243 | 52.660 | 1.00 | 0.00 | C |
| ATOM | 995  | N1   | G B | 14 | -46.989 | 11.802 | 48.228 | 1.00 | 0.00 | N |
| ATOM | 996  | C2   | G B | 14 | -46.081 | 12.788 | 48.572 | 1.00 | 0.00 | C |
| ATOM | 997  | N2   | G B | 14 | -45.238 | 13.176 | 47.609 | 1.00 | 0.00 | N |
| ATOM | 998  | N3   | G B | 14 | -46.019 | 13.341 | 49.783 | 1.00 | 0.00 | N |
| ATOM | 999  | C4   | G B | 14 | -46.951 | 12.832 | 50.632 | 1.00 | 0.00 | C |
| ATOM | 1000 | C5   | G B | 14 | -47.897 | 11.855 | 50.376 | 1.00 | 0.00 | C |
| ATOM | 1001 | C6   | G B | 14 | -47.961 | 11.264 | 49.092 | 1.00 | 0.00 | C |
| ATOM | 1002 | O6   | G B | 14 | -48.724 | 10.390 | 48.677 | 1.00 | 0.00 | O |
| ATOM | 1003 | N7   | G B | 14 | -48.668 | 11.618 | 51.516 | 1.00 | 0.00 | N |
| ATOM | 1004 | C8   | G B | 14 | -48.174 | 12.439 | 52.407 | 1.00 | 0.00 | C |

|      |      |      |     |    |         |        |        |      |      |   |
|------|------|------|-----|----|---------|--------|--------|------|------|---|
| ATOM | 1005 | N9   | G B | 14 | -47.128 | 13.212 | 51.944 | 1.00 | 0.00 | N |
| ATOM | 1006 | C2'  | G B | 14 | -47.148 | 15.094 | 53.622 | 1.00 | 0.00 | C |
| ATOM | 1007 | C3'  | G B | 14 | -46.163 | 15.327 | 54.756 | 1.00 | 0.00 | C |
| ATOM | 1008 | O3'  | G B | 14 | -45.330 | 16.437 | 54.433 | 1.00 | 0.00 | O |
| ATOM | 1009 | C4'  | G B | 14 | -45.383 | 14.014 | 54.802 | 1.00 | 0.00 | C |
| ATOM | 1010 | O4'  | G B | 14 | -45.333 | 13.575 | 53.408 | 1.00 | 0.00 | O |
| ATOM | 1011 | C5'  | G B | 14 | -45.980 | 12.907 | 55.637 | 1.00 | 0.00 | C |
| ATOM | 1012 | O5'  | G B | 14 | -47.425 | 12.934 | 55.527 | 1.00 | 0.00 | O |
| ATOM | 1013 | O1P  | G B | 14 | -48.176 | 13.543 | 57.851 | 1.00 | 0.00 | O |
| ATOM | 1014 | O2P  | G B | 14 | -49.681 | 12.203 | 56.357 | 1.00 | 0.00 | O |
| ATOM | 1015 | P    | G B | 14 | -48.300 | 12.521 | 56.795 | 1.00 | 0.00 | P |
| ATOM | 1016 | H1   | G B | 14 | -46.949 | 11.435 | 47.265 | 1.00 | 0.00 | H |
| ATOM | 1017 | H8   | G B | 14 | -48.556 | 12.507 | 53.426 | 1.00 | 0.00 | H |
| ATOM | 1018 | H1'  | G B | 14 | -45.830 | 14.865 | 51.916 | 1.00 | 0.00 | H |
| ATOM | 1019 | H21  | G B | 14 | -45.290 | 12.741 | 46.675 | 1.00 | 0.00 | H |
| ATOM | 1020 | H3'  | G B | 14 | -46.668 | 15.517 | 55.704 | 1.00 | 0.00 | H |
| ATOM | 1021 | H22  | G B | 14 | -44.540 | 13.909 | 47.799 | 1.00 | 0.00 | H |
| ATOM | 1022 | H4'  | G B | 14 | -44.399 | 14.245 | 55.211 | 1.00 | 0.00 | H |
| ATOM | 1023 | H2'1 | G B | 14 | -48.042 | 14.579 | 53.972 | 1.00 | 0.00 | H |
| ATOM | 1024 | H2'2 | G B | 14 | -47.467 | 16.035 | 53.174 | 1.00 | 0.00 | H |
| ATOM | 1025 | H5'1 | G B | 14 | -45.602 | 11.948 | 55.284 | 1.00 | 0.00 | H |
| ATOM | 1026 | H5'2 | G B | 14 | -45.687 | 13.045 | 56.678 | 1.00 | 0.00 | H |
| ATOM | 1027 | C1'  | C B | 15 | -46.021 | 17.467 | 48.912 | 1.00 | 0.00 | C |
| ATOM | 1028 | N1   | C B | 15 | -47.185 | 16.547 | 49.025 | 1.00 | 0.00 | N |
| ATOM | 1029 | C2   | C B | 15 | -47.529 | 15.787 | 47.909 | 1.00 | 0.00 | C |
| ATOM | 1030 | O2   | C B | 15 | -46.856 | 15.907 | 46.877 | 1.00 | 0.00 | O |
| ATOM | 1031 | N3   | C B | 15 | -48.586 | 14.943 | 47.992 | 1.00 | 0.00 | N |
| ATOM | 1032 | C4   | C B | 15 | -49.294 | 14.837 | 49.122 | 1.00 | 0.00 | C |
| ATOM | 1033 | N4   | C B | 15 | -50.316 | 13.994 | 49.149 | 1.00 | 0.00 | N |
| ATOM | 1034 | C5   | C B | 15 | -48.968 | 15.610 | 50.286 | 1.00 | 0.00 | C |
| ATOM | 1035 | C6   | C B | 15 | -47.897 | 16.448 | 50.181 | 1.00 | 0.00 | C |
| ATOM | 1036 | C2'  | C B | 15 | -46.209 | 18.788 | 49.644 | 1.00 | 0.00 | C |
| ATOM | 1037 | C3'  | C B | 15 | -44.805 | 19.072 | 50.154 | 1.00 | 0.00 | C |
| ATOM | 1038 | O3'  | C B | 15 | -44.053 | 19.714 | 49.126 | 1.00 | 0.00 | O |
| ATOM | 1039 | C4'  | C B | 15 | -44.271 | 17.677 | 50.473 | 1.00 | 0.00 | C |
| ATOM | 1040 | O4'  | C B | 15 | -44.899 | 16.812 | 49.473 | 1.00 | 0.00 | O |
| ATOM | 1041 | C5'  | C B | 15 | -44.589 | 17.134 | 51.848 | 1.00 | 0.00 | C |
| ATOM | 1042 | O5'  | C B | 15 | -45.917 | 17.558 | 52.246 | 1.00 | 0.00 | O |
| ATOM | 1043 | O1P  | C B | 15 | -45.480 | 19.087 | 54.198 | 1.00 | 0.00 | O |
| ATOM | 1044 | O2P  | C B | 15 | -47.658 | 17.850 | 54.036 | 1.00 | 0.00 | O |
| ATOM | 1045 | P    | C B | 15 | -46.196 | 17.862 | 53.786 | 1.00 | 0.00 | P |
| ATOM | 1046 | H5   | C B | 15 | -49.546 | 15.530 | 51.207 | 1.00 | 0.00 | H |
| ATOM | 1047 | H6   | C B | 15 | -47.605 | 17.052 | 51.041 | 1.00 | 0.00 | H |
| ATOM | 1048 | H1'  | C B | 15 | -45.819 | 17.632 | 47.853 | 1.00 | 0.00 | H |
| ATOM | 1049 | H3'  | C B | 15 | -44.813 | 19.702 | 51.043 | 1.00 | 0.00 | H |
| ATOM | 1050 | H4'  | C B | 15 | -43.186 | 17.722 | 50.377 | 1.00 | 0.00 | H |
| ATOM | 1051 | H41  | C B | 15 | -50.877 | 13.889 | 50.008 | 1.00 | 0.00 | H |
| ATOM | 1052 | H42  | C B | 15 | -50.551 | 13.441 | 48.311 | 1.00 | 0.00 | H |
| ATOM | 1053 | H2'1 | C B | 15 | -46.921 | 18.709 | 50.465 | 1.00 | 0.00 | H |
| ATOM | 1054 | H2'2 | C B | 15 | -46.560 | 19.582 | 48.983 | 1.00 | 0.00 | H |
| ATOM | 1055 | H5'1 | C B | 15 | -44.541 | 16.046 | 51.823 | 1.00 | 0.00 | H |
| ATOM | 1056 | H5'2 | C B | 15 | -43.854 | 17.511 | 52.559 | 1.00 | 0.00 | H |
| ATOM | 1057 | C1'  | G B | 16 | -46.968 | 19.044 | 44.315 | 1.00 | 0.00 | C |
| ATOM | 1058 | N1   | G B | 16 | -51.069 | 16.041 | 44.737 | 1.00 | 0.00 | N |

|      |      |      |     |    |         |        |        |      |      |   |
|------|------|------|-----|----|---------|--------|--------|------|------|---|
| ATOM | 1059 | C2   | G B | 16 | -50.201 | 16.214 | 43.673 | 1.00 | 0.00 | C |
| ATOM | 1060 | N2   | G B | 16 | -50.462 | 15.493 | 42.576 | 1.00 | 0.00 | N |
| ATOM | 1061 | N3   | G B | 16 | -49.157 | 17.040 | 43.703 | 1.00 | 0.00 | N |
| ATOM | 1062 | C4   | G B | 16 | -49.049 | 17.694 | 44.890 | 1.00 | 0.00 | C |
| ATOM | 1063 | C5   | G B | 16 | -49.868 | 17.589 | 46.001 | 1.00 | 0.00 | C |
| ATOM | 1064 | C6   | G B | 16 | -50.975 | 16.708 | 45.972 | 1.00 | 0.00 | C |
| ATOM | 1065 | O6   | G B | 16 | -51.807 | 16.480 | 46.850 | 1.00 | 0.00 | O |
| ATOM | 1066 | N7   | G B | 16 | -49.414 | 18.433 | 47.017 | 1.00 | 0.00 | N |
| ATOM | 1067 | C8   | G B | 16 | -48.358 | 19.009 | 46.502 | 1.00 | 0.00 | C |
| ATOM | 1068 | N9   | G B | 16 | -48.073 | 18.612 | 45.211 | 1.00 | 0.00 | N |
| ATOM | 1069 | C2'  | G B | 16 | -46.624 | 20.523 | 44.434 | 1.00 | 0.00 | C |
| ATOM | 1070 | C3'  | G B | 16 | -45.116 | 20.515 | 44.240 | 1.00 | 0.00 | C |
| ATOM | 1071 | O3'  | G B | 16 | -44.824 | 20.529 | 42.845 | 1.00 | 0.00 | O |
| ATOM | 1072 | C4'  | G B | 16 | -44.694 | 19.206 | 44.906 | 1.00 | 0.00 | C |
| ATOM | 1073 | O4'  | G B | 16 | -45.816 | 18.299 | 44.659 | 1.00 | 0.00 | O |
| ATOM | 1074 | C5'  | G B | 16 | -44.436 | 19.262 | 46.393 | 1.00 | 0.00 | C |
| ATOM | 1075 | O5'  | G B | 16 | -45.372 | 20.173 | 47.020 | 1.00 | 0.00 | O |
| ATOM | 1076 | O1P  | G B | 16 | -43.904 | 22.042 | 47.847 | 1.00 | 0.00 | O |
| ATOM | 1077 | O2P  | G B | 16 | -46.071 | 21.542 | 49.007 | 1.00 | 0.00 | O |
| ATOM | 1078 | P    | G B | 16 | -44.887 | 21.030 | 48.275 | 1.00 | 0.00 | P |
| ATOM | 1079 | H1   | G B | 16 | -51.844 | 15.371 | 44.614 | 1.00 | 0.00 | H |
| ATOM | 1080 | H8   | G B | 16 | -47.757 | 19.737 | 47.044 | 1.00 | 0.00 | H |
| ATOM | 1081 | H1'  | G B | 16 | -47.238 | 18.788 | 43.290 | 1.00 | 0.00 | H |
| ATOM | 1082 | H21  | G B | 16 | -51.270 | 14.853 | 42.562 | 1.00 | 0.00 | H |
| ATOM | 1083 | H3'  | G B | 16 | -44.638 | 21.371 | 44.718 | 1.00 | 0.00 | H |
| ATOM | 1084 | H22  | G B | 16 | -49.855 | 15.578 | 41.749 | 1.00 | 0.00 | H |
| ATOM | 1085 | H4'  | G B | 16 | -43.773 | 18.886 | 44.419 | 1.00 | 0.00 | H |
| ATOM | 1086 | H2'1 | G B | 16 | -46.897 | 20.933 | 45.407 | 1.00 | 0.00 | H |
| ATOM | 1087 | H2'2 | G B | 16 | -47.119 | 21.126 | 43.673 | 1.00 | 0.00 | H |
| ATOM | 1088 | H5'1 | G B | 16 | -44.554 | 18.264 | 46.814 | 1.00 | 0.00 | H |
| ATOM | 1089 | H5'2 | G B | 16 | -43.416 | 19.606 | 46.565 | 1.00 | 0.00 | H |
| ATOM | 1090 | C1'  | G B | 17 | -49.626 | 19.247 | 40.141 | 1.00 | 0.00 | C |
| ATOM | 1091 | N1   | G B | 17 | -53.484 | 17.926 | 43.206 | 1.00 | 0.00 | N |
| ATOM | 1092 | C2   | G B | 17 | -53.162 | 17.475 | 41.938 | 1.00 | 0.00 | C |
| ATOM | 1093 | N2   | G B | 17 | -53.977 | 16.550 | 41.418 | 1.00 | 0.00 | N |
| ATOM | 1094 | N3   | G B | 17 | -52.111 | 17.910 | 41.247 | 1.00 | 0.00 | N |
| ATOM | 1095 | C4   | G B | 17 | -51.401 | 18.851 | 41.924 | 1.00 | 0.00 | C |
| ATOM | 1096 | C5   | G B | 17 | -51.648 | 19.363 | 43.186 | 1.00 | 0.00 | C |
| ATOM | 1097 | C6   | G B | 17 | -52.761 | 18.899 | 43.922 | 1.00 | 0.00 | C |
| ATOM | 1098 | O6   | G B | 17 | -53.142 | 19.229 | 45.046 | 1.00 | 0.00 | O |
| ATOM | 1099 | N7   | G B | 17 | -50.681 | 20.315 | 43.519 | 1.00 | 0.00 | N |
| ATOM | 1100 | C8   | G B | 17 | -49.895 | 20.345 | 42.474 | 1.00 | 0.00 | C |
| ATOM | 1101 | N9   | G B | 17 | -50.268 | 19.484 | 41.463 | 1.00 | 0.00 | N |
| ATOM | 1102 | C2'  | G B | 17 | -49.066 | 20.508 | 39.497 | 1.00 | 0.00 | C |
| ATOM | 1103 | C3'  | G B | 17 | -47.816 | 19.984 | 38.806 | 1.00 | 0.00 | C |
| ATOM | 1104 | O3'  | G B | 17 | -48.173 | 19.455 | 37.531 | 1.00 | 0.00 | O |
| ATOM | 1105 | C4'  | G B | 17 | -47.327 | 18.901 | 39.765 | 1.00 | 0.00 | C |
| ATOM | 1106 | O4'  | G B | 17 | -48.554 | 18.345 | 40.337 | 1.00 | 0.00 | O |
| ATOM | 1107 | C5'  | G B | 17 | -46.432 | 19.357 | 40.893 | 1.00 | 0.00 | C |
| ATOM | 1108 | O5'  | G B | 17 | -46.861 | 20.659 | 41.363 | 1.00 | 0.00 | O |
| ATOM | 1109 | O1P  | G B | 17 | -44.937 | 22.161 | 40.748 | 1.00 | 0.00 | O |
| ATOM | 1110 | O2P  | G B | 17 | -46.411 | 22.744 | 42.693 | 1.00 | 0.00 | O |
| ATOM | 1111 | P    | G B | 17 | -45.758 | 21.690 | 41.880 | 1.00 | 0.00 | P |
| ATOM | 1112 | H1   | G B | 17 | -54.317 | 17.520 | 43.659 | 1.00 | 0.00 | H |

|      |      |      |     |    |         |        |        |      |      |   |
|------|------|------|-----|----|---------|--------|--------|------|------|---|
| ATOM | 1113 | H8   | G B | 17 | -49.022 | 20.993 | 42.407 | 1.00 | 0.00 | H |
| ATOM | 1114 | H1'  | G B | 17 | -50.354 | 18.766 | 39.489 | 1.00 | 0.00 | H |
| ATOM | 1115 | H21  | G B | 17 | -54.787 | 16.214 | 41.960 | 1.00 | 0.00 | H |
| ATOM | 1116 | H3'  | G B | 17 | -47.064 | 20.762 | 38.676 | 1.00 | 0.00 | H |
| ATOM | 1117 | H22  | G B | 17 | -53.794 | 16.174 | 40.476 | 1.00 | 0.00 | H |
| ATOM | 1118 | H4'  | G B | 17 | -46.770 | 18.178 | 39.170 | 1.00 | 0.00 | H |
| ATOM | 1119 | H2'1 | G B | 17 | -48.821 | 21.274 | 40.232 | 1.00 | 0.00 | H |
| ATOM | 1120 | H2'2 | G B | 17 | -49.759 | 20.950 | 38.782 | 1.00 | 0.00 | H |
| ATOM | 1121 | H5'1 | G B | 17 | -46.487 | 18.635 | 41.707 | 1.00 | 0.00 | H |
| ATOM | 1122 | H5'2 | G B | 17 | -45.405 | 19.414 | 40.533 | 1.00 | 0.00 | H |
| ATOM | 1123 | C1'  | C B | 18 | -53.802 | 18.870 | 37.505 | 1.00 | 0.00 | C |
| ATOM | 1124 | N1   | C B | 18 | -53.757 | 19.702 | 38.739 | 1.00 | 0.00 | N |
| ATOM | 1125 | C2   | C B | 18 | -54.738 | 19.488 | 39.705 | 1.00 | 0.00 | C |
| ATOM | 1126 | O2   | C B | 18 | -55.599 | 18.623 | 39.501 | 1.00 | 0.00 | O |
| ATOM | 1127 | N3   | C B | 18 | -54.715 | 20.236 | 40.834 | 1.00 | 0.00 | N |
| ATOM | 1128 | C4   | C B | 18 | -53.769 | 21.165 | 41.026 | 1.00 | 0.00 | C |
| ATOM | 1129 | N4   | C B | 18 | -53.794 | 21.866 | 42.150 | 1.00 | 0.00 | N |
| ATOM | 1130 | C5   | C B | 18 | -52.752 | 21.407 | 40.048 | 1.00 | 0.00 | C |
| ATOM | 1131 | C6   | C B | 18 | -52.792 | 20.642 | 38.920 | 1.00 | 0.00 | C |
| ATOM | 1132 | C2'  | C B | 18 | -53.421 | 19.627 | 36.239 | 1.00 | 0.00 | C |
| ATOM | 1133 | C3'  | C B | 18 | -52.686 | 18.561 | 35.441 | 1.00 | 0.00 | C |
| ATOM | 1134 | O3'  | C B | 18 | -53.636 | 17.776 | 34.724 | 1.00 | 0.00 | O |
| ATOM | 1135 | C4'  | C B | 18 | -51.974 | 17.756 | 36.526 | 1.00 | 0.00 | C |
| ATOM | 1136 | O4'  | C B | 18 | -52.884 | 17.806 | 37.671 | 1.00 | 0.00 | O |
| ATOM | 1137 | C5'  | C B | 18 | -50.621 | 18.266 | 36.962 | 1.00 | 0.00 | C |
| ATOM | 1138 | O5'  | C B | 18 | -50.621 | 19.716 | 36.960 | 1.00 | 0.00 | O |
| ATOM | 1139 | O1P  | C B | 18 | -48.983 | 20.296 | 35.138 | 1.00 | 0.00 | O |
| ATOM | 1140 | O2P  | C B | 18 | -49.358 | 21.888 | 37.041 | 1.00 | 0.00 | O |
| ATOM | 1141 | P    | C B | 18 | -49.277 | 20.483 | 36.573 | 1.00 | 0.00 | P |
| ATOM | 1142 | H5   | C B | 18 | -51.982 | 22.165 | 40.198 | 1.00 | 0.00 | H |
| ATOM | 1143 | H6   | C B | 18 | -52.036 | 20.788 | 38.150 | 1.00 | 0.00 | H |
| ATOM | 1144 | H1'  | C B | 18 | -54.800 | 18.442 | 37.419 | 1.00 | 0.00 | H |
| ATOM | 1145 | H3'  | C B | 18 | -51.973 | 18.995 | 34.741 | 1.00 | 0.00 | H |
| ATOM | 1146 | H4'  | C B | 18 | -51.837 | 16.748 | 36.134 | 1.00 | 0.00 | H |
| ATOM | 1147 | H41  | C B | 18 | -53.077 | 22.586 | 42.324 | 1.00 | 0.00 | H |
| ATOM | 1148 | H42  | C B | 18 | -54.528 | 21.690 | 42.851 | 1.00 | 0.00 | H |
| ATOM | 1149 | H2'1 | C B | 18 | -52.778 | 20.481 | 36.447 | 1.00 | 0.00 | H |
| ATOM | 1150 | H2'2 | C B | 18 | -54.294 | 19.997 | 35.701 | 1.00 | 0.00 | H |
| ATOM | 1151 | H5'1 | C B | 18 | -50.406 | 17.900 | 37.966 | 1.00 | 0.00 | H |
| ATOM | 1152 | H5'2 | C B | 18 | -49.861 | 17.897 | 36.276 | 1.00 | 0.00 | H |
| ATOM | 1153 | C1'  | C B | 19 | -58.721 | 18.932 | 36.933 | 1.00 | 0.00 | C |
| ATOM | 1154 | N1   | C B | 19 | -58.022 | 20.065 | 37.598 | 1.00 | 0.00 | N |
| ATOM | 1155 | C2   | C B | 19 | -58.492 | 20.484 | 38.842 | 1.00 | 0.00 | C |
| ATOM | 1156 | O2   | C B | 19 | -59.463 | 19.900 | 39.340 | 1.00 | 0.00 | O |
| ATOM | 1157 | N3   | C B | 19 | -57.869 | 21.514 | 39.462 | 1.00 | 0.00 | N |
| ATOM | 1158 | C4   | C B | 19 | -56.819 | 22.125 | 38.896 | 1.00 | 0.00 | C |
| ATOM | 1159 | N4   | C B | 19 | -56.248 | 23.125 | 39.547 | 1.00 | 0.00 | N |
| ATOM | 1160 | C5   | C B | 19 | -56.318 | 21.716 | 37.620 | 1.00 | 0.00 | C |
| ATOM | 1161 | C6   | C B | 19 | -56.959 | 20.677 | 37.014 | 1.00 | 0.00 | C |
| ATOM | 1162 | C2'  | C B | 19 | -58.840 | 19.085 | 35.424 | 1.00 | 0.00 | C |
| ATOM | 1163 | C3'  | C B | 19 | -58.688 | 17.648 | 34.947 | 1.00 | 0.00 | C |
| ATOM | 1164 | O3'  | C B | 19 | -59.954 | 16.996 | 35.012 | 1.00 | 0.00 | O |
| ATOM | 1165 | C4'  | C B | 19 | -57.687 | 17.064 | 35.941 | 1.00 | 0.00 | C |
| ATOM | 1166 | O4'  | C B | 19 | -57.979 | 17.756 | 37.197 | 1.00 | 0.00 | O |

|      |      |      |     |    |         |         |        |      |      |   |
|------|------|------|-----|----|---------|---------|--------|------|------|---|
| ATOM | 1167 | C5'  | C B | 19 | -56.224 | 17.258  | 35.614 | 1.00 | 0.00 | C |
| ATOM | 1168 | O5'  | C B | 19 | -56.027 | 18.556  | 35.000 | 1.00 | 0.00 | O |
| ATOM | 1169 | O1P  | C B | 19 | -55.305 | 17.989  | 32.657 | 1.00 | 0.00 | O |
| ATOM | 1170 | O2P  | C B | 19 | -54.576 | 20.149  | 33.707 | 1.00 | 0.00 | O |
| ATOM | 1171 | P    | C B | 19 | -54.904 | 18.712  | 33.880 | 1.00 | 0.00 | P |
| ATOM | 1172 | H5   | C B | 19 | -55.466 | 22.211  | 37.154 | 1.00 | 0.00 | H |
| ATOM | 1173 | H6   | C B | 19 | -56.611 | 20.329  | 36.041 | 1.00 | 0.00 | H |
| ATOM | 1174 | H1'  | C B | 19 | -59.703 | 18.820  | 37.394 | 1.00 | 0.00 | H |
| ATOM | 1175 | H3'  | C B | 19 | -58.306 | 17.595  | 33.928 | 1.00 | 0.00 | H |
| ATOM | 1176 | H4'  | C B | 19 | -57.877 | 15.992  | 35.991 | 1.00 | 0.00 | H |
| ATOM | 1177 | H41  | C B | 19 | -55.438 | 23.613  | 39.137 | 1.00 | 0.00 | H |
| ATOM | 1178 | H42  | C B | 19 | -56.612 | 23.418  | 40.467 | 1.00 | 0.00 | H |
| ATOM | 1179 | H2'1 | C B | 19 | -58.061 | 19.724  | 35.009 | 1.00 | 0.00 | H |
| ATOM | 1180 | H2'2 | C B | 19 | -59.801 | 19.503  | 35.125 | 1.00 | 0.00 | H |
| ATOM | 1181 | H5'1 | C B | 19 | -55.640 | 17.190  | 36.531 | 1.00 | 0.00 | H |
| ATOM | 1182 | H5'2 | C B | 19 | -55.906 | 16.474  | 34.928 | 1.00 | 0.00 | H |
| ATOM | 1183 | C1'  | T B | 20 | -63.330 | 20.265  | 38.149 | 1.00 | 0.00 | C |
| ATOM | 1184 | N1   | T B | 20 | -62.268 | 21.295  | 37.999 | 1.00 | 0.00 | N |
| ATOM | 1185 | C2   | T B | 20 | -62.109 | 22.191  | 39.037 | 1.00 | 0.00 | C |
| ATOM | 1186 | O2   | T B | 20 | -62.795 | 22.163  | 40.044 | 1.00 | 0.00 | O |
| ATOM | 1187 | N3   | T B | 20 | -61.112 | 23.130  | 38.856 | 1.00 | 0.00 | N |
| ATOM | 1188 | C4   | T B | 20 | -60.284 | 23.249  | 37.761 | 1.00 | 0.00 | C |
| ATOM | 1189 | O4   | T B | 20 | -59.423 | 24.137  | 37.712 | 1.00 | 0.00 | O |
| ATOM | 1190 | C5   | T B | 20 | -60.524 | 22.270  | 36.729 | 1.00 | 0.00 | C |
| ATOM | 1191 | C6   | T B | 20 | -61.488 | 21.339  | 36.870 | 1.00 | 0.00 | C |
| ATOM | 1192 | C7   | T B | 20 | -59.645 | 22.361  | 35.518 | 1.00 | 0.00 | C |
| ATOM | 1193 | C2'  | T B | 20 | -64.067 | 19.951  | 36.852 | 1.00 | 0.00 | C |
| ATOM | 1194 | C3'  | T B | 20 | -64.332 | 18.459  | 36.991 | 1.00 | 0.00 | C |
| ATOM | 1195 | O3'  | T B | 20 | -65.523 | 18.263  | 37.751 | 1.00 | 0.00 | O |
| ATOM | 1196 | C4'  | T B | 20 | -63.089 | 17.961  | 37.725 | 1.00 | 0.00 | C |
| ATOM | 1197 | O4'  | T B | 20 | -62.716 | 19.073  | 38.599 | 1.00 | 0.00 | O |
| ATOM | 1198 | C5'  | T B | 20 | -61.899 | 17.603  | 36.865 | 1.00 | 0.00 | C |
| ATOM | 1199 | O5'  | T B | 20 | -61.812 | 18.519  | 35.743 | 1.00 | 0.00 | O |
| ATOM | 1200 | O1P  | T B | 20 | -62.256 | 17.045  | 33.752 | 1.00 | 0.00 | O |
| ATOM | 1201 | O2P  | T B | 20 | -60.861 | 19.115  | 33.495 | 1.00 | 0.00 | O |
| ATOM | 1202 | P    | T B | 20 | -61.272 | 17.972  | 34.347 | 1.00 | 0.00 | P |
| ATOM | 1203 | H3   | T B | 20 | -60.973 | 23.810  | 39.616 | 1.00 | 0.00 | H |
| ATOM | 1204 | H6   | T B | 20 | -61.651 | 20.609  | 36.077 | 1.00 | 0.00 | H |
| ATOM | 1205 | H1'  | T B | 20 | -64.023 | 20.597  | 38.921 | 1.00 | 0.00 | H |
| ATOM | 1206 | H3'  | T B | 20 | -64.439 | 17.973  | 36.022 | 1.00 | 0.00 | H |
| ATOM | 1207 | H4'  | T B | 20 | -63.383 | 17.066  | 38.274 | 1.00 | 0.00 | H |
| ATOM | 1208 | H3T  | T B | 20 | -66.293 | 18.736  | 37.431 | 1.00 | 0.00 | H |
| ATOM | 1209 | H71  | T B | 20 | -60.247 | 22.627  | 34.650 | 1.00 | 0.00 | H |
| ATOM | 1210 | H72  | T B | 20 | -58.882 | 23.125  | 35.679 | 1.00 | 0.00 | H |
| ATOM | 1211 | H73  | T B | 20 | -59.162 | 21.399  | 35.344 | 1.00 | 0.00 | H |
| ATOM | 1212 | H2'1 | T B | 20 | -63.465 | 20.167  | 35.972 | 1.00 | 0.00 | H |
| ATOM | 1213 | H2'2 | T B | 20 | -64.998 | 20.512  | 36.760 | 1.00 | 0.00 | H |
| ATOM | 1214 | H5'1 | T B | 20 | -60.991 | 17.666  | 37.464 | 1.00 | 0.00 | H |
| ATOM | 1215 | H5'2 | T B | 20 | -62.017 | 16.584  | 36.499 | 1.00 | 0.00 | H |
| TER  |      |      |     |    |         |         |        |      |      |   |
| ATOM | 1    | C1'  | A A | 1  | -64.940 | -10.344 | 28.219 | 1.00 | 0.00 | C |
| ATOM | 2    | N1   | A A | 1  | -61.806 | -10.172 | 24.159 | 1.00 | 0.00 | N |
| ATOM | 3    | C2   | A A | 1  | -62.450 | -11.171 | 24.755 | 1.00 | 0.00 | C |
| ATOM | 4    | N3   | A A | 1  | -63.249 | -11.145 | 25.801 | 1.00 | 0.00 | N |



|      |    |      |     |   |         |         |        |      |      |   |
|------|----|------|-----|---|---------|---------|--------|------|------|---|
| ATOM | 5  | C4   | A A | 1 | -63.364 | -9.889  | 26.269 | 1.00 | 0.00 | C |
| ATOM | 6  | C5   | A A | 1 | -62.771 | -8.761  | 25.776 | 1.00 | 0.00 | C |
| ATOM | 7  | C6   | A A | 1 | -61.940 | -8.930  | 24.648 | 1.00 | 0.00 | C |
| ATOM | 8  | N6   | A A | 1 | -61.292 | -7.912  | 24.055 | 1.00 | 0.00 | N |
| ATOM | 9  | N7   | A A | 1 | -63.123 | -7.647  | 26.517 | 1.00 | 0.00 | N |
| ATOM | 10 | C8   | A A | 1 | -63.912 | -8.122  | 27.436 | 1.00 | 0.00 | C |
| ATOM | 11 | N9   | A A | 1 | -64.106 | -9.475  | 27.347 | 1.00 | 0.00 | N |
| ATOM | 12 | C2'  | A A | 1 | -64.907 | -9.951  | 29.689 | 1.00 | 0.00 | C |
| ATOM | 13 | C3'  | A A | 1 | -66.329 | -10.258 | 30.131 | 1.00 | 0.00 | C |
| ATOM | 14 | O3'  | A A | 1 | -66.426 | -11.639 | 30.471 | 1.00 | 0.00 | O |
| ATOM | 15 | C4'  | A A | 1 | -67.154 | -9.908  | 28.893 | 1.00 | 0.00 | C |
| ATOM | 16 | O4'  | A A | 1 | -66.278 | -10.248 | 27.770 | 1.00 | 0.00 | O |
| ATOM | 17 | C5'  | A A | 1 | -67.578 | -8.466  | 28.756 | 1.00 | 0.00 | C |
| ATOM | 18 | O5'  | A A | 1 | -66.528 | -7.595  | 29.248 | 1.00 | 0.00 | O |
| ATOM | 19 | H2   | A A | 1 | -62.296 | -12.154 | 24.312 | 1.00 | 0.00 | H |
| ATOM | 20 | H8   | A A | 1 | -64.376 | -7.501  | 28.203 | 1.00 | 0.00 | H |
| ATOM | 21 | H1'  | A A | 1 | -64.615 | -11.376 | 28.083 | 1.00 | 0.00 | H |
| ATOM | 22 | H3'  | A A | 1 | -66.631 | -9.653  | 30.988 | 1.00 | 0.00 | H |
| ATOM | 23 | H4'  | A A | 1 | -68.055 | -10.519 | 28.931 | 1.00 | 0.00 | H |
| ATOM | 24 | H61  | A A | 1 | -60.700 | -8.089  | 23.234 | 1.00 | 0.00 | H |
| ATOM | 25 | H62  | A A | 1 | -61.392 | -6.956  | 24.425 | 1.00 | 0.00 | H |
| ATOM | 26 | H5T  | A A | 1 | -66.773 | -6.775  | 29.681 | 1.00 | 0.00 | H |
| ATOM | 27 | H2'1 | A A | 1 | -64.667 | -8.898  | 29.831 | 1.00 | 0.00 | H |
| ATOM | 28 | H2'2 | A A | 1 | -64.182 | -10.534 | 30.257 | 1.00 | 0.00 | H |
| ATOM | 29 | H5'1 | A A | 1 | -67.774 | -8.249  | 27.706 | 1.00 | 0.00 | H |
| ATOM | 30 | H5'2 | A A | 1 | -68.489 | -8.304  | 29.330 | 1.00 | 0.00 | H |
| ATOM | 31 | C1'  | G A | 2 | -61.752 | -14.148 | 28.348 | 1.00 | 0.00 | C |
| ATOM | 32 | N1   | G A | 2 | -58.809 | -11.064 | 25.548 | 1.00 | 0.00 | N |
| ATOM | 33 | C2   | G A | 2 | -59.058 | -12.416 | 25.411 | 1.00 | 0.00 | C |
| ATOM | 34 | N2   | G A | 2 | -58.440 | -13.030 | 24.395 | 1.00 | 0.00 | N |
| ATOM | 35 | N3   | G A | 2 | -59.860 | -13.103 | 26.223 | 1.00 | 0.00 | N |
| ATOM | 36 | C4   | G A | 2 | -60.396 | -12.324 | 27.199 | 1.00 | 0.00 | C |
| ATOM | 37 | C5   | G A | 2 | -60.203 | -10.969 | 27.414 | 1.00 | 0.00 | C |
| ATOM | 38 | C6   | G A | 2 | -59.354 | -10.240 | 26.549 | 1.00 | 0.00 | C |
| ATOM | 39 | O6   | G A | 2 | -59.062 | -9.044  | 26.575 | 1.00 | 0.00 | O |
| ATOM | 40 | N7   | G A | 2 | -60.935 | -10.548 | 28.526 | 1.00 | 0.00 | N |
| ATOM | 41 | C8   | G A | 2 | -61.537 | -11.634 | 28.938 | 1.00 | 0.00 | C |
| ATOM | 42 | N9   | G A | 2 | -61.259 | -12.755 | 28.183 | 1.00 | 0.00 | N |
| ATOM | 43 | C2'  | G A | 2 | -61.883 | -14.586 | 29.801 | 1.00 | 0.00 | C |
| ATOM | 44 | C3'  | G A | 2 | -63.116 | -15.472 | 29.757 | 1.00 | 0.00 | C |
| ATOM | 45 | O3'  | G A | 2 | -62.734 | -16.788 | 29.363 | 1.00 | 0.00 | O |
| ATOM | 46 | C4'  | G A | 2 | -63.990 | -14.787 | 28.707 | 1.00 | 0.00 | C |
| ATOM | 47 | O4'  | G A | 2 | -63.033 | -14.226 | 27.753 | 1.00 | 0.00 | O |
| ATOM | 48 | C5'  | G A | 2 | -64.887 | -13.677 | 29.202 | 1.00 | 0.00 | C |
| ATOM | 49 | O5'  | G A | 2 | -64.212 | -12.929 | 30.244 | 1.00 | 0.00 | O |
| ATOM | 50 | O1P  | G A | 2 | -65.592 | -13.412 | 32.293 | 1.00 | 0.00 | O |
| ATOM | 51 | O2P  | G A | 2 | -64.298 | -11.269 | 32.128 | 1.00 | 0.00 | O |
| ATOM | 52 | P    | G A | 2 | -65.080 | -12.324 | 31.438 | 1.00 | 0.00 | P |
| ATOM | 53 | H1   | G A | 2 | -58.175 | -10.627 | 24.864 | 1.00 | 0.00 | H |
| ATOM | 54 | H8   | G A | 2 | -62.201 | -11.652 | 29.802 | 1.00 | 0.00 | H |
| ATOM | 55 | H1'  | G A | 2 | -61.086 | -14.814 | 27.799 | 1.00 | 0.00 | H |
| ATOM | 56 | H21  | G A | 2 | -57.822 | -12.493 | 23.770 | 1.00 | 0.00 | H |
| ATOM | 57 | H3'  | G A | 2 | -63.622 | -15.516 | 30.722 | 1.00 | 0.00 | H |
| ATOM | 58 | H22  | G A | 2 | -58.583 | -14.038 | 24.241 | 1.00 | 0.00 | H |

|      |     |      |     |   |         |         |        |      |      |   |
|------|-----|------|-----|---|---------|---------|--------|------|------|---|
| ATOM | 59  | H4'  | G A | 2 | -64.624 | -15.558 | 28.271 | 1.00 | 0.00 | H |
| ATOM | 60  | H2'1 | G A | 2 | -62.025 | -13.741 | 30.475 | 1.00 | 0.00 | H |
| ATOM | 61  | H2'2 | G A | 2 | -61.008 | -15.138 | 30.147 | 1.00 | 0.00 | H |
| ATOM | 62  | H5'1 | G A | 2 | -65.129 | -13.015 | 28.371 | 1.00 | 0.00 | H |
| ATOM | 63  | H5'2 | G A | 2 | -65.807 | -14.110 | 29.594 | 1.00 | 0.00 | H |
| ATOM | 64  | C1'  | G A | 3 | -57.482 | -16.420 | 27.284 | 1.00 | 0.00 | C |
| ATOM | 65  | N1   | G A | 3 | -55.705 | -11.657 | 26.870 | 1.00 | 0.00 | N |
| ATOM | 66  | C2   | G A | 3 | -55.479 | -12.761 | 26.069 | 1.00 | 0.00 | C |
| ATOM | 67  | N2   | G A | 3 | -54.669 | -12.572 | 25.020 | 1.00 | 0.00 | N |
| ATOM | 68  | N3   | G A | 3 | -56.016 | -13.957 | 26.297 | 1.00 | 0.00 | N |
| ATOM | 69  | C4   | G A | 3 | -56.803 | -13.968 | 27.405 | 1.00 | 0.00 | C |
| ATOM | 70  | C5   | G A | 3 | -57.084 | -12.918 | 28.263 | 1.00 | 0.00 | C |
| ATOM | 71  | C6   | G A | 3 | -56.516 | -11.646 | 28.019 | 1.00 | 0.00 | C |
| ATOM | 72  | O6   | G A | 3 | -56.646 | -10.602 | 28.659 | 1.00 | 0.00 | O |
| ATOM | 73  | N7   | G A | 3 | -57.936 | -13.344 | 29.283 | 1.00 | 0.00 | N |
| ATOM | 74  | C8   | G A | 3 | -58.143 | -14.607 | 29.016 | 1.00 | 0.00 | C |
| ATOM | 75  | N9   | G A | 3 | -57.487 | -15.060 | 27.890 | 1.00 | 0.00 | N |
| ATOM | 76  | C2'  | G A | 3 | -57.484 | -17.548 | 28.307 | 1.00 | 0.00 | C |
| ATOM | 77  | C3'  | G A | 3 | -58.343 | -18.597 | 27.622 | 1.00 | 0.00 | C |
| ATOM | 78  | O3'  | G A | 3 | -57.530 | -19.362 | 26.735 | 1.00 | 0.00 | O |
| ATOM | 79  | C4'  | G A | 3 | -59.377 | -17.756 | 26.875 | 1.00 | 0.00 | C |
| ATOM | 80  | O4'  | G A | 3 | -58.649 | -16.545 | 26.495 | 1.00 | 0.00 | O |
| ATOM | 81  | C5'  | G A | 3 | -60.606 | -17.355 | 27.656 | 1.00 | 0.00 | C |
| ATOM | 82  | O5'  | G A | 3 | -60.246 | -17.082 | 29.033 | 1.00 | 0.00 | O |
| ATOM | 83  | O1P  | G A | 3 | -61.419 | -18.902 | 30.316 | 1.00 | 0.00 | O |
| ATOM | 84  | O2P  | G A | 3 | -60.925 | -16.706 | 31.423 | 1.00 | 0.00 | O |
| ATOM | 85  | P    | G A | 3 | -61.289 | -17.439 | 30.186 | 1.00 | 0.00 | P |
| ATOM | 86  | H1   | G A | 3 | -55.244 | -10.774 | 26.603 | 1.00 | 0.00 | H |
| ATOM | 87  | H8   | G A | 3 | -58.777 | -15.247 | 29.629 | 1.00 | 0.00 | H |
| ATOM | 88  | H1'  | G A | 3 | -56.619 | -16.495 | 26.622 | 1.00 | 0.00 | H |
| ATOM | 89  | H21  | G A | 3 | -54.258 | -11.642 | 24.848 | 1.00 | 0.00 | H |
| ATOM | 90  | H3'  | G A | 3 | -58.823 | -19.265 | 28.338 | 1.00 | 0.00 | H |
| ATOM | 91  | H22  | G A | 3 | -54.458 | -13.355 | 24.386 | 1.00 | 0.00 | H |
| ATOM | 92  | H4'  | G A | 3 | -59.704 | -18.343 | 26.018 | 1.00 | 0.00 | H |
| ATOM | 93  | H2'1 | G A | 3 | -57.917 | -17.241 | 29.259 | 1.00 | 0.00 | H |
| ATOM | 94  | H2'2 | G A | 3 | -56.481 | -17.925 | 28.510 | 1.00 | 0.00 | H |
| ATOM | 95  | H5'1 | G A | 3 | -61.042 | -16.465 | 27.205 | 1.00 | 0.00 | H |
| ATOM | 96  | H5'2 | G A | 3 | -61.333 | -18.167 | 27.619 | 1.00 | 0.00 | H |
| ATOM | 97  | C1'  | C A | 4 | -52.675 | -16.523 | 26.096 | 1.00 | 0.00 | C |
| ATOM | 98  | N1   | C A | 4 | -53.150 | -15.718 | 27.255 | 1.00 | 0.00 | N |
| ATOM | 99  | C2   | C A | 4 | -52.766 | -14.380 | 27.319 | 1.00 | 0.00 | C |
| ATOM | 100 | O2   | C A | 4 | -52.052 | -13.919 | 26.420 | 1.00 | 0.00 | O |
| ATOM | 101 | N3   | C A | 4 | -53.189 | -13.630 | 28.366 | 1.00 | 0.00 | N |
| ATOM | 102 | C4   | C A | 4 | -53.960 | -14.158 | 29.325 | 1.00 | 0.00 | C |
| ATOM | 103 | N4   | C A | 4 | -54.346 | -13.378 | 30.324 | 1.00 | 0.00 | N |
| ATOM | 104 | C5   | C A | 4 | -54.367 | -15.531 | 29.284 | 1.00 | 0.00 | C |
| ATOM | 105 | C6   | C A | 4 | -53.933 | -16.267 | 28.220 | 1.00 | 0.00 | C |
| ATOM | 106 | C2'  | C A | 4 | -52.313 | -17.958 | 26.453 | 1.00 | 0.00 | C |
| ATOM | 107 | C3'  | C A | 4 | -52.756 | -18.716 | 25.210 | 1.00 | 0.00 | C |
| ATOM | 108 | O3'  | C A | 4 | -51.716 | -18.664 | 24.235 | 1.00 | 0.00 | O |
| ATOM | 109 | C4'  | C A | 4 | -54.000 | -17.948 | 24.770 | 1.00 | 0.00 | C |
| ATOM | 110 | O4'  | C A | 4 | -53.719 | -16.561 | 25.141 | 1.00 | 0.00 | O |
| ATOM | 111 | C5'  | C A | 4 | -55.305 | -18.363 | 25.407 | 1.00 | 0.00 | C |
| ATOM | 112 | O5'  | C A | 4 | -55.080 | -18.729 | 26.792 | 1.00 | 0.00 | O |

|      |     |      |     |   |         |         |        |      |      |   |
|------|-----|------|-----|---|---------|---------|--------|------|------|---|
| ATOM | 113 | O1P  | C A | 4 | -55.590 | -21.193 | 26.835 | 1.00 | 0.00 | O |
| ATOM | 114 | O2P  | C A | 4 | -55.886 | -19.815 | 28.910 | 1.00 | 0.00 | O |
| ATOM | 115 | P    | C A | 4 | -55.961 | -19.895 | 27.431 | 1.00 | 0.00 | P |
| ATOM | 116 | H5   | C A | 4 | -54.990 | -15.967 | 30.065 | 1.00 | 0.00 | H |
| ATOM | 117 | H6   | C A | 4 | -54.221 | -17.315 | 28.143 | 1.00 | 0.00 | H |
| ATOM | 118 | H1'  | C A | 4 | -51.828 | -16.006 | 25.647 | 1.00 | 0.00 | H |
| ATOM | 119 | H3'  | C A | 4 | -52.992 | -19.757 | 25.431 | 1.00 | 0.00 | H |
| ATOM | 120 | H4'  | C A | 4 | -54.095 | -18.090 | 23.693 | 1.00 | 0.00 | H |
| ATOM | 121 | H41  | C A | 4 | -54.941 | -13.759 | 31.074 | 1.00 | 0.00 | H |
| ATOM | 122 | H42  | C A | 4 | -54.051 | -12.391 | 30.352 | 1.00 | 0.00 | H |
| ATOM | 123 | H2'1 | C A | 4 | -52.839 | -18.310 | 27.339 | 1.00 | 0.00 | H |
| ATOM | 124 | H2'2 | C A | 4 | -51.244 | -18.082 | 26.635 | 1.00 | 0.00 | H |
| ATOM | 125 | H5'1 | C A | 4 | -56.010 | -17.533 | 25.355 | 1.00 | 0.00 | H |
| ATOM | 126 | H5'2 | C A | 4 | -55.714 | -19.214 | 24.863 | 1.00 | 0.00 | H |
| ATOM | 127 | C1'  | C A | 5 | -48.096 | -14.645 | 25.921 | 1.00 | 0.00 | C |
| ATOM | 128 | N1   | C A | 5 | -48.837 | -14.710 | 27.211 | 1.00 | 0.00 | N |
| ATOM | 129 | C2   | C A | 5 | -48.931 | -13.544 | 27.967 | 1.00 | 0.00 | C |
| ATOM | 130 | O2   | C A | 5 | -48.399 | -12.509 | 27.542 | 1.00 | 0.00 | O |
| ATOM | 131 | N3   | C A | 5 | -49.603 | -13.581 | 29.144 | 1.00 | 0.00 | N |
| ATOM | 132 | C4   | C A | 5 | -50.167 | -14.714 | 29.579 | 1.00 | 0.00 | C |
| ATOM | 133 | N4   | C A | 5 | -50.814 | -14.693 | 30.734 | 1.00 | 0.00 | N |
| ATOM | 134 | C5   | C A | 5 | -50.084 | -15.928 | 28.822 | 1.00 | 0.00 | C |
| ATOM | 135 | C6   | C A | 5 | -49.407 | -15.866 | 27.640 | 1.00 | 0.00 | C |
| ATOM | 136 | C2'  | C A | 5 | -47.276 | -15.892 | 25.622 | 1.00 | 0.00 | C |
| ATOM | 137 | C3'  | C A | 5 | -47.413 | -16.006 | 24.112 | 1.00 | 0.00 | C |
| ATOM | 138 | O3'  | C A | 5 | -46.434 | -15.177 | 23.490 | 1.00 | 0.00 | O |
| ATOM | 139 | C4'  | C A | 5 | -48.834 | -15.510 | 23.861 | 1.00 | 0.00 | C |
| ATOM | 140 | O4'  | C A | 5 | -49.047 | -14.488 | 24.885 | 1.00 | 0.00 | O |
| ATOM | 141 | C5'  | C A | 5 | -49.934 | -16.541 | 23.970 | 1.00 | 0.00 | C |
| ATOM | 142 | O5'  | C A | 5 | -49.625 | -17.476 | 25.036 | 1.00 | 0.00 | O |
| ATOM | 143 | O1P  | C A | 5 | -49.270 | -19.649 | 23.818 | 1.00 | 0.00 | O |
| ATOM | 144 | O2P  | C A | 5 | -50.055 | -19.660 | 26.201 | 1.00 | 0.00 | O |
| ATOM | 145 | P    | C A | 5 | -50.070 | -18.998 | 24.873 | 1.00 | 0.00 | P |
| ATOM | 146 | H5   | C A | 5 | -50.538 | -16.855 | 29.174 | 1.00 | 0.00 | H |
| ATOM | 147 | H6   | C A | 5 | -49.321 | -16.763 | 27.026 | 1.00 | 0.00 | H |
| ATOM | 148 | H1'  | C A | 5 | -47.466 | -13.756 | 25.935 | 1.00 | 0.00 | H |
| ATOM | 149 | H3'  | C A | 5 | -47.286 | -17.033 | 23.767 | 1.00 | 0.00 | H |
| ATOM | 150 | H4'  | C A | 5 | -48.855 | -15.110 | 22.847 | 1.00 | 0.00 | H |
| ATOM | 151 | H41  | C A | 5 | -51.259 | -15.551 | 31.091 | 1.00 | 0.00 | H |
| ATOM | 152 | H42  | C A | 5 | -50.871 | -13.819 | 31.277 | 1.00 | 0.00 | H |
| ATOM | 153 | H2'1 | C A | 5 | -47.669 | -16.776 | 26.123 | 1.00 | 0.00 | H |
| ATOM | 154 | H2'2 | C A | 5 | -46.232 | -15.782 | 25.920 | 1.00 | 0.00 | H |
| ATOM | 155 | H5'1 | C A | 5 | -50.877 | -16.037 | 24.185 | 1.00 | 0.00 | H |
| ATOM | 156 | H5'2 | C A | 5 | -50.019 | -17.075 | 23.025 | 1.00 | 0.00 | H |
| ATOM | 157 | C1'  | G A | 6 | -44.422 | -11.729 | 27.511 | 1.00 | 0.00 | C |
| ATOM | 158 | N1   | G A | 6 | -46.844 | -12.076 | 31.988 | 1.00 | 0.00 | N |
| ATOM | 159 | C2   | G A | 6 | -46.269 | -10.977 | 31.372 | 1.00 | 0.00 | C |
| ATOM | 160 | N2   | G A | 6 | -46.346 | -9.820  | 32.038 | 1.00 | 0.00 | N |
| ATOM | 161 | N3   | G A | 6 | -45.664 | -11.033 | 30.186 | 1.00 | 0.00 | N |
| ATOM | 162 | C4   | G A | 6 | -45.671 | -12.285 | 29.660 | 1.00 | 0.00 | C |
| ATOM | 163 | C5   | G A | 6 | -46.216 | -13.437 | 30.203 | 1.00 | 0.00 | C |
| ATOM | 164 | C6   | G A | 6 | -46.861 | -13.380 | 31.458 | 1.00 | 0.00 | C |
| ATOM | 165 | O6   | G A | 6 | -47.399 | -14.284 | 32.097 | 1.00 | 0.00 | O |
| ATOM | 166 | N7   | G A | 6 | -46.009 | -14.519 | 29.345 | 1.00 | 0.00 | N |

|      |     |      |     |   |         |         |        |      |      |   |
|------|-----|------|-----|---|---------|---------|--------|------|------|---|
| ATOM | 167 | C8   | G A | 6 | -45.365 | -14.001 | 28.332 | 1.00 | 0.00 | C |
| ATOM | 168 | N9   | G A | 6 | -45.121 | -12.648 | 28.450 | 1.00 | 0.00 | N |
| ATOM | 169 | C2'  | G A | 6 | -43.224 | -12.358 | 26.815 | 1.00 | 0.00 | C |
| ATOM | 170 | C3'  | G A | 6 | -43.285 | -11.720 | 25.437 | 1.00 | 0.00 | C |
| ATOM | 171 | O3'  | G A | 6 | -42.634 | -10.452 | 25.477 | 1.00 | 0.00 | O |
| ATOM | 172 | C4'  | G A | 6 | -44.787 | -11.591 | 25.189 | 1.00 | 0.00 | C |
| ATOM | 173 | O4'  | G A | 6 | -45.350 | -11.341 | 26.516 | 1.00 | 0.00 | O |
| ATOM | 174 | C5'  | G A | 6 | -45.475 | -12.794 | 24.590 | 1.00 | 0.00 | C |
| ATOM | 175 | O5'  | G A | 6 | -44.888 | -14.009 | 25.119 | 1.00 | 0.00 | O |
| ATOM | 176 | O1P  | G A | 6 | -43.797 | -15.054 | 23.107 | 1.00 | 0.00 | O |
| ATOM | 177 | O2P  | G A | 6 | -44.575 | -16.500 | 25.004 | 1.00 | 0.00 | O |
| ATOM | 178 | P    | G A | 6 | -44.789 | -15.289 | 24.173 | 1.00 | 0.00 | P |
| ATOM | 179 | H1   | G A | 6 | -47.294 | -11.925 | 32.904 | 1.00 | 0.00 | H |
| ATOM | 180 | H8   | G A | 6 | -45.046 | -14.585 | 27.468 | 1.00 | 0.00 | H |
| ATOM | 181 | H1'  | G A | 6 | -44.129 | -10.835 | 28.063 | 1.00 | 0.00 | H |
| ATOM | 182 | H21  | G A | 6 | -46.819 | -9.783  | 32.953 | 1.00 | 0.00 | H |
| ATOM | 183 | H3'  | G A | 6 | -42.813 | -12.343 | 24.676 | 1.00 | 0.00 | H |
| ATOM | 184 | H22  | G A | 6 | -45.936 | -8.965  | 31.635 | 1.00 | 0.00 | H |
| ATOM | 185 | H4'  | G A | 6 | -44.924 | -10.754 | 24.505 | 1.00 | 0.00 | H |
| ATOM | 186 | H2'1 | G A | 6 | -43.304 | -13.444 | 26.753 | 1.00 | 0.00 | H |
| ATOM | 187 | H2'2 | G A | 6 | -42.284 | -12.128 | 27.318 | 1.00 | 0.00 | H |
| ATOM | 188 | H5'1 | G A | 6 | -46.535 | -12.760 | 24.835 | 1.00 | 0.00 | H |
| ATOM | 189 | H5'2 | G A | 6 | -45.358 | -12.770 | 23.506 | 1.00 | 0.00 | H |
| ATOM | 190 | C1'  | C A | 7 | -41.985 | -9.115  | 30.939 | 1.00 | 0.00 | C |
| ATOM | 191 | N1   | C A | 7 | -42.351 | -10.535 | 31.191 | 1.00 | 0.00 | N |
| ATOM | 192 | C2   | C A | 7 | -43.026 | -10.833 | 32.373 | 1.00 | 0.00 | C |
| ATOM | 193 | O2   | C A | 7 | -43.290 | -9.915  | 33.160 | 1.00 | 0.00 | O |
| ATOM | 194 | N3   | C A | 7 | -43.369 | -12.121 | 32.622 | 1.00 | 0.00 | N |
| ATOM | 195 | C4   | C A | 7 | -43.069 | -13.094 | 31.753 | 1.00 | 0.00 | C |
| ATOM | 196 | N4   | C A | 7 | -43.431 | -14.335 | 32.045 | 1.00 | 0.00 | N |
| ATOM | 197 | C5   | C A | 7 | -42.372 | -12.817 | 30.531 | 1.00 | 0.00 | C |
| ATOM | 198 | C6   | C A | 7 | -42.040 | -11.512 | 30.298 | 1.00 | 0.00 | C |
| ATOM | 199 | C2'  | C A | 7 | -40.628 | -8.940  | 30.269 | 1.00 | 0.00 | C |
| ATOM | 200 | C3'  | C A | 7 | -40.874 | -7.743  | 29.363 | 1.00 | 0.00 | C |
| ATOM | 201 | O3'  | C A | 7 | -40.691 | -6.544  | 30.113 | 1.00 | 0.00 | O |
| ATOM | 202 | C4'  | C A | 7 | -42.324 | -7.938  | 28.928 | 1.00 | 0.00 | C |
| ATOM | 203 | O4'  | C A | 7 | -42.969 | -8.561  | 30.085 | 1.00 | 0.00 | O |
| ATOM | 204 | C5'  | C A | 7 | -42.550 | -8.816  | 27.719 | 1.00 | 0.00 | C |
| ATOM | 205 | O5'  | C A | 7 | -41.597 | -9.908  | 27.721 | 1.00 | 0.00 | O |
| ATOM | 206 | O1P  | C A | 7 | -40.172 | -9.444  | 25.698 | 1.00 | 0.00 | O |
| ATOM | 207 | O2P  | C A | 7 | -40.457 | -11.797 | 26.520 | 1.00 | 0.00 | O |
| ATOM | 208 | P    | C A | 7 | -41.050 | -10.453 | 26.326 | 1.00 | 0.00 | P |
| ATOM | 209 | H5   | C A | 7 | -42.119 | -13.606 | 29.822 | 1.00 | 0.00 | H |
| ATOM | 210 | H6   | C A | 7 | -41.517 | -11.250 | 29.379 | 1.00 | 0.00 | H |
| ATOM | 211 | H1'  | C A | 7 | -42.024 | -8.578  | 31.887 | 1.00 | 0.00 | H |
| ATOM | 212 | H3'  | C A | 7 | -40.201 | -7.738  | 28.504 | 1.00 | 0.00 | H |
| ATOM | 213 | H4'  | C A | 7 | -42.721 | -6.949  | 28.700 | 1.00 | 0.00 | H |
| ATOM | 214 | H41  | C A | 7 | -43.214 | -15.102 | 31.392 | 1.00 | 0.00 | H |
| ATOM | 215 | H42  | C A | 7 | -43.929 | -14.534 | 32.924 | 1.00 | 0.00 | H |
| ATOM | 216 | H2'1 | C A | 7 | -40.334 | -9.818  | 29.695 | 1.00 | 0.00 | H |
| ATOM | 217 | H2'2 | C A | 7 | -39.834 | -8.738  | 30.989 | 1.00 | 0.00 | H |
| ATOM | 218 | H5'1 | C A | 7 | -43.566 | -9.213  | 27.748 | 1.00 | 0.00 | H |
| ATOM | 219 | H5'2 | C A | 7 | -42.424 | -8.220  | 26.815 | 1.00 | 0.00 | H |
| ATOM | 220 | C1'  | A A | 8 | -40.634 | -8.006  | 35.570 | 1.00 | 0.00 | C |

|      |     |      |     |   |         |         |        |      |      |   |
|------|-----|------|-----|---|---------|---------|--------|------|------|---|
| ATOM | 221 | N1   | A A | 8 | -41.731 | -12.941 | 36.460 | 1.00 | 0.00 | N |
| ATOM | 222 | C2   | A A | 8 | -41.985 | -11.827 | 37.141 | 1.00 | 0.00 | C |
| ATOM | 223 | N3   | A A | 8 | -41.676 | -10.581 | 36.852 | 1.00 | 0.00 | N |
| ATOM | 224 | C4   | A A | 8 | -41.003 | -10.527 | 35.687 | 1.00 | 0.00 | C |
| ATOM | 225 | C5   | A A | 8 | -40.664 | -11.571 | 34.873 | 1.00 | 0.00 | C |
| ATOM | 226 | C6   | A A | 8 | -41.061 | -12.855 | 35.301 | 1.00 | 0.00 | C |
| ATOM | 227 | N6   | A A | 8 | -40.798 | -13.974 | 34.605 | 1.00 | 0.00 | N |
| ATOM | 228 | N7   | A A | 8 | -39.975 | -11.131 | 33.756 | 1.00 | 0.00 | N |
| ATOM | 229 | C8   | A A | 8 | -39.909 | -9.842  | 33.919 | 1.00 | 0.00 | C |
| ATOM | 230 | N9   | A A | 8 | -40.514 | -9.402  | 35.069 | 1.00 | 0.00 | N |
| ATOM | 231 | C2'  | A A | 8 | -39.401 | -7.152  | 35.311 | 1.00 | 0.00 | C |
| ATOM | 232 | C3'  | A A | 8 | -40.012 | -5.788  | 35.034 | 1.00 | 0.00 | C |
| ATOM | 233 | O3'  | A A | 8 | -40.250 | -5.124  | 36.272 | 1.00 | 0.00 | O |
| ATOM | 234 | C4'  | A A | 8 | -41.310 | -6.138  | 34.308 | 1.00 | 0.00 | C |
| ATOM | 235 | O4'  | A A | 8 | -41.731 | -7.405  | 34.910 | 1.00 | 0.00 | O |
| ATOM | 236 | C5'  | A A | 8 | -41.212 | -6.322  | 32.812 | 1.00 | 0.00 | C |
| ATOM | 237 | O5'  | A A | 8 | -39.952 | -6.957  | 32.477 | 1.00 | 0.00 | O |
| ATOM | 238 | O1P  | A A | 8 | -38.728 | -5.173  | 31.189 | 1.00 | 0.00 | O |
| ATOM | 239 | O2P  | A A | 8 | -38.231 | -7.596  | 30.762 | 1.00 | 0.00 | O |
| ATOM | 240 | P    | A A | 8 | -39.232 | -6.558  | 31.110 | 1.00 | 0.00 | P |
| ATOM | 241 | H2   | A A | 8 | -42.530 | -11.966 | 38.073 | 1.00 | 0.00 | H |
| ATOM | 242 | H8   | A A | 8 | -39.420 | -9.174  | 33.210 | 1.00 | 0.00 | H |
| ATOM | 243 | H1'  | A A | 8 | -40.865 | -8.046  | 36.635 | 1.00 | 0.00 | H |
| ATOM | 244 | H3'  | A A | 8 | -39.367 | -5.170  | 34.411 | 1.00 | 0.00 | H |
| ATOM | 245 | H4'  | A A | 8 | -42.008 | -5.324  | 34.498 | 1.00 | 0.00 | H |
| ATOM | 246 | H61  | A A | 8 | -41.112 | -14.887 | 34.960 | 1.00 | 0.00 | H |
| ATOM | 247 | H62  | A A | 8 | -40.281 | -13.916 | 33.715 | 1.00 | 0.00 | H |
| ATOM | 248 | H2'1 | A A | 8 | -38.824 | -7.508  | 34.458 | 1.00 | 0.00 | H |
| ATOM | 249 | H2'2 | A A | 8 | -38.732 | -7.121  | 36.170 | 1.00 | 0.00 | H |
| ATOM | 250 | H5'1 | A A | 8 | -42.040 | -6.947  | 32.475 | 1.00 | 0.00 | H |
| ATOM | 251 | H5'2 | A A | 8 | -41.275 | -5.350  | 32.326 | 1.00 | 0.00 | H |
| ATOM | 252 | C1'  | C A | 9 | -39.838 | -9.109  | 40.347 | 1.00 | 0.00 | C |
| ATOM | 253 | N1   | C A | 9 | -39.234 | -9.942  | 39.271 | 1.00 | 0.00 | N |
| ATOM | 254 | C2   | C A | 9 | -39.421 | -11.322 | 39.330 | 1.00 | 0.00 | C |
| ATOM | 255 | O2   | C A | 9 | -40.075 | -11.795 | 40.268 | 1.00 | 0.00 | O |
| ATOM | 256 | N3   | C A | 9 | -38.879 | -12.097 | 38.360 | 1.00 | 0.00 | N |
| ATOM | 257 | C4   | C A | 9 | -38.174 | -11.555 | 37.358 | 1.00 | 0.00 | C |
| ATOM | 258 | N4   | C A | 9 | -37.670 | -12.360 | 36.434 | 1.00 | 0.00 | N |
| ATOM | 259 | C5   | C A | 9 | -37.962 | -10.139 | 37.273 | 1.00 | 0.00 | C |
| ATOM | 260 | C6   | C A | 9 | -38.521 | -9.377  | 38.259 | 1.00 | 0.00 | C |
| ATOM | 261 | C2'  | C A | 9 | -38.970 | -7.934  | 40.774 | 1.00 | 0.00 | C |
| ATOM | 262 | C3'  | C A | 9 | -40.009 | -6.863  | 41.071 | 1.00 | 0.00 | C |
| ATOM | 263 | O3'  | C A | 9 | -40.487 | -7.034  | 42.404 | 1.00 | 0.00 | O |
| ATOM | 264 | C4'  | C A | 9 | -41.090 | -7.141  | 40.030 | 1.00 | 0.00 | C |
| ATOM | 265 | O4'  | C A | 9 | -41.062 | -8.593  | 39.856 | 1.00 | 0.00 | O |
| ATOM | 266 | C5'  | C A | 9 | -40.904 | -6.490  | 38.679 | 1.00 | 0.00 | C |
| ATOM | 267 | O5'  | C A | 9 | -39.495 | -6.468  | 38.336 | 1.00 | 0.00 | O |
| ATOM | 268 | O1P  | C A | 9 | -38.934 | -4.015  | 38.326 | 1.00 | 0.00 | O |
| ATOM | 269 | O2P  | C A | 9 | -37.623 | -5.607  | 36.897 | 1.00 | 0.00 | O |
| ATOM | 270 | P    | C A | 9 | -38.928 | -5.236  | 37.497 | 1.00 | 0.00 | P |
| ATOM | 271 | H5   | C A | 9 | -37.384 | -9.694  | 36.462 | 1.00 | 0.00 | H |
| ATOM | 272 | H6   | C A | 9 | -38.395 | -8.294  | 38.233 | 1.00 | 0.00 | H |
| ATOM | 273 | H1'  | C A | 9 | -40.063 | -9.757  | 41.193 | 1.00 | 0.00 | H |
| ATOM | 274 | H3'  | C A | 9 | -39.602 | -5.859  | 40.960 | 1.00 | 0.00 | H |

|      |     |      |   |   |    |         |         |        |      |      |   |
|------|-----|------|---|---|----|---------|---------|--------|------|------|---|
| ATOM | 275 | H4'  | C | A | 9  | -42.031 | -6.780  | 40.446 | 1.00 | 0.00 | H |
| ATOM | 276 | H41  | C | A | 9  | -37.126 | -11.969 | 35.651 | 1.00 | 0.00 | H |
| ATOM | 277 | H42  | C | A | 9  | -37.821 | -13.377 | 36.499 | 1.00 | 0.00 | H |
| ATOM | 278 | H2'1 | C | A | 9  | -38.288 | -7.615  | 39.987 | 1.00 | 0.00 | H |
| ATOM | 279 | H2'2 | C | A | 9  | -38.370 | -8.162  | 41.656 | 1.00 | 0.00 | H |
| ATOM | 280 | H5'1 | C | A | 9  | -41.457 | -7.054  | 37.929 | 1.00 | 0.00 | H |
| ATOM | 281 | H5'2 | C | A | 9  | -41.289 | -5.471  | 38.717 | 1.00 | 0.00 | H |
| ATOM | 282 | C1'  | C | A | 10 | -38.805 | -12.172 | 44.099 | 1.00 | 0.00 | C |
| ATOM | 283 | N1   | C | A | 10 | -37.934 | -12.135 | 42.892 | 1.00 | 0.00 | N |
| ATOM | 284 | C2   | C | A | 10 | -37.644 | -13.342 | 42.260 | 1.00 | 0.00 | C |
| ATOM | 285 | O2   | C | A | 10 | -38.116 | -14.389 | 42.723 | 1.00 | 0.00 | O |
| ATOM | 286 | N3   | C | A | 10 | -36.853 | -13.331 | 41.159 | 1.00 | 0.00 | N |
| ATOM | 287 | C4   | C | A | 10 | -36.354 | -12.183 | 40.681 | 1.00 | 0.00 | C |
| ATOM | 288 | N4   | C | A | 10 | -35.589 | -12.229 | 39.600 | 1.00 | 0.00 | N |
| ATOM | 289 | C5   | C | A | 10 | -36.633 | -10.927 | 41.313 | 1.00 | 0.00 | C |
| ATOM | 290 | C6   | C | A | 10 | -37.436 | -10.962 | 42.418 | 1.00 | 0.00 | C |
| ATOM | 291 | C2'  | C | A | 10 | -38.394 | -11.184 | 45.182 | 1.00 | 0.00 | C |
| ATOM | 292 | C3'  | C | A | 10 | -39.740 | -10.757 | 45.747 | 1.00 | 0.00 | C |
| ATOM | 293 | O3'  | C | A | 10 | -40.158 | -11.706 | 46.727 | 1.00 | 0.00 | O |
| ATOM | 294 | C4'  | C | A | 10 | -40.643 | -10.763 | 44.517 | 1.00 | 0.00 | C |
| ATOM | 295 | O4'  | C | A | 10 | -40.121 | -11.850 | 43.689 | 1.00 | 0.00 | O |
| ATOM | 296 | C5'  | C | A | 10 | -40.663 | -9.496  | 43.693 | 1.00 | 0.00 | C |
| ATOM | 297 | O5'  | C | A | 10 | -39.338 | -8.906  | 43.669 | 1.00 | 0.00 | O |
| ATOM | 298 | O1P  | C | A | 10 | -39.642 | -6.743  | 44.920 | 1.00 | 0.00 | O |
| ATOM | 299 | O2P  | C | A | 10 | -37.842 | -6.947  | 43.184 | 1.00 | 0.00 | O |
| ATOM | 300 | P    | C | A | 10 | -39.206 | -7.317  | 43.632 | 1.00 | 0.00 | P |
| ATOM | 301 | H5   | C | A | 10 | -36.224 | -9.990  | 40.932 | 1.00 | 0.00 | H |
| ATOM | 302 | H6   | C | A | 10 | -37.683 | -10.031 | 42.928 | 1.00 | 0.00 | H |
| ATOM | 303 | H1'  | C | A | 10 | -38.813 | -13.192 | 44.482 | 1.00 | 0.00 | H |
| ATOM | 304 | H3'  | C | A | 10 | -39.696 | -9.767  | 46.201 | 1.00 | 0.00 | H |
| ATOM | 305 | H4'  | C | A | 10 | -41.658 | -10.944 | 44.870 | 1.00 | 0.00 | H |
| ATOM | 306 | H41  | C | A | 10 | -35.195 | -11.360 | 39.211 | 1.00 | 0.00 | H |
| ATOM | 307 | H42  | C | A | 10 | -35.388 | -13.133 | 39.150 | 1.00 | 0.00 | H |
| ATOM | 308 | H2'1 | C | A | 10 | -37.846 | -10.333 | 44.780 | 1.00 | 0.00 | H |
| ATOM | 309 | H2'2 | C | A | 10 | -37.769 | -11.647 | 45.948 | 1.00 | 0.00 | H |
| ATOM | 310 | H5'1 | C | A | 10 | -40.978 | -9.734  | 42.676 | 1.00 | 0.00 | H |
| ATOM | 311 | H5'2 | C | A | 10 | -41.371 | -8.795  | 44.132 | 1.00 | 0.00 | H |
| ATOM | 312 | C1'  | T | A | 11 | -36.879 | -16.266 | 46.106 | 1.00 | 0.00 | C |
| ATOM | 313 | N1   | T | A | 11 | -36.043 | -15.399 | 45.234 | 1.00 | 0.00 | N |
| ATOM | 314 | C2   | T | A | 11 | -35.368 | -16.011 | 44.198 | 1.00 | 0.00 | C |
| ATOM | 315 | O2   | T | A | 11 | -35.435 | -17.209 | 43.982 | 1.00 | 0.00 | O |
| ATOM | 316 | N3   | T | A | 11 | -34.604 | -15.168 | 43.412 | 1.00 | 0.00 | N |
| ATOM | 317 | C4   | T | A | 11 | -34.458 | -13.805 | 43.571 | 1.00 | 0.00 | C |
| ATOM | 318 | O4   | T | A | 11 | -33.740 | -13.152 | 42.803 | 1.00 | 0.00 | O |
| ATOM | 319 | C5   | T | A | 11 | -35.201 | -13.256 | 44.681 | 1.00 | 0.00 | C |
| ATOM | 320 | C6   | T | A | 11 | -35.956 | -14.048 | 45.466 | 1.00 | 0.00 | C |
| ATOM | 321 | C7   | T | A | 11 | -35.073 | -11.776 | 44.889 | 1.00 | 0.00 | C |
| ATOM | 322 | C2'  | T | A | 11 | -36.845 | -15.874 | 47.578 | 1.00 | 0.00 | C |
| ATOM | 323 | C3'  | T | A | 11 | -38.268 | -16.176 | 48.021 | 1.00 | 0.00 | C |
| ATOM | 324 | O3'  | T | A | 11 | -38.371 | -17.557 | 48.360 | 1.00 | 0.00 | O |
| ATOM | 325 | C4'  | T | A | 11 | -39.090 | -15.822 | 46.784 | 1.00 | 0.00 | C |
| ATOM | 326 | O4'  | T | A | 11 | -38.218 | -16.165 | 45.660 | 1.00 | 0.00 | O |
| ATOM | 327 | C5'  | T | A | 11 | -39.510 | -14.377 | 46.646 | 1.00 | 0.00 | C |
| ATOM | 328 | O5'  | T | A | 11 | -38.456 | -13.512 | 47.139 | 1.00 | 0.00 | O |

|      |     |      |     |    |         |         |        |      |      |   |
|------|-----|------|-----|----|---------|---------|--------|------|------|---|
| ATOM | 329 | O1P  | T A | 11 | -39.487 | -12.433 | 49.165 | 1.00 | 0.00 | O |
| ATOM | 330 | O2P  | T A | 11 | -37.683 | -11.243 | 47.891 | 1.00 | 0.00 | O |
| ATOM | 331 | P    | T A | 11 | -38.857 | -12.149 | 47.861 | 1.00 | 0.00 | P |
| ATOM | 332 | H3   | T A | 11 | -34.094 | -15.599 | 42.629 | 1.00 | 0.00 | H |
| ATOM | 333 | H6   | T A | 11 | -36.509 | -13.610 | 46.298 | 1.00 | 0.00 | H |
| ATOM | 334 | H1'  | T A | 11 | -36.558 | -17.299 | 45.970 | 1.00 | 0.00 | H |
| ATOM | 335 | H3'  | T A | 11 | -38.564 | -15.572 | 48.877 | 1.00 | 0.00 | H |
| ATOM | 336 | H4'  | T A | 11 | -39.996 | -16.430 | 46.821 | 1.00 | 0.00 | H |
| ATOM | 337 | H71  | T A | 11 | -34.568 | -11.585 | 45.836 | 1.00 | 0.00 | H |
| ATOM | 338 | H72  | T A | 11 | -34.492 | -11.343 | 44.074 | 1.00 | 0.00 | H |
| ATOM | 339 | H73  | T A | 11 | -36.064 | -11.323 | 44.909 | 1.00 | 0.00 | H |
| ATOM | 340 | H2'1 | T A | 11 | -36.600 | -14.823 | 47.719 | 1.00 | 0.00 | H |
| ATOM | 341 | H2'2 | T A | 11 | -36.119 | -16.459 | 48.145 | 1.00 | 0.00 | H |
| ATOM | 342 | H5'1 | T A | 11 | -39.706 | -14.159 | 45.597 | 1.00 | 0.00 | H |
| ATOM | 343 | H5'2 | T A | 11 | -40.420 | -14.213 | 47.223 | 1.00 | 0.00 | H |
| ATOM | 344 | C1'  | A A | 12 | -33.707 | -20.080 | 46.253 | 1.00 | 0.00 | C |
| ATOM | 345 | N1   | A A | 12 | -30.739 | -16.998 | 43.419 | 1.00 | 0.00 | N |
| ATOM | 346 | C2   | A A | 12 | -31.018 | -18.295 | 43.343 | 1.00 | 0.00 | C |
| ATOM | 347 | N3   | A A | 12 | -31.799 | -19.030 | 44.108 | 1.00 | 0.00 | N |
| ATOM | 348 | C4   | A A | 12 | -32.341 | -18.275 | 45.080 | 1.00 | 0.00 | C |
| ATOM | 349 | C5   | A A | 12 | -32.156 | -16.939 | 45.297 | 1.00 | 0.00 | C |
| ATOM | 350 | C6   | A A | 12 | -31.296 | -16.271 | 44.400 | 1.00 | 0.00 | C |
| ATOM | 351 | N6   | A A | 12 | -31.020 | -14.958 | 44.488 | 1.00 | 0.00 | N |
| ATOM | 352 | N7   | A A | 12 | -32.879 | -16.506 | 46.393 | 1.00 | 0.00 | N |
| ATOM | 353 | C8   | A A | 12 | -33.478 | -17.580 | 46.817 | 1.00 | 0.00 | C |
| ATOM | 354 | N9   | A A | 12 | -33.200 | -18.694 | 46.066 | 1.00 | 0.00 | N |
| ATOM | 355 | C2'  | A A | 12 | -33.837 | -20.493 | 47.713 | 1.00 | 0.00 | C |
| ATOM | 356 | C3'  | A A | 12 | -35.080 | -21.369 | 47.685 | 1.00 | 0.00 | C |
| ATOM | 357 | O3'  | A A | 12 | -34.709 | -22.694 | 47.309 | 1.00 | 0.00 | O |
| ATOM | 358 | C4'  | A A | 12 | -35.950 | -20.692 | 46.627 | 1.00 | 0.00 | C |
| ATOM | 359 | O4'  | A A | 12 | -34.990 | -20.153 | 45.662 | 1.00 | 0.00 | O |
| ATOM | 360 | C5'  | A A | 12 | -36.836 | -19.568 | 47.108 | 1.00 | 0.00 | C |
| ATOM | 361 | O5'  | A A | 12 | -36.152 | -18.809 | 48.137 | 1.00 | 0.00 | O |
| ATOM | 362 | O1P  | A A | 12 | -37.530 | -19.250 | 50.197 | 1.00 | 0.00 | O |
| ATOM | 363 | O2P  | A A | 12 | -36.217 | -17.121 | 49.997 | 1.00 | 0.00 | O |
| ATOM | 364 | P    | A A | 12 | -37.010 | -18.179 | 49.324 | 1.00 | 0.00 | P |
| ATOM | 365 | H2   | A A | 12 | -30.532 | -18.829 | 42.527 | 1.00 | 0.00 | H |
| ATOM | 366 | H8   | A A | 12 | -34.138 | -17.595 | 47.685 | 1.00 | 0.00 | H |
| ATOM | 367 | H1'  | A A | 12 | -33.049 | -20.759 | 45.712 | 1.00 | 0.00 | H |
| ATOM | 368 | H3'  | A A | 12 | -35.584 | -21.396 | 48.650 | 1.00 | 0.00 | H |
| ATOM | 369 | H4'  | A A | 12 | -36.592 | -21.465 | 46.204 | 1.00 | 0.00 | H |
| ATOM | 370 | H61  | A A | 12 | -30.388 | -14.518 | 43.806 | 1.00 | 0.00 | H |
| ATOM | 371 | H62  | A A | 12 | -31.443 | -14.393 | 45.240 | 1.00 | 0.00 | H |
| ATOM | 372 | H2'1 | A A | 12 | -33.970 | -19.639 | 48.375 | 1.00 | 0.00 | H |
| ATOM | 373 | H2'2 | A A | 12 | -32.968 | -21.048 | 48.064 | 1.00 | 0.00 | H |
| ATOM | 374 | H5'1 | A A | 12 | -37.073 | -18.916 | 46.267 | 1.00 | 0.00 | H |
| ATOM | 375 | H5'2 | A A | 12 | -37.758 | -19.985 | 47.509 | 1.00 | 0.00 | H |
| ATOM | 376 | C1'  | G A | 13 | -29.422 | -22.342 | 45.172 | 1.00 | 0.00 | C |
| ATOM | 377 | N1   | G A | 13 | -27.645 | -17.578 | 44.757 | 1.00 | 0.00 | N |
| ATOM | 378 | C2   | G A | 13 | -27.418 | -18.683 | 43.956 | 1.00 | 0.00 | C |
| ATOM | 379 | N2   | G A | 13 | -26.606 | -18.496 | 42.906 | 1.00 | 0.00 | N |
| ATOM | 380 | N3   | G A | 13 | -27.955 | -19.880 | 44.185 | 1.00 | 0.00 | N |
| ATOM | 381 | C4   | G A | 13 | -28.742 | -19.890 | 45.292 | 1.00 | 0.00 | C |
| ATOM | 382 | C5   | G A | 13 | -29.023 | -18.840 | 46.151 | 1.00 | 0.00 | C |

|      |     |      |     |    |         |         |        |      |      |   |
|------|-----|------|-----|----|---------|---------|--------|------|------|---|
| ATOM | 383 | C6   | G A | 13 | -28.456 | -17.568 | 45.907 | 1.00 | 0.00 | C |
| ATOM | 384 | O6   | G A | 13 | -28.585 | -16.525 | 46.549 | 1.00 | 0.00 | O |
| ATOM | 385 | N7   | G A | 13 | -29.876 | -19.266 | 47.171 | 1.00 | 0.00 | N |
| ATOM | 386 | C8   | G A | 13 | -30.083 | -20.529 | 46.904 | 1.00 | 0.00 | C |
| ATOM | 387 | N9   | G A | 13 | -29.427 | -20.982 | 45.778 | 1.00 | 0.00 | N |
| ATOM | 388 | C2'  | G A | 13 | -29.424 | -23.470 | 46.195 | 1.00 | 0.00 | C |
| ATOM | 389 | C3'  | G A | 13 | -30.283 | -24.519 | 45.510 | 1.00 | 0.00 | C |
| ATOM | 390 | O3'  | G A | 13 | -29.469 | -25.284 | 44.623 | 1.00 | 0.00 | O |
| ATOM | 391 | C4'  | G A | 13 | -31.317 | -23.678 | 44.763 | 1.00 | 0.00 | C |
| ATOM | 392 | O4'  | G A | 13 | -30.589 | -22.467 | 44.383 | 1.00 | 0.00 | O |
| ATOM | 393 | C5'  | G A | 13 | -32.546 | -23.277 | 45.544 | 1.00 | 0.00 | C |
| ATOM | 394 | O5'  | G A | 13 | -32.185 | -23.004 | 46.921 | 1.00 | 0.00 | O |
| ATOM | 395 | O1P  | G A | 13 | -33.358 | -24.824 | 48.204 | 1.00 | 0.00 | O |
| ATOM | 396 | O2P  | G A | 13 | -32.865 | -22.628 | 49.311 | 1.00 | 0.00 | O |
| ATOM | 397 | P    | G A | 13 | -33.229 | -23.361 | 48.073 | 1.00 | 0.00 | P |
| ATOM | 398 | H1   | G A | 13 | -27.186 | -16.694 | 44.489 | 1.00 | 0.00 | H |
| ATOM | 399 | H8   | G A | 13 | -30.717 | -21.170 | 47.517 | 1.00 | 0.00 | H |
| ATOM | 400 | H1'  | G A | 13 | -28.559 | -22.417 | 44.510 | 1.00 | 0.00 | H |
| ATOM | 401 | H21  | G A | 13 | -26.197 | -17.565 | 42.735 | 1.00 | 0.00 | H |
| ATOM | 402 | H3'  | G A | 13 | -30.762 | -25.187 | 46.226 | 1.00 | 0.00 | H |
| ATOM | 403 | H22  | G A | 13 | -26.395 | -19.279 | 42.275 | 1.00 | 0.00 | H |
| ATOM | 404 | H4'  | G A | 13 | -31.643 | -24.265 | 43.906 | 1.00 | 0.00 | H |
| ATOM | 405 | H2'1 | G A | 13 | -29.857 | -23.163 | 47.147 | 1.00 | 0.00 | H |
| ATOM | 406 | H2'2 | G A | 13 | -28.421 | -23.847 | 46.398 | 1.00 | 0.00 | H |
| ATOM | 407 | H5'1 | G A | 13 | -32.982 | -22.387 | 45.093 | 1.00 | 0.00 | H |
| ATOM | 408 | H5'2 | G A | 13 | -33.273 | -24.089 | 45.507 | 1.00 | 0.00 | H |
| ATOM | 409 | C1'  | G A | 14 | -24.615 | -22.445 | 43.984 | 1.00 | 0.00 | C |
| ATOM | 410 | N1   | G A | 14 | -24.550 | -17.849 | 46.198 | 1.00 | 0.00 | N |
| ATOM | 411 | C2   | G A | 14 | -23.947 | -18.281 | 45.031 | 1.00 | 0.00 | C |
| ATOM | 412 | N2   | G A | 14 | -23.228 | -17.368 | 44.366 | 1.00 | 0.00 | N |
| ATOM | 413 | N3   | G A | 14 | -24.051 | -19.525 | 44.564 | 1.00 | 0.00 | N |
| ATOM | 414 | C4   | G A | 14 | -24.809 | -20.315 | 45.368 | 1.00 | 0.00 | C |
| ATOM | 415 | C5   | G A | 14 | -25.445 | -19.973 | 46.550 | 1.00 | 0.00 | C |
| ATOM | 416 | C6   | G A | 14 | -25.338 | -18.654 | 47.044 | 1.00 | 0.00 | C |
| ATOM | 417 | O6   | G A | 14 | -25.825 | -18.163 | 48.063 | 1.00 | 0.00 | O |
| ATOM | 418 | N7   | G A | 14 | -26.122 | -21.079 | 47.070 | 1.00 | 0.00 | N |
| ATOM | 419 | C8   | G A | 14 | -25.884 | -22.032 | 46.206 | 1.00 | 0.00 | C |
| ATOM | 420 | N9   | G A | 14 | -25.092 | -21.645 | 45.145 | 1.00 | 0.00 | N |
| ATOM | 421 | C2'  | G A | 14 | -24.255 | -23.882 | 44.337 | 1.00 | 0.00 | C |
| ATOM | 422 | C3'  | G A | 14 | -24.694 | -24.634 | 43.091 | 1.00 | 0.00 | C |
| ATOM | 423 | O3'  | G A | 14 | -23.653 | -24.579 | 42.118 | 1.00 | 0.00 | O |
| ATOM | 424 | C4'  | G A | 14 | -25.937 | -23.863 | 42.649 | 1.00 | 0.00 | C |
| ATOM | 425 | O4'  | G A | 14 | -25.656 | -22.478 | 43.027 | 1.00 | 0.00 | O |
| ATOM | 426 | C5'  | G A | 14 | -27.244 | -24.280 | 43.282 | 1.00 | 0.00 | C |
| ATOM | 427 | O5'  | G A | 14 | -27.023 | -24.652 | 44.665 | 1.00 | 0.00 | O |
| ATOM | 428 | O1P  | G A | 14 | -27.534 | -27.116 | 44.696 | 1.00 | 0.00 | O |
| ATOM | 429 | O2P  | G A | 14 | -27.836 | -25.746 | 46.776 | 1.00 | 0.00 | O |
| ATOM | 430 | P    | G A | 14 | -27.906 | -25.820 | 45.296 | 1.00 | 0.00 | P |
| ATOM | 431 | H1   | G A | 14 | -24.412 | -16.864 | 46.469 | 1.00 | 0.00 | H |
| ATOM | 432 | H8   | G A | 14 | -26.275 | -23.043 | 46.316 | 1.00 | 0.00 | H |
| ATOM | 433 | H1'  | G A | 14 | -23.765 | -21.927 | 43.539 | 1.00 | 0.00 | H |
| ATOM | 434 | H21  | G A | 14 | -23.154 | -16.407 | 44.731 | 1.00 | 0.00 | H |
| ATOM | 435 | H3'  | G A | 14 | -24.932 | -25.676 | 43.305 | 1.00 | 0.00 | H |
| ATOM | 436 | H22  | G A | 14 | -22.751 | -17.626 | 43.491 | 1.00 | 0.00 | H |



|      |     |      |   |   |    |         |         |        |      |      |   |
|------|-----|------|---|---|----|---------|---------|--------|------|------|---|
| ATOM | 437 | H4'  | G | A | 14 | -26.029 | -24.000 | 41.573 | 1.00 | 0.00 | H |
| ATOM | 438 | H2'1 | G | A | 14 | -24.784 | -24.236 | 45.221 | 1.00 | 0.00 | H |
| ATOM | 439 | H2'2 | G | A | 14 | -23.187 | -24.007 | 44.521 | 1.00 | 0.00 | H |
| ATOM | 440 | H5'1 | G | A | 14 | -27.948 | -23.449 | 43.230 | 1.00 | 0.00 | H |
| ATOM | 441 | H5'2 | G | A | 14 | -27.652 | -25.129 | 42.733 | 1.00 | 0.00 | H |
| ATOM | 442 | C1'  | A | A | 15 | -20.032 | -20.585 | 43.794 | 1.00 | 0.00 | C |
| ATOM | 443 | N1   | A | A | 15 | -21.567 | -17.903 | 47.892 | 1.00 | 0.00 | N |
| ATOM | 444 | C2   | A | A | 15 | -20.863 | -17.572 | 46.812 | 1.00 | 0.00 | C |
| ATOM | 445 | N3   | A | A | 15 | -20.504 | -18.315 | 45.787 | 1.00 | 0.00 | N |
| ATOM | 446 | C4   | A | A | 15 | -20.953 | -19.574 | 45.945 | 1.00 | 0.00 | C |
| ATOM | 447 | C5   | A | A | 15 | -21.681 | -20.073 | 46.988 | 1.00 | 0.00 | C |
| ATOM | 448 | C6   | A | A | 15 | -22.001 | -19.166 | 48.020 | 1.00 | 0.00 | C |
| ATOM | 449 | N6   | A | A | 15 | -22.712 | -19.514 | 49.107 | 1.00 | 0.00 | N |
| ATOM | 450 | N7   | A | A | 15 | -21.963 | -21.415 | 46.804 | 1.00 | 0.00 | N |
| ATOM | 451 | C8   | A | A | 15 | -21.400 | -21.698 | 45.666 | 1.00 | 0.00 | C |
| ATOM | 452 | N9   | A | A | 15 | -20.768 | -20.628 | 45.084 | 1.00 | 0.00 | N |
| ATOM | 453 | C2'  | A | A | 15 | -19.225 | -21.844 | 43.504 | 1.00 | 0.00 | C |
| ATOM | 454 | C3'  | A | A | 15 | -19.366 | -21.971 | 41.995 | 1.00 | 0.00 | C |
| ATOM | 455 | O3'  | A | A | 15 | -18.381 | -21.158 | 41.365 | 1.00 | 0.00 | O |
| ATOM | 456 | C4'  | A | A | 15 | -20.784 | -21.463 | 41.742 | 1.00 | 0.00 | C |
| ATOM | 457 | O4'  | A | A | 15 | -20.983 | -20.428 | 42.759 | 1.00 | 0.00 | O |
| ATOM | 458 | C5'  | A | A | 15 | -21.894 | -22.479 | 41.864 | 1.00 | 0.00 | C |
| ATOM | 459 | O5'  | A | A | 15 | -21.593 | -23.407 | 42.938 | 1.00 | 0.00 | O |
| ATOM | 460 | O1P  | A | A | 15 | -21.264 | -25.596 | 41.739 | 1.00 | 0.00 | O |
| ATOM | 461 | O2P  | A | A | 15 | -22.044 | -25.576 | 44.124 | 1.00 | 0.00 | O |
| ATOM | 462 | P    | A | A | 15 | -22.055 | -24.927 | 42.791 | 1.00 | 0.00 | P |
| ATOM | 463 | H2   | A | A | 15 | -20.538 | -16.532 | 46.771 | 1.00 | 0.00 | H |
| ATOM | 464 | H8   | A | A | 15 | -21.426 | -22.691 | 45.217 | 1.00 | 0.00 | H |
| ATOM | 465 | H1'  | A | A | 15 | -19.391 | -19.703 | 43.797 | 1.00 | 0.00 | H |
| ATOM | 466 | H3'  | A | A | 15 | -19.252 | -23.002 | 41.659 | 1.00 | 0.00 | H |
| ATOM | 467 | H4'  | A | A | 15 | -20.802 | -21.070 | 40.726 | 1.00 | 0.00 | H |
| ATOM | 468 | H61  | A | A | 15 | -22.920 | -18.811 | 49.831 | 1.00 | 0.00 | H |
| ATOM | 469 | H62  | A | A | 15 | -23.047 | -20.482 | 49.214 | 1.00 | 0.00 | H |
| ATOM | 470 | H2'1 | A | A | 15 | -19.627 | -22.718 | 44.016 | 1.00 | 0.00 | H |
| ATOM | 471 | H2'2 | A | A | 15 | -18.180 | -21.743 | 43.798 | 1.00 | 0.00 | H |
| ATOM | 472 | H5'1 | A | A | 15 | -22.830 | -21.963 | 42.076 | 1.00 | 0.00 | H |
| ATOM | 473 | H5'2 | A | A | 15 | -21.987 | -23.021 | 40.925 | 1.00 | 0.00 | H |
| ATOM | 474 | C1'  | C | A | 16 | -16.362 | -17.650 | 45.399 | 1.00 | 0.00 | C |
| ATOM | 475 | N1   | C | A | 16 | -17.062 | -18.564 | 46.342 | 1.00 | 0.00 | N |
| ATOM | 476 | C2   | C | A | 16 | -17.560 | -18.024 | 47.525 | 1.00 | 0.00 | C |
| ATOM | 477 | O2   | C | A | 16 | -17.401 | -16.816 | 47.743 | 1.00 | 0.00 | O |
| ATOM | 478 | N3   | C | A | 16 | -18.201 | -18.840 | 48.398 | 1.00 | 0.00 | N |
| ATOM | 479 | C4   | C | A | 16 | -18.356 | -20.143 | 48.133 | 1.00 | 0.00 | C |
| ATOM | 480 | N4   | C | A | 16 | -18.995 | -20.894 | 49.020 | 1.00 | 0.00 | N |
| ATOM | 481 | C5   | C | A | 16 | -17.851 | -20.728 | 46.926 | 1.00 | 0.00 | C |
| ATOM | 482 | C6   | C | A | 16 | -17.212 | -19.887 | 46.059 | 1.00 | 0.00 | C |
| ATOM | 483 | C2'  | C | A | 16 | -15.162 | -18.282 | 44.707 | 1.00 | 0.00 | C |
| ATOM | 484 | C3'  | C | A | 16 | -15.223 | -17.650 | 43.325 | 1.00 | 0.00 | C |
| ATOM | 485 | O3'  | C | A | 16 | -14.571 | -16.383 | 43.361 | 1.00 | 0.00 | O |
| ATOM | 486 | C4'  | C | A | 16 | -16.724 | -17.522 | 43.076 | 1.00 | 0.00 | C |
| ATOM | 487 | O4'  | C | A | 16 | -17.290 | -17.268 | 44.401 | 1.00 | 0.00 | O |
| ATOM | 488 | C5'  | C | A | 16 | -17.411 | -18.730 | 42.481 | 1.00 | 0.00 | C |
| ATOM | 489 | O5'  | C | A | 16 | -16.823 | -19.942 | 43.017 | 1.00 | 0.00 | O |
| ATOM | 490 | O1P  | C | A | 16 | -15.730 | -20.997 | 41.011 | 1.00 | 0.00 | O |

|      |     |      |   |   |    |         |         |        |      |      |   |
|------|-----|------|---|---|----|---------|---------|--------|------|------|---|
| ATOM | 491 | O2P  | C | A | 16 | -16.510 | -22.433 | 42.915 | 1.00 | 0.00 | O |
| ATOM | 492 | P    | C | A | 16 | -16.723 | -21.226 | 42.078 | 1.00 | 0.00 | P |
| ATOM | 493 | H5   | C | A | 16 | -17.969 | -21.791 | 46.710 | 1.00 | 0.00 | H |
| ATOM | 494 | H6   | C | A | 16 | -16.818 | -20.283 | 45.123 | 1.00 | 0.00 | H |
| ATOM | 495 | H1'  | C | A | 16 | -16.070 | -16.753 | 45.946 | 1.00 | 0.00 | H |
| ATOM | 496 | H3'  | C | A | 16 | -14.750 | -18.279 | 42.569 | 1.00 | 0.00 | H |
| ATOM | 497 | H4'  | C | A | 16 | -16.860 | -16.690 | 42.386 | 1.00 | 0.00 | H |
| ATOM | 498 | H41  | C | A | 16 | -19.130 | -21.900 | 48.841 | 1.00 | 0.00 | H |
| ATOM | 499 | H42  | C | A | 16 | -19.355 | -20.473 | 49.889 | 1.00 | 0.00 | H |
| ATOM | 500 | H2'1 | C | A | 16 | -15.241 | -19.368 | 44.650 | 1.00 | 0.00 | H |
| ATOM | 501 | H2'2 | C | A | 16 | -14.223 | -18.048 | 45.211 | 1.00 | 0.00 | H |
| ATOM | 502 | H5'1 | C | A | 16 | -18.472 | -18.693 | 42.726 | 1.00 | 0.00 | H |
| ATOM | 503 | H5'2 | C | A | 16 | -17.292 | -18.711 | 41.398 | 1.00 | 0.00 | H |
| ATOM | 504 | C1'  | G | A | 17 | -13.924 | -15.037 | 48.827 | 1.00 | 0.00 | C |
| ATOM | 505 | N1   | G | A | 17 | -16.170 | -18.269 | 52.073 | 1.00 | 0.00 | N |
| ATOM | 506 | C2   | G | A | 17 | -15.989 | -16.900 | 52.165 | 1.00 | 0.00 | C |
| ATOM | 507 | N2   | G | A | 17 | -16.468 | -16.316 | 53.270 | 1.00 | 0.00 | N |
| ATOM | 508 | N3   | G | A | 17 | -15.379 | -16.174 | 51.230 | 1.00 | 0.00 | N |
| ATOM | 509 | C4   | G | A | 17 | -14.951 | -16.931 | 50.185 | 1.00 | 0.00 | C |
| ATOM | 510 | C5   | G | A | 17 | -15.083 | -18.298 | 50.009 | 1.00 | 0.00 | C |
| ATOM | 511 | C6   | G | A | 17 | -15.734 | -19.070 | 50.999 | 1.00 | 0.00 | C |
| ATOM | 512 | O6   | G | A | 17 | -15.946 | -20.283 | 51.025 | 1.00 | 0.00 | O |
| ATOM | 513 | N7   | G | A | 17 | -14.506 | -18.688 | 48.799 | 1.00 | 0.00 | N |
| ATOM | 514 | C8   | G | A | 17 | -14.056 | -17.569 | 48.290 | 1.00 | 0.00 | C |
| ATOM | 515 | N9   | G | A | 17 | -14.288 | -16.458 | 49.074 | 1.00 | 0.00 | N |
| ATOM | 516 | C2'  | G | A | 17 | -12.570 | -14.858 | 48.154 | 1.00 | 0.00 | C |
| ATOM | 517 | C3'  | G | A | 17 | -12.817 | -13.659 | 47.254 | 1.00 | 0.00 | C |
| ATOM | 518 | O3'  | G | A | 17 | -12.636 | -12.462 | 48.007 | 1.00 | 0.00 | O |
| ATOM | 519 | C4'  | G | A | 17 | -14.270 | -13.854 | 46.821 | 1.00 | 0.00 | C |
| ATOM | 520 | O4'  | G | A | 17 | -14.909 | -14.481 | 47.977 | 1.00 | 0.00 | O |
| ATOM | 521 | C5'  | G | A | 17 | -14.497 | -14.726 | 45.609 | 1.00 | 0.00 | C |
| ATOM | 522 | O5'  | G | A | 17 | -13.544 | -15.818 | 45.605 | 1.00 | 0.00 | O |
| ATOM | 523 | O1P  | G | A | 17 | -12.125 | -15.342 | 43.581 | 1.00 | 0.00 | O |
| ATOM | 524 | O2P  | G | A | 17 | -12.404 | -17.700 | 44.393 | 1.00 | 0.00 | O |
| ATOM | 525 | P    | G | A | 17 | -12.999 | -16.355 | 44.206 | 1.00 | 0.00 | P |
| ATOM | 526 | H1   | G | A | 17 | -16.661 | -18.737 | 52.849 | 1.00 | 0.00 | H |
| ATOM | 527 | H8   | G | A | 17 | -13.542 | -17.520 | 47.329 | 1.00 | 0.00 | H |
| ATOM | 528 | H1'  | G | A | 17 | -13.961 | -14.505 | 49.777 | 1.00 | 0.00 | H |
| ATOM | 529 | H21  | G | A | 17 | -16.941 | -16.883 | 53.988 | 1.00 | 0.00 | H |
| ATOM | 530 | H3'  | G | A | 17 | -12.149 | -13.649 | 46.393 | 1.00 | 0.00 | H |
| ATOM | 531 | H22  | G | A | 17 | -16.363 | -15.299 | 53.401 | 1.00 | 0.00 | H |
| ATOM | 532 | H4'  | G | A | 17 | -14.669 | -12.865 | 46.599 | 1.00 | 0.00 | H |
| ATOM | 533 | H2'1 | G | A | 17 | -12.277 | -15.735 | 47.576 | 1.00 | 0.00 | H |
| ATOM | 534 | H2'2 | G | A | 17 | -11.774 | -14.658 | 48.873 | 1.00 | 0.00 | H |
| ATOM | 535 | H5'1 | G | A | 17 | -15.512 | -15.123 | 45.640 | 1.00 | 0.00 | H |
| ATOM | 536 | H5'2 | G | A | 17 | -14.375 | -14.125 | 44.708 | 1.00 | 0.00 | H |
| ATOM | 537 | C1'  | G | A | 18 | -12.582 | -13.950 | 53.468 | 1.00 | 0.00 | C |
| ATOM | 538 | N1   | G | A | 18 | -13.661 | -18.861 | 54.328 | 1.00 | 0.00 | N |
| ATOM | 539 | C2   | G | A | 18 | -13.957 | -17.741 | 55.085 | 1.00 | 0.00 | C |
| ATOM | 540 | N2   | G | A | 18 | -14.627 | -17.959 | 56.225 | 1.00 | 0.00 | N |
| ATOM | 541 | N3   | G | A | 18 | -13.612 | -16.505 | 54.734 | 1.00 | 0.00 | N |
| ATOM | 542 | C4   | G | A | 18 | -12.933 | -16.471 | 53.558 | 1.00 | 0.00 | C |
| ATOM | 543 | C5   | G | A | 18 | -12.590 | -17.534 | 52.738 | 1.00 | 0.00 | C |
| ATOM | 544 | C6   | G | A | 18 | -12.960 | -18.848 | 53.108 | 1.00 | 0.00 | C |

|      |     |      |     |    |         |         |        |      |      |   |
|------|-----|------|-----|----|---------|---------|--------|------|------|---|
| ATOM | 545 | O6   | G A | 18 | -12.748 | -19.909 | 52.519 | 1.00 | 0.00 | O |
| ATOM | 546 | N7   | G A | 18 | -11.892 | -17.076 | 51.620 | 1.00 | 0.00 | N |
| ATOM | 547 | C8   | G A | 18 | -11.838 | -15.780 | 51.789 | 1.00 | 0.00 | C |
| ATOM | 548 | N9   | G A | 18 | -12.447 | -15.337 | 52.945 | 1.00 | 0.00 | N |
| ATOM | 549 | C2'  | G A | 18 | -11.356 | -13.081 | 53.226 | 1.00 | 0.00 | C |
| ATOM | 550 | C3'  | G A | 18 | -11.978 | -11.719 | 52.967 | 1.00 | 0.00 | C |
| ATOM | 551 | O3'  | G A | 18 | -12.227 | -11.073 | 54.213 | 1.00 | 0.00 | O |
| ATOM | 552 | C4'  | G A | 18 | -13.271 | -12.069 | 52.231 | 1.00 | 0.00 | C |
| ATOM | 553 | O4'  | G A | 18 | -13.681 | -13.347 | 52.813 | 1.00 | 0.00 | O |
| ATOM | 554 | C5'  | G A | 18 | -13.166 | -12.232 | 50.733 | 1.00 | 0.00 | C |
| ATOM | 555 | O5'  | G A | 18 | -11.899 | -12.849 | 50.393 | 1.00 | 0.00 | O |
| ATOM | 556 | O1P  | G A | 18 | -10.686 | -11.037 | 49.136 | 1.00 | 0.00 | O |
| ATOM | 557 | O2P  | G A | 18 | -10.165 | -13.447 | 48.676 | 1.00 | 0.00 | O |
| ATOM | 558 | P    | G A | 18 | -11.177 | -12.424 | 49.035 | 1.00 | 0.00 | P |
| ATOM | 559 | H1   | G A | 18 | -13.980 | -19.775 | 54.686 | 1.00 | 0.00 | H |
| ATOM | 560 | H8   | G A | 18 | -11.353 | -15.108 | 51.082 | 1.00 | 0.00 | H |
| ATOM | 561 | H1'  | G A | 18 | -12.816 | -14.008 | 54.532 | 1.00 | 0.00 | H |
| ATOM | 562 | H21  | G A | 18 | -14.894 | -18.920 | 56.488 | 1.00 | 0.00 | H |
| ATOM | 563 | H3'  | G A | 18 | -11.336 | -11.085 | 52.354 | 1.00 | 0.00 | H |
| ATOM | 564 | H22  | G A | 18 | -14.874 | -17.168 | 56.834 | 1.00 | 0.00 | H |
| ATOM | 565 | H4'  | G A | 18 | -13.977 | -11.264 | 52.430 | 1.00 | 0.00 | H |
| ATOM | 566 | H2'1 | G A | 18 | -10.772 | -13.419 | 52.369 | 1.00 | 0.00 | H |
| ATOM | 567 | H2'2 | G A | 18 | -10.689 | -13.056 | 54.088 | 1.00 | 0.00 | H |
| ATOM | 568 | H5'1 | G A | 18 | -13.986 | -12.858 | 50.383 | 1.00 | 0.00 | H |
| ATOM | 569 | H5'2 | G A | 18 | -13.237 | -11.253 | 50.261 | 1.00 | 0.00 | H |
| ATOM | 570 | C1'  | T A | 19 | -11.776 | -15.008 | 58.236 | 1.00 | 0.00 | C |
| ATOM | 571 | N1   | T A | 19 | -11.180 | -15.858 | 57.172 | 1.00 | 0.00 | N |
| ATOM | 572 | C2   | T A | 19 | -11.383 | -17.220 | 57.265 | 1.00 | 0.00 | C |
| ATOM | 573 | O2   | T A | 19 | -12.020 | -17.731 | 58.171 | 1.00 | 0.00 | O |
| ATOM | 574 | N3   | T A | 19 | -10.813 | -17.972 | 56.256 | 1.00 | 0.00 | N |
| ATOM | 575 | C4   | T A | 19 | -10.075 | -17.496 | 55.193 | 1.00 | 0.00 | C |
| ATOM | 576 | O4   | T A | 19 | -9.609  | -18.270 | 54.348 | 1.00 | 0.00 | O |
| ATOM | 577 | C5   | T A | 19 | -9.915  | -16.061 | 55.179 | 1.00 | 0.00 | C |
| ATOM | 578 | C6   | T A | 19 | -10.458 | -15.296 | 56.147 | 1.00 | 0.00 | C |
| ATOM | 579 | C7   | T A | 19 | -9.121  | -15.499 | 54.039 | 1.00 | 0.00 | C |
| ATOM | 580 | C2'  | T A | 19 | -10.899 | -13.831 | 58.646 | 1.00 | 0.00 | C |
| ATOM | 581 | C3'  | T A | 19 | -11.929 | -12.750 | 58.931 | 1.00 | 0.00 | C |
| ATOM | 582 | O3'  | T A | 19 | -12.407 | -12.899 | 60.266 | 1.00 | 0.00 | O |
| ATOM | 583 | C4'  | T A | 19 | -13.014 | -13.034 | 57.895 | 1.00 | 0.00 | C |
| ATOM | 584 | O4'  | T A | 19 | -12.996 | -14.489 | 57.742 | 1.00 | 0.00 | O |
| ATOM | 585 | C5'  | T A | 19 | -12.827 | -12.403 | 56.535 | 1.00 | 0.00 | C |
| ATOM | 586 | O5'  | T A | 19 | -11.419 | -12.396 | 56.188 | 1.00 | 0.00 | O |
| ATOM | 587 | O1P  | T A | 19 | -10.841 | -9.947  | 56.145 | 1.00 | 0.00 | O |
| ATOM | 588 | O2P  | T A | 19 | -9.544  | -11.568 | 54.735 | 1.00 | 0.00 | O |
| ATOM | 589 | P    | T A | 19 | -10.844 | -11.180 | 55.332 | 1.00 | 0.00 | P |
| ATOM | 590 | H3   | T A | 19 | -10.954 | -18.992 | 56.301 | 1.00 | 0.00 | H |
| ATOM | 591 | H6   | T A | 19 | -10.324 | -14.215 | 56.116 | 1.00 | 0.00 | H |
| ATOM | 592 | H1'  | T A | 19 | -12.003 | -15.642 | 59.093 | 1.00 | 0.00 | H |
| ATOM | 593 | H3'  | T A | 19 | -11.516 | -11.750 | 58.804 | 1.00 | 0.00 | H |
| ATOM | 594 | H4'  | T A | 19 | -13.952 | -12.661 | 58.308 | 1.00 | 0.00 | H |
| ATOM | 595 | H71  | T A | 19 | -8.202  | -15.054 | 54.420 | 1.00 | 0.00 | H |
| ATOM | 596 | H72  | T A | 19 | -8.874  | -16.298 | 53.339 | 1.00 | 0.00 | H |
| ATOM | 597 | H73  | T A | 19 | -9.707  | -14.735 | 53.526 | 1.00 | 0.00 | H |
| ATOM | 598 | H2'1 | T A | 19 | -10.216 | -13.530 | 57.852 | 1.00 | 0.00 | H |

|      |     |      |     |   |    |         |         |        |      |      |   |
|------|-----|------|-----|---|----|---------|---------|--------|------|------|---|
| ATOM | 599 | H2'2 | T   | A | 19 | -10.298 | -14.051 | 59.529 | 1.00 | 0.00 | H |
| ATOM | 600 | H5'1 | T   | A | 19 | -13.386 | -12.974 | 55.794 | 1.00 | 0.00 | H |
| ATOM | 601 | H5'2 | T   | A | 19 | -13.204 | -11.382 | 56.560 | 1.00 | 0.00 | H |
| ATOM | 602 | C01  | LNK | A | 20 | -10.968 | -11.754 | 63.503 | 0.00 | 0.00 | C |
| ATOM | 603 | O1   | LNK | A | 20 | -10.907 | -11.901 | 62.082 | 1.00 | 0.00 | O |
| ATOM | 604 | S    | LNK | A | 20 | -8.698  | -10.406 | 66.482 | 0.00 | 0.00 | S |
| ATOM | 605 | C02  | LNK | A | 20 | -9.661  | -11.112 | 64.007 | 0.00 | 0.00 | C |
| ATOM | 606 | C03  | LNK | A | 20 | -9.280  | -11.723 | 65.368 | 0.00 | 0.00 | C |
| ATOM | 607 | O1P  | LNK | A | 20 | -9.958  | -13.776 | 60.696 | 1.00 | 0.00 | O |
| ATOM | 608 | O2P  | LNK | A | 20 | -11.625 | -14.272 | 62.506 | 1.00 | 0.00 | O |
| ATOM | 609 | P    | LNK | A | 20 | -11.153 | -13.344 | 61.448 | 1.00 | 0.00 | P |
| ATOM | 610 | H01  | LNK | A | 20 | -11.094 | -12.732 | 63.966 | 0.00 | 0.00 | H |
| ATOM | 611 | H02  | LNK | A | 20 | -11.811 | -11.115 | 63.767 | 0.00 | 0.00 | H |
| ATOM | 612 | H03  | LNK | A | 20 | -8.487  | -12.457 | 65.228 | 0.00 | 0.00 | H |
| ATOM | 613 | H04  | LNK | A | 20 | -9.803  | -10.036 | 64.117 | 0.00 | 0.00 | H |
| ATOM | 614 | H05  | LNK | A | 20 | -8.863  | -11.300 | 63.288 | 0.00 | 0.00 | H |
| ATOM | 615 | H06  | LNK | A | 20 | -10.153 | -12.209 | 65.805 | 0.00 | 0.00 | H |
| ATOM | 616 | AU   | LNK | A | 20 | -8.435  | -10.686 | 67.050 |      |      |   |
| TER  |     |      |     |   |    |         |         |        |      |      |   |
| ATOM | 618 | C1'  | A   | B | 2  | -12.261 | -25.850 | 57.188 | 1.00 | 0.00 | C |
| ATOM | 619 | N1   | A   | B | 2  | -11.201 | -20.895 | 56.372 | 1.00 | 0.00 | N |
| ATOM | 620 | C2   | A   | B | 2  | -11.888 | -21.521 | 57.322 | 1.00 | 0.00 | C |
| ATOM | 621 | N3   | A   | B | 2  | -12.121 | -22.808 | 57.475 | 1.00 | 0.00 | N |
| ATOM | 622 | C4   | A   | B | 2  | -11.548 | -23.507 | 56.478 | 1.00 | 0.00 | C |
| ATOM | 623 | C5   | A   | B | 2  | -10.815 | -23.017 | 55.434 | 1.00 | 0.00 | C |
| ATOM | 624 | C6   | A   | B | 2  | -10.640 | -21.618 | 55.391 | 1.00 | 0.00 | C |
| ATOM | 625 | N6   | A   | B | 2  | -9.943  | -20.994 | 54.426 | 1.00 | 0.00 | N |
| ATOM | 626 | N7   | A   | B | 2  | -10.383 | -24.038 | 54.605 | 1.00 | 0.00 | N |
| ATOM | 627 | C8   | A   | B | 2  | -10.863 | -25.112 | 55.157 | 1.00 | 0.00 | C |
| ATOM | 628 | N9   | A   | B | 2  | -11.579 | -24.868 | 56.300 | 1.00 | 0.00 | N |
| ATOM | 629 | C2'  | A   | B | 2  | -12.913 | -27.004 | 56.438 | 1.00 | 0.00 | C |
| ATOM | 630 | C3'  | A   | B | 2  | -12.695 | -28.166 | 57.393 | 1.00 | 0.00 | C |
| ATOM | 631 | O3'  | A   | B | 2  | -13.733 | -28.170 | 58.370 | 1.00 | 0.00 | O |
| ATOM | 632 | C4'  | A   | B | 2  | -11.330 | -27.853 | 58.004 | 1.00 | 0.00 | C |
| ATOM | 633 | O4'  | A   | B | 2  | -11.287 | -26.390 | 58.060 | 1.00 | 0.00 | O |
| ATOM | 634 | C5'  | A   | B | 2  | -10.124 | -28.343 | 57.238 | 1.00 | 0.00 | C |
| ATOM | 635 | O5'  | A   | B | 2  | -10.369 | -28.232 | 55.813 | 1.00 | 0.00 | O |
| ATOM | 636 | H2   | A   | B | 2  | -12.322 | -20.878 | 58.085 | 1.00 | 0.00 | H |
| ATOM | 637 | H8   | A   | B | 2  | -10.711 | -26.112 | 54.750 | 1.00 | 0.00 | H |
| ATOM | 638 | H1'  | A   | B | 2  | -12.993 | -25.313 | 57.791 | 1.00 | 0.00 | H |
| ATOM | 639 | H3'  | A   | B | 2  | -12.683 | -29.125 | 56.875 | 1.00 | 0.00 | H |
| ATOM | 640 | H4'  | A   | B | 2  | -11.310 | -28.317 | 58.989 | 1.00 | 0.00 | H |
| ATOM | 641 | H61  | A   | B | 2  | -9.843  | -19.971 | 54.443 | 1.00 | 0.00 | H |
| ATOM | 642 | H62  | A   | B | 2  | -9.510  | -21.544 | 53.668 | 1.00 | 0.00 | H |
| ATOM | 643 | H2'1 | A   | B | 2  | -12.442 | -27.190 | 55.473 | 1.00 | 0.00 | H |
| ATOM | 644 | H2'2 | A   | B | 2  | -13.975 | -26.832 | 56.258 | 1.00 | 0.00 | H |
| ATOM | 645 | H5'1 | A   | B | 2  | -9.258  | -27.739 | 57.511 | 1.00 | 0.00 | H |
| ATOM | 646 | H5'2 | A   | B | 2  | -9.933  | -29.383 | 57.500 | 1.00 | 0.00 | H |
| ATOM | 647 | C1'  | C   | B | 3  | -16.289 | -23.073 | 58.036 | 1.00 | 0.00 | C |
| ATOM | 648 | N1   | C   | B | 3  | -15.537 | -22.942 | 56.758 | 1.00 | 0.00 | N |
| ATOM | 649 | C2   | C   | B | 3  | -15.154 | -21.665 | 56.353 | 1.00 | 0.00 | C |
| ATOM | 650 | O2   | C   | B | 3  | -15.452 | -20.699 | 57.068 | 1.00 | 0.00 | O |
| ATOM | 651 | N3   | C   | B | 3  | -14.470 | -21.524 | 55.193 | 1.00 | 0.00 | N |
| ATOM | 652 | C4   | C   | B | 3  | -14.163 | -22.589 | 54.441 | 1.00 | 0.00 | C |

|      |     |      |     |   |         |         |        |      |      |   |
|------|-----|------|-----|---|---------|---------|--------|------|------|---|
| ATOM | 653 | N4   | C B | 3 | -13.488 | -22.393 | 53.316 | 1.00 | 0.00 | N |
| ATOM | 654 | C5   | C B | 3 | -14.547 | -23.915 | 54.828 | 1.00 | 0.00 | C |
| ATOM | 655 | C6   | C B | 3 | -15.233 | -24.034 | 56.004 | 1.00 | 0.00 | C |
| ATOM | 656 | C2'  | C B | 3 | -17.382 | -24.133 | 57.999 | 1.00 | 0.00 | C |
| ATOM | 657 | C3'  | C B | 3 | -17.328 | -24.693 | 59.412 | 1.00 | 0.00 | C |
| ATOM | 658 | O3'  | C B | 3 | -18.112 | -23.869 | 60.272 | 1.00 | 0.00 | O |
| ATOM | 659 | C4'  | C B | 3 | -15.840 | -24.625 | 59.747 | 1.00 | 0.00 | C |
| ATOM | 660 | O4'  | C B | 3 | -15.364 | -23.434 | 59.043 | 1.00 | 0.00 | O |
| ATOM | 661 | C5'  | C B | 3 | -15.001 | -25.807 | 59.319 | 1.00 | 0.00 | C |
| ATOM | 662 | O5'  | C B | 3 | -15.478 | -26.310 | 58.046 | 1.00 | 0.00 | O |
| ATOM | 663 | O1P  | C B | 3 | -16.361 | -28.597 | 58.617 | 1.00 | 0.00 | O |
| ATOM | 664 | O2P  | C B | 3 | -15.516 | -28.120 | 56.303 | 1.00 | 0.00 | O |
| ATOM | 665 | P    | C B | 3 | -15.397 | -27.876 | 57.761 | 1.00 | 0.00 | P |
| ATOM | 666 | H5   | C B | 3 | -14.307 | -24.784 | 54.216 | 1.00 | 0.00 | H |
| ATOM | 667 | H6   | C B | 3 | -15.541 | -25.022 | 56.344 | 1.00 | 0.00 | H |
| ATOM | 668 | H1'  | C B | 3 | -16.700 | -22.096 | 58.291 | 1.00 | 0.00 | H |
| ATOM | 669 | H3'  | C B | 3 | -17.696 | -25.717 | 59.459 | 1.00 | 0.00 | H |
| ATOM | 670 | H4'  | C B | 3 | -15.762 | -24.540 | 60.831 | 1.00 | 0.00 | H |
| ATOM | 671 | H41  | C B | 3 | -13.236 | -23.196 | 52.720 | 1.00 | 0.00 | H |
| ATOM | 672 | H42  | C B | 3 | -13.214 | -21.440 | 53.038 | 1.00 | 0.00 | H |
| ATOM | 673 | H2'1 | C B | 3 | -17.184 | -24.906 | 57.258 | 1.00 | 0.00 | H |
| ATOM | 674 | H2'2 | C B | 3 | -18.362 | -23.708 | 57.777 | 1.00 | 0.00 | H |
| ATOM | 675 | H5'1 | C B | 3 | -13.961 | -25.493 | 59.224 | 1.00 | 0.00 | H |
| ATOM | 676 | H5'2 | C B | 3 | -15.072 | -26.588 | 60.073 | 1.00 | 0.00 | H |
| ATOM | 677 | C1'  | C B | 4 | -19.142 | -19.068 | 57.450 | 1.00 | 0.00 | C |
| ATOM | 678 | N1   | C B | 4 | -18.637 | -19.816 | 56.268 | 1.00 | 0.00 | N |
| ATOM | 679 | C2   | C B | 4 | -17.990 | -19.096 | 55.266 | 1.00 | 0.00 | C |
| ATOM | 680 | O2   | C B | 4 | -17.862 | -17.871 | 55.399 | 1.00 | 0.00 | O |
| ATOM | 681 | N3   | C B | 4 | -17.523 | -19.757 | 54.180 | 1.00 | 0.00 | N |
| ATOM | 682 | C4   | C B | 4 | -17.676 | -21.084 | 54.064 | 1.00 | 0.00 | C |
| ATOM | 683 | N4   | C B | 4 | -17.197 | -21.682 | 52.983 | 1.00 | 0.00 | N |
| ATOM | 684 | C5   | C B | 4 | -18.342 | -21.851 | 55.076 | 1.00 | 0.00 | C |
| ATOM | 685 | C6   | C B | 4 | -18.800 | -21.163 | 56.163 | 1.00 | 0.00 | C |
| ATOM | 686 | C2'  | C B | 4 | -20.477 | -19.578 | 57.975 | 1.00 | 0.00 | C |
| ATOM | 687 | C3'  | C B | 4 | -20.321 | -19.388 | 59.476 | 1.00 | 0.00 | C |
| ATOM | 688 | O3'  | C B | 4 | -20.664 | -18.047 | 59.817 | 1.00 | 0.00 | O |
| ATOM | 689 | C4'  | C B | 4 | -18.839 | -19.680 | 59.703 | 1.00 | 0.00 | C |
| ATOM | 690 | O4'  | C B | 4 | -18.185 | -19.201 | 58.484 | 1.00 | 0.00 | O |
| ATOM | 691 | C5'  | C B | 4 | -18.464 | -21.129 | 59.914 | 1.00 | 0.00 | C |
| ATOM | 692 | O5'  | C B | 4 | -19.294 | -21.976 | 59.080 | 1.00 | 0.00 | O |
| ATOM | 693 | O1P  | C B | 4 | -20.665 | -23.271 | 60.746 | 1.00 | 0.00 | O |
| ATOM | 694 | O2P  | C B | 4 | -20.168 | -24.257 | 58.492 | 1.00 | 0.00 | O |
| ATOM | 695 | P    | C B | 4 | -19.715 | -23.413 | 59.625 | 1.00 | 0.00 | P |
| ATOM | 696 | H5   | C B | 4 | -18.476 | -22.929 | 54.983 | 1.00 | 0.00 | H |
| ATOM | 697 | H6   | C B | 4 | -19.306 | -21.704 | 56.963 | 1.00 | 0.00 | H |
| ATOM | 698 | H1'  | C B | 4 | -19.204 | -18.012 | 57.185 | 1.00 | 0.00 | H |
| ATOM | 699 | H3'  | C B | 4 | -20.948 | -20.077 | 60.042 | 1.00 | 0.00 | H |
| ATOM | 700 | H4'  | C B | 4 | -18.539 | -19.126 | 60.593 | 1.00 | 0.00 | H |
| ATOM | 701 | H41  | C B | 4 | -17.299 | -22.701 | 52.870 | 1.00 | 0.00 | H |
| ATOM | 702 | H42  | C B | 4 | -16.721 | -21.128 | 52.255 | 1.00 | 0.00 | H |
| ATOM | 703 | H2'1 | C B | 4 | -20.648 | -20.624 | 57.724 | 1.00 | 0.00 | H |
| ATOM | 704 | H2'2 | C B | 4 | -21.320 | -19.005 | 57.588 | 1.00 | 0.00 | H |
| ATOM | 705 | H5'1 | C B | 4 | -17.415 | -21.269 | 59.654 | 1.00 | 0.00 | H |
| ATOM | 706 | H5'2 | C B | 4 | -18.612 | -21.386 | 60.962 | 1.00 | 0.00 | H |

|      |     |      |     |   |         |         |        |      |      |   |
|------|-----|------|-----|---|---------|---------|--------|------|------|---|
| ATOM | 707 | C1'  | G B | 5 | -20.800 | -15.113 | 54.974 | 1.00 | 0.00 | C |
| ATOM | 708 | N1   | G B | 5 | -19.246 | -17.732 | 50.880 | 1.00 | 0.00 | N |
| ATOM | 709 | C2   | G B | 5 | -19.108 | -16.388 | 51.180 | 1.00 | 0.00 | C |
| ATOM | 710 | N2   | G B | 5 | -18.472 | -15.643 | 50.268 | 1.00 | 0.00 | N |
| ATOM | 711 | N3   | G B | 5 | -19.566 | -15.833 | 52.302 | 1.00 | 0.00 | N |
| ATOM | 712 | C4   | G B | 5 | -20.187 | -16.734 | 53.107 | 1.00 | 0.00 | C |
| ATOM | 713 | C5   | G B | 5 | -20.376 | -18.088 | 52.888 | 1.00 | 0.00 | C |
| ATOM | 714 | C6   | G B | 5 | -19.887 | -18.679 | 51.701 | 1.00 | 0.00 | C |
| ATOM | 715 | O6   | G B | 5 | -19.957 | -19.851 | 51.332 | 1.00 | 0.00 | O |
| ATOM | 716 | N7   | G B | 5 | -21.066 | -18.658 | 53.961 | 1.00 | 0.00 | N |
| ATOM | 717 | C8   | G B | 5 | -21.266 | -17.656 | 54.778 | 1.00 | 0.00 | C |
| ATOM | 718 | N9   | G B | 5 | -20.762 | -16.453 | 54.327 | 1.00 | 0.00 | N |
| ATOM | 719 | C2'  | G B | 5 | -22.099 | -14.826 | 55.714 | 1.00 | 0.00 | C |
| ATOM | 720 | C3'  | G B | 5 | -21.614 | -14.015 | 56.905 | 1.00 | 0.00 | C |
| ATOM | 721 | O3'  | G B | 5 | -21.494 | -12.647 | 56.522 | 1.00 | 0.00 | O |
| ATOM | 722 | C4'  | G B | 5 | -20.259 | -14.648 | 57.218 | 1.00 | 0.00 | C |
| ATOM | 723 | O4'  | G B | 5 | -19.743 | -15.055 | 55.911 | 1.00 | 0.00 | O |
| ATOM | 724 | C5'  | G B | 5 | -20.275 | -15.852 | 58.129 | 1.00 | 0.00 | C |
| ATOM | 725 | O5'  | G B | 5 | -21.452 | -16.654 | 57.861 | 1.00 | 0.00 | O |
| ATOM | 726 | O1P  | G B | 5 | -22.790 | -16.455 | 59.983 | 1.00 | 0.00 | O |
| ATOM | 727 | O2P  | G B | 5 | -23.029 | -18.490 | 58.536 | 1.00 | 0.00 | O |
| ATOM | 728 | P    | G B | 5 | -22.150 | -17.423 | 59.072 | 1.00 | 0.00 | P |
| ATOM | 729 | H1   | G B | 5 | -18.849 | -18.063 | 49.988 | 1.00 | 0.00 | H |
| ATOM | 730 | H8   | G B | 5 | -21.786 | -17.760 | 55.730 | 1.00 | 0.00 | H |
| ATOM | 731 | H1'  | G B | 5 | -20.612 | -14.359 | 54.210 | 1.00 | 0.00 | H |
| ATOM | 732 | H21  | G B | 5 | -18.118 | -16.079 | 49.405 | 1.00 | 0.00 | H |
| ATOM | 733 | H3'  | G B | 5 | -22.291 | -14.094 | 57.757 | 1.00 | 0.00 | H |
| ATOM | 734 | H22  | G B | 5 | -18.339 | -14.634 | 50.429 | 1.00 | 0.00 | H |
| ATOM | 735 | H4'  | G B | 5 | -19.652 | -13.878 | 57.693 | 1.00 | 0.00 | H |
| ATOM | 736 | H2'1 | G B | 5 | -22.603 | -15.738 | 56.034 | 1.00 | 0.00 | H |
| ATOM | 737 | H2'2 | G B | 5 | -22.805 | -14.258 | 55.108 | 1.00 | 0.00 | H |
| ATOM | 738 | H5'1 | G B | 5 | -19.377 | -16.444 | 57.954 | 1.00 | 0.00 | H |
| ATOM | 739 | H5'2 | G B | 5 | -20.287 | -15.516 | 59.166 | 1.00 | 0.00 | H |
| ATOM | 740 | C1'  | T B | 6 | -21.706 | -12.473 | 50.885 | 1.00 | 0.00 | C |
| ATOM | 741 | N1   | T B | 6 | -22.158 | -13.887 | 50.979 | 1.00 | 0.00 | N |
| ATOM | 742 | C2   | T B | 6 | -21.815 | -14.728 | 49.939 | 1.00 | 0.00 | C |
| ATOM | 743 | O2   | T B | 6 | -21.173 | -14.355 | 48.973 | 1.00 | 0.00 | O |
| ATOM | 744 | N3   | T B | 6 | -22.255 | -16.033 | 50.068 | 1.00 | 0.00 | N |
| ATOM | 745 | C4   | T B | 6 | -22.988 | -16.555 | 51.112 | 1.00 | 0.00 | C |
| ATOM | 746 | O4   | T B | 6 | -23.328 | -17.743 | 51.115 | 1.00 | 0.00 | O |
| ATOM | 747 | C5   | T B | 6 | -23.296 | -15.601 | 52.151 | 1.00 | 0.00 | C |
| ATOM | 748 | C6   | T B | 6 | -22.883 | -14.321 | 52.060 | 1.00 | 0.00 | C |
| ATOM | 749 | C7   | T B | 6 | -24.090 | -16.127 | 53.310 | 1.00 | 0.00 | C |
| ATOM | 750 | C2'  | T B | 6 | -22.722 | -11.469 | 51.415 | 1.00 | 0.00 | C |
| ATOM | 751 | C3'  | T B | 6 | -21.824 | -10.413 | 52.044 | 1.00 | 0.00 | C |
| ATOM | 752 | O3'  | T B | 6 | -21.400 | -9.498  | 51.037 | 1.00 | 0.00 | O |
| ATOM | 753 | C4'  | T B | 6 | -20.667 | -11.239 | 52.601 | 1.00 | 0.00 | C |
| ATOM | 754 | O4'  | T B | 6 | -20.526 | -12.345 | 51.654 | 1.00 | 0.00 | O |
| ATOM | 755 | C5'  | T B | 6 | -20.855 | -11.811 | 53.987 | 1.00 | 0.00 | C |
| ATOM | 756 | O5'  | T B | 6 | -22.238 | -12.208 | 54.169 | 1.00 | 0.00 | O |
| ATOM | 757 | O1P  | T B | 6 | -23.067 | -10.629 | 55.944 | 1.00 | 0.00 | O |
| ATOM | 758 | O2P  | T B | 6 | -24.117 | -12.894 | 55.689 | 1.00 | 0.00 | O |
| ATOM | 759 | P    | T B | 6 | -22.895 | -12.058 | 55.615 | 1.00 | 0.00 | P |
| ATOM | 760 | H3   | T B | 6 | -22.009 | -16.682 | 49.305 | 1.00 | 0.00 | H |

|      |     |      |     |   |         |         |        |      |      |   |
|------|-----|------|-----|---|---------|---------|--------|------|------|---|
| ATOM | 761 | H6   | T B | 6 | -23.129 | -13.620 | 52.858 | 1.00 | 0.00 | H |
| ATOM | 762 | H1'  | T B | 6 | -21.454 | -12.262 | 49.846 | 1.00 | 0.00 | H |
| ATOM | 763 | H3'  | T B | 6 | -22.334 | -9.866  | 52.837 | 1.00 | 0.00 | H |
| ATOM | 764 | H4'  | T B | 6 | -19.795 | -10.585 | 52.627 | 1.00 | 0.00 | H |
| ATOM | 765 | H71  | T B | 6 | -25.068 | -15.645 | 53.329 | 1.00 | 0.00 | H |
| ATOM | 766 | H72  | T B | 6 | -24.217 | -17.204 | 53.205 | 1.00 | 0.00 | H |
| ATOM | 767 | H73  | T B | 6 | -23.562 | -15.912 | 54.240 | 1.00 | 0.00 | H |
| ATOM | 768 | H2'1 | T B | 6 | -23.393 | -11.909 | 52.150 | 1.00 | 0.00 | H |
| ATOM | 769 | H2'2 | T B | 6 | -23.336 | -11.044 | 50.621 | 1.00 | 0.00 | H |
| ATOM | 770 | H5'1 | T B | 6 | -20.203 | -12.676 | 54.109 | 1.00 | 0.00 | H |
| ATOM | 771 | H5'2 | T B | 6 | -20.589 | -11.055 | 54.724 | 1.00 | 0.00 | H |
| ATOM | 772 | C1'  | C B | 7 | -22.574 | -11.979 | 46.021 | 1.00 | 0.00 | C |
| ATOM | 773 | N1   | C B | 7 | -23.387 | -12.920 | 46.843 | 1.00 | 0.00 | N |
| ATOM | 774 | C2   | C B | 7 | -23.521 | -14.231 | 46.392 | 1.00 | 0.00 | C |
| ATOM | 775 | O2   | C B | 7 | -22.963 | -14.560 | 45.336 | 1.00 | 0.00 | O |
| ATOM | 776 | N3   | C B | 7 | -24.256 | -15.103 | 47.124 | 1.00 | 0.00 | N |
| ATOM | 777 | C4   | C B | 7 | -24.848 | -14.717 | 48.262 | 1.00 | 0.00 | C |
| ATOM | 778 | N4   | C B | 7 | -25.552 | -15.611 | 48.940 | 1.00 | 0.00 | N |
| ATOM | 779 | C5   | C B | 7 | -24.732 | -13.373 | 48.748 | 1.00 | 0.00 | C |
| ATOM | 780 | C6   | C B | 7 | -23.982 | -12.514 | 47.995 | 1.00 | 0.00 | C |
| ATOM | 781 | C2'  | C B | 7 | -23.137 | -10.566 | 45.971 | 1.00 | 0.00 | C |
| ATOM | 782 | C3'  | C B | 7 | -21.871 | -9.723  | 45.948 | 1.00 | 0.00 | C |
| ATOM | 783 | O3'  | C B | 7 | -21.403 | -9.618  | 44.606 | 1.00 | 0.00 | O |
| ATOM | 784 | C4'  | C B | 7 | -20.915 | -10.520 | 46.832 | 1.00 | 0.00 | C |
| ATOM | 785 | O4'  | C B | 7 | -21.281 | -11.916 | 46.593 | 1.00 | 0.00 | O |
| ATOM | 786 | C5'  | C B | 7 | -20.990 | -10.249 | 48.318 | 1.00 | 0.00 | C |
| ATOM | 787 | O5'  | C B | 7 | -22.365 | -10.004 | 48.701 | 1.00 | 0.00 | O |
| ATOM | 788 | O1P  | C B | 7 | -22.349 | -7.591  | 49.418 | 1.00 | 0.00 | O |
| ATOM | 789 | O2P  | C B | 7 | -24.033 | -9.176  | 50.389 | 1.00 | 0.00 | O |
| ATOM | 790 | P    | C B | 7 | -22.661 | -8.960  | 49.872 | 1.00 | 0.00 | P |
| ATOM | 791 | H5   | C B | 7 | -25.218 | -13.053 | 49.669 | 1.00 | 0.00 | H |
| ATOM | 792 | H6   | C B | 7 | -23.858 | -11.483 | 48.328 | 1.00 | 0.00 | H |
| ATOM | 793 | H1'  | C B | 7 | -22.478 | -12.398 | 45.019 | 1.00 | 0.00 | H |
| ATOM | 794 | H3'  | C B | 7 | -22.039 | -8.723  | 46.352 | 1.00 | 0.00 | H |
| ATOM | 795 | H4'  | C B | 7 | -19.904 | -10.282 | 46.502 | 1.00 | 0.00 | H |
| ATOM | 796 | H41  | C B | 7 | -26.015 | -15.341 | 49.820 | 1.00 | 0.00 | H |
| ATOM | 797 | H42  | C B | 7 | -25.636 | -16.577 | 48.588 | 1.00 | 0.00 | H |
| ATOM | 798 | H2'1 | C B | 7 | -23.752 | -10.334 | 46.839 | 1.00 | 0.00 | H |
| ATOM | 799 | H2'2 | C B | 7 | -23.745 | -10.394 | 45.083 | 1.00 | 0.00 | H |
| ATOM | 800 | H5'1 | C B | 7 | -20.604 | -11.113 | 48.859 | 1.00 | 0.00 | H |
| ATOM | 801 | H5'2 | C B | 7 | -20.381 | -9.378  | 48.553 | 1.00 | 0.00 | H |
| ATOM | 802 | C1'  | C B | 8 | -24.157 | -13.548 | 41.598 | 1.00 | 0.00 | C |
| ATOM | 803 | N1   | C B | 8 | -25.034 | -13.652 | 42.796 | 1.00 | 0.00 | N |
| ATOM | 804 | C2   | C B | 8 | -25.616 | -14.888 | 43.074 | 1.00 | 0.00 | C |
| ATOM | 805 | O2   | C B | 8 | -25.381 | -15.840 | 42.319 | 1.00 | 0.00 | O |
| ATOM | 806 | N3   | C B | 8 | -26.417 | -15.004 | 44.160 | 1.00 | 0.00 | N |
| ATOM | 807 | C4   | C B | 8 | -26.652 | -13.954 | 44.958 | 1.00 | 0.00 | C |
| ATOM | 808 | N4   | C B | 8 | -27.441 | -14.126 | 46.009 | 1.00 | 0.00 | N |
| ATOM | 809 | C5   | C B | 8 | -26.072 | -12.669 | 44.696 | 1.00 | 0.00 | C |
| ATOM | 810 | C6   | C B | 8 | -25.263 | -12.577 | 43.597 | 1.00 | 0.00 | C |
| ATOM | 811 | C2'  | C B | 8 | -24.294 | -12.228 | 40.850 | 1.00 | 0.00 | C |
| ATOM | 812 | C3'  | C B | 8 | -22.869 | -11.980 | 40.380 | 1.00 | 0.00 | C |
| ATOM | 813 | O3'  | C B | 8 | -22.650 | -12.685 | 39.160 | 1.00 | 0.00 | O |
| ATOM | 814 | C4'  | C B | 8 | -22.031 | -12.539 | 41.528 | 1.00 | 0.00 | C |

|      |     |      |     |    |         |         |        |      |      |   |
|------|-----|------|-----|----|---------|---------|--------|------|------|---|
| ATOM | 815 | O4'  | C B | 8  | -22.816 | -13.665 | 42.035 | 1.00 | 0.00 | O |
| ATOM | 816 | C5'  | C B | 8  | -21.746 | -11.595 | 42.672 | 1.00 | 0.00 | C |
| ATOM | 817 | O5'  | C B | 8  | -22.900 | -10.747 | 42.907 | 1.00 | 0.00 | O |
| ATOM | 818 | O1P  | C B | 8  | -22.066 | -8.450  | 42.304 | 1.00 | 0.00 | O |
| ATOM | 819 | O2P  | C B | 8  | -23.919 | -8.714  | 43.975 | 1.00 | 0.00 | O |
| ATOM | 820 | P    | C B | 8  | -22.663 | -9.248  | 43.393 | 1.00 | 0.00 | P |
| ATOM | 821 | H5   | C B | 8  | -26.266 | -11.810 | 45.337 | 1.00 | 0.00 | H |
| ATOM | 822 | H6   | C B | 8  | -24.793 | -11.622 | 43.361 | 1.00 | 0.00 | H |
| ATOM | 823 | H1'  | C B | 8  | -24.372 | -14.392 | 40.943 | 1.00 | 0.00 | H |
| ATOM | 824 | H3'  | C B | 8  | -22.669 | -10.921 | 40.226 | 1.00 | 0.00 | H |
| ATOM | 825 | H4'  | C B | 8  | -21.074 | -12.842 | 41.103 | 1.00 | 0.00 | H |
| ATOM | 826 | H41  | C B | 8  | -27.636 | -13.335 | 46.640 | 1.00 | 0.00 | H |
| ATOM | 827 | H42  | C B | 8  | -27.859 | -15.049 | 46.194 | 1.00 | 0.00 | H |
| ATOM | 828 | H2'1 | C B | 8  | -24.645 | -11.423 | 41.493 | 1.00 | 0.00 | H |
| ATOM | 829 | H2'2 | C B | 8  | -24.984 | -12.301 | 40.008 | 1.00 | 0.00 | H |
| ATOM | 830 | H5'1 | C B | 8  | -21.527 | -12.174 | 43.570 | 1.00 | 0.00 | H |
| ATOM | 831 | H5'2 | C B | 8  | -20.883 | -10.980 | 42.423 | 1.00 | 0.00 | H |
| ATOM | 832 | C1'  | T B | 9  | -26.902 | -16.360 | 38.590 | 1.00 | 0.00 | C |
| ATOM | 833 | N1   | T B | 9  | -27.543 | -15.604 | 39.698 | 1.00 | 0.00 | N |
| ATOM | 834 | C2   | T B | 9  | -28.375 | -16.310 | 40.544 | 1.00 | 0.00 | C |
| ATOM | 835 | O2   | T B | 9  | -28.592 | -17.501 | 40.410 | 1.00 | 0.00 | O |
| ATOM | 836 | N3   | T B | 9  | -28.948 | -15.569 | 41.561 | 1.00 | 0.00 | N |
| ATOM | 837 | C4   | T B | 9  | -28.771 | -14.223 | 41.796 | 1.00 | 0.00 | C |
| ATOM | 838 | O4   | T B | 9  | -29.343 | -13.665 | 42.741 | 1.00 | 0.00 | O |
| ATOM | 839 | C5   | T B | 9  | -27.884 | -13.570 | 40.861 | 1.00 | 0.00 | C |
| ATOM | 840 | C6   | T B | 9  | -27.307 | -14.261 | 39.859 | 1.00 | 0.00 | C |
| ATOM | 841 | C7   | T B | 9  | -27.661 | -12.104 | 41.083 | 1.00 | 0.00 | C |
| ATOM | 842 | C2'  | T B | 9  | -26.796 | -15.572 | 37.289 | 1.00 | 0.00 | C |
| ATOM | 843 | C3'  | T B | 9  | -25.468 | -16.058 | 36.731 | 1.00 | 0.00 | C |
| ATOM | 844 | O3'  | T B | 9  | -25.677 | -17.271 | 36.013 | 1.00 | 0.00 | O |
| ATOM | 845 | C4'  | T B | 9  | -24.627 | -16.266 | 37.988 | 1.00 | 0.00 | C |
| ATOM | 846 | O4'  | T B | 9  | -25.592 | -16.701 | 38.999 | 1.00 | 0.00 | O |
| ATOM | 847 | C5'  | T B | 9  | -23.889 | -15.056 | 38.512 | 1.00 | 0.00 | C |
| ATOM | 848 | O5'  | T B | 9  | -24.698 | -13.868 | 38.319 | 1.00 | 0.00 | O |
| ATOM | 849 | O1P  | T B | 9  | -23.379 | -12.531 | 36.644 | 1.00 | 0.00 | O |
| ATOM | 850 | O2P  | T B | 9  | -24.900 | -11.365 | 38.264 | 1.00 | 0.00 | O |
| ATOM | 851 | P    | T B | 9  | -23.969 | -12.487 | 37.998 | 1.00 | 0.00 | P |
| ATOM | 852 | H3   | T B | 9  | -29.570 | -16.074 | 42.207 | 1.00 | 0.00 | H |
| ATOM | 853 | H6   | T B | 9  | -26.642 | -13.747 | 39.166 | 1.00 | 0.00 | H |
| ATOM | 854 | H1'  | T B | 9  | -27.457 | -17.286 | 38.440 | 1.00 | 0.00 | H |
| ATOM | 855 | H3'  | T B | 9  | -25.011 | -15.321 | 36.070 | 1.00 | 0.00 | H |
| ATOM | 856 | H4'  | T B | 9  | -23.886 | -17.031 | 37.750 | 1.00 | 0.00 | H |
| ATOM | 857 | H71  | T B | 9  | -28.076 | -11.542 | 40.246 | 1.00 | 0.00 | H |
| ATOM | 858 | H72  | T B | 9  | -28.151 | -11.796 | 42.007 | 1.00 | 0.00 | H |
| ATOM | 859 | H73  | T B | 9  | -26.590 | -11.907 | 41.157 | 1.00 | 0.00 | H |
| ATOM | 860 | H2'1 | T B | 9  | -26.787 | -14.496 | 37.458 | 1.00 | 0.00 | H |
| ATOM | 861 | H2'2 | T B | 9  | -27.618 | -15.789 | 36.606 | 1.00 | 0.00 | H |
| ATOM | 862 | H5'1 | T B | 9  | -23.682 | -15.194 | 39.573 | 1.00 | 0.00 | H |
| ATOM | 863 | H5'2 | T B | 9  | -22.948 | -14.952 | 37.974 | 1.00 | 0.00 | H |
| ATOM | 864 | C1'  | A B | 10 | -30.857 | -19.147 | 37.485 | 1.00 | 0.00 | C |
| ATOM | 865 | N1   | A B | 10 | -33.129 | -16.388 | 41.168 | 1.00 | 0.00 | N |
| ATOM | 866 | C2   | A B | 10 | -33.159 | -17.683 | 40.867 | 1.00 | 0.00 | C |
| ATOM | 867 | N3   | A B | 10 | -32.545 | -18.331 | 39.901 | 1.00 | 0.00 | N |
| ATOM | 868 | C4   | A B | 10 | -31.809 | -17.481 | 39.163 | 1.00 | 0.00 | C |



|      |     |      |     |    |         |         |        |      |      |   |
|------|-----|------|-----|----|---------|---------|--------|------|------|---|
| ATOM | 869 | C5   | A B | 10 | -31.672 | -16.131 | 39.338 | 1.00 | 0.00 | C |
| ATOM | 870 | C6   | A B | 10 | -32.385 | -15.564 | 40.414 | 1.00 | 0.00 | C |
| ATOM | 871 | N6   | A B | 10 | -32.346 | -14.252 | 40.708 | 1.00 | 0.00 | N |
| ATOM | 872 | N7   | A B | 10 | -30.830 | -15.587 | 38.384 | 1.00 | 0.00 | N |
| ATOM | 873 | C8   | A B | 10 | -30.483 | -16.607 | 37.657 | 1.00 | 0.00 | C |
| ATOM | 874 | N9   | A B | 10 | -31.036 | -17.791 | 38.072 | 1.00 | 0.00 | N |
| ATOM | 875 | C2'  | A B | 10 | -30.776 | -19.151 | 35.965 | 1.00 | 0.00 | C |
| ATOM | 876 | C3'  | A B | 10 | -29.771 | -20.262 | 35.703 | 1.00 | 0.00 | C |
| ATOM | 877 | O3'  | A B | 10 | -30.450 | -21.516 | 35.703 | 1.00 | 0.00 | O |
| ATOM | 878 | C4'  | A B | 10 | -28.805 | -20.130 | 36.880 | 1.00 | 0.00 | C |
| ATOM | 879 | O4'  | A B | 10 | -29.647 | -19.678 | 37.989 | 1.00 | 0.00 | O |
| ATOM | 880 | C5'  | A B | 10 | -27.667 | -19.153 | 36.707 | 1.00 | 0.00 | C |
| ATOM | 881 | O5'  | A B | 10 | -28.121 | -17.998 | 35.956 | 1.00 | 0.00 | O |
| ATOM | 882 | O1P  | A B | 10 | -26.812 | -18.148 | 33.811 | 1.00 | 0.00 | O |
| ATOM | 883 | O2P  | A B | 10 | -27.603 | -15.918 | 34.646 | 1.00 | 0.00 | O |
| ATOM | 884 | P    | A B | 10 | -27.100 | -17.276 | 34.966 | 1.00 | 0.00 | P |
| ATOM | 885 | H2   | A B | 10 | -33.785 | -18.296 | 41.515 | 1.00 | 0.00 | H |
| ATOM | 886 | H8   | A B | 10 | -29.815 | -16.528 | 36.799 | 1.00 | 0.00 | H |
| ATOM | 887 | H1'  | A B | 10 | -31.673 | -19.779 | 37.834 | 1.00 | 0.00 | H |
| ATOM | 888 | H3'  | A B | 10 | -29.254 | -20.130 | 34.754 | 1.00 | 0.00 | H |
| ATOM | 889 | H4'  | A B | 10 | -28.374 | -21.117 | 37.048 | 1.00 | 0.00 | H |
| ATOM | 890 | H61  | A B | 10 | -32.884 | -13.889 | 41.507 | 1.00 | 0.00 | H |
| ATOM | 891 | H62  | A B | 10 | -31.779 | -13.613 | 40.134 | 1.00 | 0.00 | H |
| ATOM | 892 | H2'1 | A B | 10 | -30.425 | -18.199 | 35.566 | 1.00 | 0.00 | H |
| ATOM | 893 | H2'2 | A B | 10 | -31.737 | -19.369 | 35.499 | 1.00 | 0.00 | H |
| ATOM | 894 | H5'1 | A B | 10 | -27.314 | -18.837 | 37.689 | 1.00 | 0.00 | H |
| ATOM | 895 | H5'2 | A B | 10 | -26.853 | -19.641 | 36.174 | 1.00 | 0.00 | H |
| ATOM | 896 | C1'  | G B | 11 | -35.580 | -20.576 | 38.030 | 1.00 | 0.00 | C |
| ATOM | 897 | N1   | G B | 11 | -36.228 | -15.844 | 39.825 | 1.00 | 0.00 | N |
| ATOM | 898 | C2   | G B | 11 | -36.732 | -17.047 | 40.289 | 1.00 | 0.00 | C |
| ATOM | 899 | N2   | G B | 11 | -37.513 | -16.979 | 41.374 | 1.00 | 0.00 | N |
| ATOM | 900 | N3   | G B | 11 | -36.475 | -18.222 | 39.716 | 1.00 | 0.00 | N |
| ATOM | 901 | C4   | G B | 11 | -35.673 | -18.101 | 38.626 | 1.00 | 0.00 | C |
| ATOM | 902 | C5   | G B | 11 | -35.129 | -16.947 | 38.089 | 1.00 | 0.00 | C |
| ATOM | 903 | C6   | G B | 11 | -35.397 | -15.699 | 38.697 | 1.00 | 0.00 | C |
| ATOM | 904 | O6   | G B | 11 | -35.010 | -14.577 | 38.371 | 1.00 | 0.00 | O |
| ATOM | 905 | N7   | G B | 11 | -34.361 | -17.254 | 36.963 | 1.00 | 0.00 | N |
| ATOM | 906 | C8   | G B | 11 | -34.460 | -18.554 | 36.858 | 1.00 | 0.00 | C |
| ATOM | 907 | N9   | G B | 11 | -35.242 | -19.141 | 37.831 | 1.00 | 0.00 | N |
| ATOM | 908 | C2'  | G B | 11 | -35.802 | -21.340 | 36.732 | 1.00 | 0.00 | C |
| ATOM | 909 | C3'  | G B | 11 | -35.231 | -22.708 | 37.067 | 1.00 | 0.00 | C |
| ATOM | 910 | O3'  | G B | 11 | -36.229 | -23.482 | 37.728 | 1.00 | 0.00 | O |
| ATOM | 911 | C4'  | G B | 11 | -34.058 | -22.372 | 37.987 | 1.00 | 0.00 | C |
| ATOM | 912 | O4'  | G B | 11 | -34.502 | -21.183 | 38.715 | 1.00 | 0.00 | O |
| ATOM | 913 | C5'  | G B | 11 | -32.743 | -22.062 | 37.311 | 1.00 | 0.00 | C |
| ATOM | 914 | O5'  | G B | 11 | -32.983 | -21.338 | 36.079 | 1.00 | 0.00 | O |
| ATOM | 915 | O1P  | G B | 11 | -32.216 | -22.944 | 34.300 | 1.00 | 0.00 | O |
| ATOM | 916 | O2P  | G B | 11 | -32.152 | -20.474 | 33.871 | 1.00 | 0.00 | O |
| ATOM | 917 | P    | G B | 11 | -32.010 | -21.587 | 34.840 | 1.00 | 0.00 | P |
| ATOM | 918 | H1   | G B | 11 | -36.481 | -14.991 | 40.344 | 1.00 | 0.00 | H |
| ATOM | 919 | H8   | G B | 11 | -33.969 | -19.123 | 36.069 | 1.00 | 0.00 | H |
| ATOM | 920 | H1'  | G B | 11 | -36.460 | -20.634 | 38.673 | 1.00 | 0.00 | H |
| ATOM | 921 | H21  | G B | 11 | -37.704 | -16.067 | 41.813 | 1.00 | 0.00 | H |
| ATOM | 922 | H3'  | G B | 11 | -34.893 | -23.239 | 36.178 | 1.00 | 0.00 | H |

|      |     |      |     |    |         |         |        |      |      |   |
|------|-----|------|-----|----|---------|---------|--------|------|------|---|
| ATOM | 923 | H22  | G B | 11 | -37.922 | -17.838 | 41.767 | 1.00 | 0.00 | H |
| ATOM | 924 | H4'  | G B | 11 | -33.905 | -23.235 | 38.634 | 1.00 | 0.00 | H |
| ATOM | 925 | H2'1 | G B | 11 | -35.277 | -20.886 | 35.891 | 1.00 | 0.00 | H |
| ATOM | 926 | H2'2 | G B | 11 | -36.856 | -21.404 | 36.465 | 1.00 | 0.00 | H |
| ATOM | 927 | H5'1 | G B | 11 | -32.131 | -21.458 | 37.980 | 1.00 | 0.00 | H |
| ATOM | 928 | H5'2 | G B | 11 | -32.225 | -22.996 | 37.095 | 1.00 | 0.00 | H |
| ATOM | 929 | C1'  | G B | 12 | -40.320 | -19.903 | 39.301 | 1.00 | 0.00 | C |
| ATOM | 930 | N1   | G B | 12 | -39.253 | -14.984 | 38.468 | 1.00 | 0.00 | N |
| ATOM | 931 | C2   | G B | 12 | -39.981 | -15.576 | 39.486 | 1.00 | 0.00 | C |
| ATOM | 932 | N2   | G B | 12 | -40.494 | -14.745 | 40.403 | 1.00 | 0.00 | N |
| ATOM | 933 | N3   | G B | 12 | -40.179 | -16.888 | 39.581 | 1.00 | 0.00 | N |
| ATOM | 934 | C4   | G B | 12 | -39.595 | -17.574 | 38.564 | 1.00 | 0.00 | C |
| ATOM | 935 | C5   | G B | 12 | -38.856 | -17.072 | 37.508 | 1.00 | 0.00 | C |
| ATOM | 936 | C6   | G B | 12 | -38.641 | -15.679 | 37.407 | 1.00 | 0.00 | C |
| ATOM | 937 | O6   | G B | 12 | -38.020 | -15.048 | 36.551 | 1.00 | 0.00 | O |
| ATOM | 938 | N7   | G B | 12 | -38.431 | -18.111 | 36.677 | 1.00 | 0.00 | N |
| ATOM | 939 | C8   | G B | 12 | -38.912 | -19.186 | 37.245 | 1.00 | 0.00 | C |
| ATOM | 940 | N9   | G B | 12 | -39.632 | -18.942 | 38.396 | 1.00 | 0.00 | N |
| ATOM | 941 | C2'  | G B | 12 | -40.987 | -21.061 | 38.571 | 1.00 | 0.00 | C |
| ATOM | 942 | C3'  | G B | 12 | -40.775 | -22.213 | 39.542 | 1.00 | 0.00 | C |
| ATOM | 943 | O3'  | G B | 12 | -41.810 | -22.194 | 40.523 | 1.00 | 0.00 | O |
| ATOM | 944 | C4'  | G B | 12 | -39.405 | -21.903 | 40.142 | 1.00 | 0.00 | C |
| ATOM | 945 | O4'  | G B | 12 | -39.349 | -20.441 | 40.177 | 1.00 | 0.00 | O |
| ATOM | 946 | C5'  | G B | 12 | -38.206 | -22.414 | 39.378 | 1.00 | 0.00 | C |
| ATOM | 947 | O5'  | G B | 12 | -38.457 | -22.322 | 37.954 | 1.00 | 0.00 | O |
| ATOM | 948 | O1P  | G B | 12 | -38.523 | -24.728 | 37.217 | 1.00 | 0.00 | O |
| ATOM | 949 | O2P  | G B | 12 | -37.843 | -22.938 | 35.596 | 1.00 | 0.00 | O |
| ATOM | 950 | P    | G B | 12 | -37.843 | -23.437 | 36.992 | 1.00 | 0.00 | P |
| ATOM | 951 | H1   | G B | 12 | -39.152 | -13.958 | 38.489 | 1.00 | 0.00 | H |
| ATOM | 952 | H8   | G B | 12 | -38.759 | -20.189 | 36.845 | 1.00 | 0.00 | H |
| ATOM | 953 | H1'  | G B | 12 | -41.043 | -19.350 | 39.900 | 1.00 | 0.00 | H |
| ATOM | 954 | H21  | G B | 12 | -40.333 | -13.730 | 40.324 | 1.00 | 0.00 | H |
| ATOM | 955 | H3'  | G B | 12 | -40.774 | -23.178 | 39.037 | 1.00 | 0.00 | H |
| ATOM | 956 | H22  | G B | 12 | -41.048 | -15.122 | 41.184 | 1.00 | 0.00 | H |
| ATOM | 957 | H4'  | G B | 12 | -39.384 | -22.353 | 41.134 | 1.00 | 0.00 | H |
| ATOM | 958 | H2'1 | G B | 12 | -40.522 | -21.265 | 37.607 | 1.00 | 0.00 | H |
| ATOM | 959 | H2'2 | G B | 12 | -42.047 | -20.882 | 38.393 | 1.00 | 0.00 | H |
| ATOM | 960 | H5'1 | G B | 12 | -37.334 | -21.815 | 39.638 | 1.00 | 0.00 | H |
| ATOM | 961 | H5'2 | G B | 12 | -38.023 | -23.453 | 39.653 | 1.00 | 0.00 | H |
| ATOM | 962 | C1'  | T B | 13 | -44.358 | -17.172 | 40.157 | 1.00 | 0.00 | C |
| ATOM | 963 | N1   | T B | 13 | -43.607 | -17.018 | 38.883 | 1.00 | 0.00 | N |
| ATOM | 964 | C2   | T B | 13 | -43.245 | -15.737 | 38.514 | 1.00 | 0.00 | C |
| ATOM | 965 | O2   | T B | 13 | -43.518 | -14.757 | 39.185 | 1.00 | 0.00 | O |
| ATOM | 966 | N3   | T B | 13 | -42.548 | -15.640 | 37.324 | 1.00 | 0.00 | N |
| ATOM | 967 | C4   | T B | 13 | -42.194 | -16.681 | 36.492 | 1.00 | 0.00 | C |
| ATOM | 968 | O4   | T B | 13 | -41.570 | -16.471 | 35.445 | 1.00 | 0.00 | O |
| ATOM | 969 | C5   | T B | 13 | -42.614 | -17.982 | 36.960 | 1.00 | 0.00 | C |
| ATOM | 970 | C6   | T B | 13 | -43.294 | -18.114 | 38.116 | 1.00 | 0.00 | C |
| ATOM | 971 | C7   | T B | 13 | -42.247 | -19.145 | 36.088 | 1.00 | 0.00 | C |
| ATOM | 972 | C2'  | T B | 13 | -45.441 | -18.242 | 40.106 | 1.00 | 0.00 | C |
| ATOM | 973 | C3'  | T B | 13 | -45.384 | -18.818 | 41.512 | 1.00 | 0.00 | C |
| ATOM | 974 | O3'  | T B | 13 | -46.178 | -18.013 | 42.380 | 1.00 | 0.00 | O |
| ATOM | 975 | C4'  | T B | 13 | -43.897 | -18.741 | 41.851 | 1.00 | 0.00 | C |
| ATOM | 976 | O4'  | T B | 13 | -43.432 | -17.536 | 41.162 | 1.00 | 0.00 | O |

|      |      |      |     |    |         |         |        |      |      |   |
|------|------|------|-----|----|---------|---------|--------|------|------|---|
| ATOM | 977  | C5'  | T B | 13 | -43.045 | -19.909 | 41.410 | 1.00 | 0.00 | C |
| ATOM | 978  | O5'  | T B | 13 | -43.516 | -20.401 | 40.129 | 1.00 | 0.00 | O |
| ATOM | 979  | O1P  | T B | 13 | -44.378 | -22.702 | 40.671 | 1.00 | 0.00 | O |
| ATOM | 980  | O2P  | T B | 13 | -43.534 | -22.190 | 38.364 | 1.00 | 0.00 | O |
| ATOM | 981  | P    | T B | 13 | -43.419 | -21.963 | 39.825 | 1.00 | 0.00 | P |
| ATOM | 982  | H3   | T B | 13 | -42.264 | -14.695 | 37.030 | 1.00 | 0.00 | H |
| ATOM | 983  | H6   | T B | 13 | -43.601 | -19.105 | 38.449 | 1.00 | 0.00 | H |
| ATOM | 984  | H1'  | T B | 13 | -44.779 | -16.203 | 40.425 | 1.00 | 0.00 | H |
| ATOM | 985  | H3'  | T B | 13 | -45.743 | -19.847 | 41.546 | 1.00 | 0.00 | H |
| ATOM | 986  | H4'  | T B | 13 | -43.823 | -18.668 | 42.936 | 1.00 | 0.00 | H |
| ATOM | 987  | H71  | T B | 13 | -43.153 | -19.597 | 35.684 | 1.00 | 0.00 | H |
| ATOM | 988  | H72  | T B | 13 | -41.617 | -18.799 | 35.266 | 1.00 | 0.00 | H |
| ATOM | 989  | H73  | T B | 13 | -41.703 | -19.885 | 36.676 | 1.00 | 0.00 | H |
| ATOM | 990  | H2'1 | T B | 13 | -45.234 | -19.004 | 39.356 | 1.00 | 0.00 | H |
| ATOM | 991  | H2'2 | T B | 13 | -46.425 | -17.826 | 39.888 | 1.00 | 0.00 | H |
| ATOM | 992  | H5'1 | T B | 13 | -42.009 | -19.584 | 41.322 | 1.00 | 0.00 | H |
| ATOM | 993  | H5'2 | T B | 13 | -43.111 | -20.701 | 42.154 | 1.00 | 0.00 | H |
| ATOM | 994  | C1'  | G B | 14 | -47.202 | -13.146 | 39.562 | 1.00 | 0.00 | C |
| ATOM | 995  | N1   | G B | 14 | -44.775 | -12.770 | 35.090 | 1.00 | 0.00 | N |
| ATOM | 996  | C2   | G B | 14 | -45.106 | -11.787 | 36.006 | 1.00 | 0.00 | C |
| ATOM | 997  | N2   | G B | 14 | -44.743 | -10.539 | 35.689 | 1.00 | 0.00 | N |
| ATOM | 998  | N3   | G B | 14 | -45.746 | -12.032 | 37.149 | 1.00 | 0.00 | N |
| ATOM | 999  | C4   | G B | 14 | -46.041 | -13.350 | 37.304 | 1.00 | 0.00 | C |
| ATOM | 1000 | C5   | G B | 14 | -45.756 | -14.396 | 36.444 | 1.00 | 0.00 | C |
| ATOM | 1001 | C6   | G B | 14 | -45.073 | -14.139 | 35.233 | 1.00 | 0.00 | C |
| ATOM | 1002 | O6   | G B | 14 | -44.734 | -14.928 | 34.349 | 1.00 | 0.00 | O |
| ATOM | 1003 | N7   | G B | 14 | -46.231 | -15.599 | 36.971 | 1.00 | 0.00 | N |
| ATOM | 1004 | C8   | G B | 14 | -46.775 | -15.251 | 38.110 | 1.00 | 0.00 | C |
| ATOM | 1005 | N9   | G B | 14 | -46.700 | -13.900 | 38.381 | 1.00 | 0.00 | N |
| ATOM | 1006 | C2'  | G B | 14 | -48.536 | -13.655 | 40.093 | 1.00 | 0.00 | C |
| ATOM | 1007 | C3'  | G B | 14 | -48.377 | -13.459 | 41.592 | 1.00 | 0.00 | C |
| ATOM | 1008 | O3'  | G B | 14 | -48.720 | -12.116 | 41.927 | 1.00 | 0.00 | O |
| ATOM | 1009 | C4'  | G B | 14 | -46.894 | -13.749 | 41.816 | 1.00 | 0.00 | C |
| ATOM | 1010 | O4'  | G B | 14 | -46.245 | -13.274 | 40.594 | 1.00 | 0.00 | O |
| ATOM | 1011 | C5'  | G B | 14 | -46.518 | -15.195 | 42.033 | 1.00 | 0.00 | C |
| ATOM | 1012 | O5'  | G B | 14 | -47.348 | -16.047 | 41.204 | 1.00 | 0.00 | O |
| ATOM | 1013 | O1P  | G B | 14 | -48.715 | -17.337 | 42.878 | 1.00 | 0.00 | O |
| ATOM | 1014 | O2P  | G B | 14 | -48.222 | -18.332 | 40.629 | 1.00 | 0.00 | O |
| ATOM | 1015 | P    | G B | 14 | -47.767 | -17.484 | 41.757 | 1.00 | 0.00 | P |
| ATOM | 1016 | H1   | G B | 14 | -44.272 | -12.476 | 34.239 | 1.00 | 0.00 | H |
| ATOM | 1017 | H8   | G B | 14 | -47.247 | -15.966 | 38.784 | 1.00 | 0.00 | H |
| ATOM | 1018 | H1'  | G B | 14 | -47.266 | -12.091 | 39.292 | 1.00 | 0.00 | H |
| ATOM | 1019 | H21  | G B | 14 | -44.245 | -10.358 | 34.804 | 1.00 | 0.00 | H |
| ATOM | 1020 | H3'  | G B | 14 | -49.002 | -14.145 | 42.162 | 1.00 | 0.00 | H |
| ATOM | 1021 | H22  | G B | 14 | -44.963 | -9.761  | 36.327 | 1.00 | 0.00 | H |
| ATOM | 1022 | H4'  | G B | 14 | -46.593 | -13.190 | 42.703 | 1.00 | 0.00 | H |
| ATOM | 1023 | H2'1 | G B | 14 | -48.707 | -14.702 | 39.845 | 1.00 | 0.00 | H |
| ATOM | 1024 | H2'2 | G B | 14 | -49.380 | -13.085 | 39.705 | 1.00 | 0.00 | H |
| ATOM | 1025 | H5'1 | G B | 14 | -45.470 | -15.336 | 41.772 | 1.00 | 0.00 | H |
| ATOM | 1026 | H5'2 | G B | 14 | -46.663 | -15.449 | 43.083 | 1.00 | 0.00 | H |
| ATOM | 1027 | C1'  | C B | 15 | -48.860 | -9.190  | 37.086 | 1.00 | 0.00 | C |
| ATOM | 1028 | N1   | C B | 15 | -48.818 | -10.527 | 36.435 | 1.00 | 0.00 | N |
| ATOM | 1029 | C2   | C B | 15 | -48.193 | -10.630 | 35.194 | 1.00 | 0.00 | C |
| ATOM | 1030 | O2   | C B | 15 | -47.702 | -9.613  | 34.688 | 1.00 | 0.00 | O |

|      |      |      |     |    |         |         |        |      |      |   |
|------|------|------|-----|----|---------|---------|--------|------|------|---|
| ATOM | 1031 | N3   | C B | 15 | -48.144 | -11.840 | 34.584 | 1.00 | 0.00 | N |
| ATOM | 1032 | C4   | C B | 15 | -48.686 | -12.922 | 35.157 | 1.00 | 0.00 | C |
| ATOM | 1033 | N4   | C B | 15 | -48.606 | -14.080 | 34.518 | 1.00 | 0.00 | N |
| ATOM | 1034 | C5   | C B | 15 | -49.340 | -12.845 | 36.432 | 1.00 | 0.00 | C |
| ATOM | 1035 | C6   | C B | 15 | -49.373 | -11.619 | 37.028 | 1.00 | 0.00 | C |
| ATOM | 1036 | C2'  | C B | 15 | -50.162 | -8.906  | 37.822 | 1.00 | 0.00 | C |
| ATOM | 1037 | C3'  | C B | 15 | -49.681 | -8.099  | 39.018 | 1.00 | 0.00 | C |
| ATOM | 1038 | O3'  | C B | 15 | -49.561 | -6.728  | 38.641 | 1.00 | 0.00 | O |
| ATOM | 1039 | C4'  | C B | 15 | -48.328 | -8.731  | 39.333 | 1.00 | 0.00 | C |
| ATOM | 1040 | O4'  | C B | 15 | -47.805 | -9.136  | 38.028 | 1.00 | 0.00 | O |
| ATOM | 1041 | C5'  | C B | 15 | -48.346 | -9.940  | 40.241 | 1.00 | 0.00 | C |
| ATOM | 1042 | O5'  | C B | 15 | -49.522 | -10.741 | 39.965 | 1.00 | 0.00 | O |
| ATOM | 1043 | O1P  | C B | 15 | -50.869 | -10.549 | 42.084 | 1.00 | 0.00 | O |
| ATOM | 1044 | O2P  | C B | 15 | -51.102 | -12.581 | 40.630 | 1.00 | 0.00 | O |
| ATOM | 1045 | P    | C B | 15 | -50.224 | -11.515 | 41.170 | 1.00 | 0.00 | P |
| ATOM | 1046 | H5   | C B | 15 | -49.788 | -13.723 | 36.898 | 1.00 | 0.00 | H |
| ATOM | 1047 | H6   | C B | 15 | -49.854 | -11.511 | 38.002 | 1.00 | 0.00 | H |
| ATOM | 1048 | H1'  | C B | 15 | -48.669 | -8.434  | 36.324 | 1.00 | 0.00 | H |
| ATOM | 1049 | H3'  | C B | 15 | -50.361 | -8.182  | 39.866 | 1.00 | 0.00 | H |
| ATOM | 1050 | H4'  | C B | 15 | -47.723 | -7.963  | 39.815 | 1.00 | 0.00 | H |
| ATOM | 1051 | H41  | C B | 15 | -49.012 | -14.929 | 34.938 | 1.00 | 0.00 | H |
| ATOM | 1052 | H42  | C B | 15 | -48.138 | -14.132 | 33.601 | 1.00 | 0.00 | H |
| ATOM | 1053 | H2'1 | C B | 15 | -50.667 | -9.819  | 38.137 | 1.00 | 0.00 | H |
| ATOM | 1054 | H2'2 | C B | 15 | -50.866 | -8.336  | 37.215 | 1.00 | 0.00 | H |
| ATOM | 1055 | H5'1 | C B | 15 | -47.448 | -10.532 | 40.067 | 1.00 | 0.00 | H |
| ATOM | 1056 | H5'2 | C B | 15 | -48.363 | -9.607  | 41.278 | 1.00 | 0.00 | H |
| ATOM | 1057 | C1'  | G B | 16 | -49.763 | -6.570  | 32.982 | 1.00 | 0.00 | C |
| ATOM | 1058 | N1   | G B | 16 | -49.808 | -11.155 | 30.747 | 1.00 | 0.00 | N |
| ATOM | 1059 | C2   | G B | 16 | -49.241 | -9.966  | 30.323 | 1.00 | 0.00 | C |
| ATOM | 1060 | N2   | G B | 16 | -48.603 | -10.004 | 29.146 | 1.00 | 0.00 | N |
| ATOM | 1061 | N3   | G B | 16 | -49.305 | -8.831  | 31.018 | 1.00 | 0.00 | N |
| ATOM | 1062 | C4   | G B | 16 | -49.994 | -8.976  | 32.180 | 1.00 | 0.00 | C |
| ATOM | 1063 | C5   | G B | 16 | -50.596 | -10.118 | 32.680 | 1.00 | 0.00 | C |
| ATOM | 1064 | C6   | G B | 16 | -50.526 | -11.324 | 31.945 | 1.00 | 0.00 | C |
| ATOM | 1065 | O6   | G B | 16 | -50.992 | -12.430 | 32.222 | 1.00 | 0.00 | O |
| ATOM | 1066 | N7   | G B | 16 | -51.206 | -9.845  | 33.907 | 1.00 | 0.00 | N |
| ATOM | 1067 | C8   | G B | 16 | -50.958 | -8.576  | 34.107 | 1.00 | 0.00 | C |
| ATOM | 1068 | N9   | G B | 16 | -50.227 | -7.978  | 33.101 | 1.00 | 0.00 | N |
| ATOM | 1069 | C2'  | G B | 16 | -50.765 | -5.548  | 33.500 | 1.00 | 0.00 | C |
| ATOM | 1070 | C3'  | G B | 16 | -49.857 | -4.491  | 34.108 | 1.00 | 0.00 | C |
| ATOM | 1071 | O3'  | G B | 16 | -49.428 | -3.597  | 33.084 | 1.00 | 0.00 | O |
| ATOM | 1072 | C4'  | G B | 16 | -48.703 | -5.319  | 34.672 | 1.00 | 0.00 | C |
| ATOM | 1073 | O4'  | G B | 16 | -48.577 | -6.441  | 33.741 | 1.00 | 0.00 | O |
| ATOM | 1074 | C5'  | G B | 16 | -48.889 | -5.866  | 36.067 | 1.00 | 0.00 | C |
| ATOM | 1075 | O5'  | G B | 16 | -50.273 | -6.248  | 36.264 | 1.00 | 0.00 | O |
| ATOM | 1076 | O1P  | G B | 16 | -51.079 | -4.634  | 38.019 | 1.00 | 0.00 | O |
| ATOM | 1077 | O2P  | G B | 16 | -52.150 | -6.892  | 37.805 | 1.00 | 0.00 | O |
| ATOM | 1078 | P    | G B | 16 | -50.921 | -6.067  | 37.711 | 1.00 | 0.00 | P |
| ATOM | 1079 | H1   | G B | 16 | -49.695 | -11.979 | 30.137 | 1.00 | 0.00 | H |
| ATOM | 1080 | H8   | G B | 16 | -51.298 | -8.038  | 34.992 | 1.00 | 0.00 | H |
| ATOM | 1081 | H1'  | G B | 16 | -49.514 | -6.379  | 31.938 | 1.00 | 0.00 | H |
| ATOM | 1082 | H21  | G B | 16 | -48.554 | -10.885 | 28.616 | 1.00 | 0.00 | H |
| ATOM | 1083 | H3'  | G B | 16 | -50.356 | -3.926  | 34.895 | 1.00 | 0.00 | H |
| ATOM | 1084 | H22  | G B | 16 | -48.161 | -9.151  | 28.775 | 1.00 | 0.00 | H |

|      |      |      |     |    |         |         |        |      |      |   |
|------|------|------|-----|----|---------|---------|--------|------|------|---|
| ATOM | 1085 | H4'  | G B | 16 | -47.825 | -4.673  | 34.682 | 1.00 | 0.00 | H |
| ATOM | 1086 | H2'1 | G B | 16 | -51.438 | -5.970  | 34.247 | 1.00 | 0.00 | H |
| ATOM | 1087 | H2'2 | G B | 16 | -51.381 | -5.131  | 32.703 | 1.00 | 0.00 | H |
| ATOM | 1088 | H5'1 | G B | 16 | -48.245 | -6.736  | 36.199 | 1.00 | 0.00 | H |
| ATOM | 1089 | H5'2 | G B | 16 | -48.611 | -5.101  | 36.791 | 1.00 | 0.00 | H |
| ATOM | 1090 | C1'  | G B | 17 | -50.636 | -6.058  | 28.134 | 1.00 | 0.00 | C |
| ATOM | 1091 | N1   | G B | 17 | -52.395 | -10.831 | 28.526 | 1.00 | 0.00 | N |
| ATOM | 1092 | C2   | G B | 17 | -51.604 | -10.253 | 27.548 | 1.00 | 0.00 | C |
| ATOM | 1093 | N2   | G B | 17 | -51.234 | -11.053 | 26.541 | 1.00 | 0.00 | N |
| ATOM | 1094 | N3   | G B | 17 | -51.213 | -8.981  | 27.575 | 1.00 | 0.00 | N |
| ATOM | 1095 | C4   | G B | 17 | -51.686 | -8.318  | 28.663 | 1.00 | 0.00 | C |
| ATOM | 1096 | C5   | G B | 17 | -52.481 | -8.809  | 29.684 | 1.00 | 0.00 | C |
| ATOM | 1097 | C6   | G B | 17 | -52.894 | -10.160 | 29.659 | 1.00 | 0.00 | C |
| ATOM | 1098 | O6   | G B | 17 | -53.594 | -10.774 | 30.465 | 1.00 | 0.00 | O |
| ATOM | 1099 | N7   | G B | 17 | -52.748 | -7.803  | 30.615 | 1.00 | 0.00 | N |
| ATOM | 1100 | C8   | G B | 17 | -52.118 | -6.759  | 30.142 | 1.00 | 0.00 | C |
| ATOM | 1101 | N9   | G B | 17 | -51.450 | -6.993  | 28.958 | 1.00 | 0.00 | N |
| ATOM | 1102 | C2'  | G B | 17 | -51.192 | -4.642  | 28.084 | 1.00 | 0.00 | C |
| ATOM | 1103 | C3'  | G B | 17 | -49.925 | -3.803  | 28.056 | 1.00 | 0.00 | C |
| ATOM | 1104 | O3'  | G B | 17 | -49.460 | -3.701  | 26.712 | 1.00 | 0.00 | O |
| ATOM | 1105 | C4'  | G B | 17 | -48.969 | -4.603  | 28.939 | 1.00 | 0.00 | C |
| ATOM | 1106 | O4'  | G B | 17 | -49.342 | -5.998  | 28.701 | 1.00 | 0.00 | O |
| ATOM | 1107 | C5'  | G B | 17 | -49.038 | -4.330  | 30.423 | 1.00 | 0.00 | C |
| ATOM | 1108 | O5'  | G B | 17 | -50.411 | -4.080  | 30.812 | 1.00 | 0.00 | O |
| ATOM | 1109 | O1P  | G B | 17 | -50.384 | -1.666  | 31.524 | 1.00 | 0.00 | O |
| ATOM | 1110 | O2P  | G B | 17 | -52.072 | -3.243  | 32.503 | 1.00 | 0.00 | O |
| ATOM | 1111 | P    | G B | 17 | -50.699 | -3.033  | 31.981 | 1.00 | 0.00 | P |
| ATOM | 1112 | H1   | G B | 17 | -52.638 | -11.827 | 28.414 | 1.00 | 0.00 | H |
| ATOM | 1113 | H8   | G B | 17 | -52.120 | -5.789  | 30.639 | 1.00 | 0.00 | H |
| ATOM | 1114 | H1'  | G B | 17 | -50.544 | -6.478  | 27.133 | 1.00 | 0.00 | H |
| ATOM | 1115 | H21  | G B | 17 | -51.537 | -12.038 | 26.528 | 1.00 | 0.00 | H |
| ATOM | 1116 | H3'  | G B | 17 | -50.087 | -2.803  | 28.459 | 1.00 | 0.00 | H |
| ATOM | 1117 | H22  | G B | 17 | -50.647 | -10.683 | 25.780 | 1.00 | 0.00 | H |
| ATOM | 1118 | H4'  | G B | 17 | -47.958 | -4.370  | 28.605 | 1.00 | 0.00 | H |
| ATOM | 1119 | H2'1 | G B | 17 | -51.805 | -4.407  | 28.954 | 1.00 | 0.00 | H |
| ATOM | 1120 | H2'2 | G B | 17 | -51.803 | -4.468  | 27.198 | 1.00 | 0.00 | H |
| ATOM | 1121 | H5'1 | G B | 17 | -48.653 | -5.195  | 30.964 | 1.00 | 0.00 | H |
| ATOM | 1122 | H5'2 | G B | 17 | -48.424 | -3.460  | 30.655 | 1.00 | 0.00 | H |
| ATOM | 1123 | C1'  | C B | 18 | -52.218 | -7.626  | 23.710 | 1.00 | 0.00 | C |
| ATOM | 1124 | N1   | C B | 18 | -53.095 | -7.730  | 24.909 | 1.00 | 0.00 | N |
| ATOM | 1125 | C2   | C B | 18 | -53.675 | -8.966  | 25.186 | 1.00 | 0.00 | C |
| ATOM | 1126 | O2   | C B | 18 | -53.441 | -9.919  | 24.431 | 1.00 | 0.00 | O |
| ATOM | 1127 | N3   | C B | 18 | -54.477 | -9.081  | 26.272 | 1.00 | 0.00 | N |
| ATOM | 1128 | C4   | C B | 18 | -54.711 | -8.031  | 27.069 | 1.00 | 0.00 | C |
| ATOM | 1129 | N4   | C B | 18 | -55.502 | -8.202  | 28.119 | 1.00 | 0.00 | N |
| ATOM | 1130 | C5   | C B | 18 | -54.129 | -6.749  | 26.806 | 1.00 | 0.00 | C |
| ATOM | 1131 | C6   | C B | 18 | -53.324 | -6.657  | 25.710 | 1.00 | 0.00 | C |
| ATOM | 1132 | C2'  | C B | 18 | -52.355 | -6.306  | 22.962 | 1.00 | 0.00 | C |
| ATOM | 1133 | C3'  | C B | 18 | -50.930 | -6.058  | 22.492 | 1.00 | 0.00 | C |
| ATOM | 1134 | O3'  | C B | 18 | -50.710 | -6.763  | 21.272 | 1.00 | 0.00 | O |
| ATOM | 1135 | C4'  | C B | 18 | -50.092 | -6.617  | 23.640 | 1.00 | 0.00 | C |
| ATOM | 1136 | O4'  | C B | 18 | -50.877 | -7.743  | 24.147 | 1.00 | 0.00 | O |
| ATOM | 1137 | C5'  | C B | 18 | -49.807 | -5.673  | 24.784 | 1.00 | 0.00 | C |
| ATOM | 1138 | O5'  | C B | 18 | -50.960 | -4.825  | 25.019 | 1.00 | 0.00 | O |

|      |      |      |     |    |         |         |        |      |      |   |
|------|------|------|-----|----|---------|---------|--------|------|------|---|
| ATOM | 1139 | O1P  | C B | 18 | -50.127 | -2.527  | 24.417 | 1.00 | 0.00 | O |
| ATOM | 1140 | O2P  | C B | 18 | -51.980 | -2.792  | 26.088 | 1.00 | 0.00 | O |
| ATOM | 1141 | P    | C B | 18 | -50.724 | -3.326  | 25.506 | 1.00 | 0.00 | P |
| ATOM | 1142 | H5   | C B | 18 | -54.320 | -5.891  | 27.450 | 1.00 | 0.00 | H |
| ATOM | 1143 | H6   | C B | 18 | -52.856 | -5.702  | 25.472 | 1.00 | 0.00 | H |
| ATOM | 1144 | H1'  | C B | 18 | -52.433 | -8.470  | 23.056 | 1.00 | 0.00 | H |
| ATOM | 1145 | H3'  | C B | 18 | -50.730 | -4.999  | 22.338 | 1.00 | 0.00 | H |
| ATOM | 1146 | H4'  | C B | 18 | -49.135 | -6.921  | 23.216 | 1.00 | 0.00 | H |
| ATOM | 1147 | H41  | C B | 18 | -55.697 | -7.410  | 28.750 | 1.00 | 0.00 | H |
| ATOM | 1148 | H42  | C B | 18 | -55.919 | -9.124  | 28.305 | 1.00 | 0.00 | H |
| ATOM | 1149 | H2'1 | C B | 18 | -52.706 | -5.501  | 23.605 | 1.00 | 0.00 | H |
| ATOM | 1150 | H2'2 | C B | 18 | -53.045 | -6.378  | 22.121 | 1.00 | 0.00 | H |
| ATOM | 1151 | H5'1 | C B | 18 | -49.588 | -6.252  | 25.682 | 1.00 | 0.00 | H |
| ATOM | 1152 | H5'2 | C B | 18 | -48.944 | -5.058  | 24.535 | 1.00 | 0.00 | H |
| ATOM | 1153 | C1'  | C B | 19 | -54.977 | -10.446 | 20.717 | 1.00 | 0.00 | C |
| ATOM | 1154 | N1   | C B | 19 | -55.607 | -9.672  | 21.821 | 1.00 | 0.00 | N |
| ATOM | 1155 | C2   | C B | 19 | -56.452 | -10.351 | 22.697 | 1.00 | 0.00 | C |
| ATOM | 1156 | O2   | C B | 19 | -56.642 | -11.562 | 22.524 | 1.00 | 0.00 | O |
| ATOM | 1157 | N3   | C B | 19 | -57.035 | -9.663  | 23.707 | 1.00 | 0.00 | N |
| ATOM | 1158 | C4   | C B | 19 | -56.809 | -8.352  | 23.868 | 1.00 | 0.00 | C |
| ATOM | 1159 | N4   | C B | 19 | -57.404 | -7.730  | 24.872 | 1.00 | 0.00 | N |
| ATOM | 1160 | C5   | C B | 19 | -55.947 | -7.631  | 22.982 | 1.00 | 0.00 | C |
| ATOM | 1161 | C6   | C B | 19 | -55.370 | -8.343  | 21.973 | 1.00 | 0.00 | C |
| ATOM | 1162 | C2'  | C B | 19 | -54.873 | -9.677  | 19.409 | 1.00 | 0.00 | C |
| ATOM | 1163 | C3'  | C B | 19 | -53.549 | -10.179 | 18.851 | 1.00 | 0.00 | C |
| ATOM | 1164 | O3'  | C B | 19 | -53.770 | -11.401 | 18.150 | 1.00 | 0.00 | O |
| ATOM | 1165 | C4'  | C B | 19 | -52.704 | -10.378 | 20.106 | 1.00 | 0.00 | C |
| ATOM | 1166 | O4'  | C B | 19 | -53.667 | -10.791 | 21.128 | 1.00 | 0.00 | O |
| ATOM | 1167 | C5'  | C B | 19 | -51.956 | -9.166  | 20.612 | 1.00 | 0.00 | C |
| ATOM | 1168 | O5'  | C B | 19 | -52.756 | -7.975  | 20.407 | 1.00 | 0.00 | O |
| ATOM | 1169 | O1P  | C B | 19 | -51.435 | -6.670  | 18.709 | 1.00 | 0.00 | O |
| ATOM | 1170 | O2P  | C B | 19 | -52.940 | -5.471  | 20.320 | 1.00 | 0.00 | O |
| ATOM | 1171 | P    | C B | 19 | -52.018 | -6.605  | 20.064 | 1.00 | 0.00 | P |
| ATOM | 1172 | H5   | C B | 19 | -55.762 | -6.564  | 23.107 | 1.00 | 0.00 | H |
| ATOM | 1173 | H6   | C B | 19 | -54.705 | -7.835  | 21.274 | 1.00 | 0.00 | H |
| ATOM | 1174 | H1'  | C B | 19 | -55.541 | -11.370 | 20.585 | 1.00 | 0.00 | H |
| ATOM | 1175 | H3'  | C B | 19 | -53.090 | -9.454  | 18.178 | 1.00 | 0.00 | H |
| ATOM | 1176 | H4'  | C B | 19 | -51.970 | -11.150 | 19.876 | 1.00 | 0.00 | H |
| ATOM | 1177 | H41  | C B | 19 | -57.247 | -6.722  | 25.021 | 1.00 | 0.00 | H |
| ATOM | 1178 | H42  | C B | 19 | -58.025 | -8.253  | 25.509 | 1.00 | 0.00 | H |
| ATOM | 1179 | H2'1 | C B | 19 | -54.854 | -8.599  | 19.563 | 1.00 | 0.00 | H |
| ATOM | 1180 | H2'2 | C B | 19 | -55.699 | -9.898  | 18.732 | 1.00 | 0.00 | H |
| ATOM | 1181 | H5'1 | C B | 19 | -51.746 | -9.292  | 21.673 | 1.00 | 0.00 | H |
| ATOM | 1182 | H5'2 | C B | 19 | -51.016 | -9.076  | 20.069 | 1.00 | 0.00 | H |
| ATOM | 1183 | C1'  | T B | 20 | -58.918 | -13.224 | 19.597 | 1.00 | 0.00 | C |
| ATOM | 1184 | N1   | T B | 20 | -59.099 | -11.869 | 20.183 | 1.00 | 0.00 | N |
| ATOM | 1185 | C2   | T B | 20 | -59.923 | -11.765 | 21.286 | 1.00 | 0.00 | C |
| ATOM | 1186 | O2   | T B | 20 | -60.491 | -12.724 | 21.779 | 1.00 | 0.00 | O |
| ATOM | 1187 | N3   | T B | 20 | -60.063 | -10.489 | 21.797 | 1.00 | 0.00 | N |
| ATOM | 1188 | C4   | T B | 20 | -59.470 | -9.342  | 21.318 | 1.00 | 0.00 | C |
| ATOM | 1189 | O4   | T B | 20 | -59.673 | -8.249  | 21.862 | 1.00 | 0.00 | O |
| ATOM | 1190 | C5   | T B | 20 | -58.627 | -9.550  | 20.165 | 1.00 | 0.00 | C |
| ATOM | 1191 | C6   | T B | 20 | -58.467 | -10.779 | 19.639 | 1.00 | 0.00 | C |
| ATOM | 1192 | C7   | T B | 20 | -57.960 | -8.327  | 19.610 | 1.00 | 0.00 | C |

|      |      |      |     |    |         |         |        |      |      |   |
|------|------|------|-----|----|---------|---------|--------|------|------|---|
| ATOM | 1193 | C2'  | T B | 20 | -58.839 | -13.228 | 18.075 | 1.00 | 0.00 | C |
| ATOM | 1194 | C3'  | T B | 20 | -57.830 | -14.337 | 17.814 | 1.00 | 0.00 | C |
| ATOM | 1195 | O3'  | T B | 20 | -58.505 | -15.593 | 17.812 | 1.00 | 0.00 | O |
| ATOM | 1196 | C4'  | T B | 20 | -56.863 | -14.201 | 18.988 | 1.00 | 0.00 | C |
| ATOM | 1197 | O4'  | T B | 20 | -57.705 | -13.752 | 20.098 | 1.00 | 0.00 | O |
| ATOM | 1198 | C5'  | T B | 20 | -55.729 | -13.219 | 18.814 | 1.00 | 0.00 | C |
| ATOM | 1199 | O5'  | T B | 20 | -56.189 | -12.066 | 18.062 | 1.00 | 0.00 | O |
| ATOM | 1200 | O1P  | T B | 20 | -54.883 | -12.212 | 15.916 | 1.00 | 0.00 | O |
| ATOM | 1201 | O2P  | T B | 20 | -55.681 | -9.984  | 16.752 | 1.00 | 0.00 | O |
| ATOM | 1202 | P    | T B | 20 | -55.172 | -11.340 | 17.072 | 1.00 | 0.00 | P |
| ATOM | 1203 | H3   | T B | 20 | -60.672 | -10.385 | 22.621 | 1.00 | 0.00 | H |
| ATOM | 1204 | H6   | T B | 20 | -57.825 | -10.912 | 18.768 | 1.00 | 0.00 | H |
| ATOM | 1205 | H1'  | T B | 20 | -59.730 | -13.860 | 19.947 | 1.00 | 0.00 | H |
| ATOM | 1206 | H3'  | T B | 20 | -57.316 | -14.203 | 16.863 | 1.00 | 0.00 | H |
| ATOM | 1207 | H4'  | T B | 20 | -56.427 | -15.187 | 19.154 | 1.00 | 0.00 | H |
| ATOM | 1208 | H3T  | T B | 20 | -59.261 | -15.649 | 17.224 | 1.00 | 0.00 | H |
| ATOM | 1209 | H71  | T B | 20 | -58.348 | -8.122  | 18.612 | 1.00 | 0.00 | H |
| ATOM | 1210 | H72  | T B | 20 | -58.161 | -7.475  | 20.261 | 1.00 | 0.00 | H |
| ATOM | 1211 | H73  | T B | 20 | -56.883 | -8.493  | 19.554 | 1.00 | 0.00 | H |
| ATOM | 1212 | H2'1 | T B | 20 | -58.493 | -12.276 | 17.677 | 1.00 | 0.00 | H |
| ATOM | 1213 | H2'2 | T B | 20 | -59.800 | -13.449 | 17.612 | 1.00 | 0.00 | H |
| ATOM | 1214 | H5'1 | T B | 20 | -55.375 | -12.902 | 19.795 | 1.00 | 0.00 | H |
| ATOM | 1215 | H5'2 | T B | 20 | -54.915 | -13.705 | 18.279 | 1.00 | 0.00 | H |
| TER  |      |      |     |    |         |         |        |      |      |   |
| ATOM | 1    | C1'  | A A | 1  | -33.552 | -27.131 | 5.410  | 1.00 | 0.00 | C |
| ATOM | 2    | N1   | A A | 1  | -31.101 | -22.993 | 3.622  | 1.00 | 0.00 | N |
| ATOM | 3    | C2   | A A | 1  | -30.792 | -24.286 | 3.631  | 1.00 | 0.00 | C |
| ATOM | 4    | N3   | A A | 1  | -31.474 | -25.306 | 4.108  | 1.00 | 0.00 | N |
| ATOM | 5    | C4   | A A | 1  | -32.630 | -24.881 | 4.648  | 1.00 | 0.00 | C |
| ATOM | 6    | C5   | A A | 1  | -33.092 | -23.597 | 4.720  | 1.00 | 0.00 | C |
| ATOM | 7    | C6   | A A | 1  | -32.262 | -22.599 | 4.167  | 1.00 | 0.00 | C |
| ATOM | 8    | N6   | A A | 1  | -32.584 | -21.294 | 4.165  | 1.00 | 0.00 | N |
| ATOM | 9    | N7   | A A | 1  | -34.325 | -23.544 | 5.347  | 1.00 | 0.00 | N |
| ATOM | 10   | C8   | A A | 1  | -34.579 | -24.785 | 5.639  | 1.00 | 0.00 | C |
| ATOM | 11   | N9   | A A | 1  | -33.596 | -25.654 | 5.244  | 1.00 | 0.00 | N |
| ATOM | 12   | C2'  | A A | 1  | -34.133 | -27.618 | 6.731  | 1.00 | 0.00 | C |
| ATOM | 13   | C3'  | A A | 1  | -34.790 | -28.927 | 6.324  | 1.00 | 0.00 | C |
| ATOM | 14   | O3'  | A A | 1  | -33.813 | -29.965 | 6.336  | 1.00 | 0.00 | O |
| ATOM | 15   | C4'  | A A | 1  | -35.300 | -28.630 | 4.915  | 1.00 | 0.00 | C |
| ATOM | 16   | O4'  | A A | 1  | -34.309 | -27.705 | 4.362  | 1.00 | 0.00 | O |
| ATOM | 17   | C5'  | A A | 1  | -36.665 | -27.990 | 4.817  | 1.00 | 0.00 | C |
| ATOM | 18   | O5'  | A A | 1  | -36.851 | -27.058 | 5.912  | 1.00 | 0.00 | O |
| ATOM | 19   | H2   | A A | 1  | -29.834 | -24.539 | 3.176  | 1.00 | 0.00 | H |
| ATOM | 20   | H8   | A A | 1  | -35.488 | -25.104 | 6.149  | 1.00 | 0.00 | H |
| ATOM | 21   | H1'  | A A | 1  | -32.518 | -27.457 | 5.294  | 1.00 | 0.00 | H |
| ATOM | 22   | H3'  | A A | 1  | -35.611 | -29.197 | 6.991  | 1.00 | 0.00 | H |
| ATOM | 23   | H4'  | A A | 1  | -35.339 | -29.581 | 4.386  | 1.00 | 0.00 | H |
| ATOM | 24   | H61  | A A | 1  | -31.944 | -20.607 | 3.748  | 1.00 | 0.00 | H |
| ATOM | 25   | H62  | A A | 1  | -33.474 | -20.985 | 4.583  | 1.00 | 0.00 | H |
| ATOM | 26   | H5T  | A A | 1  | -37.728 | -26.954 | 6.285  | 1.00 | 0.00 | H |
| ATOM | 27   | H2'1 | A A | 1  | -34.860 | -26.921 | 7.145  | 1.00 | 0.00 | H |
| ATOM | 28   | H2'2 | A A | 1  | -33.364 | -27.779 | 7.486  | 1.00 | 0.00 | H |
| ATOM | 29   | H5'1 | A A | 1  | -36.745 | -27.463 | 3.867  | 1.00 | 0.00 | H |
| ATOM | 30   | H5'2 | A A | 1  | -37.428 | -28.766 | 4.861  | 1.00 | 0.00 | H |

|      |    |      |     |   |         |         |       |      |      |   |
|------|----|------|-----|---|---------|---------|-------|------|------|---|
| ATOM | 31 | C1'  | G A | 2 | -28.722 | -27.378 | 6.533 | 1.00 | 0.00 | C |
| ATOM | 32 | N1   | G A | 2 | -28.943 | -22.295 | 6.183 | 1.00 | 0.00 | N |
| ATOM | 33 | C2   | G A | 2 | -27.983 | -23.173 | 5.720 | 1.00 | 0.00 | C |
| ATOM | 34 | N2   | G A | 2 | -26.942 | -22.627 | 5.080 | 1.00 | 0.00 | N |
| ATOM | 35 | N3   | G A | 2 | -28.054 | -24.494 | 5.881 | 1.00 | 0.00 | N |
| ATOM | 36 | C4   | G A | 2 | -29.172 | -24.871 | 6.556 | 1.00 | 0.00 | C |
| ATOM | 37 | C5   | G A | 2 | -30.181 | -24.065 | 7.058 | 1.00 | 0.00 | C |
| ATOM | 38 | C6   | G A | 2 | -30.106 | -22.663 | 6.882 | 1.00 | 0.00 | C |
| ATOM | 39 | O6   | G A | 2 | -30.895 | -21.792 | 7.249 | 1.00 | 0.00 | O |
| ATOM | 40 | N7   | G A | 2 | -31.153 | -24.845 | 7.689 | 1.00 | 0.00 | N |
| ATOM | 41 | C8   | G A | 2 | -30.715 | -26.070 | 7.550 | 1.00 | 0.00 | C |
| ATOM | 42 | N9   | G A | 2 | -29.516 | -26.167 | 6.874 | 1.00 | 0.00 | N |
| ATOM | 43 | C2'  | G A | 2 | -28.732 | -28.445 | 7.619 | 1.00 | 0.00 | C |
| ATOM | 44 | C3'  | G A | 2 | -28.726 | -29.728 | 6.805 | 1.00 | 0.00 | C |
| ATOM | 45 | O3'  | G A | 2 | -27.382 | -30.054 | 6.455 | 1.00 | 0.00 | O |
| ATOM | 46 | C4'  | G A | 2 | -29.567 | -29.360 | 5.584 | 1.00 | 0.00 | C |
| ATOM | 47 | O4'  | G A | 2 | -29.279 | -27.944 | 5.362 | 1.00 | 0.00 | O |
| ATOM | 48 | C5'  | G A | 2 | -31.061 | -29.535 | 5.723 | 1.00 | 0.00 | C |
| ATOM | 49 | O5'  | G A | 2 | -31.473 | -29.189 | 7.069 | 1.00 | 0.00 | O |
| ATOM | 50 | O1P  | G A | 2 | -32.279 | -31.379 | 8.011 | 1.00 | 0.00 | O |
| ATOM | 51 | O2P  | G A | 2 | -33.210 | -29.220 | 8.884 | 1.00 | 0.00 | O |
| ATOM | 52 | P    | G A | 2 | -32.684 | -29.989 | 7.730 | 1.00 | 0.00 | P |
| ATOM | 53 | H1   | G A | 2 | -28.794 | -21.291 | 6.003 | 1.00 | 0.00 | H |
| ATOM | 54 | H8   | G A | 2 | -31.249 | -26.937 | 7.936 | 1.00 | 0.00 | H |
| ATOM | 55 | H1'  | G A | 2 | -27.704 | -27.065 | 6.302 | 1.00 | 0.00 | H |
| ATOM | 56 | H21  | G A | 2 | -26.893 | -21.606 | 4.957 | 1.00 | 0.00 | H |
| ATOM | 57 | H3'  | G A | 2 | -29.169 | -30.561 | 7.352 | 1.00 | 0.00 | H |
| ATOM | 58 | H22  | G A | 2 | -26.192 | -23.229 | 4.712 | 1.00 | 0.00 | H |
| ATOM | 59 | H4'  | G A | 2 | -29.232 | -29.997 | 4.766 | 1.00 | 0.00 | H |
| ATOM | 60 | H2'1 | G A | 2 | -29.617 | -28.381 | 8.253 | 1.00 | 0.00 | H |
| ATOM | 61 | H2'2 | G A | 2 | -27.858 | -28.382 | 8.269 | 1.00 | 0.00 | H |
| ATOM | 62 | H5'1 | G A | 2 | -31.565 | -28.886 | 5.006 | 1.00 | 0.00 | H |
| ATOM | 63 | H5'2 | G A | 2 | -31.322 | -30.571 | 5.511 | 1.00 | 0.00 | H |
| ATOM | 64 | C1'  | G A | 3 | -24.258 | -25.441 | 7.454 | 1.00 | 0.00 | C |
| ATOM | 65 | N1   | G A | 3 | -26.948 | -21.319 | 8.791 | 1.00 | 0.00 | N |
| ATOM | 66 | C2   | G A | 3 | -25.784 | -21.417 | 8.053 | 1.00 | 0.00 | C |
| ATOM | 67 | N2   | G A | 3 | -25.265 | -20.263 | 7.614 | 1.00 | 0.00 | N |
| ATOM | 68 | N3   | G A | 3 | -25.185 | -22.572 | 7.774 | 1.00 | 0.00 | N |
| ATOM | 69 | C4   | G A | 3 | -25.843 | -23.637 | 8.303 | 1.00 | 0.00 | C |
| ATOM | 70 | C5   | G A | 3 | -27.007 | -23.634 | 9.054 | 1.00 | 0.00 | C |
| ATOM | 71 | C6   | G A | 3 | -27.646 | -22.407 | 9.346 | 1.00 | 0.00 | C |
| ATOM | 72 | O6   | G A | 3 | -28.676 | -22.202 | 9.990 | 1.00 | 0.00 | O |
| ATOM | 73 | N7   | G A | 3 | -27.356 | -24.939 | 9.408 | 1.00 | 0.00 | N |
| ATOM | 74 | C8   | G A | 3 | -26.417 | -25.674 | 8.871 | 1.00 | 0.00 | C |
| ATOM | 75 | N9   | G A | 3 | -25.461 | -24.955 | 8.183 | 1.00 | 0.00 | N |
| ATOM | 76 | C2'  | G A | 3 | -23.561 | -26.613 | 8.131 | 1.00 | 0.00 | C |
| ATOM | 77 | C3'  | G A | 3 | -23.086 | -27.431 | 6.942 | 1.00 | 0.00 | C |
| ATOM | 78 | O3'  | G A | 3 | -21.838 | -26.912 | 6.487 | 1.00 | 0.00 | O |
| ATOM | 79 | C4'  | G A | 3 | -24.203 | -27.226 | 5.920 | 1.00 | 0.00 | C |
| ATOM | 80 | O4'  | G A | 3 | -24.674 | -25.864 | 6.169 | 1.00 | 0.00 | O |
| ATOM | 81 | C5'  | G A | 3 | -25.378 | -28.170 | 6.014 | 1.00 | 0.00 | C |
| ATOM | 82 | O5'  | G A | 3 | -25.657 | -28.470 | 7.404 | 1.00 | 0.00 | O |
| ATOM | 83 | O1P  | G A | 3 | -25.132 | -30.925 | 7.587 | 1.00 | 0.00 | O |
| ATOM | 84 | O2P  | G A | 3 | -26.811 | -29.883 | 9.132 | 1.00 | 0.00 | O |



|      |     |      |     |   |         |         |        |      |      |   |
|------|-----|------|-----|---|---------|---------|--------|------|------|---|
| ATOM | 85  | P    | G A | 3 | -26.197 | -29.923 | 7.782  | 1.00 | 0.00 | P |
| ATOM | 86  | H1   | G A | 3 | -27.334 | -20.375 | 8.947  | 1.00 | 0.00 | H |
| ATOM | 87  | H8   | G A | 3 | -26.391 | -26.760 | 8.958  | 1.00 | 0.00 | H |
| ATOM | 88  | H1'  | G A | 3 | -23.574 | -24.602 | 7.325  | 1.00 | 0.00 | H |
| ATOM | 89  | H21  | G A | 3 | -25.736 | -19.372 | 7.831  | 1.00 | 0.00 | H |
| ATOM | 90  | H3'  | G A | 3 | -22.969 | -28.486 | 7.191  | 1.00 | 0.00 | H |
| ATOM | 91  | H22  | G A | 3 | -24.398 | -20.268 | 7.060  | 1.00 | 0.00 | H |
| ATOM | 92  | H4'  | G A | 3 | -23.756 | -27.348 | 4.934  | 1.00 | 0.00 | H |
| ATOM | 93  | H2'1 | G A | 3 | -24.239 | -27.188 | 8.762  | 1.00 | 0.00 | H |
| ATOM | 94  | H2'2 | G A | 3 | -22.726 | -26.294 | 8.754  | 1.00 | 0.00 | H |
| ATOM | 95  | H5'1 | G A | 3 | -26.249 | -27.703 | 5.555  | 1.00 | 0.00 | H |
| ATOM | 96  | H5'2 | G A | 3 | -25.143 | -29.089 | 5.478  | 1.00 | 0.00 | H |
| ATOM | 97  | C1'  | C A | 4 | -21.187 | -21.833 | 8.898  | 1.00 | 0.00 | C |
| ATOM | 98  | N1   | C A | 4 | -22.327 | -22.248 | 9.764  | 1.00 | 0.00 | N |
| ATOM | 99  | C2   | C A | 4 | -23.183 | -21.255 | 10.232 | 1.00 | 0.00 | C |
| ATOM | 100 | O2   | C A | 4 | -22.966 | -20.079 | 9.915  | 1.00 | 0.00 | O |
| ATOM | 101 | N3   | C A | 4 | -24.226 | -21.612 | 11.021 | 1.00 | 0.00 | N |
| ATOM | 102 | C4   | C A | 4 | -24.435 | -22.894 | 11.348 | 1.00 | 0.00 | C |
| ATOM | 103 | N4   | C A | 4 | -25.472 | -23.186 | 12.119 | 1.00 | 0.00 | N |
| ATOM | 104 | C5   | C A | 4 | -23.568 | -23.934 | 10.881 | 1.00 | 0.00 | C |
| ATOM | 105 | C6   | C A | 4 | -22.527 | -23.553 | 10.087 | 1.00 | 0.00 | C |
| ATOM | 106 | C2'  | C A | 4 | -19.908 | -22.618 | 9.151  | 1.00 | 0.00 | C |
| ATOM | 107 | C3'  | C A | 4 | -19.317 | -22.721 | 7.753  | 1.00 | 0.00 | C |
| ATOM | 108 | O3'  | C A | 4 | -18.572 | -21.537 | 7.472  | 1.00 | 0.00 | O |
| ATOM | 109 | C4'  | C A | 4 | -20.555 | -22.846 | 6.869  | 1.00 | 0.00 | C |
| ATOM | 110 | O4'  | C A | 4 | -21.571 | -22.044 | 7.552  | 1.00 | 0.00 | O |
| ATOM | 111 | C5'  | C A | 4 | -21.098 | -24.242 | 6.670  | 1.00 | 0.00 | C |
| ATOM | 112 | O5'  | C A | 4 | -20.948 | -25.006 | 7.893  | 1.00 | 0.00 | O |
| ATOM | 113 | O1P  | C A | 4 | -19.288 | -26.791 | 7.266  | 1.00 | 0.00 | O |
| ATOM | 114 | O2P  | C A | 4 | -20.958 | -27.217 | 9.089  | 1.00 | 0.00 | O |
| ATOM | 115 | P    | C A | 4 | -20.650 | -26.570 | 7.790  | 1.00 | 0.00 | P |
| ATOM | 116 | H5   | C A | 4 | -23.731 | -24.978 | 11.149 | 1.00 | 0.00 | H |
| ATOM | 117 | H6   | C A | 4 | -21.843 | -24.310 | 9.703  | 1.00 | 0.00 | H |
| ATOM | 118 | H1'  | C A | 4 | -21.026 | -20.766 | 9.038  | 1.00 | 0.00 | H |
| ATOM | 119 | H3'  | C A | 4 | -18.667 | -23.589 | 7.648  | 1.00 | 0.00 | H |
| ATOM | 120 | H4'  | C A | 4 | -20.287 | -22.451 | 5.890  | 1.00 | 0.00 | H |
| ATOM | 121 | H41  | C A | 4 | -25.656 | -24.165 | 12.385 | 1.00 | 0.00 | H |
| ATOM | 122 | H42  | C A | 4 | -26.093 | -22.436 | 12.455 | 1.00 | 0.00 | H |
| ATOM | 123 | H2'1 | C A | 4 | -20.102 | -23.604 | 9.572  | 1.00 | 0.00 | H |
| ATOM | 124 | H2'2 | C A | 4 | -19.232 | -22.099 | 9.832  | 1.00 | 0.00 | H |
| ATOM | 125 | H5'1 | C A | 4 | -22.153 | -24.182 | 6.400  | 1.00 | 0.00 | H |
| ATOM | 126 | H5'2 | C A | 4 | -20.549 | -24.727 | 5.863  | 1.00 | 0.00 | H |
| ATOM | 127 | C1'  | C A | 5 | -20.022 | -17.724 | 11.404 | 1.00 | 0.00 | C |
| ATOM | 128 | N1   | C A | 5 | -20.647 | -18.882 | 12.101 | 1.00 | 0.00 | N |
| ATOM | 129 | C2   | C A | 5 | -21.776 | -18.641 | 12.880 | 1.00 | 0.00 | C |
| ATOM | 130 | O2   | C A | 5 | -22.211 | -17.484 | 12.964 | 1.00 | 0.00 | O |
| ATOM | 131 | N3   | C A | 5 | -22.360 | -19.682 | 13.523 | 1.00 | 0.00 | N |
| ATOM | 132 | C4   | C A | 5 | -21.867 | -20.922 | 13.415 | 1.00 | 0.00 | C |
| ATOM | 133 | N4   | C A | 5 | -22.480 | -21.902 | 14.061 | 1.00 | 0.00 | N |
| ATOM | 134 | C5   | C A | 5 | -20.706 | -21.198 | 12.621 | 1.00 | 0.00 | C |
| ATOM | 135 | C6   | C A | 5 | -20.137 | -20.135 | 11.982 | 1.00 | 0.00 | C |
| ATOM | 136 | C2'  | C A | 5 | -18.501 | -17.778 | 11.369 | 1.00 | 0.00 | C |
| ATOM | 137 | C3'  | C A | 5 | -18.194 | -17.174 | 10.007 | 1.00 | 0.00 | C |
| ATOM | 138 | O3'  | C A | 5 | -18.172 | -15.753 | 10.119 | 1.00 | 0.00 | O |

|      |     |      |     |   |         |         |        |      |      |   |
|------|-----|------|-----|---|---------|---------|--------|------|------|---|
| ATOM | 139 | C4'  | C A | 5 | -19.355 | -17.668 | 9.147  | 1.00 | 0.00 | C |
| ATOM | 140 | O4'  | C A | 5 | -20.490 | -17.721 | 10.068 | 1.00 | 0.00 | O |
| ATOM | 141 | C5'  | C A | 5 | -19.187 | -19.027 | 8.509  | 1.00 | 0.00 | C |
| ATOM | 142 | O5'  | C A | 5 | -18.474 | -19.909 | 9.413  | 1.00 | 0.00 | O |
| ATOM | 143 | O1P  | C A | 5 | -16.303 | -20.339 | 8.213  | 1.00 | 0.00 | O |
| ATOM | 144 | O2P  | C A | 5 | -17.210 | -22.042 | 9.818  | 1.00 | 0.00 | O |
| ATOM | 145 | P    | C A | 5 | -17.486 | -21.000 | 8.799  | 1.00 | 0.00 | P |
| ATOM | 146 | H5   | C A | 5 | -20.297 | -22.205 | 12.535 | 1.00 | 0.00 | H |
| ATOM | 147 | H6   | C A | 5 | -19.254 | -20.296 | 11.363 | 1.00 | 0.00 | H |
| ATOM | 148 | H1'  | C A | 5 | -20.370 | -16.810 | 11.884 | 1.00 | 0.00 | H |
| ATOM | 149 | H3'  | C A | 5 | -17.237 | -17.520 | 9.614  | 1.00 | 0.00 | H |
| ATOM | 150 | H4'  | C A | 5 | -19.488 | -16.939 | 8.347  | 1.00 | 0.00 | H |
| ATOM | 151 | H41  | C A | 5 | -22.122 | -22.866 | 13.994 | 1.00 | 0.00 | H |
| ATOM | 152 | H42  | C A | 5 | -23.314 | -21.701 | 14.632 | 1.00 | 0.00 | H |
| ATOM | 153 | H2'1 | C A | 5 | -18.120 | -18.796 | 11.446 | 1.00 | 0.00 | H |
| ATOM | 154 | H2'2 | C A | 5 | -18.048 | -17.196 | 12.173 | 1.00 | 0.00 | H |
| ATOM | 155 | H5'1 | C A | 5 | -20.171 | -19.443 | 8.288  | 1.00 | 0.00 | H |
| ATOM | 156 | H5'2 | C A | 5 | -18.627 | -18.919 | 7.580  | 1.00 | 0.00 | H |
| ATOM | 157 | C1'  | G A | 6 | -20.545 | -14.472 | 15.102 | 1.00 | 0.00 | C |
| ATOM | 158 | N1   | G A | 6 | -22.529 | -18.466 | 17.580 | 1.00 | 0.00 | N |
| ATOM | 159 | C2   | G A | 6 | -22.953 | -17.149 | 17.534 | 1.00 | 0.00 | C |
| ATOM | 160 | N2   | G A | 6 | -24.049 | -16.857 | 18.244 | 1.00 | 0.00 | N |
| ATOM | 161 | N3   | G A | 6 | -22.332 | -16.201 | 16.835 | 1.00 | 0.00 | N |
| ATOM | 162 | C4   | G A | 6 | -21.237 | -16.672 | 16.184 | 1.00 | 0.00 | C |
| ATOM | 163 | C5   | G A | 6 | -20.738 | -17.964 | 16.174 | 1.00 | 0.00 | C |
| ATOM | 164 | C6   | G A | 6 | -21.398 | -18.973 | 16.912 | 1.00 | 0.00 | C |
| ATOM | 165 | O6   | G A | 6 | -21.112 | -20.164 | 17.027 | 1.00 | 0.00 | O |
| ATOM | 166 | N7   | G A | 6 | -19.592 | -18.033 | 15.380 | 1.00 | 0.00 | N |
| ATOM | 167 | C8   | G A | 6 | -19.437 | -16.811 | 14.941 | 1.00 | 0.00 | C |
| ATOM | 168 | N9   | G A | 6 | -20.397 | -15.926 | 15.386 | 1.00 | 0.00 | N |
| ATOM | 169 | C2'  | G A | 6 | -19.221 | -13.724 | 15.027 | 1.00 | 0.00 | C |
| ATOM | 170 | C3'  | G A | 6 | -19.495 | -12.700 | 13.938 | 1.00 | 0.00 | C |
| ATOM | 171 | O3'  | G A | 6 | -20.138 | -11.565 | 14.513 | 1.00 | 0.00 | O |
| ATOM | 172 | C4'  | G A | 6 | -20.411 | -13.460 | 12.980 | 1.00 | 0.00 | C |
| ATOM | 173 | O4'  | G A | 6 | -21.191 | -14.340 | 13.851 | 1.00 | 0.00 | O |
| ATOM | 174 | C5'  | G A | 6 | -19.732 | -14.301 | 11.927 | 1.00 | 0.00 | C |
| ATOM | 175 | O5'  | G A | 6 | -18.531 | -14.901 | 12.475 | 1.00 | 0.00 | O |
| ATOM | 176 | O1P  | G A | 6 | -16.682 | -13.805 | 11.168 | 1.00 | 0.00 | O |
| ATOM | 177 | O2P  | G A | 6 | -16.348 | -16.096 | 12.133 | 1.00 | 0.00 | O |
| ATOM | 178 | P    | G A | 6 | -17.272 | -15.110 | 11.520 | 1.00 | 0.00 | P |
| ATOM | 179 | H1   | G A | 6 | -23.086 | -19.125 | 18.146 | 1.00 | 0.00 | H |
| ATOM | 180 | H8   | G A | 6 | -18.621 | -16.515 | 14.281 | 1.00 | 0.00 | H |
| ATOM | 181 | H1'  | G A | 6 | -21.195 | -14.040 | 15.864 | 1.00 | 0.00 | H |
| ATOM | 182 | H21  | G A | 6 | -24.527 | -17.597 | 18.780 | 1.00 | 0.00 | H |
| ATOM | 183 | H3'  | G A | 6 | -18.581 | -12.381 | 13.437 | 1.00 | 0.00 | H |
| ATOM | 184 | H22  | G A | 6 | -24.415 | -15.894 | 18.254 | 1.00 | 0.00 | H |
| ATOM | 185 | H4'  | G A | 6 | -21.023 | -12.717 | 12.470 | 1.00 | 0.00 | H |
| ATOM | 186 | H2'1 | G A | 6 | -18.391 | -14.378 | 14.757 | 1.00 | 0.00 | H |
| ATOM | 187 | H2'2 | G A | 6 | -18.963 | -13.242 | 15.971 | 1.00 | 0.00 | H |
| ATOM | 188 | H5'1 | G A | 6 | -20.415 | -15.082 | 11.595 | 1.00 | 0.00 | H |
| ATOM | 189 | H5'2 | G A | 6 | -19.473 | -13.670 | 11.077 | 1.00 | 0.00 | H |
| ATOM | 190 | C1'  | C A | 7 | -21.894 | -13.107 | 19.668 | 1.00 | 0.00 | C |
| ATOM | 191 | N1   | C A | 7 | -21.024 | -14.297 | 19.461 | 1.00 | 0.00 | N |
| ATOM | 192 | C2   | C A | 7 | -21.403 | -15.494 | 20.064 | 1.00 | 0.00 | C |

|      |     |      |     |   |         |         |        |      |      |   |
|------|-----|------|-----|---|---------|---------|--------|------|------|---|
| ATOM | 193 | O2   | C A | 7 | -22.438 | -15.522 | 20.741 | 1.00 | 0.00 | O |
| ATOM | 194 | N3   | C A | 7 | -20.624 | -16.590 | 19.887 | 1.00 | 0.00 | N |
| ATOM | 195 | C4   | C A | 7 | -19.508 | -16.530 | 19.150 | 1.00 | 0.00 | C |
| ATOM | 196 | N4   | C A | 7 | -18.786 | -17.631 | 19.008 | 1.00 | 0.00 | N |
| ATOM | 197 | C5   | C A | 7 | -19.091 | -15.310 | 18.522 | 1.00 | 0.00 | C |
| ATOM | 198 | C6   | C A | 7 | -19.894 | -14.221 | 18.709 | 1.00 | 0.00 | C |
| ATOM | 199 | C2'  | C A | 7 | -21.124 | -11.803 | 19.827 | 1.00 | 0.00 | C |
| ATOM | 200 | C3'  | C A | 7 | -22.041 | -10.808 | 19.133 | 1.00 | 0.00 | C |
| ATOM | 201 | O3'  | C A | 7 | -23.037 | -10.367 | 20.053 | 1.00 | 0.00 | O |
| ATOM | 202 | C4'  | C A | 7 | -22.634 | -11.630 | 17.991 | 1.00 | 0.00 | C |
| ATOM | 203 | O4'  | C A | 7 | -22.733 | -12.985 | 18.534 | 1.00 | 0.00 | O |
| ATOM | 204 | C5'  | C A | 7 | -21.829 | -11.681 | 16.712 | 1.00 | 0.00 | C |
| ATOM | 205 | O5'  | C A | 7 | -20.413 | -11.710 | 17.024 | 1.00 | 0.00 | O |
| ATOM | 206 | O1P  | C A | 7 | -19.572 | -9.514  | 16.125 | 1.00 | 0.00 | O |
| ATOM | 207 | O2P  | C A | 7 | -18.023 | -11.481 | 16.288 | 1.00 | 0.00 | O |
| ATOM | 208 | P    | C A | 7 | -19.395 | -10.978 | 16.040 | 1.00 | 0.00 | P |
| ATOM | 209 | H5   | C A | 7 | -18.180 | -15.254 | 17.925 | 1.00 | 0.00 | H |
| ATOM | 210 | H6   | C A | 7 | -19.623 | -13.272 | 18.245 | 1.00 | 0.00 | H |
| ATOM | 211 | H1'  | C A | 7 | -22.528 | -13.295 | 20.535 | 1.00 | 0.00 | H |
| ATOM | 212 | H3'  | C A | 7 | -21.492 | -9.945  | 18.754 | 1.00 | 0.00 | H |
| ATOM | 213 | H4'  | C A | 7 | -23.604 | -11.192 | 17.756 | 1.00 | 0.00 | H |
| ATOM | 214 | H41  | C A | 7 | -17.924 | -17.614 | 18.444 | 1.00 | 0.00 | H |
| ATOM | 215 | H42  | C A | 7 | -19.084 | -18.507 | 19.462 | 1.00 | 0.00 | H |
| ATOM | 216 | H2'1 | C A | 7 | -20.146 | -11.840 | 19.351 | 1.00 | 0.00 | H |
| ATOM | 217 | H2'2 | C A | 7 | -20.970 | -11.539 | 20.874 | 1.00 | 0.00 | H |
| ATOM | 218 | H5'1 | C A | 7 | -22.102 | -12.576 | 16.152 | 1.00 | 0.00 | H |
| ATOM | 219 | H5'2 | C A | 7 | -22.055 | -10.800 | 16.112 | 1.00 | 0.00 | H |
| ATOM | 220 | C1'  | A A | 8 | -22.904 | -13.920 | 24.446 | 1.00 | 0.00 | C |
| ATOM | 221 | N1   | A A | 8 | -19.780 | -17.946 | 23.829 | 1.00 | 0.00 | N |
| ATOM | 222 | C2   | A A | 8 | -20.944 | -17.799 | 24.454 | 1.00 | 0.00 | C |
| ATOM | 223 | N3   | A A | 8 | -21.702 | -16.730 | 24.573 | 1.00 | 0.00 | N |
| ATOM | 224 | C4   | A A | 8 | -21.132 | -15.685 | 23.944 | 1.00 | 0.00 | C |
| ATOM | 225 | C5   | A A | 8 | -19.948 | -15.669 | 23.261 | 1.00 | 0.00 | C |
| ATOM | 226 | C6   | A A | 8 | -19.238 | -16.886 | 23.210 | 1.00 | 0.00 | C |
| ATOM | 227 | N6   | A A | 8 | -18.061 | -17.022 | 22.575 | 1.00 | 0.00 | N |
| ATOM | 228 | N7   | A A | 8 | -19.686 | -14.412 | 22.745 | 1.00 | 0.00 | N |
| ATOM | 229 | C8   | A A | 8 | -20.706 | -13.699 | 23.126 | 1.00 | 0.00 | C |
| ATOM | 230 | N9   | A A | 8 | -21.626 | -14.406 | 23.857 | 1.00 | 0.00 | N |
| ATOM | 231 | C2'  | A A | 8 | -22.825 | -12.503 | 24.998 | 1.00 | 0.00 | C |
| ATOM | 232 | C3'  | A A | 8 | -24.207 | -11.960 | 24.674 | 1.00 | 0.00 | C |
| ATOM | 233 | O3'  | A A | 8 | -25.114 | -12.345 | 25.704 | 1.00 | 0.00 | O |
| ATOM | 234 | C4'  | A A | 8 | -24.532 | -12.629 | 23.339 | 1.00 | 0.00 | C |
| ATOM | 235 | O4'  | A A | 8 | -23.883 | -13.939 | 23.425 | 1.00 | 0.00 | O |
| ATOM | 236 | C5'  | A A | 8 | -24.038 | -11.924 | 22.098 | 1.00 | 0.00 | C |
| ATOM | 237 | O5'  | A A | 8 | -22.745 | -11.321 | 22.358 | 1.00 | 0.00 | O |
| ATOM | 238 | O1P  | A A | 8 | -23.211 | -8.853  | 22.191 | 1.00 | 0.00 | O |
| ATOM | 239 | O2P  | A A | 8 | -20.915 | -9.734  | 21.690 | 1.00 | 0.00 | O |
| ATOM | 240 | P    | A A | 8 | -22.383 | -9.943  | 21.640 | 1.00 | 0.00 | P |
| ATOM | 241 | H2   | A A | 8 | -21.327 | -18.696 | 24.939 | 1.00 | 0.00 | H |
| ATOM | 242 | H8   | A A | 8 | -20.819 | -12.641 | 22.888 | 1.00 | 0.00 | H |
| ATOM | 243 | H1'  | A A | 8 | -23.212 | -14.624 | 25.218 | 1.00 | 0.00 | H |
| ATOM | 244 | H3'  | A A | 8 | -24.208 | -10.874 | 24.580 | 1.00 | 0.00 | H |
| ATOM | 245 | H4'  | A A | 8 | -25.617 | -12.695 | 23.275 | 1.00 | 0.00 | H |
| ATOM | 246 | H61  | A A | 8 | -17.584 | -17.934 | 22.565 | 1.00 | 0.00 | H |

|      |     |      |     |    |         |         |        |      |      |   |
|------|-----|------|-----|----|---------|---------|--------|------|------|---|
| ATOM | 247 | H62  | A A | 8  | -17.637 | -16.212 | 22.099 | 1.00 | 0.00 | H |
| ATOM | 248 | H2'1 | A A | 8  | -22.045 | -11.915 | 24.517 | 1.00 | 0.00 | H |
| ATOM | 249 | H2'2 | A A | 8  | -22.634 | -12.488 | 26.071 | 1.00 | 0.00 | H |
| ATOM | 250 | H5'1 | A A | 8  | -23.950 | -12.648 | 21.288 | 1.00 | 0.00 | H |
| ATOM | 251 | H5'2 | A A | 8  | -24.753 | -11.153 | 21.814 | 1.00 | 0.00 | H |
| ATOM | 252 | C1'  | C A | 9  | -22.500 | -16.449 | 28.701 | 1.00 | 0.00 | C |
| ATOM | 253 | N1   | C A | 9  | -21.281 | -16.009 | 27.967 | 1.00 | 0.00 | N |
| ATOM | 254 | C2   | C A | 9  | -20.302 | -16.963 | 27.696 | 1.00 | 0.00 | C |
| ATOM | 255 | O2   | C A | 9  | -20.483 | -18.127 | 28.075 | 1.00 | 0.00 | O |
| ATOM | 256 | N3   | C A | 9  | -19.186 | -16.583 | 27.030 | 1.00 | 0.00 | N |
| ATOM | 257 | C4   | C A | 9  | -19.017 | -15.314 | 26.635 | 1.00 | 0.00 | C |
| ATOM | 258 | N4   | C A | 9  | -17.907 | -14.998 | 25.983 | 1.00 | 0.00 | N |
| ATOM | 259 | C5   | C A | 9  | -20.005 | -14.310 | 26.902 | 1.00 | 0.00 | C |
| ATOM | 260 | C6   | C A | 9  | -21.125 | -14.716 | 27.571 | 1.00 | 0.00 | C |
| ATOM | 261 | C2'  | C A | 9  | -23.020 | -15.422 | 29.697 | 1.00 | 0.00 | C |
| ATOM | 262 | C3'  | C A | 9  | -24.526 | -15.611 | 29.590 | 1.00 | 0.00 | C |
| ATOM | 263 | O3'  | C A | 9  | -24.924 | -16.684 | 30.440 | 1.00 | 0.00 | O |
| ATOM | 264 | C4'  | C A | 9  | -24.723 | -15.942 | 28.113 | 1.00 | 0.00 | C |
| ATOM | 265 | O4'  | C A | 9  | -23.516 | -16.683 | 27.744 | 1.00 | 0.00 | O |
| ATOM | 266 | C5'  | C A | 9  | -24.871 | -14.766 | 27.176 | 1.00 | 0.00 | C |
| ATOM | 267 | O5'  | C A | 9  | -24.012 | -13.681 | 27.612 | 1.00 | 0.00 | O |
| ATOM | 268 | O1P  | C A | 9  | -25.640 | -11.886 | 28.291 | 1.00 | 0.00 | O |
| ATOM | 269 | O2P  | C A | 9  | -23.343 | -11.260 | 27.498 | 1.00 | 0.00 | O |
| ATOM | 270 | P    | C A | 9  | -24.504 | -12.179 | 27.396 | 1.00 | 0.00 | P |
| ATOM | 271 | H5   | C A | 9  | -19.870 | -13.275 | 26.588 | 1.00 | 0.00 | H |
| ATOM | 272 | H6   | C A | 9  | -21.909 | -13.992 | 27.791 | 1.00 | 0.00 | H |
| ATOM | 273 | H1'  | C A | 9  | -22.278 | -17.395 | 29.193 | 1.00 | 0.00 | H |
| ATOM | 274 | H3'  | C A | 9  | -25.070 | -14.709 | 29.868 | 1.00 | 0.00 | H |
| ATOM | 275 | H4'  | C A | 9  | -25.630 | -16.540 | 28.040 | 1.00 | 0.00 | H |
| ATOM | 276 | H41  | C A | 9  | -17.754 | -14.030 | 25.666 | 1.00 | 0.00 | H |
| ATOM | 277 | H42  | C A | 9  | -17.197 | -15.721 | 25.794 | 1.00 | 0.00 | H |
| ATOM | 278 | H2'1 | C A | 9  | -22.729 | -14.406 | 29.435 | 1.00 | 0.00 | H |
| ATOM | 279 | H2'2 | C A | 9  | -22.666 | -15.614 | 30.711 | 1.00 | 0.00 | H |
| ATOM | 280 | H5'1 | C A | 9  | -24.593 | -15.073 | 26.167 | 1.00 | 0.00 | H |
| ATOM | 281 | H5'2 | C A | 9  | -25.909 | -14.436 | 27.177 | 1.00 | 0.00 | H |
| ATOM | 282 | C1'  | C A | 10 | -20.201 | -19.456 | 31.894 | 1.00 | 0.00 | C |
| ATOM | 283 | N1   | C A | 10 | -19.496 | -18.273 | 31.329 | 1.00 | 0.00 | N |
| ATOM | 284 | C2   | C A | 10 | -18.246 | -18.475 | 30.748 | 1.00 | 0.00 | C |
| ATOM | 285 | O2   | C A | 10 | -17.774 | -19.620 | 30.725 | 1.00 | 0.00 | O |
| ATOM | 286 | N3   | C A | 10 | -17.587 | -17.411 | 30.227 | 1.00 | 0.00 | N |
| ATOM | 287 | C4   | C A | 10 | -18.121 | -16.183 | 30.267 | 1.00 | 0.00 | C |
| ATOM | 288 | N4   | C A | 10 | -17.435 | -15.179 | 29.740 | 1.00 | 0.00 | N |
| ATOM | 289 | C5   | C A | 10 | -19.404 | -15.945 | 30.862 | 1.00 | 0.00 | C |
| ATOM | 290 | C6   | C A | 10 | -20.051 | -17.033 | 31.376 | 1.00 | 0.00 | C |
| ATOM | 291 | C2'  | C A | 10 | -20.962 | -19.160 | 33.178 | 1.00 | 0.00 | C |
| ATOM | 292 | C3'  | C A | 10 | -22.184 | -20.055 | 33.035 | 1.00 | 0.00 | C |
| ATOM | 293 | O3'  | C A | 10 | -21.860 | -21.366 | 33.492 | 1.00 | 0.00 | O |
| ATOM | 294 | C4'  | C A | 10 | -22.458 | -20.018 | 31.534 | 1.00 | 0.00 | C |
| ATOM | 295 | O4'  | C A | 10 | -21.132 | -19.904 | 30.927 | 1.00 | 0.00 | O |
| ATOM | 296 | C5'  | C A | 10 | -23.316 | -18.878 | 31.036 | 1.00 | 0.00 | C |
| ATOM | 297 | O5'  | C A | 10 | -23.022 | -17.676 | 31.791 | 1.00 | 0.00 | O |
| ATOM | 298 | O1P  | C A | 10 | -25.160 | -17.235 | 33.043 | 1.00 | 0.00 | O |
| ATOM | 299 | O2P  | C A | 10 | -23.628 | -15.334 | 32.468 | 1.00 | 0.00 | O |
| ATOM | 300 | P    | C A | 10 | -24.203 | -16.646 | 32.086 | 1.00 | 0.00 | P |

|      |     |      |   |   |    |         |         |        |      |      |   |
|------|-----|------|---|---|----|---------|---------|--------|------|------|---|
| ATOM | 301 | H5   | C | A | 10 | -19.841 | -14.946 | 30.902 | 1.00 | 0.00 | H |
| ATOM | 302 | H6   | C | A | 10 | -21.033 | -16.903 | 31.831 | 1.00 | 0.00 | H |
| ATOM | 303 | H1'  | C | A | 10 | -19.469 | -20.248 | 32.047 | 1.00 | 0.00 | H |
| ATOM | 304 | H3'  | C | A | 10 | -23.036 | -19.676 | 33.601 | 1.00 | 0.00 | H |
| ATOM | 305 | H4'  | C | A | 10 | -22.965 | -20.950 | 31.282 | 1.00 | 0.00 | H |
| ATOM | 306 | H41  | C | A | 10 | -17.824 | -14.225 | 29.756 | 1.00 | 0.00 | H |
| ATOM | 307 | H42  | C | A | 10 | -16.512 | -15.353 | 29.316 | 1.00 | 0.00 | H |
| ATOM | 308 | H2'1 | C | A | 10 | -21.247 | -18.112 | 33.260 | 1.00 | 0.00 | H |
| ATOM | 309 | H2'2 | C | A | 10 | -20.385 | -19.415 | 34.069 | 1.00 | 0.00 | H |
| ATOM | 310 | H5'1 | C | A | 10 | -23.110 | -18.709 | 29.978 | 1.00 | 0.00 | H |
| ATOM | 311 | H5'2 | C | A | 10 | -24.366 | -19.142 | 31.158 | 1.00 | 0.00 | H |
| ATOM | 312 | C1'  | T | A | 11 | -16.230 | -21.620 | 33.905 | 1.00 | 0.00 | C |
| ATOM | 313 | N1   | T | A | 11 | -16.271 | -20.143 | 33.741 | 1.00 | 0.00 | N |
| ATOM | 314 | C2   | T | A | 11 | -15.195 | -19.549 | 33.113 | 1.00 | 0.00 | C |
| ATOM | 315 | O2   | T | A | 11 | -14.238 | -20.182 | 32.701 | 1.00 | 0.00 | O |
| ATOM | 316 | N3   | T | A | 11 | -15.274 | -18.174 | 32.979 | 1.00 | 0.00 | N |
| ATOM | 317 | C4   | T | A | 11 | -16.306 | -17.366 | 33.411 | 1.00 | 0.00 | C |
| ATOM | 318 | O4   | T | A | 11 | -16.264 | -16.141 | 33.238 | 1.00 | 0.00 | O |
| ATOM | 319 | C5   | T | A | 11 | -17.385 | -18.077 | 34.055 | 1.00 | 0.00 | C |
| ATOM | 320 | C6   | T | A | 11 | -17.341 | -19.415 | 34.201 | 1.00 | 0.00 | C |
| ATOM | 321 | C7   | T | A | 11 | -18.529 | -17.236 | 34.537 | 1.00 | 0.00 | C |
| ATOM | 322 | C2'  | T | A | 11 | -16.809 | -22.107 | 35.228 | 1.00 | 0.00 | C |
| ATOM | 323 | C3'  | T | A | 11 | -17.471 | -23.414 | 34.823 | 1.00 | 0.00 | C |
| ATOM | 324 | O3'  | T | A | 11 | -16.497 | -24.456 | 34.831 | 1.00 | 0.00 | O |
| ATOM | 325 | C4'  | T | A | 11 | -17.983 | -23.114 | 33.417 | 1.00 | 0.00 | C |
| ATOM | 326 | O4'  | T | A | 11 | -16.991 | -22.193 | 32.860 | 1.00 | 0.00 | O |
| ATOM | 327 | C5'  | T | A | 11 | -19.347 | -22.470 | 33.321 | 1.00 | 0.00 | C |
| ATOM | 328 | O5'  | T | A | 11 | -19.527 | -21.539 | 34.417 | 1.00 | 0.00 | O |
| ATOM | 329 | O1P  | T | A | 11 | -21.371 | -22.583 | 35.773 | 1.00 | 0.00 | O |
| ATOM | 330 | O2P  | T | A | 11 | -21.035 | -20.098 | 35.818 | 1.00 | 0.00 | O |
| ATOM | 331 | P    | T | A | 11 | -20.982 | -21.362 | 35.043 | 1.00 | 0.00 | P |
| ATOM | 332 | H3   | T | A | 11 | -14.486 | -17.708 | 32.511 | 1.00 | 0.00 | H |
| ATOM | 333 | H6   | T | A | 11 | -18.168 | -19.931 | 34.690 | 1.00 | 0.00 | H |
| ATOM | 334 | H1'  | T | A | 11 | -15.197 | -21.949 | 33.787 | 1.00 | 0.00 | H |
| ATOM | 335 | H3'  | T | A | 11 | -18.289 | -23.681 | 35.491 | 1.00 | 0.00 | H |
| ATOM | 336 | H4'  | T | A | 11 | -18.026 | -24.065 | 32.884 | 1.00 | 0.00 | H |
| ATOM | 337 | H71  | T | A | 11 | -18.576 | -17.276 | 35.626 | 1.00 | 0.00 | H |
| ATOM | 338 | H72  | T | A | 11 | -18.382 | -16.204 | 34.218 | 1.00 | 0.00 | H |
| ATOM | 339 | H73  | T | A | 11 | -19.462 | -17.615 | 34.119 | 1.00 | 0.00 | H |
| ATOM | 340 | H2'1 | T | A | 11 | -17.532 | -21.408 | 35.644 | 1.00 | 0.00 | H |
| ATOM | 341 | H2'2 | T | A | 11 | -16.038 | -22.269 | 35.982 | 1.00 | 0.00 | H |
| ATOM | 342 | H5'1 | T | A | 11 | -19.429 | -21.942 | 32.371 | 1.00 | 0.00 | H |
| ATOM | 343 | H5'2 | T | A | 11 | -20.112 | -23.245 | 33.367 | 1.00 | 0.00 | H |
| ATOM | 344 | C1'  | A | A | 12 | -11.404 | -21.891 | 35.033 | 1.00 | 0.00 | C |
| ATOM | 345 | N1   | A | A | 12 | -11.603 | -16.776 | 34.668 | 1.00 | 0.00 | N |
| ATOM | 346 | C2   | A | A | 12 | -10.716 | -17.673 | 34.249 | 1.00 | 0.00 | C |
| ATOM | 347 | N3   | A | A | 12 | -10.728 | -18.984 | 34.374 | 1.00 | 0.00 | N |
| ATOM | 348 | C4   | A | A | 12 | -11.828 | -19.377 | 35.039 | 1.00 | 0.00 | C |
| ATOM | 349 | C5   | A | A | 12 | -12.828 | -18.589 | 35.534 | 1.00 | 0.00 | C |
| ATOM | 350 | C6   | A | A | 12 | -12.692 | -17.199 | 35.327 | 1.00 | 0.00 | C |
| ATOM | 351 | N6   | A | A | 12 | -13.595 | -16.302 | 35.757 | 1.00 | 0.00 | N |
| ATOM | 352 | N7   | A | A | 12 | -13.801 | -19.348 | 36.159 | 1.00 | 0.00 | N |
| ATOM | 353 | C8   | A | A | 12 | -13.373 | -20.569 | 36.034 | 1.00 | 0.00 | C |
| ATOM | 354 | N9   | A | A | 12 | -12.180 | -20.665 | 35.362 | 1.00 | 0.00 | N |

|      |     |      |   |   |    |         |         |        |      |      |   |
|------|-----|------|---|---|----|---------|---------|--------|------|------|---|
| ATOM | 355 | C2'  | A | A | 12 | -11.434 | -22.947 | 36.130 | 1.00 | 0.00 | C |
| ATOM | 356 | C3'  | A | A | 12 | -11.445 | -24.238 | 35.327 | 1.00 | 0.00 | C |
| ATOM | 357 | O3'  | A | A | 12 | -10.105 | -24.586 | 34.984 | 1.00 | 0.00 | O |
| ATOM | 358 | C4'  | A | A | 12 | -12.277 | -23.869 | 34.099 | 1.00 | 0.00 | C |
| ATOM | 359 | O4'  | A | A | 12 | -11.967 | -22.458 | 33.866 | 1.00 | 0.00 | O |
| ATOM | 360 | C5'  | A | A | 12 | -13.773 | -24.020 | 34.234 | 1.00 | 0.00 | C |
| ATOM | 361 | O5'  | A | A | 12 | -14.185 | -23.657 | 35.576 | 1.00 | 0.00 | O |
| ATOM | 362 | O1P  | A | A | 12 | -15.026 | -25.827 | 36.535 | 1.00 | 0.00 | O |
| ATOM | 363 | O2P  | A | A | 12 | -15.928 | -23.646 | 37.386 | 1.00 | 0.00 | O |
| ATOM | 364 | P    | A | A | 12 | -15.409 | -24.433 | 36.240 | 1.00 | 0.00 | P |
| ATOM | 365 | H2   | A | A | 12 | -9.853  | -17.264 | 33.724 | 1.00 | 0.00 | H |
| ATOM | 366 | H8   | A | A | 12 | -13.908 | -21.435 | 36.424 | 1.00 | 0.00 | H |
| ATOM | 367 | H1'  | A | A | 12 | -10.381 | -21.596 | 34.804 | 1.00 | 0.00 | H |
| ATOM | 368 | H3'  | A | A | 12 | -11.901 | -25.060 | 35.878 | 1.00 | 0.00 | H |
| ATOM | 369 | H4'  | A | A | 12 | -11.948 | -24.518 | 33.288 | 1.00 | 0.00 | H |
| ATOM | 370 | H61  | A | A | 12 | -13.449 | -15.298 | 35.578 | 1.00 | 0.00 | H |
| ATOM | 371 | H62  | A | A | 12 | -14.433 | -16.619 | 36.267 | 1.00 | 0.00 | H |
| ATOM | 372 | H2'1 | A | A | 12 | -12.320 | -22.866 | 36.759 | 1.00 | 0.00 | H |
| ATOM | 373 | H2'2 | A | A | 12 | -10.563 | -22.892 | 36.782 | 1.00 | 0.00 | H |
| ATOM | 374 | H5'1 | A | A | 12 | -14.264 | -23.370 | 33.510 | 1.00 | 0.00 | H |
| ATOM | 375 | H5'2 | A | A | 12 | -14.048 | -25.054 | 34.032 | 1.00 | 0.00 | H |
| ATOM | 376 | C1'  | G | A | 13 | -6.936  | -19.931 | 35.950 | 1.00 | 0.00 | C |
| ATOM | 377 | N1   | G | A | 13 | -9.627  | -15.808 | 37.286 | 1.00 | 0.00 | N |
| ATOM | 378 | C2   | G | A | 13 | -8.462  | -15.906 | 36.548 | 1.00 | 0.00 | C |
| ATOM | 379 | N2   | G | A | 13 | -7.941  | -14.752 | 36.109 | 1.00 | 0.00 | N |
| ATOM | 380 | N3   | G | A | 13 | -7.862  | -17.062 | 36.270 | 1.00 | 0.00 | N |
| ATOM | 381 | C4   | G | A | 13 | -8.521  | -18.126 | 36.799 | 1.00 | 0.00 | C |
| ATOM | 382 | C5   | G | A | 13 | -9.685  | -18.124 | 37.550 | 1.00 | 0.00 | C |
| ATOM | 383 | C6   | G | A | 13 | -10.324 | -16.897 | 37.842 | 1.00 | 0.00 | C |
| ATOM | 384 | O6   | G | A | 13 | -11.353 | -16.693 | 38.488 | 1.00 | 0.00 | O |
| ATOM | 385 | N7   | G | A | 13 | -10.034 | -19.428 | 37.904 | 1.00 | 0.00 | N |
| ATOM | 386 | C8   | G | A | 13 | -9.095  | -20.164 | 37.367 | 1.00 | 0.00 | C |
| ATOM | 387 | N9   | G | A | 13 | -8.139  | -19.444 | 36.679 | 1.00 | 0.00 | N |
| ATOM | 388 | C2'  | G | A | 13 | -6.239  | -21.102 | 36.627 | 1.00 | 0.00 | C |
| ATOM | 389 | C3'  | G | A | 13 | -5.764  | -21.920 | 35.438 | 1.00 | 0.00 | C |
| ATOM | 390 | O3'  | G | A | 13 | -4.516  | -21.402 | 34.983 | 1.00 | 0.00 | O |
| ATOM | 391 | C4'  | G | A | 13 | -6.881  | -21.716 | 34.416 | 1.00 | 0.00 | C |
| ATOM | 392 | O4'  | G | A | 13 | -7.352  | -20.354 | 34.665 | 1.00 | 0.00 | O |
| ATOM | 393 | C5'  | G | A | 13 | -8.056  | -22.659 | 34.510 | 1.00 | 0.00 | C |
| ATOM | 394 | O5'  | G | A | 13 | -8.335  | -22.959 | 35.900 | 1.00 | 0.00 | O |
| ATOM | 395 | O1P  | G | A | 13 | -7.810  | -25.414 | 36.083 | 1.00 | 0.00 | O |
| ATOM | 396 | O2P  | G | A | 13 | -9.489  | -24.372 | 37.628 | 1.00 | 0.00 | O |
| ATOM | 397 | P    | G | A | 13 | -8.875  | -24.412 | 36.278 | 1.00 | 0.00 | P |
| ATOM | 398 | H1   | G | A | 13 | -10.014 | -14.864 | 37.440 | 1.00 | 0.00 | H |
| ATOM | 399 | H8   | G | A | 13 | -9.068  | -21.250 | 37.453 | 1.00 | 0.00 | H |
| ATOM | 400 | H1'  | G | A | 13 | -6.252  | -19.091 | 35.821 | 1.00 | 0.00 | H |
| ATOM | 401 | H21  | G | A | 13 | -8.413  | -13.861 | 36.326 | 1.00 | 0.00 | H |
| ATOM | 402 | H3'  | G | A | 13 | -5.647  | -22.975 | 35.687 | 1.00 | 0.00 | H |
| ATOM | 403 | H22  | G | A | 13 | -7.074  | -14.757 | 35.557 | 1.00 | 0.00 | H |
| ATOM | 404 | H4'  | G | A | 13 | -6.434  | -21.837 | 33.430 | 1.00 | 0.00 | H |
| ATOM | 405 | H2'1 | G | A | 13 | -6.917  | -21.678 | 37.258 | 1.00 | 0.00 | H |
| ATOM | 406 | H2'2 | G | A | 13 | -5.404  | -20.783 | 37.250 | 1.00 | 0.00 | H |
| ATOM | 407 | H5'1 | G | A | 13 | -8.927  | -22.192 | 34.051 | 1.00 | 0.00 | H |
| ATOM | 408 | H5'2 | G | A | 13 | -7.821  | -23.578 | 33.974 | 1.00 | 0.00 | H |

|      |     |      |     |    |        |         |        |      |      |   |
|------|-----|------|-----|----|--------|---------|--------|------|------|---|
| ATOM | 409 | C1'  | G A | 14 | -3.866 | -16.323 | 37.395 | 1.00 | 0.00 | C |
| ATOM | 410 | N1   | G A | 14 | -7.917 | -14.711 | 40.044 | 1.00 | 0.00 | N |
| ATOM | 411 | C2   | G A | 14 | -7.000 | -13.992 | 39.299 | 1.00 | 0.00 | C |
| ATOM | 412 | N2   | G A | 14 | -7.184 | -12.666 | 39.255 | 1.00 | 0.00 | N |
| ATOM | 413 | N3   | G A | 14 | -5.979 | -14.550 | 38.649 | 1.00 | 0.00 | N |
| ATOM | 414 | C4   | G A | 14 | -5.942 | -15.898 | 38.809 | 1.00 | 0.00 | C |
| ATOM | 415 | C5   | G A | 14 | -6.809 | -16.697 | 39.535 | 1.00 | 0.00 | C |
| ATOM | 416 | C6   | G A | 14 | -7.893 | -16.108 | 40.221 | 1.00 | 0.00 | C |
| ATOM | 417 | O6   | G A | 14 | -8.761 | -16.643 | 40.912 | 1.00 | 0.00 | O |
| ATOM | 418 | N7   | G A | 14 | -6.418 | -18.037 | 39.446 | 1.00 | 0.00 | N |
| ATOM | 419 | C8   | G A | 14 | -5.356 | -18.007 | 38.685 | 1.00 | 0.00 | C |
| ATOM | 420 | N9   | G A | 14 | -5.003 | -16.743 | 38.260 | 1.00 | 0.00 | N |
| ATOM | 421 | C2'  | G A | 14 | -2.585 | -17.108 | 37.642 | 1.00 | 0.00 | C |
| ATOM | 422 | C3'  | G A | 14 | -1.995 | -17.203 | 36.244 | 1.00 | 0.00 | C |
| ATOM | 423 | O3'  | G A | 14 | -1.253 | -16.018 | 35.967 | 1.00 | 0.00 | O |
| ATOM | 424 | C4'  | G A | 14 | -3.236 | -17.327 | 35.360 | 1.00 | 0.00 | C |
| ATOM | 425 | O4'  | G A | 14 | -4.250 | -16.528 | 36.049 | 1.00 | 0.00 | O |
| ATOM | 426 | C5'  | G A | 14 | -3.777 | -18.722 | 35.156 | 1.00 | 0.00 | C |
| ATOM | 427 | O5'  | G A | 14 | -3.624 | -19.491 | 36.374 | 1.00 | 0.00 | O |
| ATOM | 428 | O1P  | G A | 14 | -1.963 | -21.271 | 35.737 | 1.00 | 0.00 | O |
| ATOM | 429 | O2P  | G A | 14 | -3.630 | -21.707 | 37.560 | 1.00 | 0.00 | O |
| ATOM | 430 | P    | G A | 14 | -3.324 | -21.053 | 36.264 | 1.00 | 0.00 | P |
| ATOM | 431 | H1   | G A | 14 | -8.675 | -14.183 | 40.503 | 1.00 | 0.00 | H |
| ATOM | 432 | H8   | G A | 14 | -4.797 | -18.902 | 38.412 | 1.00 | 0.00 | H |
| ATOM | 433 | H1'  | G A | 14 | -3.704 | -15.255 | 37.539 | 1.00 | 0.00 | H |
| ATOM | 434 | H21  | G A | 14 | -7.978 | -12.242 | 39.757 | 1.00 | 0.00 | H |
| ATOM | 435 | H3'  | G A | 14 | -1.345 | -18.071 | 36.133 | 1.00 | 0.00 | H |
| ATOM | 436 | H22  | G A | 14 | -6.535 | -12.074 | 38.720 | 1.00 | 0.00 | H |
| ATOM | 437 | H4'  | G A | 14 | -2.970 | -16.926 | 34.383 | 1.00 | 0.00 | H |
| ATOM | 438 | H2'1 | G A | 14 | -2.778 | -18.096 | 38.059 | 1.00 | 0.00 | H |
| ATOM | 439 | H2'2 | G A | 14 | -1.908 | -16.591 | 38.324 | 1.00 | 0.00 | H |
| ATOM | 440 | H5'1 | G A | 14 | -4.831 | -18.661 | 34.887 | 1.00 | 0.00 | H |
| ATOM | 441 | H5'2 | G A | 14 | -3.229 | -19.203 | 34.345 | 1.00 | 0.00 | H |
| ATOM | 442 | C1'  | A A | 15 | -2.680 | -12.214 | 39.886 | 1.00 | 0.00 | C |
| ATOM | 443 | N1   | A A | 15 | -6.493 | -13.685 | 42.991 | 1.00 | 0.00 | N |
| ATOM | 444 | C2   | A A | 15 | -6.143 | -12.500 | 42.496 | 1.00 | 0.00 | C |
| ATOM | 445 | N3   | A A | 15 | -5.146 | -12.190 | 41.695 | 1.00 | 0.00 | N |
| ATOM | 446 | C4   | A A | 15 | -4.432 | -13.291 | 41.393 | 1.00 | 0.00 | C |
| ATOM | 447 | C5   | A A | 15 | -4.656 | -14.570 | 41.817 | 1.00 | 0.00 | C |
| ATOM | 448 | C6   | A A | 15 | -5.762 | -14.764 | 42.671 | 1.00 | 0.00 | C |
| ATOM | 449 | N6   | A A | 15 | -6.105 | -15.965 | 43.167 | 1.00 | 0.00 | N |
| ATOM | 450 | N7   | A A | 15 | -3.714 | -15.441 | 41.299 | 1.00 | 0.00 | N |
| ATOM | 451 | C8   | A A | 15 | -2.944 | -14.677 | 40.582 | 1.00 | 0.00 | C |
| ATOM | 452 | N9   | A A | 15 | -3.320 | -13.357 | 40.590 | 1.00 | 0.00 | N |
| ATOM | 453 | C2'  | A A | 15 | -1.160 | -12.287 | 39.850 | 1.00 | 0.00 | C |
| ATOM | 454 | C3'  | A A | 15 | -0.845 | -11.695 | 38.485 | 1.00 | 0.00 | C |
| ATOM | 455 | O3'  | A A | 15 | -0.805 | -10.275 | 38.591 | 1.00 | 0.00 | O |
| ATOM | 456 | C4'  | A A | 15 | -2.014 | -12.178 | 37.627 | 1.00 | 0.00 | C |
| ATOM | 457 | O4'  | A A | 15 | -3.149 | -12.211 | 38.552 | 1.00 | 0.00 | O |
| ATOM | 458 | C5'  | A A | 15 | -1.865 | -13.542 | 36.996 | 1.00 | 0.00 | C |
| ATOM | 459 | O5'  | A A | 15 | -1.163 | -14.429 | 37.904 | 1.00 | 0.00 | O |
| ATOM | 460 | O1P  | A A | 15 | 1.001  | -14.895 | 36.706 | 1.00 | 0.00 | O |
| ATOM | 461 | O2P  | A A | 15 | 0.073  | -16.577 | 38.320 | 1.00 | 0.00 | O |
| ATOM | 462 | P    | A A | 15 | -0.191 | -15.537 | 37.296 | 1.00 | 0.00 | P |

|      |     |      |     |    |        |         |        |      |      |   |
|------|-----|------|-----|----|--------|---------|--------|------|------|---|
| ATOM | 463 | H2   | A A | 15 | -6.775 | -11.665 | 42.797 | 1.00 | 0.00 | H |
| ATOM | 464 | H8   | A A | 15 | -2.082 | -15.047 | 40.028 | 1.00 | 0.00 | H |
| ATOM | 465 | H1'  | A A | 15 | -3.015 | -11.292 | 40.361 | 1.00 | 0.00 | H |
| ATOM | 466 | H3'  | A A | 15 | 0.106  | -12.056 | 38.092 | 1.00 | 0.00 | H |
| ATOM | 467 | H4'  | A A | 15 | -2.139 | -11.451 | 36.826 | 1.00 | 0.00 | H |
| ATOM | 468 | H61  | A A | 15 | -6.924 | -16.051 | 43.785 | 1.00 | 0.00 | H |
| ATOM | 469 | H62  | A A | 15 | -5.547 | -16.798 | 42.927 | 1.00 | 0.00 | H |
| ATOM | 470 | H2'1 | A A | 15 | -0.794 | -13.311 | 39.933 | 1.00 | 0.00 | H |
| ATOM | 471 | H2'2 | A A | 15 | -0.698 | -11.708 | 40.650 | 1.00 | 0.00 | H |
| ATOM | 472 | H5'1 | A A | 15 | -2.854 | -13.945 | 36.779 | 1.00 | 0.00 | H |
| ATOM | 473 | H5'2 | A A | 15 | -1.304 | -13.447 | 36.068 | 1.00 | 0.00 | H |
| ATOM | 474 | C1'  | C A | 16 | -3.223 | -8.960  | 43.599 | 1.00 | 0.00 | C |
| ATOM | 475 | N1   | C A | 16 | -3.081 | -10.414 | 43.886 | 1.00 | 0.00 | N |
| ATOM | 476 | C2   | C A | 16 | -4.027 | -11.011 | 44.716 | 1.00 | 0.00 | C |
| ATOM | 477 | O2   | C A | 16 | -4.939 | -10.314 | 45.179 | 1.00 | 0.00 | O |
| ATOM | 478 | N3   | C A | 16 | -3.915 | -12.334 | 44.991 | 1.00 | 0.00 | N |
| ATOM | 479 | C4   | C A | 16 | -2.916 | -13.061 | 44.475 | 1.00 | 0.00 | C |
| ATOM | 480 | N4   | C A | 16 | -2.858 | -14.351 | 44.774 | 1.00 | 0.00 | N |
| ATOM | 481 | C5   | C A | 16 | -1.926 | -12.474 | 43.621 | 1.00 | 0.00 | C |
| ATOM | 482 | C6   | C A | 16 | -2.060 | -11.140 | 43.355 | 1.00 | 0.00 | C |
| ATOM | 483 | C2'  | C A | 16 | -1.897 | -8.216  | 43.528 | 1.00 | 0.00 | C |
| ATOM | 484 | C3'  | C A | 16 | -2.166 | -7.193  | 42.434 | 1.00 | 0.00 | C |
| ATOM | 485 | O3'  | C A | 16 | -2.807 | -6.056  | 43.005 | 1.00 | 0.00 | O |
| ATOM | 486 | C4'  | C A | 16 | -3.080 | -7.953  | 41.476 | 1.00 | 0.00 | C |
| ATOM | 487 | O4'  | C A | 16 | -3.866 | -8.831  | 42.344 | 1.00 | 0.00 | O |
| ATOM | 488 | C5'  | C A | 16 | -2.397 | -8.799  | 40.425 | 1.00 | 0.00 | C |
| ATOM | 489 | O5'  | C A | 16 | -1.201 | -9.399  | 40.981 | 1.00 | 0.00 | O |
| ATOM | 490 | O1P  | C A | 16 | 0.657  | -8.310  | 39.678 | 1.00 | 0.00 | O |
| ATOM | 491 | O2P  | C A | 16 | 0.981  | -10.600 | 40.648 | 1.00 | 0.00 | O |
| ATOM | 492 | P    | C A | 16 | 0.062  | -9.614  | 40.031 | 1.00 | 0.00 | P |
| ATOM | 493 | H5   | C A | 16 | -1.106 | -13.061 | 43.205 | 1.00 | 0.00 | H |
| ATOM | 494 | H6   | C A | 16 | -1.336 | -10.650 | 42.704 | 1.00 | 0.00 | H |
| ATOM | 495 | H1'  | C A | 16 | -3.876 | -8.525  | 44.356 | 1.00 | 0.00 | H |
| ATOM | 496 | H3'  | C A | 16 | -1.247 | -6.879  | 41.937 | 1.00 | 0.00 | H |
| ATOM | 497 | H4'  | C A | 16 | -3.686 | -7.209  | 40.960 | 1.00 | 0.00 | H |
| ATOM | 498 | H41  | C A | 16 | -2.100 | -14.934 | 44.389 | 1.00 | 0.00 | H |
| ATOM | 499 | H42  | C A | 16 | -3.568 | -14.771 | 45.390 | 1.00 | 0.00 | H |
| ATOM | 500 | H2'1 | C A | 16 | -1.068 | -8.872  | 43.262 | 1.00 | 0.00 | H |
| ATOM | 501 | H2'2 | C A | 16 | -1.643 | -7.732  | 44.471 | 1.00 | 0.00 | H |
| ATOM | 502 | H5'1 | C A | 16 | -3.083 | -9.579  | 40.094 | 1.00 | 0.00 | H |
| ATOM | 503 | H5'2 | C A | 16 | -2.133 | -8.169  | 39.576 | 1.00 | 0.00 | H |
| ATOM | 504 | C1'  | G A | 17 | -4.572 | -7.597  | 48.164 | 1.00 | 0.00 | C |
| ATOM | 505 | N1   | G A | 17 | -3.920 | -12.545 | 49.223 | 1.00 | 0.00 | N |
| ATOM | 506 | C2   | G A | 17 | -4.924 | -11.677 | 49.616 | 1.00 | 0.00 | C |
| ATOM | 507 | N2   | G A | 17 | -5.879 | -12.196 | 50.398 | 1.00 | 0.00 | N |
| ATOM | 508 | N3   | G A | 17 | -4.970 | -10.395 | 49.259 | 1.00 | 0.00 | N |
| ATOM | 509 | C4   | G A | 17 | -3.919 | -10.039 | 48.474 | 1.00 | 0.00 | C |
| ATOM | 510 | C5   | G A | 17 | -2.872 | -10.833 | 48.035 | 1.00 | 0.00 | C |
| ATOM | 511 | C6   | G A | 17 | -2.824 | -12.196 | 48.410 | 1.00 | 0.00 | C |
| ATOM | 512 | O6   | G A | 17 | -1.986 | -13.051 | 48.126 | 1.00 | 0.00 | O |
| ATOM | 513 | N7   | G A | 17 | -1.995 | -10.084 | 47.247 | 1.00 | 0.00 | N |
| ATOM | 514 | C8   | G A | 17 | -2.528 | -8.890  | 47.231 | 1.00 | 0.00 | C |
| ATOM | 515 | N9   | G A | 17 | -3.698 | -8.783  | 47.954 | 1.00 | 0.00 | N |
| ATOM | 516 | C2'  | G A | 17 | -3.807 | -6.290  | 48.320 | 1.00 | 0.00 | C |



|      |     |      |   |   |    |        |         |        |      |      |   |
|------|-----|------|---|---|----|--------|---------|--------|------|------|---|
| ATOM | 517 | C3'  | G | A | 17 | -4.727 | -5.298  | 47.630 | 1.00 | 0.00 | C |
| ATOM | 518 | O3'  | G | A | 17 | -5.722 | -4.861  | 48.553 | 1.00 | 0.00 | O |
| ATOM | 519 | C4'  | G | A | 17 | -5.321 | -6.123  | 46.489 | 1.00 | 0.00 | C |
| ATOM | 520 | O4'  | G | A | 17 | -5.414 | -7.477  | 47.033 | 1.00 | 0.00 | O |
| ATOM | 521 | C5'  | G | A | 17 | -4.521 | -6.169  | 45.208 | 1.00 | 0.00 | C |
| ATOM | 522 | O5'  | G | A | 17 | -3.105 | -6.195  | 45.515 | 1.00 | 0.00 | O |
| ATOM | 523 | O1P  | G | A | 17 | -2.275 | -3.996  | 44.614 | 1.00 | 0.00 | O |
| ATOM | 524 | O2P  | G | A | 17 | -0.718 | -5.957  | 44.771 | 1.00 | 0.00 | O |
| ATOM | 525 | P    | G | A | 17 | -2.093 | -5.458  | 44.527 | 1.00 | 0.00 | P |
| ATOM | 526 | H1   | G | A | 17 | -3.981 | -13.521 | 49.549 | 1.00 | 0.00 | H |
| ATOM | 527 | H8   | G | A | 17 | -2.085 | -8.051  | 46.693 | 1.00 | 0.00 | H |
| ATOM | 528 | H1'  | G | A | 17 | -5.202 | -7.787  | 49.033 | 1.00 | 0.00 | H |
| ATOM | 529 | H21  | G | A | 17 | -5.839 | -13.189 | 50.668 | 1.00 | 0.00 | H |
| ATOM | 530 | H3'  | G | A | 17 | -4.184 | -4.433  | 47.248 | 1.00 | 0.00 | H |
| ATOM | 531 | H22  | G | A | 17 | -6.653 | -11.602 | 50.728 | 1.00 | 0.00 | H |
| ATOM | 532 | H4'  | G | A | 17 | -6.294 | -5.689  | 46.258 | 1.00 | 0.00 | H |
| ATOM | 533 | H2'1 | G | A | 17 | -2.828 | -6.324  | 47.840 | 1.00 | 0.00 | H |
| ATOM | 534 | H2'2 | G | A | 17 | -3.649 | -6.025  | 49.366 | 1.00 | 0.00 | H |
| ATOM | 535 | H5'1 | G | A | 17 | -4.794 | -7.064  | 44.649 | 1.00 | 0.00 | H |
| ATOM | 536 | H5'2 | G | A | 17 | -4.754 | -5.289  | 44.609 | 1.00 | 0.00 | H |
| ATOM | 537 | C1'  | G | A | 18 | -5.571 | -8.432  | 52.942 | 1.00 | 0.00 | C |
| ATOM | 538 | N1   | G | A | 18 | -2.450 | -12.418 | 52.313 | 1.00 | 0.00 | N |
| ATOM | 539 | C2   | G | A | 18 | -3.658 | -12.333 | 52.983 | 1.00 | 0.00 | C |
| ATOM | 540 | N2   | G | A | 18 | -4.091 | -13.460 | 53.565 | 1.00 | 0.00 | N |
| ATOM | 541 | N3   | G | A | 18 | -4.376 | -11.215 | 53.065 | 1.00 | 0.00 | N |
| ATOM | 542 | C4   | G | A | 18 | -3.784 | -10.172 | 52.427 | 1.00 | 0.00 | C |
| ATOM | 543 | C5   | G | A | 18 | -2.581 | -10.162 | 51.738 | 1.00 | 0.00 | C |
| ATOM | 544 | C6   | G | A | 18 | -1.820 | -11.351 | 51.646 | 1.00 | 0.00 | C |
| ATOM | 545 | O6   | G | A | 18 | -0.740 | -11.538 | 51.085 | 1.00 | 0.00 | O |
| ATOM | 546 | N7   | G | A | 18 | -2.328 | -8.888  | 51.227 | 1.00 | 0.00 | N |
| ATOM | 547 | C8   | G | A | 18 | -3.361 | -8.183  | 51.609 | 1.00 | 0.00 | C |
| ATOM | 548 | N9   | G | A | 18 | -4.288 | -8.893  | 52.344 | 1.00 | 0.00 | N |
| ATOM | 549 | C2'  | G | A | 18 | -5.513 | -7.020  | 53.507 | 1.00 | 0.00 | C |
| ATOM | 550 | C3'  | G | A | 18 | -6.902 | -6.493  | 53.192 | 1.00 | 0.00 | C |
| ATOM | 551 | O3'  | G | A | 18 | -7.802 | -6.900  | 54.221 | 1.00 | 0.00 | O |
| ATOM | 552 | C4'  | G | A | 18 | -7.222 | -7.154  | 51.852 | 1.00 | 0.00 | C |
| ATOM | 553 | O4'  | G | A | 18 | -6.554 | -8.454  | 51.925 | 1.00 | 0.00 | O |
| ATOM | 554 | C5'  | G | A | 18 | -6.740 | -6.432  | 50.617 | 1.00 | 0.00 | C |
| ATOM | 555 | O5'  | G | A | 18 | -5.456 | -5.812  | 50.879 | 1.00 | 0.00 | O |
| ATOM | 556 | O1P  | G | A | 18 | -5.958 | -3.349  | 50.736 | 1.00 | 0.00 | O |
| ATOM | 557 | O2P  | G | A | 18 | -3.652 | -4.192  | 50.222 | 1.00 | 0.00 | O |
| ATOM | 558 | P    | G | A | 18 | -5.116 | -4.422  | 50.173 | 1.00 | 0.00 | P |
| ATOM | 559 | H1   | G | A | 18 | -1.975 | -13.334 | 52.303 | 1.00 | 0.00 | H |
| ATOM | 560 | H8   | G | A | 18 | -3.480 | -7.126  | 51.371 | 1.00 | 0.00 | H |
| ATOM | 561 | H1'  | G | A | 18 | -5.866 | -9.148  | 53.709 | 1.00 | 0.00 | H |
| ATOM | 562 | H21  | G | A | 18 | -3.530 | -14.322 | 53.493 | 1.00 | 0.00 | H |
| ATOM | 563 | H3'  | G | A | 18 | -6.919 | -5.406  | 53.108 | 1.00 | 0.00 | H |
| ATOM | 564 | H22  | G | A | 18 | -4.981 | -13.462 | 54.080 | 1.00 | 0.00 | H |
| ATOM | 565 | H4'  | G | A | 18 | -8.306 | -7.236  | 51.790 | 1.00 | 0.00 | H |
| ATOM | 566 | H2'1 | G | A | 18 | -4.742 | -6.415  | 53.030 | 1.00 | 0.00 | H |
| ATOM | 567 | H2'2 | G | A | 18 | -5.317 | -7.011  | 54.580 | 1.00 | 0.00 | H |
| ATOM | 568 | H5'1 | G | A | 18 | -6.645 | -7.146  | 49.799 | 1.00 | 0.00 | H |
| ATOM | 569 | H5'2 | G | A | 18 | -7.468 | -5.669  | 50.342 | 1.00 | 0.00 | H |
| ATOM | 570 | C1'  | T | A | 19 | -5.196 | -10.924 | 57.202 | 1.00 | 0.00 | C |

|      |     |      |       |    |        |         |        |      |      |   |
|------|-----|------|-------|----|--------|---------|--------|------|------|---|
| ATOM | 571 | N1   | T A   | 19 | -3.970 | -10.506 | 56.472 | 1.00 | 0.00 | N |
| ATOM | 572 | C2   | T A   | 19 | -3.021 | -11.477 | 56.225 | 1.00 | 0.00 | C |
| ATOM | 573 | O2   | T A   | 19 | -3.156 | -12.636 | 56.578 | 1.00 | 0.00 | O |
| ATOM | 574 | N3   | T A   | 19 | -1.899 | -11.045 | 55.543 | 1.00 | 0.00 | N |
| ATOM | 575 | C4   | T A   | 19 | -1.647 | -9.763  | 55.103 | 1.00 | 0.00 | C |
| ATOM | 576 | O4   | T A   | 19 | -0.600 | -9.494  | 54.503 | 1.00 | 0.00 | O |
| ATOM | 577 | C5   | T A   | 19 | -2.695 | -8.817  | 55.407 | 1.00 | 0.00 | C |
| ATOM | 578 | C6   | T A   | 19 | -3.804 | -9.203  | 56.070 | 1.00 | 0.00 | C |
| ATOM | 579 | C7   | T A   | 19 | -2.465 | -7.409  | 54.945 | 1.00 | 0.00 | C |
| ATOM | 580 | C2'  | T A   | 19 | -5.709 | -9.882  | 58.189 | 1.00 | 0.00 | C |
| ATOM | 581 | C3'  | T A   | 19 | -7.215 | -10.054 | 58.078 | 1.00 | 0.00 | C |
| ATOM | 582 | O3'  | T A   | 19 | -7.631 | -11.115 | 58.934 | 1.00 | 0.00 | O |
| ATOM | 583 | C4'  | T A   | 19 | -7.409 | -10.393 | 56.602 | 1.00 | 0.00 | C |
| ATOM | 584 | O4'  | T A   | 19 | -6.212 | -11.153 | 56.246 | 1.00 | 0.00 | O |
| ATOM | 585 | C5'  | T A   | 19 | -7.540 | -9.223  | 55.654 | 1.00 | 0.00 | C |
| ATOM | 586 | O5'  | T A   | 19 | -6.670 | -8.146  | 56.084 | 1.00 | 0.00 | O |
| ATOM | 587 | O1P  | T A   | 19 | -8.278 | -6.326  | 56.744 | 1.00 | 0.00 | O |
| ATOM | 588 | O2P  | T A   | 19 | -5.970 | -5.736  | 55.956 | 1.00 | 0.00 | O |
| ATOM | 589 | P    | T A   | 19 | -7.141 | -6.640  | 55.855 | 1.00 | 0.00 | P |
| ATOM | 590 | H3   | T A   | 19 | -1.178 | -11.753 | 55.343 | 1.00 | 0.00 | H |
| ATOM | 591 | H6   | T A   | 19 | -4.581 | -8.471  | 56.288 | 1.00 | 0.00 | H |
| ATOM | 592 | H1'  | T A   | 19 | -4.988 | -11.869 | 57.705 | 1.00 | 0.00 | H |
| ATOM | 593 | H3'  | T A   | 19 | -7.749 | -9.142  | 58.346 | 1.00 | 0.00 | H |
| ATOM | 594 | H4'  | T A   | 19 | -8.325 | -10.982 | 56.530 | 1.00 | 0.00 | H |
| ATOM | 595 | H71  | T A   | 19 | -2.366 | -6.754  | 55.810 | 1.00 | 0.00 | H |
| ATOM | 596 | H72  | T A   | 19 | -1.551 | -7.367  | 54.351 | 1.00 | 0.00 | H |
| ATOM | 597 | H73  | T A   | 19 | -3.308 | -7.082  | 54.336 | 1.00 | 0.00 | H |
| ATOM | 598 | H2'1 | T A   | 19 | -5.402 | -8.873  | 57.919 | 1.00 | 0.00 | H |
| ATOM | 599 | H2'2 | T A   | 19 | -5.361 | -10.069 | 59.206 | 1.00 | 0.00 | H |
| ATOM | 600 | H5'1 | T A   | 19 | -7.262 | -9.542  | 54.650 | 1.00 | 0.00 | H |
| ATOM | 601 | H5'2 | T A   | 19 | -8.573 | -8.881  | 55.648 | 1.00 | 0.00 | H |
| ATOM | 602 | C01  | LNK A | 20 | -8.347 | -11.149 | 62.587 | 0.00 | 0.00 | C |
| ATOM | 603 | O1   | LNK A | 20 | -7.918 | -10.484 | 61.396 | 1.00 | 0.00 | O |
| ATOM | 604 | S    | LNK A | 20 | -8.698 | -10.406 | 66.482 | 0.00 | 0.00 | S |
| ATOM | 605 | C02  | LNK A | 20 | -8.207 | -10.192 | 63.786 | 0.00 | 0.00 | C |
| ATOM | 606 | C03  | LNK A | 20 | -7.767 | -10.988 | 65.030 | 0.00 | 0.00 | C |
| ATOM | 607 | O1P  | LNK A | 20 | -5.612 | -10.277 | 60.408 | 1.00 | 0.00 | O |
| ATOM | 608 | O2P  | LNK A | 20 | -6.527 | -12.538 | 60.999 | 1.00 | 0.00 | O |
| ATOM | 609 | P    | LNK A | 20 | -6.787 | -11.165 | 60.501 | 1.00 | 0.00 | P |
| ATOM | 610 | H01  | LNK A | 20 | -7.731 | -12.033 | 62.754 | 0.00 | 0.00 | H |
| ATOM | 611 | H02  | LNK A | 20 | -9.390 | -11.448 | 62.482 | 0.00 | 0.00 | H |
| ATOM | 612 | H03  | LNK A | 20 | -6.701 | -10.839 | 65.199 | 0.00 | 0.00 | H |
| ATOM | 613 | H04  | LNK A | 20 | -9.165 | -9.711  | 63.982 | 0.00 | 0.00 | H |
| ATOM | 614 | H05  | LNK A | 20 | -7.459 | -9.432  | 63.559 | 0.00 | 0.00 | H |
| ATOM | 615 | H06  | LNK A | 20 | -7.966 | -12.048 | 64.872 | 0.00 | 0.00 | H |
| ATOM | 616 | AU   | LNK A | 20 | -8.435 | -10.686 | 67.050 |      |      |   |
| TER  |     |      |       |    |        |         |        |      |      |   |
| ATOM | 618 | C1'  | A B   | 2  | 3.357  | -17.034 | 54.302 | 1.00 | 0.00 | C |
| ATOM | 619 | N1   | A B   | 2  | 0.181  | -13.057 | 54.965 | 1.00 | 0.00 | N |
| ATOM | 620 | C2   | A B   | 2  | 0.101  | -14.337 | 55.312 | 1.00 | 0.00 | C |
| ATOM | 621 | N3   | A B   | 2  | 0.960  | -15.313 | 55.112 | 1.00 | 0.00 | N |
| ATOM | 622 | C4   | A B   | 2  | 2.040  | -14.855 | 54.451 | 1.00 | 0.00 | C |
| ATOM | 623 | C5   | A B   | 2  | 2.274  | -13.578 | 54.027 | 1.00 | 0.00 | C |
| ATOM | 624 | C6   | A B   | 2  | 1.270  | -12.628 | 54.309 | 1.00 | 0.00 | C |

|      |     |      |     |   |        |         |        |      |      |   |
|------|-----|------|-----|---|--------|---------|--------|------|------|---|
| ATOM | 625 | N6   | A B | 2 | 1.361  | -11.335 | 53.953 | 1.00 | 0.00 | N |
| ATOM | 626 | N7   | A B | 2 | 3.496  | -13.481 | 53.383 | 1.00 | 0.00 | N |
| ATOM | 627 | C8   | A B | 2 | 3.967  | -14.692 | 53.427 | 1.00 | 0.00 | C |
| ATOM | 628 | N9   | A B | 2 | 3.140  | -15.580 | 54.064 | 1.00 | 0.00 | N |
| ATOM | 629 | C2'  | A B | 2 | 4.047  | -17.748 | 53.148 | 1.00 | 0.00 | C |
| ATOM | 630 | C3'  | A B | 2 | 4.911  | -18.765 | 53.875 | 1.00 | 0.00 | C |
| ATOM | 631 | O3'  | A B | 2 | 4.128  | -19.921 | 54.166 | 1.00 | 0.00 | O |
| ATOM | 632 | C4'  | A B | 2 | 5.326  | -18.015 | 55.141 | 1.00 | 0.00 | C |
| ATOM | 633 | O4'  | A B | 2 | 4.176  | -17.163 | 55.449 | 1.00 | 0.00 | O |
| ATOM | 634 | C5'  | A B | 2 | 6.557  | -17.147 | 55.034 | 1.00 | 0.00 | C |
| ATOM | 635 | O5'  | A B | 2 | 6.606  | -16.525 | 53.725 | 1.00 | 0.00 | O |
| ATOM | 636 | H2   | A B | 2 | -0.809 | -14.621 | 55.838 | 1.00 | 0.00 | H |
| ATOM | 637 | H8   | A B | 2 | 4.930  | -14.974 | 52.999 | 1.00 | 0.00 | H |
| ATOM | 638 | H1'  | A B | 2 | 2.392  | -17.490 | 54.524 | 1.00 | 0.00 | H |
| ATOM | 639 | H3'  | A B | 2 | 5.781  | -19.057 | 53.289 | 1.00 | 0.00 | H |
| ATOM | 640 | H4'  | A B | 2 | 5.514  | -18.768 | 55.906 | 1.00 | 0.00 | H |
| ATOM | 641 | H61  | A B | 2 | 0.601  | -10.682 | 54.186 | 1.00 | 0.00 | H |
| ATOM | 642 | H62  | A B | 2 | 2.194  | -10.999 | 53.447 | 1.00 | 0.00 | H |
| ATOM | 643 | H2'1 | A B | 2 | 4.653  | -17.072 | 52.545 | 1.00 | 0.00 | H |
| ATOM | 644 | H2'2 | A B | 2 | 3.337  | -18.236 | 52.480 | 1.00 | 0.00 | H |
| ATOM | 645 | H5'1 | A B | 2 | 6.520  | -16.378 | 55.805 | 1.00 | 0.00 | H |
| ATOM | 646 | H5'2 | A B | 2 | 7.442  | -17.763 | 55.183 | 1.00 | 0.00 | H |
| ATOM | 647 | C1'  | C B | 3 | -1.328 | -18.413 | 53.405 | 1.00 | 0.00 | C |
| ATOM | 648 | N1   | C B | 3 | -0.752 | -17.215 | 52.735 | 1.00 | 0.00 | N |
| ATOM | 649 | C2   | C B | 3 | -1.470 | -16.023 | 52.798 | 1.00 | 0.00 | C |
| ATOM | 650 | O2   | C B | 3 | -2.549 | -16.008 | 53.406 | 1.00 | 0.00 | O |
| ATOM | 651 | N3   | C B | 3 | -0.963 | -14.921 | 52.194 | 1.00 | 0.00 | N |
| ATOM | 652 | C4   | C B | 3 | 0.207  | -14.969 | 51.543 | 1.00 | 0.00 | C |
| ATOM | 653 | N4   | C B | 3 | 0.657  | -13.860 | 50.973 | 1.00 | 0.00 | N |
| ATOM | 654 | C5   | C B | 3 | 0.966  | -16.183 | 51.456 | 1.00 | 0.00 | C |
| ATOM | 655 | C6   | C B | 3 | 0.438  | -17.280 | 52.077 | 1.00 | 0.00 | C |
| ATOM | 656 | C2'  | C B | 3 | -1.105 | -19.711 | 52.642 | 1.00 | 0.00 | C |
| ATOM | 657 | C3'  | C B | 3 | -0.903 | -20.712 | 53.769 | 1.00 | 0.00 | C |
| ATOM | 658 | O3'  | C B | 3 | -2.176 | -21.163 | 54.227 | 1.00 | 0.00 | O |
| ATOM | 659 | C4'  | C B | 3 | -0.168 | -19.889 | 54.826 | 1.00 | 0.00 | C |
| ATOM | 660 | O4'  | C B | 3 | -0.706 | -18.537 | 54.670 | 1.00 | 0.00 | O |
| ATOM | 661 | C5'  | C B | 3 | 1.336  | -19.828 | 54.702 | 1.00 | 0.00 | C |
| ATOM | 662 | O5'  | C B | 3 | 1.711  | -19.788 | 53.302 | 1.00 | 0.00 | O |
| ATOM | 663 | O1P  | C B | 3 | 2.913  | -21.973 | 52.958 | 1.00 | 0.00 | O |
| ATOM | 664 | O2P  | C B | 3 | 3.469  | -19.994 | 51.518 | 1.00 | 0.00 | O |
| ATOM | 665 | P    | C B | 3 | 3.059  | -20.507 | 52.848 | 1.00 | 0.00 | P |
| ATOM | 666 | H5   | C B | 3 | 1.915  | -16.229 | 50.922 | 1.00 | 0.00 | H |
| ATOM | 667 | H6   | C B | 3 | 0.982  | -18.224 | 52.045 | 1.00 | 0.00 | H |
| ATOM | 668 | H1'  | C B | 3 | -2.391 | -18.234 | 53.570 | 1.00 | 0.00 | H |
| ATOM | 669 | H3'  | C B | 3 | -0.308 | -21.568 | 53.454 | 1.00 | 0.00 | H |
| ATOM | 670 | H4'  | C B | 3 | -0.403 | -20.333 | 55.793 | 1.00 | 0.00 | H |
| ATOM | 671 | H41  | C B | 3 | 1.556  | -13.869 | 50.469 | 1.00 | 0.00 | H |
| ATOM | 672 | H42  | C B | 3 | 0.109  | -12.989 | 51.034 | 1.00 | 0.00 | H |
| ATOM | 673 | H2'1 | C B | 3 | -0.231 | -19.664 | 51.993 | 1.00 | 0.00 | H |
| ATOM | 674 | H2'2 | C B | 3 | -1.961 | -19.978 | 52.022 | 1.00 | 0.00 | H |
| ATOM | 675 | H5'1 | C B | 3 | 1.701  | -18.932 | 55.206 | 1.00 | 0.00 | H |
| ATOM | 676 | H5'2 | C B | 3 | 1.770  | -20.707 | 55.174 | 1.00 | 0.00 | H |
| ATOM | 677 | C1'  | C B | 4 | -6.037 | -17.606 | 52.103 | 1.00 | 0.00 | C |
| ATOM | 678 | N1   | C B | 4 | -4.921 | -17.127 | 51.243 | 1.00 | 0.00 | N |

|      |     |      |     |   |         |         |        |      |      |   |
|------|-----|------|-----|---|---------|---------|--------|------|------|---|
| ATOM | 679 | C2   | C B | 4 | -4.929  | -15.791 | 50.847 | 1.00 | 0.00 | C |
| ATOM | 680 | O2   | C B | 4 | -5.856  | -15.061 | 51.224 | 1.00 | 0.00 | O |
| ATOM | 681 | N3   | C B | 4 | -3.923  | -15.334 | 50.064 | 1.00 | 0.00 | N |
| ATOM | 682 | C4   | C B | 4 | -2.933  | -16.148 | 49.670 | 1.00 | 0.00 | C |
| ATOM | 683 | N4   | C B | 4 | -1.971  | -15.649 | 48.908 | 1.00 | 0.00 | N |
| ATOM | 684 | C5   | C B | 4 | -2.901  | -17.528 | 50.058 | 1.00 | 0.00 | C |
| ATOM | 685 | C6   | C B | 4 | -3.923  | -17.965 | 50.852 | 1.00 | 0.00 | C |
| ATOM | 686 | C2'  | C B | 4 | -6.499  | -19.020 | 51.778 | 1.00 | 0.00 | C |
| ATOM | 687 | C3'  | C B | 4 | -6.853  | -19.561 | 53.155 | 1.00 | 0.00 | C |
| ATOM | 688 | O3'  | C B | 4 | -8.183  | -19.170 | 53.484 | 1.00 | 0.00 | O |
| ATOM | 689 | C4'  | C B | 4 | -5.815  | -18.899 | 54.058 | 1.00 | 0.00 | C |
| ATOM | 690 | O4'  | C B | 4 | -5.584  | -17.590 | 53.443 | 1.00 | 0.00 | O |
| ATOM | 691 | C5'  | C B | 4 | -4.488  | -19.610 | 54.191 | 1.00 | 0.00 | C |
| ATOM | 692 | O5'  | C B | 4 | -4.127  | -20.216 | 52.925 | 1.00 | 0.00 | O |
| ATOM | 693 | O1P  | C B | 4 | -4.208  | -22.683 | 53.415 | 1.00 | 0.00 | O |
| ATOM | 694 | O2P  | C B | 4 | -2.700  | -21.811 | 51.610 | 1.00 | 0.00 | O |
| ATOM | 695 | P    | C B | 4 | -3.332  | -21.597 | 52.934 | 1.00 | 0.00 | P |
| ATOM | 696 | H5   | C B | 4 | -2.102  | -18.196 | 49.735 | 1.00 | 0.00 | H |
| ATOM | 697 | H6   | C B | 4 | -3.939  | -19.004 | 51.178 | 1.00 | 0.00 | H |
| ATOM | 698 | H1'  | C B | 4 | -6.861  | -16.897 | 52.019 | 1.00 | 0.00 | H |
| ATOM | 699 | H3'  | C B | 4 | -6.775  | -20.648 | 53.198 | 1.00 | 0.00 | H |
| ATOM | 700 | H4'  | C B | 4 | -6.257  | -18.830 | 55.052 | 1.00 | 0.00 | H |
| ATOM | 701 | H41  | C B | 4 | -1.196  | -16.252 | 48.593 | 1.00 | 0.00 | H |
| ATOM | 702 | H42  | C B | 4 | -1.997  | -14.656 | 48.628 | 1.00 | 0.00 | H |
| ATOM | 703 | H2'1 | C B | 4 | -5.716  | -19.613 | 51.308 | 1.00 | 0.00 | H |
| ATOM | 704 | H2'2 | C B | 4 | -7.363  | -19.030 | 51.113 | 1.00 | 0.00 | H |
| ATOM | 705 | H5'1 | C B | 4 | -3.725  | -18.891 | 54.487 | 1.00 | 0.00 | H |
| ATOM | 706 | H5'2 | C B | 4 | -4.572  | -20.380 | 54.957 | 1.00 | 0.00 | H |
| ATOM | 707 | C1'  | G B | 5 | -9.653  | -15.117 | 49.810 | 1.00 | 0.00 | C |
| ATOM | 708 | N1   | G B | 5 | -5.880  | -13.600 | 46.729 | 1.00 | 0.00 | N |
| ATOM | 709 | C2   | G B | 5 | -6.929  | -12.877 | 47.272 | 1.00 | 0.00 | C |
| ATOM | 710 | N2   | G B | 5 | -6.979  | -11.580 | 46.949 | 1.00 | 0.00 | N |
| ATOM | 711 | N3   | G B | 5 | -7.851  | -13.409 | 48.073 | 1.00 | 0.00 | N |
| ATOM | 712 | C4   | G B | 5 | -7.648  | -14.735 | 48.286 | 1.00 | 0.00 | C |
| ATOM | 713 | C5   | G B | 5 | -6.635  | -15.536 | 47.784 | 1.00 | 0.00 | C |
| ATOM | 714 | C6   | G B | 5 | -5.654  | -14.974 | 46.938 | 1.00 | 0.00 | C |
| ATOM | 715 | O6   | G B | 5 | -4.690  | -15.517 | 46.400 | 1.00 | 0.00 | O |
| ATOM | 716 | N7   | G B | 5 | -6.787  | -16.847 | 48.242 | 1.00 | 0.00 | N |
| ATOM | 717 | C8   | G B | 5 | -7.858  | -16.800 | 48.992 | 1.00 | 0.00 | C |
| ATOM | 718 | N9   | G B | 5 | -8.439  | -15.550 | 49.066 | 1.00 | 0.00 | N |
| ATOM | 719 | C2'  | G B | 5 | -10.770 | -16.151 | 49.815 | 1.00 | 0.00 | C |
| ATOM | 720 | C3'  | G B | 5 | -11.369 | -15.964 | 51.200 | 1.00 | 0.00 | C |
| ATOM | 721 | O3'  | G B | 5 | -12.315 | -14.898 | 51.162 | 1.00 | 0.00 | O |
| ATOM | 722 | C4'  | G B | 5 | -10.150 | -15.625 | 52.055 | 1.00 | 0.00 | C |
| ATOM | 723 | O4'  | G B | 5 | -9.274  | -14.877 | 51.152 | 1.00 | 0.00 | O |
| ATOM | 724 | C5'  | G B | 5 | -9.378  | -16.794 | 52.619 | 1.00 | 0.00 | C |
| ATOM | 725 | O5'  | G B | 5 | -9.362  | -17.880 | 51.659 | 1.00 | 0.00 | O |
| ATOM | 726 | O1P  | G B | 5 | -10.702 | -19.683 | 52.794 | 1.00 | 0.00 | O |
| ATOM | 727 | O2P  | G B | 5 | -8.937  | -20.297 | 51.121 | 1.00 | 0.00 | O |
| ATOM | 728 | P    | G B | 5 | -9.387  | -19.381 | 52.197 | 1.00 | 0.00 | P |
| ATOM | 729 | H1   | G B | 5 | -5.215  | -13.092 | 46.126 | 1.00 | 0.00 | H |
| ATOM | 730 | H8   | G B | 5 | -8.260  | -17.670 | 49.510 | 1.00 | 0.00 | H |
| ATOM | 731 | H1'  | G B | 5 | -9.995  | -14.174 | 49.385 | 1.00 | 0.00 | H |
| ATOM | 732 | H21  | G B | 5 | -6.261  | -11.174 | 46.332 | 1.00 | 0.00 | H |

|      |     |      |     |   |         |         |        |      |      |   |
|------|-----|------|-----|---|---------|---------|--------|------|------|---|
| ATOM | 733 | H3'  | G B | 5 | -11.860 | -16.870 | 51.559 | 1.00 | 0.00 | H |
| ATOM | 734 | H22  | G B | 5 | -7.737  | -10.987 | 47.318 | 1.00 | 0.00 | H |
| ATOM | 735 | H4'  | G B | 5 | -10.506 | -15.026 | 52.893 | 1.00 | 0.00 | H |
| ATOM | 736 | H2'1 | G B | 5 | -10.396 | -17.166 | 49.678 | 1.00 | 0.00 | H |
| ATOM | 737 | H2'2 | G B | 5 | -11.509 | -15.966 | 49.035 | 1.00 | 0.00 | H |
| ATOM | 738 | H5'1 | G B | 5 | -8.358  | -16.478 | 52.835 | 1.00 | 0.00 | H |
| ATOM | 739 | H5'2 | G B | 5 | -9.854  | -17.126 | 53.541 | 1.00 | 0.00 | H |
| ATOM | 740 | C1'  | T B | 6 | -11.476 | -12.106 | 46.329 | 1.00 | 0.00 | C |
| ATOM | 741 | N1   | T B | 6 | -10.628 | -13.267 | 45.946 | 1.00 | 0.00 | N |
| ATOM | 742 | C2   | T B | 6 | -9.561  | -13.017 | 45.108 | 1.00 | 0.00 | C |
| ATOM | 743 | O2   | T B | 6 | -9.300  | -11.905 | 44.683 | 1.00 | 0.00 | O |
| ATOM | 744 | N3   | T B | 6 | -8.799  | -14.124 | 44.778 | 1.00 | 0.00 | N |
| ATOM | 745 | C4   | T B | 6 | -9.008  | -15.421 | 45.198 | 1.00 | 0.00 | C |
| ATOM | 746 | O4   | T B | 6 | -8.258  | -16.333 | 44.833 | 1.00 | 0.00 | O |
| ATOM | 747 | C5   | T B | 6 | -10.146 | -15.581 | 46.072 | 1.00 | 0.00 | C |
| ATOM | 748 | C6   | T B | 6 | -10.910 | -14.526 | 46.415 | 1.00 | 0.00 | C |
| ATOM | 749 | C7   | T B | 6 | -10.409 | -16.977 | 46.556 | 1.00 | 0.00 | C |
| ATOM | 750 | C2'  | T B | 6 | -12.961 | -12.435 | 46.419 | 1.00 | 0.00 | C |
| ATOM | 751 | C3'  | T B | 6 | -13.409 | -11.562 | 47.582 | 1.00 | 0.00 | C |
| ATOM | 752 | O3'  | T B | 6 | -13.697 | -10.251 | 47.099 | 1.00 | 0.00 | O |
| ATOM | 753 | C4'  | T B | 6 | -12.197 | -11.583 | 48.510 | 1.00 | 0.00 | C |
| ATOM | 754 | O4'  | T B | 6 | -11.051 | -11.663 | 47.603 | 1.00 | 0.00 | O |
| ATOM | 755 | C5'  | T B | 6 | -12.119 | -12.731 | 49.489 | 1.00 | 0.00 | C |
| ATOM | 756 | O5'  | T B | 6 | -12.631 | -13.938 | 48.869 | 1.00 | 0.00 | O |
| ATOM | 757 | O1P  | T B | 6 | -14.710 | -14.437 | 50.198 | 1.00 | 0.00 | O |
| ATOM | 758 | O2P  | T B | 6 | -13.460 | -16.301 | 49.075 | 1.00 | 0.00 | O |
| ATOM | 759 | P    | T B | 6 | -13.410 | -14.995 | 49.775 | 1.00 | 0.00 | P |
| ATOM | 760 | H3   | T B | 6 | -7.994  | -13.963 | 44.155 | 1.00 | 0.00 | H |
| ATOM | 761 | H6   | T B | 6 | -11.764 | -14.674 | 47.076 | 1.00 | 0.00 | H |
| ATOM | 762 | H1'  | T B | 6 | -11.297 | -11.302 | 45.617 | 1.00 | 0.00 | H |
| ATOM | 763 | H3'  | T B | 6 | -14.291 | -11.965 | 48.078 | 1.00 | 0.00 | H |
| ATOM | 764 | H4'  | T B | 6 | -12.222 | -10.657 | 49.085 | 1.00 | 0.00 | H |
| ATOM | 765 | H71  | T B | 6 | -11.356 | -17.330 | 46.150 | 1.00 | 0.00 | H |
| ATOM | 766 | H72  | T B | 6 | -9.604  | -17.634 | 46.227 | 1.00 | 0.00 | H |
| ATOM | 767 | H73  | T B | 6 | -10.458 | -16.981 | 47.646 | 1.00 | 0.00 | H |
| ATOM | 768 | H2'1 | T B | 6 | -13.139 | -13.489 | 46.623 | 1.00 | 0.00 | H |
| ATOM | 769 | H2'2 | T B | 6 | -13.497 | -12.182 | 45.504 | 1.00 | 0.00 | H |
| ATOM | 770 | H5'1 | T B | 6 | -11.081 | -12.881 | 49.784 | 1.00 | 0.00 | H |
| ATOM | 771 | H5'2 | T B | 6 | -12.712 | -12.490 | 50.370 | 1.00 | 0.00 | H |
| ATOM | 772 | C1'  | C B | 7 | -11.420 | -9.935  | 41.864 | 1.00 | 0.00 | C |
| ATOM | 773 | N1   | C B | 7 | -11.298 | -11.415 | 41.987 | 1.00 | 0.00 | N |
| ATOM | 774 | C2   | C B | 7 | -10.243 | -12.039 | 41.324 | 1.00 | 0.00 | C |
| ATOM | 775 | O2   | C B | 7 | -9.456  | -11.345 | 40.666 | 1.00 | 0.00 | O |
| ATOM | 776 | N3   | C B | 7 | -10.114 | -13.385 | 41.423 | 1.00 | 0.00 | N |
| ATOM | 777 | C4   | C B | 7 | -10.982 | -14.108 | 42.142 | 1.00 | 0.00 | C |
| ATOM | 778 | N4   | C B | 7 | -10.806 | -15.419 | 42.206 | 1.00 | 0.00 | N |
| ATOM | 779 | C5   | C B | 7 | -12.080 | -13.494 | 42.830 | 1.00 | 0.00 | C |
| ATOM | 780 | C6   | C B | 7 | -12.186 | -12.136 | 42.720 | 1.00 | 0.00 | C |
| ATOM | 781 | C2'  | C B | 7 | -12.857 | -9.444  | 41.764 | 1.00 | 0.00 | C |
| ATOM | 782 | C3'  | C B | 7 | -12.797 | -8.132  | 42.531 | 1.00 | 0.00 | C |
| ATOM | 783 | O3'  | C B | 7 | -12.351 | -7.099  | 41.656 | 1.00 | 0.00 | O |
| ATOM | 784 | C4'  | C B | 7 | -11.787 | -8.430  | 43.636 | 1.00 | 0.00 | C |
| ATOM | 785 | O4'  | C B | 7 | -10.840 | -9.358  | 43.019 | 1.00 | 0.00 | O |
| ATOM | 786 | C5'  | C B | 7 | -12.335 | -9.064  | 44.895 | 1.00 | 0.00 | C |

|      |     |      |     |   |         |         |        |      |      |   |
|------|-----|------|-----|---|---------|---------|--------|------|------|---|
| ATOM | 787 | O5'  | C B | 7 | -13.394 | -9.993  | 44.553 | 1.00 | 0.00 | O |
| ATOM | 788 | O1P  | C B | 7 | -15.444 | -8.934  | 45.559 | 1.00 | 0.00 | O |
| ATOM | 789 | O2P  | C B | 7 | -15.338 | -11.421 | 45.255 | 1.00 | 0.00 | O |
| ATOM | 790 | P    | C B | 7 | -14.622 | -10.160 | 45.558 | 1.00 | 0.00 | P |
| ATOM | 791 | H5   | C B | 7 | -12.792 | -14.080 | 43.410 | 1.00 | 0.00 | H |
| ATOM | 792 | H6   | C B | 7 | -13.000 | -11.622 | 43.232 | 1.00 | 0.00 | H |
| ATOM | 793 | H1'  | C B | 7 | -10.836 | -9.616  | 41.000 | 1.00 | 0.00 | H |
| ATOM | 794 | H3'  | C B | 7 | -13.768 | -7.859  | 42.948 | 1.00 | 0.00 | H |
| ATOM | 795 | H4'  | C B | 7 | -11.333 | -7.480  | 43.915 | 1.00 | 0.00 | H |
| ATOM | 796 | H41  | C B | 7 | -11.458 | -15.999 | 42.755 | 1.00 | 0.00 | H |
| ATOM | 797 | H42  | C B | 7 | -10.018 | -15.860 | 41.709 | 1.00 | 0.00 | H |
| ATOM | 798 | H2'1 | C B | 7 | -13.564 | -10.138 | 42.218 | 1.00 | 0.00 | H |
| ATOM | 799 | H2'2 | C B | 7 | -13.170 | -9.288  | 40.731 | 1.00 | 0.00 | H |
| ATOM | 800 | H5'1 | C B | 7 | -11.531 | -9.593  | 45.407 | 1.00 | 0.00 | H |
| ATOM | 801 | H5'2 | C B | 7 | -12.725 | -8.284  | 45.546 | 1.00 | 0.00 | H |
| ATOM | 802 | C1'  | C B | 8 | -10.218 | -9.644  | 37.068 | 1.00 | 0.00 | C |
| ATOM | 803 | N1   | C B | 8 | -10.871 | -10.866 | 37.612 | 1.00 | 0.00 | N |
| ATOM | 804 | C2   | C B | 8 | -10.276 | -12.098 | 37.346 | 1.00 | 0.00 | C |
| ATOM | 805 | O2   | C B | 8 | -9.236  | -12.125 | 36.675 | 1.00 | 0.00 | O |
| ATOM | 806 | N3   | C B | 8 | -10.854 | -13.222 | 37.832 | 1.00 | 0.00 | N |
| ATOM | 807 | C4   | C B | 8 | -11.980 | -13.160 | 38.556 | 1.00 | 0.00 | C |
| ATOM | 808 | N4   | C B | 8 | -12.501 | -14.291 | 39.009 | 1.00 | 0.00 | N |
| ATOM | 809 | C5   | C B | 8 | -12.619 | -11.908 | 38.842 | 1.00 | 0.00 | C |
| ATOM | 810 | C6   | C B | 8 | -12.014 | -10.787 | 38.345 | 1.00 | 0.00 | C |
| ATOM | 811 | C2'  | C B | 8 | -11.201 | -8.587  | 36.582 | 1.00 | 0.00 | C |
| ATOM | 812 | C3'  | C B | 8 | -10.489 | -7.296  | 36.957 | 1.00 | 0.00 | C |
| ATOM | 813 | O3'  | C B | 8 | -9.565  | -6.956  | 35.926 | 1.00 | 0.00 | O |
| ATOM | 814 | C4'  | C B | 8 | -9.788  | -7.662  | 38.263 | 1.00 | 0.00 | C |
| ATOM | 815 | O4'  | C B | 8 | -9.441  | -9.075  | 38.105 | 1.00 | 0.00 | O |
| ATOM | 816 | C5'  | C B | 8 | -10.598 | -7.503  | 39.528 | 1.00 | 0.00 | C |
| ATOM | 817 | O5'  | C B | 8 | -11.980 | -7.863  | 39.273 | 1.00 | 0.00 | O |
| ATOM | 818 | O1P  | C B | 8 | -13.213 | -5.688  | 39.566 | 1.00 | 0.00 | O |
| ATOM | 819 | O2P  | C B | 8 | -14.390 | -7.864  | 39.982 | 1.00 | 0.00 | O |
| ATOM | 820 | P    | C B | 8 | -13.132 | -7.081  | 40.048 | 1.00 | 0.00 | P |
| ATOM | 821 | H5   | C B | 8 | -13.538 | -11.852 | 39.423 | 1.00 | 0.00 | H |
| ATOM | 822 | H6   | C B | 8 | -12.458 | -9.811  | 38.542 | 1.00 | 0.00 | H |
| ATOM | 823 | H1'  | C B | 8 | -9.542  | -9.946  | 36.268 | 1.00 | 0.00 | H |
| ATOM | 824 | H3'  | C B | 8 | -11.188 | -6.473  | 37.102 | 1.00 | 0.00 | H |
| ATOM | 825 | H4'  | C B | 8 | -8.915  | -7.014  | 38.346 | 1.00 | 0.00 | H |
| ATOM | 826 | H41  | C B | 8 | -13.365 | -14.271 | 39.571 | 1.00 | 0.00 | H |
| ATOM | 827 | H42  | C B | 8 | -12.042 | -15.190 | 38.801 | 1.00 | 0.00 | H |
| ATOM | 828 | H2'1 | C B | 8 | -12.169 | -8.664  | 37.076 | 1.00 | 0.00 | H |
| ATOM | 829 | H2'2 | C B | 8 | -11.375 | -8.648  | 35.508 | 1.00 | 0.00 | H |
| ATOM | 830 | H5'1 | C B | 8 | -10.187 | -8.151  | 40.302 | 1.00 | 0.00 | H |
| ATOM | 831 | H5'2 | C B | 8 | -10.544 | -6.468  | 39.860 | 1.00 | 0.00 | H |
| ATOM | 832 | C1'  | T B | 9 | -8.969  | -11.531 | 32.667 | 1.00 | 0.00 | C |
| ATOM | 833 | N1   | T B | 9 | -10.154 | -12.055 | 33.396 | 1.00 | 0.00 | N |
| ATOM | 834 | C2   | T B | 9 | -10.234 | -13.422 | 33.568 | 1.00 | 0.00 | C |
| ATOM | 835 | O2   | T B | 9 | -9.385  | -14.190 | 33.149 | 1.00 | 0.00 | O |
| ATOM | 836 | N3   | T B | 9 | -11.350 | -13.866 | 34.252 | 1.00 | 0.00 | N |
| ATOM | 837 | C4   | T B | 9 | -12.366 | -13.086 | 34.761 | 1.00 | 0.00 | C |
| ATOM | 838 | O4   | T B | 9 | -13.322 | -13.599 | 35.355 | 1.00 | 0.00 | O |
| ATOM | 839 | C5   | T B | 9 | -12.194 | -11.670 | 34.533 | 1.00 | 0.00 | C |
| ATOM | 840 | C6   | T B | 9 | -11.118 | -11.202 | 33.872 | 1.00 | 0.00 | C |

|      |     |      |     |    |         |         |        |      |      |   |
|------|-----|------|-----|----|---------|---------|--------|------|------|---|
| ATOM | 841 | C7   | T B | 9  | -13.276 | -10.783 | 35.074 | 1.00 | 0.00 | C |
| ATOM | 842 | C2'  | T B | 9  | -9.282  | -10.351 | 31.752 | 1.00 | 0.00 | C |
| ATOM | 843 | C3'  | T B | 9  | -8.025  | -9.506  | 31.884 | 1.00 | 0.00 | C |
| ATOM | 844 | O3'  | T B | 9  | -7.039  | -9.988  | 30.973 | 1.00 | 0.00 | O |
| ATOM | 845 | C4'  | T B | 9  | -7.622  | -9.720  | 33.341 | 1.00 | 0.00 | C |
| ATOM | 846 | O4'  | T B | 9  | -8.026  | -11.097 | 33.627 | 1.00 | 0.00 | O |
| ATOM | 847 | C5'  | T B | 9  | -8.263  | -8.805  | 34.358 | 1.00 | 0.00 | C |
| ATOM | 848 | O5'  | T B | 9  | -9.634  | -8.533  | 33.974 | 1.00 | 0.00 | O |
| ATOM | 849 | O1P  | T B | 9  | -9.616  | -6.071  | 33.456 | 1.00 | 0.00 | O |
| ATOM | 850 | O2P  | T B | 9  | -11.732 | -7.174  | 34.232 | 1.00 | 0.00 | O |
| ATOM | 851 | P    | T B | 9  | -10.253 | -7.100  | 34.302 | 1.00 | 0.00 | P |
| ATOM | 852 | H3   | T B | 9  | -11.431 | -14.883 | 34.396 | 1.00 | 0.00 | H |
| ATOM | 853 | H6   | T B | 9  | -11.011 | -10.129 | 33.712 | 1.00 | 0.00 | H |
| ATOM | 854 | H1'  | T B | 9  | -8.521  | -12.351 | 32.105 | 1.00 | 0.00 | H |
| ATOM | 855 | H3'  | T B | 9  | -8.220  | -8.453  | 31.680 | 1.00 | 0.00 | H |
| ATOM | 856 | H4'  | T B | 9  | -6.541  | -9.573  | 33.395 | 1.00 | 0.00 | H |
| ATOM | 857 | H71  | T B | 9  | -13.798 | -10.301 | 34.247 | 1.00 | 0.00 | H |
| ATOM | 858 | H72  | T B | 9  | -13.982 | -11.380 | 35.652 | 1.00 | 0.00 | H |
| ATOM | 859 | H73  | T B | 9  | -12.833 | -10.021 | 35.717 | 1.00 | 0.00 | H |
| ATOM | 860 | H2'1 | T B | 9  | -10.165 | -9.803  | 32.075 | 1.00 | 0.00 | H |
| ATOM | 861 | H2'2 | T B | 9  | -9.447  | -10.661 | 30.721 | 1.00 | 0.00 | H |
| ATOM | 862 | H5'1 | T B | 9  | -8.242  | -9.286  | 35.336 | 1.00 | 0.00 | H |
| ATOM | 863 | H5'2 | T B | 9  | -7.702  | -7.874  | 34.404 | 1.00 | 0.00 | H |
| ATOM | 864 | C1'  | A B | 10 | -8.805  | -15.131 | 29.254 | 1.00 | 0.00 | C |
| ATOM | 865 | N1   | A B | 10 | -13.020 | -16.819 | 31.645 | 1.00 | 0.00 | N |
| ATOM | 866 | C2   | A B | 10 | -11.948 | -17.443 | 31.164 | 1.00 | 0.00 | C |
| ATOM | 867 | N3   | A B | 10 | -10.892 | -16.944 | 30.559 | 1.00 | 0.00 | N |
| ATOM | 868 | C4   | A B | 10 | -11.003 | -15.608 | 30.453 | 1.00 | 0.00 | C |
| ATOM | 869 | C5   | A B | 10 | -12.032 | -14.821 | 30.890 | 1.00 | 0.00 | C |
| ATOM | 870 | C6   | A B | 10 | -13.102 | -15.485 | 31.525 | 1.00 | 0.00 | C |
| ATOM | 871 | N6   | A B | 10 | -14.181 | -14.842 | 32.006 | 1.00 | 0.00 | N |
| ATOM | 872 | N7   | A B | 10 | -11.797 | -13.487 | 30.607 | 1.00 | 0.00 | N |
| ATOM | 873 | C8   | A B | 10 | -10.644 | -13.496 | 30.005 | 1.00 | 0.00 | C |
| ATOM | 874 | N9   | A B | 10 | -10.100 | -14.748 | 29.878 | 1.00 | 0.00 | N |
| ATOM | 875 | C2'  | A B | 10 | -8.459  | -14.318 | 28.014 | 1.00 | 0.00 | C |
| ATOM | 876 | C3'  | A B | 10 | -6.947  | -14.194 | 28.126 | 1.00 | 0.00 | C |
| ATOM | 877 | O3'  | A B | 10 | -6.339  | -15.359 | 27.574 | 1.00 | 0.00 | O |
| ATOM | 878 | C4'  | A B | 10 | -6.727  | -14.090 | 29.636 | 1.00 | 0.00 | C |
| ATOM | 879 | O4'  | A B | 10 | -7.786  | -14.920 | 30.213 | 1.00 | 0.00 | O |
| ATOM | 880 | C5'  | A B | 10 | -6.819  | -12.705 | 30.232 | 1.00 | 0.00 | C |
| ATOM | 881 | O5'  | A B | 10 | -7.852  | -11.945 | 29.554 | 1.00 | 0.00 | O |
| ATOM | 882 | O1P  | A B | 10 | -6.564  | -10.121 | 28.393 | 1.00 | 0.00 | O |
| ATOM | 883 | O2P  | A B | 10 | -8.955  | -9.744  | 29.054 | 1.00 | 0.00 | O |
| ATOM | 884 | P    | A B | 10 | -7.648  | -10.375 | 29.361 | 1.00 | 0.00 | P |
| ATOM | 885 | H2   | A B | 10 | -11.946 | -18.525 | 31.290 | 1.00 | 0.00 | H |
| ATOM | 886 | H8   | A B | 10 | -10.157 | -12.593 | 29.636 | 1.00 | 0.00 | H |
| ATOM | 887 | H1'  | A B | 10 | -8.838  | -16.196 | 29.027 | 1.00 | 0.00 | H |
| ATOM | 888 | H3'  | A B | 10 | -6.570  | -13.310 | 27.613 | 1.00 | 0.00 | H |
| ATOM | 889 | H4'  | A B | 10 | -5.728  | -14.474 | 29.836 | 1.00 | 0.00 | H |
| ATOM | 890 | H61  | A B | 10 | -14.934 | -15.375 | 32.464 | 1.00 | 0.00 | H |
| ATOM | 891 | H62  | A B | 10 | -14.253 | -13.819 | 31.917 | 1.00 | 0.00 | H |
| ATOM | 892 | H2'1 | A B | 10 | -8.937  | -13.340 | 28.012 | 1.00 | 0.00 | H |
| ATOM | 893 | H2'2 | A B | 10 | -8.746  | -14.827 | 27.092 | 1.00 | 0.00 | H |
| ATOM | 894 | H5'1 | A B | 10 | -7.059  | -12.787 | 31.292 | 1.00 | 0.00 | H |

|      |     |      |     |    |         |         |        |      |      |   |
|------|-----|------|-----|----|---------|---------|--------|------|------|---|
| ATOM | 895 | H5'2 | A B | 10 | -5.860  | -12.203 | 30.120 | 1.00 | 0.00 | H |
| ATOM | 896 | C1'  | G B | 11 | -10.483 | -19.256 | 27.060 | 1.00 | 0.00 | C |
| ATOM | 897 | N1   | G B | 11 | -14.968 | -17.809 | 29.013 | 1.00 | 0.00 | N |
| ATOM | 898 | C2   | G B | 11 | -14.391 | -19.065 | 28.949 | 1.00 | 0.00 | C |
| ATOM | 899 | N2   | G B | 11 | -15.104 | -20.069 | 29.475 | 1.00 | 0.00 | N |
| ATOM | 900 | N3   | G B | 11 | -13.197 | -19.300 | 28.407 | 1.00 | 0.00 | N |
| ATOM | 901 | C4   | G B | 11 | -12.621 | -18.170 | 27.919 | 1.00 | 0.00 | C |
| ATOM | 902 | C5   | G B | 11 | -13.122 | -16.880 | 27.933 | 1.00 | 0.00 | C |
| ATOM | 903 | C6   | G B | 11 | -14.388 | -16.628 | 28.512 | 1.00 | 0.00 | C |
| ATOM | 904 | O6   | G B | 11 | -14.995 | -15.562 | 28.618 | 1.00 | 0.00 | O |
| ATOM | 905 | N7   | G B | 11 | -12.219 | -16.004 | 27.327 | 1.00 | 0.00 | N |
| ATOM | 906 | C8   | G B | 11 | -11.220 | -16.773 | 26.975 | 1.00 | 0.00 | C |
| ATOM | 907 | N9   | G B | 11 | -11.392 | -18.103 | 27.300 | 1.00 | 0.00 | N |
| ATOM | 908 | C2'  | G B | 11 | -9.749  | -19.192 | 25.728 | 1.00 | 0.00 | C |
| ATOM | 909 | C3'  | G B | 11 | -8.398  | -19.794 | 26.080 | 1.00 | 0.00 | C |
| ATOM | 910 | O3'  | G B | 11 | -8.483  | -21.214 | 26.000 | 1.00 | 0.00 | O |
| ATOM | 911 | C4'  | G B | 11 | -8.172  | -19.309 | 27.511 | 1.00 | 0.00 | C |
| ATOM | 912 | O4'  | G B | 11 | -9.515  | -19.264 | 28.091 | 1.00 | 0.00 | O |
| ATOM | 913 | C5'  | G B | 11 | -7.533  | -17.949 | 27.666 | 1.00 | 0.00 | C |
| ATOM | 914 | O5'  | G B | 11 | -8.006  | -17.063 | 26.622 | 1.00 | 0.00 | O |
| ATOM | 915 | O1P  | G B | 11 | -5.942  | -16.617 | 25.254 | 1.00 | 0.00 | O |
| ATOM | 916 | O2P  | G B | 11 | -7.788  | -14.920 | 25.328 | 1.00 | 0.00 | O |
| ATOM | 917 | P    | G B | 11 | -7.009  | -15.965 | 26.035 | 1.00 | 0.00 | P |
| ATOM | 918 | H1   | G B | 11 | -15.894 | -17.734 | 29.460 | 1.00 | 0.00 | H |
| ATOM | 919 | H8   | G B | 11 | -10.332 | -16.396 | 26.469 | 1.00 | 0.00 | H |
| ATOM | 920 | H1'  | G B | 11 | -11.066 | -20.174 | 27.142 | 1.00 | 0.00 | H |
| ATOM | 921 | H21  | G B | 11 | -16.025 | -19.879 | 29.896 | 1.00 | 0.00 | H |
| ATOM | 922 | H3'  | G B | 11 | -7.608  | -19.441 | 25.416 | 1.00 | 0.00 | H |
| ATOM | 923 | H22  | G B | 11 | -14.732 | -21.029 | 29.457 | 1.00 | 0.00 | H |
| ATOM | 924 | H4'  | G B | 11 | -7.524  | -20.039 | 27.994 | 1.00 | 0.00 | H |
| ATOM | 925 | H2'1 | G B | 11 | -9.645  | -18.170 | 25.362 | 1.00 | 0.00 | H |
| ATOM | 926 | H2'2 | G B | 11 | -10.251 | -19.770 | 24.951 | 1.00 | 0.00 | H |
| ATOM | 927 | H5'1 | G B | 11 | -7.792  | -17.541 | 28.642 | 1.00 | 0.00 | H |
| ATOM | 928 | H5'2 | G B | 11 | -6.450  | -18.055 | 27.597 | 1.00 | 0.00 | H |
| ATOM | 929 | C1'  | G B | 12 | -13.984 | -22.529 | 25.812 | 1.00 | 0.00 | C |
| ATOM | 930 | N1   | G B | 12 | -17.123 | -18.560 | 26.459 | 1.00 | 0.00 | N |
| ATOM | 931 | C2   | G B | 12 | -17.268 | -19.881 | 26.847 | 1.00 | 0.00 | C |
| ATOM | 932 | N2   | G B | 12 | -18.402 | -20.184 | 27.493 | 1.00 | 0.00 | N |
| ATOM | 933 | N3   | G B | 12 | -16.356 | -20.821 | 26.612 | 1.00 | 0.00 | N |
| ATOM | 934 | C4   | G B | 12 | -15.278 | -20.338 | 25.943 | 1.00 | 0.00 | C |
| ATOM | 935 | C5   | G B | 12 | -15.048 | -19.043 | 25.512 | 1.00 | 0.00 | C |
| ATOM | 936 | C6   | G B | 12 | -16.014 | -18.042 | 25.765 | 1.00 | 0.00 | C |
| ATOM | 937 | O6   | G B | 12 | -15.992 | -16.849 | 25.464 | 1.00 | 0.00 | O |
| ATOM | 938 | N7   | G B | 12 | -13.816 | -18.961 | 24.860 | 1.00 | 0.00 | N |
| ATOM | 939 | C8   | G B | 12 | -13.346 | -20.180 | 24.917 | 1.00 | 0.00 | C |
| ATOM | 940 | N9   | G B | 12 | -14.178 | -21.075 | 25.559 | 1.00 | 0.00 | N |
| ATOM | 941 | C2'  | G B | 12 | -13.303 | -23.265 | 24.667 | 1.00 | 0.00 | C |
| ATOM | 942 | C3'  | G B | 12 | -12.454 | -24.288 | 25.406 | 1.00 | 0.00 | C |
| ATOM | 943 | O3'  | G B | 12 | -13.253 | -25.430 | 25.705 | 1.00 | 0.00 | O |
| ATOM | 944 | C4'  | G B | 12 | -12.032 | -23.532 | 26.664 | 1.00 | 0.00 | C |
| ATOM | 945 | O4'  | G B | 12 | -13.169 | -22.662 | 26.961 | 1.00 | 0.00 | O |
| ATOM | 946 | C5'  | G B | 12 | -10.789 | -22.682 | 26.551 | 1.00 | 0.00 | C |
| ATOM | 947 | O5'  | G B | 12 | -10.729 | -22.074 | 25.237 | 1.00 | 0.00 | O |
| ATOM | 948 | O1P  | G B | 12 | -8.709  | -23.150 | 24.190 | 1.00 | 0.00 | O |



|      |      |      |     |    |         |         |        |      |      |   |
|------|------|------|-----|----|---------|---------|--------|------|------|---|
| ATOM | 949  | O2P  | G B | 12 | -9.427  | -20.859 | 23.463 | 1.00 | 0.00 | O |
| ATOM | 950  | P    | G B | 12 | -9.302  | -21.851 | 24.559 | 1.00 | 0.00 | P |
| ATOM | 951  | H1   | G B | 12 | -17.887 | -17.907 | 26.696 | 1.00 | 0.00 | H |
| ATOM | 952  | H8   | G B | 12 | -12.383 | -20.467 | 24.495 | 1.00 | 0.00 | H |
| ATOM | 953  | H1'  | G B | 12 | -14.955 | -22.969 | 26.037 | 1.00 | 0.00 | H |
| ATOM | 954  | H21  | G B | 12 | -19.102 | -19.449 | 27.675 | 1.00 | 0.00 | H |
| ATOM | 955  | H3'  | G B | 12 | -11.587 | -24.597 | 24.823 | 1.00 | 0.00 | H |
| ATOM | 956  | H22  | G B | 12 | -18.572 | -21.149 | 27.806 | 1.00 | 0.00 | H |
| ATOM | 957  | H4'  | G B | 12 | -11.855 | -24.279 | 27.438 | 1.00 | 0.00 | H |
| ATOM | 958  | H2'1 | G B | 12 | -12.686 | -22.603 | 24.058 | 1.00 | 0.00 | H |
| ATOM | 959  | H2'2 | G B | 12 | -14.018 | -23.749 | 24.002 | 1.00 | 0.00 | H |
| ATOM | 960  | H5'1 | G B | 12 | -10.816 | -21.905 | 27.315 | 1.00 | 0.00 | H |
| ATOM | 961  | H5'2 | G B | 12 | -9.911  | -23.309 | 26.708 | 1.00 | 0.00 | H |
| ATOM | 962  | C1'  | T B | 13 | -18.640 | -23.945 | 24.910 | 1.00 | 0.00 | C |
| ATOM | 963  | N1   | T B | 13 | -18.084 | -22.737 | 24.245 | 1.00 | 0.00 | N |
| ATOM | 964  | C2   | T B | 13 | -18.823 | -21.574 | 24.329 | 1.00 | 0.00 | C |
| ATOM | 965  | O2   | T B | 13 | -19.890 | -21.513 | 24.915 | 1.00 | 0.00 | O |
| ATOM | 966  | N3   | T B | 13 | -18.269 | -20.476 | 23.699 | 1.00 | 0.00 | N |
| ATOM | 967  | C4   | T B | 13 | -17.075 | -20.439 | 23.009 | 1.00 | 0.00 | C |
| ATOM | 968  | O4   | T B | 13 | -16.681 | -19.393 | 22.480 | 1.00 | 0.00 | O |
| ATOM | 969  | C5   | T B | 13 | -16.373 | -21.701 | 22.977 | 1.00 | 0.00 | C |
| ATOM | 970  | C6   | T B | 13 | -16.883 | -22.792 | 23.581 | 1.00 | 0.00 | C |
| ATOM | 971  | C7   | T B | 13 | -15.067 | -21.708 | 22.239 | 1.00 | 0.00 | C |
| ATOM | 972  | C2'  | T B | 13 | -18.400 | -25.237 | 24.137 | 1.00 | 0.00 | C |
| ATOM | 973  | C3'  | T B | 13 | -18.182 | -26.241 | 25.258 | 1.00 | 0.00 | C |
| ATOM | 974  | O3'  | T B | 13 | -19.447 | -26.714 | 25.714 | 1.00 | 0.00 | O |
| ATOM | 975  | C4'  | T B | 13 | -17.457 | -25.415 | 26.318 | 1.00 | 0.00 | C |
| ATOM | 976  | O4'  | T B | 13 | -18.015 | -24.070 | 26.172 | 1.00 | 0.00 | O |
| ATOM | 977  | C5'  | T B | 13 | -15.953 | -25.331 | 26.192 | 1.00 | 0.00 | C |
| ATOM | 978  | O5'  | T B | 13 | -15.582 | -25.278 | 24.791 | 1.00 | 0.00 | O |
| ATOM | 979  | O1P  | T B | 13 | -14.352 | -27.442 | 24.431 | 1.00 | 0.00 | O |
| ATOM | 980  | O2P  | T B | 13 | -13.826 | -25.448 | 23.002 | 1.00 | 0.00 | O |
| ATOM | 981  | P    | T B | 13 | -14.225 | -25.975 | 24.330 | 1.00 | 0.00 | P |
| ATOM | 982  | H3   | T B | 13 | -18.801 | -19.595 | 23.750 | 1.00 | 0.00 | H |
| ATOM | 983  | H6   | T B | 13 | -16.335 | -23.733 | 23.542 | 1.00 | 0.00 | H |
| ATOM | 984  | H1'  | T B | 13 | -19.705 | -23.784 | 25.078 | 1.00 | 0.00 | H |
| ATOM | 985  | H3'  | T B | 13 | -17.576 | -27.087 | 24.935 | 1.00 | 0.00 | H |
| ATOM | 986  | H4'  | T B | 13 | -17.684 | -25.870 | 27.283 | 1.00 | 0.00 | H |
| ATOM | 987  | H71  | T B | 13 | -15.148 | -22.348 | 21.361 | 1.00 | 0.00 | H |
| ATOM | 988  | H72  | T B | 13 | -14.821 | -20.692 | 21.926 | 1.00 | 0.00 | H |
| ATOM | 989  | H73  | T B | 13 | -14.280 | -22.086 | 22.893 | 1.00 | 0.00 | H |
| ATOM | 990  | H2'1 | T B | 13 | -17.529 | -25.173 | 23.487 | 1.00 | 0.00 | H |
| ATOM | 991  | H2'2 | T B | 13 | -19.253 | -25.513 | 23.517 | 1.00 | 0.00 | H |
| ATOM | 992  | H5'1 | T B | 13 | -15.601 | -24.436 | 26.703 | 1.00 | 0.00 | H |
| ATOM | 993  | H5'2 | T B | 13 | -15.506 | -26.209 | 26.657 | 1.00 | 0.00 | H |
| ATOM | 994  | C1'  | G B | 14 | -23.359 | -23.116 | 23.606 | 1.00 | 0.00 | C |
| ATOM | 995  | N1   | G B | 14 | -21.395 | -19.104 | 21.142 | 1.00 | 0.00 | N |
| ATOM | 996  | C2   | G B | 14 | -22.545 | -19.201 | 21.905 | 1.00 | 0.00 | C |
| ATOM | 997  | N2   | G B | 14 | -23.269 | -18.083 | 22.027 | 1.00 | 0.00 | N |
| ATOM | 998  | N3   | G B | 14 | -22.940 | -20.326 | 22.500 | 1.00 | 0.00 | N |
| ATOM | 999  | C4   | G B | 14 | -22.090 | -21.361 | 22.265 | 1.00 | 0.00 | C |
| ATOM | 1000 | C5   | G B | 14 | -20.927 | -21.358 | 21.515 | 1.00 | 0.00 | C |
| ATOM | 1001 | C6   | G B | 14 | -20.504 | -20.164 | 20.886 | 1.00 | 0.00 | C |
| ATOM | 1002 | O6   | G B | 14 | -19.510 | -19.965 | 20.187 | 1.00 | 0.00 | O |

|      |      |      |     |    |         |         |        |      |      |   |
|------|------|------|-----|----|---------|---------|--------|------|------|---|
| ATOM | 1003 | N7   | G B | 14 | -20.345 | -22.628 | 21.520 | 1.00 | 0.00 | N |
| ATOM | 1004 | C8   | G B | 14 | -21.156 | -23.343 | 22.258 | 1.00 | 0.00 | C |
| ATOM | 1005 | N9   | G B | 14 | -22.241 | -22.643 | 22.745 | 1.00 | 0.00 | N |
| ATOM | 1006 | C2'  | G B | 14 | -23.822 | -24.531 | 23.288 | 1.00 | 0.00 | C |
| ATOM | 1007 | C3'  | G B | 14 | -24.179 | -25.067 | 24.665 | 1.00 | 0.00 | C |
| ATOM | 1008 | O3'  | G B | 14 | -25.509 | -24.671 | 24.990 | 1.00 | 0.00 | O |
| ATOM | 1009 | C4'  | G B | 14 | -23.141 | -24.401 | 25.567 | 1.00 | 0.00 | C |
| ATOM | 1010 | O4'  | G B | 14 | -22.909 | -23.097 | 24.947 | 1.00 | 0.00 | O |
| ATOM | 1011 | C5'  | G B | 14 | -21.817 | -25.114 | 25.707 | 1.00 | 0.00 | C |
| ATOM | 1012 | O5'  | G B | 14 | -21.453 | -25.725 | 24.444 | 1.00 | 0.00 | O |
| ATOM | 1013 | O1P  | G B | 14 | -21.538 | -28.190 | 24.944 | 1.00 | 0.00 | O |
| ATOM | 1014 | O2P  | G B | 14 | -20.025 | -27.328 | 23.138 | 1.00 | 0.00 | O |
| ATOM | 1015 | P    | G B | 14 | -20.659 | -27.108 | 24.461 | 1.00 | 0.00 | P |
| ATOM | 1016 | H1   | G B | 14 | -21.174 | -18.185 | 20.729 | 1.00 | 0.00 | H |
| ATOM | 1017 | H8   | G B | 14 | -20.989 | -24.400 | 22.469 | 1.00 | 0.00 | H |
| ATOM | 1018 | H1'  | G B | 14 | -24.182 | -22.406 | 23.519 | 1.00 | 0.00 | H |
| ATOM | 1019 | H21  | G B | 14 | -22.954 | -17.215 | 21.566 | 1.00 | 0.00 | H |
| ATOM | 1020 | H3'  | G B | 14 | -24.102 | -26.153 | 24.713 | 1.00 | 0.00 | H |
| ATOM | 1021 | H22  | G B | 14 | -24.138 | -18.089 | 22.579 | 1.00 | 0.00 | H |
| ATOM | 1022 | H4'  | G B | 14 | -23.586 | -24.327 | 26.560 | 1.00 | 0.00 | H |
| ATOM | 1023 | H2'1 | G B | 14 | -23.038 | -25.128 | 22.821 | 1.00 | 0.00 | H |
| ATOM | 1024 | H2'2 | G B | 14 | -24.684 | -24.544 | 22.621 | 1.00 | 0.00 | H |
| ATOM | 1025 | H5'1 | G B | 14 | -21.053 | -24.395 | 26.001 | 1.00 | 0.00 | H |
| ATOM | 1026 | H5'2 | G B | 14 | -21.903 | -25.880 | 26.476 | 1.00 | 0.00 | H |
| ATOM | 1027 | C1'  | C B | 15 | -26.975 | -20.627 | 21.314 | 1.00 | 0.00 | C |
| ATOM | 1028 | N1   | C B | 15 | -25.760 | -21.054 | 20.569 | 1.00 | 0.00 | N |
| ATOM | 1029 | C2   | C B | 15 | -25.078 | -20.093 | 19.826 | 1.00 | 0.00 | C |
| ATOM | 1030 | O2   | C B | 15 | -25.507 | -18.931 | 19.817 | 1.00 | 0.00 | O |
| ATOM | 1031 | N3   | C B | 15 | -23.969 | -20.461 | 19.140 | 1.00 | 0.00 | N |
| ATOM | 1032 | C4   | C B | 15 | -23.530 | -21.725 | 19.169 | 1.00 | 0.00 | C |
| ATOM | 1033 | N4   | C B | 15 | -22.439 | -22.030 | 18.483 | 1.00 | 0.00 | N |
| ATOM | 1034 | C5   | C B | 15 | -24.214 | -22.738 | 19.921 | 1.00 | 0.00 | C |
| ATOM | 1035 | C6   | C B | 15 | -25.325 | -22.342 | 20.608 | 1.00 | 0.00 | C |
| ATOM | 1036 | C2'  | C B | 15 | -28.091 | -21.662 | 21.314 | 1.00 | 0.00 | C |
| ATOM | 1037 | C3'  | C B | 15 | -28.691 | -21.484 | 22.701 | 1.00 | 0.00 | C |
| ATOM | 1038 | O3'  | C B | 15 | -29.639 | -20.418 | 22.668 | 1.00 | 0.00 | O |
| ATOM | 1039 | C4'  | C B | 15 | -27.472 | -21.145 | 23.556 | 1.00 | 0.00 | C |
| ATOM | 1040 | O4'  | C B | 15 | -26.596 | -20.393 | 22.658 | 1.00 | 0.00 | O |
| ATOM | 1041 | C5'  | C B | 15 | -26.698 | -22.318 | 24.115 | 1.00 | 0.00 | C |
| ATOM | 1042 | O5'  | C B | 15 | -26.682 | -23.398 | 23.150 | 1.00 | 0.00 | O |
| ATOM | 1043 | O1P  | C B | 15 | -28.019 | -25.209 | 24.277 | 1.00 | 0.00 | O |
| ATOM | 1044 | O2P  | C B | 15 | -26.253 | -25.814 | 22.601 | 1.00 | 0.00 | O |
| ATOM | 1045 | P    | C B | 15 | -26.703 | -24.902 | 23.680 | 1.00 | 0.00 | P |
| ATOM | 1046 | H5   | C B | 15 | -23.864 | -23.770 | 19.942 | 1.00 | 0.00 | H |
| ATOM | 1047 | H6   | C B | 15 | -25.876 | -23.075 | 21.199 | 1.00 | 0.00 | H |
| ATOM | 1048 | H1'  | C B | 15 | -27.319 | -19.682 | 20.893 | 1.00 | 0.00 | H |
| ATOM | 1049 | H3'  | C B | 15 | -29.180 | -22.391 | 23.054 | 1.00 | 0.00 | H |
| ATOM | 1050 | H4'  | C B | 15 | -27.830 | -20.553 | 24.398 | 1.00 | 0.00 | H |
| ATOM | 1051 | H41  | C B | 15 | -22.077 | -22.995 | 18.490 | 1.00 | 0.00 | H |
| ATOM | 1052 | H42  | C B | 15 | -21.950 | -21.301 | 17.941 | 1.00 | 0.00 | H |
| ATOM | 1053 | H2'1 | C B | 15 | -27.716 | -22.675 | 21.172 | 1.00 | 0.00 | H |
| ATOM | 1054 | H2'2 | C B | 15 | -28.830 | -21.475 | 20.535 | 1.00 | 0.00 | H |
| ATOM | 1055 | H5'1 | C B | 15 | -25.678 | -22.001 | 24.333 | 1.00 | 0.00 | H |
| ATOM | 1056 | H5'2 | C B | 15 | -27.174 | -22.654 | 25.036 | 1.00 | 0.00 | H |

|      |      |      |     |    |         |         |        |      |      |   |
|------|------|------|-----|----|---------|---------|--------|------|------|---|
| ATOM | 1057 | C1'  | G B | 16 | -28.778 | -17.618 | 17.819 | 1.00 | 0.00 | C |
| ATOM | 1058 | N1   | G B | 16 | -24.720 | -19.201 | 15.164 | 1.00 | 0.00 | N |
| ATOM | 1059 | C2   | G B | 16 | -25.259 | -17.933 | 15.291 | 1.00 | 0.00 | C |
| ATOM | 1060 | N2   | G B | 16 | -24.633 | -16.957 | 14.620 | 1.00 | 0.00 | N |
| ATOM | 1061 | N3   | G B | 16 | -26.334 | -17.660 | 16.029 | 1.00 | 0.00 | N |
| ATOM | 1062 | C4   | G B | 16 | -26.840 | -18.767 | 16.632 | 1.00 | 0.00 | C |
| ATOM | 1063 | C5   | G B | 16 | -26.374 | -20.069 | 16.559 | 1.00 | 0.00 | C |
| ATOM | 1064 | C6   | G B | 16 | -25.231 | -20.359 | 15.779 | 1.00 | 0.00 | C |
| ATOM | 1065 | O6   | G B | 16 | -24.672 | -21.441 | 15.593 | 1.00 | 0.00 | O |
| ATOM | 1066 | N7   | G B | 16 | -27.180 | -20.914 | 17.325 | 1.00 | 0.00 | N |
| ATOM | 1067 | C8   | G B | 16 | -28.087 | -20.116 | 17.829 | 1.00 | 0.00 | C |
| ATOM | 1068 | N9   | G B | 16 | -27.947 | -18.796 | 17.452 | 1.00 | 0.00 | N |
| ATOM | 1069 | C2'  | G B | 16 | -30.267 | -17.922 | 17.909 | 1.00 | 0.00 | C |
| ATOM | 1070 | C3'  | G B | 16 | -30.705 | -17.030 | 19.060 | 1.00 | 0.00 | C |
| ATOM | 1071 | O3'  | G B | 16 | -30.971 | -15.721 | 18.562 | 1.00 | 0.00 | O |
| ATOM | 1072 | C4'  | G B | 16 | -29.495 | -17.058 | 19.991 | 1.00 | 0.00 | C |
| ATOM | 1073 | O4'  | G B | 16 | -28.348 | -17.165 | 19.088 | 1.00 | 0.00 | O |
| ATOM | 1074 | C5'  | G B | 16 | -29.437 | -18.196 | 20.983 | 1.00 | 0.00 | C |
| ATOM | 1075 | O5'  | G B | 16 | -29.966 | -19.401 | 20.377 | 1.00 | 0.00 | O |
| ATOM | 1076 | O1P  | G B | 16 | -32.054 | -19.854 | 21.707 | 1.00 | 0.00 | O |
| ATOM | 1077 | O2P  | G B | 16 | -30.831 | -21.749 | 20.609 | 1.00 | 0.00 | O |
| ATOM | 1078 | P    | G B | 16 | -30.763 | -20.435 | 21.294 | 1.00 | 0.00 | P |
| ATOM | 1079 | H1   | G B | 16 | -23.881 | -19.304 | 14.573 | 1.00 | 0.00 | H |
| ATOM | 1080 | H8   | G B | 16 | -28.882 | -20.463 | 18.487 | 1.00 | 0.00 | H |
| ATOM | 1081 | H1'  | G B | 16 | -28.584 | -16.824 | 17.097 | 1.00 | 0.00 | H |
| ATOM | 1082 | H21  | G B | 16 | -23.801 | -17.175 | 14.054 | 1.00 | 0.00 | H |
| ATOM | 1083 | H3'  | G B | 16 | -31.595 | -17.414 | 19.559 | 1.00 | 0.00 | H |
| ATOM | 1084 | H22  | G B | 16 | -24.987 | -15.991 | 14.672 | 1.00 | 0.00 | H |
| ATOM | 1085 | H4'  | G B | 16 | -29.507 | -16.125 | 20.555 | 1.00 | 0.00 | H |
| ATOM | 1086 | H2'1 | G B | 16 | -30.462 | -18.973 | 18.125 | 1.00 | 0.00 | H |
| ATOM | 1087 | H2'2 | G B | 16 | -30.797 | -17.673 | 16.990 | 1.00 | 0.00 | H |
| ATOM | 1088 | H5'1 | G B | 16 | -28.402 | -18.357 | 21.283 | 1.00 | 0.00 | H |
| ATOM | 1089 | H5'2 | G B | 16 | -30.028 | -17.934 | 21.861 | 1.00 | 0.00 | H |
| ATOM | 1090 | C1'  | G B | 17 | -28.742 | -15.447 | 13.368 | 1.00 | 0.00 | C |
| ATOM | 1091 | N1   | G B | 17 | -26.030 | -19.552 | 12.019 | 1.00 | 0.00 | N |
| ATOM | 1092 | C2   | G B | 17 | -25.846 | -18.219 | 11.694 | 1.00 | 0.00 | C |
| ATOM | 1093 | N2   | G B | 17 | -24.801 | -17.945 | 10.904 | 1.00 | 0.00 | N |
| ATOM | 1094 | N3   | G B | 17 | -26.639 | -17.241 | 12.125 | 1.00 | 0.00 | N |
| ATOM | 1095 | C4   | G B | 17 | -27.649 | -17.702 | 12.907 | 1.00 | 0.00 | C |
| ATOM | 1096 | C5   | G B | 17 | -27.913 | -19.008 | 13.280 | 1.00 | 0.00 | C |
| ATOM | 1097 | C6   | G B | 17 | -27.070 | -20.047 | 12.827 | 1.00 | 0.00 | C |
| ATOM | 1098 | O6   | G B | 17 | -27.140 | -21.257 | 13.048 | 1.00 | 0.00 | O |
| ATOM | 1099 | N7   | G B | 17 | -29.048 | -19.059 | 14.093 | 1.00 | 0.00 | N |
| ATOM | 1100 | C8   | G B | 17 | -29.425 | -17.810 | 14.187 | 1.00 | 0.00 | C |
| ATOM | 1101 | N9   | G B | 17 | -28.626 | -16.926 | 13.493 | 1.00 | 0.00 | N |
| ATOM | 1102 | C2'  | G B | 17 | -30.178 | -14.951 | 13.271 | 1.00 | 0.00 | C |
| ATOM | 1103 | C3'  | G B | 17 | -30.113 | -13.638 | 14.035 | 1.00 | 0.00 | C |
| ATOM | 1104 | O3'  | G B | 17 | -29.666 | -12.608 | 13.157 | 1.00 | 0.00 | O |
| ATOM | 1105 | C4'  | G B | 17 | -29.100 | -13.936 | 15.138 | 1.00 | 0.00 | C |
| ATOM | 1106 | O4'  | G B | 17 | -28.158 | -14.869 | 14.520 | 1.00 | 0.00 | O |
| ATOM | 1107 | C5'  | G B | 17 | -29.646 | -14.565 | 16.398 | 1.00 | 0.00 | C |
| ATOM | 1108 | O5'  | G B | 17 | -30.708 | -15.492 | 16.063 | 1.00 | 0.00 | O |
| ATOM | 1109 | O1P  | G B | 17 | -32.752 | -14.423 | 17.072 | 1.00 | 0.00 | O |
| ATOM | 1110 | O2P  | G B | 17 | -32.656 | -16.913 | 16.775 | 1.00 | 0.00 | O |

|      |      |      |     |    |         |         |        |      |      |   |
|------|------|------|-----|----|---------|---------|--------|------|------|---|
| ATOM | 1111 | P    | G B | 17 | -31.935 | -15.651 | 17.072 | 1.00 | 0.00 | P |
| ATOM | 1112 | H1   | G B | 17 | -25.354 | -20.232 | 11.638 | 1.00 | 0.00 | H |
| ATOM | 1113 | H8   | G B | 17 | -30.295 | -17.495 | 14.763 | 1.00 | 0.00 | H |
| ATOM | 1114 | H1'  | G B | 17 | -28.160 | -15.131 | 12.503 | 1.00 | 0.00 | H |
| ATOM | 1115 | H21  | G B | 17 | -24.188 | -18.706 | 10.577 | 1.00 | 0.00 | H |
| ATOM | 1116 | H3'  | G B | 17 | -31.080 | -13.360 | 14.454 | 1.00 | 0.00 | H |
| ATOM | 1117 | H22  | G B | 17 | -24.610 | -16.972 | 10.624 | 1.00 | 0.00 | H |
| ATOM | 1118 | H4'  | G B | 17 | -28.641 | -12.987 | 15.412 | 1.00 | 0.00 | H |
| ATOM | 1119 | H2'1 | G B | 17 | -30.886 | -15.642 | 13.730 | 1.00 | 0.00 | H |
| ATOM | 1120 | H2'2 | G B | 17 | -30.494 | -14.796 | 12.240 | 1.00 | 0.00 | H |
| ATOM | 1121 | H5'1 | G B | 17 | -28.843 | -15.095 | 16.911 | 1.00 | 0.00 | H |
| ATOM | 1122 | H5'2 | G B | 17 | -30.032 | -13.782 | 17.051 | 1.00 | 0.00 | H |
| ATOM | 1123 | C1'  | C B | 18 | -27.540 | -15.155 | 8.572  | 1.00 | 0.00 | C |
| ATOM | 1124 | N1   | C B | 18 | -28.193 | -16.377 | 9.117  | 1.00 | 0.00 | N |
| ATOM | 1125 | C2   | C B | 18 | -27.597 | -17.608 | 8.851  | 1.00 | 0.00 | C |
| ATOM | 1126 | O2   | C B | 18 | -26.558 | -17.636 | 8.180  | 1.00 | 0.00 | O |
| ATOM | 1127 | N3   | C B | 18 | -28.177 | -18.732 | 9.337  | 1.00 | 0.00 | N |
| ATOM | 1128 | C4   | C B | 18 | -29.302 | -18.668 | 10.060 | 1.00 | 0.00 | C |
| ATOM | 1129 | N4   | C B | 18 | -29.824 | -19.800 | 10.512 | 1.00 | 0.00 | N |
| ATOM | 1130 | C5   | C B | 18 | -29.937 | -17.417 | 10.346 | 1.00 | 0.00 | C |
| ATOM | 1131 | C6   | C B | 18 | -29.335 | -16.299 | 9.849  | 1.00 | 0.00 | C |
| ATOM | 1132 | C2'  | C B | 18 | -28.523 | -14.098 | 8.086  | 1.00 | 0.00 | C |
| ATOM | 1133 | C3'  | C B | 18 | -27.811 | -12.807 | 8.461  | 1.00 | 0.00 | C |
| ATOM | 1134 | O3'  | C B | 18 | -26.887 | -12.466 | 7.430  | 1.00 | 0.00 | O |
| ATOM | 1135 | C4'  | C B | 18 | -27.110 | -13.173 | 9.767  | 1.00 | 0.00 | C |
| ATOM | 1136 | O4'  | C B | 18 | -26.763 | -14.585 | 9.609  | 1.00 | 0.00 | O |
| ATOM | 1137 | C5'  | C B | 18 | -27.920 | -13.013 | 11.032 | 1.00 | 0.00 | C |
| ATOM | 1138 | O5'  | C B | 18 | -29.302 | -13.374 | 10.776 | 1.00 | 0.00 | O |
| ATOM | 1139 | O1P  | C B | 18 | -30.535 | -11.199 | 11.070 | 1.00 | 0.00 | O |
| ATOM | 1140 | O2P  | C B | 18 | -31.713 | -13.375 | 11.487 | 1.00 | 0.00 | O |
| ATOM | 1141 | P    | C B | 18 | -30.455 | -12.592 | 11.553 | 1.00 | 0.00 | P |
| ATOM | 1142 | H5   | C B | 18 | -30.855 | -17.361 | 10.931 | 1.00 | 0.00 | H |
| ATOM | 1143 | H6   | C B | 18 | -29.780 | -15.324 | 10.044 | 1.00 | 0.00 | H |
| ATOM | 1144 | H1'  | C B | 18 | -26.864 | -15.457 | 7.773  | 1.00 | 0.00 | H |
| ATOM | 1145 | H3'  | C B | 18 | -28.510 | -11.984 | 8.606  | 1.00 | 0.00 | H |
| ATOM | 1146 | H4'  | C B | 18 | -26.236 | -12.526 | 9.850  | 1.00 | 0.00 | H |
| ATOM | 1147 | H41  | C B | 18 | -30.689 | -19.779 | 11.073 | 1.00 | 0.00 | H |
| ATOM | 1148 | H42  | C B | 18 | -29.365 | -20.698 | 10.305 | 1.00 | 0.00 | H |
| ATOM | 1149 | H2'1 | C B | 18 | -29.491 | -14.175 | 8.580  | 1.00 | 0.00 | H |
| ATOM | 1150 | H2'2 | C B | 18 | -28.697 | -14.159 | 7.012  | 1.00 | 0.00 | H |
| ATOM | 1151 | H5'1 | C B | 18 | -27.509 | -13.661 | 11.806 | 1.00 | 0.00 | H |
| ATOM | 1152 | H5'2 | C B | 18 | -27.866 | -11.978 | 11.364 | 1.00 | 0.00 | H |
| ATOM | 1153 | C1'  | C B | 19 | -26.295 | -17.063 | 4.175  | 1.00 | 0.00 | C |
| ATOM | 1154 | N1   | C B | 19 | -27.488 | -17.567 | 4.909  | 1.00 | 0.00 | N |
| ATOM | 1155 | C2   | C B | 19 | -27.602 | -18.943 | 5.103  | 1.00 | 0.00 | C |
| ATOM | 1156 | O2   | C B | 19 | -26.714 | -19.684 | 4.663  | 1.00 | 0.00 | O |
| ATOM | 1157 | N3   | C B | 19 | -28.681 | -19.421 | 5.769  | 1.00 | 0.00 | N |
| ATOM | 1158 | C4   | C B | 19 | -29.626 | -18.592 | 6.233  | 1.00 | 0.00 | C |
| ATOM | 1159 | N4   | C B | 19 | -30.658 | -19.113 | 6.877  | 1.00 | 0.00 | N |
| ATOM | 1160 | C5   | C B | 19 | -29.534 | -17.176 | 6.046  | 1.00 | 0.00 | C |
| ATOM | 1161 | C6   | C B | 19 | -28.440 | -16.717 | 5.375  | 1.00 | 0.00 | C |
| ATOM | 1162 | C2'  | C B | 19 | -26.593 | -15.892 | 3.251  | 1.00 | 0.00 | C |
| ATOM | 1163 | C3'  | C B | 19 | -25.326 | -15.059 | 3.376  | 1.00 | 0.00 | C |
| ATOM | 1164 | O3'  | C B | 19 | -24.344 | -15.562 | 2.473  | 1.00 | 0.00 | O |

|      |      |      |     |    |         |         |        |      |      |   |
|------|------|------|-----|----|---------|---------|--------|------|------|---|
| ATOM | 1165 | C4'  | C B | 19 | -24.927 | -15.265 | 4.836  | 1.00 | 0.00 | C |
| ATOM | 1166 | O4'  | C B | 19 | -25.350 | -16.633 | 5.137  | 1.00 | 0.00 | O |
| ATOM | 1167 | C5'  | C B | 19 | -25.561 | -14.333 | 5.843  | 1.00 | 0.00 | C |
| ATOM | 1168 | O5'  | C B | 19 | -26.928 | -14.047 | 5.455  | 1.00 | 0.00 | O |
| ATOM | 1169 | O1P  | C B | 19 | -26.878 | -11.590 | 4.913  | 1.00 | 0.00 | O |
| ATOM | 1170 | O2P  | C B | 19 | -29.008 | -12.660 | 5.695  | 1.00 | 0.00 | O |
| ATOM | 1171 | P    | C B | 19 | -27.528 | -12.604 | 5.767  | 1.00 | 0.00 | P |
| ATOM | 1172 | H5   | C B | 19 | -30.300 | -16.498 | 6.420  | 1.00 | 0.00 | H |
| ATOM | 1173 | H6   | C B | 19 | -28.325 | -15.646 | 5.210  | 1.00 | 0.00 | H |
| ATOM | 1174 | H1'  | C B | 19 | -25.858 | -17.896 | 3.623  | 1.00 | 0.00 | H |
| ATOM | 1175 | H3'  | C B | 19 | -25.508 | -14.006 | 3.163  | 1.00 | 0.00 | H |
| ATOM | 1176 | H4'  | C B | 19 | -23.847 | -15.131 | 4.892  | 1.00 | 0.00 | H |
| ATOM | 1177 | H41  | C B | 19 | -31.399 | -18.499 | 7.247  | 1.00 | 0.00 | H |
| ATOM | 1178 | H42  | C B | 19 | -30.722 | -20.134 | 7.010  | 1.00 | 0.00 | H |
| ATOM | 1179 | H2'1 | C B | 19 | -27.470 | -15.328 | 3.566  | 1.00 | 0.00 | H |
| ATOM | 1180 | H2'2 | C B | 19 | -26.759 | -16.209 | 2.221  | 1.00 | 0.00 | H |
| ATOM | 1181 | H5'1 | C B | 19 | -25.546 | -14.804 | 6.825  | 1.00 | 0.00 | H |
| ATOM | 1182 | H5'2 | C B | 19 | -24.987 | -13.408 | 5.882  | 1.00 | 0.00 | H |
| ATOM | 1183 | C1'  | T B | 20 | -26.128 | -20.641 | 0.758  | 1.00 | 0.00 | C |
| ATOM | 1184 | N1   | T B | 20 | -27.424 | -20.260 | 1.380  | 1.00 | 0.00 | N |
| ATOM | 1185 | C2   | T B | 20 | -28.194 | -21.278 | 1.904  | 1.00 | 0.00 | C |
| ATOM | 1186 | O2   | T B | 20 | -27.852 | -22.448 | 1.873  | 1.00 | 0.00 | O |
| ATOM | 1187 | N3   | T B | 20 | -29.389 | -20.880 | 2.472  | 1.00 | 0.00 | N |
| ATOM | 1188 | C4   | T B | 20 | -29.868 | -19.591 | 2.559  | 1.00 | 0.00 | C |
| ATOM | 1189 | O4   | T B | 20 | -30.960 | -19.356 | 3.092  | 1.00 | 0.00 | O |
| ATOM | 1190 | C5   | T B | 20 | -28.995 | -18.597 | 1.985  | 1.00 | 0.00 | C |
| ATOM | 1191 | C6   | T B | 20 | -27.822 | -18.947 | 1.423  | 1.00 | 0.00 | C |
| ATOM | 1192 | C7   | T B | 20 | -29.477 | -17.178 | 2.058  | 1.00 | 0.00 | C |
| ATOM | 1193 | C2'  | T B | 20 | -25.782 | -19.830 | -0.485 | 1.00 | 0.00 | C |
| ATOM | 1194 | C3'  | T B | 20 | -24.271 | -19.701 | -0.369 | 1.00 | 0.00 | C |
| ATOM | 1195 | O3'  | T B | 20 | -23.658 | -20.864 | -0.921 | 1.00 | 0.00 | O |
| ATOM | 1196 | C4'  | T B | 20 | -24.053 | -19.592 | 1.138  | 1.00 | 0.00 | C |
| ATOM | 1197 | O4'  | T B | 20 | -25.109 | -20.425 | 1.716  | 1.00 | 0.00 | O |
| ATOM | 1198 | C5'  | T B | 20 | -24.150 | -18.207 | 1.733  | 1.00 | 0.00 | C |
| ATOM | 1199 | O5'  | T B | 20 | -25.184 | -17.452 | 1.051  | 1.00 | 0.00 | O |
| ATOM | 1200 | O1P  | T B | 20 | -23.902 | -15.627 | -0.112 | 1.00 | 0.00 | O |
| ATOM | 1201 | O2P  | T B | 20 | -26.294 | -15.256 | 0.547  | 1.00 | 0.00 | O |
| ATOM | 1202 | P    | T B | 20 | -24.986 | -15.883 | 0.856  | 1.00 | 0.00 | P |
| ATOM | 1203 | H3   | T B | 20 | -29.982 | -21.621 | 2.871  | 1.00 | 0.00 | H |
| ATOM | 1204 | H6   | T B | 20 | -27.179 | -18.178 | 0.996  | 1.00 | 0.00 | H |
| ATOM | 1205 | H1'  | T B | 20 | -26.156 | -21.707 | 0.533  | 1.00 | 0.00 | H |
| ATOM | 1206 | H3'  | T B | 20 | -23.897 | -18.818 | -0.886 | 1.00 | 0.00 | H |
| ATOM | 1207 | H4'  | T B | 20 | -23.051 | -19.972 | 1.341  | 1.00 | 0.00 | H |
| ATOM | 1208 | H3T  | T B | 20 | -23.932 | -21.085 | -1.814 | 1.00 | 0.00 | H |
| ATOM | 1209 | H71  | T B | 20 | -29.668 | -16.806 | 1.052  | 1.00 | 0.00 | H |
| ATOM | 1210 | H72  | T B | 20 | -30.397 | -17.136 | 2.643  | 1.00 | 0.00 | H |
| ATOM | 1211 | H73  | T B | 20 | -28.717 | -16.559 | 2.536  | 1.00 | 0.00 | H |
| ATOM | 1212 | H2'1 | T B | 20 | -26.264 | -18.854 | -0.488 | 1.00 | 0.00 | H |
| ATOM | 1213 | H2'2 | T B | 20 | -26.068 | -20.341 | -1.404 | 1.00 | 0.00 | H |
| ATOM | 1214 | H5'1 | T B | 20 | -24.390 | -18.288 | 2.793  | 1.00 | 0.00 | H |
| ATOM | 1215 | H5'2 | T B | 20 | -23.192 | -17.702 | 1.620  | 1.00 | 0.00 | H |
| TER  |      |      |     |    |         |         |        |      |      |   |
| ATOM | 1    | C1'  | A A | 1  | -23.475 | -82.818 | 56.909 | 1.00 | 0.00 | C |
| ATOM | 2    | N1   | A A | 1  | -28.362 | -81.765 | 58.066 | 1.00 | 0.00 | N |

|      |    |      |     |   |         |         |        |      |      |   |
|------|----|------|-----|---|---------|---------|--------|------|------|---|
| ATOM | 3  | C2   | A A | 1 | -27.702 | -81.809 | 56.913 | 1.00 | 0.00 | C |
| ATOM | 4  | N3   | A A | 1 | -26.436 | -82.092 | 56.684 | 1.00 | 0.00 | N |
| ATOM | 5  | C4   | A A | 1 | -25.801 | -82.354 | 57.840 | 1.00 | 0.00 | C |
| ATOM | 6  | C5   | A A | 1 | -26.331 | -82.350 | 59.100 | 1.00 | 0.00 | C |
| ATOM | 7  | C6   | A A | 1 | -27.702 | -82.033 | 59.203 | 1.00 | 0.00 | C |
| ATOM | 8  | N6   | A A | 1 | -28.359 | -81.990 | 60.375 | 1.00 | 0.00 | N |
| ATOM | 9  | N7   | A A | 1 | -25.373 | -82.669 | 60.046 | 1.00 | 0.00 | N |
| ATOM | 10 | C8   | A A | 1 | -24.294 | -82.856 | 59.345 | 1.00 | 0.00 | C |
| ATOM | 11 | N9   | A A | 1 | -24.477 | -82.683 | 57.999 | 1.00 | 0.00 | N |
| ATOM | 12 | C2'  | A A | 1 | -22.090 | -82.307 | 57.282 | 1.00 | 0.00 | C |
| ATOM | 13 | C3'  | A A | 1 | -21.184 | -83.283 | 56.550 | 1.00 | 0.00 | C |
| ATOM | 14 | O3'  | A A | 1 | -21.016 | -82.846 | 55.203 | 1.00 | 0.00 | O |
| ATOM | 15 | C4'  | A A | 1 | -21.958 | -84.598 | 56.638 | 1.00 | 0.00 | C |
| ATOM | 16 | O4'  | A A | 1 | -23.363 | -84.192 | 56.592 | 1.00 | 0.00 | O |
| ATOM | 17 | C5'  | A A | 1 | -21.734 | -85.426 | 57.881 | 1.00 | 0.00 | C |
| ATOM | 18 | O5'  | A A | 1 | -21.570 | -84.554 | 59.029 | 1.00 | 0.00 | O |
| ATOM | 19 | H2   | A A | 1 | -28.294 | -81.579 | 56.028 | 1.00 | 0.00 | H |
| ATOM | 20 | H8   | A A | 1 | -23.334 | -83.125 | 59.787 | 1.00 | 0.00 | H |
| ATOM | 21 | H1'  | A A | 1 | -23.857 | -82.301 | 56.028 | 1.00 | 0.00 | H |
| ATOM | 22 | H3'  | A A | 1 | -20.206 | -83.370 | 57.026 | 1.00 | 0.00 | H |
| ATOM | 23 | H4'  | A A | 1 | -21.659 | -85.198 | 55.779 | 1.00 | 0.00 | H |
| ATOM | 24 | H61  | A A | 1 | -29.359 | -81.754 | 60.395 | 1.00 | 0.00 | H |
| ATOM | 25 | H62  | A A | 1 | -27.858 | -82.194 | 61.251 | 1.00 | 0.00 | H |
| ATOM | 26 | H5T  | A A | 1 | -20.974 | -84.823 | 59.730 | 1.00 | 0.00 | H |
| ATOM | 27 | H2'1 | A A | 1 | -21.915 | -82.334 | 58.357 | 1.00 | 0.00 | H |
| ATOM | 28 | H2'2 | A A | 1 | -21.922 | -81.283 | 56.947 | 1.00 | 0.00 | H |
| ATOM | 29 | H5'1 | A A | 1 | -22.593 | -86.079 | 58.035 | 1.00 | 0.00 | H |
| ATOM | 30 | H5'2 | A A | 1 | -20.840 | -86.033 | 57.751 | 1.00 | 0.00 | H |
| ATOM | 31 | C1'  | G A | 2 | -25.065 | -78.925 | 54.269 | 1.00 | 0.00 | C |
| ATOM | 32 | N1   | G A | 2 | -28.348 | -78.345 | 58.128 | 1.00 | 0.00 | N |
| ATOM | 33 | C2   | G A | 2 | -28.555 | -78.240 | 56.766 | 1.00 | 0.00 | C |
| ATOM | 34 | N2   | G A | 2 | -29.800 | -77.939 | 56.380 | 1.00 | 0.00 | N |
| ATOM | 35 | N3   | G A | 2 | -27.595 | -78.421 | 55.860 | 1.00 | 0.00 | N |
| ATOM | 36 | C4   | G A | 2 | -26.396 | -78.713 | 56.429 | 1.00 | 0.00 | C |
| ATOM | 37 | C5   | G A | 2 | -26.096 | -78.836 | 57.777 | 1.00 | 0.00 | C |
| ATOM | 38 | C6   | G A | 2 | -27.117 | -78.647 | 58.738 | 1.00 | 0.00 | C |
| ATOM | 39 | O6   | G A | 2 | -27.049 | -78.715 | 59.965 | 1.00 | 0.00 | O |
| ATOM | 40 | N7   | G A | 2 | -24.745 | -79.144 | 57.944 | 1.00 | 0.00 | N |
| ATOM | 41 | C8   | G A | 2 | -24.280 | -79.201 | 56.723 | 1.00 | 0.00 | C |
| ATOM | 42 | N9   | G A | 2 | -25.222 | -78.950 | 55.747 | 1.00 | 0.00 | N |
| ATOM | 43 | C2'  | G A | 2 | -23.743 | -78.332 | 53.801 | 1.00 | 0.00 | C |
| ATOM | 44 | C3'  | G A | 2 | -23.428 | -79.178 | 52.579 | 1.00 | 0.00 | C |
| ATOM | 45 | O3'  | G A | 2 | -24.105 | -78.636 | 51.447 | 1.00 | 0.00 | O |
| ATOM | 46 | C4'  | G A | 2 | -23.968 | -80.554 | 52.970 | 1.00 | 0.00 | C |
| ATOM | 47 | O4'  | G A | 2 | -25.132 | -80.260 | 53.805 | 1.00 | 0.00 | O |
| ATOM | 48 | C5'  | G A | 2 | -23.028 | -81.446 | 53.747 | 1.00 | 0.00 | C |
| ATOM | 49 | O5'  | G A | 2 | -22.234 | -80.647 | 54.658 | 1.00 | 0.00 | O |
| ATOM | 50 | O1P  | G A | 2 | -19.896 | -80.891 | 53.760 | 1.00 | 0.00 | O |
| ATOM | 51 | O2P  | G A | 2 | -20.261 | -80.427 | 56.198 | 1.00 | 0.00 | O |
| ATOM | 52 | P    | G A | 2 | -20.732 | -81.092 | 54.959 | 1.00 | 0.00 | P |
| ATOM | 53 | H1   | G A | 2 | -29.159 | -78.189 | 58.745 | 1.00 | 0.00 | H |
| ATOM | 54 | H8   | G A | 2 | -23.238 | -79.427 | 56.495 | 1.00 | 0.00 | H |
| ATOM | 55 | H1'  | G A | 2 | -25.908 | -78.379 | 53.844 | 1.00 | 0.00 | H |
| ATOM | 56 | H21  | G A | 2 | -30.538 | -77.801 | 57.086 | 1.00 | 0.00 | H |

|      |     |      |     |   |         |         |        |      |      |   |
|------|-----|------|-----|---|---------|---------|--------|------|------|---|
| ATOM | 57  | H3'  | G A | 2 | -22.358 | -79.219 | 52.374 | 1.00 | 0.00 | H |
| ATOM | 58  | H22  | G A | 2 | -30.018 | -77.844 | 55.378 | 1.00 | 0.00 | H |
| ATOM | 59  | H4'  | G A | 2 | -24.226 | -81.067 | 52.045 | 1.00 | 0.00 | H |
| ATOM | 60  | H2'1 | G A | 2 | -22.961 | -78.420 | 54.557 | 1.00 | 0.00 | H |
| ATOM | 61  | H2'2 | G A | 2 | -23.830 | -77.276 | 53.542 | 1.00 | 0.00 | H |
| ATOM | 62  | H5'1 | G A | 2 | -23.611 | -82.176 | 54.308 | 1.00 | 0.00 | H |
| ATOM | 63  | H5'2 | G A | 2 | -22.375 | -81.970 | 53.049 | 1.00 | 0.00 | H |
| ATOM | 64  | C1'  | G A | 3 | -27.961 | -74.996 | 53.428 | 1.00 | 0.00 | C |
| ATOM | 65  | N1   | G A | 3 | -28.397 | -74.941 | 58.509 | 1.00 | 0.00 | N |
| ATOM | 66  | C2   | G A | 3 | -29.360 | -74.758 | 57.535 | 1.00 | 0.00 | C |
| ATOM | 67  | N2   | G A | 3 | -30.605 | -74.527 | 57.971 | 1.00 | 0.00 | N |
| ATOM | 68  | N3   | G A | 3 | -29.103 | -74.801 | 56.230 | 1.00 | 0.00 | N |
| ATOM | 69  | C4   | G A | 3 | -27.790 | -75.039 | 55.969 | 1.00 | 0.00 | C |
| ATOM | 70  | C5   | G A | 3 | -26.760 | -75.231 | 56.875 | 1.00 | 0.00 | C |
| ATOM | 71  | C6   | G A | 3 | -27.035 | -75.189 | 58.262 | 1.00 | 0.00 | C |
| ATOM | 72  | O6   | G A | 3 | -26.263 | -75.336 | 59.211 | 1.00 | 0.00 | O |
| ATOM | 73  | N7   | G A | 3 | -25.558 | -75.445 | 56.201 | 1.00 | 0.00 | N |
| ATOM | 74  | C8   | G A | 3 | -25.888 | -75.381 | 54.937 | 1.00 | 0.00 | C |
| ATOM | 75  | N9   | G A | 3 | -27.227 | -75.136 | 54.716 | 1.00 | 0.00 | N |
| ATOM | 76  | C2'  | G A | 3 | -27.170 | -74.272 | 52.347 | 1.00 | 0.00 | C |
| ATOM | 77  | C3'  | G A | 3 | -27.607 | -75.004 | 51.089 | 1.00 | 0.00 | C |
| ATOM | 78  | O3'  | G A | 3 | -28.828 | -74.439 | 50.618 | 1.00 | 0.00 | O |
| ATOM | 79  | C4'  | G A | 3 | -27.787 | -76.441 | 51.577 | 1.00 | 0.00 | C |
| ATOM | 80  | O4'  | G A | 3 | -28.255 | -76.297 | 52.956 | 1.00 | 0.00 | O |
| ATOM | 81  | C5'  | G A | 3 | -26.552 | -77.310 | 51.574 | 1.00 | 0.00 | C |
| ATOM | 82  | O5'  | G A | 3 | -25.393 | -76.518 | 51.936 | 1.00 | 0.00 | O |
| ATOM | 83  | O1P  | G A | 3 | -24.009 | -76.517 | 49.833 | 1.00 | 0.00 | O |
| ATOM | 84  | O2P  | G A | 3 | -22.898 | -76.253 | 52.067 | 1.00 | 0.00 | O |
| ATOM | 85  | P    | G A | 3 | -23.987 | -76.865 | 51.267 | 1.00 | 0.00 | P |
| ATOM | 86  | H1   | G A | 3 | -28.702 | -74.893 | 59.494 | 1.00 | 0.00 | H |
| ATOM | 87  | H8   | G A | 3 | -25.169 | -75.509 | 54.128 | 1.00 | 0.00 | H |
| ATOM | 88  | H1'  | G A | 3 | -28.905 | -74.489 | 53.627 | 1.00 | 0.00 | H |
| ATOM | 89  | H21  | G A | 3 | -30.797 | -74.497 | 58.983 | 1.00 | 0.00 | H |
| ATOM | 90  | H3'  | G A | 3 | -26.855 | -74.948 | 50.301 | 1.00 | 0.00 | H |
| ATOM | 91  | H22  | G A | 3 | -31.367 | -74.379 | 57.295 | 1.00 | 0.00 | H |
| ATOM | 92  | H4'  | G A | 3 | -28.524 | -76.907 | 50.924 | 1.00 | 0.00 | H |
| ATOM | 93  | H2'1 | G A | 3 | -26.094 | -74.352 | 52.499 | 1.00 | 0.00 | H |
| ATOM | 94  | H2'2 | G A | 3 | -27.416 | -73.211 | 52.295 | 1.00 | 0.00 | H |
| ATOM | 95  | H5'1 | G A | 3 | -26.683 | -78.120 | 52.291 | 1.00 | 0.00 | H |
| ATOM | 96  | H5'2 | G A | 3 | -26.414 | -77.733 | 50.579 | 1.00 | 0.00 | H |
| ATOM | 97  | C1'  | C A | 4 | -30.893 | -71.253 | 54.817 | 1.00 | 0.00 | C |
| ATOM | 98  | N1   | C A | 4 | -29.546 | -71.426 | 55.429 | 1.00 | 0.00 | N |
| ATOM | 99  | C2   | C A | 4 | -29.459 | -71.438 | 56.819 | 1.00 | 0.00 | C |
| ATOM | 100 | O2   | C A | 4 | -30.494 | -71.306 | 57.484 | 1.00 | 0.00 | O |
| ATOM | 101 | N3   | C A | 4 | -28.242 | -71.595 | 57.395 | 1.00 | 0.00 | N |
| ATOM | 102 | C4   | C A | 4 | -27.140 | -71.734 | 56.648 | 1.00 | 0.00 | C |
| ATOM | 103 | N4   | C A | 4 | -25.977 | -71.887 | 57.264 | 1.00 | 0.00 | N |
| ATOM | 104 | C5   | C A | 4 | -27.201 | -71.722 | 55.217 | 1.00 | 0.00 | C |
| ATOM | 105 | C6   | C A | 4 | -28.435 | -71.567 | 54.658 | 1.00 | 0.00 | C |
| ATOM | 106 | C2'  | C A | 4 | -30.890 | -70.394 | 53.561 | 1.00 | 0.00 | C |
| ATOM | 107 | C3'  | C A | 4 | -31.958 | -71.069 | 52.712 | 1.00 | 0.00 | C |
| ATOM | 108 | O3'  | C A | 4 | -33.239 | -70.570 | 53.088 | 1.00 | 0.00 | O |
| ATOM | 109 | C4'  | C A | 4 | -31.788 | -72.545 | 53.063 | 1.00 | 0.00 | C |
| ATOM | 110 | O4'  | C A | 4 | -31.374 | -72.538 | 54.467 | 1.00 | 0.00 | O |

|      |     |      |     |   |         |         |        |      |      |   |
|------|-----|------|-----|---|---------|---------|--------|------|------|---|
| ATOM | 111 | C5'  | C A | 4 | -30.761 | -73.311 | 52.262 | 1.00 | 0.00 | C |
| ATOM | 112 | O5'  | C A | 4 | -29.626 | -72.456 | 51.973 | 1.00 | 0.00 | O |
| ATOM | 113 | O1P  | C A | 4 | -29.714 | -72.196 | 49.472 | 1.00 | 0.00 | O |
| ATOM | 114 | O2P  | C A | 4 | -27.521 | -72.004 | 50.676 | 1.00 | 0.00 | O |
| ATOM | 115 | P    | C A | 4 | -28.858 | -72.642 | 50.588 | 1.00 | 0.00 | P |
| ATOM | 116 | H5   | C A | 4 | -26.305 | -71.831 | 54.605 | 1.00 | 0.00 | H |
| ATOM | 117 | H6   | C A | 4 | -28.533 | -71.557 | 53.573 | 1.00 | 0.00 | H |
| ATOM | 118 | H1'  | C A | 4 | -31.559 | -70.840 | 55.572 | 1.00 | 0.00 | H |
| ATOM | 119 | H3'  | C A | 4 | -31.801 | -70.896 | 51.648 | 1.00 | 0.00 | H |
| ATOM | 120 | H4'  | C A | 4 | -32.755 | -73.022 | 52.906 | 1.00 | 0.00 | H |
| ATOM | 121 | H41  | C A | 4 | -25.112 | -71.997 | 56.714 | 1.00 | 0.00 | H |
| ATOM | 122 | H42  | C A | 4 | -25.935 | -71.893 | 58.294 | 1.00 | 0.00 | H |
| ATOM | 123 | H2'1 | C A | 4 | -29.924 | -70.398 | 53.058 | 1.00 | 0.00 | H |
| ATOM | 124 | H2'2 | C A | 4 | -31.147 | -69.355 | 53.770 | 1.00 | 0.00 | H |
| ATOM | 125 | H5'1 | C A | 4 | -30.432 | -74.178 | 52.836 | 1.00 | 0.00 | H |
| ATOM | 126 | H5'2 | C A | 4 | -31.214 | -73.649 | 51.331 | 1.00 | 0.00 | H |
| ATOM | 127 | C1'  | C A | 5 | -32.552 | -67.854 | 58.013 | 1.00 | 0.00 | C |
| ATOM | 128 | N1   | C A | 5 | -31.098 | -67.964 | 57.715 | 1.00 | 0.00 | N |
| ATOM | 129 | C2   | C A | 5 | -30.217 | -68.067 | 58.790 | 1.00 | 0.00 | C |
| ATOM | 130 | O2   | C A | 5 | -30.675 | -68.062 | 59.941 | 1.00 | 0.00 | O |
| ATOM | 131 | N3   | C A | 5 | -28.889 | -68.169 | 58.539 | 1.00 | 0.00 | N |
| ATOM | 132 | C4   | C A | 5 | -28.423 | -68.170 | 57.284 | 1.00 | 0.00 | C |
| ATOM | 133 | N4   | C A | 5 | -27.117 | -68.275 | 57.096 | 1.00 | 0.00 | N |
| ATOM | 134 | C5   | C A | 5 | -29.306 | -68.064 | 56.160 | 1.00 | 0.00 | C |
| ATOM | 135 | C6   | C A | 5 | -30.638 | -67.966 | 56.436 | 1.00 | 0.00 | C |
| ATOM | 136 | C2'  | C A | 5 | -33.300 | -66.912 | 57.081 | 1.00 | 0.00 | C |
| ATOM | 137 | C3'  | C A | 5 | -34.646 | -67.607 | 56.941 | 1.00 | 0.00 | C |
| ATOM | 138 | O3'  | C A | 5 | -35.480 | -67.235 | 58.036 | 1.00 | 0.00 | O |
| ATOM | 139 | C4'  | C A | 5 | -34.270 | -69.086 | 56.978 | 1.00 | 0.00 | C |
| ATOM | 140 | O4'  | C A | 5 | -33.118 | -69.145 | 57.878 | 1.00 | 0.00 | O |
| ATOM | 141 | C5'  | C A | 5 | -33.885 | -69.713 | 55.658 | 1.00 | 0.00 | C |
| ATOM | 142 | O5'  | C A | 5 | -33.148 | -68.755 | 54.856 | 1.00 | 0.00 | O |
| ATOM | 143 | O1P  | C A | 5 | -34.681 | -68.329 | 52.906 | 1.00 | 0.00 | O |
| ATOM | 144 | O2P  | C A | 5 | -32.202 | -68.052 | 52.637 | 1.00 | 0.00 | O |
| ATOM | 145 | P    | C A | 5 | -33.326 | -68.784 | 53.272 | 1.00 | 0.00 | P |
| ATOM | 146 | H5   | C A | 5 | -28.931 | -68.059 | 55.136 | 1.00 | 0.00 | H |
| ATOM | 147 | H6   | C A | 5 | -31.350 | -67.887 | 55.613 | 1.00 | 0.00 | H |
| ATOM | 148 | H1'  | C A | 5 | -32.663 | -67.547 | 59.053 | 1.00 | 0.00 | H |
| ATOM | 149 | H3'  | C A | 5 | -35.143 | -67.349 | 56.006 | 1.00 | 0.00 | H |
| ATOM | 150 | H4'  | C A | 5 | -35.138 | -69.624 | 57.360 | 1.00 | 0.00 | H |
| ATOM | 151 | H41  | C A | 5 | -26.732 | -68.280 | 56.141 | 1.00 | 0.00 | H |
| ATOM | 152 | H42  | C A | 5 | -26.484 | -68.350 | 57.907 | 1.00 | 0.00 | H |
| ATOM | 153 | H2'1 | C A | 5 | -32.807 | -66.806 | 56.116 | 1.00 | 0.00 | H |
| ATOM | 154 | H2'2 | C A | 5 | -33.410 | -65.913 | 57.505 | 1.00 | 0.00 | H |
| ATOM | 155 | H5'1 | C A | 5 | -33.264 | -70.590 | 55.846 | 1.00 | 0.00 | H |
| ATOM | 156 | H5'2 | C A | 5 | -34.787 | -70.020 | 55.131 | 1.00 | 0.00 | H |
| ATOM | 157 | C1'  | G A | 6 | -32.116 | -64.825 | 61.907 | 1.00 | 0.00 | C |
| ATOM | 158 | N1   | G A | 6 | -27.141 | -65.038 | 60.799 | 1.00 | 0.00 | N |
| ATOM | 159 | C2   | G A | 6 | -27.781 | -65.090 | 62.026 | 1.00 | 0.00 | C |
| ATOM | 160 | N2   | G A | 6 | -26.991 | -65.213 | 63.098 | 1.00 | 0.00 | N |
| ATOM | 161 | N3   | G A | 6 | -29.104 | -65.025 | 62.167 | 1.00 | 0.00 | N |
| ATOM | 162 | C4   | G A | 6 | -29.745 | -64.894 | 60.977 | 1.00 | 0.00 | C |
| ATOM | 163 | C5   | G A | 6 | -29.191 | -64.829 | 59.710 | 1.00 | 0.00 | C |
| ATOM | 164 | C6   | G A | 6 | -27.789 | -64.902 | 59.557 | 1.00 | 0.00 | C |



|      |     |      |     |   |         |         |        |      |      |   |
|------|-----|------|-----|---|---------|---------|--------|------|------|---|
| ATOM | 165 | O6   | G A | 6 | -27.116 | -64.862 | 58.526 | 1.00 | 0.00 | O |
| ATOM | 166 | N7   | G A | 6 | -30.196 | -64.693 | 58.750 | 1.00 | 0.00 | N |
| ATOM | 167 | C8   | G A | 6 | -31.302 | -64.683 | 59.449 | 1.00 | 0.00 | C |
| ATOM | 168 | N9   | G A | 6 | -31.110 | -64.800 | 60.810 | 1.00 | 0.00 | N |
| ATOM | 169 | C2'  | G A | 6 | -33.292 | -63.884 | 61.681 | 1.00 | 0.00 | C |
| ATOM | 170 | C3'  | G A | 6 | -34.447 | -64.670 | 62.280 | 1.00 | 0.00 | C |
| ATOM | 171 | O3'  | G A | 6 | -34.493 | -64.439 | 63.686 | 1.00 | 0.00 | O |
| ATOM | 172 | C4'  | G A | 6 | -34.085 | -66.115 | 61.943 | 1.00 | 0.00 | C |
| ATOM | 173 | O4'  | G A | 6 | -32.624 | -66.142 | 61.997 | 1.00 | 0.00 | O |
| ATOM | 174 | C5'  | G A | 6 | -34.528 | -66.621 | 60.591 | 1.00 | 0.00 | C |
| ATOM | 175 | O5'  | G A | 6 | -34.425 | -65.557 | 59.611 | 1.00 | 0.00 | O |
| ATOM | 176 | O1P  | G A | 6 | -36.819 | -65.124 | 58.966 | 1.00 | 0.00 | O |
| ATOM | 177 | O2P  | G A | 6 | -34.974 | -64.637 | 57.338 | 1.00 | 0.00 | O |
| ATOM | 178 | P    | G A | 6 | -35.495 | -65.495 | 58.430 | 1.00 | 0.00 | P |
| ATOM | 179 | H1   | G A | 6 | -26.111 | -65.104 | 60.798 | 1.00 | 0.00 | H |
| ATOM | 180 | H8   | G A | 6 | -32.290 | -64.589 | 58.997 | 1.00 | 0.00 | H |
| ATOM | 181 | H1'  | G A | 6 | -31.607 | -64.596 | 62.843 | 1.00 | 0.00 | H |
| ATOM | 182 | H21  | G A | 6 | -25.969 | -65.267 | 62.981 | 1.00 | 0.00 | H |
| ATOM | 183 | H3'  | G A | 6 | -35.404 | -64.391 | 61.838 | 1.00 | 0.00 | H |
| ATOM | 184 | H22  | G A | 6 | -27.405 | -65.255 | 64.041 | 1.00 | 0.00 | H |
| ATOM | 185 | H4'  | G A | 6 | -34.550 | -66.743 | 62.702 | 1.00 | 0.00 | H |
| ATOM | 186 | H2'1 | G A | 6 | -33.459 | -63.676 | 60.624 | 1.00 | 0.00 | H |
| ATOM | 187 | H2'2 | G A | 6 | -33.159 | -62.926 | 62.186 | 1.00 | 0.00 | H |
| ATOM | 188 | H5'1 | G A | 6 | -33.896 | -67.457 | 60.295 | 1.00 | 0.00 | H |
| ATOM | 189 | H5'2 | G A | 6 | -35.562 | -66.962 | 60.657 | 1.00 | 0.00 | H |
| ATOM | 190 | C1'  | C A | 7 | -29.567 | -62.048 | 65.119 | 1.00 | 0.00 | C |
| ATOM | 191 | N1   | C A | 7 | -29.380 | -61.871 | 63.653 | 1.00 | 0.00 | N |
| ATOM | 192 | C2   | C A | 7 | -28.080 | -61.900 | 63.153 | 1.00 | 0.00 | C |
| ATOM | 193 | O2   | C A | 7 | -27.141 | -62.070 | 63.939 | 1.00 | 0.00 | O |
| ATOM | 194 | N3   | C A | 7 | -27.889 | -61.740 | 61.820 | 1.00 | 0.00 | N |
| ATOM | 195 | C4   | C A | 7 | -28.926 | -61.557 | 60.993 | 1.00 | 0.00 | C |
| ATOM | 196 | N4   | C A | 7 | -28.682 | -61.409 | 59.699 | 1.00 | 0.00 | N |
| ATOM | 197 | C5   | C A | 7 | -30.274 | -61.518 | 61.480 | 1.00 | 0.00 | C |
| ATOM | 198 | C6   | C A | 7 | -30.444 | -61.686 | 62.825 | 1.00 | 0.00 | C |
| ATOM | 199 | C2'  | C A | 7 | -30.673 | -61.184 | 65.706 | 1.00 | 0.00 | C |
| ATOM | 200 | C3'  | C A | 7 | -31.254 | -62.096 | 66.777 | 1.00 | 0.00 | C |
| ATOM | 201 | O3'  | C A | 7 | -30.481 | -61.970 | 67.969 | 1.00 | 0.00 | O |
| ATOM | 202 | C4'  | C A | 7 | -31.125 | -63.481 | 66.149 | 1.00 | 0.00 | C |
| ATOM | 203 | O4'  | C A | 7 | -29.902 | -63.404 | 65.349 | 1.00 | 0.00 | O |
| ATOM | 204 | C5'  | C A | 7 | -32.260 | -63.920 | 65.252 | 1.00 | 0.00 | C |
| ATOM | 205 | O5'  | C A | 7 | -32.763 | -62.784 | 64.506 | 1.00 | 0.00 | O |
| ATOM | 206 | O1P  | C A | 7 | -35.097 | -62.485 | 65.401 | 1.00 | 0.00 | O |
| ATOM | 207 | O2P  | C A | 7 | -34.542 | -61.746 | 63.068 | 1.00 | 0.00 | O |
| ATOM | 208 | P    | C A | 7 | -34.319 | -62.716 | 64.167 | 1.00 | 0.00 | P |
| ATOM | 209 | H5   | C A | 7 | -31.122 | -61.363 | 60.811 | 1.00 | 0.00 | H |
| ATOM | 210 | H6   | C A | 7 | -31.451 | -61.673 | 63.242 | 1.00 | 0.00 | H |
| ATOM | 211 | H1'  | C A | 7 | -28.614 | -61.851 | 65.610 | 1.00 | 0.00 | H |
| ATOM | 212 | H3'  | C A | 7 | -32.295 | -61.856 | 66.994 | 1.00 | 0.00 | H |
| ATOM | 213 | H4'  | C A | 7 | -31.054 | -64.195 | 66.969 | 1.00 | 0.00 | H |
| ATOM | 214 | H41  | C A | 7 | -29.462 | -61.269 | 59.040 | 1.00 | 0.00 | H |
| ATOM | 215 | H42  | C A | 7 | -27.713 | -61.434 | 59.350 | 1.00 | 0.00 | H |
| ATOM | 216 | H2'1 | C A | 7 | -31.425 | -60.914 | 64.966 | 1.00 | 0.00 | H |
| ATOM | 217 | H2'2 | C A | 7 | -30.290 | -60.258 | 66.138 | 1.00 | 0.00 | H |
| ATOM | 218 | H5'1 | C A | 7 | -31.898 | -64.683 | 64.562 | 1.00 | 0.00 | H |

|      |     |      |     |   |         |         |        |      |      |   |
|------|-----|------|-----|---|---------|---------|--------|------|------|---|
| ATOM | 219 | H5'2 | C A | 7 | -33.057 | -64.340 | 65.865 | 1.00 | 0.00 | H |
| ATOM | 220 | C1'  | A A | 8 | -25.696 | -59.316 | 66.555 | 1.00 | 0.00 | C |
| ATOM | 221 | N1   | A A | 8 | -25.106 | -58.539 | 61.516 | 1.00 | 0.00 | N |
| ATOM | 222 | C2   | A A | 8 | -24.242 | -58.797 | 62.492 | 1.00 | 0.00 | C |
| ATOM | 223 | N3   | A A | 8 | -24.461 | -58.991 | 63.776 | 1.00 | 0.00 | N |
| ATOM | 224 | C4   | A A | 8 | -25.777 | -58.888 | 64.042 | 1.00 | 0.00 | C |
| ATOM | 225 | C5   | A A | 8 | -26.787 | -58.629 | 63.159 | 1.00 | 0.00 | C |
| ATOM | 226 | C6   | A A | 8 | -26.411 | -58.445 | 61.812 | 1.00 | 0.00 | C |
| ATOM | 227 | N6   | A A | 8 | -27.294 | -58.183 | 60.833 | 1.00 | 0.00 | N |
| ATOM | 228 | N7   | A A | 8 | -28.015 | -58.600 | 63.798 | 1.00 | 0.00 | N |
| ATOM | 229 | C8   | A A | 8 | -27.723 | -58.836 | 65.044 | 1.00 | 0.00 | C |
| ATOM | 230 | N9   | A A | 8 | -26.383 | -59.024 | 65.267 | 1.00 | 0.00 | N |
| ATOM | 231 | C2'  | A A | 8 | -26.293 | -58.583 | 67.749 | 1.00 | 0.00 | C |
| ATOM | 232 | C3'  | A A | 8 | -26.136 | -59.608 | 68.861 | 1.00 | 0.00 | C |
| ATOM | 233 | O3'  | A A | 8 | -24.825 | -59.503 | 69.410 | 1.00 | 0.00 | O |
| ATOM | 234 | C4'  | A A | 8 | -26.352 | -60.935 | 68.134 | 1.00 | 0.00 | C |
| ATOM | 235 | O4'  | A A | 8 | -25.805 | -60.706 | 66.795 | 1.00 | 0.00 | O |
| ATOM | 236 | C5'  | A A | 8 | -27.782 | -61.400 | 68.000 | 1.00 | 0.00 | C |
| ATOM | 237 | O5'  | A A | 8 | -28.652 | -60.259 | 67.785 | 1.00 | 0.00 | O |
| ATOM | 238 | O1P  | A A | 8 | -30.065 | -60.206 | 69.869 | 1.00 | 0.00 | O |
| ATOM | 239 | O2P  | A A | 8 | -30.960 | -59.269 | 67.719 | 1.00 | 0.00 | O |
| ATOM | 240 | P    | A A | 8 | -30.125 | -60.292 | 68.396 | 1.00 | 0.00 | P |
| ATOM | 241 | H2   | A A | 8 | -23.198 | -58.858 | 62.186 | 1.00 | 0.00 | H |
| ATOM | 242 | H8   | A A | 8 | -28.471 | -58.881 | 65.835 | 1.00 | 0.00 | H |
| ATOM | 243 | H1'  | A A | 8 | -24.639 | -59.078 | 66.438 | 1.00 | 0.00 | H |
| ATOM | 244 | H3'  | A A | 8 | -26.872 | -59.469 | 69.652 | 1.00 | 0.00 | H |
| ATOM | 245 | H4'  | A A | 8 | -25.806 | -61.694 | 68.693 | 1.00 | 0.00 | H |
| ATOM | 246 | H61  | A A | 8 | -26.968 | -58.060 | 59.865 | 1.00 | 0.00 | H |
| ATOM | 247 | H62  | A A | 8 | -28.298 | -58.107 | 61.054 | 1.00 | 0.00 | H |
| ATOM | 248 | H2'1 | A A | 8 | -27.340 | -58.324 | 67.594 | 1.00 | 0.00 | H |
| ATOM | 249 | H2'2 | A A | 8 | -25.757 | -57.663 | 67.978 | 1.00 | 0.00 | H |
| ATOM | 250 | H5'1 | A A | 8 | -27.857 | -62.083 | 67.153 | 1.00 | 0.00 | H |
| ATOM | 251 | H5'2 | A A | 8 | -28.077 | -61.922 | 68.909 | 1.00 | 0.00 | H |
| ATOM | 252 | C1'  | C A | 9 | -21.771 | -56.393 | 65.716 | 1.00 | 0.00 | C |
| ATOM | 253 | N1   | C A | 9 | -23.094 | -56.067 | 65.117 | 1.00 | 0.00 | N |
| ATOM | 254 | C2   | C A | 9 | -23.148 | -55.821 | 63.746 | 1.00 | 0.00 | C |
| ATOM | 255 | O2   | C A | 9 | -22.102 | -55.882 | 63.088 | 1.00 | 0.00 | O |
| ATOM | 256 | N3   | C A | 9 | -24.343 | -55.523 | 63.182 | 1.00 | 0.00 | N |
| ATOM | 257 | C4   | C A | 9 | -25.458 | -55.463 | 63.922 | 1.00 | 0.00 | C |
| ATOM | 258 | N4   | C A | 9 | -26.601 | -55.170 | 63.318 | 1.00 | 0.00 | N |
| ATOM | 259 | C5   | C A | 9 | -25.433 | -55.707 | 65.335 | 1.00 | 0.00 | C |
| ATOM | 260 | C6   | C A | 9 | -24.218 | -56.010 | 65.881 | 1.00 | 0.00 | C |
| ATOM | 261 | C2'  | C A | 9 | -21.558 | -55.791 | 67.097 | 1.00 | 0.00 | C |
| ATOM | 262 | C3'  | C A | 9 | -20.750 | -56.876 | 67.795 | 1.00 | 0.00 | C |
| ATOM | 263 | O3'  | C A | 9 | -19.370 | -56.710 | 67.476 | 1.00 | 0.00 | O |
| ATOM | 264 | C4'  | C A | 9 | -21.328 | -58.161 | 67.206 | 1.00 | 0.00 | C |
| ATOM | 265 | O4'  | C A | 9 | -21.687 | -57.801 | 65.834 | 1.00 | 0.00 | O |
| ATOM | 266 | C5'  | C A | 9 | -22.550 | -58.723 | 67.893 | 1.00 | 0.00 | C |
| ATOM | 267 | O5'  | C A | 9 | -23.399 | -57.639 | 68.349 | 1.00 | 0.00 | O |
| ATOM | 268 | O1P  | C A | 9 | -23.303 | -57.837 | 70.855 | 1.00 | 0.00 | O |
| ATOM | 269 | O2P  | C A | 9 | -25.317 | -56.825 | 69.754 | 1.00 | 0.00 | O |
| ATOM | 270 | P    | C A | 9 | -24.223 | -57.825 | 69.702 | 1.00 | 0.00 | P |
| ATOM | 271 | H5   | C A | 9 | -26.337 | -55.653 | 65.942 | 1.00 | 0.00 | H |
| ATOM | 272 | H6   | C A | 9 | -24.149 | -56.212 | 66.950 | 1.00 | 0.00 | H |

|      |     |      |     |    |         |         |        |      |      |   |
|------|-----|------|-----|----|---------|---------|--------|------|------|---|
| ATOM | 273 | H1'  | C A | 9  | -20.995 | -56.067 | 65.024 | 1.00 | 0.00 | H |
| ATOM | 274 | H3'  | C A | 9  | -20.877 | -56.846 | 68.877 | 1.00 | 0.00 | H |
| ATOM | 275 | H4'  | C A | 9  | -20.542 | -58.914 | 67.257 | 1.00 | 0.00 | H |
| ATOM | 276 | H41  | C A | 9  | -27.474 | -55.119 | 63.863 | 1.00 | 0.00 | H |
| ATOM | 277 | H42  | C A | 9  | -26.616 | -54.992 | 62.303 | 1.00 | 0.00 | H |
| ATOM | 278 | H2'1 | C A | 9  | -22.496 | -55.602 | 67.616 | 1.00 | 0.00 | H |
| ATOM | 279 | H2'2 | C A | 9  | -21.008 | -54.849 | 67.059 | 1.00 | 0.00 | H |
| ATOM | 280 | H5'1 | C A | 9  | -23.100 | -59.351 | 67.191 | 1.00 | 0.00 | H |
| ATOM | 281 | H5'2 | C A | 9  | -22.237 | -59.327 | 68.743 | 1.00 | 0.00 | H |
| ATOM | 282 | C1'  | C A | 10 | -19.128 | -53.128 | 63.092 | 1.00 | 0.00 | C |
| ATOM | 283 | N1   | C A | 10 | -20.559 | -52.865 | 63.404 | 1.00 | 0.00 | N |
| ATOM | 284 | C2   | C A | 10 | -21.405 | -52.529 | 62.349 | 1.00 | 0.00 | C |
| ATOM | 285 | O2   | C A | 10 | -20.938 | -52.463 | 61.204 | 1.00 | 0.00 | O |
| ATOM | 286 | N3   | C A | 10 | -22.713 | -52.286 | 62.611 | 1.00 | 0.00 | N |
| ATOM | 287 | C4   | C A | 10 | -23.191 | -52.363 | 63.860 | 1.00 | 0.00 | C |
| ATOM | 288 | N4   | C A | 10 | -24.478 | -52.118 | 64.060 | 1.00 | 0.00 | N |
| ATOM | 289 | C5   | C A | 10 | -22.343 | -52.702 | 64.965 | 1.00 | 0.00 | C |
| ATOM | 290 | C6   | C A | 10 | -21.030 | -52.948 | 64.676 | 1.00 | 0.00 | C |
| ATOM | 291 | C2'  | C A | 10 | -18.164 | -52.610 | 64.150 | 1.00 | 0.00 | C |
| ATOM | 292 | C3'  | C A | 10 | -17.078 | -53.675 | 64.138 | 1.00 | 0.00 | C |
| ATOM | 293 | O3'  | C A | 10 | -16.146 | -53.381 | 63.101 | 1.00 | 0.00 | O |
| ATOM | 294 | C4'  | C A | 10 | -17.862 | -54.956 | 63.864 | 1.00 | 0.00 | C |
| ATOM | 295 | O4'  | C A | 10 | -18.959 | -54.531 | 62.996 | 1.00 | 0.00 | O |
| ATOM | 296 | C5'  | C A | 10 | -18.444 | -55.658 | 65.070 | 1.00 | 0.00 | C |
| ATOM | 297 | O5'  | C A | 10 | -18.893 | -54.676 | 66.039 | 1.00 | 0.00 | O |
| ATOM | 298 | O1P  | C A | 10 | -17.351 | -55.041 | 67.994 | 1.00 | 0.00 | O |
| ATOM | 299 | O2P  | C A | 10 | -19.652 | -54.113 | 68.366 | 1.00 | 0.00 | O |
| ATOM | 300 | P    | C A | 10 | -18.771 | -55.020 | 67.591 | 1.00 | 0.00 | P |
| ATOM | 301 | H5   | C A | 10 | -22.725 | -52.761 | 65.985 | 1.00 | 0.00 | H |
| ATOM | 302 | H6   | C A | 10 | -20.348 | -53.218 | 65.483 | 1.00 | 0.00 | H |
| ATOM | 303 | H1'  | C A | 10 | -18.906 | -52.697 | 62.116 | 1.00 | 0.00 | H |
| ATOM | 304 | H3'  | C A | 10 | -16.551 | -53.730 | 65.091 | 1.00 | 0.00 | H |
| ATOM | 305 | H4'  | C A | 10 | -17.175 | -55.649 | 63.377 | 1.00 | 0.00 | H |
| ATOM | 306 | H41  | C A | 10 | -24.871 | -52.173 | 65.010 | 1.00 | 0.00 | H |
| ATOM | 307 | H42  | C A | 10 | -25.084 | -51.872 | 63.264 | 1.00 | 0.00 | H |
| ATOM | 308 | H2'1 | C A | 10 | -18.630 | -52.530 | 65.132 | 1.00 | 0.00 | H |
| ATOM | 309 | H2'2 | C A | 10 | -17.761 | -51.628 | 63.897 | 1.00 | 0.00 | H |
| ATOM | 310 | H5'1 | C A | 10 | -19.286 | -56.275 | 64.753 | 1.00 | 0.00 | H |
| ATOM | 311 | H5'2 | C A | 10 | -17.681 | -56.294 | 65.516 | 1.00 | 0.00 | H |
| ATOM | 312 | C1'  | T A | 11 | -18.556 | -49.500 | 59.774 | 1.00 | 0.00 | C |
| ATOM | 313 | N1   | T A | 11 | -19.559 | -49.364 | 60.863 | 1.00 | 0.00 | N |
| ATOM | 314 | C2   | T A | 11 | -20.845 | -49.022 | 60.495 | 1.00 | 0.00 | C |
| ATOM | 315 | O2   | T A | 11 | -21.173 | -48.833 | 59.337 | 1.00 | 0.00 | O |
| ATOM | 316 | N3   | T A | 11 | -21.746 | -48.906 | 61.538 | 1.00 | 0.00 | N |
| ATOM | 317 | C4   | T A | 11 | -21.478 | -49.095 | 62.879 | 1.00 | 0.00 | C |
| ATOM | 318 | O4   | T A | 11 | -22.370 | -48.960 | 63.727 | 1.00 | 0.00 | O |
| ATOM | 319 | C5   | T A | 11 | -20.108 | -49.449 | 63.165 | 1.00 | 0.00 | C |
| ATOM | 320 | C6   | T A | 11 | -19.205 | -49.571 | 62.173 | 1.00 | 0.00 | C |
| ATOM | 321 | C7   | T A | 11 | -19.774 | -49.667 | 64.610 | 1.00 | 0.00 | C |
| ATOM | 322 | C2'  | T A | 11 | -17.171 | -48.987 | 60.147 | 1.00 | 0.00 | C |
| ATOM | 323 | C3'  | T A | 11 | -16.263 | -49.966 | 59.419 | 1.00 | 0.00 | C |
| ATOM | 324 | O3'  | T A | 11 | -16.093 | -49.534 | 58.070 | 1.00 | 0.00 | O |
| ATOM | 325 | C4'  | T A | 11 | -17.036 | -51.279 | 59.512 | 1.00 | 0.00 | C |
| ATOM | 326 | O4'  | T A | 11 | -18.441 | -50.875 | 59.461 | 1.00 | 0.00 | O |

|      |     |      |     |    |         |         |        |      |      |   |
|------|-----|------|-----|----|---------|---------|--------|------|------|---|
| ATOM | 327 | C5'  | T A | 11 | -16.814 | -52.104 | 60.759 | 1.00 | 0.00 | C |
| ATOM | 328 | O5'  | T A | 11 | -16.652 | -51.228 | 61.902 | 1.00 | 0.00 | O |
| ATOM | 329 | O1P  | T A | 11 | -14.264 | -51.612 | 62.597 | 1.00 | 0.00 | O |
| ATOM | 330 | O2P  | T A | 11 | -15.962 | -50.883 | 64.294 | 1.00 | 0.00 | O |
| ATOM | 331 | P    | T A | 11 | -15.660 | -51.666 | 63.071 | 1.00 | 0.00 | P |
| ATOM | 332 | H3   | T A | 11 | -22.713 | -48.656 | 61.291 | 1.00 | 0.00 | H |
| ATOM | 333 | H6   | T A | 11 | -18.175 | -49.840 | 62.413 | 1.00 | 0.00 | H |
| ATOM | 334 | H1'  | T A | 11 | -18.937 | -48.987 | 58.891 | 1.00 | 0.00 | H |
| ATOM | 335 | H3'  | T A | 11 | -15.287 | -50.048 | 59.896 | 1.00 | 0.00 | H |
| ATOM | 336 | H4'  | T A | 11 | -16.736 | -51.885 | 58.655 | 1.00 | 0.00 | H |
| ATOM | 337 | H71  | T A | 11 | -19.075 | -48.898 | 64.941 | 1.00 | 0.00 | H |
| ATOM | 338 | H72  | T A | 11 | -20.685 | -49.609 | 65.207 | 1.00 | 0.00 | H |
| ATOM | 339 | H73  | T A | 11 | -19.320 | -50.649 | 64.736 | 1.00 | 0.00 | H |
| ATOM | 340 | H2'1 | T A | 11 | -16.998 | -49.010 | 61.221 | 1.00 | 0.00 | H |
| ATOM | 341 | H2'2 | T A | 11 | -17.004 | -47.963 | 59.809 | 1.00 | 0.00 | H |
| ATOM | 342 | H5'1 | T A | 11 | -17.672 | -52.757 | 60.914 | 1.00 | 0.00 | H |
| ATOM | 343 | H5'2 | T A | 11 | -15.918 | -52.711 | 60.630 | 1.00 | 0.00 | H |
| ATOM | 344 | C1'  | A A | 12 | -20.126 | -45.611 | 57.119 | 1.00 | 0.00 | C |
| ATOM | 345 | N1   | A A | 12 | -23.450 | -45.023 | 60.986 | 1.00 | 0.00 | N |
| ATOM | 346 | C2   | A A | 12 | -23.581 | -44.936 | 59.666 | 1.00 | 0.00 | C |
| ATOM | 347 | N3   | A A | 12 | -22.679 | -45.103 | 58.721 | 1.00 | 0.00 | N |
| ATOM | 348 | C4   | A A | 12 | -21.485 | -45.395 | 59.266 | 1.00 | 0.00 | C |
| ATOM | 349 | C5   | A A | 12 | -21.183 | -45.520 | 60.592 | 1.00 | 0.00 | C |
| ATOM | 350 | C6   | A A | 12 | -22.245 | -45.317 | 61.499 | 1.00 | 0.00 | C |
| ATOM | 351 | N6   | A A | 12 | -22.098 | -45.407 | 62.832 | 1.00 | 0.00 | N |
| ATOM | 352 | N7   | A A | 12 | -19.847 | -45.830 | 60.774 | 1.00 | 0.00 | N |
| ATOM | 353 | C8   | A A | 12 | -19.371 | -45.882 | 59.565 | 1.00 | 0.00 | C |
| ATOM | 354 | N9   | A A | 12 | -20.309 | -45.631 | 58.596 | 1.00 | 0.00 | N |
| ATOM | 355 | C2'  | A A | 12 | -18.794 | -45.022 | 56.676 | 1.00 | 0.00 | C |
| ATOM | 356 | C3'  | A A | 12 | -18.460 | -45.873 | 55.460 | 1.00 | 0.00 | C |
| ATOM | 357 | O3'  | A A | 12 | -19.117 | -45.332 | 54.316 | 1.00 | 0.00 | O |
| ATOM | 358 | C4'  | A A | 12 | -19.009 | -47.246 | 55.845 | 1.00 | 0.00 | C |
| ATOM | 359 | O4'  | A A | 12 | -20.187 | -46.948 | 56.660 | 1.00 | 0.00 | O |
| ATOM | 360 | C5'  | A A | 12 | -18.085 | -48.139 | 56.638 | 1.00 | 0.00 | C |
| ATOM | 361 | O5'  | A A | 12 | -17.304 | -47.339 | 57.563 | 1.00 | 0.00 | O |
| ATOM | 362 | O1P  | A A | 12 | -14.951 | -47.590 | 56.705 | 1.00 | 0.00 | O |
| ATOM | 363 | O2P  | A A | 12 | -15.357 | -47.119 | 59.136 | 1.00 | 0.00 | O |
| ATOM | 364 | P    | A A | 12 | -15.809 | -47.786 | 57.890 | 1.00 | 0.00 | P |
| ATOM | 365 | H2   | A A | 12 | -24.583 | -44.691 | 59.314 | 1.00 | 0.00 | H |
| ATOM | 366 | H8   | A A | 12 | -18.328 | -46.104 | 59.341 | 1.00 | 0.00 | H |
| ATOM | 367 | H1'  | A A | 12 | -20.959 | -45.066 | 56.680 | 1.00 | 0.00 | H |
| ATOM | 368 | H3'  | A A | 12 | -17.388 | -45.917 | 55.273 | 1.00 | 0.00 | H |
| ATOM | 369 | H4'  | A A | 12 | -19.252 | -47.760 | 54.915 | 1.00 | 0.00 | H |
| ATOM | 370 | H61  | A A | 12 | -22.907 | -45.252 | 63.450 | 1.00 | 0.00 | H |
| ATOM | 371 | H62  | A A | 12 | -21.176 | -45.630 | 63.234 | 1.00 | 0.00 | H |
| ATOM | 372 | H2'1 | A A | 12 | -18.025 | -45.110 | 57.443 | 1.00 | 0.00 | H |
| ATOM | 373 | H2'2 | A A | 12 | -18.875 | -43.968 | 56.412 | 1.00 | 0.00 | H |
| ATOM | 374 | H5'1 | A A | 12 | -18.679 | -48.866 | 57.192 | 1.00 | 0.00 | H |
| ATOM | 375 | H5'2 | A A | 12 | -17.420 | -48.665 | 55.955 | 1.00 | 0.00 | H |
| ATOM | 376 | C1'  | G A | 13 | -23.041 | -41.679 | 56.293 | 1.00 | 0.00 | C |
| ATOM | 377 | N1   | G A | 13 | -23.478 | -41.625 | 61.375 | 1.00 | 0.00 | N |
| ATOM | 378 | C2   | G A | 13 | -24.441 | -41.441 | 60.400 | 1.00 | 0.00 | C |
| ATOM | 379 | N2   | G A | 13 | -25.687 | -41.208 | 60.835 | 1.00 | 0.00 | N |
| ATOM | 380 | N3   | G A | 13 | -24.183 | -41.484 | 59.094 | 1.00 | 0.00 | N |

|      |     |      |     |    |         |         |        |      |      |   |
|------|-----|------|-----|----|---------|---------|--------|------|------|---|
| ATOM | 381 | C4   | G A | 13 | -22.871 | -41.722 | 58.834 | 1.00 | 0.00 | C |
| ATOM | 382 | C5   | G A | 13 | -21.841 | -41.914 | 59.741 | 1.00 | 0.00 | C |
| ATOM | 383 | C6   | G A | 13 | -22.115 | -41.872 | 61.127 | 1.00 | 0.00 | C |
| ATOM | 384 | O6   | G A | 13 | -21.343 | -42.017 | 62.075 | 1.00 | 0.00 | O |
| ATOM | 385 | N7   | G A | 13 | -20.638 | -42.128 | 59.066 | 1.00 | 0.00 | N |
| ATOM | 386 | C8   | G A | 13 | -20.968 | -42.064 | 57.802 | 1.00 | 0.00 | C |
| ATOM | 387 | N9   | G A | 13 | -22.308 | -41.819 | 57.581 | 1.00 | 0.00 | N |
| ATOM | 388 | C2'  | G A | 13 | -22.251 | -40.955 | 55.212 | 1.00 | 0.00 | C |
| ATOM | 389 | C3'  | G A | 13 | -22.687 | -41.687 | 53.954 | 1.00 | 0.00 | C |
| ATOM | 390 | O3'  | G A | 13 | -23.908 | -41.121 | 53.483 | 1.00 | 0.00 | O |
| ATOM | 391 | C4'  | G A | 13 | -22.868 | -43.124 | 54.442 | 1.00 | 0.00 | C |
| ATOM | 392 | O4'  | G A | 13 | -23.336 | -42.980 | 55.821 | 1.00 | 0.00 | O |
| ATOM | 393 | C5'  | G A | 13 | -21.632 | -43.993 | 54.440 | 1.00 | 0.00 | C |
| ATOM | 394 | O5'  | G A | 13 | -20.474 | -43.201 | 54.801 | 1.00 | 0.00 | O |
| ATOM | 395 | O1P  | G A | 13 | -19.090 | -43.200 | 52.698 | 1.00 | 0.00 | O |
| ATOM | 396 | O2P  | G A | 13 | -17.979 | -42.936 | 54.932 | 1.00 | 0.00 | O |
| ATOM | 397 | P    | G A | 13 | -19.068 | -43.548 | 54.132 | 1.00 | 0.00 | P |
| ATOM | 398 | H1   | G A | 13 | -23.784 | -41.579 | 62.360 | 1.00 | 0.00 | H |
| ATOM | 399 | H8   | G A | 13 | -20.249 | -42.192 | 56.993 | 1.00 | 0.00 | H |
| ATOM | 400 | H1'  | G A | 13 | -23.986 | -41.172 | 56.492 | 1.00 | 0.00 | H |
| ATOM | 401 | H21  | G A | 13 | -25.879 | -41.180 | 61.848 | 1.00 | 0.00 | H |
| ATOM | 402 | H3'  | G A | 13 | -21.936 | -41.631 | 53.166 | 1.00 | 0.00 | H |
| ATOM | 403 | H22  | G A | 13 | -26.448 | -41.060 | 60.160 | 1.00 | 0.00 | H |
| ATOM | 404 | H4'  | G A | 13 | -23.605 | -43.590 | 53.789 | 1.00 | 0.00 | H |
| ATOM | 405 | H2'1 | G A | 13 | -21.174 | -41.035 | 55.364 | 1.00 | 0.00 | H |
| ATOM | 406 | H2'2 | G A | 13 | -22.496 | -39.894 | 55.160 | 1.00 | 0.00 | H |
| ATOM | 407 | H5'1 | G A | 13 | -21.764 | -44.803 | 55.156 | 1.00 | 0.00 | H |
| ATOM | 408 | H5'2 | G A | 13 | -21.495 | -44.416 | 53.444 | 1.00 | 0.00 | H |
| ATOM | 409 | C1'  | G A | 14 | -25.973 | -37.936 | 57.682 | 1.00 | 0.00 | C |
| ATOM | 410 | N1   | G A | 14 | -23.372 | -38.271 | 62.058 | 1.00 | 0.00 | N |
| ATOM | 411 | C2   | G A | 14 | -24.727 | -38.094 | 61.842 | 1.00 | 0.00 | C |
| ATOM | 412 | N2   | G A | 14 | -25.491 | -37.989 | 62.936 | 1.00 | 0.00 | N |
| ATOM | 413 | N3   | G A | 14 | -25.276 | -38.026 | 60.630 | 1.00 | 0.00 | N |
| ATOM | 414 | C4   | G A | 14 | -24.354 | -38.143 | 59.639 | 1.00 | 0.00 | C |
| ATOM | 415 | C5   | G A | 14 | -22.986 | -38.318 | 59.761 | 1.00 | 0.00 | C |
| ATOM | 416 | C6   | G A | 14 | -22.403 | -38.394 | 61.045 | 1.00 | 0.00 | C |
| ATOM | 417 | O6   | G A | 14 | -21.221 | -38.544 | 61.354 | 1.00 | 0.00 | O |
| ATOM | 418 | N7   | G A | 14 | -22.396 | -38.390 | 58.495 | 1.00 | 0.00 | N |
| ATOM | 419 | C8   | G A | 14 | -23.401 | -38.264 | 57.669 | 1.00 | 0.00 | C |
| ATOM | 420 | N9   | G A | 14 | -24.624 | -38.109 | 58.288 | 1.00 | 0.00 | N |
| ATOM | 421 | C2'  | G A | 14 | -25.974 | -37.080 | 56.423 | 1.00 | 0.00 | C |
| ATOM | 422 | C3'  | G A | 14 | -27.045 | -37.755 | 55.581 | 1.00 | 0.00 | C |
| ATOM | 423 | O3'  | G A | 14 | -28.325 | -37.253 | 55.961 | 1.00 | 0.00 | O |
| ATOM | 424 | C4'  | G A | 14 | -26.875 | -39.232 | 55.936 | 1.00 | 0.00 | C |
| ATOM | 425 | O4'  | G A | 14 | -26.457 | -39.220 | 57.337 | 1.00 | 0.00 | O |
| ATOM | 426 | C5'  | G A | 14 | -25.853 | -40.000 | 55.132 | 1.00 | 0.00 | C |
| ATOM | 427 | O5'  | G A | 14 | -24.719 | -39.148 | 54.837 | 1.00 | 0.00 | O |
| ATOM | 428 | O1P  | G A | 14 | -24.817 | -38.894 | 52.335 | 1.00 | 0.00 | O |
| ATOM | 429 | O2P  | G A | 14 | -22.619 | -38.701 | 53.530 | 1.00 | 0.00 | O |
| ATOM | 430 | P    | G A | 14 | -23.957 | -39.338 | 53.449 | 1.00 | 0.00 | P |
| ATOM | 431 | H1   | G A | 14 | -23.049 | -38.316 | 63.037 | 1.00 | 0.00 | H |
| ATOM | 432 | H8   | G A | 14 | -23.284 | -38.280 | 56.585 | 1.00 | 0.00 | H |
| ATOM | 433 | H1'  | G A | 14 | -26.636 | -37.519 | 58.439 | 1.00 | 0.00 | H |
| ATOM | 434 | H21  | G A | 14 | -25.060 | -38.046 | 63.871 | 1.00 | 0.00 | H |

|      |     |      |   |   |    |         |         |        |      |      |   |
|------|-----|------|---|---|----|---------|---------|--------|------|------|---|
| ATOM | 435 | H3'  | G | A | 14 | -26.893 | -37.586 | 54.515 | 1.00 | 0.00 | H |
| ATOM | 436 | H22  | G | A | 14 | -26.507 | -37.853 | 62.844 | 1.00 | 0.00 | H |
| ATOM | 437 | H4'  | G | A | 14 | -27.844 | -39.707 | 55.785 | 1.00 | 0.00 | H |
| ATOM | 438 | H2'1 | G | A | 14 | -25.009 | -37.087 | 55.917 | 1.00 | 0.00 | H |
| ATOM | 439 | H2'2 | G | A | 14 | -26.228 | -36.040 | 56.631 | 1.00 | 0.00 | H |
| ATOM | 440 | H5'1 | G | A | 14 | -25.524 | -40.866 | 55.707 | 1.00 | 0.00 | H |
| ATOM | 441 | H5'2 | G | A | 14 | -26.311 | -40.341 | 54.203 | 1.00 | 0.00 | H |
| ATOM | 442 | C1'  | A | A | 15 | -27.650 | -34.535 | 60.863 | 1.00 | 0.00 | C |
| ATOM | 443 | N1   | A | A | 15 | -22.965 | -34.973 | 62.913 | 1.00 | 0.00 | N |
| ATOM | 444 | C2   | A | A | 15 | -24.178 | -34.886 | 63.452 | 1.00 | 0.00 | C |
| ATOM | 445 | N3   | A | A | 15 | -25.351 | -34.778 | 62.863 | 1.00 | 0.00 | N |
| ATOM | 446 | C4   | A | A | 15 | -25.198 | -34.755 | 61.526 | 1.00 | 0.00 | C |
| ATOM | 447 | C5   | A | A | 15 | -24.032 | -34.832 | 60.819 | 1.00 | 0.00 | C |
| ATOM | 448 | C6   | A | A | 15 | -22.846 | -34.948 | 61.576 | 1.00 | 0.00 | C |
| ATOM | 449 | N6   | A | A | 15 | -21.626 | -35.033 | 61.019 | 1.00 | 0.00 | N |
| ATOM | 450 | N7   | A | A | 15 | -24.267 | -34.777 | 59.457 | 1.00 | 0.00 | N |
| ATOM | 451 | C8   | A | A | 15 | -25.560 | -34.665 | 59.369 | 1.00 | 0.00 | C |
| ATOM | 452 | N9   | A | A | 15 | -26.194 | -34.646 | 60.586 | 1.00 | 0.00 | N |
| ATOM | 453 | C2'  | A | A | 15 | -28.386 | -33.597 | 59.915 | 1.00 | 0.00 | C |
| ATOM | 454 | C3'  | A | A | 15 | -29.731 | -34.292 | 59.762 | 1.00 | 0.00 | C |
| ATOM | 455 | O3'  | A | A | 15 | -30.577 | -33.914 | 60.843 | 1.00 | 0.00 | O |
| ATOM | 456 | C4'  | A | A | 15 | -29.356 | -35.773 | 59.811 | 1.00 | 0.00 | C |
| ATOM | 457 | O4'  | A | A | 15 | -28.215 | -35.825 | 60.727 | 1.00 | 0.00 | O |
| ATOM | 458 | C5'  | A | A | 15 | -28.954 | -36.407 | 58.502 | 1.00 | 0.00 | C |
| ATOM | 459 | O5'  | A | A | 15 | -28.207 | -35.455 | 57.703 | 1.00 | 0.00 | O |
| ATOM | 460 | O1P  | A | A | 15 | -29.714 | -35.039 | 55.731 | 1.00 | 0.00 | O |
| ATOM | 461 | O2P  | A | A | 15 | -27.230 | -34.765 | 55.492 | 1.00 | 0.00 | O |
| ATOM | 462 | P    | A | A | 15 | -28.363 | -35.493 | 56.116 | 1.00 | 0.00 | P |
| ATOM | 463 | H2   | A | A | 15 | -24.205 | -34.909 | 64.542 | 1.00 | 0.00 | H |
| ATOM | 464 | H8   | A | A | 15 | -26.091 | -34.592 | 58.420 | 1.00 | 0.00 | H |
| ATOM | 465 | H1'  | A | A | 15 | -27.776 | -34.221 | 61.899 | 1.00 | 0.00 | H |
| ATOM | 466 | H3'  | A | A | 15 | -30.215 | -34.041 | 58.818 | 1.00 | 0.00 | H |
| ATOM | 467 | H4'  | A | A | 15 | -30.228 | -36.306 | 60.187 | 1.00 | 0.00 | H |
| ATOM | 468 | H61  | A | A | 15 | -20.793 | -35.120 | 61.618 | 1.00 | 0.00 | H |
| ATOM | 469 | H62  | A | A | 15 | -21.526 | -35.013 | 59.994 | 1.00 | 0.00 | H |
| ATOM | 470 | H2'1 | A | A | 15 | -27.879 | -33.499 | 58.956 | 1.00 | 0.00 | H |
| ATOM | 471 | H2'2 | A | A | 15 | -28.502 | -32.597 | 60.331 | 1.00 | 0.00 | H |
| ATOM | 472 | H5'1 | A | A | 15 | -28.337 | -37.283 | 58.703 | 1.00 | 0.00 | H |
| ATOM | 473 | H5'2 | A | A | 15 | -29.849 | -36.716 | 57.964 | 1.00 | 0.00 | H |
| ATOM | 474 | C1'  | C | A | 16 | -27.197 | -31.507 | 64.773 | 1.00 | 0.00 | C |
| ATOM | 475 | N1   | C | A | 16 | -26.186 | -31.484 | 63.681 | 1.00 | 0.00 | N |
| ATOM | 476 | C2   | C | A | 16 | -24.842 | -31.593 | 64.032 | 1.00 | 0.00 | C |
| ATOM | 477 | O2   | C | A | 16 | -24.546 | -31.703 | 65.229 | 1.00 | 0.00 | O |
| ATOM | 478 | N3   | C | A | 16 | -23.906 | -31.573 | 63.053 | 1.00 | 0.00 | N |
| ATOM | 479 | C4   | C | A | 16 | -24.258 | -31.452 | 61.767 | 1.00 | 0.00 | C |
| ATOM | 480 | N4   | C | A | 16 | -23.301 | -31.442 | 60.850 | 1.00 | 0.00 | N |
| ATOM | 481 | C5   | C | A | 16 | -25.632 | -31.334 | 61.375 | 1.00 | 0.00 | C |
| ATOM | 482 | C6   | C | A | 16 | -26.559 | -31.360 | 62.378 | 1.00 | 0.00 | C |
| ATOM | 483 | C2'  | C | A | 16 | -28.369 | -30.563 | 64.545 | 1.00 | 0.00 | C |
| ATOM | 484 | C3'  | C | A | 16 | -29.529 | -31.349 | 65.138 | 1.00 | 0.00 | C |
| ATOM | 485 | O3'  | C | A | 16 | -29.580 | -31.119 | 66.544 | 1.00 | 0.00 | O |
| ATOM | 486 | C4'  | C | A | 16 | -29.168 | -32.793 | 64.800 | 1.00 | 0.00 | C |
| ATOM | 487 | O4'  | C | A | 16 | -27.707 | -32.825 | 64.858 | 1.00 | 0.00 | O |
| ATOM | 488 | C5'  | C | A | 16 | -29.609 | -33.295 | 63.444 | 1.00 | 0.00 | C |

|      |     |      |   |   |    |         |         |        |      |      |   |
|------|-----|------|---|---|----|---------|---------|--------|------|------|---|
| ATOM | 489 | O5'  | C | A | 16 | -29.499 | -32.229 | 62.467 | 1.00 | 0.00 | O |
| ATOM | 490 | O1P  | C | A | 16 | -31.890 | -31.789 | 61.814 | 1.00 | 0.00 | O |
| ATOM | 491 | O2P  | C | A | 16 | -30.037 | -31.303 | 60.194 | 1.00 | 0.00 | O |
| ATOM | 492 | P    | C | A | 16 | -30.564 | -32.162 | 61.282 | 1.00 | 0.00 | P |
| ATOM | 493 | H5   | C | A | 16 | -25.923 | -31.227 | 60.328 | 1.00 | 0.00 | H |
| ATOM | 494 | H6   | C | A | 16 | -27.618 | -31.282 | 62.129 | 1.00 | 0.00 | H |
| ATOM | 495 | H1'  | C | A | 16 | -26.690 | -31.283 | 65.712 | 1.00 | 0.00 | H |
| ATOM | 496 | H3'  | C | A | 16 | -30.483 | -31.065 | 64.691 | 1.00 | 0.00 | H |
| ATOM | 497 | H4'  | C | A | 16 | -29.640 | -33.421 | 65.555 | 1.00 | 0.00 | H |
| ATOM | 498 | H41  | C | A | 16 | -23.545 | -31.352 | 59.852 | 1.00 | 0.00 | H |
| ATOM | 499 | H42  | C | A | 16 | -22.314 | -31.524 | 61.133 | 1.00 | 0.00 | H |
| ATOM | 500 | H2'1 | C | A | 16 | -28.532 | -30.353 | 63.488 | 1.00 | 0.00 | H |
| ATOM | 501 | H2'2 | C | A | 16 | -28.235 | -29.607 | 65.053 | 1.00 | 0.00 | H |
| ATOM | 502 | H5'1 | C | A | 16 | -28.975 | -34.133 | 63.150 | 1.00 | 0.00 | H |
| ATOM | 503 | H5'2 | C | A | 16 | -30.643 | -33.633 | 63.506 | 1.00 | 0.00 | H |
| ATOM | 504 | C1'  | G | A | 17 | -24.647 | -28.731 | 67.983 | 1.00 | 0.00 | C |
| ATOM | 505 | N1   | G | A | 17 | -21.240 | -28.482 | 64.194 | 1.00 | 0.00 | N |
| ATOM | 506 | C2   | G | A | 17 | -21.047 | -28.669 | 65.551 | 1.00 | 0.00 | C |
| ATOM | 507 | N2   | G | A | 17 | -19.777 | -28.805 | 65.952 | 1.00 | 0.00 | N |
| ATOM | 508 | N3   | G | A | 17 | -22.040 | -28.716 | 66.437 | 1.00 | 0.00 | N |
| ATOM | 509 | C4   | G | A | 17 | -23.258 | -28.552 | 65.856 | 1.00 | 0.00 | C |
| ATOM | 510 | C5   | G | A | 17 | -23.547 | -28.357 | 64.516 | 1.00 | 0.00 | C |
| ATOM | 511 | C6   | G | A | 17 | -22.494 | -28.311 | 63.573 | 1.00 | 0.00 | C |
| ATOM | 512 | O6   | G | A | 17 | -22.547 | -28.147 | 62.354 | 1.00 | 0.00 | O |
| ATOM | 513 | N7   | G | A | 17 | -24.926 | -28.232 | 64.331 | 1.00 | 0.00 | N |
| ATOM | 514 | C8   | G | A | 17 | -25.418 | -28.356 | 65.537 | 1.00 | 0.00 | C |
| ATOM | 515 | N9   | G | A | 17 | -24.467 | -28.553 | 66.518 | 1.00 | 0.00 | N |
| ATOM | 516 | C2'  | G | A | 17 | -25.755 | -27.871 | 68.575 | 1.00 | 0.00 | C |
| ATOM | 517 | C3'  | G | A | 17 | -26.329 | -28.783 | 69.646 | 1.00 | 0.00 | C |
| ATOM | 518 | O3'  | G | A | 17 | -25.553 | -28.655 | 70.836 | 1.00 | 0.00 | O |
| ATOM | 519 | C4'  | G | A | 17 | -26.197 | -30.170 | 69.017 | 1.00 | 0.00 | C |
| ATOM | 520 | O4'  | G | A | 17 | -24.977 | -30.087 | 68.216 | 1.00 | 0.00 | O |
| ATOM | 521 | C5'  | G | A | 17 | -27.334 | -30.612 | 68.126 | 1.00 | 0.00 | C |
| ATOM | 522 | O5'  | G | A | 17 | -27.842 | -29.479 | 67.381 | 1.00 | 0.00 | O |
| ATOM | 523 | O1P  | G | A | 17 | -30.174 | -29.188 | 68.284 | 1.00 | 0.00 | O |
| ATOM | 524 | O2P  | G | A | 17 | -29.631 | -28.447 | 65.949 | 1.00 | 0.00 | O |
| ATOM | 525 | P    | G | A | 17 | -29.401 | -29.417 | 67.048 | 1.00 | 0.00 | P |
| ATOM | 526 | H1   | G | A | 17 | -20.403 | -28.468 | 63.592 | 1.00 | 0.00 | H |
| ATOM | 527 | H8   | G | A | 17 | -26.486 | -28.308 | 65.750 | 1.00 | 0.00 | H |
| ATOM | 528 | H1'  | G | A | 17 | -23.693 | -28.529 | 68.472 | 1.00 | 0.00 | H |
| ATOM | 529 | H21  | G | A | 17 | -19.014 | -28.771 | 65.261 | 1.00 | 0.00 | H |
| ATOM | 530 | H3'  | G | A | 17 | -27.371 | -28.549 | 69.868 | 1.00 | 0.00 | H |
| ATOM | 531 | H22  | G | A | 17 | -19.565 | -28.944 | 66.951 | 1.00 | 0.00 | H |
| ATOM | 532 | H4'  | G | A | 17 | -26.120 | -30.883 | 69.838 | 1.00 | 0.00 | H |
| ATOM | 533 | H2'1 | G | A | 17 | -26.510 | -27.603 | 67.835 | 1.00 | 0.00 | H |
| ATOM | 534 | H2'2 | G | A | 17 | -25.374 | -26.943 | 69.005 | 1.00 | 0.00 | H |
| ATOM | 535 | H5'1 | G | A | 17 | -26.971 | -31.374 | 67.437 | 1.00 | 0.00 | H |
| ATOM | 536 | H5'2 | G | A | 17 | -28.127 | -31.036 | 68.742 | 1.00 | 0.00 | H |
| ATOM | 537 | C1'  | G | A | 18 | -20.767 | -25.997 | 69.397 | 1.00 | 0.00 | C |
| ATOM | 538 | N1   | G | A | 18 | -20.208 | -25.222 | 64.386 | 1.00 | 0.00 | N |
| ATOM | 539 | C2   | G | A | 18 | -19.257 | -25.487 | 65.355 | 1.00 | 0.00 | C |
| ATOM | 540 | N2   | G | A | 18 | -17.987 | -25.553 | 64.933 | 1.00 | 0.00 | N |
| ATOM | 541 | N3   | G | A | 18 | -19.549 | -25.673 | 66.640 | 1.00 | 0.00 | N |
| ATOM | 542 | C4   | G | A | 18 | -20.880 | -25.563 | 66.889 | 1.00 | 0.00 | C |

|      |     |      |     |    |         |         |        |      |      |   |
|------|-----|------|-----|----|---------|---------|--------|------|------|---|
| ATOM | 543 | C5   | G A | 18 | -21.899 | -25.298 | 65.989 | 1.00 | 0.00 | C |
| ATOM | 544 | C6   | G A | 18 | -21.590 | -25.105 | 64.622 | 1.00 | 0.00 | C |
| ATOM | 545 | O6   | G A | 18 | -22.348 | -24.862 | 63.683 | 1.00 | 0.00 | O |
| ATOM | 546 | N7   | G A | 18 | -23.129 | -25.267 | 66.648 | 1.00 | 0.00 | N |
| ATOM | 547 | C8   | G A | 18 | -22.826 | -25.513 | 67.896 | 1.00 | 0.00 | C |
| ATOM | 548 | N9   | G A | 18 | -21.478 | -25.703 | 68.122 | 1.00 | 0.00 | N |
| ATOM | 549 | C2'  | G A | 18 | -21.343 | -25.267 | 70.603 | 1.00 | 0.00 | C |
| ATOM | 550 | C3'  | G A | 18 | -21.166 | -26.294 | 71.709 | 1.00 | 0.00 | C |
| ATOM | 551 | O3'  | G A | 18 | -19.846 | -26.189 | 72.238 | 1.00 | 0.00 | O |
| ATOM | 552 | C4'  | G A | 18 | -21.394 | -27.619 | 70.984 | 1.00 | 0.00 | C |
| ATOM | 553 | O4'  | G A | 18 | -20.870 | -27.387 | 69.638 | 1.00 | 0.00 | O |
| ATOM | 554 | C5'  | G A | 18 | -22.826 | -28.085 | 70.872 | 1.00 | 0.00 | C |
| ATOM | 555 | O5'  | G A | 18 | -23.699 | -26.945 | 70.677 | 1.00 | 0.00 | O |
| ATOM | 556 | O1P  | G A | 18 | -25.077 | -26.898 | 72.783 | 1.00 | 0.00 | O |
| ATOM | 557 | O2P  | G A | 18 | -26.010 | -25.957 | 70.653 | 1.00 | 0.00 | O |
| ATOM | 558 | P    | G A | 18 | -25.162 | -26.980 | 71.313 | 1.00 | 0.00 | P |
| ATOM | 559 | H1   | G A | 18 | -19.878 | -25.101 | 63.416 | 1.00 | 0.00 | H |
| ATOM | 560 | H8   | G A | 18 | -23.571 | -25.562 | 68.690 | 1.00 | 0.00 | H |
| ATOM | 561 | H1'  | G A | 18 | -19.713 | -25.756 | 69.262 | 1.00 | 0.00 | H |
| ATOM | 562 | H21  | G A | 18 | -17.770 | -25.411 | 63.935 | 1.00 | 0.00 | H |
| ATOM | 563 | H3'  | G A | 18 | -21.890 | -26.157 | 72.514 | 1.00 | 0.00 | H |
| ATOM | 564 | H22  | G A | 18 | -17.232 | -25.744 | 65.605 | 1.00 | 0.00 | H |
| ATOM | 565 | H4'  | G A | 18 | -20.838 | -28.379 | 71.531 | 1.00 | 0.00 | H |
| ATOM | 566 | H2'1 | G A | 18 | -22.394 | -25.008 | 70.466 | 1.00 | 0.00 | H |
| ATOM | 567 | H2'2 | G A | 18 | -20.805 | -24.346 | 70.825 | 1.00 | 0.00 | H |
| ATOM | 568 | H5'1 | G A | 18 | -22.915 | -28.767 | 70.027 | 1.00 | 0.00 | H |
| ATOM | 569 | H5'2 | G A | 18 | -23.104 | -28.610 | 71.785 | 1.00 | 0.00 | H |
| ATOM | 570 | C1'  | T A | 19 | -16.848 | -23.080 | 68.604 | 1.00 | 0.00 | C |
| ATOM | 571 | N1   | T A | 19 | -18.159 | -22.751 | 67.985 | 1.00 | 0.00 | N |
| ATOM | 572 | C2   | T A | 19 | -18.173 | -22.511 | 66.627 | 1.00 | 0.00 | C |
| ATOM | 573 | O2   | T A | 19 | -17.168 | -22.560 | 65.938 | 1.00 | 0.00 | O |
| ATOM | 574 | N3   | T A | 19 | -19.413 | -22.211 | 66.093 | 1.00 | 0.00 | N |
| ATOM | 575 | C4   | T A | 19 | -20.605 | -22.127 | 66.781 | 1.00 | 0.00 | C |
| ATOM | 576 | O4   | T A | 19 | -21.656 | -21.845 | 66.194 | 1.00 | 0.00 | O |
| ATOM | 577 | C5   | T A | 19 | -20.491 | -22.393 | 68.196 | 1.00 | 0.00 | C |
| ATOM | 578 | C6   | T A | 19 | -19.299 | -22.691 | 68.750 | 1.00 | 0.00 | C |
| ATOM | 579 | C7   | T A | 19 | -21.765 | -22.317 | 68.984 | 1.00 | 0.00 | C |
| ATOM | 580 | C2'  | T A | 19 | -16.653 | -22.478 | 69.990 | 1.00 | 0.00 | C |
| ATOM | 581 | C3'  | T A | 19 | -15.859 | -23.564 | 70.699 | 1.00 | 0.00 | C |
| ATOM | 582 | O3'  | T A | 19 | -14.474 | -23.402 | 70.401 | 1.00 | 0.00 | O |
| ATOM | 583 | C4'  | T A | 19 | -16.432 | -24.847 | 70.103 | 1.00 | 0.00 | C |
| ATOM | 584 | O4'  | T A | 19 | -16.767 | -24.487 | 68.726 | 1.00 | 0.00 | O |
| ATOM | 585 | C5'  | T A | 19 | -17.666 | -25.407 | 70.772 | 1.00 | 0.00 | C |
| ATOM | 586 | O5'  | T A | 19 | -18.519 | -24.321 | 71.213 | 1.00 | 0.00 | O |
| ATOM | 587 | O1P  | T A | 19 | -18.460 | -24.517 | 73.721 | 1.00 | 0.00 | O |
| ATOM | 588 | O2P  | T A | 19 | -20.455 | -23.501 | 72.588 | 1.00 | 0.00 | O |
| ATOM | 589 | P    | T A | 19 | -19.363 | -24.503 | 72.553 | 1.00 | 0.00 | P |
| ATOM | 590 | H3   | T A | 19 | -19.450 | -22.032 | 65.079 | 1.00 | 0.00 | H |
| ATOM | 591 | H6   | T A | 19 | -19.238 | -22.889 | 69.820 | 1.00 | 0.00 | H |
| ATOM | 592 | H1'  | T A | 19 | -16.059 | -22.757 | 67.924 | 1.00 | 0.00 | H |
| ATOM | 593 | H3'  | T A | 19 | -16.002 | -23.533 | 71.779 | 1.00 | 0.00 | H |
| ATOM | 594 | H4'  | T A | 19 | -15.648 | -25.603 | 70.167 | 1.00 | 0.00 | H |
| ATOM | 595 | H71  | T A | 19 | -21.708 | -21.486 | 69.686 | 1.00 | 0.00 | H |
| ATOM | 596 | H72  | T A | 19 | -22.603 | -22.160 | 68.304 | 1.00 | 0.00 | H |



|      |     |      |     |   |    |         |         |        |      |      |   |
|------|-----|------|-----|---|----|---------|---------|--------|------|------|---|
| ATOM | 597 | H73  | T   | A | 19 | -21.912 | -23.247 | 69.533 | 1.00 | 0.00 | H |
| ATOM | 598 | H2'1 | T   | A | 19 | -17.600 | -22.286 | 70.492 | 1.00 | 0.00 | H |
| ATOM | 599 | H2'2 | T   | A | 19 | -16.102 | -21.538 | 69.960 | 1.00 | 0.00 | H |
| ATOM | 600 | H5'1 | T   | A | 19 | -18.205 | -26.033 | 70.062 | 1.00 | 0.00 | H |
| ATOM | 601 | H5'2 | T   | A | 19 | -17.367 | -26.011 | 71.627 | 1.00 | 0.00 | H |
| ATOM | 602 | C01  | LNK | A | 20 | -11.911 | -21.164 | 71.910 | 0.00 | 0.00 | C |
| ATOM | 603 | O1   | LNK | A | 20 | -13.254 | -21.642 | 71.799 | 1.00 | 0.00 | O |
| ATOM | 604 | S    | LNK | A | 20 | -9.872  | -18.361 | 73.869 | 0.00 | 0.00 | S |
| ATOM | 605 | C02  | LNK | A | 20 | -11.863 | -20.000 | 72.919 | 0.00 | 0.00 | C |
| ATOM | 606 | C03  | LNK | A | 20 | -10.841 | -18.950 | 72.445 | 0.00 | 0.00 | C |
| ATOM | 607 | O1P  | LNK | A | 20 | -15.128 | -20.849 | 70.317 | 1.00 | 0.00 | O |
| ATOM | 608 | O2P  | LNK | A | 20 | -12.900 | -21.436 | 69.320 | 1.00 | 0.00 | O |
| ATOM | 609 | P    | LNK | A | 20 | -13.928 | -21.708 | 70.355 | 1.00 | 0.00 | P |
| ATOM | 610 | H01  | LNK | A | 20 | -11.566 | -20.814 | 70.937 | 0.00 | 0.00 | H |
| ATOM | 611 | H02  | LNK | A | 20 | -11.265 | -21.971 | 72.257 | 0.00 | 0.00 | H |
| ATOM | 612 | H03  | LNK | A | 20 | -11.367 | -18.110 | 71.991 | 0.00 | 0.00 | H |
| ATOM | 613 | H04  | LNK | A | 20 | -11.568 | -20.380 | 73.898 | 0.00 | 0.00 | H |
| ATOM | 614 | H05  | LNK | A | 20 | -12.849 | -19.541 | 72.991 | 0.00 | 0.00 | H |
| ATOM | 615 | H06  | LNK | A | 20 | -10.172 | -19.400 | 71.711 | 0.00 | 0.00 | H |
| ATOM | 616 | AU   | LNK | A | 20 | -9.489  | -17.825 | 73.679 |      |      |   |
| TER  |     |      |     |   |    |         |         |        |      |      |   |
| ATOM | 618 | C1'  | A   | B | 2  | -19.033 | -20.902 | 58.146 | 1.00 | 0.00 | C |
| ATOM | 619 | N1   | A   | B | 2  | -19.538 | -21.688 | 63.192 | 1.00 | 0.00 | N |
| ATOM | 620 | C2   | A   | B | 2  | -18.489 | -21.730 | 62.378 | 1.00 | 0.00 | C |
| ATOM | 621 | N3   | A   | B | 2  | -18.427 | -21.513 | 61.081 | 1.00 | 0.00 | N |
| ATOM | 622 | C4   | A   | B | 2  | -19.650 | -21.219 | 60.600 | 1.00 | 0.00 | C |
| ATOM | 623 | C5   | A   | B | 2  | -20.820 | -21.137 | 61.298 | 1.00 | 0.00 | C |
| ATOM | 624 | C6   | A   | B | 2  | -20.744 | -21.391 | 62.684 | 1.00 | 0.00 | C |
| ATOM | 625 | N6   | A   | B | 2  | -21.812 | -21.346 | 63.499 | 1.00 | 0.00 | N |
| ATOM | 626 | N7   | A   | B | 2  | -21.877 | -20.809 | 60.466 | 1.00 | 0.00 | N |
| ATOM | 627 | C8   | A   | B | 2  | -21.328 | -20.706 | 59.293 | 1.00 | 0.00 | C |
| ATOM | 628 | N9   | A   | B | 2  | -19.977 | -20.938 | 59.296 | 1.00 | 0.00 | N |
| ATOM | 629 | C2'  | A   | B | 2  | -19.621 | -21.451 | 56.852 | 1.00 | 0.00 | C |
| ATOM | 630 | C3'  | A   | B | 2  | -18.981 | -20.553 | 55.807 | 1.00 | 0.00 | C |
| ATOM | 631 | O3'  | A   | B | 2  | -17.691 | -21.064 | 55.477 | 1.00 | 0.00 | O |
| ATOM | 632 | C4'  | A   | B | 2  | -18.901 | -19.204 | 56.521 | 1.00 | 0.00 | C |
| ATOM | 633 | O4'  | A   | B | 2  | -18.676 | -19.551 | 57.925 | 1.00 | 0.00 | O |
| ATOM | 634 | C5'  | A   | B | 2  | -20.125 | -18.323 | 56.431 | 1.00 | 0.00 | C |
| ATOM | 635 | O5'  | A   | B | 2  | -21.321 | -19.141 | 56.471 | 1.00 | 0.00 | O |
| ATOM | 636 | H2   | A   | B | 2  | -17.541 | -21.981 | 62.852 | 1.00 | 0.00 | H |
| ATOM | 637 | H8   | A   | B | 2  | -21.889 | -20.458 | 58.391 | 1.00 | 0.00 | H |
| ATOM | 638 | H1'  | A   | B | 2  | -18.131 | -21.447 | 58.427 | 1.00 | 0.00 | H |
| ATOM | 639 | H3'  | A   | B | 2  | -19.584 | -20.483 | 54.902 | 1.00 | 0.00 | H |
| ATOM | 640 | H4'  | A   | B | 2  | -18.067 | -18.661 | 56.078 | 1.00 | 0.00 | H |
| ATOM | 641 | H61  | A   | B | 2  | -21.702 | -21.537 | 64.504 | 1.00 | 0.00 | H |
| ATOM | 642 | H62  | A   | B | 2  | -22.742 | -21.120 | 63.115 | 1.00 | 0.00 | H |
| ATOM | 643 | H2'1 | A   | B | 2  | -20.708 | -21.377 | 56.827 | 1.00 | 0.00 | H |
| ATOM | 644 | H2'2 | A   | B | 2  | -19.359 | -22.497 | 56.690 | 1.00 | 0.00 | H |
| ATOM | 645 | H5'1 | A   | B | 2  | -20.126 | -17.627 | 57.269 | 1.00 | 0.00 | H |
| ATOM | 646 | H5'2 | A   | B | 2  | -20.093 | -17.762 | 55.498 | 1.00 | 0.00 | H |
| ATOM | 647 | C1'  | C   | B | 3  | -16.361 | -24.848 | 59.543 | 1.00 | 0.00 | C |
| ATOM | 648 | N1   | C   | B | 3  | -17.801 | -24.743 | 59.908 | 1.00 | 0.00 | N |
| ATOM | 649 | C2   | C   | B | 3  | -18.150 | -24.928 | 61.244 | 1.00 | 0.00 | C |
| ATOM | 650 | O2   | C   | B | 3  | -17.257 | -25.169 | 62.067 | 1.00 | 0.00 | O |

|      |     |      |     |   |         |         |        |      |      |   |
|------|-----|------|-----|---|---------|---------|--------|------|------|---|
| ATOM | 651 | N3   | C B | 3 | -19.455 | -24.837 | 61.597 | 1.00 | 0.00 | N |
| ATOM | 652 | C4   | C B | 3 | -20.399 | -24.575 | 60.684 | 1.00 | 0.00 | C |
| ATOM | 653 | N4   | C B | 3 | -21.660 | -24.494 | 61.085 | 1.00 | 0.00 | N |
| ATOM | 654 | C5   | C B | 3 | -20.071 | -24.385 | 59.301 | 1.00 | 0.00 | C |
| ATOM | 655 | C6   | C B | 3 | -18.748 | -24.477 | 58.968 | 1.00 | 0.00 | C |
| ATOM | 656 | C2'  | C B | 3 | -16.116 | -25.520 | 58.199 | 1.00 | 0.00 | C |
| ATOM | 657 | C3'  | C B | 3 | -14.916 | -24.748 | 57.672 | 1.00 | 0.00 | C |
| ATOM | 658 | O3'  | C B | 3 | -13.723 | -25.316 | 58.209 | 1.00 | 0.00 | O |
| ATOM | 659 | C4'  | C B | 3 | -15.168 | -23.335 | 58.192 | 1.00 | 0.00 | C |
| ATOM | 660 | O4'  | C B | 3 | -15.838 | -23.535 | 59.477 | 1.00 | 0.00 | O |
| ATOM | 661 | C5'  | C B | 3 | -16.032 | -22.446 | 57.329 | 1.00 | 0.00 | C |
| ATOM | 662 | O5'  | C B | 3 | -17.082 | -23.234 | 56.712 | 1.00 | 0.00 | O |
| ATOM | 663 | O1P  | C B | 3 | -16.521 | -23.137 | 54.260 | 1.00 | 0.00 | O |
| ATOM | 664 | O2P  | C B | 3 | -18.899 | -23.464 | 54.991 | 1.00 | 0.00 | O |
| ATOM | 665 | P    | C B | 3 | -17.577 | -22.842 | 55.249 | 1.00 | 0.00 | P |
| ATOM | 666 | H5   | C B | 3 | -20.836 | -24.179 | 58.552 | 1.00 | 0.00 | H |
| ATOM | 667 | H6   | C B | 3 | -18.448 | -24.332 | 57.931 | 1.00 | 0.00 | H |
| ATOM | 668 | H1'  | C B | 3 | -15.844 | -25.376 | 60.344 | 1.00 | 0.00 | H |
| ATOM | 669 | H3'  | C B | 3 | -14.866 | -24.765 | 56.584 | 1.00 | 0.00 | H |
| ATOM | 670 | H4'  | C B | 3 | -14.194 | -22.855 | 58.289 | 1.00 | 0.00 | H |
| ATOM | 671 | H41  | C B | 3 | -22.406 | -24.290 | 60.403 | 1.00 | 0.00 | H |
| ATOM | 672 | H42  | C B | 3 | -21.895 | -24.633 | 62.079 | 1.00 | 0.00 | H |
| ATOM | 673 | H2'1 | C B | 3 | -16.971 | -25.430 | 57.529 | 1.00 | 0.00 | H |
| ATOM | 674 | H2'2 | C B | 3 | -15.891 | -26.582 | 58.303 | 1.00 | 0.00 | H |
| ATOM | 675 | H5'1 | C B | 3 | -16.474 | -21.665 | 57.948 | 1.00 | 0.00 | H |
| ATOM | 676 | H5'2 | C B | 3 | -15.417 | -21.987 | 56.558 | 1.00 | 0.00 | H |
| ATOM | 677 | C1'  | C B | 4 | -15.290 | -28.688 | 62.480 | 1.00 | 0.00 | C |
| ATOM | 678 | N1   | C B | 4 | -16.662 | -28.514 | 61.933 | 1.00 | 0.00 | N |
| ATOM | 679 | C2   | C B | 4 | -17.732 | -28.555 | 62.824 | 1.00 | 0.00 | C |
| ATOM | 680 | O2   | C B | 4 | -17.500 | -28.731 | 64.028 | 1.00 | 0.00 | O |
| ATOM | 681 | N3   | C B | 4 | -18.990 | -28.399 | 62.346 | 1.00 | 0.00 | N |
| ATOM | 682 | C4   | C B | 4 | -19.210 | -28.210 | 61.038 | 1.00 | 0.00 | C |
| ATOM | 683 | N4   | C B | 4 | -20.460 | -28.060 | 60.624 | 1.00 | 0.00 | N |
| ATOM | 684 | C5   | C B | 4 | -18.130 | -28.169 | 60.096 | 1.00 | 0.00 | C |
| ATOM | 685 | C6   | C B | 4 | -16.870 | -28.323 | 60.602 | 1.00 | 0.00 | C |
| ATOM | 686 | C2'  | C B | 4 | -14.367 | -29.499 | 61.581 | 1.00 | 0.00 | C |
| ATOM | 687 | C3'  | C B | 4 | -13.028 | -28.811 | 61.799 | 1.00 | 0.00 | C |
| ATOM | 688 | O3'  | C B | 4 | -12.411 | -29.348 | 62.966 | 1.00 | 0.00 | O |
| ATOM | 689 | C4'  | C B | 4 | -13.422 | -27.347 | 61.975 | 1.00 | 0.00 | C |
| ATOM | 690 | O4'  | C B | 4 | -14.725 | -27.400 | 62.641 | 1.00 | 0.00 | O |
| ATOM | 691 | C5'  | C B | 4 | -13.561 | -26.531 | 60.710 | 1.00 | 0.00 | C |
| ATOM | 692 | O5'  | C B | 4 | -14.119 | -27.354 | 59.655 | 1.00 | 0.00 | O |
| ATOM | 693 | O1P  | C B | 4 | -12.240 | -27.518 | 57.989 | 1.00 | 0.00 | O |
| ATOM | 694 | O2P  | C B | 4 | -14.620 | -27.717 | 57.220 | 1.00 | 0.00 | O |
| ATOM | 695 | P    | C B | 4 | -13.646 | -27.101 | 58.154 | 1.00 | 0.00 | P |
| ATOM | 696 | H5   | C B | 4 | -18.305 | -28.023 | 59.030 | 1.00 | 0.00 | H |
| ATOM | 697 | H6   | C B | 4 | -16.016 | -28.292 | 59.926 | 1.00 | 0.00 | H |
| ATOM | 698 | H1'  | C B | 4 | -15.372 | -29.143 | 63.468 | 1.00 | 0.00 | H |
| ATOM | 699 | H3'  | C B | 4 | -12.360 | -28.939 | 60.946 | 1.00 | 0.00 | H |
| ATOM | 700 | H4'  | C B | 4 | -12.650 | -26.881 | 62.588 | 1.00 | 0.00 | H |
| ATOM | 701 | H41  | C B | 4 | -20.658 | -27.910 | 59.624 | 1.00 | 0.00 | H |
| ATOM | 702 | H42  | C B | 4 | -21.236 | -28.092 | 61.302 | 1.00 | 0.00 | H |
| ATOM | 703 | H2'1 | C B | 4 | -14.668 | -29.457 | 60.535 | 1.00 | 0.00 | H |
| ATOM | 704 | H2'2 | C B | 4 | -14.326 | -30.549 | 61.870 | 1.00 | 0.00 | H |

|      |     |      |     |   |         |         |        |      |      |   |
|------|-----|------|-----|---|---------|---------|--------|------|------|---|
| ATOM | 705 | H5'1 | C B | 4 | -14.216 | -25.681 | 60.902 | 1.00 | 0.00 | H |
| ATOM | 706 | H5'2 | C B | 4 | -12.578 | -26.166 | 60.412 | 1.00 | 0.00 | H |
| ATOM | 707 | C1'  | G B | 5 | -16.411 | -32.233 | 65.752 | 1.00 | 0.00 | C |
| ATOM | 708 | N1   | G B | 5 | -21.091 | -31.794 | 63.768 | 1.00 | 0.00 | N |
| ATOM | 709 | C2   | G B | 5 | -20.694 | -31.928 | 65.087 | 1.00 | 0.00 | C |
| ATOM | 710 | N2   | G B | 5 | -21.674 | -31.948 | 65.998 | 1.00 | 0.00 | N |
| ATOM | 711 | N3   | G B | 5 | -19.421 | -32.030 | 65.465 | 1.00 | 0.00 | N |
| ATOM | 712 | C4   | G B | 5 | -18.564 | -31.997 | 64.412 | 1.00 | 0.00 | C |
| ATOM | 713 | C5   | G B | 5 | -18.869 | -31.872 | 63.066 | 1.00 | 0.00 | C |
| ATOM | 714 | C6   | G B | 5 | -20.218 | -31.759 | 62.663 | 1.00 | 0.00 | C |
| ATOM | 715 | O6   | G B | 5 | -20.682 | -31.642 | 61.529 | 1.00 | 0.00 | O |
| ATOM | 716 | N7   | G B | 5 | -17.698 | -31.883 | 62.304 | 1.00 | 0.00 | N |
| ATOM | 717 | C8   | G B | 5 | -16.743 | -32.009 | 63.190 | 1.00 | 0.00 | C |
| ATOM | 718 | N9   | G B | 5 | -17.192 | -32.086 | 64.493 | 1.00 | 0.00 | N |
| ATOM | 719 | C2'  | G B | 5 | -15.201 | -33.148 | 65.620 | 1.00 | 0.00 | C |
| ATOM | 720 | C3'  | G B | 5 | -14.191 | -32.471 | 66.533 | 1.00 | 0.00 | C |
| ATOM | 721 | O3'  | G B | 5 | -14.408 | -32.903 | 67.874 | 1.00 | 0.00 | O |
| ATOM | 722 | C4'  | G B | 5 | -14.502 | -30.988 | 66.345 | 1.00 | 0.00 | C |
| ATOM | 723 | O4'  | G B | 5 | -15.948 | -30.949 | 66.125 | 1.00 | 0.00 | O |
| ATOM | 724 | C5'  | G B | 5 | -13.819 | -30.300 | 65.187 | 1.00 | 0.00 | C |
| ATOM | 725 | O5'  | G B | 5 | -13.720 | -31.210 | 64.064 | 1.00 | 0.00 | O |
| ATOM | 726 | O1P  | G B | 5 | -11.242 | -31.578 | 63.826 | 1.00 | 0.00 | O |
| ATOM | 727 | O2P  | G B | 5 | -12.740 | -31.801 | 61.827 | 1.00 | 0.00 | O |
| ATOM | 728 | P    | G B | 5 | -12.446 | -31.117 | 63.109 | 1.00 | 0.00 | P |
| ATOM | 729 | H1   | G B | 5 | -22.102 | -31.715 | 63.581 | 1.00 | 0.00 | H |
| ATOM | 730 | H8   | G B | 5 | -15.688 | -32.051 | 62.925 | 1.00 | 0.00 | H |
| ATOM | 731 | H1'  | G B | 5 | -17.084 | -32.586 | 66.533 | 1.00 | 0.00 | H |
| ATOM | 732 | H21  | G B | 5 | -22.656 | -31.865 | 65.698 | 1.00 | 0.00 | H |
| ATOM | 733 | H3'  | G B | 5 | -13.163 | -32.697 | 66.243 | 1.00 | 0.00 | H |
| ATOM | 734 | H22  | G B | 5 | -21.446 | -32.049 | 66.998 | 1.00 | 0.00 | H |
| ATOM | 735 | H4'  | G B | 5 | -14.198 | -30.482 | 67.260 | 1.00 | 0.00 | H |
| ATOM | 736 | H2'1 | G B | 5 | -14.835 | -33.204 | 64.594 | 1.00 | 0.00 | H |
| ATOM | 737 | H2'2 | G B | 5 | -15.414 | -34.165 | 65.948 | 1.00 | 0.00 | H |
| ATOM | 738 | H5'1 | G B | 5 | -14.398 | -29.421 | 64.901 | 1.00 | 0.00 | H |
| ATOM | 739 | H5'2 | G B | 5 | -12.821 | -29.986 | 65.496 | 1.00 | 0.00 | H |
| ATOM | 740 | C1'  | T B | 6 | -19.466 | -35.403 | 68.015 | 1.00 | 0.00 | C |
| ATOM | 741 | N1   | T B | 6 | -19.392 | -35.366 | 66.530 | 1.00 | 0.00 | N |
| ATOM | 742 | C2   | T B | 6 | -20.584 | -35.251 | 65.843 | 1.00 | 0.00 | C |
| ATOM | 743 | O2   | T B | 6 | -21.664 | -35.183 | 66.402 | 1.00 | 0.00 | O |
| ATOM | 744 | N3   | T B | 6 | -20.468 | -35.219 | 64.464 | 1.00 | 0.00 | N |
| ATOM | 745 | C4   | T B | 6 | -19.301 | -35.292 | 63.735 | 1.00 | 0.00 | C |
| ATOM | 746 | O4   | T B | 6 | -19.323 | -35.256 | 62.500 | 1.00 | 0.00 | O |
| ATOM | 747 | C5   | T B | 6 | -18.108 | -35.408 | 64.541 | 1.00 | 0.00 | C |
| ATOM | 748 | C6   | T B | 6 | -18.182 | -35.442 | 65.886 | 1.00 | 0.00 | C |
| ATOM | 749 | C7   | T B | 6 | -16.813 | -35.488 | 63.788 | 1.00 | 0.00 | C |
| ATOM | 750 | C2'  | T B | 6 | -18.463 | -36.356 | 68.654 | 1.00 | 0.00 | C |
| ATOM | 751 | C3'  | T B | 6 | -18.092 | -35.615 | 69.930 | 1.00 | 0.00 | C |
| ATOM | 752 | O3'  | T B | 6 | -19.057 | -35.905 | 70.938 | 1.00 | 0.00 | O |
| ATOM | 753 | C4'  | T B | 6 | -18.130 | -34.151 | 69.496 | 1.00 | 0.00 | C |
| ATOM | 754 | O4'  | T B | 6 | -19.195 | -34.101 | 68.494 | 1.00 | 0.00 | O |
| ATOM | 755 | C5'  | T B | 6 | -16.864 | -33.598 | 68.884 | 1.00 | 0.00 | C |
| ATOM | 756 | O5'  | T B | 6 | -16.222 | -34.620 | 68.079 | 1.00 | 0.00 | O |
| ATOM | 757 | O1P  | T B | 6 | -14.076 | -35.069 | 69.314 | 1.00 | 0.00 | O |
| ATOM | 758 | O2P  | T B | 6 | -14.205 | -35.456 | 66.838 | 1.00 | 0.00 | O |

|      |     |      |     |   |         |         |        |      |      |   |
|------|-----|------|-----|---|---------|---------|--------|------|------|---|
| ATOM | 759 | P    | T B | 6 | -14.629 | -34.653 | 68.010 | 1.00 | 0.00 | P |
| ATOM | 760 | H3   | T B | 6 | -21.344 | -35.131 | 63.929 | 1.00 | 0.00 | H |
| ATOM | 761 | H6   | T B | 6 | -17.267 | -35.531 | 66.472 | 1.00 | 0.00 | H |
| ATOM | 762 | H1'  | T B | 6 | -20.485 | -35.661 | 68.300 | 1.00 | 0.00 | H |
| ATOM | 763 | H3'  | T B | 6 | -17.101 | -35.893 | 70.289 | 1.00 | 0.00 | H |
| ATOM | 764 | H4'  | T B | 6 | -18.354 | -33.563 | 70.386 | 1.00 | 0.00 | H |
| ATOM | 765 | H71  | T B | 6 | -16.361 | -36.467 | 63.945 | 1.00 | 0.00 | H |
| ATOM | 766 | H72  | T B | 6 | -17.001 | -35.341 | 62.724 | 1.00 | 0.00 | H |
| ATOM | 767 | H73  | T B | 6 | -16.135 | -34.713 | 64.147 | 1.00 | 0.00 | H |
| ATOM | 768 | H2'1 | T B | 6 | -17.592 | -36.523 | 68.024 | 1.00 | 0.00 | H |
| ATOM | 769 | H2'2 | T B | 6 | -18.901 | -37.330 | 68.875 | 1.00 | 0.00 | H |
| ATOM | 770 | H5'1 | T B | 6 | -17.113 | -32.739 | 68.260 | 1.00 | 0.00 | H |
| ATOM | 771 | H5'2 | T B | 6 | -16.192 | -33.281 | 69.680 | 1.00 | 0.00 | H |
| ATOM | 772 | C1'  | C B | 7 | -23.524 | -38.256 | 68.253 | 1.00 | 0.00 | C |
| ATOM | 773 | N1   | C B | 7 | -22.584 | -38.371 | 67.102 | 1.00 | 0.00 | N |
| ATOM | 774 | C2   | C B | 7 | -23.117 | -38.304 | 65.817 | 1.00 | 0.00 | C |
| ATOM | 775 | O2   | C B | 7 | -24.339 | -38.151 | 65.683 | 1.00 | 0.00 | O |
| ATOM | 776 | N3   | C B | 7 | -22.279 | -38.407 | 64.756 | 1.00 | 0.00 | N |
| ATOM | 777 | C4   | C B | 7 | -20.962 | -38.573 | 64.932 | 1.00 | 0.00 | C |
| ATOM | 778 | N4   | C B | 7 | -20.190 | -38.665 | 63.861 | 1.00 | 0.00 | N |
| ATOM | 779 | C5   | C B | 7 | -20.387 | -38.651 | 66.244 | 1.00 | 0.00 | C |
| ATOM | 780 | C6   | C B | 7 | -21.250 | -38.540 | 67.297 | 1.00 | 0.00 | C |
| ATOM | 781 | C2'  | C B | 7 | -23.172 | -39.160 | 69.425 | 1.00 | 0.00 | C |
| ATOM | 782 | C3'  | C B | 7 | -23.565 | -38.301 | 70.617 | 1.00 | 0.00 | C |
| ATOM | 783 | O3'  | C B | 7 | -24.958 | -38.462 | 70.871 | 1.00 | 0.00 | O |
| ATOM | 784 | C4'  | C B | 7 | -23.223 | -36.889 | 70.146 | 1.00 | 0.00 | C |
| ATOM | 785 | O4'  | C B | 7 | -23.484 | -36.916 | 68.707 | 1.00 | 0.00 | O |
| ATOM | 786 | C5'  | C B | 7 | -21.799 | -36.432 | 70.370 | 1.00 | 0.00 | C |
| ATOM | 787 | O5'  | C B | 7 | -20.892 | -37.546 | 70.177 | 1.00 | 0.00 | O |
| ATOM | 788 | O1P  | C B | 7 | -19.928 | -37.916 | 72.473 | 1.00 | 0.00 | O |
| ATOM | 789 | O2P  | C B | 7 | -18.605 | -38.552 | 70.440 | 1.00 | 0.00 | O |
| ATOM | 790 | P    | C B | 7 | -19.573 | -37.623 | 71.071 | 1.00 | 0.00 | P |
| ATOM | 791 | H5   | C B | 7 | -19.316 | -38.794 | 66.391 | 1.00 | 0.00 | H |
| ATOM | 792 | H6   | C B | 7 | -20.858 | -38.585 | 68.313 | 1.00 | 0.00 | H |
| ATOM | 793 | H1'  | C B | 7 | -24.532 | -38.458 | 67.891 | 1.00 | 0.00 | H |
| ATOM | 794 | H3'  | C B | 7 | -23.001 | -38.563 | 71.514 | 1.00 | 0.00 | H |
| ATOM | 795 | H4'  | C B | 7 | -23.879 | -36.207 | 70.686 | 1.00 | 0.00 | H |
| ATOM | 796 | H41  | C B | 7 | -19.173 | -38.790 | 63.968 | 1.00 | 0.00 | H |
| ATOM | 797 | H42  | C B | 7 | -20.606 | -38.611 | 62.918 | 1.00 | 0.00 | H |
| ATOM | 798 | H2'1 | C B | 7 | -22.112 | -39.412 | 69.450 | 1.00 | 0.00 | H |
| ATOM | 799 | H2'2 | C B | 7 | -23.731 | -40.096 | 69.408 | 1.00 | 0.00 | H |
| ATOM | 800 | H5'1 | C B | 7 | -21.564 | -35.637 | 69.662 | 1.00 | 0.00 | H |
| ATOM | 801 | H5'2 | C B | 7 | -21.703 | -36.049 | 71.385 | 1.00 | 0.00 | H |
| ATOM | 802 | C1'  | C B | 8 | -27.174 | -40.978 | 66.306 | 1.00 | 0.00 | C |
| ATOM | 803 | N1   | C B | 8 | -25.757 | -41.231 | 65.928 | 1.00 | 0.00 | N |
| ATOM | 804 | C2   | C B | 8 | -25.442 | -41.283 | 64.572 | 1.00 | 0.00 | C |
| ATOM | 805 | O2   | C B | 8 | -26.346 | -41.116 | 63.743 | 1.00 | 0.00 | O |
| ATOM | 806 | N3   | C B | 8 | -24.158 | -41.512 | 64.207 | 1.00 | 0.00 | N |
| ATOM | 807 | C4   | C B | 8 | -23.201 | -41.689 | 65.128 | 1.00 | 0.00 | C |
| ATOM | 808 | N4   | C B | 8 | -21.961 | -41.906 | 64.714 | 1.00 | 0.00 | N |
| ATOM | 809 | C5   | C B | 8 | -23.495 | -41.646 | 66.531 | 1.00 | 0.00 | C |
| ATOM | 810 | C6   | C B | 8 | -24.796 | -41.409 | 66.875 | 1.00 | 0.00 | C |
| ATOM | 811 | C2'  | C B | 8 | -27.635 | -41.767 | 67.525 | 1.00 | 0.00 | C |
| ATOM | 812 | C3'  | C B | 8 | -28.576 | -40.782 | 68.202 | 1.00 | 0.00 | C |

|      |     |      |     |    |         |         |        |      |      |   |
|------|-----|------|-----|----|---------|---------|--------|------|------|---|
| ATOM | 813 | O3'  | C B | 8  | -29.868 | -40.885 | 67.608 | 1.00 | 0.00 | O |
| ATOM | 814 | C4'  | C B | 8  | -27.916 | -39.434 | 67.920 | 1.00 | 0.00 | C |
| ATOM | 815 | O4'  | C B | 8  | -27.300 | -39.600 | 66.604 | 1.00 | 0.00 | O |
| ATOM | 816 | C5'  | C B | 8  | -26.855 | -38.988 | 68.898 | 1.00 | 0.00 | C |
| ATOM | 817 | O5'  | C B | 8  | -26.090 | -40.136 | 69.348 | 1.00 | 0.00 | O |
| ATOM | 818 | O1P  | C B | 8  | -26.661 | -40.292 | 71.795 | 1.00 | 0.00 | O |
| ATOM | 819 | O2P  | C B | 8  | -24.460 | -41.161 | 70.961 | 1.00 | 0.00 | O |
| ATOM | 820 | P    | C B | 8  | -25.540 | -40.152 | 70.843 | 1.00 | 0.00 | P |
| ATOM | 821 | H5   | C B | 8  | -22.722 | -41.797 | 67.284 | 1.00 | 0.00 | H |
| ATOM | 822 | H6   | C B | 8  | -25.068 | -41.360 | 67.930 | 1.00 | 0.00 | H |
| ATOM | 823 | H1'  | C B | 8  | -27.802 | -41.193 | 65.441 | 1.00 | 0.00 | H |
| ATOM | 824 | H3'  | C B | 8  | -28.655 | -40.965 | 69.273 | 1.00 | 0.00 | H |
| ATOM | 825 | H4'  | C B | 8  | -28.709 | -38.686 | 67.929 | 1.00 | 0.00 | H |
| ATOM | 826 | H41  | C B | 8  | -21.205 | -42.042 | 65.402 | 1.00 | 0.00 | H |
| ATOM | 827 | H42  | C B | 8  | -21.752 | -41.939 | 63.705 | 1.00 | 0.00 | H |
| ATOM | 828 | H2'1 | C B | 8  | -26.807 | -42.038 | 68.179 | 1.00 | 0.00 | H |
| ATOM | 829 | H2'2 | C B | 8  | -28.152 | -42.686 | 67.250 | 1.00 | 0.00 | H |
| ATOM | 830 | H5'1 | C B | 8  | -26.192 | -38.275 | 68.407 | 1.00 | 0.00 | H |
| ATOM | 831 | H5'2 | C B | 8  | -27.331 | -38.507 | 69.750 | 1.00 | 0.00 | H |
| ATOM | 832 | C1'  | T B | 9  | -29.249 | -43.798 | 62.808 | 1.00 | 0.00 | C |
| ATOM | 833 | N1   | T B | 9  | -27.891 | -44.122 | 63.321 | 1.00 | 0.00 | N |
| ATOM | 834 | C2   | T B | 9  | -26.892 | -44.310 | 62.388 | 1.00 | 0.00 | C |
| ATOM | 835 | O2   | T B | 9  | -27.086 | -44.221 | 61.189 | 1.00 | 0.00 | O |
| ATOM | 836 | N3   | T B | 9  | -25.647 | -44.607 | 62.909 | 1.00 | 0.00 | N |
| ATOM | 837 | C4   | T B | 9  | -25.323 | -44.733 | 64.243 | 1.00 | 0.00 | C |
| ATOM | 838 | O4   | T B | 9  | -24.168 | -45.008 | 64.591 | 1.00 | 0.00 | O |
| ATOM | 839 | C5   | T B | 9  | -26.432 | -44.518 | 65.144 | 1.00 | 0.00 | C |
| ATOM | 840 | C6   | T B | 9  | -27.659 | -44.225 | 64.671 | 1.00 | 0.00 | C |
| ATOM | 841 | C7   | T B | 9  | -26.123 | -44.643 | 66.606 | 1.00 | 0.00 | C |
| ATOM | 842 | C2'  | T B | 9  | -30.377 | -44.449 | 63.600 | 1.00 | 0.00 | C |
| ATOM | 843 | C3'  | T B | 9  | -31.457 | -43.379 | 63.550 | 1.00 | 0.00 | C |
| ATOM | 844 | O3'  | T B | 9  | -32.193 | -43.512 | 62.336 | 1.00 | 0.00 | O |
| ATOM | 845 | C4'  | T B | 9  | -30.653 | -42.082 | 63.601 | 1.00 | 0.00 | C |
| ATOM | 846 | O4'  | T B | 9  | -29.418 | -42.396 | 62.883 | 1.00 | 0.00 | O |
| ATOM | 847 | C5'  | T B | 9  | -30.298 | -41.565 | 64.976 | 1.00 | 0.00 | C |
| ATOM | 848 | O5'  | T B | 9  | -30.012 | -42.679 | 65.859 | 1.00 | 0.00 | O |
| ATOM | 849 | O1P  | T B | 9  | -31.873 | -42.576 | 67.548 | 1.00 | 0.00 | O |
| ATOM | 850 | O2P  | T B | 9  | -29.660 | -43.576 | 68.179 | 1.00 | 0.00 | O |
| ATOM | 851 | P    | T B | 9  | -30.404 | -42.558 | 67.399 | 1.00 | 0.00 | P |
| ATOM | 852 | H3   | T B | 9  | -24.883 | -44.749 | 62.233 | 1.00 | 0.00 | H |
| ATOM | 853 | H6   | T B | 9  | -28.481 | -44.068 | 65.370 | 1.00 | 0.00 | H |
| ATOM | 854 | H1'  | T B | 9  | -29.294 | -44.084 | 61.757 | 1.00 | 0.00 | H |
| ATOM | 855 | H3'  | T B | 9  | -32.140 | -43.453 | 64.396 | 1.00 | 0.00 | H |
| ATOM | 856 | H4'  | T B | 9  | -31.254 | -41.319 | 63.103 | 1.00 | 0.00 | H |
| ATOM | 857 | H71  | T B | 9  | -26.658 | -45.498 | 67.019 | 1.00 | 0.00 | H |
| ATOM | 858 | H72  | T B | 9  | -25.051 | -44.784 | 66.741 | 1.00 | 0.00 | H |
| ATOM | 859 | H73  | T B | 9  | -26.438 | -43.735 | 67.122 | 1.00 | 0.00 | H |
| ATOM | 860 | H2'1 | T B | 9  | -30.086 | -44.673 | 64.625 | 1.00 | 0.00 | H |
| ATOM | 861 | H2'2 | T B | 9  | -30.717 | -45.379 | 63.145 | 1.00 | 0.00 | H |
| ATOM | 862 | H5'1 | T B | 9  | -29.423 | -40.920 | 64.901 | 1.00 | 0.00 | H |
| ATOM | 863 | H5'2 | T B | 9  | -31.134 | -40.990 | 65.368 | 1.00 | 0.00 | H |
| ATOM | 864 | C1'  | A B | 10 | -29.116 | -46.915 | 58.948 | 1.00 | 0.00 | C |
| ATOM | 865 | N1   | A B | 10 | -24.520 | -48.183 | 60.848 | 1.00 | 0.00 | N |
| ATOM | 866 | C2   | A B | 10 | -24.953 | -47.969 | 59.608 | 1.00 | 0.00 | C |

|      |     |      |     |    |         |         |        |      |      |   |
|------|-----|------|-----|----|---------|---------|--------|------|------|---|
| ATOM | 867 | N3   | A B | 10 | -26.155 | -47.641 | 59.187 | 1.00 | 0.00 | N |
| ATOM | 868 | C4   | A B | 10 | -27.001 | -47.534 | 60.228 | 1.00 | 0.00 | C |
| ATOM | 869 | C5   | A B | 10 | -26.717 | -47.720 | 61.553 | 1.00 | 0.00 | C |
| ATOM | 870 | C6   | A B | 10 | -25.387 | -48.067 | 61.866 | 1.00 | 0.00 | C |
| ATOM | 871 | N6   | A B | 10 | -24.962 | -48.281 | 63.124 | 1.00 | 0.00 | N |
| ATOM | 872 | N7   | A B | 10 | -27.840 | -47.521 | 62.337 | 1.00 | 0.00 | N |
| ATOM | 873 | C8   | A B | 10 | -28.771 | -47.227 | 61.478 | 1.00 | 0.00 | C |
| ATOM | 874 | N9   | A B | 10 | -28.335 | -47.212 | 60.179 | 1.00 | 0.00 | N |
| ATOM | 875 | C2'  | A B | 10 | -30.539 | -47.454 | 58.980 | 1.00 | 0.00 | C |
| ATOM | 876 | C3'  | A B | 10 | -31.306 | -46.373 | 58.233 | 1.00 | 0.00 | C |
| ATOM | 877 | O3'  | A B | 10 | -31.211 | -46.616 | 56.832 | 1.00 | 0.00 | O |
| ATOM | 878 | C4'  | A B | 10 | -30.579 | -45.094 | 58.647 | 1.00 | 0.00 | C |
| ATOM | 879 | O4'  | A B | 10 | -29.185 | -45.508 | 58.811 | 1.00 | 0.00 | O |
| ATOM | 880 | C5'  | A B | 10 | -31.044 | -44.444 | 59.929 | 1.00 | 0.00 | C |
| ATOM | 881 | O5'  | A B | 10 | -31.408 | -45.464 | 60.893 | 1.00 | 0.00 | O |
| ATOM | 882 | O1P  | A B | 10 | -33.890 | -45.144 | 61.169 | 1.00 | 0.00 | O |
| ATOM | 883 | O2P  | A B | 10 | -32.534 | -46.120 | 63.042 | 1.00 | 0.00 | O |
| ATOM | 884 | P    | A B | 10 | -32.609 | -45.174 | 61.902 | 1.00 | 0.00 | P |
| ATOM | 885 | H2   | A B | 10 | -24.201 | -48.083 | 58.828 | 1.00 | 0.00 | H |
| ATOM | 886 | H8   | A B | 10 | -29.801 | -47.012 | 61.765 | 1.00 | 0.00 | H |
| ATOM | 887 | H1'  | A B | 10 | -28.568 | -47.309 | 58.093 | 1.00 | 0.00 | H |
| ATOM | 888 | H3'  | A B | 10 | -32.355 | -46.341 | 58.525 | 1.00 | 0.00 | H |
| ATOM | 889 | H4'  | A B | 10 | -30.718 | -44.376 | 57.840 | 1.00 | 0.00 | H |
| ATOM | 890 | H61  | A B | 10 | -23.978 | -48.529 | 63.298 | 1.00 | 0.00 | H |
| ATOM | 891 | H62  | A B | 10 | -25.620 | -48.195 | 63.911 | 1.00 | 0.00 | H |
| ATOM | 892 | H2'1 | A B | 10 | -30.914 | -47.574 | 59.996 | 1.00 | 0.00 | H |
| ATOM | 893 | H2'2 | A B | 10 | -30.628 | -48.419 | 58.480 | 1.00 | 0.00 | H |
| ATOM | 894 | H5'1 | A B | 10 | -30.238 | -43.829 | 60.331 | 1.00 | 0.00 | H |
| ATOM | 895 | H5'2 | A B | 10 | -31.905 | -43.813 | 59.718 | 1.00 | 0.00 | H |
| ATOM | 896 | C1'  | G B | 11 | -27.004 | -50.415 | 56.132 | 1.00 | 0.00 | C |
| ATOM | 897 | N1   | G B | 11 | -24.499 | -51.577 | 60.421 | 1.00 | 0.00 | N |
| ATOM | 898 | C2   | G B | 11 | -24.039 | -51.494 | 59.119 | 1.00 | 0.00 | C |
| ATOM | 899 | N2   | G B | 11 | -22.739 | -51.758 | 58.935 | 1.00 | 0.00 | N |
| ATOM | 900 | N3   | G B | 11 | -24.814 | -51.173 | 58.084 | 1.00 | 0.00 | N |
| ATOM | 901 | C4   | G B | 11 | -26.102 | -50.946 | 58.453 | 1.00 | 0.00 | C |
| ATOM | 902 | C5   | G B | 11 | -26.650 | -51.010 | 59.722 | 1.00 | 0.00 | C |
| ATOM | 903 | C6   | G B | 11 | -25.829 | -51.346 | 60.823 | 1.00 | 0.00 | C |
| ATOM | 904 | O6   | G B | 11 | -26.129 | -51.453 | 62.013 | 1.00 | 0.00 | O |
| ATOM | 905 | N7   | G B | 11 | -28.013 | -50.708 | 59.675 | 1.00 | 0.00 | N |
| ATOM | 906 | C8   | G B | 11 | -28.241 | -50.474 | 58.408 | 1.00 | 0.00 | C |
| ATOM | 907 | N9   | G B | 11 | -27.129 | -50.600 | 57.602 | 1.00 | 0.00 | N |
| ATOM | 908 | C2'  | G B | 11 | -28.208 | -50.918 | 55.346 | 1.00 | 0.00 | C |
| ATOM | 909 | C3'  | G B | 11 | -28.296 | -49.904 | 54.217 | 1.00 | 0.00 | C |
| ATOM | 910 | O3'  | G B | 11 | -27.412 | -50.292 | 53.169 | 1.00 | 0.00 | O |
| ATOM | 911 | C4'  | G B | 11 | -27.857 | -48.605 | 54.891 | 1.00 | 0.00 | C |
| ATOM | 912 | O4'  | G B | 11 | -26.867 | -49.030 | 55.881 | 1.00 | 0.00 | O |
| ATOM | 913 | C5'  | G B | 11 | -28.936 | -47.816 | 55.595 | 1.00 | 0.00 | C |
| ATOM | 914 | O5'  | G B | 11 | -29.879 | -48.723 | 56.219 | 1.00 | 0.00 | O |
| ATOM | 915 | O1P  | G B | 11 | -32.009 | -48.322 | 54.940 | 1.00 | 0.00 | O |
| ATOM | 916 | O2P  | G B | 11 | -32.104 | -49.128 | 57.313 | 1.00 | 0.00 | O |
| ATOM | 917 | P    | G B | 11 | -31.416 | -48.303 | 56.290 | 1.00 | 0.00 | P |
| ATOM | 918 | H1   | G B | 11 | -23.816 | -51.827 | 61.152 | 1.00 | 0.00 | H |
| ATOM | 919 | H8   | G B | 11 | -29.224 | -50.204 | 58.023 | 1.00 | 0.00 | H |
| ATOM | 920 | H1'  | G B | 11 | -26.089 | -50.907 | 55.801 | 1.00 | 0.00 | H |

|      |     |      |     |    |         |         |        |      |      |   |
|------|-----|------|-----|----|---------|---------|--------|------|------|---|
| ATOM | 921 | H21  | G B | 11 | -22.146 | -52.002 | 59.741 | 1.00 | 0.00 | H |
| ATOM | 922 | H3'  | G B | 11 | -29.309 | -49.818 | 53.822 | 1.00 | 0.00 | H |
| ATOM | 923 | H22  | G B | 11 | -22.335 | -51.717 | 57.989 | 1.00 | 0.00 | H |
| ATOM | 924 | H4'  | G B | 11 | -27.435 | -47.970 | 54.112 | 1.00 | 0.00 | H |
| ATOM | 925 | H2'1 | G B | 11 | -29.118 | -50.925 | 55.945 | 1.00 | 0.00 | H |
| ATOM | 926 | H2'2 | G B | 11 | -28.059 | -51.927 | 54.962 | 1.00 | 0.00 | H |
| ATOM | 927 | H5'1 | G B | 11 | -28.478 | -47.181 | 56.353 | 1.00 | 0.00 | H |
| ATOM | 928 | H5'2 | G B | 11 | -29.453 | -47.190 | 54.867 | 1.00 | 0.00 | H |
| ATOM | 929 | C1'  | G B | 12 | -23.949 | -54.224 | 55.304 | 1.00 | 0.00 | C |
| ATOM | 930 | N1   | G B | 12 | -24.478 | -55.000 | 60.319 | 1.00 | 0.00 | N |
| ATOM | 931 | C2   | G B | 12 | -23.346 | -55.061 | 59.525 | 1.00 | 0.00 | C |
| ATOM | 932 | N2   | G B | 12 | -22.203 | -55.371 | 60.151 | 1.00 | 0.00 | N |
| ATOM | 933 | N3   | G B | 12 | -23.353 | -54.829 | 58.215 | 1.00 | 0.00 | N |
| ATOM | 934 | C4   | G B | 12 | -24.596 | -54.538 | 57.749 | 1.00 | 0.00 | C |
| ATOM | 935 | C5   | G B | 12 | -25.779 | -54.459 | 58.462 | 1.00 | 0.00 | C |
| ATOM | 936 | C6   | G B | 12 | -25.772 | -54.700 | 59.854 | 1.00 | 0.00 | C |
| ATOM | 937 | O6   | G B | 12 | -26.711 | -54.679 | 60.651 | 1.00 | 0.00 | O |
| ATOM | 938 | N7   | G B | 12 | -26.837 | -54.133 | 57.610 | 1.00 | 0.00 | N |
| ATOM | 939 | C8   | G B | 12 | -26.274 | -54.024 | 56.435 | 1.00 | 0.00 | C |
| ATOM | 940 | N9   | G B | 12 | -24.914 | -54.256 | 56.438 | 1.00 | 0.00 | N |
| ATOM | 941 | C2'  | G B | 12 | -24.513 | -54.777 | 54.003 | 1.00 | 0.00 | C |
| ATOM | 942 | C3'  | G B | 12 | -23.855 | -53.881 | 52.965 | 1.00 | 0.00 | C |
| ATOM | 943 | O3'  | G B | 12 | -22.561 | -54.393 | 52.658 | 1.00 | 0.00 | O |
| ATOM | 944 | C4'  | G B | 12 | -23.787 | -52.531 | 53.677 | 1.00 | 0.00 | C |
| ATOM | 945 | O4'  | G B | 12 | -23.586 | -52.875 | 55.085 | 1.00 | 0.00 | O |
| ATOM | 946 | C5'  | G B | 12 | -25.009 | -51.651 | 53.565 | 1.00 | 0.00 | C |
| ATOM | 947 | O5'  | G B | 12 | -26.206 | -52.468 | 53.586 | 1.00 | 0.00 | O |
| ATOM | 948 | O1P  | G B | 12 | -27.168 | -52.151 | 51.282 | 1.00 | 0.00 | O |
| ATOM | 949 | O2P  | G B | 12 | -28.679 | -52.709 | 53.206 | 1.00 | 0.00 | O |
| ATOM | 950 | P    | G B | 12 | -27.465 | -52.009 | 52.720 | 1.00 | 0.00 | P |
| ATOM | 951 | H1   | G B | 12 | -24.363 | -55.190 | 61.327 | 1.00 | 0.00 | H |
| ATOM | 952 | H8   | G B | 12 | -26.828 | -53.772 | 55.531 | 1.00 | 0.00 | H |
| ATOM | 953 | H1'  | G B | 12 | -23.053 | -54.768 | 55.604 | 1.00 | 0.00 | H |
| ATOM | 954 | H21  | G B | 12 | -22.204 | -55.545 | 61.167 | 1.00 | 0.00 | H |
| ATOM | 955 | H3'  | G B | 12 | -24.444 | -53.813 | 52.051 | 1.00 | 0.00 | H |
| ATOM | 956 | H22  | G B | 12 | -21.326 | -55.435 | 59.616 | 1.00 | 0.00 | H |
| ATOM | 957 | H4'  | G B | 12 | -22.946 | -51.988 | 53.248 | 1.00 | 0.00 | H |
| ATOM | 958 | H2'1 | G B | 12 | -25.600 | -54.703 | 53.959 | 1.00 | 0.00 | H |
| ATOM | 959 | H2'2 | G B | 12 | -24.250 | -55.823 | 53.848 | 1.00 | 0.00 | H |
| ATOM | 960 | H5'1 | G B | 12 | -25.026 | -50.952 | 54.401 | 1.00 | 0.00 | H |
| ATOM | 961 | H5'2 | G B | 12 | -24.962 | -51.090 | 52.631 | 1.00 | 0.00 | H |
| ATOM | 962 | C1'  | T B | 13 | -21.272 | -58.162 | 56.655 | 1.00 | 0.00 | C |
| ATOM | 963 | N1   | T B | 13 | -22.704 | -58.063 | 57.042 | 1.00 | 0.00 | N |
| ATOM | 964 | C2   | T B | 13 | -23.013 | -58.253 | 58.375 | 1.00 | 0.00 | C |
| ATOM | 965 | O2   | T B | 13 | -22.167 | -58.494 | 59.219 | 1.00 | 0.00 | O |
| ATOM | 966 | N3   | T B | 13 | -24.355 | -58.151 | 58.690 | 1.00 | 0.00 | N |
| ATOM | 967 | C4   | T B | 13 | -25.387 | -57.887 | 57.814 | 1.00 | 0.00 | C |
| ATOM | 968 | O4   | T B | 13 | -26.556 | -57.823 | 58.214 | 1.00 | 0.00 | O |
| ATOM | 969 | C5   | T B | 13 | -24.968 | -57.702 | 56.445 | 1.00 | 0.00 | C |
| ATOM | 970 | C6   | T B | 13 | -23.667 | -57.794 | 56.101 | 1.00 | 0.00 | C |
| ATOM | 971 | C7   | T B | 13 | -26.058 | -57.410 | 55.457 | 1.00 | 0.00 | C |
| ATOM | 972 | C2'  | T B | 13 | -21.045 | -58.830 | 55.304 | 1.00 | 0.00 | C |
| ATOM | 973 | C3'  | T B | 13 | -19.854 | -58.053 | 54.764 | 1.00 | 0.00 | C |
| ATOM | 974 | O3'  | T B | 13 | -18.653 | -58.621 | 55.279 | 1.00 | 0.00 | O |

|      |      |      |     |    |         |         |        |      |      |   |
|------|------|------|-----|----|---------|---------|--------|------|------|---|
| ATOM | 975  | C4'  | T B | 13 | -20.101 | -56.642 | 55.292 | 1.00 | 0.00 | C |
| ATOM | 976  | O4'  | T B | 13 | -20.751 | -56.850 | 56.586 | 1.00 | 0.00 | O |
| ATOM | 977  | C5'  | T B | 13 | -20.981 | -55.751 | 54.446 | 1.00 | 0.00 | C |
| ATOM | 978  | O5'  | T B | 13 | -22.038 | -56.539 | 53.842 | 1.00 | 0.00 | O |
| ATOM | 979  | O1P  | T B | 13 | -21.513 | -56.432 | 51.384 | 1.00 | 0.00 | O |
| ATOM | 980  | O2P  | T B | 13 | -23.880 | -56.767 | 52.147 | 1.00 | 0.00 | O |
| ATOM | 981  | P    | T B | 13 | -22.556 | -56.142 | 52.387 | 1.00 | 0.00 | P |
| ATOM | 982  | H3   | T B | 13 | -24.610 | -58.286 | 59.679 | 1.00 | 0.00 | H |
| ATOM | 983  | H6   | T B | 13 | -23.375 | -57.651 | 55.061 | 1.00 | 0.00 | H |
| ATOM | 984  | H1'  | T B | 13 | -20.740 | -58.693 | 57.446 | 1.00 | 0.00 | H |
| ATOM | 985  | H3'  | T B | 13 | -19.821 | -58.066 | 53.674 | 1.00 | 0.00 | H |
| ATOM | 986  | H4'  | T B | 13 | -19.126 | -56.161 | 55.376 | 1.00 | 0.00 | H |
| ATOM | 987  | H71  | T B | 13 | -26.141 | -58.235 | 54.751 | 1.00 | 0.00 | H |
| ATOM | 988  | H72  | T B | 13 | -27.004 | -57.287 | 55.985 | 1.00 | 0.00 | H |
| ATOM | 989  | H73  | T B | 13 | -25.823 | -56.492 | 54.916 | 1.00 | 0.00 | H |
| ATOM | 990  | H2'1 | T B | 13 | -21.910 | -58.738 | 54.649 | 1.00 | 0.00 | H |
| ATOM | 991  | H2'2 | T B | 13 | -20.817 | -59.891 | 55.399 | 1.00 | 0.00 | H |
| ATOM | 992  | H5'1 | T B | 13 | -21.413 | -54.973 | 55.074 | 1.00 | 0.00 | H |
| ATOM | 993  | H5'2 | T B | 13 | -20.377 | -55.288 | 53.666 | 1.00 | 0.00 | H |
| ATOM | 994  | C1'  | G B | 14 | -20.210 | -62.005 | 59.615 | 1.00 | 0.00 | C |
| ATOM | 995  | N1   | G B | 14 | -25.179 | -61.792 | 60.752 | 1.00 | 0.00 | N |
| ATOM | 996  | C2   | G B | 14 | -24.087 | -61.986 | 61.579 | 1.00 | 0.00 | C |
| ATOM | 997  | N2   | G B | 14 | -24.353 | -62.146 | 62.881 | 1.00 | 0.00 | N |
| ATOM | 998  | N3   | G B | 14 | -22.829 | -62.016 | 61.141 | 1.00 | 0.00 | N |
| ATOM | 999  | C4   | G B | 14 | -22.746 | -61.844 | 59.795 | 1.00 | 0.00 | C |
| ATOM | 1000 | C5   | G B | 14 | -23.778 | -61.649 | 58.893 | 1.00 | 0.00 | C |
| ATOM | 1001 | C6   | G B | 14 | -25.113 | -61.613 | 59.357 | 1.00 | 0.00 | C |
| ATOM | 1002 | O6   | G B | 14 | -26.153 | -61.453 | 58.717 | 1.00 | 0.00 | O |
| ATOM | 1003 | N7   | G B | 14 | -23.270 | -61.517 | 57.599 | 1.00 | 0.00 | N |
| ATOM | 1004 | C8   | G B | 14 | -21.976 | -61.630 | 57.755 | 1.00 | 0.00 | C |
| ATOM | 1005 | N9   | G B | 14 | -21.580 | -61.832 | 59.061 | 1.00 | 0.00 | N |
| ATOM | 1006 | C2'  | G B | 14 | -19.282 | -62.812 | 58.717 | 1.00 | 0.00 | C |
| ATOM | 1007 | C3'  | G B | 14 | -17.945 | -62.125 | 58.942 | 1.00 | 0.00 | C |
| ATOM | 1008 | O3'  | G B | 14 | -17.333 | -62.664 | 60.111 | 1.00 | 0.00 | O |
| ATOM | 1009 | C4'  | G B | 14 | -18.342 | -60.661 | 59.120 | 1.00 | 0.00 | C |
| ATOM | 1010 | O4'  | G B | 14 | -19.646 | -60.719 | 59.781 | 1.00 | 0.00 | O |
| ATOM | 1011 | C5'  | G B | 14 | -18.474 | -59.843 | 57.858 | 1.00 | 0.00 | C |
| ATOM | 1012 | O5'  | G B | 14 | -19.028 | -60.662 | 56.798 | 1.00 | 0.00 | O |
| ATOM | 1013 | O1P  | G B | 14 | -17.143 | -60.821 | 55.138 | 1.00 | 0.00 | O |
| ATOM | 1014 | O2P  | G B | 14 | -19.519 | -61.019 | 54.360 | 1.00 | 0.00 | O |
| ATOM | 1015 | P    | G B | 14 | -18.549 | -60.405 | 55.299 | 1.00 | 0.00 | P |
| ATOM | 1016 | H1   | G B | 14 | -26.112 | -61.778 | 61.193 | 1.00 | 0.00 | H |
| ATOM | 1017 | H8   | G B | 14 | -21.272 | -61.570 | 56.924 | 1.00 | 0.00 | H |
| ATOM | 1018 | H1'  | G B | 14 | -20.295 | -62.463 | 60.601 | 1.00 | 0.00 | H |
| ATOM | 1019 | H21  | G B | 14 | -25.329 | -62.117 | 63.212 | 1.00 | 0.00 | H |
| ATOM | 1020 | H3'  | G B | 14 | -17.274 | -62.250 | 58.092 | 1.00 | 0.00 | H |
| ATOM | 1021 | H22  | G B | 14 | -23.584 | -62.298 | 63.549 | 1.00 | 0.00 | H |
| ATOM | 1022 | H4'  | G B | 14 | -17.572 | -60.197 | 59.738 | 1.00 | 0.00 | H |
| ATOM | 1023 | H2'1 | G B | 14 | -19.580 | -62.769 | 57.670 | 1.00 | 0.00 | H |
| ATOM | 1024 | H2'2 | G B | 14 | -19.242 | -63.863 | 59.002 | 1.00 | 0.00 | H |
| ATOM | 1025 | H5'1 | G B | 14 | -19.131 | -58.994 | 58.048 | 1.00 | 0.00 | H |
| ATOM | 1026 | H5'2 | G B | 14 | -17.491 | -59.476 | 57.565 | 1.00 | 0.00 | H |
| ATOM | 1027 | C1'  | C B | 15 | -21.331 | -65.550 | 62.888 | 1.00 | 0.00 | C |
| ATOM | 1028 | N1   | C B | 15 | -22.116 | -65.402 | 61.633 | 1.00 | 0.00 | N |



|      |      |      |     |    |         |         |        |      |      |   |
|------|------|------|-----|----|---------|---------|--------|------|------|---|
| ATOM | 1029 | C2   | C B | 15 | -23.504 | -65.328 | 61.736 | 1.00 | 0.00 | C |
| ATOM | 1030 | O2   | C B | 15 | -24.022 | -65.386 | 62.859 | 1.00 | 0.00 | O |
| ATOM | 1031 | N3   | C B | 15 | -24.238 | -65.193 | 60.605 | 1.00 | 0.00 | N |
| ATOM | 1032 | C4   | C B | 15 | -23.648 | -65.133 | 59.405 | 1.00 | 0.00 | C |
| ATOM | 1033 | N4   | C B | 15 | -24.414 | -64.998 | 58.332 | 1.00 | 0.00 | N |
| ATOM | 1034 | C5   | C B | 15 | -22.222 | -65.212 | 59.267 | 1.00 | 0.00 | C |
| ATOM | 1035 | C6   | C B | 15 | -21.504 | -65.342 | 60.420 | 1.00 | 0.00 | C |
| ATOM | 1036 | C2'  | C B | 15 | -20.124 | -66.468 | 62.752 | 1.00 | 0.00 | C |
| ATOM | 1037 | C3'  | C B | 15 | -19.107 | -65.792 | 63.659 | 1.00 | 0.00 | C |
| ATOM | 1038 | O3'  | C B | 15 | -19.320 | -66.221 | 65.003 | 1.00 | 0.00 | O |
| ATOM | 1039 | C4'  | C B | 15 | -19.417 | -64.309 | 63.471 | 1.00 | 0.00 | C |
| ATOM | 1040 | O4'  | C B | 15 | -20.863 | -64.266 | 63.257 | 1.00 | 0.00 | O |
| ATOM | 1041 | C5'  | C B | 15 | -18.736 | -63.623 | 62.309 | 1.00 | 0.00 | C |
| ATOM | 1042 | O5'  | C B | 15 | -18.644 | -64.536 | 61.188 | 1.00 | 0.00 | O |
| ATOM | 1043 | O1P  | C B | 15 | -16.167 | -64.911 | 60.940 | 1.00 | 0.00 | O |
| ATOM | 1044 | O2P  | C B | 15 | -17.674 | -65.133 | 58.946 | 1.00 | 0.00 | O |
| ATOM | 1045 | P    | C B | 15 | -17.374 | -64.447 | 60.227 | 1.00 | 0.00 | P |
| ATOM | 1046 | H5   | C B | 15 | -21.739 | -65.170 | 58.291 | 1.00 | 0.00 | H |
| ATOM | 1047 | H6   | C B | 15 | -20.416 | -65.400 | 60.367 | 1.00 | 0.00 | H |
| ATOM | 1048 | H1'  | C B | 15 | -22.003 | -65.901 | 63.672 | 1.00 | 0.00 | H |
| ATOM | 1049 | H3'  | C B | 15 | -18.083 | -66.021 | 63.365 | 1.00 | 0.00 | H |
| ATOM | 1050 | H4'  | C B | 15 | -19.106 | -63.802 | 64.385 | 1.00 | 0.00 | H |
| ATOM | 1051 | H41  | C B | 15 | -23.985 | -64.946 | 57.396 | 1.00 | 0.00 | H |
| ATOM | 1052 | H42  | C B | 15 | -25.439 | -64.944 | 58.433 | 1.00 | 0.00 | H |
| ATOM | 1053 | H2'1 | C B | 15 | -19.762 | -66.527 | 61.726 | 1.00 | 0.00 | H |
| ATOM | 1054 | H2'2 | C B | 15 | -20.338 | -67.485 | 63.083 | 1.00 | 0.00 | H |
| ATOM | 1055 | H5'1 | C B | 15 | -19.314 | -62.744 | 62.024 | 1.00 | 0.00 | H |
| ATOM | 1056 | H5'2 | C B | 15 | -17.737 | -63.313 | 62.613 | 1.00 | 0.00 | H |
| ATOM | 1057 | C1'  | G B | 16 | -24.403 | -68.718 | 65.133 | 1.00 | 0.00 | C |
| ATOM | 1058 | N1   | G B | 16 | -27.029 | -68.379 | 60.773 | 1.00 | 0.00 | N |
| ATOM | 1059 | C2   | G B | 16 | -27.478 | -68.386 | 62.082 | 1.00 | 0.00 | C |
| ATOM | 1060 | N2   | G B | 16 | -28.803 | -68.293 | 62.251 | 1.00 | 0.00 | N |
| ATOM | 1061 | N3   | G B | 16 | -26.669 | -68.479 | 63.136 | 1.00 | 0.00 | N |
| ATOM | 1062 | C4   | G B | 16 | -25.362 | -68.572 | 62.778 | 1.00 | 0.00 | C |
| ATOM | 1063 | C5   | G B | 16 | -24.823 | -68.577 | 61.503 | 1.00 | 0.00 | C |
| ATOM | 1064 | C6   | G B | 16 | -25.680 | -68.475 | 60.382 | 1.00 | 0.00 | C |
| ATOM | 1065 | O6   | G B | 16 | -25.393 | -68.462 | 59.185 | 1.00 | 0.00 | O |
| ATOM | 1066 | N7   | G B | 16 | -23.433 | -68.692 | 61.567 | 1.00 | 0.00 | N |
| ATOM | 1067 | C8   | G B | 16 | -23.178 | -68.748 | 62.849 | 1.00 | 0.00 | C |
| ATOM | 1068 | N9   | G B | 16 | -24.300 | -68.683 | 63.650 | 1.00 | 0.00 | N |
| ATOM | 1069 | C2'  | G B | 16 | -23.414 | -69.669 | 65.794 | 1.00 | 0.00 | C |
| ATOM | 1070 | C3'  | G B | 16 | -23.066 | -68.926 | 67.074 | 1.00 | 0.00 | C |
| ATOM | 1071 | O3'  | G B | 16 | -24.050 | -69.214 | 68.064 | 1.00 | 0.00 | O |
| ATOM | 1072 | C4'  | G B | 16 | -23.097 | -67.463 | 66.637 | 1.00 | 0.00 | C |
| ATOM | 1073 | O4'  | G B | 16 | -24.143 | -67.414 | 65.615 | 1.00 | 0.00 | O |
| ATOM | 1074 | C5'  | G B | 16 | -21.820 | -66.911 | 66.049 | 1.00 | 0.00 | C |
| ATOM | 1075 | O5'  | G B | 16 | -21.162 | -67.932 | 65.259 | 1.00 | 0.00 | O |
| ATOM | 1076 | O1P  | G B | 16 | -19.039 | -68.379 | 66.534 | 1.00 | 0.00 | O |
| ATOM | 1077 | O2P  | G B | 16 | -19.121 | -68.770 | 64.058 | 1.00 | 0.00 | O |
| ATOM | 1078 | P    | G B | 16 | -19.568 | -67.966 | 65.221 | 1.00 | 0.00 | P |
| ATOM | 1079 | H1   | G B | 16 | -27.737 | -68.296 | 60.028 | 1.00 | 0.00 | H |
| ATOM | 1080 | H8   | G B | 16 | -22.169 | -68.839 | 63.249 | 1.00 | 0.00 | H |
| ATOM | 1081 | H1'  | G B | 16 | -25.429 | -68.975 | 65.399 | 1.00 | 0.00 | H |
| ATOM | 1082 | H21  | G B | 16 | -29.421 | -68.218 | 61.430 | 1.00 | 0.00 | H |

|      |      |      |     |    |         |         |        |      |      |   |
|------|------|------|-----|----|---------|---------|--------|------|------|---|
| ATOM | 1083 | H3'  | G B | 16 | -22.082 | -69.203 | 67.452 | 1.00 | 0.00 | H |
| ATOM | 1084 | H22  | G B | 16 | -29.200 | -68.295 | 63.200 | 1.00 | 0.00 | H |
| ATOM | 1085 | H4'  | G B | 16 | -23.338 | -66.873 | 67.522 | 1.00 | 0.00 | H |
| ATOM | 1086 | H2'1 | G B | 16 | -22.529 | -69.837 | 65.179 | 1.00 | 0.00 | H |
| ATOM | 1087 | H2'2 | G B | 16 | -23.855 | -70.643 | 66.007 | 1.00 | 0.00 | H |
| ATOM | 1088 | H5'1 | G B | 16 | -22.057 | -66.054 | 65.419 | 1.00 | 0.00 | H |
| ATOM | 1089 | H5'2 | G B | 16 | -21.163 | -66.591 | 66.858 | 1.00 | 0.00 | H |
| ATOM | 1090 | C1'  | G B | 17 | -28.442 | -71.573 | 65.387 | 1.00 | 0.00 | C |
| ATOM | 1091 | N1   | G B | 17 | -28.034 | -71.619 | 60.301 | 1.00 | 0.00 | N |
| ATOM | 1092 | C2   | G B | 17 | -29.155 | -71.483 | 61.102 | 1.00 | 0.00 | C |
| ATOM | 1093 | N2   | G B | 17 | -30.322 | -71.343 | 60.462 | 1.00 | 0.00 | N |
| ATOM | 1094 | N3   | G B | 17 | -29.114 | -71.486 | 62.432 | 1.00 | 0.00 | N |
| ATOM | 1095 | C4   | G B | 17 | -27.852 | -71.646 | 62.909 | 1.00 | 0.00 | C |
| ATOM | 1096 | C5   | G B | 17 | -26.678 | -71.792 | 62.190 | 1.00 | 0.00 | C |
| ATOM | 1097 | C6   | G B | 17 | -26.720 | -71.785 | 60.778 | 1.00 | 0.00 | C |
| ATOM | 1098 | O6   | G B | 17 | -25.795 | -71.900 | 59.973 | 1.00 | 0.00 | O |
| ATOM | 1099 | N7   | G B | 17 | -25.593 | -71.930 | 63.059 | 1.00 | 0.00 | N |
| ATOM | 1100 | C8   | G B | 17 | -26.130 | -71.862 | 64.249 | 1.00 | 0.00 | C |
| ATOM | 1101 | N9   | G B | 17 | -27.499 | -71.691 | 64.241 | 1.00 | 0.00 | N |
| ATOM | 1102 | C2'  | G B | 17 | -28.092 | -72.473 | 66.563 | 1.00 | 0.00 | C |
| ATOM | 1103 | C3'  | G B | 17 | -28.491 | -71.613 | 67.752 | 1.00 | 0.00 | C |
| ATOM | 1104 | O3'  | G B | 17 | -29.885 | -71.776 | 68.002 | 1.00 | 0.00 | O |
| ATOM | 1105 | C4'  | G B | 17 | -28.151 | -70.201 | 67.278 | 1.00 | 0.00 | C |
| ATOM | 1106 | O4'  | G B | 17 | -28.408 | -70.233 | 65.838 | 1.00 | 0.00 | O |
| ATOM | 1107 | C5'  | G B | 17 | -26.731 | -69.740 | 67.505 | 1.00 | 0.00 | C |
| ATOM | 1108 | O5'  | G B | 17 | -25.819 | -70.851 | 67.318 | 1.00 | 0.00 | O |
| ATOM | 1109 | O1P  | G B | 17 | -24.863 | -71.213 | 69.619 | 1.00 | 0.00 | O |
| ATOM | 1110 | O2P  | G B | 17 | -23.529 | -71.852 | 67.592 | 1.00 | 0.00 | O |
| ATOM | 1111 | P    | G B | 17 | -24.503 | -70.924 | 68.218 | 1.00 | 0.00 | P |
| ATOM | 1112 | H1   | G B | 17 | -28.174 | -71.597 | 59.279 | 1.00 | 0.00 | H |
| ATOM | 1113 | H8   | G B | 17 | -25.549 | -71.934 | 65.168 | 1.00 | 0.00 | H |
| ATOM | 1114 | H1'  | G B | 17 | -29.448 | -71.778 | 65.023 | 1.00 | 0.00 | H |
| ATOM | 1115 | H21  | G B | 17 | -30.347 | -71.338 | 59.431 | 1.00 | 0.00 | H |
| ATOM | 1116 | H3'  | G B | 17 | -27.930 | -71.871 | 68.650 | 1.00 | 0.00 | H |
| ATOM | 1117 | H22  | G B | 17 | -31.195 | -71.240 | 61.000 | 1.00 | 0.00 | H |
| ATOM | 1118 | H4'  | G B | 17 | -28.811 | -69.519 | 67.813 | 1.00 | 0.00 | H |
| ATOM | 1119 | H2'1 | G B | 17 | -27.031 | -72.723 | 66.593 | 1.00 | 0.00 | H |
| ATOM | 1120 | H2'2 | G B | 17 | -28.648 | -73.410 | 66.547 | 1.00 | 0.00 | H |
| ATOM | 1121 | H5'1 | G B | 17 | -26.494 | -68.946 | 66.798 | 1.00 | 0.00 | H |
| ATOM | 1122 | H5'2 | G B | 17 | -26.638 | -69.354 | 68.521 | 1.00 | 0.00 | H |
| ATOM | 1123 | C1'  | C B | 18 | -32.094 | -74.295 | 63.441 | 1.00 | 0.00 | C |
| ATOM | 1124 | N1   | C B | 18 | -30.675 | -74.548 | 63.063 | 1.00 | 0.00 | N |
| ATOM | 1125 | C2   | C B | 18 | -30.362 | -74.599 | 61.706 | 1.00 | 0.00 | C |
| ATOM | 1126 | O2   | C B | 18 | -31.266 | -74.432 | 60.878 | 1.00 | 0.00 | O |
| ATOM | 1127 | N3   | C B | 18 | -29.077 | -74.829 | 61.343 | 1.00 | 0.00 | N |
| ATOM | 1128 | C4   | C B | 18 | -28.122 | -75.005 | 62.264 | 1.00 | 0.00 | C |
| ATOM | 1129 | N4   | C B | 18 | -26.882 | -75.224 | 61.851 | 1.00 | 0.00 | N |
| ATOM | 1130 | C5   | C B | 18 | -28.417 | -74.961 | 63.664 | 1.00 | 0.00 | C |
| ATOM | 1131 | C6   | C B | 18 | -29.715 | -74.726 | 64.008 | 1.00 | 0.00 | C |
| ATOM | 1132 | C2'  | C B | 18 | -32.555 | -75.084 | 64.659 | 1.00 | 0.00 | C |
| ATOM | 1133 | C3'  | C B | 18 | -33.495 | -74.099 | 65.337 | 1.00 | 0.00 | C |
| ATOM | 1134 | O3'  | C B | 18 | -34.787 | -74.202 | 64.743 | 1.00 | 0.00 | O |
| ATOM | 1135 | C4'  | C B | 18 | -32.836 | -72.751 | 65.055 | 1.00 | 0.00 | C |
| ATOM | 1136 | O4'  | C B | 18 | -32.219 | -72.917 | 63.738 | 1.00 | 0.00 | O |

|      |      |      |     |    |         |         |        |      |      |   |
|------|------|------|-----|----|---------|---------|--------|------|------|---|
| ATOM | 1137 | C5'  | C B | 18 | -31.774 | -72.305 | 66.033 | 1.00 | 0.00 | C |
| ATOM | 1138 | O5'  | C B | 18 | -31.010 | -73.453 | 66.483 | 1.00 | 0.00 | O |
| ATOM | 1139 | O1P  | C B | 18 | -31.580 | -73.609 | 68.930 | 1.00 | 0.00 | O |
| ATOM | 1140 | O2P  | C B | 18 | -29.378 | -74.479 | 68.096 | 1.00 | 0.00 | O |
| ATOM | 1141 | P    | C B | 18 | -30.459 | -73.469 | 67.978 | 1.00 | 0.00 | P |
| ATOM | 1142 | H5   | C B | 18 | -27.643 | -75.107 | 64.418 | 1.00 | 0.00 | H |
| ATOM | 1143 | H6   | C B | 18 | -29.987 | -74.680 | 65.062 | 1.00 | 0.00 | H |
| ATOM | 1144 | H1'  | C B | 18 | -32.720 | -74.511 | 62.576 | 1.00 | 0.00 | H |
| ATOM | 1145 | H3'  | C B | 18 | -33.574 | -74.282 | 66.408 | 1.00 | 0.00 | H |
| ATOM | 1146 | H4'  | C B | 18 | -33.628 | -72.003 | 65.063 | 1.00 | 0.00 | H |
| ATOM | 1147 | H41  | C B | 18 | -26.127 | -75.362 | 62.540 | 1.00 | 0.00 | H |
| ATOM | 1148 | H42  | C B | 18 | -26.672 | -75.256 | 60.843 | 1.00 | 0.00 | H |
| ATOM | 1149 | H2'1 | C B | 18 | -31.727 | -75.355 | 65.313 | 1.00 | 0.00 | H |
| ATOM | 1150 | H2'2 | C B | 18 | -33.071 | -76.003 | 64.385 | 1.00 | 0.00 | H |
| ATOM | 1151 | H5'1 | C B | 18 | -31.111 | -71.592 | 65.542 | 1.00 | 0.00 | H |
| ATOM | 1152 | H5'2 | C B | 18 | -32.251 | -71.824 | 66.885 | 1.00 | 0.00 | H |
| ATOM | 1153 | C1'  | C B | 19 | -34.149 | -77.119 | 59.930 | 1.00 | 0.00 | C |
| ATOM | 1154 | N1   | C B | 19 | -32.798 | -77.440 | 60.465 | 1.00 | 0.00 | N |
| ATOM | 1155 | C2   | C B | 19 | -31.763 | -77.635 | 59.552 | 1.00 | 0.00 | C |
| ATOM | 1156 | O2   | C B | 19 | -32.007 | -77.533 | 58.343 | 1.00 | 0.00 | O |
| ATOM | 1157 | N3   | C B | 19 | -30.526 | -77.929 | 60.020 | 1.00 | 0.00 | N |
| ATOM | 1158 | C4   | C B | 19 | -30.295 | -78.033 | 61.336 | 1.00 | 0.00 | C |
| ATOM | 1159 | N4   | C B | 19 | -29.068 | -78.321 | 61.738 | 1.00 | 0.00 | N |
| ATOM | 1160 | C5   | C B | 19 | -31.341 | -77.839 | 62.294 | 1.00 | 0.00 | C |
| ATOM | 1161 | C6   | C B | 19 | -32.576 | -77.543 | 61.802 | 1.00 | 0.00 | C |
| ATOM | 1162 | C2'  | C B | 19 | -35.286 | -77.769 | 60.704 | 1.00 | 0.00 | C |
| ATOM | 1163 | C3'  | C B | 19 | -36.367 | -76.700 | 60.637 | 1.00 | 0.00 | C |
| ATOM | 1164 | O3'  | C B | 19 | -37.083 | -76.834 | 59.412 | 1.00 | 0.00 | O |
| ATOM | 1165 | C4'  | C B | 19 | -35.565 | -75.402 | 60.698 | 1.00 | 0.00 | C |
| ATOM | 1166 | O4'  | C B | 19 | -34.317 | -75.715 | 60.002 | 1.00 | 0.00 | O |
| ATOM | 1167 | C5'  | C B | 19 | -35.230 | -74.884 | 62.078 | 1.00 | 0.00 | C |
| ATOM | 1168 | O5'  | C B | 19 | -34.957 | -75.996 | 62.967 | 1.00 | 0.00 | O |
| ATOM | 1169 | O1P  | C B | 19 | -36.845 | -75.891 | 64.628 | 1.00 | 0.00 | O |
| ATOM | 1170 | O2P  | C B | 19 | -34.642 | -76.889 | 65.294 | 1.00 | 0.00 | O |
| ATOM | 1171 | P    | C B | 19 | -35.375 | -75.873 | 64.500 | 1.00 | 0.00 | P |
| ATOM | 1172 | H5   | C B | 19 | -31.158 | -77.925 | 63.365 | 1.00 | 0.00 | H |
| ATOM | 1173 | H6   | C B | 19 | -33.403 | -77.385 | 62.494 | 1.00 | 0.00 | H |
| ATOM | 1174 | H1'  | C B | 19 | -34.176 | -77.407 | 58.879 | 1.00 | 0.00 | H |
| ATOM | 1175 | H3'  | C B | 19 | -37.063 | -76.771 | 61.473 | 1.00 | 0.00 | H |
| ATOM | 1176 | H4'  | C B | 19 | -36.156 | -74.639 | 60.191 | 1.00 | 0.00 | H |
| ATOM | 1177 | H41  | C B | 19 | -28.861 | -78.405 | 62.744 | 1.00 | 0.00 | H |
| ATOM | 1178 | H42  | C B | 19 | -28.317 | -78.460 | 61.045 | 1.00 | 0.00 | H |
| ATOM | 1179 | H2'1 | C B | 19 | -35.013 | -77.991 | 61.735 | 1.00 | 0.00 | H |
| ATOM | 1180 | H2'2 | C B | 19 | -35.620 | -78.700 | 60.245 | 1.00 | 0.00 | H |
| ATOM | 1181 | H5'1 | C B | 19 | -34.355 | -74.238 | 62.015 | 1.00 | 0.00 | H |
| ATOM | 1182 | H5'2 | C B | 19 | -36.073 | -74.308 | 62.457 | 1.00 | 0.00 | H |
| ATOM | 1183 | C1'  | T B | 20 | -34.035 | -80.232 | 56.084 | 1.00 | 0.00 | C |
| ATOM | 1184 | N1   | T B | 20 | -33.253 | -80.532 | 57.312 | 1.00 | 0.00 | N |
| ATOM | 1185 | C2   | T B | 20 | -31.917 | -80.836 | 57.150 | 1.00 | 0.00 | C |
| ATOM | 1186 | O2   | T B | 20 | -31.374 | -80.865 | 56.059 | 1.00 | 0.00 | O |
| ATOM | 1187 | N3   | T B | 20 | -31.229 | -81.108 | 58.318 | 1.00 | 0.00 | N |
| ATOM | 1188 | C4   | T B | 20 | -31.745 | -81.103 | 59.595 | 1.00 | 0.00 | C |
| ATOM | 1189 | O4   | T B | 20 | -31.027 | -81.366 | 60.568 | 1.00 | 0.00 | O |
| ATOM | 1190 | C5   | T B | 20 | -33.148 | -80.774 | 59.665 | 1.00 | 0.00 | C |

|      |      |      |     |    |         |         |        |      |      |   |
|------|------|------|-----|----|---------|---------|--------|------|------|---|
| ATOM | 1191 | C6   | T B | 20 | -33.851 | -80.503 | 58.548 | 1.00 | 0.00 | C |
| ATOM | 1192 | C7   | T B | 20 | -33.752 | -80.756 | 61.037 | 1.00 | 0.00 | C |
| ATOM | 1193 | C2'  | T B | 20 | -35.459 | -80.774 | 56.115 | 1.00 | 0.00 | C |
| ATOM | 1194 | C3'  | T B | 20 | -36.227 | -79.691 | 55.372 | 1.00 | 0.00 | C |
| ATOM | 1195 | O3'  | T B | 20 | -36.135 | -79.930 | 53.969 | 1.00 | 0.00 | O |
| ATOM | 1196 | C4'  | T B | 20 | -35.503 | -78.413 | 55.790 | 1.00 | 0.00 | C |
| ATOM | 1197 | O4'  | T B | 20 | -34.108 | -78.826 | 55.950 | 1.00 | 0.00 | O |
| ATOM | 1198 | C5'  | T B | 20 | -35.966 | -77.768 | 57.075 | 1.00 | 0.00 | C |
| ATOM | 1199 | O5'  | T B | 20 | -36.329 | -78.793 | 58.035 | 1.00 | 0.00 | O |
| ATOM | 1200 | O1P  | T B | 20 | -38.810 | -78.477 | 58.314 | 1.00 | 0.00 | O |
| ATOM | 1201 | O2P  | T B | 20 | -37.451 | -79.457 | 60.182 | 1.00 | 0.00 | O |
| ATOM | 1202 | P    | T B | 20 | -37.528 | -78.507 | 59.046 | 1.00 | 0.00 | P |
| ATOM | 1203 | H3   | T B | 20 | -30.230 | -81.337 | 58.224 | 1.00 | 0.00 | H |
| ATOM | 1204 | H6   | T B | 20 | -34.910 | -80.257 | 58.626 | 1.00 | 0.00 | H |
| ATOM | 1205 | H1'  | T B | 20 | -33.488 | -80.622 | 55.226 | 1.00 | 0.00 | H |
| ATOM | 1206 | H3'  | T B | 20 | -37.276 | -79.662 | 55.664 | 1.00 | 0.00 | H |
| ATOM | 1207 | H4'  | T B | 20 | -35.645 | -77.691 | 54.985 | 1.00 | 0.00 | H |
| ATOM | 1208 | H3T  | T B | 20 | -36.393 | -80.810 | 53.687 | 1.00 | 0.00 | H |
| ATOM | 1209 | H71  | T B | 20 | -34.490 | -81.553 | 61.121 | 1.00 | 0.00 | H |
| ATOM | 1210 | H72  | T B | 20 | -32.968 | -80.908 | 61.781 | 1.00 | 0.00 | H |
| ATOM | 1211 | H73  | T B | 20 | -34.235 | -79.794 | 61.211 | 1.00 | 0.00 | H |
| ATOM | 1212 | H2'1 | T B | 20 | -35.831 | -80.899 | 57.130 | 1.00 | 0.00 | H |
| ATOM | 1213 | H2'2 | T B | 20 | -35.546 | -81.737 | 55.612 | 1.00 | 0.00 | H |
| ATOM | 1214 | H5'1 | T B | 20 | -35.162 | -77.153 | 57.478 | 1.00 | 0.00 | H |
| ATOM | 1215 | H5'2 | T B | 20 | -36.829 | -77.137 | 56.866 | 1.00 | 0.00 | H |
| TER  |      |      |     |    |         |         |        |      |      |   |
| ATOM | 1    | C1'  | A A | 1  | -58.491 | -59.945 | 50.754 | 1.00 | 0.00 | C |
| ATOM | 2    | N1   | A A | 1  | -60.524 | -59.680 | 55.459 | 1.00 | 0.00 | N |
| ATOM | 3    | C2   | A A | 1  | -60.802 | -59.046 | 54.324 | 1.00 | 0.00 | C |
| ATOM | 4    | N3   | A A | 1  | -60.238 | -59.165 | 53.141 | 1.00 | 0.00 | N |
| ATOM | 5    | C4   | A A | 1  | -59.248 | -60.074 | 53.185 | 1.00 | 0.00 | C |
| ATOM | 6    | C5   | A A | 1  | -58.838 | -60.806 | 54.264 | 1.00 | 0.00 | C |
| ATOM | 7    | C6   | A A | 1  | -59.532 | -60.582 | 55.473 | 1.00 | 0.00 | C |
| ATOM | 8    | N6   | A A | 1  | -59.241 | -61.228 | 56.616 | 1.00 | 0.00 | N |
| ATOM | 9    | N7   | A A | 1  | -57.788 | -61.643 | 53.931 | 1.00 | 0.00 | N |
| ATOM | 10   | C8   | A A | 1  | -57.586 | -61.401 | 52.670 | 1.00 | 0.00 | C |
| ATOM | 11   | N9   | A A | 1  | -58.434 | -60.460 | 52.147 | 1.00 | 0.00 | N |
| ATOM | 12   | C2'  | A A | 1  | -57.125 | -59.783 | 50.104 | 1.00 | 0.00 | C |
| ATOM | 13   | C3'  | A A | 1  | -57.417 | -60.155 | 48.658 | 1.00 | 0.00 | C |
| ATOM | 14   | O3'  | A A | 1  | -57.914 | -59.009 | 47.971 | 1.00 | 0.00 | O |
| ATOM | 15   | C4'  | A A | 1  | -58.474 | -61.250 | 48.795 | 1.00 | 0.00 | C |
| ATOM | 16   | O4'  | A A | 1  | -59.238 | -60.866 | 49.983 | 1.00 | 0.00 | O |
| ATOM | 17   | C5'  | A A | 1  | -57.961 | -62.658 | 48.984 | 1.00 | 0.00 | C |
| ATOM | 18   | O5'  | A A | 1  | -56.766 | -62.639 | 49.806 | 1.00 | 0.00 | O |
| ATOM | 19   | H2   | A A | 1  | -61.616 | -58.323 | 54.380 | 1.00 | 0.00 | H |
| ATOM | 20   | H8   | A A | 1  | -56.814 | -61.899 | 52.082 | 1.00 | 0.00 | H |
| ATOM | 21   | H1'  | A A | 1  | -59.034 | -58.999 | 50.763 | 1.00 | 0.00 | H |
| ATOM | 22   | H3'  | A A | 1  | -56.529 | -60.527 | 48.144 | 1.00 | 0.00 | H |
| ATOM | 23   | H4'  | A A | 1  | -59.068 | -61.231 | 47.882 | 1.00 | 0.00 | H |
| ATOM | 24   | H61  | A A | 1  | -59.777 | -61.029 | 57.469 | 1.00 | 0.00 | H |
| ATOM | 25   | H62  | A A | 1  | -58.480 | -61.922 | 56.633 | 1.00 | 0.00 | H |
| ATOM | 26   | H5T  | A A | 1  | -56.076 | -63.283 | 49.632 | 1.00 | 0.00 | H |
| ATOM | 27   | H2'1 | A A | 1  | -56.378 | -60.445 | 50.540 | 1.00 | 0.00 | H |
| ATOM | 28   | H2'2 | A A | 1  | -56.747 | -58.764 | 50.181 | 1.00 | 0.00 | H |

|      |    |      |     |   |         |         |        |      |      |   |
|------|----|------|-----|---|---------|---------|--------|------|------|---|
| ATOM | 29 | H5'1 | A A | 1 | -58.731 | -63.257 | 49.469 | 1.00 | 0.00 | H |
| ATOM | 30 | H5'2 | A A | 1 | -57.731 | -63.089 | 48.011 | 1.00 | 0.00 | H |
| ATOM | 31 | C1'  | G A | 2 | -59.336 | -55.211 | 51.997 | 1.00 | 0.00 | C |
| ATOM | 32 | N1   | G A | 2 | -58.911 | -56.962 | 56.769 | 1.00 | 0.00 | N |
| ATOM | 33 | C2   | G A | 2 | -59.814 | -56.066 | 56.231 | 1.00 | 0.00 | C |
| ATOM | 34 | N2   | G A | 2 | -60.725 | -55.569 | 57.075 | 1.00 | 0.00 | N |
| ATOM | 35 | N3   | G A | 2 | -59.811 | -55.696 | 54.951 | 1.00 | 0.00 | N |
| ATOM | 36 | C4   | G A | 2 | -58.817 | -56.293 | 54.243 | 1.00 | 0.00 | C |
| ATOM | 37 | C5   | G A | 2 | -57.868 | -57.196 | 54.696 | 1.00 | 0.00 | C |
| ATOM | 38 | C6   | G A | 2 | -57.876 | -57.592 | 56.055 | 1.00 | 0.00 | C |
| ATOM | 39 | O6   | G A | 2 | -57.125 | -58.376 | 56.638 | 1.00 | 0.00 | O |
| ATOM | 40 | N7   | G A | 2 | -57.021 | -57.572 | 53.651 | 1.00 | 0.00 | N |
| ATOM | 41 | C8   | G A | 2 | -57.475 | -56.904 | 52.622 | 1.00 | 0.00 | C |
| ATOM | 42 | N9   | G A | 2 | -58.563 | -56.104 | 52.902 | 1.00 | 0.00 | N |
| ATOM | 43 | C2'  | G A | 2 | -58.476 | -54.485 | 50.971 | 1.00 | 0.00 | C |
| ATOM | 44 | C3'  | G A | 2 | -59.390 | -54.450 | 49.758 | 1.00 | 0.00 | C |
| ATOM | 45 | O3'  | G A | 2 | -60.265 | -53.328 | 49.863 | 1.00 | 0.00 | O |
| ATOM | 46 | C4'  | G A | 2 | -60.139 | -55.778 | 49.858 | 1.00 | 0.00 | C |
| ATOM | 47 | O4'  | G A | 2 | -60.269 | -56.011 | 51.296 | 1.00 | 0.00 | O |
| ATOM | 48 | C5'  | G A | 2 | -59.466 | -56.976 | 49.231 | 1.00 | 0.00 | C |
| ATOM | 49 | O5'  | G A | 2 | -58.033 | -56.890 | 49.424 | 1.00 | 0.00 | O |
| ATOM | 50 | O1P  | G A | 2 | -57.148 | -56.603 | 47.085 | 1.00 | 0.00 | O |
| ATOM | 51 | O2P  | G A | 2 | -55.713 | -57.666 | 48.847 | 1.00 | 0.00 | O |
| ATOM | 52 | P    | G A | 2 | -57.071 | -57.457 | 48.286 | 1.00 | 0.00 | P |
| ATOM | 53 | H1   | G A | 2 | -59.001 | -57.184 | 57.771 | 1.00 | 0.00 | H |
| ATOM | 54 | H8   | G A | 2 | -57.032 | -56.973 | 51.629 | 1.00 | 0.00 | H |
| ATOM | 55 | H1'  | G A | 2 | -59.893 | -54.503 | 52.610 | 1.00 | 0.00 | H |
| ATOM | 56 | H21  | G A | 2 | -60.723 | -55.860 | 58.063 | 1.00 | 0.00 | H |
| ATOM | 57 | H3'  | G A | 2 | -58.829 | -54.384 | 48.825 | 1.00 | 0.00 | H |
| ATOM | 58 | H22  | G A | 2 | -61.426 | -54.894 | 56.736 | 1.00 | 0.00 | H |
| ATOM | 59 | H4'  | G A | 2 | -61.099 | -55.638 | 49.362 | 1.00 | 0.00 | H |
| ATOM | 60 | H2'1 | G A | 2 | -57.551 | -55.020 | 50.755 | 1.00 | 0.00 | H |
| ATOM | 61 | H2'2 | G A | 2 | -58.206 | -53.480 | 51.295 | 1.00 | 0.00 | H |
| ATOM | 62 | H5'1 | G A | 2 | -59.847 | -57.884 | 49.699 | 1.00 | 0.00 | H |
| ATOM | 63 | H5'2 | G A | 2 | -59.696 | -56.999 | 48.166 | 1.00 | 0.00 | H |
| ATOM | 64 | C1'  | G A | 3 | -59.940 | -51.488 | 55.206 | 1.00 | 0.00 | C |
| ATOM | 65 | N1   | G A | 3 | -57.156 | -54.445 | 58.291 | 1.00 | 0.00 | N |
| ATOM | 66 | C2   | G A | 3 | -58.287 | -53.700 | 58.561 | 1.00 | 0.00 | C |
| ATOM | 67 | N2   | G A | 3 | -58.737 | -53.746 | 59.822 | 1.00 | 0.00 | N |
| ATOM | 68 | N3   | G A | 3 | -58.921 | -52.968 | 57.649 | 1.00 | 0.00 | N |
| ATOM | 69 | C4   | G A | 3 | -58.325 | -53.031 | 56.429 | 1.00 | 0.00 | C |
| ATOM | 70 | C5   | G A | 3 | -57.193 | -53.745 | 56.068 | 1.00 | 0.00 | C |
| ATOM | 71 | C6   | G A | 3 | -56.523 | -54.527 | 57.037 | 1.00 | 0.00 | C |
| ATOM | 72 | O6   | G A | 3 | -55.515 | -55.223 | 56.911 | 1.00 | 0.00 | O |
| ATOM | 73 | N7   | G A | 3 | -56.907 | -53.543 | 54.717 | 1.00 | 0.00 | N |
| ATOM | 74 | C8   | G A | 3 | -57.851 | -52.736 | 54.310 | 1.00 | 0.00 | C |
| ATOM | 75 | N9   | G A | 3 | -58.751 | -52.379 | 55.293 | 1.00 | 0.00 | N |
| ATOM | 76 | C2'  | G A | 3 | -59.737 | -50.282 | 54.300 | 1.00 | 0.00 | C |
| ATOM | 77 | C3'  | G A | 3 | -61.113 | -50.117 | 53.678 | 1.00 | 0.00 | C |
| ATOM | 78 | O3'  | G A | 3 | -61.938 | -49.357 | 54.558 | 1.00 | 0.00 | O |
| ATOM | 79 | C4'  | G A | 3 | -61.598 | -51.559 | 53.536 | 1.00 | 0.00 | C |
| ATOM | 80 | O4'  | G A | 3 | -61.012 | -52.250 | 54.685 | 1.00 | 0.00 | O |
| ATOM | 81 | C5'  | G A | 3 | -61.186 | -52.284 | 52.276 | 1.00 | 0.00 | C |
| ATOM | 82 | O5'  | G A | 3 | -59.847 | -51.885 | 51.894 | 1.00 | 0.00 | O |

|      |     |      |     |   |         |         |        |      |      |   |
|------|-----|------|-----|---|---------|---------|--------|------|------|---|
| ATOM | 83  | O1P  | G A | 3 | -60.199 | -50.668 | 49.719 | 1.00 | 0.00 | O |
| ATOM | 84  | O2P  | G A | 3 | -58.010 | -51.801 | 50.183 | 1.00 | 0.00 | O |
| ATOM | 85  | P    | G A | 3 | -59.484 | -51.797 | 50.343 | 1.00 | 0.00 | P |
| ATOM | 86  | H1   | G A | 3 | -56.743 | -54.982 | 59.069 | 1.00 | 0.00 | H |
| ATOM | 87  | H8   | G A | 3 | -57.923 | -52.376 | 53.285 | 1.00 | 0.00 | H |
| ATOM | 88  | H1'  | G A | 3 | -60.209 | -51.178 | 56.216 | 1.00 | 0.00 | H |
| ATOM | 89  | H21  | G A | 3 | -58.243 | -54.318 | 60.523 | 1.00 | 0.00 | H |
| ATOM | 90  | H3'  | G A | 3 | -61.067 | -49.621 | 52.708 | 1.00 | 0.00 | H |
| ATOM | 91  | H22  | G A | 3 | -59.574 | -53.211 | 60.089 | 1.00 | 0.00 | H |
| ATOM | 92  | H4'  | G A | 3 | -62.687 | -51.533 | 53.564 | 1.00 | 0.00 | H |
| ATOM | 93  | H2'1 | G A | 3 | -58.977 | -50.459 | 53.540 | 1.00 | 0.00 | H |
| ATOM | 94  | H2'2 | G A | 3 | -59.444 | -49.391 | 54.857 | 1.00 | 0.00 | H |
| ATOM | 95  | H5'1 | G A | 3 | -61.215 | -53.358 | 52.456 | 1.00 | 0.00 | H |
| ATOM | 96  | H5'2 | G A | 3 | -61.887 | -52.038 | 51.478 | 1.00 | 0.00 | H |
| ATOM | 97  | C1'  | C A | 4 | -59.318 | -49.235 | 59.573 | 1.00 | 0.00 | C |
| ATOM | 98  | N1   | C A | 4 | -58.146 | -49.765 | 58.821 | 1.00 | 0.00 | N |
| ATOM | 99  | C2   | C A | 4 | -57.261 | -50.600 | 59.500 | 1.00 | 0.00 | C |
| ATOM | 100 | O2   | C A | 4 | -57.481 | -50.866 | 60.688 | 1.00 | 0.00 | O |
| ATOM | 101 | N3   | C A | 4 | -56.189 | -51.093 | 58.834 | 1.00 | 0.00 | N |
| ATOM | 102 | C4   | C A | 4 | -55.977 | -50.786 | 57.548 | 1.00 | 0.00 | C |
| ATOM | 103 | N4   | C A | 4 | -54.913 | -51.299 | 56.945 | 1.00 | 0.00 | N |
| ATOM | 104 | C5   | C A | 4 | -56.869 | -49.927 | 56.828 | 1.00 | 0.00 | C |
| ATOM | 105 | C6   | C A | 4 | -57.943 | -49.446 | 57.516 | 1.00 | 0.00 | C |
| ATOM | 106 | C2'  | C A | 4 | -59.675 | -47.799 | 59.218 | 1.00 | 0.00 | C |
| ATOM | 107 | C3'  | C A | 4 | -61.194 | -47.817 | 59.312 | 1.00 | 0.00 | C |
| ATOM | 108 | O3'  | C A | 4 | -61.581 | -47.611 | 60.670 | 1.00 | 0.00 | O |
| ATOM | 109 | C4'  | C A | 4 | -61.548 | -49.218 | 58.818 | 1.00 | 0.00 | C |
| ATOM | 110 | O4'  | C A | 4 | -60.432 | -50.052 | 59.265 | 1.00 | 0.00 | O |
| ATOM | 111 | C5'  | C A | 4 | -61.705 | -49.383 | 57.325 | 1.00 | 0.00 | C |
| ATOM | 112 | O5'  | C A | 4 | -60.742 | -48.546 | 56.635 | 1.00 | 0.00 | O |
| ATOM | 113 | O1P  | C A | 4 | -62.181 | -46.854 | 55.452 | 1.00 | 0.00 | O |
| ATOM | 114 | O2P  | C A | 4 | -59.931 | -47.458 | 54.520 | 1.00 | 0.00 | O |
| ATOM | 115 | P    | C A | 4 | -61.154 | -47.892 | 55.240 | 1.00 | 0.00 | P |
| ATOM | 116 | H5   | C A | 4 | -56.697 | -49.671 | 55.781 | 1.00 | 0.00 | H |
| ATOM | 117 | H6   | C A | 4 | -58.653 | -48.792 | 57.010 | 1.00 | 0.00 | H |
| ATOM | 118 | H1'  | C A | 4 | -59.112 | -49.335 | 60.638 | 1.00 | 0.00 | H |
| ATOM | 119 | H3'  | C A | 4 | -61.650 | -47.051 | 58.687 | 1.00 | 0.00 | H |
| ATOM | 120 | H4'  | C A | 4 | -62.496 | -49.488 | 59.284 | 1.00 | 0.00 | H |
| ATOM | 121 | H41  | C A | 4 | -54.728 | -51.080 | 55.955 | 1.00 | 0.00 | H |
| ATOM | 122 | H42  | C A | 4 | -54.272 | -51.914 | 57.465 | 1.00 | 0.00 | H |
| ATOM | 123 | H2'1 | C A | 4 | -59.345 | -47.525 | 58.217 | 1.00 | 0.00 | H |
| ATOM | 124 | H2'2 | C A | 4 | -59.242 | -47.080 | 59.915 | 1.00 | 0.00 | H |
| ATOM | 125 | H5'1 | C A | 4 | -61.543 | -50.427 | 57.059 | 1.00 | 0.00 | H |
| ATOM | 126 | H5'2 | C A | 4 | -62.716 | -49.093 | 57.037 | 1.00 | 0.00 | H |
| ATOM | 127 | C1'  | C A | 5 | -56.933 | -48.356 | 63.824 | 1.00 | 0.00 | C |
| ATOM | 128 | N1   | C A | 5 | -56.208 | -48.298 | 62.524 | 1.00 | 0.00 | N |
| ATOM | 129 | C2   | C A | 5 | -55.034 | -49.036 | 62.401 | 1.00 | 0.00 | C |
| ATOM | 130 | O2   | C A | 5 | -54.641 | -49.704 | 63.367 | 1.00 | 0.00 | O |
| ATOM | 131 | N3   | C A | 5 | -54.358 | -48.997 | 61.225 | 1.00 | 0.00 | N |
| ATOM | 132 | C4   | C A | 5 | -54.805 | -48.265 | 60.199 | 1.00 | 0.00 | C |
| ATOM | 133 | N4   | C A | 5 | -54.109 | -48.266 | 59.073 | 1.00 | 0.00 | N |
| ATOM | 134 | C5   | C A | 5 | -56.010 | -47.495 | 60.299 | 1.00 | 0.00 | C |
| ATOM | 135 | C6   | C A | 5 | -56.674 | -47.552 | 61.489 | 1.00 | 0.00 | C |
| ATOM | 136 | C2'  | C A | 5 | -57.552 | -47.029 | 64.240 | 1.00 | 0.00 | C |

|      |     |      |     |   |         |         |        |      |      |   |
|------|-----|------|-----|---|---------|---------|--------|------|------|---|
| ATOM | 137 | C3'  | C A | 5 | -58.836 | -47.478 | 64.918 | 1.00 | 0.00 | C |
| ATOM | 138 | O3'  | C A | 5 | -58.558 | -47.809 | 66.277 | 1.00 | 0.00 | O |
| ATOM | 139 | C4'  | C A | 5 | -59.246 | -48.698 | 64.098 | 1.00 | 0.00 | C |
| ATOM | 140 | O4'  | C A | 5 | -57.978 | -49.303 | 63.692 | 1.00 | 0.00 | O |
| ATOM | 141 | C5'  | C A | 5 | -60.071 | -48.430 | 62.861 | 1.00 | 0.00 | C |
| ATOM | 142 | O5'  | C A | 5 | -59.630 | -47.198 | 62.235 | 1.00 | 0.00 | O |
| ATOM | 143 | O1P  | C A | 5 | -61.610 | -45.669 | 62.501 | 1.00 | 0.00 | O |
| ATOM | 144 | O2P  | C A | 5 | -60.018 | -45.339 | 60.591 | 1.00 | 0.00 | O |
| ATOM | 145 | P    | C A | 5 | -60.710 | -46.280 | 61.505 | 1.00 | 0.00 | P |
| ATOM | 146 | H5   | C A | 5 | -56.377 | -46.893 | 59.467 | 1.00 | 0.00 | H |
| ATOM | 147 | H6   | C A | 5 | -57.598 | -46.986 | 61.612 | 1.00 | 0.00 | H |
| ATOM | 148 | H1'  | C A | 5 | -56.242 | -48.722 | 64.583 | 1.00 | 0.00 | H |
| ATOM | 149 | H3'  | C A | 5 | -59.606 | -46.705 | 64.887 | 1.00 | 0.00 | H |
| ATOM | 150 | H4'  | C A | 5 | -59.833 | -49.340 | 64.756 | 1.00 | 0.00 | H |
| ATOM | 151 | H41  | C A | 5 | -54.431 | -47.712 | 58.266 | 1.00 | 0.00 | H |
| ATOM | 152 | H42  | C A | 5 | -53.241 | -48.819 | 59.003 | 1.00 | 0.00 | H |
| ATOM | 153 | H2'1 | C A | 5 | -57.758 | -46.382 | 63.388 | 1.00 | 0.00 | H |
| ATOM | 154 | H2'2 | C A | 5 | -56.912 | -46.472 | 64.928 | 1.00 | 0.00 | H |
| ATOM | 155 | H5'1 | C A | 5 | -59.953 | -49.260 | 62.164 | 1.00 | 0.00 | H |
| ATOM | 156 | H5'2 | C A | 5 | -61.120 | -48.346 | 63.144 | 1.00 | 0.00 | H |
| ATOM | 157 | C1'  | G A | 6 | -52.925 | -48.231 | 66.730 | 1.00 | 0.00 | C |
| ATOM | 158 | N1   | G A | 6 | -50.421 | -47.851 | 62.302 | 1.00 | 0.00 | N |
| ATOM | 159 | C2   | G A | 6 | -50.131 | -48.607 | 63.424 | 1.00 | 0.00 | C |
| ATOM | 160 | N2   | G A | 6 | -49.025 | -49.358 | 63.359 | 1.00 | 0.00 | N |
| ATOM | 161 | N3   | G A | 6 | -50.883 | -48.610 | 64.523 | 1.00 | 0.00 | N |
| ATOM | 162 | C4   | G A | 6 | -51.958 | -47.786 | 64.415 | 1.00 | 0.00 | C |
| ATOM | 163 | C5   | G A | 6 | -52.325 | -46.995 | 63.340 | 1.00 | 0.00 | C |
| ATOM | 164 | C6   | G A | 6 | -51.529 | -46.993 | 62.172 | 1.00 | 0.00 | C |
| ATOM | 165 | O6   | G A | 6 | -51.688 | -46.364 | 61.125 | 1.00 | 0.00 | O |
| ATOM | 166 | N7   | G A | 6 | -53.497 | -46.295 | 63.633 | 1.00 | 0.00 | N |
| ATOM | 167 | C8   | G A | 6 | -53.800 | -46.677 | 64.845 | 1.00 | 0.00 | C |
| ATOM | 168 | N9   | G A | 6 | -52.911 | -47.583 | 65.390 | 1.00 | 0.00 | N |
| ATOM | 169 | C2'  | G A | 6 | -53.401 | -47.315 | 67.849 | 1.00 | 0.00 | C |
| ATOM | 170 | C3'  | G A | 6 | -54.160 | -48.279 | 68.747 | 1.00 | 0.00 | C |
| ATOM | 171 | O3'  | G A | 6 | -53.242 | -48.924 | 69.625 | 1.00 | 0.00 | O |
| ATOM | 172 | C4'  | G A | 6 | -54.787 | -49.251 | 67.749 | 1.00 | 0.00 | C |
| ATOM | 173 | O4'  | G A | 6 | -53.808 | -49.335 | 66.666 | 1.00 | 0.00 | O |
| ATOM | 174 | C5'  | G A | 6 | -56.120 | -48.847 | 67.165 | 1.00 | 0.00 | C |
| ATOM | 175 | O5'  | G A | 6 | -56.153 | -47.413 | 66.959 | 1.00 | 0.00 | O |
| ATOM | 176 | O1P  | G A | 6 | -57.911 | -46.632 | 68.581 | 1.00 | 0.00 | O |
| ATOM | 177 | O2P  | G A | 6 | -57.454 | -45.313 | 66.496 | 1.00 | 0.00 | O |
| ATOM | 178 | P    | G A | 6 | -57.534 | -46.640 | 67.156 | 1.00 | 0.00 | P |
| ATOM | 179 | H1   | G A | 6 | -49.777 | -47.925 | 61.499 | 1.00 | 0.00 | H |
| ATOM | 180 | H8   | G A | 6 | -54.675 | -46.314 | 65.383 | 1.00 | 0.00 | H |
| ATOM | 181 | H1'  | G A | 6 | -51.924 | -48.612 | 66.935 | 1.00 | 0.00 | H |
| ATOM | 182 | H21  | G A | 6 | -48.449 | -49.353 | 62.505 | 1.00 | 0.00 | H |
| ATOM | 183 | H3'  | G A | 6 | -54.927 | -47.772 | 69.336 | 1.00 | 0.00 | H |
| ATOM | 184 | H22  | G A | 6 | -48.751 | -49.941 | 64.164 | 1.00 | 0.00 | H |
| ATOM | 185 | H4'  | G A | 6 | -54.925 | -50.196 | 68.272 | 1.00 | 0.00 | H |
| ATOM | 186 | H2'1 | G A | 6 | -54.050 | -46.517 | 67.484 | 1.00 | 0.00 | H |
| ATOM | 187 | H2'2 | G A | 6 | -52.573 | -46.845 | 68.380 | 1.00 | 0.00 | H |
| ATOM | 188 | H5'1 | G A | 6 | -56.265 | -49.359 | 66.214 | 1.00 | 0.00 | H |
| ATOM | 189 | H5'2 | G A | 6 | -56.915 | -49.139 | 67.852 | 1.00 | 0.00 | H |
| ATOM | 190 | C1'  | C A | 7 | -48.054 | -47.951 | 67.580 | 1.00 | 0.00 | C |

|      |     |      |     |   |         |         |        |      |      |   |
|------|-----|------|-----|---|---------|---------|--------|------|------|---|
| ATOM | 191 | N1   | C A | 7 | -48.730 | -46.944 | 66.718 | 1.00 | 0.00 | N |
| ATOM | 192 | C2   | C A | 7 | -48.190 | -46.698 | 65.457 | 1.00 | 0.00 | C |
| ATOM | 193 | O2   | C A | 7 | -47.179 | -47.321 | 65.108 | 1.00 | 0.00 | O |
| ATOM | 194 | N3   | C A | 7 | -48.790 | -45.785 | 64.655 | 1.00 | 0.00 | N |
| ATOM | 195 | C4   | C A | 7 | -49.883 | -45.125 | 65.061 | 1.00 | 0.00 | C |
| ATOM | 196 | N4   | C A | 7 | -50.430 | -44.244 | 64.236 | 1.00 | 0.00 | N |
| ATOM | 197 | C5   | C A | 7 | -50.458 | -45.354 | 66.354 | 1.00 | 0.00 | C |
| ATOM | 198 | C6   | C A | 7 | -49.839 | -46.282 | 67.143 | 1.00 | 0.00 | C |
| ATOM | 199 | C2'  | C A | 7 | -48.032 | -47.580 | 69.056 | 1.00 | 0.00 | C |
| ATOM | 200 | C3'  | C A | 7 | -48.189 | -48.936 | 69.727 | 1.00 | 0.00 | C |
| ATOM | 201 | O3'  | C A | 7 | -46.909 | -49.556 | 69.833 | 1.00 | 0.00 | O |
| ATOM | 202 | C4'  | C A | 7 | -49.116 | -49.683 | 68.771 | 1.00 | 0.00 | C |
| ATOM | 203 | O4'  | C A | 7 | -48.758 | -49.172 | 67.447 | 1.00 | 0.00 | O |
| ATOM | 204 | C5'  | C A | 7 | -50.600 | -49.481 | 68.980 | 1.00 | 0.00 | C |
| ATOM | 205 | O5'  | C A | 7 | -50.857 | -48.113 | 69.385 | 1.00 | 0.00 | O |
| ATOM | 206 | O1P  | C A | 7 | -51.715 | -48.353 | 71.739 | 1.00 | 0.00 | O |
| ATOM | 207 | O2P  | C A | 7 | -52.411 | -46.388 | 70.343 | 1.00 | 0.00 | O |
| ATOM | 208 | P    | C A | 7 | -52.051 | -47.825 | 70.401 | 1.00 | 0.00 | P |
| ATOM | 209 | H5   | C A | 7 | -51.344 | -44.815 | 66.693 | 1.00 | 0.00 | H |
| ATOM | 210 | H6   | C A | 7 | -50.244 | -46.497 | 68.133 | 1.00 | 0.00 | H |
| ATOM | 211 | H1'  | C A | 7 | -47.044 | -48.103 | 67.200 | 1.00 | 0.00 | H |
| ATOM | 212 | H3'  | C A | 7 | -48.633 | -48.851 | 70.720 | 1.00 | 0.00 | H |
| ATOM | 213 | H4'  | C A | 7 | -48.905 | -50.745 | 68.890 | 1.00 | 0.00 | H |
| ATOM | 214 | H41  | C A | 7 | -51.273 | -43.726 | 64.522 | 1.00 | 0.00 | H |
| ATOM | 215 | H42  | C A | 7 | -50.015 | -44.079 | 63.308 | 1.00 | 0.00 | H |
| ATOM | 216 | H2'1 | C A | 7 | -48.846 | -46.908 | 69.327 | 1.00 | 0.00 | H |
| ATOM | 217 | H2'2 | C A | 7 | -47.099 | -47.097 | 69.348 | 1.00 | 0.00 | H |
| ATOM | 218 | H5'1 | C A | 7 | -51.125 | -49.695 | 68.048 | 1.00 | 0.00 | H |
| ATOM | 219 | H5'2 | C A | 7 | -50.948 | -50.165 | 69.752 | 1.00 | 0.00 | H |
| ATOM | 220 | C1'  | A A | 8 | -43.402 | -46.683 | 66.462 | 1.00 | 0.00 | C |
| ATOM | 221 | N1   | A A | 8 | -45.680 | -43.084 | 63.597 | 1.00 | 0.00 | N |
| ATOM | 222 | C2   | A A | 8 | -44.645 | -43.889 | 63.373 | 1.00 | 0.00 | C |
| ATOM | 223 | N3   | A A | 8 | -44.108 | -44.800 | 64.157 | 1.00 | 0.00 | N |
| ATOM | 224 | C4   | A A | 8 | -44.765 | -44.847 | 65.331 | 1.00 | 0.00 | C |
| ATOM | 225 | C5   | A A | 8 | -45.839 | -44.095 | 65.716 | 1.00 | 0.00 | C |
| ATOM | 226 | C6   | A A | 8 | -46.316 | -43.157 | 64.777 | 1.00 | 0.00 | C |
| ATOM | 227 | N6   | A A | 8 | -47.362 | -42.348 | 65.013 | 1.00 | 0.00 | N |
| ATOM | 228 | N7   | A A | 8 | -46.248 | -44.424 | 66.996 | 1.00 | 0.00 | N |
| ATOM | 229 | C8   | A A | 8 | -45.418 | -45.359 | 67.358 | 1.00 | 0.00 | C |
| ATOM | 230 | N9   | A A | 8 | -44.490 | -45.671 | 66.397 | 1.00 | 0.00 | N |
| ATOM | 231 | C2'  | A A | 8 | -42.742 | -46.786 | 67.831 | 1.00 | 0.00 | C |
| ATOM | 232 | C3'  | A A | 8 | -42.442 | -48.274 | 67.925 | 1.00 | 0.00 | C |
| ATOM | 233 | O3'  | A A | 8 | -41.203 | -48.542 | 67.272 | 1.00 | 0.00 | O |
| ATOM | 234 | C4'  | A A | 8 | -43.627 | -48.908 | 67.198 | 1.00 | 0.00 | C |
| ATOM | 235 | O4'  | A A | 8 | -43.965 | -47.941 | 66.150 | 1.00 | 0.00 | O |
| ATOM | 236 | C5'  | A A | 8 | -44.859 | -49.173 | 68.030 | 1.00 | 0.00 | C |
| ATOM | 237 | O5'  | A A | 8 | -45.035 | -48.109 | 68.999 | 1.00 | 0.00 | O |
| ATOM | 238 | O1P  | A A | 8 | -44.690 | -49.270 | 71.205 | 1.00 | 0.00 | O |
| ATOM | 239 | O2P  | A A | 8 | -46.137 | -47.224 | 71.076 | 1.00 | 0.00 | O |
| ATOM | 240 | P    | A A | 8 | -45.651 | -48.466 | 70.426 | 1.00 | 0.00 | P |
| ATOM | 241 | H2   | A A | 8 | -44.172 | -43.778 | 62.399 | 1.00 | 0.00 | H |
| ATOM | 242 | H8   | A A | 8 | -45.455 | -45.848 | 68.330 | 1.00 | 0.00 | H |
| ATOM | 243 | H1'  | A A | 8 | -42.669 | -46.444 | 65.692 | 1.00 | 0.00 | H |
| ATOM | 244 | H3'  | A A | 8 | -42.386 | -48.615 | 68.958 | 1.00 | 0.00 | H |



|      |     |      |     |    |         |         |        |      |      |   |
|------|-----|------|-----|----|---------|---------|--------|------|------|---|
| ATOM | 245 | H4'  | A A | 8  | -43.281 | -49.862 | 66.801 | 1.00 | 0.00 | H |
| ATOM | 246 | H61  | A A | 8  | -47.672 | -41.682 | 64.292 | 1.00 | 0.00 | H |
| ATOM | 247 | H62  | A A | 8  | -47.854 | -42.396 | 65.918 | 1.00 | 0.00 | H |
| ATOM | 248 | H2'1 | A A | 8  | -43.403 | -46.464 | 68.634 | 1.00 | 0.00 | H |
| ATOM | 249 | H2'2 | A A | 8  | -41.830 | -46.192 | 67.895 | 1.00 | 0.00 | H |
| ATOM | 250 | H5'1 | A A | 8  | -45.729 | -49.220 | 67.373 | 1.00 | 0.00 | H |
| ATOM | 251 | H5'2 | A A | 8  | -44.746 | -50.125 | 68.545 | 1.00 | 0.00 | H |
| ATOM | 252 | C1'  | C A | 9  | -39.990 | -43.913 | 64.149 | 1.00 | 0.00 | C |
| ATOM | 253 | N1   | C A | 9  | -41.068 | -43.268 | 64.947 | 1.00 | 0.00 | N |
| ATOM | 254 | C2   | C A | 9  | -41.813 | -42.257 | 64.344 | 1.00 | 0.00 | C |
| ATOM | 255 | O2   | C A | 9  | -41.549 | -41.939 | 63.176 | 1.00 | 0.00 | O |
| ATOM | 256 | N3   | C A | 9  | -42.799 | -41.658 | 65.053 | 1.00 | 0.00 | N |
| ATOM | 257 | C4   | C A | 9  | -43.059 | -42.024 | 66.315 | 1.00 | 0.00 | C |
| ATOM | 258 | N4   | C A | 9  | -44.037 | -41.406 | 66.961 | 1.00 | 0.00 | N |
| ATOM | 259 | C5   | C A | 9  | -42.307 | -43.058 | 66.964 | 1.00 | 0.00 | C |
| ATOM | 260 | C6   | C A | 9  | -41.321 | -43.652 | 66.228 | 1.00 | 0.00 | C |
| ATOM | 261 | C2'  | C A | 9  | -38.746 | -44.251 | 64.958 | 1.00 | 0.00 | C |
| ATOM | 262 | C3'  | C A | 9  | -38.294 | -45.556 | 64.316 | 1.00 | 0.00 | C |
| ATOM | 263 | O3'  | C A | 9  | -37.505 | -45.262 | 63.166 | 1.00 | 0.00 | O |
| ATOM | 264 | C4'  | C A | 9  | -39.615 | -46.230 | 63.952 | 1.00 | 0.00 | C |
| ATOM | 265 | O4'  | C A | 9  | -40.509 | -45.120 | 63.620 | 1.00 | 0.00 | O |
| ATOM | 266 | C5'  | C A | 9  | -40.264 | -47.063 | 65.033 | 1.00 | 0.00 | C |
| ATOM | 267 | O5'  | C A | 9  | -40.051 | -46.442 | 66.326 | 1.00 | 0.00 | O |
| ATOM | 268 | O1P  | C A | 9  | -38.576 | -48.089 | 67.528 | 1.00 | 0.00 | O |
| ATOM | 269 | O2P  | C A | 9  | -40.094 | -46.579 | 68.835 | 1.00 | 0.00 | O |
| ATOM | 270 | P    | C A | 9  | -39.865 | -47.376 | 67.605 | 1.00 | 0.00 | P |
| ATOM | 271 | H5   | C A | 9  | -42.512 | -43.356 | 67.994 | 1.00 | 0.00 | H |
| ATOM | 272 | H6   | C A | 9  | -40.728 | -44.448 | 66.676 | 1.00 | 0.00 | H |
| ATOM | 273 | H1'  | C A | 9  | -39.746 | -43.258 | 63.313 | 1.00 | 0.00 | H |
| ATOM | 274 | H3'  | C A | 9  | -37.716 | -46.170 | 65.006 | 1.00 | 0.00 | H |
| ATOM | 275 | H4'  | C A | 9  | -39.414 | -46.884 | 63.104 | 1.00 | 0.00 | H |
| ATOM | 276 | H41  | C A | 9  | -44.261 | -41.671 | 67.932 | 1.00 | 0.00 | H |
| ATOM | 277 | H42  | C A | 9  | -44.575 | -40.662 | 66.493 | 1.00 | 0.00 | H |
| ATOM | 278 | H2'1 | C A | 9  | -38.964 | -44.387 | 66.017 | 1.00 | 0.00 | H |
| ATOM | 279 | H2'2 | C A | 9  | -37.978 | -43.481 | 64.878 | 1.00 | 0.00 | H |
| ATOM | 280 | H5'1 | C A | 9  | -41.333 | -47.142 | 64.833 | 1.00 | 0.00 | H |
| ATOM | 281 | H5'2 | C A | 9  | -39.825 | -48.061 | 65.026 | 1.00 | 0.00 | H |
| ATOM | 282 | C1'  | C A | 10 | -38.333 | -39.785 | 61.972 | 1.00 | 0.00 | C |
| ATOM | 283 | N1   | C A | 10 | -38.964 | -39.728 | 63.319 | 1.00 | 0.00 | N |
| ATOM | 284 | C2   | C A | 10 | -39.998 | -38.815 | 63.515 | 1.00 | 0.00 | C |
| ATOM | 285 | O2   | C A | 10 | -40.348 | -38.094 | 62.570 | 1.00 | 0.00 | O |
| ATOM | 286 | N3   | C A | 10 | -40.588 | -38.747 | 64.733 | 1.00 | 0.00 | N |
| ATOM | 287 | C4   | C A | 10 | -40.188 | -39.539 | 65.737 | 1.00 | 0.00 | C |
| ATOM | 288 | N4   | C A | 10 | -40.801 | -39.433 | 66.907 | 1.00 | 0.00 | N |
| ATOM | 289 | C5   | C A | 10 | -39.124 | -40.484 | 65.565 | 1.00 | 0.00 | C |
| ATOM | 290 | C6   | C A | 10 | -38.549 | -40.540 | 64.327 | 1.00 | 0.00 | C |
| ATOM | 291 | C2'  | C A | 10 | -36.828 | -40.015 | 62.010 | 1.00 | 0.00 | C |
| ATOM | 292 | C3'  | C A | 10 | -36.610 | -40.889 | 60.783 | 1.00 | 0.00 | C |
| ATOM | 293 | O3'  | C A | 10 | -36.486 | -40.057 | 59.633 | 1.00 | 0.00 | O |
| ATOM | 294 | C4'  | C A | 10 | -37.876 | -41.742 | 60.745 | 1.00 | 0.00 | C |
| ATOM | 295 | O4'  | C A | 10 | -38.922 | -40.862 | 61.265 | 1.00 | 0.00 | O |
| ATOM | 296 | C5'  | C A | 10 | -37.857 | -43.009 | 61.569 | 1.00 | 0.00 | C |
| ATOM | 297 | O5'  | C A | 10 | -37.121 | -42.783 | 62.798 | 1.00 | 0.00 | O |
| ATOM | 298 | O1P  | C A | 10 | -35.104 | -44.267 | 62.551 | 1.00 | 0.00 | O |

|      |     |      |   |   |    |         |         |        |      |      |   |
|------|-----|------|---|---|----|---------|---------|--------|------|------|---|
| ATOM | 299 | O2P  | C | A | 10 | -35.966 | -43.692 | 64.835 | 1.00 | 0.00 | O |
| ATOM | 300 | P    | C | A | 10 | -36.268 | -43.981 | 63.412 | 1.00 | 0.00 | P |
| ATOM | 301 | H5   | C | A | 10 | -38.791 | -41.128 | 66.380 | 1.00 | 0.00 | H |
| ATOM | 302 | H6   | C | A | 10 | -37.741 | -41.248 | 64.145 | 1.00 | 0.00 | H |
| ATOM | 303 | H1'  | C | A | 10 | -38.575 | -38.864 | 61.442 | 1.00 | 0.00 | H |
| ATOM | 304 | H3'  | C | A | 10 | -35.719 | -41.509 | 60.878 | 1.00 | 0.00 | H |
| ATOM | 305 | H4'  | C | A | 10 | -38.035 | -42.026 | 59.704 | 1.00 | 0.00 | H |
| ATOM | 306 | H41  | C | A | 10 | -40.515 | -40.032 | 67.695 | 1.00 | 0.00 | H |
| ATOM | 307 | H42  | C | A | 10 | -41.564 | -38.750 | 67.029 | 1.00 | 0.00 | H |
| ATOM | 308 | H2'1 | C | A | 10 | -36.509 | -40.523 | 62.918 | 1.00 | 0.00 | H |
| ATOM | 309 | H2'2 | C | A | 10 | -36.266 | -39.083 | 61.938 | 1.00 | 0.00 | H |
| ATOM | 310 | H5'1 | C | A | 10 | -38.882 | -43.300 | 61.802 | 1.00 | 0.00 | H |
| ATOM | 311 | H5'2 | C | A | 10 | -37.380 | -43.802 | 60.994 | 1.00 | 0.00 | H |
| ATOM | 312 | C1'  | T | A | 11 | -38.286 | -34.910 | 61.119 | 1.00 | 0.00 | C |
| ATOM | 313 | N1   | T | A | 11 | -38.228 | -35.424 | 62.513 | 1.00 | 0.00 | N |
| ATOM | 314 | C2   | T | A | 11 | -39.136 | -34.904 | 63.414 | 1.00 | 0.00 | C |
| ATOM | 315 | O2   | T | A | 11 | -39.959 | -34.058 | 63.108 | 1.00 | 0.00 | O |
| ATOM | 316 | N3   | T | A | 11 | -39.049 | -35.410 | 64.698 | 1.00 | 0.00 | N |
| ATOM | 317 | C4   | T | A | 11 | -38.156 | -36.362 | 65.147 | 1.00 | 0.00 | C |
| ATOM | 318 | O4   | T | A | 11 | -38.170 | -36.736 | 66.327 | 1.00 | 0.00 | O |
| ATOM | 319 | C5   | T | A | 11 | -37.247 | -36.845 | 64.134 | 1.00 | 0.00 | C |
| ATOM | 320 | C6   | T | A | 11 | -37.305 | -36.375 | 62.873 | 1.00 | 0.00 | C |
| ATOM | 321 | C7   | T | A | 11 | -36.260 | -37.883 | 64.578 | 1.00 | 0.00 | C |
| ATOM | 322 | C2'  | T | A | 11 | -36.918 | -34.747 | 60.468 | 1.00 | 0.00 | C |
| ATOM | 323 | C3'  | T | A | 11 | -37.206 | -35.123 | 59.024 | 1.00 | 0.00 | C |
| ATOM | 324 | O3'  | T | A | 11 | -37.706 | -33.980 | 58.332 | 1.00 | 0.00 | O |
| ATOM | 325 | C4'  | T | A | 11 | -38.259 | -36.219 | 59.162 | 1.00 | 0.00 | C |
| ATOM | 326 | O4'  | T | A | 11 | -39.027 | -35.835 | 60.347 | 1.00 | 0.00 | O |
| ATOM | 327 | C5'  | T | A | 11 | -37.744 | -37.627 | 59.356 | 1.00 | 0.00 | C |
| ATOM | 328 | O5'  | T | A | 11 | -36.550 | -37.602 | 60.178 | 1.00 | 0.00 | O |
| ATOM | 329 | O1P  | T | A | 11 | -34.743 | -38.373 | 58.607 | 1.00 | 0.00 | O |
| ATOM | 330 | O2P  | T | A | 11 | -34.506 | -38.756 | 61.076 | 1.00 | 0.00 | O |
| ATOM | 331 | P    | T | A | 11 | -35.400 | -38.668 | 59.895 | 1.00 | 0.00 | P |
| ATOM | 332 | H3   | T | A | 11 | -39.717 | -35.041 | 65.388 | 1.00 | 0.00 | H |
| ATOM | 333 | H6   | T | A | 11 | -36.608 | -36.755 | 62.124 | 1.00 | 0.00 | H |
| ATOM | 334 | H1'  | T | A | 11 | -38.829 | -33.965 | 61.124 | 1.00 | 0.00 | H |
| ATOM | 335 | H3'  | T | A | 11 | -36.317 | -35.492 | 58.513 | 1.00 | 0.00 | H |
| ATOM | 336 | H4'  | T | A | 11 | -38.854 | -36.206 | 58.247 | 1.00 | 0.00 | H |
| ATOM | 337 | H71  | T | A | 11 | -35.252 | -37.475 | 64.518 | 1.00 | 0.00 | H |
| ATOM | 338 | H72  | T | A | 11 | -36.475 | -38.171 | 65.608 | 1.00 | 0.00 | H |
| ATOM | 339 | H73  | T | A | 11 | -36.338 | -38.759 | 63.934 | 1.00 | 0.00 | H |
| ATOM | 340 | H2'1 | T | A | 11 | -36.170 | -35.405 | 60.907 | 1.00 | 0.00 | H |
| ATOM | 341 | H2'2 | T | A | 11 | -36.542 | -33.726 | 60.545 | 1.00 | 0.00 | H |
| ATOM | 342 | H5'1 | T | A | 11 | -38.514 | -38.227 | 59.840 | 1.00 | 0.00 | H |
| ATOM | 343 | H5'2 | T | A | 11 | -37.511 | -38.059 | 58.383 | 1.00 | 0.00 | H |
| ATOM | 344 | C1'  | A | A | 12 | -39.125 | -30.173 | 62.337 | 1.00 | 0.00 | C |
| ATOM | 345 | N1   | A | A | 12 | -38.720 | -31.918 | 67.146 | 1.00 | 0.00 | N |
| ATOM | 346 | C2   | A | A | 12 | -39.557 | -31.064 | 66.567 | 1.00 | 0.00 | C |
| ATOM | 347 | N3   | A | A | 12 | -39.609 | -30.658 | 65.316 | 1.00 | 0.00 | N |
| ATOM | 348 | C4   | A | A | 12 | -38.632 | -31.242 | 64.599 | 1.00 | 0.00 | C |
| ATOM | 349 | C5   | A | A | 12 | -37.695 | -32.133 | 65.038 | 1.00 | 0.00 | C |
| ATOM | 350 | C6   | A | A | 12 | -37.756 | -32.485 | 66.403 | 1.00 | 0.00 | C |
| ATOM | 351 | N6   | A | A | 12 | -36.901 | -33.350 | 66.977 | 1.00 | 0.00 | N |
| ATOM | 352 | N7   | A | A | 12 | -36.852 | -32.519 | 64.012 | 1.00 | 0.00 | N |

|      |     |      |   |   |    |         |         |        |      |      |   |
|------|-----|------|---|---|----|---------|---------|--------|------|------|---|
| ATOM | 353 | C8   | A | A | 12 | -37.288 | -31.855 | 62.982 | 1.00 | 0.00 | C |
| ATOM | 354 | N9   | A | A | 12 | -38.370 | -31.059 | 63.262 | 1.00 | 0.00 | N |
| ATOM | 355 | C2'  | A | A | 12 | -38.247 | -29.464 | 61.315 | 1.00 | 0.00 | C |
| ATOM | 356 | C3'  | A | A | 12 | -39.147 | -29.436 | 60.089 | 1.00 | 0.00 | C |
| ATOM | 357 | O3'  | A | A | 12 | -40.016 | -28.308 | 60.172 | 1.00 | 0.00 | O |
| ATOM | 358 | C4'  | A | A | 12 | -39.906 | -30.758 | 60.193 | 1.00 | 0.00 | C |
| ATOM | 359 | O4'  | A | A | 12 | -40.053 | -30.976 | 61.634 | 1.00 | 0.00 | O |
| ATOM | 360 | C5'  | A | A | 12 | -39.232 | -31.966 | 59.588 | 1.00 | 0.00 | C |
| ATOM | 361 | O5'  | A | A | 12 | -37.799 | -31.887 | 59.798 | 1.00 | 0.00 | O |
| ATOM | 362 | O1P  | A | A | 12 | -36.883 | -31.629 | 57.467 | 1.00 | 0.00 | O |
| ATOM | 363 | O2P  | A | A | 12 | -35.477 | -32.682 | 59.259 | 1.00 | 0.00 | O |
| ATOM | 364 | P    | A | A | 12 | -36.826 | -32.471 | 58.678 | 1.00 | 0.00 | P |
| ATOM | 365 | H2   | A | A | 12 | -40.313 | -30.637 | 67.226 | 1.00 | 0.00 | H |
| ATOM | 366 | H8   | A | A | 12 | -36.839 | -31.923 | 61.991 | 1.00 | 0.00 | H |
| ATOM | 367 | H1'  | A | A | 12 | -39.687 | -29.455 | 62.934 | 1.00 | 0.00 | H |
| ATOM | 368 | H3'  | A | A | 12 | -38.576 | -29.382 | 59.163 | 1.00 | 0.00 | H |
| ATOM | 369 | H4'  | A | A | 12 | -40.858 | -30.616 | 59.683 | 1.00 | 0.00 | H |
| ATOM | 370 | H61  | A | A | 12 | -36.990 | -33.575 | 67.977 | 1.00 | 0.00 | H |
| ATOM | 371 | H62  | A | A | 12 | -36.157 | -33.788 | 66.413 | 1.00 | 0.00 | H |
| ATOM | 372 | H2'1 | A | A | 12 | -37.323 | -30.005 | 61.116 | 1.00 | 0.00 | H |
| ATOM | 373 | H2'2 | A | A | 12 | -37.976 | -28.457 | 61.631 | 1.00 | 0.00 | H |
| ATOM | 374 | H5'1 | A | A | 12 | -39.623 | -32.867 | 60.061 | 1.00 | 0.00 | H |
| ATOM | 375 | H5'2 | A | A | 12 | -39.447 | -32.000 | 58.521 | 1.00 | 0.00 | H |
| ATOM | 376 | C1'  | G | A | 13 | -39.733 | -26.454 | 65.570 | 1.00 | 0.00 | C |
| ATOM | 377 | N1   | G | A | 13 | -36.948 | -29.412 | 68.655 | 1.00 | 0.00 | N |
| ATOM | 378 | C2   | G | A | 13 | -38.081 | -28.666 | 68.926 | 1.00 | 0.00 | C |
| ATOM | 379 | N2   | G | A | 13 | -38.531 | -28.710 | 70.188 | 1.00 | 0.00 | N |
| ATOM | 380 | N3   | G | A | 13 | -38.714 | -27.933 | 68.012 | 1.00 | 0.00 | N |
| ATOM | 381 | C4   | G | A | 13 | -38.117 | -27.997 | 66.793 | 1.00 | 0.00 | C |
| ATOM | 382 | C5   | G | A | 13 | -36.987 | -28.711 | 66.432 | 1.00 | 0.00 | C |
| ATOM | 383 | C6   | G | A | 13 | -36.315 | -29.493 | 67.402 | 1.00 | 0.00 | C |
| ATOM | 384 | O6   | G | A | 13 | -35.306 | -30.187 | 67.274 | 1.00 | 0.00 | O |
| ATOM | 385 | N7   | G | A | 13 | -36.699 | -28.509 | 65.081 | 1.00 | 0.00 | N |
| ATOM | 386 | C8   | G | A | 13 | -37.644 | -27.702 | 64.674 | 1.00 | 0.00 | C |
| ATOM | 387 | N9   | G | A | 13 | -38.543 | -27.346 | 65.658 | 1.00 | 0.00 | N |
| ATOM | 388 | C2'  | G | A | 13 | -39.531 | -25.248 | 64.664 | 1.00 | 0.00 | C |
| ATOM | 389 | C3'  | G | A | 13 | -40.907 | -25.083 | 64.041 | 1.00 | 0.00 | C |
| ATOM | 390 | O3'  | G | A | 13 | -41.731 | -24.323 | 64.921 | 1.00 | 0.00 | O |
| ATOM | 391 | C4'  | G | A | 13 | -41.391 | -26.525 | 63.899 | 1.00 | 0.00 | C |
| ATOM | 392 | O4'  | G | A | 13 | -40.805 | -27.216 | 65.049 | 1.00 | 0.00 | O |
| ATOM | 393 | C5'  | G | A | 13 | -40.979 | -27.250 | 62.640 | 1.00 | 0.00 | C |
| ATOM | 394 | O5'  | G | A | 13 | -39.640 | -26.851 | 62.259 | 1.00 | 0.00 | O |
| ATOM | 395 | O1P  | G | A | 13 | -39.992 | -25.634 | 60.083 | 1.00 | 0.00 | O |
| ATOM | 396 | O2P  | G | A | 13 | -37.802 | -26.767 | 60.546 | 1.00 | 0.00 | O |
| ATOM | 397 | P    | G | A | 13 | -39.277 | -26.763 | 60.707 | 1.00 | 0.00 | P |
| ATOM | 398 | H1   | G | A | 13 | -36.537 | -29.952 | 69.433 | 1.00 | 0.00 | H |
| ATOM | 399 | H8   | G | A | 13 | -37.716 | -27.341 | 63.648 | 1.00 | 0.00 | H |
| ATOM | 400 | H1'  | G | A | 13 | -40.002 | -26.144 | 66.580 | 1.00 | 0.00 | H |
| ATOM | 401 | H21  | G | A | 13 | -38.036 | -29.283 | 70.888 | 1.00 | 0.00 | H |
| ATOM | 402 | H3'  | G | A | 13 | -40.860 | -24.587 | 63.071 | 1.00 | 0.00 | H |
| ATOM | 403 | H22  | G | A | 13 | -39.367 | -28.175 | 70.453 | 1.00 | 0.00 | H |
| ATOM | 404 | H4'  | G | A | 13 | -42.479 | -26.499 | 63.929 | 1.00 | 0.00 | H |
| ATOM | 405 | H2'1 | G | A | 13 | -38.770 | -25.425 | 63.904 | 1.00 | 0.00 | H |
| ATOM | 406 | H2'2 | G | A | 13 | -39.237 | -24.357 | 65.221 | 1.00 | 0.00 | H |

|      |     |      |     |    |         |         |        |      |      |   |
|------|-----|------|-----|----|---------|---------|--------|------|------|---|
| ATOM | 407 | H5'1 | G A | 13 | -41.007 | -28.324 | 62.820 | 1.00 | 0.00 | H |
| ATOM | 408 | H5'2 | G A | 13 | -41.679 | -27.004 | 61.841 | 1.00 | 0.00 | H |
| ATOM | 409 | C1'  | G A | 14 | -39.110 | -24.201 | 69.937 | 1.00 | 0.00 | C |
| ATOM | 410 | N1   | G A | 14 | -34.932 | -27.117 | 70.205 | 1.00 | 0.00 | N |
| ATOM | 411 | C2   | G A | 14 | -35.871 | -26.818 | 71.176 | 1.00 | 0.00 | C |
| ATOM | 412 | N2   | G A | 14 | -35.668 | -27.365 | 72.381 | 1.00 | 0.00 | N |
| ATOM | 413 | N3   | G A | 14 | -36.927 | -26.034 | 70.964 | 1.00 | 0.00 | N |
| ATOM | 414 | C4   | G A | 14 | -36.969 | -25.561 | 69.691 | 1.00 | 0.00 | C |
| ATOM | 415 | C5   | G A | 14 | -36.079 | -25.803 | 68.659 | 1.00 | 0.00 | C |
| ATOM | 416 | C6   | G A | 14 | -34.960 | -26.636 | 68.882 | 1.00 | 0.00 | C |
| ATOM | 417 | O6   | G A | 14 | -34.068 | -26.966 | 68.100 | 1.00 | 0.00 | O |
| ATOM | 418 | N7   | G A | 14 | -36.483 | -25.124 | 67.506 | 1.00 | 0.00 | N |
| ATOM | 419 | C8   | G A | 14 | -37.580 | -24.512 | 67.867 | 1.00 | 0.00 | C |
| ATOM | 420 | N9   | G A | 14 | -37.940 | -24.728 | 69.181 | 1.00 | 0.00 | N |
| ATOM | 421 | C2'  | G A | 14 | -39.474 | -22.766 | 69.582 | 1.00 | 0.00 | C |
| ATOM | 422 | C3'  | G A | 14 | -40.991 | -22.788 | 69.683 | 1.00 | 0.00 | C |
| ATOM | 423 | O3'  | G A | 14 | -41.373 | -22.582 | 71.041 | 1.00 | 0.00 | O |
| ATOM | 424 | C4'  | G A | 14 | -41.343 | -24.190 | 69.190 | 1.00 | 0.00 | C |
| ATOM | 425 | O4'  | G A | 14 | -40.222 | -25.021 | 69.633 | 1.00 | 0.00 | O |
| ATOM | 426 | C5'  | G A | 14 | -41.505 | -24.356 | 67.697 | 1.00 | 0.00 | C |
| ATOM | 427 | O5'  | G A | 14 | -40.548 | -23.518 | 67.004 | 1.00 | 0.00 | O |
| ATOM | 428 | O1P  | G A | 14 | -41.995 | -21.830 | 65.826 | 1.00 | 0.00 | O |
| ATOM | 429 | O2P  | G A | 14 | -39.749 | -22.428 | 64.884 | 1.00 | 0.00 | O |
| ATOM | 430 | P    | G A | 14 | -40.967 | -22.865 | 65.611 | 1.00 | 0.00 | P |
| ATOM | 431 | H1   | G A | 14 | -34.155 | -27.741 | 70.471 | 1.00 | 0.00 | H |
| ATOM | 432 | H8   | G A | 14 | -38.160 | -23.885 | 67.189 | 1.00 | 0.00 | H |
| ATOM | 433 | H1'  | G A | 14 | -38.900 | -24.300 | 71.001 | 1.00 | 0.00 | H |
| ATOM | 434 | H21  | G A | 14 | -34.850 | -27.974 | 72.538 | 1.00 | 0.00 | H |
| ATOM | 435 | H3'  | G A | 14 | -41.452 | -22.024 | 69.058 | 1.00 | 0.00 | H |
| ATOM | 436 | H22  | G A | 14 | -36.328 | -27.181 | 73.149 | 1.00 | 0.00 | H |
| ATOM | 437 | H4'  | G A | 14 | -42.287 | -24.464 | 69.661 | 1.00 | 0.00 | H |
| ATOM | 438 | H2'1 | G A | 14 | -39.147 | -22.492 | 68.579 | 1.00 | 0.00 | H |
| ATOM | 439 | H2'2 | G A | 14 | -39.040 | -22.046 | 70.276 | 1.00 | 0.00 | H |
| ATOM | 440 | H5'1 | G A | 14 | -41.342 | -25.400 | 67.433 | 1.00 | 0.00 | H |
| ATOM | 441 | H5'2 | G A | 14 | -42.519 | -24.070 | 67.414 | 1.00 | 0.00 | H |
| ATOM | 442 | C1'  | A A | 15 | -36.746 | -23.311 | 74.193 | 1.00 | 0.00 | C |
| ATOM | 443 | N1   | A A | 15 | -32.643 | -24.976 | 71.598 | 1.00 | 0.00 | N |
| ATOM | 444 | C2   | A A | 15 | -33.076 | -25.200 | 72.836 | 1.00 | 0.00 | C |
| ATOM | 445 | N3   | A A | 15 | -34.148 | -24.739 | 73.445 | 1.00 | 0.00 | N |
| ATOM | 446 | C4   | A A | 15 | -34.840 | -23.932 | 72.619 | 1.00 | 0.00 | C |
| ATOM | 447 | C5   | A A | 15 | -34.533 | -23.600 | 71.329 | 1.00 | 0.00 | C |
| ATOM | 448 | C6   | A A | 15 | -33.355 | -24.166 | 70.798 | 1.00 | 0.00 | C |
| ATOM | 449 | N6   | A A | 15 | -32.927 | -23.931 | 69.547 | 1.00 | 0.00 | N |
| ATOM | 450 | N7   | A A | 15 | -35.480 | -22.744 | 70.794 | 1.00 | 0.00 | N |
| ATOM | 451 | C8   | A A | 15 | -36.329 | -22.574 | 71.763 | 1.00 | 0.00 | C |
| ATOM | 452 | N9   | A A | 15 | -36.007 | -23.267 | 72.903 | 1.00 | 0.00 | N |
| ATOM | 453 | C2'  | A A | 15 | -37.368 | -21.978 | 74.591 | 1.00 | 0.00 | C |
| ATOM | 454 | C3'  | A A | 15 | -38.660 | -22.418 | 75.261 | 1.00 | 0.00 | C |
| ATOM | 455 | O3'  | A A | 15 | -38.394 | -22.737 | 76.623 | 1.00 | 0.00 | O |
| ATOM | 456 | C4'  | A A | 15 | -39.063 | -23.648 | 74.448 | 1.00 | 0.00 | C |
| ATOM | 457 | O4'  | A A | 15 | -37.789 | -24.258 | 74.061 | 1.00 | 0.00 | O |
| ATOM | 458 | C5'  | A A | 15 | -39.875 | -23.393 | 73.201 | 1.00 | 0.00 | C |
| ATOM | 459 | O5'  | A A | 15 | -39.427 | -22.168 | 72.566 | 1.00 | 0.00 | O |
| ATOM | 460 | O1P  | A A | 15 | -41.409 | -20.633 | 72.797 | 1.00 | 0.00 | O |

|      |     |      |   |   |    |         |         |        |      |      |   |
|------|-----|------|---|---|----|---------|---------|--------|------|------|---|
| ATOM | 461 | O2P  | A | A | 15 | -39.796 | -20.324 | 70.899 | 1.00 | 0.00 | O |
| ATOM | 462 | P    | A | A | 15 | -40.498 | -21.255 | 71.815 | 1.00 | 0.00 | P |
| ATOM | 463 | H2   | A | A | 15 | -32.450 | -25.863 | 73.435 | 1.00 | 0.00 | H |
| ATOM | 464 | H8   | A | A | 15 | -37.213 | -21.943 | 71.680 | 1.00 | 0.00 | H |
| ATOM | 465 | H1'  | A | A | 15 | -36.064 | -23.669 | 74.964 | 1.00 | 0.00 | H |
| ATOM | 466 | H3'  | A | A | 15 | -39.429 | -21.647 | 75.213 | 1.00 | 0.00 | H |
| ATOM | 467 | H4'  | A | A | 15 | -39.655 | -24.282 | 75.108 | 1.00 | 0.00 | H |
| ATOM | 468 | H61  | A | A | 15 | -32.060 | -24.374 | 69.208 | 1.00 | 0.00 | H |
| ATOM | 469 | H62  | A | A | 15 | -33.467 | -23.309 | 68.926 | 1.00 | 0.00 | H |
| ATOM | 470 | H2'1 | A | A | 15 | -37.565 | -21.341 | 73.728 | 1.00 | 0.00 | H |
| ATOM | 471 | H2'2 | A | A | 15 | -36.737 | -21.416 | 75.278 | 1.00 | 0.00 | H |
| ATOM | 472 | H5'1 | A | A | 15 | -39.750 | -24.230 | 72.515 | 1.00 | 0.00 | H |
| ATOM | 473 | H5'2 | A | A | 15 | -40.926 | -23.303 | 73.470 | 1.00 | 0.00 | H |
| ATOM | 474 | C1'  | C | A | 16 | -32.718 | -23.198 | 77.094 | 1.00 | 0.00 | C |
| ATOM | 475 | N1   | C | A | 16 | -32.698 | -22.553 | 75.753 | 1.00 | 0.00 | N |
| ATOM | 476 | C2   | C | A | 16 | -31.656 | -22.877 | 74.888 | 1.00 | 0.00 | C |
| ATOM | 477 | O2   | C | A | 16 | -30.794 | -23.681 | 75.268 | 1.00 | 0.00 | O |
| ATOM | 478 | N3   | C | A | 16 | -31.619 | -22.300 | 73.662 | 1.00 | 0.00 | N |
| ATOM | 479 | C4   | C | A | 16 | -32.565 | -21.433 | 73.281 | 1.00 | 0.00 | C |
| ATOM | 480 | N4   | C | A | 16 | -32.482 | -20.903 | 72.069 | 1.00 | 0.00 | N |
| ATOM | 481 | C5   | C | A | 16 | -33.648 | -21.077 | 74.150 | 1.00 | 0.00 | C |
| ATOM | 482 | C6   | C | A | 16 | -33.668 | -21.673 | 75.380 | 1.00 | 0.00 | C |
| ATOM | 483 | C2'  | C | A | 16 | -33.190 | -22.277 | 78.211 | 1.00 | 0.00 | C |
| ATOM | 484 | C3'  | C | A | 16 | -33.956 | -23.237 | 79.109 | 1.00 | 0.00 | C |
| ATOM | 485 | O3'  | C | A | 16 | -33.042 | -23.884 | 79.990 | 1.00 | 0.00 | O |
| ATOM | 486 | C4'  | C | A | 16 | -34.584 | -24.208 | 78.112 | 1.00 | 0.00 | C |
| ATOM | 487 | O4'  | C | A | 16 | -33.605 | -24.299 | 77.029 | 1.00 | 0.00 | O |
| ATOM | 488 | C5'  | C | A | 16 | -35.916 | -23.799 | 77.526 | 1.00 | 0.00 | C |
| ATOM | 489 | O5'  | C | A | 16 | -35.941 | -22.365 | 77.318 | 1.00 | 0.00 | O |
| ATOM | 490 | O1P  | C | A | 16 | -37.701 | -21.572 | 78.935 | 1.00 | 0.00 | O |
| ATOM | 491 | O2P  | C | A | 16 | -37.233 | -20.261 | 76.848 | 1.00 | 0.00 | O |
| ATOM | 492 | P    | C | A | 16 | -37.320 | -21.586 | 77.509 | 1.00 | 0.00 | P |
| ATOM | 493 | H5   | C | A | 16 | -34.418 | -20.366 | 73.847 | 1.00 | 0.00 | H |
| ATOM | 494 | H6   | C | A | 16 | -34.475 | -21.441 | 76.073 | 1.00 | 0.00 | H |
| ATOM | 495 | H1'  | C | A | 16 | -31.719 | -23.583 | 77.302 | 1.00 | 0.00 | H |
| ATOM | 496 | H3'  | C | A | 16 | -34.721 | -22.723 | 79.694 | 1.00 | 0.00 | H |
| ATOM | 497 | H4'  | C | A | 16 | -34.730 | -25.151 | 78.638 | 1.00 | 0.00 | H |
| ATOM | 498 | H41  | C | A | 16 | -33.200 | -20.234 | 71.750 | 1.00 | 0.00 | H |
| ATOM | 499 | H42  | C | A | 16 | -31.702 | -21.158 | 71.446 | 1.00 | 0.00 | H |
| ATOM | 500 | H2'1 | C | A | 16 | -33.836 | -21.478 | 77.844 | 1.00 | 0.00 | H |
| ATOM | 501 | H2'2 | C | A | 16 | -32.361 | -21.811 | 78.743 | 1.00 | 0.00 | H |
| ATOM | 502 | H5'1 | C | A | 16 | -36.060 | -24.313 | 76.574 | 1.00 | 0.00 | H |
| ATOM | 503 | H5'2 | C | A | 16 | -36.713 | -24.087 | 78.212 | 1.00 | 0.00 | H |
| ATOM | 504 | C1'  | G | A | 17 | -27.848 | -22.916 | 77.943 | 1.00 | 0.00 | C |
| ATOM | 505 | N1   | G | A | 17 | -27.770 | -20.543 | 73.428 | 1.00 | 0.00 | N |
| ATOM | 506 | C2   | G | A | 17 | -26.915 | -21.502 | 73.943 | 1.00 | 0.00 | C |
| ATOM | 507 | N2   | G | A | 17 | -25.902 | -21.875 | 73.150 | 1.00 | 0.00 | N |
| ATOM | 508 | N3   | G | A | 17 | -27.057 | -22.043 | 75.151 | 1.00 | 0.00 | N |
| ATOM | 509 | C4   | G | A | 17 | -28.130 | -21.542 | 75.819 | 1.00 | 0.00 | C |
| ATOM | 510 | C5   | G | A | 17 | -29.034 | -20.584 | 75.389 | 1.00 | 0.00 | C |
| ATOM | 511 | C6   | G | A | 17 | -28.886 | -20.011 | 74.104 | 1.00 | 0.00 | C |
| ATOM | 512 | O6   | G | A | 17 | -29.577 | -19.157 | 73.549 | 1.00 | 0.00 | O |
| ATOM | 513 | N7   | G | A | 17 | -29.991 | -20.345 | 76.376 | 1.00 | 0.00 | N |
| ATOM | 514 | C8   | G | A | 17 | -29.649 | -21.150 | 77.349 | 1.00 | 0.00 | C |

|      |     |      |     |    |         |         |        |      |      |   |
|------|-----|------|-----|----|---------|---------|--------|------|------|---|
| ATOM | 515 | N9   | G A | 17 | -28.526 | -21.909 | 77.086 | 1.00 | 0.00 | N |
| ATOM | 516 | C2'  | G A | 17 | -27.825 | -22.551 | 79.421 | 1.00 | 0.00 | C |
| ATOM | 517 | C3'  | G A | 17 | -27.978 | -23.908 | 80.087 | 1.00 | 0.00 | C |
| ATOM | 518 | O3'  | G A | 17 | -26.697 | -24.525 | 80.191 | 1.00 | 0.00 | O |
| ATOM | 519 | C4'  | G A | 17 | -28.904 | -24.655 | 79.128 | 1.00 | 0.00 | C |
| ATOM | 520 | O4'  | G A | 17 | -28.546 | -24.140 | 77.808 | 1.00 | 0.00 | O |
| ATOM | 521 | C5'  | G A | 17 | -30.387 | -24.459 | 79.340 | 1.00 | 0.00 | C |
| ATOM | 522 | O5'  | G A | 17 | -30.648 | -23.094 | 79.748 | 1.00 | 0.00 | O |
| ATOM | 523 | O1P  | G A | 17 | -31.504 | -23.346 | 82.102 | 1.00 | 0.00 | O |
| ATOM | 524 | O2P  | G A | 17 | -32.209 | -21.378 | 80.714 | 1.00 | 0.00 | O |
| ATOM | 525 | P    | G A | 17 | -31.843 | -22.815 | 80.768 | 1.00 | 0.00 | P |
| ATOM | 526 | H1   | G A | 17 | -27.574 | -20.193 | 72.479 | 1.00 | 0.00 | H |
| ATOM | 527 | H8   | G A | 17 | -30.200 | -21.214 | 78.288 | 1.00 | 0.00 | H |
| ATOM | 528 | H1'  | G A | 17 | -26.837 | -23.064 | 77.563 | 1.00 | 0.00 | H |
| ATOM | 529 | H21  | G A | 17 | -25.801 | -21.455 | 72.215 | 1.00 | 0.00 | H |
| ATOM | 530 | H3'  | G A | 17 | -28.423 | -23.829 | 81.081 | 1.00 | 0.00 | H |
| ATOM | 531 | H22  | G A | 17 | -25.229 | -22.583 | 73.474 | 1.00 | 0.00 | H |
| ATOM | 532 | H4'  | G A | 17 | -28.689 | -25.716 | 79.244 | 1.00 | 0.00 | H |
| ATOM | 533 | H2'1 | G A | 17 | -28.642 | -21.881 | 79.693 | 1.00 | 0.00 | H |
| ATOM | 534 | H2'2 | G A | 17 | -26.894 | -22.066 | 79.714 | 1.00 | 0.00 | H |
| ATOM | 535 | H5'1 | G A | 17 | -30.912 | -24.673 | 78.408 | 1.00 | 0.00 | H |
| ATOM | 536 | H5'2 | G A | 17 | -30.732 | -25.149 | 80.109 | 1.00 | 0.00 | H |
| ATOM | 537 | C1'  | G A | 18 | -23.201 | -21.633 | 76.807 | 1.00 | 0.00 | C |
| ATOM | 538 | N1   | G A | 18 | -25.484 | -18.053 | 73.980 | 1.00 | 0.00 | N |
| ATOM | 539 | C2   | G A | 18 | -24.400 | -18.860 | 73.684 | 1.00 | 0.00 | C |
| ATOM | 540 | N2   | G A | 18 | -23.849 | -18.690 | 72.474 | 1.00 | 0.00 | N |
| ATOM | 541 | N3   | G A | 18 | -23.906 | -19.765 | 74.526 | 1.00 | 0.00 | N |
| ATOM | 542 | C4   | G A | 18 | -24.580 | -19.797 | 75.706 | 1.00 | 0.00 | C |
| ATOM | 543 | C5   | G A | 18 | -25.667 | -19.028 | 76.089 | 1.00 | 0.00 | C |
| ATOM | 544 | C6   | G A | 18 | -26.195 | -18.070 | 75.193 | 1.00 | 0.00 | C |
| ATOM | 545 | O6   | G A | 18 | -27.145 | -17.302 | 75.350 | 1.00 | 0.00 | O |
| ATOM | 546 | N7   | G A | 18 | -26.065 | -19.368 | 77.383 | 1.00 | 0.00 | N |
| ATOM | 547 | C8   | G A | 18 | -25.230 | -20.311 | 77.733 | 1.00 | 0.00 | C |
| ATOM | 548 | N9   | G A | 18 | -24.298 | -20.627 | 76.768 | 1.00 | 0.00 | N |
| ATOM | 549 | C2'  | G A | 18 | -22.522 | -21.748 | 78.164 | 1.00 | 0.00 | C |
| ATOM | 550 | C3'  | G A | 18 | -22.213 | -23.233 | 78.240 | 1.00 | 0.00 | C |
| ATOM | 551 | O3'  | G A | 18 | -20.982 | -23.490 | 77.569 | 1.00 | 0.00 | O |
| ATOM | 552 | C4'  | G A | 18 | -23.404 | -23.866 | 77.523 | 1.00 | 0.00 | C |
| ATOM | 553 | O4'  | G A | 18 | -23.761 | -22.893 | 76.491 | 1.00 | 0.00 | O |
| ATOM | 554 | C5'  | G A | 18 | -24.625 | -24.145 | 78.368 | 1.00 | 0.00 | C |
| ATOM | 555 | O5'  | G A | 18 | -24.793 | -23.093 | 79.350 | 1.00 | 0.00 | O |
| ATOM | 556 | O1P  | G A | 18 | -24.413 | -24.274 | 81.540 | 1.00 | 0.00 | O |
| ATOM | 557 | O2P  | G A | 18 | -25.870 | -22.235 | 81.452 | 1.00 | 0.00 | O |
| ATOM | 558 | P    | G A | 18 | -25.387 | -23.467 | 80.783 | 1.00 | 0.00 | P |
| ATOM | 559 | H1   | G A | 18 | -25.794 | -17.388 | 73.254 | 1.00 | 0.00 | H |
| ATOM | 560 | H8   | G A | 18 | -25.266 | -20.806 | 78.705 | 1.00 | 0.00 | H |
| ATOM | 561 | H1'  | G A | 18 | -22.480 | -21.382 | 76.029 | 1.00 | 0.00 | H |
| ATOM | 562 | H21  | G A | 18 | -24.240 | -17.990 | 71.826 | 1.00 | 0.00 | H |
| ATOM | 563 | H3'  | G A | 18 | -22.143 | -23.585 | 79.271 | 1.00 | 0.00 | H |
| ATOM | 564 | H22  | G A | 18 | -23.039 | -19.258 | 72.195 | 1.00 | 0.00 | H |
| ATOM | 565 | H4'  | G A | 18 | -23.059 | -24.815 | 77.113 | 1.00 | 0.00 | H |
| ATOM | 566 | H2'1 | G A | 18 | -23.175 | -21.436 | 78.980 | 1.00 | 0.00 | H |
| ATOM | 567 | H2'2 | G A | 18 | -21.613 | -21.149 | 78.225 | 1.00 | 0.00 | H |
| ATOM | 568 | H5'1 | G A | 18 | -25.503 | -24.192 | 77.724 | 1.00 | 0.00 | H |

|      |     |      |     |   |    |         |         |        |      |      |   |
|------|-----|------|-----|---|----|---------|---------|--------|------|------|---|
| ATOM | 569 | H5'2 | G   | A | 18 | -24.500 | -25.104 | 78.872 | 1.00 | 0.00 | H |
| ATOM | 570 | C1'  | T   | A | 19 | -19.769 | -18.897 | 74.521 | 1.00 | 0.00 | C |
| ATOM | 571 | N1   | T   | A | 19 | -20.849 | -18.238 | 75.301 | 1.00 | 0.00 | N |
| ATOM | 572 | C2   | T   | A | 19 | -21.564 | -17.240 | 74.670 | 1.00 | 0.00 | C |
| ATOM | 573 | O2   | T   | A | 19 | -21.339 | -16.892 | 73.524 | 1.00 | 0.00 | O |
| ATOM | 574 | N3   | T   | A | 19 | -22.559 | -16.655 | 75.432 | 1.00 | 0.00 | N |
| ATOM | 575 | C4   | T   | A | 19 | -22.891 | -16.970 | 76.732 | 1.00 | 0.00 | C |
| ATOM | 576 | O4   | T   | A | 19 | -23.803 | -16.373 | 77.314 | 1.00 | 0.00 | O |
| ATOM | 577 | C5   | T   | A | 19 | -22.090 | -18.025 | 77.308 | 1.00 | 0.00 | C |
| ATOM | 578 | C6   | T   | A | 19 | -21.112 | -18.618 | 76.595 | 1.00 | 0.00 | C |
| ATOM | 579 | C7   | T   | A | 19 | -22.418 | -18.403 | 78.721 | 1.00 | 0.00 | C |
| ATOM | 580 | C2'  | T   | A | 19 | -18.534 | -19.237 | 75.347 | 1.00 | 0.00 | C |
| ATOM | 581 | C3'  | T   | A | 19 | -18.085 | -20.547 | 74.721 | 1.00 | 0.00 | C |
| ATOM | 582 | O3'  | T   | A | 19 | -17.280 | -20.270 | 73.578 | 1.00 | 0.00 | O |
| ATOM | 583 | C4'  | T   | A | 19 | -19.406 | -21.216 | 74.350 | 1.00 | 0.00 | C |
| ATOM | 584 | O4'  | T   | A | 19 | -20.287 | -20.104 | 73.997 | 1.00 | 0.00 | O |
| ATOM | 585 | C5'  | T   | A | 19 | -20.071 | -22.038 | 75.429 | 1.00 | 0.00 | C |
| ATOM | 586 | O5'  | T   | A | 19 | -19.869 | -21.406 | 76.719 | 1.00 | 0.00 | O |
| ATOM | 587 | O1P  | T   | A | 19 | -18.416 | -23.051 | 77.951 | 1.00 | 0.00 | O |
| ATOM | 588 | O2P  | T   | A | 19 | -19.940 | -21.519 | 79.228 | 1.00 | 0.00 | O |
| ATOM | 589 | P    | T   | A | 19 | -19.703 | -22.329 | 78.009 | 1.00 | 0.00 | P |
| ATOM | 590 | H3   | T   | A | 19 | -23.109 | -15.910 | 74.981 | 1.00 | 0.00 | H |
| ATOM | 591 | H6   | T   | A | 19 | -20.521 | -19.412 | 77.050 | 1.00 | 0.00 | H |
| ATOM | 592 | H1'  | T   | A | 19 | -19.510 | -18.250 | 73.682 | 1.00 | 0.00 | H |
| ATOM | 593 | H3'  | T   | A | 19 | -17.517 | -21.160 | 75.423 | 1.00 | 0.00 | H |
| ATOM | 594 | H4'  | T   | A | 19 | -19.199 | -21.880 | 73.508 | 1.00 | 0.00 | H |
| ATOM | 595 | H71  | T   | A | 19 | -21.579 | -18.152 | 79.368 | 1.00 | 0.00 | H |
| ATOM | 596 | H72  | T   | A | 19 | -23.304 | -17.857 | 79.047 | 1.00 | 0.00 | H |
| ATOM | 597 | H73  | T   | A | 19 | -22.611 | -19.475 | 78.778 | 1.00 | 0.00 | H |
| ATOM | 598 | H2'1 | T   | A | 19 | -18.766 | -19.360 | 76.403 | 1.00 | 0.00 | H |
| ATOM | 599 | H2'2 | T   | A | 19 | -17.760 | -18.473 | 75.268 | 1.00 | 0.00 | H |
| ATOM | 600 | H5'1 | T   | A | 19 | -21.138 | -22.111 | 75.218 | 1.00 | 0.00 | H |
| ATOM | 601 | H5'2 | T   | A | 19 | -19.639 | -23.037 | 75.437 | 1.00 | 0.00 | H |
| ATOM | 602 | C01  | LNK | A | 20 | -13.668 | -19.415 | 73.298 | 0.00 | 0.00 | C |
| ATOM | 603 | O1   | LNK | A | 20 | -14.835 | -19.706 | 74.071 | 1.00 | 0.00 | O |
| ATOM | 604 | S    | LNK | A | 20 | -9.872  | -18.361 | 73.869 | 0.00 | 0.00 | S |
| ATOM | 605 | C02  | LNK | A | 20 | -12.499 | -19.077 | 74.243 | 0.00 | 0.00 | C |
| ATOM | 606 | C03  | LNK | A | 20 | -11.632 | -17.972 | 73.612 | 0.00 | 0.00 | C |
| ATOM | 607 | O1P  | LNK | A | 20 | -16.590 | -18.150 | 74.985 | 1.00 | 0.00 | O |
| ATOM | 608 | O2P  | LNK | A | 20 | -15.995 | -18.079 | 72.548 | 1.00 | 0.00 | O |
| ATOM | 609 | P    | LNK | A | 20 | -16.174 | -18.890 | 73.778 | 1.00 | 0.00 | P |
| ATOM | 610 | H01  | LNK | A | 20 | -13.865 | -18.564 | 72.645 | 0.00 | 0.00 | H |
| ATOM | 611 | H02  | LNK | A | 20 | -13.406 | -20.284 | 72.694 | 0.00 | 0.00 | H |
| ATOM | 612 | H03  | LNK | A | 20 | -11.864 | -17.015 | 74.080 | 0.00 | 0.00 | H |
| ATOM | 613 | H04  | LNK | A | 20 | -11.893 | -19.969 | 74.405 | 0.00 | 0.00 | H |
| ATOM | 614 | H05  | LNK | A | 20 | -12.893 | -18.729 | 75.198 | 0.00 | 0.00 | H |
| ATOM | 615 | H06  | LNK | A | 20 | -11.838 | -17.913 | 72.544 | 0.00 | 0.00 | H |
| ATOM | 616 | AU   | LNK | A | 20 | -9.489  | -17.825 | 73.679 |      |      |   |
| TER  |     |      |     |   |    |         |         |        |      |      |   |
| ATOM | 618 | C1'  | A   | B | 2  | -26.475 | -10.902 | 71.358 | 1.00 | 0.00 | C |
| ATOM | 619 | N1   | A   | B | 2  | -24.142 | -14.513 | 74.161 | 1.00 | 0.00 | N |
| ATOM | 620 | C2   | A   | B | 2  | -23.960 | -14.087 | 72.915 | 1.00 | 0.00 | C |
| ATOM | 621 | N3   | A   | B | 2  | -24.597 | -13.146 | 72.252 | 1.00 | 0.00 | N |
| ATOM | 622 | C4   | A   | B | 2  | -25.553 | -12.598 | 73.026 | 1.00 | 0.00 | C |

|      |     |      |     |   |         |         |        |      |      |   |
|------|-----|------|-----|---|---------|---------|--------|------|------|---|
| ATOM | 623 | C5   | A B | 2 | -25.866 | -12.921 | 74.315 | 1.00 | 0.00 | C |
| ATOM | 624 | C6   | A B | 2 | -25.101 | -13.948 | 74.909 | 1.00 | 0.00 | C |
| ATOM | 625 | N6   | A B | 2 | -25.293 | -14.372 | 76.169 | 1.00 | 0.00 | N |
| ATOM | 626 | N7   | A B | 2 | -26.907 | -12.142 | 74.788 | 1.00 | 0.00 | N |
| ATOM | 627 | C8   | A B | 2 | -27.204 | -11.375 | 73.782 | 1.00 | 0.00 | C |
| ATOM | 628 | N9   | A B | 2 | -26.421 | -11.593 | 72.678 | 1.00 | 0.00 | N |
| ATOM | 629 | C2'  | A B | 2 | -27.888 | -10.566 | 70.900 | 1.00 | 0.00 | C |
| ATOM | 630 | C3'  | A B | 2 | -27.683 | -9.236  | 70.192 | 1.00 | 0.00 | C |
| ATOM | 631 | O3'  | A B | 2 | -27.269 | -9.479  | 68.850 | 1.00 | 0.00 | O |
| ATOM | 632 | C4'  | A B | 2 | -26.584 | -8.574  | 71.024 | 1.00 | 0.00 | C |
| ATOM | 633 | O4'  | A B | 2 | -25.754 | -9.691  | 71.479 | 1.00 | 0.00 | O |
| ATOM | 634 | C5'  | A B | 2 | -27.038 | -7.786  | 72.229 | 1.00 | 0.00 | C |
| ATOM | 635 | O5'  | A B | 2 | -28.174 | -8.443  | 72.846 | 1.00 | 0.00 | O |
| ATOM | 636 | H2   | A B | 2 | -23.169 | -14.589 | 72.362 | 1.00 | 0.00 | H |
| ATOM | 637 | H8   | A B | 2 | -27.999 | -10.630 | 73.811 | 1.00 | 0.00 | H |
| ATOM | 638 | H1'  | A B | 2 | -25.964 | -11.527 | 70.626 | 1.00 | 0.00 | H |
| ATOM | 639 | H3'  | A B | 2 | -28.590 | -8.632  | 70.186 | 1.00 | 0.00 | H |
| ATOM | 640 | H4'  | A B | 2 | -26.054 | -7.892  | 70.360 | 1.00 | 0.00 | H |
| ATOM | 641 | H61  | A B | 2 | -24.706 | -15.123 | 76.555 | 1.00 | 0.00 | H |
| ATOM | 642 | H62  | A B | 2 | -26.030 | -13.943 | 76.749 | 1.00 | 0.00 | H |
| ATOM | 643 | H2'1 | A B | 2 | -28.582 | -10.468 | 71.734 | 1.00 | 0.00 | H |
| ATOM | 644 | H2'2 | A B | 2 | -28.292 | -11.317 | 70.221 | 1.00 | 0.00 | H |
| ATOM | 645 | H5'1 | A B | 2 | -26.219 | -7.722  | 72.944 | 1.00 | 0.00 | H |
| ATOM | 646 | H5'2 | A B | 2 | -27.319 | -6.782  | 71.915 | 1.00 | 0.00 | H |
| ATOM | 647 | C1'  | C B | 3 | -25.692 | -14.964 | 68.612 | 1.00 | 0.00 | C |
| ATOM | 648 | N1   | C B | 3 | -26.369 | -15.066 | 69.933 | 1.00 | 0.00 | N |
| ATOM | 649 | C2   | C B | 3 | -25.883 | -15.998 | 70.847 | 1.00 | 0.00 | C |
| ATOM | 650 | O2   | C B | 3 | -24.913 | -16.699 | 70.525 | 1.00 | 0.00 | O |
| ATOM | 651 | N3   | C B | 3 | -26.485 | -16.106 | 72.055 | 1.00 | 0.00 | N |
| ATOM | 652 | C4   | C B | 3 | -27.533 | -15.335 | 72.374 | 1.00 | 0.00 | C |
| ATOM | 653 | N4   | C B | 3 | -28.082 | -15.481 | 73.572 | 1.00 | 0.00 | N |
| ATOM | 654 | C5   | C B | 3 | -28.059 | -14.369 | 71.453 | 1.00 | 0.00 | C |
| ATOM | 655 | C6   | C B | 3 | -27.432 | -14.275 | 70.243 | 1.00 | 0.00 | C |
| ATOM | 656 | C2'  | C B | 3 | -26.644 | -14.714 | 67.451 | 1.00 | 0.00 | C |
| ATOM | 657 | C3'  | C B | 3 | -25.818 | -13.806 | 66.553 | 1.00 | 0.00 | C |
| ATOM | 658 | O3'  | C B | 3 | -24.974 | -14.606 | 65.729 | 1.00 | 0.00 | O |
| ATOM | 659 | C4'  | C B | 3 | -25.025 | -12.969 | 67.554 | 1.00 | 0.00 | C |
| ATOM | 660 | O4'  | C B | 3 | -24.787 | -13.878 | 68.676 | 1.00 | 0.00 | O |
| ATOM | 661 | C5'  | C B | 3 | -25.703 | -11.724 | 68.076 | 1.00 | 0.00 | C |
| ATOM | 662 | O5'  | C B | 3 | -27.122 | -11.972 | 68.239 | 1.00 | 0.00 | O |
| ATOM | 663 | O1P  | C B | 3 | -28.179 | -10.453 | 66.532 | 1.00 | 0.00 | O |
| ATOM | 664 | O2P  | C B | 3 | -29.452 | -11.100 | 68.596 | 1.00 | 0.00 | O |
| ATOM | 665 | P    | C B | 3 | -28.144 | -10.779 | 67.973 | 1.00 | 0.00 | P |
| ATOM | 666 | H5   | C B | 3 | -28.915 | -13.744 | 71.705 | 1.00 | 0.00 | H |
| ATOM | 667 | H6   | C B | 3 | -27.791 | -13.550 | 69.512 | 1.00 | 0.00 | H |
| ATOM | 668 | H1'  | C B | 3 | -25.113 | -15.875 | 68.454 | 1.00 | 0.00 | H |
| ATOM | 669 | H3'  | C B | 3 | -26.446 | -13.175 | 65.923 | 1.00 | 0.00 | H |
| ATOM | 670 | H4'  | C B | 3 | -24.107 | -12.661 | 67.052 | 1.00 | 0.00 | H |
| ATOM | 671 | H41  | C B | 3 | -28.887 | -14.897 | 73.844 | 1.00 | 0.00 | H |
| ATOM | 672 | H42  | C B | 3 | -27.704 | -16.177 | 74.232 | 1.00 | 0.00 | H |
| ATOM | 673 | H2'1 | C B | 3 | -27.566 | -14.227 | 67.769 | 1.00 | 0.00 | H |
| ATOM | 674 | H2'2 | C B | 3 | -26.921 | -15.636 | 66.938 | 1.00 | 0.00 | H |
| ATOM | 675 | H5'1 | C B | 3 | -25.264 | -11.453 | 69.036 | 1.00 | 0.00 | H |
| ATOM | 676 | H5'2 | C B | 3 | -25.551 | -10.911 | 67.369 | 1.00 | 0.00 | H |



|      |     |      |     |   |         |         |        |      |      |   |
|------|-----|------|-----|---|---------|---------|--------|------|------|---|
| ATOM | 677 | C1'  | C B | 4 | -24.986 | -19.819 | 67.940 | 1.00 | 0.00 | C |
| ATOM | 678 | N1   | C B | 4 | -26.135 | -19.326 | 68.746 | 1.00 | 0.00 | N |
| ATOM | 679 | C2   | C B | 4 | -26.321 | -19.864 | 70.018 | 1.00 | 0.00 | C |
| ATOM | 680 | O2   | C B | 4 | -25.528 | -20.724 | 70.424 | 1.00 | 0.00 | O |
| ATOM | 681 | N3   | C B | 4 | -27.362 | -19.429 | 70.767 | 1.00 | 0.00 | N |
| ATOM | 682 | C4   | C B | 4 | -28.205 | -18.498 | 70.301 | 1.00 | 0.00 | C |
| ATOM | 683 | N4   | C B | 4 | -29.205 | -18.105 | 71.077 | 1.00 | 0.00 | N |
| ATOM | 684 | C5   | C B | 4 | -28.042 | -17.928 | 68.994 | 1.00 | 0.00 | C |
| ATOM | 685 | C6   | C B | 4 | -26.982 | -18.380 | 68.259 | 1.00 | 0.00 | C |
| ATOM | 686 | C2'  | C B | 4 | -25.291 | -19.959 | 66.456 | 1.00 | 0.00 | C |
| ATOM | 687 | C3'  | C B | 4 | -23.967 | -19.562 | 65.822 | 1.00 | 0.00 | C |
| ATOM | 688 | O3'  | C B | 4 | -23.107 | -20.699 | 65.783 | 1.00 | 0.00 | O |
| ATOM | 689 | C4'  | C B | 4 | -23.449 | -18.479 | 66.765 | 1.00 | 0.00 | C |
| ATOM | 690 | O4'  | C B | 4 | -23.929 | -18.889 | 68.085 | 1.00 | 0.00 | O |
| ATOM | 691 | C5'  | C B | 4 | -23.924 | -17.070 | 66.495 | 1.00 | 0.00 | C |
| ATOM | 692 | O5'  | C B | 4 | -25.300 | -17.096 | 66.038 | 1.00 | 0.00 | O |
| ATOM | 693 | O1P  | C B | 4 | -25.141 | -16.281 | 63.663 | 1.00 | 0.00 | O |
| ATOM | 694 | O2P  | C B | 4 | -27.255 | -15.935 | 64.970 | 1.00 | 0.00 | O |
| ATOM | 695 | P    | C B | 4 | -25.774 | -16.013 | 64.969 | 1.00 | 0.00 | P |
| ATOM | 696 | H5   | C B | 4 | -28.728 | -17.177 | 68.607 | 1.00 | 0.00 | H |
| ATOM | 697 | H6   | C B | 4 | -26.813 | -17.972 | 67.263 | 1.00 | 0.00 | H |
| ATOM | 698 | H1'  | C B | 4 | -24.656 | -20.769 | 68.363 | 1.00 | 0.00 | H |
| ATOM | 699 | H3'  | C B | 4 | -24.098 | -19.174 | 64.812 | 1.00 | 0.00 | H |
| ATOM | 700 | H4'  | C B | 4 | -22.361 | -18.484 | 66.687 | 1.00 | 0.00 | H |
| ATOM | 701 | H41  | C B | 4 | -29.866 | -17.388 | 70.744 | 1.00 | 0.00 | H |
| ATOM | 702 | H42  | C B | 4 | -29.322 | -18.517 | 72.015 | 1.00 | 0.00 | H |
| ATOM | 703 | H2'1 | C B | 4 | -26.097 | -19.300 | 66.135 | 1.00 | 0.00 | H |
| ATOM | 704 | H2'2 | C B | 4 | -25.571 | -20.976 | 66.185 | 1.00 | 0.00 | H |
| ATOM | 705 | H5'1 | C B | 4 | -23.850 | -16.485 | 67.413 | 1.00 | 0.00 | H |
| ATOM | 706 | H5'2 | C B | 4 | -23.291 | -16.621 | 65.731 | 1.00 | 0.00 | H |
| ATOM | 707 | C1'  | G B | 5 | -25.384 | -24.588 | 69.214 | 1.00 | 0.00 | C |
| ATOM | 708 | N1   | G B | 5 | -29.444 | -22.961 | 71.840 | 1.00 | 0.00 | N |
| ATOM | 709 | C2   | G B | 5 | -28.454 | -23.859 | 72.201 | 1.00 | 0.00 | C |
| ATOM | 710 | N2   | G B | 5 | -28.560 | -24.395 | 73.423 | 1.00 | 0.00 | N |
| ATOM | 711 | N3   | G B | 5 | -27.438 | -24.192 | 71.406 | 1.00 | 0.00 | N |
| ATOM | 712 | C4   | G B | 5 | -27.492 | -23.559 | 70.205 | 1.00 | 0.00 | C |
| ATOM | 713 | C5   | G B | 5 | -28.442 | -22.655 | 69.757 | 1.00 | 0.00 | C |
| ATOM | 714 | C6   | G B | 5 | -29.518 | -22.297 | 70.601 | 1.00 | 0.00 | C |
| ATOM | 715 | O6   | G B | 5 | -30.448 | -21.521 | 70.385 | 1.00 | 0.00 | O |
| ATOM | 716 | N7   | G B | 5 | -28.135 | -22.238 | 68.460 | 1.00 | 0.00 | N |
| ATOM | 717 | C8   | G B | 5 | -27.036 | -22.884 | 68.170 | 1.00 | 0.00 | C |
| ATOM | 718 | N9   | G B | 5 | -26.584 | -23.709 | 69.181 | 1.00 | 0.00 | N |
| ATOM | 719 | C2'  | G B | 5 | -25.088 | -25.272 | 67.886 | 1.00 | 0.00 | C |
| ATOM | 720 | C3'  | G B | 5 | -23.568 | -25.289 | 67.869 | 1.00 | 0.00 | C |
| ATOM | 721 | O3'  | G B | 5 | -23.105 | -26.426 | 68.593 | 1.00 | 0.00 | O |
| ATOM | 722 | C4'  | G B | 5 | -23.206 | -23.977 | 68.561 | 1.00 | 0.00 | C |
| ATOM | 723 | O4'  | G B | 5 | -24.268 | -23.785 | 69.549 | 1.00 | 0.00 | O |
| ATOM | 724 | C5'  | G B | 5 | -23.136 | -22.751 | 67.682 | 1.00 | 0.00 | C |
| ATOM | 725 | O5'  | G B | 5 | -24.162 | -22.821 | 66.660 | 1.00 | 0.00 | O |
| ATOM | 726 | O1P  | G B | 5 | -22.846 | -23.030 | 64.526 | 1.00 | 0.00 | O |
| ATOM | 727 | O2P  | G B | 5 | -25.130 | -21.993 | 64.495 | 1.00 | 0.00 | O |
| ATOM | 728 | P    | G B | 5 | -23.855 | -22.207 | 65.221 | 1.00 | 0.00 | P |
| ATOM | 729 | H1   | G B | 5 | -30.183 | -22.766 | 72.532 | 1.00 | 0.00 | H |
| ATOM | 730 | H8   | G B | 5 | -26.521 | -22.782 | 67.215 | 1.00 | 0.00 | H |

|      |     |      |     |   |         |         |        |      |      |   |
|------|-----|------|-----|---|---------|---------|--------|------|------|---|
| ATOM | 731 | H1'  | G B | 5 | -25.520 | -25.321 | 70.009 | 1.00 | 0.00 | H |
| ATOM | 732 | H21  | G B | 5 | -29.346 | -24.129 | 74.034 | 1.00 | 0.00 | H |
| ATOM | 733 | H3'  | G B | 5 | -23.170 | -25.322 | 66.855 | 1.00 | 0.00 | H |
| ATOM | 734 | H22  | G B | 5 | -27.858 | -25.072 | 73.751 | 1.00 | 0.00 | H |
| ATOM | 735 | H4'  | G B | 5 | -22.225 | -24.118 | 69.015 | 1.00 | 0.00 | H |
| ATOM | 736 | H2'1 | G B | 5 | -25.488 | -24.718 | 67.037 | 1.00 | 0.00 | H |
| ATOM | 737 | H2'2 | G B | 5 | -25.496 | -26.282 | 67.841 | 1.00 | 0.00 | H |
| ATOM | 738 | H5'1 | G B | 5 | -23.285 | -21.863 | 68.295 | 1.00 | 0.00 | H |
| ATOM | 739 | H5'2 | G B | 5 | -22.152 | -22.703 | 67.214 | 1.00 | 0.00 | H |
| ATOM | 740 | C1'  | T B | 6 | -27.484 | -28.418 | 71.543 | 1.00 | 0.00 | C |
| ATOM | 741 | N1   | T B | 6 | -28.309 | -27.509 | 70.702 | 1.00 | 0.00 | N |
| ATOM | 742 | C2   | T B | 6 | -29.451 | -26.986 | 71.274 | 1.00 | 0.00 | C |
| ATOM | 743 | O2   | T B | 6 | -29.794 | -27.239 | 72.416 | 1.00 | 0.00 | O |
| ATOM | 744 | N3   | T B | 6 | -30.186 | -26.146 | 70.458 | 1.00 | 0.00 | N |
| ATOM | 745 | C4   | T B | 6 | -29.891 | -25.796 | 69.157 | 1.00 | 0.00 | C |
| ATOM | 746 | O4   | T B | 6 | -30.630 | -25.036 | 68.522 | 1.00 | 0.00 | O |
| ATOM | 747 | C5   | T B | 6 | -28.679 | -26.393 | 68.647 | 1.00 | 0.00 | C |
| ATOM | 748 | C6   | T B | 6 | -27.936 | -27.215 | 69.414 | 1.00 | 0.00 | C |
| ATOM | 749 | C7   | T B | 6 | -28.317 | -26.038 | 67.235 | 1.00 | 0.00 | C |
| ATOM | 750 | C2'  | T B | 6 | -26.879 | -29.586 | 70.773 | 1.00 | 0.00 | C |
| ATOM | 751 | C3'  | T B | 6 | -25.532 | -29.751 | 71.458 | 1.00 | 0.00 | C |
| ATOM | 752 | O3'  | T B | 6 | -25.692 | -30.562 | 72.620 | 1.00 | 0.00 | O |
| ATOM | 753 | C4'  | T B | 6 | -25.145 | -28.316 | 71.804 | 1.00 | 0.00 | C |
| ATOM | 754 | O4'  | T B | 6 | -26.423 | -27.658 | 72.087 | 1.00 | 0.00 | O |
| ATOM | 755 | C5'  | T B | 6 | -24.429 | -27.533 | 70.728 | 1.00 | 0.00 | C |
| ATOM | 756 | O5'  | T B | 6 | -24.958 | -27.893 | 69.426 | 1.00 | 0.00 | O |
| ATOM | 757 | O1P  | T B | 6 | -23.015 | -29.032 | 68.303 | 1.00 | 0.00 | O |
| ATOM | 758 | O2P  | T B | 6 | -24.762 | -27.874 | 66.922 | 1.00 | 0.00 | O |
| ATOM | 759 | P    | T B | 6 | -23.970 | -27.912 | 68.175 | 1.00 | 0.00 | P |
| ATOM | 760 | H3   | T B | 6 | -31.043 | -25.739 | 70.863 | 1.00 | 0.00 | H |
| ATOM | 761 | H6   | T B | 6 | -27.025 | -27.653 | 69.006 | 1.00 | 0.00 | H |
| ATOM | 762 | H1'  | T B | 6 | -28.100 | -28.773 | 72.369 | 1.00 | 0.00 | H |
| ATOM | 763 | H3'  | T B | 6 | -24.793 | -30.210 | 70.800 | 1.00 | 0.00 | H |
| ATOM | 764 | H4'  | T B | 6 | -24.489 | -28.364 | 72.673 | 1.00 | 0.00 | H |
| ATOM | 765 | H71  | T B | 6 | -28.374 | -26.930 | 66.611 | 1.00 | 0.00 | H |
| ATOM | 766 | H72  | T B | 6 | -29.010 | -25.286 | 66.860 | 1.00 | 0.00 | H |
| ATOM | 767 | H73  | T B | 6 | -27.301 | -25.642 | 67.209 | 1.00 | 0.00 | H |
| ATOM | 768 | H2'1 | T B | 6 | -26.762 | -29.365 | 69.714 | 1.00 | 0.00 | H |
| ATOM | 769 | H2'2 | T B | 6 | -27.480 | -30.491 | 70.856 | 1.00 | 0.00 | H |
| ATOM | 770 | H5'1 | T B | 6 | -24.573 | -26.467 | 70.902 | 1.00 | 0.00 | H |
| ATOM | 771 | H5'2 | T B | 6 | -23.365 | -27.764 | 70.769 | 1.00 | 0.00 | H |
| ATOM | 772 | C1'  | C B | 7 | -31.312 | -30.771 | 73.659 | 1.00 | 0.00 | C |
| ATOM | 773 | N1   | C B | 7 | -31.437 | -30.203 | 72.287 | 1.00 | 0.00 | N |
| ATOM | 774 | C2   | C B | 7 | -32.527 | -29.376 | 72.023 | 1.00 | 0.00 | C |
| ATOM | 775 | O2   | C B | 7 | -33.339 | -29.147 | 72.930 | 1.00 | 0.00 | O |
| ATOM | 776 | N3   | C B | 7 | -32.661 | -28.849 | 70.781 | 1.00 | 0.00 | N |
| ATOM | 777 | C4   | C B | 7 | -31.767 | -29.114 | 69.820 | 1.00 | 0.00 | C |
| ATOM | 778 | N4   | C B | 7 | -31.945 | -28.569 | 68.627 | 1.00 | 0.00 | N |
| ATOM | 779 | C5   | C B | 7 | -30.639 | -29.966 | 70.063 | 1.00 | 0.00 | C |
| ATOM | 780 | C6   | C B | 7 | -30.522 | -30.481 | 71.322 | 1.00 | 0.00 | C |
| ATOM | 781 | C2'  | C B | 7 | -30.792 | -32.202 | 73.685 | 1.00 | 0.00 | C |
| ATOM | 782 | C3'  | C B | 7 | -29.942 | -32.206 | 74.945 | 1.00 | 0.00 | C |
| ATOM | 783 | O3'  | C B | 7 | -30.778 | -32.458 | 76.072 | 1.00 | 0.00 | O |
| ATOM | 784 | C4'  | C B | 7 | -29.354 | -30.798 | 74.965 | 1.00 | 0.00 | C |

|      |     |      |     |   |         |         |        |      |      |   |
|------|-----|------|-----|---|---------|---------|--------|------|------|---|
| ATOM | 785 | O4'  | C B | 7 | -30.400 | -29.961 | 74.378 | 1.00 | 0.00 | O |
| ATOM | 786 | C5'  | C B | 7 | -28.075 | -30.592 | 74.184 | 1.00 | 0.00 | C |
| ATOM | 787 | O5'  | C B | 7 | -28.105 | -31.394 | 72.978 | 1.00 | 0.00 | O |
| ATOM | 788 | O1P  | C B | 7 | -26.266 | -33.072 | 73.346 | 1.00 | 0.00 | O |
| ATOM | 789 | O2P  | C B | 7 | -26.908 | -32.409 | 71.015 | 1.00 | 0.00 | O |
| ATOM | 790 | P    | C B | 7 | -26.739 | -32.014 | 72.433 | 1.00 | 0.00 | P |
| ATOM | 791 | H5   | C B | 7 | -29.913 | -30.191 | 69.282 | 1.00 | 0.00 | H |
| ATOM | 792 | H6   | C B | 7 | -29.677 | -31.128 | 71.557 | 1.00 | 0.00 | H |
| ATOM | 793 | H1'  | C B | 7 | -32.282 | -30.699 | 74.149 | 1.00 | 0.00 | H |
| ATOM | 794 | H3'  | C B | 7 | -29.155 | -32.961 | 74.905 | 1.00 | 0.00 | H |
| ATOM | 795 | H4'  | C B | 7 | -29.147 | -30.554 | 76.007 | 1.00 | 0.00 | H |
| ATOM | 796 | H41  | C B | 7 | -31.270 | -28.755 | 67.870 | 1.00 | 0.00 | H |
| ATOM | 797 | H42  | C B | 7 | -32.758 | -27.959 | 68.454 | 1.00 | 0.00 | H |
| ATOM | 798 | H2'1 | C B | 7 | -30.197 | -32.441 | 72.804 | 1.00 | 0.00 | H |
| ATOM | 799 | H2'2 | C B | 7 | -31.597 | -32.933 | 73.745 | 1.00 | 0.00 | H |
| ATOM | 800 | H5'1 | C B | 7 | -27.981 | -29.538 | 73.924 | 1.00 | 0.00 | H |
| ATOM | 801 | H5'2 | C B | 7 | -27.228 | -30.887 | 74.801 | 1.00 | 0.00 | H |
| ATOM | 802 | C1'  | C B | 8 | -36.121 | -31.734 | 74.340 | 1.00 | 0.00 | C |
| ATOM | 803 | N1   | C B | 8 | -35.534 | -31.744 | 72.973 | 1.00 | 0.00 | N |
| ATOM | 804 | C2   | C B | 8 | -36.164 | -30.988 | 71.986 | 1.00 | 0.00 | C |
| ATOM | 805 | O2   | C B | 8 | -37.178 | -30.345 | 72.284 | 1.00 | 0.00 | O |
| ATOM | 806 | N3   | C B | 8 | -35.645 | -30.984 | 70.734 | 1.00 | 0.00 | N |
| ATOM | 807 | C4   | C B | 8 | -34.546 | -31.692 | 70.442 | 1.00 | 0.00 | C |
| ATOM | 808 | N4   | C B | 8 | -34.079 | -31.648 | 69.202 | 1.00 | 0.00 | N |
| ATOM | 809 | C5   | C B | 8 | -33.878 | -32.483 | 71.434 | 1.00 | 0.00 | C |
| ATOM | 810 | C6   | C B | 8 | -34.417 | -32.468 | 72.691 | 1.00 | 0.00 | C |
| ATOM | 811 | C2'  | C B | 8 | -36.055 | -33.081 | 75.048 | 1.00 | 0.00 | C |
| ATOM | 812 | C3'  | C B | 8 | -35.815 | -32.670 | 76.492 | 1.00 | 0.00 | C |
| ATOM | 813 | O3'  | C B | 8 | -37.066 | -32.374 | 77.107 | 1.00 | 0.00 | O |
| ATOM | 814 | C4'  | C B | 8 | -34.933 | -31.431 | 76.350 | 1.00 | 0.00 | C |
| ATOM | 815 | O4'  | C B | 8 | -35.395 | -30.798 | 75.114 | 1.00 | 0.00 | O |
| ATOM | 816 | C5'  | C B | 8 | -33.446 | -31.673 | 76.243 | 1.00 | 0.00 | C |
| ATOM | 817 | O5'  | C B | 8 | -33.200 | -32.880 | 75.476 | 1.00 | 0.00 | O |
| ATOM | 818 | O1P  | C B | 8 | -32.180 | -34.444 | 77.166 | 1.00 | 0.00 | O |
| ATOM | 819 | O2P  | C B | 8 | -31.633 | -34.695 | 74.729 | 1.00 | 0.00 | O |
| ATOM | 820 | P    | C B | 8 | -31.950 | -33.790 | 75.861 | 1.00 | 0.00 | P |
| ATOM | 821 | H5   | C B | 8 | -32.988 | -33.066 | 71.201 | 1.00 | 0.00 | H |
| ATOM | 822 | H6   | C B | 8 | -33.940 | -33.047 | 73.482 | 1.00 | 0.00 | H |
| ATOM | 823 | H1'  | C B | 8 | -37.150 | -31.382 | 74.267 | 1.00 | 0.00 | H |
| ATOM | 824 | H3'  | C B | 8 | -35.308 | -33.450 | 77.059 | 1.00 | 0.00 | H |
| ATOM | 825 | H4'  | C B | 8 | -35.106 | -30.817 | 77.234 | 1.00 | 0.00 | H |
| ATOM | 826 | H41  | C B | 8 | -33.234 | -32.182 | 68.952 | 1.00 | 0.00 | H |
| ATOM | 827 | H42  | C B | 8 | -34.562 | -31.082 | 68.490 | 1.00 | 0.00 | H |
| ATOM | 828 | H2'1 | C B | 8 | -35.243 | -33.705 | 74.672 | 1.00 | 0.00 | H |
| ATOM | 829 | H2'2 | C B | 8 | -36.980 | -33.648 | 74.943 | 1.00 | 0.00 | H |
| ATOM | 830 | H5'1 | C B | 8 | -32.978 | -30.821 | 75.747 | 1.00 | 0.00 | H |
| ATOM | 831 | H5'2 | C B | 8 | -33.028 | -31.780 | 77.243 | 1.00 | 0.00 | H |
| ATOM | 832 | C1'  | T B | 9 | -40.872 | -31.890 | 72.961 | 1.00 | 0.00 | C |
| ATOM | 833 | N1   | T B | 9 | -39.822 | -32.483 | 72.092 | 1.00 | 0.00 | N |
| ATOM | 834 | C2   | T B | 9 | -39.811 | -32.103 | 70.766 | 1.00 | 0.00 | C |
| ATOM | 835 | O2   | T B | 9 | -40.618 | -31.317 | 70.300 | 1.00 | 0.00 | O |
| ATOM | 836 | N3   | T B | 9 | -38.818 | -32.677 | 69.995 | 1.00 | 0.00 | N |
| ATOM | 837 | C4   | T B | 9 | -37.863 | -33.575 | 70.422 | 1.00 | 0.00 | C |
| ATOM | 838 | O4   | T B | 9 | -37.023 | -34.026 | 69.635 | 1.00 | 0.00 | O |

|      |     |      |     |    |         |         |        |      |      |   |
|------|-----|------|-----|----|---------|---------|--------|------|------|---|
| ATOM | 839 | C5   | T B | 9  | -37.953 | -33.912 | 71.824 | 1.00 | 0.00 | C |
| ATOM | 840 | C6   | T B | 9  | -38.908 | -33.370 | 72.604 | 1.00 | 0.00 | C |
| ATOM | 841 | C7   | T B | 9  | -36.931 | -34.885 | 72.330 | 1.00 | 0.00 | C |
| ATOM | 842 | C2'  | T B | 9  | -41.436 | -32.859 | 73.993 | 1.00 | 0.00 | C |
| ATOM | 843 | C3'  | T B | 9  | -41.685 | -31.946 | 75.184 | 1.00 | 0.00 | C |
| ATOM | 844 | O3'  | T B | 9  | -42.956 | -31.318 | 75.035 | 1.00 | 0.00 | O |
| ATOM | 845 | C4'  | T B | 9  | -40.532 | -30.948 | 75.093 | 1.00 | 0.00 | C |
| ATOM | 846 | O4'  | T B | 9  | -40.295 | -30.801 | 73.656 | 1.00 | 0.00 | O |
| ATOM | 847 | C5'  | T B | 9  | -39.238 | -31.353 | 75.759 | 1.00 | 0.00 | C |
| ATOM | 848 | O5'  | T B | 9  | -39.031 | -32.780 | 75.600 | 1.00 | 0.00 | O |
| ATOM | 849 | O1P  | T B | 9  | -39.193 | -33.658 | 77.952 | 1.00 | 0.00 | O |
| ATOM | 850 | O2P  | T B | 9  | -37.819 | -34.883 | 76.246 | 1.00 | 0.00 | O |
| ATOM | 851 | P    | T B | 9  | -38.310 | -33.586 | 76.769 | 1.00 | 0.00 | P |
| ATOM | 852 | H3   | T B | 9  | -38.787 | -32.407 | 69.002 | 1.00 | 0.00 | H |
| ATOM | 853 | H6   | T B | 9  | -38.956 | -33.641 | 73.659 | 1.00 | 0.00 | H |
| ATOM | 854 | H1'  | T B | 9  | -41.663 | -31.497 | 72.322 | 1.00 | 0.00 | H |
| ATOM | 855 | H3'  | T B | 9  | -41.659 | -32.491 | 76.127 | 1.00 | 0.00 | H |
| ATOM | 856 | H4'  | T B | 9  | -40.875 | -30.025 | 75.565 | 1.00 | 0.00 | H |
| ATOM | 857 | H71  | T B | 9  | -37.426 | -35.808 | 72.635 | 1.00 | 0.00 | H |
| ATOM | 858 | H72  | T B | 9  | -36.210 | -35.102 | 71.542 | 1.00 | 0.00 | H |
| ATOM | 859 | H73  | T B | 9  | -36.412 | -34.454 | 73.187 | 1.00 | 0.00 | H |
| ATOM | 860 | H2'1 | T B | 9  | -40.733 | -33.653 | 74.242 | 1.00 | 0.00 | H |
| ATOM | 861 | H2'2 | T B | 9  | -42.358 | -33.332 | 73.656 | 1.00 | 0.00 | H |
| ATOM | 862 | H5'1 | T B | 9  | -38.413 | -30.808 | 75.301 | 1.00 | 0.00 | H |
| ATOM | 863 | H5'2 | T B | 9  | -39.289 | -31.105 | 76.818 | 1.00 | 0.00 | H |
| ATOM | 864 | C1'  | A B | 10 | -44.527 | -32.116 | 69.611 | 1.00 | 0.00 | C |
| ATOM | 865 | N1   | A B | 10 | -40.952 | -34.360 | 66.691 | 1.00 | 0.00 | N |
| ATOM | 866 | C2   | A B | 10 | -41.882 | -33.444 | 66.430 | 1.00 | 0.00 | C |
| ATOM | 867 | N3   | A B | 10 | -42.772 | -32.905 | 67.234 | 1.00 | 0.00 | N |
| ATOM | 868 | C4   | A B | 10 | -42.655 | -33.417 | 68.472 | 1.00 | 0.00 | C |
| ATOM | 869 | C5   | A B | 10 | -41.760 | -34.359 | 68.901 | 1.00 | 0.00 | C |
| ATOM | 870 | C6   | A B | 10 | -40.858 | -34.851 | 67.935 | 1.00 | 0.00 | C |
| ATOM | 871 | N6   | A B | 10 | -39.923 | -35.777 | 68.212 | 1.00 | 0.00 | N |
| ATOM | 872 | N7   | A B | 10 | -41.935 | -34.639 | 70.244 | 1.00 | 0.00 | N |
| ATOM | 873 | C8   | A B | 10 | -42.925 | -33.874 | 70.595 | 1.00 | 0.00 | C |
| ATOM | 874 | N9   | A B | 10 | -43.412 | -33.101 | 69.573 | 1.00 | 0.00 | N |
| ATOM | 875 | C2'  | A B | 10 | -45.688 | -32.539 | 70.499 | 1.00 | 0.00 | C |
| ATOM | 876 | C3'  | A B | 10 | -46.145 | -31.211 | 71.082 | 1.00 | 0.00 | C |
| ATOM | 877 | O3'  | A B | 10 | -47.033 | -30.578 | 70.164 | 1.00 | 0.00 | O |
| ATOM | 878 | C4'  | A B | 10 | -44.833 | -30.441 | 71.237 | 1.00 | 0.00 | C |
| ATOM | 879 | O4'  | A B | 10 | -44.009 | -30.900 | 70.118 | 1.00 | 0.00 | O |
| ATOM | 880 | C5'  | A B | 10 | -44.072 | -30.666 | 72.523 | 1.00 | 0.00 | C |
| ATOM | 881 | O5'  | A B | 10 | -44.201 | -32.052 | 72.933 | 1.00 | 0.00 | O |
| ATOM | 882 | O1P  | A B | 10 | -45.517 | -31.905 | 75.073 | 1.00 | 0.00 | O |
| ATOM | 883 | O2P  | A B | 10 | -43.952 | -33.829 | 74.692 | 1.00 | 0.00 | O |
| ATOM | 884 | P    | A B | 10 | -44.251 | -32.390 | 74.491 | 1.00 | 0.00 | P |
| ATOM | 885 | H2   | A B | 10 | -41.909 | -33.090 | 65.400 | 1.00 | 0.00 | H |
| ATOM | 886 | H8   | A B | 10 | -43.332 | -33.849 | 71.607 | 1.00 | 0.00 | H |
| ATOM | 887 | H1'  | A B | 10 | -44.861 | -31.939 | 68.589 | 1.00 | 0.00 | H |
| ATOM | 888 | H3'  | A B | 10 | -46.643 | -31.336 | 72.042 | 1.00 | 0.00 | H |
| ATOM | 889 | H4'  | A B | 10 | -45.079 | -29.381 | 71.178 | 1.00 | 0.00 | H |
| ATOM | 890 | H61  | A B | 10 | -39.287 | -36.101 | 67.470 | 1.00 | 0.00 | H |
| ATOM | 891 | H62  | A B | 10 | -39.843 | -36.161 | 69.164 | 1.00 | 0.00 | H |
| ATOM | 892 | H2'1 | A B | 10 | -45.380 | -33.231 | 71.284 | 1.00 | 0.00 | H |

|      |     |      |     |    |         |         |        |      |      |   |
|------|-----|------|-----|----|---------|---------|--------|------|------|---|
| ATOM | 893 | H2'2 | A B | 10 | -46.488 | -33.020 | 69.934 | 1.00 | 0.00 | H |
| ATOM | 894 | H5'1 | A B | 10 | -43.020 | -30.427 | 72.363 | 1.00 | 0.00 | H |
| ATOM | 895 | H5'2 | A B | 10 | -44.474 | -30.015 | 73.297 | 1.00 | 0.00 | H |
| ATOM | 896 | C1'  | G B | 11 | -46.432 | -33.312 | 65.186 | 1.00 | 0.00 | C |
| ATOM | 897 | N1   | G B | 11 | -42.749 | -36.842 | 65.169 | 1.00 | 0.00 | N |
| ATOM | 898 | C2   | G B | 11 | -43.190 | -36.012 | 64.152 | 1.00 | 0.00 | C |
| ATOM | 899 | N2   | G B | 11 | -42.567 | -36.144 | 62.973 | 1.00 | 0.00 | N |
| ATOM | 900 | N3   | G B | 11 | -44.172 | -35.124 | 64.300 | 1.00 | 0.00 | N |
| ATOM | 901 | C4   | G B | 11 | -44.692 | -35.133 | 65.555 | 1.00 | 0.00 | C |
| ATOM | 902 | C5   | G B | 11 | -44.319 | -35.925 | 66.628 | 1.00 | 0.00 | C |
| ATOM | 903 | C6   | G B | 11 | -43.275 | -36.865 | 66.474 | 1.00 | 0.00 | C |
| ATOM | 904 | O6   | G B | 11 | -42.807 | -37.649 | 67.301 | 1.00 | 0.00 | O |
| ATOM | 905 | N7   | G B | 11 | -45.104 | -35.626 | 67.744 | 1.00 | 0.00 | N |
| ATOM | 906 | C8   | G B | 11 | -45.906 | -34.682 | 67.322 | 1.00 | 0.00 | C |
| ATOM | 907 | N9   | G B | 11 | -45.717 | -34.329 | 66.002 | 1.00 | 0.00 | N |
| ATOM | 908 | C2'  | G B | 11 | -47.924 | -33.226 | 65.481 | 1.00 | 0.00 | C |
| ATOM | 909 | C3'  | G B | 11 | -48.194 | -31.738 | 65.323 | 1.00 | 0.00 | C |
| ATOM | 910 | O3'  | G B | 11 | -48.419 | -31.450 | 63.945 | 1.00 | 0.00 | O |
| ATOM | 911 | C4'  | G B | 11 | -46.907 | -31.102 | 65.843 | 1.00 | 0.00 | C |
| ATOM | 912 | O4'  | G B | 11 | -45.858 | -32.051 | 65.468 | 1.00 | 0.00 | O |
| ATOM | 913 | C5'  | G B | 11 | -46.832 | -30.860 | 67.332 | 1.00 | 0.00 | C |
| ATOM | 914 | O5'  | G B | 11 | -47.492 | -31.941 | 68.037 | 1.00 | 0.00 | O |
| ATOM | 915 | O1P  | G B | 11 | -49.472 | -30.815 | 69.106 | 1.00 | 0.00 | O |
| ATOM | 916 | O2P  | G B | 11 | -48.481 | -32.868 | 70.152 | 1.00 | 0.00 | O |
| ATOM | 917 | P    | G B | 11 | -48.266 | -31.612 | 69.393 | 1.00 | 0.00 | P |
| ATOM | 918 | H1   | G B | 11 | -41.977 | -37.490 | 64.952 | 1.00 | 0.00 | H |
| ATOM | 919 | H8   | G B | 11 | -46.659 | -34.216 | 67.957 | 1.00 | 0.00 | H |
| ATOM | 920 | H1'  | G B | 11 | -46.255 | -33.532 | 64.132 | 1.00 | 0.00 | H |
| ATOM | 921 | H21  | G B | 11 | -41.807 | -36.830 | 62.868 | 1.00 | 0.00 | H |
| ATOM | 922 | H3'  | G B | 11 | -49.056 | -31.415 | 65.905 | 1.00 | 0.00 | H |
| ATOM | 923 | H22  | G B | 11 | -42.851 | -35.559 | 62.175 | 1.00 | 0.00 | H |
| ATOM | 924 | H4'  | G B | 11 | -46.806 | -30.137 | 65.344 | 1.00 | 0.00 | H |
| ATOM | 925 | H2'1 | G B | 11 | -48.165 | -33.567 | 66.488 | 1.00 | 0.00 | H |
| ATOM | 926 | H2'2 | G B | 11 | -48.519 | -33.815 | 64.784 | 1.00 | 0.00 | H |
| ATOM | 927 | H5'1 | G B | 11 | -45.786 | -30.807 | 67.633 | 1.00 | 0.00 | H |
| ATOM | 928 | H5'2 | G B | 11 | -47.321 | -29.914 | 67.565 | 1.00 | 0.00 | H |
| ATOM | 929 | C1'  | G B | 12 | -46.668 | -35.955 | 61.003 | 1.00 | 0.00 | C |
| ATOM | 930 | N1   | G B | 12 | -44.364 | -39.539 | 63.810 | 1.00 | 0.00 | N |
| ATOM | 931 | C2   | G B | 12 | -44.124 | -39.141 | 62.506 | 1.00 | 0.00 | C |
| ATOM | 932 | N2   | G B | 12 | -43.141 | -39.785 | 61.864 | 1.00 | 0.00 | N |
| ATOM | 933 | N3   | G B | 12 | -44.809 | -38.177 | 61.894 | 1.00 | 0.00 | N |
| ATOM | 934 | C4   | G B | 12 | -45.771 | -37.641 | 62.690 | 1.00 | 0.00 | C |
| ATOM | 935 | C5   | G B | 12 | -46.084 | -37.975 | 63.996 | 1.00 | 0.00 | C |
| ATOM | 936 | C6   | G B | 12 | -45.354 | -38.994 | 64.649 | 1.00 | 0.00 | C |
| ATOM | 937 | O6   | G B | 12 | -45.483 | -39.430 | 65.794 | 1.00 | 0.00 | O |
| ATOM | 938 | N7   | G B | 12 | -47.140 | -37.185 | 64.457 | 1.00 | 0.00 | N |
| ATOM | 939 | C8   | G B | 12 | -47.424 | -36.414 | 63.441 | 1.00 | 0.00 | C |
| ATOM | 940 | N9   | G B | 12 | -46.636 | -36.631 | 62.329 | 1.00 | 0.00 | N |
| ATOM | 941 | C2'  | G B | 12 | -48.072 | -35.617 | 60.521 | 1.00 | 0.00 | C |
| ATOM | 942 | C3'  | G B | 12 | -47.851 | -34.294 | 59.803 | 1.00 | 0.00 | C |
| ATOM | 943 | O3'  | G B | 12 | -47.421 | -34.552 | 58.469 | 1.00 | 0.00 | O |
| ATOM | 944 | C4'  | G B | 12 | -46.761 | -33.629 | 60.643 | 1.00 | 0.00 | C |
| ATOM | 945 | O4'  | G B | 12 | -45.943 | -34.745 | 61.119 | 1.00 | 0.00 | O |
| ATOM | 946 | C5'  | G B | 12 | -47.228 | -32.829 | 61.835 | 1.00 | 0.00 | C |

|      |      |      |     |    |         |         |        |      |      |   |
|------|------|------|-----|----|---------|---------|--------|------|------|---|
| ATOM | 947  | O5'  | G B | 12 | -48.375 | -33.475 | 62.442 | 1.00 | 0.00 | O |
| ATOM | 948  | O1P  | G B | 12 | -50.243 | -31.834 | 62.047 | 1.00 | 0.00 | O |
| ATOM | 949  | O2P  | G B | 12 | -50.336 | -33.392 | 64.012 | 1.00 | 0.00 | O |
| ATOM | 950  | P    | G B | 12 | -49.510 | -32.565 | 63.098 | 1.00 | 0.00 | P |
| ATOM | 951  | H1   | G B | 12 | -43.771 | -40.291 | 64.195 | 1.00 | 0.00 | H |
| ATOM | 952  | H8   | G B | 12 | -48.215 | -35.663 | 63.467 | 1.00 | 0.00 | H |
| ATOM | 953  | H1'  | G B | 12 | -46.149 | -36.588 | 60.285 | 1.00 | 0.00 | H |
| ATOM | 954  | H21  | G B | 12 | -42.613 | -40.527 | 62.346 | 1.00 | 0.00 | H |
| ATOM | 955  | H3'  | G B | 12 | -48.755 | -33.686 | 59.780 | 1.00 | 0.00 | H |
| ATOM | 956  | H22  | G B | 12 | -42.916 | -39.538 | 60.890 | 1.00 | 0.00 | H |
| ATOM | 957  | H4'  | G B | 12 | -46.218 | -32.956 | 59.982 | 1.00 | 0.00 | H |
| ATOM | 958  | H2'1 | G B | 12 | -48.777 | -35.508 | 61.345 | 1.00 | 0.00 | H |
| ATOM | 959  | H2'2 | G B | 12 | -48.471 | -36.373 | 59.846 | 1.00 | 0.00 | H |
| ATOM | 960  | H5'1 | G B | 12 | -46.418 | -32.761 | 62.560 | 1.00 | 0.00 | H |
| ATOM | 961  | H5'2 | G B | 12 | -47.500 | -31.825 | 61.507 | 1.00 | 0.00 | H |
| ATOM | 962  | C1'  | T B | 13 | -45.905 | -39.983 | 58.231 | 1.00 | 0.00 | C |
| ATOM | 963  | N1   | T B | 13 | -46.568 | -40.102 | 59.557 | 1.00 | 0.00 | N |
| ATOM | 964  | C2   | T B | 13 | -46.058 | -41.038 | 60.435 | 1.00 | 0.00 | C |
| ATOM | 965  | O2   | T B | 13 | -45.107 | -41.749 | 60.161 | 1.00 | 0.00 | O |
| ATOM | 966  | N3   | T B | 13 | -46.704 | -41.113 | 61.655 | 1.00 | 0.00 | N |
| ATOM | 967  | C4   | T B | 13 | -47.785 | -40.361 | 62.062 | 1.00 | 0.00 | C |
| ATOM | 968  | O4   | T B | 13 | -48.283 | -40.520 | 63.182 | 1.00 | 0.00 | O |
| ATOM | 969  | C5   | T B | 13 | -48.246 | -39.409 | 61.077 | 1.00 | 0.00 | C |
| ATOM | 970  | C6   | T B | 13 | -47.640 | -39.306 | 59.878 | 1.00 | 0.00 | C |
| ATOM | 971  | C7   | T B | 13 | -49.420 | -38.566 | 61.478 | 1.00 | 0.00 | C |
| ATOM | 972  | C2'  | T B | 13 | -46.871 | -39.724 | 57.081 | 1.00 | 0.00 | C |
| ATOM | 973  | C3'  | T B | 13 | -46.059 | -38.803 | 56.185 | 1.00 | 0.00 | C |
| ATOM | 974  | O3'  | T B | 13 | -45.221 | -39.591 | 55.342 | 1.00 | 0.00 | O |
| ATOM | 975  | C4'  | T B | 13 | -45.258 | -37.975 | 57.185 | 1.00 | 0.00 | C |
| ATOM | 976  | O4'  | T B | 13 | -45.004 | -38.895 | 58.294 | 1.00 | 0.00 | O |
| ATOM | 977  | C5'  | T B | 13 | -45.934 | -36.738 | 57.729 | 1.00 | 0.00 | C |
| ATOM | 978  | O5'  | T B | 13 | -47.351 | -36.992 | 57.904 | 1.00 | 0.00 | O |
| ATOM | 979  | O1P  | T B | 13 | -48.430 | -35.461 | 56.226 | 1.00 | 0.00 | O |
| ATOM | 980  | O2P  | T B | 13 | -49.679 | -36.133 | 58.296 | 1.00 | 0.00 | O |
| ATOM | 981  | P    | T B | 13 | -48.381 | -35.801 | 57.662 | 1.00 | 0.00 | P |
| ATOM | 982  | H3   | T B | 13 | -46.340 | -41.802 | 62.330 | 1.00 | 0.00 | H |
| ATOM | 983  | H6   | T B | 13 | -48.007 | -38.582 | 59.151 | 1.00 | 0.00 | H |
| ATOM | 984  | H1'  | T B | 13 | -45.325 | -40.889 | 58.056 | 1.00 | 0.00 | H |
| ATOM | 985  | H3'  | T B | 13 | -46.695 | -38.169 | 55.568 | 1.00 | 0.00 | H |
| ATOM | 986  | H4'  | T B | 13 | -44.346 | -37.658 | 56.677 | 1.00 | 0.00 | H |
| ATOM | 987  | H71  | T B | 13 | -50.276 | -38.811 | 60.850 | 1.00 | 0.00 | H |
| ATOM | 988  | H72  | T B | 13 | -49.668 | -38.760 | 62.523 | 1.00 | 0.00 | H |
| ATOM | 989  | H73  | T B | 13 | -49.170 | -37.511 | 61.355 | 1.00 | 0.00 | H |
| ATOM | 990  | H2'1 | T B | 13 | -47.790 | -39.244 | 57.415 | 1.00 | 0.00 | H |
| ATOM | 991  | H2'2 | T B | 13 | -47.151 | -40.641 | 56.561 | 1.00 | 0.00 | H |
| ATOM | 992  | H5'1 | T B | 13 | -45.485 | -36.475 | 58.686 | 1.00 | 0.00 | H |
| ATOM | 993  | H5'2 | T B | 13 | -45.794 | -35.916 | 57.028 | 1.00 | 0.00 | H |
| ATOM | 994  | C1'  | G B | 14 | -45.194 | -44.853 | 57.577 | 1.00 | 0.00 | C |
| ATOM | 995  | N1   | G B | 14 | -47.675 | -45.251 | 62.017 | 1.00 | 0.00 | N |
| ATOM | 996  | C2   | G B | 14 | -46.551 | -45.920 | 61.565 | 1.00 | 0.00 | C |
| ATOM | 997  | N2   | G B | 14 | -46.019 | -46.813 | 62.406 | 1.00 | 0.00 | N |
| ATOM | 998  | N3   | G B | 14 | -46.003 | -45.711 | 60.370 | 1.00 | 0.00 | N |
| ATOM | 999  | C4   | G B | 14 | -46.676 | -44.776 | 59.647 | 1.00 | 0.00 | C |
| ATOM | 1000 | C5   | G B | 14 | -47.805 | -44.064 | 60.013 | 1.00 | 0.00 | C |

|      |      |      |     |    |         |         |        |      |      |   |
|------|------|------|-----|----|---------|---------|--------|------|------|---|
| ATOM | 1001 | C6   | G B | 14 | -48.387 | -44.281 | 61.285 | 1.00 | 0.00 | C |
| ATOM | 1002 | O6   | G B | 14 | -49.380 | -43.751 | 61.785 | 1.00 | 0.00 | O |
| ATOM | 1003 | N7   | G B | 14 | -48.187 | -43.201 | 58.983 | 1.00 | 0.00 | N |
| ATOM | 1004 | C8   | G B | 14 | -47.296 | -43.412 | 58.049 | 1.00 | 0.00 | C |
| ATOM | 1005 | N9   | G B | 14 | -46.345 | -44.357 | 58.378 | 1.00 | 0.00 | N |
| ATOM | 1006 | C2'  | G B | 14 | -45.493 | -44.991 | 56.091 | 1.00 | 0.00 | C |
| ATOM | 1007 | C3'  | G B | 14 | -44.165 | -44.599 | 55.462 | 1.00 | 0.00 | C |
| ATOM | 1008 | O3'  | G B | 14 | -43.310 | -45.738 | 55.427 | 1.00 | 0.00 | O |
| ATOM | 1009 | C4'  | G B | 14 | -43.649 | -43.516 | 56.408 | 1.00 | 0.00 | C |
| ATOM | 1010 | O4'  | G B | 14 | -44.135 | -43.927 | 57.725 | 1.00 | 0.00 | O |
| ATOM | 1011 | C5'  | G B | 14 | -44.117 | -42.107 | 56.136 | 1.00 | 0.00 | C |
| ATOM | 1012 | O5'  | G B | 14 | -45.492 | -42.127 | 55.676 | 1.00 | 0.00 | O |
| ATOM | 1013 | O1P  | G B | 14 | -45.322 | -41.312 | 53.300 | 1.00 | 0.00 | O |
| ATOM | 1014 | O2P  | G B | 14 | -47.439 | -40.961 | 54.599 | 1.00 | 0.00 | O |
| ATOM | 1015 | P    | G B | 14 | -45.958 | -41.042 | 54.603 | 1.00 | 0.00 | P |
| ATOM | 1016 | H1   | G B | 14 | -48.017 | -45.480 | 62.963 | 1.00 | 0.00 | H |
| ATOM | 1017 | H8   | G B | 14 | -47.304 | -42.886 | 57.093 | 1.00 | 0.00 | H |
| ATOM | 1018 | H1'  | G B | 14 | -44.868 | -45.804 | 58.000 | 1.00 | 0.00 | H |
| ATOM | 1019 | H21  | G B | 14 | -46.448 | -46.966 | 63.332 | 1.00 | 0.00 | H |
| ATOM | 1020 | H3'  | G B | 14 | -44.291 | -44.210 | 54.452 | 1.00 | 0.00 | H |
| ATOM | 1021 | H22  | G B | 14 | -45.183 | -47.348 | 62.129 | 1.00 | 0.00 | H |
| ATOM | 1022 | H4'  | G B | 14 | -42.561 | -43.526 | 56.334 | 1.00 | 0.00 | H |
| ATOM | 1023 | H2'1 | G B | 14 | -46.296 | -44.330 | 55.768 | 1.00 | 0.00 | H |
| ATOM | 1024 | H2'2 | G B | 14 | -45.776 | -46.007 | 55.818 | 1.00 | 0.00 | H |
| ATOM | 1025 | H5'1 | G B | 14 | -44.045 | -41.523 | 57.053 | 1.00 | 0.00 | H |
| ATOM | 1026 | H5'2 | G B | 14 | -43.480 | -41.659 | 55.374 | 1.00 | 0.00 | H |
| ATOM | 1027 | C1'  | C B | 15 | -45.591 | -49.623 | 58.851 | 1.00 | 0.00 | C |
| ATOM | 1028 | N1   | C B | 15 | -46.791 | -48.745 | 58.823 | 1.00 | 0.00 | N |
| ATOM | 1029 | C2   | C B | 15 | -47.606 | -48.716 | 59.953 | 1.00 | 0.00 | C |
| ATOM | 1030 | O2   | C B | 15 | -47.299 | -49.418 | 60.927 | 1.00 | 0.00 | O |
| ATOM | 1031 | N3   | C B | 15 | -48.704 | -47.922 | 59.949 | 1.00 | 0.00 | N |
| ATOM | 1032 | C4   | C B | 15 | -49.009 | -47.176 | 58.881 | 1.00 | 0.00 | C |
| ATOM | 1033 | N4   | C B | 15 | -50.092 | -46.415 | 58.932 | 1.00 | 0.00 | N |
| ATOM | 1034 | C5   | C B | 15 | -48.192 | -47.187 | 57.700 | 1.00 | 0.00 | C |
| ATOM | 1035 | C6   | C B | 15 | -47.089 | -47.991 | 57.731 | 1.00 | 0.00 | C |
| ATOM | 1036 | C2'  | C B | 15 | -45.301 | -50.307 | 57.522 | 1.00 | 0.00 | C |
| ATOM | 1037 | C3'  | C B | 15 | -43.780 | -50.322 | 57.498 | 1.00 | 0.00 | C |
| ATOM | 1038 | O3'  | C B | 15 | -43.310 | -51.459 | 58.220 | 1.00 | 0.00 | O |
| ATOM | 1039 | C4'  | C B | 15 | -43.416 | -49.010 | 58.188 | 1.00 | 0.00 | C |
| ATOM | 1040 | O4'  | C B | 15 | -44.474 | -48.817 | 59.180 | 1.00 | 0.00 | O |
| ATOM | 1041 | C5'  | C B | 15 | -43.352 | -47.783 | 57.307 | 1.00 | 0.00 | C |
| ATOM | 1042 | O5'  | C B | 15 | -44.382 | -47.856 | 56.291 | 1.00 | 0.00 | O |
| ATOM | 1043 | O1P  | C B | 15 | -43.077 | -48.064 | 54.149 | 1.00 | 0.00 | O |
| ATOM | 1044 | O2P  | C B | 15 | -45.363 | -47.030 | 54.128 | 1.00 | 0.00 | O |
| ATOM | 1045 | P    | C B | 15 | -44.084 | -47.242 | 54.850 | 1.00 | 0.00 | P |
| ATOM | 1046 | H5   | C B | 15 | -48.441 | -46.585 | 56.827 | 1.00 | 0.00 | H |
| ATOM | 1047 | H6   | C B | 15 | -46.433 | -48.028 | 56.861 | 1.00 | 0.00 | H |
| ATOM | 1048 | H1'  | C B | 15 | -45.722 | -50.356 | 59.648 | 1.00 | 0.00 | H |
| ATOM | 1049 | H3'  | C B | 15 | -43.388 | -50.353 | 56.481 | 1.00 | 0.00 | H |
| ATOM | 1050 | H4'  | C B | 15 | -42.432 | -49.149 | 58.635 | 1.00 | 0.00 | H |
| ATOM | 1051 | H41  | C B | 15 | -50.349 | -45.828 | 58.124 | 1.00 | 0.00 | H |
| ATOM | 1052 | H42  | C B | 15 | -50.679 | -46.410 | 59.779 | 1.00 | 0.00 | H |
| ATOM | 1053 | H2'1 | C B | 15 | -45.705 | -49.755 | 56.675 | 1.00 | 0.00 | H |
| ATOM | 1054 | H2'2 | C B | 15 | -45.709 | -51.318 | 57.479 | 1.00 | 0.00 | H |

|      |      |      |     |    |         |         |        |      |      |   |
|------|------|------|-----|----|---------|---------|--------|------|------|---|
| ATOM | 1055 | H5'1 | C B | 15 | -43.500 | -46.894 | 57.920 | 1.00 | 0.00 | H |
| ATOM | 1056 | H5'2 | C B | 15 | -42.371 | -47.734 | 56.833 | 1.00 | 0.00 | H |
| ATOM | 1057 | C1'  | G B | 16 | -47.712 | -53.440 | 61.185 | 1.00 | 0.00 | C |
| ATOM | 1058 | N1   | G B | 16 | -51.894 | -50.528 | 60.946 | 1.00 | 0.00 | N |
| ATOM | 1059 | C2   | G B | 16 | -51.407 | -51.301 | 61.986 | 1.00 | 0.00 | C |
| ATOM | 1060 | N2   | G B | 16 | -52.133 | -51.297 | 63.112 | 1.00 | 0.00 | N |
| ATOM | 1061 | N3   | G B | 16 | -50.287 | -52.017 | 61.909 | 1.00 | 0.00 | N |
| ATOM | 1062 | C4   | G B | 16 | -49.686 | -51.908 | 60.696 | 1.00 | 0.00 | C |
| ATOM | 1063 | C5   | G B | 16 | -50.099 | -51.168 | 59.601 | 1.00 | 0.00 | C |
| ATOM | 1064 | C6   | G B | 16 | -51.288 | -50.404 | 59.683 | 1.00 | 0.00 | C |
| ATOM | 1065 | O6   | G B | 16 | -51.811 | -49.690 | 58.826 | 1.00 | 0.00 | O |
| ATOM | 1066 | N7   | G B | 16 | -49.202 | -51.327 | 58.543 | 1.00 | 0.00 | N |
| ATOM | 1067 | C8   | G B | 16 | -48.291 | -52.137 | 59.020 | 1.00 | 0.00 | C |
| ATOM | 1068 | N9   | G B | 16 | -48.518 | -52.535 | 60.322 | 1.00 | 0.00 | N |
| ATOM | 1069 | C2'  | G B | 16 | -47.102 | -54.618 | 60.436 | 1.00 | 0.00 | C |
| ATOM | 1070 | C3'  | G B | 16 | -45.766 | -54.786 | 61.142 | 1.00 | 0.00 | C |
| ATOM | 1071 | O3'  | G B | 16 | -45.950 | -55.583 | 62.309 | 1.00 | 0.00 | O |
| ATOM | 1072 | C4'  | G B | 16 | -45.378 | -53.347 | 61.481 | 1.00 | 0.00 | C |
| ATOM | 1073 | O4'  | G B | 16 | -46.655 | -52.681 | 61.738 | 1.00 | 0.00 | O |
| ATOM | 1074 | C5'  | G B | 16 | -44.640 | -52.581 | 60.409 | 1.00 | 0.00 | C |
| ATOM | 1075 | O5'  | G B | 16 | -45.150 | -52.950 | 59.103 | 1.00 | 0.00 | O |
| ATOM | 1076 | O1P  | G B | 16 | -43.196 | -54.109 | 58.021 | 1.00 | 0.00 | O |
| ATOM | 1077 | O2P  | G B | 16 | -44.913 | -52.956 | 56.603 | 1.00 | 0.00 | O |
| ATOM | 1078 | P    | G B | 16 | -44.141 | -52.988 | 57.868 | 1.00 | 0.00 | P |
| ATOM | 1079 | H1   | G B | 16 | -52.768 | -50.007 | 61.110 | 1.00 | 0.00 | H |
| ATOM | 1080 | H8   | G B | 16 | -47.431 | -52.469 | 58.440 | 1.00 | 0.00 | H |
| ATOM | 1081 | H1'  | G B | 16 | -48.344 | -53.783 | 62.005 | 1.00 | 0.00 | H |
| ATOM | 1082 | H21  | G B | 16 | -52.997 | -50.739 | 63.165 | 1.00 | 0.00 | H |
| ATOM | 1083 | H3'  | G B | 16 | -45.020 | -55.253 | 60.500 | 1.00 | 0.00 | H |
| ATOM | 1084 | H22  | G B | 16 | -51.825 | -51.853 | 63.921 | 1.00 | 0.00 | H |
| ATOM | 1085 | H4'  | G B | 16 | -44.736 | -53.392 | 62.361 | 1.00 | 0.00 | H |
| ATOM | 1086 | H2'1 | G B | 16 | -46.966 | -54.408 | 59.376 | 1.00 | 0.00 | H |
| ATOM | 1087 | H2'2 | G B | 16 | -47.710 | -55.519 | 60.518 | 1.00 | 0.00 | H |
| ATOM | 1088 | H5'1 | G B | 16 | -44.781 | -51.513 | 60.571 | 1.00 | 0.00 | H |
| ATOM | 1089 | H5'2 | G B | 16 | -43.577 | -52.816 | 60.470 | 1.00 | 0.00 | H |
| ATOM | 1090 | C1'  | G B | 17 | -51.518 | -55.804 | 63.294 | 1.00 | 0.00 | C |
| ATOM | 1091 | N1   | G B | 17 | -54.320 | -52.839 | 60.232 | 1.00 | 0.00 | N |
| ATOM | 1092 | C2   | G B | 17 | -54.515 | -53.180 | 61.559 | 1.00 | 0.00 | C |
| ATOM | 1093 | N2   | G B | 17 | -55.600 | -52.663 | 62.147 | 1.00 | 0.00 | N |
| ATOM | 1094 | N3   | G B | 17 | -53.691 | -53.971 | 62.243 | 1.00 | 0.00 | N |
| ATOM | 1095 | C4   | G B | 17 | -52.650 | -54.409 | 61.487 | 1.00 | 0.00 | C |
| ATOM | 1096 | C5   | G B | 17 | -52.377 | -54.125 | 60.161 | 1.00 | 0.00 | C |
| ATOM | 1097 | C6   | G B | 17 | -53.248 | -53.281 | 59.434 | 1.00 | 0.00 | C |
| ATOM | 1098 | O6   | G B | 17 | -53.177 | -52.917 | 58.261 | 1.00 | 0.00 | O |
| ATOM | 1099 | N7   | G B | 17 | -51.208 | -54.773 | 59.758 | 1.00 | 0.00 | N |
| ATOM | 1100 | C8   | G B | 17 | -50.815 | -55.412 | 60.829 | 1.00 | 0.00 | C |
| ATOM | 1101 | N9   | G B | 17 | -51.641 | -55.241 | 61.922 | 1.00 | 0.00 | N |
| ATOM | 1102 | C2'  | G B | 17 | -50.996 | -57.234 | 63.324 | 1.00 | 0.00 | C |
| ATOM | 1103 | C3'  | G B | 17 | -50.151 | -57.237 | 64.589 | 1.00 | 0.00 | C |
| ATOM | 1104 | O3'  | G B | 17 | -50.990 | -57.487 | 65.713 | 1.00 | 0.00 | O |
| ATOM | 1105 | C4'  | G B | 17 | -49.565 | -55.826 | 64.608 | 1.00 | 0.00 | C |
| ATOM | 1106 | O4'  | G B | 17 | -50.612 | -54.994 | 64.014 | 1.00 | 0.00 | O |
| ATOM | 1107 | C5'  | G B | 17 | -48.286 | -55.620 | 63.833 | 1.00 | 0.00 | C |
| ATOM | 1108 | O5'  | G B | 17 | -48.308 | -56.423 | 62.626 | 1.00 | 0.00 | O |



|      |      |      |     |    |         |         |        |      |      |   |
|------|------|------|-----|----|---------|---------|--------|------|------|---|
| ATOM | 1109 | O1P  | G B | 17 | -46.467 | -58.097 | 63.007 | 1.00 | 0.00 | O |
| ATOM | 1110 | O2P  | G B | 17 | -47.100 | -57.438 | 60.671 | 1.00 | 0.00 | O |
| ATOM | 1111 | P    | G B | 17 | -46.939 | -57.042 | 62.090 | 1.00 | 0.00 | P |
| ATOM | 1112 | H1   | G B | 17 | -55.015 | -52.213 | 59.795 | 1.00 | 0.00 | H |
| ATOM | 1113 | H8   | G B | 17 | -49.917 | -56.027 | 60.858 | 1.00 | 0.00 | H |
| ATOM | 1114 | H1'  | G B | 17 | -52.491 | -55.734 | 63.780 | 1.00 | 0.00 | H |
| ATOM | 1115 | H21  | G B | 17 | -56.232 | -52.048 | 61.613 | 1.00 | 0.00 | H |
| ATOM | 1116 | H3'  | G B | 17 | -49.362 | -57.989 | 64.552 | 1.00 | 0.00 | H |
| ATOM | 1117 | H22  | G B | 17 | -55.803 | -52.880 | 63.133 | 1.00 | 0.00 | H |
| ATOM | 1118 | H4'  | G B | 17 | -49.365 | -55.580 | 65.650 | 1.00 | 0.00 | H |
| ATOM | 1119 | H2'1 | G B | 17 | -50.396 | -57.475 | 62.446 | 1.00 | 0.00 | H |
| ATOM | 1120 | H2'2 | G B | 17 | -51.800 | -57.968 | 63.383 | 1.00 | 0.00 | H |
| ATOM | 1121 | H5'1 | G B | 17 | -48.191 | -54.566 | 63.572 | 1.00 | 0.00 | H |
| ATOM | 1122 | H5'2 | G B | 17 | -47.439 | -55.912 | 64.454 | 1.00 | 0.00 | H |
| ATOM | 1123 | C1'  | C B | 18 | -56.328 | -56.768 | 63.977 | 1.00 | 0.00 | C |
| ATOM | 1124 | N1   | C B | 18 | -55.740 | -56.778 | 62.608 | 1.00 | 0.00 | N |
| ATOM | 1125 | C2   | C B | 18 | -56.371 | -56.021 | 61.622 | 1.00 | 0.00 | C |
| ATOM | 1126 | O2   | C B | 18 | -57.385 | -55.378 | 61.920 | 1.00 | 0.00 | O |
| ATOM | 1127 | N3   | C B | 18 | -55.851 | -56.018 | 60.371 | 1.00 | 0.00 | N |
| ATOM | 1128 | C4   | C B | 18 | -54.752 | -56.726 | 60.080 | 1.00 | 0.00 | C |
| ATOM | 1129 | N4   | C B | 18 | -54.287 | -56.685 | 58.841 | 1.00 | 0.00 | N |
| ATOM | 1130 | C5   | C B | 18 | -54.086 | -57.514 | 61.073 | 1.00 | 0.00 | C |
| ATOM | 1131 | C6   | C B | 18 | -54.624 | -57.500 | 62.326 | 1.00 | 0.00 | C |
| ATOM | 1132 | C2'  | C B | 18 | -56.262 | -58.115 | 64.683 | 1.00 | 0.00 | C |
| ATOM | 1133 | C3'  | C B | 18 | -56.022 | -57.704 | 66.128 | 1.00 | 0.00 | C |
| ATOM | 1134 | O3'  | C B | 18 | -57.274 | -57.408 | 66.743 | 1.00 | 0.00 | O |
| ATOM | 1135 | C4'  | C B | 18 | -55.141 | -56.465 | 65.986 | 1.00 | 0.00 | C |
| ATOM | 1136 | O4'  | C B | 18 | -55.602 | -55.832 | 64.749 | 1.00 | 0.00 | O |
| ATOM | 1137 | C5'  | C B | 18 | -53.654 | -56.707 | 65.879 | 1.00 | 0.00 | C |
| ATOM | 1138 | O5'  | C B | 18 | -53.408 | -57.914 | 65.113 | 1.00 | 0.00 | O |
| ATOM | 1139 | O1P  | C B | 18 | -52.387 | -59.478 | 66.801 | 1.00 | 0.00 | O |
| ATOM | 1140 | O2P  | C B | 18 | -51.839 | -59.731 | 64.365 | 1.00 | 0.00 | O |
| ATOM | 1141 | P    | C B | 18 | -52.157 | -58.824 | 65.496 | 1.00 | 0.00 | P |
| ATOM | 1142 | H5   | C B | 18 | -53.194 | -58.094 | 60.840 | 1.00 | 0.00 | H |
| ATOM | 1143 | H6   | C B | 18 | -54.151 | -58.083 | 63.116 | 1.00 | 0.00 | H |
| ATOM | 1144 | H1'  | C B | 18 | -57.357 | -56.416 | 63.902 | 1.00 | 0.00 | H |
| ATOM | 1145 | H3'  | C B | 18 | -55.515 | -58.484 | 66.695 | 1.00 | 0.00 | H |
| ATOM | 1146 | H4'  | C B | 18 | -55.314 | -55.850 | 66.869 | 1.00 | 0.00 | H |
| ATOM | 1147 | H41  | C B | 18 | -53.441 | -57.219 | 58.590 | 1.00 | 0.00 | H |
| ATOM | 1148 | H42  | C B | 18 | -54.768 | -56.117 | 58.128 | 1.00 | 0.00 | H |
| ATOM | 1149 | H2'1 | C B | 18 | -55.451 | -58.739 | 64.309 | 1.00 | 0.00 | H |
| ATOM | 1150 | H2'2 | C B | 18 | -57.187 | -58.682 | 64.579 | 1.00 | 0.00 | H |
| ATOM | 1151 | H5'1 | C B | 18 | -53.186 | -55.855 | 65.384 | 1.00 | 0.00 | H |
| ATOM | 1152 | H5'2 | C B | 18 | -53.235 | -56.814 | 66.878 | 1.00 | 0.00 | H |
| ATOM | 1153 | C1'  | C B | 19 | -61.076 | -56.919 | 62.575 | 1.00 | 0.00 | C |
| ATOM | 1154 | N1   | C B | 19 | -60.016 | -57.524 | 61.724 | 1.00 | 0.00 | N |
| ATOM | 1155 | C2   | C B | 19 | -59.973 | -57.162 | 60.378 | 1.00 | 0.00 | C |
| ATOM | 1156 | O2   | C B | 19 | -60.811 | -56.358 | 59.949 | 1.00 | 0.00 | O |
| ATOM | 1157 | N3   | C B | 19 | -59.015 | -57.702 | 59.587 | 1.00 | 0.00 | N |
| ATOM | 1158 | C4   | C B | 19 | -58.122 | -58.569 | 60.081 | 1.00 | 0.00 | C |
| ATOM | 1159 | N4   | C B | 19 | -57.208 | -59.065 | 59.264 | 1.00 | 0.00 | N |
| ATOM | 1160 | C5   | C B | 19 | -58.145 | -58.959 | 61.458 | 1.00 | 0.00 | C |
| ATOM | 1161 | C6   | C B | 19 | -59.116 | -58.403 | 62.236 | 1.00 | 0.00 | C |
| ATOM | 1162 | C2'  | C B | 19 | -61.656 | -57.878 | 63.605 | 1.00 | 0.00 | C |



|      |    |      |     |   |         |         |        |      |      |   |
|------|----|------|-----|---|---------|---------|--------|------|------|---|
| ATOM | 1  | C1'  | A A | 1 | -74.687 | -37.140 | 82.455 | 1.00 | 0.00 | C |
| ATOM | 2  | N1   | A A | 1 | -73.079 | -39.671 | 86.619 | 1.00 | 0.00 | N |
| ATOM | 3  | C2   | A A | 1 | -73.652 | -38.482 | 86.457 | 1.00 | 0.00 | C |
| ATOM | 4  | N3   | A A | 1 | -74.046 | -37.888 | 85.350 | 1.00 | 0.00 | N |
| ATOM | 5  | C4   | A A | 1 | -73.786 | -38.668 | 84.284 | 1.00 | 0.00 | C |
| ATOM | 6  | C5   | A A | 1 | -73.205 | -39.905 | 84.282 | 1.00 | 0.00 | C |
| ATOM | 7  | C6   | A A | 1 | -72.832 | -40.426 | 85.539 | 1.00 | 0.00 | C |
| ATOM | 8  | N6   | A A | 1 | -72.252 | -41.630 | 85.692 | 1.00 | 0.00 | N |
| ATOM | 9  | N7   | A A | 1 | -73.099 | -40.404 | 82.995 | 1.00 | 0.00 | N |
| ATOM | 10 | C8   | A A | 1 | -73.611 | -39.467 | 82.254 | 1.00 | 0.00 | C |
| ATOM | 11 | N9   | A A | 1 | -74.051 | -38.382 | 82.968 | 1.00 | 0.00 | N |
| ATOM | 12 | C2'  | A A | 1 | -74.106 | -36.653 | 81.134 | 1.00 | 0.00 | C |
| ATOM | 13 | C3'  | A A | 1 | -75.335 | -36.090 | 80.437 | 1.00 | 0.00 | C |
| ATOM | 14 | O3'  | A A | 1 | -75.548 | -34.750 | 80.872 | 1.00 | 0.00 | O |
| ATOM | 15 | C4'  | A A | 1 | -76.448 | -37.031 | 80.896 | 1.00 | 0.00 | C |
| ATOM | 16 | O4'  | A A | 1 | -76.061 | -37.410 | 82.256 | 1.00 | 0.00 | O |
| ATOM | 17 | C5'  | A A | 1 | -76.642 | -38.287 | 80.081 | 1.00 | 0.00 | C |
| ATOM | 18 | O5'  | A A | 1 | -75.357 | -38.784 | 79.630 | 1.00 | 0.00 | O |
| ATOM | 19 | H2   | A A | 1 | -73.820 | -37.917 | 87.372 | 1.00 | 0.00 | H |
| ATOM | 20 | H8   | A A | 1 | -73.686 | -39.537 | 81.170 | 1.00 | 0.00 | H |
| ATOM | 21 | H1'  | A A | 1 | -74.604 | -36.372 | 83.225 | 1.00 | 0.00 | H |
| ATOM | 22 | H3'  | A A | 1 | -75.231 | -36.105 | 79.351 | 1.00 | 0.00 | H |
| ATOM | 23 | H4'  | A A | 1 | -77.376 | -36.463 | 80.859 | 1.00 | 0.00 | H |
| ATOM | 24 | H61  | A A | 1 | -72.001 | -41.964 | 86.630 | 1.00 | 0.00 | H |
| ATOM | 25 | H62  | A A | 1 | -72.060 | -42.215 | 84.865 | 1.00 | 0.00 | H |
| ATOM | 26 | H5T  | A A | 1 | -75.304 | -39.216 | 78.774 | 1.00 | 0.00 | H |
| ATOM | 27 | H2'1 | A A | 1 | -73.657 | -37.460 | 80.557 | 1.00 | 0.00 | H |
| ATOM | 28 | H2'2 | A A | 1 | -73.344 | -35.886 | 81.274 | 1.00 | 0.00 | H |
| ATOM | 29 | H5'1 | A A | 1 | -77.132 | -39.041 | 80.698 | 1.00 | 0.00 | H |
| ATOM | 30 | H5'2 | A A | 1 | -77.272 | -38.064 | 79.222 | 1.00 | 0.00 | H |
| ATOM | 31 | C1'  | G A | 2 | -72.327 | -34.047 | 85.540 | 1.00 | 0.00 | C |
| ATOM | 32 | N1   | G A | 2 | -69.990 | -38.291 | 87.130 | 1.00 | 0.00 | N |
| ATOM | 33 | C2   | G A | 2 | -70.495 | -37.232 | 87.859 | 1.00 | 0.00 | C |
| ATOM | 34 | N2   | G A | 2 | -70.358 | -37.312 | 89.187 | 1.00 | 0.00 | N |
| ATOM | 35 | N3   | G A | 2 | -71.091 | -36.176 | 87.308 | 1.00 | 0.00 | N |
| ATOM | 36 | C4   | G A | 2 | -71.136 | -36.258 | 85.951 | 1.00 | 0.00 | C |
| ATOM | 37 | C5   | G A | 2 | -70.655 | -37.274 | 85.140 | 1.00 | 0.00 | C |
| ATOM | 38 | C6   | G A | 2 | -70.027 | -38.398 | 85.728 | 1.00 | 0.00 | C |
| ATOM | 39 | O6   | G A | 2 | -69.544 | -39.390 | 85.182 | 1.00 | 0.00 | O |
| ATOM | 40 | N7   | G A | 2 | -70.899 | -36.977 | 83.798 | 1.00 | 0.00 | N |
| ATOM | 41 | C8   | G A | 2 | -71.507 | -35.819 | 83.837 | 1.00 | 0.00 | C |
| ATOM | 42 | N9   | G A | 2 | -71.687 | -35.318 | 85.110 | 1.00 | 0.00 | N |
| ATOM | 43 | C2'  | G A | 2 | -72.047 | -32.871 | 84.613 | 1.00 | 0.00 | C |
| ATOM | 44 | C3'  | G A | 2 | -73.357 | -32.105 | 84.663 | 1.00 | 0.00 | C |
| ATOM | 45 | O3'  | G A | 2 | -73.355 | -31.246 | 85.801 | 1.00 | 0.00 | O |
| ATOM | 46 | C4'  | G A | 2 | -74.397 | -33.218 | 84.782 | 1.00 | 0.00 | C |
| ATOM | 47 | O4'  | G A | 2 | -73.727 | -34.255 | 85.567 | 1.00 | 0.00 | O |
| ATOM | 48 | C5'  | G A | 2 | -74.880 | -33.827 | 83.487 | 1.00 | 0.00 | C |
| ATOM | 49 | O5'  | G A | 2 | -73.784 | -33.901 | 82.542 | 1.00 | 0.00 | O |
| ATOM | 50 | O1P  | G A | 2 | -74.475 | -32.303 | 80.724 | 1.00 | 0.00 | O |
| ATOM | 51 | O2P  | G A | 2 | -72.963 | -34.233 | 80.191 | 1.00 | 0.00 | O |
| ATOM | 52 | P    | G A | 2 | -74.095 | -33.704 | 80.990 | 1.00 | 0.00 | P |
| ATOM | 53 | H1   | G A | 2 | -69.550 | -39.062 | 87.655 | 1.00 | 0.00 | H |
| ATOM | 54 | H8   | G A | 2 | -71.843 | -35.296 | 82.942 | 1.00 | 0.00 | H |

|      |     |      |     |   |         |         |        |      |      |   |
|------|-----|------|-----|---|---------|---------|--------|------|------|---|
| ATOM | 55  | H1'  | G A | 2 | -72.002 | -33.827 | 86.557 | 1.00 | 0.00 | H |
| ATOM | 56  | H21  | G A | 2 | -69.899 | -38.132 | 89.609 | 1.00 | 0.00 | H |
| ATOM | 57  | H3'  | G A | 2 | -73.519 | -31.511 | 83.763 | 1.00 | 0.00 | H |
| ATOM | 58  | H22  | G A | 2 | -70.713 | -36.553 | 89.787 | 1.00 | 0.00 | H |
| ATOM | 59  | H4'  | G A | 2 | -75.261 | -32.791 | 85.291 | 1.00 | 0.00 | H |
| ATOM | 60  | H2'1 | G A | 2 | -71.814 | -33.194 | 83.597 | 1.00 | 0.00 | H |
| ATOM | 61  | H2'2 | G A | 2 | -71.214 | -32.259 | 84.962 | 1.00 | 0.00 | H |
| ATOM | 62  | H5'1 | G A | 2 | -75.265 | -34.827 | 83.683 | 1.00 | 0.00 | H |
| ATOM | 63  | H5'2 | G A | 2 | -75.680 | -33.209 | 83.078 | 1.00 | 0.00 | H |
| ATOM | 64  | C1'  | G A | 3 | -69.095 | -32.935 | 89.124 | 1.00 | 0.00 | C |
| ATOM | 65  | N1   | G A | 3 | -66.773 | -37.202 | 87.573 | 1.00 | 0.00 | N |
| ATOM | 66  | C2   | G A | 3 | -67.012 | -36.739 | 88.852 | 1.00 | 0.00 | C |
| ATOM | 67  | N2   | G A | 3 | -66.572 | -37.513 | 89.852 | 1.00 | 0.00 | N |
| ATOM | 68  | N3   | G A | 3 | -67.639 | -35.595 | 89.114 | 1.00 | 0.00 | N |
| ATOM | 69  | C4   | G A | 3 | -68.008 | -34.937 | 87.984 | 1.00 | 0.00 | C |
| ATOM | 70  | C5   | G A | 3 | -67.809 | -35.322 | 86.668 | 1.00 | 0.00 | C |
| ATOM | 71  | C6   | G A | 3 | -67.147 | -36.539 | 86.389 | 1.00 | 0.00 | C |
| ATOM | 72  | O6   | G A | 3 | -66.880 | -37.047 | 85.299 | 1.00 | 0.00 | O |
| ATOM | 73  | N7   | G A | 3 | -68.339 | -34.365 | 85.800 | 1.00 | 0.00 | N |
| ATOM | 74  | C8   | G A | 3 | -68.833 | -33.453 | 86.597 | 1.00 | 0.00 | C |
| ATOM | 75  | N9   | G A | 3 | -68.670 | -33.730 | 87.939 | 1.00 | 0.00 | N |
| ATOM | 76  | C2'  | G A | 3 | -68.953 | -31.431 | 88.938 | 1.00 | 0.00 | C |
| ATOM | 77  | C3'  | G A | 3 | -70.154 | -30.901 | 89.702 | 1.00 | 0.00 | C |
| ATOM | 78  | O3'  | G A | 3 | -69.820 | -30.793 | 91.084 | 1.00 | 0.00 | O |
| ATOM | 79  | C4'  | G A | 3 | -71.217 | -31.969 | 89.449 | 1.00 | 0.00 | C |
| ATOM | 80  | O4'  | G A | 3 | -70.460 | -33.218 | 89.366 | 1.00 | 0.00 | O |
| ATOM | 81  | C5'  | G A | 3 | -72.035 | -31.815 | 88.187 | 1.00 | 0.00 | C |
| ATOM | 82  | O5'  | G A | 3 | -71.201 | -31.294 | 87.122 | 1.00 | 0.00 | O |
| ATOM | 83  | O1P  | G A | 3 | -72.178 | -29.019 | 86.674 | 1.00 | 0.00 | O |
| ATOM | 84  | O2P  | G A | 3 | -70.983 | -30.252 | 84.846 | 1.00 | 0.00 | O |
| ATOM | 85  | P    | G A | 3 | -71.853 | -30.313 | 86.047 | 1.00 | 0.00 | P |
| ATOM | 86  | H1   | G A | 3 | -66.281 | -38.105 | 87.478 | 1.00 | 0.00 | H |
| ATOM | 87  | H8   | G A | 3 | -69.330 | -32.554 | 86.235 | 1.00 | 0.00 | H |
| ATOM | 88  | H1'  | G A | 3 | -68.524 | -33.278 | 89.987 | 1.00 | 0.00 | H |
| ATOM | 89  | H21  | G A | 3 | -66.089 | -38.399 | 89.642 | 1.00 | 0.00 | H |
| ATOM | 90  | H3'  | G A | 3 | -70.478 | -29.927 | 89.332 | 1.00 | 0.00 | H |
| ATOM | 91  | H22  | G A | 3 | -66.717 | -37.223 | 90.829 | 1.00 | 0.00 | H |
| ATOM | 92  | H4'  | G A | 3 | -71.902 | -31.942 | 90.296 | 1.00 | 0.00 | H |
| ATOM | 93  | H2'1 | G A | 3 | -68.990 | -31.139 | 87.889 | 1.00 | 0.00 | H |
| ATOM | 94  | H2'2 | G A | 3 | -68.018 | -31.050 | 89.351 | 1.00 | 0.00 | H |
| ATOM | 95  | H5'1 | G A | 3 | -72.437 | -32.786 | 87.902 | 1.00 | 0.00 | H |
| ATOM | 96  | H5'2 | G A | 3 | -72.860 | -31.128 | 88.378 | 1.00 | 0.00 | H |
| ATOM | 97  | C1'  | C A | 4 | -65.036 | -33.720 | 91.852 | 1.00 | 0.00 | C |
| ATOM | 98  | N1   | C A | 4 | -64.960 | -33.726 | 90.365 | 1.00 | 0.00 | N |
| ATOM | 99  | C2   | C A | 4 | -64.356 | -34.820 | 89.749 | 1.00 | 0.00 | C |
| ATOM | 100 | O2   | C A | 4 | -63.910 | -35.732 | 90.454 | 1.00 | 0.00 | O |
| ATOM | 101 | N3   | C A | 4 | -64.277 | -34.844 | 88.396 | 1.00 | 0.00 | N |
| ATOM | 102 | C4   | C A | 4 | -64.768 | -33.840 | 87.660 | 1.00 | 0.00 | C |
| ATOM | 103 | N4   | C A | 4 | -64.667 | -33.918 | 86.340 | 1.00 | 0.00 | N |
| ATOM | 104 | C5   | C A | 4 | -65.393 | -32.703 | 88.268 | 1.00 | 0.00 | C |
| ATOM | 105 | C6   | C A | 4 | -65.464 | -32.700 | 89.630 | 1.00 | 0.00 | C |
| ATOM | 106 | C2'  | C A | 4 | -64.826 | -32.346 | 92.472 | 1.00 | 0.00 | C |
| ATOM | 107 | C3'  | C A | 4 | -65.776 | -32.385 | 93.661 | 1.00 | 0.00 | C |
| ATOM | 108 | O3'  | C A | 4 | -65.120 | -33.014 | 94.760 | 1.00 | 0.00 | O |

|      |     |      |     |   |         |         |        |      |      |   |
|------|-----|------|-----|---|---------|---------|--------|------|------|---|
| ATOM | 109 | C4'  | C A | 4 | -66.945 | -33.213 | 93.134 | 1.00 | 0.00 | C |
| ATOM | 110 | O4'  | C A | 4 | -66.328 | -34.173 | 92.219 | 1.00 | 0.00 | O |
| ATOM | 111 | C5'  | C A | 4 | -68.019 | -32.458 | 92.388 | 1.00 | 0.00 | C |
| ATOM | 112 | O5'  | C A | 4 | -67.417 | -31.395 | 91.604 | 1.00 | 0.00 | O |
| ATOM | 113 | O1P  | C A | 4 | -68.295 | -29.301 | 92.689 | 1.00 | 0.00 | O |
| ATOM | 114 | O2P  | C A | 4 | -67.655 | -29.283 | 90.264 | 1.00 | 0.00 | O |
| ATOM | 115 | P    | C A | 4 | -68.223 | -30.033 | 91.409 | 1.00 | 0.00 | P |
| ATOM | 116 | H5   | C A | 4 | -65.790 | -31.881 | 87.671 | 1.00 | 0.00 | H |
| ATOM | 117 | H6   | C A | 4 | -65.935 | -31.859 | 90.139 | 1.00 | 0.00 | H |
| ATOM | 118 | H1'  | C A | 4 | -64.309 | -34.437 | 92.233 | 1.00 | 0.00 | H |
| ATOM | 119 | H3'  | C A | 4 | -66.099 | -31.388 | 93.957 | 1.00 | 0.00 | H |
| ATOM | 120 | H4'  | C A | 4 | -67.411 | -33.686 | 93.998 | 1.00 | 0.00 | H |
| ATOM | 121 | H41  | C A | 4 | -65.037 | -33.159 | 85.749 | 1.00 | 0.00 | H |
| ATOM | 122 | H42  | C A | 4 | -64.216 | -34.736 | 85.905 | 1.00 | 0.00 | H |
| ATOM | 123 | H2'1 | C A | 4 | -65.084 | -31.539 | 91.787 | 1.00 | 0.00 | H |
| ATOM | 124 | H2'2 | C A | 4 | -63.795 | -32.189 | 92.790 | 1.00 | 0.00 | H |
| ATOM | 125 | H5'1 | C A | 4 | -68.550 | -33.145 | 91.730 | 1.00 | 0.00 | H |
| ATOM | 126 | H5'2 | C A | 4 | -68.722 | -32.033 | 93.104 | 1.00 | 0.00 | H |
| ATOM | 127 | C1'  | C A | 5 | -60.521 | -35.580 | 92.673 | 1.00 | 0.00 | C |
| ATOM | 128 | N1   | C A | 5 | -60.797 | -34.779 | 91.449 | 1.00 | 0.00 | N |
| ATOM | 129 | C2   | C A | 5 | -60.438 | -35.325 | 90.218 | 1.00 | 0.00 | C |
| ATOM | 130 | O2   | C A | 5 | -59.907 | -36.444 | 90.191 | 1.00 | 0.00 | O |
| ATOM | 131 | N3   | C A | 5 | -60.682 | -34.612 | 89.091 | 1.00 | 0.00 | N |
| ATOM | 132 | C4   | C A | 5 | -61.256 | -33.404 | 89.151 | 1.00 | 0.00 | C |
| ATOM | 133 | N4   | C A | 5 | -61.473 | -32.753 | 88.019 | 1.00 | 0.00 | N |
| ATOM | 134 | C5   | C A | 5 | -61.633 | -32.818 | 90.403 | 1.00 | 0.00 | C |
| ATOM | 135 | C6   | C A | 5 | -61.381 | -33.555 | 91.523 | 1.00 | 0.00 | C |
| ATOM | 136 | C2'  | C A | 5 | -60.069 | -34.745 | 93.863 | 1.00 | 0.00 | C |
| ATOM | 137 | C3'  | C A | 5 | -60.712 | -35.481 | 95.028 | 1.00 | 0.00 | C |
| ATOM | 138 | O3'  | C A | 5 | -59.865 | -36.559 | 95.424 | 1.00 | 0.00 | O |
| ATOM | 139 | C4'  | C A | 5 | -62.030 | -35.970 | 94.436 | 1.00 | 0.00 | C |
| ATOM | 140 | O4'  | C A | 5 | -61.718 | -36.243 | 93.033 | 1.00 | 0.00 | O |
| ATOM | 141 | C5'  | C A | 5 | -63.191 | -35.004 | 94.494 | 1.00 | 0.00 | C |
| ATOM | 142 | O5'  | C A | 5 | -62.713 | -33.650 | 94.288 | 1.00 | 0.00 | O |
| ATOM | 143 | O1P  | C A | 5 | -63.152 | -32.534 | 96.500 | 1.00 | 0.00 | O |
| ATOM | 144 | O2P  | C A | 5 | -63.101 | -31.170 | 94.394 | 1.00 | 0.00 | O |
| ATOM | 145 | P    | C A | 5 | -63.438 | -32.455 | 95.054 | 1.00 | 0.00 | P |
| ATOM | 146 | H5   | C A | 5 | -62.096 | -31.832 | 90.458 | 1.00 | 0.00 | H |
| ATOM | 147 | H6   | C A | 5 | -61.655 | -33.153 | 92.500 | 1.00 | 0.00 | H |
| ATOM | 148 | H1'  | C A | 5 | -59.779 | -36.339 | 92.422 | 1.00 | 0.00 | H |
| ATOM | 149 | H3'  | C A | 5 | -60.881 | -34.824 | 95.882 | 1.00 | 0.00 | H |
| ATOM | 150 | H4'  | C A | 5 | -62.315 | -36.863 | 94.992 | 1.00 | 0.00 | H |
| ATOM | 151 | H41  | C A | 5 | -61.915 | -31.822 | 88.036 | 1.00 | 0.00 | H |
| ATOM | 152 | H42  | C A | 5 | -61.200 | -33.176 | 87.120 | 1.00 | 0.00 | H |
| ATOM | 153 | H2'1 | C A | 5 | -60.419 | -33.716 | 93.803 | 1.00 | 0.00 | H |
| ATOM | 154 | H2'2 | C A | 5 | -58.982 | -34.717 | 93.960 | 1.00 | 0.00 | H |
| ATOM | 155 | H5'1 | C A | 5 | -63.911 | -35.263 | 93.717 | 1.00 | 0.00 | H |
| ATOM | 156 | H5'2 | C A | 5 | -63.671 | -35.081 | 95.469 | 1.00 | 0.00 | H |
| ATOM | 157 | C1'  | G A | 6 | -56.090 | -37.285 | 91.262 | 1.00 | 0.00 | C |
| ATOM | 158 | N1   | G A | 6 | -56.928 | -34.409 | 87.132 | 1.00 | 0.00 | N |
| ATOM | 159 | C2   | G A | 6 | -56.410 | -35.688 | 87.233 | 1.00 | 0.00 | C |
| ATOM | 160 | N2   | G A | 6 | -56.067 | -36.278 | 86.082 | 1.00 | 0.00 | N |
| ATOM | 161 | N3   | G A | 6 | -56.247 | -36.326 | 88.391 | 1.00 | 0.00 | N |
| ATOM | 162 | C4   | G A | 6 | -56.639 | -35.577 | 89.454 | 1.00 | 0.00 | C |

|      |     |      |     |   |         |         |        |      |      |   |
|------|-----|------|-----|---|---------|---------|--------|------|------|---|
| ATOM | 163 | C5   | G A | 6 | -57.163 | -34.294 | 89.449 | 1.00 | 0.00 | C |
| ATOM | 164 | C6   | G A | 6 | -57.340 | -33.617 | 88.222 | 1.00 | 0.00 | C |
| ATOM | 165 | O6   | G A | 6 | -57.783 | -32.488 | 88.014 | 1.00 | 0.00 | O |
| ATOM | 166 | N7   | G A | 6 | -57.436 | -33.880 | 90.754 | 1.00 | 0.00 | N |
| ATOM | 167 | C8   | G A | 6 | -57.082 | -34.900 | 91.491 | 1.00 | 0.00 | C |
| ATOM | 168 | N9   | G A | 6 | -56.587 | -35.970 | 90.773 | 1.00 | 0.00 | N |
| ATOM | 169 | C2'  | G A | 6 | -55.312 | -37.200 | 92.567 | 1.00 | 0.00 | C |
| ATOM | 170 | C3'  | G A | 6 | -55.714 | -38.492 | 93.261 | 1.00 | 0.00 | C |
| ATOM | 171 | O3'  | G A | 6 | -54.880 | -39.552 | 92.798 | 1.00 | 0.00 | O |
| ATOM | 172 | C4'  | G A | 6 | -57.168 | -38.671 | 92.831 | 1.00 | 0.00 | C |
| ATOM | 173 | O4'  | G A | 6 | -57.214 | -38.118 | 91.477 | 1.00 | 0.00 | O |
| ATOM | 174 | C5'  | G A | 6 | -58.208 | -37.972 | 93.674 | 1.00 | 0.00 | C |
| ATOM | 175 | O5'  | G A | 6 | -57.696 | -36.694 | 94.127 | 1.00 | 0.00 | O |
| ATOM | 176 | O1P  | G A | 6 | -57.521 | -36.989 | 96.620 | 1.00 | 0.00 | O |
| ATOM | 177 | O2P  | G A | 6 | -57.866 | -34.702 | 95.649 | 1.00 | 0.00 | O |
| ATOM | 178 | P    | G A | 6 | -58.132 | -36.159 | 95.565 | 1.00 | 0.00 | P |
| ATOM | 179 | H1   | G A | 6 | -57.020 | -34.007 | 86.187 | 1.00 | 0.00 | H |
| ATOM | 180 | H8   | G A | 6 | -57.169 | -34.907 | 92.578 | 1.00 | 0.00 | H |
| ATOM | 181 | H1'  | G A | 6 | -55.485 | -37.735 | 90.474 | 1.00 | 0.00 | H |
| ATOM | 182 | H21  | G A | 6 | -56.199 | -35.780 | 85.190 | 1.00 | 0.00 | H |
| ATOM | 183 | H3'  | G A | 6 | -55.630 | -38.417 | 94.346 | 1.00 | 0.00 | H |
| ATOM | 184 | H22  | G A | 6 | -55.672 | -37.230 | 86.089 | 1.00 | 0.00 | H |
| ATOM | 185 | H4'  | G A | 6 | -57.378 | -39.739 | 92.861 | 1.00 | 0.00 | H |
| ATOM | 186 | H2'1 | G A | 6 | -55.591 | -36.328 | 93.159 | 1.00 | 0.00 | H |
| ATOM | 187 | H2'2 | G A | 6 | -54.235 | -37.154 | 92.405 | 1.00 | 0.00 | H |
| ATOM | 188 | H5'1 | G A | 6 | -59.107 | -37.818 | 93.078 | 1.00 | 0.00 | H |
| ATOM | 189 | H5'2 | G A | 6 | -58.452 | -38.597 | 94.532 | 1.00 | 0.00 | H |
| ATOM | 190 | C1'  | C A | 7 | -52.255 | -37.666 | 88.150 | 1.00 | 0.00 | C |
| ATOM | 191 | N1   | C A | 7 | -52.755 | -36.329 | 88.575 | 1.00 | 0.00 | N |
| ATOM | 192 | C2   | C A | 7 | -53.044 | -35.396 | 87.581 | 1.00 | 0.00 | C |
| ATOM | 193 | O2   | C A | 7 | -52.875 | -35.712 | 86.397 | 1.00 | 0.00 | O |
| ATOM | 194 | N3   | C A | 7 | -53.499 | -34.173 | 87.947 | 1.00 | 0.00 | N |
| ATOM | 195 | C4   | C A | 7 | -53.672 | -33.859 | 89.237 | 1.00 | 0.00 | C |
| ATOM | 196 | N4   | C A | 7 | -54.122 | -32.650 | 89.538 | 1.00 | 0.00 | N |
| ATOM | 197 | C5   | C A | 7 | -53.378 | -34.797 | 90.280 | 1.00 | 0.00 | C |
| ATOM | 198 | C6   | C A | 7 | -52.924 | -36.026 | 89.889 | 1.00 | 0.00 | C |
| ATOM | 199 | C2'  | C A | 7 | -51.185 | -38.242 | 89.069 | 1.00 | 0.00 | C |
| ATOM | 200 | C3'  | C A | 7 | -51.508 | -39.727 | 89.038 | 1.00 | 0.00 | C |
| ATOM | 201 | O3'  | C A | 7 | -50.889 | -40.317 | 87.896 | 1.00 | 0.00 | O |
| ATOM | 202 | C4'  | C A | 7 | -53.032 | -39.743 | 88.941 | 1.00 | 0.00 | C |
| ATOM | 203 | O4'  | C A | 7 | -53.357 | -38.555 | 88.150 | 1.00 | 0.00 | O |
| ATOM | 204 | C5'  | C A | 7 | -53.788 | -39.673 | 90.248 | 1.00 | 0.00 | C |
| ATOM | 205 | O5'  | C A | 7 | -53.087 | -38.807 | 91.174 | 1.00 | 0.00 | O |
| ATOM | 206 | O1P  | C A | 7 | -52.349 | -40.376 | 92.998 | 1.00 | 0.00 | O |
| ATOM | 207 | O2P  | C A | 7 | -52.743 | -37.952 | 93.512 | 1.00 | 0.00 | O |
| ATOM | 208 | P    | C A | 7 | -53.130 | -39.151 | 92.731 | 1.00 | 0.00 | P |
| ATOM | 209 | H5   | C A | 7 | -53.510 | -34.545 | 91.333 | 1.00 | 0.00 | H |
| ATOM | 210 | H6   | C A | 7 | -52.695 | -36.776 | 90.646 | 1.00 | 0.00 | H |
| ATOM | 211 | H1'  | C A | 7 | -51.890 | -37.584 | 87.128 | 1.00 | 0.00 | H |
| ATOM | 212 | H3'  | C A | 7 | -51.165 | -40.237 | 89.939 | 1.00 | 0.00 | H |
| ATOM | 213 | H4'  | C A | 7 | -53.308 | -40.674 | 88.447 | 1.00 | 0.00 | H |
| ATOM | 214 | H41  | C A | 7 | -54.266 | -32.383 | 90.522 | 1.00 | 0.00 | H |
| ATOM | 215 | H42  | C A | 7 | -54.330 | -31.975 | 88.787 | 1.00 | 0.00 | H |
| ATOM | 216 | H2'1 | C A | 7 | -51.250 | -37.842 | 90.080 | 1.00 | 0.00 | H |

|      |     |      |     |   |         |         |        |      |      |   |
|------|-----|------|-----|---|---------|---------|--------|------|------|---|
| ATOM | 217 | H2'2 | C A | 7 | -50.177 | -38.046 | 88.703 | 1.00 | 0.00 | H |
| ATOM | 218 | H5'1 | C A | 7 | -54.789 | -39.282 | 90.063 | 1.00 | 0.00 | H |
| ATOM | 219 | H5'2 | C A | 7 | -53.867 | -40.675 | 90.669 | 1.00 | 0.00 | H |
| ATOM | 220 | C1'  | A A | 8 | -49.292 | -36.080 | 84.518 | 1.00 | 0.00 | C |
| ATOM | 221 | N1   | A A | 8 | -50.856 | -31.436 | 86.046 | 1.00 | 0.00 | N |
| ATOM | 222 | C2   | A A | 8 | -50.679 | -31.974 | 84.843 | 1.00 | 0.00 | C |
| ATOM | 223 | N3   | A A | 8 | -50.275 | -33.183 | 84.518 | 1.00 | 0.00 | N |
| ATOM | 224 | C4   | A A | 8 | -50.024 | -33.903 | 85.627 | 1.00 | 0.00 | C |
| ATOM | 225 | C5   | A A | 8 | -50.153 | -33.502 | 86.927 | 1.00 | 0.00 | C |
| ATOM | 226 | C6   | A A | 8 | -50.599 | -32.179 | 87.133 | 1.00 | 0.00 | C |
| ATOM | 227 | N6   | A A | 8 | -50.774 | -31.647 | 88.355 | 1.00 | 0.00 | N |
| ATOM | 228 | N7   | A A | 8 | -49.805 | -34.517 | 87.801 | 1.00 | 0.00 | N |
| ATOM | 229 | C8   | A A | 8 | -49.471 | -35.501 | 87.018 | 1.00 | 0.00 | C |
| ATOM | 230 | N9   | A A | 8 | -49.581 | -35.203 | 85.684 | 1.00 | 0.00 | N |
| ATOM | 231 | C2'  | A A | 8 | -48.086 | -36.988 | 84.717 | 1.00 | 0.00 | C |
| ATOM | 232 | C3'  | A A | 8 | -48.513 | -38.248 | 83.982 | 1.00 | 0.00 | C |
| ATOM | 233 | O3'  | A A | 8 | -48.215 | -38.103 | 82.596 | 1.00 | 0.00 | O |
| ATOM | 234 | C4'  | A A | 8 | -50.017 | -38.303 | 84.246 | 1.00 | 0.00 | C |
| ATOM | 235 | O4'  | A A | 8 | -50.425 | -36.897 | 84.301 | 1.00 | 0.00 | O |
| ATOM | 236 | C5'  | A A | 8 | -50.449 | -38.983 | 85.523 | 1.00 | 0.00 | C |
| ATOM | 237 | O5'  | A A | 8 | -49.496 | -38.696 | 86.578 | 1.00 | 0.00 | O |
| ATOM | 238 | O1P  | A A | 8 | -48.478 | -40.946 | 87.069 | 1.00 | 0.00 | O |
| ATOM | 239 | O2P  | A A | 8 | -48.568 | -39.191 | 88.860 | 1.00 | 0.00 | O |
| ATOM | 240 | P    | A A | 8 | -49.208 | -39.816 | 87.677 | 1.00 | 0.00 | P |
| ATOM | 241 | H2   | A A | 8 | -50.903 | -31.318 | 84.004 | 1.00 | 0.00 | H |
| ATOM | 242 | H8   | A A | 8 | -49.136 | -36.471 | 87.386 | 1.00 | 0.00 | H |
| ATOM | 243 | H1'  | A A | 8 | -49.163 | -35.446 | 83.640 | 1.00 | 0.00 | H |
| ATOM | 244 | H3'  | A A | 8 | -48.014 | -39.136 | 84.368 | 1.00 | 0.00 | H |
| ATOM | 245 | H4'  | A A | 8 | -50.465 | -38.843 | 83.413 | 1.00 | 0.00 | H |
| ATOM | 246 | H61  | A A | 8 | -51.104 | -30.677 | 88.451 | 1.00 | 0.00 | H |
| ATOM | 247 | H62  | A A | 8 | -50.576 | -32.211 | 89.195 | 1.00 | 0.00 | H |
| ATOM | 248 | H2'1 | A A | 8 | -47.890 | -37.190 | 85.769 | 1.00 | 0.00 | H |
| ATOM | 249 | H2'2 | A A | 8 | -47.177 | -36.567 | 84.288 | 1.00 | 0.00 | H |
| ATOM | 250 | H5'1 | A A | 8 | -51.434 | -38.613 | 85.808 | 1.00 | 0.00 | H |
| ATOM | 251 | H5'2 | A A | 8 | -50.502 | -40.058 | 85.358 | 1.00 | 0.00 | H |
| ATOM | 252 | C1'  | C A | 9 | -47.170 | -32.551 | 81.740 | 1.00 | 0.00 | C |
| ATOM | 253 | N1   | C A | 9 | -47.104 | -32.481 | 83.226 | 1.00 | 0.00 | N |
| ATOM | 254 | C2   | C A | 9 | -47.492 | -31.294 | 83.842 | 1.00 | 0.00 | C |
| ATOM | 255 | O2   | C A | 9 | -47.872 | -30.351 | 83.135 | 1.00 | 0.00 | O |
| ATOM | 256 | N3   | C A | 9 | -47.439 | -31.211 | 85.194 | 1.00 | 0.00 | N |
| ATOM | 257 | C4   | C A | 9 | -47.021 | -32.247 | 85.932 | 1.00 | 0.00 | C |
| ATOM | 258 | N4   | C A | 9 | -46.992 | -32.112 | 87.250 | 1.00 | 0.00 | N |
| ATOM | 259 | C5   | C A | 9 | -46.612 | -33.481 | 85.325 | 1.00 | 0.00 | C |
| ATOM | 260 | C6   | C A | 9 | -46.678 | -33.544 | 83.962 | 1.00 | 0.00 | C |
| ATOM | 261 | C2'  | C A | 9 | -46.024 | -33.329 | 81.111 | 1.00 | 0.00 | C |
| ATOM | 262 | C3'  | C A | 9 | -46.710 | -34.008 | 79.934 | 1.00 | 0.00 | C |
| ATOM | 263 | O3'  | C A | 9 | -46.746 | -33.108 | 78.830 | 1.00 | 0.00 | O |
| ATOM | 264 | C4'  | C A | 9 | -48.103 | -34.308 | 80.481 | 1.00 | 0.00 | C |
| ATOM | 265 | O4'  | C A | 9 | -48.381 | -33.198 | 81.394 | 1.00 | 0.00 | O |
| ATOM | 266 | C5'  | C A | 9 | -48.263 | -35.606 | 81.238 | 1.00 | 0.00 | C |
| ATOM | 267 | O5'  | C A | 9 | -47.063 | -35.875 | 82.007 | 1.00 | 0.00 | O |
| ATOM | 268 | O1P  | C A | 9 | -46.129 | -37.945 | 80.922 | 1.00 | 0.00 | O |
| ATOM | 269 | O2P  | C A | 9 | -45.650 | -37.472 | 83.339 | 1.00 | 0.00 | O |
| ATOM | 270 | P    | C A | 9 | -46.603 | -37.390 | 82.204 | 1.00 | 0.00 | P |

|      |     |      |     |    |         |         |        |      |      |   |
|------|-----|------|-----|----|---------|---------|--------|------|------|---|
| ATOM | 271 | H5   | C A | 9  | -46.265 | -34.325 | 85.922 | 1.00 | 0.00 | H |
| ATOM | 272 | H6   | C A | 9  | -46.385 | -34.463 | 83.456 | 1.00 | 0.00 | H |
| ATOM | 273 | H1'  | C A | 9  | -47.211 | -31.533 | 81.353 | 1.00 | 0.00 | H |
| ATOM | 274 | H3'  | C A | 9  | -46.198 | -34.924 | 79.637 | 1.00 | 0.00 | H |
| ATOM | 275 | H4'  | C A | 9  | -48.779 | -34.336 | 79.627 | 1.00 | 0.00 | H |
| ATOM | 276 | H41  | C A | 9  | -46.677 | -32.896 | 87.841 | 1.00 | 0.00 | H |
| ATOM | 277 | H42  | C A | 9  | -47.284 | -31.224 | 87.683 | 1.00 | 0.00 | H |
| ATOM | 278 | H2'1 | C A | 9  | -45.594 | -34.060 | 81.794 | 1.00 | 0.00 | H |
| ATOM | 279 | H2'2 | C A | 9  | -45.215 | -32.677 | 80.777 | 1.00 | 0.00 | H |
| ATOM | 280 | H5'1 | C A | 9  | -49.120 | -35.528 | 81.908 | 1.00 | 0.00 | H |
| ATOM | 281 | H5'2 | C A | 9  | -48.435 | -36.414 | 80.528 | 1.00 | 0.00 | H |
| ATOM | 282 | C1'  | C A | 10 | -45.497 | -27.971 | 80.872 | 1.00 | 0.00 | C |
| ATOM | 283 | N1   | C A | 10 | -45.078 | -28.709 | 82.095 | 1.00 | 0.00 | N |
| ATOM | 284 | C2   | C A | 10 | -45.221 | -28.069 | 83.324 | 1.00 | 0.00 | C |
| ATOM | 285 | O2   | C A | 10 | -45.686 | -26.921 | 83.349 | 1.00 | 0.00 | O |
| ATOM | 286 | N3   | C A | 10 | -44.846 | -28.723 | 84.450 | 1.00 | 0.00 | N |
| ATOM | 287 | C4   | C A | 10 | -44.345 | -29.964 | 84.390 | 1.00 | 0.00 | C |
| ATOM | 288 | N4   | C A | 10 | -43.996 | -30.559 | 85.523 | 1.00 | 0.00 | N |
| ATOM | 289 | C5   | C A | 10 | -44.183 | -30.646 | 83.140 | 1.00 | 0.00 | C |
| ATOM | 290 | C6   | C A | 10 | -44.572 | -29.968 | 82.018 | 1.00 | 0.00 | C |
| ATOM | 291 | C2'  | C A | 10 | -44.593 | -28.210 | 79.671 | 1.00 | 0.00 | C |
| ATOM | 292 | C3'  | C A | 10 | -45.585 | -28.192 | 78.518 | 1.00 | 0.00 | C |
| ATOM | 293 | O3'  | C A | 10 | -45.812 | -26.843 | 78.117 | 1.00 | 0.00 | O |
| ATOM | 294 | C4'  | C A | 10 | -46.829 | -28.830 | 79.131 | 1.00 | 0.00 | C |
| ATOM | 295 | O4'  | C A | 10 | -46.800 | -28.408 | 80.531 | 1.00 | 0.00 | O |
| ATOM | 296 | C5'  | C A | 10 | -46.903 | -30.339 | 79.084 | 1.00 | 0.00 | C |
| ATOM | 297 | O5'  | C A | 10 | -45.579 | -30.901 | 79.275 | 1.00 | 0.00 | O |
| ATOM | 298 | O1P  | C A | 10 | -45.084 | -31.992 | 77.062 | 1.00 | 0.00 | O |
| ATOM | 299 | O2P  | C A | 10 | -44.016 | -32.864 | 79.158 | 1.00 | 0.00 | O |
| ATOM | 300 | P    | C A | 10 | -45.200 | -32.247 | 78.511 | 1.00 | 0.00 | P |
| ATOM | 301 | H5   | C A | 10 | -43.770 | -31.654 | 83.085 | 1.00 | 0.00 | H |
| ATOM | 302 | H6   | C A | 10 | -44.476 | -30.449 | 81.045 | 1.00 | 0.00 | H |
| ATOM | 303 | H1'  | C A | 10 | -45.552 | -26.911 | 81.115 | 1.00 | 0.00 | H |
| ATOM | 304 | H3'  | C A | 10 | -45.227 | -28.767 | 77.663 | 1.00 | 0.00 | H |
| ATOM | 305 | H4'  | C A | 10 | -47.687 | -28.439 | 78.584 | 1.00 | 0.00 | H |
| ATOM | 306 | H41  | C A | 10 | -43.611 | -31.514 | 85.505 | 1.00 | 0.00 | H |
| ATOM | 307 | H42  | C A | 10 | -44.112 | -30.065 | 86.420 | 1.00 | 0.00 | H |
| ATOM | 308 | H2'1 | C A | 10 | -44.070 | -29.164 | 79.728 | 1.00 | 0.00 | H |
| ATOM | 309 | H2'2 | C A | 10 | -43.839 | -27.429 | 79.559 | 1.00 | 0.00 | H |
| ATOM | 310 | H5'1 | C A | 10 | -47.570 | -30.690 | 79.872 | 1.00 | 0.00 | H |
| ATOM | 311 | H5'2 | C A | 10 | -47.297 | -30.647 | 78.116 | 1.00 | 0.00 | H |
| ATOM | 312 | C1'  | T A | 11 | -43.744 | -23.540 | 82.210 | 1.00 | 0.00 | C |
| ATOM | 313 | N1   | T A | 11 | -43.106 | -24.782 | 82.725 | 1.00 | 0.00 | N |
| ATOM | 314 | C2   | T A | 11 | -42.924 | -24.877 | 84.089 | 1.00 | 0.00 | C |
| ATOM | 315 | O2   | T A | 11 | -43.260 | -23.997 | 84.863 | 1.00 | 0.00 | O |
| ATOM | 316 | N3   | T A | 11 | -42.329 | -26.047 | 84.525 | 1.00 | 0.00 | N |
| ATOM | 317 | C4   | T A | 11 | -41.909 | -27.098 | 83.735 | 1.00 | 0.00 | C |
| ATOM | 318 | O4   | T A | 11 | -41.383 | -28.098 | 84.241 | 1.00 | 0.00 | O |
| ATOM | 319 | C5   | T A | 11 | -42.141 | -26.906 | 82.323 | 1.00 | 0.00 | C |
| ATOM | 320 | C6   | T A | 11 | -42.720 | -25.780 | 81.864 | 1.00 | 0.00 | C |
| ATOM | 321 | C7   | T A | 11 | -41.703 | -28.027 | 81.427 | 1.00 | 0.00 | C |
| ATOM | 322 | C2'  | T A | 11 | -43.163 | -23.052 | 80.890 | 1.00 | 0.00 | C |
| ATOM | 323 | C3'  | T A | 11 | -44.389 | -22.493 | 80.188 | 1.00 | 0.00 | C |
| ATOM | 324 | O3'  | T A | 11 | -44.608 | -21.153 | 80.622 | 1.00 | 0.00 | O |



|      |     |      |     |    |         |         |        |      |      |   |
|------|-----|------|-----|----|---------|---------|--------|------|------|---|
| ATOM | 325 | C4'  | T A | 11 | -45.500 | -23.437 | 80.645 | 1.00 | 0.00 | C |
| ATOM | 326 | O4'  | T A | 11 | -45.117 | -23.812 | 82.007 | 1.00 | 0.00 | O |
| ATOM | 327 | C5'  | T A | 11 | -45.691 | -24.696 | 79.831 | 1.00 | 0.00 | C |
| ATOM | 328 | O5'  | T A | 11 | -44.403 | -25.188 | 79.384 | 1.00 | 0.00 | O |
| ATOM | 329 | O1P  | T A | 11 | -44.511 | -24.917 | 76.884 | 1.00 | 0.00 | O |
| ATOM | 330 | O2P  | T A | 11 | -43.051 | -26.691 | 77.891 | 1.00 | 0.00 | O |
| ATOM | 331 | P    | T A | 11 | -44.306 | -25.903 | 77.962 | 1.00 | 0.00 | P |
| ATOM | 332 | H3   | T A | 11 | -42.185 | -26.145 | 85.539 | 1.00 | 0.00 | H |
| ATOM | 333 | H6   | T A | 11 | -42.886 | -25.657 | 80.793 | 1.00 | 0.00 | H |
| ATOM | 334 | H1'  | T A | 11 | -43.665 | -22.771 | 82.979 | 1.00 | 0.00 | H |
| ATOM | 335 | H3'  | T A | 11 | -44.282 | -22.508 | 79.105 | 1.00 | 0.00 | H |
| ATOM | 336 | H4'  | T A | 11 | -46.433 | -22.872 | 80.606 | 1.00 | 0.00 | H |
| ATOM | 337 | H71  | T A | 11 | -40.891 | -27.683 | 80.788 | 1.00 | 0.00 | H |
| ATOM | 338 | H72  | T A | 11 | -41.358 | -28.864 | 82.035 | 1.00 | 0.00 | H |
| ATOM | 339 | H73  | T A | 11 | -42.541 | -28.348 | 80.808 | 1.00 | 0.00 | H |
| ATOM | 340 | H2'1 | T A | 11 | -42.710 | -23.859 | 80.315 | 1.00 | 0.00 | H |
| ATOM | 341 | H2'2 | T A | 11 | -42.401 | -22.284 | 81.032 | 1.00 | 0.00 | H |
| ATOM | 342 | H5'1 | T A | 11 | -46.179 | -25.450 | 80.447 | 1.00 | 0.00 | H |
| ATOM | 343 | H5'2 | T A | 11 | -46.318 | -24.472 | 78.969 | 1.00 | 0.00 | H |
| ATOM | 344 | C1'  | A A | 12 | -41.396 | -20.428 | 85.281 | 1.00 | 0.00 | C |
| ATOM | 345 | N1   | A A | 12 | -39.045 | -24.692 | 86.907 | 1.00 | 0.00 | N |
| ATOM | 346 | C2   | A A | 12 | -39.551 | -23.644 | 87.549 | 1.00 | 0.00 | C |
| ATOM | 347 | N3   | A A | 12 | -40.149 | -22.574 | 87.066 | 1.00 | 0.00 | N |
| ATOM | 348 | C4   | A A | 12 | -40.205 | -22.640 | 85.725 | 1.00 | 0.00 | C |
| ATOM | 349 | C5   | A A | 12 | -39.735 | -23.638 | 84.919 | 1.00 | 0.00 | C |
| ATOM | 350 | C6   | A A | 12 | -39.118 | -24.728 | 85.568 | 1.00 | 0.00 | C |
| ATOM | 351 | N6   | A A | 12 | -38.609 | -25.782 | 84.906 | 1.00 | 0.00 | N |
| ATOM | 352 | N7   | A A | 12 | -39.974 | -23.358 | 83.585 | 1.00 | 0.00 | N |
| ATOM | 353 | C8   | A A | 12 | -40.573 | -22.205 | 83.611 | 1.00 | 0.00 | C |
| ATOM | 354 | N9   | A A | 12 | -40.751 | -21.707 | 84.876 | 1.00 | 0.00 | N |
| ATOM | 355 | C2'  | A A | 12 | -41.107 | -19.270 | 84.336 | 1.00 | 0.00 | C |
| ATOM | 356 | C3'  | A A | 12 | -42.420 | -18.503 | 84.365 | 1.00 | 0.00 | C |
| ATOM | 357 | O3'  | A A | 12 | -42.424 | -17.626 | 85.490 | 1.00 | 0.00 | O |
| ATOM | 358 | C4'  | A A | 12 | -43.461 | -19.614 | 84.496 | 1.00 | 0.00 | C |
| ATOM | 359 | O4'  | A A | 12 | -42.794 | -20.639 | 85.300 | 1.00 | 0.00 | O |
| ATOM | 360 | C5'  | A A | 12 | -43.935 | -20.243 | 83.208 | 1.00 | 0.00 | C |
| ATOM | 361 | O5'  | A A | 12 | -42.833 | -20.333 | 82.270 | 1.00 | 0.00 | O |
| ATOM | 362 | O1P  | A A | 12 | -43.512 | -18.764 | 80.422 | 1.00 | 0.00 | O |
| ATOM | 363 | O2P  | A A | 12 | -41.995 | -20.703 | 79.930 | 1.00 | 0.00 | O |
| ATOM | 364 | P    | A A | 12 | -43.133 | -20.161 | 80.714 | 1.00 | 0.00 | P |
| ATOM | 365 | H2   | A A | 12 | -39.457 | -23.674 | 88.635 | 1.00 | 0.00 | H |
| ATOM | 366 | H8   | A A | 12 | -40.905 | -21.682 | 82.712 | 1.00 | 0.00 | H |
| ATOM | 367 | H1'  | A A | 12 | -41.077 | -20.193 | 86.295 | 1.00 | 0.00 | H |
| ATOM | 368 | H3'  | A A | 12 | -42.576 | -17.924 | 83.456 | 1.00 | 0.00 | H |
| ATOM | 369 | H4'  | A A | 12 | -44.327 | -19.177 | 84.993 | 1.00 | 0.00 | H |
| ATOM | 370 | H61  | A A | 12 | -38.171 | -26.554 | 85.428 | 1.00 | 0.00 | H |
| ATOM | 371 | H62  | A A | 12 | -38.660 | -25.817 | 83.877 | 1.00 | 0.00 | H |
| ATOM | 372 | H2'1 | A A | 12 | -40.868 | -19.608 | 83.328 | 1.00 | 0.00 | H |
| ATOM | 373 | H2'2 | A A | 12 | -40.278 | -18.652 | 84.680 | 1.00 | 0.00 | H |
| ATOM | 374 | H5'1 | A A | 12 | -44.321 | -21.240 | 83.418 | 1.00 | 0.00 | H |
| ATOM | 375 | H5'2 | A A | 12 | -44.731 | -19.634 | 82.783 | 1.00 | 0.00 | H |
| ATOM | 376 | C1'  | G A | 13 | -38.153 | -19.336 | 88.879 | 1.00 | 0.00 | C |
| ATOM | 377 | N1   | G A | 13 | -35.830 | -23.605 | 87.326 | 1.00 | 0.00 | N |
| ATOM | 378 | C2   | G A | 13 | -36.069 | -23.140 | 88.608 | 1.00 | 0.00 | C |

|      |     |      |     |    |         |         |        |      |      |   |
|------|-----|------|-----|----|---------|---------|--------|------|------|---|
| ATOM | 379 | N2   | G A | 13 | -35.628 | -23.913 | 89.608 | 1.00 | 0.00 | N |
| ATOM | 380 | N3   | G A | 13 | -36.697 | -21.994 | 88.868 | 1.00 | 0.00 | N |
| ATOM | 381 | C4   | G A | 13 | -37.066 | -21.338 | 87.738 | 1.00 | 0.00 | C |
| ATOM | 382 | C5   | G A | 13 | -36.867 | -21.723 | 86.422 | 1.00 | 0.00 | C |
| ATOM | 383 | C6   | G A | 13 | -36.204 | -22.940 | 86.144 | 1.00 | 0.00 | C |
| ATOM | 384 | O6   | G A | 13 | -35.936 | -23.445 | 85.053 | 1.00 | 0.00 | O |
| ATOM | 385 | N7   | G A | 13 | -37.396 | -20.765 | 85.554 | 1.00 | 0.00 | N |
| ATOM | 386 | C8   | G A | 13 | -37.890 | -19.854 | 86.352 | 1.00 | 0.00 | C |
| ATOM | 387 | N9   | G A | 13 | -37.728 | -20.130 | 87.693 | 1.00 | 0.00 | N |
| ATOM | 388 | C2'  | G A | 13 | -38.011 | -17.832 | 88.692 | 1.00 | 0.00 | C |
| ATOM | 389 | C3'  | G A | 13 | -39.212 | -17.301 | 89.457 | 1.00 | 0.00 | C |
| ATOM | 390 | O3'  | G A | 13 | -38.877 | -17.194 | 90.839 | 1.00 | 0.00 | O |
| ATOM | 391 | C4'  | G A | 13 | -40.275 | -18.369 | 89.203 | 1.00 | 0.00 | C |
| ATOM | 392 | O4'  | G A | 13 | -39.518 | -19.618 | 89.121 | 1.00 | 0.00 | O |
| ATOM | 393 | C5'  | G A | 13 | -41.092 | -18.215 | 87.942 | 1.00 | 0.00 | C |
| ATOM | 394 | O5'  | G A | 13 | -40.259 | -17.695 | 86.877 | 1.00 | 0.00 | O |
| ATOM | 395 | O1P  | G A | 13 | -41.236 | -15.419 | 86.429 | 1.00 | 0.00 | O |
| ATOM | 396 | O2P  | G A | 13 | -40.041 | -16.653 | 84.601 | 1.00 | 0.00 | O |
| ATOM | 397 | P    | G A | 13 | -40.910 | -16.714 | 85.801 | 1.00 | 0.00 | P |
| ATOM | 398 | H1   | G A | 13 | -35.341 | -24.508 | 87.232 | 1.00 | 0.00 | H |
| ATOM | 399 | H8   | G A | 13 | -38.387 | -18.954 | 85.989 | 1.00 | 0.00 | H |
| ATOM | 400 | H1'  | G A | 13 | -37.581 | -19.679 | 89.742 | 1.00 | 0.00 | H |
| ATOM | 401 | H21  | G A | 13 | -35.147 | -24.800 | 89.397 | 1.00 | 0.00 | H |
| ATOM | 402 | H3'  | G A | 13 | -39.535 | -16.328 | 89.087 | 1.00 | 0.00 | H |
| ATOM | 403 | H22  | G A | 13 | -35.773 | -23.622 | 90.584 | 1.00 | 0.00 | H |
| ATOM | 404 | H4'  | G A | 13 | -40.959 | -18.342 | 90.049 | 1.00 | 0.00 | H |
| ATOM | 405 | H2'1 | G A | 13 | -38.047 | -17.540 | 87.643 | 1.00 | 0.00 | H |
| ATOM | 406 | H2'2 | G A | 13 | -37.076 | -17.451 | 89.105 | 1.00 | 0.00 | H |
| ATOM | 407 | H5'1 | G A | 13 | -41.495 | -19.186 | 87.656 | 1.00 | 0.00 | H |
| ATOM | 408 | H5'2 | G A | 13 | -41.917 | -17.529 | 88.133 | 1.00 | 0.00 | H |
| ATOM | 409 | C1'  | G A | 14 | -34.094 | -20.121 | 91.606 | 1.00 | 0.00 | C |
| ATOM | 410 | N1   | G A | 14 | -32.527 | -22.716 | 87.504 | 1.00 | 0.00 | N |
| ATOM | 411 | C2   | G A | 14 | -32.423 | -23.032 | 88.847 | 1.00 | 0.00 | C |
| ATOM | 412 | N2   | G A | 14 | -31.818 | -24.191 | 89.136 | 1.00 | 0.00 | N |
| ATOM | 413 | N3   | G A | 14 | -32.885 | -22.251 | 89.823 | 1.00 | 0.00 | N |
| ATOM | 414 | C4   | G A | 14 | -33.459 | -21.116 | 89.348 | 1.00 | 0.00 | C |
| ATOM | 415 | C5   | G A | 14 | -33.604 | -20.717 | 88.031 | 1.00 | 0.00 | C |
| ATOM | 416 | C6   | G A | 14 | -33.118 | -21.545 | 86.993 | 1.00 | 0.00 | C |
| ATOM | 417 | O6   | G A | 14 | -33.152 | -21.366 | 85.775 | 1.00 | 0.00 | O |
| ATOM | 418 | N7   | G A | 14 | -34.250 | -19.480 | 87.970 | 1.00 | 0.00 | N |
| ATOM | 419 | C8   | G A | 14 | -34.473 | -19.177 | 89.222 | 1.00 | 0.00 | C |
| ATOM | 420 | N9   | G A | 14 | -34.021 | -20.121 | 90.119 | 1.00 | 0.00 | N |
| ATOM | 421 | C2'  | G A | 14 | -33.888 | -18.747 | 92.230 | 1.00 | 0.00 | C |
| ATOM | 422 | C3'  | G A | 14 | -34.833 | -18.793 | 93.419 | 1.00 | 0.00 | C |
| ATOM | 423 | O3'  | G A | 14 | -34.175 | -19.424 | 94.517 | 1.00 | 0.00 | O |
| ATOM | 424 | C4'  | G A | 14 | -36.002 | -19.623 | 92.892 | 1.00 | 0.00 | C |
| ATOM | 425 | O4'  | G A | 14 | -35.382 | -20.578 | 91.975 | 1.00 | 0.00 | O |
| ATOM | 426 | C5'  | G A | 14 | -37.080 | -18.868 | 92.150 | 1.00 | 0.00 | C |
| ATOM | 427 | O5'  | G A | 14 | -36.483 | -17.803 | 91.370 | 1.00 | 0.00 | O |
| ATOM | 428 | O1P  | G A | 14 | -37.366 | -15.715 | 92.462 | 1.00 | 0.00 | O |
| ATOM | 429 | O2P  | G A | 14 | -36.731 | -15.687 | 90.036 | 1.00 | 0.00 | O |
| ATOM | 430 | P    | G A | 14 | -37.295 | -16.443 | 91.181 | 1.00 | 0.00 | P |
| ATOM | 431 | H1   | G A | 14 | -32.143 | -23.392 | 86.826 | 1.00 | 0.00 | H |
| ATOM | 432 | H8   | G A | 14 | -34.973 | -18.258 | 89.530 | 1.00 | 0.00 | H |

|      |     |      |     |    |         |         |        |      |      |   |
|------|-----|------|-----|----|---------|---------|--------|------|------|---|
| ATOM | 433 | H1'  | G A | 14 | -33.363 | -20.835 | 91.984 | 1.00 | 0.00 | H |
| ATOM | 434 | H21  | G A | 14 | -31.467 | -24.790 | 88.376 | 1.00 | 0.00 | H |
| ATOM | 435 | H3'  | G A | 14 | -35.161 | -17.797 | 93.719 | 1.00 | 0.00 | H |
| ATOM | 436 | H22  | G A | 14 | -31.707 | -24.481 | 90.117 | 1.00 | 0.00 | H |
| ATOM | 437 | H4'  | G A | 14 | -36.465 | -20.101 | 93.755 | 1.00 | 0.00 | H |
| ATOM | 438 | H2'1 | G A | 14 | -34.149 | -17.939 | 91.547 | 1.00 | 0.00 | H |
| ATOM | 439 | H2'2 | G A | 14 | -32.857 | -18.588 | 92.548 | 1.00 | 0.00 | H |
| ATOM | 440 | H5'1 | G A | 14 | -37.609 | -19.556 | 91.491 | 1.00 | 0.00 | H |
| ATOM | 441 | H5'2 | G A | 14 | -37.783 | -18.449 | 92.870 | 1.00 | 0.00 | H |
| ATOM | 442 | C1'  | A A | 15 | -29.583 | -21.974 | 92.449 | 1.00 | 0.00 | C |
| ATOM | 443 | N1   | A A | 15 | -29.209 | -21.865 | 87.333 | 1.00 | 0.00 | N |
| ATOM | 444 | C2   | A A | 15 | -28.853 | -22.770 | 88.241 | 1.00 | 0.00 | C |
| ATOM | 445 | N3   | A A | 15 | -28.982 | -22.736 | 89.551 | 1.00 | 0.00 | N |
| ATOM | 446 | C4   | A A | 15 | -29.560 | -21.581 | 89.931 | 1.00 | 0.00 | C |
| ATOM | 447 | C5   | A A | 15 | -29.980 | -20.557 | 89.130 | 1.00 | 0.00 | C |
| ATOM | 448 | C6   | A A | 15 | -29.784 | -20.724 | 87.743 | 1.00 | 0.00 | C |
| ATOM | 449 | N6   | A A | 15 | -30.147 | -19.802 | 86.835 | 1.00 | 0.00 | N |
| ATOM | 450 | N7   | A A | 15 | -30.530 | -19.532 | 89.879 | 1.00 | 0.00 | N |
| ATOM | 451 | C8   | A A | 15 | -30.428 | -19.950 | 91.105 | 1.00 | 0.00 | C |
| ATOM | 452 | N9   | A A | 15 | -29.851 | -21.190 | 91.215 | 1.00 | 0.00 | N |
| ATOM | 453 | C2'  | A A | 15 | -29.142 | -21.123 | 93.633 | 1.00 | 0.00 | C |
| ATOM | 454 | C3'  | A A | 15 | -29.790 | -21.848 | 94.804 | 1.00 | 0.00 | C |
| ATOM | 455 | O3'  | A A | 15 | -28.945 | -22.917 | 95.217 | 1.00 | 0.00 | O |
| ATOM | 456 | C4'  | A A | 15 | -31.105 | -22.349 | 94.208 | 1.00 | 0.00 | C |
| ATOM | 457 | O4'  | A A | 15 | -30.781 | -22.637 | 92.809 | 1.00 | 0.00 | O |
| ATOM | 458 | C5'  | A A | 15 | -32.268 | -21.387 | 94.245 | 1.00 | 0.00 | C |
| ATOM | 459 | O5'  | A A | 15 | -31.794 | -20.034 | 94.026 | 1.00 | 0.00 | O |
| ATOM | 460 | O1P  | A A | 15 | -32.253 | -18.893 | 96.222 | 1.00 | 0.00 | O |
| ATOM | 461 | O2P  | A A | 15 | -32.191 | -17.553 | 94.101 | 1.00 | 0.00 | O |
| ATOM | 462 | P    | A A | 15 | -32.529 | -18.831 | 94.773 | 1.00 | 0.00 | P |
| ATOM | 463 | H2   | A A | 15 | -28.387 | -23.671 | 87.841 | 1.00 | 0.00 | H |
| ATOM | 464 | H8   | A A | 15 | -30.769 | -19.374 | 91.965 | 1.00 | 0.00 | H |
| ATOM | 465 | H1'  | A A | 15 | -28.837 | -22.734 | 92.215 | 1.00 | 0.00 | H |
| ATOM | 466 | H3'  | A A | 15 | -29.970 | -21.182 | 95.648 | 1.00 | 0.00 | H |
| ATOM | 467 | H4'  | A A | 15 | -31.389 | -23.237 | 94.770 | 1.00 | 0.00 | H |
| ATOM | 468 | H61  | A A | 15 | -29.983 | -19.975 | 85.833 | 1.00 | 0.00 | H |
| ATOM | 469 | H62  | A A | 15 | -30.587 | -18.923 | 87.142 | 1.00 | 0.00 | H |
| ATOM | 470 | H2'1 | A A | 15 | -29.497 | -20.096 | 93.558 | 1.00 | 0.00 | H |
| ATOM | 471 | H2'2 | A A | 15 | -28.058 | -21.091 | 93.740 | 1.00 | 0.00 | H |
| ATOM | 472 | H5'1 | A A | 15 | -32.981 | -21.657 | 93.466 | 1.00 | 0.00 | H |
| ATOM | 473 | H5'2 | A A | 15 | -32.756 | -21.452 | 95.216 | 1.00 | 0.00 | H |
| ATOM | 474 | C1'  | C A | 16 | -25.148 | -23.687 | 91.016 | 1.00 | 0.00 | C |
| ATOM | 475 | N1   | C A | 16 | -25.644 | -22.373 | 90.522 | 1.00 | 0.00 | N |
| ATOM | 476 | C2   | C A | 16 | -25.626 | -22.144 | 89.148 | 1.00 | 0.00 | C |
| ATOM | 477 | O2   | C A | 16 | -25.202 | -23.034 | 88.400 | 1.00 | 0.00 | O |
| ATOM | 478 | N3   | C A | 16 | -26.073 | -20.954 | 88.677 | 1.00 | 0.00 | N |
| ATOM | 479 | C4   | C A | 16 | -26.526 | -20.010 | 89.512 | 1.00 | 0.00 | C |
| ATOM | 480 | N4   | C A | 16 | -26.955 | -18.866 | 88.996 | 1.00 | 0.00 | N |
| ATOM | 481 | C5   | C A | 16 | -26.552 | -20.215 | 90.930 | 1.00 | 0.00 | C |
| ATOM | 482 | C6   | C A | 16 | -26.101 | -21.424 | 91.382 | 1.00 | 0.00 | C |
| ATOM | 483 | C2'  | C A | 16 | -24.368 | -23.596 | 92.319 | 1.00 | 0.00 | C |
| ATOM | 484 | C3'  | C A | 16 | -24.771 | -24.886 | 93.020 | 1.00 | 0.00 | C |
| ATOM | 485 | O3'  | C A | 16 | -23.938 | -25.948 | 92.561 | 1.00 | 0.00 | O |
| ATOM | 486 | C4'  | C A | 16 | -26.225 | -25.064 | 92.591 | 1.00 | 0.00 | C |

|      |     |      |   |   |    |         |         |        |      |      |   |
|------|-----|------|---|---|----|---------|---------|--------|------|------|---|
| ATOM | 487 | O4'  | C | A | 16 | -26.274 | -24.516 | 91.236 | 1.00 | 0.00 | O |
| ATOM | 488 | C5'  | C | A | 16 | -27.264 | -24.359 | 93.434 | 1.00 | 0.00 | C |
| ATOM | 489 | O5'  | C | A | 16 | -26.748 | -23.080 | 93.881 | 1.00 | 0.00 | O |
| ATOM | 490 | O1P  | C | A | 16 | -26.569 | -23.363 | 96.376 | 1.00 | 0.00 | O |
| ATOM | 491 | O2P  | C | A | 16 | -26.914 | -21.081 | 95.394 | 1.00 | 0.00 | O |
| ATOM | 492 | P    | C | A | 16 | -27.181 | -22.538 | 95.316 | 1.00 | 0.00 | P |
| ATOM | 493 | H5   | C | A | 16 | -26.913 | -19.447 | 91.615 | 1.00 | 0.00 | H |
| ATOM | 494 | H6   | C | A | 16 | -26.108 | -21.630 | 92.453 | 1.00 | 0.00 | H |
| ATOM | 495 | H1'  | C | A | 16 | -24.544 | -24.141 | 90.230 | 1.00 | 0.00 | H |
| ATOM | 496 | H3'  | C | A | 16 | -24.686 | -24.803 | 94.105 | 1.00 | 0.00 | H |
| ATOM | 497 | H4'  | C | A | 16 | -26.437 | -26.132 | 92.629 | 1.00 | 0.00 | H |
| ATOM | 498 | H41  | C | A | 16 | -27.310 | -18.124 | 89.617 | 1.00 | 0.00 | H |
| ATOM | 499 | H42  | C | A | 16 | -26.933 | -18.719 | 87.978 | 1.00 | 0.00 | H |
| ATOM | 500 | H2'1 | C | A | 16 | -24.644 | -22.723 | 92.909 | 1.00 | 0.00 | H |
| ATOM | 501 | H2'2 | C | A | 16 | -23.290 | -23.554 | 92.156 | 1.00 | 0.00 | H |
| ATOM | 502 | H5'1 | C | A | 16 | -28.164 | -24.207 | 92.838 | 1.00 | 0.00 | H |
| ATOM | 503 | H5'2 | C | A | 16 | -27.506 | -24.980 | 94.296 | 1.00 | 0.00 | H |
| ATOM | 504 | C1'  | G | A | 17 | -21.314 | -24.065 | 87.906 | 1.00 | 0.00 | C |
| ATOM | 505 | N1   | G | A | 17 | -22.882 | -19.481 | 86.310 | 1.00 | 0.00 | N |
| ATOM | 506 | C2   | G | A | 17 | -22.451 | -20.576 | 85.580 | 1.00 | 0.00 | C |
| ATOM | 507 | N2   | G | A | 17 | -22.435 | -20.428 | 84.250 | 1.00 | 0.00 | N |
| ATOM | 508 | N3   | G | A | 17 | -22.069 | -21.725 | 86.135 | 1.00 | 0.00 | N |
| ATOM | 509 | C4   | G | A | 17 | -22.143 | -21.694 | 87.491 | 1.00 | 0.00 | C |
| ATOM | 510 | C5   | G | A | 17 | -22.555 | -20.648 | 88.302 | 1.00 | 0.00 | C |
| ATOM | 511 | C6   | G | A | 17 | -22.966 | -19.430 | 87.714 | 1.00 | 0.00 | C |
| ATOM | 512 | O6   | G | A | 17 | -23.360 | -18.399 | 88.259 | 1.00 | 0.00 | O |
| ATOM | 513 | N7   | G | A | 17 | -22.482 | -21.021 | 89.645 | 1.00 | 0.00 | N |
| ATOM | 514 | C8   | G | A | 17 | -22.042 | -22.253 | 89.608 | 1.00 | 0.00 | C |
| ATOM | 515 | N9   | G | A | 17 | -21.812 | -22.731 | 88.335 | 1.00 | 0.00 | N |
| ATOM | 516 | C2'  | G | A | 17 | -20.246 | -24.647 | 88.822 | 1.00 | 0.00 | C |
| ATOM | 517 | C3'  | G | A | 17 | -20.568 | -26.131 | 88.786 | 1.00 | 0.00 | C |
| ATOM | 518 | O3'  | G | A | 17 | -19.948 | -26.717 | 87.642 | 1.00 | 0.00 | O |
| ATOM | 519 | C4'  | G | A | 17 | -22.093 | -26.145 | 88.686 | 1.00 | 0.00 | C |
| ATOM | 520 | O4'  | G | A | 17 | -22.414 | -24.955 | 87.900 | 1.00 | 0.00 | O |
| ATOM | 521 | C5'  | G | A | 17 | -22.850 | -26.083 | 89.992 | 1.00 | 0.00 | C |
| ATOM | 522 | O5'  | G | A | 17 | -22.151 | -25.219 | 90.922 | 1.00 | 0.00 | O |
| ATOM | 523 | O1P  | G | A | 17 | -21.416 | -26.798 | 92.739 | 1.00 | 0.00 | O |
| ATOM | 524 | O2P  | G | A | 17 | -21.809 | -24.376 | 93.265 | 1.00 | 0.00 | O |
| ATOM | 525 | P    | G | A | 17 | -22.196 | -25.572 | 92.477 | 1.00 | 0.00 | P |
| ATOM | 526 | H1   | G | A | 17 | -23.163 | -18.641 | 85.782 | 1.00 | 0.00 | H |
| ATOM | 527 | H8   | G | A | 17 | -21.871 | -22.848 | 90.505 | 1.00 | 0.00 | H |
| ATOM | 528 | H1'  | G | A | 17 | -20.945 | -23.980 | 86.883 | 1.00 | 0.00 | H |
| ATOM | 529 | H21  | G | A | 17 | -22.735 | -19.538 | 83.828 | 1.00 | 0.00 | H |
| ATOM | 530 | H3'  | G | A | 17 | -20.227 | -26.646 | 89.685 | 1.00 | 0.00 | H |
| ATOM | 531 | H22  | G | A | 17 | -22.121 | -21.205 | 83.651 | 1.00 | 0.00 | H |
| ATOM | 532 | H4'  | G | A | 17 | -22.368 | -27.074 | 88.186 | 1.00 | 0.00 | H |
| ATOM | 533 | H2'1 | G | A | 17 | -20.312 | -24.252 | 89.837 | 1.00 | 0.00 | H |
| ATOM | 534 | H2'2 | G | A | 17 | -19.236 | -24.450 | 88.459 | 1.00 | 0.00 | H |
| ATOM | 535 | H5'1 | G | A | 17 | -23.850 | -25.691 | 89.805 | 1.00 | 0.00 | H |
| ATOM | 536 | H5'2 | G | A | 17 | -22.931 | -27.086 | 90.407 | 1.00 | 0.00 | H |
| ATOM | 537 | C1'  | G | A | 18 | -18.358 | -22.457 | 84.273 | 1.00 | 0.00 | C |
| ATOM | 538 | N1   | G | A | 18 | -19.910 | -17.850 | 85.819 | 1.00 | 0.00 | N |
| ATOM | 539 | C2   | G | A | 18 | -19.746 | -18.348 | 84.538 | 1.00 | 0.00 | C |
| ATOM | 540 | N2   | G | A | 18 | -20.033 | -17.506 | 83.536 | 1.00 | 0.00 | N |

|      |     |      |     |    |         |         |        |      |      |   |
|------|-----|------|-----|----|---------|---------|--------|------|------|---|
| ATOM | 541 | N3   | G A | 18 | -19.331 | -19.586 | 84.279 | 1.00 | 0.00 | N |
| ATOM | 542 | C4   | G A | 18 | -19.082 | -20.296 | 85.410 | 1.00 | 0.00 | C |
| ATOM | 543 | C5   | G A | 18 | -19.213 | -19.881 | 86.726 | 1.00 | 0.00 | C |
| ATOM | 544 | C6   | G A | 18 | -19.659 | -18.567 | 87.002 | 1.00 | 0.00 | C |
| ATOM | 545 | O6   | G A | 18 | -19.835 | -18.022 | 88.092 | 1.00 | 0.00 | O |
| ATOM | 546 | N7   | G A | 18 | -18.855 | -20.913 | 87.594 | 1.00 | 0.00 | N |
| ATOM | 547 | C8   | G A | 18 | -18.529 | -21.898 | 86.798 | 1.00 | 0.00 | C |
| ATOM | 548 | N9   | G A | 18 | -18.640 | -21.599 | 85.457 | 1.00 | 0.00 | N |
| ATOM | 549 | C2'  | G A | 18 | -17.150 | -23.367 | 84.448 | 1.00 | 0.00 | C |
| ATOM | 550 | C3'  | G A | 18 | -17.582 | -24.616 | 83.697 | 1.00 | 0.00 | C |
| ATOM | 551 | O3'  | G A | 18 | -17.294 | -24.451 | 82.310 | 1.00 | 0.00 | O |
| ATOM | 552 | C4'  | G A | 18 | -19.084 | -24.675 | 83.970 | 1.00 | 0.00 | C |
| ATOM | 553 | O4'  | G A | 18 | -19.491 | -23.273 | 84.050 | 1.00 | 0.00 | O |
| ATOM | 554 | C5'  | G A | 18 | -19.506 | -25.374 | 85.241 | 1.00 | 0.00 | C |
| ATOM | 555 | O5'  | G A | 18 | -18.546 | -25.105 | 86.292 | 1.00 | 0.00 | O |
| ATOM | 556 | O1P  | G A | 18 | -17.524 | -27.362 | 86.741 | 1.00 | 0.00 | O |
| ATOM | 557 | O2P  | G A | 18 | -17.601 | -25.637 | 88.559 | 1.00 | 0.00 | O |
| ATOM | 558 | P    | G A | 18 | -18.249 | -26.243 | 87.371 | 1.00 | 0.00 | P |
| ATOM | 559 | H1   | G A | 18 | -20.244 | -16.878 | 85.911 | 1.00 | 0.00 | H |
| ATOM | 560 | H8   | G A | 18 | -18.196 | -22.871 | 87.162 | 1.00 | 0.00 | H |
| ATOM | 561 | H1'  | G A | 18 | -18.235 | -21.809 | 83.404 | 1.00 | 0.00 | H |
| ATOM | 562 | H21  | G A | 18 | -20.357 | -16.550 | 83.746 | 1.00 | 0.00 | H |
| ATOM | 563 | H3'  | G A | 18 | -17.079 | -25.510 | 84.066 | 1.00 | 0.00 | H |
| ATOM | 564 | H22  | G A | 18 | -19.928 | -17.815 | 82.561 | 1.00 | 0.00 | H |
| ATOM | 565 | H4'  | G A | 18 | -19.538 | -25.204 | 83.133 | 1.00 | 0.00 | H |
| ATOM | 566 | H2'1 | G A | 18 | -16.947 | -23.586 | 85.496 | 1.00 | 0.00 | H |
| ATOM | 567 | H2'2 | G A | 18 | -16.243 | -22.939 | 84.021 | 1.00 | 0.00 | H |
| ATOM | 568 | H5'1 | G A | 18 | -20.490 | -25.012 | 85.539 | 1.00 | 0.00 | H |
| ATOM | 569 | H5'2 | G A | 18 | -19.561 | -26.447 | 85.057 | 1.00 | 0.00 | H |
| ATOM | 570 | C1'  | T A | 19 | -16.222 | -18.970 | 81.482 | 1.00 | 0.00 | C |
| ATOM | 571 | N1   | T A | 19 | -16.162 | -18.879 | 82.965 | 1.00 | 0.00 | N |
| ATOM | 572 | C2   | T A | 19 | -16.551 | -17.686 | 83.540 | 1.00 | 0.00 | C |
| ATOM | 573 | O2   | T A | 19 | -16.932 | -16.732 | 82.884 | 1.00 | 0.00 | O |
| ATOM | 574 | N3   | T A | 19 | -16.480 | -17.646 | 84.920 | 1.00 | 0.00 | N |
| ATOM | 575 | C4   | T A | 19 | -16.063 | -18.663 | 85.751 | 1.00 | 0.00 | C |
| ATOM | 576 | O4   | T A | 19 | -16.039 | -18.508 | 86.978 | 1.00 | 0.00 | O |
| ATOM | 577 | C5   | T A | 19 | -15.675 | -19.870 | 85.061 | 1.00 | 0.00 | C |
| ATOM | 578 | C6   | T A | 19 | -15.732 | -19.946 | 83.716 | 1.00 | 0.00 | C |
| ATOM | 579 | C7   | T A | 19 | -15.216 | -21.005 | 85.927 | 1.00 | 0.00 | C |
| ATOM | 580 | C2'  | T A | 19 | -15.072 | -19.760 | 80.868 | 1.00 | 0.00 | C |
| ATOM | 581 | C3'  | T A | 19 | -15.753 | -20.455 | 79.699 | 1.00 | 0.00 | C |
| ATOM | 582 | O3'  | T A | 19 | -15.783 | -19.571 | 78.581 | 1.00 | 0.00 | O |
| ATOM | 583 | C4'  | T A | 19 | -17.149 | -20.745 | 80.244 | 1.00 | 0.00 | C |
| ATOM | 584 | O4'  | T A | 19 | -17.429 | -19.622 | 81.137 | 1.00 | 0.00 | O |
| ATOM | 585 | C5'  | T A | 19 | -17.314 | -22.032 | 81.018 | 1.00 | 0.00 | C |
| ATOM | 586 | O5'  | T A | 19 | -16.119 | -22.291 | 81.797 | 1.00 | 0.00 | O |
| ATOM | 587 | O1P  | T A | 19 | -15.181 | -24.377 | 80.746 | 1.00 | 0.00 | O |
| ATOM | 588 | O2P  | T A | 19 | -14.714 | -23.868 | 83.158 | 1.00 | 0.00 | O |
| ATOM | 589 | P    | T A | 19 | -15.660 | -23.802 | 82.019 | 1.00 | 0.00 | P |
| ATOM | 590 | H3   | T A | 19 | -16.770 | -16.767 | 85.373 | 1.00 | 0.00 | H |
| ATOM | 591 | H6   | T A | 19 | -15.435 | -20.869 | 83.217 | 1.00 | 0.00 | H |
| ATOM | 592 | H1'  | T A | 19 | -16.258 | -17.958 | 81.079 | 1.00 | 0.00 | H |
| ATOM | 593 | H3'  | T A | 19 | -15.240 | -21.375 | 79.418 | 1.00 | 0.00 | H |
| ATOM | 594 | H4'  | T A | 19 | -17.822 | -20.786 | 79.386 | 1.00 | 0.00 | H |

|      |     |      |       |    |         |         |        |      |      |   |
|------|-----|------|-------|----|---------|---------|--------|------|------|---|
| ATOM | 595 | H71  | T A   | 19 | -14.162 | -21.204 | 85.738 | 1.00 | 0.00 | H |
| ATOM | 596 | H72  | T A   | 19 | -15.352 | -20.740 | 86.975 | 1.00 | 0.00 | H |
| ATOM | 597 | H73  | T A   | 19 | -15.801 | -21.898 | 85.700 | 1.00 | 0.00 | H |
| ATOM | 598 | H2'1 | T A   | 19 | -14.647 | -20.480 | 81.565 | 1.00 | 0.00 | H |
| ATOM | 599 | H2'2 | T A   | 19 | -14.261 | -19.114 | 80.529 | 1.00 | 0.00 | H |
| ATOM | 600 | H5'1 | T A   | 19 | -18.174 | -21.943 | 81.682 | 1.00 | 0.00 | H |
| ATOM | 601 | H5'2 | T A   | 19 | -17.483 | -22.851 | 80.320 | 1.00 | 0.00 | H |
| ATOM | 602 | C01  | LNK A | 20 | -13.188 | -18.793 | 76.028 | 0.00 | 0.00 | C |
| ATOM | 603 | O1   | LNK A | 20 | -13.624 | -19.460 | 77.215 | 1.00 | 0.00 | O |
| ATOM | 604 | S    | LNK A | 20 | -9.872  | -18.361 | 73.869 | 0.00 | 0.00 | S |
| ATOM | 605 | C02  | LNK A | 20 | -11.700 | -19.104 | 75.783 | 0.00 | 0.00 | C |
| ATOM | 606 | C03  | LNK A | 20 | -11.003 | -17.858 | 75.204 | 0.00 | 0.00 | C |
| ATOM | 607 | O1P  | LNK A | 20 | -13.516 | -18.711 | 79.616 | 1.00 | 0.00 | O |
| ATOM | 608 | O2P  | LNK A | 20 | -14.554 | -17.223 | 77.882 | 1.00 | 0.00 | O |
| ATOM | 609 | P    | LNK A | 20 | -14.305 | -18.600 | 78.373 | 1.00 | 0.00 | P |
| ATOM | 610 | H01  | LNK A | 20 | -13.319 | -17.716 | 76.146 | 0.00 | 0.00 | H |
| ATOM | 611 | H02  | LNK A | 20 | -13.776 | -19.139 | 75.179 | 0.00 | 0.00 | H |
| ATOM | 612 | H03  | LNK A | 20 | -10.436 | -17.361 | 75.991 | 0.00 | 0.00 | H |
| ATOM | 613 | H04  | LNK A | 20 | -11.614 | -19.931 | 75.076 | 0.00 | 0.00 | H |
| ATOM | 614 | H05  | LNK A | 20 | -11.227 | -19.381 | 76.725 | 0.00 | 0.00 | H |
| ATOM | 615 | H06  | LNK A | 20 | -11.752 | -17.173 | 74.807 | 0.00 | 0.00 | H |
| ATOM | 616 | AU   | LNK A | 20 | -9.489  | -17.825 | 73.679 |      |      |   |
| TER  |     |      |       |    |         |         |        |      |      |   |
| ATOM | 618 | C1'  | A B   | 2  | -18.857 | -10.517 | 87.845 | 1.00 | 0.00 | C |
| ATOM | 619 | N1   | A B   | 2  | -17.299 | -15.135 | 86.235 | 1.00 | 0.00 | N |
| ATOM | 620 | C2   | A B   | 2  | -17.733 | -14.058 | 85.588 | 1.00 | 0.00 | C |
| ATOM | 621 | N3   | A B   | 2  | -18.116 | -12.893 | 86.066 | 1.00 | 0.00 | N |
| ATOM | 622 | C4   | A B   | 2  | -18.030 | -12.890 | 87.410 | 1.00 | 0.00 | C |
| ATOM | 623 | C5   | A B   | 2  | -17.609 | -13.908 | 88.218 | 1.00 | 0.00 | C |
| ATOM | 624 | C6   | A B   | 2  | -17.222 | -15.102 | 87.574 | 1.00 | 0.00 | C |
| ATOM | 625 | N6   | A B   | 2  | -16.787 | -16.186 | 88.239 | 1.00 | 0.00 | N |
| ATOM | 626 | N7   | A B   | 2  | -17.653 | -13.538 | 89.551 | 1.00 | 0.00 | N |
| ATOM | 627 | C8   | A B   | 2  | -18.100 | -12.317 | 89.521 | 1.00 | 0.00 | C |
| ATOM | 628 | N9   | A B   | 2  | -18.348 | -11.855 | 88.255 | 1.00 | 0.00 | N |
| ATOM | 629 | C2'  | A B   | 2  | -19.906 | -9.945  | 88.790 | 1.00 | 0.00 | C |
| ATOM | 630 | C3'  | A B   | 2  | -19.586 | -8.459  | 88.755 | 1.00 | 0.00 | C |
| ATOM | 631 | O3'  | A B   | 2  | -20.230 | -7.869  | 87.629 | 1.00 | 0.00 | O |
| ATOM | 632 | C4'  | A B   | 2  | -18.064 | -8.442  | 88.624 | 1.00 | 0.00 | C |
| ATOM | 633 | O4'  | A B   | 2  | -17.757 | -9.629  | 87.822 | 1.00 | 0.00 | O |
| ATOM | 634 | C5'  | A B   | 2  | -17.278 | -8.512  | 89.912 | 1.00 | 0.00 | C |
| ATOM | 635 | O5'  | A B   | 2  | -17.955 | -9.382  | 90.852 | 1.00 | 0.00 | O |
| ATOM | 636 | H2   | A B   | 2  | -17.775 | -14.151 | 84.505 | 1.00 | 0.00 | H |
| ATOM | 637 | H8   | A B   | 2  | -18.262 | -11.718 | 90.418 | 1.00 | 0.00 | H |
| ATOM | 638 | H1'  | A B   | 2  | -19.248 | -10.598 | 86.831 | 1.00 | 0.00 | H |
| ATOM | 639 | H3'  | A B   | 2  | -19.908 | -7.950  | 89.663 | 1.00 | 0.00 | H |
| ATOM | 640 | H4'  | A B   | 2  | -17.801 | -7.511  | 88.123 | 1.00 | 0.00 | H |
| ATOM | 641 | H61  | A B   | 2  | -16.513 | -17.032 | 87.720 | 1.00 | 0.00 | H |
| ATOM | 642 | H62  | A B   | 2  | -16.726 | -16.169 | 89.267 | 1.00 | 0.00 | H |
| ATOM | 643 | H2'1 | A B   | 2  | -19.817 | -10.346 | 89.800 | 1.00 | 0.00 | H |
| ATOM | 644 | H2'2 | A B   | 2  | -20.922 | -10.140 | 88.447 | 1.00 | 0.00 | H |
| ATOM | 645 | H5'1 | A B   | 2  | -16.282 | -8.900  | 89.701 | 1.00 | 0.00 | H |
| ATOM | 646 | H5'2 | A B   | 2  | -17.191 | -7.511  | 90.331 | 1.00 | 0.00 | H |
| ATOM | 647 | C1'  | C B   | 3  | -21.850 | -12.179 | 84.248 | 1.00 | 0.00 | C |
| ATOM | 648 | N1   | C B   | 3  | -21.549 | -13.029 | 85.433 | 1.00 | 0.00 | N |

|      |     |      |     |   |         |         |        |      |      |   |
|------|-----|------|-----|---|---------|---------|--------|------|------|---|
| ATOM | 649 | C2   | C B | 3 | -21.110 | -14.331 | 85.206 | 1.00 | 0.00 | C |
| ATOM | 650 | O2   | C B | 3 | -20.987 | -14.725 | 84.038 | 1.00 | 0.00 | O |
| ATOM | 651 | N3   | C B | 3 | -20.830 | -15.121 | 86.270 | 1.00 | 0.00 | N |
| ATOM | 652 | C4   | C B | 3 | -20.973 | -14.667 | 87.522 | 1.00 | 0.00 | C |
| ATOM | 653 | N4   | C B | 3 | -20.683 | -15.482 | 88.527 | 1.00 | 0.00 | N |
| ATOM | 654 | C5   | C B | 3 | -21.428 | -13.333 | 87.787 | 1.00 | 0.00 | C |
| ATOM | 655 | C6   | C B | 3 | -21.700 | -12.552 | 86.698 | 1.00 | 0.00 | C |
| ATOM | 656 | C2'  | C B | 3 | -23.057 | -11.270 | 84.436 | 1.00 | 0.00 | C |
| ATOM | 657 | C3'  | C B | 3 | -22.638 | -10.023 | 83.671 | 1.00 | 0.00 | C |
| ATOM | 658 | O3'  | C B | 3 | -22.944 | -10.197 | 82.290 | 1.00 | 0.00 | O |
| ATOM | 659 | C4'  | C B | 3 | -21.133 | -9.960  | 83.925 | 1.00 | 0.00 | C |
| ATOM | 660 | O4'  | C B | 3 | -20.720 | -11.361 | 84.008 | 1.00 | 0.00 | O |
| ATOM | 661 | C5'  | C B | 3 | -20.696 | -9.251  | 85.187 | 1.00 | 0.00 | C |
| ATOM | 662 | O5'  | C B | 3 | -21.643 | -9.518  | 86.252 | 1.00 | 0.00 | O |
| ATOM | 663 | O1P  | C B | 3 | -22.663 | -7.262  | 86.701 | 1.00 | 0.00 | O |
| ATOM | 664 | O2P  | C B | 3 | -22.558 | -8.978  | 88.529 | 1.00 | 0.00 | O |
| ATOM | 665 | P    | C B | 3 | -21.927 | -8.377  | 87.328 | 1.00 | 0.00 | P |
| ATOM | 666 | H5   | C B | 3 | -21.553 | -12.960 | 88.803 | 1.00 | 0.00 | H |
| ATOM | 667 | H6   | C B | 3 | -22.041 | -11.529 | 86.848 | 1.00 | 0.00 | H |
| ATOM | 668 | H1'  | C B | 3 | -21.982 | -12.830 | 83.384 | 1.00 | 0.00 | H |
| ATOM | 669 | H3'  | C B | 3 | -23.138 | -9.129  | 84.043 | 1.00 | 0.00 | H |
| ATOM | 670 | H4'  | C B | 3 | -20.691 | -9.433  | 83.080 | 1.00 | 0.00 | H |
| ATOM | 671 | H41  | C B | 3 | -20.780 | -15.156 | 89.500 | 1.00 | 0.00 | H |
| ATOM | 672 | H42  | C B | 3 | -20.357 | -16.441 | 88.335 | 1.00 | 0.00 | H |
| ATOM | 673 | H2'1 | C B | 3 | -23.248 | -11.046 | 85.484 | 1.00 | 0.00 | H |
| ATOM | 674 | H2'2 | C B | 3 | -23.968 | -11.702 | 84.021 | 1.00 | 0.00 | H |
| ATOM | 675 | H5'1 | C B | 3 | -19.708 | -9.611  | 85.475 | 1.00 | 0.00 | H |
| ATOM | 676 | H5'2 | C B | 3 | -20.646 | -8.181  | 84.997 | 1.00 | 0.00 | H |
| ATOM | 677 | C1'  | C B | 4 | -24.013 | -15.706 | 81.528 | 1.00 | 0.00 | C |
| ATOM | 678 | N1   | C B | 4 | -24.059 | -15.762 | 83.015 | 1.00 | 0.00 | N |
| ATOM | 679 | C2   | C B | 4 | -23.666 | -16.944 | 83.636 | 1.00 | 0.00 | C |
| ATOM | 680 | O2   | C B | 4 | -23.294 | -17.895 | 82.934 | 1.00 | 0.00 | O |
| ATOM | 681 | N3   | C B | 4 | -23.700 | -17.016 | 84.989 | 1.00 | 0.00 | N |
| ATOM | 682 | C4   | C B | 4 | -24.106 | -15.971 | 85.724 | 1.00 | 0.00 | C |
| ATOM | 683 | N4   | C B | 4 | -24.117 | -16.094 | 87.042 | 1.00 | 0.00 | N |
| ATOM | 684 | C5   | C B | 4 | -24.522 | -14.743 | 85.111 | 1.00 | 0.00 | C |
| ATOM | 685 | C6   | C B | 4 | -24.474 | -14.693 | 83.747 | 1.00 | 0.00 | C |
| ATOM | 686 | C2'  | C B | 4 | -25.168 | -14.933 | 80.907 | 1.00 | 0.00 | C |
| ATOM | 687 | C3'  | C B | 4 | -24.497 | -14.266 | 79.716 | 1.00 | 0.00 | C |
| ATOM | 688 | O3'  | C B | 4 | -24.477 | -15.176 | 78.619 | 1.00 | 0.00 | O |
| ATOM | 689 | C4'  | C B | 4 | -23.096 | -13.963 | 80.240 | 1.00 | 0.00 | C |
| ATOM | 690 | O4'  | C B | 4 | -22.807 | -15.065 | 81.158 | 1.00 | 0.00 | O |
| ATOM | 691 | C5'  | C B | 4 | -22.923 | -12.657 | 80.984 | 1.00 | 0.00 | C |
| ATOM | 692 | O5'  | C B | 4 | -24.113 | -12.380 | 81.766 | 1.00 | 0.00 | O |
| ATOM | 693 | O1P  | C B | 4 | -25.059 | -10.319 | 80.674 | 1.00 | 0.00 | O |
| ATOM | 694 | O2P  | C B | 4 | -25.505 | -10.770 | 83.101 | 1.00 | 0.00 | O |
| ATOM | 695 | P    | C B | 4 | -24.569 | -10.864 | 81.954 | 1.00 | 0.00 | P |
| ATOM | 696 | H5   | C B | 4 | -24.860 | -13.893 | 85.704 | 1.00 | 0.00 | H |
| ATOM | 697 | H6   | C B | 4 | -24.773 | -13.778 | 83.236 | 1.00 | 0.00 | H |
| ATOM | 698 | H1'  | C B | 4 | -23.979 | -16.728 | 81.149 | 1.00 | 0.00 | H |
| ATOM | 699 | H3'  | C B | 4 | -25.011 | -13.352 | 79.417 | 1.00 | 0.00 | H |
| ATOM | 700 | H4'  | C B | 4 | -22.431 | -13.943 | 79.377 | 1.00 | 0.00 | H |
| ATOM | 701 | H41  | C B | 4 | -24.422 | -15.306 | 87.632 | 1.00 | 0.00 | H |
| ATOM | 702 | H42  | C B | 4 | -23.820 | -16.979 | 87.481 | 1.00 | 0.00 | H |

|      |     |      |     |   |         |         |        |      |      |   |
|------|-----|------|-----|---|---------|---------|--------|------|------|---|
| ATOM | 703 | H2'1 | C B | 4 | -25.587 | -14.195 | 81.590 | 1.00 | 0.00 | H |
| ATOM | 704 | H2'2 | C B | 4 | -25.981 | -15.587 | 80.590 | 1.00 | 0.00 | H |
| ATOM | 705 | H5'1 | C B | 4 | -22.058 | -12.732 | 81.641 | 1.00 | 0.00 | H |
| ATOM | 706 | H5'2 | C B | 4 | -22.761 | -11.857 | 80.263 | 1.00 | 0.00 | H |
| ATOM | 707 | C1'  | G B | 5 | -25.696 | -20.294 | 80.720 | 1.00 | 0.00 | C |
| ATOM | 708 | N1   | G B | 5 | -26.041 | -20.453 | 85.808 | 1.00 | 0.00 | N |
| ATOM | 709 | C2   | G B | 5 | -25.586 | -21.410 | 84.917 | 1.00 | 0.00 | C |
| ATOM | 710 | N2   | G B | 5 | -25.168 | -22.563 | 85.454 | 1.00 | 0.00 | N |
| ATOM | 711 | N3   | G B | 5 | -25.549 | -21.229 | 83.598 | 1.00 | 0.00 | N |
| ATOM | 712 | C4   | G B | 5 | -26.015 | -20.007 | 83.231 | 1.00 | 0.00 | C |
| ATOM | 713 | C5   | G B | 5 | -26.492 | -18.994 | 84.046 | 1.00 | 0.00 | C |
| ATOM | 714 | C6   | G B | 5 | -26.527 | -19.182 | 85.446 | 1.00 | 0.00 | C |
| ATOM | 715 | O6   | G B | 5 | -26.912 | -18.410 | 86.323 | 1.00 | 0.00 | O |
| ATOM | 716 | N7   | G B | 5 | -26.876 | -17.896 | 83.274 | 1.00 | 0.00 | N |
| ATOM | 717 | C8   | G B | 5 | -26.625 | -18.268 | 82.044 | 1.00 | 0.00 | C |
| ATOM | 718 | N9   | G B | 5 | -26.100 | -19.539 | 81.938 | 1.00 | 0.00 | N |
| ATOM | 719 | C2'  | G B | 5 | -26.611 | -20.064 | 79.525 | 1.00 | 0.00 | C |
| ATOM | 720 | C3'  | G B | 5 | -25.631 | -20.100 | 78.363 | 1.00 | 0.00 | C |
| ATOM | 721 | O3'  | G B | 5 | -25.414 | -21.455 | 77.975 | 1.00 | 0.00 | O |
| ATOM | 722 | C4'  | G B | 5 | -24.377 | -19.460 | 78.956 | 1.00 | 0.00 | C |
| ATOM | 723 | O4'  | G B | 5 | -24.395 | -19.868 | 80.361 | 1.00 | 0.00 | O |
| ATOM | 724 | C5'  | G B | 5 | -24.297 | -17.954 | 78.891 | 1.00 | 0.00 | C |
| ATOM | 725 | O5'  | G B | 5 | -25.614 | -17.384 | 79.089 | 1.00 | 0.00 | O |
| ATOM | 726 | O1P  | G B | 5 | -26.127 | -16.314 | 76.868 | 1.00 | 0.00 | O |
| ATOM | 727 | O2P  | G B | 5 | -27.169 | -15.414 | 78.964 | 1.00 | 0.00 | O |
| ATOM | 728 | P    | G B | 5 | -25.996 | -16.042 | 78.313 | 1.00 | 0.00 | P |
| ATOM | 729 | H1   | G B | 5 | -26.021 | -20.689 | 86.812 | 1.00 | 0.00 | H |
| ATOM | 730 | H8   | G B | 5 | -26.813 | -17.631 | 81.181 | 1.00 | 0.00 | H |
| ATOM | 731 | H1'  | G B | 5 | -25.644 | -21.352 | 80.975 | 1.00 | 0.00 | H |
| ATOM | 732 | H21  | G B | 5 | -25.197 | -22.694 | 86.476 | 1.00 | 0.00 | H |
| ATOM | 733 | H3'  | G B | 5 | -25.993 | -19.533 | 77.505 | 1.00 | 0.00 | H |
| ATOM | 734 | H22  | G B | 5 | -24.820 | -23.318 | 84.846 | 1.00 | 0.00 | H |
| ATOM | 735 | H4'  | G B | 5 | -23.526 | -19.863 | 78.407 | 1.00 | 0.00 | H |
| ATOM | 736 | H2'1 | G B | 5 | -27.129 | -19.106 | 79.578 | 1.00 | 0.00 | H |
| ATOM | 737 | H2'2 | G B | 5 | -27.369 | -20.841 | 79.429 | 1.00 | 0.00 | H |
| ATOM | 738 | H5'1 | G B | 5 | -23.621 | -17.598 | 79.668 | 1.00 | 0.00 | H |
| ATOM | 739 | H5'2 | G B | 5 | -23.911 | -17.658 | 77.916 | 1.00 | 0.00 | H |
| ATOM | 740 | C1'  | T B | 6 | -27.432 | -24.714 | 82.117 | 1.00 | 0.00 | C |
| ATOM | 741 | N1   | T B | 6 | -28.062 | -23.466 | 82.629 | 1.00 | 0.00 | N |
| ATOM | 742 | C2   | T B | 6 | -28.228 | -23.359 | 83.994 | 1.00 | 0.00 | C |
| ATOM | 743 | O2   | T B | 6 | -27.884 | -24.233 | 84.772 | 1.00 | 0.00 | O |
| ATOM | 744 | N3   | T B | 6 | -28.815 | -22.183 | 84.426 | 1.00 | 0.00 | N |
| ATOM | 745 | C4   | T B | 6 | -29.241 | -21.138 | 83.634 | 1.00 | 0.00 | C |
| ATOM | 746 | O4   | T B | 6 | -29.759 | -20.134 | 84.135 | 1.00 | 0.00 | O |
| ATOM | 747 | C5   | T B | 6 | -29.024 | -21.342 | 82.221 | 1.00 | 0.00 | C |
| ATOM | 748 | C6   | T B | 6 | -28.454 | -22.474 | 81.764 | 1.00 | 0.00 | C |
| ATOM | 749 | C7   | T B | 6 | -29.471 | -20.228 | 81.322 | 1.00 | 0.00 | C |
| ATOM | 750 | C2'  | T B | 6 | -28.032 | -25.210 | 80.807 | 1.00 | 0.00 | C |
| ATOM | 751 | C3'  | T B | 6 | -26.812 | -25.778 | 80.097 | 1.00 | 0.00 | C |
| ATOM | 752 | O3'  | T B | 6 | -26.593 | -27.116 | 80.539 | 1.00 | 0.00 | O |
| ATOM | 753 | C4'  | T B | 6 | -25.694 | -24.834 | 80.533 | 1.00 | 0.00 | C |
| ATOM | 754 | O4'  | T B | 6 | -26.061 | -24.445 | 81.895 | 1.00 | 0.00 | O |
| ATOM | 755 | C5'  | T B | 6 | -25.510 | -23.582 | 79.707 | 1.00 | 0.00 | C |
| ATOM | 756 | O5'  | T B | 6 | -26.802 | -23.090 | 79.270 | 1.00 | 0.00 | O |



|      |     |      |     |   |         |         |        |      |      |   |
|------|-----|------|-----|---|---------|---------|--------|------|------|---|
| ATOM | 757 | O1P  | T B | 6 | -26.723 | -23.383 | 76.772 | 1.00 | 0.00 | O |
| ATOM | 758 | O2P  | T B | 6 | -28.166 | -21.595 | 77.781 | 1.00 | 0.00 | O |
| ATOM | 759 | P    | T B | 6 | -26.913 | -22.386 | 77.843 | 1.00 | 0.00 | P |
| ATOM | 760 | H3   | T B | 6 | -28.948 | -22.077 | 85.443 | 1.00 | 0.00 | H |
| ATOM | 761 | H6   | T B | 6 | -28.302 | -22.604 | 80.693 | 1.00 | 0.00 | H |
| ATOM | 762 | H1'  | T B | 6 | -27.504 | -25.476 | 82.892 | 1.00 | 0.00 | H |
| ATOM | 763 | H3'  | T B | 6 | -26.932 | -25.772 | 79.014 | 1.00 | 0.00 | H |
| ATOM | 764 | H4'  | T B | 6 | -24.764 | -25.402 | 80.487 | 1.00 | 0.00 | H |
| ATOM | 765 | H71  | T B | 6 | -30.291 | -20.574 | 80.693 | 1.00 | 0.00 | H |
| ATOM | 766 | H72  | T B | 6 | -29.807 | -19.384 | 81.925 | 1.00 | 0.00 | H |
| ATOM | 767 | H73  | T B | 6 | -28.639 | -19.913 | 80.690 | 1.00 | 0.00 | H |
| ATOM | 768 | H2'1 | T B | 6 | -28.488 | -24.408 | 80.231 | 1.00 | 0.00 | H |
| ATOM | 769 | H2'2 | T B | 6 | -28.791 | -25.976 | 80.964 | 1.00 | 0.00 | H |
| ATOM | 770 | H5'1 | T B | 6 | -25.012 | -22.824 | 80.310 | 1.00 | 0.00 | H |
| ATOM | 771 | H5'2 | T B | 6 | -24.893 | -23.814 | 78.839 | 1.00 | 0.00 | H |
| ATOM | 772 | C1'  | C B | 7 | -29.753 | -27.782 | 85.257 | 1.00 | 0.00 | C |
| ATOM | 773 | N1   | C B | 7 | -30.399 | -26.508 | 84.828 | 1.00 | 0.00 | N |
| ATOM | 774 | C2   | C B | 7 | -30.893 | -25.663 | 85.818 | 1.00 | 0.00 | C |
| ATOM | 775 | O2   | C B | 7 | -30.777 | -25.998 | 87.005 | 1.00 | 0.00 | O |
| ATOM | 776 | N3   | C B | 7 | -31.483 | -24.499 | 85.449 | 1.00 | 0.00 | N |
| ATOM | 777 | C4   | C B | 7 | -31.594 | -24.164 | 84.158 | 1.00 | 0.00 | C |
| ATOM | 778 | N4   | C B | 7 | -32.177 | -23.014 | 83.855 | 1.00 | 0.00 | N |
| ATOM | 779 | C5   | C B | 7 | -31.099 | -25.017 | 83.117 | 1.00 | 0.00 | C |
| ATOM | 780 | C6   | C B | 7 | -30.503 | -26.181 | 83.514 | 1.00 | 0.00 | C |
| ATOM | 781 | C2'  | C B | 7 | -30.052 | -28.959 | 84.341 | 1.00 | 0.00 | C |
| ATOM | 782 | C3'  | C B | 7 | -28.741 | -29.728 | 84.377 | 1.00 | 0.00 | C |
| ATOM | 783 | O3'  | C B | 7 | -28.729 | -30.580 | 85.519 | 1.00 | 0.00 | O |
| ATOM | 784 | C4'  | C B | 7 | -27.698 | -28.617 | 84.474 | 1.00 | 0.00 | C |
| ATOM | 785 | O4'  | C B | 7 | -28.353 | -27.574 | 85.261 | 1.00 | 0.00 | O |
| ATOM | 786 | C5'  | C B | 7 | -27.232 | -28.017 | 83.166 | 1.00 | 0.00 | C |
| ATOM | 787 | O5'  | C B | 7 | -28.343 | -27.947 | 82.238 | 1.00 | 0.00 | O |
| ATOM | 788 | O1P  | C B | 7 | -27.683 | -29.556 | 80.419 | 1.00 | 0.00 | O |
| ATOM | 789 | O2P  | C B | 7 | -29.198 | -27.627 | 79.897 | 1.00 | 0.00 | O |
| ATOM | 790 | P    | C B | 7 | -28.057 | -28.153 | 80.682 | 1.00 | 0.00 | P |
| ATOM | 791 | H5   | C B | 7 | -31.193 | -24.750 | 82.065 | 1.00 | 0.00 | H |
| ATOM | 792 | H6   | C B | 7 | -30.104 | -26.859 | 82.759 | 1.00 | 0.00 | H |
| ATOM | 793 | H1'  | C B | 7 | -30.064 | -27.992 | 86.281 | 1.00 | 0.00 | H |
| ATOM | 794 | H3'  | C B | 7 | -28.594 | -30.329 | 83.477 | 1.00 | 0.00 | H |
| ATOM | 795 | H4'  | C B | 7 | -26.826 | -29.043 | 84.971 | 1.00 | 0.00 | H |
| ATOM | 796 | H41  | C B | 7 | -32.273 | -22.729 | 82.868 | 1.00 | 0.00 | H |
| ATOM | 797 | H42  | C B | 7 | -32.535 | -22.403 | 84.604 | 1.00 | 0.00 | H |
| ATOM | 798 | H2'1 | C B | 7 | -30.299 | -28.644 | 83.328 | 1.00 | 0.00 | H |
| ATOM | 799 | H2'2 | C B | 7 | -30.880 | -29.568 | 84.707 | 1.00 | 0.00 | H |
| ATOM | 800 | H5'1 | C B | 7 | -26.843 | -27.015 | 83.352 | 1.00 | 0.00 | H |
| ATOM | 801 | H5'2 | C B | 7 | -26.442 | -28.637 | 82.749 | 1.00 | 0.00 | H |
| ATOM | 802 | C1'  | C B | 8 | -32.942 | -28.859 | 88.890 | 1.00 | 0.00 | C |
| ATOM | 803 | N1   | C B | 8 | -33.381 | -28.069 | 87.707 | 1.00 | 0.00 | N |
| ATOM | 804 | C2   | C B | 8 | -34.041 | -26.863 | 87.935 | 1.00 | 0.00 | C |
| ATOM | 805 | O2   | C B | 8 | -34.233 | -26.499 | 89.103 | 1.00 | 0.00 | O |
| ATOM | 806 | N3   | C B | 8 | -34.448 | -26.130 | 86.872 | 1.00 | 0.00 | N |
| ATOM | 807 | C4   | C B | 8 | -34.226 | -26.550 | 85.619 | 1.00 | 0.00 | C |
| ATOM | 808 | N4   | C B | 8 | -34.644 | -25.790 | 84.617 | 1.00 | 0.00 | N |
| ATOM | 809 | C5   | C B | 8 | -33.555 | -27.789 | 85.353 | 1.00 | 0.00 | C |
| ATOM | 810 | C6   | C B | 8 | -33.149 | -28.509 | 86.441 | 1.00 | 0.00 | C |

|      |     |      |     |    |         |         |        |      |      |   |
|------|-----|------|-----|----|---------|---------|--------|------|------|---|
| ATOM | 811 | C2'  | C B | 8  | -33.093 | -30.364 | 88.713 | 1.00 | 0.00 | C |
| ATOM | 812 | C3'  | C B | 8  | -31.880 | -30.893 | 89.465 | 1.00 | 0.00 | C |
| ATOM | 813 | O3'  | C B | 8  | -32.197 | -30.993 | 90.851 | 1.00 | 0.00 | O |
| ATOM | 814 | C4'  | C B | 8  | -30.819 | -29.830 | 89.189 | 1.00 | 0.00 | C |
| ATOM | 815 | O4'  | C B | 8  | -31.573 | -28.579 | 89.109 | 1.00 | 0.00 | O |
| ATOM | 816 | C5'  | C B | 8  | -30.018 | -29.993 | 87.919 | 1.00 | 0.00 | C |
| ATOM | 817 | O5'  | C B | 8  | -30.869 | -30.517 | 86.867 | 1.00 | 0.00 | O |
| ATOM | 818 | O1P  | C B | 8  | -29.903 | -32.798 | 86.419 | 1.00 | 0.00 | O |
| ATOM | 819 | O2P  | C B | 8  | -31.120 | -31.570 | 84.600 | 1.00 | 0.00 | O |
| ATOM | 820 | P    | C B | 8  | -30.235 | -31.504 | 85.789 | 1.00 | 0.00 | P |
| ATOM | 821 | H5   | C B | 8  | -33.379 | -28.138 | 84.335 | 1.00 | 0.00 | H |
| ATOM | 822 | H6   | C B | 8  | -32.628 | -29.455 | 86.289 | 1.00 | 0.00 | H |
| ATOM | 823 | H1'  | C B | 8  | -33.501 | -28.510 | 89.759 | 1.00 | 0.00 | H |
| ATOM | 824 | H3'  | C B | 8  | -31.565 | -31.869 | 89.094 | 1.00 | 0.00 | H |
| ATOM | 825 | H4'  | C B | 8  | -30.121 | -29.856 | 90.026 | 1.00 | 0.00 | H |
| ATOM | 826 | H41  | C B | 8  | -34.483 | -26.088 | 83.643 | 1.00 | 0.00 | H |
| ATOM | 827 | H42  | C B | 8  | -35.128 | -24.900 | 84.810 | 1.00 | 0.00 | H |
| ATOM | 828 | H2'1 | C B | 8  | -33.070 | -30.662 | 87.665 | 1.00 | 0.00 | H |
| ATOM | 829 | H2'2 | C B | 8  | -34.022 | -30.740 | 89.142 | 1.00 | 0.00 | H |
| ATOM | 830 | H5'1 | C B | 8  | -29.619 | -29.024 | 87.620 | 1.00 | 0.00 | H |
| ATOM | 831 | H5'2 | C B | 8  | -29.193 | -30.681 | 88.101 | 1.00 | 0.00 | H |
| ATOM | 832 | C1'  | T B | 9  | -36.958 | -28.068 | 91.671 | 1.00 | 0.00 | C |
| ATOM | 833 | N1   | T B | 9  | -37.062 | -28.053 | 90.188 | 1.00 | 0.00 | N |
| ATOM | 834 | C2   | T B | 9  | -37.677 | -26.961 | 89.609 | 1.00 | 0.00 | C |
| ATOM | 835 | O2   | T B | 9  | -38.125 | -26.036 | 90.262 | 1.00 | 0.00 | O |
| ATOM | 836 | N3   | T B | 9  | -37.750 | -26.988 | 88.230 | 1.00 | 0.00 | N |
| ATOM | 837 | C4   | T B | 9  | -37.279 | -27.985 | 87.401 | 1.00 | 0.00 | C |
| ATOM | 838 | O4   | T B | 9  | -37.406 | -27.899 | 86.174 | 1.00 | 0.00 | O |
| ATOM | 839 | C5   | T B | 9  | -36.651 | -29.084 | 88.097 | 1.00 | 0.00 | C |
| ATOM | 840 | C6   | T B | 9  | -36.562 | -29.090 | 89.441 | 1.00 | 0.00 | C |
| ATOM | 841 | C7   | T B | 9  | -36.122 | -30.190 | 87.233 | 1.00 | 0.00 | C |
| ATOM | 842 | C2'  | T B | 9  | -37.154 | -29.448 | 92.288 | 1.00 | 0.00 | C |
| ATOM | 843 | C3'  | T B | 9  | -36.185 | -29.412 | 93.460 | 1.00 | 0.00 | C |
| ATOM | 844 | O3'  | T B | 9  | -36.822 | -28.792 | 94.575 | 1.00 | 0.00 | O |
| ATOM | 845 | C4'  | T B | 9  | -35.026 | -28.579 | 92.917 | 1.00 | 0.00 | C |
| ATOM | 846 | O4'  | T B | 9  | -35.665 | -27.615 | 92.020 | 1.00 | 0.00 | O |
| ATOM | 847 | C5'  | T B | 9  | -33.963 | -29.327 | 92.147 | 1.00 | 0.00 | C |
| ATOM | 848 | O5'  | T B | 9  | -34.577 | -30.386 | 91.369 | 1.00 | 0.00 | O |
| ATOM | 849 | O1P  | T B | 9  | -33.675 | -32.484 | 92.426 | 1.00 | 0.00 | O |
| ATOM | 850 | O2P  | T B | 9  | -34.358 | -32.489 | 90.011 | 1.00 | 0.00 | O |
| ATOM | 851 | P    | T B | 9  | -33.770 | -31.744 | 91.151 | 1.00 | 0.00 | P |
| ATOM | 852 | H3   | T B | 9  | -38.201 | -26.183 | 87.774 | 1.00 | 0.00 | H |
| ATOM | 853 | H6   | T B | 9  | -36.085 | -29.932 | 89.943 | 1.00 | 0.00 | H |
| ATOM | 854 | H1'  | T B | 9  | -37.681 | -27.356 | 92.072 | 1.00 | 0.00 | H |
| ATOM | 855 | H3'  | T B | 9  | -35.854 | -30.411 | 93.743 | 1.00 | 0.00 | H |
| ATOM | 856 | H4'  | T B | 9  | -34.546 | -28.108 | 93.776 | 1.00 | 0.00 | H |
| ATOM | 857 | H71  | T B | 9  | -36.687 | -31.102 | 87.423 | 1.00 | 0.00 | H |
| ATOM | 858 | H72  | T B | 9  | -36.221 | -29.912 | 86.184 | 1.00 | 0.00 | H |
| ATOM | 859 | H73  | T B | 9  | -35.070 | -30.360 | 87.465 | 1.00 | 0.00 | H |
| ATOM | 860 | H2'1 | T B | 9  | -36.907 | -30.249 | 91.593 | 1.00 | 0.00 | H |
| ATOM | 861 | H2'2 | T B | 9  | -38.179 | -29.609 | 92.624 | 1.00 | 0.00 | H |
| ATOM | 862 | H5'1 | T B | 9  | -33.446 | -28.634 | 91.484 | 1.00 | 0.00 | H |
| ATOM | 863 | H5'2 | T B | 9  | -33.248 | -29.754 | 92.848 | 1.00 | 0.00 | H |
| ATOM | 864 | C1'  | A B | 10 | -41.470 | -26.189 | 92.540 | 1.00 | 0.00 | C |

|      |     |      |     |    |         |         |        |      |      |   |
|------|-----|------|-----|----|---------|---------|--------|------|------|---|
| ATOM | 865 | N1   | A B | 10 | -41.902 | -26.341 | 87.428 | 1.00 | 0.00 | N |
| ATOM | 866 | C2   | A B | 10 | -42.249 | -25.430 | 88.333 | 1.00 | 0.00 | C |
| ATOM | 867 | N3   | A B | 10 | -42.106 | -25.453 | 89.640 | 1.00 | 0.00 | N |
| ATOM | 868 | C4   | A B | 10 | -41.520 | -26.601 | 90.025 | 1.00 | 0.00 | C |
| ATOM | 869 | C5   | A B | 10 | -41.106 | -27.633 | 89.227 | 1.00 | 0.00 | C |
| ATOM | 870 | C6   | A B | 10 | -41.319 | -27.477 | 87.842 | 1.00 | 0.00 | C |
| ATOM | 871 | N6   | A B | 10 | -40.964 | -28.405 | 86.937 | 1.00 | 0.00 | N |
| ATOM | 872 | N7   | A B | 10 | -40.544 | -28.651 | 89.978 | 1.00 | 0.00 | N |
| ATOM | 873 | C8   | A B | 10 | -40.634 | -28.221 | 91.202 | 1.00 | 0.00 | C |
| ATOM | 874 | N9   | A B | 10 | -41.212 | -26.982 | 91.308 | 1.00 | 0.00 | N |
| ATOM | 875 | C2'  | A B | 10 | -41.893 | -27.032 | 93.735 | 1.00 | 0.00 | C |
| ATOM | 876 | C3'  | A B | 10 | -41.235 | -26.297 | 94.892 | 1.00 | 0.00 | C |
| ATOM | 877 | O3'  | A B | 10 | -42.078 | -25.225 | 95.306 | 1.00 | 0.00 | O |
| ATOM | 878 | C4'  | A B | 10 | -39.928 | -25.797 | 94.276 | 1.00 | 0.00 | C |
| ATOM | 879 | O4'  | A B | 10 | -40.269 | -25.521 | 92.880 | 1.00 | 0.00 | O |
| ATOM | 880 | C5'  | A B | 10 | -38.761 | -26.755 | 94.309 | 1.00 | 0.00 | C |
| ATOM | 881 | O5'  | A B | 10 | -39.235 | -28.111 | 94.106 | 1.00 | 0.00 | O |
| ATOM | 882 | O1P  | A B | 10 | -38.748 | -29.234 | 96.306 | 1.00 | 0.00 | O |
| ATOM | 883 | O2P  | A B | 10 | -38.831 | -30.590 | 94.196 | 1.00 | 0.00 | O |
| ATOM | 884 | P    | A B | 10 | -38.489 | -29.306 | 94.855 | 1.00 | 0.00 | P |
| ATOM | 885 | H2   | A B | 10 | -42.721 | -24.534 | 87.932 | 1.00 | 0.00 | H |
| ATOM | 886 | H8   | A B | 10 | -40.282 | -28.791 | 92.061 | 1.00 | 0.00 | H |
| ATOM | 887 | H1'  | A B | 10 | -42.221 | -25.434 | 92.308 | 1.00 | 0.00 | H |
| ATOM | 888 | H3'  | A B | 10 | -41.044 | -26.956 | 95.738 | 1.00 | 0.00 | H |
| ATOM | 889 | H4'  | A B | 10 | -39.640 | -24.903 | 94.828 | 1.00 | 0.00 | H |
| ATOM | 890 | H61  | A B | 10 | -41.139 | -28.241 | 85.936 | 1.00 | 0.00 | H |
| ATOM | 891 | H62  | A B | 10 | -40.516 | -29.281 | 87.246 | 1.00 | 0.00 | H |
| ATOM | 892 | H2'1 | A B | 10 | -41.538 | -28.059 | 93.665 | 1.00 | 0.00 | H |
| ATOM | 893 | H2'2 | A B | 10 | -42.977 | -27.066 | 93.853 | 1.00 | 0.00 | H |
| ATOM | 894 | H5'1 | A B | 10 | -38.057 | -26.490 | 93.520 | 1.00 | 0.00 | H |
| ATOM | 895 | H5'2 | A B | 10 | -38.264 | -26.681 | 95.274 | 1.00 | 0.00 | H |
| ATOM | 896 | C1'  | G B | 11 | -45.921 | -24.491 | 91.145 | 1.00 | 0.00 | C |
| ATOM | 897 | N1   | G B | 11 | -45.130 | -27.400 | 87.030 | 1.00 | 0.00 | N |
| ATOM | 898 | C2   | G B | 11 | -45.650 | -26.122 | 87.128 | 1.00 | 0.00 | C |
| ATOM | 899 | N2   | G B | 11 | -46.008 | -25.543 | 85.975 | 1.00 | 0.00 | N |
| ATOM | 900 | N3   | G B | 11 | -45.799 | -25.474 | 88.281 | 1.00 | 0.00 | N |
| ATOM | 901 | C4   | G B | 11 | -45.391 | -26.214 | 89.345 | 1.00 | 0.00 | C |
| ATOM | 902 | C5   | G B | 11 | -44.867 | -27.494 | 89.345 | 1.00 | 0.00 | C |
| ATOM | 903 | C6   | G B | 11 | -44.704 | -28.183 | 88.121 | 1.00 | 0.00 | C |
| ATOM | 904 | O6   | G B | 11 | -44.261 | -29.314 | 87.919 | 1.00 | 0.00 | O |
| ATOM | 905 | N7   | G B | 11 | -44.575 | -27.897 | 90.650 | 1.00 | 0.00 | N |
| ATOM | 906 | C8   | G B | 11 | -44.922 | -26.870 | 91.384 | 1.00 | 0.00 | C |
| ATOM | 907 | N9   | G B | 11 | -45.429 | -25.809 | 90.662 | 1.00 | 0.00 | N |
| ATOM | 908 | C2'  | G B | 11 | -46.683 | -24.565 | 92.461 | 1.00 | 0.00 | C |
| ATOM | 909 | C3'  | G B | 11 | -46.275 | -23.268 | 93.139 | 1.00 | 0.00 | C |
| ATOM | 910 | O3'  | G B | 11 | -47.117 | -22.214 | 92.676 | 1.00 | 0.00 | O |
| ATOM | 911 | C4'  | G B | 11 | -44.826 | -23.090 | 92.688 | 1.00 | 0.00 | C |
| ATOM | 912 | O4'  | G B | 11 | -44.798 | -23.655 | 91.339 | 1.00 | 0.00 | O |
| ATOM | 913 | C5'  | G B | 11 | -43.774 | -23.779 | 93.524 | 1.00 | 0.00 | C |
| ATOM | 914 | O5'  | G B | 11 | -44.279 | -25.053 | 93.995 | 1.00 | 0.00 | O |
| ATOM | 915 | O1P  | G B | 11 | -44.422 | -24.738 | 96.487 | 1.00 | 0.00 | O |
| ATOM | 916 | O2P  | G B | 11 | -44.084 | -27.032 | 95.530 | 1.00 | 0.00 | O |
| ATOM | 917 | P    | G B | 11 | -43.823 | -25.576 | 95.432 | 1.00 | 0.00 | P |
| ATOM | 918 | H1   | G B | 11 | -45.050 | -27.811 | 86.088 | 1.00 | 0.00 | H |

|      |     |      |     |    |         |         |        |      |      |   |
|------|-----|------|-----|----|---------|---------|--------|------|------|---|
| ATOM | 919 | H8   | G B | 11 | -44.822 | -26.857 | 92.468 | 1.00 | 0.00 | H |
| ATOM | 920 | H1'  | G B | 11 | -46.537 | -24.048 | 90.361 | 1.00 | 0.00 | H |
| ATOM | 921 | H21  | G B | 11 | -45.887 | -26.048 | 85.085 | 1.00 | 0.00 | H |
| ATOM | 922 | H3'  | G B | 11 | -46.343 | -23.334 | 94.225 | 1.00 | 0.00 | H |
| ATOM | 923 | H22  | G B | 11 | -46.405 | -24.592 | 85.978 | 1.00 | 0.00 | H |
| ATOM | 924 | H4'  | G B | 11 | -44.618 | -22.019 | 92.706 | 1.00 | 0.00 | H |
| ATOM | 925 | H2'1 | G B | 11 | -46.394 | -25.432 | 93.057 | 1.00 | 0.00 | H |
| ATOM | 926 | H2'2 | G B | 11 | -47.761 | -24.613 | 92.312 | 1.00 | 0.00 | H |
| ATOM | 927 | H5'1 | G B | 11 | -42.882 | -23.937 | 92.917 | 1.00 | 0.00 | H |
| ATOM | 928 | H5'2 | G B | 11 | -43.521 | -23.145 | 94.374 | 1.00 | 0.00 | H |
| ATOM | 929 | C1'  | G B | 12 | -49.793 | -24.137 | 88.077 | 1.00 | 0.00 | C |
| ATOM | 930 | N1   | G B | 12 | -48.240 | -28.735 | 86.503 | 1.00 | 0.00 | N |
| ATOM | 931 | C2   | G B | 12 | -48.683 | -27.647 | 85.770 | 1.00 | 0.00 | C |
| ATOM | 932 | N2   | G B | 12 | -48.717 | -27.807 | 84.440 | 1.00 | 0.00 | N |
| ATOM | 933 | N3   | G B | 12 | -49.059 | -26.493 | 86.318 | 1.00 | 0.00 | N |
| ATOM | 934 | C4   | G B | 12 | -48.966 | -26.513 | 87.674 | 1.00 | 0.00 | C |
| ATOM | 935 | C5   | G B | 12 | -48.541 | -27.549 | 88.488 | 1.00 | 0.00 | C |
| ATOM | 936 | C6   | G B | 12 | -48.138 | -28.772 | 87.906 | 1.00 | 0.00 | C |
| ATOM | 937 | O6   | G B | 12 | -47.736 | -29.798 | 88.456 | 1.00 | 0.00 | O |
| ATOM | 938 | N7   | G B | 12 | -48.596 | -27.164 | 89.828 | 1.00 | 0.00 | N |
| ATOM | 939 | C8   | G B | 12 | -49.039 | -25.934 | 89.787 | 1.00 | 0.00 | C |
| ATOM | 940 | N9   | G B | 12 | -49.288 | -25.467 | 88.513 | 1.00 | 0.00 | N |
| ATOM | 941 | C2'  | G B | 12 | -50.849 | -23.549 | 89.003 | 1.00 | 0.00 | C |
| ATOM | 942 | C3'  | G B | 12 | -50.529 | -22.064 | 88.948 | 1.00 | 0.00 | C |
| ATOM | 943 | O3'  | G B | 12 | -51.165 | -21.490 | 87.809 | 1.00 | 0.00 | O |
| ATOM | 944 | C4'  | G B | 12 | -49.007 | -22.049 | 88.828 | 1.00 | 0.00 | C |
| ATOM | 945 | O4'  | G B | 12 | -48.695 | -23.247 | 88.049 | 1.00 | 0.00 | O |
| ATOM | 946 | C5'  | G B | 12 | -48.231 | -22.101 | 90.124 | 1.00 | 0.00 | C |
| ATOM | 947 | O5'  | G B | 12 | -48.916 | -22.956 | 91.072 | 1.00 | 0.00 | O |
| ATOM | 948 | O1P  | G B | 12 | -49.627 | -21.361 | 92.885 | 1.00 | 0.00 | O |
| ATOM | 949 | O2P  | G B | 12 | -49.224 | -23.777 | 93.427 | 1.00 | 0.00 | O |
| ATOM | 950 | P    | G B | 12 | -48.851 | -22.587 | 92.624 | 1.00 | 0.00 | P |
| ATOM | 951 | H1   | G B | 12 | -47.966 | -29.581 | 85.980 | 1.00 | 0.00 | H |
| ATOM | 952 | H8   | G B | 12 | -49.198 | -25.329 | 90.680 | 1.00 | 0.00 | H |
| ATOM | 953 | H1'  | G B | 12 | -50.174 | -24.233 | 87.061 | 1.00 | 0.00 | H |
| ATOM | 954 | H21  | G B | 12 | -48.421 | -28.700 | 84.022 | 1.00 | 0.00 | H |
| ATOM | 955 | H3'  | G B | 12 | -50.858 | -21.541 | 89.847 | 1.00 | 0.00 | H |
| ATOM | 956 | H22  | G B | 12 | -49.040 | -27.036 | 83.839 | 1.00 | 0.00 | H |
| ATOM | 957 | H4'  | G B | 12 | -48.738 | -21.126 | 88.316 | 1.00 | 0.00 | H |
| ATOM | 958 | H2'1 | G B | 12 | -50.769 | -23.935 | 90.020 | 1.00 | 0.00 | H |
| ATOM | 959 | H2'2 | G B | 12 | -51.862 | -23.750 | 88.656 | 1.00 | 0.00 | H |
| ATOM | 960 | H5'1 | G B | 12 | -47.233 | -22.493 | 89.928 | 1.00 | 0.00 | H |
| ATOM | 961 | H5'2 | G B | 12 | -48.146 | -21.092 | 90.530 | 1.00 | 0.00 | H |
| ATOM | 962 | C1'  | T B | 13 | -52.800 | -25.756 | 84.495 | 1.00 | 0.00 | C |
| ATOM | 963 | N1   | T B | 13 | -52.495 | -26.623 | 85.663 | 1.00 | 0.00 | N |
| ATOM | 964 | C2   | T B | 13 | -52.062 | -27.907 | 85.400 | 1.00 | 0.00 | C |
| ATOM | 965 | O2   | T B | 13 | -51.929 | -28.338 | 84.268 | 1.00 | 0.00 | O |
| ATOM | 966 | N3   | T B | 13 | -51.790 | -28.678 | 86.514 | 1.00 | 0.00 | N |
| ATOM | 967 | C4   | T B | 13 | -51.910 | -28.289 | 87.833 | 1.00 | 0.00 | C |
| ATOM | 968 | O4   | T B | 13 | -51.639 | -29.072 | 88.750 | 1.00 | 0.00 | O |
| ATOM | 969 | C5   | T B | 13 | -52.367 | -26.930 | 88.009 | 1.00 | 0.00 | C |
| ATOM | 970 | C6   | T B | 13 | -52.643 | -26.150 | 86.944 | 1.00 | 0.00 | C |
| ATOM | 971 | C7   | T B | 13 | -52.511 | -26.463 | 89.426 | 1.00 | 0.00 | C |
| ATOM | 972 | C2'  | T B | 13 | -54.006 | -24.846 | 84.702 | 1.00 | 0.00 | C |

|      |      |      |     |    |         |         |        |      |      |   |
|------|------|------|-----|----|---------|---------|--------|------|------|---|
| ATOM | 973  | C3'  | T B | 13 | -53.587 | -23.590 | 83.952 | 1.00 | 0.00 | C |
| ATOM | 974  | O3'  | T B | 13 | -53.904 | -23.743 | 82.571 | 1.00 | 0.00 | O |
| ATOM | 975  | C4'  | T B | 13 | -52.082 | -23.532 | 84.198 | 1.00 | 0.00 | C |
| ATOM | 976  | O4'  | T B | 13 | -51.672 | -24.936 | 84.258 | 1.00 | 0.00 | O |
| ATOM | 977  | C5'  | T B | 13 | -51.634 | -22.843 | 85.467 | 1.00 | 0.00 | C |
| ATOM | 978  | O5'  | T B | 13 | -52.576 | -23.123 | 86.534 | 1.00 | 0.00 | O |
| ATOM | 979  | O1P  | T B | 13 | -53.589 | -20.872 | 87.021 | 1.00 | 0.00 | O |
| ATOM | 980  | O2P  | T B | 13 | -53.476 | -22.614 | 88.824 | 1.00 | 0.00 | O |
| ATOM | 981  | P    | T B | 13 | -52.850 | -21.997 | 87.629 | 1.00 | 0.00 | P |
| ATOM | 982  | H3   | T B | 13 | -51.462 | -29.640 | 86.344 | 1.00 | 0.00 | H |
| ATOM | 983  | H6   | T B | 13 | -52.986 | -25.128 | 87.102 | 1.00 | 0.00 | H |
| ATOM | 984  | H1'  | T B | 13 | -52.940 | -26.393 | 83.622 | 1.00 | 0.00 | H |
| ATOM | 985  | H3'  | T B | 13 | -54.085 | -22.701 | 84.340 | 1.00 | 0.00 | H |
| ATOM | 986  | H4'  | T B | 13 | -51.644 | -22.995 | 83.357 | 1.00 | 0.00 | H |
| ATOM | 987  | H71  | T B | 13 | -53.562 | -26.271 | 89.642 | 1.00 | 0.00 | H |
| ATOM | 988  | H72  | T B | 13 | -52.137 | -27.234 | 90.102 | 1.00 | 0.00 | H |
| ATOM | 989  | H73  | T B | 13 | -51.938 | -25.546 | 89.567 | 1.00 | 0.00 | H |
| ATOM | 990  | H2'1 | T B | 13 | -54.189 | -24.637 | 85.755 | 1.00 | 0.00 | H |
| ATOM | 991  | H2'2 | T B | 13 | -54.920 | -25.270 | 84.288 | 1.00 | 0.00 | H |
| ATOM | 992  | H5'1 | T B | 13 | -50.644 | -23.208 | 85.742 | 1.00 | 0.00 | H |
| ATOM | 993  | H5'2 | T B | 13 | -51.585 | -21.770 | 85.292 | 1.00 | 0.00 | H |
| ATOM | 994  | C1'  | G B | 14 | -54.956 | -29.306 | 81.774 | 1.00 | 0.00 | C |
| ATOM | 995  | N1   | G B | 14 | -54.105 | -32.204 | 85.886 | 1.00 | 0.00 | N |
| ATOM | 996  | C2   | G B | 14 | -53.944 | -32.499 | 84.544 | 1.00 | 0.00 | C |
| ATOM | 997  | N2   | G B | 14 | -53.500 | -33.728 | 84.259 | 1.00 | 0.00 | N |
| ATOM | 998  | N3   | G B | 14 | -54.206 | -31.634 | 83.565 | 1.00 | 0.00 | N |
| ATOM | 999  | C4   | G B | 14 | -54.653 | -30.439 | 84.036 | 1.00 | 0.00 | C |
| ATOM | 1000 | C5   | G B | 14 | -54.848 | -30.059 | 85.352 | 1.00 | 0.00 | C |
| ATOM | 1001 | C6   | G B | 14 | -54.567 | -30.974 | 86.393 | 1.00 | 0.00 | C |
| ATOM | 1002 | O6   | G B | 14 | -54.676 | -30.822 | 87.611 | 1.00 | 0.00 | O |
| ATOM | 1003 | N7   | G B | 14 | -55.321 | -28.745 | 85.410 | 1.00 | 0.00 | N |
| ATOM | 1004 | C8   | G B | 14 | -55.393 | -28.380 | 84.156 | 1.00 | 0.00 | C |
| ATOM | 1005 | N9   | G B | 14 | -55.005 | -29.357 | 83.261 | 1.00 | 0.00 | N |
| ATOM | 1006 | C2'  | G B | 14 | -56.107 | -28.530 | 81.148 | 1.00 | 0.00 | C |
| ATOM | 1007 | C3'  | G B | 14 | -55.434 | -27.870 | 79.955 | 1.00 | 0.00 | C |
| ATOM | 1008 | O3'  | G B | 14 | -55.415 | -28.784 | 78.863 | 1.00 | 0.00 | O |
| ATOM | 1009 | C4'  | G B | 14 | -54.030 | -27.569 | 80.483 | 1.00 | 0.00 | C |
| ATOM | 1010 | O4'  | G B | 14 | -53.749 | -28.669 | 81.404 | 1.00 | 0.00 | O |
| ATOM | 1011 | C5'  | G B | 14 | -53.856 | -26.263 | 81.220 | 1.00 | 0.00 | C |
| ATOM | 1012 | O5'  | G B | 14 | -55.043 | -25.978 | 82.001 | 1.00 | 0.00 | O |
| ATOM | 1013 | O1P  | G B | 14 | -55.983 | -23.918 | 80.901 | 1.00 | 0.00 | O |
| ATOM | 1014 | O2P  | G B | 14 | -56.432 | -24.359 | 83.329 | 1.00 | 0.00 | O |
| ATOM | 1015 | P    | G B | 14 | -55.496 | -24.459 | 82.184 | 1.00 | 0.00 | P |
| ATOM | 1016 | H1   | G B | 14 | -53.868 | -32.942 | 86.567 | 1.00 | 0.00 | H |
| ATOM | 1017 | H8   | G B | 14 | -55.731 | -27.390 | 83.846 | 1.00 | 0.00 | H |
| ATOM | 1018 | H1'  | G B | 14 | -54.924 | -30.329 | 81.398 | 1.00 | 0.00 | H |
| ATOM | 1019 | H21  | G B | 14 | -53.297 | -34.390 | 85.023 | 1.00 | 0.00 | H |
| ATOM | 1020 | H3'  | G B | 14 | -55.944 | -26.955 | 79.654 | 1.00 | 0.00 | H |
| ATOM | 1021 | H22  | G B | 14 | -53.363 | -34.012 | 83.278 | 1.00 | 0.00 | H |
| ATOM | 1022 | H4'  | G B | 14 | -53.365 | -27.555 | 79.619 | 1.00 | 0.00 | H |
| ATOM | 1023 | H2'1 | G B | 14 | -56.524 | -27.789 | 81.829 | 1.00 | 0.00 | H |
| ATOM | 1024 | H2'2 | G B | 14 | -56.921 | -29.181 | 80.833 | 1.00 | 0.00 | H |
| ATOM | 1025 | H5'1 | G B | 14 | -52.992 | -26.337 | 81.878 | 1.00 | 0.00 | H |
| ATOM | 1026 | H5'2 | G B | 14 | -53.689 | -25.464 | 80.498 | 1.00 | 0.00 | H |

|      |      |      |     |    |         |         |        |      |      |   |
|------|------|------|-----|----|---------|---------|--------|------|------|---|
| ATOM | 1027 | C1'  | C B | 15 | -56.638 | -33.894 | 80.965 | 1.00 | 0.00 | C |
| ATOM | 1028 | N1   | C B | 15 | -57.040 | -33.144 | 82.186 | 1.00 | 0.00 | N |
| ATOM | 1029 | C2   | C B | 15 | -56.884 | -33.774 | 83.420 | 1.00 | 0.00 | C |
| ATOM | 1030 | O2   | C B | 15 | -56.421 | -34.922 | 83.449 | 1.00 | 0.00 | O |
| ATOM | 1031 | N3   | C B | 15 | -57.244 | -33.109 | 84.544 | 1.00 | 0.00 | N |
| ATOM | 1032 | C4   | C B | 15 | -57.743 | -31.868 | 84.480 | 1.00 | 0.00 | C |
| ATOM | 1033 | N4   | C B | 15 | -58.075 | -31.263 | 85.610 | 1.00 | 0.00 | N |
| ATOM | 1034 | C5   | C B | 15 | -57.919 | -31.197 | 83.224 | 1.00 | 0.00 | C |
| ATOM | 1035 | C6   | C B | 15 | -57.545 | -31.884 | 82.106 | 1.00 | 0.00 | C |
| ATOM | 1036 | C2'  | C B | 15 | -57.558 | -33.664 | 79.774 | 1.00 | 0.00 | C |
| ATOM | 1037 | C3'  | C B | 15 | -56.580 | -33.694 | 78.608 | 1.00 | 0.00 | C |
| ATOM | 1038 | O3'  | C B | 15 | -56.361 | -35.047 | 78.215 | 1.00 | 0.00 | O |
| ATOM | 1039 | C4'  | C B | 15 | -55.327 | -33.053 | 79.199 | 1.00 | 0.00 | C |
| ATOM | 1040 | O4'  | C B | 15 | -55.339 | -33.462 | 80.604 | 1.00 | 0.00 | O |
| ATOM | 1041 | C5'  | C B | 15 | -55.251 | -31.544 | 79.138 | 1.00 | 0.00 | C |
| ATOM | 1042 | O5'  | C B | 15 | -56.570 | -30.980 | 79.341 | 1.00 | 0.00 | O |
| ATOM | 1043 | O1P  | C B | 15 | -57.093 | -29.905 | 77.125 | 1.00 | 0.00 | O |
| ATOM | 1044 | O2P  | C B | 15 | -58.132 | -29.013 | 79.227 | 1.00 | 0.00 | O |
| ATOM | 1045 | P    | C B | 15 | -56.958 | -29.638 | 78.571 | 1.00 | 0.00 | P |
| ATOM | 1046 | H5   | C B | 15 | -58.331 | -30.189 | 83.168 | 1.00 | 0.00 | H |
| ATOM | 1047 | H6   | C B | 15 | -57.654 | -31.413 | 81.129 | 1.00 | 0.00 | H |
| ATOM | 1048 | H1'  | C B | 15 | -56.582 | -34.953 | 81.218 | 1.00 | 0.00 | H |
| ATOM | 1049 | H3'  | C B | 15 | -56.948 | -33.125 | 77.754 | 1.00 | 0.00 | H |
| ATOM | 1050 | H4'  | C B | 15 | -54.476 | -33.451 | 78.646 | 1.00 | 0.00 | H |
| ATOM | 1051 | H41  | C B | 15 | -58.459 | -30.306 | 85.590 | 1.00 | 0.00 | H |
| ATOM | 1052 | H42  | C B | 15 | -57.950 | -31.749 | 86.512 | 1.00 | 0.00 | H |
| ATOM | 1053 | H2'1 | C B | 15 | -58.078 | -32.709 | 79.831 | 1.00 | 0.00 | H |
| ATOM | 1054 | H2'2 | C B | 15 | -58.313 | -34.444 | 79.678 | 1.00 | 0.00 | H |
| ATOM | 1055 | H5'1 | C B | 15 | -54.573 | -31.188 | 79.914 | 1.00 | 0.00 | H |
| ATOM | 1056 | H5'2 | C B | 15 | -54.870 | -31.245 | 78.162 | 1.00 | 0.00 | H |
| ATOM | 1057 | C1'  | G B | 16 | -58.380 | -38.306 | 82.386 | 1.00 | 0.00 | C |
| ATOM | 1058 | N1   | G B | 16 | -59.934 | -35.731 | 86.506 | 1.00 | 0.00 | N |
| ATOM | 1059 | C2   | G B | 16 | -59.345 | -36.980 | 86.409 | 1.00 | 0.00 | C |
| ATOM | 1060 | N2   | G B | 16 | -59.145 | -37.628 | 87.563 | 1.00 | 0.00 | N |
| ATOM | 1061 | N3   | G B | 16 | -58.983 | -37.534 | 85.253 | 1.00 | 0.00 | N |
| ATOM | 1062 | C4   | G B | 16 | -59.267 | -36.740 | 84.188 | 1.00 | 0.00 | C |
| ATOM | 1063 | C5   | G B | 16 | -59.856 | -35.487 | 84.188 | 1.00 | 0.00 | C |
| ATOM | 1064 | C6   | G B | 16 | -60.236 | -34.895 | 85.416 | 1.00 | 0.00 | C |
| ATOM | 1065 | O6   | G B | 16 | -60.766 | -33.803 | 85.618 | 1.00 | 0.00 | O |
| ATOM | 1066 | N7   | G B | 16 | -59.973 | -35.008 | 82.882 | 1.00 | 0.00 | N |
| ATOM | 1067 | C8   | G B | 16 | -59.460 | -35.962 | 82.148 | 1.00 | 0.00 | C |
| ATOM | 1068 | N9   | G B | 16 | -59.011 | -37.049 | 82.870 | 1.00 | 0.00 | N |
| ATOM | 1069 | C2'  | G B | 16 | -58.967 | -38.824 | 81.080 | 1.00 | 0.00 | C |
| ATOM | 1070 | C3'  | G B | 16 | -57.744 | -39.405 | 80.390 | 1.00 | 0.00 | C |
| ATOM | 1071 | O3'  | G B | 16 | -57.530 | -40.735 | 80.856 | 1.00 | 0.00 | O |
| ATOM | 1072 | C4'  | G B | 16 | -56.628 | -38.455 | 80.820 | 1.00 | 0.00 | C |
| ATOM | 1073 | O4'  | G B | 16 | -57.007 | -38.044 | 82.172 | 1.00 | 0.00 | O |
| ATOM | 1074 | C5'  | G B | 16 | -56.435 | -37.219 | 79.974 | 1.00 | 0.00 | C |
| ATOM | 1075 | O5'  | G B | 16 | -57.721 | -36.732 | 79.517 | 1.00 | 0.00 | O |
| ATOM | 1076 | O1P  | G B | 16 | -57.619 | -37.066 | 77.026 | 1.00 | 0.00 | O |
| ATOM | 1077 | O2P  | G B | 16 | -59.068 | -35.261 | 77.991 | 1.00 | 0.00 | O |
| ATOM | 1078 | P    | G B | 16 | -57.817 | -36.052 | 78.078 | 1.00 | 0.00 | P |
| ATOM | 1079 | H1   | G B | 16 | -60.169 | -35.389 | 87.450 | 1.00 | 0.00 | H |
| ATOM | 1080 | H8   | G B | 16 | -59.396 | -35.904 | 81.062 | 1.00 | 0.00 | H |

|      |      |      |     |    |         |         |        |      |      |   |
|------|------|------|-----|----|---------|---------|--------|------|------|---|
| ATOM | 1081 | H1'  | G B | 16 | -58.459 | -39.054 | 83.174 | 1.00 | 0.00 | H |
| ATOM | 1082 | H21  | G B | 16 | -59.423 | -37.192 | 88.453 | 1.00 | 0.00 | H |
| ATOM | 1083 | H3'  | G B | 16 | -57.853 | -39.417 | 79.305 | 1.00 | 0.00 | H |
| ATOM | 1084 | H22  | G B | 16 | -58.712 | -38.563 | 87.558 | 1.00 | 0.00 | H |
| ATOM | 1085 | H4'  | G B | 16 | -55.698 | -39.026 | 80.793 | 1.00 | 0.00 | H |
| ATOM | 1086 | H2'1 | G B | 16 | -59.419 | -38.030 | 80.485 | 1.00 | 0.00 | H |
| ATOM | 1087 | H2'2 | G B | 16 | -59.731 | -39.585 | 81.243 | 1.00 | 0.00 | H |
| ATOM | 1088 | H5'1 | G B | 16 | -55.941 | -36.452 | 80.570 | 1.00 | 0.00 | H |
| ATOM | 1089 | H5'2 | G B | 16 | -55.809 | -37.467 | 79.117 | 1.00 | 0.00 | H |
| ATOM | 1090 | C1'  | G B | 17 | -60.696 | -41.380 | 85.502 | 1.00 | 0.00 | C |
| ATOM | 1091 | N1   | G B | 17 | -63.013 | -37.117 | 87.084 | 1.00 | 0.00 | N |
| ATOM | 1092 | C2   | G B | 17 | -62.500 | -38.175 | 87.815 | 1.00 | 0.00 | C |
| ATOM | 1093 | N2   | G B | 17 | -62.623 | -38.084 | 89.145 | 1.00 | 0.00 | N |
| ATOM | 1094 | N3   | G B | 17 | -61.912 | -39.235 | 87.264 | 1.00 | 0.00 | N |
| ATOM | 1095 | C4   | G B | 17 | -61.882 | -39.161 | 85.908 | 1.00 | 0.00 | C |
| ATOM | 1096 | C5   | G B | 17 | -62.369 | -38.153 | 85.096 | 1.00 | 0.00 | C |
| ATOM | 1097 | C6   | G B | 17 | -62.989 | -37.025 | 85.678 | 1.00 | 0.00 | C |
| ATOM | 1098 | O6   | G B | 17 | -63.479 | -36.037 | 85.130 | 1.00 | 0.00 | O |
| ATOM | 1099 | N7   | G B | 17 | -62.140 | -38.461 | 83.753 | 1.00 | 0.00 | N |
| ATOM | 1100 | C8   | G B | 17 | -61.533 | -39.618 | 83.793 | 1.00 | 0.00 | C |
| ATOM | 1101 | N9   | G B | 17 | -61.341 | -40.110 | 85.068 | 1.00 | 0.00 | N |
| ATOM | 1102 | C2'  | G B | 17 | -60.989 | -42.560 | 84.587 | 1.00 | 0.00 | C |
| ATOM | 1103 | C3'  | G B | 17 | -59.678 | -43.329 | 84.629 | 1.00 | 0.00 | C |
| ATOM | 1104 | O3'  | G B | 17 | -59.670 | -44.178 | 85.773 | 1.00 | 0.00 | O |
| ATOM | 1105 | C4'  | G B | 17 | -58.636 | -42.216 | 84.728 | 1.00 | 0.00 | C |
| ATOM | 1106 | O4'  | G B | 17 | -59.297 | -41.173 | 85.511 | 1.00 | 0.00 | O |
| ATOM | 1107 | C5'  | G B | 17 | -58.167 | -41.617 | 83.424 | 1.00 | 0.00 | C |
| ATOM | 1108 | O5'  | G B | 17 | -59.272 | -41.549 | 82.489 | 1.00 | 0.00 | O |
| ATOM | 1109 | O1P  | G B | 17 | -58.603 | -43.163 | 80.677 | 1.00 | 0.00 | O |
| ATOM | 1110 | O2P  | G B | 17 | -60.118 | -41.235 | 80.143 | 1.00 | 0.00 | O |
| ATOM | 1111 | P    | G B | 17 | -58.978 | -41.759 | 80.935 | 1.00 | 0.00 | P |
| ATOM | 1112 | H1   | G B | 17 | -63.443 | -36.341 | 87.608 | 1.00 | 0.00 | H |
| ATOM | 1113 | H8   | G B | 17 | -61.207 | -40.149 | 82.899 | 1.00 | 0.00 | H |
| ATOM | 1114 | H1'  | G B | 17 | -61.011 | -41.590 | 86.524 | 1.00 | 0.00 | H |
| ATOM | 1115 | H21  | G B | 17 | -63.077 | -37.259 | 89.565 | 1.00 | 0.00 | H |
| ATOM | 1116 | H3'  | G B | 17 | -59.527 | -43.930 | 83.732 | 1.00 | 0.00 | H |
| ATOM | 1117 | H22  | G B | 17 | -62.265 | -38.839 | 89.747 | 1.00 | 0.00 | H |
| ATOM | 1118 | H4'  | G B | 17 | -57.767 | -42.639 | 85.232 | 1.00 | 0.00 | H |
| ATOM | 1119 | H2'1 | G B | 17 | -61.233 | -42.247 | 83.572 | 1.00 | 0.00 | H |
| ATOM | 1120 | H2'2 | G B | 17 | -61.818 | -43.168 | 84.948 | 1.00 | 0.00 | H |
| ATOM | 1121 | H5'1 | G B | 17 | -57.778 | -40.616 | 83.609 | 1.00 | 0.00 | H |
| ATOM | 1122 | H5'2 | G B | 17 | -57.372 | -42.240 | 83.010 | 1.00 | 0.00 | H |
| ATOM | 1123 | C1'  | C B | 18 | -63.885 | -42.458 | 89.135 | 1.00 | 0.00 | C |
| ATOM | 1124 | N1   | C B | 18 | -64.324 | -41.669 | 87.951 | 1.00 | 0.00 | N |
| ATOM | 1125 | C2   | C B | 18 | -64.982 | -40.462 | 88.181 | 1.00 | 0.00 | C |
| ATOM | 1126 | O2   | C B | 18 | -65.174 | -40.099 | 89.348 | 1.00 | 0.00 | O |
| ATOM | 1127 | N3   | C B | 18 | -65.390 | -39.729 | 87.116 | 1.00 | 0.00 | N |
| ATOM | 1128 | C4   | C B | 18 | -65.167 | -40.151 | 85.865 | 1.00 | 0.00 | C |
| ATOM | 1129 | N4   | C B | 18 | -65.586 | -39.392 | 84.862 | 1.00 | 0.00 | N |
| ATOM | 1130 | C5   | C B | 18 | -64.495 | -41.387 | 85.602 | 1.00 | 0.00 | C |
| ATOM | 1131 | C6   | C B | 18 | -64.092 | -42.108 | 86.686 | 1.00 | 0.00 | C |
| ATOM | 1132 | C2'  | C B | 18 | -64.035 | -43.964 | 88.958 | 1.00 | 0.00 | C |
| ATOM | 1133 | C3'  | C B | 18 | -62.823 | -44.493 | 89.710 | 1.00 | 0.00 | C |
| ATOM | 1134 | O3'  | C B | 18 | -63.139 | -44.593 | 91.097 | 1.00 | 0.00 | O |

|      |      |      |     |    |         |         |        |      |      |   |
|------|------|------|-----|----|---------|---------|--------|------|------|---|
| ATOM | 1135 | C4'  | C B | 18 | -61.762 | -43.430 | 89.435 | 1.00 | 0.00 | C |
| ATOM | 1136 | O4'  | C B | 18 | -62.515 | -42.178 | 89.355 | 1.00 | 0.00 | O |
| ATOM | 1137 | C5'  | C B | 18 | -60.960 | -43.593 | 88.164 | 1.00 | 0.00 | C |
| ATOM | 1138 | O5'  | C B | 18 | -61.812 | -44.116 | 87.114 | 1.00 | 0.00 | O |
| ATOM | 1139 | O1P  | C B | 18 | -60.845 | -46.396 | 86.663 | 1.00 | 0.00 | O |
| ATOM | 1140 | O2P  | C B | 18 | -62.063 | -45.168 | 84.844 | 1.00 | 0.00 | O |
| ATOM | 1141 | P    | C B | 18 | -61.178 | -45.103 | 86.034 | 1.00 | 0.00 | P |
| ATOM | 1142 | H5   | C B | 18 | -64.316 | -41.736 | 84.584 | 1.00 | 0.00 | H |
| ATOM | 1143 | H6   | C B | 18 | -63.573 | -43.054 | 86.535 | 1.00 | 0.00 | H |
| ATOM | 1144 | H1'  | C B | 18 | -64.443 | -42.110 | 90.003 | 1.00 | 0.00 | H |
| ATOM | 1145 | H3'  | C B | 18 | -62.507 | -45.468 | 89.340 | 1.00 | 0.00 | H |
| ATOM | 1146 | H4'  | C B | 18 | -61.063 | -43.455 | 90.272 | 1.00 | 0.00 | H |
| ATOM | 1147 | H41  | C B | 18 | -65.426 | -39.692 | 83.889 | 1.00 | 0.00 | H |
| ATOM | 1148 | H42  | C B | 18 | -66.069 | -38.503 | 85.055 | 1.00 | 0.00 | H |
| ATOM | 1149 | H2'1 | C B | 18 | -64.013 | -44.262 | 87.911 | 1.00 | 0.00 | H |
| ATOM | 1150 | H2'2 | C B | 18 | -64.964 | -44.339 | 89.386 | 1.00 | 0.00 | H |
| ATOM | 1151 | H5'1 | C B | 18 | -60.561 | -42.623 | 87.865 | 1.00 | 0.00 | H |
| ATOM | 1152 | H5'2 | C B | 18 | -60.136 | -44.279 | 88.347 | 1.00 | 0.00 | H |
| ATOM | 1153 | C1'  | C B | 19 | -67.910 | -41.651 | 91.905 | 1.00 | 0.00 | C |
| ATOM | 1154 | N1   | C B | 19 | -68.002 | -41.655 | 90.419 | 1.00 | 0.00 | N |
| ATOM | 1155 | C2   | C B | 19 | -68.615 | -40.568 | 89.799 | 1.00 | 0.00 | C |
| ATOM | 1156 | O2   | C B | 19 | -69.054 | -39.649 | 90.502 | 1.00 | 0.00 | O |
| ATOM | 1157 | N3   | C B | 19 | -68.708 | -40.554 | 88.448 | 1.00 | 0.00 | N |
| ATOM | 1158 | C4   | C B | 19 | -68.223 | -41.565 | 87.713 | 1.00 | 0.00 | C |
| ATOM | 1159 | N4   | C B | 19 | -68.340 | -41.499 | 86.398 | 1.00 | 0.00 | N |
| ATOM | 1160 | C5   | C B | 19 | -67.591 | -42.694 | 88.325 | 1.00 | 0.00 | C |
| ATOM | 1161 | C6   | C B | 19 | -67.506 | -42.686 | 89.686 | 1.00 | 0.00 | C |
| ATOM | 1162 | C2'  | C B | 19 | -68.113 | -43.020 | 92.535 | 1.00 | 0.00 | C |
| ATOM | 1163 | C3'  | C B | 19 | -67.152 | -42.970 | 93.715 | 1.00 | 0.00 | C |
| ATOM | 1164 | O3'  | C B | 19 | -67.794 | -42.333 | 94.816 | 1.00 | 0.00 | O |
| ATOM | 1165 | C4'  | C B | 19 | -65.988 | -42.147 | 93.169 | 1.00 | 0.00 | C |
| ATOM | 1166 | O4'  | C B | 19 | -66.617 | -41.194 | 92.254 | 1.00 | 0.00 | O |
| ATOM | 1167 | C5'  | C B | 19 | -64.921 | -42.906 | 92.416 | 1.00 | 0.00 | C |
| ATOM | 1168 | O5'  | C B | 19 | -65.529 | -43.975 | 91.648 | 1.00 | 0.00 | O |
| ATOM | 1169 | O1P  | C B | 19 | -64.638 | -46.059 | 92.741 | 1.00 | 0.00 | O |
| ATOM | 1170 | O2P  | C B | 19 | -65.304 | -46.096 | 90.322 | 1.00 | 0.00 | O |
| ATOM | 1171 | P    | C B | 19 | -64.724 | -45.336 | 91.456 | 1.00 | 0.00 | P |
| ATOM | 1172 | H5   | C B | 19 | -67.196 | -43.520 | 87.734 | 1.00 | 0.00 | H |
| ATOM | 1173 | H6   | C B | 19 | -67.032 | -43.524 | 90.195 | 1.00 | 0.00 | H |
| ATOM | 1174 | H1'  | C B | 19 | -68.636 | -40.931 | 92.288 | 1.00 | 0.00 | H |
| ATOM | 1175 | H3'  | C B | 19 | -66.823 | -43.966 | 94.014 | 1.00 | 0.00 | H |
| ATOM | 1176 | H4'  | C B | 19 | -65.513 | -41.665 | 94.025 | 1.00 | 0.00 | H |
| ATOM | 1177 | H41  | C B | 19 | -67.975 | -42.261 | 85.808 | 1.00 | 0.00 | H |
| ATOM | 1178 | H42  | C B | 19 | -68.796 | -40.684 | 85.959 | 1.00 | 0.00 | H |
| ATOM | 1179 | H2'1 | C B | 19 | -67.862 | -43.832 | 91.854 | 1.00 | 0.00 | H |
| ATOM | 1180 | H2'2 | C B | 19 | -69.140 | -43.175 | 92.867 | 1.00 | 0.00 | H |
| ATOM | 1181 | H5'1 | C B | 19 | -64.398 | -42.223 | 91.749 | 1.00 | 0.00 | H |
| ATOM | 1182 | H5'2 | C B | 19 | -64.210 | -43.324 | 93.129 | 1.00 | 0.00 | H |
| ATOM | 1183 | C1'  | T B | 20 | -72.411 | -39.790 | 92.784 | 1.00 | 0.00 | C |
| ATOM | 1184 | N1   | T B | 20 | -72.158 | -40.582 | 91.553 | 1.00 | 0.00 | N |
| ATOM | 1185 | C2   | T B | 20 | -72.543 | -40.022 | 90.352 | 1.00 | 0.00 | C |
| ATOM | 1186 | O2   | T B | 20 | -73.072 | -38.926 | 90.274 | 1.00 | 0.00 | O |
| ATOM | 1187 | N3   | T B | 20 | -72.289 | -40.793 | 89.234 | 1.00 | 0.00 | N |
| ATOM | 1188 | C4   | T B | 20 | -71.701 | -42.038 | 89.211 | 1.00 | 0.00 | C |



|      |      |      |     |    |         |         |         |      |      |   |
|------|------|------|-----|----|---------|---------|---------|------|------|---|
| ATOM | 1189 | O4   | T B | 20 | -71.525 | -42.636 | 88.141  | 1.00 | 0.00 | O |
| ATOM | 1190 | C5   | T B | 20 | -71.331 | -42.541 | 90.511  | 1.00 | 0.00 | C |
| ATOM | 1191 | C6   | T B | 20 | -71.564 | -41.818 | 91.625  | 1.00 | 0.00 | C |
| ATOM | 1192 | C7   | T B | 20 | -70.686 | -43.895 | 90.534  | 1.00 | 0.00 | C |
| ATOM | 1193 | C2'  | T B | 20 | -72.839 | -40.633 | 93.980  | 1.00 | 0.00 | C |
| ATOM | 1194 | C3'  | T B | 20 | -72.176 | -39.900 | 95.137  | 1.00 | 0.00 | C |
| ATOM | 1195 | O3'  | T B | 20 | -73.016 | -38.827 | 95.556  | 1.00 | 0.00 | O |
| ATOM | 1196 | C4'  | T B | 20 | -70.869 | -39.405 | 94.522  | 1.00 | 0.00 | C |
| ATOM | 1197 | O4'  | T B | 20 | -71.210 | -39.126 | 93.127  | 1.00 | 0.00 | O |
| ATOM | 1198 | C5'  | T B | 20 | -69.705 | -40.369 | 94.551  | 1.00 | 0.00 | C |
| ATOM | 1199 | O5'  | T B | 20 | -70.184 | -41.722 | 94.348  | 1.00 | 0.00 | O |
| ATOM | 1200 | O1P  | T B | 20 | -69.700 | -42.848 | 96.545  | 1.00 | 0.00 | O |
| ATOM | 1201 | O2P  | T B | 20 | -69.789 | -44.201 | 94.434  | 1.00 | 0.00 | O |
| ATOM | 1202 | P    | T B | 20 | -69.442 | -42.919 | 95.093  | 1.00 | 0.00 | P |
| ATOM | 1203 | H3   | T B | 20 | -72.567 | -40.397 | 88.325  | 1.00 | 0.00 | H |
| ATOM | 1204 | H6   | T B | 20 | -71.276 | -42.219 | 92.596  | 1.00 | 0.00 | H |
| ATOM | 1205 | H1'  | T B | 20 | -73.160 | -39.030 | 92.555  | 1.00 | 0.00 | H |
| ATOM | 1206 | H3'  | T B | 20 | -71.988 | -40.561 | 95.982  | 1.00 | 0.00 | H |
| ATOM | 1207 | H4'  | T B | 20 | -70.577 | -38.513 | 95.077  | 1.00 | 0.00 | H |
| ATOM | 1208 | H3T  | T B | 20 | -73.922 | -39.074 | 95.758  | 1.00 | 0.00 | H |
| ATOM | 1209 | H71  | T B | 20 | -71.339 | -44.601 | 91.046  | 1.00 | 0.00 | H |
| ATOM | 1210 | H72  | T B | 20 | -70.515 | -44.233 | 89.511  | 1.00 | 0.00 | H |
| ATOM | 1211 | H73  | T B | 20 | -69.732 | -43.836 | 91.061  | 1.00 | 0.00 | H |
| ATOM | 1212 | H2'1 | T B | 20 | -72.487 | -41.659 | 93.907  | 1.00 | 0.00 | H |
| ATOM | 1213 | H2'2 | T B | 20 | -73.922 | -40.664 | 94.098  | 1.00 | 0.00 | H |
| ATOM | 1214 | H5'1 | T B | 20 | -69.001 | -40.103 | 93.764  | 1.00 | 0.00 | H |
| ATOM | 1215 | H5'2 | T B | 20 | -69.206 | -40.296 | 95.517  | 1.00 | 0.00 | H |
| TER  |      |      |     |    |         |         |         |      |      |   |
| ATOM | 1    | C1'  | A A | 1  | -55.864 | -37.208 | 120.310 | 1.00 | 0.00 | C |
| ATOM | 2    | N1   | A A | 1  | -53.472 | -41.748 | 120.386 | 1.00 | 0.00 | N |
| ATOM | 3    | C2   | A A | 1  | -53.401 | -40.681 | 121.177 | 1.00 | 0.00 | C |
| ATOM | 4    | N3   | A A | 1  | -54.052 | -39.540 | 121.103 | 1.00 | 0.00 | N |
| ATOM | 5    | C4   | A A | 1  | -54.876 | -39.542 | 120.041 | 1.00 | 0.00 | C |
| ATOM | 6    | C5   | A A | 1  | -55.063 | -40.549 | 119.135 | 1.00 | 0.00 | C |
| ATOM | 7    | C6   | A A | 1  | -54.304 | -41.721 | 119.334 | 1.00 | 0.00 | C |
| ATOM | 8    | N6   | A A | 1  | -54.382 | -42.793 | 118.527 | 1.00 | 0.00 | N |
| ATOM | 9    | N7   | A A | 1  | -55.994 | -40.191 | 118.176 | 1.00 | 0.00 | N |
| ATOM | 10   | C8   | A A | 1  | -56.345 | -38.987 | 118.516 | 1.00 | 0.00 | C |
| ATOM | 11   | N9   | A A | 1  | -55.709 | -38.526 | 119.639 | 1.00 | 0.00 | N |
| ATOM | 12   | C2'  | A A | 1  | -56.053 | -36.046 | 119.344 | 1.00 | 0.00 | C |
| ATOM | 13   | C3'  | A A | 1  | -57.019 | -35.155 | 120.106 | 1.00 | 0.00 | C |
| ATOM | 14   | O3'  | A A | 1  | -56.284 | -34.328 | 121.007 | 1.00 | 0.00 | O |
| ATOM | 15   | C4'  | A A | 1  | -57.906 | -36.160 | 120.840 | 1.00 | 0.00 | C |
| ATOM | 16   | O4'  | A A | 1  | -57.010 | -37.279 | 121.138 | 1.00 | 0.00 | O |
| ATOM | 17   | C5'  | A A | 1  | -59.097 | -36.685 | 120.075 | 1.00 | 0.00 | C |
| ATOM | 18   | O5'  | A A | 1  | -58.752 | -36.845 | 118.676 | 1.00 | 0.00 | O |
| ATOM | 19   | H2   | A A | 1  | -52.704 | -40.765 | 122.011 | 1.00 | 0.00 | H |
| ATOM | 20   | H8   | A A | 1  | -57.076 | -38.399 | 117.960 | 1.00 | 0.00 | H |
| ATOM | 21   | H1'  | A A | 1  | -54.997 | -37.048 | 120.950 | 1.00 | 0.00 | H |
| ATOM | 22   | H3'  | A A | 1  | -57.609 | -34.525 | 119.438 | 1.00 | 0.00 | H |
| ATOM | 23   | H4'  | A A | 1  | -58.277 | -35.661 | 121.734 | 1.00 | 0.00 | H |
| ATOM | 24   | H61  | A A | 1  | -53.808 | -43.623 | 118.717 | 1.00 | 0.00 | H |
| ATOM | 25   | H62  | A A | 1  | -55.021 | -42.779 | 117.717 | 1.00 | 0.00 | H |
| ATOM | 26   | H5T  | A A | 1  | -59.427 | -36.687 | 118.013 | 1.00 | 0.00 | H |

|      |    |      |   |   |   |         |         |         |      |      |   |
|------|----|------|---|---|---|---------|---------|---------|------|------|---|
| ATOM | 27 | H2'1 | A | A | 1 | -56.474 | -36.364 | 118.392 | 1.00 | 0.00 | H |
| ATOM | 28 | H2'2 | A | A | 1 | -55.117 | -35.527 | 119.134 | 1.00 | 0.00 | H |
| ATOM | 29 | H5'1 | A | A | 1 | -59.395 | -37.647 | 120.493 | 1.00 | 0.00 | H |
| ATOM | 30 | H5'2 | A | A | 1 | -59.923 | -35.984 | 120.173 | 1.00 | 0.00 | H |
| ATOM | 31 | C1'  | G | A | 2 | -51.049 | -36.594 | 121.355 | 1.00 | 0.00 | C |
| ATOM | 32 | N1   | G | A | 2 | -50.506 | -41.004 | 118.850 | 1.00 | 0.00 | N |
| ATOM | 33 | C2   | G | A | 2 | -49.916 | -40.572 | 120.022 | 1.00 | 0.00 | C |
| ATOM | 34 | N2   | G | A | 2 | -49.067 | -41.426 | 120.604 | 1.00 | 0.00 | N |
| ATOM | 35 | N3   | G | A | 2 | -50.154 | -39.382 | 120.572 | 1.00 | 0.00 | N |
| ATOM | 36 | C4   | G | A | 2 | -51.034 | -38.644 | 119.844 | 1.00 | 0.00 | C |
| ATOM | 37 | C5   | G | A | 2 | -51.671 | -38.993 | 118.664 | 1.00 | 0.00 | C |
| ATOM | 38 | C6   | G | A | 2 | -51.421 | -40.258 | 118.084 | 1.00 | 0.00 | C |
| ATOM | 39 | O6   | G | A | 2 | -51.885 | -40.744 | 117.053 | 1.00 | 0.00 | O |
| ATOM | 40 | N7   | G | A | 2 | -52.499 | -37.952 | 118.237 | 1.00 | 0.00 | N |
| ATOM | 41 | C8   | G | A | 2 | -52.345 | -37.030 | 119.153 | 1.00 | 0.00 | C |
| ATOM | 42 | N9   | G | A | 2 | -51.470 | -37.377 | 120.162 | 1.00 | 0.00 | N |
| ATOM | 43 | C2'  | G | A | 2 | -50.883 | -35.105 | 121.085 | 1.00 | 0.00 | C |
| ATOM | 44 | C3'  | G | A | 2 | -51.362 | -34.489 | 122.389 | 1.00 | 0.00 | C |
| ATOM | 45 | O3'  | G | A | 2 | -50.285 | -34.472 | 123.323 | 1.00 | 0.00 | O |
| ATOM | 46 | C4'  | G | A | 2 | -52.483 | -35.435 | 122.819 | 1.00 | 0.00 | C |
| ATOM | 47 | O4'  | G | A | 2 | -52.048 | -36.748 | 122.346 | 1.00 | 0.00 | O |
| ATOM | 48 | C5'  | G | A | 2 | -53.856 | -35.147 | 122.257 | 1.00 | 0.00 | C |
| ATOM | 49 | O5'  | G | A | 2 | -53.736 | -34.670 | 120.893 | 1.00 | 0.00 | O |
| ATOM | 50 | O1P  | G | A | 2 | -54.548 | -32.292 | 121.037 | 1.00 | 0.00 | O |
| ATOM | 51 | O2P  | G | A | 2 | -54.760 | -33.562 | 118.884 | 1.00 | 0.00 | O |
| ATOM | 52 | P    | G | A | 2 | -54.781 | -33.586 | 120.367 | 1.00 | 0.00 | P |
| ATOM | 53 | H1   | G | A | 2 | -50.257 | -41.944 | 118.511 | 1.00 | 0.00 | H |
| ATOM | 54 | H8   | G | A | 2 | -52.861 | -36.071 | 119.121 | 1.00 | 0.00 | H |
| ATOM | 55 | H1'  | G | A | 2 | -50.125 | -37.026 | 121.740 | 1.00 | 0.00 | H |
| ATOM | 56 | H21  | G | A | 2 | -48.888 | -42.346 | 120.176 | 1.00 | 0.00 | H |
| ATOM | 57 | H3'  | G | A | 2 | -51.736 | -33.474 | 122.250 | 1.00 | 0.00 | H |
| ATOM | 58 | H22  | G | A | 2 | -48.593 | -41.163 | 121.480 | 1.00 | 0.00 | H |
| ATOM | 59 | H4'  | G | A | 2 | -52.549 | -35.374 | 123.906 | 1.00 | 0.00 | H |
| ATOM | 60 | H2'1 | G | A | 2 | -51.487 | -34.768 | 120.242 | 1.00 | 0.00 | H |
| ATOM | 61 | H2'2 | G | A | 2 | -49.847 | -34.835 | 120.875 | 1.00 | 0.00 | H |
| ATOM | 62 | H5'1 | G | A | 2 | -54.449 | -36.061 | 122.277 | 1.00 | 0.00 | H |
| ATOM | 63 | H5'2 | G | A | 2 | -54.343 | -34.391 | 122.873 | 1.00 | 0.00 | H |
| ATOM | 64 | C1'  | G | A | 3 | -46.271 | -37.890 | 121.264 | 1.00 | 0.00 | C |
| ATOM | 65 | N1   | G | A | 3 | -47.631 | -40.457 | 117.072 | 1.00 | 0.00 | N |
| ATOM | 66 | C2   | G | A | 3 | -46.809 | -40.836 | 118.115 | 1.00 | 0.00 | C |
| ATOM | 67 | N2   | G | A | 3 | -46.275 | -42.061 | 118.031 | 1.00 | 0.00 | N |
| ATOM | 68 | N3   | G | A | 3 | -46.539 | -40.057 | 119.160 | 1.00 | 0.00 | N |
| ATOM | 69 | C4   | G | A | 3 | -47.158 | -38.850 | 119.078 | 1.00 | 0.00 | C |
| ATOM | 70 | C5   | G | A | 3 | -47.993 | -38.384 | 118.074 | 1.00 | 0.00 | C |
| ATOM | 71 | C6   | G | A | 3 | -48.283 | -39.214 | 116.967 | 1.00 | 0.00 | C |
| ATOM | 72 | O6   | G | A | 3 | -48.993 | -38.983 | 115.988 | 1.00 | 0.00 | O |
| ATOM | 73 | N7   | G | A | 3 | -48.422 | -37.088 | 118.366 | 1.00 | 0.00 | N |
| ATOM | 74 | C8   | G | A | 3 | -47.851 | -36.816 | 119.511 | 1.00 | 0.00 | C |
| ATOM | 75 | N9   | G | A | 3 | -47.066 | -37.837 | 120.007 | 1.00 | 0.00 | N |
| ATOM | 76 | C2'  | G | A | 3 | -45.600 | -36.571 | 121.622 | 1.00 | 0.00 | C |
| ATOM | 77 | C3'  | G | A | 3 | -45.687 | -36.571 | 123.139 | 1.00 | 0.00 | C |
| ATOM | 78 | O3'  | G | A | 3 | -44.590 | -37.310 | 123.671 | 1.00 | 0.00 | O |
| ATOM | 79 | C4'  | G | A | 3 | -47.026 | -37.259 | 123.402 | 1.00 | 0.00 | C |
| ATOM | 80 | O4'  | G | A | 3 | -47.151 | -38.231 | 122.317 | 1.00 | 0.00 | O |

|      |     |      |     |   |         |         |         |      |      |   |
|------|-----|------|-----|---|---------|---------|---------|------|------|---|
| ATOM | 81  | C5'  | G A | 3 | -48.248 | -36.371 | 123.399 | 1.00 | 0.00 | C |
| ATOM | 82  | O5'  | G A | 3 | -48.102 | -35.339 | 122.392 | 1.00 | 0.00 | O |
| ATOM | 83  | O1P  | G A | 3 | -47.970 | -33.220 | 123.744 | 1.00 | 0.00 | O |
| ATOM | 84  | O2P  | G A | 3 | -48.846 | -33.156 | 121.395 | 1.00 | 0.00 | O |
| ATOM | 85  | P    | G A | 3 | -48.725 | -33.898 | 122.674 | 1.00 | 0.00 | P |
| ATOM | 86  | H1   | G A | 3 | -47.779 | -41.138 | 116.311 | 1.00 | 0.00 | H |
| ATOM | 87  | H8   | G A | 3 | -47.982 | -35.867 | 120.029 | 1.00 | 0.00 | H |
| ATOM | 88  | H1'  | G A | 3 | -45.536 | -38.690 | 121.168 | 1.00 | 0.00 | H |
| ATOM | 89  | H21  | G A | 3 | -46.490 | -42.661 | 117.220 | 1.00 | 0.00 | H |
| ATOM | 90  | H3'  | G A | 3 | -45.676 | -35.561 | 123.550 | 1.00 | 0.00 | H |
| ATOM | 91  | H22  | G A | 3 | -45.652 | -42.403 | 118.775 | 1.00 | 0.00 | H |
| ATOM | 92  | H4'  | G A | 3 | -46.956 | -37.724 | 124.385 | 1.00 | 0.00 | H |
| ATOM | 93  | H2'1 | G A | 3 | -46.120 | -35.713 | 121.195 | 1.00 | 0.00 | H |
| ATOM | 94  | H2'2 | G A | 3 | -44.565 | -36.528 | 121.283 | 1.00 | 0.00 | H |
| ATOM | 95  | H5'1 | G A | 3 | -49.129 | -36.975 | 123.182 | 1.00 | 0.00 | H |
| ATOM | 96  | H5'2 | G A | 3 | -48.361 | -35.914 | 124.381 | 1.00 | 0.00 | H |
| ATOM | 97  | C1'  | C A | 4 | -42.331 | -40.224 | 119.376 | 1.00 | 0.00 | C |
| ATOM | 98  | N1   | C A | 4 | -43.176 | -39.350 | 118.515 | 1.00 | 0.00 | N |
| ATOM | 99  | C2   | C A | 4 | -43.649 | -39.878 | 117.316 | 1.00 | 0.00 | C |
| ATOM | 100 | O2   | C A | 4 | -43.351 | -41.040 | 117.017 | 1.00 | 0.00 | O |
| ATOM | 101 | N3   | C A | 4 | -44.420 | -39.098 | 116.520 | 1.00 | 0.00 | N |
| ATOM | 102 | C4   | C A | 4 | -44.723 | -37.842 | 116.871 | 1.00 | 0.00 | C |
| ATOM | 103 | N4   | C A | 4 | -45.483 | -37.126 | 116.056 | 1.00 | 0.00 | N |
| ATOM | 104 | C5   | C A | 4 | -44.248 | -37.273 | 118.098 | 1.00 | 0.00 | C |
| ATOM | 105 | C6   | C A | 4 | -43.477 | -38.076 | 118.886 | 1.00 | 0.00 | C |
| ATOM | 106 | C2'  | C A | 4 | -41.192 | -39.488 | 120.068 | 1.00 | 0.00 | C |
| ATOM | 107 | C3'  | C A | 4 | -41.119 | -40.203 | 121.408 | 1.00 | 0.00 | C |
| ATOM | 108 | O3'  | C A | 4 | -40.319 | -41.376 | 121.270 | 1.00 | 0.00 | O |
| ATOM | 109 | C4'  | C A | 4 | -42.582 | -40.534 | 121.697 | 1.00 | 0.00 | C |
| ATOM | 110 | O4'  | C A | 4 | -43.165 | -40.778 | 120.377 | 1.00 | 0.00 | O |
| ATOM | 111 | C5'  | C A | 4 | -43.388 | -39.461 | 122.389 | 1.00 | 0.00 | C |
| ATOM | 112 | O5'  | C A | 4 | -42.977 | -38.153 | 121.913 | 1.00 | 0.00 | O |
| ATOM | 113 | O1P  | C A | 4 | -41.944 | -37.091 | 123.946 | 1.00 | 0.00 | O |
| ATOM | 114 | O2P  | C A | 4 | -42.969 | -35.653 | 122.165 | 1.00 | 0.00 | O |
| ATOM | 115 | P    | C A | 4 | -42.999 | -36.925 | 122.929 | 1.00 | 0.00 | P |
| ATOM | 116 | H5   | C A | 4 | -44.489 | -36.250 | 118.386 | 1.00 | 0.00 | H |
| ATOM | 117 | H6   | C A | 4 | -43.096 | -37.690 | 119.831 | 1.00 | 0.00 | H |
| ATOM | 118 | H1'  | C A | 4 | -41.954 | -41.041 | 118.764 | 1.00 | 0.00 | H |
| ATOM | 119 | H3'  | C A | 4 | -40.698 | -39.569 | 122.187 | 1.00 | 0.00 | H |
| ATOM | 120 | H4'  | C A | 4 | -42.587 | -41.418 | 122.335 | 1.00 | 0.00 | H |
| ATOM | 121 | H41  | C A | 4 | -45.734 | -36.156 | 116.304 | 1.00 | 0.00 | H |
| ATOM | 122 | H42  | C A | 4 | -45.824 | -37.535 | 115.174 | 1.00 | 0.00 | H |
| ATOM | 123 | H2'1 | C A | 4 | -41.402 | -38.427 | 120.197 | 1.00 | 0.00 | H |
| ATOM | 124 | H2'2 | C A | 4 | -40.252 | -39.573 | 119.521 | 1.00 | 0.00 | H |
| ATOM | 125 | H5'1 | C A | 4 | -44.447 | -39.613 | 122.176 | 1.00 | 0.00 | H |
| ATOM | 126 | H5'2 | C A | 4 | -43.226 | -39.528 | 123.464 | 1.00 | 0.00 | H |
| ATOM | 127 | C1'  | C A | 5 | -39.727 | -42.302 | 115.713 | 1.00 | 0.00 | C |
| ATOM | 128 | N1   | C A | 5 | -40.276 | -40.926 | 115.563 | 1.00 | 0.00 | N |
| ATOM | 129 | C2   | C A | 5 | -41.028 | -40.645 | 114.424 | 1.00 | 0.00 | C |
| ATOM | 130 | O2   | C A | 5 | -41.209 | -41.541 | 113.589 | 1.00 | 0.00 | O |
| ATOM | 131 | N3   | C A | 5 | -41.536 | -39.397 | 114.270 | 1.00 | 0.00 | N |
| ATOM | 132 | C4   | C A | 5 | -41.324 | -38.448 | 115.189 | 1.00 | 0.00 | C |
| ATOM | 133 | N4   | C A | 5 | -41.847 | -37.249 | 114.990 | 1.00 | 0.00 | N |
| ATOM | 134 | C5   | C A | 5 | -40.553 | -38.710 | 116.369 | 1.00 | 0.00 | C |

|      |     |      |     |   |         |         |         |      |      |   |
|------|-----|------|-----|---|---------|---------|---------|------|------|---|
| ATOM | 135 | C6   | C A | 5 | -40.054 | -39.972 | 116.505 | 1.00 | 0.00 | C |
| ATOM | 136 | C2'  | C A | 5 | -38.334 | -42.343 | 116.326 | 1.00 | 0.00 | C |
| ATOM | 137 | C3'  | C A | 5 | -38.394 | -43.614 | 117.161 | 1.00 | 0.00 | C |
| ATOM | 138 | O3'  | C A | 5 | -38.096 | -44.734 | 116.331 | 1.00 | 0.00 | O |
| ATOM | 139 | C4'  | C A | 5 | -39.840 | -43.629 | 117.653 | 1.00 | 0.00 | C |
| ATOM | 140 | O4'  | C A | 5 | -40.601 | -43.024 | 116.560 | 1.00 | 0.00 | O |
| ATOM | 141 | C5'  | C A | 5 | -40.124 | -42.861 | 118.923 | 1.00 | 0.00 | C |
| ATOM | 142 | O5'  | C A | 5 | -39.314 | -41.658 | 118.960 | 1.00 | 0.00 | O |
| ATOM | 143 | O1P  | C A | 5 | -37.765 | -42.060 | 120.902 | 1.00 | 0.00 | O |
| ATOM | 144 | O2P  | C A | 5 | -38.368 | -39.716 | 120.243 | 1.00 | 0.00 | O |
| ATOM | 145 | P    | C A | 5 | -38.783 | -41.135 | 120.370 | 1.00 | 0.00 | P |
| ATOM | 146 | H5   | C A | 5 | -40.372 | -37.939 | 117.119 | 1.00 | 0.00 | H |
| ATOM | 147 | H6   | C A | 5 | -39.464 | -40.221 | 117.387 | 1.00 | 0.00 | H |
| ATOM | 148 | H1'  | C A | 5 | -39.738 | -42.781 | 114.734 | 1.00 | 0.00 | H |
| ATOM | 149 | H3'  | C A | 5 | -37.693 | -43.587 | 117.995 | 1.00 | 0.00 | H |
| ATOM | 150 | H4'  | C A | 5 | -40.103 | -44.672 | 117.831 | 1.00 | 0.00 | H |
| ATOM | 151 | H41  | C A | 5 | -41.700 | -36.500 | 115.682 | 1.00 | 0.00 | H |
| ATOM | 152 | H42  | C A | 5 | -42.400 | -37.063 | 114.139 | 1.00 | 0.00 | H |
| ATOM | 153 | H2'1 | C A | 5 | -38.129 | -41.472 | 116.946 | 1.00 | 0.00 | H |
| ATOM | 154 | H2'2 | C A | 5 | -37.551 | -42.402 | 115.569 | 1.00 | 0.00 | H |
| ATOM | 155 | H5'1 | C A | 5 | -41.181 | -42.594 | 118.951 | 1.00 | 0.00 | H |
| ATOM | 156 | H5'2 | C A | 5 | -39.891 | -43.489 | 119.781 | 1.00 | 0.00 | H |
| ATOM | 157 | C1'  | G A | 6 | -38.447 | -42.932 | 110.970 | 1.00 | 0.00 | C |
| ATOM | 158 | N1   | G A | 6 | -40.155 | -38.152 | 110.461 | 1.00 | 0.00 | N |
| ATOM | 159 | C2   | G A | 6 | -40.340 | -39.254 | 109.643 | 1.00 | 0.00 | C |
| ATOM | 160 | N2   | G A | 6 | -41.075 | -39.055 | 108.543 | 1.00 | 0.00 | N |
| ATOM | 161 | N3   | G A | 6 | -39.831 | -40.457 | 109.904 | 1.00 | 0.00 | N |
| ATOM | 162 | C4   | G A | 6 | -39.108 | -40.474 | 111.054 | 1.00 | 0.00 | C |
| ATOM | 163 | C5   | G A | 6 | -38.867 | -39.427 | 111.928 | 1.00 | 0.00 | C |
| ATOM | 164 | C6   | G A | 6 | -39.409 | -38.151 | 111.655 | 1.00 | 0.00 | C |
| ATOM | 165 | O6   | G A | 6 | -39.307 | -37.110 | 112.303 | 1.00 | 0.00 | O |
| ATOM | 166 | N7   | G A | 6 | -38.074 | -39.860 | 112.993 | 1.00 | 0.00 | N |
| ATOM | 167 | C8   | G A | 6 | -37.868 | -41.127 | 112.738 | 1.00 | 0.00 | C |
| ATOM | 168 | N9   | G A | 6 | -38.462 | -41.574 | 111.577 | 1.00 | 0.00 | N |
| ATOM | 169 | C2'  | G A | 6 | -37.114 | -43.654 | 111.118 | 1.00 | 0.00 | C |
| ATOM | 170 | C3'  | G A | 6 | -37.552 | -45.097 | 111.308 | 1.00 | 0.00 | C |
| ATOM | 171 | O3'  | G A | 6 | -37.769 | -45.694 | 110.031 | 1.00 | 0.00 | O |
| ATOM | 172 | C4'  | G A | 6 | -38.848 | -44.955 | 112.106 | 1.00 | 0.00 | C |
| ATOM | 173 | O4'  | G A | 6 | -39.436 | -43.708 | 111.620 | 1.00 | 0.00 | O |
| ATOM | 174 | C5'  | G A | 6 | -38.705 | -44.870 | 113.607 | 1.00 | 0.00 | C |
| ATOM | 175 | O5'  | G A | 6 | -37.512 | -44.121 | 113.946 | 1.00 | 0.00 | O |
| ATOM | 176 | O1P  | G A | 6 | -36.037 | -45.838 | 115.044 | 1.00 | 0.00 | O |
| ATOM | 177 | O2P  | G A | 6 | -35.798 | -43.413 | 115.642 | 1.00 | 0.00 | O |
| ATOM | 178 | P    | G A | 6 | -36.690 | -44.532 | 115.250 | 1.00 | 0.00 | P |
| ATOM | 179 | H1   | G A | 6 | -40.598 | -37.267 | 110.173 | 1.00 | 0.00 | H |
| ATOM | 180 | H8   | G A | 6 | -37.275 | -41.774 | 113.386 | 1.00 | 0.00 | H |
| ATOM | 181 | H1'  | G A | 6 | -38.727 | -42.841 | 109.920 | 1.00 | 0.00 | H |
| ATOM | 182 | H21  | G A | 6 | -41.469 | -38.123 | 108.350 | 1.00 | 0.00 | H |
| ATOM | 183 | H3'  | G A | 6 | -36.814 | -45.681 | 111.858 | 1.00 | 0.00 | H |
| ATOM | 184 | H22  | G A | 6 | -41.248 | -39.834 | 107.892 | 1.00 | 0.00 | H |
| ATOM | 185 | H4'  | G A | 6 | -39.457 | -45.830 | 111.878 | 1.00 | 0.00 | H |
| ATOM | 186 | H2'1 | G A | 6 | -36.543 | -43.297 | 111.975 | 1.00 | 0.00 | H |
| ATOM | 187 | H2'2 | G A | 6 | -36.483 | -43.544 | 110.236 | 1.00 | 0.00 | H |
| ATOM | 188 | H5'1 | G A | 6 | -39.581 | -44.375 | 114.024 | 1.00 | 0.00 | H |

|      |     |      |     |   |         |         |         |      |      |   |
|------|-----|------|-----|---|---------|---------|---------|------|------|---|
| ATOM | 189 | H5'2 | G A | 6 | -38.637 | -45.877 | 114.018 | 1.00 | 0.00 | H |
| ATOM | 190 | C1'  | C A | 7 | -37.969 | -41.478 | 106.261 | 1.00 | 0.00 | C |
| ATOM | 191 | N1   | C A | 7 | -37.429 | -40.641 | 107.367 | 1.00 | 0.00 | N |
| ATOM | 192 | C2   | C A | 7 | -37.788 | -39.296 | 107.402 | 1.00 | 0.00 | C |
| ATOM | 193 | O2   | C A | 7 | -38.532 | -38.852 | 106.518 | 1.00 | 0.00 | O |
| ATOM | 194 | N3   | C A | 7 | -37.308 | -38.517 | 108.403 | 1.00 | 0.00 | N |
| ATOM | 195 | C4   | C A | 7 | -36.502 | -39.025 | 109.345 | 1.00 | 0.00 | C |
| ATOM | 196 | N4   | C A | 7 | -36.066 | -38.220 | 110.301 | 1.00 | 0.00 | N |
| ATOM | 197 | C5   | C A | 7 | -36.114 | -40.405 | 109.332 | 1.00 | 0.00 | C |
| ATOM | 198 | C6   | C A | 7 | -36.614 | -41.172 | 108.318 | 1.00 | 0.00 | C |
| ATOM | 199 | C2'  | C A | 7 | -36.980 | -42.508 | 105.731 | 1.00 | 0.00 | C |
| ATOM | 200 | C3'  | C A | 7 | -37.891 | -43.680 | 105.399 | 1.00 | 0.00 | C |
| ATOM | 201 | O3'  | C A | 7 | -38.439 | -43.492 | 104.095 | 1.00 | 0.00 | O |
| ATOM | 202 | C4'  | C A | 7 | -38.956 | -43.602 | 106.490 | 1.00 | 0.00 | C |
| ATOM | 203 | O4'  | C A | 7 | -39.099 | -42.170 | 106.755 | 1.00 | 0.00 | O |
| ATOM | 204 | C5'  | C A | 7 | -38.637 | -44.305 | 107.790 | 1.00 | 0.00 | C |
| ATOM | 205 | O5'  | C A | 7 | -37.224 | -44.170 | 108.086 | 1.00 | 0.00 | O |
| ATOM | 206 | O1P  | C A | 7 | -36.365 | -46.530 | 107.920 | 1.00 | 0.00 | O |
| ATOM | 207 | O2P  | C A | 7 | -35.206 | -44.872 | 109.405 | 1.00 | 0.00 | O |
| ATOM | 208 | P    | C A | 7 | -36.477 | -45.368 | 108.826 | 1.00 | 0.00 | P |
| ATOM | 209 | H5   | C A | 7 | -35.454 | -40.823 | 110.094 | 1.00 | 0.00 | H |
| ATOM | 210 | H6   | C A | 7 | -36.354 | -42.230 | 108.270 | 1.00 | 0.00 | H |
| ATOM | 211 | H1'  | C A | 7 | -38.305 | -40.813 | 105.464 | 1.00 | 0.00 | H |
| ATOM | 212 | H3'  | C A | 7 | -37.359 | -44.631 | 105.433 | 1.00 | 0.00 | H |
| ATOM | 213 | H4'  | C A | 7 | -39.860 | -44.053 | 106.082 | 1.00 | 0.00 | H |
| ATOM | 214 | H41  | C A | 7 | -35.446 | -38.585 | 111.040 | 1.00 | 0.00 | H |
| ATOM | 215 | H42  | C A | 7 | -36.342 | -37.227 | 110.308 | 1.00 | 0.00 | H |
| ATOM | 216 | H2'1 | C A | 7 | -36.234 | -42.784 | 106.474 | 1.00 | 0.00 | H |
| ATOM | 217 | H2'2 | C A | 7 | -36.448 | -42.154 | 104.847 | 1.00 | 0.00 | H |
| ATOM | 218 | H5'1 | C A | 7 | -39.227 | -43.859 | 108.592 | 1.00 | 0.00 | H |
| ATOM | 219 | H5'2 | C A | 7 | -38.894 | -45.360 | 107.699 | 1.00 | 0.00 | H |
| ATOM | 220 | C1'  | A A | 8 | -37.475 | -38.110 | 102.665 | 1.00 | 0.00 | C |
| ATOM | 221 | N1   | A A | 8 | -35.459 | -35.243 | 106.415 | 1.00 | 0.00 | N |
| ATOM | 222 | C2   | A A | 8 | -36.310 | -34.967 | 105.432 | 1.00 | 0.00 | C |
| ATOM | 223 | N3   | A A | 8 | -36.794 | -35.757 | 104.497 | 1.00 | 0.00 | N |
| ATOM | 224 | C4   | A A | 8 | -36.294 | -36.999 | 104.634 | 1.00 | 0.00 | C |
| ATOM | 225 | C5   | A A | 8 | -35.415 | -37.443 | 105.582 | 1.00 | 0.00 | C |
| ATOM | 226 | C6   | A A | 8 | -34.979 | -36.491 | 106.526 | 1.00 | 0.00 | C |
| ATOM | 227 | N6   | A A | 8 | -34.117 | -36.782 | 107.517 | 1.00 | 0.00 | N |
| ATOM | 228 | N7   | A A | 8 | -35.128 | -38.786 | 105.408 | 1.00 | 0.00 | N |
| ATOM | 229 | C8   | A A | 8 | -35.829 | -39.122 | 104.365 | 1.00 | 0.00 | C |
| ATOM | 230 | N9   | A A | 8 | -36.564 | -38.089 | 103.843 | 1.00 | 0.00 | N |
| ATOM | 231 | C2'  | A A | 8 | -36.980 | -38.986 | 101.522 | 1.00 | 0.00 | C |
| ATOM | 232 | C3'  | A A | 8 | -38.279 | -39.555 | 100.975 | 1.00 | 0.00 | C |
| ATOM | 233 | O3'  | A A | 8 | -38.848 | -38.625 | 100.059 | 1.00 | 0.00 | O |
| ATOM | 234 | C4'  | A A | 8 | -39.133 | -39.725 | 102.231 | 1.00 | 0.00 | C |
| ATOM | 235 | O4'  | A A | 8 | -38.724 | -38.617 | 103.097 | 1.00 | 0.00 | O |
| ATOM | 236 | C5'  | A A | 8 | -38.962 | -41.021 | 102.988 | 1.00 | 0.00 | C |
| ATOM | 237 | O5'  | A A | 8 | -37.572 | -41.434 | 102.945 | 1.00 | 0.00 | O |
| ATOM | 238 | O1P  | A A | 8 | -37.641 | -43.558 | 101.595 | 1.00 | 0.00 | O |
| ATOM | 239 | O2P  | A A | 8 | -35.822 | -43.204 | 103.287 | 1.00 | 0.00 | O |
| ATOM | 240 | P    | A A | 8 | -37.238 | -42.993 | 102.897 | 1.00 | 0.00 | P |
| ATOM | 241 | H2   | A A | 8 | -36.659 | -33.936 | 105.395 | 1.00 | 0.00 | H |
| ATOM | 242 | H8   | A A | 8 | -35.833 | -40.127 | 103.946 | 1.00 | 0.00 | H |

|      |     |      |     |    |         |         |         |      |      |   |
|------|-----|------|-----|----|---------|---------|---------|------|------|---|
| ATOM | 243 | H1'  | A A | 8  | -37.627 | -37.083 | 102.334 | 1.00 | 0.00 | H |
| ATOM | 244 | H3'  | A A | 8  | -38.127 | -40.511 | 100.472 | 1.00 | 0.00 | H |
| ATOM | 245 | H4'  | A A | 8  | -40.173 | -39.657 | 101.916 | 1.00 | 0.00 | H |
| ATOM | 246 | H61  | A A | 8  | -33.832 | -36.050 | 108.182 | 1.00 | 0.00 | H |
| ATOM | 247 | H62  | A A | 8  | -33.742 | -37.738 | 107.607 | 1.00 | 0.00 | H |
| ATOM | 248 | H2'1 | A A | 8  | -36.314 | -39.776 | 101.865 | 1.00 | 0.00 | H |
| ATOM | 249 | H2'2 | A A | 8  | -36.447 | -38.412 | 100.764 | 1.00 | 0.00 | H |
| ATOM | 250 | H5'1 | A A | 8  | -39.269 | -40.871 | 104.024 | 1.00 | 0.00 | H |
| ATOM | 251 | H5'2 | A A | 8  | -39.589 | -41.787 | 102.534 | 1.00 | 0.00 | H |
| ATOM | 252 | C1'  | C A | 9  | -36.132 | -33.668 | 100.898 | 1.00 | 0.00 | C |
| ATOM | 253 | N1   | C A | 9  | -35.166 | -34.493 | 101.674 | 1.00 | 0.00 | N |
| ATOM | 254 | C2   | C A | 9  | -34.506 | -33.894 | 102.745 | 1.00 | 0.00 | C |
| ATOM | 255 | O2   | C A | 9  | -34.749 | -32.708 | 103.005 | 1.00 | 0.00 | O |
| ATOM | 256 | N3   | C A | 9  | -33.624 | -34.628 | 103.463 | 1.00 | 0.00 | N |
| ATOM | 257 | C4   | C A | 9  | -33.382 | -35.909 | 103.156 | 1.00 | 0.00 | C |
| ATOM | 258 | N4   | C A | 9  | -32.511 | -36.582 | 103.895 | 1.00 | 0.00 | N |
| ATOM | 259 | C5   | C A | 9  | -34.042 | -36.552 | 102.057 | 1.00 | 0.00 | C |
| ATOM | 260 | C6   | C A | 9  | -34.932 | -35.795 | 101.349 | 1.00 | 0.00 | C |
| ATOM | 261 | C2'  | C A | 9  | -36.113 | -33.946 | 99.402  | 1.00 | 0.00 | C |
| ATOM | 262 | C3'  | C A | 9  | -37.580 | -33.782 | 99.031  | 1.00 | 0.00 | C |
| ATOM | 263 | O3'  | C A | 9  | -37.853 | -32.401 | 98.802  | 1.00 | 0.00 | O |
| ATOM | 264 | C4'  | C A | 9  | -38.304 | -34.318 | 100.263 | 1.00 | 0.00 | C |
| ATOM | 265 | O4'  | C A | 9  | -37.430 | -33.958 | 101.381 | 1.00 | 0.00 | O |
| ATOM | 266 | C5'  | C A | 9  | -38.550 | -35.807 | 100.303 | 1.00 | 0.00 | C |
| ATOM | 267 | O5'  | C A | 9  | -37.425 | -36.506 | 99.711  | 1.00 | 0.00 | O |
| ATOM | 268 | O1P  | C A | 9  | -38.410 | -37.549 | 97.643  | 1.00 | 0.00 | O |
| ATOM | 269 | O2P  | C A | 9  | -36.429 | -38.609 | 98.761  | 1.00 | 0.00 | O |
| ATOM | 270 | P    | C A | 9  | -37.698 | -37.852 | 98.900  | 1.00 | 0.00 | P |
| ATOM | 271 | H5   | C A | 9  | -33.844 | -37.593 | 101.799 | 1.00 | 0.00 | H |
| ATOM | 272 | H6   | C A | 9  | -35.464 | -36.240 | 100.510 | 1.00 | 0.00 | H |
| ATOM | 273 | H1'  | C A | 9  | -35.924 | -32.618 | 101.104 | 1.00 | 0.00 | H |
| ATOM | 274 | H3'  | C A | 9  | -37.841 | -34.354 | 98.141  | 1.00 | 0.00 | H |
| ATOM | 275 | H4'  | C A | 9  | -39.272 | -33.820 | 100.303 | 1.00 | 0.00 | H |
| ATOM | 276 | H41  | C A | 9  | -32.309 | -37.569 | 103.681 | 1.00 | 0.00 | H |
| ATOM | 277 | H42  | C A | 9  | -32.036 | -36.117 | 104.682 | 1.00 | 0.00 | H |
| ATOM | 278 | H2'1 | C A | 9  | -35.757 | -34.949 | 99.171  | 1.00 | 0.00 | H |
| ATOM | 279 | H2'2 | C A | 9  | -35.484 | -33.241 | 98.858  | 1.00 | 0.00 | H |
| ATOM | 280 | H5'1 | C A | 9  | -38.675 | -36.124 | 101.339 | 1.00 | 0.00 | H |
| ATOM | 281 | H5'2 | C A | 9  | -39.459 | -36.035 | 99.747  | 1.00 | 0.00 | H |
| ATOM | 282 | C1'  | C A | 10 | -33.458 | -29.500 | 100.892 | 1.00 | 0.00 | C |
| ATOM | 283 | N1   | C A | 10 | -32.787 | -30.827 | 100.956 | 1.00 | 0.00 | N |
| ATOM | 284 | C2   | C A | 10 | -31.850 | -31.036 | 101.967 | 1.00 | 0.00 | C |
| ATOM | 285 | O2   | C A | 10 | -31.614 | -30.118 | 102.763 | 1.00 | 0.00 | O |
| ATOM | 286 | N3   | C A | 10 | -31.229 | -32.239 | 102.044 | 1.00 | 0.00 | N |
| ATOM | 287 | C4   | C A | 10 | -31.503 | -33.213 | 101.167 | 1.00 | 0.00 | C |
| ATOM | 288 | N4   | C A | 10 | -30.869 | -34.371 | 101.290 | 1.00 | 0.00 | N |
| ATOM | 289 | C5   | C A | 10 | -32.460 | -33.025 | 100.115 | 1.00 | 0.00 | C |
| ATOM | 290 | C6   | C A | 10 | -33.077 | -31.808 | 100.061 | 1.00 | 0.00 | C |
| ATOM | 291 | C2'  | C A | 10 | -33.693 | -29.001 | 99.473  | 1.00 | 0.00 | C |
| ATOM | 292 | C3'  | C A | 10 | -35.027 | -28.282 | 99.608  | 1.00 | 0.00 | C |
| ATOM | 293 | O3'  | C A | 10 | -34.798 | -26.953 | 100.072 | 1.00 | 0.00 | O |
| ATOM | 294 | C4'  | C A | 10 | -35.769 | -29.133 | 100.636 | 1.00 | 0.00 | C |
| ATOM | 295 | O4'  | C A | 10 | -34.717 | -29.623 | 101.527 | 1.00 | 0.00 | O |
| ATOM | 296 | C5'  | C A | 10 | -36.536 | -30.318 | 100.098 | 1.00 | 0.00 | C |

|      |     |      |     |    |         |         |         |      |      |   |
|------|-----|------|-----|----|---------|---------|---------|------|------|---|
| ATOM | 297 | O5'  | C A | 10 | -35.810 | -30.912 | 98.992  | 1.00 | 0.00 | O |
| ATOM | 298 | O1P  | C A | 10 | -37.311 | -30.490 | 97.017  | 1.00 | 0.00 | O |
| ATOM | 299 | O2P  | C A | 10 | -35.753 | -32.458 | 97.012  | 1.00 | 0.00 | O |
| ATOM | 300 | P    | C A | 10 | -36.636 | -31.552 | 97.789  | 1.00 | 0.00 | P |
| ATOM | 301 | H5   | C A | 10 | -32.682 | -33.814 | 99.395  | 1.00 | 0.00 | H |
| ATOM | 302 | H6   | C A | 10 | -33.818 | -31.620 | 99.283  | 1.00 | 0.00 | H |
| ATOM | 303 | H1'  | C A | 10 | -32.862 | -28.788 | 101.463 | 1.00 | 0.00 | H |
| ATOM | 304 | H3'  | C A | 10 | -35.568 | -28.245 | 98.661  | 1.00 | 0.00 | H |
| ATOM | 305 | H4'  | C A | 10 | -36.480 | -28.476 | 101.137 | 1.00 | 0.00 | H |
| ATOM | 306 | H41  | C A | 10 | -31.064 | -35.137 | 100.630 | 1.00 | 0.00 | H |
| ATOM | 307 | H42  | C A | 10 | -30.180 | -34.502 | 102.045 | 1.00 | 0.00 | H |
| ATOM | 308 | H2'1 | C A | 10 | -33.752 | -29.814 | 98.752  | 1.00 | 0.00 | H |
| ATOM | 309 | H2'2 | C A | 10 | -32.907 | -28.321 | 99.139  | 1.00 | 0.00 | H |
| ATOM | 310 | H5'1 | C A | 10 | -36.663 | -31.054 | 100.893 | 1.00 | 0.00 | H |
| ATOM | 311 | H5'2 | C A | 10 | -37.516 | -29.985 | 99.760  | 1.00 | 0.00 | H |
| ATOM | 312 | C1'  | T A | 11 | -29.474 | -26.761 | 101.957 | 1.00 | 0.00 | C |
| ATOM | 313 | N1   | T A | 11 | -29.316 | -28.078 | 101.286 | 1.00 | 0.00 | N |
| ATOM | 314 | C2   | T A | 11 | -28.421 | -28.968 | 101.846 | 1.00 | 0.00 | C |
| ATOM | 315 | O2   | T A | 11 | -27.775 | -28.711 | 102.848 | 1.00 | 0.00 | O |
| ATOM | 316 | N3   | T A | 11 | -28.305 | -30.181 | 101.192 | 1.00 | 0.00 | N |
| ATOM | 317 | C4   | T A | 11 | -28.985 | -30.568 | 100.055 | 1.00 | 0.00 | C |
| ATOM | 318 | O4   | T A | 11 | -28.796 | -31.684 | 99.555  | 1.00 | 0.00 | O |
| ATOM | 319 | C5   | T A | 11 | -29.897 | -29.573 | 99.543  | 1.00 | 0.00 | C |
| ATOM | 320 | C6   | T A | 11 | -30.036 | -28.381 | 100.156 | 1.00 | 0.00 | C |
| ATOM | 321 | C7   | T A | 11 | -30.659 | -29.953 | 98.308  | 1.00 | 0.00 | C |
| ATOM | 322 | C2'  | T A | 11 | -29.661 | -25.598 | 100.991 | 1.00 | 0.00 | C |
| ATOM | 323 | C3'  | T A | 11 | -30.631 | -24.707 | 101.749 | 1.00 | 0.00 | C |
| ATOM | 324 | O3'  | T A | 11 | -29.900 | -23.879 | 102.652 | 1.00 | 0.00 | O |
| ATOM | 325 | C4'  | T A | 11 | -31.518 | -25.713 | 102.478 | 1.00 | 0.00 | C |
| ATOM | 326 | O4'  | T A | 11 | -30.623 | -26.831 | 102.780 | 1.00 | 0.00 | O |
| ATOM | 327 | C5'  | T A | 11 | -32.707 | -26.241 | 101.710 | 1.00 | 0.00 | C |
| ATOM | 328 | O5'  | T A | 11 | -32.356 | -26.400 | 100.312 | 1.00 | 0.00 | O |
| ATOM | 329 | O1P  | T A | 11 | -33.801 | -24.699 | 99.151  | 1.00 | 0.00 | O |
| ATOM | 330 | O2P  | T A | 11 | -33.052 | -26.755 | 97.923  | 1.00 | 0.00 | O |
| ATOM | 331 | P    | T A | 11 | -33.472 | -26.136 | 99.205  | 1.00 | 0.00 | P |
| ATOM | 332 | H3   | T A | 11 | -27.648 | -30.863 | 101.593 | 1.00 | 0.00 | H |
| ATOM | 333 | H6   | T A | 11 | -30.731 | -27.645 | 99.750  | 1.00 | 0.00 | H |
| ATOM | 334 | H1'  | T A | 11 | -28.609 | -26.598 | 102.600 | 1.00 | 0.00 | H |
| ATOM | 335 | H3'  | T A | 11 | -31.216 | -24.079 | 101.079 | 1.00 | 0.00 | H |
| ATOM | 336 | H4'  | T A | 11 | -31.894 | -25.215 | 103.372 | 1.00 | 0.00 | H |
| ATOM | 337 | H71  | T A | 11 | -30.352 | -29.316 | 97.480  | 1.00 | 0.00 | H |
| ATOM | 338 | H72  | T A | 11 | -30.452 | -30.995 | 98.060  | 1.00 | 0.00 | H |
| ATOM | 339 | H73  | T A | 11 | -31.727 | -29.829 | 98.486  | 1.00 | 0.00 | H |
| ATOM | 340 | H2'1 | T A | 11 | -30.077 | -25.917 | 100.037 | 1.00 | 0.00 | H |
| ATOM | 341 | H2'2 | T A | 11 | -28.724 | -25.079 | 100.782 | 1.00 | 0.00 | H |
| ATOM | 342 | H5'1 | T A | 11 | -33.005 | -27.203 | 102.126 | 1.00 | 0.00 | H |
| ATOM | 343 | H5'2 | T A | 11 | -33.534 | -25.538 | 101.803 | 1.00 | 0.00 | H |
| ATOM | 344 | C1'  | A A | 12 | -24.666 | -26.123 | 103.010 | 1.00 | 0.00 | C |
| ATOM | 345 | N1   | A A | 12 | -24.103 | -30.570 | 100.508 | 1.00 | 0.00 | N |
| ATOM | 346 | C2   | A A | 12 | -23.568 | -30.095 | 101.629 | 1.00 | 0.00 | C |
| ATOM | 347 | N3   | A A | 12 | -23.761 | -28.935 | 102.222 | 1.00 | 0.00 | N |
| ATOM | 348 | C4   | A A | 12 | -24.632 | -28.191 | 101.519 | 1.00 | 0.00 | C |
| ATOM | 349 | C5   | A A | 12 | -25.264 | -28.529 | 100.355 | 1.00 | 0.00 | C |
| ATOM | 350 | C6   | A A | 12 | -24.969 | -29.804 | 99.828  | 1.00 | 0.00 | C |

|      |     |      |   |   |    |         |         |         |      |      |   |
|------|-----|------|---|---|----|---------|---------|---------|------|------|---|
| ATOM | 351 | N6   | A | A | 12 | -25.515 | -30.272 | 98.692  | 1.00 | 0.00 | N |
| ATOM | 352 | N7   | A | A | 12 | -26.092 | -27.509 | 99.922  | 1.00 | 0.00 | N |
| ATOM | 353 | C8   | A | A | 12 | -25.942 | -26.582 | 100.821 | 1.00 | 0.00 | C |
| ATOM | 354 | N9   | A | A | 12 | -25.071 | -26.926 | 101.823 | 1.00 | 0.00 | N |
| ATOM | 355 | C2'  | A | A | 12 | -24.514 | -24.636 | 102.718 | 1.00 | 0.00 | C |
| ATOM | 356 | C3'  | A | A | 12 | -25.006 | -24.008 | 104.012 | 1.00 | 0.00 | C |
| ATOM | 357 | O3'  | A | A | 12 | -23.933 | -23.968 | 104.950 | 1.00 | 0.00 | O |
| ATOM | 358 | C4'  | A | A | 12 | -26.119 | -24.958 | 104.450 | 1.00 | 0.00 | C |
| ATOM | 359 | O4'  | A | A | 12 | -25.668 | -26.274 | 103.996 | 1.00 | 0.00 | O |
| ATOM | 360 | C5'  | A | A | 12 | -27.491 | -24.692 | 103.878 | 1.00 | 0.00 | C |
| ATOM | 361 | O5'  | A | A | 12 | -27.371 | -24.232 | 102.508 | 1.00 | 0.00 | O |
| ATOM | 362 | O1P  | A | A | 12 | -28.206 | -21.860 | 102.615 | 1.00 | 0.00 | O |
| ATOM | 363 | O2P  | A | A | 12 | -28.394 | -23.162 | 100.478 | 1.00 | 0.00 | O |
| ATOM | 364 | P    | A | A | 12 | -28.423 | -23.165 | 101.961 | 1.00 | 0.00 | P |
| ATOM | 365 | H2   | A | A | 12 | -22.870 | -30.764 | 102.131 | 1.00 | 0.00 | H |
| ATOM | 366 | H8   | A | A | 12 | -26.458 | -25.622 | 100.784 | 1.00 | 0.00 | H |
| ATOM | 367 | H1'  | A | A | 12 | -23.741 | -26.541 | 103.403 | 1.00 | 0.00 | H |
| ATOM | 368 | H3'  | A | A | 12 | -25.388 | -22.999 | 103.858 | 1.00 | 0.00 | H |
| ATOM | 369 | H4'  | A | A | 12 | -26.190 | -24.883 | 105.535 | 1.00 | 0.00 | H |
| ATOM | 370 | H61  | A | A | 12 | -25.269 | -31.211 | 98.351  | 1.00 | 0.00 | H |
| ATOM | 371 | H62  | A | A | 12 | -26.180 | -29.689 | 98.163  | 1.00 | 0.00 | H |
| ATOM | 372 | H2'1 | A | A | 12 | -25.115 | -24.316 | 101.869 | 1.00 | 0.00 | H |
| ATOM | 373 | H2'2 | A | A | 12 | -23.480 | -24.360 | 102.511 | 1.00 | 0.00 | H |
| ATOM | 374 | H5'1 | A | A | 12 | -28.075 | -25.612 | 103.907 | 1.00 | 0.00 | H |
| ATOM | 375 | H5'2 | A | A | 12 | -27.989 | -23.933 | 104.478 | 1.00 | 0.00 | H |
| ATOM | 376 | C1'  | G | A | 13 | -19.881 | -27.442 | 102.911 | 1.00 | 0.00 | C |
| ATOM | 377 | N1   | G | A | 13 | -21.242 | -30.009 | 98.718  | 1.00 | 0.00 | N |
| ATOM | 378 | C2   | G | A | 13 | -20.419 | -30.389 | 99.762  | 1.00 | 0.00 | C |
| ATOM | 379 | N2   | G | A | 13 | -19.883 | -31.614 | 99.678  | 1.00 | 0.00 | N |
| ATOM | 380 | N3   | G | A | 13 | -20.149 | -29.608 | 100.807 | 1.00 | 0.00 | N |
| ATOM | 381 | C4   | G | A | 13 | -20.768 | -28.401 | 100.724 | 1.00 | 0.00 | C |
| ATOM | 382 | C5   | G | A | 13 | -21.603 | -27.936 | 99.721  | 1.00 | 0.00 | C |
| ATOM | 383 | C6   | G | A | 13 | -21.892 | -28.766 | 98.613  | 1.00 | 0.00 | C |
| ATOM | 384 | O6   | G | A | 13 | -22.601 | -28.532 | 97.634  | 1.00 | 0.00 | O |
| ATOM | 385 | N7   | G | A | 13 | -22.031 | -26.640 | 100.013 | 1.00 | 0.00 | N |
| ATOM | 386 | C8   | G | A | 13 | -21.461 | -26.368 | 101.158 | 1.00 | 0.00 | C |
| ATOM | 387 | N9   | G | A | 13 | -20.676 | -27.389 | 101.653 | 1.00 | 0.00 | N |
| ATOM | 388 | C2'  | G | A | 13 | -19.210 | -26.123 | 103.269 | 1.00 | 0.00 | C |
| ATOM | 389 | C3'  | G | A | 13 | -19.297 | -26.123 | 104.785 | 1.00 | 0.00 | C |
| ATOM | 390 | O3'  | G | A | 13 | -18.200 | -26.862 | 105.318 | 1.00 | 0.00 | O |
| ATOM | 391 | C4'  | G | A | 13 | -20.636 | -26.810 | 105.049 | 1.00 | 0.00 | C |
| ATOM | 392 | O4'  | G | A | 13 | -20.762 | -27.784 | 103.964 | 1.00 | 0.00 | O |
| ATOM | 393 | C5'  | G | A | 13 | -21.858 | -25.923 | 105.045 | 1.00 | 0.00 | C |
| ATOM | 394 | O5'  | G | A | 13 | -21.712 | -24.891 | 104.039 | 1.00 | 0.00 | O |
| ATOM | 395 | O1P  | G | A | 13 | -21.579 | -22.771 | 105.390 | 1.00 | 0.00 | O |
| ATOM | 396 | O2P  | G | A | 13 | -22.456 | -22.708 | 103.042 | 1.00 | 0.00 | O |
| ATOM | 397 | P    | G | A | 13 | -22.335 | -23.449 | 104.320 | 1.00 | 0.00 | P |
| ATOM | 398 | H1   | G | A | 13 | -21.391 | -30.692 | 97.958  | 1.00 | 0.00 | H |
| ATOM | 399 | H8   | G | A | 13 | -21.592 | -25.419 | 101.676 | 1.00 | 0.00 | H |
| ATOM | 400 | H1'  | G | A | 13 | -19.145 | -28.242 | 102.815 | 1.00 | 0.00 | H |
| ATOM | 401 | H21  | G | A | 13 | -20.100 | -32.214 | 98.867  | 1.00 | 0.00 | H |
| ATOM | 402 | H3'  | G | A | 13 | -19.286 | -25.113 | 105.196 | 1.00 | 0.00 | H |
| ATOM | 403 | H22  | G | A | 13 | -19.260 | -31.954 | 100.421 | 1.00 | 0.00 | H |
| ATOM | 404 | H4'  | G | A | 13 | -20.565 | -27.276 | 106.032 | 1.00 | 0.00 | H |



|      |     |      |     |    |         |         |         |      |      |   |
|------|-----|------|-----|----|---------|---------|---------|------|------|---|
| ATOM | 405 | H2'1 | G A | 13 | -19.730 | -25.265 | 102.842 | 1.00 | 0.00 | H |
| ATOM | 406 | H2'2 | G A | 13 | -18.174 | -26.080 | 102.930 | 1.00 | 0.00 | H |
| ATOM | 407 | H5'1 | G A | 13 | -22.739 | -26.527 | 104.829 | 1.00 | 0.00 | H |
| ATOM | 408 | H5'2 | G A | 13 | -21.971 | -25.466 | 106.028 | 1.00 | 0.00 | H |
| ATOM | 409 | C1'  | G A | 14 | -15.941 | -29.775 | 101.022 | 1.00 | 0.00 | C |
| ATOM | 410 | N1   | G A | 14 | -18.561 | -29.469 | 96.656  | 1.00 | 0.00 | N |
| ATOM | 411 | C2   | G A | 14 | -17.831 | -30.520 | 97.182  | 1.00 | 0.00 | C |
| ATOM | 412 | N2   | G A | 14 | -17.793 | -31.637 | 96.446  | 1.00 | 0.00 | N |
| ATOM | 413 | N3   | G A | 14 | -17.192 | -30.461 | 98.349  | 1.00 | 0.00 | N |
| ATOM | 414 | C4   | G A | 14 | -17.333 | -29.252 | 98.954  | 1.00 | 0.00 | C |
| ATOM | 415 | C5   | G A | 14 | -18.037 | -28.148 | 98.503  | 1.00 | 0.00 | C |
| ATOM | 416 | C6   | G A | 14 | -18.719 | -28.210 | 97.268  | 1.00 | 0.00 | C |
| ATOM | 417 | O6   | G A | 14 | -19.389 | -27.344 | 96.705  | 1.00 | 0.00 | O |
| ATOM | 418 | N7   | G A | 14 | -17.930 | -27.102 | 99.424  | 1.00 | 0.00 | N |
| ATOM | 419 | C8   | G A | 14 | -17.187 | -27.595 | 100.380 | 1.00 | 0.00 | C |
| ATOM | 420 | N9   | G A | 14 | -16.784 | -28.896 | 100.167 | 1.00 | 0.00 | N |
| ATOM | 421 | C2'  | G A | 14 | -14.803 | -29.042 | 101.720 | 1.00 | 0.00 | C |
| ATOM | 422 | C3'  | G A | 14 | -14.730 | -29.764 | 103.055 | 1.00 | 0.00 | C |
| ATOM | 423 | O3'  | G A | 14 | -13.931 | -30.935 | 102.913 | 1.00 | 0.00 | O |
| ATOM | 424 | C4'  | G A | 14 | -16.195 | -30.096 | 103.341 | 1.00 | 0.00 | C |
| ATOM | 425 | O4'  | G A | 14 | -16.775 | -30.334 | 102.019 | 1.00 | 0.00 | O |
| ATOM | 426 | C5'  | G A | 14 | -17.001 | -29.025 | 104.037 | 1.00 | 0.00 | C |
| ATOM | 427 | O5'  | G A | 14 | -16.590 | -27.718 | 103.568 | 1.00 | 0.00 | O |
| ATOM | 428 | O1P  | G A | 14 | -15.558 | -26.665 | 105.608 | 1.00 | 0.00 | O |
| ATOM | 429 | O2P  | G A | 14 | -16.582 | -25.219 | 103.833 | 1.00 | 0.00 | O |
| ATOM | 430 | P    | G A | 14 | -16.612 | -26.494 | 104.591 | 1.00 | 0.00 | P |
| ATOM | 431 | H1   | G A | 14 | -19.025 | -29.620 | 95.747  | 1.00 | 0.00 | H |
| ATOM | 432 | H8   | G A | 14 | -16.910 | -27.026 | 101.268 | 1.00 | 0.00 | H |
| ATOM | 433 | H1'  | G A | 14 | -15.562 | -30.589 | 100.406 | 1.00 | 0.00 | H |
| ATOM | 434 | H21  | G A | 14 | -18.293 | -31.677 | 95.545  | 1.00 | 0.00 | H |
| ATOM | 435 | H3'  | G A | 14 | -14.311 | -29.133 | 103.838 | 1.00 | 0.00 | H |
| ATOM | 436 | H22  | G A | 14 | -17.265 | -32.455 | 96.780  | 1.00 | 0.00 | H |
| ATOM | 437 | H4'  | G A | 14 | -16.200 | -30.983 | 103.974 | 1.00 | 0.00 | H |
| ATOM | 438 | H2'1 | G A | 14 | -15.013 | -27.982 | 101.852 | 1.00 | 0.00 | H |
| ATOM | 439 | H2'2 | G A | 14 | -13.862 | -29.124 | 101.172 | 1.00 | 0.00 | H |
| ATOM | 440 | H5'1 | G A | 14 | -18.058 | -29.179 | 103.823 | 1.00 | 0.00 | H |
| ATOM | 441 | H5'2 | G A | 14 | -16.839 | -29.099 | 105.114 | 1.00 | 0.00 | H |
| ATOM | 442 | C1'  | A A | 15 | -13.324 | -31.863 | 97.377  | 1.00 | 0.00 | C |
| ATOM | 443 | N1   | A A | 15 | -16.096 | -28.751 | 94.381  | 1.00 | 0.00 | N |
| ATOM | 444 | C2   | A A | 15 | -15.732 | -30.026 | 94.261  | 1.00 | 0.00 | C |
| ATOM | 445 | N3   | A A | 15 | -15.016 | -30.772 | 95.076  | 1.00 | 0.00 | N |
| ATOM | 446 | C4   | A A | 15 | -14.639 | -30.054 | 96.151  | 1.00 | 0.00 | C |
| ATOM | 447 | C5   | A A | 15 | -14.925 | -28.747 | 96.422  | 1.00 | 0.00 | C |
| ATOM | 448 | C6   | A A | 15 | -15.705 | -28.064 | 95.465  | 1.00 | 0.00 | C |
| ATOM | 449 | N6   | A A | 15 | -16.064 | -26.775 | 95.597  | 1.00 | 0.00 | N |
| ATOM | 450 | N7   | A A | 15 | -14.368 | -28.352 | 97.625  | 1.00 | 0.00 | N |
| ATOM | 451 | C8   | A A | 15 | -13.758 | -29.418 | 98.052  | 1.00 | 0.00 | C |
| ATOM | 452 | N9   | A A | 15 | -13.881 | -30.494 | 97.210  | 1.00 | 0.00 | N |
| ATOM | 453 | C2'  | A A | 15 | -11.935 | -31.888 | 98.002  | 1.00 | 0.00 | C |
| ATOM | 454 | C3'  | A A | 15 | -11.991 | -33.151 | 98.847  | 1.00 | 0.00 | C |
| ATOM | 455 | O3'  | A A | 15 | -11.677 | -34.274 | 98.030  | 1.00 | 0.00 | O |
| ATOM | 456 | C4'  | A A | 15 | -13.440 | -33.173 | 99.330  | 1.00 | 0.00 | C |
| ATOM | 457 | O4'  | A A | 15 | -14.198 | -32.583 | 98.224  | 1.00 | 0.00 | O |
| ATOM | 458 | C5'  | A A | 15 | -13.741 | -32.396 | 100.589 | 1.00 | 0.00 | C |

|      |     |      |   |   |    |         |         |         |      |      |   |
|------|-----|------|---|---|----|---------|---------|---------|------|------|---|
| ATOM | 459 | O5'  | A | A | 15 | -12.941 | -31.187 | 100.623 | 1.00 | 0.00 | O |
| ATOM | 460 | O1P  | A | A | 15 | -11.403 | -31.559 | 102.580 | 1.00 | 0.00 | O |
| ATOM | 461 | O2P  | A | A | 15 | -12.021 | -29.225 | 101.895 | 1.00 | 0.00 | O |
| ATOM | 462 | P    | A | A | 15 | -12.425 | -30.646 | 102.031 | 1.00 | 0.00 | P |
| ATOM | 463 | H2   | A | A | 15 | -16.079 | -30.525 | 93.357  | 1.00 | 0.00 | H |
| ATOM | 464 | H8   | A | A | 15 | -13.202 | -29.456 | 98.988  | 1.00 | 0.00 | H |
| ATOM | 465 | H1'  | A | A | 15 | -13.322 | -32.351 | 96.403  | 1.00 | 0.00 | H |
| ATOM | 466 | H3'  | A | A | 15 | -11.298 | -33.110 | 99.688  | 1.00 | 0.00 | H |
| ATOM | 467 | H4'  | A | A | 15 | -13.697 | -34.216 | 99.513  | 1.00 | 0.00 | H |
| ATOM | 468 | H61  | A | A | 15 | -16.638 | -26.326 | 94.868  | 1.00 | 0.00 | H |
| ATOM | 469 | H62  | A | A | 15 | -15.767 | -26.240 | 96.425  | 1.00 | 0.00 | H |
| ATOM | 470 | H2'1 | A | A | 15 | -11.742 | -31.007 | 98.614  | 1.00 | 0.00 | H |
| ATOM | 471 | H2'2 | A | A | 15 | -11.145 | -31.947 | 97.253  | 1.00 | 0.00 | H |
| ATOM | 472 | H5'1 | A | A | 15 | -14.799 | -32.139 | 100.606 | 1.00 | 0.00 | H |
| ATOM | 473 | H5'2 | A | A | 15 | -13.509 | -33.014 | 101.455 | 1.00 | 0.00 | H |
| ATOM | 474 | C1'  | C | A | 16 | -12.057 | -32.485 | 92.615  | 1.00 | 0.00 | C |
| ATOM | 475 | N1   | C | A | 16 | -12.077 | -31.124 | 93.218  | 1.00 | 0.00 | N |
| ATOM | 476 | C2   | C | A | 16 | -12.784 | -30.126 | 92.552  | 1.00 | 0.00 | C |
| ATOM | 477 | O2   | C | A | 16 | -13.362 | -30.410 | 91.494  | 1.00 | 0.00 | O |
| ATOM | 478 | N3   | C | A | 16 | -12.815 | -28.879 | 93.083  | 1.00 | 0.00 | N |
| ATOM | 479 | C4   | C | A | 16 | -12.179 | -28.605 | 94.229  | 1.00 | 0.00 | C |
| ATOM | 480 | N4   | C | A | 16 | -12.246 | -27.370 | 94.705  | 1.00 | 0.00 | N |
| ATOM | 481 | C5   | C | A | 16 | -11.440 | -29.610 | 94.935  | 1.00 | 0.00 | C |
| ATOM | 482 | C6   | C | A | 16 | -11.426 | -30.860 | 94.384  | 1.00 | 0.00 | C |
| ATOM | 483 | C2'  | C | A | 16 | -10.721 | -33.202 | 92.763  | 1.00 | 0.00 | C |
| ATOM | 484 | C3'  | C | A | 16 | -11.157 | -34.646 | 92.959  | 1.00 | 0.00 | C |
| ATOM | 485 | O3'  | C | A | 16 | -11.372 | -35.247 | 91.685  | 1.00 | 0.00 | O |
| ATOM | 486 | C4'  | C | A | 16 | -12.450 | -34.505 | 93.759  | 1.00 | 0.00 | C |
| ATOM | 487 | O4'  | C | A | 16 | -13.044 | -33.260 | 93.271  | 1.00 | 0.00 | O |
| ATOM | 488 | C5'  | C | A | 16 | -12.305 | -34.415 | 95.261  | 1.00 | 0.00 | C |
| ATOM | 489 | O5'  | C | A | 16 | -11.112 | -33.661 | 95.592  | 1.00 | 0.00 | O |
| ATOM | 490 | O1P  | C | A | 16 | -9.628  | -35.370 | 96.695  | 1.00 | 0.00 | O |
| ATOM | 491 | O2P  | C | A | 16 | -9.397  | -32.943 | 97.284  | 1.00 | 0.00 | O |
| ATOM | 492 | P    | C | A | 16 | -10.287 | -34.064 | 96.897  | 1.00 | 0.00 | P |
| ATOM | 493 | H5   | C | A | 16 | -10.915 | -29.388 | 95.865  | 1.00 | 0.00 | H |
| ATOM | 494 | H6   | C | A | 16 | -10.884 | -31.660 | 94.888  | 1.00 | 0.00 | H |
| ATOM | 495 | H1'  | C | A | 16 | -12.341 | -32.399 | 91.567  | 1.00 | 0.00 | H |
| ATOM | 496 | H3'  | C | A | 16 | -10.413 | -35.223 | 93.511  | 1.00 | 0.00 | H |
| ATOM | 497 | H4'  | C | A | 16 | -13.056 | -35.383 | 93.537  | 1.00 | 0.00 | H |
| ATOM | 498 | H41  | C | A | 16 | -11.767 | -27.131 | 95.587  | 1.00 | 0.00 | H |
| ATOM | 499 | H42  | C | A | 16 | -12.775 | -26.647 | 94.196  | 1.00 | 0.00 | H |
| ATOM | 500 | H2'1 | C | A | 16 | -10.150 | -32.841 | 93.617  | 1.00 | 0.00 | H |
| ATOM | 501 | H2'2 | C | A | 16 | -10.093 | -33.092 | 91.878  | 1.00 | 0.00 | H |
| ATOM | 502 | H5'1 | C | A | 16 | -13.183 | -33.920 | 95.676  | 1.00 | 0.00 | H |
| ATOM | 503 | H5'2 | C | A | 16 | -12.231 | -35.421 | 95.674  | 1.00 | 0.00 | H |
| ATOM | 504 | C1'  | G | A | 17 | -11.578 | -31.029 | 87.907  | 1.00 | 0.00 | C |
| ATOM | 505 | N1   | G | A | 17 | -11.466 | -26.358 | 89.956  | 1.00 | 0.00 | N |
| ATOM | 506 | C2   | G | A | 17 | -12.121 | -26.818 | 88.827  | 1.00 | 0.00 | C |
| ATOM | 507 | N2   | G | A | 17 | -12.840 | -25.911 | 88.153  | 1.00 | 0.00 | N |
| ATOM | 508 | N3   | G | A | 17 | -12.064 | -28.079 | 88.404  | 1.00 | 0.00 | N |
| ATOM | 509 | C4   | G | A | 17 | -11.284 | -28.856 | 89.203  | 1.00 | 0.00 | C |
| ATOM | 510 | C5   | G | A | 17 | -10.591 | -28.486 | 90.343  | 1.00 | 0.00 | C |
| ATOM | 511 | C6   | G | A | 17 | -10.654 | -27.148 | 90.795  | 1.00 | 0.00 | C |
| ATOM | 512 | O6   | G | A | 17 | -10.114 | -26.631 | 91.773  | 1.00 | 0.00 | O |

|      |     |      |     |    |         |         |        |      |      |   |
|------|-----|------|-----|----|---------|---------|--------|------|------|---|
| ATOM | 513 | N7   | G A | 17 | -9.908  | -29.584 | 90.871 | 1.00 | 0.00 | N |
| ATOM | 514 | C8   | G A | 17 | -10.205 | -30.562 | 90.055 | 1.00 | 0.00 | C |
| ATOM | 515 | N9   | G A | 17 | -11.037 | -30.198 | 89.016 | 1.00 | 0.00 | N |
| ATOM | 516 | C2'  | G A | 17 | -10.595 | -32.063 | 87.376 | 1.00 | 0.00 | C |
| ATOM | 517 | C3'  | G A | 17 | -11.508 | -33.230 | 87.042 | 1.00 | 0.00 | C |
| ATOM | 518 | O3'  | G A | 17 | -12.054 | -33.038 | 85.738 | 1.00 | 0.00 | O |
| ATOM | 519 | C4'  | G A | 17 | -12.575 | -33.150 | 88.133 | 1.00 | 0.00 | C |
| ATOM | 520 | O4'  | G A | 17 | -12.712 | -31.719 | 88.399 | 1.00 | 0.00 | O |
| ATOM | 521 | C5'  | G A | 17 | -12.260 | -33.856 | 89.431 | 1.00 | 0.00 | C |
| ATOM | 522 | O5'  | G A | 17 | -10.848 | -33.727 | 89.729 | 1.00 | 0.00 | O |
| ATOM | 523 | O1P  | G A | 17 | -9.999  | -36.091 | 89.560 | 1.00 | 0.00 | O |
| ATOM | 524 | O2P  | G A | 17 | -8.833  | -34.443 | 91.049 | 1.00 | 0.00 | O |
| ATOM | 525 | P    | G A | 17 | -10.107 | -34.932 | 90.467 | 1.00 | 0.00 | P |
| ATOM | 526 | H1   | G A | 17 | -11.580 | -25.363 | 90.201 | 1.00 | 0.00 | H |
| ATOM | 527 | H8   | G A | 17 | -9.828  | -31.578 | 90.186 | 1.00 | 0.00 | H |
| ATOM | 528 | H1'  | G A | 17 | -11.910 | -30.362 | 87.112 | 1.00 | 0.00 | H |
| ATOM | 529 | H21  | G A | 17 | -12.882 | -24.937 | 88.487 | 1.00 | 0.00 | H |
| ATOM | 530 | H3'  | G A | 17 | -10.981 | -34.184 | 87.075 | 1.00 | 0.00 | H |
| ATOM | 531 | H22  | G A | 17 | -13.349 | -26.189 | 87.302 | 1.00 | 0.00 | H |
| ATOM | 532 | H4'  | G A | 17 | -13.480 | -33.595 | 87.723 | 1.00 | 0.00 | H |
| ATOM | 533 | H2'1 | G A | 17 | -9.849  | -32.344 | 88.121 | 1.00 | 0.00 | H |
| ATOM | 534 | H2'2 | G A | 17 | -10.059 | -31.710 | 86.494 | 1.00 | 0.00 | H |
| ATOM | 535 | H5'1 | G A | 17 | -12.849 | -33.410 | 90.232 | 1.00 | 0.00 | H |
| ATOM | 536 | H5'2 | G A | 17 | -12.524 | -34.910 | 89.338 | 1.00 | 0.00 | H |
| ATOM | 537 | C1'  | G A | 18 | -11.079 | -27.644 | 84.328 | 1.00 | 0.00 | C |
| ATOM | 538 | N1   | G A | 18 | -9.062  | -24.817 | 88.065 | 1.00 | 0.00 | N |
| ATOM | 539 | C2   | G A | 18 | -9.950  | -24.463 | 87.064 | 1.00 | 0.00 | C |
| ATOM | 540 | N2   | G A | 18 | -10.353 | -23.184 | 87.057 | 1.00 | 0.00 | N |
| ATOM | 541 | N3   | G A | 18 | -10.401 | -25.314 | 86.146 | 1.00 | 0.00 | N |
| ATOM | 542 | C4   | G A | 18 | -9.883  | -26.562 | 86.299 | 1.00 | 0.00 | C |
| ATOM | 543 | C5   | G A | 18 | -8.991  | -27.004 | 87.262 | 1.00 | 0.00 | C |
| ATOM | 544 | C6   | G A | 18 | -8.515  | -26.101 | 88.241 | 1.00 | 0.00 | C |
| ATOM | 545 | O6   | G A | 18 | -7.728  | -26.304 | 89.165 | 1.00 | 0.00 | O |
| ATOM | 546 | N7   | G A | 18 | -8.707  | -28.357 | 87.071 | 1.00 | 0.00 | N |
| ATOM | 547 | C8   | G A | 18 | -9.421  | -28.686 | 86.026 | 1.00 | 0.00 | C |
| ATOM | 548 | N9   | G A | 18 | -10.162 | -27.649 | 85.500 | 1.00 | 0.00 | N |
| ATOM | 549 | C2'  | G A | 18 | -10.600 | -28.507 | 83.170 | 1.00 | 0.00 | C |
| ATOM | 550 | C3'  | G A | 18 | -11.905 | -29.057 | 82.622 | 1.00 | 0.00 | C |
| ATOM | 551 | O3'  | G A | 18 | -12.472 | -28.110 | 81.720 | 1.00 | 0.00 | O |
| ATOM | 552 | C4'  | G A | 18 | -12.754 | -29.237 | 83.879 | 1.00 | 0.00 | C |
| ATOM | 553 | O4'  | G A | 18 | -12.330 | -28.145 | 84.757 | 1.00 | 0.00 | O |
| ATOM | 554 | C5'  | G A | 18 | -12.590 | -30.543 | 84.619 | 1.00 | 0.00 | C |
| ATOM | 555 | O5'  | G A | 18 | -11.206 | -30.970 | 84.560 | 1.00 | 0.00 | O |
| ATOM | 556 | O1P  | G A | 18 | -11.300 | -33.073 | 83.182 | 1.00 | 0.00 | O |
| ATOM | 557 | O2P  | G A | 18 | -9.469  | -32.760 | 84.869 | 1.00 | 0.00 | O |
| ATOM | 558 | P    | G A | 18 | -10.885 | -32.531 | 84.490 | 1.00 | 0.00 | P |
| ATOM | 559 | H1   | G A | 18 | -8.780  | -24.082 | 88.732 | 1.00 | 0.00 | H |
| ATOM | 560 | H8   | G A | 18 | -9.431  | -29.692 | 85.606 | 1.00 | 0.00 | H |
| ATOM | 561 | H1'  | G A | 18 | -11.223 | -26.610 | 84.012 | 1.00 | 0.00 | H |
| ATOM | 562 | H21  | G A | 18 | -10.002 | -22.532 | 87.774 | 1.00 | 0.00 | H |
| ATOM | 563 | H3'  | G A | 18 | -11.763 | -30.008 | 82.105 | 1.00 | 0.00 | H |
| ATOM | 564 | H22  | G A | 18 | -11.010 | -22.858 | 86.337 | 1.00 | 0.00 | H |
| ATOM | 565 | H4'  | G A | 18 | -13.796 | -29.156 | 83.572 | 1.00 | 0.00 | H |
| ATOM | 566 | H2'1 | G A | 18 | -9.937  | -29.307 | 83.498 | 1.00 | 0.00 | H |

|      |     |      |       |    |         |         |        |      |      |   |
|------|-----|------|-------|----|---------|---------|--------|------|------|---|
| ATOM | 567 | H2'2 | G A   | 18 | -10.065 | -27.927 | 82.416 | 1.00 | 0.00 | H |
| ATOM | 568 | H5'1 | G A   | 18 | -12.891 | -30.407 | 85.657 | 1.00 | 0.00 | H |
| ATOM | 569 | H5'2 | G A   | 18 | -13.227 | -31.297 | 84.158 | 1.00 | 0.00 | H |
| ATOM | 570 | C1'  | T A   | 19 | -9.754  | -23.228 | 82.526 | 1.00 | 0.00 | C |
| ATOM | 571 | N1   | T A   | 19 | -8.784  | -24.033 | 83.314 | 1.00 | 0.00 | N |
| ATOM | 572 | C2   | T A   | 19 | -8.149  | -23.406 | 84.365 | 1.00 | 0.00 | C |
| ATOM | 573 | O2   | T A   | 19 | -8.355  | -22.240 | 84.659 | 1.00 | 0.00 | O |
| ATOM | 574 | N3   | T A   | 19 | -7.256  | -24.192 | 85.070 | 1.00 | 0.00 | N |
| ATOM | 575 | C4   | T A   | 19 | -6.949  | -25.512 | 84.820 | 1.00 | 0.00 | C |
| ATOM | 576 | O4   | T A   | 19 | -6.128  | -26.115 | 85.521 | 1.00 | 0.00 | O |
| ATOM | 577 | C5   | T A   | 19 | -7.662  | -26.084 | 83.702 | 1.00 | 0.00 | C |
| ATOM | 578 | C6   | T A   | 19 | -8.541  | -25.347 | 82.993 | 1.00 | 0.00 | C |
| ATOM | 579 | C7   | T A   | 19 | -7.362  | -27.520 | 83.396 | 1.00 | 0.00 | C |
| ATOM | 580 | C2'  | T A   | 19 | -9.729  | -23.524 | 81.032 | 1.00 | 0.00 | C |
| ATOM | 581 | C3'  | T A   | 19 | -11.195 | -23.377 | 80.654 | 1.00 | 0.00 | C |
| ATOM | 582 | O3'  | T A   | 19 | -11.480 | -22.002 | 80.409 | 1.00 | 0.00 | O |
| ATOM | 583 | C4'  | T A   | 19 | -11.917 | -23.905 | 81.892 | 1.00 | 0.00 | C |
| ATOM | 584 | O4'  | T A   | 19 | -11.052 | -23.523 | 83.006 | 1.00 | 0.00 | O |
| ATOM | 585 | C5'  | T A   | 19 | -12.151 | -25.396 | 81.950 | 1.00 | 0.00 | C |
| ATOM | 586 | O5'  | T A   | 19 | -11.019 | -26.092 | 81.370 | 1.00 | 0.00 | O |
| ATOM | 587 | O1P  | T A   | 19 | -11.989 | -27.169 | 79.312 | 1.00 | 0.00 | O |
| ATOM | 588 | O2P  | T A   | 19 | -10.003 | -28.197 | 80.449 | 1.00 | 0.00 | O |
| ATOM | 589 | P    | T A   | 19 | -11.277 | -27.449 | 80.575 | 1.00 | 0.00 | P |
| ATOM | 590 | H3   | T A   | 19 | -6.773  | -23.746 | 85.863 | 1.00 | 0.00 | H |
| ATOM | 591 | H6   | T A   | 19 | -9.067  | -25.801 | 82.152 | 1.00 | 0.00 | H |
| ATOM | 592 | H1'  | T A   | 19 | -9.557  | -22.173 | 82.718 | 1.00 | 0.00 | H |
| ATOM | 593 | H3'  | T A   | 19 | -11.448 | -23.962 | 79.771 | 1.00 | 0.00 | H |
| ATOM | 594 | H4'  | T A   | 19 | -12.893 | -23.415 | 81.922 | 1.00 | 0.00 | H |
| ATOM | 595 | H71  | T A   | 19 | -6.874  | -27.591 | 82.423 | 1.00 | 0.00 | H |
| ATOM | 596 | H72  | T A   | 19 | -6.700  | -27.925 | 84.162 | 1.00 | 0.00 | H |
| ATOM | 597 | H73  | T A   | 19 | -8.290  | -28.093 | 83.377 | 1.00 | 0.00 | H |
| ATOM | 598 | H2'1 | T A   | 19 | -9.363  | -24.526 | 80.817 | 1.00 | 0.00 | H |
| ATOM | 599 | H2'2 | T A   | 19 | -9.105  | -22.820 | 80.481 | 1.00 | 0.00 | H |
| ATOM | 600 | H5'1 | T A   | 19 | -12.277 | -25.699 | 82.988 | 1.00 | 0.00 | H |
| ATOM | 601 | H5'2 | T A   | 19 | -13.056 | -25.639 | 81.393 | 1.00 | 0.00 | H |
| ATOM | 602 | C01  | LNK A | 20 | -10.952 | -19.917 | 77.370 | 0.00 | 0.00 | C |
| ATOM | 603 | O1   | LNK A | 20 | -10.831 | -21.149 | 78.087 | 1.00 | 0.00 | O |
| ATOM | 604 | S    | LNK A | 20 | -9.872  | -18.361 | 73.869 | 0.00 | 0.00 | S |
| ATOM | 605 | C02  | LNK A | 20 | -10.265 | -20.055 | 75.998 | 0.00 | 0.00 | C |
| ATOM | 606 | C03  | LNK A | 20 | -9.583  | -18.723 | 75.629 | 0.00 | 0.00 | C |
| ATOM | 607 | O1P  | LNK A | 20 | -8.978  | -21.971 | 79.579 | 1.00 | 0.00 | O |
| ATOM | 608 | O2P  | LNK A | 20 | -10.018 | -19.722 | 79.988 | 1.00 | 0.00 | O |
| ATOM | 609 | P    | LNK A | 20 | -10.190 | -21.129 | 79.546 | 1.00 | 0.00 | P |
| ATOM | 610 | H01  | LNK A | 20 | -10.475 | -19.118 | 77.937 | 0.00 | 0.00 | H |
| ATOM | 611 | H02  | LNK A | 20 | -12.006 | -19.681 | 77.226 | 0.00 | 0.00 | H |
| ATOM | 612 | H03  | LNK A | 20 | -8.511  | -18.800 | 75.813 | 0.00 | 0.00 | H |
| ATOM | 613 | H04  | LNK A | 20 | -11.009 | -20.304 | 75.242 | 0.00 | 0.00 | H |
| ATOM | 614 | H05  | LNK A | 20 | -9.516  | -20.845 | 76.044 | 0.00 | 0.00 | H |
| ATOM | 615 | H06  | LNK A | 20 | -9.999  | -17.921 | 76.238 | 0.00 | 0.00 | H |
| ATOM | 616 | AU   | LNK A | 20 | -9.489  | -17.825 | 73.679 |      |      |   |
| TER  |     |      |       |    |         |         |        |      |      |   |
| ATOM | 618 | C1'  | A B   | 2  | -3.797  | -20.133 | 91.118 | 1.00 | 0.00 | C |
| ATOM | 619 | N1   | A B   | 2  | -5.855  | -22.931 | 87.340 | 1.00 | 0.00 | N |
| ATOM | 620 | C2   | A B   | 2  | -6.034  | -21.672 | 87.724 | 1.00 | 0.00 | C |

|      |     |      |     |   |        |         |        |      |      |   |
|------|-----|------|-----|---|--------|---------|--------|------|------|---|
| ATOM | 621 | N3   | A B | 2 | -5.466 | -21.008 | 88.709 | 1.00 | 0.00 | N |
| ATOM | 622 | C4   | A B | 2 | -4.602 | -21.803 | 89.368 | 1.00 | 0.00 | C |
| ATOM | 623 | C5   | A B | 2 | -4.307 | -23.111 | 89.103 | 1.00 | 0.00 | C |
| ATOM | 624 | C6   | A B | 2 | -4.987 | -23.700 | 88.015 | 1.00 | 0.00 | C |
| ATOM | 625 | N6   | A B | 2 | -4.799 | -24.975 | 87.636 | 1.00 | 0.00 | N |
| ATOM | 626 | N7   | A B | 2 | -3.368 | -23.602 | 89.993 | 1.00 | 0.00 | N |
| ATOM | 627 | C8   | A B | 2 | -3.120 | -22.591 | 90.772 | 1.00 | 0.00 | C |
| ATOM | 628 | N9   | A B | 2 | -3.830 | -21.464 | 90.451 | 1.00 | 0.00 | N |
| ATOM | 629 | C2'  | A B | 2 | -3.656 | -20.209 | 92.633 | 1.00 | 0.00 | C |
| ATOM | 630 | C3'  | A B | 2 | -2.787 | -18.999 | 92.932 | 1.00 | 0.00 | C |
| ATOM | 631 | O3'  | A B | 2 | -3.615 | -17.842 | 93.035 | 1.00 | 0.00 | O |
| ATOM | 632 | C4'  | A B | 2 | -1.859 | -18.939 | 91.720 | 1.00 | 0.00 | C |
| ATOM | 633 | O4'  | A B | 2 | -2.682 | -19.426 | 90.611 | 1.00 | 0.00 | O |
| ATOM | 634 | C5'  | A B | 2 | -0.603 | -19.774 | 91.794 | 1.00 | 0.00 | C |
| ATOM | 635 | O5'  | A B | 2 | -0.882 | -21.019 | 92.484 | 1.00 | 0.00 | O |
| ATOM | 636 | H2   | A B | 2 | -6.754 | -21.103 | 87.138 | 1.00 | 0.00 | H |
| ATOM | 637 | H8   | A B | 2 | -2.414 | -22.637 | 91.602 | 1.00 | 0.00 | H |
| ATOM | 638 | H1'  | A B | 2 | -4.698 | -19.588 | 90.836 | 1.00 | 0.00 | H |
| ATOM | 639 | H3'  | A B | 2 | -2.221 | -19.119 | 93.855 | 1.00 | 0.00 | H |
| ATOM | 640 | H4'  | A B | 2 | -1.560 | -17.898 | 91.602 | 1.00 | 0.00 | H |
| ATOM | 641 | H61  | A B | 2 | -5.318 | -25.355 | 86.834 | 1.00 | 0.00 | H |
| ATOM | 642 | H62  | A B | 2 | -4.134 | -25.572 | 88.151 | 1.00 | 0.00 | H |
| ATOM | 643 | H2'1 | A B | 2 | -3.176 | -21.132 | 92.958 | 1.00 | 0.00 | H |
| ATOM | 644 | H2'2 | A B | 2 | -4.619 | -20.142 | 93.142 | 1.00 | 0.00 | H |
| ATOM | 645 | H5'1 | A B | 2 | -0.253 | -19.984 | 90.783 | 1.00 | 0.00 | H |
| ATOM | 646 | H5'2 | A B | 2 | 0.164  | -19.218 | 92.332 | 1.00 | 0.00 | H |
| ATOM | 647 | C1'  | C B | 3 | -8.679 | -19.278 | 90.815 | 1.00 | 0.00 | C |
| ATOM | 648 | N1   | C B | 3 | -8.160 | -20.670 | 90.906 | 1.00 | 0.00 | N |
| ATOM | 649 | C2   | C B | 3 | -8.605 | -21.594 | 89.962 | 1.00 | 0.00 | C |
| ATOM | 650 | O2   | C B | 3 | -9.405 | -21.223 | 89.093 | 1.00 | 0.00 | O |
| ATOM | 651 | N3   | C B | 3 | -8.145 | -22.867 | 90.027 | 1.00 | 0.00 | N |
| ATOM | 652 | C4   | C B | 3 | -7.280 | -23.239 | 90.980 | 1.00 | 0.00 | C |
| ATOM | 653 | N4   | C B | 3 | -6.860 | -24.497 | 90.994 | 1.00 | 0.00 | N |
| ATOM | 654 | C5   | C B | 3 | -6.809 | -22.312 | 91.967 | 1.00 | 0.00 | C |
| ATOM | 655 | C6   | C B | 3 | -7.282 | -21.032 | 91.879 | 1.00 | 0.00 | C |
| ATOM | 656 | C2'  | C B | 3 | -8.942 | -18.631 | 92.168 | 1.00 | 0.00 | C |
| ATOM | 657 | C3'  | C B | 3 | -8.554 | -17.184 | 91.909 | 1.00 | 0.00 | C |
| ATOM | 658 | O3'  | C B | 3 | -9.663 | -16.498 | 91.331 | 1.00 | 0.00 | O |
| ATOM | 659 | C4'  | C B | 3 | -7.385 | -17.314 | 90.936 | 1.00 | 0.00 | C |
| ATOM | 660 | O4'  | C B | 3 | -7.707 | -18.501 | 90.141 | 1.00 | 0.00 | O |
| ATOM | 661 | C5'  | C B | 3 | -6.018 | -17.500 | 91.550 | 1.00 | 0.00 | C |
| ATOM | 662 | O5'  | C B | 3 | -6.122 | -18.326 | 92.738 | 1.00 | 0.00 | O |
| ATOM | 663 | O1P  | C B | 3 | -5.490 | -16.753 | 94.598 | 1.00 | 0.00 | O |
| ATOM | 664 | O2P  | C B | 3 | -5.111 | -19.220 | 94.857 | 1.00 | 0.00 | O |
| ATOM | 665 | P    | C B | 3 | -5.141 | -18.038 | 93.960 | 1.00 | 0.00 | P |
| ATOM | 666 | H5   | C B | 3 | -6.111 | -22.612 | 92.749 | 1.00 | 0.00 | H |
| ATOM | 667 | H6   | C B | 3 | -6.947 | -20.290 | 92.603 | 1.00 | 0.00 | H |
| ATOM | 668 | H1'  | C B | 3 | -9.582 | -19.289 | 90.204 | 1.00 | 0.00 | H |
| ATOM | 669 | H3'  | C B | 3 | -8.251 | -16.673 | 92.823 | 1.00 | 0.00 | H |
| ATOM | 670 | H4'  | C B | 3 | -7.361 | -16.398 | 90.344 | 1.00 | 0.00 | H |
| ATOM | 671 | H41  | C B | 3 | -6.192 | -24.809 | 91.714 | 1.00 | 0.00 | H |
| ATOM | 672 | H42  | C B | 3 | -7.202 | -25.163 | 90.285 | 1.00 | 0.00 | H |
| ATOM | 673 | H2'1 | C B | 3 | -8.336 | -19.068 | 92.961 | 1.00 | 0.00 | H |
| ATOM | 674 | H2'2 | C B | 3 | -9.987 | -18.714 | 92.470 | 1.00 | 0.00 | H |

|      |     |      |     |   |         |         |        |      |      |   |
|------|-----|------|-----|---|---------|---------|--------|------|------|---|
| ATOM | 675 | H5'1 | C B | 3 | -5.361  | -17.981 | 90.824 | 1.00 | 0.00 | H |
| ATOM | 676 | H5'2 | C B | 3 | -5.608  | -16.527 | 91.814 | 1.00 | 0.00 | H |
| ATOM | 677 | C1'  | C B | 4 | -13.346 | -20.462 | 89.655 | 1.00 | 0.00 | C |
| ATOM | 678 | N1   | C B | 4 | -12.510 | -21.386 | 90.469 | 1.00 | 0.00 | N |
| ATOM | 679 | C2   | C B | 4 | -12.420 | -22.715 | 90.062 | 1.00 | 0.00 | C |
| ATOM | 680 | O2   | C B | 4 | -13.033 | -23.072 | 89.047 | 1.00 | 0.00 | O |
| ATOM | 681 | N3   | C B | 4 | -11.665 | -23.574 | 90.789 | 1.00 | 0.00 | N |
| ATOM | 682 | C4   | C B | 4 | -11.012 | -23.159 | 91.884 | 1.00 | 0.00 | C |
| ATOM | 683 | N4   | C B | 4 | -10.284 | -24.039 | 92.556 | 1.00 | 0.00 | N |
| ATOM | 684 | C5   | C B | 4 | -11.090 | -21.798 | 92.330 | 1.00 | 0.00 | C |
| ATOM | 685 | C6   | C B | 4 | -11.853 | -20.950 | 91.577 | 1.00 | 0.00 | C |
| ATOM | 686 | C2'  | C B | 4 | -14.121 | -19.447 | 90.482 | 1.00 | 0.00 | C |
| ATOM | 687 | C3'  | C B | 4 | -14.090 | -18.218 | 89.587 | 1.00 | 0.00 | C |
| ATOM | 688 | O3'  | C B | 4 | -15.151 | -18.302 | 88.638 | 1.00 | 0.00 | O |
| ATOM | 689 | C4'  | C B | 4 | -12.716 | -18.314 | 88.926 | 1.00 | 0.00 | C |
| ATOM | 690 | O4'  | C B | 4 | -12.481 | -19.752 | 88.788 | 1.00 | 0.00 | O |
| ATOM | 691 | C5'  | C B | 4 | -11.560 | -17.707 | 89.687 | 1.00 | 0.00 | C |
| ATOM | 692 | O5'  | C B | 4 | -11.744 | -17.921 | 91.110 | 1.00 | 0.00 | O |
| ATOM | 693 | O1P  | C B | 4 | -12.077 | -15.595 | 92.010 | 1.00 | 0.00 | O |
| ATOM | 694 | O2P  | C B | 4 | -11.120 | -17.386 | 93.484 | 1.00 | 0.00 | O |
| ATOM | 695 | P    | C B | 4 | -11.236 | -16.803 | 92.125 | 1.00 | 0.00 | P |
| ATOM | 696 | H5   | C B | 4 | -10.567 | -21.458 | 93.223 | 1.00 | 0.00 | H |
| ATOM | 697 | H6   | C B | 4 | -11.937 | -19.905 | 91.873 | 1.00 | 0.00 | H |
| ATOM | 698 | H1'  | C B | 4 | -14.018 | -21.062 | 89.041 | 1.00 | 0.00 | H |
| ATOM | 699 | H3'  | C B | 4 | -14.188 | -17.294 | 90.157 | 1.00 | 0.00 | H |
| ATOM | 700 | H4'  | C B | 4 | -12.788 | -17.801 | 87.967 | 1.00 | 0.00 | H |
| ATOM | 701 | H41  | C B | 4 | -9.770  | -23.746 | 93.400 | 1.00 | 0.00 | H |
| ATOM | 702 | H42  | C B | 4 | -10.232 | -25.018 | 92.235 | 1.00 | 0.00 | H |
| ATOM | 703 | H2'1 | C B | 4 | -13.649 | -19.248 | 91.444 | 1.00 | 0.00 | H |
| ATOM | 704 | H2'2 | C B | 4 | -15.144 | -19.768 | 90.679 | 1.00 | 0.00 | H |
| ATOM | 705 | H5'1 | C B | 4 | -10.632 | -18.174 | 89.361 | 1.00 | 0.00 | H |
| ATOM | 706 | H5'2 | C B | 4 | -11.518 | -16.639 | 89.478 | 1.00 | 0.00 | H |
| ATOM | 707 | C1'  | G B | 5 | -17.035 | -23.643 | 88.764 | 1.00 | 0.00 | C |
| ATOM | 708 | N1   | G B | 5 | -14.284 | -26.777 | 91.703 | 1.00 | 0.00 | N |
| ATOM | 709 | C2   | G B | 5 | -14.957 | -27.031 | 90.520 | 1.00 | 0.00 | C |
| ATOM | 710 | N2   | G B | 5 | -14.891 | -28.286 | 90.061 | 1.00 | 0.00 | N |
| ATOM | 711 | N3   | G B | 5 | -15.642 | -26.105 | 89.850 | 1.00 | 0.00 | N |
| ATOM | 712 | C4   | G B | 5 | -15.608 | -24.892 | 90.463 | 1.00 | 0.00 | C |
| ATOM | 713 | C5   | G B | 5 | -14.969 | -24.550 | 91.643 | 1.00 | 0.00 | C |
| ATOM | 714 | C6   | G B | 5 | -14.239 | -25.530 | 92.352 | 1.00 | 0.00 | C |
| ATOM | 715 | O6   | G B | 5 | -13.612 | -25.419 | 93.405 | 1.00 | 0.00 | O |
| ATOM | 716 | N7   | G B | 5 | -15.181 | -23.199 | 91.931 | 1.00 | 0.00 | N |
| ATOM | 717 | C8   | G B | 5 | -15.923 | -22.776 | 90.940 | 1.00 | 0.00 | C |
| ATOM | 718 | N9   | G B | 5 | -16.225 | -23.749 | 90.008 | 1.00 | 0.00 | N |
| ATOM | 719 | C2'  | G B | 5 | -18.247 | -22.731 | 88.897 | 1.00 | 0.00 | C |
| ATOM | 720 | C3'  | G B | 5 | -18.317 | -22.093 | 87.519 | 1.00 | 0.00 | C |
| ATOM | 721 | O3'  | G B | 5 | -19.027 | -22.958 | 86.637 | 1.00 | 0.00 | O |
| ATOM | 722 | C4'  | G B | 5 | -16.845 | -21.954 | 87.134 | 1.00 | 0.00 | C |
| ATOM | 723 | O4'  | G B | 5 | -16.202 | -23.115 | 87.750 | 1.00 | 0.00 | O |
| ATOM | 724 | C5'  | G B | 5 | -16.142 | -20.704 | 87.604 | 1.00 | 0.00 | C |
| ATOM | 725 | O5'  | G B | 5 | -16.627 | -20.334 | 88.919 | 1.00 | 0.00 | O |
| ATOM | 726 | O1P  | G B | 5 | -17.804 | -18.147 | 88.513 | 1.00 | 0.00 | O |
| ATOM | 727 | O2P  | G B | 5 | -16.819 | -18.642 | 90.766 | 1.00 | 0.00 | O |
| ATOM | 728 | P    | G B | 5 | -16.728 | -18.787 | 89.293 | 1.00 | 0.00 | P |

|      |     |      |     |   |         |         |        |      |      |   |
|------|-----|------|-----|---|---------|---------|--------|------|------|---|
| ATOM | 729 | H1   | G B | 5 | -13.779 | -27.563 | 92.140 | 1.00 | 0.00 | H |
| ATOM | 730 | H8   | G B | 5 | -16.272 | -21.747 | 90.856 | 1.00 | 0.00 | H |
| ATOM | 731 | H1'  | G B | 5 | -17.333 | -24.646 | 88.464 | 1.00 | 0.00 | H |
| ATOM | 732 | H21  | G B | 5 | -14.356 | -28.996 | 90.582 | 1.00 | 0.00 | H |
| ATOM | 733 | H3'  | G B | 5 | -18.809 | -21.119 | 87.544 | 1.00 | 0.00 | H |
| ATOM | 734 | H22  | G B | 5 | -15.373 | -28.542 | 89.187 | 1.00 | 0.00 | H |
| ATOM | 735 | H4'  | G B | 5 | -16.801 | -21.972 | 86.045 | 1.00 | 0.00 | H |
| ATOM | 736 | H2'1 | G B | 5 | -18.117 | -21.980 | 89.676 | 1.00 | 0.00 | H |
| ATOM | 737 | H2'2 | G B | 5 | -19.158 | -23.284 | 89.124 | 1.00 | 0.00 | H |
| ATOM | 738 | H5'1 | G B | 5 | -15.069 | -20.892 | 87.646 | 1.00 | 0.00 | H |
| ATOM | 739 | H5'2 | G B | 5 | -16.337 | -19.896 | 86.899 | 1.00 | 0.00 | H |
| ATOM | 740 | C1'  | T B | 6 | -19.361 | -27.993 | 89.163 | 1.00 | 0.00 | C |
| ATOM | 741 | N1   | T B | 6 | -18.897 | -27.279 | 90.382 | 1.00 | 0.00 | N |
| ATOM | 742 | C2   | T B | 6 | -18.138 | -27.998 | 91.283 | 1.00 | 0.00 | C |
| ATOM | 743 | O2   | T B | 6 | -17.846 | -29.169 | 91.114 | 1.00 | 0.00 | O |
| ATOM | 744 | N3   | T B | 6 | -17.726 | -27.294 | 92.400 | 1.00 | 0.00 | N |
| ATOM | 745 | C4   | T B | 6 | -18.002 | -25.974 | 92.688 | 1.00 | 0.00 | C |
| ATOM | 746 | O4   | T B | 6 | -17.580 | -25.452 | 93.726 | 1.00 | 0.00 | O |
| ATOM | 747 | C5   | T B | 6 | -18.800 | -25.307 | 91.688 | 1.00 | 0.00 | C |
| ATOM | 748 | C6   | T B | 6 | -19.218 | -25.960 | 90.586 | 1.00 | 0.00 | C |
| ATOM | 749 | C7   | T B | 6 | -19.122 | -23.866 | 91.959 | 1.00 | 0.00 | C |
| ATOM | 750 | C2'  | T B | 6 | -20.768 | -27.605 | 88.723 | 1.00 | 0.00 | C |
| ATOM | 751 | C3'  | T B | 6 | -20.653 | -27.668 | 87.208 | 1.00 | 0.00 | C |
| ATOM | 752 | O3'  | T B | 6 | -20.858 | -29.012 | 86.777 | 1.00 | 0.00 | O |
| ATOM | 753 | C4'  | T B | 6 | -19.226 | -27.189 | 86.954 | 1.00 | 0.00 | C |
| ATOM | 754 | O4'  | T B | 6 | -18.472 | -27.675 | 88.110 | 1.00 | 0.00 | O |
| ATOM | 755 | C5'  | T B | 6 | -19.027 | -25.695 | 86.841 | 1.00 | 0.00 | C |
| ATOM | 756 | O5'  | T B | 6 | -19.912 | -25.013 | 87.767 | 1.00 | 0.00 | O |
| ATOM | 757 | O1P  | T B | 6 | -21.491 | -23.770 | 86.251 | 1.00 | 0.00 | O |
| ATOM | 758 | O2P  | T B | 6 | -21.014 | -22.898 | 88.555 | 1.00 | 0.00 | O |
| ATOM | 759 | P    | T B | 6 | -20.517 | -23.598 | 87.347 | 1.00 | 0.00 | P |
| ATOM | 760 | H3   | T B | 6 | -17.155 | -27.808 | 93.087 | 1.00 | 0.00 | H |
| ATOM | 761 | H6   | T B | 6 | -19.819 | -25.433 | 89.845 | 1.00 | 0.00 | H |
| ATOM | 762 | H1'  | T B | 6 | -19.293 | -29.065 | 89.347 | 1.00 | 0.00 | H |
| ATOM | 763 | H3'  | T B | 6 | -21.379 | -27.018 | 86.718 | 1.00 | 0.00 | H |
| ATOM | 764 | H4'  | T B | 6 | -18.903 | -27.639 | 86.015 | 1.00 | 0.00 | H |
| ATOM | 765 | H71  | T B | 6 | -20.196 | -23.756 | 92.110 | 1.00 | 0.00 | H |
| ATOM | 766 | H72  | T B | 6 | -18.593 | -23.538 | 92.855 | 1.00 | 0.00 | H |
| ATOM | 767 | H73  | T B | 6 | -18.810 | -23.257 | 91.110 | 1.00 | 0.00 | H |
| ATOM | 768 | H2'1 | T B | 6 | -21.045 | -26.608 | 89.059 | 1.00 | 0.00 | H |
| ATOM | 769 | H2'2 | T B | 6 | -21.523 | -28.299 | 89.092 | 1.00 | 0.00 | H |
| ATOM | 770 | H5'1 | T B | 6 | -17.991 | -25.453 | 87.076 | 1.00 | 0.00 | H |
| ATOM | 771 | H5'2 | T B | 6 | -19.248 | -25.381 | 85.822 | 1.00 | 0.00 | H |
| ATOM | 772 | C1'  | C B | 7 | -20.408 | -32.276 | 91.449 | 1.00 | 0.00 | C |
| ATOM | 773 | N1   | C B | 7 | -20.504 | -30.983 | 92.184 | 1.00 | 0.00 | N |
| ATOM | 774 | C2   | C B | 7 | -19.848 | -30.877 | 93.408 | 1.00 | 0.00 | C |
| ATOM | 775 | O2   | C B | 7 | -19.215 | -31.854 | 93.833 | 1.00 | 0.00 | O |
| ATOM | 776 | N3   | C B | 7 | -19.924 | -29.710 | 94.092 | 1.00 | 0.00 | N |
| ATOM | 777 | C4   | C B | 7 | -20.618 | -28.672 | 93.608 | 1.00 | 0.00 | C |
| ATOM | 778 | N4   | C B | 7 | -20.656 | -27.554 | 94.316 | 1.00 | 0.00 | N |
| ATOM | 779 | C5   | C B | 7 | -21.307 | -28.753 | 92.353 | 1.00 | 0.00 | C |
| ATOM | 780 | C6   | C B | 7 | -21.213 | -29.938 | 91.678 | 1.00 | 0.00 | C |
| ATOM | 781 | C2'  | C B | 7 | -21.692 | -32.675 | 90.739 | 1.00 | 0.00 | C |
| ATOM | 782 | C3'  | C B | 7 | -21.162 | -33.343 | 89.479 | 1.00 | 0.00 | C |

|      |     |      |     |   |         |         |         |      |      |   |
|------|-----|------|-----|---|---------|---------|---------|------|------|---|
| ATOM | 783 | O3'  | C B | 7 | -20.860 | -34.707 | 89.765  | 1.00 | 0.00 | O |
| ATOM | 784 | C4'  | C B | 7 | -19.911 | -32.528 | 89.163  | 1.00 | 0.00 | C |
| ATOM | 785 | O4'  | C B | 7 | -19.392 | -32.140 | 90.474  | 1.00 | 0.00 | O |
| ATOM | 786 | C5'  | C B | 7 | -20.114 | -31.279 | 88.334  | 1.00 | 0.00 | C |
| ATOM | 787 | O5'  | C B | 7 | -21.369 | -30.651 | 88.698  | 1.00 | 0.00 | O |
| ATOM | 788 | O1P  | C B | 7 | -22.763 | -30.883 | 86.617  | 1.00 | 0.00 | O |
| ATOM | 789 | O2P  | C B | 7 | -23.186 | -28.988 | 88.204  | 1.00 | 0.00 | O |
| ATOM | 790 | P    | C B | 7 | -22.207 | -29.901 | 87.567  | 1.00 | 0.00 | P |
| ATOM | 791 | H5   | C B | 7 | -21.878 | -27.913 | 91.958  | 1.00 | 0.00 | H |
| ATOM | 792 | H6   | C B | 7 | -21.713 | -30.045 | 90.716  | 1.00 | 0.00 | H |
| ATOM | 793 | H1'  | C B | 7 | -20.094 | -33.045 | 92.155  | 1.00 | 0.00 | H |
| ATOM | 794 | H3'  | C B | 7 | -21.881 | -33.298 | 88.659  | 1.00 | 0.00 | H |
| ATOM | 795 | H4'  | C B | 7 | -19.236 | -33.184 | 88.613  | 1.00 | 0.00 | H |
| ATOM | 796 | H41  | C B | 7 | -21.179 | -26.739 | 93.964  | 1.00 | 0.00 | H |
| ATOM | 797 | H42  | C B | 7 | -20.161 | -27.498 | 95.219  | 1.00 | 0.00 | H |
| ATOM | 798 | H2'1 | C B | 7 | -22.318 | -31.816 | 90.499  | 1.00 | 0.00 | H |
| ATOM | 799 | H2'2 | C B | 7 | -22.296 | -33.364 | 91.330  | 1.00 | 0.00 | H |
| ATOM | 800 | H5'1 | C B | 7 | -19.289 | -30.591 | 88.517  | 1.00 | 0.00 | H |
| ATOM | 801 | H5'2 | C B | 7 | -20.131 | -31.549 | 87.280  | 1.00 | 0.00 | H |
| ATOM | 802 | C1'  | C B | 8 | -20.817 | -35.228 | 95.405  | 1.00 | 0.00 | C |
| ATOM | 803 | N1   | C B | 8 | -21.452 | -33.883 | 95.396  | 1.00 | 0.00 | N |
| ATOM | 804 | C2   | C B | 8 | -21.196 | -33.032 | 96.470  | 1.00 | 0.00 | C |
| ATOM | 805 | O2   | C B | 8 | -20.455 | -33.427 | 97.380  | 1.00 | 0.00 | O |
| ATOM | 806 | N3   | C B | 8 | -21.765 | -31.802 | 96.481  | 1.00 | 0.00 | N |
| ATOM | 807 | C4   | C B | 8 | -22.563 | -31.404 | 95.481  | 1.00 | 0.00 | C |
| ATOM | 808 | N4   | C B | 8 | -23.089 | -30.189 | 95.542  | 1.00 | 0.00 | N |
| ATOM | 809 | C5   | C B | 8 | -22.849 | -32.258 | 94.365  | 1.00 | 0.00 | C |
| ATOM | 810 | C6   | C B | 8 | -22.260 | -33.492 | 94.373  | 1.00 | 0.00 | C |
| ATOM | 811 | C2'  | C B | 8 | -21.710 | -36.333 | 94.856  | 1.00 | 0.00 | C |
| ATOM | 812 | C3'  | C B | 8 | -20.707 | -37.230 | 94.148  | 1.00 | 0.00 | C |
| ATOM | 813 | O3'  | C B | 8 | -20.129 | -38.124 | 95.095  | 1.00 | 0.00 | O |
| ATOM | 814 | C4'  | C B | 8 | -19.688 | -36.233 | 93.600  | 1.00 | 0.00 | C |
| ATOM | 815 | O4'  | C B | 8 | -19.658 | -35.161 | 94.596  | 1.00 | 0.00 | O |
| ATOM | 816 | C5'  | C B | 8 | -19.999 | -35.628 | 92.251  | 1.00 | 0.00 | C |
| ATOM | 817 | O5'  | C B | 8 | -21.428 | -35.409 | 92.129  | 1.00 | 0.00 | O |
| ATOM | 818 | O1P  | C B | 8 | -22.107 | -37.001 | 90.301  | 1.00 | 0.00 | O |
| ATOM | 819 | O2P  | C B | 8 | -23.433 | -34.909 | 90.702  | 1.00 | 0.00 | O |
| ATOM | 820 | P    | C B | 8 | -22.110 | -35.579 | 90.700  | 1.00 | 0.00 | P |
| ATOM | 821 | H5   | C B | 8 | -23.503 | -31.941 | 93.554  | 1.00 | 0.00 | H |
| ATOM | 822 | H6   | C B | 8 | -22.442 | -34.174 | 93.543  | 1.00 | 0.00 | H |
| ATOM | 823 | H1'  | C B | 8 | -20.502 | -35.450 | 96.425  | 1.00 | 0.00 | H |
| ATOM | 824 | H3'  | C B | 8 | -21.169 | -37.803 | 93.344  | 1.00 | 0.00 | H |
| ATOM | 825 | H4'  | C B | 8 | -18.740 | -36.764 | 93.513  | 1.00 | 0.00 | H |
| ATOM | 826 | H41  | C B | 8 | -23.704 | -29.856 | 94.784  | 1.00 | 0.00 | H |
| ATOM | 827 | H42  | C B | 8 | -22.884 | -29.577 | 96.345  | 1.00 | 0.00 | H |
| ATOM | 828 | H2'1 | C B | 8 | -22.460 | -35.953 | 94.164  | 1.00 | 0.00 | H |
| ATOM | 829 | H2'2 | C B | 8 | -22.235 | -36.870 | 95.647  | 1.00 | 0.00 | H |
| ATOM | 830 | H5'1 | C B | 8 | -19.472 | -34.679 | 92.153  | 1.00 | 0.00 | H |
| ATOM | 831 | H5'2 | C B | 8 | -19.663 | -36.307 | 91.469  | 1.00 | 0.00 | H |
| ATOM | 832 | C1'  | T B | 9 | -21.421 | -36.154 | 100.228 | 1.00 | 0.00 | C |
| ATOM | 833 | N1   | T B | 9 | -22.372 | -35.261 | 99.514  | 1.00 | 0.00 | N |
| ATOM | 834 | C2   | T B | 9 | -22.622 | -34.027 | 100.076 | 1.00 | 0.00 | C |
| ATOM | 835 | O2   | T B | 9 | -22.102 | -33.658 | 101.114 | 1.00 | 0.00 | O |
| ATOM | 836 | N3   | T B | 9 | -23.510 | -33.229 | 99.379  | 1.00 | 0.00 | N |



|      |     |      |     |    |         |         |         |      |      |   |
|------|-----|------|-----|----|---------|---------|---------|------|------|---|
| ATOM | 837 | C4   | T B | 9  | -24.154 | -33.551 | 98.203  | 1.00 | 0.00 | C |
| ATOM | 838 | O4   | T B | 9  | -24.935 | -32.753 | 97.670  | 1.00 | 0.00 | O |
| ATOM | 839 | C5   | T B | 9  | -23.830 | -34.862 | 97.691  | 1.00 | 0.00 | C |
| ATOM | 840 | C6   | T B | 9  | -22.967 | -35.665 | 98.344  | 1.00 | 0.00 | C |
| ATOM | 841 | C7   | T B | 9  | -24.506 | -35.252 | 96.411  | 1.00 | 0.00 | C |
| ATOM | 842 | C2'  | T B | 9  | -21.813 | -37.628 | 100.189 | 1.00 | 0.00 | C |
| ATOM | 843 | C3'  | T B | 9  | -20.458 | -38.312 | 100.102 | 1.00 | 0.00 | C |
| ATOM | 844 | O3'  | T B | 9  | -19.923 | -38.460 | 101.416 | 1.00 | 0.00 | O |
| ATOM | 845 | C4'  | T B | 9  | -19.641 | -37.345 | 99.249  | 1.00 | 0.00 | C |
| ATOM | 846 | O4'  | T B | 9  | -20.157 | -36.024 | 99.611  | 1.00 | 0.00 | O |
| ATOM | 847 | C5'  | T B | 9  | -19.748 | -37.513 | 97.751  | 1.00 | 0.00 | C |
| ATOM | 848 | O5'  | T B | 9  | -21.102 | -37.892 | 97.397  | 1.00 | 0.00 | O |
| ATOM | 849 | O1P  | T B | 9  | -20.837 | -40.227 | 96.497  | 1.00 | 0.00 | O |
| ATOM | 850 | O2P  | T B | 9  | -22.736 | -38.786 | 95.711  | 1.00 | 0.00 | O |
| ATOM | 851 | P    | T B | 9  | -21.326 | -38.874 | 96.161  | 1.00 | 0.00 | P |
| ATOM | 852 | H3   | T B | 9  | -23.711 | -32.301 | 99.777  | 1.00 | 0.00 | H |
| ATOM | 853 | H6   | T B | 9  | -22.738 | -36.650 | 97.938  | 1.00 | 0.00 | H |
| ATOM | 854 | H1'  | T B | 9  | -21.330 | -35.803 | 101.256 | 1.00 | 0.00 | H |
| ATOM | 855 | H3'  | T B | 9  | -20.528 | -39.292 | 99.628  | 1.00 | 0.00 | H |
| ATOM | 856 | H4'  | T B | 9  | -18.595 | -37.485 | 99.526  | 1.00 | 0.00 | H |
| ATOM | 857 | H71  | T B | 9  | -25.181 | -36.088 | 96.596  | 1.00 | 0.00 | H |
| ATOM | 858 | H72  | T B | 9  | -25.074 | -34.405 | 96.025  | 1.00 | 0.00 | H |
| ATOM | 859 | H73  | T B | 9  | -23.755 | -35.549 | 95.678  | 1.00 | 0.00 | H |
| ATOM | 860 | H2'1 | T B | 9  | -22.435 | -37.866 | 99.327  | 1.00 | 0.00 | H |
| ATOM | 861 | H2'2 | T B | 9  | -22.358 | -37.934 | 101.081 | 1.00 | 0.00 | H |
| ATOM | 862 | H5'1 | T B | 9  | -19.489 | -36.573 | 97.265  | 1.00 | 0.00 | H |
| ATOM | 863 | H5'2 | T B | 9  | -19.054 | -38.287 | 97.430  | 1.00 | 0.00 | H |
| ATOM | 864 | C1'  | A B | 10 | -23.002 | -35.060 | 104.805 | 1.00 | 0.00 | C |
| ATOM | 865 | N1   | A B | 10 | -26.419 | -32.146 | 102.322 | 1.00 | 0.00 | N |
| ATOM | 866 | C2   | A B | 10 | -25.688 | -31.941 | 103.414 | 1.00 | 0.00 | C |
| ATOM | 867 | N3   | A B | 10 | -24.820 | -32.737 | 104.000 | 1.00 | 0.00 | N |
| ATOM | 868 | C4   | A B | 10 | -24.732 | -33.902 | 103.334 | 1.00 | 0.00 | C |
| ATOM | 869 | C5   | A B | 10 | -25.410 | -34.268 | 102.204 | 1.00 | 0.00 | C |
| ATOM | 870 | C6   | A B | 10 | -26.309 | -33.318 | 101.678 | 1.00 | 0.00 | C |
| ATOM | 871 | N6   | A B | 10 | -27.045 | -33.537 | 100.573 | 1.00 | 0.00 | N |
| ATOM | 872 | N7   | A B | 10 | -25.058 | -35.544 | 101.802 | 1.00 | 0.00 | N |
| ATOM | 873 | C8   | A B | 10 | -24.186 | -35.922 | 102.690 | 1.00 | 0.00 | C |
| ATOM | 874 | N9   | A B | 10 | -23.935 | -34.975 | 103.649 | 1.00 | 0.00 | N |
| ATOM | 875 | C2'  | A B | 10 | -22.950 | -36.438 | 105.450 | 1.00 | 0.00 | C |
| ATOM | 876 | C3'  | A B | 10 | -21.487 | -36.545 | 105.853 | 1.00 | 0.00 | C |
| ATOM | 877 | O3'  | A B | 10 | -21.301 | -35.910 | 107.115 | 1.00 | 0.00 | O |
| ATOM | 878 | C4'  | A B | 10 | -20.770 | -35.806 | 104.724 | 1.00 | 0.00 | C |
| ATOM | 879 | O4'  | A B | 10 | -21.704 | -34.749 | 104.334 | 1.00 | 0.00 | O |
| ATOM | 880 | C5'  | A B | 10 | -20.423 | -36.621 | 103.501 | 1.00 | 0.00 | C |
| ATOM | 881 | O5'  | A B | 10 | -21.477 | -37.584 | 103.239 | 1.00 | 0.00 | O |
| ATOM | 882 | O1P  | A B | 10 | -20.352 | -39.800 | 103.634 | 1.00 | 0.00 | O |
| ATOM | 883 | O2P  | A B | 10 | -22.293 | -39.642 | 102.051 | 1.00 | 0.00 | O |
| ATOM | 884 | P    | A B | 10 | -21.084 | -39.004 | 102.630 | 1.00 | 0.00 | P |
| ATOM | 885 | H2   | A B | 10 | -25.828 | -30.972 | 103.891 | 1.00 | 0.00 | H |
| ATOM | 886 | H8   | A B | 10 | -23.701 | -36.898 | 102.673 | 1.00 | 0.00 | H |
| ATOM | 887 | H1'  | A B | 10 | -23.288 | -34.299 | 105.530 | 1.00 | 0.00 | H |
| ATOM | 888 | H3'  | A B | 10 | -21.156 | -37.581 | 105.917 | 1.00 | 0.00 | H |
| ATOM | 889 | H4'  | A B | 10 | -19.839 | -35.419 | 105.141 | 1.00 | 0.00 | H |
| ATOM | 890 | H61  | A B | 10 | -27.683 | -32.809 | 100.229 | 1.00 | 0.00 | H |

|      |     |      |     |    |         |         |         |      |      |   |
|------|-----|------|-----|----|---------|---------|---------|------|------|---|
| ATOM | 891 | H62  | A B | 10 | -26.967 | -34.434 | 100.073 | 1.00 | 0.00 | H |
| ATOM | 892 | H2'1 | A B | 10 | -23.229 | -37.231 | 104.758 | 1.00 | 0.00 | H |
| ATOM | 893 | H2'2 | A B | 10 | -23.606 | -36.513 | 106.318 | 1.00 | 0.00 | H |
| ATOM | 894 | H5'1 | A B | 10 | -20.313 | -35.956 | 102.646 | 1.00 | 0.00 | H |
| ATOM | 895 | H5'2 | A B | 10 | -19.484 | -37.143 | 103.673 | 1.00 | 0.00 | H |
| ATOM | 896 | C1'  | G B | 11 | -25.982 | -32.773 | 108.050 | 1.00 | 0.00 | C |
| ATOM | 897 | N1   | G B | 11 | -29.263 | -32.696 | 104.145 | 1.00 | 0.00 | N |
| ATOM | 898 | C2   | G B | 11 | -28.960 | -31.713 | 105.069 | 1.00 | 0.00 | C |
| ATOM | 899 | N2   | G B | 11 | -29.620 | -30.556 | 104.937 | 1.00 | 0.00 | N |
| ATOM | 900 | N3   | G B | 11 | -28.069 | -31.871 | 106.048 | 1.00 | 0.00 | N |
| ATOM | 901 | C4   | G B | 11 | -27.502 | -33.106 | 106.034 | 1.00 | 0.00 | C |
| ATOM | 902 | C5   | G B | 11 | -27.744 | -34.148 | 105.157 | 1.00 | 0.00 | C |
| ATOM | 903 | C6   | G B | 11 | -28.687 | -33.981 | 104.116 | 1.00 | 0.00 | C |
| ATOM | 904 | O6   | G B | 11 | -29.035 | -34.781 | 103.247 | 1.00 | 0.00 | O |
| ATOM | 905 | N7   | G B | 11 | -26.955 | -35.252 | 105.487 | 1.00 | 0.00 | N |
| ATOM | 906 | C8   | G B | 11 | -26.273 | -34.851 | 106.530 | 1.00 | 0.00 | C |
| ATOM | 907 | N9   | G B | 11 | -26.551 | -33.559 | 106.924 | 1.00 | 0.00 | N |
| ATOM | 908 | C2'  | G B | 11 | -25.727 | -33.596 | 109.305 | 1.00 | 0.00 | C |
| ATOM | 909 | C3'  | G B | 11 | -24.458 | -32.961 | 109.850 | 1.00 | 0.00 | C |
| ATOM | 910 | O3'  | G B | 11 | -24.805 | -31.821 | 110.633 | 1.00 | 0.00 | O |
| ATOM | 911 | C4'  | G B | 11 | -23.696 | -32.581 | 108.582 | 1.00 | 0.00 | C |
| ATOM | 912 | O4'  | G B | 11 | -24.745 | -32.237 | 107.621 | 1.00 | 0.00 | O |
| ATOM | 913 | C5'  | G B | 11 | -22.820 | -33.654 | 107.979 | 1.00 | 0.00 | C |
| ATOM | 914 | O5'  | G B | 11 | -23.452 | -34.948 | 108.134 | 1.00 | 0.00 | O |
| ATOM | 915 | O1P  | G B | 11 | -21.908 | -36.168 | 109.702 | 1.00 | 0.00 | O |
| ATOM | 916 | O2P  | G B | 11 | -23.311 | -37.455 | 108.070 | 1.00 | 0.00 | O |
| ATOM | 917 | P    | G B | 11 | -22.532 | -36.229 | 108.367 | 1.00 | 0.00 | P |
| ATOM | 918 | H1   | G B | 11 | -29.962 | -32.470 | 103.422 | 1.00 | 0.00 | H |
| ATOM | 919 | H8   | G B | 11 | -25.551 | -35.484 | 107.043 | 1.00 | 0.00 | H |
| ATOM | 920 | H1'  | G B | 11 | -26.653 | -31.939 | 108.260 | 1.00 | 0.00 | H |
| ATOM | 921 | H21  | G B | 11 | -30.306 | -30.439 | 104.177 | 1.00 | 0.00 | H |
| ATOM | 922 | H3'  | G B | 11 | -23.882 | -33.657 | 110.461 | 1.00 | 0.00 | H |
| ATOM | 923 | H22  | G B | 11 | -29.443 | -29.784 | 105.596 | 1.00 | 0.00 | H |
| ATOM | 924 | H4'  | G B | 11 | -23.058 | -31.734 | 108.837 | 1.00 | 0.00 | H |
| ATOM | 925 | H2'1 | G B | 11 | -25.577 | -34.653 | 109.082 | 1.00 | 0.00 | H |
| ATOM | 926 | H2'2 | G B | 11 | -26.546 | -33.525 | 110.020 | 1.00 | 0.00 | H |
| ATOM | 927 | H5'1 | G B | 11 | -22.671 | -33.441 | 106.921 | 1.00 | 0.00 | H |
| ATOM | 928 | H5'2 | G B | 11 | -21.854 | -33.652 | 108.484 | 1.00 | 0.00 | H |
| ATOM | 929 | C1'  | G B | 12 | -30.200 | -30.590 | 109.453 | 1.00 | 0.00 | C |
| ATOM | 930 | N1   | G B | 12 | -32.231 | -33.392 | 105.704 | 1.00 | 0.00 | N |
| ATOM | 931 | C2   | G B | 12 | -32.462 | -32.073 | 106.053 | 1.00 | 0.00 | C |
| ATOM | 932 | N2   | G B | 12 | -33.355 | -31.413 | 105.304 | 1.00 | 0.00 | N |
| ATOM | 933 | N3   | G B | 12 | -31.852 | -31.461 | 107.065 | 1.00 | 0.00 | N |
| ATOM | 934 | C4   | G B | 12 | -30.987 | -32.281 | 107.718 | 1.00 | 0.00 | C |
| ATOM | 935 | C5   | G B | 12 | -30.695 | -33.607 | 107.446 | 1.00 | 0.00 | C |
| ATOM | 936 | C6   | G B | 12 | -31.340 | -34.256 | 106.369 | 1.00 | 0.00 | C |
| ATOM | 937 | O6   | G B | 12 | -31.217 | -35.416 | 105.975 | 1.00 | 0.00 | O |
| ATOM | 938 | N7   | G B | 12 | -29.751 | -34.090 | 108.354 | 1.00 | 0.00 | N |
| ATOM | 939 | C8   | G B | 12 | -29.503 | -33.066 | 109.128 | 1.00 | 0.00 | C |
| ATOM | 940 | N9   | G B | 12 | -30.216 | -31.930 | 108.805 | 1.00 | 0.00 | N |
| ATOM | 941 | C2'  | G B | 12 | -30.069 | -30.643 | 110.968 | 1.00 | 0.00 | C |
| ATOM | 942 | C3'  | G B | 12 | -29.211 | -29.420 | 111.256 | 1.00 | 0.00 | C |
| ATOM | 943 | O3'  | G B | 12 | -30.049 | -28.269 | 111.338 | 1.00 | 0.00 | O |
| ATOM | 944 | C4'  | G B | 12 | -28.277 | -29.369 | 110.049 | 1.00 | 0.00 | C |

|      |     |      |     |    |         |         |         |      |      |   |
|------|-----|------|-----|----|---------|---------|---------|------|------|---|
| ATOM | 945 | O4'  | G B | 12 | -29.089 | -29.878 | 108.943 | 1.00 | 0.00 | O |
| ATOM | 946 | C5'  | G B | 12 | -27.015 | -30.194 | 110.141 | 1.00 | 0.00 | C |
| ATOM | 947 | O5'  | G B | 12 | -27.288 | -31.430 | 110.847 | 1.00 | 0.00 | O |
| ATOM | 948 | O1P  | G B | 12 | -25.937 | -31.204 | 112.959 | 1.00 | 0.00 | O |
| ATOM | 949 | O2P  | G B | 12 | -26.454 | -33.480 | 112.038 | 1.00 | 0.00 | O |
| ATOM | 950 | P    | G B | 12 | -26.146 | -32.054 | 111.771 | 1.00 | 0.00 | P |
| ATOM | 951 | H1   | G B | 12 | -32.752 | -33.770 | 104.898 | 1.00 | 0.00 | H |
| ATOM | 952 | H8   | G B | 12 | -28.796 | -33.104 | 109.956 | 1.00 | 0.00 | H |
| ATOM | 953 | H1'  | G B | 12 | -31.103 | -30.057 | 109.157 | 1.00 | 0.00 | H |
| ATOM | 954 | H21  | G B | 12 | -33.821 | -31.892 | 104.518 | 1.00 | 0.00 | H |
| ATOM | 955 | H3'  | G B | 12 | -28.649 | -29.524 | 112.184 | 1.00 | 0.00 | H |
| ATOM | 956 | H22  | G B | 12 | -33.574 | -30.429 | 105.512 | 1.00 | 0.00 | H |
| ATOM | 957 | H4'  | G B | 12 | -27.985 | -28.328 | 109.918 | 1.00 | 0.00 | H |
| ATOM | 958 | H2'1 | G B | 12 | -29.583 | -31.557 | 111.309 | 1.00 | 0.00 | H |
| ATOM | 959 | H2'2 | G B | 12 | -31.033 | -30.577 | 111.471 | 1.00 | 0.00 | H |
| ATOM | 960 | H5'1 | G B | 12 | -26.658 | -30.415 | 109.135 | 1.00 | 0.00 | H |
| ATOM | 961 | H5'2 | G B | 12 | -26.254 | -29.625 | 110.675 | 1.00 | 0.00 | H |
| ATOM | 962 | C1'  | T B | 13 | -35.063 | -29.708 | 109.183 | 1.00 | 0.00 | C |
| ATOM | 963 | N1   | T B | 13 | -34.559 | -31.104 | 109.256 | 1.00 | 0.00 | N |
| ATOM | 964 | C2   | T B | 13 | -35.021 | -31.993 | 108.305 | 1.00 | 0.00 | C |
| ATOM | 965 | O2   | T B | 13 | -35.811 | -31.671 | 107.432 | 1.00 | 0.00 | O |
| ATOM | 966 | N3   | T B | 13 | -34.527 | -33.279 | 108.409 | 1.00 | 0.00 | N |
| ATOM | 967 | C4   | T B | 13 | -33.638 | -33.744 | 109.355 | 1.00 | 0.00 | C |
| ATOM | 968 | O4   | T B | 13 | -33.268 | -34.924 | 109.351 | 1.00 | 0.00 | O |
| ATOM | 969 | C5   | T B | 13 | -33.210 | -32.745 | 110.306 | 1.00 | 0.00 | C |
| ATOM | 970 | C6   | T B | 13 | -33.671 | -31.479 | 110.234 | 1.00 | 0.00 | C |
| ATOM | 971 | C7   | T B | 13 | -32.241 | -33.205 | 111.353 | 1.00 | 0.00 | C |
| ATOM | 972 | C2'  | T B | 13 | -35.313 | -29.073 | 110.547 | 1.00 | 0.00 | C |
| ATOM | 973 | C3'  | T B | 13 | -34.914 | -27.626 | 110.300 | 1.00 | 0.00 | C |
| ATOM | 974 | O3'  | T B | 13 | -36.020 | -26.925 | 109.737 | 1.00 | 0.00 | O |
| ATOM | 975 | C4'  | T B | 13 | -33.751 | -27.757 | 109.318 | 1.00 | 0.00 | C |
| ATOM | 976 | O4'  | T B | 13 | -34.089 | -28.931 | 108.514 | 1.00 | 0.00 | O |
| ATOM | 977 | C5'  | T B | 13 | -32.381 | -27.963 | 109.922 | 1.00 | 0.00 | C |
| ATOM | 978 | O5'  | T B | 13 | -32.487 | -28.800 | 111.102 | 1.00 | 0.00 | O |
| ATOM | 979 | O1P  | T B | 13 | -31.830 | -27.254 | 112.975 | 1.00 | 0.00 | O |
| ATOM | 980 | O2P  | T B | 13 | -31.472 | -29.727 | 113.205 | 1.00 | 0.00 | O |
| ATOM | 981 | P    | T B | 13 | -31.496 | -28.536 | 112.321 | 1.00 | 0.00 | P |
| ATOM | 982 | H3   | T B | 13 | -34.855 | -33.960 | 107.708 | 1.00 | 0.00 | H |
| ATOM | 983 | H6   | T B | 13 | -33.334 | -30.743 | 110.963 | 1.00 | 0.00 | H |
| ATOM | 984 | H1'  | T B | 13 | -35.970 | -29.701 | 108.578 | 1.00 | 0.00 | H |
| ATOM | 985 | H3'  | T B | 13 | -34.599 | -27.129 | 111.218 | 1.00 | 0.00 | H |
| ATOM | 986 | H4'  | T B | 13 | -33.722 | -26.835 | 108.738 | 1.00 | 0.00 | H |
| ATOM | 987 | H71  | T B | 13 | -32.713 | -33.156 | 112.334 | 1.00 | 0.00 | H |
| ATOM | 988 | H72  | T B | 13 | -31.942 | -34.234 | 111.145 | 1.00 | 0.00 | H |
| ATOM | 989 | H73  | T B | 13 | -31.360 | -32.562 | 111.342 | 1.00 | 0.00 | H |
| ATOM | 990 | H2'1 | T B | 13 | -34.706 | -29.525 | 111.329 | 1.00 | 0.00 | H |
| ATOM | 991 | H2'2 | T B | 13 | -36.356 | -29.149 | 110.853 | 1.00 | 0.00 | H |
| ATOM | 992 | H5'1 | T B | 13 | -31.734 | -28.440 | 109.187 | 1.00 | 0.00 | H |
| ATOM | 993 | H5'2 | T B | 13 | -31.962 | -26.996 | 110.196 | 1.00 | 0.00 | H |
| ATOM | 994 | C1'  | G B | 14 | -39.734 | -30.910 | 108.009 | 1.00 | 0.00 | C |
| ATOM | 995 | N1   | G B | 14 | -38.038 | -35.698 | 108.491 | 1.00 | 0.00 | N |
| ATOM | 996 | C2   | G B | 14 | -38.873 | -35.144 | 107.537 | 1.00 | 0.00 | C |
| ATOM | 997 | N2   | G B | 14 | -39.315 | -35.974 | 106.586 | 1.00 | 0.00 | N |
| ATOM | 998 | N3   | G B | 14 | -39.235 | -33.862 | 107.532 | 1.00 | 0.00 | N |

|      |      |      |     |    |         |         |         |      |      |   |
|------|------|------|-----|----|---------|---------|---------|------|------|---|
| ATOM | 999  | C4   | G B | 14 | -38.699 | -33.169 | 108.571 | 1.00 | 0.00 | C |
| ATOM | 1000 | C5   | G B | 14 | -37.864 | -33.638 | 109.570 | 1.00 | 0.00 | C |
| ATOM | 1001 | C6   | G B | 14 | -37.475 | -34.998 | 109.574 | 1.00 | 0.00 | C |
| ATOM | 1002 | O6   | G B | 14 | -36.747 | -35.595 | 110.370 | 1.00 | 0.00 | O |
| ATOM | 1003 | N7   | G B | 14 | -37.538 | -32.605 | 110.452 | 1.00 | 0.00 | N |
| ATOM | 1004 | C8   | G B | 14 | -38.170 | -31.567 | 109.969 | 1.00 | 0.00 | C |
| ATOM | 1005 | N9   | G B | 14 | -38.899 | -31.830 | 108.827 | 1.00 | 0.00 | N |
| ATOM | 1006 | C2'  | G B | 14 | -40.510 | -29.891 | 108.832 | 1.00 | 0.00 | C |
| ATOM | 1007 | C3'  | G B | 14 | -40.481 | -28.667 | 107.931 | 1.00 | 0.00 | C |
| ATOM | 1008 | O3'  | G B | 14 | -41.542 | -28.757 | 106.984 | 1.00 | 0.00 | O |
| ATOM | 1009 | C4'  | G B | 14 | -39.107 | -28.766 | 107.270 | 1.00 | 0.00 | C |
| ATOM | 1010 | O4'  | G B | 14 | -38.873 | -30.204 | 107.138 | 1.00 | 0.00 | O |
| ATOM | 1011 | C5'  | G B | 14 | -37.952 | -28.155 | 108.025 | 1.00 | 0.00 | C |
| ATOM | 1012 | O5'  | G B | 14 | -38.132 | -28.362 | 109.449 | 1.00 | 0.00 | O |
| ATOM | 1013 | O1P  | G B | 14 | -38.465 | -26.032 | 110.341 | 1.00 | 0.00 | O |
| ATOM | 1014 | O2P  | G B | 14 | -37.506 | -27.817 | 111.820 | 1.00 | 0.00 | O |
| ATOM | 1015 | P    | G B | 14 | -37.624 | -27.238 | 110.459 | 1.00 | 0.00 | P |
| ATOM | 1016 | H1   | G B | 14 | -37.813 | -36.701 | 108.400 | 1.00 | 0.00 | H |
| ATOM | 1017 | H8   | G B | 14 | -38.125 | -30.579 | 110.429 | 1.00 | 0.00 | H |
| ATOM | 1018 | H1'  | G B | 14 | -40.408 | -31.513 | 107.398 | 1.00 | 0.00 | H |
| ATOM | 1019 | H21  | G B | 14 | -39.027 | -36.965 | 106.594 | 1.00 | 0.00 | H |
| ATOM | 1020 | H3'  | G B | 14 | -40.578 | -27.740 | 108.497 | 1.00 | 0.00 | H |
| ATOM | 1021 | H22  | G B | 14 | -39.943 | -35.625 | 105.848 | 1.00 | 0.00 | H |
| ATOM | 1022 | H4'  | G B | 14 | -39.182 | -28.258 | 106.308 | 1.00 | 0.00 | H |
| ATOM | 1023 | H2'1 | G B | 14 | -40.037 | -29.688 | 109.792 | 1.00 | 0.00 | H |
| ATOM | 1024 | H2'2 | G B | 14 | -41.532 | -30.211 | 109.033 | 1.00 | 0.00 | H |
| ATOM | 1025 | H5'1 | G B | 14 | -37.023 | -28.622 | 107.700 | 1.00 | 0.00 | H |
| ATOM | 1026 | H5'2 | G B | 14 | -37.909 | -27.087 | 107.811 | 1.00 | 0.00 | H |
| ATOM | 1027 | C1'  | C B | 15 | -43.425 | -34.091 | 107.116 | 1.00 | 0.00 | C |
| ATOM | 1028 | N1   | C B | 15 | -42.614 | -34.203 | 108.358 | 1.00 | 0.00 | N |
| ATOM | 1029 | C2   | C B | 15 | -42.060 | -35.443 | 108.668 | 1.00 | 0.00 | C |
| ATOM | 1030 | O2   | C B | 15 | -42.265 | -36.394 | 107.903 | 1.00 | 0.00 | O |
| ATOM | 1031 | N3   | C B | 15 | -41.318 | -35.566 | 109.795 | 1.00 | 0.00 | N |
| ATOM | 1032 | C4   | C B | 15 | -41.116 | -34.519 | 110.603 | 1.00 | 0.00 | C |
| ATOM | 1033 | N4   | C B | 15 | -40.379 | -34.694 | 111.690 | 1.00 | 0.00 | N |
| ATOM | 1034 | C5   | C B | 15 | -41.677 | -33.230 | 110.313 | 1.00 | 0.00 | C |
| ATOM | 1035 | C6   | C B | 15 | -42.416 | -33.129 | 109.171 | 1.00 | 0.00 | C |
| ATOM | 1036 | C2'  | C B | 15 | -44.638 | -33.181 | 107.255 | 1.00 | 0.00 | C |
| ATOM | 1037 | C3'  | C B | 15 | -44.710 | -32.535 | 105.880 | 1.00 | 0.00 | C |
| ATOM | 1038 | O3'  | C B | 15 | -45.420 | -33.397 | 104.993 | 1.00 | 0.00 | O |
| ATOM | 1039 | C4'  | C B | 15 | -43.239 | -32.395 | 105.493 | 1.00 | 0.00 | C |
| ATOM | 1040 | O4'  | C B | 15 | -42.592 | -33.558 | 106.104 | 1.00 | 0.00 | O |
| ATOM | 1041 | C5'  | C B | 15 | -42.534 | -31.145 | 105.971 | 1.00 | 0.00 | C |
| ATOM | 1042 | O5'  | C B | 15 | -43.020 | -30.783 | 107.288 | 1.00 | 0.00 | O |
| ATOM | 1043 | O1P  | C B | 15 | -44.200 | -28.595 | 106.892 | 1.00 | 0.00 | O |
| ATOM | 1044 | O2P  | C B | 15 | -43.212 | -29.098 | 109.144 | 1.00 | 0.00 | O |
| ATOM | 1045 | P    | C B | 15 | -43.122 | -29.239 | 107.670 | 1.00 | 0.00 | P |
| ATOM | 1046 | H5   | C B | 15 | -41.519 | -32.376 | 110.972 | 1.00 | 0.00 | H |
| ATOM | 1047 | H6   | C B | 15 | -42.857 | -32.169 | 108.904 | 1.00 | 0.00 | H |
| ATOM | 1048 | H1'  | C B | 15 | -43.723 | -35.095 | 106.812 | 1.00 | 0.00 | H |
| ATOM | 1049 | H3'  | C B | 15 | -45.201 | -31.563 | 105.911 | 1.00 | 0.00 | H |
| ATOM | 1050 | H4'  | C B | 15 | -43.194 | -32.406 | 104.404 | 1.00 | 0.00 | H |
| ATOM | 1051 | H41  | C B | 15 | -40.204 | -33.903 | 112.329 | 1.00 | 0.00 | H |
| ATOM | 1052 | H42  | C B | 15 | -39.979 | -35.621 | 111.898 | 1.00 | 0.00 | H |

|      |      |      |   |   |    |         |         |         |      |      |   |
|------|------|------|---|---|----|---------|---------|---------|------|------|---|
| ATOM | 1053 | H2'1 | C | B | 15 | -44.508 | -32.435 | 108.038 | 1.00 | 0.00 | H |
| ATOM | 1054 | H2'2 | C | B | 15 | -45.549 | -33.737 | 107.481 | 1.00 | 0.00 | H |
| ATOM | 1055 | H5'1 | C | B | 15 | -41.462 | -31.333 | 106.012 | 1.00 | 0.00 | H |
| ATOM | 1056 | H5'2 | C | B | 15 | -42.732 | -30.335 | 105.270 | 1.00 | 0.00 | H |
| ATOM | 1057 | C1'  | G | B | 16 | -45.737 | -38.449 | 107.535 | 1.00 | 0.00 | C |
| ATOM | 1058 | N1   | G | B | 16 | -43.109 | -38.784 | 111.893 | 1.00 | 0.00 | N |
| ATOM | 1059 | C2   | G | B | 16 | -43.351 | -39.744 | 110.927 | 1.00 | 0.00 | C |
| ATOM | 1060 | N2   | G | B | 16 | -42.826 | -40.954 | 111.153 | 1.00 | 0.00 | N |
| ATOM | 1061 | N3   | G | B | 16 | -44.061 | -39.514 | 109.824 | 1.00 | 0.00 | N |
| ATOM | 1062 | C4   | G | B | 16 | -44.522 | -38.237 | 109.763 | 1.00 | 0.00 | C |
| ATOM | 1063 | C5   | G | B | 16 | -44.335 | -37.216 | 110.679 | 1.00 | 0.00 | C |
| ATOM | 1064 | C6   | G | B | 16 | -43.577 | -37.458 | 111.849 | 1.00 | 0.00 | C |
| ATOM | 1065 | O6   | G | B | 16 | -43.303 | -36.687 | 112.769 | 1.00 | 0.00 | O |
| ATOM | 1066 | N7   | G | B | 16 | -44.975 | -36.053 | 110.244 | 1.00 | 0.00 | N |
| ATOM | 1067 | C8   | G | B | 16 | -45.517 | -36.398 | 109.104 | 1.00 | 0.00 | C |
| ATOM | 1068 | N9   | G | B | 16 | -45.287 | -37.711 | 108.745 | 1.00 | 0.00 | N |
| ATOM | 1069 | C2'  | G | B | 16 | -47.144 | -38.082 | 107.081 | 1.00 | 0.00 | C |
| ATOM | 1070 | C3'  | G | B | 16 | -47.021 | -38.166 | 105.568 | 1.00 | 0.00 | C |
| ATOM | 1071 | O3'  | G | B | 16 | -47.210 | -39.519 | 105.158 | 1.00 | 0.00 | O |
| ATOM | 1072 | C4'  | G | B | 16 | -45.595 | -37.680 | 105.314 | 1.00 | 0.00 | C |
| ATOM | 1073 | O4'  | G | B | 16 | -44.844 | -38.142 | 106.483 | 1.00 | 0.00 | O |
| ATOM | 1074 | C5'  | G | B | 16 | -45.409 | -36.187 | 105.179 | 1.00 | 0.00 | C |
| ATOM | 1075 | O5'  | G | B | 16 | -46.304 | -35.497 | 106.086 | 1.00 | 0.00 | O |
| ATOM | 1076 | O1P  | G | B | 16 | -47.885 | -34.292 | 104.543 | 1.00 | 0.00 | O |
| ATOM | 1077 | O2P  | G | B | 16 | -47.429 | -33.379 | 106.834 | 1.00 | 0.00 | O |
| ATOM | 1078 | P    | G | B | 16 | -46.919 | -34.094 | 105.639 | 1.00 | 0.00 | P |
| ATOM | 1079 | H1   | G | B | 16 | -42.540 | -39.063 | 112.708 | 1.00 | 0.00 | H |
| ATOM | 1080 | H8   | G | B | 16 | -46.098 | -35.710 | 108.492 | 1.00 | 0.00 | H |
| ATOM | 1081 | H1'  | G | B | 16 | -45.660 | -39.518 | 107.738 | 1.00 | 0.00 | H |
| ATOM | 1082 | H21  | G | B | 16 | -42.274 | -41.123 | 112.007 | 1.00 | 0.00 | H |
| ATOM | 1083 | H3'  | G | B | 16 | -47.749 | -37.531 | 105.062 | 1.00 | 0.00 | H |
| ATOM | 1084 | H22  | G | B | 16 | -42.972 | -41.713 | 110.473 | 1.00 | 0.00 | H |
| ATOM | 1085 | H4'  | G | B | 16 | -45.263 | -38.143 | 104.385 | 1.00 | 0.00 | H |
| ATOM | 1086 | H2'1 | G | B | 16 | -47.432 | -37.079 | 107.400 | 1.00 | 0.00 | H |
| ATOM | 1087 | H2'2 | G | B | 16 | -47.896 | -38.775 | 107.457 | 1.00 | 0.00 | H |
| ATOM | 1088 | H5'1 | G | B | 16 | -44.376 | -35.933 | 105.415 | 1.00 | 0.00 | H |
| ATOM | 1089 | H5'2 | G | B | 16 | -45.626 | -35.892 | 104.153 | 1.00 | 0.00 | H |
| ATOM | 1090 | C1'  | G | B | 17 | -46.798 | -42.722 | 109.804 | 1.00 | 0.00 | C |
| ATOM | 1091 | N1   | G | B | 17 | -45.417 | -40.178 | 114.004 | 1.00 | 0.00 | N |
| ATOM | 1092 | C2   | G | B | 17 | -45.127 | -41.474 | 113.615 | 1.00 | 0.00 | C |
| ATOM | 1093 | N2   | G | B | 17 | -44.369 | -42.185 | 114.457 | 1.00 | 0.00 | N |
| ATOM | 1094 | N3   | G | B | 17 | -45.556 | -42.013 | 112.476 | 1.00 | 0.00 | N |
| ATOM | 1095 | C4   | G | B | 17 | -46.317 | -41.152 | 111.750 | 1.00 | 0.00 | C |
| ATOM | 1096 | C5   | G | B | 17 | -46.661 | -39.847 | 112.060 | 1.00 | 0.00 | C |
| ATOM | 1097 | C6   | G | B | 17 | -46.202 | -39.272 | 113.266 | 1.00 | 0.00 | C |
| ATOM | 1098 | O6   | G | B | 17 | -46.400 | -38.141 | 113.712 | 1.00 | 0.00 | O |
| ATOM | 1099 | N7   | G | B | 17 | -47.458 | -39.305 | 111.049 | 1.00 | 0.00 | N |
| ATOM | 1100 | C8   | G | B | 17 | -47.565 | -40.274 | 110.177 | 1.00 | 0.00 | C |
| ATOM | 1101 | N9   | G | B | 17 | -46.900 | -41.429 | 110.534 | 1.00 | 0.00 | N |
| ATOM | 1102 | C2'  | G | B | 17 | -48.080 | -43.125 | 109.088 | 1.00 | 0.00 | C |
| ATOM | 1103 | C3'  | G | B | 17 | -47.546 | -43.797 | 107.832 | 1.00 | 0.00 | C |
| ATOM | 1104 | O3'  | G | B | 17 | -47.244 | -45.159 | 108.123 | 1.00 | 0.00 | O |
| ATOM | 1105 | C4'  | G | B | 17 | -46.293 | -42.982 | 107.518 | 1.00 | 0.00 | C |
| ATOM | 1106 | O4'  | G | B | 17 | -45.779 | -42.590 | 108.831 | 1.00 | 0.00 | O |

|      |      |      |     |    |         |         |         |      |      |   |
|------|------|------|-----|----|---------|---------|---------|------|------|---|
| ATOM | 1107 | C5'  | G B | 17 | -46.493 | -41.736 | 106.687 | 1.00 | 0.00 | C |
| ATOM | 1108 | O5'  | G B | 17 | -47.747 | -41.105 | 107.044 | 1.00 | 0.00 | O |
| ATOM | 1109 | O1P  | G B | 17 | -49.133 | -41.345 | 104.957 | 1.00 | 0.00 | O |
| ATOM | 1110 | O2P  | G B | 17 | -49.564 | -39.444 | 106.537 | 1.00 | 0.00 | O |
| ATOM | 1111 | P    | G B | 17 | -48.583 | -40.359 | 105.907 | 1.00 | 0.00 | P |
| ATOM | 1112 | H1   | G B | 17 | -45.031 | -39.853 | 114.904 | 1.00 | 0.00 | H |
| ATOM | 1113 | H8   | G B | 17 | -48.130 | -40.179 | 109.251 | 1.00 | 0.00 | H |
| ATOM | 1114 | H1'  | G B | 17 | -46.488 | -43.490 | 110.511 | 1.00 | 0.00 | H |
| ATOM | 1115 | H21  | G B | 17 | -44.036 | -41.760 | 115.335 | 1.00 | 0.00 | H |
| ATOM | 1116 | H3'  | G B | 17 | -48.259 | -43.752 | 107.010 | 1.00 | 0.00 | H |
| ATOM | 1117 | H22  | G B | 17 | -44.119 | -43.158 | 114.227 | 1.00 | 0.00 | H |
| ATOM | 1118 | H4'  | G B | 17 | -45.615 | -43.639 | 106.975 | 1.00 | 0.00 | H |
| ATOM | 1119 | H2'1 | G B | 17 | -48.704 | -42.266 | 108.843 | 1.00 | 0.00 | H |
| ATOM | 1120 | H2'2 | G B | 17 | -48.685 | -43.811 | 109.679 | 1.00 | 0.00 | H |
| ATOM | 1121 | H5'1 | G B | 17 | -45.669 | -41.048 | 106.871 | 1.00 | 0.00 | H |
| ATOM | 1122 | H5'2 | G B | 17 | -46.504 | -42.009 | 105.632 | 1.00 | 0.00 | H |
| ATOM | 1123 | C1'  | C B | 18 | -47.207 | -45.676 | 113.758 | 1.00 | 0.00 | C |
| ATOM | 1124 | N1   | C B | 18 | -47.842 | -44.329 | 113.749 | 1.00 | 0.00 | N |
| ATOM | 1125 | C2   | C B | 18 | -47.584 | -43.480 | 114.823 | 1.00 | 0.00 | C |
| ATOM | 1126 | O2   | C B | 18 | -46.844 | -43.874 | 115.732 | 1.00 | 0.00 | O |
| ATOM | 1127 | N3   | C B | 18 | -48.154 | -42.251 | 114.833 | 1.00 | 0.00 | N |
| ATOM | 1128 | C4   | C B | 18 | -48.951 | -41.853 | 113.833 | 1.00 | 0.00 | C |
| ATOM | 1129 | N4   | C B | 18 | -49.480 | -40.640 | 113.894 | 1.00 | 0.00 | N |
| ATOM | 1130 | C5   | C B | 18 | -49.235 | -42.707 | 112.720 | 1.00 | 0.00 | C |
| ATOM | 1131 | C6   | C B | 18 | -48.650 | -43.939 | 112.728 | 1.00 | 0.00 | C |
| ATOM | 1132 | C2'  | C B | 18 | -48.100 | -46.781 | 113.210 | 1.00 | 0.00 | C |
| ATOM | 1133 | C3'  | C B | 18 | -47.097 | -47.678 | 112.501 | 1.00 | 0.00 | C |
| ATOM | 1134 | O3'  | C B | 18 | -46.518 | -48.572 | 113.449 | 1.00 | 0.00 | O |
| ATOM | 1135 | C4'  | C B | 18 | -46.079 | -46.681 | 111.953 | 1.00 | 0.00 | C |
| ATOM | 1136 | O4'  | C B | 18 | -46.048 | -45.609 | 112.949 | 1.00 | 0.00 | O |
| ATOM | 1137 | C5'  | C B | 18 | -46.389 | -46.076 | 110.604 | 1.00 | 0.00 | C |
| ATOM | 1138 | O5'  | C B | 18 | -47.817 | -45.857 | 110.483 | 1.00 | 0.00 | O |
| ATOM | 1139 | O1P  | C B | 18 | -48.498 | -47.448 | 108.654 | 1.00 | 0.00 | O |
| ATOM | 1140 | O2P  | C B | 18 | -49.824 | -45.356 | 109.055 | 1.00 | 0.00 | O |
| ATOM | 1141 | P    | C B | 18 | -48.501 | -46.026 | 109.052 | 1.00 | 0.00 | P |
| ATOM | 1142 | H5   | C B | 18 | -49.887 | -42.389 | 111.905 | 1.00 | 0.00 | H |
| ATOM | 1143 | H6   | C B | 18 | -48.834 | -44.622 | 111.900 | 1.00 | 0.00 | H |
| ATOM | 1144 | H1'  | C B | 18 | -46.893 | -45.897 | 114.777 | 1.00 | 0.00 | H |
| ATOM | 1145 | H3'  | C B | 18 | -47.558 | -48.251 | 111.697 | 1.00 | 0.00 | H |
| ATOM | 1146 | H4'  | C B | 18 | -45.130 | -47.211 | 111.868 | 1.00 | 0.00 | H |
| ATOM | 1147 | H41  | C B | 18 | -50.096 | -40.307 | 113.137 | 1.00 | 0.00 | H |
| ATOM | 1148 | H42  | C B | 18 | -49.275 | -40.028 | 114.697 | 1.00 | 0.00 | H |
| ATOM | 1149 | H2'1 | C B | 18 | -48.850 | -46.400 | 112.518 | 1.00 | 0.00 | H |
| ATOM | 1150 | H2'2 | C B | 18 | -48.626 | -47.317 | 114.000 | 1.00 | 0.00 | H |
| ATOM | 1151 | H5'1 | C B | 18 | -45.862 | -45.127 | 110.506 | 1.00 | 0.00 | H |
| ATOM | 1152 | H5'2 | C B | 18 | -46.053 | -46.755 | 109.822 | 1.00 | 0.00 | H |
| ATOM | 1153 | C1'  | C B | 19 | -47.819 | -46.581 | 118.589 | 1.00 | 0.00 | C |
| ATOM | 1154 | N1   | C B | 19 | -48.771 | -45.703 | 117.857 | 1.00 | 0.00 | N |
| ATOM | 1155 | C2   | C B | 19 | -49.047 | -44.447 | 118.394 | 1.00 | 0.00 | C |
| ATOM | 1156 | O2   | C B | 19 | -48.492 | -44.114 | 119.449 | 1.00 | 0.00 | O |
| ATOM | 1157 | N3   | C B | 19 | -49.912 | -43.634 | 117.742 | 1.00 | 0.00 | N |
| ATOM | 1158 | C4   | C B | 19 | -50.497 | -44.024 | 116.601 | 1.00 | 0.00 | C |
| ATOM | 1159 | N4   | C B | 19 | -51.332 | -43.189 | 116.006 | 1.00 | 0.00 | N |
| ATOM | 1160 | C5   | C B | 19 | -50.232 | -45.308 | 116.029 | 1.00 | 0.00 | C |

|      |      |      |     |    |         |         |         |      |      |   |
|------|------|------|-----|----|---------|---------|---------|------|------|---|
| ATOM | 1161 | C6   | C B | 19 | -49.358 | -46.110 | 116.701 | 1.00 | 0.00 | C |
| ATOM | 1162 | C2'  | C B | 19 | -48.200 | -48.054 | 118.566 | 1.00 | 0.00 | C |
| ATOM | 1163 | C3'  | C B | 19 | -46.840 | -48.733 | 118.495 | 1.00 | 0.00 | C |
| ATOM | 1164 | O3'  | C B | 19 | -46.309 | -48.858 | 119.811 | 1.00 | 0.00 | O |
| ATOM | 1165 | C4'  | C B | 19 | -46.025 | -47.770 | 117.634 | 1.00 | 0.00 | C |
| ATOM | 1166 | O4'  | C B | 19 | -46.552 | -46.448 | 117.972 | 1.00 | 0.00 | O |
| ATOM | 1167 | C5'  | C B | 19 | -46.125 | -47.959 | 116.137 | 1.00 | 0.00 | C |
| ATOM | 1168 | O5'  | C B | 19 | -47.474 | -48.352 | 115.781 | 1.00 | 0.00 | O |
| ATOM | 1169 | O1P  | C B | 19 | -47.188 | -50.696 | 114.913 | 1.00 | 0.00 | O |
| ATOM | 1170 | O2P  | C B | 19 | -49.093 | -49.280 | 114.098 | 1.00 | 0.00 | O |
| ATOM | 1171 | P    | C B | 19 | -47.684 | -49.352 | 114.558 | 1.00 | 0.00 | P |
| ATOM | 1172 | H5   | C B | 19 | -50.706 | -45.631 | 115.102 | 1.00 | 0.00 | H |
| ATOM | 1173 | H6   | C B | 19 | -49.124 | -47.097 | 116.302 | 1.00 | 0.00 | H |
| ATOM | 1174 | H1'  | C B | 19 | -47.735 | -46.214 | 119.612 | 1.00 | 0.00 | H |
| ATOM | 1175 | H3'  | C B | 19 | -46.900 | -49.718 | 118.033 | 1.00 | 0.00 | H |
| ATOM | 1176 | H4'  | C B | 19 | -44.980 | -47.898 | 117.916 | 1.00 | 0.00 | H |
| ATOM | 1177 | H41  | C B | 19 | -51.796 | -43.460 | 115.126 | 1.00 | 0.00 | H |
| ATOM | 1178 | H42  | C B | 19 | -51.522 | -42.263 | 116.421 | 1.00 | 0.00 | H |
| ATOM | 1179 | H2'1 | C B | 19 | -48.816 | -48.310 | 117.704 | 1.00 | 0.00 | H |
| ATOM | 1180 | H2'2 | C B | 19 | -48.747 | -48.353 | 119.460 | 1.00 | 0.00 | H |
| ATOM | 1181 | H5'1 | C B | 19 | -45.869 | -47.024 | 115.641 | 1.00 | 0.00 | H |
| ATOM | 1182 | H5'2 | C B | 19 | -45.422 | -48.732 | 115.828 | 1.00 | 0.00 | H |
| ATOM | 1183 | C1'  | T B | 20 | -49.392 | -45.508 | 123.157 | 1.00 | 0.00 | C |
| ATOM | 1184 | N1   | T B | 20 | -50.328 | -45.423 | 122.004 | 1.00 | 0.00 | N |
| ATOM | 1185 | C2   | T B | 20 | -51.044 | -44.252 | 121.860 | 1.00 | 0.00 | C |
| ATOM | 1186 | O2   | T B | 20 | -50.935 | -43.313 | 122.628 | 1.00 | 0.00 | O |
| ATOM | 1187 | N3   | T B | 20 | -51.900 | -44.216 | 120.776 | 1.00 | 0.00 | N |
| ATOM | 1188 | C4   | T B | 20 | -52.098 | -45.218 | 119.851 | 1.00 | 0.00 | C |
| ATOM | 1189 | O4   | T B | 20 | -52.898 | -45.069 | 118.918 | 1.00 | 0.00 | O |
| ATOM | 1190 | C5   | T B | 20 | -51.307 | -46.402 | 120.084 | 1.00 | 0.00 | C |
| ATOM | 1191 | C6   | T B | 20 | -50.461 | -46.474 | 121.130 | 1.00 | 0.00 | C |
| ATOM | 1192 | C7   | T B | 20 | -51.489 | -47.519 | 119.101 | 1.00 | 0.00 | C |
| ATOM | 1193 | C2'  | T B | 20 | -49.342 | -46.887 | 123.805 | 1.00 | 0.00 | C |
| ATOM | 1194 | C3'  | T B | 20 | -47.878 | -46.997 | 124.204 | 1.00 | 0.00 | C |
| ATOM | 1195 | O3'  | T B | 20 | -47.687 | -46.362 | 125.468 | 1.00 | 0.00 | O |
| ATOM | 1196 | C4'  | T B | 20 | -47.162 | -46.261 | 123.074 | 1.00 | 0.00 | C |
| ATOM | 1197 | O4'  | T B | 20 | -48.095 | -45.203 | 122.685 | 1.00 | 0.00 | O |
| ATOM | 1198 | C5'  | T B | 20 | -46.822 | -47.078 | 121.849 | 1.00 | 0.00 | C |
| ATOM | 1199 | O5'  | T B | 20 | -47.879 | -48.038 | 121.591 | 1.00 | 0.00 | O |
| ATOM | 1200 | O1P  | T B | 20 | -46.759 | -50.257 | 121.986 | 1.00 | 0.00 | O |
| ATOM | 1201 | O2P  | T B | 20 | -48.703 | -50.095 | 120.407 | 1.00 | 0.00 | O |
| ATOM | 1202 | P    | T B | 20 | -47.492 | -49.459 | 120.982 | 1.00 | 0.00 | P |
| ATOM | 1203 | H3   | T B | 20 | -52.446 | -43.353 | 120.646 | 1.00 | 0.00 | H |
| ATOM | 1204 | H6   | T B | 20 | -49.873 | -47.378 | 121.286 | 1.00 | 0.00 | H |
| ATOM | 1205 | H1'  | T B | 20 | -49.673 | -44.746 | 123.883 | 1.00 | 0.00 | H |
| ATOM | 1206 | H3'  | T B | 20 | -47.550 | -48.034 | 124.269 | 1.00 | 0.00 | H |
| ATOM | 1207 | H4'  | T B | 20 | -46.229 | -45.877 | 123.487 | 1.00 | 0.00 | H |
| ATOM | 1208 | H3T  | T B | 20 | -48.273 | -46.661 | 126.166 | 1.00 | 0.00 | H |
| ATOM | 1209 | H71  | T B | 20 | -51.935 | -48.377 | 119.603 | 1.00 | 0.00 | H |
| ATOM | 1210 | H72  | T B | 20 | -52.146 | -47.189 | 118.293 | 1.00 | 0.00 | H |
| ATOM | 1211 | H73  | T B | 20 | -50.521 | -47.803 | 118.686 | 1.00 | 0.00 | H |
| ATOM | 1212 | H2'1 | T B | 20 | -49.626 | -47.679 | 123.115 | 1.00 | 0.00 | H |
| ATOM | 1213 | H2'2 | T B | 20 | -49.996 | -46.959 | 124.675 | 1.00 | 0.00 | H |
| ATOM | 1214 | H5'1 | T B | 20 | -46.710 | -46.413 | 120.993 | 1.00 | 0.00 | H |

|      |      |      |     |    |         |         |         |      |      |   |
|------|------|------|-----|----|---------|---------|---------|------|------|---|
| ATOM | 1215 | H5'2 | T B | 20 | -45.883 | -47.603 | 122.020 | 1.00 | 0.00 | H |
| TER  |      |      |     |    |         |         |         |      |      |   |
| ATOM | 1    | C1'  | A A | 1  | -20.848 | -60.081 | 126.464 | 1.00 | 0.00 | C |
| ATOM | 2    | N1   | A A | 1  | -21.310 | -63.833 | 122.993 | 1.00 | 0.00 | N |
| ATOM | 3    | C2   | A A | 1  | -20.301 | -63.444 | 123.767 | 1.00 | 0.00 | C |
| ATOM | 4    | N3   | A A | 1  | -20.250 | -62.466 | 124.646 | 1.00 | 0.00 | N |
| ATOM | 5    | C4   | A A | 1  | -21.430 | -61.822 | 124.696 | 1.00 | 0.00 | C |
| ATOM | 6    | C5   | A A | 1  | -22.556 | -62.093 | 123.971 | 1.00 | 0.00 | C |
| ATOM | 7    | C6   | A A | 1  | -22.475 | -63.172 | 123.064 | 1.00 | 0.00 | C |
| ATOM | 8    | N6   | A A | 1  | -23.502 | -63.554 | 122.286 | 1.00 | 0.00 | N |
| ATOM | 9    | N7   | A A | 1  | -23.579 | -61.218 | 124.291 | 1.00 | 0.00 | N |
| ATOM | 10   | C8   | A A | 1  | -23.052 | -60.441 | 125.191 | 1.00 | 0.00 | C |
| ATOM | 11   | N9   | A A | 1  | -21.751 | -60.749 | 125.489 | 1.00 | 0.00 | N |
| ATOM | 12   | C2'  | A A | 1  | -21.018 | -58.570 | 126.523 | 1.00 | 0.00 | C |
| ATOM | 13   | C3'  | A A | 1  | -20.786 | -58.283 | 127.998 | 1.00 | 0.00 | C |
| ATOM | 14   | O3'  | A A | 1  | -19.386 | -58.165 | 128.238 | 1.00 | 0.00 | O |
| ATOM | 15   | C4'  | A A | 1  | -21.389 | -59.508 | 128.683 | 1.00 | 0.00 | C |
| ATOM | 16   | O4'  | A A | 1  | -21.135 | -60.605 | 127.746 | 1.00 | 0.00 | O |
| ATOM | 17   | C5'  | A A | 1  | -22.870 | -59.454 | 128.972 | 1.00 | 0.00 | C |
| ATOM | 18   | O5'  | A A | 1  | -23.556 | -58.761 | 127.899 | 1.00 | 0.00 | O |
| ATOM | 19   | H2   | A A | 1  | -19.383 | -64.020 | 123.658 | 1.00 | 0.00 | H |
| ATOM | 20   | H8   | A A | 1  | -23.596 | -59.623 | 125.665 | 1.00 | 0.00 | H |
| ATOM | 21   | H1'  | A A | 1  | -19.820 | -60.350 | 126.215 | 1.00 | 0.00 | H |
| ATOM | 22   | H3'  | A A | 1  | -21.286 | -57.367 | 128.320 | 1.00 | 0.00 | H |
| ATOM | 23   | H4'  | A A | 1  | -20.868 | -59.628 | 129.631 | 1.00 | 0.00 | H |
| ATOM | 24   | H61  | A A | 1  | -23.391 | -64.349 | 121.643 | 1.00 | 0.00 | H |
| ATOM | 25   | H62  | A A | 1  | -24.399 | -63.051 | 122.337 | 1.00 | 0.00 | H |
| ATOM | 26   | H5T  | A A | 1  | -24.324 | -58.226 | 128.110 | 1.00 | 0.00 | H |
| ATOM | 27   | H2'1 | A A | 1  | -22.011 | -58.252 | 126.209 | 1.00 | 0.00 | H |
| ATOM | 28   | H2'2 | A A | 1  | -20.292 | -58.047 | 125.900 | 1.00 | 0.00 | H |
| ATOM | 29   | H5'1 | A A | 1  | -23.255 | -60.470 | 129.060 | 1.00 | 0.00 | H |
| ATOM | 30   | H5'2 | A A | 1  | -23.032 | -58.928 | 129.912 | 1.00 | 0.00 | H |
| ATOM | 31   | C1'  | G A | 2  | -16.780 | -60.307 | 123.626 | 1.00 | 0.00 | C |
| ATOM | 32   | N1   | G A | 2  | -19.945 | -62.387 | 120.210 | 1.00 | 0.00 | N |
| ATOM | 33   | C2   | G A | 2  | -18.657 | -62.746 | 120.558 | 1.00 | 0.00 | C |
| ATOM | 34   | N2   | G A | 2  | -18.141 | -63.797 | 119.909 | 1.00 | 0.00 | N |
| ATOM | 35   | N3   | G A | 2  | -17.938 | -62.107 | 121.480 | 1.00 | 0.00 | N |
| ATOM | 36   | C4   | G A | 2  | -18.614 | -61.065 | 122.030 | 1.00 | 0.00 | C |
| ATOM | 37   | C5   | G A | 2  | -19.899 | -60.632 | 121.744 | 1.00 | 0.00 | C |
| ATOM | 38   | C6   | G A | 2  | -20.662 | -61.313 | 120.767 | 1.00 | 0.00 | C |
| ATOM | 39   | O6   | G A | 2  | -21.809 | -61.084 | 120.380 | 1.00 | 0.00 | O |
| ATOM | 40   | N7   | G A | 2  | -20.222 | -59.524 | 122.530 | 1.00 | 0.00 | N |
| ATOM | 41   | C8   | G A | 2  | -19.149 | -59.327 | 123.253 | 1.00 | 0.00 | C |
| ATOM | 42   | N9   | G A | 2  | -18.129 | -60.222 | 123.007 | 1.00 | 0.00 | N |
| ATOM | 43   | C2'  | G A | 2  | -16.150 | -58.951 | 123.916 | 1.00 | 0.00 | C |
| ATOM | 44   | C3'  | G A | 2  | -15.401 | -59.218 | 125.210 | 1.00 | 0.00 | C |
| ATOM | 45   | O3'  | G A | 2  | -14.126 | -59.779 | 124.907 | 1.00 | 0.00 | O |
| ATOM | 46   | C4'  | G A | 2  | -16.311 | -60.210 | 125.932 | 1.00 | 0.00 | C |
| ATOM | 47   | O4'  | G A | 2  | -16.911 | -60.997 | 124.854 | 1.00 | 0.00 | O |
| ATOM | 48   | C5'  | G A | 2  | -17.417 | -59.617 | 126.772 | 1.00 | 0.00 | C |
| ATOM | 49   | O5'  | G A | 2  | -17.938 | -58.428 | 126.128 | 1.00 | 0.00 | O |
| ATOM | 50   | O1P  | G A | 2  | -17.295 | -56.580 | 127.712 | 1.00 | 0.00 | O |
| ATOM | 51   | O2P  | G A | 2  | -19.307 | -56.324 | 126.235 | 1.00 | 0.00 | O |
| ATOM | 52   | P    | G A | 2  | -18.443 | -57.220 | 127.040 | 1.00 | 0.00 | P |



|      |     |      |     |   |         |         |         |      |      |   |
|------|-----|------|-----|---|---------|---------|---------|------|------|---|
| ATOM | 53  | H1   | G A | 2 | -20.414 | -62.949 | 119.486 | 1.00 | 0.00 | H |
| ATOM | 54  | H8   | G A | 2 | -19.069 | -58.525 | 123.987 | 1.00 | 0.00 | H |
| ATOM | 55  | H1'  | G A | 2 | -16.141 | -60.902 | 122.974 | 1.00 | 0.00 | H |
| ATOM | 56  | H21  | G A | 2 | -18.702 | -64.287 | 119.198 | 1.00 | 0.00 | H |
| ATOM | 57  | H3'  | G A | 2 | -15.265 | -58.309 | 125.798 | 1.00 | 0.00 | H |
| ATOM | 58  | H22  | G A | 2 | -17.185 | -64.113 | 120.122 | 1.00 | 0.00 | H |
| ATOM | 59  | H4'  | G A | 2 | -15.676 | -60.803 | 126.589 | 1.00 | 0.00 | H |
| ATOM | 60  | H2'1 | G A | 2 | -16.897 | -58.168 | 124.043 | 1.00 | 0.00 | H |
| ATOM | 61  | H2'2 | G A | 2 | -15.472 | -58.632 | 123.122 | 1.00 | 0.00 | H |
| ATOM | 62  | H5'1 | G A | 2 | -18.213 | -60.353 | 126.887 | 1.00 | 0.00 | H |
| ATOM | 63  | H5'2 | G A | 2 | -17.021 | -59.362 | 127.755 | 1.00 | 0.00 | H |
| ATOM | 64  | C1'  | G A | 3 | -14.292 | -61.398 | 119.485 | 1.00 | 0.00 | C |
| ATOM | 65  | N1   | G A | 3 | -18.873 | -60.952 | 117.289 | 1.00 | 0.00 | N |
| ATOM | 66  | C2   | G A | 3 | -17.881 | -61.894 | 117.089 | 1.00 | 0.00 | C |
| ATOM | 67  | N2   | G A | 3 | -18.143 | -62.842 | 116.180 | 1.00 | 0.00 | N |
| ATOM | 68  | N3   | G A | 3 | -16.721 | -61.890 | 117.741 | 1.00 | 0.00 | N |
| ATOM | 69  | C4   | G A | 3 | -16.624 | -60.856 | 118.617 | 1.00 | 0.00 | C |
| ATOM | 70  | C5   | G A | 3 | -17.560 | -59.870 | 118.881 | 1.00 | 0.00 | C |
| ATOM | 71  | C6   | G A | 3 | -18.794 | -59.876 | 118.191 | 1.00 | 0.00 | C |
| ATOM | 72  | O6   | G A | 3 | -19.741 | -59.095 | 118.287 | 1.00 | 0.00 | O |
| ATOM | 73  | N7   | G A | 3 | -17.073 | -58.990 | 119.849 | 1.00 | 0.00 | N |
| ATOM | 74  | C8   | G A | 3 | -15.888 | -59.461 | 120.137 | 1.00 | 0.00 | C |
| ATOM | 75  | N9   | G A | 3 | -15.543 | -60.593 | 119.428 | 1.00 | 0.00 | N |
| ATOM | 76  | C2'  | G A | 3 | -13.032 | -60.562 | 119.668 | 1.00 | 0.00 | C |
| ATOM | 77  | C3'  | G A | 3 | -12.180 | -61.458 | 120.550 | 1.00 | 0.00 | C |
| ATOM | 78  | O3'  | G A | 3 | -11.479 | -62.391 | 119.732 | 1.00 | 0.00 | O |
| ATOM | 79  | C4'  | G A | 3 | -13.215 | -62.140 | 121.444 | 1.00 | 0.00 | C |
| ATOM | 80  | O4'  | G A | 3 | -14.394 | -62.278 | 120.588 | 1.00 | 0.00 | O |
| ATOM | 81  | C5'  | G A | 3 | -13.614 | -61.397 | 122.697 | 1.00 | 0.00 | C |
| ATOM | 82  | O5'  | G A | 3 | -13.648 | -59.972 | 122.433 | 1.00 | 0.00 | O |
| ATOM | 83  | O1P  | G A | 3 | -11.780 | -59.069 | 123.858 | 1.00 | 0.00 | O |
| ATOM | 84  | O2P  | G A | 3 | -13.735 | -57.607 | 123.279 | 1.00 | 0.00 | O |
| ATOM | 85  | P    | G A | 3 | -13.227 | -58.964 | 123.596 | 1.00 | 0.00 | P |
| ATOM | 86  | H1   | G A | 3 | -19.738 | -61.048 | 116.735 | 1.00 | 0.00 | H |
| ATOM | 87  | H8   | G A | 3 | -15.228 | -59.000 | 120.872 | 1.00 | 0.00 | H |
| ATOM | 88  | H1'  | G A | 3 | -14.232 | -62.000 | 118.579 | 1.00 | 0.00 | H |
| ATOM | 89  | H21  | G A | 3 | -19.045 | -62.840 | 115.680 | 1.00 | 0.00 | H |
| ATOM | 90  | H3'  | G A | 3 | -11.464 | -60.889 | 121.143 | 1.00 | 0.00 | H |
| ATOM | 91  | H22  | G A | 3 | -17.444 | -63.571 | 115.982 | 1.00 | 0.00 | H |
| ATOM | 92  | H4'  | G A | 3 | -12.793 | -63.098 | 121.744 | 1.00 | 0.00 | H |
| ATOM | 93  | H2'1 | G A | 3 | -13.237 | -59.607 | 120.153 | 1.00 | 0.00 | H |
| ATOM | 94  | H2'2 | G A | 3 | -12.536 | -60.348 | 118.721 | 1.00 | 0.00 | H |
| ATOM | 95  | H5'1 | G A | 3 | -14.597 | -61.737 | 123.017 | 1.00 | 0.00 | H |
| ATOM | 96  | H5'2 | G A | 3 | -12.888 | -61.609 | 123.483 | 1.00 | 0.00 | H |
| ATOM | 97  | C1'  | C A | 4 | -13.906 | -62.242 | 114.620 | 1.00 | 0.00 | C |
| ATOM | 98  | N1   | C A | 4 | -14.575 | -61.010 | 115.123 | 1.00 | 0.00 | N |
| ATOM | 99  | C2   | C A | 4 | -15.847 | -60.716 | 114.636 | 1.00 | 0.00 | C |
| ATOM | 100 | O2   | C A | 4 | -16.364 | -61.480 | 113.812 | 1.00 | 0.00 | O |
| ATOM | 101 | N3   | C A | 4 | -16.474 | -59.599 | 115.082 | 1.00 | 0.00 | N |
| ATOM | 102 | C4   | C A | 4 | -15.887 | -58.790 | 115.973 | 1.00 | 0.00 | C |
| ATOM | 103 | N4   | C A | 4 | -16.547 | -57.713 | 116.376 | 1.00 | 0.00 | N |
| ATOM | 104 | C5   | C A | 4 | -14.580 | -59.069 | 116.488 | 1.00 | 0.00 | C |
| ATOM | 105 | C6   | C A | 4 | -13.969 | -60.199 | 116.028 | 1.00 | 0.00 | C |
| ATOM | 106 | C2'  | C A | 4 | -12.407 | -62.083 | 114.411 | 1.00 | 0.00 | C |

|      |     |      |     |   |         |         |         |      |      |   |
|------|-----|------|-----|---|---------|---------|---------|------|------|---|
| ATOM | 107 | C3'  | C A | 4 | -11.883 | -63.455 | 114.808 | 1.00 | 0.00 | C |
| ATOM | 108 | O3'  | C A | 4 | -11.977 | -64.334 | 113.689 | 1.00 | 0.00 | O |
| ATOM | 109 | C4'  | C A | 4 | -12.822 | -63.861 | 115.942 | 1.00 | 0.00 | C |
| ATOM | 110 | O4'  | C A | 4 | -14.107 | -63.263 | 115.579 | 1.00 | 0.00 | O |
| ATOM | 111 | C5'  | C A | 4 | -12.444 | -63.389 | 117.327 | 1.00 | 0.00 | C |
| ATOM | 112 | O5'  | C A | 4 | -11.861 | -62.064 | 117.251 | 1.00 | 0.00 | O |
| ATOM | 113 | O1P  | C A | 4 | -9.477  | -62.434 | 117.966 | 1.00 | 0.00 | O |
| ATOM | 114 | O2P  | C A | 4 | -10.560 | -60.199 | 118.321 | 1.00 | 0.00 | O |
| ATOM | 115 | P    | C A | 4 | -10.703 | -61.675 | 118.277 | 1.00 | 0.00 | P |
| ATOM | 116 | H5   | C A | 4 | -14.096 | -58.410 | 117.209 | 1.00 | 0.00 | H |
| ATOM | 117 | H6   | C A | 4 | -12.975 | -60.455 | 116.395 | 1.00 | 0.00 | H |
| ATOM | 118 | H1'  | C A | 4 | -14.400 | -62.545 | 113.698 | 1.00 | 0.00 | H |
| ATOM | 119 | H3'  | C A | 4 | -10.848 | -63.413 | 115.148 | 1.00 | 0.00 | H |
| ATOM | 120 | H4'  | C A | 4 | -12.848 | -64.951 | 115.957 | 1.00 | 0.00 | H |
| ATOM | 121 | H41  | C A | 4 | -16.119 | -57.075 | 117.062 | 1.00 | 0.00 | H |
| ATOM | 122 | H42  | C A | 4 | -17.487 | -57.514 | 116.003 | 1.00 | 0.00 | H |
| ATOM | 123 | H2'1 | C A | 4 | -11.981 | -61.301 | 115.037 | 1.00 | 0.00 | H |
| ATOM | 124 | H2'2 | C A | 4 | -12.156 | -61.846 | 113.375 | 1.00 | 0.00 | H |
| ATOM | 125 | H5'1 | C A | 4 | -13.336 | -63.364 | 117.953 | 1.00 | 0.00 | H |
| ATOM | 126 | H5'2 | C A | 4 | -11.724 | -64.084 | 117.757 | 1.00 | 0.00 | H |
| ATOM | 127 | C1'  | C A | 5 | -15.346 | -61.801 | 109.902 | 1.00 | 0.00 | C |
| ATOM | 128 | N1   | C A | 5 | -15.164 | -60.592 | 110.753 | 1.00 | 0.00 | N |
| ATOM | 129 | C2   | C A | 5 | -16.212 | -59.676 | 110.813 | 1.00 | 0.00 | C |
| ATOM | 130 | O2   | C A | 5 | -17.242 | -59.899 | 110.163 | 1.00 | 0.00 | O |
| ATOM | 131 | N3   | C A | 5 | -16.068 | -58.569 | 111.583 | 1.00 | 0.00 | N |
| ATOM | 132 | C4   | C A | 5 | -14.942 | -58.353 | 112.275 | 1.00 | 0.00 | C |
| ATOM | 133 | N4   | C A | 5 | -14.856 | -57.258 | 113.013 | 1.00 | 0.00 | N |
| ATOM | 134 | C5   | C A | 5 | -13.849 | -59.279 | 112.229 | 1.00 | 0.00 | C |
| ATOM | 135 | C6   | C A | 5 | -14.018 | -60.386 | 111.452 | 1.00 | 0.00 | C |
| ATOM | 136 | C2'  | C A | 5 | -14.083 | -62.227 | 109.167 | 1.00 | 0.00 | C |
| ATOM | 137 | C3'  | C A | 5 | -14.204 | -63.743 | 109.184 | 1.00 | 0.00 | C |
| ATOM | 138 | O3'  | C A | 5 | -15.018 | -64.160 | 108.091 | 1.00 | 0.00 | O |
| ATOM | 139 | C4'  | C A | 5 | -14.864 | -64.016 | 110.533 | 1.00 | 0.00 | C |
| ATOM | 140 | O4'  | C A | 5 | -15.742 | -62.866 | 110.746 | 1.00 | 0.00 | O |
| ATOM | 141 | C5'  | C A | 5 | -13.937 | -64.144 | 111.720 | 1.00 | 0.00 | C |
| ATOM | 142 | O5'  | C A | 5 | -12.832 | -63.214 | 111.581 | 1.00 | 0.00 | O |
| ATOM | 143 | O1P  | C A | 5 | -10.836 | -64.721 | 111.307 | 1.00 | 0.00 | O |
| ATOM | 144 | O2P  | C A | 5 | -10.553 | -62.430 | 112.289 | 1.00 | 0.00 | O |
| ATOM | 145 | P    | C A | 5 | -11.399 | -63.639 | 112.136 | 1.00 | 0.00 | P |
| ATOM | 146 | H5   | C A | 5 | -12.928 | -59.106 | 112.787 | 1.00 | 0.00 | H |
| ATOM | 147 | H6   | C A | 5 | -13.216 | -61.122 | 111.389 | 1.00 | 0.00 | H |
| ATOM | 148 | H1'  | C A | 5 | -16.159 | -61.606 | 109.204 | 1.00 | 0.00 | H |
| ATOM | 149 | H3'  | C A | 5 | -13.231 | -64.231 | 109.115 | 1.00 | 0.00 | H |
| ATOM | 150 | H4'  | C A | 5 | -15.407 | -64.956 | 110.434 | 1.00 | 0.00 | H |
| ATOM | 151 | H41  | C A | 5 | -14.002 | -57.069 | 113.557 | 1.00 | 0.00 | H |
| ATOM | 152 | H42  | C A | 5 | -15.643 | -56.593 | 113.043 | 1.00 | 0.00 | H |
| ATOM | 153 | H2'1 | C A | 5 | -13.177 | -61.896 | 109.673 | 1.00 | 0.00 | H |
| ATOM | 154 | H2'2 | C A | 5 | -14.049 | -61.842 | 108.146 | 1.00 | 0.00 | H |
| ATOM | 155 | H5'1 | C A | 5 | -14.492 | -63.923 | 112.633 | 1.00 | 0.00 | H |
| ATOM | 156 | H5'2 | C A | 5 | -13.557 | -65.163 | 111.769 | 1.00 | 0.00 | H |
| ATOM | 157 | C1'  | G A | 6 | -17.637 | -59.526 | 106.146 | 1.00 | 0.00 | C |
| ATOM | 158 | N1   | G A | 6 | -16.874 | -55.339 | 108.960 | 1.00 | 0.00 | N |
| ATOM | 159 | C2   | G A | 6 | -17.991 | -55.738 | 108.245 | 1.00 | 0.00 | C |
| ATOM | 160 | N2   | G A | 6 | -19.041 | -54.910 | 108.281 | 1.00 | 0.00 | N |

|      |     |      |     |   |         |         |         |      |      |   |
|------|-----|------|-----|---|---------|---------|---------|------|------|---|
| ATOM | 161 | N3   | G A | 6 | -18.051 | -56.872 | 107.548 | 1.00 | 0.00 | N |
| ATOM | 162 | C4   | G A | 6 | -16.895 | -57.582 | 107.615 | 1.00 | 0.00 | C |
| ATOM | 163 | C5   | G A | 6 | -15.733 | -57.262 | 108.298 | 1.00 | 0.00 | C |
| ATOM | 164 | C6   | G A | 6 | -15.668 | -56.062 | 109.040 | 1.00 | 0.00 | C |
| ATOM | 165 | O6   | G A | 6 | -14.736 | -55.608 | 109.704 | 1.00 | 0.00 | O |
| ATOM | 166 | N7   | G A | 6 | -14.773 | -58.258 | 108.110 | 1.00 | 0.00 | N |
| ATOM | 167 | C8   | G A | 6 | -15.370 | -59.131 | 107.342 | 1.00 | 0.00 | C |
| ATOM | 168 | N9   | G A | 6 | -16.662 | -58.791 | 106.997 | 1.00 | 0.00 | N |
| ATOM | 169 | C2'  | G A | 6 | -17.005 | -60.223 | 104.950 | 1.00 | 0.00 | C |
| ATOM | 170 | C3'  | G A | 6 | -17.839 | -61.488 | 104.841 | 1.00 | 0.00 | C |
| ATOM | 171 | O3'  | G A | 6 | -19.020 | -61.209 | 104.092 | 1.00 | 0.00 | O |
| ATOM | 172 | C4'  | G A | 6 | -18.145 | -61.820 | 106.300 | 1.00 | 0.00 | C |
| ATOM | 173 | O4'  | G A | 6 | -18.252 | -60.514 | 106.951 | 1.00 | 0.00 | O |
| ATOM | 174 | C5'  | G A | 6 | -17.113 | -62.643 | 107.033 | 1.00 | 0.00 | C |
| ATOM | 175 | O5'  | G A | 6 | -15.784 | -62.265 | 106.596 | 1.00 | 0.00 | O |
| ATOM | 176 | O1P  | G A | 6 | -14.944 | -64.330 | 105.429 | 1.00 | 0.00 | O |
| ATOM | 177 | O2P  | G A | 6 | -13.318 | -62.736 | 106.483 | 1.00 | 0.00 | O |
| ATOM | 178 | P    | G A | 6 | -14.652 | -63.386 | 106.524 | 1.00 | 0.00 | P |
| ATOM | 179 | H1   | G A | 6 | -16.932 | -54.445 | 109.472 | 1.00 | 0.00 | H |
| ATOM | 180 | H8   | G A | 6 | -14.890 | -60.049 | 107.000 | 1.00 | 0.00 | H |
| ATOM | 181 | H1'  | G A | 6 | -18.409 | -58.825 | 105.828 | 1.00 | 0.00 | H |
| ATOM | 182 | H21  | G A | 6 | -18.989 | -54.036 | 108.826 | 1.00 | 0.00 | H |
| ATOM | 183 | H3'  | G A | 6 | -17.292 | -62.300 | 104.360 | 1.00 | 0.00 | H |
| ATOM | 184 | H22  | G A | 6 | -19.902 | -55.148 | 107.769 | 1.00 | 0.00 | H |
| ATOM | 185 | H4'  | G A | 6 | -19.082 | -62.377 | 106.309 | 1.00 | 0.00 | H |
| ATOM | 186 | H2'1 | G A | 6 | -15.952 | -60.456 | 105.115 | 1.00 | 0.00 | H |
| ATOM | 187 | H2'2 | G A | 6 | -17.069 | -59.625 | 104.040 | 1.00 | 0.00 | H |
| ATOM | 188 | H5'1 | G A | 6 | -17.212 | -62.472 | 108.103 | 1.00 | 0.00 | H |
| ATOM | 189 | H5'2 | G A | 6 | -17.284 | -63.700 | 106.823 | 1.00 | 0.00 | H |
| ATOM | 190 | C1'  | C A | 7 | -19.480 | -55.575 | 103.800 | 1.00 | 0.00 | C |
| ATOM | 191 | N1   | C A | 7 | -18.080 | -55.569 | 104.303 | 1.00 | 0.00 | N |
| ATOM | 192 | C2   | C A | 7 | -17.679 | -54.498 | 105.098 | 1.00 | 0.00 | C |
| ATOM | 193 | O2   | C A | 7 | -18.493 | -53.601 | 105.350 | 1.00 | 0.00 | O |
| ATOM | 194 | N3   | C A | 7 | -16.407 | -54.473 | 105.567 | 1.00 | 0.00 | N |
| ATOM | 195 | C4   | C A | 7 | -15.547 | -55.457 | 105.276 | 1.00 | 0.00 | C |
| ATOM | 196 | N4   | C A | 7 | -14.316 | -55.384 | 105.764 | 1.00 | 0.00 | N |
| ATOM | 197 | C5   | C A | 7 | -15.931 | -56.569 | 104.458 | 1.00 | 0.00 | C |
| ATOM | 198 | C6   | C A | 7 | -17.218 | -56.576 | 103.999 | 1.00 | 0.00 | C |
| ATOM | 199 | C2'  | C A | 7 | -19.621 | -56.112 | 102.381 | 1.00 | 0.00 | C |
| ATOM | 200 | C3'  | C A | 7 | -20.955 | -56.840 | 102.449 | 1.00 | 0.00 | C |
| ATOM | 201 | O3'  | C A | 7 | -22.010 | -55.904 | 102.231 | 1.00 | 0.00 | O |
| ATOM | 202 | C4'  | C A | 7 | -20.964 | -57.402 | 103.868 | 1.00 | 0.00 | C |
| ATOM | 203 | O4'  | C A | 7 | -20.244 | -56.402 | 104.658 | 1.00 | 0.00 | O |
| ATOM | 204 | C5'  | C A | 7 | -20.297 | -58.743 | 104.063 | 1.00 | 0.00 | C |
| ATOM | 205 | O5'  | C A | 7 | -19.131 | -58.840 | 103.208 | 1.00 | 0.00 | O |
| ATOM | 206 | O1P  | C A | 7 | -19.747 | -60.662 | 101.582 | 1.00 | 0.00 | O |
| ATOM | 207 | O2P  | C A | 7 | -17.337 | -60.231 | 102.131 | 1.00 | 0.00 | O |
| ATOM | 208 | P    | C A | 7 | -18.745 | -60.259 | 102.592 | 1.00 | 0.00 | P |
| ATOM | 209 | H5   | C A | 7 | -15.233 | -57.371 | 104.212 | 1.00 | 0.00 | H |
| ATOM | 210 | H6   | C A | 7 | -17.560 | -57.405 | 103.380 | 1.00 | 0.00 | H |
| ATOM | 211 | H1'  | C A | 7 | -19.875 | -54.561 | 103.874 | 1.00 | 0.00 | H |
| ATOM | 212 | H3'  | C A | 7 | -21.021 | -57.638 | 101.707 | 1.00 | 0.00 | H |
| ATOM | 213 | H4'  | C A | 7 | -22.009 | -57.504 | 104.160 | 1.00 | 0.00 | H |
| ATOM | 214 | H41  | C A | 7 | -13.635 | -56.129 | 105.557 | 1.00 | 0.00 | H |

|      |     |      |     |   |         |         |         |      |      |   |
|------|-----|------|-----|---|---------|---------|---------|------|------|---|
| ATOM | 215 | H42  | C A | 7 | -14.040 | -54.584 | 106.349 | 1.00 | 0.00 | H |
| ATOM | 216 | H2'1 | C A | 7 | -18.812 | -56.790 | 102.113 | 1.00 | 0.00 | H |
| ATOM | 217 | H2'2 | C A | 7 | -19.640 | -55.314 | 101.637 | 1.00 | 0.00 | H |
| ATOM | 218 | H5'1 | C A | 7 | -19.999 | -58.848 | 105.107 | 1.00 | 0.00 | H |
| ATOM | 219 | H5'2 | C A | 7 | -21.004 | -59.535 | 103.811 | 1.00 | 0.00 | H |
| ATOM | 220 | C1'  | A A | 8 | -19.770 | -50.744 | 102.758 | 1.00 | 0.00 | C |
| ATOM | 221 | N1   | A A | 8 | -14.885 | -50.698 | 104.334 | 1.00 | 0.00 | N |
| ATOM | 222 | C2   | A A | 8 | -15.907 | -49.875 | 104.551 | 1.00 | 0.00 | C |
| ATOM | 223 | N3   | A A | 8 | -17.147 | -49.948 | 104.116 | 1.00 | 0.00 | N |
| ATOM | 224 | C4   | A A | 8 | -17.306 | -51.040 | 103.345 | 1.00 | 0.00 | C |
| ATOM | 225 | C5   | A A | 8 | -16.364 | -51.977 | 103.026 | 1.00 | 0.00 | C |
| ATOM | 226 | C6   | A A | 8 | -15.075 | -51.780 | 103.563 | 1.00 | 0.00 | C |
| ATOM | 227 | N6   | A A | 8 | -14.049 | -52.618 | 103.336 | 1.00 | 0.00 | N |
| ATOM | 228 | N7   | A A | 8 | -16.894 | -52.962 | 102.210 | 1.00 | 0.00 | N |
| ATOM | 229 | C8   | A A | 8 | -18.133 | -52.600 | 102.051 | 1.00 | 0.00 | C |
| ATOM | 230 | N9   | A A | 8 | -18.457 | -51.443 | 102.713 | 1.00 | 0.00 | N |
| ATOM | 231 | C2'  | A A | 8 | -20.532 | -50.781 | 101.441 | 1.00 | 0.00 | C |
| ATOM | 232 | C3'  | A A | 8 | -21.973 | -50.890 | 101.910 | 1.00 | 0.00 | C |
| ATOM | 233 | O3'  | A A | 8 | -22.470 | -49.585 | 102.196 | 1.00 | 0.00 | O |
| ATOM | 234 | C4'  | A A | 8 | -21.858 | -51.751 | 103.167 | 1.00 | 0.00 | C |
| ATOM | 235 | O4'  | A A | 8 | -20.562 | -51.381 | 103.741 | 1.00 | 0.00 | O |
| ATOM | 236 | C5'  | A A | 8 | -21.885 | -53.247 | 102.958 | 1.00 | 0.00 | C |
| ATOM | 237 | O5'  | A A | 8 | -21.188 | -53.584 | 101.732 | 1.00 | 0.00 | O |
| ATOM | 238 | O1P  | A A | 8 | -23.016 | -54.494 | 100.258 | 1.00 | 0.00 | O |
| ATOM | 239 | O2P  | A A | 8 | -20.645 | -55.250 | 99.931  | 1.00 | 0.00 | O |
| ATOM | 240 | P    | A A | 8 | -21.712 | -54.820 | 100.868 | 1.00 | 0.00 | P |
| ATOM | 241 | H2   | A A | 8 | -15.686 | -49.017 | 105.183 | 1.00 | 0.00 | H |
| ATOM | 242 | H8   | A A | 8 | -18.848 | -53.162 | 101.450 | 1.00 | 0.00 | H |
| ATOM | 243 | H1'  | A A | 8 | -19.598 | -49.717 | 103.081 | 1.00 | 0.00 | H |
| ATOM | 244 | H3'  | A A | 8 | -22.611 | -51.364 | 101.166 | 1.00 | 0.00 | H |
| ATOM | 245 | H4'  | A A | 8 | -22.698 | -51.490 | 103.808 | 1.00 | 0.00 | H |
| ATOM | 246 | H61  | A A | 8 | -13.128 | -52.430 | 103.754 | 1.00 | 0.00 | H |
| ATOM | 247 | H62  | A A | 8 | -14.187 | -53.449 | 102.743 | 1.00 | 0.00 | H |
| ATOM | 248 | H2'1 | A A | 8 | -20.250 | -51.635 | 100.825 | 1.00 | 0.00 | H |
| ATOM | 249 | H2'2 | A A | 8 | -20.374 | -49.882 | 100.847 | 1.00 | 0.00 | H |
| ATOM | 250 | H5'1 | A A | 8 | -21.397 | -53.734 | 103.804 | 1.00 | 0.00 | H |
| ATOM | 251 | H5'2 | A A | 8 | -22.919 | -53.582 | 102.898 | 1.00 | 0.00 | H |
| ATOM | 252 | C1'  | C A | 9 | -17.913 | -46.147 | 102.465 | 1.00 | 0.00 | C |
| ATOM | 253 | N1   | C A | 9 | -17.192 | -47.292 | 101.843 | 1.00 | 0.00 | N |
| ATOM | 254 | C2   | C A | 9 | -15.842 | -47.457 | 102.149 | 1.00 | 0.00 | C |
| ATOM | 255 | O2   | C A | 9 | -15.302 | -46.652 | 102.917 | 1.00 | 0.00 | O |
| ATOM | 256 | N3   | C A | 9 | -15.169 | -48.493 | 101.593 | 1.00 | 0.00 | N |
| ATOM | 257 | C4   | C A | 9 | -15.781 | -49.348 | 100.763 | 1.00 | 0.00 | C |
| ATOM | 258 | N4   | C A | 9 | -15.075 | -50.345 | 100.251 | 1.00 | 0.00 | N |
| ATOM | 259 | C5   | C A | 9 | -17.168 | -49.200 | 100.427 | 1.00 | 0.00 | C |
| ATOM | 260 | C6   | C A | 9 | -17.828 | -48.152 | 101.002 | 1.00 | 0.00 | C |
| ATOM | 261 | C2'  | C A | 9 | -18.925 | -45.485 | 101.541 | 1.00 | 0.00 | C |
| ATOM | 262 | C3'  | C A | 9 | -20.036 | -45.103 | 102.509 | 1.00 | 0.00 | C |
| ATOM | 263 | O3'  | C A | 9 | -19.719 | -43.849 | 103.111 | 1.00 | 0.00 | O |
| ATOM | 264 | C4'  | C A | 9 | -20.016 | -46.249 | 103.517 | 1.00 | 0.00 | C |
| ATOM | 265 | O4'  | C A | 9 | -18.609 | -46.640 | 103.595 | 1.00 | 0.00 | O |
| ATOM | 266 | C5'  | C A | 9 | -20.836 | -47.468 | 103.164 | 1.00 | 0.00 | C |
| ATOM | 267 | O5'  | C A | 9 | -20.774 | -47.702 | 101.734 | 1.00 | 0.00 | O |
| ATOM | 268 | O1P  | C A | 9 | -23.138 | -47.297 | 100.972 | 1.00 | 0.00 | O |

|      |     |      |   |   |    |         |         |         |      |      |   |
|------|-----|------|---|---|----|---------|---------|---------|------|------|---|
| ATOM | 269 | O2P  | C | A | 9  | -21.653 | -48.855 | 99.681  | 1.00 | 0.00 | O |
| ATOM | 270 | P    | C | A | 9  | -22.055 | -48.300 | 100.997 | 1.00 | 0.00 | P |
| ATOM | 271 | H5   | C | A | 9  | -17.669 | -49.891 | 99.748  | 1.00 | 0.00 | H |
| ATOM | 272 | H6   | C | A | 9  | -18.886 | -48.004 | 100.785 | 1.00 | 0.00 | H |
| ATOM | 273 | H1'  | C | A | 9  | -17.173 | -45.428 | 102.814 | 1.00 | 0.00 | H |
| ATOM | 274 | H3'  | C | A | 9  | -21.002 | -45.030 | 102.012 | 1.00 | 0.00 | H |
| ATOM | 275 | H4'  | C | A | 9  | -20.401 | -45.851 | 104.457 | 1.00 | 0.00 | H |
| ATOM | 276 | H41  | C | A | 9  | -15.522 | -51.019 | 99.612  | 1.00 | 0.00 | H |
| ATOM | 277 | H42  | C | A | 9  | -14.078 | -50.447 | 100.491 | 1.00 | 0.00 | H |
| ATOM | 278 | H2'1 | C | A | 9  | -19.289 | -46.163 | 100.771 | 1.00 | 0.00 | H |
| ATOM | 279 | H2'2 | C | A | 9  | -18.516 | -44.608 | 101.039 | 1.00 | 0.00 | H |
| ATOM | 280 | H5'1 | C | A | 9  | -20.442 | -48.332 | 103.696 | 1.00 | 0.00 | H |
| ATOM | 281 | H5'2 | C | A | 9  | -21.871 | -47.302 | 103.464 | 1.00 | 0.00 | H |
| ATOM | 282 | C1'  | C | A | 10 | -14.252 | -42.842 | 102.012 | 1.00 | 0.00 | C |
| ATOM | 283 | N1   | C | A | 10 | -14.382 | -43.964 | 101.042 | 1.00 | 0.00 | N |
| ATOM | 284 | C2   | C | A | 10 | -13.257 | -44.751 | 100.801 | 1.00 | 0.00 | C |
| ATOM | 285 | O2   | C | A | 10 | -12.204 | -44.488 | 101.396 | 1.00 | 0.00 | O |
| ATOM | 286 | N3   | C | A | 10 | -13.353 | -45.778 | 99.921  | 1.00 | 0.00 | N |
| ATOM | 287 | C4   | C | A | 10 | -14.506 | -46.038 | 99.290  | 1.00 | 0.00 | C |
| ATOM | 288 | N4   | C | A | 10 | -14.545 | -47.056 | 98.442  | 1.00 | 0.00 | N |
| ATOM | 289 | C5   | C | A | 10 | -15.677 | -45.244 | 99.516  | 1.00 | 0.00 | C |
| ATOM | 290 | C6   | C | A | 10 | -15.558 | -44.217 | 100.410 | 1.00 | 0.00 | C |
| ATOM | 291 | C2'  | C | A | 10 | -15.029 | -41.595 | 101.614 | 1.00 | 0.00 | C |
| ATOM | 292 | C3'  | C | A | 10 | -15.495 | -41.069 | 102.962 | 1.00 | 0.00 | C |
| ATOM | 293 | O3'  | C | A | 10 | -14.457 | -40.277 | 103.540 | 1.00 | 0.00 | O |
| ATOM | 294 | C4'  | C | A | 10 | -15.754 | -42.346 | 103.755 | 1.00 | 0.00 | C |
| ATOM | 295 | O4'  | C | A | 10 | -14.754 | -43.291 | 103.257 | 1.00 | 0.00 | O |
| ATOM | 296 | C5'  | C | A | 10 | -17.123 | -42.967 | 103.600 | 1.00 | 0.00 | C |
| ATOM | 297 | O5'  | C | A | 10 | -17.582 | -42.806 | 102.233 | 1.00 | 0.00 | O |
| ATOM | 298 | O1P  | C | A | 10 | -19.559 | -41.264 | 102.461 | 1.00 | 0.00 | O |
| ATOM | 299 | O2P  | C | A | 10 | -19.439 | -42.878 | 100.543 | 1.00 | 0.00 | O |
| ATOM | 300 | P    | C | A | 10 | -19.139 | -42.590 | 101.966 | 1.00 | 0.00 | P |
| ATOM | 301 | H5   | C | A | 10 | -16.617 | -45.447 | 98.999  | 1.00 | 0.00 | H |
| ATOM | 302 | H6   | C | A | 10 | -16.425 | -43.590 | 100.621 | 1.00 | 0.00 | H |
| ATOM | 303 | H1'  | C | A | 10 | -13.193 | -42.621 | 102.138 | 1.00 | 0.00 | H |
| ATOM | 304 | H3'  | C | A | 10 | -16.399 | -40.467 | 102.875 | 1.00 | 0.00 | H |
| ATOM | 305 | H4'  | C | A | 10 | -15.621 | -42.098 | 104.808 | 1.00 | 0.00 | H |
| ATOM | 306 | H41  | C | A | 10 | -15.420 | -47.279 | 97.946  | 1.00 | 0.00 | H |
| ATOM | 307 | H42  | C | A | 10 | -13.702 | -47.623 | 98.280  | 1.00 | 0.00 | H |
| ATOM | 308 | H2'1 | C | A | 10 | -15.873 | -41.822 | 100.965 | 1.00 | 0.00 | H |
| ATOM | 309 | H2'2 | C | A | 10 | -14.402 | -40.866 | 101.097 | 1.00 | 0.00 | H |
| ATOM | 310 | H5'1 | C | A | 10 | -17.067 | -44.028 | 103.846 | 1.00 | 0.00 | H |
| ATOM | 311 | H5'2 | C | A | 10 | -17.817 | -42.478 | 104.282 | 1.00 | 0.00 | H |
| ATOM | 312 | C1'  | T | A | 11 | -9.745  | -41.351 | 100.611 | 1.00 | 0.00 | C |
| ATOM | 313 | N1   | T | A | 11 | -10.647 | -42.019 | 99.635  | 1.00 | 0.00 | N |
| ATOM | 314 | C2   | T | A | 11 | -10.131 | -43.085 | 98.928  | 1.00 | 0.00 | C |
| ATOM | 315 | O2   | T | A | 11 | -8.989  | -43.486 | 99.076  | 1.00 | 0.00 | O |
| ATOM | 316 | N3   | T | A | 11 | -11.003 | -43.677 | 98.032  | 1.00 | 0.00 | N |
| ATOM | 317 | C4   | T | A | 11 | -12.308 | -43.302 | 97.787  | 1.00 | 0.00 | C |
| ATOM | 318 | O4   | T | A | 11 | -12.994 | -43.908 | 96.955  | 1.00 | 0.00 | O |
| ATOM | 319 | C5   | T | A | 11 | -12.758 | -42.177 | 98.573  | 1.00 | 0.00 | C |
| ATOM | 320 | C6   | T | A | 11 | -11.935 | -41.578 | 99.456  | 1.00 | 0.00 | C |
| ATOM | 321 | C7   | T | A | 11 | -14.173 | -41.737 | 98.341  | 1.00 | 0.00 | C |
| ATOM | 322 | C2'  | T | A | 11 | -9.914  | -39.838 | 100.669 | 1.00 | 0.00 | C |

|      |     |      |     |    |         |         |         |      |      |   |
|------|-----|------|-----|----|---------|---------|---------|------|------|---|
| ATOM | 323 | C3'  | T A | 11 | -9.687  | -39.549 | 102.145 | 1.00 | 0.00 | C |
| ATOM | 324 | O3'  | T A | 11 | -8.288  | -39.433 | 102.391 | 1.00 | 0.00 | O |
| ATOM | 325 | C4'  | T A | 11 | -10.294 | -40.773 | 102.827 | 1.00 | 0.00 | C |
| ATOM | 326 | O4'  | T A | 11 | -10.037 | -41.871 | 101.894 | 1.00 | 0.00 | O |
| ATOM | 327 | C5'  | T A | 11 | -11.777 | -40.718 | 103.112 | 1.00 | 0.00 | C |
| ATOM | 328 | O5'  | T A | 11 | -12.457 | -40.025 | 102.035 | 1.00 | 0.00 | O |
| ATOM | 329 | O1P  | T A | 11 | -13.323 | -37.937 | 103.141 | 1.00 | 0.00 | O |
| ATOM | 330 | O2P  | T A | 11 | -14.509 | -38.883 | 101.142 | 1.00 | 0.00 | O |
| ATOM | 331 | P    | T A | 11 | -13.732 | -39.134 | 102.381 | 1.00 | 0.00 | P |
| ATOM | 332 | H3   | T A | 11 | -10.644 | -44.478 | 97.496  | 1.00 | 0.00 | H |
| ATOM | 333 | H6   | T A | 11 | -12.298 | -40.730 | 100.039 | 1.00 | 0.00 | H |
| ATOM | 334 | H1'  | T A | 11 | -8.718  | -41.620 | 100.367 | 1.00 | 0.00 | H |
| ATOM | 335 | H3'  | T A | 11 | -10.186 | -38.634 | 102.461 | 1.00 | 0.00 | H |
| ATOM | 336 | H4'  | T A | 11 | -9.776  | -40.894 | 103.780 | 1.00 | 0.00 | H |
| ATOM | 337 | H71  | T A | 11 | -14.175 | -40.738 | 97.904  | 1.00 | 0.00 | H |
| ATOM | 338 | H72  | T A | 11 | -14.662 | -42.433 | 97.659  | 1.00 | 0.00 | H |
| ATOM | 339 | H73  | T A | 11 | -14.710 | -41.719 | 99.289  | 1.00 | 0.00 | H |
| ATOM | 340 | H2'1 | T A | 11 | -10.905 | -39.521 | 100.351 | 1.00 | 0.00 | H |
| ATOM | 341 | H2'2 | T A | 11 | -9.186  | -39.316 | 100.045 | 1.00 | 0.00 | H |
| ATOM | 342 | H5'1 | T A | 11 | -12.163 | -41.733 | 103.199 | 1.00 | 0.00 | H |
| ATOM | 343 | H5'2 | T A | 11 | -11.941 | -40.190 | 104.051 | 1.00 | 0.00 | H |
| ATOM | 344 | C1'  | A A | 12 | -5.667  | -41.562 | 97.792  | 1.00 | 0.00 | C |
| ATOM | 345 | N1   | A A | 12 | -8.832  | -43.673 | 94.348  | 1.00 | 0.00 | N |
| ATOM | 346 | C2   | A A | 12 | -7.592  | -43.966 | 94.726  | 1.00 | 0.00 | C |
| ATOM | 347 | N3   | A A | 12 | -6.832  | -43.380 | 95.628  | 1.00 | 0.00 | N |
| ATOM | 348 | C4   | A A | 12 | -7.485  | -42.345 | 96.186  | 1.00 | 0.00 | C |
| ATOM | 349 | C5   | A A | 12 | -8.752  | -41.914 | 95.909  | 1.00 | 0.00 | C |
| ATOM | 350 | C6   | A A | 12 | -9.458  | -42.635 | 94.923  | 1.00 | 0.00 | C |
| ATOM | 351 | N6   | A A | 12 | -10.712 | -42.328 | 94.548  | 1.00 | 0.00 | N |
| ATOM | 352 | N7   | A A | 12 | -9.087  | -40.819 | 96.684  | 1.00 | 0.00 | N |
| ATOM | 353 | C8   | A A | 12 | -8.025  | -40.608 | 97.404  | 1.00 | 0.00 | C |
| ATOM | 354 | N9   | A A | 12 | -7.011  | -41.498 | 97.157  | 1.00 | 0.00 | N |
| ATOM | 355 | C2'  | A A | 12 | -5.060  | -40.195 | 98.079  | 1.00 | 0.00 | C |
| ATOM | 356 | C3'  | A A | 12 | -4.319  | -40.445 | 99.384  | 1.00 | 0.00 | C |
| ATOM | 357 | O3'  | A A | 12 | -3.034  | -40.991 | 99.094  | 1.00 | 0.00 | O |
| ATOM | 358 | C4'  | A A | 12 | -5.223  | -41.447 | 100.102 | 1.00 | 0.00 | C |
| ATOM | 359 | O4'  | A A | 12 | -5.803  | -42.247 | 99.022  | 1.00 | 0.00 | O |
| ATOM | 360 | C5'  | A A | 12 | -6.344  | -40.864 | 100.928 | 1.00 | 0.00 | C |
| ATOM | 361 | O5'  | A A | 12 | -6.877  | -39.685 | 100.273 | 1.00 | 0.00 | O |
| ATOM | 362 | O1P  | A A | 12 | -6.273  | -37.820 | 101.853 | 1.00 | 0.00 | O |
| ATOM | 363 | O2P  | A A | 12 | -8.274  | -37.599 | 100.355 | 1.00 | 0.00 | O |
| ATOM | 364 | P    | A A | 12 | -7.406  | -38.480 | 101.173 | 1.00 | 0.00 | P |
| ATOM | 365 | H2   | A A | 12 | -7.139  | -44.817 | 94.219  | 1.00 | 0.00 | H |
| ATOM | 366 | H8   | A A | 12 | -7.946  | -39.802 | 98.134  | 1.00 | 0.00 | H |
| ATOM | 367 | H1'  | A A | 12 | -5.014  | -42.152 | 97.149  | 1.00 | 0.00 | H |
| ATOM | 368 | H3'  | A A | 12 | -4.200  | -39.534 | 99.968  | 1.00 | 0.00 | H |
| ATOM | 369 | H4'  | A A | 12 | -4.584  | -42.027 | 100.768 | 1.00 | 0.00 | H |
| ATOM | 370 | H61  | A A | 12 | -11.185 | -42.888 | 93.826  | 1.00 | 0.00 | H |
| ATOM | 371 | H62  | A A | 12 | -11.199 | -41.531 | 94.984  | 1.00 | 0.00 | H |
| ATOM | 372 | H2'1 | A A | 12 | -5.817  | -39.422 | 98.196  | 1.00 | 0.00 | H |
| ATOM | 373 | H2'2 | A A | 12 | -4.380  | -39.872 | 97.292  | 1.00 | 0.00 | H |
| ATOM | 374 | H5'1 | A A | 12 | -7.131  | -41.611 | 101.038 | 1.00 | 0.00 | H |
| ATOM | 375 | H5'2 | A A | 12 | -5.962  | -40.598 | 101.913 | 1.00 | 0.00 | H |
| ATOM | 376 | C1'  | G A | 13 | -3.189  | -42.667 | 93.634  | 1.00 | 0.00 | C |

|      |     |      |     |    |        |         |        |      |      |   |
|------|-----|------|-----|----|--------|---------|--------|------|------|---|
| ATOM | 377 | N1   | G A | 13 | -7.772 | -42.222 | 91.437 | 1.00 | 0.00 | N |
| ATOM | 378 | C2   | G A | 13 | -6.779 | -43.164 | 91.236 | 1.00 | 0.00 | C |
| ATOM | 379 | N2   | G A | 13 | -7.039 | -44.113 | 90.325 | 1.00 | 0.00 | N |
| ATOM | 380 | N3   | G A | 13 | -5.618 | -43.159 | 91.889 | 1.00 | 0.00 | N |
| ATOM | 381 | C4   | G A | 13 | -5.522 | -42.126 | 92.765 | 1.00 | 0.00 | C |
| ATOM | 382 | C5   | G A | 13 | -6.457 | -41.139 | 93.029 | 1.00 | 0.00 | C |
| ATOM | 383 | C6   | G A | 13 | -7.692 | -41.145 | 92.339 | 1.00 | 0.00 | C |
| ATOM | 384 | O6   | G A | 13 | -8.638 | -40.362 | 92.435 | 1.00 | 0.00 | O |
| ATOM | 385 | N7   | G A | 13 | -5.971 | -40.259 | 93.998 | 1.00 | 0.00 | N |
| ATOM | 386 | C8   | G A | 13 | -4.785 | -40.730 | 94.286 | 1.00 | 0.00 | C |
| ATOM | 387 | N9   | G A | 13 | -4.441 | -41.862 | 93.577 | 1.00 | 0.00 | N |
| ATOM | 388 | C2'  | G A | 13 | -1.930 | -41.831 | 93.817 | 1.00 | 0.00 | C |
| ATOM | 389 | C3'  | G A | 13 | -1.078 | -42.727 | 94.699 | 1.00 | 0.00 | C |
| ATOM | 390 | O3'  | G A | 13 | -0.376 | -43.660 | 93.879 | 1.00 | 0.00 | O |
| ATOM | 391 | C4'  | G A | 13 | -2.113 | -43.409 | 95.592 | 1.00 | 0.00 | C |
| ATOM | 392 | O4'  | G A | 13 | -3.292 | -43.547 | 94.736 | 1.00 | 0.00 | O |
| ATOM | 393 | C5'  | G A | 13 | -2.511 | -42.666 | 96.845 | 1.00 | 0.00 | C |
| ATOM | 394 | O5'  | G A | 13 | -2.545 | -41.241 | 96.581 | 1.00 | 0.00 | O |
| ATOM | 395 | O1P  | G A | 13 | -0.678 | -40.338 | 98.006 | 1.00 | 0.00 | O |
| ATOM | 396 | O2P  | G A | 13 | -2.632 | -38.876 | 97.427 | 1.00 | 0.00 | O |
| ATOM | 397 | P    | G A | 13 | -2.125 | -40.234 | 97.745 | 1.00 | 0.00 | P |
| ATOM | 398 | H1   | G A | 13 | -8.638 | -42.319 | 90.885 | 1.00 | 0.00 | H |
| ATOM | 399 | H8   | G A | 13 | -4.125 | -40.269 | 95.021 | 1.00 | 0.00 | H |
| ATOM | 400 | H1'  | G A | 13 | -3.130 | -43.269 | 92.727 | 1.00 | 0.00 | H |
| ATOM | 401 | H21  | G A | 13 | -7.942 | -44.110 | 89.827 | 1.00 | 0.00 | H |
| ATOM | 402 | H3'  | G A | 13 | -0.361 | -42.157 | 95.291 | 1.00 | 0.00 | H |
| ATOM | 403 | H22  | G A | 13 | -6.340 | -44.839 | 90.128 | 1.00 | 0.00 | H |
| ATOM | 404 | H4'  | G A | 13 | -1.691 | -44.367 | 95.892 | 1.00 | 0.00 | H |
| ATOM | 405 | H2'1 | G A | 13 | -2.135 | -40.876 | 94.302 | 1.00 | 0.00 | H |
| ATOM | 406 | H2'2 | G A | 13 | -1.434 | -41.616 | 92.869 | 1.00 | 0.00 | H |
| ATOM | 407 | H5'1 | G A | 13 | -3.495 | -43.005 | 97.166 | 1.00 | 0.00 | H |
| ATOM | 408 | H5'2 | G A | 13 | -1.786 | -42.878 | 97.632 | 1.00 | 0.00 | H |
| ATOM | 409 | C1'  | G A | 14 | -2.804 | -43.510 | 88.769 | 1.00 | 0.00 | C |
| ATOM | 410 | N1   | G A | 14 | -7.001 | -40.622 | 88.509 | 1.00 | 0.00 | N |
| ATOM | 411 | C2   | G A | 14 | -6.689 | -41.795 | 87.847 | 1.00 | 0.00 | C |
| ATOM | 412 | N2   | G A | 14 | -7.616 | -42.260 | 87.001 | 1.00 | 0.00 | N |
| ATOM | 413 | N3   | G A | 14 | -5.541 | -42.453 | 88.015 | 1.00 | 0.00 | N |
| ATOM | 414 | C4   | G A | 14 | -4.718 | -41.835 | 88.901 | 1.00 | 0.00 | C |
| ATOM | 415 | C5   | G A | 14 | -4.944 | -40.663 | 89.605 | 1.00 | 0.00 | C |
| ATOM | 416 | C6   | G A | 14 | -6.160 | -39.967 | 89.430 | 1.00 | 0.00 | C |
| ATOM | 417 | O6   | G A | 14 | -6.542 | -38.923 | 89.959 | 1.00 | 0.00 | O |
| ATOM | 418 | N7   | G A | 14 | -3.843 | -40.368 | 90.413 | 1.00 | 0.00 | N |
| ATOM | 419 | C8   | G A | 14 | -3.008 | -41.348 | 90.183 | 1.00 | 0.00 | C |
| ATOM | 420 | N9   | G A | 14 | -3.468 | -42.278 | 89.274 | 1.00 | 0.00 | N |
| ATOM | 421 | C2'  | G A | 14 | -1.303 | -43.356 | 88.561 | 1.00 | 0.00 | C |
| ATOM | 422 | C3'  | G A | 14 | -0.786 | -44.730 | 88.954 | 1.00 | 0.00 | C |
| ATOM | 423 | O3'  | G A | 14 | -0.882 | -45.607 | 87.833 | 1.00 | 0.00 | O |
| ATOM | 424 | C4'  | G A | 14 | -1.727 | -45.137 | 90.086 | 1.00 | 0.00 | C |
| ATOM | 425 | O4'  | G A | 14 | -3.010 | -44.533 | 89.724 | 1.00 | 0.00 | O |
| ATOM | 426 | C5'  | G A | 14 | -1.349 | -44.670 | 91.473 | 1.00 | 0.00 | C |
| ATOM | 427 | O5'  | G A | 14 | -0.760 | -43.348 | 91.401 | 1.00 | 0.00 | O |
| ATOM | 428 | O1P  | G A | 14 | 1.622  | -43.730 | 92.117 | 1.00 | 0.00 | O |
| ATOM | 429 | O2P  | G A | 14 | 0.547  | -41.492 | 92.479 | 1.00 | 0.00 | O |
| ATOM | 430 | P    | G A | 14 | 0.398  | -42.967 | 92.429 | 1.00 | 0.00 | P |

|      |     |      |     |    |        |         |        |      |      |   |
|------|-----|------|-----|----|--------|---------|--------|------|------|---|
| ATOM | 431 | H1   | G A | 14 | -7.919 | -40.195 | 88.313 | 1.00 | 0.00 | H |
| ATOM | 432 | H8   | G A | 14 | -2.033 | -41.421 | 90.665 | 1.00 | 0.00 | H |
| ATOM | 433 | H1'  | G A | 14 | -3.298 | -43.809 | 87.844 | 1.00 | 0.00 | H |
| ATOM | 434 | H21  | G A | 14 | -8.502 | -41.749 | 86.879 | 1.00 | 0.00 | H |
| ATOM | 435 | H3'  | G A | 14 | 0.249  | -44.695 | 89.295 | 1.00 | 0.00 | H |
| ATOM | 436 | H22  | G A | 14 | -7.444 | -43.128 | 86.475 | 1.00 | 0.00 | H |
| ATOM | 437 | H4'  | G A | 14 | -1.758 | -46.225 | 90.098 | 1.00 | 0.00 | H |
| ATOM | 438 | H2'1 | G A | 14 | -0.876 | -42.576 | 89.191 | 1.00 | 0.00 | H |
| ATOM | 439 | H2'2 | G A | 14 | -1.052 | -43.118 | 87.527 | 1.00 | 0.00 | H |
| ATOM | 440 | H5'1 | G A | 14 | -2.242 | -44.645 | 92.098 | 1.00 | 0.00 | H |
| ATOM | 441 | H5'2 | G A | 14 | -0.631 | -45.370 | 91.902 | 1.00 | 0.00 | H |
| ATOM | 442 | C1'  | A A | 15 | -4.228 | -43.087 | 84.047 | 1.00 | 0.00 | C |
| ATOM | 443 | N1   | A A | 15 | -6.418 | -38.748 | 85.695 | 1.00 | 0.00 | N |
| ATOM | 444 | C2   | A A | 15 | -6.834 | -39.712 | 84.877 | 1.00 | 0.00 | C |
| ATOM | 445 | N3   | A A | 15 | -6.218 | -40.810 | 84.496 | 1.00 | 0.00 | N |
| ATOM | 446 | C4   | A A | 15 | -4.998 | -40.878 | 85.060 | 1.00 | 0.00 | C |
| ATOM | 447 | C5   | A A | 15 | -4.424 | -39.978 | 85.913 | 1.00 | 0.00 | C |
| ATOM | 448 | C6   | A A | 15 | -5.197 | -38.845 | 86.242 | 1.00 | 0.00 | C |
| ATOM | 449 | N6   | A A | 15 | -4.764 | -37.878 | 87.069 | 1.00 | 0.00 | N |
| ATOM | 450 | N7   | A A | 15 | -3.156 | -40.384 | 86.289 | 1.00 | 0.00 | N |
| ATOM | 451 | C8   | A A | 15 | -2.989 | -41.509 | 85.657 | 1.00 | 0.00 | C |
| ATOM | 452 | N9   | A A | 15 | -4.067 | -41.874 | 84.891 | 1.00 | 0.00 | N |
| ATOM | 453 | C2'  | A A | 15 | -2.953 | -43.507 | 83.326 | 1.00 | 0.00 | C |
| ATOM | 454 | C3'  | A A | 15 | -3.061 | -45.024 | 83.349 | 1.00 | 0.00 | C |
| ATOM | 455 | O3'  | A A | 15 | -3.860 | -45.451 | 82.250 | 1.00 | 0.00 | O |
| ATOM | 456 | C4'  | A A | 15 | -3.733 | -45.297 | 84.693 | 1.00 | 0.00 | C |
| ATOM | 457 | O4'  | A A | 15 | -4.623 | -44.151 | 84.891 | 1.00 | 0.00 | O |
| ATOM | 458 | C5'  | A A | 15 | -2.820 | -45.411 | 85.890 | 1.00 | 0.00 | C |
| ATOM | 459 | O5'  | A A | 15 | -1.721 | -44.473 | 85.760 | 1.00 | 0.00 | O |
| ATOM | 460 | O1P  | A A | 15 | 0.291  | -45.965 | 85.514 | 1.00 | 0.00 | O |
| ATOM | 461 | O2P  | A A | 15 | 0.544  | -43.667 | 86.489 | 1.00 | 0.00 | O |
| ATOM | 462 | P    | A A | 15 | -0.290 | -44.882 | 86.333 | 1.00 | 0.00 | P |
| ATOM | 463 | H2   | A A | 15 | -7.834 | -39.570 | 84.464 | 1.00 | 0.00 | H |
| ATOM | 464 | H8   | A A | 15 | -2.079 | -42.105 | 85.727 | 1.00 | 0.00 | H |
| ATOM | 465 | H1'  | A A | 15 | -5.035 | -42.904 | 83.338 | 1.00 | 0.00 | H |
| ATOM | 466 | H3'  | A A | 15 | -2.084 | -45.505 | 83.293 | 1.00 | 0.00 | H |
| ATOM | 467 | H4'  | A A | 15 | -4.270 | -46.240 | 84.592 | 1.00 | 0.00 | H |
| ATOM | 468 | H61  | A A | 15 | -5.370 | -37.072 | 87.279 | 1.00 | 0.00 | H |
| ATOM | 469 | H62  | A A | 15 | -3.827 | -37.944 | 87.492 | 1.00 | 0.00 | H |
| ATOM | 470 | H2'1 | A A | 15 | -2.056 | -43.165 | 83.842 | 1.00 | 0.00 | H |
| ATOM | 471 | H2'2 | A A | 15 | -2.911 | -43.128 | 82.305 | 1.00 | 0.00 | H |
| ATOM | 472 | H5'1 | A A | 15 | -3.386 | -45.190 | 86.795 | 1.00 | 0.00 | H |
| ATOM | 473 | H5'2 | A A | 15 | -2.432 | -46.426 | 85.948 | 1.00 | 0.00 | H |
| ATOM | 474 | C1'  | C A | 16 | -6.535 | -40.795 | 80.295 | 1.00 | 0.00 | C |
| ATOM | 475 | N1   | C A | 16 | -5.565 | -40.055 | 81.146 | 1.00 | 0.00 | N |
| ATOM | 476 | C2   | C A | 16 | -5.972 | -38.842 | 81.696 | 1.00 | 0.00 | C |
| ATOM | 477 | O2   | C A | 16 | -7.114 | -38.432 | 81.456 | 1.00 | 0.00 | O |
| ATOM | 478 | N3   | C A | 16 | -5.102 | -38.152 | 82.474 | 1.00 | 0.00 | N |
| ATOM | 479 | C4   | C A | 16 | -3.872 | -38.623 | 82.714 | 1.00 | 0.00 | C |
| ATOM | 480 | N4   | C A | 16 | -3.064 | -37.909 | 83.486 | 1.00 | 0.00 | N |
| ATOM | 481 | C5   | C A | 16 | -3.424 | -39.866 | 82.159 | 1.00 | 0.00 | C |
| ATOM | 482 | C6   | C A | 16 | -4.317 | -40.547 | 81.381 | 1.00 | 0.00 | C |
| ATOM | 483 | C2'  | C A | 16 | -5.900 | -41.488 | 79.097 | 1.00 | 0.00 | C |
| ATOM | 484 | C3'  | C A | 16 | -6.729 | -42.758 | 78.988 | 1.00 | 0.00 | C |



|      |     |      |   |   |    |         |         |        |      |      |   |
|------|-----|------|---|---|----|---------|---------|--------|------|------|---|
| ATOM | 485 | O3'  | C | A | 16 | -7.910  | -42.483 | 78.238 | 1.00 | 0.00 | O |
| ATOM | 486 | C4'  | C | A | 16 | -7.034  | -43.091 | 80.447 | 1.00 | 0.00 | C |
| ATOM | 487 | O4'  | C | A | 16 | -7.145  | -41.787 | 81.100 | 1.00 | 0.00 | O |
| ATOM | 488 | C5'  | C | A | 16 | -5.996  | -43.911 | 81.179 | 1.00 | 0.00 | C |
| ATOM | 489 | O5'  | C | A | 16 | -4.669  | -43.526 | 80.742 | 1.00 | 0.00 | O |
| ATOM | 490 | O1P  | C | A | 16 | -3.818  | -45.586 | 79.574 | 1.00 | 0.00 | O |
| ATOM | 491 | O2P  | C | A | 16 | -2.201  | -43.984 | 80.630 | 1.00 | 0.00 | O |
| ATOM | 492 | P    | C | A | 16 | -3.532  | -44.640 | 80.670 | 1.00 | 0.00 | P |
| ATOM | 493 | H5   | C | A | 16 | -2.419  | -40.249 | 82.347 | 1.00 | 0.00 | H |
| ATOM | 494 | H6   | C | A | 16 | -4.026  | -41.502 | 80.944 | 1.00 | 0.00 | H |
| ATOM | 495 | H1'  | C | A | 16 | -7.311  | -40.098 | 79.977 | 1.00 | 0.00 | H |
| ATOM | 496 | H3'  | C | A | 16 | -6.175  | -43.566 | 78.507 | 1.00 | 0.00 | H |
| ATOM | 497 | H4'  | C | A | 16 | -7.967  | -43.654 | 80.454 | 1.00 | 0.00 | H |
| ATOM | 498 | H41  | C | A | 16 | -2.112  | -38.248 | 83.689 | 1.00 | 0.00 | H |
| ATOM | 499 | H42  | C | A | 16 | -3.386  | -37.014 | 83.882 | 1.00 | 0.00 | H |
| ATOM | 500 | H2'1 | C | A | 16 | -4.846  | -41.716 | 79.261 | 1.00 | 0.00 | H |
| ATOM | 501 | H2'2 | C | A | 16 | -5.968  | -40.889 | 78.188 | 1.00 | 0.00 | H |
| ATOM | 502 | H5'1 | C | A | 16 | -6.098  | -43.740 | 82.250 | 1.00 | 0.00 | H |
| ATOM | 503 | H5'2 | C | A | 16 | -6.161  | -44.967 | 80.967 | 1.00 | 0.00 | H |
| ATOM | 504 | C1'  | G | A | 17 | -8.378  | -36.844 | 77.947 | 1.00 | 0.00 | C |
| ATOM | 505 | N1   | G | A | 17 | -4.936  | -34.297 | 80.722 | 1.00 | 0.00 | N |
| ATOM | 506 | C2   | G | A | 17 | -6.254  | -33.985 | 80.436 | 1.00 | 0.00 | C |
| ATOM | 507 | N2   | G | A | 17 | -6.714  | -32.841 | 80.956 | 1.00 | 0.00 | N |
| ATOM | 508 | N3   | G | A | 17 | -7.047  | -34.752 | 79.690 | 1.00 | 0.00 | N |
| ATOM | 509 | C4   | G | A | 17 | -6.413  | -35.867 | 79.240 | 1.00 | 0.00 | C |
| ATOM | 510 | C5   | G | A | 17 | -5.105  | -36.259 | 79.470 | 1.00 | 0.00 | C |
| ATOM | 511 | C6   | G | A | 17 | -4.262  | -35.447 | 80.264 | 1.00 | 0.00 | C |
| ATOM | 512 | O6   | G | A | 17 | -3.084  | -35.622 | 80.578 | 1.00 | 0.00 | O |
| ATOM | 513 | N7   | G | A | 17 | -4.842  | -37.470 | 78.827 | 1.00 | 0.00 | N |
| ATOM | 514 | C8   | G | A | 17 | -5.975  | -37.769 | 78.244 | 1.00 | 0.00 | C |
| ATOM | 515 | N9   | G | A | 17 | -6.977  | -36.843 | 78.448 | 1.00 | 0.00 | N |
| ATOM | 516 | C2'  | G | A | 17 | -8.524  | -37.383 | 76.531 | 1.00 | 0.00 | C |
| ATOM | 517 | C3'  | G | A | 17 | -9.859  | -38.105 | 76.600 | 1.00 | 0.00 | C |
| ATOM | 518 | O3'  | G | A | 17 | -10.911 | -37.167 | 76.384 | 1.00 | 0.00 | O |
| ATOM | 519 | C4'  | G | A | 17 | -9.868  | -38.665 | 78.022 | 1.00 | 0.00 | C |
| ATOM | 520 | O4'  | G | A | 17 | -9.143  | -37.667 | 78.807 | 1.00 | 0.00 | O |
| ATOM | 521 | C5'  | G | A | 17 | -9.207  | -40.009 | 78.217 | 1.00 | 0.00 | C |
| ATOM | 522 | O5'  | G | A | 17 | -8.042  | -40.112 | 77.362 | 1.00 | 0.00 | O |
| ATOM | 523 | O1P  | G | A | 17 | -8.670  | -41.933 | 75.742 | 1.00 | 0.00 | O |
| ATOM | 524 | O2P  | G | A | 17 | -6.256  | -41.512 | 76.284 | 1.00 | 0.00 | O |
| ATOM | 525 | P    | G | A | 17 | -7.665  | -41.534 | 76.747 | 1.00 | 0.00 | P |
| ATOM | 526 | H1   | G | A | 17 | -4.409  | -33.639 | 81.314 | 1.00 | 0.00 | H |
| ATOM | 527 | H8   | G | A | 17 | -6.115  | -38.672 | 77.648 | 1.00 | 0.00 | H |
| ATOM | 528 | H1'  | G | A | 17 | -8.767  | -35.829 | 78.020 | 1.00 | 0.00 | H |
| ATOM | 529 | H21  | G | A | 17 | -6.096  | -32.253 | 81.534 | 1.00 | 0.00 | H |
| ATOM | 530 | H3'  | G | A | 17 | -9.930  | -38.904 | 75.863 | 1.00 | 0.00 | H |
| ATOM | 531 | H22  | G | A | 17 | -7.686  | -32.549 | 80.778 | 1.00 | 0.00 | H |
| ATOM | 532 | H4'  | G | A | 17 | -10.912 | -38.761 | 78.317 | 1.00 | 0.00 | H |
| ATOM | 533 | H2'1 | G | A | 17 | -7.716  | -38.066 | 76.264 | 1.00 | 0.00 | H |
| ATOM | 534 | H2'2 | G | A | 17 | -8.540  | -36.587 | 75.785 | 1.00 | 0.00 | H |
| ATOM | 535 | H5'1 | G | A | 17 | -8.908  | -40.111 | 79.261 | 1.00 | 0.00 | H |
| ATOM | 536 | H5'2 | G | A | 17 | -9.918  | -40.797 | 77.970 | 1.00 | 0.00 | H |
| ATOM | 537 | C1'  | G | A | 18 | -8.645  | -32.007 | 76.917 | 1.00 | 0.00 | C |
| ATOM | 538 | N1   | G | A | 18 | -3.787  | -31.986 | 78.471 | 1.00 | 0.00 | N |

|      |     |      |     |    |         |         |        |      |      |   |
|------|-----|------|-----|----|---------|---------|--------|------|------|---|
| ATOM | 539 | C2   | G A | 18 | -4.807  | -31.090 | 78.736 | 1.00 | 0.00 | C |
| ATOM | 540 | N2   | G A | 18 | -4.491  | -30.047 | 79.516 | 1.00 | 0.00 | N |
| ATOM | 541 | N3   | G A | 18 | -6.043  | -31.223 | 78.260 | 1.00 | 0.00 | N |
| ATOM | 542 | C4   | G A | 18 | -6.183  | -32.328 | 77.484 | 1.00 | 0.00 | C |
| ATOM | 543 | C5   | G A | 18 | -5.223  | -33.274 | 77.162 | 1.00 | 0.00 | C |
| ATOM | 544 | C6   | G A | 18 | -3.910  | -33.136 | 77.670 | 1.00 | 0.00 | C |
| ATOM | 545 | O6   | G A | 18 | -2.931  | -33.864 | 77.498 | 1.00 | 0.00 | O |
| ATOM | 546 | N7   | G A | 18 | -5.770  | -34.257 | 76.336 | 1.00 | 0.00 | N |
| ATOM | 547 | C8   | G A | 18 | -7.017  | -33.888 | 76.189 | 1.00 | 0.00 | C |
| ATOM | 548 | N9   | G A | 18 | -7.343  | -32.725 | 76.855 | 1.00 | 0.00 | N |
| ATOM | 549 | C2'  | G A | 18 | -9.420  | -32.026 | 75.607 | 1.00 | 0.00 | C |
| ATOM | 550 | C3'  | G A | 18 | -10.858 | -32.118 | 76.089 | 1.00 | 0.00 | C |
| ATOM | 551 | O3'  | G A | 18 | -11.336 | -30.809 | 76.388 | 1.00 | 0.00 | O |
| ATOM | 552 | C4'  | G A | 18 | -10.743 | -32.989 | 77.340 | 1.00 | 0.00 | C |
| ATOM | 553 | O4'  | G A | 18 | -9.439  | -32.639 | 77.903 | 1.00 | 0.00 | O |
| ATOM | 554 | C5'  | G A | 18 | -10.791 | -34.483 | 77.122 | 1.00 | 0.00 | C |
| ATOM | 555 | O5'  | G A | 18 | -10.112 | -34.822 | 75.887 | 1.00 | 0.00 | O |
| ATOM | 556 | O1P  | G A | 18 | -11.964 | -35.698 | 74.425 | 1.00 | 0.00 | O |
| ATOM | 557 | O2P  | G A | 18 | -9.609  | -36.482 | 74.069 | 1.00 | 0.00 | O |
| ATOM | 558 | P    | G A | 18 | -10.660 | -36.044 | 75.020 | 1.00 | 0.00 | P |
| ATOM | 559 | H1   | G A | 18 | -2.865  | -31.795 | 78.894 | 1.00 | 0.00 | H |
| ATOM | 560 | H8   | G A | 18 | -7.736  | -34.448 | 75.591 | 1.00 | 0.00 | H |
| ATOM | 561 | H1'  | G A | 18 | -8.456  | -30.984 | 77.245 | 1.00 | 0.00 | H |
| ATOM | 562 | H21  | G A | 18 | -3.531  | -29.954 | 79.883 | 1.00 | 0.00 | H |
| ATOM | 563 | H3'  | G A | 18 | -11.511 | -32.579 | 75.347 | 1.00 | 0.00 | H |
| ATOM | 564 | H22  | G A | 18 | -5.204  | -29.344 | 79.747 | 1.00 | 0.00 | H |
| ATOM | 565 | H4'  | G A | 18 | -11.574 | -32.720 | 77.991 | 1.00 | 0.00 | H |
| ATOM | 566 | H2'1 | G A | 18 | -9.156  | -32.880 | 74.983 | 1.00 | 0.00 | H |
| ATOM | 567 | H2'2 | G A | 18 | -9.256  | -31.125 | 75.016 | 1.00 | 0.00 | H |
| ATOM | 568 | H5'1 | G A | 18 | -10.303 | -34.982 | 77.959 | 1.00 | 0.00 | H |
| ATOM | 569 | H5'2 | G A | 18 | -11.830 | -34.804 | 77.071 | 1.00 | 0.00 | H |
| ATOM | 570 | C1'  | T A | 19 | -6.833  | -27.411 | 76.609 | 1.00 | 0.00 | C |
| ATOM | 571 | N1   | T A | 19 | -6.094  | -28.547 | 75.998 | 1.00 | 0.00 | N |
| ATOM | 572 | C2   | T A | 19 | -4.759  | -28.678 | 76.321 | 1.00 | 0.00 | C |
| ATOM | 573 | O2   | T A | 19 | -4.184  | -27.908 | 77.073 | 1.00 | 0.00 | O |
| ATOM | 574 | N3   | T A | 19 | -4.111  | -29.746 | 75.732 | 1.00 | 0.00 | N |
| ATOM | 575 | C4   | T A | 19 | -4.664  | -30.669 | 74.870 | 1.00 | 0.00 | C |
| ATOM | 576 | O4   | T A | 19 | -3.981  | -31.587 | 74.400 | 1.00 | 0.00 | O |
| ATOM | 577 | C5   | T A | 19 | -6.064  | -30.452 | 74.590 | 1.00 | 0.00 | C |
| ATOM | 578 | C6   | T A | 19 | -6.728  | -29.420 | 75.148 | 1.00 | 0.00 | C |
| ATOM | 579 | C7   | T A | 19 | -6.708  | -31.434 | 73.658 | 1.00 | 0.00 | C |
| ATOM | 580 | C2'  | T A | 19 | -7.849  | -26.765 | 75.675 | 1.00 | 0.00 | C |
| ATOM | 581 | C3'  | T A | 19 | -8.970  | -26.393 | 76.632 | 1.00 | 0.00 | C |
| ATOM | 582 | O3'  | T A | 19 | -8.674  | -25.134 | 77.232 | 1.00 | 0.00 | O |
| ATOM | 583 | C4'  | T A | 19 | -8.944  | -27.535 | 77.645 | 1.00 | 0.00 | C |
| ATOM | 584 | O4'  | T A | 19 | -7.532  | -27.906 | 77.736 | 1.00 | 0.00 | O |
| ATOM | 585 | C5'  | T A | 19 | -9.746  | -28.766 | 77.292 | 1.00 | 0.00 | C |
| ATOM | 586 | O5'  | T A | 19 | -9.669  | -29.006 | 75.864 | 1.00 | 0.00 | O |
| ATOM | 587 | O1P  | T A | 19 | -12.032 | -28.634 | 75.082 | 1.00 | 0.00 | O |
| ATOM | 588 | O2P  | T A | 19 | -10.518 | -30.178 | 73.810 | 1.00 | 0.00 | O |
| ATOM | 589 | P    | T A | 19 | -10.937 | -29.623 | 75.119 | 1.00 | 0.00 | P |
| ATOM | 590 | H3   | T A | 19 | -3.113  | -29.868 | 75.961 | 1.00 | 0.00 | H |
| ATOM | 591 | H6   | T A | 19 | -7.784  | -29.276 | 74.922 | 1.00 | 0.00 | H |
| ATOM | 592 | H1'  | T A | 19 | -6.105  | -26.679 | 76.960 | 1.00 | 0.00 | H |

|      |     |      |       |    |         |         |        |      |      |   |
|------|-----|------|-------|----|---------|---------|--------|------|------|---|
| ATOM | 593 | H3'  | T A   | 19 | -9.934  | -26.336 | 76.128 | 1.00 | 0.00 | H |
| ATOM | 594 | H4'  | T A   | 19 | -9.341  | -27.137 | 78.581 | 1.00 | 0.00 | H |
| ATOM | 595 | H71  | T A   | 19 | -7.003  | -30.925 | 72.741 | 1.00 | 0.00 | H |
| ATOM | 596 | H72  | T A   | 19 | -6.000  | -32.228 | 73.420 | 1.00 | 0.00 | H |
| ATOM | 597 | H73  | T A   | 19 | -7.591  | -31.865 | 74.133 | 1.00 | 0.00 | H |
| ATOM | 598 | H2'1 | T A   | 19 | -8.196  | -27.453 | 74.905 | 1.00 | 0.00 | H |
| ATOM | 599 | H2'2 | T A   | 19 | -7.447  | -25.885 | 75.172 | 1.00 | 0.00 | H |
| ATOM | 600 | H5'1 | T A   | 19 | -9.344  | -29.623 | 77.832 | 1.00 | 0.00 | H |
| ATOM | 601 | H5'2 | T A   | 19 | -10.783 | -28.612 | 77.583 | 1.00 | 0.00 | H |
| ATOM | 602 | C01  | LNK A | 20 | -9.194  | -21.665 | 75.983 | 0.00 | 0.00 | C |
| ATOM | 603 | O1   | LNK A | 20 | -9.250  | -23.084 | 75.814 | 1.00 | 0.00 | O |
| ATOM | 604 | S    | LNK A | 20 | -9.872  | -18.361 | 73.869 | 0.00 | 0.00 | S |
| ATOM | 605 | C02  | LNK A | 20 | -9.629  | -20.977 | 74.674 | 0.00 | 0.00 | C |
| ATOM | 606 | C03  | LNK A | 20 | -8.793  | -19.702 | 74.462 | 0.00 | 0.00 | C |
| ATOM | 607 | O1P  | LNK A | 20 | -7.515  | -24.669 | 74.910 | 1.00 | 0.00 | O |
| ATOM | 608 | O2P  | LNK A | 20 | -6.922  | -23.079 | 76.760 | 1.00 | 0.00 | O |
| ATOM | 609 | P    | LNK A | 20 | -7.945  | -23.947 | 76.125 | 1.00 | 0.00 | P |
| ATOM | 610 | H01  | LNK A | 20 | -8.176  | -21.367 | 76.228 | 0.00 | 0.00 | H |
| ATOM | 611 | H02  | LNK A | 20 | -9.865  | -21.368 | 76.789 | 0.00 | 0.00 | H |
| ATOM | 612 | H03  | LNK A | 20 | -8.015  | -19.895 | 73.724 | 0.00 | 0.00 | H |
| ATOM | 613 | H04  | LNK A | 20 | -10.686 | -20.715 | 74.735 | 0.00 | 0.00 | H |
| ATOM | 614 | H05  | LNK A | 20 | -9.472  | -21.658 | 73.837 | 0.00 | 0.00 | H |
| ATOM | 615 | H06  | LNK A | 20 | -8.333  | -19.408 | 75.406 | 0.00 | 0.00 | H |
| ATOM | 616 | AU   | LNK A | 20 | -9.489  | -17.825 | 73.679 |      |      |   |
| TER  |     |      |       |    |         |         |        |      |      |   |
| ATOM | 618 | C1'  | A B   | 2  | 3.645   | -30.133 | 77.905 | 1.00 | 0.00 | C |
| ATOM | 619 | N1   | A B   | 2  | -1.252  | -30.106 | 76.371 | 1.00 | 0.00 | N |
| ATOM | 620 | C2   | A B   | 2  | -0.563  | -29.314 | 77.186 | 1.00 | 0.00 | C |
| ATOM | 621 | N3   | A B   | 2  | 0.705   | -29.376 | 77.537 | 1.00 | 0.00 | N |
| ATOM | 622 | C4   | A B   | 2  | 1.302   | -30.425 | 76.942 | 1.00 | 0.00 | C |
| ATOM | 623 | C5   | A B   | 2  | 0.738   | -31.327 | 76.085 | 1.00 | 0.00 | C |
| ATOM | 624 | C6   | A B   | 2  | -0.630  | -31.143 | 75.791 | 1.00 | 0.00 | C |
| ATOM | 625 | N6   | A B   | 2  | -1.318  | -31.949 | 74.965 | 1.00 | 0.00 | N |
| ATOM | 626 | N7   | A B   | 2  | 1.663   | -32.269 | 75.671 | 1.00 | 0.00 | N |
| ATOM | 627 | C8   | A B   | 2  | 2.756   | -31.923 | 76.284 | 1.00 | 0.00 | C |
| ATOM | 628 | N9   | A B   | 2  | 2.614   | -30.810 | 77.071 | 1.00 | 0.00 | N |
| ATOM | 629 | C2'  | A B   | 2  | 4.611   | -31.095 | 78.585 | 1.00 | 0.00 | C |
| ATOM | 630 | C3'  | A B   | 2  | 5.915   | -30.315 | 78.547 | 1.00 | 0.00 | C |
| ATOM | 631 | O3'  | A B   | 2  | 5.962   | -29.427 | 79.660 | 1.00 | 0.00 | O |
| ATOM | 632 | C4'  | A B   | 2  | 5.825   | -29.568 | 77.217 | 1.00 | 0.00 | C |
| ATOM | 633 | O4'  | A B   | 2  | 4.397   | -29.286 | 77.057 | 1.00 | 0.00 | O |
| ATOM | 634 | C5'  | A B   | 2  | 6.311   | -30.312 | 75.995 | 1.00 | 0.00 | C |
| ATOM | 635 | O5'  | A B   | 2  | 5.971   | -31.717 | 76.109 | 1.00 | 0.00 | O |
| ATOM | 636 | H2   | A B   | 2  | -1.126  | -28.495 | 77.628 | 1.00 | 0.00 | H |
| ATOM | 637 | H8   | A B   | 2  | 3.696   | -32.466 | 76.181 | 1.00 | 0.00 | H |
| ATOM | 638 | H1'  | A B   | 2  | 3.135   | -29.509 | 78.639 | 1.00 | 0.00 | H |
| ATOM | 639 | H3'  | A B   | 2  | 6.785   | -30.971 | 78.571 | 1.00 | 0.00 | H |
| ATOM | 640 | H4'  | A B   | 2  | 6.427   | -28.666 | 77.319 | 1.00 | 0.00 | H |
| ATOM | 641 | H61  | A B   | 2  | -2.314  | -31.769 | 74.782 | 1.00 | 0.00 | H |
| ATOM | 642 | H62  | A B   | 2  | -0.846  | -32.750 | 74.517 | 1.00 | 0.00 | H |
| ATOM | 643 | H2'1 | A B   | 2  | 4.698   | -32.041 | 78.051 | 1.00 | 0.00 | H |
| ATOM | 644 | H2'2 | A B   | 2  | 4.314   | -31.322 | 79.610 | 1.00 | 0.00 | H |
| ATOM | 645 | H5'1 | A B   | 2  | 5.838   | -29.889 | 75.108 | 1.00 | 0.00 | H |
| ATOM | 646 | H5'2 | A B   | 2  | 7.391   | -30.198 | 75.915 | 1.00 | 0.00 | H |

|      |     |      |     |   |        |         |        |      |      |   |
|------|-----|------|-----|---|--------|---------|--------|------|------|---|
| ATOM | 647 | C1'  | C B | 3 | 0.651  | -29.161 | 81.745 | 1.00 | 0.00 | C |
| ATOM | 648 | N1   | C B | 3 | 0.408  | -30.347 | 80.879 | 1.00 | 0.00 | N |
| ATOM | 649 | C2   | C B | 3 | -0.872 | -30.524 | 80.358 | 1.00 | 0.00 | C |
| ATOM | 650 | O2   | C B | 3 | -1.748 | -29.693 | 80.634 | 1.00 | 0.00 | O |
| ATOM | 651 | N3   | C B | 3 | -1.115 | -31.597 | 79.569 | 1.00 | 0.00 | N |
| ATOM | 652 | C4   | C B | 3 | -0.147 | -32.479 | 79.289 | 1.00 | 0.00 | C |
| ATOM | 653 | N4   | C B | 3 | -0.439 | -33.510 | 78.507 | 1.00 | 0.00 | N |
| ATOM | 654 | C5   | C B | 3 | 1.179  | -32.327 | 79.814 | 1.00 | 0.00 | C |
| ATOM | 655 | C6   | C B | 3 | 1.402  | -31.235 | 80.605 | 1.00 | 0.00 | C |
| ATOM | 656 | C2'  | C B | 3 | 1.586  | -29.437 | 82.916 | 1.00 | 0.00 | C |
| ATOM | 657 | C3'  | C B | 3 | 2.348  | -28.126 | 83.029 | 1.00 | 0.00 | C |
| ATOM | 658 | O3'  | C B | 3 | 1.587  | -27.208 | 83.811 | 1.00 | 0.00 | O |
| ATOM | 659 | C4'  | C B | 3 | 2.471  | -27.679 | 81.574 | 1.00 | 0.00 | C |
| ATOM | 660 | O4'  | C B | 3 | 1.241  | -28.157 | 80.942 | 1.00 | 0.00 | O |
| ATOM | 661 | C5'  | C B | 3 | 3.653  | -28.221 | 80.803 | 1.00 | 0.00 | C |
| ATOM | 662 | O5'  | C B | 3 | 3.917  | -29.587 | 81.211 | 1.00 | 0.00 | O |
| ATOM | 663 | O1P  | C B | 3 | 6.169  | -29.436 | 82.326 | 1.00 | 0.00 | O |
| ATOM | 664 | O2P  | C B | 3 | 5.443  | -31.584 | 81.251 | 1.00 | 0.00 | O |
| ATOM | 665 | P    | C B | 3 | 5.426  | -30.101 | 81.236 | 1.00 | 0.00 | P |
| ATOM | 666 | H5   | C B | 3 | 1.969  | -33.046 | 79.596 | 1.00 | 0.00 | H |
| ATOM | 667 | H6   | C B | 3 | 2.395  | -31.073 | 81.022 | 1.00 | 0.00 | H |
| ATOM | 668 | H1'  | C B | 3 | -0.313 | -28.790 | 82.094 | 1.00 | 0.00 | H |
| ATOM | 669 | H3'  | C B | 3 | 3.328  | -28.262 | 83.483 | 1.00 | 0.00 | H |
| ATOM | 670 | H4'  | C B | 3 | 2.553  | -26.592 | 81.581 | 1.00 | 0.00 | H |
| ATOM | 671 | H41  | C B | 3 | 0.289  | -34.202 | 78.274 | 1.00 | 0.00 | H |
| ATOM | 672 | H42  | C B | 3 | -1.392 | -33.619 | 78.132 | 1.00 | 0.00 | H |
| ATOM | 673 | H2'1 | C B | 3 | 2.258  | -30.271 | 82.721 | 1.00 | 0.00 | H |
| ATOM | 674 | H2'2 | C B | 3 | 1.042  | -29.661 | 83.835 | 1.00 | 0.00 | H |
| ATOM | 675 | H5'1 | C B | 3 | 3.429  | -28.193 | 79.736 | 1.00 | 0.00 | H |
| ATOM | 676 | H5'2 | C B | 3 | 4.525  | -27.602 | 81.002 | 1.00 | 0.00 | H |
| ATOM | 677 | C1'  | C B | 4 | -3.649 | -29.331 | 84.195 | 1.00 | 0.00 | C |
| ATOM | 678 | N1   | C B | 4 | -3.037 | -30.574 | 83.656 | 1.00 | 0.00 | N |
| ATOM | 679 | C2   | C B | 4 | -3.830 | -31.406 | 82.868 | 1.00 | 0.00 | C |
| ATOM | 680 | O2   | C B | 4 | -5.005 | -31.079 | 82.650 | 1.00 | 0.00 | O |
| ATOM | 681 | N3   | C B | 4 | -3.293 | -32.544 | 82.368 | 1.00 | 0.00 | N |
| ATOM | 682 | C4   | C B | 4 | -2.017 | -32.872 | 82.620 | 1.00 | 0.00 | C |
| ATOM | 683 | N4   | C B | 4 | -1.540 | -33.994 | 82.103 | 1.00 | 0.00 | N |
| ATOM | 684 | C5   | C B | 4 | -1.178 | -32.039 | 83.431 | 1.00 | 0.00 | C |
| ATOM | 685 | C6   | C B | 4 | -1.741 | -30.895 | 83.921 | 1.00 | 0.00 | C |
| ATOM | 686 | C2'  | C B | 4 | -3.198 | -28.987 | 85.607 | 1.00 | 0.00 | C |
| ATOM | 687 | C3'  | C B | 4 | -3.151 | -27.467 | 85.564 | 1.00 | 0.00 | C |
| ATOM | 688 | O3'  | C B | 4 | -4.455 | -26.951 | 85.822 | 1.00 | 0.00 | O |
| ATOM | 689 | C4'  | C B | 4 | -2.690 | -27.182 | 84.136 | 1.00 | 0.00 | C |
| ATOM | 690 | O4'  | C B | 4 | -3.277 | -28.264 | 83.343 | 1.00 | 0.00 | O |
| ATOM | 691 | C5'  | C B | 4 | -1.197 | -27.168 | 83.902 | 1.00 | 0.00 | C |
| ATOM | 692 | O5'  | C B | 4 | -0.563 | -28.179 | 84.726 | 1.00 | 0.00 | O |
| ATOM | 693 | O1P  | C B | 4 | 0.825  | -26.832 | 86.337 | 1.00 | 0.00 | O |
| ATOM | 694 | O2P  | C B | 4 | 1.515  | -29.169 | 85.734 | 1.00 | 0.00 | O |
| ATOM | 695 | P    | C B | 4 | 0.892  | -27.891 | 85.310 | 1.00 | 0.00 | P |
| ATOM | 696 | H5   | C B | 4 | -0.143 | -32.304 | 83.646 | 1.00 | 0.00 | H |
| ATOM | 697 | H6   | C B | 4 | -1.140 | -30.225 | 84.536 | 1.00 | 0.00 | H |
| ATOM | 698 | H1'  | C B | 4 | -4.734 | -29.436 | 84.146 | 1.00 | 0.00 | H |
| ATOM | 699 | H3'  | C B | 4 | -2.450 | -27.059 | 86.292 | 1.00 | 0.00 | H |
| ATOM | 700 | H4'  | C B | 4 | -3.077 | -26.199 | 83.867 | 1.00 | 0.00 | H |

|      |     |      |     |   |         |         |        |      |      |   |
|------|-----|------|-----|---|---------|---------|--------|------|------|---|
| ATOM | 701 | H41  | C B | 4 | -0.563  | -34.268 | 82.279 | 1.00 | 0.00 | H |
| ATOM | 702 | H42  | C B | 4 | -2.147  | -34.593 | 81.522 | 1.00 | 0.00 | H |
| ATOM | 703 | H2'1 | C B | 4 | -2.220  | -29.406 | 85.843 | 1.00 | 0.00 | H |
| ATOM | 704 | H2'2 | C B | 4 | -3.898  | -29.341 | 86.364 | 1.00 | 0.00 | H |
| ATOM | 705 | H5'1 | C B | 4 | -0.997  | -27.371 | 82.850 | 1.00 | 0.00 | H |
| ATOM | 706 | H5'2 | C B | 4 | -0.805  | -26.185 | 84.159 | 1.00 | 0.00 | H |
| ATOM | 707 | C1'  | G B | 5 | -8.062  | -31.287 | 85.302 | 1.00 | 0.00 | C |
| ATOM | 708 | N1   | G B | 5 | -5.931  | -35.611 | 83.630 | 1.00 | 0.00 | N |
| ATOM | 709 | C2   | G B | 5 | -7.198  | -35.100 | 83.406 | 1.00 | 0.00 | C |
| ATOM | 710 | N2   | G B | 5 | -8.004  | -35.840 | 82.635 | 1.00 | 0.00 | N |
| ATOM | 711 | N3   | G B | 5 | -7.625  | -33.942 | 83.910 | 1.00 | 0.00 | N |
| ATOM | 712 | C4   | G B | 5 | -6.679  | -33.330 | 84.670 | 1.00 | 0.00 | C |
| ATOM | 713 | C5   | G B | 5 | -5.396  | -33.766 | 84.952 | 1.00 | 0.00 | C |
| ATOM | 714 | C6   | G B | 5 | -4.940  | -34.992 | 84.415 | 1.00 | 0.00 | C |
| ATOM | 715 | O6   | G B | 5 | -3.846  | -35.539 | 84.551 | 1.00 | 0.00 | O |
| ATOM | 716 | N7   | G B | 5 | -4.744  | -32.845 | 85.775 | 1.00 | 0.00 | N |
| ATOM | 717 | C8   | G B | 5 | -5.631  | -31.901 | 85.960 | 1.00 | 0.00 | C |
| ATOM | 718 | N9   | G B | 5 | -6.833  | -32.126 | 85.321 | 1.00 | 0.00 | N |
| ATOM | 719 | C2'  | G B | 5 | -8.360  | -30.606 | 86.630 | 1.00 | 0.00 | C |
| ATOM | 720 | C3'  | G B | 5 | -8.940  | -29.274 | 86.182 | 1.00 | 0.00 | C |
| ATOM | 721 | O3'  | G B | 5 | -10.331 | -29.434 | 85.917 | 1.00 | 0.00 | O |
| ATOM | 722 | C4'  | G B | 5 | -8.142  | -28.965 | 84.916 | 1.00 | 0.00 | C |
| ATOM | 723 | O4'  | G B | 5 | -7.882  | -30.279 | 84.327 | 1.00 | 0.00 | O |
| ATOM | 724 | C5'  | G B | 5 | -6.825  | -28.252 | 85.109 | 1.00 | 0.00 | C |
| ATOM | 725 | O5'  | G B | 5 | -6.186  | -28.722 | 86.322 | 1.00 | 0.00 | O |
| ATOM | 726 | O1P  | G B | 5 | -6.201  | -26.696 | 87.814 | 1.00 | 0.00 | O |
| ATOM | 727 | O2P  | G B | 5 | -4.430  | -28.450 | 88.098 | 1.00 | 0.00 | O |
| ATOM | 728 | P    | G B | 5 | -5.319  | -27.696 | 87.182 | 1.00 | 0.00 | P |
| ATOM | 729 | H1   | G B | 5 | -5.697  | -36.512 | 83.188 | 1.00 | 0.00 | H |
| ATOM | 730 | H8   | G B | 5 | -5.439  | -31.016 | 86.565 | 1.00 | 0.00 | H |
| ATOM | 731 | H1'  | G B | 5 | -8.898  | -31.911 | 84.988 | 1.00 | 0.00 | H |
| ATOM | 732 | H21  | G B | 5 | -7.666  | -36.732 | 82.247 | 1.00 | 0.00 | H |
| ATOM | 733 | H3'  | G B | 5 | -8.802  | -28.494 | 86.933 | 1.00 | 0.00 | H |
| ATOM | 734 | H22  | G B | 5 | -8.961  | -35.518 | 82.433 | 1.00 | 0.00 | H |
| ATOM | 735 | H4'  | G B | 5 | -8.773  | -28.336 | 84.290 | 1.00 | 0.00 | H |
| ATOM | 736 | H2'1 | G B | 5 | -7.464  | -30.466 | 87.234 | 1.00 | 0.00 | H |
| ATOM | 737 | H2'2 | G B | 5 | -9.075  | -31.167 | 87.233 | 1.00 | 0.00 | H |
| ATOM | 738 | H5'1 | G B | 5 | -6.182  | -28.451 | 84.252 | 1.00 | 0.00 | H |
| ATOM | 739 | H5'2 | G B | 5 | -7.006  | -27.179 | 85.181 | 1.00 | 0.00 | H |
| ATOM | 740 | C1'  | T B | 6 | -11.343 | -34.979 | 85.635 | 1.00 | 0.00 | C |
| ATOM | 741 | N1   | T B | 6 | -9.980  | -35.134 | 86.209 | 1.00 | 0.00 | N |
| ATOM | 742 | C2   | T B | 6 | -9.270  | -36.263 | 85.851 | 1.00 | 0.00 | C |
| ATOM | 743 | O2   | T B | 6 | -9.717  | -37.113 | 85.100 | 1.00 | 0.00 | O |
| ATOM | 744 | N3   | T B | 6 | -8.008  | -36.367 | 86.407 | 1.00 | 0.00 | N |
| ATOM | 745 | C4   | T B | 6 | -7.412  | -35.470 | 87.267 | 1.00 | 0.00 | C |
| ATOM | 746 | O4   | T B | 6 | -6.274  | -35.672 | 87.704 | 1.00 | 0.00 | O |
| ATOM | 747 | C5   | T B | 6 | -8.230  | -34.322 | 87.581 | 1.00 | 0.00 | C |
| ATOM | 748 | C6   | T B | 6 | -9.464  | -34.187 | 87.057 | 1.00 | 0.00 | C |
| ATOM | 749 | C7   | T B | 6 | -7.618  | -33.316 | 88.512 | 1.00 | 0.00 | C |
| ATOM | 750 | C2'  | T B | 6 | -12.351 | -34.376 | 86.605 | 1.00 | 0.00 | C |
| ATOM | 751 | C3'  | T B | 6 | -13.214 | -33.531 | 85.679 | 1.00 | 0.00 | C |
| ATOM | 752 | O3'  | T B | 6 | -14.222 | -34.353 | 85.096 | 1.00 | 0.00 | O |
| ATOM | 753 | C4'  | T B | 6 | -12.210 | -33.025 | 84.646 | 1.00 | 0.00 | C |
| ATOM | 754 | O4'  | T B | 6 | -11.245 | -34.117 | 84.518 | 1.00 | 0.00 | O |

|      |     |      |     |   |         |         |        |      |      |   |
|------|-----|------|-----|---|---------|---------|--------|------|------|---|
| ATOM | 755 | C5'  | T B | 6 | -11.463 | -31.760 | 84.998 | 1.00 | 0.00 | C |
| ATOM | 756 | O5'  | T B | 6 | -11.177 | -31.739 | 86.419 | 1.00 | 0.00 | O |
| ATOM | 757 | O1P  | T B | 6 | -12.552 | -29.808 | 87.261 | 1.00 | 0.00 | O |
| ATOM | 758 | O2P  | T B | 6 | -10.458 | -30.480 | 88.471 | 1.00 | 0.00 | O |
| ATOM | 759 | P    | T B | 6 | -11.176 | -30.338 | 87.182 | 1.00 | 0.00 | P |
| ATOM | 760 | H3   | T B | 6 | -7.457  | -37.200 | 86.152 | 1.00 | 0.00 | H |
| ATOM | 761 | H6   | T B | 6 | -10.062 | -33.311 | 87.311 | 1.00 | 0.00 | H |
| ATOM | 762 | H1'  | T B | 6 | -11.678 | -35.953 | 85.279 | 1.00 | 0.00 | H |
| ATOM | 763 | H3'  | T B | 6 | -13.686 | -32.702 | 86.207 | 1.00 | 0.00 | H |
| ATOM | 764 | H4'  | T B | 6 | -12.767 | -32.838 | 83.728 | 1.00 | 0.00 | H |
| ATOM | 765 | H71  | T B | 6 | -8.183  | -33.294 | 89.444 | 1.00 | 0.00 | H |
| ATOM | 766 | H72  | T B | 6 | -6.585  | -33.593 | 88.719 | 1.00 | 0.00 | H |
| ATOM | 767 | H73  | T B | 6 | -7.645  | -32.329 | 88.049 | 1.00 | 0.00 | H |
| ATOM | 768 | H2'1 | T B | 6 | -11.875 | -33.766 | 87.370 | 1.00 | 0.00 | H |
| ATOM | 769 | H2'2 | T B | 6 | -12.944 | -35.138 | 87.112 | 1.00 | 0.00 | H |
| ATOM | 770 | H5'1 | T B | 6 | -10.531 | -31.725 | 84.433 | 1.00 | 0.00 | H |
| ATOM | 771 | H5'2 | T B | 6 | -12.075 | -30.899 | 84.733 | 1.00 | 0.00 | H |
| ATOM | 772 | C1'  | C B | 7 | -12.620 | -39.760 | 86.043 | 1.00 | 0.00 | C |
| ATOM | 773 | N1   | C B | 7 | -11.651 | -39.151 | 86.998 | 1.00 | 0.00 | N |
| ATOM | 774 | C2   | C B | 7 | -10.438 | -39.806 | 87.203 | 1.00 | 0.00 | C |
| ATOM | 775 | O2   | C B | 7 | -10.215 | -40.857 | 86.586 | 1.00 | 0.00 | O |
| ATOM | 776 | N3   | C B | 7 | -9.543  | -39.270 | 88.067 | 1.00 | 0.00 | N |
| ATOM | 777 | C4   | C B | 7 | -9.814  | -38.131 | 88.719 | 1.00 | 0.00 | C |
| ATOM | 778 | N4   | C B | 7 | -8.901  | -37.649 | 89.550 | 1.00 | 0.00 | N |
| ATOM | 779 | C5   | C B | 7 | -11.055 | -37.439 | 88.533 | 1.00 | 0.00 | C |
| ATOM | 780 | C6   | C B | 7 | -11.940 | -37.996 | 87.653 | 1.00 | 0.00 | C |
| ATOM | 781 | C2'  | C B | 7 | -14.072 | -39.634 | 86.480 | 1.00 | 0.00 | C |
| ATOM | 782 | C3'  | C B | 7 | -14.785 | -39.438 | 85.151 | 1.00 | 0.00 | C |
| ATOM | 783 | O3'  | C B | 7 | -15.040 | -40.711 | 84.564 | 1.00 | 0.00 | O |
| ATOM | 784 | C4'  | C B | 7 | -13.781 | -38.620 | 84.343 | 1.00 | 0.00 | C |
| ATOM | 785 | O4'  | C B | 7 | -12.476 | -39.094 | 84.803 | 1.00 | 0.00 | O |
| ATOM | 786 | C5'  | C B | 7 | -13.839 | -37.119 | 84.521 | 1.00 | 0.00 | C |
| ATOM | 787 | O5'  | C B | 7 | -14.155 | -36.802 | 85.898 | 1.00 | 0.00 | O |
| ATOM | 788 | O1P  | C B | 7 | -16.425 | -35.726 | 85.742 | 1.00 | 0.00 | O |
| ATOM | 789 | O2P  | C B | 7 | -14.883 | -35.131 | 87.629 | 1.00 | 0.00 | O |
| ATOM | 790 | P    | C B | 7 | -15.041 | -35.510 | 86.205 | 1.00 | 0.00 | P |
| ATOM | 791 | H5   | C B | 7 | -11.283 | -36.517 | 89.067 | 1.00 | 0.00 | H |
| ATOM | 792 | H6   | C B | 7 | -12.895 | -37.502 | 87.472 | 1.00 | 0.00 | H |
| ATOM | 793 | H1'  | C B | 7 | -12.344 | -40.805 | 85.898 | 1.00 | 0.00 | H |
| ATOM | 794 | H3'  | C B | 7 | -15.727 | -38.899 | 85.269 | 1.00 | 0.00 | H |
| ATOM | 795 | H4'  | C B | 7 | -13.967 | -38.837 | 83.292 | 1.00 | 0.00 | H |
| ATOM | 796 | H41  | C B | 7 | -9.083  | -36.774 | 90.062 | 1.00 | 0.00 | H |
| ATOM | 797 | H42  | C B | 7 | -8.009  | -38.150 | 89.684 | 1.00 | 0.00 | H |
| ATOM | 798 | H2'1 | C B | 7 | -14.233 | -38.787 | 87.145 | 1.00 | 0.00 | H |
| ATOM | 799 | H2'2 | C B | 7 | -14.429 | -40.526 | 86.994 | 1.00 | 0.00 | H |
| ATOM | 800 | H5'1 | C B | 7 | -12.873 | -36.690 | 84.256 | 1.00 | 0.00 | H |
| ATOM | 801 | H5'2 | C B | 7 | -14.604 | -36.711 | 83.864 | 1.00 | 0.00 | H |
| ATOM | 802 | C1'  | C B | 8 | -11.869 | -44.472 | 87.371 | 1.00 | 0.00 | C |
| ATOM | 803 | N1   | C B | 8 | -11.676 | -43.370 | 88.352 | 1.00 | 0.00 | N |
| ATOM | 804 | C2   | C B | 8 | -10.473 | -43.326 | 89.056 | 1.00 | 0.00 | C |
| ATOM | 805 | O2   | C B | 8 | -9.623  | -44.199 | 88.838 | 1.00 | 0.00 | O |
| ATOM | 806 | N3   | C B | 8 | -10.277 | -42.330 | 89.953 | 1.00 | 0.00 | N |
| ATOM | 807 | C4   | C B | 8 | -11.217 | -41.400 | 90.167 | 1.00 | 0.00 | C |
| ATOM | 808 | N4   | C B | 8 | -10.970 | -40.447 | 91.054 | 1.00 | 0.00 | N |

|      |     |      |     |   |         |         |        |      |      |   |
|------|-----|------|-----|---|---------|---------|--------|------|------|---|
| ATOM | 809 | C5   | C B | 8 | -12.466 | -41.421 | 89.462 | 1.00 | 0.00 | C |
| ATOM | 810 | C6   | C B | 8 | -12.639 | -42.433 | 88.557 | 1.00 | 0.00 | C |
| ATOM | 811 | C2'  | C B | 8 | -13.291 | -45.018 | 87.333 | 1.00 | 0.00 | C |
| ATOM | 812 | C3'  | C B | 8 | -13.468 | -45.342 | 85.858 | 1.00 | 0.00 | C |
| ATOM | 813 | O3'  | C B | 8 | -12.931 | -46.636 | 85.596 | 1.00 | 0.00 | O |
| ATOM | 814 | C4'  | C B | 8 | -12.671 | -44.236 | 85.170 | 1.00 | 0.00 | C |
| ATOM | 815 | O4'  | C B | 8 | -11.563 | -43.964 | 86.086 | 1.00 | 0.00 | O |
| ATOM | 816 | C5'  | C B | 8 | -13.407 | -42.944 | 84.905 | 1.00 | 0.00 | C |
| ATOM | 817 | O5'  | C B | 8 | -14.317 | -42.665 | 86.000 | 1.00 | 0.00 | O |
| ATOM | 818 | O1P  | C B | 8 | -16.588 | -42.849 | 84.930 | 1.00 | 0.00 | O |
| ATOM | 819 | O2P  | C B | 8 | -16.261 | -41.375 | 86.933 | 1.00 | 0.00 | O |
| ATOM | 820 | P    | C B | 8 | -15.700 | -41.940 | 85.681 | 1.00 | 0.00 | P |
| ATOM | 821 | H5   | C B | 8 | -13.237 | -40.672 | 89.637 | 1.00 | 0.00 | H |
| ATOM | 822 | H6   | C B | 8 | -13.570 | -42.486 | 87.991 | 1.00 | 0.00 | H |
| ATOM | 823 | H1'  | C B | 8 | -11.154 | -45.262 | 87.599 | 1.00 | 0.00 | H |
| ATOM | 824 | H3'  | C B | 8 | -14.514 | -45.318 | 85.558 | 1.00 | 0.00 | H |
| ATOM | 825 | H4'  | C B | 8 | -12.343 | -44.632 | 84.209 | 1.00 | 0.00 | H |
| ATOM | 826 | H41  | C B | 8 | -11.676 | -39.718 | 91.235 | 1.00 | 0.00 | H |
| ATOM | 827 | H42  | C B | 8 | -10.074 | -40.435 | 91.561 | 1.00 | 0.00 | H |
| ATOM | 828 | H2'1 | C B | 8 | -14.023 | -44.286 | 87.669 | 1.00 | 0.00 | H |
| ATOM | 829 | H2'2 | C B | 8 | -13.407 | -45.908 | 87.953 | 1.00 | 0.00 | H |
| ATOM | 830 | H5'1 | C B | 8 | -12.685 | -42.131 | 84.812 | 1.00 | 0.00 | H |
| ATOM | 831 | H5'2 | C B | 8 | -13.967 | -43.034 | 83.976 | 1.00 | 0.00 | H |
| ATOM | 832 | C1'  | T B | 9 | -9.799  | -48.062 | 90.076 | 1.00 | 0.00 | C |
| ATOM | 833 | N1   | T B | 9 | -10.443 | -46.900 | 90.743 | 1.00 | 0.00 | N |
| ATOM | 834 | C2   | T B | 9 | -9.703  | -46.234 | 91.700 | 1.00 | 0.00 | C |
| ATOM | 835 | O2   | T B | 9 | -8.571  | -46.563 | 92.003 | 1.00 | 0.00 | O |
| ATOM | 836 | N3   | T B | 9 | -10.340 | -45.159 | 92.293 | 1.00 | 0.00 | N |
| ATOM | 837 | C4   | T B | 9 | -11.614 | -44.709 | 92.025 | 1.00 | 0.00 | C |
| ATOM | 838 | O4   | T B | 9 | -12.080 | -43.733 | 92.627 | 1.00 | 0.00 | O |
| ATOM | 839 | C5   | T B | 9 | -12.309 | -45.468 | 91.011 | 1.00 | 0.00 | C |
| ATOM | 840 | C6   | T B | 9 | -11.719 | -46.520 | 90.410 | 1.00 | 0.00 | C |
| ATOM | 841 | C7   | T B | 9 | -13.699 | -45.010 | 90.686 | 1.00 | 0.00 | C |
| ATOM | 842 | C2'  | T B | 9 | -10.754 | -49.217 | 89.794 | 1.00 | 0.00 | C |
| ATOM | 843 | C3'  | T B | 9 | -10.230 | -49.746 | 88.469 | 1.00 | 0.00 | C |
| ATOM | 844 | O3'  | T B | 9 | -9.160  | -50.654 | 88.717 | 1.00 | 0.00 | O |
| ATOM | 845 | C4'  | T B | 9 | -9.763  | -48.479 | 87.758 | 1.00 | 0.00 | C |
| ATOM | 846 | O4'  | T B | 9 | -9.279  | -47.618 | 88.838 | 1.00 | 0.00 | O |
| ATOM | 847 | C5'  | T B | 9 | -10.808 | -47.725 | 86.969 | 1.00 | 0.00 | C |
| ATOM | 848 | O5'  | T B | 9 | -12.083 | -47.792 | 87.657 | 1.00 | 0.00 | O |
| ATOM | 849 | O1P  | T B | 9 | -13.518 | -49.145 | 86.094 | 1.00 | 0.00 | O |
| ATOM | 850 | O2P  | T B | 9 | -14.575 | -47.479 | 87.644 | 1.00 | 0.00 | O |
| ATOM | 851 | P    | T B | 9 | -13.420 | -47.846 | 86.790 | 1.00 | 0.00 | P |
| ATOM | 852 | H3   | T B | 9 | -9.807  | -44.644 | 93.007 | 1.00 | 0.00 | H |
| ATOM | 853 | H6   | T B | 9 | -12.263 | -47.077 | 89.649 | 1.00 | 0.00 | H |
| ATOM | 854 | H1'  | T B | 9 | -8.961  | -48.391 | 90.691 | 1.00 | 0.00 | H |
| ATOM | 855 | H3'  | T B | 9 | -11.009 | -50.253 | 87.898 | 1.00 | 0.00 | H |
| ATOM | 856 | H4'  | T B | 9 | -8.973  | -48.777 | 87.066 | 1.00 | 0.00 | H |
| ATOM | 857 | H71  | T B | 9 | -14.414 | -45.779 | 90.980 | 1.00 | 0.00 | H |
| ATOM | 858 | H72  | T B | 9 | -13.914 | -44.087 | 91.225 | 1.00 | 0.00 | H |
| ATOM | 859 | H73  | T B | 9 | -13.781 | -44.830 | 89.612 | 1.00 | 0.00 | H |
| ATOM | 860 | H2'1 | T B | 9 | -11.788 | -48.885 | 89.710 | 1.00 | 0.00 | H |
| ATOM | 861 | H2'2 | T B | 9 | -10.718 | -49.982 | 90.571 | 1.00 | 0.00 | H |
| ATOM | 862 | H5'1 | T B | 9 | -10.498 | -46.686 | 86.865 | 1.00 | 0.00 | H |

|      |     |      |     |    |         |         |         |      |      |   |
|------|-----|------|-----|----|---------|---------|---------|------|------|---|
| ATOM | 863 | H5'2 | T B | 9  | -10.899 | -48.172 | 85.980  | 1.00 | 0.00 | H |
| ATOM | 864 | C1'  | A B | 10 | -7.591  | -49.859 | 94.141  | 1.00 | 0.00 | C |
| ATOM | 865 | N1   | A B | 10 | -9.988  | -45.970 | 96.479  | 1.00 | 0.00 | N |
| ATOM | 866 | C2   | A B | 10 | -8.759  | -46.466 | 96.591  | 1.00 | 0.00 | C |
| ATOM | 867 | N3   | A B | 10 | -8.203  | -47.473 | 95.954  | 1.00 | 0.00 | N |
| ATOM | 868 | C4   | A B | 10 | -9.078  | -48.019 | 95.090  | 1.00 | 0.00 | C |
| ATOM | 869 | C5   | A B | 10 | -10.369 | -47.630 | 94.856  | 1.00 | 0.00 | C |
| ATOM | 870 | C6   | A B | 10 | -10.838 | -46.534 | 95.608  | 1.00 | 0.00 | C |
| ATOM | 871 | N6   | A B | 10 | -12.084 | -46.041 | 95.485  | 1.00 | 0.00 | N |
| ATOM | 872 | N7   | A B | 10 | -10.963 | -48.428 | 93.894  | 1.00 | 0.00 | N |
| ATOM | 873 | C8   | A B | 10 | -10.032 | -49.275 | 93.573  | 1.00 | 0.00 | C |
| ATOM | 874 | N9   | A B | 10 | -8.858  | -49.086 | 94.256  | 1.00 | 0.00 | N |
| ATOM | 875 | C2'  | A B | 10 | -7.800  | -51.352 | 93.932  | 1.00 | 0.00 | C |
| ATOM | 876 | C3'  | A B | 10 | -6.649  | -51.708 | 93.004  | 1.00 | 0.00 | C |
| ATOM | 877 | O3'  | A B | 10 | -5.479  | -51.948 | 93.783  | 1.00 | 0.00 | O |
| ATOM | 878 | C4'  | A B | 10 | -6.516  | -50.459 | 92.134  | 1.00 | 0.00 | C |
| ATOM | 879 | O4'  | A B | 10 | -6.879  | -49.357 | 93.027  | 1.00 | 0.00 | O |
| ATOM | 880 | C5'  | A B | 10 | -7.395  | -50.399 | 90.908  | 1.00 | 0.00 | C |
| ATOM | 881 | O5'  | A B | 10 | -8.685  | -50.995 | 91.199  | 1.00 | 0.00 | O |
| ATOM | 882 | O1P  | A B | 10 | -8.725  | -53.039 | 89.730  | 1.00 | 0.00 | O |
| ATOM | 883 | O2P  | A B | 10 | -10.875 | -51.932 | 90.400  | 1.00 | 0.00 | O |
| ATOM | 884 | P    | A B | 10 | -9.443  | -51.788 | 90.041  | 1.00 | 0.00 | P |
| ATOM | 885 | H2   | A B | 10 | -8.121  | -45.965 | 97.319  | 1.00 | 0.00 | H |
| ATOM | 886 | H8   | A B | 10 | -10.171 | -50.061 | 92.830  | 1.00 | 0.00 | H |
| ATOM | 887 | H1'  | A B | 10 | -6.995  | -49.669 | 95.033  | 1.00 | 0.00 | H |
| ATOM | 888 | H3'  | A B | 10 | -6.868  | -52.586 | 92.400  | 1.00 | 0.00 | H |
| ATOM | 889 | H4'  | A B | 10 | -5.478  | -50.413 | 91.803  | 1.00 | 0.00 | H |
| ATOM | 890 | H61  | A B | 10 | -12.376 | -45.237 | 96.057  | 1.00 | 0.00 | H |
| ATOM | 891 | H62  | A B | 10 | -12.743 | -46.469 | 94.820  | 1.00 | 0.00 | H |
| ATOM | 892 | H2'1 | A B | 10 | -8.763  | -51.575 | 93.470  | 1.00 | 0.00 | H |
| ATOM | 893 | H2'2 | A B | 10 | -7.745  | -51.913 | 94.865  | 1.00 | 0.00 | H |
| ATOM | 894 | H5'1 | A B | 10 | -7.530  | -49.358 | 90.615  | 1.00 | 0.00 | H |
| ATOM | 895 | H5'2 | A B | 10 | -6.915  | -50.941 | 90.095  | 1.00 | 0.00 | H |
| ATOM | 896 | C1'  | G B | 11 | -6.553  | -49.877 | 98.996  | 1.00 | 0.00 | C |
| ATOM | 897 | N1   | G B | 11 | -11.013 | -47.432 | 99.397  | 1.00 | 0.00 | N |
| ATOM | 898 | C2   | G B | 11 | -9.809  | -47.194 | 100.037 | 1.00 | 0.00 | C |
| ATOM | 899 | N2   | G B | 11 | -9.792  | -46.170 | 100.899 | 1.00 | 0.00 | N |
| ATOM | 900 | N3   | G B | 11 | -8.711  | -47.919 | 99.831  | 1.00 | 0.00 | N |
| ATOM | 901 | C4   | G B | 11 | -8.912  | -48.918 | 98.932  | 1.00 | 0.00 | C |
| ATOM | 902 | C5   | G B | 11 | -10.075 | -49.233 | 98.251  | 1.00 | 0.00 | C |
| ATOM | 903 | C6   | G B | 11 | -11.241 | -48.462 | 98.464  | 1.00 | 0.00 | C |
| ATOM | 904 | O6   | G B | 11 | -12.357 | -48.585 | 97.959  | 1.00 | 0.00 | O |
| ATOM | 905 | N7   | G B | 11 | -9.864  | -50.335 | 97.418  | 1.00 | 0.00 | N |
| ATOM | 906 | C8   | G B | 11 | -8.608  | -50.643 | 97.616  | 1.00 | 0.00 | C |
| ATOM | 907 | N9   | G B | 11 | -7.963  | -49.830 | 98.524  | 1.00 | 0.00 | N |
| ATOM | 908 | C2'  | G B | 11 | -6.011  | -51.289 | 99.170  | 1.00 | 0.00 | C |
| ATOM | 909 | C3'  | G B | 11 | -4.561  | -51.126 | 98.745  | 1.00 | 0.00 | C |
| ATOM | 910 | O3'  | G B | 11 | -3.797  | -50.664 | 99.857  | 1.00 | 0.00 | O |
| ATOM | 911 | C4'  | G B | 11 | -4.646  | -50.084 | 97.630  | 1.00 | 0.00 | C |
| ATOM | 912 | O4'  | G B | 11 | -5.753  | -49.217 | 98.034  | 1.00 | 0.00 | O |
| ATOM | 913 | C5'  | G B | 11 | -4.925  | -50.610 | 96.242  | 1.00 | 0.00 | C |
| ATOM | 914 | O5'  | G B | 11 | -5.840  | -51.731 | 96.315  | 1.00 | 0.00 | O |
| ATOM | 915 | O1P  | G B | 11 | -4.444  | -53.675 | 95.537  | 1.00 | 0.00 | O |
| ATOM | 916 | O2P  | G B | 11 | -6.933  | -53.716 | 95.231  | 1.00 | 0.00 | O |



|      |     |      |     |    |         |         |         |      |      |   |
|------|-----|------|-----|----|---------|---------|---------|------|------|---|
| ATOM | 917 | P    | G B | 11 | -5.682  | -52.921 | 95.265  | 1.00 | 0.00 | P |
| ATOM | 918 | H1   | G B | 11 | -11.802 | -46.808 | 99.621  | 1.00 | 0.00 | H |
| ATOM | 919 | H8   | G B | 11 | -8.116  | -51.473 | 97.109  | 1.00 | 0.00 | H |
| ATOM | 920 | H1'  | G B | 11 | -6.486  | -49.314 | 99.929  | 1.00 | 0.00 | H |
| ATOM | 921 | H21  | G B | 11 | -10.645 | -45.611 | 101.050 | 1.00 | 0.00 | H |
| ATOM | 922 | H3'  | G B | 11 | -4.135  | -52.059 | 98.378  | 1.00 | 0.00 | H |
| ATOM | 923 | H22  | G B | 11 | -8.928  | -45.942 | 101.410 | 1.00 | 0.00 | H |
| ATOM | 924 | H4'  | G B | 11 | -3.687  | -49.567 | 97.605  | 1.00 | 0.00 | H |
| ATOM | 925 | H2'1 | G B | 11 | -6.530  | -52.011 | 98.539  | 1.00 | 0.00 | H |
| ATOM | 926 | H2'2 | G B | 11 | -6.087  | -51.637 | 100.199 | 1.00 | 0.00 | H |
| ATOM | 927 | H5'1 | G B | 11 | -5.364  | -49.814 | 95.640  | 1.00 | 0.00 | H |
| ATOM | 928 | H5'2 | G B | 11 | -3.987  | -50.928 | 95.787  | 1.00 | 0.00 | H |
| ATOM | 929 | C1'  | G B | 12 | -7.481  | -48.859 | 103.754 | 1.00 | 0.00 | C |
| ATOM | 930 | N1   | G B | 12 | -12.345 | -48.854 | 102.214 | 1.00 | 0.00 | N |
| ATOM | 931 | C2   | G B | 12 | -11.683 | -47.993 | 103.072 | 1.00 | 0.00 | C |
| ATOM | 932 | N2   | G B | 12 | -12.417 | -46.999 | 103.590 | 1.00 | 0.00 | N |
| ATOM | 933 | N3   | G B | 12 | -10.396 | -48.113 | 103.386 | 1.00 | 0.00 | N |
| ATOM | 934 | C4   | G B | 12 | -9.813  | -49.179 | 102.777 | 1.00 | 0.00 | C |
| ATOM | 935 | C5   | G B | 12 | -10.391 | -50.090 | 101.912 | 1.00 | 0.00 | C |
| ATOM | 936 | C6   | G B | 12 | -11.757 | -49.962 | 101.574 | 1.00 | 0.00 | C |
| ATOM | 937 | O6   | G B | 12 | -12.444 | -50.665 | 100.833 | 1.00 | 0.00 | O |
| ATOM | 938 | N7   | G B | 12 | -9.448  | -51.038 | 101.506 | 1.00 | 0.00 | N |
| ATOM | 939 | C8   | G B | 12 | -8.353  | -50.676 | 102.122 | 1.00 | 0.00 | C |
| ATOM | 940 | N9   | G B | 12 | -8.494  | -49.556 | 102.914 | 1.00 | 0.00 | N |
| ATOM | 941 | C2'  | G B | 12 | -6.511  | -49.803 | 104.451 | 1.00 | 0.00 | C |
| ATOM | 942 | C3'  | G B | 12 | -5.215  | -49.007 | 104.418 | 1.00 | 0.00 | C |
| ATOM | 943 | O3'  | G B | 12 | -5.189  | -48.111 | 105.528 | 1.00 | 0.00 | O |
| ATOM | 944 | C4'  | G B | 12 | -5.302  | -48.270 | 103.083 | 1.00 | 0.00 | C |
| ATOM | 945 | O4'  | G B | 12 | -6.732  | -48.009 | 102.909 | 1.00 | 0.00 | O |
| ATOM | 946 | C5'  | G B | 12 | -4.796  | -49.016 | 101.870 | 1.00 | 0.00 | C |
| ATOM | 947 | O5'  | G B | 12 | -5.118  | -50.423 | 101.991 | 1.00 | 0.00 | O |
| ATOM | 948 | O1P  | G B | 12 | -2.862  | -51.522 | 102.195 | 1.00 | 0.00 | O |
| ATOM | 949 | O2P  | G B | 12 | -4.796  | -52.798 | 101.233 | 1.00 | 0.00 | O |
| ATOM | 950 | P    | G B | 12 | -4.102  | -51.498 | 101.393 | 1.00 | 0.00 | P |
| ATOM | 951 | H1   | G B | 12 | -13.343 | -48.669 | 102.030 | 1.00 | 0.00 | H |
| ATOM | 952 | H8   | G B | 12 | -7.409  | -51.213 | 102.020 | 1.00 | 0.00 | H |
| ATOM | 953 | H1'  | G B | 12 | -8.007  | -48.236 | 104.476 | 1.00 | 0.00 | H |
| ATOM | 954 | H21  | G B | 12 | -13.413 | -46.910 | 103.339 | 1.00 | 0.00 | H |
| ATOM | 955 | H3'  | G B | 12 | -4.338  | -49.652 | 104.455 | 1.00 | 0.00 | H |
| ATOM | 956 | H22  | G B | 12 | -11.985 | -46.326 | 104.238 | 1.00 | 0.00 | H |
| ATOM | 957 | H4'  | G B | 12 | -4.713  | -47.360 | 103.184 | 1.00 | 0.00 | H |
| ATOM | 958 | H2'1 | G B | 12 | -6.406  | -50.751 | 103.924 | 1.00 | 0.00 | H |
| ATOM | 959 | H2'2 | G B | 12 | -6.814  | -50.027 | 105.473 | 1.00 | 0.00 | H |
| ATOM | 960 | H5'1 | G B | 12 | -5.266  | -48.606 | 100.977 | 1.00 | 0.00 | H |
| ATOM | 961 | H5'2 | G B | 12 | -3.716  | -48.890 | 101.799 | 1.00 | 0.00 | H |
| ATOM | 962 | C1'  | T B | 13 | -10.430 | -47.887 | 107.608 | 1.00 | 0.00 | C |
| ATOM | 963 | N1   | T B | 13 | -10.696 | -49.066 | 106.742 | 1.00 | 0.00 | N |
| ATOM | 964 | C2   | T B | 13 | -11.976 | -49.208 | 106.244 | 1.00 | 0.00 | C |
| ATOM | 965 | O2   | T B | 13 | -12.870 | -48.417 | 106.491 | 1.00 | 0.00 | O |
| ATOM | 966 | N3   | T B | 13 | -12.179 | -50.317 | 105.443 | 1.00 | 0.00 | N |
| ATOM | 967 | C4   | T B | 13 | -11.241 | -51.270 | 105.108 | 1.00 | 0.00 | C |
| ATOM | 968 | O4   | T B | 13 | -11.541 | -52.226 | 104.382 | 1.00 | 0.00 | O |
| ATOM | 969 | C5   | T B | 13 | -9.932  | -51.037 | 105.673 | 1.00 | 0.00 | C |
| ATOM | 970 | C6   | T B | 13 | -9.698  | -49.967 | 106.457 | 1.00 | 0.00 | C |

|      |      |      |     |    |         |         |         |      |      |   |
|------|------|------|-----|----|---------|---------|---------|------|------|---|
| ATOM | 971  | C7   | T B | 13 | -8.879  | -52.048 | 105.332 | 1.00 | 0.00 | C |
| ATOM | 972  | C2'  | T B | 13 | -9.487  | -48.178 | 108.768 | 1.00 | 0.00 | C |
| ATOM | 973  | C3'  | T B | 13 | -8.709  | -46.876 | 108.879 | 1.00 | 0.00 | C |
| ATOM | 974  | O3'  | T B | 13 | -9.451  | -45.954 | 109.674 | 1.00 | 0.00 | O |
| ATOM | 975  | C4'  | T B | 13 | -8.594  | -46.424 | 107.425 | 1.00 | 0.00 | C |
| ATOM | 976  | O4'  | T B | 13 | -9.837  | -46.886 | 106.804 | 1.00 | 0.00 | O |
| ATOM | 977  | C5'  | T B | 13 | -7.427  | -46.976 | 106.639 | 1.00 | 0.00 | C |
| ATOM | 978  | O5'  | T B | 13 | -7.174  | -48.347 | 107.039 | 1.00 | 0.00 | O |
| ATOM | 979  | O1P  | T B | 13 | -4.911  | -48.226 | 108.132 | 1.00 | 0.00 | O |
| ATOM | 980  | O2P  | T B | 13 | -5.671  | -50.361 | 107.056 | 1.00 | 0.00 | O |
| ATOM | 981  | P    | T B | 13 | -5.671  | -48.878 | 107.047 | 1.00 | 0.00 | P |
| ATOM | 982  | H3   | T B | 13 | -13.125 | -50.442 | 105.058 | 1.00 | 0.00 | H |
| ATOM | 983  | H6   | T B | 13 | -8.703  | -49.812 | 106.873 | 1.00 | 0.00 | H |
| ATOM | 984  | H1'  | T B | 13 | -11.385 | -47.505 | 107.968 | 1.00 | 0.00 | H |
| ATOM | 985  | H3'  | T B | 13 | -7.725  | -47.025 | 109.324 | 1.00 | 0.00 | H |
| ATOM | 986  | H4'  | T B | 13 | -8.501  | -45.338 | 107.437 | 1.00 | 0.00 | H |
| ATOM | 987  | H71  | T B | 13 | -8.578  | -52.580 | 106.235 | 1.00 | 0.00 | H |
| ATOM | 988  | H72  | T B | 13 | -9.279  | -52.761 | 104.608 | 1.00 | 0.00 | H |
| ATOM | 989  | H73  | T B | 13 | -8.013  | -51.543 | 104.903 | 1.00 | 0.00 | H |
| ATOM | 990  | H2'1 | T B | 13 | -8.826  | -49.019 | 108.563 | 1.00 | 0.00 | H |
| ATOM | 991  | H2'2 | T B | 13 | -10.022 | -48.399 | 109.692 | 1.00 | 0.00 | H |
| ATOM | 992  | H5'1 | T B | 13 | -7.662  | -46.939 | 105.576 | 1.00 | 0.00 | H |
| ATOM | 993  | H5'2 | T B | 13 | -6.546  | -46.368 | 106.833 | 1.00 | 0.00 | H |
| ATOM | 994  | C1'  | G B | 14 | -14.752 | -48.062 | 110.046 | 1.00 | 0.00 | C |
| ATOM | 995  | N1   | G B | 14 | -15.542 | -52.240 | 107.226 | 1.00 | 0.00 | N |
| ATOM | 996  | C2   | G B | 14 | -16.408 | -51.211 | 107.551 | 1.00 | 0.00 | C |
| ATOM | 997  | N2   | G B | 14 | -17.649 | -51.307 | 107.059 | 1.00 | 0.00 | N |
| ATOM | 998  | N3   | G B | 14 | -16.061 | -50.167 | 108.303 | 1.00 | 0.00 | N |
| ATOM | 999  | C4   | G B | 14 | -14.769 | -50.236 | 108.719 | 1.00 | 0.00 | C |
| ATOM | 1000 | C5   | G B | 14 | -13.837 | -51.223 | 108.450 | 1.00 | 0.00 | C |
| ATOM | 1001 | C6   | G B | 14 | -14.201 | -52.329 | 107.648 | 1.00 | 0.00 | C |
| ATOM | 1002 | O6   | G B | 14 | -13.521 | -53.297 | 107.302 | 1.00 | 0.00 | O |
| ATOM | 1003 | N7   | G B | 14 | -12.621 | -50.921 | 109.067 | 1.00 | 0.00 | N |
| ATOM | 1004 | C8   | G B | 14 | -12.849 | -49.784 | 109.675 | 1.00 | 0.00 | C |
| ATOM | 1005 | N9   | G B | 14 | -14.133 | -49.306 | 109.511 | 1.00 | 0.00 | N |
| ATOM | 1006 | C2'  | G B | 14 | -14.300 | -47.712 | 111.458 | 1.00 | 0.00 | C |
| ATOM | 1007 | C3'  | G B | 14 | -14.260 | -46.193 | 111.411 | 1.00 | 0.00 | C |
| ATOM | 1008 | O3'  | G B | 14 | -15.566 | -45.682 | 111.668 | 1.00 | 0.00 | O |
| ATOM | 1009 | C4'  | G B | 14 | -13.800 | -45.910 | 109.982 | 1.00 | 0.00 | C |
| ATOM | 1010 | O4'  | G B | 14 | -14.384 | -46.996 | 109.194 | 1.00 | 0.00 | O |
| ATOM | 1011 | C5'  | G B | 14 | -12.309 | -45.890 | 109.747 | 1.00 | 0.00 | C |
| ATOM | 1012 | O5'  | G B | 14 | -11.670 | -46.897 | 110.572 | 1.00 | 0.00 | O |
| ATOM | 1013 | O1P  | G B | 14 | -10.286 | -45.541 | 112.179 | 1.00 | 0.00 | O |
| ATOM | 1014 | O2P  | G B | 14 | -9.586  | -47.874 | 111.582 | 1.00 | 0.00 | O |
| ATOM | 1015 | P    | G B | 14 | -10.214 | -46.601 | 111.155 | 1.00 | 0.00 | P |
| ATOM | 1016 | H1   | G B | 14 | -15.908 | -52.998 | 106.630 | 1.00 | 0.00 | H |
| ATOM | 1017 | H8   | G B | 14 | -12.092 | -49.263 | 110.260 | 1.00 | 0.00 | H |
| ATOM | 1018 | H1'  | G B | 14 | -15.836 | -48.172 | 109.999 | 1.00 | 0.00 | H |
| ATOM | 1019 | H21  | G B | 14 | -17.909 | -52.116 | 106.475 | 1.00 | 0.00 | H |
| ATOM | 1020 | H3'  | G B | 14 | -13.560 | -45.780 | 112.137 | 1.00 | 0.00 | H |
| ATOM | 1021 | H22  | G B | 14 | -18.343 | -50.575 | 107.267 | 1.00 | 0.00 | H |
| ATOM | 1022 | H4'  | G B | 14 | -14.193 | -44.929 | 109.712 | 1.00 | 0.00 | H |
| ATOM | 1023 | H2'1 | G B | 14 | -13.321 | -48.128 | 111.694 | 1.00 | 0.00 | H |
| ATOM | 1024 | H2'2 | G B | 14 | -14.998 | -48.067 | 112.216 | 1.00 | 0.00 | H |

|      |      |       |     |    |         |         |         |      |      |   |
|------|------|-------|-----|----|---------|---------|---------|------|------|---|
| ATOM | 1025 | H5 '1 | G B | 14 | -12.109 | -46.094 | 108.696 | 1.00 | 0.00 | H |
| ATOM | 1026 | H5 '2 | G B | 14 | -11.920 | -44.904 | 110.001 | 1.00 | 0.00 | H |
| ATOM | 1027 | C1 '  | C B | 15 | -19.165 | -50.018 | 111.153 | 1.00 | 0.00 | C |
| ATOM | 1028 | N1    | C B | 15 | -17.939 | -50.860 | 111.168 | 1.00 | 0.00 | N |
| ATOM | 1029 | C2    | C B | 15 | -17.959 | -52.055 | 110.450 | 1.00 | 0.00 | C |
| ATOM | 1030 | O2    | C B | 15 | -18.988 | -52.363 | 109.835 | 1.00 | 0.00 | O |
| ATOM | 1031 | N3    | C B | 15 | -16.852 | -52.837 | 110.451 | 1.00 | 0.00 | N |
| ATOM | 1032 | C4    | C B | 15 | -15.754 | -52.476 | 111.128 | 1.00 | 0.00 | C |
| ATOM | 1033 | N4    | C B | 15 | -14.699 | -53.277 | 111.091 | 1.00 | 0.00 | N |
| ATOM | 1034 | C5    | C B | 15 | -15.707 | -51.254 | 111.879 | 1.00 | 0.00 | C |
| ATOM | 1035 | C6    | C B | 15 | -16.830 | -50.482 | 111.860 | 1.00 | 0.00 | C |
| ATOM | 1036 | C2 '  | C B | 15 | -19.462 | -49.342 | 112.485 | 1.00 | 0.00 | C |
| ATOM | 1037 | C3 '  | C B | 15 | -20.037 | -48.005 | 112.041 | 1.00 | 0.00 | C |
| ATOM | 1038 | O3 '  | C B | 15 | -21.430 | -48.159 | 111.776 | 1.00 | 0.00 | O |
| ATOM | 1039 | C4 '  | C B | 15 | -19.240 | -47.695 | 110.777 | 1.00 | 0.00 | C |
| ATOM | 1040 | O4 '  | C B | 15 | -18.981 | -49.006 | 110.181 | 1.00 | 0.00 | O |
| ATOM | 1041 | C5 '  | C B | 15 | -17.919 | -46.985 | 110.973 | 1.00 | 0.00 | C |
| ATOM | 1042 | O5 '  | C B | 15 | -17.282 | -47.464 | 112.184 | 1.00 | 0.00 | O |
| ATOM | 1043 | O1P   | C B | 15 | -17.291 | -45.442 | 113.685 | 1.00 | 0.00 | O |
| ATOM | 1044 | O2P   | C B | 15 | -15.523 | -47.202 | 113.962 | 1.00 | 0.00 | O |
| ATOM | 1045 | P     | C B | 15 | -16.411 | -46.444 | 113.047 | 1.00 | 0.00 | P |
| ATOM | 1046 | H5    | C B | 15 | -14.817 | -50.961 | 112.436 | 1.00 | 0.00 | H |
| ATOM | 1047 | H6    | C B | 15 | -16.841 | -49.540 | 112.411 | 1.00 | 0.00 | H |
| ATOM | 1048 | H1 '  | C B | 15 | -20.003 | -50.640 | 110.836 | 1.00 | 0.00 | H |
| ATOM | 1049 | H3 '  | C B | 15 | -19.896 | -47.231 | 112.795 | 1.00 | 0.00 | H |
| ATOM | 1050 | H4 '  | C B | 15 | -19.868 | -47.059 | 110.153 | 1.00 | 0.00 | H |
| ATOM | 1051 | H41   | C B | 15 | -13.841 | -53.021 | 111.600 | 1.00 | 0.00 | H |
| ATOM | 1052 | H42   | C B | 15 | -14.737 | -54.155 | 110.552 | 1.00 | 0.00 | H |
| ATOM | 1053 | H2 '1 | C B | 15 | -18.565 | -49.206 | 113.089 | 1.00 | 0.00 | H |
| ATOM | 1054 | H2 '2 | C B | 15 | -20.178 | -49.903 | 113.085 | 1.00 | 0.00 | H |
| ATOM | 1055 | H5 '1 | C B | 15 | -17.276 | -47.183 | 110.116 | 1.00 | 0.00 | H |
| ATOM | 1056 | H5 '2 | C B | 15 | -18.097 | -45.914 | 111.050 | 1.00 | 0.00 | H |
| ATOM | 1057 | C1 '  | G B | 16 | -22.429 | -53.728 | 111.484 | 1.00 | 0.00 | C |
| ATOM | 1058 | N1    | G B | 16 | -18.243 | -56.633 | 111.721 | 1.00 | 0.00 | N |
| ATOM | 1059 | C2    | G B | 16 | -19.422 | -56.830 | 111.023 | 1.00 | 0.00 | C |
| ATOM | 1060 | N2    | G B | 16 | -19.495 | -57.950 | 110.293 | 1.00 | 0.00 | N |
| ATOM | 1061 | N3    | G B | 16 | -20.444 | -55.976 | 111.051 | 1.00 | 0.00 | N |
| ATOM | 1062 | C4    | G B | 16 | -20.198 | -54.902 | 111.845 | 1.00 | 0.00 | C |
| ATOM | 1063 | C5    | G B | 16 | -19.058 | -54.626 | 112.581 | 1.00 | 0.00 | C |
| ATOM | 1064 | C6    | G B | 16 | -17.970 | -55.530 | 112.549 | 1.00 | 0.00 | C |
| ATOM | 1065 | O6    | G B | 16 | -16.885 | -55.459 | 113.128 | 1.00 | 0.00 | O |
| ATOM | 1066 | N7    | G B | 16 | -19.206 | -53.418 | 113.268 | 1.00 | 0.00 | N |
| ATOM | 1067 | C8    | G B | 16 | -20.403 | -53.010 | 112.933 | 1.00 | 0.00 | C |
| ATOM | 1068 | N9    | G B | 16 | -21.069 | -53.858 | 112.072 | 1.00 | 0.00 | N |
| ATOM | 1069 | C2 '  | G B | 16 | -23.455 | -53.133 | 112.437 | 1.00 | 0.00 | C |
| ATOM | 1070 | C3 '  | G B | 16 | -24.321 | -52.307 | 111.499 | 1.00 | 0.00 | C |
| ATOM | 1071 | O3 '  | G B | 16 | -25.310 | -53.150 | 110.912 | 1.00 | 0.00 | O |
| ATOM | 1072 | C4 '  | G B | 16 | -23.314 | -51.795 | 110.470 | 1.00 | 0.00 | C |
| ATOM | 1073 | O4 '  | G B | 16 | -22.332 | -52.875 | 110.360 | 1.00 | 0.00 | O |
| ATOM | 1074 | C5 '  | G B | 16 | -22.590 | -50.517 | 110.819 | 1.00 | 0.00 | C |
| ATOM | 1075 | O5 '  | G B | 16 | -22.316 | -50.480 | 112.241 | 1.00 | 0.00 | O |
| ATOM | 1076 | O1P   | G B | 16 | -23.727 | -48.561 | 113.056 | 1.00 | 0.00 | O |
| ATOM | 1077 | O2P   | G B | 16 | -21.636 | -49.193 | 114.289 | 1.00 | 0.00 | O |
| ATOM | 1078 | P     | G B | 16 | -22.346 | -49.072 | 112.992 | 1.00 | 0.00 | P |

|      |      |      |     |    |         |         |         |      |      |   |
|------|------|------|-----|----|---------|---------|---------|------|------|---|
| ATOM | 1079 | H1   | G B | 16 | -17.510 | -57.352 | 111.625 | 1.00 | 0.00 | H |
| ATOM | 1080 | H8   | G B | 16 | -20.836 | -52.080 | 113.300 | 1.00 | 0.00 | H |
| ATOM | 1081 | H1'  | G B | 16 | -22.745 | -54.710 | 111.132 | 1.00 | 0.00 | H |
| ATOM | 1082 | H21  | G B | 16 | -18.700 | -58.603 | 110.272 | 1.00 | 0.00 | H |
| ATOM | 1083 | H3'  | G B | 16 | -24.810 | -51.481 | 112.014 | 1.00 | 0.00 | H |
| ATOM | 1084 | H22  | G B | 16 | -20.347 | -58.154 | 109.751 | 1.00 | 0.00 | H |
| ATOM | 1085 | H4'  | G B | 16 | -23.865 | -51.624 | 109.545 | 1.00 | 0.00 | H |
| ATOM | 1086 | H2'1 | G B | 16 | -22.995 | -52.509 | 113.204 | 1.00 | 0.00 | H |
| ATOM | 1087 | H2'2 | G B | 16 | -24.040 | -53.899 | 112.947 | 1.00 | 0.00 | H |
| ATOM | 1088 | H5'1 | G B | 16 | -21.653 | -50.474 | 110.263 | 1.00 | 0.00 | H |
| ATOM | 1089 | H5'2 | G B | 16 | -23.211 | -49.667 | 110.540 | 1.00 | 0.00 | H |
| ATOM | 1090 | C1'  | G B | 17 | -23.721 | -58.491 | 111.897 | 1.00 | 0.00 | C |
| ATOM | 1091 | N1   | G B | 17 | -19.131 | -58.958 | 114.074 | 1.00 | 0.00 | N |
| ATOM | 1092 | C2   | G B | 17 | -19.768 | -59.777 | 113.158 | 1.00 | 0.00 | C |
| ATOM | 1093 | N2   | G B | 17 | -19.091 | -60.866 | 112.772 | 1.00 | 0.00 | N |
| ATOM | 1094 | N3   | G B | 17 | -20.979 | -59.529 | 112.666 | 1.00 | 0.00 | N |
| ATOM | 1095 | C4   | G B | 17 | -21.519 | -58.389 | 113.172 | 1.00 | 0.00 | C |
| ATOM | 1096 | C5   | G B | 17 | -20.962 | -57.514 | 114.089 | 1.00 | 0.00 | C |
| ATOM | 1097 | C6   | G B | 17 | -19.674 | -57.774 | 114.610 | 1.00 | 0.00 | C |
| ATOM | 1098 | O6   | G B | 17 | -19.019 | -57.123 | 115.424 | 1.00 | 0.00 | O |
| ATOM | 1099 | N7   | G B | 17 | -21.843 | -56.462 | 114.349 | 1.00 | 0.00 | N |
| ATOM | 1100 | C8   | G B | 17 | -22.880 | -56.724 | 113.597 | 1.00 | 0.00 | C |
| ATOM | 1101 | N9   | G B | 17 | -22.758 | -57.879 | 112.853 | 1.00 | 0.00 | N |
| ATOM | 1102 | C2'  | G B | 17 | -25.176 | -58.363 | 112.327 | 1.00 | 0.00 | C |
| ATOM | 1103 | C3'  | G B | 17 | -25.886 | -58.173 | 110.996 | 1.00 | 0.00 | C |
| ATOM | 1104 | O3'  | G B | 17 | -26.138 | -59.449 | 110.412 | 1.00 | 0.00 | O |
| ATOM | 1105 | C4'  | G B | 17 | -24.879 | -57.356 | 110.189 | 1.00 | 0.00 | C |
| ATOM | 1106 | O4'  | G B | 17 | -23.575 | -57.830 | 110.655 | 1.00 | 0.00 | O |
| ATOM | 1107 | C5'  | G B | 17 | -24.938 | -55.857 | 110.360 | 1.00 | 0.00 | C |
| ATOM | 1108 | O5'  | G B | 17 | -25.258 | -55.533 | 111.736 | 1.00 | 0.00 | O |
| ATOM | 1109 | O1P  | G B | 17 | -27.529 | -54.461 | 111.568 | 1.00 | 0.00 | O |
| ATOM | 1110 | O2P  | G B | 17 | -25.994 | -53.857 | 113.458 | 1.00 | 0.00 | O |
| ATOM | 1111 | P    | G B | 17 | -26.146 | -54.241 | 112.033 | 1.00 | 0.00 | P |
| ATOM | 1112 | H1   | G B | 17 | -18.190 | -59.238 | 114.389 | 1.00 | 0.00 | H |
| ATOM | 1113 | H8   | G B | 17 | -23.763 | -56.086 | 113.560 | 1.00 | 0.00 | H |
| ATOM | 1114 | H1'  | G B | 17 | -23.445 | -59.535 | 111.756 | 1.00 | 0.00 | H |
| ATOM | 1115 | H21  | G B | 17 | -18.152 | -61.050 | 113.153 | 1.00 | 0.00 | H |
| ATOM | 1116 | H3'  | G B | 17 | -26.827 | -57.634 | 111.108 | 1.00 | 0.00 | H |
| ATOM | 1117 | H22  | G B | 17 | -19.510 | -61.517 | 112.093 | 1.00 | 0.00 | H |
| ATOM | 1118 | H4'  | G B | 17 | -25.061 | -57.578 | 109.137 | 1.00 | 0.00 | H |
| ATOM | 1119 | H2'1 | G B | 17 | -25.339 | -57.514 | 112.989 | 1.00 | 0.00 | H |
| ATOM | 1120 | H2'2 | G B | 17 | -25.534 | -59.254 | 112.844 | 1.00 | 0.00 | H |
| ATOM | 1121 | H5'1 | G B | 17 | -23.971 | -55.428 | 110.096 | 1.00 | 0.00 | H |
| ATOM | 1122 | H5'2 | G B | 17 | -25.703 | -55.451 | 109.698 | 1.00 | 0.00 | H |
| ATOM | 1123 | C1'  | C B | 18 | -22.971 | -63.203 | 113.223 | 1.00 | 0.00 | C |
| ATOM | 1124 | N1   | C B | 18 | -22.778 | -62.100 | 114.204 | 1.00 | 0.00 | N |
| ATOM | 1125 | C2   | C B | 18 | -21.576 | -62.057 | 114.907 | 1.00 | 0.00 | C |
| ATOM | 1126 | O2   | C B | 18 | -20.725 | -62.930 | 114.690 | 1.00 | 0.00 | O |
| ATOM | 1127 | N3   | C B | 18 | -21.380 | -61.061 | 115.805 | 1.00 | 0.00 | N |
| ATOM | 1128 | C4   | C B | 18 | -22.321 | -60.132 | 116.017 | 1.00 | 0.00 | C |
| ATOM | 1129 | N4   | C B | 18 | -22.075 | -59.180 | 116.906 | 1.00 | 0.00 | N |
| ATOM | 1130 | C5   | C B | 18 | -23.566 | -60.154 | 115.310 | 1.00 | 0.00 | C |
| ATOM | 1131 | C6   | C B | 18 | -23.740 | -61.163 | 114.410 | 1.00 | 0.00 | C |
| ATOM | 1132 | C2'  | C B | 18 | -24.393 | -63.749 | 113.186 | 1.00 | 0.00 | C |

|      |      |      |     |    |         |         |         |      |      |   |
|------|------|------|-----|----|---------|---------|---------|------|------|---|
| ATOM | 1133 | C3'  | C B | 18 | -24.570 | -64.073 | 111.710 | 1.00 | 0.00 | C |
| ATOM | 1134 | O3'  | C B | 18 | -24.033 | -65.367 | 111.447 | 1.00 | 0.00 | O |
| ATOM | 1135 | C4'  | C B | 18 | -23.773 | -62.967 | 111.022 | 1.00 | 0.00 | C |
| ATOM | 1136 | O4'  | C B | 18 | -22.665 | -62.695 | 111.938 | 1.00 | 0.00 | O |
| ATOM | 1137 | C5'  | C B | 18 | -24.509 | -61.675 | 110.758 | 1.00 | 0.00 | C |
| ATOM | 1138 | O5'  | C B | 18 | -25.420 | -61.396 | 111.852 | 1.00 | 0.00 | O |
| ATOM | 1139 | O1P  | C B | 18 | -27.691 | -61.579 | 110.782 | 1.00 | 0.00 | O |
| ATOM | 1140 | O2P  | C B | 18 | -27.363 | -60.105 | 112.786 | 1.00 | 0.00 | O |
| ATOM | 1141 | P    | C B | 18 | -26.803 | -60.670 | 111.534 | 1.00 | 0.00 | P |
| ATOM | 1142 | H5   | C B | 18 | -24.336 | -59.402 | 115.483 | 1.00 | 0.00 | H |
| ATOM | 1143 | H6   | C B | 18 | -24.670 | -61.219 | 113.846 | 1.00 | 0.00 | H |
| ATOM | 1144 | H1'  | C B | 18 | -22.256 | -63.992 | 113.451 | 1.00 | 0.00 | H |
| ATOM | 1145 | H3'  | C B | 18 | -25.617 | -64.049 | 111.411 | 1.00 | 0.00 | H |
| ATOM | 1146 | H4'  | C B | 18 | -23.445 | -63.363 | 110.061 | 1.00 | 0.00 | H |
| ATOM | 1147 | H41  | C B | 18 | -22.781 | -58.451 | 117.087 | 1.00 | 0.00 | H |
| ATOM | 1148 | H42  | C B | 18 | -21.179 | -59.167 | 117.412 | 1.00 | 0.00 | H |
| ATOM | 1149 | H2'1 | C B | 18 | -25.126 | -63.018 | 113.522 | 1.00 | 0.00 | H |
| ATOM | 1150 | H2'2 | C B | 18 | -24.510 | -64.638 | 113.806 | 1.00 | 0.00 | H |
| ATOM | 1151 | H5'1 | C B | 18 | -23.788 | -60.862 | 110.665 | 1.00 | 0.00 | H |
| ATOM | 1152 | H5'2 | C B | 18 | -25.069 | -61.765 | 109.828 | 1.00 | 0.00 | H |
| ATOM | 1153 | C1'  | C B | 19 | -20.892 | -66.781 | 115.944 | 1.00 | 0.00 | C |
| ATOM | 1154 | N1   | C B | 19 | -21.554 | -65.619 | 116.598 | 1.00 | 0.00 | N |
| ATOM | 1155 | C2   | C B | 19 | -20.838 | -64.920 | 117.568 | 1.00 | 0.00 | C |
| ATOM | 1156 | O2   | C B | 19 | -19.689 | -65.289 | 117.843 | 1.00 | 0.00 | O |
| ATOM | 1157 | N3   | C B | 19 | -21.424 | -63.861 | 118.175 | 1.00 | 0.00 | N |
| ATOM | 1158 | C4   | C B | 19 | -22.670 | -63.486 | 117.855 | 1.00 | 0.00 | C |
| ATOM | 1159 | N4   | C B | 19 | -23.193 | -62.444 | 118.480 | 1.00 | 0.00 | N |
| ATOM | 1160 | C5   | C B | 19 | -23.427 | -64.188 | 116.864 | 1.00 | 0.00 | C |
| ATOM | 1161 | C6   | C B | 19 | -22.818 | -65.250 | 116.265 | 1.00 | 0.00 | C |
| ATOM | 1162 | C2'  | C B | 19 | -21.830 | -67.945 | 115.666 | 1.00 | 0.00 | C |
| ATOM | 1163 | C3'  | C B | 19 | -21.291 | -68.478 | 114.345 | 1.00 | 0.00 | C |
| ATOM | 1164 | O3'  | C B | 19 | -20.211 | -69.371 | 114.607 | 1.00 | 0.00 | O |
| ATOM | 1165 | C4'  | C B | 19 | -20.832 | -67.211 | 113.629 | 1.00 | 0.00 | C |
| ATOM | 1166 | O4'  | C B | 19 | -20.368 | -66.335 | 114.707 | 1.00 | 0.00 | O |
| ATOM | 1167 | C5'  | C B | 19 | -21.881 | -66.473 | 112.829 | 1.00 | 0.00 | C |
| ATOM | 1168 | O5'  | C B | 19 | -23.160 | -66.551 | 113.506 | 1.00 | 0.00 | O |
| ATOM | 1169 | O1P  | C B | 19 | -24.566 | -67.931 | 111.942 | 1.00 | 0.00 | O |
| ATOM | 1170 | O2P  | C B | 19 | -25.656 | -66.268 | 113.473 | 1.00 | 0.00 | O |
| ATOM | 1171 | P    | C B | 19 | -24.489 | -66.627 | 112.630 | 1.00 | 0.00 | P |
| ATOM | 1172 | H5   | C B | 19 | -24.442 | -63.889 | 116.602 | 1.00 | 0.00 | H |
| ATOM | 1173 | H6   | C B | 19 | -23.357 | -65.814 | 115.503 | 1.00 | 0.00 | H |
| ATOM | 1174 | H1'  | C B | 19 | -20.055 | -67.092 | 116.570 | 1.00 | 0.00 | H |
| ATOM | 1175 | H3'  | C B | 19 | -22.059 | -68.998 | 113.772 | 1.00 | 0.00 | H |
| ATOM | 1176 | H4'  | C B | 19 | -20.036 | -67.503 | 112.945 | 1.00 | 0.00 | H |
| ATOM | 1177 | H41  | C B | 19 | -24.149 | -62.132 | 118.252 | 1.00 | 0.00 | H |
| ATOM | 1178 | H42  | C B | 19 | -22.644 | -61.940 | 119.194 | 1.00 | 0.00 | H |
| ATOM | 1179 | H2'1 | C B | 19 | -22.867 | -67.628 | 115.570 | 1.00 | 0.00 | H |
| ATOM | 1180 | H2'2 | C B | 19 | -21.789 | -68.705 | 116.447 | 1.00 | 0.00 | H |
| ATOM | 1181 | H5'1 | C B | 19 | -21.582 | -65.432 | 112.721 | 1.00 | 0.00 | H |
| ATOM | 1182 | H5'2 | C B | 19 | -21.959 | -66.928 | 111.842 | 1.00 | 0.00 | H |
| ATOM | 1183 | C1'  | T B | 20 | -18.694 | -68.590 | 119.993 | 1.00 | 0.00 | C |
| ATOM | 1184 | N1   | T B | 20 | -19.960 | -67.818 | 120.110 | 1.00 | 0.00 | N |
| ATOM | 1185 | C2   | T B | 20 | -19.981 | -66.774 | 121.013 | 1.00 | 0.00 | C |
| ATOM | 1186 | O2   | T B | 20 | -19.018 | -66.475 | 121.698 | 1.00 | 0.00 | O |

|      |      |      |     |    |         |         |         |      |      |   |
|------|------|------|-----|----|---------|---------|---------|------|------|---|
| ATOM | 1187 | N3   | T B | 20 | -21.176 | -66.086 | 121.089 | 1.00 | 0.00 | N |
| ATOM | 1188 | C4   | T B | 20 | -22.319 | -66.341 | 120.364 | 1.00 | 0.00 | C |
| ATOM | 1189 | O4   | T B | 20 | -23.336 | -65.652 | 120.521 | 1.00 | 0.00 | O |
| ATOM | 1190 | C5   | T B | 20 | -22.202 | -67.449 | 119.446 | 1.00 | 0.00 | C |
| ATOM | 1191 | C6   | T B | 20 | -21.053 | -68.143 | 119.345 | 1.00 | 0.00 | C |
| ATOM | 1192 | C7   | T B | 20 | -23.424 | -67.762 | 118.635 | 1.00 | 0.00 | C |
| ATOM | 1193 | C2'  | T B | 20 | -18.904 | -70.085 | 119.786 | 1.00 | 0.00 | C |
| ATOM | 1194 | C3'  | T B | 20 | -17.754 | -70.440 | 118.855 | 1.00 | 0.00 | C |
| ATOM | 1195 | O3'  | T B | 20 | -16.582 | -70.681 | 119.629 | 1.00 | 0.00 | O |
| ATOM | 1196 | C4'  | T B | 20 | -17.625 | -69.193 | 117.983 | 1.00 | 0.00 | C |
| ATOM | 1197 | O4'  | T B | 20 | -17.986 | -68.090 | 118.875 | 1.00 | 0.00 | O |
| ATOM | 1198 | C5'  | T B | 20 | -18.510 | -69.133 | 116.760 | 1.00 | 0.00 | C |
| ATOM | 1199 | O5'  | T B | 20 | -19.799 | -69.732 | 117.057 | 1.00 | 0.00 | O |
| ATOM | 1200 | O1P  | T B | 20 | -19.843 | -71.776 | 115.591 | 1.00 | 0.00 | O |
| ATOM | 1201 | O2P  | T B | 20 | -21.991 | -70.669 | 116.268 | 1.00 | 0.00 | O |
| ATOM | 1202 | P    | T B | 20 | -20.561 | -70.524 | 115.903 | 1.00 | 0.00 | P |
| ATOM | 1203 | H3   | T B | 20 | -21.217 | -65.301 | 121.755 | 1.00 | 0.00 | H |
| ATOM | 1204 | H6   | T B | 20 | -20.988 | -68.976 | 118.645 | 1.00 | 0.00 | H |
| ATOM | 1205 | H1'  | T B | 20 | -18.094 | -68.400 | 120.882 | 1.00 | 0.00 | H |
| ATOM | 1206 | H3'  | T B | 20 | -17.976 | -71.320 | 118.252 | 1.00 | 0.00 | H |
| ATOM | 1207 | H4'  | T B | 20 | -16.589 | -69.148 | 117.646 | 1.00 | 0.00 | H |
| ATOM | 1208 | H3T  | T B | 20 | -16.684 | -71.323 | 120.335 | 1.00 | 0.00 | H |
| ATOM | 1209 | H71  | T B | 20 | -23.808 | -68.742 | 118.919 | 1.00 | 0.00 | H |
| ATOM | 1210 | H72  | T B | 20 | -24.187 | -67.004 | 118.819 | 1.00 | 0.00 | H |
| ATOM | 1211 | H73  | T B | 20 | -23.166 | -67.765 | 117.575 | 1.00 | 0.00 | H |
| ATOM | 1212 | H2'1 | T B | 20 | -19.867 | -70.307 | 119.330 | 1.00 | 0.00 | H |
| ATOM | 1213 | H2'2 | T B | 20 | -18.845 | -70.644 | 120.720 | 1.00 | 0.00 | H |
| ATOM | 1214 | H5'1 | T B | 20 | -18.646 | -68.093 | 116.465 | 1.00 | 0.00 | H |
| ATOM | 1215 | H5'2 | T B | 20 | -18.032 | -69.677 | 115.947 | 1.00 | 0.00 | H |
| TER  |      |      |     |    |         |         |         |      |      |   |
| ATOM | 1    | C1'  | A A | 1  | -4.653  | -82.886 | 94.763  | 1.00 | 0.00 | C |
| ATOM | 2    | N1   | A A | 1  | -8.755  | -83.842 | 91.833  | 1.00 | 0.00 | N |
| ATOM | 3    | C2   | A A | 1  | -7.451  | -84.009 | 91.635  | 1.00 | 0.00 | C |
| ATOM | 4    | N3   | A A | 1  | -6.442  | -83.743 | 92.437  | 1.00 | 0.00 | N |
| ATOM | 5    | C4   | A A | 1  | -6.892  | -83.228 | 93.595  | 1.00 | 0.00 | C |
| ATOM | 6    | C5   | A A | 1  | -8.190  | -82.994 | 93.953  | 1.00 | 0.00 | C |
| ATOM | 7    | C6   | A A | 1  | -9.174  | -83.328 | 92.999  | 1.00 | 0.00 | C |
| ATOM | 8    | N6   | A A | 1  | -10.490 | -83.154 | 93.210  | 1.00 | 0.00 | N |
| ATOM | 9    | N7   | A A | 1  | -8.268  | -82.456 | 95.226  | 1.00 | 0.00 | N |
| ATOM | 10   | C8   | A A | 1  | -7.027  | -82.376 | 95.607  | 1.00 | 0.00 | C |
| ATOM | 11   | N9   | A A | 1  | -6.136  | -82.827 | 94.670  | 1.00 | 0.00 | N |
| ATOM | 12   | C2'  | A A | 1  | -4.036  | -81.700 | 95.492  | 1.00 | 0.00 | C |
| ATOM | 13   | C3'  | A A | 1  | -2.869  | -82.347 | 96.219  | 1.00 | 0.00 | C |
| ATOM | 14   | O3'  | A A | 1  | -1.752  | -82.424 | 95.337  | 1.00 | 0.00 | O |
| ATOM | 15   | C4'  | A A | 1  | -3.415  | -83.727 | 96.581  | 1.00 | 0.00 | C |
| ATOM | 16   | O4'  | A A | 1  | -4.312  | -84.061 | 95.474  | 1.00 | 0.00 | O |
| ATOM | 17   | C5'  | A A | 1  | -4.189  | -83.824 | 97.875  | 1.00 | 0.00 | C |
| ATOM | 18   | O5'  | A A | 1  | -4.965  | -82.615 | 98.075  | 1.00 | 0.00 | O |
| ATOM | 19   | H2   | A A | 1  | -7.177  | -84.427 | 90.666  | 1.00 | 0.00 | H |
| ATOM | 20   | H8   | A A | 1  | -6.725  | -81.986 | 96.579  | 1.00 | 0.00 | H |
| ATOM | 21   | H1'  | A A | 1  | -4.250  | -82.976 | 93.754  | 1.00 | 0.00 | H |
| ATOM | 22   | H3'  | A A | 1  | -2.584  | -81.790 | 97.113  | 1.00 | 0.00 | H |
| ATOM | 23   | H4'  | A A | 1  | -2.559  | -84.397 | 96.655  | 1.00 | 0.00 | H |
| ATOM | 24   | H61  | A A | 1  | -11.167 | -83.414 | 92.482  | 1.00 | 0.00 | H |

|      |    |      |     |   |         |         |        |      |      |   |
|------|----|------|-----|---|---------|---------|--------|------|------|---|
| ATOM | 25 | H62  | A A | 1 | -10.818 | -82.758 | 94.103 | 1.00 | 0.00 | H |
| ATOM | 26 | H5T  | A A | 1 | -5.097  | -82.294 | 98.969 | 1.00 | 0.00 | H |
| ATOM | 27 | H2'1 | A A | 1 | -4.731  | -81.237 | 96.191 | 1.00 | 0.00 | H |
| ATOM | 28 | H2'2 | A A | 1 | -3.695  | -80.925 | 94.806 | 1.00 | 0.00 | H |
| ATOM | 29 | H5'1 | A A | 1 | -4.854  | -84.685 | 97.830 | 1.00 | 0.00 | H |
| ATOM | 30 | H5'2 | A A | 1 | -3.491  | -83.953 | 98.701 | 1.00 | 0.00 | H |
| ATOM | 31 | C1'  | G A | 2 | -3.787  | -81.472 | 90.083 | 1.00 | 0.00 | C |
| ATOM | 32 | N1   | G A | 2 | -8.865  | -81.057 | 89.849 | 1.00 | 0.00 | N |
| ATOM | 33 | C2   | G A | 2 | -7.976  | -81.579 | 88.930 | 1.00 | 0.00 | C |
| ATOM | 34 | N2   | G A | 2 | -8.508  | -82.052 | 87.797 | 1.00 | 0.00 | N |
| ATOM | 35 | N3   | G A | 2 | -6.659  | -81.627 | 89.124 | 1.00 | 0.00 | N |
| ATOM | 36 | C4   | G A | 2 | -6.295  | -81.099 | 90.323 | 1.00 | 0.00 | C |
| ATOM | 37 | C5   | G A | 2 | -7.112  | -80.553 | 91.300 | 1.00 | 0.00 | C |
| ATOM | 38 | C6   | G A | 2 | -8.511  | -80.507 | 91.094 | 1.00 | 0.00 | C |
| ATOM | 39 | O6   | G A | 2 | -9.390  | -80.069 | 91.836 | 1.00 | 0.00 | O |
| ATOM | 40 | N7   | G A | 2 | -6.344  | -80.120 | 92.384 | 1.00 | 0.00 | N |
| ATOM | 41 | C8   | G A | 2 | -5.117  | -80.412 | 92.039 | 1.00 | 0.00 | C |
| ATOM | 42 | N9   | G A | 2 | -5.006  | -81.008 | 90.799 | 1.00 | 0.00 | N |
| ATOM | 43 | C2'  | G A | 2 | -2.579  | -80.565 | 90.274 | 1.00 | 0.00 | C |
| ATOM | 44 | C3'  | G A | 2 | -1.434  | -81.563 | 90.306 | 1.00 | 0.00 | C |
| ATOM | 45 | O3'  | G A | 2 | -1.036  | -81.862 | 88.969 | 1.00 | 0.00 | O |
| ATOM | 46 | C4'  | G A | 2 | -2.054  | -82.770 | 91.007 | 1.00 | 0.00 | C |
| ATOM | 47 | O4'  | G A | 2 | -3.453  | -82.752 | 90.584 | 1.00 | 0.00 | O |
| ATOM | 48 | C5'  | G A | 2 | -2.003  | -82.767 | 92.516 | 1.00 | 0.00 | C |
| ATOM | 49 | O5'  | G A | 2 | -2.187  | -81.416 | 93.011 | 1.00 | 0.00 | O |
| ATOM | 50 | O1P  | G A | 2 | 0.030   | -80.879 | 94.073 | 1.00 | 0.00 | O |
| ATOM | 51 | O2P  | G A | 2 | -2.058  | -79.756 | 94.892 | 1.00 | 0.00 | O |
| ATOM | 52 | P    | G A | 2 | -1.418  | -80.973 | 94.336 | 1.00 | 0.00 | P |
| ATOM | 53 | H1   | G A | 2 | -9.865  | -81.071 | 89.602 | 1.00 | 0.00 | H |
| ATOM | 54 | H8   | G A | 2 | -4.257  | -80.202 | 92.674 | 1.00 | 0.00 | H |
| ATOM | 55 | H1'  | G A | 2 | -4.032  | -81.579 | 89.027 | 1.00 | 0.00 | H |
| ATOM | 56 | H21  | G A | 2 | -9.527  | -82.014 | 87.653 | 1.00 | 0.00 | H |
| ATOM | 57 | H3'  | G A | 2 | -0.576  | -81.182 | 90.861 | 1.00 | 0.00 | H |
| ATOM | 58 | H22  | G A | 2 | -7.898  | -82.454 | 87.071 | 1.00 | 0.00 | H |
| ATOM | 59 | H4'  | G A | 2 | -1.514  | -83.650 | 90.658 | 1.00 | 0.00 | H |
| ATOM | 60 | H2'1 | G A | 2 | -2.634  | -79.994 | 91.201 | 1.00 | 0.00 | H |
| ATOM | 61 | H2'2 | G A | 2 | -2.464  | -79.852 | 89.456 | 1.00 | 0.00 | H |
| ATOM | 62 | H5'1 | G A | 2 | -2.795  | -83.410 | 92.902 | 1.00 | 0.00 | H |
| ATOM | 63 | H5'2 | G A | 2 | -1.039  | -83.152 | 92.844 | 1.00 | 0.00 | H |
| ATOM | 64 | C1'  | G A | 3 | -5.136  | -79.950 | 85.567 | 1.00 | 0.00 | C |
| ATOM | 65 | N1   | G A | 3 | -9.257  | -78.195 | 88.008 | 1.00 | 0.00 | N |
| ATOM | 66 | C2   | G A | 3 | -9.157  | -78.855 | 86.798 | 1.00 | 0.00 | C |
| ATOM | 67 | N2   | G A | 3 | -10.308 | -79.074 | 86.149 | 1.00 | 0.00 | N |
| ATOM | 68 | N3   | G A | 3 | -8.003  | -79.263 | 86.276 | 1.00 | 0.00 | N |
| ATOM | 69 | C4   | G A | 3 | -6.940  | -78.951 | 87.063 | 1.00 | 0.00 | C |
| ATOM | 70 | C5   | G A | 3 | -6.944  | -78.294 | 88.282 | 1.00 | 0.00 | C |
| ATOM | 71 | C6   | G A | 3 | -8.171  | -77.864 | 88.839 | 1.00 | 0.00 | C |
| ATOM | 72 | O6   | G A | 3 | -8.377  | -77.271 | 89.899 | 1.00 | 0.00 | O |
| ATOM | 73 | N7   | G A | 3 | -5.641  | -78.169 | 88.767 | 1.00 | 0.00 | N |
| ATOM | 74 | C8   | G A | 3 | -4.906  | -78.743 | 87.851 | 1.00 | 0.00 | C |
| ATOM | 75 | N9   | G A | 3 | -5.623  | -79.243 | 86.783 | 1.00 | 0.00 | N |
| ATOM | 76 | C2'  | G A | 3 | -3.817  | -79.412 | 85.030 | 1.00 | 0.00 | C |
| ATOM | 77 | C3'  | G A | 3 | -3.140  | -80.675 | 84.526 | 1.00 | 0.00 | C |
| ATOM | 78 | O3'  | G A | 3 | -3.598  | -80.955 | 83.205 | 1.00 | 0.00 | O |

|      |     |      |     |   |         |         |        |      |      |   |
|------|-----|------|-----|---|---------|---------|--------|------|------|---|
| ATOM | 79  | C4'  | G A | 3 | -3.597  | -81.731 | 85.531 | 1.00 | 0.00 | C |
| ATOM | 80  | O4'  | G A | 3 | -4.946  | -81.311 | 85.907 | 1.00 | 0.00 | O |
| ATOM | 81  | C5'  | G A | 3 | -2.765  | -81.866 | 86.785 | 1.00 | 0.00 | C |
| ATOM | 82  | O5'  | G A | 3 | -2.294  | -80.561 | 87.204 | 1.00 | 0.00 | O |
| ATOM | 83  | O1P  | G A | 3 | 0.201   | -80.718 | 86.903 | 1.00 | 0.00 | O |
| ATOM | 84  | O2P  | G A | 3 | -0.760  | -79.156 | 88.614 | 1.00 | 0.00 | O |
| ATOM | 85  | P    | G A | 3 | -0.859  | -80.449 | 87.894 | 1.00 | 0.00 | P |
| ATOM | 86  | H1   | G A | 3 | -10.200 | -77.925 | 88.326 | 1.00 | 0.00 | H |
| ATOM | 87  | H8   | G A | 3 | -3.821  | -78.821 | 87.923 | 1.00 | 0.00 | H |
| ATOM | 88  | H1'  | G A | 3 | -5.916  | -79.901 | 84.807 | 1.00 | 0.00 | H |
| ATOM | 89  | H21  | G A | 3 | -11.198 | -78.758 | 86.561 | 1.00 | 0.00 | H |
| ATOM | 90  | H3'  | G A | 3 | -2.053  | -80.582 | 84.519 | 1.00 | 0.00 | H |
| ATOM | 91  | H22  | G A | 3 | -10.301 | -79.559 | 85.242 | 1.00 | 0.00 | H |
| ATOM | 92  | H4'  | G A | 3 | -3.577  | -82.689 | 85.014 | 1.00 | 0.00 | H |
| ATOM | 93  | H2'1 | G A | 3 | -3.224  | -78.926 | 85.805 | 1.00 | 0.00 | H |
| ATOM | 94  | H2'2 | G A | 3 | -3.961  | -78.690 | 84.227 | 1.00 | 0.00 | H |
| ATOM | 95  | H5'1 | G A | 3 | -3.374  | -82.309 | 87.572 | 1.00 | 0.00 | H |
| ATOM | 96  | H5'2 | G A | 3 | -1.916  | -82.518 | 86.582 | 1.00 | 0.00 | H |
| ATOM | 97  | C1'  | C A | 4 | -8.187  | -77.757 | 82.340 | 1.00 | 0.00 | C |
| ATOM | 98  | N1   | C A | 4 | -7.761  | -77.048 | 83.580 | 1.00 | 0.00 | N |
| ATOM | 99  | C2   | C A | 4 | -8.752  | -76.497 | 84.387 | 1.00 | 0.00 | C |
| ATOM | 100 | O2   | C A | 4 | -9.936  | -76.614 | 84.046 | 1.00 | 0.00 | O |
| ATOM | 101 | N3   | C A | 4 | -8.385  | -75.848 | 85.519 | 1.00 | 0.00 | N |
| ATOM | 102 | C4   | C A | 4 | -7.095  | -75.736 | 85.861 | 1.00 | 0.00 | C |
| ATOM | 103 | N4   | C A | 4 | -6.793  | -75.094 | 86.980 | 1.00 | 0.00 | N |
| ATOM | 104 | C5   | C A | 4 | -6.056  | -76.293 | 85.047 | 1.00 | 0.00 | C |
| ATOM | 105 | C6   | C A | 4 | -6.448  | -76.943 | 83.915 | 1.00 | 0.00 | C |
| ATOM | 106 | C2'  | C A | 4 | -7.256  | -77.536 | 81.157 | 1.00 | 0.00 | C |
| ATOM | 107 | C3'  | C A | 4 | -7.302  | -78.888 | 80.460 | 1.00 | 0.00 | C |
| ATOM | 108 | O3'  | C A | 4 | -8.438  | -78.931 | 79.598 | 1.00 | 0.00 | O |
| ATOM | 109 | C4'  | C A | 4 | -7.425  | -79.867 | 81.625 | 1.00 | 0.00 | C |
| ATOM | 110 | O4'  | C A | 4 | -8.212  | -79.144 | 82.625 | 1.00 | 0.00 | O |
| ATOM | 111 | C5'  | C A | 4 | -6.131  | -80.315 | 82.263 | 1.00 | 0.00 | C |
| ATOM | 112 | O5'  | C A | 4 | -5.186  | -79.215 | 82.282 | 1.00 | 0.00 | O |
| ATOM | 113 | O1P  | C A | 4 | -3.362  | -79.987 | 80.729 | 1.00 | 0.00 | O |
| ATOM | 114 | O2P  | C A | 4 | -2.836  | -78.374 | 82.577 | 1.00 | 0.00 | O |
| ATOM | 115 | P    | C A | 4 | -3.633  | -79.534 | 82.107 | 1.00 | 0.00 | P |
| ATOM | 116 | H5   | C A | 4 | -5.004  | -76.200 | 85.319 | 1.00 | 0.00 | H |
| ATOM | 117 | H6   | C A | 4 | -5.693  | -77.388 | 83.266 | 1.00 | 0.00 | H |
| ATOM | 118 | H1'  | C A | 4 | -9.202  | -77.445 | 82.103 | 1.00 | 0.00 | H |
| ATOM | 119 | H3'  | C A | 4 | -6.400  | -79.077 | 79.878 | 1.00 | 0.00 | H |
| ATOM | 120 | H4'  | C A | 4 | -7.931  | -80.752 | 81.243 | 1.00 | 0.00 | H |
| ATOM | 121 | H41  | C A | 4 | -5.808  | -74.995 | 87.267 | 1.00 | 0.00 | H |
| ATOM | 122 | H42  | C A | 4 | -7.542  | -74.693 | 87.563 | 1.00 | 0.00 | H |
| ATOM | 123 | H2'1 | C A | 4 | -6.242  | -77.286 | 81.467 | 1.00 | 0.00 | H |
| ATOM | 124 | H2'2 | C A | 4 | -7.604  | -76.738 | 80.500 | 1.00 | 0.00 | H |
| ATOM | 125 | H5'1 | C A | 4 | -6.329  | -80.647 | 83.283 | 1.00 | 0.00 | H |
| ATOM | 126 | H5'2 | C A | 4 | -5.718  | -81.145 | 81.690 | 1.00 | 0.00 | H |
| ATOM | 127 | C1'  | C A | 5 | -11.758 | -74.577 | 81.053 | 1.00 | 0.00 | C |
| ATOM | 128 | N1   | C A | 5 | -10.576 | -74.111 | 81.829 | 1.00 | 0.00 | N |
| ATOM | 129 | C2   | C A | 5 | -10.807 | -73.387 | 82.996 | 1.00 | 0.00 | C |
| ATOM | 130 | O2   | C A | 5 | -11.976 | -73.159 | 83.339 | 1.00 | 0.00 | O |
| ATOM | 131 | N3   | C A | 5 | -9.744  | -72.954 | 83.718 | 1.00 | 0.00 | N |
| ATOM | 132 | C4   | C A | 5 | -8.492  | -73.214 | 83.322 | 1.00 | 0.00 | C |



|      |     |      |     |   |         |         |        |      |      |   |
|------|-----|------|-----|---|---------|---------|--------|------|------|---|
| ATOM | 133 | N4   | C A | 5 | -7.491  | -72.771 | 84.067 | 1.00 | 0.00 | N |
| ATOM | 134 | C5   | C A | 5 | -8.225  | -73.956 | 82.125 | 1.00 | 0.00 | C |
| ATOM | 135 | C6   | C A | 5 | -9.311  | -74.383 | 81.417 | 1.00 | 0.00 | C |
| ATOM | 136 | C2'  | C A | 5 | -11.566 | -74.511 | 79.545 | 1.00 | 0.00 | C |
| ATOM | 137 | C3'  | C A | 5 | -12.330 | -75.740 | 79.074 | 1.00 | 0.00 | C |
| ATOM | 138 | O3'  | C A | 5 | -13.710 | -75.411 | 78.943 | 1.00 | 0.00 | O |
| ATOM | 139 | C4'  | C A | 5 | -12.079 | -76.746 | 80.195 | 1.00 | 0.00 | C |
| ATOM | 140 | O4'  | C A | 5 | -12.000 | -75.927 | 81.405 | 1.00 | 0.00 | O |
| ATOM | 141 | C5'  | C A | 5 | -10.817 | -77.570 | 80.087 | 1.00 | 0.00 | C |
| ATOM | 142 | O5'  | C A | 5 | -9.749  | -76.762 | 79.530 | 1.00 | 0.00 | O |
| ATOM | 143 | O1P  | C A | 5 | -9.294  | -77.856 | 77.308 | 1.00 | 0.00 | O |
| ATOM | 144 | O2P  | C A | 5 | -7.470  | -76.598 | 78.487 | 1.00 | 0.00 | O |
| ATOM | 145 | P    | C A | 5 | -8.670  | -77.464 | 78.587 | 1.00 | 0.00 | P |
| ATOM | 146 | H5   | C A | 5 | -7.207  | -74.165 | 81.796 | 1.00 | 0.00 | H |
| ATOM | 147 | H6   | C A | 5 | -9.158  | -74.955 | 80.502 | 1.00 | 0.00 | H |
| ATOM | 148 | H1'  | C A | 5 | -12.622 | -73.989 | 81.363 | 1.00 | 0.00 | H |
| ATOM | 149 | H3'  | C A | 5 | -11.955 | -76.112 | 78.119 | 1.00 | 0.00 | H |
| ATOM | 150 | H4'  | C A | 5 | -12.926 | -77.432 | 80.199 | 1.00 | 0.00 | H |
| ATOM | 151 | H41  | C A | 5 | -6.517  | -72.958 | 83.786 | 1.00 | 0.00 | H |
| ATOM | 152 | H42  | C A | 5 | -7.685  | -72.237 | 84.927 | 1.00 | 0.00 | H |
| ATOM | 153 | H2'1 | C A | 5 | -10.516 | -74.563 | 79.258 | 1.00 | 0.00 | H |
| ATOM | 154 | H2'2 | C A | 5 | -11.979 | -73.598 | 79.115 | 1.00 | 0.00 | H |
| ATOM | 155 | H5'1 | C A | 5 | -10.533 | -77.921 | 81.080 | 1.00 | 0.00 | H |
| ATOM | 156 | H5'2 | C A | 5 | -11.005 | -78.429 | 79.444 | 1.00 | 0.00 | H |
| ATOM | 157 | C1'  | G A | 6 | -14.472 | -70.473 | 81.615 | 1.00 | 0.00 | C |
| ATOM | 158 | N1   | G A | 6 | -10.367 | -68.781 | 84.128 | 1.00 | 0.00 | N |
| ATOM | 159 | C2   | G A | 6 | -11.711 | -68.656 | 84.435 | 1.00 | 0.00 | C |
| ATOM | 160 | N2   | G A | 6 | -11.999 | -67.990 | 85.559 | 1.00 | 0.00 | N |
| ATOM | 161 | N3   | G A | 6 | -12.687 | -69.156 | 83.680 | 1.00 | 0.00 | N |
| ATOM | 162 | C4   | G A | 6 | -12.214 | -69.791 | 82.577 | 1.00 | 0.00 | C |
| ATOM | 163 | C5   | G A | 6 | -10.896 | -69.963 | 82.189 | 1.00 | 0.00 | C |
| ATOM | 164 | C6   | G A | 6 | -9.857  | -69.436 | 82.991 | 1.00 | 0.00 | C |
| ATOM | 165 | O6   | G A | 6 | -8.641  | -69.484 | 82.816 | 1.00 | 0.00 | O |
| ATOM | 166 | N7   | G A | 6 | -10.834 | -70.674 | 80.989 | 1.00 | 0.00 | N |
| ATOM | 167 | C8   | G A | 6 | -12.087 | -70.909 | 80.696 | 1.00 | 0.00 | C |
| ATOM | 168 | N9   | G A | 6 | -12.985 | -70.404 | 81.613 | 1.00 | 0.00 | N |
| ATOM | 169 | C2'  | G A | 6 | -15.094 | -70.338 | 80.232 | 1.00 | 0.00 | C |
| ATOM | 170 | C3'  | G A | 6 | -16.287 | -71.275 | 80.326 | 1.00 | 0.00 | C |
| ATOM | 171 | O3'  | G A | 6 | -17.382 | -70.581 | 80.919 | 1.00 | 0.00 | O |
| ATOM | 172 | C4'  | G A | 6 | -15.765 | -72.401 | 81.218 | 1.00 | 0.00 | C |
| ATOM | 173 | O4'  | G A | 6 | -14.846 | -71.732 | 82.140 | 1.00 | 0.00 | O |
| ATOM | 174 | C5'  | G A | 6 | -15.025 | -73.518 | 80.525 | 1.00 | 0.00 | C |
| ATOM | 175 | O5'  | G A | 6 | -14.241 | -72.984 | 79.429 | 1.00 | 0.00 | O |
| ATOM | 176 | O1P  | G A | 6 | -15.335 | -73.973 | 77.391 | 1.00 | 0.00 | O |
| ATOM | 177 | O2P  | G A | 6 | -12.906 | -73.348 | 77.332 | 1.00 | 0.00 | O |
| ATOM | 178 | P    | G A | 6 | -14.054 | -73.868 | 78.115 | 1.00 | 0.00 | P |
| ATOM | 179 | H1   | G A | 6 | -9.689  | -68.364 | 84.784 | 1.00 | 0.00 | H |
| ATOM | 180 | H8   | G A | 6 | -12.397 | -71.457 | 79.805 | 1.00 | 0.00 | H |
| ATOM | 181 | H1'  | G A | 6 | -14.849 | -69.702 | 82.289 | 1.00 | 0.00 | H |
| ATOM | 182 | H21  | G A | 6 | -11.238 | -67.608 | 86.141 | 1.00 | 0.00 | H |
| ATOM | 183 | H3'  | G A | 6 | -16.587 | -71.655 | 79.350 | 1.00 | 0.00 | H |
| ATOM | 184 | H22  | G A | 6 | -12.981 | -67.859 | 85.843 | 1.00 | 0.00 | H |
| ATOM | 185 | H4'  | G A | 6 | -16.629 | -72.834 | 81.721 | 1.00 | 0.00 | H |
| ATOM | 186 | H2'1 | G A | 6 | -14.410 | -70.645 | 79.439 | 1.00 | 0.00 | H |

|      |     |      |     |   |         |         |        |      |      |   |
|------|-----|------|-----|---|---------|---------|--------|------|------|---|
| ATOM | 187 | H2'2 | G A | 6 | -15.407 | -69.316 | 80.016 | 1.00 | 0.00 | H |
| ATOM | 188 | H5'1 | G A | 6 | -14.370 | -74.014 | 81.240 | 1.00 | 0.00 | H |
| ATOM | 189 | H5'2 | G A | 6 | -15.746 | -74.242 | 80.143 | 1.00 | 0.00 | H |
| ATOM | 190 | C1'  | C A | 7 | -15.280 | -65.860 | 83.228 | 1.00 | 0.00 | C |
| ATOM | 191 | N1   | C A | 7 | -14.056 | -66.184 | 82.446 | 1.00 | 0.00 | N |
| ATOM | 192 | C2   | C A | 7 | -12.825 | -65.799 | 82.973 | 1.00 | 0.00 | C |
| ATOM | 193 | O2   | C A | 7 | -12.797 | -65.210 | 84.060 | 1.00 | 0.00 | O |
| ATOM | 194 | N3   | C A | 7 | -11.698 | -66.085 | 82.276 | 1.00 | 0.00 | N |
| ATOM | 195 | C4   | C A | 7 | -11.758 | -66.723 | 81.100 | 1.00 | 0.00 | C |
| ATOM | 196 | N4   | C A | 7 | -10.626 | -66.979 | 80.463 | 1.00 | 0.00 | N |
| ATOM | 197 | C5   | C A | 7 | -13.011 | -67.126 | 80.531 | 1.00 | 0.00 | C |
| ATOM | 198 | C6   | C A | 7 | -14.133 | -66.833 | 81.254 | 1.00 | 0.00 | C |
| ATOM | 199 | C2'  | C A | 7 | -16.468 | -65.450 | 82.368 | 1.00 | 0.00 | C |
| ATOM | 200 | C3'  | C A | 7 | -17.636 | -66.047 | 83.137 | 1.00 | 0.00 | C |
| ATOM | 201 | O3'  | C A | 7 | -18.031 | -65.144 | 84.167 | 1.00 | 0.00 | O |
| ATOM | 202 | C4'  | C A | 7 | -17.049 | -67.341 | 83.698 | 1.00 | 0.00 | C |
| ATOM | 203 | O4'  | C A | 7 | -15.645 | -67.019 | 83.955 | 1.00 | 0.00 | O |
| ATOM | 204 | C5'  | C A | 7 | -17.108 | -68.552 | 82.794 | 1.00 | 0.00 | C |
| ATOM | 205 | O5'  | C A | 7 | -16.900 | -68.148 | 81.417 | 1.00 | 0.00 | O |
| ATOM | 206 | O1P  | C A | 7 | -19.113 | -68.639 | 80.323 | 1.00 | 0.00 | O |
| ATOM | 207 | O2P  | C A | 7 | -17.005 | -68.668 | 78.962 | 1.00 | 0.00 | O |
| ATOM | 208 | P    | C A | 7 | -17.667 | -68.933 | 80.262 | 1.00 | 0.00 | P |
| ATOM | 209 | H5   | C A | 7 | -13.066 | -67.641 | 79.571 | 1.00 | 0.00 | H |
| ATOM | 210 | H6   | C A | 7 | -15.109 | -67.126 | 80.866 | 1.00 | 0.00 | H |
| ATOM | 211 | H1'  | C A | 7 | -15.029 | -65.079 | 83.947 | 1.00 | 0.00 | H |
| ATOM | 212 | H3'  | C A | 7 | -18.489 | -66.250 | 82.488 | 1.00 | 0.00 | H |
| ATOM | 213 | H4'  | C A | 7 | -17.607 | -67.575 | 84.604 | 1.00 | 0.00 | H |
| ATOM | 214 | H41  | C A | 7 | -10.643 | -67.471 | 79.558 | 1.00 | 0.00 | H |
| ATOM | 215 | H42  | C A | 7 | -9.725  | -66.687 | 80.870 | 1.00 | 0.00 | H |
| ATOM | 216 | H2'1 | C A | 7 | -16.408 | -65.855 | 81.360 | 1.00 | 0.00 | H |
| ATOM | 217 | H2'2 | C A | 7 | -16.561 | -64.366 | 82.282 | 1.00 | 0.00 | H |
| ATOM | 218 | H5'1 | C A | 7 | -16.335 | -69.260 | 83.092 | 1.00 | 0.00 | H |
| ATOM | 219 | H5'2 | C A | 7 | -18.085 | -69.025 | 82.894 | 1.00 | 0.00 | H |
| ATOM | 220 | C1'  | A A | 8 | -13.880 | -61.347 | 84.704 | 1.00 | 0.00 | C |
| ATOM | 221 | N1   | A A | 8 | -9.708  | -62.346 | 81.885 | 1.00 | 0.00 | N |
| ATOM | 222 | C2   | A A | 8 | -9.873  | -61.791 | 83.081 | 1.00 | 0.00 | C |
| ATOM | 223 | N3   | A A | 8 | -10.980 | -61.564 | 83.755 | 1.00 | 0.00 | N |
| ATOM | 224 | C4   | A A | 8 | -12.047 | -61.984 | 83.049 | 1.00 | 0.00 | C |
| ATOM | 225 | C5   | A A | 8 | -12.049 | -62.571 | 81.814 | 1.00 | 0.00 | C |
| ATOM | 226 | C6   | A A | 8 | -10.791 | -62.756 | 81.206 | 1.00 | 0.00 | C |
| ATOM | 227 | N6   | A A | 8 | -10.637 | -63.319 | 79.995 | 1.00 | 0.00 | N |
| ATOM | 228 | N7   | A A | 8 | -13.337 | -62.869 | 81.405 | 1.00 | 0.00 | N |
| ATOM | 229 | C8   | A A | 8 | -14.081 | -62.457 | 82.391 | 1.00 | 0.00 | C |
| ATOM | 230 | N9   | A A | 8 | -13.366 | -61.910 | 83.425 | 1.00 | 0.00 | N |
| ATOM | 231 | C2'  | A A | 8 | -15.188 | -60.581 | 84.554 | 1.00 | 0.00 | C |
| ATOM | 232 | C3'  | A A | 8 | -15.901 | -60.916 | 85.853 | 1.00 | 0.00 | C |
| ATOM | 233 | O3'  | A A | 8 | -15.458 | -60.024 | 86.873 | 1.00 | 0.00 | O |
| ATOM | 234 | C4'  | A A | 8 | -15.467 | -62.357 | 86.119 | 1.00 | 0.00 | C |
| ATOM | 235 | O4'  | A A | 8 | -14.103 | -62.426 | 85.591 | 1.00 | 0.00 | O |
| ATOM | 236 | C5'  | A A | 8 | -16.295 | -63.437 | 85.464 | 1.00 | 0.00 | C |
| ATOM | 237 | O5'  | A A | 8 | -16.728 | -62.997 | 84.152 | 1.00 | 0.00 | O |
| ATOM | 238 | O1P  | A A | 8 | -19.227 | -62.818 | 84.395 | 1.00 | 0.00 | O |
| ATOM | 239 | O2P  | A A | 8 | -18.214 | -63.283 | 82.146 | 1.00 | 0.00 | O |
| ATOM | 240 | P    | A A | 8 | -18.155 | -63.469 | 83.617 | 1.00 | 0.00 | P |

|      |     |      |     |    |         |         |        |      |      |   |
|------|-----|------|-----|----|---------|---------|--------|------|------|---|
| ATOM | 241 | H2   | A A | 8  | -8.955  | -61.477 | 83.577 | 1.00 | 0.00 | H |
| ATOM | 242 | H8   | A A | 8  | -15.168 | -62.538 | 82.395 | 1.00 | 0.00 | H |
| ATOM | 243 | H1'  | A A | 8  | -13.104 | -60.715 | 85.134 | 1.00 | 0.00 | H |
| ATOM | 244 | H3'  | A A | 8  | -16.984 | -60.843 | 85.756 | 1.00 | 0.00 | H |
| ATOM | 245 | H4'  | A A | 8  | -15.515 | -62.508 | 87.196 | 1.00 | 0.00 | H |
| ATOM | 246 | H61  | A A | 8  | -9.695  | -63.433 | 79.596 | 1.00 | 0.00 | H |
| ATOM | 247 | H62  | A A | 8  | -11.464 | -63.634 | 79.466 | 1.00 | 0.00 | H |
| ATOM | 248 | H2'1 | A A | 8  | -15.763 | -60.909 | 83.690 | 1.00 | 0.00 | H |
| ATOM | 249 | H2'2 | A A | 8  | -15.028 | -59.507 | 84.454 | 1.00 | 0.00 | H |
| ATOM | 250 | H5'1 | A A | 8  | -15.692 | -64.340 | 85.369 | 1.00 | 0.00 | H |
| ATOM | 251 | H5'2 | A A | 8  | -17.164 | -63.651 | 86.086 | 1.00 | 0.00 | H |
| ATOM | 252 | C1'  | C A | 9  | -10.732 | -57.509 | 84.874 | 1.00 | 0.00 | C |
| ATOM | 253 | N1   | C A | 9  | -11.156 | -58.079 | 83.565 | 1.00 | 0.00 | N |
| ATOM | 254 | C2   | C A | 9  | -10.163 | -58.422 | 82.649 | 1.00 | 0.00 | C |
| ATOM | 255 | O2   | C A | 9  | -8.979  | -58.239 | 82.958 | 1.00 | 0.00 | O |
| ATOM | 256 | N3   | C A | 9  | -10.528 | -58.940 | 81.453 | 1.00 | 0.00 | N |
| ATOM | 257 | C4   | C A | 9  | -11.819 | -59.124 | 81.146 | 1.00 | 0.00 | C |
| ATOM | 258 | N4   | C A | 9  | -12.120 | -59.639 | 79.962 | 1.00 | 0.00 | N |
| ATOM | 259 | C5   | C A | 9  | -12.863 | -58.778 | 82.066 | 1.00 | 0.00 | C |
| ATOM | 260 | C6   | C A | 9  | -12.472 | -58.261 | 83.268 | 1.00 | 0.00 | C |
| ATOM | 261 | C2'  | C A | 9  | -11.648 | -56.408 | 85.389 | 1.00 | 0.00 | C |
| ATOM | 262 | C3'  | C A | 9  | -11.620 | -56.650 | 86.891 | 1.00 | 0.00 | C |
| ATOM | 263 | O3'  | C A | 9  | -10.478 | -56.004 | 87.448 | 1.00 | 0.00 | O |
| ATOM | 264 | C4'  | C A | 9  | -11.528 | -58.170 | 86.989 | 1.00 | 0.00 | C |
| ATOM | 265 | O4'  | C A | 9  | -10.737 | -58.561 | 85.821 | 1.00 | 0.00 | O |
| ATOM | 266 | C5'  | C A | 9  | -12.837 | -58.925 | 86.959 | 1.00 | 0.00 | C |
| ATOM | 267 | O5'  | C A | 9  | -13.760 | -58.268 | 86.052 | 1.00 | 0.00 | O |
| ATOM | 268 | O1P  | C A | 9  | -15.584 | -57.441 | 87.577 | 1.00 | 0.00 | O |
| ATOM | 269 | O2P  | C A | 9  | -16.097 | -57.964 | 85.177 | 1.00 | 0.00 | O |
| ATOM | 270 | P    | C A | 9  | -15.317 | -58.287 | 86.397 | 1.00 | 0.00 | P |
| ATOM | 271 | H5   | C A | 9  | -13.915 | -58.920 | 81.819 | 1.00 | 0.00 | H |
| ATOM | 272 | H6   | C A | 9  | -13.228 | -57.989 | 84.005 | 1.00 | 0.00 | H |
| ATOM | 273 | H1'  | C A | 9  | -9.708  | -57.153 | 84.774 | 1.00 | 0.00 | H |
| ATOM | 274 | H3'  | C A | 9  | -12.520 | -56.277 | 87.380 | 1.00 | 0.00 | H |
| ATOM | 275 | H4'  | C A | 9  | -11.036 | -58.398 | 87.933 | 1.00 | 0.00 | H |
| ATOM | 276 | H41  | C A | 9  | -13.105 | -59.793 | 79.703 | 1.00 | 0.00 | H |
| ATOM | 277 | H42  | C A | 9  | -11.368 | -59.885 | 79.301 | 1.00 | 0.00 | H |
| ATOM | 278 | H2'1 | C A | 9  | -12.659 | -56.490 | 84.993 | 1.00 | 0.00 | H |
| ATOM | 279 | H2'2 | C A | 9  | -11.277 | -55.413 | 85.139 | 1.00 | 0.00 | H |
| ATOM | 280 | H5'1 | C A | 9  | -12.655 | -59.947 | 86.623 | 1.00 | 0.00 | H |
| ATOM | 281 | H5'2 | C A | 9  | -13.260 | -58.948 | 87.962 | 1.00 | 0.00 | H |
| ATOM | 282 | C1'  | C A | 10 | -7.087  | -54.657 | 83.112 | 1.00 | 0.00 | C |
| ATOM | 283 | N1   | C A | 10 | -8.268  | -54.983 | 82.266 | 1.00 | 0.00 | N |
| ATOM | 284 | C2   | C A | 10 | -8.034  | -55.497 | 80.992 | 1.00 | 0.00 | C |
| ATOM | 285 | O2   | C A | 10 | -6.865  | -55.661 | 80.617 | 1.00 | 0.00 | O |
| ATOM | 286 | N3   | C A | 10 | -9.095  | -55.801 | 80.205 | 1.00 | 0.00 | N |
| ATOM | 287 | C4   | C A | 10 | -10.350 | -55.613 | 80.636 | 1.00 | 0.00 | C |
| ATOM | 288 | N4   | C A | 10 | -11.350 | -55.930 | 79.827 | 1.00 | 0.00 | N |
| ATOM | 289 | C5   | C A | 10 | -10.619 | -55.081 | 81.941 | 1.00 | 0.00 | C |
| ATOM | 290 | C6   | C A | 10 | -9.535  | -54.787 | 82.718 | 1.00 | 0.00 | C |
| ATOM | 291 | C2'  | C A | 10 | -7.264  | -53.400 | 83.952 | 1.00 | 0.00 | C |
| ATOM | 292 | C3'  | C A | 10 | -6.520  | -53.765 | 85.228 | 1.00 | 0.00 | C |
| ATOM | 293 | O3'  | C A | 10 | -5.132  | -53.491 | 85.054 | 1.00 | 0.00 | O |
| ATOM | 294 | C4'  | C A | 10 | -6.801  | -55.258 | 85.370 | 1.00 | 0.00 | C |

|      |     |      |   |   |    |         |         |        |      |      |   |
|------|-----|------|---|---|----|---------|---------|--------|------|------|---|
| ATOM | 295 | O4'  | C | A | 10 | -6.875  | -55.745 | 83.992 | 1.00 | 0.00 | O |
| ATOM | 296 | C5'  | C | A | 10 | -8.078  | -55.637 | 86.084 | 1.00 | 0.00 | C |
| ATOM | 297 | O5'  | C | A | 10 | -9.123  | -54.688 | 85.756 | 1.00 | 0.00 | O |
| ATOM | 298 | O1P  | C | A | 10 | -9.579  | -53.539 | 87.949 | 1.00 | 0.00 | O |
| ATOM | 299 | O2P  | C | A | 10 | -11.389 | -53.707 | 86.220 | 1.00 | 0.00 | O |
| ATOM | 300 | P    | C | A | 10 | -10.207 | -54.324 | 86.868 | 1.00 | 0.00 | P |
| ATOM | 301 | H5   | C | A | 10 | -11.639 | -54.921 | 82.295 | 1.00 | 0.00 | H |
| ATOM | 302 | H6   | C | A | 10 | -9.690  | -54.389 | 83.720 | 1.00 | 0.00 | H |
| ATOM | 303 | H1'  | C | A | 10 | -6.216  | -54.575 | 82.464 | 1.00 | 0.00 | H |
| ATOM | 304 | H3'  | C | A | 10 | -6.892  | -53.210 | 86.090 | 1.00 | 0.00 | H |
| ATOM | 305 | H4'  | C | A | 10 | -5.968  | -55.685 | 85.929 | 1.00 | 0.00 | H |
| ATOM | 306 | H41  | C | A | 10 | -12.324 | -55.796 | 80.135 | 1.00 | 0.00 | H |
| ATOM | 307 | H42  | C | A | 10 | -11.153 | -56.309 | 78.889 | 1.00 | 0.00 | H |
| ATOM | 308 | H2'1 | C | A | 10 | -8.312  | -53.180 | 84.155 | 1.00 | 0.00 | H |
| ATOM | 309 | H2'2 | C | A | 10 | -6.829  | -52.520 | 83.476 | 1.00 | 0.00 | H |
| ATOM | 310 | H5'1 | C | A | 10 | -8.378  | -56.639 | 85.776 | 1.00 | 0.00 | H |
| ATOM | 311 | H5'2 | C | A | 10 | -7.900  | -55.632 | 87.159 | 1.00 | 0.00 | H |
| ATOM | 312 | C1'  | T | A | 11 | -4.286  | -52.721 | 79.520 | 1.00 | 0.00 | C |
| ATOM | 313 | N1   | T | A | 11 | -5.769  | -52.661 | 79.424 | 1.00 | 0.00 | N |
| ATOM | 314 | C2   | T | A | 11 | -6.343  | -53.112 | 78.253 | 1.00 | 0.00 | C |
| ATOM | 315 | O2   | T | A | 11 | -5.688  | -53.547 | 77.320 | 1.00 | 0.00 | O |
| ATOM | 316 | N3   | T | A | 11 | -7.724  | -53.040 | 78.205 | 1.00 | 0.00 | N |
| ATOM | 317 | C4   | T | A | 11 | -8.555  | -52.565 | 79.199 | 1.00 | 0.00 | C |
| ATOM | 318 | O4   | T | A | 11 | -9.782  | -52.545 | 79.041 | 1.00 | 0.00 | O |
| ATOM | 319 | C5   | T | A | 11 | -7.863  | -52.115 | 80.385 | 1.00 | 0.00 | C |
| ATOM | 320 | C6   | T | A | 11 | -6.520  | -52.172 | 80.465 | 1.00 | 0.00 | C |
| ATOM | 321 | C7   | T | A | 11 | -8.730  | -51.593 | 81.491 | 1.00 | 0.00 | C |
| ATOM | 322 | C2'  | T | A | 11 | -3.669  | -51.533 | 80.248 | 1.00 | 0.00 | C |
| ATOM | 323 | C3'  | T | A | 11 | -2.504  | -52.179 | 80.980 | 1.00 | 0.00 | C |
| ATOM | 324 | O3'  | T | A | 11 | -1.384  | -52.260 | 80.100 | 1.00 | 0.00 | O |
| ATOM | 325 | C4'  | T | A | 11 | -3.053  | -53.555 | 81.344 | 1.00 | 0.00 | C |
| ATOM | 326 | O4'  | T | A | 11 | -3.946  | -53.893 | 80.235 | 1.00 | 0.00 | O |
| ATOM | 327 | C5'  | T | A | 11 | -3.830  | -53.649 | 82.636 | 1.00 | 0.00 | C |
| ATOM | 328 | O5'  | T | A | 11 | -4.605  | -52.439 | 82.830 | 1.00 | 0.00 | O |
| ATOM | 329 | O1P  | T | A | 11 | -3.555  | -51.394 | 84.863 | 1.00 | 0.00 | O |
| ATOM | 330 | O2P  | T | A | 11 | -5.963  | -50.946 | 84.326 | 1.00 | 0.00 | O |
| ATOM | 331 | P    | T | A | 11 | -4.826  | -51.899 | 84.313 | 1.00 | 0.00 | P |
| ATOM | 332 | H3   | T | A | 11 | -8.176  | -53.374 | 77.344 | 1.00 | 0.00 | H |
| ATOM | 333 | H6   | T | A | 11 | -6.019  | -51.828 | 81.370 | 1.00 | 0.00 | H |
| ATOM | 334 | H1'  | T | A | 11 | -3.881  | -52.814 | 78.512 | 1.00 | 0.00 | H |
| ATOM | 335 | H3'  | T | A | 11 | -2.221  | -51.619 | 81.871 | 1.00 | 0.00 | H |
| ATOM | 336 | H4'  | T | A | 11 | -2.198  | -54.229 | 81.421 | 1.00 | 0.00 | H |
| ATOM | 337 | H71  | T | A | 11 | -8.537  | -50.529 | 81.634 | 1.00 | 0.00 | H |
| ATOM | 338 | H72  | T | A | 11 | -9.779  | -51.740 | 81.232 | 1.00 | 0.00 | H |
| ATOM | 339 | H73  | T | A | 11 | -8.506  | -52.130 | 82.414 | 1.00 | 0.00 | H |
| ATOM | 340 | H2'1 | T | A | 11 | -4.366  | -51.068 | 80.943 | 1.00 | 0.00 | H |
| ATOM | 341 | H2'2 | T | A | 11 | -3.327  | -50.759 | 79.560 | 1.00 | 0.00 | H |
| ATOM | 342 | H5'1 | T | A | 11 | -4.496  | -54.511 | 82.593 | 1.00 | 0.00 | H |
| ATOM | 343 | H5'2 | T | A | 11 | -3.133  | -53.777 | 83.464 | 1.00 | 0.00 | H |
| ATOM | 344 | C1'  | A | A | 12 | -3.397  | -51.306 | 74.847 | 1.00 | 0.00 | C |
| ATOM | 345 | N1   | A | A | 12 | -8.506  | -50.900 | 74.587 | 1.00 | 0.00 | N |
| ATOM | 346 | C2   | A | A | 12 | -7.599  | -51.387 | 73.746 | 1.00 | 0.00 | C |
| ATOM | 347 | N3   | A | A | 12 | -6.291  | -51.464 | 73.877 | 1.00 | 0.00 | N |
| ATOM | 348 | C4   | A | A | 12 | -5.912  | -50.947 | 75.059 | 1.00 | 0.00 | C |

|      |     |      |   |   |    |         |         |        |      |      |   |
|------|-----|------|---|---|----|---------|---------|--------|------|------|---|
| ATOM | 349 | C5   | A | A | 12 | -6.711  | -50.410 | 76.028 | 1.00 | 0.00 | C |
| ATOM | 350 | C6   | A | A | 12 | -8.097  | -50.393 | 75.760 | 1.00 | 0.00 | C |
| ATOM | 351 | N6   | A | A | 12 | -9.003  | -49.896 | 76.618 | 1.00 | 0.00 | N |
| ATOM | 352 | N7   | A | A | 12 | -5.965  | -49.980 | 77.110 | 1.00 | 0.00 | N |
| ATOM | 353 | C8   | A | A | 12 | -4.740  | -50.258 | 76.776 | 1.00 | 0.00 | C |
| ATOM | 354 | N9   | A | A | 12 | -4.630  | -50.850 | 75.543 | 1.00 | 0.00 | N |
| ATOM | 355 | C2'  | A | A | 12 | -2.200  | -50.388 | 75.057 | 1.00 | 0.00 | C |
| ATOM | 356 | C3'  | A | A | 12 | -1.046  | -51.378 | 75.108 | 1.00 | 0.00 | C |
| ATOM | 357 | O3'  | A | A | 12 | -0.626  | -51.673 | 73.777 | 1.00 | 0.00 | O |
| ATOM | 358 | C4'  | A | A | 12 | -1.668  | -52.591 | 75.799 | 1.00 | 0.00 | C |
| ATOM | 359 | O4'  | A | A | 12 | -3.062  | -52.583 | 75.354 | 1.00 | 0.00 | O |
| ATOM | 360 | C5'  | A | A | 12 | -1.641  | -52.588 | 77.308 | 1.00 | 0.00 | C |
| ATOM | 361 | O5'  | A | A | 12 | -1.843  | -51.239 | 77.801 | 1.00 | 0.00 | O |
| ATOM | 362 | O1P  | A | A | 12 | 0.354   | -50.685 | 78.898 | 1.00 | 0.00 | O |
| ATOM | 363 | O2P  | A | A | 12 | -1.756  | -49.578 | 79.684 | 1.00 | 0.00 | O |
| ATOM | 364 | P    | A | A | 12 | -1.098  | -50.790 | 79.137 | 1.00 | 0.00 | P |
| ATOM | 365 | H2   | A | A | 12 | -7.996  | -51.780 | 72.810 | 1.00 | 0.00 | H |
| ATOM | 366 | H8   | A | A | 12 | -3.881  | -50.044 | 77.413 | 1.00 | 0.00 | H |
| ATOM | 367 | H1'  | A | A | 12 | -3.623  | -51.414 | 73.787 | 1.00 | 0.00 | H |
| ATOM | 368 | H3'  | A | A | 12 | -0.200  | -50.992 | 75.676 | 1.00 | 0.00 | H |
| ATOM | 369 | H4'  | A | A | 12 | -1.115  | -53.466 | 75.458 | 1.00 | 0.00 | H |
| ATOM | 370 | H61  | A | A | 12 | -10.004 | -49.909 | 76.374 | 1.00 | 0.00 | H |
| ATOM | 371 | H62  | A | A | 12 | -8.697  | -49.502 | 77.520 | 1.00 | 0.00 | H |
| ATOM | 372 | H2'1 | A | A | 12 | -2.272  | -49.819 | 75.984 | 1.00 | 0.00 | H |
| ATOM | 373 | H2'2 | A | A | 12 | -2.076  | -49.675 | 74.243 | 1.00 | 0.00 | H |
| ATOM | 374 | H5'1 | A | A | 12 | -2.434  | -53.237 | 77.680 | 1.00 | 0.00 | H |
| ATOM | 375 | H5'2 | A | A | 12 | -0.679  | -52.964 | 77.650 | 1.00 | 0.00 | H |
| ATOM | 376 | C1'  | G | A | 13 | -4.769  | -49.785 | 70.325 | 1.00 | 0.00 | C |
| ATOM | 377 | N1   | G | A | 13 | -8.890  | -48.031 | 72.766 | 1.00 | 0.00 | N |
| ATOM | 378 | C2   | G | A | 13 | -8.790  | -48.690 | 71.555 | 1.00 | 0.00 | C |
| ATOM | 379 | N2   | G | A | 13 | -9.941  | -48.909 | 70.905 | 1.00 | 0.00 | N |
| ATOM | 380 | N3   | G | A | 13 | -7.635  | -49.098 | 71.032 | 1.00 | 0.00 | N |
| ATOM | 381 | C4   | G | A | 13 | -6.573  | -48.785 | 71.820 | 1.00 | 0.00 | C |
| ATOM | 382 | C5   | G | A | 13 | -6.576  | -48.128 | 73.039 | 1.00 | 0.00 | C |
| ATOM | 383 | C6   | G | A | 13 | -7.803  | -47.699 | 73.596 | 1.00 | 0.00 | C |
| ATOM | 384 | O6   | G | A | 13 | -8.008  | -47.104 | 74.656 | 1.00 | 0.00 | O |
| ATOM | 385 | N7   | G | A | 13 | -5.274  | -48.003 | 73.524 | 1.00 | 0.00 | N |
| ATOM | 386 | C8   | G | A | 13 | -4.538  | -48.577 | 72.608 | 1.00 | 0.00 | C |
| ATOM | 387 | N9   | G | A | 13 | -5.256  | -49.078 | 71.540 | 1.00 | 0.00 | N |
| ATOM | 388 | C2'  | G | A | 13 | -3.451  | -49.246 | 69.788 | 1.00 | 0.00 | C |
| ATOM | 389 | C3'  | G | A | 13 | -2.773  | -50.509 | 69.283 | 1.00 | 0.00 | C |
| ATOM | 390 | O3'  | G | A | 13 | -3.231  | -50.790 | 67.962 | 1.00 | 0.00 | O |
| ATOM | 391 | C4'  | G | A | 13 | -3.229  | -51.565 | 70.289 | 1.00 | 0.00 | C |
| ATOM | 392 | O4'  | G | A | 13 | -4.579  | -51.145 | 70.664 | 1.00 | 0.00 | O |
| ATOM | 393 | C5'  | G | A | 13 | -2.398  | -51.700 | 71.542 | 1.00 | 0.00 | C |
| ATOM | 394 | O5'  | G | A | 13 | -1.927  | -50.396 | 71.962 | 1.00 | 0.00 | O |
| ATOM | 395 | O1P  | G | A | 13 | 0.567   | -50.552 | 71.661 | 1.00 | 0.00 | O |
| ATOM | 396 | O2P  | G | A | 13 | -0.394  | -48.990 | 73.372 | 1.00 | 0.00 | O |
| ATOM | 397 | P    | G | A | 13 | -0.492  | -50.283 | 72.651 | 1.00 | 0.00 | P |
| ATOM | 398 | H1   | G | A | 13 | -9.834  | -47.762 | 73.085 | 1.00 | 0.00 | H |
| ATOM | 399 | H8   | G | A | 13 | -3.454  | -48.656 | 72.679 | 1.00 | 0.00 | H |
| ATOM | 400 | H1'  | G | A | 13 | -5.550  | -49.735 | 69.565 | 1.00 | 0.00 | H |
| ATOM | 401 | H21  | G | A | 13 | -10.832 | -48.593 | 71.317 | 1.00 | 0.00 | H |
| ATOM | 402 | H3'  | G | A | 13 | -1.687  | -50.416 | 69.276 | 1.00 | 0.00 | H |

|      |     |      |   |   |    |         |         |        |      |      |   |
|------|-----|------|---|---|----|---------|---------|--------|------|------|---|
| ATOM | 403 | H22  | G | A | 13 | -9.934  | -49.392 | 69.997 | 1.00 | 0.00 | H |
| ATOM | 404 | H4'  | G | A | 13 | -3.211  | -52.524 | 69.771 | 1.00 | 0.00 | H |
| ATOM | 405 | H2'1 | G | A | 13 | -2.856  | -48.760 | 70.562 | 1.00 | 0.00 | H |
| ATOM | 406 | H2'2 | G | A | 13 | -3.595  | -48.524 | 68.985 | 1.00 | 0.00 | H |
| ATOM | 407 | H5'1 | G | A | 13 | -3.008  | -52.144 | 72.329 | 1.00 | 0.00 | H |
| ATOM | 408 | H5'2 | G | A | 13 | -1.549  | -52.352 | 71.340 | 1.00 | 0.00 | H |
| ATOM | 409 | C1'  | G | A | 14 | -7.820  | -47.591 | 67.098 | 1.00 | 0.00 | C |
| ATOM | 410 | N1   | G | A | 14 | -9.406  | -45.023 | 71.211 | 1.00 | 0.00 | N |
| ATOM | 411 | C2   | G | A | 14 | -10.136 | -45.582 | 70.177 | 1.00 | 0.00 | C |
| ATOM | 412 | N2   | G | A | 14 | -11.465 | -45.436 | 70.246 | 1.00 | 0.00 | N |
| ATOM | 413 | N3   | G | A | 14 | -9.584  | -46.235 | 69.155 | 1.00 | 0.00 | N |
| ATOM | 414 | C4   | G | A | 14 | -8.230  | -46.280 | 69.244 | 1.00 | 0.00 | C |
| ATOM | 415 | C5   | G | A | 14 | -7.419  | -45.748 | 70.233 | 1.00 | 0.00 | C |
| ATOM | 416 | C6   | G | A | 14 | -8.003  | -45.060 | 71.319 | 1.00 | 0.00 | C |
| ATOM | 417 | O6   | G | A | 14 | -7.458  | -44.522 | 72.283 | 1.00 | 0.00 | O |
| ATOM | 418 | N7   | G | A | 14 | -6.076  | -46.013 | 69.949 | 1.00 | 0.00 | N |
| ATOM | 419 | C8   | G | A | 14 | -6.115  | -46.682 | 68.827 | 1.00 | 0.00 | C |
| ATOM | 420 | N9   | G | A | 14 | -7.388  | -46.883 | 68.336 | 1.00 | 0.00 | N |
| ATOM | 421 | C2'  | G | A | 14 | -6.889  | -47.376 | 65.913 | 1.00 | 0.00 | C |
| ATOM | 422 | C3'  | G | A | 14 | -6.943  | -48.726 | 65.216 | 1.00 | 0.00 | C |
| ATOM | 423 | O3'  | G | A | 14 | -8.079  | -48.765 | 64.357 | 1.00 | 0.00 | O |
| ATOM | 424 | C4'  | G | A | 14 | -7.067  | -49.705 | 66.384 | 1.00 | 0.00 | C |
| ATOM | 425 | O4'  | G | A | 14 | -7.850  | -48.976 | 67.383 | 1.00 | 0.00 | O |
| ATOM | 426 | C5'  | G | A | 14 | -5.774  | -50.157 | 67.020 | 1.00 | 0.00 | C |
| ATOM | 427 | O5'  | G | A | 14 | -4.825  | -49.063 | 67.035 | 1.00 | 0.00 | O |
| ATOM | 428 | O1P  | G | A | 14 | -3.007  | -49.844 | 65.481 | 1.00 | 0.00 | O |
| ATOM | 429 | O2P  | G | A | 14 | -2.471  | -48.233 | 67.327 | 1.00 | 0.00 | O |
| ATOM | 430 | P    | G | A | 14 | -3.275  | -49.389 | 66.858 | 1.00 | 0.00 | P |
| ATOM | 431 | H1   | G | A | 14 | -9.932  | -44.544 | 71.959 | 1.00 | 0.00 | H |
| ATOM | 432 | H8   | G | A | 14 | -5.220  | -47.048 | 68.324 | 1.00 | 0.00 | H |
| ATOM | 433 | H1'  | G | A | 14 | -8.835  | -47.274 | 66.861 | 1.00 | 0.00 | H |
| ATOM | 434 | H21  | G | A | 14 | -11.885 | -44.933 | 71.042 | 1.00 | 0.00 | H |
| ATOM | 435 | H3'  | G | A | 14 | -6.042  | -48.922 | 64.634 | 1.00 | 0.00 | H |
| ATOM | 436 | H22  | G | A | 14 | -12.065 | -45.827 | 69.507 | 1.00 | 0.00 | H |
| ATOM | 437 | H4'  | G | A | 14 | -7.579  | -50.588 | 66.004 | 1.00 | 0.00 | H |
| ATOM | 438 | H2'1 | G | A | 14 | -5.873  | -47.129 | 66.222 | 1.00 | 0.00 | H |
| ATOM | 439 | H2'2 | G | A | 14 | -7.234  | -46.576 | 65.255 | 1.00 | 0.00 | H |
| ATOM | 440 | H5'1 | G | A | 14 | -5.974  | -50.488 | 68.039 | 1.00 | 0.00 | H |
| ATOM | 441 | H5'2 | G | A | 14 | -5.367  | -50.991 | 66.447 | 1.00 | 0.00 | H |
| ATOM | 442 | C1'  | A | A | 15 | -11.391 | -44.424 | 65.790 | 1.00 | 0.00 | C |
| ATOM | 443 | N1   | A | A | 15 | -9.853  | -41.860 | 69.961 | 1.00 | 0.00 | N |
| ATOM | 444 | C2   | A | A | 15 | -11.058 | -42.142 | 69.473 | 1.00 | 0.00 | C |
| ATOM | 445 | N3   | A | A | 15 | -11.385 | -42.813 | 68.390 | 1.00 | 0.00 | N |
| ATOM | 446 | C4   | A | A | 15 | -10.277 | -43.228 | 67.747 | 1.00 | 0.00 | C |
| ATOM | 447 | C5   | A | A | 15 | -8.977  | -43.021 | 68.112 | 1.00 | 0.00 | C |
| ATOM | 448 | C6   | A | A | 15 | -8.767  | -42.288 | 69.298 | 1.00 | 0.00 | C |
| ATOM | 449 | N6   | A | A | 15 | -7.545  | -42.006 | 69.781 | 1.00 | 0.00 | N |
| ATOM | 450 | N7   | A | A | 15 | -8.105  | -43.597 | 67.205 | 1.00 | 0.00 | N |
| ATOM | 451 | C8   | A | A | 15 | -8.889  | -44.132 | 66.316 | 1.00 | 0.00 | C |
| ATOM | 452 | N9   | A | A | 15 | -10.223 | -43.950 | 66.580 | 1.00 | 0.00 | N |
| ATOM | 453 | C2'  | A | A | 15 | -11.180 | -44.362 | 64.283 | 1.00 | 0.00 | C |
| ATOM | 454 | C3'  | A | A | 15 | -11.931 | -45.595 | 63.806 | 1.00 | 0.00 | C |
| ATOM | 455 | O3'  | A | A | 15 | -13.310 | -45.271 | 63.657 | 1.00 | 0.00 | O |
| ATOM | 456 | C4'  | A | A | 15 | -11.692 | -46.597 | 64.934 | 1.00 | 0.00 | C |

|      |     |      |   |   |    |         |         |        |      |      |   |
|------|-----|------|---|---|----|---------|---------|--------|------|------|---|
| ATOM | 457 | O4'  | A | A | 15 | -11.632 | -45.772 | 66.142 | 1.00 | 0.00 | O |
| ATOM | 458 | C5'  | A | A | 15 | -10.426 | -47.417 | 64.846 | 1.00 | 0.00 | C |
| ATOM | 459 | O5'  | A | A | 15 | -9.354  | -46.607 | 64.300 | 1.00 | 0.00 | O |
| ATOM | 460 | O1P  | A | A | 15 | -8.863  | -47.705 | 62.089 | 1.00 | 0.00 | O |
| ATOM | 461 | O2P  | A | A | 15 | -7.060  | -46.437 | 63.287 | 1.00 | 0.00 | O |
| ATOM | 462 | P    | A | A | 15 | -8.259  | -47.306 | 63.376 | 1.00 | 0.00 | P |
| ATOM | 463 | H2   | A | A | 15 | -11.897 | -41.763 | 70.057 | 1.00 | 0.00 | H |
| ATOM | 464 | H8   | A | A | 15 | -8.523  | -44.673 | 65.444 | 1.00 | 0.00 | H |
| ATOM | 465 | H1'  | A | A | 15 | -12.261 | -43.839 | 66.086 | 1.00 | 0.00 | H |
| ATOM | 466 | H3'  | A | A | 15 | -11.543 | -45.969 | 62.858 | 1.00 | 0.00 | H |
| ATOM | 467 | H4'  | A | A | 15 | -12.536 | -47.285 | 64.930 | 1.00 | 0.00 | H |
| ATOM | 468 | H61  | A | A | 15 | -7.448  | -41.469 | 70.654 | 1.00 | 0.00 | H |
| ATOM | 469 | H62  | A | A | 15 | -6.706  | -42.330 | 69.276 | 1.00 | 0.00 | H |
| ATOM | 470 | H2'1 | A | A | 15 | -10.124 | -44.410 | 64.012 | 1.00 | 0.00 | H |
| ATOM | 471 | H2'2 | A | A | 15 | -11.589 | -43.452 | 63.844 | 1.00 | 0.00 | H |
| ATOM | 472 | H5'1 | A | A | 15 | -10.155 | -47.763 | 65.843 | 1.00 | 0.00 | H |
| ATOM | 473 | H5'2 | A | A | 15 | -10.601 | -48.277 | 64.202 | 1.00 | 0.00 | H |
| ATOM | 474 | C1'  | C | A | 16 | -14.106 | -40.306 | 66.373 | 1.00 | 0.00 | C |
| ATOM | 475 | N1   | C | A | 16 | -12.619 | -40.235 | 66.377 | 1.00 | 0.00 | N |
| ATOM | 476 | C2   | C | A | 16 | -12.000 | -39.575 | 67.436 | 1.00 | 0.00 | C |
| ATOM | 477 | O2   | C | A | 16 | -12.706 | -39.078 | 68.323 | 1.00 | 0.00 | O |
| ATOM | 478 | N3   | C | A | 16 | -10.647 | -39.498 | 67.459 | 1.00 | 0.00 | N |
| ATOM | 479 | C4   | C | A | 16 | -9.911  | -40.046 | 66.484 | 1.00 | 0.00 | C |
| ATOM | 480 | N4   | C | A | 16 | -8.592  | -39.944 | 66.559 | 1.00 | 0.00 | N |
| ATOM | 481 | C5   | C | A | 16 | -10.519 | -40.728 | 65.379 | 1.00 | 0.00 | C |
| ATOM | 482 | C6   | C | A | 16 | -11.884 | -40.796 | 65.379 | 1.00 | 0.00 | C |
| ATOM | 483 | C2'  | C | A | 16 | -14.723 | -40.168 | 64.988 | 1.00 | 0.00 | C |
| ATOM | 484 | C3'  | C | A | 16 | -15.916 | -41.109 | 65.077 | 1.00 | 0.00 | C |
| ATOM | 485 | O3'  | C | A | 16 | -17.013 | -40.419 | 65.667 | 1.00 | 0.00 | O |
| ATOM | 486 | C4'  | C | A | 16 | -15.393 | -42.235 | 65.967 | 1.00 | 0.00 | C |
| ATOM | 487 | O4'  | C | A | 16 | -14.477 | -41.569 | 66.894 | 1.00 | 0.00 | O |
| ATOM | 488 | C5'  | C | A | 16 | -14.648 | -43.351 | 65.270 | 1.00 | 0.00 | C |
| ATOM | 489 | O5'  | C | A | 16 | -13.863 | -42.809 | 64.179 | 1.00 | 0.00 | O |
| ATOM | 490 | O1P  | C | A | 16 | -14.948 | -43.795 | 62.133 | 1.00 | 0.00 | O |
| ATOM | 491 | O2P  | C | A | 16 | -12.521 | -43.165 | 62.085 | 1.00 | 0.00 | O |
| ATOM | 492 | P    | C | A | 16 | -13.669 | -43.688 | 62.863 | 1.00 | 0.00 | P |
| ATOM | 493 | H5   | C | A | 16 | -9.924  | -41.169 | 64.579 | 1.00 | 0.00 | H |
| ATOM | 494 | H6   | C | A | 16 | -12.393 | -41.312 | 64.564 | 1.00 | 0.00 | H |
| ATOM | 495 | H1'  | C | A | 16 | -14.487 | -39.540 | 67.049 | 1.00 | 0.00 | H |
| ATOM | 496 | H3'  | C | A | 16 | -16.210 | -41.486 | 64.096 | 1.00 | 0.00 | H |
| ATOM | 497 | H4'  | C | A | 16 | -16.259 | -42.673 | 66.463 | 1.00 | 0.00 | H |
| ATOM | 498 | H41  | C | A | 16 | -8.002  | -40.359 | 65.822 | 1.00 | 0.00 | H |
| ATOM | 499 | H42  | C | A | 16 | -8.156  | -39.452 | 67.351 | 1.00 | 0.00 | H |
| ATOM | 500 | H2'1 | C | A | 16 | -14.037 | -40.471 | 64.197 | 1.00 | 0.00 | H |
| ATOM | 501 | H2'2 | C | A | 16 | -15.039 | -39.146 | 64.775 | 1.00 | 0.00 | H |
| ATOM | 502 | H5'1 | C | A | 16 | -13.994 | -43.845 | 65.988 | 1.00 | 0.00 | H |
| ATOM | 503 | H5'2 | C | A | 16 | -15.367 | -44.073 | 64.883 | 1.00 | 0.00 | H |
| ATOM | 504 | C1'  | G | A | 17 | -14.912 | -35.695 | 67.985 | 1.00 | 0.00 | C |
| ATOM | 505 | N1   | G | A | 17 | -9.824  | -35.359 | 67.840 | 1.00 | 0.00 | N |
| ATOM | 506 | C2   | G | A | 17 | -10.717 | -34.911 | 68.798 | 1.00 | 0.00 | C |
| ATOM | 507 | N2   | G | A | 17 | -10.182 | -34.287 | 69.856 | 1.00 | 0.00 | N |
| ATOM | 508 | N3   | G | A | 17 | -12.035 | -35.071 | 68.706 | 1.00 | 0.00 | N |
| ATOM | 509 | C4   | G | A | 17 | -12.400 | -35.715 | 67.567 | 1.00 | 0.00 | C |
| ATOM | 510 | C5   | G | A | 17 | -11.583 | -36.194 | 66.556 | 1.00 | 0.00 | C |

|      |     |      |     |    |         |         |        |      |      |   |
|------|-----|------|-----|----|---------|---------|--------|------|------|---|
| ATOM | 511 | C6   | G A | 17 | -10.181 | -36.029 | 66.654 | 1.00 | 0.00 | C |
| ATOM | 512 | O6   | G A | 17 | -9.301  | -36.380 | 65.869 | 1.00 | 0.00 | O |
| ATOM | 513 | N7   | G A | 17 | -12.352 | -36.794 | 65.556 | 1.00 | 0.00 | N |
| ATOM | 514 | C8   | G A | 17 | -13.581 | -36.666 | 65.985 | 1.00 | 0.00 | C |
| ATOM | 515 | N9   | G A | 17 | -13.692 | -36.020 | 67.199 | 1.00 | 0.00 | N |
| ATOM | 516 | C2'  | G A | 17 | -16.104 | -35.287 | 67.130 | 1.00 | 0.00 | C |
| ATOM | 517 | C3'  | G A | 17 | -17.269 | -35.881 | 67.903 | 1.00 | 0.00 | C |
| ATOM | 518 | O3'  | G A | 17 | -17.659 | -34.976 | 68.932 | 1.00 | 0.00 | O |
| ATOM | 519 | C4'  | G A | 17 | -16.679 | -37.174 | 68.464 | 1.00 | 0.00 | C |
| ATOM | 520 | O4'  | G A | 17 | -15.275 | -36.851 | 68.716 | 1.00 | 0.00 | O |
| ATOM | 521 | C5'  | G A | 17 | -16.744 | -38.387 | 67.565 | 1.00 | 0.00 | C |
| ATOM | 522 | O5'  | G A | 17 | -16.539 | -37.987 | 66.187 | 1.00 | 0.00 | O |
| ATOM | 523 | O1P  | G A | 17 | -18.757 | -38.481 | 65.104 | 1.00 | 0.00 | O |
| ATOM | 524 | O2P  | G A | 17 | -16.655 | -38.514 | 63.734 | 1.00 | 0.00 | O |
| ATOM | 525 | P    | G A | 17 | -17.313 | -38.776 | 65.037 | 1.00 | 0.00 | P |
| ATOM | 526 | H1   | G A | 17 | -8.821  | -35.191 | 68.009 | 1.00 | 0.00 | H |
| ATOM | 527 | H8   | G A | 17 | -14.443 | -37.036 | 65.429 | 1.00 | 0.00 | H |
| ATOM | 528 | H1'  | G A | 17 | -14.659 | -34.912 | 68.700 | 1.00 | 0.00 | H |
| ATOM | 529 | H21  | G A | 17 | -9.161  | -34.170 | 69.921 | 1.00 | 0.00 | H |
| ATOM | 530 | H3'  | G A | 17 | -18.125 | -36.087 | 67.259 | 1.00 | 0.00 | H |
| ATOM | 531 | H22  | G A | 17 | -10.793 | -33.927 | 70.603 | 1.00 | 0.00 | H |
| ATOM | 532 | H4'  | G A | 17 | -17.232 | -37.405 | 69.375 | 1.00 | 0.00 | H |
| ATOM | 533 | H2'1 | G A | 17 | -16.047 | -35.695 | 66.120 | 1.00 | 0.00 | H |
| ATOM | 534 | H2'2 | G A | 17 | -16.198 | -34.204 | 67.040 | 1.00 | 0.00 | H |
| ATOM | 535 | H5'1 | G A | 17 | -15.970 | -39.094 | 67.863 | 1.00 | 0.00 | H |
| ATOM | 536 | H5'2 | G A | 17 | -17.720 | -38.860 | 67.672 | 1.00 | 0.00 | H |
| ATOM | 537 | C1'  | G A | 18 | -13.490 | -31.184 | 69.452 | 1.00 | 0.00 | C |
| ATOM | 538 | N1   | G A | 18 | -9.359  | -32.189 | 66.632 | 1.00 | 0.00 | N |
| ATOM | 539 | C2   | G A | 18 | -9.460  | -31.602 | 67.881 | 1.00 | 0.00 | C |
| ATOM | 540 | N2   | G A | 18 | -8.307  | -31.231 | 68.454 | 1.00 | 0.00 | N |
| ATOM | 541 | N3   | G A | 18 | -10.618 | -31.402 | 68.508 | 1.00 | 0.00 | N |
| ATOM | 542 | C4   | G A | 18 | -11.681 | -31.829 | 67.779 | 1.00 | 0.00 | C |
| ATOM | 543 | C5   | G A | 18 | -11.677 | -32.421 | 66.525 | 1.00 | 0.00 | C |
| ATOM | 544 | C6   | G A | 18 | -10.447 | -32.639 | 65.861 | 1.00 | 0.00 | C |
| ATOM | 545 | O6   | G A | 18 | -10.242 | -33.143 | 64.756 | 1.00 | 0.00 | O |
| ATOM | 546 | N7   | G A | 18 | -12.982 | -32.712 | 66.124 | 1.00 | 0.00 | N |
| ATOM | 547 | C8   | G A | 18 | -13.719 | -32.302 | 67.124 | 1.00 | 0.00 | C |
| ATOM | 548 | N9   | G A | 18 | -13.001 | -31.752 | 68.166 | 1.00 | 0.00 | N |
| ATOM | 549 | C2'  | G A | 18 | -14.792 | -30.407 | 69.325 | 1.00 | 0.00 | C |
| ATOM | 550 | C3'  | G A | 18 | -15.489 | -30.736 | 70.633 | 1.00 | 0.00 | C |
| ATOM | 551 | O3'  | G A | 18 | -15.024 | -29.848 | 71.648 | 1.00 | 0.00 | O |
| ATOM | 552 | C4'  | G A | 18 | -15.064 | -32.181 | 70.892 | 1.00 | 0.00 | C |
| ATOM | 553 | O4'  | G A | 18 | -13.709 | -32.260 | 70.344 | 1.00 | 0.00 | O |
| ATOM | 554 | C5'  | G A | 18 | -15.909 | -33.254 | 70.249 | 1.00 | 0.00 | C |
| ATOM | 555 | O5'  | G A | 18 | -16.359 | -32.809 | 68.945 | 1.00 | 0.00 | O |
| ATOM | 556 | O1P  | G A | 18 | -18.853 | -32.610 | 69.226 | 1.00 | 0.00 | O |
| ATOM | 557 | O2P  | G A | 18 | -17.879 | -33.081 | 66.963 | 1.00 | 0.00 | O |
| ATOM | 558 | P    | G A | 18 | -17.798 | -33.269 | 68.431 | 1.00 | 0.00 | P |
| ATOM | 559 | H1   | G A | 18 | -8.413  | -32.305 | 66.236 | 1.00 | 0.00 | H |
| ATOM | 560 | H8   | G A | 18 | -14.806 | -32.384 | 67.134 | 1.00 | 0.00 | H |
| ATOM | 561 | H1'  | G A | 18 | -12.701 | -30.558 | 69.869 | 1.00 | 0.00 | H |
| ATOM | 562 | H21  | G A | 18 | -7.415  | -31.393 | 67.963 | 1.00 | 0.00 | H |
| ATOM | 563 | H3'  | G A | 18 | -16.574 | -30.654 | 70.552 | 1.00 | 0.00 | H |
| ATOM | 564 | H22  | G A | 18 | -8.314  | -30.787 | 69.382 | 1.00 | 0.00 | H |



|      |     |      |       |    |         |         |        |      |      |   |
|------|-----|------|-------|----|---------|---------|--------|------|------|---|
| ATOM | 565 | H4'  | G A   | 18 | -15.095 | -32.332 | 71.970 | 1.00 | 0.00 | H |
| ATOM | 566 | H2'1 | G A   | 18 | -15.384 | -30.730 | 68.468 | 1.00 | 0.00 | H |
| ATOM | 567 | H2'2 | G A   | 18 | -14.626 | -29.334 | 69.220 | 1.00 | 0.00 | H |
| ATOM | 568 | H5'1 | G A   | 18 | -15.316 | -34.162 | 70.145 | 1.00 | 0.00 | H |
| ATOM | 569 | H5'2 | G A   | 18 | -16.769 | -33.460 | 70.885 | 1.00 | 0.00 | H |
| ATOM | 570 | C1'  | T A   | 19 | -10.380 | -27.338 | 69.648 | 1.00 | 0.00 | C |
| ATOM | 571 | N1   | T A   | 19 | -10.781 | -27.906 | 68.334 | 1.00 | 0.00 | N |
| ATOM | 572 | C2   | T A   | 19 | -9.771  | -28.230 | 67.452 | 1.00 | 0.00 | C |
| ATOM | 573 | O2   | T A   | 19 | -8.591  | -28.069 | 67.712 | 1.00 | 0.00 | O |
| ATOM | 574 | N3   | T A   | 19 | -10.189 | -28.756 | 66.244 | 1.00 | 0.00 | N |
| ATOM | 575 | C4   | T A   | 19 | -11.491 | -28.977 | 65.850 | 1.00 | 0.00 | C |
| ATOM | 576 | O4   | T A   | 19 | -11.744 | -29.452 | 64.737 | 1.00 | 0.00 | O |
| ATOM | 577 | C5   | T A   | 19 | -12.478 | -28.607 | 66.837 | 1.00 | 0.00 | C |
| ATOM | 578 | C6   | T A   | 19 | -12.107 | -28.092 | 68.027 | 1.00 | 0.00 | C |
| ATOM | 579 | C7   | T A   | 19 | -13.910 | -28.831 | 66.452 | 1.00 | 0.00 | C |
| ATOM | 580 | C2'  | T A   | 19 | -11.311 | -26.243 | 70.154 | 1.00 | 0.00 | C |
| ATOM | 581 | C3'  | T A   | 19 | -11.301 | -26.486 | 71.655 | 1.00 | 0.00 | C |
| ATOM | 582 | O3'  | T A   | 19 | -10.171 | -25.834 | 72.229 | 1.00 | 0.00 | O |
| ATOM | 583 | C4'  | T A   | 19 | -11.200 | -28.006 | 71.750 | 1.00 | 0.00 | C |
| ATOM | 584 | O4'  | T A   | 19 | -10.390 | -28.388 | 70.595 | 1.00 | 0.00 | O |
| ATOM | 585 | C5'  | T A   | 19 | -12.503 | -28.771 | 71.703 | 1.00 | 0.00 | C |
| ATOM | 586 | O5'  | T A   | 19 | -13.418 | -28.121 | 70.786 | 1.00 | 0.00 | O |
| ATOM | 587 | O1P  | T A   | 19 | -15.267 | -27.308 | 72.287 | 1.00 | 0.00 | O |
| ATOM | 588 | O2P  | T A   | 19 | -15.744 | -27.830 | 69.879 | 1.00 | 0.00 | O |
| ATOM | 589 | P    | T A   | 19 | -14.980 | -28.151 | 71.108 | 1.00 | 0.00 | P |
| ATOM | 590 | H3   | T A   | 19 | -9.452  | -29.010 | 65.570 | 1.00 | 0.00 | H |
| ATOM | 591 | H6   | T A   | 19 | -12.870 | -27.821 | 68.756 | 1.00 | 0.00 | H |
| ATOM | 592 | H1'  | T A   | 19 | -9.356  | -26.971 | 69.563 | 1.00 | 0.00 | H |
| ATOM | 593 | H3'  | T A   | 19 | -12.211 | -26.121 | 72.132 | 1.00 | 0.00 | H |
| ATOM | 594 | H4'  | T A   | 19 | -10.718 | -28.232 | 72.703 | 1.00 | 0.00 | H |
| ATOM | 595 | H71  | T A   | 19 | -14.420 | -27.872 | 66.373 | 1.00 | 0.00 | H |
| ATOM | 596 | H72  | T A   | 19 | -13.951 | -29.345 | 65.491 | 1.00 | 0.00 | H |
| ATOM | 597 | H73  | T A   | 19 | -14.401 | -29.442 | 67.211 | 1.00 | 0.00 | H |
| ATOM | 598 | H2'1 | T A   | 19 | -12.315 | -26.333 | 69.743 | 1.00 | 0.00 | H |
| ATOM | 599 | H2'2 | T A   | 19 | -10.946 | -25.244 | 69.911 | 1.00 | 0.00 | H |
| ATOM | 600 | H5'1 | T A   | 19 | -12.309 | -29.790 | 71.368 | 1.00 | 0.00 | H |
| ATOM | 601 | H5'2 | T A   | 19 | -12.939 | -28.799 | 72.699 | 1.00 | 0.00 | H |
| ATOM | 602 | C01  | LNK A | 20 | -9.674  | -22.289 | 73.252 | 0.00 | 0.00 | C |
| ATOM | 603 | O1   | LNK A | 20 | -10.461 | -23.331 | 72.670 | 1.00 | 0.00 | O |
| ATOM | 604 | S    | LNK A | 20 | -9.872  | -18.361 | 73.869 | 0.00 | 0.00 | S |
| ATOM | 605 | C02  | LNK A | 20 | -10.429 | -20.951 | 73.135 | 0.00 | 0.00 | C |
| ATOM | 606 | C03  | LNK A | 20 | -9.422  | -19.815 | 72.870 | 0.00 | 0.00 | C |
| ATOM | 607 | O1P  | LNK A | 20 | -10.590 | -24.109 | 70.279 | 1.00 | 0.00 | O |
| ATOM | 608 | O2P  | LNK A | 20 | -8.364  | -23.936 | 71.426 | 1.00 | 0.00 | O |
| ATOM | 609 | P    | LNK A | 20 | -9.814  | -24.236 | 71.528 | 1.00 | 0.00 | P |
| ATOM | 610 | H01  | LNK A | 20 | -8.721  | -22.215 | 72.728 | 0.00 | 0.00 | H |
| ATOM | 611 | H02  | LNK A | 20 | -9.494  | -22.513 | 74.304 | 0.00 | 0.00 | H |
| ATOM | 612 | H03  | LNK A | 20 | -9.443  | -19.550 | 71.813 | 0.00 | 0.00 | H |
| ATOM | 613 | H04  | LNK A | 20 | -10.965 | -20.753 | 74.063 | 0.00 | 0.00 | H |
| ATOM | 614 | H05  | LNK A | 20 | -11.139 | -21.006 | 72.310 | 0.00 | 0.00 | H |
| ATOM | 615 | H06  | LNK A | 20 | -8.420  | -20.147 | 73.142 | 0.00 | 0.00 | H |
| ATOM | 616 | AU   | LNK A | 20 | -9.489  | -17.825 | 73.679 | 0.00 | 0.00 | H |
| TER  |     |      |       |    |         |         |        |      |      |   |
| ATOM | 618 | C1'  | A B   | 2  | -3.972  | -30.518 | 61.419 | 1.00 | 0.00 | C |

|      |     |      |     |   |         |         |        |      |      |   |
|------|-----|------|-----|---|---------|---------|--------|------|------|---|
| ATOM | 619 | N1   | A B | 2 | -8.094  | -29.485 | 64.297 | 1.00 | 0.00 | N |
| ATOM | 620 | C2   | A B | 2 | -6.790  | -29.344 | 64.513 | 1.00 | 0.00 | C |
| ATOM | 621 | N3   | A B | 2 | -5.777  | -29.628 | 63.724 | 1.00 | 0.00 | N |
| ATOM | 622 | C4   | A B | 2 | -6.221  | -30.133 | 62.558 | 1.00 | 0.00 | C |
| ATOM | 623 | C5   | A B | 2 | -7.518  | -30.339 | 62.183 | 1.00 | 0.00 | C |
| ATOM | 624 | C6   | A B | 2 | -8.508  | -29.988 | 63.125 | 1.00 | 0.00 | C |
| ATOM | 625 | N6   | A B | 2 | -9.825  | -30.135 | 62.897 | 1.00 | 0.00 | N |
| ATOM | 626 | N7   | A B | 2 | -7.592  | -30.872 | 60.907 | 1.00 | 0.00 | N |
| ATOM | 627 | C8   | A B | 2 | -6.348  | -30.980 | 60.544 | 1.00 | 0.00 | C |
| ATOM | 628 | N9   | A B | 2 | -5.459  | -30.547 | 61.493 | 1.00 | 0.00 | N |
| ATOM | 629 | C2'  | A B | 2 | -3.371  | -31.716 | 60.696 | 1.00 | 0.00 | C |
| ATOM | 630 | C3'  | A B | 2 | -2.182  | -31.092 | 59.984 | 1.00 | 0.00 | C |
| ATOM | 631 | O3'  | A B | 2 | -1.076  | -31.038 | 60.882 | 1.00 | 0.00 | O |
| ATOM | 632 | C4'  | A B | 2 | -2.697  | -29.701 | 59.617 | 1.00 | 0.00 | C |
| ATOM | 633 | O4'  | A B | 2 | -3.600  | -29.349 | 60.714 | 1.00 | 0.00 | O |
| ATOM | 634 | C5'  | A B | 2 | -3.450  | -29.586 | 58.313 | 1.00 | 0.00 | C |
| ATOM | 635 | O5'  | A B | 2 | -4.249  | -30.778 | 58.102 | 1.00 | 0.00 | O |
| ATOM | 636 | H2   | A B | 2 | -6.521  | -28.933 | 65.485 | 1.00 | 0.00 | H |
| ATOM | 637 | H8   | A B | 2 | -6.041  | -31.376 | 59.575 | 1.00 | 0.00 | H |
| ATOM | 638 | H1'  | A B | 2 | -3.582  | -30.438 | 62.434 | 1.00 | 0.00 | H |
| ATOM | 639 | H3'  | A B | 2 | -1.897  | -31.653 | 59.095 | 1.00 | 0.00 | H |
| ATOM | 640 | H4'  | A B | 2 | -1.826  | -29.048 | 59.558 | 1.00 | 0.00 | H |
| ATOM | 641 | H61  | A B | 2 | -10.506 | -29.860 | 63.617 | 1.00 | 0.00 | H |
| ATOM | 642 | H62  | A B | 2 | -10.150 | -30.523 | 61.999 | 1.00 | 0.00 | H |
| ATOM | 643 | H2'1 | A B | 2 | -4.067  | -32.164 | 59.986 | 1.00 | 0.00 | H |
| ATOM | 644 | H2'2 | A B | 2 | -3.055  | -32.499 | 61.385 | 1.00 | 0.00 | H |
| ATOM | 645 | H5'1 | A B | 2 | -4.099  | -28.711 | 58.351 | 1.00 | 0.00 | H |
| ATOM | 646 | H5'2 | A B | 2 | -2.738  | -29.470 | 57.498 | 1.00 | 0.00 | H |
| ATOM | 647 | C1'  | C B | 3 | -3.190  | -31.947 | 66.110 | 1.00 | 0.00 | C |
| ATOM | 648 | N1   | C B | 3 | -4.412  | -32.384 | 65.381 | 1.00 | 0.00 | N |
| ATOM | 649 | C2   | C B | 3 | -5.645  | -32.191 | 66.000 | 1.00 | 0.00 | C |
| ATOM | 650 | O2   | C B | 3 | -5.674  | -31.666 | 67.122 | 1.00 | 0.00 | O |
| ATOM | 651 | N3   | C B | 3 | -6.770  | -32.582 | 65.354 | 1.00 | 0.00 | N |
| ATOM | 652 | C4   | C B | 3 | -6.707  | -33.148 | 64.141 | 1.00 | 0.00 | C |
| ATOM | 653 | N4   | C B | 3 | -7.839  | -33.508 | 63.553 | 1.00 | 0.00 | N |
| ATOM | 654 | C5   | C B | 3 | -5.452  | -33.364 | 63.481 | 1.00 | 0.00 | C |
| ATOM | 655 | C6   | C B | 3 | -4.331  | -32.957 | 64.149 | 1.00 | 0.00 | C |
| ATOM | 656 | C2'  | C B | 3 | -2.002  | -32.881 | 65.932 | 1.00 | 0.00 | C |
| ATOM | 657 | C3'  | C B | 3 | -0.833  | -31.909 | 65.910 | 1.00 | 0.00 | C |
| ATOM | 658 | O3'  | C B | 3 | -0.443  | -31.617 | 67.250 | 1.00 | 0.00 | O |
| ATOM | 659 | C4'  | C B | 3 | -1.419  | -30.689 | 65.201 | 1.00 | 0.00 | C |
| ATOM | 660 | O4'  | C B | 3 | -2.825  | -30.675 | 65.610 | 1.00 | 0.00 | O |
| ATOM | 661 | C5'  | C B | 3 | -1.354  | -30.695 | 63.692 | 1.00 | 0.00 | C |
| ATOM | 662 | O5'  | C B | 3 | -1.562  | -32.042 | 63.198 | 1.00 | 0.00 | O |
| ATOM | 663 | O1P  | C B | 3 | 0.654   | -32.628 | 62.157 | 1.00 | 0.00 | O |
| ATOM | 664 | O2P  | C B | 3 | -1.452  | -33.706 | 61.318 | 1.00 | 0.00 | O |
| ATOM | 665 | P    | C B | 3 | -0.792  | -32.503 | 61.881 | 1.00 | 0.00 | P |
| ATOM | 666 | H5   | C B | 3 | -5.394  | -33.830 | 62.497 | 1.00 | 0.00 | H |
| ATOM | 667 | H6   | C B | 3 | -3.354  | -33.094 | 63.685 | 1.00 | 0.00 | H |
| ATOM | 668 | H1'  | C B | 3 | -3.443  | -31.833 | 67.164 | 1.00 | 0.00 | H |
| ATOM | 669 | H3'  | C B | 3 | 0.021   | -32.308 | 65.364 | 1.00 | 0.00 | H |
| ATOM | 670 | H4'  | C B | 3 | -0.864  | -29.820 | 65.554 | 1.00 | 0.00 | H |
| ATOM | 671 | H41  | C B | 3 | -7.818  | -33.942 | 62.619 | 1.00 | 0.00 | H |
| ATOM | 672 | H42  | C B | 3 | -8.740  | -33.354 | 64.030 | 1.00 | 0.00 | H |

|      |     |      |     |   |         |         |        |      |      |   |
|------|-----|------|-----|---|---------|---------|--------|------|------|---|
| ATOM | 673 | H2'1 | C B | 3 | -2.059  | -33.452 | 65.005 | 1.00 | 0.00 | H |
| ATOM | 674 | H2'2 | C B | 3 | -1.910  | -33.594 | 66.751 | 1.00 | 0.00 | H |
| ATOM | 675 | H5'1 | C B | 3 | -2.129  | -30.035 | 63.298 | 1.00 | 0.00 | H |
| ATOM | 676 | H5'2 | C B | 3 | -0.379  | -30.332 | 63.375 | 1.00 | 0.00 | H |
| ATOM | 677 | C1'  | C B | 4 | -4.622  | -33.444 | 70.608 | 1.00 | 0.00 | C |
| ATOM | 678 | N1   | C B | 4 | -5.112  | -34.139 | 69.387 | 1.00 | 0.00 | N |
| ATOM | 679 | C2   | C B | 4 | -6.487  | -34.326 | 69.250 | 1.00 | 0.00 | C |
| ATOM | 680 | O2   | C B | 4 | -7.239  | -33.909 | 70.141 | 1.00 | 0.00 | O |
| ATOM | 681 | N3   | C B | 4 | -6.955  | -34.956 | 68.147 | 1.00 | 0.00 | N |
| ATOM | 682 | C4   | C B | 4 | -6.117  | -35.398 | 67.198 | 1.00 | 0.00 | C |
| ATOM | 683 | N4   | C B | 4 | -6.627  | -36.004 | 66.137 | 1.00 | 0.00 | N |
| ATOM | 684 | C5   | C B | 4 | -4.698  | -35.224 | 67.314 | 1.00 | 0.00 | C |
| ATOM | 685 | C6   | C B | 4 | -4.249  | -34.581 | 68.433 | 1.00 | 0.00 | C |
| ATOM | 686 | C2'  | C B | 4 | -3.320  | -34.013 | 71.157 | 1.00 | 0.00 | C |
| ATOM | 687 | C3'  | C B | 4 | -2.621  | -32.763 | 71.670 | 1.00 | 0.00 | C |
| ATOM | 688 | O3'  | C B | 4 | -3.084  | -32.474 | 72.986 | 1.00 | 0.00 | O |
| ATOM | 689 | C4'  | C B | 4 | -3.043  | -31.698 | 70.661 | 1.00 | 0.00 | C |
| ATOM | 690 | O4'  | C B | 4 | -4.399  | -32.088 | 70.270 | 1.00 | 0.00 | O |
| ATOM | 691 | C5'  | C B | 4 | -2.197  | -31.581 | 69.414 | 1.00 | 0.00 | C |
| ATOM | 692 | O5'  | C B | 4 | -1.750  | -32.895 | 68.998 | 1.00 | 0.00 | O |
| ATOM | 693 | O1P  | C B | 4 | 0.743   | -32.794 | 69.326 | 1.00 | 0.00 | O |
| ATOM | 694 | O2P  | C B | 4 | -0.235  | -34.333 | 67.603 | 1.00 | 0.00 | O |
| ATOM | 695 | P    | C B | 4 | -0.313  | -33.040 | 68.325 | 1.00 | 0.00 | P |
| ATOM | 696 | H5   | C B | 4 | -4.011  | -35.587 | 66.549 | 1.00 | 0.00 | H |
| ATOM | 697 | H6   | C B | 4 | -3.180  | -34.419 | 68.563 | 1.00 | 0.00 | H |
| ATOM | 698 | H1'  | C B | 4 | -5.410  | -33.477 | 71.360 | 1.00 | 0.00 | H |
| ATOM | 699 | H3'  | C B | 4 | -1.537  | -32.881 | 71.687 | 1.00 | 0.00 | H |
| ATOM | 700 | H4'  | C B | 4 | -3.008  | -30.739 | 71.178 | 1.00 | 0.00 | H |
| ATOM | 701 | H41  | C B | 4 | -6.006  | -36.351 | 65.391 | 1.00 | 0.00 | H |
| ATOM | 702 | H42  | C B | 4 | -7.649  | -36.131 | 66.056 | 1.00 | 0.00 | H |
| ATOM | 703 | H2'1 | C B | 4 | -2.730  | -34.510 | 70.389 | 1.00 | 0.00 | H |
| ATOM | 704 | H2'2 | C B | 4 | -3.489  | -34.731 | 71.959 | 1.00 | 0.00 | H |
| ATOM | 705 | H5'1 | C B | 4 | -2.790  | -31.125 | 68.621 | 1.00 | 0.00 | H |
| ATOM | 706 | H5'2 | C B | 4 | -1.335  | -30.949 | 69.626 | 1.00 | 0.00 | H |
| ATOM | 707 | C1'  | G B | 5 | -7.750  | -35.582 | 73.796 | 1.00 | 0.00 | C |
| ATOM | 708 | N1   | G B | 5 | -9.334  | -38.118 | 69.663 | 1.00 | 0.00 | N |
| ATOM | 709 | C2   | G B | 5 | -10.067 | -37.548 | 70.690 | 1.00 | 0.00 | C |
| ATOM | 710 | N2   | G B | 5 | -11.396 | -37.672 | 70.604 | 1.00 | 0.00 | N |
| ATOM | 711 | N3   | G B | 5 | -9.514  | -36.905 | 71.718 | 1.00 | 0.00 | N |
| ATOM | 712 | C4   | G B | 5 | -8.158  | -36.883 | 71.645 | 1.00 | 0.00 | C |
| ATOM | 713 | C5   | G B | 5 | -7.346  | -37.428 | 70.663 | 1.00 | 0.00 | C |
| ATOM | 714 | C6   | G B | 5 | -7.929  | -38.106 | 69.570 | 1.00 | 0.00 | C |
| ATOM | 715 | O6   | G B | 5 | -7.381  | -38.650 | 68.613 | 1.00 | 0.00 | O |
| ATOM | 716 | N7   | G B | 5 | -6.002  | -37.187 | 70.962 | 1.00 | 0.00 | N |
| ATOM | 717 | C8   | G B | 5 | -6.041  | -36.517 | 72.085 | 1.00 | 0.00 | C |
| ATOM | 718 | N9   | G B | 5 | -7.317  | -36.295 | 72.564 | 1.00 | 0.00 | N |
| ATOM | 719 | C2'  | G B | 5 | -6.837  | -35.815 | 74.992 | 1.00 | 0.00 | C |
| ATOM | 720 | C3'  | G B | 5 | -6.877  | -34.464 | 75.689 | 1.00 | 0.00 | C |
| ATOM | 721 | O3'  | G B | 5 | -8.022  | -34.406 | 76.536 | 1.00 | 0.00 | O |
| ATOM | 722 | C4'  | G B | 5 | -6.970  | -33.482 | 74.522 | 1.00 | 0.00 | C |
| ATOM | 723 | O4'  | G B | 5 | -7.755  | -34.196 | 73.514 | 1.00 | 0.00 | O |
| ATOM | 724 | C5'  | G B | 5 | -5.664  | -33.049 | 73.901 | 1.00 | 0.00 | C |
| ATOM | 725 | O5'  | G B | 5 | -4.733  | -34.160 | 73.894 | 1.00 | 0.00 | O |
| ATOM | 726 | O1P  | G B | 5 | -2.919  | -33.412 | 75.471 | 1.00 | 0.00 | O |

|      |     |      |     |   |         |         |        |      |      |   |
|------|-----|------|-----|---|---------|---------|--------|------|------|---|
| ATOM | 727 | O2P  | G B | 5 | -2.390  | -35.029 | 73.628 | 1.00 | 0.00 | O |
| ATOM | 728 | P    | G B | 5 | -3.178  | -33.861 | 74.090 | 1.00 | 0.00 | P |
| ATOM | 729 | H1   | G B | 5 | -9.859  | -38.588 | 68.909 | 1.00 | 0.00 | H |
| ATOM | 730 | H8   | G B | 5 | -5.147  | -36.168 | 72.600 | 1.00 | 0.00 | H |
| ATOM | 731 | H1'  | G B | 5 | -8.773  | -35.881 | 74.021 | 1.00 | 0.00 | H |
| ATOM | 732 | H21  | G B | 5 | -11.817 | -38.167 | 69.805 | 1.00 | 0.00 | H |
| ATOM | 733 | H3'  | G B | 5 | -5.979  | -34.283 | 76.282 | 1.00 | 0.00 | H |
| ATOM | 734 | H22  | G B | 5 | -11.998 | -37.272 | 71.339 | 1.00 | 0.00 | H |
| ATOM | 735 | H4'  | G B | 5 | -7.472  | -32.590 | 74.897 | 1.00 | 0.00 | H |
| ATOM | 736 | H2'1 | G B | 5 | -5.822  | -36.078 | 74.694 | 1.00 | 0.00 | H |
| ATOM | 737 | H2'2 | G B | 5 | -7.203  | -36.608 | 75.644 | 1.00 | 0.00 | H |
| ATOM | 738 | H5'1 | G B | 5 | -5.847  | -32.715 | 72.880 | 1.00 | 0.00 | H |
| ATOM | 739 | H5'2 | G B | 5 | -5.248  | -32.225 | 74.480 | 1.00 | 0.00 | H |
| ATOM | 740 | C1'  | T B | 6 | -11.395 | -38.684 | 75.061 | 1.00 | 0.00 | C |
| ATOM | 741 | N1   | T B | 6 | -10.227 | -39.178 | 74.283 | 1.00 | 0.00 | N |
| ATOM | 742 | C2   | T B | 6 | -10.494 | -39.890 | 73.131 | 1.00 | 0.00 | C |
| ATOM | 743 | O2   | T B | 6 | -11.626 | -40.121 | 72.744 | 1.00 | 0.00 | O |
| ATOM | 744 | N3   | T B | 6 | -9.379  | -40.330 | 72.439 | 1.00 | 0.00 | N |
| ATOM | 745 | C4   | T B | 6 | -8.061  | -40.128 | 72.790 | 1.00 | 0.00 | C |
| ATOM | 746 | O4   | T B | 6 | -7.145  | -40.574 | 72.091 | 1.00 | 0.00 | O |
| ATOM | 747 | C5   | T B | 6 | -7.884  | -39.373 | 74.008 | 1.00 | 0.00 | C |
| ATOM | 748 | C6   | T B | 6 | -8.946  | -38.928 | 74.707 | 1.00 | 0.00 | C |
| ATOM | 749 | C7   | T B | 6 | -6.464  | -39.127 | 74.426 | 1.00 | 0.00 | C |
| ATOM | 750 | C2'  | T B | 6 | -11.199 | -38.751 | 76.570 | 1.00 | 0.00 | C |
| ATOM | 751 | C3'  | T B | 6 | -11.932 | -37.504 | 77.041 | 1.00 | 0.00 | C |
| ATOM | 752 | O3'  | T B | 6 | -13.321 | -37.800 | 77.177 | 1.00 | 0.00 | O |
| ATOM | 753 | C4'  | T B | 6 | -11.661 | -36.506 | 75.918 | 1.00 | 0.00 | C |
| ATOM | 754 | O4'  | T B | 6 | -11.606 | -37.330 | 74.710 | 1.00 | 0.00 | O |
| ATOM | 755 | C5'  | T B | 6 | -10.381 | -35.710 | 76.019 | 1.00 | 0.00 | C |
| ATOM | 756 | O5'  | T B | 6 | -9.331  | -36.542 | 76.575 | 1.00 | 0.00 | O |
| ATOM | 757 | O1P  | T B | 6 | -8.844  | -35.457 | 78.794 | 1.00 | 0.00 | O |
| ATOM | 758 | O2P  | T B | 6 | -7.053  | -36.759 | 77.613 | 1.00 | 0.00 | O |
| ATOM | 759 | P    | T B | 6 | -8.233  | -35.866 | 77.514 | 1.00 | 0.00 | P |
| ATOM | 760 | H3   | T B | 6 | -9.552  | -40.862 | 71.574 | 1.00 | 0.00 | H |
| ATOM | 761 | H6   | T B | 6 | -8.785  | -38.360 | 75.624 | 1.00 | 0.00 | H |
| ATOM | 762 | H1'  | T B | 6 | -12.274 | -39.250 | 74.755 | 1.00 | 0.00 | H |
| ATOM | 763 | H3'  | T B | 6 | -11.547 | -37.139 | 77.992 | 1.00 | 0.00 | H |
| ATOM | 764 | H4'  | T B | 6 | -12.492 | -35.800 | 75.914 | 1.00 | 0.00 | H |
| ATOM | 765 | H71  | T B | 6 | -6.265  | -39.649 | 75.361 | 1.00 | 0.00 | H |
| ATOM | 766 | H72  | T B | 6 | -5.788  | -39.494 | 73.654 | 1.00 | 0.00 | H |
| ATOM | 767 | H73  | T B | 6 | -6.306  | -38.057 | 74.567 | 1.00 | 0.00 | H |
| ATOM | 768 | H2'1 | T B | 6 | -10.149 | -38.724 | 76.852 | 1.00 | 0.00 | H |
| ATOM | 769 | H2'2 | T B | 6 | -11.633 | -39.653 | 77.004 | 1.00 | 0.00 | H |
| ATOM | 770 | H5'1 | T B | 6 | -10.092 | -35.368 | 75.026 | 1.00 | 0.00 | H |
| ATOM | 771 | H5'2 | T B | 6 | -10.546 | -34.847 | 76.662 | 1.00 | 0.00 | H |
| ATOM | 772 | C1'  | C B | 7 | -14.178 | -42.750 | 74.446 | 1.00 | 0.00 | C |
| ATOM | 773 | N1   | C B | 7 | -12.691 | -42.846 | 74.458 | 1.00 | 0.00 | N |
| ATOM | 774 | C2   | C B | 7 | -12.073 | -43.519 | 73.406 | 1.00 | 0.00 | C |
| ATOM | 775 | O2   | C B | 7 | -12.777 | -44.006 | 72.511 | 1.00 | 0.00 | O |
| ATOM | 776 | N3   | C B | 7 | -10.720 | -43.618 | 73.399 | 1.00 | 0.00 | N |
| ATOM | 777 | C4   | C B | 7 | -9.986  | -43.081 | 74.382 | 1.00 | 0.00 | C |
| ATOM | 778 | N4   | C B | 7 | -8.669  | -43.206 | 74.322 | 1.00 | 0.00 | N |
| ATOM | 779 | C5   | C B | 7 | -10.595 | -42.388 | 75.479 | 1.00 | 0.00 | C |
| ATOM | 780 | C6   | C B | 7 | -11.959 | -42.297 | 75.462 | 1.00 | 0.00 | C |

|      |     |      |     |   |         |         |        |      |      |   |
|------|-----|------|-----|---|---------|---------|--------|------|------|---|
| ATOM | 781 | C2'  | C B | 7 | -14.812 | -42.876 | 75.823 | 1.00 | 0.00 | C |
| ATOM | 782 | C3'  | C B | 7 | -15.987 | -41.916 | 75.719 | 1.00 | 0.00 | C |
| ATOM | 783 | O3'  | C B | 7 | -17.089 | -42.589 | 75.116 | 1.00 | 0.00 | O |
| ATOM | 784 | C4'  | C B | 7 | -15.437 | -40.800 | 74.835 | 1.00 | 0.00 | C |
| ATOM | 785 | O4'  | C B | 7 | -14.523 | -41.482 | 73.920 | 1.00 | 0.00 | O |
| ATOM | 786 | C5'  | C B | 7 | -14.681 | -39.695 | 75.538 | 1.00 | 0.00 | C |
| ATOM | 787 | O5'  | C B | 7 | -13.917 | -40.249 | 76.638 | 1.00 | 0.00 | O |
| ATOM | 788 | O1P  | C B | 7 | -15.008 | -39.242 | 78.671 | 1.00 | 0.00 | O |
| ATOM | 789 | O2P  | C B | 7 | -12.593 | -39.914 | 78.747 | 1.00 | 0.00 | O |
| ATOM | 790 | P    | C B | 7 | -13.723 | -39.372 | 77.957 | 1.00 | 0.00 | P |
| ATOM | 791 | H5   | C B | 7 | -10.001 | -41.956 | 76.284 | 1.00 | 0.00 | H |
| ATOM | 792 | H6   | C B | 7 | -12.468 | -41.772 | 76.271 | 1.00 | 0.00 | H |
| ATOM | 793 | H1'  | C B | 7 | -14.562 | -43.511 | 73.766 | 1.00 | 0.00 | H |
| ATOM | 794 | H3'  | C B | 7 | -16.288 | -41.532 | 76.696 | 1.00 | 0.00 | H |
| ATOM | 795 | H4'  | C B | 7 | -16.289 | -40.347 | 74.329 | 1.00 | 0.00 | H |
| ATOM | 796 | H41  | C B | 7 | -8.080  | -42.800 | 75.064 | 1.00 | 0.00 | H |
| ATOM | 797 | H42  | C B | 7 | -8.232  | -43.707 | 73.534 | 1.00 | 0.00 | H |
| ATOM | 798 | H2'1 | C B | 7 | -14.130 | -42.585 | 76.621 | 1.00 | 0.00 | H |
| ATOM | 799 | H2'2 | C B | 7 | -15.146 | -43.893 | 76.033 | 1.00 | 0.00 | H |
| ATOM | 800 | H5'1 | C B | 7 | -14.009 | -39.213 | 74.828 | 1.00 | 0.00 | H |
| ATOM | 801 | H5'2 | C B | 7 | -15.392 | -38.962 | 75.916 | 1.00 | 0.00 | H |
| ATOM | 802 | C1'  | C B | 8 | -15.048 | -47.347 | 72.821 | 1.00 | 0.00 | C |
| ATOM | 803 | N1   | C B | 8 | -13.828 | -47.044 | 73.618 | 1.00 | 0.00 | N |
| ATOM | 804 | C2   | C B | 8 | -12.597 | -47.452 | 73.107 | 1.00 | 0.00 | C |
| ATOM | 805 | O2   | C B | 8 | -12.569 | -48.043 | 72.020 | 1.00 | 0.00 | O |
| ATOM | 806 | N3   | C B | 8 | -11.474 | -47.185 | 73.816 | 1.00 | 0.00 | N |
| ATOM | 807 | C4   | C B | 8 | -11.537 | -46.543 | 74.990 | 1.00 | 0.00 | C |
| ATOM | 808 | N4   | C B | 8 | -10.406 | -46.306 | 75.640 | 1.00 | 0.00 | N |
| ATOM | 809 | C5   | C B | 8 | -12.789 | -46.115 | 75.544 | 1.00 | 0.00 | C |
| ATOM | 810 | C6   | C B | 8 | -13.907 | -46.391 | 74.808 | 1.00 | 0.00 | C |
| ATOM | 811 | C2'  | C B | 8 | -16.253 | -47.735 | 73.668 | 1.00 | 0.00 | C |
| ATOM | 812 | C3'  | C B | 8 | -17.402 | -47.118 | 72.885 | 1.00 | 0.00 | C |
| ATOM | 813 | O3'  | C B | 8 | -17.799 | -48.016 | 71.852 | 1.00 | 0.00 | O |
| ATOM | 814 | C4'  | C B | 8 | -16.785 | -45.836 | 72.331 | 1.00 | 0.00 | C |
| ATOM | 815 | O4'  | C B | 8 | -15.384 | -46.183 | 72.090 | 1.00 | 0.00 | O |
| ATOM | 816 | C5'  | C B | 8 | -16.835 | -44.623 | 73.229 | 1.00 | 0.00 | C |
| ATOM | 817 | O5'  | C B | 8 | -16.649 | -45.028 | 74.609 | 1.00 | 0.00 | O |
| ATOM | 818 | O1P  | C B | 8 | -18.865 | -44.495 | 75.677 | 1.00 | 0.00 | O |
| ATOM | 819 | O2P  | C B | 8 | -16.773 | -44.501 | 77.062 | 1.00 | 0.00 | O |
| ATOM | 820 | P    | C B | 8 | -17.415 | -44.227 | 75.754 | 1.00 | 0.00 | P |
| ATOM | 821 | H5   | C B | 8 | -12.847 | -45.600 | 76.501 | 1.00 | 0.00 | H |
| ATOM | 822 | H6   | C B | 8 | -14.882 | -46.080 | 75.184 | 1.00 | 0.00 | H |
| ATOM | 823 | H1'  | C B | 8 | -14.803 | -48.134 | 72.107 | 1.00 | 0.00 | H |
| ATOM | 824 | H3'  | C B | 8 | -18.258 | -46.899 | 73.523 | 1.00 | 0.00 | H |
| ATOM | 825 | H4'  | C B | 8 | -17.328 | -45.593 | 71.417 | 1.00 | 0.00 | H |
| ATOM | 826 | H41  | C B | 8 | -10.426 | -45.811 | 76.544 | 1.00 | 0.00 | H |
| ATOM | 827 | H42  | C B | 8 | -9.508  | -46.615 | 75.241 | 1.00 | 0.00 | H |
| ATOM | 828 | H2'1 | C B | 8 | -16.197 | -47.329 | 74.678 | 1.00 | 0.00 | H |
| ATOM | 829 | H2'2 | C B | 8 | -16.366 | -48.816 | 73.755 | 1.00 | 0.00 | H |
| ATOM | 830 | H5'1 | C B | 8 | -16.045 | -43.929 | 72.940 | 1.00 | 0.00 | H |
| ATOM | 831 | H5'2 | C B | 8 | -17.800 | -44.134 | 73.117 | 1.00 | 0.00 | H |
| ATOM | 832 | C1'  | T B | 9 | -13.712 | -51.884 | 71.365 | 1.00 | 0.00 | C |
| ATOM | 833 | N1   | T B | 9 | -13.202 | -51.330 | 72.647 | 1.00 | 0.00 | N |
| ATOM | 834 | C2   | T B | 9 | -11.839 | -51.375 | 72.855 | 1.00 | 0.00 | C |

|      |     |      |     |    |         |         |        |      |      |   |
|------|-----|------|-----|----|---------|---------|--------|------|------|---|
| ATOM | 835 | O2   | T B | 9  | -11.063 | -51.844 | 72.041 | 1.00 | 0.00 | O |
| ATOM | 836 | N3   | T B | 9  | -11.408 | -50.848 | 74.058 | 1.00 | 0.00 | N |
| ATOM | 837 | C4   | T B | 9  | -12.198 | -50.300 | 75.045 | 1.00 | 0.00 | C |
| ATOM | 838 | O4   | T B | 9  | -11.698 | -49.861 | 76.088 | 1.00 | 0.00 | O |
| ATOM | 839 | C5   | T B | 9  | -13.610 | -50.296 | 74.737 | 1.00 | 0.00 | C |
| ATOM | 840 | C6   | T B | 9  | -14.065 | -50.800 | 73.574 | 1.00 | 0.00 | C |
| ATOM | 841 | C7   | T B | 9  | -14.507 | -49.705 | 75.783 | 1.00 | 0.00 | C |
| ATOM | 842 | C2'  | T B | 9  | -15.037 | -52.628 | 71.500 | 1.00 | 0.00 | C |
| ATOM | 843 | C3'  | T B | 9  | -15.730 | -52.280 | 70.193 | 1.00 | 0.00 | C |
| ATOM | 844 | O3'  | T B | 9  | -15.294 | -53.181 | 69.177 | 1.00 | 0.00 | O |
| ATOM | 845 | C4'  | T B | 9  | -15.269 | -50.847 | 69.934 | 1.00 | 0.00 | C |
| ATOM | 846 | O4'  | T B | 9  | -13.910 | -50.804 | 70.474 | 1.00 | 0.00 | O |
| ATOM | 847 | C5'  | T B | 9  | -16.083 | -49.751 | 70.581 | 1.00 | 0.00 | C |
| ATOM | 848 | O5'  | T B | 9  | -16.537 | -50.186 | 71.887 | 1.00 | 0.00 | O |
| ATOM | 849 | O1P  | T B | 9  | -19.035 | -50.320 | 71.620 | 1.00 | 0.00 | O |
| ATOM | 850 | O2P  | T B | 9  | -18.037 | -49.874 | 73.878 | 1.00 | 0.00 | O |
| ATOM | 851 | P    | T B | 9  | -17.959 | -49.688 | 72.410 | 1.00 | 0.00 | P |
| ATOM | 852 | H3   | T B | 9  | -10.393 | -50.867 | 74.236 | 1.00 | 0.00 | H |
| ATOM | 853 | H6   | T B | 9  | -15.134 | -50.786 | 73.365 | 1.00 | 0.00 | H |
| ATOM | 854 | H1'  | T B | 9  | -12.943 | -52.531 | 70.941 | 1.00 | 0.00 | H |
| ATOM | 855 | H3'  | T B | 9  | -16.815 | -52.334 | 70.282 | 1.00 | 0.00 | H |
| ATOM | 856 | H4'  | T B | 9  | -15.303 | -50.695 | 68.853 | 1.00 | 0.00 | H |
| ATOM | 857 | H71  | T B | 9  | -15.152 | -50.484 | 76.192 | 1.00 | 0.00 | H |
| ATOM | 858 | H72  | T B | 9  | -13.902 | -49.276 | 76.583 | 1.00 | 0.00 | H |
| ATOM | 859 | H73  | T B | 9  | -15.122 | -48.923 | 75.335 | 1.00 | 0.00 | H |
| ATOM | 860 | H2'1 | T B | 9  | -15.613 | -52.289 | 72.359 | 1.00 | 0.00 | H |
| ATOM | 861 | H2'2 | T B | 9  | -14.897 | -53.704 | 71.602 | 1.00 | 0.00 | H |
| ATOM | 862 | H5'1 | T B | 9  | -15.465 | -48.859 | 70.683 | 1.00 | 0.00 | H |
| ATOM | 863 | H5'2 | T B | 9  | -16.940 | -49.524 | 69.950 | 1.00 | 0.00 | H |
| ATOM | 864 | C1'  | A B | 10 | -10.648 | -55.786 | 71.213 | 1.00 | 0.00 | C |
| ATOM | 865 | N1   | A B | 10 | -9.038  | -53.987 | 75.741 | 1.00 | 0.00 | N |
| ATOM | 866 | C2   | A B | 10 | -8.392  | -54.480 | 74.688 | 1.00 | 0.00 | C |
| ATOM | 867 | N3   | A B | 10 | -8.871  | -54.925 | 73.547 | 1.00 | 0.00 | N |
| ATOM | 868 | C4   | A B | 10 | -10.212 | -54.834 | 73.537 | 1.00 | 0.00 | C |
| ATOM | 869 | C5   | A B | 10 | -11.022 | -54.356 | 74.530 | 1.00 | 0.00 | C |
| ATOM | 870 | C6   | A B | 10 | -10.377 | -53.908 | 75.702 | 1.00 | 0.00 | C |
| ATOM | 871 | N6   | A B | 10 | -11.043 | -53.413 | 76.760 | 1.00 | 0.00 | N |
| ATOM | 872 | N7   | A B | 10 | -12.354 | -54.415 | 74.162 | 1.00 | 0.00 | N |
| ATOM | 873 | C8   | A B | 10 | -12.323 | -54.927 | 72.966 | 1.00 | 0.00 | C |
| ATOM | 874 | N9   | A B | 10 | -11.057 | -55.205 | 72.520 | 1.00 | 0.00 | N |
| ATOM | 875 | C2'  | A B | 10 | -11.596 | -56.860 | 70.697 | 1.00 | 0.00 | C |
| ATOM | 876 | C3'  | A B | 10 | -11.558 | -56.622 | 69.194 | 1.00 | 0.00 | C |
| ATOM | 877 | O3'  | A B | 10 | -10.433 | -57.301 | 68.641 | 1.00 | 0.00 | O |
| ATOM | 878 | C4'  | A B | 10 | -11.420 | -55.102 | 69.095 | 1.00 | 0.00 | C |
| ATOM | 879 | O4'  | A B | 10 | -10.619 | -54.736 | 70.265 | 1.00 | 0.00 | O |
| ATOM | 880 | C5'  | A B | 10 | -12.706 | -54.310 | 69.122 | 1.00 | 0.00 | C |
| ATOM | 881 | O5'  | A B | 10 | -13.651 | -54.936 | 70.027 | 1.00 | 0.00 | O |
| ATOM | 882 | O1P  | A B | 10 | -15.494 | -55.710 | 68.498 | 1.00 | 0.00 | O |
| ATOM | 883 | O2P  | A B | 10 | -15.996 | -55.172 | 70.896 | 1.00 | 0.00 | O |
| ATOM | 884 | P    | A B | 10 | -15.206 | -54.872 | 69.677 | 1.00 | 0.00 | P |
| ATOM | 885 | H2   | A B | 10 | -7.308  | -54.521 | 74.787 | 1.00 | 0.00 | H |
| ATOM | 886 | H8   | A B | 10 | -13.220 | -55.119 | 72.376 | 1.00 | 0.00 | H |
| ATOM | 887 | H1'  | A B | 10 | -9.635  | -56.175 | 71.315 | 1.00 | 0.00 | H |
| ATOM | 888 | H3'  | A B | 10 | -12.467 | -56.966 | 68.703 | 1.00 | 0.00 | H |

|      |     |      |     |    |         |         |        |      |      |   |
|------|-----|------|-----|----|---------|---------|--------|------|------|---|
| ATOM | 889 | H4'  | A B | 10 | -10.918 | -54.892 | 68.152 | 1.00 | 0.00 | H |
| ATOM | 890 | H61  | A B | 10 | -10.523 | -53.096 | 77.591 | 1.00 | 0.00 | H |
| ATOM | 891 | H62  | A B | 10 | -12.070 | -53.350 | 76.739 | 1.00 | 0.00 | H |
| ATOM | 892 | H2'1 | A B | 10 | -12.605 | -56.746 | 71.090 | 1.00 | 0.00 | H |
| ATOM | 893 | H2'2 | A B | 10 | -11.256 | -57.866 | 70.946 | 1.00 | 0.00 | H |
| ATOM | 894 | H5'1 | A B | 10 | -12.493 | -53.295 | 69.457 | 1.00 | 0.00 | H |
| ATOM | 895 | H5'2 | A B | 10 | -13.125 | -54.275 | 68.118 | 1.00 | 0.00 | H |
| ATOM | 896 | C1'  | G B | 11 | -7.064  | -58.698 | 73.037 | 1.00 | 0.00 | C |
| ATOM | 897 | N1   | G B | 11 | -8.631  | -56.872 | 77.535 | 1.00 | 0.00 | N |
| ATOM | 898 | C2   | G B | 11 | -7.349  | -57.085 | 77.061 | 1.00 | 0.00 | C |
| ATOM | 899 | N2   | G B | 11 | -6.351  | -56.771 | 77.897 | 1.00 | 0.00 | N |
| ATOM | 900 | N3   | G B | 11 | -7.083  | -57.570 | 75.849 | 1.00 | 0.00 | N |
| ATOM | 901 | C4   | G B | 11 | -8.212  | -57.838 | 75.142 | 1.00 | 0.00 | C |
| ATOM | 902 | C5   | G B | 11 | -9.528  | -57.663 | 75.533 | 1.00 | 0.00 | C |
| ATOM | 903 | C6   | G B | 11 | -9.812  | -57.144 | 76.818 | 1.00 | 0.00 | C |
| ATOM | 904 | O6   | G B | 11 | -10.904 | -56.920 | 77.341 | 1.00 | 0.00 | O |
| ATOM | 905 | N7   | G B | 11 | -10.393 | -58.062 | 74.512 | 1.00 | 0.00 | N |
| ATOM | 906 | C8   | G B | 11 | -9.592  | -58.455 | 73.554 | 1.00 | 0.00 | C |
| ATOM | 907 | N9   | G B | 11 | -8.251  | -58.350 | 73.864 | 1.00 | 0.00 | N |
| ATOM | 908 | C2'  | G B | 11 | -7.251  | -59.949 | 72.190 | 1.00 | 0.00 | C |
| ATOM | 909 | C3'  | G B | 11 | -6.479  | -59.597 | 70.928 | 1.00 | 0.00 | C |
| ATOM | 910 | O3'  | G B | 11 | -5.100  | -59.899 | 71.124 | 1.00 | 0.00 | O |
| ATOM | 911 | C4'  | G B | 11 | -6.727  | -58.096 | 70.785 | 1.00 | 0.00 | C |
| ATOM | 912 | O4'  | G B | 11 | -6.814  | -57.614 | 72.164 | 1.00 | 0.00 | O |
| ATOM | 913 | C5'  | G B | 11 | -7.983  | -57.690 | 70.050 | 1.00 | 0.00 | C |
| ATOM | 914 | O5'  | G B | 11 | -9.052  | -58.618 | 70.357 | 1.00 | 0.00 | O |
| ATOM | 915 | O1P  | G B | 11 | -9.494  | -59.751 | 68.155 | 1.00 | 0.00 | O |
| ATOM | 916 | O2P  | G B | 11 | -11.330 | -59.551 | 69.853 | 1.00 | 0.00 | O |
| ATOM | 917 | P    | G B | 11 | -10.124 | -58.958 | 69.226 | 1.00 | 0.00 | P |
| ATOM | 918 | H1   | G B | 11 | -8.728  | -56.486 | 78.486 | 1.00 | 0.00 | H |
| ATOM | 919 | H8   | G B | 11 | -9.952  | -58.833 | 72.598 | 1.00 | 0.00 | H |
| ATOM | 920 | H1'  | G B | 11 | -6.204  | -58.799 | 73.699 | 1.00 | 0.00 | H |
| ATOM | 921 | H21  | G B | 11 | -6.565  | -56.393 | 78.832 | 1.00 | 0.00 | H |
| ATOM | 922 | H3'  | G B | 11 | -6.848  | -60.141 | 70.058 | 1.00 | 0.00 | H |
| ATOM | 923 | H22  | G B | 11 | -5.373  | -56.909 | 77.606 | 1.00 | 0.00 | H |
| ATOM | 924 | H4'  | G B | 11 | -5.876  | -57.685 | 70.243 | 1.00 | 0.00 | H |
| ATOM | 925 | H2'1 | G B | 11 | -8.301  | -60.146 | 71.970 | 1.00 | 0.00 | H |
| ATOM | 926 | H2'2 | G B | 11 | -6.843  | -60.838 | 72.670 | 1.00 | 0.00 | H |
| ATOM | 927 | H5'1 | G B | 11 | -8.267  | -56.685 | 70.356 | 1.00 | 0.00 | H |
| ATOM | 928 | H5'2 | G B | 11 | -7.786  | -57.697 | 68.978 | 1.00 | 0.00 | H |
| ATOM | 929 | C1'  | G B | 12 | -4.356  | -60.677 | 76.680 | 1.00 | 0.00 | C |
| ATOM | 930 | N1   | G B | 12 | -8.468  | -59.658 | 79.521 | 1.00 | 0.00 | N |
| ATOM | 931 | C2   | G B | 12 | -7.125  | -59.487 | 79.808 | 1.00 | 0.00 | C |
| ATOM | 932 | N2   | G B | 12 | -6.840  | -58.978 | 81.014 | 1.00 | 0.00 | N |
| ATOM | 933 | N3   | G B | 12 | -6.147  | -59.797 | 78.960 | 1.00 | 0.00 | N |
| ATOM | 934 | C4   | G B | 12 | -6.617  | -60.306 | 77.793 | 1.00 | 0.00 | C |
| ATOM | 935 | C5   | G B | 12 | -7.933  | -60.517 | 77.420 | 1.00 | 0.00 | C |
| ATOM | 936 | C6   | G B | 12 | -8.974  | -60.184 | 78.318 | 1.00 | 0.00 | C |
| ATOM | 937 | O6   | G B | 12 | -10.191 | -60.297 | 78.171 | 1.00 | 0.00 | O |
| ATOM | 938 | N7   | G B | 12 | -7.992  | -61.059 | 76.135 | 1.00 | 0.00 | N |
| ATOM | 939 | C8   | G B | 12 | -6.738  | -61.155 | 75.775 | 1.00 | 0.00 | C |
| ATOM | 940 | N9   | G B | 12 | -5.843  | -60.718 | 76.730 | 1.00 | 0.00 | N |
| ATOM | 941 | C2'  | G B | 12 | -3.733  | -61.869 | 75.968 | 1.00 | 0.00 | C |
| ATOM | 942 | C3'  | G B | 12 | -2.537  | -61.236 | 75.273 | 1.00 | 0.00 | C |

|      |     |      |     |    |        |         |        |      |      |   |
|------|-----|------|-----|----|--------|---------|--------|------|------|---|
| ATOM | 943 | O3'  | G B | 12 | -1.445 | -61.173 | 76.187 | 1.00 | 0.00 | O |
| ATOM | 944 | C4'  | G B | 12 | -3.058 | -59.851 | 74.897 | 1.00 | 0.00 | C |
| ATOM | 945 | O4'  | G B | 12 | -3.980 | -59.507 | 75.979 | 1.00 | 0.00 | O |
| ATOM | 946 | C5'  | G B | 12 | -3.794 | -59.744 | 73.583 | 1.00 | 0.00 | C |
| ATOM | 947 | O5'  | G B | 12 | -4.578 | -60.942 | 73.361 | 1.00 | 0.00 | O |
| ATOM | 948 | O1P  | G B | 12 | -3.479 | -61.994 | 71.356 | 1.00 | 0.00 | O |
| ATOM | 949 | O2P  | G B | 12 | -5.909 | -62.413 | 71.817 | 1.00 | 0.00 | O |
| ATOM | 950 | P    | G B | 12 | -4.761 | -61.475 | 71.868 | 1.00 | 0.00 | P |
| ATOM | 951 | H1   | G B | 12 | -9.149 | -59.379 | 80.245 | 1.00 | 0.00 | H |
| ATOM | 952 | H8   | G B | 12 | -6.426 | -61.546 | 74.807 | 1.00 | 0.00 | H |
| ATOM | 953 | H1'  | G B | 12 | -3.982 | -60.592 | 77.700 | 1.00 | 0.00 | H |
| ATOM | 954 | H21  | G B | 12 | -7.604 | -58.736 | 81.663 | 1.00 | 0.00 | H |
| ATOM | 955 | H3'  | G B | 12 | -2.235 | -61.796 | 74.388 | 1.00 | 0.00 | H |
| ATOM | 956 | H22  | G B | 12 | -5.860 | -58.828 | 81.289 | 1.00 | 0.00 | H |
| ATOM | 957 | H4'  | G B | 12 | -2.193 | -59.189 | 74.849 | 1.00 | 0.00 | H |
| ATOM | 958 | H2'1 | G B | 12 | -4.415 | -62.325 | 75.248 | 1.00 | 0.00 | H |
| ATOM | 959 | H2'2 | G B | 12 | -3.421 | -62.650 | 76.662 | 1.00 | 0.00 | H |
| ATOM | 960 | H5'1 | G B | 12 | -4.450 | -58.874 | 73.610 | 1.00 | 0.00 | H |
| ATOM | 961 | H5'2 | G B | 12 | -3.070 | -59.622 | 72.777 | 1.00 | 0.00 | H |
| ATOM | 962 | C1'  | T B | 13 | -3.535 | -62.114 | 81.344 | 1.00 | 0.00 | C |
| ATOM | 963 | N1   | T B | 13 | -4.768 | -62.546 | 80.635 | 1.00 | 0.00 | N |
| ATOM | 964 | C2   | T B | 13 | -5.972 | -62.338 | 81.279 | 1.00 | 0.00 | C |
| ATOM | 965 | O2   | T B | 13 | -6.048 | -61.828 | 82.383 | 1.00 | 0.00 | O |
| ATOM | 966 | N3   | T B | 13 | -7.092 | -62.752 | 80.584 | 1.00 | 0.00 | N |
| ATOM | 967 | C4   | T B | 13 | -7.115 | -63.342 | 79.337 | 1.00 | 0.00 | C |
| ATOM | 968 | O4   | T B | 13 | -8.185 | -63.675 | 78.814 | 1.00 | 0.00 | O |
| ATOM | 969 | C5   | T B | 13 | -5.811 | -63.516 | 78.743 | 1.00 | 0.00 | C |
| ATOM | 970 | C6   | T B | 13 | -4.697 | -63.123 | 79.391 | 1.00 | 0.00 | C |
| ATOM | 971 | C7   | T B | 13 | -5.787 | -64.151 | 77.384 | 1.00 | 0.00 | C |
| ATOM | 972 | C2'  | T B | 13 | -2.352 | -63.056 | 81.148 | 1.00 | 0.00 | C |
| ATOM | 973 | C3'  | T B | 13 | -1.180 | -62.089 | 81.110 | 1.00 | 0.00 | C |
| ATOM | 974 | O3'  | T B | 13 | -0.768 | -61.802 | 82.444 | 1.00 | 0.00 | O |
| ATOM | 975 | C4'  | T B | 13 | -1.770 | -60.866 | 80.411 | 1.00 | 0.00 | C |
| ATOM | 976 | O4'  | T B | 13 | -3.169 | -60.845 | 80.841 | 1.00 | 0.00 | O |
| ATOM | 977 | C5'  | T B | 13 | -1.728 | -60.871 | 78.900 | 1.00 | 0.00 | C |
| ATOM | 978 | O5'  | T B | 13 | -1.949 | -62.217 | 78.409 | 1.00 | 0.00 | O |
| ATOM | 979 | O1P  | T B | 13 | 0.247  | -62.814 | 77.337 | 1.00 | 0.00 | O |
| ATOM | 980 | O2P  | T B | 13 | -1.875 | -63.881 | 76.528 | 1.00 | 0.00 | O |
| ATOM | 981 | P    | T B | 13 | -1.201 | -62.681 | 77.080 | 1.00 | 0.00 | P |
| ATOM | 982 | H3   | T B | 13 | -8.003 | -62.606 | 81.043 | 1.00 | 0.00 | H |
| ATOM | 983 | H6   | T B | 13 | -3.724 | -63.266 | 78.922 | 1.00 | 0.00 | H |
| ATOM | 984 | H1'  | T B | 13 | -3.770 | -62.000 | 82.403 | 1.00 | 0.00 | H |
| ATOM | 985 | H3'  | T B | 13 | -0.336 | -62.493 | 80.552 | 1.00 | 0.00 | H |
| ATOM | 986 | H4'  | T B | 13 | -1.203 | -60.001 | 80.757 | 1.00 | 0.00 | H |
| ATOM | 987 | H71  | T B | 13 | -5.292 | -65.120 | 77.443 | 1.00 | 0.00 | H |
| ATOM | 988 | H72  | T B | 13 | -6.810 | -64.287 | 77.028 | 1.00 | 0.00 | H |
| ATOM | 989 | H73  | T B | 13 | -5.245 | -63.508 | 76.689 | 1.00 | 0.00 | H |
| ATOM | 990 | H2'1 | T B | 13 | -2.427 | -63.625 | 80.223 | 1.00 | 0.00 | H |
| ATOM | 991 | H2'2 | T B | 13 | -2.252 | -63.771 | 81.965 | 1.00 | 0.00 | H |
| ATOM | 992 | H5'1 | T B | 13 | -2.502 | -60.205 | 78.520 | 1.00 | 0.00 | H |
| ATOM | 993 | H5'2 | T B | 13 | -0.753 | -60.514 | 78.569 | 1.00 | 0.00 | H |
| ATOM | 994 | C1'  | G B | 14 | -4.990 | -63.610 | 85.850 | 1.00 | 0.00 | C |
| ATOM | 995 | N1   | G B | 14 | -9.112 | -65.287 | 83.357 | 1.00 | 0.00 | N |
| ATOM | 996 | C2   | G B | 14 | -9.015 | -64.631 | 84.572 | 1.00 | 0.00 | C |



|      |      |      |     |    |         |         |        |      |      |   |
|------|------|------|-----|----|---------|---------|--------|------|------|---|
| ATOM | 997  | N2   | G B | 14 | -10.167 | -64.392 | 85.208 | 1.00 | 0.00 | N |
| ATOM | 998  | N3   | G B | 14 | -7.858  | -64.245 | 85.108 | 1.00 | 0.00 | N |
| ATOM | 999  | C4   | G B | 14 | -6.792  | -64.574 | 84.330 | 1.00 | 0.00 | C |
| ATOM | 1000 | C5   | G B | 14 | -6.794  | -65.229 | 83.112 | 1.00 | 0.00 | C |
| ATOM | 1001 | C6   | G B | 14 | -8.021  | -65.637 | 82.539 | 1.00 | 0.00 | C |
| ATOM | 1002 | O6   | G B | 14 | -8.224  | -66.225 | 81.476 | 1.00 | 0.00 | O |
| ATOM | 1003 | N7   | G B | 14 | -5.487  | -65.377 | 82.640 | 1.00 | 0.00 | N |
| ATOM | 1004 | C8   | G B | 14 | -4.753  | -64.816 | 83.567 | 1.00 | 0.00 | C |
| ATOM | 1005 | N9   | G B | 14 | -5.474  | -64.307 | 84.628 | 1.00 | 0.00 | N |
| ATOM | 1006 | C2'  | G B | 14 | -3.686  | -64.172 | 86.401 | 1.00 | 0.00 | C |
| ATOM | 1007 | C3'  | G B | 14 | -2.992  | -62.922 | 86.917 | 1.00 | 0.00 | C |
| ATOM | 1008 | O3'  | G B | 14 | -3.461  | -62.637 | 88.232 | 1.00 | 0.00 | O |
| ATOM | 1009 | C4'  | G B | 14 | -3.418  | -61.858 | 85.907 | 1.00 | 0.00 | C |
| ATOM | 1010 | O4'  | G B | 14 | -4.770  | -62.253 | 85.515 | 1.00 | 0.00 | O |
| ATOM | 1011 | C5'  | G B | 14 | -2.570  | -61.734 | 84.664 | 1.00 | 0.00 | C |
| ATOM | 1012 | O5'  | G B | 14 | -2.117  | -63.046 | 84.246 | 1.00 | 0.00 | O |
| ATOM | 1013 | O1P  | G B | 14 | 0.375   | -62.935 | 84.578 | 1.00 | 0.00 | O |
| ATOM | 1014 | O2P  | G B | 14 | -0.593  | -64.476 | 82.851 | 1.00 | 0.00 | O |
| ATOM | 1015 | P    | G B | 14 | -0.677  | -63.184 | 83.574 | 1.00 | 0.00 | P |
| ATOM | 1016 | H1   | G B | 14 | -10.057 | -65.538 | 83.026 | 1.00 | 0.00 | H |
| ATOM | 1017 | H8   | G B | 14 | -3.665  | -64.758 | 83.508 | 1.00 | 0.00 | H |
| ATOM | 1018 | H1'  | G B | 14 | -5.780  | -63.646 | 86.601 | 1.00 | 0.00 | H |
| ATOM | 1019 | H21  | G B | 14 | -11.059 | -64.692 | 84.784 | 1.00 | 0.00 | H |
| ATOM | 1020 | H3'  | G B | 14 | -1.908  | -63.035 | 86.935 | 1.00 | 0.00 | H |
| ATOM | 1021 | H22  | G B | 14 | -10.164 | -63.911 | 86.118 | 1.00 | 0.00 | H |
| ATOM | 1022 | H4'  | G B | 14 | -3.389  | -60.899 | 86.427 | 1.00 | 0.00 | H |
| ATOM | 1023 | H2'1 | G B | 14 | -3.092  | -64.668 | 85.633 | 1.00 | 0.00 | H |
| ATOM | 1024 | H2'2 | G B | 14 | -3.853  | -64.893 | 87.201 | 1.00 | 0.00 | H |
| ATOM | 1025 | H5'1 | G B | 14 | -3.162  | -61.280 | 83.870 | 1.00 | 0.00 | H |
| ATOM | 1026 | H5'2 | G B | 14 | -1.712  | -61.099 | 84.878 | 1.00 | 0.00 | H |
| ATOM | 1027 | C1'  | C B | 15 | -8.118  | -65.748 | 89.039 | 1.00 | 0.00 | C |
| ATOM | 1028 | N1   | C B | 15 | -7.690  | -66.460 | 87.805 | 1.00 | 0.00 | N |
| ATOM | 1029 | C2   | C B | 15 | -8.680  | -66.998 | 86.985 | 1.00 | 0.00 | C |
| ATOM | 1030 | O2   | C B | 15 | -9.866  | -66.860 | 87.313 | 1.00 | 0.00 | O |
| ATOM | 1031 | N3   | C B | 15 | -8.312  | -67.651 | 85.856 | 1.00 | 0.00 | N |
| ATOM | 1032 | C4   | C B | 15 | -7.021  | -67.784 | 85.528 | 1.00 | 0.00 | C |
| ATOM | 1033 | N4   | C B | 15 | -6.717  | -68.429 | 84.412 | 1.00 | 0.00 | N |
| ATOM | 1034 | C5   | C B | 15 | -5.979  | -67.246 | 86.355 | 1.00 | 0.00 | C |
| ATOM | 1035 | C6   | C B | 15 | -6.375  | -66.587 | 87.484 | 1.00 | 0.00 | C |
| ATOM | 1036 | C2'  | C B | 15 | -7.205  | -65.985 | 90.233 | 1.00 | 0.00 | C |
| ATOM | 1037 | C3'  | C B | 15 | -7.235  | -64.634 | 90.932 | 1.00 | 0.00 | C |
| ATOM | 1038 | O3'  | C B | 15 | -8.380  | -64.571 | 91.781 | 1.00 | 0.00 | O |
| ATOM | 1039 | C4'  | C B | 15 | -7.329  | -63.652 | 89.766 | 1.00 | 0.00 | C |
| ATOM | 1040 | O4'  | C B | 15 | -8.117  | -64.360 | 88.757 | 1.00 | 0.00 | O |
| ATOM | 1041 | C5'  | C B | 15 | -6.019  | -63.225 | 89.142 | 1.00 | 0.00 | C |
| ATOM | 1042 | O5'  | C B | 15 | -5.094  | -64.340 | 89.134 | 1.00 | 0.00 | O |
| ATOM | 1043 | O1P  | C B | 15 | -3.274  | -63.601 | 90.708 | 1.00 | 0.00 | O |
| ATOM | 1044 | O2P  | C B | 15 | -2.754  | -65.219 | 88.863 | 1.00 | 0.00 | O |
| ATOM | 1045 | P    | C B | 15 | -3.538  | -64.048 | 89.326 | 1.00 | 0.00 | P |
| ATOM | 1046 | H5   | C B | 15 | -4.927  | -67.358 | 86.096 | 1.00 | 0.00 | H |
| ATOM | 1047 | H6   | C B | 15 | -5.620  | -66.156 | 88.142 | 1.00 | 0.00 | H |
| ATOM | 1048 | H1'  | C B | 15 | -9.143  | -66.043 | 89.266 | 1.00 | 0.00 | H |
| ATOM | 1049 | H3'  | C B | 15 | -6.337  | -64.459 | 91.523 | 1.00 | 0.00 | H |
| ATOM | 1050 | H4'  | C B | 15 | -7.823  | -62.757 | 90.143 | 1.00 | 0.00 | H |

|      |      |      |     |    |         |         |        |      |      |   |
|------|------|------|-----|----|---------|---------|--------|------|------|---|
| ATOM | 1051 | H41  | C B | 15 | -5.732  | -68.543 | 84.134 | 1.00 | 0.00 | H |
| ATOM | 1052 | H42  | C B | 15 | -7.468  | -68.817 | 83.820 | 1.00 | 0.00 | H |
| ATOM | 1053 | H2'1 | C B | 15 | -6.192  | -66.253 | 89.933 | 1.00 | 0.00 | H |
| ATOM | 1054 | H2'2 | C B | 15 | -7.573  | -66.777 | 90.885 | 1.00 | 0.00 | H |
| ATOM | 1055 | H5'1 | C B | 15 | -6.202  | -62.889 | 88.122 | 1.00 | 0.00 | H |
| ATOM | 1056 | H5'2 | C B | 15 | -5.599  | -62.402 | 89.721 | 1.00 | 0.00 | H |
| ATOM | 1057 | C1'  | G B | 16 | -11.761 | -68.862 | 90.282 | 1.00 | 0.00 | C |
| ATOM | 1058 | N1   | G B | 16 | -10.203 | -71.431 | 86.160 | 1.00 | 0.00 | N |
| ATOM | 1059 | C2   | G B | 16 | -11.484 | -71.151 | 86.600 | 1.00 | 0.00 | C |
| ATOM | 1060 | N2   | G B | 16 | -12.484 | -71.619 | 85.840 | 1.00 | 0.00 | N |
| ATOM | 1061 | N3   | G B | 16 | -11.748 | -70.459 | 87.707 | 1.00 | 0.00 | N |
| ATOM | 1062 | C4   | G B | 16 | -10.618 | -70.069 | 88.353 | 1.00 | 0.00 | C |
| ATOM | 1063 | C5   | G B | 16 | -9.302  | -70.307 | 87.993 | 1.00 | 0.00 | C |
| ATOM | 1064 | C6   | G B | 16 | -9.022  | -71.038 | 86.816 | 1.00 | 0.00 | C |
| ATOM | 1065 | O6   | G B | 16 | -7.930  | -71.347 | 86.335 | 1.00 | 0.00 | O |
| ATOM | 1066 | N7   | G B | 16 | -8.435  | -69.738 | 88.928 | 1.00 | 0.00 | N |
| ATOM | 1067 | C8   | G B | 16 | -9.234  | -69.184 | 89.805 | 1.00 | 0.00 | C |
| ATOM | 1068 | N9   | G B | 16 | -10.576 | -69.344 | 89.524 | 1.00 | 0.00 | N |
| ATOM | 1069 | C2'  | G B | 16 | -11.590 | -68.926 | 91.794 | 1.00 | 0.00 | C |
| ATOM | 1070 | C3'  | G B | 16 | -12.343 | -67.687 | 92.252 | 1.00 | 0.00 | C |
| ATOM | 1071 | O3'  | G B | 16 | -13.730 | -67.997 | 92.365 | 1.00 | 0.00 | O |
| ATOM | 1072 | C4'  | G B | 16 | -12.065 | -66.687 | 91.132 | 1.00 | 0.00 | C |
| ATOM | 1073 | O4'  | G B | 16 | -11.982 | -67.512 | 89.925 | 1.00 | 0.00 | O |
| ATOM | 1074 | C5'  | G B | 16 | -10.794 | -65.879 | 91.253 | 1.00 | 0.00 | C |
| ATOM | 1075 | O5'  | G B | 16 | -9.746  | -66.698 | 91.827 | 1.00 | 0.00 | O |
| ATOM | 1076 | O1P  | G B | 16 | -9.305  | -65.605 | 94.051 | 1.00 | 0.00 | O |
| ATOM | 1077 | O2P  | G B | 16 | -7.482  | -66.889 | 92.901 | 1.00 | 0.00 | O |
| ATOM | 1078 | P    | G B | 16 | -8.670  | -66.008 | 92.782 | 1.00 | 0.00 | P |
| ATOM | 1079 | H1   | G B | 16 | -10.108 | -71.970 | 85.285 | 1.00 | 0.00 | H |
| ATOM | 1080 | H8   | G B | 16 | -8.872  | -68.645 | 90.679 | 1.00 | 0.00 | H |
| ATOM | 1081 | H1'  | G B | 16 | -12.630 | -69.439 | 89.962 | 1.00 | 0.00 | H |
| ATOM | 1082 | H21  | G B | 16 | -12.272 | -72.151 | 84.984 | 1.00 | 0.00 | H |
| ATOM | 1083 | H3'  | G B | 16 | -11.977 | -67.317 | 93.210 | 1.00 | 0.00 | H |
| ATOM | 1084 | H22  | G B | 16 | -13.461 | -71.446 | 86.116 | 1.00 | 0.00 | H |
| ATOM | 1085 | H4'  | G B | 16 | -12.903 | -65.990 | 91.114 | 1.00 | 0.00 | H |
| ATOM | 1086 | H2'1 | G B | 16 | -10.542 | -68.887 | 92.093 | 1.00 | 0.00 | H |
| ATOM | 1087 | H2'2 | G B | 16 | -12.020 | -69.832 | 92.221 | 1.00 | 0.00 | H |
| ATOM | 1088 | H5'1 | G B | 16 | -10.494 | -65.534 | 90.264 | 1.00 | 0.00 | H |
| ATOM | 1089 | H5'2 | G B | 16 | -10.981 | -65.015 | 91.892 | 1.00 | 0.00 | H |
| ATOM | 1090 | C1'  | G B | 17 | -14.544 | -72.916 | 89.688 | 1.00 | 0.00 | C |
| ATOM | 1091 | N1   | G B | 17 | -10.440 | -74.678 | 87.223 | 1.00 | 0.00 | N |
| ATOM | 1092 | C2   | G B | 17 | -11.782 | -74.782 | 86.902 | 1.00 | 0.00 | C |
| ATOM | 1093 | N2   | G B | 17 | -12.068 | -75.445 | 85.774 | 1.00 | 0.00 | N |
| ATOM | 1094 | N3   | G B | 17 | -12.758 | -74.265 | 87.644 | 1.00 | 0.00 | N |
| ATOM | 1095 | C4   | G B | 17 | -12.286 | -73.636 | 88.752 | 1.00 | 0.00 | C |
| ATOM | 1096 | C5   | G B | 17 | -10.971 | -73.487 | 89.154 | 1.00 | 0.00 | C |
| ATOM | 1097 | C6   | G B | 17 | -9.933  | -74.032 | 88.366 | 1.00 | 0.00 | C |
| ATOM | 1098 | O6   | G B | 17 | -8.716  | -74.003 | 88.555 | 1.00 | 0.00 | O |
| ATOM | 1099 | N7   | G B | 17 | -10.910 | -72.774 | 90.355 | 1.00 | 0.00 | N |
| ATOM | 1100 | C8   | G B | 17 | -12.162 | -72.518 | 90.633 | 1.00 | 0.00 | C |
| ATOM | 1101 | N9   | G B | 17 | -13.058 | -73.010 | 89.707 | 1.00 | 0.00 | N |
| ATOM | 1102 | C2'  | G B | 17 | -15.183 | -73.038 | 91.065 | 1.00 | 0.00 | C |
| ATOM | 1103 | C3'  | G B | 17 | -16.358 | -72.080 | 90.955 | 1.00 | 0.00 | C |
| ATOM | 1104 | O3'  | G B | 17 | -17.458 | -72.757 | 90.351 | 1.00 | 0.00 | O |

|      |      |      |     |    |         |         |        |      |      |   |
|------|------|------|-----|----|---------|---------|--------|------|------|---|
| ATOM | 1105 | C4'  | G B | 17 | -15.808 | -70.966 | 90.068 | 1.00 | 0.00 | C |
| ATOM | 1106 | O4'  | G B | 17 | -14.890 | -71.650 | 89.158 | 1.00 | 0.00 | O |
| ATOM | 1107 | C5'  | G B | 17 | -15.057 | -69.859 | 90.769 | 1.00 | 0.00 | C |
| ATOM | 1108 | O5'  | G B | 17 | -14.294 | -70.406 | 91.873 | 1.00 | 0.00 | O |
| ATOM | 1109 | O1P  | G B | 17 | -15.394 | -69.395 | 93.899 | 1.00 | 0.00 | O |
| ATOM | 1110 | O2P  | G B | 17 | -12.976 | -70.060 | 93.986 | 1.00 | 0.00 | O |
| ATOM | 1111 | P    | G B | 17 | -14.107 | -69.524 | 93.190 | 1.00 | 0.00 | P |
| ATOM | 1112 | H1   | G B | 17 | -9.761  | -75.109 | 86.576 | 1.00 | 0.00 | H |
| ATOM | 1113 | H8   | G B | 17 | -12.471 | -71.964 | 91.519 | 1.00 | 0.00 | H |
| ATOM | 1114 | H1'  | G B | 17 | -14.925 | -73.679 | 89.011 | 1.00 | 0.00 | H |
| ATOM | 1115 | H21  | G B | 17 | -11.308 | -75.839 | 85.202 | 1.00 | 0.00 | H |
| ATOM | 1116 | H3'  | G B | 17 | -16.663 | -71.694 | 91.928 | 1.00 | 0.00 | H |
| ATOM | 1117 | H22  | G B | 17 | -13.048 | -75.558 | 85.480 | 1.00 | 0.00 | H |
| ATOM | 1118 | H4'  | G B | 17 | -16.659 | -70.519 | 89.556 | 1.00 | 0.00 | H |
| ATOM | 1119 | H2'1 | G B | 17 | -14.503 | -72.742 | 91.864 | 1.00 | 0.00 | H |
| ATOM | 1120 | H2'2 | G B | 17 | -15.515 | -74.053 | 91.278 | 1.00 | 0.00 | H |
| ATOM | 1121 | H5'1 | G B | 17 | -14.384 | -69.377 | 90.060 | 1.00 | 0.00 | H |
| ATOM | 1122 | H5'2 | G B | 17 | -15.770 | -69.123 | 91.143 | 1.00 | 0.00 | H |
| ATOM | 1123 | C1'  | C B | 18 | -15.415 | -77.513 | 88.064 | 1.00 | 0.00 | C |
| ATOM | 1124 | N1   | C B | 18 | -14.194 | -77.209 | 88.860 | 1.00 | 0.00 | N |
| ATOM | 1125 | C2   | C B | 18 | -12.964 | -77.616 | 88.349 | 1.00 | 0.00 | C |
| ATOM | 1126 | O2   | C B | 18 | -12.935 | -78.208 | 87.262 | 1.00 | 0.00 | O |
| ATOM | 1127 | N3   | C B | 18 | -11.842 | -77.350 | 89.059 | 1.00 | 0.00 | N |
| ATOM | 1128 | C4   | C B | 18 | -11.906 | -76.708 | 90.232 | 1.00 | 0.00 | C |
| ATOM | 1129 | N4   | C B | 18 | -10.775 | -76.472 | 90.883 | 1.00 | 0.00 | N |
| ATOM | 1130 | C5   | C B | 18 | -13.157 | -76.280 | 90.783 | 1.00 | 0.00 | C |
| ATOM | 1131 | C6   | C B | 18 | -14.273 | -76.557 | 90.050 | 1.00 | 0.00 | C |
| ATOM | 1132 | C2'  | C B | 18 | -16.620 | -77.901 | 88.911 | 1.00 | 0.00 | C |
| ATOM | 1133 | C3'  | C B | 18 | -17.769 | -77.284 | 88.128 | 1.00 | 0.00 | C |
| ATOM | 1134 | O3'  | C B | 18 | -18.167 | -78.182 | 87.095 | 1.00 | 0.00 | O |
| ATOM | 1135 | C4'  | C B | 18 | -17.152 | -76.002 | 87.573 | 1.00 | 0.00 | C |
| ATOM | 1136 | O4'  | C B | 18 | -15.751 | -76.348 | 87.333 | 1.00 | 0.00 | O |
| ATOM | 1137 | C5'  | C B | 18 | -17.202 | -74.788 | 88.471 | 1.00 | 0.00 | C |
| ATOM | 1138 | O5'  | C B | 18 | -17.015 | -75.194 | 89.852 | 1.00 | 0.00 | O |
| ATOM | 1139 | O1P  | C B | 18 | -19.232 | -74.661 | 90.920 | 1.00 | 0.00 | O |
| ATOM | 1140 | O2P  | C B | 18 | -17.140 | -74.666 | 92.306 | 1.00 | 0.00 | O |
| ATOM | 1141 | P    | C B | 18 | -17.782 | -74.392 | 90.998 | 1.00 | 0.00 | P |
| ATOM | 1142 | H5   | C B | 18 | -13.214 | -75.761 | 91.739 | 1.00 | 0.00 | H |
| ATOM | 1143 | H6   | C B | 18 | -15.247 | -76.248 | 90.427 | 1.00 | 0.00 | H |
| ATOM | 1144 | H1'  | C B | 18 | -15.170 | -78.298 | 87.350 | 1.00 | 0.00 | H |
| ATOM | 1145 | H3'  | C B | 18 | -18.625 | -77.065 | 88.766 | 1.00 | 0.00 | H |
| ATOM | 1146 | H4'  | C B | 18 | -17.694 | -75.759 | 86.659 | 1.00 | 0.00 | H |
| ATOM | 1147 | H41  | C B | 18 | -10.797 | -75.978 | 91.788 | 1.00 | 0.00 | H |
| ATOM | 1148 | H42  | C B | 18 | -9.878  | -76.781 | 90.485 | 1.00 | 0.00 | H |
| ATOM | 1149 | H2'1 | C B | 18 | -16.564 | -77.495 | 89.920 | 1.00 | 0.00 | H |
| ATOM | 1150 | H2'2 | C B | 18 | -16.733 | -78.981 | 88.998 | 1.00 | 0.00 | H |
| ATOM | 1151 | H5'1 | C B | 18 | -16.413 | -74.095 | 88.183 | 1.00 | 0.00 | H |
| ATOM | 1152 | H5'2 | C B | 18 | -18.168 | -74.299 | 88.360 | 1.00 | 0.00 | H |
| ATOM | 1153 | C1'  | C B | 19 | -14.058 | -82.049 | 86.614 | 1.00 | 0.00 | C |
| ATOM | 1154 | N1   | C B | 19 | -13.568 | -81.488 | 87.903 | 1.00 | 0.00 | N |
| ATOM | 1155 | C2   | C B | 19 | -12.195 | -81.515 | 88.147 | 1.00 | 0.00 | C |
| ATOM | 1156 | O2   | C B | 19 | -11.445 | -81.998 | 87.290 | 1.00 | 0.00 | O |
| ATOM | 1157 | N3   | C B | 19 | -11.730 | -81.008 | 89.315 | 1.00 | 0.00 | N |
| ATOM | 1158 | C4   | C B | 19 | -12.569 | -80.492 | 90.223 | 1.00 | 0.00 | C |

|      |      |      |     |    |         |         |        |      |      |   |
|------|------|------|-----|----|---------|---------|--------|------|------|---|
| ATOM | 1159 | N4   | C B | 19 | -12.060 | -80.010 | 91.346 | 1.00 | 0.00 | N |
| ATOM | 1160 | C5   | C B | 19 | -13.982 | -80.454 | 89.998 | 1.00 | 0.00 | C |
| ATOM | 1161 | C6   | C B | 19 | -14.428 | -80.967 | 88.817 | 1.00 | 0.00 | C |
| ATOM | 1162 | C2'  | C B | 19 | -15.374 | -82.803 | 86.734 | 1.00 | 0.00 | C |
| ATOM | 1163 | C3'  | C B | 19 | -16.055 | -82.462 | 85.417 | 1.00 | 0.00 | C |
| ATOM | 1164 | O3'  | C B | 19 | -15.598 | -83.359 | 84.408 | 1.00 | 0.00 | O |
| ATOM | 1165 | C4'  | C B | 19 | -15.602 | -81.026 | 85.162 | 1.00 | 0.00 | C |
| ATOM | 1166 | O4'  | C B | 19 | -14.251 | -80.968 | 85.721 | 1.00 | 0.00 | O |
| ATOM | 1167 | C5'  | C B | 19 | -16.433 | -79.936 | 85.799 | 1.00 | 0.00 | C |
| ATOM | 1168 | O5'  | C B | 19 | -16.902 | -80.373 | 87.100 | 1.00 | 0.00 | O |
| ATOM | 1169 | O1P  | C B | 19 | -19.395 | -80.529 | 86.800 | 1.00 | 0.00 | O |
| ATOM | 1170 | O2P  | C B | 19 | -18.430 | -80.073 | 89.070 | 1.00 | 0.00 | O |
| ATOM | 1171 | P    | C B | 19 | -18.334 | -79.888 | 87.602 | 1.00 | 0.00 | P |
| ATOM | 1172 | H5   | C B | 19 | -14.668 | -80.036 | 90.734 | 1.00 | 0.00 | H |
| ATOM | 1173 | H6   | C B | 19 | -15.495 | -80.958 | 88.599 | 1.00 | 0.00 | H |
| ATOM | 1174 | H1'  | C B | 19 | -13.276 | -82.689 | 86.203 | 1.00 | 0.00 | H |
| ATOM | 1175 | H3'  | C B | 19 | -17.141 | -82.524 | 85.492 | 1.00 | 0.00 | H |
| ATOM | 1176 | H4'  | C B | 19 | -15.623 | -80.873 | 84.083 | 1.00 | 0.00 | H |
| ATOM | 1177 | H41  | C B | 19 | -12.681 | -79.605 | 92.062 | 1.00 | 0.00 | H |
| ATOM | 1178 | H42  | C B | 19 | -11.041 | -80.039 | 91.506 | 1.00 | 0.00 | H |
| ATOM | 1179 | H2'1 | C B | 19 | -15.966 | -82.469 | 87.585 | 1.00 | 0.00 | H |
| ATOM | 1180 | H2'2 | C B | 19 | -15.227 | -83.878 | 86.838 | 1.00 | 0.00 | H |
| ATOM | 1181 | H5'1 | C B | 19 | -15.825 | -79.039 | 85.907 | 1.00 | 0.00 | H |
| ATOM | 1182 | H5'2 | C B | 19 | -17.284 | -79.716 | 85.156 | 1.00 | 0.00 | H |
| ATOM | 1183 | C1'  | T B | 20 | -11.016 | -85.952 | 86.457 | 1.00 | 0.00 | C |
| ATOM | 1184 | N1   | T B | 20 | -11.423 | -85.373 | 87.764 | 1.00 | 0.00 | N |
| ATOM | 1185 | C2   | T B | 20 | -10.418 | -85.067 | 88.658 | 1.00 | 0.00 | C |
| ATOM | 1186 | O2   | T B | 20 | -9.238  | -85.251 | 88.413 | 1.00 | 0.00 | O |
| ATOM | 1187 | N3   | T B | 20 | -10.841 | -84.531 | 89.860 | 1.00 | 0.00 | N |
| ATOM | 1188 | C4   | T B | 20 | -12.143 | -84.283 | 90.235 | 1.00 | 0.00 | C |
| ATOM | 1189 | O4   | T B | 20 | -12.401 | -83.800 | 91.345 | 1.00 | 0.00 | O |
| ATOM | 1190 | C5   | T B | 20 | -13.122 | -84.635 | 89.237 | 1.00 | 0.00 | C |
| ATOM | 1191 | C6   | T B | 20 | -12.748 | -85.159 | 88.054 | 1.00 | 0.00 | C |
| ATOM | 1192 | C7   | T B | 20 | -14.555 | -84.381 | 89.604 | 1.00 | 0.00 | C |
| ATOM | 1193 | C2'  | T B | 20 | -11.962 | -87.028 | 85.940 | 1.00 | 0.00 | C |
| ATOM | 1194 | C3'  | T B | 20 | -11.929 | -86.787 | 84.439 | 1.00 | 0.00 | C |
| ATOM | 1195 | O3'  | T B | 20 | -10.806 | -87.464 | 83.880 | 1.00 | 0.00 | O |
| ATOM | 1196 | C4'  | T B | 20 | -11.796 | -85.269 | 84.341 | 1.00 | 0.00 | C |
| ATOM | 1197 | O4'  | T B | 20 | -10.992 | -84.902 | 85.508 | 1.00 | 0.00 | O |
| ATOM | 1198 | C5'  | T B | 20 | -13.083 | -84.478 | 84.373 | 1.00 | 0.00 | C |
| ATOM | 1199 | O5'  | T B | 20 | -14.024 | -85.109 | 85.278 | 1.00 | 0.00 | O |
| ATOM | 1200 | O1P  | T B | 20 | -15.868 | -85.885 | 83.755 | 1.00 | 0.00 | O |
| ATOM | 1201 | O2P  | T B | 20 | -16.365 | -85.350 | 86.155 | 1.00 | 0.00 | O |
| ATOM | 1202 | P    | T B | 20 | -15.578 | -85.048 | 84.935 | 1.00 | 0.00 | P |
| ATOM | 1203 | H3   | T B | 20 | -10.109 | -84.293 | 90.544 | 1.00 | 0.00 | H |
| ATOM | 1204 | H6   | T B | 20 | -13.506 | -85.416 | 87.315 | 1.00 | 0.00 | H |
| ATOM | 1205 | H1'  | T B | 20 | -10.001 | -86.338 | 86.554 | 1.00 | 0.00 | H |
| ATOM | 1206 | H3'  | T B | 20 | -12.838 | -87.135 | 83.950 | 1.00 | 0.00 | H |
| ATOM | 1207 | H4'  | T B | 20 | -11.297 | -85.055 | 83.395 | 1.00 | 0.00 | H |
| ATOM | 1208 | H3T  | T B | 20 | -10.744 | -88.398 | 84.095 | 1.00 | 0.00 | H |
| ATOM | 1209 | H71  | T B | 20 | -15.086 | -85.329 | 89.677 | 1.00 | 0.00 | H |
| ATOM | 1210 | H72  | T B | 20 | -14.599 | -83.863 | 90.563 | 1.00 | 0.00 | H |
| ATOM | 1211 | H73  | T B | 20 | -15.023 | -83.761 | 88.838 | 1.00 | 0.00 | H |
| ATOM | 1212 | H2'1 | T B | 20 | -12.970 | -86.917 | 86.337 | 1.00 | 0.00 | H |

|      |      |      |     |    |         |         |         |      |      |   |
|------|------|------|-----|----|---------|---------|---------|------|------|---|
| ATOM | 1213 | H2'2 | T B | 20 | -11.620 | -88.033 | 86.189  | 1.00 | 0.00 | H |
| ATOM | 1214 | H5'1 | T B | 20 | -12.871 | -83.463 | 84.707  | 1.00 | 0.00 | H |
| ATOM | 1215 | H5'2 | T B | 20 | -13.505 | -84.444 | 83.370  | 1.00 | 0.00 | H |
| TER  |      |      |     |    |         |         |         |      |      |   |
| ATOM | 1    | C1'  | A A | 1  | -47.453 | 23.438  | 120.390 | 1.00 | 0.00 | C |
| ATOM | 2    | N1   | A A | 1  | -44.620 | 27.626  | 119.518 | 1.00 | 0.00 | N |
| ATOM | 3    | C2   | A A | 1  | -45.782 | 27.211  | 119.026 | 1.00 | 0.00 | C |
| ATOM | 4    | N3   | A A | 1  | -46.463 | 26.116  | 119.298 | 1.00 | 0.00 | N |
| ATOM | 5    | C4   | A A | 1  | -45.807 | 25.374  | 120.208 | 1.00 | 0.00 | C |
| ATOM | 6    | C5   | A A | 1  | -44.611 | 25.657  | 120.806 | 1.00 | 0.00 | C |
| ATOM | 7    | C6   | A A | 1  | -43.989 | 26.865  | 120.426 | 1.00 | 0.00 | C |
| ATOM | 8    | N6   | A A | 1  | -42.812 | 27.275  | 120.929 | 1.00 | 0.00 | N |
| ATOM | 9    | N7   | A A | 1  | -44.247 | 24.659  | 121.692 | 1.00 | 0.00 | N |
| ATOM | 10   | C8   | A A | 1  | -45.221 | 23.801  | 121.611 | 1.00 | 0.00 | C |
| ATOM | 11   | N9   | A A | 1  | -46.203 | 24.168  | 120.731 | 1.00 | 0.00 | N |
| ATOM | 12   | C2'  | A A | 1  | -47.284 | 21.926  | 120.329 | 1.00 | 0.00 | C |
| ATOM | 13   | C3'  | A A | 1  | -48.616 | 21.436  | 120.872 | 1.00 | 0.00 | C |
| ATOM | 14   | O3'  | A A | 1  | -49.570 | 21.402  | 119.813 | 1.00 | 0.00 | O |
| ATOM | 15   | C4'  | A A | 1  | -48.961 | 22.486  | 121.928 | 1.00 | 0.00 | C |
| ATOM | 16   | O4'  | A A | 1  | -48.411 | 23.730  | 121.390 | 1.00 | 0.00 | O |
| ATOM | 17   | C5'  | A A | 1  | -48.391 | 22.261  | 123.308 | 1.00 | 0.00 | C |
| ATOM | 18   | O5'  | A A | 1  | -47.063 | 21.686  | 123.204 | 1.00 | 0.00 | O |
| ATOM | 19   | H2   | A A | 1  | -46.241 | 27.872  | 118.292 | 1.00 | 0.00 | H |
| ATOM | 20   | H8   | A A | 1  | -45.252 | 22.876  | 122.188 | 1.00 | 0.00 | H |
| ATOM | 21   | H1'  | A A | 1  | -47.829 | 23.827  | 119.443 | 1.00 | 0.00 | H |
| ATOM | 22   | H3'  | A A | 1  | -48.536 | 20.442  | 121.317 | 1.00 | 0.00 | H |
| ATOM | 23   | H4'  | A A | 1  | -50.047 | 22.501  | 122.013 | 1.00 | 0.00 | H |
| ATOM | 24   | H61  | A A | 1  | -42.402 | 28.165  | 120.619 | 1.00 | 0.00 | H |
| ATOM | 25   | H62  | A A | 1  | -42.323 | 26.695  | 121.626 | 1.00 | 0.00 | H |
| ATOM | 26   | H5T  | A A | 1  | -46.778 | 21.063  | 123.874 | 1.00 | 0.00 | H |
| ATOM | 27   | H2'1 | A A | 1  | -46.454 | 21.578  | 120.942 | 1.00 | 0.00 | H |
| ATOM | 28   | H2'2 | A A | 1  | -47.115 | 21.569  | 119.313 | 1.00 | 0.00 | H |
| ATOM | 29   | H5'1 | A A | 1  | -48.338 | 23.216  | 123.832 | 1.00 | 0.00 | H |
| ATOM | 30   | H5'2 | A A | 1  | -49.042 | 21.585  | 123.859 | 1.00 | 0.00 | H |
| ATOM | 31   | C1'  | G A | 2  | -47.323 | 24.442  | 115.529 | 1.00 | 0.00 | C |
| ATOM | 32   | N1   | G A | 2  | -42.922 | 26.747  | 116.681 | 1.00 | 0.00 | N |
| ATOM | 33   | C2   | G A | 2  | -43.944 | 27.157  | 115.847 | 1.00 | 0.00 | C |
| ATOM | 34   | N2   | G A | 2  | -43.771 | 28.335  | 115.237 | 1.00 | 0.00 | N |
| ATOM | 35   | N3   | G A | 2  | -45.052 | 26.447  | 115.637 | 1.00 | 0.00 | N |
| ATOM | 36   | C4   | G A | 2  | -45.055 | 25.278  | 116.331 | 1.00 | 0.00 | C |
| ATOM | 37   | C5   | G A | 2  | -44.079 | 24.787  | 117.185 | 1.00 | 0.00 | C |
| ATOM | 38   | C6   | G A | 2  | -42.905 | 25.544  | 117.409 | 1.00 | 0.00 | C |
| ATOM | 39   | O6   | G A | 2  | -41.938 | 25.281  | 118.124 | 1.00 | 0.00 | O |
| ATOM | 40   | N7   | G A | 2  | -44.467 | 23.548  | 117.698 | 1.00 | 0.00 | N |
| ATOM | 41   | C8   | G A | 2  | -45.638 | 23.333  | 117.156 | 1.00 | 0.00 | C |
| ATOM | 42   | N9   | G A | 2  | -46.064 | 24.339  | 116.313 | 1.00 | 0.00 | N |
| ATOM | 43   | C2'  | G A | 2  | -47.794 | 23.117  | 114.946 | 1.00 | 0.00 | C |
| ATOM | 44   | C3'  | G A | 2  | -49.305 | 23.243  | 115.048 | 1.00 | 0.00 | C |
| ATOM | 45   | O3'  | G A | 2  | -49.794 | 23.950  | 113.911 | 1.00 | 0.00 | O |
| ATOM | 46   | C4'  | G A | 2  | -49.493 | 24.032  | 116.344 | 1.00 | 0.00 | C |
| ATOM | 47   | O4'  | G A | 2  | -48.333 | 24.921  | 116.396 | 1.00 | 0.00 | O |
| ATOM | 48   | C5'  | G A | 2  | -49.541 | 23.224  | 117.620 | 1.00 | 0.00 | C |
| ATOM | 49   | O5'  | G A | 2  | -48.621 | 22.108  | 117.529 | 1.00 | 0.00 | O |
| ATOM | 50   | O1P  | G A | 2  | -50.138 | 20.100  | 117.546 | 1.00 | 0.00 | O |

|      |     |      |     |   |         |        |         |      |      |   |
|------|-----|------|-----|---|---------|--------|---------|------|------|---|
| ATOM | 51  | O2P  | G A | 2 | -47.788 | 19.905 | 118.402 | 1.00 | 0.00 | O |
| ATOM | 52  | P    | G A | 2 | -49.006 | 20.736 | 118.246 | 1.00 | 0.00 | P |
| ATOM | 53  | H1   | G A | 2 | -42.108 | 27.372 | 116.777 | 1.00 | 0.00 | H |
| ATOM | 54  | H8   | G A | 2 | -46.227 | 22.438 | 117.353 | 1.00 | 0.00 | H |
| ATOM | 55  | H1'  | G A | 2 | -47.176 | 25.183 | 114.742 | 1.00 | 0.00 | H |
| ATOM | 56  | H21  | G A | 2 | -42.913 | 28.879 | 115.404 | 1.00 | 0.00 | H |
| ATOM | 57  | H3'  | G A | 2 | -49.794 | 22.270 | 115.106 | 1.00 | 0.00 | H |
| ATOM | 58  | H22  | G A | 2 | -44.497 | 28.694 | 114.600 | 1.00 | 0.00 | H |
| ATOM | 59  | H4'  | G A | 2 | -50.437 | 24.568 | 116.254 | 1.00 | 0.00 | H |
| ATOM | 60  | H2'1 | G A | 2 | -47.428 | 22.262 | 115.516 | 1.00 | 0.00 | H |
| ATOM | 61  | H2'2 | G A | 2 | -47.476 | 22.981 | 113.912 | 1.00 | 0.00 | H |
| ATOM | 62  | H5'1 | G A | 2 | -49.265 | 23.863 | 118.458 | 1.00 | 0.00 | H |
| ATOM | 63  | H5'2 | G A | 2 | -50.556 | 22.855 | 117.771 | 1.00 | 0.00 | H |
| ATOM | 64  | C1'  | G A | 3 | -45.316 | 26.366 | 111.430 | 1.00 | 0.00 | C |
| ATOM | 65  | N1   | G A | 3 | -40.950 | 25.876 | 114.019 | 1.00 | 0.00 | N |
| ATOM | 66  | C2   | G A | 3 | -41.401 | 26.919 | 113.232 | 1.00 | 0.00 | C |
| ATOM | 67  | N2   | G A | 3 | -40.580 | 27.970 | 113.116 | 1.00 | 0.00 | N |
| ATOM | 68  | N3   | G A | 3 | -42.577 | 26.913 | 112.609 | 1.00 | 0.00 | N |
| ATOM | 69  | C4   | G A | 3 | -43.275 | 25.768 | 112.832 | 1.00 | 0.00 | C |
| ATOM | 70  | C5   | G A | 3 | -42.903 | 24.676 | 113.599 | 1.00 | 0.00 | C |
| ATOM | 71  | C6   | G A | 3 | -41.655 | 24.685 | 114.264 | 1.00 | 0.00 | C |
| ATOM | 72  | O6   | G A | 3 | -41.154 | 23.820 | 114.985 | 1.00 | 0.00 | O |
| ATOM | 73  | N7   | G A | 3 | -43.902 | 23.703 | 113.570 | 1.00 | 0.00 | N |
| ATOM | 74  | C8   | G A | 3 | -44.828 | 24.223 | 112.807 | 1.00 | 0.00 | C |
| ATOM | 75  | N9   | G A | 3 | -44.519 | 25.476 | 112.319 | 1.00 | 0.00 | N |
| ATOM | 76  | C2'  | G A | 3 | -46.085 | 25.621 | 110.347 | 1.00 | 0.00 | C |
| ATOM | 77  | C3'  | G A | 3 | -47.361 | 26.440 | 110.242 | 1.00 | 0.00 | C |
| ATOM | 78  | O3'  | G A | 3 | -47.138 | 27.544 | 109.369 | 1.00 | 0.00 | O |
| ATOM | 79  | C4'  | G A | 3 | -47.598 | 26.885 | 111.685 | 1.00 | 0.00 | C |
| ATOM | 80  | O4'  | G A | 3 | -46.253 | 27.053 | 112.236 | 1.00 | 0.00 | O |
| ATOM | 81  | C5'  | G A | 3 | -48.365 | 25.927 | 112.564 | 1.00 | 0.00 | C |
| ATOM | 82  | O5'  | G A | 3 | -48.006 | 24.562 | 112.234 | 1.00 | 0.00 | O |
| ATOM | 83  | O1P  | G A | 3 | -50.138 | 23.612 | 111.290 | 1.00 | 0.00 | O |
| ATOM | 84  | O2P  | G A | 3 | -48.467 | 22.097 | 112.387 | 1.00 | 0.00 | O |
| ATOM | 85  | P    | G A | 3 | -49.122 | 23.427 | 112.344 | 1.00 | 0.00 | P |
| ATOM | 86  | H1   | G A | 3 | -40.024 | 25.982 | 114.463 | 1.00 | 0.00 | H |
| ATOM | 87  | H8   | G A | 3 | -45.762 | 23.712 | 112.574 | 1.00 | 0.00 | H |
| ATOM | 88  | H1'  | G A | 3 | -44.642 | 27.103 | 110.994 | 1.00 | 0.00 | H |
| ATOM | 89  | H21  | G A | 3 | -39.671 | 27.968 | 113.603 | 1.00 | 0.00 | H |
| ATOM | 90  | H3'  | G A | 3 | -48.198 | 25.848 | 109.871 | 1.00 | 0.00 | H |
| ATOM | 91  | H22  | G A | 3 | -40.857 | 28.777 | 112.540 | 1.00 | 0.00 | H |
| ATOM | 92  | H4'  | G A | 3 | -48.159 | 27.818 | 111.640 | 1.00 | 0.00 | H |
| ATOM | 93  | H2'1 | G A | 3 | -46.298 | 24.589 | 110.627 | 1.00 | 0.00 | H |
| ATOM | 94  | H2'2 | G A | 3 | -45.548 | 25.599 | 109.399 | 1.00 | 0.00 | H |
| ATOM | 95  | H5'1 | G A | 3 | -48.124 | 26.128 | 113.608 | 1.00 | 0.00 | H |
| ATOM | 96  | H5'2 | G A | 3 | -49.434 | 26.076 | 112.410 | 1.00 | 0.00 | H |
| ATOM | 97  | C1'  | C A | 4 | -41.538 | 27.979 | 108.662 | 1.00 | 0.00 | C |
| ATOM | 98  | N1   | C A | 4 | -41.490 | 26.632 | 109.297 | 1.00 | 0.00 | N |
| ATOM | 99  | C2   | C A | 4 | -40.366 | 26.309 | 110.054 | 1.00 | 0.00 | C |
| ATOM | 100 | O2   | C A | 4 | -39.461 | 27.145 | 110.168 | 1.00 | 0.00 | O |
| ATOM | 101 | N3   | C A | 4 | -40.303 | 25.088 | 110.640 | 1.00 | 0.00 | N |
| ATOM | 102 | C4   | C A | 4 | -41.298 | 24.204 | 110.497 | 1.00 | 0.00 | C |
| ATOM | 103 | N4   | C A | 4 | -41.186 | 23.027 | 111.094 | 1.00 | 0.00 | N |
| ATOM | 104 | C5   | C A | 4 | -42.464 | 24.510 | 109.722 | 1.00 | 0.00 | C |

|      |     |      |     |   |         |        |         |      |      |   |
|------|-----|------|-----|---|---------|--------|---------|------|------|---|
| ATOM | 105 | C6   | C A | 4 | -42.508 | 25.744 | 109.144 | 1.00 | 0.00 | C |
| ATOM | 106 | C2'  | C A | 4 | -42.167 | 27.981 | 107.277 | 1.00 | 0.00 | C |
| ATOM | 107 | C3'  | C A | 4 | -42.899 | 29.316 | 107.263 | 1.00 | 0.00 | C |
| ATOM | 108 | O3'  | C A | 4 | -41.988 | 30.345 | 106.886 | 1.00 | 0.00 | O |
| ATOM | 109 | C4'  | C A | 4 | -43.367 | 29.461 | 108.709 | 1.00 | 0.00 | C |
| ATOM | 110 | O4'  | C A | 4 | -42.314 | 28.819 | 109.497 | 1.00 | 0.00 | O |
| ATOM | 111 | C5'  | C A | 4 | -44.689 | 28.815 | 109.054 | 1.00 | 0.00 | C |
| ATOM | 112 | O5'  | C A | 4 | -44.833 | 27.571 | 108.323 | 1.00 | 0.00 | O |
| ATOM | 113 | O1P  | C A | 4 | -46.759 | 28.028 | 106.770 | 1.00 | 0.00 | O |
| ATOM | 114 | O2P  | C A | 4 | -46.280 | 25.681 | 107.516 | 1.00 | 0.00 | O |
| ATOM | 115 | P    | C A | 4 | -46.287 | 27.129 | 107.840 | 1.00 | 0.00 | P |
| ATOM | 116 | H5   | C A | 4 | -43.275 | 23.791 | 109.599 | 1.00 | 0.00 | H |
| ATOM | 117 | H6   | C A | 4 | -43.377 | 26.025 | 108.549 | 1.00 | 0.00 | H |
| ATOM | 118 | H1'  | C A | 4 | -40.526 | 28.378 | 108.633 | 1.00 | 0.00 | H |
| ATOM | 119 | H3'  | C A | 4 | -43.743 | 29.310 | 106.574 | 1.00 | 0.00 | H |
| ATOM | 120 | H4'  | C A | 4 | -43.458 | 30.529 | 108.907 | 1.00 | 0.00 | H |
| ATOM | 121 | H41  | C A | 4 | -41.937 | 22.327 | 111.001 | 1.00 | 0.00 | H |
| ATOM | 122 | H42  | C A | 4 | -40.345 | 22.808 | 111.649 | 1.00 | 0.00 | H |
| ATOM | 123 | H2'1 | C A | 4 | -42.856 | 27.151 | 107.133 | 1.00 | 0.00 | H |
| ATOM | 124 | H2'2 | C A | 4 | -41.420 | 27.930 | 106.484 | 1.00 | 0.00 | H |
| ATOM | 125 | H5'1 | C A | 4 | -44.722 | 28.618 | 110.126 | 1.00 | 0.00 | H |
| ATOM | 126 | H5'2 | C A | 4 | -45.498 | 29.494 | 108.789 | 1.00 | 0.00 | H |
| ATOM | 127 | C1'  | C A | 5 | -36.781 | 28.149 | 107.297 | 1.00 | 0.00 | C |
| ATOM | 128 | N1   | C A | 5 | -37.488 | 26.844 | 107.410 | 1.00 | 0.00 | N |
| ATOM | 129 | C2   | C A | 5 | -36.891 | 25.843 | 108.174 | 1.00 | 0.00 | C |
| ATOM | 130 | O2   | C A | 5 | -35.805 | 26.076 | 108.722 | 1.00 | 0.00 | O |
| ATOM | 131 | N3   | C A | 5 | -37.520 | 24.648 | 108.290 | 1.00 | 0.00 | N |
| ATOM | 132 | C4   | C A | 5 | -38.692 | 24.424 | 107.683 | 1.00 | 0.00 | C |
| ATOM | 133 | N4   | C A | 5 | -39.264 | 23.239 | 107.833 | 1.00 | 0.00 | N |
| ATOM | 134 | C5   | C A | 5 | -39.328 | 25.435 | 106.891 | 1.00 | 0.00 | C |
| ATOM | 135 | C6   | C A | 5 | -38.679 | 26.631 | 106.791 | 1.00 | 0.00 | C |
| ATOM | 136 | C2'  | C A | 5 | -36.892 | 28.790 | 105.921 | 1.00 | 0.00 | C |
| ATOM | 137 | C3'  | C A | 5 | -36.967 | 30.269 | 106.265 | 1.00 | 0.00 | C |
| ATOM | 138 | O3'  | C A | 5 | -35.646 | 30.779 | 106.429 | 1.00 | 0.00 | O |
| ATOM | 139 | C4'  | C A | 5 | -37.755 | 30.275 | 107.572 | 1.00 | 0.00 | C |
| ATOM | 140 | O4'  | C A | 5 | -37.358 | 29.034 | 108.239 | 1.00 | 0.00 | O |
| ATOM | 141 | C5'  | C A | 5 | -39.261 | 30.296 | 107.447 | 1.00 | 0.00 | C |
| ATOM | 142 | O5'  | C A | 5 | -39.670 | 29.495 | 106.309 | 1.00 | 0.00 | O |
| ATOM | 143 | O1P  | C A | 5 | -40.655 | 31.190 | 104.731 | 1.00 | 0.00 | O |
| ATOM | 144 | O2P  | C A | 5 | -41.438 | 28.808 | 104.661 | 1.00 | 0.00 | O |
| ATOM | 145 | P    | C A | 5 | -40.950 | 29.950 | 105.473 | 1.00 | 0.00 | P |
| ATOM | 146 | H5   | C A | 5 | -40.280 | 25.256 | 106.391 | 1.00 | 0.00 | H |
| ATOM | 147 | H6   | C A | 5 | -39.125 | 27.433 | 106.202 | 1.00 | 0.00 | H |
| ATOM | 148 | H1'  | C A | 5 | -35.739 | 27.996 | 107.576 | 1.00 | 0.00 | H |
| ATOM | 149 | H3'  | C A | 5 | -37.480 | 30.842 | 105.492 | 1.00 | 0.00 | H |
| ATOM | 150 | H4'  | C A | 5 | -37.455 | 31.169 | 108.119 | 1.00 | 0.00 | H |
| ATOM | 151 | H41  | C A | 5 | -40.167 | 23.041 | 107.379 | 1.00 | 0.00 | H |
| ATOM | 152 | H42  | C A | 5 | -38.804 | 22.513 | 108.403 | 1.00 | 0.00 | H |
| ATOM | 153 | H2'1 | C A | 5 | -37.779 | 28.463 | 105.381 | 1.00 | 0.00 | H |
| ATOM | 154 | H2'2 | C A | 5 | -36.027 | 28.570 | 105.293 | 1.00 | 0.00 | H |
| ATOM | 155 | H5'1 | C A | 5 | -39.701 | 29.891 | 108.359 | 1.00 | 0.00 | H |
| ATOM | 156 | H5'2 | C A | 5 | -39.594 | 31.324 | 107.315 | 1.00 | 0.00 | H |
| ATOM | 157 | C1'  | G A | 6 | -32.209 | 26.295 | 106.868 | 1.00 | 0.00 | C |
| ATOM | 158 | N1   | G A | 6 | -34.622 | 21.805 | 107.072 | 1.00 | 0.00 | N |

|      |     |      |     |   |         |        |         |      |      |   |
|------|-----|------|-----|---|---------|--------|---------|------|------|---|
| ATOM | 159 | C2   | G A | 6 | -33.449 | 22.212 | 107.686 | 1.00 | 0.00 | C |
| ATOM | 160 | N2   | G A | 6 | -32.839 | 21.302 | 108.454 | 1.00 | 0.00 | N |
| ATOM | 161 | N3   | G A | 6 | -32.931 | 23.431 | 107.544 | 1.00 | 0.00 | N |
| ATOM | 162 | C4   | G A | 6 | -33.677 | 24.217 | 106.725 | 1.00 | 0.00 | C |
| ATOM | 163 | C5   | G A | 6 | -34.852 | 23.895 | 106.068 | 1.00 | 0.00 | C |
| ATOM | 164 | C6   | G A | 6 | -35.406 | 22.605 | 106.221 | 1.00 | 0.00 | C |
| ATOM | 165 | O6   | G A | 6 | -36.431 | 22.135 | 105.724 | 1.00 | 0.00 | O |
| ATOM | 166 | N7   | G A | 6 | -35.303 | 24.987 | 105.322 | 1.00 | 0.00 | N |
| ATOM | 167 | C8   | G A | 6 | -34.408 | 25.915 | 105.548 | 1.00 | 0.00 | C |
| ATOM | 168 | N9   | G A | 6 | -33.389 | 25.523 | 106.390 | 1.00 | 0.00 | N |
| ATOM | 169 | C2'  | G A | 6 | -31.614 | 27.219 | 105.814 | 1.00 | 0.00 | C |
| ATOM | 170 | C3'  | G A | 6 | -31.173 | 28.410 | 106.649 | 1.00 | 0.00 | C |
| ATOM | 171 | O3'  | G A | 6 | -29.882 | 28.150 | 107.194 | 1.00 | 0.00 | O |
| ATOM | 172 | C4'  | G A | 6 | -32.251 | 28.486 | 107.728 | 1.00 | 0.00 | C |
| ATOM | 173 | O4'  | G A | 6 | -32.628 | 27.092 | 107.959 | 1.00 | 0.00 | O |
| ATOM | 174 | C5'  | G A | 6 | -33.494 | 29.271 | 107.383 | 1.00 | 0.00 | C |
| ATOM | 175 | O5'  | G A | 6 | -33.823 | 29.079 | 105.984 | 1.00 | 0.00 | O |
| ATOM | 176 | O1P  | G A | 6 | -33.481 | 31.363 | 104.985 | 1.00 | 0.00 | O |
| ATOM | 177 | O2P  | G A | 6 | -35.113 | 29.770 | 103.941 | 1.00 | 0.00 | O |
| ATOM | 178 | P    | G A | 6 | -34.475 | 30.289 | 105.175 | 1.00 | 0.00 | P |
| ATOM | 179 | H1   | G A | 6 | -34.942 | 20.840 | 107.253 | 1.00 | 0.00 | H |
| ATOM | 180 | H8   | G A | 6 | -34.462 | 26.911 | 105.109 | 1.00 | 0.00 | H |
| ATOM | 181 | H1'  | G A | 6 | -31.464 | 25.589 | 107.234 | 1.00 | 0.00 | H |
| ATOM | 182 | H21  | G A | 6 | -33.248 | 20.363 | 108.563 | 1.00 | 0.00 | H |
| ATOM | 183 | H3'  | G A | 6 | -31.138 | 29.329 | 106.063 | 1.00 | 0.00 | H |
| ATOM | 184 | H22  | G A | 6 | -31.961 | 21.542 | 108.938 | 1.00 | 0.00 | H |
| ATOM | 185 | H4'  | G A | 6 | -31.794 | 28.953 | 108.600 | 1.00 | 0.00 | H |
| ATOM | 186 | H2'1 | G A | 6 | -32.345 | 27.511 | 105.060 | 1.00 | 0.00 | H |
| ATOM | 187 | H2'2 | G A | 6 | -30.770 | 26.765 | 105.294 | 1.00 | 0.00 | H |
| ATOM | 188 | H5'1 | G A | 6 | -34.320 | 28.930 | 108.006 | 1.00 | 0.00 | H |
| ATOM | 189 | H5'2 | G A | 6 | -33.315 | 30.329 | 107.577 | 1.00 | 0.00 | H |
| ATOM | 190 | C1'  | C A | 7 | -28.915 | 22.611 | 106.550 | 1.00 | 0.00 | C |
| ATOM | 191 | N1   | C A | 7 | -30.099 | 22.645 | 105.649 | 1.00 | 0.00 | N |
| ATOM | 192 | C2   | C A | 7 | -30.891 | 21.502 | 105.568 | 1.00 | 0.00 | C |
| ATOM | 193 | O2   | C A | 7 | -30.583 | 20.513 | 106.242 | 1.00 | 0.00 | O |
| ATOM | 194 | N3   | C A | 7 | -31.974 | 21.514 | 104.752 | 1.00 | 0.00 | N |
| ATOM | 195 | C4   | C A | 7 | -32.282 | 22.601 | 104.033 | 1.00 | 0.00 | C |
| ATOM | 196 | N4   | C A | 7 | -33.353 | 22.558 | 103.254 | 1.00 | 0.00 | N |
| ATOM | 197 | C5   | C A | 7 | -31.483 | 23.789 | 104.092 | 1.00 | 0.00 | C |
| ATOM | 198 | C6   | C A | 7 | -30.400 | 23.757 | 104.924 | 1.00 | 0.00 | C |
| ATOM | 199 | C2'  | C A | 7 | -27.702 | 23.345 | 106.000 | 1.00 | 0.00 | C |
| ATOM | 200 | C3'  | C A | 7 | -27.090 | 23.938 | 107.261 | 1.00 | 0.00 | C |
| ATOM | 201 | O3'  | C A | 7 | -26.256 | 22.962 | 107.881 | 1.00 | 0.00 | O |
| ATOM | 202 | C4'  | C A | 7 | -28.316 | 24.272 | 108.107 | 1.00 | 0.00 | C |
| ATOM | 203 | O4'  | C A | 7 | -29.285 | 23.228 | 107.769 | 1.00 | 0.00 | O |
| ATOM | 204 | C5'  | C A | 7 | -28.955 | 25.619 | 107.861 | 1.00 | 0.00 | C |
| ATOM | 205 | O5'  | C A | 7 | -28.886 | 25.945 | 106.451 | 1.00 | 0.00 | O |
| ATOM | 206 | O1P  | C A | 7 | -27.347 | 27.936 | 106.387 | 1.00 | 0.00 | O |
| ATOM | 207 | O2P  | C A | 7 | -29.082 | 27.632 | 104.600 | 1.00 | 0.00 | O |
| ATOM | 208 | P    | C A | 7 | -28.700 | 27.470 | 106.023 | 1.00 | 0.00 | P |
| ATOM | 209 | H5   | C A | 7 | -31.726 | 24.675 | 103.504 | 1.00 | 0.00 | H |
| ATOM | 210 | H6   | C A | 7 | -29.766 | 24.640 | 105.010 | 1.00 | 0.00 | H |
| ATOM | 211 | H1'  | C A | 7 | -28.678 | 21.568 | 106.762 | 1.00 | 0.00 | H |
| ATOM | 212 | H3'  | C A | 7 | -26.504 | 24.832 | 107.046 | 1.00 | 0.00 | H |



|      |     |      |     |   |         |        |         |      |      |   |
|------|-----|------|-----|---|---------|--------|---------|------|------|---|
| ATOM | 213 | H4'  | C A | 7 | -27.999 | 24.239 | 109.149 | 1.00 | 0.00 | H |
| ATOM | 214 | H41  | C A | 7 | -33.615 | 23.381 | 102.692 | 1.00 | 0.00 | H |
| ATOM | 215 | H42  | C A | 7 | -33.926 | 21.703 | 103.209 | 1.00 | 0.00 | H |
| ATOM | 216 | H2'1 | C A | 7 | -27.976 | 24.123 | 105.289 | 1.00 | 0.00 | H |
| ATOM | 217 | H2'2 | C A | 7 | -27.003 | 22.673 | 105.498 | 1.00 | 0.00 | H |
| ATOM | 218 | H5'1 | C A | 7 | -29.997 | 25.586 | 108.181 | 1.00 | 0.00 | H |
| ATOM | 219 | H5'2 | C A | 7 | -28.426 | 26.376 | 108.440 | 1.00 | 0.00 | H |
| ATOM | 220 | C1'  | A A | 8 | -27.486 | 17.990 | 105.492 | 1.00 | 0.00 | C |
| ATOM | 221 | N1   | A A | 8 | -31.459 | 18.117 | 102.246 | 1.00 | 0.00 | N |
| ATOM | 222 | C2   | A A | 8 | -31.015 | 17.188 | 103.085 | 1.00 | 0.00 | C |
| ATOM | 223 | N3   | A A | 8 | -29.981 | 17.220 | 103.900 | 1.00 | 0.00 | N |
| ATOM | 224 | C4   | A A | 8 | -29.343 | 18.400 | 103.793 | 1.00 | 0.00 | C |
| ATOM | 225 | C5   | A A | 8 | -29.669 | 19.452 | 102.984 | 1.00 | 0.00 | C |
| ATOM | 226 | C6   | A A | 8 | -30.804 | 19.284 | 102.163 | 1.00 | 0.00 | C |
| ATOM | 227 | N6   | A A | 8 | -31.243 | 20.231 | 101.316 | 1.00 | 0.00 | N |
| ATOM | 228 | N7   | A A | 8 | -28.782 | 20.502 | 103.147 | 1.00 | 0.00 | N |
| ATOM | 229 | C8   | A A | 8 | -27.943 | 20.065 | 104.041 | 1.00 | 0.00 | C |
| ATOM | 230 | N9   | A A | 8 | -28.223 | 18.797 | 104.481 | 1.00 | 0.00 | N |
| ATOM | 231 | C2'  | A A | 8 | -25.974 | 18.166 | 105.436 | 1.00 | 0.00 | C |
| ATOM | 232 | C3'  | A A | 8 | -25.590 | 18.078 | 106.904 | 1.00 | 0.00 | C |
| ATOM | 233 | O3'  | A A | 8 | -25.450 | 16.707 | 107.267 | 1.00 | 0.00 | O |
| ATOM | 234 | C4'  | A A | 8 | -26.773 | 18.742 | 107.607 | 1.00 | 0.00 | C |
| ATOM | 235 | O4'  | A A | 8 | -27.927 | 18.399 | 106.773 | 1.00 | 0.00 | O |
| ATOM | 236 | C5'  | A A | 8 | -26.709 | 20.244 | 107.750 | 1.00 | 0.00 | C |
| ATOM | 237 | O5'  | A A | 8 | -26.094 | 20.825 | 106.572 | 1.00 | 0.00 | O |
| ATOM | 238 | O1P  | A A | 8 | -23.944 | 21.792 | 107.457 | 1.00 | 0.00 | O |
| ATOM | 239 | O2P  | A A | 8 | -25.026 | 22.787 | 105.422 | 1.00 | 0.00 | O |
| ATOM | 240 | P    | A A | 8 | -25.191 | 22.129 | 106.742 | 1.00 | 0.00 | P |
| ATOM | 241 | H2   | A A | 8 | -31.590 | 16.262 | 103.102 | 1.00 | 0.00 | H |
| ATOM | 242 | H8   | A A | 8 | -27.099 | 20.650 | 104.405 | 1.00 | 0.00 | H |
| ATOM | 243 | H1'  | A A | 8 | -27.764 | 16.944 | 105.360 | 1.00 | 0.00 | H |
| ATOM | 244 | H3'  | A A | 8 | -24.660 | 18.605 | 107.115 | 1.00 | 0.00 | H |
| ATOM | 245 | H4'  | A A | 8 | -26.828 | 18.314 | 108.607 | 1.00 | 0.00 | H |
| ATOM | 246 | H61  | A A | 8 | -32.079 | 20.060 | 100.741 | 1.00 | 0.00 | H |
| ATOM | 247 | H62  | A A | 8 | -30.743 | 21.130 | 101.246 | 1.00 | 0.00 | H |
| ATOM | 248 | H2'1 | A A | 8 | -25.686 | 19.125 | 105.007 | 1.00 | 0.00 | H |
| ATOM | 249 | H2'2 | A A | 8 | -25.490 | 17.386 | 104.850 | 1.00 | 0.00 | H |
| ATOM | 250 | H5'1 | A A | 8 | -27.721 | 20.634 | 107.866 | 1.00 | 0.00 | H |
| ATOM | 251 | H5'2 | A A | 8 | -26.124 | 20.496 | 108.633 | 1.00 | 0.00 | H |
| ATOM | 252 | C1'  | C A | 9 | -27.869 | 13.669 | 103.077 | 1.00 | 0.00 | C |
| ATOM | 253 | N1   | C A | 9 | -27.839 | 14.952 | 102.323 | 1.00 | 0.00 | N |
| ATOM | 254 | C2   | C A | 9 | -28.844 | 15.182 | 101.385 | 1.00 | 0.00 | C |
| ATOM | 255 | O2   | C A | 9 | -29.712 | 14.317 | 101.216 | 1.00 | 0.00 | O |
| ATOM | 256 | N3   | C A | 9 | -28.834 | 16.345 | 100.689 | 1.00 | 0.00 | N |
| ATOM | 257 | C4   | C A | 9 | -27.879 | 17.262 | 100.893 | 1.00 | 0.00 | C |
| ATOM | 258 | N4   | C A | 9 | -27.920 | 18.383 | 100.187 | 1.00 | 0.00 | N |
| ATOM | 259 | C5   | C A | 9 | -26.831 | 17.051 | 101.849 | 1.00 | 0.00 | C |
| ATOM | 260 | C6   | C A | 9 | -26.864 | 15.874 | 102.542 | 1.00 | 0.00 | C |
| ATOM | 261 | C2'  | C A | 9 | -26.492 | 13.074 | 103.328 | 1.00 | 0.00 | C |
| ATOM | 262 | C3'  | C A | 9 | -26.661 | 12.453 | 104.708 | 1.00 | 0.00 | C |
| ATOM | 263 | O3'  | C A | 9 | -27.232 | 11.153 | 104.569 | 1.00 | 0.00 | O |
| ATOM | 264 | C4'  | C A | 9 | -27.609 | 13.428 | 105.404 | 1.00 | 0.00 | C |
| ATOM | 265 | O4'  | C A | 9 | -28.474 | 13.920 | 104.332 | 1.00 | 0.00 | O |
| ATOM | 266 | C5'  | C A | 9 | -26.968 | 14.611 | 106.089 | 1.00 | 0.00 | C |

|      |     |      |   |   |    |         |        |         |      |      |   |
|------|-----|------|---|---|----|---------|--------|---------|------|------|---|
| ATOM | 267 | O5'  | C | A | 9  | -25.829 | 15.069 | 105.316 | 1.00 | 0.00 | O |
| ATOM | 268 | O1P  | C | A | 9  | -23.871 | 14.588 | 106.821 | 1.00 | 0.00 | O |
| ATOM | 269 | O2P  | C | A | 9  | -23.734 | 16.446 | 105.141 | 1.00 | 0.00 | O |
| ATOM | 270 | P    | C | A | 9  | -24.566 | 15.663 | 106.087 | 1.00 | 0.00 | P |
| ATOM | 271 | H5   | C | A | 9  | -26.049 | 17.792 | 102.014 | 1.00 | 0.00 | H |
| ATOM | 272 | H6   | C | A | 9  | -26.093 | 15.672 | 103.286 | 1.00 | 0.00 | H |
| ATOM | 273 | H1'  | C | A | 9  | -28.503 | 12.970 | 102.532 | 1.00 | 0.00 | H |
| ATOM | 274 | H3'  | C | A | 9  | -25.713 | 12.377 | 105.240 | 1.00 | 0.00 | H |
| ATOM | 275 | H4'  | C | A | 9  | -28.149 | 12.858 | 106.160 | 1.00 | 0.00 | H |
| ATOM | 276 | H41  | C | A | 9  | -27.199 | 19.106 | 100.326 | 1.00 | 0.00 | H |
| ATOM | 277 | H42  | C | A | 9  | -28.673 | 18.531 | 99.499  | 1.00 | 0.00 | H |
| ATOM | 278 | H2'1 | C | A | 9  | -25.707 | 13.829 | 103.329 | 1.00 | 0.00 | H |
| ATOM | 279 | H2'2 | C | A | 9  | -26.222 | 12.321 | 102.585 | 1.00 | 0.00 | H |
| ATOM | 280 | H5'1 | C | A | 9  | -27.700 | 15.415 | 106.177 | 1.00 | 0.00 | H |
| ATOM | 281 | H5'2 | C | A | 9  | -26.641 | 14.315 | 107.085 | 1.00 | 0.00 | H |
| ATOM | 282 | C1'  | C | A | 10 | -29.210 | 10.796 | 99.272  | 1.00 | 0.00 | C |
| ATOM | 283 | N1   | C | A | 10 | -28.425 | 12.038 | 99.040  | 1.00 | 0.00 | N |
| ATOM | 284 | C2   | C | A | 10 | -28.902 | 12.945 | 98.096  | 1.00 | 0.00 | C |
| ATOM | 285 | O2   | C | A | 10 | -29.951 | 12.684 | 97.492  | 1.00 | 0.00 | O |
| ATOM | 286 | N3   | C | A | 10 | -28.202 | 14.084 | 97.870  | 1.00 | 0.00 | N |
| ATOM | 287 | C4   | C | A | 10 | -27.069 | 14.339 | 98.537  | 1.00 | 0.00 | C |
| ATOM | 288 | N4   | C | A | 10 | -26.425 | 15.469 | 98.279  | 1.00 | 0.00 | N |
| ATOM | 289 | C5   | C | A | 10 | -26.552 | 13.423 | 99.510  | 1.00 | 0.00 | C |
| ATOM | 290 | C6   | C | A | 10 | -27.277 | 12.285 | 99.725  | 1.00 | 0.00 | C |
| ATOM | 291 | C2'  | C | A | 10 | -28.351 | 9.563  | 99.515  | 1.00 | 0.00 | C |
| ATOM | 292 | C3'  | C | A | 10 | -29.179 | 8.797  | 100.536 | 1.00 | 0.00 | C |
| ATOM | 293 | O3'  | C | A | 10 | -30.158 | 8.018  | 99.855  | 1.00 | 0.00 | O |
| ATOM | 294 | C4'  | C | A | 10 | -29.805 | 9.912  | 101.371 | 1.00 | 0.00 | C |
| ATOM | 295 | O4'  | C | A | 10 | -30.014 | 11.002 | 100.420 | 1.00 | 0.00 | O |
| ATOM | 296 | C5'  | C | A | 10 | -28.980 | 10.430 | 102.527 | 1.00 | 0.00 | C |
| ATOM | 297 | O5'  | C | A | 10 | -27.576 | 10.442 | 102.160 | 1.00 | 0.00 | O |
| ATOM | 298 | O1P  | C | A | 10 | -26.560 | 8.723  | 103.691 | 1.00 | 0.00 | O |
| ATOM | 299 | O2P  | C | A | 10 | -25.161 | 10.617 | 102.826 | 1.00 | 0.00 | O |
| ATOM | 300 | P    | C | A | 10 | -26.488 | 10.140 | 103.285 | 1.00 | 0.00 | P |
| ATOM | 301 | H5   | C | A | 10 | -25.627 | 13.623 | 100.053 | 1.00 | 0.00 | H |
| ATOM | 302 | H6   | C | A | 10 | -26.928 | 11.561 | 100.463 | 1.00 | 0.00 | H |
| ATOM | 303 | H1'  | C | A | 10 | -29.875 | 10.648 | 98.421  | 1.00 | 0.00 | H |
| ATOM | 304 | H3'  | C | A | 10 | -28.561 | 8.142  | 101.152 | 1.00 | 0.00 | H |
| ATOM | 305 | H4'  | C | A | 10 | -30.736 | 9.516  | 101.779 | 1.00 | 0.00 | H |
| ATOM | 306 | H41  | C | A | 10 | -25.553 | 15.690 | 98.779  | 1.00 | 0.00 | H |
| ATOM | 307 | H42  | C | A | 10 | -26.798 | 16.124 | 97.576  | 1.00 | 0.00 | H |
| ATOM | 308 | H2'1 | C | A | 10 | -27.367 | 9.815  | 99.911  | 1.00 | 0.00 | H |
| ATOM | 309 | H2'2 | C | A | 10 | -28.200 | 8.978  | 98.606  | 1.00 | 0.00 | H |
| ATOM | 310 | H5'1 | C | A | 10 | -29.306 | 11.442 | 102.773 | 1.00 | 0.00 | H |
| ATOM | 311 | H5'2 | C | A | 10 | -29.130 | 9.784  | 103.390 | 1.00 | 0.00 | H |
| ATOM | 312 | C1'  | T | A | 11 | -30.374 | 9.926  | 94.540  | 1.00 | 0.00 | C |
| ATOM | 313 | N1   | T | A | 11 | -29.124 | 10.656 | 94.879  | 1.00 | 0.00 | N |
| ATOM | 314 | C2   | T | A | 11 | -28.906 | 11.860 | 94.239  | 1.00 | 0.00 | C |
| ATOM | 315 | O2   | T | A | 11 | -29.684 | 12.328 | 93.427  | 1.00 | 0.00 | O |
| ATOM | 316 | N3   | T | A | 11 | -27.732 | 12.506 | 94.583  | 1.00 | 0.00 | N |
| ATOM | 317 | C4   | T | A | 11 | -26.785 | 12.063 | 95.484  | 1.00 | 0.00 | C |
| ATOM | 318 | O4   | T | A | 11 | -25.767 | 12.730 | 95.710  | 1.00 | 0.00 | O |
| ATOM | 319 | C5   | T | A | 11 | -27.101 | 10.797 | 96.101  | 1.00 | 0.00 | C |
| ATOM | 320 | C6   | T | A | 11 | -28.236 | 10.141 | 95.790  | 1.00 | 0.00 | C |

|      |     |      |     |    |         |        |        |      |      |   |
|------|-----|------|-----|----|---------|--------|--------|------|------|---|
| ATOM | 321 | C7   | T A | 11 | -26.100 | 10.280 | 97.090 | 1.00 | 0.00 | C |
| ATOM | 322 | C2'  | T A | 11 | -30.204 | 8.414  | 94.477 | 1.00 | 0.00 | C |
| ATOM | 323 | C3'  | T A | 11 | -31.534 | 7.921  | 95.025 | 1.00 | 0.00 | C |
| ATOM | 324 | O3'  | T A | 11 | -32.493 | 7.888  | 93.970 | 1.00 | 0.00 | O |
| ATOM | 325 | C4'  | T A | 11 | -31.875 | 8.969  | 96.082 | 1.00 | 0.00 | C |
| ATOM | 326 | O4'  | T A | 11 | -31.330 | 10.215 | 95.543 | 1.00 | 0.00 | O |
| ATOM | 327 | C5'  | T A | 11 | -31.300 | 8.745  | 97.462 | 1.00 | 0.00 | C |
| ATOM | 328 | O5'  | T A | 11 | -29.973 | 8.172  | 97.351 | 1.00 | 0.00 | O |
| ATOM | 329 | O1P  | T A | 11 | -30.249 | 5.872  | 98.335 | 1.00 | 0.00 | O |
| ATOM | 330 | O2P  | T A | 11 | -28.014 | 7.009  | 98.412 | 1.00 | 0.00 | O |
| ATOM | 331 | P    | T A | 11 | -29.491 | 7.132  | 98.459 | 1.00 | 0.00 | P |
| ATOM | 332 | H3   | T A | 11 | -27.546 | 13.408 | 94.124 | 1.00 | 0.00 | H |
| ATOM | 333 | H6   | T A | 11 | -28.454 | 9.186  | 96.269 | 1.00 | 0.00 | H |
| ATOM | 334 | H1'  | T A | 11 | -30.753 | 10.316 | 93.595 | 1.00 | 0.00 | H |
| ATOM | 335 | H3'  | T A | 11 | -31.451 | 6.929  | 95.467 | 1.00 | 0.00 | H |
| ATOM | 336 | H4'  | T A | 11 | -32.962 | 8.985  | 96.174 | 1.00 | 0.00 | H |
| ATOM | 337 | H71  | T A | 11 | -25.649 | 9.364  | 96.706 | 1.00 | 0.00 | H |
| ATOM | 338 | H72  | T A | 11 | -25.322 | 11.029 | 97.246 | 1.00 | 0.00 | H |
| ATOM | 339 | H73  | T A | 11 | -26.596 | 10.071 | 98.037 | 1.00 | 0.00 | H |
| ATOM | 340 | H2'1 | T A | 11 | -29.372 | 8.066  | 95.086 | 1.00 | 0.00 | H |
| ATOM | 341 | H2'2 | T A | 11 | -30.037 | 8.058  | 93.459 | 1.00 | 0.00 | H |
| ATOM | 342 | H5'1 | T A | 11 | -31.246 | 9.698  | 97.986 | 1.00 | 0.00 | H |
| ATOM | 343 | H5'2 | T A | 11 | -31.950 | 8.066  | 98.013 | 1.00 | 0.00 | H |
| ATOM | 344 | C1'  | A A | 12 | -30.263 | 10.915 | 89.677 | 1.00 | 0.00 | C |
| ATOM | 345 | N1   | A A | 12 | -25.841 | 13.255 | 90.822 | 1.00 | 0.00 | N |
| ATOM | 346 | C2   | A A | 12 | -26.858 | 13.590 | 90.034 | 1.00 | 0.00 | C |
| ATOM | 347 | N3   | A A | 12 | -27.975 | 12.938 | 89.785 | 1.00 | 0.00 | N |
| ATOM | 348 | C4   | A A | 12 | -27.997 | 11.779 | 90.465 | 1.00 | 0.00 | C |
| ATOM | 349 | C5   | A A | 12 | -27.041 | 11.290 | 91.309 | 1.00 | 0.00 | C |
| ATOM | 350 | C6   | A A | 12 | -25.893 | 12.092 | 91.488 | 1.00 | 0.00 | C |
| ATOM | 351 | N6   | A A | 12 | -24.871 | 11.740 | 92.287 | 1.00 | 0.00 | N |
| ATOM | 352 | N7   | A A | 12 | -27.413 | 10.063 | 91.830 | 1.00 | 0.00 | N |
| ATOM | 353 | C8   | A A | 12 | -28.575 | 9.835  | 91.292 | 1.00 | 0.00 | C |
| ATOM | 354 | N9   | A A | 12 | -28.996 | 10.835 | 90.453 | 1.00 | 0.00 | N |
| ATOM | 355 | C2'  | A A | 12 | -30.719 | 9.577  | 89.112 | 1.00 | 0.00 | C |
| ATOM | 356 | C3'  | A A | 12 | -32.233 | 9.684  | 89.224 | 1.00 | 0.00 | C |
| ATOM | 357 | O3'  | A A | 12 | -32.738 | 10.375 | 88.083 | 1.00 | 0.00 | O |
| ATOM | 358 | C4'  | A A | 12 | -32.422 | 10.483 | 90.513 | 1.00 | 0.00 | C |
| ATOM | 359 | O4'  | A A | 12 | -31.272 | 11.387 | 90.549 | 1.00 | 0.00 | O |
| ATOM | 360 | C5'  | A A | 12 | -32.453 | 9.687  | 91.796 | 1.00 | 0.00 | C |
| ATOM | 361 | O5'  | A A | 12 | -31.517 | 8.581  | 91.710 | 1.00 | 0.00 | O |
| ATOM | 362 | O1P  | A A | 12 | -33.008 | 6.554  | 91.755 | 1.00 | 0.00 | O |
| ATOM | 363 | O2P  | A A | 12 | -30.649 | 6.397  | 92.597 | 1.00 | 0.00 | O |
| ATOM | 364 | P    | A A | 12 | -31.879 | 7.212  | 92.442 | 1.00 | 0.00 | P |
| ATOM | 365 | H2   | A A | 12 | -26.752 | 14.544 | 89.519 | 1.00 | 0.00 | H |
| ATOM | 366 | H8   | A A | 12 | -29.159 | 8.936  | 91.488 | 1.00 | 0.00 | H |
| ATOM | 367 | H1'  | A A | 12 | -30.132 | 11.649 | 88.885 | 1.00 | 0.00 | H |
| ATOM | 368 | H3'  | A A | 12 | -32.708 | 8.707  | 89.294 | 1.00 | 0.00 | H |
| ATOM | 369 | H4'  | A A | 12 | -33.374 | 11.006 | 90.422 | 1.00 | 0.00 | H |
| ATOM | 370 | H61  | A A | 12 | -24.057 | 12.364 | 92.385 | 1.00 | 0.00 | H |
| ATOM | 371 | H62  | A A | 12 | -24.903 | 10.848 | 92.801 | 1.00 | 0.00 | H |
| ATOM | 372 | H2'1 | A A | 12 | -30.340 | 8.732  | 89.686 | 1.00 | 0.00 | H |
| ATOM | 373 | H2'2 | A A | 12 | -30.407 | 9.437  | 88.077 | 1.00 | 0.00 | H |
| ATOM | 374 | H5'1 | A A | 12 | -32.178 | 10.337 | 92.626 | 1.00 | 0.00 | H |

|      |     |      |   |   |    |         |        |        |      |      |   |
|------|-----|------|---|---|----|---------|--------|--------|------|------|---|
| ATOM | 375 | H5'2 | A | A | 12 | -33.459 | 9.305  | 91.958 | 1.00 | 0.00 | H |
| ATOM | 376 | C1'  | G | A | 13 | -28.238 | 12.853 | 85.581 | 1.00 | 0.00 | C |
| ATOM | 377 | N1   | G | A | 13 | -23.871 | 12.365 | 88.172 | 1.00 | 0.00 | N |
| ATOM | 378 | C2   | G | A | 13 | -24.322 | 13.407 | 87.383 | 1.00 | 0.00 | C |
| ATOM | 379 | N2   | G | A | 13 | -23.501 | 14.459 | 87.264 | 1.00 | 0.00 | N |
| ATOM | 380 | N3   | G | A | 13 | -25.499 | 13.401 | 86.759 | 1.00 | 0.00 | N |
| ATOM | 381 | C4   | G | A | 13 | -26.196 | 12.256 | 86.983 | 1.00 | 0.00 | C |
| ATOM | 382 | C5   | G | A | 13 | -25.824 | 11.165 | 87.750 | 1.00 | 0.00 | C |
| ATOM | 383 | C6   | G | A | 13 | -24.576 | 11.172 | 88.415 | 1.00 | 0.00 | C |
| ATOM | 384 | O6   | G | A | 13 | -24.075 | 10.307 | 89.133 | 1.00 | 0.00 | O |
| ATOM | 385 | N7   | G | A | 13 | -26.824 | 10.191 | 87.721 | 1.00 | 0.00 | N |
| ATOM | 386 | C8   | G | A | 13 | -27.750 | 10.711 | 86.957 | 1.00 | 0.00 | C |
| ATOM | 387 | N9   | G | A | 13 | -27.441 | 11.964 | 86.470 | 1.00 | 0.00 | N |
| ATOM | 388 | C2'  | G | A | 13 | -29.006 | 12.109 | 84.498 | 1.00 | 0.00 | C |
| ATOM | 389 | C3'  | G | A | 13 | -30.282 | 12.928 | 84.393 | 1.00 | 0.00 | C |
| ATOM | 390 | O3'  | G | A | 13 | -30.059 | 14.032 | 83.519 | 1.00 | 0.00 | O |
| ATOM | 391 | C4'  | G | A | 13 | -30.520 | 13.374 | 85.836 | 1.00 | 0.00 | C |
| ATOM | 392 | O4'  | G | A | 13 | -29.175 | 13.542 | 86.387 | 1.00 | 0.00 | O |
| ATOM | 393 | C5'  | G | A | 13 | -31.286 | 12.414 | 86.716 | 1.00 | 0.00 | C |
| ATOM | 394 | O5'  | G | A | 13 | -30.928 | 11.050 | 86.384 | 1.00 | 0.00 | O |
| ATOM | 395 | O1P  | G | A | 13 | -33.060 | 10.100 | 85.441 | 1.00 | 0.00 | O |
| ATOM | 396 | O2P  | G | A | 13 | -31.388 | 8.585  | 86.538 | 1.00 | 0.00 | O |
| ATOM | 397 | P    | G | A | 13 | -32.043 | 9.915  | 86.494 | 1.00 | 0.00 | P |
| ATOM | 398 | H1   | G | A | 13 | -22.945 | 12.472 | 88.617 | 1.00 | 0.00 | H |
| ATOM | 399 | H8   | G | A | 13 | -28.684 | 10.200 | 86.725 | 1.00 | 0.00 | H |
| ATOM | 400 | H1'  | G | A | 13 | -27.564 | 13.591 | 85.144 | 1.00 | 0.00 | H |
| ATOM | 401 | H21  | G | A | 13 | -22.592 | 14.457 | 87.753 | 1.00 | 0.00 | H |
| ATOM | 402 | H3'  | G | A | 13 | -31.119 | 12.337 | 84.021 | 1.00 | 0.00 | H |
| ATOM | 403 | H22  | G | A | 13 | -23.777 | 15.265 | 86.689 | 1.00 | 0.00 | H |
| ATOM | 404 | H4'  | G | A | 13 | -31.081 | 14.306 | 85.791 | 1.00 | 0.00 | H |
| ATOM | 405 | H2'1 | G | A | 13 | -29.220 | 11.077 | 84.778 | 1.00 | 0.00 | H |
| ATOM | 406 | H2'2 | G | A | 13 | -28.469 | 12.086 | 83.550 | 1.00 | 0.00 | H |
| ATOM | 407 | H5'1 | G | A | 13 | -31.046 | 12.617 | 87.759 | 1.00 | 0.00 | H |
| ATOM | 408 | H5'2 | G | A | 13 | -32.355 | 12.564 | 86.561 | 1.00 | 0.00 | H |
| ATOM | 409 | C1'  | G | A | 14 | -24.460 | 14.466 | 82.813 | 1.00 | 0.00 | C |
| ATOM | 410 | N1   | G | A | 14 | -21.715 | 11.306 | 85.730 | 1.00 | 0.00 | N |
| ATOM | 411 | C2   | G | A | 14 | -21.430 | 12.590 | 85.301 | 1.00 | 0.00 | C |
| ATOM | 412 | N2   | G | A | 14 | -20.258 | 13.100 | 85.698 | 1.00 | 0.00 | N |
| ATOM | 413 | N3   | G | A | 14 | -22.250 | 13.308 | 84.535 | 1.00 | 0.00 | N |
| ATOM | 414 | C4   | G | A | 14 | -23.387 | 12.633 | 84.222 | 1.00 | 0.00 | C |
| ATOM | 415 | C5   | G | A | 14 | -23.752 | 11.353 | 84.601 | 1.00 | 0.00 | C |
| ATOM | 416 | C6   | G | A | 14 | -22.886 | 10.592 | 85.416 | 1.00 | 0.00 | C |
| ATOM | 417 | O6   | G | A | 14 | -23.032 | 9.449  | 85.851 | 1.00 | 0.00 | O |
| ATOM | 418 | N7   | G | A | 14 | -25.003 | 11.031 | 84.064 | 1.00 | 0.00 | N |
| ATOM | 419 | C8   | G | A | 14 | -25.347 | 12.101 | 83.398 | 1.00 | 0.00 | C |
| ATOM | 420 | N9   | G | A | 14 | -24.417 | 13.119 | 83.445 | 1.00 | 0.00 | N |
| ATOM | 421 | C2'  | G | A | 14 | -25.091 | 14.474 | 81.428 | 1.00 | 0.00 | C |
| ATOM | 422 | C3'  | G | A | 14 | -25.817 | 15.810 | 81.418 | 1.00 | 0.00 | C |
| ATOM | 423 | O3'  | G | A | 14 | -24.902 | 16.837 | 81.040 | 1.00 | 0.00 | O |
| ATOM | 424 | C4'  | G | A | 14 | -26.282 | 15.955 | 82.866 | 1.00 | 0.00 | C |
| ATOM | 425 | O4'  | G | A | 14 | -25.230 | 15.308 | 83.649 | 1.00 | 0.00 | O |
| ATOM | 426 | C5'  | G | A | 14 | -27.606 | 15.315 | 83.211 | 1.00 | 0.00 | C |
| ATOM | 427 | O5'  | G | A | 14 | -27.756 | 14.073 | 82.479 | 1.00 | 0.00 | O |
| ATOM | 428 | O1P  | G | A | 14 | -29.684 | 14.542 | 80.930 | 1.00 | 0.00 | O |

|      |     |      |     |    |         |        |        |      |      |   |
|------|-----|------|-----|----|---------|--------|--------|------|------|---|
| ATOM | 429 | O2P  | G A | 14 | -29.212 | 12.191 | 81.670 | 1.00 | 0.00 | O |
| ATOM | 430 | P    | G A | 14 | -29.213 | 13.639 | 81.998 | 1.00 | 0.00 | P |
| ATOM | 431 | H1   | G A | 14 | -21.014 | 10.838 | 86.326 | 1.00 | 0.00 | H |
| ATOM | 432 | H8   | G A | 14 | -26.287 | 12.184 | 82.852 | 1.00 | 0.00 | H |
| ATOM | 433 | H1'  | G A | 14 | -23.445 | 14.861 | 82.782 | 1.00 | 0.00 | H |
| ATOM | 434 | H21  | G A | 14 | -19.630 | 12.540 | 86.294 | 1.00 | 0.00 | H |
| ATOM | 435 | H3'  | G A | 14 | -26.663 | 15.810 | 80.730 | 1.00 | 0.00 | H |
| ATOM | 436 | H22  | G A | 14 | -19.985 | 14.049 | 85.410 | 1.00 | 0.00 | H |
| ATOM | 437 | H4'  | G A | 14 | -26.366 | 17.023 | 83.066 | 1.00 | 0.00 | H |
| ATOM | 438 | H2'1 | G A | 14 | -25.784 | 13.645 | 81.285 | 1.00 | 0.00 | H |
| ATOM | 439 | H2'2 | G A | 14 | -24.346 | 14.419 | 80.634 | 1.00 | 0.00 | H |
| ATOM | 440 | H5'1 | G A | 14 | -27.638 | 15.117 | 84.283 | 1.00 | 0.00 | H |
| ATOM | 441 | H5'2 | G A | 14 | -28.414 | 15.999 | 82.950 | 1.00 | 0.00 | H |
| ATOM | 442 | C1'  | A A | 15 | -19.709 | 14.656 | 81.436 | 1.00 | 0.00 | C |
| ATOM | 443 | N1   | A A | 15 | -19.528 | 9.945  | 83.464 | 1.00 | 0.00 | N |
| ATOM | 444 | C2   | A A | 15 | -18.699 | 10.984 | 83.527 | 1.00 | 0.00 | C |
| ATOM | 445 | N3   | A A | 15 | -18.809 | 12.177 | 82.981 | 1.00 | 0.00 | N |
| ATOM | 446 | C4   | A A | 15 | -19.950 | 12.260 | 82.273 | 1.00 | 0.00 | C |
| ATOM | 447 | C5   | A A | 15 | -20.900 | 11.292 | 82.106 | 1.00 | 0.00 | C |
| ATOM | 448 | C6   | A A | 15 | -20.659 | 10.059 | 82.750 | 1.00 | 0.00 | C |
| ATOM | 449 | N6   | A A | 15 | -21.503 | 9.016  | 82.677 | 1.00 | 0.00 | N |
| ATOM | 450 | N7   | A A | 15 | -21.938 | 11.741 | 81.310 | 1.00 | 0.00 | N |
| ATOM | 451 | C8   | A A | 15 | -21.596 | 12.960 | 81.011 | 1.00 | 0.00 | C |
| ATOM | 452 | N9   | A A | 15 | -20.400 | 13.346 | 81.561 | 1.00 | 0.00 | N |
| ATOM | 453 | C2'  | A A | 15 | -19.838 | 15.288 | 80.056 | 1.00 | 0.00 | C |
| ATOM | 454 | C3'  | A A | 15 | -19.925 | 16.770 | 80.393 | 1.00 | 0.00 | C |
| ATOM | 455 | O3'  | A A | 15 | -18.609 | 17.292 | 80.544 | 1.00 | 0.00 | O |
| ATOM | 456 | C4'  | A A | 15 | -20.703 | 16.774 | 81.709 | 1.00 | 0.00 | C |
| ATOM | 457 | O4'  | A A | 15 | -20.287 | 15.540 | 82.377 | 1.00 | 0.00 | O |
| ATOM | 458 | C5'  | A A | 15 | -22.208 | 16.779 | 81.597 | 1.00 | 0.00 | C |
| ATOM | 459 | O5'  | A A | 15 | -22.621 | 15.970 | 80.467 | 1.00 | 0.00 | O |
| ATOM | 460 | O1P  | A A | 15 | -23.636 | 17.647 | 78.889 | 1.00 | 0.00 | O |
| ATOM | 461 | O2P  | A A | 15 | -24.396 | 15.255 | 78.838 | 1.00 | 0.00 | O |
| ATOM | 462 | P    | A A | 15 | -23.913 | 16.406 | 79.640 | 1.00 | 0.00 | P |
| ATOM | 463 | H2   | A A | 15 | -17.798 | 10.824 | 84.120 | 1.00 | 0.00 | H |
| ATOM | 464 | H8   | A A | 15 | -22.201 | 13.614 | 80.382 | 1.00 | 0.00 | H |
| ATOM | 465 | H1'  | A A | 15 | -18.663 | 14.516 | 81.705 | 1.00 | 0.00 | H |
| ATOM | 466 | H3'  | A A | 15 | -20.452 | 17.333 | 79.623 | 1.00 | 0.00 | H |
| ATOM | 467 | H4'  | A A | 15 | -20.405 | 17.672 | 82.248 | 1.00 | 0.00 | H |
| ATOM | 468 | H61  | A A | 15 | -21.281 | 8.140  | 83.169 | 1.00 | 0.00 | H |
| ATOM | 469 | H62  | A A | 15 | -22.372 | 9.096  | 82.130 | 1.00 | 0.00 | H |
| ATOM | 470 | H2'1 | A A | 15 | -20.729 | 14.949 | 79.529 | 1.00 | 0.00 | H |
| ATOM | 471 | H2'2 | A A | 15 | -18.978 | 15.076 | 79.422 | 1.00 | 0.00 | H |
| ATOM | 472 | H5'1 | A A | 15 | -22.636 | 16.375 | 82.515 | 1.00 | 0.00 | H |
| ATOM | 473 | H5'2 | A A | 15 | -22.554 | 17.803 | 81.462 | 1.00 | 0.00 | H |
| ATOM | 474 | C1'  | C A | 16 | -15.129 | 12.783 | 81.019 | 1.00 | 0.00 | C |
| ATOM | 475 | N1   | C A | 16 | -16.307 | 12.005 | 80.546 | 1.00 | 0.00 | N |
| ATOM | 476 | C2   | C A | 16 | -16.444 | 10.691 | 80.988 | 1.00 | 0.00 | C |
| ATOM | 477 | O2   | C A | 16 | -15.586 | 10.227 | 81.750 | 1.00 | 0.00 | O |
| ATOM | 478 | N3   | C A | 16 | -17.508 | 9.967  | 80.568 | 1.00 | 0.00 | N |
| ATOM | 479 | C4   | C A | 16 | -18.419 | 10.497 | 79.743 | 1.00 | 0.00 | C |
| ATOM | 480 | N4   | C A | 16 | -19.443 | 9.744  | 79.367 | 1.00 | 0.00 | N |
| ATOM | 481 | C5   | C A | 16 | -18.304 | 11.845 | 79.267 | 1.00 | 0.00 | C |
| ATOM | 482 | C6   | C A | 16 | -17.225 | 12.558 | 79.706 | 1.00 | 0.00 | C |

|      |     |      |     |    |         |        |        |      |      |   |
|------|-----|------|-----|----|---------|--------|--------|------|------|---|
| ATOM | 483 | C2'  | C A | 16 | -14.535 | 13.703 | 79.962 | 1.00 | 0.00 | C |
| ATOM | 484 | C3'  | C A | 16 | -14.098 | 14.900 | 80.793 | 1.00 | 0.00 | C |
| ATOM | 485 | O3'  | C A | 16 | -12.806 | 14.645 | 81.337 | 1.00 | 0.00 | O |
| ATOM | 486 | C4'  | C A | 16 | -15.176 | 14.976 | 81.870 | 1.00 | 0.00 | C |
| ATOM | 487 | O4'  | C A | 16 | -15.552 | 13.583 | 82.108 | 1.00 | 0.00 | O |
| ATOM | 488 | C5'  | C A | 16 | -16.421 | 15.759 | 81.520 | 1.00 | 0.00 | C |
| ATOM | 489 | O5'  | C A | 16 | -16.749 | 15.559 | 80.121 | 1.00 | 0.00 | O |
| ATOM | 490 | O1P  | C A | 16 | -16.410 | 17.841 | 79.113 | 1.00 | 0.00 | O |
| ATOM | 491 | O2P  | C A | 16 | -18.039 | 16.239 | 78.075 | 1.00 | 0.00 | O |
| ATOM | 492 | P    | C A | 16 | -17.403 | 16.764 | 79.307 | 1.00 | 0.00 | P |
| ATOM | 493 | H5   | C A | 16 | -19.040 | 12.278 | 78.588 | 1.00 | 0.00 | H |
| ATOM | 494 | H6   | C A | 16 | -17.098 | 13.591 | 79.379 | 1.00 | 0.00 | H |
| ATOM | 495 | H1'  | C A | 16 | -14.383 | 12.079 | 81.390 | 1.00 | 0.00 | H |
| ATOM | 496 | H3'  | C A | 16 | -14.066 | 15.816 | 80.200 | 1.00 | 0.00 | H |
| ATOM | 497 | H4'  | C A | 16 | -14.721 | 15.450 | 82.739 | 1.00 | 0.00 | H |
| ATOM | 498 | H41  | C A | 16 | -20.160 | 10.129 | 78.733 | 1.00 | 0.00 | H |
| ATOM | 499 | H42  | C A | 16 | -19.523 | 8.775  | 79.707 | 1.00 | 0.00 | H |
| ATOM | 500 | H2'1 | C A | 16 | -15.266 | 13.991 | 79.206 | 1.00 | 0.00 | H |
| ATOM | 501 | H2'2 | C A | 16 | -13.690 | 13.247 | 79.444 | 1.00 | 0.00 | H |
| ATOM | 502 | H5'1 | C A | 16 | -17.247 | 15.416 | 82.146 | 1.00 | 0.00 | H |
| ATOM | 503 | H5'2 | C A | 16 | -16.244 | 16.817 | 81.709 | 1.00 | 0.00 | H |
| ATOM | 504 | C1'  | G A | 17 | -11.837 | 9.098  | 80.701 | 1.00 | 0.00 | C |
| ATOM | 505 | N1   | G A | 17 | -15.815 | 6.455  | 78.905 | 1.00 | 0.00 | N |
| ATOM | 506 | C2   | G A | 17 | -14.832 | 6.081  | 79.804 | 1.00 | 0.00 | C |
| ATOM | 507 | N2   | G A | 17 | -14.920 | 4.835  | 80.286 | 1.00 | 0.00 | N |
| ATOM | 508 | N3   | G A | 17 | -13.842 | 6.883  | 80.190 | 1.00 | 0.00 | N |
| ATOM | 509 | C4   | G A | 17 | -13.905 | 8.103  | 79.595 | 1.00 | 0.00 | C |
| ATOM | 510 | C5   | G A | 17 | -14.842 | 8.565  | 78.687 | 1.00 | 0.00 | C |
| ATOM | 511 | C6   | G A | 17 | -15.897 | 7.716  | 78.278 | 1.00 | 0.00 | C |
| ATOM | 512 | O6   | G A | 17 | -16.815 | 7.939  | 77.489 | 1.00 | 0.00 | O |
| ATOM | 513 | N7   | G A | 17 | -14.550 | 9.879  | 78.314 | 1.00 | 0.00 | N |
| ATOM | 514 | C8   | G A | 17 | -13.472 | 10.167 | 78.996 | 1.00 | 0.00 | C |
| ATOM | 515 | N9   | G A | 17 | -13.018 | 9.139  | 79.798 | 1.00 | 0.00 | N |
| ATOM | 516 | C2'  | G A | 17 | -10.621 | 9.835  | 80.156 | 1.00 | 0.00 | C |
| ATOM | 517 | C3'  | G A | 17 | -10.012 | 10.421 | 81.418 | 1.00 | 0.00 | C |
| ATOM | 518 | O3'  | G A | 17 | -9.179  | 9.442  | 82.035 | 1.00 | 0.00 | O |
| ATOM | 519 | C4'  | G A | 17 | -11.240 | 10.752 | 82.265 | 1.00 | 0.00 | C |
| ATOM | 520 | O4'  | G A | 17 | -12.206 | 9.710  | 81.922 | 1.00 | 0.00 | O |
| ATOM | 521 | C5'  | G A | 17 | -11.875 | 12.102 | 82.025 | 1.00 | 0.00 | C |
| ATOM | 522 | O5'  | G A | 17 | -11.805 | 12.433 | 80.617 | 1.00 | 0.00 | O |
| ATOM | 523 | O1P  | G A | 17 | -10.264 | 14.423 | 80.564 | 1.00 | 0.00 | O |
| ATOM | 524 | O2P  | G A | 17 | -11.996 | 14.130 | 78.773 | 1.00 | 0.00 | O |
| ATOM | 525 | P    | G A | 17 | -11.616 | 13.960 | 80.197 | 1.00 | 0.00 | P |
| ATOM | 526 | H1   | G A | 17 | -16.541 | 5.760  | 78.677 | 1.00 | 0.00 | H |
| ATOM | 527 | H8   | G A | 17 | -12.973 | 11.135 | 78.938 | 1.00 | 0.00 | H |
| ATOM | 528 | H1'  | G A | 17 | -11.600 | 8.053  | 80.907 | 1.00 | 0.00 | H |
| ATOM | 529 | H21  | G A | 17 | -15.690 | 4.221  | 79.986 | 1.00 | 0.00 | H |
| ATOM | 530 | H3'  | G A | 17 | -9.424  | 11.316 | 81.211 | 1.00 | 0.00 | H |
| ATOM | 531 | H22  | G A | 17 | -14.217 | 4.493  | 80.958 | 1.00 | 0.00 | H |
| ATOM | 532 | H4'  | G A | 17 | -10.924 | 10.713 | 83.308 | 1.00 | 0.00 | H |
| ATOM | 533 | H2'1 | G A | 17 | -10.895 | 10.616 | 79.446 | 1.00 | 0.00 | H |
| ATOM | 534 | H2'2 | G A | 17 | -9.923  | 9.164  | 79.651 | 1.00 | 0.00 | H |
| ATOM | 535 | H5'1 | G A | 17 | -12.917 | 12.067 | 82.345 | 1.00 | 0.00 | H |
| ATOM | 536 | H5'2 | G A | 17 | -11.347 | 12.855 | 82.610 | 1.00 | 0.00 | H |

|      |     |      |     |    |         |        |        |      |      |   |
|------|-----|------|-----|----|---------|--------|--------|------|------|---|
| ATOM | 537 | C1'  | G A | 18 | -10.428 | 4.472  | 79.630 | 1.00 | 0.00 | C |
| ATOM | 538 | N1   | G A | 18 | -14.371 | 4.624  | 76.396 | 1.00 | 0.00 | N |
| ATOM | 539 | C2   | G A | 18 | -13.960 | 3.615  | 77.249 | 1.00 | 0.00 | C |
| ATOM | 540 | N2   | G A | 18 | -14.697 | 2.496  | 77.237 | 1.00 | 0.00 | N |
| ATOM | 541 | N3   | G A | 18 | -12.901 | 3.715  | 78.049 | 1.00 | 0.00 | N |
| ATOM | 542 | C4   | G A | 18 | -12.269 | 4.911  | 77.925 | 1.00 | 0.00 | C |
| ATOM | 543 | C5   | G A | 18 | -12.604 | 5.973  | 77.101 | 1.00 | 0.00 | C |
| ATOM | 544 | C6   | G A | 18 | -13.732 | 5.870  | 76.253 | 1.00 | 0.00 | C |
| ATOM | 545 | O6   | G A | 18 | -14.183 | 6.696  | 75.459 | 1.00 | 0.00 | O |
| ATOM | 546 | N7   | G A | 18 | -11.698 | 7.021  | 77.272 | 1.00 | 0.00 | N |
| ATOM | 547 | C8   | G A | 18 | -10.866 | 6.575  | 78.177 | 1.00 | 0.00 | C |
| ATOM | 548 | N9   | G A | 18 | -11.146 | 5.299  | 78.621 | 1.00 | 0.00 | N |
| ATOM | 549 | C2'  | G A | 18 | -8.914  | 4.627  | 79.585 | 1.00 | 0.00 | C |
| ATOM | 550 | C3'  | G A | 18 | -8.541  | 4.521  | 81.054 | 1.00 | 0.00 | C |
| ATOM | 551 | O3'  | G A | 18 | -8.420  | 3.145  | 81.408 | 1.00 | 0.00 | O |
| ATOM | 552 | C4'  | G A | 18 | -9.718  | 5.196  | 81.755 | 1.00 | 0.00 | C |
| ATOM | 553 | O4'  | G A | 18 | -10.870 | 4.875  | 80.912 | 1.00 | 0.00 | O |
| ATOM | 554 | C5'  | G A | 18 | -9.636  | 6.696  | 81.911 | 1.00 | 0.00 | C |
| ATOM | 555 | O5'  | G A | 18 | -9.004  | 7.277  | 80.743 | 1.00 | 0.00 | O |
| ATOM | 556 | O1P  | G A | 18 | -6.848  | 8.208  | 81.649 | 1.00 | 0.00 | O |
| ATOM | 557 | O2P  | G A | 18 | -7.902  | 9.235  | 79.617 | 1.00 | 0.00 | O |
| ATOM | 558 | P    | G A | 18 | -8.084  | 8.567  | 80.930 | 1.00 | 0.00 | P |
| ATOM | 559 | H1   | G A | 18 | -15.210 | 4.450  | 75.822 | 1.00 | 0.00 | H |
| ATOM | 560 | H8   | G A | 18 | -10.022 | 7.158  | 78.547 | 1.00 | 0.00 | H |
| ATOM | 561 | H1'  | G A | 18 | -10.719 | 3.432  | 79.486 | 1.00 | 0.00 | H |
| ATOM | 562 | H21  | G A | 18 | -15.517 | 2.429  | 76.616 | 1.00 | 0.00 | H |
| ATOM | 563 | H3'  | G A | 18 | -7.604  | 5.035  | 81.277 | 1.00 | 0.00 | H |
| ATOM | 564 | H22  | G A | 18 | -14.442 | 1.707  | 77.846 | 1.00 | 0.00 | H |
| ATOM | 565 | H4'  | G A | 18 | -9.786  | 4.761  | 82.751 | 1.00 | 0.00 | H |
| ATOM | 566 | H2'1 | G A | 18 | -8.609  | 5.587  | 79.166 | 1.00 | 0.00 | H |
| ATOM | 567 | H2'2 | G A | 18 | -8.436  | 3.846  | 78.996 | 1.00 | 0.00 | H |
| ATOM | 568 | H5'1 | G A | 18 | -10.642 | 7.099  | 82.025 | 1.00 | 0.00 | H |
| ATOM | 569 | H5'2 | G A | 18 | -9.054  | 6.932  | 82.801 | 1.00 | 0.00 | H |
| ATOM | 570 | C1'  | T A | 19 | -10.774 | 0.150  | 77.244 | 1.00 | 0.00 | C |
| ATOM | 571 | N1   | T A | 19 | -10.763 | 1.425  | 76.479 | 1.00 | 0.00 | N |
| ATOM | 572 | C2   | T A | 19 | -11.771 | 1.616  | 75.557 | 1.00 | 0.00 | C |
| ATOM | 573 | O2   | T A | 19 | -12.647 | 0.792  | 75.357 | 1.00 | 0.00 | O |
| ATOM | 574 | N3   | T A | 19 | -11.723 | 2.816  | 74.870 | 1.00 | 0.00 | N |
| ATOM | 575 | C4   | T A | 19 | -10.778 | 3.809  | 75.017 | 1.00 | 0.00 | C |
| ATOM | 576 | O4   | T A | 19 | -10.836 | 4.843  | 74.340 | 1.00 | 0.00 | O |
| ATOM | 577 | C5   | T A | 19 | -9.764  | 3.519  | 76.003 | 1.00 | 0.00 | C |
| ATOM | 578 | C6   | T A | 19 | -9.781  | 2.362  | 76.693 | 1.00 | 0.00 | C |
| ATOM | 579 | C7   | T A | 19 | -8.717  | 4.575  | 76.200 | 1.00 | 0.00 | C |
| ATOM | 580 | C2'  | T A | 19 | -9.388  | -0.429 | 77.496 | 1.00 | 0.00 | C |
| ATOM | 581 | C3'  | T A | 19 | -9.545  | -1.038 | 78.880 | 1.00 | 0.00 | C |
| ATOM | 582 | O3'  | T A | 19 | -10.101 | -2.345 | 78.757 | 1.00 | 0.00 | O |
| ATOM | 583 | C4'  | T A | 19 | -10.499 | -0.067 | 79.571 | 1.00 | 0.00 | C |
| ATOM | 584 | O4'  | T A | 19 | -11.374 | 0.403  | 78.499 | 1.00 | 0.00 | O |
| ATOM | 585 | C5'  | T A | 19 | -9.869  | 1.131  | 80.244 | 1.00 | 0.00 | C |
| ATOM | 586 | O5'  | T A | 19 | -8.740  | 1.594  | 79.461 | 1.00 | 0.00 | O |
| ATOM | 587 | O1P  | T A | 19 | -6.769  | 1.148  | 80.960 | 1.00 | 0.00 | O |
| ATOM | 588 | O2P  | T A | 19 | -6.662  | 2.992  | 79.262 | 1.00 | 0.00 | O |
| ATOM | 589 | P    | T A | 19 | -7.480  | 2.209  | 80.219 | 1.00 | 0.00 | P |
| ATOM | 590 | H3   | T A | 19 | -12.468 | 2.984  | 74.178 | 1.00 | 0.00 | H |

|      |     |      |       |    |         |        |        |      |      |   |
|------|-----|------|-------|----|---------|--------|--------|------|------|---|
| ATOM | 591 | H6   | T A   | 19 | -9.005  | 2.165  | 77.433 | 1.00 | 0.00 | H |
| ATOM | 592 | H1'  | T A   | 19 | -11.403 | -0.563 | 76.709 | 1.00 | 0.00 | H |
| ATOM | 593 | H3'  | T A   | 19 | -8.593  | -1.099 | 79.408 | 1.00 | 0.00 | H |
| ATOM | 594 | H4'  | T A   | 19 | -11.029 | -0.636 | 80.336 | 1.00 | 0.00 | H |
| ATOM | 595 | H71  | T A   | 19 | -7.749  | 4.190  | 75.881 | 1.00 | 0.00 | H |
| ATOM | 596 | H72  | T A   | 19 | -8.972  | 5.453  | 75.605 | 1.00 | 0.00 | H |
| ATOM | 597 | H73  | T A   | 19 | -8.669  | 4.852  | 77.253 | 1.00 | 0.00 | H |
| ATOM | 598 | H2'1 | T A   | 19 | -8.614  | 0.337  | 77.484 | 1.00 | 0.00 | H |
| ATOM | 599 | H2'2 | T A   | 19 | -9.113  | -1.183 | 76.758 | 1.00 | 0.00 | H |
| ATOM | 600 | H5'1 | T A   | 19 | -10.609 | 1.925  | 80.328 | 1.00 | 0.00 | H |
| ATOM | 601 | H5'2 | T A   | 19 | -9.534  | 0.847  | 81.240 | 1.00 | 0.00 | H |
| ATOM | 602 | C01  | LNK A | 20 | -8.485  | -5.609 | 77.991 | 0.00 | 0.00 | C |
| ATOM | 603 | O1   | LNK A | 20 | -8.432  | -4.192 | 78.169 | 1.00 | 0.00 | O |
| ATOM | 604 | S    | LNK A | 20 | -6.076  | -8.595 | 76.926 | 0.00 | 0.00 | S |
| ATOM | 605 | C02  | LNK A | 20 | -7.099  | -6.123 | 77.554 | 0.00 | 0.00 | C |
| ATOM | 606 | C03  | LNK A | 20 | -7.271  | -7.275 | 76.547 | 0.00 | 0.00 | C |
| ATOM | 607 | O1P  | LNK A | 20 | -8.756  | -2.345 | 76.489 | 1.00 | 0.00 | O |
| ATOM | 608 | O2P  | LNK A | 20 | -10.490 | -4.146 | 76.727 | 1.00 | 0.00 | O |
| ATOM | 609 | P    | LNK A | 20 | -9.474  | -3.280 | 77.377 | 1.00 | 0.00 | P |
| ATOM | 610 | H01  | LNK A | 20 | -9.220  | -5.855 | 77.225 | 0.00 | 0.00 | H |
| ATOM | 611 | H02  | LNK A | 20 | -8.766  | -6.084 | 78.932 | 0.00 | 0.00 | H |
| ATOM | 612 | H03  | LNK A | 20 | -7.096  | -6.905 | 75.537 | 0.00 | 0.00 | H |
| ATOM | 613 | H04  | LNK A | 20 | -6.552  | -6.480 | 78.428 | 0.00 | 0.00 | H |
| ATOM | 614 | H05  | LNK A | 20 | -6.542  | -5.311 | 77.086 | 0.00 | 0.00 | H |
| ATOM | 615 | H06  | LNK A | 20 | -8.285  | -7.671 | 76.619 | 0.00 | 0.00 | H |
| ATOM | 616 | AU   | LNK A | 20 | -6.082  | -9.060 | 76.422 |      |      |   |
| TER  |     |      |       |    |         |        |        |      |      |   |
| ATOM | 618 | C1'  | A B   | 2  | -17.795 | 3.520  | 69.612 | 1.00 | 0.00 | C |
| ATOM | 619 | N1   | A B   | 2  | -13.844 | 3.313  | 72.880 | 1.00 | 0.00 | N |
| ATOM | 620 | C2   | A B   | 2  | -14.833 | 2.467  | 72.613 | 1.00 | 0.00 | C |
| ATOM | 621 | N3   | A B   | 2  | -15.822 | 2.581  | 71.752 | 1.00 | 0.00 | N |
| ATOM | 622 | C4   | A B   | 2  | -15.738 | 3.756  | 71.101 | 1.00 | 0.00 | C |
| ATOM | 623 | C5   | A B   | 2  | -14.792 | 4.728  | 71.257 | 1.00 | 0.00 | C |
| ATOM | 624 | C6   | A B   | 2  | -13.785 | 4.476  | 72.214 | 1.00 | 0.00 | C |
| ATOM | 625 | N6   | A B   | 2  | -12.789 | 5.339  | 72.476 | 1.00 | 0.00 | N |
| ATOM | 626 | N7   | A B   | 2  | -15.029 | 5.798  | 70.412 | 1.00 | 0.00 | N |
| ATOM | 627 | C8   | A B   | 2  | -16.107 | 5.455  | 69.772 | 1.00 | 0.00 | C |
| ATOM | 628 | N9   | A B   | 2  | -16.594 | 4.226  | 70.134 | 1.00 | 0.00 | N |
| ATOM | 629 | C2'  | A B   | 2  | -18.970 | 4.443  | 69.315 | 1.00 | 0.00 | C |
| ATOM | 630 | C3'  | A B   | 2  | -19.583 | 3.793  | 68.087 | 1.00 | 0.00 | C |
| ATOM | 631 | O3'  | A B   | 2  | -20.464 | 2.750  | 68.500 | 1.00 | 0.00 | O |
| ATOM | 632 | C4'  | A B   | 2  | -18.361 | 3.254  | 67.342 | 1.00 | 0.00 | C |
| ATOM | 633 | O4'  | A B   | 2  | -17.426 | 2.881  | 68.404 | 1.00 | 0.00 | O |
| ATOM | 634 | C5'  | A B   | 2  | -17.669 | 4.216  | 66.405 | 1.00 | 0.00 | C |
| ATOM | 635 | O5'  | A B   | 2  | -17.696 | 5.552  | 66.965 | 1.00 | 0.00 | O |
| ATOM | 636 | H2   | A B   | 2  | -14.825 | 1.544  | 73.191 | 1.00 | 0.00 | H |
| ATOM | 637 | H8   | A B   | 2  | -16.579 | 6.085  | 69.018 | 1.00 | 0.00 | H |
| ATOM | 638 | H1'  | A B   | 2  | -18.076 | 2.748  | 70.329 | 1.00 | 0.00 | H |
| ATOM | 639 | H3'  | A B   | 2  | -20.132 | 4.508  | 67.475 | 1.00 | 0.00 | H |
| ATOM | 640 | H4'  | A B   | 2  | -18.700 | 2.402  | 66.754 | 1.00 | 0.00 | H |
| ATOM | 641 | H61  | A B   | 2  | -12.077 | 5.106  | 73.182 | 1.00 | 0.00 | H |
| ATOM | 642 | H62  | A B   | 2  | -12.739 | 6.235  | 71.969 | 1.00 | 0.00 | H |
| ATOM | 643 | H2'1 | A B   | 2  | -18.651 | 5.464  | 69.106 | 1.00 | 0.00 | H |
| ATOM | 644 | H2'2 | A B   | 2  | -19.682 | 4.484  | 70.140 | 1.00 | 0.00 | H |



|      |     |       |     |   |         |        |        |      |      |   |
|------|-----|-------|-----|---|---------|--------|--------|------|------|---|
| ATOM | 645 | H5 '1 | A B | 2 | -16.637 | 3.896  | 66.264 | 1.00 | 0.00 | H |
| ATOM | 646 | H5 '2 | A B | 2 | -18.182 | 4.208  | 65.444 | 1.00 | 0.00 | H |
| ATOM | 647 | C1 '  | C B | 3 | -19.285 | 1.716  | 73.992 | 1.00 | 0.00 | C |
| ATOM | 648 | N1    | C B | 3 | -18.529 | 2.997  | 73.920 | 1.00 | 0.00 | N |
| ATOM | 649 | C2    | C B | 3 | -17.412 | 3.142  | 74.740 | 1.00 | 0.00 | C |
| ATOM | 650 | O2    | C B | 3 | -17.095 | 2.207  | 75.487 | 1.00 | 0.00 | O |
| ATOM | 651 | N3    | C B | 3 | -16.711 | 4.300  | 74.690 | 1.00 | 0.00 | N |
| ATOM | 652 | C4    | C B | 3 | -17.078 | 5.293  | 73.870 | 1.00 | 0.00 | C |
| ATOM | 653 | N4    | C B | 3 | -16.354 | 6.404  | 73.860 | 1.00 | 0.00 | N |
| ATOM | 654 | C5    | C B | 3 | -18.226 | 5.176  | 73.019 | 1.00 | 0.00 | C |
| ATOM | 655 | C6    | C B | 3 | -18.917 | 3.997  | 73.083 | 1.00 | 0.00 | C |
| ATOM | 656 | C2 '  | C B | 3 | -20.794 | 1.886  | 73.875 | 1.00 | 0.00 | C |
| ATOM | 657 | C3 '  | C B | 3 | -21.194 | 0.643  | 73.095 | 1.00 | 0.00 | C |
| ATOM | 658 | O3 '  | C B | 3 | -21.356 | -0.445 | 74.003 | 1.00 | 0.00 | O |
| ATOM | 659 | C4 '  | C B | 3 | -20.010 | 0.439  | 72.153 | 1.00 | 0.00 | C |
| ATOM | 660 | O4 '  | C B | 3 | -18.853 | 0.902  | 72.919 | 1.00 | 0.00 | O |
| ATOM | 661 | C5 '  | C B | 3 | -20.056 | 1.191  | 70.844 | 1.00 | 0.00 | C |
| ATOM | 662 | O5 '  | C B | 3 | -20.655 | 2.496  | 71.050 | 1.00 | 0.00 | O |
| ATOM | 663 | O1P   | C B | 3 | -22.801 | 2.367  | 69.740 | 1.00 | 0.00 | O |
| ATOM | 664 | O2P   | C B | 3 | -21.688 | 4.585  | 70.109 | 1.00 | 0.00 | O |
| ATOM | 665 | P     | C B | 3 | -21.543 | 3.126  | 69.886 | 1.00 | 0.00 | P |
| ATOM | 666 | H5    | C B | 3 | -18.535 | 5.984  | 72.356 | 1.00 | 0.00 | H |
| ATOM | 667 | H6    | C B | 3 | -19.792 | 3.857  | 72.449 | 1.00 | 0.00 | H |
| ATOM | 668 | H1 '  | C B | 3 | -19.020 | 1.215  | 74.923 | 1.00 | 0.00 | H |
| ATOM | 669 | H3 '  | C B | 3 | -22.119 | 0.790  | 72.540 | 1.00 | 0.00 | H |
| ATOM | 670 | H4 '  | C B | 3 | -19.970 | -0.626 | 71.921 | 1.00 | 0.00 | H |
| ATOM | 671 | H41   | C B | 3 | -16.613 | 7.183  | 73.236 | 1.00 | 0.00 | H |
| ATOM | 672 | H42   | C B | 3 | -15.530 | 6.488  | 74.474 | 1.00 | 0.00 | H |
| ATOM | 673 | H2 '1 | C B | 3 | -21.068 | 2.796  | 73.340 | 1.00 | 0.00 | H |
| ATOM | 674 | H2 '2 | C B | 3 | -21.283 | 1.919  | 74.849 | 1.00 | 0.00 | H |
| ATOM | 675 | H5 '1 | C B | 3 | -19.042 | 1.308  | 70.462 | 1.00 | 0.00 | H |
| ATOM | 676 | H5 '2 | C B | 3 | -20.647 | 0.626  | 70.126 | 1.00 | 0.00 | H |
| ATOM | 677 | C1 '  | C B | 4 | -18.999 | 1.141  | 78.902 | 1.00 | 0.00 | C |
| ATOM | 678 | N1    | C B | 4 | -18.986 | 2.500  | 78.298 | 1.00 | 0.00 | N |
| ATOM | 679 | C2    | C B | 4 | -17.967 | 3.373  | 78.672 | 1.00 | 0.00 | C |
| ATOM | 680 | O2    | C B | 4 | -17.117 | 2.985  | 79.486 | 1.00 | 0.00 | O |
| ATOM | 681 | N3    | C B | 4 | -17.937 | 4.616  | 78.134 | 1.00 | 0.00 | N |
| ATOM | 682 | C4    | C B | 4 | -18.870 | 5.007  | 77.256 | 1.00 | 0.00 | C |
| ATOM | 683 | N4    | C B | 4 | -18.793 | 6.233  | 76.757 | 1.00 | 0.00 | N |
| ATOM | 684 | C5    | C B | 4 | -19.934 | 4.134  | 76.855 | 1.00 | 0.00 | C |
| ATOM | 685 | C6    | C B | 4 | -19.941 | 2.884  | 77.407 | 1.00 | 0.00 | C |
| ATOM | 686 | C2 '  | C B | 4 | -20.395 | 0.622  | 79.220 | 1.00 | 0.00 | C |
| ATOM | 687 | C3 '  | C B | 4 | -20.256 | -0.863 | 78.923 | 1.00 | 0.00 | C |
| ATOM | 688 | O3 '  | C B | 4 | -19.718 | -1.521 | 80.067 | 1.00 | 0.00 | O |
| ATOM | 689 | C4 '  | C B | 4 | -19.293 | -0.884 | 77.738 | 1.00 | 0.00 | C |
| ATOM | 690 | O4 '  | C B | 4 | -18.402 | 0.253  | 77.975 | 1.00 | 0.00 | O |
| ATOM | 691 | C5 '  | C B | 4 | -19.911 | -0.734 | 76.367 | 1.00 | 0.00 | C |
| ATOM | 692 | O5 '  | C B | 4 | -21.028 | 0.188  | 76.431 | 1.00 | 0.00 | O |
| ATOM | 693 | O1P   | C B | 4 | -23.015 | -1.269 | 75.917 | 1.00 | 0.00 | O |
| ATOM | 694 | O2P   | C B | 4 | -23.084 | 1.182  | 75.385 | 1.00 | 0.00 | O |
| ATOM | 695 | P     | C B | 4 | -22.284 | -0.063 | 75.482 | 1.00 | 0.00 | P |
| ATOM | 696 | H5    | C B | 4 | -20.700 | 4.451  | 76.147 | 1.00 | 0.00 | H |
| ATOM | 697 | H6    | C B | 4 | -20.725 | 2.181  | 77.128 | 1.00 | 0.00 | H |
| ATOM | 698 | H1 '  | C B | 4 | -18.376 | 1.160  | 79.797 | 1.00 | 0.00 | H |

|      |     |      |     |   |         |        |        |      |      |   |
|------|-----|------|-----|---|---------|--------|--------|------|------|---|
| ATOM | 699 | H3'  | C B | 4 | -21.212 | -1.317 | 78.661 | 1.00 | 0.00 | H |
| ATOM | 700 | H4'  | C B | 4 | -18.775 | -1.843 | 77.766 | 1.00 | 0.00 | H |
| ATOM | 701 | H41  | C B | 4 | -19.495 | 6.559  | 76.077 | 1.00 | 0.00 | H |
| ATOM | 702 | H42  | C B | 4 | -18.028 | 6.861  | 77.047 | 1.00 | 0.00 | H |
| ATOM | 703 | H2'1 | C B | 4 | -21.159 | 1.082  | 78.594 | 1.00 | 0.00 | H |
| ATOM | 704 | H2'2 | C B | 4 | -20.673 | 0.795  | 80.260 | 1.00 | 0.00 | H |
| ATOM | 705 | H5'1 | C B | 4 | -19.158 | -0.356 | 75.674 | 1.00 | 0.00 | H |
| ATOM | 706 | H5'2 | C B | 4 | -20.257 | -1.709 | 76.023 | 1.00 | 0.00 | H |
| ATOM | 707 | C1'  | G B | 5 | -17.680 | 2.521  | 83.472 | 1.00 | 0.00 | C |
| ATOM | 708 | N1   | G B | 5 | -17.808 | 7.216  | 81.478 | 1.00 | 0.00 | N |
| ATOM | 709 | C2   | G B | 5 | -16.888 | 6.640  | 82.337 | 1.00 | 0.00 | C |
| ATOM | 710 | N2   | G B | 5 | -15.868 | 7.419  | 82.716 | 1.00 | 0.00 | N |
| ATOM | 711 | N3   | G B | 5 | -16.979 | 5.387  | 82.780 | 1.00 | 0.00 | N |
| ATOM | 712 | C4   | G B | 5 | -18.077 | 4.747  | 82.300 | 1.00 | 0.00 | C |
| ATOM | 713 | C5   | G B | 5 | -19.049 | 5.242  | 81.445 | 1.00 | 0.00 | C |
| ATOM | 714 | C6   | G B | 5 | -18.952 | 6.569  | 80.971 | 1.00 | 0.00 | C |
| ATOM | 715 | O6   | G B | 5 | -19.707 | 7.181  | 80.216 | 1.00 | 0.00 | O |
| ATOM | 716 | N7   | G B | 5 | -20.014 | 4.264  | 81.195 | 1.00 | 0.00 | N |
| ATOM | 717 | C8   | G B | 5 | -19.606 | 3.230  | 81.887 | 1.00 | 0.00 | C |
| ATOM | 718 | N9   | G B | 5 | -18.436 | 3.449  | 82.586 | 1.00 | 0.00 | N |
| ATOM | 719 | C2'  | G B | 5 | -18.569 | 1.621  | 84.319 | 1.00 | 0.00 | C |
| ATOM | 720 | C3'  | G B | 5 | -17.767 | 0.330  | 84.358 | 1.00 | 0.00 | C |
| ATOM | 721 | O3'  | G B | 5 | -16.801 | 0.409  | 85.404 | 1.00 | 0.00 | O |
| ATOM | 722 | C4'  | G B | 5 | -17.120 | 0.288  | 82.975 | 1.00 | 0.00 | C |
| ATOM | 723 | O4'  | G B | 5 | -16.880 | 1.694  | 82.648 | 1.00 | 0.00 | O |
| ATOM | 724 | C5'  | G B | 5 | -17.941 | -0.331 | 81.869 | 1.00 | 0.00 | C |
| ATOM | 725 | O5'  | G B | 5 | -19.340 | -0.001 | 82.050 | 1.00 | 0.00 | O |
| ATOM | 726 | O1P  | G B | 5 | -20.407 | -2.227 | 82.538 | 1.00 | 0.00 | O |
| ATOM | 727 | O2P  | G B | 5 | -21.756 | -0.395 | 81.483 | 1.00 | 0.00 | O |
| ATOM | 728 | P    | G B | 5 | -20.443 | -1.070 | 81.623 | 1.00 | 0.00 | P |
| ATOM | 729 | H1   | G B | 5 | -17.642 | 8.192  | 81.189 | 1.00 | 0.00 | H |
| ATOM | 730 | H8   | G B | 5 | -20.141 | 2.283  | 81.912 | 1.00 | 0.00 | H |
| ATOM | 731 | H1'  | G B | 5 | -17.014 | 3.113  | 84.099 | 1.00 | 0.00 | H |
| ATOM | 732 | H21  | G B | 5 | -15.803 | 8.386  | 82.367 | 1.00 | 0.00 | H |
| ATOM | 733 | H3'  | G B | 5 | -18.404 | -0.542 | 84.520 | 1.00 | 0.00 | H |
| ATOM | 734 | H22  | G B | 5 | -15.150 | 7.052  | 83.358 | 1.00 | 0.00 | H |
| ATOM | 735 | H4'  | G B | 5 | -16.202 | -0.288 | 83.072 | 1.00 | 0.00 | H |
| ATOM | 736 | H2'1 | G B | 5 | -19.550 | 1.466  | 83.868 | 1.00 | 0.00 | H |
| ATOM | 737 | H2'2 | G B | 5 | -18.728 | 2.020  | 85.320 | 1.00 | 0.00 | H |
| ATOM | 738 | H5'1 | G B | 5 | -17.592 | 0.051  | 80.908 | 1.00 | 0.00 | H |
| ATOM | 739 | H5'2 | G B | 5 | -17.811 | -1.414 | 81.891 | 1.00 | 0.00 | H |
| ATOM | 740 | C1'  | T B | 6 | -16.477 | 5.826  | 86.955 | 1.00 | 0.00 | C |
| ATOM | 741 | N1   | T B | 6 | -17.713 | 6.006  | 86.147 | 1.00 | 0.00 | N |
| ATOM | 742 | C2   | T B | 6 | -17.895 | 7.233  | 85.541 | 1.00 | 0.00 | C |
| ATOM | 743 | O2   | T B | 6 | -17.096 | 8.147  | 85.647 | 1.00 | 0.00 | O |
| ATOM | 744 | N3   | T B | 6 | -19.056 | 7.356  | 84.798 | 1.00 | 0.00 | N |
| ATOM | 745 | C4   | T B | 6 | -20.023 | 6.391  | 84.617 | 1.00 | 0.00 | C |
| ATOM | 746 | O4   | T B | 6 | -21.025 | 6.619  | 83.931 | 1.00 | 0.00 | O |
| ATOM | 747 | C5   | T B | 6 | -19.743 | 5.143  | 85.288 | 1.00 | 0.00 | C |
| ATOM | 748 | C6   | T B | 6 | -18.622 | 4.986  | 86.019 | 1.00 | 0.00 | C |
| ATOM | 749 | C7   | T B | 6 | -20.769 | 4.061  | 85.116 | 1.00 | 0.00 | C |
| ATOM | 750 | C2'  | T B | 6 | -16.687 | 4.997  | 88.217 | 1.00 | 0.00 | C |
| ATOM | 751 | C3'  | T B | 6 | -15.374 | 4.235  | 88.316 | 1.00 | 0.00 | C |
| ATOM | 752 | O3'  | T B | 6 | -14.407 | 5.050  | 88.974 | 1.00 | 0.00 | O |

|      |     |      |     |   |         |        |        |      |      |   |
|------|-----|------|-----|---|---------|--------|--------|------|------|---|
| ATOM | 753 | C4'  | T B | 6 | -15.017 | 3.981  | 86.852 | 1.00 | 0.00 | C |
| ATOM | 754 | O4'  | T B | 6 | -15.527 | 5.159  | 86.149 | 1.00 | 0.00 | O |
| ATOM | 755 | C5'  | T B | 6 | -15.612 | 2.745  | 86.220 | 1.00 | 0.00 | C |
| ATOM | 756 | O5'  | T B | 6 | -16.953 | 2.530  | 86.731 | 1.00 | 0.00 | O |
| ATOM | 757 | O1P  | T B | 6 | -16.744 | 0.382  | 88.025 | 1.00 | 0.00 | O |
| ATOM | 758 | O2P  | T B | 6 | -18.950 | 1.035  | 87.023 | 1.00 | 0.00 | O |
| ATOM | 759 | P    | T B | 6 | -17.471 | 1.033  | 86.918 | 1.00 | 0.00 | P |
| ATOM | 760 | H3   | T B | 6 | -19.213 | 8.262  | 84.334 | 1.00 | 0.00 | H |
| ATOM | 761 | H6   | T B | 6 | -18.434 | 4.034  | 86.516 | 1.00 | 0.00 | H |
| ATOM | 762 | H1'  | T B | 6 | -16.080 | 6.811  | 87.198 | 1.00 | 0.00 | H |
| ATOM | 763 | H3'  | T B | 6 | -15.487 | 3.298  | 88.861 | 1.00 | 0.00 | H |
| ATOM | 764 | H4'  | T B | 6 | -13.932 | 3.892  | 86.802 | 1.00 | 0.00 | H |
| ATOM | 765 | H71  | T B | 6 | -21.237 | 3.848  | 86.076 | 1.00 | 0.00 | H |
| ATOM | 766 | H72  | T B | 6 | -21.528 | 4.390  | 84.406 | 1.00 | 0.00 | H |
| ATOM | 767 | H73  | T B | 6 | -20.286 | 3.159  | 84.738 | 1.00 | 0.00 | H |
| ATOM | 768 | H2'1 | T B | 6 | -17.534 | 4.320  | 88.131 | 1.00 | 0.00 | H |
| ATOM | 769 | H2'2 | T B | 6 | -16.851 | 5.619  | 89.098 | 1.00 | 0.00 | H |
| ATOM | 770 | H5'1 | T B | 6 | -15.646 | 2.877  | 85.138 | 1.00 | 0.00 | H |
| ATOM | 771 | H5'2 | T B | 6 | -14.986 | 1.886  | 86.457 | 1.00 | 0.00 | H |
| ATOM | 772 | C1'  | C B | 7 | -16.522 | 10.361 | 88.978 | 1.00 | 0.00 | C |
| ATOM | 773 | N1   | C B | 7 | -17.796 | 9.697  | 88.581 | 1.00 | 0.00 | N |
| ATOM | 774 | C2   | C B | 7 | -18.682 | 10.413 | 87.779 | 1.00 | 0.00 | C |
| ATOM | 775 | O2   | C B | 7 | -18.378 | 11.562 | 87.429 | 1.00 | 0.00 | O |
| ATOM | 776 | N3   | C B | 7 | -19.846 | 9.826  | 87.407 | 1.00 | 0.00 | N |
| ATOM | 777 | C4   | C B | 7 | -20.148 | 8.583  | 87.801 | 1.00 | 0.00 | C |
| ATOM | 778 | N4   | C B | 7 | -21.297 | 8.058  | 87.406 | 1.00 | 0.00 | N |
| ATOM | 779 | C5   | C B | 7 | -19.257 | 7.825  | 88.632 | 1.00 | 0.00 | C |
| ATOM | 780 | C6   | C B | 7 | -18.088 | 8.434  | 88.990 | 1.00 | 0.00 | C |
| ATOM | 781 | C2'  | C B | 7 | -16.084 | 10.047 | 90.400 | 1.00 | 0.00 | C |
| ATOM | 782 | C3'  | C B | 7 | -14.570 | 9.997  | 90.262 | 1.00 | 0.00 | C |
| ATOM | 783 | O3'  | C B | 7 | -14.048 | 11.320 | 90.360 | 1.00 | 0.00 | O |
| ATOM | 784 | C4'  | C B | 7 | -14.376 | 9.401  | 88.869 | 1.00 | 0.00 | C |
| ATOM | 785 | O4'  | C B | 7 | -15.510 | 9.909  | 88.098 | 1.00 | 0.00 | O |
| ATOM | 786 | C5'  | C B | 7 | -14.367 | 7.892  | 88.779 | 1.00 | 0.00 | C |
| ATOM | 787 | O5'  | C B | 7 | -15.318 | 7.340  | 89.723 | 1.00 | 0.00 | O |
| ATOM | 788 | O1P  | C B | 7 | -13.860 | 6.112  | 91.368 | 1.00 | 0.00 | O |
| ATOM | 789 | O2P  | C B | 7 | -16.224 | 5.368  | 90.988 | 1.00 | 0.00 | O |
| ATOM | 790 | P    | C B | 7 | -14.982 | 5.947  | 90.423 | 1.00 | 0.00 | P |
| ATOM | 791 | H5   | C B | 7 | -19.503 | 6.815  | 88.961 | 1.00 | 0.00 | H |
| ATOM | 792 | H6   | C B | 7 | -17.376 | 7.894  | 89.613 | 1.00 | 0.00 | H |
| ATOM | 793 | H1'  | C B | 7 | -16.639 | 11.435 | 88.832 | 1.00 | 0.00 | H |
| ATOM | 794 | H3'  | C B | 7 | -14.110 | 9.369  | 91.026 | 1.00 | 0.00 | H |
| ATOM | 795 | H4'  | C B | 7 | -13.415 | 9.761  | 88.502 | 1.00 | 0.00 | H |
| ATOM | 796 | H41  | C B | 7 | -21.553 | 7.102  | 87.693 | 1.00 | 0.00 | H |
| ATOM | 797 | H42  | C B | 7 | -21.938 | 8.606  | 86.811 | 1.00 | 0.00 | H |
| ATOM | 798 | H2'1 | C B | 7 | -16.481 | 9.096  | 90.755 | 1.00 | 0.00 | H |
| ATOM | 799 | H2'2 | C B | 7 | -16.394 | 10.816 | 91.108 | 1.00 | 0.00 | H |
| ATOM | 800 | H5'1 | C B | 7 | -14.637 | 7.594  | 87.766 | 1.00 | 0.00 | H |
| ATOM | 801 | H5'2 | C B | 7 | -13.366 | 7.527  | 89.006 | 1.00 | 0.00 | H |
| ATOM | 802 | C1'  | C B | 8 | -18.432 | 14.859 | 89.784 | 1.00 | 0.00 | C |
| ATOM | 803 | N1   | C B | 8 | -19.264 | 13.639 | 89.970 | 1.00 | 0.00 | N |
| ATOM | 804 | C2   | C B | 8 | -20.503 | 13.589 | 89.335 | 1.00 | 0.00 | C |
| ATOM | 805 | O2   | C B | 8 | -20.858 | 14.554 | 88.645 | 1.00 | 0.00 | O |
| ATOM | 806 | N3   | C B | 8 | -21.275 | 12.488 | 89.492 | 1.00 | 0.00 | N |

|      |     |      |     |   |         |        |        |      |      |   |
|------|-----|------|-----|---|---------|--------|--------|------|------|---|
| ATOM | 807 | C4   | C B | 8 | -20.863 | 11.459 | 90.246 | 1.00 | 0.00 | C |
| ATOM | 808 | N4   | C B | 8 | -21.658 | 10.405 | 90.361 | 1.00 | 0.00 | N |
| ATOM | 809 | C5   | C B | 8 | -19.596 | 11.483 | 90.916 | 1.00 | 0.00 | C |
| ATOM | 810 | C6   | C B | 8 | -18.832 | 12.602 | 90.739 | 1.00 | 0.00 | C |
| ATOM | 811 | C2'  | C B | 8 | -17.672 | 15.281 | 91.035 | 1.00 | 0.00 | C |
| ATOM | 812 | C3'  | C B | 8 | -16.372 | 15.813 | 90.451 | 1.00 | 0.00 | C |
| ATOM | 813 | O3'  | C B | 8 | -16.554 | 17.173 | 90.064 | 1.00 | 0.00 | O |
| ATOM | 814 | C4'  | C B | 8 | -16.140 | 14.897 | 89.251 | 1.00 | 0.00 | C |
| ATOM | 815 | O4'  | C B | 8 | -17.485 | 14.582 | 88.769 | 1.00 | 0.00 | O |
| ATOM | 816 | C5'  | C B | 8 | -15.410 | 13.603 | 89.524 | 1.00 | 0.00 | C |
| ATOM | 817 | O5'  | C B | 8 | -15.804 | 13.083 | 90.820 | 1.00 | 0.00 | O |
| ATOM | 818 | O1P  | C B | 8 | -13.688 | 13.237 | 92.176 | 1.00 | 0.00 | O |
| ATOM | 819 | O2P  | C B | 8 | -15.414 | 11.504 | 92.735 | 1.00 | 0.00 | O |
| ATOM | 820 | P    | C B | 8 | -14.724 | 12.301 | 91.693 | 1.00 | 0.00 | P |
| ATOM | 821 | H5   | C B | 8 | -19.259 | 10.652 | 91.536 | 1.00 | 0.00 | H |
| ATOM | 822 | H6   | C B | 8 | -17.857 | 12.664 | 91.223 | 1.00 | 0.00 | H |
| ATOM | 823 | H1'  | C B | 8 | -19.079 | 15.662 | 89.429 | 1.00 | 0.00 | H |
| ATOM | 824 | H3'  | C B | 8 | -15.549 | 15.746 | 91.161 | 1.00 | 0.00 | H |
| ATOM | 825 | H4'  | C B | 8 | -15.550 | 15.463 | 88.530 | 1.00 | 0.00 | H |
| ATOM | 826 | H41  | C B | 8 | -21.364 | 9.599  | 90.932 | 1.00 | 0.00 | H |
| ATOM | 827 | H42  | C B | 8 | -22.570 | 10.391 | 89.880 | 1.00 | 0.00 | H |
| ATOM | 828 | H2'1 | C B | 8 | -17.491 | 14.446 | 91.710 | 1.00 | 0.00 | H |
| ATOM | 829 | H2'2 | C B | 8 | -18.200 | 16.051 | 91.597 | 1.00 | 0.00 | H |
| ATOM | 830 | H5'1 | C B | 8 | -15.658 | 12.880 | 88.747 | 1.00 | 0.00 | H |
| ATOM | 831 | H5'2 | C B | 8 | -14.337 | 13.787 | 89.513 | 1.00 | 0.00 | H |
| ATOM | 832 | C1'  | T B | 9 | -22.117 | 18.152 | 90.045 | 1.00 | 0.00 | C |
| ATOM | 833 | N1   | T B | 9 | -22.227 | 16.850 | 90.755 | 1.00 | 0.00 | N |
| ATOM | 834 | C2   | T B | 9 | -23.371 | 16.109 | 90.542 | 1.00 | 0.00 | C |
| ATOM | 835 | O2   | T B | 9 | -24.270 | 16.482 | 89.809 | 1.00 | 0.00 | O |
| ATOM | 836 | N3   | T B | 9 | -23.430 | 14.907 | 91.220 | 1.00 | 0.00 | N |
| ATOM | 837 | C4   | T B | 9 | -22.474 | 14.396 | 92.072 | 1.00 | 0.00 | C |
| ATOM | 838 | O4   | T B | 9 | -22.640 | 13.304 | 92.629 | 1.00 | 0.00 | O |
| ATOM | 839 | C5   | T B | 9 | -21.312 | 15.240 | 92.232 | 1.00 | 0.00 | C |
| ATOM | 840 | C6   | T B | 9 | -21.221 | 16.418 | 91.585 | 1.00 | 0.00 | C |
| ATOM | 841 | C7   | T B | 9 | -20.245 | 14.721 | 93.149 | 1.00 | 0.00 | C |
| ATOM | 842 | C2'  | T B | 9 | -21.459 | 19.250 | 90.872 | 1.00 | 0.00 | C |
| ATOM | 843 | C3'  | T B | 9 | -20.682 | 20.020 | 89.815 | 1.00 | 0.00 | C |
| ATOM | 844 | O3'  | T B | 9 | -21.548 | 20.967 | 89.193 | 1.00 | 0.00 | O |
| ATOM | 845 | C4'  | T B | 9 | -20.239 | 18.922 | 88.852 | 1.00 | 0.00 | C |
| ATOM | 846 | O4'  | T B | 9 | -21.331 | 17.950 | 88.887 | 1.00 | 0.00 | O |
| ATOM | 847 | C5'  | T B | 9 | -18.947 | 18.213 | 89.189 | 1.00 | 0.00 | C |
| ATOM | 848 | O5'  | T B | 9 | -18.831 | 18.065 | 90.627 | 1.00 | 0.00 | O |
| ATOM | 849 | O1P  | T B | 9 | -16.859 | 19.515 | 91.205 | 1.00 | 0.00 | O |
| ATOM | 850 | O2P  | T B | 9 | -17.436 | 17.547 | 92.651 | 1.00 | 0.00 | O |
| ATOM | 851 | P    | T B | 9 | -17.385 | 18.138 | 91.292 | 1.00 | 0.00 | P |
| ATOM | 852 | H3   | T B | 9 | -24.273 | 14.333 | 91.076 | 1.00 | 0.00 | H |
| ATOM | 853 | H6   | T B | 9 | -20.335 | 17.039 | 91.722 | 1.00 | 0.00 | H |
| ATOM | 854 | H1'  | T B | 9 | -23.115 | 18.451 | 89.723 | 1.00 | 0.00 | H |
| ATOM | 855 | H3'  | T B | 9 | -19.825 | 20.541 | 90.241 | 1.00 | 0.00 | H |
| ATOM | 856 | H4'  | T B | 9 | -20.116 | 19.391 | 87.874 | 1.00 | 0.00 | H |
| ATOM | 857 | H71  | T B | 9 | -20.165 | 15.372 | 94.019 | 1.00 | 0.00 | H |
| ATOM | 858 | H72  | T B | 9 | -20.501 | 13.712 | 93.470 | 1.00 | 0.00 | H |
| ATOM | 859 | H73  | T B | 9 | -19.291 | 14.704 | 92.621 | 1.00 | 0.00 | H |
| ATOM | 860 | H2'1 | T B | 9 | -20.797 | 18.850 | 91.638 | 1.00 | 0.00 | H |

|      |     |      |     |    |         |        |        |      |      |   |
|------|-----|------|-----|----|---------|--------|--------|------|------|---|
| ATOM | 861 | H2'2 | T B | 9  | -22.190 | 19.886 | 91.370 | 1.00 | 0.00 | H |
| ATOM | 862 | H5'1 | T B | 9  | -18.942 | 17.232 | 88.715 | 1.00 | 0.00 | H |
| ATOM | 863 | H5'2 | T B | 9  | -18.110 | 18.797 | 88.811 | 1.00 | 0.00 | H |
| ATOM | 864 | C1'  | A B | 10 | -26.863 | 19.481 | 90.635 | 1.00 | 0.00 | C |
| ATOM | 865 | N1   | A B | 10 | -27.181 | 15.088 | 93.270 | 1.00 | 0.00 | N |
| ATOM | 866 | C2   | A B | 10 | -27.986 | 15.664 | 92.381 | 1.00 | 0.00 | C |
| ATOM | 867 | N3   | A B | 10 | -27.842 | 16.801 | 91.735 | 1.00 | 0.00 | N |
| ATOM | 868 | C4   | A B | 10 | -26.689 | 17.397 | 92.092 | 1.00 | 0.00 | C |
| ATOM | 869 | C5   | A B | 10 | -25.759 | 16.941 | 92.985 | 1.00 | 0.00 | C |
| ATOM | 870 | C6   | A B | 10 | -26.038 | 15.706 | 93.605 | 1.00 | 0.00 | C |
| ATOM | 871 | N6   | A B | 10 | -25.215 | 15.135 | 94.503 | 1.00 | 0.00 | N |
| ATOM | 872 | N7   | A B | 10 | -24.698 | 17.823 | 93.094 | 1.00 | 0.00 | N |
| ATOM | 873 | C8   | A B | 10 | -25.009 | 18.787 | 92.279 | 1.00 | 0.00 | C |
| ATOM | 874 | N9   | A B | 10 | -26.202 | 18.596 | 91.632 | 1.00 | 0.00 | N |
| ATOM | 875 | C2'  | A B | 10 | -26.698 | 20.965 | 90.930 | 1.00 | 0.00 | C |
| ATOM | 876 | C3'  | A B | 10 | -26.583 | 21.556 | 89.533 | 1.00 | 0.00 | C |
| ATOM | 877 | O3'  | A B | 10 | -27.890 | 21.772 | 89.007 | 1.00 | 0.00 | O |
| ATOM | 878 | C4'  | A B | 10 | -25.825 | 20.472 | 88.767 | 1.00 | 0.00 | C |
| ATOM | 879 | O4'  | A B | 10 | -26.278 | 19.219 | 89.373 | 1.00 | 0.00 | O |
| ATOM | 880 | C5'  | A B | 10 | -24.317 | 20.528 | 88.843 | 1.00 | 0.00 | C |
| ATOM | 881 | O5'  | A B | 10 | -23.907 | 20.960 | 90.165 | 1.00 | 0.00 | O |
| ATOM | 882 | O1P  | A B | 10 | -22.831 | 23.195 | 89.737 | 1.00 | 0.00 | O |
| ATOM | 883 | O2P  | A B | 10 | -22.125 | 21.820 | 91.715 | 1.00 | 0.00 | O |
| ATOM | 884 | P    | A B | 10 | -22.594 | 21.855 | 90.308 | 1.00 | 0.00 | P |
| ATOM | 885 | H2   | A B | 10 | -28.899 | 15.113 | 92.156 | 1.00 | 0.00 | H |
| ATOM | 886 | H8   | A B | 10 | -24.379 | 19.664 | 92.123 | 1.00 | 0.00 | H |
| ATOM | 887 | H1'  | A B | 10 | -27.916 | 19.208 | 90.581 | 1.00 | 0.00 | H |
| ATOM | 888 | H3'  | A B | 10 | -26.032 | 22.496 | 89.531 | 1.00 | 0.00 | H |
| ATOM | 889 | H4'  | A B | 10 | -26.110 | 20.566 | 87.720 | 1.00 | 0.00 | H |
| ATOM | 890 | H61  | A B | 10 | -25.466 | 14.229 | 94.924 | 1.00 | 0.00 | H |
| ATOM | 891 | H62  | A B | 10 | -24.337 | 15.602 | 94.766 | 1.00 | 0.00 | H |
| ATOM | 892 | H2'1 | A B | 10 | -25.808 | 21.174 | 91.522 | 1.00 | 0.00 | H |
| ATOM | 893 | H2'2 | A B | 10 | -27.554 | 21.379 | 91.464 | 1.00 | 0.00 | H |
| ATOM | 894 | H5'1 | A B | 10 | -23.912 | 19.536 | 88.639 | 1.00 | 0.00 | H |
| ATOM | 895 | H5'2 | A B | 10 | -23.948 | 21.227 | 88.096 | 1.00 | 0.00 | H |
| ATOM | 896 | C1'  | G B | 11 | -31.479 | 18.838 | 92.343 | 1.00 | 0.00 | C |
| ATOM | 897 | N1   | G B | 11 | -29.179 | 15.991 | 95.896 | 1.00 | 0.00 | N |
| ATOM | 898 | C2   | G B | 11 | -30.348 | 15.761 | 95.194 | 1.00 | 0.00 | C |
| ATOM | 899 | N2   | G B | 11 | -30.992 | 14.621 | 95.478 | 1.00 | 0.00 | N |
| ATOM | 900 | N3   | G B | 11 | -30.836 | 16.600 | 94.281 | 1.00 | 0.00 | N |
| ATOM | 901 | C4   | G B | 11 | -30.060 | 17.705 | 94.128 | 1.00 | 0.00 | C |
| ATOM | 902 | C5   | G B | 11 | -28.885 | 18.020 | 94.786 | 1.00 | 0.00 | C |
| ATOM | 903 | C6   | G B | 11 | -28.362 | 17.130 | 95.751 | 1.00 | 0.00 | C |
| ATOM | 904 | O6   | G B | 11 | -27.342 | 17.233 | 96.434 | 1.00 | 0.00 | O |
| ATOM | 905 | N7   | G B | 11 | -28.397 | 19.251 | 94.340 | 1.00 | 0.00 | N |
| ATOM | 906 | C8   | G B | 11 | -29.272 | 19.632 | 93.445 | 1.00 | 0.00 | C |
| ATOM | 907 | N9   | G B | 11 | -30.313 | 18.746 | 93.261 | 1.00 | 0.00 | N |
| ATOM | 908 | C2'  | G B | 11 | -32.038 | 20.248 | 92.201 | 1.00 | 0.00 | C |
| ATOM | 909 | C3'  | G B | 11 | -32.461 | 20.276 | 90.741 | 1.00 | 0.00 | C |
| ATOM | 910 | O3'  | G B | 11 | -33.765 | 19.715 | 90.621 | 1.00 | 0.00 | O |
| ATOM | 911 | C4'  | G B | 11 | -31.398 | 19.415 | 90.061 | 1.00 | 0.00 | C |
| ATOM | 912 | O4'  | G B | 11 | -31.057 | 18.405 | 91.064 | 1.00 | 0.00 | O |
| ATOM | 913 | C5'  | G B | 11 | -30.131 | 20.122 | 89.639 | 1.00 | 0.00 | C |
| ATOM | 914 | O5'  | G B | 11 | -29.787 | 21.138 | 90.615 | 1.00 | 0.00 | O |

|      |     |      |     |    |         |        |         |      |      |   |
|------|-----|------|-----|----|---------|--------|---------|------|------|---|
| ATOM | 915 | O1P  | G B | 11 | -30.060 | 23.290 | 89.340  | 1.00 | 0.00 | O |
| ATOM | 916 | O2P  | G B | 11 | -28.453 | 23.166 | 91.260  | 1.00 | 0.00 | O |
| ATOM | 917 | P    | G B | 11 | -29.096 | 22.484 | 90.111  | 1.00 | 0.00 | P |
| ATOM | 918 | H1   | G B | 11 | -28.883 | 15.275 | 96.577  | 1.00 | 0.00 | H |
| ATOM | 919 | H8   | G B | 11 | -29.187 | 20.568 | 92.893  | 1.00 | 0.00 | H |
| ATOM | 920 | H1'  | G B | 11 | -32.247 | 18.148 | 92.693  | 1.00 | 0.00 | H |
| ATOM | 921 | H21  | G B | 11 | -30.606 | 13.976 | 96.182  | 1.00 | 0.00 | H |
| ATOM | 922 | H3'  | G B | 11 | -32.465 | 21.289 | 90.336  | 1.00 | 0.00 | H |
| ATOM | 923 | H22  | G B | 11 | -31.870 | 14.392 | 94.992  | 1.00 | 0.00 | H |
| ATOM | 924 | H4'  | G B | 11 | -31.856 | 18.991 | 89.168  | 1.00 | 0.00 | H |
| ATOM | 925 | H2'1 | G B | 11 | -31.290 | 21.011 | 92.412  | 1.00 | 0.00 | H |
| ATOM | 926 | H2'2 | G B | 11 | -32.885 | 20.425 | 92.863  | 1.00 | 0.00 | H |
| ATOM | 927 | H5'1 | G B | 11 | -29.323 | 19.395 | 89.563  | 1.00 | 0.00 | H |
| ATOM | 928 | H5'2 | G B | 11 | -30.289 | 20.586 | 88.665  | 1.00 | 0.00 | H |
| ATOM | 929 | C1'  | G B | 12 | -34.858 | 17.026 | 95.477  | 1.00 | 0.00 | C |
| ATOM | 930 | N1   | G B | 12 | -30.921 | 16.844 | 98.718  | 1.00 | 0.00 | N |
| ATOM | 931 | C2   | G B | 12 | -31.926 | 15.921 | 98.488  | 1.00 | 0.00 | C |
| ATOM | 932 | N2   | G B | 12 | -31.875 | 14.800 | 99.220  | 1.00 | 0.00 | N |
| ATOM | 933 | N3   | G B | 12 | -32.899 | 16.099 | 97.599  | 1.00 | 0.00 | N |
| ATOM | 934 | C4   | G B | 12 | -32.799 | 17.292 | 96.956  | 1.00 | 0.00 | C |
| ATOM | 935 | C5   | G B | 12 | -31.838 | 18.274 | 97.121  | 1.00 | 0.00 | C |
| ATOM | 936 | C6   | G B | 12 | -30.801 | 18.083 | 98.061  | 1.00 | 0.00 | C |
| ATOM | 937 | O6   | G B | 12 | -29.867 | 18.832 | 98.350  | 1.00 | 0.00 | O |
| ATOM | 938 | N7   | G B | 12 | -32.093 | 19.349 | 96.267  | 1.00 | 0.00 | N |
| ATOM | 939 | C8   | G B | 12 | -33.173 | 18.991 | 95.622  | 1.00 | 0.00 | C |
| ATOM | 940 | N9   | G B | 12 | -33.662 | 17.754 | 95.986  | 1.00 | 0.00 | N |
| ATOM | 941 | C2'  | G B | 12 | -36.047 | 17.929 | 95.184  | 1.00 | 0.00 | C |
| ATOM | 942 | C3'  | G B | 12 | -36.660 | 17.260 | 93.963  | 1.00 | 0.00 | C |
| ATOM | 943 | O3'  | G B | 12 | -37.524 | 16.210 | 94.390  | 1.00 | 0.00 | O |
| ATOM | 944 | C4'  | G B | 12 | -35.437 | 16.733 | 93.215  | 1.00 | 0.00 | C |
| ATOM | 945 | O4'  | G B | 12 | -34.490 | 16.381 | 94.274  | 1.00 | 0.00 | O |
| ATOM | 946 | C5'  | G B | 12 | -34.764 | 17.697 | 92.267  | 1.00 | 0.00 | C |
| ATOM | 947 | O5'  | G B | 12 | -34.806 | 19.037 | 92.817  | 1.00 | 0.00 | O |
| ATOM | 948 | O1P  | G B | 12 | -36.297 | 20.278 | 91.213  | 1.00 | 0.00 | O |
| ATOM | 949 | O2P  | G B | 12 | -34.547 | 21.519 | 92.514  | 1.00 | 0.00 | O |
| ATOM | 950 | P    | G B | 12 | -34.952 | 20.273 | 91.818  | 1.00 | 0.00 | P |
| ATOM | 951 | H1   | G B | 12 | -30.208 | 16.606 | 99.425  | 1.00 | 0.00 | H |
| ATOM | 952 | H8   | G B | 12 | -33.647 | 19.615 | 94.864  | 1.00 | 0.00 | H |
| ATOM | 953 | H1'  | G B | 12 | -35.121 | 16.256 | 96.203  | 1.00 | 0.00 | H |
| ATOM | 954 | H21  | G B | 12 | -31.115 | 14.666 | 99.904  | 1.00 | 0.00 | H |
| ATOM | 955 | H3'  | G B | 12 | -37.222 | 17.964 | 93.350  | 1.00 | 0.00 | H |
| ATOM | 956 | H22  | G B | 12 | -32.595 | 14.075 | 99.099  | 1.00 | 0.00 | H |
| ATOM | 957 | H4'  | G B | 12 | -35.766 | 15.872 | 92.635  | 1.00 | 0.00 | H |
| ATOM | 958 | H2'1 | G B | 12 | -35.744 | 18.953 | 94.965  | 1.00 | 0.00 | H |
| ATOM | 959 | H2'2 | G B | 12 | -36.754 | 17.967 | 96.012  | 1.00 | 0.00 | H |
| ATOM | 960 | H5'1 | G B | 12 | -33.728 | 17.392 | 92.120  | 1.00 | 0.00 | H |
| ATOM | 961 | H5'2 | G B | 12 | -35.282 | 17.676 | 91.307  | 1.00 | 0.00 | H |
| ATOM | 962 | C1'  | T B | 13 | -36.384 | 15.224 | 99.827  | 1.00 | 0.00 | C |
| ATOM | 963 | N1   | T B | 13 | -35.615 | 16.495 | 99.773  | 1.00 | 0.00 | N |
| ATOM | 964 | C2   | T B | 13 | -34.514 | 16.603 | 100.600 | 1.00 | 0.00 | C |
| ATOM | 965 | O2   | T B | 13 | -34.166 | 15.710 | 101.353 | 1.00 | 0.00 | O |
| ATOM | 966 | N3   | T B | 13 | -33.828 | 17.800 | 100.516 | 1.00 | 0.00 | N |
| ATOM | 967 | C4   | T B | 13 | -34.139 | 18.870 | 99.704  | 1.00 | 0.00 | C |
| ATOM | 968 | O4   | T B | 13 | -33.450 | 19.898 | 99.719  | 1.00 | 0.00 | O |

|      |      |      |     |    |         |        |         |      |      |   |
|------|------|------|-----|----|---------|--------|---------|------|------|---|
| ATOM | 969  | C5   | T B | 13 | -35.304 | 18.665 | 98.876  | 1.00 | 0.00 | C |
| ATOM | 970  | C6   | T B | 13 | -35.997 | 17.509 | 98.931  | 1.00 | 0.00 | C |
| ATOM | 971  | C7   | T B | 13 | -35.679 | 19.803 | 97.974  | 1.00 | 0.00 | C |
| ATOM | 972  | C2'  | T B | 13 | -37.891 | 15.411 | 99.701  | 1.00 | 0.00 | C |
| ATOM | 973  | C3'  | T B | 13 | -38.297 | 14.177 | 98.909  | 1.00 | 0.00 | C |
| ATOM | 974  | O3'  | T B | 13 | -38.479 | 13.085 | 99.806  | 1.00 | 0.00 | O |
| ATOM | 975  | C4'  | T B | 13 | -37.109 | 13.968 | 97.974  | 1.00 | 0.00 | C |
| ATOM | 976  | O4'  | T B | 13 | -35.954 | 14.412 | 98.754  | 1.00 | 0.00 | O |
| ATOM | 977  | C5'  | T B | 13 | -37.136 | 14.731 | 96.670  | 1.00 | 0.00 | C |
| ATOM | 978  | O5'  | T B | 13 | -37.722 | 16.040 | 96.882  | 1.00 | 0.00 | O |
| ATOM | 979  | O1P  | T B | 13 | -39.858 | 15.945 | 95.556  | 1.00 | 0.00 | O |
| ATOM | 980  | O2P  | T B | 13 | -38.725 | 18.149 | 95.950  | 1.00 | 0.00 | O |
| ATOM | 981  | P    | T B | 13 | -38.594 | 16.690 | 95.715  | 1.00 | 0.00 | P |
| ATOM | 982  | H3   | T B | 13 | -33.001 | 17.903 | 101.122 | 1.00 | 0.00 | H |
| ATOM | 983  | H6   | T B | 13 | -36.873 | 17.378 | 98.296  | 1.00 | 0.00 | H |
| ATOM | 984  | H1'  | T B | 13 | -36.132 | 14.711 | 100.757 | 1.00 | 0.00 | H |
| ATOM | 985  | H3'  | T B | 13 | -39.218 | 14.340 | 98.347  | 1.00 | 0.00 | H |
| ATOM | 986  | H4'  | T B | 13 | -37.080 | 12.904 | 97.734  | 1.00 | 0.00 | H |
| ATOM | 987  | H71  | T B | 13 | -36.639 | 20.212 | 98.283  | 1.00 | 0.00 | H |
| ATOM | 988  | H72  | T B | 13 | -34.917 | 20.581 | 98.034  | 1.00 | 0.00 | H |
| ATOM | 989  | H73  | T B | 13 | -35.750 | 19.445 | 96.946  | 1.00 | 0.00 | H |
| ATOM | 990  | H2'1 | T B | 13 | -38.149 | 16.327 | 99.171  | 1.00 | 0.00 | H |
| ATOM | 991  | H2'2 | T B | 13 | -38.388 | 15.442 | 100.670 | 1.00 | 0.00 | H |
| ATOM | 992  | H5'1 | T B | 13 | -36.118 | 14.838 | 96.296  | 1.00 | 0.00 | H |
| ATOM | 993  | H5'2 | T B | 13 | -37.729 | 14.177 | 95.943  | 1.00 | 0.00 | H |
| ATOM | 994  | C1'  | G B | 14 | -36.077 | 14.654 | 104.751 | 1.00 | 0.00 | C |
| ATOM | 995  | N1   | G B | 14 | -33.643 | 19.133 | 104.563 | 1.00 | 0.00 | N |
| ATOM | 996  | C2   | G B | 14 | -33.355 | 17.997 | 105.298 | 1.00 | 0.00 | C |
| ATOM | 997  | N2   | G B | 14 | -32.277 | 18.062 | 106.089 | 1.00 | 0.00 | N |
| ATOM | 998  | N3   | G B | 14 | -34.084 | 16.883 | 105.246 | 1.00 | 0.00 | N |
| ATOM | 999  | C4   | G B | 14 | -35.142 | 16.997 | 104.399 | 1.00 | 0.00 | C |
| ATOM | 1000 | C5   | G B | 14 | -35.508 | 18.089 | 103.631 | 1.00 | 0.00 | C |
| ATOM | 1001 | C6   | G B | 14 | -34.733 | 19.270 | 103.683 | 1.00 | 0.00 | C |
| ATOM | 1002 | O6   | G B | 14 | -34.896 | 20.333 | 103.082 | 1.00 | 0.00 | O |
| ATOM | 1003 | N7   | G B | 14 | -36.661 | 17.799 | 102.898 | 1.00 | 0.00 | N |
| ATOM | 1004 | C8   | G B | 14 | -36.947 | 16.568 | 103.235 | 1.00 | 0.00 | C |
| ATOM | 1005 | N9   | G B | 14 | -36.071 | 16.012 | 104.144 | 1.00 | 0.00 | N |
| ATOM | 1006 | C2'  | G B | 14 | -37.472 | 14.129 | 105.067 | 1.00 | 0.00 | C |
| ATOM | 1007 | C3'  | G B | 14 | -37.327 | 12.645 | 104.774 | 1.00 | 0.00 | C |
| ATOM | 1008 | O3'  | G B | 14 | -36.787 | 11.992 | 105.920 | 1.00 | 0.00 | O |
| ATOM | 1009 | C4'  | G B | 14 | -36.362 | 12.626 | 103.590 | 1.00 | 0.00 | C |
| ATOM | 1010 | O4'  | G B | 14 | -35.477 | 13.766 | 103.828 | 1.00 | 0.00 | O |
| ATOM | 1011 | C5'  | G B | 14 | -36.978 | 12.768 | 102.219 | 1.00 | 0.00 | C |
| ATOM | 1012 | O5'  | G B | 14 | -38.098 | 13.686 | 102.278 | 1.00 | 0.00 | O |
| ATOM | 1013 | O1P  | G B | 14 | -40.080 | 12.222 | 101.764 | 1.00 | 0.00 | O |
| ATOM | 1014 | O2P  | G B | 14 | -40.157 | 14.670 | 101.227 | 1.00 | 0.00 | O |
| ATOM | 1015 | P    | G B | 14 | -39.353 | 13.429 | 101.327 | 1.00 | 0.00 | P |
| ATOM | 1016 | H1   | G B | 14 | -33.009 | 19.941 | 104.670 | 1.00 | 0.00 | H |
| ATOM | 1017 | H8   | G B | 14 | -37.805 | 16.028 | 102.831 | 1.00 | 0.00 | H |
| ATOM | 1018 | H1'  | G B | 14 | -35.456 | 14.676 | 105.647 | 1.00 | 0.00 | H |
| ATOM | 1019 | H21  | G B | 14 | -31.715 | 18.926 | 106.120 | 1.00 | 0.00 | H |
| ATOM | 1020 | H3'  | G B | 14 | -38.280 | 12.186 | 104.511 | 1.00 | 0.00 | H |
| ATOM | 1021 | H22  | G B | 14 | -32.010 | 17.251 | 106.664 | 1.00 | 0.00 | H |
| ATOM | 1022 | H4'  | G B | 14 | -35.840 | 11.668 | 103.622 | 1.00 | 0.00 | H |

|      |      |      |     |    |         |        |         |      |      |   |
|------|------|------|-----|----|---------|--------|---------|------|------|---|
| ATOM | 1023 | H2'1 | G B | 14 | -38.237 | 14.586 | 104.440 | 1.00 | 0.00 | H |
| ATOM | 1024 | H2'2 | G B | 14 | -37.753 | 14.304 | 106.105 | 1.00 | 0.00 | H |
| ATOM | 1025 | H5'1 | G B | 14 | -36.227 | 13.149 | 101.526 | 1.00 | 0.00 | H |
| ATOM | 1026 | H5'2 | G B | 14 | -37.319 | 11.792 | 101.877 | 1.00 | 0.00 | H |
| ATOM | 1027 | C1'  | C B | 15 | -34.758 | 16.034 | 109.321 | 1.00 | 0.00 | C |
| ATOM | 1028 | N1   | C B | 15 | -35.509 | 16.964 | 108.437 | 1.00 | 0.00 | N |
| ATOM | 1029 | C2   | C B | 15 | -35.000 | 18.249 | 108.258 | 1.00 | 0.00 | C |
| ATOM | 1030 | O2   | C B | 15 | -33.951 | 18.560 | 108.838 | 1.00 | 0.00 | O |
| ATOM | 1031 | N3   | C B | 15 | -35.668 | 19.113 | 107.456 | 1.00 | 0.00 | N |
| ATOM | 1032 | C4   | C B | 15 | -36.800 | 18.746 | 106.843 | 1.00 | 0.00 | C |
| ATOM | 1033 | N4   | C B | 15 | -37.412 | 19.630 | 106.068 | 1.00 | 0.00 | N |
| ATOM | 1034 | C5   | C B | 15 | -37.352 | 17.432 | 107.012 | 1.00 | 0.00 | C |
| ATOM | 1035 | C6   | C B | 15 | -36.658 | 16.579 | 107.819 | 1.00 | 0.00 | C |
| ATOM | 1036 | C2'  | C B | 15 | -35.651 | 15.137 | 110.168 | 1.00 | 0.00 | C |
| ATOM | 1037 | C3'  | C B | 15 | -34.856 | 13.841 | 110.206 | 1.00 | 0.00 | C |
| ATOM | 1038 | O3'  | C B | 15 | -33.887 | 13.916 | 111.251 | 1.00 | 0.00 | O |
| ATOM | 1039 | C4'  | C B | 15 | -34.210 | 13.799 | 108.823 | 1.00 | 0.00 | C |
| ATOM | 1040 | O4'  | C B | 15 | -33.962 | 15.202 | 108.496 | 1.00 | 0.00 | O |
| ATOM | 1041 | C5'  | C B | 15 | -35.033 | 13.182 | 107.716 | 1.00 | 0.00 | C |
| ATOM | 1042 | O5'  | C B | 15 | -36.430 | 13.519 | 107.901 | 1.00 | 0.00 | O |
| ATOM | 1043 | O1P  | C B | 15 | -37.509 | 11.298 | 108.389 | 1.00 | 0.00 | O |
| ATOM | 1044 | O2P  | C B | 15 | -38.851 | 13.138 | 107.334 | 1.00 | 0.00 | O |
| ATOM | 1045 | P    | C B | 15 | -37.540 | 12.456 | 107.473 | 1.00 | 0.00 | P |
| ATOM | 1046 | H5   | C B | 15 | -38.276 | 17.133 | 106.519 | 1.00 | 0.00 | H |
| ATOM | 1047 | H6   | C B | 15 | -37.034 | 15.567 | 107.974 | 1.00 | 0.00 | H |
| ATOM | 1048 | H1'  | C B | 15 | -34.088 | 16.624 | 109.948 | 1.00 | 0.00 | H |
| ATOM | 1049 | H3'  | C B | 15 | -35.496 | 12.975 | 110.368 | 1.00 | 0.00 | H |
| ATOM | 1050 | H4'  | C B | 15 | -33.293 | 13.216 | 108.920 | 1.00 | 0.00 | H |
| ATOM | 1051 | H41  | C B | 15 | -38.284 | 19.373 | 105.582 | 1.00 | 0.00 | H |
| ATOM | 1052 | H42  | C B | 15 | -37.016 | 20.575 | 105.950 | 1.00 | 0.00 | H |
| ATOM | 1053 | H2'1 | C B | 15 | -36.632 | 14.987 | 109.719 | 1.00 | 0.00 | H |
| ATOM | 1054 | H2'2 | C B | 15 | -35.807 | 15.537 | 111.171 | 1.00 | 0.00 | H |
| ATOM | 1055 | H5'1 | C B | 15 | -34.684 | 13.563 | 106.756 | 1.00 | 0.00 | H |
| ATOM | 1056 | H5'2 | C B | 15 | -34.911 | 12.100 | 107.740 | 1.00 | 0.00 | H |
| ATOM | 1057 | C1'  | G B | 16 | -33.564 | 19.357 | 112.792 | 1.00 | 0.00 | C |
| ATOM | 1058 | N1   | G B | 16 | -36.286 | 22.537 | 109.877 | 1.00 | 0.00 | N |
| ATOM | 1059 | C2   | G B | 16 | -35.078 | 22.737 | 110.520 | 1.00 | 0.00 | C |
| ATOM | 1060 | N2   | G B | 16 | -34.522 | 23.946 | 110.369 | 1.00 | 0.00 | N |
| ATOM | 1061 | N3   | G B | 16 | -34.473 | 21.805 | 111.256 | 1.00 | 0.00 | N |
| ATOM | 1062 | C4   | G B | 16 | -35.181 | 20.647 | 111.305 | 1.00 | 0.00 | C |
| ATOM | 1063 | C5   | G B | 16 | -36.392 | 20.358 | 110.700 | 1.00 | 0.00 | C |
| ATOM | 1064 | C6   | G B | 16 | -37.034 | 21.345 | 109.916 | 1.00 | 0.00 | C |
| ATOM | 1065 | O6   | G B | 16 | -38.102 | 21.278 | 109.307 | 1.00 | 0.00 | O |
| ATOM | 1066 | N7   | G B | 16 | -36.783 | 19.052 | 111.002 | 1.00 | 0.00 | N |
| ATOM | 1067 | C8   | G B | 16 | -35.817 | 18.598 | 111.759 | 1.00 | 0.00 | C |
| ATOM | 1068 | N9   | G B | 16 | -34.807 | 19.510 | 111.990 | 1.00 | 0.00 | N |
| ATOM | 1069 | C2'  | G B | 16 | -33.750 | 18.537 | 114.061 | 1.00 | 0.00 | C |
| ATOM | 1070 | C3'  | G B | 16 | -32.427 | 17.796 | 114.158 | 1.00 | 0.00 | C |
| ATOM | 1071 | O3'  | G B | 16 | -31.469 | 18.631 | 114.803 | 1.00 | 0.00 | O |
| ATOM | 1072 | C4'  | G B | 16 | -32.075 | 17.536 | 112.695 | 1.00 | 0.00 | C |
| ATOM | 1073 | O4'  | G B | 16 | -32.607 | 18.699 | 111.984 | 1.00 | 0.00 | O |
| ATOM | 1074 | C5'  | G B | 16 | -32.653 | 16.285 | 112.077 | 1.00 | 0.00 | C |
| ATOM | 1075 | O5'  | G B | 16 | -33.986 | 16.052 | 112.597 | 1.00 | 0.00 | O |
| ATOM | 1076 | O1P  | G B | 16 | -33.736 | 13.919 | 113.908 | 1.00 | 0.00 | O |



|      |      |      |     |    |         |        |         |      |      |   |
|------|------|------|-----|----|---------|--------|---------|------|------|---|
| ATOM | 1077 | O2P  | G B | 16 | -35.957 | 14.529 | 112.915 | 1.00 | 0.00 | O |
| ATOM | 1078 | P    | G B | 16 | -34.479 | 14.550 | 112.801 | 1.00 | 0.00 | P |
| ATOM | 1079 | H1   | G B | 16 | -36.667 | 23.321 | 109.326 | 1.00 | 0.00 | H |
| ATOM | 1080 | H8   | G B | 16 | -35.811 | 17.590 | 112.171 | 1.00 | 0.00 | H |
| ATOM | 1081 | H1'  | G B | 16 | -33.181 | 20.352 | 113.022 | 1.00 | 0.00 | H |
| ATOM | 1082 | H21  | G B | 16 | -34.995 | 24.660 | 109.795 | 1.00 | 0.00 | H |
| ATOM | 1083 | H3'  | G B | 16 | -32.521 | 16.862 | 114.711 | 1.00 | 0.00 | H |
| ATOM | 1084 | H22  | G B | 16 | -33.624 | 24.158 | 110.824 | 1.00 | 0.00 | H |
| ATOM | 1085 | H4'  | G B | 16 | -30.988 | 17.463 | 112.638 | 1.00 | 0.00 | H |
| ATOM | 1086 | H2'1 | G B | 16 | -34.589 | 17.844 | 113.986 | 1.00 | 0.00 | H |
| ATOM | 1087 | H2'2 | G B | 16 | -33.920 | 19.163 | 114.938 | 1.00 | 0.00 | H |
| ATOM | 1088 | H5'1 | G B | 16 | -32.697 | 16.407 | 110.995 | 1.00 | 0.00 | H |
| ATOM | 1089 | H5'2 | G B | 16 | -32.011 | 15.438 | 112.317 | 1.00 | 0.00 | H |
| ATOM | 1090 | C1'  | G B | 17 | -33.602 | 23.872 | 114.827 | 1.00 | 0.00 | C |
| ATOM | 1091 | N1   | G B | 17 | -37.961 | 24.387 | 112.224 | 1.00 | 0.00 | N |
| ATOM | 1092 | C2   | G B | 17 | -36.917 | 25.280 | 112.396 | 1.00 | 0.00 | C |
| ATOM | 1093 | N2   | G B | 17 | -37.055 | 26.468 | 111.796 | 1.00 | 0.00 | N |
| ATOM | 1094 | N3   | G B | 17 | -35.826 | 25.008 | 113.107 | 1.00 | 0.00 | N |
| ATOM | 1095 | C4   | G B | 17 | -35.859 | 23.763 | 113.649 | 1.00 | 0.00 | C |
| ATOM | 1096 | C5   | G B | 17 | -36.855 | 22.808 | 113.535 | 1.00 | 0.00 | C |
| ATOM | 1097 | C6   | G B | 17 | -38.012 | 23.093 | 112.777 | 1.00 | 0.00 | C |
| ATOM | 1098 | O6   | G B | 17 | -38.994 | 22.382 | 112.561 | 1.00 | 0.00 | O |
| ATOM | 1099 | N7   | G B | 17 | -36.503 | 21.656 | 114.244 | 1.00 | 0.00 | N |
| ATOM | 1100 | C8   | G B | 17 | -35.332 | 21.942 | 114.751 | 1.00 | 0.00 | C |
| ATOM | 1101 | N9   | G B | 17 | -34.874 | 23.205 | 114.435 | 1.00 | 0.00 | N |
| ATOM | 1102 | C2'  | G B | 17 | -33.158 | 23.558 | 116.248 | 1.00 | 0.00 | C |
| ATOM | 1103 | C3'  | G B | 17 | -31.644 | 23.515 | 116.106 | 1.00 | 0.00 | C |
| ATOM | 1104 | O3'  | G B | 17 | -31.126 | 24.839 | 116.204 | 1.00 | 0.00 | O |
| ATOM | 1105 | C4'  | G B | 17 | -31.452 | 22.921 | 114.711 | 1.00 | 0.00 | C |
| ATOM | 1106 | O4'  | G B | 17 | -32.591 | 23.426 | 113.945 | 1.00 | 0.00 | O |
| ATOM | 1107 | C5'  | G B | 17 | -31.438 | 21.414 | 114.619 | 1.00 | 0.00 | C |
| ATOM | 1108 | O5'  | G B | 17 | -32.384 | 20.856 | 115.565 | 1.00 | 0.00 | O |
| ATOM | 1109 | O1P  | G B | 17 | -30.915 | 19.633 | 117.204 | 1.00 | 0.00 | O |
| ATOM | 1110 | O2P  | G B | 17 | -33.279 | 18.877 | 116.832 | 1.00 | 0.00 | O |
| ATOM | 1111 | P    | G B | 17 | -32.039 | 19.463 | 116.264 | 1.00 | 0.00 | P |
| ATOM | 1112 | H1   | G B | 17 | -38.759 | 24.694 | 111.647 | 1.00 | 0.00 | H |
| ATOM | 1113 | H8   | G B | 17 | -34.766 | 21.246 | 115.369 | 1.00 | 0.00 | H |
| ATOM | 1114 | H1'  | G B | 17 | -33.722 | 24.945 | 114.682 | 1.00 | 0.00 | H |
| ATOM | 1115 | H21  | G B | 17 | -37.901 | 26.672 | 111.243 | 1.00 | 0.00 | H |
| ATOM | 1116 | H3'  | G B | 17 | -31.180 | 22.887 | 116.867 | 1.00 | 0.00 | H |
| ATOM | 1117 | H22  | G B | 17 | -36.314 | 27.180 | 111.887 | 1.00 | 0.00 | H |
| ATOM | 1118 | H4'  | G B | 17 | -30.494 | 23.285 | 114.341 | 1.00 | 0.00 | H |
| ATOM | 1119 | H2'1 | G B | 17 | -33.550 | 22.605 | 116.604 | 1.00 | 0.00 | H |
| ATOM | 1120 | H2'2 | G B | 17 | -33.468 | 24.324 | 116.957 | 1.00 | 0.00 | H |
| ATOM | 1121 | H5'1 | G B | 17 | -31.708 | 21.114 | 113.607 | 1.00 | 0.00 | H |
| ATOM | 1122 | H5'2 | G B | 17 | -30.434 | 21.051 | 114.844 | 1.00 | 0.00 | H |
| ATOM | 1123 | C1'  | C B | 18 | -35.511 | 28.371 | 115.633 | 1.00 | 0.00 | C |
| ATOM | 1124 | N1   | C B | 18 | -36.343 | 27.149 | 115.820 | 1.00 | 0.00 | N |
| ATOM | 1125 | C2   | C B | 18 | -37.582 | 27.102 | 115.183 | 1.00 | 0.00 | C |
| ATOM | 1126 | O2   | C B | 18 | -37.936 | 28.066 | 114.493 | 1.00 | 0.00 | O |
| ATOM | 1127 | N3   | C B | 18 | -38.353 | 25.999 | 115.342 | 1.00 | 0.00 | N |
| ATOM | 1128 | C4   | C B | 18 | -37.940 | 24.973 | 116.094 | 1.00 | 0.00 | C |
| ATOM | 1129 | N4   | C B | 18 | -38.735 | 23.919 | 116.212 | 1.00 | 0.00 | N |
| ATOM | 1130 | C5   | C B | 18 | -36.674 | 24.997 | 116.762 | 1.00 | 0.00 | C |

|      |      |      |     |    |         |        |         |      |      |   |
|------|------|------|-----|----|---------|--------|---------|------|------|---|
| ATOM | 1131 | C6   | C B | 18 | -35.913 | 26.114 | 116.587 | 1.00 | 0.00 | C |
| ATOM | 1132 | C2'  | C B | 18 | -34.751 | 28.794 | 116.883 | 1.00 | 0.00 | C |
| ATOM | 1133 | C3'  | C B | 18 | -33.451 | 29.324 | 116.300 | 1.00 | 0.00 | C |
| ATOM | 1134 | O3'  | C B | 18 | -33.633 | 30.684 | 115.913 | 1.00 | 0.00 | O |
| ATOM | 1135 | C4'  | C B | 18 | -33.219 | 28.409 | 115.100 | 1.00 | 0.00 | C |
| ATOM | 1136 | O4'  | C B | 18 | -34.564 | 28.094 | 114.618 | 1.00 | 0.00 | O |
| ATOM | 1137 | C5'  | C B | 18 | -32.488 | 27.115 | 115.374 | 1.00 | 0.00 | C |
| ATOM | 1138 | O5'  | C B | 18 | -32.882 | 26.596 | 116.669 | 1.00 | 0.00 | O |
| ATOM | 1139 | O1P  | C B | 18 | -30.767 | 26.748 | 118.025 | 1.00 | 0.00 | O |
| ATOM | 1140 | O2P  | C B | 18 | -32.494 | 25.015 | 118.585 | 1.00 | 0.00 | O |
| ATOM | 1141 | P    | C B | 18 | -31.803 | 25.813 | 117.542 | 1.00 | 0.00 | P |
| ATOM | 1142 | H5   | C B | 18 | -36.335 | 24.164 | 117.379 | 1.00 | 0.00 | H |
| ATOM | 1143 | H6   | C B | 18 | -34.939 | 26.177 | 117.073 | 1.00 | 0.00 | H |
| ATOM | 1144 | H1'  | C B | 18 | -36.158 | 29.173 | 115.280 | 1.00 | 0.00 | H |
| ATOM | 1145 | H3'  | C B | 18 | -32.628 | 29.257 | 117.011 | 1.00 | 0.00 | H |
| ATOM | 1146 | H4'  | C B | 18 | -32.630 | 28.975 | 114.379 | 1.00 | 0.00 | H |
| ATOM | 1147 | H41  | C B | 18 | -38.441 | 23.114 | 116.785 | 1.00 | 0.00 | H |
| ATOM | 1148 | H42  | C B | 18 | -39.646 | 23.903 | 115.731 | 1.00 | 0.00 | H |
| ATOM | 1149 | H2'1 | C B | 18 | -34.571 | 27.959 | 117.559 | 1.00 | 0.00 | H |
| ATOM | 1150 | H2'2 | C B | 18 | -35.278 | 29.563 | 117.446 | 1.00 | 0.00 | H |
| ATOM | 1151 | H5'1 | C B | 18 | -32.737 | 26.392 | 114.597 | 1.00 | 0.00 | H |
| ATOM | 1152 | H5'2 | C B | 18 | -31.416 | 27.300 | 115.362 | 1.00 | 0.00 | H |
| ATOM | 1153 | C1'  | C B | 19 | -39.214 | 31.649 | 115.893 | 1.00 | 0.00 | C |
| ATOM | 1154 | N1   | C B | 19 | -39.302 | 30.349 | 116.612 | 1.00 | 0.00 | N |
| ATOM | 1155 | C2   | C B | 19 | -40.443 | 29.572 | 116.419 | 1.00 | 0.00 | C |
| ATOM | 1156 | O2   | C B | 19 | -41.329 | 29.991 | 115.664 | 1.00 | 0.00 | O |
| ATOM | 1157 | N3   | C B | 19 | -40.542 | 28.386 | 117.066 | 1.00 | 0.00 | N |
| ATOM | 1158 | C4   | C B | 19 | -39.564 | 27.961 | 117.878 | 1.00 | 0.00 | C |
| ATOM | 1159 | N4   | C B | 19 | -39.712 | 26.794 | 118.483 | 1.00 | 0.00 | N |
| ATOM | 1160 | C5   | C B | 19 | -38.383 | 28.741 | 118.094 | 1.00 | 0.00 | C |
| ATOM | 1161 | C6   | C B | 19 | -38.304 | 29.929 | 117.433 | 1.00 | 0.00 | C |
| ATOM | 1162 | C2'  | C B | 19 | -38.567 | 32.759 | 116.709 | 1.00 | 0.00 | C |
| ATOM | 1163 | C3'  | C B | 19 | -37.805 | 33.533 | 115.643 | 1.00 | 0.00 | C |
| ATOM | 1164 | O3'  | C B | 19 | -38.687 | 34.463 | 115.019 | 1.00 | 0.00 | O |
| ATOM | 1165 | C4'  | C B | 19 | -37.352 | 32.434 | 114.684 | 1.00 | 0.00 | C |
| ATOM | 1166 | O4'  | C B | 19 | -38.430 | 31.446 | 114.732 | 1.00 | 0.00 | O |
| ATOM | 1167 | C5'  | C B | 19 | -36.050 | 31.744 | 115.021 | 1.00 | 0.00 | C |
| ATOM | 1168 | O5'  | C B | 19 | -35.925 | 31.606 | 116.458 | 1.00 | 0.00 | O |
| ATOM | 1169 | O1P  | C B | 19 | -33.968 | 33.086 | 117.017 | 1.00 | 0.00 | O |
| ATOM | 1170 | O2P  | C B | 19 | -34.512 | 31.121 | 118.478 | 1.00 | 0.00 | O |
| ATOM | 1171 | P    | C B | 19 | -34.476 | 31.704 | 117.115 | 1.00 | 0.00 | P |
| ATOM | 1172 | H5   | C B | 19 | -37.587 | 28.400 | 118.755 | 1.00 | 0.00 | H |
| ATOM | 1173 | H6   | C B | 19 | -37.422 | 30.556 | 117.565 | 1.00 | 0.00 | H |
| ATOM | 1174 | H1'  | C B | 19 | -40.218 | 31.931 | 115.575 | 1.00 | 0.00 | H |
| ATOM | 1175 | H3'  | C B | 19 | -36.951 | 34.067 | 116.059 | 1.00 | 0.00 | H |
| ATOM | 1176 | H4'  | C B | 19 | -37.240 | 32.895 | 113.703 | 1.00 | 0.00 | H |
| ATOM | 1177 | H41  | C B | 19 | -38.976 | 26.442 | 119.112 | 1.00 | 0.00 | H |
| ATOM | 1178 | H42  | C B | 19 | -40.564 | 26.235 | 118.326 | 1.00 | 0.00 | H |
| ATOM | 1179 | H2'1 | C B | 19 | -37.895 | 32.374 | 117.474 | 1.00 | 0.00 | H |
| ATOM | 1180 | H2'2 | C B | 19 | -39.304 | 33.390 | 117.206 | 1.00 | 0.00 | H |
| ATOM | 1181 | H5'1 | C B | 19 | -36.035 | 30.760 | 114.553 | 1.00 | 0.00 | H |
| ATOM | 1182 | H5'2 | C B | 19 | -35.222 | 32.336 | 114.634 | 1.00 | 0.00 | H |
| ATOM | 1183 | C1'  | T B | 20 | -43.940 | 32.993 | 116.485 | 1.00 | 0.00 | C |
| ATOM | 1184 | N1   | T B | 20 | -43.284 | 32.108 | 117.483 | 1.00 | 0.00 | N |

|      |      |      |     |    |         |        |         |      |      |   |
|------|------|------|-----|----|---------|--------|---------|------|------|---|
| ATOM | 1185 | C2   | T B | 20 | -43.939 | 30.940 | 117.816 | 1.00 | 0.00 | C |
| ATOM | 1186 | O2   | T B | 20 | -45.010 | 30.621 | 117.330 | 1.00 | 0.00 | O |
| ATOM | 1187 | N3   | T B | 20 | -43.292 | 30.148 | 118.748 | 1.00 | 0.00 | N |
| ATOM | 1188 | C4   | T B | 20 | -42.086 | 30.414 | 119.356 | 1.00 | 0.00 | C |
| ATOM | 1189 | O4   | T B | 20 | -41.605 | 29.626 | 120.180 | 1.00 | 0.00 | O |
| ATOM | 1190 | C5   | T B | 20 | -41.477 | 31.656 | 118.944 | 1.00 | 0.00 | C |
| ATOM | 1191 | C6   | T B | 20 | -42.077 | 32.453 | 118.039 | 1.00 | 0.00 | C |
| ATOM | 1192 | C7   | T B | 20 | -40.160 | 31.986 | 119.581 | 1.00 | 0.00 | C |
| ATOM | 1193 | C2'  | T B | 20 | -43.778 | 34.479 | 116.781 | 1.00 | 0.00 | C |
| ATOM | 1194 | C3'  | T B | 20 | -43.658 | 35.070 | 115.385 | 1.00 | 0.00 | C |
| ATOM | 1195 | O3'  | T B | 20 | -44.964 | 35.288 | 114.854 | 1.00 | 0.00 | O |
| ATOM | 1196 | C4'  | T B | 20 | -42.897 | 33.988 | 114.622 | 1.00 | 0.00 | C |
| ATOM | 1197 | O4'  | T B | 20 | -43.353 | 32.734 | 115.225 | 1.00 | 0.00 | O |
| ATOM | 1198 | C5'  | T B | 20 | -41.389 | 34.042 | 114.704 | 1.00 | 0.00 | C |
| ATOM | 1199 | O5'  | T B | 20 | -40.986 | 34.476 | 116.028 | 1.00 | 0.00 | O |
| ATOM | 1200 | O1P  | T B | 20 | -39.908 | 36.710 | 115.605 | 1.00 | 0.00 | O |
| ATOM | 1201 | O2P  | T B | 20 | -39.210 | 35.334 | 117.583 | 1.00 | 0.00 | O |
| ATOM | 1202 | P    | T B | 20 | -39.673 | 35.369 | 116.175 | 1.00 | 0.00 | P |
| ATOM | 1203 | H3   | T B | 20 | -43.760 | 29.270 | 119.013 | 1.00 | 0.00 | H |
| ATOM | 1204 | H6   | T B | 20 | -41.598 | 33.387 | 117.744 | 1.00 | 0.00 | H |
| ATOM | 1205 | H1'  | T B | 20 | -44.994 | 32.720 | 116.425 | 1.00 | 0.00 | H |
| ATOM | 1206 | H3'  | T B | 20 | -43.109 | 36.010 | 115.386 | 1.00 | 0.00 | H |
| ATOM | 1207 | H4'  | T B | 20 | -43.177 | 34.083 | 113.572 | 1.00 | 0.00 | H |
| ATOM | 1208 | H3T  | T B | 20 | -45.550 | 35.803 | 115.412 | 1.00 | 0.00 | H |
| ATOM | 1209 | H71  | T B | 20 | -40.269 | 32.873 | 120.204 | 1.00 | 0.00 | H |
| ATOM | 1210 | H72  | T B | 20 | -39.835 | 31.147 | 120.199 | 1.00 | 0.00 | H |
| ATOM | 1211 | H73  | T B | 20 | -39.417 | 32.175 | 118.806 | 1.00 | 0.00 | H |
| ATOM | 1212 | H2'1 | T B | 20 | -42.892 | 34.686 | 117.378 | 1.00 | 0.00 | H |
| ATOM | 1213 | H2'2 | T B | 20 | -44.636 | 34.890 | 117.313 | 1.00 | 0.00 | H |
| ATOM | 1214 | H5'1 | T B | 20 | -40.983 | 33.052 | 114.499 | 1.00 | 0.00 | H |
| ATOM | 1215 | H5'2 | T B | 20 | -41.017 | 34.743 | 113.957 | 1.00 | 0.00 | H |
| TER  |      |      |     |    |         |        |         |      |      |   |
| ATOM | 1    | C1'  | A A | 1  | -31.745 | 52.146 | 93.627  | 1.00 | 0.00 | C |
| ATOM | 2    | N1   | A A | 1  | -27.143 | 53.192 | 95.645  | 1.00 | 0.00 | N |
| ATOM | 3    | C2   | A A | 1  | -27.702 | 53.497 | 94.478  | 1.00 | 0.00 | C |
| ATOM | 4    | N3   | A A | 1  | -28.899 | 53.197 | 94.021  | 1.00 | 0.00 | N |
| ATOM | 5    | C4   | A A | 1  | -29.577 | 52.473 | 94.929  | 1.00 | 0.00 | C |
| ATOM | 6    | C5   | A A | 1  | -29.149 | 52.077 | 96.165  | 1.00 | 0.00 | C |
| ATOM | 7    | C6   | A A | 1  | -27.844 | 52.470 | 96.532  | 1.00 | 0.00 | C |
| ATOM | 8    | N6   | A A | 1  | -27.288 | 52.154 | 97.715  | 1.00 | 0.00 | N |
| ATOM | 9    | N7   | A A | 1  | -30.123 | 51.344 | 96.821  | 1.00 | 0.00 | N |
| ATOM | 10   | C8   | A A | 1  | -31.109 | 51.313 | 95.975  | 1.00 | 0.00 | C |
| ATOM | 11   | N9   | A A | 1  | -30.853 | 51.977 | 94.804  | 1.00 | 0.00 | N |
| ATOM | 12   | C2'  | A A | 1  | -32.588 | 50.919 | 93.315  | 1.00 | 0.00 | C |
| ATOM | 13   | C3'  | A A | 1  | -33.886 | 51.543 | 92.826  | 1.00 | 0.00 | C |
| ATOM | 14   | O3'  | A A | 1  | -33.765 | 51.851 | 91.440  | 1.00 | 0.00 | O |
| ATOM | 15   | C4'  | A A | 1  | -34.005 | 52.800 | 93.688  | 1.00 | 0.00 | C |
| ATOM | 16   | O4'  | A A | 1  | -32.620 | 53.223 | 93.901  | 1.00 | 0.00 | O |
| ATOM | 17   | C5'  | A A | 1  | -34.671 | 52.630 | 95.033  | 1.00 | 0.00 | C |
| ATOM | 18   | O5'  | A A | 1  | -34.313 | 51.343 | 95.599  | 1.00 | 0.00 | O |
| ATOM | 19   | H2   | A A | 1  | -27.079 | 54.082 | 93.801  | 1.00 | 0.00 | H |
| ATOM | 20   | H8   | A A | 1  | -32.054 | 50.805 | 96.177  | 1.00 | 0.00 | H |
| ATOM | 21   | H1'  | A A | 1  | -31.129 | 52.426 | 92.771  | 1.00 | 0.00 | H |
| ATOM | 22   | H3'  | A A | 1  | -34.740 | 50.881 | 92.976  | 1.00 | 0.00 | H |

|      |    |      |     |   |         |        |        |      |      |   |
|------|----|------|-----|---|---------|--------|--------|------|------|---|
| ATOM | 23 | H4'  | A A | 1 | -34.588 | 53.521 | 93.116 | 1.00 | 0.00 | H |
| ATOM | 24 | H61  | A A | 1 | -26.334 | 52.465 | 97.933 | 1.00 | 0.00 | H |
| ATOM | 25 | H62  | A A | 1 | -27.821 | 51.600 | 98.400 | 1.00 | 0.00 | H |
| ATOM | 26 | H5T  | A A | 1 | -34.961 | 50.877 | 96.133 | 1.00 | 0.00 | H |
| ATOM | 27 | H2'1 | A A | 1 | -32.754 | 50.297 | 94.194 | 1.00 | 0.00 | H |
| ATOM | 28 | H2'2 | A A | 1 | -32.138 | 50.291 | 92.547 | 1.00 | 0.00 | H |
| ATOM | 29 | H5'1 | A A | 1 | -34.342 | 53.428 | 95.698 | 1.00 | 0.00 | H |
| ATOM | 30 | H5'2 | A A | 1 | -35.751 | 52.689 | 94.908 | 1.00 | 0.00 | H |
| ATOM | 31 | C1'  | G A | 2 | -28.193 | 51.550 | 90.207 | 1.00 | 0.00 | C |
| ATOM | 32 | N1   | G A | 2 | -25.195 | 50.747 | 94.255 | 1.00 | 0.00 | N |
| ATOM | 33 | C2   | G A | 2 | -24.957 | 51.477 | 93.107 | 1.00 | 0.00 | C |
| ATOM | 34 | N2   | G A | 2 | -23.762 | 52.073 | 93.025 | 1.00 | 0.00 | N |
| ATOM | 35 | N3   | G A | 2 | -25.842 | 51.606 | 92.119 | 1.00 | 0.00 | N |
| ATOM | 36 | C4   | G A | 2 | -26.995 | 50.933 | 92.368 | 1.00 | 0.00 | C |
| ATOM | 37 | C5   | G A | 2 | -27.320 | 50.175 | 93.482 | 1.00 | 0.00 | C |
| ATOM | 38 | C6   | G A | 2 | -26.381 | 50.044 | 94.533 | 1.00 | 0.00 | C |
| ATOM | 39 | O6   | G A | 2 | -26.485 | 49.422 | 95.592 | 1.00 | 0.00 | O |
| ATOM | 40 | N7   | G A | 2 | -28.606 | 49.646 | 93.349 | 1.00 | 0.00 | N |
| ATOM | 41 | C8   | G A | 2 | -29.011 | 50.092 | 92.188 | 1.00 | 0.00 | C |
| ATOM | 42 | N9   | G A | 2 | -28.088 | 50.879 | 91.531 | 1.00 | 0.00 | N |
| ATOM | 43 | C2'  | G A | 2 | -28.934 | 50.730 | 89.160 | 1.00 | 0.00 | C |
| ATOM | 44 | C3'  | G A | 2 | -29.669 | 51.804 | 88.377 | 1.00 | 0.00 | C |
| ATOM | 45 | O3'  | G A | 2 | -28.796 | 52.338 | 87.383 | 1.00 | 0.00 | O |
| ATOM | 46 | C4'  | G A | 2 | -30.018 | 52.832 | 89.452 | 1.00 | 0.00 | C |
| ATOM | 47 | O4'  | G A | 2 | -28.900 | 52.762 | 90.393 | 1.00 | 0.00 | O |
| ATOM | 48 | C5'  | G A | 2 | -31.304 | 52.600 | 90.209 | 1.00 | 0.00 | C |
| ATOM | 49 | O5'  | G A | 2 | -31.503 | 51.180 | 90.415 | 1.00 | 0.00 | O |
| ATOM | 50 | O1P  | G A | 2 | -33.553 | 50.675 | 89.045 | 1.00 | 0.00 | O |
| ATOM | 51 | O2P  | G A | 2 | -33.004 | 49.266 | 91.046 | 1.00 | 0.00 | O |
| ATOM | 52 | P    | G A | 2 | -32.990 | 50.605 | 90.407 | 1.00 | 0.00 | P |
| ATOM | 53 | H1   | G A | 2 | -24.445 | 50.712 | 94.961 | 1.00 | 0.00 | H |
| ATOM | 54 | H8   | G A | 2 | -29.992 | 49.861 | 91.775 | 1.00 | 0.00 | H |
| ATOM | 55 | H1'  | G A | 2 | -27.187 | 51.796 | 89.869 | 1.00 | 0.00 | H |
| ATOM | 56 | H21  | G A | 2 | -23.083 | 51.970 | 93.792 | 1.00 | 0.00 | H |
| ATOM | 57 | H3'  | G A | 2 | -30.569 | 51.417 | 87.896 | 1.00 | 0.00 | H |
| ATOM | 58 | H22  | G A | 2 | -23.522 | 52.631 | 92.192 | 1.00 | 0.00 | H |
| ATOM | 59 | H4'  | G A | 2 | -30.094 | 53.798 | 88.954 | 1.00 | 0.00 | H |
| ATOM | 60 | H2'1 | G A | 2 | -29.630 | 50.020 | 89.609 | 1.00 | 0.00 | H |
| ATOM | 61 | H2'2 | G A | 2 | -28.256 | 50.165 | 88.521 | 1.00 | 0.00 | H |
| ATOM | 62 | H5'1 | G A | 2 | -31.247 | 53.108 | 91.172 | 1.00 | 0.00 | H |
| ATOM | 63 | H5'2 | G A | 2 | -32.135 | 53.011 | 89.636 | 1.00 | 0.00 | H |
| ATOM | 64 | C1'  | G A | 3 | -23.564 | 50.633 | 88.706 | 1.00 | 0.00 | C |
| ATOM | 65 | N1   | G A | 3 | -23.207 | 48.180 | 93.163 | 1.00 | 0.00 | N |
| ATOM | 66 | C2   | G A | 3 | -22.308 | 49.023 | 92.542 | 1.00 | 0.00 | C |
| ATOM | 67 | N2   | G A | 3 | -21.157 | 49.242 | 93.192 | 1.00 | 0.00 | N |
| ATOM | 68 | N3   | G A | 3 | -22.534 | 49.604 | 91.367 | 1.00 | 0.00 | N |
| ATOM | 69 | C4   | G A | 3 | -23.744 | 49.266 | 90.847 | 1.00 | 0.00 | C |
| ATOM | 70 | C5   | G A | 3 | -24.705 | 48.430 | 91.394 | 1.00 | 0.00 | C |
| ATOM | 71 | C6   | G A | 3 | -24.465 | 47.817 | 92.646 | 1.00 | 0.00 | C |
| ATOM | 72 | O6   | G A | 3 | -25.187 | 47.053 | 93.288 | 1.00 | 0.00 | O |
| ATOM | 73 | N7   | G A | 3 | -25.809 | 48.344 | 90.545 | 1.00 | 0.00 | N |
| ATOM | 74 | C8   | G A | 3 | -25.493 | 49.112 | 89.536 | 1.00 | 0.00 | C |
| ATOM | 75 | N9   | G A | 3 | -24.254 | 49.708 | 89.646 | 1.00 | 0.00 | N |
| ATOM | 76 | C2'  | G A | 3 | -23.791 | 50.297 | 87.239 | 1.00 | 0.00 | C |

|      |     |      |     |   |         |        |        |      |      |   |
|------|-----|------|-----|---|---------|--------|--------|------|------|---|
| ATOM | 77  | C3'  | G A | 3 | -23.843 | 51.675 | 86.602 | 1.00 | 0.00 | C |
| ATOM | 78  | O3'  | G A | 3 | -22.515 | 52.117 | 86.328 | 1.00 | 0.00 | O |
| ATOM | 79  | C4'  | G A | 3 | -24.521 | 52.522 | 87.678 | 1.00 | 0.00 | C |
| ATOM | 80  | O4'  | G A | 3 | -24.064 | 51.935 | 88.938 | 1.00 | 0.00 | O |
| ATOM | 81  | C5'  | G A | 3 | -26.032 | 52.532 | 87.670 | 1.00 | 0.00 | C |
| ATOM | 82  | O5'  | G A | 3 | -26.531 | 51.224 | 87.298 | 1.00 | 0.00 | O |
| ATOM | 83  | O1P  | G A | 3 | -27.651 | 51.636 | 85.082 | 1.00 | 0.00 | O |
| ATOM | 84  | O2P  | G A | 3 | -28.424 | 49.753 | 86.547 | 1.00 | 0.00 | O |
| ATOM | 85  | P    | G A | 3 | -27.877 | 51.128 | 86.447 | 1.00 | 0.00 | P |
| ATOM | 86  | H1   | G A | 3 | -22.936 | 47.784 | 94.077 | 1.00 | 0.00 | H |
| ATOM | 87  | H8   | G A | 3 | -26.150 | 49.271 | 88.682 | 1.00 | 0.00 | H |
| ATOM | 88  | H1'  | G A | 3 | -22.501 | 50.634 | 88.947 | 1.00 | 0.00 | H |
| ATOM | 89  | H21  | G A | 3 | -20.989 | 48.792 | 94.104 | 1.00 | 0.00 | H |
| ATOM | 90  | H3'  | G A | 3 | -24.422 | 51.677 | 85.678 | 1.00 | 0.00 | H |
| ATOM | 91  | H22  | G A | 3 | -20.444 | 49.859 | 92.782 | 1.00 | 0.00 | H |
| ATOM | 92  | H4'  | G A | 3 | -24.181 | 53.548 | 87.537 | 1.00 | 0.00 | H |
| ATOM | 93  | H2'1 | G A | 3 | -24.719 | 49.751 | 87.079 | 1.00 | 0.00 | H |
| ATOM | 94  | H2'2 | G A | 3 | -22.980 | 49.698 | 86.822 | 1.00 | 0.00 | H |
| ATOM | 95  | H5'1 | G A | 3 | -26.393 | 52.796 | 88.664 | 1.00 | 0.00 | H |
| ATOM | 96  | H5'2 | G A | 3 | -26.380 | 53.278 | 86.955 | 1.00 | 0.00 | H |
| ATOM | 97  | C1'  | C A | 4 | -19.025 | 48.712 | 89.202 | 1.00 | 0.00 | C |
| ATOM | 98  | N1   | C A | 4 | -20.233 | 47.860 | 89.393 | 1.00 | 0.00 | N |
| ATOM | 99  | C2   | C A | 4 | -20.319 | 47.107 | 90.562 | 1.00 | 0.00 | C |
| ATOM | 100 | O2   | C A | 4 | -19.400 | 47.175 | 91.387 | 1.00 | 0.00 | O |
| ATOM | 101 | N3   | C A | 4 | -21.409 | 46.326 | 90.755 | 1.00 | 0.00 | N |
| ATOM | 102 | C4   | C A | 4 | -22.388 | 46.273 | 89.843 | 1.00 | 0.00 | C |
| ATOM | 103 | N4   | C A | 4 | -23.433 | 45.494 | 90.085 | 1.00 | 0.00 | N |
| ATOM | 104 | C5   | C A | 4 | -22.322 | 47.034 | 88.631 | 1.00 | 0.00 | C |
| ATOM | 105 | C6   | C A | 4 | -21.219 | 47.816 | 88.460 | 1.00 | 0.00 | C |
| ATOM | 106 | C2'  | C A | 4 | -18.527 | 48.755 | 87.765 | 1.00 | 0.00 | C |
| ATOM | 107 | C3'  | C A | 4 | -18.034 | 50.190 | 87.643 | 1.00 | 0.00 | C |
| ATOM | 108 | O3'  | C A | 4 | -16.699 | 50.269 | 88.141 | 1.00 | 0.00 | O |
| ATOM | 109 | C4'  | C A | 4 | -19.021 | 50.964 | 88.514 | 1.00 | 0.00 | C |
| ATOM | 110 | O4'  | C A | 4 | -19.364 | 50.031 | 89.588 | 1.00 | 0.00 | O |
| ATOM | 111 | C5'  | C A | 4 | -20.296 | 51.416 | 87.843 | 1.00 | 0.00 | C |
| ATOM | 112 | O5'  | C A | 4 | -20.734 | 50.411 | 86.894 | 1.00 | 0.00 | O |
| ATOM | 113 | O1P  | C A | 4 | -20.498 | 51.566 | 84.670 | 1.00 | 0.00 | O |
| ATOM | 114 | O2P  | C A | 4 | -22.191 | 49.737 | 84.961 | 1.00 | 0.00 | O |
| ATOM | 115 | P    | C A | 4 | -21.461 | 50.884 | 85.556 | 1.00 | 0.00 | P |
| ATOM | 116 | H5   | C A | 4 | -23.116 | 46.990 | 87.883 | 1.00 | 0.00 | H |
| ATOM | 117 | H6   | C A | 4 | -21.125 | 48.417 | 87.555 | 1.00 | 0.00 | H |
| ATOM | 118 | H1'  | C A | 4 | -18.247 | 48.354 | 89.875 | 1.00 | 0.00 | H |
| ATOM | 119 | H3'  | C A | 4 | -18.056 | 50.542 | 86.613 | 1.00 | 0.00 | H |
| ATOM | 120 | H4'  | C A | 4 | -18.499 | 51.852 | 88.871 | 1.00 | 0.00 | H |
| ATOM | 121 | H41  | C A | 4 | -24.201 | 45.436 | 89.400 | 1.00 | 0.00 | H |
| ATOM | 122 | H42  | C A | 4 | -23.477 | 44.946 | 90.956 | 1.00 | 0.00 | H |
| ATOM | 123 | H2'1 | C A | 4 | -19.318 | 48.548 | 87.046 | 1.00 | 0.00 | H |
| ATOM | 124 | H2'2 | C A | 4 | -17.723 | 48.041 | 87.583 | 1.00 | 0.00 | H |
| ATOM | 125 | H5'1 | C A | 4 | -21.066 | 51.569 | 88.599 | 1.00 | 0.00 | H |
| ATOM | 126 | H5'2 | C A | 4 | -20.113 | 52.357 | 87.323 | 1.00 | 0.00 | H |
| ATOM | 127 | C1'  | C A | 5 | -15.738 | 45.476 | 91.007 | 1.00 | 0.00 | C |
| ATOM | 128 | N1   | C A | 5 | -16.992 | 44.999 | 90.360 | 1.00 | 0.00 | N |
| ATOM | 129 | C2   | C A | 5 | -17.778 | 44.087 | 91.058 | 1.00 | 0.00 | C |
| ATOM | 130 | O2   | C A | 5 | -17.409 | 43.711 | 92.179 | 1.00 | 0.00 | O |

|      |     |      |     |   |         |        |        |      |      |   |
|------|-----|------|-----|---|---------|--------|--------|------|------|---|
| ATOM | 131 | N3   | C A | 5 | -18.925 | 43.640 | 90.486 | 1.00 | 0.00 | N |
| ATOM | 132 | C4   | C A | 5 | -19.298 | 44.062 | 89.274 | 1.00 | 0.00 | C |
| ATOM | 133 | N4   | C A | 5 | -20.428 | 43.597 | 88.764 | 1.00 | 0.00 | N |
| ATOM | 134 | C5   | C A | 5 | -18.507 | 45.000 | 88.532 | 1.00 | 0.00 | C |
| ATOM | 135 | C6   | C A | 5 | -17.361 | 45.438 | 89.128 | 1.00 | 0.00 | C |
| ATOM | 136 | C2'  | C A | 5 | -14.580 | 45.661 | 90.037 | 1.00 | 0.00 | C |
| ATOM | 137 | C3'  | C A | 5 | -13.875 | 46.877 | 90.615 | 1.00 | 0.00 | C |
| ATOM | 138 | O3'  | C A | 5 | -12.984 | 46.457 | 91.647 | 1.00 | 0.00 | O |
| ATOM | 139 | C4'  | C A | 5 | -15.030 | 47.716 | 91.155 | 1.00 | 0.00 | C |
| ATOM | 140 | O4'  | C A | 5 | -16.013 | 46.731 | 91.604 | 1.00 | 0.00 | O |
| ATOM | 141 | C5'  | C A | 5 | -15.697 | 48.652 | 90.174 | 1.00 | 0.00 | C |
| ATOM | 142 | O5'  | C A | 5 | -15.745 | 48.034 | 88.863 | 1.00 | 0.00 | O |
| ATOM | 143 | O1P  | C A | 5 | -14.234 | 49.491 | 87.476 | 1.00 | 0.00 | O |
| ATOM | 144 | O2P  | C A | 5 | -16.105 | 48.227 | 86.384 | 1.00 | 0.00 | O |
| ATOM | 145 | P    | C A | 5 | -15.607 | 48.961 | 87.573 | 1.00 | 0.00 | P |
| ATOM | 146 | H5   | C A | 5 | -18.805 | 45.345 | 87.541 | 1.00 | 0.00 | H |
| ATOM | 147 | H6   | C A | 5 | -16.728 | 46.155 | 88.605 | 1.00 | 0.00 | H |
| ATOM | 148 | H1'  | C A | 5 | -15.478 | 44.777 | 91.801 | 1.00 | 0.00 | H |
| ATOM | 149 | H3'  | C A | 5 | -13.313 | 47.423 | 89.855 | 1.00 | 0.00 | H |
| ATOM | 150 | H4'  | C A | 5 | -14.629 | 48.320 | 91.970 | 1.00 | 0.00 | H |
| ATOM | 151 | H41  | C A | 5 | -20.741 | 43.907 | 87.832 | 1.00 | 0.00 | H |
| ATOM | 152 | H42  | C A | 5 | -20.996 | 42.921 | 89.298 | 1.00 | 0.00 | H |
| ATOM | 153 | H2'1 | C A | 5 | -14.918 | 45.845 | 89.018 | 1.00 | 0.00 | H |
| ATOM | 154 | H2'2 | C A | 5 | -13.919 | 44.792 | 90.012 | 1.00 | 0.00 | H |
| ATOM | 155 | H5'1 | C A | 5 | -16.709 | 48.869 | 90.516 | 1.00 | 0.00 | H |
| ATOM | 156 | H5'2 | C A | 5 | -15.128 | 49.580 | 90.124 | 1.00 | 0.00 | H |
| ATOM | 157 | C1'  | G A | 6 | -14.385 | 41.119 | 92.933 | 1.00 | 0.00 | C |
| ATOM | 158 | N1   | G A | 6 | -18.578 | 39.416 | 90.578 | 1.00 | 0.00 | N |
| ATOM | 159 | C2   | G A | 6 | -18.092 | 39.132 | 91.842 | 1.00 | 0.00 | C |
| ATOM | 160 | N2   | G A | 6 | -18.817 | 38.278 | 92.574 | 1.00 | 0.00 | N |
| ATOM | 161 | N3   | G A | 6 | -16.971 | 39.656 | 92.334 | 1.00 | 0.00 | N |
| ATOM | 162 | C4   | G A | 6 | -16.363 | 40.493 | 91.453 | 1.00 | 0.00 | C |
| ATOM | 163 | C5   | G A | 6 | -16.771 | 40.833 | 90.175 | 1.00 | 0.00 | C |
| ATOM | 164 | C6   | G A | 6 | -17.962 | 40.279 | 89.653 | 1.00 | 0.00 | C |
| ATOM | 165 | O6   | G A | 6 | -18.483 | 40.457 | 88.551 | 1.00 | 0.00 | O |
| ATOM | 166 | N7   | G A | 6 | -15.863 | 41.723 | 89.598 | 1.00 | 0.00 | N |
| ATOM | 167 | C8   | G A | 6 | -14.956 | 41.894 | 90.523 | 1.00 | 0.00 | C |
| ATOM | 168 | N9   | G A | 6 | -15.189 | 41.179 | 91.681 | 1.00 | 0.00 | N |
| ATOM | 169 | C2'  | G A | 6 | -12.882 | 41.147 | 92.698 | 1.00 | 0.00 | C |
| ATOM | 170 | C3'  | G A | 6 | -12.389 | 41.954 | 93.889 | 1.00 | 0.00 | C |
| ATOM | 171 | O3'  | G A | 6 | -12.228 | 41.087 | 95.008 | 1.00 | 0.00 | O |
| ATOM | 172 | C4'  | G A | 6 | -13.511 | 42.968 | 94.100 | 1.00 | 0.00 | C |
| ATOM | 173 | O4'  | G A | 6 | -14.725 | 42.247 | 93.717 | 1.00 | 0.00 | O |
| ATOM | 174 | C5'  | G A | 6 | -13.429 | 44.239 | 93.288 | 1.00 | 0.00 | C |
| ATOM | 175 | O5'  | G A | 6 | -12.899 | 43.948 | 91.971 | 1.00 | 0.00 | O |
| ATOM | 176 | O1P  | G A | 6 | -10.684 | 45.143 | 91.957 | 1.00 | 0.00 | O |
| ATOM | 177 | O2P  | G A | 6 | -11.907 | 44.744 | 89.803 | 1.00 | 0.00 | O |
| ATOM | 178 | P    | G A | 6 | -11.977 | 45.036 | 91.256 | 1.00 | 0.00 | P |
| ATOM | 179 | H1   | G A | 6 | -19.460 | 38.962 | 90.294 | 1.00 | 0.00 | H |
| ATOM | 180 | H8   | G A | 6 | -14.090 | 42.543 | 90.396 | 1.00 | 0.00 | H |
| ATOM | 181 | H1'  | G A | 6 | -14.679 | 40.225 | 93.484 | 1.00 | 0.00 | H |
| ATOM | 182 | H21  | G A | 6 | -19.685 | 37.877 | 92.189 | 1.00 | 0.00 | H |
| ATOM | 183 | H3'  | G A | 6 | -11.441 | 42.454 | 93.681 | 1.00 | 0.00 | H |
| ATOM | 184 | H22  | G A | 6 | -18.507 | 38.021 | 93.523 | 1.00 | 0.00 | H |

|      |     |      |     |   |         |        |        |      |      |   |
|------|-----|------|-----|---|---------|--------|--------|------|------|---|
| ATOM | 185 | H4'  | G A | 6 | -13.495 | 43.244 | 95.153 | 1.00 | 0.00 | H |
| ATOM | 186 | H2'1 | G A | 6 | -12.618 | 41.630 | 91.755 | 1.00 | 0.00 | H |
| ATOM | 187 | H2'2 | G A | 6 | -12.445 | 40.148 | 92.686 | 1.00 | 0.00 | H |
| ATOM | 188 | H5'1 | G A | 6 | -14.425 | 44.672 | 93.196 | 1.00 | 0.00 | H |
| ATOM | 189 | H5'2 | G A | 6 | -12.777 | 44.949 | 93.799 | 1.00 | 0.00 | H |
| ATOM | 190 | C1'  | C A | 7 | -14.906 | 36.262 | 93.746 | 1.00 | 0.00 | C |
| ATOM | 191 | N1   | C A | 7 | -14.946 | 36.805 | 92.362 | 1.00 | 0.00 | N |
| ATOM | 192 | C2   | C A | 7 | -16.025 | 36.450 | 91.554 | 1.00 | 0.00 | C |
| ATOM | 193 | O2   | C A | 7 | -16.898 | 35.704 | 92.017 | 1.00 | 0.00 | O |
| ATOM | 194 | N3   | C A | 7 | -16.083 | 36.934 | 90.289 | 1.00 | 0.00 | N |
| ATOM | 195 | C4   | C A | 7 | -15.122 | 37.739 | 89.816 | 1.00 | 0.00 | C |
| ATOM | 196 | N4   | C A | 7 | -15.229 | 38.184 | 88.572 | 1.00 | 0.00 | N |
| ATOM | 197 | C5   | C A | 7 | -13.999 | 38.117 | 90.622 | 1.00 | 0.00 | C |
| ATOM | 198 | C6   | C A | 7 | -13.964 | 37.621 | 91.894 | 1.00 | 0.00 | C |
| ATOM | 199 | C2'  | C A | 7 | -13.507 | 35.889 | 94.219 | 1.00 | 0.00 | C |
| ATOM | 200 | C3'  | C A | 7 | -13.561 | 36.260 | 95.693 | 1.00 | 0.00 | C |
| ATOM | 201 | O3'  | C A | 7 | -14.129 | 35.177 | 96.427 | 1.00 | 0.00 | O |
| ATOM | 202 | C4'  | C A | 7 | -14.456 | 37.497 | 95.700 | 1.00 | 0.00 | C |
| ATOM | 203 | O4'  | C A | 7 | -15.408 | 37.260 | 94.614 | 1.00 | 0.00 | O |
| ATOM | 204 | C5'  | C A | 7 | -13.770 | 38.823 | 95.459 | 1.00 | 0.00 | C |
| ATOM | 205 | O5'  | C A | 7 | -12.702 | 38.655 | 94.493 | 1.00 | 0.00 | O |
| ATOM | 206 | O1P  | C A | 7 | -10.624 | 39.119 | 95.835 | 1.00 | 0.00 | O |
| ATOM | 207 | O2P  | C A | 7 | -10.640 | 39.536 | 93.361 | 1.00 | 0.00 | O |
| ATOM | 208 | P    | C A | 7 | -11.386 | 39.542 | 94.642 | 1.00 | 0.00 | P |
| ATOM | 209 | H5   | C A | 7 | -13.210 | 38.766 | 90.240 | 1.00 | 0.00 | H |
| ATOM | 210 | H6   | C A | 7 | -13.133 | 37.887 | 92.549 | 1.00 | 0.00 | H |
| ATOM | 211 | H1'  | C A | 7 | -15.577 | 35.404 | 93.797 | 1.00 | 0.00 | H |
| ATOM | 212 | H3'  | C A | 7 | -12.571 | 36.487 | 96.093 | 1.00 | 0.00 | H |
| ATOM | 213 | H4'  | C A | 7 | -14.928 | 37.541 | 96.681 | 1.00 | 0.00 | H |
| ATOM | 214 | H41  | C A | 7 | -14.506 | 38.807 | 88.185 | 1.00 | 0.00 | H |
| ATOM | 215 | H42  | C A | 7 | -16.036 | 37.910 | 87.994 | 1.00 | 0.00 | H |
| ATOM | 216 | H2'1 | C A | 7 | -12.731 | 36.449 | 93.698 | 1.00 | 0.00 | H |
| ATOM | 217 | H2'2 | C A | 7 | -13.293 | 34.829 | 94.082 | 1.00 | 0.00 | H |
| ATOM | 218 | H5'1 | C A | 7 | -14.500 | 39.540 | 95.081 | 1.00 | 0.00 | H |
| ATOM | 219 | H5'2 | C A | 7 | -13.362 | 39.190 | 96.399 | 1.00 | 0.00 | H |
| ATOM | 220 | C1'  | A A | 8 | -16.522 | 31.711 | 92.662 | 1.00 | 0.00 | C |
| ATOM | 221 | N1   | A A | 8 | -16.527 | 33.483 | 87.844 | 1.00 | 0.00 | N |
| ATOM | 222 | C2   | A A | 8 | -17.391 | 32.737 | 88.528 | 1.00 | 0.00 | C |
| ATOM | 223 | N3   | A A | 8 | -17.329 | 32.316 | 89.774 | 1.00 | 0.00 | N |
| ATOM | 224 | C4   | A A | 8 | -16.194 | 32.748 | 90.354 | 1.00 | 0.00 | C |
| ATOM | 225 | C5   | A A | 8 | -15.211 | 33.515 | 89.795 | 1.00 | 0.00 | C |
| ATOM | 226 | C6   | A A | 8 | -15.405 | 33.900 | 88.452 | 1.00 | 0.00 | C |
| ATOM | 227 | N6   | A A | 8 | -14.527 | 34.652 | 87.769 | 1.00 | 0.00 | N |
| ATOM | 228 | N7   | A A | 8 | -14.193 | 33.763 | 90.698 | 1.00 | 0.00 | N |
| ATOM | 229 | C8   | A A | 8 | -14.576 | 33.143 | 91.777 | 1.00 | 0.00 | C |
| ATOM | 230 | N9   | A A | 8 | -15.783 | 32.505 | 91.644 | 1.00 | 0.00 | N |
| ATOM | 231 | C2'  | A A | 8 | -15.619 | 30.868 | 93.554 | 1.00 | 0.00 | C |
| ATOM | 232 | C3'  | A A | 8 | -16.343 | 30.938 | 94.890 | 1.00 | 0.00 | C |
| ATOM | 233 | O3'  | A A | 8 | -17.360 | 29.939 | 94.921 | 1.00 | 0.00 | O |
| ATOM | 234 | C4'  | A A | 8 | -16.921 | 32.352 | 94.891 | 1.00 | 0.00 | C |
| ATOM | 235 | O4'  | A A | 8 | -17.230 | 32.616 | 93.483 | 1.00 | 0.00 | O |
| ATOM | 236 | C5'  | A A | 8 | -16.014 | 33.445 | 95.403 | 1.00 | 0.00 | C |
| ATOM | 237 | O5'  | A A | 8 | -14.647 | 33.177 | 95.001 | 1.00 | 0.00 | O |
| ATOM | 238 | O1P  | A A | 8 | -13.472 | 32.752 | 97.186 | 1.00 | 0.00 | O |

|      |     |      |     |    |         |        |        |      |      |   |
|------|-----|------|-----|----|---------|--------|--------|------|------|---|
| ATOM | 239 | O2P  | A A | 8  | -12.188 | 33.642 | 95.222 | 1.00 | 0.00 | O |
| ATOM | 240 | P    | A A | 8  | -13.463 | 33.603 | 95.980 | 1.00 | 0.00 | P |
| ATOM | 241 | H2   | A A | 8  | -18.278 | 32.430 | 87.978 | 1.00 | 0.00 | H |
| ATOM | 242 | H8   | A A | 8  | -13.994 | 33.130 | 92.697 | 1.00 | 0.00 | H |
| ATOM | 243 | H1'  | A A | 8  | -17.250 | 31.088 | 92.144 | 1.00 | 0.00 | H |
| ATOM | 244 | H3'  | A A | 8  | -15.665 | 30.788 | 95.730 | 1.00 | 0.00 | H |
| ATOM | 245 | H4'  | A A | 8  | -17.808 | 32.330 | 95.525 | 1.00 | 0.00 | H |
| ATOM | 246 | H61  | A A | 8  | -14.717 | 34.907 | 86.790 | 1.00 | 0.00 | H |
| ATOM | 247 | H62  | A A | 8  | -13.661 | 34.974 | 88.228 | 1.00 | 0.00 | H |
| ATOM | 248 | H2'1 | A A | 8  | -14.613 | 31.276 | 93.627 | 1.00 | 0.00 | H |
| ATOM | 249 | H2'2 | A A | 8  | -15.534 | 29.840 | 93.201 | 1.00 | 0.00 | H |
| ATOM | 250 | H5'1 | A A | 8  | -16.339 | 34.401 | 94.988 | 1.00 | 0.00 | H |
| ATOM | 251 | H5'2 | A A | 8  | -16.078 | 33.485 | 96.489 | 1.00 | 0.00 | H |
| ATOM | 252 | C1'  | C A | 9  | -18.059 | 28.175 | 89.531 | 1.00 | 0.00 | C |
| ATOM | 253 | N1   | C A | 9  | -16.784 | 28.900 | 89.280 | 1.00 | 0.00 | N |
| ATOM | 254 | C2   | C A | 9  | -16.588 | 29.463 | 88.020 | 1.00 | 0.00 | C |
| ATOM | 255 | O2   | C A | 9  | -17.478 | 29.336 | 87.168 | 1.00 | 0.00 | O |
| ATOM | 256 | N3   | C A | 9  | -15.435 | 30.128 | 87.772 | 1.00 | 0.00 | N |
| ATOM | 257 | C4   | C A | 9  | -14.492 | 30.246 | 88.715 | 1.00 | 0.00 | C |
| ATOM | 258 | N4   | C A | 9  | -13.384 | 30.909 | 88.418 | 1.00 | 0.00 | N |
| ATOM | 259 | C5   | C A | 9  | -14.662 | 29.674 | 90.019 | 1.00 | 0.00 | C |
| ATOM | 260 | C6   | C A | 9  | -15.835 | 29.012 | 90.249 | 1.00 | 0.00 | C |
| ATOM | 261 | C2'  | C A | 9  | -17.898 | 26.933 | 90.396 | 1.00 | 0.00 | C |
| ATOM | 262 | C3'  | C A | 9  | -19.186 | 26.941 | 91.207 | 1.00 | 0.00 | C |
| ATOM | 263 | O3'  | C A | 9  | -20.220 | 26.318 | 90.449 | 1.00 | 0.00 | O |
| ATOM | 264 | C4'  | C A | 9  | -19.445 | 28.431 | 91.418 | 1.00 | 0.00 | C |
| ATOM | 265 | O4'  | C A | 9  | -18.935 | 29.063 | 90.201 | 1.00 | 0.00 | O |
| ATOM | 266 | C5'  | C A | 9  | -18.768 | 29.068 | 92.610 | 1.00 | 0.00 | C |
| ATOM | 267 | O5'  | C A | 9  | -17.454 | 28.483 | 92.799 | 1.00 | 0.00 | O |
| ATOM | 268 | O1P  | C A | 9  | -17.663 | 27.279 | 94.999 | 1.00 | 0.00 | O |
| ATOM | 269 | O2P  | C A | 9  | -15.426 | 28.119 | 94.237 | 1.00 | 0.00 | O |
| ATOM | 270 | P    | C A | 9  | -16.895 | 28.315 | 94.283 | 1.00 | 0.00 | P |
| ATOM | 271 | H5   | C A | 9  | -13.893 | 29.763 | 90.789 | 1.00 | 0.00 | H |
| ATOM | 272 | H6   | C A | 9  | -16.013 | 28.568 | 91.227 | 1.00 | 0.00 | H |
| ATOM | 273 | H1'  | C A | 9  | -18.505 | 27.925 | 88.569 | 1.00 | 0.00 | H |
| ATOM | 274 | H3'  | C A | 9  | -19.071 | 26.423 | 92.159 | 1.00 | 0.00 | H |
| ATOM | 275 | H4'  | C A | 9  | -20.520 | 28.552 | 91.543 | 1.00 | 0.00 | H |
| ATOM | 276 | H41  | C A | 9  | -12.643 | 31.019 | 89.126 | 1.00 | 0.00 | H |
| ATOM | 277 | H42  | C A | 9  | -13.263 | 31.318 | 87.479 | 1.00 | 0.00 | H |
| ATOM | 278 | H2'1 | C A | 9  | -17.023 | 26.989 | 91.044 | 1.00 | 0.00 | H |
| ATOM | 279 | H2'2 | C A | 9  | -17.807 | 26.023 | 89.802 | 1.00 | 0.00 | H |
| ATOM | 280 | H5'1 | C A | 9  | -18.673 | 30.140 | 92.439 | 1.00 | 0.00 | H |
| ATOM | 281 | H5'2 | C A | 9  | -19.378 | 28.900 | 93.498 | 1.00 | 0.00 | H |
| ATOM | 282 | C1'  | C A | 10 | -18.337 | 25.947 | 85.117 | 1.00 | 0.00 | C |
| ATOM | 283 | N1   | C A | 10 | -17.015 | 26.297 | 85.705 | 1.00 | 0.00 | N |
| ATOM | 284 | C2   | C A | 10 | -16.123 | 27.019 | 84.915 | 1.00 | 0.00 | C |
| ATOM | 285 | O2   | C A | 10 | -16.462 | 27.338 | 83.767 | 1.00 | 0.00 | O |
| ATOM | 286 | N3   | C A | 10 | -14.914 | 27.351 | 85.430 | 1.00 | 0.00 | N |
| ATOM | 287 | C4   | C A | 10 | -14.575 | 26.992 | 86.675 | 1.00 | 0.00 | C |
| ATOM | 288 | N4   | C A | 10 | -13.381 | 27.344 | 87.130 | 1.00 | 0.00 | N |
| ATOM | 289 | C5   | C A | 10 | -15.471 | 26.245 | 87.509 | 1.00 | 0.00 | C |
| ATOM | 290 | C6   | C A | 10 | -16.686 | 25.928 | 86.971 | 1.00 | 0.00 | C |
| ATOM | 291 | C2'  | C A | 10 | -18.837 | 24.564 | 85.515 | 1.00 | 0.00 | C |
| ATOM | 292 | C3'  | C A | 10 | -20.338 | 24.790 | 85.627 | 1.00 | 0.00 | C |



|      |     |      |     |    |         |        |        |      |      |   |
|------|-----|------|-----|----|---------|--------|--------|------|------|---|
| ATOM | 293 | O3'  | C A | 10 | -20.926 | 24.666 | 84.335 | 1.00 | 0.00 | O |
| ATOM | 294 | C4'  | C A | 10 | -20.428 | 26.216 | 86.167 | 1.00 | 0.00 | C |
| ATOM | 295 | O4'  | C A | 10 | -19.279 | 26.901 | 85.575 | 1.00 | 0.00 | O |
| ATOM | 296 | C5'  | C A | 10 | -20.360 | 26.370 | 87.669 | 1.00 | 0.00 | C |
| ATOM | 297 | O5'  | C A | 10 | -19.436 | 25.397 | 88.220 | 1.00 | 0.00 | O |
| ATOM | 298 | O1P  | C A | 10 | -20.921 | 23.890 | 89.583 | 1.00 | 0.00 | O |
| ATOM | 299 | O2P  | C A | 10 | -18.507 | 24.167 | 90.203 | 1.00 | 0.00 | O |
| ATOM | 300 | P    | C A | 10 | -19.743 | 24.776 | 89.656 | 1.00 | 0.00 | P |
| ATOM | 301 | H5   | C A | 10 | -15.198 | 25.946 | 88.521 | 1.00 | 0.00 | H |
| ATOM | 302 | H6   | C A | 10 | -17.404 | 25.368 | 87.568 | 1.00 | 0.00 | H |
| ATOM | 303 | H1'  | C A | 10 | -18.265 | 26.040 | 84.034 | 1.00 | 0.00 | H |
| ATOM | 304 | H3'  | C A | 10 | -20.807 | 24.080 | 86.307 | 1.00 | 0.00 | H |
| ATOM | 305 | H4'  | C A | 10 | -21.384 | 26.620 | 85.835 | 1.00 | 0.00 | H |
| ATOM | 306 | H41  | C A | 10 | -13.096 | 27.083 | 88.085 | 1.00 | 0.00 | H |
| ATOM | 307 | H42  | C A | 10 | -12.737 | 27.879 | 86.528 | 1.00 | 0.00 | H |
| ATOM | 308 | H2'1 | C A | 10 | -18.417 | 24.228 | 86.462 | 1.00 | 0.00 | H |
| ATOM | 309 | H2'2 | C A | 10 | -18.604 | 23.809 | 84.764 | 1.00 | 0.00 | H |
| ATOM | 310 | H5'1 | C A | 10 | -20.021 | 27.378 | 87.911 | 1.00 | 0.00 | H |
| ATOM | 311 | H5'2 | C A | 10 | -21.353 | 26.214 | 88.089 | 1.00 | 0.00 | H |
| ATOM | 312 | C1'  | T A | 11 | -16.706 | 24.833 | 80.579 | 1.00 | 0.00 | C |
| ATOM | 313 | N1   | T A | 11 | -15.813 | 24.662 | 81.755 | 1.00 | 0.00 | N |
| ATOM | 314 | C2   | T A | 11 | -14.561 | 25.239 | 81.684 | 1.00 | 0.00 | C |
| ATOM | 315 | O2   | T A | 11 | -14.177 | 25.865 | 80.711 | 1.00 | 0.00 | O |
| ATOM | 316 | N3   | T A | 11 | -13.763 | 25.058 | 82.799 | 1.00 | 0.00 | N |
| ATOM | 317 | C4   | T A | 11 | -14.099 | 24.366 | 83.946 | 1.00 | 0.00 | C |
| ATOM | 318 | O4   | T A | 11 | -13.296 | 24.266 | 84.883 | 1.00 | 0.00 | O |
| ATOM | 319 | C5   | T A | 11 | -15.427 | 23.799 | 83.927 | 1.00 | 0.00 | C |
| ATOM | 320 | C6   | T A | 11 | -16.231 | 23.958 | 82.858 | 1.00 | 0.00 | C |
| ATOM | 321 | C7   | T A | 11 | -15.835 | 23.041 | 85.155 | 1.00 | 0.00 | C |
| ATOM | 322 | C2'  | T A | 11 | -17.550 | 23.604 | 80.266 | 1.00 | 0.00 | C |
| ATOM | 323 | C3'  | T A | 11 | -18.850 | 24.225 | 79.782 | 1.00 | 0.00 | C |
| ATOM | 324 | O3'  | T A | 11 | -18.733 | 24.537 | 78.394 | 1.00 | 0.00 | O |
| ATOM | 325 | C4'  | T A | 11 | -18.970 | 25.478 | 80.645 | 1.00 | 0.00 | C |
| ATOM | 326 | O4'  | T A | 11 | -17.586 | 25.905 | 80.856 | 1.00 | 0.00 | O |
| ATOM | 327 | C5'  | T A | 11 | -19.632 | 25.305 | 81.993 | 1.00 | 0.00 | C |
| ATOM | 328 | O5'  | T A | 11 | -19.271 | 24.018 | 82.554 | 1.00 | 0.00 | O |
| ATOM | 329 | O1P  | T A | 11 | -21.452 | 22.765 | 82.592 | 1.00 | 0.00 | O |
| ATOM | 330 | O2P  | T A | 11 | -19.654 | 22.202 | 84.249 | 1.00 | 0.00 | O |
| ATOM | 331 | P    | T A | 11 | -20.342 | 23.238 | 83.441 | 1.00 | 0.00 | P |
| ATOM | 332 | H3   | T A | 11 | -12.826 | 25.481 | 82.772 | 1.00 | 0.00 | H |
| ATOM | 333 | H6   | T A | 11 | -17.231 | 23.520 | 82.866 | 1.00 | 0.00 | H |
| ATOM | 334 | H1'  | T A | 11 | -16.095 | 25.113 | 79.722 | 1.00 | 0.00 | H |
| ATOM | 335 | H3'  | T A | 11 | -19.701 | 23.560 | 79.930 | 1.00 | 0.00 | H |
| ATOM | 336 | H4'  | T A | 11 | -19.557 | 26.201 | 80.077 | 1.00 | 0.00 | H |
| ATOM | 337 | H71  | T A | 11 | -15.970 | 21.989 | 84.904 | 1.00 | 0.00 | H |
| ATOM | 338 | H72  | T A | 11 | -15.059 | 23.137 | 85.915 | 1.00 | 0.00 | H |
| ATOM | 339 | H73  | T A | 11 | -16.771 | 23.447 | 85.539 | 1.00 | 0.00 | H |
| ATOM | 340 | H2'1 | T A | 11 | -17.712 | 22.979 | 81.142 | 1.00 | 0.00 | H |
| ATOM | 341 | H2'2 | T A | 11 | -17.099 | 22.977 | 79.495 | 1.00 | 0.00 | H |
| ATOM | 342 | H5'1 | T A | 11 | -19.305 | 26.103 | 82.659 | 1.00 | 0.00 | H |
| ATOM | 343 | H5'2 | T A | 11 | -20.713 | 25.362 | 81.870 | 1.00 | 0.00 | H |
| ATOM | 344 | C1'  | A A | 12 | -13.175 | 24.235 | 77.144 | 1.00 | 0.00 | C |
| ATOM | 345 | N1   | A A | 12 | -10.138 | 23.443 | 81.204 | 1.00 | 0.00 | N |
| ATOM | 346 | C2   | A A | 12 | -9.973  | 24.128 | 80.077 | 1.00 | 0.00 | C |

|      |     |      |   |   |    |         |        |        |      |      |   |
|------|-----|------|---|---|----|---------|--------|--------|------|------|---|
| ATOM | 347 | N3   | A | A | 12 | -10.801 | 24.295 | 79.068 | 1.00 | 0.00 | N |
| ATOM | 348 | C4   | A | A | 12 | -11.951 | 23.636 | 79.299 | 1.00 | 0.00 | C |
| ATOM | 349 | C5   | A | A | 12 | -12.278 | 22.890 | 80.394 | 1.00 | 0.00 | C |
| ATOM | 350 | C6   | A | A | 12 | -11.298 | 22.796 | 81.405 | 1.00 | 0.00 | C |
| ATOM | 351 | N6   | A | A | 12 | -11.478 | 22.098 | 82.540 | 1.00 | 0.00 | N |
| ATOM | 352 | N7   | A | A | 12 | -13.552 | 22.363 | 80.279 | 1.00 | 0.00 | N |
| ATOM | 353 | C8   | A | A | 12 | -13.965 | 22.793 | 79.123 | 1.00 | 0.00 | C |
| ATOM | 354 | N9   | A | A | 12 | -13.046 | 23.575 | 78.470 | 1.00 | 0.00 | N |
| ATOM | 355 | C2'  | A | A | 12 | -13.927 | 23.401 | 76.116 | 1.00 | 0.00 | C |
| ATOM | 356 | C3'  | A | A | 12 | -14.680 | 24.466 | 75.333 | 1.00 | 0.00 | C |
| ATOM | 357 | O3'  | A | A | 12 | -13.824 | 24.997 | 74.323 | 1.00 | 0.00 | O |
| ATOM | 358 | C4'  | A | A | 12 | -15.019 | 25.501 | 76.404 | 1.00 | 0.00 | C |
| ATOM | 359 | O4'  | A | A | 12 | -13.887 | 25.443 | 77.332 | 1.00 | 0.00 | O |
| ATOM | 360 | C5'  | A | A | 12 | -16.293 | 25.267 | 77.181 | 1.00 | 0.00 | C |
| ATOM | 361 | O5'  | A | A | 12 | -16.481 | 23.846 | 77.402 | 1.00 | 0.00 | O |
| ATOM | 362 | O1P  | A | A | 12 | -18.547 | 23.317 | 76.064 | 1.00 | 0.00 | O |
| ATOM | 363 | O2P  | A | A | 12 | -17.960 | 21.927 | 78.069 | 1.00 | 0.00 | O |
| ATOM | 364 | P    | A | A | 12 | -17.964 | 23.261 | 77.419 | 1.00 | 0.00 | P |
| ATOM | 365 | H2   | A | A | 12 | -9.009  | 24.625 | 79.975 | 1.00 | 0.00 | H |
| ATOM | 366 | H8   | A | A | 12 | -14.946 | 22.556 | 78.711 | 1.00 | 0.00 | H |
| ATOM | 367 | H1'  | A | A | 12 | -12.176 | 24.486 | 76.788 | 1.00 | 0.00 | H |
| ATOM | 368 | H3'  | A | A | 12 | -15.582 | 24.071 | 74.867 | 1.00 | 0.00 | H |
| ATOM | 369 | H4'  | A | A | 12 | -15.108 | 26.461 | 75.898 | 1.00 | 0.00 | H |
| ATOM | 370 | H61  | A | A | 12 | -10.731 | 22.064 | 83.247 | 1.00 | 0.00 | H |
| ATOM | 371 | H62  | A | A | 12 | -12.365 | 21.598 | 82.701 | 1.00 | 0.00 | H |
| ATOM | 372 | H2'1 | A | A | 12 | -14.611 | 22.691 | 76.578 | 1.00 | 0.00 | H |
| ATOM | 373 | H2'2 | A | A | 12 | -13.254 | 22.836 | 75.471 | 1.00 | 0.00 | H |
| ATOM | 374 | H5'1 | A | A | 12 | -16.225 | 25.781 | 78.140 | 1.00 | 0.00 | H |
| ATOM | 375 | H5'2 | A | A | 12 | -17.135 | 25.667 | 76.618 | 1.00 | 0.00 | H |
| ATOM | 376 | C1'  | G | A | 13 | -8.527  | 23.318 | 75.658 | 1.00 | 0.00 | C |
| ATOM | 377 | N1   | G | A | 13 | -8.171  | 20.864 | 80.116 | 1.00 | 0.00 | N |
| ATOM | 378 | C2   | G | A | 13 | -7.270  | 21.710 | 79.494 | 1.00 | 0.00 | C |
| ATOM | 379 | N2   | G | A | 13 | -6.118  | 21.928 | 80.144 | 1.00 | 0.00 | N |
| ATOM | 380 | N3   | G | A | 13 | -7.498  | 22.289 | 78.317 | 1.00 | 0.00 | N |
| ATOM | 381 | C4   | G | A | 13 | -8.708  | 21.950 | 77.799 | 1.00 | 0.00 | C |
| ATOM | 382 | C5   | G | A | 13 | -9.668  | 21.116 | 78.346 | 1.00 | 0.00 | C |
| ATOM | 383 | C6   | G | A | 13 | -9.428  | 20.502 | 79.599 | 1.00 | 0.00 | C |
| ATOM | 384 | O6   | G | A | 13 | -10.151 | 19.737 | 80.238 | 1.00 | 0.00 | O |
| ATOM | 385 | N7   | G | A | 13 | -10.772 | 21.028 | 77.497 | 1.00 | 0.00 | N |
| ATOM | 386 | C8   | G | A | 13 | -10.457 | 21.798 | 76.488 | 1.00 | 0.00 | C |
| ATOM | 387 | N9   | G | A | 13 | -9.217  | 22.392 | 76.600 | 1.00 | 0.00 | N |
| ATOM | 388 | C2'  | G | A | 13 | -8.754  | 22.983 | 74.191 | 1.00 | 0.00 | C |
| ATOM | 389 | C3'  | G | A | 13 | -8.807  | 24.361 | 73.553 | 1.00 | 0.00 | C |
| ATOM | 390 | O3'  | G | A | 13 | -7.480  | 24.802 | 73.280 | 1.00 | 0.00 | O |
| ATOM | 391 | C4'  | G | A | 13 | -9.485  | 25.208 | 74.629 | 1.00 | 0.00 | C |
| ATOM | 392 | O4'  | G | A | 13 | -9.028  | 24.621 | 75.890 | 1.00 | 0.00 | O |
| ATOM | 393 | C5'  | G | A | 13 | -10.996 | 25.217 | 74.622 | 1.00 | 0.00 | C |
| ATOM | 394 | O5'  | G | A | 13 | -11.493 | 23.909 | 74.250 | 1.00 | 0.00 | O |
| ATOM | 395 | O1P  | G | A | 13 | -12.614 | 24.321 | 72.034 | 1.00 | 0.00 | O |
| ATOM | 396 | O2P  | G | A | 13 | -13.388 | 22.438 | 73.499 | 1.00 | 0.00 | O |
| ATOM | 397 | P    | G | A | 13 | -12.841 | 23.813 | 73.400 | 1.00 | 0.00 | P |
| ATOM | 398 | H1   | G | A | 13 | -7.901  | 20.472 | 81.032 | 1.00 | 0.00 | H |
| ATOM | 399 | H8   | G | A | 13 | -11.114 | 21.956 | 75.633 | 1.00 | 0.00 | H |
| ATOM | 400 | H1'  | G | A | 13 | -7.464  | 23.320 | 75.899 | 1.00 | 0.00 | H |

|      |     |      |     |    |         |        |        |      |      |   |
|------|-----|------|-----|----|---------|--------|--------|------|------|---|
| ATOM | 401 | H21  | G A | 13 | -5.951  | 21.477 | 81.056 | 1.00 | 0.00 | H |
| ATOM | 402 | H3'  | G A | 13 | -9.386  | 24.363 | 72.629 | 1.00 | 0.00 | H |
| ATOM | 403 | H22  | G A | 13 | -5.406  | 22.544 | 79.732 | 1.00 | 0.00 | H |
| ATOM | 404 | H4'  | G A | 13 | -9.144  | 26.232 | 74.490 | 1.00 | 0.00 | H |
| ATOM | 405 | H2'1 | G A | 13 | -9.683  | 22.436 | 74.031 | 1.00 | 0.00 | H |
| ATOM | 406 | H2'2 | G A | 13 | -7.944  | 22.383 | 73.774 | 1.00 | 0.00 | H |
| ATOM | 407 | H5'1 | G A | 13 | -11.356 | 25.481 | 75.616 | 1.00 | 0.00 | H |
| ATOM | 408 | H5'2 | G A | 13 | -11.345 | 25.962 | 73.907 | 1.00 | 0.00 | H |
| ATOM | 409 | C1'  | G A | 14 | -3.989  | 21.397 | 76.154 | 1.00 | 0.00 | C |
| ATOM | 410 | N1   | G A | 14 | -6.341  | 18.100 | 79.258 | 1.00 | 0.00 | N |
| ATOM | 411 | C2   | G A | 14 | -5.128  | 18.749 | 79.405 | 1.00 | 0.00 | C |
| ATOM | 412 | N2   | G A | 14 | -4.448  | 18.481 | 80.527 | 1.00 | 0.00 | N |
| ATOM | 413 | N3   | G A | 14 | -4.631  | 19.596 | 78.505 | 1.00 | 0.00 | N |
| ATOM | 414 | C4   | G A | 14 | -5.447  | 19.741 | 77.429 | 1.00 | 0.00 | C |
| ATOM | 415 | C5   | G A | 14 | -6.670  | 19.134 | 77.195 | 1.00 | 0.00 | C |
| ATOM | 416 | C6   | G A | 14 | -7.199  | 18.238 | 78.150 | 1.00 | 0.00 | C |
| ATOM | 417 | O6   | G A | 14 | -8.257  | 17.608 | 78.123 | 1.00 | 0.00 | O |
| ATOM | 418 | N7   | G A | 14 | -7.186  | 19.552 | 75.965 | 1.00 | 0.00 | N |
| ATOM | 419 | C8   | G A | 14 | -6.285  | 20.380 | 75.508 | 1.00 | 0.00 | C |
| ATOM | 420 | N9   | G A | 14 | -5.198  | 20.547 | 76.340 | 1.00 | 0.00 | N |
| ATOM | 421 | C2'  | G A | 14 | -3.490  | 21.447 | 74.717 | 1.00 | 0.00 | C |
| ATOM | 422 | C3'  | G A | 14 | -2.993  | 22.879 | 74.603 | 1.00 | 0.00 | C |
| ATOM | 423 | O3'  | G A | 14 | -1.659  | 22.954 | 75.101 | 1.00 | 0.00 | O |
| ATOM | 424 | C4'  | G A | 14 | -3.980  | 23.651 | 75.475 | 1.00 | 0.00 | C |
| ATOM | 425 | O4'  | G A | 14 | -4.326  | 22.714 | 76.545 | 1.00 | 0.00 | O |
| ATOM | 426 | C5'  | G A | 14 | -5.254  | 24.109 | 74.805 | 1.00 | 0.00 | C |
| ATOM | 427 | O5'  | G A | 14 | -5.693  | 23.109 | 73.852 | 1.00 | 0.00 | O |
| ATOM | 428 | O1P  | G A | 14 | -5.452  | 24.272 | 71.634 | 1.00 | 0.00 | O |
| ATOM | 429 | O2P  | G A | 14 | -7.150  | 22.448 | 71.913 | 1.00 | 0.00 | O |
| ATOM | 430 | P    | G A | 14 | -6.417  | 23.589 | 72.515 | 1.00 | 0.00 | P |
| ATOM | 431 | H1   | G A | 14 | -6.638  | 17.469 | 80.018 | 1.00 | 0.00 | H |
| ATOM | 432 | H8   | G A | 14 | -6.383  | 20.894 | 74.551 | 1.00 | 0.00 | H |
| ATOM | 433 | H1'  | G A | 14 | -3.212  | 21.035 | 76.826 | 1.00 | 0.00 | H |
| ATOM | 434 | H21  | G A | 14 | -4.840  | 17.827 | 81.222 | 1.00 | 0.00 | H |
| ATOM | 435 | H3'  | G A | 14 | -3.014  | 23.237 | 73.574 | 1.00 | 0.00 | H |
| ATOM | 436 | H22  | G A | 14 | -3.537  | 18.929 | 80.698 | 1.00 | 0.00 | H |
| ATOM | 437 | H4'  | G A | 14 | -3.457  | 24.536 | 75.839 | 1.00 | 0.00 | H |
| ATOM | 438 | H2'1 | G A | 14 | -4.281  | 21.243 | 73.996 | 1.00 | 0.00 | H |
| ATOM | 439 | H2'2 | G A | 14 | -2.687  | 20.732 | 74.533 | 1.00 | 0.00 | H |
| ATOM | 440 | H5'1 | G A | 14 | -6.023  | 24.260 | 75.561 | 1.00 | 0.00 | H |
| ATOM | 441 | H5'2 | G A | 14 | -5.068  | 25.052 | 74.290 | 1.00 | 0.00 | H |
| ATOM | 442 | C1'  | A A | 15 | -0.687  | 18.177 | 77.950 | 1.00 | 0.00 | C |
| ATOM | 443 | N1   | A A | 15 | -4.791  | 15.141 | 78.479 | 1.00 | 0.00 | N |
| ATOM | 444 | C2   | A A | 15 | -3.750  | 15.392 | 79.269 | 1.00 | 0.00 | C |
| ATOM | 445 | N3   | A A | 15 | -2.723  | 16.191 | 79.072 | 1.00 | 0.00 | N |
| ATOM | 446 | C4   | A A | 15 | -2.826  | 16.793 | 77.873 | 1.00 | 0.00 | C |
| ATOM | 447 | C5   | A A | 15 | -3.822  | 16.644 | 76.949 | 1.00 | 0.00 | C |
| ATOM | 448 | C6   | A A | 15 | -4.865  | 15.756 | 77.288 | 1.00 | 0.00 | C |
| ATOM | 449 | N6   | A A | 15 | -5.910  | 15.509 | 76.481 | 1.00 | 0.00 | N |
| ATOM | 450 | N7   | A A | 15 | -3.589  | 17.425 | 75.831 | 1.00 | 0.00 | N |
| ATOM | 451 | C8   | A A | 15 | -2.465  | 18.022 | 76.097 | 1.00 | 0.00 | C |
| ATOM | 452 | N9   | A A | 15 | -1.943  | 17.688 | 77.321 | 1.00 | 0.00 | N |
| ATOM | 453 | C2'  | A A | 15 | 0.460   | 18.367 | 76.965 | 1.00 | 0.00 | C |
| ATOM | 454 | C3'  | A A | 15 | 1.165   | 19.589 | 77.531 | 1.00 | 0.00 | C |

|      |     |      |   |   |    |        |        |        |      |      |   |
|------|-----|------|---|---|----|--------|--------|--------|------|------|---|
| ATOM | 455 | O3'  | A | A | 15 | 2.068  | 19.177 | 78.552 | 1.00 | 0.00 | O |
| ATOM | 456 | C4'  | A | A | 15 | 0.010  | 20.423 | 78.083 | 1.00 | 0.00 | C |
| ATOM | 457 | O4'  | A | A | 15 | -0.962 | 19.430 | 78.547 | 1.00 | 0.00 | O |
| ATOM | 458 | C5'  | A | A | 15 | -0.676 | 21.351 | 77.110 | 1.00 | 0.00 | C |
| ATOM | 459 | O5'  | A | A | 15 | -0.737 | 20.730 | 75.800 | 1.00 | 0.00 | O |
| ATOM | 460 | O1P  | A | A | 15 | 0.749  | 22.193 | 74.390 | 1.00 | 0.00 | O |
| ATOM | 461 | O2P  | A | A | 15 | -1.128 | 20.912 | 73.324 | 1.00 | 0.00 | O |
| ATOM | 462 | P    | A | A | 15 | -0.621 | 21.653 | 74.505 | 1.00 | 0.00 | P |
| ATOM | 463 | H2   | A | A | 15 | -3.748 | 14.857 | 80.219 | 1.00 | 0.00 | H |
| ATOM | 464 | H8   | A | A | 15 | -1.983 | 18.720 | 75.414 | 1.00 | 0.00 | H |
| ATOM | 465 | H1'  | A | A | 15 | -0.410 | 17.482 | 78.743 | 1.00 | 0.00 | H |
| ATOM | 466 | H3'  | A | A | 15 | 1.712  | 20.137 | 76.763 | 1.00 | 0.00 | H |
| ATOM | 467 | H4'  | A | A | 15 | 0.417  | 21.030 | 78.892 | 1.00 | 0.00 | H |
| ATOM | 468 | H61  | A | A | 15 | -6.647 | 14.854 | 76.780 | 1.00 | 0.00 | H |
| ATOM | 469 | H62  | A | A | 15 | -5.974 | 15.977 | 75.564 | 1.00 | 0.00 | H |
| ATOM | 470 | H2'1 | A | A | 15 | 0.106  | 18.546 | 75.950 | 1.00 | 0.00 | H |
| ATOM | 471 | H2'2 | A | A | 15 | 1.126  | 17.505 | 76.935 | 1.00 | 0.00 | H |
| ATOM | 472 | H5'1 | A | A | 15 | -1.684 | 21.561 | 77.465 | 1.00 | 0.00 | H |
| ATOM | 473 | H5'2 | A | A | 15 | -0.115 | 22.282 | 77.047 | 1.00 | 0.00 | H |
| ATOM | 474 | C1'  | C | A | 16 | 0.651  | 13.805 | 79.886 | 1.00 | 0.00 | C |
| ATOM | 475 | N1   | C | A | 16 | -0.157 | 13.859 | 78.637 | 1.00 | 0.00 | N |
| ATOM | 476 | C2   | C | A | 16 | -1.323 | 13.100 | 78.579 | 1.00 | 0.00 | C |
| ATOM | 477 | O2   | C | A | 16 | -1.636 | 12.413 | 79.561 | 1.00 | 0.00 | O |
| ATOM | 478 | N3   | C | A | 16 | -2.072 | 13.135 | 77.451 | 1.00 | 0.00 | N |
| ATOM | 479 | C4   | C | A | 16 | -1.706 | 13.886 | 76.405 | 1.00 | 0.00 | C |
| ATOM | 480 | N4   | C | A | 16 | -2.480 | 13.887 | 75.329 | 1.00 | 0.00 | N |
| ATOM | 481 | C5   | C | A | 16 | -0.510 | 14.676 | 76.433 | 1.00 | 0.00 | C |
| ATOM | 482 | C6   | C | A | 16 | 0.229  | 14.629 | 77.582 | 1.00 | 0.00 | C |
| ATOM | 483 | C2'  | C | A | 16 | 2.154  | 13.828 | 79.646 | 1.00 | 0.00 | C |
| ATOM | 484 | C3'  | C | A | 16 | 2.650  | 14.640 | 80.833 | 1.00 | 0.00 | C |
| ATOM | 485 | O3'  | C | A | 16 | 2.814  | 13.777 | 81.955 | 1.00 | 0.00 | O |
| ATOM | 486 | C4'  | C | A | 16 | 1.530  | 15.656 | 81.043 | 1.00 | 0.00 | C |
| ATOM | 487 | O4'  | C | A | 16 | 0.313  | 14.936 | 80.667 | 1.00 | 0.00 | O |
| ATOM | 488 | C5'  | C | A | 16 | 1.613  | 16.924 | 80.226 | 1.00 | 0.00 | C |
| ATOM | 489 | O5'  | C | A | 16 | 2.139  | 16.626 | 78.909 | 1.00 | 0.00 | O |
| ATOM | 490 | O1P  | C | A | 16 | 4.356  | 17.821 | 78.883 | 1.00 | 0.00 | O |
| ATOM | 491 | O2P  | C | A | 16 | 3.125  | 17.413 | 76.735 | 1.00 | 0.00 | O |
| ATOM | 492 | P    | C | A | 16 | 3.059  | 17.711 | 78.187 | 1.00 | 0.00 | P |
| ATOM | 493 | H5   | C | A | 16 | -0.204 | 15.285 | 75.581 | 1.00 | 0.00 | H |
| ATOM | 494 | H6   | C | A | 16 | 1.142  | 15.218 | 77.654 | 1.00 | 0.00 | H |
| ATOM | 495 | H1'  | C | A | 16 | 0.358  | 12.913 | 80.442 | 1.00 | 0.00 | H |
| ATOM | 496 | H3'  | C | A | 16 | 3.598  | 15.138 | 80.617 | 1.00 | 0.00 | H |
| ATOM | 497 | H4'  | C | A | 16 | 1.552  | 15.938 | 82.095 | 1.00 | 0.00 | H |
| ATOM | 498 | H41  | C | A | 16 | -2.221 | 14.460 | 74.510 | 1.00 | 0.00 | H |
| ATOM | 499 | H42  | C | A | 16 | -3.338 | 13.317 | 75.309 | 1.00 | 0.00 | H |
| ATOM | 500 | H2'1 | C | A | 16 | 2.415  | 14.308 | 78.701 | 1.00 | 0.00 | H |
| ATOM | 501 | H2'2 | C | A | 16 | 2.589  | 12.829 | 79.638 | 1.00 | 0.00 | H |
| ATOM | 502 | H5'1 | C | A | 16 | 0.615  | 17.357 | 80.136 | 1.00 | 0.00 | H |
| ATOM | 503 | H5'2 | C | A | 16 | 2.266  | 17.635 | 80.733 | 1.00 | 0.00 | H |
| ATOM | 504 | C1'  | G | A | 17 | 0.131  | 8.948  | 80.697 | 1.00 | 0.00 | C |
| ATOM | 505 | N1   | G | A | 17 | -2.494 | 9.072  | 76.325 | 1.00 | 0.00 | N |
| ATOM | 506 | C2   | G | A | 17 | -2.768 | 8.407  | 77.507 | 1.00 | 0.00 | C |
| ATOM | 507 | N2   | G | A | 17 | -3.889 | 7.674  | 77.525 | 1.00 | 0.00 | N |
| ATOM | 508 | N3   | G | A | 17 | -1.987 | 8.466  | 78.583 | 1.00 | 0.00 | N |

|      |     |      |     |    |        |        |        |      |      |   |
|------|-----|------|-----|----|--------|--------|--------|------|------|---|
| ATOM | 509 | C4   | G A | 17 | -0.891 | 9.245  | 78.385 | 1.00 | 0.00 | C |
| ATOM | 510 | C5   | G A | 17 | -0.533 | 9.942  | 77.242 | 1.00 | 0.00 | C |
| ATOM | 511 | C6   | G A | 17 | -1.364 | 9.883  | 76.099 | 1.00 | 0.00 | C |
| ATOM | 512 | O6   | G A | 17 | -1.220 | 10.425 | 75.003 | 1.00 | 0.00 | O |
| ATOM | 513 | N7   | G A | 17 | 0.669  | 10.621 | 77.446 | 1.00 | 0.00 | N |
| ATOM | 514 | C8   | G A | 17 | 0.993  | 10.326 | 78.679 | 1.00 | 0.00 | C |
| ATOM | 515 | N9   | G A | 17 | 0.095  | 9.492  | 79.315 | 1.00 | 0.00 | N |
| ATOM | 516 | C2'  | G A | 17 | 1.528  | 8.576  | 81.176 | 1.00 | 0.00 | C |
| ATOM | 517 | C3'  | G A | 17 | 1.469  | 8.944  | 82.648 | 1.00 | 0.00 | C |
| ATOM | 518 | O3'  | G A | 17 | 0.899  | 7.860  | 83.379 | 1.00 | 0.00 | O |
| ATOM | 519 | C4'  | G A | 17 | 0.571  | 10.180 | 82.654 | 1.00 | 0.00 | C |
| ATOM | 520 | O4'  | G A | 17 | -0.377 | 9.942  | 81.567 | 1.00 | 0.00 | O |
| ATOM | 521 | C5'  | G A | 17 | 1.256  | 11.506 | 82.420 | 1.00 | 0.00 | C |
| ATOM | 522 | O5'  | G A | 17 | 2.326  | 11.342 | 81.458 | 1.00 | 0.00 | O |
| ATOM | 523 | O1P  | G A | 17 | 4.398  | 11.808 | 82.810 | 1.00 | 0.00 | O |
| ATOM | 524 | O2P  | G A | 17 | 4.392  | 12.231 | 80.336 | 1.00 | 0.00 | O |
| ATOM | 525 | P    | G A | 17 | 3.641  | 12.232 | 81.616 | 1.00 | 0.00 | P |
| ATOM | 526 | H1   | G A | 17 | -3.168 | 8.964  | 75.553 | 1.00 | 0.00 | H |
| ATOM | 527 | H8   | G A | 17 | 1.896  | 10.702 | 79.162 | 1.00 | 0.00 | H |
| ATOM | 528 | H1'  | G A | 17 | -0.538 | 8.089  | 80.744 | 1.00 | 0.00 | H |
| ATOM | 529 | H21  | G A | 17 | -4.491 | 7.637  | 76.690 | 1.00 | 0.00 | H |
| ATOM | 530 | H3'  | G A | 17 | 2.456  | 9.173  | 83.053 | 1.00 | 0.00 | H |
| ATOM | 531 | H22  | G A | 17 | -4.150 | 7.154  | 78.374 | 1.00 | 0.00 | H |
| ATOM | 532 | H4'  | G A | 17 | 0.095  | 10.220 | 83.633 | 1.00 | 0.00 | H |
| ATOM | 533 | H2'1 | G A | 17 | 2.305  | 9.139  | 80.657 | 1.00 | 0.00 | H |
| ATOM | 534 | H2'2 | G A | 17 | 1.745  | 7.516  | 81.038 | 1.00 | 0.00 | H |
| ATOM | 535 | H5'1 | G A | 17 | 0.525  | 12.223 | 82.041 | 1.00 | 0.00 | H |
| ATOM | 536 | H5'2 | G A | 17 | 1.657  | 11.873 | 83.363 | 1.00 | 0.00 | H |
| ATOM | 537 | C1'  | G A | 18 | -1.491 | 4.401  | 79.590 | 1.00 | 0.00 | C |
| ATOM | 538 | N1   | G A | 18 | -1.473 | 6.176  | 74.807 | 1.00 | 0.00 | N |
| ATOM | 539 | C2   | G A | 18 | -2.411 | 5.397  | 75.461 | 1.00 | 0.00 | C |
| ATOM | 540 | N2   | G A | 18 | -3.488 | 5.042  | 74.746 | 1.00 | 0.00 | N |
| ATOM | 541 | N3   | G A | 18 | -2.287 | 5.005  | 76.727 | 1.00 | 0.00 | N |
| ATOM | 542 | C4   | G A | 18 | -1.134 | 5.448  | 77.296 | 1.00 | 0.00 | C |
| ATOM | 543 | C5   | G A | 18 | -0.142 | 6.224  | 76.720 | 1.00 | 0.00 | C |
| ATOM | 544 | C6   | G A | 18 | -0.276 | 6.645  | 75.376 | 1.00 | 0.00 | C |
| ATOM | 545 | O6   | G A | 18 | 0.491  | 7.330  | 74.698 | 1.00 | 0.00 | O |
| ATOM | 546 | N7   | G A | 18 | 0.880  | 6.461  | 77.641 | 1.00 | 0.00 | N |
| ATOM | 547 | C8   | G A | 18 | 0.482  | 5.841  | 78.720 | 1.00 | 0.00 | C |
| ATOM | 548 | N9   | G A | 18 | -0.732 | 5.201  | 78.590 | 1.00 | 0.00 | N |
| ATOM | 549 | C2'  | G A | 18 | -0.610 | 3.545  | 80.488 | 1.00 | 0.00 | C |
| ATOM | 550 | C3'  | G A | 18 | -1.350 | 3.609  | 81.813 | 1.00 | 0.00 | C |
| ATOM | 551 | O3'  | G A | 18 | -2.375 | 2.618  | 81.825 | 1.00 | 0.00 | O |
| ATOM | 552 | C4'  | G A | 18 | -1.918 | 5.027  | 81.818 | 1.00 | 0.00 | C |
| ATOM | 553 | O4'  | G A | 18 | -2.205 | 5.304  | 80.411 | 1.00 | 0.00 | O |
| ATOM | 554 | C5'  | G A | 18 | -1.010 | 6.111  | 82.350 | 1.00 | 0.00 | C |
| ATOM | 555 | O5'  | G A | 18 | 0.360  | 5.836  | 81.966 | 1.00 | 0.00 | O |
| ATOM | 556 | O1P  | G A | 18 | 1.502  | 5.386  | 84.163 | 1.00 | 0.00 | O |
| ATOM | 557 | O2P  | G A | 18 | 2.820  | 6.279  | 82.225 | 1.00 | 0.00 | O |
| ATOM | 558 | P    | G A | 18 | 1.535  | 6.244  | 82.965 | 1.00 | 0.00 | P |
| ATOM | 559 | H1   | G A | 18 | -1.668 | 6.432  | 73.827 | 1.00 | 0.00 | H |
| ATOM | 560 | H8   | G A | 18 | 1.060  | 5.828  | 79.646 | 1.00 | 0.00 | H |
| ATOM | 561 | H1'  | G A | 18 | -2.218 | 3.788  | 79.056 | 1.00 | 0.00 | H |
| ATOM | 562 | H21  | G A | 18 | -3.579 | 5.353  | 73.767 | 1.00 | 0.00 | H |

|      |     |      |     |   |    |        |        |        |      |      |   |
|------|-----|------|-----|---|----|--------|--------|--------|------|------|---|
| ATOM | 563 | H3'  | G   | A | 18 | -0.683 | 3.449  | 82.662 | 1.00 | 0.00 | H |
| ATOM | 564 | H22  | G   | A | 18 | -4.219 | 4.461  | 75.175 | 1.00 | 0.00 | H |
| ATOM | 565 | H4'  | G   | A | 18 | -2.812 | 5.007  | 82.440 | 1.00 | 0.00 | H |
| ATOM | 566 | H2'1 | G   | A | 18 | 0.400  | 3.946  | 80.577 | 1.00 | 0.00 | H |
| ATOM | 567 | H2'2 | G   | A | 18 | -0.524 | 2.519  | 80.129 | 1.00 | 0.00 | H |
| ATOM | 568 | H5'1 | G   | A | 18 | -1.322 | 7.072  | 81.940 | 1.00 | 0.00 | H |
| ATOM | 569 | H5'2 | G   | A | 18 | -1.089 | 6.143  | 83.437 | 1.00 | 0.00 | H |
| ATOM | 570 | C1'  | T   | A | 19 | -3.028 | 0.850  | 76.505 | 1.00 | 0.00 | C |
| ATOM | 571 | N1   | T   | A | 19 | -1.761 | 1.577  | 76.231 | 1.00 | 0.00 | N |
| ATOM | 572 | C2   | T   | A | 19 | -1.603 | 2.119  | 74.972 | 1.00 | 0.00 | C |
| ATOM | 573 | O2   | T   | A | 19 | -2.450 | 2.018  | 74.101 | 1.00 | 0.00 | O |
| ATOM | 574 | N3   | T   | A | 19 | -0.410 | 2.787  | 74.762 | 1.00 | 0.00 | N |
| ATOM | 575 | C4   | T   | A | 19 | 0.609  | 2.954  | 75.673 | 1.00 | 0.00 | C |
| ATOM | 576 | O4   | T   | A | 19 | 1.635  | 3.571  | 75.368 | 1.00 | 0.00 | O |
| ATOM | 577 | C5   | T   | A | 19 | 0.355  | 2.354  | 76.962 | 1.00 | 0.00 | C |
| ATOM | 578 | C6   | T   | A | 19 | -0.796 | 1.695  | 77.203 | 1.00 | 0.00 | C |
| ATOM | 579 | C7   | T   | A | 19 | 1.437  | 2.513  | 77.987 | 1.00 | 0.00 | C |
| ATOM | 580 | C2'  | T   | A | 19 | -2.851 | -0.386 | 77.379 | 1.00 | 0.00 | C |
| ATOM | 581 | C3'  | T   | A | 19 | -4.128 | -0.377 | 78.203 | 1.00 | 0.00 | C |
| ATOM | 582 | O3'  | T   | A | 19 | -5.169 | -1.012 | 77.464 | 1.00 | 0.00 | O |
| ATOM | 583 | C4'  | T   | A | 19 | -4.390 | 1.113  | 78.405 | 1.00 | 0.00 | C |
| ATOM | 584 | O4'  | T   | A | 19 | -3.901 | 1.736  | 77.177 | 1.00 | 0.00 | O |
| ATOM | 585 | C5'  | T   | A | 19 | -3.705 | 1.763  | 79.585 | 1.00 | 0.00 | C |
| ATOM | 586 | O5'  | T   | A | 19 | -2.386 | 1.187  | 79.762 | 1.00 | 0.00 | O |
| ATOM | 587 | O1P  | T   | A | 19 | -2.563 | -0.002 | 81.973 | 1.00 | 0.00 | O |
| ATOM | 588 | O2P  | T   | A | 19 | -0.338 | 0.843  | 81.176 | 1.00 | 0.00 | O |
| ATOM | 589 | P    | T   | A | 19 | -1.807 | 1.033  | 81.240 | 1.00 | 0.00 | P |
| ATOM | 590 | H3   | T   | A | 19 | -0.272 | 3.203  | 73.830 | 1.00 | 0.00 | H |
| ATOM | 591 | H6   | T   | A | 19 | -0.967 | 1.251  | 78.183 | 1.00 | 0.00 | H |
| ATOM | 592 | H1'  | T   | A | 19 | -3.485 | 0.588  | 75.549 | 1.00 | 0.00 | H |
| ATOM | 593 | H3'  | T   | A | 19 | -4.000 | -0.887 | 79.158 | 1.00 | 0.00 | H |
| ATOM | 594 | H4'  | T   | A | 19 | -5.467 | 1.230  | 78.543 | 1.00 | 0.00 | H |
| ATOM | 595 | H71  | T   | A | 19 | 1.861  | 1.538  | 78.222 | 1.00 | 0.00 | H |
| ATOM | 596 | H72  | T   | A | 19 | 2.219  | 3.163  | 77.592 | 1.00 | 0.00 | H |
| ATOM | 597 | H73  | T   | A | 19 | 1.021  | 2.954  | 78.894 | 1.00 | 0.00 | H |
| ATOM | 598 | H2'1 | T   | A | 19 | -1.969 | -0.320 | 78.013 | 1.00 | 0.00 | H |
| ATOM | 599 | H2'2 | T   | A | 19 | -2.765 | -1.300 | 76.791 | 1.00 | 0.00 | H |
| ATOM | 600 | H5'1 | T   | A | 19 | -3.618 | 2.834  | 79.403 | 1.00 | 0.00 | H |
| ATOM | 601 | H5'2 | T   | A | 19 | -4.301 | 1.600  | 80.481 | 1.00 | 0.00 | H |
| ATOM | 602 | C01  | LNK | A | 20 | -5.998 | -4.616 | 77.042 | 0.00 | 0.00 | C |
| ATOM | 603 | O1   | LNK | A | 20 | -5.170 | -3.568 | 77.552 | 1.00 | 0.00 | O |
| ATOM | 604 | S    | LNK | A | 20 | -6.076 | -8.595 | 76.926 | 0.00 | 0.00 | S |
| ATOM | 605 | C02  | LNK | A | 20 | -5.377 | -5.980 | 77.402 | 0.00 | 0.00 | C |
| ATOM | 606 | C03  | LNK | A | 20 | -5.610 | -6.971 | 76.247 | 0.00 | 0.00 | C |
| ATOM | 607 | O1P  | LNK | A | 20 | -3.170 | -2.446 | 76.514 | 1.00 | 0.00 | O |
| ATOM | 608 | O2P  | LNK | A | 20 | -5.326 | -2.603 | 75.237 | 1.00 | 0.00 | O |
| ATOM | 609 | P    | LNK | A | 20 | -4.646 | -2.445 | 76.547 | 1.00 | 0.00 | P |
| ATOM | 610 | H01  | LNK | A | 20 | -6.074 | -4.527 | 75.958 | 0.00 | 0.00 | H |
| ATOM | 611 | H02  | LNK | A | 20 | -6.992 | -4.543 | 77.484 | 0.00 | 0.00 | H |
| ATOM | 612 | H03  | LNK | A | 20 | -4.695 | -7.071 | 75.663 | 0.00 | 0.00 | H |
| ATOM | 613 | H04  | LNK | A | 20 | -5.842 | -6.362 | 78.311 | 0.00 | 0.00 | H |
| ATOM | 614 | H05  | LNK | A | 20 | -4.306 | -5.859 | 77.567 | 0.00 | 0.00 | H |
| ATOM | 615 | H06  | LNK | A | 20 | -6.410 | -6.602 | 75.607 | 0.00 | 0.00 | H |
| ATOM | 616 | AU   | LNK | A | 20 | -6.082 | -9.060 | 76.422 |      |      |   |

TER

|      |     |      |     |   |        |       |        |      |      |   |
|------|-----|------|-----|---|--------|-------|--------|------|------|---|
| ATOM | 618 | C1'  | A B | 2 | 0.077  | 5.792 | 67.294 | 1.00 | 0.00 | C |
| ATOM | 619 | N1   | A B | 2 | 0.010  | 3.982 | 72.096 | 1.00 | 0.00 | N |
| ATOM | 620 | C2   | A B | 2 | -0.870 | 3.920 | 71.101 | 1.00 | 0.00 | C |
| ATOM | 621 | N3   | A B | 2 | -0.788 | 4.408 | 69.882 | 1.00 | 0.00 | N |
| ATOM | 622 | C4   | A B | 2 | 0.386  | 5.046 | 69.714 | 1.00 | 0.00 | C |
| ATOM | 623 | C5   | A B | 2 | 1.388  | 5.199 | 70.629 | 1.00 | 0.00 | C |
| ATOM | 624 | C6   | A B | 2 | 1.172  | 4.623 | 71.900 | 1.00 | 0.00 | C |
| ATOM | 625 | N6   | A B | 2 | 2.067  | 4.691 | 72.899 | 1.00 | 0.00 | N |
| ATOM | 626 | N7   | A B | 2 | 2.447  | 5.912 | 70.098 | 1.00 | 0.00 | N |
| ATOM | 627 | C8   | A B | 2 | 2.065  | 6.180 | 68.885 | 1.00 | 0.00 | C |
| ATOM | 628 | N9   | A B | 2 | 0.824  | 5.682 | 68.580 | 1.00 | 0.00 | N |
| ATOM | 629 | C2'  | A B | 2 | 0.254  | 7.134 | 66.596 | 1.00 | 0.00 | C |
| ATOM | 630 | C3'  | A B | 2 | 0.250  | 6.731 | 65.130 | 1.00 | 0.00 | C |
| ATOM | 631 | O3'  | A B | 2 | -1.097 | 6.632 | 64.675 | 1.00 | 0.00 | O |
| ATOM | 632 | C4'  | A B | 2 | 0.953  | 5.373 | 65.150 | 1.00 | 0.00 | C |
| ATOM | 633 | O4'  | A B | 2 | 0.560  | 4.782 | 66.430 | 1.00 | 0.00 | O |
| ATOM | 634 | C5'  | A B | 2 | 2.461  | 5.397 | 65.070 | 1.00 | 0.00 | C |
| ATOM | 635 | O5'  | A B | 2 | 2.973  | 6.535 | 65.809 | 1.00 | 0.00 | O |
| ATOM | 636 | H2   | A B | 2 | -1.792 | 3.389 | 71.327 | 1.00 | 0.00 | H |
| ATOM | 637 | H8   | A B | 2 | 2.671  | 6.746 | 68.177 | 1.00 | 0.00 | H |
| ATOM | 638 | H1'  | A B | 2 | -0.975 | 5.590 | 67.495 | 1.00 | 0.00 | H |
| ATOM | 639 | H3'  | A B | 2 | 0.790  | 7.444 | 64.509 | 1.00 | 0.00 | H |
| ATOM | 640 | H4'  | A B | 2 | 0.583  | 4.814 | 64.291 | 1.00 | 0.00 | H |
| ATOM | 641 | H61  | A B | 2 | 1.861  | 4.252 | 73.806 | 1.00 | 0.00 | H |
| ATOM | 642 | H62  | A B | 2 | 2.961  | 5.184 | 72.755 | 1.00 | 0.00 | H |
| ATOM | 643 | H2'1 | A B | 2 | 1.187  | 7.624 | 66.870 | 1.00 | 0.00 | H |
| ATOM | 644 | H2'2 | A B | 2 | -0.559 | 7.825 | 66.818 | 1.00 | 0.00 | H |
| ATOM | 645 | H5'1 | A B | 2 | 2.857  | 4.476 | 65.496 | 1.00 | 0.00 | H |
| ATOM | 646 | H5'2 | A B | 2 | 2.763  | 5.469 | 64.027 | 1.00 | 0.00 | H |
| ATOM | 647 | C1'  | C B | 3 | -4.381 | 6.543 | 69.347 | 1.00 | 0.00 | C |
| ATOM | 648 | N1   | C B | 3 | -3.144 | 6.981 | 70.049 | 1.00 | 0.00 | N |
| ATOM | 649 | C2   | C B | 3 | -2.971 | 6.591 | 71.375 | 1.00 | 0.00 | C |
| ATOM | 650 | O2   | C B | 3 | -3.848 | 5.899 | 71.912 | 1.00 | 0.00 | O |
| ATOM | 651 | N3   | C B | 3 | -1.852 | 6.980 | 72.031 | 1.00 | 0.00 | N |
| ATOM | 652 | C4   | C B | 3 | -0.923 | 7.729 | 71.424 | 1.00 | 0.00 | C |
| ATOM | 653 | N4   | C B | 3 | 0.155  | 8.079 | 72.113 | 1.00 | 0.00 | N |
| ATOM | 654 | C5   | C B | 3 | -1.074 | 8.150 | 70.061 | 1.00 | 0.00 | C |
| ATOM | 655 | C6   | C B | 3 | -2.209 | 7.742 | 69.418 | 1.00 | 0.00 | C |
| ATOM | 656 | C2'  | C B | 3 | -4.958 | 7.590 | 68.406 | 1.00 | 0.00 | C |
| ATOM | 657 | C3'  | C B | 3 | -5.496 | 6.734 | 67.270 | 1.00 | 0.00 | C |
| ATOM | 658 | O3'  | C B | 3 | -6.802 | 6.275 | 67.609 | 1.00 | 0.00 | O |
| ATOM | 659 | C4'  | C B | 3 | -4.483 | 5.595 | 67.195 | 1.00 | 0.00 | C |
| ATOM | 660 | O4'  | C B | 3 | -4.057 | 5.398 | 68.581 | 1.00 | 0.00 | O |
| ATOM | 661 | C5'  | C B | 3 | -3.260 | 5.838 | 66.342 | 1.00 | 0.00 | C |
| ATOM | 662 | O5'  | C B | 3 | -2.848 | 7.222 | 66.462 | 1.00 | 0.00 | O |
| ATOM | 663 | O1P  | C B | 3 | -3.237 | 8.148 | 64.154 | 1.00 | 0.00 | O |
| ATOM | 664 | O2P  | C B | 3 | -1.480 | 9.161 | 65.633 | 1.00 | 0.00 | O |
| ATOM | 665 | P    | C B | 3 | -2.207 | 7.944 | 65.195 | 1.00 | 0.00 | P |
| ATOM | 666 | H5   | C B | 3 | -0.324 | 8.765 | 69.564 | 1.00 | 0.00 | H |
| ATOM | 667 | H6   | C B | 3 | -2.365 | 8.031 | 68.379 | 1.00 | 0.00 | H |
| ATOM | 668 | H1'  | C B | 3 | -5.114 | 6.247 | 70.100 | 1.00 | 0.00 | H |
| ATOM | 669 | H3'  | C B | 3 | -5.540 | 7.285 | 66.330 | 1.00 | 0.00 | H |
| ATOM | 670 | H4'  | C B | 3 | -5.008 | 4.731 | 66.783 | 1.00 | 0.00 | H |

|      |     |      |     |   |         |        |        |      |      |   |
|------|-----|------|-----|---|---------|--------|--------|------|------|---|
| ATOM | 671 | H41  | C B | 3 | 0.887   | 8.652  | 71.668 | 1.00 | 0.00 | H |
| ATOM | 672 | H42  | C B | 3 | 0.261   | 7.777  | 73.093 | 1.00 | 0.00 | H |
| ATOM | 673 | H2'1 | C B | 3 | -4.202  | 8.291  | 68.052 | 1.00 | 0.00 | H |
| ATOM | 674 | H2'2 | C B | 3 | -5.752  | 8.174  | 68.875 | 1.00 | 0.00 | H |
| ATOM | 675 | H5'1 | C B | 3 | -2.455  | 5.184  | 66.677 | 1.00 | 0.00 | H |
| ATOM | 676 | H5'2 | C B | 3 | -3.497  | 5.614  | 65.304 | 1.00 | 0.00 | H |
| ATOM | 677 | C1'  | C B | 4 | -7.479  | 7.201  | 73.154 | 1.00 | 0.00 | C |
| ATOM | 678 | N1   | C B | 4 | -6.251  | 8.031  | 73.026 | 1.00 | 0.00 | N |
| ATOM | 679 | C2   | C B | 4 | -5.402  | 8.120  | 74.128 | 1.00 | 0.00 | C |
| ATOM | 680 | O2   | C B | 4 | -5.702  | 7.508  | 75.162 | 1.00 | 0.00 | O |
| ATOM | 681 | N3   | C B | 4 | -4.280  | 8.871  | 74.031 | 1.00 | 0.00 | N |
| ATOM | 682 | C4   | C B | 4 | -3.982  | 9.523  | 72.899 | 1.00 | 0.00 | C |
| ATOM | 683 | N4   | C B | 4 | -2.869  | 10.241 | 72.857 | 1.00 | 0.00 | N |
| ATOM | 684 | C5   | C B | 4 | -4.837  | 9.454  | 71.749 | 1.00 | 0.00 | C |
| ATOM | 685 | C6   | C B | 4 | -5.962  | 8.687  | 71.870 | 1.00 | 0.00 | C |
| ATOM | 686 | C2'  | C B | 4 | -8.693  | 7.787  | 72.449 | 1.00 | 0.00 | C |
| ATOM | 687 | C3'  | C B | 4 | -9.398  | 6.538  | 71.943 | 1.00 | 0.00 | C |
| ATOM | 688 | O3'  | C B | 4 | -10.219 | 6.010  | 72.982 | 1.00 | 0.00 | O |
| ATOM | 689 | C4'  | C B | 4 | -8.237  | 5.609  | 71.596 | 1.00 | 0.00 | C |
| ATOM | 690 | O4'  | C B | 4 | -7.205  | 5.937  | 72.580 | 1.00 | 0.00 | O |
| ATOM | 691 | C5'  | C B | 4 | -7.649  | 5.756  | 70.212 | 1.00 | 0.00 | C |
| ATOM | 692 | O5'  | C B | 4 | -7.656  | 7.153  | 69.823 | 1.00 | 0.00 | O |
| ATOM | 693 | O1P  | C B | 4 | -9.279  | 7.215  | 67.901 | 1.00 | 0.00 | O |
| ATOM | 694 | O2P  | C B | 4 | -7.436  | 8.912  | 68.043 | 1.00 | 0.00 | O |
| ATOM | 695 | P    | C B | 4 | -7.889  | 7.521  | 68.290 | 1.00 | 0.00 | P |
| ATOM | 696 | H5   | C B | 4 | -4.605  | 9.988  | 70.830 | 1.00 | 0.00 | H |
| ATOM | 697 | H6   | C B | 4 | -6.639  | 8.598  | 71.021 | 1.00 | 0.00 | H |
| ATOM | 698 | H1'  | C B | 4 | -7.678  | 7.050  | 74.216 | 1.00 | 0.00 | H |
| ATOM | 699 | H3'  | C B | 4 | -10.012 | 6.743  | 71.066 | 1.00 | 0.00 | H |
| ATOM | 700 | H4'  | C B | 4 | -8.608  | 4.588  | 71.693 | 1.00 | 0.00 | H |
| ATOM | 701 | H41  | C B | 4 | -2.615  | 10.750 | 71.998 | 1.00 | 0.00 | H |
| ATOM | 702 | H42  | C B | 4 | -2.256  | 10.291 | 73.685 | 1.00 | 0.00 | H |
| ATOM | 703 | H2'1 | C B | 4 | -8.416  | 8.446  | 71.627 | 1.00 | 0.00 | H |
| ATOM | 704 | H2'2 | C B | 4 | -9.330  | 8.355  | 73.125 | 1.00 | 0.00 | H |
| ATOM | 705 | H5'1 | C B | 4 | -6.625  | 5.379  | 70.216 | 1.00 | 0.00 | H |
| ATOM | 706 | H5'2 | C B | 4 | -8.243  | 5.175  | 69.509 | 1.00 | 0.00 | H |
| ATOM | 707 | C1'  | G B | 5 | -8.611  | 8.549  | 77.783 | 1.00 | 0.00 | C |
| ATOM | 708 | N1   | G B | 5 | -4.511  | 11.548 | 77.308 | 1.00 | 0.00 | N |
| ATOM | 709 | C2   | G B | 5 | -4.922  | 10.767 | 78.375 | 1.00 | 0.00 | C |
| ATOM | 710 | N2   | G B | 5 | -4.136  | 10.787 | 79.459 | 1.00 | 0.00 | N |
| ATOM | 711 | N3   | G B | 5 | -6.026  | 10.022 | 78.359 | 1.00 | 0.00 | N |
| ATOM | 712 | C4   | G B | 5 | -6.703  | 10.125 | 77.185 | 1.00 | 0.00 | C |
| ATOM | 713 | C5   | G B | 5 | -6.373  | 10.883 | 76.072 | 1.00 | 0.00 | C |
| ATOM | 714 | C6   | G B | 5 | -5.199  | 11.670 | 76.086 | 1.00 | 0.00 | C |
| ATOM | 715 | O6   | G B | 5 | -4.744  | 12.400 | 75.206 | 1.00 | 0.00 | O |
| ATOM | 716 | N7   | G B | 5 | -7.334  | 10.714 | 75.073 | 1.00 | 0.00 | N |
| ATOM | 717 | C8   | G B | 5 | -8.194  | 9.879  | 75.597 | 1.00 | 0.00 | C |
| ATOM | 718 | N9   | G B | 5 | -7.879  | 9.478  | 76.881 | 1.00 | 0.00 | N |
| ATOM | 719 | C2'  | G B | 5 | -10.126 | 8.671  | 77.691 | 1.00 | 0.00 | C |
| ATOM | 720 | C3'  | G B | 5 | -10.573 | 7.230  | 77.883 | 1.00 | 0.00 | C |
| ATOM | 721 | O3'  | G B | 5 | -10.650 | 6.947  | 79.278 | 1.00 | 0.00 | O |
| ATOM | 722 | C4'  | G B | 5 | -9.466  | 6.437  | 77.192 | 1.00 | 0.00 | C |
| ATOM | 723 | O4'  | G B | 5 | -8.257  | 7.227  | 77.424 | 1.00 | 0.00 | O |
| ATOM | 724 | C5'  | G B | 5 | -9.624  | 6.218  | 75.707 | 1.00 | 0.00 | C |



|      |     |      |     |   |         |        |        |      |      |   |
|------|-----|------|-----|---|---------|--------|--------|------|------|---|
| ATOM | 725 | O5'  | G B | 5 | -10.220 | 7.391  | 75.098 | 1.00 | 0.00 | O |
| ATOM | 726 | O1P  | G B | 5 | -12.460 | 6.564  | 74.306 | 1.00 | 0.00 | O |
| ATOM | 727 | O2P  | G B | 5 | -11.347 | 8.486  | 73.138 | 1.00 | 0.00 | O |
| ATOM | 728 | P    | G B | 5 | -11.204 | 7.198  | 73.859 | 1.00 | 0.00 | P |
| ATOM | 729 | H1   | G B | 5 | -3.636  | 12.082 | 77.420 | 1.00 | 0.00 | H |
| ATOM | 730 | H8   | G B | 5 | -9.081  | 9.531  | 75.070 | 1.00 | 0.00 | H |
| ATOM | 731 | H1'  | G B | 5 | -8.266  | 8.722  | 78.803 | 1.00 | 0.00 | H |
| ATOM | 732 | H21  | G B | 5 | -3.281  | 11.362 | 79.462 | 1.00 | 0.00 | H |
| ATOM | 733 | H3'  | G B | 5 | -11.542 | 7.037  | 77.423 | 1.00 | 0.00 | H |
| ATOM | 734 | H22  | G B | 5 | -4.387  | 10.231 | 80.287 | 1.00 | 0.00 | H |
| ATOM | 735 | H4'  | G B | 5 | -9.432  | 5.458  | 77.672 | 1.00 | 0.00 | H |
| ATOM | 736 | H2'1 | G B | 5 | -10.452 | 9.062  | 76.728 | 1.00 | 0.00 | H |
| ATOM | 737 | H2'2 | G B | 5 | -10.536 | 9.319  | 78.465 | 1.00 | 0.00 | H |
| ATOM | 738 | H5'1 | G B | 5 | -8.645  | 6.030  | 75.267 | 1.00 | 0.00 | H |
| ATOM | 739 | H5'2 | G B | 5 | -10.264 | 5.351  | 75.540 | 1.00 | 0.00 | H |
| ATOM | 740 | C1'  | T B | 6 | -7.938  | 11.098 | 81.973 | 1.00 | 0.00 | C |
| ATOM | 741 | N1   | T B | 6 | -7.967  | 11.803 | 80.664 | 1.00 | 0.00 | N |
| ATOM | 742 | C2   | T B | 6 | -6.921  | 12.660 | 80.387 | 1.00 | 0.00 | C |
| ATOM | 743 | O2   | T B | 6 | -5.999  | 12.850 | 81.162 | 1.00 | 0.00 | O |
| ATOM | 744 | N3   | T B | 6 | -6.988  | 13.293 | 79.160 | 1.00 | 0.00 | N |
| ATOM | 745 | C4   | T B | 6 | -7.982  | 13.153 | 78.213 | 1.00 | 0.00 | C |
| ATOM | 746 | O4   | T B | 6 | -7.936  | 13.778 | 77.149 | 1.00 | 0.00 | O |
| ATOM | 747 | C5   | T B | 6 | -9.032  | 12.237 | 78.594 | 1.00 | 0.00 | C |
| ATOM | 748 | C6   | T B | 6 | -8.999  | 11.601 | 79.781 | 1.00 | 0.00 | C |
| ATOM | 749 | C7   | T B | 6 | -10.134 | 12.051 | 77.593 | 1.00 | 0.00 | C |
| ATOM | 750 | C2'  | T B | 6 | -9.310  | 10.948 | 82.621 | 1.00 | 0.00 | C |
| ATOM | 751 | C3'  | T B | 6 | -9.197  | 9.587  | 83.287 | 1.00 | 0.00 | C |
| ATOM | 752 | O3'  | T B | 6 | -8.579  | 9.738  | 84.563 | 1.00 | 0.00 | O |
| ATOM | 753 | C4'  | T B | 6 | -8.326  | 8.799  | 82.313 | 1.00 | 0.00 | C |
| ATOM | 754 | O4'  | T B | 6 | -7.416  | 9.802  | 81.754 | 1.00 | 0.00 | O |
| ATOM | 755 | C5'  | T B | 6 | -9.041  | 8.110  | 81.174 | 1.00 | 0.00 | C |
| ATOM | 756 | O5'  | T B | 6 | -10.148 | 8.932  | 80.723 | 1.00 | 0.00 | O |
| ATOM | 757 | O1P  | T B | 6 | -12.173 | 7.563  | 81.323 | 1.00 | 0.00 | O |
| ATOM | 758 | O2P  | T B | 6 | -12.273 | 9.179  | 79.405 | 1.00 | 0.00 | O |
| ATOM | 759 | P    | T B | 6 | -11.472 | 8.215  | 80.198 | 1.00 | 0.00 | P |
| ATOM | 760 | H3   | T B | 6 | -6.216  | 13.936 | 78.927 | 1.00 | 0.00 | H |
| ATOM | 761 | H6   | T B | 6 | -9.804  | 10.914 | 80.045 | 1.00 | 0.00 | H |
| ATOM | 762 | H1'  | T B | 6 | -7.252  | 11.628 | 82.633 | 1.00 | 0.00 | H |
| ATOM | 763 | H3'  | T B | 6 | -10.172 | 9.113  | 83.415 | 1.00 | 0.00 | H |
| ATOM | 764 | H4'  | T B | 6 | -7.811  | 8.034  | 82.894 | 1.00 | 0.00 | H |
| ATOM | 765 | H71  | T B | 6 | -11.066 | 12.438 | 78.004 | 1.00 | 0.00 | H |
| ATOM | 766 | H72  | T B | 6 | -9.889  | 12.589 | 76.678 | 1.00 | 0.00 | H |
| ATOM | 767 | H73  | T B | 6 | -10.248 | 10.989 | 77.371 | 1.00 | 0.00 | H |
| ATOM | 768 | H2'1 | T B | 6 | -10.115 | 10.967 | 81.889 | 1.00 | 0.00 | H |
| ATOM | 769 | H2'2 | T B | 6 | -9.510  | 11.732 | 83.351 | 1.00 | 0.00 | H |
| ATOM | 770 | H5'1 | T B | 6 | -8.342  | 7.950  | 80.354 | 1.00 | 0.00 | H |
| ATOM | 771 | H5'2 | T B | 6 | -9.416  | 7.147  | 81.521 | 1.00 | 0.00 | H |
| ATOM | 772 | C1'  | C B | 7 | -6.248  | 14.960 | 84.598 | 1.00 | 0.00 | C |
| ATOM | 773 | N1   | C B | 7 | -7.078  | 15.178 | 83.380 | 1.00 | 0.00 | N |
| ATOM | 774 | C2   | C B | 7 | -6.593  | 16.055 | 82.412 | 1.00 | 0.00 | C |
| ATOM | 775 | O2   | C B | 7 | -5.503  | 16.612 | 82.600 | 1.00 | 0.00 | O |
| ATOM | 776 | N3   | C B | 7 | -7.333  | 16.269 | 81.296 | 1.00 | 0.00 | N |
| ATOM | 777 | C4   | C B | 7 | -8.508  | 15.652 | 81.119 | 1.00 | 0.00 | C |
| ATOM | 778 | N4   | C B | 7 | -9.186  | 15.894 | 80.009 | 1.00 | 0.00 | N |

|      |     |      |     |   |         |        |        |      |      |   |
|------|-----|------|-----|---|---------|--------|--------|------|------|---|
| ATOM | 779 | C5   | C B | 7 | -9.032  | 14.748 | 82.102 | 1.00 | 0.00 | C |
| ATOM | 780 | C6   | C B | 7 | -8.268  | 14.545 | 83.215 | 1.00 | 0.00 | C |
| ATOM | 781 | C2'  | C B | 7 | -7.062  | 14.818 | 85.877 | 1.00 | 0.00 | C |
| ATOM | 782 | C3'  | C B | 7 | -6.255  | 13.789 | 86.652 | 1.00 | 0.00 | C |
| ATOM | 783 | O3'  | C B | 7 | -5.207  | 14.450 | 87.357 | 1.00 | 0.00 | O |
| ATOM | 784 | C4'  | C B | 7 | -5.723  | 12.873 | 85.553 | 1.00 | 0.00 | C |
| ATOM | 785 | O4'  | C B | 7 | -5.515  | 13.763 | 84.411 | 1.00 | 0.00 | O |
| ATOM | 786 | C5'  | C B | 7 | -6.630  | 11.741 | 85.124 | 1.00 | 0.00 | C |
| ATOM | 787 | O5'  | C B | 7 | -8.009  | 12.181 | 85.155 | 1.00 | 0.00 | O |
| ATOM | 788 | O1P  | C B | 7 | -9.027  | 10.785 | 86.984 | 1.00 | 0.00 | O |
| ATOM | 789 | O2P  | C B | 7 | -10.463 | 11.639 | 85.115 | 1.00 | 0.00 | O |
| ATOM | 790 | P    | C B | 7 | -9.143  | 11.131 | 85.555 | 1.00 | 0.00 | P |
| ATOM | 791 | H5   | C B | 7 | -9.992  | 14.250 | 81.967 | 1.00 | 0.00 | H |
| ATOM | 792 | H6   | C B | 7 | -8.622  | 13.861 | 83.986 | 1.00 | 0.00 | H |
| ATOM | 793 | H1'  | C B | 7 | -5.535  | 15.780 | 84.678 | 1.00 | 0.00 | H |
| ATOM | 794 | H3'  | C B | 7 | -6.872  | 13.235 | 87.361 | 1.00 | 0.00 | H |
| ATOM | 795 | H4'  | C B | 7 | -4.798  | 12.433 | 85.925 | 1.00 | 0.00 | H |
| ATOM | 796 | H41  | C B | 7 | -10.092 | 15.431 | 79.847 | 1.00 | 0.00 | H |
| ATOM | 797 | H42  | C B | 7 | -8.808  | 16.547 | 79.305 | 1.00 | 0.00 | H |
| ATOM | 798 | H2'1 | C B | 7 | -8.075  | 14.465 | 85.685 | 1.00 | 0.00 | H |
| ATOM | 799 | H2'2 | C B | 7 | -7.140  | 15.757 | 86.424 | 1.00 | 0.00 | H |
| ATOM | 800 | H5'1 | C B | 7 | -6.363  | 11.433 | 84.113 | 1.00 | 0.00 | H |
| ATOM | 801 | H5'2 | C B | 7 | -6.496  | 10.900 | 85.802 | 1.00 | 0.00 | H |
| ATOM | 802 | C1'  | C B | 8 | -4.803  | 19.661 | 85.176 | 1.00 | 0.00 | C |
| ATOM | 803 | N1   | C B | 8 | -6.107  | 19.344 | 84.533 | 1.00 | 0.00 | N |
| ATOM | 804 | C2   | C B | 8 | -6.386  | 19.928 | 83.299 | 1.00 | 0.00 | C |
| ATOM | 805 | O2   | C B | 8 | -5.545  | 20.681 | 82.792 | 1.00 | 0.00 | O |
| ATOM | 806 | N3   | C B | 8 | -7.568  | 19.652 | 82.696 | 1.00 | 0.00 | N |
| ATOM | 807 | C4   | C B | 8 | -8.459  | 18.834 | 83.271 | 1.00 | 0.00 | C |
| ATOM | 808 | N4   | C B | 8 | -9.598  | 18.595 | 82.635 | 1.00 | 0.00 | N |
| ATOM | 809 | C5   | C B | 8 | -8.204  | 18.221 | 84.542 | 1.00 | 0.00 | C |
| ATOM | 810 | C6   | C B | 8 | -7.002  | 18.511 | 85.129 | 1.00 | 0.00 | C |
| ATOM | 811 | C2'  | C B | 8 | -4.884  | 19.811 | 86.690 | 1.00 | 0.00 | C |
| ATOM | 812 | C3'  | C B | 8 | -3.554  | 19.226 | 87.138 | 1.00 | 0.00 | C |
| ATOM | 813 | O3'  | C B | 8 | -2.551  | 20.236 | 87.062 | 1.00 | 0.00 | O |
| ATOM | 814 | C4'  | C B | 8 | -3.320  | 18.102 | 86.132 | 1.00 | 0.00 | C |
| ATOM | 815 | O4'  | C B | 8 | -3.912  | 18.600 | 84.889 | 1.00 | 0.00 | O |
| ATOM | 816 | C5'  | C B | 8 | -3.941  | 16.765 | 86.461 | 1.00 | 0.00 | C |
| ATOM | 817 | O5'  | C B | 8 | -5.229  | 16.967 | 87.098 | 1.00 | 0.00 | O |
| ATOM | 818 | O1P  | C B | 8 | -4.866  | 16.090 | 89.431 | 1.00 | 0.00 | O |
| ATOM | 819 | O2P  | C B | 8 | -7.163  | 16.059 | 88.419 | 1.00 | 0.00 | O |
| ATOM | 820 | P    | C B | 8 | -5.698  | 15.936 | 88.220 | 1.00 | 0.00 | P |
| ATOM | 821 | H5   | C B | 8 | -8.927  | 17.560 | 85.018 | 1.00 | 0.00 | H |
| ATOM | 822 | H6   | C B | 8 | -6.758  | 18.062 | 86.092 | 1.00 | 0.00 | H |
| ATOM | 823 | H1'  | C B | 8 | -4.407  | 20.566 | 84.715 | 1.00 | 0.00 | H |
| ATOM | 824 | H3'  | C B | 8 | -3.601  | 18.839 | 88.156 | 1.00 | 0.00 | H |
| ATOM | 825 | H4'  | C B | 8 | -2.242  | 17.958 | 86.063 | 1.00 | 0.00 | H |
| ATOM | 826 | H41  | C B | 8 | -10.299 | 17.968 | 83.055 | 1.00 | 0.00 | H |
| ATOM | 827 | H42  | C B | 8 | -9.781  | 19.039 | 81.724 | 1.00 | 0.00 | H |
| ATOM | 828 | H2'1 | C B | 8 | -5.724  | 19.259 | 87.114 | 1.00 | 0.00 | H |
| ATOM | 829 | H2'2 | C B | 8 | -4.986  | 20.851 | 86.996 | 1.00 | 0.00 | H |
| ATOM | 830 | H5'1 | C B | 8 | -4.073  | 16.193 | 85.541 | 1.00 | 0.00 | H |
| ATOM | 831 | H5'2 | C B | 8 | -3.280  | 16.218 | 87.131 | 1.00 | 0.00 | H |
| ATOM | 832 | C1'  | T B | 9 | -4.696  | 24.466 | 83.993 | 1.00 | 0.00 | C |

|      |     |      |     |    |         |        |        |      |      |   |
|------|-----|------|-----|----|---------|--------|--------|------|------|---|
| ATOM | 833 | N1   | T B | 9  | -5.997  | 23.766 | 84.160 | 1.00 | 0.00 | N |
| ATOM | 834 | C2   | T B | 9  | -6.917  | 23.893 | 83.141 | 1.00 | 0.00 | C |
| ATOM | 835 | O2   | T B | 9  | -6.700  | 24.547 | 82.135 | 1.00 | 0.00 | O |
| ATOM | 836 | N3   | T B | 9  | -8.112  | 23.226 | 83.337 | 1.00 | 0.00 | N |
| ATOM | 837 | C4   | T B | 9  | -8.457  | 22.466 | 84.434 | 1.00 | 0.00 | C |
| ATOM | 838 | O4   | T B | 9  | -9.563  | 21.917 | 84.499 | 1.00 | 0.00 | O |
| ATOM | 839 | C5   | T B | 9  | -7.431  | 22.391 | 85.448 | 1.00 | 0.00 | C |
| ATOM | 840 | C6   | T B | 9  | -6.255  | 23.028 | 85.288 | 1.00 | 0.00 | C |
| ATOM | 841 | C7   | T B | 9  | -7.766  | 21.572 | 86.658 | 1.00 | 0.00 | C |
| ATOM | 842 | C2'  | T B | 9  | -4.149  | 25.064 | 85.284 | 1.00 | 0.00 | C |
| ATOM | 843 | C3'  | T B | 9  | -2.650  | 24.864 | 85.117 | 1.00 | 0.00 | C |
| ATOM | 844 | O3'  | T B | 9  | -2.116  | 25.944 | 84.355 | 1.00 | 0.00 | O |
| ATOM | 845 | C4'  | T B | 9  | -2.567  | 23.533 | 84.373 | 1.00 | 0.00 | C |
| ATOM | 846 | O4'  | T B | 9  | -3.755  | 23.522 | 83.518 | 1.00 | 0.00 | O |
| ATOM | 847 | C5'  | T B | 9  | -2.571  | 22.285 | 85.224 | 1.00 | 0.00 | C |
| ATOM | 848 | O5'  | T B | 9  | -3.449  | 22.473 | 86.363 | 1.00 | 0.00 | O |
| ATOM | 849 | O1P  | T B | 9  | -1.875  | 22.434 | 88.325 | 1.00 | 0.00 | O |
| ATOM | 850 | O2P  | T B | 9  | -4.266  | 21.731 | 88.620 | 1.00 | 0.00 | O |
| ATOM | 851 | P    | T B | 9  | -3.069  | 21.783 | 87.747 | 1.00 | 0.00 | P |
| ATOM | 852 | H3   | T B | 9  | -8.815  | 23.303 | 82.588 | 1.00 | 0.00 | H |
| ATOM | 853 | H6   | T B | 9  | -5.497  | 22.956 | 86.068 | 1.00 | 0.00 | H |
| ATOM | 854 | H1'  | T B | 9  | -4.816  | 25.233 | 83.228 | 1.00 | 0.00 | H |
| ATOM | 855 | H3'  | T B | 9  | -2.138  | 24.811 | 86.077 | 1.00 | 0.00 | H |
| ATOM | 856 | H4'  | T B | 9  | -1.634  | 23.546 | 83.805 | 1.00 | 0.00 | H |
| ATOM | 857 | H71  | T B | 9  | -7.820  | 22.220 | 87.533 | 1.00 | 0.00 | H |
| ATOM | 858 | H72  | T B | 9  | -8.726  | 21.078 | 86.512 | 1.00 | 0.00 | H |
| ATOM | 859 | H73  | T B | 9  | -6.991  | 20.820 | 86.814 | 1.00 | 0.00 | H |
| ATOM | 860 | H2'1 | T B | 9  | -4.522  | 24.550 | 86.168 | 1.00 | 0.00 | H |
| ATOM | 861 | H2'2 | T B | 9  | -4.400  | 26.119 | 85.389 | 1.00 | 0.00 | H |
| ATOM | 862 | H5'1 | T B | 9  | -2.918  | 21.444 | 84.626 | 1.00 | 0.00 | H |
| ATOM | 863 | H5'2 | T B | 9  | -1.558  | 22.086 | 85.570 | 1.00 | 0.00 | H |
| ATOM | 864 | C1'  | A B | 10 | -6.565  | 28.590 | 81.961 | 1.00 | 0.00 | C |
| ATOM | 865 | N1   | A B | 10 | -11.070 | 26.258 | 82.739 | 1.00 | 0.00 | N |
| ATOM | 866 | C2   | A B | 10 | -10.585 | 26.961 | 81.717 | 1.00 | 0.00 | C |
| ATOM | 867 | N3   | A B | 10 | -9.409  | 27.532 | 81.581 | 1.00 | 0.00 | N |
| ATOM | 868 | C4   | A B | 10 | -8.661  | 27.332 | 82.680 | 1.00 | 0.00 | C |
| ATOM | 869 | C5   | A B | 10 | -9.010  | 26.640 | 83.808 | 1.00 | 0.00 | C |
| ATOM | 870 | C6   | A B | 10 | -10.301 | 26.073 | 83.821 | 1.00 | 0.00 | C |
| ATOM | 871 | N6   | A B | 10 | -10.779 | 25.366 | 84.860 | 1.00 | 0.00 | N |
| ATOM | 872 | N7   | A B | 10 | -7.981  | 26.641 | 84.733 | 1.00 | 0.00 | N |
| ATOM | 873 | C8   | A B | 10 | -7.044  | 27.331 | 84.154 | 1.00 | 0.00 | C |
| ATOM | 874 | N9   | A B | 10 | -7.383  | 27.781 | 82.905 | 1.00 | 0.00 | N |
| ATOM | 875 | C2'  | A B | 10 | -5.707  | 29.646 | 82.643 | 1.00 | 0.00 | C |
| ATOM | 876 | C3'  | A B | 10 | -4.455  | 29.647 | 81.781 | 1.00 | 0.00 | C |
| ATOM | 877 | O3'  | A B | 10 | -4.664  | 30.495 | 80.654 | 1.00 | 0.00 | O |
| ATOM | 878 | C4'  | A B | 10 | -4.321  | 28.178 | 81.378 | 1.00 | 0.00 | C |
| ATOM | 879 | O4'  | A B | 10 | -5.702  | 27.704 | 81.272 | 1.00 | 0.00 | O |
| ATOM | 880 | C5'  | A B | 10 | -3.575  | 27.284 | 82.341 | 1.00 | 0.00 | C |
| ATOM | 881 | O5'  | A B | 10 | -3.867  | 27.681 | 83.705 | 1.00 | 0.00 | O |
| ATOM | 882 | O1P  | A B | 10 | -1.652  | 28.523 | 84.553 | 1.00 | 0.00 | O |
| ATOM | 883 | O2P  | A B | 10 | -3.334  | 27.580 | 86.159 | 1.00 | 0.00 | O |
| ATOM | 884 | P    | A B | 10 | -2.723  | 27.540 | 84.808 | 1.00 | 0.00 | P |
| ATOM | 885 | H2   | A B | 10 | -11.262 | 27.078 | 80.872 | 1.00 | 0.00 | H |
| ATOM | 886 | H8   | A B | 10 | -6.078  | 27.535 | 84.619 | 1.00 | 0.00 | H |

|      |     |      |     |    |         |        |        |      |      |   |
|------|-----|------|-----|----|---------|--------|--------|------|------|---|
| ATOM | 887 | H1'  | A B | 10 | -7.235  | 29.043 | 81.230 | 1.00 | 0.00 | H |
| ATOM | 888 | H3'  | A B | 10 | -3.579  | 29.984 | 82.333 | 1.00 | 0.00 | H |
| ATOM | 889 | H4'  | A B | 10 | -3.790  | 28.158 | 80.426 | 1.00 | 0.00 | H |
| ATOM | 890 | H61  | A B | 10 | -11.729 | 24.971 | 84.817 | 1.00 | 0.00 | H |
| ATOM | 891 | H62  | A B | 10 | -10.196 | 25.219 | 85.696 | 1.00 | 0.00 | H |
| ATOM | 892 | H2'1 | A B | 10 | -5.476  | 29.388 | 83.678 | 1.00 | 0.00 | H |
| ATOM | 893 | H2'2 | A B | 10 | -6.185  | 30.627 | 82.650 | 1.00 | 0.00 | H |
| ATOM | 894 | H5'1 | A B | 10 | -3.886  | 26.251 | 82.185 | 1.00 | 0.00 | H |
| ATOM | 895 | H5'2 | A B | 10 | -2.506  | 27.369 | 82.154 | 1.00 | 0.00 | H |
| ATOM | 896 | C1'  | G B | 11 | -10.283 | 31.478 | 80.389 | 1.00 | 0.00 | C |
| ATOM | 897 | N1   | G B | 11 | -13.029 | 28.856 | 83.796 | 1.00 | 0.00 | N |
| ATOM | 898 | C2   | G B | 11 | -13.350 | 29.247 | 82.507 | 1.00 | 0.00 | C |
| ATOM | 899 | N2   | G B | 11 | -14.567 | 28.893 | 82.070 | 1.00 | 0.00 | N |
| ATOM | 900 | N3   | G B | 11 | -12.524 | 29.934 | 81.719 | 1.00 | 0.00 | N |
| ATOM | 901 | C4   | G B | 11 | -11.342 | 30.212 | 82.327 | 1.00 | 0.00 | C |
| ATOM | 902 | C5   | G B | 11 | -10.937 | 29.867 | 83.605 | 1.00 | 0.00 | C |
| ATOM | 903 | C6   | G B | 11 | -11.810 | 29.134 | 84.441 | 1.00 | 0.00 | C |
| ATOM | 904 | O6   | G B | 11 | -11.633 | 28.739 | 85.595 | 1.00 | 0.00 | O |
| ATOM | 905 | N7   | G B | 11 | -9.647  | 30.344 | 83.849 | 1.00 | 0.00 | N |
| ATOM | 906 | C8   | G B | 11 | -9.318  | 30.946 | 82.734 | 1.00 | 0.00 | C |
| ATOM | 907 | N9   | G B | 11 | -10.296 | 30.909 | 81.762 | 1.00 | 0.00 | N |
| ATOM | 908 | C2'  | G B | 11 | -9.580  | 32.826 | 80.289 | 1.00 | 0.00 | C |
| ATOM | 909 | C3'  | G B | 11 | -8.918  | 32.739 | 78.923 | 1.00 | 0.00 | C |
| ATOM | 910 | O3'  | G B | 11 | -9.860  | 33.123 | 77.925 | 1.00 | 0.00 | O |
| ATOM | 911 | C4'  | G B | 11 | -8.539  | 31.263 | 78.823 | 1.00 | 0.00 | C |
| ATOM | 912 | O4'  | G B | 11 | -9.601  | 30.567 | 79.550 | 1.00 | 0.00 | O |
| ATOM | 913 | C5'  | G B | 11 | -7.207  | 30.871 | 79.417 | 1.00 | 0.00 | C |
| ATOM | 914 | O5'  | G B | 11 | -6.959  | 31.646 | 80.617 | 1.00 | 0.00 | O |
| ATOM | 915 | O1P  | G B | 11 | -4.975  | 33.062 | 79.994 | 1.00 | 0.00 | O |
| ATOM | 916 | O2P  | G B | 11 | -5.374  | 32.448 | 82.393 | 1.00 | 0.00 | O |
| ATOM | 917 | P    | G B | 11 | -5.458  | 32.063 | 80.963 | 1.00 | 0.00 | P |
| ATOM | 918 | H1   | G B | 11 | -13.738 | 28.321 | 84.320 | 1.00 | 0.00 | H |
| ATOM | 919 | H8   | G B | 11 | -8.356  | 31.435 | 82.586 | 1.00 | 0.00 | H |
| ATOM | 920 | H1'  | G B | 11 | -11.314 | 31.550 | 80.037 | 1.00 | 0.00 | H |
| ATOM | 921 | H21  | G B | 11 | -15.197 | 28.359 | 82.684 | 1.00 | 0.00 | H |
| ATOM | 922 | H3'  | G B | 11 | -8.038  | 33.377 | 78.854 | 1.00 | 0.00 | H |
| ATOM | 923 | H22  | G B | 11 | -14.867 | 29.157 | 81.122 | 1.00 | 0.00 | H |
| ATOM | 924 | H4'  | G B | 11 | -8.516  | 31.014 | 77.761 | 1.00 | 0.00 | H |
| ATOM | 925 | H2'1 | G B | 11 | -8.841  | 32.964 | 81.079 | 1.00 | 0.00 | H |
| ATOM | 926 | H2'2 | G B | 11 | -10.277 | 33.662 | 80.342 | 1.00 | 0.00 | H |
| ATOM | 927 | H5'1 | G B | 11 | -7.224  | 29.808 | 79.660 | 1.00 | 0.00 | H |
| ATOM | 928 | H5'2 | G B | 11 | -6.420  | 31.059 | 78.686 | 1.00 | 0.00 | H |
| ATOM | 929 | C1'  | G B | 12 | -14.965 | 33.097 | 80.365 | 1.00 | 0.00 | C |
| ATOM | 930 | N1   | G B | 12 | -15.008 | 31.306 | 85.142 | 1.00 | 0.00 | N |
| ATOM | 931 | C2   | G B | 12 | -15.965 | 31.207 | 84.148 | 1.00 | 0.00 | C |
| ATOM | 932 | N2   | G B | 12 | -17.083 | 30.544 | 84.469 | 1.00 | 0.00 | N |
| ATOM | 933 | N3   | G B | 12 | -15.817 | 31.725 | 82.930 | 1.00 | 0.00 | N |
| ATOM | 934 | C4   | G B | 12 | -14.629 | 32.368 | 82.783 | 1.00 | 0.00 | C |
| ATOM | 935 | C5   | G B | 12 | -13.618 | 32.521 | 83.716 | 1.00 | 0.00 | C |
| ATOM | 936 | C6   | G B | 12 | -13.772 | 31.966 | 85.007 | 1.00 | 0.00 | C |
| ATOM | 937 | O6   | G B | 12 | -12.995 | 31.997 | 85.963 | 1.00 | 0.00 | O |
| ATOM | 938 | N7   | G B | 12 | -12.559 | 33.248 | 83.167 | 1.00 | 0.00 | N |
| ATOM | 939 | C8   | G B | 12 | -12.951 | 33.504 | 81.948 | 1.00 | 0.00 | C |
| ATOM | 940 | N9   | G B | 12 | -14.199 | 33.003 | 81.638 | 1.00 | 0.00 | N |

|      |     |      |     |    |         |        |        |      |      |   |
|------|-----|------|-----|----|---------|--------|--------|------|------|---|
| ATOM | 941 | C2'  | G B | 12 | -14.810 | 34.434 | 79.653 | 1.00 | 0.00 | C |
| ATOM | 942 | C3'  | G B | 12 | -14.829 | 34.019 | 78.190 | 1.00 | 0.00 | C |
| ATOM | 943 | O3'  | G B | 12 | -16.181 | 33.907 | 77.753 | 1.00 | 0.00 | O |
| ATOM | 944 | C4'  | G B | 12 | -14.116 | 32.667 | 78.210 | 1.00 | 0.00 | C |
| ATOM | 945 | O4'  | G B | 12 | -14.487 | 32.084 | 79.499 | 1.00 | 0.00 | O |
| ATOM | 946 | C5'  | G B | 12 | -12.610 | 32.703 | 78.112 | 1.00 | 0.00 | C |
| ATOM | 947 | O5'  | G B | 12 | -12.097 | 33.850 | 78.835 | 1.00 | 0.00 | O |
| ATOM | 948 | O1P  | G B | 12 | -11.111 | 35.288 | 77.018 | 1.00 | 0.00 | O |
| ATOM | 949 | O2P  | G B | 12 | -10.206 | 35.422 | 79.355 | 1.00 | 0.00 | O |
| ATOM | 950 | P    | G B | 12 | -10.796 | 34.589 | 78.278 | 1.00 | 0.00 | P |
| ATOM | 951 | H1   | G B | 12 | -15.217 | 30.862 | 86.050 | 1.00 | 0.00 | H |
| ATOM | 952 | H8   | G B | 12 | -12.346 | 34.065 | 81.234 | 1.00 | 0.00 | H |
| ATOM | 953 | H1'  | G B | 12 | -16.011 | 32.886 | 80.580 | 1.00 | 0.00 | H |
| ATOM | 954 | H21  | G B | 12 | -17.189 | 30.142 | 85.412 | 1.00 | 0.00 | H |
| ATOM | 955 | H3'  | G B | 12 | -14.303 | 34.731 | 77.556 | 1.00 | 0.00 | H |
| ATOM | 956 | H22  | G B | 12 | -17.836 | 30.439 | 83.774 | 1.00 | 0.00 | H |
| ATOM | 957 | H4'  | G B | 12 | -14.491 | 32.098 | 77.362 | 1.00 | 0.00 | H |
| ATOM | 958 | H2'1 | G B | 12 | -13.876 | 34.933 | 79.911 | 1.00 | 0.00 | H |
| ATOM | 959 | H2'2 | G B | 12 | -15.623 | 35.121 | 79.882 | 1.00 | 0.00 | H |
| ATOM | 960 | H5'1 | G B | 12 | -12.201 | 31.788 | 78.538 | 1.00 | 0.00 | H |
| ATOM | 961 | H5'2 | G B | 12 | -12.322 | 32.769 | 77.062 | 1.00 | 0.00 | H |
| ATOM | 962 | C1'  | T B | 13 | -19.423 | 33.862 | 82.373 | 1.00 | 0.00 | C |
| ATOM | 963 | N1   | T B | 13 | -18.194 | 34.291 | 83.093 | 1.00 | 0.00 | N |
| ATOM | 964 | C2   | T B | 13 | -18.059 | 33.886 | 84.406 | 1.00 | 0.00 | C |
| ATOM | 965 | O2   | T B | 13 | -18.896 | 33.206 | 84.975 | 1.00 | 0.00 | O |
| ATOM | 966 | N3   | T B | 13 | -16.902 | 34.306 | 85.036 | 1.00 | 0.00 | N |
| ATOM | 967 | C4   | T B | 13 | -15.900 | 35.076 | 84.487 | 1.00 | 0.00 | C |
| ATOM | 968 | O4   | T B | 13 | -14.907 | 35.393 | 85.152 | 1.00 | 0.00 | O |
| ATOM | 969 | C5   | T B | 13 | -16.129 | 35.450 | 83.110 | 1.00 | 0.00 | C |
| ATOM | 970 | C6   | T B | 13 | -17.244 | 35.057 | 82.463 | 1.00 | 0.00 | C |
| ATOM | 971 | C7   | T B | 13 | -15.062 | 36.287 | 82.470 | 1.00 | 0.00 | C |
| ATOM | 972 | C2'  | T B | 13 | -19.983 | 34.919 | 81.428 | 1.00 | 0.00 | C |
| ATOM | 973 | C3'  | T B | 13 | -20.509 | 34.073 | 80.281 | 1.00 | 0.00 | C |
| ATOM | 974 | O3'  | T B | 13 | -21.823 | 33.619 | 80.599 | 1.00 | 0.00 | O |
| ATOM | 975 | C4'  | T B | 13 | -19.503 | 32.928 | 80.213 | 1.00 | 0.00 | C |
| ATOM | 976 | O4'  | T B | 13 | -19.097 | 32.722 | 81.604 | 1.00 | 0.00 | O |
| ATOM | 977 | C5'  | T B | 13 | -18.266 | 33.167 | 79.380 | 1.00 | 0.00 | C |
| ATOM | 978 | O5'  | T B | 13 | -17.847 | 34.549 | 79.511 | 1.00 | 0.00 | O |
| ATOM | 979 | O1P  | T B | 13 | -18.200 | 35.488 | 77.205 | 1.00 | 0.00 | O |
| ATOM | 980 | O2P  | T B | 13 | -16.457 | 36.483 | 78.712 | 1.00 | 0.00 | O |
| ATOM | 981 | P    | T B | 13 | -17.186 | 35.275 | 78.257 | 1.00 | 0.00 | P |
| ATOM | 982 | H3   | T B | 13 | -16.776 | 34.013 | 86.016 | 1.00 | 0.00 | H |
| ATOM | 983 | H6   | T B | 13 | -17.396 | 35.353 | 81.425 | 1.00 | 0.00 | H |
| ATOM | 984 | H1'  | T B | 13 | -20.167 | 33.567 | 83.112 | 1.00 | 0.00 | H |
| ATOM | 985 | H3'  | T B | 13 | -20.538 | 34.628 | 79.344 | 1.00 | 0.00 | H |
| ATOM | 986 | H4'  | T B | 13 | -20.027 | 32.069 | 79.790 | 1.00 | 0.00 | H |
| ATOM | 987 | H71  | T B | 13 | -15.462 | 37.273 | 82.238 | 1.00 | 0.00 | H |
| ATOM | 988 | H72  | T B | 13 | -14.218 | 36.388 | 83.155 | 1.00 | 0.00 | H |
| ATOM | 989 | H73  | T B | 13 | -14.725 | 35.806 | 81.550 | 1.00 | 0.00 | H |
| ATOM | 990 | H2'1 | T B | 13 | -19.217 | 35.616 | 81.089 | 1.00 | 0.00 | H |
| ATOM | 991 | H2'2 | T B | 13 | -20.779 | 35.506 | 81.888 | 1.00 | 0.00 | H |
| ATOM | 992 | H5'1 | T B | 13 | -17.470 | 32.506 | 79.720 | 1.00 | 0.00 | H |
| ATOM | 993 | H5'2 | T B | 13 | -18.490 | 32.951 | 78.336 | 1.00 | 0.00 | H |
| ATOM | 994 | C1'  | G B | 14 | -22.514 | 34.517 | 86.203 | 1.00 | 0.00 | C |

|      |      |      |     |    |         |        |        |      |      |   |
|------|------|------|-----|----|---------|--------|--------|------|------|---|
| ATOM | 995  | N1   | G B | 14 | -18.327 | 36.201 | 88.582 | 1.00 | 0.00 | N |
| ATOM | 996  | C2   | G B | 14 | -19.339 | 35.377 | 89.042 | 1.00 | 0.00 | C |
| ATOM | 997  | N2   | G B | 14 | -19.220 | 34.946 | 90.303 | 1.00 | 0.00 | N |
| ATOM | 998  | N3   | G B | 14 | -20.383 | 35.012 | 88.302 | 1.00 | 0.00 | N |
| ATOM | 999  | C4   | G B | 14 | -20.344 | 35.546 | 87.051 | 1.00 | 0.00 | C |
| ATOM | 1000 | C5   | G B | 14 | -19.382 | 36.379 | 86.509 | 1.00 | 0.00 | C |
| ATOM | 1001 | C6   | G B | 14 | -18.268 | 36.765 | 87.293 | 1.00 | 0.00 | C |
| ATOM | 1002 | O6   | G B | 14 | -17.320 | 37.490 | 86.990 | 1.00 | 0.00 | O |
| ATOM | 1003 | N7   | G B | 14 | -19.714 | 36.708 | 85.192 | 1.00 | 0.00 | N |
| ATOM | 1004 | C8   | G B | 14 | -20.840 | 36.076 | 84.984 | 1.00 | 0.00 | C |
| ATOM | 1005 | N9   | G B | 14 | -21.288 | 35.349 | 86.069 | 1.00 | 0.00 | N |
| ATOM | 1006 | C2'  | G B | 14 | -23.731 | 35.097 | 85.495 | 1.00 | 0.00 | C |
| ATOM | 1007 | C3'  | G B | 14 | -24.435 | 33.844 | 84.996 | 1.00 | 0.00 | C |
| ATOM | 1008 | O3'  | G B | 14 | -25.252 | 33.321 | 86.039 | 1.00 | 0.00 | O |
| ATOM | 1009 | C4'  | G B | 14 | -23.271 | 32.916 | 84.651 | 1.00 | 0.00 | C |
| ATOM | 1010 | O4'  | G B | 14 | -22.240 | 33.251 | 85.634 | 1.00 | 0.00 | O |
| ATOM | 1011 | C5'  | G B | 14 | -22.686 | 33.058 | 83.267 | 1.00 | 0.00 | C |
| ATOM | 1012 | O5'  | G B | 14 | -22.694 | 34.453 | 82.871 | 1.00 | 0.00 | O |
| ATOM | 1013 | O1P  | G B | 14 | -24.320 | 34.504 | 80.951 | 1.00 | 0.00 | O |
| ATOM | 1014 | O2P  | G B | 14 | -22.481 | 36.204 | 81.083 | 1.00 | 0.00 | O |
| ATOM | 1015 | P    | G B | 14 | -22.931 | 34.813 | 81.335 | 1.00 | 0.00 | P |
| ATOM | 1016 | H1   | G B | 14 | -17.557 | 36.418 | 89.233 | 1.00 | 0.00 | H |
| ATOM | 1017 | H8   | G B | 14 | -21.377 | 36.120 | 84.036 | 1.00 | 0.00 | H |
| ATOM | 1018 | H1'  | G B | 14 | -22.713 | 34.370 | 87.265 | 1.00 | 0.00 | H |
| ATOM | 1019 | H21  | G B | 14 | -18.406 | 35.230 | 90.868 | 1.00 | 0.00 | H |
| ATOM | 1020 | H3'  | G B | 14 | -25.050 | 34.044 | 84.120 | 1.00 | 0.00 | H |
| ATOM | 1021 | H22  | G B | 14 | -19.942 | 34.332 | 90.708 | 1.00 | 0.00 | H |
| ATOM | 1022 | H4'  | G B | 14 | -23.641 | 31.896 | 84.754 | 1.00 | 0.00 | H |
| ATOM | 1023 | H2'1 | G B | 14 | -23.456 | 35.753 | 84.671 | 1.00 | 0.00 | H |
| ATOM | 1024 | H2'2 | G B | 14 | -24.368 | 35.668 | 86.169 | 1.00 | 0.00 | H |
| ATOM | 1025 | H5'1 | G B | 14 | -21.663 | 32.682 | 83.271 | 1.00 | 0.00 | H |
| ATOM | 1026 | H5'2 | G B | 14 | -23.281 | 32.473 | 82.566 | 1.00 | 0.00 | H |
| ATOM | 1027 | C1'  | C B | 15 | -23.647 | 35.864 | 90.833 | 1.00 | 0.00 | C |
| ATOM | 1028 | N1   | C B | 15 | -22.911 | 36.792 | 89.933 | 1.00 | 0.00 | N |
| ATOM | 1029 | C2   | C B | 15 | -21.731 | 37.363 | 90.407 | 1.00 | 0.00 | C |
| ATOM | 1030 | O2   | C B | 15 | -21.347 | 37.075 | 91.549 | 1.00 | 0.00 | O |
| ATOM | 1031 | N3   | C B | 15 | -21.045 | 38.211 | 89.603 | 1.00 | 0.00 | N |
| ATOM | 1032 | C4   | C B | 15 | -21.486 | 38.502 | 88.374 | 1.00 | 0.00 | C |
| ATOM | 1033 | N4   | C B | 15 | -20.774 | 39.334 | 87.629 | 1.00 | 0.00 | N |
| ATOM | 1034 | C5   | C B | 15 | -22.700 | 37.934 | 87.859 | 1.00 | 0.00 | C |
| ATOM | 1035 | C6   | C B | 15 | -23.371 | 37.079 | 88.686 | 1.00 | 0.00 | C |
| ATOM | 1036 | C2'  | C B | 15 | -25.161 | 35.991 | 90.739 | 1.00 | 0.00 | C |
| ATOM | 1037 | C3'  | C B | 15 | -25.613 | 34.551 | 90.926 | 1.00 | 0.00 | C |
| ATOM | 1038 | O3'  | C B | 15 | -25.694 | 34.261 | 92.320 | 1.00 | 0.00 | O |
| ATOM | 1039 | C4'  | C B | 15 | -24.509 | 33.755 | 90.234 | 1.00 | 0.00 | C |
| ATOM | 1040 | O4'  | C B | 15 | -23.297 | 34.541 | 90.467 | 1.00 | 0.00 | O |
| ATOM | 1041 | C5'  | C B | 15 | -24.666 | 33.542 | 88.746 | 1.00 | 0.00 | C |
| ATOM | 1042 | O5'  | C B | 15 | -25.257 | 34.719 | 88.143 | 1.00 | 0.00 | O |
| ATOM | 1043 | O1P  | C B | 15 | -27.500 | 33.904 | 87.344 | 1.00 | 0.00 | O |
| ATOM | 1044 | O2P  | C B | 15 | -26.380 | 35.826 | 86.184 | 1.00 | 0.00 | O |
| ATOM | 1045 | P    | C B | 15 | -26.241 | 34.535 | 86.901 | 1.00 | 0.00 | P |
| ATOM | 1046 | H5   | C B | 15 | -23.065 | 38.173 | 86.861 | 1.00 | 0.00 | H |
| ATOM | 1047 | H6   | C B | 15 | -24.294 | 36.616 | 88.337 | 1.00 | 0.00 | H |
| ATOM | 1048 | H1'  | C B | 15 | -23.302 | 36.032 | 91.854 | 1.00 | 0.00 | H |

|      |      |      |     |    |         |        |        |      |      |   |
|------|------|------|-----|----|---------|--------|--------|------|------|---|
| ATOM | 1049 | H3'  | C B | 15 | -26.582 | 34.364 | 90.462 | 1.00 | 0.00 | H |
| ATOM | 1050 | H4'  | C B | 15 | -24.480 | 32.775 | 90.709 | 1.00 | 0.00 | H |
| ATOM | 1051 | H41  | C B | 15 | -21.090 | 39.574 | 86.677 | 1.00 | 0.00 | H |
| ATOM | 1052 | H42  | C B | 15 | -19.905 | 39.743 | 88.001 | 1.00 | 0.00 | H |
| ATOM | 1053 | H2'1 | C B | 15 | -25.485 | 36.387 | 89.778 | 1.00 | 0.00 | H |
| ATOM | 1054 | H2'2 | C B | 15 | -25.571 | 36.640 | 91.515 | 1.00 | 0.00 | H |
| ATOM | 1055 | H5'1 | C B | 15 | -23.687 | 33.354 | 88.306 | 1.00 | 0.00 | H |
| ATOM | 1056 | H5'2 | C B | 15 | -25.310 | 32.679 | 88.574 | 1.00 | 0.00 | H |
| ATOM | 1057 | C1'  | G B | 16 | -22.958 | 38.428 | 95.012 | 1.00 | 0.00 | C |
| ATOM | 1058 | N1   | G B | 16 | -20.583 | 41.725 | 91.927 | 1.00 | 0.00 | N |
| ATOM | 1059 | C2   | G B | 16 | -20.229 | 41.272 | 93.186 | 1.00 | 0.00 | C |
| ATOM | 1060 | N2   | G B | 16 | -19.089 | 41.765 | 93.689 | 1.00 | 0.00 | N |
| ATOM | 1061 | N3   | G B | 16 | -20.951 | 40.398 | 93.884 | 1.00 | 0.00 | N |
| ATOM | 1062 | C4   | G B | 16 | -22.074 | 40.011 | 93.224 | 1.00 | 0.00 | C |
| ATOM | 1063 | C5   | G B | 16 | -22.510 | 40.411 | 91.973 | 1.00 | 0.00 | C |
| ATOM | 1064 | C6   | G B | 16 | -21.741 | 41.338 | 91.229 | 1.00 | 0.00 | C |
| ATOM | 1065 | O6   | G B | 16 | -21.962 | 41.808 | 90.111 | 1.00 | 0.00 | O |
| ATOM | 1066 | N7   | G B | 16 | -23.716 | 39.782 | 91.656 | 1.00 | 0.00 | N |
| ATOM | 1067 | C8   | G B | 16 | -23.965 | 39.033 | 92.701 | 1.00 | 0.00 | C |
| ATOM | 1068 | N9   | G B | 16 | -23.013 | 39.121 | 93.696 | 1.00 | 0.00 | N |
| ATOM | 1069 | C2'  | G B | 16 | -24.319 | 38.273 | 95.679 | 1.00 | 0.00 | C |
| ATOM | 1070 | C3'  | G B | 16 | -24.187 | 36.919 | 96.358 | 1.00 | 0.00 | C |
| ATOM | 1071 | O3'  | G B | 16 | -23.551 | 37.089 | 97.622 | 1.00 | 0.00 | O |
| ATOM | 1072 | C4'  | G B | 16 | -23.320 | 36.130 | 95.377 | 1.00 | 0.00 | C |
| ATOM | 1073 | O4'  | G B | 16 | -22.428 | 37.135 | 94.797 | 1.00 | 0.00 | O |
| ATOM | 1074 | C5'  | G B | 16 | -24.046 | 35.424 | 94.257 | 1.00 | 0.00 | C |
| ATOM | 1075 | O5'  | G B | 16 | -25.166 | 36.231 | 93.813 | 1.00 | 0.00 | O |
| ATOM | 1076 | O1P  | G B | 16 | -27.169 | 34.849 | 94.454 | 1.00 | 0.00 | O |
| ATOM | 1077 | O2P  | G B | 16 | -27.311 | 36.445 | 92.524 | 1.00 | 0.00 | O |
| ATOM | 1078 | P    | G B | 16 | -26.492 | 35.496 | 93.316 | 1.00 | 0.00 | P |
| ATOM | 1079 | H1   | G B | 16 | -19.952 | 42.398 | 91.469 | 1.00 | 0.00 | H |
| ATOM | 1080 | H8   | G B | 16 | -24.847 | 38.399 | 92.778 | 1.00 | 0.00 | H |
| ATOM | 1081 | H1'  | G B | 16 | -22.266 | 38.972 | 95.656 | 1.00 | 0.00 | H |
| ATOM | 1082 | H21  | G B | 16 | -18.535 | 42.439 | 93.143 | 1.00 | 0.00 | H |
| ATOM | 1083 | H3'  | G B | 16 | -25.154 | 36.438 | 96.502 | 1.00 | 0.00 | H |
| ATOM | 1084 | H22  | G B | 16 | -18.772 | 41.469 | 94.622 | 1.00 | 0.00 | H |
| ATOM | 1085 | H4'  | G B | 16 | -22.790 | 35.376 | 95.960 | 1.00 | 0.00 | H |
| ATOM | 1086 | H2'1 | G B | 16 | -25.135 | 38.277 | 94.959 | 1.00 | 0.00 | H |
| ATOM | 1087 | H2'2 | G B | 16 | -24.516 | 39.063 | 96.404 | 1.00 | 0.00 | H |
| ATOM | 1088 | H5'1 | G B | 16 | -23.357 | 35.263 | 93.429 | 1.00 | 0.00 | H |
| ATOM | 1089 | H5'2 | G B | 16 | -24.406 | 34.460 | 94.618 | 1.00 | 0.00 | H |
| ATOM | 1090 | C1'  | G B | 17 | -21.285 | 42.274 | 97.645 | 1.00 | 0.00 | C |
| ATOM | 1091 | N1   | G B | 17 | -21.613 | 44.738 | 93.191 | 1.00 | 0.00 | N |
| ATOM | 1092 | C2   | G B | 17 | -20.622 | 44.776 | 94.155 | 1.00 | 0.00 | C |
| ATOM | 1093 | N2   | G B | 17 | -19.581 | 45.577 | 93.899 | 1.00 | 0.00 | N |
| ATOM | 1094 | N3   | G B | 17 | -20.666 | 44.069 | 95.283 | 1.00 | 0.00 | N |
| ATOM | 1095 | C4   | G B | 17 | -21.796 | 43.320 | 95.378 | 1.00 | 0.00 | C |
| ATOM | 1096 | C5   | G B | 17 | -22.836 | 43.221 | 94.472 | 1.00 | 0.00 | C |
| ATOM | 1097 | C6   | G B | 17 | -22.789 | 43.967 | 93.271 | 1.00 | 0.00 | C |
| ATOM | 1098 | O6   | G B | 17 | -23.607 | 44.014 | 92.353 | 1.00 | 0.00 | O |
| ATOM | 1099 | N7   | G B | 17 | -23.809 | 42.341 | 94.946 | 1.00 | 0.00 | N |
| ATOM | 1100 | C8   | G B | 17 | -23.338 | 41.938 | 96.097 | 1.00 | 0.00 | C |
| ATOM | 1101 | N9   | G B | 17 | -22.118 | 42.491 | 96.431 | 1.00 | 0.00 | N |
| ATOM | 1102 | C2'  | G B | 17 | -22.096 | 42.129 | 98.925 | 1.00 | 0.00 | C |

|      |      |      |     |    |         |        |         |      |      |   |
|------|------|------|-----|----|---------|--------|---------|------|------|---|
| ATOM | 1103 | C3'  | G B | 17 | -21.283 | 41.103 | 99.701  | 1.00 | 0.00 | C |
| ATOM | 1104 | O3'  | G B | 17 | -20.236 | 41.768 | 100.403 | 1.00 | 0.00 | O |
| ATOM | 1105 | C4'  | G B | 17 | -20.750 | 40.189 | 98.599  | 1.00 | 0.00 | C |
| ATOM | 1106 | O4'  | G B | 17 | -20.549 | 41.082 | 97.457  | 1.00 | 0.00 | O |
| ATOM | 1107 | C5'  | G B | 17 | -21.651 | 39.055 | 98.173  | 1.00 | 0.00 | C |
| ATOM | 1108 | O5'  | G B | 17 | -23.035 | 39.489 | 98.205  | 1.00 | 0.00 | O |
| ATOM | 1109 | O1P  | G B | 17 | -24.040 | 38.087 | 100.039 | 1.00 | 0.00 | O |
| ATOM | 1110 | O2P  | G B | 17 | -25.485 | 38.934 | 98.171  | 1.00 | 0.00 | O |
| ATOM | 1111 | P    | G B | 17 | -24.161 | 38.434 | 98.610  | 1.00 | 0.00 | P |
| ATOM | 1112 | H1   | G B | 17 | -21.480 | 45.320 | 92.348  | 1.00 | 0.00 | H |
| ATOM | 1113 | H8   | G B | 17 | -23.862 | 41.232 | 96.739  | 1.00 | 0.00 | H |
| ATOM | 1114 | H1'  | G B | 17 | -20.576 | 43.098 | 97.724  | 1.00 | 0.00 | H |
| ATOM | 1115 | H21  | G B | 17 | -19.551 | 46.119 | 93.023  | 1.00 | 0.00 | H |
| ATOM | 1116 | H3'  | G B | 17 | -21.897 | 40.546 | 100.410 | 1.00 | 0.00 | H |
| ATOM | 1117 | H22  | G B | 17 | -18.810 | 45.652 | 94.578  | 1.00 | 0.00 | H |
| ATOM | 1118 | H4'  | G B | 17 | -19.822 | 39.755 | 98.968  | 1.00 | 0.00 | H |
| ATOM | 1119 | H2'1 | G B | 17 | -23.108 | 41.771 | 98.737  | 1.00 | 0.00 | H |
| ATOM | 1120 | H2'2 | G B | 17 | -22.176 | 43.067 | 99.474  | 1.00 | 0.00 | H |
| ATOM | 1121 | H5'1 | G B | 17 | -21.386 | 38.747 | 97.161  | 1.00 | 0.00 | H |
| ATOM | 1122 | H5'2 | G B | 17 | -21.513 | 38.213 | 98.851  | 1.00 | 0.00 | H |
| ATOM | 1123 | C1'  | C B | 18 | -19.839 | 46.975 | 98.224  | 1.00 | 0.00 | C |
| ATOM | 1124 | N1   | C B | 18 | -21.145 | 46.658 | 97.581  | 1.00 | 0.00 | N |
| ATOM | 1125 | C2   | C B | 18 | -21.422 | 47.242 | 96.346  | 1.00 | 0.00 | C |
| ATOM | 1126 | O2   | C B | 18 | -20.581 | 47.995 | 95.839  | 1.00 | 0.00 | O |
| ATOM | 1127 | N3   | C B | 18 | -22.604 | 46.966 | 95.745  | 1.00 | 0.00 | N |
| ATOM | 1128 | C4   | C B | 18 | -23.494 | 46.147 | 96.320  | 1.00 | 0.00 | C |
| ATOM | 1129 | N4   | C B | 18 | -24.633 | 45.911 | 95.687  | 1.00 | 0.00 | N |
| ATOM | 1130 | C5   | C B | 18 | -23.236 | 45.536 | 97.589  | 1.00 | 0.00 | C |
| ATOM | 1131 | C6   | C B | 18 | -22.039 | 45.825 | 98.175  | 1.00 | 0.00 | C |
| ATOM | 1132 | C2'  | C B | 18 | -19.921 | 47.125 | 99.737  | 1.00 | 0.00 | C |
| ATOM | 1133 | C3'  | C B | 18 | -18.590 | 46.541 | 100.186 | 1.00 | 0.00 | C |
| ATOM | 1134 | O3'  | C B | 18 | -17.587 | 47.551 | 100.109 | 1.00 | 0.00 | O |
| ATOM | 1135 | C4'  | C B | 18 | -18.357 | 45.417 | 99.179  | 1.00 | 0.00 | C |
| ATOM | 1136 | O4'  | C B | 18 | -18.949 | 45.915 | 97.937  | 1.00 | 0.00 | O |
| ATOM | 1137 | C5'  | C B | 18 | -18.978 | 44.080 | 99.509  | 1.00 | 0.00 | C |
| ATOM | 1138 | O5'  | C B | 18 | -20.265 | 44.282 | 100.147 | 1.00 | 0.00 | O |
| ATOM | 1139 | O1P  | C B | 18 | -19.903 | 43.405 | 102.479 | 1.00 | 0.00 | O |
| ATOM | 1140 | O2P  | C B | 18 | -22.201 | 43.373 | 101.469 | 1.00 | 0.00 | O |
| ATOM | 1141 | P    | C B | 18 | -20.735 | 43.251 | 101.267 | 1.00 | 0.00 | P |
| ATOM | 1142 | H5   | C B | 18 | -23.959 | 44.872 | 98.063  | 1.00 | 0.00 | H |
| ATOM | 1143 | H6   | C B | 18 | -21.796 | 45.382 | 99.140  | 1.00 | 0.00 | H |
| ATOM | 1144 | H1'  | C B | 18 | -19.444 | 47.880 | 97.763  | 1.00 | 0.00 | H |
| ATOM | 1145 | H3'  | C B | 18 | -18.638 | 46.154 | 101.204 | 1.00 | 0.00 | H |
| ATOM | 1146 | H4'  | C B | 18 | -17.279 | 45.274 | 99.109  | 1.00 | 0.00 | H |
| ATOM | 1147 | H41  | C B | 18 | -25.335 | 45.283 | 96.107  | 1.00 | 0.00 | H |
| ATOM | 1148 | H42  | C B | 18 | -24.816 | 46.352 | 94.774  | 1.00 | 0.00 | H |
| ATOM | 1149 | H2'1 | C B | 18 | -20.759 | 46.575 | 100.163 | 1.00 | 0.00 | H |
| ATOM | 1150 | H2'2 | C B | 18 | -20.023 | 48.166 | 100.044 | 1.00 | 0.00 | H |
| ATOM | 1151 | H5'1 | C B | 18 | -19.108 | 43.509 | 98.589  | 1.00 | 0.00 | H |
| ATOM | 1152 | H5'2 | C B | 18 | -18.317 | 43.533 | 100.179 | 1.00 | 0.00 | H |
| ATOM | 1153 | C1'  | C B | 19 | -19.749 | 51.780 | 97.026  | 1.00 | 0.00 | C |
| ATOM | 1154 | N1   | C B | 19 | -21.044 | 51.071 | 97.214  | 1.00 | 0.00 | N |
| ATOM | 1155 | C2   | C B | 19 | -21.999 | 51.176 | 96.203  | 1.00 | 0.00 | C |
| ATOM | 1156 | O2   | C B | 19 | -21.733 | 51.848 | 95.198  | 1.00 | 0.00 | O |



|      |      |      |     |    |         |        |         |      |      |   |
|------|------|------|-----|----|---------|--------|---------|------|------|---|
| ATOM | 1157 | N3   | C B | 19 | -23.183 | 50.537 | 96.355  | 1.00 | 0.00 | N |
| ATOM | 1158 | C4   | C B | 19 | -23.441 | 49.817 | 97.454  | 1.00 | 0.00 | C |
| ATOM | 1159 | N4   | C B | 19 | -24.614 | 49.213 | 97.550  | 1.00 | 0.00 | N |
| ATOM | 1160 | C5   | C B | 19 | -22.480 | 49.695 | 98.507  | 1.00 | 0.00 | C |
| ATOM | 1161 | C6   | C B | 19 | -21.294 | 50.344 | 98.333  | 1.00 | 0.00 | C |
| ATOM | 1162 | C2'  | C B | 19 | -19.195 | 52.392 | 98.305  | 1.00 | 0.00 | C |
| ATOM | 1163 | C3'  | C B | 19 | -17.696 | 52.201 | 98.122  | 1.00 | 0.00 | C |
| ATOM | 1164 | O3'  | C B | 19 | -17.178 | 53.279 | 97.345  | 1.00 | 0.00 | O |
| ATOM | 1165 | C4'  | C B | 19 | -17.611 | 50.866 | 97.387  | 1.00 | 0.00 | C |
| ATOM | 1166 | O4'  | C B | 19 | -18.809 | 50.838 | 96.547  | 1.00 | 0.00 | O |
| ATOM | 1167 | C5'  | C B | 19 | -17.598 | 49.625 | 98.249  | 1.00 | 0.00 | C |
| ATOM | 1168 | O5'  | C B | 19 | -18.464 | 49.814 | 99.397  | 1.00 | 0.00 | O |
| ATOM | 1169 | O1P  | C B | 19 | -16.866 | 49.802 | 101.341 | 1.00 | 0.00 | O |
| ATOM | 1170 | O2P  | C B | 19 | -19.249 | 49.085 | 101.669 | 1.00 | 0.00 | O |
| ATOM | 1171 | P    | C B | 19 | -18.061 | 49.138 | 100.783 | 1.00 | 0.00 | P |
| ATOM | 1172 | H5   | C B | 19 | -22.685 | 49.111 | 99.405  | 1.00 | 0.00 | H |
| ATOM | 1173 | H6   | C B | 19 | -20.530 | 50.278 | 99.108  | 1.00 | 0.00 | H |
| ATOM | 1174 | H1'  | C B | 19 | -19.886 | 52.539 | 96.256  | 1.00 | 0.00 | H |
| ATOM | 1175 | H3'  | C B | 19 | -17.172 | 52.159 | 99.078  | 1.00 | 0.00 | H |
| ATOM | 1176 | H4'  | C B | 19 | -16.686 | 50.880 | 96.810  | 1.00 | 0.00 | H |
| ATOM | 1177 | H41  | C B | 19 | -24.840 | 48.651 | 98.384  | 1.00 | 0.00 | H |
| ATOM | 1178 | H42  | C B | 19 | -25.306 | 49.305 | 96.790  | 1.00 | 0.00 | H |
| ATOM | 1179 | H2'1 | C B | 19 | -19.554 | 51.881 | 99.197  | 1.00 | 0.00 | H |
| ATOM | 1180 | H2'2 | C B | 19 | -19.452 | 53.447 | 98.403  | 1.00 | 0.00 | H |
| ATOM | 1181 | H5'1 | C B | 19 | -17.944 | 48.776 | 97.660  | 1.00 | 0.00 | H |
| ATOM | 1182 | H5'2 | C B | 19 | -16.579 | 49.434 | 98.585  | 1.00 | 0.00 | H |
| ATOM | 1183 | C1'  | T B | 20 | -21.602 | 55.904 | 95.010  | 1.00 | 0.00 | C |
| ATOM | 1184 | N1   | T B | 20 | -22.423 | 55.099 | 95.952  | 1.00 | 0.00 | N |
| ATOM | 1185 | C2   | T B | 20 | -23.691 | 54.744 | 95.540  | 1.00 | 0.00 | C |
| ATOM | 1186 | O2   | T B | 20 | -24.144 | 55.065 | 94.455  | 1.00 | 0.00 | O |
| ATOM | 1187 | N3   | T B | 20 | -24.417 | 53.996 | 96.447  | 1.00 | 0.00 | N |
| ATOM | 1188 | C4   | T B | 20 | -24.001 | 53.584 | 97.693  | 1.00 | 0.00 | C |
| ATOM | 1189 | O4   | T B | 20 | -24.746 | 52.915 | 98.420  | 1.00 | 0.00 | O |
| ATOM | 1190 | C5   | T B | 20 | -22.663 | 54.000 | 98.036  | 1.00 | 0.00 | C |
| ATOM | 1191 | C6   | T B | 20 | -21.924 | 54.730 | 97.178  | 1.00 | 0.00 | C |
| ATOM | 1192 | C7   | T B | 20 | -22.167 | 53.572 | 99.385  | 1.00 | 0.00 | C |
| ATOM | 1193 | C2'  | T B | 20 | -20.745 | 56.963 | 95.693  | 1.00 | 0.00 | C |
| ATOM | 1194 | C3'  | T B | 20 | -19.492 | 56.960 | 94.833  | 1.00 | 0.00 | C |
| ATOM | 1195 | O3'  | T B | 20 | -19.694 | 57.808 | 93.705  | 1.00 | 0.00 | O |
| ATOM | 1196 | C4'  | T B | 20 | -19.355 | 55.493 | 94.434  | 1.00 | 0.00 | C |
| ATOM | 1197 | O4'  | T B | 20 | -20.736 | 55.019 | 94.326  | 1.00 | 0.00 | O |
| ATOM | 1198 | C5'  | T B | 20 | -18.613 | 54.599 | 95.402  | 1.00 | 0.00 | C |
| ATOM | 1199 | O5'  | T B | 20 | -18.910 | 55.001 | 96.764  | 1.00 | 0.00 | O |
| ATOM | 1200 | O1P  | T B | 20 | -16.697 | 55.844 | 97.617  | 1.00 | 0.00 | O |
| ATOM | 1201 | O2P  | T B | 20 | -18.384 | 54.904 | 99.219  | 1.00 | 0.00 | O |
| ATOM | 1202 | P    | T B | 20 | -17.770 | 54.861 | 97.870  | 1.00 | 0.00 | P |
| ATOM | 1203 | H3   | T B | 20 | -25.367 | 53.718 | 96.161  | 1.00 | 0.00 | H |
| ATOM | 1204 | H6   | T B | 20 | -20.915 | 55.033 | 97.459  | 1.00 | 0.00 | H |
| ATOM | 1205 | H1'  | T B | 20 | -22.268 | 56.355 | 94.275  | 1.00 | 0.00 | H |
| ATOM | 1206 | H3'  | T B | 20 | -18.616 | 57.300 | 95.387  | 1.00 | 0.00 | H |
| ATOM | 1207 | H4'  | T B | 20 | -18.820 | 55.470 | 93.485  | 1.00 | 0.00 | H |
| ATOM | 1208 | H3T  | T B | 20 | -19.985 | 58.699 | 93.911  | 1.00 | 0.00 | H |
| ATOM | 1209 | H71  | T B | 20 | -22.018 | 54.451 | 100.014 | 1.00 | 0.00 | H |
| ATOM | 1210 | H72  | T B | 20 | -22.901 | 52.912 | 99.850  | 1.00 | 0.00 | H |

|      |      |      |     |    |         |        |        |      |      |   |
|------|------|------|-----|----|---------|--------|--------|------|------|---|
| ATOM | 1211 | H73  | T B | 20 | -21.221 | 53.041 | 99.275 | 1.00 | 0.00 | H |
| ATOM | 1212 | H2'1 | T B | 20 | -20.518 | 56.707 | 96.727 | 1.00 | 0.00 | H |
| ATOM | 1213 | H2'2 | T B | 20 | -21.223 | 57.943 | 95.694 | 1.00 | 0.00 | H |
| ATOM | 1214 | H5'1 | T B | 20 | -18.923 | 53.567 | 95.246 | 1.00 | 0.00 | H |
| ATOM | 1215 | H5'2 | T B | 20 | -17.545 | 54.685 | 95.217 | 1.00 | 0.00 | H |
| TER  |      |      |     |    |         |        |        |      |      |   |
| ATOM | 1    | C1'  | A A | 1  | 10.100  | 56.315 | 89.270 | 1.00 | 0.00 | C |
| ATOM | 2    | N1   | A A | 1  | 11.886  | 54.687 | 93.796 | 1.00 | 0.00 | N |
| ATOM | 3    | C2   | A A | 1  | 12.485  | 54.964 | 92.642 | 1.00 | 0.00 | C |
| ATOM | 4    | N3   | A A | 1  | 11.963  | 55.385 | 91.509 | 1.00 | 0.00 | N |
| ATOM | 5    | C4   | A A | 1  | 10.629  | 55.519 | 91.632 | 1.00 | 0.00 | C |
| ATOM | 6    | C5   | A A | 1  | 9.868   | 55.275 | 92.740 | 1.00 | 0.00 | C |
| ATOM | 7    | C6   | A A | 1  | 10.556  | 54.830 | 93.889 | 1.00 | 0.00 | C |
| ATOM | 8    | N6   | A A | 1  | 9.940   | 54.551 | 95.052 | 1.00 | 0.00 | N |
| ATOM | 9    | N7   | A A | 1  | 8.530   | 55.524 | 92.491 | 1.00 | 0.00 | N |
| ATOM | 10   | C8   | A A | 1  | 8.510   | 55.907 | 91.250 | 1.00 | 0.00 | C |
| ATOM | 11   | N9   | A A | 1  | 9.749   | 55.930 | 90.662 | 1.00 | 0.00 | N |
| ATOM | 12   | C2'  | A A | 1  | 9.076   | 55.872 | 88.234 | 1.00 | 0.00 | C |
| ATOM | 13   | C3'  | A A | 1  | 9.112   | 57.024 | 87.241 | 1.00 | 0.00 | C |
| ATOM | 14   | O3'  | A A | 1  | 10.179  | 56.815 | 86.320 | 1.00 | 0.00 | O |
| ATOM | 15   | C4'  | A A | 1  | 9.350   | 58.238 | 88.137 | 1.00 | 0.00 | C |
| ATOM | 16   | O4'  | A A | 1  | 10.188  | 57.726 | 89.223 | 1.00 | 0.00 | O |
| ATOM | 17   | C5'  | A A | 1  | 8.122   | 58.880 | 88.736 | 1.00 | 0.00 | C |
| ATOM | 18   | O5'  | A A | 1  | 7.149   | 57.859 | 89.073 | 1.00 | 0.00 | O |
| ATOM | 19   | H2   | A A | 1  | 13.565  | 54.822 | 92.631 | 1.00 | 0.00 | H |
| ATOM | 20   | H8   | A A | 1  | 7.597   | 56.186 | 90.725 | 1.00 | 0.00 | H |
| ATOM | 21   | H1'  | A A | 1  | 11.086  | 55.909 | 89.043 | 1.00 | 0.00 | H |
| ATOM | 22   | H3'  | A A | 1  | 8.174   | 57.119 | 86.692 | 1.00 | 0.00 | H |
| ATOM | 23   | H4'  | A A | 1  | 9.853   | 58.987 | 87.527 | 1.00 | 0.00 | H |
| ATOM | 24   | H61  | A A | 1  | 10.488  | 54.231 | 95.860 | 1.00 | 0.00 | H |
| ATOM | 25   | H62  | A A | 1  | 8.918   | 54.660 | 95.129 | 1.00 | 0.00 | H |
| ATOM | 26   | H5T  | A A | 1  | 6.215   | 58.067 | 88.989 | 1.00 | 0.00 | H |
| ATOM | 27   | H2'1 | A A | 1  | 8.082   | 55.747 | 88.661 | 1.00 | 0.00 | H |
| ATOM | 28   | H2'2 | A A | 1  | 9.349   | 54.930 | 87.757 | 1.00 | 0.00 | H |
| ATOM | 29   | H5'1 | A A | 1  | 8.407   | 59.427 | 89.636 | 1.00 | 0.00 | H |
| ATOM | 30   | H5'2 | A A | 1  | 7.692   | 59.574 | 88.017 | 1.00 | 0.00 | H |
| ATOM | 31   | C1'  | G A | 2  | 13.494  | 52.754 | 88.596 | 1.00 | 0.00 | C |
| ATOM | 32   | N1   | G A | 2  | 12.113  | 51.311 | 93.288 | 1.00 | 0.00 | N |
| ATOM | 33   | C2   | G A | 2  | 13.370  | 51.399 | 92.723 | 1.00 | 0.00 | C |
| ATOM | 34   | N2   | G A | 2  | 14.396  | 51.056 | 93.509 | 1.00 | 0.00 | N |
| ATOM | 35   | N3   | G A | 2  | 13.589  | 51.800 | 91.471 | 1.00 | 0.00 | N |
| ATOM | 36   | C4   | G A | 2  | 12.436  | 52.101 | 90.816 | 1.00 | 0.00 | C |
| ATOM | 37   | C5   | G A | 2  | 11.138  | 52.039 | 91.299 | 1.00 | 0.00 | C |
| ATOM | 38   | C6   | G A | 2  | 10.908  | 51.618 | 92.631 | 1.00 | 0.00 | C |
| ATOM | 39   | O6   | G A | 2  | 9.841   | 51.502 | 93.234 | 1.00 | 0.00 | O |
| ATOM | 40   | N7   | G A | 2  | 10.235  | 52.432 | 90.310 | 1.00 | 0.00 | N |
| ATOM | 41   | C8   | G A | 2  | 10.996  | 52.715 | 89.283 | 1.00 | 0.00 | C |
| ATOM | 42   | N9   | G A | 2  | 12.345  | 52.538 | 89.514 | 1.00 | 0.00 | N |
| ATOM | 43   | C2'  | G A | 2  | 13.213  | 52.356 | 87.153 | 1.00 | 0.00 | C |
| ATOM | 44   | C3'  | G A | 2  | 13.990  | 53.404 | 86.375 | 1.00 | 0.00 | C |
| ATOM | 45   | O3'  | G A | 2  | 15.349  | 52.988 | 86.257 | 1.00 | 0.00 | O |
| ATOM | 46   | C4'  | G A | 2  | 13.843  | 54.651 | 87.245 | 1.00 | 0.00 | C |
| ATOM | 47   | O4'  | G A | 2  | 13.807  | 54.135 | 88.613 | 1.00 | 0.00 | O |
| ATOM | 48   | C5'  | G A | 2  | 12.609  | 55.490 | 87.011 | 1.00 | 0.00 | C |

|      |     |      |     |   |        |        |        |      |      |   |
|------|-----|------|-----|---|--------|--------|--------|------|------|---|
| ATOM | 49  | O5'  | G A | 2 | 11.482 | 54.631 | 86.708 | 1.00 | 0.00 | O |
| ATOM | 50  | O1P  | G A | 2 | 10.937 | 55.208 | 84.319 | 1.00 | 0.00 | O |
| ATOM | 51  | O2P  | G A | 2 | 9.141  | 54.344 | 85.843 | 1.00 | 0.00 | O |
| ATOM | 52  | P    | G A | 2 | 10.376 | 55.150 | 85.683 | 1.00 | 0.00 | P |
| ATOM | 53  | H1   | G A | 2 | 12.054 | 50.992 | 94.267 | 1.00 | 0.00 | H |
| ATOM | 54  | H8   | G A | 2 | 10.599 | 53.061 | 88.329 | 1.00 | 0.00 | H |
| ATOM | 55  | H1'  | G A | 2 | 14.353 | 52.212 | 88.990 | 1.00 | 0.00 | H |
| ATOM | 56  | H21  | G A | 2 | 14.223 | 50.750 | 94.478 | 1.00 | 0.00 | H |
| ATOM | 57  | H3'  | G A | 2 | 13.575 | 53.567 | 85.380 | 1.00 | 0.00 | H |
| ATOM | 58  | H22  | G A | 2 | 15.360 | 51.099 | 93.146 | 1.00 | 0.00 | H |
| ATOM | 59  | H4'  | G A | 2 | 14.713 | 55.278 | 87.050 | 1.00 | 0.00 | H |
| ATOM | 60  | H2'1 | G A | 2 | 12.149 | 52.393 | 86.915 | 1.00 | 0.00 | H |
| ATOM | 61  | H2'2 | G A | 2 | 13.566 | 51.349 | 86.926 | 1.00 | 0.00 | H |
| ATOM | 62  | H5'1 | G A | 2 | 12.397 | 56.073 | 87.907 | 1.00 | 0.00 | H |
| ATOM | 63  | H5'2 | G A | 2 | 12.791 | 56.170 | 86.178 | 1.00 | 0.00 | H |
| ATOM | 64  | C1'  | G A | 3 | 16.103 | 48.771 | 89.957 | 1.00 | 0.00 | C |
| ATOM | 65  | N1   | G A | 3 | 12.108 | 47.898 | 93.003 | 1.00 | 0.00 | N |
| ATOM | 66  | C2   | G A | 3 | 13.460 | 47.785 | 93.262 | 1.00 | 0.00 | C |
| ATOM | 67  | N2   | G A | 3 | 13.793 | 47.384 | 94.495 | 1.00 | 0.00 | N |
| ATOM | 68  | N3   | G A | 3 | 14.404 | 48.051 | 92.364 | 1.00 | 0.00 | N |
| ATOM | 69  | C4   | G A | 3 | 13.887 | 48.436 | 91.168 | 1.00 | 0.00 | C |
| ATOM | 70  | C5   | G A | 3 | 12.553 | 48.573 | 90.819 | 1.00 | 0.00 | C |
| ATOM | 71  | C6   | G A | 3 | 11.549 | 48.296 | 91.774 | 1.00 | 0.00 | C |
| ATOM | 72  | O6   | G A | 3 | 10.325 | 48.359 | 91.657 | 1.00 | 0.00 | O |
| ATOM | 73  | N7   | G A | 3 | 12.442 | 48.991 | 89.491 | 1.00 | 0.00 | N |
| ATOM | 74  | C8   | G A | 3 | 13.682 | 49.093 | 89.086 | 1.00 | 0.00 | C |
| ATOM | 75  | N9   | G A | 3 | 14.617 | 48.772 | 90.049 | 1.00 | 0.00 | N |
| ATOM | 76  | C2'  | G A | 3 | 16.634 | 48.292 | 88.613 | 1.00 | 0.00 | C |
| ATOM | 77  | C3'  | G A | 3 | 17.860 | 49.170 | 88.425 | 1.00 | 0.00 | C |
| ATOM | 78  | O3'  | G A | 3 | 18.966 | 48.582 | 89.107 | 1.00 | 0.00 | O |
| ATOM | 79  | C4'  | G A | 3 | 17.431 | 50.493 | 89.057 | 1.00 | 0.00 | C |
| ATOM | 80  | O4'  | G A | 3 | 16.548 | 50.099 | 90.155 | 1.00 | 0.00 | O |
| ATOM | 81  | C5'  | G A | 3 | 16.687 | 51.455 | 88.159 | 1.00 | 0.00 | C |
| ATOM | 82  | O5'  | G A | 3 | 15.821 | 50.717 | 87.261 | 1.00 | 0.00 | O |
| ATOM | 83  | O1P  | G A | 3 | 16.819 | 51.157 | 84.994 | 1.00 | 0.00 | O |
| ATOM | 84  | O2P  | G A | 3 | 14.373 | 50.648 | 85.208 | 1.00 | 0.00 | O |
| ATOM | 85  | P    | G A | 3 | 15.584 | 51.281 | 85.788 | 1.00 | 0.00 | P |
| ATOM | 86  | H1   | G A | 3 | 11.456 | 47.671 | 93.772 | 1.00 | 0.00 | H |
| ATOM | 87  | H8   | G A | 3 | 13.954 | 49.406 | 88.079 | 1.00 | 0.00 | H |
| ATOM | 88  | H1'  | G A | 3 | 16.494 | 48.161 | 90.772 | 1.00 | 0.00 | H |
| ATOM | 89  | H21  | G A | 3 | 13.057 | 47.183 | 95.187 | 1.00 | 0.00 | H |
| ATOM | 90  | H3'  | G A | 3 | 18.113 | 49.300 | 87.372 | 1.00 | 0.00 | H |
| ATOM | 91  | H22  | G A | 3 | 14.785 | 47.279 | 94.751 | 1.00 | 0.00 | H |
| ATOM | 92  | H4'  | G A | 3 | 18.339 | 50.990 | 89.399 | 1.00 | 0.00 | H |
| ATOM | 93  | H2'1 | G A | 3 | 15.915 | 48.438 | 87.808 | 1.00 | 0.00 | H |
| ATOM | 94  | H2'2 | G A | 3 | 16.900 | 47.234 | 88.627 | 1.00 | 0.00 | H |
| ATOM | 95  | H5'1 | G A | 3 | 16.094 | 52.130 | 88.774 | 1.00 | 0.00 | H |
| ATOM | 96  | H5'2 | G A | 3 | 17.407 | 52.035 | 87.582 | 1.00 | 0.00 | H |
| ATOM | 97  | C1'  | C A | 4 | 16.855 | 44.623 | 92.558 | 1.00 | 0.00 | C |
| ATOM | 98  | N1   | C A | 4 | 15.596 | 44.813 | 91.786 | 1.00 | 0.00 | N |
| ATOM | 99  | C2   | C A | 4 | 14.388 | 44.619 | 92.452 | 1.00 | 0.00 | C |
| ATOM | 100 | O2   | C A | 4 | 14.409 | 44.299 | 93.646 | 1.00 | 0.00 | O |
| ATOM | 101 | N3   | C A | 4 | 13.231 | 44.787 | 91.766 | 1.00 | 0.00 | N |
| ATOM | 102 | C4   | C A | 4 | 13.242 | 45.133 | 90.473 | 1.00 | 0.00 | C |

|      |     |      |     |   |        |        |        |      |      |   |
|------|-----|------|-----|---|--------|--------|--------|------|------|---|
| ATOM | 103 | N4   | C A | 4 | 12.080 | 45.287 | 89.853 | 1.00 | 0.00 | N |
| ATOM | 104 | C5   | C A | 4 | 14.470 | 45.337 | 89.764 | 1.00 | 0.00 | C |
| ATOM | 105 | C6   | C A | 4 | 15.622 | 45.166 | 90.474 | 1.00 | 0.00 | C |
| ATOM | 106 | C2'  | C A | 4 | 17.974 | 43.971 | 91.759 | 1.00 | 0.00 | C |
| ATOM | 107 | C3'  | C A | 4 | 19.207 | 44.677 | 92.304 | 1.00 | 0.00 | C |
| ATOM | 108 | O3'  | C A | 4 | 19.633 | 44.017 | 93.495 | 1.00 | 0.00 | O |
| ATOM | 109 | C4'  | C A | 4 | 18.697 | 46.090 | 92.577 | 1.00 | 0.00 | C |
| ATOM | 110 | O4'  | C A | 4 | 17.302 | 45.903 | 92.974 | 1.00 | 0.00 | O |
| ATOM | 111 | C5'  | C A | 4 | 18.742 | 47.055 | 91.416 | 1.00 | 0.00 | C |
| ATOM | 112 | O5'  | C A | 4 | 18.436 | 46.353 | 90.183 | 1.00 | 0.00 | O |
| ATOM | 113 | O1P  | C A | 4 | 20.592 | 46.476 | 88.891 | 1.00 | 0.00 | O |
| ATOM | 114 | O2P  | C A | 4 | 18.409 | 46.287 | 87.671 | 1.00 | 0.00 | O |
| ATOM | 115 | P    | C A | 4 | 19.156 | 46.815 | 88.837 | 1.00 | 0.00 | P |
| ATOM | 116 | H5   | C A | 4 | 14.482 | 45.615 | 88.709 | 1.00 | 0.00 | H |
| ATOM | 117 | H6   | C A | 4 | 16.582 | 45.315 | 89.979 | 1.00 | 0.00 | H |
| ATOM | 118 | H1'  | C A | 4 | 16.622 | 44.044 | 93.451 | 1.00 | 0.00 | H |
| ATOM | 119 | H3'  | C A | 4 | 20.024 | 44.684 | 91.584 | 1.00 | 0.00 | H |
| ATOM | 120 | H4'  | C A | 4 | 19.316 | 46.501 | 93.374 | 1.00 | 0.00 | H |
| ATOM | 121 | H41  | C A | 4 | 12.059 | 45.554 | 88.857 | 1.00 | 0.00 | H |
| ATOM | 122 | H42  | C A | 4 | 11.198 | 45.139 | 90.365 | 1.00 | 0.00 | H |
| ATOM | 123 | H2'1 | C A | 4 | 17.866 | 44.136 | 90.687 | 1.00 | 0.00 | H |
| ATOM | 124 | H2'2 | C A | 4 | 18.025 | 42.895 | 91.922 | 1.00 | 0.00 | H |
| ATOM | 125 | H5'1 | C A | 4 | 18.012 | 47.847 | 91.579 | 1.00 | 0.00 | H |
| ATOM | 126 | H5'2 | C A | 4 | 19.738 | 47.493 | 91.352 | 1.00 | 0.00 | H |
| ATOM | 127 | C1'  | C A | 5 | 15.377 | 40.645 | 95.109 | 1.00 | 0.00 | C |
| ATOM | 128 | N1   | C A | 5 | 14.825 | 40.922 | 93.755 | 1.00 | 0.00 | N |
| ATOM | 129 | C2   | C A | 5 | 13.439 | 40.932 | 93.606 | 1.00 | 0.00 | C |
| ATOM | 130 | O2   | C A | 5 | 12.729 | 40.711 | 94.596 | 1.00 | 0.00 | O |
| ATOM | 131 | N3   | C A | 5 | 12.916 | 41.184 | 92.381 | 1.00 | 0.00 | N |
| ATOM | 132 | C4   | C A | 5 | 13.709 | 41.418 | 91.328 | 1.00 | 0.00 | C |
| ATOM | 133 | N4   | C A | 5 | 13.144 | 41.661 | 90.156 | 1.00 | 0.00 | N |
| ATOM | 134 | C5   | C A | 5 | 15.136 | 41.411 | 91.453 | 1.00 | 0.00 | C |
| ATOM | 135 | C6   | C A | 5 | 15.640 | 41.159 | 92.695 | 1.00 | 0.00 | C |
| ATOM | 136 | C2'  | C A | 5 | 16.642 | 39.797 | 95.094 | 1.00 | 0.00 | C |
| ATOM | 137 | C3'  | C A | 5 | 17.434 | 40.389 | 96.249 | 1.00 | 0.00 | C |
| ATOM | 138 | O3'  | C A | 5 | 17.006 | 39.783 | 97.468 | 1.00 | 0.00 | O |
| ATOM | 139 | C4'  | C A | 5 | 17.074 | 41.870 | 96.184 | 1.00 | 0.00 | C |
| ATOM | 140 | O4'  | C A | 5 | 15.691 | 41.887 | 95.709 | 1.00 | 0.00 | O |
| ATOM | 141 | C5'  | C A | 5 | 17.913 | 42.724 | 95.261 | 1.00 | 0.00 | C |
| ATOM | 142 | O5'  | C A | 5 | 18.262 | 41.967 | 94.074 | 1.00 | 0.00 | O |
| ATOM | 143 | O1P  | C A | 5 | 20.759 | 41.718 | 94.254 | 1.00 | 0.00 | O |
| ATOM | 144 | O2P  | C A | 5 | 19.655 | 41.698 | 92.001 | 1.00 | 0.00 | O |
| ATOM | 145 | P    | C A | 5 | 19.677 | 42.224 | 93.388 | 1.00 | 0.00 | P |
| ATOM | 146 | H5   | C A | 5 | 15.787 | 41.596 | 90.597 | 1.00 | 0.00 | H |
| ATOM | 147 | H6   | C A | 5 | 16.722 | 41.149 | 92.841 | 1.00 | 0.00 | H |
| ATOM | 148 | H1'  | C A | 5 | 14.596 | 40.172 | 95.705 | 1.00 | 0.00 | H |
| ATOM | 149 | H3'  | C A | 5 | 18.507 | 40.236 | 96.129 | 1.00 | 0.00 | H |
| ATOM | 150 | H4'  | C A | 5 | 17.185 | 42.267 | 97.193 | 1.00 | 0.00 | H |
| ATOM | 151 | H41  | C A | 5 | 13.730 | 41.846 | 89.329 | 1.00 | 0.00 | H |
| ATOM | 152 | H42  | C A | 5 | 12.117 | 41.664 | 90.069 | 1.00 | 0.00 | H |
| ATOM | 153 | H2'1 | C A | 5 | 17.186 | 39.884 | 94.155 | 1.00 | 0.00 | H |
| ATOM | 154 | H2'2 | C A | 5 | 16.432 | 38.738 | 95.255 | 1.00 | 0.00 | H |
| ATOM | 155 | H5'1 | C A | 5 | 17.344 | 43.611 | 94.979 | 1.00 | 0.00 | H |
| ATOM | 156 | H5'2 | C A | 5 | 18.819 | 43.030 | 95.783 | 1.00 | 0.00 | H |

|      |     |      |     |   |        |        |         |      |      |   |
|------|-----|------|-----|---|--------|--------|---------|------|------|---|
| ATOM | 157 | C1'  | G A | 6 | 12.145 | 37.099 | 96.338  | 1.00 | 0.00 | C |
| ATOM | 158 | N1   | G A | 6 | 10.339 | 37.902 | 91.635  | 1.00 | 0.00 | N |
| ATOM | 159 | C2   | G A | 6 | 9.661  | 37.710 | 92.826  | 1.00 | 0.00 | C |
| ATOM | 160 | N2   | G A | 6 | 8.325  | 37.733 | 92.754  | 1.00 | 0.00 | N |
| ATOM | 161 | N3   | G A | 6 | 10.269 | 37.512 | 93.995  | 1.00 | 0.00 | N |
| ATOM | 162 | C4   | G A | 6 | 11.622 | 37.511 | 93.880  | 1.00 | 0.00 | C |
| ATOM | 163 | C5   | G A | 6 | 12.383 | 37.691 | 92.736  | 1.00 | 0.00 | C |
| ATOM | 164 | C6   | G A | 6 | 11.741 | 37.905 | 91.497  | 1.00 | 0.00 | C |
| ATOM | 165 | O6   | G A | 6 | 12.237 | 38.081 | 90.384  | 1.00 | 0.00 | O |
| ATOM | 166 | N7   | G A | 6 | 13.743 | 37.618 | 93.046  | 1.00 | 0.00 | N |
| ATOM | 167 | C8   | G A | 6 | 13.763 | 37.407 | 94.335  | 1.00 | 0.00 | C |
| ATOM | 168 | N9   | G A | 6 | 12.513 | 37.329 | 94.915  | 1.00 | 0.00 | N |
| ATOM | 169 | C2'  | G A | 6 | 13.052 | 36.108 | 97.053  | 1.00 | 0.00 | C |
| ATOM | 170 | C3'  | G A | 6 | 13.118 | 36.692 | 98.456  | 1.00 | 0.00 | C |
| ATOM | 171 | O3'  | G A | 6 | 11.989 | 36.244 | 99.203  | 1.00 | 0.00 | O |
| ATOM | 172 | C4'  | G A | 6 | 13.080 | 38.196 | 98.200  | 1.00 | 0.00 | C |
| ATOM | 173 | O4'  | G A | 6 | 12.236 | 38.339 | 97.013  | 1.00 | 0.00 | O |
| ATOM | 174 | C5'  | G A | 6 | 14.408 | 38.864 | 97.931  | 1.00 | 0.00 | C |
| ATOM | 175 | O5'  | G A | 6 | 15.258 | 37.978 | 97.161  | 1.00 | 0.00 | O |
| ATOM | 176 | O1P  | G A | 6 | 17.136 | 37.448 | 98.750  | 1.00 | 0.00 | O |
| ATOM | 177 | O2P  | G A | 6 | 17.530 | 37.375 | 96.274  | 1.00 | 0.00 | O |
| ATOM | 178 | P    | G A | 6 | 16.831 | 38.008 | 97.420  | 1.00 | 0.00 | P |
| ATOM | 179 | H1   | G A | 6 | 9.774  | 38.054 | 90.786  | 1.00 | 0.00 | H |
| ATOM | 180 | H8   | G A | 6 | 14.687 | 37.301 | 94.906  | 1.00 | 0.00 | H |
| ATOM | 181 | H1'  | G A | 6 | 11.105 | 36.773 | 96.373  | 1.00 | 0.00 | H |
| ATOM | 182 | H21  | G A | 6 | 7.861  | 37.890 | 91.848  | 1.00 | 0.00 | H |
| ATOM | 183 | H3'  | G A | 6 | 14.031 | 36.403 | 98.978  | 1.00 | 0.00 | H |
| ATOM | 184 | H22  | G A | 6 | 7.761  | 37.593 | 93.606  | 1.00 | 0.00 | H |
| ATOM | 185 | H4'  | G A | 6 | 12.649 | 38.658 | 99.087  | 1.00 | 0.00 | H |
| ATOM | 186 | H2'1 | G A | 6 | 14.043 | 36.052 | 96.600  | 1.00 | 0.00 | H |
| ATOM | 187 | H2'2 | G A | 6 | 12.639 | 35.099 | 97.061  | 1.00 | 0.00 | H |
| ATOM | 188 | H5'1 | G A | 6 | 14.239 | 39.786 | 97.376  | 1.00 | 0.00 | H |
| ATOM | 189 | H5'2 | G A | 6 | 14.887 | 39.103 | 98.880  | 1.00 | 0.00 | H |
| ATOM | 190 | C1'  | C A | 7 | 8.307  | 34.087 | 95.482  | 1.00 | 0.00 | C |
| ATOM | 191 | N1   | C A | 7 | 9.444  | 34.155 | 94.524  | 1.00 | 0.00 | N |
| ATOM | 192 | C2   | C A | 7 | 9.150  | 34.371 | 93.179  | 1.00 | 0.00 | C |
| ATOM | 193 | O2   | C A | 7 | 7.967  | 34.496 | 92.838  | 1.00 | 0.00 | O |
| ATOM | 194 | N3   | C A | 7 | 10.171 | 34.434 | 92.290  | 1.00 | 0.00 | N |
| ATOM | 195 | C4   | C A | 7 | 11.442 | 34.295 | 92.688  | 1.00 | 0.00 | C |
| ATOM | 196 | N4   | C A | 7 | 12.401 | 34.368 | 91.777  | 1.00 | 0.00 | N |
| ATOM | 197 | C5   | C A | 7 | 11.773 | 34.066 | 94.063  | 1.00 | 0.00 | C |
| ATOM | 198 | C6   | C A | 7 | 10.729 | 34.010 | 94.944  | 1.00 | 0.00 | C |
| ATOM | 199 | C2'  | C A | 7 | 8.493  | 33.051 | 96.584  | 1.00 | 0.00 | C |
| ATOM | 200 | C3'  | C A | 7 | 7.841  | 33.735 | 97.775  | 1.00 | 0.00 | C |
| ATOM | 201 | O3'  | C A | 7 | 6.435  | 33.493 | 97.741  | 1.00 | 0.00 | O |
| ATOM | 202 | C4'  | C A | 7 | 8.178  | 35.207 | 97.549  | 1.00 | 0.00 | C |
| ATOM | 203 | O4'  | C A | 7 | 8.186  | 35.359 | 96.093  | 1.00 | 0.00 | O |
| ATOM | 204 | C5'  | C A | 7 | 9.508  | 35.681 | 98.089  | 1.00 | 0.00 | C |
| ATOM | 205 | O5'  | C A | 7 | 10.499 | 34.635 | 97.939  | 1.00 | 0.00 | O |
| ATOM | 206 | O1P  | C A | 7 | 11.050 | 34.004 | 100.312 | 1.00 | 0.00 | O |
| ATOM | 207 | O2P  | C A | 7 | 12.756 | 33.684 | 98.501  | 1.00 | 0.00 | O |
| ATOM | 208 | P    | C A | 7 | 11.638 | 34.489 | 99.046  | 1.00 | 0.00 | P |
| ATOM | 209 | H5   | C A | 7 | 12.806 | 33.945 | 94.393  | 1.00 | 0.00 | H |
| ATOM | 210 | H6   | C A | 7 | 10.931 | 33.846 | 96.002  | 1.00 | 0.00 | H |

|      |     |      |     |   |        |        |        |      |      |   |
|------|-----|------|-----|---|--------|--------|--------|------|------|---|
| ATOM | 211 | H1'  | C A | 7 | 7.396  | 33.898 | 94.918 | 1.00 | 0.00 | H |
| ATOM | 212 | H3'  | C A | 7 | 8.247  | 33.378 | 98.722 | 1.00 | 0.00 | H |
| ATOM | 213 | H4'  | C A | 7 | 7.396  | 35.789 | 98.036 | 1.00 | 0.00 | H |
| ATOM | 214 | H41  | C A | 7 | 13.387 | 34.266 | 92.056 | 1.00 | 0.00 | H |
| ATOM | 215 | H42  | C A | 7 | 12.161 | 34.529 | 90.787 | 1.00 | 0.00 | H |
| ATOM | 216 | H2'1 | C A | 7 | 9.543  | 32.836 | 96.775 | 1.00 | 0.00 | H |
| ATOM | 217 | H2'2 | C A | 7 | 8.002  | 32.106 | 96.350 | 1.00 | 0.00 | H |
| ATOM | 218 | H5'1 | C A | 7 | 9.823  | 36.569 | 97.540 | 1.00 | 0.00 | H |
| ATOM | 219 | H5'2 | C A | 7 | 9.397  | 35.933 | 99.144 | 1.00 | 0.00 | H |
| ATOM | 220 | C1'  | A A | 8 | 5.229  | 31.506 | 92.593 | 1.00 | 0.00 | C |
| ATOM | 221 | N1   | A A | 8 | 9.175  | 31.567 | 89.311 | 1.00 | 0.00 | N |
| ATOM | 222 | C2   | A A | 8 | 7.867  | 31.744 | 89.147 | 1.00 | 0.00 | C |
| ATOM | 223 | N3   | A A | 8 | 6.901  | 31.718 | 90.040 | 1.00 | 0.00 | N |
| ATOM | 224 | C4   | A A | 8 | 7.405  | 31.464 | 91.262 | 1.00 | 0.00 | C |
| ATOM | 225 | C5   | A A | 8 | 8.713  | 31.259 | 91.598 | 1.00 | 0.00 | C |
| ATOM | 226 | C6   | A A | 8 | 9.647  | 31.317 | 90.541 | 1.00 | 0.00 | C |
| ATOM | 227 | N6   | A A | 8 | 10.967 | 31.137 | 90.720 | 1.00 | 0.00 | N |
| ATOM | 228 | N7   | A A | 8 | 8.852  | 31.028 | 92.955 | 1.00 | 0.00 | N |
| ATOM | 229 | C8   | A A | 8 | 7.634  | 31.093 | 93.408 | 1.00 | 0.00 | C |
| ATOM | 230 | N9   | A A | 8 | 6.701  | 31.357 | 92.438 | 1.00 | 0.00 | N |
| ATOM | 231 | C2'  | A A | 8 | 4.619  | 30.549 | 93.609 | 1.00 | 0.00 | C |
| ATOM | 232 | C3'  | A A | 8 | 3.520  | 31.400 | 94.225 | 1.00 | 0.00 | C |
| ATOM | 233 | O3'  | A A | 8 | 2.357  | 31.322 | 93.406 | 1.00 | 0.00 | O |
| ATOM | 234 | C4'  | A A | 8 | 4.133  | 32.799 | 94.226 | 1.00 | 0.00 | C |
| ATOM | 235 | O4'  | A A | 8 | 4.971  | 32.827 | 93.025 | 1.00 | 0.00 | O |
| ATOM | 236 | C5'  | A A | 8 | 4.986  | 33.157 | 95.420 | 1.00 | 0.00 | C |
| ATOM | 237 | O5'  | A A | 8 | 5.734  | 31.993 | 95.854 | 1.00 | 0.00 | O |
| ATOM | 238 | O1P  | A A | 8 | 4.772  | 31.499 | 98.128 | 1.00 | 0.00 | O |
| ATOM | 239 | O2P  | A A | 8 | 7.130  | 30.833 | 97.592 | 1.00 | 0.00 | O |
| ATOM | 240 | P    | A A | 8 | 6.026  | 31.806 | 97.412 | 1.00 | 0.00 | P |
| ATOM | 241 | H2   | A A | 8 | 7.550  | 31.940 | 88.125 | 1.00 | 0.00 | H |
| ATOM | 242 | H8   | A A | 8 | 7.378  | 30.952 | 94.458 | 1.00 | 0.00 | H |
| ATOM | 243 | H1'  | A A | 8 | 4.770  | 31.378 | 91.612 | 1.00 | 0.00 | H |
| ATOM | 244 | H3'  | A A | 8 | 3.273  | 31.079 | 95.236 | 1.00 | 0.00 | H |
| ATOM | 245 | H4'  | A A | 8 | 3.306  | 33.507 | 94.183 | 1.00 | 0.00 | H |
| ATOM | 246 | H61  | A A | 8 | 11.607 | 31.192 | 89.916 | 1.00 | 0.00 | H |
| ATOM | 247 | H62  | A A | 8 | 11.337 | 30.942 | 91.662 | 1.00 | 0.00 | H |
| ATOM | 248 | H2'1 | A A | 8 | 5.340  | 30.229 | 94.359 | 1.00 | 0.00 | H |
| ATOM | 249 | H2'2 | A A | 8 | 4.212  | 29.654 | 93.140 | 1.00 | 0.00 | H |
| ATOM | 250 | H5'1 | A A | 8 | 5.676  | 33.952 | 95.139 | 1.00 | 0.00 | H |
| ATOM | 251 | H5'2 | A A | 8 | 4.345  | 33.505 | 96.228 | 1.00 | 0.00 | H |
| ATOM | 252 | C1'  | C A | 9 | 4.033  | 29.090 | 88.421 | 1.00 | 0.00 | C |
| ATOM | 253 | N1   | C A | 9 | 5.282  | 28.749 | 89.157 | 1.00 | 0.00 | N |
| ATOM | 254 | C2   | C A | 9 | 6.474  | 28.714 | 88.438 | 1.00 | 0.00 | C |
| ATOM | 255 | O2   | C A | 9 | 6.448  | 28.964 | 87.226 | 1.00 | 0.00 | O |
| ATOM | 256 | N3   | C A | 9 | 7.622  | 28.406 | 89.091 | 1.00 | 0.00 | N |
| ATOM | 257 | C4   | C A | 9 | 7.618  | 28.137 | 90.402 | 1.00 | 0.00 | C |
| ATOM | 258 | N4   | C A | 9 | 8.769  | 27.845 | 90.990 | 1.00 | 0.00 | N |
| ATOM | 259 | C5   | C A | 9 | 6.404  | 28.163 | 91.167 | 1.00 | 0.00 | C |
| ATOM | 260 | C6   | C A | 9 | 5.261  | 28.480 | 90.491 | 1.00 | 0.00 | C |
| ATOM | 261 | C2'  | C A | 9 | 2.815  | 28.303 | 88.882 | 1.00 | 0.00 | C |
| ATOM | 262 | C3'  | C A | 9 | 1.702  | 29.332 | 88.745 | 1.00 | 0.00 | C |
| ATOM | 263 | O3'  | C A | 9 | 1.230  | 29.335 | 87.400 | 1.00 | 0.00 | O |
| ATOM | 264 | C4'  | C A | 9 | 2.400  | 30.638 | 89.115 | 1.00 | 0.00 | C |

|      |     |      |     |    |        |        |        |      |      |   |
|------|-----|------|-----|----|--------|--------|--------|------|------|---|
| ATOM | 265 | O4'  | C A | 9  | 3.772  | 30.465 | 88.632 | 1.00 | 0.00 | O |
| ATOM | 266 | C5'  | C A | 9  | 2.447  | 30.982 | 90.585 | 1.00 | 0.00 | C |
| ATOM | 267 | O5'  | C A | 9  | 2.621  | 29.772 | 91.366 | 1.00 | 0.00 | O |
| ATOM | 268 | O1P  | C A | 9  | 0.460  | 29.590 | 92.644 | 1.00 | 0.00 | O |
| ATOM | 269 | O2P  | C A | 9  | 2.561  | 28.592 | 93.585 | 1.00 | 0.00 | O |
| ATOM | 270 | P    | C A | 9  | 1.925  | 29.678 | 92.798 | 1.00 | 0.00 | P |
| ATOM | 271 | H5   | C A | 9  | 6.396  | 27.939 | 92.235 | 1.00 | 0.00 | H |
| ATOM | 272 | H6   | C A | 9  | 4.315  | 28.519 | 91.031 | 1.00 | 0.00 | H |
| ATOM | 273 | H1'  | C A | 9  | 4.214  | 28.942 | 87.356 | 1.00 | 0.00 | H |
| ATOM | 274 | H3'  | C A | 9  | 0.870  | 29.126 | 89.419 | 1.00 | 0.00 | H |
| ATOM | 275 | H4'  | C A | 9  | 1.867  | 31.439 | 88.603 | 1.00 | 0.00 | H |
| ATOM | 276 | H41  | C A | 9  | 8.793  | 27.637 | 92.000 | 1.00 | 0.00 | H |
| ATOM | 277 | H42  | C A | 9  | 9.638  | 27.825 | 90.438 | 1.00 | 0.00 | H |
| ATOM | 278 | H2'1 | C A | 9  | 2.909  | 27.957 | 89.910 | 1.00 | 0.00 | H |
| ATOM | 279 | H2'2 | C A | 9  | 2.626  | 27.428 | 88.257 | 1.00 | 0.00 | H |
| ATOM | 280 | H5'1 | C A | 9  | 3.281  | 31.661 | 90.769 | 1.00 | 0.00 | H |
| ATOM | 281 | H5'2 | C A | 9  | 1.516  | 31.472 | 90.867 | 1.00 | 0.00 | H |
| ATOM | 282 | C1'  | C A | 10 | 5.054  | 26.504 | 84.322 | 1.00 | 0.00 | C |
| ATOM | 283 | N1   | C A | 10 | 5.597  | 26.076 | 85.640 | 1.00 | 0.00 | N |
| ATOM | 284 | C2   | C A | 10 | 6.966  | 25.836 | 85.736 | 1.00 | 0.00 | C |
| ATOM | 285 | O2   | C A | 10 | 7.670  | 25.988 | 84.728 | 1.00 | 0.00 | O |
| ATOM | 286 | N3   | C A | 10 | 7.480  | 25.445 | 86.927 | 1.00 | 0.00 | N |
| ATOM | 287 | C4   | C A | 10 | 6.691  | 25.289 | 87.999 | 1.00 | 0.00 | C |
| ATOM | 288 | N4   | C A | 10 | 7.247  | 24.907 | 89.141 | 1.00 | 0.00 | N |
| ATOM | 289 | C5   | C A | 10 | 5.279  | 25.524 | 87.929 | 1.00 | 0.00 | C |
| ATOM | 290 | C6   | C A | 10 | 4.784  | 25.922 | 86.719 | 1.00 | 0.00 | C |
| ATOM | 291 | C2'  | C A | 10 | 3.689  | 25.914 | 83.998 | 1.00 | 0.00 | C |
| ATOM | 292 | C3'  | C A | 10 | 3.018  | 27.056 | 83.251 | 1.00 | 0.00 | C |
| ATOM | 293 | O3'  | C A | 10 | 3.399  | 27.005 | 81.878 | 1.00 | 0.00 | O |
| ATOM | 294 | C4'  | C A | 10 | 3.567  | 28.293 | 83.958 | 1.00 | 0.00 | C |
| ATOM | 295 | O4'  | C A | 10 | 4.924  | 27.914 | 84.348 | 1.00 | 0.00 | O |
| ATOM | 296 | C5'  | C A | 10 | 2.820  | 28.748 | 85.191 | 1.00 | 0.00 | C |
| ATOM | 297 | O5'  | C A | 10 | 2.338  | 27.595 | 85.926 | 1.00 | 0.00 | O |
| ATOM | 298 | O1P  | C A | 10 | -0.164 | 27.784 | 85.732 | 1.00 | 0.00 | O |
| ATOM | 299 | O2P  | C A | 10 | 0.857  | 26.617 | 87.705 | 1.00 | 0.00 | O |
| ATOM | 300 | P    | C A | 10 | 0.948  | 27.704 | 86.699 | 1.00 | 0.00 | P |
| ATOM | 301 | H5   | C A | 10 | 4.632  | 25.392 | 88.797 | 1.00 | 0.00 | H |
| ATOM | 302 | H6   | C A | 10 | 3.717  | 26.121 | 86.619 | 1.00 | 0.00 | H |
| ATOM | 303 | H1'  | C A | 10 | 5.783  | 26.249 | 83.554 | 1.00 | 0.00 | H |
| ATOM | 304 | H3'  | C A | 10 | 1.931  | 27.009 | 83.325 | 1.00 | 0.00 | H |
| ATOM | 305 | H4'  | C A | 10 | 3.541  | 29.108 | 83.235 | 1.00 | 0.00 | H |
| ATOM | 306 | H41  | C A | 10 | 6.664  | 24.782 | 89.980 | 1.00 | 0.00 | H |
| ATOM | 307 | H42  | C A | 10 | 8.263  | 24.736 | 89.186 | 1.00 | 0.00 | H |
| ATOM | 308 | H2'1 | C A | 10 | 3.130  | 25.644 | 84.893 | 1.00 | 0.00 | H |
| ATOM | 309 | H2'2 | C A | 10 | 3.763  | 25.020 | 83.376 | 1.00 | 0.00 | H |
| ATOM | 310 | H5'1 | C A | 10 | 3.492  | 29.333 | 85.821 | 1.00 | 0.00 | H |
| ATOM | 311 | H5'2 | C A | 10 | 1.978  | 29.370 | 84.889 | 1.00 | 0.00 | H |
| ATOM | 312 | C1'  | T A | 11 | 7.813  | 23.493 | 81.526 | 1.00 | 0.00 | C |
| ATOM | 313 | N1   | T A | 11 | 7.463  | 23.106 | 82.919 | 1.00 | 0.00 | N |
| ATOM | 314 | C2   | T A | 11 | 8.499  | 22.717 | 83.743 | 1.00 | 0.00 | C |
| ATOM | 315 | O2   | T A | 11 | 9.660  | 22.682 | 83.373 | 1.00 | 0.00 | O |
| ATOM | 316 | N3   | T A | 11 | 8.130  | 22.367 | 85.029 | 1.00 | 0.00 | N |
| ATOM | 317 | C4   | T A | 11 | 6.850  | 22.368 | 85.545 | 1.00 | 0.00 | C |
| ATOM | 318 | O4   | T A | 11 | 6.641  | 22.028 | 86.717 | 1.00 | 0.00 | O |

|      |     |      |     |    |        |        |        |      |      |   |
|------|-----|------|-----|----|--------|--------|--------|------|------|---|
| ATOM | 319 | C5   | T A | 11 | 5.835  | 22.788 | 84.608 | 1.00 | 0.00 | C |
| ATOM | 320 | C6   | T A | 11 | 6.159  | 23.139 | 83.349 | 1.00 | 0.00 | C |
| ATOM | 321 | C7   | T A | 11 | 4.428  | 22.808 | 85.129 | 1.00 | 0.00 | C |
| ATOM | 322 | C2'  | T A | 11 | 6.790  | 23.049 | 80.489 | 1.00 | 0.00 | C |
| ATOM | 323 | C3'  | T A | 11 | 6.820  | 24.200 | 79.497 | 1.00 | 0.00 | C |
| ATOM | 324 | O3'  | T A | 11 | 7.888  | 23.998 | 78.575 | 1.00 | 0.00 | O |
| ATOM | 325 | C4'  | T A | 11 | 7.054  | 25.414 | 80.395 | 1.00 | 0.00 | C |
| ATOM | 326 | O4'  | T A | 11 | 7.897  | 24.904 | 81.478 | 1.00 | 0.00 | O |
| ATOM | 327 | C5'  | T A | 11 | 5.824  | 26.053 | 80.998 | 1.00 | 0.00 | C |
| ATOM | 328 | O5'  | T A | 11 | 4.856  | 25.028 | 81.332 | 1.00 | 0.00 | O |
| ATOM | 329 | O1P  | T A | 11 | 2.942  | 25.501 | 79.769 | 1.00 | 0.00 | O |
| ATOM | 330 | O2P  | T A | 11 | 2.514  | 24.378 | 81.970 | 1.00 | 0.00 | O |
| ATOM | 331 | P    | T A | 11 | 3.304  | 25.363 | 81.192 | 1.00 | 0.00 | P |
| ATOM | 332 | H3   | T A | 11 | 8.884  | 22.076 | 85.666 | 1.00 | 0.00 | H |
| ATOM | 333 | H6   | T A | 11 | 5.376  | 23.454 | 82.658 | 1.00 | 0.00 | H |
| ATOM | 334 | H1'  | T A | 11 | 8.801  | 23.091 | 81.297 | 1.00 | 0.00 | H |
| ATOM | 335 | H3'  | T A | 11 | 5.884  | 24.292 | 78.950 | 1.00 | 0.00 | H |
| ATOM | 336 | H4'  | T A | 11 | 7.555  | 26.168 | 79.785 | 1.00 | 0.00 | H |
| ATOM | 337 | H71  | T A | 11 | 3.837  | 22.061 | 84.602 | 1.00 | 0.00 | H |
| ATOM | 338 | H72  | T A | 11 | 4.433  | 22.582 | 86.196 | 1.00 | 0.00 | H |
| ATOM | 339 | H73  | T A | 11 | 3.993  | 23.795 | 84.968 | 1.00 | 0.00 | H |
| ATOM | 340 | H2'1 | T A | 11 | 5.797  | 22.921 | 80.918 | 1.00 | 0.00 | H |
| ATOM | 341 | H2'2 | T A | 11 | 7.066  | 22.107 | 80.013 | 1.00 | 0.00 | H |
| ATOM | 342 | H5'1 | T A | 11 | 6.108  | 26.598 | 81.897 | 1.00 | 0.00 | H |
| ATOM | 343 | H5'2 | T A | 11 | 5.392  | 26.745 | 80.276 | 1.00 | 0.00 | H |
| ATOM | 344 | C1'  | A A | 12 | 11.208 | 19.942 | 80.827 | 1.00 | 0.00 | C |
| ATOM | 345 | N1   | A A | 12 | 9.844  | 18.483 | 85.556 | 1.00 | 0.00 | N |
| ATOM | 346 | C2   | A A | 12 | 11.024 | 18.591 | 84.954 | 1.00 | 0.00 | C |
| ATOM | 347 | N3   | A A | 12 | 11.306 | 18.977 | 83.727 | 1.00 | 0.00 | N |
| ATOM | 348 | C4   | A A | 12 | 10.177 | 19.282 | 83.065 | 1.00 | 0.00 | C |
| ATOM | 349 | C5   | A A | 12 | 8.895  | 19.225 | 83.534 | 1.00 | 0.00 | C |
| ATOM | 350 | C6   | A A | 12 | 8.735  | 18.796 | 84.869 | 1.00 | 0.00 | C |
| ATOM | 351 | N6   | A A | 12 | 7.535  | 18.691 | 85.466 | 1.00 | 0.00 | N |
| ATOM | 352 | N7   | A A | 12 | 7.989  | 19.617 | 82.564 | 1.00 | 0.00 | N |
| ATOM | 353 | C8   | A A | 12 | 8.734  | 19.895 | 81.536 | 1.00 | 0.00 | C |
| ATOM | 354 | N9   | A A | 12 | 10.075 | 19.718 | 81.766 | 1.00 | 0.00 | N |
| ATOM | 355 | C2'  | A A | 12 | 10.902 | 19.543 | 79.390 | 1.00 | 0.00 | C |
| ATOM | 356 | C3'  | A A | 12 | 11.662 | 20.596 | 78.600 | 1.00 | 0.00 | C |
| ATOM | 357 | O3'  | A A | 12 | 13.021 | 20.184 | 78.459 | 1.00 | 0.00 | O |
| ATOM | 358 | C4'  | A A | 12 | 11.526 | 21.842 | 79.474 | 1.00 | 0.00 | C |
| ATOM | 359 | O4'  | A A | 12 | 11.513 | 21.322 | 80.842 | 1.00 | 0.00 | O |
| ATOM | 360 | C5'  | A A | 12 | 10.286 | 22.676 | 79.262 | 1.00 | 0.00 | C |
| ATOM | 361 | O5'  | A A | 12 | 9.156  | 21.814 | 78.977 | 1.00 | 0.00 | O |
| ATOM | 362 | O1P  | A A | 12 | 8.568  | 22.392 | 76.598 | 1.00 | 0.00 | O |
| ATOM | 363 | O2P  | A A | 12 | 6.801  | 21.518 | 78.152 | 1.00 | 0.00 | O |
| ATOM | 364 | P    | A A | 12 | 8.031  | 22.329 | 77.972 | 1.00 | 0.00 | P |
| ATOM | 365 | H2   | A A | 12 | 11.885 | 18.318 | 85.565 | 1.00 | 0.00 | H |
| ATOM | 366 | H8   | A A | 12 | 8.333  | 20.238 | 80.580 | 1.00 | 0.00 | H |
| ATOM | 367 | H1'  | A A | 12 | 12.074 | 19.401 | 81.206 | 1.00 | 0.00 | H |
| ATOM | 368 | H3'  | A A | 12 | 11.231 | 20.759 | 77.614 | 1.00 | 0.00 | H |
| ATOM | 369 | H4'  | A A | 12 | 12.391 | 22.471 | 79.264 | 1.00 | 0.00 | H |
| ATOM | 370 | H61  | A A | 12 | 7.473  | 18.375 | 86.444 | 1.00 | 0.00 | H |
| ATOM | 371 | H62  | A A | 12 | 6.678  | 18.929 | 84.944 | 1.00 | 0.00 | H |
| ATOM | 372 | H2'1 | A A | 12 | 9.835  | 19.576 | 79.170 | 1.00 | 0.00 | H |



|      |     |      |   |   |    |        |        |        |      |      |   |
|------|-----|------|---|---|----|--------|--------|--------|------|------|---|
| ATOM | 373 | H2'2 | A | A | 12 | 11.254 | 18.538 | 79.155 | 1.00 | 0.00 | H |
| ATOM | 374 | H5'1 | A | A | 12 | 10.087 | 23.256 | 80.163 | 1.00 | 0.00 | H |
| ATOM | 375 | H5'2 | A | A | 12 | 10.449 | 23.357 | 78.428 | 1.00 | 0.00 | H |
| ATOM | 376 | C1'  | G | A | 13 | 13.816 | 15.950 | 82.213 | 1.00 | 0.00 | C |
| ATOM | 377 | N1   | G | A | 13 | 9.818  | 15.077 | 85.260 | 1.00 | 0.00 | N |
| ATOM | 378 | C2   | G | A | 13 | 11.173 | 14.963 | 85.519 | 1.00 | 0.00 | C |
| ATOM | 379 | N2   | G | A | 13 | 11.507 | 14.561 | 86.752 | 1.00 | 0.00 | N |
| ATOM | 380 | N3   | G | A | 13 | 12.118 | 15.229 | 84.618 | 1.00 | 0.00 | N |
| ATOM | 381 | C4   | G | A | 13 | 11.599 | 15.615 | 83.423 | 1.00 | 0.00 | C |
| ATOM | 382 | C5   | G | A | 13 | 10.265 | 15.752 | 83.075 | 1.00 | 0.00 | C |
| ATOM | 383 | C6   | G | A | 13 | 9.262  | 15.474 | 84.031 | 1.00 | 0.00 | C |
| ATOM | 384 | O6   | G | A | 13 | 8.038  | 15.536 | 83.910 | 1.00 | 0.00 | O |
| ATOM | 385 | N7   | G | A | 13 | 10.155 | 16.169 | 81.746 | 1.00 | 0.00 | N |
| ATOM | 386 | C8   | G | A | 13 | 11.395 | 16.272 | 81.343 | 1.00 | 0.00 | C |
| ATOM | 387 | N9   | G | A | 13 | 12.329 | 15.951 | 82.304 | 1.00 | 0.00 | N |
| ATOM | 388 | C2'  | G | A | 13 | 14.347 | 15.472 | 80.869 | 1.00 | 0.00 | C |
| ATOM | 389 | C3'  | G | A | 13 | 15.573 | 16.349 | 80.680 | 1.00 | 0.00 | C |
| ATOM | 390 | O3'  | G | A | 13 | 16.679 | 15.761 | 81.363 | 1.00 | 0.00 | O |
| ATOM | 391 | C4'  | G | A | 13 | 15.144 | 17.672 | 81.312 | 1.00 | 0.00 | C |
| ATOM | 392 | O4'  | G | A | 13 | 14.262 | 17.278 | 82.410 | 1.00 | 0.00 | O |
| ATOM | 393 | C5'  | G | A | 13 | 14.400 | 18.633 | 80.415 | 1.00 | 0.00 | C |
| ATOM | 394 | O5'  | G | A | 13 | 13.534 | 17.896 | 79.517 | 1.00 | 0.00 | O |
| ATOM | 395 | O1P  | G | A | 13 | 14.533 | 18.336 | 77.249 | 1.00 | 0.00 | O |
| ATOM | 396 | O2P  | G | A | 13 | 12.086 | 17.827 | 77.464 | 1.00 | 0.00 | O |
| ATOM | 397 | P    | G | A | 13 | 13.296 | 18.460 | 78.044 | 1.00 | 0.00 | P |
| ATOM | 398 | H1   | G | A | 13 | 9.168  | 14.853 | 86.029 | 1.00 | 0.00 | H |
| ATOM | 399 | H8   | G | A | 13 | 11.666 | 16.584 | 80.334 | 1.00 | 0.00 | H |
| ATOM | 400 | H1'  | G | A | 13 | 14.207 | 15.340 | 83.028 | 1.00 | 0.00 | H |
| ATOM | 401 | H21  | G | A | 13 | 10.770 | 14.362 | 87.444 | 1.00 | 0.00 | H |
| ATOM | 402 | H3'  | G | A | 13 | 15.826 | 16.478 | 79.628 | 1.00 | 0.00 | H |
| ATOM | 403 | H22  | G | A | 13 | 12.498 | 14.456 | 87.006 | 1.00 | 0.00 | H |
| ATOM | 404 | H4'  | G | A | 13 | 16.051 | 18.169 | 81.653 | 1.00 | 0.00 | H |
| ATOM | 405 | H2'1 | G | A | 13 | 13.627 | 15.617 | 80.064 | 1.00 | 0.00 | H |
| ATOM | 406 | H2'2 | G | A | 13 | 14.612 | 14.414 | 80.883 | 1.00 | 0.00 | H |
| ATOM | 407 | H5'1 | G | A | 13 | 13.807 | 19.309 | 81.029 | 1.00 | 0.00 | H |
| ATOM | 408 | H5'2 | G | A | 13 | 15.120 | 19.213 | 79.839 | 1.00 | 0.00 | H |
| ATOM | 409 | C1'  | G | A | 14 | 14.567 | 11.803 | 84.814 | 1.00 | 0.00 | C |
| ATOM | 410 | N1   | G | A | 14 | 9.472  | 11.678 | 85.014 | 1.00 | 0.00 | N |
| ATOM | 411 | C2   | G | A | 14 | 10.405 | 11.422 | 86.003 | 1.00 | 0.00 | C |
| ATOM | 412 | N2   | G | A | 14 | 9.917  | 11.085 | 87.203 | 1.00 | 0.00 | N |
| ATOM | 413 | N3   | G | A | 14 | 11.721 | 11.496 | 85.807 | 1.00 | 0.00 | N |
| ATOM | 414 | C4   | G | A | 14 | 12.035 | 11.842 | 84.532 | 1.00 | 0.00 | C |
| ATOM | 415 | C5   | G | A | 14 | 11.175 | 12.112 | 83.483 | 1.00 | 0.00 | C |
| ATOM | 416 | C6   | G | A | 14 | 9.778  | 12.038 | 83.688 | 1.00 | 0.00 | C |
| ATOM | 417 | O6   | G | A | 14 | 8.862  | 12.239 | 82.889 | 1.00 | 0.00 | O |
| ATOM | 418 | N7   | G | A | 14 | 11.901 | 12.428 | 82.332 | 1.00 | 0.00 | N |
| ATOM | 419 | C8   | G | A | 14 | 13.149 | 12.346 | 82.713 | 1.00 | 0.00 | C |
| ATOM | 420 | N9   | G | A | 14 | 13.312 | 11.994 | 84.036 | 1.00 | 0.00 | N |
| ATOM | 421 | C2'  | G | A | 14 | 15.690 | 11.154 | 84.016 | 1.00 | 0.00 | C |
| ATOM | 422 | C3'  | G | A | 14 | 16.919 | 11.857 | 84.568 | 1.00 | 0.00 | C |
| ATOM | 423 | O3'  | G | A | 14 | 17.342 | 11.196 | 85.760 | 1.00 | 0.00 | O |
| ATOM | 424 | C4'  | G | A | 14 | 16.408 | 13.270 | 84.842 | 1.00 | 0.00 | C |
| ATOM | 425 | O4'  | G | A | 14 | 15.013 | 13.079 | 85.235 | 1.00 | 0.00 | O |
| ATOM | 426 | C5'  | G | A | 14 | 16.457 | 14.238 | 83.683 | 1.00 | 0.00 | C |

|      |     |      |     |    |        |        |        |      |      |   |
|------|-----|------|-----|----|--------|--------|--------|------|------|---|
| ATOM | 427 | O5'  | G A | 14 | 16.157 | 13.540 | 82.450 | 1.00 | 0.00 | O |
| ATOM | 428 | O1P  | G A | 14 | 18.317 | 13.668 | 81.166 | 1.00 | 0.00 | O |
| ATOM | 429 | O2P  | G A | 14 | 16.140 | 13.481 | 79.937 | 1.00 | 0.00 | O |
| ATOM | 430 | P    | G A | 14 | 16.883 | 14.006 | 81.108 | 1.00 | 0.00 | P |
| ATOM | 431 | H1   | G A | 14 | 8.476  | 11.600 | 85.270 | 1.00 | 0.00 | H |
| ATOM | 432 | H8   | G A | 14 | 13.988 | 12.538 | 82.043 | 1.00 | 0.00 | H |
| ATOM | 433 | H1'  | G A | 14 | 14.332 | 11.219 | 85.703 | 1.00 | 0.00 | H |
| ATOM | 434 | H21  | G A | 14 | 8.899  | 11.034 | 87.347 | 1.00 | 0.00 | H |
| ATOM | 435 | H3'  | G A | 14 | 17.740 | 11.868 | 83.850 | 1.00 | 0.00 | H |
| ATOM | 436 | H22  | G A | 14 | 10.560 | 10.880 | 87.980 | 1.00 | 0.00 | H |
| ATOM | 437 | H4'  | G A | 14 | 17.023 | 13.679 | 85.643 | 1.00 | 0.00 | H |
| ATOM | 438 | H2'1 | G A | 14 | 15.586 | 11.320 | 82.944 | 1.00 | 0.00 | H |
| ATOM | 439 | H2'2 | G A | 14 | 15.743 | 10.077 | 84.178 | 1.00 | 0.00 | H |
| ATOM | 440 | H5'1 | G A | 14 | 15.726 | 15.029 | 83.847 | 1.00 | 0.00 | H |
| ATOM | 441 | H5'2 | G A | 14 | 17.454 | 14.676 | 83.626 | 1.00 | 0.00 | H |
| ATOM | 442 | C1'  | A A | 15 | 13.112 | 7.822  | 87.370 | 1.00 | 0.00 | C |
| ATOM | 443 | N1   | A A | 15 | 8.813  | 8.336  | 84.617 | 1.00 | 0.00 | N |
| ATOM | 444 | C2   | A A | 15 | 9.031  | 8.064  | 85.901 | 1.00 | 0.00 | C |
| ATOM | 445 | N3   | A A | 15 | 10.171 | 7.948  | 86.550 | 1.00 | 0.00 | N |
| ATOM | 446 | C4   | A A | 15 | 11.205 | 8.144  | 85.710 | 1.00 | 0.00 | C |
| ATOM | 447 | C5   | A A | 15 | 11.152 | 8.428  | 84.375 | 1.00 | 0.00 | C |
| ATOM | 448 | C6   | A A | 15 | 9.865  | 8.526  | 83.805 | 1.00 | 0.00 | C |
| ATOM | 449 | N6   | A A | 15 | 9.657  | 8.801  | 82.506 | 1.00 | 0.00 | N |
| ATOM | 450 | N7   | A A | 15 | 12.422 | 8.564  | 83.844 | 1.00 | 0.00 | N |
| ATOM | 451 | C8   | A A | 15 | 13.209 | 8.357  | 84.856 | 1.00 | 0.00 | C |
| ATOM | 452 | N9   | A A | 15 | 12.541 | 8.098  | 86.026 | 1.00 | 0.00 | N |
| ATOM | 453 | C2'  | A A | 15 | 14.383 | 6.982  | 87.337 | 1.00 | 0.00 | C |
| ATOM | 454 | C3'  | A A | 15 | 15.186 | 7.575  | 88.485 | 1.00 | 0.00 | C |
| ATOM | 455 | O3'  | A A | 15 | 14.777 | 6.965  | 89.705 | 1.00 | 0.00 | O |
| ATOM | 456 | C4'  | A A | 15 | 14.817 | 9.057  | 88.429 | 1.00 | 0.00 | C |
| ATOM | 457 | O4'  | A A | 15 | 13.426 | 9.066  | 87.970 | 1.00 | 0.00 | O |
| ATOM | 458 | C5'  | A A | 15 | 15.637 | 9.918  | 87.498 | 1.00 | 0.00 | C |
| ATOM | 459 | O5'  | A A | 15 | 15.975 | 9.167  | 86.305 | 1.00 | 0.00 | O |
| ATOM | 460 | O1P  | A A | 15 | 18.477 | 8.934  | 86.453 | 1.00 | 0.00 | O |
| ATOM | 461 | O2P  | A A | 15 | 17.346 | 8.912  | 84.213 | 1.00 | 0.00 | O |
| ATOM | 462 | P    | A A | 15 | 17.381 | 9.435  | 85.600 | 1.00 | 0.00 | P |
| ATOM | 463 | H2   | A A | 15 | 8.134  | 7.915  | 86.503 | 1.00 | 0.00 | H |
| ATOM | 464 | H8   | A A | 15 | 14.296 | 8.387  | 84.786 | 1.00 | 0.00 | H |
| ATOM | 465 | H1'  | A A | 15 | 12.343 | 7.343  | 87.976 | 1.00 | 0.00 | H |
| ATOM | 466 | H3'  | A A | 15 | 16.258 | 7.432  | 88.351 | 1.00 | 0.00 | H |
| ATOM | 467 | H4'  | A A | 15 | 14.934 | 9.451  | 89.437 | 1.00 | 0.00 | H |
| ATOM | 468 | H61  | A A | 15 | 8.696  | 8.863  | 82.141 | 1.00 | 0.00 | H |
| ATOM | 469 | H62  | A A | 15 | 10.459 | 8.946  | 81.877 | 1.00 | 0.00 | H |
| ATOM | 470 | H2'1 | A A | 15 | 14.915 | 7.077  | 86.391 | 1.00 | 0.00 | H |
| ATOM | 471 | H2'2 | A A | 15 | 14.184 | 5.923  | 87.500 | 1.00 | 0.00 | H |
| ATOM | 472 | H5'1 | A A | 15 | 15.059 | 10.801 | 87.225 | 1.00 | 0.00 | H |
| ATOM | 473 | H5'2 | A A | 15 | 16.548 | 10.229 | 88.007 | 1.00 | 0.00 | H |
| ATOM | 474 | C1'  | C A | 16 | 9.857  | 4.278  | 88.595 | 1.00 | 0.00 | C |
| ATOM | 475 | N1   | C A | 16 | 10.220 | 4.509  | 87.169 | 1.00 | 0.00 | N |
| ATOM | 476 | C2   | C A | 16 | 9.185  | 4.675  | 86.252 | 1.00 | 0.00 | C |
| ATOM | 477 | O2   | C A | 16 | 8.016  | 4.625  | 86.656 | 1.00 | 0.00 | O |
| ATOM | 478 | N3   | C A | 16 | 9.493  | 4.886  | 84.949 | 1.00 | 0.00 | N |
| ATOM | 479 | C4   | C A | 16 | 10.768 | 4.935  | 84.543 | 1.00 | 0.00 | C |
| ATOM | 480 | N4   | C A | 16 | 11.011 | 5.148  | 83.256 | 1.00 | 0.00 | N |

|      |     |      |     |    |        |        |        |      |      |   |
|------|-----|------|-----|----|--------|--------|--------|------|------|---|
| ATOM | 481 | C5   | C A | 16 | 11.853 | 4.763  | 85.462 | 1.00 | 0.00 | C |
| ATOM | 482 | C6   | C A | 16 | 11.519 | 4.556  | 86.772 | 1.00 | 0.00 | C |
| ATOM | 483 | C2'  | C A | 16 | 10.765 | 3.284  | 89.304 | 1.00 | 0.00 | C |
| ATOM | 484 | C3'  | C A | 16 | 10.837 | 3.868  | 90.708 | 1.00 | 0.00 | C |
| ATOM | 485 | O3'  | C A | 16 | 9.711  | 3.420  | 91.459 | 1.00 | 0.00 | O |
| ATOM | 486 | C4'  | C A | 16 | 10.801 | 5.372  | 90.452 | 1.00 | 0.00 | C |
| ATOM | 487 | O4'  | C A | 16 | 9.955  | 5.519  | 89.269 | 1.00 | 0.00 | O |
| ATOM | 488 | C5'  | C A | 16 | 12.132 | 6.037  | 90.179 | 1.00 | 0.00 | C |
| ATOM | 489 | O5'  | C A | 16 | 12.976 | 5.148  | 89.405 | 1.00 | 0.00 | O |
| ATOM | 490 | O1P  | C A | 16 | 14.860 | 4.611  | 90.985 | 1.00 | 0.00 | O |
| ATOM | 491 | O2P  | C A | 16 | 15.242 | 4.541  | 88.507 | 1.00 | 0.00 | O |
| ATOM | 492 | P    | C A | 16 | 14.549 | 5.173  | 89.656 | 1.00 | 0.00 | P |
| ATOM | 493 | H5   | C A | 16 | 12.893 | 4.794  | 85.136 | 1.00 | 0.00 | H |
| ATOM | 494 | H6   | C A | 16 | 12.311 | 4.426  | 87.511 | 1.00 | 0.00 | H |
| ATOM | 495 | H1'  | C A | 16 | 8.817  | 3.954  | 88.634 | 1.00 | 0.00 | H |
| ATOM | 496 | H3'  | C A | 16 | 11.754 | 3.576  | 91.224 | 1.00 | 0.00 | H |
| ATOM | 497 | H4'  | C A | 16 | 10.377 | 5.834  | 91.343 | 1.00 | 0.00 | H |
| ATOM | 498 | H41  | C A | 16 | 11.984 | 5.192  | 82.919 | 1.00 | 0.00 | H |
| ATOM | 499 | H42  | C A | 16 | 10.231 | 5.269  | 82.597 | 1.00 | 0.00 | H |
| ATOM | 500 | H2'1 | C A | 16 | 11.753 | 3.226  | 88.849 | 1.00 | 0.00 | H |
| ATOM | 501 | H2'2 | C A | 16 | 10.349 | 2.276  | 89.315 | 1.00 | 0.00 | H |
| ATOM | 502 | H5'1 | C A | 16 | 11.962 | 6.961  | 89.625 | 1.00 | 0.00 | H |
| ATOM | 503 | H5'2 | C A | 16 | 12.615 | 6.272  | 91.127 | 1.00 | 0.00 | H |
| ATOM | 504 | C1'  | G A | 17 | 6.022  | 1.267  | 87.737 | 1.00 | 0.00 | C |
| ATOM | 505 | N1   | G A | 17 | 7.347  | 1.894  | 82.852 | 1.00 | 0.00 | N |
| ATOM | 506 | C2   | G A | 17 | 6.092  | 1.885  | 83.438 | 1.00 | 0.00 | C |
| ATOM | 507 | N2   | G A | 17 | 5.055  | 2.066  | 82.611 | 1.00 | 0.00 | N |
| ATOM | 508 | N3   | G A | 17 | 5.892  | 1.711  | 84.743 | 1.00 | 0.00 | N |
| ATOM | 509 | C4   | G A | 17 | 7.053  | 1.536  | 85.425 | 1.00 | 0.00 | C |
| ATOM | 510 | C5   | G A | 17 | 8.346  | 1.525  | 84.926 | 1.00 | 0.00 | C |
| ATOM | 511 | C6   | G A | 17 | 8.560  | 1.715  | 83.542 | 1.00 | 0.00 | C |
| ATOM | 512 | O6   | G A | 17 | 9.620  | 1.737  | 82.916 | 1.00 | 0.00 | O |
| ATOM | 513 | N7   | G A | 17 | 9.261  | 1.313  | 85.959 | 1.00 | 0.00 | N |
| ATOM | 514 | C8   | G A | 17 | 8.513  | 1.209  | 87.028 | 1.00 | 0.00 | C |
| ATOM | 515 | N9   | G A | 17 | 7.161  | 1.332  | 86.783 | 1.00 | 0.00 | N |
| ATOM | 516 | C2'  | G A | 17 | 6.203  | 0.234  | 88.842 | 1.00 | 0.00 | C |
| ATOM | 517 | C3'  | G A | 17 | 5.547  | 0.918  | 90.029 | 1.00 | 0.00 | C |
| ATOM | 518 | O3'  | G A | 17 | 4.142  | 0.675  | 89.992 | 1.00 | 0.00 | O |
| ATOM | 519 | C4'  | G A | 17 | 5.884  | 2.391  | 89.801 | 1.00 | 0.00 | C |
| ATOM | 520 | O4'  | G A | 17 | 5.895  | 2.538  | 88.346 | 1.00 | 0.00 | O |
| ATOM | 521 | C5'  | G A | 17 | 7.209  | 2.868  | 90.347 | 1.00 | 0.00 | C |
| ATOM | 522 | O5'  | G A | 17 | 8.203  | 1.823  | 90.200 | 1.00 | 0.00 | O |
| ATOM | 523 | O1P  | G A | 17 | 8.744  | 1.200  | 92.577 | 1.00 | 0.00 | O |
| ATOM | 524 | O2P  | G A | 17 | 10.459 | 0.876  | 90.774 | 1.00 | 0.00 | O |
| ATOM | 525 | P    | G A | 17 | 9.336  | 1.682  | 91.313 | 1.00 | 0.00 | P |
| ATOM | 526 | H1   | G A | 17 | 7.392  | 2.044  | 81.833 | 1.00 | 0.00 | H |
| ATOM | 527 | H8   | G A | 17 | 8.922  | 1.037  | 88.023 | 1.00 | 0.00 | H |
| ATOM | 528 | H1'  | G A | 17 | 5.111  | 1.073  | 87.170 | 1.00 | 0.00 | H |
| ATOM | 529 | H21  | G A | 17 | 5.218  | 2.203  | 81.604 | 1.00 | 0.00 | H |
| ATOM | 530 | H3'  | G A | 17 | 5.950  | 0.565  | 90.979 | 1.00 | 0.00 | H |
| ATOM | 531 | H22  | G A | 17 | 4.095  | 2.066  | 82.985 | 1.00 | 0.00 | H |
| ATOM | 532 | H4'  | G A | 17 | 5.097  | 2.973  | 90.282 | 1.00 | 0.00 | H |
| ATOM | 533 | H2'1 | G A | 17 | 7.255  | 0.021  | 89.040 | 1.00 | 0.00 | H |
| ATOM | 534 | H2'2 | G A | 17 | 5.715  | -0.713 | 88.609 | 1.00 | 0.00 | H |

|      |     |      |     |    |        |        |        |      |      |   |
|------|-----|------|-----|----|--------|--------|--------|------|------|---|
| ATOM | 535 | H5'1 | G A | 17 | 7.522  | 3.755  | 89.796 | 1.00 | 0.00 | H |
| ATOM | 536 | H5'2 | G A | 17 | 7.092  | 3.123  | 91.399 | 1.00 | 0.00 | H |
| ATOM | 537 | C1'  | G A | 18 | 2.956  | -1.313 | 84.828 | 1.00 | 0.00 | C |
| ATOM | 538 | N1   | G A | 18 | 6.896  | -1.258 | 81.588 | 1.00 | 0.00 | N |
| ATOM | 539 | C2   | G A | 18 | 5.546  | -1.065 | 81.348 | 1.00 | 0.00 | C |
| ATOM | 540 | N2   | G A | 18 | 5.201  | -0.826 | 80.076 | 1.00 | 0.00 | N |
| ATOM | 541 | N3   | G A | 18 | 4.618  | -1.105 | 82.301 | 1.00 | 0.00 | N |
| ATOM | 542 | C4   | G A | 18 | 5.145  | -1.363 | 83.527 | 1.00 | 0.00 | C |
| ATOM | 543 | C5   | G A | 18 | 6.474  | -1.573 | 83.859 | 1.00 | 0.00 | C |
| ATOM | 544 | C6   | G A | 18 | 7.462  | -1.525 | 82.847 | 1.00 | 0.00 | C |
| ATOM | 545 | O6   | G A | 18 | 8.679  | -1.684 | 82.944 | 1.00 | 0.00 | O |
| ATOM | 546 | N7   | G A | 18 | 6.597  | -1.808 | 85.228 | 1.00 | 0.00 | N |
| ATOM | 547 | C8   | G A | 18 | 5.370  | -1.733 | 85.674 | 1.00 | 0.00 | C |
| ATOM | 548 | N9   | G A | 18 | 4.432  | -1.467 | 84.700 | 1.00 | 0.00 | N |
| ATOM | 549 | C2'  | G A | 18 | 2.325  | -2.267 | 85.833 | 1.00 | 0.00 | C |
| ATOM | 550 | C3'  | G A | 18 | 1.219  | -1.412 | 86.431 | 1.00 | 0.00 | C |
| ATOM | 551 | O3'  | G A | 18 | 0.067  | -1.484 | 85.594 | 1.00 | 0.00 | O |
| ATOM | 552 | C4'  | G A | 18 | 1.837  | -0.015 | 86.440 | 1.00 | 0.00 | C |
| ATOM | 553 | O4'  | G A | 18 | 2.694  | 0.008  | 85.256 | 1.00 | 0.00 | O |
| ATOM | 554 | C5'  | G A | 18 | 2.673  | 0.339  | 87.648 | 1.00 | 0.00 | C |
| ATOM | 555 | O5'  | G A | 18 | 3.407  | -0.827 | 88.096 | 1.00 | 0.00 | O |
| ATOM | 556 | O1P  | G A | 18 | 2.405  | -1.315 | 90.354 | 1.00 | 0.00 | O |
| ATOM | 557 | O2P  | G A | 18 | 4.768  | -1.991 | 89.859 | 1.00 | 0.00 | O |
| ATOM | 558 | P    | G A | 18 | 3.671  | -1.014 | 89.659 | 1.00 | 0.00 | P |
| ATOM | 559 | H1   | G A | 18 | 7.534  | -1.199 | 80.779 | 1.00 | 0.00 | H |
| ATOM | 560 | H8   | G A | 18 | 5.109  | -1.871 | 86.724 | 1.00 | 0.00 | H |
| ATOM | 561 | H1'  | G A | 18 | 2.513  | -1.440 | 83.839 | 1.00 | 0.00 | H |
| ATOM | 562 | H21  | G A | 18 | 5.927  | -0.794 | 79.344 | 1.00 | 0.00 | H |
| ATOM | 563 | H3'  | G A | 18 | 0.954  | -1.732 | 87.439 | 1.00 | 0.00 | H |
| ATOM | 564 | H22  | G A | 18 | 4.213  | -0.678 | 79.832 | 1.00 | 0.00 | H |
| ATOM | 565 | H4'  | G A | 18 | 1.014  | 0.696  | 86.386 | 1.00 | 0.00 | H |
| ATOM | 566 | H2'1 | G A | 18 | 3.032  | -2.589 | 86.596 | 1.00 | 0.00 | H |
| ATOM | 567 | H2'2 | G A | 18 | 1.923  | -3.163 | 85.359 | 1.00 | 0.00 | H |
| ATOM | 568 | H5'1 | G A | 18 | 3.370  | 1.133  | 87.381 | 1.00 | 0.00 | H |
| ATOM | 569 | H5'2 | G A | 18 | 2.018  | 0.692  | 88.445 | 1.00 | 0.00 | H |
| ATOM | 570 | C1'  | T A | 19 | 1.725  | -3.730 | 80.686 | 1.00 | 0.00 | C |
| ATOM | 571 | N1   | T A | 19 | 2.983  | -4.070 | 81.402 | 1.00 | 0.00 | N |
| ATOM | 572 | C2   | T A | 19 | 4.145  | -4.098 | 80.657 | 1.00 | 0.00 | C |
| ATOM | 573 | O2   | T A | 19 | 4.167  | -3.859 | 79.462 | 1.00 | 0.00 | O |
| ATOM | 574 | N3   | T A | 19 | 5.290  | -4.417 | 81.362 | 1.00 | 0.00 | N |
| ATOM | 575 | C4   | T A | 19 | 5.372  | -4.706 | 82.707 | 1.00 | 0.00 | C |
| ATOM | 576 | O4   | T A | 19 | 6.459  | -4.983 | 83.229 | 1.00 | 0.00 | O |
| ATOM | 577 | C5   | T A | 19 | 4.109  | -4.653 | 83.403 | 1.00 | 0.00 | C |
| ATOM | 578 | C6   | T A | 19 | 2.971  | -4.344 | 82.748 | 1.00 | 0.00 | C |
| ATOM | 579 | C7   | T A | 19 | 4.152  | -4.958 | 84.870 | 1.00 | 0.00 | C |
| ATOM | 580 | C2'  | T A | 19 | 0.512  | -4.520 | 81.165 | 1.00 | 0.00 | C |
| ATOM | 581 | C3'  | T A | 19 | -0.603 | -3.493 | 81.047 | 1.00 | 0.00 | C |
| ATOM | 582 | O3'  | T A | 19 | -1.096 | -3.489 | 79.709 | 1.00 | 0.00 | O |
| ATOM | 583 | C4'  | T A | 19 | 0.099  | -2.187 | 81.407 | 1.00 | 0.00 | C |
| ATOM | 584 | O4'  | T A | 19 | 1.461  | -2.357 | 80.902 | 1.00 | 0.00 | O |
| ATOM | 585 | C5'  | T A | 19 | 0.167  | -1.843 | 82.877 | 1.00 | 0.00 | C |
| ATOM | 586 | O5'  | T A | 19 | 0.355  | -3.053 | 83.653 | 1.00 | 0.00 | O |
| ATOM | 587 | O1P  | T A | 19 | -1.786 | -3.241 | 84.964 | 1.00 | 0.00 | O |
| ATOM | 588 | O2P  | T A | 19 | 0.332  | -4.236 | 85.870 | 1.00 | 0.00 | O |

|      |     |      |       |    |        |        |        |      |      |   |
|------|-----|------|-------|----|--------|--------|--------|------|------|---|
| ATOM | 589 | P    | T A   | 19 | -0.318 | -3.152 | 85.096 | 1.00 | 0.00 | P |
| ATOM | 590 | H3   | T A   | 19 | 6.171  | -4.440 | 80.828 | 1.00 | 0.00 | H |
| ATOM | 591 | H6   | T A   | 19 | 2.029  | -4.309 | 83.295 | 1.00 | 0.00 | H |
| ATOM | 592 | H1'  | T A   | 19 | 1.888  | -3.878 | 79.619 | 1.00 | 0.00 | H |
| ATOM | 593 | H3'  | T A   | 19 | -1.424 | -3.702 | 81.733 | 1.00 | 0.00 | H |
| ATOM | 594 | H4'  | T A   | 19 | -0.445 | -1.385 | 80.904 | 1.00 | 0.00 | H |
| ATOM | 595 | H71  | T A   | 19 | 3.604  | -5.879 | 85.067 | 1.00 | 0.00 | H |
| ATOM | 596 | H72  | T A   | 19 | 5.188  | -5.079 | 85.186 | 1.00 | 0.00 | H |
| ATOM | 597 | H73  | T A   | 19 | 3.696  | -4.138 | 85.428 | 1.00 | 0.00 | H |
| ATOM | 598 | H2'1 | T A   | 19 | 0.625  | -4.867 | 82.191 | 1.00 | 0.00 | H |
| ATOM | 599 | H2'2 | T A   | 19 | 0.316  | -5.394 | 80.543 | 1.00 | 0.00 | H |
| ATOM | 600 | H5'1 | T A   | 19 | 1.002  | -1.163 | 83.048 | 1.00 | 0.00 | H |
| ATOM | 601 | H5'2 | T A   | 19 | -0.760 | -1.356 | 83.174 | 1.00 | 0.00 | H |
| ATOM | 602 | C01  | LNK A | 20 | -3.565 | -5.707 | 78.024 | 0.00 | 0.00 | C |
| ATOM | 603 | O1   | LNK A | 20 | -2.780 | -5.334 | 79.158 | 1.00 | 0.00 | O |
| ATOM | 604 | S    | LNK A | 20 | -6.076 | -8.595 | 76.926 | 0.00 | 0.00 | S |
| ATOM | 605 | C02  | LNK A | 20 | -4.334 | -7.004 | 78.338 | 0.00 | 0.00 | C |
| ATOM | 606 | C03  | LNK A | 20 | -4.409 | -7.877 | 77.071 | 0.00 | 0.00 | C |
| ATOM | 607 | O1P  | LNK A | 20 | -0.455 | -6.044 | 79.813 | 1.00 | 0.00 | O |
| ATOM | 608 | O2P  | LNK A | 20 | -0.887 | -5.124 | 77.519 | 1.00 | 0.00 | O |
| ATOM | 609 | P    | LNK A | 20 | -1.213 | -5.103 | 78.965 | 1.00 | 0.00 | P |
| ATOM | 610 | H01  | LNK A | 20 | -2.911 | -5.872 | 77.166 | 0.00 | 0.00 | H |
| ATOM | 611 | H02  | LNK A | 20 | -4.273 | -4.912 | 77.792 | 0.00 | 0.00 | H |
| ATOM | 612 | H03  | LNK A | 20 | -3.674 | -8.679 | 77.140 | 0.00 | 0.00 | H |
| ATOM | 613 | H04  | LNK A | 20 | -5.344 | -6.755 | 78.668 | 0.00 | 0.00 | H |
| ATOM | 614 | H05  | LNK A | 20 | -3.818 | -7.550 | 79.127 | 0.00 | 0.00 | H |
| ATOM | 615 | H06  | LNK A | 20 | -4.199 | -7.266 | 76.194 | 0.00 | 0.00 | H |
| ATOM | 616 | AU   | LNK A | 20 | -6.082 | -9.060 | 76.422 |      |      |   |
| TER  |     |      |       |    |        |        |        |      |      |   |
| ATOM | 618 | C1'  | A B   | 2  | 11.821 | -4.448 | 76.633 | 1.00 | 0.00 | C |
| ATOM | 619 | N1   | A B   | 2  | 7.822  | -4.495 | 79.850 | 1.00 | 0.00 | N |
| ATOM | 620 | C2   | A B   | 2  | 7.925  | -4.238 | 78.550 | 1.00 | 0.00 | C |
| ATOM | 621 | N3   | A B   | 2  | 8.991  | -4.248 | 77.778 | 1.00 | 0.00 | N |
| ATOM | 622 | C4   | A B   | 2  | 10.084 | -4.566 | 78.497 | 1.00 | 0.00 | C |
| ATOM | 623 | C5   | A B   | 2  | 10.146 | -4.854 | 79.831 | 1.00 | 0.00 | C |
| ATOM | 624 | C6   | A B   | 2  | 8.928  | -4.812 | 80.540 | 1.00 | 0.00 | C |
| ATOM | 625 | N6   | A B   | 2  | 8.835  | -5.072 | 81.855 | 1.00 | 0.00 | N |
| ATOM | 626 | N7   | A B   | 2  | 11.444 | -5.139 | 80.220 | 1.00 | 0.00 | N |
| ATOM | 627 | C8   | A B   | 2  | 12.133 | -5.013 | 79.125 | 1.00 | 0.00 | C |
| ATOM | 628 | N9   | A B   | 2  | 11.374 | -4.670 | 78.036 | 1.00 | 0.00 | N |
| ATOM | 629 | C2'  | A B   | 2  | 13.175 | -3.757 | 76.524 | 1.00 | 0.00 | C |
| ATOM | 630 | C3'  | A B   | 2  | 13.773 | -4.427 | 75.298 | 1.00 | 0.00 | C |
| ATOM | 631 | O3'  | A B   | 2  | 13.303 | -3.764 | 74.127 | 1.00 | 0.00 | O |
| ATOM | 632 | C4'  | A B   | 2  | 13.248 | -5.858 | 75.401 | 1.00 | 0.00 | C |
| ATOM | 633 | O4'  | A B   | 2  | 11.923 | -5.713 | 76.011 | 1.00 | 0.00 | O |
| ATOM | 634 | C5'  | A B   | 2  | 14.064 | -6.815 | 76.238 | 1.00 | 0.00 | C |
| ATOM | 635 | O5'  | A B   | 2  | 14.613 | -6.117 | 77.383 | 1.00 | 0.00 | O |
| ATOM | 636 | H2   | A B   | 2  | 6.993  | -3.985 | 78.049 | 1.00 | 0.00 | H |
| ATOM | 637 | H8   | A B   | 2  | 13.212 | -5.165 | 79.077 | 1.00 | 0.00 | H |
| ATOM | 638 | H1'  | A B   | 2  | 11.050 | -3.878 | 76.117 | 1.00 | 0.00 | H |
| ATOM | 639 | H3'  | A B   | 2  | 14.863 | -4.407 | 75.311 | 1.00 | 0.00 | H |
| ATOM | 640 | H4'  | A B   | 2  | 13.208 | -6.253 | 74.387 | 1.00 | 0.00 | H |
| ATOM | 641 | H61  | A B   | 2  | 7.920  | -5.030 | 82.325 | 1.00 | 0.00 | H |
| ATOM | 642 | H62  | A B   | 2  | 9.680  | -5.314 | 82.393 | 1.00 | 0.00 | H |

|      |     |      |     |   |        |        |        |      |      |   |
|------|-----|------|-----|---|--------|--------|--------|------|------|---|
| ATOM | 643 | H2'1 | A B | 2 | 13.795 | -3.919 | 77.407 | 1.00 | 0.00 | H |
| ATOM | 644 | H2'2 | A B | 2 | 13.080 | -2.681 | 76.382 | 1.00 | 0.00 | H |
| ATOM | 645 | H5'1 | A B | 2 | 13.423 | -7.629 | 76.575 | 1.00 | 0.00 | H |
| ATOM | 646 | H5'2 | A B | 2 | 14.870 | -7.221 | 75.630 | 1.00 | 0.00 | H |
| ATOM | 647 | C1'  | C B | 3 | 8.870  | -0.552 | 75.757 | 1.00 | 0.00 | C |
| ATOM | 648 | N1   | C B | 3 | 9.359  | -0.834 | 77.135 | 1.00 | 0.00 | N |
| ATOM | 649 | C2   | C B | 3 | 8.420  | -0.887 | 78.162 | 1.00 | 0.00 | C |
| ATOM | 650 | O2   | C B | 3 | 7.226  | -0.701 | 77.889 | 1.00 | 0.00 | O |
| ATOM | 651 | N3   | C B | 3 | 8.844  | -1.143 | 79.422 | 1.00 | 0.00 | N |
| ATOM | 652 | C4   | C B | 3 | 10.142 | -1.339 | 79.686 | 1.00 | 0.00 | C |
| ATOM | 653 | N4   | C B | 3 | 10.502 | -1.588 | 80.938 | 1.00 | 0.00 | N |
| ATOM | 654 | C5   | C B | 3 | 11.133 | -1.286 | 78.651 | 1.00 | 0.00 | C |
| ATOM | 655 | C6   | C B | 3 | 10.682 | -1.031 | 77.385 | 1.00 | 0.00 | C |
| ATOM | 656 | C2'  | C B | 3 | 9.802  | 0.337  | 74.945 | 1.00 | 0.00 | C |
| ATOM | 657 | C3'  | C B | 3 | 9.651  | -0.239 | 73.545 | 1.00 | 0.00 | C |
| ATOM | 658 | O3'  | C B | 3 | 8.506  | 0.338  | 72.922 | 1.00 | 0.00 | O |
| ATOM | 659 | C4'  | C B | 3 | 9.472  | -1.733 | 73.811 | 1.00 | 0.00 | C |
| ATOM | 660 | O4'  | C B | 3 | 8.749  | -1.790 | 75.082 | 1.00 | 0.00 | O |
| ATOM | 661 | C5'  | C B | 3 | 10.739 | -2.547 | 73.938 | 1.00 | 0.00 | C |
| ATOM | 662 | O5'  | C B | 3 | 11.759 | -1.765 | 74.609 | 1.00 | 0.00 | O |
| ATOM | 663 | O1P  | C B | 3 | 13.506 | -1.436 | 72.828 | 1.00 | 0.00 | O |
| ATOM | 664 | O2P  | C B | 3 | 14.166 | -1.428 | 75.249 | 1.00 | 0.00 | O |
| ATOM | 665 | P    | C B | 3 | 13.282 | -1.969 | 74.186 | 1.00 | 0.00 | P |
| ATOM | 666 | H5   | C B | 3 | 12.191 | -1.438 | 78.860 | 1.00 | 0.00 | H |
| ATOM | 667 | H6   | C B | 3 | 11.395 | -0.988 | 76.564 | 1.00 | 0.00 | H |
| ATOM | 668 | H1'  | C B | 3 | 7.875  | -0.112 | 75.830 | 1.00 | 0.00 | H |
| ATOM | 669 | H3'  | C B | 3 | 10.531 | -0.052 | 72.930 | 1.00 | 0.00 | H |
| ATOM | 670 | H4'  | C B | 3 | 8.901  | -2.137 | 72.976 | 1.00 | 0.00 | H |
| ATOM | 671 | H41  | C B | 3 | 11.494 | -1.747 | 81.167 | 1.00 | 0.00 | H |
| ATOM | 672 | H42  | C B | 3 | 9.789  | -1.625 | 81.682 | 1.00 | 0.00 | H |
| ATOM | 673 | H2'1 | C B | 3 | 10.833 | 0.280  | 75.288 | 1.00 | 0.00 | H |
| ATOM | 674 | H2'2 | C B | 3 | 9.503  | 1.386  | 74.976 | 1.00 | 0.00 | H |
| ATOM | 675 | H5'1 | C B | 3 | 10.529 | -3.449 | 74.514 | 1.00 | 0.00 | H |
| ATOM | 676 | H5'2 | C B | 3 | 11.084 | -2.829 | 72.945 | 1.00 | 0.00 | H |
| ATOM | 677 | C1'  | C B | 4 | 5.514  | 2.866  | 77.013 | 1.00 | 0.00 | C |
| ATOM | 678 | N1   | C B | 4 | 6.735  | 2.663  | 77.841 | 1.00 | 0.00 | N |
| ATOM | 679 | C2   | C B | 4 | 6.570  | 2.475  | 79.210 | 1.00 | 0.00 | C |
| ATOM | 680 | O2   | C B | 4 | 5.424  | 2.482  | 79.683 | 1.00 | 0.00 | O |
| ATOM | 681 | N3   | C B | 4 | 7.668  | 2.289  | 79.983 | 1.00 | 0.00 | N |
| ATOM | 682 | C4   | C B | 4 | 8.896  | 2.285  | 79.444 | 1.00 | 0.00 | C |
| ATOM | 683 | N4   | C B | 4 | 9.934  | 2.095  | 80.244 | 1.00 | 0.00 | N |
| ATOM | 684 | C5   | C B | 4 | 9.096  | 2.482  | 78.038 | 1.00 | 0.00 | C |
| ATOM | 685 | C6   | C B | 4 | 7.974  | 2.663  | 77.280 | 1.00 | 0.00 | C |
| ATOM | 686 | C2'  | C B | 4 | 5.694  | 3.881  | 75.893 | 1.00 | 0.00 | C |
| ATOM | 687 | C3'  | C B | 4 | 4.840  | 3.284  | 74.785 | 1.00 | 0.00 | C |
| ATOM | 688 | O3'  | C B | 4 | 3.485  | 3.685  | 74.971 | 1.00 | 0.00 | O |
| ATOM | 689 | C4'  | C B | 4 | 5.030  | 1.783  | 74.980 | 1.00 | 0.00 | C |
| ATOM | 690 | O4'  | C B | 4 | 5.179  | 1.622  | 76.427 | 1.00 | 0.00 | O |
| ATOM | 691 | C5'  | C B | 4 | 6.229  | 1.161  | 74.299 | 1.00 | 0.00 | C |
| ATOM | 692 | O5'  | C B | 4 | 7.344  | 2.088  | 74.334 | 1.00 | 0.00 | O |
| ATOM | 693 | O1P  | C B | 4 | 7.697  | 2.665  | 71.910 | 1.00 | 0.00 | O |
| ATOM | 694 | O2P  | C B | 4 | 9.618  | 2.778  | 73.518 | 1.00 | 0.00 | O |
| ATOM | 695 | P    | C B | 4 | 8.359  | 2.111  | 73.105 | 1.00 | 0.00 | P |
| ATOM | 696 | H5   | C B | 4 | 10.092 | 2.487  | 77.597 | 1.00 | 0.00 | H |

|      |     |      |     |   |        |       |        |      |      |   |
|------|-----|------|-----|---|--------|-------|--------|------|------|---|
| ATOM | 697 | H6   | C B | 4 | 8.075  | 2.808 | 76.205 | 1.00 | 0.00 | H |
| ATOM | 698 | H1'  | C B | 4 | 4.697  | 3.155 | 77.674 | 1.00 | 0.00 | H |
| ATOM | 699 | H3'  | C B | 4 | 5.176  | 3.598 | 73.797 | 1.00 | 0.00 | H |
| ATOM | 700 | H4'  | C B | 4 | 4.137  | 1.296 | 74.589 | 1.00 | 0.00 | H |
| ATOM | 701 | H41  | C B | 4 | 10.889 | 2.086 | 79.857 | 1.00 | 0.00 | H |
| ATOM | 702 | H42  | C B | 4 | 9.788  | 1.957 | 81.256 | 1.00 | 0.00 | H |
| ATOM | 703 | H2'1 | C B | 4 | 6.734  | 3.976 | 75.584 | 1.00 | 0.00 | H |
| ATOM | 704 | H2'2 | C B | 4 | 5.343  | 4.875 | 76.174 | 1.00 | 0.00 | H |
| ATOM | 705 | H5'1 | C B | 4 | 6.497  | 0.241 | 74.816 | 1.00 | 0.00 | H |
| ATOM | 706 | H5'2 | C B | 4 | 5.971  | 0.933 | 73.266 | 1.00 | 0.00 | H |
| ATOM | 707 | C1'  | G B | 5 | 3.100  | 5.757 | 80.230 | 1.00 | 0.00 | C |
| ATOM | 708 | N1   | G B | 5 | 7.344  | 5.233 | 83.014 | 1.00 | 0.00 | N |
| ATOM | 709 | C2   | G B | 5 | 6.015  | 5.195 | 83.402 | 1.00 | 0.00 | C |
| ATOM | 710 | N2   | G B | 5 | 5.788  | 4.991 | 84.705 | 1.00 | 0.00 | N |
| ATOM | 711 | N3   | G B | 5 | 4.997  | 5.346 | 82.556 | 1.00 | 0.00 | N |
| ATOM | 712 | C4   | G B | 5 | 5.412  | 5.549 | 81.279 | 1.00 | 0.00 | C |
| ATOM | 713 | C5   | G B | 5 | 6.711  | 5.607 | 80.801 | 1.00 | 0.00 | C |
| ATOM | 714 | C6   | G B | 5 | 7.792  | 5.442 | 81.695 | 1.00 | 0.00 | C |
| ATOM | 715 | O6   | G B | 5 | 9.000  | 5.462 | 81.464 | 1.00 | 0.00 | O |
| ATOM | 716 | N7   | G B | 5 | 6.707  | 5.833 | 79.423 | 1.00 | 0.00 | N |
| ATOM | 717 | C8   | G B | 5 | 5.436  | 5.903 | 79.116 | 1.00 | 0.00 | C |
| ATOM | 718 | N9   | G B | 5 | 4.588  | 5.739 | 80.191 | 1.00 | 0.00 | N |
| ATOM | 719 | C2'  | G B | 5 | 2.475  | 6.780 | 79.292 | 1.00 | 0.00 | C |
| ATOM | 720 | C3'  | G B | 5 | 1.219  | 6.059 | 78.828 | 1.00 | 0.00 | C |
| ATOM | 721 | O3'  | G B | 5 | 0.182  | 6.259 | 79.786 | 1.00 | 0.00 | O |
| ATOM | 722 | C4'  | G B | 5 | 1.670  | 4.601 | 78.758 | 1.00 | 0.00 | C |
| ATOM | 723 | O4'  | G B | 5 | 2.644  | 4.474 | 79.842 | 1.00 | 0.00 | O |
| ATOM | 724 | C5'  | G B | 5 | 2.320  | 4.160 | 77.469 | 1.00 | 0.00 | C |
| ATOM | 725 | O5'  | G B | 5 | 3.127  | 5.237 | 76.934 | 1.00 | 0.00 | O |
| ATOM | 726 | O1P  | G B | 5 | 1.943  | 5.848 | 74.797 | 1.00 | 0.00 | O |
| ATOM | 727 | O2P  | G B | 5 | 4.408  | 6.248 | 75.023 | 1.00 | 0.00 | O |
| ATOM | 728 | P    | G B | 5 | 3.237  | 5.402 | 75.349 | 1.00 | 0.00 | P |
| ATOM | 729 | H1   | G B | 5 | 8.058  | 5.097 | 83.746 | 1.00 | 0.00 | H |
| ATOM | 730 | H8   | G B | 5 | 5.080  | 6.074 | 78.101 | 1.00 | 0.00 | H |
| ATOM | 731 | H1'  | G B | 5 | 2.787  | 5.927 | 81.259 | 1.00 | 0.00 | H |
| ATOM | 732 | H21  | G B | 5 | 6.581  | 4.872 | 85.352 | 1.00 | 0.00 | H |
| ATOM | 733 | H3'  | G B | 5 | 0.881  | 6.413 | 77.853 | 1.00 | 0.00 | H |
| ATOM | 734 | H22  | G B | 5 | 4.822  | 4.955 | 85.060 | 1.00 | 0.00 | H |
| ATOM | 735 | H4'  | G B | 5 | 0.782  | 3.988 | 78.911 | 1.00 | 0.00 | H |
| ATOM | 736 | H2'1 | G B | 5 | 3.126  | 7.024 | 78.452 | 1.00 | 0.00 | H |
| ATOM | 737 | H2'2 | G B | 5 | 2.232  | 7.713 | 79.800 | 1.00 | 0.00 | H |
| ATOM | 738 | H5'1 | G B | 5 | 2.948  | 3.291 | 77.665 | 1.00 | 0.00 | H |
| ATOM | 739 | H5'2 | G B | 5 | 1.545  | 3.889 | 76.752 | 1.00 | 0.00 | H |
| ATOM | 740 | C1'  | T B | 6 | 2.612  | 8.269 | 84.467 | 1.00 | 0.00 | C |
| ATOM | 741 | N1   | T B | 6 | 3.815  | 8.468 | 83.612 | 1.00 | 0.00 | N |
| ATOM | 742 | C2   | T B | 6 | 5.047  | 8.360 | 84.225 | 1.00 | 0.00 | C |
| ATOM | 743 | O2   | T B | 6 | 5.175  | 8.114 | 85.412 | 1.00 | 0.00 | O |
| ATOM | 744 | N3   | T B | 6 | 6.137  | 8.549 | 83.394 | 1.00 | 0.00 | N |
| ATOM | 745 | C4   | T B | 6 | 6.102  | 8.833 | 82.045 | 1.00 | 0.00 | C |
| ATOM | 746 | O4   | T B | 6 | 7.147  | 8.987 | 81.404 | 1.00 | 0.00 | O |
| ATOM | 747 | C5   | T B | 6 | 4.770  | 8.925 | 81.495 | 1.00 | 0.00 | C |
| ATOM | 748 | C6   | T B | 6 | 3.686  | 8.745 | 82.274 | 1.00 | 0.00 | C |
| ATOM | 749 | C7   | T B | 6 | 4.686  | 9.229 | 80.029 | 1.00 | 0.00 | C |
| ATOM | 750 | C2'  | T B | 6 | 1.453  | 9.194 | 84.116 | 1.00 | 0.00 | C |

|      |     |      |     |   |        |        |        |      |      |   |
|------|-----|------|-----|---|--------|--------|--------|------|------|---|
| ATOM | 751 | C3'  | T B | 6 | 0.249  | 8.299  | 84.367 | 1.00 | 0.00 | C |
| ATOM | 752 | O3'  | T B | 6 | -0.091 | 8.347  | 85.751 | 1.00 | 0.00 | O |
| ATOM | 753 | C4'  | T B | 6 | 0.754  | 6.922  | 83.943 | 1.00 | 0.00 | C |
| ATOM | 754 | O4'  | T B | 6 | 2.175  | 6.935  | 84.292 | 1.00 | 0.00 | O |
| ATOM | 755 | C5'  | T B | 6 | 0.621  | 6.579  | 82.477 | 1.00 | 0.00 | C |
| ATOM | 756 | O5'  | T B | 6 | 0.856  | 7.763  | 81.674 | 1.00 | 0.00 | O |
| ATOM | 757 | O1P  | T B | 6 | -1.381 | 8.198  | 80.607 | 1.00 | 0.00 | O |
| ATOM | 758 | O2P  | T B | 6 | 0.723  | 8.949  | 79.463 | 1.00 | 0.00 | O |
| ATOM | 759 | P    | T B | 6 | 0.042  | 7.942  | 80.314 | 1.00 | 0.00 | P |
| ATOM | 760 | H3   | T B | 6 | 7.069  | 8.471  | 83.827 | 1.00 | 0.00 | H |
| ATOM | 761 | H6   | T B | 6 | 2.691  | 8.820  | 81.835 | 1.00 | 0.00 | H |
| ATOM | 762 | H1'  | T B | 6 | 2.908  | 8.393  | 85.508 | 1.00 | 0.00 | H |
| ATOM | 763 | H3'  | T B | 6 | -0.614 | 8.601  | 83.774 | 1.00 | 0.00 | H |
| ATOM | 764 | H4'  | T B | 6 | 0.182  | 6.186  | 84.509 | 1.00 | 0.00 | H |
| ATOM | 765 | H71  | T B | 6 | 4.226  | 10.207 | 79.886 | 1.00 | 0.00 | H |
| ATOM | 766 | H72  | T B | 6 | 5.688  | 9.233  | 79.598 | 1.00 | 0.00 | H |
| ATOM | 767 | H73  | T B | 6 | 4.081  | 8.469  | 79.532 | 1.00 | 0.00 | H |
| ATOM | 768 | H2'1 | T B | 6 | 1.489  | 9.529  | 83.082 | 1.00 | 0.00 | H |
| ATOM | 769 | H2'2 | T B | 6 | 1.426  | 10.081 | 84.749 | 1.00 | 0.00 | H |
| ATOM | 770 | H5'1 | T B | 6 | 1.348  | 5.809  | 82.221 | 1.00 | 0.00 | H |
| ATOM | 771 | H5'2 | T B | 6 | -0.384 | 6.201  | 82.288 | 1.00 | 0.00 | H |
| ATOM | 772 | C1'  | C B | 7 | 4.387  | 10.696 | 88.419 | 1.00 | 0.00 | C |
| ATOM | 773 | N1   | C B | 7 | 4.826  | 11.068 | 87.043 | 1.00 | 0.00 | N |
| ATOM | 774 | C2   | C B | 7 | 6.194  | 11.154 | 86.797 | 1.00 | 0.00 | C |
| ATOM | 775 | O2   | C B | 7 | 6.985  | 10.919 | 87.720 | 1.00 | 0.00 | O |
| ATOM | 776 | N3   | C B | 7 | 6.614  | 11.489 | 85.552 | 1.00 | 0.00 | N |
| ATOM | 777 | C4   | C B | 7 | 5.735  | 11.738 | 84.574 | 1.00 | 0.00 | C |
| ATOM | 778 | N4   | C B | 7 | 6.201  | 12.059 | 83.376 | 1.00 | 0.00 | N |
| ATOM | 779 | C5   | C B | 7 | 4.321  | 11.662 | 84.800 | 1.00 | 0.00 | C |
| ATOM | 780 | C6   | C B | 7 | 3.922  | 11.316 | 86.060 | 1.00 | 0.00 | C |
| ATOM | 781 | C2'  | C B | 7 | 3.142  | 11.435 | 88.885 | 1.00 | 0.00 | C |
| ATOM | 782 | C3'  | C B | 7 | 2.435  | 10.373 | 89.711 | 1.00 | 0.00 | C |
| ATOM | 783 | O3'  | C B | 7 | 2.969  | 10.374 | 91.032 | 1.00 | 0.00 | O |
| ATOM | 784 | C4'  | C B | 7 | 2.760  | 9.085  | 88.958 | 1.00 | 0.00 | C |
| ATOM | 785 | O4'  | C B | 7 | 4.100  | 9.310  | 88.418 | 1.00 | 0.00 | O |
| ATOM | 786 | C5'  | C B | 7 | 1.834  | 8.720  | 87.819 | 1.00 | 0.00 | C |
| ATOM | 787 | O5'  | C B | 7 | 1.407  | 9.924  | 87.133 | 1.00 | 0.00 | O |
| ATOM | 788 | O1P  | C B | 7 | -1.063 | 10.016 | 87.602 | 1.00 | 0.00 | O |
| ATOM | 789 | O2P  | C B | 7 | -0.143 | 11.068 | 85.520 | 1.00 | 0.00 | O |
| ATOM | 790 | P    | C B | 7 | -0.064 | 9.975  | 86.517 | 1.00 | 0.00 | P |
| ATOM | 791 | H5   | C B | 7 | 3.603  | 11.869 | 84.007 | 1.00 | 0.00 | H |
| ATOM | 792 | H6   | C B | 7 | 2.857  | 11.237 | 86.279 | 1.00 | 0.00 | H |
| ATOM | 793 | H1'  | C B | 7 | 5.223  | 10.865 | 89.099 | 1.00 | 0.00 | H |
| ATOM | 794 | H3'  | C B | 7 | 1.357  | 10.541 | 89.757 | 1.00 | 0.00 | H |
| ATOM | 795 | H4'  | C B | 7 | 2.724  | 8.274  | 89.686 | 1.00 | 0.00 | H |
| ATOM | 796 | H41  | C B | 7 | 5.546  | 12.252 | 82.603 | 1.00 | 0.00 | H |
| ATOM | 797 | H42  | C B | 7 | 7.218  | 12.116 | 83.216 | 1.00 | 0.00 | H |
| ATOM | 798 | H2'1 | C B | 7 | 2.523  | 11.769 | 88.054 | 1.00 | 0.00 | H |
| ATOM | 799 | H2'2 | C B | 7 | 3.384  | 12.312 | 89.489 | 1.00 | 0.00 | H |
| ATOM | 800 | H5'1 | C B | 7 | 2.363  | 8.067  | 87.124 | 1.00 | 0.00 | H |
| ATOM | 801 | H5'2 | C B | 7 | 0.968  | 8.196  | 88.216 | 1.00 | 0.00 | H |
| ATOM | 802 | C1'  | C B | 8 | 7.775  | 13.365 | 90.854 | 1.00 | 0.00 | C |
| ATOM | 803 | N1   | C B | 8 | 7.296  | 13.793 | 89.511 | 1.00 | 0.00 | N |
| ATOM | 804 | C2   | C B | 8 | 8.252  | 14.080 | 88.538 | 1.00 | 0.00 | C |



|      |     |      |     |   |        |        |        |      |      |   |
|------|-----|------|-----|---|--------|--------|--------|------|------|---|
| ATOM | 805 | O2   | C B | 8 | 9.451  | 13.968 | 88.827 | 1.00 | 0.00 | O |
| ATOM | 806 | N3   | C B | 8 | 7.837  | 14.471 | 87.310 | 1.00 | 0.00 | N |
| ATOM | 807 | C4   | C B | 8 | 6.532  | 14.584 | 87.026 | 1.00 | 0.00 | C |
| ATOM | 808 | N4   | C B | 8 | 6.183  | 14.968 | 85.807 | 1.00 | 0.00 | N |
| ATOM | 809 | C5   | C B | 8 | 5.526  | 14.301 | 88.008 | 1.00 | 0.00 | C |
| ATOM | 810 | C6   | C B | 8 | 5.968  | 13.904 | 89.238 | 1.00 | 0.00 | C |
| ATOM | 811 | C2'  | C B | 8 | 6.944  | 13.916 | 92.005 | 1.00 | 0.00 | C |
| ATOM | 812 | C3'  | C B | 8 | 6.974  | 12.761 | 92.996 | 1.00 | 0.00 | C |
| ATOM | 813 | O3'  | C B | 8 | 8.165  | 12.845 | 93.775 | 1.00 | 0.00 | O |
| ATOM | 814 | C4'  | C B | 8 | 6.961  | 11.534 | 92.088 | 1.00 | 0.00 | C |
| ATOM | 815 | O4'  | C B | 8 | 7.709  | 11.953 | 90.903 | 1.00 | 0.00 | O |
| ATOM | 816 | C5'  | C B | 8 | 5.604  | 11.034 | 91.651 | 1.00 | 0.00 | C |
| ATOM | 817 | O5'  | C B | 8 | 4.716  | 12.160 | 91.430 | 1.00 | 0.00 | O |
| ATOM | 818 | O1P  | C B | 8 | 2.974  | 11.889 | 93.226 | 1.00 | 0.00 | O |
| ATOM | 819 | O2P  | C B | 8 | 2.396  | 13.059 | 91.083 | 1.00 | 0.00 | O |
| ATOM | 820 | P    | C B | 8 | 3.168  | 11.992 | 91.766 | 1.00 | 0.00 | P |
| ATOM | 821 | H5   | C B | 8 | 4.463  | 14.399 | 87.784 | 1.00 | 0.00 | H |
| ATOM | 822 | H6   | C B | 8 | 5.240  | 13.671 | 90.016 | 1.00 | 0.00 | H |
| ATOM | 823 | H1'  | C B | 8 | 8.821  | 13.658 | 90.952 | 1.00 | 0.00 | H |
| ATOM | 824 | H3'  | C B | 8 | 6.107  | 12.770 | 93.658 | 1.00 | 0.00 | H |
| ATOM | 825 | H4'  | C B | 8 | 7.448  | 10.729 | 92.639 | 1.00 | 0.00 | H |
| ATOM | 826 | H41  | C B | 8 | 5.186  | 15.060 | 85.561 | 1.00 | 0.00 | H |
| ATOM | 827 | H42  | C B | 8 | 6.908  | 15.173 | 85.102 | 1.00 | 0.00 | H |
| ATOM | 828 | H2'1 | C B | 8 | 5.923  | 14.152 | 91.703 | 1.00 | 0.00 | H |
| ATOM | 829 | H2'2 | C B | 8 | 7.378  | 14.820 | 92.434 | 1.00 | 0.00 | H |
| ATOM | 830 | H5'1 | C B | 8 | 5.712  | 10.465 | 90.729 | 1.00 | 0.00 | H |
| ATOM | 831 | H5'2 | C B | 8 | 5.193  | 10.389 | 92.427 | 1.00 | 0.00 | H |
| ATOM | 832 | C1'  | T B | 9 | 11.587 | 16.505 | 91.168 | 1.00 | 0.00 | C |
| ATOM | 833 | N1   | T B | 9 | 10.392 | 16.860 | 90.358 | 1.00 | 0.00 | N |
| ATOM | 834 | C2   | T B | 9 | 10.610 | 17.274 | 89.059 | 1.00 | 0.00 | C |
| ATOM | 835 | O2   | T B | 9 | 11.724 | 17.355 | 88.573 | 1.00 | 0.00 | O |
| ATOM | 836 | N3   | T B | 9 | 9.473  | 17.592 | 88.343 | 1.00 | 0.00 | N |
| ATOM | 837 | C4   | T B | 9 | 8.172  | 17.538 | 88.799 | 1.00 | 0.00 | C |
| ATOM | 838 | O4   | T B | 9 | 7.230  | 17.852 | 88.062 | 1.00 | 0.00 | O |
| ATOM | 839 | C5   | T B | 9 | 8.044  | 17.092 | 90.167 | 1.00 | 0.00 | C |
| ATOM | 840 | C6   | T B | 9 | 9.132  | 16.774 | 90.895 | 1.00 | 0.00 | C |
| ATOM | 841 | C7   | T B | 9 | 6.645  | 17.016 | 90.704 | 1.00 | 0.00 | C |
| ATOM | 842 | C2'  | T B | 9 | 11.488 | 16.928 | 92.629 | 1.00 | 0.00 | C |
| ATOM | 843 | C3'  | T B | 9 | 12.208 | 15.791 | 93.338 | 1.00 | 0.00 | C |
| ATOM | 844 | O3'  | T B | 9 | 13.610 | 16.047 | 93.330 | 1.00 | 0.00 | O |
| ATOM | 845 | C4'  | T B | 9 | 11.835 | 14.574 | 92.494 | 1.00 | 0.00 | C |
| ATOM | 846 | O4'  | T B | 9 | 11.734 | 15.099 | 91.132 | 1.00 | 0.00 | O |
| ATOM | 847 | C5'  | T B | 9 | 10.538 | 13.884 | 92.845 | 1.00 | 0.00 | C |
| ATOM | 848 | O5'  | T B | 9 | 9.553  | 14.869 | 93.247 | 1.00 | 0.00 | O |
| ATOM | 849 | O1P  | T B | 9 | 9.166  | 14.349 | 95.679 | 1.00 | 0.00 | O |
| ATOM | 850 | O2P  | T B | 9 | 7.349  | 15.424 | 94.321 | 1.00 | 0.00 | O |
| ATOM | 851 | P    | T B | 9 | 8.491  | 14.478 | 94.371 | 1.00 | 0.00 | P |
| ATOM | 852 | H3   | T B | 9 | 9.608  | 17.900 | 87.370 | 1.00 | 0.00 | H |
| ATOM | 853 | H6   | T B | 9 | 9.009  | 16.442 | 91.926 | 1.00 | 0.00 | H |
| ATOM | 854 | H1'  | T B | 9 | 12.465 | 16.945 | 90.694 | 1.00 | 0.00 | H |
| ATOM | 855 | H3'  | T B | 9 | 11.868 | 15.676 | 94.367 | 1.00 | 0.00 | H |
| ATOM | 856 | H4'  | T B | 9 | 12.641 | 13.849 | 92.612 | 1.00 | 0.00 | H |
| ATOM | 857 | H71  | T B | 9 | 6.521  | 17.749 | 91.500 | 1.00 | 0.00 | H |
| ATOM | 858 | H72  | T B | 9 | 5.936  | 17.225 | 89.903 | 1.00 | 0.00 | H |

|      |     |      |     |    |        |        |        |      |      |   |
|------|-----|------|-----|----|--------|--------|--------|------|------|---|
| ATOM | 859 | H73  | T B | 9  | 6.462  | 16.016 | 91.098 | 1.00 | 0.00 | H |
| ATOM | 860 | H2'1 | T B | 9  | 10.456 | 17.015 | 92.964 | 1.00 | 0.00 | H |
| ATOM | 861 | H2'2 | T B | 9  | 11.976 | 17.885 | 92.816 | 1.00 | 0.00 | H |
| ATOM | 862 | H5'1 | T B | 9  | 10.177 | 13.334 | 91.976 | 1.00 | 0.00 | H |
| ATOM | 863 | H5'2 | T B | 9  | 10.714 | 13.187 | 93.662 | 1.00 | 0.00 | H |
| ATOM | 864 | C1'  | A B | 10 | 14.475 | 20.179 | 89.496 | 1.00 | 0.00 | C |
| ATOM | 865 | N1   | A B | 10 | 10.279 | 21.525 | 86.865 | 1.00 | 0.00 | N |
| ATOM | 866 | C2   | A B | 10 | 11.567 | 21.469 | 86.537 | 1.00 | 0.00 | C |
| ATOM | 867 | N3   | A B | 10 | 12.601 | 21.109 | 87.265 | 1.00 | 0.00 | N |
| ATOM | 868 | C4   | A B | 10 | 12.203 | 20.771 | 88.505 | 1.00 | 0.00 | C |
| ATOM | 869 | C5   | A B | 10 | 10.927 | 20.774 | 89.000 | 1.00 | 0.00 | C |
| ATOM | 870 | C6   | A B | 10 | 9.912  | 21.181 | 88.110 | 1.00 | 0.00 | C |
| ATOM | 871 | N6   | A B | 10 | 8.613  | 21.233 | 88.453 | 1.00 | 0.00 | N |
| ATOM | 872 | N7   | A B | 10 | 10.902 | 20.362 | 90.321 | 1.00 | 0.00 | N |
| ATOM | 873 | C8   | A B | 10 | 12.151 | 20.126 | 90.597 | 1.00 | 0.00 | C |
| ATOM | 874 | N9   | A B | 10 | 12.998 | 20.348 | 89.542 | 1.00 | 0.00 | N |
| ATOM | 875 | C2'  | A B | 10 | 15.179 | 20.583 | 90.784 | 1.00 | 0.00 | C |
| ATOM | 876 | C3'  | A B | 10 | 16.310 | 19.570 | 90.861 | 1.00 | 0.00 | C |
| ATOM | 877 | O3'  | A B | 10 | 17.407 | 20.033 | 90.076 | 1.00 | 0.00 | O |
| ATOM | 878 | C4'  | A B | 10 | 15.675 | 18.309 | 90.275 | 1.00 | 0.00 | C |
| ATOM | 879 | O4'  | A B | 10 | 14.744 | 18.809 | 89.263 | 1.00 | 0.00 | O |
| ATOM | 880 | C5'  | A B | 10 | 14.914 | 17.431 | 91.241 | 1.00 | 0.00 | C |
| ATOM | 881 | O5'  | A B | 10 | 14.224 | 18.257 | 92.213 | 1.00 | 0.00 | O |
| ATOM | 882 | O1P  | A B | 10 | 15.372 | 17.688 | 94.380 | 1.00 | 0.00 | O |
| ATOM | 883 | O2P  | A B | 10 | 12.989 | 18.476 | 94.392 | 1.00 | 0.00 | O |
| ATOM | 884 | P    | A B | 10 | 14.061 | 17.714 | 93.705 | 1.00 | 0.00 | P |
| ATOM | 885 | H2   | A B | 10 | 11.798 | 21.765 | 85.514 | 1.00 | 0.00 | H |
| ATOM | 886 | H8   | A B | 10 | 12.490 | 19.782 | 91.573 | 1.00 | 0.00 | H |
| ATOM | 887 | H1'  | A B | 10 | 14.857 | 20.747 | 88.647 | 1.00 | 0.00 | H |
| ATOM | 888 | H3'  | A B | 10 | 16.641 | 19.405 | 91.885 | 1.00 | 0.00 | H |
| ATOM | 889 | H4'  | A B | 10 | 16.484 | 17.714 | 89.852 | 1.00 | 0.00 | H |
| ATOM | 890 | H61  | A B | 10 | 7.910  | 21.534 | 87.764 | 1.00 | 0.00 | H |
| ATOM | 891 | H62  | A B | 10 | 8.322  | 20.971 | 89.407 | 1.00 | 0.00 | H |
| ATOM | 892 | H2'1 | A B | 10 | 14.526 | 20.514 | 91.653 | 1.00 | 0.00 | H |
| ATOM | 893 | H2'2 | A B | 10 | 15.563 | 21.604 | 90.742 | 1.00 | 0.00 | H |
| ATOM | 894 | H5'1 | A B | 10 | 14.190 | 16.833 | 90.687 | 1.00 | 0.00 | H |
| ATOM | 895 | H5'2 | A B | 10 | 15.612 | 16.770 | 91.750 | 1.00 | 0.00 | H |
| ATOM | 896 | C1'  | G B | 11 | 15.380 | 24.238 | 86.785 | 1.00 | 0.00 | C |
| ATOM | 897 | N1   | G B | 11 | 10.339 | 24.933 | 87.147 | 1.00 | 0.00 | N |
| ATOM | 898 | C2   | G B | 11 | 11.183 | 25.092 | 86.062 | 1.00 | 0.00 | C |
| ATOM | 899 | N2   | G B | 11 | 10.605 | 25.490 | 84.922 | 1.00 | 0.00 | N |
| ATOM | 900 | N3   | G B | 11 | 12.494 | 24.870 | 86.110 | 1.00 | 0.00 | N |
| ATOM | 901 | C4   | G B | 11 | 12.906 | 24.480 | 87.344 | 1.00 | 0.00 | C |
| ATOM | 902 | C5   | G B | 11 | 12.142 | 24.300 | 88.483 | 1.00 | 0.00 | C |
| ATOM | 903 | C6   | G B | 11 | 10.748 | 24.532 | 88.434 | 1.00 | 0.00 | C |
| ATOM | 904 | O6   | G B | 11 | 9.911  | 24.428 | 89.331 | 1.00 | 0.00 | O |
| ATOM | 905 | N7   | G B | 11 | 12.950 | 23.894 | 89.548 | 1.00 | 0.00 | N |
| ATOM | 906 | C8   | G B | 11 | 14.152 | 23.839 | 89.032 | 1.00 | 0.00 | C |
| ATOM | 907 | N9   | G B | 11 | 14.206 | 24.184 | 87.697 | 1.00 | 0.00 | N |
| ATOM | 908 | C2'  | G B | 11 | 16.650 | 24.752 | 87.450 | 1.00 | 0.00 | C |
| ATOM | 909 | C3'  | G B | 11 | 17.724 | 23.920 | 86.771 | 1.00 | 0.00 | C |
| ATOM | 910 | O3'  | G B | 11 | 18.084 | 24.540 | 85.537 | 1.00 | 0.00 | O |
| ATOM | 911 | C4'  | G B | 11 | 17.031 | 22.575 | 86.560 | 1.00 | 0.00 | C |
| ATOM | 912 | O4'  | G B | 11 | 15.631 | 22.926 | 86.324 | 1.00 | 0.00 | O |

|      |     |      |     |    |        |        |        |      |      |   |
|------|-----|------|-----|----|--------|--------|--------|------|------|---|
| ATOM | 913 | C5'  | G B | 11 | 17.099 | 21.599 | 87.711 | 1.00 | 0.00 | C |
| ATOM | 914 | O5'  | G B | 11 | 17.016 | 22.316 | 88.967 | 1.00 | 0.00 | O |
| ATOM | 915 | O1P  | G B | 11 | 19.277 | 21.936 | 90.004 | 1.00 | 0.00 | O |
| ATOM | 916 | O2P  | G B | 11 | 17.281 | 22.355 | 91.465 | 1.00 | 0.00 | O |
| ATOM | 917 | P    | G B | 11 | 17.829 | 21.760 | 90.223 | 1.00 | 0.00 | P |
| ATOM | 918 | H1   | G B | 11 | 9.337  | 25.125 | 87.003 | 1.00 | 0.00 | H |
| ATOM | 919 | H8   | G B | 11 | 15.030 | 23.551 | 89.607 | 1.00 | 0.00 | H |
| ATOM | 920 | H1'  | G B | 11 | 15.115 | 24.852 | 85.923 | 1.00 | 0.00 | H |
| ATOM | 921 | H21  | G B | 11 | 9.589  | 25.657 | 84.889 | 1.00 | 0.00 | H |
| ATOM | 922 | H3'  | G B | 11 | 18.613 | 23.811 | 87.392 | 1.00 | 0.00 | H |
| ATOM | 923 | H22  | G B | 11 | 11.177 | 25.630 | 84.076 | 1.00 | 0.00 | H |
| ATOM | 924 | H4'  | G B | 11 | 17.505 | 22.106 | 85.696 | 1.00 | 0.00 | H |
| ATOM | 925 | H2'1 | G B | 11 | 16.645 | 24.589 | 88.529 | 1.00 | 0.00 | H |
| ATOM | 926 | H2'2 | G B | 11 | 16.804 | 25.816 | 87.279 | 1.00 | 0.00 | H |
| ATOM | 927 | H5'1 | G B | 11 | 16.269 | 20.895 | 87.632 | 1.00 | 0.00 | H |
| ATOM | 928 | H5'2 | G B | 11 | 18.040 | 21.051 | 87.659 | 1.00 | 0.00 | H |
| ATOM | 929 | C1'  | G B | 12 | 14.086 | 28.375 | 84.389 | 1.00 | 0.00 | C |
| ATOM | 930 | N1   | G B | 12 | 10.127 | 28.321 | 87.607 | 1.00 | 0.00 | N |
| ATOM | 931 | C2   | G B | 12 | 10.167 | 28.599 | 86.251 | 1.00 | 0.00 | C |
| ATOM | 932 | N2   | G B | 12 | 8.995  | 28.905 | 85.677 | 1.00 | 0.00 | N |
| ATOM | 933 | N3   | G B | 12 | 11.284 | 28.573 | 85.526 | 1.00 | 0.00 | N |
| ATOM | 934 | C4   | G B | 12 | 12.374 | 28.252 | 86.272 | 1.00 | 0.00 | C |
| ATOM | 935 | C5   | G B | 12 | 12.431 | 27.963 | 87.624 | 1.00 | 0.00 | C |
| ATOM | 936 | C6   | G B | 12 | 11.245 | 27.987 | 88.393 | 1.00 | 0.00 | C |
| ATOM | 937 | O6   | G B | 12 | 11.094 | 27.764 | 89.594 | 1.00 | 0.00 | O |
| ATOM | 938 | N7   | G B | 12 | 13.744 | 27.684 | 88.004 | 1.00 | 0.00 | N |
| ATOM | 939 | C8   | G B | 12 | 14.428 | 27.806 | 86.895 | 1.00 | 0.00 | C |
| ATOM | 940 | N9   | G B | 12 | 13.665 | 28.150 | 85.798 | 1.00 | 0.00 | N |
| ATOM | 941 | C2'  | G B | 12 | 15.433 | 29.071 | 84.255 | 1.00 | 0.00 | C |
| ATOM | 942 | C3'  | G B | 12 | 16.015 | 28.405 | 83.019 | 1.00 | 0.00 | C |
| ATOM | 943 | O3'  | G B | 12 | 15.524 | 29.067 | 81.856 | 1.00 | 0.00 | O |
| ATOM | 944 | C4'  | G B | 12 | 15.497 | 26.973 | 83.130 | 1.00 | 0.00 | C |
| ATOM | 945 | O4'  | G B | 12 | 14.185 | 27.112 | 83.762 | 1.00 | 0.00 | O |
| ATOM | 946 | C5'  | G B | 12 | 16.331 | 26.020 | 83.955 | 1.00 | 0.00 | C |
| ATOM | 947 | O5'  | G B | 12 | 16.897 | 26.720 | 85.090 | 1.00 | 0.00 | O |
| ATOM | 948 | O1P  | G B | 12 | 19.370 | 26.680 | 84.623 | 1.00 | 0.00 | O |
| ATOM | 949 | O2P  | G B | 12 | 18.542 | 26.805 | 86.988 | 1.00 | 0.00 | O |
| ATOM | 950 | P    | G B | 12 | 18.345 | 26.293 | 85.610 | 1.00 | 0.00 | P |
| ATOM | 951 | H1   | G B | 12 | 9.208  | 28.363 | 88.074 | 1.00 | 0.00 | H |
| ATOM | 952 | H8   | G B | 12 | 15.505 | 27.650 | 86.840 | 1.00 | 0.00 | H |
| ATOM | 953 | H1'  | G B | 12 | 13.302 | 28.940 | 83.885 | 1.00 | 0.00 | H |
| ATOM | 954 | H21  | G B | 12 | 8.135  | 28.919 | 86.242 | 1.00 | 0.00 | H |
| ATOM | 955 | H3'  | G B | 12 | 17.105 | 28.430 | 83.015 | 1.00 | 0.00 | H |
| ATOM | 956 | H22  | G B | 12 | 8.958  | 29.125 | 84.672 | 1.00 | 0.00 | H |
| ATOM | 957 | H4'  | G B | 12 | 15.442 | 26.576 | 82.117 | 1.00 | 0.00 | H |
| ATOM | 958 | H2'1 | G B | 12 | 16.069 | 28.913 | 85.127 | 1.00 | 0.00 | H |
| ATOM | 959 | H2'2 | G B | 12 | 15.331 | 30.147 | 84.116 | 1.00 | 0.00 | H |
| ATOM | 960 | H5'1 | G B | 12 | 15.700 | 25.202 | 84.303 | 1.00 | 0.00 | H |
| ATOM | 961 | H5'2 | G B | 12 | 17.131 | 25.616 | 83.333 | 1.00 | 0.00 | H |
| ATOM | 962 | C1'  | T B | 13 | 11.171 | 32.271 | 83.482 | 1.00 | 0.00 | C |
| ATOM | 963 | N1   | T B | 13 | 11.637 | 31.992 | 84.866 | 1.00 | 0.00 | N |
| ATOM | 964 | C2   | T B | 13 | 10.678 | 31.947 | 85.858 | 1.00 | 0.00 | C |
| ATOM | 965 | O2   | T B | 13 | 9.493  | 32.126 | 85.637 | 1.00 | 0.00 | O |
| ATOM | 966 | N3   | T B | 13 | 11.155 | 31.685 | 87.128 | 1.00 | 0.00 | N |

|      |      |      |     |    |        |        |        |      |      |   |
|------|------|------|-----|----|--------|--------|--------|------|------|---|
| ATOM | 967  | C4   | T B | 13 | 12.471 | 31.471 | 87.485 | 1.00 | 0.00 | C |
| ATOM | 968  | O4   | T B | 13 | 12.779 | 31.248 | 88.661 | 1.00 | 0.00 | O |
| ATOM | 969  | C5   | T B | 13 | 13.401 | 31.536 | 86.381 | 1.00 | 0.00 | C |
| ATOM | 970  | C6   | T B | 13 | 12.970 | 31.790 | 85.129 | 1.00 | 0.00 | C |
| ATOM | 971  | C7   | T B | 13 | 14.843 | 31.308 | 86.721 | 1.00 | 0.00 | C |
| ATOM | 972  | C2'  | T B | 13 | 12.119 | 33.155 | 82.680 | 1.00 | 0.00 | C |
| ATOM | 973  | C3'  | T B | 13 | 11.985 | 32.574 | 81.280 | 1.00 | 0.00 | C |
| ATOM | 974  | O3'  | T B | 13 | 10.853 | 33.156 | 80.639 | 1.00 | 0.00 | O |
| ATOM | 975  | C4'  | T B | 13 | 11.797 | 31.083 | 81.546 | 1.00 | 0.00 | C |
| ATOM | 976  | O4'  | T B | 13 | 11.055 | 31.033 | 82.807 | 1.00 | 0.00 | O |
| ATOM | 977  | C5'  | T B | 13 | 13.058 | 30.262 | 81.695 | 1.00 | 0.00 | C |
| ATOM | 978  | O5'  | T B | 13 | 14.071 | 31.042 | 82.379 | 1.00 | 0.00 | O |
| ATOM | 979  | O1P  | T B | 13 | 15.845 | 31.359 | 80.622 | 1.00 | 0.00 | O |
| ATOM | 980  | O2P  | T B | 13 | 16.470 | 31.370 | 83.053 | 1.00 | 0.00 | O |
| ATOM | 981  | P    | T B | 13 | 15.600 | 30.830 | 81.979 | 1.00 | 0.00 | P |
| ATOM | 982  | H3   | T B | 13 | 10.458 | 31.643 | 87.886 | 1.00 | 0.00 | H |
| ATOM | 983  | H6   | T B | 13 | 13.690 | 31.834 | 84.312 | 1.00 | 0.00 | H |
| ATOM | 984  | H1'  | T B | 13 | 10.178 | 32.716 | 83.538 | 1.00 | 0.00 | H |
| ATOM | 985  | H3'  | T B | 13 | 12.875 | 32.758 | 80.678 | 1.00 | 0.00 | H |
| ATOM | 986  | H4'  | T B | 13 | 11.235 | 30.679 | 80.704 | 1.00 | 0.00 | H |
| ATOM | 987  | H71  | T B | 13 | 15.408 | 32.223 | 86.545 | 1.00 | 0.00 | H |
| ATOM | 988  | H72  | T B | 13 | 14.927 | 31.026 | 87.772 | 1.00 | 0.00 | H |
| ATOM | 989  | H73  | T B | 13 | 15.242 | 30.508 | 86.097 | 1.00 | 0.00 | H |
| ATOM | 990  | H2'1 | T B | 13 | 13.145 | 33.093 | 83.039 | 1.00 | 0.00 | H |
| ATOM | 991  | H2'2 | T B | 13 | 11.826 | 34.204 | 82.704 | 1.00 | 0.00 | H |
| ATOM | 992  | H5'1 | T B | 13 | 12.833 | 29.362 | 82.268 | 1.00 | 0.00 | H |
| ATOM | 993  | H5'2 | T B | 13 | 13.416 | 29.978 | 80.707 | 1.00 | 0.00 | H |
| ATOM | 994  | C1'  | G B | 14 | 7.802  | 35.688 | 84.758 | 1.00 | 0.00 | C |
| ATOM | 995  | N1   | G B | 14 | 9.579  | 34.881 | 89.471 | 1.00 | 0.00 | N |
| ATOM | 996  | C2   | G B | 14 | 8.278  | 35.036 | 89.029 | 1.00 | 0.00 | C |
| ATOM | 997  | N2   | G B | 14 | 7.324  | 34.971 | 89.964 | 1.00 | 0.00 | N |
| ATOM | 998  | N3   | G B | 14 | 7.956  | 35.241 | 87.752 | 1.00 | 0.00 | N |
| ATOM | 999  | C4   | G B | 14 | 9.048  | 35.286 | 86.943 | 1.00 | 0.00 | C |
| ATOM | 1000 | C5   | G B | 14 | 10.379 | 35.146 | 87.297 | 1.00 | 0.00 | C |
| ATOM | 1001 | C6   | G B | 14 | 10.723 | 34.924 | 88.650 | 1.00 | 0.00 | C |
| ATOM | 1002 | O6   | G B | 14 | 11.838 | 34.777 | 89.154 | 1.00 | 0.00 | O |
| ATOM | 1003 | N7   | G B | 14 | 11.193 | 35.258 | 86.166 | 1.00 | 0.00 | N |
| ATOM | 1004 | C8   | G B | 14 | 10.348 | 35.455 | 85.187 | 1.00 | 0.00 | C |
| ATOM | 1005 | N9   | G B | 14 | 9.025  | 35.486 | 85.581 | 1.00 | 0.00 | N |
| ATOM | 1006 | C2'  | G B | 14 | 7.978  | 36.699 | 83.633 | 1.00 | 0.00 | C |
| ATOM | 1007 | C3'  | G B | 14 | 7.118  | 36.103 | 82.531 | 1.00 | 0.00 | C |
| ATOM | 1008 | O3'  | G B | 14 | 5.765  | 36.504 | 82.722 | 1.00 | 0.00 | O |
| ATOM | 1009 | C4'  | G B | 14 | 7.309  | 34.598 | 82.730 | 1.00 | 0.00 | C |
| ATOM | 1010 | O4'  | G B | 14 | 7.465  | 34.444 | 84.175 | 1.00 | 0.00 | O |
| ATOM | 1011 | C5'  | G B | 14 | 8.503  | 33.977 | 82.045 | 1.00 | 0.00 | C |
| ATOM | 1012 | O5'  | G B | 14 | 9.620  | 34.899 | 82.073 | 1.00 | 0.00 | O |
| ATOM | 1013 | O1P  | G B | 14 | 9.963  | 35.472 | 79.646 | 1.00 | 0.00 | O |
| ATOM | 1014 | O2P  | G B | 14 | 11.892 | 35.584 | 81.246 | 1.00 | 0.00 | O |
| ATOM | 1015 | P    | G B | 14 | 10.631 | 34.919 | 80.839 | 1.00 | 0.00 | P |
| ATOM | 1016 | H1   | G B | 14 | 9.722  | 34.720 | 90.481 | 1.00 | 0.00 | H |
| ATOM | 1017 | H8   | G B | 14 | 10.663 | 35.584 | 84.151 | 1.00 | 0.00 | H |
| ATOM | 1018 | H1'  | G B | 14 | 6.987  | 35.979 | 85.421 | 1.00 | 0.00 | H |
| ATOM | 1019 | H21  | G B | 14 | 7.583  | 34.809 | 90.949 | 1.00 | 0.00 | H |
| ATOM | 1020 | H3'  | G B | 14 | 7.452  | 36.413 | 81.541 | 1.00 | 0.00 | H |

|      |      |      |     |    |        |        |        |      |      |   |
|------|------|------|-----|----|--------|--------|--------|------|------|---|
| ATOM | 1021 | H22  | G B | 14 | 6.335  | 35.083 | 89.700 | 1.00 | 0.00 | H |
| ATOM | 1022 | H4'  | G B | 14 | 6.413  | 34.113 | 82.343 | 1.00 | 0.00 | H |
| ATOM | 1023 | H2'1 | G B | 14 | 9.017  | 36.792 | 83.321 | 1.00 | 0.00 | H |
| ATOM | 1024 | H2'2 | G B | 14 | 7.630  | 37.693 | 83.913 | 1.00 | 0.00 | H |
| ATOM | 1025 | H5'1 | G B | 14 | 8.772  | 33.057 | 82.562 | 1.00 | 0.00 | H |
| ATOM | 1026 | H5'2 | G B | 14 | 8.242  | 33.745 | 81.013 | 1.00 | 0.00 | H |
| ATOM | 1027 | C1'  | C B | 15 | 5.386  | 38.578 | 87.974 | 1.00 | 0.00 | C |
| ATOM | 1028 | N1   | C B | 15 | 6.874  | 38.559 | 87.942 | 1.00 | 0.00 | N |
| ATOM | 1029 | C2   | C B | 15 | 7.551  | 38.352 | 89.143 | 1.00 | 0.00 | C |
| ATOM | 1030 | O2   | C B | 15 | 6.892  | 38.192 | 90.179 | 1.00 | 0.00 | O |
| ATOM | 1031 | N3   | C B | 15 | 8.906  | 38.331 | 89.135 | 1.00 | 0.00 | N |
| ATOM | 1032 | C4   | C B | 15 | 9.591  | 38.508 | 87.998 | 1.00 | 0.00 | C |
| ATOM | 1033 | N4   | C B | 15 | 10.913 | 38.475 | 88.048 | 1.00 | 0.00 | N |
| ATOM | 1034 | C5   | C B | 15 | 8.921  | 38.728 | 86.749 | 1.00 | 0.00 | C |
| ATOM | 1035 | C6   | C B | 15 | 7.557  | 38.739 | 86.779 | 1.00 | 0.00 | C |
| ATOM | 1036 | C2'  | C B | 15 | 4.766  | 39.605 | 87.038 | 1.00 | 0.00 | C |
| ATOM | 1037 | C3'  | C B | 15 | 3.510  | 38.885 | 86.566 | 1.00 | 0.00 | C |
| ATOM | 1038 | O3'  | C B | 15 | 2.470  | 39.084 | 87.521 | 1.00 | 0.00 | O |
| ATOM | 1039 | C4'  | C B | 15 | 3.960  | 37.428 | 86.495 | 1.00 | 0.00 | C |
| ATOM | 1040 | O4'  | C B | 15 | 4.932  | 37.296 | 87.580 | 1.00 | 0.00 | O |
| ATOM | 1041 | C5'  | C B | 15 | 4.616  | 36.990 | 85.205 | 1.00 | 0.00 | C |
| ATOM | 1042 | O5'  | C B | 15 | 5.425  | 38.069 | 84.677 | 1.00 | 0.00 | O |
| ATOM | 1043 | O1P  | C B | 15 | 4.250  | 38.687 | 82.537 | 1.00 | 0.00 | O |
| ATOM | 1044 | O2P  | C B | 15 | 6.716  | 39.085 | 82.773 | 1.00 | 0.00 | O |
| ATOM | 1045 | P    | C B | 15 | 5.542  | 38.238 | 83.095 | 1.00 | 0.00 | P |
| ATOM | 1046 | H5   | C B | 15 | 9.476  | 38.878 | 85.822 | 1.00 | 0.00 | H |
| ATOM | 1047 | H6   | C B | 15 | 7.003  | 38.896 | 85.854 | 1.00 | 0.00 | H |
| ATOM | 1048 | H1'  | C B | 15 | 5.070  | 38.745 | 89.004 | 1.00 | 0.00 | H |
| ATOM | 1049 | H3'  | C B | 15 | 3.178  | 39.243 | 85.591 | 1.00 | 0.00 | H |
| ATOM | 1050 | H4'  | C B | 15 | 3.071  | 36.814 | 86.641 | 1.00 | 0.00 | H |
| ATOM | 1051 | H41  | C B | 15 | 11.466 | 38.605 | 87.186 | 1.00 | 0.00 | H |
| ATOM | 1052 | H42  | C B | 15 | 11.393 | 38.319 | 88.948 | 1.00 | 0.00 | H |
| ATOM | 1053 | H2'1 | C B | 15 | 5.419  | 39.852 | 86.203 | 1.00 | 0.00 | H |
| ATOM | 1054 | H2'2 | C B | 15 | 4.521  | 40.536 | 87.549 | 1.00 | 0.00 | H |
| ATOM | 1055 | H5'1 | C B | 15 | 5.243  | 36.119 | 85.400 | 1.00 | 0.00 | H |
| ATOM | 1056 | H5'2 | C B | 15 | 3.844  | 36.723 | 84.484 | 1.00 | 0.00 | H |
| ATOM | 1057 | C1'  | G B | 16 | 4.924  | 41.090 | 92.216 | 1.00 | 0.00 | C |
| ATOM | 1058 | N1   | G B | 16 | 10.021 | 41.204 | 92.044 | 1.00 | 0.00 | N |
| ATOM | 1059 | C2   | G B | 16 | 9.173  | 40.972 | 93.114 | 1.00 | 0.00 | C |
| ATOM | 1060 | N2   | G B | 16 | 9.763  | 40.742 | 94.293 | 1.00 | 0.00 | N |
| ATOM | 1061 | N3   | G B | 16 | 7.845  | 40.969 | 93.012 | 1.00 | 0.00 | N |
| ATOM | 1062 | C4   | G B | 16 | 7.423  | 41.227 | 91.746 | 1.00 | 0.00 | C |
| ATOM | 1063 | C5   | G B | 16 | 8.193  | 41.475 | 90.622 | 1.00 | 0.00 | C |
| ATOM | 1064 | C6   | G B | 16 | 9.604  | 41.474 | 90.728 | 1.00 | 0.00 | C |
| ATOM | 1065 | O6   | G B | 16 | 10.446 | 41.670 | 89.853 | 1.00 | 0.00 | O |
| ATOM | 1066 | N7   | G B | 16 | 7.372  | 41.696 | 89.514 | 1.00 | 0.00 | N |
| ATOM | 1067 | C8   | G B | 16 | 6.159  | 41.574 | 89.990 | 1.00 | 0.00 | C |
| ATOM | 1068 | N9   | G B | 16 | 6.109  | 41.292 | 91.340 | 1.00 | 0.00 | N |
| ATOM | 1069 | C2'  | G B | 16 | 3.754  | 42.007 | 91.888 | 1.00 | 0.00 | C |
| ATOM | 1070 | C3'  | G B | 16 | 2.559  | 41.109 | 92.161 | 1.00 | 0.00 | C |
| ATOM | 1071 | O3'  | G B | 16 | 2.245  | 41.156 | 93.550 | 1.00 | 0.00 | O |
| ATOM | 1072 | C4'  | G B | 16 | 3.063  | 39.733 | 91.728 | 1.00 | 0.00 | C |
| ATOM | 1073 | O4'  | G B | 16 | 4.489  | 39.754 | 92.052 | 1.00 | 0.00 | O |
| ATOM | 1074 | C5'  | G B | 16 | 2.903  | 39.389 | 90.266 | 1.00 | 0.00 | C |

|      |      |      |     |    |        |        |        |      |      |   |
|------|------|------|-----|----|--------|--------|--------|------|------|---|
| ATOM | 1075 | O5'  | G B | 16 | 3.118  | 40.572 | 89.458 | 1.00 | 0.00 | O |
| ATOM | 1076 | O1P  | G B | 16 | 0.860  | 40.995 | 88.432 | 1.00 | 0.00 | O |
| ATOM | 1077 | O2P  | G B | 16 | 2.937  | 41.754 | 87.249 | 1.00 | 0.00 | O |
| ATOM | 1078 | P    | G B | 16 | 2.278  | 40.746 | 88.113 | 1.00 | 0.00 | P |
| ATOM | 1079 | H1   | G B | 16 | 11.035 | 41.177 | 92.228 | 1.00 | 0.00 | H |
| ATOM | 1080 | H8   | G B | 16 | 5.268  | 41.689 | 89.374 | 1.00 | 0.00 | H |
| ATOM | 1081 | H1'  | G B | 16 | 5.239  | 41.214 | 93.252 | 1.00 | 0.00 | H |
| ATOM | 1082 | H21  | G B | 16 | 10.790 | 40.742 | 94.364 | 1.00 | 0.00 | H |
| ATOM | 1083 | H3'  | G B | 16 | 1.683  | 41.406 | 91.583 | 1.00 | 0.00 | H |
| ATOM | 1084 | H22  | G B | 16 | 9.186  | 40.564 | 95.129 | 1.00 | 0.00 | H |
| ATOM | 1085 | H4'  | G B | 16 | 2.505  | 38.995 | 92.307 | 1.00 | 0.00 | H |
| ATOM | 1086 | H2'1 | G B | 16 | 3.769  | 42.344 | 90.851 | 1.00 | 0.00 | H |
| ATOM | 1087 | H2'2 | G B | 16 | 3.736  | 42.896 | 92.519 | 1.00 | 0.00 | H |
| ATOM | 1088 | H5'1 | G B | 16 | 3.630  | 38.622 | 89.999 | 1.00 | 0.00 | H |
| ATOM | 1089 | H5'2 | G B | 16 | 1.897  | 39.005 | 90.098 | 1.00 | 0.00 | H |
| ATOM | 1090 | C1'  | G B | 17 | 6.675  | 43.517 | 96.162 | 1.00 | 0.00 | C |
| ATOM | 1091 | N1   | G B | 17 | 10.692 | 44.381 | 93.135 | 1.00 | 0.00 | N |
| ATOM | 1092 | C2   | G B | 17 | 10.645 | 44.029 | 94.474 | 1.00 | 0.00 | C |
| ATOM | 1093 | N2   | G B | 17 | 11.828 | 43.890 | 95.086 | 1.00 | 0.00 | N |
| ATOM | 1094 | N3   | G B | 17 | 9.512  | 43.831 | 95.144 | 1.00 | 0.00 | N |
| ATOM | 1095 | C4   | G B | 17 | 8.414  | 44.021 | 94.368 | 1.00 | 0.00 | C |
| ATOM | 1096 | C5   | G B | 17 | 8.362  | 44.375 | 93.032 | 1.00 | 0.00 | C |
| ATOM | 1097 | C6   | G B | 17 | 9.563  | 44.582 | 92.317 | 1.00 | 0.00 | C |
| ATOM | 1098 | O6   | G B | 17 | 9.721  | 44.898 | 91.137 | 1.00 | 0.00 | O |
| ATOM | 1099 | N7   | G B | 17 | 7.035  | 44.470 | 92.608 | 1.00 | 0.00 | N |
| ATOM | 1100 | C8   | G B | 17 | 6.340  | 44.174 | 93.675 | 1.00 | 0.00 | C |
| ATOM | 1101 | N9   | G B | 17 | 7.107  | 43.890 | 94.787 | 1.00 | 0.00 | N |
| ATOM | 1102 | C2'  | G B | 17 | 5.428  | 44.252 | 96.632 | 1.00 | 0.00 | C |
| ATOM | 1103 | C3'  | G B | 17 | 4.725  | 43.188 | 97.461 | 1.00 | 0.00 | C |
| ATOM | 1104 | O3'  | G B | 17 | 5.263  | 43.192 | 98.780 | 1.00 | 0.00 | O |
| ATOM | 1105 | C4'  | G B | 17 | 5.053  | 41.900 | 96.707 | 1.00 | 0.00 | C |
| ATOM | 1106 | O4'  | G B | 17 | 6.391  | 42.132 | 96.165 | 1.00 | 0.00 | O |
| ATOM | 1107 | C5'  | G B | 17 | 4.129  | 41.533 | 95.572 | 1.00 | 0.00 | C |
| ATOM | 1108 | O5'  | G B | 17 | 3.694  | 42.732 | 94.884 | 1.00 | 0.00 | O |
| ATOM | 1109 | O1P  | G B | 17 | 1.224  | 42.815 | 95.362 | 1.00 | 0.00 | O |
| ATOM | 1110 | O2P  | G B | 17 | 2.134  | 43.870 | 93.275 | 1.00 | 0.00 | O |
| ATOM | 1111 | P    | G B | 17 | 2.221  | 42.777 | 94.274 | 1.00 | 0.00 | P |
| ATOM | 1112 | H1   | G B | 17 | 11.622 | 44.505 | 92.708 | 1.00 | 0.00 | H |
| ATOM | 1113 | H8   | G B | 17 | 5.251  | 44.153 | 93.688 | 1.00 | 0.00 | H |
| ATOM | 1114 | H1'  | G B | 17 | 7.510  | 43.691 | 96.840 | 1.00 | 0.00 | H |
| ATOM | 1115 | H21  | G B | 17 | 12.701 | 44.043 | 94.560 | 1.00 | 0.00 | H |
| ATOM | 1116 | H3'  | G B | 17 | 3.649  | 43.352 | 97.509 | 1.00 | 0.00 | H |
| ATOM | 1117 | H22  | G B | 17 | 11.863 | 43.633 | 96.082 | 1.00 | 0.00 | H |
| ATOM | 1118 | H4'  | G B | 17 | 5.025  | 41.090 | 97.436 | 1.00 | 0.00 | H |
| ATOM | 1119 | H2'1 | G B | 17 | 4.804  | 44.584 | 95.802 | 1.00 | 0.00 | H |
| ATOM | 1120 | H2'2 | G B | 17 | 5.666  | 45.130 | 97.232 | 1.00 | 0.00 | H |
| ATOM | 1121 | H5'1 | G B | 17 | 4.657  | 40.880 | 94.877 | 1.00 | 0.00 | H |
| ATOM | 1122 | H5'2 | G B | 17 | 3.262  | 41.004 | 95.973 | 1.00 | 0.00 | H |
| ATOM | 1123 | C1'  | C B | 18 | 10.062 | 46.187 | 98.598 | 1.00 | 0.00 | C |
| ATOM | 1124 | N1   | C B | 18 | 9.582  | 46.615 | 97.255 | 1.00 | 0.00 | N |
| ATOM | 1125 | C2   | C B | 18 | 10.539 | 46.900 | 96.282 | 1.00 | 0.00 | C |
| ATOM | 1126 | O2   | C B | 18 | 11.737 | 46.788 | 96.571 | 1.00 | 0.00 | O |
| ATOM | 1127 | N3   | C B | 18 | 10.123 | 47.292 | 95.053 | 1.00 | 0.00 | N |
| ATOM | 1128 | C4   | C B | 18 | 8.818  | 47.404 | 94.773 | 1.00 | 0.00 | C |

|      |      |      |     |    |        |        |         |      |      |   |
|------|------|------|-----|----|--------|--------|---------|------|------|---|
| ATOM | 1129 | N4   | C B | 18 | 8.469  | 47.790 | 93.553  | 1.00 | 0.00 | N |
| ATOM | 1130 | C5   | C B | 18 | 7.816  | 47.119 | 95.754  | 1.00 | 0.00 | C |
| ATOM | 1131 | C6   | C B | 18 | 8.255  | 46.726 | 96.982  | 1.00 | 0.00 | C |
| ATOM | 1132 | C2'  | C B | 18 | 9.230  | 46.737 | 99.750  | 1.00 | 0.00 | C |
| ATOM | 1133 | C3'  | C B | 18 | 9.260  | 45.583 | 100.741 | 1.00 | 0.00 | C |
| ATOM | 1134 | O3'  | C B | 18 | 10.452 | 45.666 | 101.520 | 1.00 | 0.00 | O |
| ATOM | 1135 | C4'  | C B | 18 | 9.249  | 44.356 | 99.833  | 1.00 | 0.00 | C |
| ATOM | 1136 | O4'  | C B | 18 | 9.997  | 44.774 | 98.647  | 1.00 | 0.00 | O |
| ATOM | 1137 | C5'  | C B | 18 | 7.891  | 43.855 | 99.396  | 1.00 | 0.00 | C |
| ATOM | 1138 | O5'  | C B | 18 | 7.005  | 44.981 | 99.175  | 1.00 | 0.00 | O |
| ATOM | 1139 | O1P  | C B | 18 | 5.260  | 44.709 | 100.969 | 1.00 | 0.00 | O |
| ATOM | 1140 | O2P  | C B | 18 | 4.683  | 45.881 | 98.825  | 1.00 | 0.00 | O |
| ATOM | 1141 | P    | C B | 18 | 5.455  | 44.814 | 99.509  | 1.00 | 0.00 | P |
| ATOM | 1142 | H5   | C B | 18 | 6.752  | 47.215 | 95.530  | 1.00 | 0.00 | H |
| ATOM | 1143 | H6   | C B | 18 | 7.529  | 46.494 | 97.760  | 1.00 | 0.00 | H |
| ATOM | 1144 | H1'  | C B | 18 | 11.106 | 46.479 | 98.696  | 1.00 | 0.00 | H |
| ATOM | 1145 | H3'  | C B | 18 | 8.395  | 45.591 | 101.402 | 1.00 | 0.00 | H |
| ATOM | 1146 | H4'  | C B | 18 | 9.736  | 43.549 | 100.383 | 1.00 | 0.00 | H |
| ATOM | 1147 | H41  | C B | 18 | 7.472  | 47.883 | 93.310  | 1.00 | 0.00 | H |
| ATOM | 1148 | H42  | C B | 18 | 9.193  | 47.994 | 92.850  | 1.00 | 0.00 | H |
| ATOM | 1149 | H2'1 | C B | 18 | 8.211  | 46.974 | 99.448  | 1.00 | 0.00 | H |
| ATOM | 1150 | H2'2 | C B | 18 | 9.664  | 47.641 | 100.177 | 1.00 | 0.00 | H |
| ATOM | 1151 | H5'1 | C B | 18 | 7.999  | 43.285 | 98.472  | 1.00 | 0.00 | H |
| ATOM | 1152 | H5'2 | C B | 18 | 7.482  | 43.210 | 100.170 | 1.00 | 0.00 | H |
| ATOM | 1153 | C1'  | C B | 19 | 13.875 | 49.333 | 98.892  | 1.00 | 0.00 | C |
| ATOM | 1154 | N1   | C B | 19 | 12.665 | 49.682 | 98.097  | 1.00 | 0.00 | N |
| ATOM | 1155 | C2   | C B | 19 | 12.846 | 50.103 | 96.781  | 1.00 | 0.00 | C |
| ATOM | 1156 | O2   | C B | 19 | 13.996 | 50.168 | 96.328  | 1.00 | 0.00 | O |
| ATOM | 1157 | N3   | C B | 19 | 11.757 | 50.424 | 96.043  | 1.00 | 0.00 | N |
| ATOM | 1158 | C4   | C B | 19 | 10.524 | 50.344 | 96.562  | 1.00 | 0.00 | C |
| ATOM | 1159 | N4   | C B | 19 | 9.497  | 50.669 | 95.796  | 1.00 | 0.00 | N |
| ATOM | 1160 | C5   | C B | 19 | 10.311 | 49.917 | 97.912  | 1.00 | 0.00 | C |
| ATOM | 1161 | C6   | C B | 19 | 11.421 | 49.596 | 98.636  | 1.00 | 0.00 | C |
| ATOM | 1162 | C2'  | C B | 19 | 13.794 | 49.758 | 100.349 | 1.00 | 0.00 | C |
| ATOM | 1163 | C3'  | C B | 19 | 14.530 | 48.623 | 101.050 | 1.00 | 0.00 | C |
| ATOM | 1164 | O3'  | C B | 19 | 15.930 | 48.883 | 101.019 | 1.00 | 0.00 | O |
| ATOM | 1165 | C4'  | C B | 19 | 14.148 | 47.405 | 100.213 | 1.00 | 0.00 | C |
| ATOM | 1166 | O4'  | C B | 19 | 14.024 | 47.926 | 98.851  | 1.00 | 0.00 | O |
| ATOM | 1167 | C5'  | C B | 19 | 12.859 | 46.710 | 100.583 | 1.00 | 0.00 | C |
| ATOM | 1168 | O5'  | C B | 19 | 11.875 | 47.691 | 100.999 | 1.00 | 0.00 | O |
| ATOM | 1169 | O1P  | C B | 19 | 11.528 | 47.172 | 103.437 | 1.00 | 0.00 | O |
| ATOM | 1170 | O2P  | C B | 19 | 9.688  | 48.239 | 102.106 | 1.00 | 0.00 | O |
| ATOM | 1171 | P    | C B | 19 | 10.834 | 47.298 | 102.139 | 1.00 | 0.00 | P |
| ATOM | 1172 | H5   | C B | 19 | 9.311  | 49.851 | 98.341  | 1.00 | 0.00 | H |
| ATOM | 1173 | H6   | C B | 19 | 11.307 | 49.264 | 99.667  | 1.00 | 0.00 | H |
| ATOM | 1174 | H1'  | C B | 19 | 14.743 | 49.777 | 98.401  | 1.00 | 0.00 | H |
| ATOM | 1175 | H3'  | C B | 19 | 14.205 | 48.507 | 102.085 | 1.00 | 0.00 | H |
| ATOM | 1176 | H4'  | C B | 19 | 14.959 | 46.682 | 100.320 | 1.00 | 0.00 | H |
| ATOM | 1177 | H41  | C B | 19 | 8.537  | 50.616 | 96.169  | 1.00 | 0.00 | H |
| ATOM | 1178 | H42  | C B | 19 | 9.653  | 50.977 | 94.824  | 1.00 | 0.00 | H |
| ATOM | 1179 | H2'1 | C B | 19 | 12.767 | 49.841 | 100.701 | 1.00 | 0.00 | H |
| ATOM | 1180 | H2'2 | C B | 19 | 14.282 | 50.716 | 100.529 | 1.00 | 0.00 | H |
| ATOM | 1181 | H5'1 | C B | 19 | 12.488 | 46.159 | 99.721  | 1.00 | 0.00 | H |
| ATOM | 1182 | H5'2 | C B | 19 | 13.050 | 46.013 | 101.399 | 1.00 | 0.00 | H |

|      |      |      |     |    |        |        |         |      |      |   |
|------|------|------|-----|----|--------|--------|---------|------|------|---|
| ATOM | 1183 | C1'  | T B | 20 | 16.760 | 53.000 | 97.241  | 1.00 | 0.00 | C |
| ATOM | 1184 | N1   | T B | 20 | 15.285 | 53.173 | 97.286  | 1.00 | 0.00 | N |
| ATOM | 1185 | C2   | T B | 20 | 14.666 | 53.610 | 96.133  | 1.00 | 0.00 | C |
| ATOM | 1186 | O2   | T B | 20 | 15.278 | 53.853 | 95.106  | 1.00 | 0.00 | O |
| ATOM | 1187 | N3   | T B | 20 | 13.295 | 53.757 | 96.219  | 1.00 | 0.00 | N |
| ATOM | 1188 | C4   | T B | 20 | 12.511 | 53.512 | 97.325  | 1.00 | 0.00 | C |
| ATOM | 1189 | O4   | T B | 20 | 11.285 | 53.681 | 97.282  | 1.00 | 0.00 | O |
| ATOM | 1190 | C5   | T B | 20 | 13.244 | 53.057 | 98.480  | 1.00 | 0.00 | C |
| ATOM | 1191 | C6   | T B | 20 | 14.583 | 52.903 | 98.434  | 1.00 | 0.00 | C |
| ATOM | 1192 | C7   | T B | 20 | 12.430 | 52.777 | 99.709  | 1.00 | 0.00 | C |
| ATOM | 1193 | C2'  | T B | 20 | 17.466 | 53.409 | 98.529  | 1.00 | 0.00 | C |
| ATOM | 1194 | C3'  | T B | 20 | 18.595 | 52.391 | 98.608  | 1.00 | 0.00 | C |
| ATOM | 1195 | O3'  | T B | 20 | 19.695 | 52.850 | 97.826  | 1.00 | 0.00 | O |
| ATOM | 1196 | C4'  | T B | 20 | 17.958 | 51.131 | 98.027  | 1.00 | 0.00 | C |
| ATOM | 1197 | O4'  | T B | 20 | 17.030 | 51.630 | 97.013  | 1.00 | 0.00 | O |
| ATOM | 1198 | C5'  | T B | 20 | 17.192 | 50.258 | 98.995  | 1.00 | 0.00 | C |
| ATOM | 1199 | O5'  | T B | 20 | 16.504 | 51.088 | 99.965  | 1.00 | 0.00 | O |
| ATOM | 1200 | O1P  | T B | 20 | 17.650 | 50.523 | 102.132 | 1.00 | 0.00 | O |
| ATOM | 1201 | O2P  | T B | 20 | 15.269 | 51.316 | 102.140 | 1.00 | 0.00 | O |
| ATOM | 1202 | P    | T B | 20 | 16.338 | 50.550 | 101.455 | 1.00 | 0.00 | P |
| ATOM | 1203 | H3   | T B | 20 | 12.809 | 54.082 | 95.372  | 1.00 | 0.00 | H |
| ATOM | 1204 | H6   | T B | 20 | 15.115 | 52.559 | 99.320  | 1.00 | 0.00 | H |
| ATOM | 1205 | H1'  | T B | 20 | 17.146 | 53.563 | 96.390  | 1.00 | 0.00 | H |
| ATOM | 1206 | H3'  | T B | 20 | 18.925 | 52.229 | 99.633  | 1.00 | 0.00 | H |
| ATOM | 1207 | H4'  | T B | 20 | 18.767 | 50.533 | 97.608  | 1.00 | 0.00 | H |
| ATOM | 1208 | H3T  | T B | 20 | 19.997 | 53.739 | 98.029  | 1.00 | 0.00 | H |
| ATOM | 1209 | H71  | T B | 20 | 12.697 | 53.486 | 100.492 | 1.00 | 0.00 | H |
| ATOM | 1210 | H72  | T B | 20 | 11.370 | 52.878 | 99.472  | 1.00 | 0.00 | H |
| ATOM | 1211 | H73  | T B | 20 | 12.629 | 51.762 | 100.055 | 1.00 | 0.00 | H |
| ATOM | 1212 | H2'1 | T B | 20 | 16.812 | 53.343 | 99.395  | 1.00 | 0.00 | H |
| ATOM | 1213 | H2'2 | T B | 20 | 17.851 | 54.427 | 98.485  | 1.00 | 0.00 | H |
| ATOM | 1214 | H5'1 | T B | 20 | 16.470 | 49.659 | 98.442  | 1.00 | 0.00 | H |
| ATOM | 1215 | H5'2 | T B | 20 | 17.889 | 49.595 | 99.506  | 1.00 | 0.00 | H |
| TER  |      |      |     |    |        |        |         |      |      |   |
| ATOM | 1    | C1'  | A A | 1  | 36.234 | 31.773 | 111.676 | 1.00 | 0.00 | C |
| ATOM | 2    | N1   | A A | 1  | 33.438 | 30.617 | 115.821 | 1.00 | 0.00 | N |
| ATOM | 3    | C2   | A A | 1  | 34.590 | 30.144 | 115.353 | 1.00 | 0.00 | C |
| ATOM | 4    | N3   | A A | 1  | 35.261 | 30.492 | 114.276 | 1.00 | 0.00 | N |
| ATOM | 5    | C4   | A A | 1  | 34.609 | 31.463 | 113.614 | 1.00 | 0.00 | C |
| ATOM | 6    | C5   | A A | 1  | 33.423 | 32.051 | 113.957 | 1.00 | 0.00 | C |
| ATOM | 7    | C6   | A A | 1  | 32.811 | 31.587 | 115.139 | 1.00 | 0.00 | C |
| ATOM | 8    | N6   | A A | 1  | 31.645 | 32.070 | 115.603 | 1.00 | 0.00 | N |
| ATOM | 9    | N7   | A A | 1  | 33.060 | 33.017 | 113.034 | 1.00 | 0.00 | N |
| ATOM | 10   | C8   | A A | 1  | 34.021 | 32.990 | 112.160 | 1.00 | 0.00 | C |
| ATOM | 11   | N9   | A A | 1  | 34.998 | 32.073 | 112.446 | 1.00 | 0.00 | N |
| ATOM | 12   | C2'  | A A | 1  | 36.046 | 31.832 | 110.166 | 1.00 | 0.00 | C |
| ATOM | 13   | C3'  | A A | 1  | 37.378 | 32.396 | 109.702 | 1.00 | 0.00 | C |
| ATOM | 14   | O3'  | A A | 1  | 38.320 | 31.331 | 109.575 | 1.00 | 0.00 | O |
| ATOM | 15   | C4'  | A A | 1  | 37.750 | 33.363 | 110.825 | 1.00 | 0.00 | C |
| ATOM | 16   | O4'  | A A | 1  | 37.207 | 32.737 | 112.033 | 1.00 | 0.00 | O |
| ATOM | 17   | C5'  | A A | 1  | 37.195 | 34.763 | 110.715 | 1.00 | 0.00 | C |
| ATOM | 18   | O5'  | A A | 1  | 35.860 | 34.719 | 110.151 | 1.00 | 0.00 | O |
| ATOM | 19   | H2   | A A | 1  | 35.047 | 29.355 | 115.950 | 1.00 | 0.00 | H |
| ATOM | 20   | H8   | A A | 1  | 34.047 | 33.637 | 111.283 | 1.00 | 0.00 | H |



|      |    |      |     |   |        |        |         |      |      |   |
|------|----|------|-----|---|--------|--------|---------|------|------|---|
| ATOM | 21 | H1'  | A A | 1 | 36.600 | 30.796 | 111.986 | 1.00 | 0.00 | H |
| ATOM | 22 | H3'  | A A | 1 | 37.292 | 32.917 | 108.747 | 1.00 | 0.00 | H |
| ATOM | 23 | H4'  | A A | 1 | 38.837 | 33.435 | 110.834 | 1.00 | 0.00 | H |
| ATOM | 24 | H61  | A A | 1 | 31.242 | 31.698 | 116.471 | 1.00 | 0.00 | H |
| ATOM | 25 | H62  | A A | 1 | 31.158 | 32.817 | 115.084 | 1.00 | 0.00 | H |
| ATOM | 26 | H5T  | A A | 1 | 35.574 | 35.439 | 109.585 | 1.00 | 0.00 | H |
| ATOM | 27 | H2'1 | A A | 1 | 35.219 | 32.479 | 109.877 | 1.00 | 0.00 | H |
| ATOM | 28 | H2'2 | A A | 1 | 35.860 | 30.848 | 109.734 | 1.00 | 0.00 | H |
| ATOM | 29 | H5'1 | A A | 1 | 37.161 | 35.213 | 111.707 | 1.00 | 0.00 | H |
| ATOM | 30 | H5'2 | A A | 1 | 37.845 | 35.357 | 110.077 | 1.00 | 0.00 | H |
| ATOM | 31 | C1'  | G A | 2 | 36.053 | 26.852 | 112.305 | 1.00 | 0.00 | C |
| ATOM | 32 | N1   | G A | 2 | 31.694 | 27.875 | 114.748 | 1.00 | 0.00 | N |
| ATOM | 33 | C2   | G A | 2 | 32.710 | 27.000 | 115.078 | 1.00 | 0.00 | C |
| ATOM | 34 | N2   | G A | 2 | 32.544 | 26.303 | 116.207 | 1.00 | 0.00 | N |
| ATOM | 35 | N3   | G A | 2 | 33.807 | 26.833 | 114.341 | 1.00 | 0.00 | N |
| ATOM | 36 | C4   | G A | 2 | 33.805 | 27.614 | 113.228 | 1.00 | 0.00 | C |
| ATOM | 37 | C5   | G A | 2 | 32.835 | 28.515 | 112.818 | 1.00 | 0.00 | C |
| ATOM | 38 | C6   | G A | 2 | 31.673 | 28.695 | 113.604 | 1.00 | 0.00 | C |
| ATOM | 39 | O6   | G A | 2 | 30.713 | 29.439 | 113.409 | 1.00 | 0.00 | O |
| ATOM | 40 | N7   | G A | 2 | 33.214 | 29.118 | 111.616 | 1.00 | 0.00 | N |
| ATOM | 41 | C8   | G A | 2 | 34.376 | 28.581 | 111.346 | 1.00 | 0.00 | C |
| ATOM | 42 | N9   | G A | 2 | 34.802 | 27.657 | 112.279 | 1.00 | 0.00 | N |
| ATOM | 43 | C2'  | G A | 2 | 36.500 | 26.369 | 110.932 | 1.00 | 0.00 | C |
| ATOM | 44 | C3'  | G A | 2 | 38.014 | 26.442 | 111.046 | 1.00 | 0.00 | C |
| ATOM | 45 | O3'  | G A | 2 | 38.497 | 25.249 | 111.659 | 1.00 | 0.00 | O |
| ATOM | 46 | C4'  | G A | 2 | 38.228 | 27.671 | 111.930 | 1.00 | 0.00 | C |
| ATOM | 47 | O4'  | G A | 2 | 37.080 | 27.668 | 112.836 | 1.00 | 0.00 | O |
| ATOM | 48 | C5'  | G A | 2 | 38.284 | 29.005 | 111.223 | 1.00 | 0.00 | C |
| ATOM | 49 | O5'  | G A | 2 | 37.348 | 29.010 | 110.115 | 1.00 | 0.00 | O |
| ATOM | 50 | O1P  | G A | 2 | 38.842 | 29.164 | 108.095 | 1.00 | 0.00 | O |
| ATOM | 51 | O2P  | G A | 2 | 36.501 | 30.061 | 107.996 | 1.00 | 0.00 | O |
| ATOM | 52 | P    | G A | 2 | 37.726 | 29.827 | 108.798 | 1.00 | 0.00 | P |
| ATOM | 53 | H1   | G A | 2 | 30.889 | 27.933 | 115.388 | 1.00 | 0.00 | H |
| ATOM | 54 | H8   | G A | 2 | 34.957 | 28.838 | 110.461 | 1.00 | 0.00 | H |
| ATOM | 55 | H1'  | G A | 2 | 35.906 | 26.012 | 112.985 | 1.00 | 0.00 | H |
| ATOM | 56 | H21  | G A | 2 | 31.695 | 26.438 | 116.775 | 1.00 | 0.00 | H |
| ATOM | 57 | H3'  | G A | 2 | 38.493 | 26.569 | 110.075 | 1.00 | 0.00 | H |
| ATOM | 58 | H22  | G A | 2 | 33.266 | 25.633 | 116.509 | 1.00 | 0.00 | H |
| ATOM | 59 | H4'  | G A | 2 | 39.178 | 27.528 | 112.446 | 1.00 | 0.00 | H |
| ATOM | 60 | H2'1 | G A | 2 | 36.132 | 27.007 | 110.129 | 1.00 | 0.00 | H |
| ATOM | 61 | H2'2 | G A | 2 | 36.167 | 25.351 | 110.722 | 1.00 | 0.00 | H |
| ATOM | 62 | H5'1 | G A | 2 | 38.025 | 29.795 | 111.928 | 1.00 | 0.00 | H |
| ATOM | 63 | H5'2 | G A | 2 | 39.296 | 29.172 | 110.854 | 1.00 | 0.00 | H |
| ATOM | 64 | C1'  | G A | 3 | 34.017 | 22.641 | 113.932 | 1.00 | 0.00 | C |
| ATOM | 65 | N1   | G A | 3 | 29.678 | 25.313 | 113.701 | 1.00 | 0.00 | N |
| ATOM | 66 | C2   | G A | 3 | 30.132 | 24.442 | 114.672 | 1.00 | 0.00 | C |
| ATOM | 67 | N2   | G A | 3 | 29.322 | 24.254 | 115.722 | 1.00 | 0.00 | N |
| ATOM | 68 | N3   | G A | 3 | 31.300 | 23.807 | 114.605 | 1.00 | 0.00 | N |
| ATOM | 69 | C4   | G A | 3 | 31.987 | 24.109 | 113.472 | 1.00 | 0.00 | C |
| ATOM | 70 | C5   | G A | 3 | 31.611 | 24.964 | 112.447 | 1.00 | 0.00 | C |
| ATOM | 71 | C6   | G A | 3 | 30.373 | 25.641 | 112.522 | 1.00 | 0.00 | C |
| ATOM | 72 | O6   | G A | 3 | 29.870 | 26.431 | 111.723 | 1.00 | 0.00 | O |
| ATOM | 73 | N7   | G A | 3 | 32.599 | 24.997 | 111.460 | 1.00 | 0.00 | N |
| ATOM | 74 | C8   | G A | 3 | 33.521 | 24.185 | 111.908 | 1.00 | 0.00 | C |

|      |     |      |     |   |        |        |         |      |      |   |
|------|-----|------|-----|---|--------|--------|---------|------|------|---|
| ATOM | 75  | N9   | G A | 3 | 33.221 | 23.605 | 113.124 | 1.00 | 0.00 | N |
| ATOM | 76  | C2'  | G A | 3 | 34.763 | 21.610 | 113.096 | 1.00 | 0.00 | C |
| ATOM | 77  | C3'  | G A | 3 | 36.047 | 21.427 | 113.889 | 1.00 | 0.00 | C |
| ATOM | 78  | O3'  | G A | 3 | 35.825 | 20.474 | 114.925 | 1.00 | 0.00 | O |
| ATOM | 79  | C4'  | G A | 3 | 36.307 | 22.828 | 114.441 | 1.00 | 0.00 | C |
| ATOM | 80  | O4'  | G A | 3 | 34.972 | 23.380 | 114.667 | 1.00 | 0.00 | O |
| ATOM | 81  | C5'  | G A | 3 | 37.074 | 23.770 | 113.544 | 1.00 | 0.00 | C |
| ATOM | 82  | O5'  | G A | 3 | 36.696 | 23.550 | 112.162 | 1.00 | 0.00 | O |
| ATOM | 83  | O1P  | G A | 3 | 38.803 | 22.658 | 111.115 | 1.00 | 0.00 | O |
| ATOM | 84  | O2P  | G A | 3 | 37.129 | 23.888 | 109.711 | 1.00 | 0.00 | O |
| ATOM | 85  | P    | G A | 3 | 37.799 | 23.734 | 111.025 | 1.00 | 0.00 | P |
| ATOM | 86  | H1   | G A | 3 | 28.759 | 25.757 | 113.852 | 1.00 | 0.00 | H |
| ATOM | 87  | H8   | G A | 3 | 34.446 | 23.982 | 111.370 | 1.00 | 0.00 | H |
| ATOM | 88  | H1'  | G A | 3 | 33.346 | 22.158 | 114.643 | 1.00 | 0.00 | H |
| ATOM | 89  | H21  | G A | 3 | 28.419 | 24.751 | 115.770 | 1.00 | 0.00 | H |
| ATOM | 90  | H3'  | G A | 3 | 36.872 | 21.092 | 113.260 | 1.00 | 0.00 | H |
| ATOM | 91  | H22  | G A | 3 | 29.600 | 23.616 | 116.479 | 1.00 | 0.00 | H |
| ATOM | 92  | H4'  | G A | 3 | 36.879 | 22.705 | 115.360 | 1.00 | 0.00 | H |
| ATOM | 93  | H2'1 | G A | 3 | 34.968 | 21.966 | 112.086 | 1.00 | 0.00 | H |
| ATOM | 94  | H2'2 | G A | 3 | 34.213 | 20.673 | 113.008 | 1.00 | 0.00 | H |
| ATOM | 95  | H5'1 | G A | 3 | 36.849 | 24.798 | 113.828 | 1.00 | 0.00 | H |
| ATOM | 96  | H5'2 | G A | 3 | 38.142 | 23.592 | 113.666 | 1.00 | 0.00 | H |
| ATOM | 97  | C1'  | C A | 4 | 30.223 | 19.803 | 115.376 | 1.00 | 0.00 | C |
| ATOM | 98  | N1   | C A | 4 | 30.166 | 20.541 | 114.083 | 1.00 | 0.00 | N |
| ATOM | 99  | C2   | C A | 4 | 29.048 | 21.333 | 113.834 | 1.00 | 0.00 | C |
| ATOM | 100 | O2   | C A | 4 | 28.156 | 21.392 | 114.687 | 1.00 | 0.00 | O |
| ATOM | 101 | N3   | C A | 4 | 28.979 | 22.012 | 112.663 | 1.00 | 0.00 | N |
| ATOM | 102 | C4   | C A | 4 | 29.961 | 21.925 | 111.757 | 1.00 | 0.00 | C |
| ATOM | 103 | N4   | C A | 4 | 29.842 | 22.613 | 110.631 | 1.00 | 0.00 | N |
| ATOM | 104 | C5   | C A | 4 | 31.121 | 21.115 | 111.987 | 1.00 | 0.00 | C |
| ATOM | 105 | C6   | C A | 4 | 31.172 | 20.444 | 113.173 | 1.00 | 0.00 | C |
| ATOM | 106 | C2'  | C A | 4 | 30.834 | 18.414 | 115.265 | 1.00 | 0.00 | C |
| ATOM | 107 | C3'  | C A | 4 | 31.581 | 18.288 | 116.583 | 1.00 | 0.00 | C |
| ATOM | 108 | O3'  | C A | 4 | 30.677 | 17.843 | 117.593 | 1.00 | 0.00 | O |
| ATOM | 109 | C4'  | C A | 4 | 32.070 | 19.713 | 116.834 | 1.00 | 0.00 | C |
| ATOM | 110 | O4'  | C A | 4 | 31.019 | 20.561 | 116.269 | 1.00 | 0.00 | O |
| ATOM | 111 | C5'  | C A | 4 | 33.387 | 20.091 | 116.200 | 1.00 | 0.00 | C |
| ATOM | 112 | O5'  | C A | 4 | 33.508 | 19.456 | 114.901 | 1.00 | 0.00 | O |
| ATOM | 113 | O1P  | C A | 4 | 35.420 | 17.851 | 115.212 | 1.00 | 0.00 | O |
| ATOM | 114 | O2P  | C A | 4 | 34.922 | 18.780 | 112.937 | 1.00 | 0.00 | O |
| ATOM | 115 | P    | C A | 4 | 34.951 | 18.992 | 114.405 | 1.00 | 0.00 | P |
| ATOM | 116 | H5   | C A | 4 | 31.921 | 21.039 | 111.251 | 1.00 | 0.00 | H |
| ATOM | 117 | H6   | C A | 4 | 32.037 | 19.819 | 113.396 | 1.00 | 0.00 | H |
| ATOM | 118 | H1'  | C A | 4 | 29.215 | 19.756 | 115.785 | 1.00 | 0.00 | H |
| ATOM | 119 | H3'  | C A | 4 | 32.416 | 17.592 | 116.515 | 1.00 | 0.00 | H |
| ATOM | 120 | H4'  | C A | 4 | 32.175 | 19.827 | 117.913 | 1.00 | 0.00 | H |
| ATOM | 121 | H41  | C A | 4 | 30.586 | 22.566 | 109.917 | 1.00 | 0.00 | H |
| ATOM | 122 | H42  | C A | 4 | 29.008 | 23.194 | 110.466 | 1.00 | 0.00 | H |
| ATOM | 123 | H2'1 | C A | 4 | 31.512 | 18.326 | 114.416 | 1.00 | 0.00 | H |
| ATOM | 124 | H2'2 | C A | 4 | 30.076 | 17.636 | 115.162 | 1.00 | 0.00 | H |
| ATOM | 125 | H5'1 | C A | 4 | 33.433 | 21.175 | 116.085 | 1.00 | 0.00 | H |
| ATOM | 126 | H5'2 | C A | 4 | 34.202 | 19.765 | 116.846 | 1.00 | 0.00 | H |
| ATOM | 127 | C1'  | C A | 5 | 25.452 | 18.485 | 115.502 | 1.00 | 0.00 | C |
| ATOM | 128 | N1   | C A | 5 | 26.144 | 18.690 | 114.200 | 1.00 | 0.00 | N |

|      |     |      |     |   |        |        |         |      |      |   |
|------|-----|------|-----|---|--------|--------|---------|------|------|---|
| ATOM | 129 | C2   | C A | 5 | 25.545 | 19.536 | 113.269 | 1.00 | 0.00 | C |
| ATOM | 130 | O2   | C A | 5 | 24.470 | 20.078 | 113.557 | 1.00 | 0.00 | O |
| ATOM | 131 | N3   | C A | 5 | 26.161 | 19.735 | 112.077 | 1.00 | 0.00 | N |
| ATOM | 132 | C4   | C A | 5 | 27.322 | 19.134 | 111.793 | 1.00 | 0.00 | C |
| ATOM | 133 | N4   | C A | 5 | 27.882 | 19.368 | 110.617 | 1.00 | 0.00 | N |
| ATOM | 134 | C5   | C A | 5 | 27.960 | 18.259 | 112.732 | 1.00 | 0.00 | C |
| ATOM | 135 | C6   | C A | 5 | 27.325 | 18.075 | 113.925 | 1.00 | 0.00 | C |
| ATOM | 136 | C2'  | C A | 5 | 25.552 | 17.061 | 116.032 | 1.00 | 0.00 | C |
| ATOM | 137 | C3'  | C A | 5 | 25.648 | 17.290 | 117.534 | 1.00 | 0.00 | C |
| ATOM | 138 | O3'  | C A | 5 | 24.336 | 17.431 | 118.071 | 1.00 | 0.00 | O |
| ATOM | 139 | C4'  | C A | 5 | 26.454 | 18.584 | 117.629 | 1.00 | 0.00 | C |
| ATOM | 140 | O4'  | C A | 5 | 26.051 | 19.349 | 116.449 | 1.00 | 0.00 | O |
| ATOM | 141 | C5'  | C A | 5 | 27.958 | 18.440 | 117.621 | 1.00 | 0.00 | C |
| ATOM | 142 | O5'  | C A | 5 | 28.343 | 17.362 | 116.731 | 1.00 | 0.00 | O |
| ATOM | 143 | O1P  | C A | 5 | 29.328 | 15.647 | 118.286 | 1.00 | 0.00 | O |
| ATOM | 144 | O2P  | C A | 5 | 30.080 | 15.751 | 115.896 | 1.00 | 0.00 | O |
| ATOM | 145 | P    | C A | 5 | 29.617 | 16.478 | 117.103 | 1.00 | 0.00 | P |
| ATOM | 146 | H5   | C A | 5 | 28.904 | 17.762 | 112.504 | 1.00 | 0.00 | H |
| ATOM | 147 | H6   | C A | 5 | 27.772 | 17.421 | 114.673 | 1.00 | 0.00 | H |
| ATOM | 148 | H1'  | C A | 5 | 24.411 | 18.787 | 115.385 | 1.00 | 0.00 | H |
| ATOM | 149 | H3'  | C A | 5 | 26.158 | 16.469 | 118.039 | 1.00 | 0.00 | H |
| ATOM | 150 | H4'  | C A | 5 | 26.172 | 19.064 | 118.566 | 1.00 | 0.00 | H |
| ATOM | 151 | H41  | C A | 5 | 28.776 | 18.919 | 110.372 | 1.00 | 0.00 | H |
| ATOM | 152 | H42  | C A | 5 | 27.419 | 19.997 | 109.942 | 1.00 | 0.00 | H |
| ATOM | 153 | H2'1 | C A | 5 | 26.429 | 16.540 | 115.654 | 1.00 | 0.00 | H |
| ATOM | 154 | H2'2 | C A | 5 | 24.676 | 16.463 | 115.777 | 1.00 | 0.00 | H |
| ATOM | 155 | H5'1 | C A | 5 | 28.405 | 19.375 | 117.282 | 1.00 | 0.00 | H |
| ATOM | 156 | H5'2 | C A | 5 | 28.302 | 18.225 | 118.631 | 1.00 | 0.00 | H |
| ATOM | 157 | C1'  | G A | 6 | 20.853 | 18.255 | 113.678 | 1.00 | 0.00 | C |
| ATOM | 158 | N1   | G A | 6 | 23.214 | 18.776 | 109.186 | 1.00 | 0.00 | N |
| ATOM | 159 | C2   | G A | 6 | 22.054 | 19.371 | 109.655 | 1.00 | 0.00 | C |
| ATOM | 160 | N2   | G A | 6 | 21.443 | 20.214 | 108.816 | 1.00 | 0.00 | N |
| ATOM | 161 | N3   | G A | 6 | 21.549 | 19.141 | 110.866 | 1.00 | 0.00 | N |
| ATOM | 162 | C4   | G A | 6 | 22.293 | 18.255 | 111.578 | 1.00 | 0.00 | C |
| ATOM | 163 | C5   | G A | 6 | 23.456 | 17.611 | 111.191 | 1.00 | 0.00 | C |
| ATOM | 164 | C6   | G A | 6 | 23.997 | 17.856 | 109.909 | 1.00 | 0.00 | C |
| ATOM | 165 | O6   | G A | 6 | 25.009 | 17.385 | 109.390 | 1.00 | 0.00 | O |
| ATOM | 166 | N7   | G A | 6 | 23.910 | 16.777 | 112.215 | 1.00 | 0.00 | N |
| ATOM | 167 | C8   | G A | 6 | 23.030 | 16.942 | 113.170 | 1.00 | 0.00 | C |
| ATOM | 168 | N9   | G A | 6 | 22.016 | 17.823 | 112.857 | 1.00 | 0.00 | N |
| ATOM | 169 | C2'  | G A | 6 | 20.255 | 17.140 | 114.526 | 1.00 | 0.00 | C |
| ATOM | 170 | C3'  | G A | 6 | 19.839 | 17.884 | 115.784 | 1.00 | 0.00 | C |
| ATOM | 171 | O3'  | G A | 6 | 18.551 | 18.464 | 115.583 | 1.00 | 0.00 | O |
| ATOM | 172 | C4'  | G A | 6 | 20.932 | 18.943 | 115.928 | 1.00 | 0.00 | C |
| ATOM | 173 | O4'  | G A | 6 | 21.294 | 19.276 | 114.552 | 1.00 | 0.00 | O |
| ATOM | 174 | C5'  | G A | 6 | 22.179 | 18.522 | 116.669 | 1.00 | 0.00 | C |
| ATOM | 175 | O5'  | G A | 6 | 22.488 | 17.140 | 116.366 | 1.00 | 0.00 | O |
| ATOM | 176 | O1P  | G A | 6 | 22.159 | 15.972 | 118.570 | 1.00 | 0.00 | O |
| ATOM | 177 | O2P  | G A | 6 | 23.759 | 15.033 | 116.880 | 1.00 | 0.00 | O |
| ATOM | 178 | P    | G A | 6 | 23.143 | 16.231 | 117.502 | 1.00 | 0.00 | P |
| ATOM | 179 | H1   | G A | 6 | 23.525 | 19.027 | 108.236 | 1.00 | 0.00 | H |
| ATOM | 180 | H8   | G A | 6 | 23.090 | 16.426 | 114.129 | 1.00 | 0.00 | H |
| ATOM | 181 | H1'  | G A | 6 | 20.103 | 18.682 | 113.011 | 1.00 | 0.00 | H |
| ATOM | 182 | H21  | G A | 6 | 21.842 | 20.390 | 107.883 | 1.00 | 0.00 | H |

|      |     |      |     |   |        |        |         |      |      |   |
|------|-----|------|-----|---|--------|--------|---------|------|------|---|
| ATOM | 183 | H3'  | G A | 6 | 19.807 | 17.231 | 116.656 | 1.00 | 0.00 | H |
| ATOM | 184 | H22  | G A | 6 | 20.575 | 20.687 | 109.104 | 1.00 | 0.00 | H |
| ATOM | 185 | H4'  | G A | 6 | 20.490 | 19.781 | 116.467 | 1.00 | 0.00 | H |
| ATOM | 186 | H2'1 | G A | 6 | 20.979 | 16.356 | 114.750 | 1.00 | 0.00 | H |
| ATOM | 187 | H2'2 | G A | 6 | 19.399 | 16.666 | 114.045 | 1.00 | 0.00 | H |
| ATOM | 188 | H5'1 | G A | 6 | 23.009 | 19.160 | 116.366 | 1.00 | 0.00 | H |
| ATOM | 189 | H5'2 | G A | 6 | 22.015 | 18.637 | 117.740 | 1.00 | 0.00 | H |
| ATOM | 190 | C1'  | C A | 7 | 17.511 | 18.261 | 110.024 | 1.00 | 0.00 | C |
| ATOM | 191 | N1   | C A | 7 | 18.683 | 17.344 | 109.973 | 1.00 | 0.00 | N |
| ATOM | 192 | C2   | C A | 7 | 19.461 | 17.344 | 108.818 | 1.00 | 0.00 | C |
| ATOM | 193 | O2   | C A | 7 | 19.149 | 18.096 | 107.886 | 1.00 | 0.00 | O |
| ATOM | 194 | N3   | C A | 7 | 20.534 | 16.517 | 108.753 | 1.00 | 0.00 | N |
| ATOM | 195 | C4   | C A | 7 | 20.845 | 15.711 | 109.777 | 1.00 | 0.00 | C |
| ATOM | 196 | N4   | C A | 7 | 21.906 | 14.927 | 109.661 | 1.00 | 0.00 | N |
| ATOM | 197 | C5   | C A | 7 | 20.060 | 15.689 | 110.976 | 1.00 | 0.00 | C |
| ATOM | 198 | C6   | C A | 7 | 18.988 | 16.534 | 111.022 | 1.00 | 0.00 | C |
| ATOM | 199 | C2'  | C A | 7 | 16.298 | 17.670 | 110.729 | 1.00 | 0.00 | C |
| ATOM | 200 | C3'  | C A | 7 | 15.712 | 18.888 | 111.426 | 1.00 | 0.00 | C |
| ATOM | 201 | O3'  | C A | 7 | 14.873 | 19.592 | 110.510 | 1.00 | 0.00 | O |
| ATOM | 202 | C4'  | C A | 7 | 16.953 | 19.692 | 111.807 | 1.00 | 0.00 | C |
| ATOM | 203 | O4'  | C A | 7 | 17.903 | 19.424 | 110.727 | 1.00 | 0.00 | O |
| ATOM | 204 | C5'  | C A | 7 | 17.603 | 19.336 | 113.124 | 1.00 | 0.00 | C |
| ATOM | 205 | O5'  | C A | 7 | 17.520 | 17.905 | 113.341 | 1.00 | 0.00 | O |
| ATOM | 206 | O1P  | C A | 7 | 16.003 | 17.706 | 115.340 | 1.00 | 0.00 | O |
| ATOM | 207 | O2P  | C A | 7 | 17.712 | 15.927 | 114.877 | 1.00 | 0.00 | O |
| ATOM | 208 | P    | C A | 7 | 17.347 | 17.363 | 114.830 | 1.00 | 0.00 | P |
| ATOM | 209 | H5   | C A | 7 | 20.307 | 15.031 | 111.812 | 1.00 | 0.00 | H |
| ATOM | 210 | H6   | C A | 7 | 18.365 | 16.559 | 111.917 | 1.00 | 0.00 | H |
| ATOM | 211 | H1'  | C A | 7 | 17.265 | 18.555 | 109.002 | 1.00 | 0.00 | H |
| ATOM | 212 | H3'  | C A | 7 | 15.132 | 18.613 | 112.307 | 1.00 | 0.00 | H |
| ATOM | 213 | H4'  | C A | 7 | 16.649 | 20.737 | 111.858 | 1.00 | 0.00 | H |
| ATOM | 214 | H41  | C A | 7 | 22.170 | 14.298 | 110.434 | 1.00 | 0.00 | H |
| ATOM | 215 | H42  | C A | 7 | 22.468 | 14.940 | 108.797 | 1.00 | 0.00 | H |
| ATOM | 216 | H2'1 | C A | 7 | 16.573 | 16.898 | 111.446 | 1.00 | 0.00 | H |
| ATOM | 217 | H2'2 | C A | 7 | 15.586 | 17.230 | 110.030 | 1.00 | 0.00 | H |
| ATOM | 218 | H5'1 | C A | 7 | 18.649 | 19.646 | 113.102 | 1.00 | 0.00 | H |
| ATOM | 219 | H5'2 | C A | 7 | 17.091 | 19.860 | 113.930 | 1.00 | 0.00 | H |
| ATOM | 220 | C1'  | A A | 8 | 16.013 | 17.579 | 105.354 | 1.00 | 0.00 | C |
| ATOM | 221 | N1   | A A | 8 | 19.946 | 14.286 | 105.179 | 1.00 | 0.00 | N |
| ATOM | 222 | C2   | A A | 8 | 19.501 | 15.200 | 104.323 | 1.00 | 0.00 | C |
| ATOM | 223 | N3   | A A | 8 | 18.479 | 16.022 | 104.432 | 1.00 | 0.00 | N |
| ATOM | 224 | C4   | A A | 8 | 17.854 | 15.832 | 105.608 | 1.00 | 0.00 | C |
| ATOM | 225 | C5   | A A | 8 | 18.181 | 14.940 | 106.591 | 1.00 | 0.00 | C |
| ATOM | 226 | C6   | A A | 8 | 19.302 | 14.121 | 106.345 | 1.00 | 0.00 | C |
| ATOM | 227 | N6   | A A | 8 | 19.744 | 13.200 | 107.220 | 1.00 | 0.00 | N |
| ATOM | 228 | N7   | A A | 8 | 17.308 | 15.033 | 107.661 | 1.00 | 0.00 | N |
| ATOM | 229 | C8   | A A | 8 | 16.476 | 15.967 | 107.305 | 1.00 | 0.00 | C |
| ATOM | 230 | N9   | A A | 8 | 16.747 | 16.500 | 106.072 | 1.00 | 0.00 | N |
| ATOM | 231 | C2'  | A A | 8 | 14.503 | 17.527 | 105.545 | 1.00 | 0.00 | C |
| ATOM | 232 | C3'  | A A | 8 | 14.138 | 19.002 | 105.574 | 1.00 | 0.00 | C |
| ATOM | 233 | O3'  | A A | 8 | 13.985 | 19.472 | 104.238 | 1.00 | 0.00 | O |
| ATOM | 234 | C4'  | A A | 8 | 15.337 | 19.638 | 106.276 | 1.00 | 0.00 | C |
| ATOM | 235 | O4'  | A A | 8 | 16.476 | 18.820 | 105.855 | 1.00 | 0.00 | O |
| ATOM | 236 | C5'  | A A | 8 | 15.292 | 19.666 | 107.786 | 1.00 | 0.00 | C |

|      |     |      |   |   |    |        |        |         |      |      |   |
|------|-----|------|---|---|----|--------|--------|---------|------|------|---|
| ATOM | 237 | O5'  | A | A | 8  | 14.669 | 18.453 | 108.281 | 1.00 | 0.00 | O |
| ATOM | 238 | O1P  | A | A | 8  | 12.543 | 19.286 | 109.341 | 1.00 | 0.00 | O |
| ATOM | 239 | O2P  | A | A | 8  | 13.610 | 17.169 | 110.163 | 1.00 | 0.00 | O |
| ATOM | 240 | P    | A | A | 8  | 13.784 | 18.533 | 109.605 | 1.00 | 0.00 | P |
| ATOM | 241 | H2   | A | A | 8  | 20.065 | 15.281 | 103.395 | 1.00 | 0.00 | H |
| ATOM | 242 | H8   | A | A | 8  | 15.645 | 16.295 | 107.927 | 1.00 | 0.00 | H |
| ATOM | 243 | H1'  | A | A | 8  | 16.276 | 17.526 | 104.298 | 1.00 | 0.00 | H |
| ATOM | 244 | H3'  | A | A | 8  | 13.216 | 19.185 | 106.129 | 1.00 | 0.00 | H |
| ATOM | 245 | H4'  | A | A | 8  | 15.399 | 20.667 | 105.925 | 1.00 | 0.00 | H |
| ATOM | 246 | H61  | A | A | 8  | 20.569 | 12.629 | 106.992 | 1.00 | 0.00 | H |
| ATOM | 247 | H62  | A | A | 8  | 19.252 | 13.066 | 108.116 | 1.00 | 0.00 | H |
| ATOM | 248 | H2'1 | A | A | 8  | 14.221 | 17.030 | 106.472 | 1.00 | 0.00 | H |
| ATOM | 249 | H2'2 | A | A | 8  | 14.002 | 17.009 | 104.727 | 1.00 | 0.00 | H |
| ATOM | 250 | H5'1 | A | A | 8  | 16.310 | 19.740 | 108.170 | 1.00 | 0.00 | H |
| ATOM | 251 | H5'2 | A | A | 8  | 14.721 | 20.534 | 108.112 | 1.00 | 0.00 | H |
| ATOM | 252 | C1'  | C | A | 9  | 16.314 | 15.500 | 100.854 | 1.00 | 0.00 | C |
| ATOM | 253 | N1   | C | A | 9  | 16.290 | 14.651 | 102.076 | 1.00 | 0.00 | N |
| ATOM | 254 | C2   | C | A | 9  | 17.284 | 13.685 | 102.222 | 1.00 | 0.00 | C |
| ATOM | 255 | O2   | C | A | 9  | 18.140 | 13.574 | 101.334 | 1.00 | 0.00 | O |
| ATOM | 256 | N3   | C | A | 9  | 17.280 | 12.902 | 103.326 | 1.00 | 0.00 | N |
| ATOM | 257 | C4   | C | A | 9  | 16.339 | 13.046 | 104.269 | 1.00 | 0.00 | C |
| ATOM | 258 | N4   | C | A | 9  | 16.385 | 12.255 | 105.332 | 1.00 | 0.00 | N |
| ATOM | 259 | C5   | C | A | 9  | 15.301 | 14.028 | 104.146 | 1.00 | 0.00 | C |
| ATOM | 260 | C6   | C | A | 9  | 15.327 | 14.810 | 103.026 | 1.00 | 0.00 | C |
| ATOM | 261 | C2'  | C | A | 9  | 14.933 | 15.814 | 100.298 | 1.00 | 0.00 | C |
| ATOM | 262 | C3'  | C | A | 9  | 15.114 | 17.235 | 99.784  | 1.00 | 0.00 | C |
| ATOM | 263 | O3'  | C | A | 9  | 15.666 | 17.190 | 98.470  | 1.00 | 0.00 | O |
| ATOM | 264 | C4'  | C | A | 9  | 16.080 | 17.842 | 100.797 | 1.00 | 0.00 | C |
| ATOM | 265 | O4'  | C | A | 9  | 16.938 | 16.724 | 101.194 | 1.00 | 0.00 | O |
| ATOM | 266 | C5'  | C | A | 9  | 15.464 | 18.442 | 102.038 | 1.00 | 0.00 | C |
| ATOM | 267 | O5'  | C | A | 9  | 14.321 | 17.649 | 102.450 | 1.00 | 0.00 | O |
| ATOM | 268 | O1P  | C | A | 9  | 12.376 | 19.210 | 102.110 | 1.00 | 0.00 | O |
| ATOM | 269 | O2P  | C | A | 9  | 12.239 | 17.392 | 103.835 | 1.00 | 0.00 | O |
| ATOM | 270 | P    | C | A | 9  | 13.074 | 18.387 | 103.117 | 1.00 | 0.00 | P |
| ATOM | 271 | H5   | C | A | 9  | 14.529 | 14.144 | 104.908 | 1.00 | 0.00 | H |
| ATOM | 272 | H6   | C | A | 9  | 14.565 | 15.575 | 102.890 | 1.00 | 0.00 | H |
| ATOM | 273 | H1'  | C | A | 9  | 16.934 | 15.004 | 100.108 | 1.00 | 0.00 | H |
| ATOM | 274 | H3'  | C | A | 9  | 14.172 | 17.782 | 99.761  | 1.00 | 0.00 | H |
| ATOM | 275 | H4'  | C | A | 9  | 16.624 | 18.633 | 100.281 | 1.00 | 0.00 | H |
| ATOM | 276 | H41  | C | A | 9  | 15.674 | 12.347 | 106.072 | 1.00 | 0.00 | H |
| ATOM | 277 | H42  | C | A | 9  | 17.130 | 11.549 | 105.417 | 1.00 | 0.00 | H |
| ATOM | 278 | H2'1 | C | A | 9  | 14.158 | 15.766 | 101.062 | 1.00 | 0.00 | H |
| ATOM | 279 | H2'2 | C | A | 9  | 14.646 | 15.134 | 99.496  | 1.00 | 0.00 | H |
| ATOM | 280 | H5'1 | C | A | 9  | 16.206 | 18.458 | 102.837 | 1.00 | 0.00 | H |
| ATOM | 281 | H5'2 | C | A | 9  | 15.146 | 19.462 | 101.824 | 1.00 | 0.00 | H |
| ATOM | 282 | C1'  | C | A | 10 | 17.573 | 11.913 | 97.681  | 1.00 | 0.00 | C |
| ATOM | 283 | N1   | C | A | 10 | 16.798 | 11.595 | 98.911  | 1.00 | 0.00 | N |
| ATOM | 284 | C2   | C | A | 10 | 17.275 | 10.578 | 99.737  | 1.00 | 0.00 | C |
| ATOM | 285 | O2   | C | A | 10 | 18.313 | 9.984  | 99.416  | 1.00 | 0.00 | O |
| ATOM | 286 | N3   | C | A | 10 | 16.585 | 10.273 | 100.864 | 1.00 | 0.00 | N |
| ATOM | 287 | C4   | C | A | 10 | 15.464 | 10.931 | 101.184 | 1.00 | 0.00 | C |
| ATOM | 288 | N4   | C | A | 10 | 14.830 | 10.595 | 102.299 | 1.00 | 0.00 | N |
| ATOM | 289 | C5   | C | A | 10 | 14.948 | 11.980 | 100.351 | 1.00 | 0.00 | C |
| ATOM | 290 | C6   | C | A | 10 | 15.663 | 12.273 | 99.225  | 1.00 | 0.00 | C |

|      |     |      |     |    |        |        |         |      |      |   |
|------|-----|------|-----|----|--------|--------|---------|------|------|---|
| ATOM | 291 | C2'  | C A | 10 | 16.701 | 12.261 | 96.482  | 1.00 | 0.00 | C |
| ATOM | 292 | C3'  | C A | 10 | 17.533 | 13.328 | 95.786  | 1.00 | 0.00 | C |
| ATOM | 293 | O3'  | C A | 10 | 18.496 | 12.697 | 94.944  | 1.00 | 0.00 | O |
| ATOM | 294 | C4'  | C A | 10 | 18.183 | 14.067 | 96.953  | 1.00 | 0.00 | C |
| ATOM | 295 | O4'  | C A | 10 | 18.393 | 13.032 | 97.965  | 1.00 | 0.00 | O |
| ATOM | 296 | C5'  | C A | 10 | 17.379 | 15.188 | 97.569  | 1.00 | 0.00 | C |
| ATOM | 297 | O5'  | C A | 10 | 15.972 | 14.839 | 97.572  | 1.00 | 0.00 | O |
| ATOM | 298 | O1P  | C A | 10 | 14.955 | 16.509 | 95.988  | 1.00 | 0.00 | O |
| ATOM | 299 | O2P  | C A | 10 | 13.566 | 15.518 | 97.829  | 1.00 | 0.00 | O |
| ATOM | 300 | P    | C A | 10 | 14.895 | 15.996 | 97.371  | 1.00 | 0.00 | P |
| ATOM | 301 | H5   | C A | 10 | 14.032 | 12.515 | 100.606 | 1.00 | 0.00 | H |
| ATOM | 302 | H6   | C A | 10 | 15.315 | 13.068 | 98.565  | 1.00 | 0.00 | H |
| ATOM | 303 | H1'  | C A | 10 | 18.224 | 11.068 | 97.459  | 1.00 | 0.00 | H |
| ATOM | 304 | H3'  | C A | 10 | 16.916 | 14.000 | 95.187  | 1.00 | 0.00 | H |
| ATOM | 305 | H4'  | C A | 10 | 19.115 | 14.492 | 96.579  | 1.00 | 0.00 | H |
| ATOM | 306 | H41  | C A | 10 | 13.967 | 11.088 | 102.569 | 1.00 | 0.00 | H |
| ATOM | 307 | H42  | C A | 10 | 15.201 | 9.840  | 102.893 | 1.00 | 0.00 | H |
| ATOM | 308 | H2'1 | C A | 10 | 15.727 | 12.647 | 96.776  | 1.00 | 0.00 | H |
| ATOM | 309 | H2'2 | C A | 10 | 16.533 | 11.401 | 95.831  | 1.00 | 0.00 | H |
| ATOM | 310 | H5'1 | C A | 10 | 17.720 | 15.354 | 98.592  | 1.00 | 0.00 | H |
| ATOM | 311 | H5'2 | C A | 10 | 17.533 | 16.097 | 96.990  | 1.00 | 0.00 | H |
| ATOM | 312 | C1'  | T A | 11 | 18.666 | 7.248  | 96.435  | 1.00 | 0.00 | C |
| ATOM | 313 | N1   | T A | 11 | 17.429 | 7.545  | 97.205  | 1.00 | 0.00 | N |
| ATOM | 314 | C2   | T A | 11 | 17.214 | 6.817  | 98.358  | 1.00 | 0.00 | C |
| ATOM | 315 | O2   | T A | 11 | 17.990 | 5.962  | 98.752  | 1.00 | 0.00 | O |
| ATOM | 316 | N3   | T A | 11 | 16.054 | 7.124  | 99.045  | 1.00 | 0.00 | N |
| ATOM | 317 | C4   | T A | 11 | 15.113 | 8.067  | 98.684  | 1.00 | 0.00 | C |
| ATOM | 318 | O4   | T A | 11 | 14.107 | 8.254  | 99.380  | 1.00 | 0.00 | O |
| ATOM | 319 | C5   | T A | 11 | 15.423 | 8.777  | 97.466  | 1.00 | 0.00 | C |
| ATOM | 320 | C6   | T A | 11 | 16.546 | 8.504  | 96.772  | 1.00 | 0.00 | C |
| ATOM | 321 | C7   | T A | 11 | 14.427 | 9.814  | 97.037  | 1.00 | 0.00 | C |
| ATOM | 322 | C2'  | T A | 11 | 18.477 | 7.305  | 94.924  | 1.00 | 0.00 | C |
| ATOM | 323 | C3'  | T A | 11 | 19.807 | 7.873  | 94.458  | 1.00 | 0.00 | C |
| ATOM | 324 | O3'  | T A | 11 | 20.752 | 6.812  | 94.331  | 1.00 | 0.00 | O |
| ATOM | 325 | C4'  | T A | 11 | 20.175 | 8.842  | 95.579  | 1.00 | 0.00 | C |
| ATOM | 326 | O4'  | T A | 11 | 19.636 | 8.216  | 96.788  | 1.00 | 0.00 | O |
| ATOM | 327 | C5'  | T A | 11 | 19.615 | 10.241 | 95.470  | 1.00 | 0.00 | C |
| ATOM | 328 | O5'  | T A | 11 | 18.279 | 10.191 | 94.907  | 1.00 | 0.00 | O |
| ATOM | 329 | O1P  | T A | 11 | 18.540 | 11.345 | 92.687  | 1.00 | 0.00 | O |
| ATOM | 330 | O2P  | T A | 11 | 16.319 | 11.361 | 93.855  | 1.00 | 0.00 | O |
| ATOM | 331 | P    | T A | 11 | 17.800 | 11.382 | 93.962  | 1.00 | 0.00 | P |
| ATOM | 332 | H3   | T A | 11 | 15.874 | 6.598  | 99.910  | 1.00 | 0.00 | H |
| ATOM | 333 | H6   | T A | 11 | 16.758 | 9.053  | 95.854  | 1.00 | 0.00 | H |
| ATOM | 334 | H1'  | T A | 11 | 19.036 | 6.271  | 96.744  | 1.00 | 0.00 | H |
| ATOM | 335 | H3'  | T A | 11 | 19.717 | 8.391  | 93.504  | 1.00 | 0.00 | H |
| ATOM | 336 | H4'  | T A | 11 | 21.262 | 8.919  | 95.588  | 1.00 | 0.00 | H |
| ATOM | 337 | H71  | T A | 11 | 13.962 | 9.508  | 96.102  | 1.00 | 0.00 | H |
| ATOM | 338 | H72  | T A | 11 | 13.661 | 9.921  | 97.806  | 1.00 | 0.00 | H |
| ATOM | 339 | H73  | T A | 11 | 14.933 | 10.769 | 96.896  | 1.00 | 0.00 | H |
| ATOM | 340 | H2'1 | T A | 11 | 17.647 | 7.948  | 94.636  | 1.00 | 0.00 | H |
| ATOM | 341 | H2'2 | T A | 11 | 18.292 | 6.320  | 94.493  | 1.00 | 0.00 | H |
| ATOM | 342 | H5'1 | T A | 11 | 19.579 | 10.692 | 96.461  | 1.00 | 0.00 | H |
| ATOM | 343 | H5'2 | T A | 11 | 20.262 | 10.836 | 94.827  | 1.00 | 0.00 | H |
| ATOM | 344 | C1'  | A A | 12 | 18.504 | 2.326  | 97.047  | 1.00 | 0.00 | C |

|      |     |      |   |   |    |        |        |         |      |      |   |
|------|-----|------|---|---|----|--------|--------|---------|------|------|---|
| ATOM | 345 | N1   | A | A | 12 | 14.124 | 3.339  | 99.525  | 1.00 | 0.00 | N |
| ATOM | 346 | C2   | A | A | 12 | 15.135 | 2.515  | 99.786  | 1.00 | 0.00 | C |
| ATOM | 347 | N3   | A | A | 12 | 16.241 | 2.305  | 99.102  | 1.00 | 0.00 | N |
| ATOM | 348 | C4   | A | A | 12 | 16.259 | 3.072  | 97.998  | 1.00 | 0.00 | C |
| ATOM | 349 | C5   | A | A | 12 | 15.306 | 3.962  | 97.588  | 1.00 | 0.00 | C |
| ATOM | 350 | C6   | A | A | 12 | 14.171 | 4.092  | 98.416  | 1.00 | 0.00 | C |
| ATOM | 351 | N6   | A | A | 12 | 13.155 | 4.928  | 98.141  | 1.00 | 0.00 | N |
| ATOM | 352 | N7   | A | A | 12 | 15.670 | 4.571  | 96.401  | 1.00 | 0.00 | N |
| ATOM | 353 | C8   | A | A | 12 | 16.822 | 4.039  | 96.117  | 1.00 | 0.00 | C |
| ATOM | 354 | N9   | A | A | 12 | 17.245 | 3.120  | 97.043  | 1.00 | 0.00 | N |
| ATOM | 355 | C2'  | A | A | 12 | 18.937 | 1.861  | 95.663  | 1.00 | 0.00 | C |
| ATOM | 356 | C3'  | A | A | 12 | 20.452 | 1.946  | 95.760  | 1.00 | 0.00 | C |
| ATOM | 357 | O3'  | A | A | 12 | 20.950 | 0.749  | 96.355  | 1.00 | 0.00 | O |
| ATOM | 358 | C4'  | A | A | 12 | 20.668 | 3.166  | 96.653  | 1.00 | 0.00 | C |
| ATOM | 359 | O4'  | A | A | 12 | 19.530 | 3.145  | 97.573  | 1.00 | 0.00 | O |
| ATOM | 360 | C5'  | A | A | 12 | 20.705 | 4.506  | 95.958  | 1.00 | 0.00 | C |
| ATOM | 361 | O5'  | A | A | 12 | 19.756 | 4.517  | 94.862  | 1.00 | 0.00 | O |
| ATOM | 362 | O1P  | A | A | 12 | 21.222 | 4.701  | 92.824  | 1.00 | 0.00 | O |
| ATOM | 363 | O2P  | A | A | 12 | 18.872 | 5.580  | 92.763  | 1.00 | 0.00 | O |
| ATOM | 364 | P    | A | A | 12 | 20.110 | 5.348  | 93.547  | 1.00 | 0.00 | P |
| ATOM | 365 | H2   | A | A | 12 | 15.034 | 1.929  | 100.699 | 1.00 | 0.00 | H |
| ATOM | 366 | H8   | A | A | 12 | 17.399 | 4.297  | 95.228  | 1.00 | 0.00 | H |
| ATOM | 367 | H1'  | A | A | 12 | 18.370 | 1.481  | 97.720  | 1.00 | 0.00 | H |
| ATOM | 368 | H3'  | A | A | 12 | 20.917 | 2.084  | 94.785  | 1.00 | 0.00 | H |
| ATOM | 369 | H4'  | A | A | 12 | 21.625 | 3.025  | 97.155  | 1.00 | 0.00 | H |
| ATOM | 370 | H61  | A | A | 12 | 12.350 | 4.988  | 98.779  | 1.00 | 0.00 | H |
| ATOM | 371 | H62  | A | A | 12 | 13.183 | 5.508  | 97.290  | 1.00 | 0.00 | H |
| ATOM | 372 | H2'1 | A | A | 12 | 18.554 | 2.502  | 94.871  | 1.00 | 0.00 | H |
| ATOM | 373 | H2'2 | A | A | 12 | 18.609 | 0.843  | 95.449  | 1.00 | 0.00 | H |
| ATOM | 374 | H5'1 | A | A | 12 | 20.448 | 5.287  | 96.674  | 1.00 | 0.00 | H |
| ATOM | 375 | H5'2 | A | A | 12 | 21.708 | 4.686  | 95.577  | 1.00 | 0.00 | H |
| ATOM | 376 | C1'  | G | A | 13 | 16.449 | -1.884 | 98.690  | 1.00 | 0.00 | C |
| ATOM | 377 | N1   | G | A | 13 | 12.110 | 0.788  | 98.459  | 1.00 | 0.00 | N |
| ATOM | 378 | C2   | G | A | 13 | 12.563 | -0.083 | 99.431  | 1.00 | 0.00 | C |
| ATOM | 379 | N2   | G | A | 13 | 11.753 | -0.273 | 100.481 | 1.00 | 0.00 | N |
| ATOM | 380 | N3   | G | A | 13 | 13.732 | -0.719 | 99.362  | 1.00 | 0.00 | N |
| ATOM | 381 | C4   | G | A | 13 | 14.418 | -0.416 | 98.229  | 1.00 | 0.00 | C |
| ATOM | 382 | C5   | G | A | 13 | 14.043 | 0.438  | 97.205  | 1.00 | 0.00 | C |
| ATOM | 383 | C6   | G | A | 13 | 12.804 | 1.115  | 97.280  | 1.00 | 0.00 | C |
| ATOM | 384 | O6   | G | A | 13 | 12.302 | 1.904  | 96.478  | 1.00 | 0.00 | O |
| ATOM | 385 | N7   | G | A | 13 | 15.031 | 0.471  | 96.219  | 1.00 | 0.00 | N |
| ATOM | 386 | C8   | G | A | 13 | 15.953 | -0.340 | 96.667  | 1.00 | 0.00 | C |
| ATOM | 387 | N9   | G | A | 13 | 15.652 | -0.920 | 97.882  | 1.00 | 0.00 | N |
| ATOM | 388 | C2'  | G | A | 13 | 17.195 | -2.915 | 97.855  | 1.00 | 0.00 | C |
| ATOM | 389 | C3'  | G | A | 13 | 18.478 | -3.098 | 98.646  | 1.00 | 0.00 | C |
| ATOM | 390 | O3'  | G | A | 13 | 18.257 | -4.051 | 99.684  | 1.00 | 0.00 | O |
| ATOM | 391 | C4'  | G | A | 13 | 18.740 | -1.697 | 99.198  | 1.00 | 0.00 | C |
| ATOM | 392 | O4'  | G | A | 13 | 17.404 | -1.144 | 99.426  | 1.00 | 0.00 | O |
| ATOM | 393 | C5'  | G | A | 13 | 19.506 | -0.755 | 98.301  | 1.00 | 0.00 | C |
| ATOM | 394 | O5'  | G | A | 13 | 19.128 | -0.975 | 96.921  | 1.00 | 0.00 | O |
| ATOM | 395 | O1P  | G | A | 13 | 21.235 | -1.869 | 95.872  | 1.00 | 0.00 | O |
| ATOM | 396 | O2P  | G | A | 13 | 19.561 | -0.638 | 94.469  | 1.00 | 0.00 | O |
| ATOM | 397 | P    | G | A | 13 | 20.231 | -0.792 | 95.782  | 1.00 | 0.00 | P |
| ATOM | 398 | H1   | G | A | 13 | 11.191 | 1.234  | 98.612  | 1.00 | 0.00 | H |

|      |     |      |   |   |    |        |        |         |      |      |   |
|------|-----|------|---|---|----|--------|--------|---------|------|------|---|
| ATOM | 399 | H8   | G | A | 13 | 16.878 | -0.544 | 96.128  | 1.00 | 0.00 | H |
| ATOM | 400 | H1'  | G | A | 13 | 15.778 | -2.368 | 99.401  | 1.00 | 0.00 | H |
| ATOM | 401 | H21  | G | A | 13 | 10.851 | 0.226  | 100.529 | 1.00 | 0.00 | H |
| ATOM | 402 | H3'  | G | A | 13 | 19.303 | -3.433 | 98.017  | 1.00 | 0.00 | H |
| ATOM | 403 | H22  | G | A | 13 | 12.031 | -0.911 | 101.236 | 1.00 | 0.00 | H |
| ATOM | 404 | H4'  | G | A | 13 | 19.311 | -1.821 | 100.119 | 1.00 | 0.00 | H |
| ATOM | 405 | H2'1 | G | A | 13 | 17.400 | -2.560 | 96.845  | 1.00 | 0.00 | H |
| ATOM | 406 | H2'2 | G | A | 13 | 16.645 | -3.853 | 97.767  | 1.00 | 0.00 | H |
| ATOM | 407 | H5'1 | G | A | 13 | 19.281 | 0.273  | 98.586  | 1.00 | 0.00 | H |
| ATOM | 408 | H5'2 | G | A | 13 | 20.574 | -0.934 | 98.424  | 1.00 | 0.00 | H |
| ATOM | 409 | C1'  | G | A | 14 | 12.654 | -4.722 | 100.133 | 1.00 | 0.00 | C |
| ATOM | 410 | N1   | G | A | 14 | 9.910  | -1.538 | 97.244  | 1.00 | 0.00 | N |
| ATOM | 411 | C2   | G | A | 14 | 9.635  | -2.063 | 98.494  | 1.00 | 0.00 | C |
| ATOM | 412 | N2   | G | A | 14 | 8.475  | -1.691 | 99.047  | 1.00 | 0.00 | N |
| ATOM | 413 | N3   | G | A | 14 | 10.454 | -2.891 | 99.141  | 1.00 | 0.00 | N |
| ATOM | 414 | C4   | G | A | 14 | 11.579 | -3.165 | 98.428  | 1.00 | 0.00 | C |
| ATOM | 415 | C5   | G | A | 14 | 11.934 | -2.691 | 97.176  | 1.00 | 0.00 | C |
| ATOM | 416 | C6   | G | A | 14 | 11.069 | -1.810 | 96.491  | 1.00 | 0.00 | C |
| ATOM | 417 | O6   | G | A | 14 | 11.207 | -1.289 | 95.384  | 1.00 | 0.00 | O |
| ATOM | 418 | N7   | G | A | 14 | 13.173 | -3.216 | 96.799  | 1.00 | 0.00 | N |
| ATOM | 419 | C8   | G | A | 14 | 13.521 | -3.968 | 97.810  | 1.00 | 0.00 | C |
| ATOM | 420 | N9   | G | A | 14 | 12.604 | -3.989 | 98.839  | 1.00 | 0.00 | N |
| ATOM | 421 | C2'  | G | A | 14 | 13.270 | -6.111 | 100.027 | 1.00 | 0.00 | C |
| ATOM | 422 | C3'  | G | A | 14 | 14.009 | -6.234 | 101.349 | 1.00 | 0.00 | C |
| ATOM | 423 | O3'  | G | A | 14 | 13.103 | -6.677 | 102.355 | 1.00 | 0.00 | O |
| ATOM | 424 | C4'  | G | A | 14 | 14.496 | -4.806 | 101.599 | 1.00 | 0.00 | C |
| ATOM | 425 | O4'  | G | A | 14 | 13.445 | -3.963 | 101.028 | 1.00 | 0.00 | O |
| ATOM | 426 | C5'  | G | A | 14 | 15.815 | -4.428 | 100.969 | 1.00 | 0.00 | C |
| ATOM | 427 | O5'  | G | A | 14 | 15.942 | -5.064 | 99.674  | 1.00 | 0.00 | O |
| ATOM | 428 | O1P  | G | A | 14 | 17.855 | -6.667 | 99.996  | 1.00 | 0.00 | O |
| ATOM | 429 | O2P  | G | A | 14 | 17.365 | -5.743 | 97.717  | 1.00 | 0.00 | O |
| ATOM | 430 | P    | G | A | 14 | 17.388 | -5.528 | 99.185  | 1.00 | 0.00 | P |
| ATOM | 431 | H1   | G | A | 14 | 9.212  | -0.899 | 96.832  | 1.00 | 0.00 | H |
| ATOM | 432 | H8   | G | A | 14 | 14.456 | -4.529 | 97.836  | 1.00 | 0.00 | H |
| ATOM | 433 | H1'  | G | A | 14 | 11.644 | -4.771 | 100.537 | 1.00 | 0.00 | H |
| ATOM | 434 | H21  | G | A | 14 | 7.847  | -1.047 | 98.542  | 1.00 | 0.00 | H |
| ATOM | 435 | H3'  | G | A | 14 | 14.846 | -6.928 | 101.285 | 1.00 | 0.00 | H |
| ATOM | 436 | H22  | G | A | 14 | 8.210  | -2.048 | 99.975  | 1.00 | 0.00 | H |
| ATOM | 437 | H4'  | G | A | 14 | 14.595 | -4.691 | 102.678 | 1.00 | 0.00 | H |
| ATOM | 438 | H2'1 | G | A | 14 | 13.949 | -6.199 | 99.181  | 1.00 | 0.00 | H |
| ATOM | 439 | H2'2 | G | A | 14 | 12.512 | -6.891 | 99.921  | 1.00 | 0.00 | H |
| ATOM | 440 | H5'1 | G | A | 14 | 15.859 | -3.346 | 100.855 | 1.00 | 0.00 | H |
| ATOM | 441 | H5'2 | G | A | 14 | 16.628 | -4.753 | 101.621 | 1.00 | 0.00 | H |
| ATOM | 442 | C1'  | A | A | 15 | 7.890  | -6.053 | 100.278 | 1.00 | 0.00 | C |
| ATOM | 443 | N1   | A | A | 15 | 7.679  | -3.666 | 95.740  | 1.00 | 0.00 | N |
| ATOM | 444 | C2   | A | A | 15 | 6.862  | -3.673 | 96.791  | 1.00 | 0.00 | C |
| ATOM | 445 | N3   | A | A | 15 | 6.979  | -4.312 | 97.937  | 1.00 | 0.00 | N |
| ATOM | 446 | C4   | A | A | 15 | 8.112  | -5.038 | 97.949  | 1.00 | 0.00 | C |
| ATOM | 447 | C5   | A | A | 15 | 9.048  | -5.140 | 96.960  | 1.00 | 0.00 | C |
| ATOM | 448 | C6   | A | A | 15 | 8.801  | -4.400 | 95.785  | 1.00 | 0.00 | C |
| ATOM | 449 | N6   | A | A | 15 | 9.633  | -4.404 | 94.728  | 1.00 | 0.00 | N |
| ATOM | 450 | N7   | A | A | 15 | 10.081 | -5.980 | 97.334  | 1.00 | 0.00 | N |
| ATOM | 451 | C8   | A | A | 15 | 9.751  | -6.369 | 98.530  | 1.00 | 0.00 | C |
| ATOM | 452 | N9   | A | A | 15 | 8.567  | -5.836 | 98.972  | 1.00 | 0.00 | N |



|      |     |      |   |   |    |        |        |         |      |      |   |
|------|-----|------|---|---|----|--------|--------|---------|------|------|---|
| ATOM | 453 | C2'  | A | A | 15 | 8.009  | -7.479 | 100.801 | 1.00 | 0.00 | C |
| ATOM | 454 | C3'  | A | A | 15 | 8.116  | -7.259 | 102.302 | 1.00 | 0.00 | C |
| ATOM | 455 | O3'  | A | A | 15 | 6.809  | -7.134 | 102.851 | 1.00 | 0.00 | O |
| ATOM | 456 | C4'  | A | A | 15 | 8.912  | -5.958 | 102.398 | 1.00 | 0.00 | C |
| ATOM | 457 | O4'  | A | A | 15 | 8.490  | -5.190 | 101.224 | 1.00 | 0.00 | O |
| ATOM | 458 | C5'  | A | A | 15 | 10.416 | -6.086 | 102.375 | 1.00 | 0.00 | C |
| ATOM | 459 | O5'  | A | A | 15 | 10.804 | -7.156 | 101.476 | 1.00 | 0.00 | O |
| ATOM | 460 | O1P  | A | A | 15 | 11.819 | -8.871 | 103.013 | 1.00 | 0.00 | O |
| ATOM | 461 | O2P  | A | A | 15 | 12.549 | -8.745 | 100.615 | 1.00 | 0.00 | O |
| ATOM | 462 | P    | A | A | 15 | 12.090 | -8.029 | 101.830 | 1.00 | 0.00 | P |
| ATOM | 463 | H2   | A | A | 15 | 5.968  | -3.060 | 96.689  | 1.00 | 0.00 | H |
| ATOM | 464 | H8   | A | A | 15 | 10.355 | -7.053 | 99.125  | 1.00 | 0.00 | H |
| ATOM | 465 | H1'  | A | A | 15 | 6.845  | -5.763 | 100.173 | 1.00 | 0.00 | H |
| ATOM | 466 | H3'  | A | A | 15 | 8.641  | -8.076 | 102.797 | 1.00 | 0.00 | H |
| ATOM | 467 | H4'  | A | A | 15 | 8.632  | -5.485 | 103.338 | 1.00 | 0.00 | H |
| ATOM | 468 | H61  | A | A | 15 | 9.404  | -3.841 | 93.895  | 1.00 | 0.00 | H |
| ATOM | 469 | H62  | A | A | 15 | 10.495 | -4.965 | 94.754  | 1.00 | 0.00 | H |
| ATOM | 470 | H2'1 | A | A | 15 | 8.888  | -7.991 | 100.409 | 1.00 | 0.00 | H |
| ATOM | 471 | H2'2 | A | A | 15 | 7.138  | -8.086 | 100.551 | 1.00 | 0.00 | H |
| ATOM | 472 | H5'1 | A | A | 15 | 10.849 | -5.146 | 102.038 | 1.00 | 0.00 | H |
| ATOM | 473 | H5'2 | A | A | 15 | 10.772 | -6.304 | 103.380 | 1.00 | 0.00 | H |
| ATOM | 474 | C1'  | C | A | 16 | 3.283  | -6.270 | 98.436  | 1.00 | 0.00 | C |
| ATOM | 475 | N1   | C | A | 16 | 4.445  | -6.697 | 97.610  | 1.00 | 0.00 | N |
| ATOM | 476 | C2   | C | A | 16 | 4.572  | -6.156 | 96.333  | 1.00 | 0.00 | C |
| ATOM | 477 | O2   | C | A | 16 | 3.718  | -5.349 | 95.940  | 1.00 | 0.00 | O |
| ATOM | 478 | N3   | C | A | 16 | 5.623  | -6.531 | 95.563  | 1.00 | 0.00 | N |
| ATOM | 479 | C4   | C | A | 16 | 6.529  | -7.406 | 96.018  | 1.00 | 0.00 | C |
| ATOM | 480 | N4   | C | A | 16 | 7.538  | -7.734 | 95.225  | 1.00 | 0.00 | N |
| ATOM | 481 | C5   | C | A | 16 | 6.423  | -7.983 | 97.326  | 1.00 | 0.00 | C |
| ATOM | 482 | C6   | C | A | 16 | 5.359  | -7.587 | 98.086  | 1.00 | 0.00 | C |
| ATOM | 483 | C2'  | C | A | 16 | 2.686  | -7.389 | 99.280  | 1.00 | 0.00 | C |
| ATOM | 484 | C3'  | C | A | 16 | 2.274  | -6.647 | 100.543 | 1.00 | 0.00 | C |
| ATOM | 485 | O3'  | C | A | 16 | 0.987  | -6.069 | 100.347 | 1.00 | 0.00 | O |
| ATOM | 486 | C4'  | C | A | 16 | 3.368  | -5.591 | 100.689 | 1.00 | 0.00 | C |
| ATOM | 487 | O4'  | C | A | 16 | 3.729  | -5.251 | 99.313  | 1.00 | 0.00 | O |
| ATOM | 488 | C5'  | C | A | 16 | 4.617  | -6.015 | 101.426 | 1.00 | 0.00 | C |
| ATOM | 489 | O5'  | C | A | 16 | 4.923  | -7.398 | 101.115 | 1.00 | 0.00 | O |
| ATOM | 490 | O1P  | C | A | 16 | 4.599  | -8.577 | 103.316 | 1.00 | 0.00 | O |
| ATOM | 491 | O2P  | C | A | 16 | 6.195  | -9.507 | 101.618 | 1.00 | 0.00 | O |
| ATOM | 492 | P    | C | A | 16 | 5.581  | -8.311 | 102.245 | 1.00 | 0.00 | P |
| ATOM | 493 | H5   | C | A | 16 | 7.156  | -8.701 | 97.696  | 1.00 | 0.00 | H |
| ATOM | 494 | H6   | C | A | 16 | 5.240  | -7.992 | 99.091  | 1.00 | 0.00 | H |
| ATOM | 495 | H1'  | C | A | 16 | 2.533  | -5.837 | 97.774  | 1.00 | 0.00 | H |
| ATOM | 496 | H3'  | C | A | 16 | 2.246  | -7.308 | 101.411 | 1.00 | 0.00 | H |
| ATOM | 497 | H4'  | C | A | 16 | 2.929  | -4.756 | 101.234 | 1.00 | 0.00 | H |
| ATOM | 498 | H41  | C | A | 16 | 8.252  | -8.405 | 95.550  | 1.00 | 0.00 | H |
| ATOM | 499 | H42  | C | A | 16 | 7.612  | -7.322 | 94.283  | 1.00 | 0.00 | H |
| ATOM | 500 | H2'1 | C | A | 16 | 3.410  | -8.173 | 99.500  | 1.00 | 0.00 | H |
| ATOM | 501 | H2'2 | C | A | 16 | 1.829  | -7.859 | 98.797  | 1.00 | 0.00 | H |
| ATOM | 502 | H5'1 | C | A | 16 | 5.446  | -5.376 | 101.122 | 1.00 | 0.00 | H |
| ATOM | 503 | H5'2 | C | A | 16 | 4.454  | -5.907 | 102.498 | 1.00 | 0.00 | H |
| ATOM | 504 | C1'  | G | A | 17 | -0.057 | -6.265 | 94.781  | 1.00 | 0.00 | C |
| ATOM | 505 | N1   | G | A | 17 | 3.866  | -7.898 | 91.958  | 1.00 | 0.00 | N |
| ATOM | 506 | C2   | G | A | 17 | 2.890  | -6.961 | 91.666  | 1.00 | 0.00 | C |

|      |     |      |     |    |        |         |         |      |      |   |
|------|-----|------|-----|----|--------|---------|---------|------|------|---|
| ATOM | 507 | N2   | G A | 17 | 2.969  | -6.385  | 90.459  | 1.00 | 0.00 | N |
| ATOM | 508 | N3   | G A | 17 | 1.915  | -6.626  | 92.508  | 1.00 | 0.00 | N |
| ATOM | 509 | C4   | G A | 17 | 1.985  | -7.315  | 93.679  | 1.00 | 0.00 | C |
| ATOM | 510 | C5   | G A | 17 | 2.916  | -8.267  | 94.056  | 1.00 | 0.00 | C |
| ATOM | 511 | C6   | G A | 17 | 3.955  | -8.621  | 93.165  | 1.00 | 0.00 | C |
| ATOM | 512 | O6   | G A | 17 | 4.865  | -9.436  | 93.315  | 1.00 | 0.00 | O |
| ATOM | 513 | N7   | G A | 17 | 2.634  | -8.736  | 95.342  | 1.00 | 0.00 | N |
| ATOM | 514 | C8   | G A | 17 | 1.568  | -8.065  | 95.694  | 1.00 | 0.00 | C |
| ATOM | 515 | N9   | G A | 17 | 1.113  | -7.182  | 94.737  | 1.00 | 0.00 | N |
| ATOM | 516 | C2'  | G A | 17 | -1.271 | -6.850  | 95.489  | 1.00 | 0.00 | C |
| ATOM | 517 | C3'  | G A | 17 | -1.857 | -5.630  | 96.179  | 1.00 | 0.00 | C |
| ATOM | 518 | O3'  | G A | 17 | -2.694 | -4.929  | 95.261  | 1.00 | 0.00 | O |
| ATOM | 519 | C4'  | G A | 17 | -0.614 | -4.825  | 96.558  | 1.00 | 0.00 | C |
| ATOM | 520 | O4'  | G A | 17 | 0.335  | -5.099  | 95.481  | 1.00 | 0.00 | O |
| ATOM | 521 | C5'  | G A | 17 | 0.035  | -5.176  | 97.877  | 1.00 | 0.00 | C |
| ATOM | 522 | O5'  | G A | 17 | -0.050 | -6.605  | 98.100  | 1.00 | 0.00 | O |
| ATOM | 523 | O1P  | G A | 17 | -1.568 | -6.793  | 100.099 | 1.00 | 0.00 | O |
| ATOM | 524 | O2P  | G A | 17 | 0.137  | -8.576  | 99.647  | 1.00 | 0.00 | O |
| ATOM | 525 | P    | G A | 17 | -0.226 | -7.139  | 99.593  | 1.00 | 0.00 | P |
| ATOM | 526 | H1   | G A | 17 | 4.582  | -8.081  | 91.238  | 1.00 | 0.00 | H |
| ATOM | 527 | H8   | G A | 17 | 1.081  | -8.194  | 96.663  | 1.00 | 0.00 | H |
| ATOM | 528 | H1'  | G A | 17 | -0.303 | -5.976  | 93.759  | 1.00 | 0.00 | H |
| ATOM | 529 | H21  | G A | 17 | 3.728  | -6.647  | 89.813  | 1.00 | 0.00 | H |
| ATOM | 530 | H3'  | G A | 17 | -2.437 | -5.899  | 97.062  | 1.00 | 0.00 | H |
| ATOM | 531 | H22  | G A | 17 | 2.271  | -5.682  | 90.180  | 1.00 | 0.00 | H |
| ATOM | 532 | H4'  | G A | 17 | -0.917 | -3.780  | 96.604  | 1.00 | 0.00 | H |
| ATOM | 533 | H2'1 | G A | 17 | -0.997 | -7.620  | 96.210  | 1.00 | 0.00 | H |
| ATOM | 534 | H2'2 | G A | 17 | -1.983 | -7.294  | 94.791  | 1.00 | 0.00 | H |
| ATOM | 535 | H5'1 | G A | 17 | 1.079  | -4.867  | 97.854  | 1.00 | 0.00 | H |
| ATOM | 536 | H5'2 | G A | 17 | -0.477 | -4.645  | 98.680  | 1.00 | 0.00 | H |
| ATOM | 537 | C1'  | G A | 18 | -1.535 | -6.959  | 90.106  | 1.00 | 0.00 | C |
| ATOM | 538 | N1   | G A | 18 | 2.368  | -10.241 | 89.959  | 1.00 | 0.00 | N |
| ATOM | 539 | C2   | G A | 18 | 1.956  | -9.308  | 89.022  | 1.00 | 0.00 | C |
| ATOM | 540 | N2   | G A | 18 | 2.680  | -9.243  | 87.895  | 1.00 | 0.00 | N |
| ATOM | 541 | N3   | G A | 18 | 0.909  | -8.505  | 89.196  | 1.00 | 0.00 | N |
| ATOM | 542 | C4   | G A | 18 | 0.290  | -8.713  | 90.388  | 1.00 | 0.00 | C |
| ATOM | 543 | C5   | G A | 18 | 0.627  | -9.621  | 91.378  | 1.00 | 0.00 | C |
| ATOM | 544 | C6   | G A | 18 | 1.742  | -10.472 | 91.197  | 1.00 | 0.00 | C |
| ATOM | 545 | O6   | G A | 18 | 2.191  | -11.332 | 91.953  | 1.00 | 0.00 | O |
| ATOM | 546 | N7   | G A | 18 | -0.264 | -9.520  | 92.448  | 1.00 | 0.00 | N |
| ATOM | 547 | C8   | G A | 18 | -1.091 | -8.575  | 92.083  | 1.00 | 0.00 | C |
| ATOM | 548 | N9   | G A | 18 | -0.820 | -8.036  | 90.843  | 1.00 | 0.00 | N |
| ATOM | 549 | C2'  | G A | 18 | -3.046 | -6.996  | 90.277  | 1.00 | 0.00 | C |
| ATOM | 550 | C3'  | G A | 18 | -3.402 | -5.520  | 90.288  | 1.00 | 0.00 | C |
| ATOM | 551 | O3'  | G A | 18 | -3.535 | -5.059  | 88.946  | 1.00 | 0.00 | O |
| ATOM | 552 | C4'  | G A | 18 | -2.208 | -4.887  | 91.000  | 1.00 | 0.00 | C |
| ATOM | 553 | O4'  | G A | 18 | -1.071 | -5.717  | 90.600  | 1.00 | 0.00 | O |
| ATOM | 554 | C5'  | G A | 18 | -2.269 | -4.846  | 92.508  | 1.00 | 0.00 | C |
| ATOM | 555 | O5'  | G A | 18 | -2.911 | -6.047  | 93.006  | 1.00 | 0.00 | O |
| ATOM | 556 | O1P  | G A | 18 | -5.043 | -5.191  | 94.030  | 1.00 | 0.00 | O |
| ATOM | 557 | O2P  | G A | 18 | -4.004 | -7.308  | 94.885  | 1.00 | 0.00 | O |
| ATOM | 558 | P    | G A | 18 | -3.812 | -5.951  | 94.318  | 1.00 | 0.00 | P |
| ATOM | 559 | H1   | G A | 18 | 3.198  | -10.810 | 89.729  | 1.00 | 0.00 | H |
| ATOM | 560 | H8   | G A | 18 | -1.922 | -8.240  | 92.704  | 1.00 | 0.00 | H |

|      |     |      |     |   |    |        |         |        |      |      |   |
|------|-----|------|-----|---|----|--------|---------|--------|------|------|---|
| ATOM | 561 | H1'  | G   | A | 18 | -1.258 | -7.025  | 89.053 | 1.00 | 0.00 | H |
| ATOM | 562 | H21  | G   | A | 18 | 3.492  | -9.866  | 87.771 | 1.00 | 0.00 | H |
| ATOM | 563 | H3'  | G   | A | 18 | -4.329 | -5.327  | 90.830 | 1.00 | 0.00 | H |
| ATOM | 564 | H22  | G   | A | 18 | 2.423  | -8.572  | 87.160 | 1.00 | 0.00 | H |
| ATOM | 565 | H4'  | G   | A | 18 | -2.133 | -3.861  | 90.641 | 1.00 | 0.00 | H |
| ATOM | 566 | H2'1 | G   | A | 18 | -3.345 | -7.485  | 91.203 | 1.00 | 0.00 | H |
| ATOM | 567 | H2'2 | G   | A | 18 | -3.542 | -7.518  | 89.456 | 1.00 | 0.00 | H |
| ATOM | 568 | H5'1 | G   | A | 18 | -1.258 | -4.776  | 92.906 | 1.00 | 0.00 | H |
| ATOM | 569 | H5'2 | G   | A | 18 | -2.838 | -3.971  | 92.819 | 1.00 | 0.00 | H |
| ATOM | 570 | C1'  | T   | A | 19 | -1.270 | -9.008  | 85.608 | 1.00 | 0.00 | C |
| ATOM | 571 | N1   | T   | A | 19 | -1.275 | -9.869  | 86.820 | 1.00 | 0.00 | N |
| ATOM | 572 | C2   | T   | A | 19 | -0.278 | -10.814 | 86.928 | 1.00 | 0.00 | C |
| ATOM | 573 | O2   | T   | A | 19 | 0.587  | -10.961 | 86.079 | 1.00 | 0.00 | O |
| ATOM | 574 | N3   | T   | A | 19 | -0.321 | -11.592 | 88.071 | 1.00 | 0.00 | N |
| ATOM | 575 | C4   | T   | A | 19 | -1.251 | -11.511 | 89.084 | 1.00 | 0.00 | C |
| ATOM | 576 | O4   | T   | A | 19 | -1.190 | -12.265 | 90.062 | 1.00 | 0.00 | O |
| ATOM | 577 | C5   | T   | A | 19 | -2.256 | -10.493 | 88.885 | 1.00 | 0.00 | C |
| ATOM | 578 | C6   | T   | A | 19 | -2.244 | -9.716  | 87.783 | 1.00 | 0.00 | C |
| ATOM | 579 | C7   | T   | A | 19 | -3.287 | -10.366 | 89.966 | 1.00 | 0.00 | C |
| ATOM | 580 | C2'  | T   | A | 19 | -2.660 | -8.696  | 85.069 | 1.00 | 0.00 | C |
| ATOM | 581 | C3'  | T   | A | 19 | -2.493 | -7.271  | 84.565 | 1.00 | 0.00 | C |
| ATOM | 582 | O3'  | T   | A | 19 | -1.954 | -7.300  | 83.246 | 1.00 | 0.00 | O |
| ATOM | 583 | C4'  | T   | A | 19 | -1.519 | -6.668  | 85.575 | 1.00 | 0.00 | C |
| ATOM | 584 | O4'  | T   | A | 19 | -0.651 | -7.782  | 85.950 | 1.00 | 0.00 | O |
| ATOM | 585 | C5'  | T   | A | 19 | -2.125 | -6.083  | 86.829 | 1.00 | 0.00 | C |
| ATOM | 586 | O5'  | T   | A | 19 | -3.258 | -6.885  | 87.245 | 1.00 | 0.00 | O |
| ATOM | 587 | O1P  | T   | A | 19 | -5.215 | -5.332  | 86.941 | 1.00 | 0.00 | O |
| ATOM | 588 | O2P  | T   | A | 19 | -5.322 | -7.165  | 88.650 | 1.00 | 0.00 | O |
| ATOM | 589 | P    | T   | A | 19 | -4.501 | -6.161  | 87.932 | 1.00 | 0.00 | P |
| ATOM | 590 | H3   | T   | A | 19 | 0.417  | -12.302 | 88.175 | 1.00 | 0.00 | H |
| ATOM | 591 | H6   | T   | A | 19 | -3.014 | -8.954  | 87.654 | 1.00 | 0.00 | H |
| ATOM | 592 | H1'  | T   | A | 19 | -0.657 | -9.493  | 84.848 | 1.00 | 0.00 | H |
| ATOM | 593 | H3'  | T   | A | 19 | -3.438 | -6.729  | 84.558 | 1.00 | 0.00 | H |
| ATOM | 594 | H4'  | T   | A | 19 | -0.985 | -5.866  | 85.059 | 1.00 | 0.00 | H |
| ATOM | 595 | H71  | T   | A | 19 | -4.265 | -10.642 | 89.570 | 1.00 | 0.00 | H |
| ATOM | 596 | H72  | T   | A | 19 | -3.031 | -11.029 | 90.792 | 1.00 | 0.00 | H |
| ATOM | 597 | H73  | T   | A | 19 | -3.320 | -9.336  | 90.322 | 1.00 | 0.00 | H |
| ATOM | 598 | H2'1 | T   | A | 19 | -3.424 | -8.757  | 85.841 | 1.00 | 0.00 | H |
| ATOM | 599 | H2'2 | T   | A | 19 | -2.952 | -9.370  | 84.263 | 1.00 | 0.00 | H |
| ATOM | 600 | H5'1 | T   | A | 19 | -1.374 | -6.069  | 87.617 | 1.00 | 0.00 | H |
| ATOM | 601 | H5'2 | T   | A | 19 | -2.451 | -5.063  | 86.627 | 1.00 | 0.00 | H |
| ATOM | 602 | C01  | LNK | A | 20 | -3.618 | -7.791  | 79.952 | 0.00 | 0.00 | C |
| ATOM | 603 | O1   | LNK | A | 20 | -3.651 | -7.724  | 81.381 | 1.00 | 0.00 | O |
| ATOM | 604 | S    | LNK | A | 20 | -6.076 | -8.595  | 76.926 | 0.00 | 0.00 | S |
| ATOM | 605 | C02  | LNK | A | 20 | -5.016 | -8.170  | 79.426 | 0.00 | 0.00 | C |
| ATOM | 606 | C03  | LNK | A | 20 | -4.870 | -9.088  | 78.197 | 0.00 | 0.00 | C |
| ATOM | 607 | O1P  | LNK | A | 20 | -3.327 | -9.545  | 83.088 | 1.00 | 0.00 | O |
| ATOM | 608 | O2P  | LNK | A | 20 | -1.612 | -9.188  | 81.289 | 1.00 | 0.00 | O |
| ATOM | 609 | P    | LNK | A | 20 | -2.609 | -8.595  | 82.215 | 1.00 | 0.00 | P |
| ATOM | 610 | H01  | LNK | A | 20 | -2.895 | -8.544  | 79.640 | 0.00 | 0.00 | H |
| ATOM | 611 | H02  | LNK | A | 20 | -3.329 | -6.821  | 79.548 | 0.00 | 0.00 | H |
| ATOM | 612 | H03  | LNK | A | 20 | -5.054 | -10.122 | 78.490 | 0.00 | 0.00 | H |
| ATOM | 613 | H04  | LNK | A | 20 | -5.556 | -7.267  | 79.144 | 0.00 | 0.00 | H |
| ATOM | 614 | H05  | LNK | A | 20 | -5.568 | -8.694  | 80.206 | 0.00 | 0.00 | H |

|      |     |      |     |   |    |        |         |        |      |      |   |
|------|-----|------|-----|---|----|--------|---------|--------|------|------|---|
| ATOM | 615 | H06  | LNK | A | 20 | -3.861 | -8.999  | 77.795 | 0.00 | 0.00 | H |
| ATOM | 616 | AU   | LNK | A | 20 | -6.082 | -9.060  | 76.422 |      |      |   |
| TER  |     |      |     |   |    |        |         |        |      |      |   |
| ATOM | 618 | C1'  | A   | B | 2  | 5.692  | -16.960 | 88.289 | 1.00 | 0.00 | C |
| ATOM | 619 | N1   | A   | B | 2  | 1.780  | -13.639 | 88.386 | 1.00 | 0.00 | N |
| ATOM | 620 | C2   | A   | B | 2  | 2.757  | -13.850 | 87.510 | 1.00 | 0.00 | C |
| ATOM | 621 | N3   | A   | B | 2  | 3.736  | -14.730 | 87.544 | 1.00 | 0.00 | N |
| ATOM | 622 | C4   | A   | B | 2  | 3.658  | -15.469 | 88.666 | 1.00 | 0.00 | C |
| ATOM | 623 | C5   | A   | B | 2  | 2.725  | -15.377 | 89.660 | 1.00 | 0.00 | C |
| ATOM | 624 | C6   | A   | B | 2  | 1.727  | -14.392 | 89.495 | 1.00 | 0.00 | C |
| ATOM | 625 | N6   | A   | B | 2  | 0.745  | -14.186 | 90.388 | 1.00 | 0.00 | N |
| ATOM | 626 | N7   | A   | B | 2  | 2.964  | -16.305 | 90.659 | 1.00 | 0.00 | N |
| ATOM | 627 | C8   | A   | B | 2  | 4.029  | -16.930 | 90.253 | 1.00 | 0.00 | C |
| ATOM | 628 | N9   | A   | B | 2  | 4.505  | -16.479 | 89.049 | 1.00 | 0.00 | N |
| ATOM | 629 | C2'  | A   | B | 2  | 6.873  | -17.341 | 89.172 | 1.00 | 0.00 | C |
| ATOM | 630 | C3'  | A   | B | 2  | 7.463  | -18.523 | 88.421 | 1.00 | 0.00 | C |
| ATOM | 631 | O3'  | A   | B | 2  | 8.338  | -18.042 | 87.403 | 1.00 | 0.00 | O |
| ATOM | 632 | C4'  | A   | B | 2  | 6.226  | -19.209 | 87.843 | 1.00 | 0.00 | C |
| ATOM | 633 | O4'  | A   | B | 2  | 5.300  | -18.110 | 87.564 | 1.00 | 0.00 | O |
| ATOM | 634 | C5'  | A   | B | 2  | 5.534  | -20.210 | 88.738 | 1.00 | 0.00 | C |
| ATOM | 635 | O5'  | A   | B | 2  | 5.584  | -19.754 | 90.114 | 1.00 | 0.00 | O |
| ATOM | 636 | H2   | A   | B | 2  | 2.746  | -13.204 | 86.634 | 1.00 | 0.00 | H |
| ATOM | 637 | H8   | A   | B | 2  | 4.499  | -17.736 | 90.817 | 1.00 | 0.00 | H |
| ATOM | 638 | H1'  | A   | B | 2  | 5.972  | -16.189 | 87.572 | 1.00 | 0.00 | H |
| ATOM | 639 | H3'  | A   | B | 2  | 8.013  | -19.194 | 89.080 | 1.00 | 0.00 | H |
| ATOM | 640 | H4'  | A   | B | 2  | 6.547  | -19.734 | 86.944 | 1.00 | 0.00 | H |
| ATOM | 641 | H61  | A   | B | 2  | 0.041  | -13.456 | 90.219 | 1.00 | 0.00 | H |
| ATOM | 642 | H62  | A   | B | 2  | 0.699  | -14.760 | 91.243 | 1.00 | 0.00 | H |
| ATOM | 643 | H2'1 | A   | B | 2  | 6.564  | -17.624 | 90.178 | 1.00 | 0.00 | H |
| ATOM | 644 | H2'2 | A   | B | 2  | 7.597  | -16.530 | 89.267 | 1.00 | 0.00 | H |
| ATOM | 645 | H5'1 | A   | B | 2  | 4.495  | -20.313 | 88.422 | 1.00 | 0.00 | H |
| ATOM | 646 | H5'2 | A   | B | 2  | 6.034  | -21.173 | 88.650 | 1.00 | 0.00 | H |
| ATOM | 647 | C1'  | C   | B | 3  | 7.217  | -12.472 | 86.811 | 1.00 | 0.00 | C |
| ATOM | 648 | N1   | C   | B | 3  | 6.476  | -12.634 | 88.092 | 1.00 | 0.00 | N |
| ATOM | 649 | C2   | C   | B | 3  | 5.370  | -11.814 | 88.313 | 1.00 | 0.00 | C |
| ATOM | 650 | O2   | C   | B | 3  | 5.051  | -10.992 | 87.443 | 1.00 | 0.00 | O |
| ATOM | 651 | N3   | C   | B | 3  | 4.682  | -11.945 | 89.473 | 1.00 | 0.00 | N |
| ATOM | 652 | C4   | C   | B | 3  | 5.052  | -12.843 | 90.396 | 1.00 | 0.00 | C |
| ATOM | 653 | N4   | C   | B | 3  | 4.339  | -12.931 | 91.511 | 1.00 | 0.00 | N |
| ATOM | 654 | C5   | C   | B | 3  | 6.187  | -13.696 | 90.198 | 1.00 | 0.00 | C |
| ATOM | 655 | C6   | C   | B | 3  | 6.863  | -13.550 | 89.018 | 1.00 | 0.00 | C |
| ATOM | 656 | C2'  | C   | B | 3  | 8.725  | -12.620 | 86.952 | 1.00 | 0.00 | C |
| ATOM | 657 | C3'  | C   | B | 3  | 9.100  | -13.306 | 85.647 | 1.00 | 0.00 | C |
| ATOM | 658 | O3'  | C   | B | 3  | 9.261  | -12.320 | 84.629 | 1.00 | 0.00 | O |
| ATOM | 659 | C4'  | C   | B | 3  | 7.903  | -14.216 | 85.385 | 1.00 | 0.00 | C |
| ATOM | 660 | O4'  | C   | B | 3  | 6.760  | -13.473 | 85.921 | 1.00 | 0.00 | O |
| ATOM | 661 | C5'  | C   | B | 3  | 7.941  | -15.579 | 86.034 | 1.00 | 0.00 | C |
| ATOM | 662 | O5'  | C   | B | 3  | 8.558  | -15.481 | 87.344 | 1.00 | 0.00 | O |
| ATOM | 663 | O1P  | C   | B | 3  | 10.684 | -16.802 | 87.085 | 1.00 | 0.00 | O |
| ATOM | 664 | O2P  | C   | B | 3  | 9.603  | -16.592 | 89.340 | 1.00 | 0.00 | O |
| ATOM | 665 | P    | C   | B | 3  | 9.437  | -16.702 | 87.869 | 1.00 | 0.00 | P |
| ATOM | 666 | H5   | C   | B | 3  | 6.496  | -14.423 | 90.949 | 1.00 | 0.00 | H |
| ATOM | 667 | H6   | C   | B | 3  | 7.729  | -14.181 | 88.820 | 1.00 | 0.00 | H |
| ATOM | 668 | H1'  | C   | B | 3  | 6.956  | -11.502 | 86.386 | 1.00 | 0.00 | H |

|      |     |      |     |   |        |         |        |      |      |   |
|------|-----|------|-----|---|--------|---------|--------|------|------|---|
| ATOM | 669 | H3'  | C B | 3 | 10.021 | -13.882 | 85.739 | 1.00 | 0.00 | H |
| ATOM | 670 | H4'  | C B | 3 | 7.847  | -14.364 | 84.306 | 1.00 | 0.00 | H |
| ATOM | 671 | H41  | C B | 3 | 4.600  | -13.615 | 92.236 | 1.00 | 0.00 | H |
| ATOM | 672 | H42  | C B | 3 | 3.525  | -12.315 | 91.653 | 1.00 | 0.00 | H |
| ATOM | 673 | H2'1 | C B | 3 | 9.004  | -13.227 | 87.813 | 1.00 | 0.00 | H |
| ATOM | 674 | H2'2 | C B | 3 | 9.228  | -11.657 | 87.053 | 1.00 | 0.00 | H |
| ATOM | 675 | H5'1 | C B | 3 | 6.923  | -15.957 | 86.135 | 1.00 | 0.00 | H |
| ATOM | 676 | H5'2 | C B | 3 | 8.515  | -16.258 | 85.408 | 1.00 | 0.00 | H |
| ATOM | 677 | C1'  | C B | 4 | 6.986  | -7.528  | 86.618 | 1.00 | 0.00 | C |
| ATOM | 678 | N1   | C B | 4 | 6.983  | -8.236  | 87.927 | 1.00 | 0.00 | N |
| ATOM | 679 | C2   | C B | 4 | 5.978  | -7.918  | 88.838 | 1.00 | 0.00 | C |
| ATOM | 680 | O2   | C B | 4 | 5.135  | -7.067  | 88.525 | 1.00 | 0.00 | O |
| ATOM | 681 | N3   | C B | 4 | 5.957  | -8.550  | 90.037 | 1.00 | 0.00 | N |
| ATOM | 682 | C4   | C B | 4 | 6.883  | -9.467  | 90.348 | 1.00 | 0.00 | C |
| ATOM | 683 | N4   | C B | 4 | 6.813  | -10.059 | 91.532 | 1.00 | 0.00 | N |
| ATOM | 684 | C5   | C B | 4 | 7.932  | -9.811  | 89.432 | 1.00 | 0.00 | C |
| ATOM | 685 | C6   | C B | 4 | 7.929  | -9.165  | 88.228 | 1.00 | 0.00 | C |
| ATOM | 686 | C2'  | C B | 4 | 8.379  | -7.189  | 86.108 | 1.00 | 0.00 | C |
| ATOM | 687 | C3'  | C B | 4 | 8.220  | -7.368  | 84.606 | 1.00 | 0.00 | C |
| ATOM | 688 | O3'  | C B | 4 | 7.688  | -6.171  | 84.044 | 1.00 | 0.00 | O |
| ATOM | 689 | C4'  | C B | 4 | 7.241  | -8.537  | 84.506 | 1.00 | 0.00 | C |
| ATOM | 690 | O4'  | C B | 4 | 6.367  | -8.377  | 85.669 | 1.00 | 0.00 | O |
| ATOM | 691 | C5'  | C B | 4 | 7.843  | -9.923  | 84.541 | 1.00 | 0.00 | C |
| ATOM | 692 | O5'  | C B | 4 | 8.972  | -9.944  | 85.451 | 1.00 | 0.00 | O |
| ATOM | 693 | O1P  | C B | 4 | 10.935 | -10.365 | 83.934 | 1.00 | 0.00 | O |
| ATOM | 694 | O2P  | C B | 4 | 11.027 | -11.088 | 86.335 | 1.00 | 0.00 | O |
| ATOM | 695 | P    | C B | 4 | 10.213 | -10.885 | 85.112 | 1.00 | 0.00 | P |
| ATOM | 696 | H5   | C B | 4 | 8.691  | -10.551 | 89.684 | 1.00 | 0.00 | H |
| ATOM | 697 | H6   | C B | 4 | 8.703  | -9.398  | 87.497 | 1.00 | 0.00 | H |
| ATOM | 698 | H1'  | C B | 4 | 6.375  | -6.631  | 86.714 | 1.00 | 0.00 | H |
| ATOM | 699 | H3'  | C B | 4 | 9.167  | -7.606  | 84.120 | 1.00 | 0.00 | H |
| ATOM | 700 | H4'  | C B | 4 | 6.713  | -8.429  | 83.559 | 1.00 | 0.00 | H |
| ATOM | 701 | H41  | C B | 4 | 7.512  | -10.769 | 91.796 | 1.00 | 0.00 | H |
| ATOM | 702 | H42  | C B | 4 | 6.060  | -9.807  | 92.191 | 1.00 | 0.00 | H |
| ATOM | 703 | H2'1 | C B | 4 | 9.142  | -7.856  | 86.508 | 1.00 | 0.00 | H |
| ATOM | 704 | H2'2 | C B | 4 | 8.673  | -6.169  | 86.356 | 1.00 | 0.00 | H |
| ATOM | 705 | H5'1 | C B | 4 | 7.088  | -10.633 | 84.875 | 1.00 | 0.00 | H |
| ATOM | 706 | H5'2 | C B | 4 | 8.173  | -10.193 | 83.539 | 1.00 | 0.00 | H |
| ATOM | 707 | C1'  | G B | 5 | 5.742  | -3.064  | 88.363 | 1.00 | 0.00 | C |
| ATOM | 708 | N1   | G B | 5 | 5.902  | -5.416  | 92.888 | 1.00 | 0.00 | N |
| ATOM | 709 | C2   | G B | 5 | 4.985  | -4.504  | 92.392 | 1.00 | 0.00 | C |
| ATOM | 710 | N2   | G B | 5 | 3.980  | -4.173  | 93.211 | 1.00 | 0.00 | N |
| ATOM | 711 | N3   | G B | 5 | 5.067  | -3.966  | 91.176 | 1.00 | 0.00 | N |
| ATOM | 712 | C4   | G B | 5 | 6.152  | -4.409  | 90.486 | 1.00 | 0.00 | C |
| ATOM | 713 | C5   | G B | 5 | 7.118  | -5.309  | 90.902 | 1.00 | 0.00 | C |
| ATOM | 714 | C6   | G B | 5 | 7.029  | -5.884  | 92.190 | 1.00 | 0.00 | C |
| ATOM | 715 | O6   | G B | 5 | 7.782  | -6.693  | 92.731 | 1.00 | 0.00 | O |
| ATOM | 716 | N7   | G B | 5 | 8.068  | -5.496  | 89.894 | 1.00 | 0.00 | N |
| ATOM | 717 | C8   | G B | 5 | 7.656  | -4.721  | 88.924 | 1.00 | 0.00 | C |
| ATOM | 718 | N9   | G B | 5 | 6.498  | -4.027  | 89.210 | 1.00 | 0.00 | N |
| ATOM | 719 | C2'  | G B | 5 | 6.631  | -2.161  | 87.519 | 1.00 | 0.00 | C |
| ATOM | 720 | C3'  | G B | 5 | 5.815  | -2.012  | 86.245 | 1.00 | 0.00 | C |
| ATOM | 721 | O3'  | G B | 5 | 4.864  | -0.966  | 86.418 | 1.00 | 0.00 | O |
| ATOM | 722 | C4'  | G B | 5 | 5.151  | -3.381  | 86.106 | 1.00 | 0.00 | C |

|      |     |      |     |   |       |        |        |      |      |   |
|------|-----|------|-----|---|-------|--------|--------|------|------|---|
| ATOM | 723 | O4'  | G B | 5 | 4.923 | -3.812 | 87.486 | 1.00 | 0.00 | O |
| ATOM | 724 | C5'  | G B | 5 | 5.948 | -4.446 | 85.392 | 1.00 | 0.00 | C |
| ATOM | 725 | O5'  | G B | 5 | 7.354 | -4.307 | 85.717 | 1.00 | 0.00 | O |
| ATOM | 726 | O1P  | G B | 5 | 8.401 | -3.661 | 83.522 | 1.00 | 0.00 | O |
| ATOM | 727 | O2P  | G B | 5 | 9.757 | -4.870 | 85.251 | 1.00 | 0.00 | O |
| ATOM | 728 | P    | G B | 5 | 8.439 | -4.663 | 84.604 | 1.00 | 0.00 | P |
| ATOM | 729 | H1   | G B | 5 | 5.744 | -5.777 | 93.841 | 1.00 | 0.00 | H |
| ATOM | 730 | H8   | G B | 5 | 8.181 | -4.631 | 87.972 | 1.00 | 0.00 | H |
| ATOM | 731 | H1'  | G B | 5 | 5.093 | -2.477 | 89.010 | 1.00 | 0.00 | H |
| ATOM | 732 | H21  | G B | 5 | 3.921 | -4.596 | 94.148 | 1.00 | 0.00 | H |
| ATOM | 733 | H3'  | G B | 5 | 6.443 | -1.792 | 85.380 | 1.00 | 0.00 | H |
| ATOM | 734 | H22  | G B | 5 | 3.266 | -3.497 | 92.904 | 1.00 | 0.00 | H |
| ATOM | 735 | H4'  | G B | 5 | 4.226 | -3.228 | 85.550 | 1.00 | 0.00 | H |
| ATOM | 736 | H2'1 | G B | 5 | 7.604 | -2.609 | 87.317 | 1.00 | 0.00 | H |
| ATOM | 737 | H2'2 | G B | 5 | 6.808 | -1.195 | 87.991 | 1.00 | 0.00 | H |
| ATOM | 738 | H5'1 | G B | 5 | 5.592 | -5.428 | 85.703 | 1.00 | 0.00 | H |
| ATOM | 739 | H5'2 | G B | 5 | 5.807 | -4.338 | 84.316 | 1.00 | 0.00 | H |
| ATOM | 740 | C1'  | T B | 6 | 4.625 | 0.168  | 91.940 | 1.00 | 0.00 | C |
| ATOM | 741 | N1   | T B | 6 | 5.852 | -0.666 | 92.043 | 1.00 | 0.00 | N |
| ATOM | 742 | C2   | T B | 6 | 6.041 | -1.367 | 93.217 | 1.00 | 0.00 | C |
| ATOM | 743 | O2   | T B | 6 | 5.254 | -1.323 | 94.146 | 1.00 | 0.00 | O |
| ATOM | 744 | N3   | T B | 6 | 7.192 | -2.131 | 93.268 | 1.00 | 0.00 | N |
| ATOM | 745 | C4   | T B | 6 | 8.146 | -2.248 | 92.278 | 1.00 | 0.00 | C |
| ATOM | 746 | O4   | T B | 6 | 9.141 | -2.963 | 92.441 | 1.00 | 0.00 | O |
| ATOM | 747 | C5   | T B | 6 | 7.860 | -1.480 | 91.091 | 1.00 | 0.00 | C |
| ATOM | 748 | C6   | T B | 6 | 6.747 | -0.726 | 91.004 | 1.00 | 0.00 | C |
| ATOM | 749 | C7   | T B | 6 | 8.870 | -1.581 | 89.985 | 1.00 | 0.00 | C |
| ATOM | 750 | C2'  | T B | 6 | 4.840 | 1.488  | 91.209 | 1.00 | 0.00 | C |
| ATOM | 751 | C3'  | T B | 6 | 3.520 | 1.660  | 90.474 | 1.00 | 0.00 | C |
| ATOM | 752 | O3'  | T B | 6 | 2.571 | 2.266  | 91.349 | 1.00 | 0.00 | O |
| ATOM | 753 | C4'  | T B | 6 | 3.141 | 0.226  | 90.113 | 1.00 | 0.00 | C |
| ATOM | 754 | O4'  | T B | 6 | 3.656 | -0.573 | 91.225 | 1.00 | 0.00 | O |
| ATOM | 755 | C5'  | T B | 6 | 3.713 | -0.317 | 88.823 | 1.00 | 0.00 | C |
| ATOM | 756 | O5'  | T B | 6 | 5.058 | 0.193  | 88.632 | 1.00 | 0.00 | O |
| ATOM | 757 | O1P  | T B | 6 | 4.840 | 1.651  | 86.592 | 1.00 | 0.00 | O |
| ATOM | 758 | O2P  | T B | 6 | 7.040 | 0.576  | 87.138 | 1.00 | 0.00 | O |
| ATOM | 759 | P    | T B | 6 | 5.561 | 0.489  | 87.147 | 1.00 | 0.00 | P |
| ATOM | 760 | H3   | T B | 6 | 7.355 | -2.667 | 94.133 | 1.00 | 0.00 | H |
| ATOM | 761 | H6   | T B | 6 | 6.554 | -0.155 | 90.096 | 1.00 | 0.00 | H |
| ATOM | 762 | H1'  | T B | 6 | 4.241 | 0.339  | 92.946 | 1.00 | 0.00 | H |
| ATOM | 763 | H3'  | T B | 6 | 3.629 | 2.275  | 89.580 | 1.00 | 0.00 | H |
| ATOM | 764 | H4'  | T B | 6 | 2.054 | 0.195  | 90.033 | 1.00 | 0.00 | H |
| ATOM | 765 | H71  | T B | 6 | 9.349 | -0.612 | 89.840 | 1.00 | 0.00 | H |
| ATOM | 766 | H72  | T B | 6 | 9.625 | -2.324 | 90.249 | 1.00 | 0.00 | H |
| ATOM | 767 | H73  | T B | 6 | 8.372 | -1.881 | 89.063 | 1.00 | 0.00 | H |
| ATOM | 768 | H2'1 | T B | 6 | 5.677 | 1.444  | 90.516 | 1.00 | 0.00 | H |
| ATOM | 769 | H2'2 | T B | 6 | 5.022 | 2.316  | 91.894 | 1.00 | 0.00 | H |
| ATOM | 770 | H5'1 | T B | 6 | 3.735 | -1.406 | 88.872 | 1.00 | 0.00 | H |
| ATOM | 771 | H5'2 | T B | 6 | 3.080 | -0.007 | 87.993 | 1.00 | 0.00 | H |
| ATOM | 772 | C1'  | C B | 7 | 4.749 | 1.835  | 96.617 | 1.00 | 0.00 | C |
| ATOM | 773 | N1   | C B | 7 | 6.009 | 1.474  | 95.909 | 1.00 | 0.00 | N |
| ATOM | 774 | C2   | C B | 7 | 6.893 | 0.608  | 96.548 | 1.00 | 0.00 | C |
| ATOM | 775 | O2   | C B | 7 | 6.598 | 0.175  | 97.671 | 1.00 | 0.00 | O |
| ATOM | 776 | N3   | C B | 7 | 8.046 | 0.269  | 95.921 | 1.00 | 0.00 | N |

|      |     |      |     |   |        |        |         |      |      |   |
|------|-----|------|-----|---|--------|--------|---------|------|------|---|
| ATOM | 777 | C4   | C B | 7 | 8.338  | 0.756  | 94.708  | 1.00 | 0.00 | C |
| ATOM | 778 | N4   | C B | 7 | 9.476  | 0.388  | 94.140  | 1.00 | 0.00 | N |
| ATOM | 779 | C5   | C B | 7 | 7.450  | 1.652  | 94.028  | 1.00 | 0.00 | C |
| ATOM | 780 | C6   | C B | 7 | 6.292  | 1.977  | 94.677  | 1.00 | 0.00 | C |
| ATOM | 781 | C2'  | C B | 7 | 4.325  | 3.282  | 96.419  | 1.00 | 0.00 | C |
| ATOM | 782 | C3'  | C B | 7 | 2.809  | 3.165  | 96.378  | 1.00 | 0.00 | C |
| ATOM | 783 | O3'  | C B | 7 | 2.304  | 3.168  | 97.711  | 1.00 | 0.00 | O |
| ATOM | 784 | C4'  | C B | 7 | 2.590  | 1.825  | 95.680  | 1.00 | 0.00 | C |
| ATOM | 785 | O4'  | C B | 7 | 3.721  | 1.004  | 96.112  | 1.00 | 0.00 | O |
| ATOM | 786 | C5'  | C B | 7 | 2.562  | 1.851  | 94.168  | 1.00 | 0.00 | C |
| ATOM | 787 | O5'  | C B | 7 | 3.517  | 2.826  | 93.679  | 1.00 | 0.00 | O |
| ATOM | 788 | O1P  | C B | 7 | 2.067  | 4.576  | 92.601  | 1.00 | 0.00 | O |
| ATOM | 789 | O2P  | C B | 7 | 4.417  | 4.227  | 91.798  | 1.00 | 0.00 | O |
| ATOM | 790 | P    | C B | 7 | 3.174  | 3.635  | 92.348  | 1.00 | 0.00 | P |
| ATOM | 791 | H5   | C B | 7 | 7.687  | 2.055  | 93.043  | 1.00 | 0.00 | H |
| ATOM | 792 | H6   | C B | 7 | 5.581  | 2.648  | 94.196  | 1.00 | 0.00 | H |
| ATOM | 793 | H1'  | C B | 7 | 4.876  | 1.604  | 97.675  | 1.00 | 0.00 | H |
| ATOM | 794 | H3'  | C B | 7 | 2.351  | 3.982  | 95.818  | 1.00 | 0.00 | H |
| ATOM | 795 | H4'  | C B | 7 | 1.629  | 1.443  | 96.022  | 1.00 | 0.00 | H |
| ATOM | 796 | H41  | C B | 7 | 9.723  | 0.745  | 93.205  | 1.00 | 0.00 | H |
| ATOM | 797 | H42  | C B | 7 | 10.115 | -0.255 | 94.632  | 1.00 | 0.00 | H |
| ATOM | 798 | H2'1 | C B | 7 | 4.715  | 3.705  | 95.493  | 1.00 | 0.00 | H |
| ATOM | 799 | H2'2 | C B | 7 | 4.652  | 3.925  | 97.236  | 1.00 | 0.00 | H |
| ATOM | 800 | H5'1 | C B | 7 | 2.815  | 0.862  | 93.788  | 1.00 | 0.00 | H |
| ATOM | 801 | H5'2 | C B | 7 | 1.561  | 2.120  | 93.834  | 1.00 | 0.00 | H |
| ATOM | 802 | C1'  | C B | 8 | 6.723  | 2.269  | 101.139 | 1.00 | 0.00 | C |
| ATOM | 803 | N1   | C B | 8 | 7.542  | 2.539  | 99.927  | 1.00 | 0.00 | N |
| ATOM | 804 | C2   | C B | 8 | 8.772  | 1.894  | 99.812  | 1.00 | 0.00 | C |
| ATOM | 805 | O2   | C B | 8 | 9.130  | 1.128  | 100.717 | 1.00 | 0.00 | O |
| ATOM | 806 | N3   | C B | 8 | 9.534  | 2.127  | 98.716  | 1.00 | 0.00 | N |
| ATOM | 807 | C4   | C B | 8 | 9.119  | 2.962  | 97.754  | 1.00 | 0.00 | C |
| ATOM | 808 | N4   | C B | 8 | 9.902  | 3.149  | 96.702  | 1.00 | 0.00 | N |
| ATOM | 809 | C5   | C B | 8 | 7.860  | 3.644  | 97.845  | 1.00 | 0.00 | C |
| ATOM | 810 | C6   | C B | 8 | 7.107  | 3.390  | 98.958  | 1.00 | 0.00 | C |
| ATOM | 811 | C2'  | C B | 8 | 5.983  | 3.491  | 101.666 | 1.00 | 0.00 | C |
| ATOM | 812 | C3'  | C B | 8 | 4.683  | 2.884  | 102.168 | 1.00 | 0.00 | C |
| ATOM | 813 | O3'  | C B | 8 | 4.876  | 2.391  | 103.491 | 1.00 | 0.00 | O |
| ATOM | 814 | C4'  | C B | 8 | 4.424  | 1.761  | 101.166 | 1.00 | 0.00 | C |
| ATOM | 815 | O4'  | C B | 8 | 5.760  | 1.290  | 100.797 | 1.00 | 0.00 | O |
| ATOM | 816 | C5'  | C B | 8 | 3.683  | 2.142  | 99.906  | 1.00 | 0.00 | C |
| ATOM | 817 | O5'  | C B | 8 | 4.086  | 3.470  | 99.482  | 1.00 | 0.00 | O |
| ATOM | 818 | O1P  | C B | 8 | 1.991  | 4.834  | 99.767  | 1.00 | 0.00 | O |
| ATOM | 819 | O2P  | C B | 8 | 3.703  | 5.504  | 98.061  | 1.00 | 0.00 | O |
| ATOM | 820 | P    | C B | 8 | 3.009  | 4.412  | 98.785  | 1.00 | 0.00 | P |
| ATOM | 821 | H5   | C B | 8 | 7.522  | 4.329  | 97.070  | 1.00 | 0.00 | H |
| ATOM | 822 | H6   | C B | 8 | 6.139  | 3.879  | 99.069  | 1.00 | 0.00 | H |
| ATOM | 823 | H1'  | C B | 8 | 7.374  | 1.845  | 101.904 | 1.00 | 0.00 | H |
| ATOM | 824 | H3'  | C B | 8 | 3.868  | 3.608  | 102.167 | 1.00 | 0.00 | H |
| ATOM | 825 | H4'  | C B | 8 | 3.831  | 1.006  | 101.682 | 1.00 | 0.00 | H |
| ATOM | 826 | H41  | C B | 8 | 9.606  | 3.784  | 95.946  | 1.00 | 0.00 | H |
| ATOM | 827 | H42  | C B | 8 | 10.807 | 2.660  | 96.638  | 1.00 | 0.00 | H |
| ATOM | 828 | H2'1 | C B | 8 | 5.802  | 4.232  | 100.889 | 1.00 | 0.00 | H |
| ATOM | 829 | H2'2 | C B | 8 | 6.528  | 3.987  | 102.471 | 1.00 | 0.00 | H |
| ATOM | 830 | H5'1 | C B | 8 | 3.912  | 1.420  | 99.122  | 1.00 | 0.00 | H |

|      |     |      |     |    |        |        |         |      |      |   |
|------|-----|------|-----|----|--------|--------|---------|------|------|---|
| ATOM | 831 | H5'2 | C B | 8  | 2.612  | 2.129  | 100.103 | 1.00 | 0.00 | H |
| ATOM | 832 | C1'  | T B | 9  | 10.449 | 2.230  | 104.395 | 1.00 | 0.00 | C |
| ATOM | 833 | N1   | T B | 9  | 10.552 | 3.037  | 103.150 | 1.00 | 0.00 | N |
| ATOM | 834 | C2   | T B | 9  | 11.684 | 2.869  | 102.381 | 1.00 | 0.00 | C |
| ATOM | 835 | O2   | T B | 9  | 12.579 | 2.099  | 102.685 | 1.00 | 0.00 | O |
| ATOM | 836 | N3   | T B | 9  | 11.739 | 3.637  | 101.233 | 1.00 | 0.00 | N |
| ATOM | 837 | C4   | T B | 9  | 10.787 | 4.537  | 100.802 | 1.00 | 0.00 | C |
| ATOM | 838 | O4   | T B | 9  | 10.948 | 5.175  | 99.754  | 1.00 | 0.00 | O |
| ATOM | 839 | C5   | T B | 9  | 9.639  | 4.646  | 101.671 | 1.00 | 0.00 | C |
| ATOM | 840 | C6   | T B | 9  | 9.552  | 3.910  | 102.797 | 1.00 | 0.00 | C |
| ATOM | 841 | C7   | T B | 9  | 8.577  | 5.611  | 101.238 | 1.00 | 0.00 | C |
| ATOM | 842 | C2'  | T B | 9  | 9.815  | 2.978  | 105.563 | 1.00 | 0.00 | C |
| ATOM | 843 | C3'  | T B | 9  | 9.034  | 1.874  | 106.258 | 1.00 | 0.00 | C |
| ATOM | 844 | O3'  | T B | 9  | 9.904  | 1.171  | 107.143 | 1.00 | 0.00 | O |
| ATOM | 845 | C4'  | T B | 9  | 8.564  | 1.004  | 105.095 | 1.00 | 0.00 | C |
| ATOM | 846 | O4'  | T B | 9  | 9.646  | 1.102  | 104.114 | 1.00 | 0.00 | O |
| ATOM | 847 | C5'  | T B | 9  | 7.269  | 1.410  | 104.430 | 1.00 | 0.00 | C |
| ATOM | 848 | O5'  | T B | 9  | 7.171  | 2.856  | 104.395 | 1.00 | 0.00 | O |
| ATOM | 849 | O1P  | T B | 9  | 5.223  | 3.345  | 105.911 | 1.00 | 0.00 | O |
| ATOM | 850 | O2P  | T B | 9  | 5.796  | 4.931  | 104.052 | 1.00 | 0.00 | O |
| ATOM | 851 | P    | T B | 9  | 5.733  | 3.532  | 104.537 | 1.00 | 0.00 | P |
| ATOM | 852 | H3   | T B | 9  | 12.573 | 3.527  | 100.640 | 1.00 | 0.00 | H |
| ATOM | 853 | H6   | T B | 9  | 8.676  | 4.009  | 103.437 | 1.00 | 0.00 | H |
| ATOM | 854 | H1'  | T B | 9  | 11.446 | 1.875  | 104.655 | 1.00 | 0.00 | H |
| ATOM | 855 | H3'  | T B | 9  | 8.187  | 2.269  | 106.821 | 1.00 | 0.00 | H |
| ATOM | 856 | H4'  | T B | 9  | 8.434  | -0.006 | 105.488 | 1.00 | 0.00 | H |
| ATOM | 857 | H71  | T B | 9  | 8.516  | 6.430  | 101.955 | 1.00 | 0.00 | H |
| ATOM | 858 | H72  | T B | 9  | 8.824  | 6.008  | 100.253 | 1.00 | 0.00 | H |
| ATOM | 859 | H73  | T B | 9  | 7.615  | 5.099  | 101.192 | 1.00 | 0.00 | H |
| ATOM | 860 | H2'1 | T B | 9  | 9.158  | 3.781  | 105.230 | 1.00 | 0.00 | H |
| ATOM | 861 | H2'2 | T B | 9  | 10.560 | 3.417  | 106.225 | 1.00 | 0.00 | H |
| ATOM | 862 | H5'1 | T B | 9  | 7.247  | 1.014  | 103.416 | 1.00 | 0.00 | H |
| ATOM | 863 | H5'2 | T B | 9  | 6.435  | 0.999  | 104.995 | 1.00 | 0.00 | H |
| ATOM | 864 | C1'  | A B | 10 | 15.218 | 2.660  | 105.704 | 1.00 | 0.00 | C |
| ATOM | 865 | N1   | A B | 10 | 15.517 | 5.621  | 101.524 | 1.00 | 0.00 | N |
| ATOM | 866 | C2   | A B | 10 | 16.318 | 4.682  | 102.020 | 1.00 | 0.00 | C |
| ATOM | 867 | N3   | A B | 10 | 16.178 | 3.952  | 103.105 | 1.00 | 0.00 | N |
| ATOM | 868 | C4   | A B | 10 | 15.039 | 4.276  | 103.741 | 1.00 | 0.00 | C |
| ATOM | 869 | C5   | A B | 10 | 14.113 | 5.211  | 103.367 | 1.00 | 0.00 | C |
| ATOM | 870 | C6   | A B | 10 | 14.386 | 5.922  | 102.181 | 1.00 | 0.00 | C |
| ATOM | 871 | N6   | A B | 10 | 13.569 | 6.871  | 101.689 | 1.00 | 0.00 | N |
| ATOM | 872 | N7   | A B | 10 | 13.066 | 5.265  | 104.269 | 1.00 | 0.00 | N |
| ATOM | 873 | C8   | A B | 10 | 13.377 | 4.373  | 105.163 | 1.00 | 0.00 | C |
| ATOM | 874 | N9   | A B | 10 | 14.560 | 3.730  | 104.907 | 1.00 | 0.00 | N |
| ATOM | 875 | C2'  | A B | 10 | 15.074 | 2.842  | 107.209 | 1.00 | 0.00 | C |
| ATOM | 876 | C3'  | A B | 10 | 14.948 | 1.405  | 107.692 | 1.00 | 0.00 | C |
| ATOM | 877 | O3'  | A B | 10 | 16.250 | 0.848  | 107.850 | 1.00 | 0.00 | O |
| ATOM | 878 | C4'  | A B | 10 | 14.167 | 0.735  | 106.562 | 1.00 | 0.00 | C |
| ATOM | 879 | O4'  | A B | 10 | 14.614 | 1.429  | 105.354 | 1.00 | 0.00 | O |
| ATOM | 880 | C5'  | A B | 10 | 12.662 | 0.823  | 106.642 | 1.00 | 0.00 | C |
| ATOM | 881 | O5'  | A B | 10 | 12.274 | 2.113  | 107.182 | 1.00 | 0.00 | O |
| ATOM | 882 | O1P  | A B | 10 | 11.218 | 1.526  | 109.390 | 1.00 | 0.00 | O |
| ATOM | 883 | O2P  | A B | 10 | 10.523 | 3.612  | 108.181 | 1.00 | 0.00 | O |
| ATOM | 884 | P    | A B | 10 | 10.973 | 2.200  | 108.100 | 1.00 | 0.00 | P |



|      |     |      |     |    |        |        |         |      |      |   |
|------|-----|------|-----|----|--------|--------|---------|------|------|---|
| ATOM | 885 | H2   | A B | 10 | 17.221 | 4.490  | 101.441 | 1.00 | 0.00 | H |
| ATOM | 886 | H8   | A B | 10 | 12.756 | 4.158  | 106.033 | 1.00 | 0.00 | H |
| ATOM | 887 | H1'  | A B | 10 | 16.267 | 2.615  | 105.414 | 1.00 | 0.00 | H |
| ATOM | 888 | H3'  | A B | 10 | 14.409 | 1.337  | 108.636 | 1.00 | 0.00 | H |
| ATOM | 889 | H4'  | A B | 10 | 14.440 | -0.321 | 106.572 | 1.00 | 0.00 | H |
| ATOM | 890 | H61  | A B | 10 | 13.813 | 7.357  | 100.818 | 1.00 | 0.00 | H |
| ATOM | 891 | H62  | A B | 10 | 12.699 | 7.109  | 102.187 | 1.00 | 0.00 | H |
| ATOM | 892 | H2'1 | A B | 10 | 14.195 | 3.427  | 107.474 | 1.00 | 0.00 | H |
| ATOM | 893 | H2'2 | A B | 10 | 15.941 | 3.333  | 107.651 | 1.00 | 0.00 | H |
| ATOM | 894 | H5'1 | A B | 10 | 12.242 | 0.701  | 105.644 | 1.00 | 0.00 | H |
| ATOM | 895 | H5'2 | A B | 10 | 12.290 | 0.029  | 107.286 | 1.00 | 0.00 | H |
| ATOM | 896 | C1'  | G B | 11 | 19.848 | 4.358  | 105.136 | 1.00 | 0.00 | C |
| ATOM | 897 | N1   | G B | 11 | 17.560 | 8.147  | 102.601 | 1.00 | 0.00 | N |
| ATOM | 898 | C2   | G B | 11 | 18.716 | 7.451  | 102.302 | 1.00 | 0.00 | C |
| ATOM | 899 | N2   | G B | 11 | 19.349 | 7.814  | 101.180 | 1.00 | 0.00 | N |
| ATOM | 900 | N3   | G B | 11 | 19.204 | 6.470  | 103.062 | 1.00 | 0.00 | N |
| ATOM | 901 | C4   | G B | 11 | 18.438 | 6.242  | 104.161 | 1.00 | 0.00 | C |
| ATOM | 902 | C5   | G B | 11 | 17.275 | 6.886  | 104.542 | 1.00 | 0.00 | C |
| ATOM | 903 | C6   | G B | 11 | 16.755 | 7.925  | 103.735 | 1.00 | 0.00 | C |
| ATOM | 904 | O6   | G B | 11 | 15.744 | 8.608  | 103.904 | 1.00 | 0.00 | O |
| ATOM | 905 | N7   | G B | 11 | 16.796 | 6.353  | 105.741 | 1.00 | 0.00 | N |
| ATOM | 906 | C8   | G B | 11 | 17.664 | 5.420  | 106.040 | 1.00 | 0.00 | C |
| ATOM | 907 | N9   | G B | 11 | 18.693 | 5.293  | 105.130 | 1.00 | 0.00 | N |
| ATOM | 908 | C2'  | G B | 11 | 20.421 | 4.100  | 106.522 | 1.00 | 0.00 | C |
| ATOM | 909 | C3'  | G B | 11 | 20.825 | 2.638  | 106.433 | 1.00 | 0.00 | C |
| ATOM | 910 | O3'  | G B | 11 | 22.122 | 2.546  | 105.848 | 1.00 | 0.00 | O |
| ATOM | 911 | C4'  | G B | 11 | 19.743 | 2.039  | 105.537 | 1.00 | 0.00 | C |
| ATOM | 912 | O4'  | G B | 11 | 19.404 | 3.121  | 104.611 | 1.00 | 0.00 | O |
| ATOM | 913 | C5'  | G B | 11 | 18.480 | 1.579  | 106.226 | 1.00 | 0.00 | C |
| ATOM | 914 | O5'  | G B | 11 | 18.161 | 2.477  | 107.317 | 1.00 | 0.00 | O |
| ATOM | 915 | O1P  | G B | 11 | 18.443 | 1.037  | 109.361 | 1.00 | 0.00 | O |
| ATOM | 916 | O2P  | G B | 11 | 16.859 | 2.980  | 109.405 | 1.00 | 0.00 | O |
| ATOM | 917 | P    | G B | 11 | 17.479 | 1.880  | 108.629 | 1.00 | 0.00 | P |
| ATOM | 918 | H1   | G B | 11 | 17.264 | 8.883  | 101.943 | 1.00 | 0.00 | H |
| ATOM | 919 | H8   | G B | 11 | 17.583 | 4.801  | 106.932 | 1.00 | 0.00 | H |
| ATOM | 920 | H1'  | G B | 11 | 20.612 | 4.751  | 104.464 | 1.00 | 0.00 | H |
| ATOM | 921 | H21  | G B | 11 | 18.966 | 8.571  | 100.595 | 1.00 | 0.00 | H |
| ATOM | 922 | H3'  | G B | 11 | 20.836 | 2.156  | 107.412 | 1.00 | 0.00 | H |
| ATOM | 923 | H22  | G B | 11 | 20.219 | 7.337  | 100.902 | 1.00 | 0.00 | H |
| ATOM | 924 | H4'  | G B | 11 | 20.185 | 1.175  | 105.039 | 1.00 | 0.00 | H |
| ATOM | 925 | H2'1 | G B | 11 | 19.684 | 4.261  | 107.310 | 1.00 | 0.00 | H |
| ATOM | 926 | H2'2 | G B | 11 | 21.278 | 4.737  | 106.740 | 1.00 | 0.00 | H |
| ATOM | 927 | H5'1 | G B | 11 | 17.663 | 1.569  | 105.506 | 1.00 | 0.00 | H |
| ATOM | 928 | H5'2 | G B | 11 | 18.631 | 0.570  | 106.611 | 1.00 | 0.00 | H |
| ATOM | 929 | C1'  | G B | 12 | 23.244 | 7.583  | 103.527 | 1.00 | 0.00 | C |
| ATOM | 930 | N1   | G B | 12 | 19.347 | 10.874 | 103.646 | 1.00 | 0.00 | N |
| ATOM | 931 | C2   | G B | 12 | 20.338 | 10.703 | 102.695 | 1.00 | 0.00 | C |
| ATOM | 932 | N2   | G B | 12 | 20.284 | 11.520 | 101.635 | 1.00 | 0.00 | N |
| ATOM | 933 | N3   | G B | 12 | 21.303 | 9.792  | 102.792 | 1.00 | 0.00 | N |
| ATOM | 934 | C4   | G B | 12 | 21.208 | 9.059  | 103.932 | 1.00 | 0.00 | C |
| ATOM | 935 | C5   | G B | 12 | 20.260 | 9.160  | 104.937 | 1.00 | 0.00 | C |
| ATOM | 936 | C6   | G B | 12 | 19.233 | 10.125 | 104.833 | 1.00 | 0.00 | C |
| ATOM | 937 | O6   | G B | 12 | 18.312 | 10.367 | 105.613 | 1.00 | 0.00 | O |
| ATOM | 938 | N7   | G B | 12 | 20.518 | 8.223  | 105.939 | 1.00 | 0.00 | N |

|      |     |      |     |    |        |        |         |      |      |   |
|------|-----|------|-----|----|--------|--------|---------|------|------|---|
| ATOM | 939 | C8   | G B | 12 | 21.585 | 7.595  | 105.520 | 1.00 | 0.00 | C |
| ATOM | 940 | N9   | G B | 12 | 22.064 | 8.047  | 104.307 | 1.00 | 0.00 | N |
| ATOM | 941 | C2'  | G B | 12 | 24.439 | 7.206  | 104.390 | 1.00 | 0.00 | C |
| ATOM | 942 | C3'  | G B | 12 | 25.029 | 6.033  | 103.621 | 1.00 | 0.00 | C |
| ATOM | 943 | O3'  | G B | 12 | 25.886 | 6.529  | 102.595 | 1.00 | 0.00 | O |
| ATOM | 944 | C4'  | G B | 12 | 23.791 | 5.342  | 103.054 | 1.00 | 0.00 | C |
| ATOM | 945 | O4'  | G B | 12 | 22.854 | 6.436  | 102.796 | 1.00 | 0.00 | O |
| ATOM | 946 | C5'  | G B | 12 | 23.116 | 4.330  | 103.950 | 1.00 | 0.00 | C |
| ATOM | 947 | O5'  | G B | 12 | 23.182 | 4.775  | 105.328 | 1.00 | 0.00 | O |
| ATOM | 948 | O1P  | G B | 12 | 24.667 | 3.062  | 106.422 | 1.00 | 0.00 | O |
| ATOM | 949 | O2P  | G B | 12 | 22.949 | 4.285  | 107.782 | 1.00 | 0.00 | O |
| ATOM | 950 | P    | G B | 12 | 23.329 | 3.682  | 106.481 | 1.00 | 0.00 | P |
| ATOM | 951 | H1   | G B | 12 | 18.641 | 11.606 | 103.473 | 1.00 | 0.00 | H |
| ATOM | 952 | H8   | G B | 12 | 22.056 | 6.786  | 106.077 | 1.00 | 0.00 | H |
| ATOM | 953 | H1'  | G B | 12 | 23.508 | 8.361  | 102.812 | 1.00 | 0.00 | H |
| ATOM | 954 | H21  | G B | 12 | 19.531 | 12.221 | 101.563 | 1.00 | 0.00 | H |
| ATOM | 955 | H3'  | G B | 12 | 25.592 | 5.361  | 104.268 | 1.00 | 0.00 | H |
| ATOM | 956 | H22  | G B | 12 | 20.993 | 11.446 | 100.892 | 1.00 | 0.00 | H |
| ATOM | 957 | H4'  | G B | 12 | 24.103 | 4.827  | 102.147 | 1.00 | 0.00 | H |
| ATOM | 958 | H2'1 | G B | 12 | 24.146 | 6.912  | 105.397 | 1.00 | 0.00 | H |
| ATOM | 959 | H2'2 | G B | 12 | 25.158 | 8.019  | 104.482 | 1.00 | 0.00 | H |
| ATOM | 960 | H5'1 | G B | 12 | 22.075 | 4.222  | 103.647 | 1.00 | 0.00 | H |
| ATOM | 961 | H5'2 | G B | 12 | 23.622 | 3.370  | 103.849 | 1.00 | 0.00 | H |
| ATOM | 962 | C1'  | T B | 13 | 24.804 | 12.041 | 102.046 | 1.00 | 0.00 | C |
| ATOM | 963 | N1   | T B | 13 | 24.050 | 11.897 | 103.319 | 1.00 | 0.00 | N |
| ATOM | 964 | C2   | T B | 13 | 22.961 | 12.726 | 103.505 | 1.00 | 0.00 | C |
| ATOM | 965 | O2   | T B | 13 | 22.612 | 13.550 | 102.676 | 1.00 | 0.00 | O |
| ATOM | 966 | N3   | T B | 13 | 22.289 | 12.558 | 104.700 | 1.00 | 0.00 | N |
| ATOM | 967 | C4   | T B | 13 | 22.601 | 11.662 | 105.701 | 1.00 | 0.00 | C |
| ATOM | 968 | O4   | T B | 13 | 21.925 | 11.605 | 106.735 | 1.00 | 0.00 | O |
| ATOM | 969 | C5   | T B | 13 | 23.753 | 10.838 | 105.418 | 1.00 | 0.00 | C |
| ATOM | 970 | C6   | T B | 13 | 24.433 | 10.974 | 104.260 | 1.00 | 0.00 | C |
| ATOM | 971 | C7   | T B | 13 | 24.130 | 9.847  | 106.477 | 1.00 | 0.00 | C |
| ATOM | 972 | C2'  | T B | 13 | 26.313 | 11.881 | 102.204 | 1.00 | 0.00 | C |
| ATOM | 973 | C3'  | T B | 13 | 26.694 | 11.183 | 100.908 | 1.00 | 0.00 | C |
| ATOM | 974 | O3'  | T B | 13 | 26.874 | 12.160 | 99.886  | 1.00 | 0.00 | O |
| ATOM | 975 | C4'  | T B | 13 | 25.491 | 10.280 | 100.641 | 1.00 | 0.00 | C |
| ATOM | 976 | O4'  | T B | 13 | 24.351 | 11.036 | 101.160 | 1.00 | 0.00 | O |
| ATOM | 977 | C5'  | T B | 13 | 25.510 | 8.921  | 101.302 | 1.00 | 0.00 | C |
| ATOM | 978 | O5'  | T B | 13 | 26.115 | 9.024  | 102.616 | 1.00 | 0.00 | O |
| ATOM | 979 | O1P  | T B | 13 | 28.233 | 7.684  | 102.390 | 1.00 | 0.00 | O |
| ATOM | 980 | O2P  | T B | 13 | 27.130 | 7.921  | 104.632 | 1.00 | 0.00 | O |
| ATOM | 981 | P    | T B | 13 | 26.978 | 7.801  | 103.162 | 1.00 | 0.00 | P |
| ATOM | 982 | H3   | T B | 13 | 21.470 | 13.164 | 104.861 | 1.00 | 0.00 | H |
| ATOM | 983 | H6   | T B | 13 | 25.299 | 10.341 | 104.070 | 1.00 | 0.00 | H |
| ATOM | 984 | H1'  | T B | 13 | 24.558 | 13.009 | 101.609 | 1.00 | 0.00 | H |
| ATOM | 985 | H3'  | T B | 13 | 27.608 | 10.598 | 101.015 | 1.00 | 0.00 | H |
| ATOM | 986 | H4'  | T B | 13 | 25.446 | 10.124 | 99.564  | 1.00 | 0.00 | H |
| ATOM | 987 | H71  | T B | 13 | 25.100 | 10.112 | 106.897 | 1.00 | 0.00 | H |
| ATOM | 988 | H72  | T B | 13 | 23.377 | 9.856  | 107.268 | 1.00 | 0.00 | H |
| ATOM | 989 | H73  | T B | 13 | 24.185 | 8.849  | 106.040 | 1.00 | 0.00 | H |
| ATOM | 990 | H2'1 | T B | 13 | 26.574 | 11.279 | 103.072 | 1.00 | 0.00 | H |
| ATOM | 991 | H2'2 | T B | 13 | 26.821 | 12.840 | 102.302 | 1.00 | 0.00 | H |
| ATOM | 992 | H5'1 | T B | 13 | 24.489 | 8.553  | 101.393 | 1.00 | 0.00 | H |

|      |      |      |   |   |    |        |        |         |      |      |   |
|------|------|------|---|---|----|--------|--------|---------|------|------|---|
| ATOM | 993  | H5'2 | T | B | 13 | 26.087 | 8.233  | 100.687 | 1.00 | 0.00 | H |
| ATOM | 994  | C1'  | G | B | 14 | 24.554 | 16.995 | 101.860 | 1.00 | 0.00 | C |
| ATOM | 995  | N1   | G | B | 14 | 22.171 | 16.492 | 106.343 | 1.00 | 0.00 | N |
| ATOM | 996  | C2   | G | B | 14 | 21.879 | 17.316 | 105.271 | 1.00 | 0.00 | C |
| ATOM | 997  | N2   | G | B | 14 | 20.813 | 18.111 | 105.410 | 1.00 | 0.00 | N |
| ATOM | 998  | N3   | G | B | 14 | 22.595 | 17.341 | 104.147 | 1.00 | 0.00 | N |
| ATOM | 999  | C4   | G | B | 14 | 23.642 | 16.475 | 104.181 | 1.00 | 0.00 | C |
| ATOM | 1000 | C5   | G | B | 14 | 24.012 | 15.622 | 105.206 | 1.00 | 0.00 | C |
| ATOM | 1001 | C6   | G | B | 14 | 23.250 | 15.591 | 106.398 | 1.00 | 0.00 | C |
| ATOM | 1002 | O6   | G | B | 14 | 23.420 | 14.907 | 107.410 | 1.00 | 0.00 | O |
| ATOM | 1003 | N7   | G | B | 14 | 25.151 | 14.899 | 104.846 | 1.00 | 0.00 | N |
| ATOM | 1004 | C8   | G | B | 14 | 25.428 | 15.326 | 103.641 | 1.00 | 0.00 | C |
| ATOM | 1005 | N9   | G | B | 14 | 24.556 | 16.286 | 103.168 | 1.00 | 0.00 | N |
| ATOM | 1006 | C2'  | G | B | 14 | 25.946 | 17.335 | 101.345 | 1.00 | 0.00 | C |
| ATOM | 1007 | C3'  | G | B | 14 | 25.781 | 17.160 | 99.844  | 1.00 | 0.00 | C |
| ATOM | 1008 | O3'  | G | B | 14 | 25.247 | 18.358 | 99.288  | 1.00 | 0.00 | O |
| ATOM | 1009 | C4'  | G | B | 14 | 24.800 | 15.992 | 99.746  | 1.00 | 0.00 | C |
| ATOM | 1010 | O4'  | G | B | 14 | 23.931 | 16.151 | 100.912 | 1.00 | 0.00 | O |
| ATOM | 1011 | C5'  | G | B | 14 | 25.399 | 14.607 | 99.775  | 1.00 | 0.00 | C |
| ATOM | 1012 | O5'  | G | B | 14 | 26.532 | 14.580 | 100.680 | 1.00 | 0.00 | O |
| ATOM | 1013 | O1P  | G | B | 14 | 28.489 | 14.159 | 99.155  | 1.00 | 0.00 | O |
| ATOM | 1014 | O2P  | G | B | 14 | 28.588 | 13.433 | 101.554 | 1.00 | 0.00 | O |
| ATOM | 1015 | P    | G | B | 14 | 27.770 | 13.639 | 100.333 | 1.00 | 0.00 | P |
| ATOM | 1016 | H1   | G | B | 14 | 21.548 | 16.544 | 107.165 | 1.00 | 0.00 | H |
| ATOM | 1017 | H8   | G | B | 14 | 26.274 | 14.956 | 103.061 | 1.00 | 0.00 | H |
| ATOM | 1018 | H1'  | G | B | 14 | 23.945 | 17.895 | 101.960 | 1.00 | 0.00 | H |
| ATOM | 1019 | H21  | G | B | 14 | 20.261 | 18.083 | 106.281 | 1.00 | 0.00 | H |
| ATOM | 1020 | H3'  | G | B | 14 | 26.725 | 16.921 | 99.353  | 1.00 | 0.00 | H |
| ATOM | 1021 | H22  | G | B | 14 | 20.544 | 18.751 | 104.649 | 1.00 | 0.00 | H |
| ATOM | 1022 | H4'  | G | B | 14 | 24.268 | 16.105 | 98.801  | 1.00 | 0.00 | H |
| ATOM | 1023 | H2'1 | G | B | 14 | 26.709 | 16.666 | 101.741 | 1.00 | 0.00 | H |
| ATOM | 1024 | H2'2 | G | B | 14 | 26.244 | 18.353 | 101.594 | 1.00 | 0.00 | H |
| ATOM | 1025 | H5'1 | G | B | 14 | 24.644 | 13.896 | 100.109 | 1.00 | 0.00 | H |
| ATOM | 1026 | H5'2 | G | B | 14 | 25.725 | 14.336 | 98.770  | 1.00 | 0.00 | H |
| ATOM | 1027 | C1'  | C | B | 15 | 23.310 | 21.461 | 103.604 | 1.00 | 0.00 | C |
| ATOM | 1028 | N1   | C | B | 15 | 24.060 | 20.499 | 104.455 | 1.00 | 0.00 | N |
| ATOM | 1029 | C2   | C | B | 15 | 23.564 | 20.227 | 105.728 | 1.00 | 0.00 | C |
| ATOM | 1030 | O2   | C | B | 15 | 22.528 | 20.794 | 106.097 | 1.00 | 0.00 | O |
| ATOM | 1031 | N3   | C | B | 15 | 24.233 | 19.354 | 106.519 | 1.00 | 0.00 | N |
| ATOM | 1032 | C4   | C | B | 15 | 25.353 | 18.758 | 106.093 | 1.00 | 0.00 | C |
| ATOM | 1033 | N4   | C | B | 15 | 25.965 | 17.910 | 106.906 | 1.00 | 0.00 | N |
| ATOM | 1034 | C5   | C | B | 15 | 25.891 | 19.021 | 104.788 | 1.00 | 0.00 | C |
| ATOM | 1035 | C6   | C | B | 15 | 25.198 | 19.900 | 104.008 | 1.00 | 0.00 | C |
| ATOM | 1036 | C2'  | C | B | 15 | 24.203 | 22.365 | 102.765 | 1.00 | 0.00 | C |
| ATOM | 1037 | C3'  | C | B | 15 | 23.393 | 22.513 | 101.486 | 1.00 | 0.00 | C |
| ATOM | 1038 | O3'  | C | B | 15 | 22.439 | 23.560 | 101.653 | 1.00 | 0.00 | O |
| ATOM | 1039 | C4'  | C | B | 15 | 22.728 | 21.145 | 101.344 | 1.00 | 0.00 | C |
| ATOM | 1040 | O4'  | C | B | 15 | 22.494 | 20.712 | 102.724 | 1.00 | 0.00 | O |
| ATOM | 1041 | C5'  | C | B | 15 | 23.531 | 20.077 | 100.635 | 1.00 | 0.00 | C |
| ATOM | 1042 | O5'  | C | B | 15 | 24.935 | 20.219 | 100.968 | 1.00 | 0.00 | O |
| ATOM | 1043 | O1P  | C | B | 15 | 25.992 | 20.865 | 98.777  | 1.00 | 0.00 | O |
| ATOM | 1044 | O2P  | C | B | 15 | 27.343 | 19.655 | 100.512 | 1.00 | 0.00 | O |
| ATOM | 1045 | P    | C | B | 15 | 26.026 | 19.863 | 99.861  | 1.00 | 0.00 | P |
| ATOM | 1046 | H5   | C | B | 15 | 26.806 | 18.542 | 104.440 | 1.00 | 0.00 | H |

|      |      |      |     |    |        |        |         |      |      |   |
|------|------|------|-----|----|--------|--------|---------|------|------|---|
| ATOM | 1047 | H6   | C B | 15 | 25.562 | 20.127 | 103.007 | 1.00 | 0.00 | H |
| ATOM | 1048 | H1'  | C B | 15 | 22.656 | 22.049 | 104.250 | 1.00 | 0.00 | H |
| ATOM | 1049 | H3'  | C B | 15 | 24.025 | 22.732 | 100.626 | 1.00 | 0.00 | H |
| ATOM | 1050 | H4'  | C B | 15 | 21.807 | 21.296 | 100.783 | 1.00 | 0.00 | H |
| ATOM | 1051 | H41  | C B | 15 | 26.828 | 17.433 | 106.601 | 1.00 | 0.00 | H |
| ATOM | 1052 | H42  | C B | 15 | 25.578 | 17.724 | 107.843 | 1.00 | 0.00 | H |
| ATOM | 1053 | H2'1 | C B | 15 | 25.176 | 21.917 | 102.569 | 1.00 | 0.00 | H |
| ATOM | 1054 | H2'2 | C B | 15 | 24.377 | 23.331 | 103.239 | 1.00 | 0.00 | H |
| ATOM | 1055 | H5'1 | C B | 15 | 23.175 | 19.096 | 100.946 | 1.00 | 0.00 | H |
| ATOM | 1056 | H5'2 | C B | 15 | 23.396 | 20.186 | 99.559  | 1.00 | 0.00 | H |
| ATOM | 1057 | C1'  | G B | 16 | 22.201 | 24.678 | 107.201 | 1.00 | 0.00 | C |
| ATOM | 1058 | N1   | G B | 16 | 24.923 | 21.496 | 110.111 | 1.00 | 0.00 | N |
| ATOM | 1059 | C2   | G B | 16 | 23.725 | 22.135 | 110.376 | 1.00 | 0.00 | C |
| ATOM | 1060 | N2   | G B | 16 | 23.182 | 21.898 | 111.576 | 1.00 | 0.00 | N |
| ATOM | 1061 | N3   | G B | 16 | 23.119 | 22.947 | 109.512 | 1.00 | 0.00 | N |
| ATOM | 1062 | C4   | G B | 16 | 23.813 | 23.078 | 108.351 | 1.00 | 0.00 | C |
| ATOM | 1063 | C5   | G B | 16 | 25.014 | 22.484 | 108.002 | 1.00 | 0.00 | C |
| ATOM | 1064 | C6   | G B | 16 | 25.657 | 21.618 | 108.917 | 1.00 | 0.00 | C |
| ATOM | 1065 | O6   | G B | 16 | 26.716 | 21.003 | 108.791 | 1.00 | 0.00 | O |
| ATOM | 1066 | N7   | G B | 16 | 25.393 | 22.879 | 106.716 | 1.00 | 0.00 | N |
| ATOM | 1067 | C8   | G B | 16 | 24.431 | 23.682 | 106.336 | 1.00 | 0.00 | C |
| ATOM | 1068 | N9   | G B | 16 | 23.436 | 23.853 | 107.277 | 1.00 | 0.00 | N |
| ATOM | 1069 | C2'  | G B | 16 | 22.394 | 26.006 | 106.479 | 1.00 | 0.00 | C |
| ATOM | 1070 | C3'  | G B | 16 | 21.063 | 26.175 | 105.764 | 1.00 | 0.00 | C |
| ATOM | 1071 | O3'  | G B | 16 | 20.123 | 26.765 | 106.660 | 1.00 | 0.00 | O |
| ATOM | 1072 | C4'  | G B | 16 | 20.688 | 24.740 | 105.397 | 1.00 | 0.00 | C |
| ATOM | 1073 | O4'  | G B | 16 | 21.226 | 23.936 | 106.496 | 1.00 | 0.00 | O |
| ATOM | 1074 | C5'  | G B | 16 | 21.245 | 24.214 | 104.095 | 1.00 | 0.00 | C |
| ATOM | 1075 | O5'  | G B | 16 | 22.580 | 24.735 | 103.886 | 1.00 | 0.00 | O |
| ATOM | 1076 | O1P  | G B | 16 | 22.323 | 26.210 | 101.863 | 1.00 | 0.00 | O |
| ATOM | 1077 | O2P  | G B | 16 | 24.538 | 25.146 | 102.365 | 1.00 | 0.00 | O |
| ATOM | 1078 | P    | G B | 16 | 23.058 | 25.048 | 102.396 | 1.00 | 0.00 | P |
| ATOM | 1079 | H1   | G B | 16 | 25.306 | 20.881 | 110.847 | 1.00 | 0.00 | H |
| ATOM | 1080 | H8   | G B | 16 | 24.417 | 24.170 | 105.363 | 1.00 | 0.00 | H |
| ATOM | 1081 | H1'  | G B | 16 | 21.832 | 24.837 | 108.215 | 1.00 | 0.00 | H |
| ATOM | 1082 | H21  | G B | 16 | 23.656 | 21.265 | 112.238 | 1.00 | 0.00 | H |
| ATOM | 1083 | H3'  | G B | 16 | 21.153 | 26.798 | 104.874 | 1.00 | 0.00 | H |
| ATOM | 1084 | H22  | G B | 16 | 22.292 | 22.346 | 111.835 | 1.00 | 0.00 | H |
| ATOM | 1085 | H4'  | G B | 16 | 19.601 | 24.703 | 105.335 | 1.00 | 0.00 | H |
| ATOM | 1086 | H2'1 | G B | 16 | 23.223 | 25.974 | 105.771 | 1.00 | 0.00 | H |
| ATOM | 1087 | H2'2 | G B | 16 | 22.582 | 26.830 | 107.168 | 1.00 | 0.00 | H |
| ATOM | 1088 | H5'1 | G B | 16 | 21.274 | 23.125 | 104.134 | 1.00 | 0.00 | H |
| ATOM | 1089 | H5'2 | G B | 16 | 20.596 | 24.527 | 103.278 | 1.00 | 0.00 | H |
| ATOM | 1090 | C1'  | G B | 17 | 22.319 | 26.359 | 111.858 | 1.00 | 0.00 | C |
| ATOM | 1091 | N1   | G B | 17 | 26.647 | 23.672 | 112.115 | 1.00 | 0.00 | N |
| ATOM | 1092 | C2   | G B | 17 | 25.618 | 23.788 | 113.033 | 1.00 | 0.00 | C |
| ATOM | 1093 | N2   | G B | 17 | 25.762 | 23.096 | 114.169 | 1.00 | 0.00 | N |
| ATOM | 1094 | N3   | G B | 17 | 24.532 | 24.531 | 112.830 | 1.00 | 0.00 | N |
| ATOM | 1095 | C4   | G B | 17 | 24.558 | 25.168 | 111.629 | 1.00 | 0.00 | C |
| ATOM | 1096 | C5   | G B | 17 | 25.541 | 25.115 | 110.656 | 1.00 | 0.00 | C |
| ATOM | 1097 | C6   | G B | 17 | 26.691 | 24.323 | 110.868 | 1.00 | 0.00 | C |
| ATOM | 1098 | O6   | G B | 17 | 27.662 | 24.150 | 110.130 | 1.00 | 0.00 | O |
| ATOM | 1099 | N7   | G B | 17 | 25.186 | 25.915 | 109.567 | 1.00 | 0.00 | N |
| ATOM | 1100 | C8   | G B | 17 | 24.024 | 26.412 | 109.906 | 1.00 | 0.00 | C |

|      |      |      |     |    |        |        |         |      |      |   |
|------|------|------|-----|----|--------|--------|---------|------|------|---|
| ATOM | 1101 | N9   | G B | 17 | 23.577 | 26.005 | 111.147 | 1.00 | 0.00 | N |
| ATOM | 1102 | C2'  | G B | 17 | 21.888 | 27.806 | 111.660 | 1.00 | 0.00 | C |
| ATOM | 1103 | C3'  | G B | 17 | 20.372 | 27.685 | 111.625 | 1.00 | 0.00 | C |
| ATOM | 1104 | O3'  | G B | 17 | 19.872 | 27.687 | 112.960 | 1.00 | 0.00 | O |
| ATOM | 1105 | C4'  | G B | 17 | 20.155 | 26.344 | 110.929 | 1.00 | 0.00 | C |
| ATOM | 1106 | O4'  | G B | 17 | 21.290 | 25.526 | 111.358 | 1.00 | 0.00 | O |
| ATOM | 1107 | C5'  | G B | 17 | 20.122 | 26.368 | 109.418 | 1.00 | 0.00 | C |
| ATOM | 1108 | O5'  | G B | 17 | 21.073 | 27.342 | 108.923 | 1.00 | 0.00 | O |
| ATOM | 1109 | O1P  | G B | 17 | 19.612 | 29.088 | 107.850 | 1.00 | 0.00 | O |
| ATOM | 1110 | O2P  | G B | 17 | 21.961 | 28.746 | 107.037 | 1.00 | 0.00 | O |
| ATOM | 1111 | P    | G B | 17 | 20.723 | 28.151 | 107.593 | 1.00 | 0.00 | P |
| ATOM | 1112 | H1   | G B | 17 | 27.444 | 23.066 | 112.366 | 1.00 | 0.00 | H |
| ATOM | 1113 | H8   | G B | 17 | 23.459 | 27.089 | 109.267 | 1.00 | 0.00 | H |
| ATOM | 1114 | H1'  | G B | 17 | 22.449 | 26.132 | 112.915 | 1.00 | 0.00 | H |
| ATOM | 1115 | H21  | G B | 17 | 26.603 | 22.519 | 114.317 | 1.00 | 0.00 | H |
| ATOM | 1116 | H3'  | G B | 17 | 19.911 | 28.497 | 111.065 | 1.00 | 0.00 | H |
| ATOM | 1117 | H22  | G B | 17 | 25.032 | 23.142 | 114.894 | 1.00 | 0.00 | H |
| ATOM | 1118 | H4'  | G B | 17 | 19.198 | 25.957 | 111.276 | 1.00 | 0.00 | H |
| ATOM | 1119 | H2'1 | G B | 17 | 22.274 | 28.228 | 110.733 | 1.00 | 0.00 | H |
| ATOM | 1120 | H2'2 | G B | 17 | 22.217 | 28.450 | 112.474 | 1.00 | 0.00 | H |
| ATOM | 1121 | H5'1 | G B | 17 | 20.377 | 25.380 | 109.039 | 1.00 | 0.00 | H |
| ATOM | 1122 | H5'2 | G B | 17 | 19.118 | 26.632 | 109.088 | 1.00 | 0.00 | H |
| ATOM | 1123 | C1'  | C B | 18 | 24.291 | 26.794 | 116.381 | 1.00 | 0.00 | C |
| ATOM | 1124 | N1   | C B | 18 | 25.110 | 27.063 | 115.167 | 1.00 | 0.00 | N |
| ATOM | 1125 | C2   | C B | 18 | 26.340 | 26.417 | 115.054 | 1.00 | 0.00 | C |
| ATOM | 1126 | O2   | C B | 18 | 26.697 | 25.652 | 115.957 | 1.00 | 0.00 | O |
| ATOM | 1127 | N3   | C B | 18 | 27.100 | 26.651 | 113.958 | 1.00 | 0.00 | N |
| ATOM | 1128 | C4   | C B | 18 | 26.685 | 27.486 | 112.997 | 1.00 | 0.00 | C |
| ATOM | 1129 | N4   | C B | 18 | 27.468 | 27.676 | 111.946 | 1.00 | 0.00 | N |
| ATOM | 1130 | C5   | C B | 18 | 25.428 | 28.165 | 113.090 | 1.00 | 0.00 | C |
| ATOM | 1131 | C6   | C B | 18 | 24.677 | 27.914 | 114.200 | 1.00 | 0.00 | C |
| ATOM | 1132 | C2'  | C B | 18 | 23.552 | 28.016 | 116.909 | 1.00 | 0.00 | C |
| ATOM | 1133 | C3'  | C B | 18 | 22.251 | 27.409 | 117.410 | 1.00 | 0.00 | C |
| ATOM | 1134 | O3'  | C B | 18 | 22.444 | 26.915 | 118.733 | 1.00 | 0.00 | O |
| ATOM | 1135 | C4'  | C B | 18 | 21.992 | 26.287 | 116.408 | 1.00 | 0.00 | C |
| ATOM | 1136 | O4'  | C B | 18 | 23.328 | 25.815 | 116.039 | 1.00 | 0.00 | O |
| ATOM | 1137 | C5'  | C B | 18 | 21.251 | 26.667 | 115.148 | 1.00 | 0.00 | C |
| ATOM | 1138 | O5'  | C B | 18 | 21.655 | 27.994 | 114.724 | 1.00 | 0.00 | O |
| ATOM | 1139 | O1P  | C B | 18 | 19.559 | 29.360 | 115.008 | 1.00 | 0.00 | O |
| ATOM | 1140 | O2P  | C B | 18 | 21.272 | 30.030 | 113.301 | 1.00 | 0.00 | O |
| ATOM | 1141 | P    | C B | 18 | 20.577 | 28.938 | 114.025 | 1.00 | 0.00 | P |
| ATOM | 1142 | H5   | C B | 18 | 25.087 | 28.849 | 112.311 | 1.00 | 0.00 | H |
| ATOM | 1143 | H6   | C B | 18 | 23.711 | 28.405 | 114.312 | 1.00 | 0.00 | H |
| ATOM | 1144 | H1'  | C B | 18 | 24.942 | 26.371 | 117.144 | 1.00 | 0.00 | H |
| ATOM | 1145 | H3'  | C B | 18 | 21.435 | 28.133 | 117.408 | 1.00 | 0.00 | H |
| ATOM | 1146 | H4'  | C B | 18 | 21.401 | 25.531 | 116.924 | 1.00 | 0.00 | H |
| ATOM | 1147 | H41  | C B | 18 | 27.173 | 28.312 | 111.190 | 1.00 | 0.00 | H |
| ATOM | 1148 | H42  | C B | 18 | 28.373 | 27.187 | 111.882 | 1.00 | 0.00 | H |
| ATOM | 1149 | H2'1 | C B | 18 | 23.371 | 28.756 | 116.130 | 1.00 | 0.00 | H |
| ATOM | 1150 | H2'2 | C B | 18 | 24.096 | 28.513 | 117.712 | 1.00 | 0.00 | H |
| ATOM | 1151 | H5'1 | C B | 18 | 21.480 | 25.946 | 114.364 | 1.00 | 0.00 | H |
| ATOM | 1152 | H5'2 | C B | 18 | 20.180 | 26.654 | 115.345 | 1.00 | 0.00 | H |
| ATOM | 1153 | C1'  | C B | 19 | 28.036 | 26.756 | 119.622 | 1.00 | 0.00 | C |
| ATOM | 1154 | N1   | C B | 19 | 28.117 | 27.571 | 118.381 | 1.00 | 0.00 | N |

|      |      |      |     |    |        |        |         |      |      |   |
|------|------|------|-----|----|--------|--------|---------|------|------|---|
| ATOM | 1155 | C2   | C B | 19 | 29.246 | 27.426 | 117.576 | 1.00 | 0.00 | C |
| ATOM | 1156 | O2   | C B | 19 | 30.128 | 26.630 | 117.923 | 1.00 | 0.00 | O |
| ATOM | 1157 | N3   | C B | 19 | 29.339 | 28.161 | 116.443 | 1.00 | 0.00 | N |
| ATOM | 1158 | C4   | C B | 19 | 28.367 | 29.016 | 116.094 | 1.00 | 0.00 | C |
| ATOM | 1159 | N4   | C B | 19 | 28.509 | 29.706 | 114.976 | 1.00 | 0.00 | N |
| ATOM | 1160 | C5   | C B | 19 | 27.199 | 29.184 | 116.902 | 1.00 | 0.00 | C |
| ATOM | 1161 | C6   | C B | 19 | 27.125 | 28.435 | 118.038 | 1.00 | 0.00 | C |
| ATOM | 1162 | C2'  | C B | 19 | 27.412 | 27.491 | 120.800 | 1.00 | 0.00 | C |
| ATOM | 1163 | C3'  | C B | 19 | 26.646 | 26.378 | 121.499 | 1.00 | 0.00 | C |
| ATOM | 1164 | O3'  | C B | 19 | 27.530 | 25.673 | 122.366 | 1.00 | 0.00 | O |
| ATOM | 1165 | C4'  | C B | 19 | 26.168 | 25.512 | 120.335 | 1.00 | 0.00 | C |
| ATOM | 1166 | O4'  | C B | 19 | 27.233 | 25.624 | 119.340 | 1.00 | 0.00 | O |
| ATOM | 1167 | C5'  | C B | 19 | 24.862 | 25.917 | 119.689 | 1.00 | 0.00 | C |
| ATOM | 1168 | O5'  | C B | 19 | 24.754 | 27.362 | 119.665 | 1.00 | 0.00 | O |
| ATOM | 1169 | O1P  | C B | 19 | 22.822 | 27.828 | 121.209 | 1.00 | 0.00 | O |
| ATOM | 1170 | O2P  | C B | 19 | 23.361 | 29.431 | 119.354 | 1.00 | 0.00 | O |
| ATOM | 1171 | P    | C B | 19 | 23.314 | 28.026 | 119.831 | 1.00 | 0.00 | P |
| ATOM | 1172 | H5   | C B | 19 | 26.406 | 29.879 | 116.624 | 1.00 | 0.00 | H |
| ATOM | 1173 | H6   | C B | 19 | 26.253 | 28.528 | 118.684 | 1.00 | 0.00 | H |
| ATOM | 1174 | H1'  | C B | 19 | 29.038 | 26.405 | 119.866 | 1.00 | 0.00 | H |
| ATOM | 1175 | H3'  | C B | 19 | 25.804 | 26.762 | 122.074 | 1.00 | 0.00 | H |
| ATOM | 1176 | H4'  | C B | 19 | 26.048 | 24.499 | 120.720 | 1.00 | 0.00 | H |
| ATOM | 1177 | H41  | C B | 19 | 27.778 | 30.370 | 114.680 | 1.00 | 0.00 | H |
| ATOM | 1178 | H42  | C B | 19 | 29.354 | 29.583 | 114.395 | 1.00 | 0.00 | H |
| ATOM | 1179 | H2'1 | C B | 19 | 26.745 | 28.293 | 120.483 | 1.00 | 0.00 | H |
| ATOM | 1180 | H2'2 | C B | 19 | 28.163 | 27.930 | 121.457 | 1.00 | 0.00 | H |
| ATOM | 1181 | H5'1 | C B | 19 | 24.830 | 25.526 | 118.673 | 1.00 | 0.00 | H |
| ATOM | 1182 | H5'2 | C B | 19 | 24.036 | 25.495 | 120.261 | 1.00 | 0.00 | H |
| ATOM | 1183 | C1'  | T B | 20 | 32.785 | 27.185 | 120.946 | 1.00 | 0.00 | C |
| ATOM | 1184 | N1   | T B | 20 | 32.130 | 28.257 | 120.149 | 1.00 | 0.00 | N |
| ATOM | 1185 | C2   | T B | 20 | 32.776 | 28.672 | 119.002 | 1.00 | 0.00 | C |
| ATOM | 1186 | O2   | T B | 20 | 33.836 | 28.199 | 118.633 | 1.00 | 0.00 | O |
| ATOM | 1187 | N3   | T B | 20 | 32.132 | 29.668 | 118.293 | 1.00 | 0.00 | N |
| ATOM | 1188 | C4   | T B | 20 | 30.936 | 30.269 | 118.620 | 1.00 | 0.00 | C |
| ATOM | 1189 | O4   | T B | 20 | 30.457 | 31.157 | 117.903 | 1.00 | 0.00 | O |
| ATOM | 1190 | C5   | T B | 20 | 30.337 | 29.771 | 119.834 | 1.00 | 0.00 | C |
| ATOM | 1191 | C6   | T B | 20 | 30.935 | 28.800 | 120.552 | 1.00 | 0.00 | C |
| ATOM | 1192 | C7   | T B | 20 | 29.033 | 30.395 | 120.230 | 1.00 | 0.00 | C |
| ATOM | 1193 | C2'  | T B | 20 | 32.643 | 27.369 | 122.452 | 1.00 | 0.00 | C |
| ATOM | 1194 | C3'  | T B | 20 | 32.513 | 25.932 | 122.936 | 1.00 | 0.00 | C |
| ATOM | 1195 | O3'  | T B | 20 | 33.815 | 25.370 | 123.095 | 1.00 | 0.00 | O |
| ATOM | 1196 | C4'  | T B | 20 | 31.730 | 25.264 | 121.808 | 1.00 | 0.00 | C |
| ATOM | 1197 | O4'  | T B | 20 | 32.178 | 25.957 | 120.599 | 1.00 | 0.00 | O |
| ATOM | 1198 | C5'  | T B | 20 | 30.224 | 25.359 | 121.887 | 1.00 | 0.00 | C |
| ATOM | 1199 | O5'  | T B | 20 | 29.841 | 26.651 | 122.427 | 1.00 | 0.00 | O |
| ATOM | 1200 | O1P  | T B | 20 | 28.786 | 26.070 | 124.636 | 1.00 | 0.00 | O |
| ATOM | 1201 | O2P  | T B | 20 | 28.096 | 28.157 | 123.426 | 1.00 | 0.00 | O |
| ATOM | 1202 | P    | T B | 20 | 28.542 | 26.744 | 123.345 | 1.00 | 0.00 | P |
| ATOM | 1203 | H3   | T B | 20 | 32.593 | 29.995 | 117.432 | 1.00 | 0.00 | H |
| ATOM | 1204 | H6   | T B | 20 | 30.464 | 28.438 | 121.466 | 1.00 | 0.00 | H |
| ATOM | 1205 | H1'  | T B | 20 | 33.834 | 27.135 | 120.656 | 1.00 | 0.00 | H |
| ATOM | 1206 | H3'  | T B | 20 | 31.975 | 25.867 | 123.881 | 1.00 | 0.00 | H |
| ATOM | 1207 | H4'  | T B | 20 | 31.997 | 24.208 | 121.819 | 1.00 | 0.00 | H |
| ATOM | 1208 | H3T  | T B | 20 | 34.414 | 25.880 | 123.644 | 1.00 | 0.00 | H |

|      |      |      |     |    |        |        |         |      |      |   |
|------|------|------|-----|----|--------|--------|---------|------|------|---|
| ATOM | 1209 | H71  | T B | 20 | 29.161 | 30.947 | 121.161 | 1.00 | 0.00 | H |
| ATOM | 1210 | H72  | T B | 20 | 28.705 | 31.080 | 119.444 | 1.00 | 0.00 | H |
| ATOM | 1211 | H73  | T B | 20 | 28.281 | 29.617 | 120.367 | 1.00 | 0.00 | H |
| ATOM | 1212 | H2'1 | T B | 20 | 31.768 | 27.958 | 122.717 | 1.00 | 0.00 | H |
| ATOM | 1213 | H2'2 | T B | 20 | 33.514 | 27.857 | 122.893 | 1.00 | 0.00 | H |
| ATOM | 1214 | H5'1 | T B | 20 | 29.802 | 25.237 | 120.890 | 1.00 | 0.00 | H |
| ATOM | 1215 | H5'2 | T B | 20 | 29.850 | 24.566 | 122.534 | 1.00 | 0.00 | H |
| TER  |      |      |     |    |        |        |         |      |      |   |
| ATOM | 1    | C1'  | A A | 1  | 20.525 | 3.065  | 138.438 | 1.00 | 0.00 | C |
| ATOM | 2    | N1   | A A | 1  | 15.962 | 5.051  | 139.694 | 1.00 | 0.00 | N |
| ATOM | 3    | C2   | A A | 1  | 16.510 | 3.857  | 139.901 | 1.00 | 0.00 | C |
| ATOM | 4    | N3   | A A | 1  | 17.698 | 3.410  | 139.551 | 1.00 | 0.00 | N |
| ATOM | 5    | C4   | A A | 1  | 18.379 | 4.364  | 138.892 | 1.00 | 0.00 | C |
| ATOM | 6    | C5   | A A | 1  | 17.961 | 5.631  | 138.598 | 1.00 | 0.00 | C |
| ATOM | 7    | C6   | A A | 1  | 16.665 | 5.983  | 139.033 | 1.00 | 0.00 | C |
| ATOM | 8    | N6   | A A | 1  | 16.122 | 7.193  | 138.816 | 1.00 | 0.00 | N |
| ATOM | 9    | N7   | A A | 1  | 18.935 | 6.331  | 137.907 | 1.00 | 0.00 | N |
| ATOM | 10   | C8   | A A | 1  | 19.910 | 5.477  | 137.795 | 1.00 | 0.00 | C |
| ATOM | 11   | N9   | A A | 1  | 19.645 | 4.263  | 138.372 | 1.00 | 0.00 | N |
| ATOM | 12   | C2'  | A A | 1  | 21.350 | 2.839  | 137.180 | 1.00 | 0.00 | C |
| ATOM | 13   | C3'  | A A | 1  | 22.648 | 2.288  | 137.748 | 1.00 | 0.00 | C |
| ATOM | 14   | O3'  | A A | 1  | 22.513 | 0.883  | 137.948 | 1.00 | 0.00 | O |
| ATOM | 15   | C4'  | A A | 1  | 22.794 | 3.048  | 139.065 | 1.00 | 0.00 | C |
| ATOM | 16   | O4'  | A A | 1  | 21.416 | 3.245  | 139.521 | 1.00 | 0.00 | O |
| ATOM | 17   | C5'  | A A | 1  | 23.474 | 4.394  | 138.990 | 1.00 | 0.00 | C |
| ATOM | 18   | O5'  | A A | 1  | 23.109 | 5.063  | 137.756 | 1.00 | 0.00 | O |
| ATOM | 19   | H2   | A A | 1  | 15.885 | 3.146  | 140.440 | 1.00 | 0.00 | H |
| ATOM | 20   | H8   | A A | 1  | 20.850 | 5.708  | 137.293 | 1.00 | 0.00 | H |
| ATOM | 21   | H1'  | A A | 1  | 19.901 | 2.197  | 138.658 | 1.00 | 0.00 | H |
| ATOM | 22   | H3'  | A A | 1  | 23.497 | 2.479  | 137.088 | 1.00 | 0.00 | H |
| ATOM | 23   | H4'  | A A | 1  | 23.378 | 2.416  | 139.731 | 1.00 | 0.00 | H |
| ATOM | 24   | H61  | A A | 1  | 15.174 | 7.398  | 139.157 | 1.00 | 0.00 | H |
| ATOM | 25   | H62  | A A | 1  | 16.658 | 7.912  | 138.311 | 1.00 | 0.00 | H |
| ATOM | 26   | H5T  | A A | 1  | 23.757 | 5.623  | 137.325 | 1.00 | 0.00 | H |
| ATOM | 27   | H2'1 | A A | 1  | 21.520 | 3.760  | 136.624 | 1.00 | 0.00 | H |
| ATOM | 28   | H2'2 | A A | 1  | 20.882 | 2.126  | 136.500 | 1.00 | 0.00 | H |
| ATOM | 29   | H5'1 | A A | 1  | 23.164 | 5.000  | 139.843 | 1.00 | 0.00 | H |
| ATOM | 30   | H5'2 | A A | 1  | 24.553 | 4.253  | 139.026 | 1.00 | 0.00 | H |
| ATOM | 31   | C1'  | G A | 2  | 16.923 | -0.255 | 137.625 | 1.00 | 0.00 | C |
| ATOM | 32   | N1   | G A | 2  | 13.968 | 3.878  | 137.175 | 1.00 | 0.00 | N |
| ATOM | 33   | C2   | G A | 2  | 13.724 | 2.680  | 137.819 | 1.00 | 0.00 | C |
| ATOM | 34   | N2   | G A | 2  | 12.534 | 2.565  | 138.421 | 1.00 | 0.00 | N |
| ATOM | 35   | N3   | G A | 2  | 14.597 | 1.674  | 137.858 | 1.00 | 0.00 | N |
| ATOM | 36   | C4   | G A | 2  | 15.745 | 1.961  | 137.192 | 1.00 | 0.00 | C |
| ATOM | 37   | C5   | G A | 2  | 16.075 | 3.126  | 136.519 | 1.00 | 0.00 | C |
| ATOM | 38   | C6   | G A | 2  | 15.149 | 4.194  | 136.480 | 1.00 | 0.00 | C |
| ATOM | 39   | O6   | G A | 2  | 15.258 | 5.297  | 135.942 | 1.00 | 0.00 | O |
| ATOM | 40   | N7   | G A | 2  | 17.353 | 3.019  | 135.965 | 1.00 | 0.00 | N |
| ATOM | 41   | C8   | G A | 2  | 17.748 | 1.822  | 136.314 | 1.00 | 0.00 | C |
| ATOM | 42   | N9   | G A | 2  | 16.827 | 1.117  | 137.061 | 1.00 | 0.00 | N |
| ATOM | 43   | C2'  | G A | 2  | 17.642 | -1.244 | 136.718 | 1.00 | 0.00 | C |
| ATOM | 44   | C3'  | G A | 2  | 18.378 | -2.118 | 137.719 | 1.00 | 0.00 | C |
| ATOM | 45   | O3'  | G A | 2  | 17.500 | -3.139 | 138.186 | 1.00 | 0.00 | O |
| ATOM | 46   | C4'  | G A | 2  | 18.753 | -1.130 | 138.822 | 1.00 | 0.00 | C |

|      |     |      |     |   |        |        |         |      |      |   |
|------|-----|------|-----|---|--------|--------|---------|------|------|---|
| ATOM | 47  | O4'  | G A | 2 | 17.646 | -0.173 | 138.839 | 1.00 | 0.00 | O |
| ATOM | 48  | C5'  | G A | 2 | 20.046 | -0.372 | 138.633 | 1.00 | 0.00 | C |
| ATOM | 49  | O5'  | G A | 2 | 20.230 | -0.060 | 137.230 | 1.00 | 0.00 | O |
| ATOM | 50  | O1P  | G A | 2 | 22.257 | -1.412 | 136.596 | 1.00 | 0.00 | O |
| ATOM | 51  | O2P  | G A | 2 | 21.717 | 0.699  | 135.352 | 1.00 | 0.00 | O |
| ATOM | 52  | P    | G A | 2 | 21.711 | -0.041 | 136.636 | 1.00 | 0.00 | P |
| ATOM | 53  | H1   | G A | 2 | 13.227 | 4.591  | 137.206 | 1.00 | 0.00 | H |
| ATOM | 54  | H8   | G A | 2 | 18.722 | 1.416  | 136.039 | 1.00 | 0.00 | H |
| ATOM | 55  | H1'  | G A | 2 | 15.916 | -0.600 | 137.858 | 1.00 | 0.00 | H |
| ATOM | 56  | H21  | G A | 2 | 11.864 | 3.346  | 138.387 | 1.00 | 0.00 | H |
| ATOM | 57  | H3'  | G A | 2 | 19.267 | -2.577 | 137.284 | 1.00 | 0.00 | H |
| ATOM | 58  | H22  | G A | 2 | 12.291 | 1.696  | 138.916 | 1.00 | 0.00 | H |
| ATOM | 59  | H4'  | G A | 2 | 18.835 | -1.702 | 139.746 | 1.00 | 0.00 | H |
| ATOM | 60  | H2'1 | G A | 2 | 18.334 | -0.751 | 136.036 | 1.00 | 0.00 | H |
| ATOM | 61  | H2'2 | G A | 2 | 16.947 | -1.831 | 136.113 | 1.00 | 0.00 | H |
| ATOM | 62  | H5'1 | G A | 2 | 20.008 | 0.550  | 139.214 | 1.00 | 0.00 | H |
| ATOM | 63  | H5'2 | G A | 2 | 20.874 | -0.985 | 138.988 | 1.00 | 0.00 | H |
| ATOM | 64  | C1'  | G A | 3 | 12.264 | -1.626 | 136.655 | 1.00 | 0.00 | C |
| ATOM | 65  | N1   | G A | 3 | 11.936 | 3.010  | 134.556 | 1.00 | 0.00 | N |
| ATOM | 66  | C2   | G A | 3 | 11.038 | 2.336  | 135.363 | 1.00 | 0.00 | C |
| ATOM | 67  | N2   | G A | 3 | 9.899  | 2.981  | 135.645 | 1.00 | 0.00 | N |
| ATOM | 68  | N3   | G A | 3 | 11.257 | 1.116  | 135.847 | 1.00 | 0.00 | N |
| ATOM | 69  | C4   | G A | 3 | 12.456 | 0.612  | 135.454 | 1.00 | 0.00 | C |
| ATOM | 70  | C5   | G A | 3 | 13.413 | 1.210  | 134.651 | 1.00 | 0.00 | C |
| ATOM | 71  | C6   | G A | 3 | 13.182 | 2.508  | 134.140 | 1.00 | 0.00 | C |
| ATOM | 72  | O6   | G A | 3 | 13.903 | 3.198  | 133.418 | 1.00 | 0.00 | O |
| ATOM | 73  | N7   | G A | 3 | 14.505 | 0.357  | 134.485 | 1.00 | 0.00 | N |
| ATOM | 74  | C8   | G A | 3 | 14.186 | -0.704 | 135.178 | 1.00 | 0.00 | C |
| ATOM | 75  | N9   | G A | 3 | 12.954 | -0.626 | 135.796 | 1.00 | 0.00 | N |
| ATOM | 76  | C2'  | G A | 3 | 12.467 | -3.067 | 136.205 | 1.00 | 0.00 | C |
| ATOM | 77  | C3'  | G A | 3 | 12.529 | -3.809 | 137.529 | 1.00 | 0.00 | C |
| ATOM | 78  | O3'  | G A | 3 | 11.204 | -4.100 | 137.965 | 1.00 | 0.00 | O |
| ATOM | 79  | C4'  | G A | 3 | 13.231 | -2.809 | 138.447 | 1.00 | 0.00 | C |
| ATOM | 80  | O4'  | G A | 3 | 12.783 | -1.502 | 137.965 | 1.00 | 0.00 | O |
| ATOM | 81  | C5'  | G A | 3 | 14.741 | -2.835 | 138.438 | 1.00 | 0.00 | C |
| ATOM | 82  | O5'  | G A | 3 | 15.219 | -3.112 | 137.098 | 1.00 | 0.00 | O |
| ATOM | 83  | O1P  | G A | 3 | 16.316 | -5.366 | 137.323 | 1.00 | 0.00 | O |
| ATOM | 84  | O2P  | G A | 3 | 17.087 | -3.768 | 135.549 | 1.00 | 0.00 | O |
| ATOM | 85  | P    | G A | 3 | 16.553 | -3.969 | 136.919 | 1.00 | 0.00 | P |
| ATOM | 86  | H1   | G A | 3 | 11.671 | 3.955  | 134.237 | 1.00 | 0.00 | H |
| ATOM | 87  | H8   | G A | 3 | 14.834 | -1.577 | 135.261 | 1.00 | 0.00 | H |
| ATOM | 88  | H1'  | G A | 3 | 11.204 | -1.374 | 136.689 | 1.00 | 0.00 | H |
| ATOM | 89  | H21  | G A | 3 | 9.737  | 3.928  | 135.268 | 1.00 | 0.00 | H |
| ATOM | 90  | H3'  | G A | 3 | 13.096 | -4.737 | 137.453 | 1.00 | 0.00 | H |
| ATOM | 91  | H22  | G A | 3 | 9.188  | 2.533  | 136.238 | 1.00 | 0.00 | H |
| ATOM | 92  | H4'  | G A | 3 | 12.900 | -3.024 | 139.462 | 1.00 | 0.00 | H |
| ATOM | 93  | H2'1 | G A | 3 | 13.388 | -3.195 | 135.635 | 1.00 | 0.00 | H |
| ATOM | 94  | H2'2 | G A | 3 | 11.646 | -3.427 | 135.585 | 1.00 | 0.00 | H |
| ATOM | 95  | H5'1 | G A | 3 | 15.118 | -1.870 | 138.772 | 1.00 | 0.00 | H |
| ATOM | 96  | H5'2 | G A | 3 | 15.089 | -3.611 | 139.121 | 1.00 | 0.00 | H |
| ATOM | 97  | C1'  | C A | 4 | 7.710  | -0.930 | 134.837 | 1.00 | 0.00 | C |
| ATOM | 98  | N1   | C A | 4 | 8.909  | -0.689 | 133.986 | 1.00 | 0.00 | N |
| ATOM | 99  | C2   | C A | 4 | 9.002  | 0.534  | 133.325 | 1.00 | 0.00 | C |
| ATOM | 100 | O2   | C A | 4 | 8.094  | 1.362  | 133.467 | 1.00 | 0.00 | O |



|      |     |      |     |   |        |        |         |      |      |   |
|------|-----|------|-----|---|--------|--------|---------|------|------|---|
| ATOM | 101 | N3   | C A | 4 | 10.086 | 0.774  | 132.547 | 1.00 | 0.00 | N |
| ATOM | 102 | C4   | C A | 4 | 11.052 | -0.143 | 132.411 | 1.00 | 0.00 | C |
| ATOM | 103 | N4   | C A | 4 | 12.091 | 0.146  | 131.639 | 1.00 | 0.00 | N |
| ATOM | 104 | C5   | C A | 4 | 10.980 | -1.408 | 133.079 | 1.00 | 0.00 | C |
| ATOM | 105 | C6   | C A | 4 | 9.882  | -1.627 | 133.859 | 1.00 | 0.00 | C |
| ATOM | 106 | C2'  | C A | 4 | 7.194  | -2.360 | 134.777 | 1.00 | 0.00 | C |
| ATOM | 107 | C3'  | C A | 4 | 6.716  | -2.586 | 136.203 | 1.00 | 0.00 | C |
| ATOM | 108 | O3'  | C A | 4 | 5.389  | -2.081 | 136.337 | 1.00 | 0.00 | O |
| ATOM | 109 | C4'  | C A | 4 | 7.724  | -1.789 | 137.029 | 1.00 | 0.00 | C |
| ATOM | 110 | O4'  | C A | 4 | 8.070  | -0.651 | 136.177 | 1.00 | 0.00 | O |
| ATOM | 111 | C5'  | C A | 4 | 8.995  | -2.510 | 137.412 | 1.00 | 0.00 | C |
| ATOM | 112 | O5'  | C A | 4 | 9.409  | -3.383 | 136.331 | 1.00 | 0.00 | O |
| ATOM | 113 | O1P  | C A | 4 | 9.158  | -5.686 | 137.313 | 1.00 | 0.00 | O |
| ATOM | 114 | O2P  | C A | 4 | 10.833 | -5.275 | 135.491 | 1.00 | 0.00 | O |
| ATOM | 115 | P    | C A | 4 | 10.125 | -4.763 | 136.690 | 1.00 | 0.00 | P |
| ATOM | 116 | H5   | C A | 4 | 11.761 | -2.160 | 132.966 | 1.00 | 0.00 | H |
| ATOM | 117 | H6   | C A | 4 | 9.786  | -2.574 | 134.390 | 1.00 | 0.00 | H |
| ATOM | 118 | H1'  | C A | 4 | 6.936  | -0.222 | 134.542 | 1.00 | 0.00 | H |
| ATOM | 119 | H3'  | C A | 4 | 6.729  | -3.642 | 136.475 | 1.00 | 0.00 | H |
| ATOM | 120 | H4'  | C A | 4 | 7.217  | -1.495 | 137.948 | 1.00 | 0.00 | H |
| ATOM | 121 | H41  | C A | 4 | 12.848 | -0.542 | 131.519 | 1.00 | 0.00 | H |
| ATOM | 122 | H42  | C A | 4 | 12.140 | 1.056  | 131.159 | 1.00 | 0.00 | H |
| ATOM | 123 | H2'1 | C A | 4 | 7.972  | -3.071 | 134.504 | 1.00 | 0.00 | H |
| ATOM | 124 | H2'2 | C A | 4 | 6.379  | -2.477 | 134.060 | 1.00 | 0.00 | H |
| ATOM | 125 | H5'1 | C A | 4 | 9.776  | -1.776 | 137.613 | 1.00 | 0.00 | H |
| ATOM | 126 | H5'2 | C A | 4 | 8.816  | -3.097 | 138.311 | 1.00 | 0.00 | H |
| ATOM | 127 | C1'  | C A | 5 | 4.408  | 1.158  | 131.792 | 1.00 | 0.00 | C |
| ATOM | 128 | N1   | C A | 5 | 5.647  | 0.533  | 131.250 | 1.00 | 0.00 | N |
| ATOM | 129 | C2   | C A | 5 | 6.432  | 1.292  | 130.384 | 1.00 | 0.00 | C |
| ATOM | 130 | O2   | C A | 5 | 6.072  | 2.443  | 130.101 | 1.00 | 0.00 | O |
| ATOM | 131 | N3   | C A | 5 | 7.565  | 0.743  | 129.880 | 1.00 | 0.00 | N |
| ATOM | 132 | C4   | C A | 5 | 7.929  | -0.504 | 130.203 | 1.00 | 0.00 | C |
| ATOM | 133 | N4   | C A | 5 | 9.046  | -0.989 | 129.685 | 1.00 | 0.00 | N |
| ATOM | 134 | C5   | C A | 5 | 7.139  | -1.306 | 131.091 | 1.00 | 0.00 | C |
| ATOM | 135 | C6   | C A | 5 | 6.007  | -0.732 | 131.588 | 1.00 | 0.00 | C |
| ATOM | 136 | C2'  | C A | 5 | 3.240  | 0.191  | 131.916 | 1.00 | 0.00 | C |
| ATOM | 137 | C3'  | C A | 5 | 2.556  | 0.682  | 133.183 | 1.00 | 0.00 | C |
| ATOM | 138 | O3'  | C A | 5 | 1.675  | 1.753  | 132.855 | 1.00 | 0.00 | O |
| ATOM | 139 | C4'  | C A | 5 | 3.729  | 1.142  | 134.045 | 1.00 | 0.00 | C |
| ATOM | 140 | O4'  | C A | 5 | 4.706  | 1.653  | 133.084 | 1.00 | 0.00 | O |
| ATOM | 141 | C5'  | C A | 5 | 4.394  | 0.083  | 134.895 | 1.00 | 0.00 | C |
| ATOM | 142 | O5'  | C A | 5 | 4.418  | -1.177 | 134.176 | 1.00 | 0.00 | O |
| ATOM | 143 | O1P  | C A | 5 | 2.906  | -2.653 | 135.542 | 1.00 | 0.00 | O |
| ATOM | 144 | O2P  | C A | 5 | 4.747  | -3.667 | 134.173 | 1.00 | 0.00 | O |
| ATOM | 145 | P    | C A | 5 | 4.273  | -2.533 | 135.003 | 1.00 | 0.00 | P |
| ATOM | 146 | H5   | C A | 5 | 7.428  | -2.324 | 131.354 | 1.00 | 0.00 | H |
| ATOM | 147 | H6   | C A | 5 | 5.375  | -1.301 | 132.271 | 1.00 | 0.00 | H |
| ATOM | 148 | H1'  | C A | 5 | 4.150  | 2.006  | 131.159 | 1.00 | 0.00 | H |
| ATOM | 149 | H3'  | C A | 5 | 1.992  | -0.111 | 133.676 | 1.00 | 0.00 | H |
| ATOM | 150 | H4'  | C A | 5 | 3.345  | 1.911  | 134.715 | 1.00 | 0.00 | H |
| ATOM | 151 | H41  | C A | 5 | 9.350  | -1.945 | 129.919 | 1.00 | 0.00 | H |
| ATOM | 152 | H42  | C A | 5 | 9.612  | -0.411 | 129.046 | 1.00 | 0.00 | H |
| ATOM | 153 | H2'1 | C A | 5 | 3.566  | -0.844 | 132.017 | 1.00 | 0.00 | H |
| ATOM | 154 | H2'2 | C A | 5 | 2.568  | 0.241  | 131.057 | 1.00 | 0.00 | H |

|      |     |      |     |   |        |        |         |      |      |   |
|------|-----|------|-----|---|--------|--------|---------|------|------|---|
| ATOM | 155 | H5'1 | C A | 5 | 5.413  | 0.396  | 135.124 | 1.00 | 0.00 | H |
| ATOM | 156 | H5'2 | C A | 5 | 3.836  | -0.033 | 135.823 | 1.00 | 0.00 | H |
| ATOM | 157 | C1'  | G A | 6 | 3.028  | 3.429  | 127.613 | 1.00 | 0.00 | C |
| ATOM | 158 | N1   | G A | 6 | 7.171  | 1.163  | 125.681 | 1.00 | 0.00 | N |
| ATOM | 159 | C2   | G A | 6 | 6.697  | 2.452  | 125.500 | 1.00 | 0.00 | C |
| ATOM | 160 | N2   | G A | 6 | 7.420  | 3.239  | 124.695 | 1.00 | 0.00 | N |
| ATOM | 161 | N3   | G A | 6 | 5.588  | 2.915  | 126.076 | 1.00 | 0.00 | N |
| ATOM | 162 | C4   | G A | 6 | 4.978  | 1.980  | 126.850 | 1.00 | 0.00 | C |
| ATOM | 163 | C5   | G A | 6 | 5.375  | 0.673  | 127.085 | 1.00 | 0.00 | C |
| ATOM | 164 | C6   | G A | 6 | 6.552  | 0.182  | 126.479 | 1.00 | 0.00 | C |
| ATOM | 165 | O6   | G A | 6 | 7.062  | -0.936 | 126.563 | 1.00 | 0.00 | O |
| ATOM | 166 | N7   | G A | 6 | 4.470  | 0.041  | 127.940 | 1.00 | 0.00 | N |
| ATOM | 167 | C8   | G A | 6 | 3.578  | 0.962  | 128.193 | 1.00 | 0.00 | C |
| ATOM | 168 | N9   | G A | 6 | 3.817  | 2.168  | 127.566 | 1.00 | 0.00 | N |
| ATOM | 169 | C2'  | G A | 6 | 1.522  | 3.211  | 127.643 | 1.00 | 0.00 | C |
| ATOM | 170 | C3'  | G A | 6 | 1.054  | 4.341  | 128.545 | 1.00 | 0.00 | C |
| ATOM | 171 | O3'  | G A | 6 | 0.897  | 5.527  | 127.769 | 1.00 | 0.00 | O |
| ATOM | 172 | C4'  | G A | 6 | 2.191  | 4.459  | 129.558 | 1.00 | 0.00 | C |
| ATOM | 173 | O4'  | G A | 6 | 3.391  | 4.121  | 128.793 | 1.00 | 0.00 | O |
| ATOM | 174 | C5'  | G A | 6 | 2.114  | 3.554  | 130.764 | 1.00 | 0.00 | C |
| ATOM | 175 | O5'  | G A | 6 | 1.562  | 2.270  | 130.378 | 1.00 | 0.00 | O |
| ATOM | 176 | O1P  | G A | 6 | -0.637 | 2.191  | 131.597 | 1.00 | 0.00 | O |
| ATOM | 177 | O2P  | G A | 6 | 0.552  | 0.060  | 131.017 | 1.00 | 0.00 | O |
| ATOM | 178 | P    | G A | 6 | 0.646  | 1.485  | 131.420 | 1.00 | 0.00 | P |
| ATOM | 179 | H1   | G A | 6 | 8.044  | 0.906  | 125.194 | 1.00 | 0.00 | H |
| ATOM | 180 | H8   | G A | 6 | 2.717  | 0.795  | 128.842 | 1.00 | 0.00 | H |
| ATOM | 181 | H1'  | G A | 6 | 3.318  | 4.045  | 126.761 | 1.00 | 0.00 | H |
| ATOM | 182 | H21  | G A | 6 | 8.279  | 2.875  | 124.256 | 1.00 | 0.00 | H |
| ATOM | 183 | H3'  | G A | 6 | 0.111  | 4.107  | 129.039 | 1.00 | 0.00 | H |
| ATOM | 184 | H22  | G A | 6 | 7.120  | 4.208  | 124.518 | 1.00 | 0.00 | H |
| ATOM | 185 | H4'  | G A | 6 | 2.191  | 5.489  | 129.915 | 1.00 | 0.00 | H |
| ATOM | 186 | H2'1 | G A | 6 | 1.253  | 2.238  | 128.055 | 1.00 | 0.00 | H |
| ATOM | 187 | H2'2 | G A | 6 | 1.073  | 3.282  | 126.651 | 1.00 | 0.00 | H |
| ATOM | 188 | H5'1 | G A | 6 | 3.113  | 3.418  | 131.174 | 1.00 | 0.00 | H |
| ATOM | 189 | H5'2 | G A | 6 | 1.478  | 4.018  | 131.519 | 1.00 | 0.00 | H |
| ATOM | 190 | C1'  | C A | 7 | 3.502  | 4.608  | 122.828 | 1.00 | 0.00 | C |
| ATOM | 191 | N1   | C A | 7 | 3.531  | 3.186  | 123.261 | 1.00 | 0.00 | N |
| ATOM | 192 | C2   | C A | 7 | 4.596  | 2.397  | 122.832 | 1.00 | 0.00 | C |
| ATOM | 193 | O2   | C A | 7 | 5.465  | 2.904  | 122.112 | 1.00 | 0.00 | O |
| ATOM | 194 | N3   | C A | 7 | 4.642  | 1.097  | 123.216 | 1.00 | 0.00 | N |
| ATOM | 195 | C4   | C A | 7 | 3.685  | 0.575  | 123.993 | 1.00 | 0.00 | C |
| ATOM | 196 | N4   | C A | 7 | 3.781  | -0.701 | 124.342 | 1.00 | 0.00 | N |
| ATOM | 197 | C5   | C A | 7 | 2.577  | 1.362  | 124.447 | 1.00 | 0.00 | C |
| ATOM | 198 | C6   | C A | 7 | 2.552  | 2.670  | 124.052 | 1.00 | 0.00 | C |
| ATOM | 199 | C2'  | C A | 7 | 2.104  | 5.126  | 122.510 | 1.00 | 0.00 | C |
| ATOM | 200 | C3'  | C A | 7 | 2.182  | 6.566  | 122.994 | 1.00 | 0.00 | C |
| ATOM | 201 | O3'  | C A | 7 | 2.747  | 7.375  | 121.963 | 1.00 | 0.00 | O |
| ATOM | 202 | C4'  | C A | 7 | 3.091  | 6.466  | 124.215 | 1.00 | 0.00 | C |
| ATOM | 203 | O4'  | C A | 7 | 4.028  | 5.392  | 123.882 | 1.00 | 0.00 | O |
| ATOM | 204 | C5'  | C A | 7 | 2.420  | 6.132  | 125.526 | 1.00 | 0.00 | C |
| ATOM | 205 | O5'  | C A | 7 | 1.337  | 5.196  | 125.298 | 1.00 | 0.00 | O |
| ATOM | 206 | O1P  | C A | 7 | -0.719 | 6.523  | 125.892 | 1.00 | 0.00 | O |
| ATOM | 207 | O2P  | C A | 7 | -0.729 | 4.024  | 126.117 | 1.00 | 0.00 | O |
| ATOM | 208 | P    | C A | 7 | 0.033  | 5.291  | 126.211 | 1.00 | 0.00 | P |

|      |     |      |     |   |       |        |         |      |      |   |
|------|-----|------|-----|---|-------|--------|---------|------|------|---|
| ATOM | 209 | H5   | C A | 7 | 1.791 | 0.941  | 125.076 | 1.00 | 0.00 | H |
| ATOM | 210 | H6   | C A | 7 | 1.734 | 3.311  | 124.378 | 1.00 | 0.00 | H |
| ATOM | 211 | H1'  | C A | 7 | 4.163 | 4.718  | 121.967 | 1.00 | 0.00 | H |
| ATOM | 212 | H3'  | C A | 7 | 1.199 | 6.958  | 123.263 | 1.00 | 0.00 | H |
| ATOM | 213 | H4'  | C A | 7 | 3.576 | 7.436  | 124.327 | 1.00 | 0.00 | H |
| ATOM | 214 | H41  | C A | 7 | 3.060 | -1.127 | 124.941 | 1.00 | 0.00 | H |
| ATOM | 215 | H42  | C A | 7 | 4.576 | -1.266 | 124.014 | 1.00 | 0.00 | H |
| ATOM | 216 | H2'1 | C A | 7 | 1.328 | 4.572  | 123.037 | 1.00 | 0.00 | H |
| ATOM | 217 | H2'2 | C A | 7 | 1.877 | 5.075  | 121.444 | 1.00 | 0.00 | H |
| ATOM | 218 | H5'1 | C A | 7 | 3.152 | 5.691  | 126.204 | 1.00 | 0.00 | H |
| ATOM | 219 | H5'2 | C A | 7 | 2.026 | 7.047  | 125.971 | 1.00 | 0.00 | H |
| ATOM | 220 | C1'  | A A | 8 | 5.048 | 3.860  | 118.185 | 1.00 | 0.00 | C |
| ATOM | 221 | N1   | A A | 8 | 5.014 | -1.080 | 119.581 | 1.00 | 0.00 | N |
| ATOM | 222 | C2   | A A | 8 | 5.877 | -0.350 | 118.879 | 1.00 | 0.00 | C |
| ATOM | 223 | N3   | A A | 8 | 5.827 | 0.925  | 118.558 | 1.00 | 0.00 | N |
| ATOM | 224 | C4   | A A | 8 | 4.704 | 1.485  | 119.047 | 1.00 | 0.00 | C |
| ATOM | 225 | C5   | A A | 8 | 3.724 | 0.878  | 119.781 | 1.00 | 0.00 | C |
| ATOM | 226 | C6   | A A | 8 | 3.905 | -0.493 | 120.058 | 1.00 | 0.00 | C |
| ATOM | 227 | N6   | A A | 8 | 3.026 | -1.221 | 120.767 | 1.00 | 0.00 | N |
| ATOM | 228 | N7   | A A | 8 | 2.720 | 1.772  | 120.111 | 1.00 | 0.00 | N |
| ATOM | 229 | C8   | A A | 8 | 3.109 | 2.889  | 119.570 | 1.00 | 0.00 | C |
| ATOM | 230 | N9   | A A | 8 | 4.307 | 2.792  | 118.909 | 1.00 | 0.00 | N |
| ATOM | 231 | C2'  | A A | 8 | 4.150 | 4.826  | 117.425 | 1.00 | 0.00 | C |
| ATOM | 232 | C3'  | A A | 8 | 4.889 | 6.143  | 117.588 | 1.00 | 0.00 | C |
| ATOM | 233 | O3'  | A A | 8 | 5.895 | 6.240  | 116.583 | 1.00 | 0.00 | O |
| ATOM | 234 | C4'  | A A | 8 | 5.485 | 6.028  | 118.990 | 1.00 | 0.00 | C |
| ATOM | 235 | O4'  | A A | 8 | 5.778 | 4.601  | 119.143 | 1.00 | 0.00 | O |
| ATOM | 236 | C5'  | A A | 8 | 4.598 | 6.464  | 120.132 | 1.00 | 0.00 | C |
| ATOM | 237 | O5'  | A A | 8 | 3.223 | 6.100  | 119.852 | 1.00 | 0.00 | O |
| ATOM | 238 | O1P  | A A | 8 | 2.071 | 8.326  | 119.611 | 1.00 | 0.00 | O |
| ATOM | 239 | O2P  | A A | 8 | 0.772 | 6.315  | 120.364 | 1.00 | 0.00 | O |
| ATOM | 240 | P    | A A | 8 | 2.055 | 7.059  | 120.368 | 1.00 | 0.00 | P |
| ATOM | 241 | H2   | A A | 8 | 6.754 | -0.886 | 118.521 | 1.00 | 0.00 | H |
| ATOM | 242 | H8   | A A | 8 | 2.538 | 3.815  | 119.636 | 1.00 | 0.00 | H |
| ATOM | 243 | H1'  | A A | 8 | 5.764 | 3.383  | 117.515 | 1.00 | 0.00 | H |
| ATOM | 244 | H3'  | A A | 8 | 4.221 | 6.999  | 117.514 | 1.00 | 0.00 | H |
| ATOM | 245 | H4'  | A A | 8 | 6.378 | 6.651  | 119.007 | 1.00 | 0.00 | H |
| ATOM | 246 | H61  | A A | 8 | 3.206 | -2.218 | 120.944 | 1.00 | 0.00 | H |
| ATOM | 247 | H62  | A A | 8 | 2.171 | -0.778 | 121.134 | 1.00 | 0.00 | H |
| ATOM | 248 | H2'1 | A A | 8 | 3.148 | 4.879  | 117.851 | 1.00 | 0.00 | H |
| ATOM | 249 | H2'2 | A A | 8 | 4.047 | 4.555  | 116.376 | 1.00 | 0.00 | H |
| ATOM | 250 | H5'1 | A A | 8 | 4.929 | 5.973  | 121.049 | 1.00 | 0.00 | H |
| ATOM | 251 | H5'2 | A A | 8 | 4.675 | 7.543  | 120.255 | 1.00 | 0.00 | H |
| ATOM | 252 | C1'  | C A | 9 | 6.504 | 0.994  | 114.399 | 1.00 | 0.00 | C |
| ATOM | 253 | N1   | C A | 9 | 5.234 | 0.703  | 115.120 | 1.00 | 0.00 | N |
| ATOM | 254 | C2   | C A | 9 | 5.031 | -0.595 | 115.586 | 1.00 | 0.00 | C |
| ATOM | 255 | O2   | C A | 9 | 5.906 | -1.445 | 115.383 | 1.00 | 0.00 | O |
| ATOM | 256 | N3   | C A | 9 | 3.882 | -0.880 | 116.244 | 1.00 | 0.00 | N |
| ATOM | 257 | C4   | C A | 9 | 2.951 | 0.062  | 116.447 | 1.00 | 0.00 | C |
| ATOM | 258 | N4   | C A | 9 | 1.848 | -0.271 | 117.100 | 1.00 | 0.00 | N |
| ATOM | 259 | C5   | C A | 9 | 3.131 | 1.405  | 115.975 | 1.00 | 0.00 | C |
| ATOM | 260 | C6   | C A | 9 | 4.299 | 1.671  | 115.318 | 1.00 | 0.00 | C |
| ATOM | 261 | C2'  | C A | 9 | 6.339 | 1.954  | 113.230 | 1.00 | 0.00 | C |
| ATOM | 262 | C3'  | C A | 9 | 7.638 | 2.747  | 113.285 | 1.00 | 0.00 | C |

|      |     |      |   |   |    |       |        |         |      |      |   |
|------|-----|------|---|---|----|-------|--------|---------|------|------|---|
| ATOM | 263 | O3'  | C | A | 9  | 8.654 | 2.027  | 112.590 | 1.00 | 0.00 | O |
| ATOM | 264 | C4'  | C | A | 9  | 7.916 | 2.838  | 114.783 | 1.00 | 0.00 | C |
| ATOM | 265 | O4'  | C | A | 9  | 7.399 | 1.582  | 115.325 | 1.00 | 0.00 | O |
| ATOM | 266 | C5'  | C | A | 9  | 7.264 | 3.985  | 115.519 | 1.00 | 0.00 | C |
| ATOM | 267 | O5'  | C | A | 9  | 5.946 | 4.235  | 114.966 | 1.00 | 0.00 | O |
| ATOM | 268 | O1P  | C | A | 9  | 6.170 | 6.519  | 113.932 | 1.00 | 0.00 | O |
| ATOM | 269 | O2P  | C | A | 9  | 3.931 | 5.720  | 114.739 | 1.00 | 0.00 | O |
| ATOM | 270 | P    | C | A | 9  | 5.404 | 5.734  | 114.921 | 1.00 | 0.00 | P |
| ATOM | 271 | H5   | C | A | 9  | 2.374 | 2.174  | 116.134 | 1.00 | 0.00 | H |
| ATOM | 272 | H6   | C | A | 9  | 4.485 | 2.679  | 114.949 | 1.00 | 0.00 | H |
| ATOM | 273 | H1'  | C | A | 9  | 6.934 | 0.049  | 114.071 | 1.00 | 0.00 | H |
| ATOM | 274 | H3'  | C | A | 9  | 7.530 | 3.736  | 112.842 | 1.00 | 0.00 | H |
| ATOM | 275 | H4'  | C | A | 9  | 8.996 | 2.940  | 114.899 | 1.00 | 0.00 | H |
| ATOM | 276 | H41  | C | A | 9  | 1.117 | 0.435  | 117.273 | 1.00 | 0.00 | H |
| ATOM | 277 | H42  | C | A | 9  | 1.719 | -1.237 | 117.435 | 1.00 | 0.00 | H |
| ATOM | 278 | H2'1 | C | A | 9  | 5.475 | 2.605  | 113.347 | 1.00 | 0.00 | H |
| ATOM | 279 | H2'2 | C | A | 9  | 6.231 | 1.434  | 112.278 | 1.00 | 0.00 | H |
| ATOM | 280 | H5'1 | C | A | 9  | 7.179 | 3.733  | 116.574 | 1.00 | 0.00 | H |
| ATOM | 281 | H5'2 | C | A | 9  | 7.882 | 4.877  | 115.411 | 1.00 | 0.00 | H |
| ATOM | 282 | C1'  | C | A | 10 | 6.700 | -3.239 | 111.835 | 1.00 | 0.00 | C |
| ATOM | 283 | N1   | C | A | 10 | 5.390 | -2.664 | 112.247 | 1.00 | 0.00 | N |
| ATOM | 284 | C2   | C | A | 10 | 4.496 | -3.497 | 112.919 | 1.00 | 0.00 | C |
| ATOM | 285 | O2   | C | A | 10 | 4.822 | -4.670 | 113.142 | 1.00 | 0.00 | O |
| ATOM | 286 | N3   | C | A | 10 | 3.296 | -2.995 | 113.303 | 1.00 | 0.00 | N |
| ATOM | 287 | C4   | C | A | 10 | 2.969 | -1.721 | 113.046 | 1.00 | 0.00 | C |
| ATOM | 288 | N4   | C | A | 10 | 1.785 | -1.281 | 113.447 | 1.00 | 0.00 | N |
| ATOM | 289 | C5   | C | A | 10 | 3.867 | -0.844 | 112.355 | 1.00 | 0.00 | C |
| ATOM | 290 | C6   | C | A | 10 | 5.071 | -1.371 | 111.981 | 1.00 | 0.00 | C |
| ATOM | 291 | C2'  | C | A | 10 | 7.188 | -2.740 | 110.482 | 1.00 | 0.00 | C |
| ATOM | 292 | C3'  | C | A | 10 | 8.691 | -2.664 | 110.696 | 1.00 | 0.00 | C |
| ATOM | 293 | O3'  | C | A | 10 | 9.263 | -3.952 | 110.465 | 1.00 | 0.00 | O |
| ATOM | 294 | C4'  | C | A | 10 | 8.806 | -2.238 | 112.156 | 1.00 | 0.00 | C |
| ATOM | 295 | O4'  | C | A | 10 | 7.657 | -2.866 | 112.809 | 1.00 | 0.00 | O |
| ATOM | 296 | C5'  | C | A | 10 | 8.760 | -0.752 | 112.427 | 1.00 | 0.00 | C |
| ATOM | 297 | O5'  | C | A | 10 | 7.831 | -0.115 | 111.512 | 1.00 | 0.00 | O |
| ATOM | 298 | O1P  | C | A | 10 | 9.317 | 1.342  | 110.095 | 1.00 | 0.00 | O |
| ATOM | 299 | O2P  | C | A | 10 | 6.912 | 1.967  | 110.450 | 1.00 | 0.00 | O |
| ATOM | 300 | P    | C | A | 10 | 8.149 | 1.360  | 110.998 | 1.00 | 0.00 | P |
| ATOM | 301 | H5   | C | A | 10 | 3.603 | 0.193  | 112.136 | 1.00 | 0.00 | H |
| ATOM | 302 | H6   | C | A | 10 | 5.791 | -0.739 | 111.459 | 1.00 | 0.00 | H |
| ATOM | 303 | H1'  | C | A | 10 | 6.615 | -4.324 | 111.846 | 1.00 | 0.00 | H |
| ATOM | 304 | H3'  | C | A | 10 | 9.162 | -1.939 | 110.034 | 1.00 | 0.00 | H |
| ATOM | 305 | H4'  | C | A | 10 | 9.763 | -2.611 | 112.522 | 1.00 | 0.00 | H |
| ATOM | 306 | H41  | C | A | 10 | 1.510 | -0.305 | 113.264 | 1.00 | 0.00 | H |
| ATOM | 307 | H42  | C | A | 10 | 1.141 | -1.914 | 113.941 | 1.00 | 0.00 | H |
| ATOM | 308 | H2'1 | C | A | 10 | 6.776 | -1.766 | 110.225 | 1.00 | 0.00 | H |
| ATOM | 309 | H2'2 | C | A | 10 | 6.936 | -3.429 | 109.673 | 1.00 | 0.00 | H |
| ATOM | 310 | H5'1 | C | A | 10 | 8.437 | -0.583 | 113.455 | 1.00 | 0.00 | H |
| ATOM | 311 | H5'2 | C | A | 10 | 9.756 | -0.332 | 112.292 | 1.00 | 0.00 | H |
| ATOM | 312 | C1'  | T | A | 11 | 4.997 | -7.658 | 110.395 | 1.00 | 0.00 | C |
| ATOM | 313 | N1   | T | A | 11 | 4.117 | -6.461 | 110.329 | 1.00 | 0.00 | N |
| ATOM | 314 | C2   | T | A | 11 | 2.871 | -6.562 | 110.913 | 1.00 | 0.00 | C |
| ATOM | 315 | O2   | T | A | 11 | 2.482 | -7.575 | 111.468 | 1.00 | 0.00 | O |
| ATOM | 316 | N3   | T | A | 11 | 2.085 | -5.426 | 110.828 | 1.00 | 0.00 | N |

|      |     |      |   |   |    |        |         |         |      |      |   |
|------|-----|------|---|---|----|--------|---------|---------|------|------|---|
| ATOM | 317 | C4   | T | A | 11 | 2.427  | -4.234  | 110.223 | 1.00 | 0.00 | C |
| ATOM | 318 | O4   | T | A | 11 | 1.636  | -3.284  | 110.208 | 1.00 | 0.00 | O |
| ATOM | 319 | C5   | T | A | 11 | 3.748  | -4.225  | 109.640 | 1.00 | 0.00 | C |
| ATOM | 320 | C6   | T | A | 11 | 4.541  | -5.313  | 109.705 | 1.00 | 0.00 | C |
| ATOM | 321 | C7   | T | A | 11 | 4.163  | -2.947  | 108.974 | 1.00 | 0.00 | C |
| ATOM | 322 | C2'  | T | A | 11 | 5.822  | -7.885  | 109.135 | 1.00 | 0.00 | C |
| ATOM | 323 | C3'  | T | A | 11 | 7.124  | -8.432  | 109.701 | 1.00 | 0.00 | C |
| ATOM | 324 | O3'  | T | A | 11 | 6.993  | -9.836  | 109.906 | 1.00 | 0.00 | O |
| ATOM | 325 | C4'  | T | A | 11 | 7.269  | -7.668  | 111.015 | 1.00 | 0.00 | C |
| ATOM | 326 | O4'  | T | A | 11 | 5.893  | -7.474  | 111.475 | 1.00 | 0.00 | O |
| ATOM | 327 | C5'  | T | A | 11 | 7.946  | -6.319  | 110.938 | 1.00 | 0.00 | C |
| ATOM | 328 | O5'  | T | A | 11 | 7.577  | -5.656  | 109.702 | 1.00 | 0.00 | O |
| ATOM | 329 | O1P  | T | A | 11 | 9.744  | -5.547  | 108.428 | 1.00 | 0.00 | O |
| ATOM | 330 | O2P  | T | A | 11 | 7.960  | -3.831  | 108.019 | 1.00 | 0.00 | O |
| ATOM | 331 | P    | T | A | 11 | 8.650  | -4.725  | 108.981 | 1.00 | 0.00 | P |
| ATOM | 332 | H3   | T | A | 11 | 1.154  | -5.474  | 111.261 | 1.00 | 0.00 | H |
| ATOM | 333 | H6   | T | A | 11 | 5.535  | -5.281  | 109.257 | 1.00 | 0.00 | H |
| ATOM | 334 | H1'  | T | A | 11 | 4.378  | -8.526  | 110.618 | 1.00 | 0.00 | H |
| ATOM | 335 | H3'  | T | A | 11 | 7.967  | -8.241  | 109.039 | 1.00 | 0.00 | H |
| ATOM | 336 | H4'  | T | A | 11 | 7.857  | -8.298  | 111.685 | 1.00 | 0.00 | H |
| ATOM | 337 | H71  | T | A | 11 | 4.283  | -3.118  | 107.903 | 1.00 | 0.00 | H |
| ATOM | 338 | H72  | T | A | 11 | 3.398  | -2.187  | 109.137 | 1.00 | 0.00 | H |
| ATOM | 339 | H73  | T | A | 11 | 5.109  | -2.606  | 109.394 | 1.00 | 0.00 | H |
| ATOM | 340 | H2'1 | T | A | 11 | 5.988  | -6.965  | 108.579 | 1.00 | 0.00 | H |
| ATOM | 341 | H2'2 | T | A | 11 | 5.353  | -8.599  | 108.456 | 1.00 | 0.00 | H |
| ATOM | 342 | H5'1 | T | A | 11 | 7.637  | -5.713  | 111.788 | 1.00 | 0.00 | H |
| ATOM | 343 | H5'2 | T | A | 11 | 9.027  | -6.459  | 110.971 | 1.00 | 0.00 | H |
| ATOM | 344 | C1'  | A | A | 12 | 1.416  | -10.994 | 109.581 | 1.00 | 0.00 | C |
| ATOM | 345 | N1   | A | A | 12 | -1.578 | -6.849  | 109.142 | 1.00 | 0.00 | N |
| ATOM | 346 | C2   | A | A | 12 | -1.752 | -8.023  | 109.740 | 1.00 | 0.00 | C |
| ATOM | 347 | N3   | A | A | 12 | -0.932 | -9.051  | 109.819 | 1.00 | 0.00 | N |
| ATOM | 348 | C4   | A | A | 12 | 0.213  | -8.786  | 109.165 | 1.00 | 0.00 | C |
| ATOM | 349 | C5   | A | A | 12 | 0.545  | -7.638  | 108.501 | 1.00 | 0.00 | C |
| ATOM | 350 | C6   | A | A | 12 | -0.425 | -6.613  | 108.498 | 1.00 | 0.00 | C |
| ATOM | 351 | N6   | A | A | 12 | -0.237 | -5.430  | 107.888 | 1.00 | 0.00 | N |
| ATOM | 352 | N7   | A | A | 12 | 1.810  | -7.729  | 107.951 | 1.00 | 0.00 | N |
| ATOM | 353 | C8   | A | A | 12 | 2.213  | -8.919  | 108.285 | 1.00 | 0.00 | C |
| ATOM | 354 | N9   | A | A | 12 | 1.295  | -9.619  | 109.027 | 1.00 | 0.00 | N |
| ATOM | 355 | C2'  | A | A | 12 | 2.144  | -11.964 | 108.660 | 1.00 | 0.00 | C |
| ATOM | 356 | C3'  | A | A | 12 | 2.900  | -12.836 | 109.652 | 1.00 | 0.00 | C |
| ATOM | 357 | O3'  | A | A | 12 | 2.037  | -13.872 | 110.115 | 1.00 | 0.00 | O |
| ATOM | 358 | C4'  | A | A | 12 | 3.265  | -11.851 | 110.762 | 1.00 | 0.00 | C |
| ATOM | 359 | O4'  | A | A | 12 | 2.144  | -10.909 | 110.791 | 1.00 | 0.00 | O |
| ATOM | 360 | C5'  | A | A | 12 | 4.545  | -11.073 | 110.572 | 1.00 | 0.00 | C |
| ATOM | 361 | O5'  | A | A | 12 | 4.719  | -10.746 | 109.170 | 1.00 | 0.00 | O |
| ATOM | 362 | O1P  | A | A | 12 | 6.762  | -12.064 | 108.515 | 1.00 | 0.00 | O |
| ATOM | 363 | O2P  | A | A | 12 | 6.184  | -9.951  | 107.291 | 1.00 | 0.00 | O |
| ATOM | 364 | P    | A | A | 12 | 6.195  | -10.701 | 108.570 | 1.00 | 0.00 | P |
| ATOM | 365 | H2   | A | A | 12 | -2.710 | -8.153  | 110.242 | 1.00 | 0.00 | H |
| ATOM | 366 | H8   | A | A | 12 | 3.186  | -9.324  | 108.005 | 1.00 | 0.00 | H |
| ATOM | 367 | H1'  | A | A | 12 | 0.415  | -11.356 | 109.817 | 1.00 | 0.00 | H |
| ATOM | 368 | H3'  | A | A | 12 | 3.791  | -13.279 | 109.211 | 1.00 | 0.00 | H |
| ATOM | 369 | H4'  | A | A | 12 | 3.359  | -12.431 | 111.680 | 1.00 | 0.00 | H |
| ATOM | 370 | H61  | A | A | 12 | -0.975 | -4.713  | 107.918 | 1.00 | 0.00 | H |

|      |     |      |   |   |    |         |         |         |      |      |   |
|------|-----|------|---|---|----|---------|---------|---------|------|------|---|
| ATOM | 371 | H62  | A | A | 12 | 0.645   | -5.242  | 107.389 | 1.00 | 0.00 | H |
| ATOM | 372 | H2'1 | A | A | 12 | 2.826   | -11.457 | 107.980 | 1.00 | 0.00 | H |
| ATOM | 373 | H2'2 | A | A | 12 | 1.456   | -12.554 | 108.056 | 1.00 | 0.00 | H |
| ATOM | 374 | H5'1 | A | A | 12 | 4.496   | -10.157 | 111.161 | 1.00 | 0.00 | H |
| ATOM | 375 | H5'2 | A | A | 12 | 5.384   | -11.676 | 110.917 | 1.00 | 0.00 | H |
| ATOM | 376 | C1'  | G | A | 13 | -3.261  | -12.349 | 108.613 | 1.00 | 0.00 | C |
| ATOM | 377 | N1   | G | A | 13 | -3.590  | -7.711  | 106.513 | 1.00 | 0.00 | N |
| ATOM | 378 | C2   | G | A | 13 | -4.489  | -8.386  | 107.320 | 1.00 | 0.00 | C |
| ATOM | 379 | N2   | G | A | 13 | -5.631  | -7.742  | 107.602 | 1.00 | 0.00 | N |
| ATOM | 380 | N3   | G | A | 13 | -4.269  | -9.607  | 107.804 | 1.00 | 0.00 | N |
| ATOM | 381 | C4   | G | A | 13 | -3.070  | -10.110 | 107.412 | 1.00 | 0.00 | C |
| ATOM | 382 | C5   | G | A | 13 | -2.114  | -9.513  | 106.608 | 1.00 | 0.00 | C |
| ATOM | 383 | C6   | G | A | 13 | -2.344  | -8.214  | 106.097 | 1.00 | 0.00 | C |
| ATOM | 384 | O6   | G | A | 13 | -1.622  | -7.526  | 105.374 | 1.00 | 0.00 | O |
| ATOM | 385 | N7   | G | A | 13 | -1.020  | -10.365 | 106.442 | 1.00 | 0.00 | N |
| ATOM | 386 | C8   | G | A | 13 | -1.340  | -11.428 | 107.136 | 1.00 | 0.00 | C |
| ATOM | 387 | N9   | G | A | 13 | -2.571  | -11.348 | 107.753 | 1.00 | 0.00 | N |
| ATOM | 388 | C2'  | G | A | 13 | -3.058  | -13.789 | 108.163 | 1.00 | 0.00 | C |
| ATOM | 389 | C3'  | G | A | 13 | -2.996  | -14.531 | 109.486 | 1.00 | 0.00 | C |
| ATOM | 390 | O3'  | G | A | 13 | -4.323  | -14.823 | 109.922 | 1.00 | 0.00 | O |
| ATOM | 391 | C4'  | G | A | 13 | -2.295  | -13.532 | 110.404 | 1.00 | 0.00 | C |
| ATOM | 392 | O4'  | G | A | 13 | -2.742  | -12.224 | 109.922 | 1.00 | 0.00 | O |
| ATOM | 393 | C5'  | G | A | 13 | -0.785  | -13.558 | 110.395 | 1.00 | 0.00 | C |
| ATOM | 394 | O5'  | G | A | 13 | -0.307  | -13.835 | 109.055 | 1.00 | 0.00 | O |
| ATOM | 395 | O1P  | G | A | 13 | 0.790   | -16.088 | 109.280 | 1.00 | 0.00 | O |
| ATOM | 396 | O2P  | G | A | 13 | 1.561   | -14.492 | 107.506 | 1.00 | 0.00 | O |
| ATOM | 397 | P    | G | A | 13 | 1.028   | -14.691 | 108.877 | 1.00 | 0.00 | P |
| ATOM | 398 | H1   | G | A | 13 | -3.853  | -6.765  | 106.196 | 1.00 | 0.00 | H |
| ATOM | 399 | H8   | G | A | 13 | -0.692  | -12.300 | 107.219 | 1.00 | 0.00 | H |
| ATOM | 400 | H1'  | G | A | 13 | -4.321  | -12.096 | 108.646 | 1.00 | 0.00 | H |
| ATOM | 401 | H21  | G | A | 13 | -5.790  | -6.795  | 107.225 | 1.00 | 0.00 | H |
| ATOM | 402 | H3'  | G | A | 13 | -2.430  | -15.460 | 109.409 | 1.00 | 0.00 | H |
| ATOM | 403 | H22  | G | A | 13 | -6.340  | -8.191  | 108.194 | 1.00 | 0.00 | H |
| ATOM | 404 | H4'  | G | A | 13 | -2.626  | -13.747 | 111.419 | 1.00 | 0.00 | H |
| ATOM | 405 | H2'1 | G | A | 13 | -2.137  | -13.917 | 107.593 | 1.00 | 0.00 | H |
| ATOM | 406 | H2'2 | G | A | 13 | -3.880  | -14.149 | 107.541 | 1.00 | 0.00 | H |
| ATOM | 407 | H5'1 | G | A | 13 | -0.407  | -12.592 | 110.729 | 1.00 | 0.00 | H |
| ATOM | 408 | H5'2 | G | A | 13 | -0.436  | -14.333 | 111.079 | 1.00 | 0.00 | H |
| ATOM | 409 | C1'  | G | A | 14 | -7.815  | -11.652 | 106.793 | 1.00 | 0.00 | C |
| ATOM | 410 | N1   | G | A | 14 | -5.464  | -8.332  | 103.715 | 1.00 | 0.00 | N |
| ATOM | 411 | C2   | G | A | 14 | -6.667  | -8.220  | 104.388 | 1.00 | 0.00 | C |
| ATOM | 412 | N2   | G | A | 14 | -7.335  | -7.073  | 104.217 | 1.00 | 0.00 | N |
| ATOM | 413 | N3   | G | A | 14 | -7.166  | -9.178  | 105.170 | 1.00 | 0.00 | N |
| ATOM | 414 | C4   | G | A | 14 | -6.362  | -10.272 | 105.222 | 1.00 | 0.00 | C |
| ATOM | 415 | C5   | G | A | 14 | -5.149  | -10.473 | 104.583 | 1.00 | 0.00 | C |
| ATOM | 416 | C6   | G | A | 14 | -4.619  | -9.458  | 103.756 | 1.00 | 0.00 | C |
| ATOM | 417 | O6   | G | A | 14 | -3.569  | -9.448  | 103.113 | 1.00 | 0.00 | O |
| ATOM | 418 | N7   | G | A | 14 | -4.644  | -11.736 | 104.898 | 1.00 | 0.00 | N |
| ATOM | 419 | C8   | G | A | 14 | -5.541  | -12.246 | 105.701 | 1.00 | 0.00 | C |
| ATOM | 420 | N9   | G | A | 14 | -6.615  | -11.417 | 105.945 | 1.00 | 0.00 | N |
| ATOM | 421 | C2'  | G | A | 14 | -8.332  | -13.084 | 106.738 | 1.00 | 0.00 | C |
| ATOM | 422 | C3'  | G | A | 14 | -8.813  | -13.302 | 108.163 | 1.00 | 0.00 | C |
| ATOM | 423 | O3'  | G | A | 14 | -10.140 | -12.795 | 108.294 | 1.00 | 0.00 | O |
| ATOM | 424 | C4'  | G | A | 14 | -7.807  | -12.502 | 108.988 | 1.00 | 0.00 | C |

|      |     |      |     |    |         |         |         |      |      |   |
|------|-----|------|-----|----|---------|---------|---------|------|------|---|
| ATOM | 425 | O4'  | G A | 14 | -7.458  | -11.368 | 108.132 | 1.00 | 0.00 | O |
| ATOM | 426 | C5'  | G A | 14 | -6.536  | -13.222 | 109.377 | 1.00 | 0.00 | C |
| ATOM | 427 | O5'  | G A | 14 | -6.122  | -14.101 | 108.301 | 1.00 | 0.00 | O |
| ATOM | 428 | O1P  | G A | 14 | -6.378  | -16.399 | 109.294 | 1.00 | 0.00 | O |
| ATOM | 429 | O2P  | G A | 14 | -4.697  | -15.998 | 107.474 | 1.00 | 0.00 | O |
| ATOM | 430 | P    | G A | 14 | -5.409  | -15.479 | 108.668 | 1.00 | 0.00 | P |
| ATOM | 431 | H1   | G A | 14 | -5.165  | -7.530  | 103.140 | 1.00 | 0.00 | H |
| ATOM | 432 | H8   | G A | 14 | -5.448  | -13.241 | 106.138 | 1.00 | 0.00 | H |
| ATOM | 433 | H1'  | G A | 14 | -8.589  | -10.945 | 106.494 | 1.00 | 0.00 | H |
| ATOM | 434 | H21  | G A | 14 | -6.942  | -6.335  | 103.614 | 1.00 | 0.00 | H |
| ATOM | 435 | H3'  | G A | 14 | -8.803  | -14.356 | 108.442 | 1.00 | 0.00 | H |
| ATOM | 436 | H22  | G A | 14 | -8.238  | -6.927  | 104.688 | 1.00 | 0.00 | H |
| ATOM | 437 | H4'  | G A | 14 | -8.313  | -12.203 | 109.904 | 1.00 | 0.00 | H |
| ATOM | 438 | H2'1 | G A | 14 | -7.552  | -13.796 | 106.469 | 1.00 | 0.00 | H |
| ATOM | 439 | H2'2 | G A | 14 | -9.146  | -13.201 | 106.022 | 1.00 | 0.00 | H |
| ATOM | 440 | H5'1 | G A | 14 | -5.756  | -12.487 | 109.577 | 1.00 | 0.00 | H |
| ATOM | 441 | H5'2 | G A | 14 | -6.718  | -13.806 | 110.280 | 1.00 | 0.00 | H |
| ATOM | 442 | C1'  | A A | 15 | -11.133 | -9.575  | 103.764 | 1.00 | 0.00 | C |
| ATOM | 443 | N1   | A A | 15 | -7.059  | -8.862  | 100.724 | 1.00 | 0.00 | N |
| ATOM | 444 | C2   | A A | 15 | -8.087  | -8.082  | 101.050 | 1.00 | 0.00 | C |
| ATOM | 445 | N3   | A A | 15 | -9.105  | -8.327  | 101.845 | 1.00 | 0.00 | N |
| ATOM | 446 | C4   | A A | 15 | -9.011  | -9.571  | 102.351 | 1.00 | 0.00 | C |
| ATOM | 447 | C5   | A A | 15 | -8.029  | -10.492 | 102.117 | 1.00 | 0.00 | C |
| ATOM | 448 | C6   | A A | 15 | -6.993  | -10.097 | 101.245 | 1.00 | 0.00 | C |
| ATOM | 449 | N6   | A A | 15 | -5.961  | -10.895 | 100.924 | 1.00 | 0.00 | N |
| ATOM | 450 | N7   | A A | 15 | -8.267  | -11.664 | 102.813 | 1.00 | 0.00 | N |
| ATOM | 451 | C8   | A A | 15 | -9.381  | -11.431 | 103.444 | 1.00 | 0.00 | C |
| ATOM | 452 | N9   | A A | 15 | -9.892  | -10.179 | 103.212 | 1.00 | 0.00 | N |
| ATOM | 453 | C2'  | A A | 15 | -12.290 | -10.557 | 103.892 | 1.00 | 0.00 | C |
| ATOM | 454 | C3'  | A A | 15 | -12.973 | -10.080 | 105.164 | 1.00 | 0.00 | C |
| ATOM | 455 | O3'  | A A | 15 | -13.868 | -9.019  | 104.843 | 1.00 | 0.00 | O |
| ATOM | 456 | C4'  | A A | 15 | -11.801 | -9.607  | 106.022 | 1.00 | 0.00 | C |
| ATOM | 457 | O4'  | A A | 15 | -10.835 | -9.080  | 105.055 | 1.00 | 0.00 | O |
| ATOM | 458 | C5'  | A A | 15 | -11.117 | -10.658 | 106.863 | 1.00 | 0.00 | C |
| ATOM | 459 | O5'  | A A | 15 | -11.080 | -11.916 | 106.142 | 1.00 | 0.00 | O |
| ATOM | 460 | O1P  | A A | 15 | -12.566 | -13.416 | 107.512 | 1.00 | 0.00 | O |
| ATOM | 461 | O2P  | A A | 15 | -10.718 | -14.402 | 106.130 | 1.00 | 0.00 | O |
| ATOM | 462 | P    | A A | 15 | -11.201 | -13.277 | 106.965 | 1.00 | 0.00 | P |
| ATOM | 463 | H2   | A A | 15 | -8.082  | -7.093  | 100.589 | 1.00 | 0.00 | H |
| ATOM | 464 | H8   | A A | 15 | -9.865  | -12.161 | 104.093 | 1.00 | 0.00 | H |
| ATOM | 465 | H1'  | A A | 15 | -11.407 | -8.728  | 103.136 | 1.00 | 0.00 | H |
| ATOM | 466 | H3'  | A A | 15 | -13.524 | -10.880 | 105.658 | 1.00 | 0.00 | H |
| ATOM | 467 | H4'  | A A | 15 | -12.190 | -8.842  | 106.694 | 1.00 | 0.00 | H |
| ATOM | 468 | H61  | A A | 15 | -5.228  | -10.557 | 100.284 | 1.00 | 0.00 | H |
| ATOM | 469 | H62  | A A | 15 | -5.903  | -11.845 | 101.319 | 1.00 | 0.00 | H |
| ATOM | 470 | H2'1 | A A | 15 | -11.947 | -11.588 | 103.988 | 1.00 | 0.00 | H |
| ATOM | 471 | H2'2 | A A | 15 | -12.966 | -10.513 | 103.038 | 1.00 | 0.00 | H |
| ATOM | 472 | H5'1 | A A | 15 | -10.101 | -10.333 | 107.087 | 1.00 | 0.00 | H |
| ATOM | 473 | H5'2 | A A | 15 | -11.667 | -10.784 | 107.794 | 1.00 | 0.00 | H |
| ATOM | 474 | C1'  | C A | 16 | -12.497 | -7.293  | 99.570  | 1.00 | 0.00 | C |
| ATOM | 475 | N1   | C A | 16 | -11.705 | -8.551  | 99.519  | 1.00 | 0.00 | N |
| ATOM | 476 | C2   | C A | 16 | -10.549 | -8.563  | 98.742  | 1.00 | 0.00 | C |
| ATOM | 477 | O2   | C A | 16 | -10.231 | -7.535  | 98.130  | 1.00 | 0.00 | O |
| ATOM | 478 | N3   | C A | 16 | -9.813  | -9.700  | 98.681  | 1.00 | 0.00 | N |

|      |     |      |     |    |         |         |         |      |      |   |
|------|-----|------|-----|----|---------|---------|---------|------|------|---|
| ATOM | 479 | C4   | C A | 16 | -10.185 | -10.795 | 99.355  | 1.00 | 0.00 | C |
| ATOM | 480 | N4   | C A | 16 | -9.425  | -11.879 | 99.263  | 1.00 | 0.00 | N |
| ATOM | 481 | C5   | C A | 16 | -11.371 | -10.814 | 100.159 | 1.00 | 0.00 | C |
| ATOM | 482 | C6   | C A | 16 | -12.095 | -9.657  | 100.210 | 1.00 | 0.00 | C |
| ATOM | 483 | C2'  | C A | 16 | -14.003 | -7.514  | 99.596  | 1.00 | 0.00 | C |
| ATOM | 484 | C3'  | C A | 16 | -14.475 | -6.389  | 100.503 | 1.00 | 0.00 | C |
| ATOM | 485 | O3'  | C A | 16 | -14.635 | -5.201  | 99.730  | 1.00 | 0.00 | O |
| ATOM | 486 | C4'  | C A | 16 | -13.339 | -6.271  | 101.517 | 1.00 | 0.00 | C |
| ATOM | 487 | O4'  | C A | 16 | -12.137 | -6.605  | 100.754 | 1.00 | 0.00 | O |
| ATOM | 488 | C5'  | C A | 16 | -13.417 | -7.182  | 102.720 | 1.00 | 0.00 | C |
| ATOM | 489 | O5'  | C A | 16 | -13.965 | -8.466  | 102.329 | 1.00 | 0.00 | O |
| ATOM | 490 | O1P  | C A | 16 | -16.166 | -8.557  | 103.545 | 1.00 | 0.00 | O |
| ATOM | 491 | O2P  | C A | 16 | -14.968 | -10.682 | 102.958 | 1.00 | 0.00 | O |
| ATOM | 492 | P    | C A | 16 | -14.880 | -9.257  | 103.366 | 1.00 | 0.00 | P |
| ATOM | 493 | H5   | C A | 16 | -11.680 | -11.709 | 100.704 | 1.00 | 0.00 | H |
| ATOM | 494 | H6   | C A | 16 | -13.000 | -9.619  | 100.816 | 1.00 | 0.00 | H |
| ATOM | 495 | H1'  | C A | 16 | -12.208 | -6.672  | 98.722  | 1.00 | 0.00 | H |
| ATOM | 496 | H3'  | C A | 16 | -15.419 | -6.630  | 100.995 | 1.00 | 0.00 | H |
| ATOM | 497 | H4'  | C A | 16 | -13.344 | -5.243  | 101.879 | 1.00 | 0.00 | H |
| ATOM | 498 | H41  | C A | 16 | -9.686  | -12.736 | 99.772  | 1.00 | 0.00 | H |
| ATOM | 499 | H42  | C A | 16 | -8.575  | -11.865 | 98.682  | 1.00 | 0.00 | H |
| ATOM | 500 | H2'1 | C A | 16 | -14.272 | -8.490  | 100.004 | 1.00 | 0.00 | H |
| ATOM | 501 | H2'2 | C A | 16 | -14.450 | -7.440  | 98.604  | 1.00 | 0.00 | H |
| ATOM | 502 | H5'1 | C A | 16 | -12.417 | -7.316  | 103.131 | 1.00 | 0.00 | H |
| ATOM | 503 | H5'2 | C A | 16 | -14.057 | -6.724  | 103.474 | 1.00 | 0.00 | H |
| ATOM | 504 | C1'  | G A | 17 | -12.025 | -6.114  | 94.784  | 1.00 | 0.00 | C |
| ATOM | 505 | N1   | G A | 17 | -9.454  | -10.514 | 94.538  | 1.00 | 0.00 | N |
| ATOM | 506 | C2   | G A | 17 | -9.173  | -9.287  | 93.963  | 1.00 | 0.00 | C |
| ATOM | 507 | N2   | G A | 17 | -8.061  | -9.226  | 93.221  | 1.00 | 0.00 | N |
| ATOM | 508 | N3   | G A | 17 | -9.941  | -8.209  | 94.114  | 1.00 | 0.00 | N |
| ATOM | 509 | C4   | G A | 17 | -11.029 | -8.456  | 94.890  | 1.00 | 0.00 | C |
| ATOM | 510 | C5   | G A | 17 | -11.393 | -9.644  | 95.501  | 1.00 | 0.00 | C |
| ATOM | 511 | C6   | G A | 17 | -10.578 | -10.788 | 95.344  | 1.00 | 0.00 | C |
| ATOM | 512 | O6   | G A | 17 | -10.730 | -11.921 | 95.802  | 1.00 | 0.00 | O |
| ATOM | 513 | N7   | G A | 17 | -12.584 | -9.479  | 96.210  | 1.00 | 0.00 | N |
| ATOM | 514 | C8   | G A | 17 | -12.896 | -8.223  | 96.013  | 1.00 | 0.00 | C |
| ATOM | 515 | N9   | G A | 17 | -12.000 | -7.536  | 95.221  | 1.00 | 0.00 | N |
| ATOM | 516 | C2'  | G A | 17 | -13.420 | -5.592  | 94.469  | 1.00 | 0.00 | C |
| ATOM | 517 | C3'  | G A | 17 | -13.338 | -4.152  | 94.948  | 1.00 | 0.00 | C |
| ATOM | 518 | O3'  | G A | 17 | -12.771 | -3.347  | 93.917  | 1.00 | 0.00 | O |
| ATOM | 519 | C4'  | G A | 17 | -12.425 | -4.253  | 96.170  | 1.00 | 0.00 | C |
| ATOM | 520 | O4'  | G A | 17 | -11.495 | -5.330  | 95.836  | 1.00 | 0.00 | O |
| ATOM | 521 | C5'  | G A | 17 | -13.096 | -4.581  | 97.482  | 1.00 | 0.00 | C |
| ATOM | 522 | O5'  | G A | 17 | -14.181 | -5.514  | 97.260  | 1.00 | 0.00 | O |
| ATOM | 523 | O1P  | G A | 17 | -16.229 | -4.177  | 97.854  | 1.00 | 0.00 | O |
| ATOM | 524 | O2P  | G A | 17 | -16.251 | -6.676  | 98.084  | 1.00 | 0.00 | O |
| ATOM | 525 | P    | G A | 17 | -15.483 | -5.410  | 98.174  | 1.00 | 0.00 | P |
| ATOM | 526 | H1   | G A | 17 | -8.793  | -11.284 | 94.363  | 1.00 | 0.00 | H |
| ATOM | 527 | H8   | G A | 17 | -13.788 | -7.759  | 96.439  | 1.00 | 0.00 | H |
| ATOM | 528 | H1'  | G A | 17 | -11.366 | -6.010  | 93.923  | 1.00 | 0.00 | H |
| ATOM | 529 | H21  | G A | 17 | -7.470  | -10.063 | 93.109  | 1.00 | 0.00 | H |
| ATOM | 530 | H3'  | G A | 17 | -14.315 | -3.756  | 95.220  | 1.00 | 0.00 | H |
| ATOM | 531 | H22  | G A | 17 | -7.796  | -8.342  | 92.762  | 1.00 | 0.00 | H |
| ATOM | 532 | H4'  | G A | 17 | -11.935 | -3.286  | 96.278  | 1.00 | 0.00 | H |



|      |     |      |     |    |         |         |        |      |      |   |
|------|-----|------|-----|----|---------|---------|--------|------|------|---|
| ATOM | 533 | H2'1 | G A | 17 | -14.197 | -6.144  | 95.001 | 1.00 | 0.00 | H |
| ATOM | 534 | H2'2 | G A | 17 | -13.651 | -5.645  | 93.404 | 1.00 | 0.00 | H |
| ATOM | 535 | H5'1 | G A | 17 | -12.362 | -5.023  | 98.157 | 1.00 | 0.00 | H |
| ATOM | 536 | H5'2 | G A | 17 | -13.483 | -3.663  | 97.926 | 1.00 | 0.00 | H |
| ATOM | 537 | C1'  | G A | 18 | -10.472 | -6.888  | 90.146 | 1.00 | 0.00 | C |
| ATOM | 538 | N1   | G A | 18 | -10.529 | -11.791 | 91.547 | 1.00 | 0.00 | N |
| ATOM | 539 | C2   | G A | 18 | -9.592  | -11.090 | 90.810 | 1.00 | 0.00 | C |
| ATOM | 540 | N2   | G A | 18 | -8.529  | -11.789 | 90.386 | 1.00 | 0.00 | N |
| ATOM | 541 | N3   | G A | 18 | -9.706  | -9.797  | 90.518 | 1.00 | 0.00 | N |
| ATOM | 542 | C4   | G A | 18 | -10.844 | -9.251  | 91.018 | 1.00 | 0.00 | C |
| ATOM | 543 | C5   | G A | 18 | -11.836 | -9.873  | 91.760 | 1.00 | 0.00 | C |
| ATOM | 544 | C6   | G A | 18 | -11.714 | -11.246 | 92.074 | 1.00 | 0.00 | C |
| ATOM | 545 | O6   | G A | 18 | -12.482 | -11.967 | 92.714 | 1.00 | 0.00 | O |
| ATOM | 546 | N7   | G A | 18 | -12.843 | -8.961  | 92.080 | 1.00 | 0.00 | N |
| ATOM | 547 | C8   | G A | 18 | -12.439 | -7.840  | 91.540 | 1.00 | 0.00 | C |
| ATOM | 548 | N9   | G A | 18 | -11.234 | -7.937  | 90.876 | 1.00 | 0.00 | N |
| ATOM | 549 | C2'  | G A | 18 | -11.352 | -5.915  | 89.373 | 1.00 | 0.00 | C |
| ATOM | 550 | C3'  | G A | 18 | -10.595 | -4.607  | 89.529 | 1.00 | 0.00 | C |
| ATOM | 551 | O3'  | G A | 18 | -9.581  | -4.532  | 88.529 | 1.00 | 0.00 | O |
| ATOM | 552 | C4'  | G A | 18 | -10.008 | -4.718  | 90.936 | 1.00 | 0.00 | C |
| ATOM | 553 | O4'  | G A | 18 | -9.736  | -6.146  | 91.101 | 1.00 | 0.00 | O |
| ATOM | 554 | C5'  | G A | 18 | -10.897 | -4.261  | 92.069 | 1.00 | 0.00 | C |
| ATOM | 555 | O5'  | G A | 18 | -12.275 | -4.607  | 91.783 | 1.00 | 0.00 | O |
| ATOM | 556 | O1P  | G A | 18 | -13.394 | -2.368  | 91.518 | 1.00 | 0.00 | O |
| ATOM | 557 | O2P  | G A | 18 | -14.726 | -4.352  | 92.277 | 1.00 | 0.00 | O |
| ATOM | 558 | P    | G A | 18 | -13.431 | -3.627  | 92.283 | 1.00 | 0.00 | P |
| ATOM | 559 | H1   | G A | 18 | -10.343 | -12.791 | 91.724 | 1.00 | 0.00 | H |
| ATOM | 560 | H8   | G A | 18 | -13.004 | -6.911  | 91.605 | 1.00 | 0.00 | H |
| ATOM | 561 | H1'  | G A | 18 | -9.759  | -7.381  | 89.484 | 1.00 | 0.00 | H |
| ATOM | 562 | H21  | G A | 18 | -8.448  | -12.790 | 90.620 | 1.00 | 0.00 | H |
| ATOM | 563 | H3'  | G A | 18 | -11.251 | -3.740  | 89.443 | 1.00 | 0.00 | H |
| ATOM | 564 | H22  | G A | 18 | -7.799  | -11.326 | 89.831 | 1.00 | 0.00 | H |
| ATOM | 565 | H4'  | G A | 18 | -9.106  | -4.108  | 90.953 | 1.00 | 0.00 | H |
| ATOM | 566 | H2'1 | G A | 18 | -12.356 | -5.844  | 89.792 | 1.00 | 0.00 | H |
| ATOM | 567 | H2'2 | G A | 18 | -11.454 | -6.193  | 88.324 | 1.00 | 0.00 | H |
| ATOM | 568 | H5'1 | G A | 18 | -10.579 | -4.748  | 92.991 | 1.00 | 0.00 | H |
| ATOM | 569 | H5'2 | G A | 18 | -10.804 | -3.183  | 92.184 | 1.00 | 0.00 | H |
| ATOM | 570 | C1'  | T A | 19 | -9.016  | -9.708  | 86.347 | 1.00 | 0.00 | C |
| ATOM | 571 | N1   | T A | 19 | -10.278 | -10.020 | 87.068 | 1.00 | 0.00 | N |
| ATOM | 572 | C2   | T A | 19 | -10.446 | -11.315 | 87.513 | 1.00 | 0.00 | C |
| ATOM | 573 | O2   | T A | 19 | -9.611  | -12.187 | 87.335 | 1.00 | 0.00 | O |
| ATOM | 574 | N3   | T A | 19 | -11.631 | -11.562 | 88.178 | 1.00 | 0.00 | N |
| ATOM | 575 | C4   | T A | 19 | -12.638 | -10.654 | 88.428 | 1.00 | 0.00 | C |
| ATOM | 576 | O4   | T A | 19 | -13.662 | -10.993 | 89.034 | 1.00 | 0.00 | O |
| ATOM | 577 | C5   | T A | 19 | -12.375 | -9.326  | 87.926 | 1.00 | 0.00 | C |
| ATOM | 578 | C6   | T A | 19 | -11.228 | -9.049  | 87.273 | 1.00 | 0.00 | C |
| ATOM | 579 | C7   | T A | 19 | -13.442 | -8.304  | 88.178 | 1.00 | 0.00 | C |
| ATOM | 580 | C2'  | T A | 19 | -9.196  | -8.738  | 85.185 | 1.00 | 0.00 | C |
| ATOM | 581 | C3'  | T A | 19 | -7.909  | -7.931  | 85.242 | 1.00 | 0.00 | C |
| ATOM | 582 | O3'  | T A | 19 | -6.886  | -8.633  | 84.539 | 1.00 | 0.00 | O |
| ATOM | 583 | C4'  | T A | 19 | -7.626  | -7.848  | 86.740 | 1.00 | 0.00 | C |
| ATOM | 584 | O4'  | T A | 19 | -8.124  | -9.116  | 87.273 | 1.00 | 0.00 | O |
| ATOM | 585 | C5'  | T A | 19 | -8.289  | -6.715  | 87.488 | 1.00 | 0.00 | C |
| ATOM | 586 | O5'  | T A | 19 | -9.612  | -6.478  | 86.943 | 1.00 | 0.00 | O |

|      |     |      |       |    |         |         |        |      |      |   |
|------|-----|------|-------|----|---------|---------|--------|------|------|---|
| ATOM | 587 | O1P  | T A   | 19 | -9.422  | -4.183  | 85.927 | 1.00 | 0.00 | O |
| ATOM | 588 | O2P  | T A   | 19 | -11.645 | -5.016  | 86.736 | 1.00 | 0.00 | O |
| ATOM | 589 | P    | T A   | 19 | -10.174 | -4.985  | 86.911 | 1.00 | 0.00 | P |
| ATOM | 590 | H3   | T A   | 19 | -11.779 | -12.522 | 88.524 | 1.00 | 0.00 | H |
| ATOM | 591 | H6   | T A   | 19 | -11.051 | -8.040  | 86.903 | 1.00 | 0.00 | H |
| ATOM | 592 | H1'  | T A   | 19 | -8.575  | -10.645 | 86.008 | 1.00 | 0.00 | H |
| ATOM | 593 | H3'  | T A   | 19 | -8.031  | -6.939  | 84.809 | 1.00 | 0.00 | H |
| ATOM | 594 | H4'  | T A   | 19 | -6.546  | -7.733  | 86.852 | 1.00 | 0.00 | H |
| ATOM | 595 | H71  | T A   | 19 | -13.875 | -7.990  | 87.229 | 1.00 | 0.00 | H |
| ATOM | 596 | H72  | T A   | 19 | -14.221 | -8.738  | 88.805 | 1.00 | 0.00 | H |
| ATOM | 597 | H73  | T A   | 19 | -13.009 | -7.439  | 88.683 | 1.00 | 0.00 | H |
| ATOM | 598 | H2'1 | T A   | 19 | -10.070 | -8.100  | 85.313 | 1.00 | 0.00 | H |
| ATOM | 599 | H2'2 | T A   | 19 | -9.302  | -9.252  | 84.230 | 1.00 | 0.00 | H |
| ATOM | 600 | H5'1 | T A   | 19 | -8.367  | -6.978  | 88.543 | 1.00 | 0.00 | H |
| ATOM | 601 | H5'2 | T A   | 19 | -7.684  | -5.817  | 87.385 | 1.00 | 0.00 | H |
| ATOM | 602 | C01  | LNK A | 20 | -6.104  | -8.785  | 80.902 | 0.00 | 0.00 | C |
| ATOM | 603 | O1   | LNK A | 20 | -6.913  | -8.348  | 81.997 | 1.00 | 0.00 | O |
| ATOM | 604 | S    | LNK A | 20 | -6.076  | -8.595  | 76.926 | 0.00 | 0.00 | S |
| ATOM | 605 | C02  | LNK A | 20 | -6.737  | -8.314  | 79.578 | 0.00 | 0.00 | C |
| ATOM | 606 | C03  | LNK A | 20 | -6.532  | -9.391  | 78.498 | 0.00 | 0.00 | C |
| ATOM | 607 | O1P  | LNK A | 20 | -8.913  | -9.445  | 83.062 | 1.00 | 0.00 | O |
| ATOM | 608 | O2P  | LNK A | 20 | -6.776  | -10.732 | 82.779 | 1.00 | 0.00 | O |
| ATOM | 609 | P    | LNK A | 20 | -7.436  | -9.429  | 83.046 | 1.00 | 0.00 | P |
| ATOM | 610 | H01  | LNK A | 20 | -6.041  | -9.872  | 80.906 | 0.00 | 0.00 | H |
| ATOM | 611 | H02  | LNK A | 20 | -5.104  | -8.362  | 80.996 | 0.00 | 0.00 | H |
| ATOM | 612 | H03  | LNK A | 20 | -7.455  | -9.954  | 78.365 | 0.00 | 0.00 | H |
| ATOM | 613 | H04  | LNK A | 20 | -6.265  | -7.383  | 79.260 | 0.00 | 0.00 | H |
| ATOM | 614 | H05  | LNK A | 20 | -7.805  | -8.146  | 79.726 | 0.00 | 0.00 | H |
| ATOM | 615 | H06  | LNK A | 20 | -5.735  | -10.068 | 78.807 | 0.00 | 0.00 | H |
| ATOM | 616 | AU   | LNK A | 20 | -6.082  | -9.060  | 76.422 |      |      |   |
| TER  |     |      |       |    |         |         |        |      |      |   |
| ATOM | 618 | C1'  | A B   | 2  | -12.181 | -19.233 | 90.606 | 1.00 | 0.00 | C |
| ATOM | 619 | N1   | A B   | 2  | -12.073 | -14.307 | 89.169 | 1.00 | 0.00 | N |
| ATOM | 620 | C2   | A B   | 2  | -11.207 | -15.304 | 89.020 | 1.00 | 0.00 | C |
| ATOM | 621 | N3   | A B   | 2  | -11.300 | -16.557 | 89.414 | 1.00 | 0.00 | N |
| ATOM | 622 | C4   | A B   | 2  | -12.467 | -16.760 | 90.053 | 1.00 | 0.00 | C |
| ATOM | 623 | C5   | A B   | 2  | -13.456 | -15.847 | 90.288 | 1.00 | 0.00 | C |
| ATOM | 624 | C6   | A B   | 2  | -13.229 | -14.539 | 89.809 | 1.00 | 0.00 | C |
| ATOM | 625 | N6   | A B   | 2  | -14.111 | -13.537 | 89.964 | 1.00 | 0.00 | N |
| ATOM | 626 | N7   | A B   | 2  | -14.513 | -16.420 | 90.973 | 1.00 | 0.00 | N |
| ATOM | 627 | C8   | A B   | 2  | -14.142 | -17.655 | 91.141 | 1.00 | 0.00 | C |
| ATOM | 628 | N9   | A B   | 2  | -12.912 | -17.935 | 90.606 | 1.00 | 0.00 | N |
| ATOM | 629 | C2'  | A B   | 2  | -12.351 | -20.031 | 91.892 | 1.00 | 0.00 | C |
| ATOM | 630 | C3'  | A B   | 2  | -12.370 | -21.461 | 91.377 | 1.00 | 0.00 | C |
| ATOM | 631 | O3'  | A B   | 2  | -11.031 | -21.923 | 91.227 | 1.00 | 0.00 | O |
| ATOM | 632 | C4'  | A B   | 2  | -13.089 | -21.329 | 90.035 | 1.00 | 0.00 | C |
| ATOM | 633 | O4'  | A B   | 2  | -12.687 | -20.012 | 89.538 | 1.00 | 0.00 | O |
| ATOM | 634 | C5'  | A B   | 2  | -14.598 | -21.392 | 90.073 | 1.00 | 0.00 | C |
| ATOM | 635 | O5'  | A B   | 2  | -15.086 | -20.737 | 91.271 | 1.00 | 0.00 | O |
| ATOM | 636 | H2   | A B   | 2  | -10.288 | -15.050 | 88.498 | 1.00 | 0.00 | H |
| ATOM | 637 | H8   | A B   | 2  | -14.752 | -18.396 | 91.658 | 1.00 | 0.00 | H |
| ATOM | 638 | H1'  | A B   | 2  | -11.128 | -19.031 | 90.408 | 1.00 | 0.00 | H |
| ATOM | 639 | H3'  | A B   | 2  | -12.910 | -22.130 | 92.047 | 1.00 | 0.00 | H |
| ATOM | 640 | H4'  | A B   | 2  | -12.737 | -22.146 | 89.406 | 1.00 | 0.00 | H |

|      |     |      |     |   |         |         |        |      |      |   |
|------|-----|------|-----|---|---------|---------|--------|------|------|---|
| ATOM | 641 | H61  | A B | 2 | -13.898 | -12.602 | 89.594 | 1.00 | 0.00 | H |
| ATOM | 642 | H62  | A B | 2 | -15.002 | -13.708 | 90.458 | 1.00 | 0.00 | H |
| ATOM | 643 | H2'1 | A B | 2 | -13.275 | -19.784 | 92.414 | 1.00 | 0.00 | H |
| ATOM | 644 | H2'2 | A B | 2 | -11.526 | -19.871 | 92.588 | 1.00 | 0.00 | H |
| ATOM | 645 | H5'1 | A B | 2 | -14.998 | -20.892 | 89.190 | 1.00 | 0.00 | H |
| ATOM | 646 | H5'2 | A B | 2 | -14.911 | -22.435 | 90.067 | 1.00 | 0.00 | H |
| ATOM | 647 | C1'  | C B | 3 | -7.688  | -17.297 | 91.454 | 1.00 | 0.00 | C |
| ATOM | 648 | N1   | C B | 3 | -8.911  | -16.618 | 91.962 | 1.00 | 0.00 | N |
| ATOM | 649 | C2   | C B | 3 | -9.071  | -15.263 | 91.677 | 1.00 | 0.00 | C |
| ATOM | 650 | O2   | C B | 3 | -8.197  | -14.685 | 91.018 | 1.00 | 0.00 | O |
| ATOM | 651 | N3   | C B | 3 | -10.176 | -14.625 | 92.130 | 1.00 | 0.00 | N |
| ATOM | 652 | C4   | C B | 3 | -11.105 | -15.278 | 92.842 | 1.00 | 0.00 | C |
| ATOM | 653 | N4   | C B | 3 | -12.170 | -14.605 | 93.257 | 1.00 | 0.00 | N |
| ATOM | 654 | C5   | C B | 3 | -10.966 | -16.670 | 93.155 | 1.00 | 0.00 | C |
| ATOM | 655 | C6   | C B | 3 | -9.845  | -17.294 | 92.684 | 1.00 | 0.00 | C |
| ATOM | 656 | C2'  | C B | 3 | -7.110  | -18.324 | 92.420 | 1.00 | 0.00 | C |
| ATOM | 657 | C3'  | C B | 3 | -6.597  | -19.397 | 91.473 | 1.00 | 0.00 | C |
| ATOM | 658 | O3'  | C B | 3 | -5.292  | -19.039 | 91.023 | 1.00 | 0.00 | O |
| ATOM | 659 | C4'  | C B | 3 | -7.623  | -19.371 | 90.343 | 1.00 | 0.00 | C |
| ATOM | 660 | O4'  | C B | 3 | -8.035  | -17.969 | 90.259 | 1.00 | 0.00 | O |
| ATOM | 661 | C5'  | C B | 3 | -8.855  | -20.226 | 90.535 | 1.00 | 0.00 | C |
| ATOM | 662 | O5'  | C B | 3 | -9.249  | -20.207 | 91.930 | 1.00 | 0.00 | O |
| ATOM | 663 | O1P  | C B | 3 | -8.880  | -22.585 | 92.671 | 1.00 | 0.00 | O |
| ATOM | 664 | O2P  | C B | 3 | -10.606 | -21.169 | 93.816 | 1.00 | 0.00 | O |
| ATOM | 665 | P    | C B | 3 | -9.898  | -21.520 | 92.561 | 1.00 | 0.00 | P |
| ATOM | 666 | H5   | C B | 3 | -11.714 | -17.205 | 93.740 | 1.00 | 0.00 | H |
| ATOM | 667 | H6   | C B | 3 | -9.698  | -18.354 | 92.891 | 1.00 | 0.00 | H |
| ATOM | 668 | H1'  | C B | 3 | -6.950  | -16.533 | 91.209 | 1.00 | 0.00 | H |
| ATOM | 669 | H3'  | C B | 3 | -6.559  | -20.376 | 91.948 | 1.00 | 0.00 | H |
| ATOM | 670 | H4'  | C B | 3 | -7.116  | -19.722 | 89.444 | 1.00 | 0.00 | H |
| ATOM | 671 | H41  | C B | 3 | -12.900 | -15.085 | 93.804 | 1.00 | 0.00 | H |
| ATOM | 672 | H42  | C B | 3 | -12.267 | -13.605 | 93.033 | 1.00 | 0.00 | H |
| ATOM | 673 | H2'1 | C B | 3 | -7.862  | -18.721 | 93.100 | 1.00 | 0.00 | H |
| ATOM | 674 | H2'2 | C B | 3 | -6.303  | -17.911 | 93.028 | 1.00 | 0.00 | H |
| ATOM | 675 | H5'1 | C B | 3 | -9.665  | -19.832 | 89.919 | 1.00 | 0.00 | H |
| ATOM | 676 | H5'2 | C B | 3 | -8.635  | -21.246 | 90.228 | 1.00 | 0.00 | H |
| ATOM | 677 | C1'  | C B | 4 | -4.535  | -13.589 | 92.365 | 1.00 | 0.00 | C |
| ATOM | 678 | N1   | C B | 4 | -5.753  | -13.767 | 93.198 | 1.00 | 0.00 | N |
| ATOM | 679 | C2   | C B | 4 | -6.587  | -12.666 | 93.382 | 1.00 | 0.00 | C |
| ATOM | 680 | O2   | C B | 4 | -6.282  | -11.590 | 92.848 | 1.00 | 0.00 | O |
| ATOM | 681 | N3   | C B | 4 | -7.701  | -12.805 | 94.139 | 1.00 | 0.00 | N |
| ATOM | 682 | C4   | C B | 4 | -8.007  | -13.983 | 94.705 | 1.00 | 0.00 | C |
| ATOM | 683 | N4   | C B | 4 | -9.110  | -14.066 | 95.432 | 1.00 | 0.00 | N |
| ATOM | 684 | C5   | C B | 4 | -7.166  | -15.132 | 94.538 | 1.00 | 0.00 | C |
| ATOM | 685 | C6   | C B | 4 | -6.050  | -14.967 | 93.767 | 1.00 | 0.00 | C |
| ATOM | 686 | C2'  | C B | 4 | -3.322  | -14.352 | 92.879 | 1.00 | 0.00 | C |
| ATOM | 687 | C3'  | C B | 4 | -2.638  | -14.769 | 91.586 | 1.00 | 0.00 | C |
| ATOM | 688 | O3'  | C B | 4 | -1.811  | -13.702 | 91.129 | 1.00 | 0.00 | O |
| ATOM | 689 | C4'  | C B | 4 | -3.815  | -15.029 | 90.648 | 1.00 | 0.00 | C |
| ATOM | 690 | O4'  | C B | 4 | -4.831  | -14.061 | 91.064 | 1.00 | 0.00 | O |
| ATOM | 691 | C5'  | C B | 4 | -4.419  | -16.413 | 90.695 | 1.00 | 0.00 | C |
| ATOM | 692 | O5'  | C B | 4 | -4.400  | -16.909 | 92.058 | 1.00 | 0.00 | O |
| ATOM | 693 | O1P  | C B | 4 | -2.801  | -18.850 | 91.951 | 1.00 | 0.00 | O |
| ATOM | 694 | O2P  | C B | 4 | -4.622  | -18.817 | 93.678 | 1.00 | 0.00 | O |

|      |     |      |     |   |        |         |        |      |      |   |
|------|-----|------|-----|---|--------|---------|--------|------|------|---|
| ATOM | 695 | P    | C B | 4 | -4.183 | -18.469 | 92.304 | 1.00 | 0.00 | P |
| ATOM | 696 | H5   | C B | 4 | -7.404 | -16.089 | 95.001 | 1.00 | 0.00 | H |
| ATOM | 697 | H6   | C B | 4 | -5.384 | -15.815 | 93.604 | 1.00 | 0.00 | H |
| ATOM | 698 | H1'  | C B | 4 | -4.323 | -12.521 | 92.294 | 1.00 | 0.00 | H |
| ATOM | 699 | H3'  | C B | 4 | -2.033 | -15.666 | 91.715 | 1.00 | 0.00 | H |
| ATOM | 700 | H4'  | C B | 4 | -3.456 | -14.859 | 89.632 | 1.00 | 0.00 | H |
| ATOM | 701 | H41  | C B | 4 | -9.369 | -14.959 | 95.875 | 1.00 | 0.00 | H |
| ATOM | 702 | H42  | C B | 4 | -9.712 | -13.236 | 95.552 | 1.00 | 0.00 | H |
| ATOM | 703 | H2'1 | C B | 4 | -3.602 | -15.220 | 93.476 | 1.00 | 0.00 | H |
| ATOM | 704 | H2'2 | C B | 4 | -2.669 | -13.730 | 93.491 | 1.00 | 0.00 | H |
| ATOM | 705 | H5'1 | C B | 4 | -5.446 | -16.369 | 90.334 | 1.00 | 0.00 | H |
| ATOM | 706 | H5'2 | C B | 4 | -3.841 | -17.077 | 90.054 | 1.00 | 0.00 | H |
| ATOM | 707 | C1'  | G B | 5 | -3.326 | -9.092  | 94.051 | 1.00 | 0.00 | C |
| ATOM | 708 | N1   | G B | 5 | -7.396 | -9.748  | 97.058 | 1.00 | 0.00 | N |
| ATOM | 709 | C2   | G B | 5 | -6.982 | -8.630  | 96.354 | 1.00 | 0.00 | C |
| ATOM | 710 | N2   | G B | 5 | -7.753 | -7.542  | 96.469 | 1.00 | 0.00 | N |
| ATOM | 711 | N3   | G B | 5 | -5.885 | -8.601  | 95.597 | 1.00 | 0.00 | N |
| ATOM | 712 | C4   | G B | 5 | -5.223 | -9.788  | 95.601 | 1.00 | 0.00 | C |
| ATOM | 713 | C5   | G B | 5 | -5.558 | -10.950 | 96.274 | 1.00 | 0.00 | C |
| ATOM | 714 | C6   | G B | 5 | -6.723 | -10.984 | 97.075 | 1.00 | 0.00 | C |
| ATOM | 715 | O6   | G B | 5 | -7.179 | -11.913 | 97.741 | 1.00 | 0.00 | O |
| ATOM | 716 | N7   | G B | 5 | -4.612 | -11.945 | 96.017 | 1.00 | 0.00 | N |
| ATOM | 717 | C8   | G B | 5 | -3.756 | -11.369 | 95.213 | 1.00 | 0.00 | C |
| ATOM | 718 | N9   | G B | 5 | -4.059 | -10.056 | 94.916 | 1.00 | 0.00 | N |
| ATOM | 719 | C2'  | G B | 5 | -1.812 | -9.211  | 94.145 | 1.00 | 0.00 | C |
| ATOM | 720 | C3'  | G B | 5 | -1.379 | -8.913  | 92.719 | 1.00 | 0.00 | C |
| ATOM | 721 | O3'  | G B | 5 | -1.288 | -7.502  | 92.542 | 1.00 | 0.00 | O |
| ATOM | 722 | C4'  | G B | 5 | -2.504 | -9.528  | 91.887 | 1.00 | 0.00 | C |
| ATOM | 723 | O4'  | G B | 5 | -3.700 | -9.345  | 92.711 | 1.00 | 0.00 | O |
| ATOM | 724 | C5'  | G B | 5 | -2.368 | -10.995 | 91.553 | 1.00 | 0.00 | C |
| ATOM | 725 | O5'  | G B | 5 | -1.766 | -11.698 | 92.668 | 1.00 | 0.00 | O |
| ATOM | 726 | O1P  | G B | 5 | 0.454  | -12.452 | 91.755 | 1.00 | 0.00 | O |
| ATOM | 727 | O2P  | G B | 5 | -0.651 | -13.750 | 93.595 | 1.00 | 0.00 | O |
| ATOM | 728 | P    | G B | 5 | -0.800 | -12.931 | 92.368 | 1.00 | 0.00 | P |
| ATOM | 729 | H1   | G B | 5 | -8.263 | -9.668  | 97.609 | 1.00 | 0.00 | H |
| ATOM | 730 | H8   | G B | 5 | -2.880 | -11.879 | 94.814 | 1.00 | 0.00 | H |
| ATOM | 731 | H1'  | G B | 5 | -3.655 | -8.085  | 94.306 | 1.00 | 0.00 | H |
| ATOM | 732 | H21  | G B | 5 | -8.600 | -7.573  | 97.054 | 1.00 | 0.00 | H |
| ATOM | 733 | H3'  | G B | 5 | -0.418 | -9.371  | 92.478 | 1.00 | 0.00 | H |
| ATOM | 734 | H22  | G B | 5 | -7.498 | -6.676  | 95.974 | 1.00 | 0.00 | H |
| ATOM | 735 | H4'  | G B | 5 | -2.544 | -8.975  | 90.950 | 1.00 | 0.00 | H |
| ATOM | 736 | H2'1 | G B | 5 | -1.494 | -10.205 | 94.457 | 1.00 | 0.00 | H |
| ATOM | 737 | H2'2 | G B | 5 | -1.383 | -8.496  | 94.847 | 1.00 | 0.00 | H |
| ATOM | 738 | H5'1 | G B | 5 | -3.355 | -11.407 | 91.345 | 1.00 | 0.00 | H |
| ATOM | 739 | H5'2 | G B | 5 | -1.740 | -11.103 | 90.668 | 1.00 | 0.00 | H |
| ATOM | 740 | C1'  | T B | 6 | -3.915 | -5.103  | 96.923 | 1.00 | 0.00 | C |
| ATOM | 741 | N1   | T B | 6 | -3.894 | -6.463  | 97.525 | 1.00 | 0.00 | N |
| ATOM | 742 | C2   | T B | 6 | -4.934 | -6.795  | 98.370 | 1.00 | 0.00 | C |
| ATOM | 743 | O2   | T B | 6 | -5.843 | -6.025  | 98.631 | 1.00 | 0.00 | O |
| ATOM | 744 | N3   | T B | 6 | -4.875 | -8.068  | 98.907 | 1.00 | 0.00 | N |
| ATOM | 745 | C4   | T B | 6 | -3.895 | -9.010  | 98.682 | 1.00 | 0.00 | C |
| ATOM | 746 | O4   | T B | 6 | -3.948 | -10.120 | 99.223 | 1.00 | 0.00 | O |
| ATOM | 747 | C5   | T B | 6 | -2.852 | -8.573  | 97.784 | 1.00 | 0.00 | C |
| ATOM | 748 | C6   | T B | 6 | -2.877 | -7.340  | 97.242 | 1.00 | 0.00 | C |

|      |     |      |     |   |        |         |         |      |      |   |
|------|-----|------|-----|---|--------|---------|---------|------|------|---|
| ATOM | 749 | C7   | T B | 6 | -1.765 | -9.570  | 97.508  | 1.00 | 0.00 | C |
| ATOM | 750 | C2'  | T B | 6 | -2.537 | -4.464  | 96.807  | 1.00 | 0.00 | C |
| ATOM | 751 | C3'  | T B | 6 | -2.657 | -3.691  | 95.501  | 1.00 | 0.00 | C |
| ATOM | 752 | O3'  | T B | 6 | -3.256 | -2.424  | 95.759  | 1.00 | 0.00 | O |
| ATOM | 753 | C4'  | T B | 6 | -3.551 | -4.593  | 94.653  | 1.00 | 0.00 | C |
| ATOM | 754 | O4'  | T B | 6 | -4.453 | -5.216  | 95.620  | 1.00 | 0.00 | O |
| ATOM | 755 | C5'  | T B | 6 | -2.857 | -5.682  | 93.869  | 1.00 | 0.00 | C |
| ATOM | 756 | O5'  | T B | 6 | -1.747 | -6.209  | 94.639  | 1.00 | 0.00 | O |
| ATOM | 757 | O1P  | T B | 6 | 0.268  | -5.529  | 93.294  | 1.00 | 0.00 | O |
| ATOM | 758 | O2P  | T B | 6 | 0.363  | -7.567  | 94.756  | 1.00 | 0.00 | O |
| ATOM | 759 | P    | T B | 6 | -0.438 | -6.693  | 93.866  | 1.00 | 0.00 | P |
| ATOM | 760 | H3   | T B | 6 | -5.643 | -8.340  | 99.539  | 1.00 | 0.00 | H |
| ATOM | 761 | H6   | T B | 6 | -2.076 | -7.034  | 96.567  | 1.00 | 0.00 | H |
| ATOM | 762 | H1'  | T B | 6 | -4.587 | -4.479  | 97.511  | 1.00 | 0.00 | H |
| ATOM | 763 | H3'  | T B | 6 | -1.687 | -3.541  | 95.026  | 1.00 | 0.00 | H |
| ATOM | 764 | H4'  | T B | 6 | -4.067 | -3.948  | 93.942  | 1.00 | 0.00 | H |
| ATOM | 765 | H71  | T B | 6 | -0.822 | -9.201  | 97.913  | 1.00 | 0.00 | H |
| ATOM | 766 | H72  | T B | 6 | -2.015 | -10.521 | 97.977  | 1.00 | 0.00 | H |
| ATOM | 767 | H73  | T B | 6 | -1.665 | -9.710  | 96.431  | 1.00 | 0.00 | H |
| ATOM | 768 | H2'1 | T B | 6 | -1.740 | -5.204  | 96.758  | 1.00 | 0.00 | H |
| ATOM | 769 | H2'2 | T B | 6 | -2.318 | -3.798  | 97.642  | 1.00 | 0.00 | H |
| ATOM | 770 | H5'1 | T B | 6 | -3.569 | -6.479  | 93.655  | 1.00 | 0.00 | H |
| ATOM | 771 | H5'2 | T B | 6 | -2.490 | -5.268  | 92.931  | 1.00 | 0.00 | H |
| ATOM | 772 | C1'  | C B | 7 | -5.526 | -2.764  | 100.996 | 1.00 | 0.00 | C |
| ATOM | 773 | N1   | C B | 7 | -4.710 | -4.006  | 101.109 | 1.00 | 0.00 | N |
| ATOM | 774 | C2   | C B | 7 | -5.195 | -5.034  | 101.917 | 1.00 | 0.00 | C |
| ATOM | 775 | O2   | C B | 7 | -6.276 | -4.875  | 102.500 | 1.00 | 0.00 | O |
| ATOM | 776 | N3   | C B | 7 | -4.469 | -6.172  | 102.034 | 1.00 | 0.00 | N |
| ATOM | 777 | C4   | C B | 7 | -3.302 | -6.312  | 101.390 | 1.00 | 0.00 | C |
| ATOM | 778 | N4   | C B | 7 | -2.635 | -7.448  | 101.537 | 1.00 | 0.00 | N |
| ATOM | 779 | C5   | C B | 7 | -2.776 | -5.271  | 100.558 | 1.00 | 0.00 | C |
| ATOM | 780 | C6   | C B | 7 | -3.528 | -4.135  | 100.451 | 1.00 | 0.00 | C |
| ATOM | 781 | C2'  | C B | 7 | -4.697 | -1.490  | 100.943 | 1.00 | 0.00 | C |
| ATOM | 782 | C3'  | C B | 7 | -5.506 | -0.627  | 99.987  | 1.00 | 0.00 | C |
| ATOM | 783 | O3'  | C B | 7 | -6.536 | 0.037   | 100.714 | 1.00 | 0.00 | O |
| ATOM | 784 | C4'  | C B | 7 | -6.063 | -1.646  | 98.996  | 1.00 | 0.00 | C |
| ATOM | 785 | O4'  | C B | 7 | -6.274 | -2.850  | 99.798  | 1.00 | 0.00 | O |
| ATOM | 786 | C5'  | C B | 7 | -5.175 | -1.997  | 97.823  | 1.00 | 0.00 | C |
| ATOM | 787 | O5'  | C B | 7 | -3.790 | -2.016  | 98.247  | 1.00 | 0.00 | O |
| ATOM | 788 | O1P  | C B | 7 | -2.766 | -0.096  | 96.982  | 1.00 | 0.00 | O |
| ATOM | 789 | O2P  | C B | 7 | -1.344 | -2.044  | 97.671  | 1.00 | 0.00 | O |
| ATOM | 790 | P    | C B | 7 | -2.665 | -1.549  | 97.216  | 1.00 | 0.00 | P |
| ATOM | 791 | H5   | C B | 7 | -1.824 | -5.378  | 100.038 | 1.00 | 0.00 | H |
| ATOM | 792 | H6   | C B | 7 | -3.173 | -3.317  | 99.823  | 1.00 | 0.00 | H |
| ATOM | 793 | H1'  | C B | 7 | -6.228 | -2.740  | 101.830 | 1.00 | 0.00 | H |
| ATOM | 794 | H3'  | C B | 7 | -4.885 | 0.115   | 99.482  | 1.00 | 0.00 | H |
| ATOM | 795 | H4'  | C B | 7 | -6.988 | -1.230  | 98.600  | 1.00 | 0.00 | H |
| ATOM | 796 | H41  | C B | 7 | -1.737 | -7.583  | 101.051 | 1.00 | 0.00 | H |
| ATOM | 797 | H42  | C B | 7 | -3.015 | -8.196  | 102.138 | 1.00 | 0.00 | H |
| ATOM | 798 | H2'1 | C B | 7 | -3.691 | -1.664  | 100.564 | 1.00 | 0.00 | H |
| ATOM | 799 | H2'2 | C B | 7 | -4.601 | -1.017  | 101.920 | 1.00 | 0.00 | H |
| ATOM | 800 | H5'1 | C B | 7 | -5.458 | -2.977  | 97.442  | 1.00 | 0.00 | H |
| ATOM | 801 | H5'2 | C B | 7 | -5.309 | -1.255  | 97.039  | 1.00 | 0.00 | H |
| ATOM | 802 | C1'  | C B | 8 | -6.907 | -2.535  | 105.747 | 1.00 | 0.00 | C |

|      |     |      |     |   |         |        |         |      |      |   |
|------|-----|------|-----|---|---------|--------|---------|------|------|---|
| ATOM | 803 | N1   | C B | 8 | -5.614  | -3.166 | 105.365 | 1.00 | 0.00 | N |
| ATOM | 804 | C2   | C B | 8 | -5.345  | -4.446 | 105.848 | 1.00 | 0.00 | C |
| ATOM | 805 | O2   | C B | 8 | -6.185  | -4.999 | 106.570 | 1.00 | 0.00 | O |
| ATOM | 806 | N3   | C B | 8 | -4.174  | -5.038 | 105.511 | 1.00 | 0.00 | N |
| ATOM | 807 | C4   | C B | 8 | -3.286  | -4.413 | 104.728 | 1.00 | 0.00 | C |
| ATOM | 808 | N4   | C B | 8 | -2.158  | -5.042 | 104.428 | 1.00 | 0.00 | N |
| ATOM | 809 | C5   | C B | 8 | -3.532  | -3.095 | 104.219 | 1.00 | 0.00 | C |
| ATOM | 810 | C6   | C B | 8 | -4.723  | -2.519 | 104.568 | 1.00 | 0.00 | C |
| ATOM | 811 | C2'  | C B | 8 | -6.804  | -1.037 | 106.010 | 1.00 | 0.00 | C |
| ATOM | 812 | C3'  | C B | 8 | -8.136  | -0.529 | 105.480 | 1.00 | 0.00 | C |
| ATOM | 813 | O3'  | C B | 8 | -9.128  | -0.672 | 106.494 | 1.00 | 0.00 | O |
| ATOM | 814 | C4'  | C B | 8 | -8.396  | -1.444 | 104.285 | 1.00 | 0.00 | C |
| ATOM | 815 | O4'  | C B | 8 | -7.814  | -2.728 | 104.678 | 1.00 | 0.00 | O |
| ATOM | 816 | C5'  | C B | 8 | -7.787  | -1.020 | 102.970 | 1.00 | 0.00 | C |
| ATOM | 817 | O5'  | C B | 8 | -6.489  | -0.415 | 103.203 | 1.00 | 0.00 | O |
| ATOM | 818 | O1P  | C B | 8 | -6.832  | 1.981  | 102.513 | 1.00 | 0.00 | O |
| ATOM | 819 | O2P  | C B | 8 | -4.549  | 0.951  | 102.375 | 1.00 | 0.00 | O |
| ATOM | 820 | P    | C B | 8 | -6.018  | 0.777  | 102.256 | 1.00 | 0.00 | P |
| ATOM | 821 | H5   | C B | 8 | -2.810  | -2.579 | 103.588 | 1.00 | 0.00 | H |
| ATOM | 822 | H6   | C B | 8 | -4.959  | -1.520 | 104.199 | 1.00 | 0.00 | H |
| ATOM | 823 | H1'  | C B | 8 | -7.298  | -3.058 | 106.619 | 1.00 | 0.00 | H |
| ATOM | 824 | H3'  | C B | 8 | -8.081  | 0.513  | 105.173 | 1.00 | 0.00 | H |
| ATOM | 825 | H4'  | C B | 8 | -9.476  | -1.489 | 104.149 | 1.00 | 0.00 | H |
| ATOM | 826 | H41  | C B | 8 | -1.459  | -4.584 | 103.825 | 1.00 | 0.00 | H |
| ATOM | 827 | H42  | C B | 8 | -1.982  | -5.987 | 104.796 | 1.00 | 0.00 | H |
| ATOM | 828 | H2'1 | C B | 8 | -5.968  | -0.582 | 105.484 | 1.00 | 0.00 | H |
| ATOM | 829 | H2'2 | C B | 8 | -6.687  | -0.813 | 107.071 | 1.00 | 0.00 | H |
| ATOM | 830 | H5'1 | C B | 8 | -7.674  | -1.894 | 102.327 | 1.00 | 0.00 | H |
| ATOM | 831 | H5'2 | C B | 8 | -8.445  | -0.301 | 102.485 | 1.00 | 0.00 | H |
| ATOM | 832 | C1'  | T B | 9 | -6.971  | -4.083 | 110.447 | 1.00 | 0.00 | C |
| ATOM | 833 | N1   | T B | 9 | -5.677  | -3.877 | 109.745 | 1.00 | 0.00 | N |
| ATOM | 834 | C2   | T B | 9 | -4.768  | -4.916 | 109.783 | 1.00 | 0.00 | C |
| ATOM | 835 | O2   | T B | 9 | -4.992  | -5.965 | 110.359 | 1.00 | 0.00 | O |
| ATOM | 836 | N3   | T B | 9 | -3.579  | -4.682 | 109.117 | 1.00 | 0.00 | N |
| ATOM | 837 | C4   | T B | 9 | -3.229  | -3.534 | 108.440 | 1.00 | 0.00 | C |
| ATOM | 838 | O4   | T B | 9 | -2.128  | -3.440 | 107.882 | 1.00 | 0.00 | O |
| ATOM | 839 | C5   | T B | 9 | -4.242  | -2.505 | 108.455 | 1.00 | 0.00 | C |
| ATOM | 840 | C6   | T B | 9 | -5.414  | -2.698 | 109.093 | 1.00 | 0.00 | C |
| ATOM | 841 | C7   | T B | 9 | -3.903  | -1.238 | 107.728 | 1.00 | 0.00 | C |
| ATOM | 842 | C2'  | T B | 9 | -7.496  | -2.835 | 111.150 | 1.00 | 0.00 | C |
| ATOM | 843 | C3'  | T B | 9 | -8.998  | -2.970 | 110.957 | 1.00 | 0.00 | C |
| ATOM | 844 | O3'  | T B | 9 | -9.529  | -3.806 | 111.982 | 1.00 | 0.00 | O |
| ATOM | 845 | C4'  | T B | 9 | -9.107  | -3.607 | 109.574 | 1.00 | 0.00 | C |
| ATOM | 846 | O4'  | T B | 9 | -7.930  | -4.472 | 109.483 | 1.00 | 0.00 | O |
| ATOM | 847 | C5'  | T B | 9 | -9.106  | -2.662 | 108.395 | 1.00 | 0.00 | C |
| ATOM | 848 | O5'  | T B | 9 | -8.211  | -1.551 | 108.659 | 1.00 | 0.00 | O |
| ATOM | 849 | O1P  | T B | 9 | -9.761  | 0.427  | 108.791 | 1.00 | 0.00 | O |
| ATOM | 850 | O2P  | T B | 9 | -7.375  | 0.746  | 108.083 | 1.00 | 0.00 | O |
| ATOM | 851 | P    | T B | 9 | -8.584  | -0.113 | 108.081 | 1.00 | 0.00 | P |
| ATOM | 852 | H3   | T B | 9 | -2.887  | -5.443 | 109.128 | 1.00 | 0.00 | H |
| ATOM | 853 | H6   | T B | 9 | -6.162  | -1.908 | 109.091 | 1.00 | 0.00 | H |
| ATOM | 854 | H1'  | T B | 9 | -6.854  | -4.906 | 111.151 | 1.00 | 0.00 | H |
| ATOM | 855 | H3'  | T B | 9 | -9.499  | -2.001 | 110.985 | 1.00 | 0.00 | H |
| ATOM | 856 | H4'  | T B | 9 | -10.046 | -4.163 | 109.555 | 1.00 | 0.00 | H |

|      |     |      |     |    |         |         |         |      |      |   |
|------|-----|------|-----|----|---------|---------|---------|------|------|---|
| ATOM | 857 | H71  | T B | 9  | -3.830  | -0.417  | 108.441 | 1.00 | 0.00 | H |
| ATOM | 858 | H72  | T B | 9  | -2.950  | -1.359  | 107.212 | 1.00 | 0.00 | H |
| ATOM | 859 | H73  | T B | 9  | -4.685  | -1.017  | 106.999 | 1.00 | 0.00 | H |
| ATOM | 860 | H2'1 | T B | 9  | -7.117  | -1.919  | 110.700 | 1.00 | 0.00 | H |
| ATOM | 861 | H2'2 | T B | 9  | -7.230  | -2.815  | 112.208 | 1.00 | 0.00 | H |
| ATOM | 862 | H5'1 | T B | 9  | -8.778  | -3.198  | 107.506 | 1.00 | 0.00 | H |
| ATOM | 863 | H5'2 | T B | 9  | -10.118 | -2.290  | 108.236 | 1.00 | 0.00 | H |
| ATOM | 864 | C1'  | A B | 10 | -5.081  | -6.449  | 114.378 | 1.00 | 0.00 | C |
| ATOM | 865 | N1   | A B | 10 | -0.594  | -5.548  | 112.056 | 1.00 | 0.00 | N |
| ATOM | 866 | C2   | A B | 10 | -1.083  | -6.614  | 112.683 | 1.00 | 0.00 | C |
| ATOM | 867 | N3   | A B | 10 | -2.253  | -6.780  | 113.259 | 1.00 | 0.00 | N |
| ATOM | 868 | C4   | A B | 10 | -2.990  | -5.659  | 113.153 | 1.00 | 0.00 | C |
| ATOM | 869 | C5   | A B | 10 | -2.636  | -4.486  | 112.544 | 1.00 | 0.00 | C |
| ATOM | 870 | C6   | A B | 10 | -1.351  | -4.445  | 111.964 | 1.00 | 0.00 | C |
| ATOM | 871 | N6   | A B | 10 | -0.868  | -3.360  | 111.332 | 1.00 | 0.00 | N |
| ATOM | 872 | N7   | A B | 10 | -3.653  | -3.552  | 112.632 | 1.00 | 0.00 | N |
| ATOM | 873 | C8   | A B | 10 | -4.589  | -4.171  | 113.287 | 1.00 | 0.00 | C |
| ATOM | 874 | N9   | A B | 10 | -4.258  | -5.456  | 113.634 | 1.00 | 0.00 | N |
| ATOM | 875 | C2'  | A B | 10 | -5.916  | -5.840  | 115.495 | 1.00 | 0.00 | C |
| ATOM | 876 | C3'  | A B | 10 | -7.180  | -6.685  | 115.444 | 1.00 | 0.00 | C |
| ATOM | 877 | O3'  | A B | 10 | -6.976  | -7.875  | 116.202 | 1.00 | 0.00 | O |
| ATOM | 878 | C4'  | A B | 10 | -7.337  | -6.971  | 113.952 | 1.00 | 0.00 | C |
| ATOM | 879 | O4'  | A B | 10 | -5.962  | -7.057  | 113.455 | 1.00 | 0.00 | O |
| ATOM | 880 | C5'  | A B | 10 | -8.080  | -5.934  | 113.144 | 1.00 | 0.00 | C |
| ATOM | 881 | O5'  | A B | 10 | -7.765  | -4.608  | 113.640 | 1.00 | 0.00 | O |
| ATOM | 882 | O1P  | A B | 10 | -9.960  | -3.801  | 114.574 | 1.00 | 0.00 | O |
| ATOM | 883 | O2P  | A B | 10 | -8.269  | -2.148  | 113.735 | 1.00 | 0.00 | O |
| ATOM | 884 | P    | A B | 10 | -8.898  | -3.485  | 113.600 | 1.00 | 0.00 | P |
| ATOM | 885 | H2   | A B | 10 | -0.416  | -7.474  | 112.726 | 1.00 | 0.00 | H |
| ATOM | 886 | H8   | A B | 10 | -5.546  | -3.712  | 113.537 | 1.00 | 0.00 | H |
| ATOM | 887 | H1'  | A B | 10 | -4.415  | -7.220  | 114.764 | 1.00 | 0.00 | H |
| ATOM | 888 | H3'  | A B | 10 | -8.044  | -6.151  | 115.835 | 1.00 | 0.00 | H |
| ATOM | 889 | H4'  | A B | 10 | -7.879  | -7.913  | 113.865 | 1.00 | 0.00 | H |
| ATOM | 890 | H61  | A B | 10 | 0.077   | -3.383  | 110.924 | 1.00 | 0.00 | H |
| ATOM | 891 | H62  | A B | 10 | -1.442  | -2.509  | 111.258 | 1.00 | 0.00 | H |
| ATOM | 892 | H2'1 | A B | 10 | -6.138  | -4.786  | 115.320 | 1.00 | 0.00 | H |
| ATOM | 893 | H2'2 | A B | 10 | -5.428  | -5.916  | 116.467 | 1.00 | 0.00 | H |
| ATOM | 894 | H5'1 | A B | 10 | -7.783  | -6.014  | 112.099 | 1.00 | 0.00 | H |
| ATOM | 895 | H5'2 | A B | 10 | -9.150  | -6.113  | 113.228 | 1.00 | 0.00 | H |
| ATOM | 896 | C1'  | G B | 11 | -1.349  | -8.284  | 117.090 | 1.00 | 0.00 | C |
| ATOM | 897 | N1   | G B | 11 | 1.410   | -4.718  | 114.702 | 1.00 | 0.00 | N |
| ATOM | 898 | C2   | G B | 11 | 1.719   | -6.036  | 114.989 | 1.00 | 0.00 | C |
| ATOM | 899 | N2   | G B | 11 | 2.924   | -6.459  | 114.587 | 1.00 | 0.00 | N |
| ATOM | 900 | N3   | G B | 11 | 0.892   | -6.864  | 115.623 | 1.00 | 0.00 | N |
| ATOM | 901 | C4   | G B | 11 | -0.280  | -6.266  | 115.962 | 1.00 | 0.00 | C |
| ATOM | 902 | C5   | G B | 11 | -0.673  | -4.960  | 115.723 | 1.00 | 0.00 | C |
| ATOM | 903 | C6   | G B | 11 | 0.202   | -4.080  | 115.045 | 1.00 | 0.00 | C |
| ATOM | 904 | O6   | G B | 11 | 0.035   | -2.898  | 114.744 | 1.00 | 0.00 | O |
| ATOM | 905 | N7   | G B | 11 | -1.955  | -4.740  | 116.233 | 1.00 | 0.00 | N |
| ATOM | 906 | C8   | G B | 11 | -2.290  | -5.893  | 116.751 | 1.00 | 0.00 | C |
| ATOM | 907 | N9   | G B | 11 | -1.324  | -6.870  | 116.628 | 1.00 | 0.00 | N |
| ATOM | 908 | C2'  | G B | 11 | -2.037  | -8.477  | 118.434 | 1.00 | 0.00 | C |
| ATOM | 909 | C3'  | G B | 11 | -2.716  | -9.825  | 118.251 | 1.00 | 0.00 | C |
| ATOM | 910 | O3'  | G B | 11 | -1.784  | -10.862 | 118.545 | 1.00 | 0.00 | O |

|      |     |      |     |    |        |         |         |      |      |   |
|------|-----|------|-----|----|--------|---------|---------|------|------|---|
| ATOM | 911 | C4'  | G B | 11 | -3.116 | -9.809  | 116.776 | 1.00 | 0.00 | C |
| ATOM | 912 | O4'  | G B | 11 | -2.053 | -9.042  | 116.125 | 1.00 | 0.00 | O |
| ATOM | 913 | C5'  | G B | 11 | -4.444 | -9.168  | 116.448 | 1.00 | 0.00 | C |
| ATOM | 914 | O5'  | G B | 11 | -4.668 | -8.030  | 117.316 | 1.00 | 0.00 | O |
| ATOM | 915 | O1P  | G B | 11 | -6.642 | -8.737  | 118.707 | 1.00 | 0.00 | O |
| ATOM | 916 | O2P  | G B | 11 | -6.221 | -6.303  | 118.274 | 1.00 | 0.00 | O |
| ATOM | 917 | P    | G B | 11 | -6.158 | -7.699  | 117.778 | 1.00 | 0.00 | P |
| ATOM | 918 | H1   | G B | 11 | 2.117  | -4.162  | 114.200 | 1.00 | 0.00 | H |
| ATOM | 919 | H8   | G B | 11 | -3.249 | -6.066  | 117.239 | 1.00 | 0.00 | H |
| ATOM | 920 | H1'  | G B | 11 | -0.321 | -8.652  | 117.120 | 1.00 | 0.00 | H |
| ATOM | 921 | H21  | G B | 11 | 3.558  | -5.813  | 114.093 | 1.00 | 0.00 | H |
| ATOM | 922 | H3'  | G B | 11 | -3.590 | -9.933  | 118.892 | 1.00 | 0.00 | H |
| ATOM | 923 | H22  | G B | 11 | 3.217  | -7.428  | 114.773 | 1.00 | 0.00 | H |
| ATOM | 924 | H4'  | G B | 11 | -3.155 | -10.847 | 116.446 | 1.00 | 0.00 | H |
| ATOM | 925 | H2'1 | G B | 11 | -2.764 | -7.692  | 118.643 | 1.00 | 0.00 | H |
| ATOM | 926 | H2'2 | G B | 11 | -1.330 | -8.498  | 119.262 | 1.00 | 0.00 | H |
| ATOM | 927 | H5'1 | G B | 11 | -4.437 | -8.844  | 115.407 | 1.00 | 0.00 | H |
| ATOM | 928 | H5'2 | G B | 11 | -5.237 | -9.902  | 116.590 | 1.00 | 0.00 | H |
| ATOM | 929 | C1'  | G B | 12 | 3.351  | -8.488  | 118.640 | 1.00 | 0.00 | C |
| ATOM | 930 | N1   | G B | 12 | 3.434  | -3.588  | 117.223 | 1.00 | 0.00 | N |
| ATOM | 931 | C2   | G B | 12 | 4.377  | -4.584  | 117.036 | 1.00 | 0.00 | C |
| ATOM | 932 | N2   | G B | 12 | 5.492  | -4.224  | 116.385 | 1.00 | 0.00 | N |
| ATOM | 933 | N3   | G B | 12 | 4.220  | -5.834  | 117.461 | 1.00 | 0.00 | N |
| ATOM | 934 | C4   | G B | 12 | 3.037  | -6.016  | 118.105 | 1.00 | 0.00 | C |
| ATOM | 935 | C5   | G B | 12 | 2.041  | -5.087  | 118.341 | 1.00 | 0.00 | C |
| ATOM | 936 | C6   | G B | 12 | 2.204  | -3.759  | 117.887 | 1.00 | 0.00 | C |
| ATOM | 937 | O6   | G B | 12 | 1.442  | -2.799  | 118.000 | 1.00 | 0.00 | O |
| ATOM | 938 | N7   | G B | 12 | 0.983  | -5.677  | 119.038 | 1.00 | 0.00 | N |
| ATOM | 939 | C8   | G B | 12 | 1.364  | -6.918  | 119.194 | 1.00 | 0.00 | C |
| ATOM | 940 | N9   | G B | 12 | 2.601  | -7.202  | 118.656 | 1.00 | 0.00 | N |
| ATOM | 941 | C2'  | G B | 12 | 3.204  | -9.298  | 119.921 | 1.00 | 0.00 | C |
| ATOM | 942 | C3'  | G B | 12 | 3.198  | -10.725 | 119.394 | 1.00 | 0.00 | C |
| ATOM | 943 | O3'  | G B | 12 | 4.545  | -11.169 | 119.233 | 1.00 | 0.00 | O |
| ATOM | 944 | C4'  | G B | 12 | 2.470  | -10.593 | 118.058 | 1.00 | 0.00 | C |
| ATOM | 945 | O4'  | G B | 12 | 2.851  | -9.266  | 117.571 | 1.00 | 0.00 | O |
| ATOM | 946 | C5'  | G B | 12 | 0.961  | -10.676 | 118.105 | 1.00 | 0.00 | C |
| ATOM | 947 | O5'  | G B | 12 | 0.473  | -10.039 | 119.310 | 1.00 | 0.00 | O |
| ATOM | 948 | O1P  | G B | 12 | -0.518 | -11.948 | 120.618 | 1.00 | 0.00 | O |
| ATOM | 949 | O2P  | G B | 12 | -1.392 | -9.619  | 120.942 | 1.00 | 0.00 | O |
| ATOM | 950 | P    | G B | 12 | -0.826 | -10.633 | 120.021 | 1.00 | 0.00 | P |
| ATOM | 951 | H1   | G B | 12 | 3.650  | -2.651  | 116.848 | 1.00 | 0.00 | H |
| ATOM | 952 | H8   | G B | 12 | 0.756  | -7.665  | 119.707 | 1.00 | 0.00 | H |
| ATOM | 953 | H1'  | G B | 12 | 4.398  | -8.270  | 118.434 | 1.00 | 0.00 | H |
| ATOM | 954 | H21  | G B | 12 | 5.604  | -3.254  | 116.055 | 1.00 | 0.00 | H |
| ATOM | 955 | H3'  | G B | 12 | 2.673  | -11.406 | 120.063 | 1.00 | 0.00 | H |
| ATOM | 956 | H22  | G B | 12 | 6.234  | -4.917  | 116.216 | 1.00 | 0.00 | H |
| ATOM | 957 | H4'  | G B | 12 | 2.828  | -11.399 | 117.420 | 1.00 | 0.00 | H |
| ATOM | 958 | H2'1 | G B | 12 | 2.279  | -9.069  | 120.450 | 1.00 | 0.00 | H |
| ATOM | 959 | H2'2 | G B | 12 | 4.029  | -9.133  | 120.612 | 1.00 | 0.00 | H |
| ATOM | 960 | H5'1 | G B | 12 | 0.549  | -10.174 | 117.230 | 1.00 | 0.00 | H |
| ATOM | 961 | H5'2 | G B | 12 | 0.662  | -11.723 | 118.094 | 1.00 | 0.00 | H |
| ATOM | 962 | C1'  | T B | 13 | 7.844  | -6.598  | 119.501 | 1.00 | 0.00 | C |
| ATOM | 963 | N1   | T B | 13 | 6.630  | -5.899  | 120.000 | 1.00 | 0.00 | N |
| ATOM | 964 | C2   | T B | 13 | 6.506  | -4.557  | 119.698 | 1.00 | 0.00 | C |



|      |      |      |     |    |        |         |         |      |      |   |
|------|------|------|-----|----|--------|---------|---------|------|------|---|
| ATOM | 965  | O2   | T B | 13 | 7.342  | -3.946  | 119.055 | 1.00 | 0.00 | O |
| ATOM | 966  | N3   | T B | 13 | 5.363  | -3.946  | 120.181 | 1.00 | 0.00 | N |
| ATOM | 967  | C4   | T B | 13 | 4.363  | -4.542  | 120.919 | 1.00 | 0.00 | C |
| ATOM | 968  | O4   | T B | 13 | 3.383  | -3.891  | 121.300 | 1.00 | 0.00 | O |
| ATOM | 969  | C5   | T B | 13 | 4.578  | -5.946  | 121.183 | 1.00 | 0.00 | C |
| ATOM | 970  | C6   | T B | 13 | 5.680  | -6.574  | 120.728 | 1.00 | 0.00 | C |
| ATOM | 971  | C7   | T B | 13 | 3.513  | -6.637  | 121.981 | 1.00 | 0.00 | C |
| ATOM | 972  | C2'  | T B | 13 | 8.403  | -7.627  | 120.475 | 1.00 | 0.00 | C |
| ATOM | 973  | C3'  | T B | 13 | 8.906  | -8.712  | 119.537 | 1.00 | 0.00 | C |
| ATOM | 974  | O3'  | T B | 13 | 10.218 | -8.376  | 119.092 | 1.00 | 0.00 | O |
| ATOM | 975  | C4'  | T B | 13 | 7.885  | -8.680  | 118.402 | 1.00 | 0.00 | C |
| ATOM | 976  | O4'  | T B | 13 | 7.494  | -7.272  | 118.308 | 1.00 | 0.00 | O |
| ATOM | 977  | C5'  | T B | 13 | 6.640  | -9.516  | 118.593 | 1.00 | 0.00 | C |
| ATOM | 978  | O5'  | T B | 13 | 6.240  | -9.484  | 119.986 | 1.00 | 0.00 | O |
| ATOM | 979  | O1P  | T B | 13 | 6.573  | -11.861 | 120.741 | 1.00 | 0.00 | O |
| ATOM | 980  | O2P  | T B | 13 | 4.862  | -10.415 | 121.871 | 1.00 | 0.00 | O |
| ATOM | 981  | P    | T B | 13 | 5.570  | -10.784 | 120.621 | 1.00 | 0.00 | P |
| ATOM | 982  | H3   | T B | 13 | 5.247  | -2.946  | 119.965 | 1.00 | 0.00 | H |
| ATOM | 983  | H6   | T B | 13 | 5.822  | -7.633  | 120.941 | 1.00 | 0.00 | H |
| ATOM | 984  | H1'  | T B | 13 | 8.594  | -5.847  | 119.254 | 1.00 | 0.00 | H |
| ATOM | 985  | H3'  | T B | 13 | 8.928  | -9.690  | 120.018 | 1.00 | 0.00 | H |
| ATOM | 986  | H4'  | T B | 13 | 8.393  | -9.042  | 117.508 | 1.00 | 0.00 | H |
| ATOM | 987  | H71  | T B | 13 | 3.922  | -6.949  | 122.942 | 1.00 | 0.00 | H |
| ATOM | 988  | H72  | T B | 13 | 2.680  | -5.951  | 122.147 | 1.00 | 0.00 | H |
| ATOM | 989  | H73  | T B | 13 | 3.159  | -7.512  | 121.436 | 1.00 | 0.00 | H |
| ATOM | 990  | H2'1 | T B | 13 | 7.642  | -8.010  | 121.154 | 1.00 | 0.00 | H |
| ATOM | 991  | H2'2 | T B | 13 | 9.213  | -7.224  | 121.084 | 1.00 | 0.00 | H |
| ATOM | 992  | H5'1 | T B | 13 | 5.841  | -9.115  | 117.970 | 1.00 | 0.00 | H |
| ATOM | 993  | H5'2 | T B | 13 | 6.848  | -10.541 | 118.293 | 1.00 | 0.00 | H |
| ATOM | 994  | C1'  | G B | 14 | 10.991 | -2.866  | 120.407 | 1.00 | 0.00 | C |
| ATOM | 995  | N1   | G B | 14 | 6.855  | -0.575  | 122.325 | 1.00 | 0.00 | N |
| ATOM | 996  | C2   | G B | 14 | 7.863  | -0.065  | 121.527 | 1.00 | 0.00 | C |
| ATOM | 997  | N2   | G B | 14 | 7.755  | 1.227   | 121.195 | 1.00 | 0.00 | N |
| ATOM | 998  | N3   | G B | 14 | 8.894  | -0.788  | 121.091 | 1.00 | 0.00 | N |
| ATOM | 999  | C4   | G B | 14 | 8.845  | -2.074  | 121.528 | 1.00 | 0.00 | C |
| ATOM | 1000 | C5   | G B | 14 | 7.885  | -2.668  | 122.329 | 1.00 | 0.00 | C |
| ATOM | 1001 | C6   | G B | 14 | 6.787  | -1.904  | 122.788 | 1.00 | 0.00 | C |
| ATOM | 1002 | O6   | G B | 14 | 5.843  | -2.249  | 123.501 | 1.00 | 0.00 | O |
| ATOM | 1003 | N7   | G B | 14 | 8.203  | -4.009  | 122.551 | 1.00 | 0.00 | N |
| ATOM | 1004 | C8   | G B | 14 | 9.320  | -4.183  | 121.891 | 1.00 | 0.00 | C |
| ATOM | 1005 | N9   | G B | 14 | 9.773  | -3.051  | 121.245 | 1.00 | 0.00 | N |
| ATOM | 1006 | C2'  | G B | 14 | 12.205 | -3.631  | 120.916 | 1.00 | 0.00 | C |
| ATOM | 1007 | C3'  | G B | 14 | 12.888 | -4.041  | 119.621 | 1.00 | 0.00 | C |
| ATOM | 1008 | O3'  | G B | 14 | 13.713 | -2.970  | 119.168 | 1.00 | 0.00 | O |
| ATOM | 1009 | C4'  | G B | 14 | 11.710 | -4.299  | 118.684 | 1.00 | 0.00 | C |
| ATOM | 1010 | O4'  | G B | 14 | 10.695 | -3.333  | 119.107 | 1.00 | 0.00 | O |
| ATOM | 1011 | C5'  | G B | 14 | 11.108 | -5.683  | 118.726 | 1.00 | 0.00 | C |
| ATOM | 1012 | O5'  | G B | 14 | 11.128 | -6.184  | 120.087 | 1.00 | 0.00 | O |
| ATOM | 1013 | O1P  | G B | 14 | 12.730 | -8.123  | 119.969 | 1.00 | 0.00 | O |
| ATOM | 1014 | O2P  | G B | 14 | 10.913 | -8.102  | 121.697 | 1.00 | 0.00 | O |
| ATOM | 1015 | P    | G B | 14 | 11.348 | -7.747  | 120.326 | 1.00 | 0.00 | P |
| ATOM | 1016 | H1   | G B | 14 | 6.096  | 0.067   | 122.601 | 1.00 | 0.00 | H |
| ATOM | 1017 | H8   | G B | 14 | 9.846  | -5.136  | 121.856 | 1.00 | 0.00 | H |
| ATOM | 1018 | H1'  | G B | 14 | 11.201 | -1.798  | 120.342 | 1.00 | 0.00 | H |

|      |      |      |     |    |        |        |         |      |      |   |
|------|------|------|-----|----|--------|--------|---------|------|------|---|
| ATOM | 1019 | H21  | G B | 14 | 6.952  | 1.779  | 121.533 | 1.00 | 0.00 | H |
| ATOM | 1020 | H3'  | G B | 14 | 13.495 | -4.938 | 119.745 | 1.00 | 0.00 | H |
| ATOM | 1021 | H22  | G B | 14 | 8.474  | 1.669  | 120.605 | 1.00 | 0.00 | H |
| ATOM | 1022 | H4'  | G B | 14 | 12.069 | -4.123 | 117.669 | 1.00 | 0.00 | H |
| ATOM | 1023 | H2'1 | G B | 14 | 11.927 | -4.501 | 121.511 | 1.00 | 0.00 | H |
| ATOM | 1024 | H2'2 | G B | 14 | 12.858 | -3.011 | 121.530 | 1.00 | 0.00 | H |
| ATOM | 1025 | H5'1 | G B | 14 | 10.081 | -5.638 | 118.366 | 1.00 | 0.00 | H |
| ATOM | 1026 | H5'2 | G B | 14 | 11.686 | -6.344 | 118.080 | 1.00 | 0.00 | H |
| ATOM | 1027 | C1'  | C B | 15 | 12.199 | 1.631  | 122.093 | 1.00 | 0.00 | C |
| ATOM | 1028 | N1   | C B | 15 | 11.463 | 0.671  | 122.959 | 1.00 | 0.00 | N |
| ATOM | 1029 | C2   | C B | 15 | 10.296 | 1.115  | 123.579 | 1.00 | 0.00 | C |
| ATOM | 1030 | O2   | C B | 15 | 9.924  | 2.280  | 123.386 | 1.00 | 0.00 | O |
| ATOM | 1031 | N3   | C B | 15 | 9.610  | 0.256  | 124.372 | 1.00 | 0.00 | N |
| ATOM | 1032 | C4   | C B | 15 | 10.039 | -0.998 | 124.563 | 1.00 | 0.00 | C |
| ATOM | 1033 | N4   | C B | 15 | 9.327  | -1.796 | 125.345 | 1.00 | 0.00 | N |
| ATOM | 1034 | C5   | C B | 15 | 11.239 | -1.480 | 123.940 | 1.00 | 0.00 | C |
| ATOM | 1035 | C6   | C B | 15 | 11.910 | -0.600 | 123.144 | 1.00 | 0.00 | C |
| ATOM | 1036 | C2'  | C B | 15 | 13.714 | 1.512  | 122.194 | 1.00 | 0.00 | C |
| ATOM | 1037 | C3'  | C B | 15 | 14.151 | 1.803  | 120.766 | 1.00 | 0.00 | C |
| ATOM | 1038 | O3'  | C B | 15 | 14.246 | 3.214  | 120.584 | 1.00 | 0.00 | O |
| ATOM | 1039 | C4'  | C B | 15 | 13.028 | 1.188  | 119.935 | 1.00 | 0.00 | C |
| ATOM | 1040 | O4'  | C B | 15 | 11.829 | 1.373  | 120.752 | 1.00 | 0.00 | O |
| ATOM | 1041 | C5'  | C B | 15 | 13.165 | -0.282 | 119.605 | 1.00 | 0.00 | C |
| ATOM | 1042 | O5'  | C B | 15 | 13.761 | -0.981 | 120.726 | 1.00 | 0.00 | O |
| ATOM | 1043 | O1P  | C B | 15 | 15.985 | -1.741 | 119.822 | 1.00 | 0.00 | O |
| ATOM | 1044 | O2P  | C B | 15 | 14.872 | -3.033 | 121.663 | 1.00 | 0.00 | O |
| ATOM | 1045 | P    | C B | 15 | 14.726 | -2.216 | 120.434 | 1.00 | 0.00 | P |
| ATOM | 1046 | H5   | C B | 15 | 11.594 | -2.499 | 124.098 | 1.00 | 0.00 | H |
| ATOM | 1047 | H6   | C B | 15 | 12.825 | -0.922 | 122.643 | 1.00 | 0.00 | H |
| ATOM | 1048 | H1'  | C B | 15 | 11.870 | 2.640  | 122.345 | 1.00 | 0.00 | H |
| ATOM | 1049 | H3'  | C B | 15 | 15.111 | 1.343  | 120.533 | 1.00 | 0.00 | H |
| ATOM | 1050 | H4'  | C B | 15 | 12.993 | 1.737  | 118.993 | 1.00 | 0.00 | H |
| ATOM | 1051 | H41  | C B | 15 | 9.634  | -2.767 | 125.505 | 1.00 | 0.00 | H |
| ATOM | 1052 | H42  | C B | 15 | 8.467  | -1.446 | 125.792 | 1.00 | 0.00 | H |
| ATOM | 1053 | H2'1 | C B | 15 | 14.030 | 0.518  | 122.510 | 1.00 | 0.00 | H |
| ATOM | 1054 | H2'2 | C B | 15 | 14.141 | 2.229  | 122.895 | 1.00 | 0.00 | H |
| ATOM | 1055 | H5'1 | C B | 15 | 12.178 | -0.694 | 119.396 | 1.00 | 0.00 | H |
| ATOM | 1056 | H5'2 | C B | 15 | 13.795 | -0.393 | 118.724 | 1.00 | 0.00 | H |
| ATOM | 1057 | C1'  | G B | 16 | 11.596 | 5.609  | 124.982 | 1.00 | 0.00 | C |
| ATOM | 1058 | N1   | G B | 16 | 9.221  | 2.307  | 128.060 | 1.00 | 0.00 | N |
| ATOM | 1059 | C2   | G B | 16 | 8.876  | 3.601  | 127.711 | 1.00 | 0.00 | C |
| ATOM | 1060 | N2   | G B | 16 | 7.750  | 4.078  | 128.256 | 1.00 | 0.00 | N |
| ATOM | 1061 | N3   | G B | 16 | 9.597  | 4.356  | 126.884 | 1.00 | 0.00 | N |
| ATOM | 1062 | C4   | G B | 16 | 10.706 | 3.714  | 126.433 | 1.00 | 0.00 | C |
| ATOM | 1063 | C5   | G B | 16 | 11.131 | 2.431  | 126.731 | 1.00 | 0.00 | C |
| ATOM | 1064 | C6   | G B | 16 | 10.365 | 1.626  | 127.606 | 1.00 | 0.00 | C |
| ATOM | 1065 | O6   | G B | 16 | 10.576 | 0.473  | 127.986 | 1.00 | 0.00 | O |
| ATOM | 1066 | N7   | G B | 16 | 12.326 | 2.149  | 126.062 | 1.00 | 0.00 | N |
| ATOM | 1067 | C8   | G B | 16 | 12.579 | 3.246  | 125.395 | 1.00 | 0.00 | C |
| ATOM | 1068 | N9   | G B | 16 | 11.641 | 4.243  | 125.569 | 1.00 | 0.00 | N |
| ATOM | 1069 | C2'  | G B | 16 | 12.960 | 6.270  | 124.861 | 1.00 | 0.00 | C |
| ATOM | 1070 | C3'  | G B | 16 | 12.822 | 7.053  | 123.564 | 1.00 | 0.00 | C |
| ATOM | 1071 | O3'  | G B | 16 | 12.204 | 8.308  | 123.840 | 1.00 | 0.00 | O |
| ATOM | 1072 | C4'  | G B | 16 | 11.934 | 6.146  | 122.714 | 1.00 | 0.00 | C |

|      |      |      |     |    |        |        |         |      |      |   |
|------|------|------|-----|----|--------|--------|---------|------|------|---|
| ATOM | 1073 | O4'  | G B | 16 | 11.047 | 5.500  | 123.683 | 1.00 | 0.00 | O |
| ATOM | 1074 | C5'  | G B | 16 | 12.638 | 5.076  | 121.914 | 1.00 | 0.00 | C |
| ATOM | 1075 | O5'  | G B | 16 | 13.759 | 4.557  | 122.670 | 1.00 | 0.00 | O |
| ATOM | 1076 | O1P  | G B | 16 | 15.756 | 5.278  | 121.317 | 1.00 | 0.00 | O |
| ATOM | 1077 | O2P  | G B | 16 | 15.891 | 3.229  | 122.757 | 1.00 | 0.00 | O |
| ATOM | 1078 | P    | G B | 16 | 15.071 | 4.102  | 121.881 | 1.00 | 0.00 | P |
| ATOM | 1079 | H1   | G B | 16 | 8.590  | 1.805  | 128.703 | 1.00 | 0.00 | H |
| ATOM | 1080 | H8   | G B | 16 | 13.453 | 3.361  | 124.755 | 1.00 | 0.00 | H |
| ATOM | 1081 | H1'  | G B | 16 | 10.918 | 6.217  | 125.581 | 1.00 | 0.00 | H |
| ATOM | 1082 | H21  | G B | 16 | 7.196  | 3.488  | 128.891 | 1.00 | 0.00 | H |
| ATOM | 1083 | H3'  | G B | 16 | 13.785 | 7.222  | 123.083 | 1.00 | 0.00 | H |
| ATOM | 1084 | H22  | G B | 16 | 7.440  | 5.036  | 128.036 | 1.00 | 0.00 | H |
| ATOM | 1085 | H4'  | G B | 16 | 11.402 | 6.790  | 122.013 | 1.00 | 0.00 | H |
| ATOM | 1086 | H2'1 | G B | 16 | 13.770 | 5.541  | 124.799 | 1.00 | 0.00 | H |
| ATOM | 1087 | H2'2 | G B | 16 | 13.178 | 6.929  | 125.702 | 1.00 | 0.00 | H |
| ATOM | 1088 | H5'1 | G B | 16 | 11.935 | 4.270  | 121.699 | 1.00 | 0.00 | H |
| ATOM | 1089 | H5'2 | G B | 16 | 12.990 | 5.504  | 120.977 | 1.00 | 0.00 | H |
| ATOM | 1090 | C1'  | G B | 17 | 10.001 | 7.957  | 129.040 | 1.00 | 0.00 | C |
| ATOM | 1091 | N1   | G B | 17 | 10.301 | 3.321  | 131.149 | 1.00 | 0.00 | N |
| ATOM | 1092 | C2   | G B | 17 | 9.323  | 4.293  | 131.273 | 1.00 | 0.00 | C |
| ATOM | 1093 | N2   | G B | 17 | 8.288  | 3.988  | 132.066 | 1.00 | 0.00 | N |
| ATOM | 1094 | N3   | G B | 17 | 9.373  | 5.470  | 130.656 | 1.00 | 0.00 | N |
| ATOM | 1095 | C4   | G B | 17 | 10.494 | 5.611  | 129.900 | 1.00 | 0.00 | C |
| ATOM | 1096 | C5   | G B | 17 | 11.522 | 4.701  | 129.719 | 1.00 | 0.00 | C |
| ATOM | 1097 | C6   | G B | 17 | 11.469 | 3.448  | 130.371 | 1.00 | 0.00 | C |
| ATOM | 1098 | O6   | G B | 17 | 12.276 | 2.519  | 130.336 | 1.00 | 0.00 | O |
| ATOM | 1099 | N7   | G B | 17 | 12.491 | 5.232  | 128.865 | 1.00 | 0.00 | N |
| ATOM | 1100 | C8   | G B | 17 | 12.030 | 6.416  | 128.560 | 1.00 | 0.00 | C |
| ATOM | 1101 | N9   | G B | 17 | 10.821 | 6.719  | 129.151 | 1.00 | 0.00 | N |
| ATOM | 1102 | C2'  | G B | 17 | 10.827 | 9.235  | 128.982 | 1.00 | 0.00 | C |
| ATOM | 1103 | C3'  | G B | 17 | 10.012 | 10.097 | 128.030 | 1.00 | 0.00 | C |
| ATOM | 1104 | O3'  | G B | 17 | 8.982  | 10.758 | 128.761 | 1.00 | 0.00 | O |
| ATOM | 1105 | C4'  | G B | 17 | 9.455  | 9.075  | 127.041 | 1.00 | 0.00 | C |
| ATOM | 1106 | O4'  | G B | 17 | 9.248  | 7.870  | 127.846 | 1.00 | 0.00 | O |
| ATOM | 1107 | C5'  | G B | 17 | 10.336 | 8.727  | 125.866 | 1.00 | 0.00 | C |
| ATOM | 1108 | O5'  | G B | 17 | 11.724 | 8.709  | 126.283 | 1.00 | 0.00 | O |
| ATOM | 1109 | O1P  | G B | 17 | 12.736 | 10.634 | 125.015 | 1.00 | 0.00 | O |
| ATOM | 1110 | O2P  | G B | 17 | 14.168 | 8.690  | 125.697 | 1.00 | 0.00 | O |
| ATOM | 1111 | P    | G B | 17 | 12.842 | 9.180  | 125.246 | 1.00 | 0.00 | P |
| ATOM | 1112 | H1   | G B | 17 | 10.164 | 2.440  | 131.666 | 1.00 | 0.00 | H |
| ATOM | 1113 | H8   | G B | 17 | 12.554 | 7.104  | 127.896 | 1.00 | 0.00 | H |
| ATOM | 1114 | H1'  | G B | 17 | 9.303  | 7.979  | 129.876 | 1.00 | 0.00 | H |
| ATOM | 1115 | H21  | G B | 17 | 8.254  | 3.073  | 132.538 | 1.00 | 0.00 | H |
| ATOM | 1116 | H3'  | G B | 17 | 10.628 | 10.839 | 127.521 | 1.00 | 0.00 | H |
| ATOM | 1117 | H22  | G B | 17 | 7.528  | 4.668  | 132.202 | 1.00 | 0.00 | H |
| ATOM | 1118 | H4'  | G B | 17 | 8.525  | 9.488  | 126.648 | 1.00 | 0.00 | H |
| ATOM | 1119 | H2'1 | G B | 17 | 11.831 | 9.062  | 128.599 | 1.00 | 0.00 | H |
| ATOM | 1120 | H2'2 | G B | 17 | 10.926 | 9.708  | 129.959 | 1.00 | 0.00 | H |
| ATOM | 1121 | H5'1 | G B | 17 | 10.054 | 7.745  | 125.485 | 1.00 | 0.00 | H |
| ATOM | 1122 | H5'2 | G B | 17 | 10.196 | 9.470  | 125.081 | 1.00 | 0.00 | H |
| ATOM | 1123 | C1'  | C B | 18 | 8.619  | 8.188  | 133.790 | 1.00 | 0.00 | C |
| ATOM | 1124 | N1   | C B | 18 | 9.912  | 7.556  | 133.407 | 1.00 | 0.00 | N |
| ATOM | 1125 | C2   | C B | 18 | 10.180 | 6.278  | 133.891 | 1.00 | 0.00 | C |
| ATOM | 1126 | O2   | C B | 18 | 9.341  | 5.723  | 134.613 | 1.00 | 0.00 | O |

|      |      |      |     |    |        |        |         |      |      |   |
|------|------|------|-----|----|--------|--------|---------|------|------|---|
| ATOM | 1127 | N3   | C B | 18 | 11.352 | 5.685  | 133.554 | 1.00 | 0.00 | N |
| ATOM | 1128 | C4   | C B | 18 | 12.239 | 6.312  | 132.770 | 1.00 | 0.00 | C |
| ATOM | 1129 | N4   | C B | 18 | 13.367 | 5.684  | 132.472 | 1.00 | 0.00 | N |
| ATOM | 1130 | C5   | C B | 18 | 11.989 | 7.626  | 132.262 | 1.00 | 0.00 | C |
| ATOM | 1131 | C6   | C B | 18 | 10.804 | 8.202  | 132.611 | 1.00 | 0.00 | C |
| ATOM | 1132 | C2'  | C B | 18 | 8.722  | 9.685  | 134.054 | 1.00 | 0.00 | C |
| ATOM | 1133 | C3'  | C B | 18 | 7.390  | 10.193 | 133.523 | 1.00 | 0.00 | C |
| ATOM | 1134 | O3'  | C B | 18 | 6.397  | 10.051 | 134.536 | 1.00 | 0.00 | O |
| ATOM | 1135 | C4'  | C B | 18 | 7.130  | 9.278  | 132.328 | 1.00 | 0.00 | C |
| ATOM | 1136 | O4'  | C B | 18 | 7.712  | 7.994  | 132.721 | 1.00 | 0.00 | O |
| ATOM | 1137 | C5'  | C B | 18 | 7.740  | 9.702  | 131.014 | 1.00 | 0.00 | C |
| ATOM | 1138 | O5'  | C B | 18 | 9.037  | 10.308 | 131.246 | 1.00 | 0.00 | O |
| ATOM | 1139 | O1P  | C B | 18 | 8.695  | 12.704 | 130.555 | 1.00 | 0.00 | O |
| ATOM | 1140 | O2P  | C B | 18 | 10.978 | 11.672 | 130.418 | 1.00 | 0.00 | O |
| ATOM | 1141 | P    | C B | 18 | 9.510  | 11.500 | 130.299 | 1.00 | 0.00 | P |
| ATOM | 1142 | H5   | C B | 18 | 12.711 | 8.142  | 131.627 | 1.00 | 0.00 | H |
| ATOM | 1143 | H6   | C B | 18 | 10.568 | 9.201  | 132.245 | 1.00 | 0.00 | H |
| ATOM | 1144 | H1'  | C B | 18 | 8.228  | 7.664  | 134.661 | 1.00 | 0.00 | H |
| ATOM | 1145 | H3'  | C B | 18 | 7.446  | 11.236 | 133.216 | 1.00 | 0.00 | H |
| ATOM | 1146 | H4'  | C B | 18 | 6.049  | 9.233  | 132.192 | 1.00 | 0.00 | H |
| ATOM | 1147 | H41  | C B | 18 | 14.067 | 6.142  | 131.869 | 1.00 | 0.00 | H |
| ATOM | 1148 | H42  | C B | 18 | 13.543 | 4.738  | 132.839 | 1.00 | 0.00 | H |
| ATOM | 1149 | H2'1 | C B | 18 | 9.559  | 10.141 | 133.528 | 1.00 | 0.00 | H |
| ATOM | 1150 | H2'2 | C B | 18 | 8.841  | 9.910  | 135.114 | 1.00 | 0.00 | H |
| ATOM | 1151 | H5'1 | C B | 18 | 7.853  | 8.829  | 130.370 | 1.00 | 0.00 | H |
| ATOM | 1152 | H5'2 | C B | 18 | 7.081  | 10.421 | 130.528 | 1.00 | 0.00 | H |
| ATOM | 1153 | C1'  | C B | 19 | 8.571  | 6.625  | 138.489 | 1.00 | 0.00 | C |
| ATOM | 1154 | N1   | C B | 19 | 9.859  | 6.850  | 137.779 | 1.00 | 0.00 | N |
| ATOM | 1155 | C2   | C B | 19 | 10.802 | 5.824  | 137.793 | 1.00 | 0.00 | C |
| ATOM | 1156 | O2   | C B | 19 | 10.531 | 4.774  | 138.390 | 1.00 | 0.00 | O |
| ATOM | 1157 | N3   | C B | 19 | 11.981 | 6.011  | 137.153 | 1.00 | 0.00 | N |
| ATOM | 1158 | C4   | C B | 19 | 12.244 | 7.160  | 136.516 | 1.00 | 0.00 | C |
| ATOM | 1159 | N4   | C B | 19 | 13.412 | 7.288  | 135.908 | 1.00 | 0.00 | N |
| ATOM | 1160 | C5   | C B | 19 | 11.294 | 8.230  | 136.488 | 1.00 | 0.00 | C |
| ATOM | 1161 | C6   | C B | 19 | 10.114 | 8.020  | 137.137 | 1.00 | 0.00 | C |
| ATOM | 1162 | C2'  | C B | 19 | 8.041  | 7.858  | 139.204 | 1.00 | 0.00 | C |
| ATOM | 1163 | C3'  | C B | 19 | 6.536  | 7.709  | 139.019 | 1.00 | 0.00 | C |
| ATOM | 1164 | O3'  | C B | 19 | 6.021  | 6.858  | 140.040 | 1.00 | 0.00 | O |
| ATOM | 1165 | C4'  | C B | 19 | 6.425  | 7.081  | 137.632 | 1.00 | 0.00 | C |
| ATOM | 1166 | O4'  | C B | 19 | 7.613  | 6.231  | 137.525 | 1.00 | 0.00 | O |
| ATOM | 1167 | C5'  | C B | 19 | 6.410  | 8.036  | 136.461 | 1.00 | 0.00 | C |
| ATOM | 1168 | O5'  | C B | 19 | 7.292  | 9.155  | 136.727 | 1.00 | 0.00 | O |
| ATOM | 1169 | O1P  | C B | 19 | 5.720  | 11.112 | 136.885 | 1.00 | 0.00 | O |
| ATOM | 1170 | O2P  | C B | 19 | 8.098  | 11.466 | 136.165 | 1.00 | 0.00 | O |
| ATOM | 1171 | P    | C B | 19 | 6.899  | 10.593 | 136.164 | 1.00 | 0.00 | P |
| ATOM | 1172 | H5   | C B | 19 | 11.504 | 9.168  | 135.973 | 1.00 | 0.00 | H |
| ATOM | 1173 | H6   | C B | 19 | 9.360  | 8.808  | 137.141 | 1.00 | 0.00 | H |
| ATOM | 1174 | H1'  | C B | 19 | 8.707  | 5.796  | 139.185 | 1.00 | 0.00 | H |
| ATOM | 1175 | H3'  | C B | 19 | 6.024  | 8.671  | 139.058 | 1.00 | 0.00 | H |
| ATOM | 1176 | H4'  | C B | 19 | 5.494  | 6.516  | 137.613 | 1.00 | 0.00 | H |
| ATOM | 1177 | H41  | C B | 19 | 13.640 | 8.160  | 135.408 | 1.00 | 0.00 | H |
| ATOM | 1178 | H42  | C B | 19 | 14.094 | 6.514  | 135.930 | 1.00 | 0.00 | H |
| ATOM | 1179 | H2'1 | C B | 19 | 8.404  | 8.783  | 138.760 | 1.00 | 0.00 | H |
| ATOM | 1180 | H2'2 | C B | 19 | 8.311  | 7.872  | 140.261 | 1.00 | 0.00 | H |

|      |      |      |     |    |         |        |         |      |      |   |
|------|------|------|-----|----|---------|--------|---------|------|------|---|
| ATOM | 1181 | H5'1 | C B | 19 | 6.739   | 7.510  | 135.566 | 1.00 | 0.00 | H |
| ATOM | 1182 | H5'2 | C B | 19 | 5.393   | 8.397  | 136.311 | 1.00 | 0.00 | H |
| ATOM | 1183 | C1'  | T B | 20 | 10.445  | 4.274  | 142.421 | 1.00 | 0.00 | C |
| ATOM | 1184 | N1   | T B | 20 | 11.269  | 5.266  | 141.679 | 1.00 | 0.00 | N |
| ATOM | 1185 | C2   | T B | 20 | 12.528  | 4.867  | 141.278 | 1.00 | 0.00 | C |
| ATOM | 1186 | O2   | T B | 20 | 12.972  | 3.755  | 141.508 | 1.00 | 0.00 | O |
| ATOM | 1187 | N3   | T B | 20 | 13.257  | 5.820  | 140.594 | 1.00 | 0.00 | N |
| ATOM | 1188 | C4   | T B | 20 | 12.851  | 7.099  | 140.284 | 1.00 | 0.00 | C |
| ATOM | 1189 | O4   | T B | 20 | 13.598  | 7.868  | 139.664 | 1.00 | 0.00 | O |
| ATOM | 1190 | C5   | T B | 20 | 11.522  | 7.426  | 140.743 | 1.00 | 0.00 | C |
| ATOM | 1191 | C6   | T B | 20 | 10.782  | 6.523  | 141.413 | 1.00 | 0.00 | C |
| ATOM | 1192 | C7   | T B | 20 | 11.039  | 8.810  | 140.426 | 1.00 | 0.00 | C |
| ATOM | 1193 | C2'  | T B | 20 | 9.611   | 4.884  | 143.541 | 1.00 | 0.00 | C |
| ATOM | 1194 | C3'  | T B | 20 | 8.346   | 4.041  | 143.487 | 1.00 | 0.00 | C |
| ATOM | 1195 | O3'  | T B | 20 | 8.544   | 2.849  | 144.243 | 1.00 | 0.00 | O |
| ATOM | 1196 | C4'  | T B | 20 | 8.187   | 3.759  | 141.995 | 1.00 | 0.00 | C |
| ATOM | 1197 | O4'  | T B | 20 | 9.561   | 3.671  | 141.497 | 1.00 | 0.00 | O |
| ATOM | 1198 | C5'  | T B | 20 | 7.448   | 4.801  | 141.188 | 1.00 | 0.00 | C |
| ATOM | 1199 | O5'  | T B | 20 | 7.766   | 6.126  | 141.690 | 1.00 | 0.00 | O |
| ATOM | 1200 | O1P  | T B | 20 | 5.575   | 6.936  | 142.625 | 1.00 | 0.00 | O |
| ATOM | 1201 | O2P  | T B | 20 | 7.271   | 8.586  | 141.790 | 1.00 | 0.00 | O |
| ATOM | 1202 | P    | T B | 20 | 6.639   | 7.252  | 141.651 | 1.00 | 0.00 | P |
| ATOM | 1203 | H3   | T B | 20 | 14.200  | 5.546  | 140.282 | 1.00 | 0.00 | H |
| ATOM | 1204 | H6   | T B | 20 | 9.781   | 6.791  | 141.750 | 1.00 | 0.00 | H |
| ATOM | 1205 | H1'  | T B | 20 | 11.107  | 3.500  | 142.806 | 1.00 | 0.00 | H |
| ATOM | 1206 | H3'  | T B | 20 | 7.482   | 4.578  | 143.880 | 1.00 | 0.00 | H |
| ATOM | 1207 | H4'  | T B | 20 | 7.640   | 2.820  | 141.906 | 1.00 | 0.00 | H |
| ATOM | 1208 | H3T  | T B | 20 | 8.849   | 2.983  | 145.143 | 1.00 | 0.00 | H |
| ATOM | 1209 | H71  | T B | 20 | 10.909  | 9.370  | 141.352 | 1.00 | 0.00 | H |
| ATOM | 1210 | H72  | T B | 20 | 11.771  | 9.315  | 139.793 | 1.00 | 0.00 | H |
| ATOM | 1211 | H73  | T B | 20 | 10.086  | 8.750  | 139.899 | 1.00 | 0.00 | H |
| ATOM | 1212 | H2'1 | T B | 20 | 9.394   | 5.937  | 143.367 | 1.00 | 0.00 | H |
| ATOM | 1213 | H2'2 | T B | 20 | 10.100  | 4.804  | 144.512 | 1.00 | 0.00 | H |
| ATOM | 1214 | H5'1 | T B | 20 | 7.743   | 4.723  | 140.143 | 1.00 | 0.00 | H |
| ATOM | 1215 | H5'2 | T B | 20 | 6.377   | 4.625  | 141.274 | 1.00 | 0.00 | H |
| TER  |      |      |     |    |         |        |         |      |      |   |
| ATOM | 1    | C1'  | A A | 1  | -21.320 | -1.103 | 142.795 | 1.00 | 0.00 | C |
| ATOM | 2    | N1   | A A | 1  | -23.067 | 3.556  | 141.543 | 1.00 | 0.00 | N |
| ATOM | 3    | C2   | A A | 1  | -23.677 | 2.390  | 141.738 | 1.00 | 0.00 | C |
| ATOM | 4    | N3   | A A | 1  | -23.164 | 1.223  | 142.064 | 1.00 | 0.00 | N |
| ATOM | 5    | C4   | A A | 1  | -21.829 | 1.319  | 142.189 | 1.00 | 0.00 | C |
| ATOM | 6    | C5   | A A | 1  | -21.056 | 2.434  | 142.022 | 1.00 | 0.00 | C |
| ATOM | 7    | C6   | A A | 1  | -21.734 | 3.622  | 141.677 | 1.00 | 0.00 | C |
| ATOM | 8    | N6   | A A | 1  | -21.108 | 4.795  | 141.481 | 1.00 | 0.00 | N |
| ATOM | 9    | N7   | A A | 1  | -19.718 | 2.151  | 142.235 | 1.00 | 0.00 | N |
| ATOM | 10   | C8   | A A | 1  | -19.710 | 0.883  | 142.522 | 1.00 | 0.00 | C |
| ATOM | 11   | N9   | A A | 1  | -20.954 | 0.311  | 142.514 | 1.00 | 0.00 | N |
| ATOM | 12   | C2'  | A A | 1  | -20.315 | -2.115 | 142.261 | 1.00 | 0.00 | C |
| ATOM | 13   | C3'  | A A | 1  | -20.349 | -3.192 | 143.332 | 1.00 | 0.00 | C |
| ATOM | 14   | O3'  | A A | 1  | -21.431 | -4.081 | 143.067 | 1.00 | 0.00 | O |
| ATOM | 15   | C4'  | A A | 1  | -20.562 | -2.390 | 144.615 | 1.00 | 0.00 | C |
| ATOM | 16   | O4'  | A A | 1  | -21.392 | -1.259 | 144.200 | 1.00 | 0.00 | O |
| ATOM | 17   | C5'  | A A | 1  | -19.318 | -1.856 | 145.287 | 1.00 | 0.00 | C |
| ATOM | 18   | O5'  | A A | 1  | -18.352 | -1.454 | 144.282 | 1.00 | 0.00 | O |

|      |    |      |     |   |         |        |         |      |      |   |
|------|----|------|-----|---|---------|--------|---------|------|------|---|
| ATOM | 19 | H2   | A A | 1 | -24.759 | 2.404  | 141.610 | 1.00 | 0.00 | H |
| ATOM | 20 | H8   | A A | 1 | -18.799 | 0.327  | 142.746 | 1.00 | 0.00 | H |
| ATOM | 21 | H1'  | A A | 1 | -22.313 | -1.287 | 142.386 | 1.00 | 0.00 | H |
| ATOM | 22 | H3'  | A A | 1 | -19.418 | -3.759 | 143.373 | 1.00 | 0.00 | H |
| ATOM | 23 | H4'  | A A | 1 | -21.063 | -3.051 | 145.322 | 1.00 | 0.00 | H |
| ATOM | 24 | H61  | A A | 1 | -21.648 | 5.632  | 141.230 | 1.00 | 0.00 | H |
| ATOM | 25 | H62  | A A | 1 | -20.084 | 4.852  | 141.581 | 1.00 | 0.00 | H |
| ATOM | 26 | H5T  | A A | 1 | -17.418 | -1.565 | 144.469 | 1.00 | 0.00 | H |
| ATOM | 27 | H2'1 | A A | 1 | -19.317 | -1.691 | 142.157 | 1.00 | 0.00 | H |
| ATOM | 28 | H2'2 | A A | 1 | -20.606 | -2.513 | 141.289 | 1.00 | 0.00 | H |
| ATOM | 29 | H5'1 | A A | 1 | -19.585 | -0.999 | 145.904 | 1.00 | 0.00 | H |
| ATOM | 30 | H5'2 | A A | 1 | -18.890 | -2.633 | 145.918 | 1.00 | 0.00 | H |
| ATOM | 31 | C1'  | G A | 2 | -24.765 | -1.461 | 139.237 | 1.00 | 0.00 | C |
| ATOM | 32 | N1   | G A | 2 | -23.340 | 3.312  | 138.141 | 1.00 | 0.00 | N |
| ATOM | 33 | C2   | G A | 2 | -24.603 | 2.757  | 138.202 | 1.00 | 0.00 | C |
| ATOM | 34 | N2   | G A | 2 | -25.623 | 3.581  | 137.934 | 1.00 | 0.00 | N |
| ATOM | 35 | N3   | G A | 2 | -24.833 | 1.481  | 138.507 | 1.00 | 0.00 | N |
| ATOM | 36 | C4   | G A | 2 | -23.685 | 0.792  | 138.743 | 1.00 | 0.00 | C |
| ATOM | 37 | C5   | G A | 2 | -22.382 | 1.263  | 138.701 | 1.00 | 0.00 | C |
| ATOM | 38 | C6   | G A | 2 | -22.140 | 2.620  | 138.382 | 1.00 | 0.00 | C |
| ATOM | 39 | O6   | G A | 2 | -21.067 | 3.217  | 138.299 | 1.00 | 0.00 | O |
| ATOM | 40 | N7   | G A | 2 | -21.488 | 0.233  | 139.006 | 1.00 | 0.00 | N |
| ATOM | 41 | C8   | G A | 2 | -22.258 | -0.802 | 139.219 | 1.00 | 0.00 | C |
| ATOM | 42 | N9   | G A | 2 | -23.606 | -0.541 | 139.077 | 1.00 | 0.00 | N |
| ATOM | 43 | C2'  | G A | 2 | -24.506 | -2.871 | 138.725 | 1.00 | 0.00 | C |
| ATOM | 44 | C3'  | G A | 2 | -25.281 | -3.718 | 139.721 | 1.00 | 0.00 | C |
| ATOM | 45 | O3'  | G A | 2 | -26.646 | -3.788 | 139.313 | 1.00 | 0.00 | O |
| ATOM | 46 | C4'  | G A | 2 | -25.108 | -2.949 | 141.029 | 1.00 | 0.00 | C |
| ATOM | 47 | O4'  | G A | 2 | -25.060 | -1.547 | 140.618 | 1.00 | 0.00 | O |
| ATOM | 48 | C5'  | G A | 2 | -23.868 | -3.262 | 141.831 | 1.00 | 0.00 | C |
| ATOM | 49 | O5'  | G A | 2 | -22.754 | -3.511 | 140.937 | 1.00 | 0.00 | O |
| ATOM | 50 | O1P  | G A | 2 | -22.233 | -5.943 | 141.320 | 1.00 | 0.00 | O |
| ATOM | 51 | O2P  | G A | 2 | -20.427 | -4.379 | 140.554 | 1.00 | 0.00 | O |
| ATOM | 52 | P    | G A | 2 | -21.655 | -4.587 | 141.361 | 1.00 | 0.00 | P |
| ATOM | 53 | H1   | G A | 2 | -23.272 | 4.311  | 137.899 | 1.00 | 0.00 | H |
| ATOM | 54 | H8   | G A | 2 | -21.870 | -1.785 | 139.485 | 1.00 | 0.00 | H |
| ATOM | 55 | H1'  | G A | 2 | -25.624 | -1.016 | 138.738 | 1.00 | 0.00 | H |
| ATOM | 56 | H21  | G A | 2 | -25.440 | 4.567  | 137.701 | 1.00 | 0.00 | H |
| ATOM | 57 | H3'  | G A | 2 | -24.876 | -4.727 | 139.800 | 1.00 | 0.00 | H |
| ATOM | 58 | H22  | G A | 2 | -26.590 | 3.227  | 137.962 | 1.00 | 0.00 | H |
| ATOM | 59 | H4'  | G A | 2 | -25.973 | -3.182 | 141.649 | 1.00 | 0.00 | H |
| ATOM | 60 | H2'1 | G A | 2 | -23.446 | -3.124 | 138.730 | 1.00 | 0.00 | H |
| ATOM | 61 | H2'2 | G A | 2 | -24.873 | -3.015 | 137.708 | 1.00 | 0.00 | H |
| ATOM | 62 | H5'1 | G A | 2 | -23.637 | -2.415 | 142.478 | 1.00 | 0.00 | H |
| ATOM | 63 | H5'2 | G A | 2 | -24.051 | -4.142 | 142.447 | 1.00 | 0.00 | H |
| ATOM | 64 | C1'  | G A | 3 | -27.402 | 0.235  | 135.404 | 1.00 | 0.00 | C |
| ATOM | 65 | N1   | G A | 3 | -23.378 | 3.293  | 134.716 | 1.00 | 0.00 | N |
| ATOM | 66 | C2   | G A | 3 | -24.729 | 3.575  | 134.642 | 1.00 | 0.00 | C |
| ATOM | 67 | N2   | G A | 3 | -25.052 | 4.839  | 134.341 | 1.00 | 0.00 | N |
| ATOM | 68 | N3   | G A | 3 | -25.681 | 2.669  | 134.850 | 1.00 | 0.00 | N |
| ATOM | 69 | C4   | G A | 3 | -25.175 | 1.441  | 135.135 | 1.00 | 0.00 | C |
| ATOM | 70 | C5   | G A | 3 | -23.844 | 1.067  | 135.228 | 1.00 | 0.00 | C |
| ATOM | 71 | C6   | G A | 3 | -22.832 | 2.031  | 135.011 | 1.00 | 0.00 | C |
| ATOM | 72 | O6   | G A | 3 | -21.608 | 1.893  | 135.049 | 1.00 | 0.00 | O |

|      |     |      |     |   |         |        |         |      |      |   |
|------|-----|------|-----|---|---------|--------|---------|------|------|---|
| ATOM | 73  | N7   | G A | 3 | -23.746 | -0.290 | 135.540 | 1.00 | 0.00 | N |
| ATOM | 74  | C8   | G A | 3 | -24.988 | -0.686 | 135.628 | 1.00 | 0.00 | C |
| ATOM | 75  | N9   | G A | 3 | -25.916 | 0.309  | 135.394 | 1.00 | 0.00 | N |
| ATOM | 76  | C2'  | G A | 3 | -27.957 | -1.061 | 134.830 | 1.00 | 0.00 | C |
| ATOM | 77  | C3'  | G A | 3 | -29.174 | -1.302 | 135.707 | 1.00 | 0.00 | C |
| ATOM | 78  | O3'  | G A | 3 | -30.278 | -0.564 | 135.186 | 1.00 | 0.00 | O |
| ATOM | 79  | C4'  | G A | 3 | -28.722 | -0.779 | 137.069 | 1.00 | 0.00 | C |
| ATOM | 80  | O4'  | G A | 3 | -27.830 | 0.335  | 136.750 | 1.00 | 0.00 | O |
| ATOM | 81  | C5'  | G A | 3 | -27.978 | -1.757 | 137.948 | 1.00 | 0.00 | C |
| ATOM | 82  | O5'  | G A | 3 | -27.132 | -2.606 | 137.132 | 1.00 | 0.00 | O |
| ATOM | 83  | O1P  | G A | 3 | -28.155 | -4.889 | 137.411 | 1.00 | 0.00 | O |
| ATOM | 84  | O2P  | G A | 3 | -25.712 | -4.665 | 136.888 | 1.00 | 0.00 | O |
| ATOM | 85  | P    | G A | 3 | -26.906 | -4.121 | 137.580 | 1.00 | 0.00 | P |
| ATOM | 86  | H1   | G A | 3 | -22.720 | 4.068  | 134.542 | 1.00 | 0.00 | H |
| ATOM | 87  | H8   | G A | 3 | -25.269 | -1.712 | 135.864 | 1.00 | 0.00 | H |
| ATOM | 88  | H1'  | G A | 3 | -27.792 | 1.099  | 134.864 | 1.00 | 0.00 | H |
| ATOM | 89  | H21  | G A | 3 | -24.309 | 5.536  | 134.184 | 1.00 | 0.00 | H |
| ATOM | 90  | H3'  | G A | 3 | -29.439 | -2.359 | 135.758 | 1.00 | 0.00 | H |
| ATOM | 91  | H22  | G A | 3 | -26.041 | 5.113  | 134.269 | 1.00 | 0.00 | H |
| ATOM | 92  | H4'  | G A | 3 | -29.619 | -0.468 | 137.602 | 1.00 | 0.00 | H |
| ATOM | 93  | H2'1 | G A | 3 | -27.245 | -1.883 | 134.905 | 1.00 | 0.00 | H |
| ATOM | 94  | H2'2 | G A | 3 | -28.235 | -0.964 | 133.781 | 1.00 | 0.00 | H |
| ATOM | 95  | H5'1 | G A | 3 | -27.368 | -1.205 | 138.662 | 1.00 | 0.00 | H |
| ATOM | 96  | H5'2 | G A | 3 | -28.698 | -2.367 | 138.492 | 1.00 | 0.00 | H |
| ATOM | 97  | C1'  | C A | 4 | -28.171 | 3.158  | 131.480 | 1.00 | 0.00 | C |
| ATOM | 98  | N1   | C A | 4 | -26.918 | 2.358  | 131.593 | 1.00 | 0.00 | N |
| ATOM | 99  | C2   | C A | 4 | -25.706 | 3.023  | 131.436 | 1.00 | 0.00 | C |
| ATOM | 100 | O2   | C A | 4 | -25.715 | 4.239  | 131.208 | 1.00 | 0.00 | O |
| ATOM | 101 | N3   | C A | 4 | -24.555 | 2.312  | 131.535 | 1.00 | 0.00 | N |
| ATOM | 102 | C4   | C A | 4 | -24.578 | 0.996  | 131.781 | 1.00 | 0.00 | C |
| ATOM | 103 | N4   | C A | 4 | -23.424 | 0.352  | 131.871 | 1.00 | 0.00 | N |
| ATOM | 104 | C5   | C A | 4 | -25.813 | 0.289  | 131.945 | 1.00 | 0.00 | C |
| ATOM | 105 | C6   | C A | 4 | -26.957 | 1.023  | 131.844 | 1.00 | 0.00 | C |
| ATOM | 106 | C2'  | C A | 4 | -29.306 | 2.424  | 130.783 | 1.00 | 0.00 | C |
| ATOM | 107 | C3'  | C A | 4 | -30.525 | 2.927  | 131.543 | 1.00 | 0.00 | C |
| ATOM | 108 | O3'  | C A | 4 | -30.944 | 4.171  | 130.983 | 1.00 | 0.00 | O |
| ATOM | 109 | C4'  | C A | 4 | -29.995 | 3.085  | 132.966 | 1.00 | 0.00 | C |
| ATOM | 110 | O4'  | C A | 4 | -28.597 | 3.479  | 132.792 | 1.00 | 0.00 | O |
| ATOM | 111 | C5'  | C A | 4 | -30.043 | 1.853  | 133.839 | 1.00 | 0.00 | C |
| ATOM | 112 | O5'  | C A | 4 | -29.761 | 0.675  | 133.042 | 1.00 | 0.00 | O |
| ATOM | 113 | O1P  | C A | 4 | -31.932 | -0.597 | 133.092 | 1.00 | 0.00 | O |
| ATOM | 114 | O2P  | C A | 4 | -29.767 | -1.825 | 132.781 | 1.00 | 0.00 | O |
| ATOM | 115 | P    | C A | 4 | -30.494 | -0.694 | 133.408 | 1.00 | 0.00 | P |
| ATOM | 116 | H5   | C A | 4 | -25.836 | -0.784 | 132.141 | 1.00 | 0.00 | H |
| ATOM | 117 | H6   | C A | 4 | -27.921 | 0.529  | 131.967 | 1.00 | 0.00 | H |
| ATOM | 118 | H1'  | C A | 4 | -27.934 | 4.088  | 130.968 | 1.00 | 0.00 | H |
| ATOM | 119 | H3'  | C A | 4 | -31.351 | 2.218  | 131.505 | 1.00 | 0.00 | H |
| ATOM | 120 | H4'  | C A | 4 | -30.598 | 3.855  | 133.445 | 1.00 | 0.00 | H |
| ATOM | 121 | H41  | C A | 4 | -23.413 | -0.661 | 132.061 | 1.00 | 0.00 | H |
| ATOM | 122 | H42  | C A | 4 | -22.537 | 0.863  | 131.751 | 1.00 | 0.00 | H |
| ATOM | 123 | H2'1 | C A | 4 | -29.212 | 1.341  | 130.861 | 1.00 | 0.00 | H |
| ATOM | 124 | H2'2 | C A | 4 | -29.370 | 2.671  | 129.722 | 1.00 | 0.00 | H |
| ATOM | 125 | H5'1 | C A | 4 | -29.301 | 1.946  | 134.633 | 1.00 | 0.00 | H |
| ATOM | 126 | H5'2 | C A | 4 | -31.035 | 1.767  | 134.283 | 1.00 | 0.00 | H |

|      |     |      |     |   |         |        |         |      |      |   |
|------|-----|------|-----|---|---------|--------|---------|------|------|---|
| ATOM | 127 | C1'  | C A | 5 | -26.707 | 5.990  | 127.690 | 1.00 | 0.00 | C |
| ATOM | 128 | N1   | C A | 5 | -26.169 | 4.612  | 127.855 | 1.00 | 0.00 | N |
| ATOM | 129 | C2   | C A | 5 | -24.786 | 4.446  | 127.836 | 1.00 | 0.00 | C |
| ATOM | 130 | O2   | C A | 5 | -24.065 | 5.442  | 127.683 | 1.00 | 0.00 | O |
| ATOM | 131 | N3   | C A | 5 | -24.275 | 3.199  | 127.986 | 1.00 | 0.00 | N |
| ATOM | 132 | C4   | C A | 5 | -25.079 | 2.141  | 128.148 | 1.00 | 0.00 | C |
| ATOM | 133 | N4   | C A | 5 | -24.526 | 0.947  | 128.294 | 1.00 | 0.00 | N |
| ATOM | 134 | C5   | C A | 5 | -26.505 | 2.282  | 128.170 | 1.00 | 0.00 | C |
| ATOM | 135 | C6   | C A | 5 | -26.995 | 3.547  | 128.021 | 1.00 | 0.00 | C |
| ATOM | 136 | C2'  | C A | 5 | -27.981 | 6.055  | 126.860 | 1.00 | 0.00 | C |
| ATOM | 137 | C3'  | C A | 5 | -28.752 | 7.172  | 127.549 | 1.00 | 0.00 | C |
| ATOM | 138 | O3'  | C A | 5 | -28.316 | 8.427  | 127.034 | 1.00 | 0.00 | O |
| ATOM | 139 | C4'  | C A | 5 | -28.376 | 6.988  | 129.018 | 1.00 | 0.00 | C |
| ATOM | 140 | O4'  | C A | 5 | -26.999 | 6.496  | 128.980 | 1.00 | 0.00 | O |
| ATOM | 141 | C5'  | C A | 5 | -29.216 | 6.011  | 129.807 | 1.00 | 0.00 | C |
| ATOM | 142 | O5'  | C A | 5 | -29.587 | 4.889  | 128.965 | 1.00 | 0.00 | O |
| ATOM | 143 | O1P  | C A | 5 | -32.087 | 5.119  | 128.764 | 1.00 | 0.00 | O |
| ATOM | 144 | O2P  | C A | 5 | -31.011 | 2.861  | 128.556 | 1.00 | 0.00 | O |
| ATOM | 145 | P    | C A | 5 | -31.010 | 4.203  | 129.188 | 1.00 | 0.00 | P |
| ATOM | 146 | H5   | C A | 5 | -27.163 | 1.423  | 128.297 | 1.00 | 0.00 | H |
| ATOM | 147 | H6   | C A | 5 | -28.074 | 3.705  | 128.035 | 1.00 | 0.00 | H |
| ATOM | 148 | H1'  | C A | 5 | -25.925 | 6.611  | 127.254 | 1.00 | 0.00 | H |
| ATOM | 149 | H3'  | C A | 5 | -29.829 | 7.075  | 127.402 | 1.00 | 0.00 | H |
| ATOM | 150 | H4'  | C A | 5 | -28.468 | 7.965  | 129.491 | 1.00 | 0.00 | H |
| ATOM | 151 | H41  | C A | 5 | -25.122 | 0.115  | 128.422 | 1.00 | 0.00 | H |
| ATOM | 152 | H42  | C A | 5 | -23.500 | 0.847  | 128.277 | 1.00 | 0.00 | H |
| ATOM | 153 | H2'1 | C A | 5 | -28.538 | 5.118  | 126.881 | 1.00 | 0.00 | H |
| ATOM | 154 | H2'2 | C A | 5 | -27.782 | 6.295  | 125.815 | 1.00 | 0.00 | H |
| ATOM | 155 | H5'1 | C A | 5 | -28.641 | 5.654  | 130.662 | 1.00 | 0.00 | H |
| ATOM | 156 | H5'2 | C A | 5 | -30.112 | 6.517  | 130.165 | 1.00 | 0.00 | H |
| ATOM | 157 | C1'  | G A | 6 | -23.503 | 7.450  | 124.209 | 1.00 | 0.00 | C |
| ATOM | 158 | N1   | G A | 6 | -21.747 | 2.678  | 124.623 | 1.00 | 0.00 | N |
| ATOM | 159 | C2   | G A | 6 | -21.056 | 3.873  | 124.515 | 1.00 | 0.00 | C |
| ATOM | 160 | N2   | G A | 6 | -19.721 | 3.783  | 124.516 | 1.00 | 0.00 | N |
| ATOM | 161 | N3   | G A | 6 | -21.652 | 5.059  | 124.415 | 1.00 | 0.00 | N |
| ATOM | 162 | C4   | G A | 6 | -23.006 | 4.961  | 124.423 | 1.00 | 0.00 | C |
| ATOM | 163 | C5   | G A | 6 | -23.779 | 3.817  | 124.524 | 1.00 | 0.00 | C |
| ATOM | 164 | C6   | G A | 6 | -23.149 | 2.555  | 124.634 | 1.00 | 0.00 | C |
| ATOM | 165 | O6   | G A | 6 | -23.657 | 1.440  | 124.731 | 1.00 | 0.00 | O |
| ATOM | 166 | N7   | G A | 6 | -25.136 | 4.146  | 124.493 | 1.00 | 0.00 | N |
| ATOM | 167 | C8   | G A | 6 | -25.142 | 5.449  | 124.381 | 1.00 | 0.00 | C |
| ATOM | 168 | N9   | G A | 6 | -23.886 | 6.017  | 124.332 | 1.00 | 0.00 | N |
| ATOM | 169 | C2'  | G A | 6 | -24.412 | 8.251  | 123.287 | 1.00 | 0.00 | C |
| ATOM | 170 | C3'  | G A | 6 | -24.453 | 9.605  | 123.977 | 1.00 | 0.00 | C |
| ATOM | 171 | O3'  | G A | 6 | -23.319 | 10.370 | 123.573 | 1.00 | 0.00 | O |
| ATOM | 172 | C4'  | G A | 6 | -24.401 | 9.233  | 125.458 | 1.00 | 0.00 | C |
| ATOM | 173 | O4'  | G A | 6 | -23.570 | 8.029  | 125.498 | 1.00 | 0.00 | O |
| ATOM | 174 | C5'  | G A | 6 | -25.722 | 8.929  | 126.120 | 1.00 | 0.00 | C |
| ATOM | 175 | O5'  | G A | 6 | -26.593 | 8.241  | 125.188 | 1.00 | 0.00 | O |
| ATOM | 176 | O1P  | G A | 6 | -28.457 | 9.887  | 124.805 | 1.00 | 0.00 | O |
| ATOM | 177 | O2P  | G A | 6 | -28.883 | 7.428  | 124.548 | 1.00 | 0.00 | O |
| ATOM | 178 | P    | G A | 6 | -28.163 | 8.514  | 125.258 | 1.00 | 0.00 | P |
| ATOM | 179 | H1   | G A | 6 | -21.191 | 1.813  | 124.703 | 1.00 | 0.00 | H |
| ATOM | 180 | H8   | G A | 6 | -26.060 | 6.037  | 124.332 | 1.00 | 0.00 | H |



|      |     |      |     |   |         |        |         |      |      |   |
|------|-----|------|-----|---|---------|--------|---------|------|------|---|
| ATOM | 181 | H1'  | G A | 6 | -22.466 | 7.498  | 123.872 | 1.00 | 0.00 | H |
| ATOM | 182 | H21  | G A | 6 | -19.266 | 2.861  | 124.596 | 1.00 | 0.00 | H |
| ATOM | 183 | H3'  | G A | 6 | -25.362 | 10.156 | 123.742 | 1.00 | 0.00 | H |
| ATOM | 184 | H22  | G A | 6 | -19.148 | 4.636  | 124.435 | 1.00 | 0.00 | H |
| ATOM | 185 | H4'  | G A | 6 | -23.951 | 10.076 | 125.982 | 1.00 | 0.00 | H |
| ATOM | 186 | H2'1 | G A | 6 | -25.409 | 7.815  | 123.209 | 1.00 | 0.00 | H |
| ATOM | 187 | H2'2 | G A | 6 | -24.011 | 8.332  | 122.276 | 1.00 | 0.00 | H |
| ATOM | 188 | H5'1 | G A | 6 | -25.551 | 8.304  | 126.996 | 1.00 | 0.00 | H |
| ATOM | 189 | H5'2 | G A | 6 | -26.187 | 9.863  | 126.437 | 1.00 | 0.00 | H |
| ATOM | 190 | C1'  | C A | 7 | -19.712 | 6.784  | 121.090 | 1.00 | 0.00 | C |
| ATOM | 191 | N1   | C A | 7 | -20.860 | 5.837  | 121.099 | 1.00 | 0.00 | N |
| ATOM | 192 | C2   | C A | 7 | -20.580 | 4.476  | 121.206 | 1.00 | 0.00 | C |
| ATOM | 193 | O2   | C A | 7 | -19.402 | 4.111  | 121.290 | 1.00 | 0.00 | O |
| ATOM | 194 | N3   | C A | 7 | -21.612 | 3.596  | 121.216 | 1.00 | 0.00 | N |
| ATOM | 195 | C4   | C A | 7 | -22.879 | 4.019  | 121.122 | 1.00 | 0.00 | C |
| ATOM | 196 | N4   | C A | 7 | -23.848 | 3.116  | 121.138 | 1.00 | 0.00 | N |
| ATOM | 197 | C5   | C A | 7 | -23.196 | 5.412  | 121.005 | 1.00 | 0.00 | C |
| ATOM | 198 | C6   | C A | 7 | -22.141 | 6.281  | 121.004 | 1.00 | 0.00 | C |
| ATOM | 199 | C2'  | C A | 7 | -19.896 | 7.964  | 120.145 | 1.00 | 0.00 | C |
| ATOM | 200 | C3'  | C A | 7 | -19.220 | 9.090  | 120.910 | 1.00 | 0.00 | C |
| ATOM | 201 | O3'  | C A | 7 | -17.819 | 9.060  | 120.648 | 1.00 | 0.00 | O |
| ATOM | 202 | C4'  | C A | 7 | -19.542 | 8.756  | 122.365 | 1.00 | 0.00 | C |
| ATOM | 203 | O4'  | C A | 7 | -19.566 | 7.294  | 122.403 | 1.00 | 0.00 | O |
| ATOM | 204 | C5'  | C A | 7 | -20.861 | 9.274  | 122.896 | 1.00 | 0.00 | C |
| ATOM | 205 | O5'  | C A | 7 | -21.867 | 9.216  | 121.854 | 1.00 | 0.00 | O |
| ATOM | 206 | O1P  | C A | 7 | -22.394 | 11.638 | 121.415 | 1.00 | 0.00 | O |
| ATOM | 207 | O2P  | C A | 7 | -24.126 | 9.876  | 120.978 | 1.00 | 0.00 | O |
| ATOM | 208 | P    | C A | 7 | -22.990 | 10.345 | 121.807 | 1.00 | 0.00 | P |
| ATOM | 209 | H5   | C A | 7 | -24.226 | 5.762  | 120.922 | 1.00 | 0.00 | H |
| ATOM | 210 | H6   | C A | 7 | -22.332 | 7.352  | 120.924 | 1.00 | 0.00 | H |
| ATOM | 211 | H1'  | C A | 7 | -18.809 | 6.224  | 120.846 | 1.00 | 0.00 | H |
| ATOM | 212 | H3'  | C A | 7 | -19.618 | 10.067 | 120.632 | 1.00 | 0.00 | H |
| ATOM | 213 | H4'  | C A | 7 | -18.747 | 9.188  | 122.973 | 1.00 | 0.00 | H |
| ATOM | 214 | H41  | C A | 7 | -24.832 | 3.414  | 121.070 | 1.00 | 0.00 | H |
| ATOM | 215 | H42  | C A | 7 | -23.621 | 2.114  | 121.219 | 1.00 | 0.00 | H |
| ATOM | 216 | H2'1 | C A | 7 | -20.945 | 8.184  | 119.959 | 1.00 | 0.00 | H |
| ATOM | 217 | H2'2 | C A | 7 | -19.419 | 7.796  | 119.178 | 1.00 | 0.00 | H |
| ATOM | 218 | H5'1 | C A | 7 | -21.171 | 8.662  | 123.743 | 1.00 | 0.00 | H |
| ATOM | 219 | H5'2 | C A | 7 | -20.733 | 10.305 | 123.226 | 1.00 | 0.00 | H |
| ATOM | 220 | C1'  | A A | 8 | -16.701 | 4.065  | 118.255 | 1.00 | 0.00 | C |
| ATOM | 221 | N1   | A A | 8 | -20.688 | 0.835  | 118.114 | 1.00 | 0.00 | N |
| ATOM | 222 | C2   | A A | 8 | -19.382 | 0.644  | 118.261 | 1.00 | 0.00 | C |
| ATOM | 223 | N3   | A A | 8 | -18.403 | 1.523  | 118.291 | 1.00 | 0.00 | N |
| ATOM | 224 | C4   | A A | 8 | -18.894 | 2.768  | 118.139 | 1.00 | 0.00 | C |
| ATOM | 225 | C5   | A A | 8 | -20.202 | 3.133  | 117.978 | 1.00 | 0.00 | C |
| ATOM | 226 | C6   | A A | 8 | -21.147 | 2.088  | 117.966 | 1.00 | 0.00 | C |
| ATOM | 227 | N6   | A A | 8 | -22.467 | 2.294  | 117.817 | 1.00 | 0.00 | N |
| ATOM | 228 | N7   | A A | 8 | -20.325 | 4.506  | 117.853 | 1.00 | 0.00 | N |
| ATOM | 229 | C8   | A A | 8 | -19.100 | 4.939  | 117.938 | 1.00 | 0.00 | C |
| ATOM | 230 | N9   | A A | 8 | -18.178 | 3.940  | 118.114 | 1.00 | 0.00 | N |
| ATOM | 231 | C2'  | A A | 8 | -16.090 | 5.145  | 117.372 | 1.00 | 0.00 | C |
| ATOM | 232 | C3'  | A A | 8 | -14.974 | 5.680  | 118.253 | 1.00 | 0.00 | C |
| ATOM | 233 | O3'  | A A | 8 | -13.821 | 4.857  | 118.098 | 1.00 | 0.00 | O |
| ATOM | 234 | C4'  | A A | 8 | -15.570 | 5.580  | 119.657 | 1.00 | 0.00 | C |

|      |     |      |     |    |         |        |         |      |      |   |
|------|-----|------|-----|----|---------|--------|---------|------|------|---|
| ATOM | 235 | O4'  | A A | 8  | -16.422 | 4.391  | 119.603 | 1.00 | 0.00 | O |
| ATOM | 236 | C5'  | A A | 8  | -16.403 | 6.753  | 120.115 | 1.00 | 0.00 | C |
| ATOM | 237 | O5'  | A A | 8  | -17.159 | 7.286  | 118.998 | 1.00 | 0.00 | O |
| ATOM | 238 | O1P  | A A | 8  | -16.173 | 9.578  | 118.669 | 1.00 | 0.00 | O |
| ATOM | 239 | O2P  | A A | 8  | -18.547 | 9.124  | 117.994 | 1.00 | 0.00 | O |
| ATOM | 240 | P    | A A | 8  | -17.432 | 8.856  | 118.936 | 1.00 | 0.00 | P |
| ATOM | 241 | H2   | A A | 8  | -19.075 | -0.395 | 118.373 | 1.00 | 0.00 | H |
| ATOM | 242 | H8   | A A | 8  | -18.832 | 5.993  | 117.874 | 1.00 | 0.00 | H |
| ATOM | 243 | H1'  | A A | 8  | -16.255 | 3.092  | 118.047 | 1.00 | 0.00 | H |
| ATOM | 244 | H3'  | A A | 8  | -14.717 | 6.710  | 118.007 | 1.00 | 0.00 | H |
| ATOM | 245 | H4'  | A A | 8  | -14.735 | 5.475  | 120.348 | 1.00 | 0.00 | H |
| ATOM | 246 | H61  | A A | 8  | -23.117 | 1.496  | 117.817 | 1.00 | 0.00 | H |
| ATOM | 247 | H62  | A A | 8  | -22.827 | 3.253  | 117.700 | 1.00 | 0.00 | H |
| ATOM | 248 | H2'1 | A A | 8  | -16.805 | 5.926  | 117.119 | 1.00 | 0.00 | H |
| ATOM | 249 | H2'2 | A A | 8  | -15.700 | 4.742  | 116.437 | 1.00 | 0.00 | H |
| ATOM | 250 | H5'1 | A A | 8  | -17.086 | 6.421  | 120.897 | 1.00 | 0.00 | H |
| ATOM | 251 | H5'2 | A A | 8  | -15.747 | 7.525  | 120.517 | 1.00 | 0.00 | H |
| ATOM | 252 | C1'  | C A | 9  | -15.587 | 0.078  | 115.510 | 1.00 | 0.00 | C |
| ATOM | 253 | N1   | C A | 9  | -16.830 | 0.854  | 115.243 | 1.00 | 0.00 | N |
| ATOM | 254 | C2   | C A | 9  | -18.034 | 0.154  | 115.169 | 1.00 | 0.00 | C |
| ATOM | 255 | O2   | C A | 9  | -18.020 | -1.073 | 115.324 | 1.00 | 0.00 | O |
| ATOM | 256 | N3   | C A | 9  | -19.175 | 0.841  | 114.926 | 1.00 | 0.00 | N |
| ATOM | 257 | C4   | C A | 9  | -19.158 | 2.170  | 114.759 | 1.00 | 0.00 | C |
| ATOM | 258 | N4   | C A | 9  | -20.305 | 2.793  | 114.528 | 1.00 | 0.00 | N |
| ATOM | 259 | C5   | C A | 9  | -17.935 | 2.916  | 114.827 | 1.00 | 0.00 | C |
| ATOM | 260 | C6   | C A | 9  | -16.797 | 2.204  | 115.077 | 1.00 | 0.00 | C |
| ATOM | 261 | C2'  | C A | 9  | -14.373 | 0.585  | 114.745 | 1.00 | 0.00 | C |
| ATOM | 262 | C3'  | C A | 9  | -13.250 | 0.355  | 115.747 | 1.00 | 0.00 | C |
| ATOM | 263 | O3'  | C A | 9  | -12.795 | -0.991 | 115.640 | 1.00 | 0.00 | O |
| ATOM | 264 | C4'  | C A | 9  | -13.928 | 0.630  | 117.086 | 1.00 | 0.00 | C |
| ATOM | 265 | O4'  | C A | 9  | -15.307 | 0.180  | 116.894 | 1.00 | 0.00 | O |
| ATOM | 266 | C5'  | C A | 9  | -13.951 | 2.071  | 117.543 | 1.00 | 0.00 | C |
| ATOM | 267 | O5'  | C A | 9  | -14.129 | 2.945  | 116.398 | 1.00 | 0.00 | O |
| ATOM | 268 | O1P  | C A | 9  | -11.955 | 4.208  | 116.287 | 1.00 | 0.00 | O |
| ATOM | 269 | O2P  | C A | 9  | -14.056 | 5.248  | 115.393 | 1.00 | 0.00 | O |
| ATOM | 270 | P    | C A | 9  | -13.417 | 4.372  | 116.406 | 1.00 | 0.00 | P |
| ATOM | 271 | H5   | C A | 9  | -17.915 | 3.997  | 114.686 | 1.00 | 0.00 | H |
| ATOM | 272 | H6   | C A | 9  | -15.843 | 2.727  | 115.146 | 1.00 | 0.00 | H |
| ATOM | 273 | H1'  | C A | 9  | -15.785 | -0.969 | 115.284 | 1.00 | 0.00 | H |
| ATOM | 274 | H3'  | C A | 9  | -12.413 | 1.034  | 115.582 | 1.00 | 0.00 | H |
| ATOM | 275 | H4'  | C A | 9  | -13.392 | 0.053  | 117.838 | 1.00 | 0.00 | H |
| ATOM | 276 | H41  | C A | 9  | -20.319 | 3.815  | 114.399 | 1.00 | 0.00 | H |
| ATOM | 277 | H42  | C A | 9  | -21.182 | 2.254  | 114.477 | 1.00 | 0.00 | H |
| ATOM | 278 | H2'1 | C A | 9  | -14.458 | 1.637  | 114.480 | 1.00 | 0.00 | H |
| ATOM | 279 | H2'2 | C A | 9  | -14.204 | 0.027  | 113.823 | 1.00 | 0.00 | H |
| ATOM | 280 | H5'1 | C A | 9  | -14.774 | 2.212  | 118.246 | 1.00 | 0.00 | H |
| ATOM | 281 | H5'2 | C A | 9  | -13.012 | 2.304  | 118.042 | 1.00 | 0.00 | H |
| ATOM | 282 | C1'  | C A | 10 | -16.692 | -3.797 | 112.631 | 1.00 | 0.00 | C |
| ATOM | 283 | N1   | C A | 10 | -17.222 | -2.443 | 112.312 | 1.00 | 0.00 | N |
| ATOM | 284 | C2   | C A | 10 | -18.593 | -2.314 | 112.098 | 1.00 | 0.00 | C |
| ATOM | 285 | O2   | C A | 10 | -19.310 | -3.320 | 112.180 | 1.00 | 0.00 | O |
| ATOM | 286 | N3   | C A | 10 | -19.096 | -1.090 | 111.806 | 1.00 | 0.00 | N |
| ATOM | 287 | C4   | C A | 10 | -18.297 | -0.017 | 111.722 | 1.00 | 0.00 | C |
| ATOM | 288 | N4   | C A | 10 | -18.843 | 1.156  | 111.437 | 1.00 | 0.00 | N |

|      |     |      |     |    |         |        |         |      |      |   |
|------|-----|------|-----|----|---------|--------|---------|------|------|---|
| ATOM | 289 | C5   | C A | 10 | -16.882 | -0.122 | 111.933 | 1.00 | 0.00 | C |
| ATOM | 290 | C6   | C A | 10 | -16.398 | -1.364 | 112.231 | 1.00 | 0.00 | C |
| ATOM | 291 | C2'  | C A | 10 | -15.339 | -4.090 | 111.998 | 1.00 | 0.00 | C |
| ATOM | 292 | C3'  | C A | 10 | -14.664 | -4.931 | 113.072 | 1.00 | 0.00 | C |
| ATOM | 293 | O3'  | C A | 10 | -15.064 | -6.290 | 112.920 | 1.00 | 0.00 | O |
| ATOM | 294 | C4'  | C A | 10 | -15.188 | -4.315 | 114.366 | 1.00 | 0.00 | C |
| ATOM | 295 | O4'  | C A | 10 | -16.546 | -3.881 | 114.036 | 1.00 | 0.00 | O |
| ATOM | 296 | C5'  | C A | 10 | -14.421 | -3.129 | 114.905 | 1.00 | 0.00 | C |
| ATOM | 297 | O5'  | C A | 10 | -13.943 | -2.314 | 113.806 | 1.00 | 0.00 | O |
| ATOM | 298 | O1P  | C A | 10 | -11.441 | -2.551 | 113.946 | 1.00 | 0.00 | O |
| ATOM | 299 | O2P  | C A | 10 | -12.452 | -0.482 | 112.950 | 1.00 | 0.00 | O |
| ATOM | 300 | P    | C A | 10 | -12.542 | -1.567 | 113.956 | 1.00 | 0.00 | P |
| ATOM | 301 | H5   | C A | 10 | -16.226 | 0.747  | 111.861 | 1.00 | 0.00 | H |
| ATOM | 302 | H6   | C A | 10 | -15.331 | -1.492 | 112.408 | 1.00 | 0.00 | H |
| ATOM | 303 | H1'  | C A | 10 | -17.434 | -4.533 | 112.326 | 1.00 | 0.00 | H |
| ATOM | 304 | H3'  | C A | 10 | -13.576 | -4.866 | 113.016 | 1.00 | 0.00 | H |
| ATOM | 305 | H4'  | C A | 10 | -15.162 | -5.099 | 115.122 | 1.00 | 0.00 | H |
| ATOM | 306 | H41  | C A | 10 | -18.250 | 1.996  | 111.368 | 1.00 | 0.00 | H |
| ATOM | 307 | H42  | C A | 10 | -19.859 | 1.228  | 111.283 | 1.00 | 0.00 | H |
| ATOM | 308 | H2'1 | C A | 10 | -14.772 | -3.182 | 111.792 | 1.00 | 0.00 | H |
| ATOM | 309 | H2'2 | C A | 10 | -15.431 | -4.641 | 111.061 | 1.00 | 0.00 | H |
| ATOM | 310 | H5'1 | C A | 10 | -15.076 | -2.539 | 115.546 | 1.00 | 0.00 | H |
| ATOM | 311 | H5'2 | C A | 10 | -13.576 | -3.488 | 115.491 | 1.00 | 0.00 | H |
| ATOM | 312 | C1'  | T A | 11 | -19.523 | -6.319 | 109.449 | 1.00 | 0.00 | C |
| ATOM | 313 | N1   | T A | 11 | -19.159 | -4.905 | 109.165 | 1.00 | 0.00 | N |
| ATOM | 314 | C2   | T A | 11 | -20.188 | -4.040 | 108.854 | 1.00 | 0.00 | C |
| ATOM | 315 | O2   | T A | 11 | -21.356 | -4.392 | 108.805 | 1.00 | 0.00 | O |
| ATOM | 316 | N3   | T A | 11 | -19.808 | -2.735 | 108.598 | 1.00 | 0.00 | N |
| ATOM | 317 | C4   | T A | 11 | -18.521 | -2.236 | 108.623 | 1.00 | 0.00 | C |
| ATOM | 318 | O4   | T A | 11 | -18.300 | -1.045 | 108.372 | 1.00 | 0.00 | O |
| ATOM | 319 | C5   | T A | 11 | -17.513 | -3.215 | 108.958 | 1.00 | 0.00 | C |
| ATOM | 320 | C6   | T A | 11 | -17.849 | -4.494 | 109.213 | 1.00 | 0.00 | C |
| ATOM | 321 | C7   | T A | 11 | -16.101 | -2.714 | 108.999 | 1.00 | 0.00 | C |
| ATOM | 322 | C2'  | T A | 11 | -18.518 | -7.331 | 108.912 | 1.00 | 0.00 | C |
| ATOM | 323 | C3'  | T A | 11 | -18.547 | -8.407 | 109.985 | 1.00 | 0.00 | C |
| ATOM | 324 | O3'  | T A | 11 | -19.630 | -9.299 | 109.725 | 1.00 | 0.00 | O |
| ATOM | 325 | C4'  | T A | 11 | -18.755 | -7.604 | 111.266 | 1.00 | 0.00 | C |
| ATOM | 326 | O4'  | T A | 11 | -19.590 | -6.475 | 110.853 | 1.00 | 0.00 | O |
| ATOM | 327 | C5'  | T A | 11 | -17.511 | -7.067 | 111.933 | 1.00 | 0.00 | C |
| ATOM | 328 | O5'  | T A | 11 | -16.550 | -6.665 | 110.925 | 1.00 | 0.00 | O |
| ATOM | 329 | O1P  | T A | 11 | -14.651 | -8.283 | 111.252 | 1.00 | 0.00 | O |
| ATOM | 330 | O2P  | T A | 11 | -14.208 | -6.007 | 110.296 | 1.00 | 0.00 | O |
| ATOM | 331 | P    | T A | 11 | -14.996 | -6.850 | 111.229 | 1.00 | 0.00 | P |
| ATOM | 332 | H3   | T A | 11 | -20.557 | -2.070 | 108.367 | 1.00 | 0.00 | H |
| ATOM | 333 | H6   | T A | 11 | -17.072 | -5.216 | 109.465 | 1.00 | 0.00 | H |
| ATOM | 334 | H1'  | T A | 11 | -20.518 | -6.504 | 109.043 | 1.00 | 0.00 | H |
| ATOM | 335 | H3'  | T A | 11 | -17.616 | -8.972 | 110.022 | 1.00 | 0.00 | H |
| ATOM | 336 | H4'  | T A | 11 | -19.255 | -8.263 | 111.977 | 1.00 | 0.00 | H |
| ATOM | 337 | H71  | T A | 11 | -15.523 | -3.189 | 108.205 | 1.00 | 0.00 | H |
| ATOM | 338 | H72  | T A | 11 | -16.094 | -1.633 | 108.856 | 1.00 | 0.00 | H |
| ATOM | 339 | H73  | T A | 11 | -15.656 | -2.955 | 109.966 | 1.00 | 0.00 | H |
| ATOM | 340 | H2'1 | T A | 11 | -17.521 | -6.905 | 108.804 | 1.00 | 0.00 | H |
| ATOM | 341 | H2'2 | T A | 11 | -18.811 | -7.729 | 107.941 | 1.00 | 0.00 | H |
| ATOM | 342 | H5'1 | T A | 11 | -17.777 | -6.210 | 112.552 | 1.00 | 0.00 | H |

|      |     |      |   |   |    |         |         |         |      |      |   |
|------|-----|------|---|---|----|---------|---------|---------|------|------|---|
| ATOM | 343 | H5'2 | T | A | 11 | -17.080 | -7.844  | 112.564 | 1.00 | 0.00 | H |
| ATOM | 344 | C1'  | A | A | 12 | -22.968 | -6.700  | 105.897 | 1.00 | 0.00 | C |
| ATOM | 345 | N1   | A | A | 12 | -21.560 | -1.891  | 104.790 | 1.00 | 0.00 | N |
| ATOM | 346 | C2   | A | A | 12 | -22.747 | -2.485  | 104.866 | 1.00 | 0.00 | C |
| ATOM | 347 | N3   | A | A | 12 | -23.041 | -3.734  | 105.160 | 1.00 | 0.00 | N |
| ATOM | 348 | C4   | A | A | 12 | -21.916 | -4.432  | 105.399 | 1.00 | 0.00 | C |
| ATOM | 349 | C5   | A | A | 12 | -20.629 | -3.975  | 105.362 | 1.00 | 0.00 | C |
| ATOM | 350 | C6   | A | A | 12 | -20.456 | -2.612  | 105.036 | 1.00 | 0.00 | C |
| ATOM | 351 | N6   | A | A | 12 | -19.251 | -2.024  | 104.961 | 1.00 | 0.00 | N |
| ATOM | 352 | N7   | A | A | 12 | -19.732 | -4.982  | 105.666 | 1.00 | 0.00 | N |
| ATOM | 353 | C8   | A | A | 12 | -20.485 | -6.021  | 105.873 | 1.00 | 0.00 | C |
| ATOM | 354 | N9   | A | A | 12 | -21.825 | -5.762  | 105.731 | 1.00 | 0.00 | N |
| ATOM | 355 | C2'  | A | A | 12 | -22.685 | -8.106  | 105.384 | 1.00 | 0.00 | C |
| ATOM | 356 | C3'  | A | A | 12 | -23.443 | -8.966  | 106.384 | 1.00 | 0.00 | C |
| ATOM | 357 | O3'  | A | A | 12 | -24.807 | -9.059  | 105.979 | 1.00 | 0.00 | O |
| ATOM | 358 | C4'  | A | A | 12 | -23.280 | -8.192  | 107.692 | 1.00 | 0.00 | C |
| ATOM | 359 | O4'  | A | A | 12 | -23.257 | -6.789  | 107.278 | 1.00 | 0.00 | O |
| ATOM | 360 | C5'  | A | A | 12 | -22.034 | -8.483  | 108.491 | 1.00 | 0.00 | C |
| ATOM | 361 | O5'  | A | A | 12 | -20.917 | -8.714  | 107.595 | 1.00 | 0.00 | O |
| ATOM | 362 | O1P  | A | A | 12 | -20.353 | -11.137 | 107.980 | 1.00 | 0.00 | O |
| ATOM | 363 | O2P  | A | A | 12 | -18.577 | -9.542  | 107.208 | 1.00 | 0.00 | O |
| ATOM | 364 | P    | A | A | 12 | -19.800 | -9.770  | 108.017 | 1.00 | 0.00 | P |
| ATOM | 365 | H2   | A | A | 12 | -23.603 | -1.845  | 104.651 | 1.00 | 0.00 | H |
| ATOM | 366 | H8   | A | A | 12 | -20.093 | -7.004  | 106.136 | 1.00 | 0.00 | H |
| ATOM | 367 | H1'  | A | A | 12 | -23.837 | -6.272  | 105.399 | 1.00 | 0.00 | H |
| ATOM | 368 | H3'  | A | A | 12 | -23.021 | -9.968  | 106.465 | 1.00 | 0.00 | H |
| ATOM | 369 | H4'  | A | A | 12 | -24.140 | -8.440  | 108.314 | 1.00 | 0.00 | H |
| ATOM | 370 | H61  | A | A | 12 | -19.180 | -1.025  | 104.720 | 1.00 | 0.00 | H |
| ATOM | 371 | H62  | A | A | 12 | -18.398 | -2.572  | 105.146 | 1.00 | 0.00 | H |
| ATOM | 372 | H2'1 | A | A | 12 | -21.621 | -8.342  | 105.388 | 1.00 | 0.00 | H |
| ATOM | 373 | H2'2 | A | A | 12 | -23.051 | -8.260  | 104.370 | 1.00 | 0.00 | H |
| ATOM | 374 | H5'1 | A | A | 12 | -21.817 | -7.631  | 109.136 | 1.00 | 0.00 | H |
| ATOM | 375 | H5'2 | A | A | 12 | -22.200 | -9.365  | 109.106 | 1.00 | 0.00 | H |
| ATOM | 376 | C1'  | G | A | 13 | -25.605 | -4.981  | 102.058 | 1.00 | 0.00 | C |
| ATOM | 377 | N1   | G | A | 13 | -21.581 | -1.923  | 101.371 | 1.00 | 0.00 | N |
| ATOM | 378 | C2   | G | A | 13 | -22.932 | -1.641  | 101.296 | 1.00 | 0.00 | C |
| ATOM | 379 | N2   | G | A | 13 | -23.255 | -0.376  | 100.994 | 1.00 | 0.00 | N |
| ATOM | 380 | N3   | G | A | 13 | -23.885 | -2.547  | 101.503 | 1.00 | 0.00 | N |
| ATOM | 381 | C4   | G | A | 13 | -23.377 | -3.775  | 101.788 | 1.00 | 0.00 | C |
| ATOM | 382 | C5   | G | A | 13 | -22.047 | -4.150  | 101.881 | 1.00 | 0.00 | C |
| ATOM | 383 | C6   | G | A | 13 | -21.035 | -3.186  | 101.665 | 1.00 | 0.00 | C |
| ATOM | 384 | O6   | G | A | 13 | -19.811 | -3.325  | 101.701 | 1.00 | 0.00 | O |
| ATOM | 385 | N7   | G | A | 13 | -21.948 | -5.506  | 102.193 | 1.00 | 0.00 | N |
| ATOM | 386 | C8   | G | A | 13 | -23.191 | -5.903  | 102.280 | 1.00 | 0.00 | C |
| ATOM | 387 | N9   | G | A | 13 | -24.119 | -4.907  | 102.048 | 1.00 | 0.00 | N |
| ATOM | 388 | C2'  | G | A | 13 | -26.159 | -6.277  | 101.483 | 1.00 | 0.00 | C |
| ATOM | 389 | C3'  | G | A | 13 | -27.377 | -6.518  | 102.360 | 1.00 | 0.00 | C |
| ATOM | 390 | O3'  | G | A | 13 | -28.481 | -5.780  | 101.840 | 1.00 | 0.00 | O |
| ATOM | 391 | C4'  | G | A | 13 | -26.923 | -5.996  | 103.722 | 1.00 | 0.00 | C |
| ATOM | 392 | O4'  | G | A | 13 | -26.032 | -4.881  | 103.402 | 1.00 | 0.00 | O |
| ATOM | 393 | C5'  | G | A | 13 | -26.181 | -6.974  | 104.601 | 1.00 | 0.00 | C |
| ATOM | 394 | O5'  | G | A | 13 | -25.334 | -7.821  | 103.787 | 1.00 | 0.00 | O |
| ATOM | 395 | O1P  | G | A | 13 | -26.356 | -10.105 | 104.065 | 1.00 | 0.00 | O |
| ATOM | 396 | O2P  | G | A | 13 | -23.914 | -9.880  | 103.541 | 1.00 | 0.00 | O |

|      |     |      |     |    |         |        |         |      |      |   |
|------|-----|------|-----|----|---------|--------|---------|------|------|---|
| ATOM | 397 | P    | G A | 13 | -25.109 | -9.337 | 104.233 | 1.00 | 0.00 | P |
| ATOM | 398 | H1   | G A | 13 | -20.922 | -1.147 | 101.198 | 1.00 | 0.00 | H |
| ATOM | 399 | H8   | G A | 13 | -23.473 | -6.928 | 102.518 | 1.00 | 0.00 | H |
| ATOM | 400 | H1'  | G A | 13 | -25.993 | -4.116 | 101.518 | 1.00 | 0.00 | H |
| ATOM | 401 | H21  | G A | 13 | -22.512 | 0.321  | 100.837 | 1.00 | 0.00 | H |
| ATOM | 402 | H3'  | G A | 13 | -27.641 | -7.574 | 102.411 | 1.00 | 0.00 | H |
| ATOM | 403 | H22  | G A | 13 | -24.244 | -0.103 | 100.920 | 1.00 | 0.00 | H |
| ATOM | 404 | H4'  | G A | 13 | -27.821 | -5.683 | 104.256 | 1.00 | 0.00 | H |
| ATOM | 405 | H2'1 | G A | 13 | -25.448 | -7.100 | 101.558 | 1.00 | 0.00 | H |
| ATOM | 406 | H2'2 | G A | 13 | -26.437 | -6.179 | 100.434 | 1.00 | 0.00 | H |
| ATOM | 407 | H5'1 | G A | 13 | -25.571 | -6.420 | 105.315 | 1.00 | 0.00 | H |
| ATOM | 408 | H5'2 | G A | 13 | -26.900 | -7.584 | 105.146 | 1.00 | 0.00 | H |
| ATOM | 409 | C1'  | G A | 14 | -26.373 | -2.058 | 98.133  | 1.00 | 0.00 | C |
| ATOM | 410 | N1   | G A | 14 | -21.276 | -1.910 | 97.959  | 1.00 | 0.00 | N |
| ATOM | 411 | C2   | G A | 14 | -22.200 | -0.894 | 97.792  | 1.00 | 0.00 | C |
| ATOM | 412 | N2   | G A | 14 | -21.701 | 0.323  | 97.542  | 1.00 | 0.00 | N |
| ATOM | 413 | N3   | G A | 14 | -23.518 | -1.078 | 97.867  | 1.00 | 0.00 | N |
| ATOM | 414 | C4   | G A | 14 | -23.844 | -2.371 | 98.118  | 1.00 | 0.00 | C |
| ATOM | 415 | C5   | G A | 14 | -22.993 | -3.450 | 98.294  | 1.00 | 0.00 | C |
| ATOM | 416 | C6   | G A | 14 | -21.596 | -3.256 | 98.220  | 1.00 | 0.00 | C |
| ATOM | 417 | O6   | G A | 14 | -20.689 | -4.078 | 98.345  | 1.00 | 0.00 | O |
| ATOM | 418 | N7   | G A | 14 | -23.732 | -4.613 | 98.532  | 1.00 | 0.00 | N |
| ATOM | 419 | C8   | G A | 14 | -24.975 | -4.212 | 98.495  | 1.00 | 0.00 | C |
| ATOM | 420 | N9   | G A | 14 | -25.124 | -2.863 | 98.247  | 1.00 | 0.00 | N |
| ATOM | 421 | C2'  | G A | 14 | -27.513 | -2.791 | 97.440  | 1.00 | 0.00 | C |
| ATOM | 422 | C3'  | G A | 14 | -28.728 | -2.280 | 98.198  | 1.00 | 0.00 | C |
| ATOM | 423 | O3'  | G A | 14 | -29.142 | -1.038 | 97.636  | 1.00 | 0.00 | O |
| ATOM | 424 | C4'  | G A | 14 | -28.196 | -2.122 | 99.623  | 1.00 | 0.00 | C |
| ATOM | 425 | O4'  | G A | 14 | -26.796 | -1.733 | 99.443  | 1.00 | 0.00 | O |
| ATOM | 426 | C5'  | G A | 14 | -28.247 | -3.352 | 100.498 | 1.00 | 0.00 | C |
| ATOM | 427 | O5'  | G A | 14 | -27.972 | -4.531 | 99.704  | 1.00 | 0.00 | O |
| ATOM | 428 | O1P  | G A | 14 | -30.147 | -5.795 | 99.760  | 1.00 | 0.00 | O |
| ATOM | 429 | O2P  | G A | 14 | -27.987 | -7.032 | 99.451  | 1.00 | 0.00 | O |
| ATOM | 430 | P    | G A | 14 | -28.709 | -5.895 | 100.074 | 1.00 | 0.00 | P |
| ATOM | 431 | H1   | G A | 14 | -20.277 | -1.660 | 97.888  | 1.00 | 0.00 | H |
| ATOM | 432 | H8   | G A | 14 | -25.819 | -4.885 | 98.646  | 1.00 | 0.00 | H |
| ATOM | 433 | H1'  | G A | 14 | -26.133 | -1.129 | 97.617  | 1.00 | 0.00 | H |
| ATOM | 434 | H21  | G A | 14 | -20.680 | 0.457  | 97.490  | 1.00 | 0.00 | H |
| ATOM | 435 | H3'  | G A | 14 | -29.557 | -2.987 | 98.165  | 1.00 | 0.00 | H |
| ATOM | 436 | H22  | G A | 14 | -22.336 | 1.121  | 97.406  | 1.00 | 0.00 | H |
| ATOM | 437 | H4'  | G A | 14 | -28.794 | -1.347 | 100.100 | 1.00 | 0.00 | H |
| ATOM | 438 | H2'1 | G A | 14 | -27.421 | -3.874 | 97.521  | 1.00 | 0.00 | H |
| ATOM | 439 | H2'2 | G A | 14 | -27.577 | -2.547 | 96.378  | 1.00 | 0.00 | H |
| ATOM | 440 | H5'1 | G A | 14 | -27.505 | -3.257 | 101.290 | 1.00 | 0.00 | H |
| ATOM | 441 | H5'2 | G A | 14 | -29.239 | -3.430 | 100.944 | 1.00 | 0.00 | H |
| ATOM | 442 | C1'  | A A | 15 | -24.933 | 0.780  | 94.343  | 1.00 | 0.00 | C |
| ATOM | 443 | N1   | A A | 15 | -20.663 | -2.056 | 94.587  | 1.00 | 0.00 | N |
| ATOM | 444 | C2   | A A | 15 | -20.867 | -0.753 | 94.418  | 1.00 | 0.00 | C |
| ATOM | 445 | N3   | A A | 15 | -21.999 | -0.084 | 94.368  | 1.00 | 0.00 | N |
| ATOM | 446 | C4   | A A | 15 | -23.042 | -0.922 | 94.512  | 1.00 | 0.00 | C |
| ATOM | 447 | C5   | A A | 15 | -23.003 | -2.276 | 94.691  | 1.00 | 0.00 | C |
| ATOM | 448 | C6   | A A | 15 | -21.723 | -2.867 | 94.729  | 1.00 | 0.00 | C |
| ATOM | 449 | N6   | A A | 15 | -21.527 | -4.186 | 94.898  | 1.00 | 0.00 | N |
| ATOM | 450 | N7   | A A | 15 | -24.277 | -2.804 | 94.802  | 1.00 | 0.00 | N |

|      |     |      |     |    |         |        |        |      |      |   |
|------|-----|------|-----|----|---------|--------|--------|------|------|---|
| ATOM | 451 | C8   | A A | 15 | -25.054 | -1.767 | 94.684 | 1.00 | 0.00 | C |
| ATOM | 452 | N9   | A A | 15 | -24.375 | -0.589 | 94.507 | 1.00 | 0.00 | N |
| ATOM | 453 | C2'  | A A | 15 | -26.213 | 0.828  | 93.520 | 1.00 | 0.00 | C |
| ATOM | 454 | C3'  | A A | 15 | -26.994 | 1.935  | 94.210 | 1.00 | 0.00 | C |
| ATOM | 455 | O3'  | A A | 15 | -26.576 | 3.193  | 93.690 | 1.00 | 0.00 | O |
| ATOM | 456 | C4'  | A A | 15 | -26.608 | 1.760  | 95.678 | 1.00 | 0.00 | C |
| ATOM | 457 | O4'  | A A | 15 | -25.224 | 1.285  | 95.632 | 1.00 | 0.00 | O |
| ATOM | 458 | C5'  | A A | 15 | -27.430 | 0.775  | 96.475 | 1.00 | 0.00 | C |
| ATOM | 459 | O5'  | A A | 15 | -27.792 | -0.353 | 95.638 | 1.00 | 0.00 | O |
| ATOM | 460 | O1P  | A A | 15 | -30.294 | -0.159 | 95.450 | 1.00 | 0.00 | O |
| ATOM | 461 | O2P  | A A | 15 | -29.192 | -2.402 | 95.241 | 1.00 | 0.00 | O |
| ATOM | 462 | P    | A A | 15 | -29.202 | -1.059 | 95.870 | 1.00 | 0.00 | P |
| ATOM | 463 | H2   | A A | 15 | -19.965 | -0.151 | 94.306 | 1.00 | 0.00 | H |
| ATOM | 464 | H8   | A A | 15 | -26.141 | -1.828 | 94.722 | 1.00 | 0.00 | H |
| ATOM | 465 | H1'  | A A | 15 | -24.162 | 1.411  | 93.902 | 1.00 | 0.00 | H |
| ATOM | 466 | H3'  | A A | 15 | -28.070 | 1.825  | 94.070 | 1.00 | 0.00 | H |
| ATOM | 467 | H4'  | A A | 15 | -26.707 | 2.736  | 96.149 | 1.00 | 0.00 | H |
| ATOM | 468 | H61  | A A | 15 | -20.571 | -4.565 | 94.921 | 1.00 | 0.00 | H |
| ATOM | 469 | H62  | A A | 15 | -22.337 | -4.815 | 95.006 | 1.00 | 0.00 | H |
| ATOM | 470 | H2'1 | A A | 15 | -26.756 | -0.118 | 93.546 | 1.00 | 0.00 | H |
| ATOM | 471 | H2'2 | A A | 15 | -26.024 | 1.067  | 92.473 | 1.00 | 0.00 | H |
| ATOM | 472 | H5'1 | A A | 15 | -26.845 | 0.428  | 97.326 | 1.00 | 0.00 | H |
| ATOM | 473 | H5'2 | A A | 15 | -28.331 | 1.269  | 96.835 | 1.00 | 0.00 | H |
| ATOM | 474 | C1'  | C A | 16 | -21.703 | 2.235  | 90.861 | 1.00 | 0.00 | C |
| ATOM | 475 | N1   | C A | 16 | -22.081 | 0.800  | 90.986 | 1.00 | 0.00 | N |
| ATOM | 476 | C2   | C A | 16 | -21.057 | -0.140 | 91.069 | 1.00 | 0.00 | C |
| ATOM | 477 | O2   | C A | 16 | -19.883 | 0.253  | 91.034 | 1.00 | 0.00 | O |
| ATOM | 478 | N3   | C A | 16 | -21.378 | -1.452 | 91.183 | 1.00 | 0.00 | N |
| ATOM | 479 | C4   | C A | 16 | -22.658 | -1.845 | 91.217 | 1.00 | 0.00 | C |
| ATOM | 480 | N4   | C A | 16 | -22.915 | -3.139 | 91.333 | 1.00 | 0.00 | N |
| ATOM | 481 | C5   | C A | 16 | -23.734 | -0.902 | 91.130 | 1.00 | 0.00 | C |
| ATOM | 482 | C6   | C A | 16 | -23.386 | 0.415  | 91.019 | 1.00 | 0.00 | C |
| ATOM | 483 | C2'  | C A | 16 | -22.614 | 3.030  | 89.936 | 1.00 | 0.00 | C |
| ATOM | 484 | C3'  | C A | 16 | -22.661 | 4.386  | 90.627 | 1.00 | 0.00 | C |
| ATOM | 485 | O3'  | C A | 16 | -21.532 | 5.155  | 90.225 | 1.00 | 0.00 | O |
| ATOM | 486 | C4'  | C A | 16 | -22.612 | 4.013  | 92.108 | 1.00 | 0.00 | C |
| ATOM | 487 | O4'  | C A | 16 | -21.777 | 2.812  | 92.152 | 1.00 | 0.00 | O |
| ATOM | 488 | C5'  | C A | 16 | -23.937 | 3.705  | 92.767 | 1.00 | 0.00 | C |
| ATOM | 489 | O5'  | C A | 16 | -24.800 | 3.013  | 91.831 | 1.00 | 0.00 | O |
| ATOM | 490 | O1P  | C A | 16 | -26.671 | 4.651  | 91.443 | 1.00 | 0.00 | O |
| ATOM | 491 | O2P  | C A | 16 | -27.085 | 2.191  | 91.187 | 1.00 | 0.00 | O |
| ATOM | 492 | P    | C A | 16 | -26.371 | 3.279  | 91.896 | 1.00 | 0.00 | P |
| ATOM | 493 | H5   | C A | 16 | -24.777 | -1.218 | 91.150 | 1.00 | 0.00 | H |
| ATOM | 494 | H6   | C A | 16 | -24.169 | 1.172  | 90.959 | 1.00 | 0.00 | H |
| ATOM | 495 | H1'  | C A | 16 | -20.666 | 2.287  | 90.529 | 1.00 | 0.00 | H |
| ATOM | 496 | H3'  | C A | 16 | -23.575 | 4.932  | 90.388 | 1.00 | 0.00 | H |
| ATOM | 497 | H4'  | C A | 16 | -22.169 | 4.861  | 92.631 | 1.00 | 0.00 | H |
| ATOM | 498 | H41  | C A | 16 | -23.892 | -3.468 | 91.364 | 1.00 | 0.00 | H |
| ATOM | 499 | H42  | C A | 16 | -22.142 | -3.816 | 91.393 | 1.00 | 0.00 | H |
| ATOM | 500 | H2'1 | C A | 16 | -23.609 | 2.591  | 89.856 | 1.00 | 0.00 | H |
| ATOM | 501 | H2'2 | C A | 16 | -22.210 | 3.113  | 88.927 | 1.00 | 0.00 | H |
| ATOM | 502 | H5'1 | C A | 16 | -23.762 | 3.080  | 93.642 | 1.00 | 0.00 | H |
| ATOM | 503 | H5'2 | C A | 16 | -24.406 | 4.638  | 93.080 | 1.00 | 0.00 | H |
| ATOM | 504 | C1'  | G A | 17 | -17.915 | 1.567  | 87.744 | 1.00 | 0.00 | C |

|      |     |      |     |    |         |        |        |      |      |   |
|------|-----|------|-----|----|---------|--------|--------|------|------|---|
| ATOM | 505 | N1   | G A | 17 | -19.295 | -3.336 | 88.011 | 1.00 | 0.00 | N |
| ATOM | 506 | C2   | G A | 17 | -18.034 | -2.766 | 88.032 | 1.00 | 0.00 | C |
| ATOM | 507 | N2   | G A | 17 | -17.004 | -3.617 | 88.134 | 1.00 | 0.00 | N |
| ATOM | 508 | N3   | G A | 17 | -17.820 | -1.455 | 87.956 | 1.00 | 0.00 | N |
| ATOM | 509 | C4   | G A | 17 | -18.974 | -0.747 | 87.849 | 1.00 | 0.00 | C |
| ATOM | 510 | C5   | G A | 17 | -20.272 | -1.228 | 87.816 | 1.00 | 0.00 | C |
| ATOM | 511 | C6   | G A | 17 | -20.503 | -2.621 | 87.902 | 1.00 | 0.00 | C |
| ATOM | 512 | O6   | G A | 17 | -21.570 | -3.234 | 87.889 | 1.00 | 0.00 | O |
| ATOM | 513 | N7   | G A | 17 | -21.177 | -0.170 | 87.696 | 1.00 | 0.00 | N |
| ATOM | 514 | C8   | G A | 17 | -20.416 | 0.893  | 87.664 | 1.00 | 0.00 | C |
| ATOM | 515 | N9   | G A | 17 | -19.066 | 0.625  | 87.751 | 1.00 | 0.00 | N |
| ATOM | 516 | C2'  | G A | 17 | -18.095 | 2.750  | 86.803 | 1.00 | 0.00 | C |
| ATOM | 517 | C3'  | G A | 17 | -17.415 | 3.873  | 87.567 | 1.00 | 0.00 | C |
| ATOM | 518 | O3'  | G A | 17 | -16.015 | 3.838  | 87.304 | 1.00 | 0.00 | O |
| ATOM | 519 | C4'  | G A | 17 | -17.738 | 3.536  | 89.022 | 1.00 | 0.00 | C |
| ATOM | 520 | O4'  | G A | 17 | -17.765 | 2.074  | 89.057 | 1.00 | 0.00 | O |
| ATOM | 521 | C5'  | G A | 17 | -19.051 | 4.058  | 89.557 | 1.00 | 0.00 | C |
| ATOM | 522 | O5'  | G A | 17 | -20.059 | 4.005  | 88.517 | 1.00 | 0.00 | O |
| ATOM | 523 | O1P  | G A | 17 | -20.577 | 6.430  | 88.086 | 1.00 | 0.00 | O |
| ATOM | 524 | O2P  | G A | 17 | -22.318 | 4.677  | 87.647 | 1.00 | 0.00 | O |
| ATOM | 525 | P    | G A | 17 | -21.178 | 5.140  | 88.475 | 1.00 | 0.00 | P |
| ATOM | 526 | H1   | G A | 17 | -19.354 | -4.363 | 88.082 | 1.00 | 0.00 | H |
| ATOM | 527 | H8   | G A | 17 | -20.815 | 1.904  | 87.575 | 1.00 | 0.00 | H |
| ATOM | 528 | H1'  | G A | 17 | -17.015 | 1.005  | 87.496 | 1.00 | 0.00 | H |
| ATOM | 529 | H21  | G A | 17 | -17.179 | -4.630 | 88.195 | 1.00 | 0.00 | H |
| ATOM | 530 | H3'  | G A | 17 | -17.810 | 4.852  | 87.294 | 1.00 | 0.00 | H |
| ATOM | 531 | H22  | G A | 17 | -16.040 | -3.256 | 88.152 | 1.00 | 0.00 | H |
| ATOM | 532 | H4'  | G A | 17 | -16.938 | 3.960  | 89.630 | 1.00 | 0.00 | H |
| ATOM | 533 | H2'1 | G A | 17 | -19.147 | 2.975  | 86.618 | 1.00 | 0.00 | H |
| ATOM | 534 | H2'2 | G A | 17 | -17.621 | 2.585  | 85.834 | 1.00 | 0.00 | H |
| ATOM | 535 | H5'1 | G A | 17 | -19.361 | 3.446  | 90.403 | 1.00 | 0.00 | H |
| ATOM | 536 | H5'2 | G A | 17 | -18.918 | 5.087  | 89.891 | 1.00 | 0.00 | H |
| ATOM | 537 | C1'  | G A | 18 | -14.918 | -1.171 | 84.908 | 1.00 | 0.00 | C |
| ATOM | 538 | N1   | G A | 18 | -18.898 | -4.360 | 84.767 | 1.00 | 0.00 | N |
| ATOM | 539 | C2   | G A | 18 | -17.550 | -4.629 | 84.923 | 1.00 | 0.00 | C |
| ATOM | 540 | N2   | G A | 18 | -17.218 | -5.920 | 85.057 | 1.00 | 0.00 | N |
| ATOM | 541 | N3   | G A | 18 | -16.610 | -3.686 | 84.945 | 1.00 | 0.00 | N |
| ATOM | 542 | C4   | G A | 18 | -17.124 | -2.439 | 84.787 | 1.00 | 0.00 | C |
| ATOM | 543 | C5   | G A | 18 | -18.452 | -2.076 | 84.621 | 1.00 | 0.00 | C |
| ATOM | 544 | C6   | G A | 18 | -19.452 | -3.076 | 84.603 | 1.00 | 0.00 | C |
| ATOM | 545 | O6   | G A | 18 | -20.669 | -2.952 | 84.467 | 1.00 | 0.00 | O |
| ATOM | 546 | N7   | G A | 18 | -18.560 | -0.690 | 84.492 | 1.00 | 0.00 | N |
| ATOM | 547 | C8   | G A | 18 | -17.326 | -0.266 | 84.587 | 1.00 | 0.00 | C |
| ATOM | 548 | N9   | G A | 18 | -16.397 | -1.269 | 84.765 | 1.00 | 0.00 | N |
| ATOM | 549 | C2'  | G A | 18 | -14.285 | -0.103 | 84.029 | 1.00 | 0.00 | C |
| ATOM | 550 | C3'  | G A | 18 | -13.163 | 0.414  | 84.912 | 1.00 | 0.00 | C |
| ATOM | 551 | O3'  | G A | 18 | -12.022 | -0.429 | 84.761 | 1.00 | 0.00 | O |
| ATOM | 552 | C4'  | G A | 18 | -13.764 | 0.325  | 86.314 | 1.00 | 0.00 | C |
| ATOM | 553 | O4'  | G A | 18 | -14.636 | -0.850 | 86.257 | 1.00 | 0.00 | O |
| ATOM | 554 | C5'  | G A | 18 | -14.580 | 1.510  | 86.771 | 1.00 | 0.00 | C |
| ATOM | 555 | O5'  | G A | 18 | -15.322 | 2.056  | 85.652 | 1.00 | 0.00 | O |
| ATOM | 556 | O1P  | G A | 18 | -14.296 | 4.332  | 85.327 | 1.00 | 0.00 | O |
| ATOM | 557 | O2P  | G A | 18 | -16.674 | 3.919  | 84.644 | 1.00 | 0.00 | O |
| ATOM | 558 | P    | G A | 18 | -15.568 | 3.631  | 85.589 | 1.00 | 0.00 | P |

|      |     |      |       |    |         |        |        |      |      |   |
|------|-----|------|-------|----|---------|--------|--------|------|------|---|
| ATOM | 559 | H1   | G A   | 18 | -19.547 | -5.162 | 84.771 | 1.00 | 0.00 | H |
| ATOM | 560 | H8   | G A   | 18 | -17.054 | 0.788  | 84.527 | 1.00 | 0.00 | H |
| ATOM | 561 | H1'  | G A   | 18 | -14.491 | -2.152 | 84.701 | 1.00 | 0.00 | H |
| ATOM | 562 | H21  | G A   | 18 | -17.953 | -6.643 | 85.042 | 1.00 | 0.00 | H |
| ATOM | 563 | H3'  | G A   | 18 | -12.888 | 1.441  | 84.667 | 1.00 | 0.00 | H |
| ATOM | 564 | H22  | G A   | 18 | -16.231 | -6.187 | 85.174 | 1.00 | 0.00 | H |
| ATOM | 565 | H4'  | G A   | 18 | -12.933 | 0.203  | 87.008 | 1.00 | 0.00 | H |
| ATOM | 566 | H2'1 | G A   | 18 | -14.987 | 0.692  | 83.774 | 1.00 | 0.00 | H |
| ATOM | 567 | H2'2 | G A   | 18 | -13.901 | -0.511 | 83.093 | 1.00 | 0.00 | H |
| ATOM | 568 | H5'1 | G A   | 18 | -15.270 | 1.190  | 87.551 | 1.00 | 0.00 | H |
| ATOM | 569 | H5'2 | G A   | 18 | -13.911 | 2.269  | 87.175 | 1.00 | 0.00 | H |
| ATOM | 570 | C1'  | T A   | 19 | -13.769 | -5.128 | 82.166 | 1.00 | 0.00 | C |
| ATOM | 571 | N1   | T A   | 19 | -15.022 | -4.374 | 81.898 | 1.00 | 0.00 | N |
| ATOM | 572 | C2   | T A   | 19 | -16.192 | -5.100 | 81.827 | 1.00 | 0.00 | C |
| ATOM | 573 | O2   | T A   | 19 | -16.229 | -6.310 | 81.974 | 1.00 | 0.00 | O |
| ATOM | 574 | N3   | T A   | 19 | -17.332 | -4.359 | 81.578 | 1.00 | 0.00 | N |
| ATOM | 575 | C4   | T A   | 19 | -17.402 | -2.995 | 81.395 | 1.00 | 0.00 | C |
| ATOM | 576 | O4   | T A   | 19 | -18.485 | -2.440 | 81.173 | 1.00 | 0.00 | O |
| ATOM | 577 | C5   | T A   | 19 | -16.129 | -2.320 | 81.485 | 1.00 | 0.00 | C |
| ATOM | 578 | C6   | T A   | 19 | -14.996 | -3.011 | 81.728 | 1.00 | 0.00 | C |
| ATOM | 579 | C7   | T A   | 19 | -16.156 | -0.833 | 81.294 | 1.00 | 0.00 | C |
| ATOM | 580 | C2'  | T A   | 19 | -12.560 | -4.604 | 81.400 | 1.00 | 0.00 | C |
| ATOM | 581 | C3'  | T A   | 19 | -11.434 | -4.816 | 82.399 | 1.00 | 0.00 | C |
| ATOM | 582 | O3'  | T A   | 19 | -10.959 | -6.155 | 82.295 | 1.00 | 0.00 | O |
| ATOM | 583 | C4'  | T A   | 19 | -12.117 | -4.549 | 83.738 | 1.00 | 0.00 | C |
| ATOM | 584 | O4'  | T A   | 19 | -13.487 | -5.022 | 83.547 | 1.00 | 0.00 | O |
| ATOM | 585 | C5'  | T A   | 19 | -12.161 | -3.108 | 84.195 | 1.00 | 0.00 | C |
| ATOM | 586 | O5'  | T A   | 19 | -12.353 | -2.239 | 83.052 | 1.00 | 0.00 | O |
| ATOM | 587 | O1P  | T A   | 19 | -10.198 | -0.944 | 82.937 | 1.00 | 0.00 | O |
| ATOM | 588 | O2P  | T A   | 19 | -12.316 | 0.062  | 82.042 | 1.00 | 0.00 | O |
| ATOM | 589 | P    | T A   | 19 | -11.664 | -0.800 | 83.056 | 1.00 | 0.00 | P |
| ATOM | 590 | H3   | T A   | 19 | -18.220 | -4.879 | 81.525 | 1.00 | 0.00 | H |
| ATOM | 591 | H6   | T A   | 19 | -14.047 | -2.480 | 81.793 | 1.00 | 0.00 | H |
| ATOM | 592 | H1'  | T A   | 19 | -13.949 | -6.180 | 81.938 | 1.00 | 0.00 | H |
| ATOM | 593 | H3'  | T A   | 19 | -10.608 | -4.124 | 82.234 | 1.00 | 0.00 | H |
| ATOM | 594 | H4'  | T A   | 19 | -11.570 | -5.118 | 84.491 | 1.00 | 0.00 | H |
| ATOM | 595 | H71  | T A   | 19 | -15.617 | -0.573 | 80.384 | 1.00 | 0.00 | H |
| ATOM | 596 | H72  | T A   | 19 | -17.191 | -0.497 | 81.211 | 1.00 | 0.00 | H |
| ATOM | 597 | H73  | T A   | 19 | -15.684 | -0.346 | 82.148 | 1.00 | 0.00 | H |
| ATOM | 598 | H2'1 | T A   | 19 | -12.665 | -3.553 | 81.134 | 1.00 | 0.00 | H |
| ATOM | 599 | H2'2 | T A   | 19 | -12.382 | -5.158 | 80.477 | 1.00 | 0.00 | H |
| ATOM | 600 | H5'1 | T A   | 19 | -12.985 | -2.980 | 84.897 | 1.00 | 0.00 | H |
| ATOM | 601 | H5'2 | T A   | 19 | -11.226 | -2.861 | 84.692 | 1.00 | 0.00 | H |
| ATOM | 602 | C01  | LNK A | 20 | -8.538  | -7.694 | 79.921 | 0.00 | 0.00 | C |
| ATOM | 603 | O1   | LNK A | 20 | -9.304  | -6.582 | 80.391 | 1.00 | 0.00 | O |
| ATOM | 604 | S    | LNK A | 20 | -6.076  | -8.595 | 76.926 | 0.00 | 0.00 | S |
| ATOM | 605 | C02  | LNK A | 20 | -7.779  | -7.289 | 78.643 | 0.00 | 0.00 | C |
| ATOM | 606 | C03  | LNK A | 20 | -7.732  | -8.485 | 77.673 | 0.00 | 0.00 | C |
| ATOM | 607 | O1P  | LNK A | 20 | -11.629 | -5.846 | 79.763 | 1.00 | 0.00 | O |
| ATOM | 608 | O2P  | LNK A | 20 | -11.215 | -8.210 | 80.498 | 1.00 | 0.00 | O |
| ATOM | 609 | P    | LNK A | 20 | -10.870 | -6.772 | 80.626 | 1.00 | 0.00 | P |
| ATOM | 610 | H01  | LNK A | 20 | -9.204  | -8.528 | 79.699 | 0.00 | 0.00 | H |
| ATOM | 611 | H02  | LNK A | 20 | -7.823  | -7.993 | 80.688 | 0.00 | 0.00 | H |
| ATOM | 612 | H03  | LNK A | 20 | -8.476  | -8.346 | 76.888 | 0.00 | 0.00 | H |



|      |     |      |     |   |    |        |         |         |        |      |      |   |
|------|-----|------|-----|---|----|--------|---------|---------|--------|------|------|---|
| ATOM | 613 | H04  | LNK | A | 20 | -6.763 | -6.990  | 78.902  | 0.00   | 0.00 | H    |   |
| ATOM | 614 | H05  | LNK | A | 20 | -8.292 | -6.454  | 78.165  | 0.00   | 0.00 | H    |   |
| ATOM | 615 | H06  | LNK | A | 20 | -7.946 | -9.404  | 78.219  | 0.00   | 0.00 | H    |   |
| ATOM | 616 | AU   | LNK | A | 20 | -6.082 | -9.060  | 76.422  |        |      |      |   |
| TER  |     |      |     |   |    |        |         |         |        |      |      |   |
| ATOM | 618 | C1'  |     | A | B  | 2      | -23.925 | -8.994  | 81.267 | 1.00 | 0.00 | C |
| ATOM | 619 | N1   |     | A | B  | 2      | -19.886 | -5.831  | 81.417 | 1.00 | 0.00 | N |
| ATOM | 620 | C2   |     | A | B  | 2      | -20.003 | -7.146  | 81.573 | 1.00 | 0.00 | C |
| ATOM | 621 | N3   |     | A | B  | 2      | -21.078 | -7.901  | 81.518 | 1.00 | 0.00 | N |
| ATOM | 622 | C4   |     | A | B  | 2      | -22.165 | -7.148  | 81.271 | 1.00 | 0.00 | C |
| ATOM | 623 | C5   |     | A | B  | 2      | -22.214 | -5.795  | 81.086 | 1.00 | 0.00 | C |
| ATOM | 624 | C6   |     | A | B  | 2      | -20.986 | -5.105  | 81.168 | 1.00 | 0.00 | C |
| ATOM | 625 | N6   |     | A | B  | 2      | -20.878 | -3.775  | 81.009 | 1.00 | 0.00 | N |
| ATOM | 626 | N7   |     | A | B  | 2      | -23.509 | -5.368  | 80.849 | 1.00 | 0.00 | N |
| ATOM | 627 | C8   |     | A | B  | 2      | -24.210 | -6.462  | 80.900 | 1.00 | 0.00 | C |
| ATOM | 628 | N9   |     | A | B  | 2      | -23.462 | -7.583  | 81.148 | 1.00 | 0.00 | N |
| ATOM | 629 | C2'  |     | A | B  | 2      | -25.271 | -9.140  | 81.964 | 1.00 | 0.00 | C |
| ATOM | 630 | C3'  |     | A | B  | 2      | -25.893 | -10.303 | 81.210 | 1.00 | 0.00 | C |
| ATOM | 631 | O3'  |     | A | B  | 2      | -25.431 | -11.527 | 81.776 | 1.00 | 0.00 | O |
| ATOM | 632 | C4'  |     | A | B  | 2      | -25.383 | -10.096 | 79.784 | 1.00 | 0.00 | C |
| ATOM | 633 | O4'  |     | A | B  | 2      | -24.050 | -9.516  | 79.959 | 1.00 | 0.00 | O |
| ATOM | 634 | C5'  |     | A | B  | 2      | -26.200 | -9.179  | 78.905 | 1.00 | 0.00 | C |
| ATOM | 635 | O5'  |     | A | B  | 2      | -26.727 | -8.083  | 79.696 | 1.00 | 0.00 | O |
| ATOM | 636 | H2   |     | A | B  | 2      | -19.073 | -7.675  | 81.775 | 1.00 | 0.00 | H |
| ATOM | 637 | H8   |     | A | B  | 2      | -25.292 | -6.486  | 80.757 | 1.00 | 0.00 | H |
| ATOM | 638 | H1'  |     | A | B  | 2      | -23.153 | -9.563  | 81.785 | 1.00 | 0.00 | H |
| ATOM | 639 | H3'  |     | A | B  | 2      | -26.981 | -10.279 | 81.245 | 1.00 | 0.00 | H |
| ATOM | 640 | H4'  |     | A | B  | 2      | -25.360 | -11.078 | 79.312 | 1.00 | 0.00 | H |
| ATOM | 641 | H61  |     | A | B  | 2      | -19.957 | -3.321  | 81.075 | 1.00 | 0.00 | H |
| ATOM | 642 | H62  |     | A | B  | 2      | -21.720 | -3.211  | 80.819 | 1.00 | 0.00 | H |
| ATOM | 643 | H2'1 |     | A | B  | 2      | -25.882 | -8.241  | 81.879 | 1.00 | 0.00 | H |
| ATOM | 644 | H2'2 |     | A | B  | 2      | -25.165 | -9.366  | 83.025 | 1.00 | 0.00 | H |
| ATOM | 645 | H5'1 |     | A | B  | 2      | -25.565 | -8.786  | 78.111 | 1.00 | 0.00 | H |
| ATOM | 646 | H5'2 |     | A | B  | 2      | -27.019 | -9.743  | 78.464 | 1.00 | 0.00 | H |
| ATOM | 647 | C1'  |     | C | B  | 3      | -20.939 | -10.203 | 85.046 | 1.00 | 0.00 | C |
| ATOM | 648 | N1   |     | C | B  | 3      | -21.413 | -8.803  | 84.877 | 1.00 | 0.00 | N |
| ATOM | 649 | C2   |     | C | B  | 3      | -20.462 | -7.785  | 84.891 | 1.00 | 0.00 | C |
| ATOM | 650 | O2   |     | C | B  | 3      | -19.269 | -8.085  | 85.040 | 1.00 | 0.00 | O |
| ATOM | 651 | N3   |     | C | B  | 3      | -20.872 | -6.503  | 84.739 | 1.00 | 0.00 | N |
| ATOM | 652 | C4   |     | C | B  | 3      | -22.170 | -6.209  | 84.580 | 1.00 | 0.00 | C |
| ATOM | 653 | N4   |     | C | B  | 3      | -22.516 | -4.938  | 84.432 | 1.00 | 0.00 | N |
| ATOM | 654 | C5   |     | C | B  | 3      | -23.173 | -7.234  | 84.566 | 1.00 | 0.00 | C |
| ATOM | 655 | C6   |     | C | B  | 3      | -22.735 | -8.521  | 84.716 | 1.00 | 0.00 | C |
| ATOM | 656 | C2'  |     | C | B  | 3      | -21.869 | -11.070 | 85.882 | 1.00 | 0.00 | C |
| ATOM | 657 | C3'  |     | C | B  | 3      | -21.745 | -12.422 | 85.198 | 1.00 | 0.00 | C |
| ATOM | 658 | O3'  |     | C | B  | 3      | -20.600 | -13.101 | 85.710 | 1.00 | 0.00 | O |
| ATOM | 659 | C4'  |     | C | B  | 3      | -21.581 | -12.045 | 83.726 | 1.00 | 0.00 | C |
| ATOM | 660 | O4'  |     | C | B  | 3      | -20.842 | -10.781 | 83.758 | 1.00 | 0.00 | O |
| ATOM | 661 | C5'  |     | C | B  | 3      | -22.855 | -11.841 | 82.941 | 1.00 | 0.00 | C |
| ATOM | 662 | O5'  |     | C | B  | 3      | -23.857 | -11.219 | 83.785 | 1.00 | 0.00 | O |
| ATOM | 663 | O1P  |     | C | B  | 3      | -25.623 | -13.001 | 83.998 | 1.00 | 0.00 | O |
| ATOM | 664 | O2P  |     | C | B  | 3      | -26.251 | -10.579 | 84.200 | 1.00 | 0.00 | O |
| ATOM | 665 | P    |     | C | B  | 3      | -25.387 | -11.607 | 83.569 | 1.00 | 0.00 | P |
| ATOM | 666 | H5   |     | C | B  | 3      | -24.231 | -7.001  | 84.444 | 1.00 | 0.00 | H |

|      |     |      |     |   |         |         |        |      |      |   |
|------|-----|------|-----|---|---------|---------|--------|------|------|---|
| ATOM | 667 | H6   | C B | 3 | -23.459 | -9.335  | 84.705 | 1.00 | 0.00 | H |
| ATOM | 668 | H1'  | C B | 3 | -19.938 | -10.176 | 85.477 | 1.00 | 0.00 | H |
| ATOM | 669 | H3'  | C B | 3 | -22.629 | -13.040 | 85.349 | 1.00 | 0.00 | H |
| ATOM | 670 | H4'  | C B | 3 | -21.024 | -12.852 | 83.252 | 1.00 | 0.00 | H |
| ATOM | 671 | H41  | C B | 3 | -23.506 | -4.686  | 84.304 | 1.00 | 0.00 | H |
| ATOM | 672 | H42  | C B | 3 | -21.794 | -4.202  | 84.444 | 1.00 | 0.00 | H |
| ATOM | 673 | H2'1 | C B | 3 | -22.898 | -10.711 | 85.864 | 1.00 | 0.00 | H |
| ATOM | 674 | H2'2 | C B | 3 | -21.559 | -11.123 | 86.925 | 1.00 | 0.00 | H |
| ATOM | 675 | H5'1 | C B | 3 | -22.647 | -11.199 | 82.083 | 1.00 | 0.00 | H |
| ATOM | 676 | H5'2 | C B | 3 | -23.215 | -12.804 | 82.588 | 1.00 | 0.00 | H |
| ATOM | 677 | C1'  | C B | 4 | -17.527 | -9.254  | 88.507 | 1.00 | 0.00 | C |
| ATOM | 678 | N1   | C B | 4 | -18.739 | -8.400  | 88.384 | 1.00 | 0.00 | N |
| ATOM | 679 | C2   | C B | 4 | -18.558 | -7.019  | 88.300 | 1.00 | 0.00 | C |
| ATOM | 680 | O2   | C B | 4 | -17.408 | -6.564  | 88.329 | 1.00 | 0.00 | O |
| ATOM | 681 | N3   | C B | 4 | -19.647 | -6.223  | 88.187 | 1.00 | 0.00 | N |
| ATOM | 682 | C4   | C B | 4 | -20.883 | -6.744  | 88.159 | 1.00 | 0.00 | C |
| ATOM | 683 | N4   | C B | 4 | -21.913 | -5.921  | 88.044 | 1.00 | 0.00 | N |
| ATOM | 684 | C5   | C B | 4 | -21.099 | -8.159  | 88.249 | 1.00 | 0.00 | C |
| ATOM | 685 | C6   | C B | 4 | -19.985 | -8.944  | 88.357 | 1.00 | 0.00 | C |
| ATOM | 686 | C2'  | C B | 4 | -17.709 | -10.448 | 89.436 | 1.00 | 0.00 | C |
| ATOM | 687 | C3'  | C B | 4 | -16.875 | -11.516 | 88.744 | 1.00 | 0.00 | C |
| ATOM | 688 | O3'  | C B | 4 | -15.514 | -11.378 | 89.141 | 1.00 | 0.00 | O |
| ATOM | 689 | C4'  | C B | 4 | -17.081 | -11.203 | 87.264 | 1.00 | 0.00 | C |
| ATOM | 690 | O4'  | C B | 4 | -17.215 | -9.746  | 87.217 | 1.00 | 0.00 | O |
| ATOM | 691 | C5'  | C B | 4 | -18.296 | -11.819 | 86.609 | 1.00 | 0.00 | C |
| ATOM | 692 | O5'  | C B | 4 | -19.401 | -11.844 | 87.547 | 1.00 | 0.00 | O |
| ATOM | 693 | O1P  | C B | 4 | -19.776 | -14.301 | 87.942 | 1.00 | 0.00 | O |
| ATOM | 694 | O2P  | C B | 4 | -21.676 | -12.683 | 88.202 | 1.00 | 0.00 | O |
| ATOM | 695 | P    | C B | 4 | -20.431 | -13.058 | 87.489 | 1.00 | 0.00 | P |
| ATOM | 696 | H5   | C B | 4 | -22.101 | -8.589  | 88.233 | 1.00 | 0.00 | H |
| ATOM | 697 | H6   | C B | 4 | -20.098 | -10.025 | 88.421 | 1.00 | 0.00 | H |
| ATOM | 698 | H1'  | C B | 4 | -16.698 | -8.627  | 88.836 | 1.00 | 0.00 | H |
| ATOM | 699 | H3'  | C B | 4 | -17.221 | -12.521 | 88.985 | 1.00 | 0.00 | H |
| ATOM | 700 | H4'  | C B | 4 | -16.199 | -11.567 | 86.736 | 1.00 | 0.00 | H |
| ATOM | 701 | H41  | C B | 4 | -22.873 | -6.295  | 88.017 | 1.00 | 0.00 | H |
| ATOM | 702 | H42  | C B | 4 | -21.756 | -4.902  | 87.982 | 1.00 | 0.00 | H |
| ATOM | 703 | H2'1 | C B | 4 | -18.751 | -10.751 | 89.519 | 1.00 | 0.00 | H |
| ATOM | 704 | H2'2 | C B | 4 | -17.343 | -10.248 | 90.442 | 1.00 | 0.00 | H |
| ATOM | 705 | H5'1 | C B | 4 | -18.569 | -11.230 | 85.734 | 1.00 | 0.00 | H |
| ATOM | 706 | H5'2 | C B | 4 | -18.056 | -12.835 | 86.297 | 1.00 | 0.00 | H |
| ATOM | 707 | C1'  | G B | 5 | -15.038 | -6.300  | 91.605 | 1.00 | 0.00 | C |
| ATOM | 708 | N1   | G B | 5 | -19.250 | -3.433  | 91.352 | 1.00 | 0.00 | N |
| ATOM | 709 | C2   | G B | 5 | -17.917 | -3.057  | 91.327 | 1.00 | 0.00 | C |
| ATOM | 710 | N2   | G B | 5 | -17.677 | -1.746  | 91.222 | 1.00 | 0.00 | N |
| ATOM | 711 | N3   | G B | 5 | -16.908 | -3.925  | 91.399 | 1.00 | 0.00 | N |
| ATOM | 712 | C4   | G B | 5 | -17.337 | -5.209  | 91.509 | 1.00 | 0.00 | C |
| ATOM | 713 | C5   | G B | 5 | -18.642 | -5.674  | 91.546 | 1.00 | 0.00 | C |
| ATOM | 714 | C6   | G B | 5 | -19.714 | -4.758  | 91.465 | 1.00 | 0.00 | C |
| ATOM | 715 | O6   | G B | 5 | -20.924 | -4.976  | 91.483 | 1.00 | 0.00 | O |
| ATOM | 716 | N7   | G B | 5 | -18.653 | -7.066  | 91.667 | 1.00 | 0.00 | N |
| ATOM | 717 | C8   | G B | 5 | -17.387 | -7.393  | 91.694 | 1.00 | 0.00 | C |
| ATOM | 718 | N9   | G B | 5 | -16.525 | -6.318  | 91.605 | 1.00 | 0.00 | N |
| ATOM | 719 | C2'  | G B | 5 | -14.412 | -7.320  | 92.546 | 1.00 | 0.00 | C |
| ATOM | 720 | C3'  | G B | 5 | -13.171 | -7.742  | 91.776 | 1.00 | 0.00 | C |

|      |     |      |     |   |         |         |        |      |      |   |
|------|-----|------|-----|---|---------|---------|--------|------|------|---|
| ATOM | 721 | O3'  | G B | 5 | -12.120 | -6.815  | 92.035 | 1.00 | 0.00 | O |
| ATOM | 722 | C4'  | G B | 5 | -13.640 | -7.694  | 90.322 | 1.00 | 0.00 | C |
| ATOM | 723 | O4'  | G B | 5 | -14.602 | -6.592  | 90.292 | 1.00 | 0.00 | O |
| ATOM | 724 | C5'  | G B | 5 | -14.311 | -8.937  | 89.791 | 1.00 | 0.00 | C |
| ATOM | 725 | O5'  | G B | 5 | -15.113 | -9.545  | 90.834 | 1.00 | 0.00 | O |
| ATOM | 726 | O1P  | G B | 5 | -13.950 | -11.736 | 91.264 | 1.00 | 0.00 | O |
| ATOM | 727 | O2P  | G B | 5 | -16.408 | -11.512 | 91.711 | 1.00 | 0.00 | O |
| ATOM | 728 | P    | G B | 5 | -15.241 | -11.135 | 90.878 | 1.00 | 0.00 | P |
| ATOM | 729 | H1   | G B | 5 | -19.956 | -2.684  | 91.283 | 1.00 | 0.00 | H |
| ATOM | 730 | H8   | G B | 5 | -17.041 | -8.422  | 91.784 | 1.00 | 0.00 | H |
| ATOM | 731 | H1'  | G B | 5 | -14.709 | -5.290  | 91.849 | 1.00 | 0.00 | H |
| ATOM | 732 | H21  | G B | 5 | -18.462 | -1.081  | 91.163 | 1.00 | 0.00 | H |
| ATOM | 733 | H3'  | G B | 5 | -12.842 | -8.746  | 92.048 | 1.00 | 0.00 | H |
| ATOM | 734 | H22  | G B | 5 | -16.706 | -1.401  | 91.201 | 1.00 | 0.00 | H |
| ATOM | 735 | H4'  | G B | 5 | -12.758 | -7.505  | 89.710 | 1.00 | 0.00 | H |
| ATOM | 736 | H2'1 | G B | 5 | -15.070 | -8.169  | 92.734 | 1.00 | 0.00 | H |
| ATOM | 737 | H2'2 | G B | 5 | -14.151 | -6.888  | 93.512 | 1.00 | 0.00 | H |
| ATOM | 738 | H5'1 | G B | 5 | -14.947 | -8.668  | 88.947 | 1.00 | 0.00 | H |
| ATOM | 739 | H5'2 | G B | 5 | -13.549 | -9.641  | 89.456 | 1.00 | 0.00 | H |
| ATOM | 740 | C1'  | T B | 6 | -14.466 | -2.275  | 94.431 | 1.00 | 0.00 | C |
| ATOM | 741 | N1   | T B | 6 | -15.676 | -3.127  | 94.577 | 1.00 | 0.00 | N |
| ATOM | 742 | C2   | T B | 6 | -16.902 | -2.493  | 94.533 | 1.00 | 0.00 | C |
| ATOM | 743 | O2   | T B | 6 | -17.018 | -1.290  | 94.383 | 1.00 | 0.00 | O |
| ATOM | 744 | N3   | T B | 6 | -18.000 | -3.324  | 94.673 | 1.00 | 0.00 | N |
| ATOM | 745 | C4   | T B | 6 | -17.979 | -4.691  | 94.851 | 1.00 | 0.00 | C |
| ATOM | 746 | O4   | T B | 6 | -19.031 | -5.329  | 94.968 | 1.00 | 0.00 | O |
| ATOM | 747 | C5   | T B | 6 | -16.653 | -5.262  | 94.883 | 1.00 | 0.00 | C |
| ATOM | 748 | C6   | T B | 6 | -15.562 | -4.484  | 94.749 | 1.00 | 0.00 | C |
| ATOM | 749 | C7   | T B | 6 | -16.584 | -6.749  | 95.073 | 1.00 | 0.00 | C |
| ATOM | 750 | C2'  | T B | 6 | -13.300 | -2.709  | 95.310 | 1.00 | 0.00 | C |
| ATOM | 751 | C3'  | T B | 6 | -12.103 | -2.405  | 94.422 | 1.00 | 0.00 | C |
| ATOM | 752 | O3'  | T B | 6 | -11.745 | -1.033  | 94.572 | 1.00 | 0.00 | O |
| ATOM | 753 | C4'  | T B | 6 | -12.629 | -2.716  | 93.023 | 1.00 | 0.00 | C |
| ATOM | 754 | O4'  | T B | 6 | -14.045 | -2.351  | 93.082 | 1.00 | 0.00 | O |
| ATOM | 755 | C5'  | T B | 6 | -12.519 | -4.152  | 92.566 | 1.00 | 0.00 | C |
| ATOM | 756 | O5'  | T B | 6 | -12.752 | -5.041  | 93.688 | 1.00 | 0.00 | O |
| ATOM | 757 | O1P  | T B | 6 | -10.523 | -6.165  | 94.011 | 1.00 | 0.00 | O |
| ATOM | 758 | O2P  | T B | 6 | -12.632 | -7.338  | 94.699 | 1.00 | 0.00 | O |
| ATOM | 759 | P    | T B | 6 | -11.953 | -6.420  | 93.752 | 1.00 | 0.00 | P |
| ATOM | 760 | H3   | T B | 6 | -18.926 | -2.875  | 94.640 | 1.00 | 0.00 | H |
| ATOM | 761 | H6   | T B | 6 | -14.571 | -4.940  | 94.778 | 1.00 | 0.00 | H |
| ATOM | 762 | H1'  | T B | 6 | -14.747 | -1.243  | 94.636 | 1.00 | 0.00 | H |
| ATOM | 763 | H3'  | T B | 6 | -11.245 | -3.030  | 94.666 | 1.00 | 0.00 | H |
| ATOM | 764 | H4'  | T B | 6 | -12.060 | -2.100  | 92.326 | 1.00 | 0.00 | H |
| ATOM | 765 | H71  | T B | 6 | -16.116 | -6.972  | 96.030 | 1.00 | 0.00 | H |
| ATOM | 766 | H72  | T B | 6 | -17.591 | -7.165  | 95.055 | 1.00 | 0.00 | H |
| ATOM | 767 | H73  | T B | 6 | -15.995 | -7.191  | 94.268 | 1.00 | 0.00 | H |
| ATOM | 768 | H2'1 | T B | 6 | -13.346 | -3.765  | 95.565 | 1.00 | 0.00 | H |
| ATOM | 769 | H2'2 | T B | 6 | -13.254 | -2.147  | 96.243 | 1.00 | 0.00 | H |
| ATOM | 770 | H5'1 | T B | 6 | -13.259 | -4.338  | 91.789 | 1.00 | 0.00 | H |
| ATOM | 771 | H5'2 | T B | 6 | -11.523 | -4.323  | 92.161 | 1.00 | 0.00 | H |
| ATOM | 772 | C1'  | C B | 7 | -16.161 | 1.499   | 97.177 | 1.00 | 0.00 | C |
| ATOM | 773 | N1   | C B | 7 | -16.612 | 0.105   | 97.446 | 1.00 | 0.00 | N |
| ATOM | 774 | C2   | C B | 7 | -17.983 | -0.131  | 97.531 | 1.00 | 0.00 | C |

|      |     |      |     |   |         |        |         |      |      |   |
|------|-----|------|-----|---|---------|--------|---------|------|------|---|
| ATOM | 775 | O2   | C B | 7 | -18.764 | 0.818  | 97.379  | 1.00 | 0.00 | O |
| ATOM | 776 | N3   | C B | 7 | -18.415 | -1.394 | 97.776  | 1.00 | 0.00 | N |
| ATOM | 777 | C4   | C B | 7 | -17.545 | -2.399 | 97.936  | 1.00 | 0.00 | C |
| ATOM | 778 | N4   | C B | 7 | -18.023 | -3.611 | 98.171  | 1.00 | 0.00 | N |
| ATOM | 779 | C5   | C B | 7 | -16.129 | -2.185 | 97.860  | 1.00 | 0.00 | C |
| ATOM | 780 | C6   | C B | 7 | -15.719 | -0.905 | 97.607  | 1.00 | 0.00 | C |
| ATOM | 781 | C2'  | C B | 7 | -14.901 | 1.893  | 97.933  | 1.00 | 0.00 | C |
| ATOM | 782 | C3'  | C B | 7 | -14.196 | 2.790  | 96.928  | 1.00 | 0.00 | C |
| ATOM | 783 | O3'  | C B | 7 | -14.713 | 4.113  | 97.039  | 1.00 | 0.00 | O |
| ATOM | 784 | C4'  | C B | 7 | -14.545 | 2.143  | 95.591  | 1.00 | 0.00 | C |
| ATOM | 785 | O4'  | C B | 7 | -15.889 | 1.603  | 95.792  | 1.00 | 0.00 | O |
| ATOM | 786 | C5'  | C B | 7 | -13.640 | 1.023  | 95.128  | 1.00 | 0.00 | C |
| ATOM | 787 | O5'  | C B | 7 | -13.207 | 0.241  | 96.269  | 1.00 | 0.00 | O |
| ATOM | 788 | O1P  | C B | 7 | -10.729 | 0.672  | 96.366  | 1.00 | 0.00 | O |
| ATOM | 789 | O2P  | C B | 7 | -11.665 | -1.473 | 97.267  | 1.00 | 0.00 | O |
| ATOM | 790 | P    | C B | 7 | -11.743 | -0.394 | 96.255  | 1.00 | 0.00 | P |
| ATOM | 791 | H5   | C B | 7 | -15.419 | -2.999 | 97.996  | 1.00 | 0.00 | H |
| ATOM | 792 | H6   | C B | 7 | -14.651 | -0.694 | 97.532  | 1.00 | 0.00 | H |
| ATOM | 793 | H1'  | C B | 7 | -16.985 | 2.174  | 97.409  | 1.00 | 0.00 | H |
| ATOM | 794 | H3'  | C B | 7 | -13.116 | 2.810  | 97.086  | 1.00 | 0.00 | H |
| ATOM | 795 | H4'  | C B | 7 | -14.509 | 2.929  | 94.838  | 1.00 | 0.00 | H |
| ATOM | 796 | H41  | C B | 7 | -17.375 | -4.404 | 98.295  | 1.00 | 0.00 | H |
| ATOM | 797 | H42  | C B | 7 | -19.041 | -3.764 | 98.228  | 1.00 | 0.00 | H |
| ATOM | 798 | H2'1 | C B | 7 | -14.289 | 1.031  | 98.195  | 1.00 | 0.00 | H |
| ATOM | 799 | H2'2 | C B | 7 | -15.124 | 2.428  | 98.857  | 1.00 | 0.00 | H |
| ATOM | 800 | H5'1 | C B | 7 | -14.184 | 0.387  | 94.430  | 1.00 | 0.00 | H |
| ATOM | 801 | H5'2 | C B | 7 | -12.773 | 1.451  | 94.626  | 1.00 | 0.00 | H |
| ATOM | 802 | C1'  | C B | 8 | -19.484 | 3.761  | 100.069 | 1.00 | 0.00 | C |
| ATOM | 803 | N1   | C B | 8 | -19.017 | 2.384  | 100.386 | 1.00 | 0.00 | N |
| ATOM | 804 | C2   | C B | 8 | -19.982 | 1.403  | 100.610 | 1.00 | 0.00 | C |
| ATOM | 805 | O2   | C B | 8 | -21.178 | 1.715  | 100.534 | 1.00 | 0.00 | O |
| ATOM | 806 | N3   | C B | 8 | -19.579 | 0.143  | 100.899 | 1.00 | 0.00 | N |
| ATOM | 807 | C4   | C B | 8 | -18.277 | -0.164 | 100.974 | 1.00 | 0.00 | C |
| ATOM | 808 | N4   | C B | 8 | -17.939 | -1.414 | 101.258 | 1.00 | 0.00 | N |
| ATOM | 809 | C5   | C B | 8 | -17.261 | 0.825  | 100.754 | 1.00 | 0.00 | C |
| ATOM | 810 | C6   | C B | 8 | -17.692 | 2.087  | 100.458 | 1.00 | 0.00 | C |
| ATOM | 811 | C2'  | C B | 8 | -18.632 | 4.857  | 100.695 | 1.00 | 0.00 | C |
| ATOM | 812 | C3'  | C B | 8 | -18.663 | 5.934  | 99.621  | 1.00 | 0.00 | C |
| ATOM | 813 | O3'  | C B | 8 | -19.843 | 6.718  | 99.780  | 1.00 | 0.00 | O |
| ATOM | 814 | C4'  | C B | 8 | -18.677 | 5.123  | 98.328  | 1.00 | 0.00 | C |
| ATOM | 815 | O4'  | C B | 8 | -19.436 | 3.918  | 98.664  | 1.00 | 0.00 | O |
| ATOM | 816 | C5'  | C B | 8 | -17.332 | 4.711  | 97.779  | 1.00 | 0.00 | C |
| ATOM | 817 | O5'  | C B | 8 | -16.434 | 4.393  | 98.872  | 1.00 | 0.00 | O |
| ATOM | 818 | O1P  | C B | 8 | -14.671 | 6.183  | 98.717  | 1.00 | 0.00 | O |
| ATOM | 819 | O2P  | C B | 8 | -14.109 | 3.949  | 99.712  | 1.00 | 0.00 | O |
| ATOM | 820 | P    | C B | 8 | -14.883 | 4.721  | 98.711  | 1.00 | 0.00 | P |
| ATOM | 821 | H5   | C B | 8 | -16.202 | 0.584  | 100.821 | 1.00 | 0.00 | H |
| ATOM | 822 | H6   | C B | 8 | -16.958 | 2.872  | 100.276 | 1.00 | 0.00 | H |
| ATOM | 823 | H1'  | C B | 8 | -20.525 | 3.849  | 100.382 | 1.00 | 0.00 | H |
| ATOM | 824 | H3'  | C B | 8 | -17.789 | 6.583  | 99.670  | 1.00 | 0.00 | H |
| ATOM | 825 | H4'  | C B | 8 | -19.167 | 5.740  | 97.573  | 1.00 | 0.00 | H |
| ATOM | 826 | H41  | C B | 8 | -16.944 | -1.677 | 101.318 | 1.00 | 0.00 | H |
| ATOM | 827 | H42  | C B | 8 | -18.670 | -2.122 | 101.416 | 1.00 | 0.00 | H |
| ATOM | 828 | H2'1 | C B | 8 | -17.613 | 4.525  | 100.896 | 1.00 | 0.00 | H |

|      |     |      |     |    |         |        |         |      |      |   |
|------|-----|------|-----|----|---------|--------|---------|------|------|---|
| ATOM | 829 | H2'2 | C B | 8  | -19.050 | 5.219  | 101.635 | 1.00 | 0.00 | H |
| ATOM | 830 | H5'1 | C B | 8  | -17.458 | 3.835  | 97.140  | 1.00 | 0.00 | H |
| ATOM | 831 | H5'2 | C B | 8  | -16.920 | 5.527  | 97.190  | 1.00 | 0.00 | H |
| ATOM | 832 | C1'  | T B | 9  | -23.255 | 3.878  | 103.272 | 1.00 | 0.00 | C |
| ATOM | 833 | N1   | T B | 9  | -22.066 | 3.029  | 103.548 | 1.00 | 0.00 | N |
| ATOM | 834 | C2   | T B | 9  | -22.296 | 1.706  | 103.863 | 1.00 | 0.00 | C |
| ATOM | 835 | O2   | T B | 9  | -23.415 | 1.227  | 103.921 | 1.00 | 0.00 | O |
| ATOM | 836 | N3   | T B | 9  | -21.164 | 0.953  | 104.110 | 1.00 | 0.00 | N |
| ATOM | 837 | C4   | T B | 9  | -19.859 | 1.395  | 104.075 | 1.00 | 0.00 | C |
| ATOM | 838 | O4   | T B | 9  | -18.921 | 0.626  | 104.320 | 1.00 | 0.00 | O |
| ATOM | 839 | C5   | T B | 9  | -19.718 | 2.793  | 103.736 | 1.00 | 0.00 | C |
| ATOM | 840 | C6   | T B | 9  | -20.800 | 3.556  | 103.487 | 1.00 | 0.00 | C |
| ATOM | 841 | C7   | T B | 9  | -18.314 | 3.316  | 103.683 | 1.00 | 0.00 | C |
| ATOM | 842 | C2'  | T B | 9  | -23.132 | 5.302  | 103.805 | 1.00 | 0.00 | C |
| ATOM | 843 | C3'  | T B | 9  | -23.856 | 6.104  | 102.736 | 1.00 | 0.00 | C |
| ATOM | 844 | O3'  | T B | 9  | -25.256 | 6.092  | 103.008 | 1.00 | 0.00 | O |
| ATOM | 845 | C4'  | T B | 9  | -23.508 | 5.352  | 101.452 | 1.00 | 0.00 | C |
| ATOM | 846 | O4'  | T B | 9  | -23.419 | 3.952  | 101.869 | 1.00 | 0.00 | O |
| ATOM | 847 | C5'  | T B | 9  | -22.215 | 5.740  | 100.775 | 1.00 | 0.00 | C |
| ATOM | 848 | O5'  | T B | 9  | -21.214 | 6.052  | 101.775 | 1.00 | 0.00 | O |
| ATOM | 849 | O1P  | T B | 9  | -20.802 | 8.511  | 101.439 | 1.00 | 0.00 | O |
| ATOM | 850 | O2P  | T B | 9  | -18.991 | 7.054  | 102.383 | 1.00 | 0.00 | O |
| ATOM | 851 | P    | T B | 9  | -20.142 | 7.190  | 101.459 | 1.00 | 0.00 | P |
| ATOM | 852 | H3   | T B | 9  | -21.309 | -0.040 | 104.345 | 1.00 | 0.00 | H |
| ATOM | 853 | H6   | T B | 9  | -20.668 | 4.607  | 103.233 | 1.00 | 0.00 | H |
| ATOM | 854 | H1'  | T B | 9  | -24.134 | 3.381  | 103.685 | 1.00 | 0.00 | H |
| ATOM | 855 | H3'  | T B | 9  | -23.505 | 7.135  | 102.695 | 1.00 | 0.00 | H |
| ATOM | 856 | H4'  | T B | 9  | -24.323 | 5.536  | 100.748 | 1.00 | 0.00 | H |
| ATOM | 857 | H71  | T B | 9  | -18.170 | 4.053  | 104.474 | 1.00 | 0.00 | H |
| ATOM | 858 | H72  | T B | 9  | -17.612 | 2.492  | 103.820 | 1.00 | 0.00 | H |
| ATOM | 859 | H73  | T B | 9  | -18.137 | 3.785  | 102.714 | 1.00 | 0.00 | H |
| ATOM | 860 | H2'1 | T B | 9  | -22.095 | 5.615  | 103.904 | 1.00 | 0.00 | H |
| ATOM | 861 | H2'2 | T B | 9  | -23.606 | 5.419  | 104.779 | 1.00 | 0.00 | H |
| ATOM | 862 | H5'1 | T B | 9  | -21.872 | 4.911  | 100.156 | 1.00 | 0.00 | H |
| ATOM | 863 | H5'2 | T B | 9  | -22.390 | 6.610  | 100.145 | 1.00 | 0.00 | H |
| ATOM | 864 | C1'  | A B | 10 | -26.120 | 1.962  | 106.843 | 1.00 | 0.00 | C |
| ATOM | 865 | N1   | A B | 10 | -21.943 | -0.815 | 107.927 | 1.00 | 0.00 | N |
| ATOM | 866 | C2   | A B | 10 | -23.236 | -1.122 | 107.863 | 1.00 | 0.00 | C |
| ATOM | 867 | N3   | A B | 10 | -24.264 | -0.355 | 107.574 | 1.00 | 0.00 | N |
| ATOM | 868 | C4   | A B | 10 | -23.853 | 0.901  | 107.328 | 1.00 | 0.00 | C |
| ATOM | 869 | C5   | A B | 10 | -22.572 | 1.379  | 107.352 | 1.00 | 0.00 | C |
| ATOM | 870 | C6   | A B | 10 | -21.563 | 0.447  | 107.676 | 1.00 | 0.00 | C |
| ATOM | 871 | N6   | A B | 10 | -20.260 | 0.773  | 107.738 | 1.00 | 0.00 | N |
| ATOM | 872 | N7   | A B | 10 | -22.534 | 2.727  | 107.044 | 1.00 | 0.00 | N |
| ATOM | 873 | C8   | A B | 10 | -23.783 | 3.035  | 106.844 | 1.00 | 0.00 | C |
| ATOM | 874 | N9   | A B | 10 | -24.641 | 1.977  | 106.997 | 1.00 | 0.00 | N |
| ATOM | 875 | C2'  | A B | 10 | -26.802 | 3.223  | 107.355 | 1.00 | 0.00 | C |
| ATOM | 876 | C3'  | A B | 10 | -27.945 | 3.391  | 106.365 | 1.00 | 0.00 | C |
| ATOM | 877 | O3'  | A B | 10 | -29.046 | 2.586  | 106.780 | 1.00 | 0.00 | O |
| ATOM | 878 | C4'  | A B | 10 | -27.333 | 2.897  | 105.053 | 1.00 | 0.00 | C |
| ATOM | 879 | O4'  | A B | 10 | -26.409 | 1.838  | 105.464 | 1.00 | 0.00 | O |
| ATOM | 880 | C5'  | A B | 10 | -26.569 | 3.919  | 104.245 | 1.00 | 0.00 | C |
| ATOM | 881 | O5'  | A B | 10 | -25.856 | 4.817  | 105.133 | 1.00 | 0.00 | O |
| ATOM | 882 | O1P  | A B | 10 | -26.984 | 7.033  | 104.747 | 1.00 | 0.00 | O |

|      |     |      |     |    |         |        |         |      |      |   |
|------|-----|------|-----|----|---------|--------|---------|------|------|---|
| ATOM | 883 | O2P  | A B | 10 | -24.593 | 6.956  | 105.503 | 1.00 | 0.00 | O |
| ATOM | 884 | P    | A B | 10 | -25.681 | 6.343  | 104.703 | 1.00 | 0.00 | P |
| ATOM | 885 | H2   | A B | 10 | -23.476 | -2.162 | 108.083 | 1.00 | 0.00 | H |
| ATOM | 886 | H8   | A B | 10 | -24.114 | 4.040  | 106.583 | 1.00 | 0.00 | H |
| ATOM | 887 | H1'  | A B | 10 | -26.506 | 1.076  | 107.348 | 1.00 | 0.00 | H |
| ATOM | 888 | H3'  | A B | 10 | -28.265 | 4.428  | 106.282 | 1.00 | 0.00 | H |
| ATOM | 889 | H4'  | A B | 10 | -28.155 | 2.532  | 104.440 | 1.00 | 0.00 | H |
| ATOM | 890 | H61  | A B | 10 | -19.563 | 0.053  | 107.976 | 1.00 | 0.00 | H |
| ATOM | 891 | H62  | A B | 10 | -19.960 | 1.738  | 107.548 | 1.00 | 0.00 | H |
| ATOM | 892 | H2'1 | A B | 10 | -26.139 | 4.087  | 107.344 | 1.00 | 0.00 | H |
| ATOM | 893 | H2'2 | A B | 10 | -27.176 | 3.107  | 108.374 | 1.00 | 0.00 | H |
| ATOM | 894 | H5'1 | A B | 10 | -25.861 | 3.404  | 103.596 | 1.00 | 0.00 | H |
| ATOM | 895 | H5'2 | A B | 10 | -27.269 | 4.485  | 103.632 | 1.00 | 0.00 | H |
| ATOM | 896 | C1'  | G B | 11 | -27.012 | -1.043 | 110.694 | 1.00 | 0.00 | C |
| ATOM | 897 | N1   | G B | 11 | -21.959 | -0.796 | 111.349 | 1.00 | 0.00 | N |
| ATOM | 898 | C2   | G B | 11 | -22.814 | -1.880 | 111.434 | 1.00 | 0.00 | C |
| ATOM | 899 | N2   | G B | 11 | -22.247 | -3.056 | 111.736 | 1.00 | 0.00 | N |
| ATOM | 900 | N3   | G B | 11 | -24.128 | -1.800 | 111.233 | 1.00 | 0.00 | N |
| ATOM | 901 | C4   | G B | 11 | -24.529 | -0.534 | 110.945 | 1.00 | 0.00 | C |
| ATOM | 902 | C5   | G B | 11 | -23.752 | 0.607  | 110.843 | 1.00 | 0.00 | C |
| ATOM | 903 | C6   | G B | 11 | -22.356 | 0.522  | 111.053 | 1.00 | 0.00 | C |
| ATOM | 904 | O6   | G B | 11 | -21.509 | 1.415  | 111.007 | 1.00 | 0.00 | O |
| ATOM | 905 | N7   | G B | 11 | -24.551 | 1.709  | 110.531 | 1.00 | 0.00 | N |
| ATOM | 906 | C8   | G B | 11 | -25.760 | 1.213  | 110.453 | 1.00 | 0.00 | C |
| ATOM | 907 | N9   | G B | 11 | -25.826 | -0.145 | 110.694 | 1.00 | 0.00 | N |
| ATOM | 908 | C2'  | G B | 11 | -28.267 | -0.404 | 111.273 | 1.00 | 0.00 | C |
| ATOM | 909 | C3'  | G B | 11 | -29.360 | -1.006 | 110.404 | 1.00 | 0.00 | C |
| ATOM | 910 | O3'  | G B | 11 | -29.728 | -2.278 | 110.931 | 1.00 | 0.00 | O |
| ATOM | 911 | C4'  | G B | 11 | -28.685 | -1.120 | 109.038 | 1.00 | 0.00 | C |
| ATOM | 912 | O4'  | G B | 11 | -27.284 | -1.399 | 109.352 | 1.00 | 0.00 | O |
| ATOM | 913 | C5'  | G B | 11 | -28.749 | 0.103  | 108.154 | 1.00 | 0.00 | C |
| ATOM | 914 | O5'  | G B | 11 | -28.643 | 1.299  | 108.964 | 1.00 | 0.00 | O |
| ATOM | 915 | O1P  | G B | 11 | -30.894 | 2.389  | 108.695 | 1.00 | 0.00 | O |
| ATOM | 916 | O2P  | G B | 11 | -28.875 | 3.790  | 109.201 | 1.00 | 0.00 | O |
| ATOM | 917 | P    | G B | 11 | -29.447 | 2.603  | 108.519 | 1.00 | 0.00 | P |
| ATOM | 918 | H1   | G B | 11 | -20.957 | -0.967 | 111.516 | 1.00 | 0.00 | H |
| ATOM | 919 | H8   | G B | 11 | -26.635 | 1.817  | 110.220 | 1.00 | 0.00 | H |
| ATOM | 920 | H1'  | G B | 11 | -26.752 | -1.953 | 111.235 | 1.00 | 0.00 | H |
| ATOM | 921 | H21  | G B | 11 | -21.229 | -3.110 | 111.887 | 1.00 | 0.00 | H |
| ATOM | 922 | H3'  | G B | 11 | -30.242 | -0.367 | 110.355 | 1.00 | 0.00 | H |
| ATOM | 923 | H22  | G B | 11 | -22.829 | -3.902 | 111.818 | 1.00 | 0.00 | H |
| ATOM | 924 | H4'  | G B | 11 | -29.175 | -1.938 | 108.511 | 1.00 | 0.00 | H |
| ATOM | 925 | H2'1 | G B | 11 | -28.251 | 0.683  | 111.193 | 1.00 | 0.00 | H |
| ATOM | 926 | H2'2 | G B | 11 | -28.411 | -0.655 | 112.323 | 1.00 | 0.00 | H |
| ATOM | 927 | H5'1 | G B | 11 | -27.931 | 0.069  | 107.437 | 1.00 | 0.00 | H |
| ATOM | 928 | H5'2 | G B | 11 | -29.697 | 0.105  | 107.616 | 1.00 | 0.00 | H |
| ATOM | 929 | C1'  | G B | 12 | -25.699 | -3.766 | 114.616 | 1.00 | 0.00 | C |
| ATOM | 930 | N1   | G B | 12 | -21.700 | -0.603 | 114.759 | 1.00 | 0.00 | N |
| ATOM | 931 | C2   | G B | 12 | -21.755 | -1.975 | 114.932 | 1.00 | 0.00 | C |
| ATOM | 932 | N2   | G B | 12 | -20.588 | -2.585 | 115.178 | 1.00 | 0.00 | N |
| ATOM | 933 | N3   | G B | 12 | -22.882 | -2.680 | 114.864 | 1.00 | 0.00 | N |
| ATOM | 934 | C4   | G B | 12 | -23.965 | -1.901 | 114.616 | 1.00 | 0.00 | C |
| ATOM | 935 | C5   | G B | 12 | -24.008 | -0.530 | 114.434 | 1.00 | 0.00 | C |
| ATOM | 936 | C6   | G B | 12 | -22.811 | 0.221  | 114.502 | 1.00 | 0.00 | C |

|      |     |      |     |    |         |        |         |      |      |   |
|------|-----|------|-----|----|---------|--------|---------|------|------|---|
| ATOM | 937 | O6   | G B | 12 | -22.648 | 1.434  | 114.369 | 1.00 | 0.00 | O |
| ATOM | 938 | N7   | G B | 12 | -25.320 | -0.113 | 114.202 | 1.00 | 0.00 | N |
| ATOM | 939 | C8   | G B | 12 | -26.016 | -1.220 | 114.246 | 1.00 | 0.00 | C |
| ATOM | 940 | N9   | G B | 12 | -25.262 | -2.349 | 114.494 | 1.00 | 0.00 | N |
| ATOM | 941 | C2'  | G B | 12 | -27.040 | -3.937 | 115.317 | 1.00 | 0.00 | C |
| ATOM | 942 | C3'  | G B | 12 | -27.645 | -5.112 | 114.564 | 1.00 | 0.00 | C |
| ATOM | 943 | O3'  | G B | 12 | -27.161 | -6.328 | 115.129 | 1.00 | 0.00 | O |
| ATOM | 944 | C4'  | G B | 12 | -27.144 | -4.896 | 113.139 | 1.00 | 0.00 | C |
| ATOM | 945 | O4'  | G B | 12 | -25.822 | -4.294 | 113.309 | 1.00 | 0.00 | O |
| ATOM | 946 | C5'  | G B | 12 | -27.977 | -3.992 | 112.263 | 1.00 | 0.00 | C |
| ATOM | 947 | O5'  | G B | 12 | -28.520 | -2.907 | 113.055 | 1.00 | 0.00 | O |
| ATOM | 948 | O1P  | G B | 12 | -31.000 | -3.339 | 113.012 | 1.00 | 0.00 | O |
| ATOM | 949 | O2P  | G B | 12 | -30.140 | -1.001 | 113.309 | 1.00 | 0.00 | O |
| ATOM | 950 | P    | G B | 12 | -29.966 | -2.338 | 112.689 | 1.00 | 0.00 | P |
| ATOM | 951 | H1   | G B | 12 | -20.774 | -0.151 | 114.824 | 1.00 | 0.00 | H |
| ATOM | 952 | H8   | G B | 12 | -27.095 | -1.250 | 114.100 | 1.00 | 0.00 | H |
| ATOM | 953 | H1'  | G B | 12 | -24.916 | -4.322 | 115.131 | 1.00 | 0.00 | H |
| ATOM | 954 | H21  | G B | 12 | -19.719 | -2.031 | 115.225 | 1.00 | 0.00 | H |
| ATOM | 955 | H3'  | G B | 12 | -28.735 | -5.105 | 114.603 | 1.00 | 0.00 | H |
| ATOM | 956 | H22  | G B | 12 | -20.561 | -3.604 | 115.318 | 1.00 | 0.00 | H |
| ATOM | 957 | H4'  | G B | 12 | -27.106 | -5.877 | 112.664 | 1.00 | 0.00 | H |
| ATOM | 958 | H2'1 | G B | 12 | -27.667 | -3.047 | 115.234 | 1.00 | 0.00 | H |
| ATOM | 959 | H2'2 | G B | 12 | -26.927 | -4.160 | 116.378 | 1.00 | 0.00 | H |
| ATOM | 960 | H5'1 | G B | 12 | -27.352 | -3.589 | 111.466 | 1.00 | 0.00 | H |
| ATOM | 961 | H5'2 | G B | 12 | -28.790 | -4.570 | 111.823 | 1.00 | 0.00 | H |
| ATOM | 962 | C1'  | T B | 13 | -22.750 | -5.006 | 118.392 | 1.00 | 0.00 | C |
| ATOM | 963 | N1   | T B | 13 | -23.203 | -3.600 | 118.228 | 1.00 | 0.00 | N |
| ATOM | 964 | C2   | T B | 13 | -22.231 | -2.618 | 118.246 | 1.00 | 0.00 | C |
| ATOM | 965 | O2   | T B | 13 | -21.048 | -2.867 | 118.393 | 1.00 | 0.00 | O |
| ATOM | 966 | N3   | T B | 13 | -22.695 | -1.326 | 118.088 | 1.00 | 0.00 | N |
| ATOM | 967 | C4   | T B | 13 | -24.009 | -0.939 | 117.921 | 1.00 | 0.00 | C |
| ATOM | 968 | O4   | T B | 13 | -24.304 | 0.255  | 117.792 | 1.00 | 0.00 | O |
| ATOM | 969 | C5   | T B | 13 | -24.950 | -2.033 | 117.913 | 1.00 | 0.00 | C |
| ATOM | 970 | C6   | T B | 13 | -24.534 | -3.305 | 118.062 | 1.00 | 0.00 | C |
| ATOM | 971 | C7   | T B | 13 | -26.391 | -1.659 | 117.729 | 1.00 | 0.00 | C |
| ATOM | 972 | C2'  | T B | 13 | -23.698 | -5.863 | 119.224 | 1.00 | 0.00 | C |
| ATOM | 973 | C3'  | T B | 13 | -23.590 | -7.214 | 118.536 | 1.00 | 0.00 | C |
| ATOM | 974 | O3'  | T B | 13 | -22.459 | -7.912 | 119.052 | 1.00 | 0.00 | O |
| ATOM | 975 | C4'  | T B | 13 | -23.416 | -6.835 | 117.067 | 1.00 | 0.00 | C |
| ATOM | 976 | O4'  | T B | 13 | -22.658 | -5.584 | 117.105 | 1.00 | 0.00 | O |
| ATOM | 977 | C5'  | T B | 13 | -24.684 | -6.609 | 116.277 | 1.00 | 0.00 | C |
| ATOM | 978 | O5'  | T B | 13 | -25.679 | -5.977 | 117.120 | 1.00 | 0.00 | O |
| ATOM | 979 | O1P  | T B | 13 | -27.471 | -7.731 | 117.324 | 1.00 | 0.00 | O |
| ATOM | 980 | O2P  | T B | 13 | -28.064 | -5.302 | 117.530 | 1.00 | 0.00 | O |
| ATOM | 981 | P    | T B | 13 | -27.216 | -6.340 | 116.898 | 1.00 | 0.00 | P |
| ATOM | 982 | H3   | T B | 13 | -21.989 | -0.576 | 118.097 | 1.00 | 0.00 | H |
| ATOM | 983 | H6   | T B | 13 | -25.264 | -4.114 | 118.054 | 1.00 | 0.00 | H |
| ATOM | 984 | H1'  | T B | 13 | -21.750 | -4.997 | 118.828 | 1.00 | 0.00 | H |
| ATOM | 985 | H3'  | T B | 13 | -24.484 | -7.819 | 118.684 | 1.00 | 0.00 | H |
| ATOM | 986 | H4'  | T B | 13 | -22.869 | -7.652 | 116.594 | 1.00 | 0.00 | H |
| ATOM | 987 | H71  | T B | 13 | -26.948 | -1.898 | 118.635 | 1.00 | 0.00 | H |
| ATOM | 988 | H72  | T B | 13 | -26.467 | -0.588 | 117.529 | 1.00 | 0.00 | H |
| ATOM | 989 | H73  | T B | 13 | -26.809 | -2.214 | 116.888 | 1.00 | 0.00 | H |
| ATOM | 990 | H2'1 | T B | 13 | -24.719 | -5.487 | 119.203 | 1.00 | 0.00 | H |

|      |      |      |     |    |         |        |         |      |      |   |
|------|------|------|-----|----|---------|--------|---------|------|------|---|
| ATOM | 991  | H2'2 | T B | 13 | -23.392 | -5.923 | 120.269 | 1.00 | 0.00 | H |
| ATOM | 992  | H5'1 | T B | 13 | -24.462 | -5.972 | 115.422 | 1.00 | 0.00 | H |
| ATOM | 993  | H5'2 | T B | 13 | -25.059 | -7.569 | 115.922 | 1.00 | 0.00 | H |
| ATOM | 994  | C1'  | G B | 14 | -19.325 | -4.037 | 121.854 | 1.00 | 0.00 | C |
| ATOM | 995  | N1   | G B | 14 | -21.052 | 0.745  | 121.436 | 1.00 | 0.00 | N |
| ATOM | 996  | C2   | G B | 14 | -19.754 | 0.275  | 121.540 | 1.00 | 0.00 | C |
| ATOM | 997  | N2   | G B | 14 | -18.789 | 1.201  | 121.534 | 1.00 | 0.00 | N |
| ATOM | 998  | N3   | G B | 14 | -19.446 | -1.017 | 121.642 | 1.00 | 0.00 | N |
| ATOM | 999  | C4   | G B | 14 | -20.548 | -1.813 | 121.637 | 1.00 | 0.00 | C |
| ATOM | 1000 | C5   | G B | 14 | -21.875 | -1.434 | 121.542 | 1.00 | 0.00 | C |
| ATOM | 1001 | C6   | G B | 14 | -22.205 | -0.063 | 121.431 | 1.00 | 0.00 | C |
| ATOM | 1002 | O6   | G B | 14 | -23.314 | 0.463  | 121.337 | 1.00 | 0.00 | O |
| ATOM | 1003 | N7   | G B | 14 | -22.703 | -2.559 | 121.577 | 1.00 | 0.00 | N |
| ATOM | 1004 | C8   | G B | 14 | -21.868 | -3.561 | 121.687 | 1.00 | 0.00 | C |
| ATOM | 1005 | N9   | G B | 14 | -20.540 | -3.187 | 121.733 | 1.00 | 0.00 | N |
| ATOM | 1006 | C2'  | G B | 14 | -19.503 | -5.235 | 122.777 | 1.00 | 0.00 | C |
| ATOM | 1007 | C3'  | G B | 14 | -18.665 | -6.298 | 122.086 | 1.00 | 0.00 | C |
| ATOM | 1008 | O3'  | G B | 14 | -17.305 | -6.153 | 122.486 | 1.00 | 0.00 | O |
| ATOM | 1009 | C4'  | G B | 14 | -18.871 | -5.981 | 120.606 | 1.00 | 0.00 | C |
| ATOM | 1010 | O4'  | G B | 14 | -19.010 | -4.526 | 120.564 | 1.00 | 0.00 | O |
| ATOM | 1011 | C5'  | G B | 14 | -20.080 | -6.602 | 119.949 | 1.00 | 0.00 | C |
| ATOM | 1012 | O5'  | G B | 14 | -21.187 | -6.632 | 120.884 | 1.00 | 0.00 | O |
| ATOM | 1013 | O1P  | G B | 14 | -21.554 | -9.091 | 121.273 | 1.00 | 0.00 | O |
| ATOM | 1014 | O2P  | G B | 14 | -23.461 | -7.482 | 121.534 | 1.00 | 0.00 | O |
| ATOM | 1015 | P    | G B | 14 | -22.214 | -7.851 | 120.822 | 1.00 | 0.00 | P |
| ATOM | 1016 | H1   | G B | 14 | -21.184 | 1.765  | 121.355 | 1.00 | 0.00 | H |
| ATOM | 1017 | H8   | G B | 14 | -22.193 | -4.601 | 121.741 | 1.00 | 0.00 | H |
| ATOM | 1018 | H1'  | G B | 14 | -18.498 | -3.407 | 122.184 | 1.00 | 0.00 | H |
| ATOM | 1019 | H21  | G B | 14 | -19.036 | 2.200  | 121.452 | 1.00 | 0.00 | H |
| ATOM | 1020 | H3'  | G B | 14 | -19.008 | -7.305 | 122.324 | 1.00 | 0.00 | H |
| ATOM | 1021 | H22  | G B | 14 | -17.802 | 0.919  | 121.613 | 1.00 | 0.00 | H |
| ATOM | 1022 | H4'  | G B | 14 | -17.985 | -6.340 | 120.080 | 1.00 | 0.00 | H |
| ATOM | 1023 | H2'1 | G B | 14 | -20.546 | -5.542 | 122.860 | 1.00 | 0.00 | H |
| ATOM | 1024 | H2'2 | G B | 14 | -19.140 | -5.036 | 123.786 | 1.00 | 0.00 | H |
| ATOM | 1025 | H5'1 | G B | 14 | -20.355 | -6.013 | 119.074 | 1.00 | 0.00 | H |
| ATOM | 1026 | H5'2 | G B | 14 | -19.836 | -7.615 | 119.634 | 1.00 | 0.00 | H |
| ATOM | 1027 | C1'  | C B | 15 | -16.835 | -1.082 | 124.952 | 1.00 | 0.00 | C |
| ATOM | 1028 | N1   | C B | 15 | -18.322 | -1.096 | 124.949 | 1.00 | 0.00 | N |
| ATOM | 1029 | C2   | C B | 15 | -18.986 | 0.125  | 124.845 | 1.00 | 0.00 | C |
| ATOM | 1030 | O2   | C B | 15 | -18.316 | 1.162  | 124.757 | 1.00 | 0.00 | O |
| ATOM | 1031 | N3   | C B | 15 | -20.341 | 0.136  | 124.841 | 1.00 | 0.00 | N |
| ATOM | 1032 | C4   | C B | 15 | -21.038 | -1.003 | 124.938 | 1.00 | 0.00 | C |
| ATOM | 1033 | N4   | C B | 15 | -22.361 | -0.936 | 124.926 | 1.00 | 0.00 | N |
| ATOM | 1034 | C5   | C B | 15 | -20.383 | -2.275 | 125.052 | 1.00 | 0.00 | C |
| ATOM | 1035 | C6   | C B | 15 | -19.018 | -2.260 | 125.048 | 1.00 | 0.00 | C |
| ATOM | 1036 | C2'  | C B | 15 | -16.213 | -2.102 | 125.895 | 1.00 | 0.00 | C |
| ATOM | 1037 | C3'  | C B | 15 | -14.973 | -2.533 | 125.127 | 1.00 | 0.00 | C |
| ATOM | 1038 | O3'  | C B | 15 | -13.918 | -1.608 | 125.383 | 1.00 | 0.00 | O |
| ATOM | 1039 | C4'  | C B | 15 | -15.441 | -2.485 | 123.674 | 1.00 | 0.00 | C |
| ATOM | 1040 | O4'  | C B | 15 | -16.400 | -1.381 | 123.638 | 1.00 | 0.00 | O |
| ATOM | 1041 | C5'  | C B | 15 | -16.119 | -3.730 | 123.146 | 1.00 | 0.00 | C |
| ATOM | 1042 | O5'  | C B | 15 | -16.922 | -4.331 | 124.192 | 1.00 | 0.00 | O |
| ATOM | 1043 | O1P  | C B | 15 | -15.767 | -6.524 | 124.628 | 1.00 | 0.00 | O |
| ATOM | 1044 | O2P  | C B | 15 | -18.224 | -6.292 | 125.074 | 1.00 | 0.00 | O |



|      |      |      |     |    |         |        |         |      |      |   |
|------|------|------|-----|----|---------|--------|---------|------|------|---|
| ATOM | 1045 | P    | C B | 15 | -17.056 | -5.919 | 124.240 | 1.00 | 0.00 | P |
| ATOM | 1046 | H5   | C B | 15 | -20.946 | -3.203 | 125.138 | 1.00 | 0.00 | H |
| ATOM | 1047 | H6   | C B | 15 | -18.474 | -3.202 | 125.127 | 1.00 | 0.00 | H |
| ATOM | 1048 | H1'  | C B | 15 | -16.502 | -0.072 | 125.194 | 1.00 | 0.00 | H |
| ATOM | 1049 | H3'  | C B | 15 | -14.648 | -3.536 | 125.404 | 1.00 | 0.00 | H |
| ATOM | 1050 | H4'  | C B | 15 | -14.558 | -2.304 | 123.062 | 1.00 | 0.00 | H |
| ATOM | 1051 | H41  | C B | 15 | -22.922 | -1.797 | 124.996 | 1.00 | 0.00 | H |
| ATOM | 1052 | H42  | C B | 15 | -22.830 | -0.020 | 124.846 | 1.00 | 0.00 | H |
| ATOM | 1053 | H2'1 | C B | 15 | -16.875 | -2.947 | 126.086 | 1.00 | 0.00 | H |
| ATOM | 1054 | H2'2 | C B | 15 | -15.951 | -1.668 | 126.860 | 1.00 | 0.00 | H |
| ATOM | 1055 | H5'1 | C B | 15 | -16.752 | -3.461 | 122.302 | 1.00 | 0.00 | H |
| ATOM | 1056 | H5'2 | C B | 15 | -15.358 | -4.437 | 122.814 | 1.00 | 0.00 | H |
| ATOM | 1057 | C1'  | G B | 16 | -16.288 | 2.947  | 127.777 | 1.00 | 0.00 | C |
| ATOM | 1058 | N1   | G B | 16 | -21.384 | 2.828  | 127.943 | 1.00 | 0.00 | N |
| ATOM | 1059 | C2   | G B | 16 | -20.526 | 3.900  | 127.783 | 1.00 | 0.00 | C |
| ATOM | 1060 | N2   | G B | 16 | -21.103 | 5.103  | 127.651 | 1.00 | 0.00 | N |
| ATOM | 1061 | N3   | G B | 16 | -19.199 | 3.785  | 127.756 | 1.00 | 0.00 | N |
| ATOM | 1062 | C4   | G B | 16 | -18.791 | 2.498  | 127.909 | 1.00 | 0.00 | C |
| ATOM | 1063 | C5   | G B | 16 | -19.572 | 1.368  | 128.080 | 1.00 | 0.00 | C |
| ATOM | 1064 | C6   | G B | 16 | -20.980 | 1.490  | 128.105 | 1.00 | 0.00 | C |
| ATOM | 1065 | O6   | G B | 16 | -21.834 | 0.611  | 128.245 | 1.00 | 0.00 | O |
| ATOM | 1066 | N7   | G B | 16 | -18.764 | 0.236  | 128.204 | 1.00 | 0.00 | N |
| ATOM | 1067 | C8   | G B | 16 | -17.545 | 0.705  | 128.105 | 1.00 | 0.00 | C |
| ATOM | 1068 | N9   | G B | 16 | -17.481 | 2.072  | 127.926 | 1.00 | 0.00 | N |
| ATOM | 1069 | C2'  | G B | 16 | -15.111 | 2.535  | 128.652 | 1.00 | 0.00 | C |
| ATOM | 1070 | C3'  | G B | 16 | -13.923 | 2.862  | 127.761 | 1.00 | 0.00 | C |
| ATOM | 1071 | O3'  | G B | 16 | -13.591 | 4.241  | 127.911 | 1.00 | 0.00 | O |
| ATOM | 1072 | C4'  | G B | 16 | -14.448 | 2.544  | 126.363 | 1.00 | 0.00 | C |
| ATOM | 1073 | O4'  | G B | 16 | -15.871 | 2.883  | 126.427 | 1.00 | 0.00 | O |
| ATOM | 1074 | C5'  | G B | 16 | -14.313 | 1.111  | 125.905 | 1.00 | 0.00 | C |
| ATOM | 1075 | O5'  | G B | 16 | -14.524 | 0.217  | 127.025 | 1.00 | 0.00 | O |
| ATOM | 1076 | O1P  | G B | 16 | -12.274 | -0.866 | 127.339 | 1.00 | 0.00 | O |
| ATOM | 1077 | O2P  | G B | 16 | -14.357 | -2.080 | 128.032 | 1.00 | 0.00 | O |
| ATOM | 1078 | P    | G B | 16 | -13.699 | -1.148 | 127.084 | 1.00 | 0.00 | P |
| ATOM | 1079 | H1   | G B | 16 | -22.397 | 3.025  | 127.944 | 1.00 | 0.00 | H |
| ATOM | 1080 | H8   | G B | 16 | -16.661 | 0.072  | 128.160 | 1.00 | 0.00 | H |
| ATOM | 1081 | H1'  | G B | 16 | -16.589 | 3.975  | 127.985 | 1.00 | 0.00 | H |
| ATOM | 1082 | H21  | G B | 16 | -22.130 | 5.184  | 127.671 | 1.00 | 0.00 | H |
| ATOM | 1083 | H3'  | G B | 16 | -13.051 | 2.253  | 128.003 | 1.00 | 0.00 | H |
| ATOM | 1084 | H22  | G B | 16 | -20.518 | 5.942  | 127.532 | 1.00 | 0.00 | H |
| ATOM | 1085 | H4'  | G B | 16 | -13.892 | 3.171  | 125.665 | 1.00 | 0.00 | H |
| ATOM | 1086 | H2'1 | G B | 16 | -15.137 | 1.475  | 128.906 | 1.00 | 0.00 | H |
| ATOM | 1087 | H2'2 | G B | 16 | -15.074 | 3.096  | 129.585 | 1.00 | 0.00 | H |
| ATOM | 1088 | H5'1 | G B | 16 | -15.051 | 0.912  | 125.129 | 1.00 | 0.00 | H |
| ATOM | 1089 | H5'2 | G B | 16 | -13.313 | 0.961  | 125.495 | 1.00 | 0.00 | H |
| ATOM | 1090 | C1'  | G B | 17 | -17.959 | 6.714  | 130.524 | 1.00 | 0.00 | C |
| ATOM | 1091 | N1   | G B | 17 | -22.002 | 3.678  | 131.202 | 1.00 | 0.00 | N |
| ATOM | 1092 | C2   | G B | 17 | -21.944 | 5.039  | 130.955 | 1.00 | 0.00 | C |
| ATOM | 1093 | N2   | G B | 17 | -23.120 | 5.674  | 130.879 | 1.00 | 0.00 | N |
| ATOM | 1094 | N3   | G B | 17 | -20.806 | 5.709  | 130.794 | 1.00 | 0.00 | N |
| ATOM | 1095 | C4   | G B | 17 | -19.714 | 4.908  | 130.910 | 1.00 | 0.00 | C |
| ATOM | 1096 | C5   | G B | 17 | -19.676 | 3.548  | 131.159 | 1.00 | 0.00 | C |
| ATOM | 1097 | C6   | G B | 17 | -20.883 | 2.834  | 131.327 | 1.00 | 0.00 | C |
| ATOM | 1098 | O6   | G B | 17 | -21.052 | 1.635  | 131.553 | 1.00 | 0.00 | O |

|      |      |      |     |    |         |        |         |      |      |   |
|------|------|------|-----|----|---------|--------|---------|------|------|---|
| ATOM | 1099 | N7   | G B | 17 | -18.352 | 3.101  | 131.204 | 1.00 | 0.00 | N |
| ATOM | 1100 | C8   | G B | 17 | -17.648 | 4.181  | 130.982 | 1.00 | 0.00 | C |
| ATOM | 1101 | N9   | G B | 17 | -18.404 | 5.319  | 130.795 | 1.00 | 0.00 | N |
| ATOM | 1102 | C2'  | G B | 17 | -16.696 | 7.112  | 131.276 | 1.00 | 0.00 | C |
| ATOM | 1103 | C3'  | G B | 17 | -15.997 | 8.011  | 130.269 | 1.00 | 0.00 | C |
| ATOM | 1104 | O3'  | G B | 17 | -16.518 | 9.333  | 130.383 | 1.00 | 0.00 | O |
| ATOM | 1105 | C4'  | G B | 17 | -16.350 | 7.364  | 128.932 | 1.00 | 0.00 | C |
| ATOM | 1106 | O4'  | G B | 17 | -17.692 | 6.820  | 129.138 | 1.00 | 0.00 | O |
| ATOM | 1107 | C5'  | G B | 17 | -15.444 | 6.249  | 128.466 | 1.00 | 0.00 | C |
| ATOM | 1108 | O5'  | G B | 17 | -15.004 | 5.466  | 129.604 | 1.00 | 0.00 | O |
| ATOM | 1109 | O1P  | G B | 17 | -12.527 | 5.906  | 129.692 | 1.00 | 0.00 | O |
| ATOM | 1110 | O2P  | G B | 17 | -13.451 | 3.754  | 130.593 | 1.00 | 0.00 | O |
| ATOM | 1111 | P    | G B | 17 | -13.538 | 4.837  | 129.583 | 1.00 | 0.00 | P |
| ATOM | 1112 | H1   | G B | 17 | -22.937 | 3.253  | 131.305 | 1.00 | 0.00 | H |
| ATOM | 1113 | H8   | G B | 17 | -16.559 | 4.181  | 130.948 | 1.00 | 0.00 | H |
| ATOM | 1114 | H1'  | G B | 17 | -18.783 | 7.386  | 130.759 | 1.00 | 0.00 | H |
| ATOM | 1115 | H21  | G B | 17 | -23.998 | 5.149  | 131.001 | 1.00 | 0.00 | H |
| ATOM | 1116 | H3'  | G B | 17 | -14.918 | 8.034  | 130.423 | 1.00 | 0.00 | H |
| ATOM | 1117 | H22  | G B | 17 | -23.145 | 6.687  | 130.698 | 1.00 | 0.00 | H |
| ATOM | 1118 | H4'  | G B | 17 | -16.321 | 8.153  | 128.181 | 1.00 | 0.00 | H |
| ATOM | 1119 | H2'1 | G B | 17 | -16.080 | 6.250  | 131.534 | 1.00 | 0.00 | H |
| ATOM | 1120 | H2'2 | G B | 17 | -16.917 | 7.644  | 132.200 | 1.00 | 0.00 | H |
| ATOM | 1121 | H5'1 | G B | 17 | -15.988 | 5.612  | 127.769 | 1.00 | 0.00 | H |
| ATOM | 1122 | H5'2 | G B | 17 | -14.579 | 6.679  | 127.959 | 1.00 | 0.00 | H |
| ATOM | 1123 | C1'  | C B | 18 | -21.282 | 8.977  | 133.416 | 1.00 | 0.00 | C |
| ATOM | 1124 | N1   | C B | 18 | -20.816 | 7.599  | 133.732 | 1.00 | 0.00 | N |
| ATOM | 1125 | C2   | C B | 18 | -21.780 | 6.619  | 133.955 | 1.00 | 0.00 | C |
| ATOM | 1126 | O2   | C B | 18 | -22.976 | 6.930  | 133.880 | 1.00 | 0.00 | O |
| ATOM | 1127 | N3   | C B | 18 | -21.376 | 5.359  | 134.245 | 1.00 | 0.00 | N |
| ATOM | 1128 | C4   | C B | 18 | -20.074 | 5.054  | 134.319 | 1.00 | 0.00 | C |
| ATOM | 1129 | N4   | C B | 18 | -19.736 | 3.804  | 134.604 | 1.00 | 0.00 | N |
| ATOM | 1130 | C5   | C B | 18 | -19.061 | 6.042  | 134.098 | 1.00 | 0.00 | C |
| ATOM | 1131 | C6   | C B | 18 | -19.491 | 7.303  | 133.805 | 1.00 | 0.00 | C |
| ATOM | 1132 | C2'  | C B | 18 | -20.429 | 10.073 | 134.042 | 1.00 | 0.00 | C |
| ATOM | 1133 | C3'  | C B | 18 | -20.461 | 11.150 | 132.969 | 1.00 | 0.00 | C |
| ATOM | 1134 | O3'  | C B | 18 | -21.640 | 11.935 | 133.127 | 1.00 | 0.00 | O |
| ATOM | 1135 | C4'  | C B | 18 | -20.475 | 10.340 | 131.674 | 1.00 | 0.00 | C |
| ATOM | 1136 | O4'  | C B | 18 | -21.233 | 9.134  | 132.010 | 1.00 | 0.00 | O |
| ATOM | 1137 | C5'  | C B | 18 | -19.130 | 9.927  | 131.124 | 1.00 | 0.00 | C |
| ATOM | 1138 | O5'  | C B | 18 | -18.232 | 9.608  | 132.219 | 1.00 | 0.00 | O |
| ATOM | 1139 | O1P  | C B | 18 | -16.469 | 11.399 | 132.064 | 1.00 | 0.00 | O |
| ATOM | 1140 | O2P  | C B | 18 | -15.905 | 9.165  | 133.059 | 1.00 | 0.00 | O |
| ATOM | 1141 | P    | C B | 18 | -16.679 | 9.937  | 132.058 | 1.00 | 0.00 | P |
| ATOM | 1142 | H5   | C B | 18 | -18.001 | 5.799  | 134.161 | 1.00 | 0.00 | H |
| ATOM | 1143 | H6   | C B | 18 | -18.757 | 8.087  | 133.626 | 1.00 | 0.00 | H |
| ATOM | 1144 | H1'  | C B | 18 | -22.322 | 9.065  | 133.727 | 1.00 | 0.00 | H |
| ATOM | 1145 | H3'  | C B | 18 | -19.586 | 11.799 | 133.017 | 1.00 | 0.00 | H |
| ATOM | 1146 | H4'  | C B | 18 | -20.965 | 10.955 | 130.920 | 1.00 | 0.00 | H |
| ATOM | 1147 | H41  | C B | 18 | -18.740 | 3.543  | 134.666 | 1.00 | 0.00 | H |
| ATOM | 1148 | H42  | C B | 18 | -20.466 | 3.097  | 134.763 | 1.00 | 0.00 | H |
| ATOM | 1149 | H2'1 | C B | 18 | -19.412 | 9.741  | 134.242 | 1.00 | 0.00 | H |
| ATOM | 1150 | H2'2 | C B | 18 | -20.847 | 10.435 | 134.981 | 1.00 | 0.00 | H |
| ATOM | 1151 | H5'1 | C B | 18 | -19.255 | 9.052  | 130.487 | 1.00 | 0.00 | H |
| ATOM | 1152 | H5'2 | C B | 18 | -18.716 | 10.744 | 130.536 | 1.00 | 0.00 | H |

|      |      |      |     |    |         |        |         |      |      |   |
|------|------|------|-----|----|---------|--------|---------|------|------|---|
| ATOM | 1153 | C1'  | C B | 19 | -25.053 | 9.072  | 136.624 | 1.00 | 0.00 | C |
| ATOM | 1154 | N1   | C B | 19 | -23.849 | 8.240  | 136.895 | 1.00 | 0.00 | N |
| ATOM | 1155 | C2   | C B | 19 | -24.044 | 6.896  | 137.216 | 1.00 | 0.00 | C |
| ATOM | 1156 | O2   | C B | 19 | -25.198 | 6.453  | 137.260 | 1.00 | 0.00 | O |
| ATOM | 1157 | N3   | C B | 19 | -22.959 | 6.122  | 137.465 | 1.00 | 0.00 | N |
| ATOM | 1158 | C4   | C B | 19 | -21.722 | 6.633  | 137.410 | 1.00 | 0.00 | C |
| ATOM | 1159 | N4   | C B | 19 | -20.699 | 5.831  | 137.662 | 1.00 | 0.00 | N |
| ATOM | 1160 | C5   | C B | 19 | -21.496 | 8.008  | 137.085 | 1.00 | 0.00 | C |
| ATOM | 1161 | C6   | C B | 19 | -22.599 | 8.768  | 136.836 | 1.00 | 0.00 | C |
| ATOM | 1162 | C2'  | C B | 19 | -24.950 | 10.493 | 137.158 | 1.00 | 0.00 | C |
| ATOM | 1163 | C3'  | C B | 19 | -25.688 | 11.287 | 136.091 | 1.00 | 0.00 | C |
| ATOM | 1164 | O3'  | C B | 19 | -27.086 | 11.253 | 136.367 | 1.00 | 0.00 | O |
| ATOM | 1165 | C4'  | C B | 19 | -25.334 | 10.542 | 134.807 | 1.00 | 0.00 | C |
| ATOM | 1166 | O4'  | C B | 19 | -25.219 | 9.143  | 135.220 | 1.00 | 0.00 | O |
| ATOM | 1167 | C5'  | C B | 19 | -24.047 | 10.949 | 134.126 | 1.00 | 0.00 | C |
| ATOM | 1168 | O5'  | C B | 19 | -23.047 | 11.277 | 135.124 | 1.00 | 0.00 | O |
| ATOM | 1169 | O1P  | C B | 19 | -22.675 | 13.742 | 134.790 | 1.00 | 0.00 | O |
| ATOM | 1170 | O2P  | C B | 19 | -20.840 | 12.312 | 135.727 | 1.00 | 0.00 | O |
| ATOM | 1171 | P    | C B | 19 | -21.996 | 12.431 | 134.807 | 1.00 | 0.00 | P |
| ATOM | 1172 | H5   | C B | 19 | -20.491 | 8.428  | 137.039 | 1.00 | 0.00 | H |
| ATOM | 1173 | H6   | C B | 19 | -22.478 | 9.820  | 136.582 | 1.00 | 0.00 | H |
| ATOM | 1174 | H1'  | C B | 19 | -25.922 | 8.560  | 137.039 | 1.00 | 0.00 | H |
| ATOM | 1175 | H3'  | C B | 19 | -25.353 | 12.324 | 136.050 | 1.00 | 0.00 | H |
| ATOM | 1176 | H4'  | C B | 19 | -26.150 | 10.712 | 134.104 | 1.00 | 0.00 | H |
| ATOM | 1177 | H41  | C B | 19 | -19.736 | 6.196  | 137.624 | 1.00 | 0.00 | H |
| ATOM | 1178 | H42  | C B | 19 | -20.865 | 4.840  | 137.896 | 1.00 | 0.00 | H |
| ATOM | 1179 | H2'1 | C B | 19 | -23.917 | 10.824 | 137.256 | 1.00 | 0.00 | H |
| ATOM | 1180 | H2'2 | C B | 19 | -25.423 | 10.603 | 138.134 | 1.00 | 0.00 | H |
| ATOM | 1181 | H5'1 | C B | 19 | -23.694 | 10.127 | 133.505 | 1.00 | 0.00 | H |
| ATOM | 1182 | H5'2 | C B | 19 | -24.237 | 11.817 | 133.497 | 1.00 | 0.00 | H |
| ATOM | 1183 | C1'  | T B | 20 | -27.917 | 7.178  | 140.191 | 1.00 | 0.00 | C |
| ATOM | 1184 | N1   | T B | 20 | -26.439 | 7.192  | 140.347 | 1.00 | 0.00 | N |
| ATOM | 1185 | C2   | T B | 20 | -25.830 | 6.002  | 140.686 | 1.00 | 0.00 | C |
| ATOM | 1186 | O2   | T B | 20 | -26.451 | 4.967  | 140.856 | 1.00 | 0.00 | O |
| ATOM | 1187 | N3   | T B | 20 | -24.455 | 6.060  | 140.821 | 1.00 | 0.00 | N |
| ATOM | 1188 | C4   | T B | 20 | -23.660 | 7.172  | 140.651 | 1.00 | 0.00 | C |
| ATOM | 1189 | O4   | T B | 20 | -22.434 | 7.103  | 140.801 | 1.00 | 0.00 | O |
| ATOM | 1190 | C5   | T B | 20 | -24.385 | 8.368  | 140.298 | 1.00 | 0.00 | C |
| ATOM | 1191 | C6   | T B | 20 | -25.724 | 8.350  | 140.158 | 1.00 | 0.00 | C |
| ATOM | 1192 | C7   | T B | 20 | -23.557 | 9.604  | 140.103 | 1.00 | 0.00 | C |
| ATOM | 1193 | C2'  | T B | 20 | -28.601 | 8.439  | 140.704 | 1.00 | 0.00 | C |
| ATOM | 1194 | C3'  | T B | 20 | -29.740 | 8.610  | 139.712 | 1.00 | 0.00 | C |
| ATOM | 1195 | O3'  | T B | 20 | -30.844 | 7.808  | 140.122 | 1.00 | 0.00 | O |
| ATOM | 1196 | C4'  | T B | 20 | -29.126 | 8.121  | 138.402 | 1.00 | 0.00 | C |
| ATOM | 1197 | O4'  | T B | 20 | -28.205 | 7.059  | 138.810 | 1.00 | 0.00 | O |
| ATOM | 1198 | C5'  | T B | 20 | -28.358 | 9.144  | 137.597 | 1.00 | 0.00 | C |
| ATOM | 1199 | O5'  | T B | 20 | -27.648 | 10.039 | 138.490 | 1.00 | 0.00 | O |
| ATOM | 1200 | O1P  | T B | 20 | -28.772 | 12.256 | 138.108 | 1.00 | 0.00 | O |
| ATOM | 1201 | O2P  | T B | 20 | -26.382 | 12.175 | 138.868 | 1.00 | 0.00 | O |
| ATOM | 1202 | P    | T B | 20 | -27.469 | 11.564 | 138.066 | 1.00 | 0.00 | P |
| ATOM | 1203 | H3   | T B | 20 | -23.977 | 5.184  | 141.073 | 1.00 | 0.00 | H |
| ATOM | 1204 | H6   | T B | 20 | -26.250 | 9.265  | 139.889 | 1.00 | 0.00 | H |
| ATOM | 1205 | H1'  | T B | 20 | -28.306 | 6.291  | 140.691 | 1.00 | 0.00 | H |
| ATOM | 1206 | H3'  | T B | 20 | -30.060 | 9.648  | 139.633 | 1.00 | 0.00 | H |

|      |      |      |     |    |         |        |         |      |      |   |
|------|------|------|-----|----|---------|--------|---------|------|------|---|
| ATOM | 1207 | H4'  | T B | 20 | -29.947 | 7.758  | 137.783 | 1.00 | 0.00 | H |
| ATOM | 1208 | H3T  | T B | 20 | -31.134 | 7.944  | 141.028 | 1.00 | 0.00 | H |
| ATOM | 1209 | H71  | T B | 20 | -23.806 | 10.334 | 140.872 | 1.00 | 0.00 | H |
| ATOM | 1210 | H72  | T B | 20 | -22.499 | 9.349  | 140.170 | 1.00 | 0.00 | H |
| ATOM | 1211 | H73  | T B | 20 | -23.763 | 10.029 | 139.119 | 1.00 | 0.00 | H |
| ATOM | 1212 | H2'1 | T B | 20 | -27.936 | 9.301  | 140.697 | 1.00 | 0.00 | H |
| ATOM | 1213 | H2'2 | T B | 20 | -28.974 | 8.320  | 141.722 | 1.00 | 0.00 | H |
| ATOM | 1214 | H5'1 | T B | 20 | -27.650 | 8.630  | 136.947 | 1.00 | 0.00 | H |
| ATOM | 1215 | H5'2 | T B | 20 | -29.056 | 9.713  | 136.985 | 1.00 | 0.00 | H |
| TER  |      |      |     |    |         |        |         |      |      |   |
| ATOM | 1    | C1'  | A A | 1  | 63.211  | 8.596  | 61.838  | 1.00 | 0.00 | C |
| ATOM | 2    | N1   | A A | 1  | 63.716  | 5.003  | 58.209  | 1.00 | 0.00 | N |
| ATOM | 3    | C2   | A A | 1  | 63.431  | 6.301  | 58.155  | 1.00 | 0.00 | C |
| ATOM | 4    | N3   | A A | 1  | 63.319  | 7.174  | 59.134  | 1.00 | 0.00 | N |
| ATOM | 5    | C4   | A A | 1  | 63.533  | 6.576  | 60.319  | 1.00 | 0.00 | C |
| ATOM | 6    | C5   | A A | 1  | 63.832  | 5.261  | 60.545  | 1.00 | 0.00 | C |
| ATOM | 7    | C6   | A A | 1  | 63.926  | 4.434  | 59.406  | 1.00 | 0.00 | C |
| ATOM | 8    | N6   | A A | 1  | 64.213  | 3.123  | 59.473  | 1.00 | 0.00 | N |
| ATOM | 9    | N7   | A A | 1  | 63.985  | 5.009  | 61.897  | 1.00 | 0.00 | N |
| ATOM | 10   | C8   | A A | 1  | 63.775  | 6.165  | 62.454  | 1.00 | 0.00 | C |
| ATOM | 11   | N9   | A A | 1  | 63.496  | 7.163  | 61.560  | 1.00 | 0.00 | N |
| ATOM | 12   | C2'  | A A | 1  | 62.383  | 8.823  | 63.096  | 1.00 | 0.00 | C |
| ATOM | 13   | C3'  | A A | 1  | 62.969  | 10.119 | 63.632  | 1.00 | 0.00 | C |
| ATOM | 14   | O3'  | A A | 1  | 62.341  | 11.221 | 62.982  | 1.00 | 0.00 | O |
| ATOM | 15   | C4'  | A A | 1  | 64.449  | 10.000 | 63.266  | 1.00 | 0.00 | C |
| ATOM | 16   | O4'  | A A | 1  | 64.449  | 9.259  | 62.004  | 1.00 | 0.00 | O |
| ATOM | 17   | C5'  | A A | 1  | 65.327  | 9.271  | 64.255  | 1.00 | 0.00 | C |
| ATOM | 18   | O5'  | A A | 1  | 64.592  | 8.169  | 64.846  | 1.00 | 0.00 | O |
| ATOM | 19   | H2   | A A | 1  | 63.269  | 6.701  | 57.154  | 1.00 | 0.00 | H |
| ATOM | 20   | H8   | A A | 1  | 63.817  | 6.324  | 63.532  | 1.00 | 0.00 | H |
| ATOM | 21   | H1'  | A A | 1  | 62.717  | 9.022  | 60.964  | 1.00 | 0.00 | H |
| ATOM | 22   | H3'  | A A | 1  | 62.838  | 10.213 | 64.711  | 1.00 | 0.00 | H |
| ATOM | 23   | H4'  | A A | 1  | 64.831  | 11.015 | 63.165  | 1.00 | 0.00 | H |
| ATOM | 24   | H61  | A A | 1  | 64.270  | 2.564  | 58.612  | 1.00 | 0.00 | H |
| ATOM | 25   | H62  | A A | 1  | 64.375  | 2.680  | 60.389  | 1.00 | 0.00 | H |
| ATOM | 26   | H5T  | A A | 1  | 64.768  | 7.935  | 65.759  | 1.00 | 0.00 | H |
| ATOM | 27   | H2'1 | A A | 1  | 62.492  | 8.012  | 63.815  | 1.00 | 0.00 | H |
| ATOM | 28   | H2'2 | A A | 1  | 61.320  | 8.929  | 62.879  | 1.00 | 0.00 | H |
| ATOM | 29   | H5'1 | A A | 1  | 66.208  | 8.891  | 63.738  | 1.00 | 0.00 | H |
| ATOM | 30   | H5'2 | A A | 1  | 65.640  | 9.963  | 65.035  | 1.00 | 0.00 | H |
| ATOM | 31   | C1'  | G A | 2  | 59.623  | 9.072  | 58.439  | 1.00 | 0.00 | C |
| ATOM | 32   | N1   | G A | 2  | 60.462  | 4.103  | 57.654  | 1.00 | 0.00 | N |
| ATOM | 33   | C2   | G A | 2  | 60.253  | 5.121  | 56.743  | 1.00 | 0.00 | C |
| ATOM | 34   | N2   | G A | 2  | 60.267  | 4.769  | 55.453  | 1.00 | 0.00 | N |
| ATOM | 35   | N3   | G A | 2  | 60.046  | 6.390  | 57.092  | 1.00 | 0.00 | N |
| ATOM | 36   | C4   | G A | 2  | 60.059  | 6.564  | 58.440  | 1.00 | 0.00 | C |
| ATOM | 37   | C5   | G A | 2  | 60.258  | 5.607  | 59.424  | 1.00 | 0.00 | C |
| ATOM | 38   | C6   | G A | 2  | 60.481  | 4.261  | 59.052  | 1.00 | 0.00 | C |
| ATOM | 39   | O6   | G A | 2  | 60.678  | 3.280  | 59.770  | 1.00 | 0.00 | O |
| ATOM | 40   | N7   | G A | 2  | 60.194  | 6.196  | 60.688  | 1.00 | 0.00 | N |
| ATOM | 41   | C8   | G A | 2  | 59.968  | 7.460  | 60.438  | 1.00 | 0.00 | C |
| ATOM | 42   | N9   | G A | 2  | 59.873  | 7.762  | 59.095  | 1.00 | 0.00 | N |
| ATOM | 43   | C2'  | G A | 2  | 58.632  | 9.955  | 59.185  | 1.00 | 0.00 | C |
| ATOM | 44   | C3'  | G A | 2  | 59.199  | 11.344 | 58.948  | 1.00 | 0.00 | C |

|      |    |      |     |   |        |        |        |      |      |   |
|------|----|------|-----|---|--------|--------|--------|------|------|---|
| ATOM | 45 | O3'  | G A | 2 | 58.733 | 11.832 | 57.692 | 1.00 | 0.00 | O |
| ATOM | 46 | C4'  | G A | 2 | 60.709 | 11.099 | 58.948 | 1.00 | 0.00 | C |
| ATOM | 47 | O4'  | G A | 2 | 60.856 | 9.763  | 58.372 | 1.00 | 0.00 | O |
| ATOM | 48 | C5'  | G A | 2 | 61.391 | 11.123 | 60.296 | 1.00 | 0.00 | C |
| ATOM | 49 | O5'  | G A | 2 | 60.520 | 10.542 | 61.297 | 1.00 | 0.00 | O |
| ATOM | 50 | O1P  | G A | 2 | 59.989 | 12.484 | 62.805 | 1.00 | 0.00 | O |
| ATOM | 51 | O2P  | G A | 2 | 59.949 | 10.146 | 63.711 | 1.00 | 0.00 | O |
| ATOM | 52 | P    | G A | 2 | 60.561 | 11.125 | 62.781 | 1.00 | 0.00 | P |
| ATOM | 53 | H1   | G A | 2 | 60.616 | 3.155  | 57.280 | 1.00 | 0.00 | H |
| ATOM | 54 | H8   | G A | 2 | 59.865 | 8.210  | 61.222 | 1.00 | 0.00 | H |
| ATOM | 55 | H1'  | G A | 2 | 59.287 | 8.886  | 57.419 | 1.00 | 0.00 | H |
| ATOM | 56 | H21  | G A | 2 | 60.428 | 3.786  | 55.189 | 1.00 | 0.00 | H |
| ATOM | 57 | H3'  | G A | 2 | 58.914 | 12.042 | 59.735 | 1.00 | 0.00 | H |
| ATOM | 58 | H22  | G A | 2 | 60.114 | 5.481  | 54.725 | 1.00 | 0.00 | H |
| ATOM | 59 | H4'  | G A | 2 | 61.155 | 11.879 | 58.334 | 1.00 | 0.00 | H |
| ATOM | 60 | H2'1 | G A | 2 | 58.590 | 9.719  | 60.250 | 1.00 | 0.00 | H |
| ATOM | 61 | H2'2 | G A | 2 | 57.619 | 9.866  | 58.790 | 1.00 | 0.00 | H |
| ATOM | 62 | H5'1 | G A | 2 | 62.318 | 10.553 | 60.236 | 1.00 | 0.00 | H |
| ATOM | 63 | H5'2 | G A | 2 | 61.622 | 12.155 | 60.560 | 1.00 | 0.00 | H |
| ATOM | 64 | C1'  | G A | 3 | 56.588 | 7.399  | 54.901 | 1.00 | 0.00 | C |
| ATOM | 65 | N1   | G A | 3 | 57.281 | 2.909  | 57.219 | 1.00 | 0.00 | N |
| ATOM | 66 | C2   | G A | 3 | 57.256 | 3.217  | 55.872 | 1.00 | 0.00 | C |
| ATOM | 67 | N2   | G A | 3 | 57.438 | 2.192  | 55.028 | 1.00 | 0.00 | N |
| ATOM | 68 | N3   | G A | 3 | 57.065 | 4.447  | 55.402 | 1.00 | 0.00 | N |
| ATOM | 69 | C4   | G A | 3 | 56.893 | 5.359  | 56.395 | 1.00 | 0.00 | C |
| ATOM | 70 | C5   | G A | 3 | 56.899 | 5.143  | 57.764 | 1.00 | 0.00 | C |
| ATOM | 71 | C6   | G A | 3 | 57.107 | 3.836  | 58.262 | 1.00 | 0.00 | C |
| ATOM | 72 | O6   | G A | 3 | 57.148 | 3.448  | 59.431 | 1.00 | 0.00 | O |
| ATOM | 73 | N7   | G A | 3 | 56.685 | 6.343  | 58.442 | 1.00 | 0.00 | N |
| ATOM | 74 | C8   | G A | 3 | 56.561 | 7.229  | 57.488 | 1.00 | 0.00 | C |
| ATOM | 75 | N9   | G A | 3 | 56.674 | 6.707  | 56.217 | 1.00 | 0.00 | N |
| ATOM | 76 | C2'  | G A | 3 | 55.544 | 8.507  | 54.859 | 1.00 | 0.00 | C |
| ATOM | 77 | C3'  | G A | 3 | 56.209 | 9.535  | 53.958 | 1.00 | 0.00 | C |
| ATOM | 78 | O3'  | G A | 3 | 55.954 | 9.201  | 52.597 | 1.00 | 0.00 | O |
| ATOM | 79 | C4'  | G A | 3 | 57.688 | 9.398  | 54.319 | 1.00 | 0.00 | C |
| ATOM | 80 | O4'  | G A | 3 | 57.851 | 7.979  | 54.635 | 1.00 | 0.00 | O |
| ATOM | 81 | C5'  | G A | 3 | 58.170 | 10.214 | 55.495 | 1.00 | 0.00 | C |
| ATOM | 82 | O5'  | G A | 3 | 57.136 | 10.271 | 56.510 | 1.00 | 0.00 | O |
| ATOM | 83 | O1P  | G A | 3 | 56.490 | 12.704 | 56.546 | 1.00 | 0.00 | O |
| ATOM | 84 | O2P  | G A | 3 | 56.203 | 11.298 | 58.604 | 1.00 | 0.00 | O |
| ATOM | 85 | P    | G A | 3 | 56.992 | 11.598 | 57.384 | 1.00 | 0.00 | P |
| ATOM | 86 | H1   | G A | 3 | 57.442 | 1.923  | 57.478 | 1.00 | 0.00 | H |
| ATOM | 87 | H8   | G A | 3 | 56.382 | 8.287  | 57.679 | 1.00 | 0.00 | H |
| ATOM | 88 | H1'  | G A | 3 | 56.393 | 6.650  | 54.134 | 1.00 | 0.00 | H |
| ATOM | 89 | H21  | G A | 3 | 57.587 | 1.243  | 55.399 | 1.00 | 0.00 | H |
| ATOM | 90 | H3'  | G A | 3 | 55.849 | 10.546 | 54.156 | 1.00 | 0.00 | H |
| ATOM | 91 | H22  | G A | 3 | 57.427 | 2.355  | 54.012 | 1.00 | 0.00 | H |
| ATOM | 92 | H4'  | G A | 3 | 58.257 | 9.707  | 53.443 | 1.00 | 0.00 | H |
| ATOM | 93 | H2'1 | G A | 3 | 55.339 | 8.919  | 55.847 | 1.00 | 0.00 | H |
| ATOM | 94 | H2'2 | G A | 3 | 54.596 | 8.167  | 54.441 | 1.00 | 0.00 | H |
| ATOM | 95 | H5'1 | G A | 3 | 59.066 | 9.751  | 55.908 | 1.00 | 0.00 | H |
| ATOM | 96 | H5'2 | G A | 3 | 58.412 | 11.221 | 55.157 | 1.00 | 0.00 | H |
| ATOM | 97 | C1'  | C A | 4 | 54.013 | 3.883  | 52.546 | 1.00 | 0.00 | C |
| ATOM | 98 | N1   | C A | 4 | 53.877 | 4.062  | 54.019 | 1.00 | 0.00 | N |

|      |     |      |     |   |        |        |        |      |      |   |
|------|-----|------|-----|---|--------|--------|--------|------|------|---|
| ATOM | 99  | C2   | C A | 4 | 54.035 | 2.940  | 54.829 | 1.00 | 0.00 | C |
| ATOM | 100 | O2   | C A | 4 | 54.280 | 1.850  | 54.298 | 1.00 | 0.00 | O |
| ATOM | 101 | N3   | C A | 4 | 53.915 | 3.083  | 56.171 | 1.00 | 0.00 | N |
| ATOM | 102 | C4   | C A | 4 | 53.648 | 4.277  | 56.715 | 1.00 | 0.00 | C |
| ATOM | 103 | N4   | C A | 4 | 53.544 | 4.359  | 58.034 | 1.00 | 0.00 | N |
| ATOM | 104 | C5   | C A | 4 | 53.477 | 5.446  | 55.905 | 1.00 | 0.00 | C |
| ATOM | 105 | C6   | C A | 4 | 53.606 | 5.281  | 54.558 | 1.00 | 0.00 | C |
| ATOM | 106 | C2'  | C A | 4 | 53.040 | 4.724  | 51.733 | 1.00 | 0.00 | C |
| ATOM | 107 | C3'  | C A | 4 | 53.877 | 5.090  | 50.516 | 1.00 | 0.00 | C |
| ATOM | 108 | O3'  | C A | 4 | 53.806 | 4.032  | 49.564 | 1.00 | 0.00 | O |
| ATOM | 109 | C4'  | C A | 4 | 55.278 | 5.247  | 51.101 | 1.00 | 0.00 | C |
| ATOM | 110 | O4'  | C A | 4 | 55.328 | 4.266  | 52.187 | 1.00 | 0.00 | O |
| ATOM | 111 | C5'  | C A | 4 | 55.622 | 6.606  | 51.664 | 1.00 | 0.00 | C |
| ATOM | 112 | O5'  | C A | 4 | 54.455 | 7.182  | 52.304 | 1.00 | 0.00 | O |
| ATOM | 113 | O1P  | C A | 4 | 53.925 | 9.175  | 50.861 | 1.00 | 0.00 | O |
| ATOM | 114 | O2P  | C A | 4 | 53.277 | 9.174  | 53.286 | 1.00 | 0.00 | O |
| ATOM | 115 | P    | C A | 4 | 54.248 | 8.762  | 52.241 | 1.00 | 0.00 | P |
| ATOM | 116 | H5   | C A | 4 | 53.256 | 6.419  | 56.344 | 1.00 | 0.00 | H |
| ATOM | 117 | H6   | C A | 4 | 53.490 | 6.142  | 53.900 | 1.00 | 0.00 | H |
| ATOM | 118 | H1'  | C A | 4 | 53.899 | 2.825  | 52.321 | 1.00 | 0.00 | H |
| ATOM | 119 | H3'  | C A | 4 | 53.537 | 6.016  | 50.053 | 1.00 | 0.00 | H |
| ATOM | 120 | H4'  | C A | 4 | 55.983 | 5.031  | 50.299 | 1.00 | 0.00 | H |
| ATOM | 121 | H41  | C A | 4 | 53.340 | 5.266  | 58.480 | 1.00 | 0.00 | H |
| ATOM | 122 | H42  | C A | 4 | 53.665 | 3.516  | 58.615 | 1.00 | 0.00 | H |
| ATOM | 123 | H2'1 | C A | 4 | 52.712 | 5.614  | 52.270 | 1.00 | 0.00 | H |
| ATOM | 124 | H2'2 | C A | 4 | 52.148 | 4.165  | 51.449 | 1.00 | 0.00 | H |
| ATOM | 125 | H5'1 | C A | 4 | 56.426 | 6.499  | 52.393 | 1.00 | 0.00 | H |
| ATOM | 126 | H5'2 | C A | 4 | 55.956 | 7.253  | 50.855 | 1.00 | 0.00 | H |
| ATOM | 127 | C1'  | C A | 5 | 51.632 | -0.450 | 52.265 | 1.00 | 0.00 | C |
| ATOM | 128 | N1   | C A | 5 | 51.294 | 0.529  | 53.333 | 1.00 | 0.00 | N |
| ATOM | 129 | C2   | C A | 5 | 51.278 | 0.078  | 54.652 | 1.00 | 0.00 | C |
| ATOM | 130 | O2   | C A | 5 | 51.543 | -1.111 | 54.880 | 1.00 | 0.00 | O |
| ATOM | 131 | N3   | C A | 5 | 50.974 | 0.955  | 55.639 | 1.00 | 0.00 | N |
| ATOM | 132 | C4   | C A | 5 | 50.690 | 2.233  | 55.362 | 1.00 | 0.00 | C |
| ATOM | 133 | N4   | C A | 5 | 50.402 | 3.047  | 56.365 | 1.00 | 0.00 | N |
| ATOM | 134 | C5   | C A | 5 | 50.698 | 2.724  | 54.016 | 1.00 | 0.00 | C |
| ATOM | 135 | C6   | C A | 5 | 51.011 | 1.826  | 53.039 | 1.00 | 0.00 | C |
| ATOM | 136 | C2'  | C A | 5 | 50.830 | -0.264 | 50.986 | 1.00 | 0.00 | C |
| ATOM | 137 | C3'  | C A | 5 | 51.851 | -0.622 | 49.916 | 1.00 | 0.00 | C |
| ATOM | 138 | O3'  | C A | 5 | 51.864 | -2.036 | 49.738 | 1.00 | 0.00 | O |
| ATOM | 139 | C4'  | C A | 5 | 53.158 | -0.102 | 50.507 | 1.00 | 0.00 | C |
| ATOM | 140 | O4'  | C A | 5 | 53.003 | -0.287 | 51.950 | 1.00 | 0.00 | O |
| ATOM | 141 | C5'  | C A | 5 | 53.486 | 1.349  | 50.238 | 1.00 | 0.00 | C |
| ATOM | 142 | O5'  | C A | 5 | 52.269 | 2.138  | 50.257 | 1.00 | 0.00 | O |
| ATOM | 143 | O1P  | C A | 5 | 52.052 | 2.929  | 47.878 | 1.00 | 0.00 | O |
| ATOM | 144 | O2P  | C A | 5 | 51.063 | 4.282  | 49.745 | 1.00 | 0.00 | O |
| ATOM | 145 | P    | C A | 5 | 52.152 | 3.389  | 49.276 | 1.00 | 0.00 | P |
| ATOM | 146 | H5   | C A | 5 | 50.462 | 3.764  | 53.784 | 1.00 | 0.00 | H |
| ATOM | 147 | H6   | C A | 5 | 51.033 | 2.153  | 51.998 | 1.00 | 0.00 | H |
| ATOM | 148 | H1'  | C A | 5 | 51.499 | -1.453 | 52.669 | 1.00 | 0.00 | H |
| ATOM | 149 | H3'  | C A | 5 | 51.629 | -0.141 | 48.963 | 1.00 | 0.00 | H |
| ATOM | 150 | H4'  | C A | 5 | 53.960 | -0.707 | 50.083 | 1.00 | 0.00 | H |
| ATOM | 151 | H41  | C A | 5 | 50.182 | 4.036  | 56.180 | 1.00 | 0.00 | H |
| ATOM | 152 | H42  | C A | 5 | 50.396 | 2.691  | 57.333 | 1.00 | 0.00 | H |

|      |     |      |     |   |        |        |        |      |      |   |
|------|-----|------|-----|---|--------|--------|--------|------|------|---|
| ATOM | 153 | H2'1 | C A | 5 | 50.473 | 0.758  | 50.866 | 1.00 | 0.00 | H |
| ATOM | 154 | H2'2 | C A | 5 | 49.961 | -0.922 | 50.944 | 1.00 | 0.00 | H |
| ATOM | 155 | H5'1 | C A | 5 | 54.171 | 1.710  | 51.006 | 1.00 | 0.00 | H |
| ATOM | 156 | H5'2 | C A | 5 | 53.965 | 1.433  | 49.264 | 1.00 | 0.00 | H |
| ATOM | 157 | C1'  | G A | 6 | 49.105 | -4.265 | 54.157 | 1.00 | 0.00 | C |
| ATOM | 158 | N1   | G A | 6 | 47.781 | -0.882 | 57.738 | 1.00 | 0.00 | N |
| ATOM | 159 | C2   | G A | 6 | 48.161 | -2.208 | 57.865 | 1.00 | 0.00 | C |
| ATOM | 160 | N2   | G A | 6 | 48.189 | -2.696 | 59.110 | 1.00 | 0.00 | N |
| ATOM | 161 | N3   | G A | 6 | 48.486 | -2.981 | 56.830 | 1.00 | 0.00 | N |
| ATOM | 162 | C4   | G A | 6 | 48.394 | -2.323 | 55.645 | 1.00 | 0.00 | C |
| ATOM | 163 | C5   | G A | 6 | 48.021 | -1.009 | 55.423 | 1.00 | 0.00 | C |
| ATOM | 164 | C6   | G A | 6 | 47.680 | -0.186 | 56.519 | 1.00 | 0.00 | C |
| ATOM | 165 | O6   | G A | 6 | 47.328 | 0.995  | 56.525 | 1.00 | 0.00 | O |
| ATOM | 166 | N7   | G A | 6 | 48.055 | -0.722 | 54.057 | 1.00 | 0.00 | N |
| ATOM | 167 | C8   | G A | 6 | 48.440 | -1.845 | 53.507 | 1.00 | 0.00 | C |
| ATOM | 168 | N9   | G A | 6 | 48.665 | -2.865 | 54.407 | 1.00 | 0.00 | N |
| ATOM | 169 | C2'  | G A | 6 | 48.509 | -4.878 | 52.896 | 1.00 | 0.00 | C |
| ATOM | 170 | C3'  | G A | 6 | 49.654 | -5.742 | 52.392 | 1.00 | 0.00 | C |
| ATOM | 171 | O3'  | G A | 6 | 49.620 | -7.002 | 53.058 | 1.00 | 0.00 | O |
| ATOM | 172 | C4'  | G A | 6 | 50.888 | -4.923 | 52.767 | 1.00 | 0.00 | C |
| ATOM | 173 | O4'  | G A | 6 | 50.512 | -4.257 | 54.014 | 1.00 | 0.00 | O |
| ATOM | 174 | C5'  | G A | 6 | 51.327 | -3.876 | 51.773 | 1.00 | 0.00 | C |
| ATOM | 175 | O5'  | G A | 6 | 50.165 | -3.269 | 51.153 | 1.00 | 0.00 | O |
| ATOM | 176 | O1P  | G A | 6 | 50.342 | -3.991 | 48.749 | 1.00 | 0.00 | O |
| ATOM | 177 | O2P  | G A | 6 | 49.163 | -1.856 | 49.333 | 1.00 | 0.00 | O |
| ATOM | 178 | P    | G A | 6 | 50.259 | -2.809 | 49.629 | 1.00 | 0.00 | P |
| ATOM | 179 | H1   | G A | 6 | 47.556 | -0.367 | 58.604 | 1.00 | 0.00 | H |
| ATOM | 180 | H8   | G A | 6 | 48.571 | -1.965 | 52.431 | 1.00 | 0.00 | H |
| ATOM | 181 | H1'  | G A | 6 | 48.859 | -4.863 | 55.035 | 1.00 | 0.00 | H |
| ATOM | 182 | H21  | G A | 6 | 47.940 | -2.091 | 59.906 | 1.00 | 0.00 | H |
| ATOM | 183 | H3'  | G A | 6 | 49.602 | -5.902 | 51.315 | 1.00 | 0.00 | H |
| ATOM | 184 | H22  | G A | 6 | 48.460 | -3.677 | 59.273 | 1.00 | 0.00 | H |
| ATOM | 185 | H4'  | G A | 6 | 51.709 | -5.628 | 52.893 | 1.00 | 0.00 | H |
| ATOM | 186 | H2'1 | G A | 6 | 48.228 | -4.123 | 52.162 | 1.00 | 0.00 | H |
| ATOM | 187 | H2'2 | G A | 6 | 47.622 | -5.477 | 53.106 | 1.00 | 0.00 | H |
| ATOM | 188 | H5'1 | G A | 6 | 51.910 | -3.113 | 52.287 | 1.00 | 0.00 | H |
| ATOM | 189 | H5'2 | G A | 6 | 51.949 | -4.345 | 51.009 | 1.00 | 0.00 | H |
| ATOM | 190 | C1'  | C A | 7 | 46.143 | -6.426 | 57.486 | 1.00 | 0.00 | C |
| ATOM | 191 | N1   | C A | 7 | 45.742 | -5.149 | 56.835 | 1.00 | 0.00 | N |
| ATOM | 192 | C2   | C A | 7 | 45.345 | -4.095 | 57.654 | 1.00 | 0.00 | C |
| ATOM | 193 | O2   | C A | 7 | 45.341 | -4.259 | 58.880 | 1.00 | 0.00 | O |
| ATOM | 194 | N3   | C A | 7 | 44.975 | -2.924 | 57.079 | 1.00 | 0.00 | N |
| ATOM | 195 | C4   | C A | 7 | 44.989 | -2.776 | 55.749 | 1.00 | 0.00 | C |
| ATOM | 196 | N4   | C A | 7 | 44.621 | -1.609 | 55.240 | 1.00 | 0.00 | N |
| ATOM | 197 | C5   | C A | 7 | 45.388 | -3.845 | 54.881 | 1.00 | 0.00 | C |
| ATOM | 198 | C6   | C A | 7 | 45.761 | -5.014 | 55.481 | 1.00 | 0.00 | C |
| ATOM | 199 | C2'  | C A | 7 | 45.701 | -7.668 | 56.727 | 1.00 | 0.00 | C |
| ATOM | 200 | C3'  | C A | 7 | 46.864 | -8.620 | 56.972 | 1.00 | 0.00 | C |
| ATOM | 201 | O3'  | C A | 7 | 46.674 | -9.279 | 58.222 | 1.00 | 0.00 | O |
| ATOM | 202 | C4'  | C A | 7 | 48.069 | -7.684 | 56.989 | 1.00 | 0.00 | C |
| ATOM | 203 | O4'  | C A | 7 | 47.556 | -6.442 | 57.568 | 1.00 | 0.00 | O |
| ATOM | 204 | C5'  | C A | 7 | 48.694 | -7.369 | 55.649 | 1.00 | 0.00 | C |
| ATOM | 205 | O5'  | C A | 7 | 47.661 | -7.269 | 54.638 | 1.00 | 0.00 | O |
| ATOM | 206 | O1P  | C A | 7 | 48.139 | -9.222 | 53.121 | 1.00 | 0.00 | O |

|      |     |      |     |   |        |         |        |      |      |   |
|------|-----|------|-----|---|--------|---------|--------|------|------|---|
| ATOM | 207 | O2P  | C A | 7 | 46.993 | -7.180  | 52.218 | 1.00 | 0.00 | O |
| ATOM | 208 | P    | C A | 7 | 47.990 | -7.753  | 53.155 | 1.00 | 0.00 | P |
| ATOM | 209 | H5   | C A | 7 | 45.395 | -3.731  | 53.795 | 1.00 | 0.00 | H |
| ATOM | 210 | H6   | C A | 7 | 46.081 | -5.853  | 54.863 | 1.00 | 0.00 | H |
| ATOM | 211 | H1'  | C A | 7 | 45.749 | -6.428  | 58.503 | 1.00 | 0.00 | H |
| ATOM | 212 | H3'  | C A | 7 | 46.953 | -9.364  | 56.180 | 1.00 | 0.00 | H |
| ATOM | 213 | H4'  | C A | 7 | 48.830 | -8.160  | 57.607 | 1.00 | 0.00 | H |
| ATOM | 214 | H41  | C A | 7 | 44.625 | -1.467  | 54.220 | 1.00 | 0.00 | H |
| ATOM | 215 | H42  | C A | 7 | 44.331 | -0.842  | 55.865 | 1.00 | 0.00 | H |
| ATOM | 216 | H2'1 | C A | 7 | 45.563 | -7.477  | 55.664 | 1.00 | 0.00 | H |
| ATOM | 217 | H2'2 | C A | 7 | 44.765 | -8.078  | 57.112 | 1.00 | 0.00 | H |
| ATOM | 218 | H5'1 | C A | 7 | 49.235 | -6.425  | 55.718 | 1.00 | 0.00 | H |
| ATOM | 219 | H5'2 | C A | 7 | 49.392 | -8.163  | 55.386 | 1.00 | 0.00 | H |
| ATOM | 220 | C1'  | A A | 8 | 42.636 | -6.447  | 60.981 | 1.00 | 0.00 | C |
| ATOM | 221 | N1   | A A | 8 | 41.112 | -2.126  | 58.668 | 1.00 | 0.00 | N |
| ATOM | 222 | C2   | A A | 8 | 41.236 | -2.464  | 59.947 | 1.00 | 0.00 | C |
| ATOM | 223 | N3   | A A | 8 | 41.640 | -3.599  | 60.479 | 1.00 | 0.00 | N |
| ATOM | 224 | C4   | A A | 8 | 41.942 | -4.483  | 59.509 | 1.00 | 0.00 | C |
| ATOM | 225 | C5   | A A | 8 | 41.869 | -4.294  | 58.158 | 1.00 | 0.00 | C |
| ATOM | 226 | C6   | A A | 8 | 41.424 | -3.027  | 57.725 | 1.00 | 0.00 | C |
| ATOM | 227 | N6   | A A | 8 | 41.300 | -2.697  | 56.428 | 1.00 | 0.00 | N |
| ATOM | 228 | N7   | A A | 8 | 42.263 | -5.430  | 57.471 | 1.00 | 0.00 | N |
| ATOM | 229 | C8   | A A | 8 | 42.560 | -6.276  | 58.415 | 1.00 | 0.00 | C |
| ATOM | 230 | N9   | A A | 8 | 42.392 | -5.770  | 59.678 | 1.00 | 0.00 | N |
| ATOM | 231 | C2'  | A A | 8 | 42.252 | -7.920  | 60.989 | 1.00 | 0.00 | C |
| ATOM | 232 | C3'  | A A | 8 | 43.321 | -8.522  | 61.887 | 1.00 | 0.00 | C |
| ATOM | 233 | O3'  | A A | 8 | 42.922 | -8.376  | 63.248 | 1.00 | 0.00 | O |
| ATOM | 234 | C4'  | A A | 8 | 44.555 | -7.684  | 61.556 | 1.00 | 0.00 | C |
| ATOM | 235 | O4'  | A A | 8 | 44.020 | -6.353  | 61.261 | 1.00 | 0.00 | O |
| ATOM | 236 | C5'  | A A | 8 | 45.381 | -8.145  | 60.379 | 1.00 | 0.00 | C |
| ATOM | 237 | O5'  | A A | 8 | 44.511 | -8.670  | 59.343 | 1.00 | 0.00 | O |
| ATOM | 238 | O1P  | A A | 8 | 45.112 | -11.114 | 59.264 | 1.00 | 0.00 | O |
| ATOM | 239 | O2P  | A A | 8 | 44.205 | -9.975  | 57.219 | 1.00 | 0.00 | O |
| ATOM | 240 | P    | A A | 8 | 45.029 | -9.885  | 58.450 | 1.00 | 0.00 | P |
| ATOM | 241 | H2   | A A | 8 | 40.965 | -1.688  | 60.662 | 1.00 | 0.00 | H |
| ATOM | 242 | H8   | A A | 8 | 42.909 | -7.290  | 58.220 | 1.00 | 0.00 | H |
| ATOM | 243 | H1'  | A A | 8 | 42.100 | -5.898  | 61.755 | 1.00 | 0.00 | H |
| ATOM | 244 | H3'  | A A | 8 | 43.491 | -9.576  | 61.671 | 1.00 | 0.00 | H |
| ATOM | 245 | H4'  | A A | 8 | 45.194 | -7.700  | 62.438 | 1.00 | 0.00 | H |
| ATOM | 246 | H61  | A A | 8 | 40.973 | -1.758  | 56.164 | 1.00 | 0.00 | H |
| ATOM | 247 | H62  | A A | 8 | 41.536 | -3.386  | 55.698 | 1.00 | 0.00 | H |
| ATOM | 248 | H2'1 | A A | 8 | 42.278 | -8.360  | 59.992 | 1.00 | 0.00 | H |
| ATOM | 249 | H2'2 | A A | 8 | 41.254 | -8.084  | 61.394 | 1.00 | 0.00 | H |
| ATOM | 250 | H5'1 | A A | 8 | 45.948 | -7.300  | 59.989 | 1.00 | 0.00 | H |
| ATOM | 251 | H5'2 | A A | 8 | 46.072 | -8.920  | 60.707 | 1.00 | 0.00 | H |
| ATOM | 252 | C1'  | C A | 9 | 38.653 | -4.579  | 63.283 | 1.00 | 0.00 | C |
| ATOM | 253 | N1   | C A | 9 | 38.638 | -4.796  | 61.811 | 1.00 | 0.00 | N |
| ATOM | 254 | C2   | C A | 9 | 38.251 | -3.732  | 60.997 | 1.00 | 0.00 | C |
| ATOM | 255 | O2   | C A | 9 | 37.936 | -2.660  | 61.528 | 1.00 | 0.00 | O |
| ATOM | 256 | N3   | C A | 9 | 38.232 | -3.910  | 59.654 | 1.00 | 0.00 | N |
| ATOM | 257 | C4   | C A | 9 | 38.577 | -5.084  | 59.110 | 1.00 | 0.00 | C |
| ATOM | 258 | N4   | C A | 9 | 38.543 | -5.202  | 57.790 | 1.00 | 0.00 | N |
| ATOM | 259 | C5   | C A | 9 | 38.976 | -6.197  | 59.921 | 1.00 | 0.00 | C |
| ATOM | 260 | C6   | C A | 9 | 38.992 | -5.994  | 61.272 | 1.00 | 0.00 | C |



|      |     |      |     |    |        |        |        |      |      |   |
|------|-----|------|-----|----|--------|--------|--------|------|------|---|
| ATOM | 261 | C2'  | C A | 9  | 38.190 | -5.786 | 64.085 | 1.00 | 0.00 | C |
| ATOM | 262 | C3'  | C A | 9  | 39.083 | -5.711 | 65.316 | 1.00 | 0.00 | C |
| ATOM | 263 | O3'  | C A | 9  | 38.500 | -4.819 | 66.263 | 1.00 | 0.00 | O |
| ATOM | 264 | C4'  | C A | 9  | 40.396 | -5.174 | 64.749 | 1.00 | 0.00 | C |
| ATOM | 265 | O4'  | C A | 9  | 39.985 | -4.286 | 63.662 | 1.00 | 0.00 | O |
| ATOM | 266 | C5'  | C A | 9  | 41.357 | -6.200 | 64.197 | 1.00 | 0.00 | C |
| ATOM | 267 | O5'  | C A | 9  | 40.618 | -7.264 | 63.544 | 1.00 | 0.00 | O |
| ATOM | 268 | O1P  | C A | 9  | 41.088 | -9.272 | 64.984 | 1.00 | 0.00 | O |
| ATOM | 269 | O2P  | C A | 9  | 40.551 | -9.572 | 62.552 | 1.00 | 0.00 | O |
| ATOM | 270 | P    | C A | 9  | 41.191 | -8.750 | 63.608 | 1.00 | 0.00 | P |
| ATOM | 271 | H5   | C A | 9  | 39.252 | -7.157 | 59.483 | 1.00 | 0.00 | H |
| ATOM | 272 | H6   | C A | 9  | 39.297 | -6.807 | 61.930 | 1.00 | 0.00 | H |
| ATOM | 273 | H1'  | C A | 9  | 38.041 | -3.705 | 63.504 | 1.00 | 0.00 | H |
| ATOM | 274 | H3'  | C A | 9  | 39.223 | -6.688 | 65.778 | 1.00 | 0.00 | H |
| ATOM | 275 | H4'  | C A | 9  | 40.900 | -4.650 | 65.561 | 1.00 | 0.00 | H |
| ATOM | 276 | H41  | C A | 9  | 38.805 | -6.093 | 57.345 | 1.00 | 0.00 | H |
| ATOM | 277 | H42  | C A | 9  | 38.253 | -4.401 | 57.209 | 1.00 | 0.00 | H |
| ATOM | 278 | H2'1 | C A | 9  | 38.336 | -6.721 | 63.548 | 1.00 | 0.00 | H |
| ATOM | 279 | H2'2 | C A | 9  | 37.134 | -5.724 | 64.357 | 1.00 | 0.00 | H |
| ATOM | 280 | H5'1 | C A | 9  | 42.022 | -5.719 | 63.479 | 1.00 | 0.00 | H |
| ATOM | 281 | H5'2 | C A | 9  | 41.949 | -6.612 | 65.013 | 1.00 | 0.00 | H |
| ATOM | 282 | C1'  | C A | 10 | 34.483 | -1.917 | 63.516 | 1.00 | 0.00 | C |
| ATOM | 283 | N1   | C A | 10 | 34.671 | -2.935 | 62.447 | 1.00 | 0.00 | N |
| ATOM | 284 | C2   | C A | 10 | 34.457 | -2.541 | 61.128 | 1.00 | 0.00 | C |
| ATOM | 285 | O2   | C A | 10 | 34.123 | -1.371 | 60.898 | 1.00 | 0.00 | O |
| ATOM | 286 | N3   | C A | 10 | 34.624 | -3.453 | 60.138 | 1.00 | 0.00 | N |
| ATOM | 287 | C4   | C A | 10 | 34.984 | -4.713 | 60.416 | 1.00 | 0.00 | C |
| ATOM | 288 | N4   | C A | 10 | 35.135 | -5.563 | 59.410 | 1.00 | 0.00 | N |
| ATOM | 289 | C5   | C A | 10 | 35.206 | -5.147 | 61.764 | 1.00 | 0.00 | C |
| ATOM | 290 | C6   | C A | 10 | 35.037 | -4.209 | 62.744 | 1.00 | 0.00 | C |
| ATOM | 291 | C2'  | C A | 10 | 33.850 | -2.469 | 64.786 | 1.00 | 0.00 | C |
| ATOM | 292 | C3'  | C A | 10 | 34.560 | -1.669 | 65.868 | 1.00 | 0.00 | C |
| ATOM | 293 | O3'  | C A | 10 | 33.892 | -0.422 | 66.041 | 1.00 | 0.00 | O |
| ATOM | 294 | C4'  | C A | 10 | 35.965 | -1.497 | 65.296 | 1.00 | 0.00 | C |
| ATOM | 295 | O4'  | C A | 10 | 35.760 | -1.404 | 63.852 | 1.00 | 0.00 | O |
| ATOM | 296 | C5'  | C A | 10 | 36.944 | -2.615 | 65.574 | 1.00 | 0.00 | C |
| ATOM | 297 | O5'  | C A | 10 | 36.254 | -3.891 | 65.542 | 1.00 | 0.00 | O |
| ATOM | 298 | O1P  | C A | 10 | 36.411 | -4.697 | 67.921 | 1.00 | 0.00 | O |
| ATOM | 299 | O2P  | C A | 10 | 36.215 | -6.351 | 66.045 | 1.00 | 0.00 | O |
| ATOM | 300 | P    | C A | 10 | 36.738 | -5.049 | 66.525 | 1.00 | 0.00 | P |
| ATOM | 301 | H5   | C A | 10 | 35.494 | -6.173 | 61.997 | 1.00 | 0.00 | H |
| ATOM | 302 | H6   | C A | 10 | 35.203 | -4.490 | 63.785 | 1.00 | 0.00 | H |
| ATOM | 303 | H1'  | C A | 10 | 33.890 | -1.098 | 63.109 | 1.00 | 0.00 | H |
| ATOM | 304 | H3'  | C A | 10 | 34.582 | -2.201 | 66.819 | 1.00 | 0.00 | H |
| ATOM | 305 | H4'  | C A | 10 | 36.373 | -0.584 | 65.730 | 1.00 | 0.00 | H |
| ATOM | 306 | H41  | C A | 10 | 35.414 | -6.536 | 59.596 | 1.00 | 0.00 | H |
| ATOM | 307 | H42  | C A | 10 | 34.972 | -5.249 | 58.443 | 1.00 | 0.00 | H |
| ATOM | 308 | H2'1 | C A | 10 | 34.025 | -3.539 | 64.905 | 1.00 | 0.00 | H |
| ATOM | 309 | H2'2 | C A | 10 | 32.771 | -2.308 | 64.814 | 1.00 | 0.00 | H |
| ATOM | 310 | H5'1 | C A | 10 | 37.728 | -2.601 | 64.816 | 1.00 | 0.00 | H |
| ATOM | 311 | H5'2 | C A | 10 | 37.391 | -2.462 | 66.555 | 1.00 | 0.00 | H |
| ATOM | 312 | C1'  | T A | 11 | 30.460 | 0.238  | 61.599 | 1.00 | 0.00 | C |
| ATOM | 313 | N1   | T A | 11 | 30.745 | -1.194 | 61.319 | 1.00 | 0.00 | N |
| ATOM | 314 | C2   | T A | 11 | 30.733 | -1.591 | 59.997 | 1.00 | 0.00 | C |

|      |     |      |     |    |        |        |        |      |      |   |
|------|-----|------|-----|----|--------|--------|--------|------|------|---|
| ATOM | 315 | O2   | T A | 11 | 30.503 | -0.824 | 59.079 | 1.00 | 0.00 | O |
| ATOM | 316 | N3   | T A | 11 | 31.003 | -2.930 | 59.781 | 1.00 | 0.00 | N |
| ATOM | 317 | C4   | T A | 11 | 31.273 | -3.880 | 60.746 | 1.00 | 0.00 | C |
| ATOM | 318 | O4   | T A | 11 | 31.498 | -5.056 | 60.431 | 1.00 | 0.00 | O |
| ATOM | 319 | C5   | T A | 11 | 31.262 | -3.370 | 62.097 | 1.00 | 0.00 | C |
| ATOM | 320 | C6   | T A | 11 | 31.004 | -2.071 | 62.343 | 1.00 | 0.00 | C |
| ATOM | 321 | C7   | T A | 11 | 31.554 | -4.368 | 63.177 | 1.00 | 0.00 | C |
| ATOM | 322 | C2'  | T A | 11 | 29.631 | 0.465  | 62.857 | 1.00 | 0.00 | C |
| ATOM | 323 | C3'  | T A | 11 | 30.220 | 1.759  | 63.397 | 1.00 | 0.00 | C |
| ATOM | 324 | O3'  | T A | 11 | 29.595 | 2.865  | 62.748 | 1.00 | 0.00 | O |
| ATOM | 325 | C4'  | T A | 11 | 31.698 | 1.636  | 63.034 | 1.00 | 0.00 | C |
| ATOM | 326 | O4'  | T A | 11 | 31.699 | 0.900  | 61.770 | 1.00 | 0.00 | O |
| ATOM | 327 | C5'  | T A | 11 | 32.575 | 0.902  | 64.023 | 1.00 | 0.00 | C |
| ATOM | 328 | O5'  | T A | 11 | 31.836 | -0.198 | 64.609 | 1.00 | 0.00 | O |
| ATOM | 329 | O1P  | T A | 11 | 31.619 | 0.467  | 67.027 | 1.00 | 0.00 | O |
| ATOM | 330 | O2P  | T A | 11 | 31.608 | -1.959 | 66.387 | 1.00 | 0.00 | O |
| ATOM | 331 | P    | T A | 11 | 32.119 | -0.591 | 66.128 | 1.00 | 0.00 | P |
| ATOM | 332 | H3   | T A | 11 | 31.005 | -3.252 | 58.803 | 1.00 | 0.00 | H |
| ATOM | 333 | H6   | T A | 11 | 31.002 | -1.709 | 63.372 | 1.00 | 0.00 | H |
| ATOM | 334 | H1'  | T A | 11 | 29.970 | 0.667  | 60.726 | 1.00 | 0.00 | H |
| ATOM | 335 | H3'  | T A | 11 | 30.084 | 1.850  | 64.474 | 1.00 | 0.00 | H |
| ATOM | 336 | H4'  | T A | 11 | 32.086 | 2.652  | 62.936 | 1.00 | 0.00 | H |
| ATOM | 337 | H71  | T A | 11 | 30.667 | -4.500 | 63.798 | 1.00 | 0.00 | H |
| ATOM | 338 | H72  | T A | 11 | 31.827 | -5.323 | 62.726 | 1.00 | 0.00 | H |
| ATOM | 339 | H73  | T A | 11 | 32.378 | -4.009 | 63.793 | 1.00 | 0.00 | H |
| ATOM | 340 | H2'1 | T A | 11 | 29.736 | -0.347 | 63.573 | 1.00 | 0.00 | H |
| ATOM | 341 | H2'2 | T A | 11 | 28.567 | 0.573  | 62.637 | 1.00 | 0.00 | H |
| ATOM | 342 | H5'1 | T A | 11 | 33.455 | 0.521  | 63.507 | 1.00 | 0.00 | H |
| ATOM | 343 | H5'2 | T A | 11 | 32.886 | 1.595  | 64.805 | 1.00 | 0.00 | H |
| ATOM | 344 | C1'  | A A | 12 | 26.869 | 0.738  | 58.209 | 1.00 | 0.00 | C |
| ATOM | 345 | N1   | A A | 12 | 27.713 | -4.259 | 57.393 | 1.00 | 0.00 | N |
| ATOM | 346 | C2   | A A | 12 | 27.505 | -3.236 | 56.571 | 1.00 | 0.00 | C |
| ATOM | 347 | N3   | A A | 12 | 27.296 | -1.966 | 56.849 | 1.00 | 0.00 | N |
| ATOM | 348 | C4   | A A | 12 | 27.307 | -1.774 | 58.179 | 1.00 | 0.00 | C |
| ATOM | 349 | C5   | A A | 12 | 27.505 | -2.711 | 59.154 | 1.00 | 0.00 | C |
| ATOM | 350 | C6   | A A | 12 | 27.720 | -4.035 | 58.717 | 1.00 | 0.00 | C |
| ATOM | 351 | N6   | A A | 12 | 27.928 | -5.061 | 59.560 | 1.00 | 0.00 | N |
| ATOM | 352 | N7   | A A | 12 | 27.449 | -2.141 | 60.414 | 1.00 | 0.00 | N |
| ATOM | 353 | C8   | A A | 12 | 27.217 | -0.884 | 60.178 | 1.00 | 0.00 | C |
| ATOM | 354 | N9   | A A | 12 | 27.121 | -0.585 | 58.842 | 1.00 | 0.00 | N |
| ATOM | 355 | C2'  | A A | 12 | 25.882 | 1.605  | 58.977 | 1.00 | 0.00 | C |
| ATOM | 356 | C3'  | A A | 12 | 26.450 | 3.000  | 58.760 | 1.00 | 0.00 | C |
| ATOM | 357 | O3'  | A A | 12 | 25.977 | 3.508  | 57.514 | 1.00 | 0.00 | O |
| ATOM | 358 | C4'  | A A | 12 | 27.958 | 2.755  | 58.749 | 1.00 | 0.00 | C |
| ATOM | 359 | O4'  | A A | 12 | 28.103 | 1.428  | 58.150 | 1.00 | 0.00 | O |
| ATOM | 360 | C5'  | A A | 12 | 28.647 | 2.758  | 60.092 | 1.00 | 0.00 | C |
| ATOM | 361 | O5'  | A A | 12 | 27.781 | 2.158  | 61.090 | 1.00 | 0.00 | O |
| ATOM | 362 | O1P  | A A | 12 | 27.257 | 4.077  | 62.633 | 1.00 | 0.00 | O |
| ATOM | 363 | O2P  | A A | 12 | 27.221 | 1.722  | 63.500 | 1.00 | 0.00 | O |
| ATOM | 364 | P    | A A | 12 | 27.829 | 2.717  | 62.582 | 1.00 | 0.00 | P |
| ATOM | 365 | H2   | A A | 12 | 27.508 | -3.485 | 55.510 | 1.00 | 0.00 | H |
| ATOM | 366 | H8   | A A | 12 | 27.110 | -0.137 | 60.964 | 1.00 | 0.00 | H |
| ATOM | 367 | H1'  | A A | 12 | 26.529 | 0.568  | 57.190 | 1.00 | 0.00 | H |
| ATOM | 368 | H3'  | A A | 12 | 26.169 | 3.685  | 59.559 | 1.00 | 0.00 | H |

|      |     |      |   |   |    |        |        |        |      |      |   |
|------|-----|------|---|---|----|--------|--------|--------|------|------|---|
| ATOM | 369 | H4'  | A | A | 12 | 28.401 | 3.547  | 58.145 | 1.00 | 0.00 | H |
| ATOM | 370 | H61  | A | A | 12 | 28.082 | -6.009 | 59.188 | 1.00 | 0.00 | H |
| ATOM | 371 | H62  | A | A | 12 | 27.932 | -4.898 | 60.577 | 1.00 | 0.00 | H |
| ATOM | 372 | H2'1 | A | A | 12 | 25.845 | 1.354  | 60.037 | 1.00 | 0.00 | H |
| ATOM | 373 | H2'2 | A | A | 12 | 24.868 | 1.524  | 58.586 | 1.00 | 0.00 | H |
| ATOM | 374 | H5'1 | A | A | 12 | 29.574 | 2.188  | 60.019 | 1.00 | 0.00 | H |
| ATOM | 375 | H5'2 | A | A | 12 | 28.879 | 3.784  | 60.375 | 1.00 | 0.00 | H |
| ATOM | 376 | C1'  | G | A | 13 | 23.838 | -0.958 | 54.663 | 1.00 | 0.00 | C |
| ATOM | 377 | N1   | G | A | 13 | 24.533 | -5.448 | 56.980 | 1.00 | 0.00 | N |
| ATOM | 378 | C2   | G | A | 13 | 24.507 | -5.141 | 55.633 | 1.00 | 0.00 | C |
| ATOM | 379 | N2   | G | A | 13 | 24.687 | -6.165 | 54.788 | 1.00 | 0.00 | N |
| ATOM | 380 | N3   | G | A | 13 | 24.315 | -3.909 | 55.163 | 1.00 | 0.00 | N |
| ATOM | 381 | C4   | G | A | 13 | 24.144 | -2.998 | 56.157 | 1.00 | 0.00 | C |
| ATOM | 382 | C5   | G | A | 13 | 24.150 | -3.215 | 57.525 | 1.00 | 0.00 | C |
| ATOM | 383 | C6   | G | A | 13 | 24.357 | -4.521 | 58.024 | 1.00 | 0.00 | C |
| ATOM | 384 | O6   | G | A | 13 | 24.396 | -4.908 | 59.192 | 1.00 | 0.00 | O |
| ATOM | 385 | N7   | G | A | 13 | 23.935 | -2.014 | 58.204 | 1.00 | 0.00 | N |
| ATOM | 386 | C8   | G | A | 13 | 23.811 | -1.128 | 57.250 | 1.00 | 0.00 | C |
| ATOM | 387 | N9   | G | A | 13 | 23.925 | -1.650 | 55.978 | 1.00 | 0.00 | N |
| ATOM | 388 | C2'  | G | A | 13 | 22.795 | 0.150  | 54.620 | 1.00 | 0.00 | C |
| ATOM | 389 | C3'  | G | A | 13 | 23.459 | 1.179  | 53.720 | 1.00 | 0.00 | C |
| ATOM | 390 | O3'  | G | A | 13 | 23.203 | 0.844  | 52.358 | 1.00 | 0.00 | O |
| ATOM | 391 | C4'  | G | A | 13 | 24.938 | 1.041  | 54.080 | 1.00 | 0.00 | C |
| ATOM | 392 | O4'  | G | A | 13 | 25.101 | -0.379 | 54.396 | 1.00 | 0.00 | O |
| ATOM | 393 | C5'  | G | A | 13 | 25.420 | 1.856  | 55.257 | 1.00 | 0.00 | C |
| ATOM | 394 | O5'  | G | A | 13 | 24.387 | 1.914  | 56.271 | 1.00 | 0.00 | O |
| ATOM | 395 | O1P  | G | A | 13 | 23.741 | 4.347  | 56.307 | 1.00 | 0.00 | O |
| ATOM | 396 | O2P  | G | A | 13 | 23.453 | 2.941  | 58.365 | 1.00 | 0.00 | O |
| ATOM | 397 | P    | G | A | 13 | 24.242 | 3.240  | 57.145 | 1.00 | 0.00 | P |
| ATOM | 398 | H1   | G | A | 13 | 24.696 | -6.435 | 57.240 | 1.00 | 0.00 | H |
| ATOM | 399 | H8   | G | A | 13 | 23.632 | -0.070 | 57.441 | 1.00 | 0.00 | H |
| ATOM | 400 | H1'  | G | A | 13 | 23.644 | -1.707 | 53.895 | 1.00 | 0.00 | H |
| ATOM | 401 | H21  | G | A | 13 | 24.838 | -7.115 | 55.160 | 1.00 | 0.00 | H |
| ATOM | 402 | H3'  | G | A | 13 | 23.099 | 2.189  | 53.917 | 1.00 | 0.00 | H |
| ATOM | 403 | H22  | G | A | 13 | 24.675 | -6.003 | 53.773 | 1.00 | 0.00 | H |
| ATOM | 404 | H4'  | G | A | 13 | 25.508 | 1.350  | 53.204 | 1.00 | 0.00 | H |
| ATOM | 405 | H2'1 | G | A | 13 | 22.589 | 0.562  | 55.608 | 1.00 | 0.00 | H |
| ATOM | 406 | H2'2 | G | A | 13 | 21.847 | -0.190 | 54.203 | 1.00 | 0.00 | H |
| ATOM | 407 | H5'1 | G | A | 13 | 26.316 | 1.394  | 55.669 | 1.00 | 0.00 | H |
| ATOM | 408 | H5'2 | G | A | 13 | 25.662 | 2.864  | 54.918 | 1.00 | 0.00 | H |
| ATOM | 409 | C1'  | G | A | 14 | 21.263 | -4.474 | 52.308 | 1.00 | 0.00 | C |
| ATOM | 410 | N1   | G | A | 14 | 21.393 | -6.809 | 56.842 | 1.00 | 0.00 | N |
| ATOM | 411 | C2   | G | A | 14 | 21.577 | -7.325 | 55.572 | 1.00 | 0.00 | C |
| ATOM | 412 | N2   | G | A | 14 | 21.825 | -8.639 | 55.498 | 1.00 | 0.00 | N |
| ATOM | 413 | N3   | G | A | 14 | 21.517 | -6.590 | 54.463 | 1.00 | 0.00 | N |
| ATOM | 414 | C4   | G | A | 14 | 21.249 | -5.284 | 54.724 | 1.00 | 0.00 | C |
| ATOM | 415 | C5   | G | A | 14 | 21.048 | -4.682 | 55.955 | 1.00 | 0.00 | C |
| ATOM | 416 | C6   | G | A | 14 | 21.115 | -5.460 | 57.132 | 1.00 | 0.00 | C |
| ATOM | 417 | O6   | G | A | 14 | 20.966 | -5.112 | 58.303 | 1.00 | 0.00 | O |
| ATOM | 418 | N7   | G | A | 14 | 20.796 | -3.317 | 55.787 | 1.00 | 0.00 | N |
| ATOM | 419 | C8   | G | A | 14 | 20.855 | -3.140 | 54.494 | 1.00 | 0.00 | C |
| ATOM | 420 | N9   | G | A | 14 | 21.126 | -4.288 | 53.779 | 1.00 | 0.00 | N |
| ATOM | 421 | C2'  | G | A | 14 | 20.294 | -3.631 | 51.491 | 1.00 | 0.00 | C |
| ATOM | 422 | C3'  | G | A | 14 | 21.132 | -3.272 | 50.274 | 1.00 | 0.00 | C |

|      |     |      |     |    |        |         |        |      |      |   |
|------|-----|------|-----|----|--------|---------|--------|------|------|---|
| ATOM | 423 | O3'  | G A | 14 | 21.058 | -4.334  | 49.325 | 1.00 | 0.00 | O |
| ATOM | 424 | C4'  | G A | 14 | 22.535 | -3.119  | 50.862 | 1.00 | 0.00 | C |
| ATOM | 425 | O4'  | G A | 14 | 22.579 | -4.097  | 51.949 | 1.00 | 0.00 | O |
| ATOM | 426 | C5'  | G A | 14 | 22.882 | -1.759  | 51.420 | 1.00 | 0.00 | C |
| ATOM | 427 | O5'  | G A | 14 | 21.717 | -1.177  | 52.056 | 1.00 | 0.00 | O |
| ATOM | 428 | O1P  | G A | 14 | 21.196 | 0.812   | 50.606 | 1.00 | 0.00 | O |
| ATOM | 429 | O2P  | G A | 14 | 20.545 | 0.821   | 53.029 | 1.00 | 0.00 | O |
| ATOM | 430 | P    | G A | 14 | 21.515 | 0.403   | 51.987 | 1.00 | 0.00 | P |
| ATOM | 431 | H1   | G A | 14 | 21.466 | -7.464  | 57.636 | 1.00 | 0.00 | H |
| ATOM | 432 | H8   | G A | 14 | 20.705 | -2.169  | 54.020 | 1.00 | 0.00 | H |
| ATOM | 433 | H1'  | G A | 14 | 21.144 | -5.533  | 52.085 | 1.00 | 0.00 | H |
| ATOM | 434 | H21  | G A | 14 | 21.874 | -9.201  | 56.361 | 1.00 | 0.00 | H |
| ATOM | 435 | H3'  | G A | 14 | 20.798 | -2.346  | 49.807 | 1.00 | 0.00 | H |
| ATOM | 436 | H22  | G A | 14 | 21.968 | -9.086  | 54.582 | 1.00 | 0.00 | H |
| ATOM | 437 | H4'  | G A | 14 | 23.239 | -3.341  | 50.061 | 1.00 | 0.00 | H |
| ATOM | 438 | H2'1 | G A | 14 | 19.969 | -2.739  | 52.025 | 1.00 | 0.00 | H |
| ATOM | 439 | H2'2 | G A | 14 | 19.400 | -4.188  | 51.208 | 1.00 | 0.00 | H |
| ATOM | 440 | H5'1 | G A | 14 | 23.685 | -1.867  | 52.149 | 1.00 | 0.00 | H |
| ATOM | 441 | H5'2 | G A | 14 | 23.220 | -1.115  | 50.608 | 1.00 | 0.00 | H |
| ATOM | 442 | C1'  | A A | 15 | 18.884 | -8.803  | 52.003 | 1.00 | 0.00 | C |
| ATOM | 443 | N1   | A A | 15 | 18.244 | -8.154  | 57.055 | 1.00 | 0.00 | N |
| ATOM | 444 | C2   | A A | 15 | 18.566 | -9.214  | 56.318 | 1.00 | 0.00 | C |
| ATOM | 445 | N3   | A A | 15 | 18.719 | -9.312  | 55.013 | 1.00 | 0.00 | N |
| ATOM | 446 | C4   | A A | 15 | 18.490 | -8.122  | 54.429 | 1.00 | 0.00 | C |
| ATOM | 447 | C5   | A A | 15 | 18.151 | -6.946  | 55.036 | 1.00 | 0.00 | C |
| ATOM | 448 | C6   | A A | 15 | 18.023 | -6.981  | 56.441 | 1.00 | 0.00 | C |
| ATOM | 449 | N6   | A A | 15 | 17.694 | -5.903  | 57.174 | 1.00 | 0.00 | N |
| ATOM | 450 | N7   | A A | 15 | 17.997 | -5.930  | 54.110 | 1.00 | 0.00 | N |
| ATOM | 451 | C8   | A A | 15 | 18.240 | -6.508  | 52.971 | 1.00 | 0.00 | C |
| ATOM | 452 | N9   | A A | 15 | 18.549 | -7.840  | 53.085 | 1.00 | 0.00 | N |
| ATOM | 453 | C2'  | A A | 15 | 18.080 | -8.597  | 50.726 | 1.00 | 0.00 | C |
| ATOM | 454 | C3'  | A A | 15 | 19.099 | -8.944  | 49.651 | 1.00 | 0.00 | C |
| ATOM | 455 | O3'  | A A | 15 | 19.108 | -10.354 | 49.454 | 1.00 | 0.00 | O |
| ATOM | 456 | C4'  | A A | 15 | 20.410 | -8.434  | 50.247 | 1.00 | 0.00 | C |
| ATOM | 457 | O4'  | A A | 15 | 20.254 | -8.639  | 51.689 | 1.00 | 0.00 | O |
| ATOM | 458 | C5'  | A A | 15 | 20.741 | -6.982  | 49.999 | 1.00 | 0.00 | C |
| ATOM | 459 | O5'  | A A | 15 | 19.527 | -6.189  | 50.030 | 1.00 | 0.00 | O |
| ATOM | 460 | O1P  | A A | 15 | 19.310 | -5.365  | 47.662 | 1.00 | 0.00 | O |
| ATOM | 461 | O2P  | A A | 15 | 18.326 | -4.034  | 49.550 | 1.00 | 0.00 | O |
| ATOM | 462 | P    | A A | 15 | 19.412 | -4.923  | 49.067 | 1.00 | 0.00 | P |
| ATOM | 463 | H2   | A A | 15 | 18.730 | -10.136 | 56.876 | 1.00 | 0.00 | H |
| ATOM | 464 | H8   | A A | 15 | 18.203 | -5.986  | 52.015 | 1.00 | 0.00 | H |
| ATOM | 465 | H1'  | A A | 15 | 18.747 | -9.812  | 52.392 | 1.00 | 0.00 | H |
| ATOM | 466 | H3'  | A A | 15 | 18.879 | -8.447  | 48.705 | 1.00 | 0.00 | H |
| ATOM | 467 | H4'  | A A | 15 | 21.208 | -9.037  | 49.816 | 1.00 | 0.00 | H |
| ATOM | 468 | H61  | A A | 15 | 17.618 | -5.983  | 58.198 | 1.00 | 0.00 | H |
| ATOM | 469 | H62  | A A | 15 | 17.521 | -5.000  | 56.711 | 1.00 | 0.00 | H |
| ATOM | 470 | H2'1 | A A | 15 | 17.727 | -7.572  | 50.623 | 1.00 | 0.00 | H |
| ATOM | 471 | H2'2 | A A | 15 | 17.211 | -9.252  | 50.675 | 1.00 | 0.00 | H |
| ATOM | 472 | H5'1 | A A | 15 | 21.427 | -6.635  | 50.772 | 1.00 | 0.00 | H |
| ATOM | 473 | H5'2 | A A | 15 | 21.219 | -6.885  | 49.026 | 1.00 | 0.00 | H |
| ATOM | 474 | C1'  | C A | 16 | 16.354 | -12.624 | 53.918 | 1.00 | 0.00 | C |
| ATOM | 475 | N1   | C A | 16 | 15.916 | -11.225 | 54.176 | 1.00 | 0.00 | N |
| ATOM | 476 | C2   | C A | 16 | 15.687 | -10.844 | 55.496 | 1.00 | 0.00 | C |

|      |     |      |     |    |        |         |        |      |      |   |
|------|-----|------|-----|----|--------|---------|--------|------|------|---|
| ATOM | 477 | O2   | C A | 16 | 15.856 | -11.679 | 56.395 | 1.00 | 0.00 | O |
| ATOM | 478 | N3   | C A | 16 | 15.286 | -9.575  | 55.752 | 1.00 | 0.00 | N |
| ATOM | 479 | C4   | C A | 16 | 15.112 | -8.696  | 54.758 | 1.00 | 0.00 | C |
| ATOM | 480 | N4   | C A | 16 | 14.722 | -7.467  | 55.065 | 1.00 | 0.00 | N |
| ATOM | 481 | C5   | C A | 16 | 15.335 | -9.059  | 53.389 | 1.00 | 0.00 | C |
| ATOM | 482 | C6   | C A | 16 | 15.742 | -10.342 | 53.155 | 1.00 | 0.00 | C |
| ATOM | 483 | C2'  | C A | 16 | 15.755 | -13.234 | 52.659 | 1.00 | 0.00 | C |
| ATOM | 484 | C3'  | C A | 16 | 16.900 | -14.095 | 52.148 | 1.00 | 0.00 | C |
| ATOM | 485 | O3'  | C A | 16 | 16.868 | -15.357 | 52.809 | 1.00 | 0.00 | O |
| ATOM | 486 | C4'  | C A | 16 | 18.133 | -13.276 | 52.522 | 1.00 | 0.00 | C |
| ATOM | 487 | O4'  | C A | 16 | 17.762 | -12.612 | 53.771 | 1.00 | 0.00 | O |
| ATOM | 488 | C5'  | C A | 16 | 18.568 | -12.225 | 51.526 | 1.00 | 0.00 | C |
| ATOM | 489 | O5'  | C A | 16 | 17.402 | -11.618 | 50.913 | 1.00 | 0.00 | O |
| ATOM | 490 | O1P  | C A | 16 | 17.570 | -12.333 | 48.506 | 1.00 | 0.00 | O |
| ATOM | 491 | O2P  | C A | 16 | 16.391 | -10.201 | 49.101 | 1.00 | 0.00 | O |
| ATOM | 492 | P    | C A | 16 | 17.490 | -11.154 | 49.390 | 1.00 | 0.00 | P |
| ATOM | 493 | H5   | C A | 16 | 15.186 | -8.347  | 52.574 | 1.00 | 0.00 | H |
| ATOM | 494 | H6   | C A | 16 | 15.933 | -10.663 | 52.130 | 1.00 | 0.00 | H |
| ATOM | 495 | H1'  | C A | 16 | 16.115 | -13.223 | 54.797 | 1.00 | 0.00 | H |
| ATOM | 496 | H3'  | C A | 16 | 16.841 | -14.251 | 51.070 | 1.00 | 0.00 | H |
| ATOM | 497 | H4'  | C A | 16 | 18.956 | -13.981 | 52.640 | 1.00 | 0.00 | H |
| ATOM | 498 | H41  | C A | 16 | 14.582 | -6.769  | 54.318 | 1.00 | 0.00 | H |
| ATOM | 499 | H42  | C A | 16 | 14.559 | -7.208  | 56.048 | 1.00 | 0.00 | H |
| ATOM | 500 | H2'1 | C A | 16 | 15.471 | -12.477 | 51.928 | 1.00 | 0.00 | H |
| ATOM | 501 | H2'2 | C A | 16 | 14.869 | -13.834 | 52.872 | 1.00 | 0.00 | H |
| ATOM | 502 | H5'1 | C A | 16 | 19.152 | -11.463 | 52.043 | 1.00 | 0.00 | H |
| ATOM | 503 | H5'2 | C A | 16 | 19.186 | -12.691 | 50.760 | 1.00 | 0.00 | H |
| ATOM | 504 | C1'  | G A | 17 | 13.393 | -14.782 | 57.248 | 1.00 | 0.00 | C |
| ATOM | 505 | N1   | G A | 17 | 11.738 | -10.019 | 58.027 | 1.00 | 0.00 | N |
| ATOM | 506 | C2   | G A | 17 | 12.029 | -11.019 | 58.938 | 1.00 | 0.00 | C |
| ATOM | 507 | N2   | G A | 17 | 11.853 | -10.709 | 60.229 | 1.00 | 0.00 | N |
| ATOM | 508 | N3   | G A | 17 | 12.460 | -12.230 | 58.591 | 1.00 | 0.00 | N |
| ATOM | 509 | C4   | G A | 17 | 12.573 | -12.371 | 57.244 | 1.00 | 0.00 | C |
| ATOM | 510 | C5   | G A | 17 | 12.303 | -11.434 | 56.260 | 1.00 | 0.00 | C |
| ATOM | 511 | C6   | G A | 17 | 11.850 | -10.146 | 56.627 | 1.00 | 0.00 | C |
| ATOM | 512 | O6   | G A | 17 | 11.558 | -9.189  | 55.909 | 1.00 | 0.00 | O |
| ATOM | 513 | N7   | G A | 17 | 12.547 | -11.975 | 54.996 | 1.00 | 0.00 | N |
| ATOM | 514 | C8   | G A | 17 | 12.951 | -13.194 | 55.247 | 1.00 | 0.00 | C |
| ATOM | 515 | N9   | G A | 17 | 12.993 | -13.510 | 56.591 | 1.00 | 0.00 | N |
| ATOM | 516 | C2'  | G A | 17 | 12.956 | -16.028 | 56.490 | 1.00 | 0.00 | C |
| ATOM | 517 | C3'  | G A | 17 | 14.117 | -16.977 | 56.741 | 1.00 | 0.00 | C |
| ATOM | 518 | O3'  | G A | 17 | 13.924 | -17.633 | 57.992 | 1.00 | 0.00 | O |
| ATOM | 519 | C4'  | G A | 17 | 15.323 | -16.038 | 56.760 | 1.00 | 0.00 | C |
| ATOM | 520 | O4'  | G A | 17 | 14.805 | -14.798 | 57.335 | 1.00 | 0.00 | O |
| ATOM | 521 | C5'  | G A | 17 | 15.952 | -15.728 | 55.422 | 1.00 | 0.00 | C |
| ATOM | 522 | O5'  | G A | 17 | 14.924 | -15.631 | 54.408 | 1.00 | 0.00 | O |
| ATOM | 523 | O1P  | G A | 17 | 15.409 | -17.587 | 52.899 | 1.00 | 0.00 | O |
| ATOM | 524 | O2P  | G A | 17 | 14.265 | -15.550 | 51.984 | 1.00 | 0.00 | O |
| ATOM | 525 | P    | G A | 17 | 15.259 | -16.119 | 52.926 | 1.00 | 0.00 | P |
| ATOM | 526 | H1   | G A | 17 | 11.417 | -9.114  | 58.401 | 1.00 | 0.00 | H |
| ATOM | 527 | H8   | G A | 17 | 13.229 | -13.900 | 54.465 | 1.00 | 0.00 | H |
| ATOM | 528 | H1'  | G A | 17 | 12.994 | -14.783 | 58.263 | 1.00 | 0.00 | H |
| ATOM | 529 | H21  | G A | 17 | 11.523 | -9.769  | 60.490 | 1.00 | 0.00 | H |
| ATOM | 530 | H3'  | G A | 17 | 14.212 | -17.724 | 55.952 | 1.00 | 0.00 | H |

|      |     |      |     |    |        |         |        |      |      |   |
|------|-----|------|-----|----|--------|---------|--------|------|------|---|
| ATOM | 531 | H22  | G A | 17 | 12.049 | -11.410 | 60.958 | 1.00 | 0.00 | H |
| ATOM | 532 | H4'  | G A | 17 | 16.082 | -16.512 | 57.384 | 1.00 | 0.00 | H |
| ATOM | 533 | H2'1 | G A | 17 | 12.821 | -15.838 | 55.425 | 1.00 | 0.00 | H |
| ATOM | 534 | H2'2 | G A | 17 | 12.019 | -16.437 | 56.872 | 1.00 | 0.00 | H |
| ATOM | 535 | H5'1 | G A | 17 | 16.492 | -14.784 | 55.493 | 1.00 | 0.00 | H |
| ATOM | 536 | H5'2 | G A | 17 | 16.653 | -16.522 | 55.164 | 1.00 | 0.00 | H |
| ATOM | 537 | C1'  | G A | 18 | 9.879  | -14.780 | 60.738 | 1.00 | 0.00 | C |
| ATOM | 538 | N1   | G A | 18 | 8.369  | -10.497 | 58.414 | 1.00 | 0.00 | N |
| ATOM | 539 | C2   | G A | 18 | 8.475  | -10.786 | 59.763 | 1.00 | 0.00 | C |
| ATOM | 540 | N2   | G A | 18 | 8.131  | -9.802  | 60.605 | 1.00 | 0.00 | N |
| ATOM | 541 | N3   | G A | 18 | 8.892  | -11.959 | 60.233 | 1.00 | 0.00 | N |
| ATOM | 542 | C4   | G A | 18 | 9.189  | -12.838 | 59.241 | 1.00 | 0.00 | C |
| ATOM | 543 | C5   | G A | 18 | 9.111  | -12.640 | 57.872 | 1.00 | 0.00 | C |
| ATOM | 544 | C6   | G A | 18 | 8.673  | -11.392 | 57.371 | 1.00 | 0.00 | C |
| ATOM | 545 | O6   | G A | 18 | 8.538  | -11.030 | 56.202 | 1.00 | 0.00 | O |
| ATOM | 546 | N7   | G A | 18 | 9.506  | -13.794 | 57.194 | 1.00 | 0.00 | N |
| ATOM | 547 | C8   | G A | 18 | 9.809  | -14.634 | 58.149 | 1.00 | 0.00 | C |
| ATOM | 548 | N9   | G A | 18 | 9.641  | -14.126 | 59.421 | 1.00 | 0.00 | N |
| ATOM | 549 | C2'  | G A | 18 | 9.493  | -16.253 | 60.770 | 1.00 | 0.00 | C |
| ATOM | 550 | C3'  | G A | 18 | 10.558 | -16.839 | 61.682 | 1.00 | 0.00 | C |
| ATOM | 551 | O3'  | G A | 18 | 10.154 | -16.673 | 63.040 | 1.00 | 0.00 | O |
| ATOM | 552 | C4'  | G A | 18 | 11.794 | -16.010 | 61.342 | 1.00 | 0.00 | C |
| ATOM | 553 | O4'  | G A | 18 | 11.261 | -14.685 | 61.024 | 1.00 | 0.00 | O |
| ATOM | 554 | C5'  | G A | 18 | 12.624 | -16.490 | 60.175 | 1.00 | 0.00 | C |
| ATOM | 555 | O5'  | G A | 18 | 11.758 | -17.033 | 59.147 | 1.00 | 0.00 | O |
| ATOM | 556 | O1P  | G A | 18 | 12.357 | -19.477 | 59.110 | 1.00 | 0.00 | O |
| ATOM | 557 | O2P  | G A | 18 | 11.460 | -18.374 | 57.043 | 1.00 | 0.00 | O |
| ATOM | 558 | P    | G A | 18 | 12.279 | -18.264 | 58.276 | 1.00 | 0.00 | P |
| ATOM | 559 | H1   | G A | 18 | 8.043  | -9.554  | 58.153 | 1.00 | 0.00 | H |
| ATOM | 560 | H8   | G A | 18 | 10.161 | -15.648 | 57.960 | 1.00 | 0.00 | H |
| ATOM | 561 | H1'  | G A | 18 | 9.339  | -14.219 | 61.499 | 1.00 | 0.00 | H |
| ATOM | 562 | H21  | G A | 18 | 7.813  | -8.895  | 60.232 | 1.00 | 0.00 | H |
| ATOM | 563 | H3'  | G A | 18 | 10.728 | -17.899 | 61.483 | 1.00 | 0.00 | H |
| ATOM | 564 | H22  | G A | 18 | 8.185  | -9.954  | 61.621 | 1.00 | 0.00 | H |
| ATOM | 565 | H4'  | G A | 18 | 12.430 | -16.011 | 62.226 | 1.00 | 0.00 | H |
| ATOM | 566 | H2'1 | G A | 18 | 9.523  | -16.710 | 59.780 | 1.00 | 0.00 | H |
| ATOM | 567 | H2'2 | G A | 18 | 8.493  | -16.410 | 61.173 | 1.00 | 0.00 | H |
| ATOM | 568 | H5'1 | G A | 18 | 13.195 | -15.653 | 59.774 | 1.00 | 0.00 | H |
| ATOM | 569 | H5'2 | G A | 18 | 13.314 | -17.260 | 60.520 | 1.00 | 0.00 | H |
| ATOM | 570 | C1'  | T A | 19 | 5.909  | -12.953 | 63.060 | 1.00 | 0.00 | C |
| ATOM | 571 | N1   | T A | 19 | 5.886  | -13.148 | 61.587 | 1.00 | 0.00 | N |
| ATOM | 572 | C2   | T A | 19 | 5.494  | -12.074 | 60.814 | 1.00 | 0.00 | C |
| ATOM | 573 | O2   | T A | 19 | 5.176  | -10.999 | 61.293 | 1.00 | 0.00 | O |
| ATOM | 574 | N3   | T A | 19 | 5.490  | -12.299 | 59.450 | 1.00 | 0.00 | N |
| ATOM | 575 | C4   | T A | 19 | 5.827  | -13.473 | 58.810 | 1.00 | 0.00 | C |
| ATOM | 576 | O4   | T A | 19 | 5.780  | -13.558 | 57.577 | 1.00 | 0.00 | O |
| ATOM | 577 | C5   | T A | 19 | 6.222  | -14.539 | 59.700 | 1.00 | 0.00 | C |
| ATOM | 578 | C6   | T A | 19 | 6.241  | -14.355 | 61.035 | 1.00 | 0.00 | C |
| ATOM | 579 | C7   | T A | 19 | 6.603  | -15.835 | 59.046 | 1.00 | 0.00 | C |
| ATOM | 580 | C2'  | T A | 19 | 5.452  | -14.173 | 63.850 | 1.00 | 0.00 | C |
| ATOM | 581 | C3'  | T A | 19 | 6.351  | -14.113 | 65.075 | 1.00 | 0.00 | C |
| ATOM | 582 | O3'  | T A | 19 | 5.773  | -13.235 | 66.039 | 1.00 | 0.00 | O |
| ATOM | 583 | C4'  | T A | 19 | 7.660  | -13.569 | 64.509 | 1.00 | 0.00 | C |
| ATOM | 584 | O4'  | T A | 19 | 7.241  | -12.664 | 63.439 | 1.00 | 0.00 | O |

|      |     |      |       |    |        |         |        |      |      |   |
|------|-----|------|-------|----|--------|---------|--------|------|------|---|
| ATOM | 585 | C5'  | T A   | 19 | 8.620  | -14.586 | 63.937 | 1.00 | 0.00 | C |
| ATOM | 586 | O5'  | T A   | 19 | 7.878  | -15.639 | 63.272 | 1.00 | 0.00 | O |
| ATOM | 587 | O1P  | T A   | 19 | 8.357  | -17.667 | 64.682 | 1.00 | 0.00 | O |
| ATOM | 588 | O2P  | T A   | 19 | 7.807  | -17.932 | 62.248 | 1.00 | 0.00 | O |
| ATOM | 589 | P    | T A   | 19 | 8.452  | -17.126 | 63.312 | 1.00 | 0.00 | P |
| ATOM | 590 | H3   | T A   | 19 | 5.205  | -11.511 | 58.851 | 1.00 | 0.00 | H |
| ATOM | 591 | H6   | T A   | 19 | 6.544  | -15.174 | 61.686 | 1.00 | 0.00 | H |
| ATOM | 592 | H1'  | T A   | 19 | 5.297  | -12.082 | 63.299 | 1.00 | 0.00 | H |
| ATOM | 593 | H3'  | T A   | 19 | 6.494  | -15.097 | 65.523 | 1.00 | 0.00 | H |
| ATOM | 594 | H4'  | T A   | 19 | 8.168  | -13.055 | 65.326 | 1.00 | 0.00 | H |
| ATOM | 595 | H71  | T A   | 19 | 5.882  | -16.604 | 59.319 | 1.00 | 0.00 | H |
| ATOM | 596 | H72  | T A   | 19 | 6.604  | -15.707 | 57.963 | 1.00 | 0.00 | H |
| ATOM | 597 | H73  | T A   | 19 | 7.597  | -16.134 | 59.377 | 1.00 | 0.00 | H |
| ATOM | 598 | H2'1 | T A   | 19 | 5.595  | -15.099 | 63.296 | 1.00 | 0.00 | H |
| ATOM | 599 | H2'2 | T A   | 19 | 4.399  | -14.116 | 64.127 | 1.00 | 0.00 | H |
| ATOM | 600 | H5'1 | T A   | 19 | 9.279  | -14.093 | 63.223 | 1.00 | 0.00 | H |
| ATOM | 601 | H5'2 | T A   | 19 | 9.217  | -15.008 | 64.743 | 1.00 | 0.00 | H |
| ATOM | 602 | C01  | LNK A | 20 | 3.111  | -13.825 | 68.573 | 0.00 | 0.00 | C |
| ATOM | 603 | O1   | LNK A | 20 | 3.928  | -14.260 | 67.483 | 1.00 | 0.00 | O |
| ATOM | 604 | S    | LNK A | 20 | 0.113  | -15.186 | 70.811 | 0.00 | 0.00 | S |
| ATOM | 605 | C02  | LNK A | 20 | 2.114  | -14.940 | 68.943 | 0.00 | 0.00 | C |
| ATOM | 606 | C03  | LNK A | 20 | 0.770  | -14.311 | 69.356 | 0.00 | 0.00 | C |
| ATOM | 607 | O1P  | LNK A | 20 | 3.514  | -14.118 | 65.004 | 1.00 | 0.00 | O |
| ATOM | 608 | O2P  | LNK A | 20 | 3.328  | -12.060 | 66.429 | 1.00 | 0.00 | O |
| ATOM | 609 | P    | LNK A | 20 | 4.002  | -13.357 | 66.171 | 1.00 | 0.00 | P |
| ATOM | 610 | H01  | LNK A | 20 | 2.562  | -12.929 | 68.283 | 0.00 | 0.00 | H |
| ATOM | 611 | H02  | LNK A | 20 | 3.742  | -13.603 | 69.434 | 0.00 | 0.00 | H |
| ATOM | 612 | H03  | LNK A | 20 | 0.061  | -14.394 | 68.532 | 0.00 | 0.00 | H |
| ATOM | 613 | H04  | LNK A | 20 | 2.513  | -15.524 | 69.772 | 0.00 | 0.00 | H |
| ATOM | 614 | H05  | LNK A | 20 | 1.961  | -15.590 | 68.082 | 0.00 | 0.00 | H |
| ATOM | 615 | H06  | LNK A | 20 | 0.921  | -13.260 | 69.602 | 0.00 | 0.00 | H |
| ATOM | 616 | AU   | LNK A | 20 | -0.528 | -14.976 | 70.935 |      |      |   |
| TER  |     |      |       |    |        |         |        |      |      |   |
| ATOM | 618 | C1'  | A B   | 2  | 3.160  | -5.771  | 55.330 | 1.00 | 0.00 | C |
| ATOM | 619 | N1   | A B   | 2  | 4.670  | -10.055 | 57.719 | 1.00 | 0.00 | N |
| ATOM | 620 | C2   | A B   | 2  | 4.317  | -8.855  | 58.166 | 1.00 | 0.00 | C |
| ATOM | 621 | N3   | A B   | 2  | 3.933  | -7.790  | 57.493 | 1.00 | 0.00 | N |
| ATOM | 622 | C4   | A B   | 2  | 3.936  | -8.050  | 56.172 | 1.00 | 0.00 | C |
| ATOM | 623 | C5   | A B   | 2  | 4.271  | -9.221  | 55.556 | 1.00 | 0.00 | C |
| ATOM | 624 | C6   | A B   | 2  | 4.662  | -10.284 | 56.397 | 1.00 | 0.00 | C |
| ATOM | 625 | N6   | A B   | 2  | 5.017  | -11.495 | 55.934 | 1.00 | 0.00 | N |
| ATOM | 626 | N7   | A B   | 2  | 4.151  | -9.114  | 54.180 | 1.00 | 0.00 | N |
| ATOM | 627 | C8   | A B   | 2  | 3.756  | -7.891  | 53.997 | 1.00 | 0.00 | C |
| ATOM | 628 | N9   | A B   | 2  | 3.600  | -7.183  | 55.161 | 1.00 | 0.00 | N |
| ATOM | 629 | C2'  | A B   | 2  | 3.688  | -4.832  | 54.253 | 1.00 | 0.00 | C |
| ATOM | 630 | C3'  | A B   | 2  | 2.526  | -3.870  | 54.074 | 1.00 | 0.00 | C |
| ATOM | 631 | O3'  | A B   | 2  | 2.612  | -2.843  | 55.060 | 1.00 | 0.00 | O |
| ATOM | 632 | C4'  | A B   | 2  | 1.307  | -4.768  | 54.282 | 1.00 | 0.00 | C |
| ATOM | 633 | O4'  | A B   | 2  | 1.747  | -5.751  | 55.272 | 1.00 | 0.00 | O |
| ATOM | 634 | C5'  | A B   | 2  | 0.799  | -5.503  | 53.064 | 1.00 | 0.00 | C |
| ATOM | 635 | O5'  | A B   | 2  | 1.917  | -5.909  | 52.235 | 1.00 | 0.00 | O |
| ATOM | 636 | H2   | A B   | 2  | 4.349  | -8.733  | 59.248 | 1.00 | 0.00 | H |
| ATOM | 637 | H8   | A B   | 2  | 3.565  | -7.466  | 53.011 | 1.00 | 0.00 | H |
| ATOM | 638 | H1'  | A B   | 2  | 3.462  | -5.436  | 56.323 | 1.00 | 0.00 | H |

|      |     |      |     |   |        |         |        |      |      |   |
|------|-----|------|-----|---|--------|---------|--------|------|------|---|
| ATOM | 639 | H3'  | A B | 2 | 2.516  | -3.419  | 53.082 | 1.00 | 0.00 | H |
| ATOM | 640 | H4'  | A B | 2 | 0.502  | -4.129  | 54.644 | 1.00 | 0.00 | H |
| ATOM | 641 | H61  | A B | 2 | 5.292  | -12.238 | 56.590 | 1.00 | 0.00 | H |
| ATOM | 642 | H62  | A B | 2 | 5.015  | -11.678 | 54.919 | 1.00 | 0.00 | H |
| ATOM | 643 | H2'1 | A B | 2 | 3.918  | -5.354  | 53.324 | 1.00 | 0.00 | H |
| ATOM | 644 | H2'2 | A B | 2 | 4.591  | -4.308  | 54.568 | 1.00 | 0.00 | H |
| ATOM | 645 | H5'1 | A B | 2 | 0.239  | -6.381  | 53.384 | 1.00 | 0.00 | H |
| ATOM | 646 | H5'2 | A B | 2 | 0.141  | -4.844  | 52.498 | 1.00 | 0.00 | H |
| ATOM | 647 | C1'  | C B | 3 | 6.343  | -4.669  | 58.979 | 1.00 | 0.00 | C |
| ATOM | 648 | N1   | C B | 3 | 6.690  | -5.696  | 57.958 | 1.00 | 0.00 | N |
| ATOM | 649 | C2   | C B | 3 | 7.128  | -6.940  | 58.408 | 1.00 | 0.00 | C |
| ATOM | 650 | O2   | C B | 3 | 7.209  | -7.140  | 59.627 | 1.00 | 0.00 | O |
| ATOM | 651 | N3   | C B | 3 | 7.449  | -7.889  | 57.496 | 1.00 | 0.00 | N |
| ATOM | 652 | C4   | C B | 3 | 7.351  | -7.643  | 56.183 | 1.00 | 0.00 | C |
| ATOM | 653 | N4   | C B | 3 | 7.676  | -8.609  | 55.334 | 1.00 | 0.00 | N |
| ATOM | 654 | C5   | C B | 3 | 6.909  | -6.372  | 55.690 | 1.00 | 0.00 | C |
| ATOM | 655 | C6   | C B | 3 | 6.586  | -5.431  | 56.628 | 1.00 | 0.00 | C |
| ATOM | 656 | C2'  | C B | 3 | 6.749  | -3.255  | 58.589 | 1.00 | 0.00 | C |
| ATOM | 657 | C3'  | C B | 3 | 5.614  | -2.426  | 59.171 | 1.00 | 0.00 | C |
| ATOM | 658 | O3'  | C B | 3 | 5.888  | -2.159  | 60.545 | 1.00 | 0.00 | O |
| ATOM | 659 | C4'  | C B | 3 | 4.403  | -3.337  | 58.989 | 1.00 | 0.00 | C |
| ATOM | 660 | O4'  | C B | 3 | 4.939  | -4.689  | 59.148 | 1.00 | 0.00 | O |
| ATOM | 661 | C5'  | C B | 3 | 3.692  | -3.252  | 57.659 | 1.00 | 0.00 | C |
| ATOM | 662 | O5'  | C B | 3 | 4.660  | -3.044  | 56.599 | 1.00 | 0.00 | O |
| ATOM | 663 | O1P  | C B | 3 | 4.109  | -0.739  | 55.750 | 1.00 | 0.00 | O |
| ATOM | 664 | O2P  | C B | 3 | 5.175  | -2.418  | 54.220 | 1.00 | 0.00 | O |
| ATOM | 665 | P    | C B | 3 | 4.245  | -2.152  | 55.345 | 1.00 | 0.00 | P |
| ATOM | 666 | H5   | C B | 3 | 6.834  | -6.163  | 54.622 | 1.00 | 0.00 | H |
| ATOM | 667 | H6   | C B | 3 | 6.237  | -4.452  | 56.303 | 1.00 | 0.00 | H |
| ATOM | 668 | H1'  | C B | 3 | 6.800  | -4.960  | 59.925 | 1.00 | 0.00 | H |
| ATOM | 669 | H3'  | C B | 3 | 5.483  | -1.484  | 58.639 | 1.00 | 0.00 | H |
| ATOM | 670 | H4'  | C B | 3 | 3.686  | -3.069  | 59.765 | 1.00 | 0.00 | H |
| ATOM | 671 | H41  | C B | 3 | 7.606  | -8.447  | 54.318 | 1.00 | 0.00 | H |
| ATOM | 672 | H42  | C B | 3 | 7.996  | -9.522  | 55.689 | 1.00 | 0.00 | H |
| ATOM | 673 | H2'1 | C B | 3 | 6.820  | -3.127  | 57.509 | 1.00 | 0.00 | H |
| ATOM | 674 | H2'2 | C B | 3 | 7.711  | -2.968  | 59.017 | 1.00 | 0.00 | H |
| ATOM | 675 | H5'1 | C B | 3 | 3.148  | -4.180  | 57.483 | 1.00 | 0.00 | H |
| ATOM | 676 | H5'2 | C B | 3 | 2.988  | -2.423  | 57.681 | 1.00 | 0.00 | H |
| ATOM | 677 | C1'  | C B | 4 | 10.062 | -5.658  | 62.095 | 1.00 | 0.00 | C |
| ATOM | 678 | N1   | C B | 4 | 10.212 | -5.905  | 60.636 | 1.00 | 0.00 | N |
| ATOM | 679 | C2   | C B | 4 | 10.659 | -7.159  | 60.227 | 1.00 | 0.00 | C |
| ATOM | 680 | O2   | C B | 4 | 10.910 | -8.013  | 61.088 | 1.00 | 0.00 | O |
| ATOM | 681 | N3   | C B | 4 | 10.804 | -7.403  | 58.902 | 1.00 | 0.00 | N |
| ATOM | 682 | C4   | C B | 4 | 10.524 | -6.459  | 57.994 | 1.00 | 0.00 | C |
| ATOM | 683 | N4   | C B | 4 | 10.680 | -6.752  | 56.711 | 1.00 | 0.00 | N |
| ATOM | 684 | C5   | C B | 4 | 10.068 | -5.157  | 58.385 | 1.00 | 0.00 | C |
| ATOM | 685 | C6   | C B | 4 | 9.925  | -4.935  | 59.726 | 1.00 | 0.00 | C |
| ATOM | 686 | C2'  | C B | 4 | 10.466 | -4.256  | 62.528 | 1.00 | 0.00 | C |
| ATOM | 687 | C3'  | C B | 4 | 9.463  | -3.965  | 63.634 | 1.00 | 0.00 | C |
| ATOM | 688 | O3'  | C B | 4 | 9.945  | -4.512  | 64.858 | 1.00 | 0.00 | O |
| ATOM | 689 | C4'  | C B | 4 | 8.201  | -4.668  | 63.144 | 1.00 | 0.00 | C |
| ATOM | 690 | O4'  | C B | 4 | 8.697  | -5.843  | 62.424 | 1.00 | 0.00 | O |
| ATOM | 691 | C5'  | C B | 4 | 7.307  | -3.877  | 62.216 | 1.00 | 0.00 | C |
| ATOM | 692 | O5'  | C B | 4 | 8.117  | -3.055  | 61.339 | 1.00 | 0.00 | O |



|      |     |      |     |   |        |         |        |      |      |   |
|------|-----|------|-----|---|--------|---------|--------|------|------|---|
| ATOM | 693 | O1P  | C B | 4 | 7.543  | -0.709  | 62.045 | 1.00 | 0.00 | O |
| ATOM | 694 | O2P  | C B | 4 | 8.303  | -1.162  | 59.698 | 1.00 | 0.00 | O |
| ATOM | 695 | P    | C B | 4 | 7.559  | -1.630  | 60.892 | 1.00 | 0.00 | P |
| ATOM | 696 | H5   | C B | 4 | 9.847  | -4.383  | 57.650 | 1.00 | 0.00 | H |
| ATOM | 697 | H6   | C B | 4 | 9.573  | -3.964  | 60.072 | 1.00 | 0.00 | H |
| ATOM | 698 | H1'  | C B | 4 | 10.639 | -6.414  | 62.630 | 1.00 | 0.00 | H |
| ATOM | 699 | H3'  | C B | 4 | 9.294  | -2.894  | 63.760 | 1.00 | 0.00 | H |
| ATOM | 700 | H4'  | C B | 4 | 7.617  | -4.927  | 64.028 | 1.00 | 0.00 | H |
| ATOM | 701 | H41  | C B | 4 | 10.469 | -6.045  | 55.991 | 1.00 | 0.00 | H |
| ATOM | 702 | H42  | C B | 4 | 11.010 | -7.687  | 56.431 | 1.00 | 0.00 | H |
| ATOM | 703 | H2'1 | C B | 4 | 10.381 | -3.533  | 61.717 | 1.00 | 0.00 | H |
| ATOM | 704 | H2'2 | C B | 4 | 11.489 | -4.216  | 62.899 | 1.00 | 0.00 | H |
| ATOM | 705 | H5'1 | C B | 4 | 6.704  | -4.567  | 61.625 | 1.00 | 0.00 | H |
| ATOM | 706 | H5'2 | C B | 4 | 6.648  | -3.244  | 62.810 | 1.00 | 0.00 | H |
| ATOM | 707 | C1'  | G B | 5 | 14.153 | -8.060  | 63.518 | 1.00 | 0.00 | C |
| ATOM | 708 | N1   | G B | 5 | 14.798 | -8.762  | 58.506 | 1.00 | 0.00 | N |
| ATOM | 709 | C2   | G B | 5 | 14.977 | -9.645  | 59.557 | 1.00 | 0.00 | C |
| ATOM | 710 | N2   | G B | 5 | 15.382 | -10.877 | 59.229 | 1.00 | 0.00 | N |
| ATOM | 711 | N3   | G B | 5 | 14.765 | -9.322  | 60.832 | 1.00 | 0.00 | N |
| ATOM | 712 | C4   | G B | 5 | 14.365 | -8.033  | 60.980 | 1.00 | 0.00 | C |
| ATOM | 713 | C5   | G B | 5 | 14.166 | -7.081  | 59.992 | 1.00 | 0.00 | C |
| ATOM | 714 | C6   | G B | 5 | 14.385 | -7.422  | 58.639 | 1.00 | 0.00 | C |
| ATOM | 715 | O6   | G B | 5 | 14.264 | -6.723  | 57.634 | 1.00 | 0.00 | O |
| ATOM | 716 | N7   | G B | 5 | 13.755 | -5.874  | 60.563 | 1.00 | 0.00 | N |
| ATOM | 717 | C8   | G B | 5 | 13.717 | -6.126  | 61.847 | 1.00 | 0.00 | C |
| ATOM | 718 | N9   | G B | 5 | 14.076 | -7.417  | 62.177 | 1.00 | 0.00 | N |
| ATOM | 719 | C2'  | G B | 5 | 14.670 | -7.137  | 64.613 | 1.00 | 0.00 | C |
| ATOM | 720 | C3'  | G B | 5 | 13.855 | -7.585  | 65.816 | 1.00 | 0.00 | C |
| ATOM | 721 | O3'  | G B | 5 | 14.492 | -8.708  | 66.421 | 1.00 | 0.00 | O |
| ATOM | 722 | C4'  | G B | 5 | 12.507 | -7.948  | 65.198 | 1.00 | 0.00 | C |
| ATOM | 723 | O4'  | G B | 5 | 12.846 | -8.471  | 63.875 | 1.00 | 0.00 | O |
| ATOM | 724 | C5'  | G B | 5 | 11.518 | -6.818  | 65.032 | 1.00 | 0.00 | C |
| ATOM | 725 | O5'  | G B | 5 | 12.219 | -5.600  | 64.679 | 1.00 | 0.00 | O |
| ATOM | 726 | O1P  | G B | 5 | 11.848 | -4.113  | 66.675 | 1.00 | 0.00 | O |
| ATOM | 727 | O2P  | G B | 5 | 12.233 | -3.102  | 64.412 | 1.00 | 0.00 | O |
| ATOM | 728 | P    | G B | 5 | 11.657 | -4.207  | 65.215 | 1.00 | 0.00 | P |
| ATOM | 729 | H1   | G B | 5 | 14.983 | -9.113  | 57.554 | 1.00 | 0.00 | H |
| ATOM | 730 | H8   | G B | 5 | 13.430 | -5.384  | 62.590 | 1.00 | 0.00 | H |
| ATOM | 731 | H1'  | G B | 5 | 14.773 | -8.952  | 63.434 | 1.00 | 0.00 | H |
| ATOM | 732 | H21  | G B | 5 | 15.540 | -11.120 | 58.240 | 1.00 | 0.00 | H |
| ATOM | 733 | H3'  | G B | 5 | 13.747 | -6.789  | 66.555 | 1.00 | 0.00 | H |
| ATOM | 734 | H22  | G B | 5 | 15.537 | -11.582 | 59.965 | 1.00 | 0.00 | H |
| ATOM | 735 | H4'  | G B | 5 | 12.052 | -8.696  | 65.846 | 1.00 | 0.00 | H |
| ATOM | 736 | H2'1 | G B | 5 | 14.495 | -6.085  | 64.383 | 1.00 | 0.00 | H |
| ATOM | 737 | H2'2 | G B | 5 | 15.738 | -7.261  | 64.788 | 1.00 | 0.00 | H |
| ATOM | 738 | H5'1 | G B | 5 | 10.808 | -7.077  | 64.246 | 1.00 | 0.00 | H |
| ATOM | 739 | H5'2 | G B | 5 | 10.978 | -6.675  | 65.969 | 1.00 | 0.00 | H |
| ATOM | 740 | C1'  | T B | 6 | 18.303 | -10.642 | 62.735 | 1.00 | 0.00 | C |
| ATOM | 741 | N1   | T B | 6 | 18.065 | -9.369  | 62.004 | 1.00 | 0.00 | N |
| ATOM | 742 | C2   | T B | 6 | 18.204 | -9.396  | 60.631 | 1.00 | 0.00 | C |
| ATOM | 743 | O2   | T B | 6 | 18.509 | -10.403 | 60.018 | 1.00 | 0.00 | O |
| ATOM | 744 | N3   | T B | 6 | 17.971 | -8.190  | 59.991 | 1.00 | 0.00 | N |
| ATOM | 745 | C4   | T B | 6 | 17.625 | -6.997  | 60.587 | 1.00 | 0.00 | C |
| ATOM | 746 | O4   | T B | 6 | 17.445 | -5.980  | 59.909 | 1.00 | 0.00 | O |

|      |     |      |     |   |        |         |        |      |      |   |
|------|-----|------|-----|---|--------|---------|--------|------|------|---|
| ATOM | 747 | C5   | T B | 6 | 17.501 | -7.069  | 62.025 | 1.00 | 0.00 | C |
| ATOM | 748 | C6   | T B | 6 | 17.720 | -8.225  | 62.681 | 1.00 | 0.00 | C |
| ATOM | 749 | C7   | T B | 6 | 17.123 | -5.792  | 62.715 | 1.00 | 0.00 | C |
| ATOM | 750 | C2'  | T B | 6 | 19.009 | -10.456 | 64.073 | 1.00 | 0.00 | C |
| ATOM | 751 | C3'  | T B | 6 | 18.356 | -11.534 | 64.926 | 1.00 | 0.00 | C |
| ATOM | 752 | O3'  | T B | 6 | 19.026 | -12.773 | 64.709 | 1.00 | 0.00 | O |
| ATOM | 753 | C4'  | T B | 6 | 16.920 | -11.554 | 64.408 | 1.00 | 0.00 | C |
| ATOM | 754 | O4'  | T B | 6 | 17.046 | -11.239 | 62.985 | 1.00 | 0.00 | O |
| ATOM | 755 | C5'  | T B | 6 | 15.964 | -10.567 | 65.039 | 1.00 | 0.00 | C |
| ATOM | 756 | O5'  | T B | 6 | 16.659 | -9.326  | 65.325 | 1.00 | 0.00 | O |
| ATOM | 757 | O1P  | T B | 6 | 16.639 | -9.215  | 67.838 | 1.00 | 0.00 | O |
| ATOM | 758 | O2P  | T B | 6 | 16.739 | -7.102  | 66.489 | 1.00 | 0.00 | O |
| ATOM | 759 | P    | T B | 6 | 16.237 | -8.491  | 66.616 | 1.00 | 0.00 | P |
| ATOM | 760 | H3   | T B | 6 | 18.067 | -8.186  | 58.966 | 1.00 | 0.00 | H |
| ATOM | 761 | H6   | T B | 6 | 17.621 | -8.254  | 63.766 | 1.00 | 0.00 | H |
| ATOM | 762 | H1'  | T B | 6 | 18.868 | -11.308 | 62.085 | 1.00 | 0.00 | H |
| ATOM | 763 | H3'  | T B | 6 | 18.388 | -11.287 | 65.988 | 1.00 | 0.00 | H |
| ATOM | 764 | H4'  | T B | 6 | 16.532 | -12.556 | 64.590 | 1.00 | 0.00 | H |
| ATOM | 765 | H71  | T B | 6 | 17.949 | -5.461  | 63.345 | 1.00 | 0.00 | H |
| ATOM | 766 | H72  | T B | 6 | 16.905 | -5.026  | 61.970 | 1.00 | 0.00 | H |
| ATOM | 767 | H73  | T B | 6 | 16.240 | -5.960  | 63.332 | 1.00 | 0.00 | H |
| ATOM | 768 | H2'1 | T B | 6 | 18.847 | -9.465  | 64.492 | 1.00 | 0.00 | H |
| ATOM | 769 | H2'2 | T B | 6 | 20.086 | -10.610 | 63.997 | 1.00 | 0.00 | H |
| ATOM | 770 | H5'1 | T B | 6 | 15.139 | -10.378 | 64.351 | 1.00 | 0.00 | H |
| ATOM | 771 | H5'2 | T B | 6 | 15.572 | -10.990 | 65.962 | 1.00 | 0.00 | H |
| ATOM | 772 | C1'  | C B | 7 | 22.183 | -12.087 | 59.992 | 1.00 | 0.00 | C |
| ATOM | 773 | N1   | C B | 7 | 21.888 | -10.638 | 60.183 | 1.00 | 0.00 | N |
| ATOM | 774 | C2   | C B | 7 | 21.816 | -9.833  | 59.049 | 1.00 | 0.00 | C |
| ATOM | 775 | O2   | C B | 7 | 21.995 | -10.349 | 57.937 | 1.00 | 0.00 | O |
| ATOM | 776 | N3   | C B | 7 | 21.549 | -8.513  | 59.201 | 1.00 | 0.00 | N |
| ATOM | 777 | C4   | C B | 7 | 21.361 | -7.983  | 60.417 | 1.00 | 0.00 | C |
| ATOM | 778 | N4   | C B | 7 | 21.101 | -6.689  | 60.507 | 1.00 | 0.00 | N |
| ATOM | 779 | C5   | C B | 7 | 21.436 | -8.788  | 61.602 | 1.00 | 0.00 | C |
| ATOM | 780 | C6   | C B | 7 | 21.701 | -10.116 | 61.424 | 1.00 | 0.00 | C |
| ATOM | 781 | C2'  | C B | 7 | 23.089 | -12.675 | 61.063 | 1.00 | 0.00 | C |
| ATOM | 782 | C3'  | C B | 7 | 22.528 | -14.080 | 61.217 | 1.00 | 0.00 | C |
| ATOM | 783 | O3'  | C B | 7 | 23.101 | -14.925 | 60.223 | 1.00 | 0.00 | O |
| ATOM | 784 | C4'  | C B | 7 | 21.030 | -13.872 | 61.004 | 1.00 | 0.00 | C |
| ATOM | 785 | O4'  | C B | 7 | 20.951 | -12.783 | 60.031 | 1.00 | 0.00 | O |
| ATOM | 786 | C5'  | C B | 7 | 20.224 | -13.487 | 62.225 | 1.00 | 0.00 | C |
| ATOM | 787 | O5'  | C B | 7 | 21.008 | -12.609 | 63.071 | 1.00 | 0.00 | O |
| ATOM | 788 | O1P  | C B | 7 | 21.373 | -13.979 | 65.151 | 1.00 | 0.00 | O |
| ATOM | 789 | O2P  | C B | 7 | 21.359 | -11.475 | 65.285 | 1.00 | 0.00 | O |
| ATOM | 790 | P    | C B | 7 | 20.823 | -12.704 | 64.653 | 1.00 | 0.00 | P |
| ATOM | 791 | H5   | C B | 7 | 21.291 | -8.359  | 62.594 | 1.00 | 0.00 | H |
| ATOM | 792 | H6   | C B | 7 | 21.759 | -10.769 | 62.295 | 1.00 | 0.00 | H |
| ATOM | 793 | H1'  | C B | 7 | 22.612 | -12.219 | 58.999 | 1.00 | 0.00 | H |
| ATOM | 794 | H3'  | C B | 7 | 22.730 | -14.495 | 62.206 | 1.00 | 0.00 | H |
| ATOM | 795 | H4'  | C B | 7 | 20.630 | -14.813 | 60.626 | 1.00 | 0.00 | H |
| ATOM | 796 | H41  | C B | 7 | 20.949 | -6.257  | 61.430 | 1.00 | 0.00 | H |
| ATOM | 797 | H42  | C B | 7 | 21.050 | -6.111  | 59.653 | 1.00 | 0.00 | H |
| ATOM | 798 | H2'1 | C B | 7 | 23.036 | -12.121 | 62.000 | 1.00 | 0.00 | H |
| ATOM | 799 | H2'2 | C B | 7 | 24.135 | -12.696 | 60.754 | 1.00 | 0.00 | H |
| ATOM | 800 | H5'1 | C B | 7 | 19.314 | -12.978 | 61.906 | 1.00 | 0.00 | H |

|      |     |      |     |   |        |         |        |      |      |   |
|------|-----|------|-----|---|--------|---------|--------|------|------|---|
| ATOM | 801 | H5'2 | C B | 7 | 19.957 | -14.389 | 62.775 | 1.00 | 0.00 | H |
| ATOM | 802 | C1'  | C B | 8 | 25.555 | -11.533 | 56.409 | 1.00 | 0.00 | C |
| ATOM | 803 | N1   | C B | 8 | 25.354 | -10.469 | 57.429 | 1.00 | 0.00 | N |
| ATOM | 804 | C2   | C B | 8 | 25.149 | -9.165  | 56.982 | 1.00 | 0.00 | C |
| ATOM | 805 | O2   | C B | 8 | 25.141 | -8.947  | 55.764 | 1.00 | 0.00 | O |
| ATOM | 806 | N3   | C B | 8 | 24.963 | -8.182  | 57.895 | 1.00 | 0.00 | N |
| ATOM | 807 | C4   | C B | 8 | 24.978 | -8.450  | 59.208 | 1.00 | 0.00 | C |
| ATOM | 808 | N4   | C B | 8 | 24.787 | -7.449  | 60.056 | 1.00 | 0.00 | N |
| ATOM | 809 | C5   | C B | 8 | 25.191 | -9.780  | 59.699 | 1.00 | 0.00 | C |
| ATOM | 810 | C6   | C B | 8 | 25.371 | -10.756 | 58.759 | 1.00 | 0.00 | C |
| ATOM | 811 | C2'  | C B | 8 | 26.585 | -12.582 | 56.809 | 1.00 | 0.00 | C |
| ATOM | 812 | C3'  | C B | 8 | 25.993 | -13.850 | 56.214 | 1.00 | 0.00 | C |
| ATOM | 813 | O3'  | C B | 8 | 26.380 | -13.949 | 54.845 | 1.00 | 0.00 | O |
| ATOM | 814 | C4'  | C B | 8 | 24.491 | -13.632 | 56.376 | 1.00 | 0.00 | C |
| ATOM | 815 | O4'  | C B | 8 | 24.315 | -12.188 | 56.220 | 1.00 | 0.00 | O |
| ATOM | 816 | C5'  | C B | 8 | 23.890 | -14.052 | 57.696 | 1.00 | 0.00 | C |
| ATOM | 817 | O5'  | C B | 8 | 24.825 | -13.774 | 58.771 | 1.00 | 0.00 | O |
| ATOM | 818 | O1P  | C B | 8 | 25.433 | -16.065 | 59.619 | 1.00 | 0.00 | O |
| ATOM | 819 | O2P  | C B | 8 | 25.544 | -14.086 | 61.157 | 1.00 | 0.00 | O |
| ATOM | 820 | P    | C B | 8 | 24.870 | -14.760 | 60.022 | 1.00 | 0.00 | P |
| ATOM | 821 | H5   | C B | 8 | 25.212 | -10.001 | 60.766 | 1.00 | 0.00 | H |
| ATOM | 822 | H6   | C B | 8 | 25.530 | -11.785 | 59.083 | 1.00 | 0.00 | H |
| ATOM | 823 | H1'  | C B | 8 | 25.829 | -11.056 | 55.467 | 1.00 | 0.00 | H |
| ATOM | 824 | H3'  | C B | 8 | 26.321 | -14.742 | 56.747 | 1.00 | 0.00 | H |
| ATOM | 825 | H4'  | C B | 8 | 24.001 | -14.209 | 55.592 | 1.00 | 0.00 | H |
| ATOM | 826 | H41  | C B | 8 | 24.790 | -7.628  | 61.072 | 1.00 | 0.00 | H |
| ATOM | 827 | H42  | C B | 8 | 24.636 | -6.493  | 59.702 | 1.00 | 0.00 | H |
| ATOM | 828 | H2'1 | C B | 8 | 26.693 | -12.663 | 57.890 | 1.00 | 0.00 | H |
| ATOM | 829 | H2'2 | C B | 8 | 27.571 | -12.371 | 56.396 | 1.00 | 0.00 | H |
| ATOM | 830 | H5'1 | C B | 8 | 22.965 | -13.498 | 57.862 | 1.00 | 0.00 | H |
| ATOM | 831 | H5'2 | C B | 8 | 23.669 | -15.117 | 57.668 | 1.00 | 0.00 | H |
| ATOM | 832 | C1'  | T B | 9 | 28.391 | -8.893  | 53.329 | 1.00 | 0.00 | C |
| ATOM | 833 | N1   | T B | 9 | 28.383 | -8.587  | 54.784 | 1.00 | 0.00 | N |
| ATOM | 834 | C2   | T B | 9 | 28.168 | -7.275  | 55.153 | 1.00 | 0.00 | C |
| ATOM | 835 | O2   | T B | 9 | 27.990 | -6.384  | 54.342 | 1.00 | 0.00 | O |
| ATOM | 836 | N3   | T B | 9 | 28.167 | -7.038  | 56.514 | 1.00 | 0.00 | N |
| ATOM | 837 | C4   | T B | 9 | 28.361 | -7.970  | 57.511 | 1.00 | 0.00 | C |
| ATOM | 838 | O4   | T B | 9 | 28.343 | -7.636  | 58.703 | 1.00 | 0.00 | O |
| ATOM | 839 | C5   | T B | 9 | 28.576 | -9.315  | 57.030 | 1.00 | 0.00 | C |
| ATOM | 840 | C6   | T B | 9 | 28.582 | -9.583  | 55.710 | 1.00 | 0.00 | C |
| ATOM | 841 | C7   | T B | 9 | 28.789 | -10.362 | 58.082 | 1.00 | 0.00 | C |
| ATOM | 842 | C2'  | T B | 9 | 29.423 | -9.939  | 52.926 | 1.00 | 0.00 | C |
| ATOM | 843 | C3'  | T B | 9 | 28.700 | -10.686 | 51.815 | 1.00 | 0.00 | C |
| ATOM | 844 | O3'  | T B | 9 | 28.883 | -9.988  | 50.585 | 1.00 | 0.00 | O |
| ATOM | 845 | C4'  | T B | 9 | 27.246 | -10.665 | 52.282 | 1.00 | 0.00 | C |
| ATOM | 846 | O4'  | T B | 9 | 27.112 | -9.388  | 52.983 | 1.00 | 0.00 | O |
| ATOM | 847 | C5'  | T B | 9 | 26.824 | -11.777 | 53.214 | 1.00 | 0.00 | C |
| ATOM | 848 | O5'  | T B | 9 | 27.913 | -12.102 | 54.114 | 1.00 | 0.00 | O |
| ATOM | 849 | O1P  | T B | 9 | 28.543 | -14.443 | 53.445 | 1.00 | 0.00 | O |
| ATOM | 850 | O2P  | T B | 9 | 28.954 | -13.656 | 55.791 | 1.00 | 0.00 | O |
| ATOM | 851 | P    | T B | 9 | 28.097 | -13.614 | 54.583 | 1.00 | 0.00 | P |
| ATOM | 852 | H3   | T B | 9 | 28.006 | -6.066  | 56.816 | 1.00 | 0.00 | H |
| ATOM | 853 | H6   | T B | 9 | 28.748 | -10.606 | 55.370 | 1.00 | 0.00 | H |
| ATOM | 854 | H1'  | T B | 9 | 28.547 | -7.961  | 52.785 | 1.00 | 0.00 | H |

|      |     |      |     |    |        |         |        |      |      |   |
|------|-----|------|-----|----|--------|---------|--------|------|------|---|
| ATOM | 855 | H3'  | T B | 9  | 29.065 | -11.707 | 51.709 | 1.00 | 0.00 | H |
| ATOM | 856 | H4'  | T B | 9  | 26.626 | -10.727 | 51.386 | 1.00 | 0.00 | H |
| ATOM | 857 | H71  | T B | 9  | 29.803 | -10.753 | 58.006 | 1.00 | 0.00 | H |
| ATOM | 858 | H72  | T B | 9  | 28.640 | -9.923  | 59.068 | 1.00 | 0.00 | H |
| ATOM | 859 | H73  | T B | 9  | 28.076 | -11.174 | 57.935 | 1.00 | 0.00 | H |
| ATOM | 860 | H2'1 | T B | 9  | 29.681 | -10.603 | 53.749 | 1.00 | 0.00 | H |
| ATOM | 861 | H2'2 | T B | 9  | 30.348 | -9.489  | 52.566 | 1.00 | 0.00 | H |
| ATOM | 862 | H5'1 | T B | 9  | 25.956 | -11.453 | 53.788 | 1.00 | 0.00 | H |
| ATOM | 863 | H5'2 | T B | 9  | 26.558 | -12.653 | 52.627 | 1.00 | 0.00 | H |
| ATOM | 864 | C1'  | A B | 10 | 30.848 | -4.809  | 51.943 | 1.00 | 0.00 | C |
| ATOM | 865 | N1   | A B | 10 | 31.004 | -3.870  | 56.986 | 1.00 | 0.00 | N |
| ATOM | 866 | C2   | A B | 10 | 30.769 | -3.091  | 55.933 | 1.00 | 0.00 | C |
| ATOM | 867 | N3   | A B | 10 | 30.741 | -3.400  | 54.654 | 1.00 | 0.00 | N |
| ATOM | 868 | C4   | A B | 10 | 31.003 | -4.709  | 54.484 | 1.00 | 0.00 | C |
| ATOM | 869 | C5   | A B | 10 | 31.264 | -5.638  | 55.454 | 1.00 | 0.00 | C |
| ATOM | 870 | C6   | A B | 10 | 31.261 | -5.172  | 56.785 | 1.00 | 0.00 | C |
| ATOM | 871 | N6   | A B | 10 | 31.501 | -5.970  | 57.841 | 1.00 | 0.00 | N |
| ATOM | 872 | N7   | A B | 10 | 31.485 | -6.887  | 54.902 | 1.00 | 0.00 | N |
| ATOM | 873 | C8   | A B | 10 | 31.359 | -6.689  | 53.623 | 1.00 | 0.00 | C |
| ATOM | 874 | N9   | A B | 10 | 31.063 | -5.392  | 53.294 | 1.00 | 0.00 | N |
| ATOM | 875 | C2'  | A B | 10 | 31.762 | -5.388  | 50.873 | 1.00 | 0.00 | C |
| ATOM | 876 | C3'  | A B | 10 | 30.855 | -5.401  | 49.651 | 1.00 | 0.00 | C |
| ATOM | 877 | O3'  | A B | 10 | 30.888 | -4.118  | 49.031 | 1.00 | 0.00 | O |
| ATOM | 878 | C4'  | A B | 10 | 29.485 | -5.717  | 50.250 | 1.00 | 0.00 | C |
| ATOM | 879 | O4'  | A B | 10 | 29.510 | -5.079  | 51.566 | 1.00 | 0.00 | O |
| ATOM | 880 | C5'  | A B | 10 | 29.154 | -7.181  | 50.428 | 1.00 | 0.00 | C |
| ATOM | 881 | O5'  | A B | 10 | 30.345 | -7.911  | 50.815 | 1.00 | 0.00 | O |
| ATOM | 882 | O1P  | A B | 10 | 30.768 | -9.420  | 48.844 | 1.00 | 0.00 | O |
| ATOM | 883 | O2P  | A B | 10 | 31.548 | -10.094 | 51.133 | 1.00 | 0.00 | O |
| ATOM | 884 | P    | A B | 10 | 30.528 | -9.410  | 50.301 | 1.00 | 0.00 | P |
| ATOM | 885 | H2   | A B | 10 | 30.572 | -2.045  | 56.164 | 1.00 | 0.00 | H |
| ATOM | 886 | H8   | A B | 10 | 31.477 | -7.480  | 52.882 | 1.00 | 0.00 | H |
| ATOM | 887 | H1'  | A B | 10 | 30.965 | -3.729  | 52.014 | 1.00 | 0.00 | H |
| ATOM | 888 | H3'  | A B | 10 | 31.154 | -6.160  | 48.929 | 1.00 | 0.00 | H |
| ATOM | 889 | H4'  | A B | 10 | 28.741 | -5.286  | 49.581 | 1.00 | 0.00 | H |
| ATOM | 890 | H61  | A B | 10 | 31.484 | -5.579  | 58.793 | 1.00 | 0.00 | H |
| ATOM | 891 | H62  | A B | 10 | 31.700 | -6.969  | 57.696 | 1.00 | 0.00 | H |
| ATOM | 892 | H2'1 | A B | 10 | 32.106 | -6.392  | 51.120 | 1.00 | 0.00 | H |
| ATOM | 893 | H2'2 | A B | 10 | 32.645 | -4.770  | 50.703 | 1.00 | 0.00 | H |
| ATOM | 894 | H5'1 | A B | 10 | 28.392 | -7.283  | 51.202 | 1.00 | 0.00 | H |
| ATOM | 895 | H5'2 | A B | 10 | 28.767 | -7.576  | 49.491 | 1.00 | 0.00 | H |
| ATOM | 896 | C1'  | G B | 11 | 33.244 | -0.552  | 52.819 | 1.00 | 0.00 | C |
| ATOM | 897 | N1   | G B | 11 | 34.178 | -2.653  | 57.372 | 1.00 | 0.00 | N |
| ATOM | 898 | C2   | G B | 11 | 33.811 | -1.359  | 57.050 | 1.00 | 0.00 | C |
| ATOM | 899 | N2   | G B | 11 | 33.676 | -0.511  | 58.078 | 1.00 | 0.00 | N |
| ATOM | 900 | N3   | G B | 11 | 33.594 | -0.944  | 55.803 | 1.00 | 0.00 | N |
| ATOM | 901 | C4   | G B | 11 | 33.783 | -1.932  | 54.889 | 1.00 | 0.00 | C |
| ATOM | 902 | C5   | G B | 11 | 34.153 | -3.246  | 55.117 | 1.00 | 0.00 | C |
| ATOM | 903 | C6   | G B | 11 | 34.379 | -3.690  | 56.440 | 1.00 | 0.00 | C |
| ATOM | 904 | O6   | G B | 11 | 34.711 | -4.807  | 56.840 | 1.00 | 0.00 | O |
| ATOM | 905 | N7   | G B | 11 | 34.241 | -3.940  | 53.908 | 1.00 | 0.00 | N |
| ATOM | 906 | C8   | G B | 11 | 33.926 | -3.044  | 53.007 | 1.00 | 0.00 | C |
| ATOM | 907 | N9   | G B | 11 | 33.636 | -1.800  | 53.526 | 1.00 | 0.00 | N |
| ATOM | 908 | C2'  | G B | 11 | 33.963 | -0.347  | 51.491 | 1.00 | 0.00 | C |

|      |     |      |   |   |    |        |        |        |      |      |   |
|------|-----|------|---|---|----|--------|--------|--------|------|------|---|
| ATOM | 909 | C3'  | G | B | 11 | 32.883 | 0.305  | 50.643 | 1.00 | 0.00 | C |
| ATOM | 910 | O3'  | G | B | 11 | 32.877 | 1.708  | 50.890 | 1.00 | 0.00 | O |
| ATOM | 911 | C4'  | G | B | 11 | 31.607 | -0.374 | 51.137 | 1.00 | 0.00 | C |
| ATOM | 912 | O4'  | G | B | 11 | 31.856 | -0.621 | 52.557 | 1.00 | 0.00 | O |
| ATOM | 913 | C5'  | G | B | 11 | 31.243 | -1.682 | 50.475 | 1.00 | 0.00 | C |
| ATOM | 914 | O5'  | G | B | 11 | 32.447 | -2.435 | 50.182 | 1.00 | 0.00 | O |
| ATOM | 915 | O1P  | G | B | 11 | 32.503 | -2.489 | 47.666 | 1.00 | 0.00 | O |
| ATOM | 916 | O2P  | G | B | 11 | 33.589 | -4.325 | 48.985 | 1.00 | 0.00 | O |
| ATOM | 917 | P    | G | B | 11 | 32.485 | -3.341 | 48.870 | 1.00 | 0.00 | P |
| ATOM | 918 | H1   | G | B | 11 | 34.315 | -2.875 | 58.370 | 1.00 | 0.00 | H |
| ATOM | 919 | H8   | G | B | 11 | 33.896 | -3.263 | 51.940 | 1.00 | 0.00 | H |
| ATOM | 920 | H1'  | G | B | 11 | 33.417 | 0.291  | 53.489 | 1.00 | 0.00 | H |
| ATOM | 921 | H21  | G | B | 11 | 33.842 | -0.841 | 59.040 | 1.00 | 0.00 | H |
| ATOM | 922 | H3'  | G | B | 11 | 33.036 | 0.126  | 49.578 | 1.00 | 0.00 | H |
| ATOM | 923 | H22  | G | B | 11 | 33.408 | 0.467  | 57.906 | 1.00 | 0.00 | H |
| ATOM | 924 | H4'  | G | B | 11 | 30.788 | 0.325  | 50.963 | 1.00 | 0.00 | H |
| ATOM | 925 | H2'1 | G | B | 11 | 34.298 | -1.287 | 51.054 | 1.00 | 0.00 | H |
| ATOM | 926 | H2'2 | G | B | 11 | 34.835 | 0.299  | 51.589 | 1.00 | 0.00 | H |
| ATOM | 927 | H5'1 | G | B | 11 | 30.604 | -2.256 | 51.145 | 1.00 | 0.00 | H |
| ATOM | 928 | H5'2 | G | B | 11 | 30.702 | -1.477 | 49.551 | 1.00 | 0.00 | H |
| ATOM | 929 | C1'  | G | B | 12 | 35.916 | 2.569  | 55.584 | 1.00 | 0.00 | C |
| ATOM | 930 | N1   | G | B | 12 | 37.419 | -1.702 | 57.935 | 1.00 | 0.00 | N |
| ATOM | 931 | C2   | G | B | 12 | 37.064 | -0.474 | 58.466 | 1.00 | 0.00 | C |
| ATOM | 932 | N2   | G | B | 12 | 37.117 | -0.371 | 59.800 | 1.00 | 0.00 | N |
| ATOM | 933 | N3   | G | B | 12 | 36.684 | 0.564  | 57.726 | 1.00 | 0.00 | N |
| ATOM | 934 | C4   | G | B | 12 | 36.697 | 0.283  | 56.396 | 1.00 | 0.00 | C |
| ATOM | 935 | C5   | G | B | 12 | 37.040 | -0.906 | 55.778 | 1.00 | 0.00 | C |
| ATOM | 936 | C6   | G | B | 12 | 37.438 | -2.011 | 56.562 | 1.00 | 0.00 | C |
| ATOM | 937 | O6   | G | B | 12 | 37.778 | -3.139 | 56.201 | 1.00 | 0.00 | O |
| ATOM | 938 | N7   | G | B | 12 | 36.920 | -0.783 | 54.391 | 1.00 | 0.00 | N |
| ATOM | 939 | C8   | G | B | 12 | 36.514 | 0.448  | 54.218 | 1.00 | 0.00 | C |
| ATOM | 940 | N9   | G | B | 12 | 36.356 | 1.160  | 55.389 | 1.00 | 0.00 | N |
| ATOM | 941 | C2'  | G | B | 12 | 36.441 | 3.527  | 54.524 | 1.00 | 0.00 | C |
| ATOM | 942 | C3'  | G | B | 12 | 35.276 | 4.492  | 54.364 | 1.00 | 0.00 | C |
| ATOM | 943 | O3'  | G | B | 12 | 35.364 | 5.502  | 55.366 | 1.00 | 0.00 | O |
| ATOM | 944 | C4'  | G | B | 12 | 34.059 | 3.590  | 54.561 | 1.00 | 0.00 | C |
| ATOM | 945 | O4'  | G | B | 12 | 34.503 | 2.591  | 55.533 | 1.00 | 0.00 | O |
| ATOM | 946 | C5'  | G | B | 12 | 33.549 | 2.875  | 53.333 | 1.00 | 0.00 | C |
| ATOM | 947 | O5'  | G | B | 12 | 34.664 | 2.484  | 52.494 | 1.00 | 0.00 | O |
| ATOM | 948 | O1P  | G | B | 12 | 34.347 | 3.875  | 50.420 | 1.00 | 0.00 | O |
| ATOM | 949 | O2P  | G | B | 12 | 35.537 | 1.670  | 50.282 | 1.00 | 0.00 | O |
| ATOM | 950 | P    | G | B | 12 | 34.472 | 2.489  | 50.910 | 1.00 | 0.00 | P |
| ATOM | 951 | H1   | G | B | 12 | 37.692 | -2.446 | 58.598 | 1.00 | 0.00 | H |
| ATOM | 952 | H8   | G | B | 12 | 36.318 | 0.877  | 53.235 | 1.00 | 0.00 | H |
| ATOM | 953 | H1'  | G | B | 12 | 36.221 | 2.886  | 56.582 | 1.00 | 0.00 | H |
| ATOM | 954 | H21  | G | B | 12 | 37.407 | -1.181 | 60.368 | 1.00 | 0.00 | H |
| ATOM | 955 | H3'  | G | B | 12 | 35.264 | 4.959  | 53.380 | 1.00 | 0.00 | H |
| ATOM | 956 | H22  | G | B | 12 | 36.867 | 0.517  | 60.256 | 1.00 | 0.00 | H |
| ATOM | 957 | H4'  | G | B | 12 | 33.254 | 4.220  | 54.937 | 1.00 | 0.00 | H |
| ATOM | 958 | H2'1 | G | B | 12 | 36.669 | 3.021  | 53.586 | 1.00 | 0.00 | H |
| ATOM | 959 | H2'2 | G | B | 12 | 37.344 | 4.046  | 54.844 | 1.00 | 0.00 | H |
| ATOM | 960 | H5'1 | G | B | 12 | 32.990 | 1.990  | 53.639 | 1.00 | 0.00 | H |
| ATOM | 961 | H5'2 | G | B | 12 | 32.886 | 3.541  | 52.779 | 1.00 | 0.00 | H |
| ATOM | 962 | C1'  | T | B | 13 | 39.085 | 3.711  | 59.212 | 1.00 | 0.00 | C |

|      |      |      |     |    |        |        |        |      |      |   |
|------|------|------|-----|----|--------|--------|--------|------|------|---|
| ATOM | 963  | N1   | T B | 13 | 39.438 | 2.670  | 58.211 | 1.00 | 0.00 | N |
| ATOM | 964  | C2   | T B | 13 | 39.869 | 1.449  | 58.693 | 1.00 | 0.00 | C |
| ATOM | 965  | O2   | T B | 13 | 39.966 | 1.209  | 59.884 | 1.00 | 0.00 | O |
| ATOM | 966  | N3   | T B | 13 | 40.186 | 0.512  | 57.728 | 1.00 | 0.00 | N |
| ATOM | 967  | C4   | T B | 13 | 40.115 | 0.684  | 56.361 | 1.00 | 0.00 | C |
| ATOM | 968  | O4   | T B | 13 | 40.430 | -0.232 | 55.591 | 1.00 | 0.00 | O |
| ATOM | 969  | C5   | T B | 13 | 39.653 | 1.989  | 55.952 | 1.00 | 0.00 | C |
| ATOM | 970  | C6   | T B | 13 | 39.335 | 2.928  | 56.866 | 1.00 | 0.00 | C |
| ATOM | 971  | C7   | T B | 13 | 39.558 | 2.219  | 54.473 | 1.00 | 0.00 | C |
| ATOM | 972  | C2'  | T B | 13 | 39.491 | 5.121  | 58.802 | 1.00 | 0.00 | C |
| ATOM | 973  | C3'  | T B | 13 | 38.352 | 5.955  | 59.369 | 1.00 | 0.00 | C |
| ATOM | 974  | O3'  | T B | 13 | 38.621 | 6.244  | 60.738 | 1.00 | 0.00 | O |
| ATOM | 975  | C4'  | T B | 13 | 37.143 | 5.040  | 59.196 | 1.00 | 0.00 | C |
| ATOM | 976  | O4'  | T B | 13 | 37.681 | 3.692  | 59.378 | 1.00 | 0.00 | O |
| ATOM | 977  | C5'  | T B | 13 | 36.436 | 5.103  | 57.862 | 1.00 | 0.00 | C |
| ATOM | 978  | O5'  | T B | 13 | 37.407 | 5.297  | 56.803 | 1.00 | 0.00 | O |
| ATOM | 979  | O1P  | T B | 13 | 36.857 | 7.587  | 55.919 | 1.00 | 0.00 | O |
| ATOM | 980  | O2P  | T B | 13 | 37.931 | 5.888  | 54.416 | 1.00 | 0.00 | O |
| ATOM | 981  | P    | T B | 13 | 36.995 | 6.169  | 55.533 | 1.00 | 0.00 | P |
| ATOM | 982  | H3   | T B | 13 | 40.507 | -0.408 | 58.063 | 1.00 | 0.00 | H |
| ATOM | 983  | H6   | T B | 13 | 38.990 | 3.907  | 56.533 | 1.00 | 0.00 | H |
| ATOM | 984  | H1'  | T B | 13 | 39.539 | 3.436  | 60.165 | 1.00 | 0.00 | H |
| ATOM | 985  | H3'  | T B | 13 | 38.221 | 6.889  | 58.822 | 1.00 | 0.00 | H |
| ATOM | 986  | H4'  | T B | 13 | 36.422 | 5.320  | 59.966 | 1.00 | 0.00 | H |
| ATOM | 987  | H71  | T B | 13 | 40.280 | 2.978  | 54.175 | 1.00 | 0.00 | H |
| ATOM | 988  | H72  | T B | 13 | 39.770 | 1.289  | 53.945 | 1.00 | 0.00 | H |
| ATOM | 989  | H73  | T B | 13 | 38.552 | 2.558  | 54.221 | 1.00 | 0.00 | H |
| ATOM | 990  | H2'1 | T B | 13 | 39.565 | 5.231  | 57.721 | 1.00 | 0.00 | H |
| ATOM | 991  | H2'2 | T B | 13 | 40.450 | 5.417  | 59.228 | 1.00 | 0.00 | H |
| ATOM | 992  | H5'1 | T B | 13 | 35.893 | 4.173  | 57.699 | 1.00 | 0.00 | H |
| ATOM | 993  | H5'2 | T B | 13 | 35.730 | 5.934  | 57.869 | 1.00 | 0.00 | H |
| ATOM | 994  | C1'  | G B | 14 | 42.811 | 2.698  | 62.334 | 1.00 | 0.00 | C |
| ATOM | 995  | N1   | G B | 14 | 44.136 | -0.707 | 58.773 | 1.00 | 0.00 | N |
| ATOM | 996  | C2   | G B | 14 | 44.118 | -0.826 | 60.151 | 1.00 | 0.00 | C |
| ATOM | 997  | N2   | G B | 14 | 44.504 | -2.007 | 60.647 | 1.00 | 0.00 | N |
| ATOM | 998  | N3   | G B | 14 | 43.741 | 0.156  | 60.969 | 1.00 | 0.00 | N |
| ATOM | 999  | C4   | G B | 14 | 43.389 | 1.283  | 60.295 | 1.00 | 0.00 | C |
| ATOM | 1000 | C5   | G B | 14 | 43.380 | 1.494  | 58.927 | 1.00 | 0.00 | C |
| ATOM | 1001 | C6   | G B | 14 | 43.776 | 0.451  | 58.058 | 1.00 | 0.00 | C |
| ATOM | 1002 | O6   | G B | 14 | 43.836 | 0.447  | 56.828 | 1.00 | 0.00 | O |
| ATOM | 1003 | N7   | G B | 14 | 42.954 | 2.793  | 58.641 | 1.00 | 0.00 | N |
| ATOM | 1004 | C8   | G B | 14 | 42.719 | 3.314  | 59.817 | 1.00 | 0.00 | C |
| ATOM | 1005 | N9   | G B | 14 | 42.961 | 2.459  | 60.873 | 1.00 | 0.00 | N |
| ATOM | 1006 | C2'  | G B | 14 | 43.210 | 4.102  | 62.770 | 1.00 | 0.00 | C |
| ATOM | 1007 | C3'  | G B | 14 | 42.210 | 4.386  | 63.879 | 1.00 | 0.00 | C |
| ATOM | 1008 | O3'  | G B | 14 | 42.696 | 3.835  | 65.100 | 1.00 | 0.00 | O |
| ATOM | 1009 | C4'  | G B | 14 | 40.949 | 3.679  | 63.387 | 1.00 | 0.00 | C |
| ATOM | 1010 | O4'  | G B | 14 | 41.449 | 2.510  | 62.664 | 1.00 | 0.00 | O |
| ATOM | 1011 | C5'  | G B | 14 | 40.052 | 4.471  | 62.466 | 1.00 | 0.00 | C |
| ATOM | 1012 | O5'  | G B | 14 | 40.856 | 5.298  | 61.589 | 1.00 | 0.00 | O |
| ATOM | 1013 | O1P  | G B | 14 | 40.277 | 7.641  | 62.303 | 1.00 | 0.00 | O |
| ATOM | 1014 | O2P  | G B | 14 | 41.034 | 7.197  | 59.953 | 1.00 | 0.00 | O |
| ATOM | 1015 | P    | G B | 14 | 40.293 | 6.723  | 61.148 | 1.00 | 0.00 | P |
| ATOM | 1016 | H1   | G B | 14 | 44.438 | -1.531 | 58.229 | 1.00 | 0.00 | H |

|      |      |      |     |    |        |        |        |      |      |   |
|------|------|------|-----|----|--------|--------|--------|------|------|---|
| ATOM | 1017 | H8   | G B | 14 | 42.363 | 4.336  | 59.951 | 1.00 | 0.00 | H |
| ATOM | 1018 | H1'  | G B | 14 | 43.392 | 1.944  | 62.865 | 1.00 | 0.00 | H |
| ATOM | 1019 | H21  | G B | 14 | 44.790 | -2.763 | 60.007 | 1.00 | 0.00 | H |
| ATOM | 1020 | H3'  | G B | 14 | 42.037 | 5.455  | 64.008 | 1.00 | 0.00 | H |
| ATOM | 1021 | H22  | G B | 14 | 44.516 | -2.159 | 61.666 | 1.00 | 0.00 | H |
| ATOM | 1022 | H4'  | G B | 14 | 40.368 | 3.416  | 64.272 | 1.00 | 0.00 | H |
| ATOM | 1023 | H2'1 | G B | 14 | 43.124 | 4.826  | 61.961 | 1.00 | 0.00 | H |
| ATOM | 1024 | H2'2 | G B | 14 | 44.235 | 4.144  | 63.138 | 1.00 | 0.00 | H |
| ATOM | 1025 | H5'1 | G B | 14 | 39.450 | 3.782  | 61.872 | 1.00 | 0.00 | H |
| ATOM | 1026 | H5'2 | G B | 14 | 39.391 | 5.099  | 63.063 | 1.00 | 0.00 | H |
| ATOM | 1027 | C1'  | C B | 15 | 46.903 | 0.296  | 63.756 | 1.00 | 0.00 | C |
| ATOM | 1028 | N1   | C B | 15 | 46.827 | 0.933  | 62.415 | 1.00 | 0.00 | N |
| ATOM | 1029 | C2   | C B | 15 | 47.157 | 0.159  | 61.304 | 1.00 | 0.00 | C |
| ATOM | 1030 | O2   | C B | 15 | 47.495 | -1.019 | 61.478 | 1.00 | 0.00 | O |
| ATOM | 1031 | N3   | C B | 15 | 47.094 | 0.720  | 60.072 | 1.00 | 0.00 | N |
| ATOM | 1032 | C4   | C B | 15 | 46.725 | 1.998  | 59.917 | 1.00 | 0.00 | C |
| ATOM | 1033 | N4   | C B | 15 | 46.678 | 2.495  | 58.689 | 1.00 | 0.00 | N |
| ATOM | 1034 | C5   | C B | 15 | 46.385 | 2.821  | 61.041 | 1.00 | 0.00 | C |
| ATOM | 1035 | C6   | C B | 15 | 46.450 | 2.232  | 62.270 | 1.00 | 0.00 | C |
| ATOM | 1036 | C2'  | C B | 15 | 47.423 | 1.222  | 64.847 | 1.00 | 0.00 | C |
| ATOM | 1037 | C3'  | C B | 15 | 46.606 | 0.782  | 66.053 | 1.00 | 0.00 | C |
| ATOM | 1038 | O3'  | C B | 15 | 47.240 | -0.342 | 66.663 | 1.00 | 0.00 | O |
| ATOM | 1039 | C4'  | C B | 15 | 45.258 | 0.420  | 65.436 | 1.00 | 0.00 | C |
| ATOM | 1040 | O4'  | C B | 15 | 45.594 | -0.109 | 64.115 | 1.00 | 0.00 | O |
| ATOM | 1041 | C5'  | C B | 15 | 44.271 | 1.552  | 65.267 | 1.00 | 0.00 | C |
| ATOM | 1042 | O5'  | C B | 15 | 44.977 | 2.766  | 64.910 | 1.00 | 0.00 | O |
| ATOM | 1043 | O1P  | C B | 15 | 44.612 | 4.263  | 66.900 | 1.00 | 0.00 | O |
| ATOM | 1044 | O2P  | C B | 15 | 44.999 | 5.265  | 64.633 | 1.00 | 0.00 | O |
| ATOM | 1045 | P    | C B | 15 | 44.420 | 4.163  | 65.440 | 1.00 | 0.00 | P |
| ATOM | 1046 | H5   | C B | 15 | 46.090 | 3.863  | 60.918 | 1.00 | 0.00 | H |
| ATOM | 1047 | H6   | C B | 15 | 46.194 | 2.816  | 63.156 | 1.00 | 0.00 | H |
| ATOM | 1048 | H1'  | C B | 15 | 47.521 | -0.599 | 63.675 | 1.00 | 0.00 | H |
| ATOM | 1049 | H3'  | C B | 15 | 46.502 | 1.580  | 66.788 | 1.00 | 0.00 | H |
| ATOM | 1050 | H4'  | C B | 15 | 44.800 | -0.324 | 66.090 | 1.00 | 0.00 | H |
| ATOM | 1051 | H41  | C B | 15 | 46.394 | 3.475  | 58.541 | 1.00 | 0.00 | H |
| ATOM | 1052 | H42  | C B | 15 | 46.926 | 1.902  | 57.882 | 1.00 | 0.00 | H |
| ATOM | 1053 | H2'1 | C B | 15 | 47.252 | 2.272  | 64.615 | 1.00 | 0.00 | H |
| ATOM | 1054 | H2'2 | C B | 15 | 48.492 | 1.095  | 65.023 | 1.00 | 0.00 | H |
| ATOM | 1055 | H5'1 | C B | 15 | 43.561 | 1.293  | 64.482 | 1.00 | 0.00 | H |
| ATOM | 1056 | H5'2 | C B | 15 | 43.734 | 1.702  | 66.203 | 1.00 | 0.00 | H |
| ATOM | 1057 | C1'  | G B | 16 | 51.054 | -2.280 | 62.950 | 1.00 | 0.00 | C |
| ATOM | 1058 | N1   | G B | 16 | 50.929 | 0.029  | 58.403 | 1.00 | 0.00 | N |
| ATOM | 1059 | C2   | G B | 16 | 51.222 | -1.285 | 58.724 | 1.00 | 0.00 | C |
| ATOM | 1060 | N2   | G B | 16 | 51.524 | -2.089 | 57.697 | 1.00 | 0.00 | N |
| ATOM | 1061 | N3   | G B | 16 | 51.214 | -1.756 | 59.970 | 1.00 | 0.00 | N |
| ATOM | 1062 | C4   | G B | 16 | 50.893 | -0.802 | 60.882 | 1.00 | 0.00 | C |
| ATOM | 1063 | C5   | G B | 16 | 50.591 | 0.530  | 60.655 | 1.00 | 0.00 | C |
| ATOM | 1064 | C6   | G B | 16 | 50.595 | 1.032  | 59.332 | 1.00 | 0.00 | C |
| ATOM | 1065 | O6   | G B | 16 | 50.355 | 2.172  | 58.935 | 1.00 | 0.00 | O |
| ATOM | 1066 | N7   | G B | 16 | 50.320 | 1.176  | 61.863 | 1.00 | 0.00 | N |
| ATOM | 1067 | C8   | G B | 16 | 50.459 | 0.236  | 62.763 | 1.00 | 0.00 | C |
| ATOM | 1068 | N9   | G B | 16 | 50.809 | -0.994 | 62.244 | 1.00 | 0.00 | N |
| ATOM | 1069 | C2'  | G B | 16 | 51.764 | -2.120 | 64.287 | 1.00 | 0.00 | C |
| ATOM | 1070 | C3'  | G B | 16 | 51.117 | -3.212 | 65.123 | 1.00 | 0.00 | C |

|      |      |      |     |    |        |        |        |      |      |   |
|------|------|------|-----|----|--------|--------|--------|------|------|---|
| ATOM | 1071 | O3'  | G B | 16 | 51.787 | -4.446 | 64.881 | 1.00 | 0.00 | O |
| ATOM | 1072 | C4'  | G B | 16 | 49.678 | -3.226 | 64.610 | 1.00 | 0.00 | C |
| ATOM | 1073 | O4'  | G B | 16 | 49.798 | -2.885 | 63.192 | 1.00 | 0.00 | O |
| ATOM | 1074 | C5'  | G B | 16 | 48.724 | -2.254 | 65.262 | 1.00 | 0.00 | C |
| ATOM | 1075 | O5'  | G B | 16 | 49.415 | -1.018 | 65.569 | 1.00 | 0.00 | O |
| ATOM | 1076 | O1P  | G B | 16 | 49.404 | -0.952 | 68.085 | 1.00 | 0.00 | O |
| ATOM | 1077 | O2P  | G B | 16 | 49.495 | 1.184  | 66.775 | 1.00 | 0.00 | O |
| ATOM | 1078 | P    | G B | 16 | 48.997 | -0.209 | 66.878 | 1.00 | 0.00 | P |
| ATOM | 1079 | H1   | G B | 16 | 50.956 | 0.292  | 57.406 | 1.00 | 0.00 | H |
| ATOM | 1080 | H8   | G B | 16 | 50.313 | 0.410  | 63.828 | 1.00 | 0.00 | H |
| ATOM | 1081 | H1'  | G B | 16 | 51.618 | -2.934 | 62.284 | 1.00 | 0.00 | H |
| ATOM | 1082 | H21  | G B | 16 | 51.524 | -1.717 | 56.736 | 1.00 | 0.00 | H |
| ATOM | 1083 | H3'  | G B | 16 | 51.152 | -2.985 | 66.189 | 1.00 | 0.00 | H |
| ATOM | 1084 | H22  | G B | 16 | 51.753 | -3.077 | 57.870 | 1.00 | 0.00 | H |
| ATOM | 1085 | H4'  | G B | 16 | 49.293 | -4.232 | 64.775 | 1.00 | 0.00 | H |
| ATOM | 1086 | H2'1 | G B | 16 | 51.601 | -1.134 | 64.726 | 1.00 | 0.00 | H |
| ATOM | 1087 | H2'2 | G B | 16 | 52.841 | -2.268 | 64.204 | 1.00 | 0.00 | H |
| ATOM | 1088 | H5'1 | G B | 16 | 47.896 | -2.054 | 64.582 | 1.00 | 0.00 | H |
| ATOM | 1089 | H5'2 | G B | 16 | 48.335 | -2.696 | 66.180 | 1.00 | 0.00 | H |
| ATOM | 1090 | C1'  | G B | 17 | 54.932 | -3.728 | 60.231 | 1.00 | 0.00 | C |
| ATOM | 1091 | N1   | G B | 17 | 54.237 | 0.750  | 57.886 | 1.00 | 0.00 | N |
| ATOM | 1092 | C2   | G B | 17 | 54.519 | -0.497 | 57.356 | 1.00 | 0.00 | C |
| ATOM | 1093 | N2   | G B | 17 | 54.633 | -0.558 | 56.024 | 1.00 | 0.00 | N |
| ATOM | 1094 | N3   | G B | 17 | 54.674 | -1.593 | 58.094 | 1.00 | 0.00 | N |
| ATOM | 1095 | C4   | G B | 17 | 54.532 | -1.345 | 59.422 | 1.00 | 0.00 | C |
| ATOM | 1096 | C5   | G B | 17 | 54.255 | -0.138 | 60.042 | 1.00 | 0.00 | C |
| ATOM | 1097 | C6   | G B | 17 | 54.086 | 1.025  | 59.259 | 1.00 | 0.00 | C |
| ATOM | 1098 | O6   | G B | 17 | 53.838 | 2.176  | 59.621 | 1.00 | 0.00 | O |
| ATOM | 1099 | N7   | G B | 17 | 54.190 | -0.310 | 61.427 | 1.00 | 0.00 | N |
| ATOM | 1100 | C8   | G B | 17 | 54.421 | -1.585 | 61.599 | 1.00 | 0.00 | C |
| ATOM | 1101 | N9   | G B | 17 | 54.640 | -2.282 | 60.428 | 1.00 | 0.00 | N |
| ATOM | 1102 | C2'  | G B | 17 | 55.836 | -4.322 | 61.302 | 1.00 | 0.00 | C |
| ATOM | 1103 | C3'  | G B | 17 | 55.274 | -5.727 | 61.449 | 1.00 | 0.00 | C |
| ATOM | 1104 | O3'  | G B | 17 | 55.850 | -6.569 | 60.453 | 1.00 | 0.00 | O |
| ATOM | 1105 | C4'  | G B | 17 | 53.776 | -5.518 | 61.233 | 1.00 | 0.00 | C |
| ATOM | 1106 | O4'  | G B | 17 | 53.702 | -4.425 | 60.263 | 1.00 | 0.00 | O |
| ATOM | 1107 | C5'  | G B | 17 | 52.969 | -5.139 | 62.452 | 1.00 | 0.00 | C |
| ATOM | 1108 | O5'  | G B | 17 | 53.749 | -4.264 | 63.304 | 1.00 | 0.00 | O |
| ATOM | 1109 | O1P  | G B | 17 | 54.109 | -5.644 | 65.379 | 1.00 | 0.00 | O |
| ATOM | 1110 | O2P  | G B | 17 | 54.096 | -3.139 | 65.526 | 1.00 | 0.00 | O |
| ATOM | 1111 | P    | G B | 17 | 53.561 | -4.367 | 64.886 | 1.00 | 0.00 | P |
| ATOM | 1112 | H1   | G B | 17 | 54.129 | 1.535  | 57.225 | 1.00 | 0.00 | H |
| ATOM | 1113 | H8   | G B | 17 | 54.441 | -2.058 | 62.580 | 1.00 | 0.00 | H |
| ATOM | 1114 | H1'  | G B | 17 | 55.363 | -3.857 | 59.240 | 1.00 | 0.00 | H |
| ATOM | 1115 | H21  | G B | 17 | 54.508 | 0.294  | 55.456 | 1.00 | 0.00 | H |
| ATOM | 1116 | H3'  | G B | 17 | 55.474 | -6.146 | 62.436 | 1.00 | 0.00 | H |
| ATOM | 1117 | H22  | G B | 17 | 54.845 | -1.457 | 55.566 | 1.00 | 0.00 | H |
| ATOM | 1118 | H4'  | G B | 17 | 53.377 | -6.456 | 60.849 | 1.00 | 0.00 | H |
| ATOM | 1119 | H2'1 | G B | 17 | 55.781 | -3.772 | 62.243 | 1.00 | 0.00 | H |
| ATOM | 1120 | H2'2 | G B | 17 | 56.881 | -4.342 | 60.996 | 1.00 | 0.00 | H |
| ATOM | 1121 | H5'1 | G B | 17 | 52.059 | -4.629 | 62.135 | 1.00 | 0.00 | H |
| ATOM | 1122 | H5'2 | G B | 17 | 52.700 | -6.043 | 62.999 | 1.00 | 0.00 | H |
| ATOM | 1123 | C1'  | C B | 18 | 58.305 | -3.176 | 56.647 | 1.00 | 0.00 | C |
| ATOM | 1124 | N1   | C B | 18 | 58.103 | -2.111 | 57.669 | 1.00 | 0.00 | N |



|      |      |      |     |    |        |        |        |      |      |   |
|------|------|------|-----|----|--------|--------|--------|------|------|---|
| ATOM | 1125 | C2   | C B | 18 | 57.898 | -0.808 | 57.220 | 1.00 | 0.00 | C |
| ATOM | 1126 | O2   | C B | 18 | 57.889 | -0.591 | 56.002 | 1.00 | 0.00 | O |
| ATOM | 1127 | N3   | C B | 18 | 57.713 | 0.174  | 58.135 | 1.00 | 0.00 | N |
| ATOM | 1128 | C4   | C B | 18 | 57.727 | -0.094 | 59.446 | 1.00 | 0.00 | C |
| ATOM | 1129 | N4   | C B | 18 | 57.538 | 0.905  | 60.295 | 1.00 | 0.00 | N |
| ATOM | 1130 | C5   | C B | 18 | 57.940 | -1.423 | 59.934 | 1.00 | 0.00 | C |
| ATOM | 1131 | C6   | C B | 18 | 58.121 | -2.397 | 58.997 | 1.00 | 0.00 | C |
| ATOM | 1132 | C2'  | C B | 18 | 59.335 | -4.224 | 57.047 | 1.00 | 0.00 | C |
| ATOM | 1133 | C3'  | C B | 18 | 58.743 | -5.493 | 56.453 | 1.00 | 0.00 | C |
| ATOM | 1134 | O3'  | C B | 18 | 59.129 | -5.592 | 55.084 | 1.00 | 0.00 | O |
| ATOM | 1135 | C4'  | C B | 18 | 57.241 | -5.275 | 56.614 | 1.00 | 0.00 | C |
| ATOM | 1136 | O4'  | C B | 18 | 57.064 | -3.830 | 56.459 | 1.00 | 0.00 | O |
| ATOM | 1137 | C5'  | C B | 18 | 56.639 | -5.695 | 57.935 | 1.00 | 0.00 | C |
| ATOM | 1138 | O5'  | C B | 18 | 57.574 | -5.417 | 59.009 | 1.00 | 0.00 | O |
| ATOM | 1139 | O1P  | C B | 18 | 58.183 | -7.708 | 59.858 | 1.00 | 0.00 | O |
| ATOM | 1140 | O2P  | C B | 18 | 58.294 | -5.728 | 61.397 | 1.00 | 0.00 | O |
| ATOM | 1141 | P    | C B | 18 | 57.619 | -6.403 | 60.261 | 1.00 | 0.00 | P |
| ATOM | 1142 | H5   | C B | 18 | 57.955 | -1.646 | 61.001 | 1.00 | 0.00 | H |
| ATOM | 1143 | H6   | C B | 18 | 58.282 | -3.424 | 59.321 | 1.00 | 0.00 | H |
| ATOM | 1144 | H1'  | C B | 18 | 58.579 | -2.698 | 55.707 | 1.00 | 0.00 | H |
| ATOM | 1145 | H3'  | C B | 18 | 59.071 | -6.384 | 56.986 | 1.00 | 0.00 | H |
| ATOM | 1146 | H4'  | C B | 18 | 56.750 | -5.851 | 55.830 | 1.00 | 0.00 | H |
| ATOM | 1147 | H41  | C B | 18 | 57.544 | 0.726  | 61.310 | 1.00 | 0.00 | H |
| ATOM | 1148 | H42  | C B | 18 | 57.386 | 1.861  | 59.941 | 1.00 | 0.00 | H |
| ATOM | 1149 | H2'1 | C B | 18 | 59.442 | -4.306 | 58.128 | 1.00 | 0.00 | H |
| ATOM | 1150 | H2'2 | C B | 18 | 60.321 | -4.013 | 56.635 | 1.00 | 0.00 | H |
| ATOM | 1151 | H5'1 | C B | 18 | 55.715 | -5.141 | 58.101 | 1.00 | 0.00 | H |
| ATOM | 1152 | H5'2 | C B | 18 | 56.419 | -6.761 | 57.906 | 1.00 | 0.00 | H |
| ATOM | 1153 | C1'  | C B | 19 | 61.137 | -0.515 | 53.577 | 1.00 | 0.00 | C |
| ATOM | 1154 | N1   | C B | 19 | 61.131 | -0.232 | 55.038 | 1.00 | 0.00 | N |
| ATOM | 1155 | C2   | C B | 19 | 60.915 | 1.083  | 55.449 | 1.00 | 0.00 | C |
| ATOM | 1156 | O2   | C B | 19 | 60.738 | 1.955  | 54.588 | 1.00 | 0.00 | O |
| ATOM | 1157 | N3   | C B | 19 | 60.907 | 1.360  | 56.775 | 1.00 | 0.00 | N |
| ATOM | 1158 | C4   | C B | 19 | 61.104 | 0.393  | 57.681 | 1.00 | 0.00 | C |
| ATOM | 1159 | N4   | C B | 19 | 61.084 | 0.719  | 58.963 | 1.00 | 0.00 | N |
| ATOM | 1160 | C5   | C B | 19 | 61.329 | -0.964 | 57.286 | 1.00 | 0.00 | C |
| ATOM | 1161 | C6   | C B | 19 | 61.331 | -1.221 | 55.948 | 1.00 | 0.00 | C |
| ATOM | 1162 | C2'  | C B | 19 | 62.169 | -1.550 | 53.157 | 1.00 | 0.00 | C |
| ATOM | 1163 | C3'  | C B | 19 | 61.445 | -2.283 | 52.037 | 1.00 | 0.00 | C |
| ATOM | 1164 | O3'  | C B | 19 | 61.622 | -1.566 | 50.818 | 1.00 | 0.00 | O |
| ATOM | 1165 | C4'  | C B | 19 | 59.992 | -2.271 | 52.507 | 1.00 | 0.00 | C |
| ATOM | 1166 | O4'  | C B | 19 | 59.856 | -1.007 | 53.230 | 1.00 | 0.00 | O |
| ATOM | 1167 | C5'  | C B | 19 | 59.575 | -3.398 | 53.425 | 1.00 | 0.00 | C |
| ATOM | 1168 | O5'  | C B | 19 | 60.667 | -3.735 | 54.317 | 1.00 | 0.00 | O |
| ATOM | 1169 | O1P  | C B | 19 | 61.298 | -6.066 | 53.611 | 1.00 | 0.00 | O |
| ATOM | 1170 | O2P  | C B | 19 | 61.715 | -5.313 | 55.967 | 1.00 | 0.00 | O |
| ATOM | 1171 | P    | C B | 19 | 60.855 | -5.254 | 54.760 | 1.00 | 0.00 | P |
| ATOM | 1172 | H5   | C B | 19 | 61.491 | -1.754 | 58.020 | 1.00 | 0.00 | H |
| ATOM | 1173 | H6   | C B | 19 | 61.497 | -2.241 | 55.600 | 1.00 | 0.00 | H |
| ATOM | 1174 | H1'  | C B | 19 | 61.290 | 0.427  | 53.049 | 1.00 | 0.00 | H |
| ATOM | 1175 | H3'  | C B | 19 | 61.809 | -3.303 | 51.914 | 1.00 | 0.00 | H |
| ATOM | 1176 | H4'  | C B | 19 | 59.368 | -2.322 | 51.615 | 1.00 | 0.00 | H |
| ATOM | 1177 | H41  | C B | 19 | 61.230 | -0.004 | 59.682 | 1.00 | 0.00 | H |
| ATOM | 1178 | H42  | C B | 19 | 60.922 | 1.698  | 59.244 | 1.00 | 0.00 | H |

|      |      |      |     |    |        |         |        |      |      |   |
|------|------|------|-----|----|--------|---------|--------|------|------|---|
| ATOM | 1179 | H2'1 | C B | 19 | 62.431 | -2.229  | 53.968 | 1.00 | 0.00 | H |
| ATOM | 1180 | H2'2 | C B | 19 | 63.092 | -1.094  | 52.800 | 1.00 | 0.00 | H |
| ATOM | 1181 | H5'1 | C B | 19 | 58.707 | -3.084  | 54.005 | 1.00 | 0.00 | H |
| ATOM | 1182 | H5'2 | C B | 19 | 59.308 | -4.267  | 52.825 | 1.00 | 0.00 | H |
| ATOM | 1183 | C1'  | T B | 20 | 63.597 | 3.547   | 52.182 | 1.00 | 0.00 | C |
| ATOM | 1184 | N1   | T B | 20 | 63.815 | 2.968   | 53.534 | 1.00 | 0.00 | N |
| ATOM | 1185 | C2   | T B | 20 | 63.712 | 3.825   | 54.610 | 1.00 | 0.00 | C |
| ATOM | 1186 | O2   | T B | 20 | 63.453 | 5.010   | 54.489 | 1.00 | 0.00 | O |
| ATOM | 1187 | N3   | T B | 20 | 63.922 | 3.244   | 55.847 | 1.00 | 0.00 | N |
| ATOM | 1188 | C4   | T B | 20 | 64.218 | 1.922   | 56.094 | 1.00 | 0.00 | C |
| ATOM | 1189 | O4   | T B | 20 | 64.388 | 1.517   | 57.251 | 1.00 | 0.00 | O |
| ATOM | 1190 | C5   | T B | 20 | 64.305 | 1.104   | 54.909 | 1.00 | 0.00 | C |
| ATOM | 1191 | C6   | T B | 20 | 64.107 | 1.635   | 53.686 | 1.00 | 0.00 | C |
| ATOM | 1192 | C7   | T B | 20 | 64.626 | -0.343  | 55.130 | 1.00 | 0.00 | C |
| ATOM | 1193 | C2'  | T B | 20 | 64.515 | 2.970   | 51.111 | 1.00 | 0.00 | C |
| ATOM | 1194 | C3'  | T B | 20 | 63.607 | 2.952   | 49.891 | 1.00 | 0.00 | C |
| ATOM | 1195 | O3'  | T B | 20 | 63.636 | 4.234   | 49.266 | 1.00 | 0.00 | O |
| ATOM | 1196 | C4'  | T B | 20 | 62.239 | 2.631   | 50.489 | 1.00 | 0.00 | C |
| ATOM | 1197 | O4'  | T B | 20 | 62.262 | 3.273   | 51.804 | 1.00 | 0.00 | O |
| ATOM | 1198 | C5'  | T B | 20 | 61.912 | 1.168   | 50.672 | 1.00 | 0.00 | C |
| ATOM | 1199 | O5'  | T B | 20 | 63.107 | 0.443   | 51.058 | 1.00 | 0.00 | O |
| ATOM | 1200 | O1P  | T B | 20 | 63.534 | -1.067  | 49.091 | 1.00 | 0.00 | O |
| ATOM | 1201 | O2P  | T B | 20 | 64.317 | -1.735  | 51.379 | 1.00 | 0.00 | O |
| ATOM | 1202 | P    | T B | 20 | 63.294 | -1.056  | 50.548 | 1.00 | 0.00 | P |
| ATOM | 1203 | H3   | T B | 20 | 63.849 | 3.862   | 56.667 | 1.00 | 0.00 | H |
| ATOM | 1204 | H6   | T B | 20 | 64.178 | 0.997   | 52.805 | 1.00 | 0.00 | H |
| ATOM | 1205 | H1'  | T B | 20 | 63.710 | 4.629   | 52.250 | 1.00 | 0.00 | H |
| ATOM | 1206 | H3'  | T B | 20 | 63.908 | 2.194   | 49.169 | 1.00 | 0.00 | H |
| ATOM | 1207 | H4'  | T B | 20 | 61.492 | 3.058   | 49.819 | 1.00 | 0.00 | H |
| ATOM | 1208 | H3T  | T B | 20 | 64.512 | 4.566   | 49.057 | 1.00 | 0.00 | H |
| ATOM | 1209 | H71  | T B | 20 | 65.601 | -0.571  | 54.702 | 1.00 | 0.00 | H |
| ATOM | 1210 | H72  | T B | 20 | 64.643 | -0.552  | 56.202 | 1.00 | 0.00 | H |
| ATOM | 1211 | H73  | T B | 20 | 63.866 | -0.963  | 54.653 | 1.00 | 0.00 | H |
| ATOM | 1212 | H2'1 | T B | 20 | 64.863 | 1.969   | 51.362 | 1.00 | 0.00 | H |
| ATOM | 1213 | H2'2 | T B | 20 | 65.394 | 3.590   | 50.942 | 1.00 | 0.00 | H |
| ATOM | 1214 | H5'1 | T B | 20 | 61.151 | 1.064   | 51.445 | 1.00 | 0.00 | H |
| ATOM | 1215 | H5'2 | T B | 20 | 61.526 | 0.769   | 49.734 | 1.00 | 0.00 | H |
| TER  |      |      |     |    |        |         |        |      |      |   |
| ATOM | 1    | C1'  | A A | 1  | 50.456 | -8.847  | 25.503 | 1.00 | 0.00 | C |
| ATOM | 2    | N1   | A A | 1  | 51.349 | -13.844 | 26.259 | 1.00 | 0.00 | N |
| ATOM | 3    | C2   | A A | 1  | 50.684 | -13.184 | 25.317 | 1.00 | 0.00 | C |
| ATOM | 4    | N3   | A A | 1  | 50.494 | -11.889 | 25.180 | 1.00 | 0.00 | N |
| ATOM | 5    | C4   | A A | 1  | 51.089 | -11.221 | 26.184 | 1.00 | 0.00 | C |
| ATOM | 6    | C5   | A A | 1  | 51.804 | -11.746 | 27.224 | 1.00 | 0.00 | C |
| ATOM | 7    | C6   | A A | 1  | 51.933 | -13.152 | 27.248 | 1.00 | 0.00 | C |
| ATOM | 8    | N6   | A A | 1  | 52.607 | -13.809 | 28.208 | 1.00 | 0.00 | N |
| ATOM | 9    | N7   | A A | 1  | 52.267 | -10.751 | 28.066 | 1.00 | 0.00 | N |
| ATOM | 10   | C8   | A A | 1  | 51.825 | -9.655  | 27.524 | 1.00 | 0.00 | C |
| ATOM | 11   | N9   | A A | 1  | 51.101 | -9.860  | 26.378 | 1.00 | 0.00 | N |
| ATOM | 12   | C2'  | A A | 1  | 49.840 | -7.683  | 26.265 | 1.00 | 0.00 | C |
| ATOM | 13   | C3'  | A A | 1  | 50.098 | -6.517  | 25.322 | 1.00 | 0.00 | C |
| ATOM | 14   | O3'  | A A | 1  | 49.061 | -6.466  | 24.345 | 1.00 | 0.00 | O |
| ATOM | 15   | C4'  | A A | 1  | 51.453 | -6.868  | 24.709 | 1.00 | 0.00 | C |
| ATOM | 16   | O4'  | A A | 1  | 51.447 | -8.330  | 24.637 | 1.00 | 0.00 | O |

|      |    |      |     |   |        |         |        |      |      |   |
|------|----|------|-----|---|--------|---------|--------|------|------|---|
| ATOM | 17 | C5'  | A A | 1 | 52.674 | -6.427  | 25.482 | 1.00 | 0.00 | C |
| ATOM | 18 | O5'  | A A | 1 | 52.423 | -6.546  | 26.906 | 1.00 | 0.00 | O |
| ATOM | 19 | H2   | A A | 1 | 50.230 | -13.804 | 24.544 | 1.00 | 0.00 | H |
| ATOM | 20 | H8   | A A | 1 | 52.011 | -8.664  | 27.941 | 1.00 | 0.00 | H |
| ATOM | 21 | H1'  | A A | 1 | 49.708 | -9.353  | 24.892 | 1.00 | 0.00 | H |
| ATOM | 22 | H3'  | A A | 1 | 50.141 | -5.564  | 25.853 | 1.00 | 0.00 | H |
| ATOM | 23 | H4'  | A A | 1 | 51.489 | -6.393  | 23.730 | 1.00 | 0.00 | H |
| ATOM | 24 | H61  | A A | 1 | 52.672 | -14.834 | 28.180 | 1.00 | 0.00 | H |
| ATOM | 25 | H62  | A A | 1 | 53.058 | -13.283 | 28.970 | 1.00 | 0.00 | H |
| ATOM | 26 | H5T  | A A | 1 | 52.822 | -5.906  | 27.499 | 1.00 | 0.00 | H |
| ATOM | 27 | H2'1 | A A | 1 | 50.315 | -7.523  | 27.232 | 1.00 | 0.00 | H |
| ATOM | 28 | H2'2 | A A | 1 | 48.773 | -7.820  | 26.441 | 1.00 | 0.00 | H |
| ATOM | 29 | H5'1 | A A | 1 | 53.519 | -7.056  | 25.204 | 1.00 | 0.00 | H |
| ATOM | 30 | H5'2 | A A | 1 | 52.900 | -5.392  | 25.233 | 1.00 | 0.00 | H |
| ATOM | 31 | C1'  | G A | 2 | 46.336 | -11.481 | 24.630 | 1.00 | 0.00 | C |
| ATOM | 32 | N1   | G A | 2 | 48.471 | -14.845 | 27.815 | 1.00 | 0.00 | N |
| ATOM | 33 | C2   | G A | 2 | 47.804 | -15.053 | 26.624 | 1.00 | 0.00 | C |
| ATOM | 34 | N2   | G A | 2 | 47.689 | -16.325 | 26.227 | 1.00 | 0.00 | N |
| ATOM | 35 | N3   | G A | 2 | 47.294 | -14.069 | 25.884 | 1.00 | 0.00 | N |
| ATOM | 36 | C4   | G A | 2 | 47.498 | -12.846 | 26.439 | 1.00 | 0.00 | C |
| ATOM | 37 | C5   | G A | 2 | 48.148 | -12.543 | 27.625 | 1.00 | 0.00 | C |
| ATOM | 38 | C6   | G A | 2 | 48.694 | -13.588 | 28.407 | 1.00 | 0.00 | C |
| ATOM | 39 | O6   | G A | 2 | 49.303 | -13.520 | 29.477 | 1.00 | 0.00 | O |
| ATOM | 40 | N7   | G A | 2 | 48.141 | -11.163 | 27.841 | 1.00 | 0.00 | N |
| ATOM | 41 | C8   | G A | 2 | 47.505 | -10.685 | 26.802 | 1.00 | 0.00 | C |
| ATOM | 42 | N9   | G A | 2 | 47.082 | -11.645 | 25.907 | 1.00 | 0.00 | N |
| ATOM | 43 | C2'  | G A | 2 | 45.279 | -10.386 | 24.674 | 1.00 | 0.00 | C |
| ATOM | 44 | C3'  | G A | 2 | 45.352 | -9.818  | 23.267 | 1.00 | 0.00 | C |
| ATOM | 45 | O3'  | G A | 2 | 44.540 | -10.608 | 22.399 | 1.00 | 0.00 | O |
| ATOM | 46 | C4'  | G A | 2 | 46.838 | -9.931  | 22.931 | 1.00 | 0.00 | C |
| ATOM | 47 | O4'  | G A | 2 | 47.273 | -11.143 | 23.625 | 1.00 | 0.00 | O |
| ATOM | 48 | C5'  | G A | 2 | 47.714 | -8.781  | 23.368 | 1.00 | 0.00 | C |
| ATOM | 49 | O5'  | G A | 2 | 47.255 | -8.273  | 24.644 | 1.00 | 0.00 | O |
| ATOM | 50 | O1P  | G A | 2 | 46.447 | -5.954  | 24.091 | 1.00 | 0.00 | O |
| ATOM | 51 | O2P  | G A | 2 | 47.275 | -6.475  | 26.401 | 1.00 | 0.00 | O |
| ATOM | 52 | P    | G A | 2 | 47.386 | -6.712  | 24.940 | 1.00 | 0.00 | P |
| ATOM | 53 | H1   | G A | 2 | 48.831 | -15.674 | 28.310 | 1.00 | 0.00 | H |
| ATOM | 54 | H8   | G A | 2 | 47.325 | -9.620  | 26.657 | 1.00 | 0.00 | H |
| ATOM | 55 | H1'  | G A | 2 | 45.893 | -12.441 | 24.368 | 1.00 | 0.00 | H |
| ATOM | 56 | H21  | G A | 2 | 48.087 | -17.081 | 26.803 | 1.00 | 0.00 | H |
| ATOM | 57 | H3'  | G A | 2 | 45.017 | -8.780  | 23.227 | 1.00 | 0.00 | H |
| ATOM | 58 | H22  | G A | 2 | 47.201 | -16.547 | 25.348 | 1.00 | 0.00 | H |
| ATOM | 59 | H4'  | G A | 2 | 46.912 | -10.013 | 21.847 | 1.00 | 0.00 | H |
| ATOM | 60 | H2'1 | G A | 2 | 45.503 | -9.625  | 25.421 | 1.00 | 0.00 | H |
| ATOM | 61 | H2'2 | G A | 2 | 44.286 | -10.779 | 24.893 | 1.00 | 0.00 | H |
| ATOM | 62 | H5'1 | G A | 2 | 48.742 | -9.130  | 23.458 | 1.00 | 0.00 | H |
| ATOM | 63 | H5'2 | G A | 2 | 47.669 | -7.992  | 22.617 | 1.00 | 0.00 | H |
| ATOM | 64 | C1'  | G A | 3 | 43.354 | -15.397 | 25.175 | 1.00 | 0.00 | C |
| ATOM | 65 | N1   | G A | 3 | 45.771 | -15.905 | 29.637 | 1.00 | 0.00 | N |
| ATOM | 66 | C2   | G A | 3 | 45.411 | -16.863 | 28.710 | 1.00 | 0.00 | C |
| ATOM | 67 | N2   | G A | 3 | 45.735 | -18.127 | 29.012 | 1.00 | 0.00 | N |
| ATOM | 68 | N3   | G A | 3 | 44.779 | -16.586 | 27.573 | 1.00 | 0.00 | N |
| ATOM | 69 | C4   | G A | 3 | 44.523 | -15.259 | 27.433 | 1.00 | 0.00 | C |
| ATOM | 70 | C5   | G A | 3 | 44.842 | -14.231 | 28.307 | 1.00 | 0.00 | C |

|      |     |      |     |   |        |         |        |      |      |   |
|------|-----|------|-----|---|--------|---------|--------|------|------|---|
| ATOM | 71  | C6   | G A | 3 | 45.518 | -14.526 | 29.513 | 1.00 | 0.00 | C |
| ATOM | 72  | O6   | G A | 3 | 45.884 | -13.760 | 30.405 | 1.00 | 0.00 | O |
| ATOM | 73  | N7   | G A | 3 | 44.404 | -13.009 | 27.794 | 1.00 | 0.00 | N |
| ATOM | 74  | C8   | G A | 3 | 43.849 | -13.325 | 26.653 | 1.00 | 0.00 | C |
| ATOM | 75  | N9   | G A | 3 | 43.881 | -14.674 | 26.364 | 1.00 | 0.00 | N |
| ATOM | 76  | C2'  | G A | 3 | 42.038 | -14.840 | 24.652 | 1.00 | 0.00 | C |
| ATOM | 77  | C3'  | G A | 3 | 42.188 | -15.023 | 23.152 | 1.00 | 0.00 | C |
| ATOM | 78  | O3'  | G A | 3 | 41.803 | -16.349 | 22.799 | 1.00 | 0.00 | O |
| ATOM | 79  | C4'  | G A | 3 | 43.680 | -14.777 | 22.927 | 1.00 | 0.00 | C |
| ATOM | 80  | O4'  | G A | 3 | 44.315 | -15.286 | 24.142 | 1.00 | 0.00 | O |
| ATOM | 81  | C5'  | G A | 3 | 44.100 | -13.339 | 22.729 | 1.00 | 0.00 | C |
| ATOM | 82  | O5'  | G A | 3 | 43.299 | -12.472 | 23.568 | 1.00 | 0.00 | O |
| ATOM | 83  | O1P  | G A | 3 | 41.971 | -11.120 | 21.912 | 1.00 | 0.00 | O |
| ATOM | 84  | O2P  | G A | 3 | 42.496 | -10.171 | 24.173 | 1.00 | 0.00 | O |
| ATOM | 85  | P    | G A | 3 | 42.923 | -11.017 | 23.033 | 1.00 | 0.00 | P |
| ATOM | 86  | H1   | G A | 3 | 46.263 | -16.224 | 30.485 | 1.00 | 0.00 | H |
| ATOM | 87  | H8   | G A | 3 | 43.400 | -12.589 | 25.988 | 1.00 | 0.00 | H |
| ATOM | 88  | H1'  | G A | 3 | 43.258 | -16.452 | 25.431 | 1.00 | 0.00 | H |
| ATOM | 89  | H21  | G A | 3 | 46.228 | -18.335 | 29.893 | 1.00 | 0.00 | H |
| ATOM | 90  | H3'  | G A | 3 | 41.584 | -14.310 | 22.590 | 1.00 | 0.00 | H |
| ATOM | 91  | H22  | G A | 3 | 45.493 | -18.889 | 28.365 | 1.00 | 0.00 | H |
| ATOM | 92  | H4'  | G A | 3 | 43.963 | -15.332 | 22.033 | 1.00 | 0.00 | H |
| ATOM | 93  | H2'1 | G A | 3 | 41.900 | -13.791 | 24.912 | 1.00 | 0.00 | H |
| ATOM | 94  | H2'2 | G A | 3 | 41.176 | -15.389 | 25.034 | 1.00 | 0.00 | H |
| ATOM | 95  | H5'1 | G A | 3 | 45.153 | -13.236 | 22.988 | 1.00 | 0.00 | H |
| ATOM | 96  | H5'2 | G A | 3 | 43.964 | -13.069 | 21.682 | 1.00 | 0.00 | H |
| ATOM | 97  | C1'  | C A | 4 | 41.571 | -19.326 | 27.607 | 1.00 | 0.00 | C |
| ATOM | 98  | N1   | C A | 4 | 41.656 | -17.997 | 28.275 | 1.00 | 0.00 | N |
| ATOM | 99  | C2   | C A | 4 | 42.288 | -17.931 | 29.516 | 1.00 | 0.00 | C |
| ATOM | 100 | O2   | C A | 4 | 42.748 | -18.968 | 30.008 | 1.00 | 0.00 | O |
| ATOM | 101 | N3   | C A | 4 | 42.376 | -16.731 | 30.139 | 1.00 | 0.00 | N |
| ATOM | 102 | C4   | C A | 4 | 41.866 | -15.626 | 29.581 | 1.00 | 0.00 | C |
| ATOM | 103 | N4   | C A | 4 | 41.983 | -14.479 | 30.235 | 1.00 | 0.00 | N |
| ATOM | 104 | C5   | C A | 4 | 41.209 | -15.667 | 28.309 | 1.00 | 0.00 | C |
| ATOM | 105 | C6   | C A | 4 | 41.135 | -16.883 | 27.697 | 1.00 | 0.00 | C |
| ATOM | 106 | C2'  | C A | 4 | 40.260 | -19.559 | 26.871 | 1.00 | 0.00 | C |
| ATOM | 107 | C3'  | C A | 4 | 40.713 | -20.366 | 25.663 | 1.00 | 0.00 | C |
| ATOM | 108 | O3'  | C A | 4 | 40.792 | -21.744 | 26.025 | 1.00 | 0.00 | O |
| ATOM | 109 | C4'  | C A | 4 | 42.085 | -19.772 | 25.354 | 1.00 | 0.00 | C |
| ATOM | 110 | O4'  | C A | 4 | 42.623 | -19.401 | 26.663 | 1.00 | 0.00 | O |
| ATOM | 111 | C5'  | C A | 4 | 42.103 | -18.553 | 24.462 | 1.00 | 0.00 | C |
| ATOM | 112 | O5'  | C A | 4 | 40.952 | -17.719 | 24.750 | 1.00 | 0.00 | O |
| ATOM | 113 | O1P  | C A | 4 | 39.597 | -17.842 | 22.632 | 1.00 | 0.00 | O |
| ATOM | 114 | O2P  | C A | 4 | 39.430 | -15.824 | 24.113 | 1.00 | 0.00 | O |
| ATOM | 115 | P    | C A | 4 | 40.273 | -16.910 | 23.555 | 1.00 | 0.00 | P |
| ATOM | 116 | H5   | C A | 4 | 40.788 | -14.769 | 27.853 | 1.00 | 0.00 | H |
| ATOM | 117 | H6   | C A | 4 | 40.649 | -16.964 | 26.725 | 1.00 | 0.00 | H |
| ATOM | 118 | H1'  | C A | 4 | 41.740 | -20.096 | 28.360 | 1.00 | 0.00 | H |
| ATOM | 119 | H3'  | C A | 4 | 40.034 | -20.253 | 24.820 | 1.00 | 0.00 | H |
| ATOM | 120 | H4'  | C A | 4 | 42.665 | -20.553 | 24.861 | 1.00 | 0.00 | H |
| ATOM | 121 | H41  | C A | 4 | 41.601 | -13.613 | 29.826 | 1.00 | 0.00 | H |
| ATOM | 122 | H42  | C A | 4 | 42.454 | -14.452 | 31.150 | 1.00 | 0.00 | H |
| ATOM | 123 | H2'1 | C A | 4 | 39.784 | -18.628 | 26.568 | 1.00 | 0.00 | H |
| ATOM | 124 | H2'2 | C A | 4 | 39.540 | -20.115 | 27.474 | 1.00 | 0.00 | H |

|      |     |      |   |   |   |        |         |        |      |      |   |
|------|-----|------|---|---|---|--------|---------|--------|------|------|---|
| ATOM | 125 | H5'1 | C | A | 4 | 43.019 | -17.991 | 24.639 | 1.00 | 0.00 | H |
| ATOM | 126 | H5'2 | C | A | 4 | 42.074 | -18.872 | 23.419 | 1.00 | 0.00 | H |
| ATOM | 127 | C1'  | C | A | 5 | 40.590 | -21.964 | 31.683 | 1.00 | 0.00 | C |
| ATOM | 128 | N1   | C | A | 5 | 40.173 | -20.537 | 31.587 | 1.00 | 0.00 | N |
| ATOM | 129 | C2   | C | A | 5 | 40.533 | -19.683 | 32.626 | 1.00 | 0.00 | C |
| ATOM | 130 | O2   | C | A | 5 | 41.178 | -20.137 | 33.580 | 1.00 | 0.00 | O |
| ATOM | 131 | N3   | C | A | 5 | 40.162 | -18.379 | 32.558 | 1.00 | 0.00 | N |
| ATOM | 132 | C4   | C | A | 5 | 39.464 | -17.916 | 31.515 | 1.00 | 0.00 | C |
| ATOM | 133 | N4   | C | A | 5 | 39.132 | -16.635 | 31.497 | 1.00 | 0.00 | N |
| ATOM | 134 | C5   | C | A | 5 | 39.079 | -18.774 | 30.433 | 1.00 | 0.00 | C |
| ATOM | 135 | C6   | C | A | 5 | 39.466 | -20.079 | 30.521 | 1.00 | 0.00 | C |
| ATOM | 136 | C2'  | C | A | 5 | 39.551 | -22.943 | 31.157 | 1.00 | 0.00 | C |
| ATOM | 137 | C3'  | C | A | 5 | 40.420 | -24.020 | 30.529 | 1.00 | 0.00 | C |
| ATOM | 138 | O3'  | C | A | 5 | 40.825 | -24.944 | 31.537 | 1.00 | 0.00 | O |
| ATOM | 139 | C4'  | C | A | 5 | 41.596 | -23.224 | 29.968 | 1.00 | 0.00 | C |
| ATOM | 140 | O4'  | C | A | 5 | 41.768 | -22.120 | 30.912 | 1.00 | 0.00 | O |
| ATOM | 141 | C5'  | C | A | 5 | 41.419 | -22.651 | 28.581 | 1.00 | 0.00 | C |
| ATOM | 142 | O5'  | C | A | 5 | 40.046 | -22.220 | 28.400 | 1.00 | 0.00 | O |
| ATOM | 143 | O1P  | C | A | 5 | 39.176 | -23.781 | 26.629 | 1.00 | 0.00 | O |
| ATOM | 144 | O2P  | C | A | 5 | 38.182 | -21.492 | 26.882 | 1.00 | 0.00 | O |
| ATOM | 145 | P    | C | A | 5 | 39.384 | -22.358 | 26.956 | 1.00 | 0.00 | P |
| ATOM | 146 | H5   | C | A | 5 | 38.507 | -18.403 | 29.582 | 1.00 | 0.00 | H |
| ATOM | 147 | H6   | C | A | 5 | 39.200 | -20.770 | 29.720 | 1.00 | 0.00 | H |
| ATOM | 148 | H1'  | C | A | 5 | 40.839 | -22.176 | 32.723 | 1.00 | 0.00 | H |
| ATOM | 149 | H3'  | C | A | 5 | 39.896 | -24.558 | 29.737 | 1.00 | 0.00 | H |
| ATOM | 150 | H4'  | C | A | 5 | 42.452 | -23.899 | 29.941 | 1.00 | 0.00 | H |
| ATOM | 151 | H41  | C | A | 5 | 38.595 | -16.251 | 30.706 | 1.00 | 0.00 | H |
| ATOM | 152 | H42  | C | A | 5 | 39.407 | -16.019 | 32.278 | 1.00 | 0.00 | H |
| ATOM | 153 | H2'1 | C | A | 5 | 38.888 | -22.489 | 30.422 | 1.00 | 0.00 | H |
| ATOM | 154 | H2'2 | C | A | 5 | 38.926 | -23.351 | 31.955 | 1.00 | 0.00 | H |
| ATOM | 155 | H5'1 | C | A | 5 | 42.091 | -21.801 | 28.456 | 1.00 | 0.00 | H |
| ATOM | 156 | H5'2 | C | A | 5 | 41.667 | -23.415 | 27.846 | 1.00 | 0.00 | H |
| ATOM | 157 | C1'  | G | A | 6 | 39.709 | -22.501 | 36.527 | 1.00 | 0.00 | C |
| ATOM | 158 | N1   | G | A | 6 | 38.103 | -17.670 | 36.195 | 1.00 | 0.00 | N |
| ATOM | 159 | C2   | G | A | 6 | 38.880 | -18.283 | 37.162 | 1.00 | 0.00 | C |
| ATOM | 160 | N2   | G | A | 6 | 39.278 | -17.507 | 38.178 | 1.00 | 0.00 | N |
| ATOM | 161 | N3   | G | A | 6 | 39.228 | -19.568 | 37.120 | 1.00 | 0.00 | N |
| ATOM | 162 | C4   | G | A | 6 | 38.730 | -20.202 | 36.026 | 1.00 | 0.00 | C |
| ATOM | 163 | C5   | G | A | 6 | 37.948 | -19.674 | 35.014 | 1.00 | 0.00 | C |
| ATOM | 164 | C6   | G | A | 6 | 37.580 | -18.310 | 35.056 | 1.00 | 0.00 | C |
| ATOM | 165 | O6   | G | A | 6 | 36.896 | -17.665 | 34.260 | 1.00 | 0.00 | O |
| ATOM | 166 | N7   | G | A | 6 | 37.644 | -20.660 | 34.073 | 1.00 | 0.00 | N |
| ATOM | 167 | C8   | G | A | 6 | 38.242 | -21.729 | 34.530 | 1.00 | 0.00 | C |
| ATOM | 168 | N9   | G | A | 6 | 38.923 | -21.531 | 35.715 | 1.00 | 0.00 | N |
| ATOM | 169 | C2'  | G | A | 6 | 39.107 | -23.899 | 36.563 | 1.00 | 0.00 | C |
| ATOM | 170 | C3'  | G | A | 6 | 40.347 | -24.778 | 36.577 | 1.00 | 0.00 | C |
| ATOM | 171 | O3'  | G | A | 6 | 40.813 | -24.911 | 37.917 | 1.00 | 0.00 | O |
| ATOM | 172 | C4'  | G | A | 6 | 41.326 | -24.000 | 35.699 | 1.00 | 0.00 | C |
| ATOM | 173 | O4'  | G | A | 6 | 40.999 | -22.597 | 35.953 | 1.00 | 0.00 | O |
| ATOM | 174 | C5'  | G | A | 6 | 41.241 | -24.253 | 34.212 | 1.00 | 0.00 | C |
| ATOM | 175 | O5'  | G | A | 6 | 39.860 | -24.455 | 33.825 | 1.00 | 0.00 | O |
| ATOM | 176 | O1P  | G | A | 6 | 39.807 | -26.860 | 33.087 | 1.00 | 0.00 | O |
| ATOM | 177 | O2P  | G | A | 6 | 38.167 | -25.218 | 32.132 | 1.00 | 0.00 | O |
| ATOM | 178 | P    | G | A | 6 | 39.534 | -25.480 | 32.647 | 1.00 | 0.00 | P |

|      |     |      |     |   |        |         |        |      |      |   |
|------|-----|------|-----|---|--------|---------|--------|------|------|---|
| ATOM | 179 | H1   | G A | 6 | 37.895 | -16.667 | 36.318 | 1.00 | 0.00 | H |
| ATOM | 180 | H8   | G A | 6 | 38.207 | -22.693 | 34.025 | 1.00 | 0.00 | H |
| ATOM | 181 | H1'  | G A | 6 | 39.817 | -22.095 | 37.533 | 1.00 | 0.00 | H |
| ATOM | 182 | H21  | G A | 6 | 39.008 | -16.514 | 38.203 | 1.00 | 0.00 | H |
| ATOM | 183 | H3'  | G A | 6 | 40.151 | -25.769 | 36.163 | 1.00 | 0.00 | H |
| ATOM | 184 | H22  | G A | 6 | 39.856 | -17.905 | 38.933 | 1.00 | 0.00 | H |
| ATOM | 185 | H4'  | G A | 6 | 42.328 | -24.269 | 36.027 | 1.00 | 0.00 | H |
| ATOM | 186 | H2'1 | G A | 6 | 38.484 | -24.105 | 35.691 | 1.00 | 0.00 | H |
| ATOM | 187 | H2'2 | G A | 6 | 38.493 | -24.062 | 37.449 | 1.00 | 0.00 | H |
| ATOM | 188 | H5'1 | G A | 6 | 41.653 | -23.397 | 33.678 | 1.00 | 0.00 | H |
| ATOM | 189 | H5'2 | G A | 6 | 41.826 | -25.141 | 33.967 | 1.00 | 0.00 | H |
| ATOM | 190 | C1'  | C A | 7 | 38.186 | -20.934 | 40.971 | 1.00 | 0.00 | C |
| ATOM | 191 | N1   | C A | 7 | 37.310 | -20.788 | 39.777 | 1.00 | 0.00 | N |
| ATOM | 192 | C2   | C A | 7 | 36.770 | -19.531 | 39.515 | 1.00 | 0.00 | C |
| ATOM | 193 | O2   | C A | 7 | 37.038 | -18.594 | 40.279 | 1.00 | 0.00 | O |
| ATOM | 194 | N3   | C A | 7 | 35.969 | -19.375 | 38.432 | 1.00 | 0.00 | N |
| ATOM | 195 | C4   | C A | 7 | 35.696 | -20.408 | 37.624 | 1.00 | 0.00 | C |
| ATOM | 196 | N4   | C A | 7 | 34.908 | -20.199 | 36.579 | 1.00 | 0.00 | N |
| ATOM | 197 | C5   | C A | 7 | 36.234 | -21.714 | 37.871 | 1.00 | 0.00 | C |
| ATOM | 198 | C6   | C A | 7 | 37.041 | -21.845 | 38.965 | 1.00 | 0.00 | C |
| ATOM | 199 | C2'  | C A | 7 | 38.008 | -22.255 | 41.706 | 1.00 | 0.00 | C |
| ATOM | 200 | C3'  | C A | 7 | 39.425 | -22.556 | 42.168 | 1.00 | 0.00 | C |
| ATOM | 201 | O3'  | C A | 7 | 39.671 | -21.872 | 43.395 | 1.00 | 0.00 | O |
| ATOM | 202 | C4'  | C A | 7 | 40.278 | -22.014 | 41.023 | 1.00 | 0.00 | C |
| ATOM | 203 | O4'  | C A | 7 | 39.529 | -20.857 | 40.530 | 1.00 | 0.00 | O |
| ATOM | 204 | C5'  | C A | 7 | 40.526 | -22.955 | 39.867 | 1.00 | 0.00 | C |
| ATOM | 205 | O5'  | C A | 7 | 39.345 | -23.761 | 39.628 | 1.00 | 0.00 | O |
| ATOM | 206 | O1P  | C A | 7 | 40.102 | -26.092 | 40.204 | 1.00 | 0.00 | O |
| ATOM | 207 | O2P  | C A | 7 | 38.254 | -25.746 | 38.543 | 1.00 | 0.00 | O |
| ATOM | 208 | P    | C A | 7 | 39.529 | -25.262 | 39.124 | 1.00 | 0.00 | P |
| ATOM | 209 | H5   | C A | 7 | 36.010 | -22.560 | 37.221 | 1.00 | 0.00 | H |
| ATOM | 210 | H6   | C A | 7 | 37.481 | -22.818 | 39.191 | 1.00 | 0.00 | H |
| ATOM | 211 | H1'  | C A | 7 | 38.002 | -20.090 | 41.635 | 1.00 | 0.00 | H |
| ATOM | 212 | H3'  | C A | 7 | 39.590 | -23.625 | 42.310 | 1.00 | 0.00 | H |
| ATOM | 213 | H4'  | C A | 7 | 41.245 | -21.746 | 41.448 | 1.00 | 0.00 | H |
| ATOM | 214 | H41  | C A | 7 | 34.686 | -20.976 | 35.940 | 1.00 | 0.00 | H |
| ATOM | 215 | H42  | C A | 7 | 34.521 | -19.261 | 36.404 | 1.00 | 0.00 | H |
| ATOM | 216 | H2'1 | C A | 7 | 37.628 | -23.043 | 41.055 | 1.00 | 0.00 | H |
| ATOM | 217 | H2'2 | C A | 7 | 37.323 | -22.171 | 42.550 | 1.00 | 0.00 | H |
| ATOM | 218 | H5'1 | C A | 7 | 40.762 | -22.373 | 38.975 | 1.00 | 0.00 | H |
| ATOM | 219 | H5'2 | C A | 7 | 41.370 | -23.601 | 40.106 | 1.00 | 0.00 | H |
| ATOM | 220 | C1'  | A A | 8 | 35.541 | -18.068 | 44.019 | 1.00 | 0.00 | C |
| ATOM | 221 | N1   | A A | 8 | 32.398 | -17.661 | 39.981 | 1.00 | 0.00 | N |
| ATOM | 222 | C2   | A A | 8 | 32.848 | -16.773 | 40.863 | 1.00 | 0.00 | C |
| ATOM | 223 | N3   | A A | 8 | 33.662 | -16.944 | 41.883 | 1.00 | 0.00 | N |
| ATOM | 224 | C4   | A A | 8 | 34.035 | -18.235 | 41.967 | 1.00 | 0.00 | C |
| ATOM | 225 | C5   | A A | 8 | 33.666 | -19.264 | 41.148 | 1.00 | 0.00 | C |
| ATOM | 226 | C6   | A A | 8 | 32.790 | -18.940 | 40.090 | 1.00 | 0.00 | C |
| ATOM | 227 | N6   | A A | 8 | 32.341 | -19.845 | 39.205 | 1.00 | 0.00 | N |
| ATOM | 228 | N7   | A A | 8 | 34.251 | -20.454 | 41.543 | 1.00 | 0.00 | N |
| ATOM | 229 | C8   | A A | 8 | 34.954 | -20.124 | 42.588 | 1.00 | 0.00 | C |
| ATOM | 230 | N9   | A A | 8 | 34.873 | -18.791 | 42.904 | 1.00 | 0.00 | N |
| ATOM | 231 | C2'  | A A | 8 | 35.623 | -18.873 | 45.310 | 1.00 | 0.00 | C |
| ATOM | 232 | C3'  | A A | 8 | 36.968 | -18.435 | 45.869 | 1.00 | 0.00 | C |

|      |     |      |     |    |        |         |        |      |      |   |
|------|-----|------|-----|----|--------|---------|--------|------|------|---|
| ATOM | 233 | O3'  | A A | 8  | 36.797 | -17.222 | 46.599 | 1.00 | 0.00 | O |
| ATOM | 234 | C4'  | A A | 8  | 37.813 | -18.238 | 44.612 | 1.00 | 0.00 | C |
| ATOM | 235 | O4'  | A A | 8  | 36.858 | -17.763 | 43.607 | 1.00 | 0.00 | O |
| ATOM | 236 | C5'  | A A | 8  | 38.512 | -19.465 | 44.076 | 1.00 | 0.00 | C |
| ATOM | 237 | O5'  | A A | 8  | 37.667 | -20.629 | 44.256 | 1.00 | 0.00 | O |
| ATOM | 238 | O1P  | A A | 8  | 38.947 | -22.025 | 45.913 | 1.00 | 0.00 | O |
| ATOM | 239 | O2P  | A A | 8  | 37.387 | -23.126 | 44.285 | 1.00 | 0.00 | O |
| ATOM | 240 | P    | A A | 8  | 38.355 | -22.035 | 44.563 | 1.00 | 0.00 | P |
| ATOM | 241 | H2   | A A | 8  | 32.491 | -15.754 | 40.720 | 1.00 | 0.00 | H |
| ATOM | 242 | H8   | A A | 8  | 35.549 | -20.835 | 43.157 | 1.00 | 0.00 | H |
| ATOM | 243 | H1'  | A A | 8  | 35.014 | -17.128 | 44.178 | 1.00 | 0.00 | H |
| ATOM | 244 | H3'  | A A | 8  | 37.404 | -19.190 | 46.522 | 1.00 | 0.00 | H |
| ATOM | 245 | H4'  | A A | 8  | 38.576 | -17.500 | 44.856 | 1.00 | 0.00 | H |
| ATOM | 246 | H61  | A A | 8  | 31.705 | -19.556 | 38.449 | 1.00 | 0.00 | H |
| ATOM | 247 | H62  | A A | 8  | 32.636 | -20.830 | 39.284 | 1.00 | 0.00 | H |
| ATOM | 248 | H2'1 | A A | 8  | 35.600 | -19.947 | 45.129 | 1.00 | 0.00 | H |
| ATOM | 249 | H2'2 | A A | 8  | 34.811 | -18.635 | 45.996 | 1.00 | 0.00 | H |
| ATOM | 250 | H5'1 | A A | 8  | 38.719 | -19.321 | 43.014 | 1.00 | 0.00 | H |
| ATOM | 251 | H5'2 | A A | 8  | 39.450 | -19.605 | 44.609 | 1.00 | 0.00 | H |
| ATOM | 252 | C1'  | C A | 9  | 31.666 | -15.172 | 45.142 | 1.00 | 0.00 | C |
| ATOM | 253 | N1   | C A | 9  | 31.451 | -16.523 | 44.556 | 1.00 | 0.00 | N |
| ATOM | 254 | C2   | C A | 9  | 30.622 | -16.629 | 43.442 | 1.00 | 0.00 | C |
| ATOM | 255 | O2   | C A | 9  | 30.102 | -15.601 | 42.987 | 1.00 | 0.00 | O |
| ATOM | 256 | N3   | C A | 9  | 30.414 | -17.850 | 42.893 | 1.00 | 0.00 | N |
| ATOM | 257 | C4   | C A | 9  | 30.991 | -18.943 | 43.410 | 1.00 | 0.00 | C |
| ATOM | 258 | N4   | C A | 9  | 30.755 | -20.112 | 42.831 | 1.00 | 0.00 | N |
| ATOM | 259 | C5   | C A | 9  | 31.845 | -18.867 | 44.559 | 1.00 | 0.00 | C |
| ATOM | 260 | C6   | C A | 9  | 32.045 | -17.625 | 45.092 | 1.00 | 0.00 | C |
| ATOM | 261 | C2'  | C A | 9  | 31.740 | -15.167 | 46.662 | 1.00 | 0.00 | C |
| ATOM | 262 | C3'  | C A | 9  | 32.777 | -14.083 | 46.926 | 1.00 | 0.00 | C |
| ATOM | 263 | O3'  | C A | 9  | 32.135 | -12.811 | 46.921 | 1.00 | 0.00 | O |
| ATOM | 264 | C4'  | C A | 9  | 33.743 | -14.247 | 45.755 | 1.00 | 0.00 | C |
| ATOM | 265 | O4'  | C A | 9  | 32.895 | -14.677 | 44.643 | 1.00 | 0.00 | O |
| ATOM | 266 | C5'  | C A | 9  | 34.851 | -15.259 | 45.934 | 1.00 | 0.00 | C |
| ATOM | 267 | O5'  | C A | 9  | 34.359 | -16.397 | 46.687 | 1.00 | 0.00 | O |
| ATOM | 268 | O1P  | C A | 9  | 35.663 | -16.283 | 48.836 | 1.00 | 0.00 | O |
| ATOM | 269 | O2P  | C A | 9  | 34.810 | -18.490 | 48.003 | 1.00 | 0.00 | O |
| ATOM | 270 | P    | C A | 9  | 35.353 | -17.148 | 47.682 | 1.00 | 0.00 | P |
| ATOM | 271 | H5   | C A | 9  | 32.313 | -19.756 | 44.986 | 1.00 | 0.00 | H |
| ATOM | 272 | H6   | C A | 9  | 32.692 | -17.516 | 45.961 | 1.00 | 0.00 | H |
| ATOM | 273 | H1'  | C A | 9  | 30.871 | -14.516 | 44.787 | 1.00 | 0.00 | H |
| ATOM | 274 | H3'  | C A | 9  | 33.285 | -14.230 | 47.879 | 1.00 | 0.00 | H |
| ATOM | 275 | H4'  | C A | 9  | 34.206 | -13.275 | 45.588 | 1.00 | 0.00 | H |
| ATOM | 276 | H41  | C A | 9  | 31.189 | -20.969 | 43.206 | 1.00 | 0.00 | H |
| ATOM | 277 | H42  | C A | 9  | 30.139 | -20.164 | 42.007 | 1.00 | 0.00 | H |
| ATOM | 278 | H2'1 | C A | 9  | 32.060 | -16.127 | 47.065 | 1.00 | 0.00 | H |
| ATOM | 279 | H2'2 | C A | 9  | 30.782 | -14.921 | 47.122 | 1.00 | 0.00 | H |
| ATOM | 280 | H5'1 | C A | 9  | 35.200 | -15.587 | 44.955 | 1.00 | 0.00 | H |
| ATOM | 281 | H5'2 | C A | 9  | 35.678 | -14.792 | 46.470 | 1.00 | 0.00 | H |
| ATOM | 282 | C1'  | C A | 10 | 27.004 | -13.577 | 44.642 | 1.00 | 0.00 | C |
| ATOM | 283 | N1   | C A | 10 | 27.292 | -15.026 | 44.821 | 1.00 | 0.00 | N |
| ATOM | 284 | C2   | C A | 10 | 26.735 | -15.918 | 43.906 | 1.00 | 0.00 | C |
| ATOM | 285 | O2   | C A | 10 | 26.031 | -15.473 | 42.989 | 1.00 | 0.00 | O |
| ATOM | 286 | N3   | C A | 10 | 26.985 | -17.242 | 44.049 | 1.00 | 0.00 | N |

|      |     |      |     |    |        |         |        |      |      |   |
|------|-----|------|-----|----|--------|---------|--------|------|------|---|
| ATOM | 287 | C4   | C A | 10 | 27.751 | -17.694 | 45.052 | 1.00 | 0.00 | C |
| ATOM | 288 | N4   | C A | 10 | 27.965 | -18.998 | 45.143 | 1.00 | 0.00 | N |
| ATOM | 289 | C5   | C A | 10 | 28.333 | -16.800 | 46.009 | 1.00 | 0.00 | C |
| ATOM | 290 | C6   | C A | 10 | 28.073 | -15.469 | 45.841 | 1.00 | 0.00 | C |
| ATOM | 291 | C2'  | C A | 10 | 26.808 | -12.825 | 45.952 | 1.00 | 0.00 | C |
| ATOM | 292 | C3'  | C A | 10 | 27.428 | -11.471 | 45.636 | 1.00 | 0.00 | C |
| ATOM | 293 | O3'  | C A | 10 | 26.460 | -10.654 | 44.985 | 1.00 | 0.00 | O |
| ATOM | 294 | C4'  | C A | 10 | 28.590 | -11.837 | 44.715 | 1.00 | 0.00 | C |
| ATOM | 295 | O4'  | C A | 10 | 28.108 | -12.998 | 43.967 | 1.00 | 0.00 | O |
| ATOM | 296 | C5'  | C A | 10 | 29.892 | -12.203 | 45.389 | 1.00 | 0.00 | C |
| ATOM | 297 | O5'  | C A | 10 | 29.622 | -12.936 | 46.611 | 1.00 | 0.00 | O |
| ATOM | 298 | O1P  | C A | 10 | 30.442 | -11.385 | 48.414 | 1.00 | 0.00 | O |
| ATOM | 299 | O2P  | C A | 10 | 30.415 | -13.862 | 48.807 | 1.00 | 0.00 | O |
| ATOM | 300 | P    | C A | 10 | 30.600 | -12.741 | 47.854 | 1.00 | 0.00 | P |
| ATOM | 301 | H5   | C A | 10 | 28.953 | -17.163 | 46.830 | 1.00 | 0.00 | H |
| ATOM | 302 | H6   | C A | 10 | 28.499 | -14.750 | 46.540 | 1.00 | 0.00 | H |
| ATOM | 303 | H1'  | C A | 10 | 26.130 | -13.479 | 43.999 | 1.00 | 0.00 | H |
| ATOM | 304 | H3'  | C A | 10 | 27.781 | -10.966 | 46.535 | 1.00 | 0.00 | H |
| ATOM | 305 | H4'  | C A | 10 | 28.776 | -10.969 | 44.082 | 1.00 | 0.00 | H |
| ATOM | 306 | H41  | C A | 10 | 28.552 | -19.372 | 45.903 | 1.00 | 0.00 | H |
| ATOM | 307 | H42  | C A | 10 | 27.543 | -19.639 | 44.455 | 1.00 | 0.00 | H |
| ATOM | 308 | H2'1 | C A | 10 | 27.314 | -13.306 | 46.786 | 1.00 | 0.00 | H |
| ATOM | 309 | H2'2 | C A | 10 | 25.754 | -12.726 | 46.217 | 1.00 | 0.00 | H |
| ATOM | 310 | H5'1 | C A | 10 | 30.484 | -12.820 | 44.712 | 1.00 | 0.00 | H |
| ATOM | 311 | H5'2 | C A | 10 | 30.443 | -11.292 | 45.619 | 1.00 | 0.00 | H |
| ATOM | 312 | C1'  | T A | 11 | 22.244 | -14.056 | 43.375 | 1.00 | 0.00 | C |
| ATOM | 313 | N1   | T A | 11 | 22.889 | -15.070 | 44.251 | 1.00 | 0.00 | N |
| ATOM | 314 | C2   | T A | 11 | 22.758 | -16.394 | 43.883 | 1.00 | 0.00 | C |
| ATOM | 315 | O2   | T A | 11 | 22.145 | -16.746 | 42.890 | 1.00 | 0.00 | O |
| ATOM | 316 | N3   | T A | 11 | 23.373 | -17.304 | 44.724 | 1.00 | 0.00 | N |
| ATOM | 317 | C4   | T A | 11 | 24.085 | -17.012 | 45.869 | 1.00 | 0.00 | C |
| ATOM | 318 | O4   | T A | 11 | 24.591 | -17.916 | 46.548 | 1.00 | 0.00 | O |
| ATOM | 319 | C5   | T A | 11 | 24.167 | -15.602 | 46.172 | 1.00 | 0.00 | C |
| ATOM | 320 | C6   | T A | 11 | 23.581 | -14.689 | 45.375 | 1.00 | 0.00 | C |
| ATOM | 321 | C7   | T A | 11 | 24.934 | -15.239 | 47.409 | 1.00 | 0.00 | C |
| ATOM | 322 | C2'  | T A | 11 | 21.627 | -12.890 | 44.138 | 1.00 | 0.00 | C |
| ATOM | 323 | C3'  | T A | 11 | 21.888 | -11.723 | 43.200 | 1.00 | 0.00 | C |
| ATOM | 324 | O3'  | T A | 11 | 20.854 | -11.669 | 42.219 | 1.00 | 0.00 | O |
| ATOM | 325 | C4'  | T A | 11 | 23.243 | -12.073 | 42.591 | 1.00 | 0.00 | C |
| ATOM | 326 | O4'  | T A | 11 | 23.237 | -13.534 | 42.513 | 1.00 | 0.00 | O |
| ATOM | 327 | C5'  | T A | 11 | 24.463 | -11.635 | 43.368 | 1.00 | 0.00 | C |
| ATOM | 328 | O5'  | T A | 11 | 24.207 | -11.756 | 44.790 | 1.00 | 0.00 | O |
| ATOM | 329 | O1P  | T A | 11 | 24.243 | -9.372  | 45.594 | 1.00 | 0.00 | O |
| ATOM | 330 | O2P  | T A | 11 | 24.845 | -11.235 | 47.164 | 1.00 | 0.00 | O |
| ATOM | 331 | P    | T A | 11 | 24.866 | -10.697 | 45.782 | 1.00 | 0.00 | P |
| ATOM | 332 | H3   | T A | 11 | 23.293 | -18.298 | 44.470 | 1.00 | 0.00 | H |
| ATOM | 333 | H6   | T A | 11 | 23.656 | -13.629 | 45.623 | 1.00 | 0.00 | H |
| ATOM | 334 | H1'  | T A | 11 | 21.496 | -14.558 | 42.761 | 1.00 | 0.00 | H |
| ATOM | 335 | H3'  | T A | 11 | 21.928 | -10.773 | 43.732 | 1.00 | 0.00 | H |
| ATOM | 336 | H4'  | T A | 11 | 23.284 | -11.595 | 41.611 | 1.00 | 0.00 | H |
| ATOM | 337 | H71  | T A | 11 | 24.257 | -14.805 | 48.142 | 1.00 | 0.00 | H |
| ATOM | 338 | H72  | T A | 11 | 25.395 | -16.136 | 47.826 | 1.00 | 0.00 | H |
| ATOM | 339 | H73  | T A | 11 | 25.711 | -14.518 | 47.157 | 1.00 | 0.00 | H |
| ATOM | 340 | H2'1 | T A | 11 | 22.098 | -12.733 | 45.106 | 1.00 | 0.00 | H |



|      |     |      |   |   |    |        |         |        |      |      |   |
|------|-----|------|---|---|----|--------|---------|--------|------|------|---|
| ATOM | 341 | H2'2 | T | A | 11 | 20.559 | -13.029 | 44.312 | 1.00 | 0.00 | H |
| ATOM | 342 | H5'1 | T | A | 11 | 25.309 | -12.263 | 43.090 | 1.00 | 0.00 | H |
| ATOM | 343 | H5'2 | T | A | 11 | 24.690 | -10.598 | 43.122 | 1.00 | 0.00 | H |
| ATOM | 344 | C1'  | A | A | 12 | 18.117 | -16.667 | 42.493 | 1.00 | 0.00 | C |
| ATOM | 345 | N1   | A | A | 12 | 20.257 | -20.073 | 45.680 | 1.00 | 0.00 | N |
| ATOM | 346 | C2   | A | A | 12 | 19.606 | -20.204 | 44.529 | 1.00 | 0.00 | C |
| ATOM | 347 | N3   | A | A | 12 | 19.080 | -19.280 | 43.753 | 1.00 | 0.00 | N |
| ATOM | 348 | C4   | A | A | 12 | 19.275 | -18.061 | 44.287 | 1.00 | 0.00 | C |
| ATOM | 349 | C5   | A | A | 12 | 19.916 | -17.755 | 45.453 | 1.00 | 0.00 | C |
| ATOM | 350 | C6   | A | A | 12 | 20.436 | -18.842 | 46.187 | 1.00 | 0.00 | C |
| ATOM | 351 | N6   | A | A | 12 | 21.091 | -18.695 | 47.352 | 1.00 | 0.00 | N |
| ATOM | 352 | N7   | A | A | 12 | 19.922 | -16.390 | 45.678 | 1.00 | 0.00 | N |
| ATOM | 353 | C8   | A | A | 12 | 19.285 | -15.902 | 44.654 | 1.00 | 0.00 | C |
| ATOM | 354 | N9   | A | A | 12 | 18.864 | -16.858 | 43.765 | 1.00 | 0.00 | N |
| ATOM | 355 | C2'  | A | A | 12 | 17.071 | -15.563 | 42.557 | 1.00 | 0.00 | C |
| ATOM | 356 | C3'  | A | A | 12 | 17.145 | -14.975 | 41.156 | 1.00 | 0.00 | C |
| ATOM | 357 | O3'  | A | A | 12 | 16.324 | -15.745 | 40.281 | 1.00 | 0.00 | O |
| ATOM | 358 | C4'  | A | A | 12 | 18.629 | -15.098 | 40.812 | 1.00 | 0.00 | C |
| ATOM | 359 | O4'  | A | A | 12 | 19.055 | -16.324 | 41.491 | 1.00 | 0.00 | O |
| ATOM | 360 | C5'  | A | A | 12 | 19.517 | -13.963 | 41.264 | 1.00 | 0.00 | C |
| ATOM | 361 | O5'  | A | A | 12 | 19.067 | -13.467 | 42.550 | 1.00 | 0.00 | O |
| ATOM | 362 | O1P  | A | A | 12 | 18.279 | -11.133 | 42.032 | 1.00 | 0.00 | O |
| ATOM | 363 | O2P  | A | A | 12 | 19.109 | -11.696 | 44.332 | 1.00 | 0.00 | O |
| ATOM | 364 | P    | A | A | 12 | 19.214 | -11.912 | 42.868 | 1.00 | 0.00 | P |
| ATOM | 365 | H2   | A | A | 12 | 19.492 | -21.229 | 44.176 | 1.00 | 0.00 | H |
| ATOM | 366 | H8   | A | A | 12 | 19.102 | -14.836 | 44.514 | 1.00 | 0.00 | H |
| ATOM | 367 | H1'  | A | A | 12 | 17.664 | -17.619 | 42.217 | 1.00 | 0.00 | H |
| ATOM | 368 | H3'  | A | A | 12 | 16.820 | -13.935 | 41.130 | 1.00 | 0.00 | H |
| ATOM | 369 | H4'  | A | A | 12 | 18.697 | -15.164 | 39.727 | 1.00 | 0.00 | H |
| ATOM | 370 | H61  | A | A | 12 | 21.453 | -19.522 | 47.847 | 1.00 | 0.00 | H |
| ATOM | 371 | H62  | A | A | 12 | 21.231 | -17.754 | 47.748 | 1.00 | 0.00 | H |
| ATOM | 372 | H2'1 | A | A | 12 | 17.304 | -14.814 | 43.313 | 1.00 | 0.00 | H |
| ATOM | 373 | H2'2 | A | A | 12 | 16.075 | -15.949 | 42.773 | 1.00 | 0.00 | H |
| ATOM | 374 | H5'1 | A | A | 12 | 20.542 | -14.323 | 41.347 | 1.00 | 0.00 | H |
| ATOM | 375 | H5'2 | A | A | 12 | 19.478 | -13.162 | 40.526 | 1.00 | 0.00 | H |
| ATOM | 376 | C1'  | G | A | 13 | 15.143 | -20.604 | 43.048 | 1.00 | 0.00 | C |
| ATOM | 377 | N1   | G | A | 13 | 17.561 | -21.111 | 47.511 | 1.00 | 0.00 | N |
| ATOM | 378 | C2   | G | A | 13 | 17.200 | -22.071 | 46.583 | 1.00 | 0.00 | C |
| ATOM | 379 | N2   | G | A | 13 | 17.523 | -23.337 | 46.885 | 1.00 | 0.00 | N |
| ATOM | 380 | N3   | G | A | 13 | 16.567 | -21.793 | 45.445 | 1.00 | 0.00 | N |
| ATOM | 381 | C4   | G | A | 13 | 16.311 | -20.465 | 45.307 | 1.00 | 0.00 | C |
| ATOM | 382 | C5   | G | A | 13 | 16.631 | -19.439 | 46.179 | 1.00 | 0.00 | C |
| ATOM | 383 | C6   | G | A | 13 | 17.307 | -19.733 | 47.387 | 1.00 | 0.00 | C |
| ATOM | 384 | O6   | G | A | 13 | 17.670 | -18.966 | 48.279 | 1.00 | 0.00 | O |
| ATOM | 385 | N7   | G | A | 13 | 16.192 | -18.216 | 45.668 | 1.00 | 0.00 | N |
| ATOM | 386 | C8   | G | A | 13 | 15.637 | -18.532 | 44.526 | 1.00 | 0.00 | C |
| ATOM | 387 | N9   | G | A | 13 | 15.671 | -19.881 | 44.238 | 1.00 | 0.00 | N |
| ATOM | 388 | C2'  | G | A | 13 | 13.827 | -20.047 | 42.524 | 1.00 | 0.00 | C |
| ATOM | 389 | C3'  | G | A | 13 | 13.977 | -20.229 | 41.024 | 1.00 | 0.00 | C |
| ATOM | 390 | O3'  | G | A | 13 | 13.592 | -21.555 | 40.672 | 1.00 | 0.00 | O |
| ATOM | 391 | C4'  | G | A | 13 | 15.468 | -19.983 | 40.799 | 1.00 | 0.00 | C |
| ATOM | 392 | O4'  | G | A | 13 | 16.104 | -20.493 | 42.016 | 1.00 | 0.00 | O |
| ATOM | 393 | C5'  | G | A | 13 | 15.889 | -18.546 | 40.602 | 1.00 | 0.00 | C |
| ATOM | 394 | O5'  | G | A | 13 | 15.088 | -17.680 | 41.442 | 1.00 | 0.00 | O |

|      |     |      |     |    |        |         |        |      |      |   |
|------|-----|------|-----|----|--------|---------|--------|------|------|---|
| ATOM | 395 | O1P  | G A | 13 | 13.760 | -16.327 | 39.785 | 1.00 | 0.00 | O |
| ATOM | 396 | O2P  | G A | 13 | 14.284 | -15.376 | 42.047 | 1.00 | 0.00 | O |
| ATOM | 397 | P    | G A | 13 | 14.712 | -16.224 | 40.907 | 1.00 | 0.00 | P |
| ATOM | 398 | H1   | G A | 13 | 18.056 | -21.431 | 48.358 | 1.00 | 0.00 | H |
| ATOM | 399 | H8   | G A | 13 | 15.188 | -17.795 | 43.860 | 1.00 | 0.00 | H |
| ATOM | 400 | H1'  | G A | 13 | 15.047 | -21.659 | 43.305 | 1.00 | 0.00 | H |
| ATOM | 401 | H21  | G A | 13 | 18.016 | -23.543 | 47.767 | 1.00 | 0.00 | H |
| ATOM | 402 | H3'  | G A | 13 | 13.373 | -19.516 | 40.462 | 1.00 | 0.00 | H |
| ATOM | 403 | H22  | G A | 13 | 17.279 | -24.096 | 46.237 | 1.00 | 0.00 | H |
| ATOM | 404 | H4'  | G A | 13 | 15.751 | -20.540 | 39.907 | 1.00 | 0.00 | H |
| ATOM | 405 | H2'1 | G A | 13 | 13.689 | -18.998 | 42.785 | 1.00 | 0.00 | H |
| ATOM | 406 | H2'2 | G A | 13 | 12.964 | -20.595 | 42.907 | 1.00 | 0.00 | H |
| ATOM | 407 | H5'1 | G A | 13 | 16.942 | -18.442 | 40.862 | 1.00 | 0.00 | H |
| ATOM | 408 | H5'2 | G A | 13 | 15.752 | -18.275 | 39.555 | 1.00 | 0.00 | H |
| ATOM | 409 | C1'  | G A | 14 | 13.360 | -24.532 | 45.481 | 1.00 | 0.00 | C |
| ATOM | 410 | N1   | G A | 14 | 15.002 | -22.013 | 49.603 | 1.00 | 0.00 | N |
| ATOM | 411 | C2   | G A | 14 | 15.099 | -23.356 | 49.285 | 1.00 | 0.00 | C |
| ATOM | 412 | N2   | G A | 14 | 15.712 | -24.133 | 50.187 | 1.00 | 0.00 | N |
| ATOM | 413 | N3   | G A | 14 | 14.622 | -23.883 | 48.158 | 1.00 | 0.00 | N |
| ATOM | 414 | C4   | G A | 14 | 14.027 | -22.953 | 47.367 | 1.00 | 0.00 | C |
| ATOM | 415 | C5   | G A | 14 | 13.882 | -21.597 | 47.602 | 1.00 | 0.00 | C |
| ATOM | 416 | C6   | G A | 14 | 14.390 | -21.036 | 48.795 | 1.00 | 0.00 | C |
| ATOM | 417 | O6   | G A | 14 | 14.359 | -19.867 | 49.179 | 1.00 | 0.00 | O |
| ATOM | 418 | N7   | G A | 14 | 13.206 | -20.993 | 46.537 | 1.00 | 0.00 | N |
| ATOM | 419 | C8   | G A | 14 | 12.974 | -21.979 | 45.710 | 1.00 | 0.00 | C |
| ATOM | 420 | N9   | G A | 14 | 13.442 | -23.201 | 46.145 | 1.00 | 0.00 | N |
| ATOM | 421 | C2'  | G A | 14 | 12.051 | -24.768 | 44.740 | 1.00 | 0.00 | C |
| ATOM | 422 | C3'  | G A | 14 | 12.509 | -25.580 | 43.538 | 1.00 | 0.00 | C |
| ATOM | 423 | O3'  | G A | 14 | 12.586 | -26.956 | 43.903 | 1.00 | 0.00 | O |
| ATOM | 424 | C4'  | G A | 14 | 13.881 | -24.985 | 43.230 | 1.00 | 0.00 | C |
| ATOM | 425 | O4'  | G A | 14 | 14.414 | -24.609 | 44.541 | 1.00 | 0.00 | O |
| ATOM | 426 | C5'  | G A | 14 | 13.901 | -23.769 | 42.335 | 1.00 | 0.00 | C |
| ATOM | 427 | O5'  | G A | 14 | 12.751 | -22.934 | 42.615 | 1.00 | 0.00 | O |
| ATOM | 428 | O1P  | G A | 14 | 11.403 | -23.065 | 40.495 | 1.00 | 0.00 | O |
| ATOM | 429 | O2P  | G A | 14 | 11.229 | -21.042 | 41.966 | 1.00 | 0.00 | O |
| ATOM | 430 | P    | G A | 14 | 12.075 | -22.130 | 41.416 | 1.00 | 0.00 | P |
| ATOM | 431 | H1   | G A | 14 | 15.412 | -21.705 | 50.498 | 1.00 | 0.00 | H |
| ATOM | 432 | H8   | G A | 14 | 12.456 | -21.846 | 44.760 | 1.00 | 0.00 | H |
| ATOM | 433 | H1'  | G A | 14 | 13.526 | -25.299 | 46.236 | 1.00 | 0.00 | H |
| ATOM | 434 | H21  | G A | 14 | 16.082 | -23.718 | 51.056 | 1.00 | 0.00 | H |
| ATOM | 435 | H3'  | G A | 14 | 11.833 | -25.468 | 42.690 | 1.00 | 0.00 | H |
| ATOM | 436 | H22  | G A | 14 | 15.815 | -25.142 | 50.013 | 1.00 | 0.00 | H |
| ATOM | 437 | H4'  | G A | 14 | 14.464 | -25.768 | 42.744 | 1.00 | 0.00 | H |
| ATOM | 438 | H2'1 | G A | 14 | 11.576 | -23.837 | 44.432 | 1.00 | 0.00 | H |
| ATOM | 439 | H2'2 | G A | 14 | 11.330 | -25.322 | 45.341 | 1.00 | 0.00 | H |
| ATOM | 440 | H5'1 | G A | 14 | 14.818 | -23.207 | 42.513 | 1.00 | 0.00 | H |
| ATOM | 441 | H5'2 | G A | 14 | 13.877 | -24.092 | 41.293 | 1.00 | 0.00 | H |
| ATOM | 442 | C1'  | A A | 15 | 12.375 | -27.187 | 49.540 | 1.00 | 0.00 | C |
| ATOM | 443 | N1   | A A | 15 | 12.495 | -22.613 | 51.865 | 1.00 | 0.00 | N |
| ATOM | 444 | C2   | A A | 15 | 12.982 | -23.805 | 52.200 | 1.00 | 0.00 | C |
| ATOM | 445 | N3   | A A | 15 | 12.917 | -24.949 | 51.551 | 1.00 | 0.00 | N |
| ATOM | 446 | C4   | A A | 15 | 12.240 | -24.791 | 50.398 | 1.00 | 0.00 | C |
| ATOM | 447 | C5   | A A | 15 | 11.680 | -23.643 | 49.912 | 1.00 | 0.00 | C |
| ATOM | 448 | C6   | A A | 15 | 11.825 | -22.487 | 50.708 | 1.00 | 0.00 | C |

|      |     |      |   |   |    |        |         |        |      |      |   |
|------|-----|------|---|---|----|--------|---------|--------|------|------|---|
| ATOM | 449 | N6   | A | A | 15 | 11.327 | -21.289 | 50.360 | 1.00 | 0.00 | N |
| ATOM | 450 | N7   | A | A | 15 | 11.064 | -23.864 | 48.693 | 1.00 | 0.00 | N |
| ATOM | 451 | C8   | A | A | 15 | 11.258 | -25.130 | 48.471 | 1.00 | 0.00 | C |
| ATOM | 452 | N9   | A | A | 15 | 11.968 | -25.759 | 49.463 | 1.00 | 0.00 | N |
| ATOM | 453 | C2'  | A | A | 15 | 11.328 | -28.154 | 49.001 | 1.00 | 0.00 | C |
| ATOM | 454 | C3'  | A | A | 15 | 12.190 | -29.230 | 48.360 | 1.00 | 0.00 | C |
| ATOM | 455 | O3'  | A | A | 15 | 12.587 | -30.166 | 49.358 | 1.00 | 0.00 | O |
| ATOM | 456 | C4'  | A | A | 15 | 13.374 | -28.435 | 47.811 | 1.00 | 0.00 | C |
| ATOM | 457 | O4'  | A | A | 15 | 13.552 | -27.343 | 48.771 | 1.00 | 0.00 | O |
| ATOM | 458 | C5'  | A | A | 15 | 13.205 | -27.843 | 46.432 | 1.00 | 0.00 | C |
| ATOM | 459 | O5'  | A | A | 15 | 11.836 | -27.400 | 46.253 | 1.00 | 0.00 | O |
| ATOM | 460 | O1P  | A | A | 15 | 10.956 | -28.934 | 44.461 | 1.00 | 0.00 | O |
| ATOM | 461 | O2P  | A | A | 15 | 9.978  | -26.640 | 44.741 | 1.00 | 0.00 | O |
| ATOM | 462 | P    | A | A | 15 | 11.173 | -27.515 | 44.807 | 1.00 | 0.00 | P |
| ATOM | 463 | H2   | A | A | 15 | 13.512 | -23.840 | 53.153 | 1.00 | 0.00 | H |
| ATOM | 464 | H8   | A | A | 15 | 10.894 | -25.645 | 47.583 | 1.00 | 0.00 | H |
| ATOM | 465 | H1'  | A | A | 15 | 12.620 | -27.416 | 50.577 | 1.00 | 0.00 | H |
| ATOM | 466 | H3'  | A | A | 15 | 11.665 | -29.754 | 47.561 | 1.00 | 0.00 | H |
| ATOM | 467 | H4'  | A | A | 15 | 14.225 | -29.116 | 47.780 | 1.00 | 0.00 | H |
| ATOM | 468 | H61  | A | A | 15 | 11.465 | -20.476 | 50.978 | 1.00 | 0.00 | H |
| ATOM | 469 | H62  | A | A | 15 | 10.810 | -21.184 | 49.474 | 1.00 | 0.00 | H |
| ATOM | 470 | H2'1 | A | A | 15 | 10.671 | -27.684 | 48.269 | 1.00 | 0.00 | H |
| ATOM | 471 | H2'2 | A | A | 15 | 10.701 | -28.567 | 49.790 | 1.00 | 0.00 | H |
| ATOM | 472 | H5'1 | A | A | 15 | 13.883 | -26.998 | 46.320 | 1.00 | 0.00 | H |
| ATOM | 473 | H5'2 | A | A | 15 | 13.446 | -28.599 | 45.686 | 1.00 | 0.00 | H |
| ATOM | 474 | C1'  | C | A | 16 | 11.498 | -27.707 | 54.400 | 1.00 | 0.00 | C |
| ATOM | 475 | N1   | C | A | 16 | 10.714 | -26.733 | 53.594 | 1.00 | 0.00 | N |
| ATOM | 476 | C2   | C | A | 16 | 10.625 | -25.423 | 54.058 | 1.00 | 0.00 | C |
| ATOM | 477 | O2   | C | A | 16 | 11.196 | -25.125 | 55.115 | 1.00 | 0.00 | O |
| ATOM | 478 | N3   | C | A | 16 | 9.915  | -24.520 | 53.338 | 1.00 | 0.00 | N |
| ATOM | 479 | C4   | C | A | 16 | 9.306  | -24.874 | 52.199 | 1.00 | 0.00 | C |
| ATOM | 480 | N4   | C | A | 16 | 8.630  | -23.948 | 51.534 | 1.00 | 0.00 | N |
| ATOM | 481 | C5   | C | A | 16 | 9.377  | -26.215 | 51.698 | 1.00 | 0.00 | C |
| ATOM | 482 | C6   | C | A | 16 | 10.101 | -27.108 | 52.437 | 1.00 | 0.00 | C |
| ATOM | 483 | C2'  | C | A | 16 | 10.891 | -29.103 | 54.438 | 1.00 | 0.00 | C |
| ATOM | 484 | C3'  | C | A | 16 | 12.129 | -29.987 | 54.445 | 1.00 | 0.00 | C |
| ATOM | 485 | O3'  | C | A | 16 | 12.598 | -30.124 | 55.784 | 1.00 | 0.00 | O |
| ATOM | 486 | C4'  | C | A | 16 | 13.107 | -29.210 | 53.567 | 1.00 | 0.00 | C |
| ATOM | 487 | O4'  | C | A | 16 | 12.787 | -27.806 | 53.822 | 1.00 | 0.00 | O |
| ATOM | 488 | C5'  | C | A | 16 | 13.017 | -29.463 | 52.079 | 1.00 | 0.00 | C |
| ATOM | 489 | O5'  | C | A | 16 | 11.633 | -29.659 | 51.697 | 1.00 | 0.00 | O |
| ATOM | 490 | O1P  | C | A | 16 | 11.568 | -32.063 | 50.953 | 1.00 | 0.00 | O |
| ATOM | 491 | O2P  | C | A | 16 | 9.933  | -30.413 | 50.007 | 1.00 | 0.00 | O |
| ATOM | 492 | P    | C | A | 16 | 11.300 | -30.679 | 50.517 | 1.00 | 0.00 | P |
| ATOM | 493 | H5   | C | A | 16 | 8.877  | -26.509 | 50.774 | 1.00 | 0.00 | H |
| ATOM | 494 | H6   | C | A | 16 | 10.191 | -28.137 | 52.093 | 1.00 | 0.00 | H |
| ATOM | 495 | H1'  | C | A | 16 | 11.612 | -27.304 | 55.407 | 1.00 | 0.00 | H |
| ATOM | 496 | H3'  | C | A | 16 | 11.925 | -30.975 | 54.030 | 1.00 | 0.00 | H |
| ATOM | 497 | H4'  | C | A | 16 | 14.110 | -29.486 | 53.889 | 1.00 | 0.00 | H |
| ATOM | 498 | H41  | C | A | 16 | 8.154  | -24.194 | 50.652 | 1.00 | 0.00 | H |
| ATOM | 499 | H42  | C | A | 16 | 8.578  | -22.985 | 51.896 | 1.00 | 0.00 | H |
| ATOM | 500 | H2'1 | C | A | 16 | 10.265 | -29.306 | 53.567 | 1.00 | 0.00 | H |
| ATOM | 501 | H2'2 | C | A | 16 | 10.281 | -29.266 | 55.326 | 1.00 | 0.00 | H |
| ATOM | 502 | H5'1 | C | A | 16 | 13.430 | -28.605 | 51.546 | 1.00 | 0.00 | H |

|      |     |      |   |   |    |        |         |        |      |      |   |
|------|-----|------|---|---|----|--------|---------|--------|------|------|---|
| ATOM | 503 | H5'2 | C | A | 16 | 13.599 | -30.351 | 51.831 | 1.00 | 0.00 | H |
| ATOM | 504 | C1'  | G | A | 17 | 9.974  | -26.141 | 58.843 | 1.00 | 0.00 | C |
| ATOM | 505 | N1   | G | A | 17 | 7.137  | -22.906 | 56.102 | 1.00 | 0.00 | N |
| ATOM | 506 | C2   | G | A | 17 | 7.875  | -22.686 | 57.252 | 1.00 | 0.00 | C |
| ATOM | 507 | N2   | G | A | 17 | 7.850  | -21.438 | 57.739 | 1.00 | 0.00 | N |
| ATOM | 508 | N3   | G | A | 17 | 8.578  | -23.634 | 57.869 | 1.00 | 0.00 | N |
| ATOM | 509 | C4   | G | A | 17 | 8.483  | -24.837 | 57.244 | 1.00 | 0.00 | C |
| ATOM | 510 | C5   | G | A | 17 | 7.770  | -25.152 | 56.098 | 1.00 | 0.00 | C |
| ATOM | 511 | C6   | G | A | 17 | 7.025  | -24.145 | 55.440 | 1.00 | 0.00 | C |
| ATOM | 512 | O6   | G | A | 17 | 6.337  | -24.226 | 54.423 | 1.00 | 0.00 | O |
| ATOM | 513 | N7   | G | A | 17 | 7.931  | -26.502 | 55.784 | 1.00 | 0.00 | N |
| ATOM | 514 | C8   | G | A | 17 | 8.722  | -26.953 | 56.724 | 1.00 | 0.00 | C |
| ATOM | 515 | N9   | G | A | 17 | 9.099  | -26.000 | 57.650 | 1.00 | 0.00 | N |
| ATOM | 516 | C2'  | G | A | 17 | 9.801  | -27.462 | 59.580 | 1.00 | 0.00 | C |
| ATOM | 517 | C3'  | G | A | 17 | 11.218 | -27.756 | 60.043 | 1.00 | 0.00 | C |
| ATOM | 518 | O3'  | G | A | 17 | 11.461 | -27.071 | 61.270 | 1.00 | 0.00 | O |
| ATOM | 519 | C4'  | G | A | 17 | 12.070 | -27.211 | 58.898 | 1.00 | 0.00 | C |
| ATOM | 520 | O4'  | G | A | 17 | 11.318 | -26.059 | 58.406 | 1.00 | 0.00 | O |
| ATOM | 521 | C5'  | G | A | 17 | 12.324 | -28.153 | 57.745 | 1.00 | 0.00 | C |
| ATOM | 522 | O5'  | G | A | 17 | 11.147 | -28.963 | 57.505 | 1.00 | 0.00 | O |
| ATOM | 523 | O1P  | G | A | 17 | 11.916 | -31.289 | 58.084 | 1.00 | 0.00 | O |
| ATOM | 524 | O2P  | G | A | 17 | 10.068 | -30.956 | 56.419 | 1.00 | 0.00 | O |
| ATOM | 525 | P    | G | A | 17 | 11.341 | -30.465 | 57.004 | 1.00 | 0.00 | P |
| ATOM | 526 | H1   | G | A | 17 | 6.633  | -22.102 | 55.701 | 1.00 | 0.00 | H |
| ATOM | 527 | H8   | G | A | 17 | 9.052  | -27.991 | 56.774 | 1.00 | 0.00 | H |
| ATOM | 528 | H1'  | G | A | 17 | 9.785  | -25.297 | 59.507 | 1.00 | 0.00 | H |
| ATOM | 529 | H21  | G | A | 17 | 7.307  | -20.710 | 57.254 | 1.00 | 0.00 | H |
| ATOM | 530 | H3'  | G | A | 17 | 11.389 | -28.825 | 60.186 | 1.00 | 0.00 | H |
| ATOM | 531 | H22  | G | A | 17 | 8.376  | -21.209 | 58.593 | 1.00 | 0.00 | H |
| ATOM | 532 | H4'  | G | A | 17 | 13.035 | -26.939 | 59.324 | 1.00 | 0.00 | H |
| ATOM | 533 | H2'1 | G | A | 17 | 9.425  | -28.252 | 58.928 | 1.00 | 0.00 | H |
| ATOM | 534 | H2'2 | G | A | 17 | 9.115  | -27.380 | 60.423 | 1.00 | 0.00 | H |
| ATOM | 535 | H5'1 | G | A | 17 | 12.560 | -27.571 | 56.853 | 1.00 | 0.00 | H |
| ATOM | 536 | H5'2 | G | A | 17 | 13.172 | -28.793 | 57.986 | 1.00 | 0.00 | H |
| ATOM | 537 | C1'  | G | A | 18 | 7.314  | -23.266 | 61.874 | 1.00 | 0.00 | C |
| ATOM | 538 | N1   | G | A | 18 | 4.195  | -22.889 | 57.855 | 1.00 | 0.00 | N |
| ATOM | 539 | C2   | G | A | 18 | 4.625  | -21.915 | 58.740 | 1.00 | 0.00 | C |
| ATOM | 540 | N2   | G | A | 18 | 4.160  | -20.676 | 58.527 | 1.00 | 0.00 | N |
| ATOM | 541 | N3   | G | A | 18 | 5.452  | -22.158 | 59.754 | 1.00 | 0.00 | N |
| ATOM | 542 | C4   | G | A | 18 | 5.816  | -23.466 | 59.825 | 1.00 | 0.00 | C |
| ATOM | 543 | C5   | G | A | 18 | 5.434  | -24.504 | 58.991 | 1.00 | 0.00 | C |
| ATOM | 544 | C6   | G | A | 18 | 4.559  | -24.246 | 57.910 | 1.00 | 0.00 | C |
| ATOM | 545 | O6   | G | A | 18 | 4.112  | -25.028 | 57.070 | 1.00 | 0.00 | O |
| ATOM | 546 | N7   | G | A | 18 | 6.028  | -25.697 | 59.405 | 1.00 | 0.00 | N |
| ATOM | 547 | C8   | G | A | 18 | 6.736  | -25.352 | 60.448 | 1.00 | 0.00 | C |
| ATOM | 548 | N9   | G | A | 18 | 6.658  | -24.014 | 60.767 | 1.00 | 0.00 | N |
| ATOM | 549 | C2'  | G | A | 18 | 7.401  | -24.049 | 63.176 | 1.00 | 0.00 | C |
| ATOM | 550 | C3'  | G | A | 18 | 8.738  | -23.592 | 63.733 | 1.00 | 0.00 | C |
| ATOM | 551 | O3'  | G | A | 18 | 8.556  | -22.371 | 64.445 | 1.00 | 0.00 | O |
| ATOM | 552 | C4'  | G | A | 18 | 9.585  | -23.407 | 62.476 | 1.00 | 0.00 | C |
| ATOM | 553 | O4'  | G | A | 18 | 8.631  | -22.956 | 61.463 | 1.00 | 0.00 | O |
| ATOM | 554 | C5'  | G | A | 18 | 10.296 | -24.636 | 61.959 | 1.00 | 0.00 | C |
| ATOM | 555 | O5'  | G | A | 18 | 9.462  | -25.804 | 62.154 | 1.00 | 0.00 | O |
| ATOM | 556 | O1P  | G | A | 18 | 10.749 | -27.164 | 63.836 | 1.00 | 0.00 | O |

|      |     |      |       |    |        |         |        |      |      |   |
|------|-----|------|-------|----|--------|---------|--------|------|------|---|
| ATOM | 557 | O2P  | G A   | 18 | 9.204  | -28.303 | 62.223 | 1.00 | 0.00 | O |
| ATOM | 558 | P    | G A   | 18 | 10.160 | -27.200 | 62.485 | 1.00 | 0.00 | P |
| ATOM | 559 | H1   | G A   | 18 | 3.559  | -22.595 | 57.097 | 1.00 | 0.00 | H |
| ATOM | 560 | H8   | G A   | 18 | 7.337  | -26.062 | 61.020 | 1.00 | 0.00 | H |
| ATOM | 561 | H1'  | G A   | 18 | 6.778  | -22.328 | 62.017 | 1.00 | 0.00 | H |
| ATOM | 562 | H21  | G A   | 18 | 3.523  | -20.496 | 57.737 | 1.00 | 0.00 | H |
| ATOM | 563 | H3'  | G A   | 18 | 9.180  | -24.336 | 64.399 | 1.00 | 0.00 | H |
| ATOM | 564 | H22  | G A   | 18 | 4.440  | -19.909 | 59.152 | 1.00 | 0.00 | H |
| ATOM | 565 | H4'  | G A   | 18 | 10.342 | -22.659 | 62.712 | 1.00 | 0.00 | H |
| ATOM | 566 | H2'1 | G A   | 18 | 7.386  | -25.127 | 63.011 | 1.00 | 0.00 | H |
| ATOM | 567 | H2'2 | G A   | 18 | 6.584  | -23.811 | 63.858 | 1.00 | 0.00 | H |
| ATOM | 568 | H5'1 | G A   | 18 | 10.507 | -24.507 | 60.897 | 1.00 | 0.00 | H |
| ATOM | 569 | H5'2 | G A   | 18 | 11.236 | -24.759 | 62.497 | 1.00 | 0.00 | H |
| ATOM | 570 | C1'  | T A   | 19 | 3.469  | -20.375 | 63.034 | 1.00 | 0.00 | C |
| ATOM | 571 | N1   | T A   | 19 | 3.239  | -21.715 | 62.435 | 1.00 | 0.00 | N |
| ATOM | 572 | C2   | T A   | 19 | 2.411  | -21.780 | 61.332 | 1.00 | 0.00 | C |
| ATOM | 573 | O2   | T A   | 19 | 1.876  | -20.796 | 60.852 | 1.00 | 0.00 | O |
| ATOM | 574 | N3   | T A   | 19 | 2.225  | -23.046 | 60.807 | 1.00 | 0.00 | N |
| ATOM | 575 | C4   | T A   | 19 | 2.778  | -24.218 | 61.275 | 1.00 | 0.00 | C |
| ATOM | 576 | O4   | T A   | 19 | 2.535  | -25.296 | 60.721 | 1.00 | 0.00 | O |
| ATOM | 577 | C5   | T A   | 19 | 3.629  | -24.052 | 62.429 | 1.00 | 0.00 | C |
| ATOM | 578 | C6   | T A   | 19 | 3.833  | -22.833 | 62.968 | 1.00 | 0.00 | C |
| ATOM | 579 | C7   | T A   | 19 | 4.255  | -25.302 | 62.971 | 1.00 | 0.00 | C |
| ATOM | 580 | C2'  | T A   | 19 | 3.549  | -20.387 | 64.556 | 1.00 | 0.00 | C |
| ATOM | 581 | C3'  | T A   | 19 | 4.594  | -19.318 | 64.827 | 1.00 | 0.00 | C |
| ATOM | 582 | O3'  | T A   | 19 | 3.965  | -18.039 | 64.842 | 1.00 | 0.00 | O |
| ATOM | 583 | C4'  | T A   | 19 | 5.555  | -19.476 | 63.651 | 1.00 | 0.00 | C |
| ATOM | 584 | O4'  | T A   | 19 | 4.699  | -19.883 | 62.538 | 1.00 | 0.00 | O |
| ATOM | 585 | C5'  | T A   | 19 | 6.656  | -20.498 | 63.814 | 1.00 | 0.00 | C |
| ATOM | 586 | O5'  | T A   | 19 | 6.156  | -21.641 | 64.554 | 1.00 | 0.00 | O |
| ATOM | 587 | O1P  | T A   | 19 | 7.468  | -21.563 | 66.701 | 1.00 | 0.00 | O |
| ATOM | 588 | O2P  | T A   | 19 | 6.592  | -23.753 | 65.843 | 1.00 | 0.00 | O |
| ATOM | 589 | P    | T A   | 19 | 7.147  | -22.413 | 65.536 | 1.00 | 0.00 | P |
| ATOM | 590 | H3   | T A   | 19 | 1.614  | -23.119 | 59.981 | 1.00 | 0.00 | H |
| ATOM | 591 | H6   | T A   | 19 | 4.480  | -22.732 | 63.839 | 1.00 | 0.00 | H |
| ATOM | 592 | H1'  | T A   | 19 | 2.677  | -19.707 | 62.692 | 1.00 | 0.00 | H |
| ATOM | 593 | H3'  | T A   | 19 | 5.105  | -19.480 | 65.778 | 1.00 | 0.00 | H |
| ATOM | 594 | H4'  | T A   | 19 | 6.026  | -18.504 | 63.494 | 1.00 | 0.00 | H |
| ATOM | 595 | H71  | T A   | 19 | 3.861  | -25.503 | 63.966 | 1.00 | 0.00 | H |
| ATOM | 596 | H72  | T A   | 19 | 4.022  | -26.140 | 62.313 | 1.00 | 0.00 | H |
| ATOM | 597 | H73  | T A   | 19 | 5.336  | -25.175 | 63.029 | 1.00 | 0.00 | H |
| ATOM | 598 | H2'1 | T A   | 19 | 3.861  | -21.355 | 64.944 | 1.00 | 0.00 | H |
| ATOM | 599 | H2'2 | T A   | 19 | 2.596  | -20.138 | 65.023 | 1.00 | 0.00 | H |
| ATOM | 600 | H5'1 | T A   | 19 | 6.998  | -20.817 | 62.830 | 1.00 | 0.00 | H |
| ATOM | 601 | H5'2 | T A   | 19 | 7.487  | -20.046 | 64.352 | 1.00 | 0.00 | H |
| ATOM | 602 | C01  | LNK A | 20 | 2.107  | -16.275 | 67.542 | 0.00 | 0.00 | C |
| ATOM | 603 | O1   | LNK A | 20 | 2.805  | -17.414 | 67.034 | 1.00 | 0.00 | O |
| ATOM | 604 | S    | LNK A | 20 | 0.113  | -15.186 | 70.811 | 0.00 | 0.00 | S |
| ATOM | 605 | C02  | LNK A | 20 | 1.575  | -16.589 | 68.954 | 0.00 | 0.00 | C |
| ATOM | 606 | C03  | LNK A | 20 | 0.203  | -15.917 | 69.146 | 0.00 | 0.00 | C |
| ATOM | 607 | O1P  | LNK A | 20 | 1.926  | -19.417 | 65.788 | 1.00 | 0.00 | O |
| ATOM | 608 | O2P  | LNK A | 20 | 1.393  | -17.102 | 64.979 | 1.00 | 0.00 | O |
| ATOM | 609 | P    | LNK A | 20 | 2.366  | -18.018 | 65.624 | 1.00 | 0.00 | P |
| ATOM | 610 | H01  | LNK A | 20 | 1.272  | -16.034 | 66.884 | 0.00 | 0.00 | H |

|      |     |      |     |   |    |        |         |         |        |      |      |   |
|------|-----|------|-----|---|----|--------|---------|---------|--------|------|------|---|
| ATOM | 611 | H02  | LNK | A | 20 | 2.787  | -15.424 | 67.592  | 0.00   | 0.00 | H    |   |
| ATOM | 612 | H03  | LNK | A | 20 | -0.586 | -16.661 | 69.033  | 0.00   | 0.00 | H    |   |
| ATOM | 613 | H04  | LNK | A | 20 | 2.275  | -16.209 | 69.699  | 0.00   | 0.00 | H    |   |
| ATOM | 614 | H05  | LNK | A | 20 | 1.471  | -17.667 | 69.071  | 0.00   | 0.00 | H    |   |
| ATOM | 615 | H06  | LNK | A | 20 | 0.073  | -15.134 | 68.399  | 0.00   | 0.00 | H    |   |
| ATOM | 616 | AU   | LNK | A | 20 | -0.528 | -14.976 | 70.935  |        |      |      |   |
| TER  |     |      |     |   |    |        |         |         |        |      |      |   |
| ATOM | 618 | C1'  |     | A | B  | 2      | -2.660  | -22.952 | 54.392 | 1.00 | 0.00 | C |
| ATOM | 619 | N1   |     | A | B  | 2      | 0.471   | -23.278 | 58.445 | 1.00 | 0.00 | N |
| ATOM | 620 | C2   |     | A | B  | 2      | -0.138  | -22.250 | 57.862 | 1.00 | 0.00 | C |
| ATOM | 621 | N3   |     | A | B  | 2      | -0.938  | -22.236 | 56.817 | 1.00 | 0.00 | N |
| ATOM | 622 | C4   |     | A | B  | 2      | -1.097  | -23.484 | 56.337 | 1.00 | 0.00 | C |
| ATOM | 623 | C5   |     | A | B  | 2      | -0.544  | -24.637 | 56.816 | 1.00 | 0.00 | C |
| ATOM | 624 | C6   |     | A | B  | 2      | 0.293   | -24.509 | 57.946 | 1.00 | 0.00 | C |
| ATOM | 625 | N6   |     | A | B  | 2      | 0.906   | -25.554 | 58.527 | 1.00 | 0.00 | N |
| ATOM | 626 | N7   |     | A | B  | 2      | -0.937  | -25.731 | 56.066 | 1.00 | 0.00 | N |
| ATOM | 627 | C8   |     | A | B  | 2      | -1.708  | -25.221 | 55.152 | 1.00 | 0.00 | C |
| ATOM | 628 | N9   |     | A | B  | 2      | -1.855  | -23.862 | 55.256 | 1.00 | 0.00 | N |
| ATOM | 629 | C2'  |     | A | B  | 2      | -2.641  | -23.334 | 52.917 | 1.00 | 0.00 | C |
| ATOM | 630 | C3'  |     | A | B  | 2      | -4.052  | -22.973 | 52.480 | 1.00 | 0.00 | C |
| ATOM | 631 | O3'  |     | A | B  | 2      | -4.101  | -21.586 | 52.156 | 1.00 | 0.00 | O |
| ATOM | 632 | C4'  |     | A | B  | 2      | -4.887  | -23.306 | 53.717 | 1.00 | 0.00 | C |
| ATOM | 633 | O4'  |     | A | B  | 2      | -4.000  | -23.009 | 54.842 | 1.00 | 0.00 | O |
| ATOM | 634 | C5'  |     | A | B  | 2      | -5.363  | -24.734 | 53.839 | 1.00 | 0.00 | C |
| ATOM | 635 | O5'  |     | A | B  | 2      | -4.344  | -25.636 | 53.338 | 1.00 | 0.00 | O |
| ATOM | 636 | H2   |     | A | B  | 2      | 0.051   | -21.279 | 58.314 | 1.00 | 0.00 | H |
| ATOM | 637 | H8   |     | A | B  | 2      | -2.192  | -25.815 | 54.377 | 1.00 | 0.00 | H |
| ATOM | 638 | H1'  |     | A | B  | 2      | -2.297  | -21.935 | 54.538 | 1.00 | 0.00 | H |
| ATOM | 639 | H3'  |     | A | B  | 2      | -4.375  | -23.556 | 51.618 | 1.00 | 0.00 | H |
| ATOM | 640 | H4'  |     | A | B  | 2      | -5.767  | -22.664 | 53.686 | 1.00 | 0.00 | H |
| ATOM | 641 | H61  |     | A | B  | 2      | 1.504   | -25.407 | 59.351 | 1.00 | 0.00 | H |
| ATOM | 642 | H62  |     | A | B  | 2      | 0.774   | -26.504 | 58.147 | 1.00 | 0.00 | H |
| ATOM | 643 | H2'1 |     | A | B  | 2      | -2.438  | -24.393 | 52.766 | 1.00 | 0.00 | H |
| ATOM | 644 | H2'2 |     | A | B  | 2      | -1.897  | -22.771 | 52.354 | 1.00 | 0.00 | H |
| ATOM | 645 | H5'1 |     | A | B  | 2      | -5.565  | -24.955 | 54.886 | 1.00 | 0.00 | H |
| ATOM | 646 | H5'2 |     | A | B  | 2      | -6.279  | -24.857 | 53.264 | 1.00 | 0.00 | H |
| ATOM | 647 | C1'  |     | C | B  | 3      | 0.652   | -19.254 | 54.300 | 1.00 | 0.00 | C |
| ATOM | 648 | N1   |     | C | B  | 3      | 1.101   | -20.664 | 54.455 | 1.00 | 0.00 | N |
| ATOM | 649 | C2   |     | C | B  | 3      | 1.965   | -20.964 | 55.506 | 1.00 | 0.00 | C |
| ATOM | 650 | O2   |     | C | B  | 3      | 2.322   | -20.051 | 56.264 | 1.00 | 0.00 | O |
| ATOM | 651 | N3   |     | C | B  | 3      | 2.384   | -22.242 | 55.664 | 1.00 | 0.00 | N |
| ATOM | 652 | C4   |     | C | B  | 3      | 1.982   | -23.208 | 54.828 | 1.00 | 0.00 | C |
| ATOM | 653 | N4   |     | C | B  | 3      | 2.422   | -24.442 | 55.032 | 1.00 | 0.00 | N |
| ATOM | 654 | C5   |     | C | B  | 3      | 1.096   | -22.930 | 53.735 | 1.00 | 0.00 | C |
| ATOM | 655 | C6   |     | C | B  | 3      | 0.683   | -21.635 | 53.598 | 1.00 | 0.00 | C |
| ATOM | 656 | C2'  |     | C | B  | 3      | 0.537   | -18.801 | 52.852 | 1.00 | 0.00 | C |
| ATOM | 657 | C3'  |     | C | B  | 3      | -0.668  | -17.876 | 52.903 | 1.00 | 0.00 | C |
| ATOM | 658 | O3'  |     | C | B  | 3      | -0.244  | -16.577 | 53.308 | 1.00 | 0.00 | O |
| ATOM | 659 | C4'  |     | C | B  | 3      | -1.564  | -18.543 | 53.944 | 1.00 | 0.00 | C |
| ATOM | 660 | O4'  |     | C | B  | 3      | -0.627  | -19.143 | 54.895 | 1.00 | 0.00 | O |
| ATOM | 661 | C5'  |     | C | B  | 3      | -2.496  | -19.619 | 53.440 | 1.00 | 0.00 | C |
| ATOM | 662 | O5'  |     | C | B  | 3      | -1.843  | -20.379 | 52.391 | 1.00 | 0.00 | O |
| ATOM | 663 | O1P  |     | C | B  | 3      | -3.204  | -19.835 | 50.344 | 1.00 | 0.00 | O |
| ATOM | 664 | O2P  |     | C | B  | 3      | -1.979  | -22.021 | 50.493 | 1.00 | 0.00 | O |

|      |     |      |     |   |        |         |        |      |      |   |
|------|-----|------|-----|---|--------|---------|--------|------|------|---|
| ATOM | 665 | P    | C B | 3 | -2.727 | -20.947 | 51.193 | 1.00 | 0.00 | P |
| ATOM | 666 | H5   | C B | 3 | 0.771  | -23.711 | 53.048 | 1.00 | 0.00 | H |
| ATOM | 667 | H6   | C B | 3 | 0.003  | -21.376 | 52.786 | 1.00 | 0.00 | H |
| ATOM | 668 | H1'  | C B | 3 | 1.338  | -18.615 | 54.857 | 1.00 | 0.00 | H |
| ATOM | 669 | H3'  | C B | 3 | -1.171 | -17.808 | 51.938 | 1.00 | 0.00 | H |
| ATOM | 670 | H4'  | C B | 3 | -2.176 | -17.755 | 54.387 | 1.00 | 0.00 | H |
| ATOM | 671 | H41  | C B | 3 | 2.124  | -25.205 | 54.405 | 1.00 | 0.00 | H |
| ATOM | 672 | H42  | C B | 3 | 3.060  | -24.640 | 55.817 | 1.00 | 0.00 | H |
| ATOM | 673 | H2'1 | C B | 3 | 0.370  | -19.635 | 52.169 | 1.00 | 0.00 | H |
| ATOM | 674 | H2'2 | C B | 3 | 1.430  | -18.274 | 52.512 | 1.00 | 0.00 | H |
| ATOM | 675 | H5'1 | C B | 3 | -2.759 | -20.281 | 54.265 | 1.00 | 0.00 | H |
| ATOM | 676 | H5'2 | C B | 3 | -3.400 | -19.156 | 53.049 | 1.00 | 0.00 | H |
| ATOM | 677 | C1'  | C B | 4 | 4.996  | -17.136 | 55.382 | 1.00 | 0.00 | C |
| ATOM | 678 | N1   | C B | 4 | 4.946  | -18.491 | 54.768 | 1.00 | 0.00 | N |
| ATOM | 679 | C2   | C B | 4 | 5.667  | -19.514 | 55.381 | 1.00 | 0.00 | C |
| ATOM | 680 | O2   | C B | 4 | 6.314  | -19.257 | 56.405 | 1.00 | 0.00 | O |
| ATOM | 681 | N3   | C B | 4 | 5.635  | -20.753 | 54.837 | 1.00 | 0.00 | N |
| ATOM | 682 | C4   | C B | 4 | 4.927  | -21.002 | 53.727 | 1.00 | 0.00 | C |
| ATOM | 683 | N4   | C B | 4 | 4.928  | -22.234 | 53.239 | 1.00 | 0.00 | N |
| ATOM | 684 | C5   | C B | 4 | 4.178  | -19.968 | 53.071 | 1.00 | 0.00 | C |
| ATOM | 685 | C6   | C B | 4 | 4.222  | -18.727 | 53.641 | 1.00 | 0.00 | C |
| ATOM | 686 | C2'  | C B | 4 | 5.032  | -16.003 | 54.368 | 1.00 | 0.00 | C |
| ATOM | 687 | C3'  | C B | 4 | 4.206  | -14.931 | 55.062 | 1.00 | 0.00 | C |
| ATOM | 688 | O3'  | C B | 4 | 5.044  | -14.199 | 55.954 | 1.00 | 0.00 | O |
| ATOM | 689 | C4'  | C B | 4 | 3.146  | -15.743 | 55.801 | 1.00 | 0.00 | C |
| ATOM | 690 | O4'  | C B | 4 | 3.832  | -16.981 | 56.173 | 1.00 | 0.00 | O |
| ATOM | 691 | C5'  | C B | 4 | 1.903  | -16.098 | 55.017 | 1.00 | 0.00 | C |
| ATOM | 692 | O5'  | C B | 4 | 2.257  | -16.372 | 53.637 | 1.00 | 0.00 | O |
| ATOM | 693 | O1P  | C B | 4 | 1.144  | -14.505 | 52.369 | 1.00 | 0.00 | O |
| ATOM | 694 | O2P  | C B | 4 | 1.566  | -16.708 | 51.245 | 1.00 | 0.00 | O |
| ATOM | 695 | P    | C B | 4 | 1.226  | -15.973 | 52.488 | 1.00 | 0.00 | P |
| ATOM | 696 | H5   | C B | 4 | 3.607  | -20.162 | 52.165 | 1.00 | 0.00 | H |
| ATOM | 697 | H6   | C B | 4 | 3.664  | -17.911 | 53.183 | 1.00 | 0.00 | H |
| ATOM | 698 | H1'  | C B | 4 | 5.860  | -17.095 | 56.046 | 1.00 | 0.00 | H |
| ATOM | 699 | H3'  | C B | 4 | 3.749  | -14.243 | 54.350 | 1.00 | 0.00 | H |
| ATOM | 700 | H4'  | C B | 4 | 2.837  | -15.152 | 56.664 | 1.00 | 0.00 | H |
| ATOM | 701 | H41  | C B | 4 | 4.389  | -22.452 | 52.388 | 1.00 | 0.00 | H |
| ATOM | 702 | H42  | C B | 4 | 5.468  | -22.975 | 53.711 | 1.00 | 0.00 | H |
| ATOM | 703 | H2'1 | C B | 4 | 4.590  | -16.287 | 53.413 | 1.00 | 0.00 | H |
| ATOM | 704 | H2'2 | C B | 4 | 6.045  | -15.656 | 54.170 | 1.00 | 0.00 | H |
| ATOM | 705 | H5'1 | C B | 4 | 1.439  | -16.979 | 55.461 | 1.00 | 0.00 | H |
| ATOM | 706 | H5'2 | C B | 4 | 1.205  | -15.263 | 55.059 | 1.00 | 0.00 | H |
| ATOM | 707 | C1'  | G B | 5 | 9.805  | -17.206 | 56.561 | 1.00 | 0.00 | C |
| ATOM | 708 | N1   | G B | 5 | 9.712  | -21.776 | 54.296 | 1.00 | 0.00 | N |
| ATOM | 709 | C2   | G B | 5 | 10.335 | -21.377 | 55.466 | 1.00 | 0.00 | C |
| ATOM | 710 | N2   | G B | 5 | 11.026 | -22.320 | 56.119 | 1.00 | 0.00 | N |
| ATOM | 711 | N3   | G B | 5 | 10.271 | -20.136 | 55.947 | 1.00 | 0.00 | N |
| ATOM | 712 | C4   | G B | 5 | 9.536  | -19.312 | 55.155 | 1.00 | 0.00 | C |
| ATOM | 713 | C5   | G B | 5 | 8.885  | -19.621 | 53.971 | 1.00 | 0.00 | C |
| ATOM | 714 | C6   | G B | 5 | 8.949  | -20.938 | 53.462 | 1.00 | 0.00 | C |
| ATOM | 715 | O6   | G B | 5 | 8.443  | -21.399 | 52.440 | 1.00 | 0.00 | O |
| ATOM | 716 | N7   | G B | 5 | 8.243  | -18.488 | 53.467 | 1.00 | 0.00 | N |
| ATOM | 717 | C8   | G B | 5 | 8.515  | -17.553 | 54.339 | 1.00 | 0.00 | C |
| ATOM | 718 | N9   | G B | 5 | 9.299  | -17.977 | 55.394 | 1.00 | 0.00 | N |

|      |     |      |     |   |        |         |        |      |      |   |
|------|-----|------|-----|---|--------|---------|--------|------|------|---|
| ATOM | 719 | C2'  | G B | 5 | 10.210 | -15.778 | 56.224 | 1.00 | 0.00 | C |
| ATOM | 720 | C3'  | G B | 5 | 9.800  | -15.026 | 57.480 | 1.00 | 0.00 | C |
| ATOM | 721 | O3'  | G B | 5 | 10.842 | -15.126 | 58.447 | 1.00 | 0.00 | O |
| ATOM | 722 | C4'  | G B | 5 | 8.534  | -15.760 | 57.917 | 1.00 | 0.00 | C |
| ATOM | 723 | O4'  | G B | 5 | 8.769  | -17.150 | 57.524 | 1.00 | 0.00 | O |
| ATOM | 724 | C5'  | G B | 5 | 7.239  | -15.295 | 57.295 | 1.00 | 0.00 | C |
| ATOM | 725 | O5'  | G B | 5 | 7.467  | -14.914 | 55.914 | 1.00 | 0.00 | O |
| ATOM | 726 | O1P  | G B | 5 | 7.036  | -12.435 | 55.914 | 1.00 | 0.00 | O |
| ATOM | 727 | O2P  | G B | 5 | 6.683  | -13.770 | 53.820 | 1.00 | 0.00 | O |
| ATOM | 728 | P    | G B | 5 | 6.620  | -13.711 | 55.300 | 1.00 | 0.00 | P |
| ATOM | 729 | H1   | G B | 5 | 9.818  | -22.762 | 54.014 | 1.00 | 0.00 | H |
| ATOM | 730 | H8   | G B | 5 | 8.157  | -16.528 | 54.243 | 1.00 | 0.00 | H |
| ATOM | 731 | H1'  | G B | 5 | 10.639 | -17.756 | 56.998 | 1.00 | 0.00 | H |
| ATOM | 732 | H21  | G B | 5 | 11.067 | -23.279 | 55.743 | 1.00 | 0.00 | H |
| ATOM | 733 | H3'  | G B | 5 | 9.595  | -13.974 | 57.279 | 1.00 | 0.00 | H |
| ATOM | 734 | H22  | G B | 5 | 11.514 | -22.088 | 56.994 | 1.00 | 0.00 | H |
| ATOM | 735 | H4'  | G B | 5 | 8.450  | -15.633 | 58.996 | 1.00 | 0.00 | H |
| ATOM | 736 | H2'1 | G B | 5 | 9.690  | -15.396 | 55.346 | 1.00 | 0.00 | H |
| ATOM | 737 | H2'2 | G B | 5 | 11.281 | -15.684 | 56.038 | 1.00 | 0.00 | H |
| ATOM | 738 | H5'1 | G B | 5 | 6.510  | -16.103 | 57.340 | 1.00 | 0.00 | H |
| ATOM | 739 | H5'2 | G B | 5 | 6.861  | -14.439 | 57.855 | 1.00 | 0.00 | H |
| ATOM | 740 | C1'  | T B | 6 | 14.325 | -19.218 | 56.722 | 1.00 | 0.00 | C |
| ATOM | 741 | N1   | T B | 6 | 13.586 | -19.137 | 55.432 | 1.00 | 0.00 | N |
| ATOM | 742 | C2   | T B | 6 | 13.478 | -20.299 | 54.696 | 1.00 | 0.00 | C |
| ATOM | 743 | O2   | T B | 6 | 13.955 | -21.360 | 55.060 | 1.00 | 0.00 | O |
| ATOM | 744 | N3   | T B | 6 | 12.783 | -20.178 | 53.506 | 1.00 | 0.00 | N |
| ATOM | 745 | C4   | T B | 6 | 12.207 | -19.031 | 53.001 | 1.00 | 0.00 | C |
| ATOM | 746 | O4   | T B | 6 | 11.612 | -19.044 | 51.918 | 1.00 | 0.00 | O |
| ATOM | 747 | C5   | T B | 6 | 12.375 | -17.869 | 53.842 | 1.00 | 0.00 | C |
| ATOM | 748 | C6   | T B | 6 | 13.044 | -17.949 | 55.009 | 1.00 | 0.00 | C |
| ATOM | 749 | C7   | T B | 6 | 11.762 | -16.598 | 53.333 | 1.00 | 0.00 | C |
| ATOM | 750 | C2'  | T B | 6 | 15.174 | -17.987 | 57.021 | 1.00 | 0.00 | C |
| ATOM | 751 | C3'  | T B | 6 | 15.039 | -17.871 | 58.531 | 1.00 | 0.00 | C |
| ATOM | 752 | O3'  | T B | 6 | 15.998 | -18.721 | 59.155 | 1.00 | 0.00 | O |
| ATOM | 753 | C4'  | T B | 6 | 13.606 | -18.334 | 58.784 | 1.00 | 0.00 | C |
| ATOM | 754 | O4'  | T B | 6 | 13.372 | -19.352 | 57.757 | 1.00 | 0.00 | O |
| ATOM | 755 | C5'  | T B | 6 | 12.529 | -17.281 | 58.671 | 1.00 | 0.00 | C |
| ATOM | 756 | O5'  | T B | 6 | 12.859 | -16.353 | 57.606 | 1.00 | 0.00 | O |
| ATOM | 757 | O1P  | T B | 6 | 13.263 | -14.188 | 58.825 | 1.00 | 0.00 | O |
| ATOM | 758 | O2P  | T B | 6 | 12.479 | -14.161 | 56.440 | 1.00 | 0.00 | O |
| ATOM | 759 | P    | T B | 6 | 12.447 | -14.821 | 57.768 | 1.00 | 0.00 | P |
| ATOM | 760 | H3   | T B | 6 | 12.685 | -21.033 | 52.938 | 1.00 | 0.00 | H |
| ATOM | 761 | H6   | T B | 6 | 13.156 | -17.057 | 55.626 | 1.00 | 0.00 | H |
| ATOM | 762 | H1'  | T B | 6 | 14.937 | -20.120 | 56.710 | 1.00 | 0.00 | H |
| ATOM | 763 | H3'  | T B | 6 | 15.188 | -16.848 | 58.877 | 1.00 | 0.00 | H |
| ATOM | 764 | H4'  | T B | 6 | 13.576 | -18.735 | 59.797 | 1.00 | 0.00 | H |
| ATOM | 765 | H71  | T B | 6 | 12.551 | -15.878 | 53.112 | 1.00 | 0.00 | H |
| ATOM | 766 | H72  | T B | 6 | 11.193 | -16.805 | 52.428 | 1.00 | 0.00 | H |
| ATOM | 767 | H73  | T B | 6 | 11.098 | -16.185 | 54.093 | 1.00 | 0.00 | H |
| ATOM | 768 | H2'1 | T B | 6 | 14.800 | -17.097 | 56.519 | 1.00 | 0.00 | H |
| ATOM | 769 | H2'2 | T B | 6 | 16.213 | -18.121 | 56.725 | 1.00 | 0.00 | H |
| ATOM | 770 | H5'1 | T B | 6 | 11.575 | -17.763 | 58.457 | 1.00 | 0.00 | H |
| ATOM | 771 | H5'2 | T B | 6 | 12.456 | -16.744 | 59.617 | 1.00 | 0.00 | H |
| ATOM | 772 | C1'  | C B | 7 | 17.895 | -22.253 | 55.076 | 1.00 | 0.00 | C |



|      |     |      |     |   |        |         |        |      |      |   |
|------|-----|------|-----|---|--------|---------|--------|------|------|---|
| ATOM | 773 | N1   | C B | 7 | 17.221 | -21.303 | 54.147 | 1.00 | 0.00 | N |
| ATOM | 774 | C2   | C B | 7 | 16.705 | -21.814 | 52.957 | 1.00 | 0.00 | C |
| ATOM | 775 | O2   | C B | 7 | 16.825 | -23.025 | 52.723 | 1.00 | 0.00 | O |
| ATOM | 776 | N3   | C B | 7 | 16.088 | -20.968 | 52.096 | 1.00 | 0.00 | N |
| ATOM | 777 | C4   | C B | 7 | 15.973 | -19.664 | 52.376 | 1.00 | 0.00 | C |
| ATOM | 778 | N4   | C B | 7 | 15.357 | -18.884 | 51.502 | 1.00 | 0.00 | N |
| ATOM | 779 | C5   | C B | 7 | 16.499 | -19.111 | 53.591 | 1.00 | 0.00 | C |
| ATOM | 780 | C6   | C B | 7 | 17.111 | -19.982 | 54.444 | 1.00 | 0.00 | C |
| ATOM | 781 | C2'  | C B | 7 | 19.116 | -21.666 | 55.772 | 1.00 | 0.00 | C |
| ATOM | 782 | C3'  | C B | 7 | 19.037 | -22.313 | 57.146 | 1.00 | 0.00 | C |
| ATOM | 783 | O3'  | C B | 7 | 19.649 | -23.599 | 57.092 | 1.00 | 0.00 | O |
| ATOM | 784 | C4'  | C B | 7 | 17.534 | -22.398 | 57.398 | 1.00 | 0.00 | C |
| ATOM | 785 | O4'  | C B | 7 | 16.957 | -22.619 | 56.072 | 1.00 | 0.00 | O |
| ATOM | 786 | C5'  | C B | 7 | 16.885 | -21.177 | 58.010 | 1.00 | 0.00 | C |
| ATOM | 787 | O5'  | C B | 7 | 17.509 | -19.978 | 57.487 | 1.00 | 0.00 | O |
| ATOM | 788 | O1P  | C B | 7 | 18.638 | -18.981 | 59.503 | 1.00 | 0.00 | O |
| ATOM | 789 | O2P  | C B | 7 | 17.900 | -17.499 | 57.620 | 1.00 | 0.00 | O |
| ATOM | 790 | P    | C B | 7 | 17.651 | -18.707 | 58.442 | 1.00 | 0.00 | P |
| ATOM | 791 | H5   | C B | 7 | 16.414 | -18.048 | 53.819 | 1.00 | 0.00 | H |
| ATOM | 792 | H6   | C B | 7 | 17.520 | -19.610 | 55.384 | 1.00 | 0.00 | H |
| ATOM | 793 | H1'  | C B | 7 | 18.158 | -23.150 | 54.518 | 1.00 | 0.00 | H |
| ATOM | 794 | H3'  | C B | 7 | 19.531 | -21.711 | 57.910 | 1.00 | 0.00 | H |
| ATOM | 795 | H4'  | C B | 7 | 17.372 | -23.234 | 58.078 | 1.00 | 0.00 | H |
| ATOM | 796 | H41  | C B | 7 | 15.252 | -17.877 | 51.694 | 1.00 | 0.00 | H |
| ATOM | 797 | H42  | C B | 7 | 14.982 | -19.284 | 50.628 | 1.00 | 0.00 | H |
| ATOM | 798 | H2'1 | C B | 7 | 19.069 | -20.580 | 55.842 | 1.00 | 0.00 | H |
| ATOM | 799 | H2'2 | C B | 7 | 20.044 | -21.922 | 55.264 | 1.00 | 0.00 | H |
| ATOM | 800 | H5'1 | C B | 7 | 15.823 | -21.176 | 57.766 | 1.00 | 0.00 | H |
| ATOM | 801 | H5'2 | C B | 7 | 17.005 | -21.212 | 59.091 | 1.00 | 0.00 | H |
| ATOM | 802 | C1'  | C B | 8 | 20.239 | -24.904 | 51.613 | 1.00 | 0.00 | C |
| ATOM | 803 | N1   | C B | 8 | 19.917 | -23.471 | 51.379 | 1.00 | 0.00 | N |
| ATOM | 804 | C2   | C B | 8 | 19.252 | -23.135 | 50.201 | 1.00 | 0.00 | C |
| ATOM | 805 | O2   | C B | 8 | 18.959 | -24.035 | 49.404 | 1.00 | 0.00 | O |
| ATOM | 806 | N3   | C B | 8 | 18.949 | -21.835 | 49.968 | 1.00 | 0.00 | N |
| ATOM | 807 | C4   | C B | 8 | 19.280 | -20.882 | 50.850 | 1.00 | 0.00 | C |
| ATOM | 808 | N4   | C B | 8 | 18.956 | -19.627 | 50.574 | 1.00 | 0.00 | N |
| ATOM | 809 | C5   | C B | 8 | 19.969 | -21.195 | 52.068 | 1.00 | 0.00 | C |
| ATOM | 810 | C6   | C B | 8 | 20.260 | -22.514 | 52.284 | 1.00 | 0.00 | C |
| ATOM | 811 | C2'  | C B | 8 | 21.591 | -25.130 | 52.279 | 1.00 | 0.00 | C |
| ATOM | 812 | C3'  | C B | 8 | 21.310 | -26.329 | 53.170 | 1.00 | 0.00 | C |
| ATOM | 813 | O3'  | C B | 8 | 21.453 | -27.523 | 52.405 | 1.00 | 0.00 | O |
| ATOM | 814 | C4'  | C B | 8 | 19.866 | -26.094 | 53.610 | 1.00 | 0.00 | C |
| ATOM | 815 | O4'  | C B | 8 | 19.240 | -25.438 | 52.461 | 1.00 | 0.00 | O |
| ATOM | 816 | C5'  | C B | 8 | 19.668 | -25.226 | 54.830 | 1.00 | 0.00 | C |
| ATOM | 817 | O5'  | C B | 8 | 20.654 | -24.162 | 54.840 | 1.00 | 0.00 | O |
| ATOM | 818 | O1P  | C B | 8 | 22.066 | -24.698 | 56.855 | 1.00 | 0.00 | O |
| ATOM | 819 | O2P  | C B | 8 | 21.853 | -22.326 | 56.064 | 1.00 | 0.00 | O |
| ATOM | 820 | P    | C B | 8 | 21.219 | -23.655 | 56.241 | 1.00 | 0.00 | P |
| ATOM | 821 | H5   | C B | 8 | 20.247 | -20.425 | 52.786 | 1.00 | 0.00 | H |
| ATOM | 822 | H6   | C B | 8 | 20.775 | -22.804 | 53.200 | 1.00 | 0.00 | H |
| ATOM | 823 | H1'  | C B | 8 | 20.183 | -25.427 | 50.659 | 1.00 | 0.00 | H |
| ATOM | 824 | H3'  | C B | 8 | 21.981 | -26.366 | 54.028 | 1.00 | 0.00 | H |
| ATOM | 825 | H4'  | C B | 8 | 19.438 | -27.073 | 53.827 | 1.00 | 0.00 | H |
| ATOM | 826 | H41  | C B | 8 | 19.197 | -18.876 | 51.237 | 1.00 | 0.00 | H |

|      |     |      |     |    |        |         |        |      |      |   |
|------|-----|------|-----|----|--------|---------|--------|------|------|---|
| ATOM | 827 | H42  | C B | 8  | 18.464 | -19.404 | 49.697 | 1.00 | 0.00 | H |
| ATOM | 828 | H2'1 | C B | 8  | 21.912 | -24.267 | 52.863 | 1.00 | 0.00 | H |
| ATOM | 829 | H2'2 | C B | 8  | 22.376 | -25.347 | 51.555 | 1.00 | 0.00 | H |
| ATOM | 830 | H5'1 | C B | 8  | 18.665 | -24.797 | 54.807 | 1.00 | 0.00 | H |
| ATOM | 831 | H5'2 | C B | 8  | 19.776 | -25.838 | 55.725 | 1.00 | 0.00 | H |
| ATOM | 832 | C1'  | T B | 9  | 21.546 | -26.000 | 46.967 | 1.00 | 0.00 | C |
| ATOM | 833 | N1   | T B | 9  | 21.710 | -24.615 | 47.482 | 1.00 | 0.00 | N |
| ATOM | 834 | C2   | T B | 9  | 21.183 | -23.592 | 46.723 | 1.00 | 0.00 | C |
| ATOM | 835 | O2   | T B | 9  | 20.602 | -23.786 | 45.669 | 1.00 | 0.00 | O |
| ATOM | 836 | N3   | T B | 9  | 21.357 | -22.322 | 47.240 | 1.00 | 0.00 | N |
| ATOM | 837 | C4   | T B | 9  | 21.998 | -21.995 | 48.416 | 1.00 | 0.00 | C |
| ATOM | 838 | O4   | T B | 9  | 22.096 | -20.817 | 48.776 | 1.00 | 0.00 | O |
| ATOM | 839 | C5   | T B | 9  | 22.516 | -23.132 | 49.142 | 1.00 | 0.00 | C |
| ATOM | 840 | C6   | T B | 9  | 22.363 | -24.383 | 48.667 | 1.00 | 0.00 | C |
| ATOM | 841 | C7   | T B | 9  | 23.219 | -22.820 | 50.429 | 1.00 | 0.00 | C |
| ATOM | 842 | C2'  | T B | 9  | 22.753 | -26.896 | 47.214 | 1.00 | 0.00 | C |
| ATOM | 843 | C3'  | T B | 9  | 22.100 | -28.244 | 47.478 | 1.00 | 0.00 | C |
| ATOM | 844 | O3'  | T B | 9  | 21.838 | -28.889 | 46.234 | 1.00 | 0.00 | O |
| ATOM | 845 | C4'  | T B | 9  | 20.816 | -27.861 | 48.212 | 1.00 | 0.00 | C |
| ATOM | 846 | O4'  | T B | 9  | 20.433 | -26.577 | 47.623 | 1.00 | 0.00 | O |
| ATOM | 847 | C5'  | T B | 9  | 20.922 | -27.695 | 49.710 | 1.00 | 0.00 | C |
| ATOM | 848 | O5'  | T B | 9  | 22.203 | -27.105 | 50.048 | 1.00 | 0.00 | O |
| ATOM | 849 | O1P  | T B | 9  | 23.374 | -28.938 | 51.312 | 1.00 | 0.00 | O |
| ATOM | 850 | O2P  | T B | 9  | 23.947 | -26.537 | 51.764 | 1.00 | 0.00 | O |
| ATOM | 851 | P    | T B | 9  | 22.913 | -27.537 | 51.406 | 1.00 | 0.00 | P |
| ATOM | 852 | H3   | T B | 9  | 20.969 | -21.541 | 46.693 | 1.00 | 0.00 | H |
| ATOM | 853 | H6   | T B | 9  | 22.764 | -25.224 | 49.233 | 1.00 | 0.00 | H |
| ATOM | 854 | H1'  | T B | 9  | 21.314 | -25.943 | 45.903 | 1.00 | 0.00 | H |
| ATOM | 855 | H3'  | T B | 9  | 22.727 | -28.887 | 48.094 | 1.00 | 0.00 | H |
| ATOM | 856 | H4'  | T B | 9  | 20.091 | -28.653 | 48.015 | 1.00 | 0.00 | H |
| ATOM | 857 | H71  | T B | 9  | 24.274 | -23.084 | 50.341 | 1.00 | 0.00 | H |
| ATOM | 858 | H72  | T B | 9  | 23.128 | -21.757 | 50.649 | 1.00 | 0.00 | H |
| ATOM | 859 | H73  | T B | 9  | 22.769 | -23.397 | 51.238 | 1.00 | 0.00 | H |
| ATOM | 860 | H2'1 | T B | 9  | 23.343 | -26.568 | 48.069 | 1.00 | 0.00 | H |
| ATOM | 861 | H2'2 | T B | 9  | 23.420 | -26.940 | 46.353 | 1.00 | 0.00 | H |
| ATOM | 862 | H5'1 | T B | 9  | 20.116 | -27.048 | 50.057 | 1.00 | 0.00 | H |
| ATOM | 863 | H5'2 | T B | 9  | 20.830 | -28.670 | 50.184 | 1.00 | 0.00 | H |
| ATOM | 864 | C1'  | A B | 10 | 22.371 | -24.894 | 42.199 | 1.00 | 0.00 | C |
| ATOM | 865 | N1   | A B | 10 | 23.150 | -20.157 | 44.015 | 1.00 | 0.00 | N |
| ATOM | 866 | C2   | A B | 10 | 22.505 | -20.616 | 42.944 | 1.00 | 0.00 | C |
| ATOM | 867 | N3   | A B | 10 | 22.339 | -21.855 | 42.536 | 1.00 | 0.00 | N |
| ATOM | 868 | C4   | A B | 10 | 22.946 | -22.710 | 43.378 | 1.00 | 0.00 | C |
| ATOM | 869 | C5   | A B | 10 | 23.646 | -22.403 | 44.513 | 1.00 | 0.00 | C |
| ATOM | 870 | C6   | A B | 10 | 23.744 | -21.034 | 44.837 | 1.00 | 0.00 | C |
| ATOM | 871 | N6   | A B | 10 | 24.399 | -20.584 | 45.922 | 1.00 | 0.00 | N |
| ATOM | 872 | N7   | A B | 10 | 24.127 | -23.545 | 45.128 | 1.00 | 0.00 | N |
| ATOM | 873 | C8   | A B | 10 | 23.718 | -24.508 | 44.358 | 1.00 | 0.00 | C |
| ATOM | 874 | N9   | A B | 10 | 22.992 | -24.078 | 43.277 | 1.00 | 0.00 | N |
| ATOM | 875 | C2'  | A B | 10 | 23.207 | -26.094 | 41.779 | 1.00 | 0.00 | C |
| ATOM | 876 | C3'  | A B | 10 | 22.142 | -27.136 | 41.476 | 1.00 | 0.00 | C |
| ATOM | 877 | O3'  | A B | 10 | 21.674 | -26.952 | 40.142 | 1.00 | 0.00 | O |
| ATOM | 878 | C4'  | A B | 10 | 21.061 | -26.826 | 42.512 | 1.00 | 0.00 | C |
| ATOM | 879 | O4'  | A B | 10 | 21.130 | -25.374 | 42.684 | 1.00 | 0.00 | O |
| ATOM | 880 | C5'  | A B | 10 | 21.220 | -27.482 | 43.864 | 1.00 | 0.00 | C |

|      |     |      |     |    |        |         |        |      |      |   |
|------|-----|------|-----|----|--------|---------|--------|------|------|---|
| ATOM | 881 | O5'  | A B | 10 | 22.627 | -27.542 | 44.217 | 1.00 | 0.00 | O |
| ATOM | 882 | O1P  | A B | 10 | 23.117 | -30.010 | 44.231 | 1.00 | 0.00 | O |
| ATOM | 883 | O2P  | A B | 10 | 24.466 | -28.454 | 45.666 | 1.00 | 0.00 | O |
| ATOM | 884 | P    | A B | 10 | 23.154 | -28.790 | 45.059 | 1.00 | 0.00 | P |
| ATOM | 885 | H2   | A B | 10 | 22.049 | -19.853 | 42.314 | 1.00 | 0.00 | H |
| ATOM | 886 | H8   | A B | 10 | 23.932 | -25.560 | 44.551 | 1.00 | 0.00 | H |
| ATOM | 887 | H1'  | A B | 10 | 22.170 | -24.242 | 41.350 | 1.00 | 0.00 | H |
| ATOM | 888 | H3'  | A B | 10 | 22.518 | -28.151 | 41.592 | 1.00 | 0.00 | H |
| ATOM | 889 | H4'  | A B | 10 | 20.113 | -27.160 | 42.091 | 1.00 | 0.00 | H |
| ATOM | 890 | H61  | A B | 10 | 24.438 | -19.573 | 46.114 | 1.00 | 0.00 | H |
| ATOM | 891 | H62  | A B | 10 | 24.859 | -21.248 | 46.560 | 1.00 | 0.00 | H |
| ATOM | 892 | H2'1 | A B | 10 | 23.876 | -26.432 | 42.572 | 1.00 | 0.00 | H |
| ATOM | 893 | H2'2 | A B | 10 | 23.819 | -25.886 | 40.900 | 1.00 | 0.00 | H |
| ATOM | 894 | H5'1 | A B | 10 | 20.679 | -26.900 | 44.610 | 1.00 | 0.00 | H |
| ATOM | 895 | H5'2 | A B | 10 | 20.808 | -28.488 | 43.826 | 1.00 | 0.00 | H |
| ATOM | 896 | C1'  | G B | 11 | 23.498 | -21.800 | 38.485 | 1.00 | 0.00 | C |
| ATOM | 897 | N1   | G B | 11 | 25.828 | -19.126 | 42.152 | 1.00 | 0.00 | N |
| ATOM | 898 | C2   | G B | 11 | 25.036 | -18.693 | 41.102 | 1.00 | 0.00 | C |
| ATOM | 899 | N2   | G B | 11 | 24.843 | -17.370 | 41.019 | 1.00 | 0.00 | N |
| ATOM | 900 | N3   | G B | 11 | 24.483 | -19.513 | 40.210 | 1.00 | 0.00 | N |
| ATOM | 901 | C4   | G B | 11 | 24.791 | -20.815 | 40.444 | 1.00 | 0.00 | C |
| ATOM | 902 | C5   | G B | 11 | 25.573 | -21.338 | 41.460 | 1.00 | 0.00 | C |
| ATOM | 903 | C6   | G B | 11 | 26.158 | -20.470 | 42.410 | 1.00 | 0.00 | C |
| ATOM | 904 | O6   | G B | 11 | 26.875 | -20.743 | 43.374 | 1.00 | 0.00 | O |
| ATOM | 905 | N7   | G B | 11 | 25.645 | -22.728 | 41.347 | 1.00 | 0.00 | N |
| ATOM | 906 | C8   | G B | 11 | 24.918 | -22.997 | 40.292 | 1.00 | 0.00 | C |
| ATOM | 907 | N9   | G B | 11 | 24.367 | -21.886 | 39.689 | 1.00 | 0.00 | N |
| ATOM | 908 | C2'  | G B | 11 | 23.869 | -22.789 | 37.388 | 1.00 | 0.00 | C |
| ATOM | 909 | C3'  | G B | 11 | 22.508 | -23.158 | 36.819 | 1.00 | 0.00 | C |
| ATOM | 910 | O3'  | G B | 11 | 22.127 | -22.182 | 35.852 | 1.00 | 0.00 | O |
| ATOM | 911 | C4'  | G B | 11 | 21.607 | -23.133 | 38.051 | 1.00 | 0.00 | C |
| ATOM | 912 | O4'  | G B | 11 | 22.171 | -22.075 | 38.890 | 1.00 | 0.00 | O |
| ATOM | 913 | C5'  | G B | 11 | 21.538 | -24.407 | 38.859 | 1.00 | 0.00 | C |
| ATOM | 914 | O5'  | G B | 11 | 22.839 | -25.047 | 38.874 | 1.00 | 0.00 | O |
| ATOM | 915 | O1P  | G B | 11 | 22.451 | -27.181 | 37.598 | 1.00 | 0.00 | O |
| ATOM | 916 | O2P  | G B | 11 | 24.258 | -27.068 | 39.335 | 1.00 | 0.00 | O |
| ATOM | 917 | P    | G B | 11 | 22.908 | -26.641 | 38.891 | 1.00 | 0.00 | P |
| ATOM | 918 | H1   | G B | 11 | 26.203 | -18.410 | 42.792 | 1.00 | 0.00 | H |
| ATOM | 919 | H8   | G B | 11 | 24.763 | -24.010 | 39.922 | 1.00 | 0.00 | H |
| ATOM | 920 | H1'  | G B | 11 | 23.528 | -20.775 | 38.113 | 1.00 | 0.00 | H |
| ATOM | 921 | H21  | G B | 11 | 25.271 | -16.743 | 41.714 | 1.00 | 0.00 | H |
| ATOM | 922 | H3'  | G B | 11 | 22.513 | -24.143 | 36.355 | 1.00 | 0.00 | H |
| ATOM | 923 | H22  | G B | 11 | 24.267 | -16.983 | 40.258 | 1.00 | 0.00 | H |
| ATOM | 924 | H4'  | G B | 11 | 20.598 | -22.906 | 37.702 | 1.00 | 0.00 | H |
| ATOM | 925 | H2'1 | G B | 11 | 24.385 | -23.665 | 37.780 | 1.00 | 0.00 | H |
| ATOM | 926 | H2'2 | G B | 11 | 24.511 | -22.344 | 36.628 | 1.00 | 0.00 | H |
| ATOM | 927 | H5'1 | G B | 11 | 21.233 | -24.168 | 39.877 | 1.00 | 0.00 | H |
| ATOM | 928 | H5'2 | G B | 11 | 20.803 | -25.075 | 38.411 | 1.00 | 0.00 | H |
| ATOM | 929 | C1'  | G B | 12 | 25.567 | -17.742 | 36.538 | 1.00 | 0.00 | C |
| ATOM | 930 | N1   | G B | 12 | 28.681 | -18.091 | 40.565 | 1.00 | 0.00 | N |
| ATOM | 931 | C2   | G B | 12 | 28.075 | -16.980 | 40.004 | 1.00 | 0.00 | C |
| ATOM | 932 | N2   | G B | 12 | 28.334 | -15.806 | 40.593 | 1.00 | 0.00 | N |
| ATOM | 933 | N3   | G B | 12 | 27.273 | -17.037 | 38.943 | 1.00 | 0.00 | N |
| ATOM | 934 | C4   | G B | 12 | 27.129 | -18.304 | 38.471 | 1.00 | 0.00 | C |

|      |     |      |     |    |        |         |        |      |      |   |
|------|-----|------|-----|----|--------|---------|--------|------|------|---|
| ATOM | 935 | C5   | G B | 12 | 27.695 | -19.468 | 38.961 | 1.00 | 0.00 | C |
| ATOM | 936 | C6   | G B | 12 | 28.542 | -19.409 | 40.092 | 1.00 | 0.00 | C |
| ATOM | 937 | O6   | G B | 12 | 29.134 | -20.324 | 40.667 | 1.00 | 0.00 | O |
| ATOM | 938 | N7   | G B | 12 | 27.294 | -20.562 | 38.190 | 1.00 | 0.00 | N |
| ATOM | 939 | C8   | G B | 12 | 26.515 | -20.038 | 37.282 | 1.00 | 0.00 | C |
| ATOM | 940 | N9   | G B | 12 | 26.364 | -18.670 | 37.385 | 1.00 | 0.00 | N |
| ATOM | 941 | C2'  | G B | 12 | 25.578 | -18.099 | 35.059 | 1.00 | 0.00 | C |
| ATOM | 942 | C3'  | G B | 12 | 24.168 | -17.720 | 34.630 | 1.00 | 0.00 | C |
| ATOM | 943 | O3'  | G B | 12 | 24.130 | -16.328 | 34.326 | 1.00 | 0.00 | O |
| ATOM | 944 | C4'  | G B | 12 | 23.333 | -18.065 | 35.863 | 1.00 | 0.00 | C |
| ATOM | 945 | O4'  | G B | 12 | 24.226 | -17.791 | 36.990 | 1.00 | 0.00 | O |
| ATOM | 946 | C5'  | G B | 12 | 22.849 | -19.491 | 35.966 | 1.00 | 0.00 | C |
| ATOM | 947 | O5'  | G B | 12 | 23.859 | -20.393 | 35.448 | 1.00 | 0.00 | O |
| ATOM | 948 | O1P  | G B | 12 | 22.769 | -21.373 | 33.401 | 1.00 | 0.00 | O |
| ATOM | 949 | O2P  | G B | 12 | 24.521 | -22.678 | 34.637 | 1.00 | 0.00 | O |
| ATOM | 950 | P    | G B | 12 | 23.390 | -21.719 | 34.694 | 1.00 | 0.00 | P |
| ATOM | 951 | H1   | G B | 12 | 29.279 | -17.940 | 41.393 | 1.00 | 0.00 | H |
| ATOM | 952 | H8   | G B | 12 | 26.024 | -20.629 | 36.507 | 1.00 | 0.00 | H |
| ATOM | 953 | H1'  | G B | 12 | 25.936 | -16.730 | 36.700 | 1.00 | 0.00 | H |
| ATOM | 954 | H21  | G B | 12 | 28.953 | -15.770 | 41.417 | 1.00 | 0.00 | H |
| ATOM | 955 | H3'  | G B | 12 | 23.839 | -18.289 | 33.761 | 1.00 | 0.00 | H |
| ATOM | 956 | H22  | G B | 12 | 27.917 | -14.941 | 40.221 | 1.00 | 0.00 | H |
| ATOM | 957 | H4'  | G B | 12 | 22.460 | -17.417 | 35.846 | 1.00 | 0.00 | H |
| ATOM | 958 | H2'1 | G B | 12 | 25.772 | -19.158 | 34.890 | 1.00 | 0.00 | H |
| ATOM | 959 | H2'2 | G B | 12 | 26.326 | -17.536 | 34.503 | 1.00 | 0.00 | H |
| ATOM | 960 | H5'1 | G B | 12 | 22.647 | -19.726 | 37.010 | 1.00 | 0.00 | H |
| ATOM | 961 | H5'2 | G B | 12 | 21.928 | -19.598 | 35.391 | 1.00 | 0.00 | H |
| ATOM | 962 | C1'  | T B | 13 | 28.849 | -14.040 | 36.411 | 1.00 | 0.00 | C |
| ATOM | 963 | N1   | T B | 13 | 29.310 | -15.443 | 36.583 | 1.00 | 0.00 | N |
| ATOM | 964 | C2   | T B | 13 | 30.167 | -15.700 | 37.635 | 1.00 | 0.00 | C |
| ATOM | 965 | O2   | T B | 13 | 30.545 | -14.834 | 38.404 | 1.00 | 0.00 | O |
| ATOM | 966 | N3   | T B | 13 | 30.569 | -17.017 | 37.758 | 1.00 | 0.00 | N |
| ATOM | 967 | C4   | T B | 13 | 30.205 | -18.068 | 36.944 | 1.00 | 0.00 | C |
| ATOM | 968 | O4   | T B | 13 | 30.633 | -19.209 | 37.151 | 1.00 | 0.00 | O |
| ATOM | 969 | C5   | T B | 13 | 29.306 | -17.702 | 35.873 | 1.00 | 0.00 | C |
| ATOM | 970 | C6   | T B | 13 | 28.891 | -16.429 | 35.723 | 1.00 | 0.00 | C |
| ATOM | 971 | C7   | T B | 13 | 28.880 | -18.816 | 34.963 | 1.00 | 0.00 | C |
| ATOM | 972 | C2'  | T B | 13 | 28.731 | -13.605 | 34.955 | 1.00 | 0.00 | C |
| ATOM | 973 | C3'  | T B | 13 | 27.517 | -12.691 | 34.993 | 1.00 | 0.00 | C |
| ATOM | 974 | O3'  | T B | 13 | 27.929 | -11.382 | 35.381 | 1.00 | 0.00 | O |
| ATOM | 975 | C4'  | T B | 13 | 26.627 | -13.351 | 36.042 | 1.00 | 0.00 | C |
| ATOM | 976 | O4'  | T B | 13 | 27.569 | -13.930 | 37.001 | 1.00 | 0.00 | O |
| ATOM | 977 | C5'  | T B | 13 | 25.705 | -14.443 | 35.552 | 1.00 | 0.00 | C |
| ATOM | 978 | O5'  | T B | 13 | 26.364 | -15.210 | 34.513 | 1.00 | 0.00 | O |
| ATOM | 979 | O1P  | T B | 13 | 25.001 | -14.705 | 32.461 | 1.00 | 0.00 | O |
| ATOM | 980 | O2P  | T B | 13 | 26.245 | -16.877 | 32.637 | 1.00 | 0.00 | O |
| ATOM | 981 | P    | T B | 13 | 25.488 | -15.802 | 33.321 | 1.00 | 0.00 | P |
| ATOM | 982 | H3   | T B | 13 | 31.206 | -17.236 | 38.538 | 1.00 | 0.00 | H |
| ATOM | 983 | H6   | T B | 13 | 28.215 | -16.176 | 34.907 | 1.00 | 0.00 | H |
| ATOM | 984 | H1'  | T B | 13 | 29.528 | -13.387 | 36.958 | 1.00 | 0.00 | H |
| ATOM | 985 | H3'  | T B | 13 | 27.015 | -12.639 | 34.027 | 1.00 | 0.00 | H |
| ATOM | 986 | H4'  | T B | 13 | 26.008 | -12.564 | 36.475 | 1.00 | 0.00 | H |
| ATOM | 987 | H71  | T B | 13 | 29.276 | -18.640 | 33.963 | 1.00 | 0.00 | H |
| ATOM | 988 | H72  | T B | 13 | 29.263 | -19.764 | 35.344 | 1.00 | 0.00 | H |

|      |      |      |     |    |        |         |        |      |      |   |
|------|------|------|-----|----|--------|---------|--------|------|------|---|
| ATOM | 989  | H73  | T B | 13 | 27.791 | -18.855 | 34.920 | 1.00 | 0.00 | H |
| ATOM | 990  | H2'1 | T B | 13 | 28.571 | -14.449 | 34.284 | 1.00 | 0.00 | H |
| ATOM | 991  | H2'2 | T B | 13 | 29.618 | -13.074 | 34.608 | 1.00 | 0.00 | H |
| ATOM | 992  | H5'1 | T B | 13 | 25.447 | -15.096 | 36.385 | 1.00 | 0.00 | H |
| ATOM | 993  | H5'2 | T B | 13 | 24.797 | -13.993 | 35.153 | 1.00 | 0.00 | H |
| ATOM | 994  | C1'  | G B | 14 | 33.207 | -11.931 | 37.508 | 1.00 | 0.00 | C |
| ATOM | 995  | N1   | G B | 14 | 34.825 | -16.756 | 37.868 | 1.00 | 0.00 | N |
| ATOM | 996  | C2   | G B | 14 | 35.093 | -15.667 | 38.679 | 1.00 | 0.00 | C |
| ATOM | 997  | N2   | G B | 14 | 35.898 | -15.893 | 39.723 | 1.00 | 0.00 | N |
| ATOM | 998  | N3   | G B | 14 | 34.594 | -14.451 | 38.465 | 1.00 | 0.00 | N |
| ATOM | 999  | C4   | G B | 14 | 33.802 | -14.403 | 37.360 | 1.00 | 0.00 | C |
| ATOM | 1000 | C5   | G B | 14 | 33.485 | -15.433 | 36.492 | 1.00 | 0.00 | C |
| ATOM | 1001 | C6   | G B | 14 | 34.010 | -16.727 | 36.720 | 1.00 | 0.00 | C |
| ATOM | 1002 | O6   | G B | 14 | 33.844 | -17.758 | 36.067 | 1.00 | 0.00 | O |
| ATOM | 1003 | N7   | G B | 14 | 32.643 | -14.968 | 35.478 | 1.00 | 0.00 | N |
| ATOM | 1004 | C8   | G B | 14 | 32.480 | -13.701 | 35.760 | 1.00 | 0.00 | C |
| ATOM | 1005 | N9   | G B | 14 | 33.155 | -13.282 | 36.890 | 1.00 | 0.00 | N |
| ATOM | 1006 | C2'  | G B | 14 | 33.240 | -10.793 | 36.498 | 1.00 | 0.00 | C |
| ATOM | 1007 | C3'  | G B | 14 | 32.418 | -9.722  | 37.199 | 1.00 | 0.00 | C |
| ATOM | 1008 | O3'  | G B | 14 | 33.259 | -8.996  | 38.089 | 1.00 | 0.00 | O |
| ATOM | 1009 | C4'  | G B | 14 | 31.359 | -10.538 | 37.938 | 1.00 | 0.00 | C |
| ATOM | 1010 | O4'  | G B | 14 | 32.048 | -11.775 | 38.303 | 1.00 | 0.00 | O |
| ATOM | 1011 | C5'  | G B | 14 | 30.114 | -10.888 | 37.158 | 1.00 | 0.00 | C |
| ATOM | 1012 | O5'  | G B | 14 | 30.461 | -11.160 | 35.777 | 1.00 | 0.00 | O |
| ATOM | 1013 | O1P  | G B | 14 | 29.345 | -9.287  | 34.518 | 1.00 | 0.00 | O |
| ATOM | 1014 | O2P  | G B | 14 | 29.762 | -11.486 | 33.386 | 1.00 | 0.00 | O |
| ATOM | 1015 | P    | G B | 14 | 29.426 | -10.755 | 34.632 | 1.00 | 0.00 | P |
| ATOM | 1016 | H1   | G B | 14 | 35.255 | -17.658 | 38.125 | 1.00 | 0.00 | H |
| ATOM | 1017 | H8   | G B | 14 | 31.864 | -13.034 | 35.156 | 1.00 | 0.00 | H |
| ATOM | 1018 | H1'  | G B | 14 | 34.074 | -11.891 | 38.169 | 1.00 | 0.00 | H |
| ATOM | 1019 | H21  | G B | 14 | 36.277 | -16.839 | 39.883 | 1.00 | 0.00 | H |
| ATOM | 1020 | H3'  | G B | 14 | 31.959 | -9.032  | 36.491 | 1.00 | 0.00 | H |
| ATOM | 1021 | H22  | G B | 14 | 36.140 | -15.123 | 40.364 | 1.00 | 0.00 | H |
| ATOM | 1022 | H4'  | G B | 14 | 31.055 | -9.948  | 38.804 | 1.00 | 0.00 | H |
| ATOM | 1023 | H2'1 | G B | 14 | 32.795 | -11.074 | 35.544 | 1.00 | 0.00 | H |
| ATOM | 1024 | H2'2 | G B | 14 | 34.253 | -10.446 | 36.296 | 1.00 | 0.00 | H |
| ATOM | 1025 | H5'1 | G B | 14 | 29.651 | -11.769 | 37.601 | 1.00 | 0.00 | H |
| ATOM | 1026 | H5'2 | G B | 14 | 29.416 | -10.052 | 37.205 | 1.00 | 0.00 | H |
| ATOM | 1027 | C1'  | C B | 15 | 38.017 | -12.000 | 38.689 | 1.00 | 0.00 | C |
| ATOM | 1028 | N1   | C B | 15 | 37.513 | -12.775 | 37.524 | 1.00 | 0.00 | N |
| ATOM | 1029 | C2   | C B | 15 | 37.852 | -14.124 | 37.440 | 1.00 | 0.00 | C |
| ATOM | 1030 | O2   | C B | 15 | 38.554 | -14.618 | 38.334 | 1.00 | 0.00 | O |
| ATOM | 1031 | N3   | C B | 15 | 37.402 | -14.849 | 36.388 | 1.00 | 0.00 | N |
| ATOM | 1032 | C4   | C B | 15 | 36.646 | -14.286 | 35.438 | 1.00 | 0.00 | C |
| ATOM | 1033 | N4   | C B | 15 | 36.230 | -15.041 | 34.433 | 1.00 | 0.00 | N |
| ATOM | 1034 | C5   | C B | 15 | 36.283 | -12.897 | 35.494 | 1.00 | 0.00 | C |
| ATOM | 1035 | C6   | C B | 15 | 36.744 | -12.190 | 36.567 | 1.00 | 0.00 | C |
| ATOM | 1036 | C2'  | C B | 15 | 38.424 | -10.573 | 38.346 | 1.00 | 0.00 | C |
| ATOM | 1037 | C3'  | C B | 15 | 38.011 | -9.816  | 39.599 | 1.00 | 0.00 | C |
| ATOM | 1038 | O3'  | C B | 15 | 39.051 | -9.911  | 40.570 | 1.00 | 0.00 | O |
| ATOM | 1039 | C4'  | C B | 15 | 36.744 | -10.547 | 40.036 | 1.00 | 0.00 | C |
| ATOM | 1040 | O4'  | C B | 15 | 36.978 | -11.939 | 39.649 | 1.00 | 0.00 | O |
| ATOM | 1041 | C5'  | C B | 15 | 35.450 | -10.083 | 39.408 | 1.00 | 0.00 | C |
| ATOM | 1042 | O5'  | C B | 15 | 35.682 | -9.709  | 38.028 | 1.00 | 0.00 | O |

|      |      |      |     |    |        |         |        |      |      |   |
|------|------|------|-----|----|--------|---------|--------|------|------|---|
| ATOM | 1043 | O1P  | C B | 15 | 35.252 | -7.229  | 38.014 | 1.00 | 0.00 | O |
| ATOM | 1044 | O2P  | C B | 15 | 34.904 | -8.573  | 35.924 | 1.00 | 0.00 | O |
| ATOM | 1045 | P    | C B | 15 | 34.837 | -8.509  | 37.405 | 1.00 | 0.00 | P |
| ATOM | 1046 | H5   | C B | 15 | 35.672 | -12.435 | 34.719 | 1.00 | 0.00 | H |
| ATOM | 1047 | H6   | C B | 15 | 36.489 | -11.134 | 36.657 | 1.00 | 0.00 | H |
| ATOM | 1048 | H1'  | C B | 15 | 38.850 | -12.549 | 39.130 | 1.00 | 0.00 | H |
| ATOM | 1049 | H3'  | C B | 15 | 37.806 | -8.765  | 39.391 | 1.00 | 0.00 | H |
| ATOM | 1050 | H4'  | C B | 15 | 36.657 | -10.413 | 41.114 | 1.00 | 0.00 | H |
| ATOM | 1051 | H41  | C B | 15 | 35.643 | -14.633 | 33.689 | 1.00 | 0.00 | H |
| ATOM | 1052 | H42  | C B | 15 | 36.493 | -16.037 | 34.393 | 1.00 | 0.00 | H |
| ATOM | 1053 | H2'1 | C B | 15 | 37.907 | -10.195 | 37.466 | 1.00 | 0.00 | H |
| ATOM | 1054 | H2'2 | C B | 15 | 39.496 | -10.481 | 38.162 | 1.00 | 0.00 | H |
| ATOM | 1055 | H5'1 | C B | 15 | 34.720 | -10.891 | 39.454 | 1.00 | 0.00 | H |
| ATOM | 1056 | H5'2 | C B | 15 | 35.071 | -9.224  | 39.963 | 1.00 | 0.00 | H |
| ATOM | 1057 | C1'  | G B | 16 | 42.531 | -14.029 | 38.832 | 1.00 | 0.00 | C |
| ATOM | 1058 | N1   | G B | 16 | 40.897 | -16.574 | 34.724 | 1.00 | 0.00 | N |
| ATOM | 1059 | C2   | G B | 16 | 41.625 | -17.018 | 35.814 | 1.00 | 0.00 | C |
| ATOM | 1060 | N2   | G B | 16 | 41.963 | -18.315 | 35.807 | 1.00 | 0.00 | N |
| ATOM | 1061 | N3   | G B | 16 | 41.985 | -16.235 | 36.828 | 1.00 | 0.00 | N |
| ATOM | 1062 | C4   | G B | 16 | 41.564 | -14.954 | 36.666 | 1.00 | 0.00 | C |
| ATOM | 1063 | C5   | G B | 16 | 40.840 | -14.418 | 35.614 | 1.00 | 0.00 | C |
| ATOM | 1064 | C6   | G B | 16 | 40.455 | -15.252 | 34.537 | 1.00 | 0.00 | C |
| ATOM | 1065 | O6   | G B | 16 | 39.816 | -14.963 | 33.524 | 1.00 | 0.00 | O |
| ATOM | 1066 | N7   | G B | 16 | 40.611 | -13.058 | 35.827 | 1.00 | 0.00 | N |
| ATOM | 1067 | C8   | G B | 16 | 41.186 | -12.816 | 36.977 | 1.00 | 0.00 | C |
| ATOM | 1068 | N9   | G B | 16 | 41.789 | -13.919 | 37.548 | 1.00 | 0.00 | N |
| ATOM | 1069 | C2'  | G B | 16 | 43.391 | -12.811 | 39.149 | 1.00 | 0.00 | C |
| ATOM | 1070 | C3'  | G B | 16 | 43.264 | -12.717 | 40.661 | 1.00 | 0.00 | C |
| ATOM | 1071 | O3'  | G B | 16 | 44.218 | -13.587 | 41.266 | 1.00 | 0.00 | O |
| ATOM | 1072 | C4'  | G B | 16 | 41.827 | -13.174 | 40.910 | 1.00 | 0.00 | C |
| ATOM | 1073 | O4'  | G B | 16 | 41.581 | -14.173 | 39.869 | 1.00 | 0.00 | O |
| ATOM | 1074 | C5'  | G B | 16 | 40.760 | -12.110 | 40.821 | 1.00 | 0.00 | C |
| ATOM | 1075 | O5'  | G B | 16 | 41.093 | -11.167 | 39.771 | 1.00 | 0.00 | O |
| ATOM | 1076 | O1P  | G B | 16 | 41.518 | -9.027  | 41.024 | 1.00 | 0.00 | O |
| ATOM | 1077 | O2P  | G B | 16 | 40.725 | -8.953  | 38.646 | 1.00 | 0.00 | O |
| ATOM | 1078 | P    | G B | 16 | 40.696 | -9.634  | 39.962 | 1.00 | 0.00 | P |
| ATOM | 1079 | H1   | G B | 16 | 40.666 | -17.263 | 33.994 | 1.00 | 0.00 | H |
| ATOM | 1080 | H8   | G B | 16 | 41.191 | -11.831 | 37.443 | 1.00 | 0.00 | H |
| ATOM | 1081 | H1'  | G B | 16 | 43.135 | -14.936 | 38.802 | 1.00 | 0.00 | H |
| ATOM | 1082 | H21  | G B | 16 | 41.679 | -18.916 | 35.020 | 1.00 | 0.00 | H |
| ATOM | 1083 | H3'  | G B | 16 | 43.422 | -11.702 | 41.022 | 1.00 | 0.00 | H |
| ATOM | 1084 | H22  | G B | 16 | 42.505 | -18.707 | 36.588 | 1.00 | 0.00 | H |
| ATOM | 1085 | H4'  | G B | 16 | 41.799 | -13.592 | 41.917 | 1.00 | 0.00 | H |
| ATOM | 1086 | H2'1 | G B | 16 | 43.023 | -11.908 | 38.664 | 1.00 | 0.00 | H |
| ATOM | 1087 | H2'2 | G B | 16 | 44.429 | -12.948 | 38.845 | 1.00 | 0.00 | H |
| ATOM | 1088 | H5'1 | G B | 16 | 39.802 | -12.581 | 40.603 | 1.00 | 0.00 | H |
| ATOM | 1089 | H5'2 | G B | 16 | 40.694 | -11.589 | 41.777 | 1.00 | 0.00 | H |
| ATOM | 1090 | C1'  | G B | 17 | 46.105 | -17.045 | 37.203 | 1.00 | 0.00 | C |
| ATOM | 1091 | N1   | G B | 17 | 43.688 | -16.567 | 32.737 | 1.00 | 0.00 | N |
| ATOM | 1092 | C2   | G B | 17 | 44.230 | -17.690 | 33.337 | 1.00 | 0.00 | C |
| ATOM | 1093 | N2   | G B | 17 | 44.113 | -18.836 | 32.657 | 1.00 | 0.00 | N |
| ATOM | 1094 | N3   | G B | 17 | 44.837 | -17.669 | 34.522 | 1.00 | 0.00 | N |
| ATOM | 1095 | C4   | G B | 17 | 44.871 | -16.423 | 35.063 | 1.00 | 0.00 | C |
| ATOM | 1096 | C5   | G B | 17 | 44.361 | -15.249 | 34.538 | 1.00 | 0.00 | C |

|      |      |      |     |    |        |         |        |      |      |   |
|------|------|------|-----|----|--------|---------|--------|------|------|---|
| ATOM | 1097 | C6   | G B | 17 | 43.711 | -15.270 | 33.282 | 1.00 | 0.00 | C |
| ATOM | 1098 | O6   | G B | 17 | 43.201 | -14.341 | 32.656 | 1.00 | 0.00 | O |
| ATOM | 1099 | N7   | G B | 17 | 44.602 | -14.184 | 35.408 | 1.00 | 0.00 | N |
| ATOM | 1100 | C8   | G B | 17 | 45.232 | -14.734 | 36.414 | 1.00 | 0.00 | C |
| ATOM | 1101 | N9   | G B | 17 | 45.435 | -16.093 | 36.276 | 1.00 | 0.00 | N |
| ATOM | 1102 | C2'  | G B | 17 | 47.325 | -16.461 | 37.903 | 1.00 | 0.00 | C |
| ATOM | 1103 | C3'  | G B | 17 | 47.247 | -17.114 | 39.275 | 1.00 | 0.00 | C |
| ATOM | 1104 | O3'  | G B | 17 | 47.858 | -18.400 | 39.217 | 1.00 | 0.00 | O |
| ATOM | 1105 | C4'  | G B | 17 | 45.742 | -17.200 | 39.524 | 1.00 | 0.00 | C |
| ATOM | 1106 | O4'  | G B | 17 | 45.169 | -17.415 | 38.194 | 1.00 | 0.00 | O |
| ATOM | 1107 | C5'  | G B | 17 | 45.093 | -15.984 | 40.139 | 1.00 | 0.00 | C |
| ATOM | 1108 | O5'  | G B | 17 | 45.716 | -14.781 | 39.623 | 1.00 | 0.00 | O |
| ATOM | 1109 | O1P  | G B | 17 | 46.842 | -13.794 | 41.646 | 1.00 | 0.00 | O |
| ATOM | 1110 | O2P  | G B | 17 | 46.104 | -12.303 | 39.769 | 1.00 | 0.00 | O |
| ATOM | 1111 | P    | G B | 17 | 45.857 | -13.516 | 40.584 | 1.00 | 0.00 | P |
| ATOM | 1112 | H1   | G B | 17 | 43.232 | -16.692 | 31.819 | 1.00 | 0.00 | H |
| ATOM | 1113 | H8   | G B | 17 | 45.571 | -14.172 | 37.282 | 1.00 | 0.00 | H |
| ATOM | 1114 | H1'  | G B | 17 | 46.370 | -17.940 | 36.640 | 1.00 | 0.00 | H |
| ATOM | 1115 | H21  | G B | 17 | 43.639 | -18.847 | 31.742 | 1.00 | 0.00 | H |
| ATOM | 1116 | H3'  | G B | 17 | 47.738 | -16.515 | 40.042 | 1.00 | 0.00 | H |
| ATOM | 1117 | H22  | G B | 17 | 44.498 | -19.708 | 33.048 | 1.00 | 0.00 | H |
| ATOM | 1118 | H4'  | G B | 17 | 45.580 | -18.040 | 40.198 | 1.00 | 0.00 | H |
| ATOM | 1119 | H2'1 | G B | 17 | 47.279 | -15.374 | 37.979 | 1.00 | 0.00 | H |
| ATOM | 1120 | H2'2 | G B | 17 | 48.256 | -16.715 | 37.396 | 1.00 | 0.00 | H |
| ATOM | 1121 | H5'1 | G B | 17 | 44.031 | -15.982 | 39.895 | 1.00 | 0.00 | H |
| ATOM | 1122 | H5'2 | G B | 17 | 45.211 | -16.024 | 41.222 | 1.00 | 0.00 | H |
| ATOM | 1123 | C1'  | C B | 18 | 48.451 | -19.698 | 33.741 | 1.00 | 0.00 | C |
| ATOM | 1124 | N1   | C B | 18 | 48.128 | -18.263 | 33.506 | 1.00 | 0.00 | N |
| ATOM | 1125 | C2   | C B | 18 | 47.462 | -17.928 | 32.328 | 1.00 | 0.00 | C |
| ATOM | 1126 | O2   | C B | 18 | 47.170 | -18.829 | 31.531 | 1.00 | 0.00 | O |
| ATOM | 1127 | N3   | C B | 18 | 47.160 | -16.628 | 32.097 | 1.00 | 0.00 | N |
| ATOM | 1128 | C4   | C B | 18 | 47.492 | -15.677 | 32.979 | 1.00 | 0.00 | C |
| ATOM | 1129 | N4   | C B | 18 | 47.170 | -14.422 | 32.702 | 1.00 | 0.00 | N |
| ATOM | 1130 | C5   | C B | 18 | 48.178 | -15.992 | 34.196 | 1.00 | 0.00 | C |
| ATOM | 1131 | C6   | C B | 18 | 48.469 | -17.307 | 34.410 | 1.00 | 0.00 | C |
| ATOM | 1132 | C2'  | C B | 18 | 49.802 | -19.922 | 34.405 | 1.00 | 0.00 | C |
| ATOM | 1133 | C3'  | C B | 18 | 49.521 | -21.122 | 35.297 | 1.00 | 0.00 | C |
| ATOM | 1134 | O3'  | C B | 18 | 49.665 | -22.317 | 34.531 | 1.00 | 0.00 | O |
| ATOM | 1135 | C4'  | C B | 18 | 48.078 | -20.888 | 35.736 | 1.00 | 0.00 | C |
| ATOM | 1136 | O4'  | C B | 18 | 47.452 | -20.230 | 34.588 | 1.00 | 0.00 | O |
| ATOM | 1137 | C5'  | C B | 18 | 47.879 | -20.020 | 36.956 | 1.00 | 0.00 | C |
| ATOM | 1138 | O5'  | C B | 18 | 48.866 | -18.957 | 36.967 | 1.00 | 0.00 | O |
| ATOM | 1139 | O1P  | C B | 18 | 50.278 | -19.490 | 38.982 | 1.00 | 0.00 | O |
| ATOM | 1140 | O2P  | C B | 18 | 50.066 | -17.118 | 38.192 | 1.00 | 0.00 | O |
| ATOM | 1141 | P    | C B | 18 | 49.430 | -18.447 | 38.367 | 1.00 | 0.00 | P |
| ATOM | 1142 | H5   | C B | 18 | 48.453 | -15.221 | 34.914 | 1.00 | 0.00 | H |
| ATOM | 1143 | H6   | C B | 18 | 48.989 | -17.596 | 35.323 | 1.00 | 0.00 | H |
| ATOM | 1144 | H1'  | C B | 18 | 48.394 | -20.220 | 32.785 | 1.00 | 0.00 | H |
| ATOM | 1145 | H3'  | C B | 18 | 50.192 | -21.159 | 36.155 | 1.00 | 0.00 | H |
| ATOM | 1146 | H4'  | C B | 18 | 47.649 | -21.866 | 35.952 | 1.00 | 0.00 | H |
| ATOM | 1147 | H41  | C B | 18 | 47.412 | -13.670 | 33.365 | 1.00 | 0.00 | H |
| ATOM | 1148 | H42  | C B | 18 | 46.676 | -14.198 | 31.826 | 1.00 | 0.00 | H |
| ATOM | 1149 | H2'1 | C B | 18 | 50.124 | -19.061 | 34.990 | 1.00 | 0.00 | H |
| ATOM | 1150 | H2'2 | C B | 18 | 50.587 | -20.140 | 33.682 | 1.00 | 0.00 | H |

|      |      |      |   |   |    |        |         |        |      |      |   |
|------|------|------|---|---|----|--------|---------|--------|------|------|---|
| ATOM | 1151 | H5'1 | C | B | 18 | 46.877 | -19.592 | 36.934 | 1.00 | 0.00 | H |
| ATOM | 1152 | H5'2 | C | B | 18 | 47.987 | -20.630 | 37.852 | 1.00 | 0.00 | H |
| ATOM | 1153 | C1'  | C | B | 19 | 49.749 | -20.774 | 29.083 | 1.00 | 0.00 | C |
| ATOM | 1154 | N1   | C | B | 19 | 49.924 | -19.397 | 29.619 | 1.00 | 0.00 | N |
| ATOM | 1155 | C2   | C | B | 19 | 49.402 | -18.337 | 28.879 | 1.00 | 0.00 | C |
| ATOM | 1156 | O2   | C | B | 19 | 48.818 | -18.582 | 27.815 | 1.00 | 0.00 | O |
| ATOM | 1157 | N3   | C | B | 19 | 49.551 | -17.076 | 29.350 | 1.00 | 0.00 | N |
| ATOM | 1158 | C4   | C | B | 19 | 50.188 | -16.843 | 30.505 | 1.00 | 0.00 | C |
| ATOM | 1159 | N4   | C | B | 19 | 50.305 | -15.592 | 30.918 | 1.00 | 0.00 | N |
| ATOM | 1160 | C5   | C | B | 19 | 50.735 | -17.913 | 31.283 | 1.00 | 0.00 | C |
| ATOM | 1161 | C6   | C | B | 19 | 50.573 | -19.173 | 30.791 | 1.00 | 0.00 | C |
| ATOM | 1162 | C2'  | C | B | 19 | 50.951 | -21.679 | 29.315 | 1.00 | 0.00 | C |
| ATOM | 1163 | C3'  | C | B | 19 | 50.289 | -23.027 | 29.562 | 1.00 | 0.00 | C |
| ATOM | 1164 | O3'  | C | B | 19 | 50.019 | -23.653 | 28.311 | 1.00 | 0.00 | O |
| ATOM | 1165 | C4'  | C | B | 19 | 49.010 | -22.645 | 30.305 | 1.00 | 0.00 | C |
| ATOM | 1166 | O4'  | C | B | 19 | 48.634 | -21.350 | 29.737 | 1.00 | 0.00 | O |
| ATOM | 1167 | C5'  | C | B | 19 | 49.123 | -22.499 | 31.805 | 1.00 | 0.00 | C |
| ATOM | 1168 | O5'  | C | B | 19 | 50.409 | -21.923 | 32.147 | 1.00 | 0.00 | O |
| ATOM | 1169 | O1P  | C | B | 19 | 51.571 | -23.782 | 33.383 | 1.00 | 0.00 | O |
| ATOM | 1170 | O2P  | C | B | 19 | 52.163 | -21.391 | 33.865 | 1.00 | 0.00 | O |
| ATOM | 1171 | P    | C | B | 19 | 51.121 | -22.380 | 33.497 | 1.00 | 0.00 | P |
| ATOM | 1172 | H5   | C | B | 19 | 51.257 | -17.729 | 32.222 | 1.00 | 0.00 | H |
| ATOM | 1173 | H6   | C | B | 19 | 50.970 | -20.020 | 31.351 | 1.00 | 0.00 | H |
| ATOM | 1174 | H1'  | C | B | 19 | 49.514 | -20.699 | 28.022 | 1.00 | 0.00 | H |
| ATOM | 1175 | H3'  | C | B | 19 | 50.915 | -23.682 | 30.169 | 1.00 | 0.00 | H |
| ATOM | 1176 | H4'  | C | B | 19 | 48.280 | -23.429 | 30.102 | 1.00 | 0.00 | H |
| ATOM | 1177 | H41  | C | B | 19 | 50.789 | -15.382 | 31.804 | 1.00 | 0.00 | H |
| ATOM | 1178 | H42  | C | B | 19 | 49.911 | -14.823 | 30.354 | 1.00 | 0.00 | H |
| ATOM | 1179 | H2'1 | C | B | 19 | 51.546 | -21.366 | 30.172 | 1.00 | 0.00 | H |
| ATOM | 1180 | H2'2 | C | B | 19 | 51.613 | -21.715 | 28.450 | 1.00 | 0.00 | H |
| ATOM | 1181 | H5'1 | C | B | 19 | 48.322 | -21.854 | 32.164 | 1.00 | 0.00 | H |
| ATOM | 1182 | H5'2 | C | B | 19 | 49.025 | -23.480 | 32.268 | 1.00 | 0.00 | H |
| ATOM | 1183 | C1'  | T | B | 20 | 50.582 | -19.687 | 24.327 | 1.00 | 0.00 | C |
| ATOM | 1184 | N1   | T | B | 20 | 51.206 | -18.869 | 25.401 | 1.00 | 0.00 | N |
| ATOM | 1185 | C2   | T | B | 20 | 51.047 | -17.501 | 25.324 | 1.00 | 0.00 | C |
| ATOM | 1186 | O2   | T | B | 20 | 50.427 | -16.959 | 24.425 | 1.00 | 0.00 | O |
| ATOM | 1187 | N3   | T | B | 20 | 51.642 | -16.781 | 26.343 | 1.00 | 0.00 | N |
| ATOM | 1188 | C4   | T | B | 20 | 52.361 | -17.293 | 27.399 | 1.00 | 0.00 | C |
| ATOM | 1189 | O4   | T | B | 20 | 52.850 | -16.544 | 28.255 | 1.00 | 0.00 | O |
| ATOM | 1190 | C5   | T | B | 20 | 52.473 | -18.731 | 27.396 | 1.00 | 0.00 | C |
| ATOM | 1191 | C6   | T | B | 20 | 51.906 | -19.467 | 26.420 | 1.00 | 0.00 | C |
| ATOM | 1192 | C7   | T | B | 20 | 53.247 | -19.333 | 28.530 | 1.00 | 0.00 | C |
| ATOM | 1193 | C2'  | T | B | 20 | 51.422 | -20.888 | 23.905 | 1.00 | 0.00 | C |
| ATOM | 1194 | C3'  | T | B | 20 | 50.355 | -21.929 | 23.606 | 1.00 | 0.00 | C |
| ATOM | 1195 | O3'  | T | B | 20 | 49.885 | -21.751 | 22.272 | 1.00 | 0.00 | O |
| ATOM | 1196 | C4'  | T | B | 20 | 49.279 | -21.623 | 24.644 | 1.00 | 0.00 | C |
| ATOM | 1197 | O4'  | T | B | 20 | 49.346 | -20.171 | 24.815 | 1.00 | 0.00 | O |
| ATOM | 1198 | C5'  | T | B | 20 | 49.443 | -22.276 | 25.998 | 1.00 | 0.00 | C |
| ATOM | 1199 | O5'  | T | B | 20 | 50.851 | -22.333 | 26.344 | 1.00 | 0.00 | O |
| ATOM | 1200 | O1P  | T | B | 20 | 51.347 | -24.799 | 26.359 | 1.00 | 0.00 | O |
| ATOM | 1201 | O2P  | T | B | 20 | 52.695 | -23.240 | 27.789 | 1.00 | 0.00 | O |
| ATOM | 1202 | P    | T | B | 20 | 51.383 | -23.577 | 27.187 | 1.00 | 0.00 | P |
| ATOM | 1203 | H3   | T | B | 20 | 51.536 | -15.757 | 26.309 | 1.00 | 0.00 | H |
| ATOM | 1204 | H6   | T | B | 20 | 52.004 | -20.553 | 26.438 | 1.00 | 0.00 | H |



|      |      |      |     |    |        |         |        |      |      |   |
|------|------|------|-----|----|--------|---------|--------|------|------|---|
| ATOM | 1205 | H1'  | T B | 20 | 50.376 | -19.036 | 23.477 | 1.00 | 0.00 | H |
| ATOM | 1206 | H3'  | T B | 20 | 50.735 | -22.945 | 23.722 | 1.00 | 0.00 | H |
| ATOM | 1207 | H4'  | T B | 20 | 48.330 | -21.961 | 24.226 | 1.00 | 0.00 | H |
| ATOM | 1208 | H3T  | T B | 20 | 50.567 | -21.732 | 21.598 | 1.00 | 0.00 | H |
| ATOM | 1209 | H71  | T B | 20 | 54.152 | -19.804 | 28.144 | 1.00 | 0.00 | H |
| ATOM | 1210 | H72  | T B | 20 | 53.520 | -18.551 | 29.241 | 1.00 | 0.00 | H |
| ATOM | 1211 | H73  | T B | 20 | 52.635 | -20.082 | 29.035 | 1.00 | 0.00 | H |
| ATOM | 1212 | H2'1 | T B | 20 | 52.093 | -21.221 | 24.694 | 1.00 | 0.00 | H |
| ATOM | 1213 | H2'2 | T B | 20 | 52.029 | -20.678 | 23.024 | 1.00 | 0.00 | H |
| ATOM | 1214 | H5'1 | T B | 20 | 48.903 | -21.696 | 26.743 | 1.00 | 0.00 | H |
| ATOM | 1215 | H5'2 | T B | 20 | 49.033 | -23.282 | 25.959 | 1.00 | 0.00 | H |
| TER  |      |      |     |    |        |         |        |      |      |   |
| ATOM | 1    | C1'  | A A | 1  | 37.159 | -48.973 | 24.839 | 1.00 | 0.00 | C |
| ATOM | 2    | N1   | A A | 1  | 39.632 | -51.060 | 28.822 | 1.00 | 0.00 | N |
| ATOM | 3    | C2   | A A | 1  | 38.640 | -51.498 | 28.052 | 1.00 | 0.00 | C |
| ATOM | 4    | N3   | A A | 1  | 38.048 | -50.907 | 27.035 | 1.00 | 0.00 | N |
| ATOM | 5    | C4   | A A | 1  | 38.587 | -49.692 | 26.823 | 1.00 | 0.00 | C |
| ATOM | 6    | C5   | A A | 1  | 39.603 | -49.101 | 27.521 | 1.00 | 0.00 | C |
| ATOM | 7    | C6   | A A | 1  | 40.149 | -49.846 | 28.588 | 1.00 | 0.00 | C |
| ATOM | 8    | N6   | A A | 1  | 41.153 | -49.394 | 29.361 | 1.00 | 0.00 | N |
| ATOM | 9    | N7   | A A | 1  | 39.890 | -47.845 | 27.016 | 1.00 | 0.00 | N |
| ATOM | 10   | C8   | A A | 1  | 39.050 | -47.704 | 26.034 | 1.00 | 0.00 | C |
| ATOM | 11   | N9   | A A | 1  | 38.227 | -48.786 | 25.857 | 1.00 | 0.00 | N |
| ATOM | 12   | C2'  | A A | 1  | 36.371 | -47.705 | 24.537 | 1.00 | 0.00 | C |
| ATOM | 13   | C3'  | A A | 1  | 36.092 | -47.854 | 23.049 | 1.00 | 0.00 | C |
| ATOM | 14   | O3'  | A A | 1  | 34.929 | -48.657 | 22.868 | 1.00 | 0.00 | O |
| ATOM | 15   | C4'  | A A | 1  | 37.356 | -48.541 | 22.533 | 1.00 | 0.00 | C |
| ATOM | 16   | O4'  | A A | 1  | 37.776 | -49.401 | 23.641 | 1.00 | 0.00 | O |
| ATOM | 17   | C5'  | A A | 1  | 38.506 | -47.637 | 22.161 | 1.00 | 0.00 | C |
| ATOM | 18   | O5'  | A A | 1  | 38.565 | -46.514 | 23.076 | 1.00 | 0.00 | O |
| ATOM | 19   | H2   | A A | 1  | 38.261 | -52.488 | 28.298 | 1.00 | 0.00 | H |
| ATOM | 20   | H8   | A A | 1  | 39.004 | -46.812 | 25.410 | 1.00 | 0.00 | H |
| ATOM | 21   | H1'  | A A | 1  | 36.499 | -49.771 | 25.181 | 1.00 | 0.00 | H |
| ATOM | 22   | H3'  | A A | 1  | 35.944 | -46.888 | 22.564 | 1.00 | 0.00 | H |
| ATOM | 23   | H4'  | A A | 1  | 37.070 | -49.100 | 21.644 | 1.00 | 0.00 | H |
| ATOM | 24   | H61  | A A | 1  | 41.516 | -49.977 | 30.124 | 1.00 | 0.00 | H |
| ATOM | 25   | H62  | A A | 1  | 41.554 | -48.461 | 29.185 | 1.00 | 0.00 | H |
| ATOM | 26   | H5T  | A A | 1  | 38.856 | -45.662 | 22.743 | 1.00 | 0.00 | H |
| ATOM | 27   | H2'1 | A A | 1  | 36.943 | -46.803 | 24.746 | 1.00 | 0.00 | H |
| ATOM | 28   | H2'2 | A A | 1  | 35.445 | -47.647 | 25.110 | 1.00 | 0.00 | H |
| ATOM | 29   | H5'1 | A A | 1  | 39.437 | -48.203 | 22.213 | 1.00 | 0.00 | H |
| ATOM | 30   | H5'2 | A A | 1  | 38.364 | -47.275 | 21.144 | 1.00 | 0.00 | H |
| ATOM | 31   | C1'  | G A | 2  | 33.934 | -51.197 | 27.889 | 1.00 | 0.00 | C |
| ATOM | 32   | N1   | G A | 2  | 37.518 | -50.344 | 31.415 | 1.00 | 0.00 | N |
| ATOM | 33   | C2   | G A | 2  | 36.740 | -51.464 | 31.196 | 1.00 | 0.00 | C |
| ATOM | 34   | N2   | G A | 2  | 36.941 | -52.493 | 32.026 | 1.00 | 0.00 | N |
| ATOM | 35   | N3   | G A | 2  | 35.833 | -51.553 | 30.224 | 1.00 | 0.00 | N |
| ATOM | 36   | C4   | G A | 2  | 35.757 | -50.415 | 29.483 | 1.00 | 0.00 | C |
| ATOM | 37   | C5   | G A | 2  | 36.490 | -49.248 | 29.631 | 1.00 | 0.00 | C |
| ATOM | 38   | C6   | G A | 2  | 37.458 | -49.158 | 30.661 | 1.00 | 0.00 | C |
| ATOM | 39   | O6   | G A | 2  | 38.200 | -48.219 | 30.947 | 1.00 | 0.00 | O |
| ATOM | 40   | N7   | G A | 2  | 36.111 | -48.314 | 28.666 | 1.00 | 0.00 | N |
| ATOM | 41   | C8   | G A | 2  | 35.183 | -48.929 | 27.979 | 1.00 | 0.00 | C |
| ATOM | 42   | N9   | G A | 2  | 34.912 | -50.210 | 28.416 | 1.00 | 0.00 | N |

|      |    |      |     |   |        |         |        |      |      |   |
|------|----|------|-----|---|--------|---------|--------|------|------|---|
| ATOM | 43 | C2'  | G A | 2 | 32.622 | -50.578 | 27.425 | 1.00 | 0.00 | C |
| ATOM | 44 | C3'  | G A | 2 | 32.264 | -51.443 | 26.230 | 1.00 | 0.00 | C |
| ATOM | 45 | O3'  | G A | 2 | 31.586 | -52.612 | 26.683 | 1.00 | 0.00 | O |
| ATOM | 46 | C4'  | G A | 2 | 33.629 | -51.767 | 25.624 | 1.00 | 0.00 | C |
| ATOM | 47 | O4'  | G A | 2 | 34.526 | -51.843 | 26.778 | 1.00 | 0.00 | O |
| ATOM | 48 | C5'  | G A | 2 | 34.185 | -50.760 | 24.645 | 1.00 | 0.00 | C |
| ATOM | 49 | O5'  | G A | 2 | 33.833 | -49.420 | 25.068 | 1.00 | 0.00 | O |
| ATOM | 50 | O1P  | G A | 2 | 32.281 | -48.626 | 23.252 | 1.00 | 0.00 | O |
| ATOM | 51 | O2P  | G A | 2 | 33.631 | -46.967 | 24.563 | 1.00 | 0.00 | O |
| ATOM | 52 | P    | G A | 2 | 33.542 | -48.316 | 23.953 | 1.00 | 0.00 | P |
| ATOM | 53 | H1   | G A | 2 | 38.193 | -50.380 | 32.193 | 1.00 | 0.00 | H |
| ATOM | 54 | H8   | G A | 2 | 34.669 | -48.470 | 27.135 | 1.00 | 0.00 | H |
| ATOM | 55 | H1'  | G A | 2 | 33.758 | -51.949 | 28.659 | 1.00 | 0.00 | H |
| ATOM | 56 | H21  | G A | 2 | 37.645 | -52.421 | 32.775 | 1.00 | 0.00 | H |
| ATOM | 57 | H3'  | G A | 2 | 31.633 | -50.914 | 25.515 | 1.00 | 0.00 | H |
| ATOM | 58 | H22  | G A | 2 | 36.391 | -53.358 | 31.916 | 1.00 | 0.00 | H |
| ATOM | 59 | H4'  | G A | 2 | 33.527 | -52.717 | 25.102 | 1.00 | 0.00 | H |
| ATOM | 60 | H2'1 | G A | 2 | 32.739 | -49.532 | 27.137 | 1.00 | 0.00 | H |
| ATOM | 61 | H2'2 | G A | 2 | 31.849 | -50.622 | 28.194 | 1.00 | 0.00 | H |
| ATOM | 62 | H5'1 | G A | 2 | 35.269 | -50.861 | 24.604 | 1.00 | 0.00 | H |
| ATOM | 63 | H5'2 | G A | 2 | 33.770 | -50.957 | 23.656 | 1.00 | 0.00 | H |
| ATOM | 64 | C1'  | G A | 3 | 32.412 | -52.924 | 32.274 | 1.00 | 0.00 | C |
| ATOM | 65 | N1   | G A | 3 | 35.636 | -49.436 | 34.129 | 1.00 | 0.00 | N |
| ATOM | 66 | C2   | G A | 3 | 35.419 | -50.741 | 34.526 | 1.00 | 0.00 | C |
| ATOM | 67 | N2   | G A | 3 | 36.156 | -51.174 | 35.557 | 1.00 | 0.00 | N |
| ATOM | 68 | N3   | G A | 3 | 34.537 | -51.549 | 33.944 | 1.00 | 0.00 | N |
| ATOM | 69 | C4   | G A | 3 | 33.875 | -50.943 | 32.924 | 1.00 | 0.00 | C |
| ATOM | 70 | C5   | G A | 3 | 34.024 | -49.646 | 32.461 | 1.00 | 0.00 | C |
| ATOM | 71 | C6   | G A | 3 | 34.964 | -48.788 | 33.076 | 1.00 | 0.00 | C |
| ATOM | 72 | O6   | G A | 3 | 35.239 | -47.617 | 32.809 | 1.00 | 0.00 | O |
| ATOM | 73 | N7   | G A | 3 | 33.154 | -49.412 | 31.393 | 1.00 | 0.00 | N |
| ATOM | 74 | C8   | G A | 3 | 32.522 | -50.547 | 31.245 | 1.00 | 0.00 | C |
| ATOM | 75 | N9   | G A | 3 | 32.905 | -51.526 | 32.139 | 1.00 | 0.00 | N |
| ATOM | 76 | C2'  | G A | 3 | 30.917 | -53.076 | 32.030 | 1.00 | 0.00 | C |
| ATOM | 77 | C3'  | G A | 3 | 30.842 | -54.429 | 31.345 | 1.00 | 0.00 | C |
| ATOM | 78 | O3'  | G A | 3 | 30.816 | -55.455 | 32.335 | 1.00 | 0.00 | O |
| ATOM | 79 | C4'  | G A | 3 | 32.125 | -54.462 | 30.516 | 1.00 | 0.00 | C |
| ATOM | 80 | O4'  | G A | 3 | 33.093 | -53.715 | 31.319 | 1.00 | 0.00 | O |
| ATOM | 81 | C5'  | G A | 3 | 32.052 | -53.836 | 29.142 | 1.00 | 0.00 | C |
| ATOM | 82 | O5'  | G A | 3 | 31.192 | -52.670 | 29.179 | 1.00 | 0.00 | O |
| ATOM | 83 | O1P  | G A | 3 | 29.243 | -53.334 | 27.732 | 1.00 | 0.00 | O |
| ATOM | 84 | O2P  | G A | 3 | 29.859 | -50.914 | 27.973 | 1.00 | 0.00 | O |
| ATOM | 85 | P    | G A | 3 | 30.308 | -52.327 | 27.897 | 1.00 | 0.00 | P |
| ATOM | 86 | H1   | G A | 3 | 36.347 | -48.893 | 34.645 | 1.00 | 0.00 | H |
| ATOM | 87 | H8   | G A | 3 | 31.760 | -50.708 | 30.484 | 1.00 | 0.00 | H |
| ATOM | 88 | H1'  | G A | 3 | 32.685 | -53.288 | 33.265 | 1.00 | 0.00 | H |
| ATOM | 89 | H21  | G A | 3 | 36.839 | -50.544 | 36.002 | 1.00 | 0.00 | H |
| ATOM | 90 | H3'  | G A | 3 | 29.960 | -54.518 | 30.709 | 1.00 | 0.00 | H |
| ATOM | 91 | H22  | G A | 3 | 36.041 | -52.137 | 35.902 | 1.00 | 0.00 | H |
| ATOM | 92 | H4'  | G A | 3 | 32.395 | -55.511 | 30.390 | 1.00 | 0.00 | H |
| ATOM | 93 | H2'1 | G A | 3 | 30.521 | -52.286 | 31.393 | 1.00 | 0.00 | H |
| ATOM | 94 | H2'2 | G A | 3 | 30.344 | -53.066 | 32.958 | 1.00 | 0.00 | H |
| ATOM | 95 | H5'1 | G A | 3 | 33.054 | -53.548 | 28.827 | 1.00 | 0.00 | H |
| ATOM | 96 | H5'2 | G A | 3 | 31.652 | -54.566 | 28.437 | 1.00 | 0.00 | H |

|      |     |      |   |   |   |        |         |        |      |      |   |
|------|-----|------|---|---|---|--------|---------|--------|------|------|---|
| ATOM | 97  | C1'  | C | A | 4 | 32.361 | -53.060 | 37.225 | 1.00 | 0.00 | C |
| ATOM | 98  | N1   | C | A | 4 | 32.163 | -51.774 | 36.503 | 1.00 | 0.00 | N |
| ATOM | 99  | C2   | C | A | 4 | 32.960 | -50.692 | 36.870 | 1.00 | 0.00 | C |
| ATOM | 100 | O2   | C | A | 4 | 33.791 | -50.840 | 37.773 | 1.00 | 0.00 | O |
| ATOM | 101 | N3   | C | A | 4 | 32.795 | -49.512 | 36.223 | 1.00 | 0.00 | N |
| ATOM | 102 | C4   | C | A | 4 | 31.885 | -49.382 | 35.250 | 1.00 | 0.00 | C |
| ATOM | 103 | N4   | C | A | 4 | 31.769 | -48.205 | 34.649 | 1.00 | 0.00 | N |
| ATOM | 104 | C5   | C | A | 4 | 31.052 | -50.478 | 34.854 | 1.00 | 0.00 | C |
| ATOM | 105 | C6   | C | A | 4 | 31.236 | -51.656 | 35.515 | 1.00 | 0.00 | C |
| ATOM | 106 | C2'  | C | A | 4 | 31.070 | -53.823 | 37.487 | 1.00 | 0.00 | C |
| ATOM | 107 | C3'  | C | A | 4 | 31.519 | -55.269 | 37.335 | 1.00 | 0.00 | C |
| ATOM | 108 | O3'  | C | A | 4 | 32.069 | -55.718 | 38.571 | 1.00 | 0.00 | O |
| ATOM | 109 | C4'  | C | A | 4 | 32.569 | -55.184 | 36.230 | 1.00 | 0.00 | C |
| ATOM | 110 | O4'  | C | A | 4 | 33.198 | -53.878 | 36.427 | 1.00 | 0.00 | O |
| ATOM | 111 | C5'  | C | A | 4 | 32.058 | -55.265 | 34.812 | 1.00 | 0.00 | C |
| ATOM | 112 | O5'  | C | A | 4 | 30.782 | -54.582 | 34.710 | 1.00 | 0.00 | O |
| ATOM | 113 | O1P  | C | A | 4 | 29.166 | -56.439 | 34.189 | 1.00 | 0.00 | O |
| ATOM | 114 | O2P  | C | A | 4 | 28.672 | -54.099 | 33.433 | 1.00 | 0.00 | O |
| ATOM | 115 | P    | C | A | 4 | 29.686 | -55.147 | 33.699 | 1.00 | 0.00 | P |
| ATOM | 116 | H5   | C | A | 4 | 30.307 | -50.373 | 34.064 | 1.00 | 0.00 | H |
| ATOM | 117 | H6   | C | A | 4 | 30.629 | -52.521 | 35.246 | 1.00 | 0.00 | H |
| ATOM | 118 | H1'  | C | A | 4 | 32.887 | -52.850 | 38.156 | 1.00 | 0.00 | H |
| ATOM | 119 | H3'  | C | A | 4 | 30.696 | -55.923 | 37.048 | 1.00 | 0.00 | H |
| ATOM | 120 | H4'  | C | A | 4 | 33.256 | -56.016 | 36.384 | 1.00 | 0.00 | H |
| ATOM | 121 | H41  | C | A | 4 | 31.077 | -48.077 | 33.896 | 1.00 | 0.00 | H |
| ATOM | 122 | H42  | C | A | 4 | 32.369 | -47.418 | 34.937 | 1.00 | 0.00 | H |
| ATOM | 123 | H2'1 | C | A | 4 | 30.289 | -53.574 | 36.769 | 1.00 | 0.00 | H |
| ATOM | 124 | H2'2 | C | A | 4 | 30.672 | -53.631 | 38.484 | 1.00 | 0.00 | H |
| ATOM | 125 | H5'1 | C | A | 4 | 32.780 | -54.797 | 34.143 | 1.00 | 0.00 | H |
| ATOM | 126 | H5'2 | C | A | 4 | 31.938 | -56.311 | 34.533 | 1.00 | 0.00 | H |
| ATOM | 127 | C1'  | C | A | 5 | 32.972 | -51.106 | 41.734 | 1.00 | 0.00 | C |
| ATOM | 128 | N1   | C | A | 5 | 32.136 | -50.412 | 40.717 | 1.00 | 0.00 | N |
| ATOM | 129 | C2   | C | A | 5 | 32.404 | -49.069 | 40.459 | 1.00 | 0.00 | C |
| ATOM | 130 | O2   | C | A | 5 | 33.318 | -48.510 | 41.082 | 1.00 | 0.00 | O |
| ATOM | 131 | N3   | C | A | 5 | 31.655 | -48.419 | 39.535 | 1.00 | 0.00 | N |
| ATOM | 132 | C4   | C | A | 5 | 30.672 | -49.048 | 38.879 | 1.00 | 0.00 | C |
| ATOM | 133 | N4   | C | A | 5 | 29.974 | -48.365 | 37.985 | 1.00 | 0.00 | N |
| ATOM | 134 | C5   | C | A | 5 | 30.373 | -50.427 | 39.126 | 1.00 | 0.00 | C |
| ATOM | 135 | C6   | C | A | 5 | 31.142 | -51.062 | 40.057 | 1.00 | 0.00 | C |
| ATOM | 136 | C2'  | C | A | 5 | 32.196 | -52.096 | 42.593 | 1.00 | 0.00 | C |
| ATOM | 137 | C3'  | C | A | 5 | 33.220 | -53.200 | 42.805 | 1.00 | 0.00 | C |
| ATOM | 138 | O3'  | C | A | 5 | 34.059 | -52.855 | 43.906 | 1.00 | 0.00 | O |
| ATOM | 139 | C4'  | C | A | 5 | 33.981 | -53.217 | 41.483 | 1.00 | 0.00 | C |
| ATOM | 140 | O4'  | C | A | 5 | 33.982 | -51.820 | 41.047 | 1.00 | 0.00 | O |
| ATOM | 141 | C5'  | C | A | 5 | 33.393 | -54.067 | 40.380 | 1.00 | 0.00 | C |
| ATOM | 142 | O5'  | C | A | 5 | 31.945 | -54.002 | 40.431 | 1.00 | 0.00 | O |
| ATOM | 143 | O1P  | C | A | 5 | 31.276 | -56.350 | 41.042 | 1.00 | 0.00 | O |
| ATOM | 144 | O2P  | C | A | 5 | 29.704 | -54.898 | 39.730 | 1.00 | 0.00 | O |
| ATOM | 145 | P    | C | A | 5 | 31.103 | -55.293 | 40.025 | 1.00 | 0.00 | P |
| ATOM | 146 | H5   | C | A | 5 | 29.570 | -50.943 | 38.598 | 1.00 | 0.00 | H |
| ATOM | 147 | H6   | C | A | 5 | 30.956 | -52.115 | 40.276 | 1.00 | 0.00 | H |
| ATOM | 148 | H1'  | C | A | 5 | 33.456 | -50.348 | 42.350 | 1.00 | 0.00 | H |
| ATOM | 149 | H3'  | C | A | 5 | 32.747 | -54.163 | 43.001 | 1.00 | 0.00 | H |
| ATOM | 150 | H4'  | C | A | 5 | 34.980 | -53.598 | 41.697 | 1.00 | 0.00 | H |

|      |     |      |     |   |        |         |        |      |      |   |
|------|-----|------|-----|---|--------|---------|--------|------|------|---|
| ATOM | 151 | H41  | C A | 5 | 29.213 | -48.825 | 37.464 | 1.00 | 0.00 | H |
| ATOM | 152 | H42  | C A | 5 | 30.190 | -47.373 | 37.810 | 1.00 | 0.00 | H |
| ATOM | 153 | H2'1 | C A | 5 | 31.307 | -52.471 | 42.090 | 1.00 | 0.00 | H |
| ATOM | 154 | H2'2 | C A | 5 | 31.878 | -51.660 | 43.542 | 1.00 | 0.00 | H |
| ATOM | 155 | H5'1 | C A | 5 | 33.745 | -53.697 | 39.417 | 1.00 | 0.00 | H |
| ATOM | 156 | H5'2 | C A | 5 | 33.720 | -55.098 | 40.512 | 1.00 | 0.00 | H |
| ATOM | 157 | C1'  | G A | 6 | 33.184 | -47.358 | 44.965 | 1.00 | 0.00 | C |
| ATOM | 158 | N1   | G A | 6 | 30.172 | -45.014 | 41.579 | 1.00 | 0.00 | N |
| ATOM | 159 | C2   | G A | 6 | 31.257 | -44.529 | 42.287 | 1.00 | 0.00 | C |
| ATOM | 160 | N2   | G A | 6 | 31.582 | -43.250 | 42.066 | 1.00 | 0.00 | N |
| ATOM | 161 | N3   | G A | 6 | 31.962 | -45.263 | 43.147 | 1.00 | 0.00 | N |
| ATOM | 162 | C4   | G A | 6 | 31.489 | -46.532 | 43.253 | 1.00 | 0.00 | C |
| ATOM | 163 | C5   | G A | 6 | 30.413 | -47.101 | 42.590 | 1.00 | 0.00 | C |
| ATOM | 164 | C6   | G A | 6 | 29.667 | -46.325 | 41.675 | 1.00 | 0.00 | C |
| ATOM | 165 | O6   | G A | 6 | 28.690 | -46.647 | 40.999 | 1.00 | 0.00 | O |
| ATOM | 166 | N7   | G A | 6 | 30.255 | -48.432 | 42.982 | 1.00 | 0.00 | N |
| ATOM | 167 | C8   | G A | 6 | 31.218 | -48.625 | 43.844 | 1.00 | 0.00 | C |
| ATOM | 168 | N9   | G A | 6 | 32.011 | -47.516 | 44.063 | 1.00 | 0.00 | N |
| ATOM | 169 | C2'  | G A | 6 | 33.046 | -48.099 | 46.286 | 1.00 | 0.00 | C |
| ATOM | 170 | C3'  | G A | 6 | 34.474 | -48.553 | 46.546 | 1.00 | 0.00 | C |
| ATOM | 171 | O3'  | G A | 6 | 35.194 | -47.497 | 47.179 | 1.00 | 0.00 | O |
| ATOM | 172 | C4'  | G A | 6 | 34.998 | -48.849 | 45.143 | 1.00 | 0.00 | C |
| ATOM | 173 | O4'  | G A | 6 | 34.318 | -47.872 | 44.291 | 1.00 | 0.00 | O |
| ATOM | 174 | C5'  | G A | 6 | 34.726 | -50.233 | 44.603 | 1.00 | 0.00 | C |
| ATOM | 175 | O5'  | G A | 6 | 33.422 | -50.686 | 45.044 | 1.00 | 0.00 | O |
| ATOM | 176 | O1P  | G A | 6 | 33.960 | -52.620 | 46.561 | 1.00 | 0.00 | O |
| ATOM | 177 | O2P  | G A | 6 | 31.760 | -52.543 | 45.359 | 1.00 | 0.00 | O |
| ATOM | 178 | P    | G A | 6 | 33.211 | -52.237 | 45.350 | 1.00 | 0.00 | P |
| ATOM | 179 | H1   | G A | 6 | 29.699 | -44.365 | 40.932 | 1.00 | 0.00 | H |
| ATOM | 180 | H8   | G A | 6 | 31.383 | -49.577 | 44.349 | 1.00 | 0.00 | H |
| ATOM | 181 | H1'  | G A | 6 | 33.347 | -46.292 | 45.129 | 1.00 | 0.00 | H |
| ATOM | 182 | H21  | G A | 6 | 31.035 | -42.689 | 41.397 | 1.00 | 0.00 | H |
| ATOM | 183 | H3'  | G A | 6 | 34.512 | -49.442 | 47.177 | 1.00 | 0.00 | H |
| ATOM | 184 | H22  | G A | 6 | 32.379 | -42.827 | 42.564 | 1.00 | 0.00 | H |
| ATOM | 185 | H4'  | G A | 6 | 36.077 | -48.708 | 45.172 | 1.00 | 0.00 | H |
| ATOM | 186 | H2'1 | G A | 6 | 32.366 | -48.949 | 46.215 | 1.00 | 0.00 | H |
| ATOM | 187 | H2'2 | G A | 6 | 32.681 | -47.455 | 47.087 | 1.00 | 0.00 | H |
| ATOM | 188 | H5'1 | G A | 6 | 34.758 | -50.205 | 43.515 | 1.00 | 0.00 | H |
| ATOM | 189 | H5'2 | G A | 6 | 35.495 | -50.915 | 44.964 | 1.00 | 0.00 | H |
| ATOM | 190 | C1'  | C A | 7 | 32.093 | -42.800 | 46.568 | 1.00 | 0.00 | C |
| ATOM | 191 | N1   | C A | 7 | 31.012 | -43.732 | 46.144 | 1.00 | 0.00 | N |
| ATOM | 192 | C2   | C A | 7 | 30.082 | -43.270 | 45.214 | 1.00 | 0.00 | C |
| ATOM | 193 | O2   | C A | 7 | 30.190 | -42.116 | 44.783 | 1.00 | 0.00 | O |
| ATOM | 194 | N3   | C A | 7 | 29.089 | -44.102 | 44.816 | 1.00 | 0.00 | N |
| ATOM | 195 | C4   | C A | 7 | 28.997 | -45.347 | 45.300 | 1.00 | 0.00 | C |
| ATOM | 196 | N4   | C A | 7 | 28.008 | -46.119 | 44.874 | 1.00 | 0.00 | N |
| ATOM | 197 | C5   | C A | 7 | 29.936 | -45.847 | 46.260 | 1.00 | 0.00 | C |
| ATOM | 198 | C6   | C A | 7 | 30.932 | -44.992 | 46.646 | 1.00 | 0.00 | C |
| ATOM | 199 | C2'  | C A | 7 | 32.455 | -42.911 | 48.044 | 1.00 | 0.00 | C |
| ATOM | 200 | C3'  | C A | 7 | 33.956 | -42.670 | 48.019 | 1.00 | 0.00 | C |
| ATOM | 201 | O3'  | C A | 7 | 34.205 | -41.265 | 48.032 | 1.00 | 0.00 | O |
| ATOM | 202 | C4'  | C A | 7 | 34.385 | -43.320 | 46.706 | 1.00 | 0.00 | C |
| ATOM | 203 | O4'  | C A | 7 | 33.247 | -43.109 | 45.809 | 1.00 | 0.00 | O |
| ATOM | 204 | C5'  | C A | 7 | 34.690 | -44.799 | 46.758 | 1.00 | 0.00 | C |

|      |     |      |     |   |        |         |        |      |      |   |
|------|-----|------|-----|---|--------|---------|--------|------|------|---|
| ATOM | 205 | O5'  | C A | 7 | 33.784 | -45.455 | 47.678 | 1.00 | 0.00 | O |
| ATOM | 206 | O1P  | C A | 7 | 35.296 | -46.238 | 49.531 | 1.00 | 0.00 | O |
| ATOM | 207 | O2P  | C A | 7 | 33.161 | -47.465 | 49.051 | 1.00 | 0.00 | O |
| ATOM | 208 | P    | C A | 7 | 34.315 | -46.697 | 48.526 | 1.00 | 0.00 | P |
| ATOM | 209 | H5   | C A | 7 | 29.863 | -46.857 | 46.664 | 1.00 | 0.00 | H |
| ATOM | 210 | H6   | C A | 7 | 31.675 | -45.330 | 47.368 | 1.00 | 0.00 | H |
| ATOM | 211 | H1'  | C A | 7 | 31.787 | -41.786 | 46.316 | 1.00 | 0.00 | H |
| ATOM | 212 | H3'  | C A | 7 | 34.457 | -43.133 | 48.870 | 1.00 | 0.00 | H |
| ATOM | 213 | H4'  | C A | 7 | 35.288 | -42.805 | 46.378 | 1.00 | 0.00 | H |
| ATOM | 214 | H41  | C A | 7 | 27.915 | -47.081 | 45.228 | 1.00 | 0.00 | H |
| ATOM | 215 | H42  | C A | 7 | 27.332 | -45.758 | 44.185 | 1.00 | 0.00 | H |
| ATOM | 216 | H2'1 | C A | 7 | 32.217 | -43.891 | 48.455 | 1.00 | 0.00 | H |
| ATOM | 217 | H2'2 | C A | 7 | 31.942 | -42.166 | 48.652 | 1.00 | 0.00 | H |
| ATOM | 218 | H5'1 | C A | 7 | 34.575 | -45.225 | 45.760 | 1.00 | 0.00 | H |
| ATOM | 219 | H5'2 | C A | 7 | 35.718 | -44.940 | 47.090 | 1.00 | 0.00 | H |
| ATOM | 220 | C1'  | A A | 8 | 29.309 | -38.717 | 46.828 | 1.00 | 0.00 | C |
| ATOM | 221 | N1   | A A | 8 | 25.511 | -41.915 | 45.524 | 1.00 | 0.00 | N |
| ATOM | 222 | C2   | A A | 8 | 25.826 | -40.685 | 45.129 | 1.00 | 0.00 | C |
| ATOM | 223 | N3   | A A | 8 | 26.824 | -39.916 | 45.504 | 1.00 | 0.00 | N |
| ATOM | 224 | C4   | A A | 8 | 27.576 | -40.546 | 46.425 | 1.00 | 0.00 | C |
| ATOM | 225 | C5   | A A | 8 | 27.390 | -41.799 | 46.936 | 1.00 | 0.00 | C |
| ATOM | 226 | C6   | A A | 8 | 26.280 | -42.518 | 46.443 | 1.00 | 0.00 | C |
| ATOM | 227 | N6   | A A | 8 | 25.973 | -43.761 | 46.851 | 1.00 | 0.00 | N |
| ATOM | 228 | N7   | A A | 8 | 28.367 | -42.112 | 47.865 | 1.00 | 0.00 | N |
| ATOM | 229 | C8   | A A | 8 | 29.114 | -41.047 | 47.901 | 1.00 | 0.00 | C |
| ATOM | 230 | N9   | A A | 8 | 28.697 | -40.055 | 47.051 | 1.00 | 0.00 | N |
| ATOM | 231 | C2'  | A A | 8 | 29.861 | -38.076 | 48.093 | 1.00 | 0.00 | C |
| ATOM | 232 | C3'  | A A | 8 | 31.090 | -37.350 | 47.571 | 1.00 | 0.00 | C |
| ATOM | 233 | O3'  | A A | 8 | 30.698 | -36.079 | 47.059 | 1.00 | 0.00 | O |
| ATOM | 234 | C4'  | A A | 8 | 31.595 | -38.283 | 46.471 | 1.00 | 0.00 | C |
| ATOM | 235 | O4'  | A A | 8 | 30.376 | -38.878 | 45.915 | 1.00 | 0.00 | O |
| ATOM | 236 | C5'  | A A | 8 | 32.520 | -39.394 | 46.908 | 1.00 | 0.00 | C |
| ATOM | 237 | O5'  | A A | 8 | 32.110 | -39.892 | 48.207 | 1.00 | 0.00 | O |
| ATOM | 238 | O1P  | A A | 8 | 34.028 | -39.250 | 49.706 | 1.00 | 0.00 | O |
| ATOM | 239 | O2P  | A A | 8 | 32.602 | -41.236 | 50.272 | 1.00 | 0.00 | O |
| ATOM | 240 | P    | A A | 8 | 33.231 | -40.395 | 49.224 | 1.00 | 0.00 | P |
| ATOM | 241 | H2   | A A | 8 | 25.161 | -40.253 | 44.384 | 1.00 | 0.00 | H |
| ATOM | 242 | H8   | A A | 8 | 29.990 | -40.952 | 48.544 | 1.00 | 0.00 | H |
| ATOM | 243 | H1'  | A A | 8 | 28.561 | -38.077 | 46.359 | 1.00 | 0.00 | H |
| ATOM | 244 | H3'  | A A | 8 | 31.843 | -37.211 | 48.345 | 1.00 | 0.00 | H |
| ATOM | 245 | H4'  | A A | 8 | 32.132 | -37.665 | 45.753 | 1.00 | 0.00 | H |
| ATOM | 246 | H61  | A A | 8 | 25.153 | -44.244 | 46.458 | 1.00 | 0.00 | H |
| ATOM | 247 | H62  | A A | 8 | 26.558 | -44.230 | 47.559 | 1.00 | 0.00 | H |
| ATOM | 248 | H2'1 | A A | 8 | 30.128 | -38.814 | 48.848 | 1.00 | 0.00 | H |
| ATOM | 249 | H2'2 | A A | 8 | 29.153 | -37.382 | 48.547 | 1.00 | 0.00 | H |
| ATOM | 250 | H5'1 | A A | 8 | 32.478 | -40.201 | 46.176 | 1.00 | 0.00 | H |
| ATOM | 251 | H5'2 | A A | 8 | 33.538 | -39.012 | 46.965 | 1.00 | 0.00 | H |
| ATOM | 252 | C1'  | C A | 9 | 25.014 | -36.243 | 46.500 | 1.00 | 0.00 | C |
| ATOM | 253 | N1   | C A | 9 | 25.111 | -37.476 | 47.329 | 1.00 | 0.00 | N |
| ATOM | 254 | C2   | C A | 9 | 24.165 | -38.477 | 47.125 | 1.00 | 0.00 | C |
| ATOM | 255 | O2   | C A | 9 | 23.286 | -38.303 | 46.270 | 1.00 | 0.00 | O |
| ATOM | 256 | N3   | C A | 9 | 24.237 | -39.608 | 47.870 | 1.00 | 0.00 | N |
| ATOM | 257 | C4   | C A | 9 | 25.198 | -39.767 | 48.789 | 1.00 | 0.00 | C |
| ATOM | 258 | N4   | C A | 9 | 25.223 | -40.893 | 49.487 | 1.00 | 0.00 | N |

|      |     |      |     |    |        |         |        |      |      |   |
|------|-----|------|-----|----|--------|---------|--------|------|------|---|
| ATOM | 259 | C5   | C A | 9  | 26.184 | -38.751 | 49.024 | 1.00 | 0.00 | C |
| ATOM | 260 | C6   | C A | 9  | 26.095 | -37.623 | 48.259 | 1.00 | 0.00 | C |
| ATOM | 261 | C2'  | C A | 9  | 25.357 | -34.968 | 47.255 | 1.00 | 0.00 | C |
| ATOM | 262 | C3'  | C A | 9  | 26.051 | -34.141 | 46.182 | 1.00 | 0.00 | C |
| ATOM | 263 | O3'  | C A | 9  | 25.068 | -33.457 | 45.410 | 1.00 | 0.00 | O |
| ATOM | 264 | C4'  | C A | 9  | 26.793 | -35.197 | 45.367 | 1.00 | 0.00 | C |
| ATOM | 265 | O4'  | C A | 9  | 25.926 | -36.375 | 45.425 | 1.00 | 0.00 | O |
| ATOM | 266 | C5'  | C A | 9  | 28.167 | -35.586 | 45.863 | 1.00 | 0.00 | C |
| ATOM | 267 | O5'  | C A | 9  | 28.182 | -35.585 | 47.313 | 1.00 | 0.00 | O |
| ATOM | 268 | O1P  | C A | 9  | 29.759 | -33.706 | 47.877 | 1.00 | 0.00 | O |
| ATOM | 269 | O2P  | C A | 9  | 29.472 | -35.623 | 49.471 | 1.00 | 0.00 | O |
| ATOM | 270 | P    | C A | 9  | 29.520 | -35.150 | 48.065 | 1.00 | 0.00 | P |
| ATOM | 271 | H5   | C A | 9  | 26.964 | -38.874 | 49.776 | 1.00 | 0.00 | H |
| ATOM | 272 | H6   | C A | 9  | 26.826 | -36.827 | 48.395 | 1.00 | 0.00 | H |
| ATOM | 273 | H1'  | C A | 9  | 24.008 | -36.193 | 46.083 | 1.00 | 0.00 | H |
| ATOM | 274 | H3'  | C A | 9  | 26.743 | -33.416 | 46.610 | 1.00 | 0.00 | H |
| ATOM | 275 | H4'  | C A | 9  | 26.903 | -34.800 | 44.359 | 1.00 | 0.00 | H |
| ATOM | 276 | H41  | C A | 9  | 25.954 | -41.041 | 50.199 | 1.00 | 0.00 | H |
| ATOM | 277 | H42  | C A | 9  | 24.512 | -41.619 | 49.319 | 1.00 | 0.00 | H |
| ATOM | 278 | H2'1 | C A | 9  | 26.017 | -35.151 | 48.102 | 1.00 | 0.00 | H |
| ATOM | 279 | H2'2 | C A | 9  | 24.469 | -34.460 | 47.636 | 1.00 | 0.00 | H |
| ATOM | 280 | H5'1 | C A | 9  | 28.414 | -36.581 | 45.492 | 1.00 | 0.00 | H |
| ATOM | 281 | H5'2 | C A | 9  | 28.897 | -34.871 | 45.486 | 1.00 | 0.00 | H |
| ATOM | 282 | C1'  | C A | 10 | 20.078 | -35.852 | 46.627 | 1.00 | 0.00 | C |
| ATOM | 283 | N1   | C A | 10 | 20.814 | -36.492 | 47.752 | 1.00 | 0.00 | N |
| ATOM | 284 | C2   | C A | 10 | 20.396 | -37.753 | 48.171 | 1.00 | 0.00 | C |
| ATOM | 285 | O2   | C A | 10 | 19.435 | -38.285 | 47.597 | 1.00 | 0.00 | O |
| ATOM | 286 | N3   | C A | 10 | 21.052 | -38.354 | 49.193 | 1.00 | 0.00 | N |
| ATOM | 287 | C4   | C A | 10 | 22.087 | -37.751 | 49.795 | 1.00 | 0.00 | C |
| ATOM | 288 | N4   | C A | 10 | 22.695 | -38.386 | 50.788 | 1.00 | 0.00 | N |
| ATOM | 289 | C5   | C A | 10 | 22.537 | -36.453 | 49.387 | 1.00 | 0.00 | C |
| ATOM | 290 | C6   | C A | 10 | 21.862 | -35.869 | 48.352 | 1.00 | 0.00 | C |
| ATOM | 291 | C2'  | C A | 10 | 19.906 | -34.348 | 46.784 | 1.00 | 0.00 | C |
| ATOM | 292 | C3'  | C A | 10 | 20.024 | -33.863 | 45.347 | 1.00 | 0.00 | C |
| ATOM | 293 | O3'  | C A | 10 | 18.753 | -33.973 | 44.710 | 1.00 | 0.00 | O |
| ATOM | 294 | C4'  | C A | 10 | 21.054 | -34.818 | 44.751 | 1.00 | 0.00 | C |
| ATOM | 295 | O4'  | C A | 10 | 20.816 | -36.085 | 45.442 | 1.00 | 0.00 | O |
| ATOM | 296 | C5'  | C A | 10 | 22.506 | -34.437 | 44.929 | 1.00 | 0.00 | C |
| ATOM | 297 | O5'  | C A | 10 | 22.695 | -33.819 | 46.227 | 1.00 | 0.00 | O |
| ATOM | 298 | O1P  | C A | 10 | 23.324 | -31.449 | 45.658 | 1.00 | 0.00 | O |
| ATOM | 299 | O2P  | C A | 10 | 24.113 | -32.476 | 47.807 | 1.00 | 0.00 | O |
| ATOM | 300 | P    | C A | 10 | 23.777 | -32.658 | 46.374 | 1.00 | 0.00 | P |
| ATOM | 301 | H5   | C A | 10 | 23.375 | -35.956 | 49.878 | 1.00 | 0.00 | H |
| ATOM | 302 | H6   | C A | 10 | 22.174 | -34.885 | 48.001 | 1.00 | 0.00 | H |
| ATOM | 303 | H1'  | C A | 10 | 19.114 | -36.347 | 46.524 | 1.00 | 0.00 | H |
| ATOM | 304 | H3'  | C A | 10 | 20.366 | -32.829 | 45.292 | 1.00 | 0.00 | H |
| ATOM | 305 | H4'  | C A | 10 | 20.854 | -34.871 | 43.680 | 1.00 | 0.00 | H |
| ATOM | 306 | H41  | C A | 10 | 23.495 | -37.946 | 51.266 | 1.00 | 0.00 | H |
| ATOM | 307 | H42  | C A | 10 | 22.367 | -39.318 | 51.080 | 1.00 | 0.00 | H |
| ATOM | 308 | H2'1 | C A | 10 | 20.675 | -33.905 | 47.415 | 1.00 | 0.00 | H |
| ATOM | 309 | H2'2 | C A | 10 | 18.937 | -34.085 | 47.214 | 1.00 | 0.00 | H |
| ATOM | 310 | H5'1 | C A | 10 | 23.124 | -35.333 | 44.854 | 1.00 | 0.00 | H |
| ATOM | 311 | H5'2 | C A | 10 | 22.791 | -33.738 | 44.143 | 1.00 | 0.00 | H |
| ATOM | 312 | C1'  | T A | 11 | 15.533 | -37.237 | 48.014 | 1.00 | 0.00 | C |

|      |     |      |     |    |        |         |        |      |      |   |
|------|-----|------|-----|----|--------|---------|--------|------|------|---|
| ATOM | 313 | N1   | T A | 11 | 16.601 | -37.051 | 49.034 | 1.00 | 0.00 | N |
| ATOM | 314 | C2   | T A | 11 | 16.808 | -38.084 | 49.924 | 1.00 | 0.00 | C |
| ATOM | 315 | O2   | T A | 11 | 16.159 | -39.116 | 49.900 | 1.00 | 0.00 | O |
| ATOM | 316 | N3   | T A | 11 | 17.810 | -37.871 | 50.853 | 1.00 | 0.00 | N |
| ATOM | 317 | C4   | T A | 11 | 18.596 | -36.742 | 50.968 | 1.00 | 0.00 | C |
| ATOM | 318 | O4   | T A | 11 | 19.464 | -36.664 | 51.848 | 1.00 | 0.00 | O |
| ATOM | 319 | C5   | T A | 11 | 18.305 | -35.717 | 49.995 | 1.00 | 0.00 | C |
| ATOM | 320 | C6   | T A | 11 | 17.338 | -35.892 | 49.074 | 1.00 | 0.00 | C |
| ATOM | 321 | C7   | T A | 11 | 19.140 | -34.473 | 50.080 | 1.00 | 0.00 | C |
| ATOM | 322 | C2'  | T A | 11 | 14.744 | -35.970 | 47.712 | 1.00 | 0.00 | C |
| ATOM | 323 | C3'  | T A | 11 | 14.468 | -36.112 | 46.225 | 1.00 | 0.00 | C |
| ATOM | 324 | O3'  | T A | 11 | 13.306 | -36.917 | 46.038 | 1.00 | 0.00 | O |
| ATOM | 325 | C4'  | T A | 11 | 15.733 | -36.796 | 45.710 | 1.00 | 0.00 | C |
| ATOM | 326 | O4'  | T A | 11 | 16.151 | -37.661 | 46.815 | 1.00 | 0.00 | O |
| ATOM | 327 | C5'  | T A | 11 | 16.886 | -35.890 | 45.341 | 1.00 | 0.00 | C |
| ATOM | 328 | O5'  | T A | 11 | 16.939 | -34.770 | 46.260 | 1.00 | 0.00 | O |
| ATOM | 329 | O1P  | T A | 11 | 16.404 | -32.791 | 44.800 | 1.00 | 0.00 | O |
| ATOM | 330 | O2P  | T A | 11 | 17.810 | -32.489 | 46.856 | 1.00 | 0.00 | O |
| ATOM | 331 | P    | T A | 11 | 17.418 | -33.351 | 45.713 | 1.00 | 0.00 | P |
| ATOM | 332 | H3   | T A | 11 | 17.988 | -38.628 | 51.527 | 1.00 | 0.00 | H |
| ATOM | 333 | H6   | T A | 11 | 17.135 | -35.104 | 48.347 | 1.00 | 0.00 | H |
| ATOM | 334 | H1'  | T A | 11 | 14.873 | -38.036 | 48.352 | 1.00 | 0.00 | H |
| ATOM | 335 | H3'  | T A | 11 | 14.319 | -35.147 | 45.743 | 1.00 | 0.00 | H |
| ATOM | 336 | H4'  | T A | 11 | 15.451 | -37.354 | 44.816 | 1.00 | 0.00 | H |
| ATOM | 337 | H71  | T A | 11 | 18.507 | -33.631 | 50.356 | 1.00 | 0.00 | H |
| ATOM | 338 | H72  | T A | 11 | 19.915 | -34.608 | 50.835 | 1.00 | 0.00 | H |
| ATOM | 339 | H73  | T A | 11 | 19.603 | -34.278 | 49.113 | 1.00 | 0.00 | H |
| ATOM | 340 | H2'1 | T A | 11 | 15.315 | -35.067 | 47.925 | 1.00 | 0.00 | H |
| ATOM | 341 | H2'2 | T A | 11 | 13.817 | -35.914 | 48.285 | 1.00 | 0.00 | H |
| ATOM | 342 | H5'1 | T A | 11 | 17.816 | -36.454 | 45.394 | 1.00 | 0.00 | H |
| ATOM | 343 | H5'2 | T A | 11 | 16.742 | -35.525 | 44.325 | 1.00 | 0.00 | H |
| ATOM | 344 | C1'  | A A | 12 | 12.291 | -39.460 | 51.043 | 1.00 | 0.00 | C |
| ATOM | 345 | N1   | A A | 12 | 15.895 | -38.625 | 54.603 | 1.00 | 0.00 | N |
| ATOM | 346 | C2   | A A | 12 | 15.117 | -39.670 | 54.339 | 1.00 | 0.00 | C |
| ATOM | 347 | N3   | A A | 12 | 14.206 | -39.820 | 53.399 | 1.00 | 0.00 | N |
| ATOM | 348 | C4   | A A | 12 | 14.119 | -38.705 | 52.655 | 1.00 | 0.00 | C |
| ATOM | 349 | C5   | A A | 12 | 14.839 | -37.552 | 52.793 | 1.00 | 0.00 | C |
| ATOM | 350 | C6   | A A | 12 | 15.785 | -37.527 | 53.840 | 1.00 | 0.00 | C |
| ATOM | 351 | N6   | A A | 12 | 16.565 | -36.462 | 54.097 | 1.00 | 0.00 | N |
| ATOM | 352 | N7   | A A | 12 | 14.476 | -36.617 | 51.840 | 1.00 | 0.00 | N |
| ATOM | 353 | C8   | A A | 12 | 13.548 | -37.216 | 51.154 | 1.00 | 0.00 | C |
| ATOM | 354 | N9   | A A | 12 | 13.279 | -38.489 | 51.589 | 1.00 | 0.00 | N |
| ATOM | 355 | C2'  | A A | 12 | 10.992 | -38.816 | 50.580 | 1.00 | 0.00 | C |
| ATOM | 356 | C3'  | A A | 12 | 10.632 | -39.666 | 49.371 | 1.00 | 0.00 | C |
| ATOM | 357 | O3'  | A A | 12 | 9.936  | -40.831 | 49.809 | 1.00 | 0.00 | O |
| ATOM | 358 | C4'  | A A | 12 | 11.996 | -40.000 | 48.771 | 1.00 | 0.00 | C |
| ATOM | 359 | O4'  | A A | 12 | 12.885 | -40.097 | 49.930 | 1.00 | 0.00 | O |
| ATOM | 360 | C5'  | A A | 12 | 12.570 | -38.990 | 47.806 | 1.00 | 0.00 | C |
| ATOM | 361 | O5'  | A A | 12 | 12.232 | -37.649 | 48.240 | 1.00 | 0.00 | O |
| ATOM | 362 | O1P  | A A | 12 | 10.701 | -36.817 | 46.423 | 1.00 | 0.00 | O |
| ATOM | 363 | O2P  | A A | 12 | 12.063 | -35.188 | 47.762 | 1.00 | 0.00 | O |
| ATOM | 364 | P    | A A | 12 | 11.961 | -36.530 | 47.137 | 1.00 | 0.00 | P |
| ATOM | 365 | H2   | A A | 12 | 15.253 | -40.529 | 54.997 | 1.00 | 0.00 | H |
| ATOM | 366 | H8   | A A | 12 | 13.032 | -36.753 | 50.311 | 1.00 | 0.00 | H |

|      |     |      |   |   |    |        |         |        |      |      |   |
|------|-----|------|---|---|----|--------|---------|--------|------|------|---|
| ATOM | 367 | H1'  | A | A | 12 | 12.103 | -40.216 | 51.804 | 1.00 | 0.00 | H |
| ATOM | 368 | H3'  | A | A | 12 | 10.012 | -39.122 | 48.659 | 1.00 | 0.00 | H |
| ATOM | 369 | H4'  | A | A | 12 | 11.883 | -40.944 | 48.238 | 1.00 | 0.00 | H |
| ATOM | 370 | H61  | A | A | 12 | 17.242 | -36.496 | 54.872 | 1.00 | 0.00 | H |
| ATOM | 371 | H62  | A | A | 12 | 16.486 | -35.614 | 53.516 | 1.00 | 0.00 | H |
| ATOM | 372 | H2'1 | A | A | 12 | 11.123 | -37.770 | 50.304 | 1.00 | 0.00 | H |
| ATOM | 373 | H2'2 | A | A | 12 | 10.214 | -38.859 | 51.342 | 1.00 | 0.00 | H |
| ATOM | 374 | H5'1 | A | A | 12 | 13.653 | -39.104 | 47.771 | 1.00 | 0.00 | H |
| ATOM | 375 | H5'2 | A | A | 12 | 12.160 | -39.170 | 46.813 | 1.00 | 0.00 | H |
| ATOM | 376 | C1'  | G | A | 13 | 10.787 | -41.188 | 55.448 | 1.00 | 0.00 | C |
| ATOM | 377 | N1   | G | A | 13 | 14.013 | -37.697 | 57.303 | 1.00 | 0.00 | N |
| ATOM | 378 | C2   | G | A | 13 | 13.794 | -39.005 | 57.702 | 1.00 | 0.00 | C |
| ATOM | 379 | N2   | G | A | 13 | 14.530 | -39.438 | 58.733 | 1.00 | 0.00 | N |
| ATOM | 380 | N3   | G | A | 13 | 12.910 | -39.812 | 57.117 | 1.00 | 0.00 | N |
| ATOM | 381 | C4   | G | A | 13 | 12.250 | -39.206 | 56.098 | 1.00 | 0.00 | C |
| ATOM | 382 | C5   | G | A | 13 | 12.399 | -37.909 | 55.634 | 1.00 | 0.00 | C |
| ATOM | 383 | C6   | G | A | 13 | 13.339 | -37.051 | 56.250 | 1.00 | 0.00 | C |
| ATOM | 384 | O6   | G | A | 13 | 13.611 | -35.880 | 55.984 | 1.00 | 0.00 | O |
| ATOM | 385 | N7   | G | A | 13 | 11.528 | -37.675 | 54.567 | 1.00 | 0.00 | N |
| ATOM | 386 | C8   | G | A | 13 | 10.897 | -38.811 | 54.420 | 1.00 | 0.00 | C |
| ATOM | 387 | N9   | G | A | 13 | 11.279 | -39.789 | 55.313 | 1.00 | 0.00 | N |
| ATOM | 388 | C2'  | G | A | 13 | 9.292  | -41.339 | 55.204 | 1.00 | 0.00 | C |
| ATOM | 389 | C3'  | G | A | 13 | 9.216  | -42.693 | 54.519 | 1.00 | 0.00 | C |
| ATOM | 390 | O3'  | G | A | 13 | 9.191  | -43.718 | 55.509 | 1.00 | 0.00 | O |
| ATOM | 391 | C4'  | G | A | 13 | 10.499 | -42.726 | 53.689 | 1.00 | 0.00 | C |
| ATOM | 392 | O4'  | G | A | 13 | 11.467 | -41.980 | 54.493 | 1.00 | 0.00 | O |
| ATOM | 393 | C5'  | G | A | 13 | 10.426 | -42.100 | 52.316 | 1.00 | 0.00 | C |
| ATOM | 394 | O5'  | G | A | 13 | 9.567  | -40.934 | 52.353 | 1.00 | 0.00 | O |
| ATOM | 395 | O1P  | G | A | 13 | 7.618  | -41.598 | 50.906 | 1.00 | 0.00 | O |
| ATOM | 396 | O2P  | G | A | 13 | 8.234  | -39.178 | 51.147 | 1.00 | 0.00 | O |
| ATOM | 397 | P    | G | A | 13 | 8.682  | -40.590 | 51.071 | 1.00 | 0.00 | P |
| ATOM | 398 | H1   | G | A | 13 | 14.725 | -37.157 | 57.818 | 1.00 | 0.00 | H |
| ATOM | 399 | H8   | G | A | 13 | 10.134 | -38.970 | 53.658 | 1.00 | 0.00 | H |
| ATOM | 400 | H1'  | G | A | 13 | 11.060 | -41.551 | 56.440 | 1.00 | 0.00 | H |
| ATOM | 401 | H21  | G | A | 13 | 15.215 | -38.808 | 59.176 | 1.00 | 0.00 | H |
| ATOM | 402 | H3'  | G | A | 13 | 8.335  | -42.781 | 53.884 | 1.00 | 0.00 | H |
| ATOM | 403 | H22  | G | A | 13 | 14.413 | -40.400 | 59.078 | 1.00 | 0.00 | H |
| ATOM | 404 | H4'  | G | A | 13 | 10.769 | -43.773 | 53.564 | 1.00 | 0.00 | H |
| ATOM | 405 | H2'1 | G | A | 13 | 8.896  | -40.548 | 54.567 | 1.00 | 0.00 | H |
| ATOM | 406 | H2'2 | G | A | 13 | 8.719  | -41.329 | 56.132 | 1.00 | 0.00 | H |
| ATOM | 407 | H5'1 | G | A | 13 | 11.428 | -41.811 | 52.000 | 1.00 | 0.00 | H |
| ATOM | 408 | H5'2 | G | A | 13 | 10.027 | -42.830 | 51.612 | 1.00 | 0.00 | H |
| ATOM | 409 | C1'  | G | A | 14 | 10.736 | -41.323 | 60.399 | 1.00 | 0.00 | C |
| ATOM | 410 | N1   | G | A | 14 | 12.265 | -36.475 | 59.984 | 1.00 | 0.00 | N |
| ATOM | 411 | C2   | G | A | 14 | 12.702 | -37.473 | 60.836 | 1.00 | 0.00 | C |
| ATOM | 412 | N2   | G | A | 14 | 13.672 | -37.134 | 61.694 | 1.00 | 0.00 | N |
| ATOM | 413 | N3   | G | A | 14 | 12.208 | -38.711 | 60.832 | 1.00 | 0.00 | N |
| ATOM | 414 | C4   | G | A | 14 | 11.229 | -38.873 | 59.905 | 1.00 | 0.00 | C |
| ATOM | 415 | C5   | G | A | 14 | 10.727 | -37.937 | 59.018 | 1.00 | 0.00 | C |
| ATOM | 416 | C6   | G | A | 14 | 11.253 | -36.624 | 59.017 | 1.00 | 0.00 | C |
| ATOM | 417 | O6   | G | A | 14 | 10.942 | -35.662 | 58.313 | 1.00 | 0.00 | O |
| ATOM | 418 | N7   | G | A | 14 | 9.722  | -38.506 | 58.233 | 1.00 | 0.00 | N |
| ATOM | 419 | C8   | G | A | 14 | 9.650  | -39.740 | 58.657 | 1.00 | 0.00 | C |
| ATOM | 420 | N9   | G | A | 14 | 10.533 | -40.040 | 59.673 | 1.00 | 0.00 | N |



|      |     |      |     |    |        |         |        |      |      |   |
|------|-----|------|-----|----|--------|---------|--------|------|------|---|
| ATOM | 421 | C2'  | G A | 14 | 9.447  | -42.091 | 60.659 | 1.00 | 0.00 | C |
| ATOM | 422 | C3'  | G A | 14 | 9.901  | -43.534 | 60.512 | 1.00 | 0.00 | C |
| ATOM | 423 | O3'  | G A | 14 | 10.453 | -43.980 | 61.750 | 1.00 | 0.00 | O |
| ATOM | 424 | C4'  | G A | 14 | 10.953 | -43.448 | 59.408 | 1.00 | 0.00 | C |
| ATOM | 425 | O4'  | G A | 14 | 11.576 | -42.140 | 59.605 | 1.00 | 0.00 | O |
| ATOM | 426 | C5'  | G A | 14 | 10.444 | -43.534 | 57.988 | 1.00 | 0.00 | C |
| ATOM | 427 | O5'  | G A | 14 | 9.167  | -42.857 | 57.885 | 1.00 | 0.00 | O |
| ATOM | 428 | O1P  | G A | 14 | 7.560  | -44.721 | 57.364 | 1.00 | 0.00 | O |
| ATOM | 429 | O2P  | G A | 14 | 7.057  | -42.385 | 56.602 | 1.00 | 0.00 | O |
| ATOM | 430 | P    | G A | 14 | 8.076  | -43.430 | 56.872 | 1.00 | 0.00 | P |
| ATOM | 431 | H1   | G A | 14 | 12.718 | -35.552 | 60.062 | 1.00 | 0.00 | H |
| ATOM | 432 | H8   | G A | 14 | 8.952  | -40.470 | 58.244 | 1.00 | 0.00 | H |
| ATOM | 433 | H1'  | G A | 14 | 11.258 | -41.109 | 61.331 | 1.00 | 0.00 | H |
| ATOM | 434 | H21  | G A | 14 | 14.051 | -36.177 | 61.688 | 1.00 | 0.00 | H |
| ATOM | 435 | H3'  | G A | 14 | 9.081  | -44.193 | 60.224 | 1.00 | 0.00 | H |
| ATOM | 436 | H22  | G A | 14 | 14.038 | -37.832 | 62.357 | 1.00 | 0.00 | H |
| ATOM | 437 | H4'  | G A | 14 | 11.643 | -44.276 | 59.564 | 1.00 | 0.00 | H |
| ATOM | 438 | H2'1 | G A | 14 | 8.666  | -41.845 | 59.940 | 1.00 | 0.00 | H |
| ATOM | 439 | H2'2 | G A | 14 | 9.046  | -41.900 | 61.656 | 1.00 | 0.00 | H |
| ATOM | 440 | H5'1 | G A | 14 | 11.166 | -43.064 | 57.321 | 1.00 | 0.00 | H |
| ATOM | 441 | H5'2 | G A | 14 | 10.330 | -44.582 | 57.712 | 1.00 | 0.00 | H |
| ATOM | 442 | C1'  | A A | 15 | 11.344 | -39.391 | 64.915 | 1.00 | 0.00 | C |
| ATOM | 443 | N1   | A A | 15 | 10.507 | -34.943 | 62.498 | 1.00 | 0.00 | N |
| ATOM | 444 | C2   | A A | 15 | 11.381 | -35.308 | 63.433 | 1.00 | 0.00 | C |
| ATOM | 445 | N3   | A A | 15 | 11.546 | -36.478 | 64.013 | 1.00 | 0.00 | N |
| ATOM | 446 | C4   | A A | 15 | 10.654 | -37.365 | 63.532 | 1.00 | 0.00 | C |
| ATOM | 447 | C5   | A A | 15 | 9.698  | -37.151 | 62.580 | 1.00 | 0.00 | C |
| ATOM | 448 | C6   | A A | 15 | 9.631  | -35.850 | 62.038 | 1.00 | 0.00 | C |
| ATOM | 449 | N6   | A A | 15 | 8.743  | -35.493 | 61.095 | 1.00 | 0.00 | N |
| ATOM | 450 | N7   | A A | 15 | 8.967  | -38.301 | 62.340 | 1.00 | 0.00 | N |
| ATOM | 451 | C8   | A A | 15 | 9.487  | -39.177 | 63.147 | 1.00 | 0.00 | C |
| ATOM | 452 | N9   | A A | 15 | 10.521 | -38.681 | 63.902 | 1.00 | 0.00 | N |
| ATOM | 453 | C2'  | A A | 15 | 10.556 | -40.385 | 65.758 | 1.00 | 0.00 | C |
| ATOM | 454 | C3'  | A A | 15 | 11.571 | -41.500 | 65.967 | 1.00 | 0.00 | C |
| ATOM | 455 | O3'  | A A | 15 | 12.404 | -41.172 | 67.075 | 1.00 | 0.00 | O |
| ATOM | 456 | C4'  | A A | 15 | 12.342 | -41.509 | 64.648 | 1.00 | 0.00 | C |
| ATOM | 457 | O4'  | A A | 15 | 12.354 | -40.106 | 64.227 | 1.00 | 0.00 | O |
| ATOM | 458 | C5'  | A A | 15 | 11.756 | -42.341 | 63.533 | 1.00 | 0.00 | C |
| ATOM | 459 | O5'  | A A | 15 | 10.308 | -42.267 | 63.574 | 1.00 | 0.00 | O |
| ATOM | 460 | O1P  | A A | 15 | 9.620  | -44.617 | 64.155 | 1.00 | 0.00 | O |
| ATOM | 461 | O2P  | A A | 15 | 8.066  | -43.141 | 62.849 | 1.00 | 0.00 | O |
| ATOM | 462 | P    | A A | 15 | 9.460  | -43.549 | 63.148 | 1.00 | 0.00 | P |
| ATOM | 463 | H2   | A A | 15 | 12.060 | -34.522 | 63.766 | 1.00 | 0.00 | H |
| ATOM | 464 | H8   | A A | 15 | 9.140  | -40.207 | 63.218 | 1.00 | 0.00 | H |
| ATOM | 465 | H1'  | A A | 15 | 11.831 | -38.645 | 65.543 | 1.00 | 0.00 | H |
| ATOM | 466 | H3'  | A A | 15 | 11.091 | -42.462 | 66.148 | 1.00 | 0.00 | H |
| ATOM | 467 | H4'  | A A | 15 | 13.336 | -41.896 | 64.865 | 1.00 | 0.00 | H |
| ATOM | 468 | H61  | A A | 15 | 8.739  | -34.530 | 60.731 | 1.00 | 0.00 | H |
| ATOM | 469 | H62  | A A | 15 | 8.067  | -36.183 | 60.738 | 1.00 | 0.00 | H |
| ATOM | 470 | H2'1 | A A | 15 | 9.668  | -40.750 | 65.244 | 1.00 | 0.00 | H |
| ATOM | 471 | H2'2 | A A | 15 | 10.236 | -39.960 | 66.709 | 1.00 | 0.00 | H |
| ATOM | 472 | H5'1 | A A | 15 | 12.116 | -41.964 | 62.577 | 1.00 | 0.00 | H |
| ATOM | 473 | H5'2 | A A | 15 | 12.073 | -43.376 | 63.654 | 1.00 | 0.00 | H |
| ATOM | 474 | C1'  | C A | 16 | 11.560 | -35.621 | 68.138 | 1.00 | 0.00 | C |

|      |     |      |     |    |        |         |        |      |      |   |
|------|-----|------|-----|----|--------|---------|--------|------|------|---|
| ATOM | 475 | N1   | C A | 16 | 10.387 | -35.774 | 67.235 | 1.00 | 0.00 | N |
| ATOM | 476 | C2   | C A | 16 | 9.995  | -34.669 | 66.482 | 1.00 | 0.00 | C |
| ATOM | 477 | O2   | C A | 16 | 10.632 | -33.614 | 66.594 | 1.00 | 0.00 | O |
| ATOM | 478 | N3   | C A | 16 | 8.928  | -34.786 | 65.653 | 1.00 | 0.00 | N |
| ATOM | 479 | C4   | C A | 16 | 8.259  | -35.942 | 65.554 | 1.00 | 0.00 | C |
| ATOM | 480 | N4   | C A | 16 | 7.226  | -36.001 | 64.724 | 1.00 | 0.00 | N |
| ATOM | 481 | C5   | C A | 16 | 8.635  | -37.093 | 66.319 | 1.00 | 0.00 | C |
| ATOM | 482 | C6   | C A | 16 | 9.716  | -36.953 | 67.144 | 1.00 | 0.00 | C |
| ATOM | 483 | C2'  | C A | 16 | 11.416 | -36.361 | 69.459 | 1.00 | 0.00 | C |
| ATOM | 484 | C3'  | C A | 16 | 12.843 | -36.821 | 69.722 | 1.00 | 0.00 | C |
| ATOM | 485 | O3'  | C A | 16 | 13.565 | -35.769 | 70.357 | 1.00 | 0.00 | O |
| ATOM | 486 | C4'  | C A | 16 | 13.366 | -37.118 | 68.319 | 1.00 | 0.00 | C |
| ATOM | 487 | O4'  | C A | 16 | 12.691 | -36.141 | 67.465 | 1.00 | 0.00 | O |
| ATOM | 488 | C5'  | C A | 16 | 13.088 | -38.504 | 67.779 | 1.00 | 0.00 | C |
| ATOM | 489 | O5'  | C A | 16 | 11.781 | -38.949 | 68.220 | 1.00 | 0.00 | O |
| ATOM | 490 | O1P  | C A | 16 | 12.307 | -40.887 | 69.739 | 1.00 | 0.00 | O |
| ATOM | 491 | O2P  | C A | 16 | 10.110 | -40.799 | 68.533 | 1.00 | 0.00 | O |
| ATOM | 492 | P    | C A | 16 | 11.562 | -40.498 | 68.525 | 1.00 | 0.00 | P |
| ATOM | 493 | H5   | C A | 16 | 8.089  | -38.035 | 66.247 | 1.00 | 0.00 | H |
| ATOM | 494 | H6   | C A | 16 | 10.046 | -37.804 | 67.741 | 1.00 | 0.00 | H |
| ATOM | 495 | H1'  | C A | 16 | 11.727 | -34.556 | 68.303 | 1.00 | 0.00 | H |
| ATOM | 496 | H3'  | C A | 16 | 12.873 | -37.712 | 70.352 | 1.00 | 0.00 | H |
| ATOM | 497 | H4'  | C A | 16 | 14.447 | -36.986 | 68.350 | 1.00 | 0.00 | H |
| ATOM | 498 | H41  | C A | 16 | 6.695  | -36.879 | 64.628 | 1.00 | 0.00 | H |
| ATOM | 499 | H42  | C A | 16 | 6.954  | -35.173 | 64.178 | 1.00 | 0.00 | H |
| ATOM | 500 | H2'1 | C A | 16 | 10.734 | -37.207 | 69.390 | 1.00 | 0.00 | H |
| ATOM | 501 | H2'2 | C A | 16 | 11.054 | -35.714 | 70.261 | 1.00 | 0.00 | H |
| ATOM | 502 | H5'1 | C A | 16 | 13.122 | -38.475 | 66.690 | 1.00 | 0.00 | H |
| ATOM | 503 | H5'2 | C A | 16 | 13.853 | -39.189 | 68.143 | 1.00 | 0.00 | H |
| ATOM | 504 | C1'  | G A | 17 | 10.467 | -31.065 | 69.741 | 1.00 | 0.00 | C |
| ATOM | 505 | N1   | G A | 17 | 6.343  | -31.628 | 66.792 | 1.00 | 0.00 | N |
| ATOM | 506 | C2   | G A | 17 | 7.176  | -30.533 | 66.955 | 1.00 | 0.00 | C |
| ATOM | 507 | N2   | G A | 17 | 6.867  | -29.446 | 66.238 | 1.00 | 0.00 | N |
| ATOM | 508 | N3   | G A | 17 | 8.232  | -30.528 | 67.767 | 1.00 | 0.00 | N |
| ATOM | 509 | C4   | G A | 17 | 8.389  | -31.709 | 68.418 | 1.00 | 0.00 | C |
| ATOM | 510 | C5   | G A | 17 | 7.608  | -32.850 | 68.322 | 1.00 | 0.00 | C |
| ATOM | 511 | C6   | G A | 17 | 6.491  | -32.859 | 67.456 | 1.00 | 0.00 | C |
| ATOM | 512 | O6   | G A | 17 | 5.686  | -33.765 | 67.237 | 1.00 | 0.00 | O |
| ATOM | 513 | N7   | G A | 17 | 8.108  | -33.850 | 69.159 | 1.00 | 0.00 | N |
| ATOM | 514 | C8   | G A | 17 | 9.154  | -33.298 | 69.720 | 1.00 | 0.00 | C |
| ATOM | 515 | N9   | G A | 17 | 9.388  | -31.999 | 69.321 | 1.00 | 0.00 | N |
| ATOM | 516 | C2'  | G A | 17 | 10.835 | -31.174 | 71.215 | 1.00 | 0.00 | C |
| ATOM | 517 | C3'  | G A | 17 | 12.334 | -30.928 | 71.188 | 1.00 | 0.00 | C |
| ATOM | 518 | O3'  | G A | 17 | 12.578 | -29.522 | 71.200 | 1.00 | 0.00 | O |
| ATOM | 519 | C4'  | G A | 17 | 12.761 | -31.576 | 69.872 | 1.00 | 0.00 | C |
| ATOM | 520 | O4'  | G A | 17 | 11.621 | -31.369 | 68.981 | 1.00 | 0.00 | O |
| ATOM | 521 | C5'  | G A | 17 | 13.074 | -33.053 | 69.924 | 1.00 | 0.00 | C |
| ATOM | 522 | O5'  | G A | 17 | 12.170 | -33.713 | 70.845 | 1.00 | 0.00 | O |
| ATOM | 523 | O1P  | G A | 17 | 13.692 | -34.489 | 72.694 | 1.00 | 0.00 | O |
| ATOM | 524 | O2P  | G A | 17 | 11.560 | -35.725 | 72.221 | 1.00 | 0.00 | O |
| ATOM | 525 | P    | G A | 17 | 12.710 | -34.952 | 71.692 | 1.00 | 0.00 | P |
| ATOM | 526 | H1   | G A | 17 | 5.557  | -31.530 | 66.132 | 1.00 | 0.00 | H |
| ATOM | 527 | H8   | G A | 17 | 9.783  | -33.820 | 70.441 | 1.00 | 0.00 | H |
| ATOM | 528 | H1'  | G A | 17 | 10.157 | -30.050 | 69.491 | 1.00 | 0.00 | H |

|      |     |      |   |   |    |        |         |        |      |      |   |
|------|-----|------|---|---|----|--------|---------|--------|------|------|---|
| ATOM | 529 | H21  | G | A | 17 | 6.052  | -29.459 | 65.610 | 1.00 | 0.00 | H |
| ATOM | 530 | H3'  | G | A | 17 | 12.839 | -31.390 | 72.038 | 1.00 | 0.00 | H |
| ATOM | 531 | H22  | G | A | 17 | 7.446  | -28.597 | 66.318 | 1.00 | 0.00 | H |
| ATOM | 532 | H4'  | G | A | 17 | 13.661 | -31.057 | 69.542 | 1.00 | 0.00 | H |
| ATOM | 533 | H2'1 | G | A | 17 | 10.602 | -32.156 | 71.628 | 1.00 | 0.00 | H |
| ATOM | 534 | H2'2 | G | A | 17 | 10.321 | -30.431 | 71.827 | 1.00 | 0.00 | H |
| ATOM | 535 | H5'1 | G | A | 17 | 12.957 | -33.477 | 68.926 | 1.00 | 0.00 | H |
| ATOM | 536 | H5'2 | G | A | 17 | 14.103 | -33.190 | 70.252 | 1.00 | 0.00 | H |
| ATOM | 537 | C1'  | G | A | 18 | 7.663  | -26.991 | 69.991 | 1.00 | 0.00 | C |
| ATOM | 538 | N1   | G | A | 18 | 3.900  | -30.189 | 68.713 | 1.00 | 0.00 | N |
| ATOM | 539 | C2   | G | A | 18 | 4.171  | -28.910 | 68.259 | 1.00 | 0.00 | C |
| ATOM | 540 | N2   | G | A | 18 | 3.326  | -28.418 | 67.342 | 1.00 | 0.00 | N |
| ATOM | 541 | N3   | G | A | 18 | 5.202  | -28.183 | 68.683 | 1.00 | 0.00 | N |
| ATOM | 542 | C4   | G | A | 18 | 5.947  | -28.835 | 69.613 | 1.00 | 0.00 | C |
| ATOM | 543 | C5   | G | A | 18 | 5.750  | -30.107 | 70.128 | 1.00 | 0.00 | C |
| ATOM | 544 | C6   | G | A | 18 | 4.658  | -30.882 | 69.673 | 1.00 | 0.00 | C |
| ATOM | 545 | O6   | G | A | 18 | 4.322  | -32.018 | 70.009 | 1.00 | 0.00 | O |
| ATOM | 546 | N7   | G | A | 18 | 6.740  | -30.405 | 71.065 | 1.00 | 0.00 | N |
| ATOM | 547 | C8   | G | A | 18 | 7.489  | -29.333 | 71.087 | 1.00 | 0.00 | C |
| ATOM | 548 | N9   | G | A | 18 | 7.070  | -28.336 | 70.233 | 1.00 | 0.00 | N |
| ATOM | 549 | C2'  | G | A | 18 | 8.214  | -26.328 | 71.246 | 1.00 | 0.00 | C |
| ATOM | 550 | C3'  | G | A | 18 | 9.432  | -25.594 | 70.708 | 1.00 | 0.00 | C |
| ATOM | 551 | O3'  | G | A | 18 | 9.023  | -24.332 | 70.184 | 1.00 | 0.00 | O |
| ATOM | 552 | C4'  | G | A | 18 | 9.941  | -26.533 | 69.616 | 1.00 | 0.00 | C |
| ATOM | 553 | O4'  | G | A | 18 | 8.729  | -27.147 | 69.075 | 1.00 | 0.00 | O |
| ATOM | 554 | C5'  | G | A | 18 | 10.881 | -27.629 | 70.061 | 1.00 | 0.00 | C |
| ATOM | 555 | O5'  | G | A | 18 | 10.485 | -28.115 | 71.367 | 1.00 | 0.00 | O |
| ATOM | 556 | O1P  | G | A | 18 | 12.404 | -27.435 | 72.849 | 1.00 | 0.00 | O |
| ATOM | 557 | O2P  | G | A | 18 | 11.007 | -29.429 | 73.445 | 1.00 | 0.00 | O |
| ATOM | 558 | P    | G | A | 18 | 11.619 | -28.593 | 72.384 | 1.00 | 0.00 | P |
| ATOM | 559 | H1   | G | A | 18 | 3.079  | -30.670 | 68.314 | 1.00 | 0.00 | H |
| ATOM | 560 | H8   | G | A | 18 | 8.367  | -29.235 | 71.727 | 1.00 | 0.00 | H |
| ATOM | 561 | H1'  | G | A | 18 | 6.905  | -26.364 | 69.519 | 1.00 | 0.00 | H |
| ATOM | 562 | H21  | G | A | 18 | 2.532  | -28.989 | 67.017 | 1.00 | 0.00 | H |
| ATOM | 563 | H3'  | G | A | 18 | 10.188 | -25.437 | 71.478 | 1.00 | 0.00 | H |
| ATOM | 564 | H22  | G | A | 18 | 3.471  | -27.471 | 66.968 | 1.00 | 0.00 | H |
| ATOM | 565 | H4'  | G | A | 18 | 10.469 | -25.917 | 68.889 | 1.00 | 0.00 | H |
| ATOM | 566 | H2'1 | G | A | 18 | 8.494  | -27.055 | 72.007 | 1.00 | 0.00 | H |
| ATOM | 567 | H2'2 | G | A | 18 | 7.500  | -25.639 | 71.698 | 1.00 | 0.00 | H |
| ATOM | 568 | H5'1 | G | A | 18 | 10.847 | -28.444 | 69.339 | 1.00 | 0.00 | H |
| ATOM | 569 | H5'2 | G | A | 18 | 11.895 | -27.233 | 70.106 | 1.00 | 0.00 | H |
| ATOM | 570 | C1'  | T | A | 19 | 3.403  | -24.489 | 69.676 | 1.00 | 0.00 | C |
| ATOM | 571 | N1   | T | A | 19 | 3.482  | -25.728 | 70.494 | 1.00 | 0.00 | N |
| ATOM | 572 | C2   | T | A | 19 | 2.525  | -26.696 | 70.267 | 1.00 | 0.00 | C |
| ATOM | 573 | O2   | T | A | 19 | 1.642  | -26.568 | 69.436 | 1.00 | 0.00 | O |
| ATOM | 574 | N3   | T | A | 19 | 2.637  | -27.830 | 71.049 | 1.00 | 0.00 | N |
| ATOM | 575 | C4   | T | A | 19 | 3.591  | -28.073 | 72.013 | 1.00 | 0.00 | C |
| ATOM | 576 | O4   | T | A | 19 | 3.587  | -29.130 | 72.655 | 1.00 | 0.00 | O |
| ATOM | 577 | C5   | T | A | 19 | 4.547  | -27.005 | 72.182 | 1.00 | 0.00 | C |
| ATOM | 578 | C6   | T | A | 19 | 4.470  | -25.884 | 71.436 | 1.00 | 0.00 | C |
| ATOM | 579 | C7   | T | A | 19 | 5.606  | -27.227 | 73.220 | 1.00 | 0.00 | C |
| ATOM | 580 | C2'  | T | A | 19 | 3.758  | -23.221 | 70.444 | 1.00 | 0.00 | C |
| ATOM | 581 | C3'  | T | A | 19 | 4.467  | -22.395 | 69.382 | 1.00 | 0.00 | C |
| ATOM | 582 | O3'  | T | A | 19 | 3.496  | -21.691 | 68.610 | 1.00 | 0.00 | O |

|      |     |      |       |    |        |         |        |      |      |   |
|------|-----|------|-------|----|--------|---------|--------|------|------|---|
| ATOM | 583 | C4'  | T A   | 19 | 5.200  | -23.453 | 68.562 | 1.00 | 0.00 | C |
| ATOM | 584 | O4'  | T A   | 19 | 4.318  | -24.619 | 68.605 | 1.00 | 0.00 | O |
| ATOM | 585 | C5'  | T A   | 19 | 6.567  | -23.861 | 69.060 | 1.00 | 0.00 | C |
| ATOM | 586 | O5'  | T A   | 19 | 6.575  | -23.874 | 70.510 | 1.00 | 0.00 | O |
| ATOM | 587 | O1P  | T A   | 19 | 8.170  | -22.018 | 71.098 | 1.00 | 0.00 | O |
| ATOM | 588 | O2P  | T A   | 19 | 7.852  | -23.944 | 72.673 | 1.00 | 0.00 | O |
| ATOM | 589 | P    | T A   | 19 | 7.913  | -23.461 | 71.273 | 1.00 | 0.00 | P |
| ATOM | 590 | H3   | T A   | 19 | 1.936  | -28.570 | 70.894 | 1.00 | 0.00 | H |
| ATOM | 591 | H6   | T A   | 19 | 5.205  | -25.091 | 71.580 | 1.00 | 0.00 | H |
| ATOM | 592 | H1'  | T A   | 19 | 2.400  | -24.421 | 69.255 | 1.00 | 0.00 | H |
| ATOM | 593 | H3'  | T A   | 19 | 5.165  | -21.681 | 69.820 | 1.00 | 0.00 | H |
| ATOM | 594 | H4'  | T A   | 19 | 5.322  | -23.047 | 67.556 | 1.00 | 0.00 | H |
| ATOM | 595 | H71  | T A   | 19 | 5.478  | -26.510 | 74.030 | 1.00 | 0.00 | H |
| ATOM | 596 | H72  | T A   | 19 | 5.520  | -28.238 | 73.615 | 1.00 | 0.00 | H |
| ATOM | 597 | H73  | T A   | 19 | 6.592  | -27.095 | 72.771 | 1.00 | 0.00 | H |
| ATOM | 598 | H2'1 | T A   | 19 | 4.411  | -23.421 | 71.292 | 1.00 | 0.00 | H |
| ATOM | 599 | H2'2 | T A   | 19 | 2.875  | -22.707 | 70.824 | 1.00 | 0.00 | H |
| ATOM | 600 | H5'1 | T A   | 19 | 6.804  | -24.856 | 68.682 | 1.00 | 0.00 | H |
| ATOM | 601 | H5'2 | T A   | 19 | 7.308  | -23.152 | 68.694 | 1.00 | 0.00 | H |
| ATOM | 602 | C01  | LNK A | 20 | 1.716  | -18.491 | 69.277 | 0.00 | 0.00 | C |
| ATOM | 603 | O1   | LNK A | 20 | 2.619  | -19.531 | 69.660 | 1.00 | 0.00 | O |
| ATOM | 604 | S    | LNK A | 20 | 0.113  | -15.186 | 70.811 | 0.00 | 0.00 | S |
| ATOM | 605 | C02  | LNK A | 20 | 1.567  | -17.489 | 70.437 | 0.00 | 0.00 | C |
| ATOM | 606 | C03  | LNK A | 20 | 0.114  | -16.978 | 70.491 | 0.00 | 0.00 | C |
| ATOM | 607 | O1P  | LNK A | 20 | 2.171  | -21.681 | 70.889 | 1.00 | 0.00 | O |
| ATOM | 608 | O2P  | LNK A | 20 | 0.831  | -21.098 | 68.849 | 1.00 | 0.00 | O |
| ATOM | 609 | P    | LNK A | 20 | 2.133  | -21.046 | 69.557 | 1.00 | 0.00 | P |
| ATOM | 610 | H01  | LNK A | 20 | 0.742  | -18.922 | 69.042 | 0.00 | 0.00 | H |
| ATOM | 611 | H02  | LNK A | 20 | 2.106  | -17.975 | 68.400 | 0.00 | 0.00 | H |
| ATOM | 612 | H03  | LNK A | 20 | -0.421 | -17.490 | 71.291 | 0.00 | 0.00 | H |
| ATOM | 613 | H04  | LNK A | 20 | 2.243  | -16.648 | 70.279 | 0.00 | 0.00 | H |
| ATOM | 614 | H05  | LNK A | 20 | 1.814  | -17.983 | 71.377 | 0.00 | 0.00 | H |
| ATOM | 615 | H06  | LNK A | 20 | -0.378 | -17.177 | 69.539 | 0.00 | 0.00 | H |
| ATOM | 616 | AU   | LNK A | 20 | -0.528 | -14.976 | 70.935 |      |      |   |
| TER  |     |      |       |    |        |         |        |      |      |   |
| ATOM | 618 | C1'  | A B   | 2  | -3.129 | -33.214 | 69.374 | 1.00 | 0.00 | C |
| ATOM | 619 | N1   | A B   | 2  | 0.636  | -29.957 | 70.625 | 1.00 | 0.00 | N |
| ATOM | 620 | C2   | A B   | 2  | -0.348 | -29.892 | 69.734 | 1.00 | 0.00 | C |
| ATOM | 621 | N3   | A B   | 2  | -1.292 | -30.769 | 69.464 | 1.00 | 0.00 | N |
| ATOM | 622 | C4   | A B   | 2  | -1.154 | -31.857 | 70.247 | 1.00 | 0.00 | C |
| ATOM | 623 | C5   | A B   | 2  | -0.202 | -32.078 | 71.202 | 1.00 | 0.00 | C |
| ATOM | 624 | C6   | A B   | 2  | 0.747  | -31.052 | 71.392 | 1.00 | 0.00 | C |
| ATOM | 625 | N6   | A B   | 2  | 1.740  | -31.130 | 72.295 | 1.00 | 0.00 | N |
| ATOM | 626 | N7   | A B   | 2  | -0.379 | -33.311 | 71.806 | 1.00 | 0.00 | N |
| ATOM | 627 | C8   | A B   | 2  | -1.420 | -33.806 | 71.205 | 1.00 | 0.00 | C |
| ATOM | 628 | N9   | A B   | 2  | -1.946 | -32.978 | 70.248 | 1.00 | 0.00 | N |
| ATOM | 629 | C2'  | A B   | 2  | -3.264 | -34.657 | 68.903 | 1.00 | 0.00 | C |
| ATOM | 630 | C3'  | A B   | 2  | -4.773 | -34.844 | 68.890 | 1.00 | 0.00 | C |
| ATOM | 631 | O3'  | A B   | 2  | -5.293 | -34.357 | 67.656 | 1.00 | 0.00 | O |
| ATOM | 632 | C4'  | A B   | 2  | -5.231 | -34.004 | 70.081 | 1.00 | 0.00 | C |
| ATOM | 633 | O4'  | A B   | 2  | -4.285 | -32.886 | 70.120 | 1.00 | 0.00 | O |
| ATOM | 634 | C5'  | A B   | 2  | -5.225 | -34.689 | 71.428 | 1.00 | 0.00 | C |
| ATOM | 635 | O5'  | A B   | 2  | -4.092 | -35.587 | 71.516 | 1.00 | 0.00 | O |
| ATOM | 636 | H2   | A B   | 2  | -0.381 | -28.980 | 69.142 | 1.00 | 0.00 | H |

|      |     |      |     |   |        |         |        |      |      |   |
|------|-----|------|-----|---|--------|---------|--------|------|------|---|
| ATOM | 637 | H8   | A B | 2 | -1.835 | -34.787 | 71.441 | 1.00 | 0.00 | H |
| ATOM | 638 | H1'  | A B | 2 | -3.067 | -32.531 | 68.527 | 1.00 | 0.00 | H |
| ATOM | 639 | H3'  | A B | 2 | -5.056 | -35.889 | 69.014 | 1.00 | 0.00 | H |
| ATOM | 640 | H4'  | A B | 2 | -6.252 | -33.689 | 69.871 | 1.00 | 0.00 | H |
| ATOM | 641 | H61  | A B | 2 | 2.405  | -30.350 | 72.396 | 1.00 | 0.00 | H |
| ATOM | 642 | H62  | A B | 2 | 1.833  | -31.968 | 72.887 | 1.00 | 0.00 | H |
| ATOM | 643 | H2'1 | A B | 2 | -2.783 | -35.361 | 69.582 | 1.00 | 0.00 | H |
| ATOM | 644 | H2'2 | A B | 2 | -2.837 | -34.810 | 67.913 | 1.00 | 0.00 | H |
| ATOM | 645 | H5'1 | A B | 2 | -5.160 | -33.934 | 72.211 | 1.00 | 0.00 | H |
| ATOM | 646 | H5'2 | A B | 2 | -6.151 | -35.249 | 71.546 | 1.00 | 0.00 | H |
| ATOM | 647 | C1'  | C B | 3 | -1.152 | -31.223 | 65.277 | 1.00 | 0.00 | C |
| ATOM | 648 | N1   | C B | 3 | -0.281 | -31.860 | 66.303 | 1.00 | 0.00 | N |
| ATOM | 649 | C2   | C B | 3 | 0.808  | -31.133 | 66.776 | 1.00 | 0.00 | C |
| ATOM | 650 | O2   | C B | 3 | 1.006  | -29.994 | 66.329 | 1.00 | 0.00 | O |
| ATOM | 651 | N3   | C B | 3 | 1.613  | -31.693 | 67.710 | 1.00 | 0.00 | N |
| ATOM | 652 | C4   | C B | 3 | 1.375  | -32.927 | 68.174 | 1.00 | 0.00 | C |
| ATOM | 653 | N4   | C B | 3 | 2.193  | -33.427 | 69.090 | 1.00 | 0.00 | N |
| ATOM | 654 | C5   | C B | 3 | 0.264  | -33.702 | 67.703 | 1.00 | 0.00 | C |
| ATOM | 655 | C6   | C B | 3 | -0.538 | -33.114 | 66.764 | 1.00 | 0.00 | C |
| ATOM | 656 | C2'  | C B | 3 | -1.657 | -32.191 | 64.215 | 1.00 | 0.00 | C |
| ATOM | 657 | C3'  | C B | 3 | -3.056 | -31.658 | 63.940 | 1.00 | 0.00 | C |
| ATOM | 658 | O3'  | C B | 3 | -2.974 | -30.603 | 62.985 | 1.00 | 0.00 | O |
| ATOM | 659 | C4'  | C B | 3 | -3.505 | -31.161 | 65.313 | 1.00 | 0.00 | C |
| ATOM | 660 | O4'  | C B | 3 | -2.276 | -30.681 | 65.945 | 1.00 | 0.00 | O |
| ATOM | 661 | C5'  | C B | 3 | -4.147 | -32.186 | 66.219 | 1.00 | 0.00 | C |
| ATOM | 662 | O5'  | C B | 3 | -3.498 | -33.471 | 66.043 | 1.00 | 0.00 | O |
| ATOM | 663 | O1P  | C B | 3 | -5.306 | -34.903 | 65.039 | 1.00 | 0.00 | O |
| ATOM | 664 | O2P  | C B | 3 | -3.476 | -35.959 | 66.394 | 1.00 | 0.00 | O |
| ATOM | 665 | P    | C B | 3 | -4.373 | -34.796 | 66.177 | 1.00 | 0.00 | P |
| ATOM | 666 | H5   | C B | 3 | 0.069  | -34.709 | 68.071 | 1.00 | 0.00 | H |
| ATOM | 667 | H6   | C B | 3 | -1.398 | -33.661 | 66.381 | 1.00 | 0.00 | H |
| ATOM | 668 | H1'  | C B | 3 | -0.601 | -30.399 | 64.824 | 1.00 | 0.00 | H |
| ATOM | 669 | H3'  | C B | 3 | -3.722 | -32.435 | 63.565 | 1.00 | 0.00 | H |
| ATOM | 670 | H4'  | C B | 3 | -4.234 | -30.370 | 65.140 | 1.00 | 0.00 | H |
| ATOM | 671 | H41  | C B | 3 | 2.029  | -34.372 | 69.467 | 1.00 | 0.00 | H |
| ATOM | 672 | H42  | C B | 3 | 2.992  | -32.869 | 69.427 | 1.00 | 0.00 | H |
| ATOM | 673 | H2'1 | C B | 3 | -1.688 | -33.218 | 64.572 | 1.00 | 0.00 | H |
| ATOM | 674 | H2'2 | C B | 3 | -1.042 | -32.174 | 63.315 | 1.00 | 0.00 | H |
| ATOM | 675 | H5'1 | C B | 3 | -4.045 | -31.862 | 67.255 | 1.00 | 0.00 | H |
| ATOM | 676 | H5'2 | C B | 3 | -5.203 | -32.270 | 65.973 | 1.00 | 0.00 | H |
| ATOM | 677 | C1'  | C B | 4 | 2.477  | -29.102 | 62.660 | 1.00 | 0.00 | C |
| ATOM | 678 | N1   | C B | 4 | 2.726  | -30.359 | 63.419 | 1.00 | 0.00 | N |
| ATOM | 679 | C2   | C B | 4 | 3.818  | -30.395 | 64.281 | 1.00 | 0.00 | C |
| ATOM | 680 | O2   | C B | 4 | 4.533  | -29.388 | 64.385 | 1.00 | 0.00 | O |
| ATOM | 681 | N3   | C B | 4 | 4.062  | -31.529 | 64.981 | 1.00 | 0.00 | N |
| ATOM | 682 | C4   | C B | 4 | 3.271  | -32.603 | 64.850 | 1.00 | 0.00 | C |
| ATOM | 683 | N4   | C B | 4 | 3.553  | -33.684 | 65.560 | 1.00 | 0.00 | N |
| ATOM | 684 | C5   | C B | 4 | 2.142  | -32.596 | 63.965 | 1.00 | 0.00 | C |
| ATOM | 685 | C6   | C B | 4 | 1.914  | -31.440 | 63.274 | 1.00 | 0.00 | C |
| ATOM | 686 | C2'  | C B | 4 | 1.987  | -29.331 | 61.237 | 1.00 | 0.00 | C |
| ATOM | 687 | C3'  | C B | 4 | 1.018  | -28.174 | 61.047 | 1.00 | 0.00 | C |
| ATOM | 688 | O3'  | C B | 4 | 1.744  | -27.016 | 60.642 | 1.00 | 0.00 | O |
| ATOM | 689 | C4'  | C B | 4 | 0.403  | -28.014 | 62.434 | 1.00 | 0.00 | C |
| ATOM | 690 | O4'  | C B | 4 | 1.484  | -28.370 | 63.353 | 1.00 | 0.00 | O |

|      |     |      |     |   |        |         |        |      |      |   |
|------|-----|------|-----|---|--------|---------|--------|------|------|---|
| ATOM | 691 | C5'  | C B | 4 | -0.798 | -28.881 | 62.743 | 1.00 | 0.00 | C |
| ATOM | 692 | O5'  | C B | 4 | -0.633 | -30.181 | 62.120 | 1.00 | 0.00 | O |
| ATOM | 693 | O1P  | C B | 4 | -2.466 | -30.236 | 60.396 | 1.00 | 0.00 | O |
| ATOM | 694 | O2P  | C B | 4 | -1.614 | -32.376 | 61.389 | 1.00 | 0.00 | O |
| ATOM | 695 | P    | C B | 4 | -1.926 | -30.938 | 61.575 | 1.00 | 0.00 | P |
| ATOM | 696 | H5   | C B | 4 | 1.500  | -33.469 | 63.849 | 1.00 | 0.00 | H |
| ATOM | 697 | H6   | C B | 4 | 1.063  | -31.384 | 62.595 | 1.00 | 0.00 | H |
| ATOM | 698 | H1'  | C B | 4 | 3.394  | -28.512 | 62.667 | 1.00 | 0.00 | H |
| ATOM | 699 | H3'  | C B | 4 | 0.255  | -28.399 | 60.302 | 1.00 | 0.00 | H |
| ATOM | 700 | H4'  | C B | 4 | 0.092  | -26.973 | 62.526 | 1.00 | 0.00 | H |
| ATOM | 701 | H41  | C B | 4 | 2.960  | -34.524 | 65.481 | 1.00 | 0.00 | H |
| ATOM | 702 | H42  | C B | 4 | 4.367  | -33.688 | 66.194 | 1.00 | 0.00 | H |
| ATOM | 703 | H2'1 | C B | 4 | 1.485  | -30.291 | 61.121 | 1.00 | 0.00 | H |
| ATOM | 704 | H2'2 | C B | 4 | 2.798  | -29.294 | 60.509 | 1.00 | 0.00 | H |
| ATOM | 705 | H5'1 | C B | 4 | -0.888 | -28.997 | 63.822 | 1.00 | 0.00 | H |
| ATOM | 706 | H5'2 | C B | 4 | -1.694 | -28.398 | 62.355 | 1.00 | 0.00 | H |
| ATOM | 707 | C1'  | G B | 5 | 7.217  | -28.089 | 61.639 | 1.00 | 0.00 | C |
| ATOM | 708 | N1   | G B | 5 | 8.090  | -32.487 | 64.074 | 1.00 | 0.00 | N |
| ATOM | 709 | C2   | G B | 5 | 8.765  | -31.281 | 64.148 | 1.00 | 0.00 | C |
| ATOM | 710 | N2   | G B | 5 | 9.812  | -31.242 | 64.981 | 1.00 | 0.00 | N |
| ATOM | 711 | N3   | G B | 5 | 8.420  | -30.201 | 63.449 | 1.00 | 0.00 | N |
| ATOM | 712 | C4   | G B | 5 | 7.341  | -30.423 | 62.653 | 1.00 | 0.00 | C |
| ATOM | 713 | C5   | G B | 5 | 6.610  | -31.590 | 62.511 | 1.00 | 0.00 | C |
| ATOM | 714 | C6   | G B | 5 | 6.971  | -32.736 | 63.256 | 1.00 | 0.00 | C |
| ATOM | 715 | O6   | G B | 5 | 6.451  | -33.850 | 63.265 | 1.00 | 0.00 | O |
| ATOM | 716 | N7   | G B | 5 | 5.577  | -31.402 | 61.591 | 1.00 | 0.00 | N |
| ATOM | 717 | C8   | G B | 5 | 5.710  | -30.155 | 61.214 | 1.00 | 0.00 | C |
| ATOM | 718 | N9   | G B | 5 | 6.760  | -29.495 | 61.816 | 1.00 | 0.00 | N |
| ATOM | 719 | C2'  | G B | 5 | 7.107  | -27.585 | 60.207 | 1.00 | 0.00 | C |
| ATOM | 720 | C3'  | G B | 5 | 6.724  | -26.128 | 60.412 | 1.00 | 0.00 | C |
| ATOM | 721 | O3'  | G B | 5 | 7.906  | -25.359 | 60.624 | 1.00 | 0.00 | O |
| ATOM | 722 | C4'  | G B | 5 | 5.837  | -26.180 | 61.655 | 1.00 | 0.00 | C |
| ATOM | 723 | O4'  | G B | 5 | 6.404  | -27.267 | 62.455 | 1.00 | 0.00 | O |
| ATOM | 724 | C5'  | G B | 5 | 4.373  | -26.463 | 61.423 | 1.00 | 0.00 | C |
| ATOM | 725 | O5'  | G B | 5 | 4.222  | -27.408 | 60.334 | 1.00 | 0.00 | O |
| ATOM | 726 | O1P  | G B | 5 | 3.074  | -26.058 | 58.545 | 1.00 | 0.00 | O |
| ATOM | 727 | O2P  | G B | 5 | 2.765  | -28.545 | 58.632 | 1.00 | 0.00 | O |
| ATOM | 728 | P    | G B | 5 | 2.956  | -27.276 | 59.371 | 1.00 | 0.00 | P |
| ATOM | 729 | H1   | G B | 5 | 8.432  | -33.262 | 64.663 | 1.00 | 0.00 | H |
| ATOM | 730 | H8   | G B | 5 | 5.050  | -29.681 | 60.489 | 1.00 | 0.00 | H |
| ATOM | 731 | H1'  | G B | 5 | 8.241  | -28.014 | 62.003 | 1.00 | 0.00 | H |
| ATOM | 732 | H21  | G B | 5 | 10.070 | -32.081 | 65.521 | 1.00 | 0.00 | H |
| ATOM | 733 | H3'  | G B | 5 | 6.180  | -25.724 | 59.558 | 1.00 | 0.00 | H |
| ATOM | 734 | H22  | G B | 5 | 10.359 | -30.375 | 65.080 | 1.00 | 0.00 | H |
| ATOM | 735 | H4'  | G B | 5 | 5.916  | -25.208 | 62.141 | 1.00 | 0.00 | H |
| ATOM | 736 | H2'1 | G B | 5 | 6.345  | -28.119 | 59.637 | 1.00 | 0.00 | H |
| ATOM | 737 | H2'2 | G B | 5 | 8.046  | -27.676 | 59.663 | 1.00 | 0.00 | H |
| ATOM | 738 | H5'1 | G B | 5 | 3.940  | -26.879 | 62.333 | 1.00 | 0.00 | H |
| ATOM | 739 | H5'2 | G B | 5 | 3.863  | -25.533 | 61.175 | 1.00 | 0.00 | H |
| ATOM | 740 | C1'  | T B | 6 | 12.083 | -28.995 | 61.712 | 1.00 | 0.00 | C |
| ATOM | 741 | N1   | T B | 6 | 11.133 | -30.041 | 61.241 | 1.00 | 0.00 | N |
| ATOM | 742 | C2   | T B | 6 | 11.245 | -31.293 | 61.807 | 1.00 | 0.00 | C |
| ATOM | 743 | O2   | T B | 6 | 12.077 | -31.562 | 62.658 | 1.00 | 0.00 | O |
| ATOM | 744 | N3   | T B | 6 | 10.342 | -32.233 | 61.343 | 1.00 | 0.00 | N |

|      |     |      |     |   |        |         |        |      |      |   |
|------|-----|------|-----|---|--------|---------|--------|------|------|---|
| ATOM | 745 | C4   | T B | 6 | 9.369  | -32.035 | 60.387 | 1.00 | 0.00 | C |
| ATOM | 746 | O4   | T B | 6 | 8.619  | -32.956 | 60.046 | 1.00 | 0.00 | O |
| ATOM | 747 | C5   | T B | 6 | 9.329  | -30.693 | 59.855 | 1.00 | 0.00 | C |
| ATOM | 748 | C6   | T B | 6 | 10.192 | -29.752 | 60.284 | 1.00 | 0.00 | C |
| ATOM | 749 | C7   | T B | 6 | 8.283  | -30.432 | 58.813 | 1.00 | 0.00 | C |
| ATOM | 750 | C2'  | T B | 6 | 12.562 | -28.061 | 60.608 | 1.00 | 0.00 | C |
| ATOM | 751 | C3'  | T B | 6 | 12.674 | -26.734 | 61.344 | 1.00 | 0.00 | C |
| ATOM | 752 | O3'  | T B | 6 | 13.942 | -26.665 | 61.995 | 1.00 | 0.00 | O |
| ATOM | 753 | C4'  | T B | 6 | 11.517 | -26.797 | 62.338 | 1.00 | 0.00 | C |
| ATOM | 754 | O4'  | T B | 6 | 11.416 | -28.214 | 62.686 | 1.00 | 0.00 | O |
| ATOM | 755 | C5'  | T B | 6 | 10.171 | -26.327 | 61.834 | 1.00 | 0.00 | C |
| ATOM | 756 | O5'  | T B | 6 | 10.010 | -26.707 | 60.444 | 1.00 | 0.00 | O |
| ATOM | 757 | O1P  | T B | 6 | 9.960  | -24.498 | 59.239 | 1.00 | 0.00 | O |
| ATOM | 758 | O2P  | T B | 6 | 8.785  | -26.488 | 58.261 | 1.00 | 0.00 | O |
| ATOM | 759 | P    | T B | 6 | 9.195  | -25.738 | 59.473 | 1.00 | 0.00 | P |
| ATOM | 760 | H3   | T B | 6 | 10.404 | -33.178 | 61.752 | 1.00 | 0.00 | H |
| ATOM | 761 | H6   | T B | 6 | 10.141 | -28.747 | 59.867 | 1.00 | 0.00 | H |
| ATOM | 762 | H1'  | T B | 6 | 12.924 | -29.490 | 62.196 | 1.00 | 0.00 | H |
| ATOM | 763 | H3'  | T B | 6 | 12.569 | -25.884 | 60.670 | 1.00 | 0.00 | H |
| ATOM | 764 | H4'  | T B | 6 | 11.792 | -26.168 | 63.185 | 1.00 | 0.00 | H |
| ATOM | 765 | H71  | T B | 6 | 8.764  | -30.214 | 57.860 | 1.00 | 0.00 | H |
| ATOM | 766 | H72  | T B | 6 | 7.647  | -31.312 | 58.705 | 1.00 | 0.00 | H |
| ATOM | 767 | H73  | T B | 6 | 7.673  | -29.579 | 59.114 | 1.00 | 0.00 | H |
| ATOM | 768 | H2'1 | T B | 6 | 11.854 | -27.998 | 59.784 | 1.00 | 0.00 | H |
| ATOM | 769 | H2'2 | T B | 6 | 13.522 | -28.367 | 60.195 | 1.00 | 0.00 | H |
| ATOM | 770 | H5'1 | T B | 6 | 9.385  | -26.783 | 62.434 | 1.00 | 0.00 | H |
| ATOM | 771 | H5'2 | T B | 6 | 10.113 | -25.243 | 61.927 | 1.00 | 0.00 | H |
| ATOM | 772 | C1'  | C B | 7 | 16.038 | -31.984 | 61.985 | 1.00 | 0.00 | C |
| ATOM | 773 | N1   | C B | 7 | 14.953 | -32.254 | 60.998 | 1.00 | 0.00 | N |
| ATOM | 774 | C2   | C B | 7 | 14.408 | -33.535 | 60.964 | 1.00 | 0.00 | C |
| ATOM | 775 | O2   | C B | 7 | 14.841 | -34.392 | 61.747 | 1.00 | 0.00 | O |
| ATOM | 776 | N3   | C B | 7 | 13.419 | -33.801 | 60.075 | 1.00 | 0.00 | N |
| ATOM | 777 | C4   | C B | 7 | 12.972 | -32.854 | 59.241 | 1.00 | 0.00 | C |
| ATOM | 778 | N4   | C B | 7 | 12.003 | -33.168 | 58.395 | 1.00 | 0.00 | N |
| ATOM | 779 | C5   | C B | 7 | 13.518 | -31.528 | 59.250 | 1.00 | 0.00 | C |
| ATOM | 780 | C6   | C B | 7 | 14.509 | -31.283 | 60.159 | 1.00 | 0.00 | C |
| ATOM | 781 | C2'  | C B | 7 | 17.130 | -31.065 | 61.458 | 1.00 | 0.00 | C |
| ATOM | 782 | C3'  | C B | 7 | 17.501 | -30.271 | 62.700 | 1.00 | 0.00 | C |
| ATOM | 783 | O3'  | C B | 7 | 18.449 | -31.011 | 63.464 | 1.00 | 0.00 | O |
| ATOM | 784 | C4'  | C B | 7 | 16.163 | -30.127 | 63.423 | 1.00 | 0.00 | C |
| ATOM | 785 | O4'  | C B | 7 | 15.450 | -31.364 | 63.113 | 1.00 | 0.00 | O |
| ATOM | 786 | C5'  | C B | 7 | 15.301 | -28.954 | 63.012 | 1.00 | 0.00 | C |
| ATOM | 787 | O5'  | C B | 7 | 15.431 | -28.728 | 61.587 | 1.00 | 0.00 | O |
| ATOM | 788 | O1P  | C B | 7 | 16.555 | -26.481 | 61.454 | 1.00 | 0.00 | O |
| ATOM | 789 | O2P  | C B | 7 | 15.077 | -27.256 | 59.582 | 1.00 | 0.00 | O |
| ATOM | 790 | P    | C B | 7 | 15.356 | -27.233 | 61.037 | 1.00 | 0.00 | P |
| ATOM | 791 | H5   | C B | 7 | 13.161 | -30.757 | 58.569 | 1.00 | 0.00 | H |
| ATOM | 792 | H6   | C B | 7 | 14.951 | -30.287 | 60.210 | 1.00 | 0.00 | H |
| ATOM | 793 | H1'  | C B | 7 | 16.451 | -32.942 | 62.306 | 1.00 | 0.00 | H |
| ATOM | 794 | H3'  | C B | 7 | 17.921 | -29.294 | 62.451 | 1.00 | 0.00 | H |
| ATOM | 795 | H4'  | C B | 7 | 16.386 | -30.017 | 64.484 | 1.00 | 0.00 | H |
| ATOM | 796 | H41  | C B | 7 | 11.637 | -32.457 | 57.743 | 1.00 | 0.00 | H |
| ATOM | 797 | H42  | C B | 7 | 11.613 | -34.122 | 58.387 | 1.00 | 0.00 | H |
| ATOM | 798 | H2'1 | C B | 7 | 16.775 | -30.413 | 60.662 | 1.00 | 0.00 | H |

|      |     |      |     |   |        |         |        |      |      |   |
|------|-----|------|-----|---|--------|---------|--------|------|------|---|
| ATOM | 799 | H2'2 | C B | 7 | 17.987 | -31.620 | 61.071 | 1.00 | 0.00 | H |
| ATOM | 800 | H5'1 | C B | 7 | 14.261 | -29.173 | 63.258 | 1.00 | 0.00 | H |
| ATOM | 801 | H5'2 | C B | 7 | 15.619 | -28.068 | 63.556 | 1.00 | 0.00 | H |
| ATOM | 802 | C1'  | C B | 8 | 18.401 | -36.304 | 61.449 | 1.00 | 0.00 | C |
| ATOM | 803 | N1   | C B | 8 | 17.626 | -35.720 | 60.320 | 1.00 | 0.00 | N |
| ATOM | 804 | C2   | C B | 8 | 16.690 | -36.531 | 59.682 | 1.00 | 0.00 | C |
| ATOM | 805 | O2   | C B | 8 | 16.541 | -37.695 | 60.077 | 1.00 | 0.00 | O |
| ATOM | 806 | N3   | C B | 8 | 15.975 | -36.018 | 58.653 | 1.00 | 0.00 | N |
| ATOM | 807 | C4   | C B | 8 | 16.159 | -34.754 | 58.247 | 1.00 | 0.00 | C |
| ATOM | 808 | N4   | C B | 8 | 15.429 | -34.305 | 57.237 | 1.00 | 0.00 | N |
| ATOM | 809 | C5   | C B | 8 | 17.119 | -33.898 | 58.881 | 1.00 | 0.00 | C |
| ATOM | 810 | C6   | C B | 8 | 17.825 | -34.435 | 59.920 | 1.00 | 0.00 | C |
| ATOM | 811 | C2'  | C B | 8 | 19.855 | -35.852 | 61.494 | 1.00 | 0.00 | C |
| ATOM | 812 | C3'  | C B | 8 | 20.112 | -35.766 | 62.992 | 1.00 | 0.00 | C |
| ATOM | 813 | O3'  | C B | 8 | 20.467 | -37.057 | 63.479 | 1.00 | 0.00 | O |
| ATOM | 814 | C4'  | C B | 8 | 18.770 | -35.288 | 63.540 | 1.00 | 0.00 | C |
| ATOM | 815 | O4'  | C B | 8 | 17.779 | -35.897 | 62.652 | 1.00 | 0.00 | O |
| ATOM | 816 | C5'  | C B | 8 | 18.545 | -33.794 | 63.561 | 1.00 | 0.00 | C |
| ATOM | 817 | O5'  | C B | 8 | 19.153 | -33.191 | 62.390 | 1.00 | 0.00 | O |
| ATOM | 818 | O1P  | C B | 8 | 21.000 | -31.779 | 63.355 | 1.00 | 0.00 | O |
| ATOM | 819 | O2P  | C B | 8 | 19.947 | -31.146 | 61.166 | 1.00 | 0.00 | O |
| ATOM | 820 | P    | C B | 8 | 19.783 | -31.733 | 62.519 | 1.00 | 0.00 | P |
| ATOM | 821 | H5   | C B | 8 | 17.277 | -32.871 | 58.549 | 1.00 | 0.00 | H |
| ATOM | 822 | H6   | C B | 8 | 18.562 | -33.820 | 60.438 | 1.00 | 0.00 | H |
| ATOM | 823 | H1'  | C B | 8 | 18.332 | -37.390 | 61.384 | 1.00 | 0.00 | H |
| ATOM | 824 | H3'  | C B | 8 | 20.908 | -35.059 | 63.228 | 1.00 | 0.00 | H |
| ATOM | 825 | H4'  | C B | 8 | 18.702 | -35.647 | 64.567 | 1.00 | 0.00 | H |
| ATOM | 826 | H41  | C B | 8 | 15.548 | -33.335 | 56.907 | 1.00 | 0.00 | H |
| ATOM | 827 | H42  | C B | 8 | 14.741 | -34.923 | 56.781 | 1.00 | 0.00 | H |
| ATOM | 828 | H2'1 | C B | 8 | 20.004 | -34.887 | 61.011 | 1.00 | 0.00 | H |
| ATOM | 829 | H2'2 | C B | 8 | 20.525 | -36.566 | 61.016 | 1.00 | 0.00 | H |
| ATOM | 830 | H5'1 | C B | 8 | 17.474 | -33.593 | 63.565 | 1.00 | 0.00 | H |
| ATOM | 831 | H5'2 | C B | 8 | 18.992 | -33.377 | 64.463 | 1.00 | 0.00 | H |
| ATOM | 832 | C1'  | T B | 9 | 19.112 | -40.774 | 59.448 | 1.00 | 0.00 | C |
| ATOM | 833 | N1   | T B | 9 | 18.945 | -39.583 | 58.575 | 1.00 | 0.00 | N |
| ATOM | 834 | C2   | T B | 9 | 18.005 | -39.666 | 57.566 | 1.00 | 0.00 | C |
| ATOM | 835 | O2   | T B | 9 | 17.330 | -40.662 | 57.378 | 1.00 | 0.00 | O |
| ATOM | 836 | N3   | T B | 9 | 17.882 | -38.537 | 56.781 | 1.00 | 0.00 | N |
| ATOM | 837 | C4   | T B | 9 | 18.598 | -37.365 | 56.907 | 1.00 | 0.00 | C |
| ATOM | 838 | O4   | T B | 9 | 18.401 | -36.417 | 56.138 | 1.00 | 0.00 | O |
| ATOM | 839 | C5   | T B | 9 | 19.555 | -37.371 | 57.990 | 1.00 | 0.00 | C |
| ATOM | 840 | C6   | T B | 9 | 19.701 | -38.455 | 58.776 | 1.00 | 0.00 | C |
| ATOM | 841 | C7   | T B | 9 | 20.354 | -36.114 | 58.166 | 1.00 | 0.00 | C |
| ATOM | 842 | C2'  | T B | 9 | 20.557 | -41.041 | 59.854 | 1.00 | 0.00 | C |
| ATOM | 843 | C3'  | T B | 9 | 20.396 | -41.567 | 61.273 | 1.00 | 0.00 | C |
| ATOM | 844 | O3'  | T B | 9 | 20.120 | -42.965 | 61.225 | 1.00 | 0.00 | O |
| ATOM | 845 | C4'  | T B | 9 | 19.212 | -40.760 | 61.801 | 1.00 | 0.00 | C |
| ATOM | 846 | O4'  | T B | 9 | 18.362 | -40.556 | 60.627 | 1.00 | 0.00 | O |
| ATOM | 847 | C5'  | T B | 9 | 19.533 | -39.414 | 62.407 | 1.00 | 0.00 | C |
| ATOM | 848 | O5'  | T B | 9 | 20.617 | -38.792 | 61.671 | 1.00 | 0.00 | O |
| ATOM | 849 | O1P  | T B | 9 | 22.493 | -38.720 | 63.347 | 1.00 | 0.00 | O |
| ATOM | 850 | O2P  | T B | 9 | 22.392 | -37.021 | 61.503 | 1.00 | 0.00 | O |
| ATOM | 851 | P    | T B | 9 | 21.658 | -37.880 | 62.464 | 1.00 | 0.00 | P |
| ATOM | 852 | H3   | T B | 9 | 17.185 | -38.573 | 56.024 | 1.00 | 0.00 | H |



|      |     |      |     |    |        |         |        |      |      |   |
|------|-----|------|-----|----|--------|---------|--------|------|------|---|
| ATOM | 853 | H6   | T B | 9  | 20.431 | -38.436 | 59.585 | 1.00 | 0.00 | H |
| ATOM | 854 | H1'  | T B | 9  | 18.685 | -41.637 | 58.936 | 1.00 | 0.00 | H |
| ATOM | 855 | H3'  | T B | 9  | 21.289 | -41.395 | 61.872 | 1.00 | 0.00 | H |
| ATOM | 856 | H4'  | T B | 9  | 18.735 | -41.367 | 62.572 | 1.00 | 0.00 | H |
| ATOM | 857 | H71  | T B | 9  | 21.403 | -36.319 | 57.957 | 1.00 | 0.00 | H |
| ATOM | 858 | H72  | T B | 9  | 19.988 | -35.351 | 57.479 | 1.00 | 0.00 | H |
| ATOM | 859 | H73  | T B | 9  | 20.250 | -35.759 | 59.191 | 1.00 | 0.00 | H |
| ATOM | 860 | H2'1 | T B | 9  | 21.165 | -40.139 | 59.832 | 1.00 | 0.00 | H |
| ATOM | 861 | H2'2 | T B | 9  | 21.038 | -41.778 | 59.209 | 1.00 | 0.00 | H |
| ATOM | 862 | H5'1 | T B | 9  | 18.647 | -38.781 | 62.364 | 1.00 | 0.00 | H |
| ATOM | 863 | H5'2 | T B | 9  | 19.826 | -39.551 | 63.447 | 1.00 | 0.00 | H |
| ATOM | 864 | C1'  | A B | 10 | 18.690 | -44.150 | 55.833 | 1.00 | 0.00 | C |
| ATOM | 865 | N1   | A B | 10 | 18.327 | -40.029 | 52.796 | 1.00 | 0.00 | N |
| ATOM | 866 | C2   | A B | 10 | 17.668 | -41.183 | 52.827 | 1.00 | 0.00 | C |
| ATOM | 867 | N3   | A B | 10 | 17.810 | -42.206 | 53.642 | 1.00 | 0.00 | N |
| ATOM | 868 | C4   | A B | 10 | 18.787 | -41.959 | 54.533 | 1.00 | 0.00 | C |
| ATOM | 869 | C5   | A B | 10 | 19.556 | -40.832 | 54.635 | 1.00 | 0.00 | C |
| ATOM | 870 | C6   | A B | 10 | 19.297 | -39.811 | 53.698 | 1.00 | 0.00 | C |
| ATOM | 871 | N6   | A B | 10 | 19.970 | -38.648 | 53.676 | 1.00 | 0.00 | N |
| ATOM | 872 | N7   | A B | 10 | 20.461 | -40.937 | 55.678 | 1.00 | 0.00 | N |
| ATOM | 873 | C8   | A B | 10 | 20.227 | -42.115 | 56.175 | 1.00 | 0.00 | C |
| ATOM | 874 | N9   | A B | 10 | 19.222 | -42.793 | 55.535 | 1.00 | 0.00 | N |
| ATOM | 875 | C2'  | A B | 10 | 19.758 | -45.146 | 56.262 | 1.00 | 0.00 | C |
| ATOM | 876 | C3'  | A B | 10 | 19.016 | -45.984 | 57.292 | 1.00 | 0.00 | C |
| ATOM | 877 | O3'  | A B | 10 | 18.282 | -47.006 | 56.624 | 1.00 | 0.00 | O |
| ATOM | 878 | C4'  | A B | 10 | 18.099 | -44.961 | 57.964 | 1.00 | 0.00 | C |
| ATOM | 879 | O4'  | A B | 10 | 17.760 | -44.023 | 56.893 | 1.00 | 0.00 | O |
| ATOM | 880 | C5'  | A B | 10 | 18.690 | -44.186 | 59.118 | 1.00 | 0.00 | C |
| ATOM | 881 | O5'  | A B | 10 | 20.088 | -43.906 | 58.854 | 1.00 | 0.00 | O |
| ATOM | 882 | O1P  | A B | 10 | 21.292 | -45.237 | 60.620 | 1.00 | 0.00 | O |
| ATOM | 883 | O2P  | A B | 10 | 22.347 | -43.167 | 59.672 | 1.00 | 0.00 | O |
| ATOM | 884 | P    | A B | 10 | 21.110 | -43.876 | 60.080 | 1.00 | 0.00 | P |
| ATOM | 885 | H2   | A B | 10 | 16.897 | -41.298 | 52.066 | 1.00 | 0.00 | H |
| ATOM | 886 | H8   | A B | 10 | 20.777 | -42.524 | 57.022 | 1.00 | 0.00 | H |
| ATOM | 887 | H1'  | A B | 10 | 18.152 | -44.506 | 54.955 | 1.00 | 0.00 | H |
| ATOM | 888 | H3'  | A B | 10 | 19.694 | -46.437 | 58.014 | 1.00 | 0.00 | H |
| ATOM | 889 | H4'  | A B | 10 | 17.235 | -45.509 | 58.338 | 1.00 | 0.00 | H |
| ATOM | 890 | H61  | A B | 10 | 19.740 | -37.933 | 52.973 | 1.00 | 0.00 | H |
| ATOM | 891 | H62  | A B | 10 | 20.717 | -38.472 | 54.365 | 1.00 | 0.00 | H |
| ATOM | 892 | H2'1 | A B | 10 | 20.628 | -44.660 | 56.700 | 1.00 | 0.00 | H |
| ATOM | 893 | H2'2 | A B | 10 | 20.108 | -45.760 | 55.431 | 1.00 | 0.00 | H |
| ATOM | 894 | H5'1 | A B | 10 | 18.144 | -43.251 | 59.238 | 1.00 | 0.00 | H |
| ATOM | 895 | H5'2 | A B | 10 | 18.599 | -44.775 | 60.028 | 1.00 | 0.00 | H |
| ATOM | 896 | C1'  | G B | 11 | 18.145 | -45.550 | 51.102 | 1.00 | 0.00 | C |
| ATOM | 897 | N1   | G B | 11 | 20.189 | -40.987 | 50.091 | 1.00 | 0.00 | N |
| ATOM | 898 | C2   | G B | 11 | 19.129 | -41.640 | 49.487 | 1.00 | 0.00 | C |
| ATOM | 899 | N2   | G B | 11 | 18.536 | -40.989 | 48.478 | 1.00 | 0.00 | N |
| ATOM | 900 | N3   | G B | 11 | 18.695 | -42.841 | 49.860 | 1.00 | 0.00 | N |
| ATOM | 901 | C4   | G B | 11 | 19.417 | -43.353 | 50.892 | 1.00 | 0.00 | C |
| ATOM | 902 | C5   | G B | 11 | 20.489 | -42.780 | 51.551 | 1.00 | 0.00 | C |
| ATOM | 903 | C6   | G B | 11 | 20.949 | -41.502 | 51.159 | 1.00 | 0.00 | C |
| ATOM | 904 | O6   | G B | 11 | 21.878 | -40.836 | 51.618 | 1.00 | 0.00 | O |
| ATOM | 905 | N7   | G B | 11 | 20.952 | -43.634 | 52.555 | 1.00 | 0.00 | N |
| ATOM | 906 | C8   | G B | 11 | 20.161 | -44.675 | 52.475 | 1.00 | 0.00 | C |

|      |     |      |   |   |    |        |         |        |      |      |   |
|------|-----|------|---|---|----|--------|---------|--------|------|------|---|
| ATOM | 907 | N9   | G | B | 11 | 19.203 | -44.578 | 51.486 | 1.00 | 0.00 | N |
| ATOM | 908 | C2'  | G | B | 11 | 18.590 | -47.004 | 51.179 | 1.00 | 0.00 | C |
| ATOM | 909 | C3'  | G | B | 11 | 17.324 | -47.701 | 51.650 | 1.00 | 0.00 | C |
| ATOM | 910 | O3'  | G | B | 11 | 16.499 | -47.982 | 50.521 | 1.00 | 0.00 | O |
| ATOM | 911 | C4'  | G | B | 11 | 16.695 | -46.667 | 52.583 | 1.00 | 0.00 | C |
| ATOM | 912 | O4'  | G | B | 11 | 17.059 | -45.380 | 51.991 | 1.00 | 0.00 | O |
| ATOM | 913 | C5'  | G | B | 11 | 17.160 | -46.690 | 54.019 | 1.00 | 0.00 | C |
| ATOM | 914 | O5'  | G | B | 11 | 18.572 | -47.010 | 54.072 | 1.00 | 0.00 | O |
| ATOM | 915 | O1P  | G | B | 11 | 18.618 | -49.250 | 55.217 | 1.00 | 0.00 | O |
| ATOM | 916 | O2P  | G | B | 11 | 20.590 | -47.710 | 55.394 | 1.00 | 0.00 | O |
| ATOM | 917 | P    | G | B | 11 | 19.119 | -47.866 | 55.303 | 1.00 | 0.00 | P |
| ATOM | 918 | H1   | G | B | 11 | 20.442 | -40.055 | 49.731 | 1.00 | 0.00 | H |
| ATOM | 919 | H8   | G | B | 11 | 20.254 | -45.540 | 53.130 | 1.00 | 0.00 | H |
| ATOM | 920 | H1'  | G | B | 11 | 17.799 | -45.300 | 50.098 | 1.00 | 0.00 | H |
| ATOM | 921 | H21  | G | B | 11 | 18.874 | -40.057 | 48.196 | 1.00 | 0.00 | H |
| ATOM | 922 | H3'  | G | B | 11 | 17.540 | -48.629 | 52.179 | 1.00 | 0.00 | H |
| ATOM | 923 | H22  | G | B | 11 | 17.742 | -41.421 | 47.984 | 1.00 | 0.00 | H |
| ATOM | 924 | H4'  | G | B | 11 | 15.619 | -46.850 | 52.577 | 1.00 | 0.00 | H |
| ATOM | 925 | H2'1 | G | B | 11 | 19.408 | -47.149 | 51.887 | 1.00 | 0.00 | H |
| ATOM | 926 | H2'2 | G | B | 11 | 18.919 | -47.387 | 50.214 | 1.00 | 0.00 | H |
| ATOM | 927 | H5'1 | G | B | 11 | 16.986 | -45.710 | 54.466 | 1.00 | 0.00 | H |
| ATOM | 928 | H5'2 | G | B | 11 | 16.590 | -47.440 | 54.568 | 1.00 | 0.00 | H |
| ATOM | 929 | C1'  | G | B | 12 | 18.513 | -44.931 | 46.202 | 1.00 | 0.00 | C |
| ATOM | 930 | N1   | G | B | 12 | 22.264 | -41.712 | 47.464 | 1.00 | 0.00 | N |
| ATOM | 931 | C2   | G | B | 12 | 21.262 | -41.582 | 46.518 | 1.00 | 0.00 | C |
| ATOM | 932 | N2   | G | B | 12 | 21.260 | -40.442 | 45.814 | 1.00 | 0.00 | N |
| ATOM | 933 | N3   | G | B | 12 | 20.335 | -42.512 | 46.294 | 1.00 | 0.00 | N |
| ATOM | 934 | C4   | G | B | 12 | 20.495 | -43.600 | 47.092 | 1.00 | 0.00 | C |
| ATOM | 935 | C5   | G | B | 12 | 21.463 | -43.820 | 48.057 | 1.00 | 0.00 | C |
| ATOM | 936 | C6   | G | B | 12 | 22.443 | -42.831 | 48.298 | 1.00 | 0.00 | C |
| ATOM | 937 | O6   | G | B | 12 | 23.375 | -42.842 | 49.103 | 1.00 | 0.00 | O |
| ATOM | 938 | N7   | G | B | 12 | 21.276 | -45.067 | 48.653 | 1.00 | 0.00 | N |
| ATOM | 939 | C8   | G | B | 12 | 20.223 | -45.554 | 48.048 | 1.00 | 0.00 | C |
| ATOM | 940 | N9   | G | B | 12 | 19.692 | -44.721 | 47.085 | 1.00 | 0.00 | N |
| ATOM | 941 | C2'  | G | B | 12 | 18.362 | -46.365 | 45.713 | 1.00 | 0.00 | C |
| ATOM | 942 | C3'  | G | B | 12 | 16.851 | -46.536 | 45.689 | 1.00 | 0.00 | C |
| ATOM | 943 | O3'  | G | B | 12 | 16.342 | -46.030 | 44.458 | 1.00 | 0.00 | O |
| ATOM | 944 | C4'  | G | B | 12 | 16.397 | -45.704 | 46.886 | 1.00 | 0.00 | C |
| ATOM | 945 | O4'  | G | B | 12 | 17.355 | -44.600 | 46.943 | 1.00 | 0.00 | O |
| ATOM | 946 | C5'  | G | B | 12 | 16.389 | -46.405 | 48.226 | 1.00 | 0.00 | C |
| ATOM | 947 | O5'  | G | B | 12 | 17.511 | -47.318 | 48.308 | 1.00 | 0.00 | O |
| ATOM | 948 | O1P  | G | B | 12 | 16.414 | -49.581 | 48.398 | 1.00 | 0.00 | O |
| ATOM | 949 | O2P  | G | B | 12 | 18.668 | -49.238 | 49.443 | 1.00 | 0.00 | O |
| ATOM | 950 | P    | G | B | 12 | 17.332 | -48.681 | 49.119 | 1.00 | 0.00 | P |
| ATOM | 951 | H1   | G | B | 12 | 22.929 | -40.929 | 47.563 | 1.00 | 0.00 | H |
| ATOM | 952 | H8   | G | B | 12 | 19.801 | -46.532 | 48.283 | 1.00 | 0.00 | H |
| ATOM | 953 | H1'  | G | B | 12 | 18.586 | -44.238 | 45.365 | 1.00 | 0.00 | H |
| ATOM | 954 | H21  | G | B | 12 | 21.976 | -39.725 | 45.995 | 1.00 | 0.00 | H |
| ATOM | 955 | H3'  | G | B | 12 | 16.556 | -47.580 | 45.800 | 1.00 | 0.00 | H |
| ATOM | 956 | H22  | G | B | 12 | 20.542 | -40.286 | 45.092 | 1.00 | 0.00 | H |
| ATOM | 957 | H4'  | G | B | 12 | 15.380 | -45.375 | 46.677 | 1.00 | 0.00 | H |
| ATOM | 958 | H2'1 | G | B | 12 | 18.832 | -47.084 | 46.385 | 1.00 | 0.00 | H |
| ATOM | 959 | H2'2 | G | B | 12 | 18.793 | -46.512 | 44.723 | 1.00 | 0.00 | H |
| ATOM | 960 | H5'1 | G | B | 12 | 16.459 | -45.661 | 49.019 | 1.00 | 0.00 | H |

|      |      |      |     |    |        |         |        |      |      |   |
|------|------|------|-----|----|--------|---------|--------|------|------|---|
| ATOM | 961  | H5'2 | G B | 12 | 15.454 | -46.957 | 48.334 | 1.00 | 0.00 | H |
| ATOM | 962  | C1'  | T B | 13 | 20.454 | -42.970 | 42.094 | 1.00 | 0.00 | C |
| ATOM | 963  | N1   | T B | 13 | 21.338 | -43.587 | 43.117 | 1.00 | 0.00 | N |
| ATOM | 964  | C2   | T B | 13 | 22.408 | -42.837 | 43.562 | 1.00 | 0.00 | C |
| ATOM | 965  | O2   | T B | 13 | 22.642 | -41.714 | 43.149 | 1.00 | 0.00 | O |
| ATOM | 966  | N3   | T B | 13 | 23.203 | -43.448 | 44.513 | 1.00 | 0.00 | N |
| ATOM | 967  | C4   | T B | 13 | 23.028 | -44.710 | 45.043 | 1.00 | 0.00 | C |
| ATOM | 968  | O4   | T B | 13 | 23.811 | -45.154 | 45.891 | 1.00 | 0.00 | O |
| ATOM | 969  | C5   | T B | 13 | 21.883 | -45.418 | 44.519 | 1.00 | 0.00 | C |
| ATOM | 970  | C6   | T B | 13 | 21.087 | -44.852 | 43.589 | 1.00 | 0.00 | C |
| ATOM | 971  | C7   | T B | 13 | 21.653 | -46.794 | 45.067 | 1.00 | 0.00 | C |
| ATOM | 972  | C2'  | T B | 13 | 19.950 | -43.953 | 41.043 | 1.00 | 0.00 | C |
| ATOM | 973  | C3'  | T B | 13 | 18.545 | -43.435 | 40.774 | 1.00 | 0.00 | C |
| ATOM | 974  | O3'  | T B | 13 | 18.609 | -42.391 | 39.806 | 1.00 | 0.00 | O |
| ATOM | 975  | C4'  | T B | 13 | 18.099 | -42.930 | 42.143 | 1.00 | 0.00 | C |
| ATOM | 976  | O4'  | T B | 13 | 19.329 | -42.432 | 42.761 | 1.00 | 0.00 | O |
| ATOM | 977  | C5'  | T B | 13 | 17.474 | -43.952 | 43.066 | 1.00 | 0.00 | C |
| ATOM | 978  | O5'  | T B | 13 | 18.135 | -45.232 | 42.898 | 1.00 | 0.00 | O |
| ATOM | 979  | O1P  | T B | 13 | 16.334 | -46.692 | 41.920 | 1.00 | 0.00 | O |
| ATOM | 980  | O2P  | T B | 13 | 18.183 | -47.716 | 43.273 | 1.00 | 0.00 | O |
| ATOM | 981  | P    | T B | 13 | 17.274 | -46.565 | 43.052 | 1.00 | 0.00 | P |
| ATOM | 982  | H3   | T B | 13 | 24.006 | -42.907 | 44.864 | 1.00 | 0.00 | H |
| ATOM | 983  | H6   | T B | 13 | 20.229 | -45.406 | 43.209 | 1.00 | 0.00 | H |
| ATOM | 984  | H1'  | T B | 13 | 20.993 | -42.146 | 41.627 | 1.00 | 0.00 | H |
| ATOM | 985  | H3'  | T B | 13 | 17.885 | -44.224 | 40.410 | 1.00 | 0.00 | H |
| ATOM | 986  | H4'  | T B | 13 | 17.362 | -42.147 | 41.967 | 1.00 | 0.00 | H |
| ATOM | 987  | H71  | T B | 13 | 21.790 | -47.530 | 44.276 | 1.00 | 0.00 | H |
| ATOM | 988  | H72  | T B | 13 | 22.366 | -46.988 | 45.871 | 1.00 | 0.00 | H |
| ATOM | 989  | H73  | T B | 13 | 20.637 | -46.865 | 45.457 | 1.00 | 0.00 | H |
| ATOM | 990  | H2'1 | T B | 13 | 19.932 | -44.978 | 41.412 | 1.00 | 0.00 | H |
| ATOM | 991  | H2'2 | T B | 13 | 20.558 | -43.941 | 40.139 | 1.00 | 0.00 | H |
| ATOM | 992  | H5'1 | T B | 13 | 17.579 | -43.614 | 44.097 | 1.00 | 0.00 | H |
| ATOM | 993  | H5'2 | T B | 13 | 16.417 | -44.049 | 42.826 | 1.00 | 0.00 | H |
| ATOM | 994  | C1'  | G B | 14 | 24.103 | -40.839 | 39.486 | 1.00 | 0.00 | C |
| ATOM | 995  | N1   | G B | 14 | 27.130 | -43.157 | 42.877 | 1.00 | 0.00 | N |
| ATOM | 996  | C2   | G B | 14 | 27.201 | -41.879 | 42.352 | 1.00 | 0.00 | C |
| ATOM | 997  | N2   | G B | 14 | 28.213 | -41.118 | 42.785 | 1.00 | 0.00 | N |
| ATOM | 998  | N3   | G B | 14 | 26.330 | -41.399 | 41.465 | 1.00 | 0.00 | N |
| ATOM | 999  | C4   | G B | 14 | 25.375 | -42.309 | 41.133 | 1.00 | 0.00 | C |
| ATOM | 1000 | C5   | G B | 14 | 25.230 | -43.603 | 41.601 | 1.00 | 0.00 | C |
| ATOM | 1001 | C6   | G B | 14 | 26.150 | -44.112 | 42.546 | 1.00 | 0.00 | C |
| ATOM | 1002 | O6   | G B | 14 | 26.186 | -45.226 | 43.073 | 1.00 | 0.00 | O |
| ATOM | 1003 | N7   | G B | 14 | 24.118 | -44.208 | 41.009 | 1.00 | 0.00 | N |
| ATOM | 1004 | C8   | G B | 14 | 23.636 | -43.281 | 40.222 | 1.00 | 0.00 | C |
| ATOM | 1005 | N9   | G B | 14 | 24.348 | -42.098 | 40.241 | 1.00 | 0.00 | N |
| ATOM | 1006 | C2'  | G B | 14 | 23.609 | -41.063 | 38.063 | 1.00 | 0.00 | C |
| ATOM | 1007 | C3'  | G B | 14 | 22.645 | -39.902 | 37.875 | 1.00 | 0.00 | C |
| ATOM | 1008 | O3'  | G B | 14 | 23.376 | -38.747 | 37.473 | 1.00 | 0.00 | O |
| ATOM | 1009 | C4'  | G B | 14 | 22.031 | -39.743 | 39.267 | 1.00 | 0.00 | C |
| ATOM | 1010 | O4'  | G B | 14 | 23.114 | -40.105 | 40.181 | 1.00 | 0.00 | O |
| ATOM | 1011 | C5'  | G B | 14 | 20.830 | -40.604 | 39.573 | 1.00 | 0.00 | C |
| ATOM | 1012 | O5'  | G B | 14 | 20.986 | -41.903 | 38.951 | 1.00 | 0.00 | O |
| ATOM | 1013 | O1P  | G B | 14 | 19.152 | -41.948 | 37.227 | 1.00 | 0.00 | O |
| ATOM | 1014 | O2P  | G B | 14 | 19.995 | -44.093 | 38.217 | 1.00 | 0.00 | O |

|      |      |      |     |    |        |         |        |      |      |   |
|------|------|------|-----|----|--------|---------|--------|------|------|---|
| ATOM | 1015 | P    | G B | 14 | 19.688 | -42.655 | 38.405 | 1.00 | 0.00 | P |
| ATOM | 1016 | H1   | G B | 14 | 27.850 | -43.429 | 43.563 | 1.00 | 0.00 | H |
| ATOM | 1017 | H8   | G B | 14 | 22.750 | -43.431 | 39.604 | 1.00 | 0.00 | H |
| ATOM | 1018 | H1'  | G B | 14 | 25.022 | -40.252 | 39.493 | 1.00 | 0.00 | H |
| ATOM | 1019 | H21  | G B | 14 | 28.880 | -41.496 | 43.474 | 1.00 | 0.00 | H |
| ATOM | 1020 | H3'  | G B | 14 | 21.880 | -40.124 | 37.132 | 1.00 | 0.00 | H |
| ATOM | 1021 | H22  | G B | 14 | 28.324 | -40.157 | 42.429 | 1.00 | 0.00 | H |
| ATOM | 1022 | H4'  | G B | 14 | 21.726 | -38.700 | 39.359 | 1.00 | 0.00 | H |
| ATOM | 1023 | H2'1 | G B | 14 | 23.103 | -42.021 | 37.948 | 1.00 | 0.00 | H |
| ATOM | 1024 | H2'2 | G B | 14 | 24.417 | -41.029 | 37.335 | 1.00 | 0.00 | H |
| ATOM | 1025 | H5'1 | G B | 14 | 20.740 | -40.721 | 40.651 | 1.00 | 0.00 | H |
| ATOM | 1026 | H5'2 | G B | 14 | 19.933 | -40.117 | 39.189 | 1.00 | 0.00 | H |
| ATOM | 1027 | C1'  | C B | 15 | 28.843 | -39.825 | 38.466 | 1.00 | 0.00 | C |
| ATOM | 1028 | N1   | C B | 15 | 28.391 | -41.232 | 38.647 | 1.00 | 0.00 | N |
| ATOM | 1029 | C2   | C B | 15 | 29.099 | -42.035 | 39.540 | 1.00 | 0.00 | C |
| ATOM | 1030 | O2   | C B | 15 | 30.066 | -41.549 | 40.141 | 1.00 | 0.00 | O |
| ATOM | 1031 | N3   | C B | 15 | 28.704 | -43.318 | 39.719 | 1.00 | 0.00 | N |
| ATOM | 1032 | C4   | C B | 15 | 27.654 | -43.815 | 39.054 | 1.00 | 0.00 | C |
| ATOM | 1033 | N4   | C B | 15 | 27.309 | -45.075 | 39.270 | 1.00 | 0.00 | N |
| ATOM | 1034 | C5   | C B | 15 | 26.910 | -43.014 | 38.125 | 1.00 | 0.00 | C |
| ATOM | 1035 | C6   | C B | 15 | 27.322 | -41.723 | 37.964 | 1.00 | 0.00 | C |
| ATOM | 1036 | C2'  | C B | 15 | 28.734 | -39.327 | 37.031 | 1.00 | 0.00 | C |
| ATOM | 1037 | C3'  | C B | 15 | 28.346 | -37.868 | 37.231 | 1.00 | 0.00 | C |
| ATOM | 1038 | O3'  | C B | 15 | 29.525 | -37.095 | 37.442 | 1.00 | 0.00 | O |
| ATOM | 1039 | C4'  | C B | 15 | 27.458 | -37.920 | 38.472 | 1.00 | 0.00 | C |
| ATOM | 1040 | O4'  | C B | 15 | 28.024 | -39.003 | 39.277 | 1.00 | 0.00 | O |
| ATOM | 1041 | C5'  | C B | 15 | 25.993 | -38.209 | 38.238 | 1.00 | 0.00 | C |
| ATOM | 1042 | O5'  | C B | 15 | 25.849 | -39.157 | 37.152 | 1.00 | 0.00 | O |
| ATOM | 1043 | O1P  | C B | 15 | 24.699 | -37.818 | 35.356 | 1.00 | 0.00 | O |
| ATOM | 1044 | O2P  | C B | 15 | 24.398 | -40.307 | 35.450 | 1.00 | 0.00 | O |
| ATOM | 1045 | P    | C B | 15 | 24.585 | -39.033 | 36.187 | 1.00 | 0.00 | P |
| ATOM | 1046 | H5   | C B | 15 | 26.058 | -43.417 | 37.577 | 1.00 | 0.00 | H |
| ATOM | 1047 | H6   | C B | 15 | 26.784 | -41.073 | 37.274 | 1.00 | 0.00 | H |
| ATOM | 1048 | H1'  | C B | 15 | 29.866 | -39.746 | 38.832 | 1.00 | 0.00 | H |
| ATOM | 1049 | H3'  | C B | 15 | 27.802 | -37.471 | 36.374 | 1.00 | 0.00 | H |
| ATOM | 1050 | H4'  | C B | 15 | 27.532 | -36.946 | 38.955 | 1.00 | 0.00 | H |
| ATOM | 1051 | H41  | C B | 15 | 26.503 | -45.483 | 38.773 | 1.00 | 0.00 | H |
| ATOM | 1052 | H42  | C B | 15 | 27.848 | -45.651 | 39.936 | 1.00 | 0.00 | H |
| ATOM | 1053 | H2'1 | C B | 15 | 27.977 | -39.864 | 36.462 | 1.00 | 0.00 | H |
| ATOM | 1054 | H2'2 | C B | 15 | 29.676 | -39.415 | 36.490 | 1.00 | 0.00 | H |
| ATOM | 1055 | H5'1 | C B | 15 | 25.560 | -38.623 | 39.149 | 1.00 | 0.00 | H |
| ATOM | 1056 | H5'2 | C B | 15 | 25.482 | -37.281 | 37.986 | 1.00 | 0.00 | H |
| ATOM | 1057 | C1'  | G B | 16 | 33.705 | -40.756 | 38.545 | 1.00 | 0.00 | C |
| ATOM | 1058 | N1   | G B | 16 | 32.194 | -45.608 | 38.984 | 1.00 | 0.00 | N |
| ATOM | 1059 | C2   | G B | 16 | 33.207 | -44.930 | 39.641 | 1.00 | 0.00 | C |
| ATOM | 1060 | N2   | G B | 16 | 33.910 | -45.641 | 40.531 | 1.00 | 0.00 | N |
| ATOM | 1061 | N3   | G B | 16 | 33.491 | -43.647 | 39.426 | 1.00 | 0.00 | N |
| ATOM | 1062 | C4   | G B | 16 | 32.683 | -43.088 | 38.488 | 1.00 | 0.00 | C |
| ATOM | 1063 | C5   | G B | 16 | 31.655 | -43.685 | 37.779 | 1.00 | 0.00 | C |
| ATOM | 1064 | C6   | G B | 16 | 31.348 | -45.048 | 38.010 | 1.00 | 0.00 | C |
| ATOM | 1065 | O6   | G B | 16 | 30.481 | -45.746 | 37.485 | 1.00 | 0.00 | O |
| ATOM | 1066 | N7   | G B | 16 | 31.071 | -42.765 | 36.907 | 1.00 | 0.00 | N |
| ATOM | 1067 | C8   | G B | 16 | 31.746 | -41.663 | 37.111 | 1.00 | 0.00 | C |
| ATOM | 1068 | N9   | G B | 16 | 32.744 | -41.781 | 38.057 | 1.00 | 0.00 | N |

|      |      |      |     |    |        |         |        |      |      |   |
|------|------|------|-----|----|--------|---------|--------|------|------|---|
| ATOM | 1069 | C2'  | G B | 16 | 34.202 | -39.813 | 37.457 | 1.00 | 0.00 | C |
| ATOM | 1070 | C3'  | G B | 16 | 34.329 | -38.499 | 38.209 | 1.00 | 0.00 | C |
| ATOM | 1071 | O3'  | G B | 16 | 35.593 | -38.455 | 38.866 | 1.00 | 0.00 | O |
| ATOM | 1072 | C4'  | G B | 16 | 33.165 | -38.559 | 39.197 | 1.00 | 0.00 | C |
| ATOM | 1073 | O4'  | G B | 16 | 33.046 | -39.979 | 39.525 | 1.00 | 0.00 | O |
| ATOM | 1074 | C5'  | G B | 16 | 31.830 | -38.064 | 38.692 | 1.00 | 0.00 | C |
| ATOM | 1075 | O5'  | G B | 16 | 31.670 | -38.423 | 37.298 | 1.00 | 0.00 | O |
| ATOM | 1076 | O1P  | G B | 16 | 31.653 | -36.199 | 36.122 | 1.00 | 0.00 | O |
| ATOM | 1077 | O2P  | G B | 16 | 30.458 | -38.159 | 35.114 | 1.00 | 0.00 | O |
| ATOM | 1078 | P    | G B | 16 | 30.872 | -37.431 | 36.337 | 1.00 | 0.00 | P |
| ATOM | 1079 | H1   | G B | 16 | 32.050 | -46.599 | 39.229 | 1.00 | 0.00 | H |
| ATOM | 1080 | H8   | G B | 16 | 31.539 | -40.735 | 36.580 | 1.00 | 0.00 | H |
| ATOM | 1081 | H1'  | G B | 16 | 34.537 | -41.269 | 39.027 | 1.00 | 0.00 | H |
| ATOM | 1082 | H21  | G B | 16 | 33.681 | -46.631 | 40.695 | 1.00 | 0.00 | H |
| ATOM | 1083 | H3'  | G B | 16 | 34.237 | -37.638 | 37.546 | 1.00 | 0.00 | H |
| ATOM | 1084 | H22  | G B | 16 | 34.678 | -45.194 | 41.052 | 1.00 | 0.00 | H |
| ATOM | 1085 | H4'  | G B | 16 | 33.446 | -37.945 | 40.054 | 1.00 | 0.00 | H |
| ATOM | 1086 | H2'1 | G B | 16 | 33.499 | -39.730 | 36.628 | 1.00 | 0.00 | H |
| ATOM | 1087 | H2'2 | G B | 16 | 35.160 | -40.129 | 37.042 | 1.00 | 0.00 | H |
| ATOM | 1088 | H5'1 | G B | 16 | 31.035 | -38.518 | 39.283 | 1.00 | 0.00 | H |
| ATOM | 1089 | H5'2 | G B | 16 | 31.786 | -36.981 | 38.802 | 1.00 | 0.00 | H |
| ATOM | 1090 | C1'  | G B | 17 | 37.663 | -43.721 | 38.810 | 1.00 | 0.00 | C |
| ATOM | 1091 | N1   | G B | 17 | 34.445 | -47.232 | 36.977 | 1.00 | 0.00 | N |
| ATOM | 1092 | C2   | G B | 17 | 35.399 | -47.334 | 37.975 | 1.00 | 0.00 | C |
| ATOM | 1093 | N2   | G B | 17 | 35.510 | -48.533 | 38.561 | 1.00 | 0.00 | N |
| ATOM | 1094 | N3   | G B | 17 | 36.176 | -46.323 | 38.357 | 1.00 | 0.00 | N |
| ATOM | 1095 | C4   | G B | 17 | 35.931 | -45.189 | 37.651 | 1.00 | 0.00 | C |
| ATOM | 1096 | C5   | G B | 17 | 35.007 | -44.994 | 36.641 | 1.00 | 0.00 | C |
| ATOM | 1097 | C6   | G B | 17 | 34.178 | -46.064 | 36.236 | 1.00 | 0.00 | C |
| ATOM | 1098 | O6   | G B | 17 | 33.306 | -46.087 | 35.366 | 1.00 | 0.00 | O |
| ATOM | 1099 | N7   | G B | 17 | 35.071 | -43.679 | 36.174 | 1.00 | 0.00 | N |
| ATOM | 1100 | C8   | G B | 17 | 36.008 | -43.131 | 36.902 | 1.00 | 0.00 | C |
| ATOM | 1101 | N9   | G B | 17 | 36.580 | -43.985 | 37.822 | 1.00 | 0.00 | N |
| ATOM | 1102 | C2'  | G B | 17 | 38.756 | -42.800 | 38.289 | 1.00 | 0.00 | C |
| ATOM | 1103 | C3'  | G B | 17 | 39.127 | -42.010 | 39.535 | 1.00 | 0.00 | C |
| ATOM | 1104 | O3'  | G B | 17 | 40.074 | -42.755 | 40.296 | 1.00 | 0.00 | O |
| ATOM | 1105 | C4'  | G B | 17 | 37.788 | -41.869 | 40.257 | 1.00 | 0.00 | C |
| ATOM | 1106 | O4'  | G B | 17 | 37.076 | -43.106 | 39.940 | 1.00 | 0.00 | O |
| ATOM | 1107 | C5'  | G B | 17 | 36.926 | -40.697 | 39.851 | 1.00 | 0.00 | C |
| ATOM | 1108 | O5'  | G B | 17 | 37.055 | -40.462 | 38.427 | 1.00 | 0.00 | O |
| ATOM | 1109 | O1P  | G B | 17 | 38.183 | -38.215 | 38.306 | 1.00 | 0.00 | O |
| ATOM | 1110 | O2P  | G B | 17 | 36.704 | -38.980 | 36.428 | 1.00 | 0.00 | O |
| ATOM | 1111 | P    | G B | 17 | 36.982 | -38.964 | 37.886 | 1.00 | 0.00 | P |
| ATOM | 1112 | H1   | G B | 17 | 33.890 | -48.074 | 36.761 | 1.00 | 0.00 | H |
| ATOM | 1113 | H8   | G B | 17 | 36.313 | -42.090 | 36.792 | 1.00 | 0.00 | H |
| ATOM | 1114 | H1'  | G B | 17 | 38.076 | -44.679 | 39.126 | 1.00 | 0.00 | H |
| ATOM | 1115 | H21  | G B | 17 | 34.903 | -49.311 | 38.262 | 1.00 | 0.00 | H |
| ATOM | 1116 | H3'  | G B | 17 | 39.547 | -41.034 | 39.291 | 1.00 | 0.00 | H |
| ATOM | 1117 | H22  | G B | 17 | 36.203 | -48.677 | 39.309 | 1.00 | 0.00 | H |
| ATOM | 1118 | H4'  | G B | 17 | 38.010 | -41.767 | 41.319 | 1.00 | 0.00 | H |
| ATOM | 1119 | H2'1 | G B | 17 | 38.401 | -42.143 | 37.495 | 1.00 | 0.00 | H |
| ATOM | 1120 | H2'2 | G B | 17 | 39.611 | -43.351 | 37.899 | 1.00 | 0.00 | H |
| ATOM | 1121 | H5'1 | G B | 17 | 35.887 | -40.915 | 40.097 | 1.00 | 0.00 | H |
| ATOM | 1122 | H5'2 | G B | 17 | 37.247 | -39.811 | 40.401 | 1.00 | 0.00 | H |

|      |      |      |     |    |        |         |        |      |      |   |
|------|------|------|-----|----|--------|---------|--------|------|------|---|
| ATOM | 1123 | C1'  | C B | 18 | 40.027 | -48.040 | 38.274 | 1.00 | 0.00 | C |
| ATOM | 1124 | N1   | C B | 18 | 39.252 | -47.455 | 37.145 | 1.00 | 0.00 | N |
| ATOM | 1125 | C2   | C B | 18 | 38.315 | -48.268 | 36.509 | 1.00 | 0.00 | C |
| ATOM | 1126 | O2   | C B | 18 | 38.166 | -49.431 | 36.904 | 1.00 | 0.00 | O |
| ATOM | 1127 | N3   | C B | 18 | 37.600 | -47.753 | 35.478 | 1.00 | 0.00 | N |
| ATOM | 1128 | C4   | C B | 18 | 37.786 | -46.490 | 35.075 | 1.00 | 0.00 | C |
| ATOM | 1129 | N4   | C B | 18 | 37.057 | -46.040 | 34.063 | 1.00 | 0.00 | N |
| ATOM | 1130 | C5   | C B | 18 | 38.743 | -45.636 | 35.710 | 1.00 | 0.00 | C |
| ATOM | 1131 | C6   | C B | 18 | 39.450 | -46.172 | 36.745 | 1.00 | 0.00 | C |
| ATOM | 1132 | C2'  | C B | 18 | 41.481 | -47.588 | 38.320 | 1.00 | 0.00 | C |
| ATOM | 1133 | C3'  | C B | 18 | 41.738 | -47.502 | 39.817 | 1.00 | 0.00 | C |
| ATOM | 1134 | O3'  | C B | 18 | 42.092 | -48.794 | 40.306 | 1.00 | 0.00 | O |
| ATOM | 1135 | C4'  | C B | 18 | 40.396 | -47.025 | 40.366 | 1.00 | 0.00 | C |
| ATOM | 1136 | O4'  | C B | 18 | 39.404 | -47.634 | 39.479 | 1.00 | 0.00 | O |
| ATOM | 1137 | C5'  | C B | 18 | 40.171 | -45.530 | 40.388 | 1.00 | 0.00 | C |
| ATOM | 1138 | O5'  | C B | 18 | 40.778 | -44.929 | 39.216 | 1.00 | 0.00 | O |
| ATOM | 1139 | O1P  | C B | 18 | 42.624 | -43.514 | 40.180 | 1.00 | 0.00 | O |
| ATOM | 1140 | O2P  | C B | 18 | 41.571 | -42.882 | 37.991 | 1.00 | 0.00 | O |
| ATOM | 1141 | P    | C B | 18 | 41.408 | -43.470 | 39.344 | 1.00 | 0.00 | P |
| ATOM | 1142 | H5   | C B | 18 | 38.900 | -44.608 | 35.381 | 1.00 | 0.00 | H |
| ATOM | 1143 | H6   | C B | 18 | 40.187 | -45.558 | 37.262 | 1.00 | 0.00 | H |
| ATOM | 1144 | H1'  | C B | 18 | 39.958 | -49.125 | 38.210 | 1.00 | 0.00 | H |
| ATOM | 1145 | H3'  | C B | 18 | 42.533 | -46.795 | 40.054 | 1.00 | 0.00 | H |
| ATOM | 1146 | H4'  | C B | 18 | 40.327 | -47.384 | 41.394 | 1.00 | 0.00 | H |
| ATOM | 1147 | H41  | C B | 18 | 37.178 | -45.071 | 33.734 | 1.00 | 0.00 | H |
| ATOM | 1148 | H42  | C B | 18 | 36.369 | -46.657 | 33.609 | 1.00 | 0.00 | H |
| ATOM | 1149 | H2'1 | C B | 18 | 41.630 | -46.624 | 37.836 | 1.00 | 0.00 | H |
| ATOM | 1150 | H2'2 | C B | 18 | 42.150 | -48.302 | 37.841 | 1.00 | 0.00 | H |
| ATOM | 1151 | H5'1 | C B | 18 | 39.099 | -45.329 | 40.391 | 1.00 | 0.00 | H |
| ATOM | 1152 | H5'2 | C B | 18 | 40.616 | -45.115 | 41.289 | 1.00 | 0.00 | H |
| ATOM | 1153 | C1'  | C B | 19 | 40.723 | -52.509 | 36.258 | 1.00 | 0.00 | C |
| ATOM | 1154 | N1   | C B | 19 | 40.570 | -51.305 | 35.395 | 1.00 | 0.00 | N |
| ATOM | 1155 | C2   | C B | 19 | 39.630 | -51.352 | 34.368 | 1.00 | 0.00 | C |
| ATOM | 1156 | O2   | C B | 19 | 38.964 | -52.384 | 34.214 | 1.00 | 0.00 | O |
| ATOM | 1157 | N3   | C B | 19 | 39.476 | -50.266 | 33.573 | 1.00 | 0.00 | N |
| ATOM | 1158 | C4   | C B | 19 | 40.213 | -49.163 | 33.764 | 1.00 | 0.00 | C |
| ATOM | 1159 | N4   | C B | 19 | 40.022 | -48.132 | 32.959 | 1.00 | 0.00 | N |
| ATOM | 1160 | C5   | C B | 19 | 41.187 | -49.089 | 34.810 | 1.00 | 0.00 | C |
| ATOM | 1161 | C6   | C B | 19 | 41.323 | -50.193 | 35.600 | 1.00 | 0.00 | C |
| ATOM | 1162 | C2'  | C B | 19 | 42.161 | -52.794 | 36.662 | 1.00 | 0.00 | C |
| ATOM | 1163 | C3'  | C B | 19 | 41.990 | -53.334 | 38.076 | 1.00 | 0.00 | C |
| ATOM | 1164 | O3'  | C B | 19 | 41.698 | -54.727 | 38.014 | 1.00 | 0.00 | O |
| ATOM | 1165 | C4'  | C B | 19 | 40.814 | -52.519 | 38.609 | 1.00 | 0.00 | C |
| ATOM | 1166 | O4'  | C B | 19 | 39.969 | -52.293 | 37.436 | 1.00 | 0.00 | O |
| ATOM | 1167 | C5'  | C B | 19 | 41.146 | -51.183 | 39.229 | 1.00 | 0.00 | C |
| ATOM | 1168 | O5'  | C B | 19 | 42.239 | -50.564 | 38.505 | 1.00 | 0.00 | O |
| ATOM | 1169 | O1P  | C B | 19 | 44.109 | -50.531 | 40.189 | 1.00 | 0.00 | O |
| ATOM | 1170 | O2P  | C B | 19 | 44.033 | -48.812 | 38.362 | 1.00 | 0.00 | O |
| ATOM | 1171 | P    | C B | 19 | 43.287 | -49.675 | 39.311 | 1.00 | 0.00 | P |
| ATOM | 1172 | H5   | C B | 19 | 41.791 | -48.196 | 34.970 | 1.00 | 0.00 | H |
| ATOM | 1173 | H6   | C B | 19 | 42.051 | -50.182 | 36.410 | 1.00 | 0.00 | H |
| ATOM | 1174 | H1'  | C B | 19 | 40.287 | -53.361 | 35.731 | 1.00 | 0.00 | H |
| ATOM | 1175 | H3'  | C B | 19 | 42.883 | -53.177 | 38.682 | 1.00 | 0.00 | H |
| ATOM | 1176 | H4'  | C B | 19 | 40.327 | -53.129 | 39.372 | 1.00 | 0.00 | H |

|      |      |      |     |    |        |         |        |      |      |   |
|------|------|------|-----|----|--------|---------|--------|------|------|---|
| ATOM | 1177 | H41  | C B | 19 | 40.573 | -47.270 | 33.084 | 1.00 | 0.00 | H |
| ATOM | 1178 | H42  | C B | 19 | 39.319 | -48.187 | 32.206 | 1.00 | 0.00 | H |
| ATOM | 1179 | H2'1 | C B | 19 | 42.780 | -51.898 | 36.653 | 1.00 | 0.00 | H |
| ATOM | 1180 | H2'2 | C B | 19 | 42.636 | -53.530 | 36.013 | 1.00 | 0.00 | H |
| ATOM | 1181 | H5'1 | C B | 19 | 40.267 | -50.541 | 39.191 | 1.00 | 0.00 | H |
| ATOM | 1182 | H5'2 | C B | 19 | 41.433 | -51.334 | 40.270 | 1.00 | 0.00 | H |
| ATOM | 1183 | C1'  | T B | 20 | 40.316 | -55.884 | 32.660 | 1.00 | 0.00 | C |
| ATOM | 1184 | N1   | T B | 20 | 40.849 | -54.531 | 32.357 | 1.00 | 0.00 | N |
| ATOM | 1185 | C2   | T B | 20 | 40.275 | -53.848 | 31.304 | 1.00 | 0.00 | C |
| ATOM | 1186 | O2   | T B | 20 | 39.370 | -54.312 | 30.632 | 1.00 | 0.00 | O |
| ATOM | 1187 | N3   | T B | 20 | 40.801 | -52.594 | 31.058 | 1.00 | 0.00 | N |
| ATOM | 1188 | C4   | T B | 20 | 41.820 | -51.980 | 31.752 | 1.00 | 0.00 | C |
| ATOM | 1189 | O4   | T B | 20 | 42.208 | -50.848 | 31.437 | 1.00 | 0.00 | O |
| ATOM | 1190 | C5   | T B | 20 | 42.355 | -52.767 | 32.836 | 1.00 | 0.00 | C |
| ATOM | 1191 | C6   | T B | 20 | 41.868 | -53.996 | 33.105 | 1.00 | 0.00 | C |
| ATOM | 1192 | C7   | T B | 20 | 43.467 | -52.137 | 33.621 | 1.00 | 0.00 | C |
| ATOM | 1193 | C2'  | T B | 20 | 41.386 | -56.884 | 33.086 | 1.00 | 0.00 | C |
| ATOM | 1194 | C3'  | T B | 20 | 40.645 | -57.719 | 34.120 | 1.00 | 0.00 | C |
| ATOM | 1195 | O3'  | T B | 20 | 39.909 | -58.744 | 33.456 | 1.00 | 0.00 | O |
| ATOM | 1196 | C4'  | T B | 20 | 39.732 | -56.695 | 34.793 | 1.00 | 0.00 | C |
| ATOM | 1197 | O4'  | T B | 20 | 39.391 | -55.758 | 33.722 | 1.00 | 0.00 | O |
| ATOM | 1198 | C5'  | T B | 20 | 40.329 | -55.917 | 35.943 | 1.00 | 0.00 | C |
| ATOM | 1199 | O5'  | T B | 20 | 41.726 | -55.640 | 35.675 | 1.00 | 0.00 | O |
| ATOM | 1200 | O1P  | T B | 20 | 42.933 | -56.969 | 37.437 | 1.00 | 0.00 | O |
| ATOM | 1201 | O2P  | T B | 20 | 43.987 | -54.902 | 36.483 | 1.00 | 0.00 | O |
| ATOM | 1202 | P    | T B | 20 | 42.750 | -55.608 | 36.895 | 1.00 | 0.00 | P |
| ATOM | 1203 | H3   | T B | 20 | 40.390 | -52.064 | 30.277 | 1.00 | 0.00 | H |
| ATOM | 1204 | H6   | T B | 20 | 42.289 | -54.572 | 33.929 | 1.00 | 0.00 | H |
| ATOM | 1205 | H1'  | T B | 20 | 39.774 | -56.243 | 31.784 | 1.00 | 0.00 | H |
| ATOM | 1206 | H3'  | T B | 20 | 41.325 | -58.172 | 34.839 | 1.00 | 0.00 | H |
| ATOM | 1207 | H4'  | T B | 20 | 38.870 | -57.243 | 35.172 | 1.00 | 0.00 | H |
| ATOM | 1208 | H3T  | T B | 20 | 40.422 | -59.289 | 32.854 | 1.00 | 0.00 | H |
| ATOM | 1209 | H71  | T B | 20 | 44.385 | -52.706 | 33.473 | 1.00 | 0.00 | H |
| ATOM | 1210 | H72  | T B | 20 | 43.615 | -51.111 | 33.280 | 1.00 | 0.00 | H |
| ATOM | 1211 | H73  | T B | 20 | 43.209 | -52.134 | 34.681 | 1.00 | 0.00 | H |
| ATOM | 1212 | H2'1 | T B | 20 | 42.255 | -56.396 | 33.519 | 1.00 | 0.00 | H |
| ATOM | 1213 | H2'2 | T B | 20 | 41.732 | -57.498 | 32.254 | 1.00 | 0.00 | H |
| ATOM | 1214 | H5'1 | T B | 20 | 39.782 | -54.983 | 36.064 | 1.00 | 0.00 | H |
| ATOM | 1215 | H5'2 | T B | 20 | 40.239 | -56.506 | 36.856 | 1.00 | 0.00 | H |
| TER  |      |      |     |    |        |         |        |      |      |   |
| ATOM | 1    | C1'  | A A | 1  | 36.617 | -71.654 | 60.513 | 1.00 | 0.00 | C |
| ATOM | 2    | N1   | A A | 1  | 40.282 | -69.429 | 63.334 | 1.00 | 0.00 | N |
| ATOM | 3    | C2   | A A | 1  | 39.343 | -70.326 | 63.625 | 1.00 | 0.00 | C |
| ATOM | 4    | N3   | A A | 1  | 38.429 | -70.863 | 62.845 | 1.00 | 0.00 | N |
| ATOM | 5    | C4   | A A | 1  | 38.531 | -70.368 | 61.600 | 1.00 | 0.00 | C |
| ATOM | 6    | C5   | A A | 1  | 39.431 | -69.446 | 61.141 | 1.00 | 0.00 | C |
| ATOM | 7    | C6   | A A | 1  | 40.359 | -68.954 | 62.082 | 1.00 | 0.00 | C |
| ATOM | 8    | N6   | A A | 1  | 41.303 | -68.047 | 61.778 | 1.00 | 0.00 | N |
| ATOM | 9    | N7   | A A | 1  | 39.232 | -69.180 | 59.798 | 1.00 | 0.00 | N |
| ATOM | 10   | C8   | A A | 1  | 38.225 | -69.936 | 59.476 | 1.00 | 0.00 | C |
| ATOM | 11   | N9   | A A | 1  | 37.747 | -70.687 | 60.517 | 1.00 | 0.00 | N |
| ATOM | 12   | C2'  | A A | 1  | 35.445 | -71.225 | 59.641 | 1.00 | 0.00 | C |
| ATOM | 13   | C3'  | A A | 1  | 34.960 | -72.553 | 59.086 | 1.00 | 0.00 | C |
| ATOM | 14   | O3'  | A A | 1  | 34.078 | -73.162 | 60.028 | 1.00 | 0.00 | O |

|      |    |      |   |   |   |        |         |        |      |      |   |
|------|----|------|---|---|---|--------|---------|--------|------|------|---|
| ATOM | 15 | C4'  | A | A | 1 | 36.255 | -73.346 | 58.914 | 1.00 | 0.00 | C |
| ATOM | 16 | O4'  | A | A | 1 | 37.107 | -72.884 | 60.012 | 1.00 | 0.00 | O |
| ATOM | 17 | C5'  | A | A | 1 | 36.994 | -73.147 | 57.613 | 1.00 | 0.00 | C |
| ATOM | 18 | O5'  | A | A | 1 | 36.878 | -71.766 | 57.187 | 1.00 | 0.00 | O |
| ATOM | 19 | H2   | A | A | 1 | 39.331 | -70.669 | 64.660 | 1.00 | 0.00 | H |
| ATOM | 20 | H8   | A | A | 1 | 37.801 | -69.968 | 58.472 | 1.00 | 0.00 | H |
| ATOM | 21 | H1'  | A | A | 1 | 36.301 | -71.813 | 61.543 | 1.00 | 0.00 | H |
| ATOM | 22 | H3'  | A | A | 1 | 34.443 | -72.434 | 58.132 | 1.00 | 0.00 | H |
| ATOM | 23 | H4'  | A | A | 1 | 35.993 | -74.400 | 58.992 | 1.00 | 0.00 | H |
| ATOM | 24 | H61  | A | A | 1 | 41.956 | -67.722 | 62.501 | 1.00 | 0.00 | H |
| ATOM | 25 | H62  | A | A | 1 | 41.368 | -67.678 | 60.817 | 1.00 | 0.00 | H |
| ATOM | 26 | H5T  | A | A | 1 | 36.834 | -71.575 | 56.248 | 1.00 | 0.00 | H |
| ATOM | 27 | H2'1 | A | A | 1 | 35.748 | -70.549 | 58.843 | 1.00 | 0.00 | H |
| ATOM | 28 | H2'2 | A | A | 1 | 34.663 | -70.727 | 60.216 | 1.00 | 0.00 | H |
| ATOM | 29 | H5'1 | A | A | 1 | 38.044 | -73.402 | 57.755 | 1.00 | 0.00 | H |
| ATOM | 30 | H5'2 | A | A | 1 | 36.569 | -73.803 | 56.856 | 1.00 | 0.00 | H |
| ATOM | 31 | C1'  | G | A | 2 | 34.816 | -70.362 | 64.955 | 1.00 | 0.00 | C |
| ATOM | 32 | N1   | G | A | 2 | 38.556 | -66.895 | 64.853 | 1.00 | 0.00 | N |
| ATOM | 33 | C2   | G | A | 2 | 38.124 | -67.702 | 65.888 | 1.00 | 0.00 | C |
| ATOM | 34 | N2   | G | A | 2 | 38.771 | -67.568 | 67.050 | 1.00 | 0.00 | N |
| ATOM | 35 | N3   | G | A | 2 | 37.124 | -68.576 | 65.773 | 1.00 | 0.00 | N |
| ATOM | 36 | C4   | G | A | 2 | 36.578 | -68.574 | 64.527 | 1.00 | 0.00 | C |
| ATOM | 37 | C5   | G | A | 2 | 36.943 | -67.803 | 63.435 | 1.00 | 0.00 | C |
| ATOM | 38 | C6   | G | A | 2 | 38.007 | -66.880 | 63.558 | 1.00 | 0.00 | C |
| ATOM | 39 | O6   | G | A | 2 | 38.473 | -66.117 | 62.712 | 1.00 | 0.00 | O |
| ATOM | 40 | N7   | G | A | 2 | 36.131 | -68.104 | 62.339 | 1.00 | 0.00 | N |
| ATOM | 41 | C8   | G | A | 2 | 35.322 | -69.030 | 62.791 | 1.00 | 0.00 | C |
| ATOM | 42 | N9   | G | A | 2 | 35.532 | -69.368 | 64.112 | 1.00 | 0.00 | N |
| ATOM | 43 | C2'  | G | A | 2 | 33.318 | -70.427 | 64.689 | 1.00 | 0.00 | C |
| ATOM | 44 | C3'  | G | A | 2 | 33.026 | -71.907 | 64.874 | 1.00 | 0.00 | C |
| ATOM | 45 | O3'  | G | A | 2 | 32.823 | -72.176 | 66.259 | 1.00 | 0.00 | O |
| ATOM | 46 | C4'  | G | A | 2 | 34.293 | -72.572 | 64.337 | 1.00 | 0.00 | C |
| ATOM | 47 | O4'  | G | A | 2 | 35.363 | -71.637 | 64.678 | 1.00 | 0.00 | O |
| ATOM | 48 | C5'  | G | A | 2 | 34.333 | -72.835 | 62.849 | 1.00 | 0.00 | C |
| ATOM | 49 | O5'  | G | A | 2 | 33.677 | -71.751 | 62.143 | 1.00 | 0.00 | O |
| ATOM | 50 | O1P  | G | A | 2 | 31.657 | -72.858 | 61.128 | 1.00 | 0.00 | O |
| ATOM | 51 | O2P  | G | A | 2 | 32.662 | -70.835 | 60.036 | 1.00 | 0.00 | O |
| ATOM | 52 | P    | G | A | 2 | 32.872 | -72.085 | 60.807 | 1.00 | 0.00 | P |
| ATOM | 53 | H1   | G | A | 2 | 39.340 | -66.255 | 65.045 | 1.00 | 0.00 | H |
| ATOM | 54 | H8   | G | A | 2 | 34.549 | -69.491 | 62.177 | 1.00 | 0.00 | H |
| ATOM | 55 | H1'  | G | A | 2 | 35.016 | -70.131 | 66.002 | 1.00 | 0.00 | H |
| ATOM | 56 | H21  | G | A | 2 | 39.545 | -66.892 | 67.133 | 1.00 | 0.00 | H |
| ATOM | 57 | H3'  | G | A | 2 | 32.147 | -72.224 | 64.312 | 1.00 | 0.00 | H |
| ATOM | 58 | H22  | G | A | 2 | 38.496 | -68.140 | 67.861 | 1.00 | 0.00 | H |
| ATOM | 59 | H4'  | G | A | 2 | 34.386 | -73.532 | 64.847 | 1.00 | 0.00 | H |
| ATOM | 60 | H2'1 | G | A | 2 | 33.062 | -70.095 | 63.683 | 1.00 | 0.00 | H |
| ATOM | 61 | H2'2 | G | A | 2 | 32.746 | -69.818 | 65.391 | 1.00 | 0.00 | H |
| ATOM | 62 | H5'1 | G | A | 2 | 35.371 | -72.909 | 62.527 | 1.00 | 0.00 | H |
| ATOM | 63 | H5'2 | G | A | 2 | 33.825 | -73.776 | 62.638 | 1.00 | 0.00 | H |
| ATOM | 64 | C1'  | G | A | 3 | 34.704 | -67.656 | 69.101 | 1.00 | 0.00 | C |
| ATOM | 65 | N1   | G | A | 3 | 37.013 | -64.152 | 66.203 | 1.00 | 0.00 | N |
| ATOM | 66 | C2   | G | A | 3 | 37.273 | -64.536 | 67.504 | 1.00 | 0.00 | C |
| ATOM | 67 | N2   | G | A | 3 | 38.280 | -63.902 | 68.117 | 1.00 | 0.00 | N |
| ATOM | 68 | N3   | G | A | 3 | 36.584 | -65.478 | 68.145 | 1.00 | 0.00 | N |



|      |     |      |     |   |        |         |        |      |      |   |
|------|-----|------|-----|---|--------|---------|--------|------|------|---|
| ATOM | 69  | C4   | G A | 3 | 35.597 | -66.009 | 67.376 | 1.00 | 0.00 | C |
| ATOM | 70  | C5   | G A | 3 | 35.263 | -65.686 | 66.070 | 1.00 | 0.00 | C |
| ATOM | 71  | C6   | G A | 3 | 35.999 | -64.689 | 65.388 | 1.00 | 0.00 | C |
| ATOM | 72  | O6   | G A | 3 | 35.857 | -64.267 | 64.240 | 1.00 | 0.00 | O |
| ATOM | 73  | N7   | G A | 3 | 34.185 | -66.462 | 65.641 | 1.00 | 0.00 | N |
| ATOM | 74  | C8   | G A | 3 | 33.907 | -67.215 | 66.673 | 1.00 | 0.00 | C |
| ATOM | 75  | N9   | G A | 3 | 34.721 | -66.998 | 67.766 | 1.00 | 0.00 | N |
| ATOM | 76  | C2'  | G A | 3 | 33.304 | -67.963 | 69.616 | 1.00 | 0.00 | C |
| ATOM | 77  | C3'  | G A | 3 | 33.515 | -69.278 | 70.347 | 1.00 | 0.00 | C |
| ATOM | 78  | O3'  | G A | 3 | 33.978 | -69.011 | 71.669 | 1.00 | 0.00 | O |
| ATOM | 79  | C4'  | G A | 3 | 34.577 | -69.973 | 69.495 | 1.00 | 0.00 | C |
| ATOM | 80  | O4'  | G A | 3 | 35.404 | -68.880 | 68.987 | 1.00 | 0.00 | O |
| ATOM | 81  | C5'  | G A | 3 | 34.072 | -70.782 | 68.323 | 1.00 | 0.00 | C |
| ATOM | 82  | O5'  | G A | 3 | 32.925 | -70.124 | 67.731 | 1.00 | 0.00 | O |
| ATOM | 83  | O1P  | G A | 3 | 31.036 | -71.725 | 68.185 | 1.00 | 0.00 | O |
| ATOM | 84  | O2P  | G A | 3 | 30.931 | -70.192 | 66.203 | 1.00 | 0.00 | O |
| ATOM | 85  | P    | G A | 3 | 31.761 | -71.022 | 67.110 | 1.00 | 0.00 | P |
| ATOM | 86  | H1   | G A | 3 | 37.609 | -63.414 | 65.797 | 1.00 | 0.00 | H |
| ATOM | 87  | H8   | G A | 3 | 33.104 | -67.951 | 66.672 | 1.00 | 0.00 | H |
| ATOM | 88  | H1'  | G A | 3 | 35.248 | -67.021 | 69.800 | 1.00 | 0.00 | H |
| ATOM | 89  | H21  | G A | 3 | 38.811 | -63.175 | 67.615 | 1.00 | 0.00 | H |
| ATOM | 90  | H3'  | G A | 3 | 32.601 | -69.870 | 70.397 | 1.00 | 0.00 | H |
| ATOM | 91  | H22  | G A | 3 | 38.523 | -64.140 | 69.088 | 1.00 | 0.00 | H |
| ATOM | 92  | H4'  | G A | 3 | 35.121 | -70.648 | 70.155 | 1.00 | 0.00 | H |
| ATOM | 93  | H2'1 | G A | 3 | 32.580 | -68.070 | 68.808 | 1.00 | 0.00 | H |
| ATOM | 94  | H2'2 | G A | 3 | 32.933 | -67.189 | 70.289 | 1.00 | 0.00 | H |
| ATOM | 95  | H5'1 | G A | 3 | 34.867 | -70.874 | 67.583 | 1.00 | 0.00 | H |
| ATOM | 96  | H5'2 | G A | 3 | 33.789 | -71.775 | 68.669 | 1.00 | 0.00 | H |
| ATOM | 97  | C1'  | C A | 4 | 35.594 | -63.587 | 71.782 | 1.00 | 0.00 | C |
| ATOM | 98  | N1   | C A | 4 | 34.892 | -63.490 | 70.471 | 1.00 | 0.00 | N |
| ATOM | 99  | C2   | C A | 4 | 35.379 | -62.580 | 69.536 | 1.00 | 0.00 | C |
| ATOM | 100 | O2   | C A | 4 | 36.366 | -61.895 | 69.829 | 1.00 | 0.00 | O |
| ATOM | 101 | N3   | C A | 4 | 34.754 | -62.479 | 68.338 | 1.00 | 0.00 | N |
| ATOM | 102 | C4   | C A | 4 | 33.686 | -63.233 | 68.053 | 1.00 | 0.00 | C |
| ATOM | 103 | N4   | C A | 4 | 33.116 | -63.095 | 66.865 | 1.00 | 0.00 | N |
| ATOM | 104 | C5   | C A | 4 | 33.162 | -64.177 | 68.997 | 1.00 | 0.00 | C |
| ATOM | 105 | C6   | C A | 4 | 33.808 | -64.265 | 70.194 | 1.00 | 0.00 | C |
| ATOM | 106 | C2'  | C A | 4 | 34.660 | -63.802 | 72.964 | 1.00 | 0.00 | C |
| ATOM | 107 | C3'  | C A | 4 | 35.485 | -64.714 | 73.859 | 1.00 | 0.00 | C |
| ATOM | 108 | O3'  | C A | 4 | 36.361 | -63.919 | 74.656 | 1.00 | 0.00 | O |
| ATOM | 109 | C4'  | C A | 4 | 36.244 | -65.579 | 72.856 | 1.00 | 0.00 | C |
| ATOM | 110 | O4'  | C A | 4 | 36.477 | -64.691 | 71.716 | 1.00 | 0.00 | O |
| ATOM | 111 | C5'  | C A | 4 | 35.533 | -66.817 | 72.365 | 1.00 | 0.00 | C |
| ATOM | 112 | O5'  | C A | 4 | 34.114 | -66.546 | 72.225 | 1.00 | 0.00 | O |
| ATOM | 113 | O1P  | C A | 4 | 33.064 | -68.020 | 73.972 | 1.00 | 0.00 | O |
| ATOM | 114 | O2P  | C A | 4 | 31.762 | -67.379 | 71.927 | 1.00 | 0.00 | O |
| ATOM | 115 | P    | C A | 4 | 33.075 | -67.717 | 72.529 | 1.00 | 0.00 | P |
| ATOM | 116 | H5   | C A | 4 | 32.291 | -64.790 | 68.770 | 1.00 | 0.00 | H |
| ATOM | 117 | H6   | C A | 4 | 33.450 | -64.971 | 70.943 | 1.00 | 0.00 | H |
| ATOM | 118 | H1'  | C A | 4 | 36.191 | -62.687 | 71.914 | 1.00 | 0.00 | H |
| ATOM | 119 | H3'  | C A | 4 | 34.859 | -65.323 | 74.510 | 1.00 | 0.00 | H |
| ATOM | 120 | H4'  | C A | 4 | 37.166 | -65.896 | 73.344 | 1.00 | 0.00 | H |
| ATOM | 121 | H41  | C A | 4 | 32.293 | -63.667 | 66.618 | 1.00 | 0.00 | H |
| ATOM | 122 | H42  | C A | 4 | 33.492 | -62.417 | 66.187 | 1.00 | 0.00 | H |

|      |     |      |     |   |        |         |        |      |      |   |
|------|-----|------|-----|---|--------|---------|--------|------|------|---|
| ATOM | 123 | H2'1 | C A | 4 | 33.724 | -64.277 | 72.672 | 1.00 | 0.00 | H |
| ATOM | 124 | H2'2 | C A | 4 | 34.411 | -62.868 | 73.470 | 1.00 | 0.00 | H |
| ATOM | 125 | H5'1 | C A | 4 | 35.947 | -67.111 | 71.400 | 1.00 | 0.00 | H |
| ATOM | 126 | H5'2 | C A | 4 | 35.683 | -67.625 | 73.080 | 1.00 | 0.00 | H |
| ATOM | 127 | C1'  | C A | 5 | 36.395 | -58.736 | 72.369 | 1.00 | 0.00 | C |
| ATOM | 128 | N1   | C A | 5 | 35.219 | -59.219 | 71.592 | 1.00 | 0.00 | N |
| ATOM | 129 | C2   | C A | 5 | 35.022 | -58.696 | 70.316 | 1.00 | 0.00 | C |
| ATOM | 130 | O2   | C A | 5 | 35.823 | -57.858 | 69.881 | 1.00 | 0.00 | O |
| ATOM | 131 | N3   | C A | 5 | 33.957 | -59.124 | 69.594 | 1.00 | 0.00 | N |
| ATOM | 132 | C4   | C A | 5 | 33.107 | -60.030 | 70.090 | 1.00 | 0.00 | C |
| ATOM | 133 | N4   | C A | 5 | 32.086 | -60.415 | 69.341 | 1.00 | 0.00 | N |
| ATOM | 134 | C5   | C A | 5 | 33.286 | -60.583 | 71.401 | 1.00 | 0.00 | C |
| ATOM | 135 | C6   | C A | 5 | 34.365 | -60.141 | 72.108 | 1.00 | 0.00 | C |
| ATOM | 136 | C2'  | C A | 5 | 36.120 | -58.569 | 73.857 | 1.00 | 0.00 | C |
| ATOM | 137 | C3'  | C A | 5 | 37.450 | -58.981 | 74.472 | 1.00 | 0.00 | C |
| ATOM | 138 | O3'  | C A | 5 | 38.331 | -57.861 | 74.476 | 1.00 | 0.00 | O |
| ATOM | 139 | C4'  | C A | 5 | 37.929 | -60.088 | 73.534 | 1.00 | 0.00 | C |
| ATOM | 140 | O4'  | C A | 5 | 37.431 | -59.689 | 72.218 | 1.00 | 0.00 | O |
| ATOM | 141 | C5'  | C A | 5 | 37.433 | -61.483 | 73.836 | 1.00 | 0.00 | C |
| ATOM | 142 | O5'  | C A | 5 | 36.065 | -61.424 | 74.317 | 1.00 | 0.00 | O |
| ATOM | 143 | O1P  | C A | 5 | 36.254 | -62.206 | 76.701 | 1.00 | 0.00 | O |
| ATOM | 144 | O2P  | C A | 5 | 34.109 | -62.530 | 75.441 | 1.00 | 0.00 | O |
| ATOM | 145 | P    | C A | 5 | 35.592 | -62.482 | 75.413 | 1.00 | 0.00 | P |
| ATOM | 146 | H5   | C A | 5 | 32.593 | -61.318 | 71.813 | 1.00 | 0.00 | H |
| ATOM | 147 | H6   | C A | 5 | 34.545 | -60.535 | 73.108 | 1.00 | 0.00 | H |
| ATOM | 148 | H1'  | C A | 5 | 36.734 | -57.800 | 71.925 | 1.00 | 0.00 | H |
| ATOM | 149 | H3'  | C A | 5 | 37.331 | -59.350 | 75.490 | 1.00 | 0.00 | H |
| ATOM | 150 | H4'  | C A | 5 | 39.017 | -60.104 | 73.593 | 1.00 | 0.00 | H |
| ATOM | 151 | H41  | C A | 5 | 31.417 | -61.112 | 69.698 | 1.00 | 0.00 | H |
| ATOM | 152 | H42  | C A | 5 | 31.959 | -60.014 | 68.399 | 1.00 | 0.00 | H |
| ATOM | 153 | H2'1 | C A | 5 | 35.310 | -59.208 | 74.203 | 1.00 | 0.00 | H |
| ATOM | 154 | H2'2 | C A | 5 | 35.864 | -57.541 | 74.117 | 1.00 | 0.00 | H |
| ATOM | 155 | H5'1 | C A | 5 | 37.477 | -62.083 | 72.927 | 1.00 | 0.00 | H |
| ATOM | 156 | H5'2 | C A | 5 | 38.071 | -61.934 | 74.594 | 1.00 | 0.00 | H |
| ATOM | 157 | C1'  | G A | 6 | 36.054 | -53.980 | 71.032 | 1.00 | 0.00 | C |
| ATOM | 158 | N1   | G A | 6 | 31.917 | -55.571 | 68.507 | 1.00 | 0.00 | N |
| ATOM | 159 | C2   | G A | 6 | 32.918 | -54.698 | 68.113 | 1.00 | 0.00 | C |
| ATOM | 160 | N2   | G A | 6 | 32.798 | -54.179 | 66.886 | 1.00 | 0.00 | N |
| ATOM | 161 | N3   | G A | 6 | 33.953 | -54.371 | 68.885 | 1.00 | 0.00 | N |
| ATOM | 162 | C4   | G A | 6 | 33.909 | -54.983 | 70.096 | 1.00 | 0.00 | C |
| ATOM | 163 | C5   | G A | 6 | 32.952 | -55.862 | 70.576 | 1.00 | 0.00 | C |
| ATOM | 164 | C6   | G A | 6 | 31.854 | -56.213 | 69.758 | 1.00 | 0.00 | C |
| ATOM | 165 | O6   | G A | 6 | 30.914 | -56.968 | 70.003 | 1.00 | 0.00 | O |
| ATOM | 166 | N7   | G A | 6 | 33.273 | -56.266 | 71.873 | 1.00 | 0.00 | N |
| ATOM | 167 | C8   | G A | 6 | 34.391 | -55.636 | 72.132 | 1.00 | 0.00 | C |
| ATOM | 168 | N9   | G A | 6 | 34.840 | -54.836 | 71.102 | 1.00 | 0.00 | N |
| ATOM | 169 | C2'  | G A | 6 | 36.388 | -53.280 | 72.343 | 1.00 | 0.00 | C |
| ATOM | 170 | C3'  | G A | 6 | 37.908 | -53.291 | 72.333 | 1.00 | 0.00 | C |
| ATOM | 171 | O3'  | G A | 6 | 38.380 | -52.174 | 71.581 | 1.00 | 0.00 | O |
| ATOM | 172 | C4'  | G A | 6 | 38.232 | -54.621 | 71.654 | 1.00 | 0.00 | C |
| ATOM | 173 | O4'  | G A | 6 | 37.150 | -54.809 | 70.691 | 1.00 | 0.00 | O |
| ATOM | 174 | C5'  | G A | 6 | 38.296 | -55.834 | 72.553 | 1.00 | 0.00 | C |
| ATOM | 175 | O5'  | G A | 6 | 37.291 | -55.730 | 73.591 | 1.00 | 0.00 | O |
| ATOM | 176 | O1P  | G A | 6 | 38.649 | -55.511 | 75.698 | 1.00 | 0.00 | O |

|      |     |      |     |   |        |         |        |      |      |   |
|------|-----|------|-----|---|--------|---------|--------|------|------|---|
| ATOM | 177 | O2P  | G A | 6 | 36.346 | -56.504 | 75.788 | 1.00 | 0.00 | O |
| ATOM | 178 | P    | G A | 6 | 37.613 | -56.325 | 75.036 | 1.00 | 0.00 | P |
| ATOM | 179 | H1   | G A | 6 | 31.163 | -55.764 | 67.831 | 1.00 | 0.00 | H |
| ATOM | 180 | H8   | G A | 6 | 34.921 | -55.732 | 73.080 | 1.00 | 0.00 | H |
| ATOM | 181 | H1'  | G A | 6 | 35.917 | -53.256 | 70.227 | 1.00 | 0.00 | H |
| ATOM | 182 | H21  | G A | 6 | 31.997 | -54.440 | 66.293 | 1.00 | 0.00 | H |
| ATOM | 183 | H3'  | G A | 6 | 38.325 | -53.250 | 73.339 | 1.00 | 0.00 | H |
| ATOM | 184 | H22  | G A | 6 | 33.508 | -53.521 | 66.534 | 1.00 | 0.00 | H |
| ATOM | 185 | H4'  | G A | 6 | 39.208 | -54.505 | 71.182 | 1.00 | 0.00 | H |
| ATOM | 186 | H2'1 | G A | 6 | 35.994 | -53.813 | 73.208 | 1.00 | 0.00 | H |
| ATOM | 187 | H2'2 | G A | 6 | 35.998 | -52.263 | 72.381 | 1.00 | 0.00 | H |
| ATOM | 188 | H5'1 | G A | 6 | 38.121 | -56.730 | 71.959 | 1.00 | 0.00 | H |
| ATOM | 189 | H5'2 | G A | 6 | 39.286 | -55.894 | 73.003 | 1.00 | 0.00 | H |
| ATOM | 190 | C1'  | C A | 7 | 33.958 | -50.159 | 68.681 | 1.00 | 0.00 | C |
| ATOM | 191 | N1   | C A | 7 | 33.145 | -51.036 | 69.568 | 1.00 | 0.00 | N |
| ATOM | 192 | C2   | C A | 7 | 31.969 | -51.575 | 69.053 | 1.00 | 0.00 | C |
| ATOM | 193 | O2   | C A | 7 | 31.646 | -51.303 | 67.890 | 1.00 | 0.00 | O |
| ATOM | 194 | N3   | C A | 7 | 31.216 | -52.378 | 69.845 | 1.00 | 0.00 | N |
| ATOM | 195 | C4   | C A | 7 | 31.591 | -52.653 | 71.101 | 1.00 | 0.00 | C |
| ATOM | 196 | N4   | C A | 7 | 30.820 | -53.447 | 71.828 | 1.00 | 0.00 | N |
| ATOM | 197 | C5   | C A | 7 | 32.795 | -52.110 | 71.658 | 1.00 | 0.00 | C |
| ATOM | 198 | C6   | C A | 7 | 33.540 | -51.309 | 70.841 | 1.00 | 0.00 | C |
| ATOM | 199 | C2'  | C A | 7 | 34.597 | -48.980 | 69.402 | 1.00 | 0.00 | C |
| ATOM | 200 | C3'  | C A | 7 | 35.927 | -48.848 | 68.676 | 1.00 | 0.00 | C |
| ATOM | 201 | O3'  | C A | 7 | 35.741 | -48.064 | 67.498 | 1.00 | 0.00 | O |
| ATOM | 202 | C4'  | C A | 7 | 36.284 | -50.297 | 68.355 | 1.00 | 0.00 | C |
| ATOM | 203 | O4'  | C A | 7 | 34.993 | -50.946 | 68.126 | 1.00 | 0.00 | O |
| ATOM | 204 | C5'  | C A | 7 | 37.024 | -51.059 | 69.431 | 1.00 | 0.00 | C |
| ATOM | 205 | O5'  | C A | 7 | 36.537 | -50.659 | 70.737 | 1.00 | 0.00 | O |
| ATOM | 206 | O1P  | C A | 7 | 38.524 | -49.516 | 71.776 | 1.00 | 0.00 | O |
| ATOM | 207 | O2P  | C A | 7 | 36.804 | -50.617 | 73.234 | 1.00 | 0.00 | O |
| ATOM | 208 | P    | C A | 7 | 37.560 | -50.621 | 71.959 | 1.00 | 0.00 | P |
| ATOM | 209 | H5   | C A | 7 | 33.102 | -52.327 | 72.683 | 1.00 | 0.00 | H |
| ATOM | 210 | H6   | C A | 7 | 34.469 | -50.879 | 71.217 | 1.00 | 0.00 | H |
| ATOM | 211 | H1'  | C A | 7 | 33.320 | -49.818 | 67.864 | 1.00 | 0.00 | H |
| ATOM | 212 | H3'  | C A | 7 | 36.688 | -48.382 | 69.302 | 1.00 | 0.00 | H |
| ATOM | 213 | H4'  | C A | 7 | 36.916 | -50.278 | 67.468 | 1.00 | 0.00 | H |
| ATOM | 214 | H41  | C A | 7 | 31.085 | -53.677 | 72.798 | 1.00 | 0.00 | H |
| ATOM | 215 | H42  | C A | 7 | 29.952 | -53.834 | 71.429 | 1.00 | 0.00 | H |
| ATOM | 216 | H2'1 | C A | 7 | 34.743 | -49.174 | 70.463 | 1.00 | 0.00 | H |
| ATOM | 217 | H2'2 | C A | 7 | 34.003 | -48.069 | 69.314 | 1.00 | 0.00 | H |
| ATOM | 218 | H5'1 | C A | 7 | 36.863 | -52.128 | 69.288 | 1.00 | 0.00 | H |
| ATOM | 219 | H5'2 | C A | 7 | 38.089 | -50.843 | 69.355 | 1.00 | 0.00 | H |
| ATOM | 220 | C1'  | A A | 8 | 30.170 | -47.743 | 66.598 | 1.00 | 0.00 | C |
| ATOM | 221 | N1   | A A | 8 | 27.338 | -50.635 | 69.754 | 1.00 | 0.00 | N |
| ATOM | 222 | C2   | A A | 8 | 27.192 | -50.290 | 68.479 | 1.00 | 0.00 | C |
| ATOM | 223 | N3   | A A | 8 | 27.964 | -49.541 | 67.720 | 1.00 | 0.00 | N |
| ATOM | 224 | C4   | A A | 8 | 29.024 | -49.104 | 68.426 | 1.00 | 0.00 | C |
| ATOM | 225 | C5   | A A | 8 | 29.318 | -49.365 | 69.735 | 1.00 | 0.00 | C |
| ATOM | 226 | C6   | A A | 8 | 28.406 | -50.185 | 70.430 | 1.00 | 0.00 | C |
| ATOM | 227 | N6   | A A | 8 | 28.564 | -50.528 | 71.721 | 1.00 | 0.00 | N |
| ATOM | 228 | N7   | A A | 8 | 30.495 | -48.745 | 70.116 | 1.00 | 0.00 | N |
| ATOM | 229 | C8   | A A | 8 | 30.883 | -48.124 | 69.041 | 1.00 | 0.00 | C |
| ATOM | 230 | N9   | A A | 8 | 30.041 | -48.298 | 67.974 | 1.00 | 0.00 | N |

|      |     |      |     |    |        |         |        |      |      |   |
|------|-----|------|-----|----|--------|---------|--------|------|------|---|
| ATOM | 231 | C2'  | A A | 8  | 30.726 | -46.326 | 66.557 | 1.00 | 0.00 | C |
| ATOM | 232 | C3'  | A A | 8  | 31.563 | -46.351 | 65.289 | 1.00 | 0.00 | C |
| ATOM | 233 | O3'  | A A | 8  | 30.724 | -46.089 | 64.169 | 1.00 | 0.00 | O |
| ATOM | 234 | C4'  | A A | 8  | 32.118 | -47.775 | 65.275 | 1.00 | 0.00 | C |
| ATOM | 235 | O4'  | A A | 8  | 31.055 | -48.582 | 65.878 | 1.00 | 0.00 | O |
| ATOM | 236 | C5'  | A A | 8  | 33.398 | -48.005 | 66.045 | 1.00 | 0.00 | C |
| ATOM | 237 | O5'  | A A | 8  | 33.397 | -47.195 | 67.248 | 1.00 | 0.00 | O |
| ATOM | 238 | O1P  | A A | 8  | 35.273 | -45.564 | 66.849 | 1.00 | 0.00 | O |
| ATOM | 239 | O2P  | A A | 8  | 34.636 | -46.195 | 69.192 | 1.00 | 0.00 | O |
| ATOM | 240 | P    | A A | 8  | 34.783 | -46.604 | 67.773 | 1.00 | 0.00 | P |
| ATOM | 241 | H2   | A A | 8  | 26.303 | -50.685 | 67.989 | 1.00 | 0.00 | H |
| ATOM | 242 | H8   | A A | 8  | 31.790 | -47.523 | 68.992 | 1.00 | 0.00 | H |
| ATOM | 243 | H1'  | A A | 8  | 29.194 | -47.796 | 66.117 | 1.00 | 0.00 | H |
| ATOM | 244 | H3'  | A A | 8  | 32.369 | -45.617 | 65.317 | 1.00 | 0.00 | H |
| ATOM | 245 | H4'  | A A | 8  | 32.305 | -48.030 | 64.233 | 1.00 | 0.00 | H |
| ATOM | 246 | H61  | A A | 8  | 27.869 | -51.132 | 72.181 | 1.00 | 0.00 | H |
| ATOM | 247 | H62  | A A | 8  | 29.380 | -50.184 | 72.247 | 1.00 | 0.00 | H |
| ATOM | 248 | H2'1 | A A | 8  | 31.334 | -46.095 | 67.430 | 1.00 | 0.00 | H |
| ATOM | 249 | H2'2 | A A | 8  | 29.937 | -45.576 | 66.498 | 1.00 | 0.00 | H |
| ATOM | 250 | H5'1 | A A | 8  | 33.468 | -49.060 | 66.312 | 1.00 | 0.00 | H |
| ATOM | 251 | H5'2 | A A | 8  | 34.246 | -47.735 | 65.418 | 1.00 | 0.00 | H |
| ATOM | 252 | C1'  | C A | 9  | 25.348 | -46.722 | 65.999 | 1.00 | 0.00 | C |
| ATOM | 253 | N1   | C A | 9  | 25.959 | -46.701 | 67.356 | 1.00 | 0.00 | N |
| ATOM | 254 | C2   | C A | 9  | 25.336 | -47.432 | 68.366 | 1.00 | 0.00 | C |
| ATOM | 255 | O2   | C A | 9  | 24.306 | -48.064 | 68.094 | 1.00 | 0.00 | O |
| ATOM | 256 | N3   | C A | 9  | 25.877 | -47.425 | 69.607 | 1.00 | 0.00 | N |
| ATOM | 257 | C4   | C A | 9  | 26.991 | -46.731 | 69.870 | 1.00 | 0.00 | C |
| ATOM | 258 | N4   | C A | 9  | 27.480 | -46.763 | 71.102 | 1.00 | 0.00 | N |
| ATOM | 259 | C5   | C A | 9  | 27.653 | -45.966 | 68.853 | 1.00 | 0.00 | C |
| ATOM | 260 | C6   | C A | 9  | 27.094 | -45.990 | 67.607 | 1.00 | 0.00 | C |
| ATOM | 261 | C2'  | C A | 9  | 25.423 | -45.387 | 65.272 | 1.00 | 0.00 | C |
| ATOM | 262 | C3'  | C A | 9  | 25.632 | -45.825 | 63.829 | 1.00 | 0.00 | C |
| ATOM | 263 | O3'  | C A | 9  | 24.365 | -46.109 | 63.239 | 1.00 | 0.00 | O |
| ATOM | 264 | C4'  | C A | 9  | 26.496 | -47.074 | 63.974 | 1.00 | 0.00 | C |
| ATOM | 265 | O4'  | C A | 9  | 26.046 | -47.681 | 65.228 | 1.00 | 0.00 | O |
| ATOM | 266 | C5'  | C A | 9  | 27.987 | -46.855 | 64.052 | 1.00 | 0.00 | C |
| ATOM | 267 | O5'  | C A | 9  | 28.266 | -45.640 | 64.795 | 1.00 | 0.00 | O |
| ATOM | 268 | O1P  | C A | 9  | 29.280 | -44.119 | 63.065 | 1.00 | 0.00 | O |
| ATOM | 269 | O2P  | C A | 9  | 29.873 | -43.837 | 65.487 | 1.00 | 0.00 | O |
| ATOM | 270 | P    | C A | 9  | 29.524 | -44.755 | 64.375 | 1.00 | 0.00 | P |
| ATOM | 271 | H5   | C A | 9  | 28.557 | -45.394 | 69.063 | 1.00 | 0.00 | H |
| ATOM | 272 | H6   | C A | 9  | 27.563 | -45.431 | 66.799 | 1.00 | 0.00 | H |
| ATOM | 273 | H1'  | C A | 9  | 24.315 | -47.057 | 66.097 | 1.00 | 0.00 | H |
| ATOM | 274 | H3'  | C A | 9  | 26.140 | -45.061 | 63.241 | 1.00 | 0.00 | H |
| ATOM | 275 | H4'  | C A | 9  | 26.297 | -47.699 | 63.104 | 1.00 | 0.00 | H |
| ATOM | 276 | H41  | C A | 9  | 28.337 | -46.239 | 71.329 | 1.00 | 0.00 | H |
| ATOM | 277 | H42  | C A | 9  | 27.001 | -47.311 | 71.831 | 1.00 | 0.00 | H |
| ATOM | 278 | H2'1 | C A | 9  | 26.251 | -44.771 | 65.621 | 1.00 | 0.00 | H |
| ATOM | 279 | H2'2 | C A | 9  | 24.510 | -44.803 | 65.383 | 1.00 | 0.00 | H |
| ATOM | 280 | H5'1 | C A | 9  | 28.451 | -47.705 | 64.552 | 1.00 | 0.00 | H |
| ATOM | 281 | H5'2 | C A | 9  | 28.390 | -46.769 | 63.043 | 1.00 | 0.00 | H |
| ATOM | 282 | C1'  | C A | 10 | 20.631 | -46.468 | 67.485 | 1.00 | 0.00 | C |
| ATOM | 283 | N1   | C A | 10 | 21.715 | -45.867 | 68.309 | 1.00 | 0.00 | N |
| ATOM | 284 | C2   | C A | 10 | 21.777 | -46.211 | 69.658 | 1.00 | 0.00 | C |

|      |     |      |     |    |        |         |        |      |      |   |
|------|-----|------|-----|----|--------|---------|--------|------|------|---|
| ATOM | 285 | O2   | C A | 10 | 20.934 | -46.995 | 70.115 | 1.00 | 0.00 | O |
| ATOM | 286 | N3   | C A | 10 | 22.758 | -45.676 | 70.425 | 1.00 | 0.00 | N |
| ATOM | 287 | C4   | C A | 10 | 23.654 | -44.828 | 69.905 | 1.00 | 0.00 | C |
| ATOM | 288 | N4   | C A | 10 | 24.595 | -44.336 | 70.699 | 1.00 | 0.00 | N |
| ATOM | 289 | C5   | C A | 10 | 23.613 | -44.454 | 68.520 | 1.00 | 0.00 | C |
| ATOM | 290 | C6   | C A | 10 | 22.620 | -45.010 | 67.766 | 1.00 | 0.00 | C |
| ATOM | 291 | C2'  | C A | 10 | 20.047 | -45.515 | 66.452 | 1.00 | 0.00 | C |
| ATOM | 292 | C3'  | C A | 10 | 19.752 | -46.452 | 65.290 | 1.00 | 0.00 | C |
| ATOM | 293 | O3'  | C A | 10 | 18.479 | -47.063 | 65.493 | 1.00 | 0.00 | O |
| ATOM | 294 | C4'  | C A | 10 | 20.896 | -47.460 | 65.367 | 1.00 | 0.00 | C |
| ATOM | 295 | O4'  | C A | 10 | 21.178 | -47.578 | 66.798 | 1.00 | 0.00 | O |
| ATOM | 296 | C5'  | C A | 10 | 22.172 | -47.082 | 64.653 | 1.00 | 0.00 | C |
| ATOM | 297 | O5'  | C A | 10 | 22.399 | -45.655 | 64.775 | 1.00 | 0.00 | O |
| ATOM | 298 | O1P  | C A | 10 | 22.174 | -44.827 | 62.409 | 1.00 | 0.00 | O |
| ATOM | 299 | O2P  | C A | 10 | 23.612 | -43.579 | 64.045 | 1.00 | 0.00 | O |
| ATOM | 300 | P    | C A | 10 | 23.092 | -44.884 | 63.564 | 1.00 | 0.00 | P |
| ATOM | 301 | H5   | C A | 10 | 24.338 | -43.759 | 68.093 | 1.00 | 0.00 | H |
| ATOM | 302 | H6   | C A | 10 | 22.553 | -44.762 | 66.706 | 1.00 | 0.00 | H |
| ATOM | 303 | H1'  | C A | 10 | 19.857 | -46.838 | 68.158 | 1.00 | 0.00 | H |
| ATOM | 304 | H3'  | C A | 10 | 19.751 | -45.927 | 64.333 | 1.00 | 0.00 | H |
| ATOM | 305 | H4'  | C A | 10 | 20.530 | -48.388 | 64.927 | 1.00 | 0.00 | H |
| ATOM | 306 | H41  | C A | 10 | 25.298 | -43.685 | 70.322 | 1.00 | 0.00 | H |
| ATOM | 307 | H42  | C A | 10 | 24.620 | -44.605 | 71.693 | 1.00 | 0.00 | H |
| ATOM | 308 | H2'1 | C A | 10 | 20.749 | -44.735 | 66.164 | 1.00 | 0.00 | H |
| ATOM | 309 | H2'2 | C A | 10 | 19.139 | -45.025 | 66.808 | 1.00 | 0.00 | H |
| ATOM | 310 | H5'1 | C A | 10 | 23.006 | -47.627 | 65.098 | 1.00 | 0.00 | H |
| ATOM | 311 | H5'2 | C A | 10 | 22.087 | -47.355 | 63.602 | 1.00 | 0.00 | H |
| ATOM | 312 | C1'  | T A | 11 | 17.040 | -46.125 | 70.876 | 1.00 | 0.00 | C |
| ATOM | 313 | N1   | T A | 11 | 18.168 | -45.156 | 70.883 | 1.00 | 0.00 | N |
| ATOM | 314 | C2   | T A | 11 | 18.834 | -44.972 | 72.079 | 1.00 | 0.00 | C |
| ATOM | 315 | O2   | T A | 11 | 18.532 | -45.566 | 73.100 | 1.00 | 0.00 | O |
| ATOM | 316 | N3   | T A | 11 | 19.877 | -44.064 | 72.041 | 1.00 | 0.00 | N |
| ATOM | 317 | C4   | T A | 11 | 20.295 | -43.341 | 70.943 | 1.00 | 0.00 | C |
| ATOM | 318 | O4   | T A | 11 | 21.244 | -42.551 | 71.031 | 1.00 | 0.00 | O |
| ATOM | 319 | C5   | T A | 11 | 19.540 | -43.600 | 69.740 | 1.00 | 0.00 | C |
| ATOM | 320 | C6   | T A | 11 | 18.519 | -44.479 | 69.740 | 1.00 | 0.00 | C |
| ATOM | 321 | C7   | T A | 11 | 19.963 | -42.835 | 68.521 | 1.00 | 0.00 | C |
| ATOM | 322 | C2'  | T A | 11 | 15.867 | -45.695 | 70.006 | 1.00 | 0.00 | C |
| ATOM | 323 | C3'  | T A | 11 | 15.382 | -47.022 | 69.446 | 1.00 | 0.00 | C |
| ATOM | 324 | O3'  | T A | 11 | 14.500 | -47.634 | 70.385 | 1.00 | 0.00 | O |
| ATOM | 325 | C4'  | T A | 11 | 16.678 | -47.810 | 69.272 | 1.00 | 0.00 | C |
| ATOM | 326 | O4'  | T A | 11 | 17.529 | -47.352 | 70.370 | 1.00 | 0.00 | O |
| ATOM | 327 | C5'  | T A | 11 | 17.418 | -47.607 | 67.971 | 1.00 | 0.00 | C |
| ATOM | 328 | O5'  | T A | 11 | 17.300 | -46.224 | 67.550 | 1.00 | 0.00 | O |
| ATOM | 329 | O1P  | T A | 11 | 15.941 | -46.372 | 65.438 | 1.00 | 0.00 | O |
| ATOM | 330 | O2P  | T A | 11 | 17.539 | -44.466 | 65.770 | 1.00 | 0.00 | O |
| ATOM | 331 | P    | T A | 11 | 17.224 | -45.899 | 65.991 | 1.00 | 0.00 | P |
| ATOM | 332 | H3   | T A | 11 | 20.392 | -43.913 | 72.918 | 1.00 | 0.00 | H |
| ATOM | 333 | H6   | T A | 11 | 17.962 | -44.657 | 68.820 | 1.00 | 0.00 | H |
| ATOM | 334 | H1'  | T A | 11 | 16.723 | -46.288 | 71.906 | 1.00 | 0.00 | H |
| ATOM | 335 | H3'  | T A | 11 | 14.865 | -46.898 | 68.495 | 1.00 | 0.00 | H |
| ATOM | 336 | H4'  | T A | 11 | 16.418 | -48.867 | 69.345 | 1.00 | 0.00 | H |
| ATOM | 337 | H71  | T A | 11 | 19.169 | -42.151 | 68.226 | 1.00 | 0.00 | H |
| ATOM | 338 | H72  | T A | 11 | 20.867 | -42.267 | 68.744 | 1.00 | 0.00 | H |

|      |     |      |   |   |    |        |         |        |      |      |   |
|------|-----|------|---|---|----|--------|---------|--------|------|------|---|
| ATOM | 339 | H73  | T | A | 11 | 20.165 | -43.531 | 67.707 | 1.00 | 0.00 | H |
| ATOM | 340 | H2'1 | T | A | 11 | 16.169 | -45.015 | 69.212 | 1.00 | 0.00 | H |
| ATOM | 341 | H2'2 | T | A | 11 | 15.085 | -45.197 | 70.582 | 1.00 | 0.00 | H |
| ATOM | 342 | H5'1 | T | A | 11 | 18.469 | -47.860 | 68.112 | 1.00 | 0.00 | H |
| ATOM | 343 | H5'2 | T | A | 11 | 16.991 | -48.260 | 67.210 | 1.00 | 0.00 | H |
| ATOM | 344 | C1'  | A | A | 12 | 15.219 | -44.848 | 75.313 | 1.00 | 0.00 | C |
| ATOM | 345 | N1   | A | A | 12 | 18.989 | -41.365 | 75.236 | 1.00 | 0.00 | N |
| ATOM | 346 | C2   | A | A | 12 | 18.525 | -42.167 | 76.190 | 1.00 | 0.00 | C |
| ATOM | 347 | N3   | A | A | 12 | 17.547 | -43.048 | 76.140 | 1.00 | 0.00 | N |
| ATOM | 348 | C4   | A | A | 12 | 16.996 | -43.064 | 74.915 | 1.00 | 0.00 | C |
| ATOM | 349 | C5   | A | A | 12 | 17.351 | -42.307 | 73.833 | 1.00 | 0.00 | C |
| ATOM | 350 | C6   | A | A | 12 | 18.418 | -41.403 | 74.023 | 1.00 | 0.00 | C |
| ATOM | 351 | N6   | A | A | 12 | 18.877 | -40.596 | 73.050 | 1.00 | 0.00 | N |
| ATOM | 352 | N7   | A | A | 12 | 16.558 | -42.598 | 72.738 | 1.00 | 0.00 | N |
| ATOM | 353 | C8   | A | A | 12 | 15.744 | -43.512 | 73.176 | 1.00 | 0.00 | C |
| ATOM | 354 | N9   | A | A | 12 | 15.951 | -43.847 | 74.490 | 1.00 | 0.00 | N |
| ATOM | 355 | C2'  | A | A | 12 | 13.725 | -44.902 | 75.024 | 1.00 | 0.00 | C |
| ATOM | 356 | C3'  | A | A | 12 | 13.423 | -46.382 | 75.191 | 1.00 | 0.00 | C |
| ATOM | 357 | O3'  | A | A | 12 | 13.201 | -46.662 | 76.571 | 1.00 | 0.00 | O |
| ATOM | 358 | C4'  | A | A | 12 | 14.693 | -47.049 | 74.665 | 1.00 | 0.00 | C |
| ATOM | 359 | O4'  | A | A | 12 | 15.764 | -46.122 | 75.030 | 1.00 | 0.00 | O |
| ATOM | 360 | C5'  | A | A | 12 | 14.752 | -47.298 | 73.177 | 1.00 | 0.00 | C |
| ATOM | 361 | O5'  | A | A | 12 | 14.112 | -46.205 | 72.471 | 1.00 | 0.00 | O |
| ATOM | 362 | O1P  | A | A | 12 | 12.100 | -47.290 | 71.418 | 1.00 | 0.00 | O |
| ATOM | 363 | O2P  | A | A | 12 | 13.130 | -45.261 | 70.359 | 1.00 | 0.00 | O |
| ATOM | 364 | P    | A | A | 12 | 13.323 | -46.520 | 71.121 | 1.00 | 0.00 | P |
| ATOM | 365 | H2   | A | A | 12 | 19.029 | -42.084 | 77.152 | 1.00 | 0.00 | H |
| ATOM | 366 | H8   | A | A | 12 | 14.969 | -43.969 | 72.560 | 1.00 | 0.00 | H |
| ATOM | 367 | H1'  | A | A | 12 | 15.407 | -44.628 | 76.362 | 1.00 | 0.00 | H |
| ATOM | 368 | H3'  | A | A | 12 | 12.550 | -46.689 | 74.615 | 1.00 | 0.00 | H |
| ATOM | 369 | H4'  | A | A | 12 | 14.774 | -48.013 | 75.167 | 1.00 | 0.00 | H |
| ATOM | 370 | H61  | A | A | 12 | 19.660 | -39.957 | 73.239 | 1.00 | 0.00 | H |
| ATOM | 371 | H62  | A | A | 12 | 18.442 | -40.619 | 72.116 | 1.00 | 0.00 | H |
| ATOM | 372 | H2'1 | A | A | 12 | 13.484 | -44.559 | 74.020 | 1.00 | 0.00 | H |
| ATOM | 373 | H2'2 | A | A | 12 | 13.148 | -44.298 | 75.725 | 1.00 | 0.00 | H |
| ATOM | 374 | H5'1 | A | A | 12 | 15.795 | -47.374 | 72.868 | 1.00 | 0.00 | H |
| ATOM | 375 | H5'2 | A | A | 12 | 14.242 | -48.231 | 72.948 | 1.00 | 0.00 | H |
| ATOM | 376 | C1'  | G | A | 13 | 15.126 | -42.127 | 79.464 | 1.00 | 0.00 | C |
| ATOM | 377 | N1   | G | A | 13 | 17.436 | -38.622 | 76.565 | 1.00 | 0.00 | N |
| ATOM | 378 | C2   | G | A | 13 | 17.696 | -39.007 | 77.868 | 1.00 | 0.00 | C |
| ATOM | 379 | N2   | G | A | 13 | 18.702 | -38.371 | 78.483 | 1.00 | 0.00 | N |
| ATOM | 380 | N3   | G | A | 13 | 17.005 | -39.949 | 78.508 | 1.00 | 0.00 | N |
| ATOM | 381 | C4   | G | A | 13 | 16.018 | -40.479 | 77.739 | 1.00 | 0.00 | C |
| ATOM | 382 | C5   | G | A | 13 | 15.686 | -40.156 | 76.433 | 1.00 | 0.00 | C |
| ATOM | 383 | C6   | G | A | 13 | 16.421 | -39.158 | 75.752 | 1.00 | 0.00 | C |
| ATOM | 384 | O6   | G | A | 13 | 16.276 | -38.737 | 74.604 | 1.00 | 0.00 | O |
| ATOM | 385 | N7   | G | A | 13 | 14.607 | -40.932 | 76.005 | 1.00 | 0.00 | N |
| ATOM | 386 | C8   | G | A | 13 | 14.329 | -41.686 | 77.037 | 1.00 | 0.00 | C |
| ATOM | 387 | N9   | G | A | 13 | 15.143 | -41.468 | 78.129 | 1.00 | 0.00 | N |
| ATOM | 388 | C2'  | G | A | 13 | 13.727 | -42.433 | 79.980 | 1.00 | 0.00 | C |
| ATOM | 389 | C3'  | G | A | 13 | 13.937 | -43.748 | 80.710 | 1.00 | 0.00 | C |
| ATOM | 390 | O3'  | G | A | 13 | 14.400 | -43.482 | 82.032 | 1.00 | 0.00 | O |
| ATOM | 391 | C4'  | G | A | 13 | 14.998 | -44.444 | 79.858 | 1.00 | 0.00 | C |
| ATOM | 392 | O4'  | G | A | 13 | 15.827 | -43.351 | 79.350 | 1.00 | 0.00 | O |

|      |     |      |   |   |    |        |         |        |      |      |   |
|------|-----|------|---|---|----|--------|---------|--------|------|------|---|
| ATOM | 393 | C5'  | G | A | 13 | 14.494 | -45.252 | 78.686 | 1.00 | 0.00 | C |
| ATOM | 394 | O5'  | G | A | 13 | 13.347 | -44.595 | 78.094 | 1.00 | 0.00 | O |
| ATOM | 395 | O1P  | G | A | 13 | 11.457 | -46.195 | 78.548 | 1.00 | 0.00 | O |
| ATOM | 396 | O2P  | G | A | 13 | 11.354 | -44.662 | 76.566 | 1.00 | 0.00 | O |
| ATOM | 397 | P    | G | A | 13 | 12.182 | -45.492 | 77.473 | 1.00 | 0.00 | P |
| ATOM | 398 | H1   | G | A | 13 | 18.034 | -37.885 | 76.159 | 1.00 | 0.00 | H |
| ATOM | 399 | H8   | G | A | 13 | 13.526 | -42.421 | 77.036 | 1.00 | 0.00 | H |
| ATOM | 400 | H1'  | G | A | 13 | 15.671 | -41.491 | 80.165 | 1.00 | 0.00 | H |
| ATOM | 401 | H21  | G | A | 13 | 19.235 | -37.645 | 77.979 | 1.00 | 0.00 | H |
| ATOM | 402 | H3'  | G | A | 13 | 13.023 | -44.340 | 80.759 | 1.00 | 0.00 | H |
| ATOM | 403 | H22  | G | A | 13 | 18.943 | -38.610 | 79.453 | 1.00 | 0.00 | H |
| ATOM | 404 | H4'  | G | A | 13 | 15.543 | -45.119 | 80.519 | 1.00 | 0.00 | H |
| ATOM | 405 | H2'1 | G | A | 13 | 13.002 | -42.540 | 79.172 | 1.00 | 0.00 | H |
| ATOM | 406 | H2'2 | G | A | 13 | 13.355 | -41.660 | 80.653 | 1.00 | 0.00 | H |
| ATOM | 407 | H5'1 | G | A | 13 | 15.289 | -45.345 | 77.946 | 1.00 | 0.00 | H |
| ATOM | 408 | H5'2 | G | A | 13 | 14.211 | -46.246 | 79.033 | 1.00 | 0.00 | H |
| ATOM | 409 | C1'  | G | A | 14 | 16.015 | -38.057 | 82.144 | 1.00 | 0.00 | C |
| ATOM | 410 | N1   | G | A | 14 | 15.919 | -35.733 | 77.605 | 1.00 | 0.00 | N |
| ATOM | 411 | C2   | G | A | 14 | 16.781 | -35.559 | 78.673 | 1.00 | 0.00 | C |
| ATOM | 412 | N2   | G | A | 14 | 17.743 | -34.644 | 78.511 | 1.00 | 0.00 | N |
| ATOM | 413 | N3   | G | A | 14 | 16.689 | -36.245 | 79.811 | 1.00 | 0.00 | N |
| ATOM | 414 | C4   | G | A | 14 | 15.652 | -37.124 | 79.803 | 1.00 | 0.00 | C |
| ATOM | 415 | C5   | G | A | 14 | 14.742 | -37.360 | 78.786 | 1.00 | 0.00 | C |
| ATOM | 416 | C6   | G | A | 14 | 14.839 | -36.637 | 77.577 | 1.00 | 0.00 | C |
| ATOM | 417 | O6   | G | A | 14 | 14.133 | -36.704 | 76.571 | 1.00 | 0.00 | O |
| ATOM | 418 | N7   | G | A | 14 | 13.829 | -38.343 | 79.179 | 1.00 | 0.00 | N |
| ATOM | 419 | C8   | G | A | 14 | 14.208 | -38.664 | 80.388 | 1.00 | 0.00 | C |
| ATOM | 420 | N9   | G | A | 14 | 15.308 | -37.966 | 80.838 | 1.00 | 0.00 | N |
| ATOM | 421 | C2'  | G | A | 14 | 15.085 | -38.277 | 83.330 | 1.00 | 0.00 | C |
| ATOM | 422 | C3'  | G | A | 14 | 15.916 | -39.183 | 84.224 | 1.00 | 0.00 | C |
| ATOM | 423 | O3'  | G | A | 14 | 16.790 | -38.385 | 85.017 | 1.00 | 0.00 | O |
| ATOM | 424 | C4'  | G | A | 14 | 16.677 | -40.047 | 83.217 | 1.00 | 0.00 | C |
| ATOM | 425 | O4'  | G | A | 14 | 16.903 | -39.157 | 82.078 | 1.00 | 0.00 | O |
| ATOM | 426 | C5'  | G | A | 14 | 15.967 | -41.287 | 82.729 | 1.00 | 0.00 | C |
| ATOM | 427 | O5'  | G | A | 14 | 14.550 | -41.022 | 82.592 | 1.00 | 0.00 | O |
| ATOM | 428 | O1P  | G | A | 14 | 13.510 | -42.500 | 84.344 | 1.00 | 0.00 | O |
| ATOM | 429 | O2P  | G | A | 14 | 12.201 | -41.865 | 82.301 | 1.00 | 0.00 | O |
| ATOM | 430 | P    | G | A | 14 | 13.517 | -42.197 | 82.901 | 1.00 | 0.00 | P |
| ATOM | 431 | H1   | G | A | 14 | 16.081 | -35.156 | 76.765 | 1.00 | 0.00 | H |
| ATOM | 432 | H8   | G | A | 14 | 13.698 | -39.418 | 80.988 | 1.00 | 0.00 | H |
| ATOM | 433 | H1'  | G | A | 14 | 16.609 | -37.154 | 82.276 | 1.00 | 0.00 | H |
| ATOM | 434 | H21  | G | A | 14 | 17.810 | -34.119 | 77.626 | 1.00 | 0.00 | H |
| ATOM | 435 | H3'  | G | A | 14 | 15.294 | -39.795 | 84.875 | 1.00 | 0.00 | H |
| ATOM | 436 | H22  | G | A | 14 | 18.416 | -34.465 | 79.270 | 1.00 | 0.00 | H |
| ATOM | 437 | H4'  | G | A | 14 | 17.600 | -40.359 | 83.703 | 1.00 | 0.00 | H |
| ATOM | 438 | H2'1 | G | A | 14 | 14.150 | -38.754 | 83.040 | 1.00 | 0.00 | H |
| ATOM | 439 | H2'2 | G | A | 14 | 14.833 | -37.343 | 83.835 | 1.00 | 0.00 | H |
| ATOM | 440 | H5'1 | G | A | 14 | 16.383 | -41.579 | 81.765 | 1.00 | 0.00 | H |
| ATOM | 441 | H5'2 | G | A | 14 | 16.125 | -42.095 | 83.446 | 1.00 | 0.00 | H |
| ATOM | 442 | C1'  | A | A | 15 | 16.824 | -33.213 | 82.754 | 1.00 | 0.00 | C |
| ATOM | 443 | N1   | A | A | 15 | 14.267 | -32.813 | 78.321 | 1.00 | 0.00 | N |
| ATOM | 444 | C2   | A | A | 15 | 15.365 | -32.218 | 78.783 | 1.00 | 0.00 | C |
| ATOM | 445 | N3   | A | A | 15 | 15.975 | -32.370 | 79.940 | 1.00 | 0.00 | N |
| ATOM | 446 | C4   | A | A | 15 | 15.318 | -33.270 | 80.696 | 1.00 | 0.00 | C |

|      |     |      |   |   |    |        |         |        |      |      |   |
|------|-----|------|---|---|----|--------|---------|--------|------|------|---|
| ATOM | 447 | C5   | A | A | 15 | 14.187 | -33.962 | 80.373 | 1.00 | 0.00 | C |
| ATOM | 448 | C6   | A | A | 15 | 13.637 | -33.706 | 79.099 | 1.00 | 0.00 | C |
| ATOM | 449 | N6   | A | A | 15 | 12.526 | -34.312 | 78.645 | 1.00 | 0.00 | N |
| ATOM | 450 | N7   | A | A | 15 | 13.803 | -34.802 | 81.403 | 1.00 | 0.00 | N |
| ATOM | 451 | C8   | A | A | 15 | 14.700 | -34.600 | 82.322 | 1.00 | 0.00 | C |
| ATOM | 452 | N9   | A | A | 15 | 15.656 | -33.684 | 81.963 | 1.00 | 0.00 | N |
| ATOM | 453 | C2'  | A | A | 15 | 16.537 | -33.061 | 84.242 | 1.00 | 0.00 | C |
| ATOM | 454 | C3'  | A | A | 15 | 17.859 | -33.482 | 84.864 | 1.00 | 0.00 | C |
| ATOM | 455 | O3'  | A | A | 15 | 18.740 | -32.364 | 84.889 | 1.00 | 0.00 | O |
| ATOM | 456 | C4'  | A | A | 15 | 18.344 | -34.581 | 83.920 | 1.00 | 0.00 | C |
| ATOM | 457 | O4'  | A | A | 15 | 17.858 | -34.166 | 82.602 | 1.00 | 0.00 | O |
| ATOM | 458 | C5'  | A | A | 15 | 17.843 | -35.977 | 84.201 | 1.00 | 0.00 | C |
| ATOM | 459 | O5'  | A | A | 15 | 16.472 | -35.922 | 84.671 | 1.00 | 0.00 | O |
| ATOM | 460 | O1P  | A | A | 15 | 16.637 | -36.730 | 87.049 | 1.00 | 0.00 | O |
| ATOM | 461 | O2P  | A | A | 15 | 14.503 | -37.036 | 85.764 | 1.00 | 0.00 | O |
| ATOM | 462 | P    | A | A | 15 | 15.986 | -36.990 | 85.750 | 1.00 | 0.00 | P |
| ATOM | 463 | H2   | A | A | 15 | 15.826 | -31.502 | 78.104 | 1.00 | 0.00 | H |
| ATOM | 464 | H8   | A | A | 15 | 14.696 | -35.108 | 83.286 | 1.00 | 0.00 | H |
| ATOM | 465 | H1'  | A | A | 15 | 17.169 | -32.272 | 82.325 | 1.00 | 0.00 | H |
| ATOM | 466 | H3'  | A | A | 15 | 17.730 | -33.864 | 85.877 | 1.00 | 0.00 | H |
| ATOM | 467 | H4'  | A | A | 15 | 19.432 | -34.598 | 83.987 | 1.00 | 0.00 | H |
| ATOM | 468 | H61  | A | A | 15 | 12.169 | -34.089 | 77.704 | 1.00 | 0.00 | H |
| ATOM | 469 | H62  | A | A | 15 | 12.035 | -34.997 | 79.236 | 1.00 | 0.00 | H |
| ATOM | 470 | H2'1 | A | A | 15 | 15.719 | -33.702 | 84.572 | 1.00 | 0.00 | H |
| ATOM | 471 | H2'2 | A | A | 15 | 16.280 | -32.037 | 84.512 | 1.00 | 0.00 | H |
| ATOM | 472 | H5'1 | A | A | 15 | 17.896 | -36.566 | 83.286 | 1.00 | 0.00 | H |
| ATOM | 473 | H5'2 | A | A | 15 | 18.473 | -36.438 | 84.960 | 1.00 | 0.00 | H |
| ATOM | 474 | C1'  | C | A | 16 | 16.477 | -28.448 | 81.394 | 1.00 | 0.00 | C |
| ATOM | 475 | N1   | C | A | 16 | 15.261 | -29.304 | 81.458 | 1.00 | 0.00 | N |
| ATOM | 476 | C2   | C | A | 16 | 14.426 | -29.336 | 80.344 | 1.00 | 0.00 | C |
| ATOM | 477 | O2   | C | A | 16 | 14.728 | -28.656 | 79.354 | 1.00 | 0.00 | O |
| ATOM | 478 | N3   | C | A | 16 | 13.313 | -30.108 | 80.381 | 1.00 | 0.00 | N |
| ATOM | 479 | C4   | C | A | 16 | 13.015 | -30.832 | 81.467 | 1.00 | 0.00 | C |
| ATOM | 480 | N4   | C | A | 16 | 11.916 | -31.572 | 81.447 | 1.00 | 0.00 | N |
| ATOM | 481 | C5   | C | A | 16 | 13.852 | -30.817 | 82.630 | 1.00 | 0.00 | C |
| ATOM | 482 | C6   | C | A | 16 | 14.971 | -30.035 | 82.569 | 1.00 | 0.00 | C |
| ATOM | 483 | C2'  | C | A | 16 | 16.805 | -27.749 | 82.707 | 1.00 | 0.00 | C |
| ATOM | 484 | C3'  | C | A | 16 | 18.326 | -27.763 | 82.702 | 1.00 | 0.00 | C |
| ATOM | 485 | O3'  | C | A | 16 | 18.802 | -26.647 | 81.955 | 1.00 | 0.00 | O |
| ATOM | 486 | C4'  | C | A | 16 | 18.651 | -29.094 | 82.027 | 1.00 | 0.00 | C |
| ATOM | 487 | O4'  | C | A | 16 | 17.572 | -29.282 | 81.058 | 1.00 | 0.00 | O |
| ATOM | 488 | C5'  | C | A | 16 | 18.710 | -30.307 | 82.927 | 1.00 | 0.00 | C |
| ATOM | 489 | O5'  | C | A | 16 | 17.699 | -30.198 | 83.960 | 1.00 | 0.00 | O |
| ATOM | 490 | O1P  | C | A | 16 | 19.048 | -29.981 | 86.075 | 1.00 | 0.00 | O |
| ATOM | 491 | O2P  | C | A | 16 | 16.744 | -30.970 | 86.154 | 1.00 | 0.00 | O |
| ATOM | 492 | P    | C | A | 16 | 18.013 | -30.795 | 85.406 | 1.00 | 0.00 | P |
| ATOM | 493 | H5   | C | A | 16 | 13.609 | -31.400 | 83.519 | 1.00 | 0.00 | H |
| ATOM | 494 | H6   | C | A | 16 | 15.643 | -29.997 | 83.426 | 1.00 | 0.00 | H |
| ATOM | 495 | H1'  | C | A | 16 | 16.346 | -27.727 | 80.589 | 1.00 | 0.00 | H |
| ATOM | 496 | H3'  | C | A | 16 | 18.736 | -27.723 | 83.713 | 1.00 | 0.00 | H |
| ATOM | 497 | H4'  | C | A | 16 | 19.630 | -28.980 | 81.561 | 1.00 | 0.00 | H |
| ATOM | 498 | H41  | C | A | 16 | 11.663 | -32.141 | 82.269 | 1.00 | 0.00 | H |
| ATOM | 499 | H42  | C | A | 16 | 11.313 | -31.581 | 80.612 | 1.00 | 0.00 | H |
| ATOM | 500 | H2'1 | C | A | 16 | 16.407 | -28.281 | 83.570 | 1.00 | 0.00 | H |



|      |     |      |   |   |    |        |         |        |      |      |   |
|------|-----|------|---|---|----|--------|---------|--------|------|------|---|
| ATOM | 501 | H2'2 | C | A | 16 | 16.416 | -26.730 | 82.741 | 1.00 | 0.00 | H |
| ATOM | 502 | H5'1 | C | A | 16 | 18.535 | -31.203 | 82.331 | 1.00 | 0.00 | H |
| ATOM | 503 | H5'2 | C | A | 16 | 19.698 | -30.367 | 83.383 | 1.00 | 0.00 | H |
| ATOM | 504 | C1'  | G | A | 17 | 14.378 | -24.629 | 79.045 | 1.00 | 0.00 | C |
| ATOM | 505 | N1   | G | A | 17 | 10.151 | -27.462 | 79.404 | 1.00 | 0.00 | N |
| ATOM | 506 | C2   | G | A | 17 | 10.633 | -26.715 | 78.343 | 1.00 | 0.00 | C |
| ATOM | 507 | N2   | G | A | 17 | 9.888  | -26.723 | 77.230 | 1.00 | 0.00 | N |
| ATOM | 508 | N3   | G | A | 17 | 11.766 | -26.018 | 78.387 | 1.00 | 0.00 | N |
| ATOM | 509 | C4   | G | A | 17 | 12.386 | -26.118 | 79.594 | 1.00 | 0.00 | C |
| ATOM | 510 | C5   | G | A | 17 | 11.980 | -26.833 | 80.708 | 1.00 | 0.00 | C |
| ATOM | 511 | C6   | G | A | 17 | 10.779 | -27.577 | 80.660 | 1.00 | 0.00 | C |
| ATOM | 512 | O6   | G | A | 17 | 10.256 | -28.267 | 81.535 | 1.00 | 0.00 | O |
| ATOM | 513 | N7   | G | A | 17 | 12.900 | -26.672 | 81.747 | 1.00 | 0.00 | N |
| ATOM | 514 | C8   | G | A | 17 | 13.814 | -25.886 | 81.240 | 1.00 | 0.00 | C |
| ATOM | 515 | N9   | G | A | 17 | 13.572 | -25.506 | 79.935 | 1.00 | 0.00 | N |
| ATOM | 516 | C2'  | G | A | 17 | 15.023 | -23.450 | 79.761 | 1.00 | 0.00 | C |
| ATOM | 517 | C3'  | G | A | 17 | 16.349 | -23.319 | 79.031 | 1.00 | 0.00 | C |
| ATOM | 518 | O3'  | G | A | 17 | 16.158 | -22.536 | 77.854 | 1.00 | 0.00 | O |
| ATOM | 519 | C4'  | G | A | 17 | 16.705 | -24.770 | 78.708 | 1.00 | 0.00 | C |
| ATOM | 520 | O4'  | G | A | 17 | 15.413 | -25.417 | 78.485 | 1.00 | 0.00 | O |
| ATOM | 521 | C5'  | G | A | 17 | 17.448 | -25.531 | 79.781 | 1.00 | 0.00 | C |
| ATOM | 522 | O5'  | G | A | 17 | 16.968 | -25.132 | 81.088 | 1.00 | 0.00 | O |
| ATOM | 523 | O1P  | G | A | 17 | 18.961 | -23.990 | 82.118 | 1.00 | 0.00 | O |
| ATOM | 524 | O2P  | G | A | 17 | 17.249 | -25.089 | 83.585 | 1.00 | 0.00 | O |
| ATOM | 525 | P    | G | A | 17 | 17.999 | -25.093 | 82.305 | 1.00 | 0.00 | P |
| ATOM | 526 | H1   | G | A | 17 | 9.265  | -27.971 | 79.264 | 1.00 | 0.00 | H |
| ATOM | 527 | H8   | G | A | 17 | 14.692 | -25.561 | 81.800 | 1.00 | 0.00 | H |
| ATOM | 528 | H1'  | G | A | 17 | 13.738 | -24.288 | 78.231 | 1.00 | 0.00 | H |
| ATOM | 529 | H21  | G | A | 17 | 9.013  | -27.267 | 77.202 | 1.00 | 0.00 | H |
| ATOM | 530 | H3'  | G | A | 17 | 17.114 | -22.854 | 79.653 | 1.00 | 0.00 | H |
| ATOM | 531 | H22  | G | A | 17 | 10.190 | -26.185 | 76.406 | 1.00 | 0.00 | H |
| ATOM | 532 | H4'  | G | A | 17 | 17.331 | -24.751 | 77.818 | 1.00 | 0.00 | H |
| ATOM | 533 | H2'1 | G | A | 17 | 15.174 | -23.646 | 80.824 | 1.00 | 0.00 | H |
| ATOM | 534 | H2'2 | G | A | 17 | 14.429 | -22.539 | 79.677 | 1.00 | 0.00 | H |
| ATOM | 535 | H5'1 | G | A | 17 | 17.287 | -26.599 | 79.637 | 1.00 | 0.00 | H |
| ATOM | 536 | H5'2 | G | A | 17 | 18.514 | -25.317 | 79.697 | 1.00 | 0.00 | H |
| ATOM | 537 | C1'  | G | A | 18 | 10.576 | -22.229 | 76.972 | 1.00 | 0.00 | C |
| ATOM | 538 | N1   | G | A | 18 | 7.779  | -25.100 | 80.128 | 1.00 | 0.00 | N |
| ATOM | 539 | C2   | G | A | 18 | 7.567  | -24.776 | 78.799 | 1.00 | 0.00 | C |
| ATOM | 540 | N2   | G | A | 18 | 6.461  | -25.284 | 78.237 | 1.00 | 0.00 | N |
| ATOM | 541 | N3   | G | A | 18 | 8.391  | -24.011 | 78.088 | 1.00 | 0.00 | N |
| ATOM | 542 | C4   | G | A | 18 | 9.453  | -23.577 | 78.818 | 1.00 | 0.00 | C |
| ATOM | 543 | C5   | G | A | 18 | 9.744  | -23.845 | 80.146 | 1.00 | 0.00 | C |
| ATOM | 544 | C6   | G | A | 18 | 8.871  | -24.663 | 80.901 | 1.00 | 0.00 | C |
| ATOM | 545 | O6   | G | A | 18 | 8.958  | -25.008 | 82.079 | 1.00 | 0.00 | O |
| ATOM | 546 | N7   | G | A | 18 | 10.929 | -23.209 | 80.517 | 1.00 | 0.00 | N |
| ATOM | 547 | C8   | G | A | 18 | 11.314 | -22.594 | 79.429 | 1.00 | 0.00 | C |
| ATOM | 548 | N9   | G | A | 18 | 10.468 | -22.769 | 78.354 | 1.00 | 0.00 | N |
| ATOM | 549 | C2'  | G | A | 18 | 11.121 | -20.810 | 76.908 | 1.00 | 0.00 | C |
| ATOM | 550 | C3'  | G | A | 18 | 11.942 | -20.842 | 75.631 | 1.00 | 0.00 | C |
| ATOM | 551 | O3'  | G | A | 18 | 11.088 | -20.595 | 74.516 | 1.00 | 0.00 | O |
| ATOM | 552 | C4'  | G | A | 18 | 12.506 | -22.262 | 75.623 | 1.00 | 0.00 | C |
| ATOM | 553 | O4'  | G | A | 18 | 11.455 | -23.068 | 76.248 | 1.00 | 0.00 | O |
| ATOM | 554 | C5'  | G | A | 18 | 13.794 | -22.478 | 76.379 | 1.00 | 0.00 | C |

|      |     |      |     |   |    |        |         |        |      |      |   |
|------|-----|------|-----|---|----|--------|---------|--------|------|------|---|
| ATOM | 555 | O5'  | G   | A | 18 | 13.807 | -21.654 | 77.572 | 1.00 | 0.00 | O |
| ATOM | 556 | O1P  | G   | A | 18 | 15.667 | -20.017 | 77.133 | 1.00 | 0.00 | O |
| ATOM | 557 | O2P  | G   | A | 18 | 15.064 | -20.628 | 79.491 | 1.00 | 0.00 | O |
| ATOM | 558 | P    | G   | A | 18 | 15.195 | -21.050 | 78.075 | 1.00 | 0.00 | P |
| ATOM | 559 | H1   | G   | A | 18 | 7.083  | -25.707 | 80.587 | 1.00 | 0.00 | H |
| ATOM | 560 | H8   | G   | A | 18 | 12.223 | -21.995 | 79.375 | 1.00 | 0.00 | H |
| ATOM | 561 | H1'  | G   | A | 18 | 9.593  | -22.292 | 76.504 | 1.00 | 0.00 | H |
| ATOM | 562 | H21  | G   | A | 18 | 5.830  | -25.880 | 78.794 | 1.00 | 0.00 | H |
| ATOM | 563 | H3'  | G   | A | 18 | 12.745 | -20.102 | 75.641 | 1.00 | 0.00 | H |
| ATOM | 564 | H22  | G   | A | 18 | 6.246  | -25.078 | 77.253 | 1.00 | 0.00 | H |
| ATOM | 565 | H4'  | G   | A | 18 | 12.682 | -22.528 | 74.581 | 1.00 | 0.00 | H |
| ATOM | 566 | H2'1 | G   | A | 18 | 11.738 | -20.566 | 77.772 | 1.00 | 0.00 | H |
| ATOM | 567 | H2'2 | G   | A | 18 | 10.327 | -20.064 | 76.851 | 1.00 | 0.00 | H |
| ATOM | 568 | H5'1 | G   | A | 18 | 13.876 | -23.529 | 76.655 | 1.00 | 0.00 | H |
| ATOM | 569 | H5'2 | G   | A | 18 | 14.634 | -22.210 | 75.739 | 1.00 | 0.00 | H |
| ATOM | 570 | C1'  | T   | A | 19 | 5.779  | -21.181 | 76.344 | 1.00 | 0.00 | C |
| ATOM | 571 | N1   | T   | A | 19 | 6.371  | -21.173 | 77.707 | 1.00 | 0.00 | N |
| ATOM | 572 | C2   | T   | A | 19 | 5.726  | -21.906 | 78.681 | 1.00 | 0.00 | C |
| ATOM | 573 | O2   | T   | A | 19 | 4.709  | -22.543 | 78.461 | 1.00 | 0.00 | O |
| ATOM | 574 | N3   | T   | A | 19 | 6.312  | -21.870 | 79.933 | 1.00 | 0.00 | N |
| ATOM | 575 | C4   | T   | A | 19 | 7.452  | -21.182 | 80.287 | 1.00 | 0.00 | C |
| ATOM | 576 | O4   | T   | A | 19 | 7.883  | -21.224 | 81.445 | 1.00 | 0.00 | O |
| ATOM | 577 | C5   | T   | A | 19 | 8.059  | -20.445 | 79.204 | 1.00 | 0.00 | C |
| ATOM | 578 | C6   | T   | A | 19 | 7.515  | -20.458 | 77.969 | 1.00 | 0.00 | C |
| ATOM | 579 | C7   | T   | A | 19 | 9.305  | -19.684 | 79.542 | 1.00 | 0.00 | C |
| ATOM | 580 | C2'  | T   | A | 19 | 5.870  | -19.840 | 75.626 | 1.00 | 0.00 | C |
| ATOM | 581 | C3'  | T   | A | 19 | 6.093  | -20.267 | 74.183 | 1.00 | 0.00 | C |
| ATOM | 582 | O3'  | T   | A | 19 | 4.833  | -20.543 | 73.576 | 1.00 | 0.00 | O |
| ATOM | 583 | C4'  | T   | A | 19 | 6.950  | -21.523 | 74.331 | 1.00 | 0.00 | C |
| ATOM | 584 | O4'  | T   | A | 19 | 6.481  | -22.136 | 75.572 | 1.00 | 0.00 | O |
| ATOM | 585 | C5'  | T   | A | 19 | 8.442  | -21.312 | 74.429 | 1.00 | 0.00 | C |
| ATOM | 586 | O5'  | T   | A | 19 | 8.718  | -20.105 | 75.184 | 1.00 | 0.00 | O |
| ATOM | 587 | O1P  | T   | A | 19 | 9.761  | -18.576 | 73.478 | 1.00 | 0.00 | O |
| ATOM | 588 | O2P  | T   | A | 19 | 10.325 | -18.315 | 75.909 | 1.00 | 0.00 | O |
| ATOM | 589 | P    | T   | A | 19 | 9.984  | -19.223 | 74.787 | 1.00 | 0.00 | P |
| ATOM | 590 | H3   | T   | A | 19 | 5.849  | -22.414 | 80.676 | 1.00 | 0.00 | H |
| ATOM | 591 | H6   | T   | A | 19 | 7.991  | -19.892 | 77.167 | 1.00 | 0.00 | H |
| ATOM | 592 | H1'  | T   | A | 19 | 4.743  | -21.510 | 76.424 | 1.00 | 0.00 | H |
| ATOM | 593 | H3'  | T   | A | 19 | 6.613  | -19.502 | 73.608 | 1.00 | 0.00 | H |
| ATOM | 594 | H4'  | T   | A | 19 | 6.760  | -22.141 | 73.451 | 1.00 | 0.00 | H |
| ATOM | 595 | H71  | T   | A | 19 | 9.116  | -18.614 | 79.445 | 1.00 | 0.00 | H |
| ATOM | 596 | H72  | T   | A | 19 | 9.600  | -19.907 | 80.568 | 1.00 | 0.00 | H |
| ATOM | 597 | H73  | T   | A | 19 | 10.107 | -19.973 | 78.862 | 1.00 | 0.00 | H |
| ATOM | 598 | H2'1 | T   | A | 19 | 6.696  | -19.233 | 75.991 | 1.00 | 0.00 | H |
| ATOM | 599 | H2'2 | T   | A | 19 | 4.958  | -19.253 | 75.729 | 1.00 | 0.00 | H |
| ATOM | 600 | H5'1 | T   | A | 19 | 8.894  | -22.168 | 74.927 | 1.00 | 0.00 | H |
| ATOM | 601 | H5'2 | T   | A | 19 | 8.858  | -21.220 | 73.426 | 1.00 | 0.00 | H |
| ATOM | 602 | C01  | LNK | A | 20 | 2.327  | -18.257 | 72.040 | 0.00 | 0.00 | C |
| ATOM | 603 | O1   | LNK | A | 20 | 3.554  | -18.493 | 72.736 | 1.00 | 0.00 | O |
| ATOM | 604 | S    | LNK | A | 20 | 0.113  | -15.186 | 70.811 | 0.00 | 0.00 | S |
| ATOM | 605 | C02  | LNK | A | 20 | 2.098  | -16.740 | 71.909 | 0.00 | 0.00 | C |
| ATOM | 606 | C03  | LNK | A | 20 | 0.593  | -16.434 | 72.046 | 0.00 | 0.00 | C |
| ATOM | 607 | O1P  | LNK | A | 20 | 4.003  | -18.646 | 75.208 | 1.00 | 0.00 | O |
| ATOM | 608 | O2P  | LNK | A | 20 | 2.202  | -20.053 | 74.167 | 1.00 | 0.00 | O |

|      |     |      |     |   |    |        |         |        |      |      |   |
|------|-----|------|-----|---|----|--------|---------|--------|------|------|---|
| ATOM | 609 | P    | LNK | A | 20 | 3.536  | -19.414 | 74.037 | 1.00 | 0.00 | P |
| ATOM | 610 | H01  | LNK | A | 20 | 1.502  | -18.703 | 72.596 | 0.00 | 0.00 | H |
| ATOM | 611 | H02  | LNK | A | 20 | 2.379  | -18.704 | 71.048 | 0.00 | 0.00 | H |
| ATOM | 612 | H03  | LNK | A | 20 | 0.390  | -16.052 | 73.047 | 0.00 | 0.00 | H |
| ATOM | 613 | H04  | LNK | A | 20 | 2.450  | -16.402 | 70.934 | 0.00 | 0.00 | H |
| ATOM | 614 | H05  | LNK | A | 20 | 2.647  | -16.220 | 72.693 | 0.00 | 0.00 | H |
| ATOM | 615 | H06  | LNK | A | 20 | 0.021  | -17.346 | 71.882 | 0.00 | 0.00 | H |
| ATOM | 616 | AU   | LNK | A | 20 | -0.528 | -14.976 | 70.935 |      |      |   |
| TER  |     |      |     |   |    |        |         |        |      |      |   |
| ATOM | 618 | C1'  | A   | B | 2  | 2.223  | -26.293 | 85.294 | 1.00 | 0.00 | C |
| ATOM | 619 | N1   | A   | B | 2  | 4.998  | -23.415 | 82.076 | 1.00 | 0.00 | N |
| ATOM | 620 | C2   | A   | B | 2  | 3.897  | -24.138 | 81.910 | 1.00 | 0.00 | C |
| ATOM | 621 | N3   | A   | B | 2  | 3.227  | -24.857 | 82.787 | 1.00 | 0.00 | N |
| ATOM | 622 | C4   | A   | B | 2  | 3.823  | -24.795 | 83.992 | 1.00 | 0.00 | C |
| ATOM | 623 | C5   | A   | B | 2  | 4.954  | -24.103 | 84.326 | 1.00 | 0.00 | C |
| ATOM | 624 | C6   | A   | B | 2  | 5.571  | -23.371 | 83.289 | 1.00 | 0.00 | C |
| ATOM | 625 | N6   | A   | B | 2  | 6.686  | -22.643 | 83.468 | 1.00 | 0.00 | N |
| ATOM | 626 | N7   | A   | B | 2  | 5.269  | -24.275 | 85.663 | 1.00 | 0.00 | N |
| ATOM | 627 | C8   | A   | B | 2  | 4.332  | -25.062 | 86.104 | 1.00 | 0.00 | C |
| ATOM | 628 | N9   | A   | B | 2  | 3.418  | -25.416 | 85.147 | 1.00 | 0.00 | N |
| ATOM | 629 | C2'  | A   | B | 2  | 2.442  | -27.478 | 86.226 | 1.00 | 0.00 | C |
| ATOM | 630 | C3'  | A   | B | 2  | 1.084  | -27.612 | 86.894 | 1.00 | 0.00 | C |
| ATOM | 631 | O3'  | A   | B | 2  | 0.226  | -28.387 | 86.058 | 1.00 | 0.00 | O |
| ATOM | 632 | C4'  | A   | B | 2  | 0.619  | -26.162 | 87.012 | 1.00 | 0.00 | C |
| ATOM | 633 | O4'  | A   | B | 2  | 1.176  | -25.506 | 85.828 | 1.00 | 0.00 | O |
| ATOM | 634 | C5'  | A   | B | 2  | 1.072  | -25.409 | 88.241 | 1.00 | 0.00 | C |
| ATOM | 635 | O5'  | A   | B | 2  | 2.420  | -25.812 | 88.592 | 1.00 | 0.00 | O |
| ATOM | 636 | H2   | A   | B | 2  | 3.484  | -24.136 | 80.903 | 1.00 | 0.00 | H |
| ATOM | 637 | H8   | A   | B | 2  | 4.281  | -25.406 | 87.137 | 1.00 | 0.00 | H |
| ATOM | 638 | H1'  | A   | B | 2  | 1.921  | -26.627 | 84.301 | 1.00 | 0.00 | H |
| ATOM | 639 | H3'  | A   | B | 2  | 1.154  | -28.084 | 87.873 | 1.00 | 0.00 | H |
| ATOM | 640 | H4'  | A   | B | 2  | -0.471 | -26.179 | 87.016 | 1.00 | 0.00 | H |
| ATOM | 641 | H61  | A   | B | 2  | 7.094  | -22.126 | 82.679 | 1.00 | 0.00 | H |
| ATOM | 642 | H62  | A   | B | 2  | 7.132  | -22.606 | 84.397 | 1.00 | 0.00 | H |
| ATOM | 643 | H2'1 | A   | B | 2  | 3.227  | -27.289 | 86.959 | 1.00 | 0.00 | H |
| ATOM | 644 | H2'2 | A   | B | 2  | 2.710  | -28.387 | 85.685 | 1.00 | 0.00 | H |
| ATOM | 645 | H5'1 | A   | B | 2  | 1.050  | -24.339 | 88.033 | 1.00 | 0.00 | H |
| ATOM | 646 | H5'2 | A   | B | 2  | 0.394  | -25.630 | 89.065 | 1.00 | 0.00 | H |
| ATOM | 647 | C1'  | C   | B | 3  | 2.736  | -28.608 | 80.931 | 1.00 | 0.00 | C |
| ATOM | 648 | N1   | C   | B | 3  | 3.927  | -28.086 | 81.654 | 1.00 | 0.00 | N |
| ATOM | 649 | C2   | C   | B | 3  | 4.816  | -27.277 | 80.947 | 1.00 | 0.00 | C |
| ATOM | 650 | O2   | C   | B | 3  | 4.579  | -27.026 | 79.758 | 1.00 | 0.00 | O |
| ATOM | 651 | N3   | C   | B | 3  | 5.907  | -26.792 | 81.586 | 1.00 | 0.00 | N |
| ATOM | 652 | C4   | C   | B | 3  | 6.137  | -27.082 | 82.874 | 1.00 | 0.00 | C |
| ATOM | 653 | N4   | C   | B | 3  | 7.219  | -26.576 | 83.451 | 1.00 | 0.00 | N |
| ATOM | 654 | C5   | C   | B | 3  | 5.244  | -27.915 | 83.625 | 1.00 | 0.00 | C |
| ATOM | 655 | C6   | C   | B | 3  | 4.146  | -28.389 | 82.961 | 1.00 | 0.00 | C |
| ATOM | 656 | C2'  | C   | B | 3  | 2.359  | -30.032 | 81.315 | 1.00 | 0.00 | C |
| ATOM | 657 | C3'  | C   | B | 3  | 0.841  | -29.989 | 81.247 | 1.00 | 0.00 | C |
| ATOM | 658 | O3'  | C   | B | 3  | 0.427  | -30.210 | 79.900 | 1.00 | 0.00 | O |
| ATOM | 659 | C4'  | C   | B | 3  | 0.519  | -28.576 | 81.725 | 1.00 | 0.00 | C |
| ATOM | 660 | O4'  | C   | B | 3  | 1.641  | -27.767 | 81.245 | 1.00 | 0.00 | O |
| ATOM | 661 | C5'  | C   | B | 3  | 0.389  | -28.385 | 83.218 | 1.00 | 0.00 | C |
| ATOM | 662 | O5'  | C   | B | 3  | 1.351  | -29.226 | 83.905 | 1.00 | 0.00 | O |

|      |     |      |     |   |        |         |        |      |      |   |
|------|-----|------|-----|---|--------|---------|--------|------|------|---|
| ATOM | 663 | O1P  | C B | 3 | -0.095 | -30.876 | 85.138 | 1.00 | 0.00 | O |
| ATOM | 664 | O2P  | C B | 3 | 2.180  | -30.294 | 86.022 | 1.00 | 0.00 | O |
| ATOM | 665 | P    | C B | 3 | 0.953  | -29.851 | 85.315 | 1.00 | 0.00 | P |
| ATOM | 666 | H5   | C B | 3 | 5.431  | -28.159 | 84.671 | 1.00 | 0.00 | H |
| ATOM | 667 | H6   | C B | 3 | 3.435  | -29.020 | 83.493 | 1.00 | 0.00 | H |
| ATOM | 668 | H1'  | C B | 3 | 2.923  | -28.528 | 79.860 | 1.00 | 0.00 | H |
| ATOM | 669 | H3'  | C B | 3 | 0.382  | -30.738 | 81.893 | 1.00 | 0.00 | H |
| ATOM | 670 | H4'  | C B | 3 | -0.433 | -28.296 | 81.271 | 1.00 | 0.00 | H |
| ATOM | 671 | H41  | C B | 3 | 7.418  | -26.780 | 84.441 | 1.00 | 0.00 | H |
| ATOM | 672 | H42  | C B | 3 | 7.862  | -25.980 | 82.908 | 1.00 | 0.00 | H |
| ATOM | 673 | H2'1 | C B | 3 | 2.704  | -30.296 | 82.315 | 1.00 | 0.00 | H |
| ATOM | 674 | H2'2 | C B | 3 | 2.767  | -30.769 | 80.622 | 1.00 | 0.00 | H |
| ATOM | 675 | H5'1 | C B | 3 | 0.575  | -27.339 | 83.463 | 1.00 | 0.00 | H |
| ATOM | 676 | H5'2 | C B | 3 | -0.619 | -28.652 | 83.527 | 1.00 | 0.00 | H |
| ATOM | 677 | C1'  | C B | 4 | 5.024  | -29.590 | 76.650 | 1.00 | 0.00 | C |
| ATOM | 678 | N1   | C B | 4 | 5.771  | -29.639 | 77.937 | 1.00 | 0.00 | N |
| ATOM | 679 | C2   | C B | 4 | 6.961  | -28.922 | 78.029 | 1.00 | 0.00 | C |
| ATOM | 680 | O2   | C B | 4 | 7.348  | -28.276 | 77.046 | 1.00 | 0.00 | O |
| ATOM | 681 | N3   | C B | 4 | 7.658  | -28.953 | 79.191 | 1.00 | 0.00 | N |
| ATOM | 682 | C4   | C B | 4 | 7.215  | -29.661 | 80.240 | 1.00 | 0.00 | C |
| ATOM | 683 | N4   | C B | 4 | 7.932  | -29.654 | 81.355 | 1.00 | 0.00 | N |
| ATOM | 684 | C5   | C B | 4 | 5.995  | -30.413 | 80.173 | 1.00 | 0.00 | C |
| ATOM | 685 | C6   | C B | 4 | 5.308  | -30.361 | 78.992 | 1.00 | 0.00 | C |
| ATOM | 686 | C2'  | C B | 4 | 4.376  | -30.912 | 76.267 | 1.00 | 0.00 | C |
| ATOM | 687 | C3'  | C B | 4 | 3.087  | -30.452 | 75.603 | 1.00 | 0.00 | C |
| ATOM | 688 | O3'  | C B | 4 | 3.347  | -30.147 | 74.235 | 1.00 | 0.00 | O |
| ATOM | 689 | C4'  | C B | 4 | 2.713  | -29.211 | 76.411 | 1.00 | 0.00 | C |
| ATOM | 690 | O4'  | C B | 4 | 4.000  | -28.622 | 76.785 | 1.00 | 0.00 | O |
| ATOM | 691 | C5'  | C B | 4 | 1.906  | -29.443 | 77.667 | 1.00 | 0.00 | C |
| ATOM | 692 | O5'  | C B | 4 | 2.336  | -30.673 | 78.305 | 1.00 | 0.00 | O |
| ATOM | 693 | O1P  | C B | 4 | 0.325  | -32.171 | 78.097 | 1.00 | 0.00 | O |
| ATOM | 694 | O2P  | C B | 4 | 1.944  | -32.499 | 79.986 | 1.00 | 0.00 | O |
| ATOM | 695 | P    | C B | 4 | 1.254  | -31.560 | 79.068 | 1.00 | 0.00 | P |
| ATOM | 696 | H5   | C B | 4 | 5.635  | -30.995 | 81.020 | 1.00 | 0.00 | H |
| ATOM | 697 | H6   | C B | 4 | 4.373  | -30.911 | 78.896 | 1.00 | 0.00 | H |
| ATOM | 698 | H1'  | C B | 4 | 5.708  | -29.249 | 75.873 | 1.00 | 0.00 | H |
| ATOM | 699 | H3'  | C B | 4 | 2.305  | -31.209 | 75.662 | 1.00 | 0.00 | H |
| ATOM | 700 | H4'  | C B | 4 | 2.127  | -28.568 | 75.754 | 1.00 | 0.00 | H |
| ATOM | 701 | H41  | C B | 4 | 7.613  | -30.188 | 82.177 | 1.00 | 0.00 | H |
| ATOM | 702 | H42  | C B | 4 | 8.810  | -29.115 | 81.399 | 1.00 | 0.00 | H |
| ATOM | 703 | H2'1 | C B | 4 | 4.173  | -31.541 | 77.133 | 1.00 | 0.00 | H |
| ATOM | 704 | H2'2 | C B | 4 | 4.992  | -31.490 | 75.578 | 1.00 | 0.00 | H |
| ATOM | 705 | H5'1 | C B | 4 | 2.051  | -28.605 | 78.347 | 1.00 | 0.00 | H |
| ATOM | 706 | H5'2 | C B | 4 | 0.851  | -29.514 | 77.404 | 1.00 | 0.00 | H |
| ATOM | 707 | C1'  | G B | 5 | 8.975  | -29.827 | 73.674 | 1.00 | 0.00 | C |
| ATOM | 708 | N1   | G B | 5 | 11.552 | -30.184 | 78.062 | 1.00 | 0.00 | N |
| ATOM | 709 | C2   | G B | 5 | 11.836 | -29.452 | 76.922 | 1.00 | 0.00 | C |
| ATOM | 710 | N2   | G B | 5 | 12.957 | -28.721 | 76.954 | 1.00 | 0.00 | N |
| ATOM | 711 | N3   | G B | 5 | 11.064 | -29.451 | 75.836 | 1.00 | 0.00 | N |
| ATOM | 712 | C4   | G B | 5 | 9.974  | -30.252 | 75.976 | 1.00 | 0.00 | C |
| ATOM | 713 | C5   | G B | 5 | 9.615  | -31.020 | 77.072 | 1.00 | 0.00 | C |
| ATOM | 714 | C6   | G B | 5 | 10.432 | -31.018 | 78.225 | 1.00 | 0.00 | C |
| ATOM | 715 | O6   | G B | 5 | 10.280 | -31.628 | 79.283 | 1.00 | 0.00 | O |
| ATOM | 716 | N7   | G B | 5 | 8.423  | -31.702 | 76.811 | 1.00 | 0.00 | N |

|      |     |      |     |   |        |         |        |      |      |   |
|------|-----|------|-----|---|--------|---------|--------|------|------|---|
| ATOM | 717 | C8   | G B | 5 | 8.106  | -31.334 | 75.597 | 1.00 | 0.00 | C |
| ATOM | 718 | N9   | G B | 5 | 9.002  | -30.454 | 75.023 | 1.00 | 0.00 | N |
| ATOM | 719 | C2'  | G B | 5 | 8.461  | -30.751 | 72.578 | 1.00 | 0.00 | C |
| ATOM | 720 | C3'  | G B | 5 | 7.704  | -29.787 | 71.679 | 1.00 | 0.00 | C |
| ATOM | 721 | O3'  | G B | 5 | 8.618  | -29.173 | 70.774 | 1.00 | 0.00 | O |
| ATOM | 722 | C4'  | G B | 5 | 7.113  | -28.789 | 72.673 | 1.00 | 0.00 | C |
| ATOM | 723 | O4'  | G B | 5 | 8.115  | -28.705 | 73.736 | 1.00 | 0.00 | O |
| ATOM | 724 | C5'  | G B | 5 | 5.784  | -29.156 | 73.286 | 1.00 | 0.00 | C |
| ATOM | 725 | O5'  | G B | 5 | 5.729  | -30.587 | 73.515 | 1.00 | 0.00 | O |
| ATOM | 726 | O1P  | G B | 5 | 3.925  | -31.360 | 71.939 | 1.00 | 0.00 | O |
| ATOM | 727 | O2P  | G B | 5 | 4.398  | -32.653 | 74.036 | 1.00 | 0.00 | O |
| ATOM | 728 | P    | G B | 5 | 4.330  | -31.336 | 73.358 | 1.00 | 0.00 | P |
| ATOM | 729 | H1   | G B | 5 | 12.213 | -30.110 | 78.851 | 1.00 | 0.00 | H |
| ATOM | 730 | H8   | G B | 5 | 7.213  | -31.689 | 75.082 | 1.00 | 0.00 | H |
| ATOM | 731 | H1'  | G B | 5 | 9.976  | -29.468 | 73.443 | 1.00 | 0.00 | H |
| ATOM | 732 | H21  | G B | 5 | 13.547 | -28.723 | 77.798 | 1.00 | 0.00 | H |
| ATOM | 733 | H3'  | G B | 5 | 6.917  | -30.289 | 71.113 | 1.00 | 0.00 | H |
| ATOM | 734 | H22  | G B | 5 | 13.228 | -28.156 | 76.136 | 1.00 | 0.00 | H |
| ATOM | 735 | H4'  | G B | 5 | 6.984  | -27.849 | 72.136 | 1.00 | 0.00 | H |
| ATOM | 736 | H2'1 | G B | 5 | 7.806  | -31.530 | 72.967 | 1.00 | 0.00 | H |
| ATOM | 737 | H2'2 | G B | 5 | 9.270  | -31.243 | 72.039 | 1.00 | 0.00 | H |
| ATOM | 738 | H5'1 | G B | 5 | 5.668  | -28.627 | 74.232 | 1.00 | 0.00 | H |
| ATOM | 739 | H5'2 | G B | 5 | 4.982  | -28.861 | 72.609 | 1.00 | 0.00 | H |
| ATOM | 740 | C1'  | T B | 6 | 13.816 | -30.197 | 72.716 | 1.00 | 0.00 | C |
| ATOM | 741 | N1   | T B | 6 | 13.156 | -31.175 | 73.622 | 1.00 | 0.00 | N |
| ATOM | 742 | C2   | T B | 6 | 13.740 | -31.385 | 74.854 | 1.00 | 0.00 | C |
| ATOM | 743 | O2   | T B | 6 | 14.752 | -30.810 | 75.213 | 1.00 | 0.00 | O |
| ATOM | 744 | N3   | T B | 6 | 13.091 | -32.300 | 75.664 | 1.00 | 0.00 | N |
| ATOM | 745 | C4   | T B | 6 | 11.947 | -33.005 | 75.356 | 1.00 | 0.00 | C |
| ATOM | 746 | O4   | T B | 6 | 11.460 | -33.803 | 76.165 | 1.00 | 0.00 | O |
| ATOM | 747 | C5   | T B | 6 | 11.412 | -32.717 | 74.048 | 1.00 | 0.00 | C |
| ATOM | 748 | C6   | T B | 6 | 12.015 | -31.831 | 73.232 | 1.00 | 0.00 | C |
| ATOM | 749 | C7   | T B | 6 | 10.163 | -33.460 | 73.671 | 1.00 | 0.00 | C |
| ATOM | 750 | C2'  | T B | 6 | 13.786 | -30.603 | 71.247 | 1.00 | 0.00 | C |
| ATOM | 751 | C3'  | T B | 6 | 13.627 | -29.260 | 70.552 | 1.00 | 0.00 | C |
| ATOM | 752 | O3'  | T B | 6 | 14.912 | -28.661 | 70.389 | 1.00 | 0.00 | O |
| ATOM | 753 | C4'  | T B | 6 | 12.741 | -28.478 | 71.518 | 1.00 | 0.00 | C |
| ATOM | 754 | O4'  | T B | 6 | 13.136 | -28.963 | 72.841 | 1.00 | 0.00 | O |
| ATOM | 755 | C5'  | T B | 6 | 11.249 | -28.661 | 71.362 | 1.00 | 0.00 | C |
| ATOM | 756 | O5'  | T B | 6 | 10.961 | -30.035 | 70.998 | 1.00 | 0.00 | O |
| ATOM | 757 | O1P  | T B | 6 | 10.032 | -29.835 | 68.667 | 1.00 | 0.00 | O |
| ATOM | 758 | O2P  | T B | 6 | 9.351  | -31.757 | 70.129 | 1.00 | 0.00 | O |
| ATOM | 759 | P    | T B | 6 | 9.731  | -30.328 | 70.025 | 1.00 | 0.00 | P |
| ATOM | 760 | H3   | T B | 6 | 13.506 | -32.473 | 76.592 | 1.00 | 0.00 | H |
| ATOM | 761 | H6   | T B | 6 | 11.590 | -31.630 | 72.248 | 1.00 | 0.00 | H |
| ATOM | 762 | H1'  | T B | 6 | 14.841 | -30.051 | 73.058 | 1.00 | 0.00 | H |
| ATOM | 763 | H3'  | T B | 6 | 13.151 | -29.362 | 69.576 | 1.00 | 0.00 | H |
| ATOM | 764 | H4'  | T B | 6 | 12.964 | -27.422 | 71.368 | 1.00 | 0.00 | H |
| ATOM | 765 | H71  | T B | 6 | 10.377 | -34.133 | 72.840 | 1.00 | 0.00 | H |
| ATOM | 766 | H72  | T B | 6 | 9.813  | -34.039 | 74.527 | 1.00 | 0.00 | H |
| ATOM | 767 | H73  | T B | 6 | 9.391  | -32.749 | 73.374 | 1.00 | 0.00 | H |
| ATOM | 768 | H2'1 | T B | 6 | 12.955 | -31.268 | 71.021 | 1.00 | 0.00 | H |
| ATOM | 769 | H2'2 | T B | 6 | 14.703 | -31.104 | 70.938 | 1.00 | 0.00 | H |
| ATOM | 770 | H5'1 | T B | 6 | 10.758 | -28.419 | 72.304 | 1.00 | 0.00 | H |

|      |     |      |     |   |        |         |        |      |      |   |
|------|-----|------|-----|---|--------|---------|--------|------|------|---|
| ATOM | 771 | H5'2 | T B | 6 | 10.887 | -27.990 | 70.584 | 1.00 | 0.00 | H |
| ATOM | 772 | C1'  | C B | 7 | 18.468 | -31.551 | 73.808 | 1.00 | 0.00 | C |
| ATOM | 773 | N1   | C B | 7 | 17.354 | -32.537 | 73.890 | 1.00 | 0.00 | N |
| ATOM | 774 | C2   | C B | 7 | 17.220 | -33.275 | 75.064 | 1.00 | 0.00 | C |
| ATOM | 775 | O2   | C B | 7 | 18.026 | -33.082 | 75.986 | 1.00 | 0.00 | O |
| ATOM | 776 | N3   | C B | 7 | 16.214 | -34.177 | 75.159 | 1.00 | 0.00 | N |
| ATOM | 777 | C4   | C B | 7 | 15.360 | -34.365 | 74.144 | 1.00 | 0.00 | C |
| ATOM | 778 | N4   | C B | 7 | 14.393 | -35.257 | 74.292 | 1.00 | 0.00 | N |
| ATOM | 779 | C5   | C B | 7 | 15.476 | -33.624 | 72.922 | 1.00 | 0.00 | C |
| ATOM | 780 | C6   | C B | 7 | 16.495 | -32.716 | 72.851 | 1.00 | 0.00 | C |
| ATOM | 781 | C2'  | C B | 7 | 19.120 | -31.475 | 72.436 | 1.00 | 0.00 | C |
| ATOM | 782 | C3'  | C B | 7 | 19.453 | -29.994 | 72.326 | 1.00 | 0.00 | C |
| ATOM | 783 | O3'  | C B | 7 | 20.703 | -29.748 | 72.967 | 1.00 | 0.00 | O |
| ATOM | 784 | C4'  | C B | 7 | 18.288 | -29.329 | 73.054 | 1.00 | 0.00 | C |
| ATOM | 785 | O4'  | C B | 7 | 17.935 | -30.276 | 74.111 | 1.00 | 0.00 | O |
| ATOM | 786 | C5'  | C B | 7 | 17.054 | -29.043 | 72.228 | 1.00 | 0.00 | C |
| ATOM | 787 | O5'  | C B | 7 | 16.851 | -30.111 | 71.269 | 1.00 | 0.00 | O |
| ATOM | 788 | O1P  | C B | 7 | 17.206 | -28.979 | 69.051 | 1.00 | 0.00 | O |
| ATOM | 789 | O2P  | C B | 7 | 15.714 | -30.989 | 69.208 | 1.00 | 0.00 | O |
| ATOM | 790 | P    | C B | 7 | 16.232 | -29.753 | 69.843 | 1.00 | 0.00 | P |
| ATOM | 791 | H5   | C B | 7 | 14.787 | -33.778 | 72.092 | 1.00 | 0.00 | H |
| ATOM | 792 | H6   | C B | 7 | 16.618 | -32.123 | 71.945 | 1.00 | 0.00 | H |
| ATOM | 793 | H1'  | C B | 7 | 19.200 | -31.800 | 74.577 | 1.00 | 0.00 | H |
| ATOM | 794 | H3'  | C B | 7 | 19.510 | -29.664 | 71.287 | 1.00 | 0.00 | H |
| ATOM | 795 | H4'  | C B | 7 | 18.657 | -28.378 | 73.439 | 1.00 | 0.00 | H |
| ATOM | 796 | H41  | C B | 7 | 13.720 | -35.418 | 73.528 | 1.00 | 0.00 | H |
| ATOM | 797 | H42  | C B | 7 | 14.312 | -35.791 | 75.171 | 1.00 | 0.00 | H |
| ATOM | 798 | H2'1 | C B | 7 | 18.447 | -31.790 | 71.639 | 1.00 | 0.00 | H |
| ATOM | 799 | H2'2 | C B | 7 | 20.017 | -32.090 | 72.368 | 1.00 | 0.00 | H |
| ATOM | 800 | H5'1 | C B | 7 | 16.191 | -28.971 | 72.889 | 1.00 | 0.00 | H |
| ATOM | 801 | H5'2 | C B | 7 | 17.186 | -28.099 | 71.704 | 1.00 | 0.00 | H |
| ATOM | 802 | C1'  | C B | 8 | 21.880 | -34.332 | 76.079 | 1.00 | 0.00 | C |
| ATOM | 803 | N1   | C B | 8 | 20.775 | -34.967 | 75.312 | 1.00 | 0.00 | N |
| ATOM | 804 | C2   | C B | 8 | 20.025 | -35.957 | 75.943 | 1.00 | 0.00 | C |
| ATOM | 805 | O2   | C B | 8 | 20.306 | -36.265 | 77.109 | 1.00 | 0.00 | O |
| ATOM | 806 | N3   | C B | 8 | 19.014 | -36.549 | 75.261 | 1.00 | 0.00 | N |
| ATOM | 807 | C4   | C B | 8 | 18.735 | -36.193 | 74.000 | 1.00 | 0.00 | C |
| ATOM | 808 | N4   | C B | 8 | 17.733 | -36.802 | 73.382 | 1.00 | 0.00 | N |
| ATOM | 809 | C5   | C B | 8 | 19.491 | -35.181 | 73.321 | 1.00 | 0.00 | C |
| ATOM | 810 | C6   | C B | 8 | 20.503 | -34.595 | 74.031 | 1.00 | 0.00 | C |
| ATOM | 811 | C2'  | C B | 8 | 23.114 | -34.026 | 75.241 | 1.00 | 0.00 | C |
| ATOM | 812 | C3'  | C B | 8 | 23.601 | -32.723 | 75.856 | 1.00 | 0.00 | C |
| ATOM | 813 | O3'  | C B | 8 | 24.407 | -33.016 | 76.994 | 1.00 | 0.00 | O |
| ATOM | 814 | C4'  | C B | 8 | 22.300 | -32.021 | 76.237 | 1.00 | 0.00 | C |
| ATOM | 815 | O4'  | C B | 8 | 21.393 | -33.110 | 76.601 | 1.00 | 0.00 | O |
| ATOM | 816 | C5'  | C B | 8 | 21.645 | -31.189 | 75.159 | 1.00 | 0.00 | C |
| ATOM | 817 | O5'  | C B | 8 | 21.820 | -31.831 | 73.870 | 1.00 | 0.00 | O |
| ATOM | 818 | O1P  | C B | 8 | 23.301 | -30.226 | 72.618 | 1.00 | 0.00 | O |
| ATOM | 819 | O2P  | C B | 8 | 21.729 | -31.725 | 71.362 | 1.00 | 0.00 | O |
| ATOM | 820 | P    | C B | 8 | 21.997 | -30.918 | 72.577 | 1.00 | 0.00 | P |
| ATOM | 821 | H5   | C B | 8 | 19.273 | -34.895 | 72.294 | 1.00 | 0.00 | H |
| ATOM | 822 | H6   | C B | 8 | 21.101 | -33.816 | 73.560 | 1.00 | 0.00 | H |
| ATOM | 823 | H1'  | C B | 8 | 22.128 | -34.981 | 76.919 | 1.00 | 0.00 | H |
| ATOM | 824 | H3'  | C B | 8 | 24.177 | -32.128 | 75.147 | 1.00 | 0.00 | H |

|      |     |      |     |    |        |         |        |      |      |   |
|------|-----|------|-----|----|--------|---------|--------|------|------|---|
| ATOM | 825 | H4'  | C B | 8  | 22.530 | -31.357 | 77.071 | 1.00 | 0.00 | H |
| ATOM | 826 | H41  | C B | 8  | 17.494 | -36.546 | 72.412 | 1.00 | 0.00 | H |
| ATOM | 827 | H42  | C B | 8  | 17.191 | -37.530 | 73.870 | 1.00 | 0.00 | H |
| ATOM | 828 | H2'1 | C B | 8  | 22.877 | -33.901 | 74.185 | 1.00 | 0.00 | H |
| ATOM | 829 | H2'2 | C B | 8  | 23.869 | -34.809 | 75.318 | 1.00 | 0.00 | H |
| ATOM | 830 | H5'1 | C B | 8  | 20.582 | -31.090 | 75.378 | 1.00 | 0.00 | H |
| ATOM | 831 | H5'2 | C B | 8  | 22.101 | -30.201 | 75.143 | 1.00 | 0.00 | H |
| ATOM | 832 | C1'  | T B | 9  | 23.523 | -38.441 | 78.293 | 1.00 | 0.00 | C |
| ATOM | 833 | N1   | T B | 9  | 22.851 | -38.523 | 76.969 | 1.00 | 0.00 | N |
| ATOM | 834 | C2   | T B | 9  | 21.814 | -39.424 | 76.842 | 1.00 | 0.00 | C |
| ATOM | 835 | O2   | T B | 9  | 21.445 | -40.137 | 77.759 | 1.00 | 0.00 | O |
| ATOM | 836 | N3   | T B | 9  | 21.217 | -39.467 | 75.597 | 1.00 | 0.00 | N |
| ATOM | 837 | C4   | T B | 9  | 21.559 | -38.710 | 74.496 | 1.00 | 0.00 | C |
| ATOM | 838 | O4   | T B | 9  | 20.952 | -38.838 | 73.426 | 1.00 | 0.00 | O |
| ATOM | 839 | C5   | T B | 9  | 22.654 | -37.796 | 74.724 | 1.00 | 0.00 | C |
| ATOM | 840 | C6   | T B | 9  | 23.258 | -37.727 | 75.926 | 1.00 | 0.00 | C |
| ATOM | 841 | C7   | T B | 9  | 23.057 | -36.950 | 73.553 | 1.00 | 0.00 | C |
| ATOM | 842 | C2'  | T B | 9  | 25.031 | -38.229 | 78.205 | 1.00 | 0.00 | C |
| ATOM | 843 | C3'  | T B | 9  | 25.293 | -37.331 | 79.404 | 1.00 | 0.00 | C |
| ATOM | 844 | O3'  | T B | 9  | 25.446 | -38.139 | 80.569 | 1.00 | 0.00 | O |
| ATOM | 845 | C4'  | T B | 9  | 24.040 | -36.462 | 79.461 | 1.00 | 0.00 | C |
| ATOM | 846 | O4'  | T B | 9  | 22.970 | -37.345 | 78.993 | 1.00 | 0.00 | O |
| ATOM | 847 | C5'  | T B | 9  | 24.045 | -35.214 | 78.609 | 1.00 | 0.00 | C |
| ATOM | 848 | O5'  | T B | 9  | 24.741 | -35.476 | 77.364 | 1.00 | 0.00 | O |
| ATOM | 849 | O1P  | T B | 9  | 26.780 | -34.009 | 77.517 | 1.00 | 0.00 | O |
| ATOM | 850 | O2P  | T B | 9  | 25.842 | -34.625 | 75.272 | 1.00 | 0.00 | O |
| ATOM | 851 | P    | T B | 9  | 25.587 | -34.301 | 76.696 | 1.00 | 0.00 | P |
| ATOM | 852 | H3   | T B | 9  | 20.438 | -40.130 | 75.478 | 1.00 | 0.00 | H |
| ATOM | 853 | H6   | T B | 9  | 24.082 | -37.030 | 76.074 | 1.00 | 0.00 | H |
| ATOM | 854 | H1'  | T B | 9  | 23.290 | -39.348 | 78.851 | 1.00 | 0.00 | H |
| ATOM | 855 | H3'  | T B | 9  | 26.188 | -36.722 | 79.266 | 1.00 | 0.00 | H |
| ATOM | 856 | H4'  | T B | 9  | 23.915 | -36.155 | 80.500 | 1.00 | 0.00 | H |
| ATOM | 857 | H71  | T B | 9  | 24.064 | -37.222 | 73.237 | 1.00 | 0.00 | H |
| ATOM | 858 | H72  | T B | 9  | 22.362 | -37.112 | 72.729 | 1.00 | 0.00 | H |
| ATOM | 859 | H73  | T B | 9  | 23.040 | -35.898 | 73.841 | 1.00 | 0.00 | H |
| ATOM | 860 | H2'1 | T B | 9  | 25.326 | -37.746 | 77.274 | 1.00 | 0.00 | H |
| ATOM | 861 | H2'2 | T B | 9  | 25.585 | -39.164 | 78.278 | 1.00 | 0.00 | H |
| ATOM | 862 | H5'1 | T B | 9  | 23.018 | -34.916 | 78.402 | 1.00 | 0.00 | H |
| ATOM | 863 | H5'2 | T B | 9  | 24.549 | -34.417 | 79.151 | 1.00 | 0.00 | H |
| ATOM | 864 | C1'  | A B | 10 | 23.485 | -43.319 | 79.211 | 1.00 | 0.00 | C |
| ATOM | 865 | N1   | A B | 10 | 21.360 | -43.612 | 74.549 | 1.00 | 0.00 | N |
| ATOM | 866 | C2   | A B | 10 | 21.095 | -44.227 | 75.698 | 1.00 | 0.00 | C |
| ATOM | 867 | N3   | A B | 10 | 21.682 | -44.101 | 76.868 | 1.00 | 0.00 | N |
| ATOM | 868 | C4   | A B | 10 | 22.685 | -43.208 | 76.793 | 1.00 | 0.00 | C |
| ATOM | 869 | C5   | A B | 10 | 23.084 | -42.495 | 75.696 | 1.00 | 0.00 | C |
| ATOM | 870 | C6   | A B | 10 | 22.366 | -42.725 | 74.505 | 1.00 | 0.00 | C |
| ATOM | 871 | N6   | A B | 10 | 22.644 | -42.098 | 73.348 | 1.00 | 0.00 | N |
| ATOM | 872 | N7   | A B | 10 | 24.152 | -41.669 | 76.000 | 1.00 | 0.00 | N |
| ATOM | 873 | C8   | A B | 10 | 24.377 | -41.900 | 77.260 | 1.00 | 0.00 | C |
| ATOM | 874 | N9   | A B | 10 | 23.523 | -42.820 | 77.810 | 1.00 | 0.00 | N |
| ATOM | 875 | C2'  | A B | 10 | 24.862 | -43.491 | 79.837 | 1.00 | 0.00 | C |
| ATOM | 876 | C3'  | A B | 10 | 24.605 | -43.097 | 81.284 | 1.00 | 0.00 | C |
| ATOM | 877 | O3'  | A B | 10 | 24.103 | -44.226 | 81.995 | 1.00 | 0.00 | O |
| ATOM | 878 | C4'  | A B | 10 | 23.562 | -41.988 | 81.152 | 1.00 | 0.00 | C |

|      |     |      |     |    |        |         |        |      |      |   |
|------|-----|------|-----|----|--------|---------|--------|------|------|---|
| ATOM | 879 | O4'  | A B | 10 | 22.769 | -42.375 | 79.985 | 1.00 | 0.00 | O |
| ATOM | 880 | C5'  | A B | 10 | 24.091 | -40.590 | 80.935 | 1.00 | 0.00 | C |
| ATOM | 881 | O5'  | A B | 10 | 25.270 | -40.638 | 80.090 | 1.00 | 0.00 | O |
| ATOM | 882 | O1P  | A B | 10 | 27.115 | -39.873 | 81.622 | 1.00 | 0.00 | O |
| ATOM | 883 | O2P  | A B | 10 | 27.312 | -39.520 | 79.145 | 1.00 | 0.00 | O |
| ATOM | 884 | P    | A B | 10 | 26.438 | -39.582 | 80.343 | 1.00 | 0.00 | P |
| ATOM | 885 | H2   | A B | 10 | 20.270 | -44.937 | 75.665 | 1.00 | 0.00 | H |
| ATOM | 886 | H8   | A B | 10 | 25.169 | -41.407 | 77.824 | 1.00 | 0.00 | H |
| ATOM | 887 | H1'  | A B | 10 | 22.930 | -44.256 | 79.224 | 1.00 | 0.00 | H |
| ATOM | 888 | H3'  | A B | 10 | 25.507 | -42.732 | 81.774 | 1.00 | 0.00 | H |
| ATOM | 889 | H4'  | A B | 10 | 22.985 | -41.986 | 82.077 | 1.00 | 0.00 | H |
| ATOM | 890 | H61  | A B | 10 | 22.087 | -42.299 | 72.509 | 1.00 | 0.00 | H |
| ATOM | 891 | H62  | A B | 10 | 23.415 | -41.416 | 73.305 | 1.00 | 0.00 | H |
| ATOM | 892 | H2'1 | A B | 10 | 25.610 | -42.847 | 79.378 | 1.00 | 0.00 | H |
| ATOM | 893 | H2'2 | A B | 10 | 25.224 | -44.518 | 79.765 | 1.00 | 0.00 | H |
| ATOM | 894 | H5'1 | A B | 10 | 23.322 | -39.986 | 80.458 | 1.00 | 0.00 | H |
| ATOM | 895 | H5'2 | A B | 10 | 24.347 | -40.151 | 81.897 | 1.00 | 0.00 | H |
| ATOM | 896 | C1'  | G B | 11 | 22.539 | -48.053 | 78.054 | 1.00 | 0.00 | C |
| ATOM | 897 | N1   | G B | 11 | 22.902 | -46.377 | 73.250 | 1.00 | 0.00 | N |
| ATOM | 898 | C2   | G B | 11 | 21.995 | -47.252 | 73.818 | 1.00 | 0.00 | C |
| ATOM | 899 | N2   | G B | 11 | 21.061 | -47.749 | 72.997 | 1.00 | 0.00 | N |
| ATOM | 900 | N3   | G B | 11 | 22.017 | -47.604 | 75.103 | 1.00 | 0.00 | N |
| ATOM | 901 | C4   | G B | 11 | 23.033 | -47.010 | 75.783 | 1.00 | 0.00 | C |
| ATOM | 902 | C5   | G B | 11 | 23.985 | -46.131 | 75.301 | 1.00 | 0.00 | C |
| ATOM | 903 | C6   | G B | 11 | 23.961 | -45.753 | 73.938 | 1.00 | 0.00 | C |
| ATOM | 904 | O6   | G B | 11 | 24.714 | -44.992 | 73.329 | 1.00 | 0.00 | O |
| ATOM | 905 | N7   | G B | 11 | 24.856 | -45.751 | 76.324 | 1.00 | 0.00 | N |
| ATOM | 906 | C8   | G B | 11 | 24.412 | -46.398 | 77.372 | 1.00 | 0.00 | C |
| ATOM | 907 | N9   | G B | 11 | 23.308 | -47.186 | 77.123 | 1.00 | 0.00 | N |
| ATOM | 908 | C2'  | G B | 11 | 23.406 | -48.778 | 79.074 | 1.00 | 0.00 | C |
| ATOM | 909 | C3'  | G B | 11 | 22.513 | -48.782 | 80.304 | 1.00 | 0.00 | C |
| ATOM | 910 | O3'  | G B | 11 | 21.621 | -49.891 | 80.231 | 1.00 | 0.00 | O |
| ATOM | 911 | C4'  | G B | 11 | 21.783 | -47.444 | 80.199 | 1.00 | 0.00 | C |
| ATOM | 912 | O4'  | G B | 11 | 21.630 | -47.230 | 78.760 | 1.00 | 0.00 | O |
| ATOM | 913 | C5'  | G B | 11 | 22.486 | -46.247 | 80.795 | 1.00 | 0.00 | C |
| ATOM | 914 | O5'  | G B | 11 | 23.914 | -46.359 | 80.580 | 1.00 | 0.00 | O |
| ATOM | 915 | O1P  | G B | 11 | 24.837 | -46.626 | 82.905 | 1.00 | 0.00 | O |
| ATOM | 916 | O2P  | G B | 11 | 26.254 | -45.611 | 81.102 | 1.00 | 0.00 | O |
| ATOM | 917 | P    | G B | 11 | 24.905 | -45.791 | 81.691 | 1.00 | 0.00 | P |
| ATOM | 918 | H1   | G B | 11 | 22.793 | -46.163 | 72.247 | 1.00 | 0.00 | H |
| ATOM | 919 | H8   | G B | 11 | 24.876 | -46.322 | 78.354 | 1.00 | 0.00 | H |
| ATOM | 920 | H1'  | G B | 11 | 21.958 | -48.761 | 77.462 | 1.00 | 0.00 | H |
| ATOM | 921 | H21  | G B | 11 | 21.048 | -47.471 | 72.005 | 1.00 | 0.00 | H |
| ATOM | 922 | H3'  | G B | 11 | 23.090 | -48.843 | 81.228 | 1.00 | 0.00 | H |
| ATOM | 923 | H22  | G B | 11 | 20.358 | -48.409 | 73.358 | 1.00 | 0.00 | H |
| ATOM | 924 | H4'  | G B | 11 | 20.829 | -47.562 | 80.715 | 1.00 | 0.00 | H |
| ATOM | 925 | H2'1 | G B | 11 | 24.343 | -48.254 | 79.266 | 1.00 | 0.00 | H |
| ATOM | 926 | H2'2 | G B | 11 | 23.655 | -49.791 | 78.760 | 1.00 | 0.00 | H |
| ATOM | 927 | H5'1 | G B | 11 | 22.111 | -45.341 | 80.322 | 1.00 | 0.00 | H |
| ATOM | 928 | H5'2 | G B | 11 | 22.276 | -46.206 | 81.864 | 1.00 | 0.00 | H |
| ATOM | 929 | C1'  | G B | 12 | 21.811 | -51.811 | 74.912 | 1.00 | 0.00 | C |
| ATOM | 930 | N1   | G B | 12 | 24.586 | -48.944 | 71.733 | 1.00 | 0.00 | N |
| ATOM | 931 | C2   | G B | 12 | 23.437 | -49.678 | 71.495 | 1.00 | 0.00 | C |
| ATOM | 932 | N2   | G B | 12 | 22.966 | -49.645 | 70.241 | 1.00 | 0.00 | N |



|      |     |      |     |    |        |         |        |      |      |   |
|------|-----|------|-----|----|--------|---------|--------|------|------|---|
| ATOM | 933 | N3   | G B | 12 | 22.808 | -50.386 | 72.429 | 1.00 | 0.00 | N |
| ATOM | 934 | C4   | G B | 12 | 23.428 | -50.312 | 73.637 | 1.00 | 0.00 | C |
| ATOM | 935 | C5   | G B | 12 | 24.575 | -49.611 | 73.968 | 1.00 | 0.00 | C |
| ATOM | 936 | C6   | G B | 12 | 25.241 | -48.856 | 72.976 | 1.00 | 0.00 | C |
| ATOM | 937 | O6   | G B | 12 | 26.263 | -48.176 | 73.073 | 1.00 | 0.00 | O |
| ATOM | 938 | N7   | G B | 12 | 24.883 | -49.797 | 75.316 | 1.00 | 0.00 | N |
| ATOM | 939 | C8   | G B | 12 | 23.934 | -50.583 | 75.753 | 1.00 | 0.00 | C |
| ATOM | 940 | N9   | G B | 12 | 23.012 | -50.940 | 74.791 | 1.00 | 0.00 | N |
| ATOM | 941 | C2'  | G B | 12 | 22.011 | -53.007 | 75.832 | 1.00 | 0.00 | C |
| ATOM | 942 | C3'  | G B | 12 | 20.642 | -53.140 | 76.482 | 1.00 | 0.00 | C |
| ATOM | 943 | O3'  | G B | 12 | 19.790 | -53.901 | 75.628 | 1.00 | 0.00 | O |
| ATOM | 944 | C4'  | G B | 12 | 20.184 | -51.689 | 76.610 | 1.00 | 0.00 | C |
| ATOM | 945 | O4'  | G B | 12 | 20.760 | -51.025 | 75.440 | 1.00 | 0.00 | O |
| ATOM | 946 | C5'  | G B | 12 | 20.628 | -50.951 | 77.851 | 1.00 | 0.00 | C |
| ATOM | 947 | O5'  | G B | 12 | 21.968 | -51.367 | 78.214 | 1.00 | 0.00 | O |
| ATOM | 948 | O1P  | G B | 12 | 21.635 | -52.544 | 80.414 | 1.00 | 0.00 | O |
| ATOM | 949 | O2P  | G B | 12 | 23.834 | -51.452 | 79.896 | 1.00 | 0.00 | O |
| ATOM | 950 | P    | G B | 12 | 22.357 | -51.435 | 79.761 | 1.00 | 0.00 | P |
| ATOM | 951 | H1   | G B | 12 | 24.992 | -48.424 | 70.940 | 1.00 | 0.00 | H |
| ATOM | 952 | H8   | G B | 12 | 23.874 | -50.928 | 76.784 | 1.00 | 0.00 | H |
| ATOM | 953 | H1'  | G B | 12 | 21.519 | -52.132 | 73.912 | 1.00 | 0.00 | H |
| ATOM | 954 | H21  | G B | 12 | 23.456 | -49.090 | 69.522 | 1.00 | 0.00 | H |
| ATOM | 955 | H3'  | G B | 12 | 20.698 | -53.622 | 77.458 | 1.00 | 0.00 | H |
| ATOM | 956 | H22  | G B | 12 | 22.116 | -50.171 | 69.997 | 1.00 | 0.00 | H |
| ATOM | 957 | H4'  | G B | 12 | 19.095 | -51.698 | 76.601 | 1.00 | 0.00 | H |
| ATOM | 958 | H2'1 | G B | 12 | 22.787 | -52.830 | 76.576 | 1.00 | 0.00 | H |
| ATOM | 959 | H2'2 | G B | 12 | 22.279 | -53.910 | 75.286 | 1.00 | 0.00 | H |
| ATOM | 960 | H5'1 | G B | 12 | 20.616 | -49.879 | 77.653 | 1.00 | 0.00 | H |
| ATOM | 961 | H5'2 | G B | 12 | 19.940 | -51.174 | 78.665 | 1.00 | 0.00 | H |
| ATOM | 962 | C1'  | T B | 13 | 22.296 | -54.151 | 70.577 | 1.00 | 0.00 | C |
| ATOM | 963 | N1   | T B | 13 | 23.494 | -53.620 | 71.279 | 1.00 | 0.00 | N |
| ATOM | 964 | C2   | T B | 13 | 24.353 | -52.823 | 70.548 | 1.00 | 0.00 | C |
| ATOM | 965 | O2   | T B | 13 | 24.159 | -52.552 | 69.374 | 1.00 | 0.00 | O |
| ATOM | 966 | N3   | T B | 13 | 25.452 | -52.350 | 71.239 | 1.00 | 0.00 | N |
| ATOM | 967 | C4   | T B | 13 | 25.763 | -52.600 | 72.559 | 1.00 | 0.00 | C |
| ATOM | 968 | O4   | T B | 13 | 26.783 | -52.123 | 73.071 | 1.00 | 0.00 | O |
| ATOM | 969 | C5   | T B | 13 | 24.809 | -53.441 | 73.242 | 1.00 | 0.00 | C |
| ATOM | 970 | C6   | T B | 13 | 23.723 | -53.919 | 72.600 | 1.00 | 0.00 | C |
| ATOM | 971 | C7   | T B | 13 | 25.105 | -53.738 | 74.682 | 1.00 | 0.00 | C |
| ATOM | 972 | C2'  | T B | 13 | 21.929 | -55.576 | 70.981 | 1.00 | 0.00 | C |
| ATOM | 973 | C3'  | T B | 13 | 20.409 | -55.537 | 70.927 | 1.00 | 0.00 | C |
| ATOM | 974 | O3'  | T B | 13 | 19.982 | -55.773 | 69.588 | 1.00 | 0.00 | O |
| ATOM | 975 | C4'  | T B | 13 | 20.088 | -54.119 | 71.396 | 1.00 | 0.00 | C |
| ATOM | 976 | O4'  | T B | 13 | 21.202 | -53.314 | 70.896 | 1.00 | 0.00 | O |
| ATOM | 977 | C5'  | T B | 13 | 19.976 | -53.914 | 72.889 | 1.00 | 0.00 | C |
| ATOM | 978 | O5'  | T B | 13 | 20.948 | -54.746 | 73.572 | 1.00 | 0.00 | O |
| ATOM | 979 | O1P  | T B | 13 | 19.522 | -56.388 | 74.838 | 1.00 | 0.00 | O |
| ATOM | 980 | O2P  | T B | 13 | 21.805 | -55.790 | 75.691 | 1.00 | 0.00 | O |
| ATOM | 981 | P    | T B | 13 | 20.569 | -55.357 | 74.994 | 1.00 | 0.00 | P |
| ATOM | 982 | H3   | T B | 13 | 26.106 | -51.750 | 70.715 | 1.00 | 0.00 | H |
| ATOM | 983 | H6   | T B | 13 | 23.018 | -54.553 | 73.136 | 1.00 | 0.00 | H |
| ATOM | 984 | H1'  | T B | 13 | 22.469 | -54.083 | 69.503 | 1.00 | 0.00 | H |
| ATOM | 985 | H3'  | T B | 13 | 19.961 | -56.280 | 71.588 | 1.00 | 0.00 | H |
| ATOM | 986 | H4'  | T B | 13 | 19.131 | -53.848 | 70.952 | 1.00 | 0.00 | H |

|      |      |      |     |    |        |         |        |      |      |   |
|------|------|------|-----|----|--------|---------|--------|------|------|---|
| ATOM | 987  | H71  | T B | 13 | 25.310 | -54.801 | 74.800 | 1.00 | 0.00 | H |
| ATOM | 988  | H72  | T B | 13 | 25.976 | -53.162 | 75.000 | 1.00 | 0.00 | H |
| ATOM | 989  | H73  | T B | 13 | 24.245 | -53.464 | 75.294 | 1.00 | 0.00 | H |
| ATOM | 990  | H2'1 | T B | 13 | 22.286 | -55.826 | 71.978 | 1.00 | 0.00 | H |
| ATOM | 991  | H2'2 | T B | 13 | 22.330 | -56.317 | 70.290 | 1.00 | 0.00 | H |
| ATOM | 992  | H5'1 | T B | 13 | 20.159 | -52.865 | 73.121 | 1.00 | 0.00 | H |
| ATOM | 993  | H5'2 | T B | 13 | 18.972 | -54.183 | 73.213 | 1.00 | 0.00 | H |
| ATOM | 994  | C1'  | G B | 14 | 24.602 | -55.119 | 66.289 | 1.00 | 0.00 | C |
| ATOM | 995  | N1   | G B | 14 | 28.747 | -53.509 | 68.791 | 1.00 | 0.00 | N |
| ATOM | 996  | C2   | G B | 14 | 28.335 | -53.249 | 67.496 | 1.00 | 0.00 | C |
| ATOM | 997  | N2   | G B | 14 | 29.132 | -52.457 | 66.771 | 1.00 | 0.00 | N |
| ATOM | 998  | N3   | G B | 14 | 27.215 | -53.740 | 66.968 | 1.00 | 0.00 | N |
| ATOM | 999  | C4   | G B | 14 | 26.533 | -54.527 | 67.842 | 1.00 | 0.00 | C |
| ATOM | 1000 | C5   | G B | 14 | 26.869 | -54.845 | 69.146 | 1.00 | 0.00 | C |
| ATOM | 1001 | C6   | G B | 14 | 28.056 | -54.321 | 69.709 | 1.00 | 0.00 | C |
| ATOM | 1002 | O6   | G B | 14 | 28.519 | -54.489 | 70.839 | 1.00 | 0.00 | O |
| ATOM | 1003 | N7   | G B | 14 | 25.903 | -55.687 | 69.702 | 1.00 | 0.00 | N |
| ATOM | 1004 | C8   | G B | 14 | 25.031 | -55.846 | 68.740 | 1.00 | 0.00 | C |
| ATOM | 1005 | N9   | G B | 14 | 25.345 | -55.173 | 67.576 | 1.00 | 0.00 | N |
| ATOM | 1006 | C2'  | G B | 14 | 23.949 | -56.439 | 65.902 | 1.00 | 0.00 | C |
| ATOM | 1007 | C3'  | G B | 14 | 22.665 | -55.974 | 65.235 | 1.00 | 0.00 | C |
| ATOM | 1008 | O3'  | G B | 14 | 22.931 | -55.669 | 63.868 | 1.00 | 0.00 | O |
| ATOM | 1009 | C4'  | G B | 14 | 22.294 | -54.732 | 66.043 | 1.00 | 0.00 | C |
| ATOM | 1010 | O4'  | G B | 14 | 23.582 | -54.149 | 66.419 | 1.00 | 0.00 | O |
| ATOM | 1011 | C5'  | G B | 14 | 21.482 | -54.961 | 67.294 | 1.00 | 0.00 | C |
| ATOM | 1012 | O5'  | G B | 14 | 21.905 | -56.192 | 67.935 | 1.00 | 0.00 | O |
| ATOM | 1013 | O1P  | G B | 14 | 19.888 | -57.683 | 67.722 | 1.00 | 0.00 | O |
| ATOM | 1014 | O2P  | G B | 14 | 21.502 | -58.016 | 69.614 | 1.00 | 0.00 | O |
| ATOM | 1015 | P    | G B | 14 | 20.816 | -57.075 | 68.694 | 1.00 | 0.00 | P |
| ATOM | 1016 | H1   | G B | 14 | 29.628 | -53.073 | 69.106 | 1.00 | 0.00 | H |
| ATOM | 1017 | H8   | G B | 14 | 24.134 | -56.457 | 68.848 | 1.00 | 0.00 | H |
| ATOM | 1018 | H1'  | G B | 14 | 25.289 | -54.780 | 65.512 | 1.00 | 0.00 | H |
| ATOM | 1019 | H21  | G B | 14 | 29.996 | -52.077 | 67.188 | 1.00 | 0.00 | H |
| ATOM | 1020 | H3'  | G B | 14 | 21.879 | -56.728 | 65.291 | 1.00 | 0.00 | H |
| ATOM | 1021 | H22  | G B | 14 | 28.885 | -52.227 | 65.798 | 1.00 | 0.00 | H |
| ATOM | 1022 | H4'  | G B | 14 | 21.713 | -54.087 | 65.382 | 1.00 | 0.00 | H |
| ATOM | 1023 | H2'1 | G B | 14 | 23.742 | -57.067 | 66.767 | 1.00 | 0.00 | H |
| ATOM | 1024 | H2'2 | G B | 14 | 24.564 | -57.021 | 65.216 | 1.00 | 0.00 | H |
| ATOM | 1025 | H5'1 | G B | 14 | 21.627 | -54.123 | 67.975 | 1.00 | 0.00 | H |
| ATOM | 1026 | H5'2 | G B | 14 | 20.427 | -55.027 | 67.029 | 1.00 | 0.00 | H |
| ATOM | 1027 | C1'  | C B | 15 | 28.552 | -55.355 | 63.310 | 1.00 | 0.00 | C |
| ATOM | 1028 | N1   | C B | 15 | 28.585 | -55.978 | 64.660 | 1.00 | 0.00 | N |
| ATOM | 1029 | C2   | C B | 15 | 29.649 | -55.662 | 65.501 | 1.00 | 0.00 | C |
| ATOM | 1030 | O2   | C B | 15 | 30.518 | -54.881 | 65.093 | 1.00 | 0.00 | O |
| ATOM | 1031 | N3   | C B | 15 | 29.698 | -56.219 | 66.735 | 1.00 | 0.00 | N |
| ATOM | 1032 | C4   | C B | 15 | 28.743 | -57.061 | 67.147 | 1.00 | 0.00 | C |
| ATOM | 1033 | N4   | C B | 15 | 28.838 | -57.575 | 68.365 | 1.00 | 0.00 | N |
| ATOM | 1034 | C5   | C B | 15 | 27.637 | -57.411 | 66.302 | 1.00 | 0.00 | C |
| ATOM | 1035 | C6   | C B | 15 | 27.607 | -56.834 | 65.066 | 1.00 | 0.00 | C |
| ATOM | 1036 | C2'  | C B | 15 | 28.042 | -56.284 | 62.217 | 1.00 | 0.00 | C |
| ATOM | 1037 | C3'  | C B | 15 | 27.278 | -55.326 | 61.316 | 1.00 | 0.00 | C |
| ATOM | 1038 | O3'  | C B | 15 | 28.188 | -54.709 | 60.408 | 1.00 | 0.00 | O |
| ATOM | 1039 | C4'  | C B | 15 | 26.686 | -54.327 | 62.308 | 1.00 | 0.00 | C |
| ATOM | 1040 | O4'  | C B | 15 | 27.688 | -54.237 | 63.372 | 1.00 | 0.00 | O |

|      |      |      |     |    |        |         |        |      |      |   |
|------|------|------|-----|----|--------|---------|--------|------|------|---|
| ATOM | 1041 | C5'  | C B | 15 | 25.357 | -54.700 | 62.927 | 1.00 | 0.00 | C |
| ATOM | 1042 | O5'  | C B | 15 | 25.310 | -56.131 | 63.157 | 1.00 | 0.00 | O |
| ATOM | 1043 | O1P  | C B | 15 | 23.508 | -56.914 | 61.585 | 1.00 | 0.00 | O |
| ATOM | 1044 | O2P  | C B | 15 | 23.987 | -58.202 | 63.685 | 1.00 | 0.00 | O |
| ATOM | 1045 | P    | C B | 15 | 23.915 | -56.886 | 63.004 | 1.00 | 0.00 | P |
| ATOM | 1046 | H5   | C B | 15 | 26.861 | -58.101 | 66.632 | 1.00 | 0.00 | H |
| ATOM | 1047 | H6   | C B | 15 | 26.783 | -57.062 | 64.391 | 1.00 | 0.00 | H |
| ATOM | 1048 | H1'  | C B | 15 | 29.554 | -54.993 | 63.077 | 1.00 | 0.00 | H |
| ATOM | 1049 | H3'  | C B | 15 | 26.493 | -55.832 | 60.755 | 1.00 | 0.00 | H |
| ATOM | 1050 | H4'  | C B | 15 | 26.550 | -53.388 | 61.771 | 1.00 | 0.00 | H |
| ATOM | 1051 | H41  | C B | 15 | 28.114 | -58.224 | 68.710 | 1.00 | 0.00 | H |
| ATOM | 1052 | H42  | C B | 15 | 29.634 | -57.325 | 68.970 | 1.00 | 0.00 | H |
| ATOM | 1053 | H2'1 | C B | 15 | 27.391 | -57.065 | 62.608 | 1.00 | 0.00 | H |
| ATOM | 1054 | H2'2 | C B | 15 | 28.853 | -56.775 | 61.678 | 1.00 | 0.00 | H |
| ATOM | 1055 | H5'1 | C B | 15 | 25.242 | -54.170 | 63.872 | 1.00 | 0.00 | H |
| ATOM | 1056 | H5'2 | C B | 15 | 24.555 | -54.410 | 62.250 | 1.00 | 0.00 | H |
| ATOM | 1057 | C1'  | G B | 16 | 33.400 | -55.733 | 62.376 | 1.00 | 0.00 | C |
| ATOM | 1058 | N1   | G B | 16 | 33.520 | -58.040 | 66.923 | 1.00 | 0.00 | N |
| ATOM | 1059 | C2   | G B | 16 | 34.383 | -57.106 | 66.379 | 1.00 | 0.00 | C |
| ATOM | 1060 | N2   | G B | 16 | 35.417 | -56.740 | 67.146 | 1.00 | 0.00 | N |
| ATOM | 1061 | N3   | G B | 16 | 34.227 | -56.580 | 65.165 | 1.00 | 0.00 | N |
| ATOM | 1062 | C4   | G B | 16 | 33.132 | -57.071 | 64.527 | 1.00 | 0.00 | C |
| ATOM | 1063 | C5   | G B | 16 | 32.220 | -58.004 | 64.988 | 1.00 | 0.00 | C |
| ATOM | 1064 | C6   | G B | 16 | 32.383 | -58.560 | 66.279 | 1.00 | 0.00 | C |
| ATOM | 1065 | O6   | G B | 16 | 31.685 | -59.393 | 66.858 | 1.00 | 0.00 | O |
| ATOM | 1066 | N7   | G B | 16 | 31.238 | -58.239 | 64.022 | 1.00 | 0.00 | N |
| ATOM | 1067 | C8   | G B | 16 | 31.578 | -57.457 | 63.030 | 1.00 | 0.00 | C |
| ATOM | 1068 | N9   | G B | 16 | 32.720 | -56.716 | 63.261 | 1.00 | 0.00 | N |
| ATOM | 1069 | C2'  | G B | 16 | 33.388 | -56.123 | 60.903 | 1.00 | 0.00 | C |
| ATOM | 1070 | C3'  | G B | 16 | 33.247 | -54.772 | 60.219 | 1.00 | 0.00 | C |
| ATOM | 1071 | O3'  | G B | 16 | 34.538 | -54.181 | 60.083 | 1.00 | 0.00 | O |
| ATOM | 1072 | C4'  | G B | 16 | 32.355 | -53.992 | 61.184 | 1.00 | 0.00 | C |
| ATOM | 1073 | O4'  | G B | 16 | 32.729 | -54.496 | 62.507 | 1.00 | 0.00 | O |
| ATOM | 1074 | C5'  | G B | 16 | 30.865 | -54.162 | 61.005 | 1.00 | 0.00 | C |
| ATOM | 1075 | O5'  | G B | 16 | 30.569 | -55.528 | 60.621 | 1.00 | 0.00 | O |
| ATOM | 1076 | O1P  | G B | 16 | 29.674 | -55.297 | 58.281 | 1.00 | 0.00 | O |
| ATOM | 1077 | O2P  | G B | 16 | 28.958 | -57.228 | 59.712 | 1.00 | 0.00 | O |
| ATOM | 1078 | P    | G B | 16 | 29.350 | -55.800 | 59.628 | 1.00 | 0.00 | P |
| ATOM | 1079 | H1   | G B | 16 | 33.727 | -58.380 | 67.875 | 1.00 | 0.00 | H |
| ATOM | 1080 | H8   | G B | 16 | 31.010 | -57.395 | 62.103 | 1.00 | 0.00 | H |
| ATOM | 1081 | H1'  | G B | 16 | 34.421 | -55.599 | 62.735 | 1.00 | 0.00 | H |
| ATOM | 1082 | H21  | G B | 16 | 35.528 | -57.149 | 68.086 | 1.00 | 0.00 | H |
| ATOM | 1083 | H3'  | G B | 16 | 32.784 | -54.857 | 59.236 | 1.00 | 0.00 | H |
| ATOM | 1084 | H22  | G B | 16 | 36.097 | -56.050 | 66.798 | 1.00 | 0.00 | H |
| ATOM | 1085 | H4'  | G B | 16 | 32.589 | -52.937 | 61.049 | 1.00 | 0.00 | H |
| ATOM | 1086 | H2'1 | G B | 16 | 32.552 | -56.780 | 60.657 | 1.00 | 0.00 | H |
| ATOM | 1087 | H2'2 | G B | 16 | 34.304 | -56.628 | 60.600 | 1.00 | 0.00 | H |
| ATOM | 1088 | H5'1 | G B | 16 | 30.363 | -53.926 | 61.943 | 1.00 | 0.00 | H |
| ATOM | 1089 | H5'2 | G B | 16 | 30.518 | -53.479 | 60.230 | 1.00 | 0.00 | H |
| ATOM | 1090 | C1'  | G B | 17 | 38.044 | -57.082 | 63.445 | 1.00 | 0.00 | C |
| ATOM | 1091 | N1   | G B | 17 | 35.752 | -60.578 | 66.368 | 1.00 | 0.00 | N |
| ATOM | 1092 | C2   | G B | 17 | 36.857 | -59.787 | 66.630 | 1.00 | 0.00 | C |
| ATOM | 1093 | N2   | G B | 17 | 37.426 | -59.951 | 67.830 | 1.00 | 0.00 | N |
| ATOM | 1094 | N3   | G B | 17 | 37.350 | -58.903 | 65.766 | 1.00 | 0.00 | N |

|      |      |      |     |    |        |         |        |      |      |   |
|------|------|------|-----|----|--------|---------|--------|------|------|---|
| ATOM | 1095 | C4   | G B | 17 | 36.654 | -58.876 | 64.599 | 1.00 | 0.00 | C |
| ATOM | 1096 | C5   | G B | 17 | 35.545 | -59.629 | 64.249 | 1.00 | 0.00 | C |
| ATOM | 1097 | C6   | G B | 17 | 35.018 | -60.563 | 65.167 | 1.00 | 0.00 | C |
| ATOM | 1098 | O6   | G B | 17 | 34.051 | -61.316 | 65.041 | 1.00 | 0.00 | O |
| ATOM | 1099 | N7   | G B | 17 | 35.128 | -59.300 | 62.957 | 1.00 | 0.00 | N |
| ATOM | 1100 | C8   | G B | 17 | 35.973 | -58.377 | 62.577 | 1.00 | 0.00 | C |
| ATOM | 1101 | N9   | G B | 17 | 36.931 | -58.067 | 63.520 | 1.00 | 0.00 | N |
| ATOM | 1102 | C2'  | G B | 17 | 38.698 | -56.999 | 62.072 | 1.00 | 0.00 | C |
| ATOM | 1103 | C3'  | G B | 17 | 39.035 | -55.519 | 61.969 | 1.00 | 0.00 | C |
| ATOM | 1104 | O3'  | G B | 17 | 40.283 | -55.277 | 62.612 | 1.00 | 0.00 | O |
| ATOM | 1105 | C4'  | G B | 17 | 37.870 | -54.855 | 62.700 | 1.00 | 0.00 | C |
| ATOM | 1106 | O4'  | G B | 17 | 37.514 | -55.807 | 63.753 | 1.00 | 0.00 | O |
| ATOM | 1107 | C5'  | G B | 17 | 36.637 | -54.565 | 61.876 | 1.00 | 0.00 | C |
| ATOM | 1108 | O5'  | G B | 17 | 36.430 | -55.627 | 60.913 | 1.00 | 0.00 | O |
| ATOM | 1109 | O1P  | G B | 17 | 36.790 | -54.484 | 58.700 | 1.00 | 0.00 | O |
| ATOM | 1110 | O2P  | G B | 17 | 35.294 | -56.493 | 58.845 | 1.00 | 0.00 | O |
| ATOM | 1111 | P    | G B | 17 | 35.814 | -55.262 | 59.486 | 1.00 | 0.00 | P |
| ATOM | 1112 | H1   | G B | 17 | 35.445 | -61.228 | 67.108 | 1.00 | 0.00 | H |
| ATOM | 1113 | H8   | G B | 17 | 35.927 | -57.896 | 61.601 | 1.00 | 0.00 | H |
| ATOM | 1114 | H1'  | G B | 17 | 38.776 | -57.334 | 64.211 | 1.00 | 0.00 | H |
| ATOM | 1115 | H21  | G B | 17 | 37.036 | -60.633 | 68.497 | 1.00 | 0.00 | H |
| ATOM | 1116 | H3'  | G B | 17 | 39.090 | -55.184 | 60.934 | 1.00 | 0.00 | H |
| ATOM | 1117 | H22  | G B | 17 | 38.254 | -59.394 | 68.086 | 1.00 | 0.00 | H |
| ATOM | 1118 | H4'  | G B | 17 | 38.239 | -53.907 | 63.090 | 1.00 | 0.00 | H |
| ATOM | 1119 | H2'1 | G B | 17 | 38.024 | -57.309 | 61.274 | 1.00 | 0.00 | H |
| ATOM | 1120 | H2'2 | G B | 17 | 39.593 | -57.616 | 62.003 | 1.00 | 0.00 | H |
| ATOM | 1121 | H5'1 | G B | 17 | 35.774 | -54.494 | 62.536 | 1.00 | 0.00 | H |
| ATOM | 1122 | H5'2 | G B | 17 | 36.770 | -53.616 | 61.356 | 1.00 | 0.00 | H |
| ATOM | 1123 | C1'  | C B | 18 | 41.457 | -59.861 | 65.716 | 1.00 | 0.00 | C |
| ATOM | 1124 | N1   | C B | 18 | 40.351 | -60.496 | 64.948 | 1.00 | 0.00 | N |
| ATOM | 1125 | C2   | C B | 18 | 39.602 | -61.486 | 65.582 | 1.00 | 0.00 | C |
| ATOM | 1126 | O2   | C B | 18 | 39.883 | -61.793 | 66.746 | 1.00 | 0.00 | O |
| ATOM | 1127 | N3   | C B | 18 | 38.593 | -62.076 | 64.898 | 1.00 | 0.00 | N |
| ATOM | 1128 | C4   | C B | 18 | 38.313 | -61.721 | 63.638 | 1.00 | 0.00 | C |
| ATOM | 1129 | N4   | C B | 18 | 37.313 | -62.330 | 63.018 | 1.00 | 0.00 | N |
| ATOM | 1130 | C5   | C B | 18 | 39.069 | -60.710 | 62.963 | 1.00 | 0.00 | C |
| ATOM | 1131 | C6   | C B | 18 | 40.080 | -60.126 | 63.668 | 1.00 | 0.00 | C |
| ATOM | 1132 | C2'  | C B | 18 | 42.692 | -59.556 | 64.878 | 1.00 | 0.00 | C |
| ATOM | 1133 | C3'  | C B | 18 | 43.179 | -58.252 | 65.493 | 1.00 | 0.00 | C |
| ATOM | 1134 | O3'  | C B | 18 | 43.985 | -58.545 | 66.632 | 1.00 | 0.00 | O |
| ATOM | 1135 | C4'  | C B | 18 | 41.877 | -57.550 | 65.873 | 1.00 | 0.00 | C |
| ATOM | 1136 | O4'  | C B | 18 | 40.970 | -58.639 | 66.238 | 1.00 | 0.00 | O |
| ATOM | 1137 | C5'  | C B | 18 | 41.222 | -56.718 | 64.796 | 1.00 | 0.00 | C |
| ATOM | 1138 | O5'  | C B | 18 | 41.398 | -57.361 | 63.508 | 1.00 | 0.00 | O |
| ATOM | 1139 | O1P  | C B | 18 | 42.878 | -55.756 | 62.253 | 1.00 | 0.00 | O |
| ATOM | 1140 | O2P  | C B | 18 | 41.306 | -57.255 | 60.998 | 1.00 | 0.00 | O |
| ATOM | 1141 | P    | C B | 18 | 41.574 | -56.447 | 62.212 | 1.00 | 0.00 | P |
| ATOM | 1142 | H5   | C B | 18 | 38.848 | -60.420 | 61.934 | 1.00 | 0.00 | H |
| ATOM | 1143 | H6   | C B | 18 | 40.680 | -59.349 | 63.197 | 1.00 | 0.00 | H |
| ATOM | 1144 | H1'  | C B | 18 | 41.705 | -60.510 | 66.554 | 1.00 | 0.00 | H |
| ATOM | 1145 | H3'  | C B | 18 | 43.754 | -57.657 | 64.785 | 1.00 | 0.00 | H |
| ATOM | 1146 | H4'  | C B | 18 | 42.107 | -56.889 | 66.709 | 1.00 | 0.00 | H |
| ATOM | 1147 | H41  | C B | 18 | 37.075 | -62.075 | 62.048 | 1.00 | 0.00 | H |
| ATOM | 1148 | H42  | C B | 18 | 36.772 | -63.058 | 63.506 | 1.00 | 0.00 | H |

|      |      |      |   |   |    |        |         |        |      |      |   |
|------|------|------|---|---|----|--------|---------|--------|------|------|---|
| ATOM | 1149 | H2'1 | C | B | 18 | 42.453 | -59.432 | 63.822 | 1.00 | 0.00 | H |
| ATOM | 1150 | H2'2 | C | B | 18 | 43.446 | -60.339 | 64.953 | 1.00 | 0.00 | H |
| ATOM | 1151 | H5'1 | C | B | 18 | 40.159 | -56.619 | 65.015 | 1.00 | 0.00 | H |
| ATOM | 1152 | H5'2 | C | B | 18 | 41.679 | -55.730 | 64.780 | 1.00 | 0.00 | H |
| ATOM | 1153 | C1'  | C | B | 19 | 43.084 | -63.986 | 67.923 | 1.00 | 0.00 | C |
| ATOM | 1154 | N1   | C | B | 19 | 42.424 | -64.050 | 66.592 | 1.00 | 0.00 | N |
| ATOM | 1155 | C2   | C | B | 19 | 41.371 | -64.948 | 66.427 | 1.00 | 0.00 | C |
| ATOM | 1156 | O2   | C | B | 19 | 41.028 | -65.649 | 67.387 | 1.00 | 0.00 | O |
| ATOM | 1157 | N3   | C | B | 19 | 40.758 | -65.021 | 65.221 | 1.00 | 0.00 | N |
| ATOM | 1158 | C4   | C | B | 19 | 41.153 | -64.248 | 64.200 | 1.00 | 0.00 | C |
| ATOM | 1159 | N4   | C | B | 19 | 40.518 | -64.360 | 63.045 | 1.00 | 0.00 | N |
| ATOM | 1160 | C5   | C | B | 19 | 42.231 | -63.319 | 64.342 | 1.00 | 0.00 | C |
| ATOM | 1161 | C6   | C | B | 19 | 42.833 | -63.261 | 65.564 | 1.00 | 0.00 | C |
| ATOM | 1162 | C2'  | C | B | 19 | 44.590 | -63.782 | 67.853 | 1.00 | 0.00 | C |
| ATOM | 1163 | C3'  | C | B | 19 | 44.848 | -62.897 | 69.063 | 1.00 | 0.00 | C |
| ATOM | 1164 | O3'  | C | B | 19 | 44.981 | -63.714 | 70.223 | 1.00 | 0.00 | O |
| ATOM | 1165 | C4'  | C | B | 19 | 43.598 | -62.021 | 69.115 | 1.00 | 0.00 | C |
| ATOM | 1166 | O4'  | C | B | 19 | 42.527 | -62.890 | 68.625 | 1.00 | 0.00 | O |
| ATOM | 1167 | C5'  | C | B | 19 | 43.622 | -60.766 | 68.273 | 1.00 | 0.00 | C |
| ATOM | 1168 | O5'  | C | B | 19 | 44.329 | -61.019 | 67.034 | 1.00 | 0.00 | O |
| ATOM | 1169 | O1P  | C | B | 19 | 46.374 | -59.567 | 67.223 | 1.00 | 0.00 | O |
| ATOM | 1170 | O2P  | C | B | 19 | 45.458 | -60.156 | 64.962 | 1.00 | 0.00 | O |
| ATOM | 1171 | P    | C | B | 19 | 45.190 | -59.844 | 66.387 | 1.00 | 0.00 | P |
| ATOM | 1172 | H5   | C | B | 19 | 42.557 | -62.689 | 63.514 | 1.00 | 0.00 | H |
| ATOM | 1173 | H6   | C | B | 19 | 43.659 | -62.566 | 65.720 | 1.00 | 0.00 | H |
| ATOM | 1174 | H1'  | C | B | 19 | 42.837 | -64.896 | 68.470 | 1.00 | 0.00 | H |
| ATOM | 1175 | H3'  | C | B | 19 | 45.746 | -62.292 | 68.942 | 1.00 | 0.00 | H |
| ATOM | 1176 | H4'  | C | B | 19 | 43.462 | -61.722 | 70.155 | 1.00 | 0.00 | H |
| ATOM | 1177 | H41  | C | B | 19 | 40.797 | -63.777 | 62.242 | 1.00 | 0.00 | H |
| ATOM | 1178 | H42  | C | B | 19 | 39.740 | -65.031 | 62.945 | 1.00 | 0.00 | H |
| ATOM | 1179 | H2'1 | C | B | 19 | 44.900 | -63.292 | 66.930 | 1.00 | 0.00 | H |
| ATOM | 1180 | H2'2 | C | B | 19 | 45.138 | -64.722 | 67.924 | 1.00 | 0.00 | H |
| ATOM | 1181 | H5'1 | C | B | 19 | 42.599 | -60.459 | 68.059 | 1.00 | 0.00 | H |
| ATOM | 1182 | H5'2 | C | B | 19 | 44.123 | -59.974 | 68.829 | 1.00 | 0.00 | H |
| ATOM | 1183 | C1'  | T | B | 20 | 43.063 | -68.848 | 68.847 | 1.00 | 0.00 | C |
| ATOM | 1184 | N1   | T | B | 20 | 43.102 | -68.353 | 67.445 | 1.00 | 0.00 | N |
| ATOM | 1185 | C2   | T | B | 20 | 42.169 | -68.870 | 66.569 | 1.00 | 0.00 | C |
| ATOM | 1186 | O2   | T | B | 20 | 41.339 | -69.697 | 66.901 | 1.00 | 0.00 | O |
| ATOM | 1187 | N3   | T | B | 20 | 42.241 | -68.382 | 65.278 | 1.00 | 0.00 | N |
| ATOM | 1188 | C4   | T | B | 20 | 43.136 | -67.450 | 64.800 | 1.00 | 0.00 | C |
| ATOM | 1189 | O4   | T | B | 20 | 43.103 | -67.090 | 63.616 | 1.00 | 0.00 | O |
| ATOM | 1190 | C5   | T | B | 20 | 44.072 | -66.968 | 65.787 | 1.00 | 0.00 | C |
| ATOM | 1191 | C6   | T | B | 20 | 44.032 | -67.420 | 67.056 | 1.00 | 0.00 | C |
| ATOM | 1192 | C7   | T | B | 20 | 45.065 | -65.952 | 65.312 | 1.00 | 0.00 | C |
| ATOM | 1193 | C2'  | T | B | 20 | 44.442 | -69.023 | 69.473 | 1.00 | 0.00 | C |
| ATOM | 1194 | C3'  | T | B | 20 | 44.187 | -68.624 | 70.919 | 1.00 | 0.00 | C |
| ATOM | 1195 | O3'  | T | B | 20 | 43.684 | -69.752 | 71.635 | 1.00 | 0.00 | O |
| ATOM | 1196 | C4'  | T | B | 20 | 43.147 | -67.514 | 70.786 | 1.00 | 0.00 | C |
| ATOM | 1197 | O4'  | T | B | 20 | 42.352 | -67.902 | 69.620 | 1.00 | 0.00 | O |
| ATOM | 1198 | C5'  | T | B | 20 | 43.679 | -66.117 | 70.563 | 1.00 | 0.00 | C |
| ATOM | 1199 | O5'  | T | B | 20 | 44.857 | -66.171 | 69.718 | 1.00 | 0.00 | O |
| ATOM | 1200 | O1P  | T | B | 20 | 46.706 | -65.408 | 71.245 | 1.00 | 0.00 | O |
| ATOM | 1201 | O2P  | T | B | 20 | 46.901 | -65.060 | 68.767 | 1.00 | 0.00 | O |
| ATOM | 1202 | P    | T | B | 20 | 46.027 | -65.118 | 69.966 | 1.00 | 0.00 | P |

|      |      |      |     |    |        |         |        |      |      |   |
|------|------|------|-----|----|--------|---------|--------|------|------|---|
| ATOM | 1203 | H3   | T B | 20 | 41.555 | -68.752 | 64.605 | 1.00 | 0.00 | H |
| ATOM | 1204 | H6   | T B | 20 | 44.748 | -67.042 | 67.785 | 1.00 | 0.00 | H |
| ATOM | 1205 | H1'  | T B | 20 | 42.505 | -69.783 | 68.864 | 1.00 | 0.00 | H |
| ATOM | 1206 | H3'  | T B | 20 | 45.090 | -68.261 | 71.407 | 1.00 | 0.00 | H |
| ATOM | 1207 | H4'  | T B | 20 | 42.571 | -67.506 | 71.712 | 1.00 | 0.00 | H |
| ATOM | 1208 | H3T  | T B | 20 | 44.218 | -70.546 | 71.571 | 1.00 | 0.00 | H |
| ATOM | 1209 | H71  | T B | 20 | 46.069 | -66.374 | 65.358 | 1.00 | 0.00 | H |
| ATOM | 1210 | H72  | T B | 20 | 44.835 | -65.673 | 64.281 | 1.00 | 0.00 | H |
| ATOM | 1211 | H73  | T B | 20 | 45.014 | -65.065 | 65.946 | 1.00 | 0.00 | H |
| ATOM | 1212 | H2'1 | T B | 20 | 45.191 | -68.383 | 69.011 | 1.00 | 0.00 | H |
| ATOM | 1213 | H2'2 | T B | 20 | 44.800 | -70.051 | 69.403 | 1.00 | 0.00 | H |
| ATOM | 1214 | H5'1 | T B | 20 | 42.909 | -65.511 | 70.087 | 1.00 | 0.00 | H |
| ATOM | 1215 | H5'2 | T B | 20 | 43.938 | -65.677 | 71.525 | 1.00 | 0.00 | H |
| TER  |      |      |     |    |        |         |        |      |      |   |
| ATOM | 1    | C1'  | A A | 1  | 49.372 | -54.211 | 96.847 | 1.00 | 0.00 | C |
| ATOM | 2    | N1   | A A | 1  | 52.648 | -50.582 | 95.284 | 1.00 | 0.00 | N |
| ATOM | 3    | C2   | A A | 1  | 52.091 | -50.842 | 96.463 | 1.00 | 0.00 | C |
| ATOM | 4    | N3   | A A | 1  | 51.253 | -51.800 | 96.800 | 1.00 | 0.00 | N |
| ATOM | 5    | C4   | A A | 1  | 50.976 | -52.572 | 95.734 | 1.00 | 0.00 | C |
| ATOM | 6    | C5   | A A | 1  | 51.459 | -52.439 | 94.463 | 1.00 | 0.00 | C |
| ATOM | 7    | C6   | A A | 1  | 52.353 | -51.369 | 94.239 | 1.00 | 0.00 | C |
| ATOM | 8    | N6   | A A | 1  | 52.908 | -51.116 | 93.041 | 1.00 | 0.00 | N |
| ATOM | 9    | N7   | A A | 1  | 50.951 | -53.420 | 93.629 | 1.00 | 0.00 | N |
| ATOM | 10   | C8   | A A | 1  | 50.174 | -54.115 | 94.407 | 1.00 | 0.00 | C |
| ATOM | 11   | N9   | A A | 1  | 50.141 | -53.661 | 95.699 | 1.00 | 0.00 | N |
| ATOM | 12   | C2'  | A A | 1  | 47.988 | -54.720 | 96.473 | 1.00 | 0.00 | C |
| ATOM | 13   | C3'  | A A | 1  | 47.831 | -55.918 | 97.396 | 1.00 | 0.00 | C |
| ATOM | 14   | O3'  | A A | 1  | 47.357 | -55.473 | 98.664 | 1.00 | 0.00 | O |
| ATOM | 15   | C4'  | A A | 1  | 49.250 | -56.478 | 97.472 | 1.00 | 0.00 | C |
| ATOM | 16   | O4'  | A A | 1  | 50.109 | -55.295 | 97.379 | 1.00 | 0.00 | O |
| ATOM | 17   | C5'  | A A | 1  | 49.648 | -57.449 | 96.386 | 1.00 | 0.00 | C |
| ATOM | 18   | O5'  | A A | 1  | 49.048 | -57.052 | 95.127 | 1.00 | 0.00 | O |
| ATOM | 19   | H2   | A A | 1  | 52.369 | -50.164 | 97.269 | 1.00 | 0.00 | H |
| ATOM | 20   | H8   | A A | 1  | 49.606 | -54.980 | 94.063 | 1.00 | 0.00 | H |
| ATOM | 21   | H1'  | A A | 1  | 49.311 | -53.439 | 97.616 | 1.00 | 0.00 | H |
| ATOM | 22   | H3'  | A A | 1  | 47.138 | -56.658 | 96.990 | 1.00 | 0.00 | H |
| ATOM | 23   | H4'  | A A | 1  | 49.336 | -56.992 | 98.427 | 1.00 | 0.00 | H |
| ATOM | 24   | H61  | A A | 1  | 53.555 | -50.324 | 92.933 | 1.00 | 0.00 | H |
| ATOM | 25   | H62  | A A | 1  | 52.686 | -51.717 | 92.236 | 1.00 | 0.00 | H |
| ATOM | 26   | H5T  | A A | 1  | 48.779 | -57.733 | 94.508 | 1.00 | 0.00 | H |
| ATOM | 27   | H2'1 | A A | 1  | 47.924 | -55.015 | 95.426 | 1.00 | 0.00 | H |
| ATOM | 28   | H2'2 | A A | 1  | 47.211 | -53.977 | 96.654 | 1.00 | 0.00 | H |
| ATOM | 29   | H5'1 | A A | 1  | 50.734 | -57.454 | 96.291 | 1.00 | 0.00 | H |
| ATOM | 30   | H5'2 | A A | 1  | 49.308 | -58.447 | 96.657 | 1.00 | 0.00 | H |
| ATOM | 31   | C1'  | G A | 2  | 48.102 | -49.809 | 98.762 | 1.00 | 0.00 | C |
| ATOM | 32   | N1   | G A | 2  | 50.547 | -47.949 | 94.691 | 1.00 | 0.00 | N |
| ATOM | 33   | C2   | G A | 2  | 50.572 | -47.530 | 96.007 | 1.00 | 0.00 | C |
| ATOM | 34   | N2   | G A | 2  | 51.349 | -46.473 | 96.277 | 1.00 | 0.00 | N |
| ATOM | 35   | N3   | G A | 2  | 49.876 | -48.116 | 96.980 | 1.00 | 0.00 | N |
| ATOM | 36   | C4   | G A | 2  | 49.140 | -49.165 | 96.528 | 1.00 | 0.00 | C |
| ATOM | 37   | C5   | G A | 2  | 49.052 | -49.653 | 95.234 | 1.00 | 0.00 | C |
| ATOM | 38   | C6   | G A | 2  | 49.793 | -49.030 | 94.202 | 1.00 | 0.00 | C |
| ATOM | 39   | O6   | G A | 2  | 49.848 | -49.316 | 93.005 | 1.00 | 0.00 | O |
| ATOM | 40   | N7   | G A | 2  | 48.184 | -50.745 | 95.187 | 1.00 | 0.00 | N |

|      |    |      |     |   |        |         |         |      |      |   |
|------|----|------|-----|---|--------|---------|---------|------|------|---|
| ATOM | 41 | C8   | G A | 2 | 47.785 | -50.884 | 96.426  | 1.00 | 0.00 | C |
| ATOM | 42 | N9   | G A | 2 | 48.322 | -49.962 | 97.300  | 1.00 | 0.00 | N |
| ATOM | 43 | C2'  | G A | 2 | 46.671 | -50.087 | 99.201  | 1.00 | 0.00 | C |
| ATOM | 44 | C3'  | G A | 2 | 46.875 | -50.746 | 100.554 | 1.00 | 0.00 | C |
| ATOM | 45 | O3'  | G A | 2 | 47.015 | -49.736 | 101.551 | 1.00 | 0.00 | O |
| ATOM | 46 | C4'  | G A | 2 | 48.162 | -51.543 | 100.355 | 1.00 | 0.00 | C |
| ATOM | 47 | O4'  | G A | 2 | 48.947 | -50.731 | 99.424  | 1.00 | 0.00 | O |
| ATOM | 48 | C5'  | G A | 2 | 48.010 | -52.930 | 99.777  | 1.00 | 0.00 | C |
| ATOM | 49 | O5'  | G A | 2 | 46.944 | -52.938 | 98.796  | 1.00 | 0.00 | O |
| ATOM | 50 | O1P  | G A | 2 | 45.199 | -54.419 | 99.844  | 1.00 | 0.00 | O |
| ATOM | 51 | O2P  | G A | 2 | 45.336 | -54.214 | 97.347  | 1.00 | 0.00 | O |
| ATOM | 52 | P    | G A | 2 | 46.047 | -54.249 | 98.647  | 1.00 | 0.00 | P |
| ATOM | 53 | H1   | G A | 2 | 51.125 | -47.427 | 94.017  | 1.00 | 0.00 | H |
| ATOM | 54 | H8   | G A | 2 | 47.089 | -51.662 | 96.741  | 1.00 | 0.00 | H |
| ATOM | 55 | H1'  | G A | 2 | 48.410 | -48.805 | 99.052  | 1.00 | 0.00 | H |
| ATOM | 56 | H21  | G A | 2 | 51.885 | -46.024 | 95.520  | 1.00 | 0.00 | H |
| ATOM | 57 | H3'  | G A | 2 | 46.043 | -51.401 | 100.819 | 1.00 | 0.00 | H |
| ATOM | 58 | H22  | G A | 2 | 51.409 | -46.112 | 97.238  | 1.00 | 0.00 | H |
| ATOM | 59 | H4'  | G A | 2 | 48.630 | -51.640 | 101.334 | 1.00 | 0.00 | H |
| ATOM | 60 | H2'1 | G A | 2 | 46.149 | -50.750 | 98.511  | 1.00 | 0.00 | H |
| ATOM | 61 | H2'2 | G A | 2 | 46.080 | -49.173 | 99.288  | 1.00 | 0.00 | H |
| ATOM | 62 | H5'1 | G A | 2 | 48.947 | -53.227 | 99.306  | 1.00 | 0.00 | H |
| ATOM | 63 | H5'2 | G A | 2 | 47.777 | -53.628 | 100.582 | 1.00 | 0.00 | H |
| ATOM | 64 | C1'  | G A | 3 | 47.937 | -44.860 | 98.827  | 1.00 | 0.00 | C |
| ATOM | 65 | N1   | G A | 3 | 48.522 | -45.338 | 93.784  | 1.00 | 0.00 | N |
| ATOM | 66 | C2   | G A | 3 | 49.118 | -44.456 | 94.666  | 1.00 | 0.00 | C |
| ATOM | 67 | N2   | G A | 3 | 49.982 | -43.582 | 94.134  | 1.00 | 0.00 | N |
| ATOM | 68 | N3   | G A | 3 | 48.870 | -44.445 | 95.974  | 1.00 | 0.00 | N |
| ATOM | 69 | C4   | G A | 3 | 47.966 | -45.392 | 96.337  | 1.00 | 0.00 | C |
| ATOM | 70 | C5   | G A | 3 | 47.321 | -46.311 | 95.527  | 1.00 | 0.00 | C |
| ATOM | 71 | C6   | G A | 3 | 47.587 | -46.326 | 94.138  | 1.00 | 0.00 | C |
| ATOM | 72 | O6   | G A | 3 | 47.119 | -47.058 | 93.266  | 1.00 | 0.00 | O |
| ATOM | 73 | N7   | G A | 3 | 46.466 | -47.109 | 96.289  | 1.00 | 0.00 | N |
| ATOM | 74 | C8   | G A | 3 | 46.619 | -46.661 | 97.508  | 1.00 | 0.00 | C |
| ATOM | 75 | N9   | G A | 3 | 47.513 | -45.617 | 97.617  | 1.00 | 0.00 | N |
| ATOM | 76 | C2'  | G A | 3 | 46.812 | -44.614 | 99.823  | 1.00 | 0.00 | C |
| ATOM | 77 | C3'  | G A | 3 | 47.535 | -44.720 | 101.154 | 1.00 | 0.00 | C |
| ATOM | 78 | O3'  | G A | 3 | 48.127 | -43.462 | 101.467 | 1.00 | 0.00 | O |
| ATOM | 79 | C4'  | G A | 3 | 48.584 | -45.799 | 100.888 | 1.00 | 0.00 | C |
| ATOM | 80 | O4'  | G A | 3 | 48.939 | -45.615 | 99.480  | 1.00 | 0.00 | O |
| ATOM | 81 | C5'  | G A | 3 | 48.142 | -47.229 | 101.090 | 1.00 | 0.00 | C |
| ATOM | 82 | O5'  | G A | 3 | 46.762 | -47.380 | 100.672 | 1.00 | 0.00 | O |
| ATOM | 83 | O1P  | G A | 3 | 45.555 | -47.901 | 102.819 | 1.00 | 0.00 | O |
| ATOM | 84 | O2P  | G A | 3 | 44.638 | -48.723 | 100.633 | 1.00 | 0.00 | O |
| ATOM | 85 | P    | G A | 3 | 45.827 | -48.405 | 101.460 | 1.00 | 0.00 | P |
| ATOM | 86 | H1   | G A | 3 | 48.787 | -45.266 | 92.789  | 1.00 | 0.00 | H |
| ATOM | 87 | H8   | G A | 3 | 46.086 | -47.075 | 98.364  | 1.00 | 0.00 | H |
| ATOM | 88 | H1'  | G A | 3 | 48.382 | -43.920 | 98.503  | 1.00 | 0.00 | H |
| ATOM | 89 | H21  | G A | 3 | 50.171 | -43.598 | 93.120  | 1.00 | 0.00 | H |
| ATOM | 90 | H3'  | G A | 3 | 46.866 | -45.014 | 101.963 | 1.00 | 0.00 | H |
| ATOM | 91 | H22  | G A | 3 | 50.457 | -42.897 | 94.737  | 1.00 | 0.00 | H |
| ATOM | 92 | H4'  | G A | 3 | 49.415 | -45.608 | 101.565 | 1.00 | 0.00 | H |
| ATOM | 93 | H2'1 | G A | 3 | 46.019 | -45.359 | 99.742  | 1.00 | 0.00 | H |
| ATOM | 94 | H2'2 | G A | 3 | 46.353 | -43.633 | 99.696  | 1.00 | 0.00 | H |

|      |     |       |     |   |        |         |         |      |      |   |
|------|-----|-------|-----|---|--------|---------|---------|------|------|---|
| ATOM | 95  | H5 '1 | G A | 3 | 48.779 | -47.887 | 100.503 | 1.00 | 0.00 | H |
| ATOM | 96  | H5 '2 | G A | 3 | 48.237 | -47.486 | 102.145 | 1.00 | 0.00 | H |
| ATOM | 97  | C1 '  | C A | 4 | 48.035 | -40.378 | 96.720  | 1.00 | 0.00 | C |
| ATOM | 98  | N1    | C A | 4 | 47.111 | -41.431 | 96.215  | 1.00 | 0.00 | N |
| ATOM | 99  | C2    | C A | 4 | 47.126 | -41.710 | 94.850  | 1.00 | 0.00 | C |
| ATOM | 100 | O2    | C A | 4 | 47.897 | -41.076 | 94.119  | 1.00 | 0.00 | O |
| ATOM | 101 | N3    | C A | 4 | 46.293 | -42.666 | 94.370  | 1.00 | 0.00 | N |
| ATOM | 102 | C4    | C A | 4 | 45.468 | -43.333 | 95.187  | 1.00 | 0.00 | C |
| ATOM | 103 | N4    | C A | 4 | 44.676 | -44.258 | 94.664  | 1.00 | 0.00 | N |
| ATOM | 104 | C5    | C A | 4 | 45.432 | -43.065 | 96.594  | 1.00 | 0.00 | C |
| ATOM | 105 | C6    | C A | 4 | 46.280 | -42.101 | 97.055  | 1.00 | 0.00 | C |
| ATOM | 106 | C2 '  | C A | 4 | 47.439 | -39.519 | 97.826  | 1.00 | 0.00 | C |
| ATOM | 107 | C3 '  | C A | 4 | 48.648 | -39.257 | 98.712  | 1.00 | 0.00 | C |
| ATOM | 108 | O3 '  | C A | 4 | 49.374 | -38.143 | 98.196  | 1.00 | 0.00 | O |
| ATOM | 109 | C4 '  | C A | 4 | 49.437 | -40.561 | 98.604  | 1.00 | 0.00 | C |
| ATOM | 110 | O4 '  | C A | 4 | 49.182 | -41.025 | 97.240  | 1.00 | 0.00 | O |
| ATOM | 111 | C5 '  | C A | 4 | 49.052 | -41.659 | 99.568  | 1.00 | 0.00 | C |
| ATOM | 112 | O5 '  | C A | 4 | 47.618 | -41.645 | 99.779  | 1.00 | 0.00 | O |
| ATOM | 113 | O1P   | C A | 4 | 47.392 | -41.002 | 102.202 | 1.00 | 0.00 | O |
| ATOM | 114 | O2P   | C A | 4 | 45.610 | -42.381 | 101.099 | 1.00 | 0.00 | O |
| ATOM | 115 | P     | C A | 4 | 47.050 | -42.045 | 101.216 | 1.00 | 0.00 | P |
| ATOM | 116 | H5    | C A | 4 | 44.757 | -43.601 | 97.261  | 1.00 | 0.00 | H |
| ATOM | 117 | H6    | C A | 4 | 46.292 | -41.866 | 98.120  | 1.00 | 0.00 | H |
| ATOM | 118 | H1 '  | C A | 4 | 48.349 | -39.767 | 95.875  | 1.00 | 0.00 | H |
| ATOM | 119 | H3 '  | C A | 4 | 48.361 | -39.054 | 99.744  | 1.00 | 0.00 | H |
| ATOM | 120 | H4 '  | C A | 4 | 50.484 | -40.313 | 98.781  | 1.00 | 0.00 | H |
| ATOM | 121 | H41   | C A | 4 | 44.033 | -44.787 | 95.270  | 1.00 | 0.00 | H |
| ATOM | 122 | H42   | C A | 4 | 44.703 | -44.449 | 93.651  | 1.00 | 0.00 | H |
| ATOM | 123 | H2 '1 | C A | 4 | 46.653 | -40.035 | 98.374  | 1.00 | 0.00 | H |
| ATOM | 124 | H2 '2 | C A | 4 | 47.016 | -38.588 | 97.445  | 1.00 | 0.00 | H |
| ATOM | 125 | H5 '1 | C A | 4 | 49.354 | -42.621 | 99.154  | 1.00 | 0.00 | H |
| ATOM | 126 | H5 '2 | C A | 4 | 49.565 | -41.499 | 100.515 | 1.00 | 0.00 | H |
| ATOM | 127 | C1 '  | C A | 5 | 47.438 | -37.222 | 92.951  | 1.00 | 0.00 | C |
| ATOM | 128 | N1    | C A | 5 | 46.340 | -38.151 | 93.340  | 1.00 | 0.00 | N |
| ATOM | 129 | C2    | C A | 5 | 45.768 | -38.936 | 92.342  | 1.00 | 0.00 | C |
| ATOM | 130 | O2    | C A | 5 | 46.188 | -38.832 | 91.182  | 1.00 | 0.00 | O |
| ATOM | 131 | N3    | C A | 5 | 44.768 | -39.790 | 92.675  | 1.00 | 0.00 | N |
| ATOM | 132 | C4    | C A | 5 | 44.333 | -39.881 | 93.938  | 1.00 | 0.00 | C |
| ATOM | 133 | N4    | C A | 5 | 43.357 | -40.733 | 94.208  | 1.00 | 0.00 | N |
| ATOM | 134 | C5    | C A | 5 | 44.904 | -39.084 | 94.983  | 1.00 | 0.00 | C |
| ATOM | 135 | C6    | C A | 5 | 45.910 | -38.237 | 94.626  | 1.00 | 0.00 | C |
| ATOM | 136 | C2 '  | C A | 5 | 47.400 | -35.890 | 93.685  | 1.00 | 0.00 | C |
| ATOM | 137 | C3 '  | C A | 5 | 48.880 | -35.583 | 93.859  | 1.00 | 0.00 | C |
| ATOM | 138 | O3 '  | C A | 5 | 49.370 | -34.954 | 92.678  | 1.00 | 0.00 | O |
| ATOM | 139 | C4 '  | C A | 5 | 49.490 | -36.966 | 94.073  | 1.00 | 0.00 | C |
| ATOM | 140 | O4 '  | C A | 5 | 48.666 | -37.856 | 93.255  | 1.00 | 0.00 | O |
| ATOM | 141 | C5 '  | C A | 5 | 49.499 | -37.483 | 95.493  | 1.00 | 0.00 | C |
| ATOM | 142 | O5 '  | C A | 5 | 48.287 | -37.066 | 96.174  | 1.00 | 0.00 | O |
| ATOM | 143 | O1P   | C A | 5 | 49.131 | -35.496 | 97.950  | 1.00 | 0.00 | O |
| ATOM | 144 | O2P   | C A | 5 | 46.991 | -36.757 | 98.303  | 1.00 | 0.00 | O |
| ATOM | 145 | P     | C A | 5 | 48.360 | -36.734 | 97.732  | 1.00 | 0.00 | P |
| ATOM | 146 | H5    | C A | 5 | 44.550 | -39.151 | 96.013  | 1.00 | 0.00 | H |
| ATOM | 147 | H6    | C A | 5 | 46.379 | -37.613 | 95.387  | 1.00 | 0.00 | H |
| ATOM | 148 | H1 '  | C A | 5 | 47.393 | -37.077 | 91.872  | 1.00 | 0.00 | H |



|      |     |      |     |   |        |         |        |      |      |   |
|------|-----|------|-----|---|--------|---------|--------|------|------|---|
| ATOM | 149 | H3'  | C A | 5 | 49.064 | -34.934 | 94.716 | 1.00 | 0.00 | H |
| ATOM | 150 | H4'  | C A | 5 | 50.525 | -36.910 | 93.735 | 1.00 | 0.00 | H |
| ATOM | 151 | H41  | C A | 5 | 43.005 | -40.825 | 95.172 | 1.00 | 0.00 | H |
| ATOM | 152 | H42  | C A | 5 | 42.947 | -41.304 | 93.454 | 1.00 | 0.00 | H |
| ATOM | 153 | H2'1 | C A | 5 | 46.894 | -35.960 | 94.647 | 1.00 | 0.00 | H |
| ATOM | 154 | H2'2 | C A | 5 | 46.899 | -35.112 | 93.105 | 1.00 | 0.00 | H |
| ATOM | 155 | H5'1 | C A | 5 | 49.556 | -38.573 | 95.477 | 1.00 | 0.00 | H |
| ATOM | 156 | H5'2 | C A | 5 | 50.369 | -37.087 | 96.013 | 1.00 | 0.00 | H |
| ATOM | 157 | C1'  | G A | 6 | 45.450 | -35.743 | 88.662 | 1.00 | 0.00 | C |
| ATOM | 158 | N1   | G A | 6 | 41.595 | -38.784 | 90.051 | 1.00 | 0.00 | N |
| ATOM | 159 | C2   | G A | 6 | 42.199 | -38.623 | 88.815 | 1.00 | 0.00 | C |
| ATOM | 160 | N2   | G A | 6 | 41.709 | -39.366 | 87.818 | 1.00 | 0.00 | N |
| ATOM | 161 | N3   | G A | 6 | 43.210 | -37.783 | 88.595 | 1.00 | 0.00 | N |
| ATOM | 162 | C4   | G A | 6 | 43.572 | -37.104 | 89.715 | 1.00 | 0.00 | C |
| ATOM | 163 | C5   | G A | 6 | 43.026 | -37.197 | 90.985 | 1.00 | 0.00 | C |
| ATOM | 164 | C6   | G A | 6 | 41.957 | -38.088 | 91.221 | 1.00 | 0.00 | C |
| ATOM | 165 | O6   | G A | 6 | 41.346 | -38.309 | 92.267 | 1.00 | 0.00 | O |
| ATOM | 166 | N7   | G A | 6 | 43.684 | -36.327 | 91.857 | 1.00 | 0.00 | N |
| ATOM | 167 | C8   | G A | 6 | 44.587 | -35.752 | 91.108 | 1.00 | 0.00 | C |
| ATOM | 168 | N9   | G A | 6 | 44.582 | -36.171 | 89.793 | 1.00 | 0.00 | N |
| ATOM | 169 | C2'  | G A | 6 | 45.790 | -34.260 | 88.676 | 1.00 | 0.00 | C |
| ATOM | 170 | C3'  | G A | 6 | 47.214 | -34.255 | 88.148 | 1.00 | 0.00 | C |
| ATOM | 171 | O3'  | G A | 6 | 47.187 | -34.265 | 86.722 | 1.00 | 0.00 | O |
| ATOM | 172 | C4'  | G A | 6 | 47.795 | -35.544 | 88.724 | 1.00 | 0.00 | C |
| ATOM | 173 | O4'  | G A | 6 | 46.661 | -36.469 | 88.751 | 1.00 | 0.00 | O |
| ATOM | 174 | C5'  | G A | 6 | 48.381 | -35.456 | 90.113 | 1.00 | 0.00 | C |
| ATOM | 175 | O5'  | G A | 6 | 47.596 | -34.542 | 90.919 | 1.00 | 0.00 | O |
| ATOM | 176 | O1P  | G A | 6 | 49.184 | -32.641 | 91.360 | 1.00 | 0.00 | O |
| ATOM | 177 | O2P  | G A | 6 | 47.341 | -33.140 | 92.989 | 1.00 | 0.00 | O |
| ATOM | 178 | P    | G A | 6 | 48.338 | -33.656 | 92.017 | 1.00 | 0.00 | P |
| ATOM | 179 | H1   | G A | 6 | 40.823 | -39.465 | 90.117 | 1.00 | 0.00 | H |
| ATOM | 180 | H8   | G A | 6 | 45.285 | -35.004 | 91.486 | 1.00 | 0.00 | H |
| ATOM | 181 | H1'  | G A | 6 | 44.959 | -36.024 | 87.730 | 1.00 | 0.00 | H |
| ATOM | 182 | H21  | G A | 6 | 40.929 | -40.017 | 87.996 | 1.00 | 0.00 | H |
| ATOM | 183 | H3'  | G A | 6 | 47.776 | -33.384 | 88.489 | 1.00 | 0.00 | H |
| ATOM | 184 | H22  | G A | 6 | 42.113 | -39.292 | 86.874 | 1.00 | 0.00 | H |
| ATOM | 185 | H4'  | G A | 6 | 48.589 | -35.865 | 88.049 | 1.00 | 0.00 | H |
| ATOM | 186 | H2'1 | G A | 6 | 45.738 | -33.832 | 89.678 | 1.00 | 0.00 | H |
| ATOM | 187 | H2'2 | G A | 6 | 45.127 | -33.676 | 88.036 | 1.00 | 0.00 | H |
| ATOM | 188 | H5'1 | G A | 6 | 48.377 | -36.445 | 90.567 | 1.00 | 0.00 | H |
| ATOM | 189 | H5'2 | G A | 6 | 49.409 | -35.098 | 90.045 | 1.00 | 0.00 | H |
| ATOM | 190 | C1'  | C A | 7 | 41.914 | -35.650 | 85.198 | 1.00 | 0.00 | C |
| ATOM | 191 | N1   | C A | 7 | 41.579 | -35.398 | 86.626 | 1.00 | 0.00 | N |
| ATOM | 192 | C2   | C A | 7 | 40.545 | -36.140 | 87.191 | 1.00 | 0.00 | C |
| ATOM | 193 | O2   | C A | 7 | 39.949 | -36.968 | 86.492 | 1.00 | 0.00 | O |
| ATOM | 194 | N3   | C A | 7 | 40.223 | -35.926 | 88.491 | 1.00 | 0.00 | N |
| ATOM | 195 | C4   | C A | 7 | 40.884 | -35.021 | 89.224 | 1.00 | 0.00 | C |
| ATOM | 196 | N4   | C A | 7 | 40.531 | -34.855 | 90.491 | 1.00 | 0.00 | N |
| ATOM | 197 | C5   | C A | 7 | 41.950 | -34.242 | 88.667 | 1.00 | 0.00 | C |
| ATOM | 198 | C6   | C A | 7 | 42.260 | -34.476 | 87.357 | 1.00 | 0.00 | C |
| ATOM | 199 | C2'  | C A | 7 | 42.290 | -34.393 | 84.424 | 1.00 | 0.00 | C |
| ATOM | 200 | C3'  | C A | 7 | 43.365 | -34.911 | 83.480 | 1.00 | 0.00 | C |
| ATOM | 201 | O3'  | C A | 7 | 42.741 | -35.471 | 82.325 | 1.00 | 0.00 | O |
| ATOM | 202 | C4'  | C A | 7 | 44.077 | -35.967 | 84.322 | 1.00 | 0.00 | C |

|      |     |      |     |   |        |         |        |      |      |   |
|------|-----|------|-----|---|--------|---------|--------|------|------|---|
| ATOM | 203 | O4'  | C A | 7 | 43.020 | -36.532 | 85.163 | 1.00 | 0.00 | O |
| ATOM | 204 | C5'  | C A | 7 | 45.191 | -35.473 | 85.214 | 1.00 | 0.00 | C |
| ATOM | 205 | O5'  | C A | 7 | 44.853 | -34.169 | 85.747 | 1.00 | 0.00 | O |
| ATOM | 206 | O1P  | C A | 7 | 46.560 | -32.646 | 84.694 | 1.00 | 0.00 | O |
| ATOM | 207 | O2P  | C A | 7 | 45.544 | -32.051 | 86.910 | 1.00 | 0.00 | O |
| ATOM | 208 | P    | C A | 7 | 46.021 | -33.111 | 85.990 | 1.00 | 0.00 | P |
| ATOM | 209 | H5   | C A | 7 | 42.488 | -33.498 | 89.257 | 1.00 | 0.00 | H |
| ATOM | 210 | H6   | C A | 7 | 43.069 | -33.914 | 86.890 | 1.00 | 0.00 | H |
| ATOM | 211 | H1'  | C A | 7 | 41.068 | -36.156 | 84.732 | 1.00 | 0.00 | H |
| ATOM | 212 | H3'  | C A | 7 | 44.052 | -34.121 | 83.173 | 1.00 | 0.00 | H |
| ATOM | 213 | H4'  | C A | 7 | 44.502 | -36.690 | 83.627 | 1.00 | 0.00 | H |
| ATOM | 214 | H41  | C A | 7 | 41.024 | -34.167 | 91.077 | 1.00 | 0.00 | H |
| ATOM | 215 | H42  | C A | 7 | 39.764 | -35.413 | 90.890 | 1.00 | 0.00 | H |
| ATOM | 216 | H2'1 | C A | 7 | 42.677 | -33.608 | 85.073 | 1.00 | 0.00 | H |
| ATOM | 217 | H2'2 | C A | 7 | 41.444 | -33.977 | 83.875 | 1.00 | 0.00 | H |
| ATOM | 218 | H5'1 | C A | 7 | 45.336 | -36.180 | 86.033 | 1.00 | 0.00 | H |
| ATOM | 219 | H5'2 | C A | 7 | 46.112 | -35.405 | 84.633 | 1.00 | 0.00 | H |
| ATOM | 220 | C1'  | A A | 8 | 37.266 | -36.122 | 83.559 | 1.00 | 0.00 | C |
| ATOM | 221 | N1   | A A | 8 | 36.052 | -35.100 | 88.441 | 1.00 | 0.00 | N |
| ATOM | 222 | C2   | A A | 8 | 35.580 | -35.981 | 87.563 | 1.00 | 0.00 | C |
| ATOM | 223 | N3   | A A | 8 | 35.943 | -36.196 | 86.316 | 1.00 | 0.00 | N |
| ATOM | 224 | C4   | A A | 8 | 36.932 | -35.352 | 85.967 | 1.00 | 0.00 | C |
| ATOM | 225 | C5   | A A | 8 | 37.522 | -34.396 | 86.745 | 1.00 | 0.00 | C |
| ATOM | 226 | C6   | A A | 8 | 37.040 | -34.274 | 88.064 | 1.00 | 0.00 | C |
| ATOM | 227 | N6   | A A | 8 | 37.524 | -33.379 | 88.943 | 1.00 | 0.00 | N |
| ATOM | 228 | N7   | A A | 8 | 38.508 | -33.720 | 86.045 | 1.00 | 0.00 | N |
| ATOM | 229 | C8   | A A | 8 | 38.490 | -34.275 | 84.869 | 1.00 | 0.00 | C |
| ATOM | 230 | N9   | A A | 8 | 37.560 | -35.276 | 84.748 | 1.00 | 0.00 | N |
| ATOM | 231 | C2'  | A A | 8 | 37.353 | -35.375 | 82.236 | 1.00 | 0.00 | C |
| ATOM | 232 | C3'  | A A | 8 | 37.917 | -36.437 | 81.307 | 1.00 | 0.00 | C |
| ATOM | 233 | O3'  | A A | 8 | 36.848 | -37.243 | 80.817 | 1.00 | 0.00 | O |
| ATOM | 234 | C4'  | A A | 8 | 38.859 | -37.221 | 82.219 | 1.00 | 0.00 | C |
| ATOM | 235 | O4'  | A A | 8 | 38.215 | -37.171 | 83.534 | 1.00 | 0.00 | O |
| ATOM | 236 | C5'  | A A | 8 | 40.266 | -36.685 | 82.348 | 1.00 | 0.00 | C |
| ATOM | 237 | O5'  | A A | 8 | 40.241 | -35.235 | 82.337 | 1.00 | 0.00 | O |
| ATOM | 238 | O1P  | A A | 8 | 41.437 | -34.653 | 80.199 | 1.00 | 0.00 | O |
| ATOM | 239 | O2P  | A A | 8 | 41.455 | -33.045 | 82.126 | 1.00 | 0.00 | O |
| ATOM | 240 | P    | A A | 8 | 41.458 | -34.454 | 81.661 | 1.00 | 0.00 | P |
| ATOM | 241 | H2   | A A | 8 | 34.779 | -36.619 | 87.930 | 1.00 | 0.00 | H |
| ATOM | 242 | H8   | A A | 8 | 39.151 | -33.975 | 84.056 | 1.00 | 0.00 | H |
| ATOM | 243 | H1'  | A A | 8 | 36.280 | -36.567 | 83.693 | 1.00 | 0.00 | H |
| ATOM | 244 | H3'  | A A | 8 | 38.455 | -36.002 | 80.467 | 1.00 | 0.00 | H |
| ATOM | 245 | H4'  | A A | 8 | 38.924 | -38.230 | 81.815 | 1.00 | 0.00 | H |
| ATOM | 246 | H61  | A A | 8 | 37.139 | -33.333 | 89.896 | 1.00 | 0.00 | H |
| ATOM | 247 | H62  | A A | 8 | 38.281 | -32.740 | 88.660 | 1.00 | 0.00 | H |
| ATOM | 248 | H2'1 | A A | 8 | 38.012 | -34.509 | 82.294 | 1.00 | 0.00 | H |
| ATOM | 249 | H2'2 | A A | 8 | 36.380 | -35.025 | 81.895 | 1.00 | 0.00 | H |
| ATOM | 250 | H5'1 | A A | 8 | 40.697 | -37.038 | 83.286 | 1.00 | 0.00 | H |
| ATOM | 251 | H5'2 | A A | 8 | 40.866 | -37.050 | 81.517 | 1.00 | 0.00 | H |
| ATOM | 252 | C1'  | C A | 9 | 32.334 | -36.129 | 84.140 | 1.00 | 0.00 | C |
| ATOM | 253 | N1   | C A | 9 | 33.147 | -34.973 | 84.610 | 1.00 | 0.00 | N |
| ATOM | 254 | C2   | C A | 9 | 32.964 | -34.537 | 85.922 | 1.00 | 0.00 | C |
| ATOM | 255 | O2   | C A | 9 | 32.141 | -35.123 | 86.635 | 1.00 | 0.00 | O |
| ATOM | 256 | N3   | C A | 9 | 33.694 | -33.487 | 86.368 | 1.00 | 0.00 | N |

|      |     |      |     |    |        |         |        |      |      |   |
|------|-----|------|-----|----|--------|---------|--------|------|------|---|
| ATOM | 257 | C4   | C A | 9  | 34.577 | -32.872 | 85.570 | 1.00 | 0.00 | C |
| ATOM | 258 | N4   | C A | 9  | 35.267 | -31.852 | 86.060 | 1.00 | 0.00 | N |
| ATOM | 259 | C5   | C A | 9  | 34.783 | -33.296 | 84.215 | 1.00 | 0.00 | C |
| ATOM | 260 | C6   | C A | 9  | 34.040 | -34.359 | 83.788 | 1.00 | 0.00 | C |
| ATOM | 261 | C2'  | C A | 9  | 31.873 | -36.007 | 82.695 | 1.00 | 0.00 | C |
| ATOM | 262 | C3'  | C A | 9  | 31.938 | -37.451 | 82.218 | 1.00 | 0.00 | C |
| ATOM | 263 | O3'  | C A | 9  | 30.730 | -38.117 | 82.580 | 1.00 | 0.00 | O |
| ATOM | 264 | C4'  | C A | 9  | 33.148 | -38.001 | 82.969 | 1.00 | 0.00 | C |
| ATOM | 265 | O4'  | C A | 9  | 33.137 | -37.290 | 84.247 | 1.00 | 0.00 | O |
| ATOM | 266 | C5'  | C A | 9  | 34.494 | -37.796 | 82.315 | 1.00 | 0.00 | C |
| ATOM | 267 | O5'  | C A | 9  | 34.524 | -36.507 | 81.651 | 1.00 | 0.00 | O |
| ATOM | 268 | O1P  | C A | 9  | 34.705 | -37.109 | 79.214 | 1.00 | 0.00 | O |
| ATOM | 269 | O2P  | C A | 9  | 35.616 | -34.920 | 80.036 | 1.00 | 0.00 | O |
| ATOM | 270 | P    | C A | 9  | 35.361 | -36.357 | 80.302 | 1.00 | 0.00 | P |
| ATOM | 271 | H5   | C A | 9  | 35.497 | -32.795 | 83.561 | 1.00 | 0.00 | H |
| ATOM | 272 | H6   | C A | 9  | 34.168 | -34.724 | 82.769 | 1.00 | 0.00 | H |
| ATOM | 273 | H1'  | C A | 9  | 31.485 | -36.245 | 84.813 | 1.00 | 0.00 | H |
| ATOM | 274 | H3'  | C A | 9  | 32.078 | -37.518 | 81.140 | 1.00 | 0.00 | H |
| ATOM | 275 | H4'  | C A | 9  | 32.992 | -39.076 | 83.077 | 1.00 | 0.00 | H |
| ATOM | 276 | H41  | C A | 9  | 35.955 | -31.363 | 85.469 | 1.00 | 0.00 | H |
| ATOM | 277 | H42  | C A | 9  | 35.115 | -31.547 | 87.033 | 1.00 | 0.00 | H |
| ATOM | 278 | H2'1 | C A | 9  | 32.525 | -35.367 | 82.104 | 1.00 | 0.00 | H |
| ATOM | 279 | H2'2 | C A | 9  | 30.862 | -35.607 | 82.615 | 1.00 | 0.00 | H |
| ATOM | 280 | H5'1 | C A | 9  | 35.273 | -37.837 | 83.075 | 1.00 | 0.00 | H |
| ATOM | 281 | H5'2 | C A | 9  | 34.662 | -38.589 | 81.586 | 1.00 | 0.00 | H |
| ATOM | 282 | C1'  | C A | 10 | 28.108 | -34.808 | 86.360 | 1.00 | 0.00 | C |
| ATOM | 283 | N1   | C A | 10 | 29.094 | -33.776 | 85.936 | 1.00 | 0.00 | N |
| ATOM | 284 | C2   | C A | 10 | 29.499 | -32.835 | 86.880 | 1.00 | 0.00 | C |
| ATOM | 285 | O2   | C A | 10 | 29.028 | -32.892 | 88.023 | 1.00 | 0.00 | O |
| ATOM | 286 | N3   | C A | 10 | 30.396 | -31.886 | 86.515 | 1.00 | 0.00 | N |
| ATOM | 287 | C4   | C A | 10 | 30.888 | -31.847 | 85.269 | 1.00 | 0.00 | C |
| ATOM | 288 | N4   | C A | 10 | 31.764 | -30.900 | 84.966 | 1.00 | 0.00 | N |
| ATOM | 289 | C5   | C A | 10 | 30.487 | -32.800 | 84.277 | 1.00 | 0.00 | C |
| ATOM | 290 | C6   | C A | 10 | 29.586 | -33.750 | 84.669 | 1.00 | 0.00 | C |
| ATOM | 291 | C2'  | C A | 10 | 27.089 | -35.161 | 85.286 | 1.00 | 0.00 | C |
| ATOM | 292 | C3'  | C A | 10 | 26.884 | -36.649 | 85.521 | 1.00 | 0.00 | C |
| ATOM | 293 | O3'  | C A | 10 | 25.911 | -36.831 | 86.549 | 1.00 | 0.00 | O |
| ATOM | 294 | C4'  | C A | 10 | 28.270 | -37.120 | 85.949 | 1.00 | 0.00 | C |
| ATOM | 295 | O4'  | C A | 10 | 28.829 | -35.984 | 86.681 | 1.00 | 0.00 | O |
| ATOM | 296 | C5'  | C A | 10 | 29.225 | -37.495 | 84.839 | 1.00 | 0.00 | C |
| ATOM | 297 | O5'  | C A | 10 | 29.031 | -36.610 | 83.707 | 1.00 | 0.00 | O |
| ATOM | 298 | O1P  | C A | 10 | 28.143 | -38.140 | 81.916 | 1.00 | 0.00 | O |
| ATOM | 299 | O2P  | C A | 10 | 29.411 | -36.069 | 81.283 | 1.00 | 0.00 | O |
| ATOM | 300 | P    | C A | 10 | 29.228 | -37.191 | 82.235 | 1.00 | 0.00 | P |
| ATOM | 301 | H5   | C A | 10 | 30.879 | -32.769 | 83.259 | 1.00 | 0.00 | H |
| ATOM | 302 | H6   | C A | 10 | 29.257 | -34.502 | 83.951 | 1.00 | 0.00 | H |
| ATOM | 303 | H1'  | C A | 10 | 27.617 | -34.458 | 87.267 | 1.00 | 0.00 | H |
| ATOM | 304 | H3'  | C A | 10 | 26.552 | -37.162 | 84.619 | 1.00 | 0.00 | H |
| ATOM | 305 | H4'  | C A | 10 | 28.126 | -38.002 | 86.573 | 1.00 | 0.00 | H |
| ATOM | 306 | H41  | C A | 10 | 32.160 | -30.850 | 84.016 | 1.00 | 0.00 | H |
| ATOM | 307 | H42  | C A | 10 | 32.049 | -30.215 | 85.680 | 1.00 | 0.00 | H |
| ATOM | 308 | H2'1 | C A | 10 | 27.461 | -34.966 | 84.282 | 1.00 | 0.00 | H |
| ATOM | 309 | H2'2 | C A | 10 | 26.156 | -34.606 | 85.405 | 1.00 | 0.00 | H |
| ATOM | 310 | H5'1 | C A | 10 | 30.249 | -37.410 | 85.202 | 1.00 | 0.00 | H |

|      |     |      |   |   |    |        |         |        |      |      |   |
|------|-----|------|---|---|----|--------|---------|--------|------|------|---|
| ATOM | 311 | H5'2 | C | A | 10 | 29.037 | -38.525 | 84.539 | 1.00 | 0.00 | H |
| ATOM | 312 | C1'  | T | A | 11 | 25.257 | -31.830 | 89.099 | 1.00 | 0.00 | C |
| ATOM | 313 | N1   | T | A | 11 | 26.025 | -31.279 | 87.951 | 1.00 | 0.00 | N |
| ATOM | 314 | C2   | T | A | 11 | 26.809 | -30.170 | 88.192 | 1.00 | 0.00 | C |
| ATOM | 315 | O2   | T | A | 11 | 26.890 | -29.643 | 89.288 | 1.00 | 0.00 | O |
| ATOM | 316 | N3   | T | A | 11 | 27.507 | -29.691 | 87.097 | 1.00 | 0.00 | N |
| ATOM | 317 | C4   | T | A | 11 | 27.484 | -30.209 | 85.819 | 1.00 | 0.00 | C |
| ATOM | 318 | O4   | T | A | 11 | 28.150 | -29.690 | 84.915 | 1.00 | 0.00 | O |
| ATOM | 319 | C5   | T | A | 11 | 26.635 | -31.367 | 85.664 | 1.00 | 0.00 | C |
| ATOM | 320 | C6   | T | A | 11 | 25.943 | -31.861 | 86.710 | 1.00 | 0.00 | C |
| ATOM | 321 | C7   | T | A | 11 | 26.583 | -31.965 | 84.289 | 1.00 | 0.00 | C |
| ATOM | 322 | C2'  | T | A | 11 | 23.871 | -32.339 | 88.724 | 1.00 | 0.00 | C |
| ATOM | 323 | C3'  | T | A | 11 | 23.713 | -33.540 | 89.643 | 1.00 | 0.00 | C |
| ATOM | 324 | O3'  | T | A | 11 | 23.242 | -33.101 | 90.915 | 1.00 | 0.00 | O |
| ATOM | 325 | C4'  | T | A | 11 | 25.132 | -34.100 | 89.715 | 1.00 | 0.00 | C |
| ATOM | 326 | O4'  | T | A | 11 | 25.991 | -32.918 | 89.627 | 1.00 | 0.00 | O |
| ATOM | 327 | C5'  | T | A | 11 | 25.529 | -35.068 | 88.625 | 1.00 | 0.00 | C |
| ATOM | 328 | O5'  | T | A | 11 | 24.927 | -34.666 | 87.369 | 1.00 | 0.00 | O |
| ATOM | 329 | O1P  | T | A | 11 | 23.316 | -36.534 | 86.870 | 1.00 | 0.00 | O |
| ATOM | 330 | O2P  | T | A | 11 | 24.303 | -35.191 | 84.993 | 1.00 | 0.00 | O |
| ATOM | 331 | P    | T | A | 11 | 24.477 | -35.794 | 86.338 | 1.00 | 0.00 | P |
| ATOM | 332 | H3   | T | A | 11 | 28.103 | -28.868 | 87.252 | 1.00 | 0.00 | H |
| ATOM | 333 | H6   | T | A | 11 | 25.309 | -32.737 | 86.568 | 1.00 | 0.00 | H |
| ATOM | 334 | H1'  | T | A | 11 | 25.196 | -31.063 | 89.870 | 1.00 | 0.00 | H |
| ATOM | 335 | H3'  | T | A | 11 | 23.020 | -34.275 | 89.236 | 1.00 | 0.00 | H |
| ATOM | 336 | H4'  | T | A | 11 | 25.220 | -34.620 | 90.671 | 1.00 | 0.00 | H |
| ATOM | 337 | H71  | T | A | 11 | 25.578 | -31.848 | 83.881 | 1.00 | 0.00 | H |
| ATOM | 338 | H72  | T | A | 11 | 27.298 | -31.454 | 83.644 | 1.00 | 0.00 | H |
| ATOM | 339 | H73  | T | A | 11 | 26.832 | -33.024 | 84.342 | 1.00 | 0.00 | H |
| ATOM | 340 | H2'1 | T | A | 11 | 23.806 | -32.629 | 87.678 | 1.00 | 0.00 | H |
| ATOM | 341 | H2'2 | T | A | 11 | 23.093 | -31.594 | 88.907 | 1.00 | 0.00 | H |
| ATOM | 342 | H5'1 | T | A | 11 | 26.614 | -35.074 | 88.528 | 1.00 | 0.00 | H |
| ATOM | 343 | H5'2 | T | A | 11 | 25.188 | -36.068 | 88.893 | 1.00 | 0.00 | H |
| ATOM | 344 | C1'  | A | A | 12 | 23.972 | -27.443 | 91.030 | 1.00 | 0.00 | C |
| ATOM | 345 | N1   | A | A | 12 | 26.444 | -25.552 | 86.949 | 1.00 | 0.00 | N |
| ATOM | 346 | C2   | A | A | 12 | 26.423 | -25.198 | 88.230 | 1.00 | 0.00 | C |
| ATOM | 347 | N3   | A | A | 12 | 25.763 | -25.735 | 89.236 | 1.00 | 0.00 | N |
| ATOM | 348 | C4   | A | A | 12 | 25.028 | -26.777 | 88.808 | 1.00 | 0.00 | C |
| ATOM | 349 | C5   | A | A | 12 | 24.938 | -27.263 | 87.534 | 1.00 | 0.00 | C |
| ATOM | 350 | C6   | A | A | 12 | 25.701 | -26.596 | 86.552 | 1.00 | 0.00 | C |
| ATOM | 351 | N6   | A | A | 12 | 25.713 | -26.963 | 85.259 | 1.00 | 0.00 | N |
| ATOM | 352 | N7   | A | A | 12 | 24.084 | -28.349 | 87.474 | 1.00 | 0.00 | N |
| ATOM | 353 | C8   | A | A | 12 | 23.675 | -28.494 | 88.699 | 1.00 | 0.00 | C |
| ATOM | 354 | N9   | A | A | 12 | 24.209 | -27.575 | 89.566 | 1.00 | 0.00 | N |
| ATOM | 355 | C2'  | A | A | 12 | 22.536 | -27.733 | 91.446 | 1.00 | 0.00 | C |
| ATOM | 356 | C3'  | A | A | 12 | 22.728 | -28.409 | 92.795 | 1.00 | 0.00 | C |
| ATOM | 357 | O3'  | A | A | 12 | 22.853 | -27.409 | 93.804 | 1.00 | 0.00 | O |
| ATOM | 358 | C4'  | A | A | 12 | 24.023 | -29.197 | 92.601 | 1.00 | 0.00 | C |
| ATOM | 359 | O4'  | A | A | 12 | 24.814 | -28.371 | 91.688 | 1.00 | 0.00 | O |
| ATOM | 360 | C5'  | A | A | 12 | 23.882 | -30.577 | 92.005 | 1.00 | 0.00 | C |
| ATOM | 361 | O5'  | A | A | 12 | 22.828 | -30.579 | 91.009 | 1.00 | 0.00 | O |
| ATOM | 362 | O1P  | A | A | 12 | 21.077 | -32.080 | 92.020 | 1.00 | 0.00 | O |
| ATOM | 363 | O2P  | A | A | 12 | 21.242 | -31.843 | 89.527 | 1.00 | 0.00 | O |
| ATOM | 364 | P    | A | A | 12 | 21.939 | -31.891 | 90.835 | 1.00 | 0.00 | P |

|      |     |      |   |   |    |        |         |        |      |      |   |
|------|-----|------|---|---|----|--------|---------|--------|------|------|---|
| ATOM | 365 | H2   | A | A | 12 | 27.044 | -24.341 | 88.487 | 1.00 | 0.00 | H |
| ATOM | 366 | H8   | A | A | 12 | 22.975 | -29.270 | 89.010 | 1.00 | 0.00 | H |
| ATOM | 367 | H1'  | A | A | 12 | 24.273 | -26.441 | 91.335 | 1.00 | 0.00 | H |
| ATOM | 368 | H3'  | A | A | 12 | 21.899 | -29.069 | 93.044 | 1.00 | 0.00 | H |
| ATOM | 369 | H4'  | A | A | 12 | 24.478 | -29.303 | 93.585 | 1.00 | 0.00 | H |
| ATOM | 370 | H61  | A | A | 12 | 26.289 | -26.445 | 84.582 | 1.00 | 0.00 | H |
| ATOM | 371 | H62  | A | A | 12 | 25.143 | -27.763 | 84.945 | 1.00 | 0.00 | H |
| ATOM | 372 | H2'1 | A | A | 12 | 22.026 | -28.390 | 90.744 | 1.00 | 0.00 | H |
| ATOM | 373 | H2'2 | A | A | 12 | 21.942 | -26.825 | 91.537 | 1.00 | 0.00 | H |
| ATOM | 374 | H5'1 | A | A | 12 | 24.827 | -30.863 | 91.541 | 1.00 | 0.00 | H |
| ATOM | 375 | H5'2 | A | A | 12 | 23.643 | -31.286 | 92.797 | 1.00 | 0.00 | H |
| ATOM | 376 | C1'  | G | A | 13 | 23.821 | -22.481 | 91.080 | 1.00 | 0.00 | C |
| ATOM | 377 | N1   | G | A | 13 | 24.408 | -22.959 | 86.034 | 1.00 | 0.00 | N |
| ATOM | 378 | C2   | G | A | 13 | 25.003 | -22.076 | 86.917 | 1.00 | 0.00 | C |
| ATOM | 379 | N2   | G | A | 13 | 25.867 | -21.199 | 86.386 | 1.00 | 0.00 | N |
| ATOM | 380 | N3   | G | A | 13 | 24.754 | -22.065 | 88.226 | 1.00 | 0.00 | N |
| ATOM | 381 | C4   | G | A | 13 | 23.851 | -23.012 | 88.588 | 1.00 | 0.00 | C |
| ATOM | 382 | C5   | G | A | 13 | 23.205 | -23.932 | 87.779 | 1.00 | 0.00 | C |
| ATOM | 383 | C6   | G | A | 13 | 23.471 | -23.947 | 86.389 | 1.00 | 0.00 | C |
| ATOM | 384 | O6   | G | A | 13 | 23.001 | -24.679 | 85.518 | 1.00 | 0.00 | O |
| ATOM | 385 | N7   | G | A | 13 | 22.350 | -24.731 | 88.541 | 1.00 | 0.00 | N |
| ATOM | 386 | C8   | G | A | 13 | 22.503 | -24.282 | 89.760 | 1.00 | 0.00 | C |
| ATOM | 387 | N9   | G | A | 13 | 23.397 | -23.238 | 89.869 | 1.00 | 0.00 | N |
| ATOM | 388 | C2'  | G | A | 13 | 22.696 | -22.236 | 92.075 | 1.00 | 0.00 | C |
| ATOM | 389 | C3'  | G | A | 13 | 23.419 | -22.342 | 93.406 | 1.00 | 0.00 | C |
| ATOM | 390 | O3'  | G | A | 13 | 24.011 | -21.081 | 93.719 | 1.00 | 0.00 | O |
| ATOM | 391 | C4'  | G | A | 13 | 24.468 | -23.420 | 93.139 | 1.00 | 0.00 | C |
| ATOM | 392 | O4'  | G | A | 13 | 24.823 | -23.236 | 91.732 | 1.00 | 0.00 | O |
| ATOM | 393 | C5'  | G | A | 13 | 24.025 | -24.850 | 93.342 | 1.00 | 0.00 | C |
| ATOM | 394 | O5'  | G | A | 13 | 22.646 | -25.001 | 92.924 | 1.00 | 0.00 | O |
| ATOM | 395 | O1P  | G | A | 13 | 21.439 | -25.522 | 95.070 | 1.00 | 0.00 | O |
| ATOM | 396 | O2P  | G | A | 13 | 20.522 | -26.344 | 92.885 | 1.00 | 0.00 | O |
| ATOM | 397 | P    | G | A | 13 | 21.712 | -26.027 | 93.712 | 1.00 | 0.00 | P |
| ATOM | 398 | H1   | G | A | 13 | 24.674 | -22.889 | 85.040 | 1.00 | 0.00 | H |
| ATOM | 399 | H8   | G | A | 13 | 21.970 | -24.696 | 90.616 | 1.00 | 0.00 | H |
| ATOM | 400 | H1'  | G | A | 13 | 24.267 | -21.541 | 90.754 | 1.00 | 0.00 | H |
| ATOM | 401 | H21  | G | A | 13 | 26.055 | -21.218 | 85.372 | 1.00 | 0.00 | H |
| ATOM | 402 | H3'  | G | A | 13 | 22.749 | -22.635 | 94.215 | 1.00 | 0.00 | H |
| ATOM | 403 | H22  | G | A | 13 | 26.339 | -20.515 | 86.989 | 1.00 | 0.00 | H |
| ATOM | 404 | H4'  | G | A | 13 | 25.299 | -23.229 | 93.816 | 1.00 | 0.00 | H |
| ATOM | 405 | H2'1 | G | A | 13 | 21.903 | -22.981 | 91.994 | 1.00 | 0.00 | H |
| ATOM | 406 | H2'2 | G | A | 13 | 22.236 | -21.255 | 91.948 | 1.00 | 0.00 | H |
| ATOM | 407 | H5'1 | G | A | 13 | 24.663 | -25.509 | 92.754 | 1.00 | 0.00 | H |
| ATOM | 408 | H5'2 | G | A | 13 | 24.122 | -25.108 | 94.397 | 1.00 | 0.00 | H |
| ATOM | 409 | C1'  | G | A | 14 | 23.919 | -18.000 | 88.972 | 1.00 | 0.00 | C |
| ATOM | 410 | N1   | G | A | 14 | 22.309 | -20.529 | 84.844 | 1.00 | 0.00 | N |
| ATOM | 411 | C2   | G | A | 14 | 23.258 | -19.529 | 84.958 | 1.00 | 0.00 | C |
| ATOM | 412 | N2   | G | A | 14 | 23.855 | -19.150 | 83.823 | 1.00 | 0.00 | N |
| ATOM | 413 | N3   | G | A | 14 | 23.584 | -18.952 | 86.116 | 1.00 | 0.00 | N |
| ATOM | 414 | C4   | G | A | 14 | 22.874 | -19.453 | 87.160 | 1.00 | 0.00 | C |
| ATOM | 415 | C5   | G | A | 14 | 21.908 | -20.446 | 87.139 | 1.00 | 0.00 | C |
| ATOM | 416 | C6   | G | A | 14 | 21.563 | -21.060 | 85.915 | 1.00 | 0.00 | C |
| ATOM | 417 | O6   | G | A | 14 | 20.741 | -21.949 | 85.695 | 1.00 | 0.00 | O |
| ATOM | 418 | N7   | G | A | 14 | 21.419 | -20.667 | 88.429 | 1.00 | 0.00 | N |

|      |     |      |     |    |        |         |        |      |      |   |
|------|-----|------|-----|----|--------|---------|--------|------|------|---|
| ATOM | 419 | C8   | G A | 14 | 22.091 | -19.826 | 89.172 | 1.00 | 0.00 | C |
| ATOM | 420 | N9   | G A | 14 | 22.993 | -19.053 | 88.472 | 1.00 | 0.00 | N |
| ATOM | 421 | C2'  | G A | 14 | 23.327 | -17.140 | 90.081 | 1.00 | 0.00 | C |
| ATOM | 422 | C3'  | G A | 14 | 24.539 | -16.877 | 90.959 | 1.00 | 0.00 | C |
| ATOM | 423 | O3'  | G A | 14 | 25.264 | -15.763 | 90.440 | 1.00 | 0.00 | O |
| ATOM | 424 | C4'  | G A | 14 | 25.329 | -18.180 | 90.848 | 1.00 | 0.00 | C |
| ATOM | 425 | O4'  | G A | 14 | 25.068 | -18.646 | 89.486 | 1.00 | 0.00 | O |
| ATOM | 426 | C5'  | G A | 14 | 24.949 | -19.279 | 91.814 | 1.00 | 0.00 | C |
| ATOM | 427 | O5'  | G A | 14 | 23.517 | -19.264 | 92.034 | 1.00 | 0.00 | O |
| ATOM | 428 | O1P  | G A | 14 | 23.303 | -18.621 | 94.457 | 1.00 | 0.00 | O |
| ATOM | 429 | O2P  | G A | 14 | 21.517 | -20.003 | 93.364 | 1.00 | 0.00 | O |
| ATOM | 430 | P    | G A | 14 | 22.957 | -19.664 | 93.472 | 1.00 | 0.00 | P |
| ATOM | 431 | H1   | G A | 14 | 22.135 | -20.914 | 83.904 | 1.00 | 0.00 | H |
| ATOM | 432 | H8   | G A | 14 | 21.947 | -19.742 | 90.250 | 1.00 | 0.00 | H |
| ATOM | 433 | H1'  | G A | 14 | 24.228 | -17.388 | 88.125 | 1.00 | 0.00 | H |
| ATOM | 434 | H21  | G A | 14 | 23.601 | -19.603 | 82.933 | 1.00 | 0.00 | H |
| ATOM | 435 | H3'  | G A | 14 | 24.259 | -16.673 | 91.993 | 1.00 | 0.00 | H |
| ATOM | 436 | H22  | G A | 14 | 24.569 | -18.409 | 83.839 | 1.00 | 0.00 | H |
| ATOM | 437 | H4'  | G A | 14 | 26.375 | -17.933 | 91.020 | 1.00 | 0.00 | H |
| ATOM | 438 | H2'1 | G A | 14 | 22.542 | -17.658 | 90.632 | 1.00 | 0.00 | H |
| ATOM | 439 | H2'2 | G A | 14 | 22.903 | -16.210 | 89.701 | 1.00 | 0.00 | H |
| ATOM | 440 | H5'1 | G A | 14 | 25.252 | -20.240 | 91.400 | 1.00 | 0.00 | H |
| ATOM | 441 | H5'2 | G A | 14 | 25.468 | -19.117 | 92.760 | 1.00 | 0.00 | H |
| ATOM | 442 | C1'  | A A | 15 | 23.333 | -14.829 | 85.217 | 1.00 | 0.00 | C |
| ATOM | 443 | N1   | A A | 15 | 20.016 | -18.353 | 83.510 | 1.00 | 0.00 | N |
| ATOM | 444 | C2   | A A | 15 | 20.949 | -17.626 | 82.901 | 1.00 | 0.00 | C |
| ATOM | 445 | N3   | A A | 15 | 21.776 | -16.735 | 83.403 | 1.00 | 0.00 | N |
| ATOM | 446 | C4   | A A | 15 | 21.569 | -16.603 | 84.726 | 1.00 | 0.00 | C |
| ATOM | 447 | C5   | A A | 15 | 20.657 | -17.267 | 85.497 | 1.00 | 0.00 | C |
| ATOM | 448 | C6   | A A | 15 | 19.834 | -18.199 | 84.831 | 1.00 | 0.00 | C |
| ATOM | 449 | N6   | A A | 15 | 18.894 | -18.926 | 85.458 | 1.00 | 0.00 | N |
| ATOM | 450 | N7   | A A | 15 | 20.735 | -16.869 | 86.820 | 1.00 | 0.00 | N |
| ATOM | 451 | C8   | A A | 15 | 21.682 | -15.977 | 86.821 | 1.00 | 0.00 | C |
| ATOM | 452 | N9   | A A | 15 | 22.237 | -15.763 | 85.584 | 1.00 | 0.00 | N |
| ATOM | 453 | C2'  | A A | 15 | 23.289 | -13.504 | 85.967 | 1.00 | 0.00 | C |
| ATOM | 454 | C3'  | A A | 15 | 24.766 | -13.196 | 86.156 | 1.00 | 0.00 | C |
| ATOM | 455 | O3'  | A A | 15 | 25.261 | -12.552 | 84.985 | 1.00 | 0.00 | O |
| ATOM | 456 | C4'  | A A | 15 | 25.379 | -14.580 | 86.357 | 1.00 | 0.00 | C |
| ATOM | 457 | O4'  | A A | 15 | 24.561 | -15.462 | 85.522 | 1.00 | 0.00 | O |
| ATOM | 458 | C5'  | A A | 15 | 25.380 | -15.116 | 87.768 | 1.00 | 0.00 | C |
| ATOM | 459 | O5'  | A A | 15 | 24.163 | -14.711 | 88.447 | 1.00 | 0.00 | O |
| ATOM | 460 | O1P  | A A | 15 | 24.992 | -13.161 | 90.249 | 1.00 | 0.00 | O |
| ATOM | 461 | O2P  | A A | 15 | 22.853 | -14.432 | 90.572 | 1.00 | 0.00 | O |
| ATOM | 462 | P    | A A | 15 | 24.223 | -14.400 | 90.010 | 1.00 | 0.00 | P |
| ATOM | 463 | H2   | A A | 15 | 21.043 | -17.798 | 81.827 | 1.00 | 0.00 | H |
| ATOM | 464 | H8   | A A | 15 | 22.004 | -15.448 | 87.718 | 1.00 | 0.00 | H |
| ATOM | 465 | H1'  | A A | 15 | 23.297 | -14.669 | 84.139 | 1.00 | 0.00 | H |
| ATOM | 466 | H3'  | A A | 15 | 24.944 | -12.557 | 87.021 | 1.00 | 0.00 | H |
| ATOM | 467 | H4'  | A A | 15 | 26.415 | -14.519 | 86.023 | 1.00 | 0.00 | H |
| ATOM | 468 | H61  | A A | 15 | 18.322 | -19.596 | 84.925 | 1.00 | 0.00 | H |
| ATOM | 469 | H62  | A A | 15 | 18.747 | -18.813 | 86.472 | 1.00 | 0.00 | H |
| ATOM | 470 | H2'1 | A A | 15 | 22.776 | -13.589 | 86.925 | 1.00 | 0.00 | H |
| ATOM | 471 | H2'2 | A A | 15 | 22.790 | -12.721 | 85.395 | 1.00 | 0.00 | H |
| ATOM | 472 | H5'1 | A A | 15 | 25.438 | -16.204 | 87.739 | 1.00 | 0.00 | H |

|      |     |      |   |   |    |        |         |        |      |      |   |
|------|-----|------|---|---|----|--------|---------|--------|------|------|---|
| ATOM | 473 | H5'2 | A | A | 15 | 26.245 | -14.724 | 88.299 | 1.00 | 0.00 | H |
| ATOM | 474 | C1'  | C | A | 16 | 21.334 | -13.365 | 80.914 | 1.00 | 0.00 | C |
| ATOM | 475 | N1   | C | A | 16 | 20.463 | -13.796 | 82.040 | 1.00 | 0.00 | N |
| ATOM | 476 | C2   | C | A | 16 | 19.489 | -14.757 | 81.781 | 1.00 | 0.00 | C |
| ATOM | 477 | O2   | C | A | 16 | 19.388 | -15.209 | 80.634 | 1.00 | 0.00 | O |
| ATOM | 478 | N3   | C | A | 16 | 18.685 | -15.163 | 82.794 | 1.00 | 0.00 | N |
| ATOM | 479 | C4   | C | A | 16 | 18.819 | -14.654 | 84.024 | 1.00 | 0.00 | C |
| ATOM | 480 | N4   | C | A | 16 | 18.008 | -15.090 | 84.979 | 1.00 | 0.00 | N |
| ATOM | 481 | C5   | C | A | 16 | 19.809 | -13.661 | 84.320 | 1.00 | 0.00 | C |
| ATOM | 482 | C6   | C | A | 16 | 20.612 | -13.269 | 83.287 | 1.00 | 0.00 | C |
| ATOM | 483 | C2'  | C | A | 16 | 21.669 | -11.880 | 80.929 | 1.00 | 0.00 | C |
| ATOM | 484 | C3'  | C | A | 16 | 23.097 | -11.871 | 80.405 | 1.00 | 0.00 | C |
| ATOM | 485 | O3'  | C | A | 16 | 23.073 | -11.880 | 78.980 | 1.00 | 0.00 | O |
| ATOM | 486 | C4'  | C | A | 16 | 23.679 | -13.160 | 80.983 | 1.00 | 0.00 | C |
| ATOM | 487 | O4'  | C | A | 16 | 22.548 | -14.087 | 81.008 | 1.00 | 0.00 | O |
| ATOM | 488 | C5'  | C | A | 16 | 24.260 | -13.068 | 82.375 | 1.00 | 0.00 | C |
| ATOM | 489 | O5'  | C | A | 16 | 23.468 | -12.157 | 83.178 | 1.00 | 0.00 | O |
| ATOM | 490 | O1P  | C | A | 16 | 25.049 | -10.252 | 83.628 | 1.00 | 0.00 | O |
| ATOM | 491 | O2P  | C | A | 16 | 23.201 | -10.758 | 85.248 | 1.00 | 0.00 | O |
| ATOM | 492 | P    | C | A | 16 | 24.203 | -11.270 | 84.279 | 1.00 | 0.00 | P |
| ATOM | 493 | H5   | C | A | 16 | 19.916 | -13.238 | 85.321 | 1.00 | 0.00 | H |
| ATOM | 494 | H6   | C | A | 16 | 21.386 | -12.523 | 83.464 | 1.00 | 0.00 | H |
| ATOM | 495 | H1'  | C | A | 16 | 20.848 | -13.647 | 79.979 | 1.00 | 0.00 | H |
| ATOM | 496 | H3'  | C | A | 16 | 23.653 | -10.998 | 80.752 | 1.00 | 0.00 | H |
| ATOM | 497 | H4'  | C | A | 16 | 24.476 | -13.475 | 80.310 | 1.00 | 0.00 | H |
| ATOM | 498 | H41  | C | A | 16 | 18.090 | -14.717 | 85.936 | 1.00 | 0.00 | H |
| ATOM | 499 | H42  | C | A | 16 | 17.295 | -15.802 | 84.764 | 1.00 | 0.00 | H |
| ATOM | 500 | H2'1 | C | A | 16 | 21.612 | -11.452 | 81.930 | 1.00 | 0.00 | H |
| ATOM | 501 | H2'2 | C | A | 16 | 21.006 | -11.299 | 80.286 | 1.00 | 0.00 | H |
| ATOM | 502 | H5'1 | C | A | 16 | 24.257 | -14.059 | 82.828 | 1.00 | 0.00 | H |
| ATOM | 503 | H5'2 | C | A | 16 | 25.285 | -12.706 | 82.311 | 1.00 | 0.00 | H |
| ATOM | 504 | C1'  | G | A | 17 | 17.798 | -13.270 | 77.449 | 1.00 | 0.00 | C |
| ATOM | 505 | N1   | G | A | 17 | 14.752 | -14.576 | 81.329 | 1.00 | 0.00 | N |
| ATOM | 506 | C2   | G | A | 17 | 14.788 | -15.049 | 80.028 | 1.00 | 0.00 | C |
| ATOM | 507 | N2   | G | A | 17 | 13.891 | -15.994 | 79.721 | 1.00 | 0.00 | N |
| ATOM | 508 | N3   | G | A | 17 | 15.648 | -14.614 | 79.110 | 1.00 | 0.00 | N |
| ATOM | 509 | C4   | G | A | 17 | 16.478 | -13.652 | 79.593 | 1.00 | 0.00 | C |
| ATOM | 510 | C5   | G | A | 17 | 16.514 | -13.116 | 80.870 | 1.00 | 0.00 | C |
| ATOM | 511 | C6   | G | A | 17 | 15.603 | -13.579 | 81.847 | 1.00 | 0.00 | C |
| ATOM | 512 | O6   | G | A | 17 | 15.479 | -13.230 | 83.022 | 1.00 | 0.00 | O |
| ATOM | 513 | N7   | G | A | 17 | 17.514 | -12.147 | 80.960 | 1.00 | 0.00 | N |
| ATOM | 514 | C8   | G | A | 17 | 18.044 | -12.129 | 79.763 | 1.00 | 0.00 | C |
| ATOM | 515 | N9   | G | A | 17 | 17.467 | -13.015 | 78.877 | 1.00 | 0.00 | N |
| ATOM | 516 | C2'  | G | A | 17 | 18.178 | -12.017 | 76.673 | 1.00 | 0.00 | C |
| ATOM | 517 | C3'  | G | A | 17 | 19.247 | -12.539 | 75.728 | 1.00 | 0.00 | C |
| ATOM | 518 | O3'  | G | A | 17 | 18.621 | -13.099 | 74.576 | 1.00 | 0.00 | O |
| ATOM | 519 | C4'  | G | A | 17 | 19.958 | -13.597 | 76.571 | 1.00 | 0.00 | C |
| ATOM | 520 | O4'  | G | A | 17 | 18.901 | -14.156 | 77.413 | 1.00 | 0.00 | O |
| ATOM | 521 | C5'  | G | A | 17 | 21.077 | -13.106 | 77.458 | 1.00 | 0.00 | C |
| ATOM | 522 | O5'  | G | A | 17 | 20.744 | -11.800 | 77.991 | 1.00 | 0.00 | O |
| ATOM | 523 | O1P  | G | A | 17 | 22.455 | -10.288 | 76.931 | 1.00 | 0.00 | O |
| ATOM | 524 | O2P  | G | A | 17 | 21.446 | -9.684  | 79.148 | 1.00 | 0.00 | O |
| ATOM | 525 | P    | G | A | 17 | 21.918 | -10.747 | 78.228 | 1.00 | 0.00 | P |
| ATOM | 526 | H1   | G | A | 17 | 14.051 | -14.983 | 81.964 | 1.00 | 0.00 | H |

|      |     |      |     |    |        |         |        |      |      |   |
|------|-----|------|-----|----|--------|---------|--------|------|------|---|
| ATOM | 527 | H8   | G A | 17 | 18.870 | -11.471 | 79.490 | 1.00 | 0.00 | H |
| ATOM | 528 | H1'  | G A | 17 | 16.949 | -13.773 | 76.987 | 1.00 | 0.00 | H |
| ATOM | 529 | H21  | G A | 17 | 13.229 | -16.328 | 80.437 | 1.00 | 0.00 | H |
| ATOM | 530 | H3'  | G A | 17 | 19.937 | -11.755 | 75.419 | 1.00 | 0.00 | H |
| ATOM | 531 | H22  | G A | 17 | 13.863 | -16.386 | 78.769 | 1.00 | 0.00 | H |
| ATOM | 532 | H4'  | G A | 17 | 20.377 | -14.324 | 75.877 | 1.00 | 0.00 | H |
| ATOM | 533 | H2'1 | G A | 17 | 18.570 | -11.233 | 77.322 | 1.00 | 0.00 | H |
| ATOM | 534 | H2'2 | G A | 17 | 17.333 | -11.598 | 76.125 | 1.00 | 0.00 | H |
| ATOM | 535 | H5'1 | G A | 17 | 21.219 | -13.813 | 78.277 | 1.00 | 0.00 | H |
| ATOM | 536 | H5'2 | G A | 17 | 21.995 | -13.045 | 76.875 | 1.00 | 0.00 | H |
| ATOM | 537 | C1'  | G A | 18 | 13.140 | -13.743 | 75.834 | 1.00 | 0.00 | C |
| ATOM | 538 | N1   | G A | 18 | 11.954 | -12.709 | 80.686 | 1.00 | 0.00 | N |
| ATOM | 539 | C2   | G A | 18 | 11.418 | -13.648 | 79.823 | 1.00 | 0.00 | C |
| ATOM | 540 | N2   | G A | 18 | 10.432 | -14.411 | 80.315 | 1.00 | 0.00 | N |
| ATOM | 541 | N3   | G A | 18 | 11.831 | -13.811 | 78.568 | 1.00 | 0.00 | N |
| ATOM | 542 | C4   | G A | 18 | 12.827 | -12.951 | 78.235 | 1.00 | 0.00 | C |
| ATOM | 543 | C5   | G A | 18 | 13.420 | -11.981 | 79.027 | 1.00 | 0.00 | C |
| ATOM | 544 | C6   | G A | 18 | 12.985 | -11.809 | 80.362 | 1.00 | 0.00 | C |
| ATOM | 545 | O6   | G A | 18 | 13.383 | -11.010 | 81.211 | 1.00 | 0.00 | O |
| ATOM | 546 | N7   | G A | 18 | 14.408 | -11.306 | 78.308 | 1.00 | 0.00 | N |
| ATOM | 547 | C8   | G A | 18 | 14.387 | -11.876 | 77.130 | 1.00 | 0.00 | C |
| ATOM | 548 | N9   | G A | 18 | 13.452 | -12.883 | 77.008 | 1.00 | 0.00 | N |
| ATOM | 549 | C2'  | G A | 18 | 13.213 | -13.012 | 74.501 | 1.00 | 0.00 | C |
| ATOM | 550 | C3'  | G A | 18 | 13.762 | -14.088 | 73.579 | 1.00 | 0.00 | C |
| ATOM | 551 | O3'  | G A | 18 | 12.686 | -14.897 | 73.111 | 1.00 | 0.00 | O |
| ATOM | 552 | C4'  | G A | 18 | 14.713 | -14.865 | 74.489 | 1.00 | 0.00 | C |
| ATOM | 553 | O4'  | G A | 18 | 14.085 | -14.796 | 75.808 | 1.00 | 0.00 | O |
| ATOM | 554 | C5'  | G A | 18 | 16.122 | -14.332 | 74.595 | 1.00 | 0.00 | C |
| ATOM | 555 | O5'  | G A | 18 | 16.104 | -12.883 | 74.565 | 1.00 | 0.00 | O |
| ATOM | 556 | O1P  | G A | 18 | 17.276 | -12.330 | 72.407 | 1.00 | 0.00 | O |
| ATOM | 557 | O2P  | G A | 18 | 17.321 | -10.699 | 74.311 | 1.00 | 0.00 | O |
| ATOM | 558 | P    | G A | 18 | 17.314 | -12.114 | 73.865 | 1.00 | 0.00 | P |
| ATOM | 559 | H1   | G A | 18 | 11.566 | -12.667 | 81.642 | 1.00 | 0.00 | H |
| ATOM | 560 | H8   | G A | 18 | 15.047 | -11.581 | 76.315 | 1.00 | 0.00 | H |
| ATOM | 561 | H1'  | G A | 18 | 12.153 | -14.183 | 75.986 | 1.00 | 0.00 | H |
| ATOM | 562 | H21  | G A | 18 | 10.121 | -14.279 | 81.290 | 1.00 | 0.00 | H |
| ATOM | 563 | H3'  | G A | 18 | 14.292 | -13.665 | 72.725 | 1.00 | 0.00 | H |
| ATOM | 564 | H22  | G A | 18 | 9.990  | -15.124 | 79.722 | 1.00 | 0.00 | H |
| ATOM | 565 | H4'  | G A | 18 | 14.769 | -15.880 | 74.096 | 1.00 | 0.00 | H |
| ATOM | 566 | H2'1 | G A | 18 | 13.876 | -12.148 | 74.540 | 1.00 | 0.00 | H |
| ATOM | 567 | H2'2 | G A | 18 | 12.237 | -12.662 | 74.167 | 1.00 | 0.00 | H |
| ATOM | 568 | H5'1 | G A | 18 | 16.564 | -14.674 | 75.531 | 1.00 | 0.00 | H |
| ATOM | 569 | H5'2 | G A | 18 | 16.712 | -14.710 | 73.762 | 1.00 | 0.00 | H |
| ATOM | 570 | C1'  | T A | 19 | 8.219  | -13.759 | 76.370 | 1.00 | 0.00 | C |
| ATOM | 571 | N1   | T A | 19 | 9.019  | -12.605 | 76.859 | 1.00 | 0.00 | N |
| ATOM | 572 | C2   | T A | 19 | 8.811  | -12.200 | 78.162 | 1.00 | 0.00 | C |
| ATOM | 573 | O2   | T A | 19 | 8.009  | -12.746 | 78.902 | 1.00 | 0.00 | O |
| ATOM | 574 | N3   | T A | 19 | 9.574  | -11.126 | 78.575 | 1.00 | 0.00 | N |
| ATOM | 575 | C4   | T A | 19 | 10.502 | -10.438 | 77.821 | 1.00 | 0.00 | C |
| ATOM | 576 | O4   | T A | 19 | 11.128 | -9.485  | 78.301 | 1.00 | 0.00 | O |
| ATOM | 577 | C5   | T A | 19 | 10.652 | -10.933 | 76.473 | 1.00 | 0.00 | C |
| ATOM | 578 | C6   | T A | 19 | 9.923  | -11.980 | 76.036 | 1.00 | 0.00 | C |
| ATOM | 579 | C7   | T A | 19 | 11.653 | -10.216 | 75.617 | 1.00 | 0.00 | C |
| ATOM | 580 | C2'  | T A | 19 | 7.773  | -13.626 | 74.919 | 1.00 | 0.00 | C |



|      |     |      |       |    |        |         |        |      |      |   |
|------|-----|------|-------|----|--------|---------|--------|------|------|---|
| ATOM | 581 | C3'  | T A   | 19 | 7.850  | -15.063 | 74.430 | 1.00 | 0.00 | C |
| ATOM | 582 | O3'  | T A   | 19 | 6.642  | -15.739 | 74.773 | 1.00 | 0.00 | O |
| ATOM | 583 | C4'  | T A   | 19 | 9.054  | -15.616 | 75.188 | 1.00 | 0.00 | C |
| ATOM | 584 | O4'  | T A   | 19 | 9.024  | -14.918 | 76.473 | 1.00 | 0.00 | O |
| ATOM | 585 | C5'  | T A   | 19 | 10.407 | -15.399 | 74.551 | 1.00 | 0.00 | C |
| ATOM | 586 | O5'  | T A   | 19 | 10.439 | -14.103 | 73.901 | 1.00 | 0.00 | O |
| ATOM | 587 | O1P  | T A   | 19 | 10.649 | -14.680 | 71.460 | 1.00 | 0.00 | O |
| ATOM | 588 | O2P  | T A   | 19 | 11.540 | -12.495 | 72.315 | 1.00 | 0.00 | O |
| ATOM | 589 | P    | T A   | 19 | 11.289 | -13.935 | 72.562 | 1.00 | 0.00 | P |
| ATOM | 590 | H3   | T A   | 19 | 9.440  | -10.806 | 79.546 | 1.00 | 0.00 | H |
| ATOM | 591 | H6   | T A   | 19 | 10.053 | -12.335 | 75.015 | 1.00 | 0.00 | H |
| ATOM | 592 | H1'  | T A   | 19 | 7.362  | -13.885 | 77.032 | 1.00 | 0.00 | H |
| ATOM | 593 | H3'  | T A   | 19 | 8.003  | -15.120 | 73.353 | 1.00 | 0.00 | H |
| ATOM | 594 | H4'  | T A   | 19 | 8.901  | -16.693 | 75.284 | 1.00 | 0.00 | H |
| ATOM | 595 | H71  | T A   | 19 | 11.138 | -9.715  | 74.798 | 1.00 | 0.00 | H |
| ATOM | 596 | H72  | T A   | 19 | 12.182 | -9.476  | 76.218 | 1.00 | 0.00 | H |
| ATOM | 597 | H73  | T A   | 19 | 12.368 | -10.933 | 75.211 | 1.00 | 0.00 | H |
| ATOM | 598 | H2'1 | T A   | 19 | 8.430  | -12.975 | 74.344 | 1.00 | 0.00 | H |
| ATOM | 599 | H2'2 | T A   | 19 | 6.761  | -13.230 | 74.833 | 1.00 | 0.00 | H |
| ATOM | 600 | H5'1 | T A   | 19 | 11.177 | -15.444 | 75.321 | 1.00 | 0.00 | H |
| ATOM | 601 | H5'2 | T A   | 19 | 10.586 | -16.182 | 73.817 | 1.00 | 0.00 | H |
| ATOM | 602 | C01  | LNK A | 20 | 3.330  | -15.808 | 73.072 | 0.00 | 0.00 | C |
| ATOM | 603 | O1   | LNK A | 20 | 4.676  | -15.339 | 73.185 | 1.00 | 0.00 | O |
| ATOM | 604 | S    | LNK A | 20 | 0.113  | -15.186 | 70.811 | 0.00 | 0.00 | S |
| ATOM | 605 | C02  | LNK A | 20 | 2.635  | -15.091 | 71.897 | 0.00 | 0.00 | C |
| ATOM | 606 | C03  | LNK A | 20 | 1.162  | -14.828 | 72.256 | 0.00 | 0.00 | C |
| ATOM | 607 | O1P  | LNK A | 20 | 5.590  | -13.347 | 74.424 | 1.00 | 0.00 | O |
| ATOM | 608 | O2P  | LNK A | 20 | 4.137  | -15.011 | 75.617 | 1.00 | 0.00 | O |
| ATOM | 609 | P    | LNK A | 20 | 5.172  | -14.754 | 74.584 | 1.00 | 0.00 | P |
| ATOM | 610 | H01  | LNK A | 20 | 2.792  | -15.597 | 73.994 | 0.00 | 0.00 | H |
| ATOM | 611 | H02  | LNK A | 20 | 3.334  | -16.883 | 72.889 | 0.00 | 0.00 | H |
| ATOM | 612 | H03  | LNK A | 20 | 1.037  | -13.785 | 72.545 | 0.00 | 0.00 | H |
| ATOM | 613 | H04  | LNK A | 20 | 2.689  | -15.718 | 71.006 | 0.00 | 0.00 | H |
| ATOM | 614 | H05  | LNK A | 20 | 3.137  | -14.142 | 71.704 | 0.00 | 0.00 | H |
| ATOM | 615 | H06  | LNK A | 20 | 0.869  | -15.472 | 73.086 | 0.00 | 0.00 | H |
| ATOM | 616 | AU   | LNK A | 20 | -0.528 | -14.976 | 70.935 |      |      |   |
| TER  |     |      |       |    |        |         |        |      |      |   |
| ATOM | 618 | C1'  | A B   | 2  | 8.043  | -9.111  | 86.232 | 1.00 | 0.00 | C |
| ATOM | 619 | N1   | A B   | 2  | 9.197  | -10.193 | 81.350 | 1.00 | 0.00 | N |
| ATOM | 620 | C2   | A B   | 2  | 8.350  | -10.742 | 82.214 | 1.00 | 0.00 | C |
| ATOM | 621 | N3   | A B   | 2  | 8.098  | -10.410 | 83.464 | 1.00 | 0.00 | N |
| ATOM | 622 | C4   | A B   | 2  | 8.857  | -9.360  | 83.828 | 1.00 | 0.00 | C |
| ATOM | 623 | C5   | A B   | 2  | 9.769  | -8.687  | 83.064 | 1.00 | 0.00 | C |
| ATOM | 624 | C6   | A B   | 2  | 9.939  | -9.147  | 81.741 | 1.00 | 0.00 | C |
| ATOM | 625 | N6   | A B   | 2  | 10.798 | -8.584  | 80.874 | 1.00 | 0.00 | N |
| ATOM | 626 | N7   | A B   | 2  | 10.356 | -7.658  | 83.778 | 1.00 | 0.00 | N |
| ATOM | 627 | C8   | A B   | 2  | 9.797  | -7.732  | 84.949 | 1.00 | 0.00 | C |
| ATOM | 628 | N9   | A B   | 2  | 8.873  | -8.739  | 85.053 | 1.00 | 0.00 | N |
| ATOM | 629 | C2'  | A B   | 2  | 8.773  | -8.976  | 87.562 | 1.00 | 0.00 | C |
| ATOM | 630 | C3'  | A B   | 2  | 7.661  | -8.509  | 88.488 | 1.00 | 0.00 | C |
| ATOM | 631 | O3'  | A B   | 2  | 6.939  | -9.643  | 88.960 | 1.00 | 0.00 | O |
| ATOM | 632 | C4'  | A B   | 2  | 6.811  | -7.623  | 87.578 | 1.00 | 0.00 | C |
| ATOM | 633 | O4'  | A B   | 2  | 6.922  | -8.248  | 86.259 | 1.00 | 0.00 | O |
| ATOM | 634 | C5'  | A B   | 2  | 7.234  | -6.177  | 87.465 | 1.00 | 0.00 | C |

|      |     |      |     |   |        |         |        |      |      |   |
|------|-----|------|-----|---|--------|---------|--------|------|------|---|
| ATOM | 635 | O5'  | A B | 2 | 8.681  | -6.085  | 87.490 | 1.00 | 0.00 | O |
| ATOM | 636 | H2   | A B | 2 | 7.782  | -11.590 | 81.837 | 1.00 | 0.00 | H |
| ATOM | 637 | H8   | A B | 2 | 10.039 | -7.056  | 85.770 | 1.00 | 0.00 | H |
| ATOM | 638 | H1'  | A B | 2 | 7.682  | -10.129 | 86.087 | 1.00 | 0.00 | H |
| ATOM | 639 | H3'  | A B | 2 | 8.046  | -7.946  | 89.338 | 1.00 | 0.00 | H |
| ATOM | 640 | H4'  | A B | 2 | 5.797  | -7.644  | 87.974 | 1.00 | 0.00 | H |
| ATOM | 641 | H61  | A B | 2 | 10.882 | -8.956  | 79.919 | 1.00 | 0.00 | H |
| ATOM | 642 | H62  | A B | 2 | 11.374 | -7.780  | 81.169 | 1.00 | 0.00 | H |
| ATOM | 643 | H2'1 | A B | 2 | 9.584  | -8.249  | 87.517 | 1.00 | 0.00 | H |
| ATOM | 644 | H2'2 | A B | 2 | 9.198  | -9.923  | 87.898 | 1.00 | 0.00 | H |
| ATOM | 645 | H5'1 | A B | 2 | 6.854  | -5.766  | 86.529 | 1.00 | 0.00 | H |
| ATOM | 646 | H5'2 | A B | 2 | 6.814  | -5.617  | 88.300 | 1.00 | 0.00 | H |
| ATOM | 647 | C1'  | C B | 3 | 8.426  | -14.022 | 85.608 | 1.00 | 0.00 | C |
| ATOM | 648 | N1   | C B | 3 | 9.517  | -13.116 | 85.156 | 1.00 | 0.00 | N |
| ATOM | 649 | C2   | C B | 3 | 9.979  | -13.252 | 83.849 | 1.00 | 0.00 | C |
| ATOM | 650 | O2   | C B | 3 | 9.466  | -14.114 | 83.122 | 1.00 | 0.00 | O |
| ATOM | 651 | N3   | C B | 3 | 10.972 | -12.439 | 83.417 | 1.00 | 0.00 | N |
| ATOM | 652 | C4   | C B | 3 | 11.507 | -11.516 | 84.227 | 1.00 | 0.00 | C |
| ATOM | 653 | N4   | C B | 3 | 12.474 | -10.743 | 83.752 | 1.00 | 0.00 | N |
| ATOM | 654 | C5   | C B | 3 | 11.056 | -11.355 | 85.579 | 1.00 | 0.00 | C |
| ATOM | 655 | C6   | C B | 3 | 10.051 | -12.185 | 85.992 | 1.00 | 0.00 | C |
| ATOM | 656 | C2'  | C B | 3 | 8.571  | -14.485 | 87.052 | 1.00 | 0.00 | C |
| ATOM | 657 | C3'  | C B | 3 | 7.124  | -14.540 | 87.515 | 1.00 | 0.00 | C |
| ATOM | 658 | O3'  | C B | 3 | 6.558  | -15.793 | 87.136 | 1.00 | 0.00 | O |
| ATOM | 659 | C4'  | C B | 3 | 6.485  | -13.371 | 86.769 | 1.00 | 0.00 | C |
| ATOM | 660 | O4'  | C B | 3 | 7.206  | -13.314 | 85.497 | 1.00 | 0.00 | O |
| ATOM | 661 | C5'  | C B | 3 | 6.576  | -12.018 | 87.437 | 1.00 | 0.00 | C |
| ATOM | 662 | O5'  | C B | 3 | 7.853  | -11.892 | 88.111 | 1.00 | 0.00 | O |
| ATOM | 663 | O1P  | C B | 3 | 7.218  | -11.779 | 90.545 | 1.00 | 0.00 | O |
| ATOM | 664 | O2P  | C B | 3 | 9.334  | -10.690 | 89.749 | 1.00 | 0.00 | O |
| ATOM | 665 | P    | C B | 3 | 7.924  | -11.056 | 89.468 | 1.00 | 0.00 | P |
| ATOM | 666 | H5   | C B | 3 | 11.493 | -10.612 | 86.246 | 1.00 | 0.00 | H |
| ATOM | 667 | H6   | C B | 3 | 9.671  | -12.096 | 87.008 | 1.00 | 0.00 | H |
| ATOM | 668 | H1'  | C B | 3 | 8.385  | -14.873 | 84.928 | 1.00 | 0.00 | H |
| ATOM | 669 | H3'  | C B | 3 | 7.035  | -14.414 | 88.593 | 1.00 | 0.00 | H |
| ATOM | 670 | H4'  | C B | 3 | 5.428  | -13.609 | 86.650 | 1.00 | 0.00 | H |
| ATOM | 671 | H41  | C B | 3 | 12.901 | -10.023 | 84.354 | 1.00 | 0.00 | H |
| ATOM | 672 | H42  | C B | 3 | 12.798 | -10.861 | 82.781 | 1.00 | 0.00 | H |
| ATOM | 673 | H2'1 | C B | 3 | 9.154  | -13.789 | 87.653 | 1.00 | 0.00 | H |
| ATOM | 674 | H2'2 | C B | 3 | 9.050  | -15.463 | 87.127 | 1.00 | 0.00 | H |
| ATOM | 675 | H5'1 | C B | 3 | 6.481  | -11.237 | 86.681 | 1.00 | 0.00 | H |
| ATOM | 676 | H5'2 | C B | 3 | 5.768  | -11.919 | 88.158 | 1.00 | 0.00 | H |
| ATOM | 677 | C1'  | C B | 4 | 10.090 | -18.111 | 83.365 | 1.00 | 0.00 | C |
| ATOM | 678 | N1   | C B | 4 | 11.037 | -17.053 | 83.806 | 1.00 | 0.00 | N |
| ATOM | 679 | C2   | C B | 4 | 11.954 | -16.566 | 82.876 | 1.00 | 0.00 | C |
| ATOM | 680 | O2   | C B | 4 | 11.944 | -17.032 | 81.728 | 1.00 | 0.00 | O |
| ATOM | 681 | N3   | C B | 4 | 12.826 | -15.603 | 83.257 | 1.00 | 0.00 | N |
| ATOM | 682 | C4   | C B | 4 | 12.813 | -15.117 | 84.507 | 1.00 | 0.00 | C |
| ATOM | 683 | N4   | C B | 4 | 13.684 | -14.172 | 84.826 | 1.00 | 0.00 | N |
| ATOM | 684 | C5   | C B | 4 | 11.885 | -15.601 | 85.486 | 1.00 | 0.00 | C |
| ATOM | 685 | C6   | C B | 4 | 11.013 | -16.570 | 85.078 | 1.00 | 0.00 | C |
| ATOM | 686 | C2'  | C B | 4 | 9.810  | -19.165 | 84.426 | 1.00 | 0.00 | C |
| ATOM | 687 | C3'  | C B | 4 | 8.344  | -19.486 | 84.176 | 1.00 | 0.00 | C |
| ATOM | 688 | O3'  | C B | 4 | 8.249  | -20.461 | 83.140 | 1.00 | 0.00 | O |

|      |     |      |     |   |        |         |        |      |      |   |
|------|-----|------|-----|---|--------|---------|--------|------|------|---|
| ATOM | 689 | C4'  | C B | 4 | 7.769  | -18.136 | 83.753 | 1.00 | 0.00 | C |
| ATOM | 690 | O4'  | C B | 4 | 8.865  | -17.483 | 83.036 | 1.00 | 0.00 | O |
| ATOM | 691 | C5'  | C B | 4 | 7.309  | -17.223 | 84.866 | 1.00 | 0.00 | C |
| ATOM | 692 | O5'  | C B | 4 | 8.196  | -17.356 | 86.006 | 1.00 | 0.00 | O |
| ATOM | 693 | O1P  | C B | 4 | 6.724  | -18.375 | 87.775 | 1.00 | 0.00 | O |
| ATOM | 694 | O2P  | C B | 4 | 8.682  | -16.952 | 88.438 | 1.00 | 0.00 | O |
| ATOM | 695 | P    | C B | 4 | 7.587  | -17.216 | 87.472 | 1.00 | 0.00 | P |
| ATOM | 696 | H5   | C B | 4 | 11.874 | -15.216 | 86.506 | 1.00 | 0.00 | H |
| ATOM | 697 | H6   | C B | 4 | 10.282 | -16.964 | 85.785 | 1.00 | 0.00 | H |
| ATOM | 698 | H1'  | C B | 4 | 10.487 | -18.567 | 82.457 | 1.00 | 0.00 | H |
| ATOM | 699 | H3'  | C B | 4 | 7.849  | -19.861 | 85.072 | 1.00 | 0.00 | H |
| ATOM | 700 | H4'  | C B | 4 | 6.907  | -18.343 | 83.117 | 1.00 | 0.00 | H |
| ATOM | 701 | H41  | C B | 4 | 13.694 | -13.780 | 85.778 | 1.00 | 0.00 | H |
| ATOM | 702 | H42  | C B | 4 | 14.353 | -13.828 | 84.119 | 1.00 | 0.00 | H |
| ATOM | 703 | H2'1 | C B | 4 | 9.965  | -18.787 | 85.437 | 1.00 | 0.00 | H |
| ATOM | 704 | H2'2 | C B | 4 | 10.436 | -20.050 | 84.308 | 1.00 | 0.00 | H |
| ATOM | 705 | H5'1 | C B | 4 | 7.317  | -16.192 | 84.511 | 1.00 | 0.00 | H |
| ATOM | 706 | H5'2 | C B | 4 | 6.295  | -17.495 | 85.156 | 1.00 | 0.00 | H |
| ATOM | 707 | C1'  | G B | 5 | 13.322 | -20.681 | 80.630 | 1.00 | 0.00 | C |
| ATOM | 708 | N1   | G B | 5 | 16.639 | -17.169 | 82.272 | 1.00 | 0.00 | N |
| ATOM | 709 | C2   | G B | 5 | 16.478 | -17.720 | 81.012 | 1.00 | 0.00 | C |
| ATOM | 710 | N2   | G B | 5 | 17.314 | -17.276 | 80.065 | 1.00 | 0.00 | N |
| ATOM | 711 | N3   | G B | 5 | 15.557 | -18.638 | 80.721 | 1.00 | 0.00 | N |
| ATOM | 712 | C4   | G B | 5 | 14.803 | -18.973 | 81.802 | 1.00 | 0.00 | C |
| ATOM | 713 | C5   | G B | 5 | 14.895 | -18.481 | 83.093 | 1.00 | 0.00 | C |
| ATOM | 714 | C6   | G B | 5 | 15.869 | -17.504 | 83.402 | 1.00 | 0.00 | C |
| ATOM | 715 | O6   | G B | 5 | 16.101 | -16.954 | 84.478 | 1.00 | 0.00 | O |
| ATOM | 716 | N7   | G B | 5 | 13.937 | -19.088 | 83.908 | 1.00 | 0.00 | N |
| ATOM | 717 | C8   | G B | 5 | 13.308 | -19.907 | 83.104 | 1.00 | 0.00 | C |
| ATOM | 718 | N9   | G B | 5 | 13.780 | -19.894 | 81.807 | 1.00 | 0.00 | N |
| ATOM | 719 | C2'  | G B | 5 | 12.920 | -22.110 | 80.966 | 1.00 | 0.00 | C |
| ATOM | 720 | C3'  | G B | 5 | 11.758 | -22.346 | 80.014 | 1.00 | 0.00 | C |
| ATOM | 721 | O3'  | G B | 5 | 12.267 | -22.755 | 78.747 | 1.00 | 0.00 | O |
| ATOM | 722 | C4'  | G B | 5 | 11.085 | -20.976 | 79.952 | 1.00 | 0.00 | C |
| ATOM | 723 | O4'  | G B | 5 | 12.192 | -20.028 | 80.087 | 1.00 | 0.00 | O |
| ATOM | 724 | C5'  | G B | 5 | 10.062 | -20.681 | 81.023 | 1.00 | 0.00 | C |
| ATOM | 725 | O5'  | G B | 5 | 10.480 | -21.273 | 82.278 | 1.00 | 0.00 | O |
| ATOM | 726 | O1P  | G B | 5 | 8.739  | -23.039 | 82.700 | 1.00 | 0.00 | O |
| ATOM | 727 | O2P  | G B | 5 | 9.949  | -21.985 | 84.628 | 1.00 | 0.00 | O |
| ATOM | 728 | P    | G B | 5 | 9.367  | -21.833 | 83.273 | 1.00 | 0.00 | P |
| ATOM | 729 | H1   | G B | 5 | 17.377 | -16.460 | 82.390 | 1.00 | 0.00 | H |
| ATOM | 730 | H8   | G B | 5 | 12.486 | -20.544 | 83.429 | 1.00 | 0.00 | H |
| ATOM | 731 | H1'  | G B | 5 | 14.111 | -20.665 | 79.879 | 1.00 | 0.00 | H |
| ATOM | 732 | H21  | G B | 5 | 18.021 | -16.565 | 80.296 | 1.00 | 0.00 | H |
| ATOM | 733 | H3'  | G B | 5 | 11.069 | -23.105 | 80.390 | 1.00 | 0.00 | H |
| ATOM | 734 | H22  | G B | 5 | 17.249 | -17.649 | 79.107 | 1.00 | 0.00 | H |
| ATOM | 735 | H4'  | G B | 5 | 10.586 | -20.912 | 78.987 | 1.00 | 0.00 | H |
| ATOM | 736 | H2'1 | G B | 5 | 12.610 | -22.220 | 82.005 | 1.00 | 0.00 | H |
| ATOM | 737 | H2'2 | G B | 5 | 13.728 | -22.821 | 80.790 | 1.00 | 0.00 | H |
| ATOM | 738 | H5'1 | G B | 5 | 9.967  | -19.601 | 81.138 | 1.00 | 0.00 | H |
| ATOM | 739 | H5'2 | G B | 5 | 9.100  | -21.096 | 80.723 | 1.00 | 0.00 | H |
| ATOM | 740 | C1'  | T B | 6 | 17.795 | -21.621 | 78.730 | 1.00 | 0.00 | C |
| ATOM | 741 | N1   | T B | 6 | 17.633 | -21.407 | 80.192 | 1.00 | 0.00 | N |
| ATOM | 742 | C2   | T B | 6 | 18.465 | -20.481 | 80.790 | 1.00 | 0.00 | C |

|      |     |      |     |   |        |         |        |      |      |   |
|------|-----|------|-----|---|--------|---------|--------|------|------|---|
| ATOM | 743 | O2   | T B | 6 | 19.307 | -19.854 | 80.170 | 1.00 | 0.00 | O |
| ATOM | 744 | N3   | T B | 6 | 18.280 | -20.313 | 82.150 | 1.00 | 0.00 | N |
| ATOM | 745 | C4   | T B | 6 | 17.365 | -20.972 | 82.943 | 1.00 | 0.00 | C |
| ATOM | 746 | O4   | T B | 6 | 17.293 | -20.739 | 84.154 | 1.00 | 0.00 | O |
| ATOM | 747 | C5   | T B | 6 | 16.539 | -21.917 | 82.229 | 1.00 | 0.00 | C |
| ATOM | 748 | C6   | T B | 6 | 16.691 | -22.106 | 80.903 | 1.00 | 0.00 | C |
| ATOM | 749 | C7   | T B | 6 | 15.524 | -22.655 | 83.053 | 1.00 | 0.00 | C |
| ATOM | 750 | C2'  | T B | 6 | 17.622 | -23.072 | 78.301 | 1.00 | 0.00 | C |
| ATOM | 751 | C3'  | T B | 6 | 16.944 | -22.922 | 76.946 | 1.00 | 0.00 | C |
| ATOM | 752 | O3'  | T B | 6 | 17.937 | -22.714 | 75.945 | 1.00 | 0.00 | O |
| ATOM | 753 | C4'  | T B | 6 | 16.055 | -21.697 | 77.144 | 1.00 | 0.00 | C |
| ATOM | 754 | O4'  | T B | 6 | 16.810 | -20.851 | 78.069 | 1.00 | 0.00 | O |
| ATOM | 755 | C5'  | T B | 6 | 14.685 | -21.948 | 77.729 | 1.00 | 0.00 | C |
| ATOM | 756 | O5'  | T B | 6 | 14.760 | -23.009 | 78.715 | 1.00 | 0.00 | O |
| ATOM | 757 | O1P  | T B | 6 | 13.408 | -24.861 | 77.680 | 1.00 | 0.00 | O |
| ATOM | 758 | O2P  | T B | 6 | 13.612 | -24.699 | 80.177 | 1.00 | 0.00 | O |
| ATOM | 759 | P    | T B | 6 | 13.519 | -23.999 | 78.874 | 1.00 | 0.00 | P |
| ATOM | 760 | H3   | T B | 6 | 18.888 | -19.625 | 82.618 | 1.00 | 0.00 | H |
| ATOM | 761 | H6   | T B | 6 | 16.055 | -22.827 | 80.388 | 1.00 | 0.00 | H |
| ATOM | 762 | H1'  | T B | 6 | 18.773 | -21.240 | 78.434 | 1.00 | 0.00 | H |
| ATOM | 763 | H3'  | T B | 6 | 16.352 | -23.801 | 76.688 | 1.00 | 0.00 | H |
| ATOM | 764 | H4'  | T B | 6 | 15.920 | -21.242 | 76.163 | 1.00 | 0.00 | H |
| ATOM | 765 | H71  | T B | 6 | 15.776 | -23.715 | 83.074 | 1.00 | 0.00 | H |
| ATOM | 766 | H72  | T B | 6 | 15.525 | -22.261 | 84.069 | 1.00 | 0.00 | H |
| ATOM | 767 | H73  | T B | 6 | 14.535 | -22.526 | 82.613 | 1.00 | 0.00 | H |
| ATOM | 768 | H2'1 | T B | 6 | 17.002 | -23.637 | 78.994 | 1.00 | 0.00 | H |
| ATOM | 769 | H2'2 | T B | 6 | 18.575 | -23.594 | 78.210 | 1.00 | 0.00 | H |
| ATOM | 770 | H5'1 | T B | 6 | 14.322 | -21.033 | 78.197 | 1.00 | 0.00 | H |
| ATOM | 771 | H5'2 | T B | 6 | 14.004 | -22.236 | 76.930 | 1.00 | 0.00 | H |
| ATOM | 772 | C1'  | C B | 7 | 22.755 | -21.385 | 78.723 | 1.00 | 0.00 | C |
| ATOM | 773 | N1   | C B | 7 | 22.022 | -21.871 | 79.926 | 1.00 | 0.00 | N |
| ATOM | 774 | C2   | C B | 7 | 22.332 | -21.295 | 81.157 | 1.00 | 0.00 | C |
| ATOM | 775 | O2   | C B | 7 | 23.194 | -20.406 | 81.200 | 1.00 | 0.00 | O |
| ATOM | 776 | N3   | C B | 7 | 21.677 | -21.722 | 82.263 | 1.00 | 0.00 | N |
| ATOM | 777 | C4   | C B | 7 | 20.749 | -22.685 | 82.184 | 1.00 | 0.00 | C |
| ATOM | 778 | N4   | C B | 7 | 20.137 | -23.062 | 83.297 | 1.00 | 0.00 | N |
| ATOM | 779 | C5   | C B | 7 | 20.413 | -23.300 | 80.934 | 1.00 | 0.00 | C |
| ATOM | 780 | C6   | C B | 7 | 21.083 | -22.849 | 79.831 | 1.00 | 0.00 | C |
| ATOM | 781 | C2'  | C B | 7 | 23.094 | -22.484 | 77.727 | 1.00 | 0.00 | C |
| ATOM | 782 | C3'  | C B | 7 | 22.944 | -21.761 | 76.397 | 1.00 | 0.00 | C |
| ATOM | 783 | O3'  | C B | 7 | 24.155 | -21.073 | 76.098 | 1.00 | 0.00 | O |
| ATOM | 784 | C4'  | C B | 7 | 21.785 | -20.803 | 76.660 | 1.00 | 0.00 | C |
| ATOM | 785 | O4'  | C B | 7 | 21.928 | -20.441 | 78.070 | 1.00 | 0.00 | O |
| ATOM | 786 | C5'  | C B | 7 | 20.393 | -21.355 | 76.443 | 1.00 | 0.00 | C |
| ATOM | 787 | O5'  | C B | 7 | 20.349 | -22.743 | 76.854 | 1.00 | 0.00 | O |
| ATOM | 788 | O1P  | C B | 7 | 19.939 | -23.976 | 74.698 | 1.00 | 0.00 | O |
| ATOM | 789 | O2P  | C B | 7 | 19.174 | -24.965 | 76.873 | 1.00 | 0.00 | O |
| ATOM | 790 | P    | C B | 7 | 19.404 | -23.751 | 76.054 | 1.00 | 0.00 | P |
| ATOM | 791 | H5   | C B | 7 | 19.665 | -24.089 | 80.865 | 1.00 | 0.00 | H |
| ATOM | 792 | H6   | C B | 7 | 20.857 | -23.282 | 78.856 | 1.00 | 0.00 | H |
| ATOM | 793 | H1'  | C B | 7 | 23.655 | -20.869 | 79.059 | 1.00 | 0.00 | H |
| ATOM | 794 | H3'  | C B | 7 | 22.708 | -22.449 | 75.583 | 1.00 | 0.00 | H |
| ATOM | 795 | H4'  | C B | 7 | 21.914 | -19.956 | 75.987 | 1.00 | 0.00 | H |
| ATOM | 796 | H41  | C B | 7 | 19.417 | -23.799 | 83.263 | 1.00 | 0.00 | H |

|      |     |      |     |   |        |         |        |      |      |   |
|------|-----|------|-----|---|--------|---------|--------|------|------|---|
| ATOM | 797 | H42  | C B | 7 | 20.381 | -22.619 | 84.196 | 1.00 | 0.00 | H |
| ATOM | 798 | H2'1 | C B | 7 | 22.414 | -23.331 | 77.797 | 1.00 | 0.00 | H |
| ATOM | 799 | H2'2 | C B | 7 | 24.107 | -22.865 | 77.859 | 1.00 | 0.00 | H |
| ATOM | 800 | H5'1 | C B | 7 | 19.683 | -20.774 | 77.029 | 1.00 | 0.00 | H |
| ATOM | 801 | H5'2 | C B | 7 | 20.138 | -21.275 | 75.389 | 1.00 | 0.00 | H |
| ATOM | 802 | C1'  | C B | 8 | 27.195 | -20.960 | 80.875 | 1.00 | 0.00 | C |
| ATOM | 803 | N1   | C B | 8 | 26.213 | -21.966 | 81.362 | 1.00 | 0.00 | N |
| ATOM | 804 | C2   | C B | 8 | 25.921 | -21.987 | 82.725 | 1.00 | 0.00 | C |
| ATOM | 805 | O2   | C B | 8 | 26.488 | -21.176 | 83.469 | 1.00 | 0.00 | O |
| ATOM | 806 | N3   | C B | 8 | 25.028 | -22.895 | 83.188 | 1.00 | 0.00 | N |
| ATOM | 807 | C4   | C B | 8 | 24.432 | -23.760 | 82.358 | 1.00 | 0.00 | C |
| ATOM | 808 | N4   | C B | 8 | 23.564 | -24.624 | 82.866 | 1.00 | 0.00 | N |
| ATOM | 809 | C5   | C B | 8 | 24.714 | -23.766 | 80.952 | 1.00 | 0.00 | C |
| ATOM | 810 | C6   | C B | 8 | 25.615 | -22.837 | 80.507 | 1.00 | 0.00 | C |
| ATOM | 811 | C2'  | C B | 8 | 28.108 | -21.478 | 79.771 | 1.00 | 0.00 | C |
| ATOM | 812 | C3'  | C B | 8 | 28.285 | -20.244 | 78.900 | 1.00 | 0.00 | C |
| ATOM | 813 | O3'  | C B | 8 | 29.335 | -19.442 | 79.434 | 1.00 | 0.00 | O |
| ATOM | 814 | C4'  | C B | 8 | 26.924 | -19.558 | 79.003 | 1.00 | 0.00 | C |
| ATOM | 815 | O4'  | C B | 8 | 26.468 | -19.861 | 80.360 | 1.00 | 0.00 | O |
| ATOM | 816 | C5'  | C B | 8 | 25.867 | -20.014 | 78.026 | 1.00 | 0.00 | C |
| ATOM | 817 | O5'  | C B | 8 | 25.990 | -21.442 | 77.801 | 1.00 | 0.00 | O |
| ATOM | 818 | O1P  | C B | 8 | 26.668 | -21.593 | 75.382 | 1.00 | 0.00 | O |
| ATOM | 819 | O2P  | C B | 8 | 25.419 | -23.485 | 76.455 | 1.00 | 0.00 | O |
| ATOM | 820 | P    | C B | 8 | 25.647 | -22.022 | 76.357 | 1.00 | 0.00 | P |
| ATOM | 821 | H5   | C B | 8 | 24.237 | -24.472 | 80.273 | 1.00 | 0.00 | H |
| ATOM | 822 | H6   | C B | 8 | 25.856 | -22.797 | 79.443 | 1.00 | 0.00 | H |
| ATOM | 823 | H1'  | C B | 8 | 27.776 | -20.609 | 81.728 | 1.00 | 0.00 | H |
| ATOM | 824 | H3'  | C B | 8 | 28.517 | -20.503 | 77.868 | 1.00 | 0.00 | H |
| ATOM | 825 | H4'  | C B | 8 | 27.092 | -18.494 | 78.836 | 1.00 | 0.00 | H |
| ATOM | 826 | H41  | C B | 8 | 23.089 | -25.299 | 82.248 | 1.00 | 0.00 | H |
| ATOM | 827 | H42  | C B | 8 | 23.365 | -24.620 | 83.876 | 1.00 | 0.00 | H |
| ATOM | 828 | H2'1 | C B | 8 | 27.657 | -22.296 | 79.212 | 1.00 | 0.00 | H |
| ATOM | 829 | H2'2 | C B | 8 | 29.064 | -21.832 | 80.158 | 1.00 | 0.00 | H |
| ATOM | 830 | H5'1 | C B | 8 | 24.880 | -19.790 | 78.433 | 1.00 | 0.00 | H |
| ATOM | 831 | H5'2 | C B | 8 | 25.995 | -19.481 | 77.085 | 1.00 | 0.00 | H |
| ATOM | 832 | C1'  | T B | 9 | 30.368 | -21.335 | 84.655 | 1.00 | 0.00 | C |
| ATOM | 833 | N1   | T B | 9 | 29.524 | -22.496 | 84.269 | 1.00 | 0.00 | N |
| ATOM | 834 | C2   | T B | 9 | 28.800 | -23.109 | 85.274 | 1.00 | 0.00 | C |
| ATOM | 835 | O2   | T B | 9 | 28.835 | -22.735 | 86.431 | 1.00 | 0.00 | O |
| ATOM | 836 | N3   | T B | 9 | 28.027 | -24.183 | 84.870 | 1.00 | 0.00 | N |
| ATOM | 837 | C4   | T B | 9 | 27.922 | -24.685 | 83.592 | 1.00 | 0.00 | C |
| ATOM | 838 | O4   | T B | 9 | 27.197 | -25.659 | 83.353 | 1.00 | 0.00 | O |
| ATOM | 839 | C5   | T B | 9 | 28.714 | -23.979 | 82.611 | 1.00 | 0.00 | C |
| ATOM | 840 | C6   | T B | 9 | 29.477 | -22.927 | 82.967 | 1.00 | 0.00 | C |
| ATOM | 841 | C7   | T B | 9 | 28.626 | -24.491 | 81.205 | 1.00 | 0.00 | C |
| ATOM | 842 | C2'  | T B | 9 | 31.700 | -21.271 | 83.915 | 1.00 | 0.00 | C |
| ATOM | 843 | C3'  | T B | 9 | 31.895 | -19.773 | 83.741 | 1.00 | 0.00 | C |
| ATOM | 844 | O3'  | T B | 9 | 32.491 | -19.238 | 84.920 | 1.00 | 0.00 | O |
| ATOM | 845 | C4'  | T B | 9 | 30.470 | -19.268 | 83.531 | 1.00 | 0.00 | C |
| ATOM | 846 | O4'  | T B | 9 | 29.648 | -20.156 | 84.353 | 1.00 | 0.00 | O |
| ATOM | 847 | C5'  | T B | 9 | 29.947 | -19.298 | 82.114 | 1.00 | 0.00 | C |
| ATOM | 848 | O5'  | T B | 9 | 30.452 | -20.474 | 81.431 | 1.00 | 0.00 | O |
| ATOM | 849 | O1P  | T B | 9 | 31.949 | -19.516 | 79.650 | 1.00 | 0.00 | O |
| ATOM | 850 | O2P  | T B | 9 | 30.849 | -21.743 | 79.300 | 1.00 | 0.00 | O |

|      |     |      |     |    |        |         |        |      |      |   |
|------|-----|------|-----|----|--------|---------|--------|------|------|---|
| ATOM | 851 | P    | T B | 9  | 30.770 | -20.377 | 79.872 | 1.00 | 0.00 | P |
| ATOM | 852 | H3   | T B | 9  | 27.476 | -24.654 | 85.600 | 1.00 | 0.00 | H |
| ATOM | 853 | H6   | T B | 9  | 30.066 | -22.412 | 82.211 | 1.00 | 0.00 | H |
| ATOM | 854 | H1'  | T B | 9  | 30.523 | -21.365 | 85.733 | 1.00 | 0.00 | H |
| ATOM | 855 | H3'  | T B | 9  | 32.525 | -19.543 | 82.881 | 1.00 | 0.00 | H |
| ATOM | 856 | H4'  | T B | 9  | 30.449 | -18.231 | 83.873 | 1.00 | 0.00 | H |
| ATOM | 857 | H71  | T B | 9  | 29.595 | -24.891 | 80.902 | 1.00 | 0.00 | H |
| ATOM | 858 | H72  | T B | 9  | 27.874 | -25.278 | 81.150 | 1.00 | 0.00 | H |
| ATOM | 859 | H73  | T B | 9  | 28.346 | -23.674 | 80.537 | 1.00 | 0.00 | H |
| ATOM | 860 | H2'1 | T B | 9  | 31.663 | -21.782 | 82.954 | 1.00 | 0.00 | H |
| ATOM | 861 | H2'2 | T B | 9  | 32.514 | -21.714 | 84.490 | 1.00 | 0.00 | H |
| ATOM | 862 | H5'1 | T B | 9  | 28.859 | -19.321 | 82.134 | 1.00 | 0.00 | H |
| ATOM | 863 | H5'2 | T B | 9  | 30.277 | -18.400 | 81.593 | 1.00 | 0.00 | H |
| ATOM | 864 | C1'  | A B | 10 | 31.962 | -23.233 | 88.954 | 1.00 | 0.00 | C |
| ATOM | 865 | N1   | A B | 10 | 29.216 | -27.324 | 87.520 | 1.00 | 0.00 | N |
| ATOM | 866 | C2   | A B | 10 | 29.359 | -26.702 | 88.686 | 1.00 | 0.00 | C |
| ATOM | 867 | N3   | A B | 10 | 30.084 | -25.647 | 88.987 | 1.00 | 0.00 | N |
| ATOM | 868 | C4   | A B | 10 | 30.742 | -25.207 | 87.899 | 1.00 | 0.00 | C |
| ATOM | 869 | C5   | A B | 10 | 30.704 | -25.731 | 86.636 | 1.00 | 0.00 | C |
| ATOM | 870 | C6   | A B | 10 | 29.883 | -26.862 | 86.452 | 1.00 | 0.00 | C |
| ATOM | 871 | N6   | A B | 10 | 29.747 | -27.483 | 85.266 | 1.00 | 0.00 | N |
| ATOM | 872 | N7   | A B | 10 | 31.511 | -25.011 | 85.773 | 1.00 | 0.00 | N |
| ATOM | 873 | C8   | A B | 10 | 32.018 | -24.080 | 86.525 | 1.00 | 0.00 | C |
| ATOM | 874 | N9   | A B | 10 | 31.594 | -24.134 | 87.828 | 1.00 | 0.00 | N |
| ATOM | 875 | C2'  | A B | 10 | 33.417 | -22.786 | 88.932 | 1.00 | 0.00 | C |
| ATOM | 876 | C3'  | A B | 10 | 33.320 | -21.362 | 89.458 | 1.00 | 0.00 | C |
| ATOM | 877 | O3'  | A B | 10 | 33.317 | -21.392 | 90.884 | 1.00 | 0.00 | O |
| ATOM | 878 | C4'  | A B | 10 | 31.987 | -20.880 | 88.889 | 1.00 | 0.00 | C |
| ATOM | 879 | O4'  | A B | 10 | 31.148 | -22.080 | 88.868 | 1.00 | 0.00 | O |
| ATOM | 880 | C5'  | A B | 10 | 32.024 | -20.290 | 87.500 | 1.00 | 0.00 | C |
| ATOM | 881 | O5'  | A B | 10 | 32.988 | -21.008 | 86.688 | 1.00 | 0.00 | O |
| ATOM | 882 | O1P  | A B | 10 | 34.765 | -19.283 | 86.235 | 1.00 | 0.00 | O |
| ATOM | 883 | O2P  | A B | 10 | 34.394 | -21.159 | 84.611 | 1.00 | 0.00 | O |
| ATOM | 884 | P    | A B | 10 | 33.813 | -20.203 | 85.585 | 1.00 | 0.00 | P |
| ATOM | 885 | H2   | A B | 10 | 28.793 | -27.130 | 89.514 | 1.00 | 0.00 | H |
| ATOM | 886 | H8   | A B | 10 | 32.714 | -23.327 | 86.154 | 1.00 | 0.00 | H |
| ATOM | 887 | H1'  | A B | 10 | 31.724 | -23.742 | 89.888 | 1.00 | 0.00 | H |
| ATOM | 888 | H3'  | A B | 10 | 34.143 | -20.742 | 89.111 | 1.00 | 0.00 | H |
| ATOM | 889 | H4'  | A B | 10 | 31.612 | -20.113 | 89.568 | 1.00 | 0.00 | H |
| ATOM | 890 | H61  | A B | 10 | 29.133 | -28.305 | 85.186 | 1.00 | 0.00 | H |
| ATOM | 891 | H62  | A B | 10 | 30.257 | -27.136 | 84.442 | 1.00 | 0.00 | H |
| ATOM | 892 | H2'1 | A B | 10 | 33.841 | -22.807 | 87.927 | 1.00 | 0.00 | H |
| ATOM | 893 | H2'2 | A B | 10 | 34.050 | -23.402 | 89.569 | 1.00 | 0.00 | H |
| ATOM | 894 | H5'1 | A B | 10 | 31.035 | -20.369 | 87.051 | 1.00 | 0.00 | H |
| ATOM | 895 | H5'2 | A B | 10 | 32.307 | -19.240 | 87.563 | 1.00 | 0.00 | H |
| ATOM | 896 | C1'  | G B | 11 | 32.286 | -26.804 | 92.388 | 1.00 | 0.00 | C |
| ATOM | 897 | N1   | G B | 11 | 31.253 | -29.903 | 88.470 | 1.00 | 0.00 | N |
| ATOM | 898 | C2   | G B | 11 | 30.769 | -29.919 | 89.766 | 1.00 | 0.00 | C |
| ATOM | 899 | N2   | G B | 11 | 29.895 | -30.891 | 90.057 | 1.00 | 0.00 | N |
| ATOM | 900 | N3   | G B | 11 | 31.127 | -29.035 | 90.696 | 1.00 | 0.00 | N |
| ATOM | 901 | C4   | G B | 11 | 32.024 | -28.128 | 90.228 | 1.00 | 0.00 | C |
| ATOM | 902 | C5   | G B | 11 | 32.565 | -28.039 | 88.957 | 1.00 | 0.00 | C |
| ATOM | 903 | C6   | G B | 11 | 32.183 | -28.973 | 87.967 | 1.00 | 0.00 | C |
| ATOM | 904 | O6   | G B | 11 | 32.550 | -29.056 | 86.795 | 1.00 | 0.00 | O |

|      |     |      |     |    |        |         |        |      |      |   |
|------|-----|------|-----|----|--------|---------|--------|------|------|---|
| ATOM | 905 | N7   | G B | 11 | 33.453 | -26.962 | 88.885 | 1.00 | 0.00 | N |
| ATOM | 906 | C8   | G B | 11 | 33.420 | -26.445 | 90.086 | 1.00 | 0.00 | C |
| ATOM | 907 | N9   | G B | 11 | 32.577 | -27.100 | 90.960 | 1.00 | 0.00 | N |
| ATOM | 908 | C2'  | G B | 11 | 33.501 | -26.336 | 93.178 | 1.00 | 0.00 | C |
| ATOM | 909 | C3'  | G B | 11 | 32.888 | -25.320 | 94.128 | 1.00 | 0.00 | C |
| ATOM | 910 | O3'  | G B | 11 | 32.371 | -26.000 | 95.270 | 1.00 | 0.00 | O |
| ATOM | 911 | C4'  | G B | 11 | 31.782 | -24.685 | 93.285 | 1.00 | 0.00 | C |
| ATOM | 912 | O4'  | G B | 11 | 31.316 | -25.775 | 92.428 | 1.00 | 0.00 | O |
| ATOM | 913 | C5'  | G B | 11 | 32.191 | -23.523 | 92.411 | 1.00 | 0.00 | C |
| ATOM | 914 | O5'  | G B | 11 | 33.523 | -23.746 | 91.886 | 1.00 | 0.00 | O |
| ATOM | 915 | O1P  | G B | 11 | 34.888 | -21.933 | 92.974 | 1.00 | 0.00 | O |
| ATOM | 916 | O2P  | G B | 11 | 35.585 | -22.867 | 90.753 | 1.00 | 0.00 | O |
| ATOM | 917 | P    | G B | 11 | 34.483 | -22.491 | 91.670 | 1.00 | 0.00 | P |
| ATOM | 918 | H1   | G B | 11 | 30.907 | -30.628 | 87.824 | 1.00 | 0.00 | H |
| ATOM | 919 | H8   | G B | 11 | 34.011 | -25.575 | 90.372 | 1.00 | 0.00 | H |
| ATOM | 920 | H1'  | G B | 11 | 31.846 | -27.696 | 92.839 | 1.00 | 0.00 | H |
| ATOM | 921 | H21  | G B | 11 | 29.619 | -31.569 | 89.331 | 1.00 | 0.00 | H |
| ATOM | 922 | H3'  | G B | 11 | 33.612 | -24.573 | 94.451 | 1.00 | 0.00 | H |
| ATOM | 923 | H22  | G B | 11 | 29.499 | -30.960 | 91.005 | 1.00 | 0.00 | H |
| ATOM | 924 | H4'  | G B | 11 | 31.019 | -24.331 | 93.977 | 1.00 | 0.00 | H |
| ATOM | 925 | H2'1 | G B | 11 | 34.256 | -25.876 | 92.540 | 1.00 | 0.00 | H |
| ATOM | 926 | H2'2 | G B | 11 | 33.980 | -27.149 | 93.720 | 1.00 | 0.00 | H |
| ATOM | 927 | H5'1 | G B | 11 | 31.481 | -23.429 | 91.588 | 1.00 | 0.00 | H |
| ATOM | 928 | H5'2 | G B | 11 | 32.176 | -22.609 | 93.004 | 1.00 | 0.00 | H |
| ATOM | 929 | C1'  | G B | 12 | 32.161 | -31.500 | 93.958 | 1.00 | 0.00 | C |
| ATOM | 930 | N1   | G B | 12 | 33.325 | -32.556 | 89.104 | 1.00 | 0.00 | N |
| ATOM | 931 | C2   | G B | 12 | 32.426 | -33.172 | 89.957 | 1.00 | 0.00 | C |
| ATOM | 932 | N2   | G B | 12 | 31.748 | -34.209 | 89.447 | 1.00 | 0.00 | N |
| ATOM | 933 | N3   | G B | 12 | 32.219 | -32.784 | 91.212 | 1.00 | 0.00 | N |
| ATOM | 934 | C4   | G B | 12 | 32.997 | -31.725 | 91.561 | 1.00 | 0.00 | C |
| ATOM | 935 | C5   | G B | 12 | 33.919 | -31.050 | 90.783 | 1.00 | 0.00 | C |
| ATOM | 936 | C6   | G B | 12 | 34.138 | -31.458 | 89.448 | 1.00 | 0.00 | C |
| ATOM | 937 | O6   | G B | 12 | 34.908 | -30.991 | 88.608 | 1.00 | 0.00 | O |
| ATOM | 938 | N7   | G B | 12 | 34.509 | -30.018 | 91.517 | 1.00 | 0.00 | N |
| ATOM | 939 | C8   | G B | 12 | 33.934 | -30.097 | 92.689 | 1.00 | 0.00 | C |
| ATOM | 940 | N9   | G B | 12 | 33.004 | -31.110 | 92.795 | 1.00 | 0.00 | N |
| ATOM | 941 | C2'  | G B | 12 | 32.874 | -31.382 | 95.297 | 1.00 | 0.00 | C |
| ATOM | 942 | C3'  | G B | 12 | 31.750 | -30.928 | 96.216 | 1.00 | 0.00 | C |
| ATOM | 943 | O3'  | G B | 12 | 31.026 | -32.071 | 96.668 | 1.00 | 0.00 | O |
| ATOM | 944 | C4'  | G B | 12 | 30.908 | -30.033 | 95.308 | 1.00 | 0.00 | C |
| ATOM | 945 | O4'  | G B | 12 | 31.038 | -30.642 | 93.983 | 1.00 | 0.00 | O |
| ATOM | 946 | C5'  | G B | 12 | 31.328 | -28.584 | 95.217 | 1.00 | 0.00 | C |
| ATOM | 947 | O5'  | G B | 12 | 32.773 | -28.489 | 95.261 | 1.00 | 0.00 | O |
| ATOM | 948 | O1P  | G B | 12 | 33.214 | -27.298 | 97.434 | 1.00 | 0.00 | O |
| ATOM | 949 | O2P  | G B | 12 | 34.852 | -27.104 | 95.543 | 1.00 | 0.00 | O |
| ATOM | 950 | P    | G B | 12 | 33.439 | -27.229 | 95.976 | 1.00 | 0.00 | P |
| ATOM | 951 | H1   | G B | 12 | 33.405 | -32.929 | 88.146 | 1.00 | 0.00 | H |
| ATOM | 952 | H8   | G B | 12 | 34.169 | -29.422 | 93.512 | 1.00 | 0.00 | H |
| ATOM | 953 | H1'  | G B | 12 | 31.803 | -32.516 | 93.794 | 1.00 | 0.00 | H |
| ATOM | 954 | H21  | G B | 12 | 31.911 | -34.501 | 88.472 | 1.00 | 0.00 | H |
| ATOM | 955 | H3'  | G B | 12 | 32.124 | -30.374 | 97.077 | 1.00 | 0.00 | H |
| ATOM | 956 | H22  | G B | 12 | 31.066 | -34.713 | 90.031 | 1.00 | 0.00 | H |
| ATOM | 957 | H4'  | G B | 12 | 29.890 | -30.061 | 95.691 | 1.00 | 0.00 | H |
| ATOM | 958 | H2'1 | G B | 12 | 33.683 | -30.652 | 95.272 | 1.00 | 0.00 | H |

|      |      |      |     |    |        |         |        |      |      |   |
|------|------|------|-----|----|--------|---------|--------|------|------|---|
| ATOM | 959  | H2'2 | G B | 12 | 33.298 | -32.330 | 95.626 | 1.00 | 0.00 | H |
| ATOM | 960  | H5'1 | G B | 12 | 30.960 | -28.164 | 94.283 | 1.00 | 0.00 | H |
| ATOM | 961  | H5'2 | G B | 12 | 30.898 | -28.035 | 96.054 | 1.00 | 0.00 | H |
| ATOM | 962  | C1'  | T B | 13 | 32.532 | -36.402 | 93.379 | 1.00 | 0.00 | C |
| ATOM | 963  | N1   | T B | 13 | 33.623 | -35.508 | 92.907 | 1.00 | 0.00 | N |
| ATOM | 964  | C2   | T B | 13 | 34.055 | -35.672 | 91.605 | 1.00 | 0.00 | C |
| ATOM | 965  | O2   | T B | 13 | 33.582 | -36.509 | 90.855 | 1.00 | 0.00 | O |
| ATOM | 966  | N3   | T B | 13 | 35.069 | -34.821 | 91.207 | 1.00 | 0.00 | N |
| ATOM | 967  | C4   | T B | 13 | 35.673 | -33.849 | 91.976 | 1.00 | 0.00 | C |
| ATOM | 968  | O4   | T B | 13 | 36.578 | -33.145 | 91.510 | 1.00 | 0.00 | O |
| ATOM | 969  | C5   | T B | 13 | 35.155 | -33.750 | 93.321 | 1.00 | 0.00 | C |
| ATOM | 970  | C6   | T B | 13 | 34.167 | -34.562 | 93.742 | 1.00 | 0.00 | C |
| ATOM | 971  | C7   | T B | 13 | 35.782 | -32.703 | 94.191 | 1.00 | 0.00 | C |
| ATOM | 972  | C2'  | T B | 13 | 32.689 | -36.848 | 94.827 | 1.00 | 0.00 | C |
| ATOM | 973  | C3'  | T B | 13 | 31.245 | -36.891 | 95.303 | 1.00 | 0.00 | C |
| ATOM | 974  | O3'  | T B | 13 | 30.672 | -38.147 | 94.947 | 1.00 | 0.00 | O |
| ATOM | 975  | C4'  | T B | 13 | 30.604 | -35.728 | 94.550 | 1.00 | 0.00 | C |
| ATOM | 976  | O4'  | T B | 13 | 31.315 | -35.691 | 93.271 | 1.00 | 0.00 | O |
| ATOM | 977  | C5'  | T B | 13 | 30.707 | -34.367 | 95.200 | 1.00 | 0.00 | C |
| ATOM | 978  | O5'  | T B | 13 | 31.991 | -34.238 | 95.862 | 1.00 | 0.00 | O |
| ATOM | 979  | O1P  | T B | 13 | 31.378 | -34.094 | 98.298 | 1.00 | 0.00 | O |
| ATOM | 980  | O2P  | T B | 13 | 33.491 | -33.024 | 97.471 | 1.00 | 0.00 | O |
| ATOM | 981  | P    | T B | 13 | 32.078 | -33.387 | 97.207 | 1.00 | 0.00 | P |
| ATOM | 982  | H3   | T B | 13 | 35.405 | -34.923 | 90.240 | 1.00 | 0.00 | H |
| ATOM | 983  | H6   | T B | 13 | 33.793 | -34.470 | 94.761 | 1.00 | 0.00 | H |
| ATOM | 984  | H1'  | T B | 13 | 32.480 | -37.260 | 92.710 | 1.00 | 0.00 | H |
| ATOM | 985  | H3'  | T B | 13 | 31.167 | -36.753 | 96.382 | 1.00 | 0.00 | H |
| ATOM | 986  | H4'  | T B | 13 | 29.545 | -35.964 | 94.443 | 1.00 | 0.00 | H |
| ATOM | 987  | H71  | T B | 13 | 36.315 | -33.183 | 95.012 | 1.00 | 0.00 | H |
| ATOM | 988  | H72  | T B | 13 | 36.484 | -32.110 | 93.601 | 1.00 | 0.00 | H |
| ATOM | 989  | H73  | T B | 13 | 35.006 | -32.051 | 94.595 | 1.00 | 0.00 | H |
| ATOM | 990  | H2'1 | T B | 13 | 33.280 | -36.147 | 95.415 | 1.00 | 0.00 | H |
| ATOM | 991  | H2'2 | T B | 13 | 33.162 | -37.826 | 94.911 | 1.00 | 0.00 | H |
| ATOM | 992  | H5'1 | T B | 13 | 30.607 | -33.597 | 94.435 | 1.00 | 0.00 | H |
| ATOM | 993  | H5'2 | T B | 13 | 29.906 | -34.257 | 95.927 | 1.00 | 0.00 | H |
| ATOM | 994  | C1'  | G B | 14 | 34.206 | -40.490 | 91.112 | 1.00 | 0.00 | C |
| ATOM | 995  | N1   | G B | 14 | 38.059 | -37.460 | 89.696 | 1.00 | 0.00 | N |
| ATOM | 996  | C2   | G B | 14 | 37.361 | -38.407 | 88.969 | 1.00 | 0.00 | C |
| ATOM | 997  | N2   | G B | 14 | 37.739 | -38.569 | 87.695 | 1.00 | 0.00 | N |
| ATOM | 998  | N3   | G B | 14 | 36.362 | -39.132 | 89.472 | 1.00 | 0.00 | N |
| ATOM | 999  | C4   | G B | 14 | 36.118 | -38.841 | 90.777 | 1.00 | 0.00 | C |
| ATOM | 1000 | C5   | G B | 14 | 36.765 | -37.919 | 91.581 | 1.00 | 0.00 | C |
| ATOM | 1001 | C6   | G B | 14 | 37.821 | -37.145 | 91.048 | 1.00 | 0.00 | C |
| ATOM | 1002 | O6   | G B | 14 | 38.510 | -36.284 | 91.599 | 1.00 | 0.00 | O |
| ATOM | 1003 | N7   | G B | 14 | 36.213 | -37.925 | 92.864 | 1.00 | 0.00 | N |
| ATOM | 1004 | C8   | G B | 14 | 35.269 | -38.830 | 92.797 | 1.00 | 0.00 | C |
| ATOM | 1005 | N9   | G B | 14 | 35.152 | -39.431 | 91.561 | 1.00 | 0.00 | N |
| ATOM | 1006 | C2'  | G B | 14 | 33.920 | -41.545 | 92.173 | 1.00 | 0.00 | C |
| ATOM | 1007 | C3'  | G B | 14 | 32.457 | -41.865 | 91.916 | 1.00 | 0.00 | C |
| ATOM | 1008 | O3'  | G B | 14 | 32.366 | -42.839 | 90.878 | 1.00 | 0.00 | O |
| ATOM | 1009 | C4'  | G B | 14 | 31.883 | -40.515 | 91.492 | 1.00 | 0.00 | C |
| ATOM | 1010 | O4'  | G B | 14 | 32.983 | -39.863 | 90.780 | 1.00 | 0.00 | O |
| ATOM | 1011 | C5'  | G B | 14 | 31.419 | -39.603 | 92.601 | 1.00 | 0.00 | C |
| ATOM | 1012 | O5'  | G B | 14 | 32.300 | -39.736 | 93.745 | 1.00 | 0.00 | O |



|      |      |      |     |    |        |         |        |      |      |   |
|------|------|------|-----|----|--------|---------|--------|------|------|---|
| ATOM | 1013 | O1P  | G B | 14 | 30.820 | -40.756 | 95.507 | 1.00 | 0.00 | O |
| ATOM | 1014 | O2P  | G B | 14 | 32.773 | -39.334 | 96.181 | 1.00 | 0.00 | O |
| ATOM | 1015 | P    | G B | 14 | 31.683 | -39.596 | 95.210 | 1.00 | 0.00 | P |
| ATOM | 1016 | H1   | G B | 14 | 38.810 | -36.946 | 89.210 | 1.00 | 0.00 | H |
| ATOM | 1017 | H8   | G B | 14 | 34.633 | -39.086 | 93.644 | 1.00 | 0.00 | H |
| ATOM | 1018 | H1'  | G B | 14 | 34.608 | -40.946 | 90.207 | 1.00 | 0.00 | H |
| ATOM | 1019 | H21  | G B | 14 | 38.510 | -38.002 | 87.312 | 1.00 | 0.00 | H |
| ATOM | 1020 | H3'  | G B | 14 | 31.957 | -42.240 | 92.809 | 1.00 | 0.00 | H |
| ATOM | 1021 | H22  | G B | 14 | 37.261 | -39.261 | 87.101 | 1.00 | 0.00 | H |
| ATOM | 1022 | H4'  | G B | 14 | 31.025 | -40.723 | 90.850 | 1.00 | 0.00 | H |
| ATOM | 1023 | H2'1 | G B | 14 | 34.072 | -41.166 | 93.184 | 1.00 | 0.00 | H |
| ATOM | 1024 | H2'2 | G B | 14 | 34.546 | -42.429 | 92.057 | 1.00 | 0.00 | H |
| ATOM | 1025 | H5'1 | G B | 14 | 31.428 | -38.573 | 92.247 | 1.00 | 0.00 | H |
| ATOM | 1026 | H5'2 | G B | 14 | 30.402 | -39.875 | 92.886 | 1.00 | 0.00 | H |
| ATOM | 1027 | C1'  | C B | 15 | 37.438 | -43.060 | 88.377 | 1.00 | 0.00 | C |
| ATOM | 1028 | N1   | C B | 15 | 37.899 | -42.270 | 89.551 | 1.00 | 0.00 | N |
| ATOM | 1029 | C2   | C B | 15 | 38.954 | -41.379 | 89.363 | 1.00 | 0.00 | C |
| ATOM | 1030 | O2   | C B | 15 | 39.459 | -41.282 | 88.238 | 1.00 | 0.00 | O |
| ATOM | 1031 | N3   | C B | 15 | 39.390 | -40.650 | 90.420 | 1.00 | 0.00 | N |
| ATOM | 1032 | C4   | C B | 15 | 38.822 | -40.779 | 91.627 | 1.00 | 0.00 | C |
| ATOM | 1033 | N4   | C B | 15 | 39.286 | -40.038 | 92.623 | 1.00 | 0.00 | N |
| ATOM | 1034 | C5   | C B | 15 | 37.738 | -41.692 | 91.849 | 1.00 | 0.00 | C |
| ATOM | 1035 | C6   | C B | 15 | 37.314 | -42.411 | 90.771 | 1.00 | 0.00 | C |
| ATOM | 1036 | C2'  | C B | 15 | 37.041 | -44.490 | 88.717 | 1.00 | 0.00 | C |
| ATOM | 1037 | C3'  | C B | 15 | 35.874 | -44.729 | 87.771 | 1.00 | 0.00 | C |
| ATOM | 1038 | O3'  | C B | 15 | 36.377 | -45.140 | 86.501 | 1.00 | 0.00 | O |
| ATOM | 1039 | C4'  | C B | 15 | 35.200 | -43.361 | 87.709 | 1.00 | 0.00 | C |
| ATOM | 1040 | O4'  | C B | 15 | 36.303 | -42.408 | 87.838 | 1.00 | 0.00 | O |
| ATOM | 1041 | C5'  | C B | 15 | 34.179 | -43.065 | 88.785 | 1.00 | 0.00 | C |
| ATOM | 1042 | O5'  | C B | 15 | 34.606 | -43.655 | 90.039 | 1.00 | 0.00 | O |
| ATOM | 1043 | O1P  | C B | 15 | 32.868 | -45.425 | 90.471 | 1.00 | 0.00 | O |
| ATOM | 1044 | O2P  | C B | 15 | 34.084 | -44.364 | 92.394 | 1.00 | 0.00 | O |
| ATOM | 1045 | P    | C B | 15 | 33.498 | -44.214 | 91.040 | 1.00 | 0.00 | P |
| ATOM | 1046 | H5   | C B | 15 | 37.279 | -41.803 | 92.831 | 1.00 | 0.00 | H |
| ATOM | 1047 | H6   | C B | 15 | 36.488 | -43.114 | 90.889 | 1.00 | 0.00 | H |
| ATOM | 1048 | H1'  | C B | 15 | 38.225 | -43.042 | 87.623 | 1.00 | 0.00 | H |
| ATOM | 1049 | H3'  | C B | 15 | 35.190 | -45.487 | 88.151 | 1.00 | 0.00 | H |
| ATOM | 1050 | H4'  | C B | 15 | 34.693 | -43.299 | 86.746 | 1.00 | 0.00 | H |
| ATOM | 1051 | H41  | C B | 15 | 38.865 | -40.116 | 93.560 | 1.00 | 0.00 | H |
| ATOM | 1052 | H42  | C B | 15 | 40.066 | -39.385 | 92.460 | 1.00 | 0.00 | H |
| ATOM | 1053 | H2'1 | C B | 15 | 36.735 | -44.598 | 89.758 | 1.00 | 0.00 | H |
| ATOM | 1054 | H2'2 | C B | 15 | 37.849 | -45.199 | 88.539 | 1.00 | 0.00 | H |
| ATOM | 1055 | H5'1 | C B | 15 | 34.083 | -41.986 | 88.900 | 1.00 | 0.00 | H |
| ATOM | 1056 | H5'2 | C B | 15 | 33.219 | -43.483 | 88.490 | 1.00 | 0.00 | H |
| ATOM | 1057 | C1'  | G B | 16 | 41.923 | -43.985 | 86.493 | 1.00 | 0.00 | C |
| ATOM | 1058 | N1   | G B | 16 | 43.549 | -41.439 | 90.603 | 1.00 | 0.00 | N |
| ATOM | 1059 | C2   | G B | 16 | 43.981 | -41.372 | 89.289 | 1.00 | 0.00 | C |
| ATOM | 1060 | N2   | G B | 16 | 44.978 | -40.515 | 89.038 | 1.00 | 0.00 | N |
| ATOM | 1061 | N3   | G B | 16 | 43.456 | -42.102 | 88.306 | 1.00 | 0.00 | N |
| ATOM | 1062 | C4   | G B | 16 | 42.462 | -42.918 | 88.742 | 1.00 | 0.00 | C |
| ATOM | 1063 | C5   | G B | 16 | 41.971 | -43.055 | 90.030 | 1.00 | 0.00 | C |
| ATOM | 1064 | C6   | G B | 16 | 42.524 | -42.278 | 91.074 | 1.00 | 0.00 | C |
| ATOM | 1065 | O6   | G B | 16 | 42.225 | -42.258 | 92.269 | 1.00 | 0.00 | O |
| ATOM | 1066 | N7   | G B | 16 | 40.947 | -44.005 | 90.059 | 1.00 | 0.00 | N |

|      |      |      |     |    |        |         |        |      |      |   |
|------|------|------|-----|----|--------|---------|--------|------|------|---|
| ATOM | 1067 | C8   | G B | 16 | 40.852 | -44.404 | 88.816 | 1.00 | 0.00 | C |
| ATOM | 1068 | N9   | G B | 16 | 41.739 | -43.790 | 87.956 | 1.00 | 0.00 | N |
| ATOM | 1069 | C2'  | G B | 16 | 41.760 | -45.429 | 86.041 | 1.00 | 0.00 | C |
| ATOM | 1070 | C3'  | G B | 16 | 41.101 | -45.266 | 84.681 | 1.00 | 0.00 | C |
| ATOM | 1071 | O3'  | G B | 16 | 42.107 | -45.039 | 83.697 | 1.00 | 0.00 | O |
| ATOM | 1072 | C4'  | G B | 16 | 40.205 | -44.044 | 84.883 | 1.00 | 0.00 | C |
| ATOM | 1073 | O4'  | G B | 16 | 40.946 | -43.208 | 85.829 | 1.00 | 0.00 | O |
| ATOM | 1074 | C5'  | G B | 16 | 38.829 | -44.307 | 85.445 | 1.00 | 0.00 | C |
| ATOM | 1075 | O5'  | G B | 16 | 38.892 | -45.378 | 86.418 | 1.00 | 0.00 | O |
| ATOM | 1076 | O1P  | G B | 16 | 37.559 | -47.222 | 85.342 | 1.00 | 0.00 | O |
| ATOM | 1077 | O2P  | G B | 16 | 37.728 | -47.091 | 87.841 | 1.00 | 0.00 | O |
| ATOM | 1078 | P    | G B | 16 | 37.652 | -46.375 | 86.544 | 1.00 | 0.00 | P |
| ATOM | 1079 | H1   | G B | 16 | 44.017 | -40.825 | 91.286 | 1.00 | 0.00 | H |
| ATOM | 1080 | H8   | G B | 16 | 40.132 | -45.153 | 88.488 | 1.00 | 0.00 | H |
| ATOM | 1081 | H1'  | G B | 16 | 42.903 | -43.597 | 86.217 | 1.00 | 0.00 | H |
| ATOM | 1082 | H21  | G B | 16 | 45.375 | -39.950 | 89.802 | 1.00 | 0.00 | H |
| ATOM | 1083 | H3'  | G B | 16 | 40.514 | -46.140 | 84.403 | 1.00 | 0.00 | H |
| ATOM | 1084 | H22  | G B | 16 | 45.343 | -40.420 | 88.080 | 1.00 | 0.00 | H |
| ATOM | 1085 | H4'  | G B | 16 | 40.083 | -43.576 | 83.906 | 1.00 | 0.00 | H |
| ATOM | 1086 | H2'1 | G B | 16 | 41.132 | -46.007 | 86.720 | 1.00 | 0.00 | H |
| ATOM | 1087 | H2'2 | G B | 16 | 42.716 | -45.948 | 85.960 | 1.00 | 0.00 | H |
| ATOM | 1088 | H5'1 | G B | 16 | 38.458 | -43.399 | 85.921 | 1.00 | 0.00 | H |
| ATOM | 1089 | H5'2 | G B | 16 | 38.159 | -44.585 | 84.633 | 1.00 | 0.00 | H |
| ATOM | 1090 | C1'  | G B | 17 | 46.871 | -43.765 | 86.474 | 1.00 | 0.00 | C |
| ATOM | 1091 | N1   | G B | 17 | 46.301 | -43.261 | 91.518 | 1.00 | 0.00 | N |
| ATOM | 1092 | C2   | G B | 17 | 47.146 | -42.595 | 90.648 | 1.00 | 0.00 | C |
| ATOM | 1093 | N2   | G B | 17 | 47.946 | -41.672 | 91.197 | 1.00 | 0.00 | N |
| ATOM | 1094 | N3   | G B | 17 | 47.188 | -42.828 | 89.339 | 1.00 | 0.00 | N |
| ATOM | 1095 | C4   | G B | 17 | 46.315 | -43.799 | 88.959 | 1.00 | 0.00 | C |
| ATOM | 1096 | C5   | G B | 17 | 45.439 | -44.518 | 89.753 | 1.00 | 0.00 | C |
| ATOM | 1097 | C6   | G B | 17 | 45.391 | -44.269 | 91.144 | 1.00 | 0.00 | C |
| ATOM | 1098 | O6   | G B | 17 | 44.688 | -44.799 | 92.004 | 1.00 | 0.00 | O |
| ATOM | 1099 | N7   | G B | 17 | 44.715 | -45.424 | 88.975 | 1.00 | 0.00 | N |
| ATOM | 1100 | C8   | G B | 17 | 45.162 | -45.228 | 87.762 | 1.00 | 0.00 | C |
| ATOM | 1101 | N9   | G B | 17 | 46.136 | -44.256 | 87.672 | 1.00 | 0.00 | N |
| ATOM | 1102 | C2'  | G B | 17 | 47.208 | -44.860 | 85.471 | 1.00 | 0.00 | C |
| ATOM | 1103 | C3'  | G B | 17 | 47.062 | -44.133 | 84.144 | 1.00 | 0.00 | C |
| ATOM | 1104 | O3'  | G B | 17 | 48.276 | -43.445 | 83.849 | 1.00 | 0.00 | O |
| ATOM | 1105 | C4'  | G B | 17 | 45.904 | -43.173 | 84.410 | 1.00 | 0.00 | C |
| ATOM | 1106 | O4'  | G B | 17 | 46.048 | -42.817 | 85.822 | 1.00 | 0.00 | O |
| ATOM | 1107 | C5'  | G B | 17 | 44.514 | -43.720 | 84.188 | 1.00 | 0.00 | C |
| ATOM | 1108 | O5'  | G B | 17 | 44.463 | -45.111 | 84.594 | 1.00 | 0.00 | O |
| ATOM | 1109 | O1P  | G B | 17 | 44.056 | -46.333 | 82.432 | 1.00 | 0.00 | O |
| ATOM | 1110 | O2P  | G B | 17 | 43.285 | -47.330 | 84.601 | 1.00 | 0.00 | O |
| ATOM | 1111 | P    | G B | 17 | 43.518 | -46.111 | 83.788 | 1.00 | 0.00 | P |
| ATOM | 1112 | H1   | G B | 17 | 46.343 | -43.002 | 92.515 | 1.00 | 0.00 | H |
| ATOM | 1113 | H8   | G B | 17 | 44.797 | -45.782 | 86.898 | 1.00 | 0.00 | H |
| ATOM | 1114 | H1'  | G B | 17 | 47.770 | -43.253 | 86.811 | 1.00 | 0.00 | H |
| ATOM | 1115 | H21  | G B | 17 | 47.906 | -41.493 | 92.210 | 1.00 | 0.00 | H |
| ATOM | 1116 | H3'  | G B | 17 | 46.825 | -44.815 | 83.328 | 1.00 | 0.00 | H |
| ATOM | 1117 | H22  | G B | 17 | 48.600 | -41.142 | 90.604 | 1.00 | 0.00 | H |
| ATOM | 1118 | H4'  | G B | 17 | 46.036 | -42.323 | 83.741 | 1.00 | 0.00 | H |
| ATOM | 1119 | H2'1 | G B | 17 | 46.527 | -45.707 | 85.537 | 1.00 | 0.00 | H |
| ATOM | 1120 | H2'2 | G B | 17 | 48.220 | -45.244 | 85.604 | 1.00 | 0.00 | H |

|      |      |       |     |    |        |         |        |      |      |   |
|------|------|-------|-----|----|--------|---------|--------|------|------|---|
| ATOM | 1121 | H5 '1 | G B | 17 | 43.802 | -43.139 | 84.776 | 1.00 | 0.00 | H |
| ATOM | 1122 | H5 '2 | G B | 17 | 44.259 | -43.635 | 83.132 | 1.00 | 0.00 | H |
| ATOM | 1123 | C1 '  | C B | 18 | 51.311 | -43.339 | 88.624 | 1.00 | 0.00 | C |
| ATOM | 1124 | N1    | C B | 18 | 50.328 | -44.345 | 89.110 | 1.00 | 0.00 | N |
| ATOM | 1125 | C2    | C B | 18 | 50.037 | -44.366 | 90.473 | 1.00 | 0.00 | C |
| ATOM | 1126 | O2    | C B | 18 | 50.604 | -43.555 | 91.217 | 1.00 | 0.00 | O |
| ATOM | 1127 | N3    | C B | 18 | 49.144 | -45.274 | 90.936 | 1.00 | 0.00 | N |
| ATOM | 1128 | C4    | C B | 18 | 48.549 | -46.138 | 90.104 | 1.00 | 0.00 | C |
| ATOM | 1129 | N4    | C B | 18 | 47.683 | -47.004 | 90.612 | 1.00 | 0.00 | N |
| ATOM | 1130 | C5    | C B | 18 | 48.830 | -46.140 | 88.700 | 1.00 | 0.00 | C |
| ATOM | 1131 | C6    | C B | 18 | 49.729 | -45.216 | 88.256 | 1.00 | 0.00 | C |
| ATOM | 1132 | C2 '  | C B | 18 | 52.224 | -43.858 | 87.520 | 1.00 | 0.00 | C |
| ATOM | 1133 | C3 '  | C B | 18 | 52.401 | -42.623 | 86.648 | 1.00 | 0.00 | C |
| ATOM | 1134 | O3 '  | C B | 18 | 53.450 | -41.820 | 87.182 | 1.00 | 0.00 | O |
| ATOM | 1135 | C4 '  | C B | 18 | 51.040 | -41.937 | 86.752 | 1.00 | 0.00 | C |
| ATOM | 1136 | O4 '  | C B | 18 | 50.584 | -42.239 | 88.109 | 1.00 | 0.00 | O |
| ATOM | 1137 | C5 '  | C B | 18 | 49.983 | -42.393 | 85.775 | 1.00 | 0.00 | C |
| ATOM | 1138 | O5 '  | C B | 18 | 50.106 | -43.821 | 85.549 | 1.00 | 0.00 | O |
| ATOM | 1139 | O1P   | C B | 18 | 50.783 | -43.973 | 83.129 | 1.00 | 0.00 | O |
| ATOM | 1140 | O2P   | C B | 18 | 49.534 | -45.865 | 84.204 | 1.00 | 0.00 | O |
| ATOM | 1141 | P     | C B | 18 | 49.762 | -44.403 | 84.105 | 1.00 | 0.00 | P |
| ATOM | 1142 | H5    | C B | 18 | 48.351 | -46.845 | 88.021 | 1.00 | 0.00 | H |
| ATOM | 1143 | H6    | C B | 18 | 49.973 | -45.177 | 87.196 | 1.00 | 0.00 | H |
| ATOM | 1144 | H1 '  | C B | 18 | 51.891 | -42.988 | 89.477 | 1.00 | 0.00 | H |
| ATOM | 1145 | H3 '  | C B | 18 | 52.634 | -42.883 | 85.617 | 1.00 | 0.00 | H |
| ATOM | 1146 | H4 '  | C B | 18 | 51.208 | -40.873 | 86.585 | 1.00 | 0.00 | H |
| ATOM | 1147 | H41   | C B | 18 | 47.208 | -47.679 | 89.994 | 1.00 | 0.00 | H |
| ATOM | 1148 | H42   | C B | 18 | 47.482 | -47.000 | 91.621 | 1.00 | 0.00 | H |
| ATOM | 1149 | H2 '1 | C B | 18 | 51.774 | -44.676 | 86.961 | 1.00 | 0.00 | H |
| ATOM | 1150 | H2 '2 | C B | 18 | 53.179 | -44.212 | 87.907 | 1.00 | 0.00 | H |
| ATOM | 1151 | H5 '1 | C B | 18 | 48.996 | -42.171 | 86.182 | 1.00 | 0.00 | H |
| ATOM | 1152 | H5 '2 | C B | 18 | 50.111 | -41.860 | 84.834 | 1.00 | 0.00 | H |
| ATOM | 1153 | C1 '  | C B | 19 | 54.472 | -43.726 | 92.417 | 1.00 | 0.00 | C |
| ATOM | 1154 | N1    | C B | 19 | 53.631 | -44.885 | 92.010 | 1.00 | 0.00 | N |
| ATOM | 1155 | C2    | C B | 19 | 52.884 | -45.528 | 92.995 | 1.00 | 0.00 | C |
| ATOM | 1156 | O2    | C B | 19 | 52.949 | -45.113 | 94.159 | 1.00 | 0.00 | O |
| ATOM | 1157 | N3    | C B | 19 | 52.114 | -46.585 | 92.645 | 1.00 | 0.00 | N |
| ATOM | 1158 | C4    | C B | 19 | 52.066 | -47.012 | 91.375 | 1.00 | 0.00 | C |
| ATOM | 1159 | N4    | C B | 19 | 51.297 | -48.049 | 91.089 | 1.00 | 0.00 | N |
| ATOM | 1160 | C5    | C B | 19 | 52.824 | -46.369 | 90.345 | 1.00 | 0.00 | C |
| ATOM | 1161 | C6    | C B | 19 | 53.592 | -45.307 | 90.720 | 1.00 | 0.00 | C |
| ATOM | 1162 | C2 '  | C B | 19 | 55.808 | -43.654 | 91.695 | 1.00 | 0.00 | C |
| ATOM | 1163 | C3 '  | C B | 19 | 56.003 | -42.152 | 91.537 | 1.00 | 0.00 | C |
| ATOM | 1164 | O3 '  | C B | 19 | 56.584 | -41.628 | 92.729 | 1.00 | 0.00 | O |
| ATOM | 1165 | C4 '  | C B | 19 | 54.580 | -41.646 | 91.317 | 1.00 | 0.00 | C |
| ATOM | 1166 | O4 '  | C B | 19 | 53.749 | -42.546 | 92.119 | 1.00 | 0.00 | O |
| ATOM | 1167 | C5 '  | C B | 19 | 54.072 | -41.665 | 89.893 | 1.00 | 0.00 | C |
| ATOM | 1168 | O5 '  | C B | 19 | 54.587 | -42.831 | 89.204 | 1.00 | 0.00 | O |
| ATOM | 1169 | O1P   | C B | 19 | 56.102 | -41.852 | 87.451 | 1.00 | 0.00 | O |
| ATOM | 1170 | O2P   | C B | 19 | 55.011 | -44.078 | 87.065 | 1.00 | 0.00 | O |
| ATOM | 1171 | P     | C B | 19 | 54.923 | -42.718 | 87.650 | 1.00 | 0.00 | P |
| ATOM | 1172 | H5    | C B | 19 | 52.791 | -46.714 | 89.312 | 1.00 | 0.00 | H |
| ATOM | 1173 | H6    | C B | 19 | 54.186 | -44.787 | 89.968 | 1.00 | 0.00 | H |
| ATOM | 1174 | H1 '  | C B | 19 | 54.611 | -43.770 | 93.498 | 1.00 | 0.00 | H |

|      |      |      |     |    |        |         |        |      |      |   |
|------|------|------|-----|----|--------|---------|--------|------|------|---|
| ATOM | 1175 | H3'  | C B | 19 | 56.642 | -41.912 | 90.687 | 1.00 | 0.00 | H |
| ATOM | 1176 | H4'  | C B | 19 | 54.552 | -40.615 | 91.667 | 1.00 | 0.00 | H |
| ATOM | 1177 | H41  | C B | 19 | 51.239 | -48.397 | 90.120 | 1.00 | 0.00 | H |
| ATOM | 1178 | H42  | C B | 19 | 50.751 | -48.510 | 91.834 | 1.00 | 0.00 | H |
| ATOM | 1179 | H2'1 | C B | 19 | 55.785 | -44.153 | 90.728 | 1.00 | 0.00 | H |
| ATOM | 1180 | H2'2 | C B | 19 | 56.617 | -44.100 | 92.276 | 1.00 | 0.00 | H |
| ATOM | 1181 | H5'1 | C B | 19 | 52.984 | -41.690 | 89.902 | 1.00 | 0.00 | H |
| ATOM | 1182 | H5'2 | C B | 19 | 54.406 | -40.761 | 89.386 | 1.00 | 0.00 | H |
| ATOM | 1183 | C1'  | T B | 20 | 56.078 | -45.613 | 96.702 | 1.00 | 0.00 | C |
| ATOM | 1184 | N1   | T B | 20 | 55.711 | -46.515 | 95.578 | 1.00 | 0.00 | N |
| ATOM | 1185 | C2   | T B | 20 | 54.834 | -47.544 | 95.855 | 1.00 | 0.00 | C |
| ATOM | 1186 | O2   | T B | 20 | 54.364 | -47.729 | 96.965 | 1.00 | 0.00 | O |
| ATOM | 1187 | N3   | T B | 20 | 54.522 | -48.356 | 94.783 | 1.00 | 0.00 | N |
| ATOM | 1188 | C4   | T B | 20 | 54.995 | -48.235 | 93.495 | 1.00 | 0.00 | C |
| ATOM | 1189 | O4   | T B | 20 | 54.642 | -49.030 | 92.613 | 1.00 | 0.00 | O |
| ATOM | 1190 | C5   | T B | 20 | 55.905 | -47.131 | 93.300 | 1.00 | 0.00 | C |
| ATOM | 1191 | C6   | T B | 20 | 56.232 | -46.319 | 94.322 | 1.00 | 0.00 | C |
| ATOM | 1192 | C7   | T B | 20 | 56.444 | -46.962 | 91.911 | 1.00 | 0.00 | C |
| ATOM | 1193 | C2'  | T B | 20 | 57.535 | -45.167 | 96.680 | 1.00 | 0.00 | C |
| ATOM | 1194 | C3'  | T B | 20 | 57.438 | -43.742 | 97.204 | 1.00 | 0.00 | C |
| ATOM | 1195 | O3'  | T B | 20 | 57.435 | -43.766 | 98.629 | 1.00 | 0.00 | O |
| ATOM | 1196 | C4'  | T B | 20 | 56.107 | -43.259 | 96.631 | 1.00 | 0.00 | C |
| ATOM | 1197 | O4'  | T B | 20 | 55.267 | -44.458 | 96.610 | 1.00 | 0.00 | O |
| ATOM | 1198 | C5'  | T B | 20 | 56.147 | -42.674 | 95.239 | 1.00 | 0.00 | C |
| ATOM | 1199 | O5'  | T B | 20 | 57.114 | -43.396 | 94.431 | 1.00 | 0.00 | O |
| ATOM | 1200 | O1P  | T B | 20 | 58.892 | -41.676 | 93.977 | 1.00 | 0.00 | O |
| ATOM | 1201 | O2P  | T B | 20 | 58.521 | -43.557 | 92.358 | 1.00 | 0.00 | O |
| ATOM | 1202 | P    | T B | 20 | 57.939 | -42.597 | 93.326 | 1.00 | 0.00 | P |
| ATOM | 1203 | H3   | T B | 20 | 53.868 | -49.131 | 94.964 | 1.00 | 0.00 | H |
| ATOM | 1204 | H6   | T B | 20 | 56.921 | -45.491 | 94.152 | 1.00 | 0.00 | H |
| ATOM | 1205 | H1'  | T B | 20 | 55.839 | -46.117 | 97.637 | 1.00 | 0.00 | H |
| ATOM | 1206 | H3'  | T B | 20 | 58.264 | -43.123 | 96.855 | 1.00 | 0.00 | H |
| ATOM | 1207 | H4'  | T B | 20 | 55.733 | -42.487 | 97.305 | 1.00 | 0.00 | H |
| ATOM | 1208 | H3T  | T B | 20 | 58.161 | -44.247 | 99.030 | 1.00 | 0.00 | H |
| ATOM | 1209 | H71  | T B | 20 | 57.520 | -47.141 | 91.915 | 1.00 | 0.00 | H |
| ATOM | 1210 | H72  | T B | 20 | 55.958 | -47.674 | 91.242 | 1.00 | 0.00 | H |
| ATOM | 1211 | H73  | T B | 20 | 56.245 | -45.947 | 91.565 | 1.00 | 0.00 | H |
| ATOM | 1212 | H2'1 | T B | 20 | 57.960 | -45.193 | 95.678 | 1.00 | 0.00 | H |
| ATOM | 1213 | H2'2 | T B | 20 | 58.166 | -45.783 | 97.321 | 1.00 | 0.00 | H |
| ATOM | 1214 | H5'1 | T B | 20 | 55.158 | -42.752 | 94.787 | 1.00 | 0.00 | H |
| ATOM | 1215 | H5'2 | T B | 20 | 56.431 | -41.625 | 95.301 | 1.00 | 0.00 | H |
| TER  |      |      |     |    |        |         |        |      |      |   |
| ATOM | 1    | C1'  | A A | 1  | 62.669 | -14.085 | 97.510 | 1.00 | 0.00 | C |
| ATOM | 2    | N1   | A A | 1  | 64.365 | -13.366 | 92.722 | 1.00 | 0.00 | N |
| ATOM | 3    | C2   | A A | 1  | 64.136 | -12.529 | 93.729 | 1.00 | 0.00 | C |
| ATOM | 4    | N3   | A A | 1  | 63.699 | -12.782 | 94.944 | 1.00 | 0.00 | N |
| ATOM | 5    | C4   | A A | 1  | 63.477 | -14.099 | 95.093 | 1.00 | 0.00 | C |
| ATOM | 6    | C5   | A A | 1  | 63.660 | -15.085 | 94.164 | 1.00 | 0.00 | C |
| ATOM | 7    | C6   | A A | 1  | 64.136 | -14.675 | 92.901 | 1.00 | 0.00 | C |
| ATOM | 8    | N6   | A A | 1  | 64.364 | -15.531 | 91.890 | 1.00 | 0.00 | N |
| ATOM | 9    | N7   | A A | 1  | 63.326 | -16.325 | 94.679 | 1.00 | 0.00 | N |
| ATOM | 10   | C8   | A A | 1  | 62.950 | -16.067 | 95.897 | 1.00 | 0.00 | C |
| ATOM | 11   | N9   | A A | 1  | 63.016 | -14.737 | 96.220 | 1.00 | 0.00 | N |
| ATOM | 12   | C2'  | A A | 1  | 61.457 | -14.696 | 98.201 | 1.00 | 0.00 | C |

|      |    |      |     |   |        |         |         |      |      |   |
|------|----|------|-----|---|--------|---------|---------|------|------|---|
| ATOM | 13 | C3'  | A A | 1 | 61.836 | -14.582 | 99.667  | 1.00 | 0.00 | C |
| ATOM | 14 | O3'  | A A | 1 | 61.489 | -13.283 | 100.141 | 1.00 | 0.00 | O |
| ATOM | 15 | C4'  | A A | 1 | 63.347 | -14.804 | 99.648  | 1.00 | 0.00 | C |
| ATOM | 16 | O4'  | A A | 1 | 63.780 | -14.224 | 98.376  | 1.00 | 0.00 | O |
| ATOM | 17 | C5'  | A A | 1 | 63.815 | -16.240 | 99.707  | 1.00 | 0.00 | C |
| ATOM | 18 | O5'  | A A | 1 | 62.905 | -17.084 | 98.957  | 1.00 | 0.00 | O |
| ATOM | 19 | H2   | A A | 1 | 64.338 | -11.478 | 93.517  | 1.00 | 0.00 | H |
| ATOM | 20 | H8   | A A | 1 | 62.614 | -16.834 | 96.594  | 1.00 | 0.00 | H |
| ATOM | 21 | H1'  | A A | 1 | 62.518 | -13.021 | 97.327  | 1.00 | 0.00 | H |
| ATOM | 22 | H3'  | A A | 1 | 61.336 | -15.334 | 100.280 | 1.00 | 0.00 | H |
| ATOM | 23 | H4'  | A A | 1 | 63.755 | -14.286 | 100.515 | 1.00 | 0.00 | H |
| ATOM | 24 | H61  | A A | 1 | 64.711 | -15.181 | 90.988  | 1.00 | 0.00 | H |
| ATOM | 25 | H62  | A A | 1 | 64.188 | -16.538 | 92.021  | 1.00 | 0.00 | H |
| ATOM | 26 | H5T  | A A | 1 | 62.746 | -17.978 | 99.264  | 1.00 | 0.00 | H |
| ATOM | 27 | H2'1 | A A | 1 | 61.296 | -15.734 | 97.912  | 1.00 | 0.00 | H |
| ATOM | 28 | H2'2 | A A | 1 | 60.539 | -14.149 | 97.985  | 1.00 | 0.00 | H |
| ATOM | 29 | H5'1 | A A | 1 | 64.815 | -16.307 | 99.282  | 1.00 | 0.00 | H |
| ATOM | 30 | H5'2 | A A | 1 | 63.844 | -16.564 | 100.746 | 1.00 | 0.00 | H |
| ATOM | 31 | C1'  | G A | 2 | 60.505 | -10.092 | 95.504  | 1.00 | 0.00 | C |
| ATOM | 32 | N1   | G A | 2 | 61.500 | -12.449 | 91.092  | 1.00 | 0.00 | N |
| ATOM | 33 | C2   | G A | 2 | 61.636 | -11.118 | 91.435  | 1.00 | 0.00 | C |
| ATOM | 34 | N2   | G A | 2 | 62.096 | -10.306 | 90.477  | 1.00 | 0.00 | N |
| ATOM | 35 | N3   | G A | 2 | 61.337 | -10.634 | 92.640  | 1.00 | 0.00 | N |
| ATOM | 36 | C4   | G A | 2 | 60.880 | -11.597 | 93.484  | 1.00 | 0.00 | C |
| ATOM | 37 | C5   | G A | 2 | 60.709 | -12.947 | 93.227  | 1.00 | 0.00 | C |
| ATOM | 38 | C6   | G A | 2 | 61.030 | -13.461 | 91.949  | 1.00 | 0.00 | C |
| ATOM | 39 | O6   | G A | 2 | 60.950 | -14.617 | 91.535  | 1.00 | 0.00 | O |
| ATOM | 40 | N7   | G A | 2 | 60.215 | -13.595 | 94.363  | 1.00 | 0.00 | N |
| ATOM | 41 | C8   | G A | 2 | 60.108 | -12.640 | 95.250  | 1.00 | 0.00 | C |
| ATOM | 42 | N9   | G A | 2 | 60.492 | -11.397 | 94.790  | 1.00 | 0.00 | N |
| ATOM | 43 | C2'  | G A | 2 | 59.328 | -9.896  | 96.449  | 1.00 | 0.00 | C |
| ATOM | 44 | C3'  | G A | 2 | 59.962 | -9.121  | 97.592  | 1.00 | 0.00 | C |
| ATOM | 45 | O3'  | G A | 2 | 59.971 | -7.732  | 97.267  | 1.00 | 0.00 | O |
| ATOM | 46 | C4'  | G A | 2 | 61.371 | -9.707  | 97.660  | 1.00 | 0.00 | C |
| ATOM | 47 | O4'  | G A | 2 | 61.693 | -10.031 | 96.271  | 1.00 | 0.00 | O |
| ATOM | 48 | C5'  | G A | 2 | 61.539 | -10.950 | 98.500  | 1.00 | 0.00 | C |
| ATOM | 49 | O5'  | G A | 2 | 60.365 | -11.792 | 98.373  | 1.00 | 0.00 | O |
| ATOM | 50 | O1P  | G A | 2 | 59.365 | -11.748 | 100.681 | 1.00 | 0.00 | O |
| ATOM | 51 | O2P  | G A | 2 | 58.979 | -13.724 | 99.184  | 1.00 | 0.00 | O |
| ATOM | 52 | P    | G A | 2 | 59.891 | -12.644 | 99.635  | 1.00 | 0.00 | P |
| ATOM | 53 | H1   | G A | 2 | 61.762 | -12.721 | 90.134  | 1.00 | 0.00 | H |
| ATOM | 54 | H8   | G A | 2 | 59.746 | -12.811 | 96.263  | 1.00 | 0.00 | H |
| ATOM | 55 | H1'  | G A | 2 | 60.546 | -9.297  | 94.761  | 1.00 | 0.00 | H |
| ATOM | 56 | H21  | G A | 2 | 62.326 | -10.686 | 89.548  | 1.00 | 0.00 | H |
| ATOM | 57 | H3'  | G A | 2 | 59.428 | -9.268  | 98.531  | 1.00 | 0.00 | H |
| ATOM | 58 | H22  | G A | 2 | 62.219 | -9.301  | 90.670  | 1.00 | 0.00 | H |
| ATOM | 59 | H4'  | G A | 2 | 62.015 | -8.934  | 98.077  | 1.00 | 0.00 | H |
| ATOM | 60 | H2'1 | G A | 2 | 58.913 | -10.843 | 96.794  | 1.00 | 0.00 | H |
| ATOM | 61 | H2'2 | G A | 2 | 58.516 | -9.332  | 95.987  | 1.00 | 0.00 | H |
| ATOM | 62 | H5'1 | G A | 2 | 62.420 | -11.496 | 98.160  | 1.00 | 0.00 | H |
| ATOM | 63 | H5'2 | G A | 2 | 61.677 | -10.664 | 99.541  | 1.00 | 0.00 | H |
| ATOM | 64 | C1'  | G A | 3 | 58.878 | -7.332  | 91.728  | 1.00 | 0.00 | C |
| ATOM | 65 | N1   | G A | 3 | 58.658 | -11.808 | 89.291  | 1.00 | 0.00 | N |
| ATOM | 66 | C2   | G A | 3 | 59.110 | -10.579 | 88.849  | 1.00 | 0.00 | C |

|      |     |      |     |   |        |         |        |      |      |   |
|------|-----|------|-----|---|--------|---------|--------|------|------|---|
| ATOM | 67  | N2   | G A | 3 | 59.560 | -10.535 | 87.589 | 1.00 | 0.00 | N |
| ATOM | 68  | N3   | G A | 3 | 59.112 | -9.482  | 89.602 | 1.00 | 0.00 | N |
| ATOM | 69  | C4   | G A | 3 | 58.614 | -9.708  | 90.847 | 1.00 | 0.00 | C |
| ATOM | 70  | C5   | G A | 3 | 58.140 | -10.897 | 91.374 | 1.00 | 0.00 | C |
| ATOM | 71  | C6   | G A | 3 | 58.141 | -12.064 | 90.574 | 1.00 | 0.00 | C |
| ATOM | 72  | O6   | G A | 3 | 57.765 | -13.202 | 90.860 | 1.00 | 0.00 | O |
| ATOM | 73  | N7   | G A | 3 | 57.716 | -10.707 | 92.690 | 1.00 | 0.00 | N |
| ATOM | 74  | C8   | G A | 3 | 57.945 | -9.440  | 92.916 | 1.00 | 0.00 | C |
| ATOM | 75  | N9   | G A | 3 | 58.490 | -8.764  | 91.843 | 1.00 | 0.00 | N |
| ATOM | 76  | C2'  | G A | 3 | 57.931 | -6.379  | 92.444 | 1.00 | 0.00 | C |
| ATOM | 77  | C3'  | G A | 3 | 58.883 | -5.314  | 92.961 | 1.00 | 0.00 | C |
| ATOM | 78  | O3'  | G A | 3 | 59.115 | -4.356  | 91.931 | 1.00 | 0.00 | O |
| ATOM | 79  | C4'  | G A | 3 | 60.140 | -6.114  | 93.298 | 1.00 | 0.00 | C |
| ATOM | 80  | O4'  | G A | 3 | 60.163 | -7.185  | 92.304 | 1.00 | 0.00 | O |
| ATOM | 81  | C5'  | G A | 3 | 60.190 | -6.732  | 94.676 | 1.00 | 0.00 | C |
| ATOM | 82  | O5'  | G A | 3 | 58.867 | -7.182  | 95.061 | 1.00 | 0.00 | O |
| ATOM | 83  | O1P  | G A | 3 | 58.282 | -5.686  | 97.000 | 1.00 | 0.00 | O |
| ATOM | 84  | O2P  | G A | 3 | 57.274 | -7.977  | 96.834 | 1.00 | 0.00 | O |
| ATOM | 85  | P    | G A | 3 | 58.444 | -7.097  | 96.597 | 1.00 | 0.00 | P |
| ATOM | 86  | H1   | G A | 3 | 58.703 | -12.597 | 88.629 | 1.00 | 0.00 | H |
| ATOM | 87  | H8   | G A | 3 | 57.725 | -8.957  | 93.868 | 1.00 | 0.00 | H |
| ATOM | 88  | H1'  | G A | 3 | 58.956 | -7.082  | 90.669 | 1.00 | 0.00 | H |
| ATOM | 89  | H21  | G A | 3 | 59.559 | -11.389 | 87.012 | 1.00 | 0.00 | H |
| ATOM | 90  | H3'  | G A | 3 | 58.490 | -4.807  | 93.843 | 1.00 | 0.00 | H |
| ATOM | 91  | H22  | G A | 3 | 59.909 | -9.649  | 87.199 | 1.00 | 0.00 | H |
| ATOM | 92  | H4'  | G A | 3 | 60.983 | -5.431  | 93.209 | 1.00 | 0.00 | H |
| ATOM | 93  | H2'1 | G A | 3 | 57.398 | -6.865  | 93.261 | 1.00 | 0.00 | H |
| ATOM | 94  | H2'2 | G A | 3 | 57.185 | -5.955  | 91.773 | 1.00 | 0.00 | H |
| ATOM | 95  | H5'1 | G A | 3 | 60.878 | -7.575  | 94.665 | 1.00 | 0.00 | H |
| ATOM | 96  | H5'2 | G A | 3 | 60.548 | -5.989  | 95.388 | 1.00 | 0.00 | H |
| ATOM | 97  | C1'  | C A | 4 | 57.245 | -6.643  | 87.103 | 1.00 | 0.00 | C |
| ATOM | 98  | N1   | C A | 4 | 56.604 | -7.655  | 87.988 | 1.00 | 0.00 | N |
| ATOM | 99  | C2   | C A | 4 | 56.455 | -8.949  | 87.496 | 1.00 | 0.00 | C |
| ATOM | 100 | O2   | C A | 4 | 56.855 | -9.204  | 86.353 | 1.00 | 0.00 | O |
| ATOM | 101 | N3   | C A | 4 | 55.873 | -9.884  | 88.286 | 1.00 | 0.00 | N |
| ATOM | 102 | C4   | C A | 4 | 55.448 | -9.577  | 89.519 | 1.00 | 0.00 | C |
| ATOM | 103 | N4   | C A | 4 | 54.890 | -10.531 | 90.249 | 1.00 | 0.00 | N |
| ATOM | 104 | C5   | C A | 4 | 55.589 | -8.253  | 90.048 | 1.00 | 0.00 | C |
| ATOM | 105 | C6   | C A | 4 | 56.178 | -7.329  | 89.237 | 1.00 | 0.00 | C |
| ATOM | 106 | C2'  | C A | 4 | 56.629 | -5.256  | 87.211 | 1.00 | 0.00 | C |
| ATOM | 107 | C3'  | C A | 4 | 57.844 | -4.355  | 87.041 | 1.00 | 0.00 | C |
| ATOM | 108 | O3'  | C A | 4 | 58.096 | -4.168  | 85.649 | 1.00 | 0.00 | O |
| ATOM | 109 | C4'  | C A | 4 | 58.954 | -5.148  | 87.727 | 1.00 | 0.00 | C |
| ATOM | 110 | O4'  | C A | 4 | 58.608 | -6.547  | 87.476 | 1.00 | 0.00 | O |
| ATOM | 111 | C5'  | C A | 4 | 59.097 | -4.947  | 89.217 | 1.00 | 0.00 | C |
| ATOM | 112 | O5'  | C A | 4 | 57.788 | -4.782  | 89.819 | 1.00 | 0.00 | O |
| ATOM | 113 | O1P  | C A | 4 | 57.823 | -2.405  | 90.646 | 1.00 | 0.00 | O |
| ATOM | 114 | O2P  | C A | 4 | 56.367 | -4.106  | 91.778 | 1.00 | 0.00 | O |
| ATOM | 115 | P    | C A | 4 | 57.637 | -3.806  | 91.071 | 1.00 | 0.00 | P |
| ATOM | 116 | H5   | C A | 4 | 55.239 | -7.997  | 91.049 | 1.00 | 0.00 | H |
| ATOM | 117 | H6   | C A | 4 | 56.311 | -6.309  | 89.598 | 1.00 | 0.00 | H |
| ATOM | 118 | H1'  | C A | 4 | 57.203 | -7.011  | 86.080 | 1.00 | 0.00 | H |
| ATOM | 119 | H3'  | C A | 4 | 57.701 | -3.384  | 87.514 | 1.00 | 0.00 | H |
| ATOM | 120 | H4'  | C A | 4 | 59.891 | -4.850  | 87.259 | 1.00 | 0.00 | H |

|      |     |      |   |   |   |        |         |        |      |      |   |
|------|-----|------|---|---|---|--------|---------|--------|------|------|---|
| ATOM | 121 | H41  | C | A | 4 | 54.556 | -10.321 | 91.201 | 1.00 | 0.00 | H |
| ATOM | 122 | H42  | C | A | 4 | 54.789 | -11.482 | 89.865 | 1.00 | 0.00 | H |
| ATOM | 123 | H2'1 | C | A | 4 | 56.146 | -5.089  | 88.173 | 1.00 | 0.00 | H |
| ATOM | 124 | H2'2 | C | A | 4 | 55.886 | -5.071  | 86.434 | 1.00 | 0.00 | H |
| ATOM | 125 | H5'1 | C | A | 4 | 59.594 | -5.816  | 89.651 | 1.00 | 0.00 | H |
| ATOM | 126 | H5'2 | C | A | 4 | 59.702 | -4.059  | 89.402 | 1.00 | 0.00 | H |
| ATOM | 127 | C1'  | C | A | 5 | 55.057 | -8.080  | 82.900 | 1.00 | 0.00 | C |
| ATOM | 128 | N1   | C | A | 5 | 54.378 | -8.277  | 84.210 | 1.00 | 0.00 | N |
| ATOM | 129 | C2   | C | A | 5 | 53.896 | -9.549  | 84.509 | 1.00 | 0.00 | C |
| ATOM | 130 | O2   | C | A | 5 | 54.048 | -10.458 | 83.680 | 1.00 | 0.00 | O |
| ATOM | 131 | N3   | C | A | 5 | 53.276 | -9.751  | 85.698 | 1.00 | 0.00 | N |
| ATOM | 132 | C4   | C | A | 5 | 53.125 | -8.749  | 86.573 | 1.00 | 0.00 | C |
| ATOM | 133 | N4   | C | A | 5 | 52.515 | -9.003  | 87.721 | 1.00 | 0.00 | N |
| ATOM | 134 | C5   | C | A | 5 | 53.610 | -7.430  | 86.291 | 1.00 | 0.00 | C |
| ATOM | 135 | C6   | C | A | 5 | 54.233 | -7.253  | 85.090 | 1.00 | 0.00 | C |
| ATOM | 136 | C2'  | C | A | 5 | 54.755 | -6.738  | 82.249 | 1.00 | 0.00 | C |
| ATOM | 137 | C3'  | C | A | 5 | 56.081 | -6.404  | 81.581 | 1.00 | 0.00 | C |
| ATOM | 138 | O3'  | C | A | 5 | 56.137 | -7.042  | 80.309 | 1.00 | 0.00 | O |
| ATOM | 139 | C4'  | C | A | 5 | 57.106 | -6.972  | 82.559 | 1.00 | 0.00 | C |
| ATOM | 140 | O4'  | C | A | 5 | 56.453 | -8.155  | 83.122 | 1.00 | 0.00 | O |
| ATOM | 141 | C5'  | C | A | 5 | 57.525 | -6.067  | 83.694 | 1.00 | 0.00 | C |
| ATOM | 142 | O5'  | C | A | 5 | 56.389 | -5.286  | 84.144 | 1.00 | 0.00 | O |
| ATOM | 143 | O1P  | C | A | 5 | 57.031 | -2.928  | 83.538 | 1.00 | 0.00 | O |
| ATOM | 144 | O2P  | C | A | 5 | 55.468 | -3.352  | 85.456 | 1.00 | 0.00 | O |
| ATOM | 145 | P    | C | A | 5 | 56.640 | -3.798  | 84.664 | 1.00 | 0.00 | P |
| ATOM | 146 | H5   | C | A | 5 | 53.484 | -6.611  | 86.999 | 1.00 | 0.00 | H |
| ATOM | 147 | H6   | C | A | 5 | 54.622 | -6.268  | 84.833 | 1.00 | 0.00 | H |
| ATOM | 148 | H1'  | C | A | 5 | 54.776 | -8.904  | 82.243 | 1.00 | 0.00 | H |
| ATOM | 149 | H3'  | C | A | 5 | 56.213 | -5.328  | 81.452 | 1.00 | 0.00 | H |
| ATOM | 150 | H4'  | C | A | 5 | 57.997 | -7.213  | 81.978 | 1.00 | 0.00 | H |
| ATOM | 151 | H41  | C | A | 5 | 52.386 | -8.250  | 88.413 | 1.00 | 0.00 | H |
| ATOM | 152 | H42  | C | A | 5 | 52.166 | -9.952  | 87.921 | 1.00 | 0.00 | H |
| ATOM | 153 | H2'1 | C | A | 5 | 54.476 | -5.977  | 82.978 | 1.00 | 0.00 | H |
| ATOM | 154 | H2'2 | C | A | 5 | 53.948 | -6.804  | 81.519 | 1.00 | 0.00 | H |
| ATOM | 155 | H5'1 | C | A | 5 | 57.902 | -6.676  | 84.517 | 1.00 | 0.00 | H |
| ATOM | 156 | H5'2 | C | A | 5 | 58.317 | -5.403  | 83.348 | 1.00 | 0.00 | H |
| ATOM | 157 | C1'  | G | A | 6 | 51.976 | -10.886 | 80.225 | 1.00 | 0.00 | C |
| ATOM | 158 | N1   | G | A | 6 | 49.526 | -11.438 | 84.666 | 1.00 | 0.00 | N |
| ATOM | 159 | C2   | G | A | 6 | 49.821 | -12.376 | 83.691 | 1.00 | 0.00 | C |
| ATOM | 160 | N2   | G | A | 6 | 49.405 | -13.625 | 83.930 | 1.00 | 0.00 | N |
| ATOM | 161 | N3   | G | A | 6 | 50.477 | -12.088 | 82.569 | 1.00 | 0.00 | N |
| ATOM | 162 | C4   | G | A | 6 | 50.814 | -10.775 | 82.489 | 1.00 | 0.00 | C |
| ATOM | 163 | C5   | G | A | 6 | 50.562 | -9.770  | 83.408 | 1.00 | 0.00 | C |
| ATOM | 164 | C6   | G | A | 6 | 49.868 | -10.074 | 84.603 | 1.00 | 0.00 | C |
| ATOM | 165 | O6   | G | A | 6 | 49.552 | -9.329  | 85.528 | 1.00 | 0.00 | O |
| ATOM | 166 | N7   | G | A | 6 | 51.074 | -8.555  | 82.949 | 1.00 | 0.00 | N |
| ATOM | 167 | C8   | G | A | 6 | 51.612 | -8.855  | 81.795 | 1.00 | 0.00 | C |
| ATOM | 168 | N9   | G | A | 6 | 51.494 | -10.185 | 81.446 | 1.00 | 0.00 | N |
| ATOM | 169 | C2'  | G | A | 6 | 51.851 | -10.059 | 78.953 | 1.00 | 0.00 | C |
| ATOM | 170 | C3'  | G | A | 6 | 53.088 | -10.480 | 78.176 | 1.00 | 0.00 | C |
| ATOM | 171 | O3'  | G | A | 6 | 52.806 | -11.679 | 77.460 | 1.00 | 0.00 | O |
| ATOM | 172 | C4'  | G | A | 6 | 54.124 | -10.695 | 79.279 | 1.00 | 0.00 | C |
| ATOM | 173 | O4'  | G | A | 6 | 53.344 | -11.193 | 80.413 | 1.00 | 0.00 | O |
| ATOM | 174 | C5'  | G | A | 6 | 54.896 | -9.477  | 79.722 | 1.00 | 0.00 | C |

|      |     |      |     |   |        |         |        |      |      |   |
|------|-----|------|-----|---|--------|---------|--------|------|------|---|
| ATOM | 175 | O5'  | G A | 6 | 54.034 | -8.312  | 79.700 | 1.00 | 0.00 | O |
| ATOM | 176 | O1P  | G A | 6 | 55.031 | -6.882  | 77.886 | 1.00 | 0.00 | O |
| ATOM | 177 | O2P  | G A | 6 | 53.750 | -5.817  | 79.762 | 1.00 | 0.00 | O |
| ATOM | 178 | P    | G A | 6 | 54.662 | -6.898  | 79.314 | 1.00 | 0.00 | P |
| ATOM | 179 | H1   | G A | 6 | 49.021 | -11.766 | 85.503 | 1.00 | 0.00 | H |
| ATOM | 180 | H8   | G A | 6 | 52.111 | -8.120  | 81.162 | 1.00 | 0.00 | H |
| ATOM | 181 | H1'  | G A | 6 | 51.430 | -11.827 | 80.133 | 1.00 | 0.00 | H |
| ATOM | 182 | H21  | G A | 6 | 48.900 | -13.842 | 84.803 | 1.00 | 0.00 | H |
| ATOM | 183 | H3'  | G A | 6 | 53.414 | -9.710  | 77.477 | 1.00 | 0.00 | H |
| ATOM | 184 | H22  | G A | 6 | 49.589 | -14.370 | 83.242 | 1.00 | 0.00 | H |
| ATOM | 185 | H4'  | G A | 6 | 54.840 | -11.426 | 78.904 | 1.00 | 0.00 | H |
| ATOM | 186 | H2'1 | G A | 6 | 51.855 | -8.987  | 79.155 | 1.00 | 0.00 | H |
| ATOM | 187 | H2'2 | G A | 6 | 50.939 | -10.284 | 78.400 | 1.00 | 0.00 | H |
| ATOM | 188 | H5'1 | G A | 6 | 55.273 | -9.638  | 80.732 | 1.00 | 0.00 | H |
| ATOM | 189 | H5'2 | G A | 6 | 55.740 | -9.324  | 79.049 | 1.00 | 0.00 | H |
| ATOM | 190 | C1'  | C A | 7 | 48.007 | -13.783 | 79.599 | 1.00 | 0.00 | C |
| ATOM | 191 | N1   | C A | 7 | 47.877 | -12.455 | 80.258 | 1.00 | 0.00 | N |
| ATOM | 192 | C2   | C A | 7 | 47.231 | -12.400 | 81.492 | 1.00 | 0.00 | C |
| ATOM | 193 | O2   | C A | 7 | 46.796 | -13.446 | 81.987 | 1.00 | 0.00 | O |
| ATOM | 194 | N3   | C A | 7 | 47.103 | -11.200 | 82.109 | 1.00 | 0.00 | N |
| ATOM | 195 | C4   | C A | 7 | 47.583 | -10.082 | 81.548 | 1.00 | 0.00 | C |
| ATOM | 196 | N4   | C A | 7 | 47.432 | -8.937  | 82.196 | 1.00 | 0.00 | N |
| ATOM | 197 | C5   | C A | 7 | 48.247 | -10.108 | 80.277 | 1.00 | 0.00 | C |
| ATOM | 198 | C6   | C A | 7 | 48.370 | -11.329 | 79.677 | 1.00 | 0.00 | C |
| ATOM | 199 | C2'  | C A | 7 | 47.843 | -13.737 | 78.086 | 1.00 | 0.00 | C |
| ATOM | 200 | C3'  | C A | 7 | 48.832 | -14.797 | 77.628 | 1.00 | 0.00 | C |
| ATOM | 201 | O3'  | C A | 7 | 48.209 | -16.078 | 77.687 | 1.00 | 0.00 | O |
| ATOM | 202 | C4'  | C A | 7 | 49.969 | -14.661 | 78.639 | 1.00 | 0.00 | C |
| ATOM | 203 | O4'  | C A | 7 | 49.302 | -14.280 | 79.884 | 1.00 | 0.00 | O |
| ATOM | 204 | C5'  | C A | 7 | 51.028 | -13.628 | 78.324 | 1.00 | 0.00 | C |
| ATOM | 205 | O5'  | C A | 7 | 50.416 | -12.473 | 77.697 | 1.00 | 0.00 | O |
| ATOM | 206 | O1P  | C A | 7 | 51.367 | -12.499 | 75.367 | 1.00 | 0.00 | O |
| ATOM | 207 | O2P  | C A | 7 | 50.638 | -10.332 | 76.402 | 1.00 | 0.00 | O |
| ATOM | 208 | P    | C A | 7 | 51.236 | -11.677 | 76.586 | 1.00 | 0.00 | P |
| ATOM | 209 | H5   | C A | 7 | 48.635 | -9.200  | 79.814 | 1.00 | 0.00 | H |
| ATOM | 210 | H6   | C A | 7 | 48.874 | -11.401 | 78.713 | 1.00 | 0.00 | H |
| ATOM | 211 | H1'  | C A | 7 | 47.281 | -14.461 | 80.051 | 1.00 | 0.00 | H |
| ATOM | 212 | H3'  | C A | 7 | 49.184 | -14.613 | 76.612 | 1.00 | 0.00 | H |
| ATOM | 213 | H4'  | C A | 7 | 50.459 | -15.632 | 78.696 | 1.00 | 0.00 | H |
| ATOM | 214 | H41  | C A | 7 | 47.794 | -8.062  | 81.789 | 1.00 | 0.00 | H |
| ATOM | 215 | H42  | C A | 7 | 46.953 | -8.917  | 83.108 | 1.00 | 0.00 | H |
| ATOM | 216 | H2'1 | C A | 7 | 48.088 | -12.760 | 77.673 | 1.00 | 0.00 | H |
| ATOM | 217 | H2'2 | C A | 7 | 46.826 | -13.980 | 77.773 | 1.00 | 0.00 | H |
| ATOM | 218 | H5'1 | C A | 7 | 51.523 | -13.328 | 79.247 | 1.00 | 0.00 | H |
| ATOM | 219 | H5'2 | C A | 7 | 51.763 | -14.065 | 77.649 | 1.00 | 0.00 | H |
| ATOM | 220 | C1'  | A A | 8 | 43.499 | -15.475 | 80.752 | 1.00 | 0.00 | C |
| ATOM | 221 | N1   | A A | 8 | 42.939 | -10.845 | 82.898 | 1.00 | 0.00 | N |
| ATOM | 222 | C2   | A A | 8 | 42.603 | -12.068 | 83.297 | 1.00 | 0.00 | C |
| ATOM | 223 | N3   | A A | 8 | 42.779 | -13.224 | 82.695 | 1.00 | 0.00 | N |
| ATOM | 224 | C4   | A A | 8 | 43.390 | -13.042 | 81.509 | 1.00 | 0.00 | C |
| ATOM | 225 | C5   | A A | 8 | 43.798 | -11.859 | 80.957 | 1.00 | 0.00 | C |
| ATOM | 226 | C6   | A A | 8 | 43.548 | -10.695 | 81.712 | 1.00 | 0.00 | C |
| ATOM | 227 | N6   | A A | 8 | 43.893 | -9.464  | 81.297 | 1.00 | 0.00 | N |
| ATOM | 228 | N7   | A A | 8 | 44.392 | -12.063 | 79.723 | 1.00 | 0.00 | N |



|      |     |      |     |    |        |         |        |      |      |   |
|------|-----|------|-----|----|--------|---------|--------|------|------|---|
| ATOM | 229 | C8   | A A | 8  | 44.328 | -13.352 | 79.555 | 1.00 | 0.00 | C |
| ATOM | 230 | N9   | A A | 8  | 43.735 | -14.012 | 80.600 | 1.00 | 0.00 | N |
| ATOM | 231 | C2'  | A A | 8  | 43.117 | -16.171 | 79.452 | 1.00 | 0.00 | C |
| ATOM | 232 | C3'  | A A | 8  | 43.795 | -17.522 | 79.607 | 1.00 | 0.00 | C |
| ATOM | 233 | O3'  | A A | 8  | 42.947 | -18.387 | 80.358 | 1.00 | 0.00 | O |
| ATOM | 234 | C4'  | A A | 8  | 45.078 | -17.176 | 80.360 | 1.00 | 0.00 | C |
| ATOM | 235 | O4'  | A A | 8  | 44.698 | -16.057 | 81.225 | 1.00 | 0.00 | O |
| ATOM | 236 | C5'  | A A | 8  | 46.258 | -16.755 | 79.515 | 1.00 | 0.00 | C |
| ATOM | 237 | O5'  | A A | 8  | 45.798 | -15.973 | 78.385 | 1.00 | 0.00 | O |
| ATOM | 238 | O1P  | A A | 8  | 46.356 | -17.427 | 76.407 | 1.00 | 0.00 | O |
| ATOM | 239 | O2P  | A A | 8  | 46.239 | -14.934 | 76.139 | 1.00 | 0.00 | O |
| ATOM | 240 | P    | A A | 8  | 46.581 | -16.094 | 76.999 | 1.00 | 0.00 | P |
| ATOM | 241 | H2   | A A | 8  | 42.109 | -12.120 | 84.267 | 1.00 | 0.00 | H |
| ATOM | 242 | H8   | A A | 8  | 44.710 | -13.860 | 78.669 | 1.00 | 0.00 | H |
| ATOM | 243 | H1'  | A A | 8  | 42.734 | -15.619 | 81.513 | 1.00 | 0.00 | H |
| ATOM | 244 | H3'  | A A | 8  | 44.016 | -17.981 | 78.643 | 1.00 | 0.00 | H |
| ATOM | 245 | H4'  | A A | 8  | 45.368 | -18.065 | 80.917 | 1.00 | 0.00 | H |
| ATOM | 246 | H61  | A A | 8  | 43.689 | -8.646  | 81.888 | 1.00 | 0.00 | H |
| ATOM | 247 | H62  | A A | 8  | 44.359 | -9.340  | 80.386 | 1.00 | 0.00 | H |
| ATOM | 248 | H2'1 | A A | 8  | 43.484 | -15.641 | 78.575 | 1.00 | 0.00 | H |
| ATOM | 249 | H2'2 | A A | 8  | 42.037 | -16.278 | 79.344 | 1.00 | 0.00 | H |
| ATOM | 250 | H5'1 | A A | 8  | 46.938 | -16.159 | 80.124 | 1.00 | 0.00 | H |
| ATOM | 251 | H5'2 | A A | 8  | 46.781 | -17.643 | 79.161 | 1.00 | 0.00 | H |
| ATOM | 252 | C1'  | C A | 9  | 38.986 | -15.057 | 82.783 | 1.00 | 0.00 | C |
| ATOM | 253 | N1   | C A | 9  | 39.486 | -14.021 | 81.838 | 1.00 | 0.00 | N |
| ATOM | 254 | C2   | C A | 9  | 39.423 | -12.687 | 82.237 | 1.00 | 0.00 | C |
| ATOM | 255 | O2   | C A | 9  | 38.956 | -12.421 | 83.352 | 1.00 | 0.00 | O |
| ATOM | 256 | N3   | C A | 9  | 39.871 | -11.730 | 81.392 | 1.00 | 0.00 | N |
| ATOM | 257 | C4   | C A | 9  | 40.369 | -12.049 | 80.190 | 1.00 | 0.00 | C |
| ATOM | 258 | N4   | C A | 9  | 40.798 | -11.071 | 79.404 | 1.00 | 0.00 | N |
| ATOM | 259 | C5   | C A | 9  | 40.445 | -13.411 | 79.750 | 1.00 | 0.00 | C |
| ATOM | 260 | C6   | C A | 9  | 39.991 | -14.361 | 80.620 | 1.00 | 0.00 | C |
| ATOM | 261 | C2'  | C A | 9  | 38.257 | -16.207 | 82.102 | 1.00 | 0.00 | C |
| ATOM | 262 | C3'  | C A | 9  | 38.664 | -17.394 | 82.962 | 1.00 | 0.00 | C |
| ATOM | 263 | O3'  | C A | 9  | 37.798 | -17.472 | 84.092 | 1.00 | 0.00 | O |
| ATOM | 264 | C4'  | C A | 9  | 40.098 | -17.052 | 83.357 | 1.00 | 0.00 | C |
| ATOM | 265 | O4'  | C A | 9  | 40.105 | -15.592 | 83.464 | 1.00 | 0.00 | O |
| ATOM | 266 | C5'  | C A | 9  | 41.179 | -17.470 | 82.387 | 1.00 | 0.00 | C |
| ATOM | 267 | O5'  | C A | 9  | 40.699 | -17.318 | 81.025 | 1.00 | 0.00 | O |
| ATOM | 268 | O1P  | C A | 9  | 40.609 | -19.685 | 80.173 | 1.00 | 0.00 | O |
| ATOM | 269 | O2P  | C A | 9  | 40.955 | -17.787 | 78.569 | 1.00 | 0.00 | O |
| ATOM | 270 | P    | C A | 9  | 41.195 | -18.354 | 79.919 | 1.00 | 0.00 | P |
| ATOM | 271 | H5   | C A | 9  | 40.843 | -13.676 | 78.770 | 1.00 | 0.00 | H |
| ATOM | 272 | H6   | C A | 9  | 40.034 | -15.412 | 80.335 | 1.00 | 0.00 | H |
| ATOM | 273 | H1'  | C A | 9  | 38.349 | -14.568 | 83.517 | 1.00 | 0.00 | H |
| ATOM | 274 | H3'  | C A | 9  | 38.620 | -18.332 | 82.409 | 1.00 | 0.00 | H |
| ATOM | 275 | H4'  | C A | 9  | 40.293 | -17.550 | 84.305 | 1.00 | 0.00 | H |
| ATOM | 276 | H41  | C A | 9  | 41.188 | -11.291 | 78.476 | 1.00 | 0.00 | H |
| ATOM | 277 | H42  | C A | 9  | 40.741 | -10.092 | 79.721 | 1.00 | 0.00 | H |
| ATOM | 278 | H2'1 | C A | 9  | 38.569 | -16.342 | 81.067 | 1.00 | 0.00 | H |
| ATOM | 279 | H2'2 | C A | 9  | 37.175 | -16.067 | 82.103 | 1.00 | 0.00 | H |
| ATOM | 280 | H5'1 | C A | 9  | 42.060 | -16.844 | 82.539 | 1.00 | 0.00 | H |
| ATOM | 281 | H5'2 | C A | 9  | 41.442 | -18.510 | 82.570 | 1.00 | 0.00 | H |
| ATOM | 282 | C1'  | C A | 10 | 35.035 | -12.532 | 84.376 | 1.00 | 0.00 | C |

|      |     |      |   |   |    |        |         |        |      |      |   |
|------|-----|------|---|---|----|--------|---------|--------|------|------|---|
| ATOM | 283 | N1   | C | A | 10 | 35.572 | -12.310 | 83.005 | 1.00 | 0.00 | N |
| ATOM | 284 | C2   | C | A | 10 | 35.839 | -11.000 | 82.615 | 1.00 | 0.00 | C |
| ATOM | 285 | O2   | C | A | 10 | 35.623 | -10.080 | 83.416 | 1.00 | 0.00 | O |
| ATOM | 286 | N3   | C | A | 10 | 36.328 | -10.775 | 81.371 | 1.00 | 0.00 | N |
| ATOM | 287 | C4   | C | A | 10 | 36.553 | -11.789 | 80.524 | 1.00 | 0.00 | C |
| ATOM | 288 | N4   | C | A | 10 | 37.035 | -11.513 | 79.322 | 1.00 | 0.00 | N |
| ATOM | 289 | C5   | C | A | 10 | 36.282 | -13.147 | 80.898 | 1.00 | 0.00 | C |
| ATOM | 290 | C6   | C | A | 10 | 35.794 | -13.350 | 82.158 | 1.00 | 0.00 | C |
| ATOM | 291 | C2'  | C | A | 10 | 33.991 | -13.637 | 84.453 | 1.00 | 0.00 | C |
| ATOM | 292 | C3'  | C | A | 10 | 34.287 | -14.258 | 85.810 | 1.00 | 0.00 | C |
| ATOM | 293 | O3'  | C | A | 10 | 33.617 | -13.511 | 86.823 | 1.00 | 0.00 | O |
| ATOM | 294 | C4'  | C | A | 10 | 35.805 | -14.140 | 85.914 | 1.00 | 0.00 | C |
| ATOM | 295 | O4'  | C | A | 10 | 36.120 | -12.897 | 85.208 | 1.00 | 0.00 | O |
| ATOM | 296 | C5'  | C | A | 10 | 36.610 | -15.261 | 85.298 | 1.00 | 0.00 | C |
| ATOM | 297 | O5'  | C | A | 10 | 35.958 | -15.727 | 84.091 | 1.00 | 0.00 | O |
| ATOM | 298 | O1P  | C | A | 10 | 35.261 | -18.075 | 84.671 | 1.00 | 0.00 | O |
| ATOM | 299 | O2P  | C | A | 10 | 35.714 | -17.454 | 82.283 | 1.00 | 0.00 | O |
| ATOM | 300 | P    | C | A | 10 | 36.051 | -17.274 | 83.716 | 1.00 | 0.00 | P |
| ATOM | 301 | H5   | C | A | 10 | 36.458 | -13.977 | 80.211 | 1.00 | 0.00 | H |
| ATOM | 302 | H6   | C | A | 10 | 35.582 | -14.366 | 82.490 | 1.00 | 0.00 | H |
| ATOM | 303 | H1'  | C | A | 10 | 34.634 | -11.589 | 84.742 | 1.00 | 0.00 | H |
| ATOM | 304 | H3'  | C | A | 10 | 33.969 | -15.300 | 85.861 | 1.00 | 0.00 | H |
| ATOM | 305 | H4'  | C | A | 10 | 36.048 | -14.100 | 86.976 | 1.00 | 0.00 | H |
| ATOM | 306 | H41  | C | A | 10 | 37.217 | -12.275 | 78.653 | 1.00 | 0.00 | H |
| ATOM | 307 | H42  | C | A | 10 | 37.225 | -10.536 | 79.055 | 1.00 | 0.00 | H |
| ATOM | 308 | H2'1 | C | A | 10 | 34.099 | -14.368 | 83.652 | 1.00 | 0.00 | H |
| ATOM | 309 | H2'2 | C | A | 10 | 32.973 | -13.247 | 84.408 | 1.00 | 0.00 | H |
| ATOM | 310 | H5'1 | C | A | 10 | 37.611 | -14.896 | 85.062 | 1.00 | 0.00 | H |
| ATOM | 311 | H5'2 | C | A | 10 | 36.688 | -16.078 | 86.014 | 1.00 | 0.00 | H |
| ATOM | 312 | C1'  | T | A | 11 | 31.968 | -8.649  | 84.461 | 1.00 | 0.00 | C |
| ATOM | 313 | N1   | T | A | 11 | 32.313 | -9.299  | 83.169 | 1.00 | 0.00 | N |
| ATOM | 314 | C2   | T | A | 11 | 32.759 | -8.480  | 82.151 | 1.00 | 0.00 | C |
| ATOM | 315 | O2   | T | A | 11 | 32.875 | -7.272  | 82.277 | 1.00 | 0.00 | O |
| ATOM | 316 | N3   | T | A | 11 | 33.070 | -9.124  | 80.967 | 1.00 | 0.00 | N |
| ATOM | 317 | C4   | T | A | 11 | 32.972 | -10.478 | 80.720 | 1.00 | 0.00 | C |
| ATOM | 318 | O4   | T | A | 11 | 33.277 | -10.943 | 79.614 | 1.00 | 0.00 | O |
| ATOM | 319 | C5   | T | A | 11 | 32.496 | -11.253 | 81.843 | 1.00 | 0.00 | C |
| ATOM | 320 | C6   | T | A | 11 | 32.185 | -10.658 | 83.010 | 1.00 | 0.00 | C |
| ATOM | 321 | C7   | T | A | 11 | 32.377 | -12.730 | 81.617 | 1.00 | 0.00 | C |
| ATOM | 322 | C2'  | T | A | 11 | 30.753 | -9.259  | 85.150 | 1.00 | 0.00 | C |
| ATOM | 323 | C3'  | T | A | 11 | 31.133 | -9.151  | 86.618 | 1.00 | 0.00 | C |
| ATOM | 324 | O3'  | T | A | 11 | 30.789 | -7.851  | 87.096 | 1.00 | 0.00 | O |
| ATOM | 325 | C4'  | T | A | 11 | 32.641 | -9.377  | 86.596 | 1.00 | 0.00 | C |
| ATOM | 326 | O4'  | T | A | 11 | 33.077 | -8.793  | 85.327 | 1.00 | 0.00 | O |
| ATOM | 327 | C5'  | T | A | 11 | 33.107 | -10.813 | 86.651 | 1.00 | 0.00 | C |
| ATOM | 328 | O5'  | T | A | 11 | 32.195 | -11.652 | 85.899 | 1.00 | 0.00 | O |
| ATOM | 329 | O1P  | T | A | 11 | 31.156 | -13.114 | 87.663 | 1.00 | 0.00 | O |
| ATOM | 330 | O2P  | T | A | 11 | 31.336 | -13.936 | 85.301 | 1.00 | 0.00 | O |
| ATOM | 331 | P    | T | A | 11 | 31.925 | -13.139 | 86.405 | 1.00 | 0.00 | P |
| ATOM | 332 | H3   | T | A | 11 | 33.409 | -8.536  | 80.194 | 1.00 | 0.00 | H |
| ATOM | 333 | H6   | T | A | 11 | 31.829 | -11.262 | 83.845 | 1.00 | 0.00 | H |
| ATOM | 334 | H1'  | T | A | 11 | 31.819 | -7.584  | 84.280 | 1.00 | 0.00 | H |
| ATOM | 335 | H3'  | T | A | 11 | 30.630 | -9.902  | 87.226 | 1.00 | 0.00 | H |
| ATOM | 336 | H4'  | T | A | 11 | 33.054 | -8.861  | 87.465 | 1.00 | 0.00 | H |

|      |     |      |   |   |    |        |         |        |      |      |   |
|------|-----|------|---|---|----|--------|---------|--------|------|------|---|
| ATOM | 337 | H71  | T | A | 11 | 31.328 | -13.023 | 81.667 | 1.00 | 0.00 | H |
| ATOM | 338 | H72  | T | A | 11 | 32.778 | -12.982 | 80.635 | 1.00 | 0.00 | H |
| ATOM | 339 | H73  | T | A | 11 | 32.939 | -13.262 | 82.386 | 1.00 | 0.00 | H |
| ATOM | 340 | H2'1 | T | A | 11 | 30.591 | -10.295 | 84.858 | 1.00 | 0.00 | H |
| ATOM | 341 | H2'2 | T | A | 11 | 29.836 | -8.710  | 84.934 | 1.00 | 0.00 | H |
| ATOM | 342 | H5'1 | T | A | 11 | 34.108 | -10.883 | 86.227 | 1.00 | 0.00 | H |
| ATOM | 343 | H5'2 | T | A | 11 | 33.136 | -11.140 | 87.691 | 1.00 | 0.00 | H |
| ATOM | 344 | C1'  | A | A | 12 | 29.797 | -4.651  | 82.478 | 1.00 | 0.00 | C |
| ATOM | 345 | N1   | A | A | 12 | 30.806 | -6.999  | 78.028 | 1.00 | 0.00 | N |
| ATOM | 346 | C2   | A | A | 12 | 30.913 | -5.734  | 78.421 | 1.00 | 0.00 | C |
| ATOM | 347 | N3   | A | A | 12 | 30.637 | -5.193  | 79.590 | 1.00 | 0.00 | N |
| ATOM | 348 | C4   | A | A | 12 | 30.184 | -6.132  | 80.439 | 1.00 | 0.00 | C |
| ATOM | 349 | C5   | A | A | 12 | 30.015 | -7.465  | 80.195 | 1.00 | 0.00 | C |
| ATOM | 350 | C6   | A | A | 12 | 30.353 | -7.913  | 78.899 | 1.00 | 0.00 | C |
| ATOM | 351 | N6   | A | A | 12 | 30.239 | -9.195  | 78.514 | 1.00 | 0.00 | N |
| ATOM | 352 | N7   | A | A | 12 | 29.530 | -8.121  | 81.311 | 1.00 | 0.00 | N |
| ATOM | 353 | C8   | A | A | 12 | 29.412 | -7.180  | 82.200 | 1.00 | 0.00 | C |
| ATOM | 354 | N9   | A | A | 12 | 29.793 | -5.944  | 81.743 | 1.00 | 0.00 | N |
| ATOM | 355 | C2'  | A | A | 12 | 28.615 | -4.479  | 83.422 | 1.00 | 0.00 | C |
| ATOM | 356 | C3'  | A | A | 12 | 29.241 | -3.718  | 84.580 | 1.00 | 0.00 | C |
| ATOM | 357 | O3'  | A | A | 12 | 29.241 | -2.324  | 84.276 | 1.00 | 0.00 | O |
| ATOM | 358 | C4'  | A | A | 12 | 30.655 | -4.295  | 84.642 | 1.00 | 0.00 | C |
| ATOM | 359 | O4'  | A | A | 12 | 30.982 | -4.596  | 83.248 | 1.00 | 0.00 | O |
| ATOM | 360 | C5'  | A | A | 12 | 30.830 | -5.549  | 85.463 | 1.00 | 0.00 | C |
| ATOM | 361 | O5'  | A | A | 12 | 29.662 | -6.398  | 85.320 | 1.00 | 0.00 | O |
| ATOM | 362 | O1P  | A | A | 12 | 28.656 | -6.397  | 87.627 | 1.00 | 0.00 | O |
| ATOM | 363 | O2P  | A | A | 12 | 28.288 | -8.352  | 86.097 | 1.00 | 0.00 | O |
| ATOM | 364 | P    | A | A | 12 | 29.191 | -7.272  | 86.566 | 1.00 | 0.00 | P |
| ATOM | 365 | H2   | A | A | 12 | 31.283 | -5.041  | 77.665 | 1.00 | 0.00 | H |
| ATOM | 366 | H8   | A | A | 12 | 29.046 | -7.354  | 83.213 | 1.00 | 0.00 | H |
| ATOM | 367 | H1'  | A | A | 12 | 29.833 | -3.843  | 81.748 | 1.00 | 0.00 | H |
| ATOM | 368 | H3'  | A | A | 12 | 28.707 | -3.883  | 85.516 | 1.00 | 0.00 | H |
| ATOM | 369 | H4'  | A | A | 12 | 31.292 | -3.523  | 85.074 | 1.00 | 0.00 | H |
| ATOM | 370 | H61  | A | A | 12 | 30.501 | -9.469  | 77.556 | 1.00 | 0.00 | H |
| ATOM | 371 | H62  | A | A | 12 | 29.889 | -9.903  | 79.176 | 1.00 | 0.00 | H |
| ATOM | 372 | H2'1 | A | A | 12 | 28.207 | -5.434  | 83.753 | 1.00 | 0.00 | H |
| ATOM | 373 | H2'2 | A | A | 12 | 27.801 | -3.914  | 82.969 | 1.00 | 0.00 | H |
| ATOM | 374 | H5'1 | A | A | 12 | 31.715 | -6.082  | 85.115 | 1.00 | 0.00 | H |
| ATOM | 375 | H5'2 | A | A | 12 | 30.961 | -5.278  | 86.508 | 1.00 | 0.00 | H |
| ATOM | 376 | C1'  | G | A | 13 | 28.177 | -1.897  | 78.679 | 1.00 | 0.00 | C |
| ATOM | 377 | N1   | G | A | 13 | 27.958 | -6.372  | 76.242 | 1.00 | 0.00 | N |
| ATOM | 378 | C2   | G | A | 13 | 28.408 | -5.143  | 75.800 | 1.00 | 0.00 | C |
| ATOM | 379 | N2   | G | A | 13 | 28.859 | -5.098  | 74.539 | 1.00 | 0.00 | N |
| ATOM | 380 | N3   | G | A | 13 | 28.410 | -4.044  | 76.553 | 1.00 | 0.00 | N |
| ATOM | 381 | C4   | G | A | 13 | 27.912 | -4.272  | 77.797 | 1.00 | 0.00 | C |
| ATOM | 382 | C5   | G | A | 13 | 27.437 | -5.461  | 78.325 | 1.00 | 0.00 | C |
| ATOM | 383 | C6   | G | A | 13 | 27.440 | -6.628  | 77.526 | 1.00 | 0.00 | C |
| ATOM | 384 | O6   | G | A | 13 | 27.061 | -7.765  | 77.812 | 1.00 | 0.00 | O |
| ATOM | 385 | N7   | G | A | 13 | 27.014 | -5.271  | 79.640 | 1.00 | 0.00 | N |
| ATOM | 386 | C8   | G | A | 13 | 27.242 | -4.004  | 79.867 | 1.00 | 0.00 | C |
| ATOM | 387 | N9   | G | A | 13 | 27.789 | -3.328  | 78.794 | 1.00 | 0.00 | N |
| ATOM | 388 | C2'  | G | A | 13 | 27.229 | -0.945  | 79.394 | 1.00 | 0.00 | C |
| ATOM | 389 | C3'  | G | A | 13 | 28.180 | 0.122   | 79.911 | 1.00 | 0.00 | C |
| ATOM | 390 | O3'  | G | A | 13 | 28.414 | 1.080   | 78.881 | 1.00 | 0.00 | O |

|      |     |      |     |    |        |        |        |      |      |   |
|------|-----|------|-----|----|--------|--------|--------|------|------|---|
| ATOM | 391 | C4'  | G A | 13 | 29.437 | -0.679 | 80.250 | 1.00 | 0.00 | C |
| ATOM | 392 | O4'  | G A | 13 | 29.460 | -1.750 | 79.254 | 1.00 | 0.00 | O |
| ATOM | 393 | C5'  | G A | 13 | 29.487 | -1.296 | 81.627 | 1.00 | 0.00 | C |
| ATOM | 394 | O5'  | G A | 13 | 28.166 | -1.747 | 82.012 | 1.00 | 0.00 | O |
| ATOM | 395 | O1P  | G A | 13 | 27.580 | -0.252 | 83.950 | 1.00 | 0.00 | O |
| ATOM | 396 | O2P  | G A | 13 | 26.572 | -2.542 | 83.784 | 1.00 | 0.00 | O |
| ATOM | 397 | P    | G A | 13 | 27.742 | -1.661 | 83.548 | 1.00 | 0.00 | P |
| ATOM | 398 | H1   | G A | 13 | 28.004 | -7.163 | 75.580 | 1.00 | 0.00 | H |
| ATOM | 399 | H8   | G A | 13 | 27.023 | -3.520 | 80.819 | 1.00 | 0.00 | H |
| ATOM | 400 | H1'  | G A | 13 | 28.254 | -1.648 | 77.620 | 1.00 | 0.00 | H |
| ATOM | 401 | H21  | G A | 13 | 28.857 | -5.952 | 73.962 | 1.00 | 0.00 | H |
| ATOM | 402 | H3'  | G A | 13 | 27.788 | 0.629  | 80.793 | 1.00 | 0.00 | H |
| ATOM | 403 | H22  | G A | 13 | 29.205 | -4.211 | 74.149 | 1.00 | 0.00 | H |
| ATOM | 404 | H4'  | G A | 13 | 30.282 | 0.005  | 80.159 | 1.00 | 0.00 | H |
| ATOM | 405 | H2'1 | G A | 13 | 26.695 | -1.429 | 80.213 | 1.00 | 0.00 | H |
| ATOM | 406 | H2'2 | G A | 13 | 26.483 | -0.520 | 78.723 | 1.00 | 0.00 | H |
| ATOM | 407 | H5'1 | G A | 13 | 30.177 | -2.140 | 81.615 | 1.00 | 0.00 | H |
| ATOM | 408 | H5'2 | G A | 13 | 29.846 | -0.554 | 82.339 | 1.00 | 0.00 | H |
| ATOM | 409 | C1'  | G A | 14 | 26.543 | -1.208 | 74.054 | 1.00 | 0.00 | C |
| ATOM | 410 | N1   | G A | 14 | 25.046 | -6.067 | 74.464 | 1.00 | 0.00 | N |
| ATOM | 411 | C2   | G A | 14 | 25.655 | -5.412 | 73.409 | 1.00 | 0.00 | C |
| ATOM | 412 | N2   | G A | 14 | 25.896 | -6.148 | 72.316 | 1.00 | 0.00 | N |
| ATOM | 413 | N3   | G A | 14 | 25.997 | -4.124 | 73.440 | 1.00 | 0.00 | N |
| ATOM | 414 | C4   | G A | 14 | 25.673 | -3.535 | 74.619 | 1.00 | 0.00 | C |
| ATOM | 415 | C5   | G A | 14 | 25.061 | -4.107 | 75.723 | 1.00 | 0.00 | C |
| ATOM | 416 | C6   | G A | 14 | 24.703 | -5.472 | 75.692 | 1.00 | 0.00 | C |
| ATOM | 417 | O6   | G A | 14 | 24.157 | -6.153 | 76.561 | 1.00 | 0.00 | O |
| ATOM | 418 | N7   | G A | 14 | 24.904 | -3.154 | 76.734 | 1.00 | 0.00 | N |
| ATOM | 419 | C8   | G A | 14 | 25.414 | -2.064 | 76.225 | 1.00 | 0.00 | C |
| ATOM | 420 | N9   | G A | 14 | 25.900 | -2.215 | 74.943 | 1.00 | 0.00 | N |
| ATOM | 421 | C2'  | G A | 14 | 25.933 | 0.183  | 74.162 | 1.00 | 0.00 | C |
| ATOM | 422 | C3'  | G A | 14 | 27.148 | 1.079  | 73.985 | 1.00 | 0.00 | C |
| ATOM | 423 | O3'  | G A | 14 | 27.397 | 1.262  | 72.594 | 1.00 | 0.00 | O |
| ATOM | 424 | C4'  | G A | 14 | 28.258 | 0.283  | 74.671 | 1.00 | 0.00 | C |
| ATOM | 425 | O4'  | G A | 14 | 27.905 | -1.115 | 74.422 | 1.00 | 0.00 | O |
| ATOM | 426 | C5'  | G A | 14 | 28.406 | 0.486  | 76.161 | 1.00 | 0.00 | C |
| ATOM | 427 | O5'  | G A | 14 | 27.100 | 0.658  | 76.765 | 1.00 | 0.00 | O |
| ATOM | 428 | O1P  | G A | 14 | 27.145 | 3.035  | 77.588 | 1.00 | 0.00 | O |
| ATOM | 429 | O2P  | G A | 14 | 25.688 | 1.341  | 78.728 | 1.00 | 0.00 | O |
| ATOM | 430 | P    | G A | 14 | 26.956 | 1.636  | 78.015 | 1.00 | 0.00 | P |
| ATOM | 431 | H1   | G A | 14 | 24.829 | -7.069 | 74.339 | 1.00 | 0.00 | H |
| ATOM | 432 | H8   | G A | 14 | 25.450 | -1.118 | 76.766 | 1.00 | 0.00 | H |
| ATOM | 433 | H1'  | G A | 14 | 26.496 | -1.578 | 73.030 | 1.00 | 0.00 | H |
| ATOM | 434 | H21  | G A | 14 | 25.632 | -7.144 | 72.301 | 1.00 | 0.00 | H |
| ATOM | 435 | H3'  | G A | 14 | 27.011 | 2.051  | 74.459 | 1.00 | 0.00 | H |
| ATOM | 436 | H22  | G A | 14 | 26.345 | -5.719 | 71.495 | 1.00 | 0.00 | H |
| ATOM | 437 | H4'  | G A | 14 | 29.195 | 0.576  | 74.200 | 1.00 | 0.00 | H |
| ATOM | 438 | H2'1 | G A | 14 | 25.452 | 0.352  | 75.125 | 1.00 | 0.00 | H |
| ATOM | 439 | H2'2 | G A | 14 | 25.186 | 0.369  | 73.387 | 1.00 | 0.00 | H |
| ATOM | 440 | H5'1 | G A | 14 | 28.902 | -0.383 | 76.592 | 1.00 | 0.00 | H |
| ATOM | 441 | H5'2 | G A | 14 | 29.016 | 1.372  | 76.341 | 1.00 | 0.00 | H |
| ATOM | 442 | C1'  | A A | 15 | 24.364 | -2.624 | 69.842 | 1.00 | 0.00 | C |
| ATOM | 443 | N1   | A A | 15 | 22.005 | -6.024 | 72.877 | 1.00 | 0.00 | N |
| ATOM | 444 | C2   | A A | 15 | 22.551 | -6.125 | 71.668 | 1.00 | 0.00 | C |

|      |     |      |   |   |    |        |        |        |      |      |   |
|------|-----|------|---|---|----|--------|--------|--------|------|------|---|
| ATOM | 445 | N3   | A | A | 15 | 23.148 | -5.206 | 70.941 | 1.00 | 0.00 | N |
| ATOM | 446 | C4   | A | A | 15 | 23.155 | -4.028 | 71.593 | 1.00 | 0.00 | C |
| ATOM | 447 | C5   | A | A | 15 | 22.639 | -3.759 | 72.829 | 1.00 | 0.00 | C |
| ATOM | 448 | C6   | A | A | 15 | 22.028 | -4.837 | 73.502 | 1.00 | 0.00 | C |
| ATOM | 449 | N6   | A | A | 15 | 21.478 | -4.723 | 74.723 | 1.00 | 0.00 | N |
| ATOM | 450 | N7   | A | A | 15 | 22.832 | -2.433 | 73.174 | 1.00 | 0.00 | N |
| ATOM | 451 | C8   | A | A | 15 | 23.452 | -1.931 | 72.146 | 1.00 | 0.00 | C |
| ATOM | 452 | N9   | A | A | 15 | 23.684 | -2.842 | 71.147 | 1.00 | 0.00 | N |
| ATOM | 453 | C2'  | A | A | 15 | 24.061 | -1.272 | 69.209 | 1.00 | 0.00 | C |
| ATOM | 454 | C3'  | A | A | 15 | 25.386 | -0.926 | 68.549 | 1.00 | 0.00 | C |
| ATOM | 455 | O3'  | A | A | 15 | 25.445 | -1.547 | 67.268 | 1.00 | 0.00 | O |
| ATOM | 456 | C4'  | A | A | 15 | 26.412 | -1.507 | 69.520 | 1.00 | 0.00 | C |
| ATOM | 457 | O4'  | A | A | 15 | 25.758 | -2.699 | 70.064 | 1.00 | 0.00 | O |
| ATOM | 458 | C5'  | A | A | 15 | 26.829 | -0.618 | 70.668 | 1.00 | 0.00 | C |
| ATOM | 459 | O5'  | A | A | 15 | 25.691 | 0.155  | 71.127 | 1.00 | 0.00 | O |
| ATOM | 460 | O1P  | A | A | 15 | 26.328 | 2.523  | 70.557 | 1.00 | 0.00 | O |
| ATOM | 461 | O2P  | A | A | 15 | 24.764 | 2.070  | 72.465 | 1.00 | 0.00 | O |
| ATOM | 462 | P    | A | A | 15 | 25.937 | 1.634  | 71.669 | 1.00 | 0.00 | P |
| ATOM | 463 | H2   | A | A | 15 | 22.496 | -7.115 | 71.214 | 1.00 | 0.00 | H |
| ATOM | 464 | H8   | A | A | 15 | 23.758 | -0.887 | 72.083 | 1.00 | 0.00 | H |
| ATOM | 465 | H1'  | A | A | 15 | 24.087 | -3.438 | 69.174 | 1.00 | 0.00 | H |
| ATOM | 466 | H3'  | A | A | 15 | 25.518 | 0.150  | 68.435 | 1.00 | 0.00 | H |
| ATOM | 467 | H4'  | A | A | 15 | 27.303 | -1.739 | 68.938 | 1.00 | 0.00 | H |
| ATOM | 468 | H61  | A | A | 15 | 21.046 | -5.543 | 75.172 | 1.00 | 0.00 | H |
| ATOM | 469 | H62  | A | A | 15 | 21.490 | -3.813 | 75.209 | 1.00 | 0.00 | H |
| ATOM | 470 | H2'1 | A | A | 15 | 23.778 | -0.523 | 69.950 | 1.00 | 0.00 | H |
| ATOM | 471 | H2'2 | A | A | 15 | 23.255 | -1.329 | 68.477 | 1.00 | 0.00 | H |
| ATOM | 472 | H5'1 | A | A | 15 | 27.205 | -1.238 | 71.481 | 1.00 | 0.00 | H |
| ATOM | 473 | H5'2 | A | A | 15 | 27.617 | 0.053  | 70.332 | 1.00 | 0.00 | H |
| ATOM | 474 | C1'  | C | A | 16 | 21.273 | -5.452 | 67.175 | 1.00 | 0.00 | C |
| ATOM | 475 | N1   | C | A | 16 | 20.790 | -4.756 | 68.399 | 1.00 | 0.00 | N |
| ATOM | 476 | C2   | C | A | 16 | 20.119 | -5.511 | 69.358 | 1.00 | 0.00 | C |
| ATOM | 477 | O2   | C | A | 16 | 19.952 | -6.721 | 69.154 | 1.00 | 0.00 | O |
| ATOM | 478 | N3   | C | A | 16 | 19.670 | -4.897 | 70.480 | 1.00 | 0.00 | N |
| ATOM | 479 | C4   | C | A | 16 | 19.867 | -3.586 | 70.671 | 1.00 | 0.00 | C |
| ATOM | 480 | N4   | C | A | 16 | 19.410 | -3.039 | 71.787 | 1.00 | 0.00 | N |
| ATOM | 481 | C5   | C | A | 16 | 20.550 | -2.782 | 69.700 | 1.00 | 0.00 | C |
| ATOM | 482 | C6   | C | A | 16 | 20.997 | -3.423 | 68.579 | 1.00 | 0.00 | C |
| ATOM | 483 | C2'  | C | A | 16 | 21.144 | -4.622 | 65.905 | 1.00 | 0.00 | C |
| ATOM | 484 | C3'  | C | A | 16 | 22.384 | -5.037 | 65.127 | 1.00 | 0.00 | C |
| ATOM | 485 | O3'  | C | A | 16 | 22.106 | -6.234 | 64.408 | 1.00 | 0.00 | O |
| ATOM | 486 | C4'  | C | A | 16 | 23.419 | -5.250 | 66.230 | 1.00 | 0.00 | C |
| ATOM | 487 | O4'  | C | A | 16 | 22.643 | -5.753 | 67.364 | 1.00 | 0.00 | O |
| ATOM | 488 | C5'  | C | A | 16 | 24.188 | -4.027 | 66.675 | 1.00 | 0.00 | C |
| ATOM | 489 | O5'  | C | A | 16 | 23.319 | -2.868 | 66.654 | 1.00 | 0.00 | O |
| ATOM | 490 | O1P  | C | A | 16 | 24.310 | -1.427 | 64.843 | 1.00 | 0.00 | O |
| ATOM | 491 | O2P  | C | A | 16 | 23.026 | -0.373 | 66.722 | 1.00 | 0.00 | O |
| ATOM | 492 | P    | C | A | 16 | 23.940 | -1.450 | 66.273 | 1.00 | 0.00 | P |
| ATOM | 493 | H5   | C | A | 16 | 20.706 | -1.713 | 69.848 | 1.00 | 0.00 | H |
| ATOM | 494 | H6   | C | A | 16 | 21.530 | -2.856 | 67.816 | 1.00 | 0.00 | H |
| ATOM | 495 | H1'  | C | A | 16 | 20.733 | -6.395 | 67.082 | 1.00 | 0.00 | H |
| ATOM | 496 | H3'  | C | A | 16 | 22.705 | -4.261 | 64.430 | 1.00 | 0.00 | H |
| ATOM | 497 | H4'  | C | A | 16 | 24.139 | -5.975 | 65.850 | 1.00 | 0.00 | H |
| ATOM | 498 | H41  | C | A | 16 | 19.550 | -2.031 | 71.960 | 1.00 | 0.00 | H |

|      |     |      |   |   |    |        |         |        |      |      |   |
|------|-----|------|---|---|----|--------|---------|--------|------|------|---|
| ATOM | 499 | H42  | C | A | 16 | 18.917 | -3.616  | 72.482 | 1.00 | 0.00 | H |
| ATOM | 500 | H2'1 | C | A | 16 | 21.143 | -3.551  | 66.109 | 1.00 | 0.00 | H |
| ATOM | 501 | H2'2 | C | A | 16 | 20.232 | -4.851  | 65.351 | 1.00 | 0.00 | H |
| ATOM | 502 | H5'1 | C | A | 16 | 24.564 | -4.191  | 67.684 | 1.00 | 0.00 | H |
| ATOM | 503 | H5'2 | C | A | 16 | 25.029 | -3.868  | 66.000 | 1.00 | 0.00 | H |
| ATOM | 504 | C1'  | G | A | 17 | 17.305 | -8.347  | 66.551 | 1.00 | 0.00 | C |
| ATOM | 505 | N1   | G | A | 17 | 15.546 | -5.854  | 70.639 | 1.00 | 0.00 | N |
| ATOM | 506 | C2   | G | A | 17 | 15.486 | -7.201  | 70.326 | 1.00 | 0.00 | C |
| ATOM | 507 | N2   | G | A | 17 | 14.873 | -7.987  | 71.221 | 1.00 | 0.00 | N |
| ATOM | 508 | N3   | G | A | 17 | 15.996 | -7.720  | 69.211 | 1.00 | 0.00 | N |
| ATOM | 509 | C4   | G | A | 17 | 16.571 | -6.779  | 68.418 | 1.00 | 0.00 | C |
| ATOM | 510 | C5   | G | A | 17 | 16.675 | -5.416  | 68.646 | 1.00 | 0.00 | C |
| ATOM | 511 | C6   | G | A | 17 | 16.138 | -4.863  | 69.832 | 1.00 | 0.00 | C |
| ATOM | 512 | O6   | G | A | 17 | 16.130 | -3.692  | 70.209 | 1.00 | 0.00 | O |
| ATOM | 513 | N7   | G | A | 17 | 17.338 | -4.798  | 67.583 | 1.00 | 0.00 | N |
| ATOM | 514 | C8   | G | A | 17 | 17.612 | -5.783  | 66.767 | 1.00 | 0.00 | C |
| ATOM | 515 | N9   | G | A | 17 | 17.177 | -7.017  | 67.205 | 1.00 | 0.00 | N |
| ATOM | 516 | C2'  | G | A | 17 | 17.145 | -8.306  | 65.037 | 1.00 | 0.00 | C |
| ATOM | 517 | C3'  | G | A | 17 | 18.131 | -9.368  | 64.583 | 1.00 | 0.00 | C |
| ATOM | 518 | O3'  | G | A | 17 | 17.504 | -10.647 | 64.646 | 1.00 | 0.00 | O |
| ATOM | 519 | C4'  | G | A | 17 | 19.266 | -9.232  | 65.597 | 1.00 | 0.00 | C |
| ATOM | 520 | O4'  | G | A | 17 | 18.597 | -8.847  | 66.839 | 1.00 | 0.00 | O |
| ATOM | 521 | C5'  | G | A | 17 | 20.329 | -8.205  | 65.279 | 1.00 | 0.00 | C |
| ATOM | 522 | O5'  | G | A | 17 | 19.721 | -7.049  | 64.650 | 1.00 | 0.00 | O |
| ATOM | 523 | O1P  | G | A | 17 | 20.678 | -7.087  | 62.322 | 1.00 | 0.00 | O |
| ATOM | 524 | O2P  | G | A | 17 | 19.954 | -4.914  | 63.348 | 1.00 | 0.00 | O |
| ATOM | 525 | P    | G | A | 17 | 20.548 | -6.260  | 63.537 | 1.00 | 0.00 | P |
| ATOM | 526 | H1   | G | A | 17 | 15.126 | -5.554  | 71.532 | 1.00 | 0.00 | H |
| ATOM | 527 | H8   | G | A | 17 | 18.137 | -5.639  | 65.822 | 1.00 | 0.00 | H |
| ATOM | 528 | H1'  | G | A | 17 | 16.577 | -9.020  | 67.002 | 1.00 | 0.00 | H |
| ATOM | 529 | H21  | G | A | 17 | 14.484 | -7.578  | 72.082 | 1.00 | 0.00 | H |
| ATOM | 530 | H3'  | G | A | 17 | 18.487 | -9.189  | 63.568 | 1.00 | 0.00 | H |
| ATOM | 531 | H22  | G | A | 17 | 14.792 | -8.999  | 71.046 | 1.00 | 0.00 | H |
| ATOM | 532 | H4'  | G | A | 17 | 19.753 | -10.206 | 65.660 | 1.00 | 0.00 | H |
| ATOM | 533 | H2'1 | G | A | 17 | 17.393 | -7.329  | 64.621 | 1.00 | 0.00 | H |
| ATOM | 534 | H2'2 | G | A | 17 | 16.128 | -8.546  | 64.722 | 1.00 | 0.00 | H |
| ATOM | 535 | H5'1 | G | A | 17 | 20.823 | -7.905  | 66.204 | 1.00 | 0.00 | H |
| ATOM | 536 | H5'2 | G | A | 17 | 21.065 | -8.648  | 64.609 | 1.00 | 0.00 | H |
| ATOM | 537 | C1'  | G | A | 18 | 12.792 | -10.019 | 67.717 | 1.00 | 0.00 | C |
| ATOM | 538 | N1   | G | A | 18 | 12.249 | -5.408  | 69.830 | 1.00 | 0.00 | N |
| ATOM | 539 | C2   | G | A | 18 | 11.871 | -6.652  | 70.304 | 1.00 | 0.00 | C |
| ATOM | 540 | N2   | G | A | 18 | 11.266 | -6.669  | 71.500 | 1.00 | 0.00 | N |
| ATOM | 541 | N3   | G | A | 18 | 12.082 | -7.787  | 69.640 | 1.00 | 0.00 | N |
| ATOM | 542 | C4   | G | A | 18 | 12.696 | -7.581  | 68.446 | 1.00 | 0.00 | C |
| ATOM | 543 | C5   | G | A | 18 | 13.104 | -6.378  | 67.890 | 1.00 | 0.00 | C |
| ATOM | 544 | C6   | G | A | 18 | 12.886 | -5.173  | 68.598 | 1.00 | 0.00 | C |
| ATOM | 545 | O6   | G | A | 18 | 13.173 | -4.020  | 68.271 | 1.00 | 0.00 | O |
| ATOM | 546 | N7   | G | A | 18 | 13.697 | -6.599  | 66.645 | 1.00 | 0.00 | N |
| ATOM | 547 | C8   | G | A | 18 | 13.635 | -7.896  | 66.491 | 1.00 | 0.00 | C |
| ATOM | 548 | N9   | G | A | 18 | 13.039 | -8.562  | 67.542 | 1.00 | 0.00 | N |
| ATOM | 549 | C2'  | G | A | 18 | 12.401 | -10.735 | 66.433 | 1.00 | 0.00 | C |
| ATOM | 550 | C3'  | G | A | 18 | 13.069 | -12.087 | 66.604 | 1.00 | 0.00 | C |
| ATOM | 551 | O3'  | G | A | 18 | 12.219 | -12.937 | 67.372 | 1.00 | 0.00 | O |
| ATOM | 552 | C4'  | G | A | 18 | 14.358 | -11.738 | 67.347 | 1.00 | 0.00 | C |

|      |     |      |       |    |        |         |        |      |      |   |
|------|-----|------|-------|----|--------|---------|--------|------|------|---|
| ATOM | 553 | O4'  | G A   | 18 | 13.988 | -10.605 | 68.196 | 1.00 | 0.00 | O |
| ATOM | 554 | C5'  | G A   | 18 | 15.537 | -11.338 | 66.494 | 1.00 | 0.00 | C |
| ATOM | 555 | O5'  | G A   | 18 | 15.079 | -10.572 | 65.352 | 1.00 | 0.00 | O |
| ATOM | 556 | O1P  | G A   | 18 | 15.621 | -12.061 | 63.395 | 1.00 | 0.00 | O |
| ATOM | 557 | O2P  | G A   | 18 | 15.519 | -9.573  | 63.089 | 1.00 | 0.00 | O |
| ATOM | 558 | P    | G A   | 18 | 15.856 | -10.720 | 63.966 | 1.00 | 0.00 | P |
| ATOM | 559 | H1   | G A   | 18 | 12.046 | -4.590  | 70.426 | 1.00 | 0.00 | H |
| ATOM | 560 | H8   | G A   | 18 | 14.018 | -8.408  | 65.608 | 1.00 | 0.00 | H |
| ATOM | 561 | H1'  | G A   | 18 | 12.027 | -10.145 | 68.483 | 1.00 | 0.00 | H |
| ATOM | 562 | H21  | G A   | 18 | 11.111 | -5.786  | 72.009 | 1.00 | 0.00 | H |
| ATOM | 563 | H3'  | G A   | 18 | 13.284 | -12.563 | 65.646 | 1.00 | 0.00 | H |
| ATOM | 564 | H22  | G A   | 18 | 10.960 | -7.562  | 71.907 | 1.00 | 0.00 | H |
| ATOM | 565 | H4'  | G A   | 18 | 14.643 | -12.621 | 67.919 | 1.00 | 0.00 | H |
| ATOM | 566 | H2'1 | G A   | 18 | 12.768 | -10.220 | 65.544 | 1.00 | 0.00 | H |
| ATOM | 567 | H2'2 | G A   | 18 | 11.320 | -10.835 | 66.327 | 1.00 | 0.00 | H |
| ATOM | 568 | H5'1 | G A   | 18 | 16.224 | -10.738 | 67.090 | 1.00 | 0.00 | H |
| ATOM | 569 | H5'2 | G A   | 18 | 16.052 | -12.236 | 66.152 | 1.00 | 0.00 | H |
| ATOM | 570 | C1'  | T A   | 19 | 8.285  | -9.644  | 69.729 | 1.00 | 0.00 | C |
| ATOM | 571 | N1   | T A   | 19 | 8.777  | -8.593  | 68.800 | 1.00 | 0.00 | N |
| ATOM | 572 | C2   | T A   | 19 | 8.695  | -7.284  | 69.228 | 1.00 | 0.00 | C |
| ATOM | 573 | O2   | T A   | 19 | 8.243  | -6.973  | 70.317 | 1.00 | 0.00 | O |
| ATOM | 574 | N3   | T A   | 19 | 9.164  | -6.340  | 68.334 | 1.00 | 0.00 | N |
| ATOM | 575 | C4   | T A   | 19 | 9.690  | -6.582  | 67.083 | 1.00 | 0.00 | C |
| ATOM | 576 | O4   | T A   | 19 | 10.076 | -5.651  | 66.368 | 1.00 | 0.00 | O |
| ATOM | 577 | C5   | T A   | 19 | 9.734  | -7.980  | 66.722 | 1.00 | 0.00 | C |
| ATOM | 578 | C6   | T A   | 19 | 9.286  | -8.928  | 67.569 | 1.00 | 0.00 | C |
| ATOM | 579 | C7   | T A   | 19 | 10.300 | -8.291  | 65.368 | 1.00 | 0.00 | C |
| ATOM | 580 | C2'  | T A   | 19 | 7.565  | -10.792 | 69.032 | 1.00 | 0.00 | C |
| ATOM | 581 | C3'  | T A   | 19 | 7.978  | -11.987 | 69.877 | 1.00 | 0.00 | C |
| ATOM | 582 | O3'  | T A   | 19 | 7.112  | -12.086 | 71.005 | 1.00 | 0.00 | O |
| ATOM | 583 | C4'  | T A   | 19 | 9.409  | -11.638 | 70.278 | 1.00 | 0.00 | C |
| ATOM | 584 | O4'  | T A   | 19 | 9.404  | -10.182 | 70.406 | 1.00 | 0.00 | O |
| ATOM | 585 | C5'  | T A   | 19 | 10.495 | -12.036 | 69.305 | 1.00 | 0.00 | C |
| ATOM | 586 | O5'  | T A   | 19 | 10.019 | -11.870 | 67.946 | 1.00 | 0.00 | O |
| ATOM | 587 | O1P  | T A   | 19 | 9.946  | -14.225 | 67.063 | 1.00 | 0.00 | O |
| ATOM | 588 | O2P  | T A   | 19 | 10.281 | -12.303 | 65.484 | 1.00 | 0.00 | O |
| ATOM | 589 | P    | T A   | 19 | 10.524 | -12.886 | 66.825 | 1.00 | 0.00 | P |
| ATOM | 590 | H3   | T A   | 19 | 9.117  | -5.355  | 68.634 | 1.00 | 0.00 | H |
| ATOM | 591 | H6   | T A   | 19 | 9.331  | -9.976  | 67.274 | 1.00 | 0.00 | H |
| ATOM | 592 | H1'  | T A   | 19 | 7.639  | -9.171  | 70.469 | 1.00 | 0.00 | H |
| ATOM | 593 | H3'  | T A   | 19 | 7.943  | -12.917 | 69.310 | 1.00 | 0.00 | H |
| ATOM | 594 | H4'  | T A   | 19 | 9.606  | -12.149 | 71.222 | 1.00 | 0.00 | H |
| ATOM | 595 | H71  | T A   | 19 | 9.520  | -8.711  | 64.735 | 1.00 | 0.00 | H |
| ATOM | 596 | H72  | T A   | 19 | 10.683 | -7.376  | 64.916 | 1.00 | 0.00 | H |
| ATOM | 597 | H73  | T A   | 19 | 11.113 | -9.013  | 65.469 | 1.00 | 0.00 | H |
| ATOM | 598 | H2'1 | T A   | 19 | 7.880  | -10.909 | 67.996 | 1.00 | 0.00 | H |
| ATOM | 599 | H2'2 | T A   | 19 | 6.481  | -10.662 | 69.031 | 1.00 | 0.00 | H |
| ATOM | 600 | H5'1 | T A   | 19 | 11.370 | -11.406 | 69.467 | 1.00 | 0.00 | H |
| ATOM | 601 | H5'2 | T A   | 19 | 10.766 | -13.075 | 69.475 | 1.00 | 0.00 | H |
| ATOM | 602 | C01  | LNK A | 20 | 3.723  | -13.591 | 71.337 | 0.00 | 0.00 | C |
| ATOM | 603 | O1   | LNK A | 20 | 4.863  | -13.222 | 70.559 | 1.00 | 0.00 | O |
| ATOM | 604 | S    | LNK A | 20 | 0.113  | -15.186 | 70.811 | 0.00 | 0.00 | S |
| ATOM | 605 | C02  | LNK A | 20 | 2.645  | -14.191 | 70.414 | 0.00 | 0.00 | C |
| ATOM | 606 | C03  | LNK A | 20 | 1.249  | -13.767 | 70.911 | 0.00 | 0.00 | C |

|      |     |      |     |   |    |        |         |        |        |      |      |   |
|------|-----|------|-----|---|----|--------|---------|--------|--------|------|------|---|
| ATOM | 607 | O1P  | LNK | A | 20 | 5.346  | -11.082 | 69.322 | 1.00   | 0.00 | O    |   |
| ATOM | 608 | O2P  | LNK | A | 20 | 4.701  | -11.015 | 71.747 | 1.00   | 0.00 | O    |   |
| ATOM | 609 | P    | LNK | A | 20 | 5.404  | -11.725 | 70.650 | 1.00   | 0.00 | P    |   |
| ATOM | 610 | H01  | LNK | A | 20 | 3.322  | -12.710 | 71.838 | 0.00   | 0.00 | H    |   |
| ATOM | 611 | H02  | LNK | A | 20 | 4.015  | -14.331 | 72.083 | 0.00   | 0.00 | H    |   |
| ATOM | 612 | H03  | LNK | A | 20 | 0.873  | -12.956 | 70.288 | 0.00   | 0.00 | H    |   |
| ATOM | 613 | H04  | LNK | A | 20 | 2.720  | -15.279 | 70.426 | 0.00   | 0.00 | H    |   |
| ATOM | 614 | H05  | LNK | A | 20 | 2.794  | -13.828 | 69.398 | 0.00   | 0.00 | H    |   |
| ATOM | 615 | H06  | LNK | A | 20 | 1.319  | -13.429 | 71.945 | 0.00   | 0.00 | H    |   |
| ATOM | 616 | AU   | LNK | A | 20 | -0.528 | -14.976 | 70.935 |        |      |      |   |
| TER  |     |      |     |   |    |        |         |        |        |      |      |   |
| ATOM | 618 | C1'  |     | A | B  | 2      | 8.512   | 1.150  | 71.250 | 1.00 | 0.00 | C |
| ATOM | 619 | N1   |     | A | B  | 2      | 9.033   | -3.513 | 69.171 | 1.00 | 0.00 | N |
| ATOM | 620 | C2   |     | A | B  | 2      | 8.561   | -3.100 | 70.343 | 1.00 | 0.00 | C |
| ATOM | 621 | N3   |     | A | B  | 2      | 8.452   | -1.878 | 70.816 | 1.00 | 0.00 | N |
| ATOM | 622 | C4   |     | A | B  | 2      | 8.914   | -0.987 | 69.919 | 1.00 | 0.00 | C |
| ATOM | 623 | C5   |     | A | B  | 2      | 9.426   | -1.247 | 68.680 | 1.00 | 0.00 | C |
| ATOM | 624 | C6   |     | A | B  | 2      | 9.484   | -2.603 | 68.295 | 1.00 | 0.00 | C |
| ATOM | 625 | N6   |     | A | B  | 2      | 9.964   | -3.010 | 67.107 | 1.00 | 0.00 | N |
| ATOM | 626 | N7   |     | A | B  | 2      | 9.797   | -0.078 | 68.036 | 1.00 | 0.00 | N |
| ATOM | 627 | C8   |     | A | B  | 2      | 9.508   | 0.854  | 68.896 | 1.00 | 0.00 | C |
| ATOM | 628 | N9   |     | A | B  | 2      | 8.964   | 0.378  | 70.060 | 1.00 | 0.00 | N |
| ATOM | 629 | C2'  |     | A | B  | 2      | 9.396   | 2.347  | 71.577 | 1.00 | 0.00 | C |
| ATOM | 630 | C3'  |     | A | B  | 2      | 8.382   | 3.362  | 72.077 | 1.00 | 0.00 | C |
| ATOM | 631 | O3'  |     | A | B  | 2      | 8.132   | 3.128  | 73.461 | 1.00 | 0.00 | O |
| ATOM | 632 | C4'  |     | A | B  | 2      | 7.156   | 3.074  | 71.212 | 1.00 | 0.00 | C |
| ATOM | 633 | O4'  |     | A | B  | 2      | 7.208   | 1.629  | 70.981 | 1.00 | 0.00 | O |
| ATOM | 634 | C5'  |     | A | B  | 2      | 7.097   | 3.777  | 69.876 | 1.00 | 0.00 | C |
| ATOM | 635 | O5'  |     | A | B  | 2      | 8.429   | 3.866  | 69.310 | 1.00 | 0.00 | O |
| ATOM | 636 | H2   |     | A | B  | 2      | 8.214   | -3.889 | 71.008 | 1.00 | 0.00 | H |
| ATOM | 637 | H8   |     | A | B  | 2      | 9.680   | 1.914  | 68.707 | 1.00 | 0.00 | H |
| ATOM | 638 | H1'  |     | A | B  | 2      | 8.451   | 0.466  | 72.097 | 1.00 | 0.00 | H |
| ATOM | 639 | H3'  |     | A | B  | 2      | 8.727   | 4.386  | 71.942 | 1.00 | 0.00 | H |
| ATOM | 640 | H4'  |     | A | B  | 2      | 6.284   | 3.381  | 71.789 | 1.00 | 0.00 | H |
| ATOM | 641 | H61  |     | A | B  | 2      | 9.981   | -4.012 | 66.874 | 1.00 | 0.00 | H |
| ATOM | 642 | H62  |     | A | B  | 2      | 10.314  | -2.316 | 66.429 | 1.00 | 0.00 | H |
| ATOM | 643 | H2'1 |     | A | B  | 2      | 9.930   | 2.719  | 70.702 | 1.00 | 0.00 | H |
| ATOM | 644 | H2'2 |     | A | B  | 2      | 10.138  | 2.116  | 72.341 | 1.00 | 0.00 | H |
| ATOM | 645 | H5'1 |     | A | B  | 2      | 6.450   | 3.213  | 69.204 | 1.00 | 0.00 | H |
| ATOM | 646 | H5'2 |     | A | B  | 2      | 6.687   | 4.775  | 70.016 | 1.00 | 0.00 | H |
| ATOM | 647 | C1'  |     | C | B  | 3      | 10.231  | -2.054 | 74.633 | 1.00 | 0.00 | C |
| ATOM | 648 | N1   |     | C | B  | 3      | 10.899  | -1.922 | 73.309 | 1.00 | 0.00 | N |
| ATOM | 649 | C2   |     | C | B  | 3      | 11.135  | -3.085 | 72.579 | 1.00 | 0.00 | C |
| ATOM | 650 | O2   |     | C | B  | 3      | 10.781  | -4.172 | 73.057 | 1.00 | 0.00 | O |
| ATOM | 651 | N3   |     | C | B  | 3      | 11.743  | -2.987 | 71.372 | 1.00 | 0.00 | N |
| ATOM | 652 | C4   |     | C | B  | 3      | 12.115  | -1.797 | 70.881 | 1.00 | 0.00 | C |
| ATOM | 653 | N4   |     | C | B  | 3      | 12.702  | -1.760 | 69.694 | 1.00 | 0.00 | N |
| ATOM | 654 | C5   |     | C | B  | 3      | 11.889  | -0.584 | 71.612 | 1.00 | 0.00 | C |
| ATOM | 655 | C6   |     | C | B  | 3      | 11.270  | -0.705 | 72.825 | 1.00 | 0.00 | C |
| ATOM | 656 | C2'  |     | C | B  | 3      | 10.766  | -1.098 | 75.688 | 1.00 | 0.00 | C |
| ATOM | 657 | C3'  |     | C | B  | 3      | 9.511   | -0.758 | 76.477 | 1.00 | 0.00 | C |
| ATOM | 658 | O3'  |     | C | B  | 3      | 9.289   | -1.768 | 77.459 | 1.00 | 0.00 | O |
| ATOM | 659 | C4'  |     | C | B  | 3      | 8.426   | -0.750 | 75.401 | 1.00 | 0.00 | C |
| ATOM | 660 | O4'  |     | C | B  | 3      | 8.856   | -1.776 | 74.448 | 1.00 | 0.00 | O |



|      |     |      |     |   |        |        |        |      |      |   |
|------|-----|------|-----|---|--------|--------|--------|------|------|---|
| ATOM | 661 | C5'  | C B | 3 | 8.228  | 0.549  | 74.658 | 1.00 | 0.00 | C |
| ATOM | 662 | O5'  | C B | 3 | 9.508  | 1.200  | 74.460 | 1.00 | 0.00 | O |
| ATOM | 663 | O1P  | C B | 3 | 9.319  | 3.290  | 75.851 | 1.00 | 0.00 | O |
| ATOM | 664 | O2P  | C B | 3 | 10.831 | 3.247  | 73.848 | 1.00 | 0.00 | O |
| ATOM | 665 | P    | C B | 3 | 9.570  | 2.793  | 74.483 | 1.00 | 0.00 | P |
| ATOM | 666 | H5   | C B | 3 | 12.196 | 0.387  | 71.221 | 1.00 | 0.00 | H |
| ATOM | 667 | H6   | C B | 3 | 11.071 | 0.190  | 73.414 | 1.00 | 0.00 | H |
| ATOM | 668 | H1'  | C B | 3 | 10.322 | -3.089 | 74.961 | 1.00 | 0.00 | H |
| ATOM | 669 | H3'  | C B | 3 | 9.586  | 0.212  | 76.967 | 1.00 | 0.00 | H |
| ATOM | 670 | H4'  | C B | 3 | 7.487  | -0.996 | 75.897 | 1.00 | 0.00 | H |
| ATOM | 671 | H41  | C B | 3 | 12.994 | -0.857 | 69.293 | 1.00 | 0.00 | H |
| ATOM | 672 | H42  | C B | 3 | 12.865 | -2.634 | 69.171 | 1.00 | 0.00 | H |
| ATOM | 673 | H2'1 | C B | 3 | 11.212 | -0.204 | 75.251 | 1.00 | 0.00 | H |
| ATOM | 674 | H2'2 | C B | 3 | 11.520 | -1.563 | 76.323 | 1.00 | 0.00 | H |
| ATOM | 675 | H5'1 | C B | 3 | 7.768  | 0.341  | 73.690 | 1.00 | 0.00 | H |
| ATOM | 676 | H5'2 | C B | 3 | 7.571  | 1.195  | 75.236 | 1.00 | 0.00 | H |
| ATOM | 677 | C1'  | C B | 4 | 12.609 | -6.147 | 76.087 | 1.00 | 0.00 | C |
| ATOM | 678 | N1   | C B | 4 | 13.258 | -5.184 | 75.156 | 1.00 | 0.00 | N |
| ATOM | 679 | C2   | C B | 4 | 13.803 | -5.686 | 73.974 | 1.00 | 0.00 | C |
| ATOM | 680 | O2   | C B | 4 | 13.726 | -6.901 | 73.749 | 1.00 | 0.00 | O |
| ATOM | 681 | N3   | C B | 4 | 14.398 | -4.828 | 73.113 | 1.00 | 0.00 | N |
| ATOM | 682 | C4   | C B | 4 | 14.468 | -3.517 | 73.383 | 1.00 | 0.00 | C |
| ATOM | 683 | N4   | C B | 4 | 15.058 | -2.721 | 72.505 | 1.00 | 0.00 | N |
| ATOM | 684 | C5   | C B | 4 | 13.921 | -2.973 | 74.592 | 1.00 | 0.00 | C |
| ATOM | 685 | C6   | C B | 4 | 13.320 | -3.856 | 75.445 | 1.00 | 0.00 | C |
| ATOM | 686 | C2'  | C B | 4 | 12.855 | -5.837 | 77.558 | 1.00 | 0.00 | C |
| ATOM | 687 | C3'  | C B | 4 | 11.532 | -6.243 | 78.191 | 1.00 | 0.00 | C |
| ATOM | 688 | O3'  | C B | 4 | 11.548 | -7.643 | 78.452 | 1.00 | 0.00 | O |
| ATOM | 689 | C4'  | C B | 4 | 10.512 | -5.865 | 77.120 | 1.00 | 0.00 | C |
| ATOM | 690 | O4'  | C B | 4 | 11.214 | -6.094 | 75.856 | 1.00 | 0.00 | O |
| ATOM | 691 | C5'  | C B | 4 | 10.011 | -4.440 | 77.142 | 1.00 | 0.00 | C |
| ATOM | 692 | O5'  | C B | 4 | 11.086 | -3.546 | 77.523 | 1.00 | 0.00 | O |
| ATOM | 693 | O1P  | C B | 4 | 10.334 | -2.644 | 79.748 | 1.00 | 0.00 | O |
| ATOM | 694 | O2P  | C B | 4 | 11.861 | -1.285 | 78.294 | 1.00 | 0.00 | O |
| ATOM | 695 | P    | C B | 4 | 10.740 | -2.252 | 78.385 | 1.00 | 0.00 | P |
| ATOM | 696 | H5   | C B | 4 | 13.980 | -1.909 | 74.821 | 1.00 | 0.00 | H |
| ATOM | 697 | H6   | C B | 4 | 12.883 | -3.490 | 76.373 | 1.00 | 0.00 | H |
| ATOM | 698 | H1'  | C B | 4 | 12.953 | -7.150 | 75.837 | 1.00 | 0.00 | H |
| ATOM | 699 | H3'  | C B | 4 | 11.344 | -5.705 | 79.120 | 1.00 | 0.00 | H |
| ATOM | 700 | H4'  | C B | 4 | 9.652  | -6.522 | 77.254 | 1.00 | 0.00 | H |
| ATOM | 701 | H41  | C B | 4 | 15.123 | -1.708 | 72.686 | 1.00 | 0.00 | H |
| ATOM | 702 | H42  | C B | 4 | 15.454 | -3.114 | 71.636 | 1.00 | 0.00 | H |
| ATOM | 703 | H2'1 | C B | 4 | 13.069 | -4.783 | 77.728 | 1.00 | 0.00 | H |
| ATOM | 704 | H2'2 | C B | 4 | 13.684 | -6.412 | 77.968 | 1.00 | 0.00 | H |
| ATOM | 705 | H5'1 | C B | 4 | 9.645  | -4.174 | 76.150 | 1.00 | 0.00 | H |
| ATOM | 706 | H5'2 | C B | 4 | 9.194  | -4.360 | 77.859 | 1.00 | 0.00 | H |
| ATOM | 707 | C1'  | G B | 5 | 15.911 | -9.798 | 75.552 | 1.00 | 0.00 | C |
| ATOM | 708 | N1   | G B | 5 | 18.260 | -6.459 | 72.494 | 1.00 | 0.00 | N |
| ATOM | 709 | C2   | G B | 5 | 18.049 | -7.817 | 72.329 | 1.00 | 0.00 | C |
| ATOM | 710 | N2   | G B | 5 | 18.527 | -8.355 | 71.202 | 1.00 | 0.00 | N |
| ATOM | 711 | N3   | G B | 5 | 17.408 | -8.574 | 73.220 | 1.00 | 0.00 | N |
| ATOM | 712 | C4   | G B | 5 | 16.999 | -7.864 | 74.303 | 1.00 | 0.00 | C |
| ATOM | 713 | C5   | G B | 5 | 17.171 | -6.511 | 74.553 | 1.00 | 0.00 | C |
| ATOM | 714 | C6   | G B | 5 | 17.845 | -5.706 | 73.609 | 1.00 | 0.00 | C |

|      |     |      |     |   |        |         |        |      |      |   |
|------|-----|------|-----|---|--------|---------|--------|------|------|---|
| ATOM | 715 | O6   | G B | 5 | 18.092 | -4.502  | 73.653 | 1.00 | 0.00 | O |
| ATOM | 716 | N7   | G B | 5 | 16.602 | -6.174  | 75.785 | 1.00 | 0.00 | N |
| ATOM | 717 | C8   | G B | 5 | 16.113 | -7.303  | 76.229 | 1.00 | 0.00 | C |
| ATOM | 718 | N9   | G B | 5 | 16.317 | -8.376  | 75.385 | 1.00 | 0.00 | N |
| ATOM | 719 | C2'  | G B | 5 | 16.024 | -10.303 | 76.984 | 1.00 | 0.00 | C |
| ATOM | 720 | C3'  | G B | 5 | 14.835 | -11.245 | 77.083 | 1.00 | 0.00 | C |
| ATOM | 721 | O3'  | G B | 5 | 15.204 | -12.523 | 76.570 | 1.00 | 0.00 | O |
| ATOM | 722 | C4'  | G B | 5 | 13.782 | -10.556 | 76.216 | 1.00 | 0.00 | C |
| ATOM | 723 | O4'  | G B | 5 | 14.558 | -9.910  | 75.156 | 1.00 | 0.00 | O |
| ATOM | 724 | C5'  | G B | 5 | 12.929 | -9.512  | 76.896 | 1.00 | 0.00 | C |
| ATOM | 725 | O5'  | G B | 5 | 13.726 | -8.780  | 77.859 | 1.00 | 0.00 | O |
| ATOM | 726 | O1P  | G B | 5 | 12.700 | -9.415  | 80.069 | 1.00 | 0.00 | O |
| ATOM | 727 | O2P  | G B | 5 | 13.866 | -7.209  | 79.816 | 1.00 | 0.00 | O |
| ATOM | 728 | P    | G B | 5 | 13.031 | -8.269  | 79.202 | 1.00 | 0.00 | P |
| ATOM | 729 | H1   | G B | 5 | 18.762 | -5.961  | 71.742 | 1.00 | 0.00 | H |
| ATOM | 730 | H8   | G B | 5 | 15.595 | -7.391  | 77.183 | 1.00 | 0.00 | H |
| ATOM | 731 | H1'  | G B | 5 | 16.509 | -10.406 | 74.874 | 1.00 | 0.00 | H |
| ATOM | 732 | H21  | G B | 5 | 19.018 | -7.764  | 70.517 | 1.00 | 0.00 | H |
| ATOM | 733 | H3'  | G B | 5 | 14.484 | -11.355 | 78.110 | 1.00 | 0.00 | H |
| ATOM | 734 | H22  | G B | 5 | 18.405 | -9.362  | 71.021 | 1.00 | 0.00 | H |
| ATOM | 735 | H4'  | G B | 5 | 13.119 | -11.336 | 75.841 | 1.00 | 0.00 | H |
| ATOM | 736 | H2'1 | G B | 5 | 15.955 | -9.498  | 77.715 | 1.00 | 0.00 | H |
| ATOM | 737 | H2'2 | G B | 5 | 16.962 | -10.829 | 77.164 | 1.00 | 0.00 | H |
| ATOM | 738 | H5'1 | G B | 5 | 12.536 | -8.827  | 76.145 | 1.00 | 0.00 | H |
| ATOM | 739 | H5'2 | G B | 5 | 12.099 | -10.004 | 77.403 | 1.00 | 0.00 | H |
| ATOM | 740 | C1'  | T B | 6 | 20.038 | -11.843 | 73.739 | 1.00 | 0.00 | C |
| ATOM | 741 | N1   | T B | 6 | 20.087 | -10.503 | 74.384 | 1.00 | 0.00 | N |
| ATOM | 742 | C2   | T B | 6 | 20.698 | -9.487  | 73.677 | 1.00 | 0.00 | C |
| ATOM | 743 | O2   | T B | 6 | 21.187 | -9.650  | 72.573 | 1.00 | 0.00 | O |
| ATOM | 744 | N3   | T B | 6 | 20.720 | -8.258  | 74.314 | 1.00 | 0.00 | N |
| ATOM | 745 | C4   | T B | 6 | 20.203 | -7.967  | 75.558 | 1.00 | 0.00 | C |
| ATOM | 746 | O4   | T B | 6 | 20.286 | -6.827  | 76.027 | 1.00 | 0.00 | O |
| ATOM | 747 | C5   | T B | 6 | 19.584 | -9.093  | 76.217 | 1.00 | 0.00 | C |
| ATOM | 748 | C6   | T B | 6 | 19.543 | -10.304 | 75.628 | 1.00 | 0.00 | C |
| ATOM | 749 | C7   | T B | 6 | 19.005 | -8.820  | 77.574 | 1.00 | 0.00 | C |
| ATOM | 750 | C2'  | T B | 6 | 20.233 | -12.999 | 74.712 | 1.00 | 0.00 | C |
| ATOM | 751 | C3'  | T B | 6 | 19.308 | -14.059 | 74.135 | 1.00 | 0.00 | C |
| ATOM | 752 | O3'  | T B | 6 | 19.995 | -14.770 | 73.105 | 1.00 | 0.00 | O |
| ATOM | 753 | C4'  | T B | 6 | 18.144 | -13.235 | 73.590 | 1.00 | 0.00 | C |
| ATOM | 754 | O4'  | T B | 6 | 18.765 | -11.989 | 73.141 | 1.00 | 0.00 | O |
| ATOM | 755 | C5'  | T B | 6 | 17.041 | -12.901 | 74.567 | 1.00 | 0.00 | C |
| ATOM | 756 | O5'  | T B | 6 | 17.608 | -12.654 | 75.879 | 1.00 | 0.00 | O |
| ATOM | 757 | O1P  | T B | 6 | 16.712 | -14.553 | 77.267 | 1.00 | 0.00 | O |
| ATOM | 758 | O2P  | T B | 6 | 17.306 | -12.372 | 78.357 | 1.00 | 0.00 | O |
| ATOM | 759 | P    | T B | 6 | 16.773 | -13.081 | 77.169 | 1.00 | 0.00 | P |
| ATOM | 760 | H3   | T B | 6 | 21.169 | -7.482  | 73.806 | 1.00 | 0.00 | H |
| ATOM | 761 | H6   | T B | 6 | 19.070 | -11.138 | 76.147 | 1.00 | 0.00 | H |
| ATOM | 762 | H1'  | T B | 6 | 20.785 | -11.869 | 72.947 | 1.00 | 0.00 | H |
| ATOM | 763 | H3'  | T B | 6 | 18.970 | -14.763 | 74.894 | 1.00 | 0.00 | H |
| ATOM | 764 | H4'  | T B | 6 | 17.703 | -13.809 | 72.775 | 1.00 | 0.00 | H |
| ATOM | 765 | H71  | T B | 6 | 19.561 | -9.379  | 78.326 | 1.00 | 0.00 | H |
| ATOM | 766 | H72  | T B | 6 | 19.070 | -7.754  | 77.791 | 1.00 | 0.00 | H |
| ATOM | 767 | H73  | T B | 6 | 17.959 | -9.130  | 77.593 | 1.00 | 0.00 | H |
| ATOM | 768 | H2'1 | T B | 6 | 19.949 | -12.736 | 75.729 | 1.00 | 0.00 | H |

|      |     |      |     |   |        |         |        |      |      |   |
|------|-----|------|-----|---|--------|---------|--------|------|------|---|
| ATOM | 769 | H2'2 | T B | 6 | 21.267 | -13.347 | 74.740 | 1.00 | 0.00 | H |
| ATOM | 770 | H5'1 | T B | 6 | 16.512 | -12.014 | 74.221 | 1.00 | 0.00 | H |
| ATOM | 771 | H5'2 | T B | 6 | 16.344 | -13.736 | 74.619 | 1.00 | 0.00 | H |
| ATOM | 772 | C1'  | C B | 7 | 24.612 | -11.654 | 71.816 | 1.00 | 0.00 | C |
| ATOM | 773 | N1   | C B | 7 | 24.290 | -10.922 | 73.074 | 1.00 | 0.00 | N |
| ATOM | 774 | C2   | C B | 7 | 24.629 | -9.573  | 73.148 | 1.00 | 0.00 | C |
| ATOM | 775 | O2   | C B | 7 | 25.179 | -9.039  | 72.175 | 1.00 | 0.00 | O |
| ATOM | 776 | N3   | C B | 7 | 24.344 | -8.889  | 74.285 | 1.00 | 0.00 | N |
| ATOM | 777 | C4   | C B | 7 | 23.749 | -9.495  | 75.320 | 1.00 | 0.00 | C |
| ATOM | 778 | N4   | C B | 7 | 23.492 | -8.778  | 76.404 | 1.00 | 0.00 | N |
| ATOM | 779 | C5   | C B | 7 | 23.394 | -10.883 | 75.274 | 1.00 | 0.00 | C |
| ATOM | 780 | C6   | C B | 7 | 23.686 | -11.549 | 74.117 | 1.00 | 0.00 | C |
| ATOM | 781 | C2'  | C B | 7 | 25.079 | -13.084 | 72.041 | 1.00 | 0.00 | C |
| ATOM | 782 | C3'  | C B | 7 | 24.480 | -13.804 | 70.842 | 1.00 | 0.00 | C |
| ATOM | 783 | O3'  | C B | 7 | 25.355 | -13.661 | 69.726 | 1.00 | 0.00 | O |
| ATOM | 784 | C4'  | C B | 7 | 23.155 | -13.075 | 70.635 | 1.00 | 0.00 | C |
| ATOM | 785 | O4'  | C B | 7 | 23.437 | -11.695 | 71.029 | 1.00 | 0.00 | O |
| ATOM | 786 | C5'  | C B | 7 | 21.978 | -13.576 | 71.441 | 1.00 | 0.00 | C |
| ATOM | 787 | O5'  | C B | 7 | 22.427 | -13.993 | 72.755 | 1.00 | 0.00 | O |
| ATOM | 788 | O1P  | C B | 7 | 22.023 | -16.478 | 72.748 | 1.00 | 0.00 | O |
| ATOM | 789 | O2P  | C B | 7 | 21.997 | -15.208 | 74.911 | 1.00 | 0.00 | O |
| ATOM | 790 | P    | C B | 7 | 21.700 | -15.226 | 73.460 | 1.00 | 0.00 | P |
| ATOM | 791 | H5   | C B | 7 | 22.915 | -11.380 | 76.117 | 1.00 | 0.00 | H |
| ATOM | 792 | H6   | C B | 7 | 23.428 | -12.605 | 74.030 | 1.00 | 0.00 | H |
| ATOM | 793 | H1'  | C B | 7 | 25.361 | -11.078 | 71.271 | 1.00 | 0.00 | H |
| ATOM | 794 | H3'  | C B | 7 | 24.319 | -14.865 | 71.042 | 1.00 | 0.00 | H |
| ATOM | 795 | H4'  | C B | 7 | 22.899 | -13.174 | 69.581 | 1.00 | 0.00 | H |
| ATOM | 796 | H41  | C B | 7 | 23.032 | -9.218  | 77.214 | 1.00 | 0.00 | H |
| ATOM | 797 | H42  | C B | 7 | 23.750 | -7.780  | 76.437 | 1.00 | 0.00 | H |
| ATOM | 798 | H2'1 | C B | 7 | 24.709 | -13.498 | 72.978 | 1.00 | 0.00 | H |
| ATOM | 799 | H2'2 | C B | 7 | 26.166 | -13.167 | 72.053 | 1.00 | 0.00 | H |
| ATOM | 800 | H5'1 | C B | 7 | 21.244 | -12.777 | 71.539 | 1.00 | 0.00 | H |
| ATOM | 801 | H5'2 | C B | 7 | 21.525 | -14.420 | 70.922 | 1.00 | 0.00 | H |
| ATOM | 802 | C1'  | C B | 8 | 29.033 | -9.560  | 71.039 | 1.00 | 0.00 | C |
| ATOM | 803 | N1   | C B | 8 | 28.502 | -9.717  | 72.421 | 1.00 | 0.00 | N |
| ATOM | 804 | C2   | C B | 8 | 28.484 | -8.592  | 73.244 | 1.00 | 0.00 | C |
| ATOM | 805 | O2   | C B | 8 | 28.905 | -7.518  | 72.795 | 1.00 | 0.00 | O |
| ATOM | 806 | N3   | C B | 8 | 28.003 | -8.712  | 74.505 | 1.00 | 0.00 | N |
| ATOM | 807 | C4   | C B | 8 | 27.553 | -9.888  | 74.961 | 1.00 | 0.00 | C |
| ATOM | 808 | N4   | C B | 8 | 27.092 | -9.948  | 76.203 | 1.00 | 0.00 | N |
| ATOM | 809 | C5   | C B | 8 | 27.564 | -11.064 | 74.140 | 1.00 | 0.00 | C |
| ATOM | 810 | C6   | C B | 8 | 28.048 | -10.917 | 72.871 | 1.00 | 0.00 | C |
| ATOM | 811 | C2'  | C B | 8 | 29.844 | -10.756 | 70.555 | 1.00 | 0.00 | C |
| ATOM | 812 | C3'  | C B | 8 | 29.481 | -10.807 | 69.079 | 1.00 | 0.00 | C |
| ATOM | 813 | O3'  | C B | 8 | 30.320 | -9.907  | 68.360 | 1.00 | 0.00 | O |
| ATOM | 814 | C4'  | C B | 8 | 28.020 | -10.365 | 69.073 | 1.00 | 0.00 | C |
| ATOM | 815 | O4'  | C B | 8 | 27.929 | -9.400  | 70.170 | 1.00 | 0.00 | O |
| ATOM | 816 | C5'  | C B | 8 | 26.989 | -11.446 | 69.294 | 1.00 | 0.00 | C |
| ATOM | 817 | O5'  | C B | 8 | 27.492 | -12.413 | 70.250 | 1.00 | 0.00 | O |
| ATOM | 818 | O1P  | C B | 8 | 27.735 | -14.512 | 68.882 | 1.00 | 0.00 | O |
| ATOM | 819 | O2P  | C B | 8 | 27.326 | -14.664 | 71.353 | 1.00 | 0.00 | O |
| ATOM | 820 | P    | C B | 8 | 27.084 | -13.944 | 70.080 | 1.00 | 0.00 | P |
| ATOM | 821 | H5   | C B | 8 | 27.207 | -12.025 | 74.508 | 1.00 | 0.00 | H |
| ATOM | 822 | H6   | C B | 8 | 28.071 | -11.781 | 72.206 | 1.00 | 0.00 | H |

|      |     |      |     |    |        |         |        |      |      |   |
|------|-----|------|-----|----|--------|---------|--------|------|------|---|
| ATOM | 823 | H1'  | C B | 8  | 29.627 | -8.646  | 71.003 | 1.00 | 0.00 | H |
| ATOM | 824 | H3'  | C B | 8  | 29.590 | -11.810 | 68.668 | 1.00 | 0.00 | H |
| ATOM | 825 | H4'  | C B | 8  | 27.828 | -9.920  | 68.096 | 1.00 | 0.00 | H |
| ATOM | 826 | H41  | C B | 8  | 26.737 | -10.840 | 76.578 | 1.00 | 0.00 | H |
| ATOM | 827 | H42  | C B | 8  | 27.086 | -9.102  | 76.791 | 1.00 | 0.00 | H |
| ATOM | 828 | H2'1 | C B | 8  | 29.565 | -11.678 | 71.065 | 1.00 | 0.00 | H |
| ATOM | 829 | H2'2 | C B | 8  | 30.915 | -10.613 | 70.697 | 1.00 | 0.00 | H |
| ATOM | 830 | H5'1 | C B | 8  | 26.072 | -10.996 | 69.676 | 1.00 | 0.00 | H |
| ATOM | 831 | H5'2 | C B | 8  | 26.779 | -11.940 | 68.348 | 1.00 | 0.00 | H |
| ATOM | 832 | C1'  | T B | 9  | 32.802 | -6.560  | 72.173 | 1.00 | 0.00 | C |
| ATOM | 833 | N1   | T B | 9  | 32.289 | -7.528  | 73.178 | 1.00 | 0.00 | N |
| ATOM | 834 | C2   | T B | 9  | 31.977 | -7.034  | 74.427 | 1.00 | 0.00 | C |
| ATOM | 835 | O2   | T B | 9  | 32.107 | -5.859  | 74.723 | 1.00 | 0.00 | O |
| ATOM | 836 | N3   | T B | 9  | 31.502 | -7.968  | 75.329 | 1.00 | 0.00 | N |
| ATOM | 837 | C4   | T B | 9  | 31.323 | -9.315  | 75.100 | 1.00 | 0.00 | C |
| ATOM | 838 | O4   | T B | 9  | 30.893 | -10.059 | 75.990 | 1.00 | 0.00 | O |
| ATOM | 839 | C5   | T B | 9  | 31.675 | -9.738  | 73.764 | 1.00 | 0.00 | C |
| ATOM | 840 | C6   | T B | 9  | 32.140 | -8.856  | 72.859 | 1.00 | 0.00 | C |
| ATOM | 841 | C7   | T B | 9  | 31.492 | -11.197 | 73.469 | 1.00 | 0.00 | C |
| ATOM | 842 | C2'  | T B | 9  | 33.897 | -7.127  | 71.275 | 1.00 | 0.00 | C |
| ATOM | 843 | C3'  | T B | 9  | 33.599 | -6.451  | 69.947 | 1.00 | 0.00 | C |
| ATOM | 844 | O3'  | T B | 9  | 34.210 | -5.162  | 69.929 | 1.00 | 0.00 | O |
| ATOM | 845 | C4'  | T B | 9  | 32.073 | -6.369  | 69.941 | 1.00 | 0.00 | C |
| ATOM | 846 | O4'  | T B | 9  | 31.719 | -6.177  | 71.348 | 1.00 | 0.00 | O |
| ATOM | 847 | C5'  | T B | 9  | 31.337 | -7.579  | 69.416 | 1.00 | 0.00 | C |
| ATOM | 848 | O5'  | T B | 9  | 32.038 | -8.785  | 69.807 | 1.00 | 0.00 | O |
| ATOM | 849 | O1P  | T B | 9  | 32.831 | -9.733  | 67.615 | 1.00 | 0.00 | O |
| ATOM | 850 | O2P  | T B | 9  | 32.405 | -11.259 | 69.560 | 1.00 | 0.00 | O |
| ATOM | 851 | P    | T B | 9  | 32.025 | -10.035 | 68.816 | 1.00 | 0.00 | P |
| ATOM | 852 | H3   | T B | 9  | 31.259 | -7.623  | 76.270 | 1.00 | 0.00 | H |
| ATOM | 853 | H6   | T B | 9  | 32.399 | -9.199  | 71.859 | 1.00 | 0.00 | H |
| ATOM | 854 | H1'  | T B | 9  | 33.151 | -5.671  | 72.700 | 1.00 | 0.00 | H |
| ATOM | 855 | H3'  | T B | 9  | 33.964 | -7.035  | 69.103 | 1.00 | 0.00 | H |
| ATOM | 856 | H4'  | T B | 9  | 31.805 | -5.516  | 69.314 | 1.00 | 0.00 | H |
| ATOM | 857 | H71  | T B | 9  | 32.464 | -11.657 | 73.287 | 1.00 | 0.00 | H |
| ATOM | 858 | H72  | T B | 9  | 31.013 | -11.684 | 74.320 | 1.00 | 0.00 | H |
| ATOM | 859 | H73  | T B | 9  | 30.864 | -11.313 | 72.585 | 1.00 | 0.00 | H |
| ATOM | 860 | H2'1 | T B | 9  | 33.841 | -8.210  | 71.192 | 1.00 | 0.00 | H |
| ATOM | 861 | H2'2 | T B | 9  | 34.895 | -6.876  | 71.634 | 1.00 | 0.00 | H |
| ATOM | 862 | H5'1 | T B | 9  | 30.327 | -7.589  | 69.827 | 1.00 | 0.00 | H |
| ATOM | 863 | H5'2 | T B | 9  | 31.282 | -7.519  | 68.331 | 1.00 | 0.00 | H |
| ATOM | 864 | C1'  | A B | 10 | 35.643 | -3.979  | 75.320 | 1.00 | 0.00 | C |
| ATOM | 865 | N1   | A B | 10 | 34.036 | -7.453  | 78.738 | 1.00 | 0.00 | N |
| ATOM | 866 | C2   | A B | 10 | 34.196 | -6.134  | 78.803 | 1.00 | 0.00 | C |
| ATOM | 867 | N3   | A B | 10 | 34.613 | -5.296  | 77.880 | 1.00 | 0.00 | N |
| ATOM | 868 | C4   | A B | 10 | 34.900 | -5.957  | 76.745 | 1.00 | 0.00 | C |
| ATOM | 869 | C5   | A B | 10 | 34.793 | -7.301  | 76.515 | 1.00 | 0.00 | C |
| ATOM | 870 | C6   | A B | 10 | 34.330 | -8.086  | 77.592 | 1.00 | 0.00 | C |
| ATOM | 871 | N6   | A B | 10 | 34.175 | -9.419  | 77.512 | 1.00 | 0.00 | N |
| ATOM | 872 | N7   | A B | 10 | 35.176 | -7.620  | 75.224 | 1.00 | 0.00 | N |
| ATOM | 873 | C8   | A B | 10 | 35.508 | -6.473  | 74.707 | 1.00 | 0.00 | C |
| ATOM | 874 | N9   | A B | 10 | 35.364 | -5.419  | 75.570 | 1.00 | 0.00 | N |
| ATOM | 875 | C2'  | A B | 10 | 36.867 | -3.735  | 74.448 | 1.00 | 0.00 | C |
| ATOM | 876 | C3'  | A B | 10 | 36.445 | -2.514  | 73.643 | 1.00 | 0.00 | C |

|      |     |      |     |    |        |        |        |      |      |   |
|------|-----|------|-----|----|--------|--------|--------|------|------|---|
| ATOM | 877 | O3'  | A B | 10 | 36.709 | -1.337 | 74.403 | 1.00 | 0.00 | O |
| ATOM | 878 | C4'  | A B | 10 | 34.947 | -2.744 | 73.438 | 1.00 | 0.00 | C |
| ATOM | 879 | O4'  | A B | 10 | 34.518 | -3.431 | 74.658 | 1.00 | 0.00 | O |
| ATOM | 880 | C5'  | A B | 10 | 34.555 | -3.585 | 72.246 | 1.00 | 0.00 | C |
| ATOM | 881 | O5'  | A B | 10 | 35.527 | -4.645 | 72.050 | 1.00 | 0.00 | O |
| ATOM | 882 | O1P  | A B | 10 | 36.591 | -4.057 | 69.847 | 1.00 | 0.00 | O |
| ATOM | 883 | O2P  | A B | 10 | 36.513 | -6.446 | 70.605 | 1.00 | 0.00 | O |
| ATOM | 884 | P    | A B | 10 | 35.857 | -5.117 | 70.563 | 1.00 | 0.00 | P |
| ATOM | 885 | H2   | A B | 10 | 33.944 | -5.684 | 79.763 | 1.00 | 0.00 | H |
| ATOM | 886 | H8   | A B | 10 | 35.869 | -6.363 | 73.684 | 1.00 | 0.00 | H |
| ATOM | 887 | H1'  | A B | 10 | 35.743 | -3.479 | 76.283 | 1.00 | 0.00 | H |
| ATOM | 888 | H3'  | A B | 10 | 36.966 | -2.454 | 72.688 | 1.00 | 0.00 | H |
| ATOM | 889 | H4'  | A B | 10 | 34.491 | -1.763 | 73.319 | 1.00 | 0.00 | H |
| ATOM | 890 | H61  | A B | 10 | 33.830 | -9.945 | 78.328 | 1.00 | 0.00 | H |
| ATOM | 891 | H62  | A B | 10 | 34.399 | -9.913 | 76.637 | 1.00 | 0.00 | H |
| ATOM | 892 | H2'1 | A B | 10 | 37.089 | -4.580 | 73.799 | 1.00 | 0.00 | H |
| ATOM | 893 | H2'2 | A B | 10 | 37.761 | -3.528 | 75.039 | 1.00 | 0.00 | H |
| ATOM | 894 | H5'1 | A B | 10 | 33.570 | -4.017 | 72.422 | 1.00 | 0.00 | H |
| ATOM | 895 | H5'2 | A B | 10 | 34.516 | -2.953 | 71.361 | 1.00 | 0.00 | H |
| ATOM | 896 | C1'  | G B | 11 | 37.639 | -3.053 | 79.771 | 1.00 | 0.00 | C |
| ATOM | 897 | N1   | G B | 11 | 36.890 | -8.042 | 80.531 | 1.00 | 0.00 | N |
| ATOM | 898 | C2   | G B | 11 | 36.677 | -6.972 | 81.382 | 1.00 | 0.00 | C |
| ATOM | 899 | N2   | G B | 11 | 36.202 | -7.271 | 82.597 | 1.00 | 0.00 | N |
| ATOM | 900 | N3   | G B | 11 | 36.915 | -5.705 | 81.046 | 1.00 | 0.00 | N |
| ATOM | 901 | C4   | G B | 11 | 37.399 | -5.589 | 79.781 | 1.00 | 0.00 | C |
| ATOM | 902 | C5   | G B | 11 | 37.648 | -6.596 | 78.865 | 1.00 | 0.00 | C |
| ATOM | 903 | C6   | G B | 11 | 37.391 | -7.942 | 79.219 | 1.00 | 0.00 | C |
| ATOM | 904 | O6   | G B | 11 | 37.547 | -8.964 | 78.550 | 1.00 | 0.00 | O |
| ATOM | 905 | N7   | G B | 11 | 38.144 | -6.057 | 77.677 | 1.00 | 0.00 | N |
| ATOM | 906 | C8   | G B | 11 | 38.177 | -4.768 | 77.903 | 1.00 | 0.00 | C |
| ATOM | 907 | N9   | G B | 11 | 37.741 | -4.407 | 79.162 | 1.00 | 0.00 | N |
| ATOM | 908 | C2'  | G B | 11 | 38.778 | -2.120 | 79.387 | 1.00 | 0.00 | C |
| ATOM | 909 | C3'  | G B | 11 | 38.072 | -0.776 | 79.298 | 1.00 | 0.00 | C |
| ATOM | 910 | O3'  | G B | 11 | 37.999 | -0.200 | 80.599 | 1.00 | 0.00 | O |
| ATOM | 911 | C4'  | G B | 11 | 36.695 | -1.151 | 78.753 | 1.00 | 0.00 | C |
| ATOM | 912 | O4'  | G B | 11 | 36.429 | -2.471 | 79.327 | 1.00 | 0.00 | O |
| ATOM | 913 | C5'  | G B | 11 | 36.569 | -1.241 | 77.251 | 1.00 | 0.00 | C |
| ATOM | 914 | O5'  | G B | 11 | 37.789 | -1.783 | 76.688 | 1.00 | 0.00 | O |
| ATOM | 915 | O1P  | G B | 11 | 38.720 | 0.136  | 75.354 | 1.00 | 0.00 | O |
| ATOM | 916 | O2P  | G B | 11 | 39.252 | -2.225 | 74.694 | 1.00 | 0.00 | O |
| ATOM | 917 | P    | G B | 11 | 38.273 | -1.265 | 75.259 | 1.00 | 0.00 | P |
| ATOM | 918 | H1   | G B | 11 | 36.667 | -8.983 | 80.886 | 1.00 | 0.00 | H |
| ATOM | 919 | H8   | G B | 11 | 38.520 | -4.044 | 77.165 | 1.00 | 0.00 | H |
| ATOM | 920 | H1'  | G B | 11 | 37.576 | -3.169 | 80.853 | 1.00 | 0.00 | H |
| ATOM | 921 | H21  | G B | 11 | 36.016 | -8.254 | 82.848 | 1.00 | 0.00 | H |
| ATOM | 922 | H3'  | G B | 11 | 38.586 | -0.088 | 78.627 | 1.00 | 0.00 | H |
| ATOM | 923 | H22  | G B | 11 | 36.024 | -6.520 | 83.280 | 1.00 | 0.00 | H |
| ATOM | 924 | H4'  | G B | 11 | 35.999 | -0.388 | 79.101 | 1.00 | 0.00 | H |
| ATOM | 925 | H2'1 | G B | 11 | 39.232 | -2.393 | 78.433 | 1.00 | 0.00 | H |
| ATOM | 926 | H2'2 | G B | 11 | 39.570 | -2.104 | 80.135 | 1.00 | 0.00 | H |
| ATOM | 927 | H5'1 | G B | 11 | 35.728 | -1.886 | 77.001 | 1.00 | 0.00 | H |
| ATOM | 928 | H5'2 | G B | 11 | 36.388 | -0.244 | 76.848 | 1.00 | 0.00 | H |
| ATOM | 929 | C1'  | G B | 12 | 39.214 | -4.311 | 84.294 | 1.00 | 0.00 | C |
| ATOM | 930 | N1   | G B | 12 | 39.742 | -8.934 | 82.205 | 1.00 | 0.00 | N |

|      |     |      |     |    |        |         |        |      |      |   |
|------|-----|------|-----|----|--------|---------|--------|------|------|---|
| ATOM | 931 | C2   | G B | 12 | 39.239 | -8.570  | 83.442 | 1.00 | 0.00 | C |
| ATOM | 932 | N2   | G B | 12 | 38.823 | -9.572  | 84.228 | 1.00 | 0.00 | N |
| ATOM | 933 | N3   | G B | 12 | 39.157 | -7.309  | 83.860 | 1.00 | 0.00 | N |
| ATOM | 934 | C4   | G B | 12 | 39.630 | -6.429  | 82.941 | 1.00 | 0.00 | C |
| ATOM | 935 | C5   | G B | 12 | 40.152 | -6.698  | 81.688 | 1.00 | 0.00 | C |
| ATOM | 936 | C6   | G B | 12 | 40.236 | -8.037  | 81.241 | 1.00 | 0.00 | C |
| ATOM | 937 | O6   | G B | 12 | 40.666 | -8.473  | 80.173 | 1.00 | 0.00 | O |
| ATOM | 938 | N7   | G B | 12 | 40.527 | -5.512  | 81.054 | 1.00 | 0.00 | N |
| ATOM | 939 | C8   | G B | 12 | 40.224 | -4.581  | 81.921 | 1.00 | 0.00 | C |
| ATOM | 940 | N9   | G B | 12 | 39.675 | -5.060  | 83.093 | 1.00 | 0.00 | N |
| ATOM | 941 | C2'  | G B | 12 | 40.088 | -3.114  | 84.643 | 1.00 | 0.00 | C |
| ATOM | 942 | C3'  | G B | 12 | 39.066 | -2.112  | 85.157 | 1.00 | 0.00 | C |
| ATOM | 943 | O3'  | G B | 12 | 38.813 | -2.368  | 86.537 | 1.00 | 0.00 | O |
| ATOM | 944 | C4'  | G B | 12 | 37.846 | -2.394  | 84.283 | 1.00 | 0.00 | C |
| ATOM | 945 | O4'  | G B | 12 | 37.909 | -3.833  | 84.030 | 1.00 | 0.00 | O |
| ATOM | 946 | C5'  | G B | 12 | 37.788 | -1.673  | 82.958 | 1.00 | 0.00 | C |
| ATOM | 947 | O5'  | G B | 12 | 39.121 | -1.565  | 82.400 | 1.00 | 0.00 | O |
| ATOM | 948 | O1P  | G B | 12 | 39.569 | 0.911   | 82.435 | 1.00 | 0.00 | O |
| ATOM | 949 | O2P  | G B | 12 | 40.704 | -0.544  | 80.735 | 1.00 | 0.00 | O |
| ATOM | 950 | P    | G B | 12 | 39.496 | -0.267  | 81.551 | 1.00 | 0.00 | P |
| ATOM | 951 | H1   | G B | 12 | 39.756 | -9.940  | 81.974 | 1.00 | 0.00 | H |
| ATOM | 952 | H8   | G B | 12 | 40.390 | -3.520  | 81.737 | 1.00 | 0.00 | H |
| ATOM | 953 | H1'  | G B | 12 | 39.154 | -5.008  | 85.129 | 1.00 | 0.00 | H |
| ATOM | 954 | H21  | G B | 12 | 38.886 | -10.546 | 83.895 | 1.00 | 0.00 | H |
| ATOM | 955 | H3'  | G B | 12 | 39.406 | -1.084  | 85.038 | 1.00 | 0.00 | H |
| ATOM | 956 | H22  | G B | 12 | 38.440 | -9.368  | 85.161 | 1.00 | 0.00 | H |
| ATOM | 957 | H4'  | G B | 12 | 36.968 | -2.102  | 84.860 | 1.00 | 0.00 | H |
| ATOM | 958 | H2'1 | G B | 12 | 40.624 | -2.725  | 83.776 | 1.00 | 0.00 | H |
| ATOM | 959 | H2'2 | G B | 12 | 40.830 | -3.351  | 85.407 | 1.00 | 0.00 | H |
| ATOM | 960 | H5'1 | G B | 12 | 37.147 | -2.229  | 82.275 | 1.00 | 0.00 | H |
| ATOM | 961 | H5'2 | G B | 12 | 37.371 | -0.677  | 83.111 | 1.00 | 0.00 | H |
| ATOM | 962 | C1'  | T B | 13 | 40.927 | -7.471  | 87.696 | 1.00 | 0.00 | C |
| ATOM | 963 | N1   | T B | 13 | 41.595 | -7.363  | 86.373 | 1.00 | 0.00 | N |
| ATOM | 964 | C2   | T B | 13 | 41.813 | -8.536  | 85.678 | 1.00 | 0.00 | C |
| ATOM | 965 | O2   | T B | 13 | 41.484 | -9.627  | 86.110 | 1.00 | 0.00 | O |
| ATOM | 966 | N3   | T B | 13 | 42.435 | -8.390  | 84.453 | 1.00 | 0.00 | N |
| ATOM | 967 | C4   | T B | 13 | 42.850 | -7.206  | 83.877 | 1.00 | 0.00 | C |
| ATOM | 968 | O4   | T B | 13 | 43.401 | -7.200  | 82.770 | 1.00 | 0.00 | O |
| ATOM | 969 | C5   | T B | 13 | 42.578 | -6.035  | 84.676 | 1.00 | 0.00 | C |
| ATOM | 970 | C6   | T B | 13 | 41.972 | -6.140  | 85.874 | 1.00 | 0.00 | C |
| ATOM | 971 | C7   | T B | 13 | 43.009 | -4.724  | 84.088 | 1.00 | 0.00 | C |
| ATOM | 972 | C2'  | T B | 13 | 41.469 | -6.500  | 88.739 | 1.00 | 0.00 | C |
| ATOM | 973 | C3'  | T B | 13 | 40.216 | -6.145  | 89.523 | 1.00 | 0.00 | C |
| ATOM | 974 | O3'  | T B | 13 | 39.992 | -7.137  | 90.521 | 1.00 | 0.00 | O |
| ATOM | 975 | C4'  | T B | 13 | 39.130 | -6.148  | 88.449 | 1.00 | 0.00 | C |
| ATOM | 976 | O4'  | T B | 13 | 39.554 | -7.189  | 87.511 | 1.00 | 0.00 | O |
| ATOM | 977 | C5'  | T B | 13 | 38.938 | -4.858  | 87.685 | 1.00 | 0.00 | C |
| ATOM | 978 | O5'  | T B | 13 | 40.221 | -4.216  | 87.477 | 1.00 | 0.00 | O |
| ATOM | 979 | O1P  | T B | 13 | 40.044 | -2.107  | 88.838 | 1.00 | 0.00 | O |
| ATOM | 980 | O2P  | T B | 13 | 41.554 | -2.185  | 86.835 | 1.00 | 0.00 | O |
| ATOM | 981 | P    | T B | 13 | 40.291 | -2.624  | 87.476 | 1.00 | 0.00 | P |
| ATOM | 982 | H3   | T B | 13 | 42.606 | -9.251  | 83.914 | 1.00 | 0.00 | H |
| ATOM | 983 | H6   | T B | 13 | 41.779 | -5.241  | 86.459 | 1.00 | 0.00 | H |
| ATOM | 984 | H1'  | T B | 13 | 41.014 | -8.502  | 88.041 | 1.00 | 0.00 | H |

|      |      |      |   |   |    |        |         |        |      |      |   |
|------|------|------|---|---|----|--------|---------|--------|------|------|---|
| ATOM | 985  | H3'  | T | B | 13 | 40.297 | -5.168  | 89.999 | 1.00 | 0.00 | H |
| ATOM | 986  | H4'  | T | B | 13 | 38.191 | -6.381  | 88.951 | 1.00 | 0.00 | H |
| ATOM | 987  | H71  | T | B | 13 | 43.801 | -4.293  | 84.700 | 1.00 | 0.00 | H |
| ATOM | 988  | H72  | T | B | 13 | 43.381 | -4.885  | 83.074 | 1.00 | 0.00 | H |
| ATOM | 989  | H73  | T | B | 13 | 42.160 | -4.040  | 84.057 | 1.00 | 0.00 | H |
| ATOM | 990  | H2'1 | T | B | 13 | 41.918 | -5.618  | 88.287 | 1.00 | 0.00 | H |
| ATOM | 991  | H2'2 | T | B | 13 | 42.222 | -6.959  | 89.380 | 1.00 | 0.00 | H |
| ATOM | 992  | H5'1 | T | B | 13 | 38.473 | -5.079  | 86.724 | 1.00 | 0.00 | H |
| ATOM | 993  | H5'2 | T | B | 13 | 38.285 | -4.199  | 88.256 | 1.00 | 0.00 | H |
| ATOM | 994  | C1'  | G | B | 14 | 43.312 | -11.582 | 89.135 | 1.00 | 0.00 | C |
| ATOM | 995  | N1   | G | B | 14 | 45.754 | -11.059 | 84.688 | 1.00 | 0.00 | N |
| ATOM | 996  | C2   | G | B | 14 | 45.251 | -12.196 | 85.296 | 1.00 | 0.00 | C |
| ATOM | 997  | N2   | G | B | 14 | 45.424 | -13.345 | 84.635 | 1.00 | 0.00 | N |
| ATOM | 998  | N3   | G | B | 14 | 44.626 | -12.184 | 86.473 | 1.00 | 0.00 | N |
| ATOM | 999  | C4   | G | B | 14 | 44.546 | -10.934 | 87.004 | 1.00 | 0.00 | C |
| ATOM | 1000 | C5   | G | B | 14 | 45.021 | -9.749  | 86.472 | 1.00 | 0.00 | C |
| ATOM | 1001 | C6   | G | B | 14 | 45.682 | -9.758  | 85.222 | 1.00 | 0.00 | C |
| ATOM | 1002 | O6   | G | B | 14 | 46.168 | -8.817  | 84.594 | 1.00 | 0.00 | O |
| ATOM | 1003 | N7   | G | B | 14 | 44.739 | -8.685  | 87.333 | 1.00 | 0.00 | N |
| ATOM | 1004 | C8   | G | B | 14 | 44.113 | -9.250  | 88.335 | 1.00 | 0.00 | C |
| ATOM | 1005 | N9   | G | B | 14 | 43.960 | -10.615 | 88.209 | 1.00 | 0.00 | N |
| ATOM | 1006 | C2'  | G | B | 14 | 43.550 | -11.275 | 90.608 | 1.00 | 0.00 | C |
| ATOM | 1007 | C3'  | G | B | 14 | 42.229 | -11.686 | 91.238 | 1.00 | 0.00 | C |
| ATOM | 1008 | O3'  | G | B | 14 | 42.251 | -13.087 | 91.495 | 1.00 | 0.00 | O |
| ATOM | 1009 | C4'  | G | B | 14 | 41.211 | -11.309 | 90.163 | 1.00 | 0.00 | C |
| ATOM | 1010 | O4'  | G | B | 14 | 41.917 | -11.534 | 88.903 | 1.00 | 0.00 | O |
| ATOM | 1011 | C5'  | G | B | 14 | 40.703 | -9.888  | 90.188 | 1.00 | 0.00 | C |
| ATOM | 1012 | O5'  | G | B | 14 | 41.775 | -8.990  | 90.572 | 1.00 | 0.00 | O |
| ATOM | 1013 | O1P  | G | B | 14 | 41.014 | -8.094  | 92.797 | 1.00 | 0.00 | O |
| ATOM | 1014 | O2P  | G | B | 14 | 42.539 | -6.726  | 91.350 | 1.00 | 0.00 | O |
| ATOM | 1015 | P    | G | B | 14 | 41.421 | -7.697  | 91.436 | 1.00 | 0.00 | P |
| ATOM | 1016 | H1   | G | B | 14 | 46.216 | -11.174 | 83.772 | 1.00 | 0.00 | H |
| ATOM | 1017 | H8   | G | B | 14 | 43.747 | -8.690  | 89.197 | 1.00 | 0.00 | H |
| ATOM | 1018 | H1'  | G | B | 14 | 43.659 | -12.585 | 88.883 | 1.00 | 0.00 | H |
| ATOM | 1019 | H21  | G | B | 14 | 45.906 | -13.345 | 83.722 | 1.00 | 0.00 | H |
| ATOM | 1020 | H3'  | G | B | 14 | 42.036 | -11.150 | 92.167 | 1.00 | 0.00 | H |
| ATOM | 1021 | H22  | G | B | 14 | 45.077 | -14.228 | 85.034 | 1.00 | 0.00 | H |
| ATOM | 1022 | H4'  | G | B | 14 | 40.354 | -11.971 | 90.294 | 1.00 | 0.00 | H |
| ATOM | 1023 | H2'1 | G | B | 14 | 43.762 | -10.220 | 90.781 | 1.00 | 0.00 | H |
| ATOM | 1024 | H2'2 | G | B | 14 | 44.382 | -11.847 | 91.019 | 1.00 | 0.00 | H |
| ATOM | 1025 | H5'1 | G | B | 14 | 40.339 | -9.620  | 89.196 | 1.00 | 0.00 | H |
| ATOM | 1026 | H5'2 | G | B | 14 | 39.885 | -9.812  | 90.902 | 1.00 | 0.00 | H |
| ATOM | 1027 | C1'  | C | B | 15 | 46.613 | -15.234 | 88.601 | 1.00 | 0.00 | C |
| ATOM | 1028 | N1   | C | B | 15 | 47.020 | -13.814 | 88.428 | 1.00 | 0.00 | N |
| ATOM | 1029 | C2   | C | B | 15 | 47.708 | -13.469 | 87.266 | 1.00 | 0.00 | C |
| ATOM | 1030 | O2   | C | B | 15 | 47.949 | -14.351 | 86.431 | 1.00 | 0.00 | O |
| ATOM | 1031 | N3   | C | B | 15 | 48.089 | -12.180 | 87.089 | 1.00 | 0.00 | N |
| ATOM | 1032 | C4   | C | B | 15 | 47.814 | -11.249 | 88.010 | 1.00 | 0.00 | C |
| ATOM | 1033 | N4   | C | B | 15 | 48.206 | -10.004 | 87.785 | 1.00 | 0.00 | N |
| ATOM | 1034 | C5   | C | B | 15 | 47.112 | -11.575 | 89.219 | 1.00 | 0.00 | C |
| ATOM | 1035 | C6   | C | B | 15 | 46.734 | -12.878 | 89.372 | 1.00 | 0.00 | C |
| ATOM | 1036 | C2'  | C | B | 15 | 46.731 | -15.737 | 90.032 | 1.00 | 0.00 | C |
| ATOM | 1037 | C3'  | C | B | 15 | 45.538 | -16.676 | 90.141 | 1.00 | 0.00 | C |
| ATOM | 1038 | O3'  | C | B | 15 | 45.903 | -17.957 | 89.628 | 1.00 | 0.00 | O |

|      |      |      |     |    |        |         |        |      |      |   |
|------|------|------|-----|----|--------|---------|--------|------|------|---|
| ATOM | 1039 | C4'  | C B | 15 | 44.486 | -15.988 | 89.273 | 1.00 | 0.00 | C |
| ATOM | 1040 | O4'  | C B | 15 | 45.257 | -15.344 | 88.209 | 1.00 | 0.00 | O |
| ATOM | 1041 | C5'  | C B | 15 | 43.637 | -14.938 | 89.956 | 1.00 | 0.00 | C |
| ATOM | 1042 | O5'  | C B | 15 | 44.439 | -14.207 | 90.915 | 1.00 | 0.00 | O |
| ATOM | 1043 | O1P  | C B | 15 | 43.421 | -14.835 | 93.129 | 1.00 | 0.00 | O |
| ATOM | 1044 | O2P  | C B | 15 | 44.589 | -12.631 | 92.868 | 1.00 | 0.00 | O |
| ATOM | 1045 | P    | C B | 15 | 43.750 | -13.690 | 92.257 | 1.00 | 0.00 | P |
| ATOM | 1046 | H5   | C B | 15 | 46.893 | -10.822 | 89.974 | 1.00 | 0.00 | H |
| ATOM | 1047 | H6   | C B | 15 | 46.194 | -13.174 | 90.271 | 1.00 | 0.00 | H |
| ATOM | 1048 | H1'  | C B | 15 | 47.208 | -15.845 | 87.922 | 1.00 | 0.00 | H |
| ATOM | 1049 | H3'  | C B | 15 | 45.193 | -16.782 | 91.168 | 1.00 | 0.00 | H |
| ATOM | 1050 | H4'  | C B | 15 | 43.818 | -16.766 | 88.906 | 1.00 | 0.00 | H |
| ATOM | 1051 | H41  | C B | 15 | 48.006 | -9.267  | 88.475 | 1.00 | 0.00 | H |
| ATOM | 1052 | H42  | C B | 15 | 48.713 | -9.772  | 86.916 | 1.00 | 0.00 | H |
| ATOM | 1053 | H2'1 | C B | 15 | 46.666 | -14.929 | 90.761 | 1.00 | 0.00 | H |
| ATOM | 1054 | H2'2 | C B | 15 | 47.668 | -16.264 | 90.211 | 1.00 | 0.00 | H |
| ATOM | 1055 | H5'1 | C B | 15 | 43.243 | -14.254 | 89.205 | 1.00 | 0.00 | H |
| ATOM | 1056 | H5'2 | C B | 15 | 42.807 | -15.427 | 90.467 | 1.00 | 0.00 | H |
| ATOM | 1057 | C1'  | G B | 16 | 50.749 | -17.257 | 86.780 | 1.00 | 0.00 | C |
| ATOM | 1058 | N1   | G B | 16 | 52.254 | -12.403 | 86.342 | 1.00 | 0.00 | N |
| ATOM | 1059 | C2   | G B | 16 | 52.399 | -13.460 | 85.463 | 1.00 | 0.00 | C |
| ATOM | 1060 | N2   | G B | 16 | 53.031 | -13.188 | 84.312 | 1.00 | 0.00 | N |
| ATOM | 1061 | N3   | G B | 16 | 51.950 | -14.690 | 85.708 | 1.00 | 0.00 | N |
| ATOM | 1062 | C4   | G B | 16 | 51.342 | -14.785 | 86.920 | 1.00 | 0.00 | C |
| ATOM | 1063 | C5   | G B | 16 | 51.157 | -13.788 | 87.863 | 1.00 | 0.00 | C |
| ATOM | 1064 | C6   | G B | 16 | 51.630 | -12.482 | 87.601 | 1.00 | 0.00 | C |
| ATOM | 1065 | O6   | G B | 16 | 51.560 | -11.474 | 88.307 | 1.00 | 0.00 | O |
| ATOM | 1066 | N7   | G B | 16 | 50.488 | -14.297 | 88.978 | 1.00 | 0.00 | N |
| ATOM | 1067 | C8   | G B | 16 | 50.291 | -15.557 | 88.682 | 1.00 | 0.00 | C |
| ATOM | 1068 | N9   | G B | 16 | 50.784 | -15.929 | 87.447 | 1.00 | 0.00 | N |
| ATOM | 1069 | C2'  | G B | 16 | 50.948 | -18.428 | 87.734 | 1.00 | 0.00 | C |
| ATOM | 1070 | C3'  | G B | 16 | 50.035 | -19.485 | 87.134 | 1.00 | 0.00 | C |
| ATOM | 1071 | O3'  | G B | 16 | 50.732 | -20.172 | 86.096 | 1.00 | 0.00 | O |
| ATOM | 1072 | C4'  | G B | 16 | 48.867 | -18.661 | 86.596 | 1.00 | 0.00 | C |
| ATOM | 1073 | O4'  | G B | 16 | 49.482 | -17.401 | 86.171 | 1.00 | 0.00 | O |
| ATOM | 1074 | C5'  | G B | 16 | 47.758 | -18.351 | 87.574 | 1.00 | 0.00 | C |
| ATOM | 1075 | O5'  | G B | 16 | 48.315 | -18.123 | 88.891 | 1.00 | 0.00 | O |
| ATOM | 1076 | O1P  | G B | 16 | 47.425 | -20.050 | 90.243 | 1.00 | 0.00 | O |
| ATOM | 1077 | O2P  | G B | 16 | 47.997 | -17.884 | 91.373 | 1.00 | 0.00 | O |
| ATOM | 1078 | P    | G B | 16 | 47.475 | -18.578 | 90.169 | 1.00 | 0.00 | P |
| ATOM | 1079 | H1   | G B | 16 | 52.633 | -11.488 | 86.052 | 1.00 | 0.00 | H |
| ATOM | 1080 | H8   | G B | 16 | 49.784 | -16.251 | 89.351 | 1.00 | 0.00 | H |
| ATOM | 1081 | H1'  | G B | 16 | 51.502 | -17.264 | 85.991 | 1.00 | 0.00 | H |
| ATOM | 1082 | H21  | G B | 16 | 53.373 | -12.234 | 84.128 | 1.00 | 0.00 | H |
| ATOM | 1083 | H3'  | G B | 16 | 49.698 | -20.205 | 87.880 | 1.00 | 0.00 | H |
| ATOM | 1084 | H22  | G B | 16 | 53.173 | -13.934 | 83.617 | 1.00 | 0.00 | H |
| ATOM | 1085 | H4'  | G B | 16 | 48.436 | -19.224 | 85.769 | 1.00 | 0.00 | H |
| ATOM | 1086 | H2'1 | G B | 16 | 50.655 | -18.183 | 88.755 | 1.00 | 0.00 | H |
| ATOM | 1087 | H2'2 | G B | 16 | 51.984 | -18.768 | 87.761 | 1.00 | 0.00 | H |
| ATOM | 1088 | H5'1 | G B | 16 | 47.224 | -17.462 | 87.239 | 1.00 | 0.00 | H |
| ATOM | 1089 | H5'2 | G B | 16 | 47.066 | -19.194 | 87.606 | 1.00 | 0.00 | H |
| ATOM | 1090 | C1'  | G B | 17 | 55.314 | -17.088 | 84.866 | 1.00 | 0.00 | C |
| ATOM | 1091 | N1   | G B | 17 | 55.543 | -12.598 | 87.277 | 1.00 | 0.00 | N |
| ATOM | 1092 | C2   | G B | 17 | 55.977 | -12.950 | 86.011 | 1.00 | 0.00 | C |



|      |      |      |     |    |        |         |        |      |      |   |
|------|------|------|-----|----|--------|---------|--------|------|------|---|
| ATOM | 1093 | N2   | G B | 17 | 56.550 | -11.976 | 85.293 | 1.00 | 0.00 | N |
| ATOM | 1094 | N3   | G B | 17 | 55.849 | -14.173 | 85.503 | 1.00 | 0.00 | N |
| ATOM | 1095 | C4   | G B | 17 | 55.254 | -15.033 | 86.371 | 1.00 | 0.00 | C |
| ATOM | 1096 | C5   | G B | 17 | 54.794 | -14.773 | 87.650 | 1.00 | 0.00 | C |
| ATOM | 1097 | C6   | G B | 17 | 54.926 | -13.475 | 88.190 | 1.00 | 0.00 | C |
| ATOM | 1098 | O6   | G B | 17 | 54.582 | -13.054 | 89.295 | 1.00 | 0.00 | O |
| ATOM | 1099 | N7   | G B | 17 | 54.246 | -15.930 | 88.211 | 1.00 | 0.00 | N |
| ATOM | 1100 | C8   | G B | 17 | 54.386 | -16.832 | 87.274 | 1.00 | 0.00 | C |
| ATOM | 1101 | N9   | G B | 17 | 54.991 | -16.364 | 86.126 | 1.00 | 0.00 | N |
| ATOM | 1102 | C2'  | G B | 17 | 55.778 | -18.522 | 85.086 | 1.00 | 0.00 | C |
| ATOM | 1103 | C3'  | G B | 17 | 55.181 | -19.236 | 83.884 | 1.00 | 0.00 | C |
| ATOM | 1104 | O3'  | G B | 17 | 56.059 | -19.090 | 82.770 | 1.00 | 0.00 | O |
| ATOM | 1105 | C4'  | G B | 17 | 53.857 | -18.504 | 83.676 | 1.00 | 0.00 | C |
| ATOM | 1106 | O4'  | G B | 17 | 54.140 | -17.126 | 84.076 | 1.00 | 0.00 | O |
| ATOM | 1107 | C5'  | G B | 17 | 52.679 | -19.007 | 84.476 | 1.00 | 0.00 | C |
| ATOM | 1108 | O5'  | G B | 17 | 53.123 | -19.429 | 85.790 | 1.00 | 0.00 | O |
| ATOM | 1109 | O1P  | G B | 17 | 52.716 | -21.913 | 85.772 | 1.00 | 0.00 | O |
| ATOM | 1110 | O2P  | G B | 17 | 52.685 | -20.654 | 87.942 | 1.00 | 0.00 | O |
| ATOM | 1111 | P    | G B | 17 | 52.392 | -20.665 | 86.488 | 1.00 | 0.00 | P |
| ATOM | 1112 | H1   | G B | 17 | 55.684 | -11.620 | 87.574 | 1.00 | 0.00 | H |
| ATOM | 1113 | H8   | G B | 17 | 54.054 | -17.863 | 87.389 | 1.00 | 0.00 | H |
| ATOM | 1114 | H1'  | G B | 17 | 56.064 | -16.513 | 84.325 | 1.00 | 0.00 | H |
| ATOM | 1115 | H21  | G B | 17 | 56.643 | -11.030 | 85.690 | 1.00 | 0.00 | H |
| ATOM | 1116 | H3'  | G B | 17 | 55.018 | -20.296 | 84.078 | 1.00 | 0.00 | H |
| ATOM | 1117 | H22  | G B | 17 | 56.895 | -12.174 | 84.344 | 1.00 | 0.00 | H |
| ATOM | 1118 | H4'  | G B | 17 | 53.606 | -18.597 | 82.620 | 1.00 | 0.00 | H |
| ATOM | 1119 | H2'1 | G B | 17 | 55.405 | -18.939 | 86.021 | 1.00 | 0.00 | H |
| ATOM | 1120 | H2'2 | G B | 17 | 56.864 | -18.607 | 85.101 | 1.00 | 0.00 | H |
| ATOM | 1121 | H5'1 | G B | 17 | 51.945 | -18.208 | 84.575 | 1.00 | 0.00 | H |
| ATOM | 1122 | H5'2 | G B | 17 | 52.224 | -19.849 | 83.953 | 1.00 | 0.00 | H |
| ATOM | 1123 | C1'  | C B | 18 | 59.736 | -14.996 | 84.089 | 1.00 | 0.00 | C |
| ATOM | 1124 | N1   | C B | 18 | 59.203 | -15.151 | 85.471 | 1.00 | 0.00 | N |
| ATOM | 1125 | C2   | C B | 18 | 59.184 | -14.027 | 86.293 | 1.00 | 0.00 | C |
| ATOM | 1126 | O2   | C B | 18 | 59.606 | -12.953 | 85.845 | 1.00 | 0.00 | O |
| ATOM | 1127 | N3   | C B | 18 | 58.705 | -14.148 | 87.553 | 1.00 | 0.00 | N |
| ATOM | 1128 | C4   | C B | 18 | 58.255 | -15.325 | 88.008 | 1.00 | 0.00 | C |
| ATOM | 1129 | N4   | C B | 18 | 57.795 | -15.384 | 89.250 | 1.00 | 0.00 | N |
| ATOM | 1130 | C5   | C B | 18 | 58.265 | -16.498 | 87.186 | 1.00 | 0.00 | C |
| ATOM | 1131 | C6   | C B | 18 | 58.750 | -16.351 | 85.921 | 1.00 | 0.00 | C |
| ATOM | 1132 | C2'  | C B | 18 | 60.546 | -16.192 | 83.605 | 1.00 | 0.00 | C |
| ATOM | 1133 | C3'  | C B | 18 | 60.183 | -16.243 | 82.128 | 1.00 | 0.00 | C |
| ATOM | 1134 | O3'  | C B | 18 | 61.023 | -15.343 | 81.409 | 1.00 | 0.00 | O |
| ATOM | 1135 | C4'  | C B | 18 | 58.722 | -15.800 | 82.122 | 1.00 | 0.00 | C |
| ATOM | 1136 | O4'  | C B | 18 | 58.630 | -14.836 | 83.219 | 1.00 | 0.00 | O |
| ATOM | 1137 | C5'  | C B | 18 | 57.690 | -16.881 | 82.343 | 1.00 | 0.00 | C |
| ATOM | 1138 | O5'  | C B | 18 | 58.194 | -17.849 | 83.301 | 1.00 | 0.00 | O |
| ATOM | 1139 | O1P  | C B | 18 | 58.437 | -19.948 | 81.932 | 1.00 | 0.00 | O |
| ATOM | 1140 | O2P  | C B | 18 | 58.028 | -20.101 | 84.403 | 1.00 | 0.00 | O |
| ATOM | 1141 | P    | C B | 18 | 57.786 | -19.381 | 83.130 | 1.00 | 0.00 | P |
| ATOM | 1142 | H5   | C B | 18 | 57.904 | -17.457 | 87.554 | 1.00 | 0.00 | H |
| ATOM | 1143 | H6   | C B | 18 | 58.775 | -17.215 | 85.257 | 1.00 | 0.00 | H |
| ATOM | 1144 | H1'  | C B | 18 | 60.327 | -14.083 | 84.052 | 1.00 | 0.00 | H |
| ATOM | 1145 | H3'  | C B | 18 | 60.292 | -17.246 | 81.717 | 1.00 | 0.00 | H |
| ATOM | 1146 | H4'  | C B | 18 | 58.529 | -15.355 | 81.146 | 1.00 | 0.00 | H |

|      |      |      |   |   |    |        |         |        |      |      |   |
|------|------|------|---|---|----|--------|---------|--------|------|------|---|
| ATOM | 1147 | H41  | C | B | 18 | 57.441 | -16.278 | 89.625 | 1.00 | 0.00 | H |
| ATOM | 1148 | H42  | C | B | 18 | 57.789 | -14.540 | 89.839 | 1.00 | 0.00 | H |
| ATOM | 1149 | H2'1 | C | B | 18 | 60.268 | -17.113 | 84.114 | 1.00 | 0.00 | H |
| ATOM | 1150 | H2'2 | C | B | 18 | 61.617 | -16.049 | 83.746 | 1.00 | 0.00 | H |
| ATOM | 1151 | H5'1 | C | B | 18 | 56.774 | -16.432 | 82.724 | 1.00 | 0.00 | H |
| ATOM | 1152 | H5'2 | C | B | 18 | 57.481 | -17.376 | 81.397 | 1.00 | 0.00 | H |
| ATOM | 1153 | C1'  | C | B | 19 | 63.498 | -11.991 | 85.243 | 1.00 | 0.00 | C |
| ATOM | 1154 | N1   | C | B | 19 | 62.985 | -12.977 | 86.234 | 1.00 | 0.00 | N |
| ATOM | 1155 | C2   | C | B | 19 | 62.657 | -12.512 | 87.507 | 1.00 | 0.00 | C |
| ATOM | 1156 | O2   | C | B | 19 | 62.802 | -11.310 | 87.761 | 1.00 | 0.00 | O |
| ATOM | 1157 | N3   | C | B | 19 | 62.188 | -13.395 | 88.423 | 1.00 | 0.00 | N |
| ATOM | 1158 | C4   | C | B | 19 | 62.043 | -14.691 | 88.116 | 1.00 | 0.00 | C |
| ATOM | 1159 | N4   | C | B | 19 | 61.580 | -15.509 | 89.049 | 1.00 | 0.00 | N |
| ATOM | 1160 | C5   | C | B | 19 | 62.374 | -15.194 | 86.818 | 1.00 | 0.00 | C |
| ATOM | 1161 | C6   | C | B | 19 | 62.842 | -14.289 | 85.912 | 1.00 | 0.00 | C |
| ATOM | 1162 | C2'  | C | B | 19 | 64.598 | -12.538 | 84.346 | 1.00 | 0.00 | C |
| ATOM | 1163 | C3'  | C | B | 19 | 64.302 | -11.846 | 83.024 | 1.00 | 0.00 | C |
| ATOM | 1164 | O3'  | C | B | 19 | 64.905 | -10.555 | 83.027 | 1.00 | 0.00 | O |
| ATOM | 1165 | C4'  | C | B | 19 | 62.777 | -11.772 | 83.013 | 1.00 | 0.00 | C |
| ATOM | 1166 | O4'  | C | B | 19 | 62.413 | -11.604 | 84.421 | 1.00 | 0.00 | O |
| ATOM | 1167 | C5'  | C | B | 19 | 62.049 | -12.980 | 82.470 | 1.00 | 0.00 | C |
| ATOM | 1168 | O5'  | C | B | 19 | 62.756 | -14.190 | 82.846 | 1.00 | 0.00 | O |
| ATOM | 1169 | O1P  | C | B | 19 | 63.564 | -15.102 | 80.644 | 1.00 | 0.00 | O |
| ATOM | 1170 | O2P  | C | B | 19 | 63.140 | -16.656 | 82.567 | 1.00 | 0.00 | O |
| ATOM | 1171 | P    | C | B | 19 | 62.756 | -15.423 | 81.837 | 1.00 | 0.00 | P |
| ATOM | 1172 | H5   | C | B | 19 | 62.258 | -16.247 | 86.564 | 1.00 | 0.00 | H |
| ATOM | 1173 | H6   | C | B | 19 | 63.104 | -14.623 | 84.909 | 1.00 | 0.00 | H |
| ATOM | 1174 | H1'  | C | B | 19 | 63.838 | -11.109 | 85.787 | 1.00 | 0.00 | H |
| ATOM | 1175 | H3'  | C | B | 19 | 64.674 | -12.418 | 82.173 | 1.00 | 0.00 | H |
| ATOM | 1176 | H4'  | C | B | 19 | 62.504 | -10.915 | 82.398 | 1.00 | 0.00 | H |
| ATOM | 1177 | H41  | C | B | 19 | 61.455 | -16.511 | 88.841 | 1.00 | 0.00 | H |
| ATOM | 1178 | H42  | C | B | 19 | 61.342 | -15.144 | 89.984 | 1.00 | 0.00 | H |
| ATOM | 1179 | H2'1 | C | B | 19 | 64.550 | -13.622 | 84.247 | 1.00 | 0.00 | H |
| ATOM | 1180 | H2'2 | C | B | 19 | 65.594 | -12.286 | 84.712 | 1.00 | 0.00 | H |
| ATOM | 1181 | H5'1 | C | B | 19 | 61.038 | -13.002 | 82.874 | 1.00 | 0.00 | H |
| ATOM | 1182 | H5'2 | C | B | 19 | 61.998 | -12.906 | 81.384 | 1.00 | 0.00 | H |
| ATOM | 1183 | C1'  | T | B | 20 | 66.346 | -9.416  | 88.369 | 1.00 | 0.00 | C |
| ATOM | 1184 | N1   | T | B | 20 | 66.069 | -10.854 | 88.622 | 1.00 | 0.00 | N |
| ATOM | 1185 | C2   | T | B | 20 | 65.606 | -11.196 | 89.876 | 1.00 | 0.00 | C |
| ATOM | 1186 | O2   | T | B | 20 | 65.422 | -10.375 | 90.758 | 1.00 | 0.00 | O |
| ATOM | 1187 | N3   | T | B | 20 | 65.362 | -12.544 | 90.067 | 1.00 | 0.00 | N |
| ATOM | 1188 | C4   | T | B | 20 | 65.535 | -13.549 | 89.141 | 1.00 | 0.00 | C |
| ATOM | 1189 | O4   | T | B | 20 | 65.284 | -14.726 | 89.429 | 1.00 | 0.00 | O |
| ATOM | 1190 | C5   | T | B | 20 | 66.021 | -13.095 | 87.861 | 1.00 | 0.00 | C |
| ATOM | 1191 | C6   | T | B | 20 | 66.271 | -11.791 | 87.638 | 1.00 | 0.00 | C |
| ATOM | 1192 | C7   | T | B | 20 | 66.225 | -14.158 | 86.822 | 1.00 | 0.00 | C |
| ATOM | 1193 | C2'  | T | B | 20 | 67.571 | -9.170  | 87.499 | 1.00 | 0.00 | C |
| ATOM | 1194 | C3'  | T | B | 20 | 67.148 | -7.954  | 86.690 | 1.00 | 0.00 | C |
| ATOM | 1195 | O3'  | T | B | 20 | 67.410 | -6.773  | 87.445 | 1.00 | 0.00 | O |
| ATOM | 1196 | C4'  | T | B | 20 | 65.653 | -8.187  | 86.482 | 1.00 | 0.00 | C |
| ATOM | 1197 | O4'  | T | B | 20 | 65.222 | -8.870  | 87.703 | 1.00 | 0.00 | O |
| ATOM | 1198 | C5'  | T | B | 20 | 65.263 | -9.032  | 85.292 | 1.00 | 0.00 | C |
| ATOM | 1199 | O5'  | T | B | 20 | 66.238 | -10.088 | 85.100 | 1.00 | 0.00 | O |
| ATOM | 1200 | O1P  | T | B | 20 | 67.305 | -9.505  | 82.900 | 1.00 | 0.00 | O |
