# Supplementary material
Source: PubMed Central journal article supplement (PMC1224651)

1

2

3

4

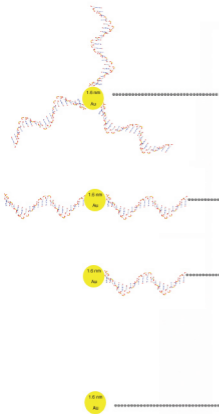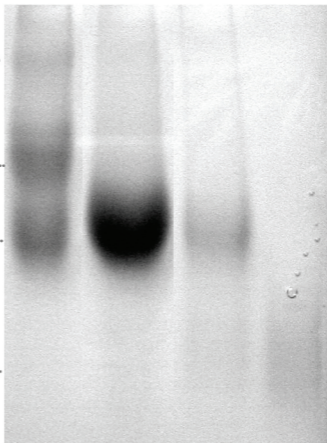

Supplement: pnas_0506290102_4.pdf [file pnas_0506290102_4.pdf]

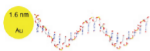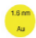

+

-

+

-

ssDNA

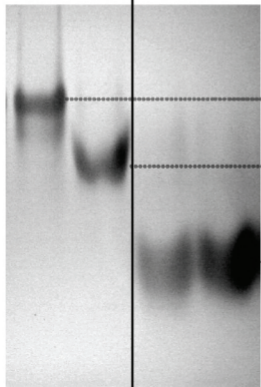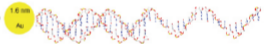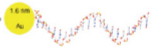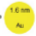

Supplement: pnas_0506290102_5.pdf [file pnas_0506290102_5.pdf]
